# Supplementary material
Source: PubMed Central journal article supplement (PMC4858947)

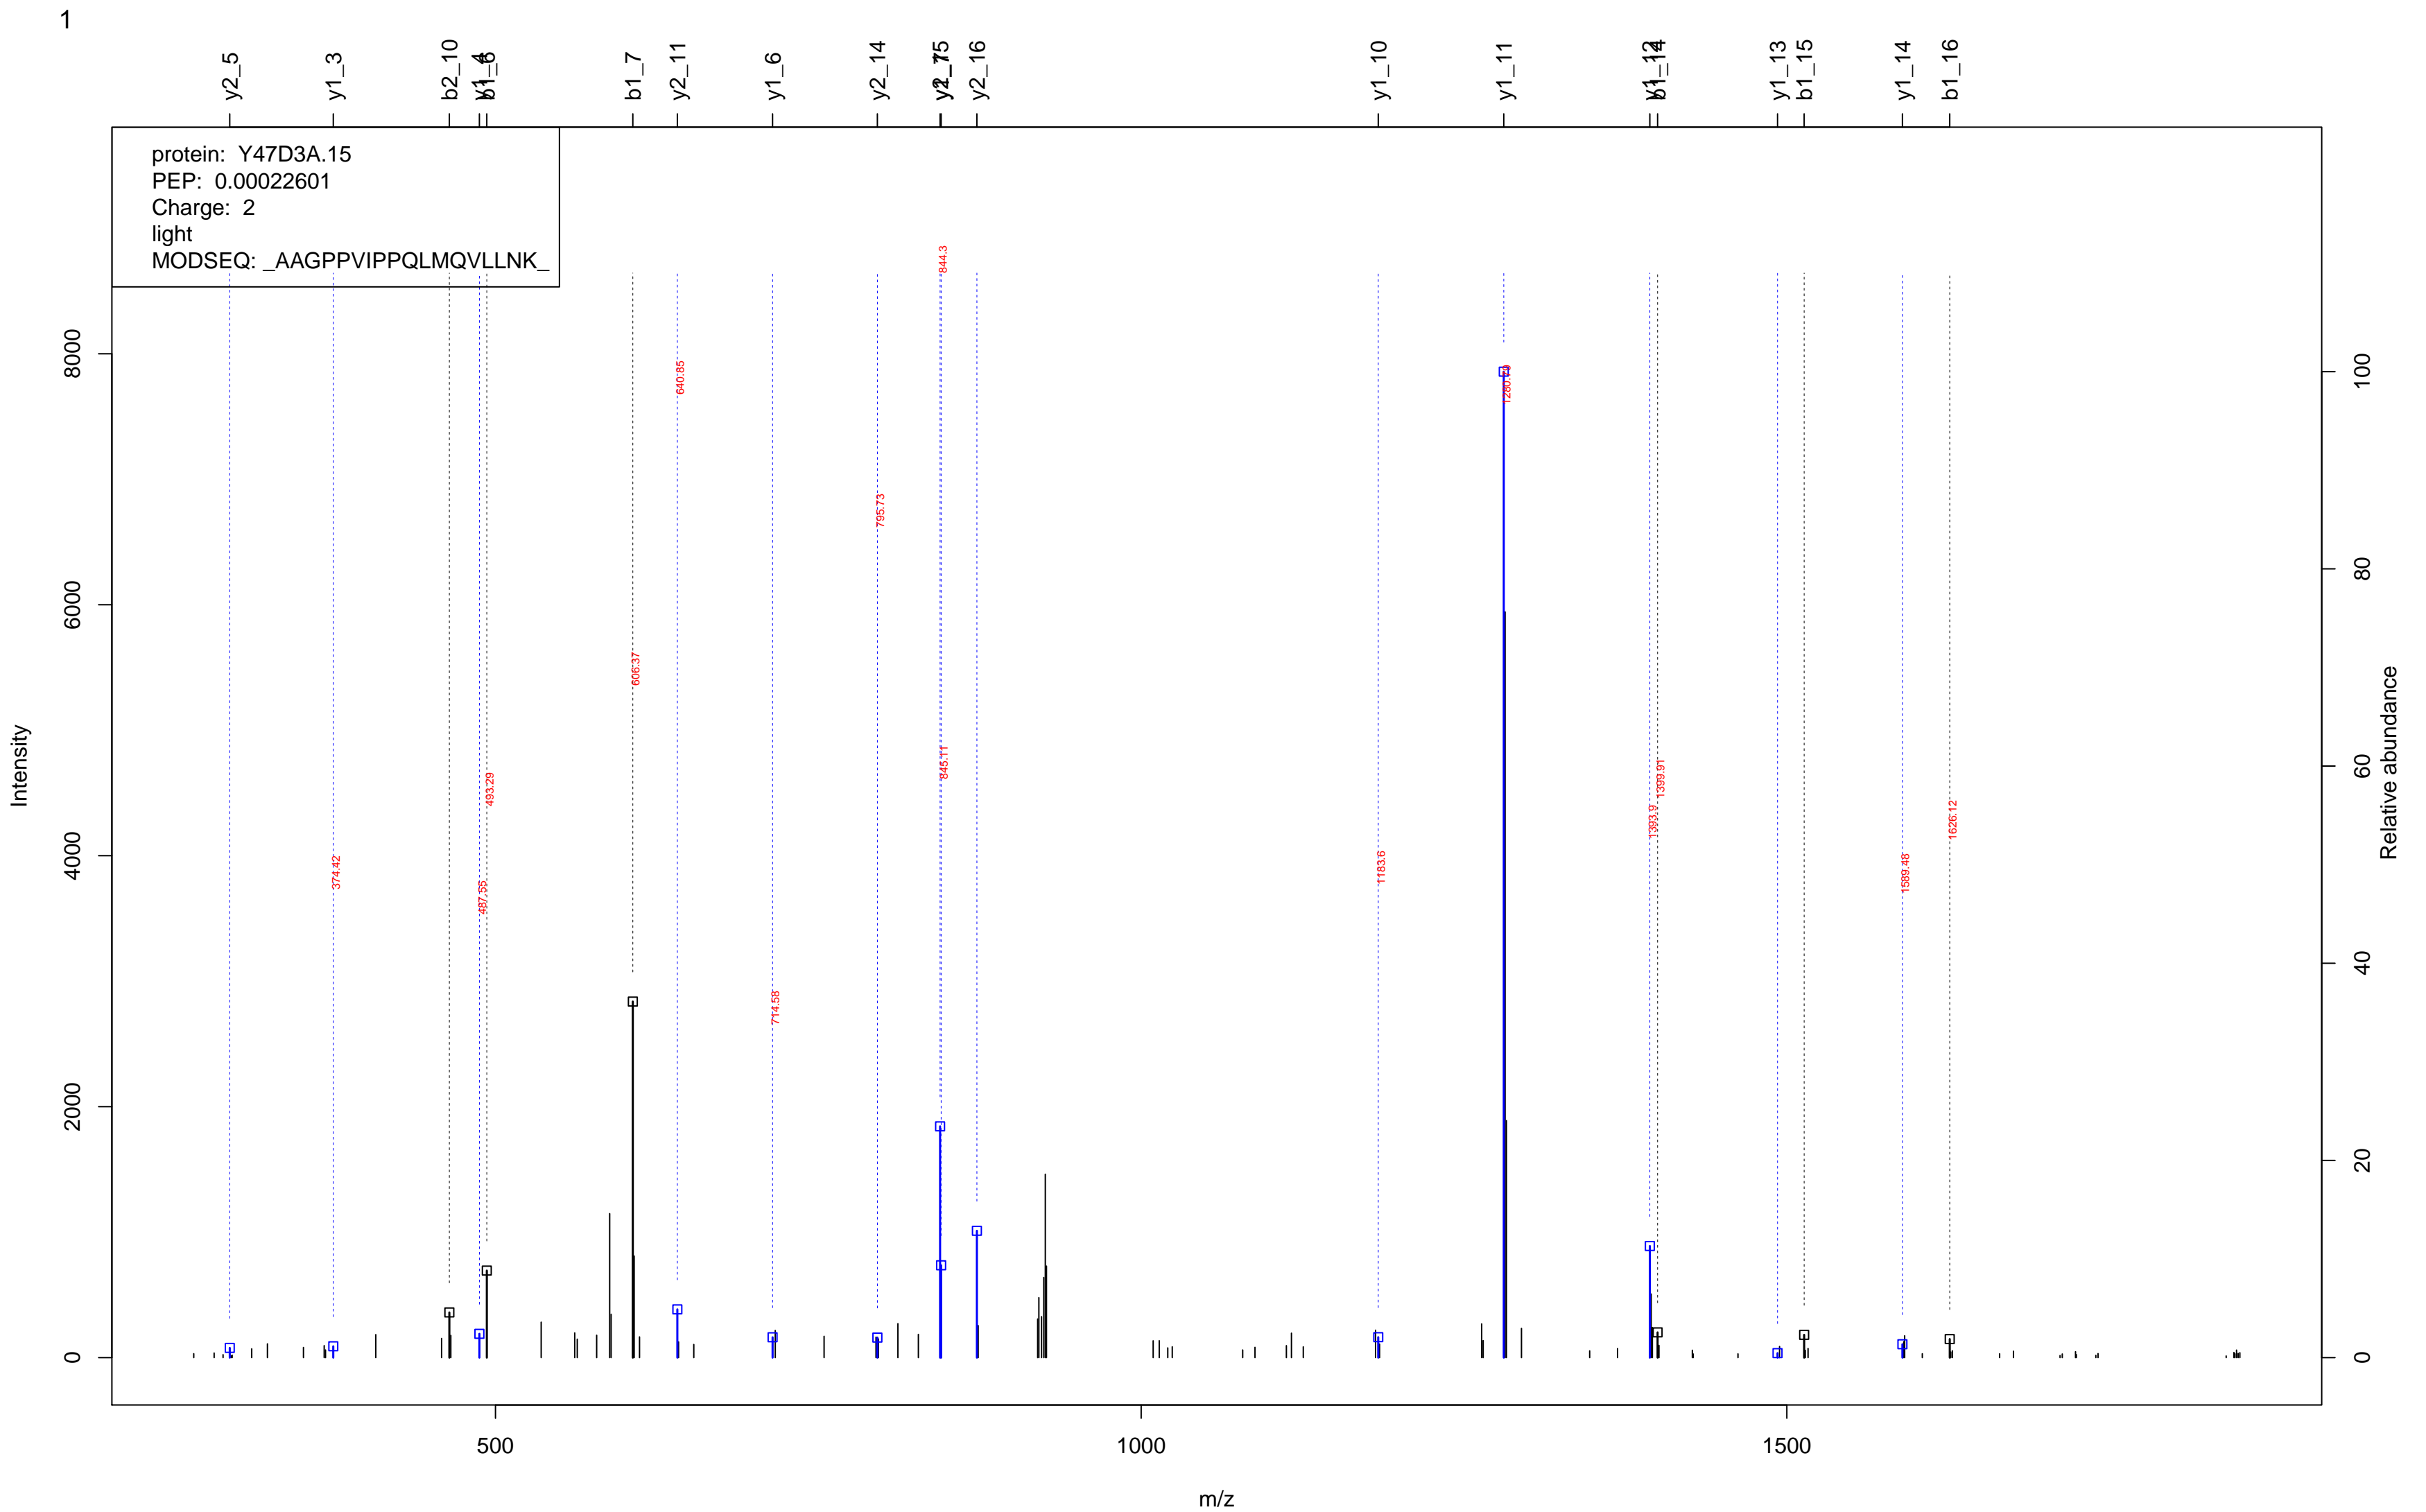

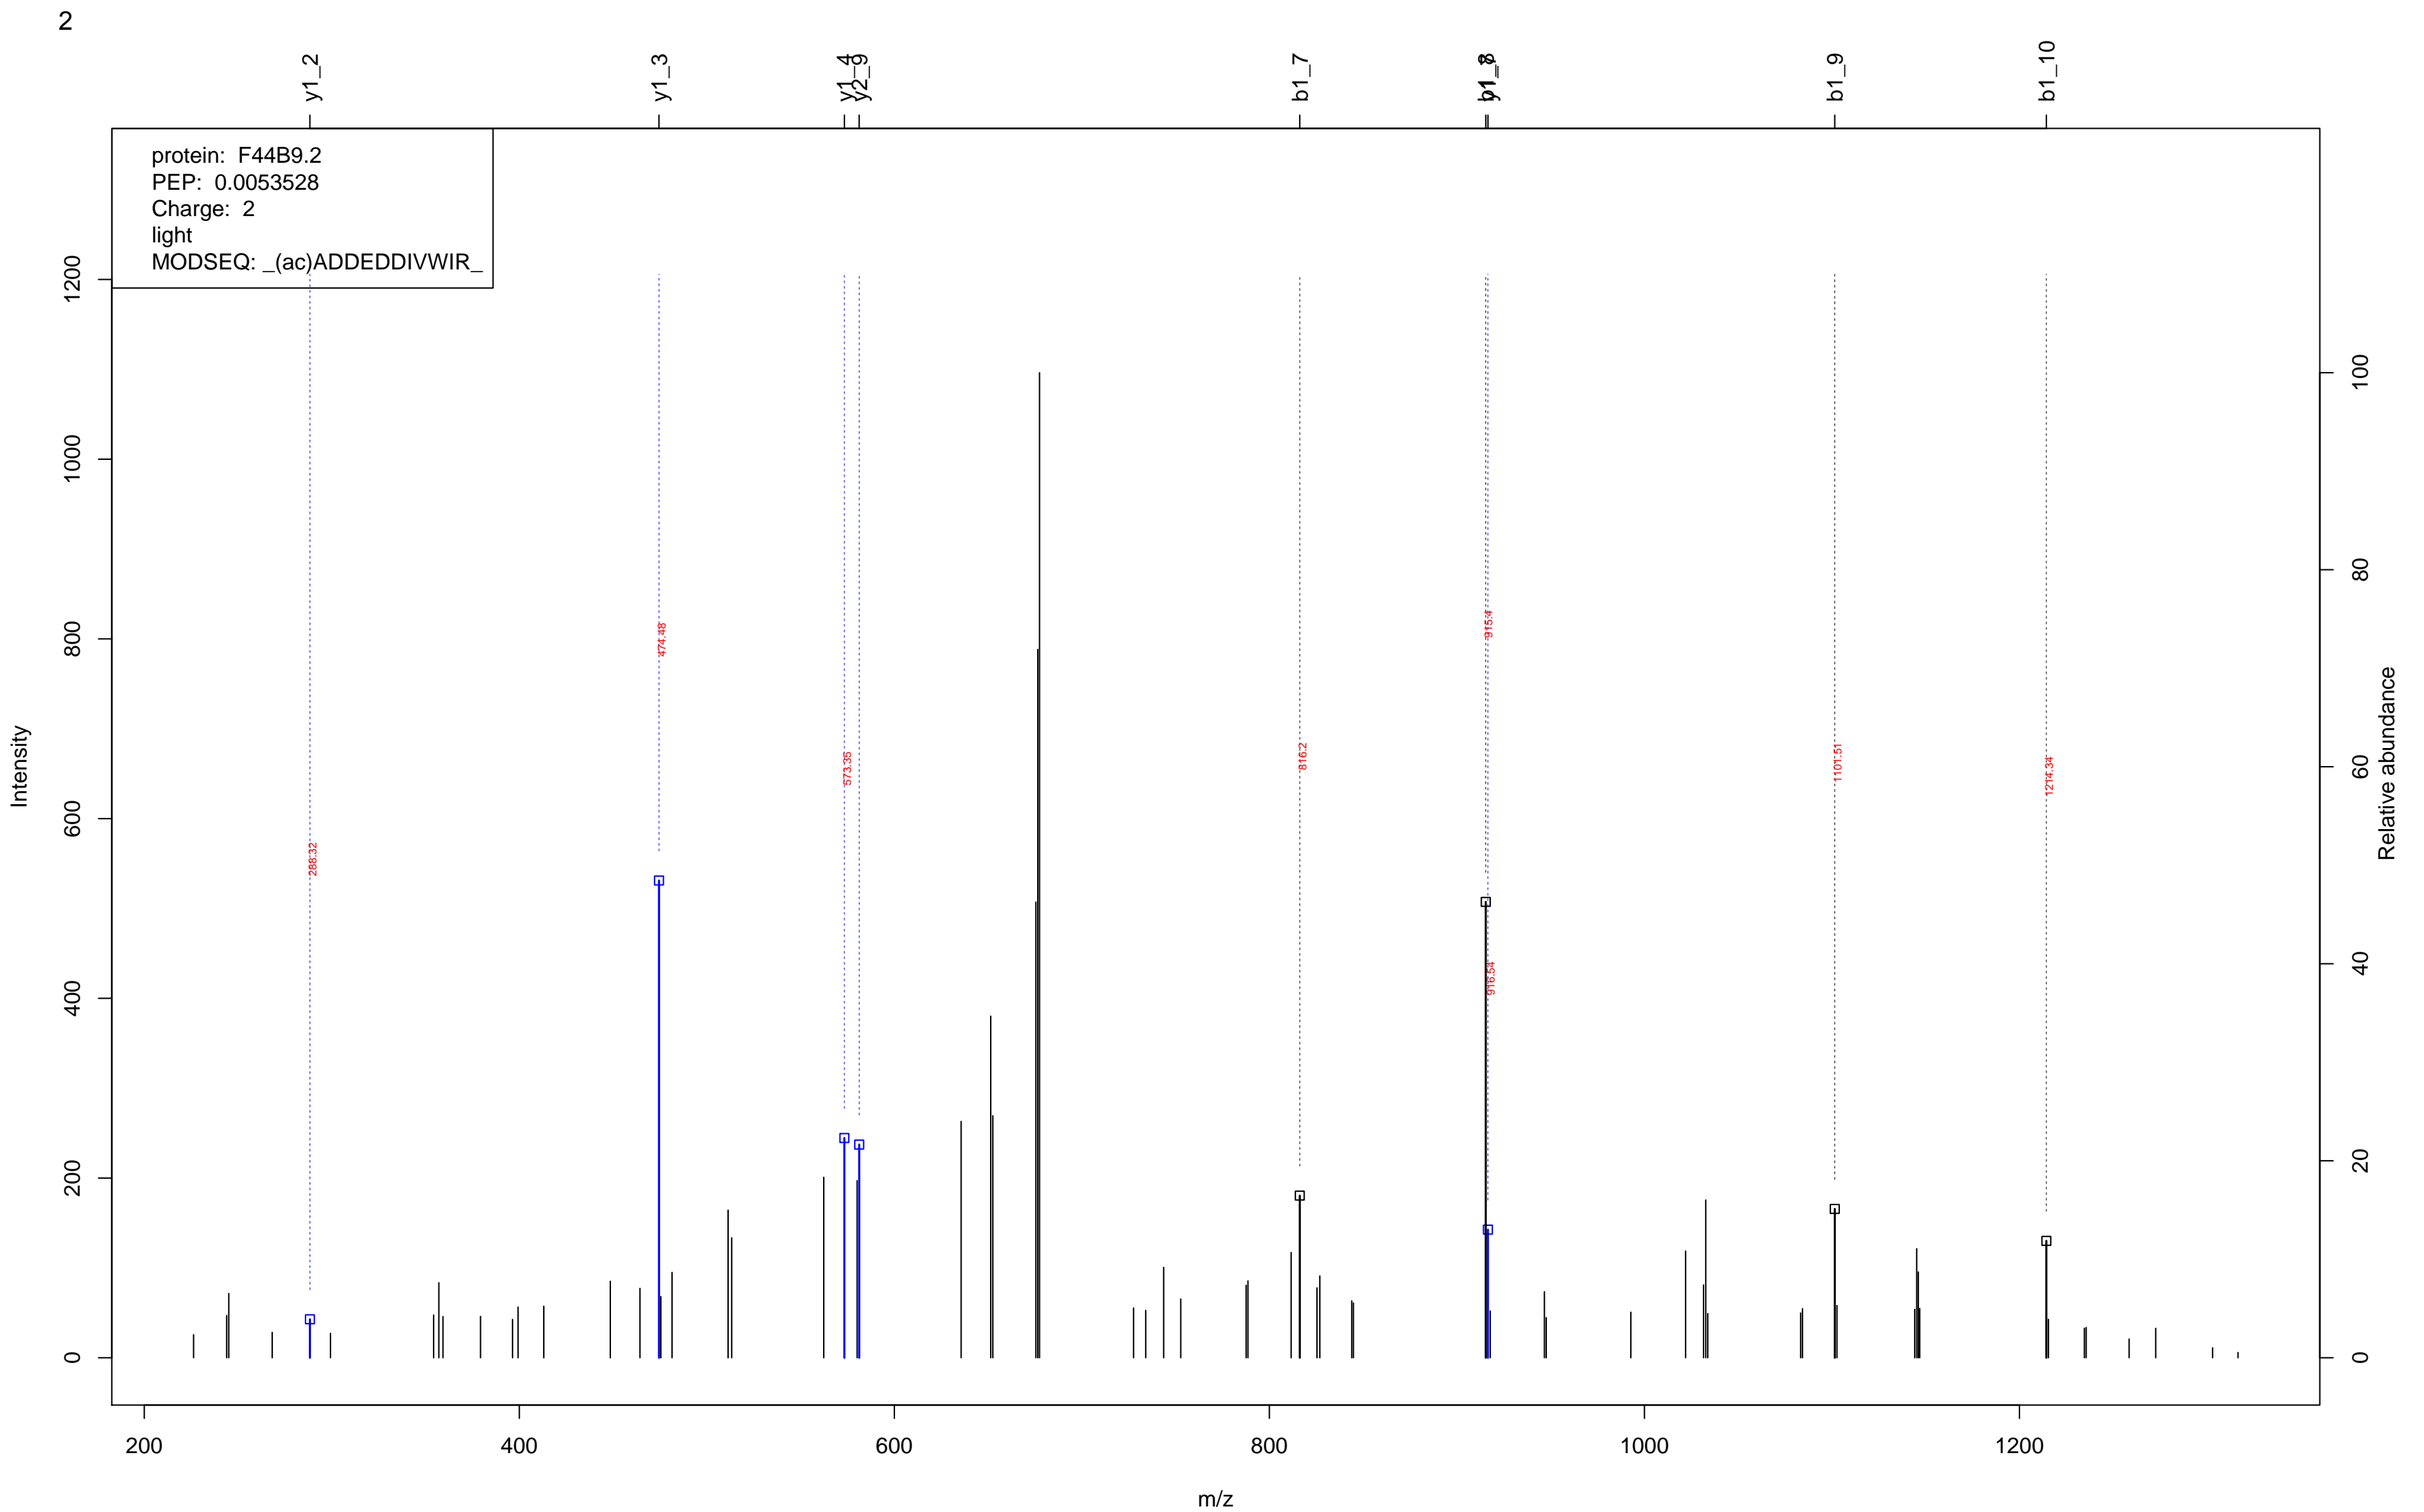

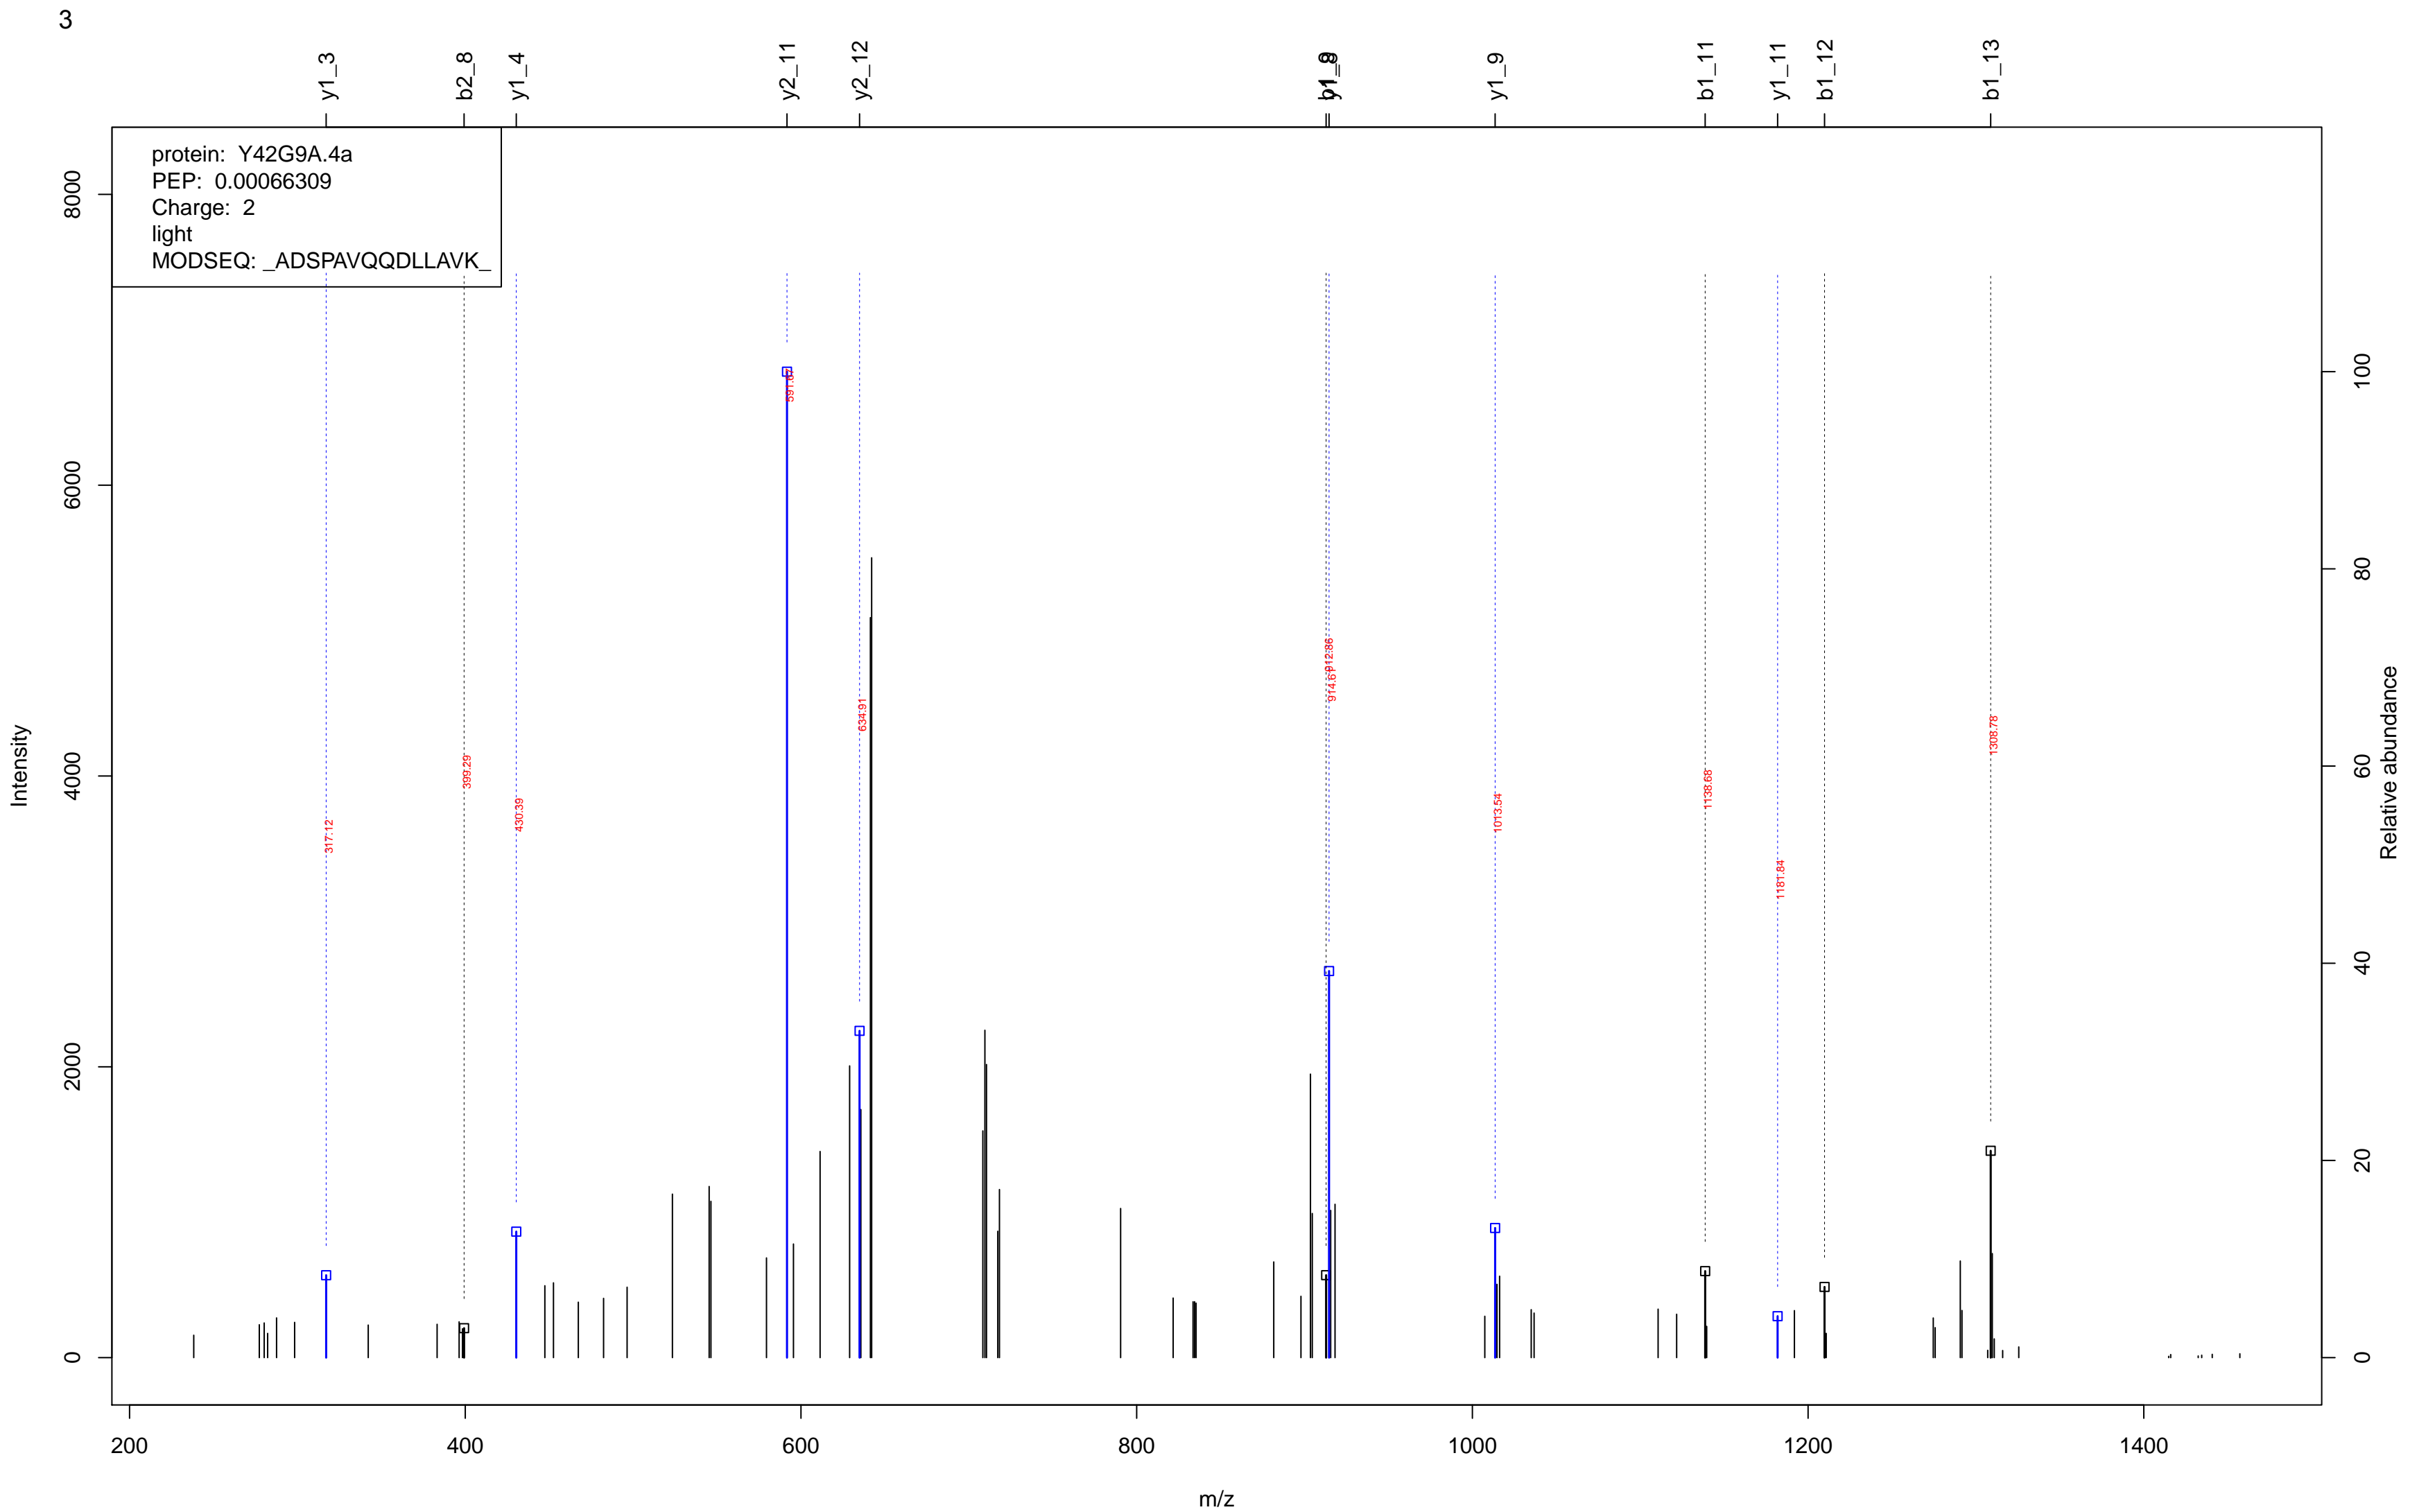

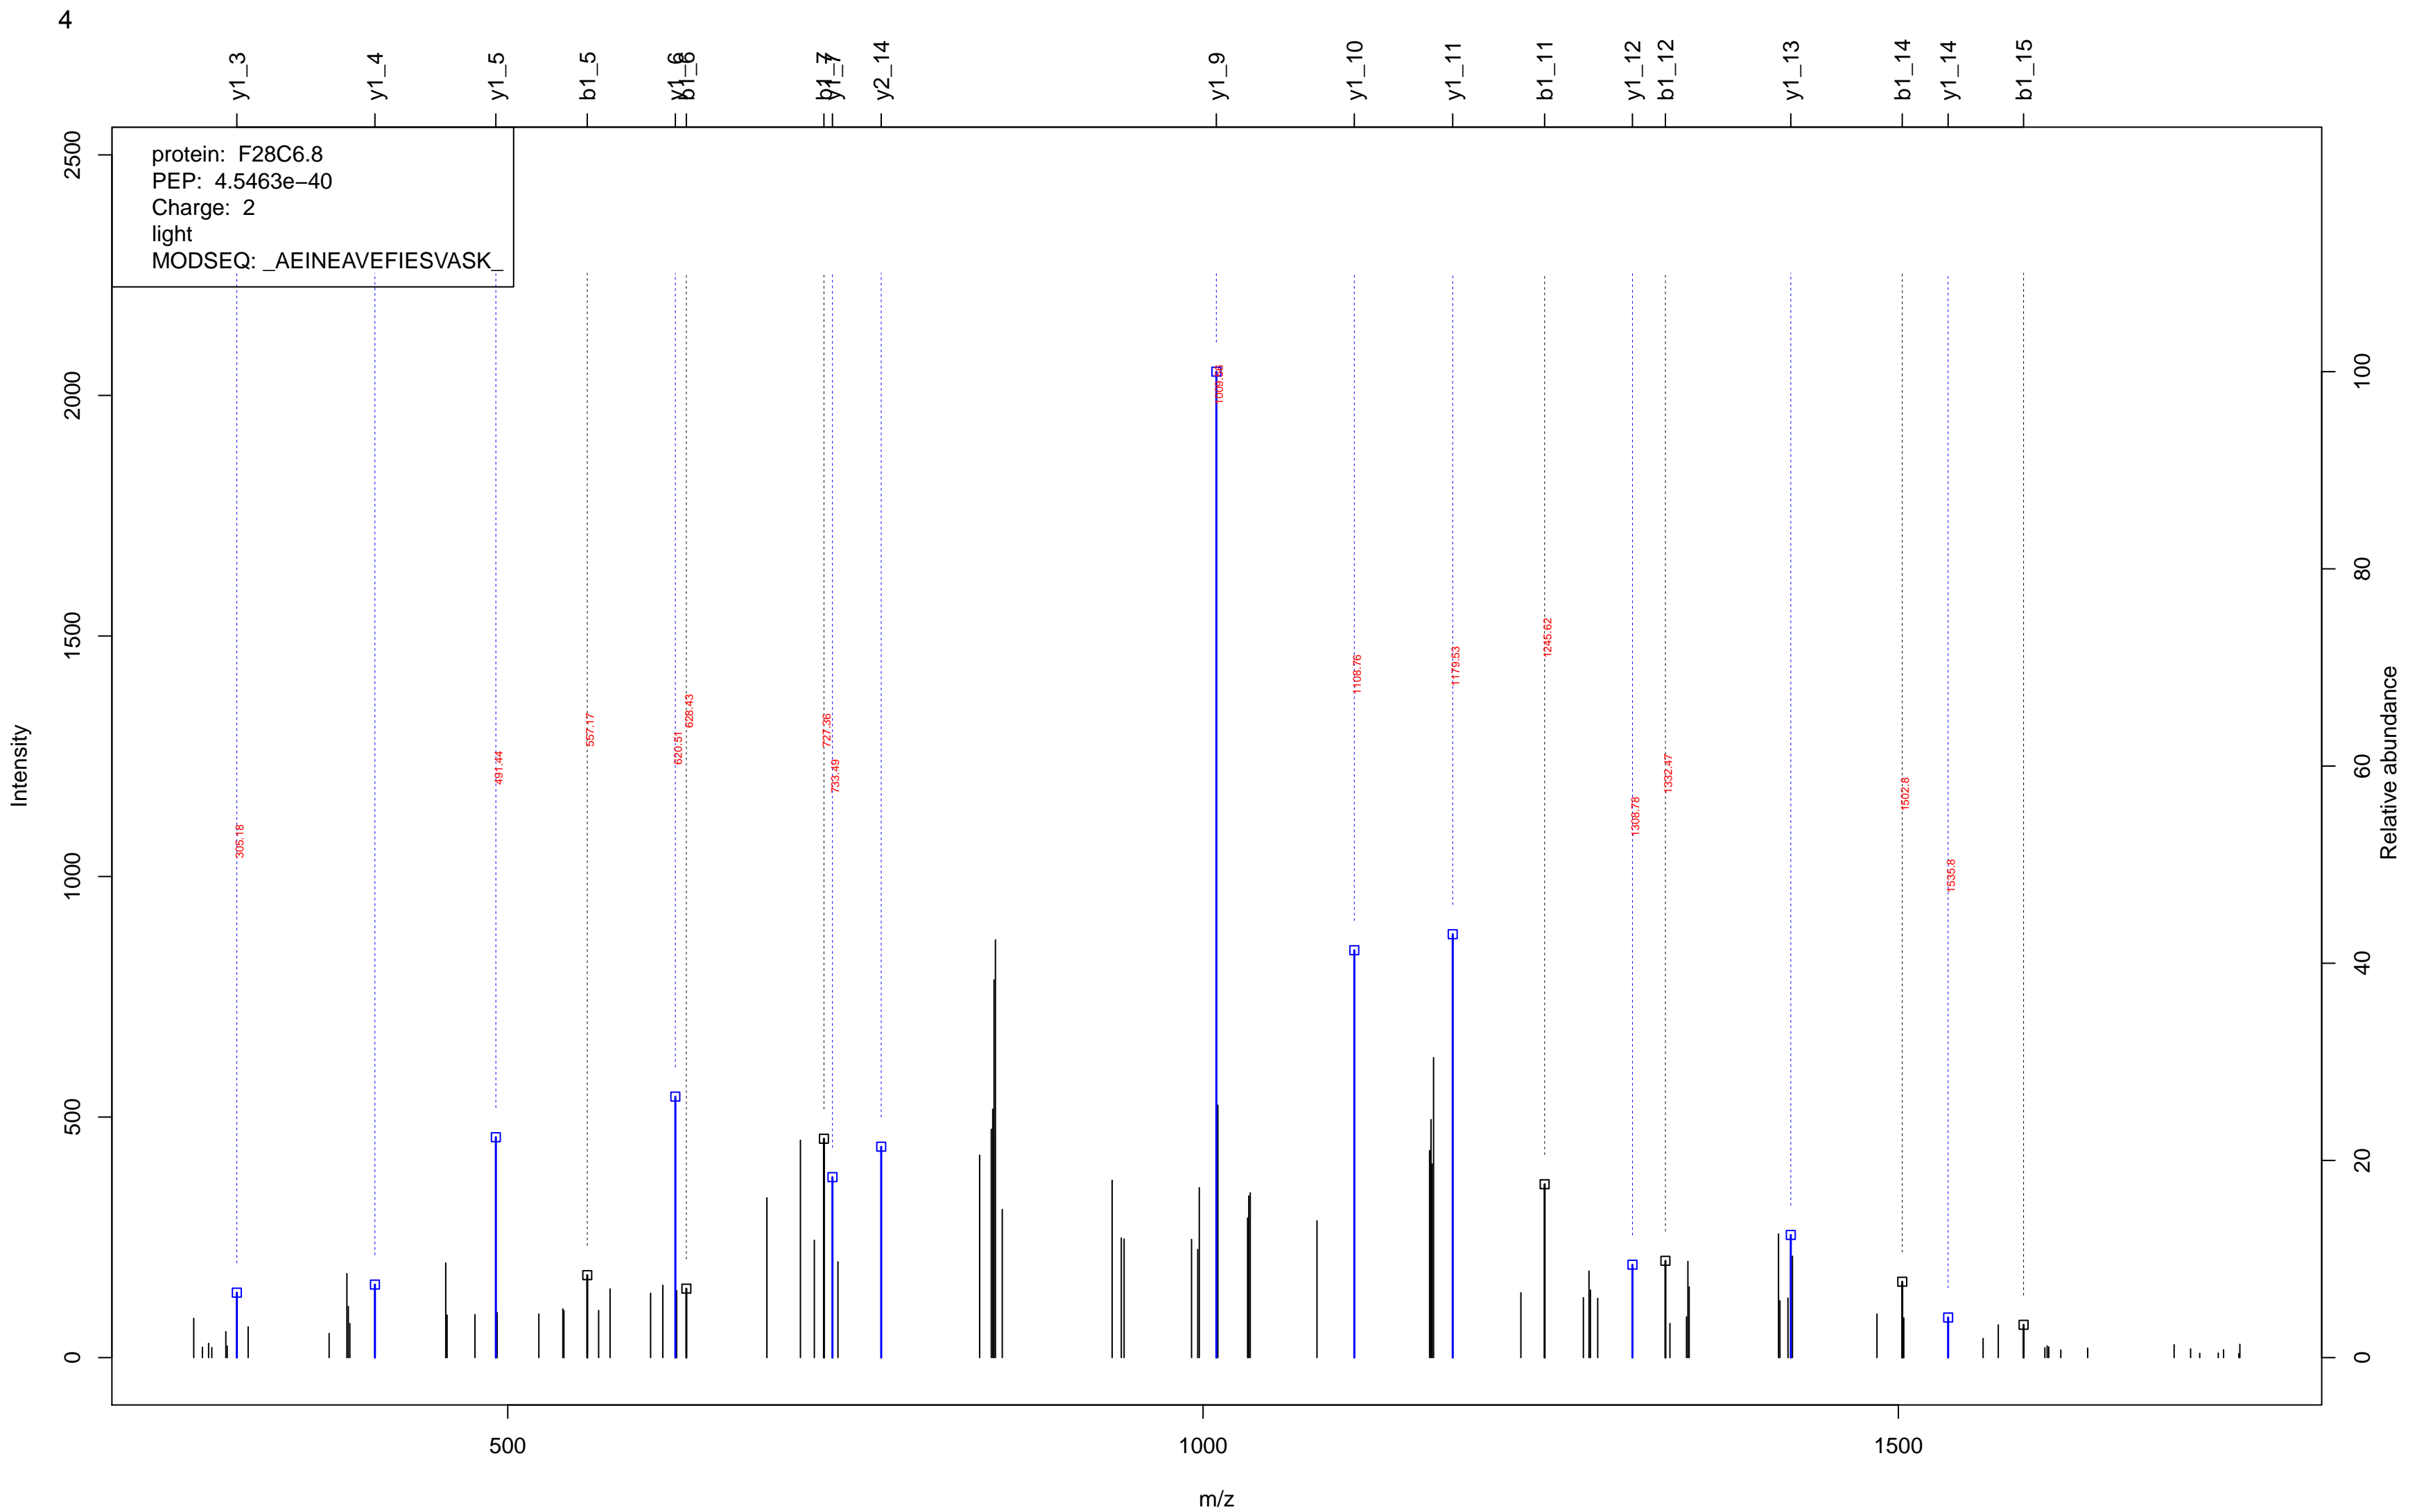

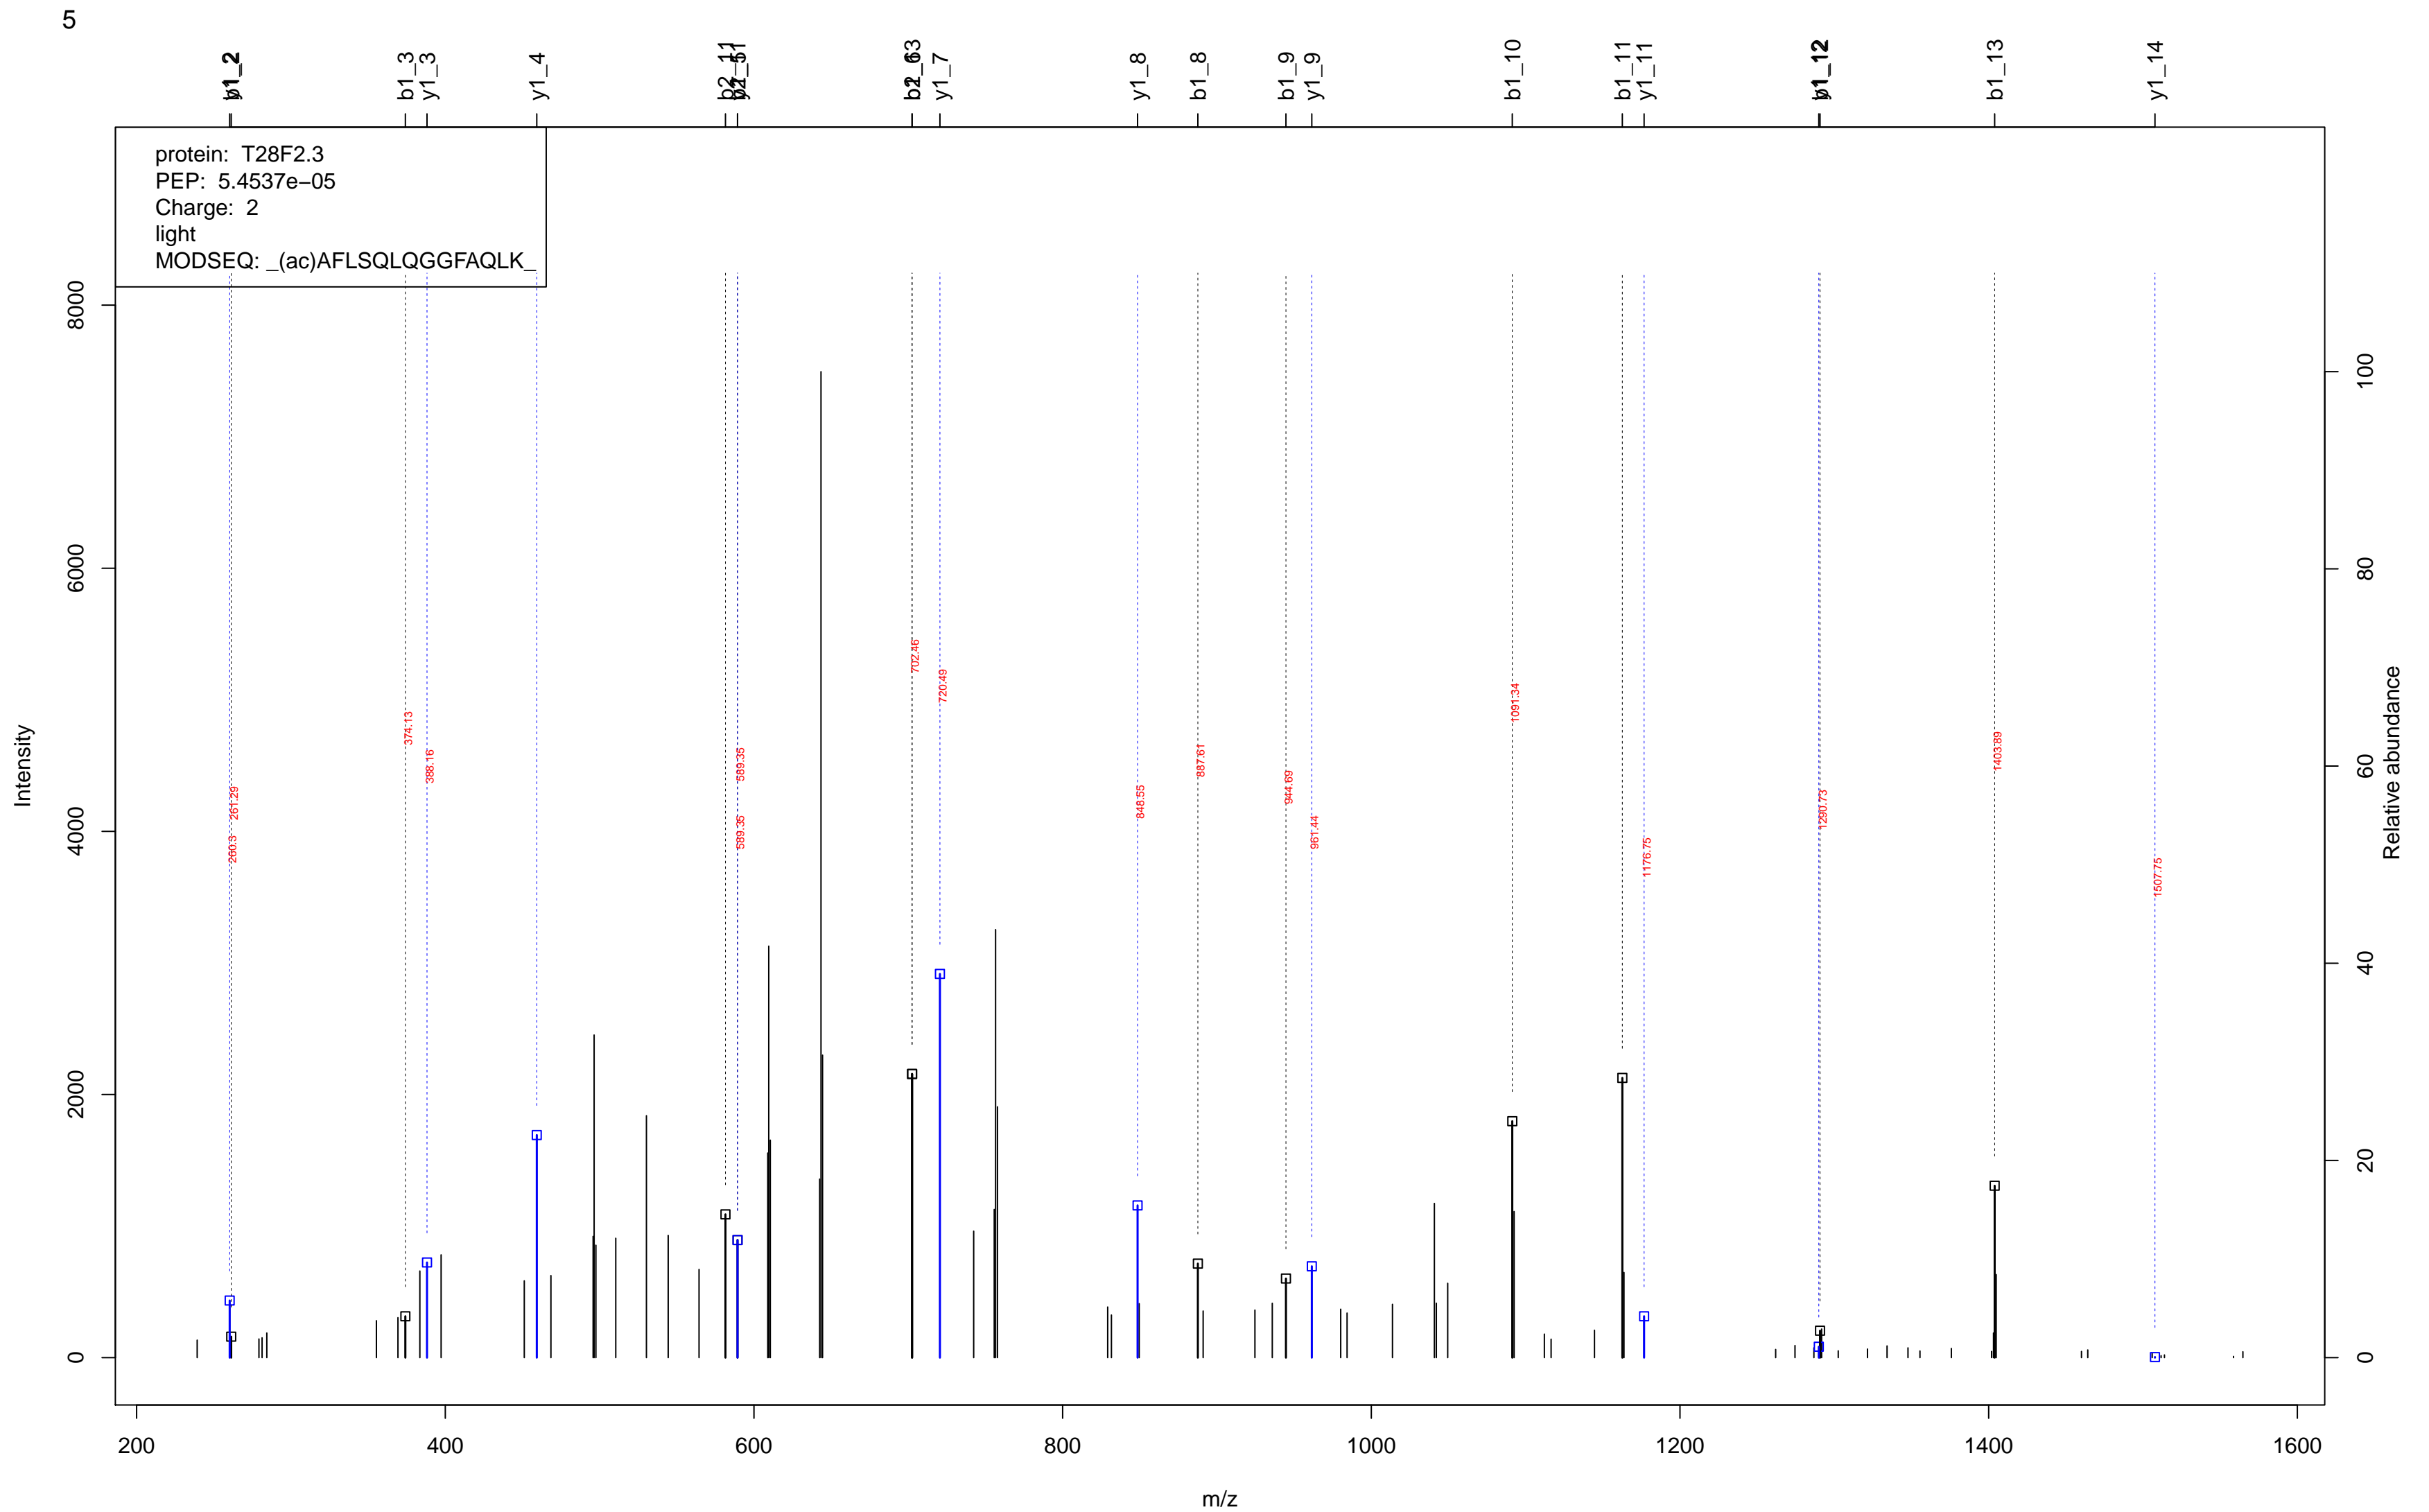

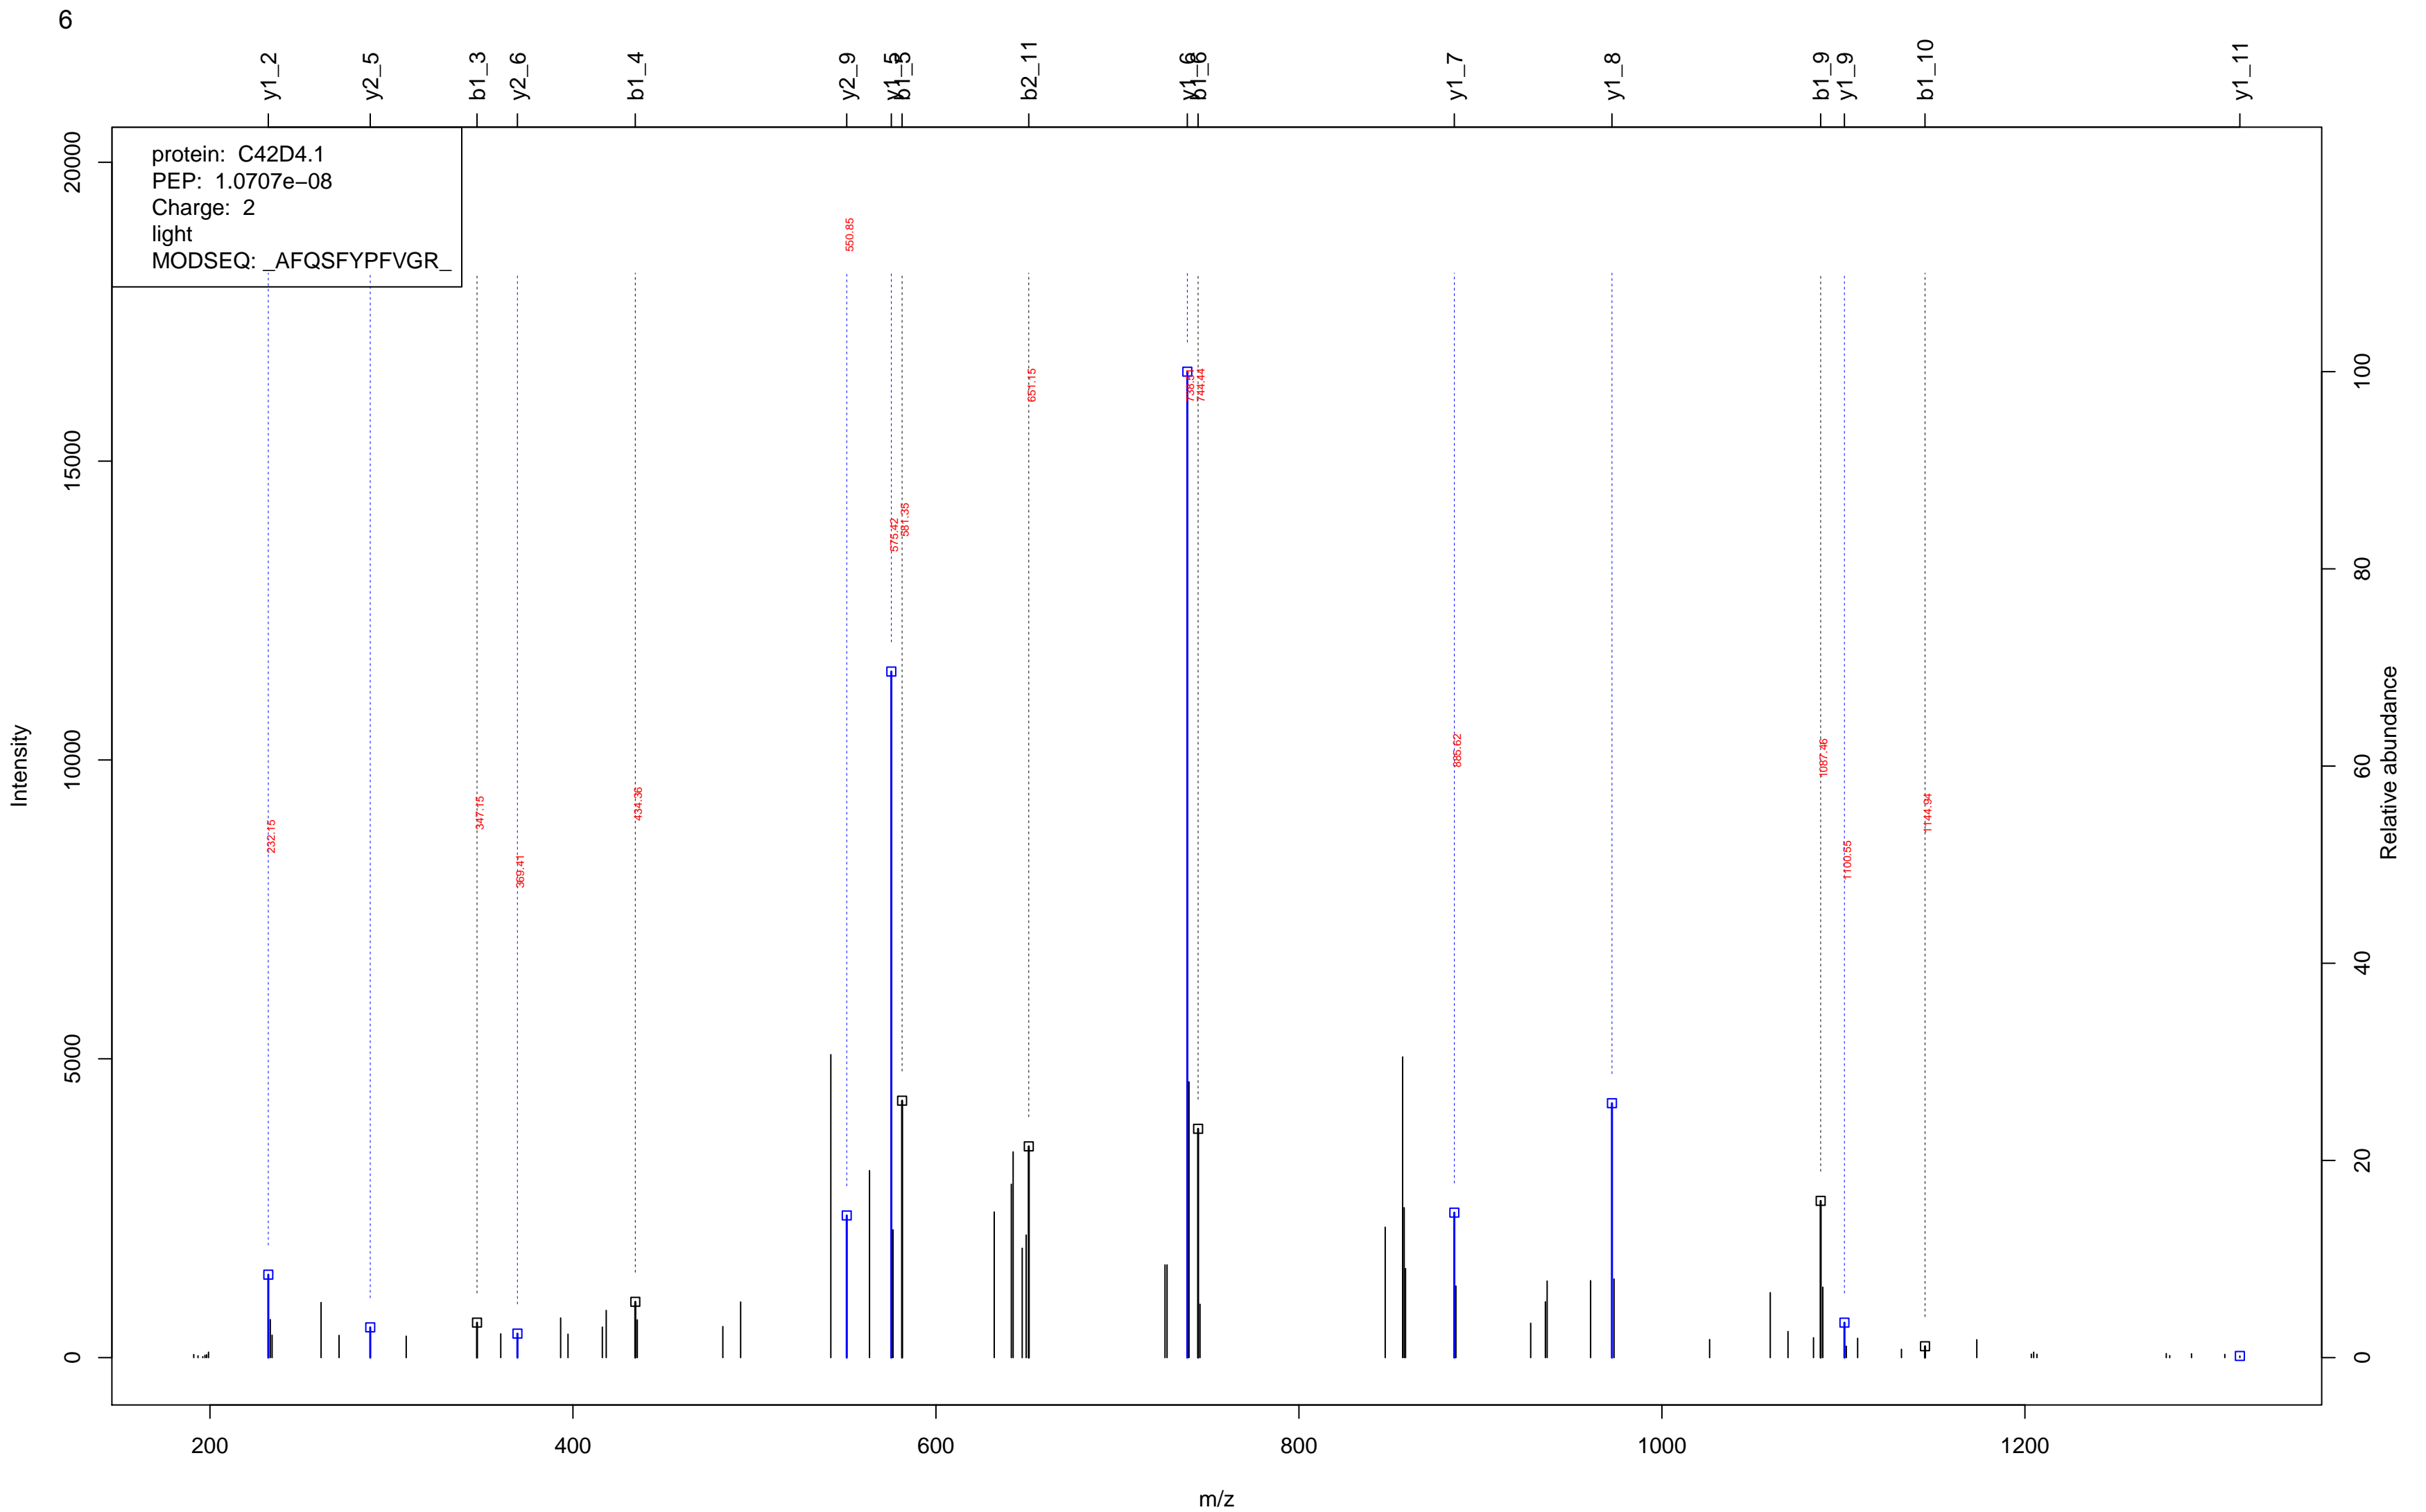

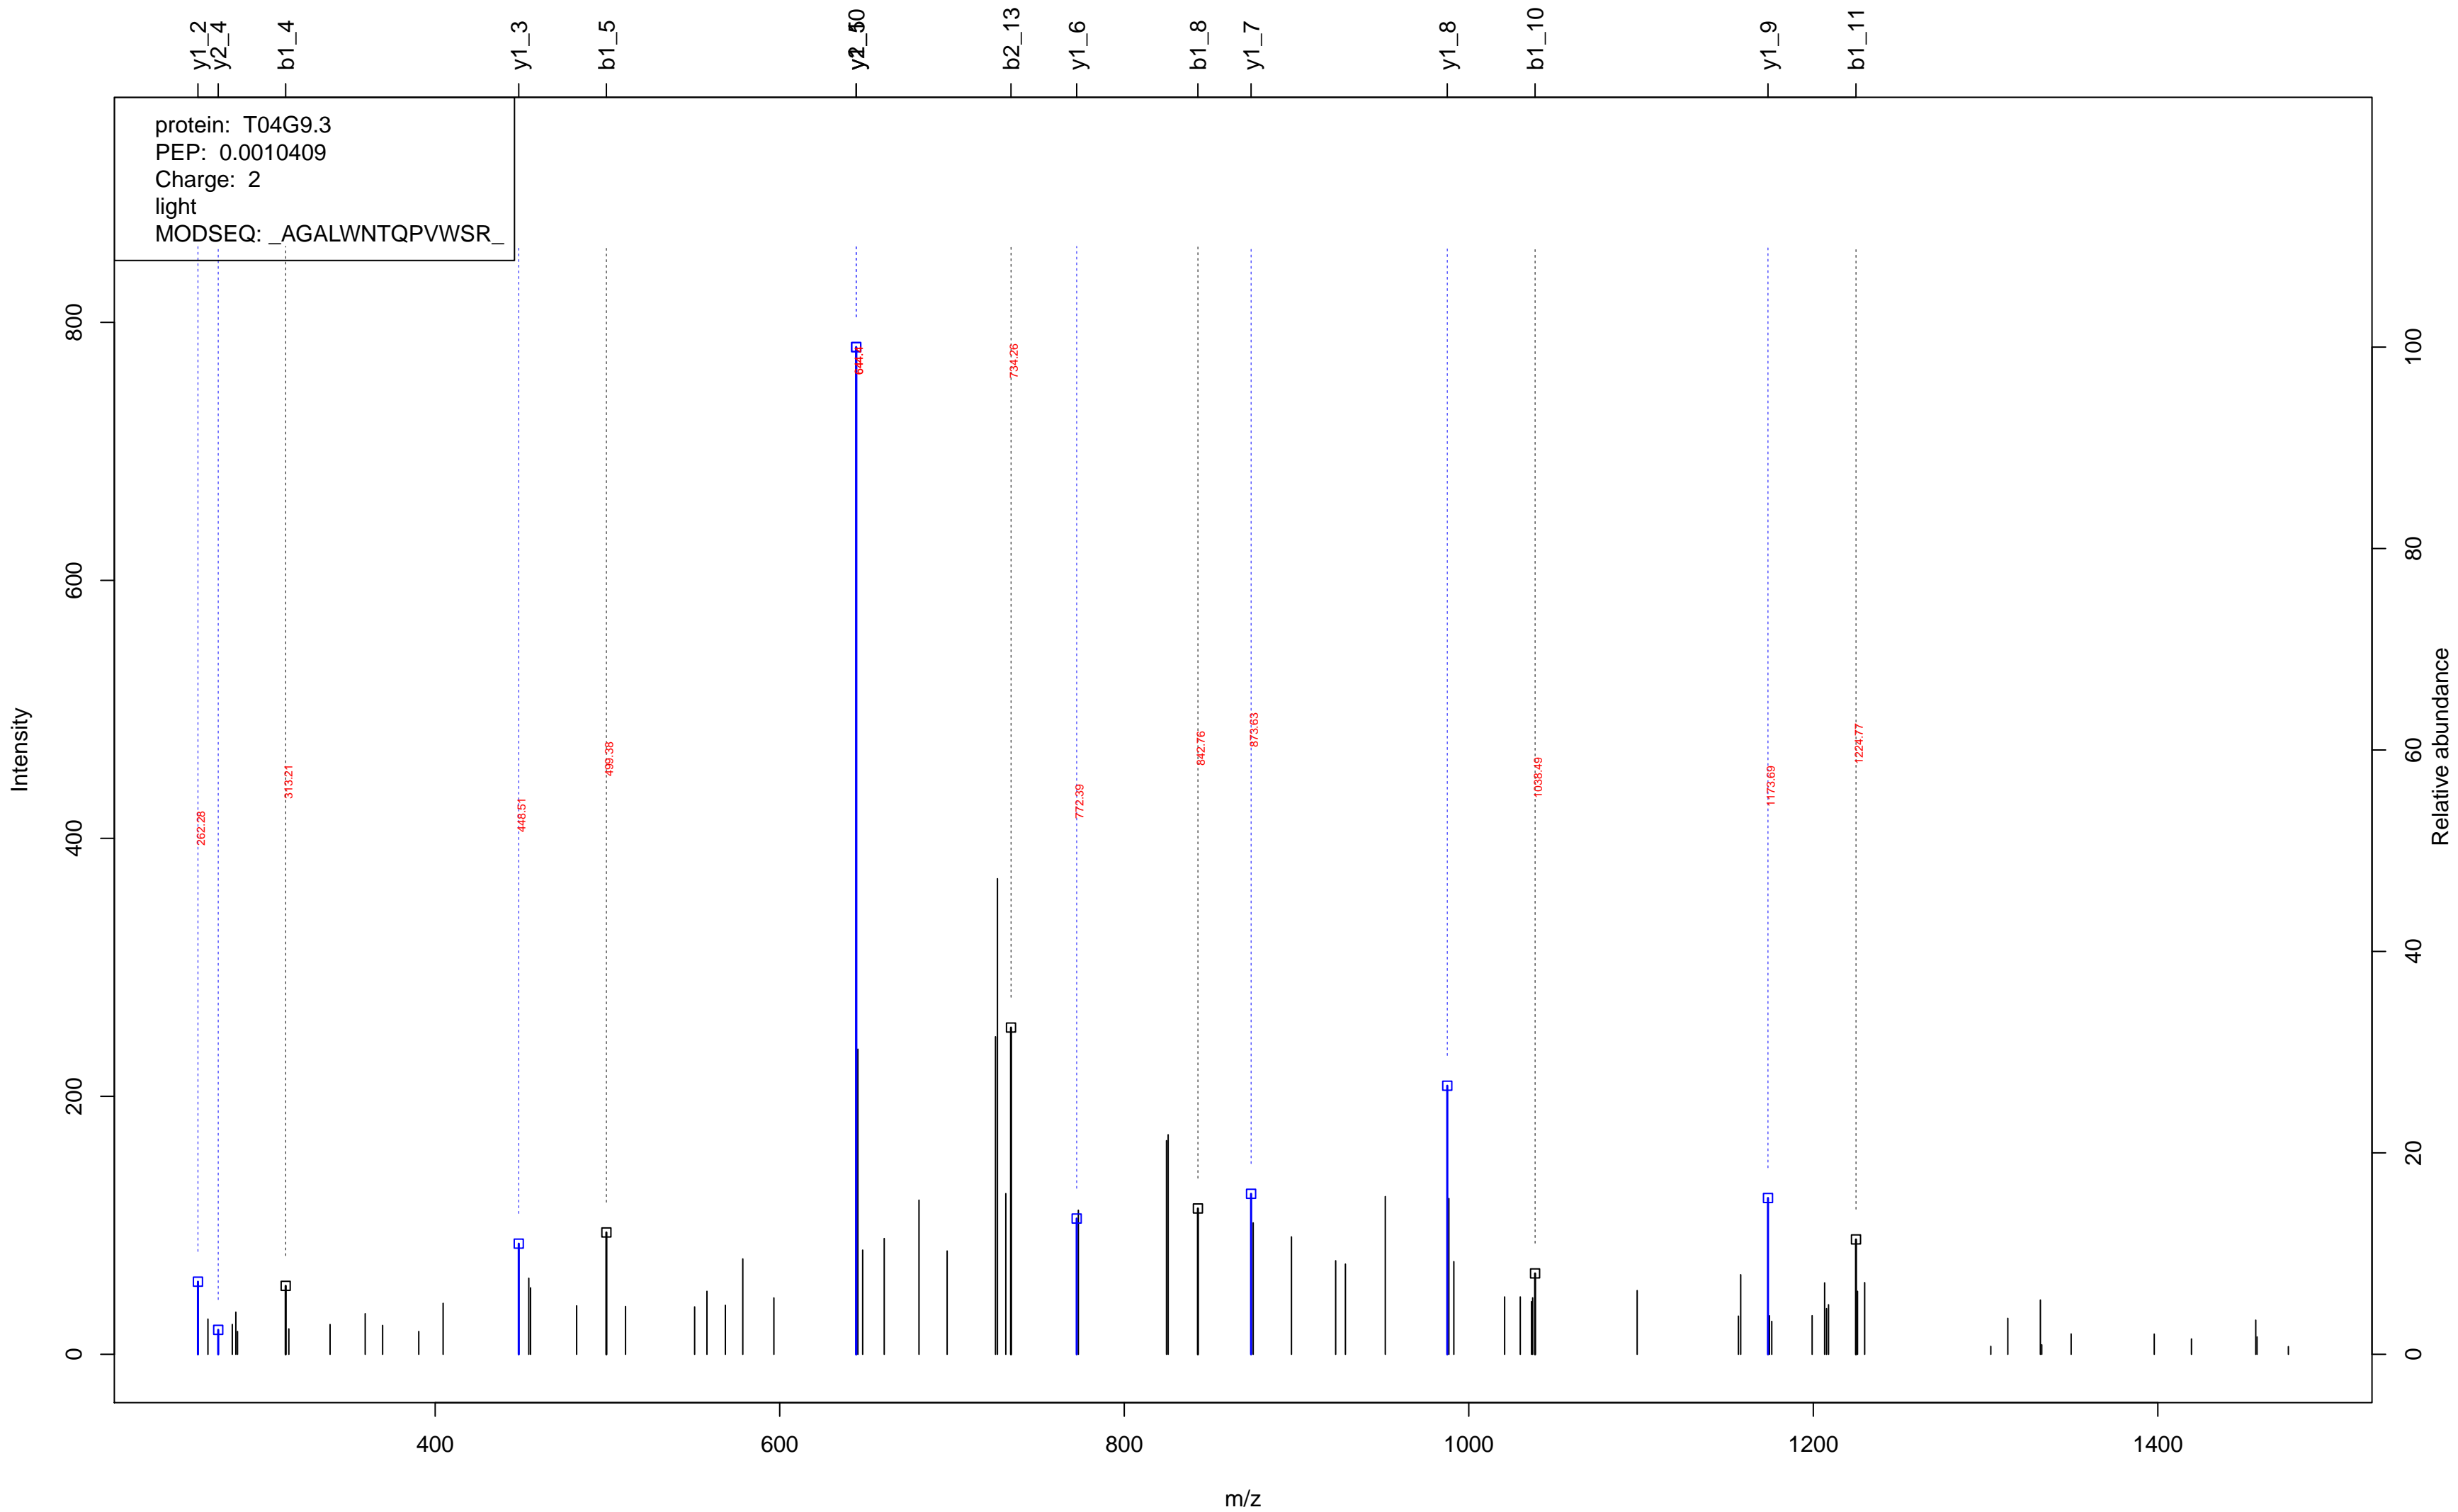

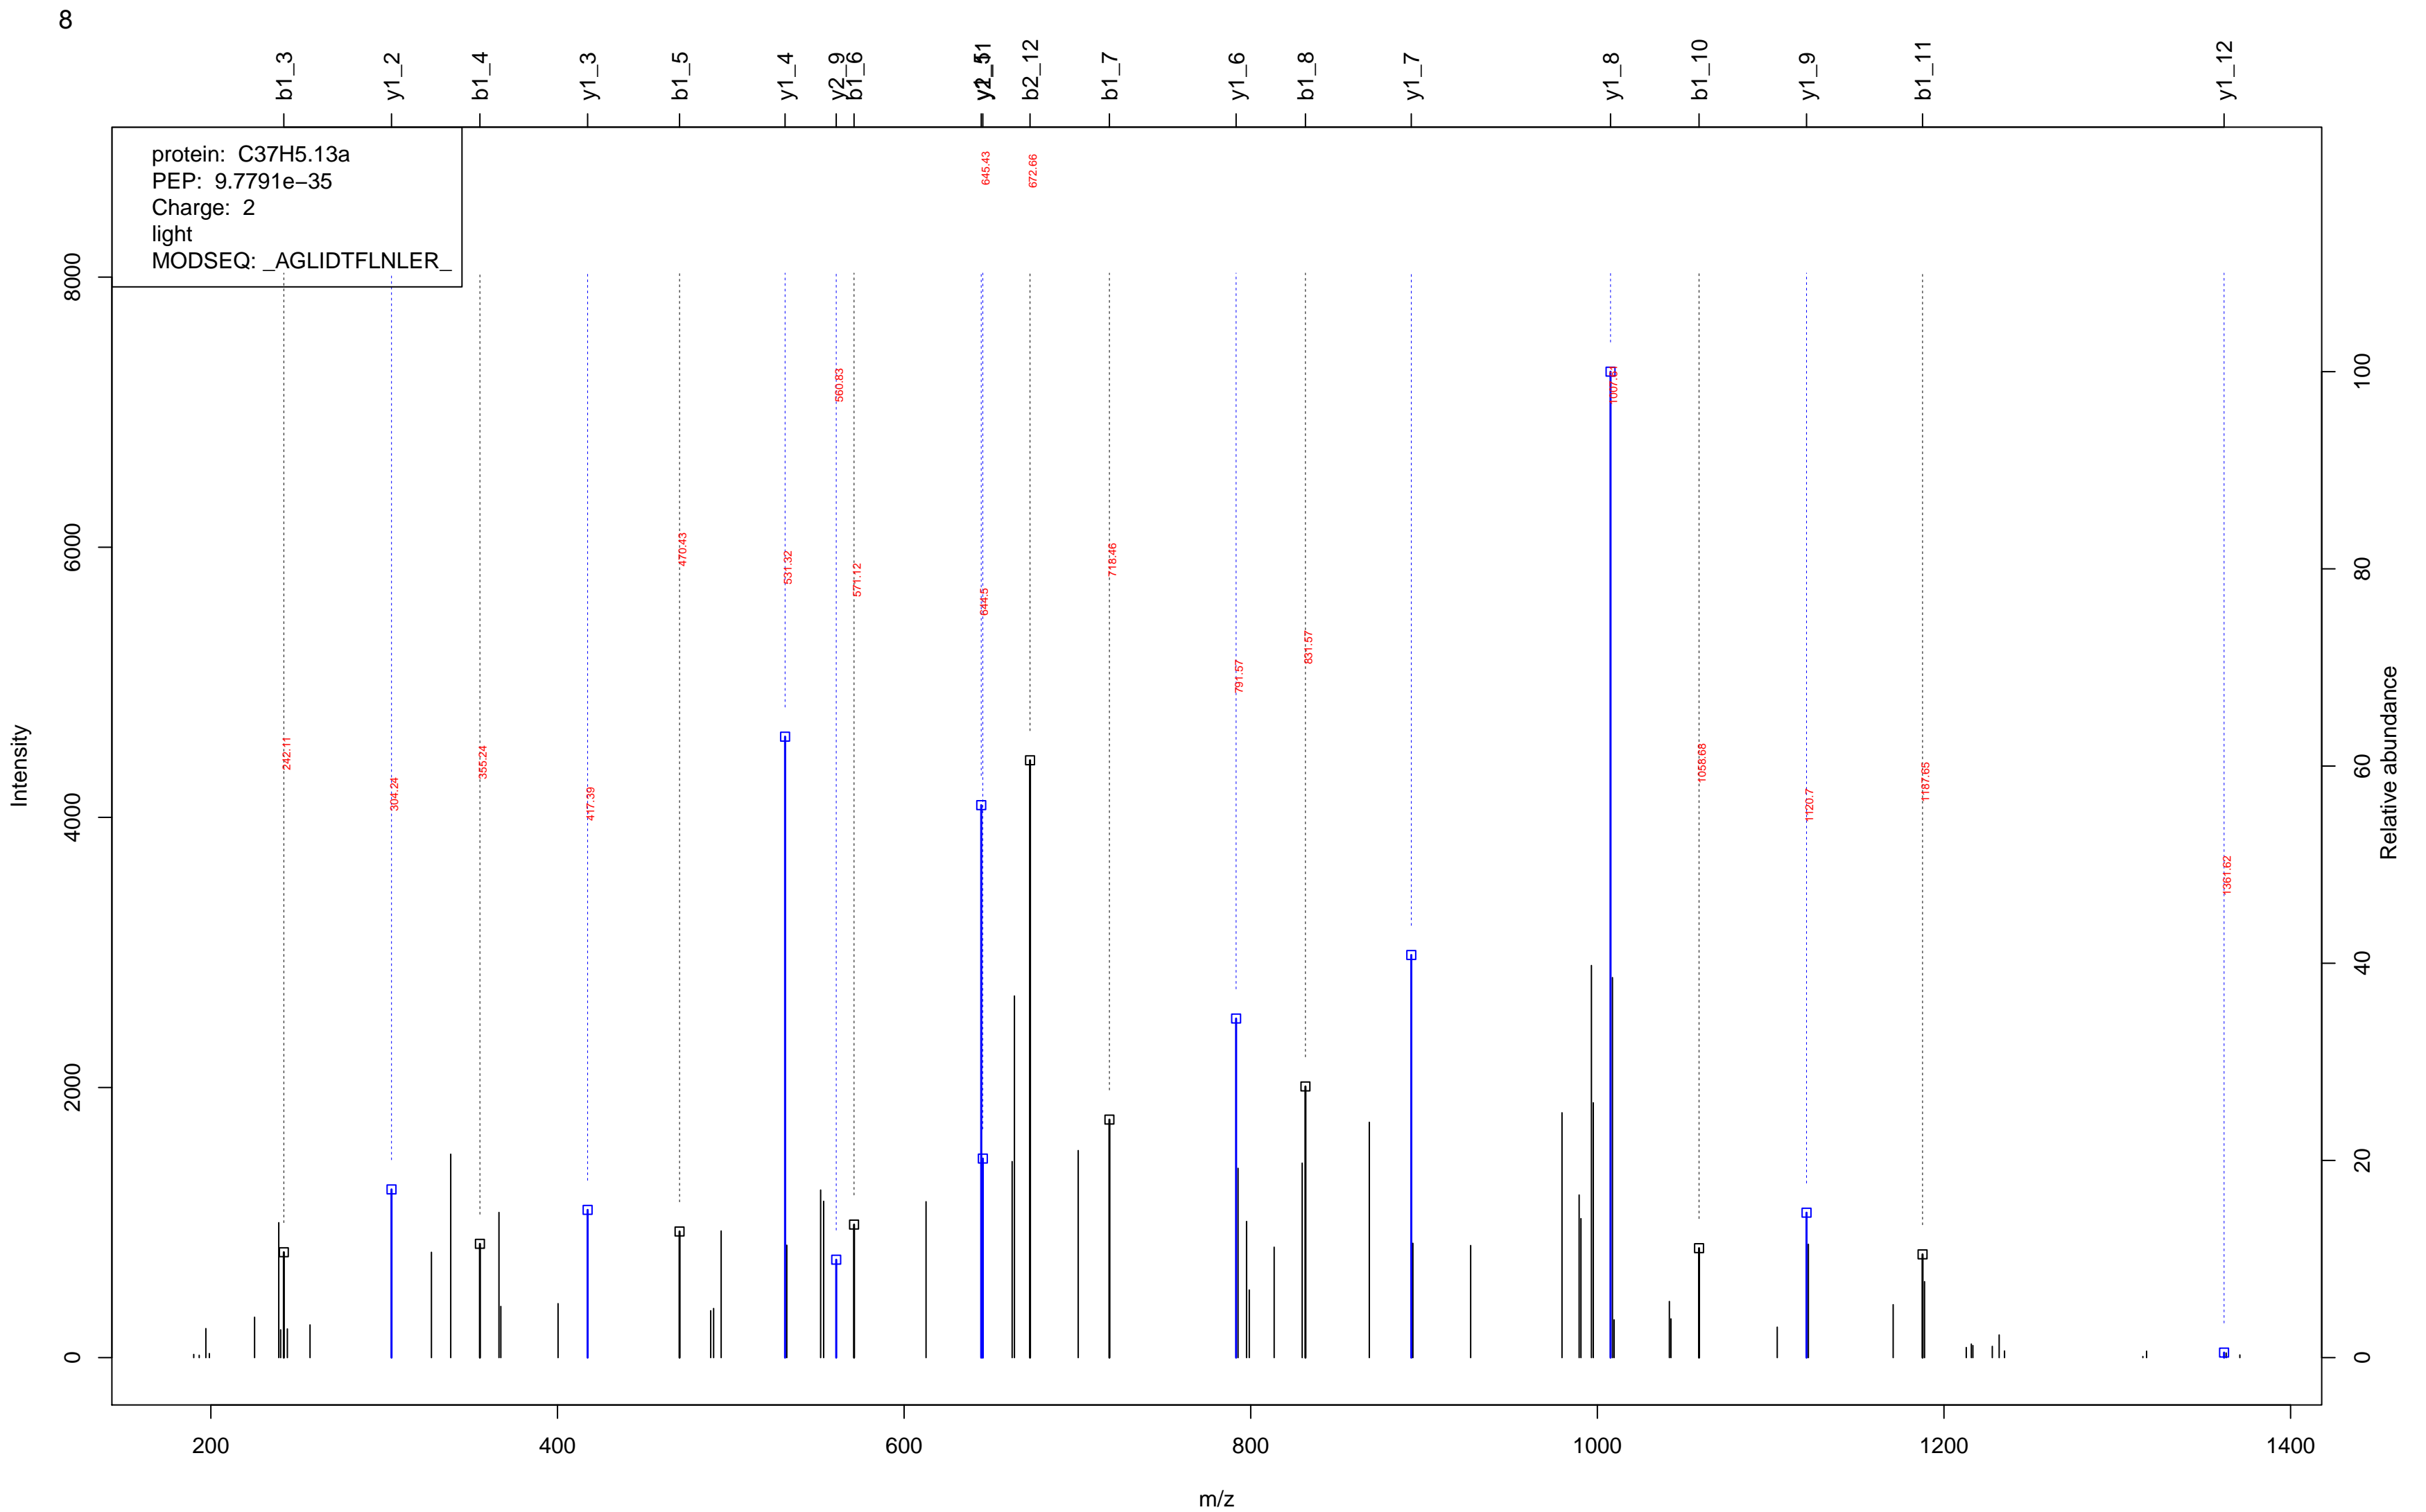



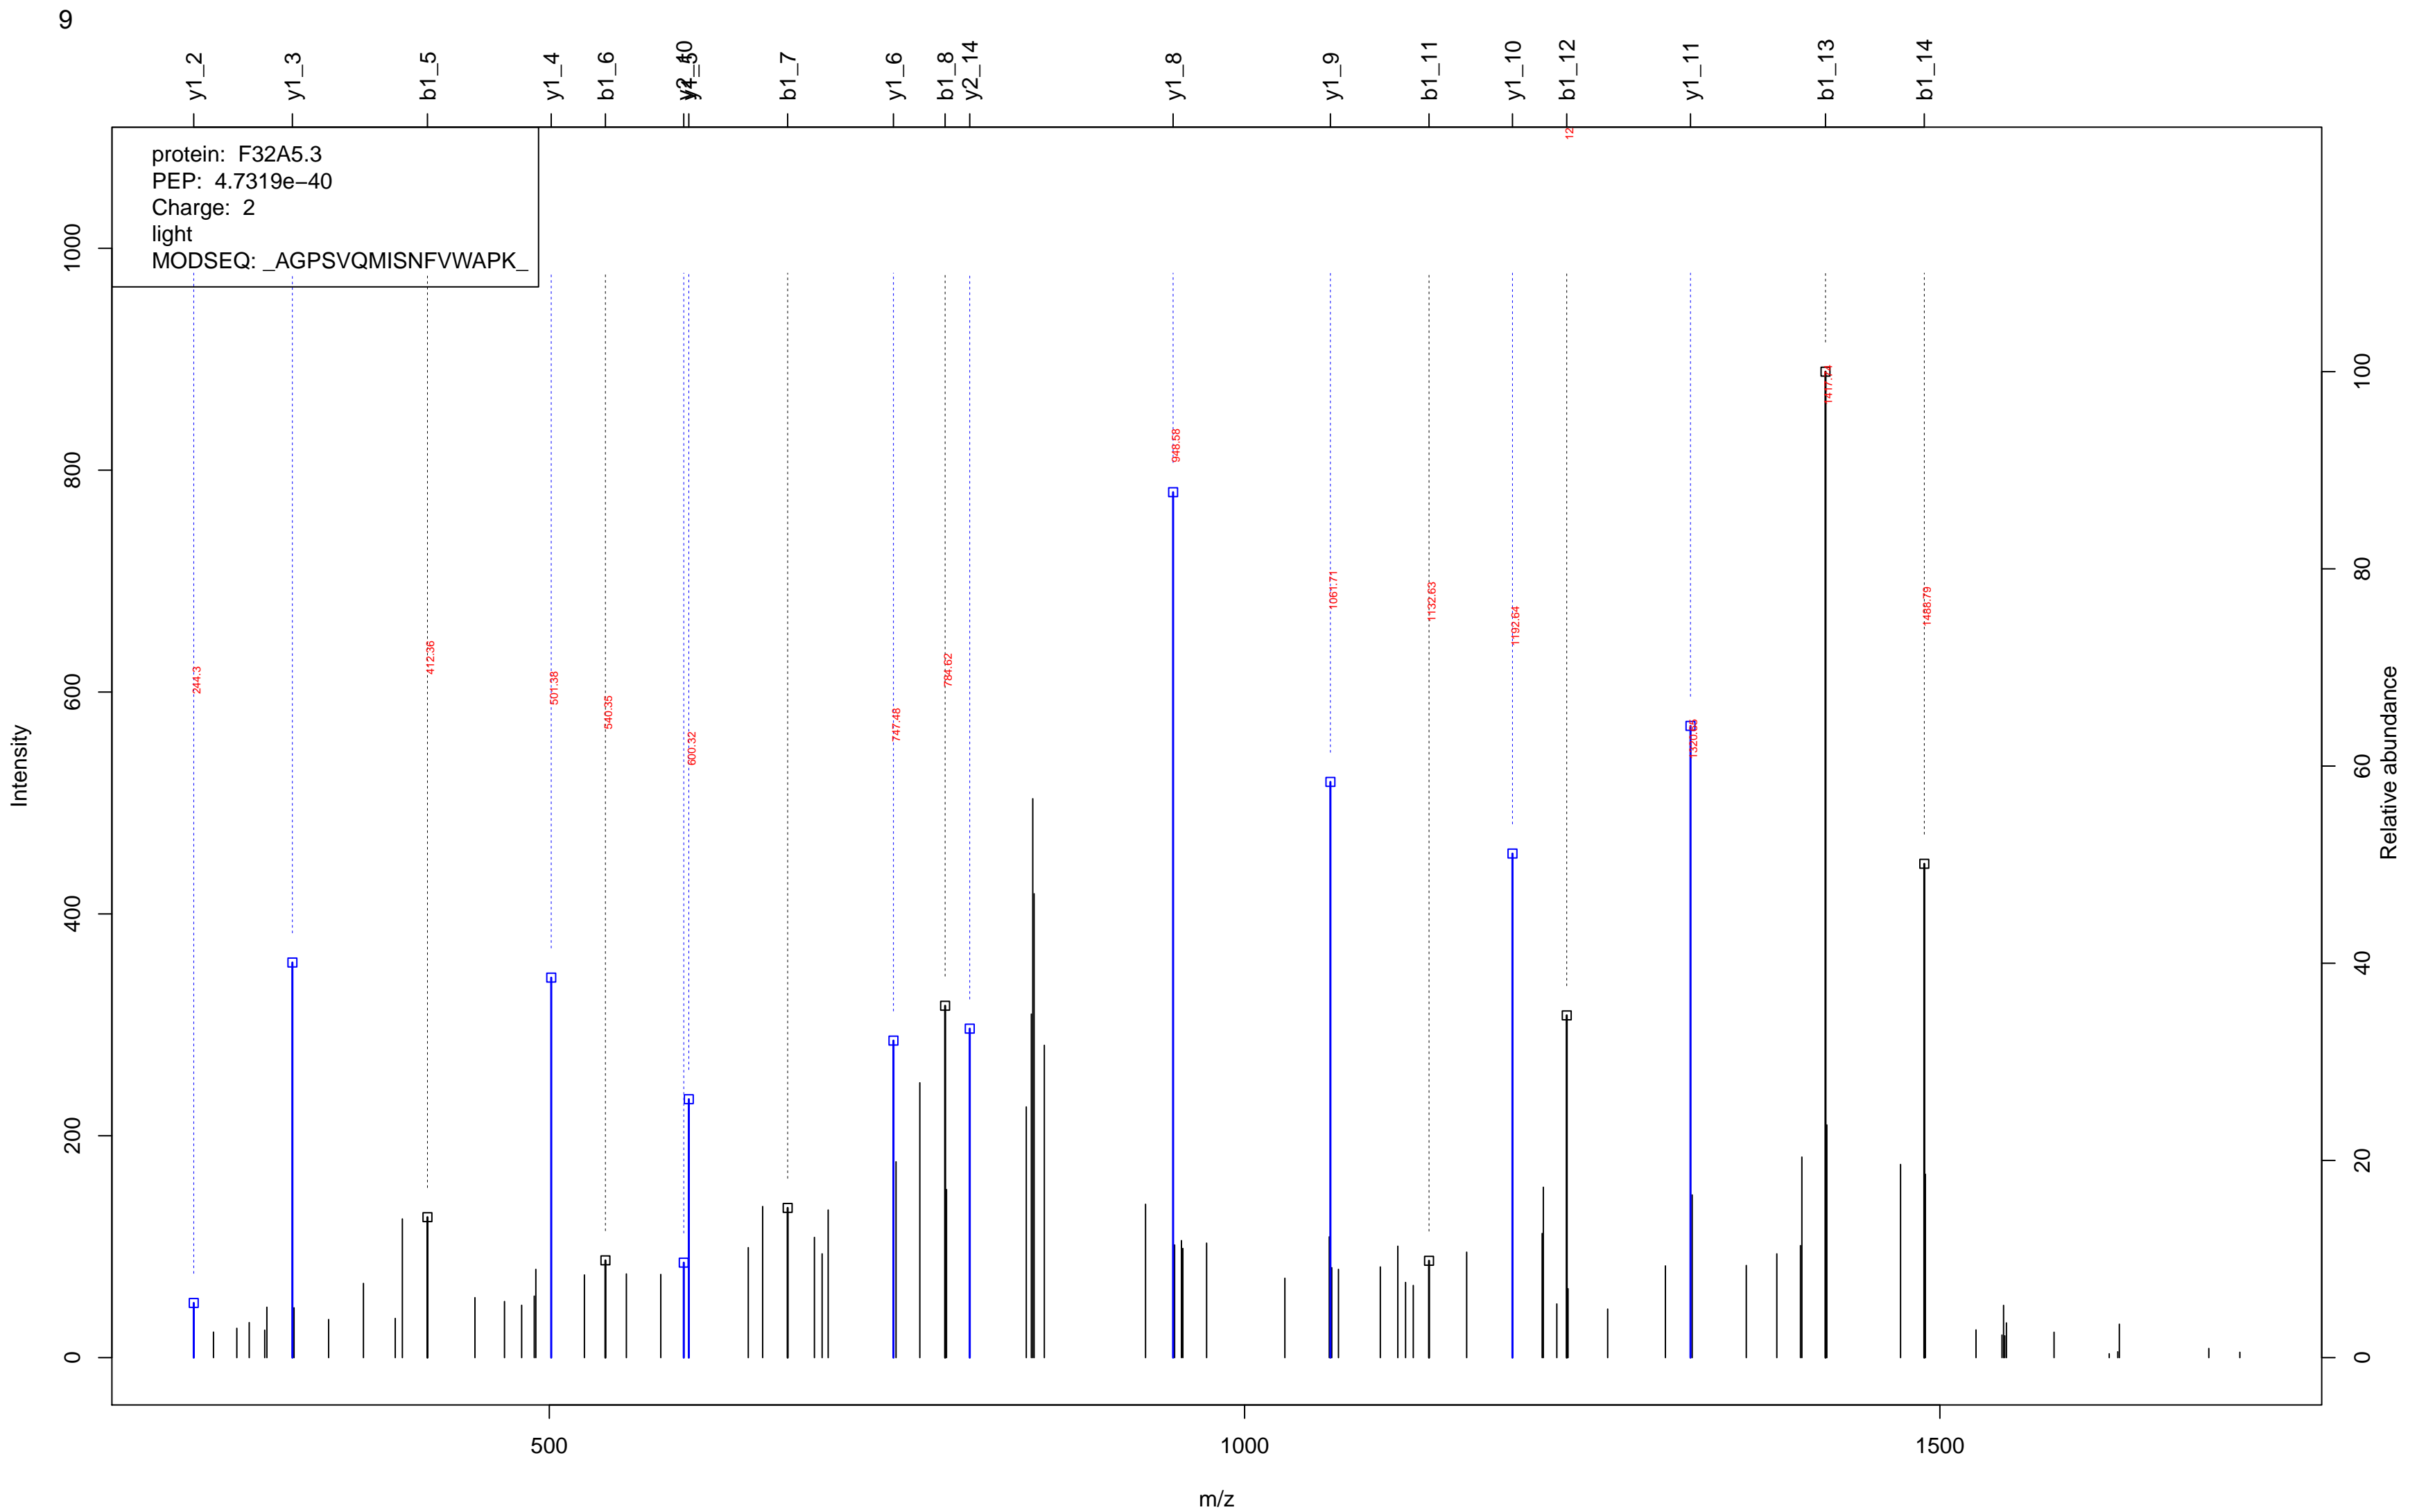

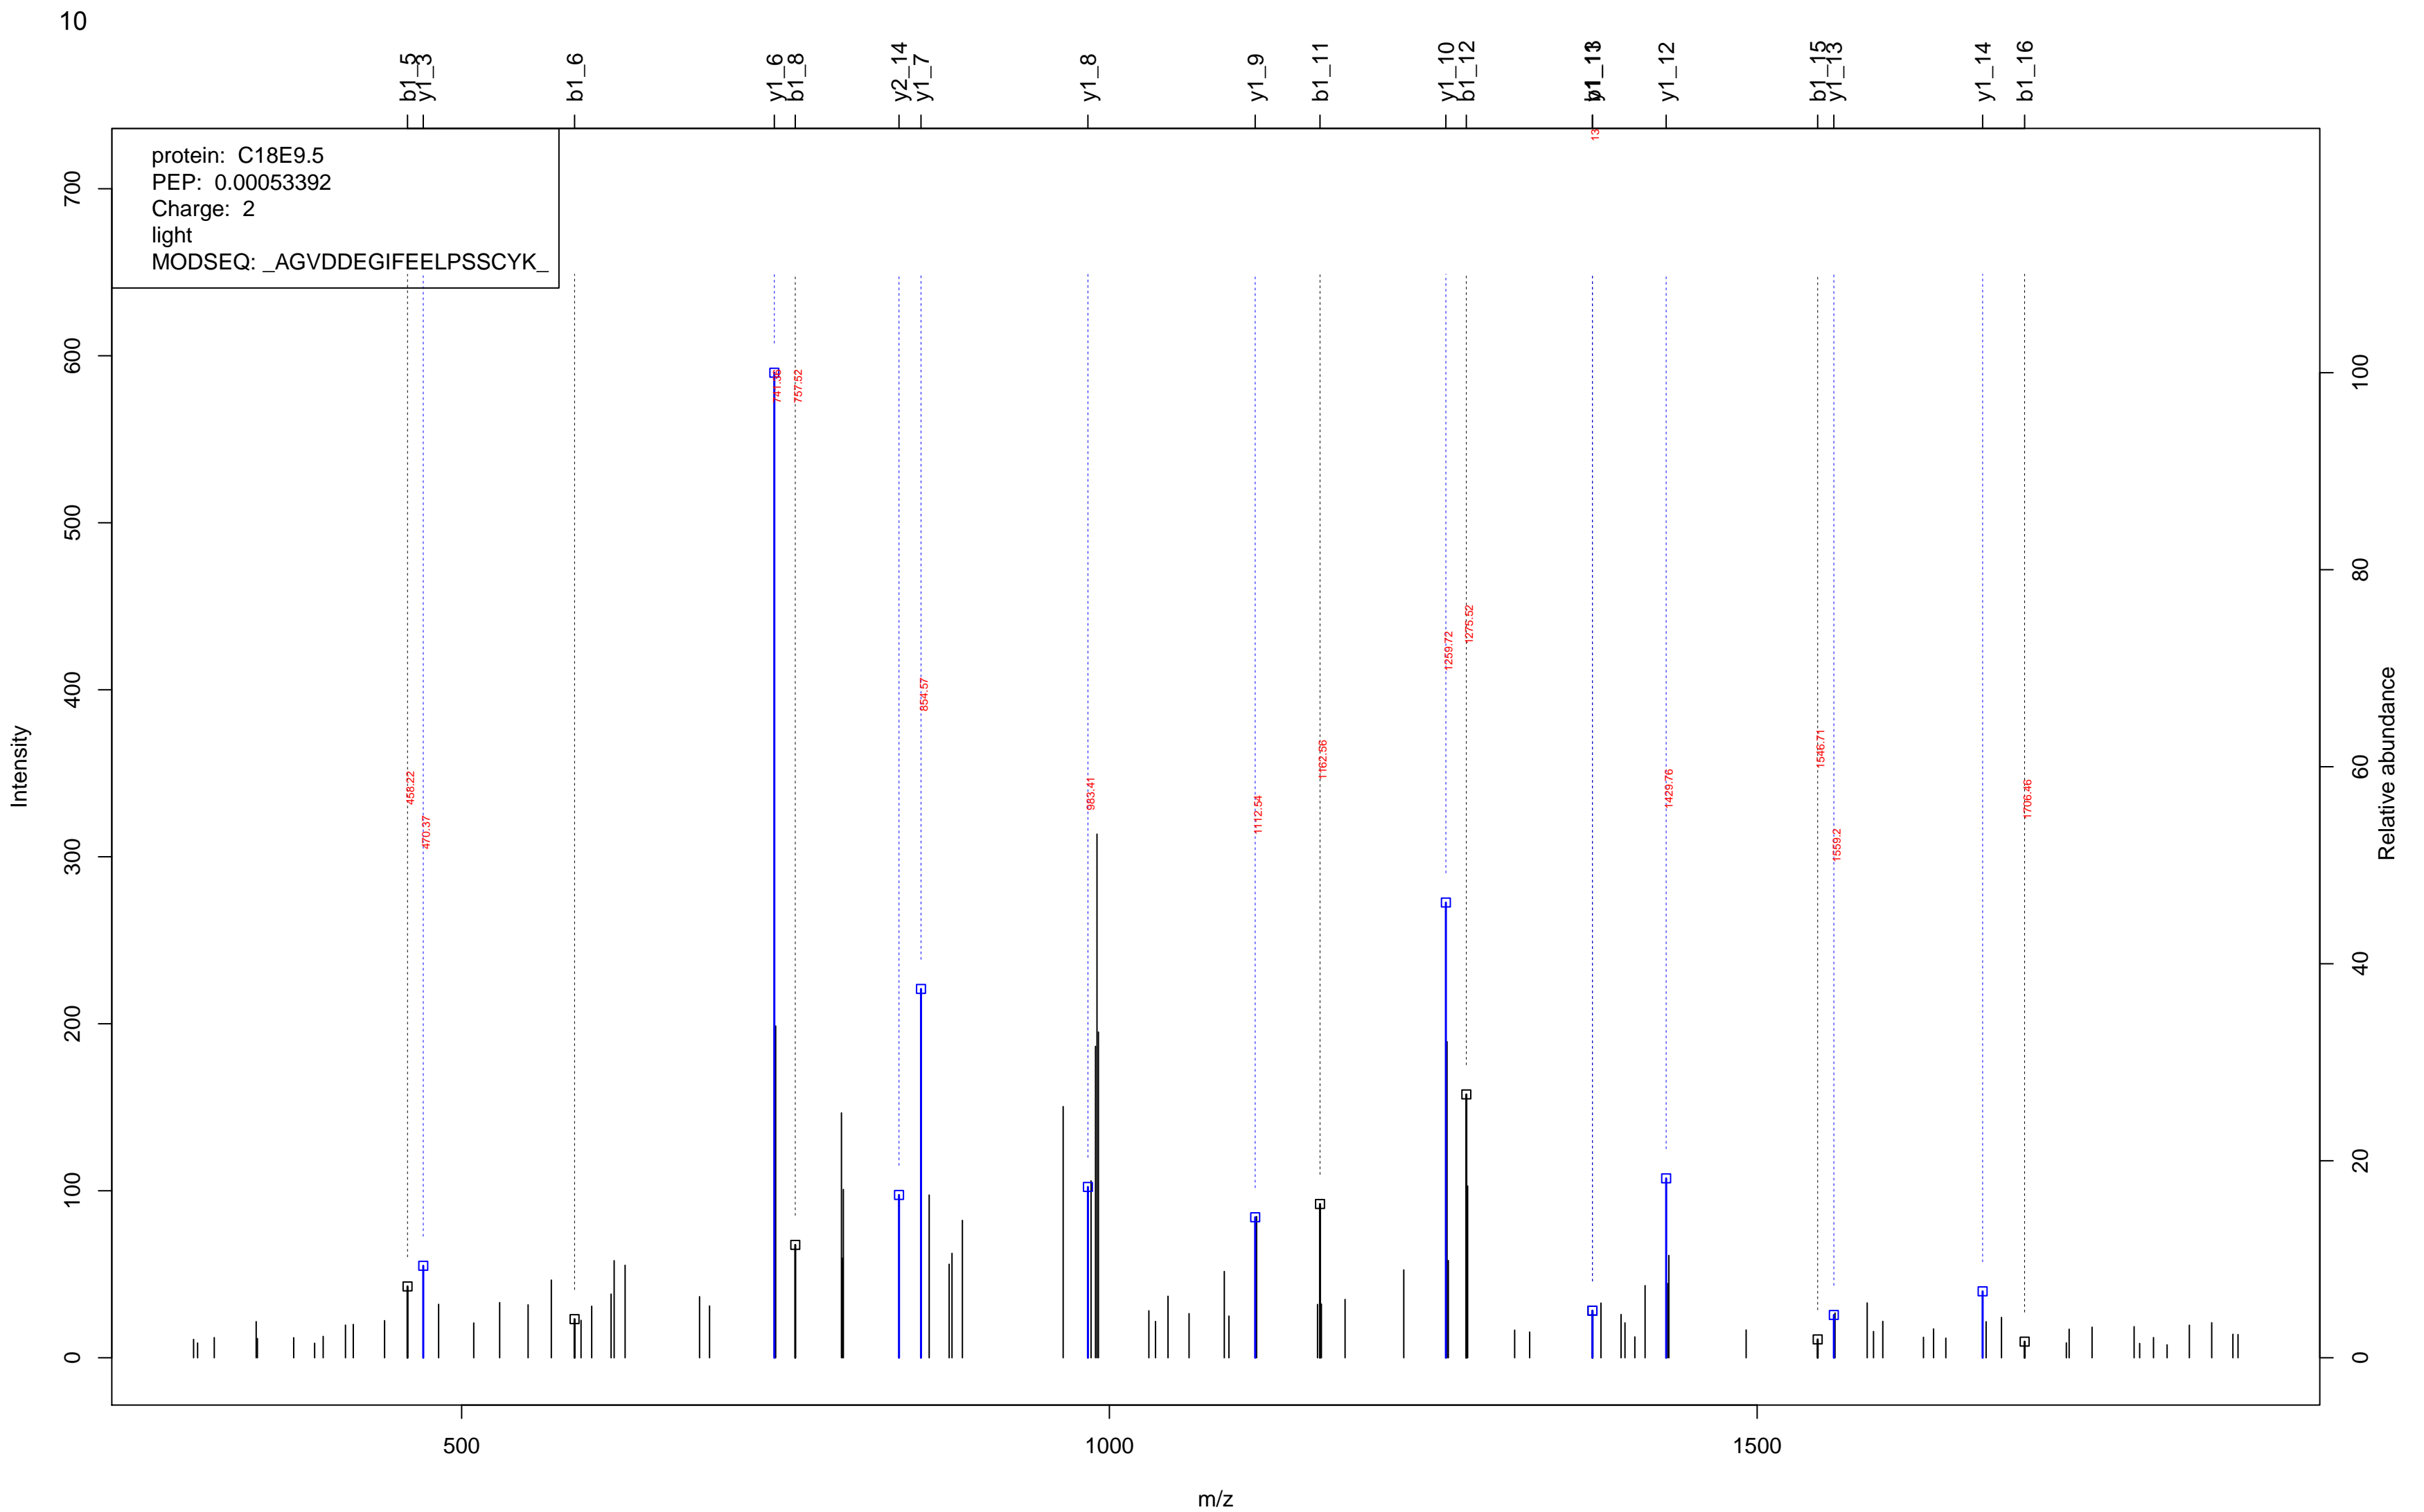

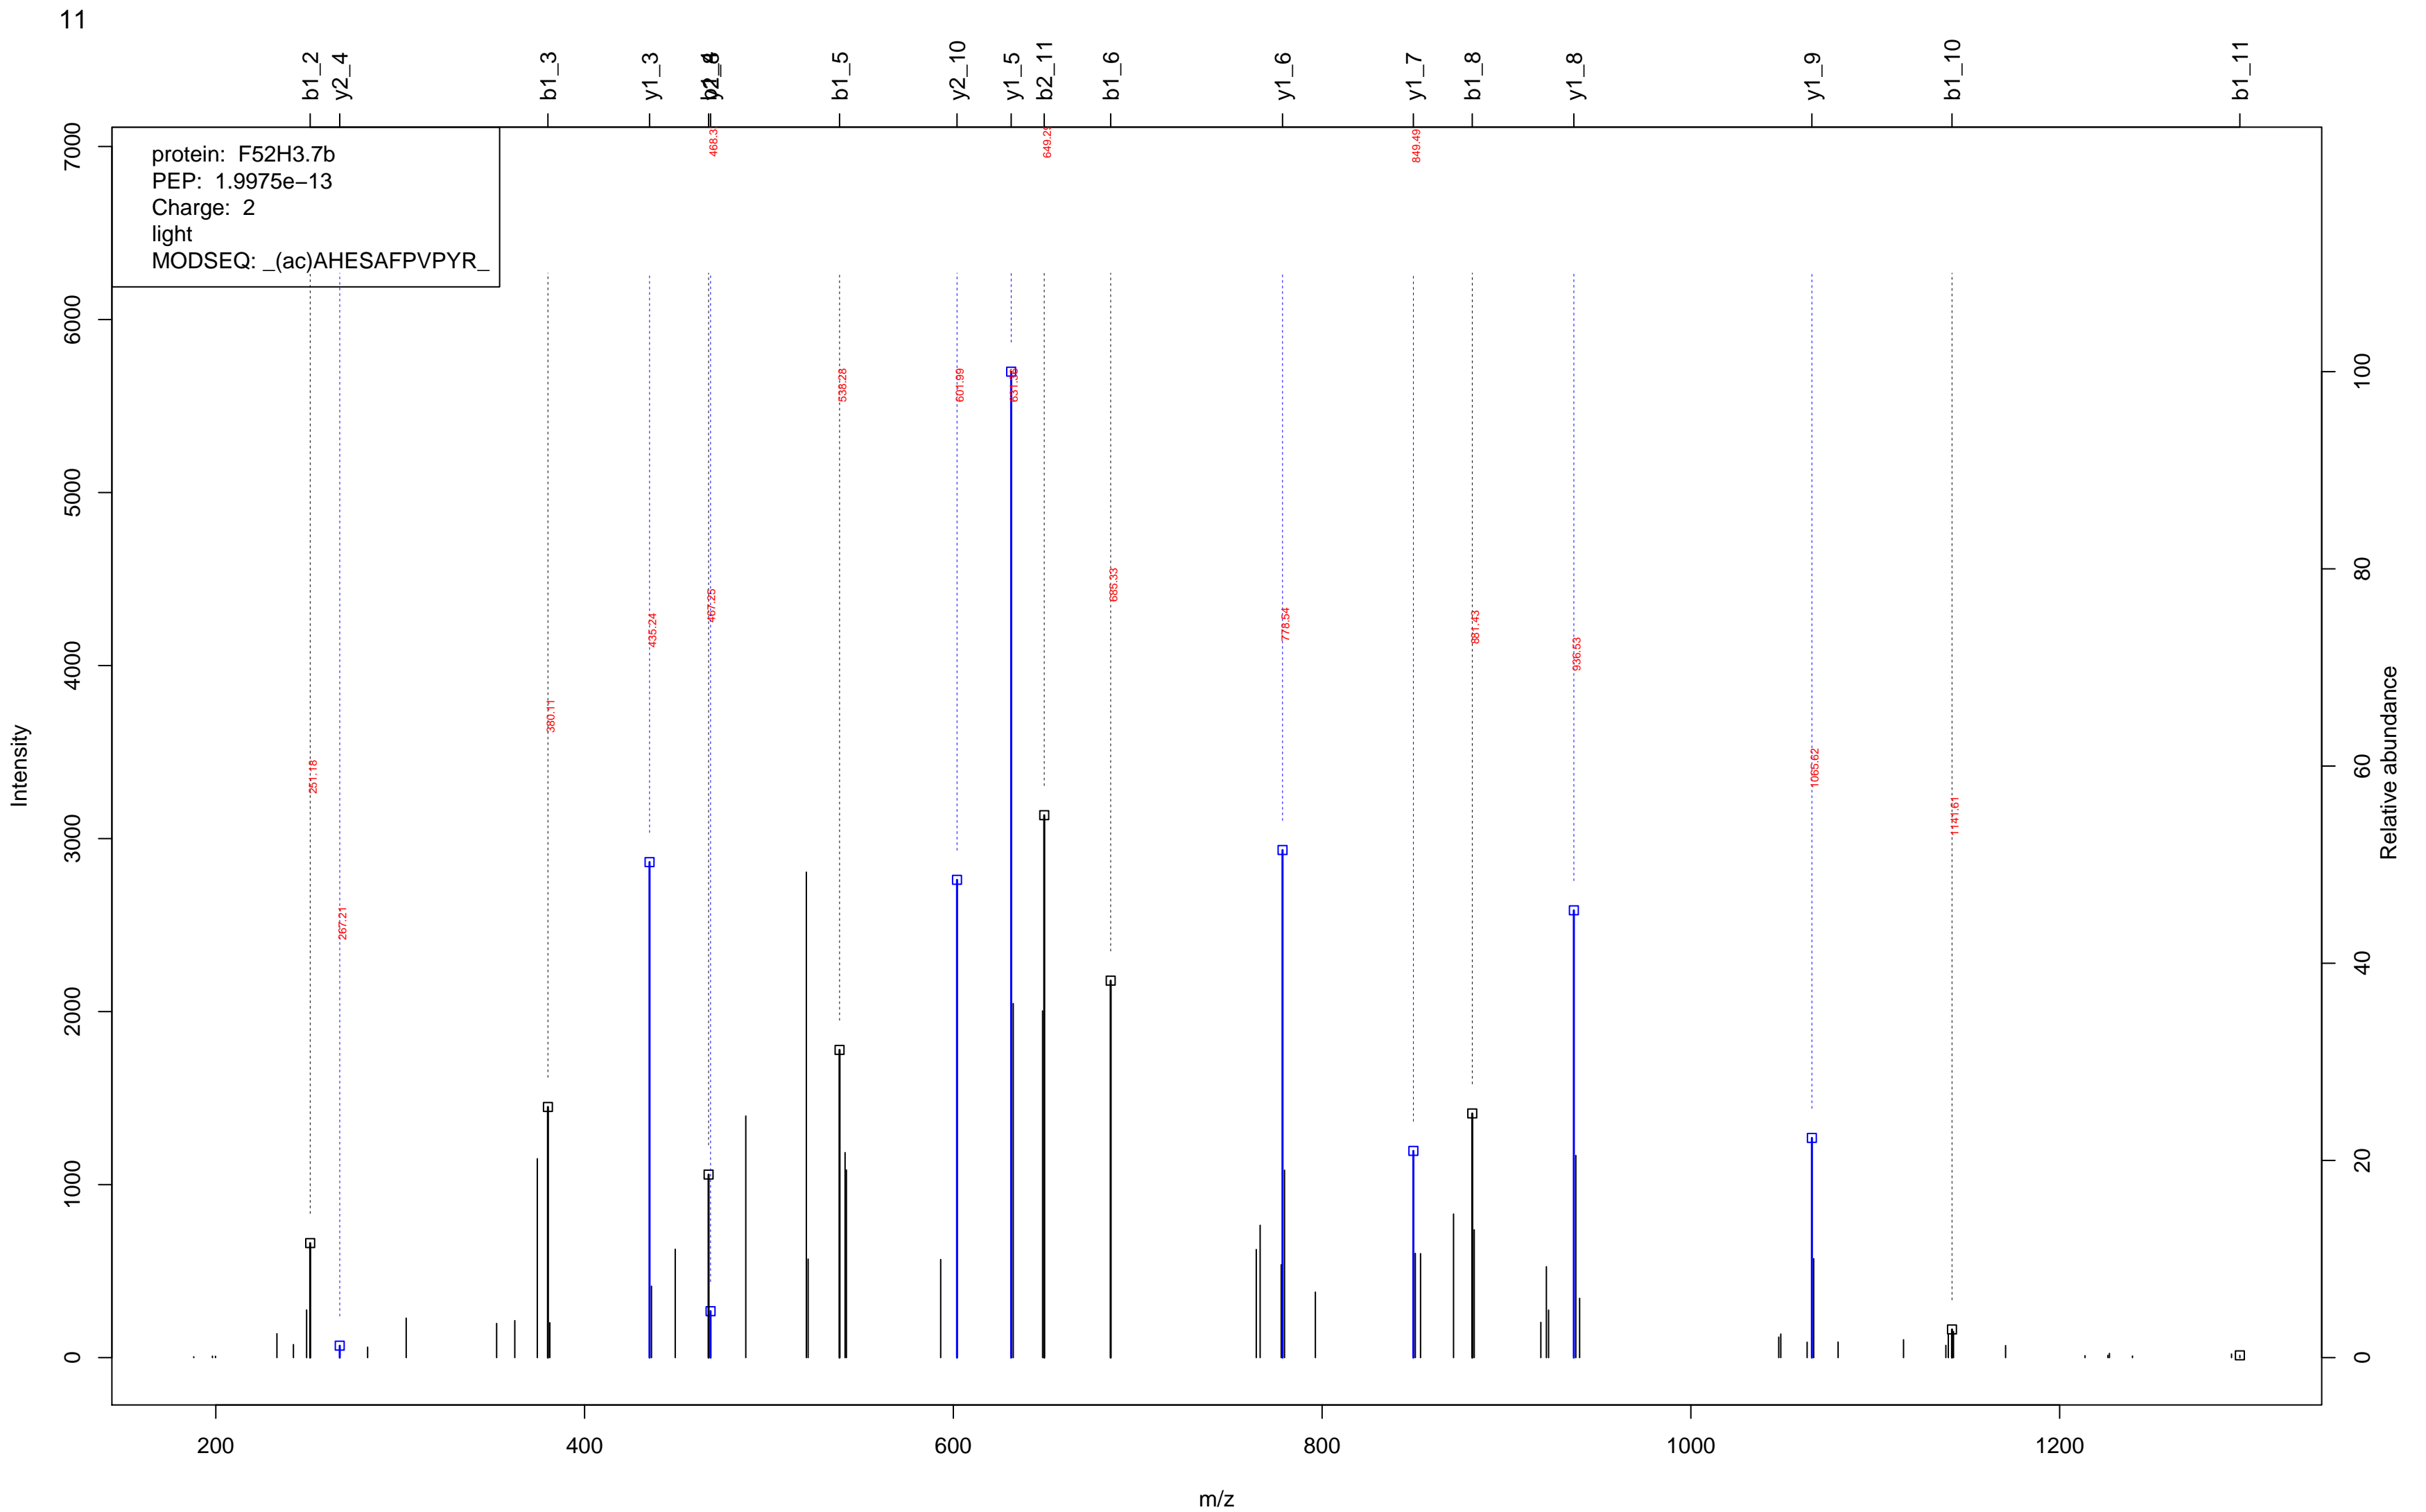

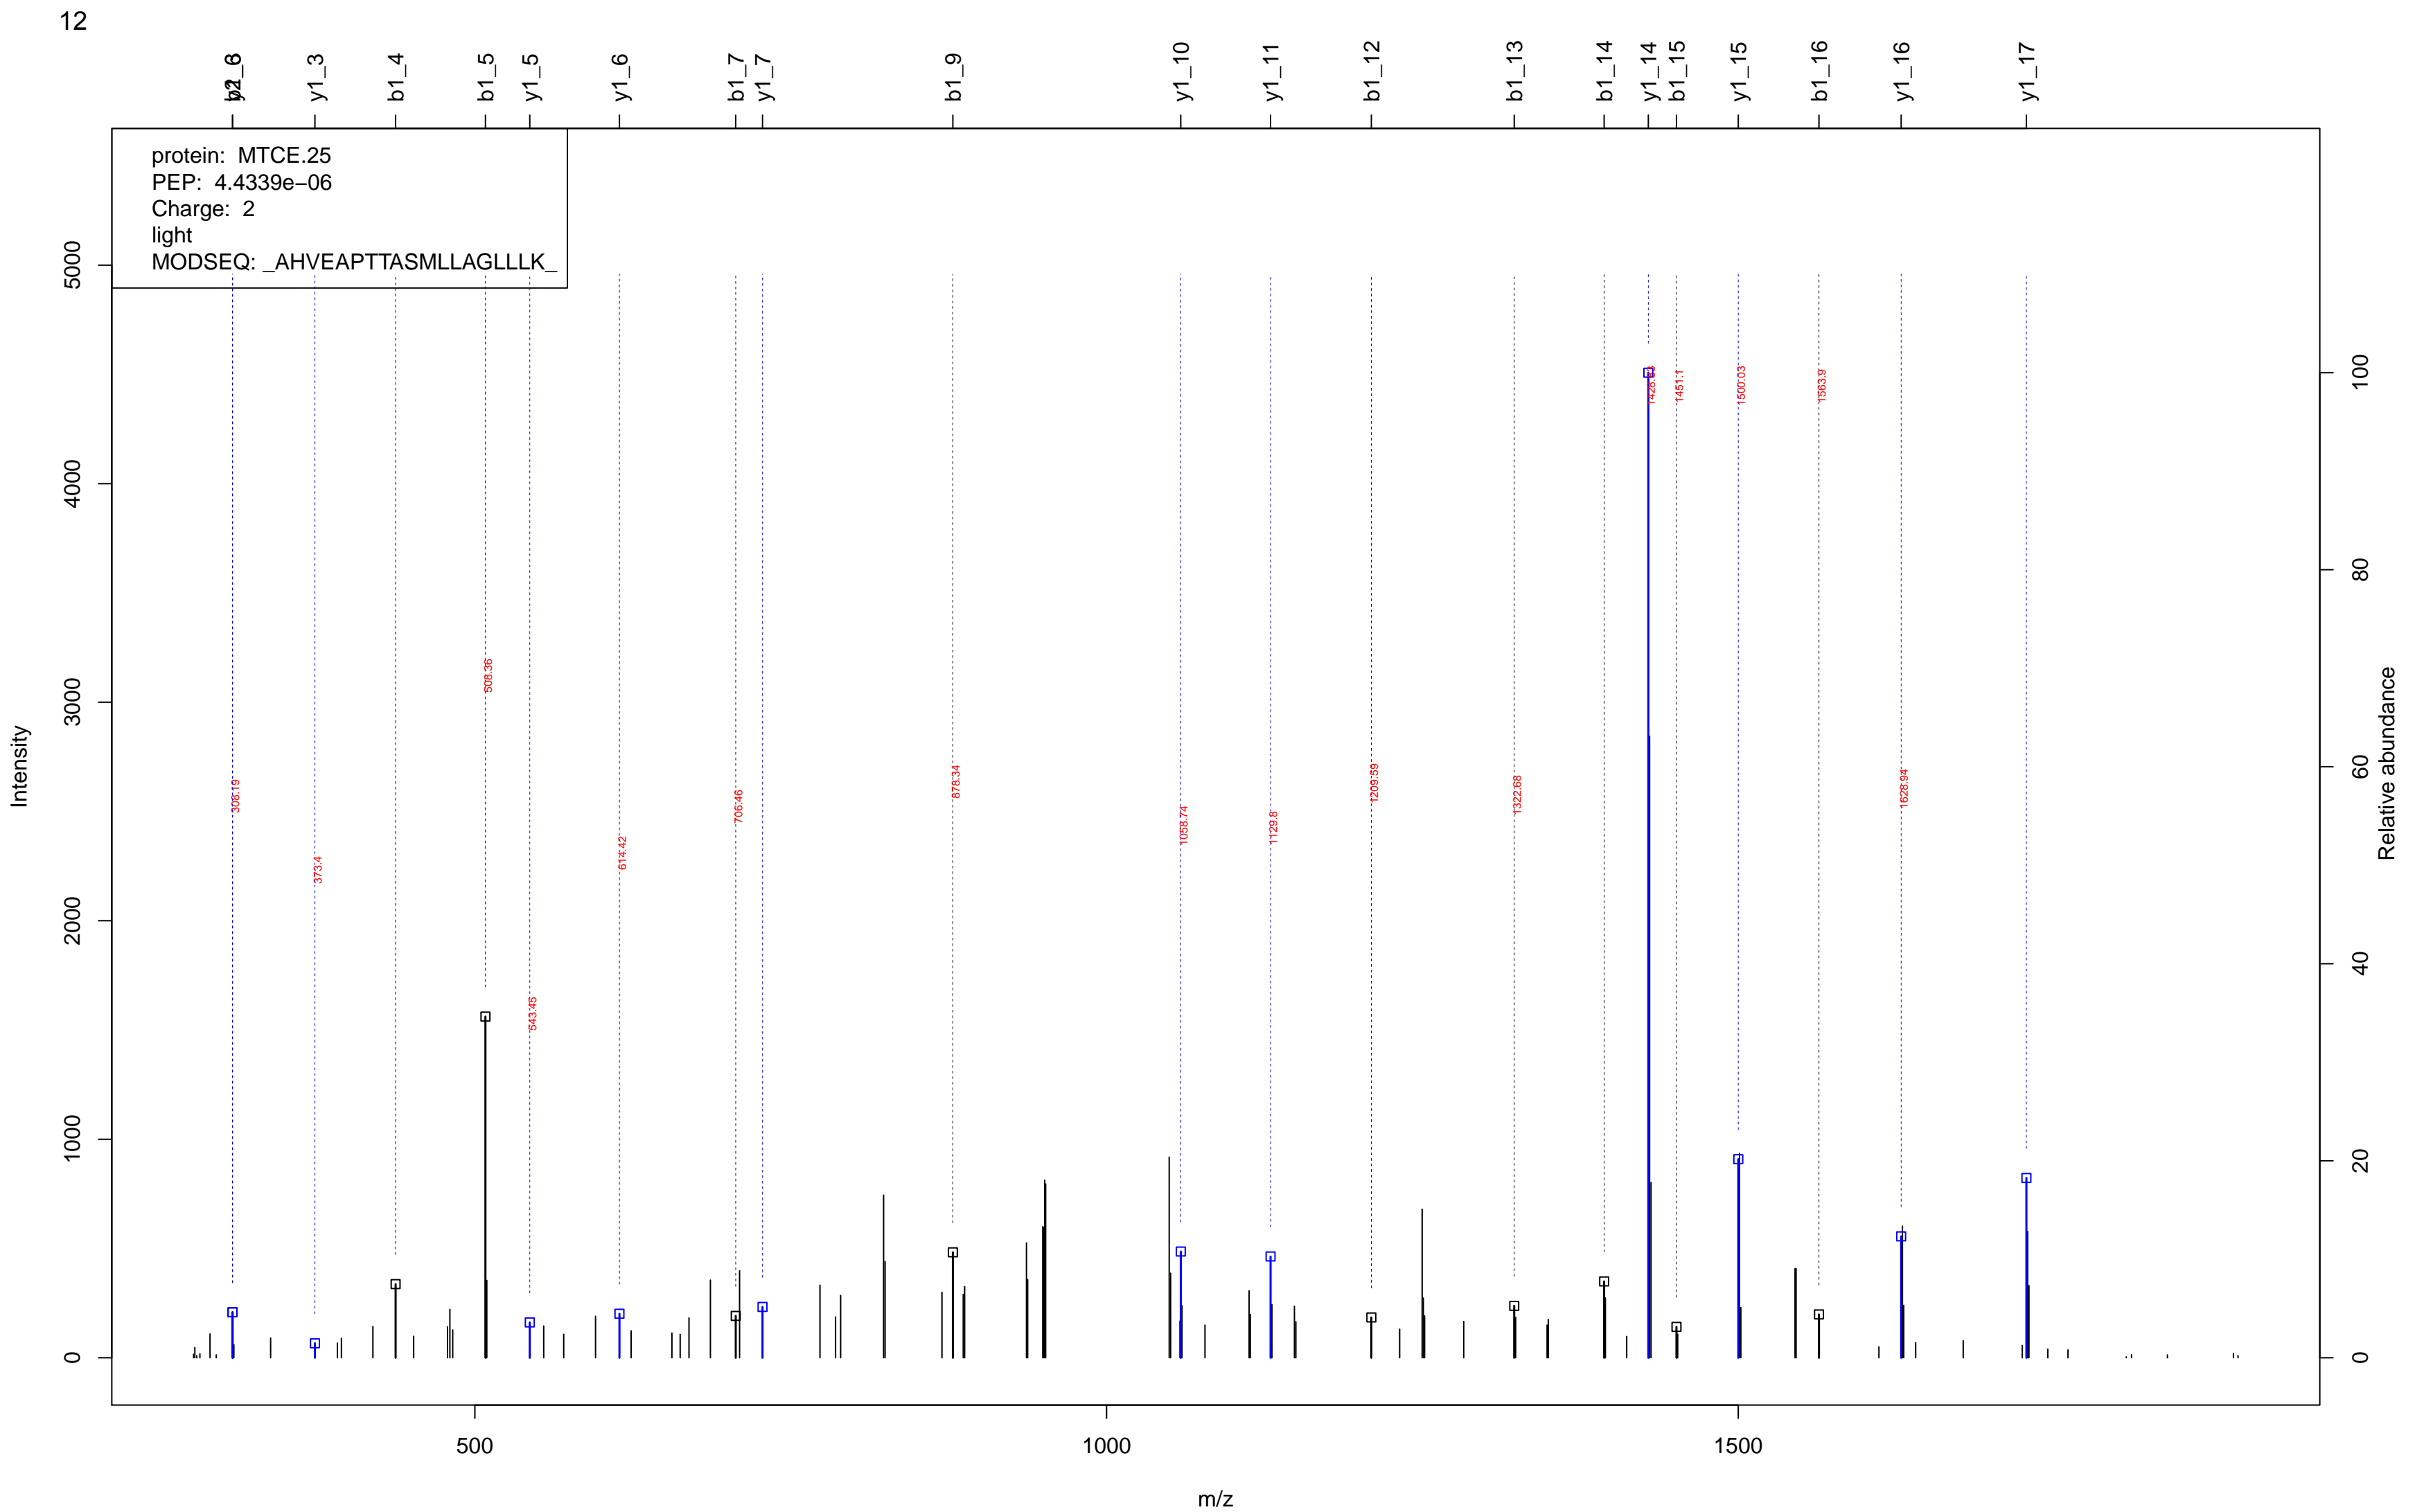

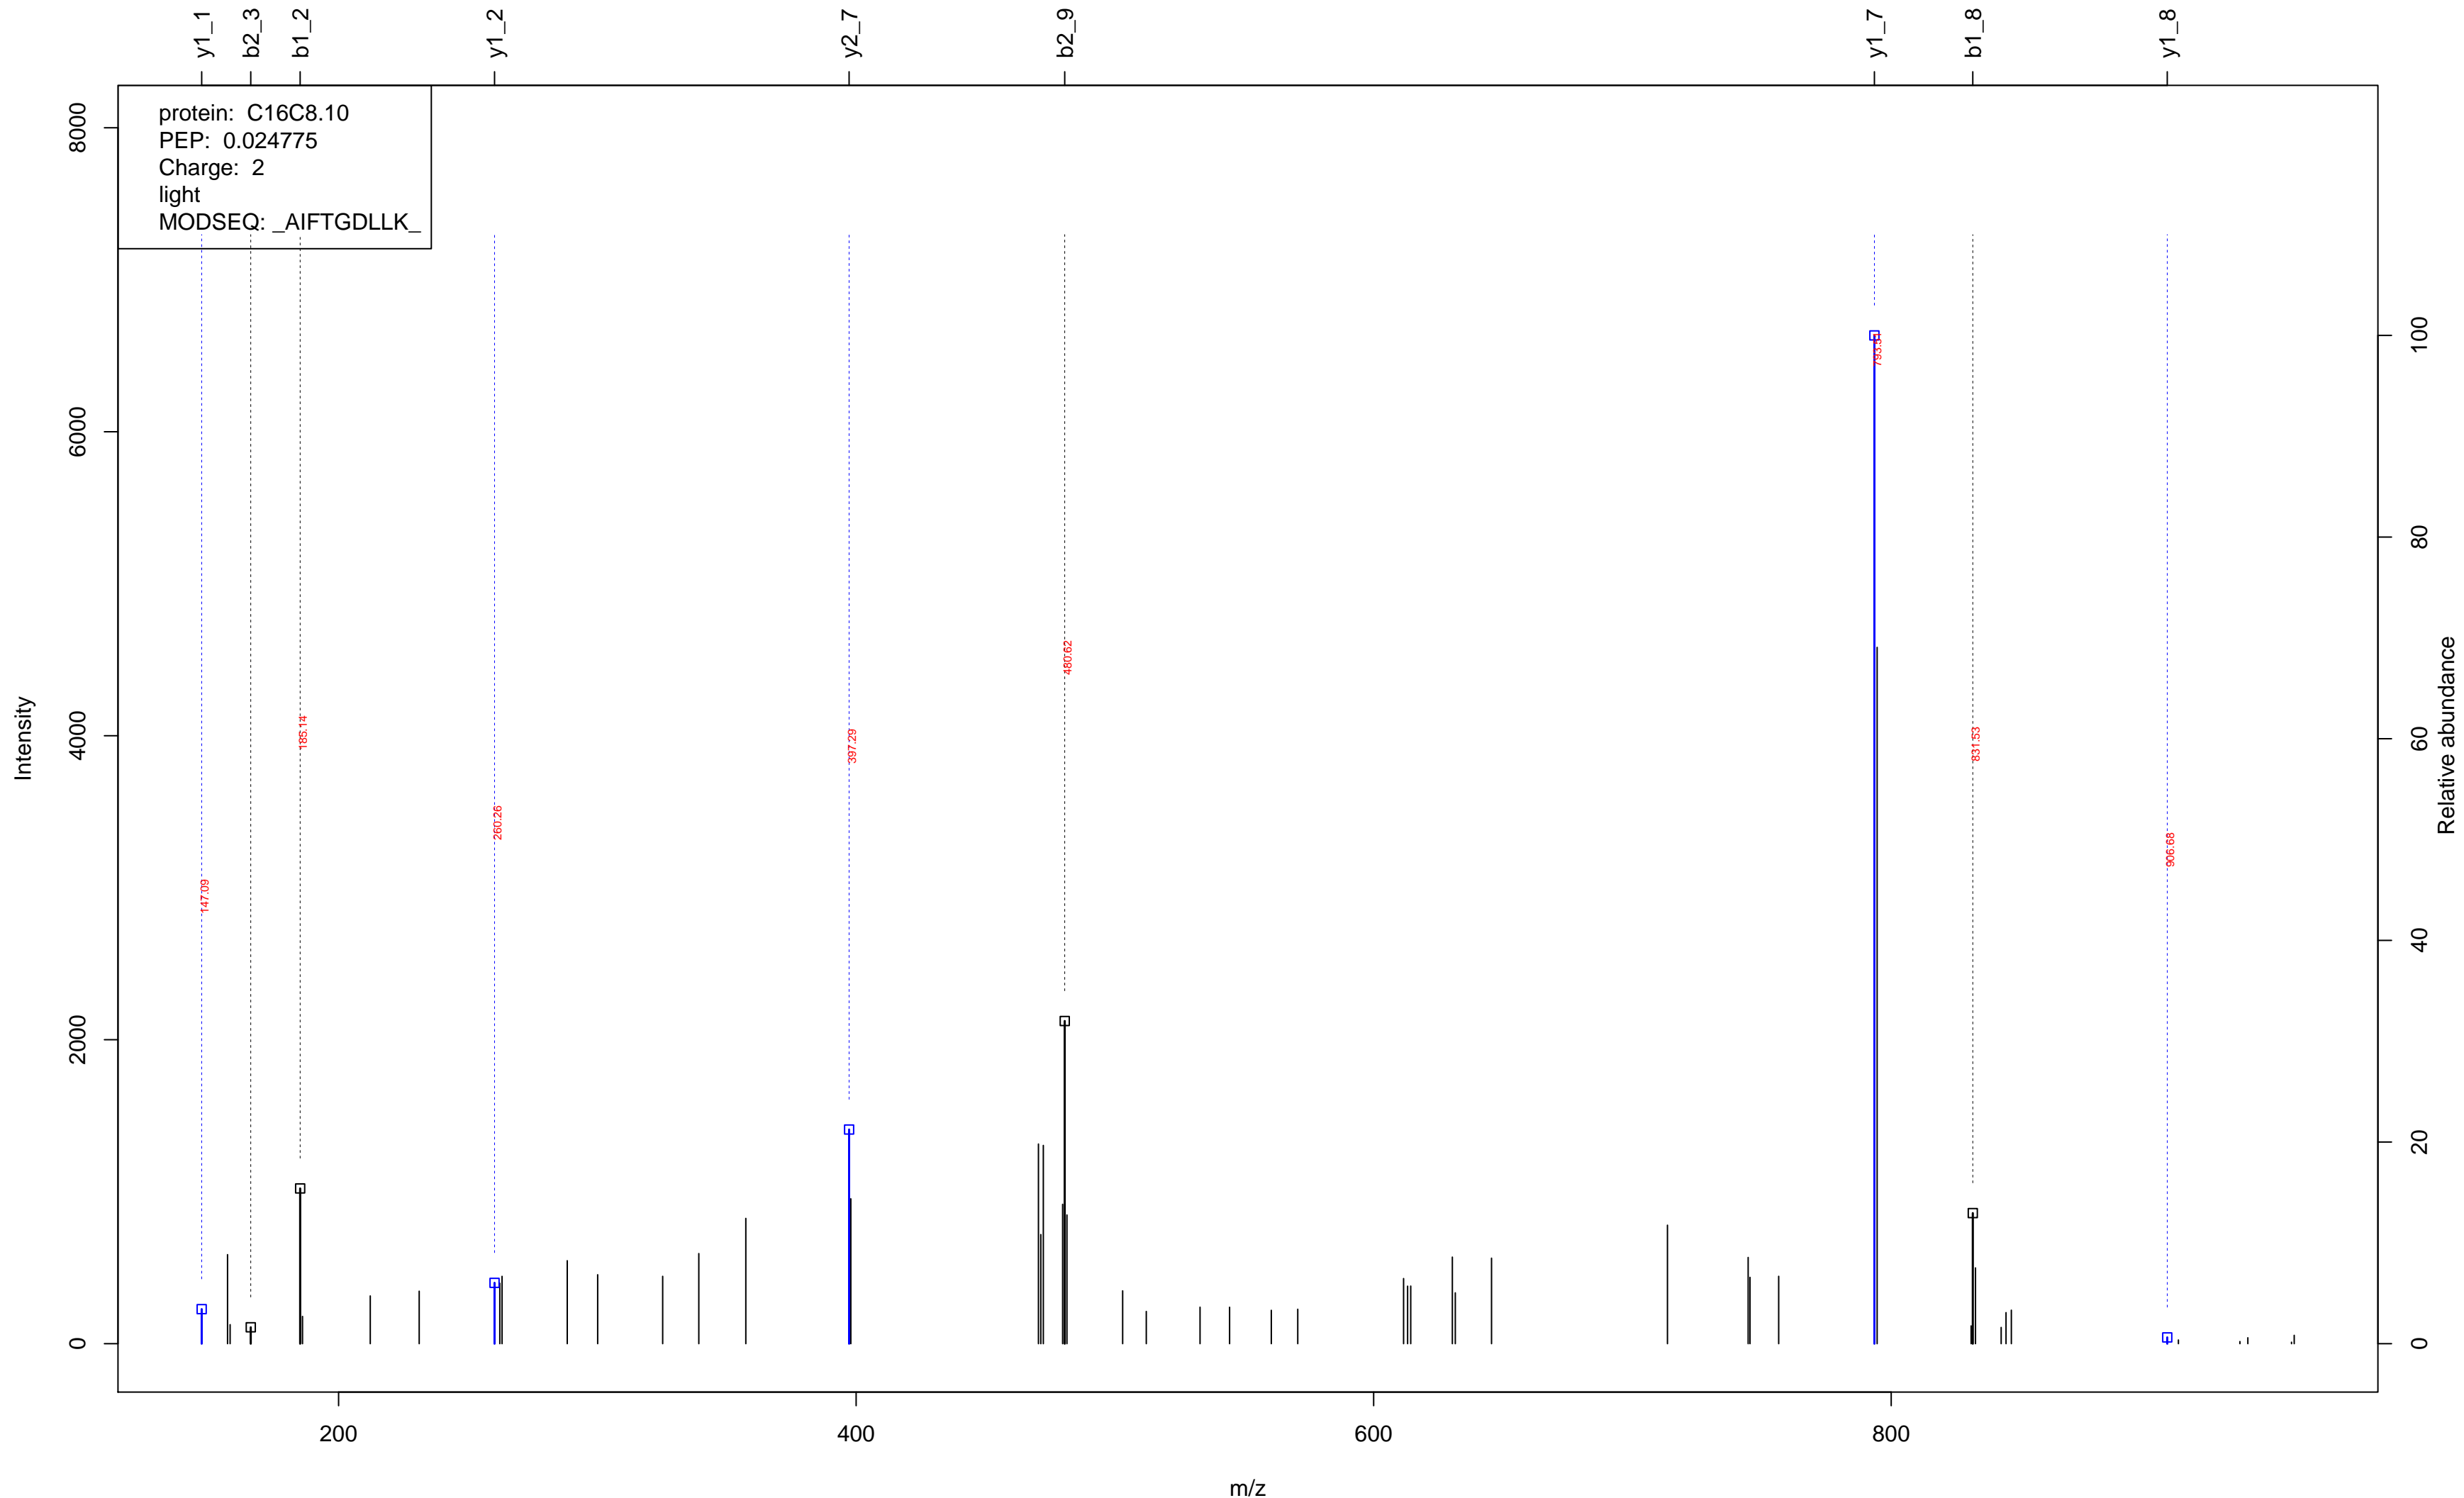

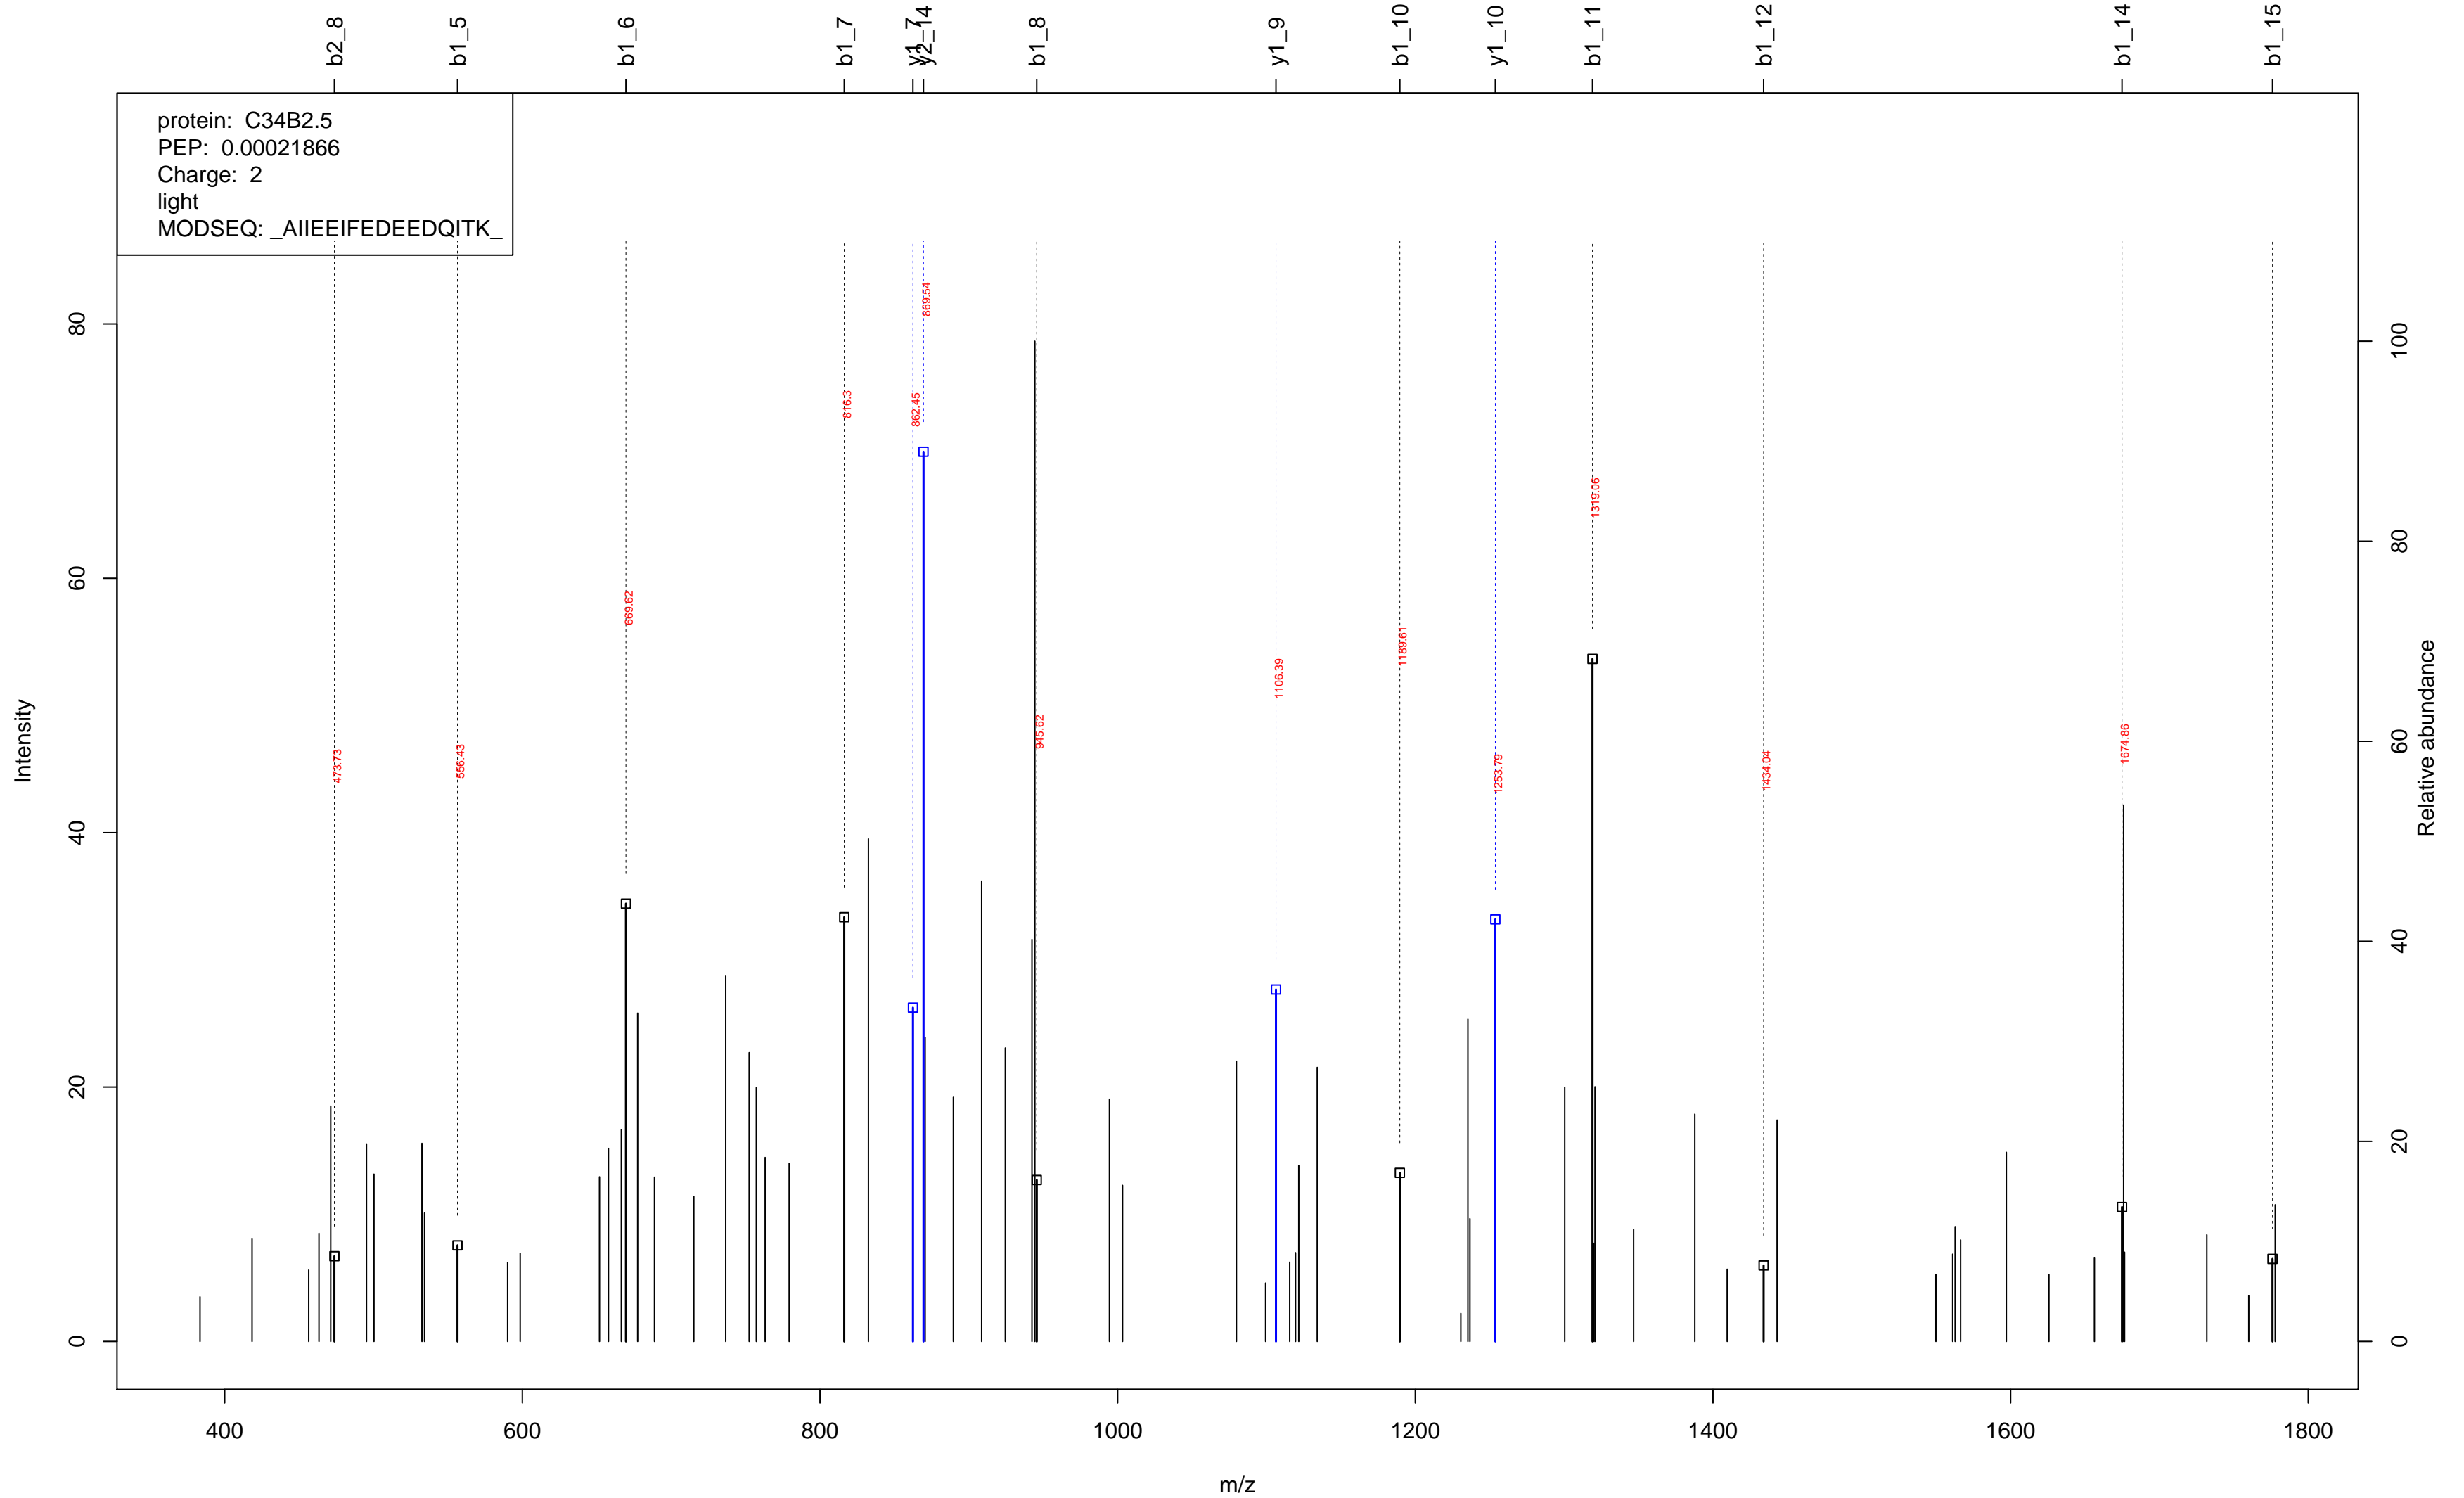

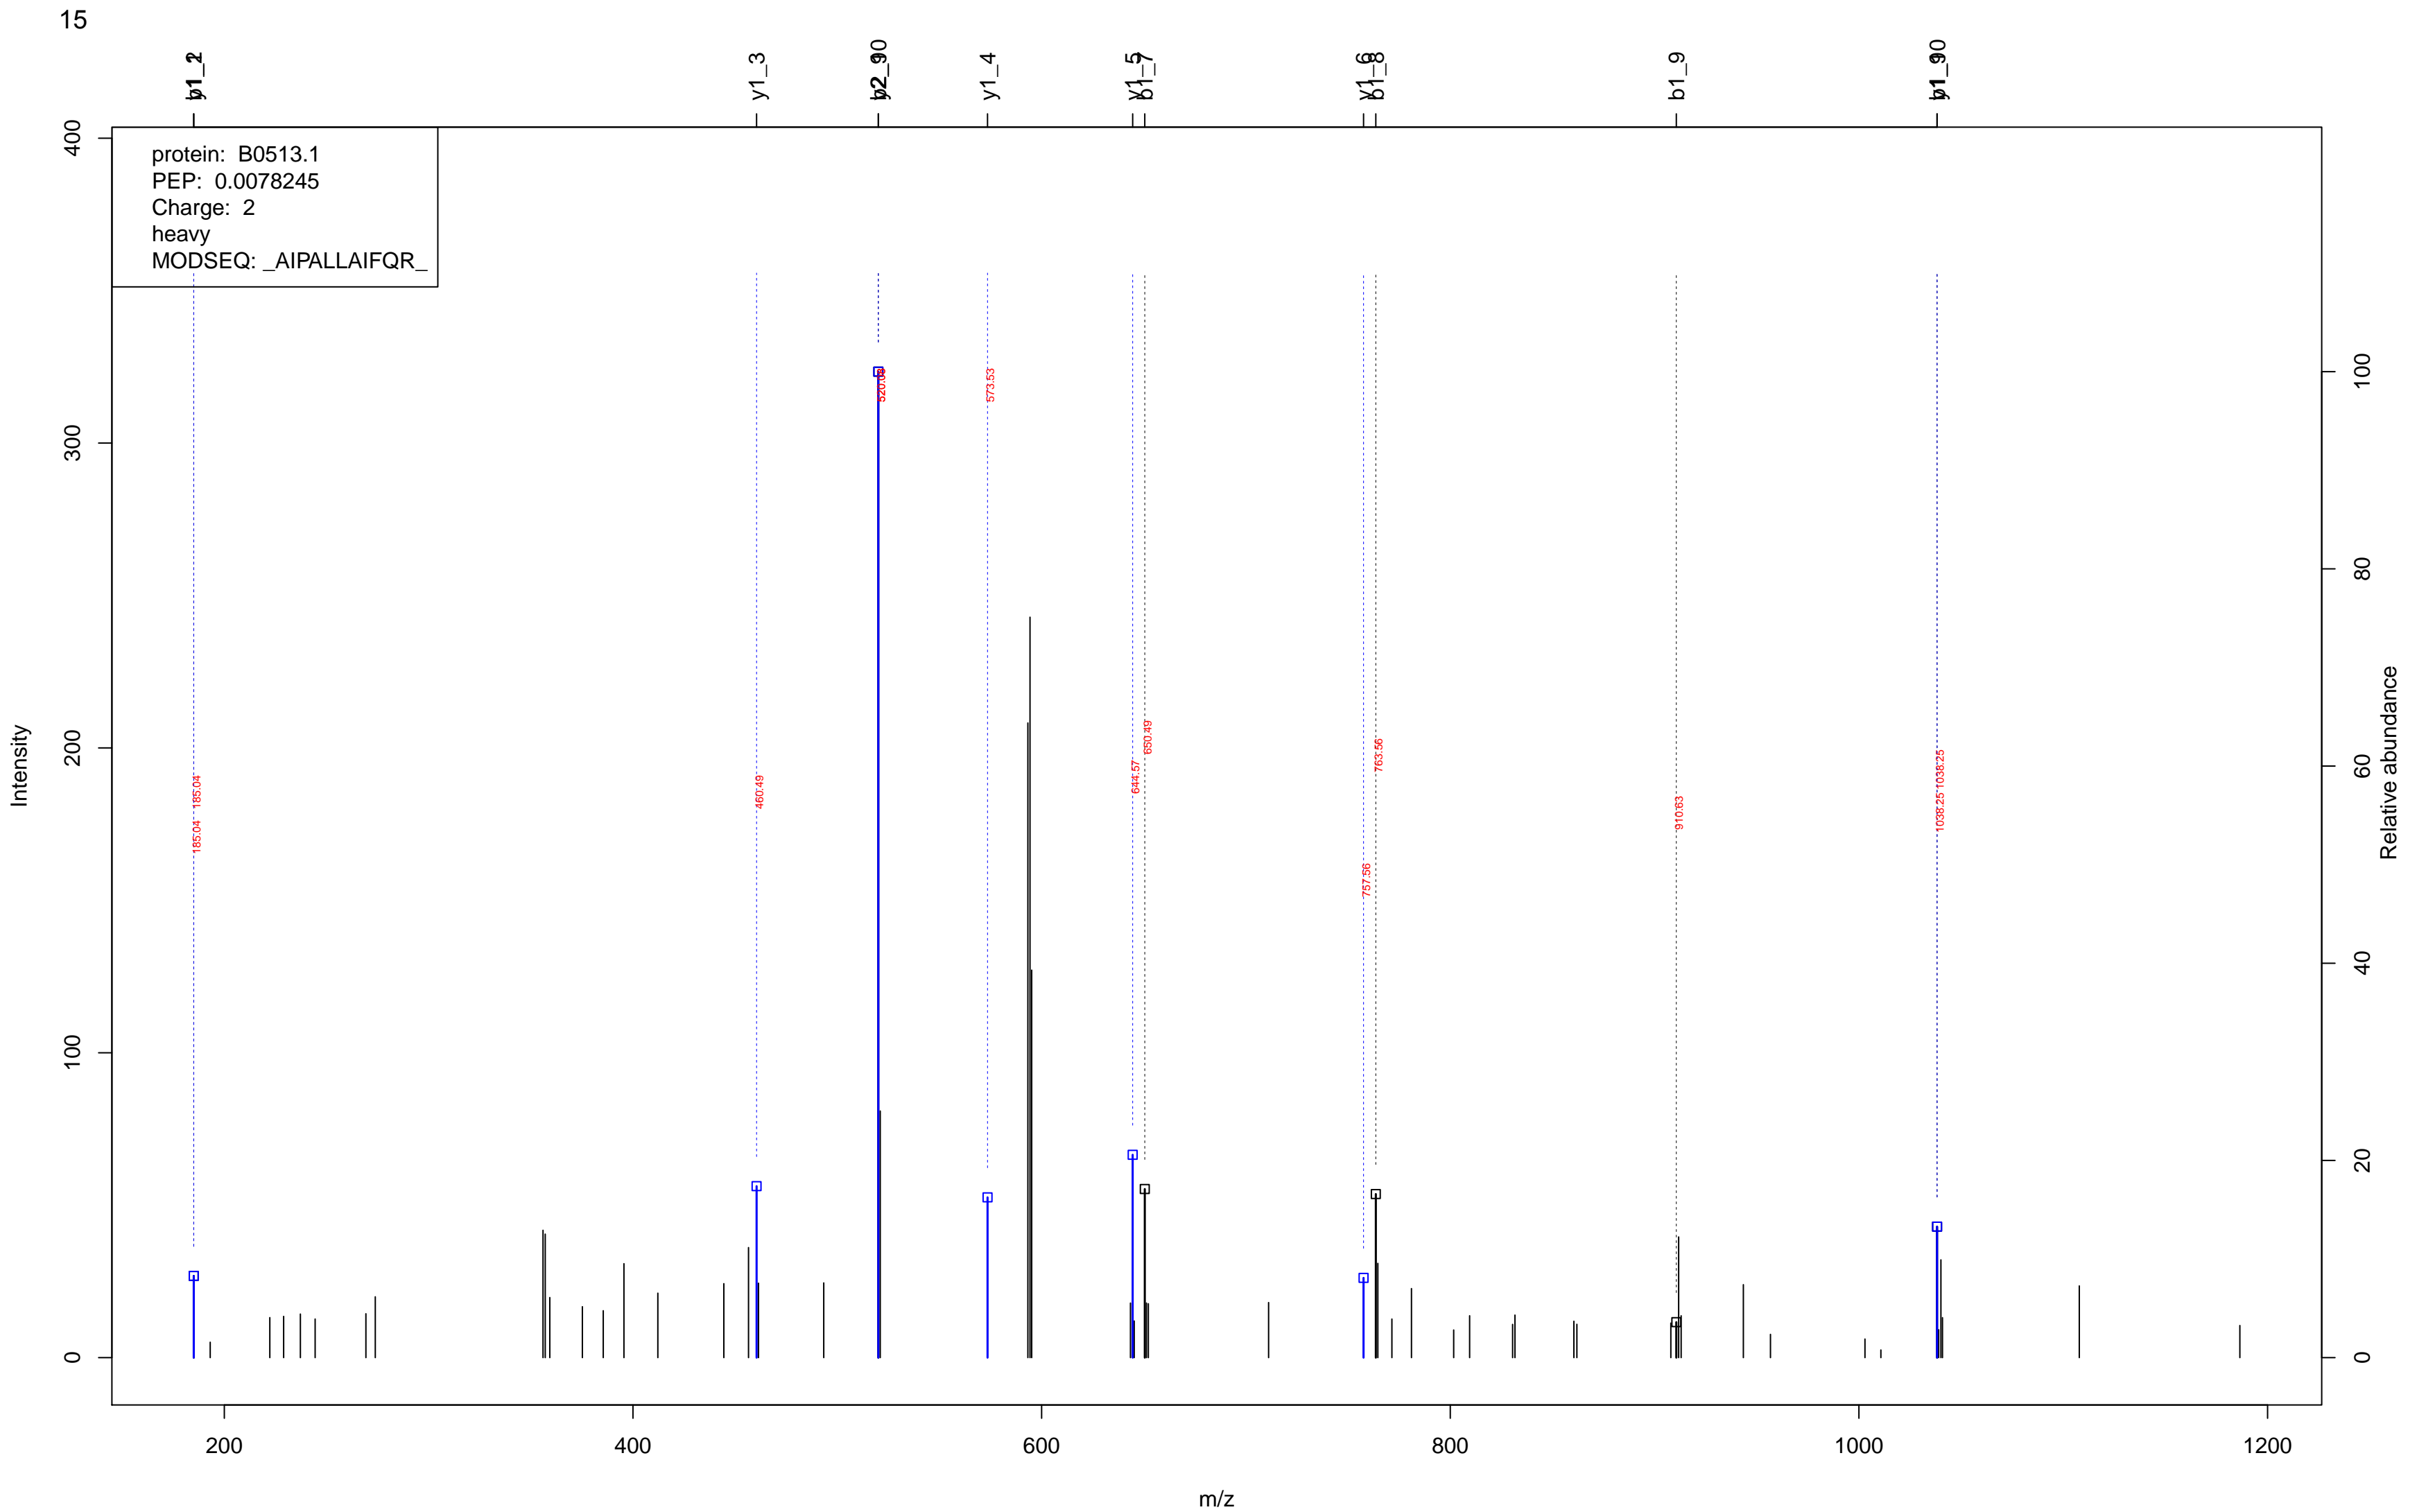

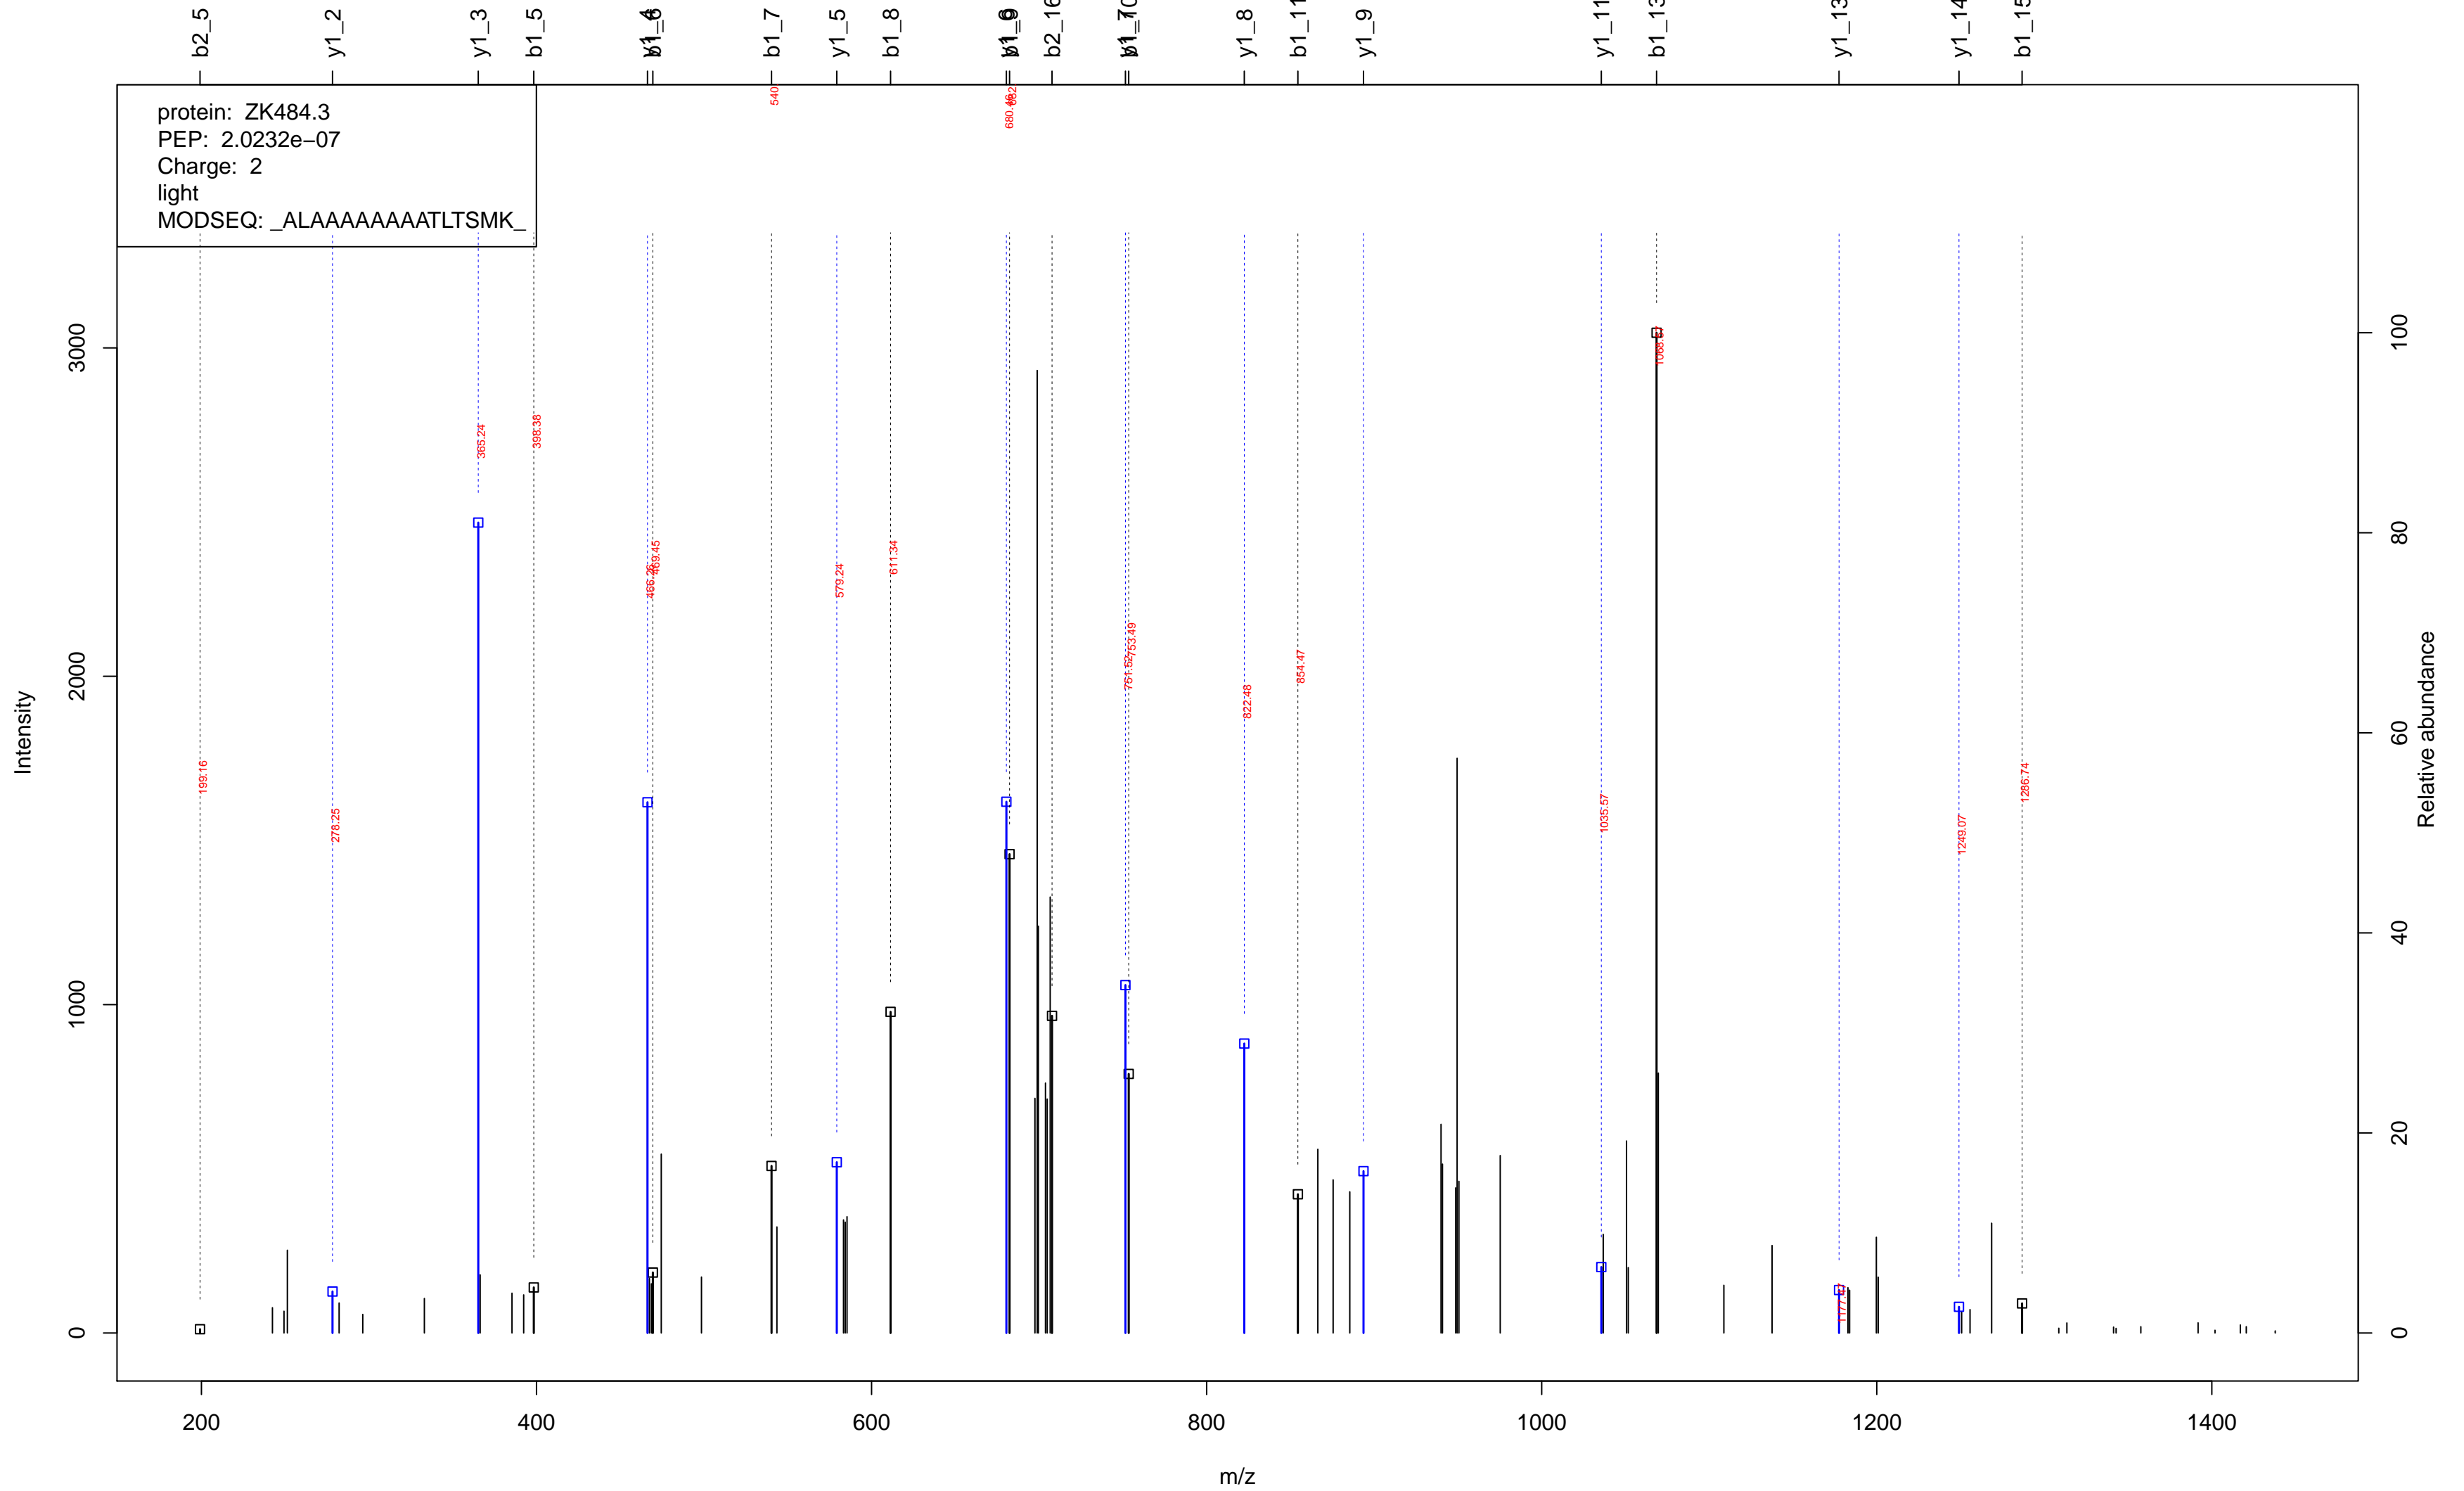



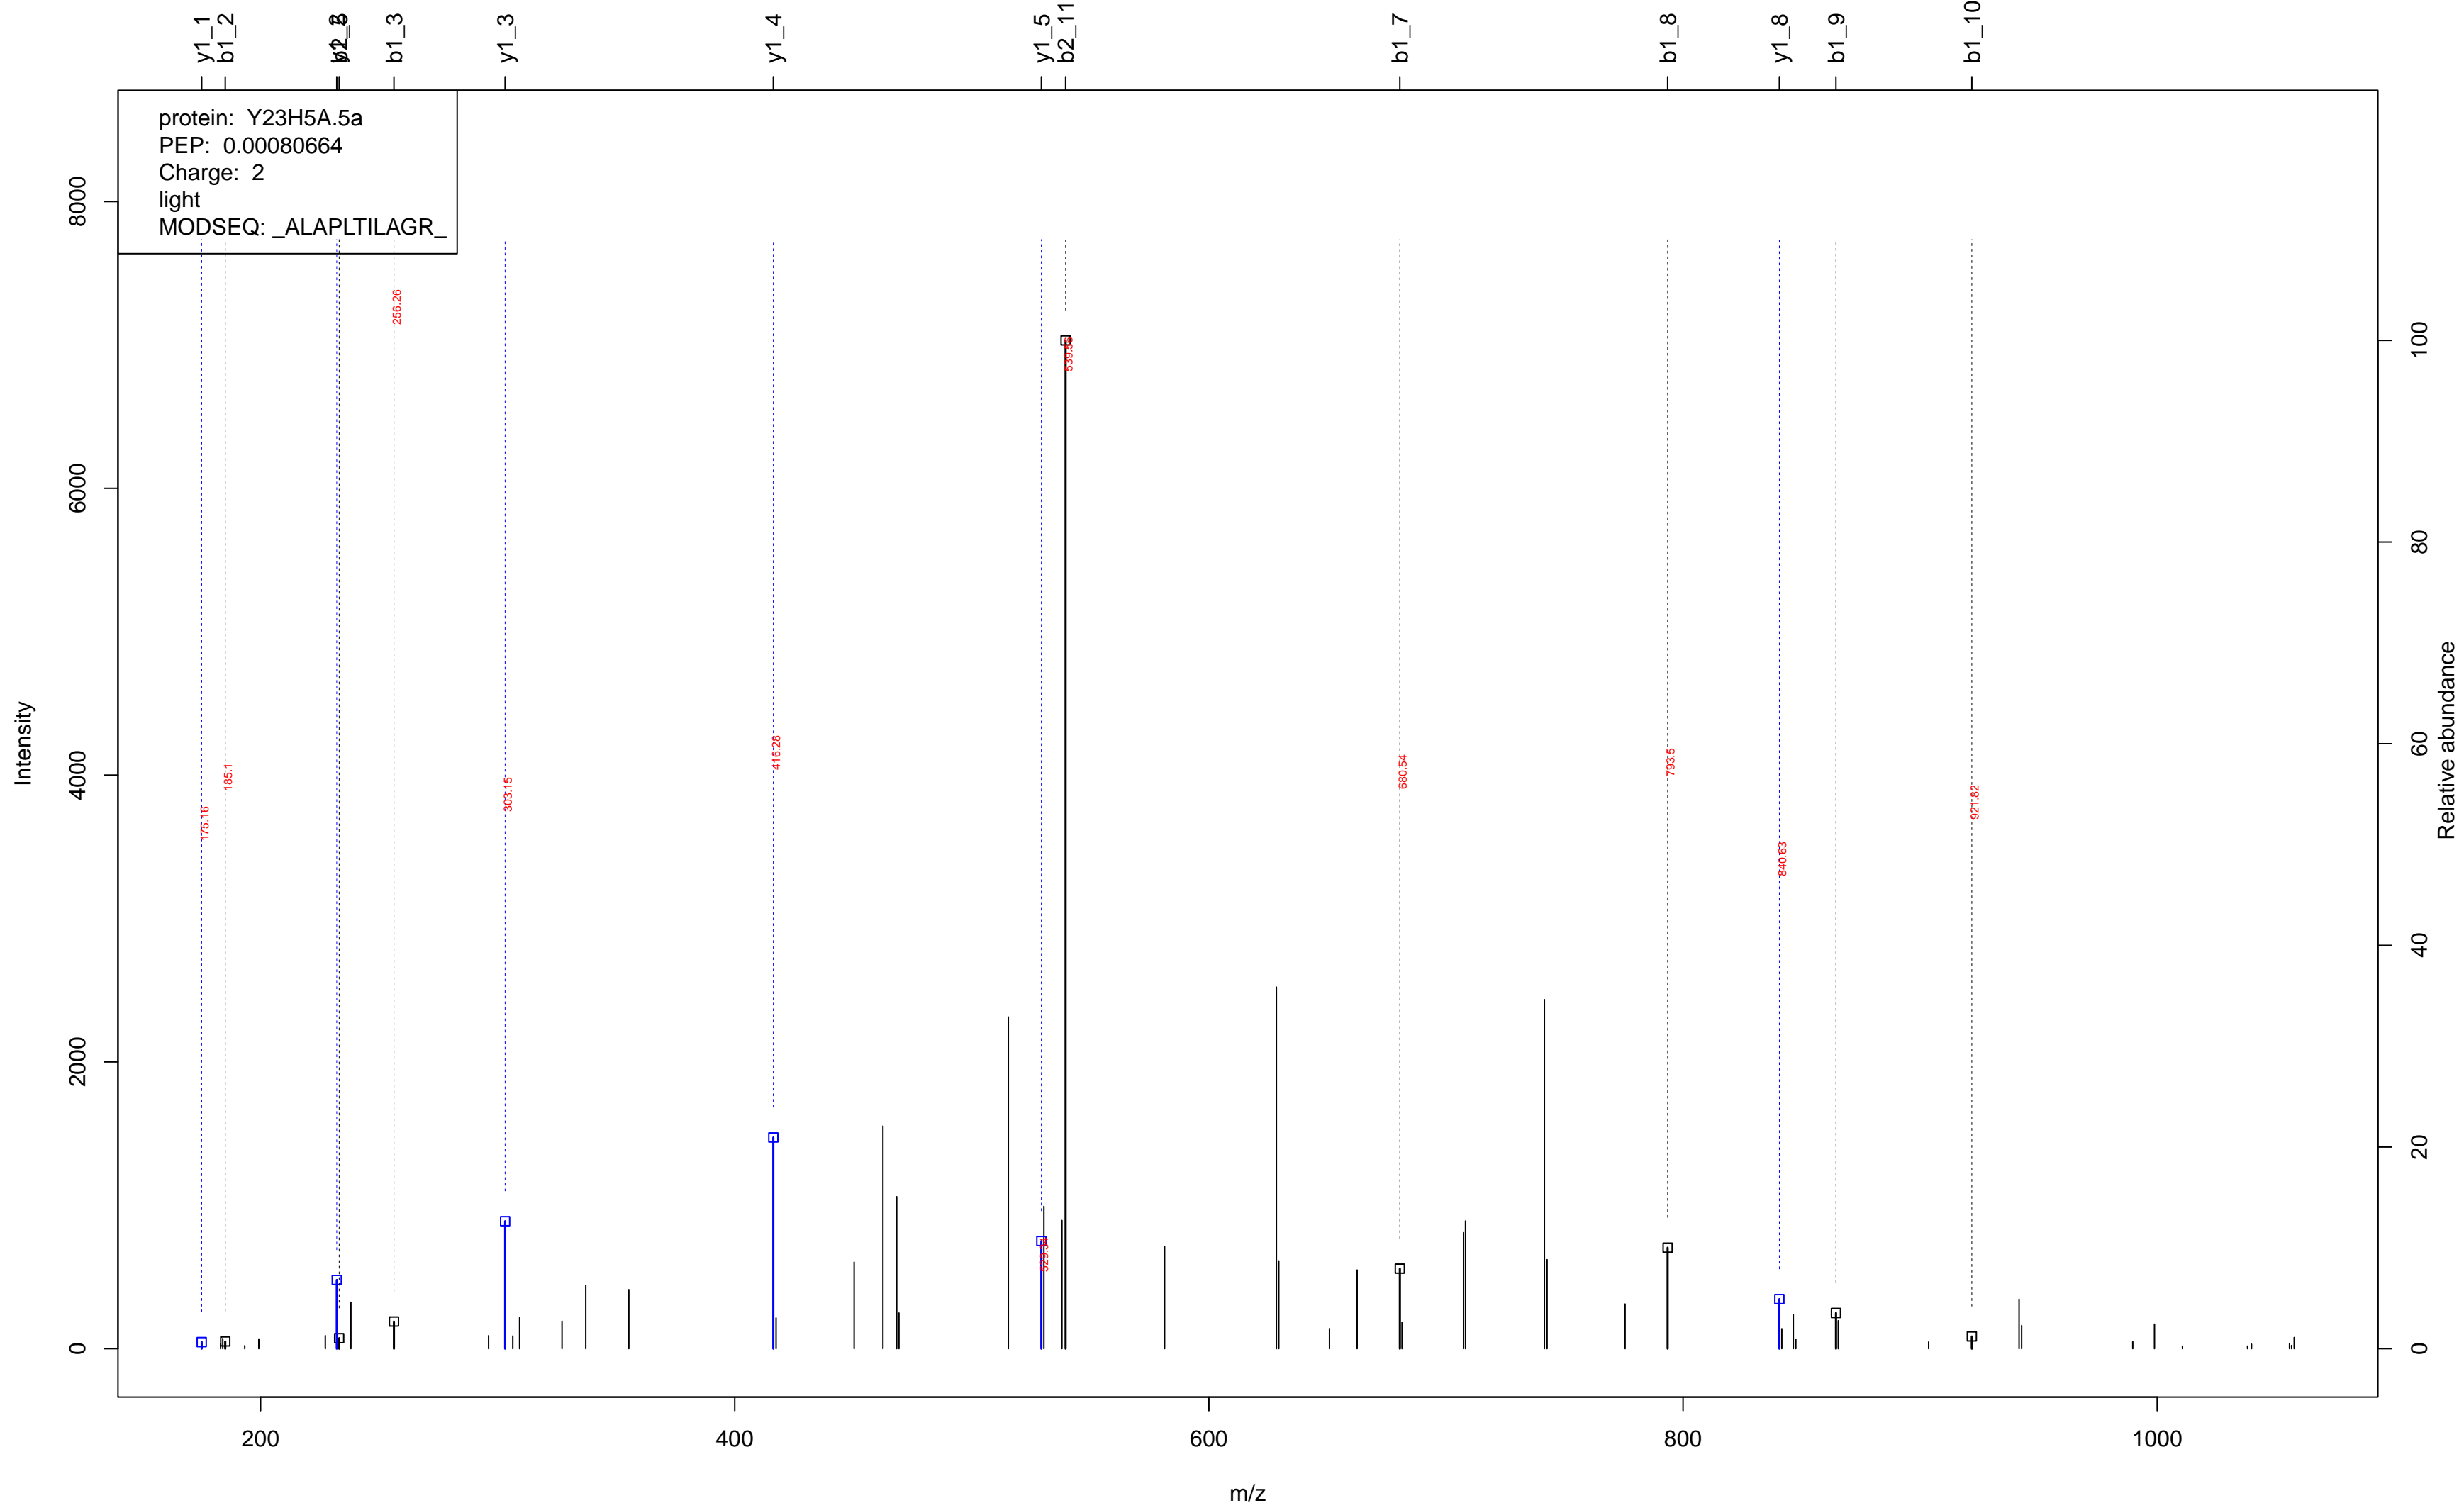

protein: Y23H5A.5a  
PEP: 0.00080664  
Charge: 2  
light  
MODSEQ: \_ALAPLTILAGR\_

y1\_1  
b1\_2

y2\_8  
b1\_3

y1\_3

y1\_4

y1\_5  
b2\_11

b1\_7

b1\_8

y1\_8  
b1\_9

b1\_10

Intensity

Relative abundance

m/z

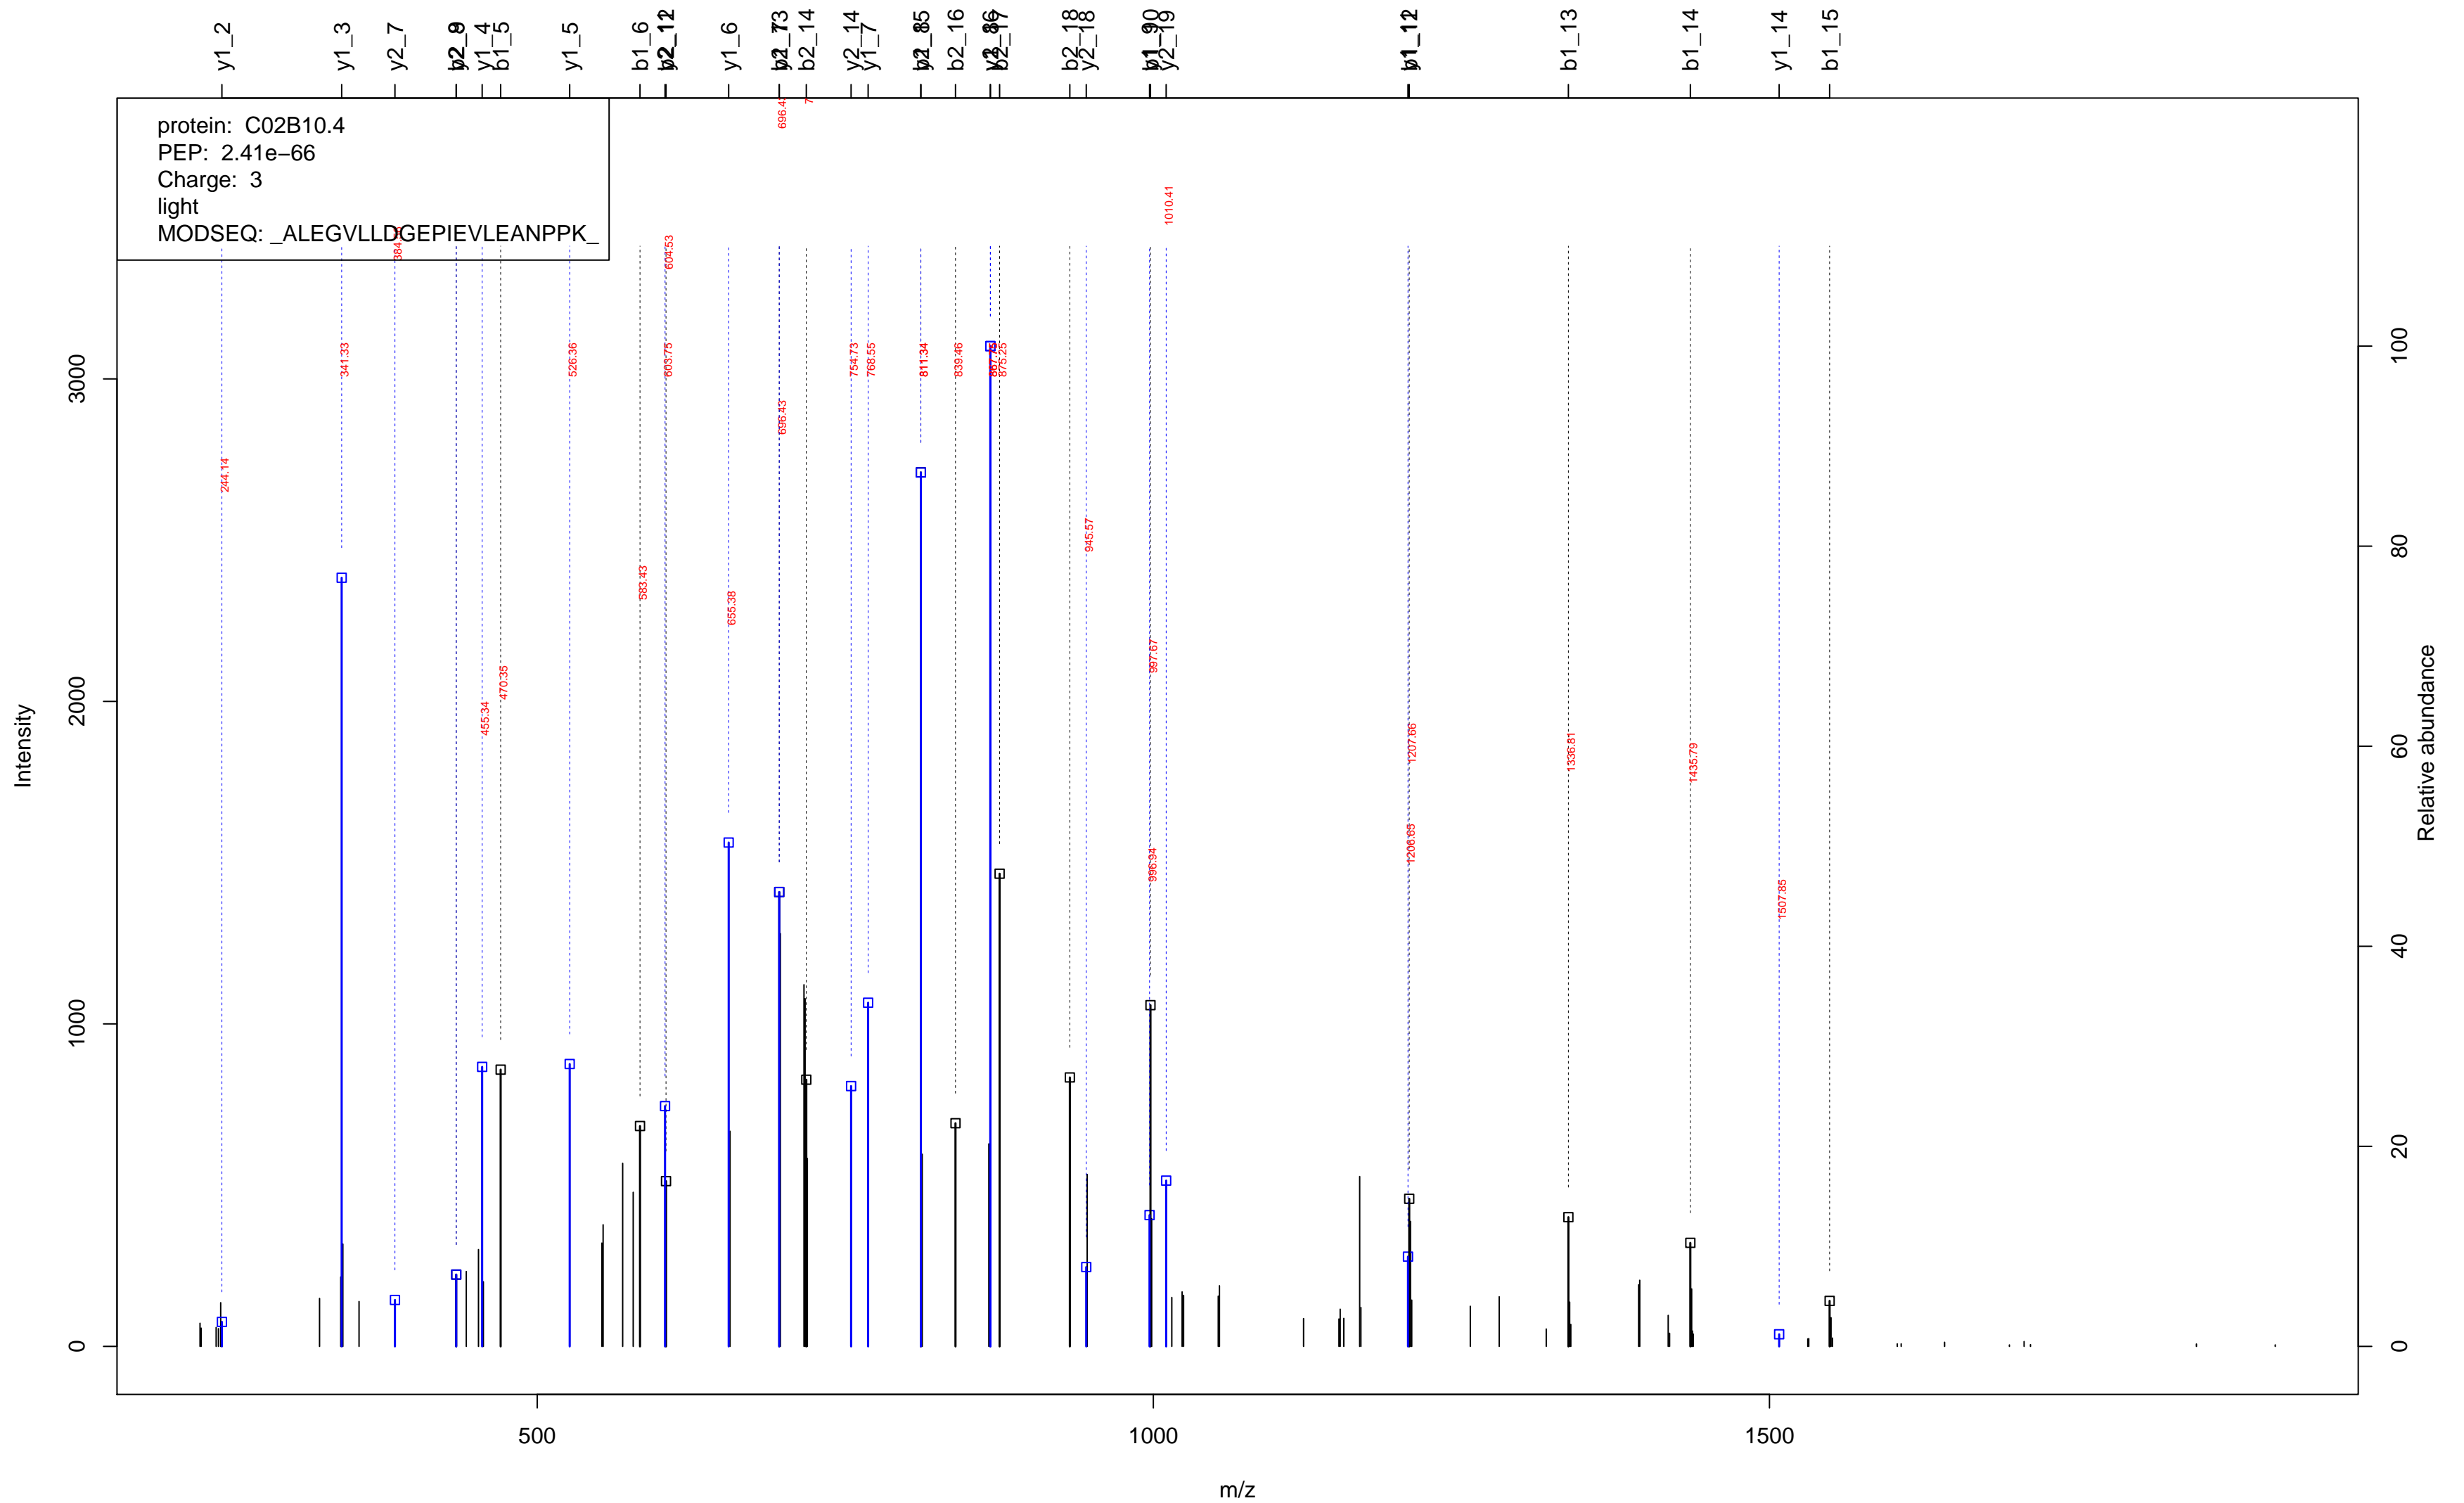

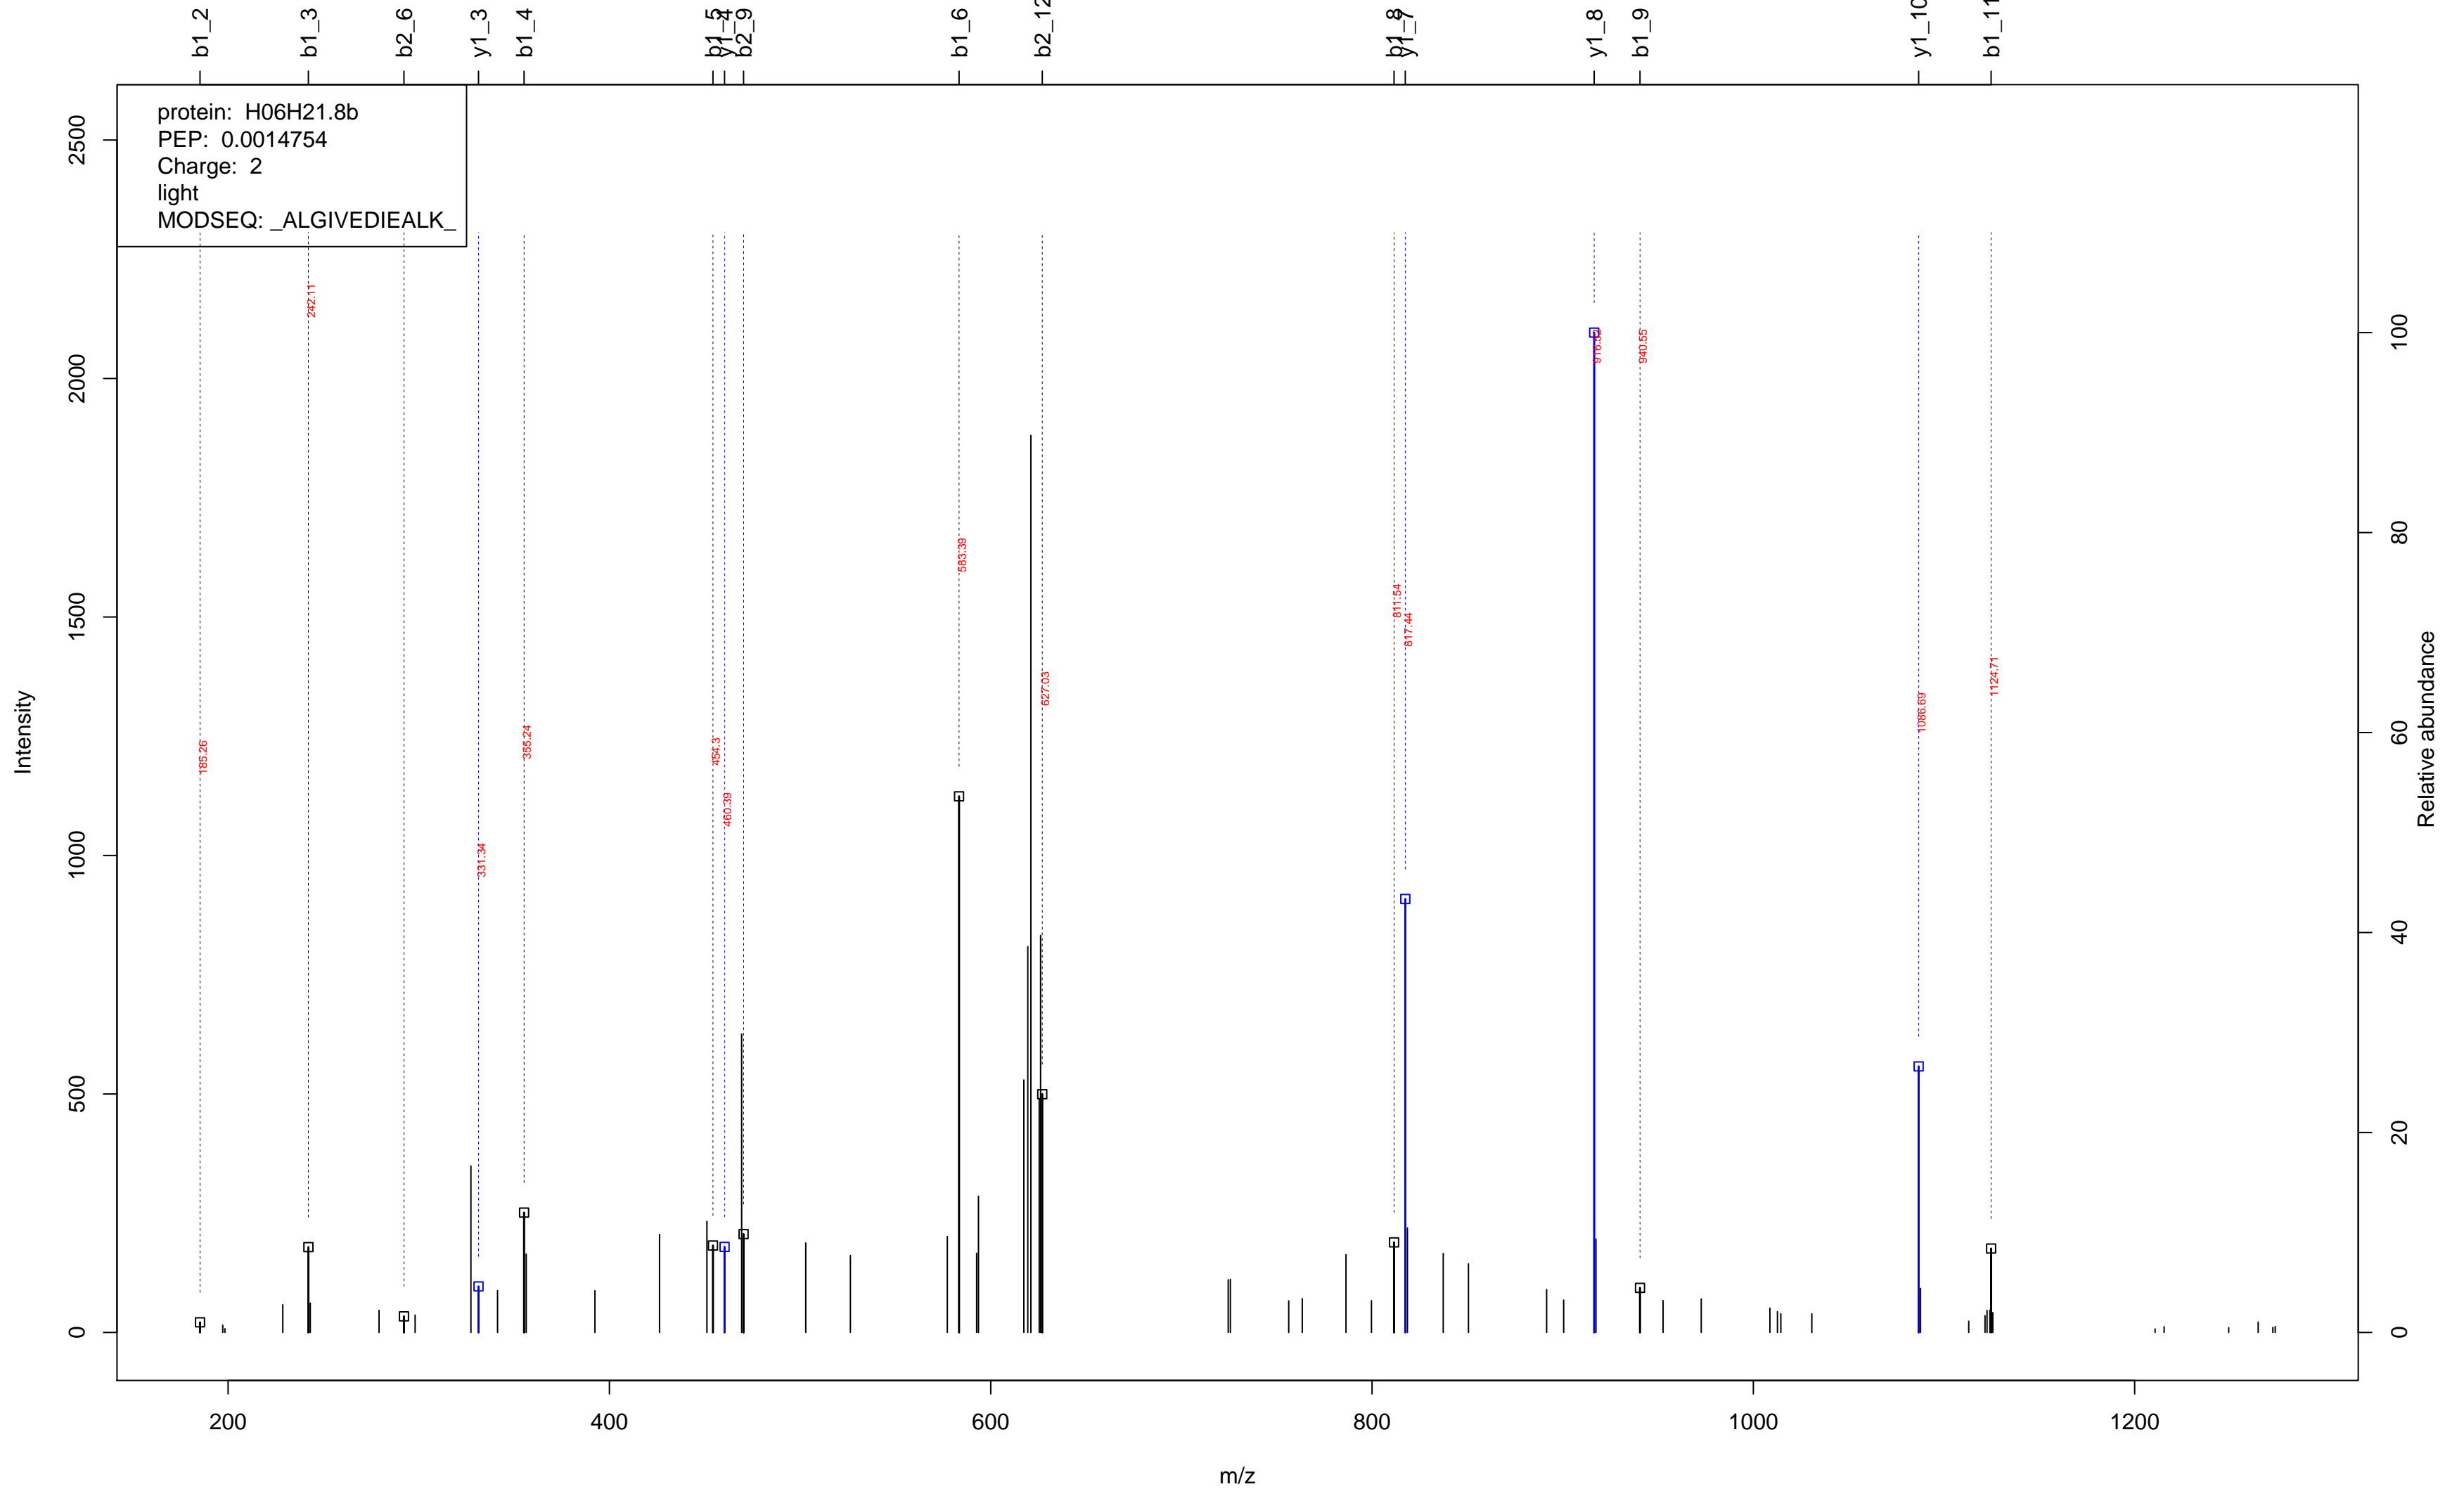

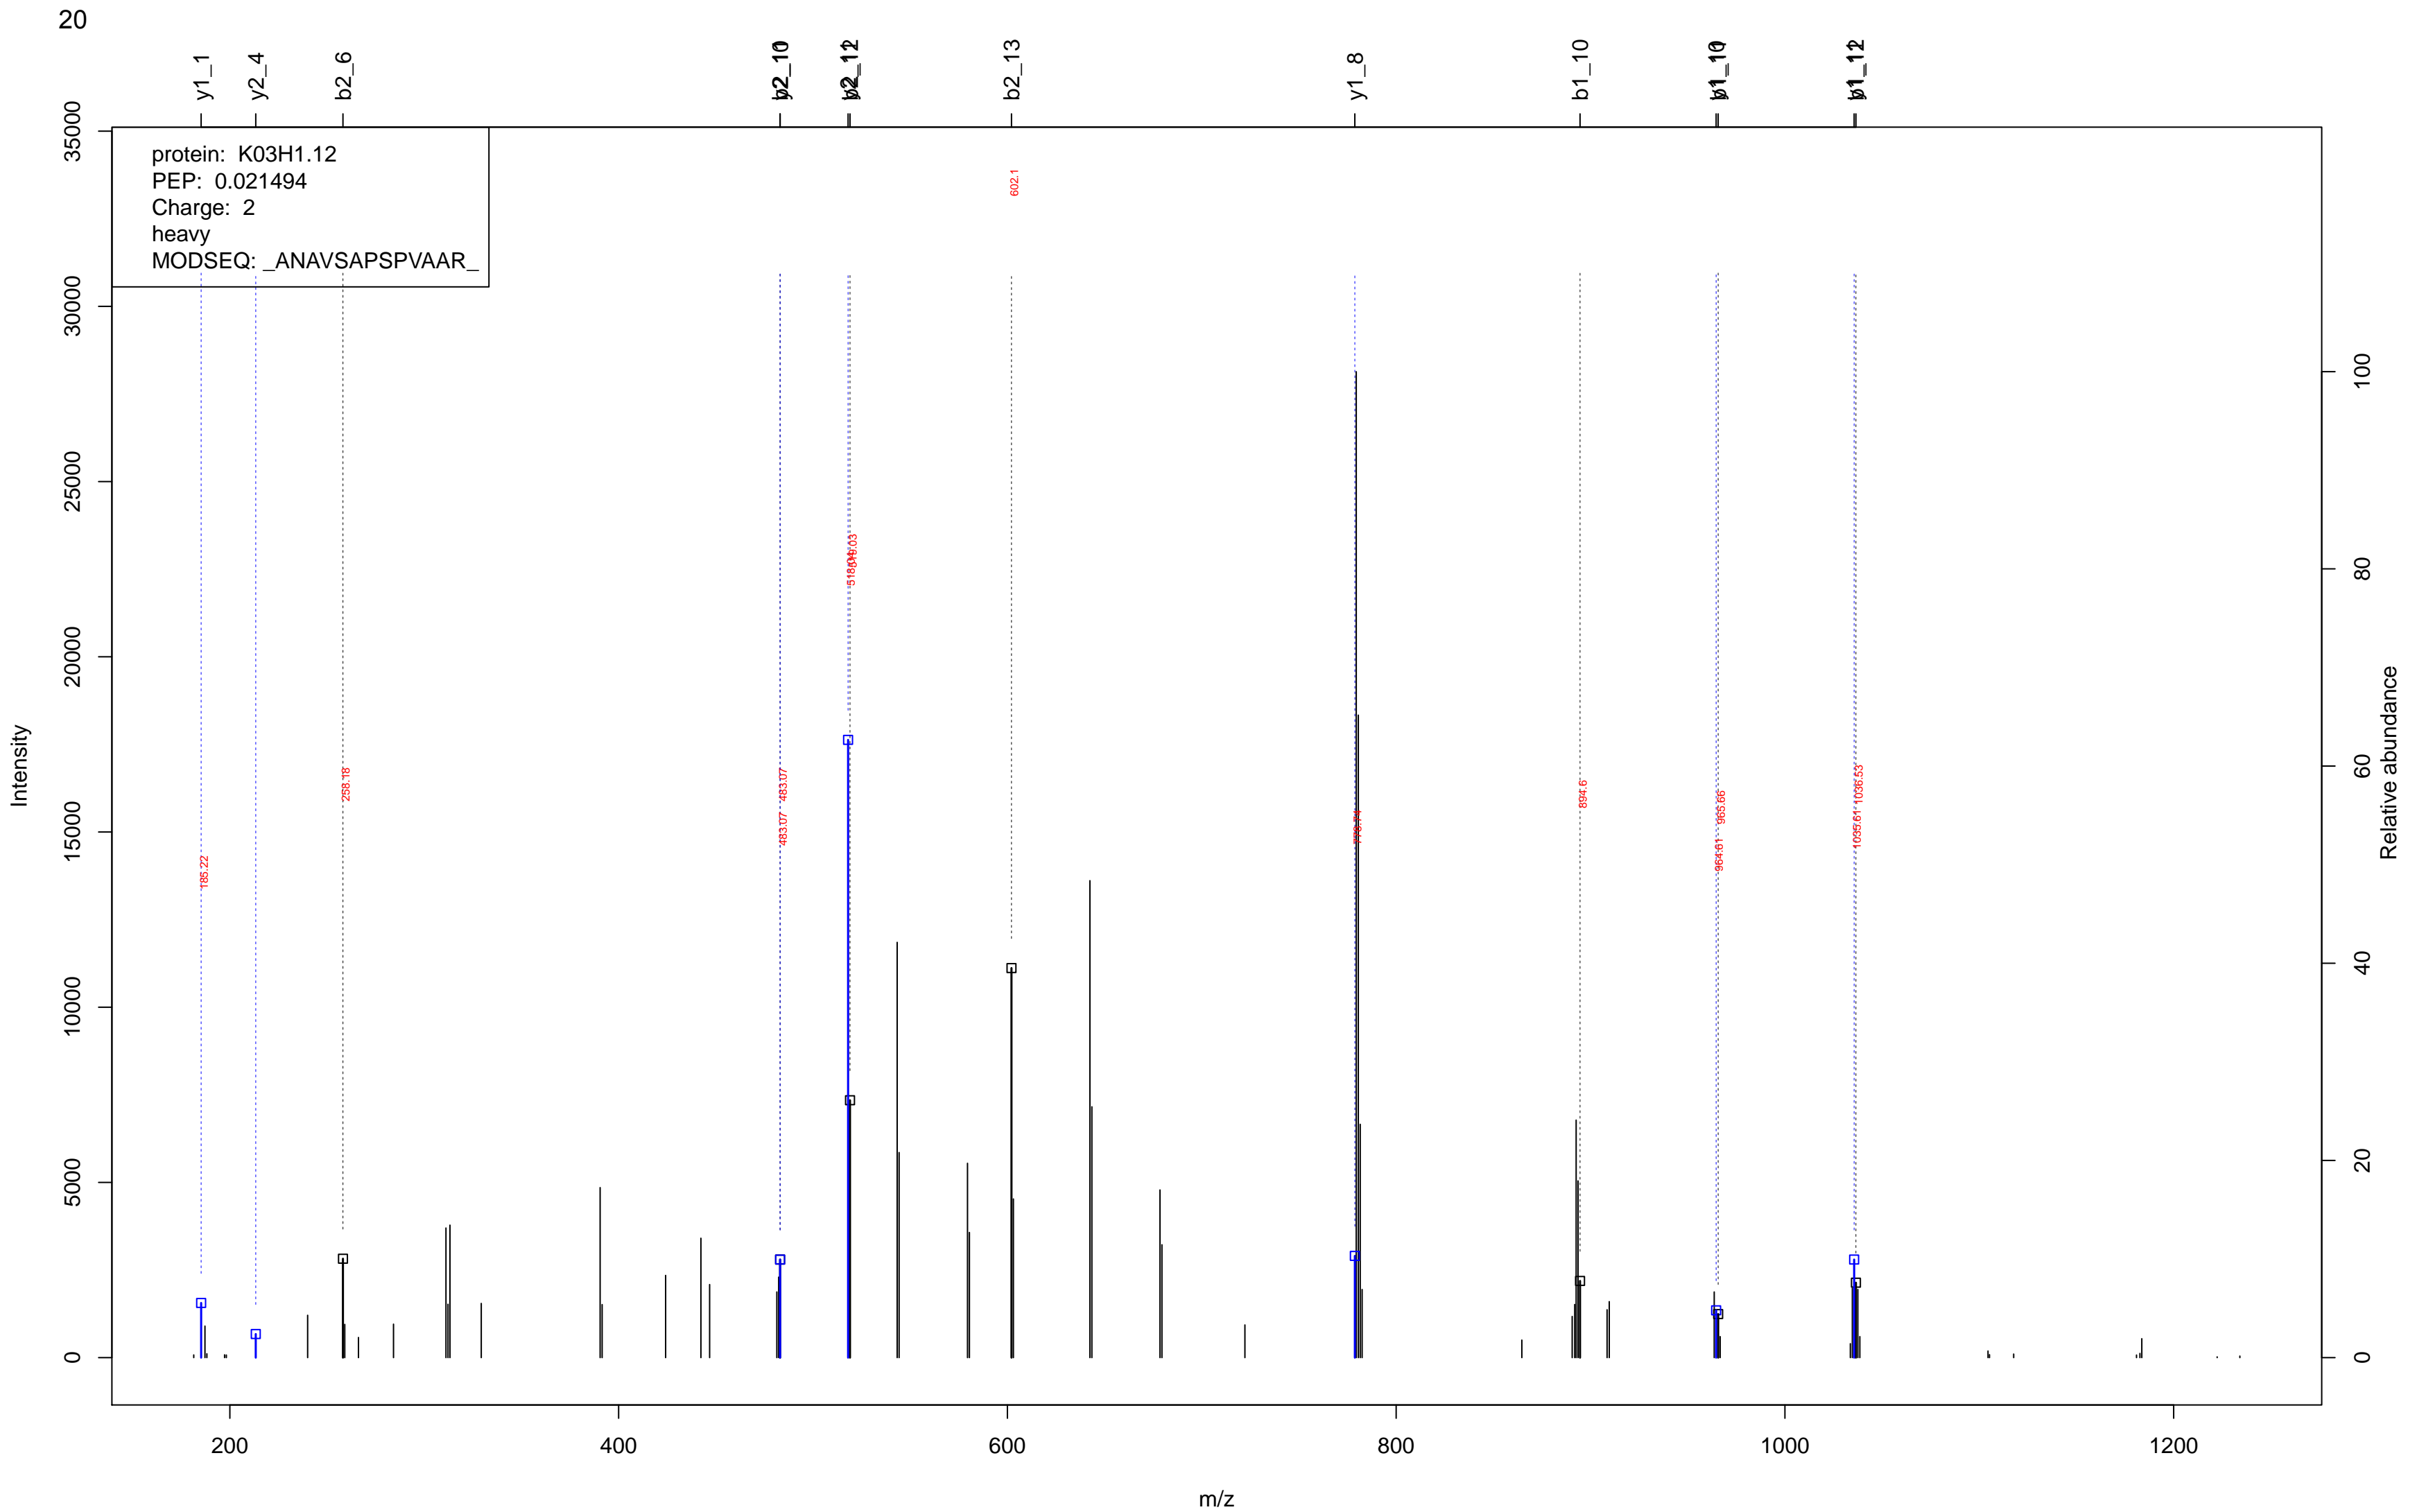

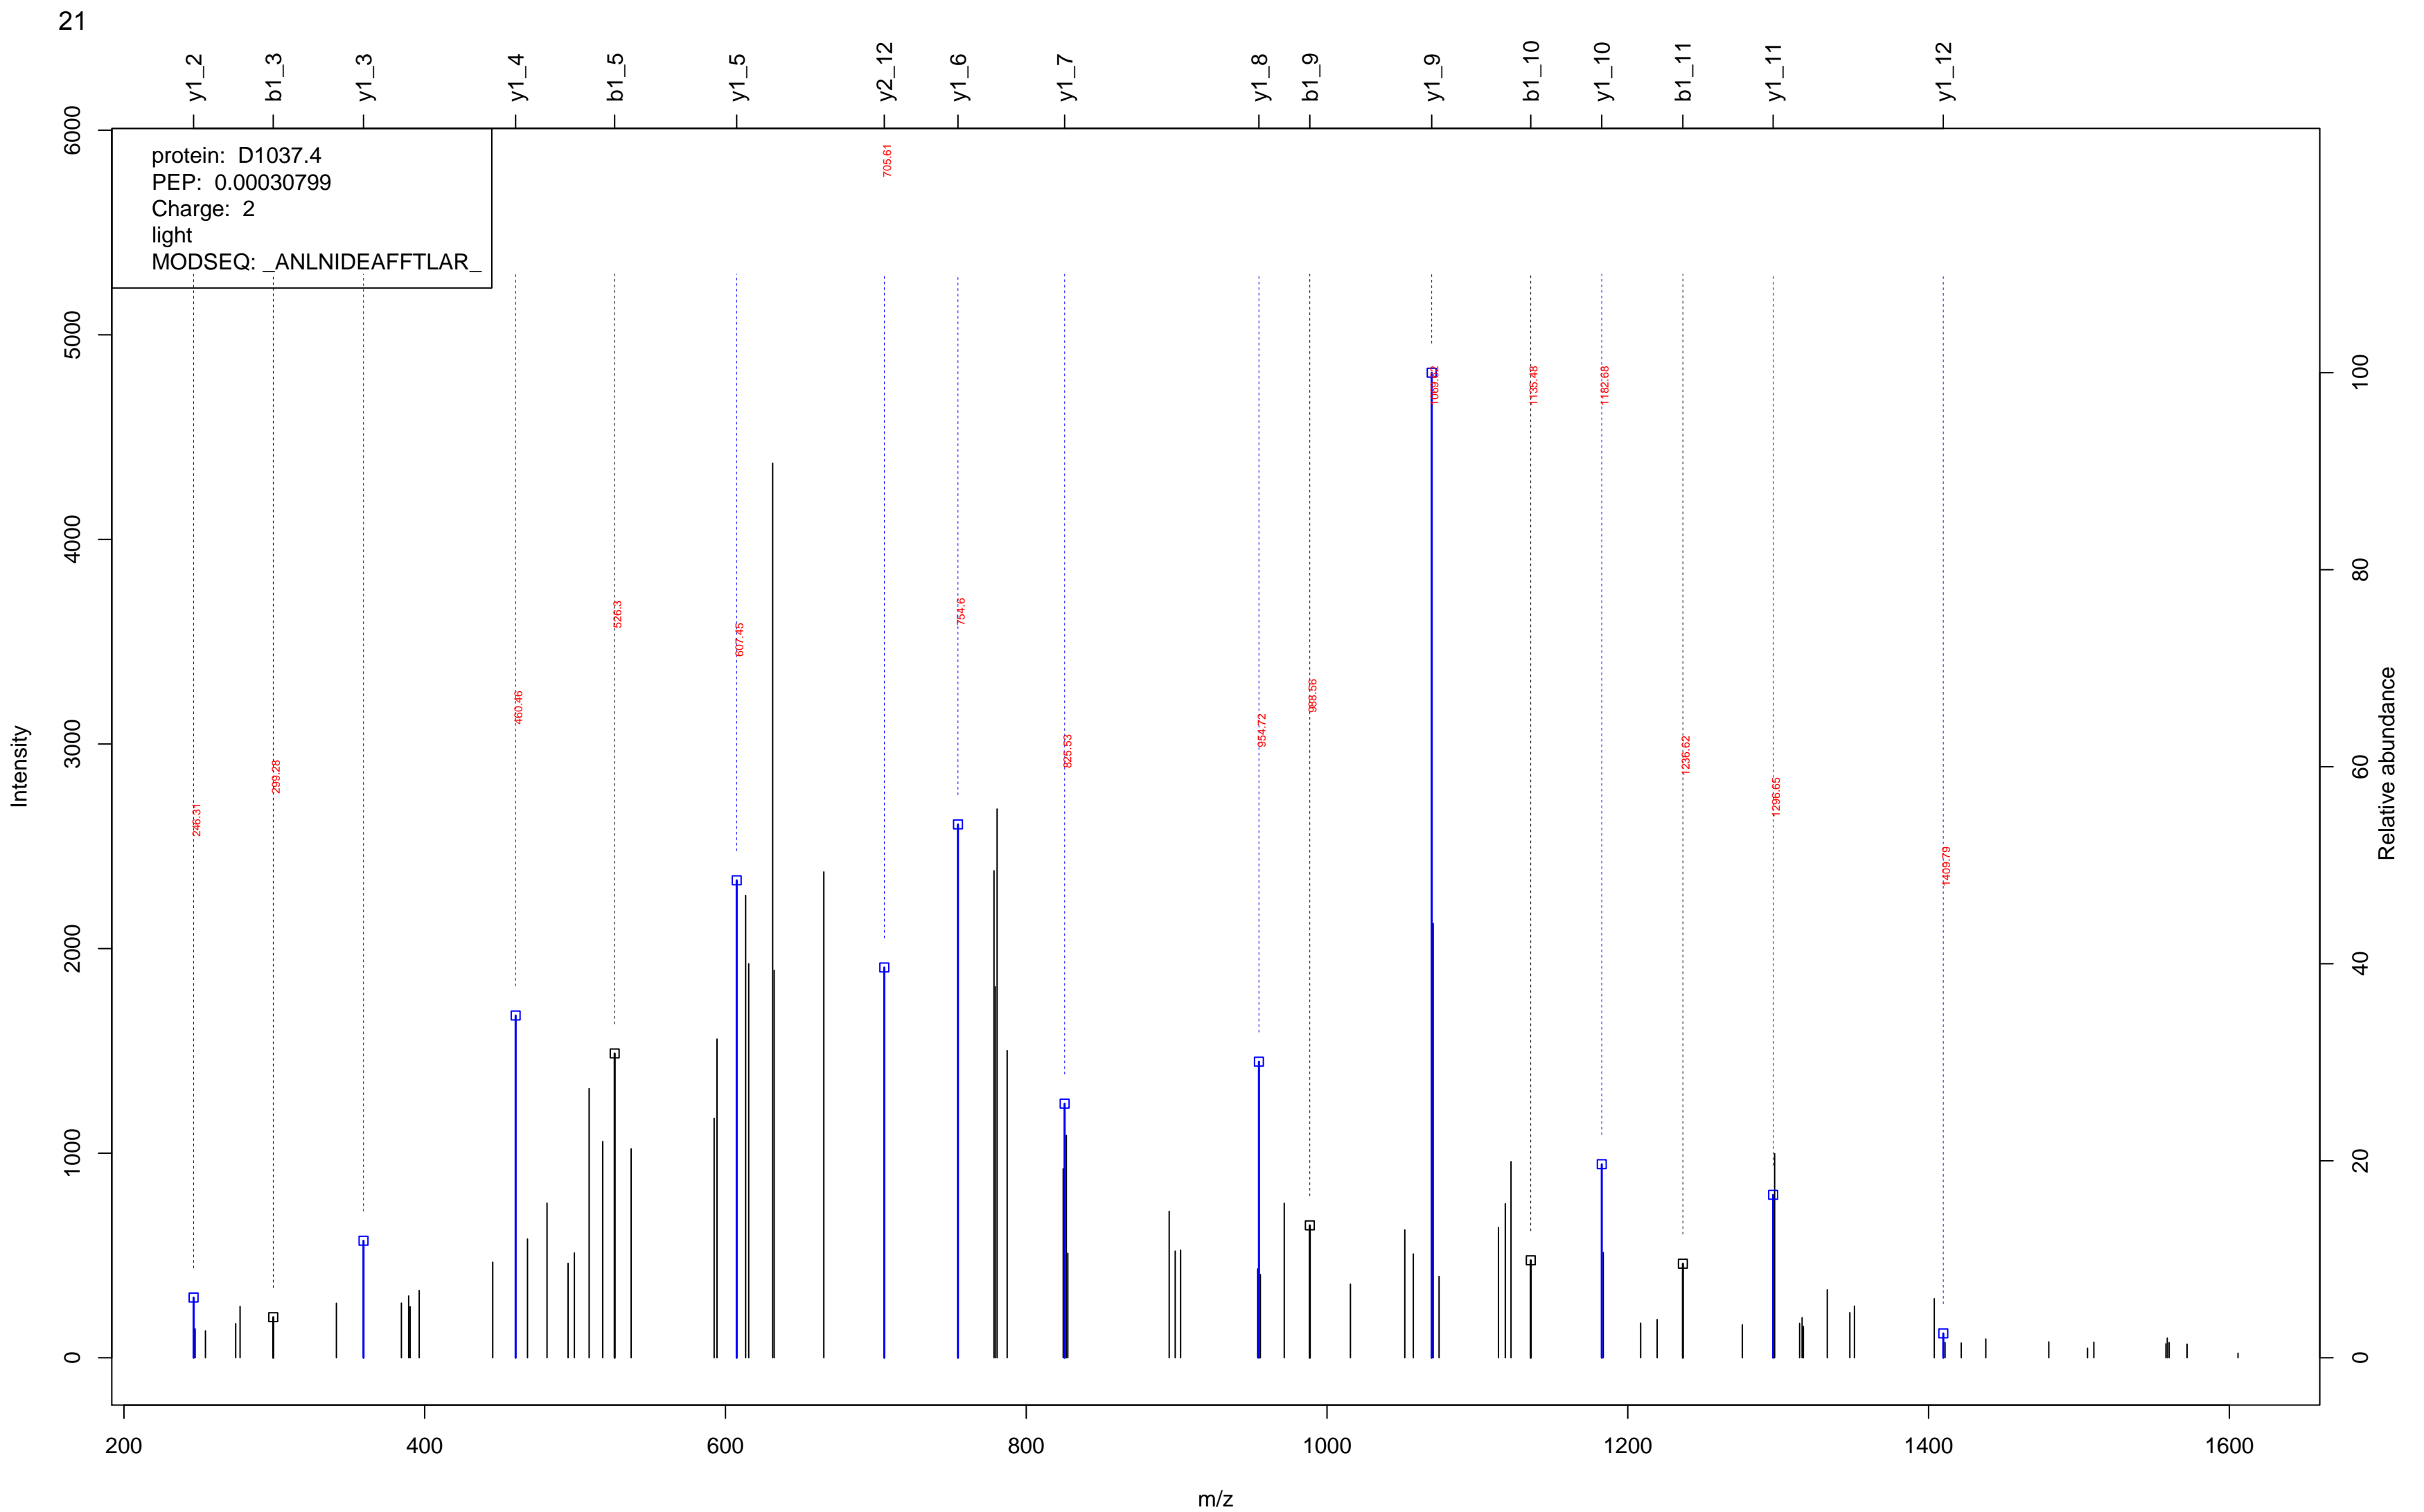

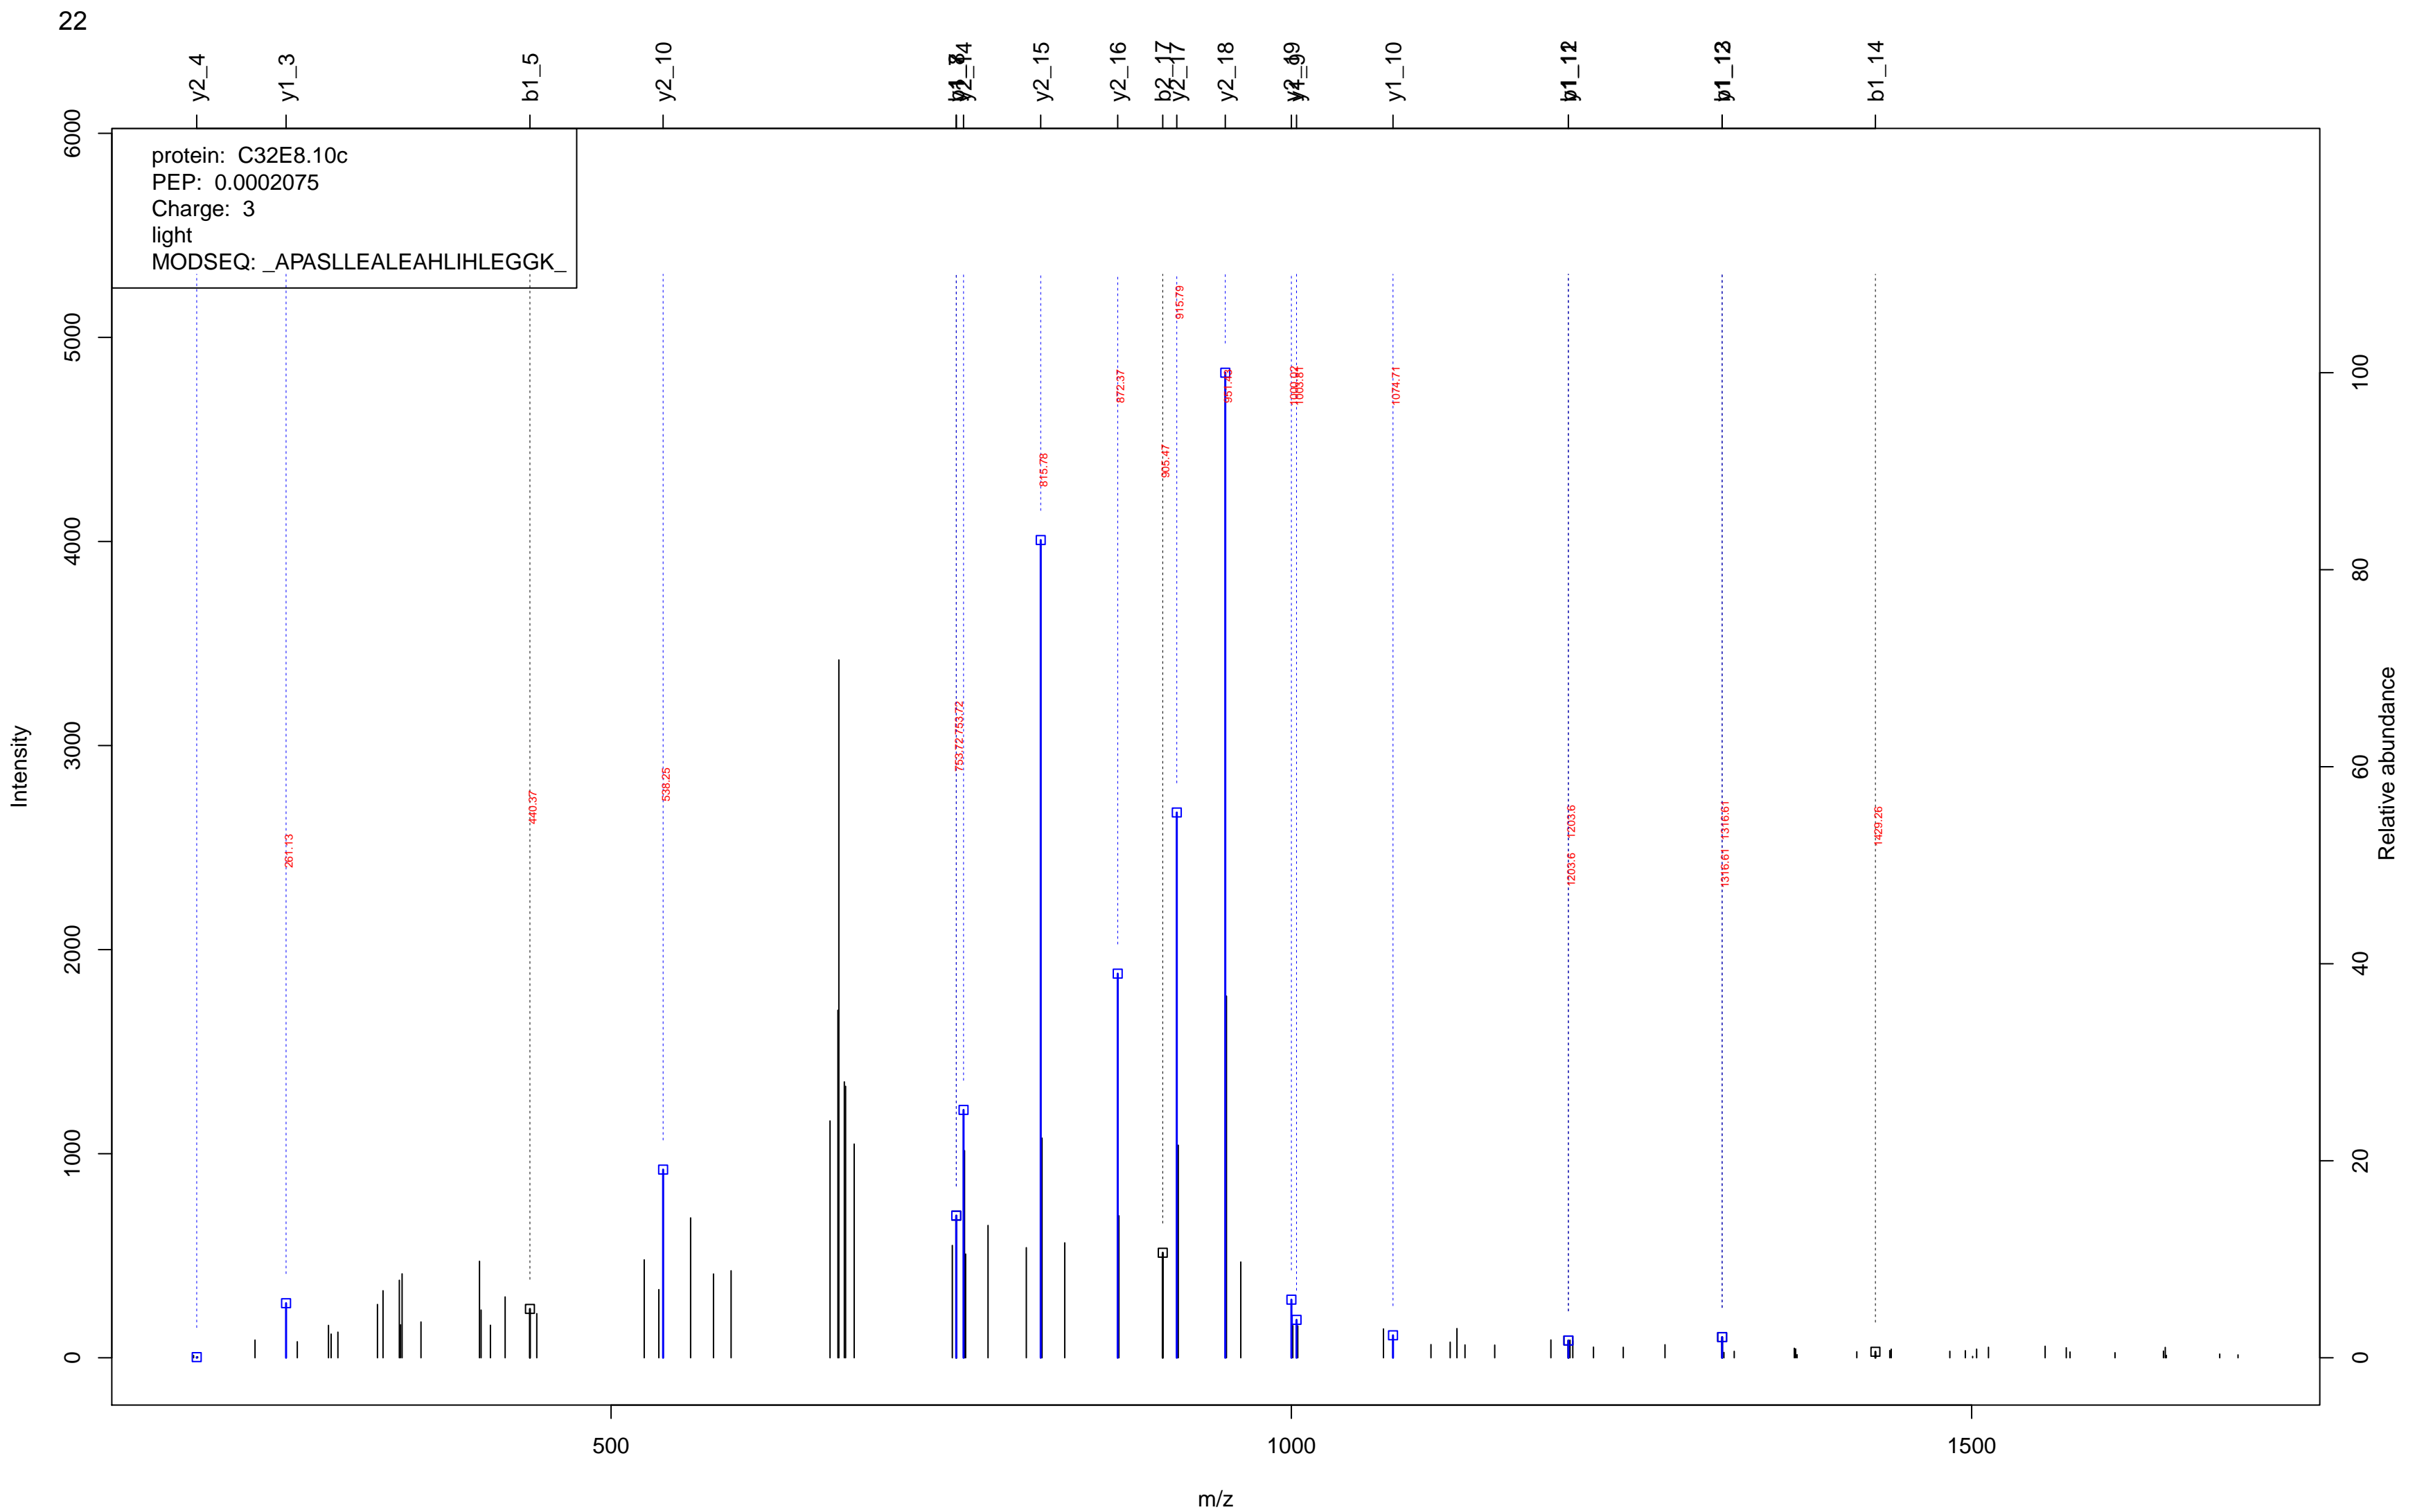

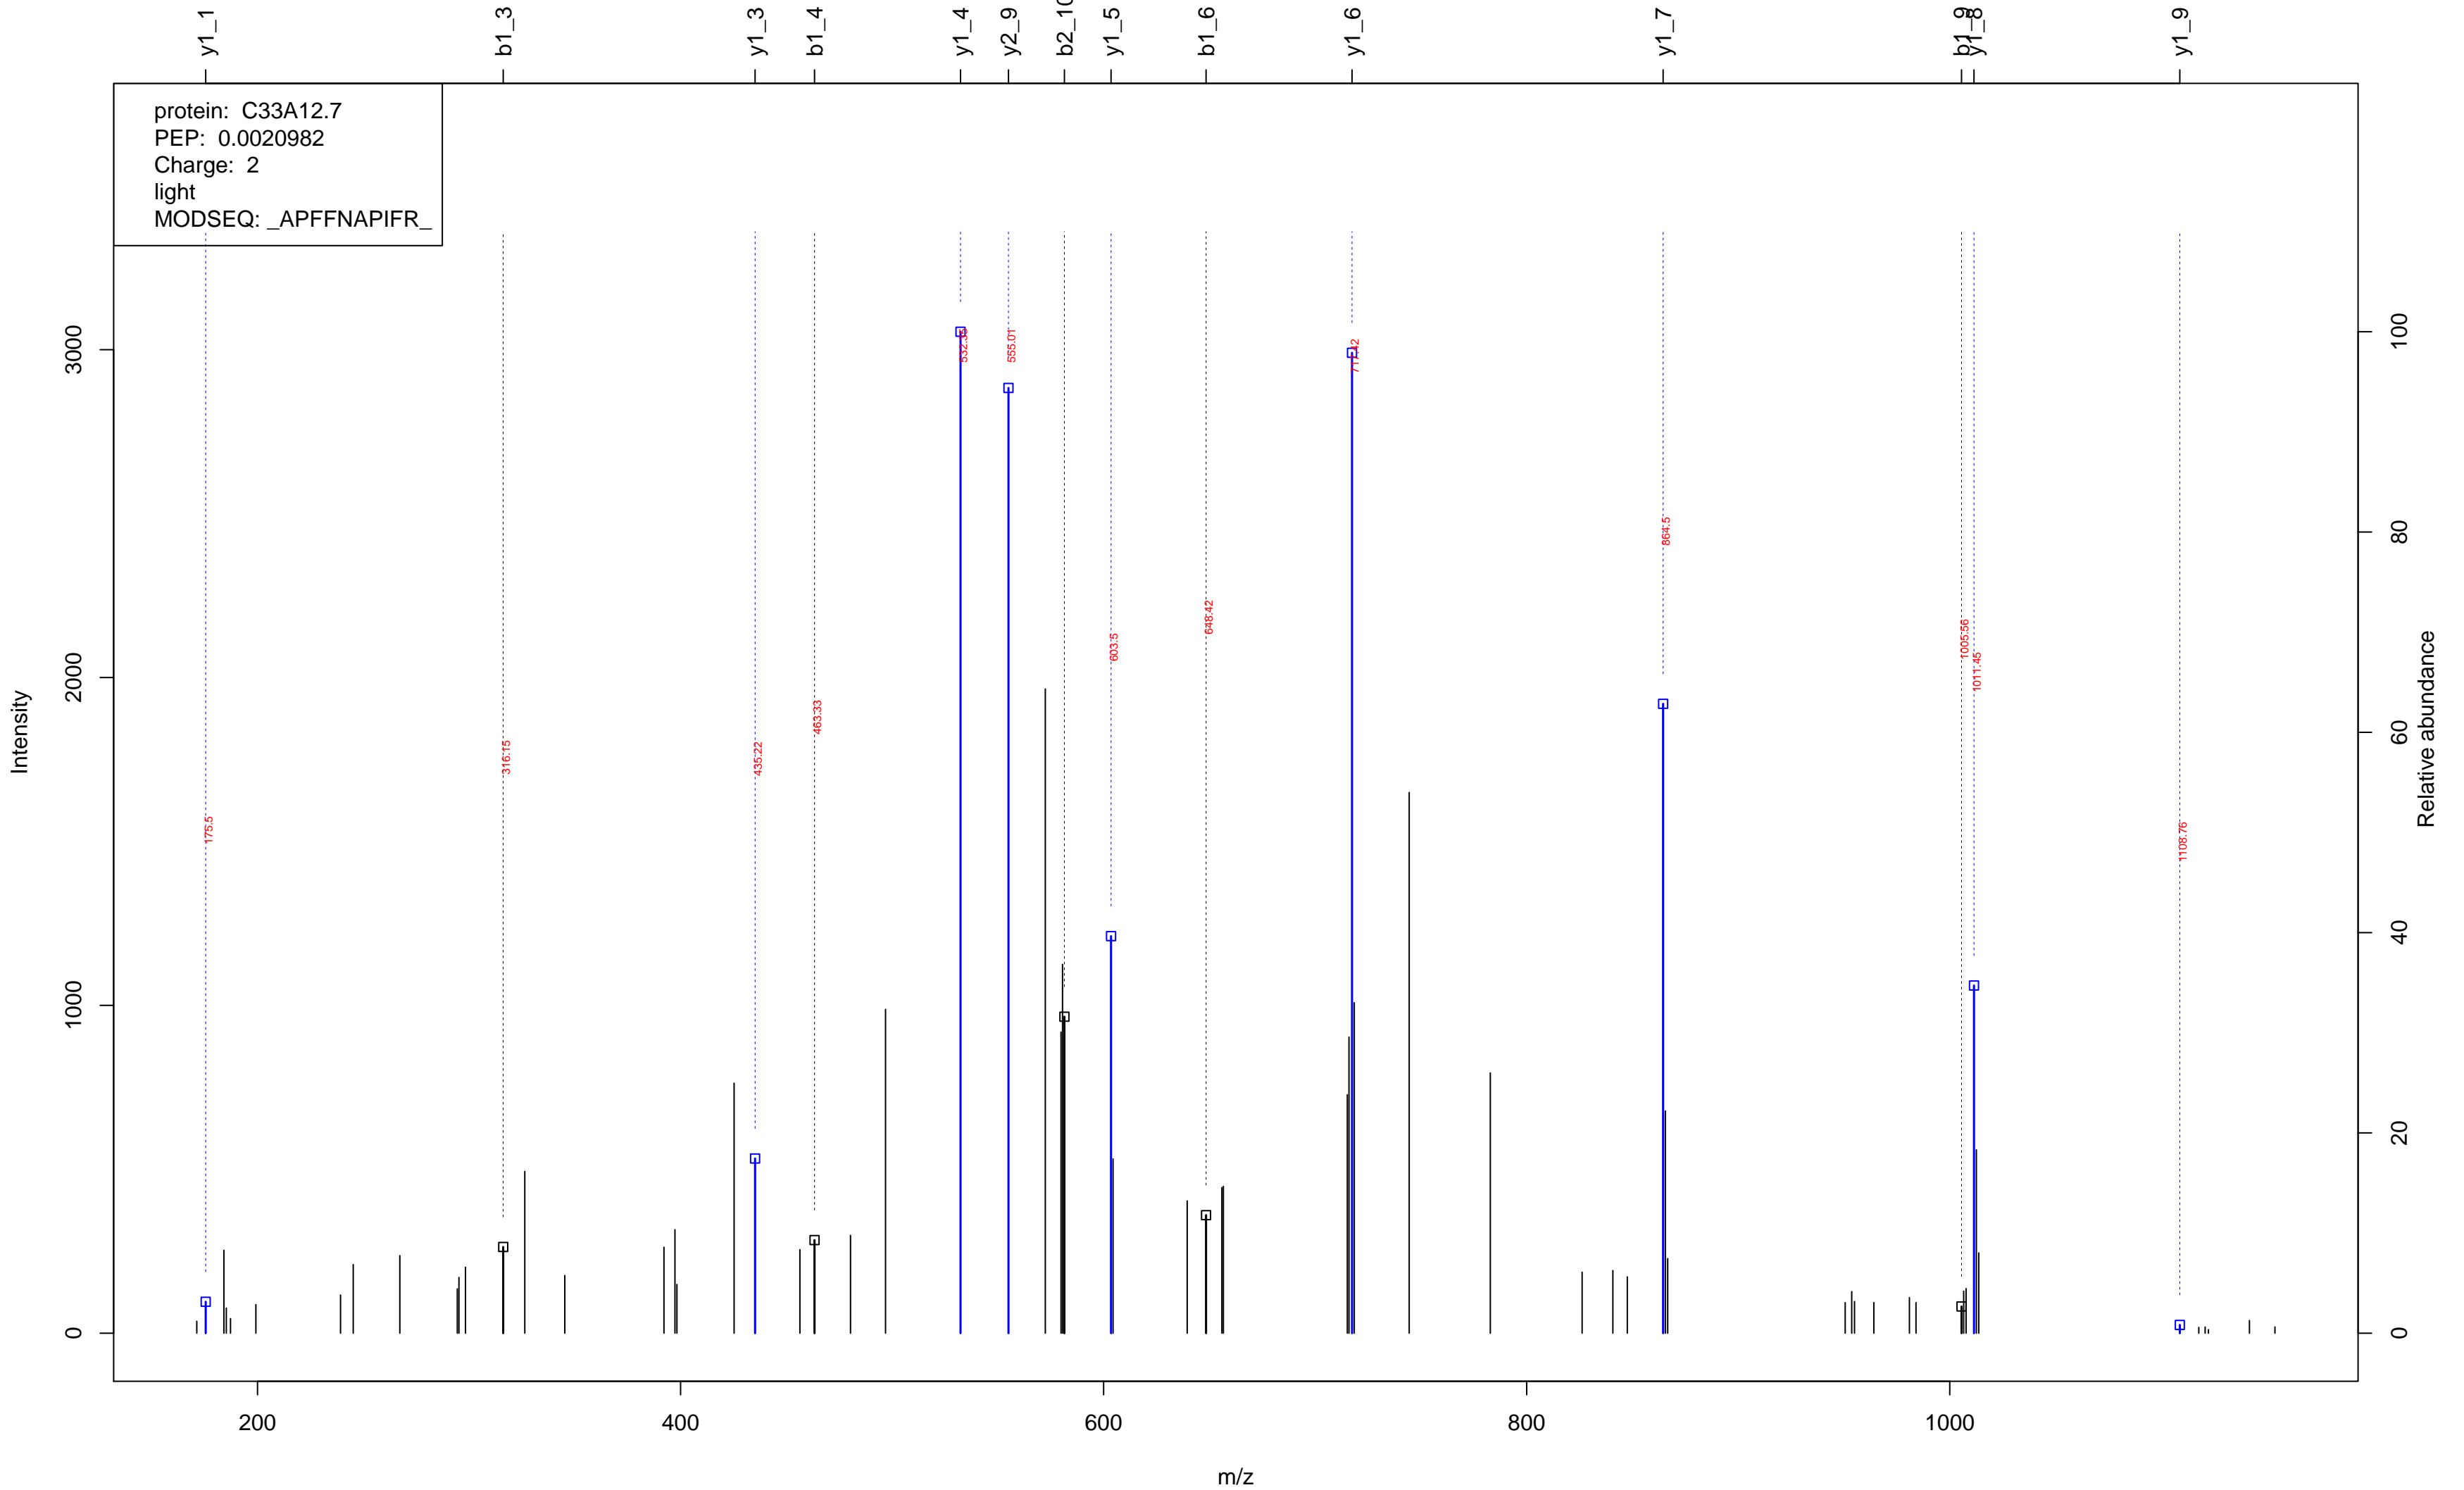

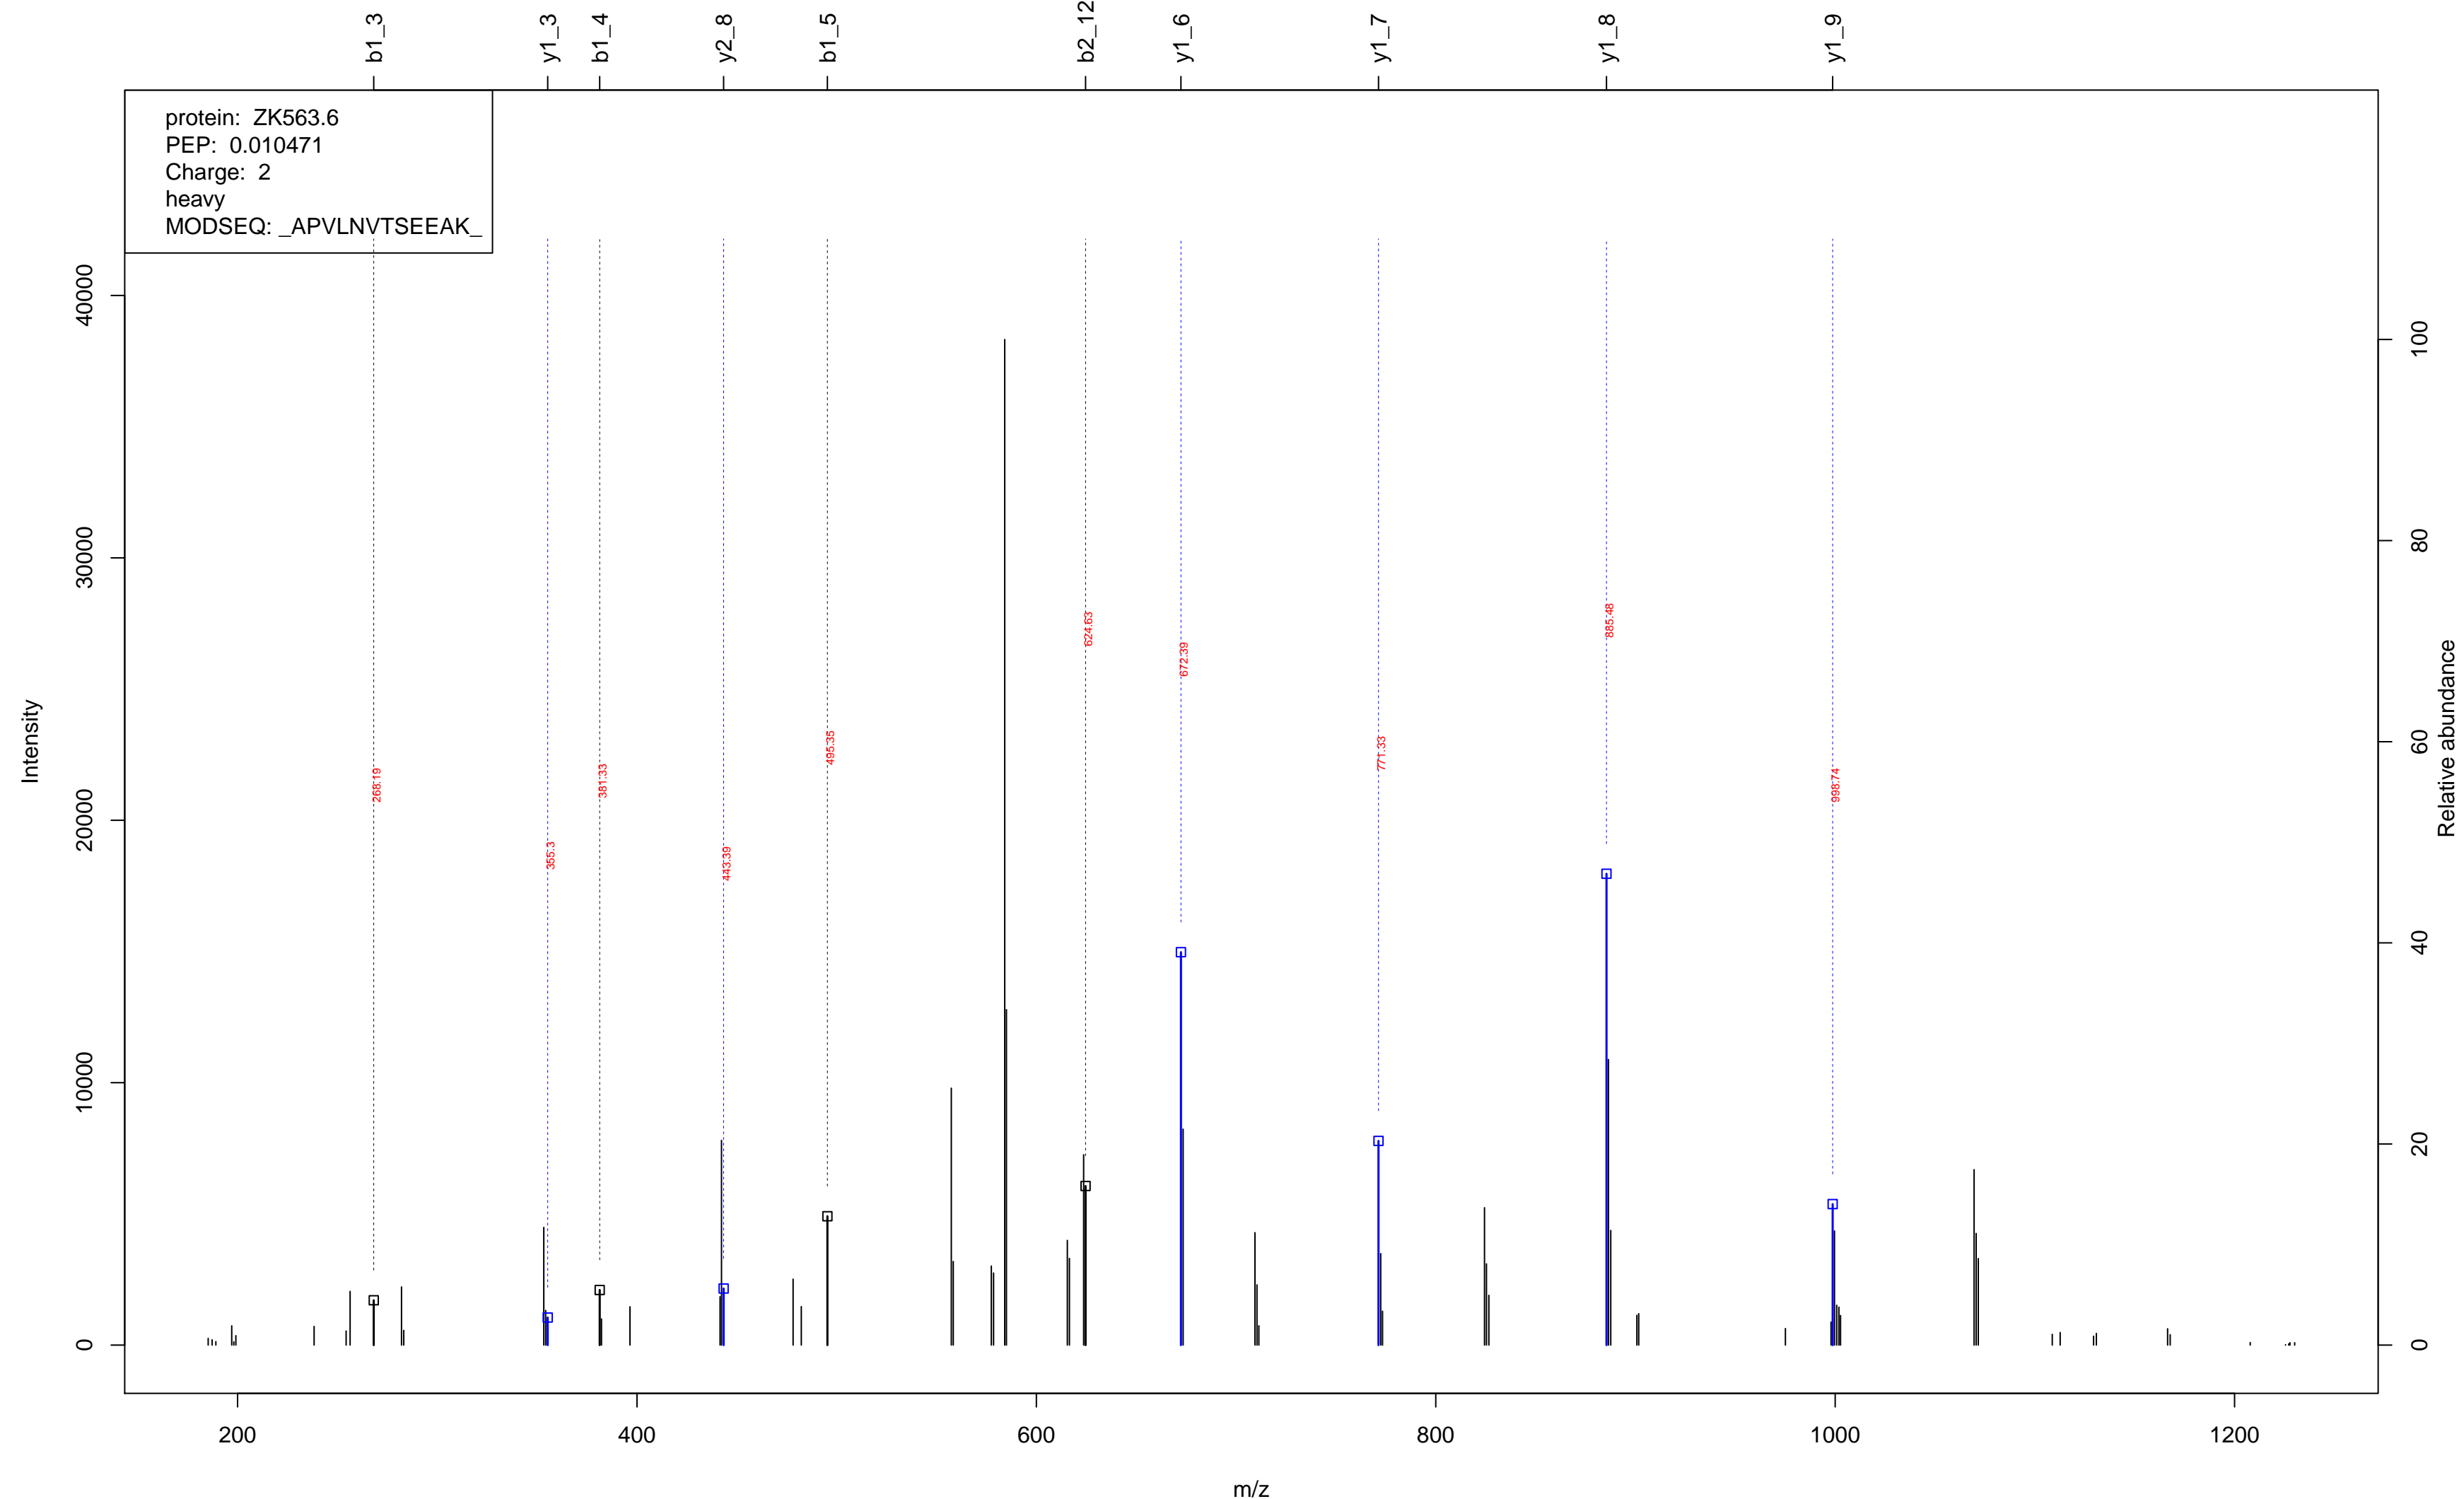



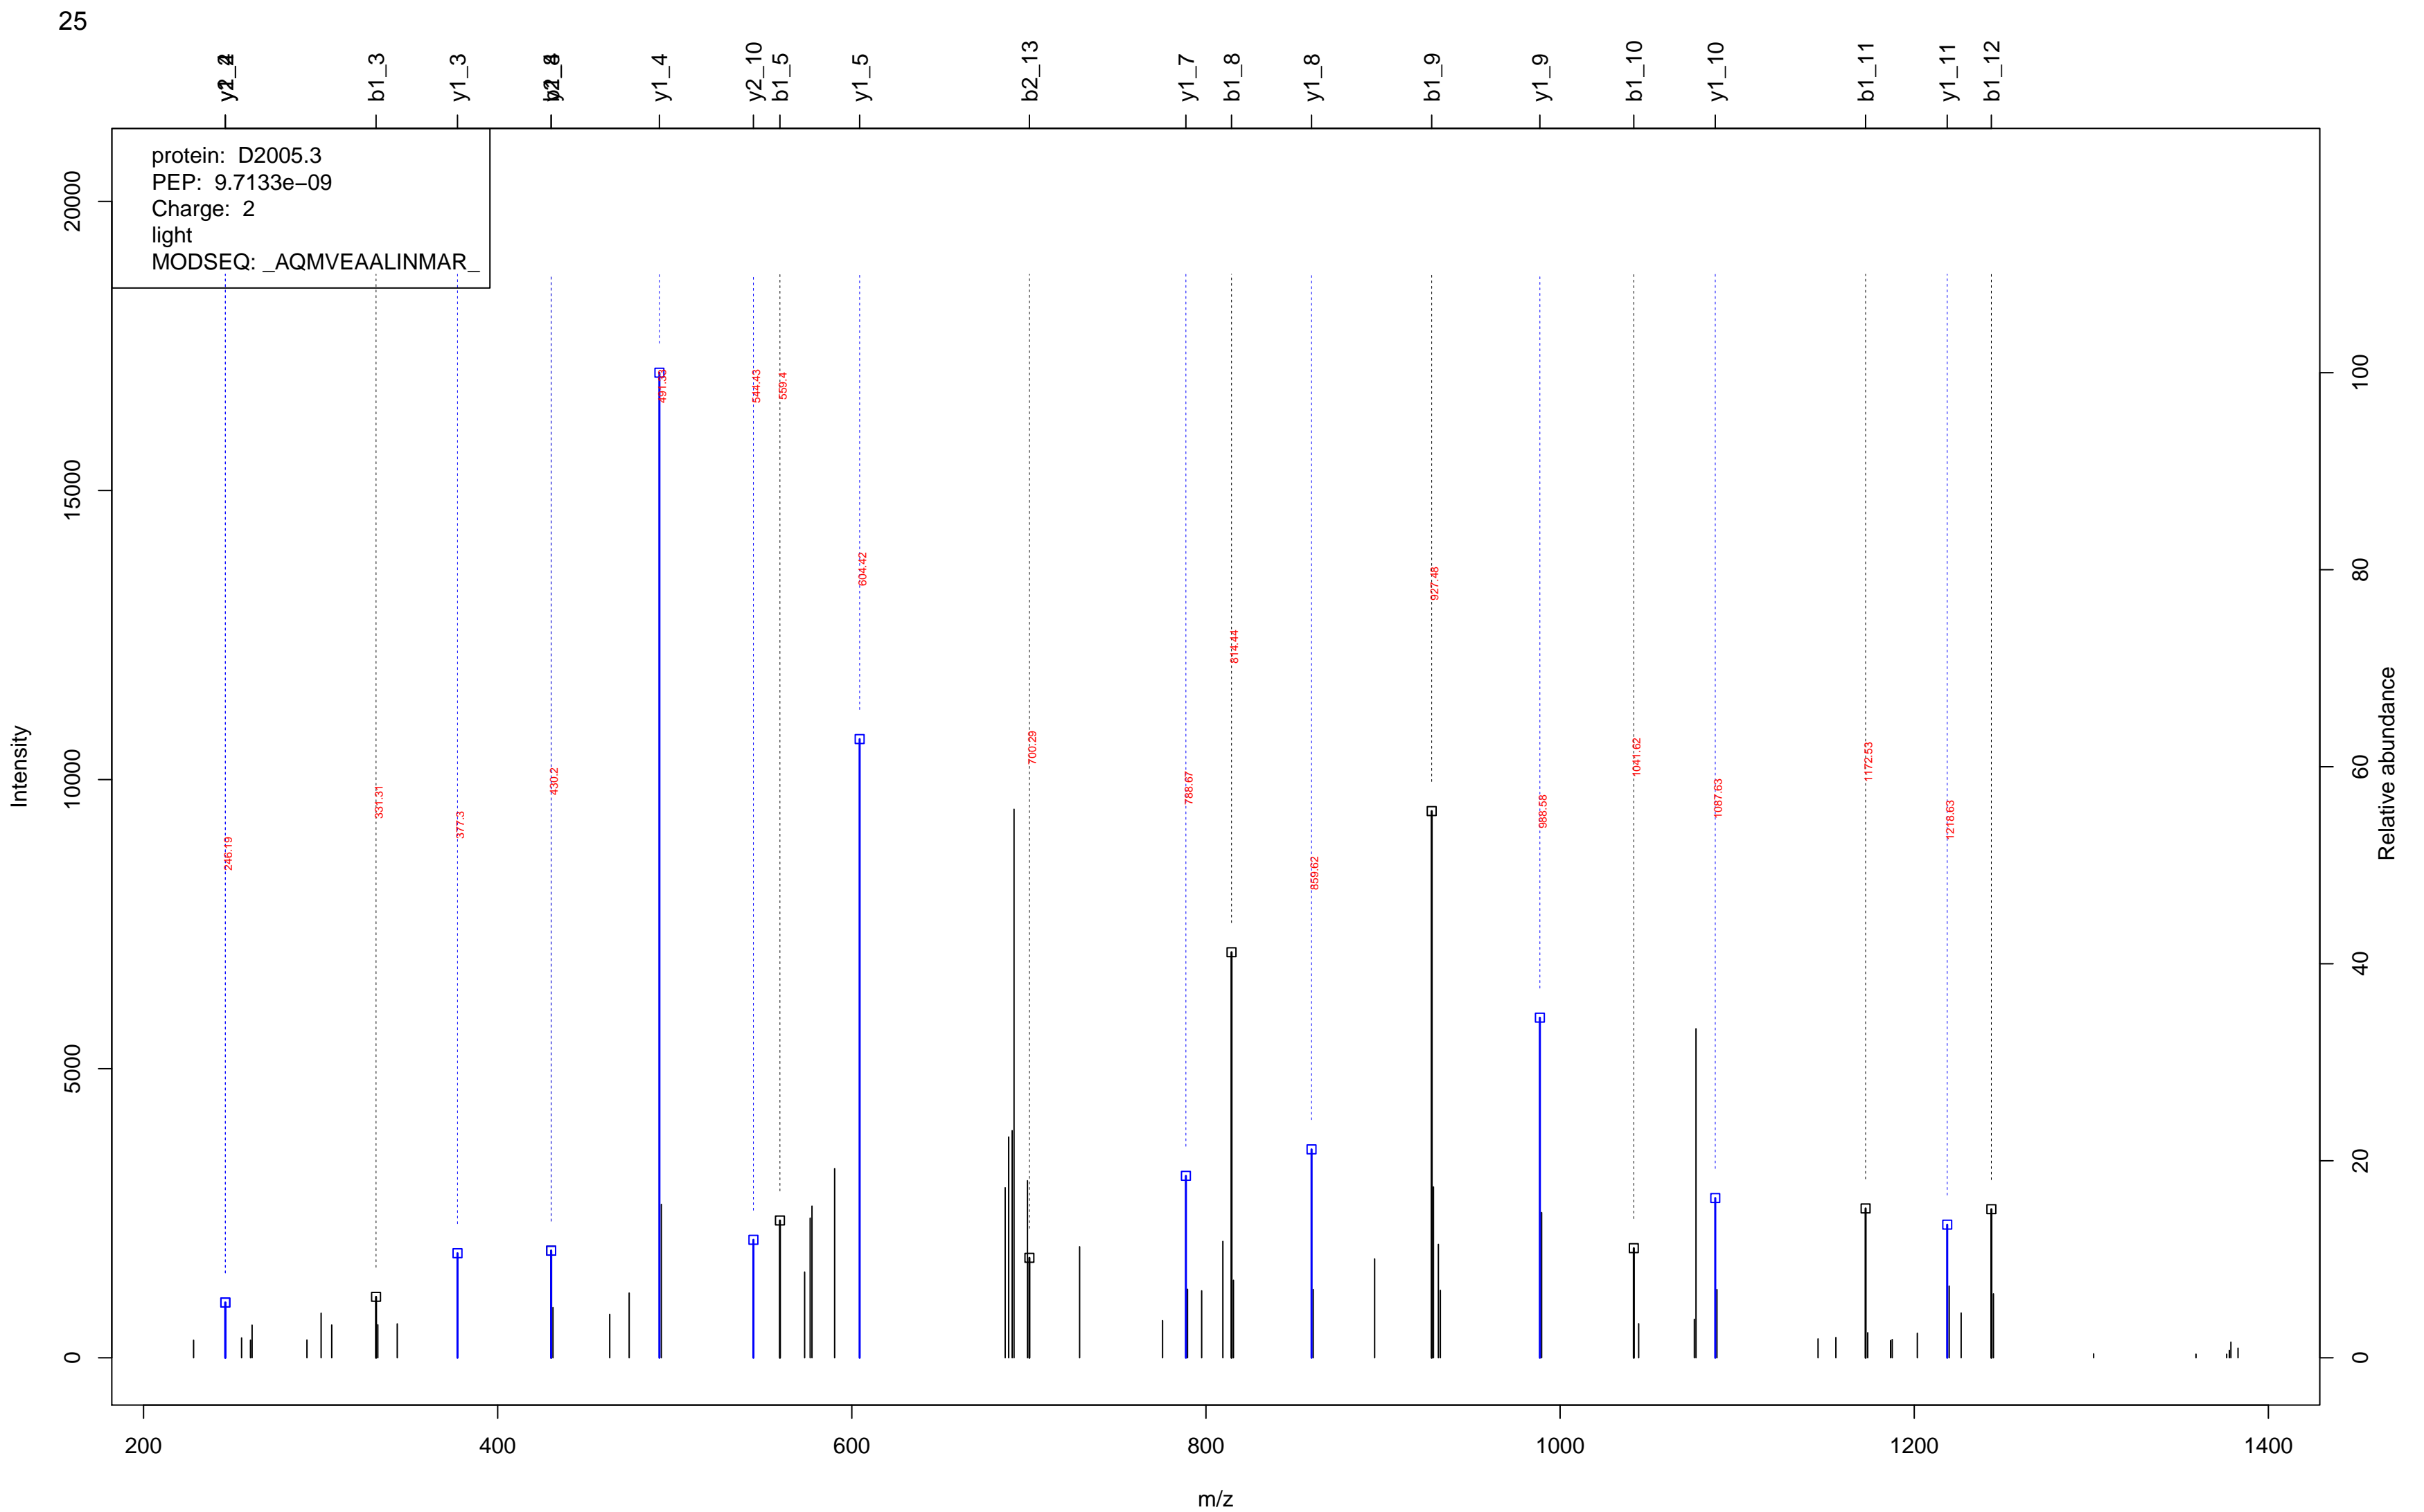



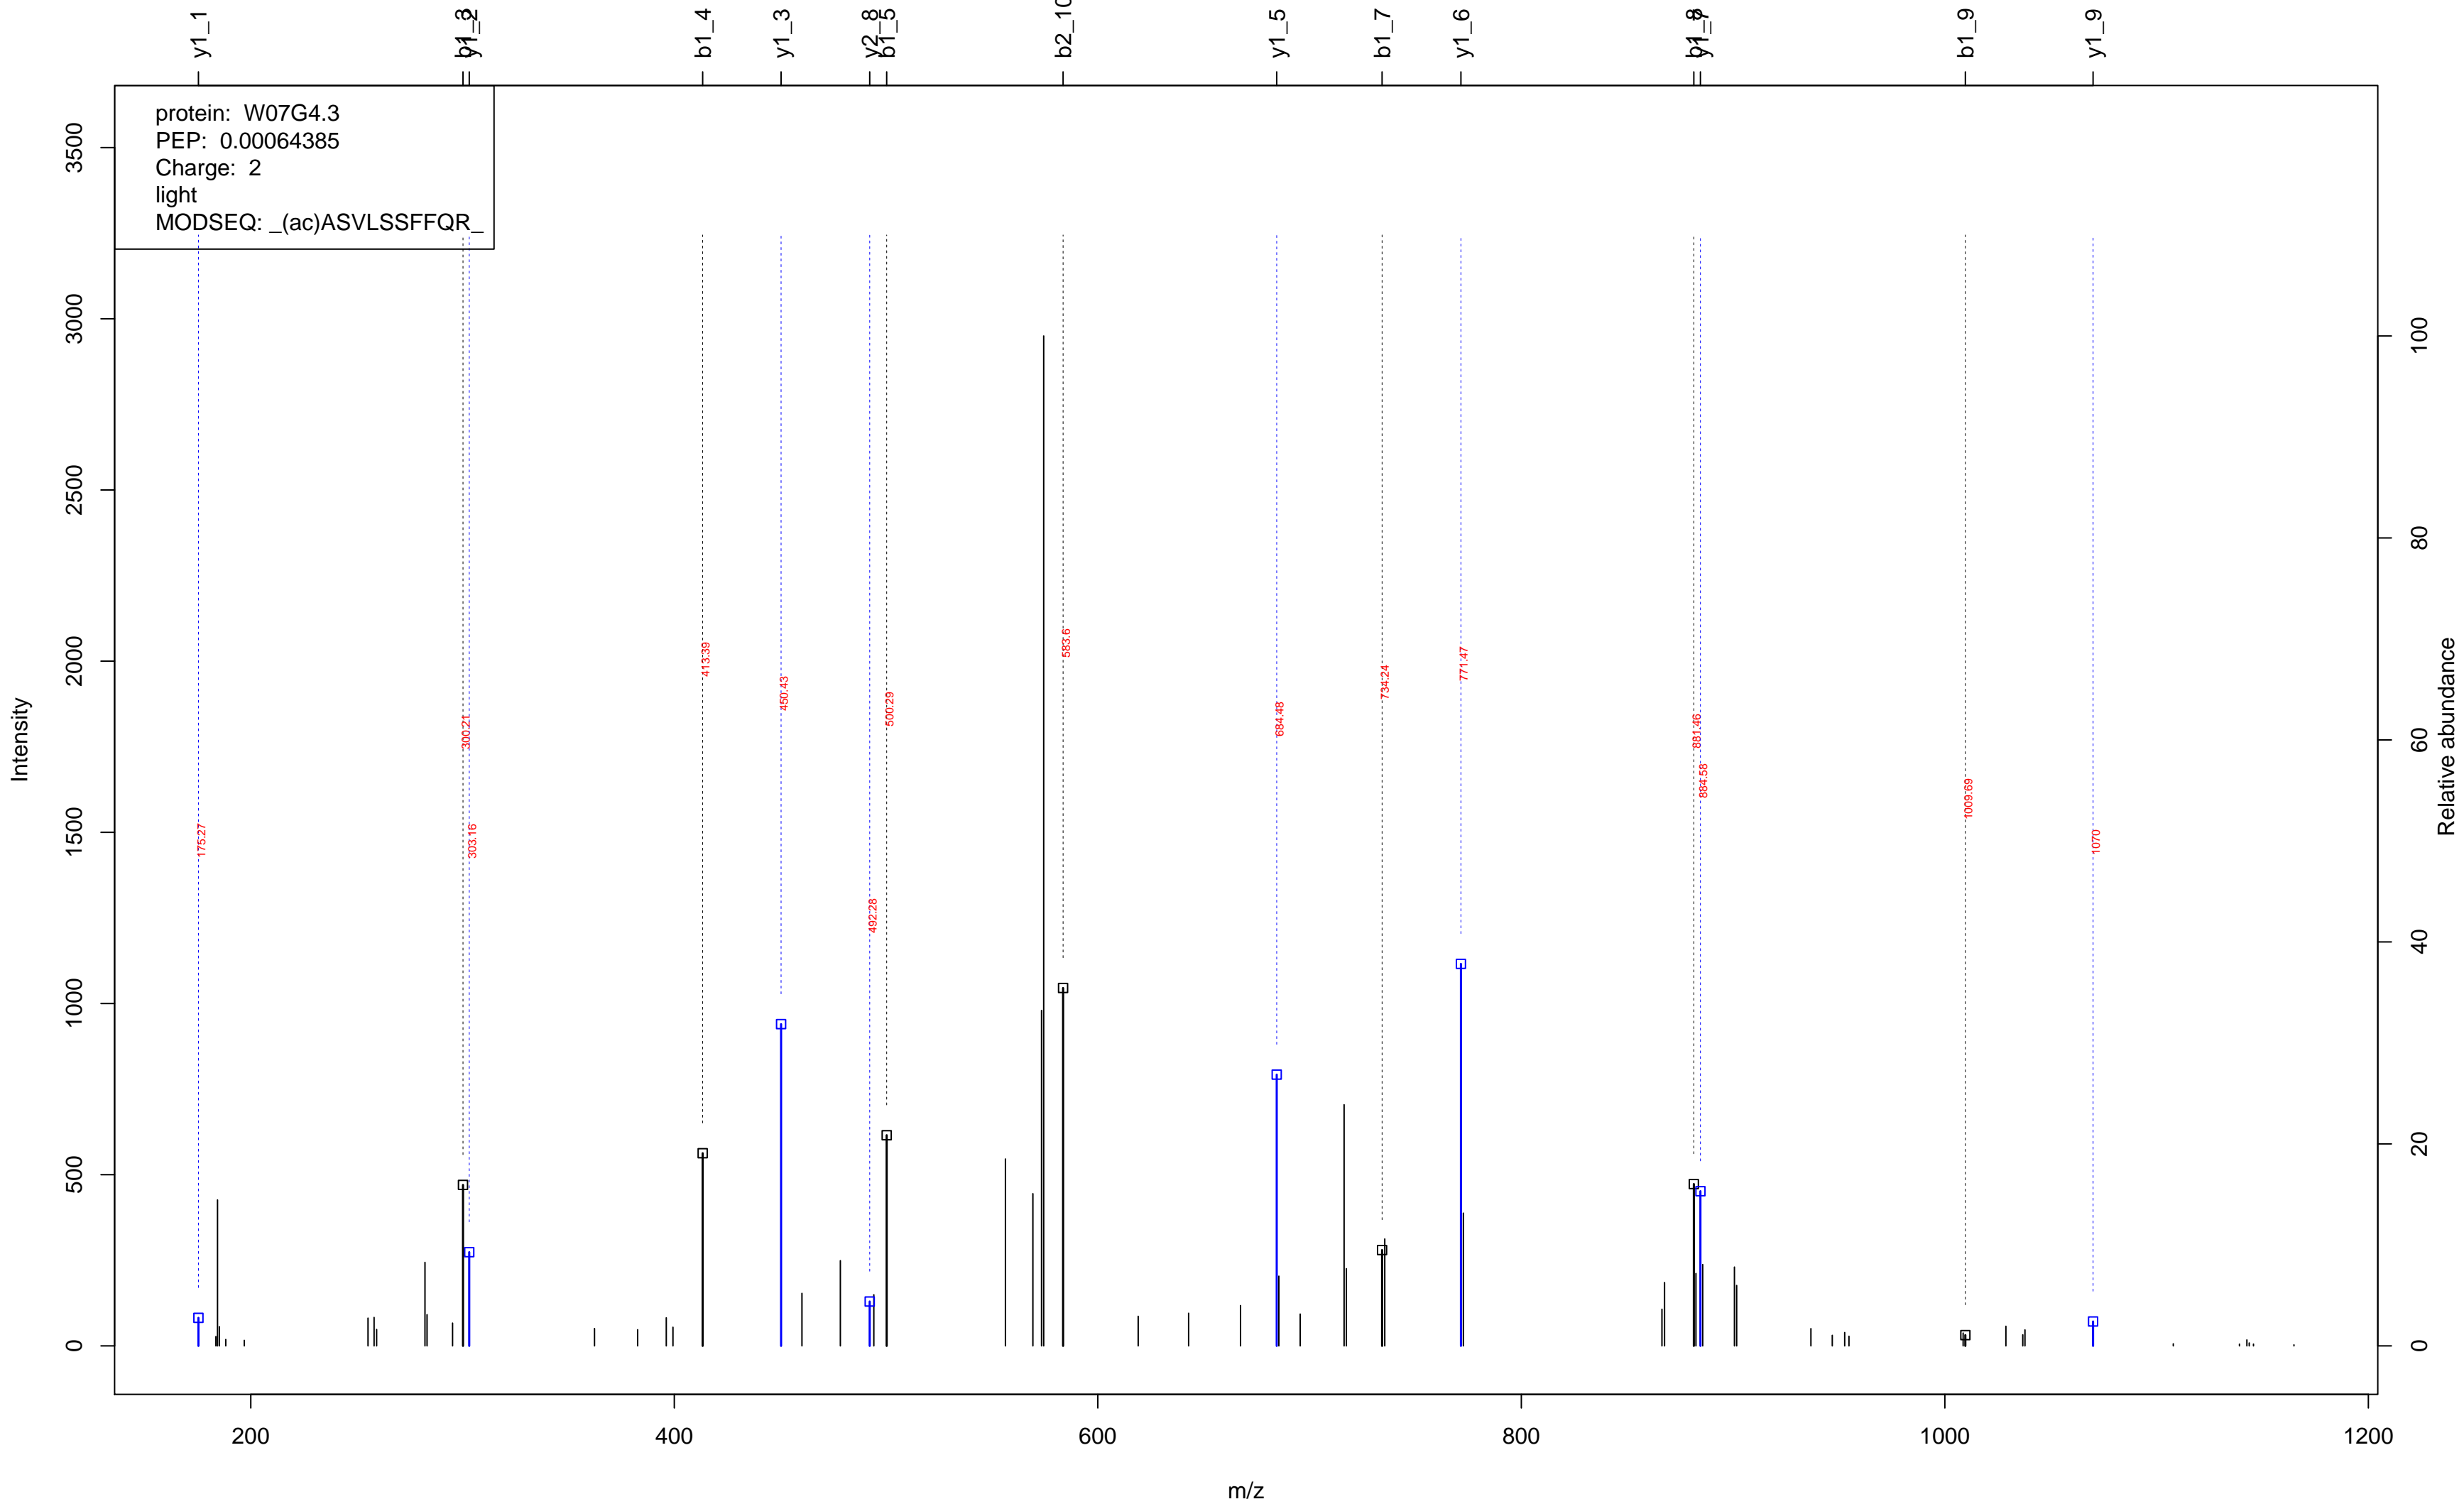

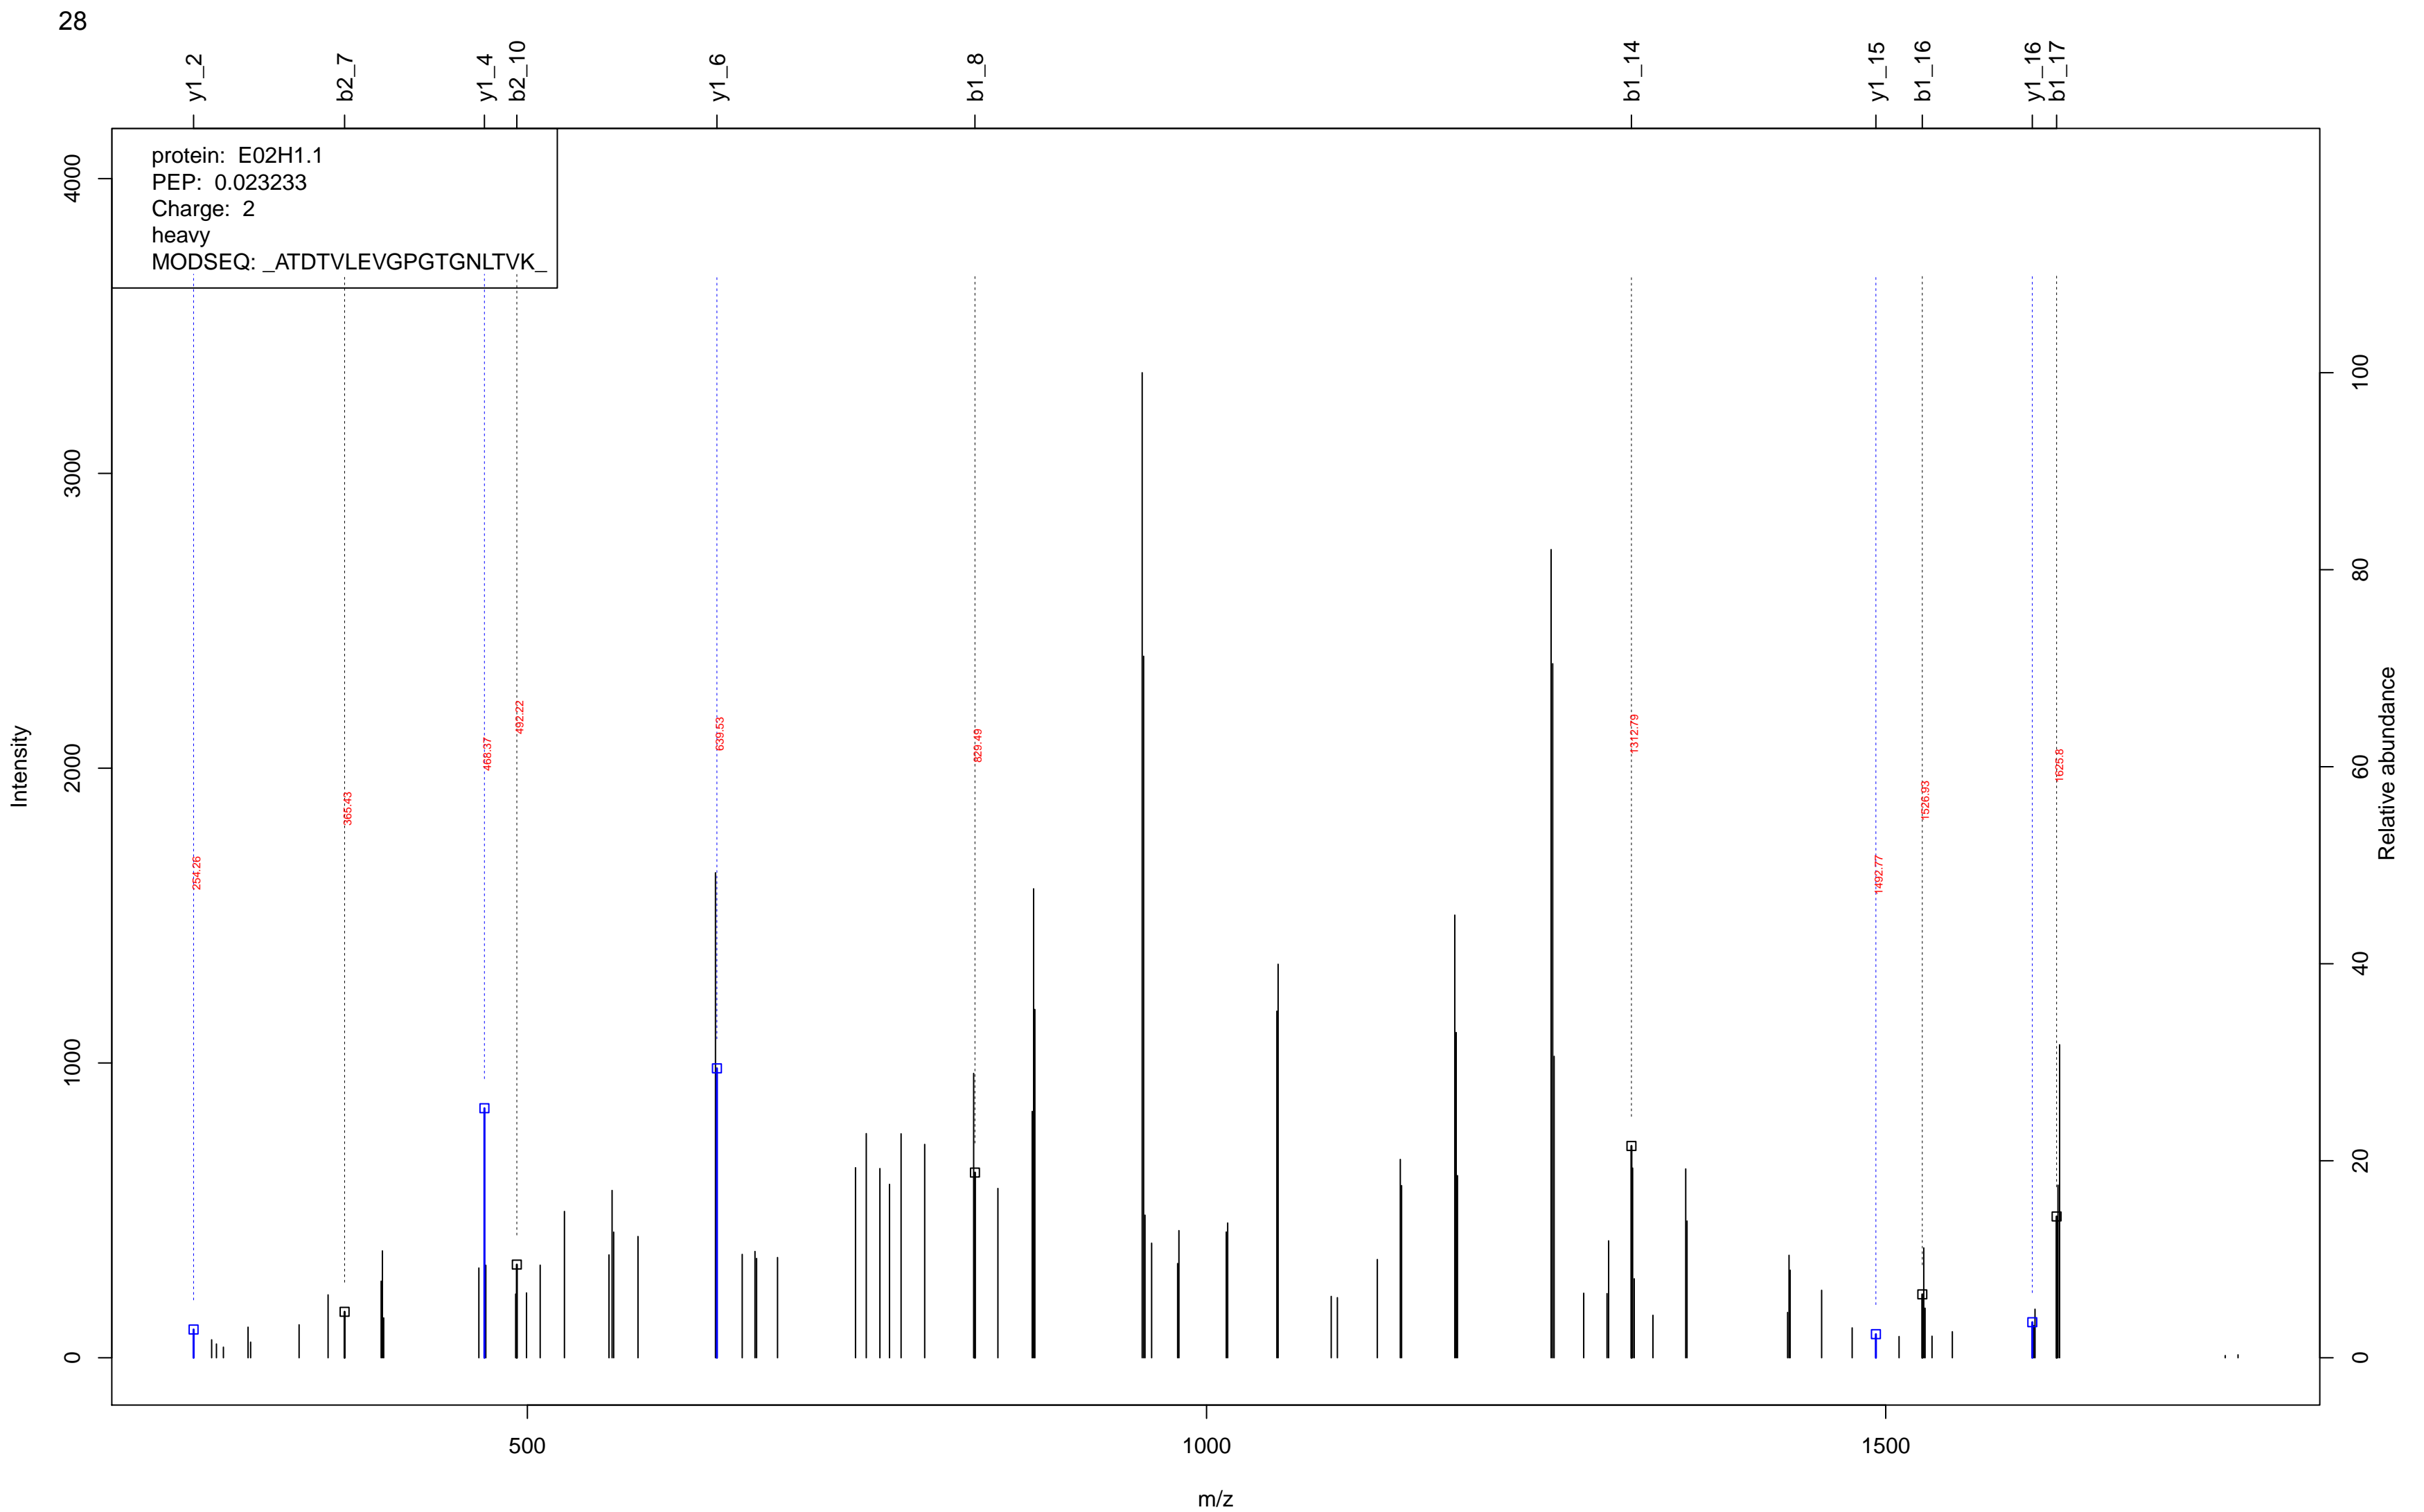

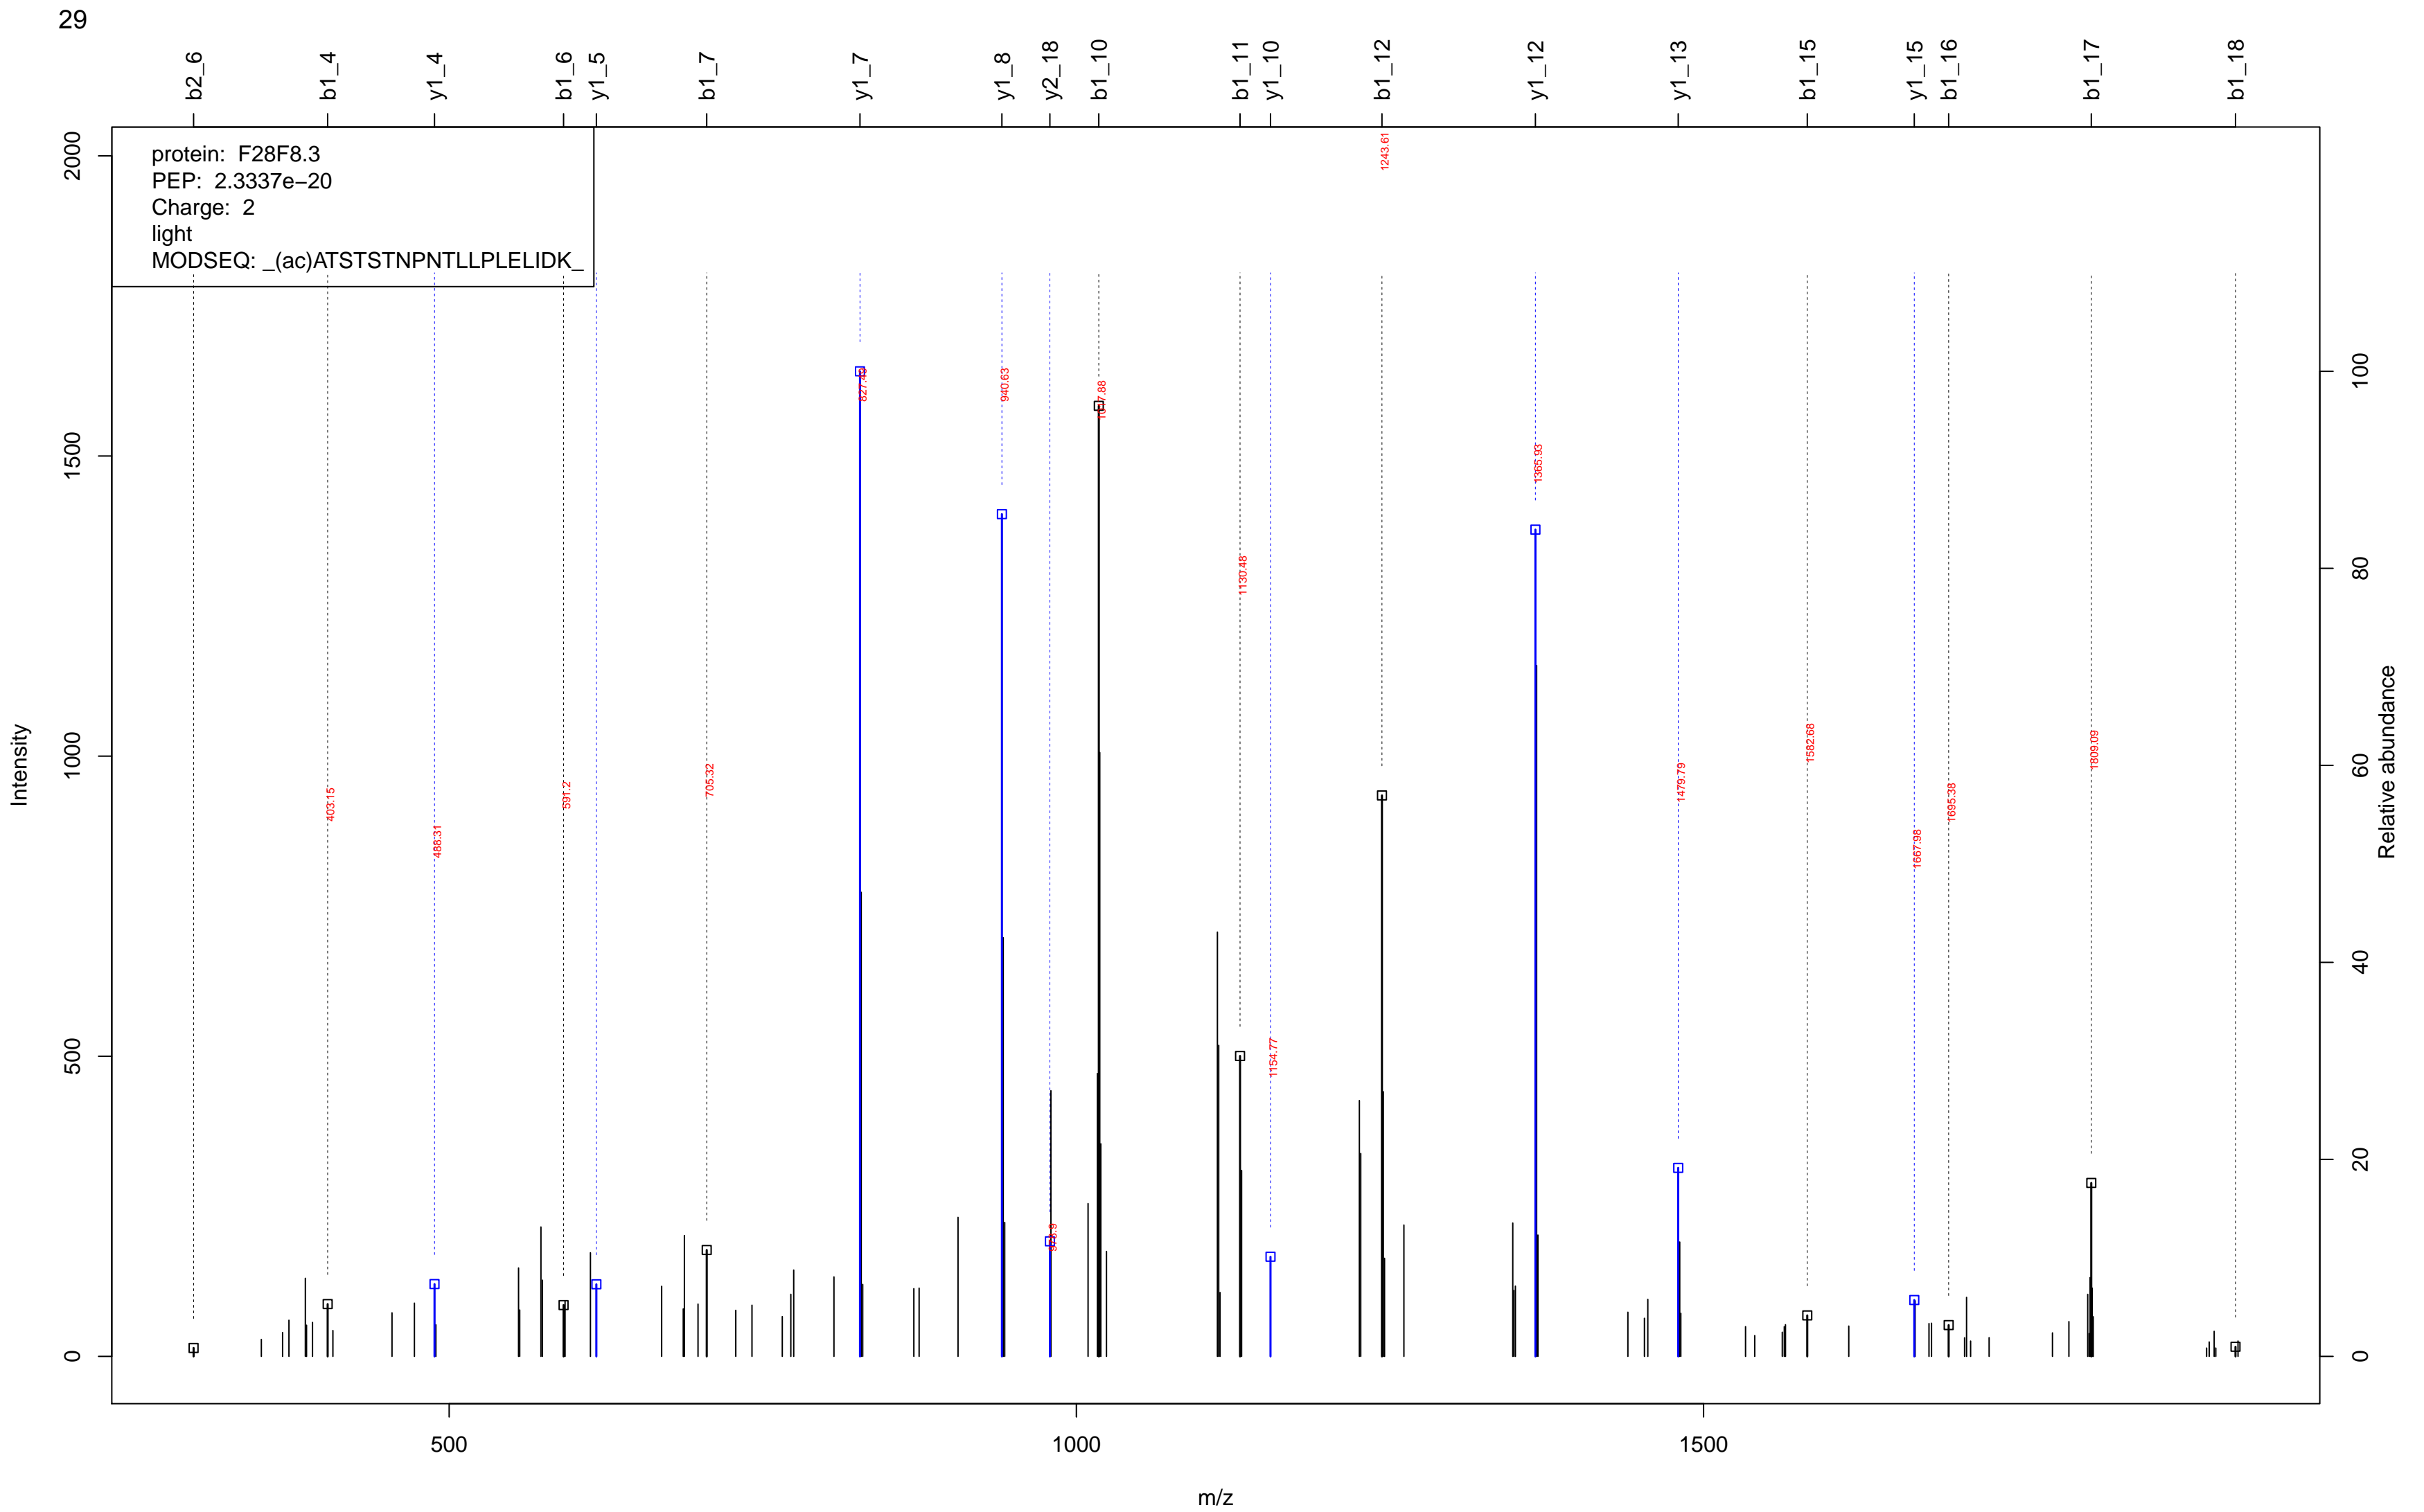

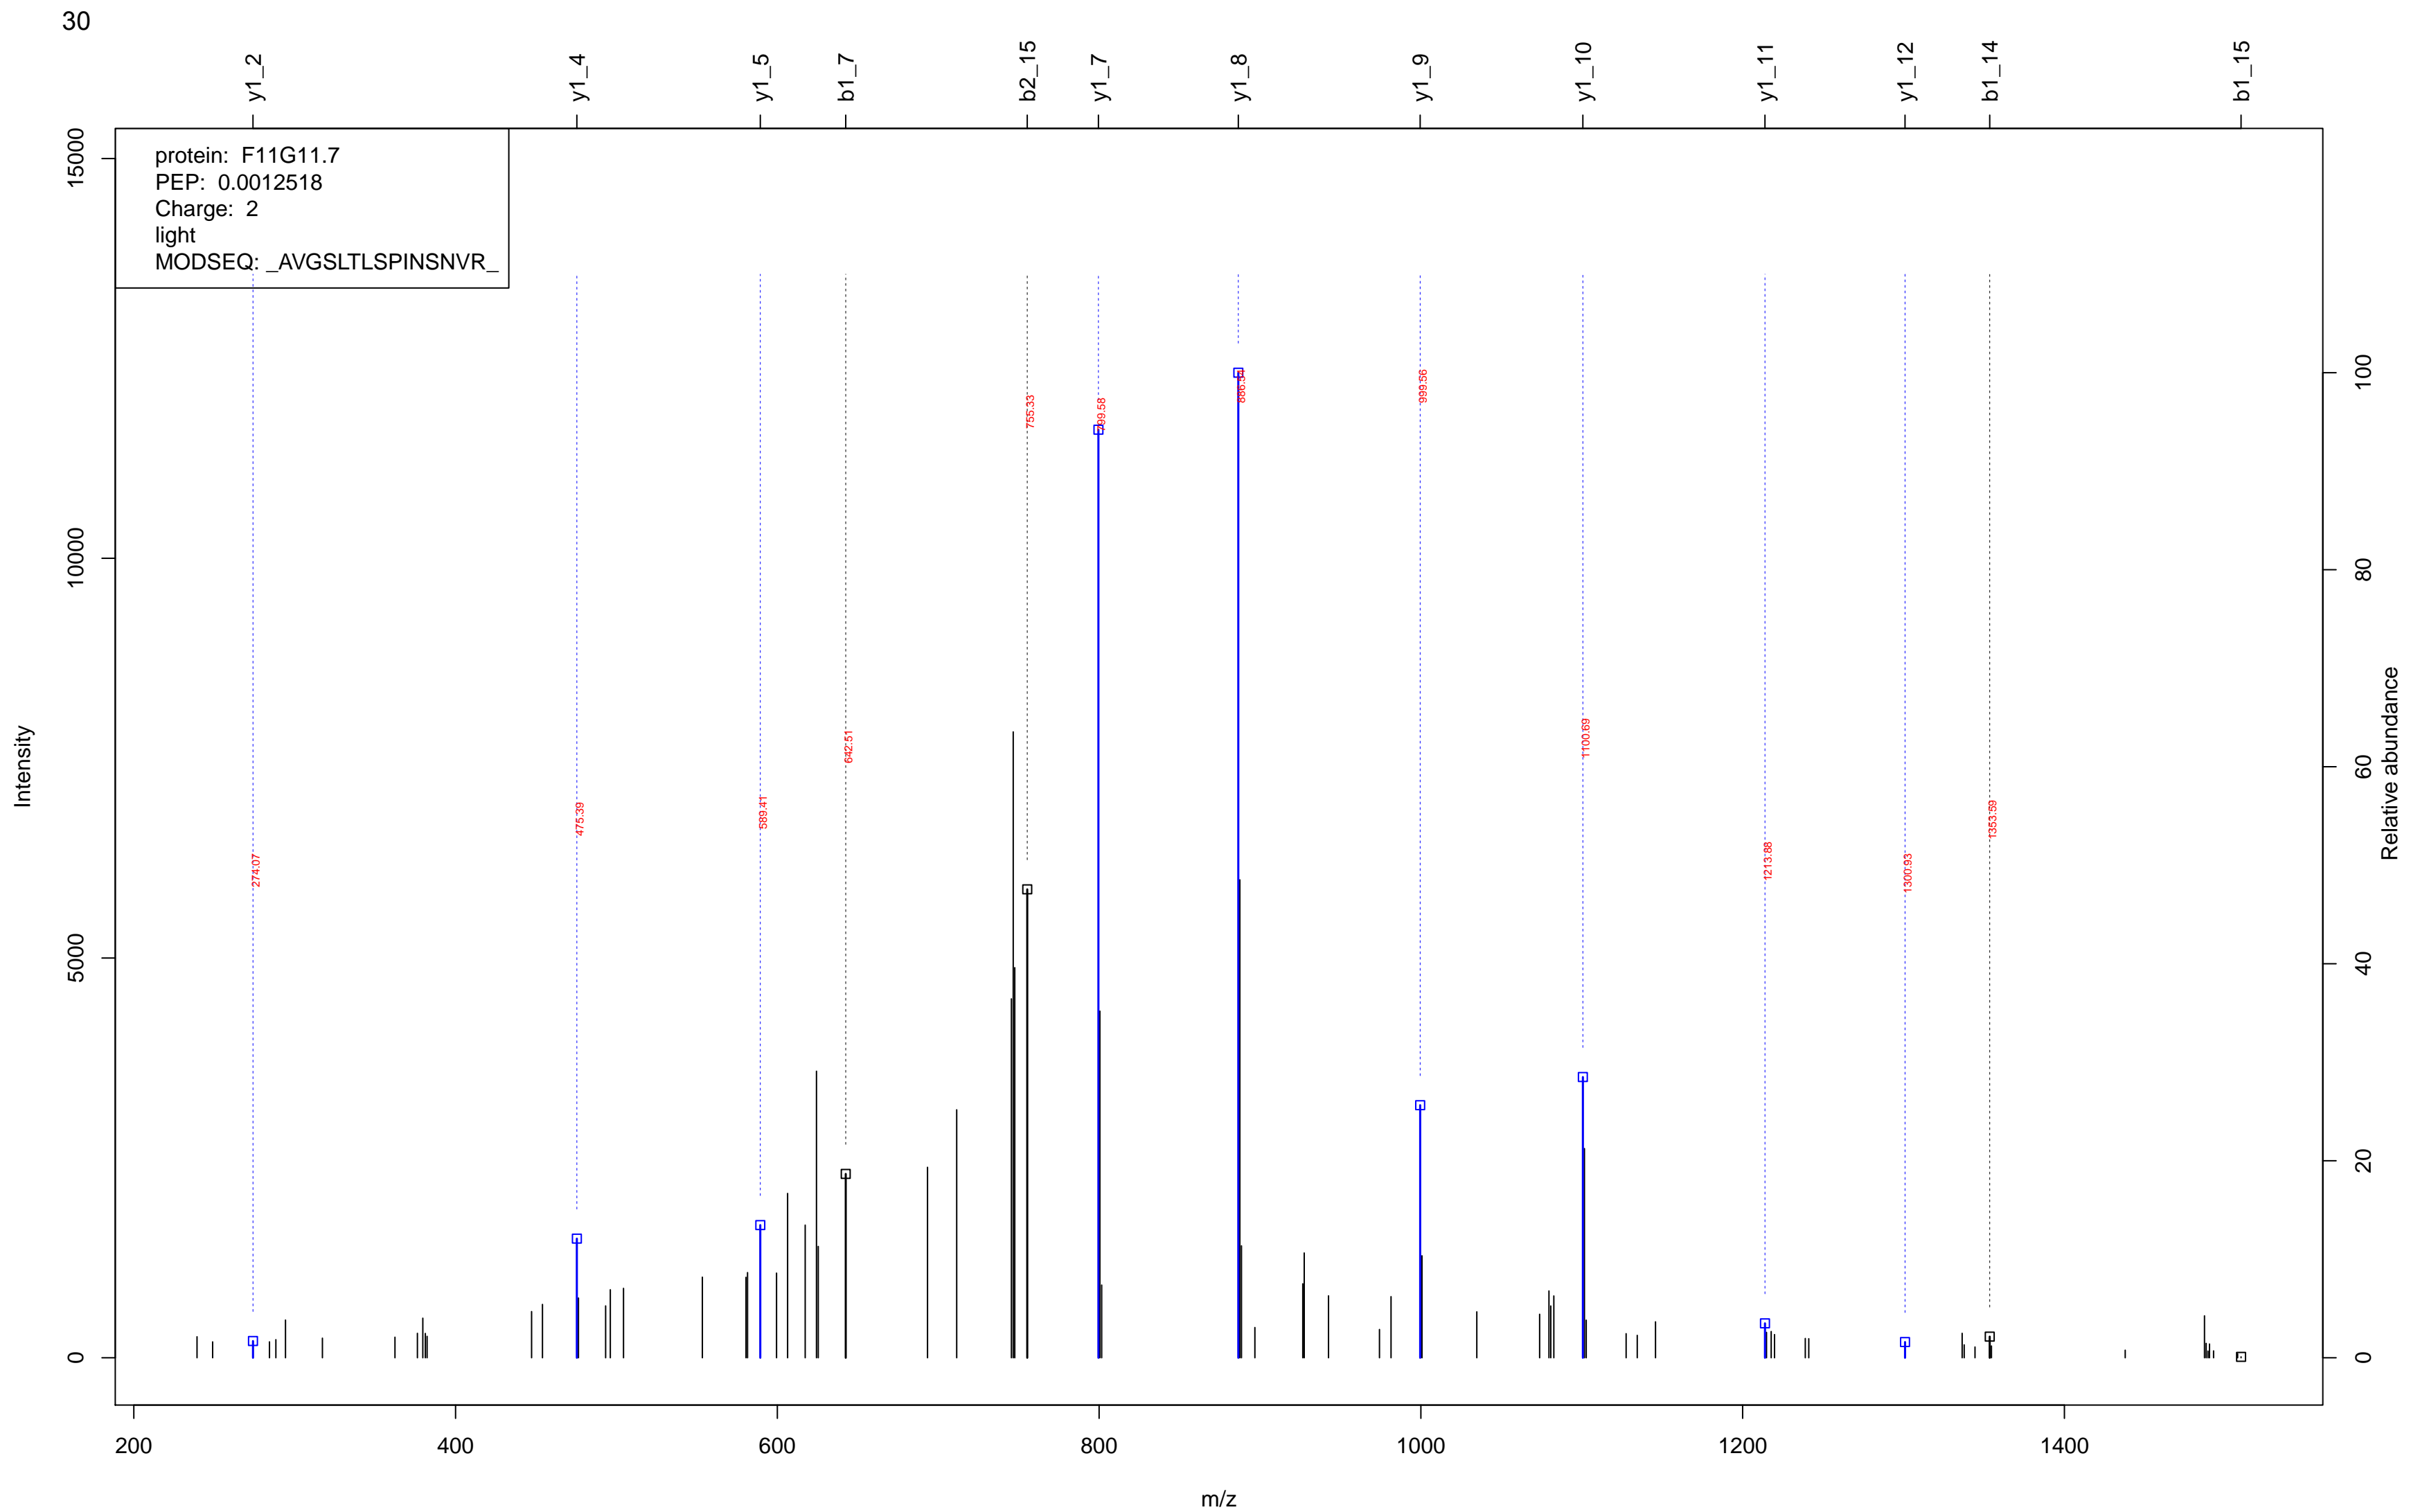

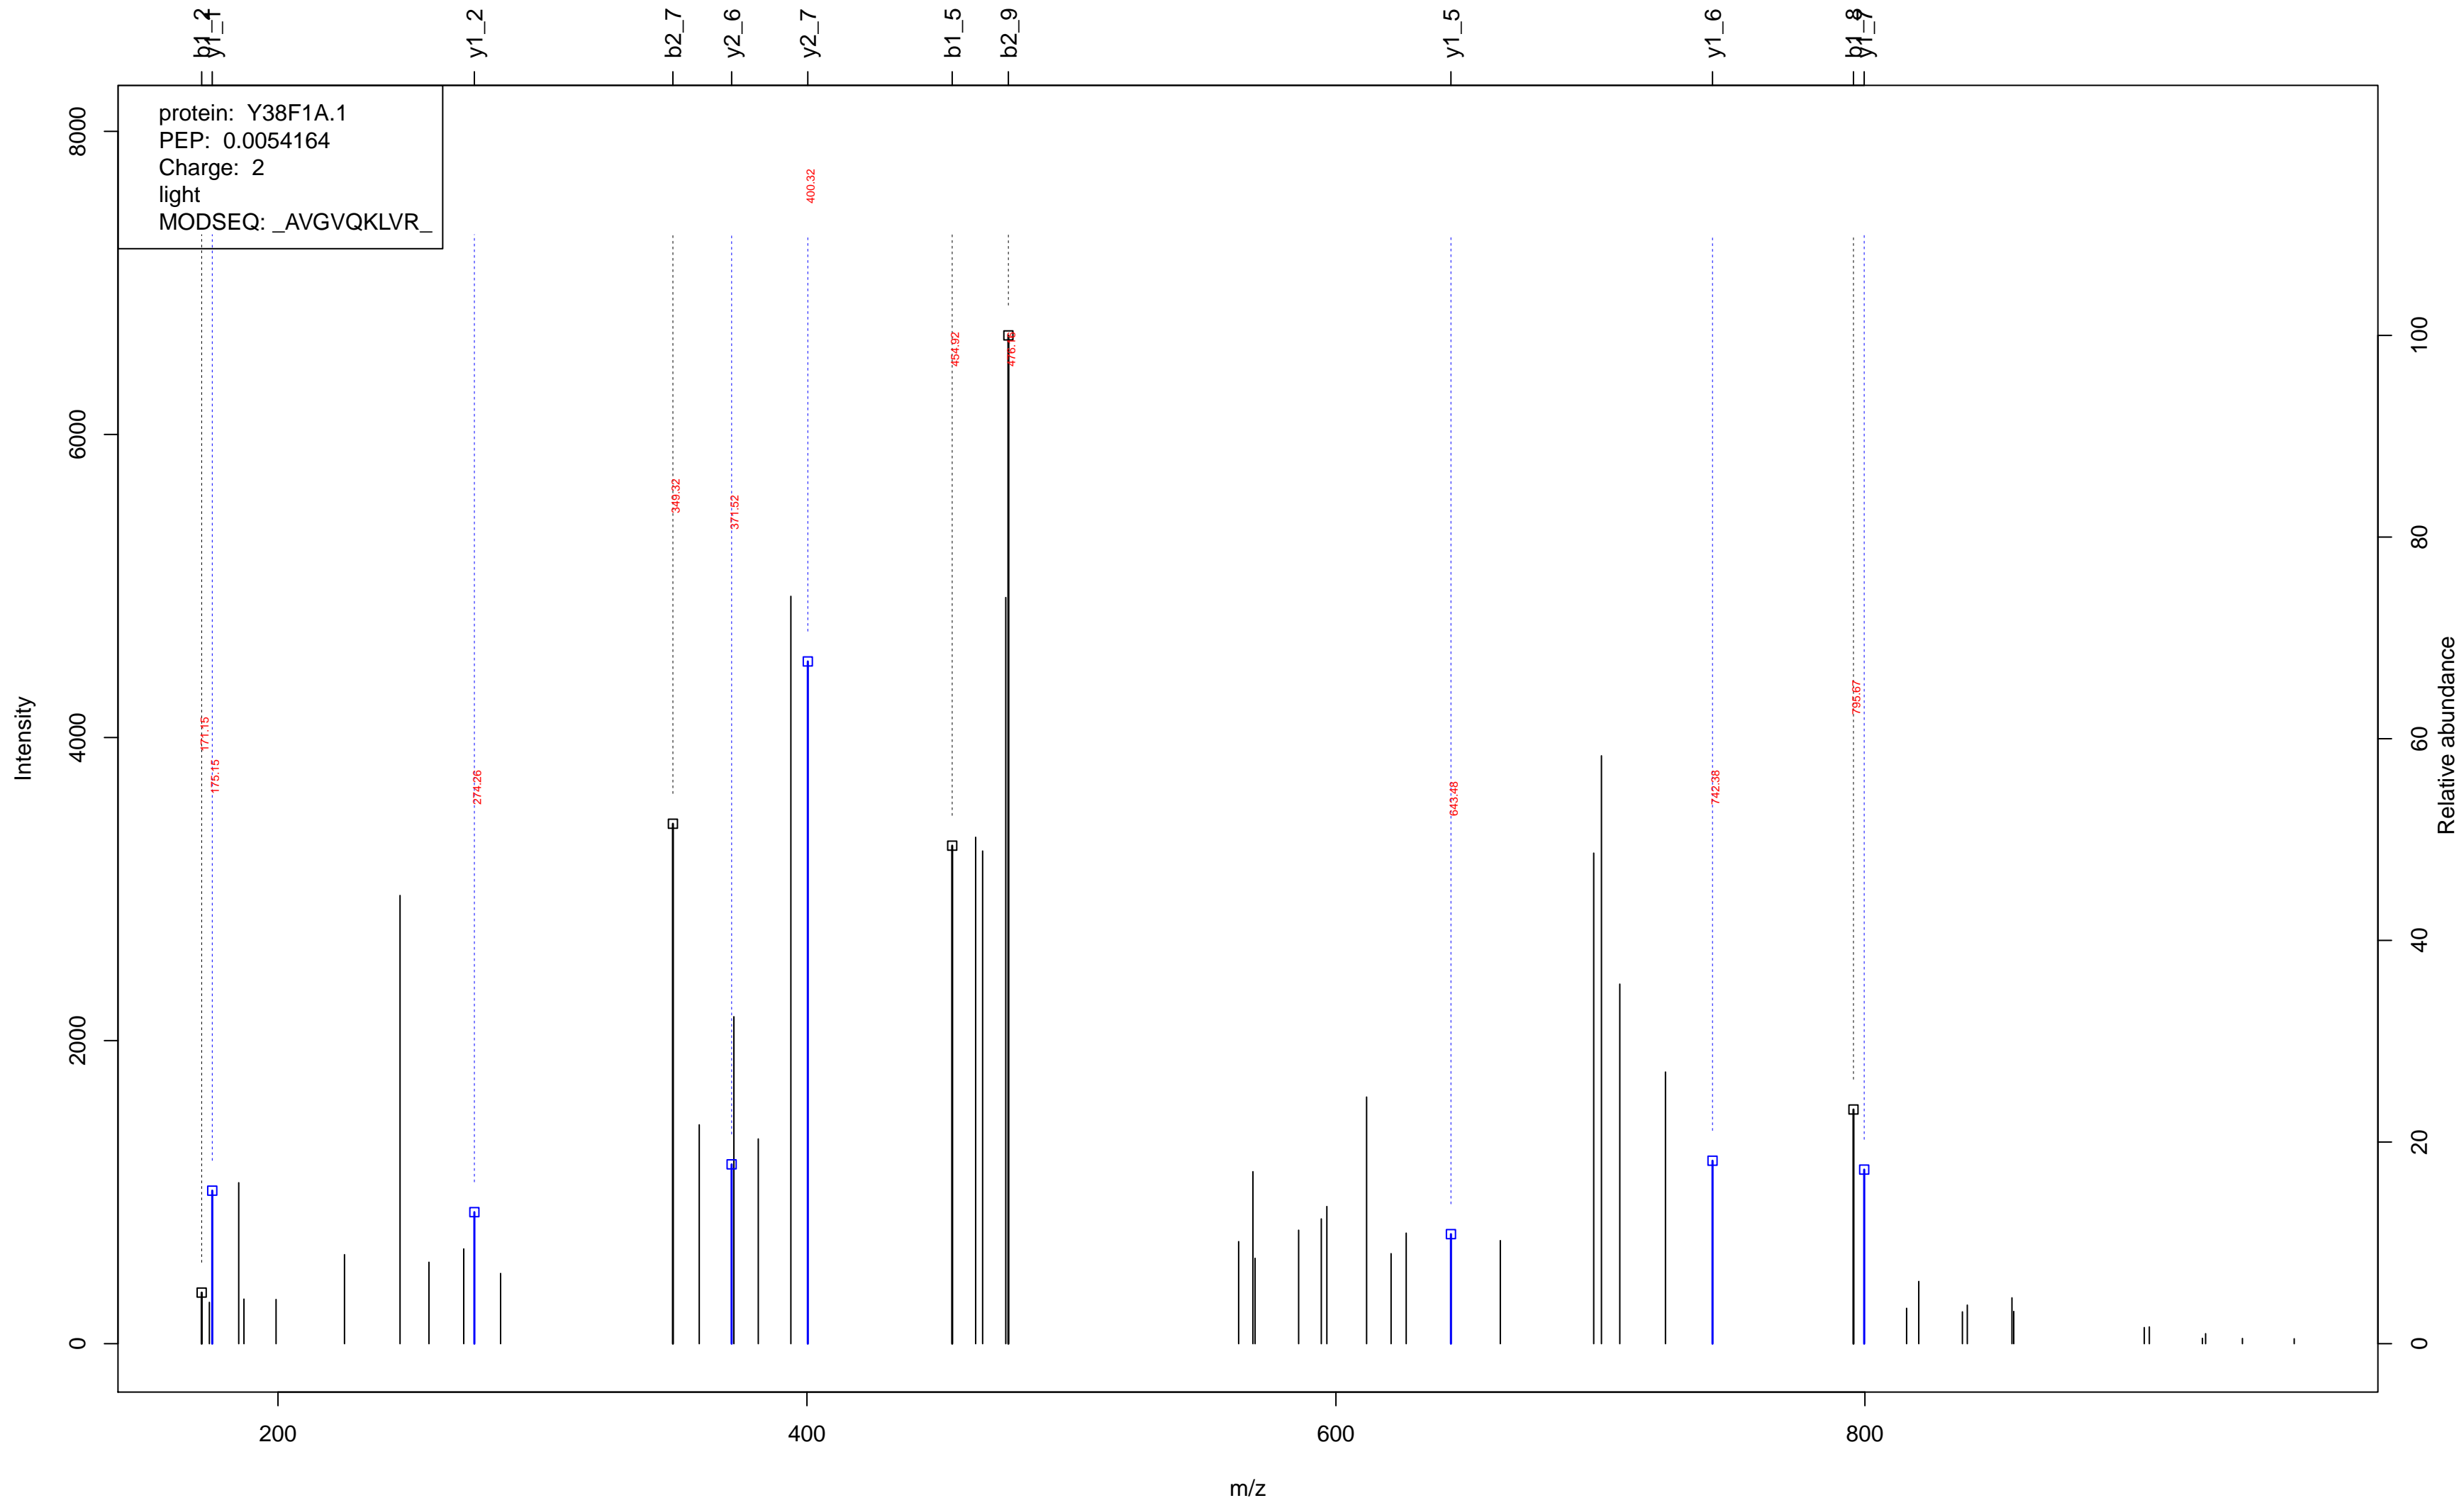

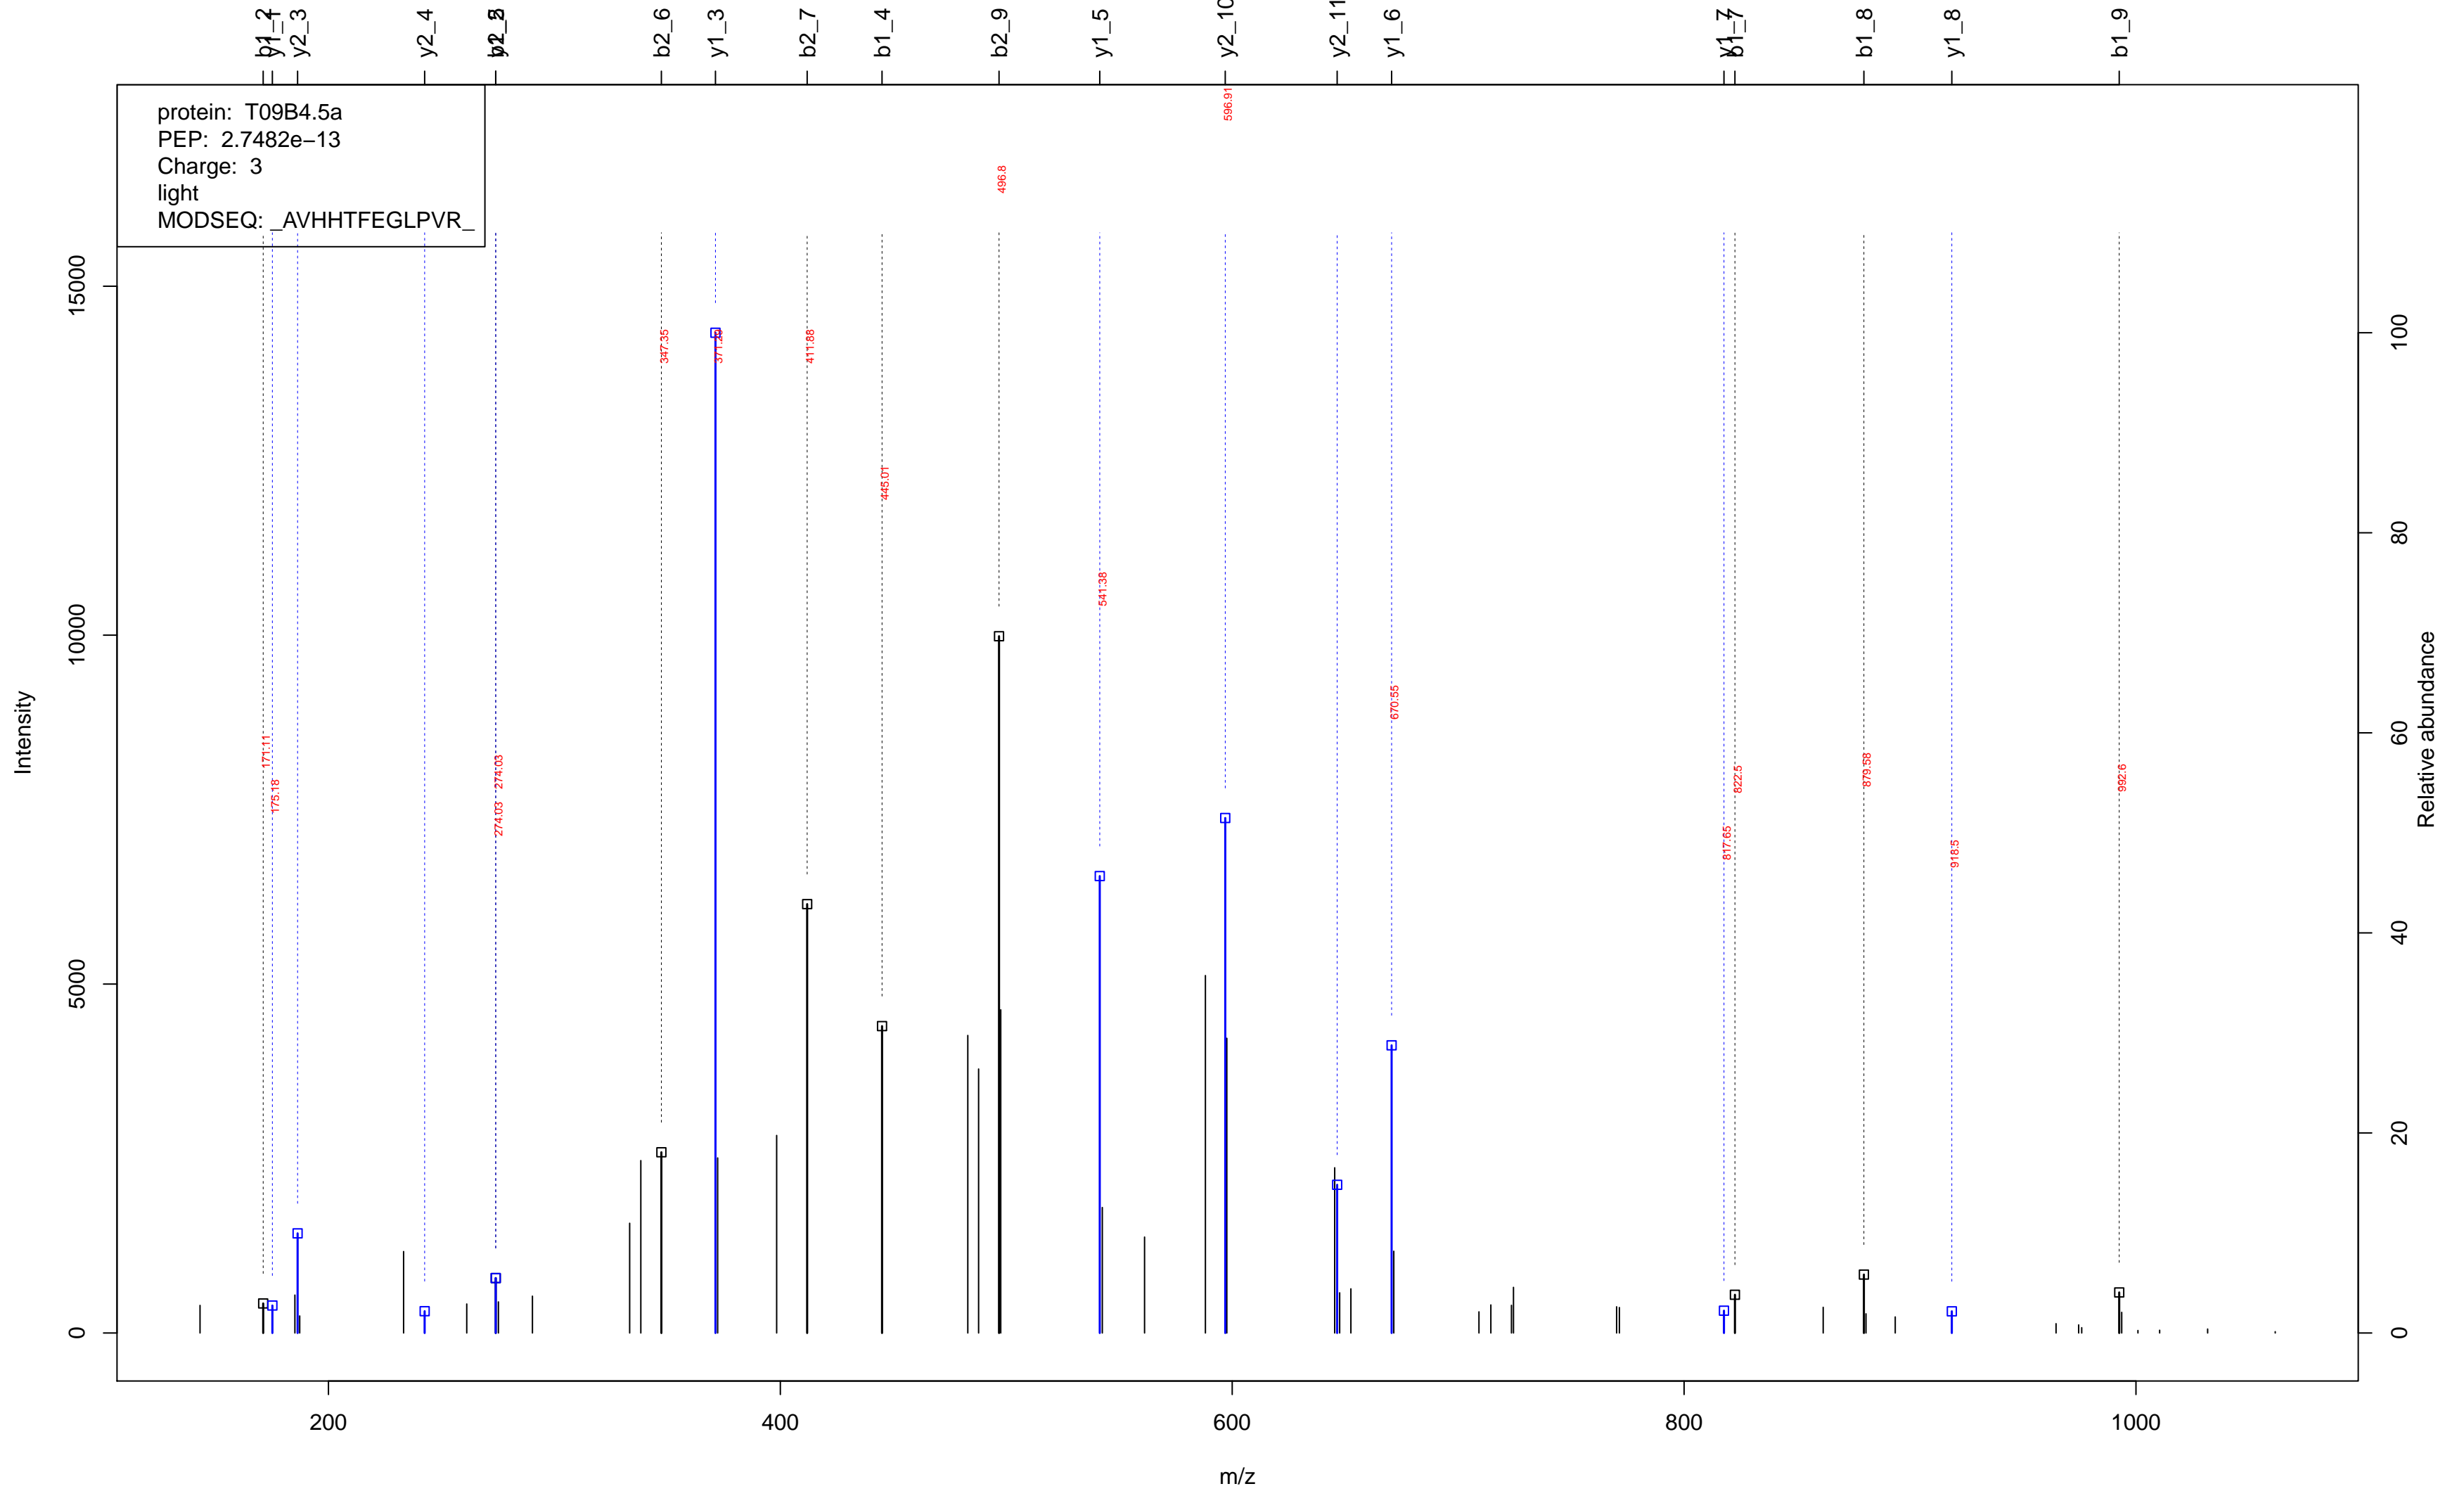



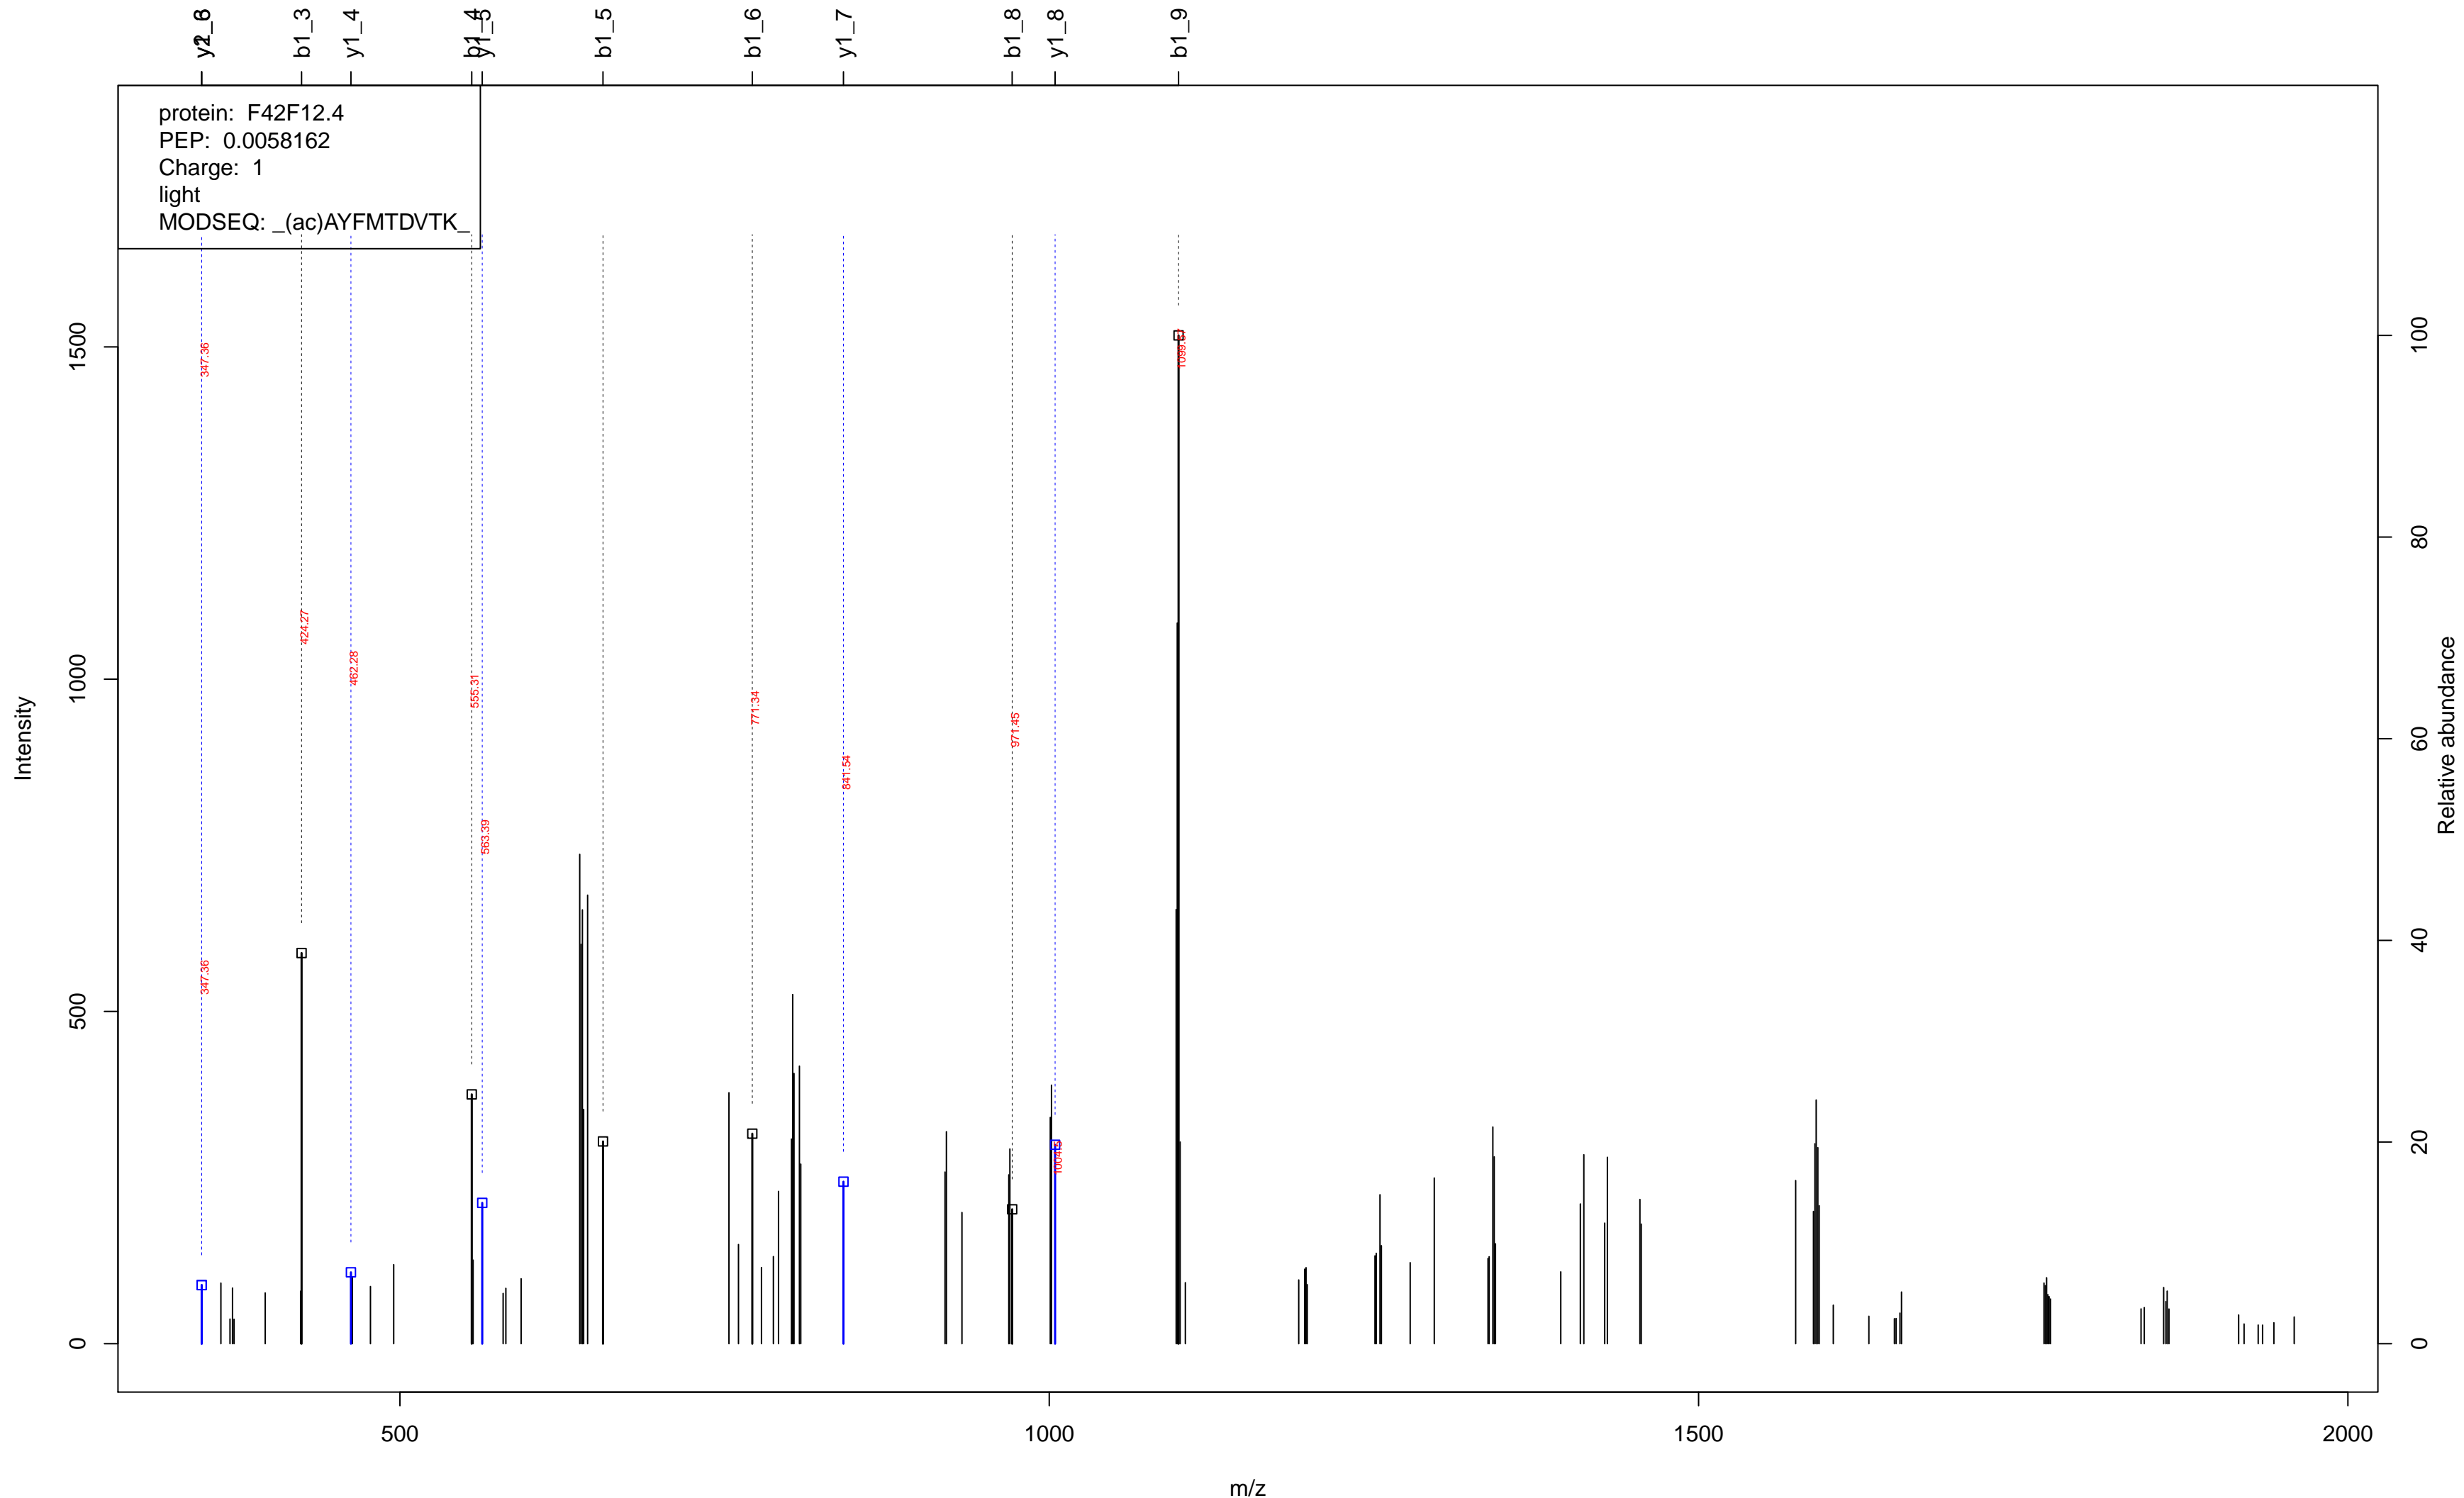

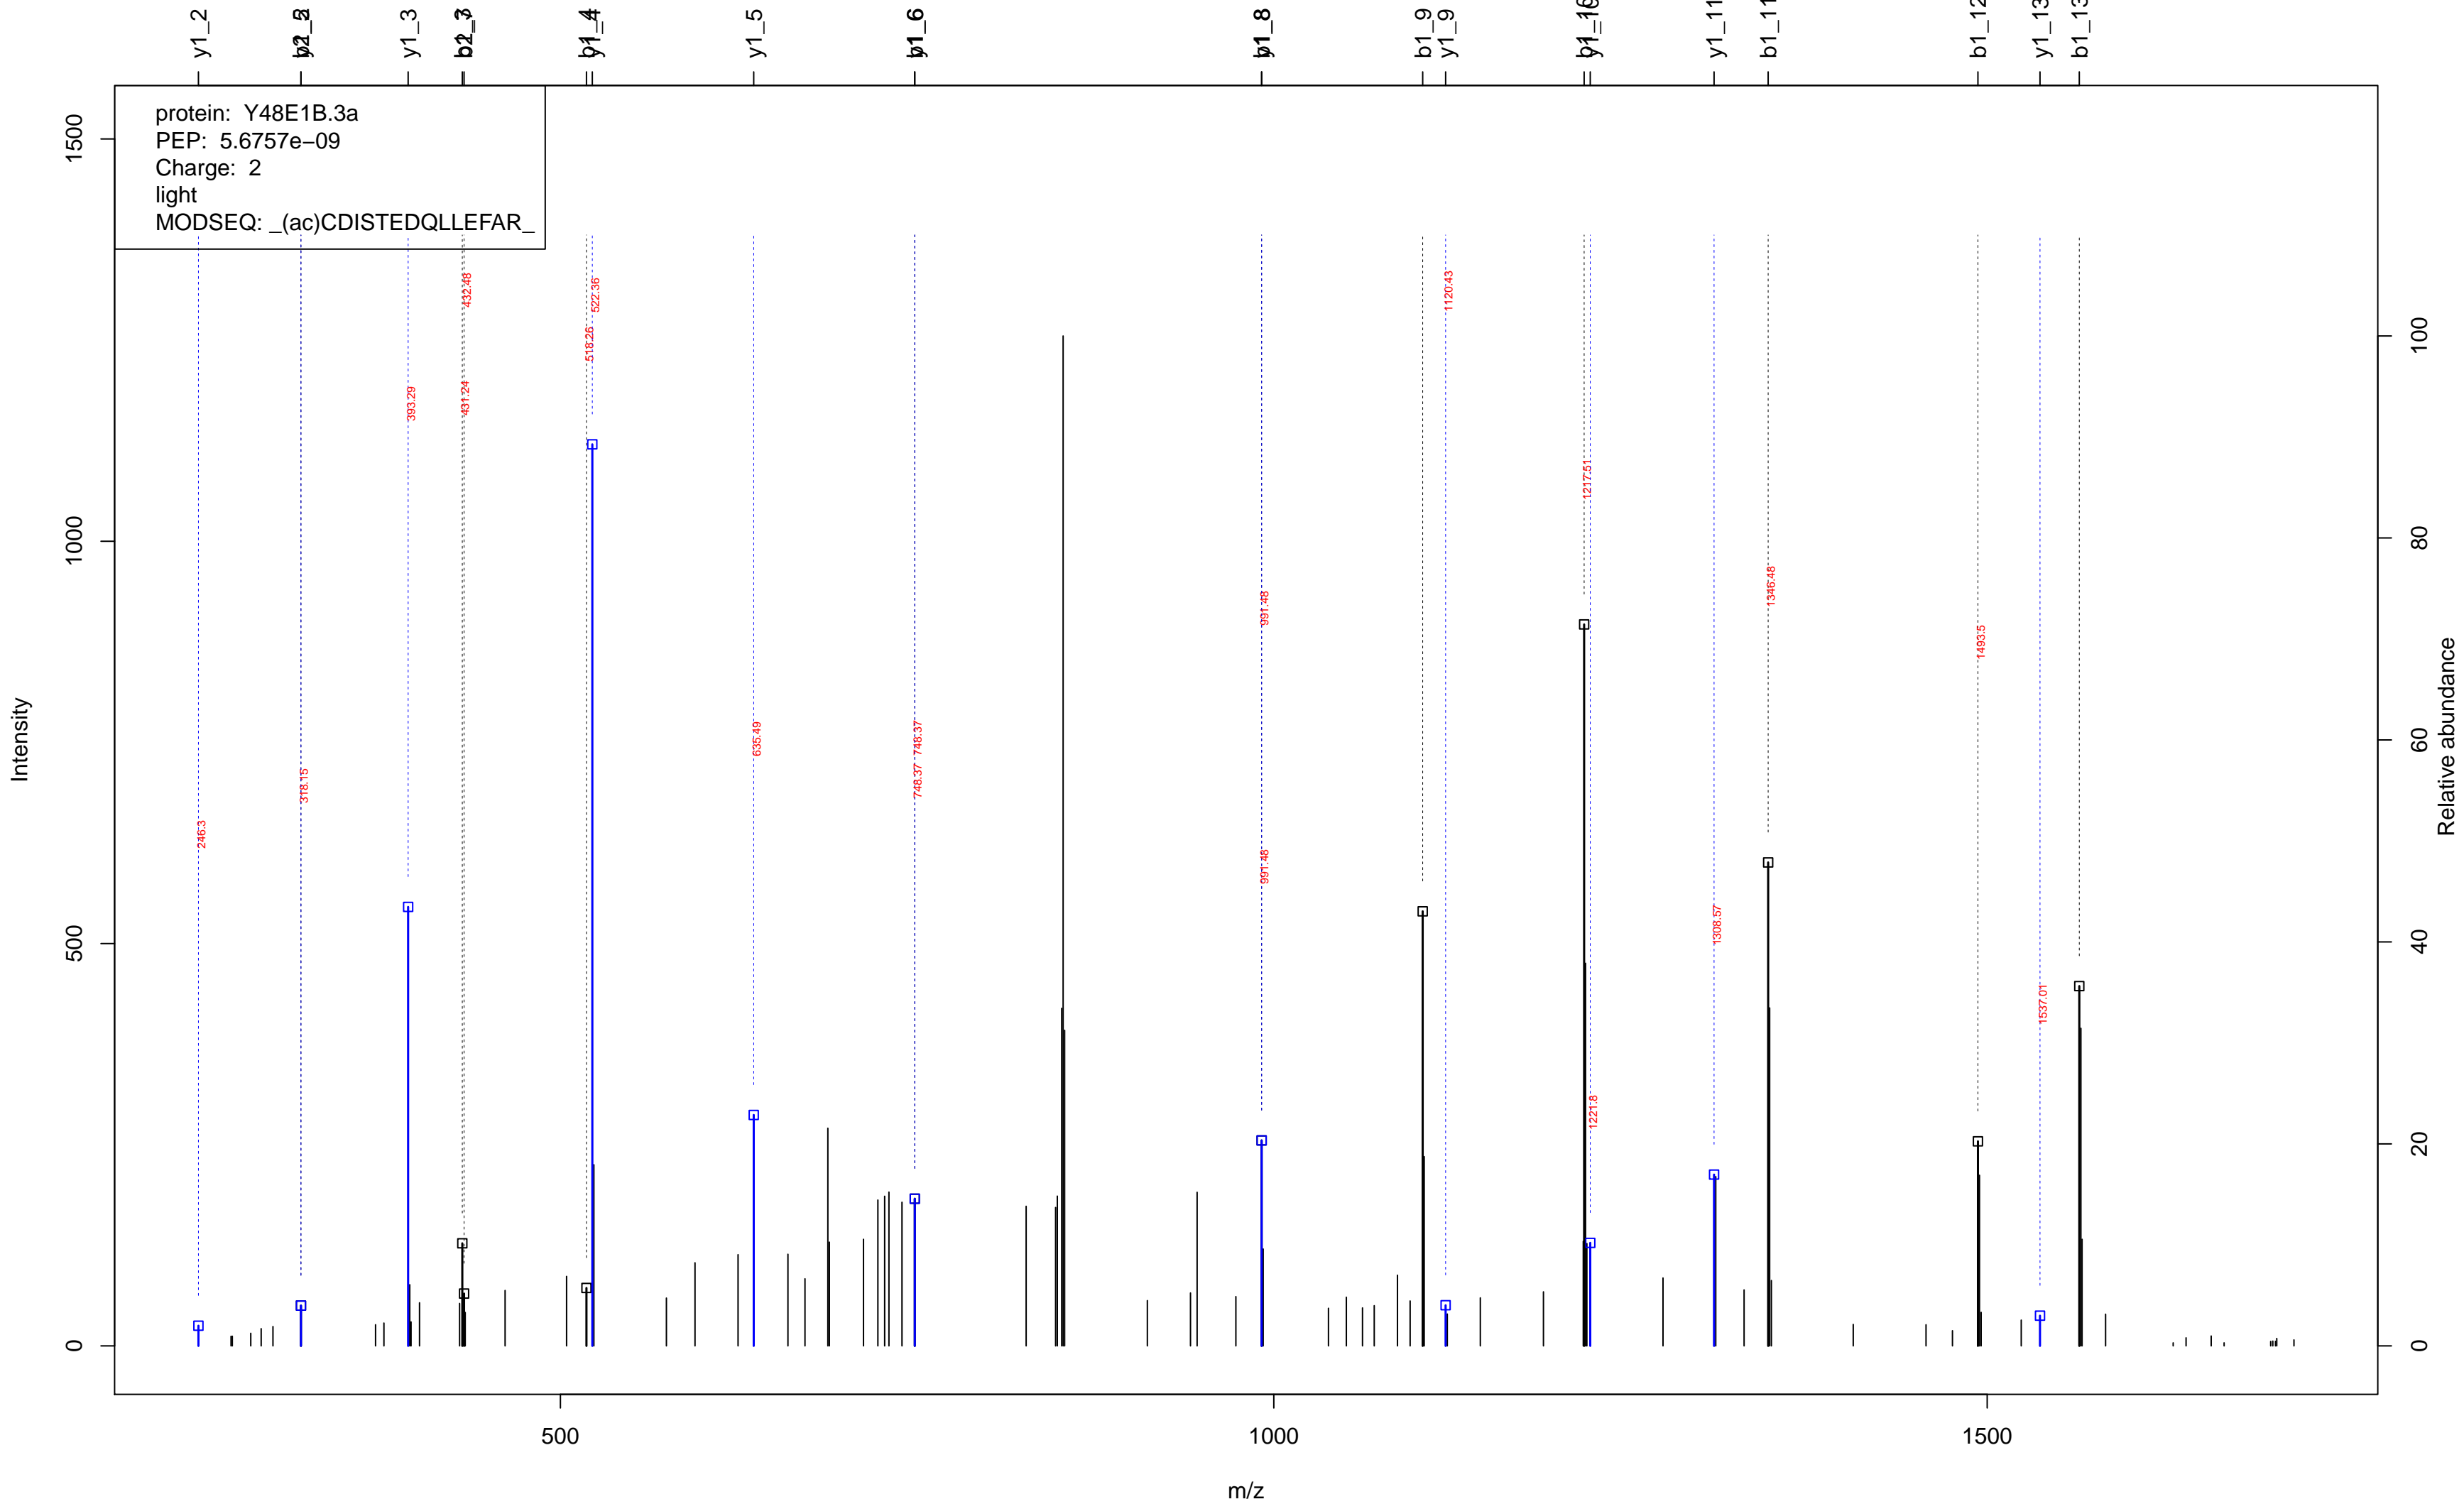

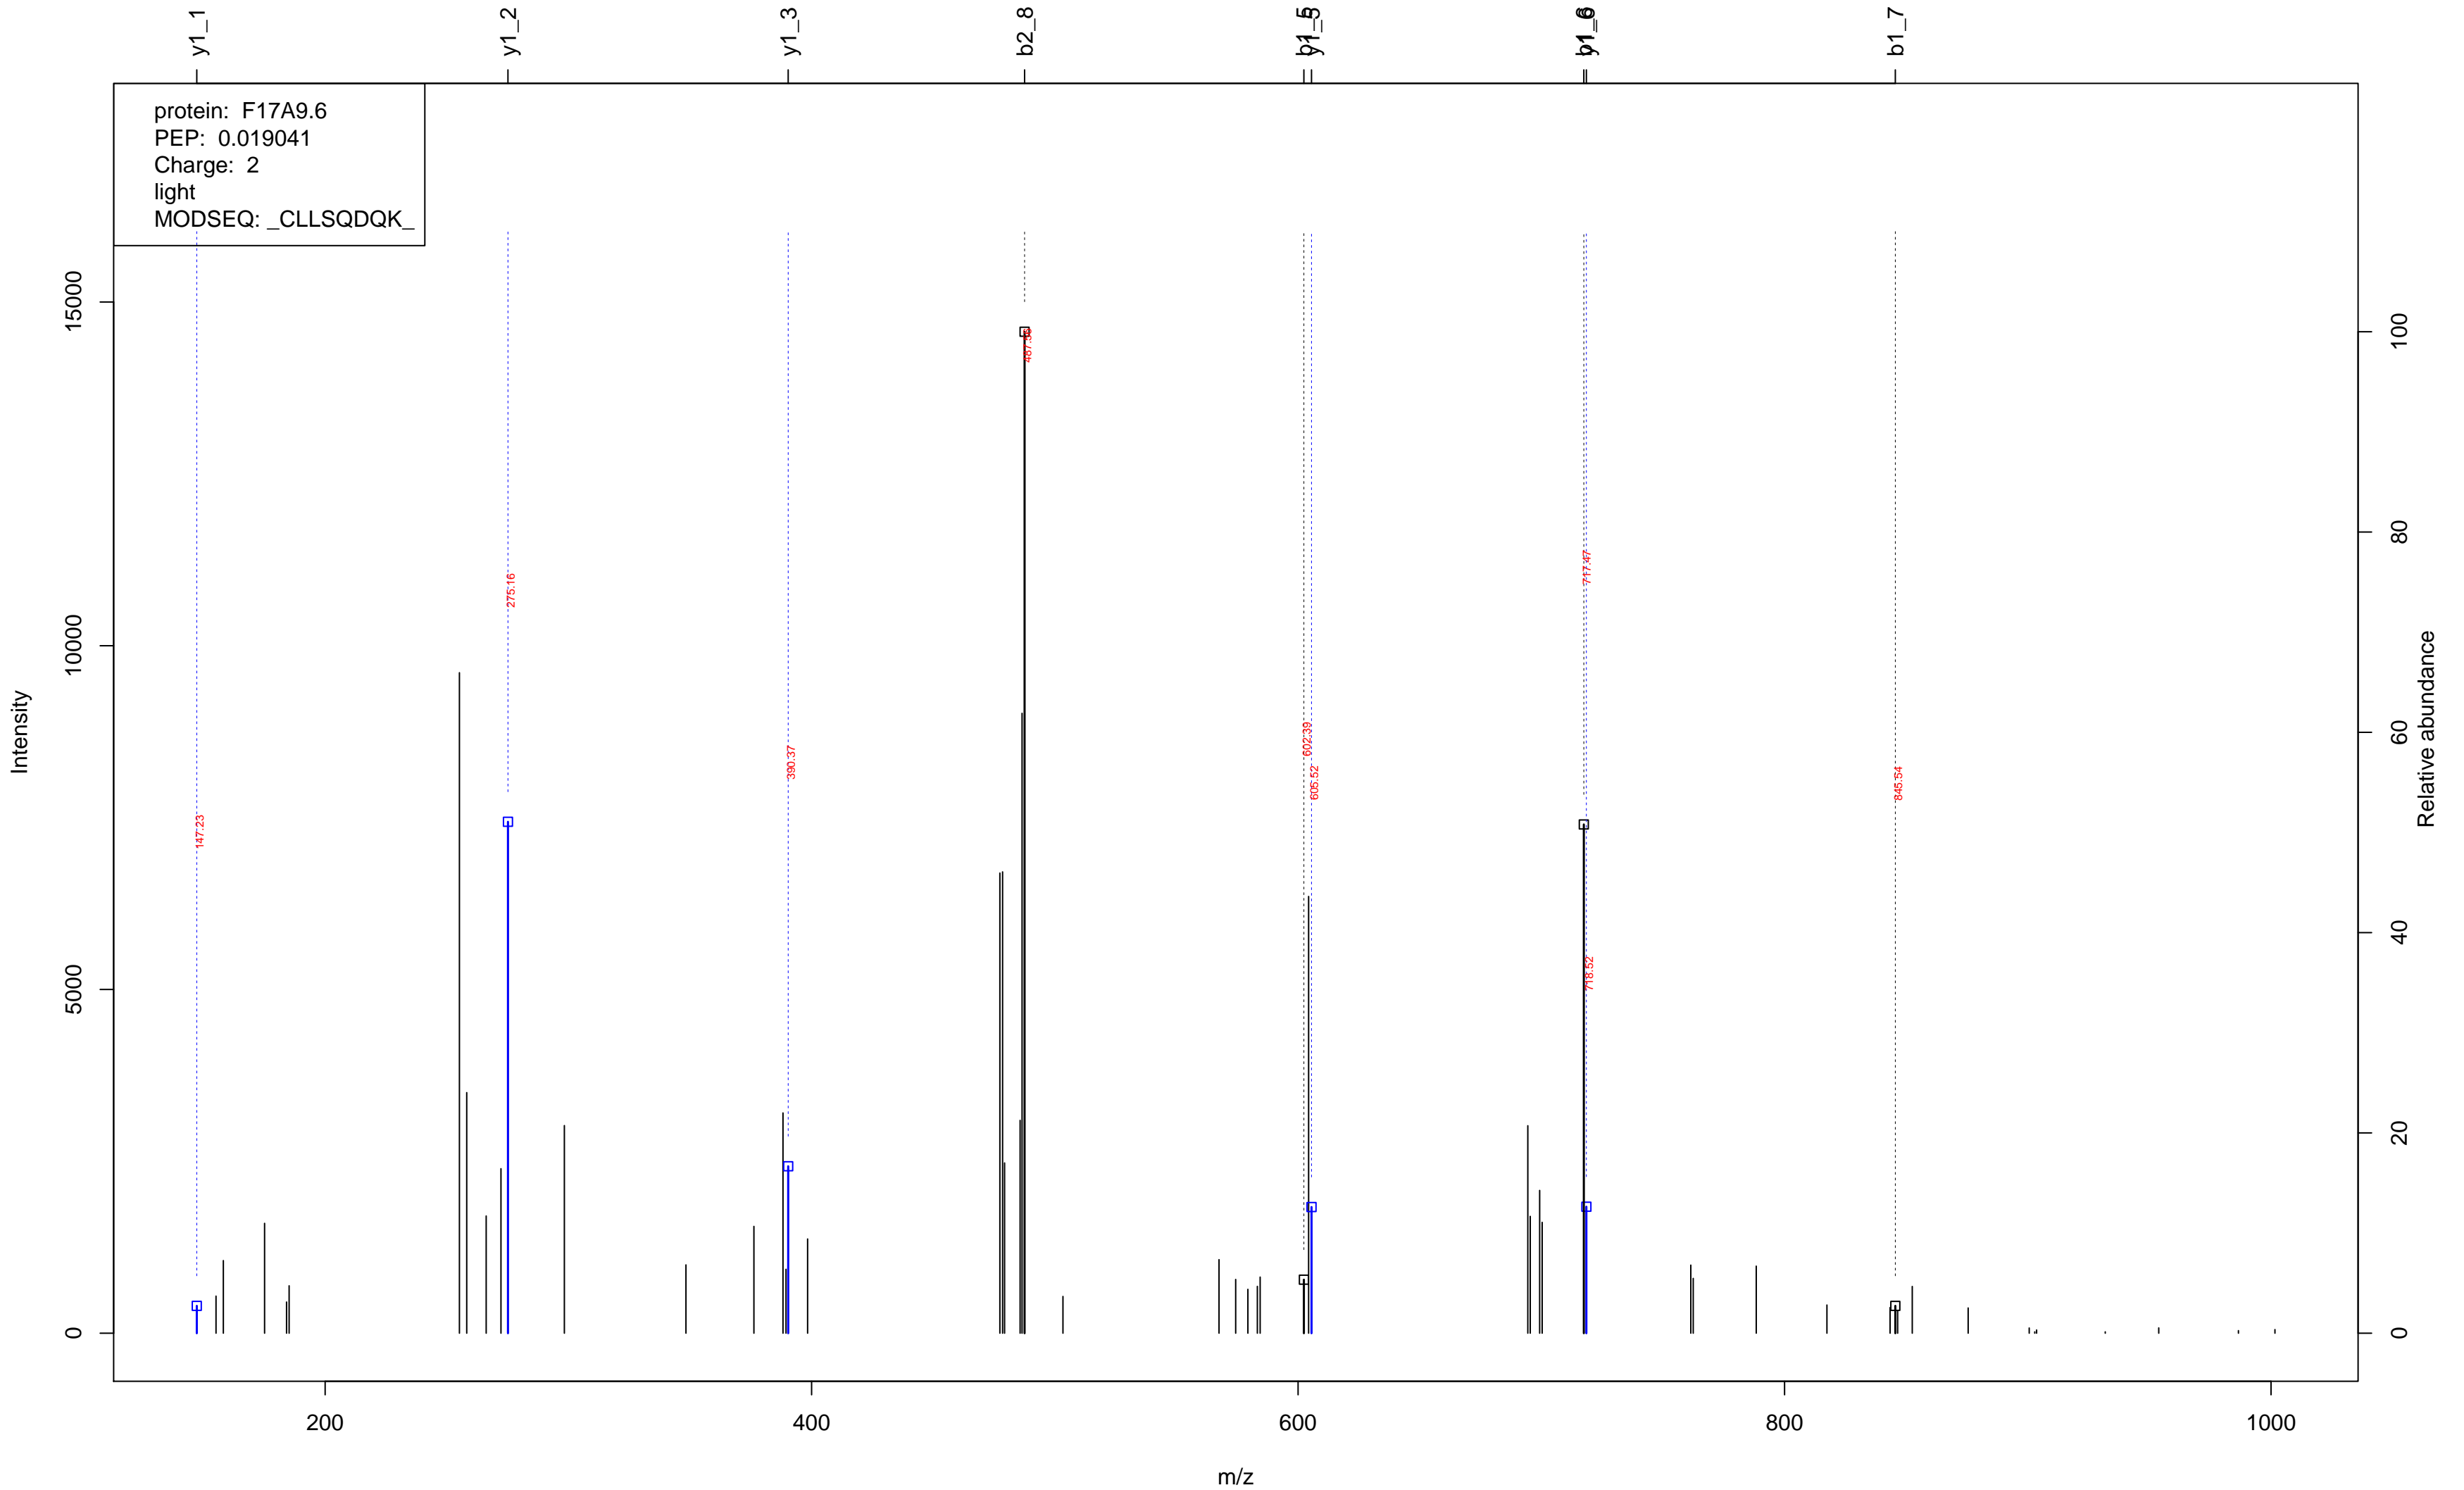

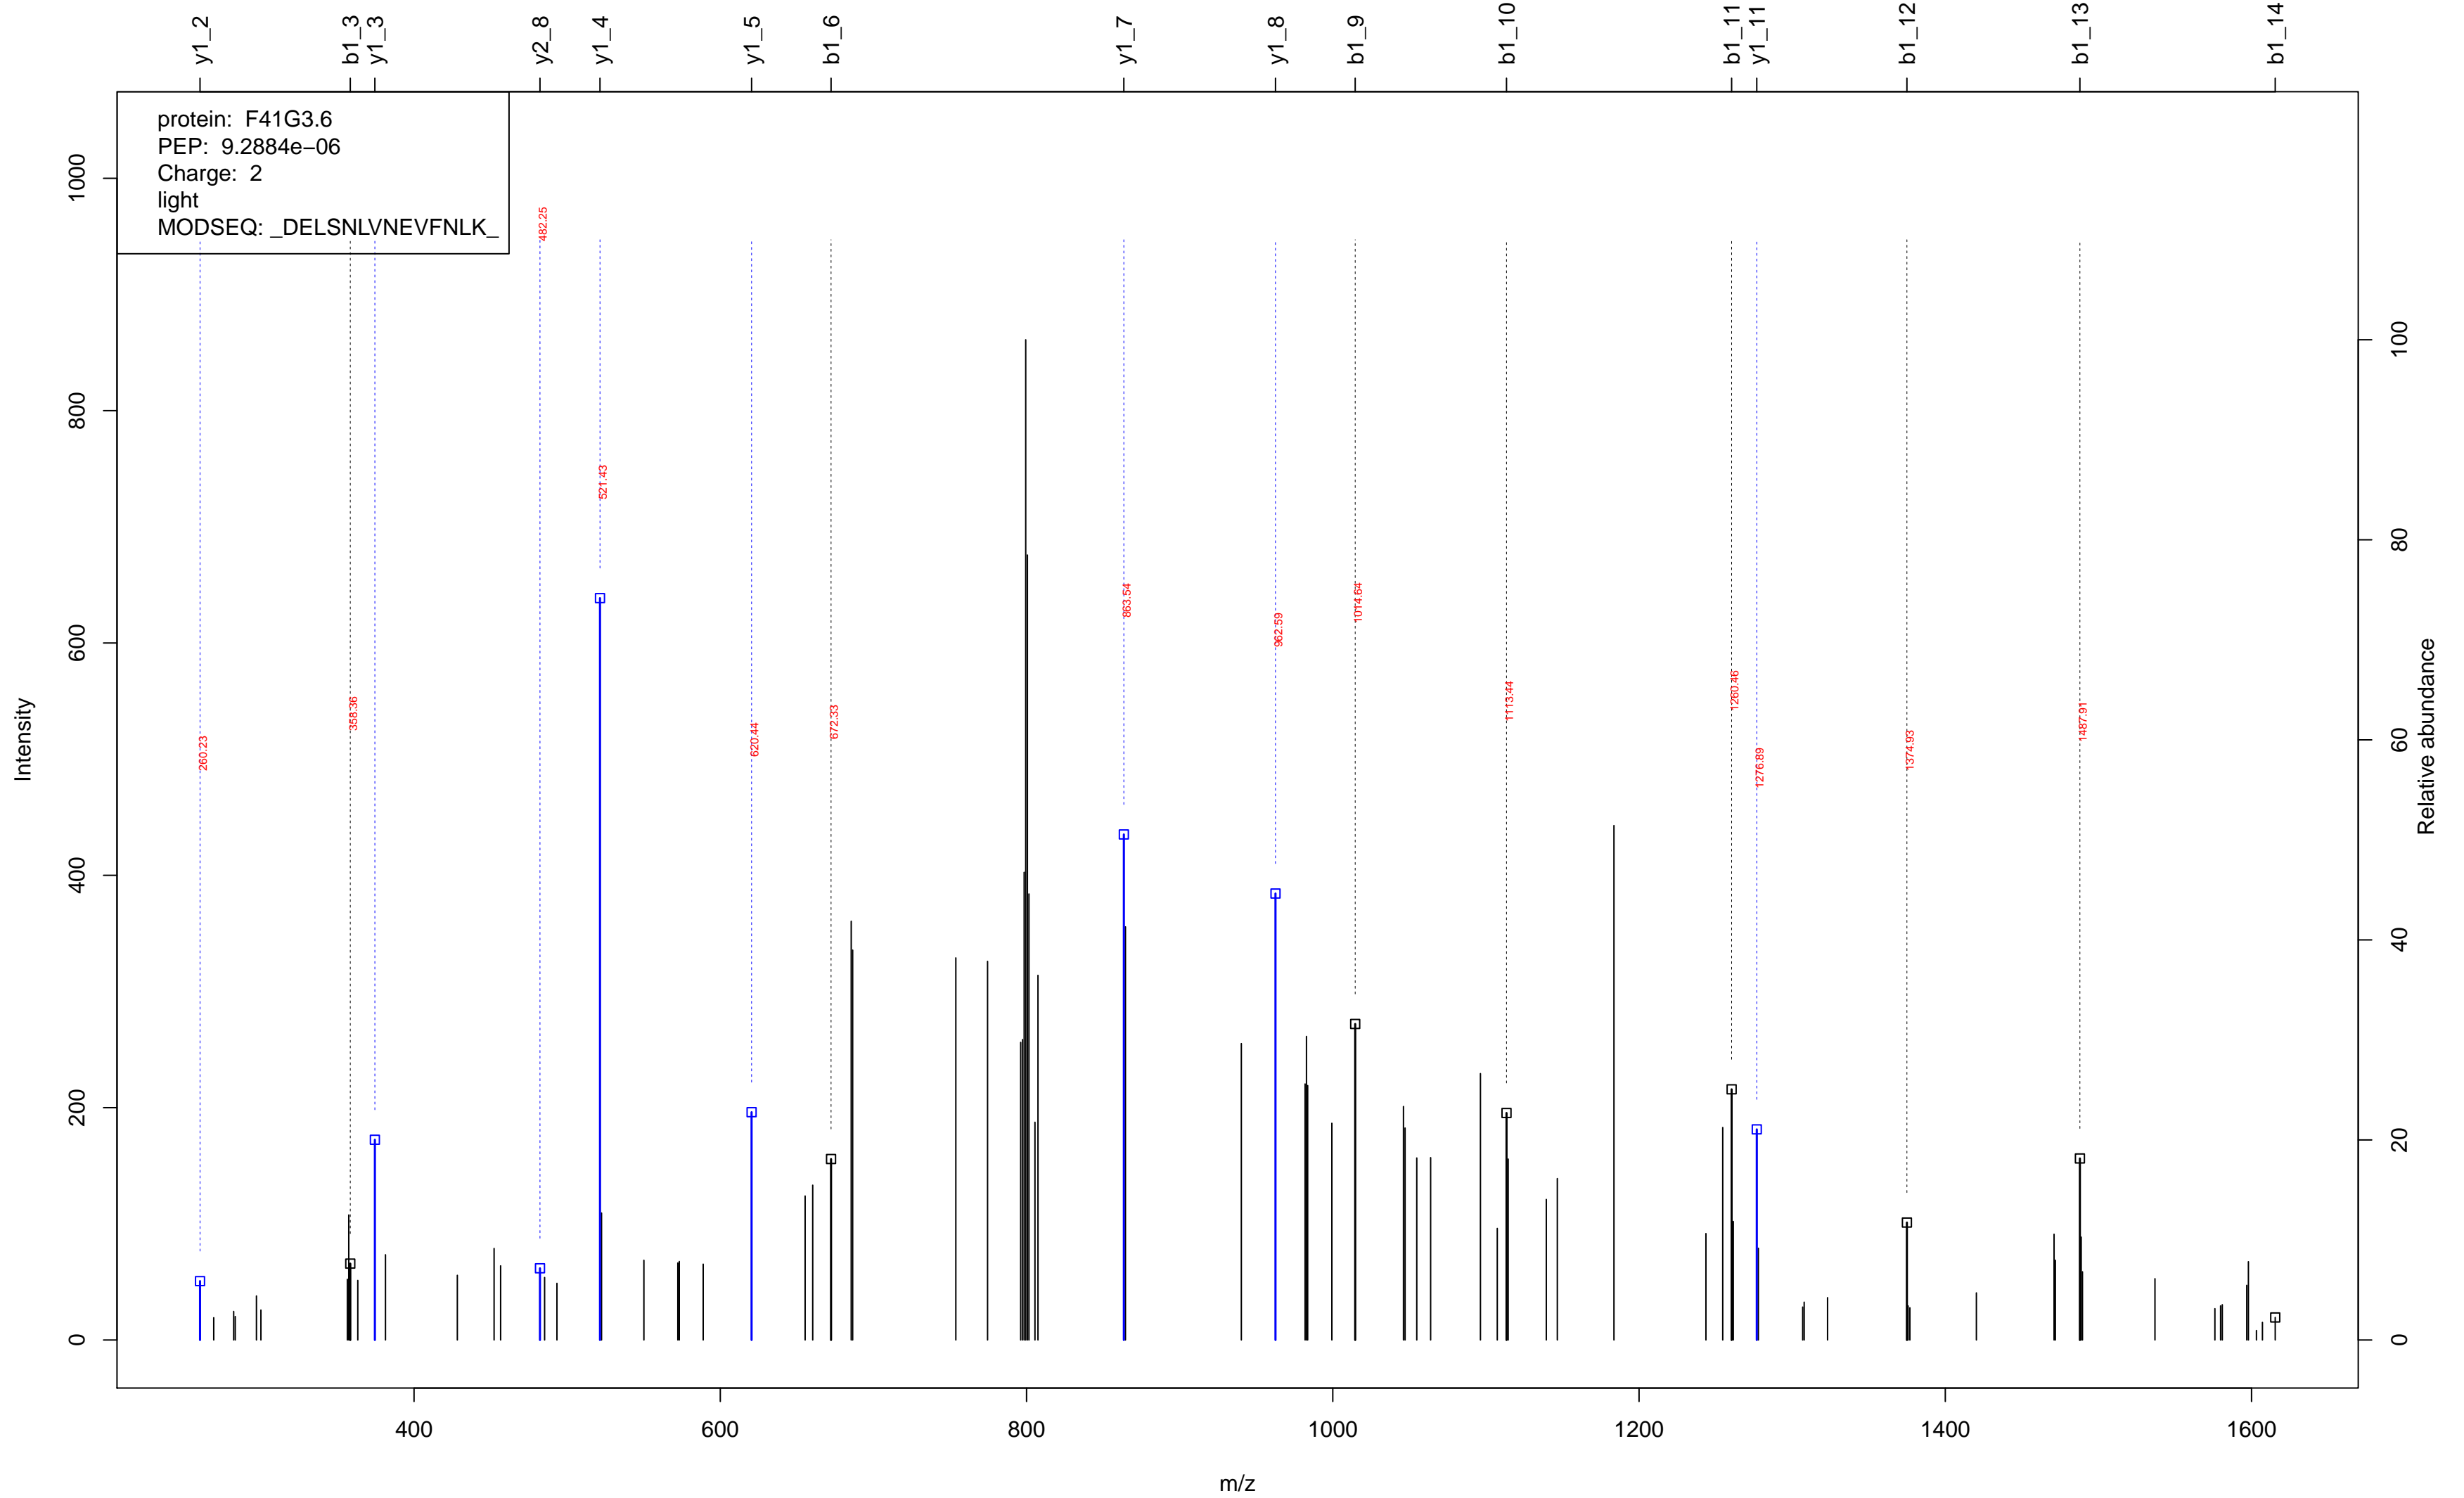

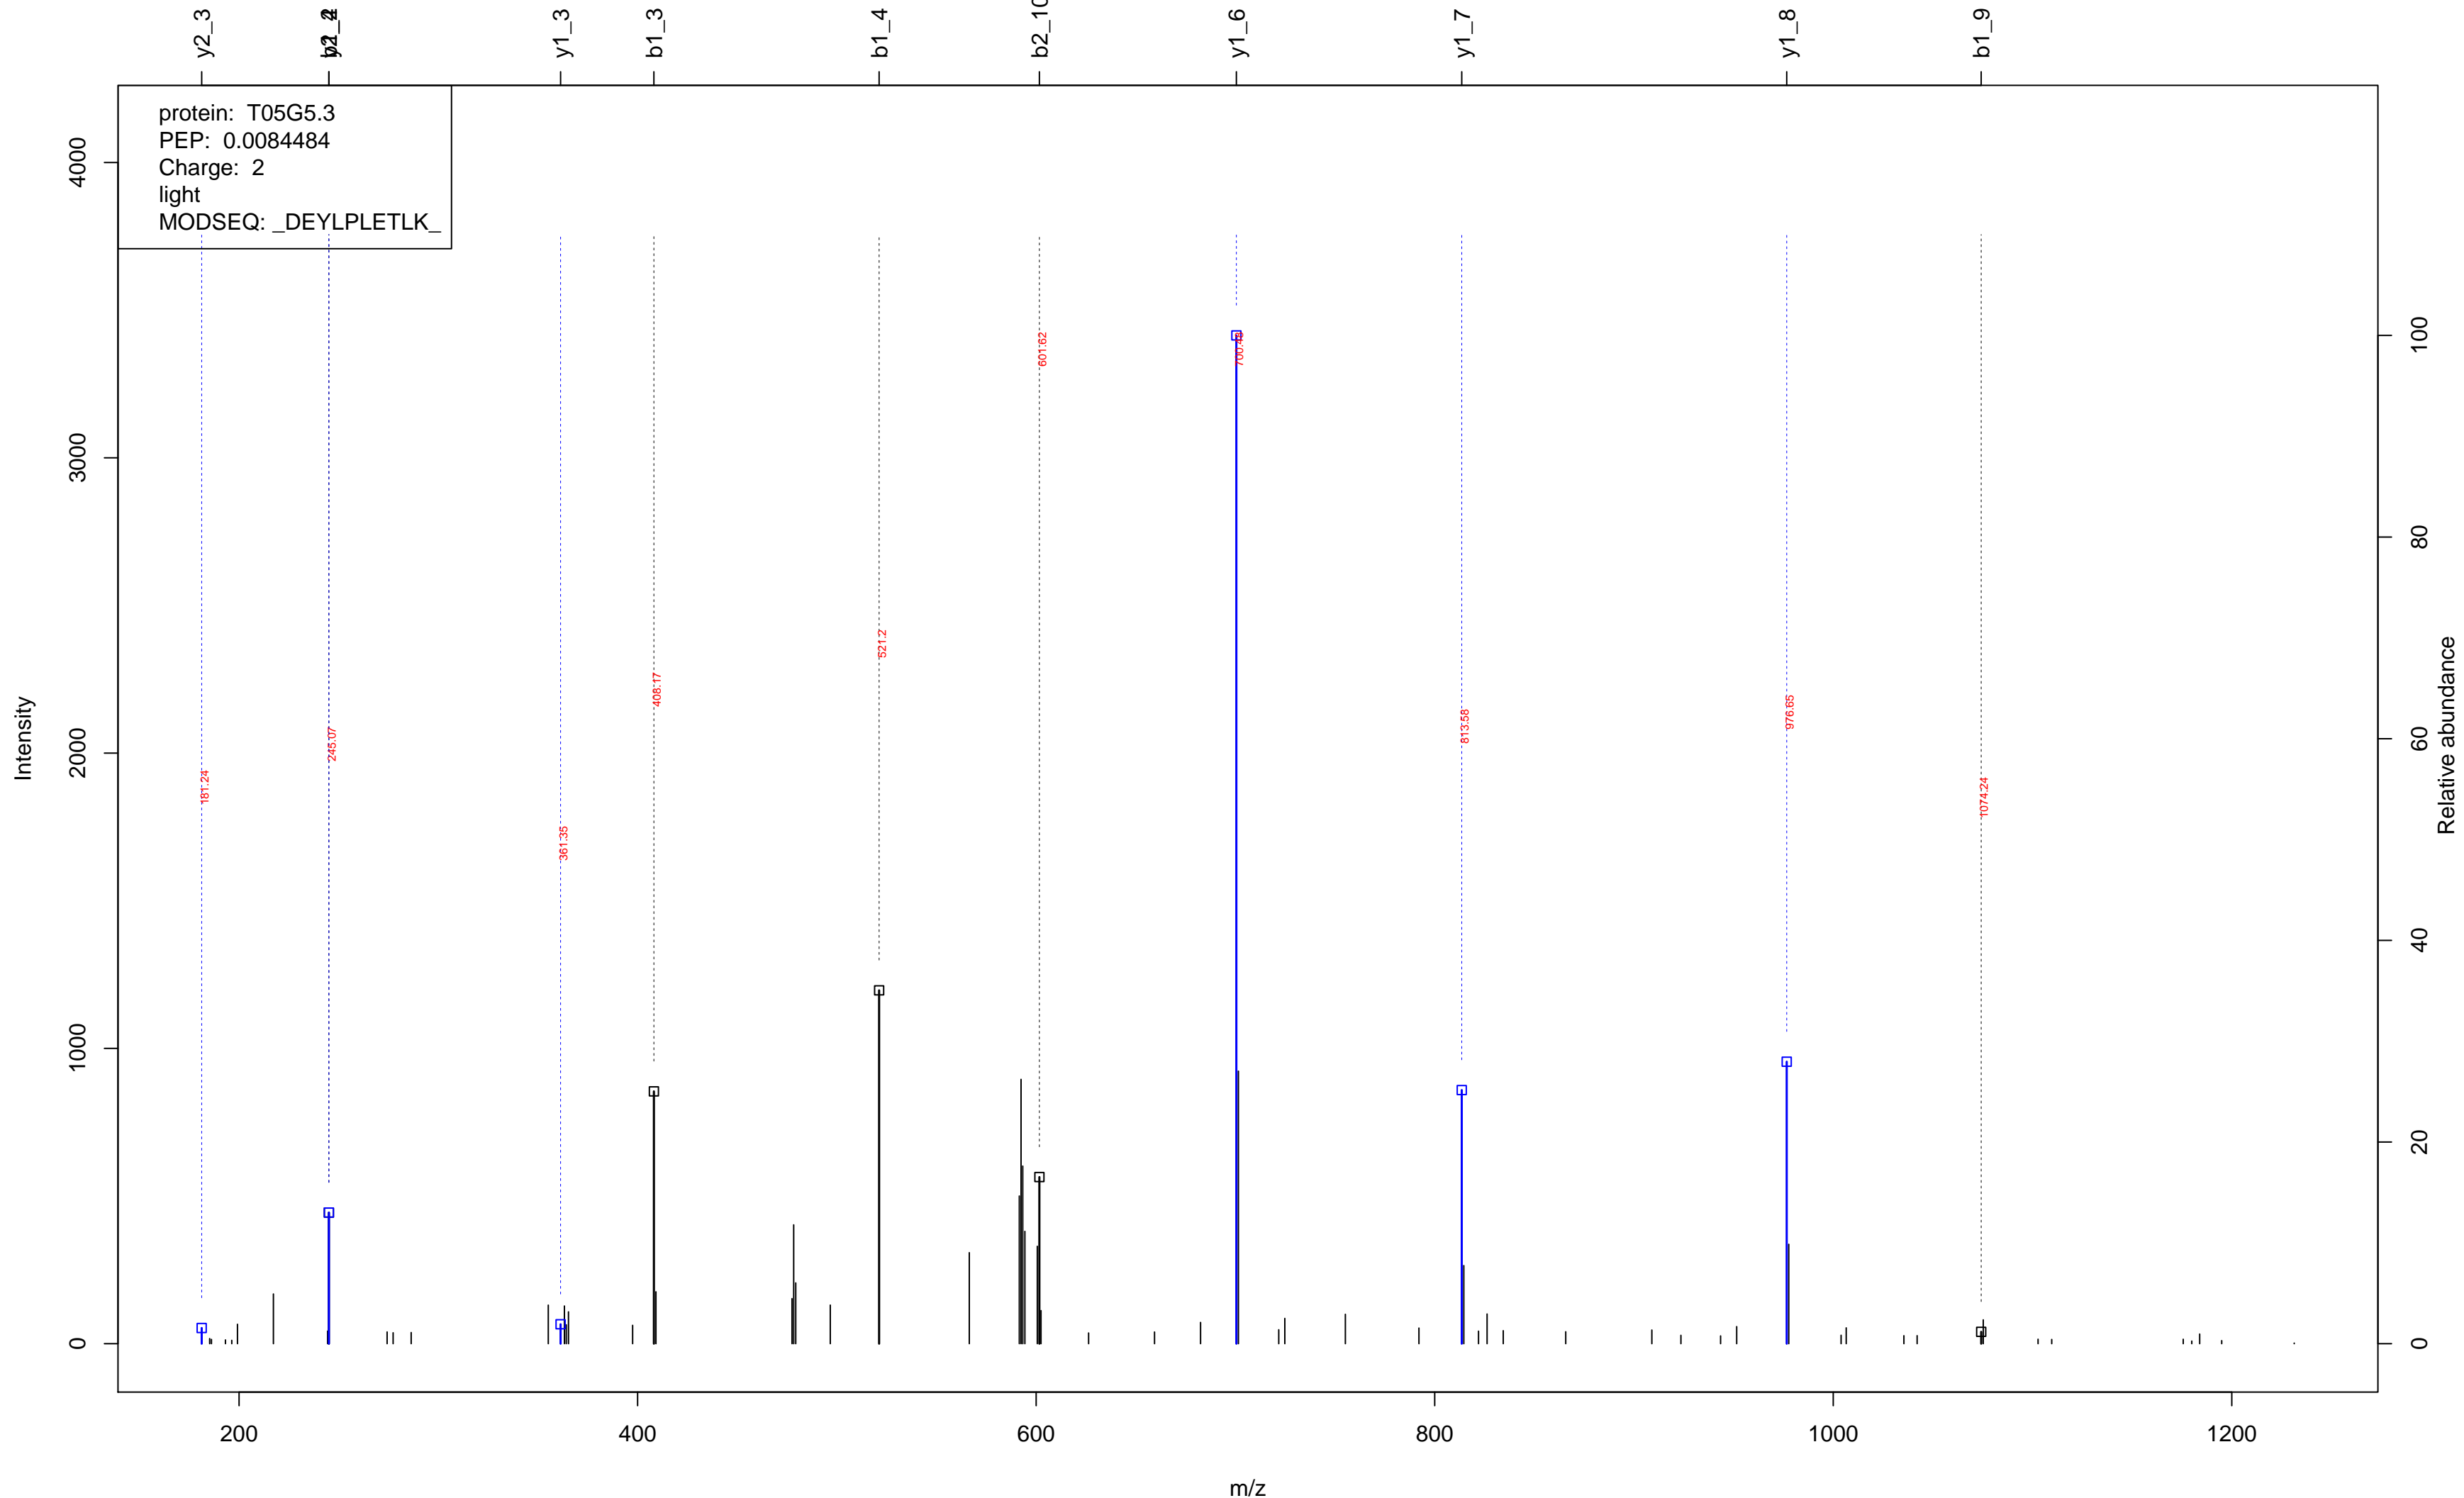

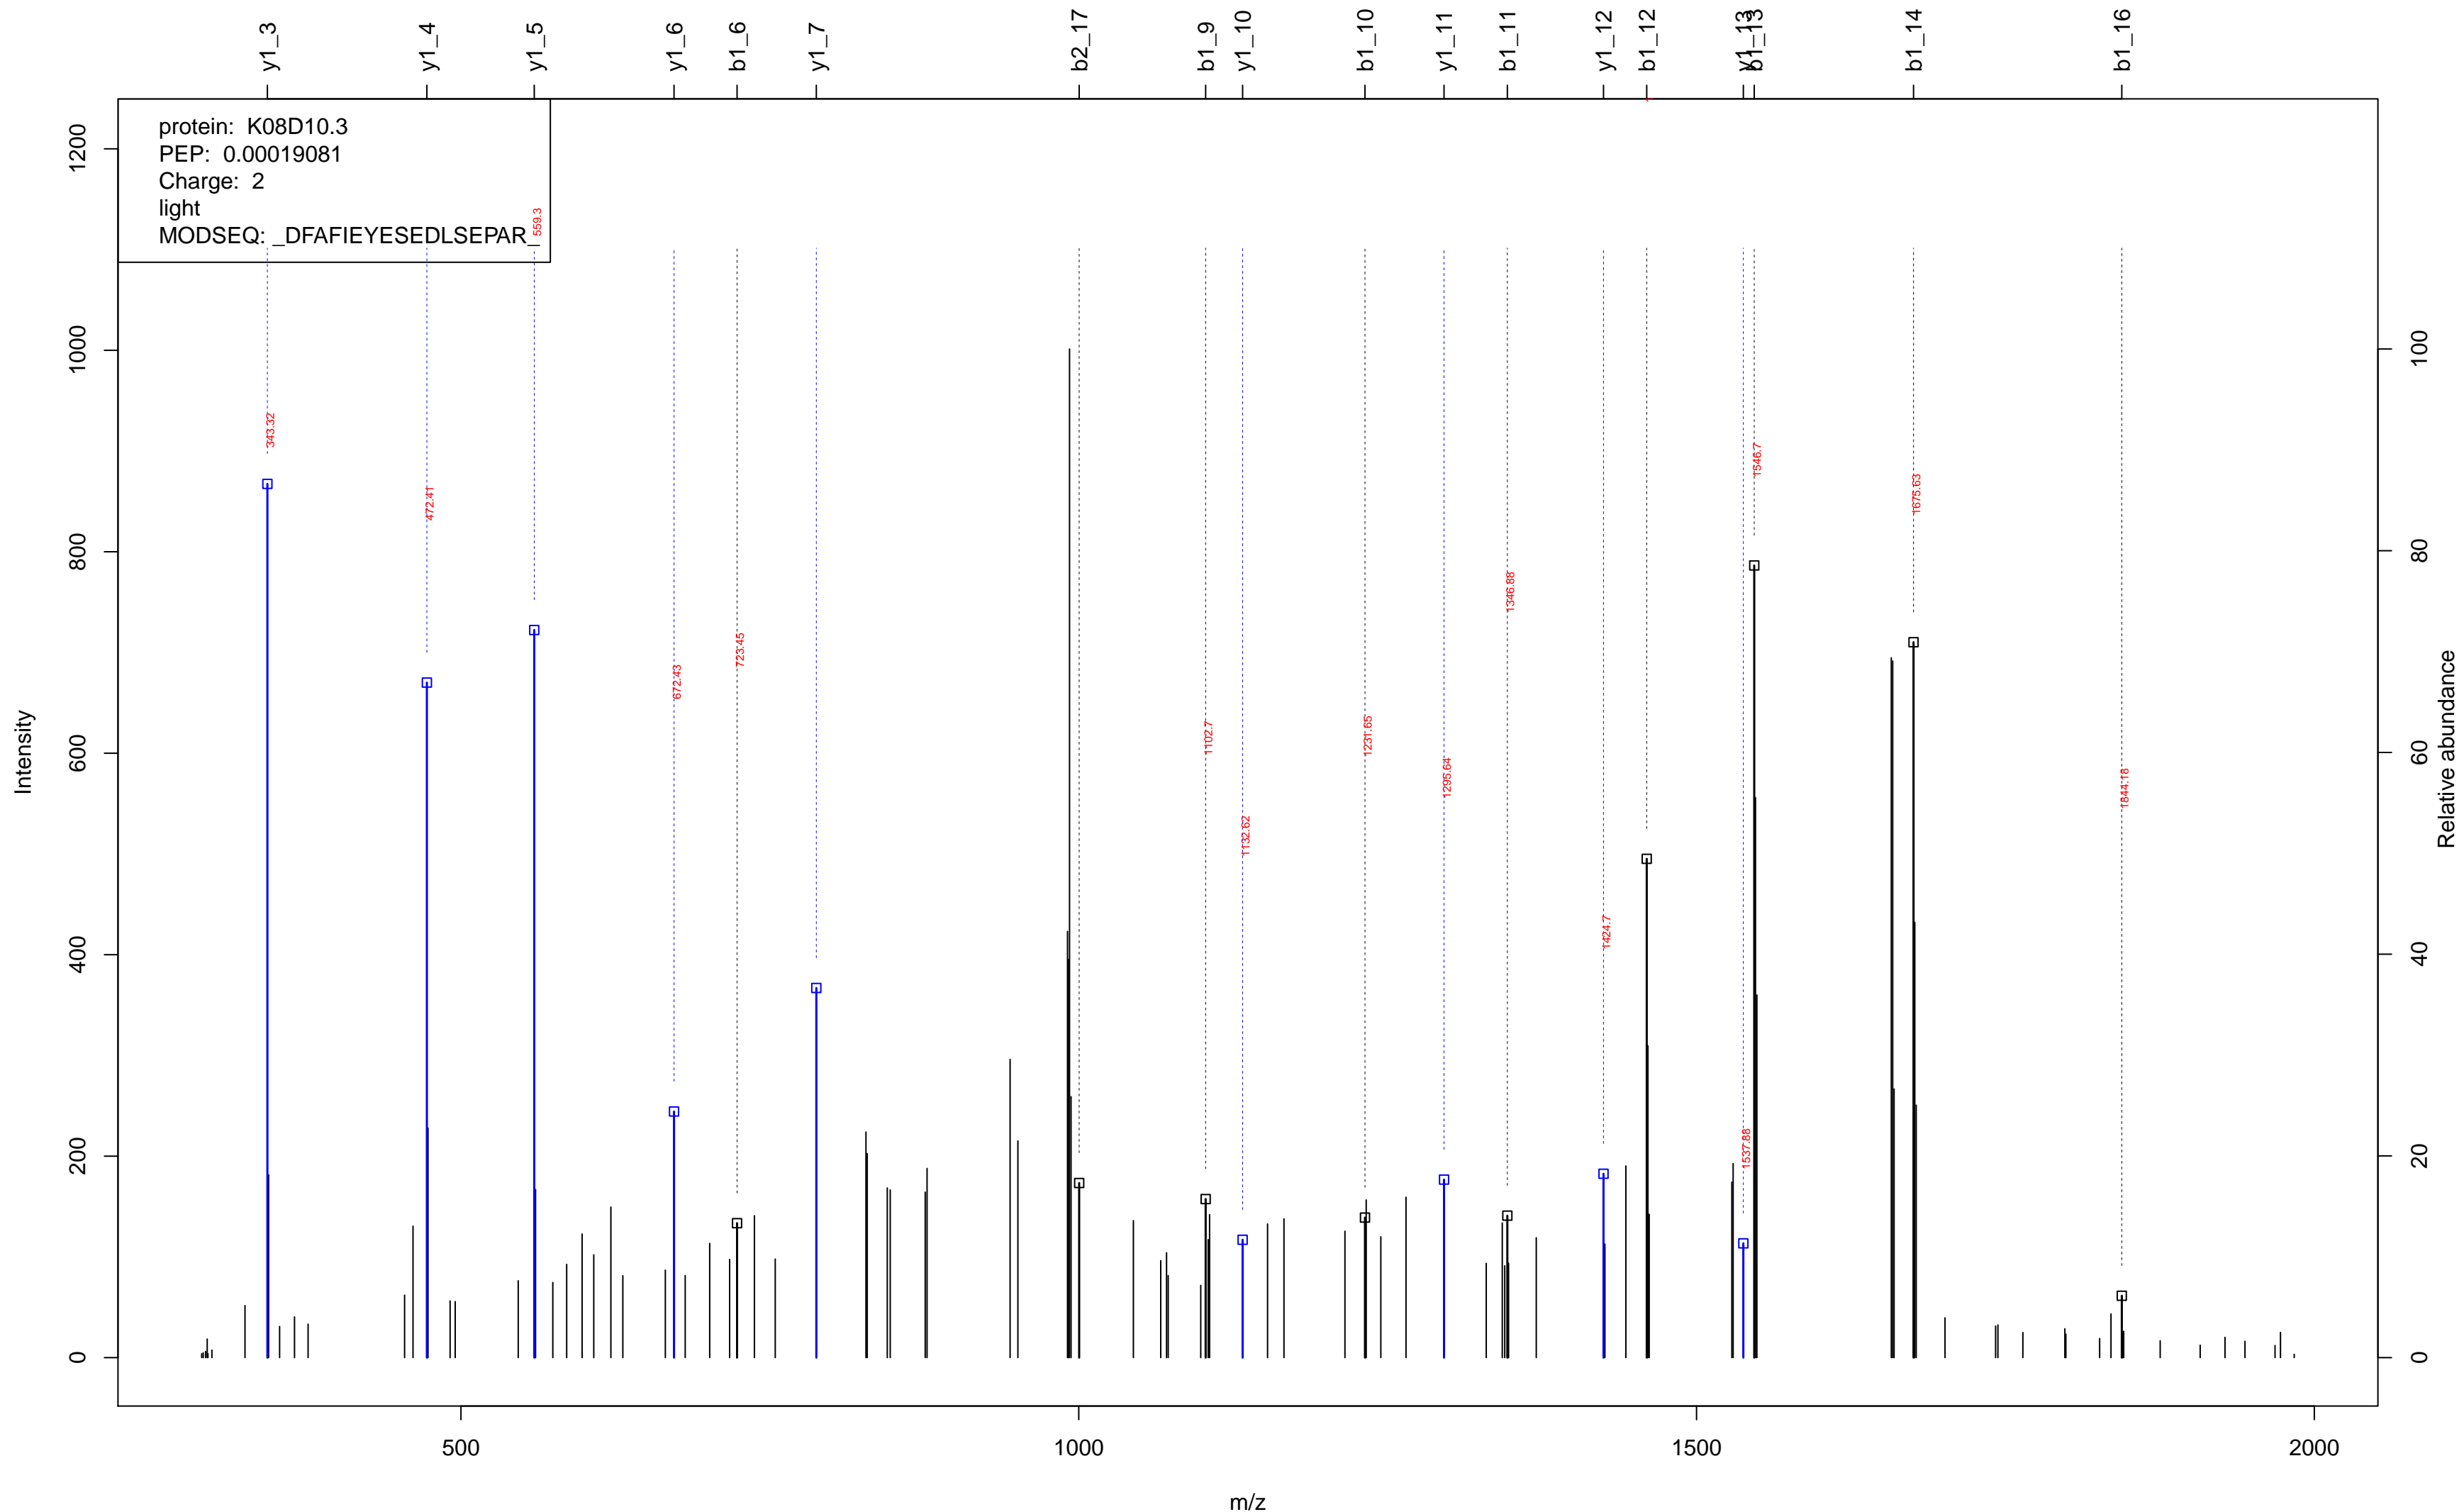

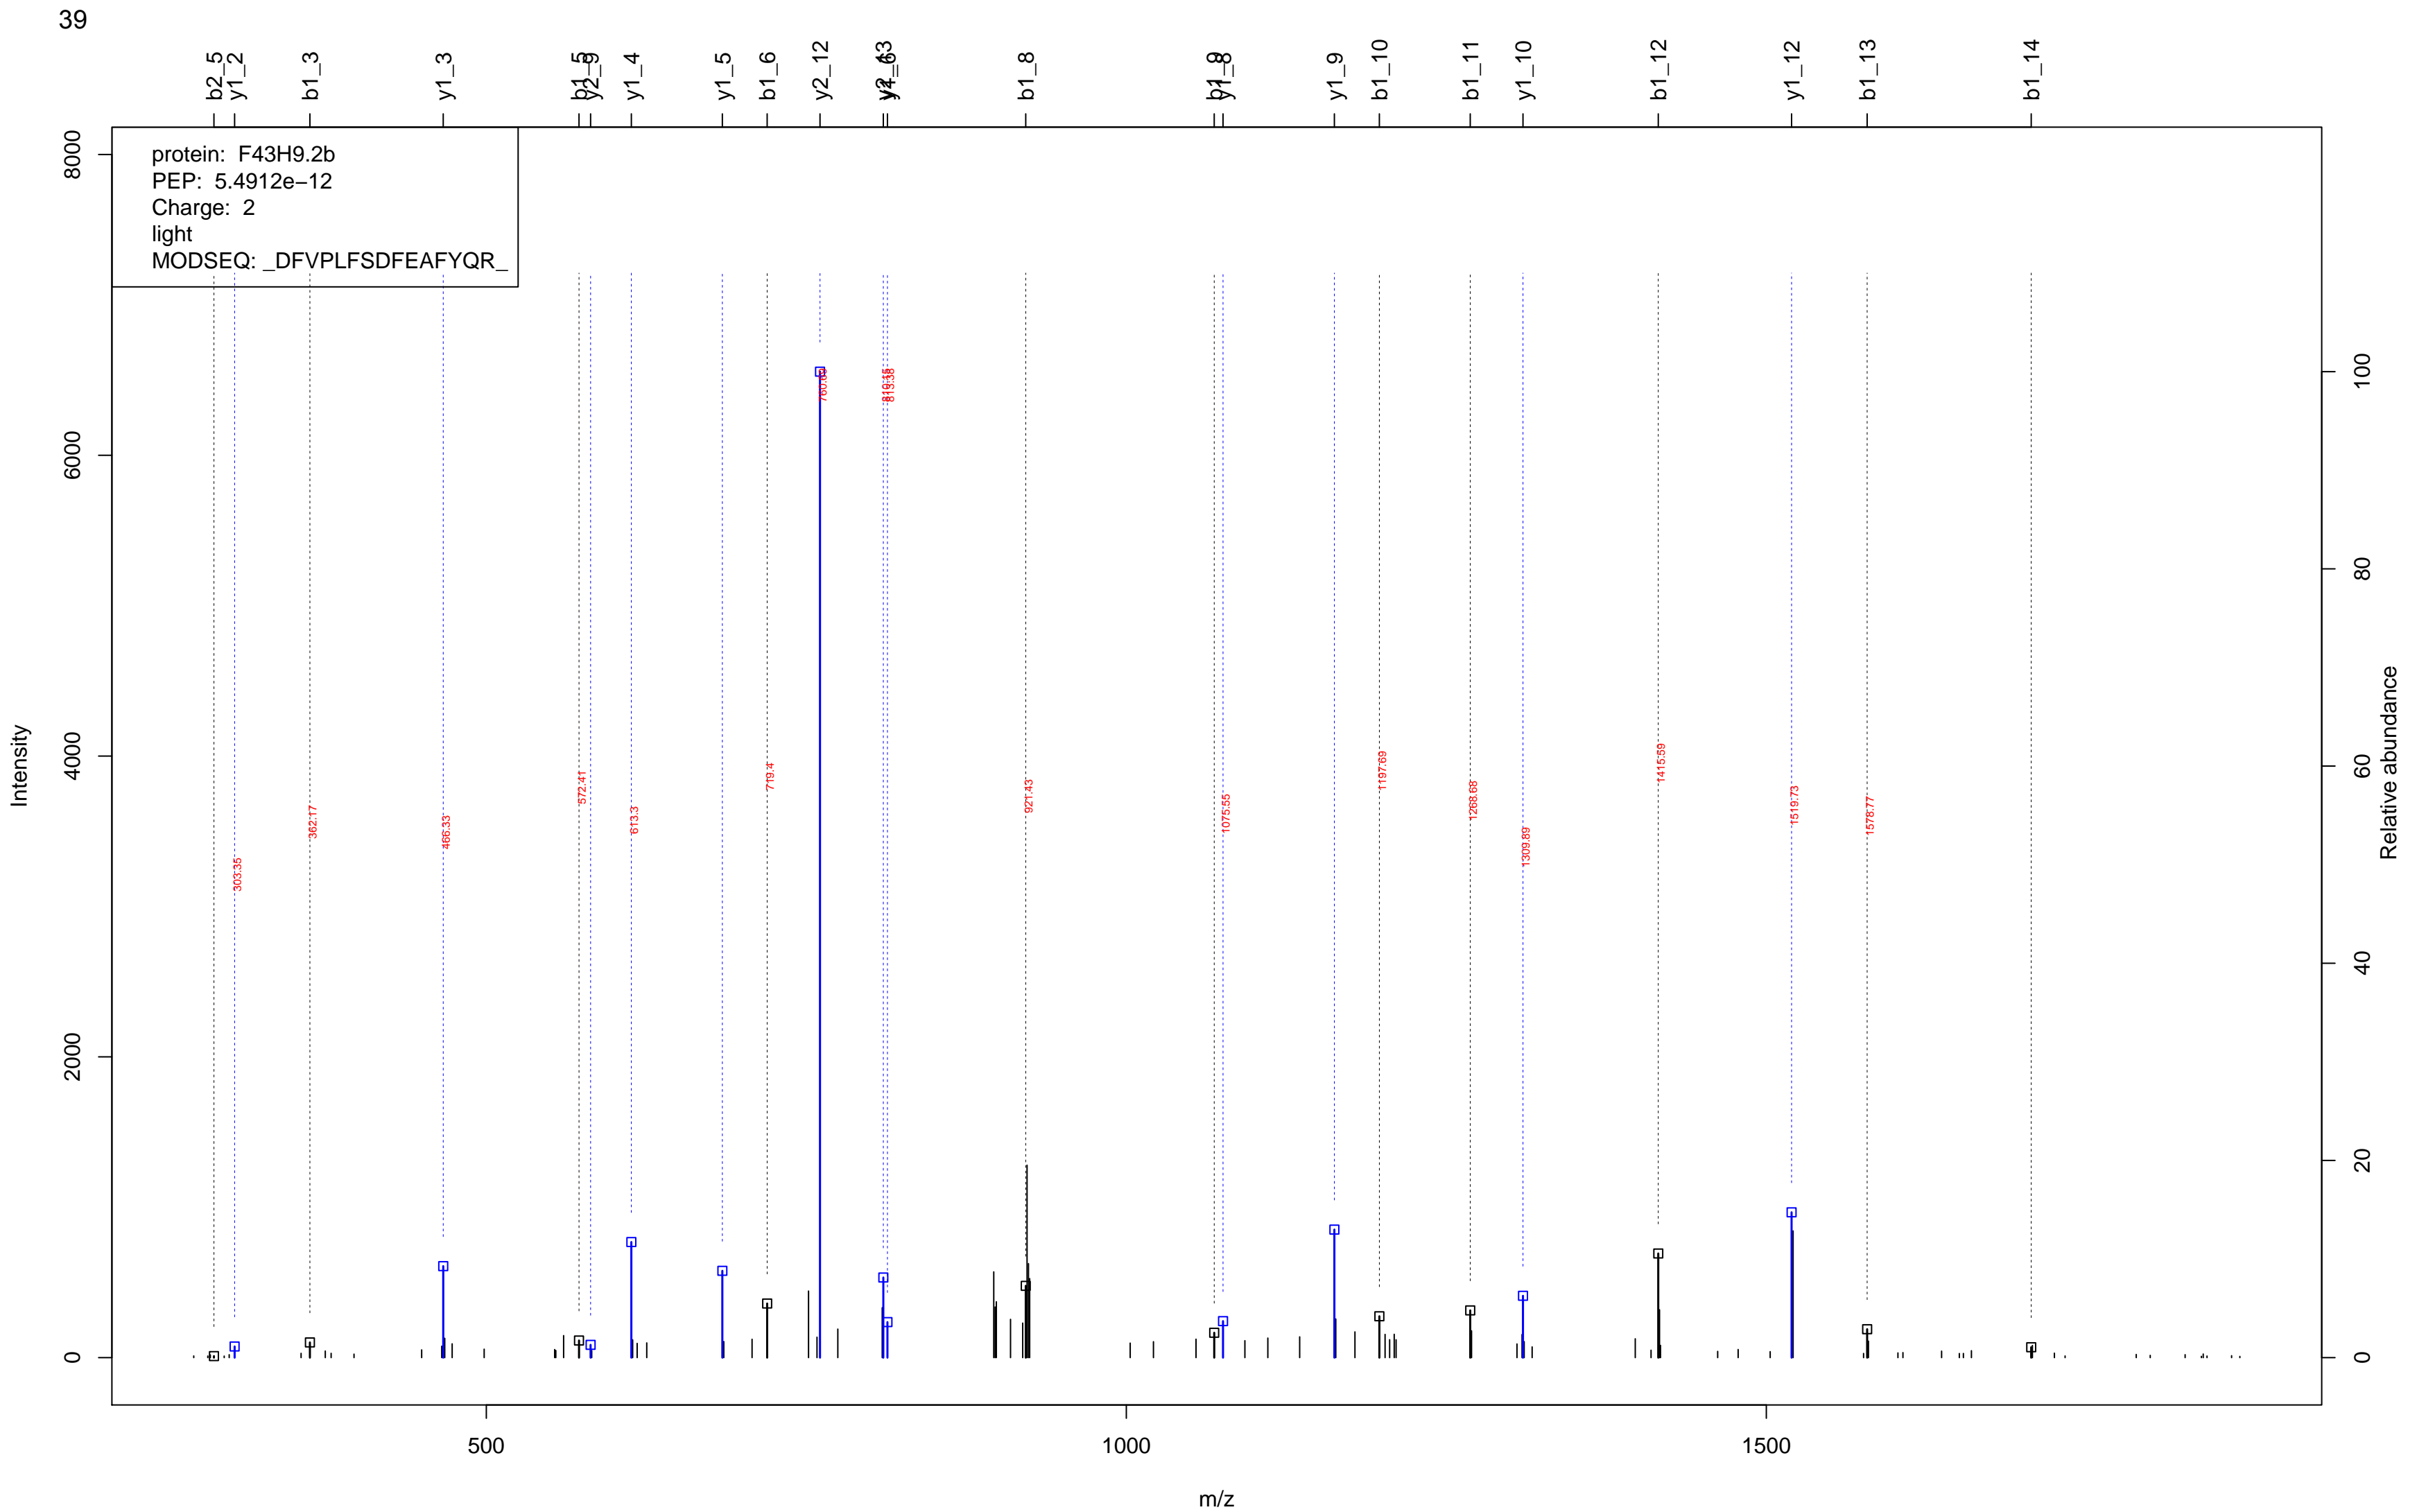

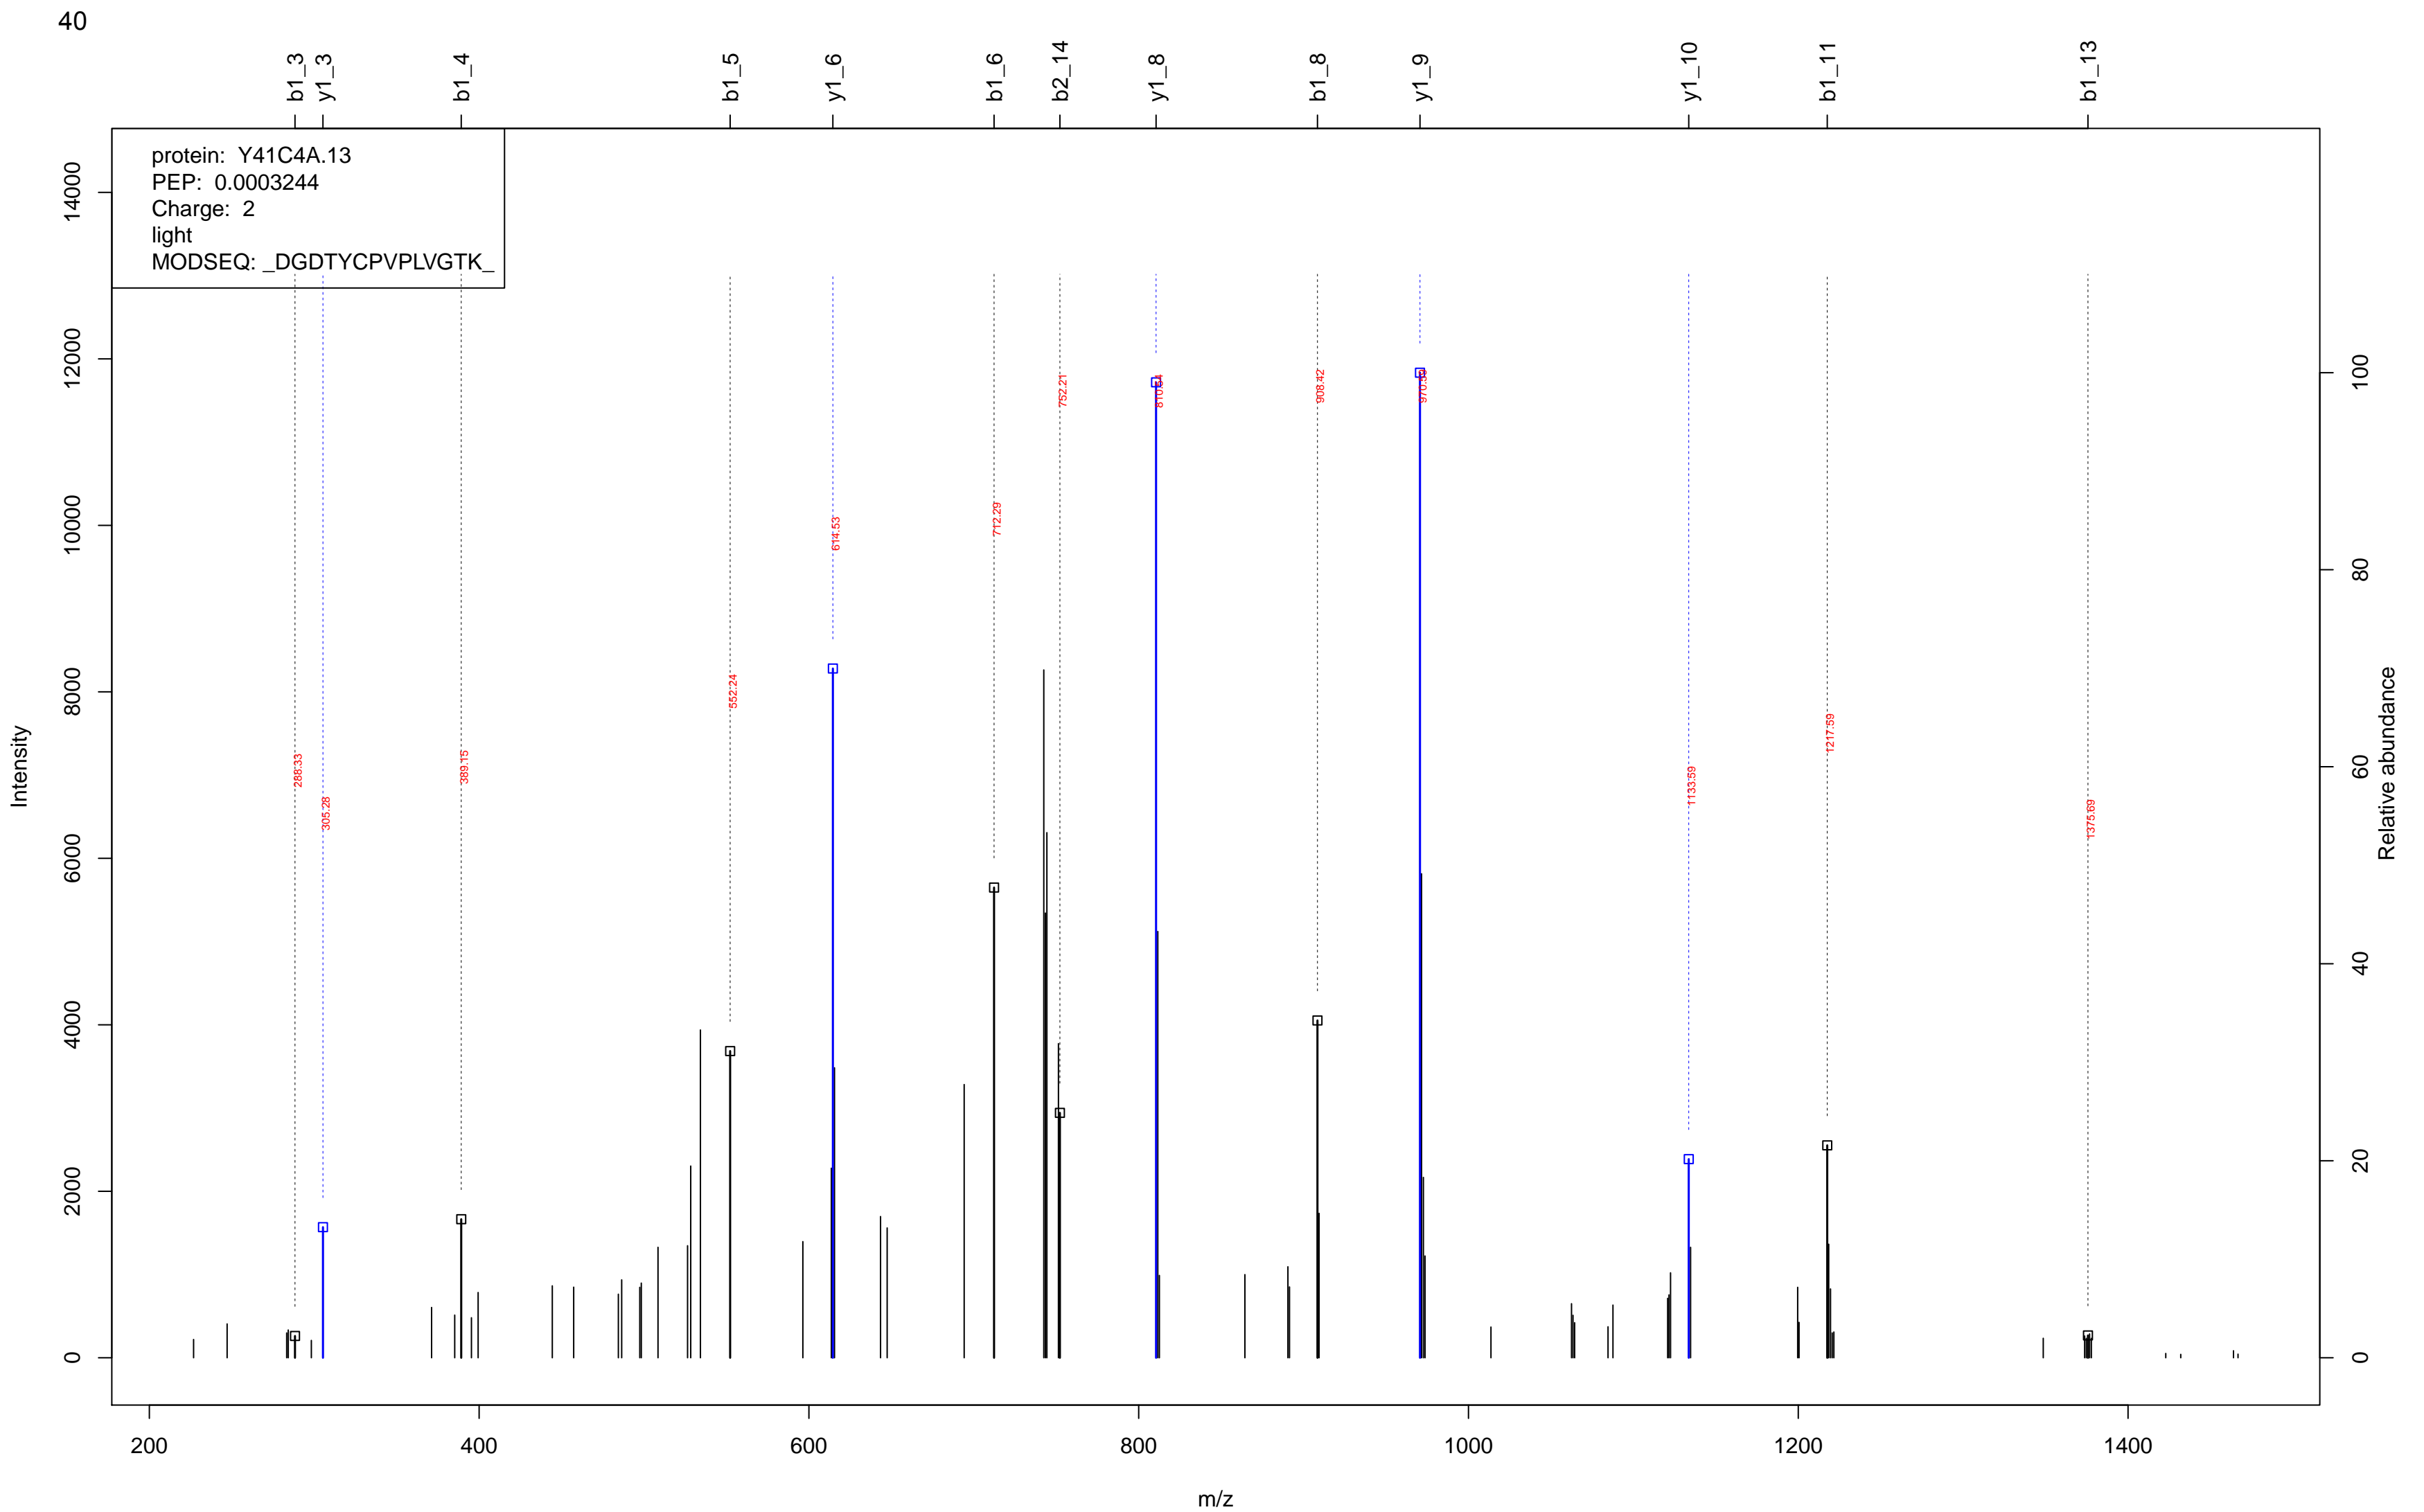



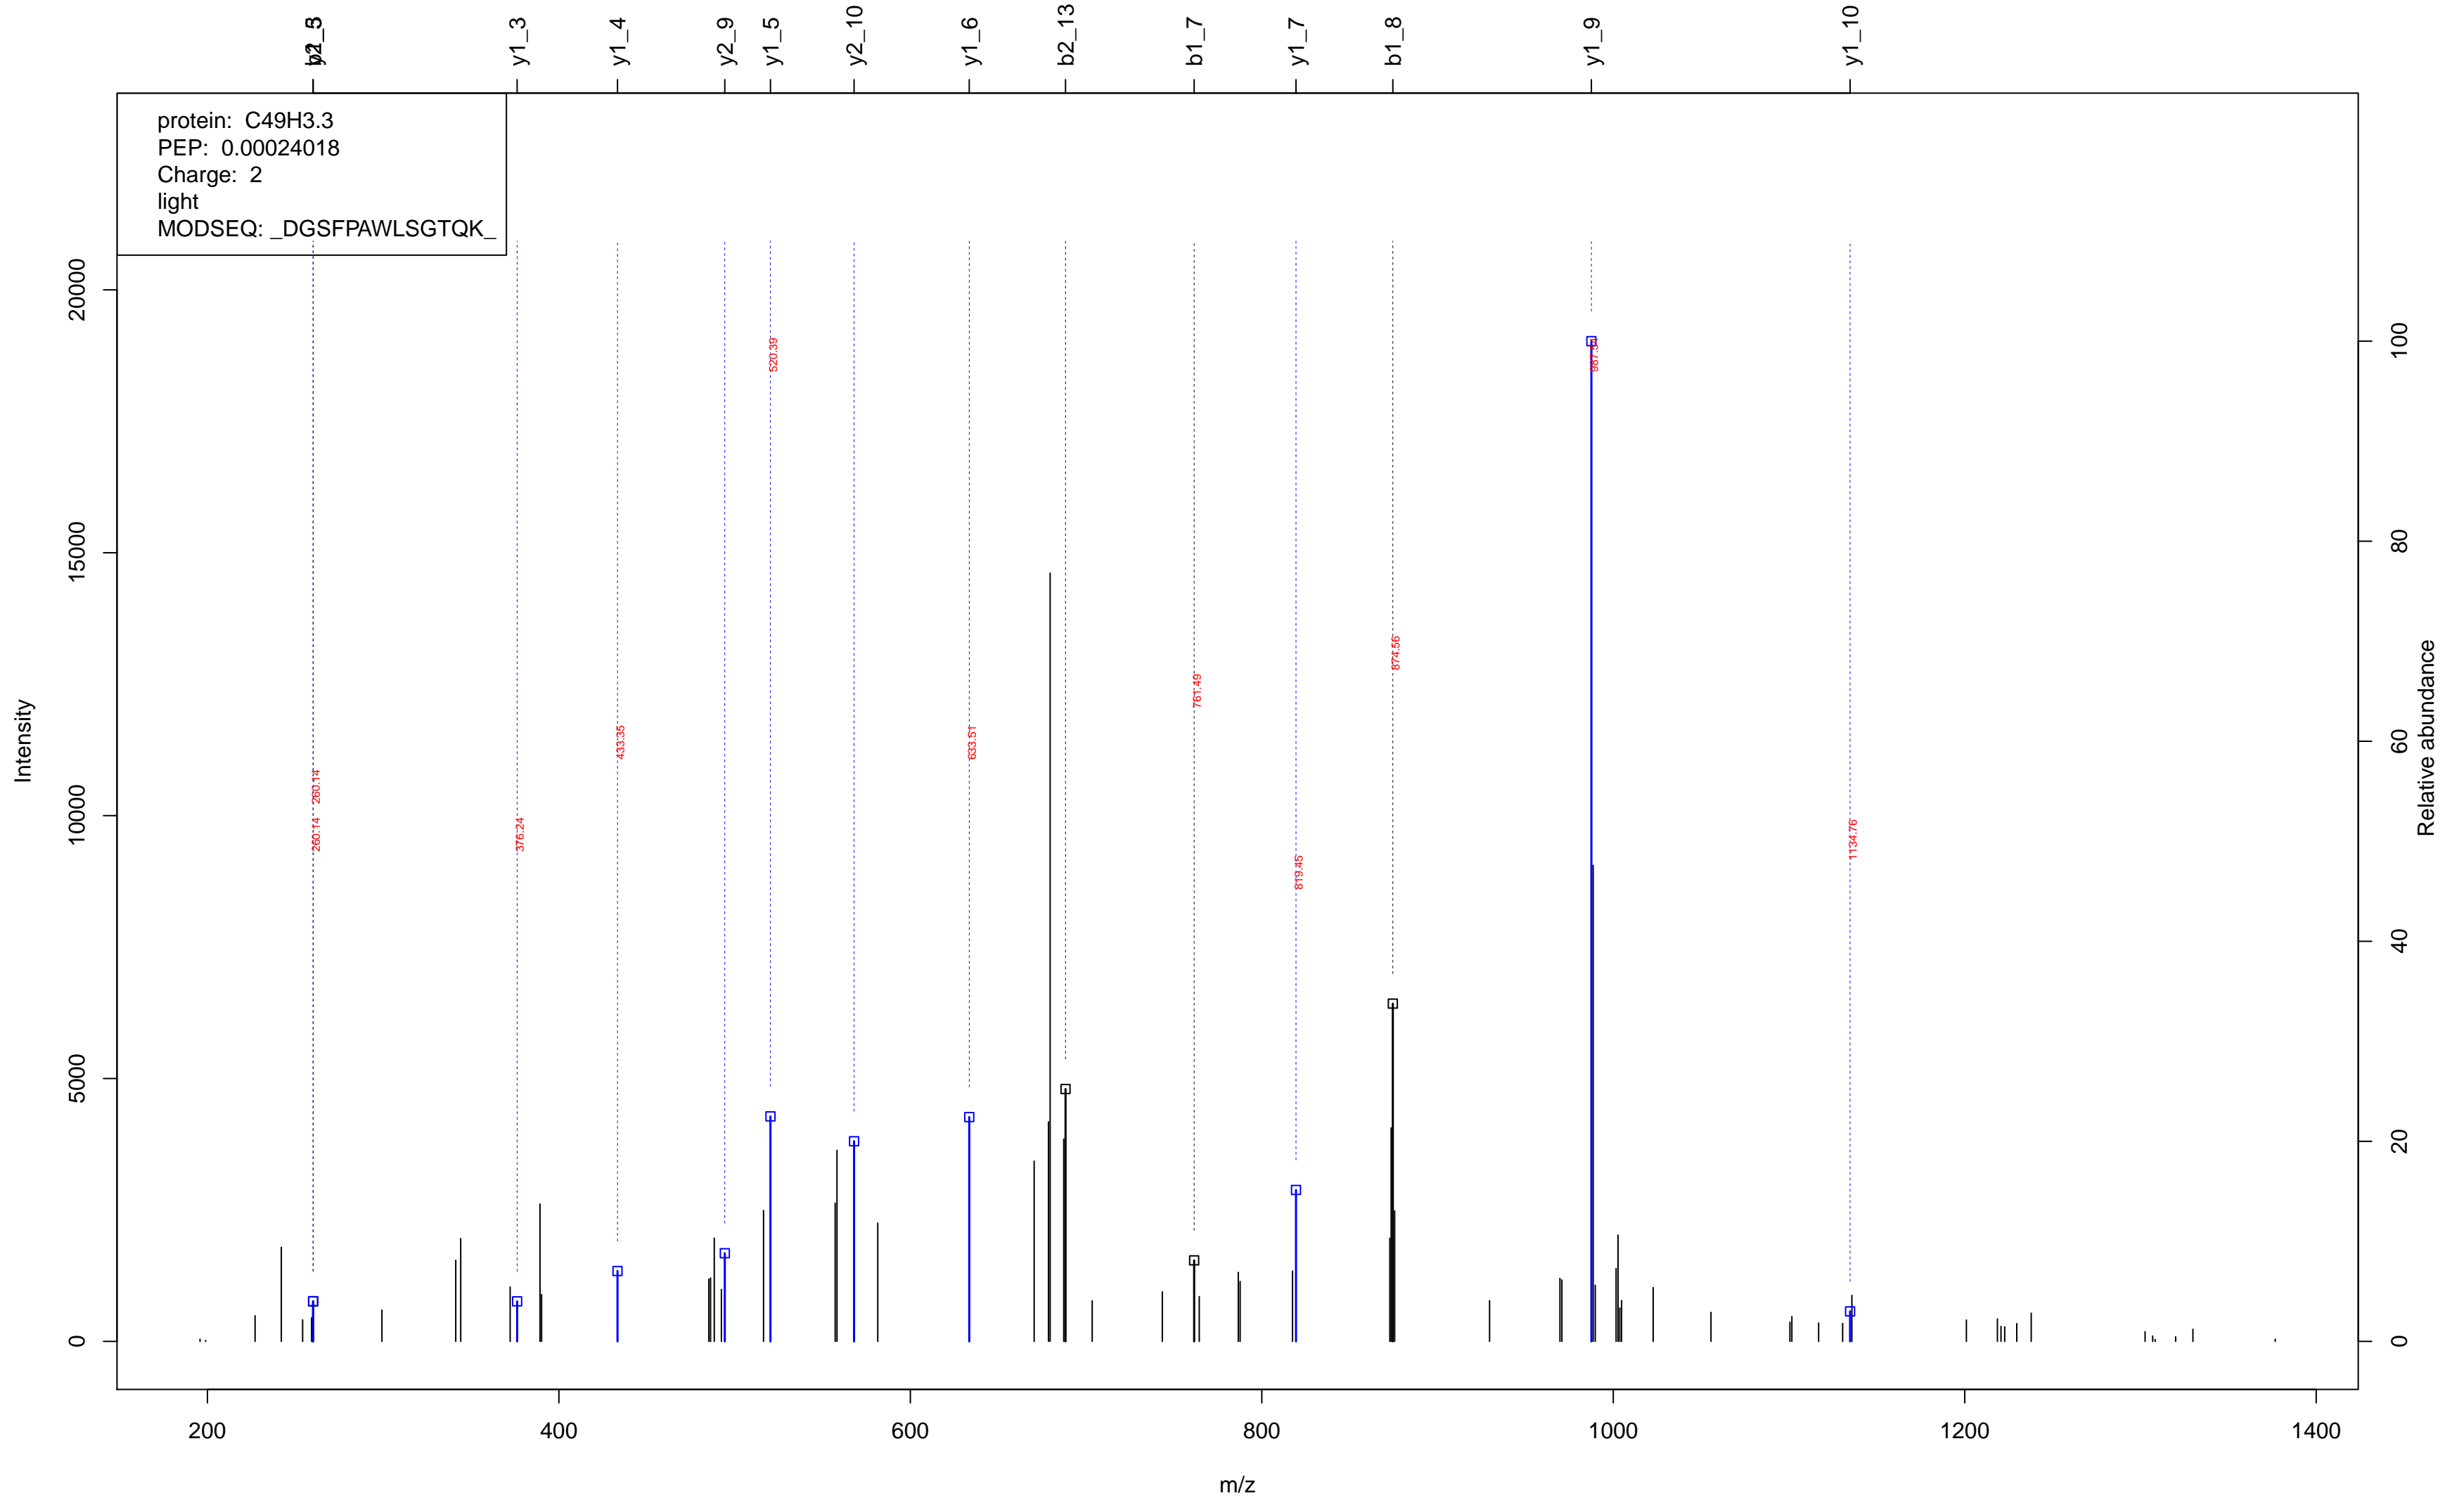

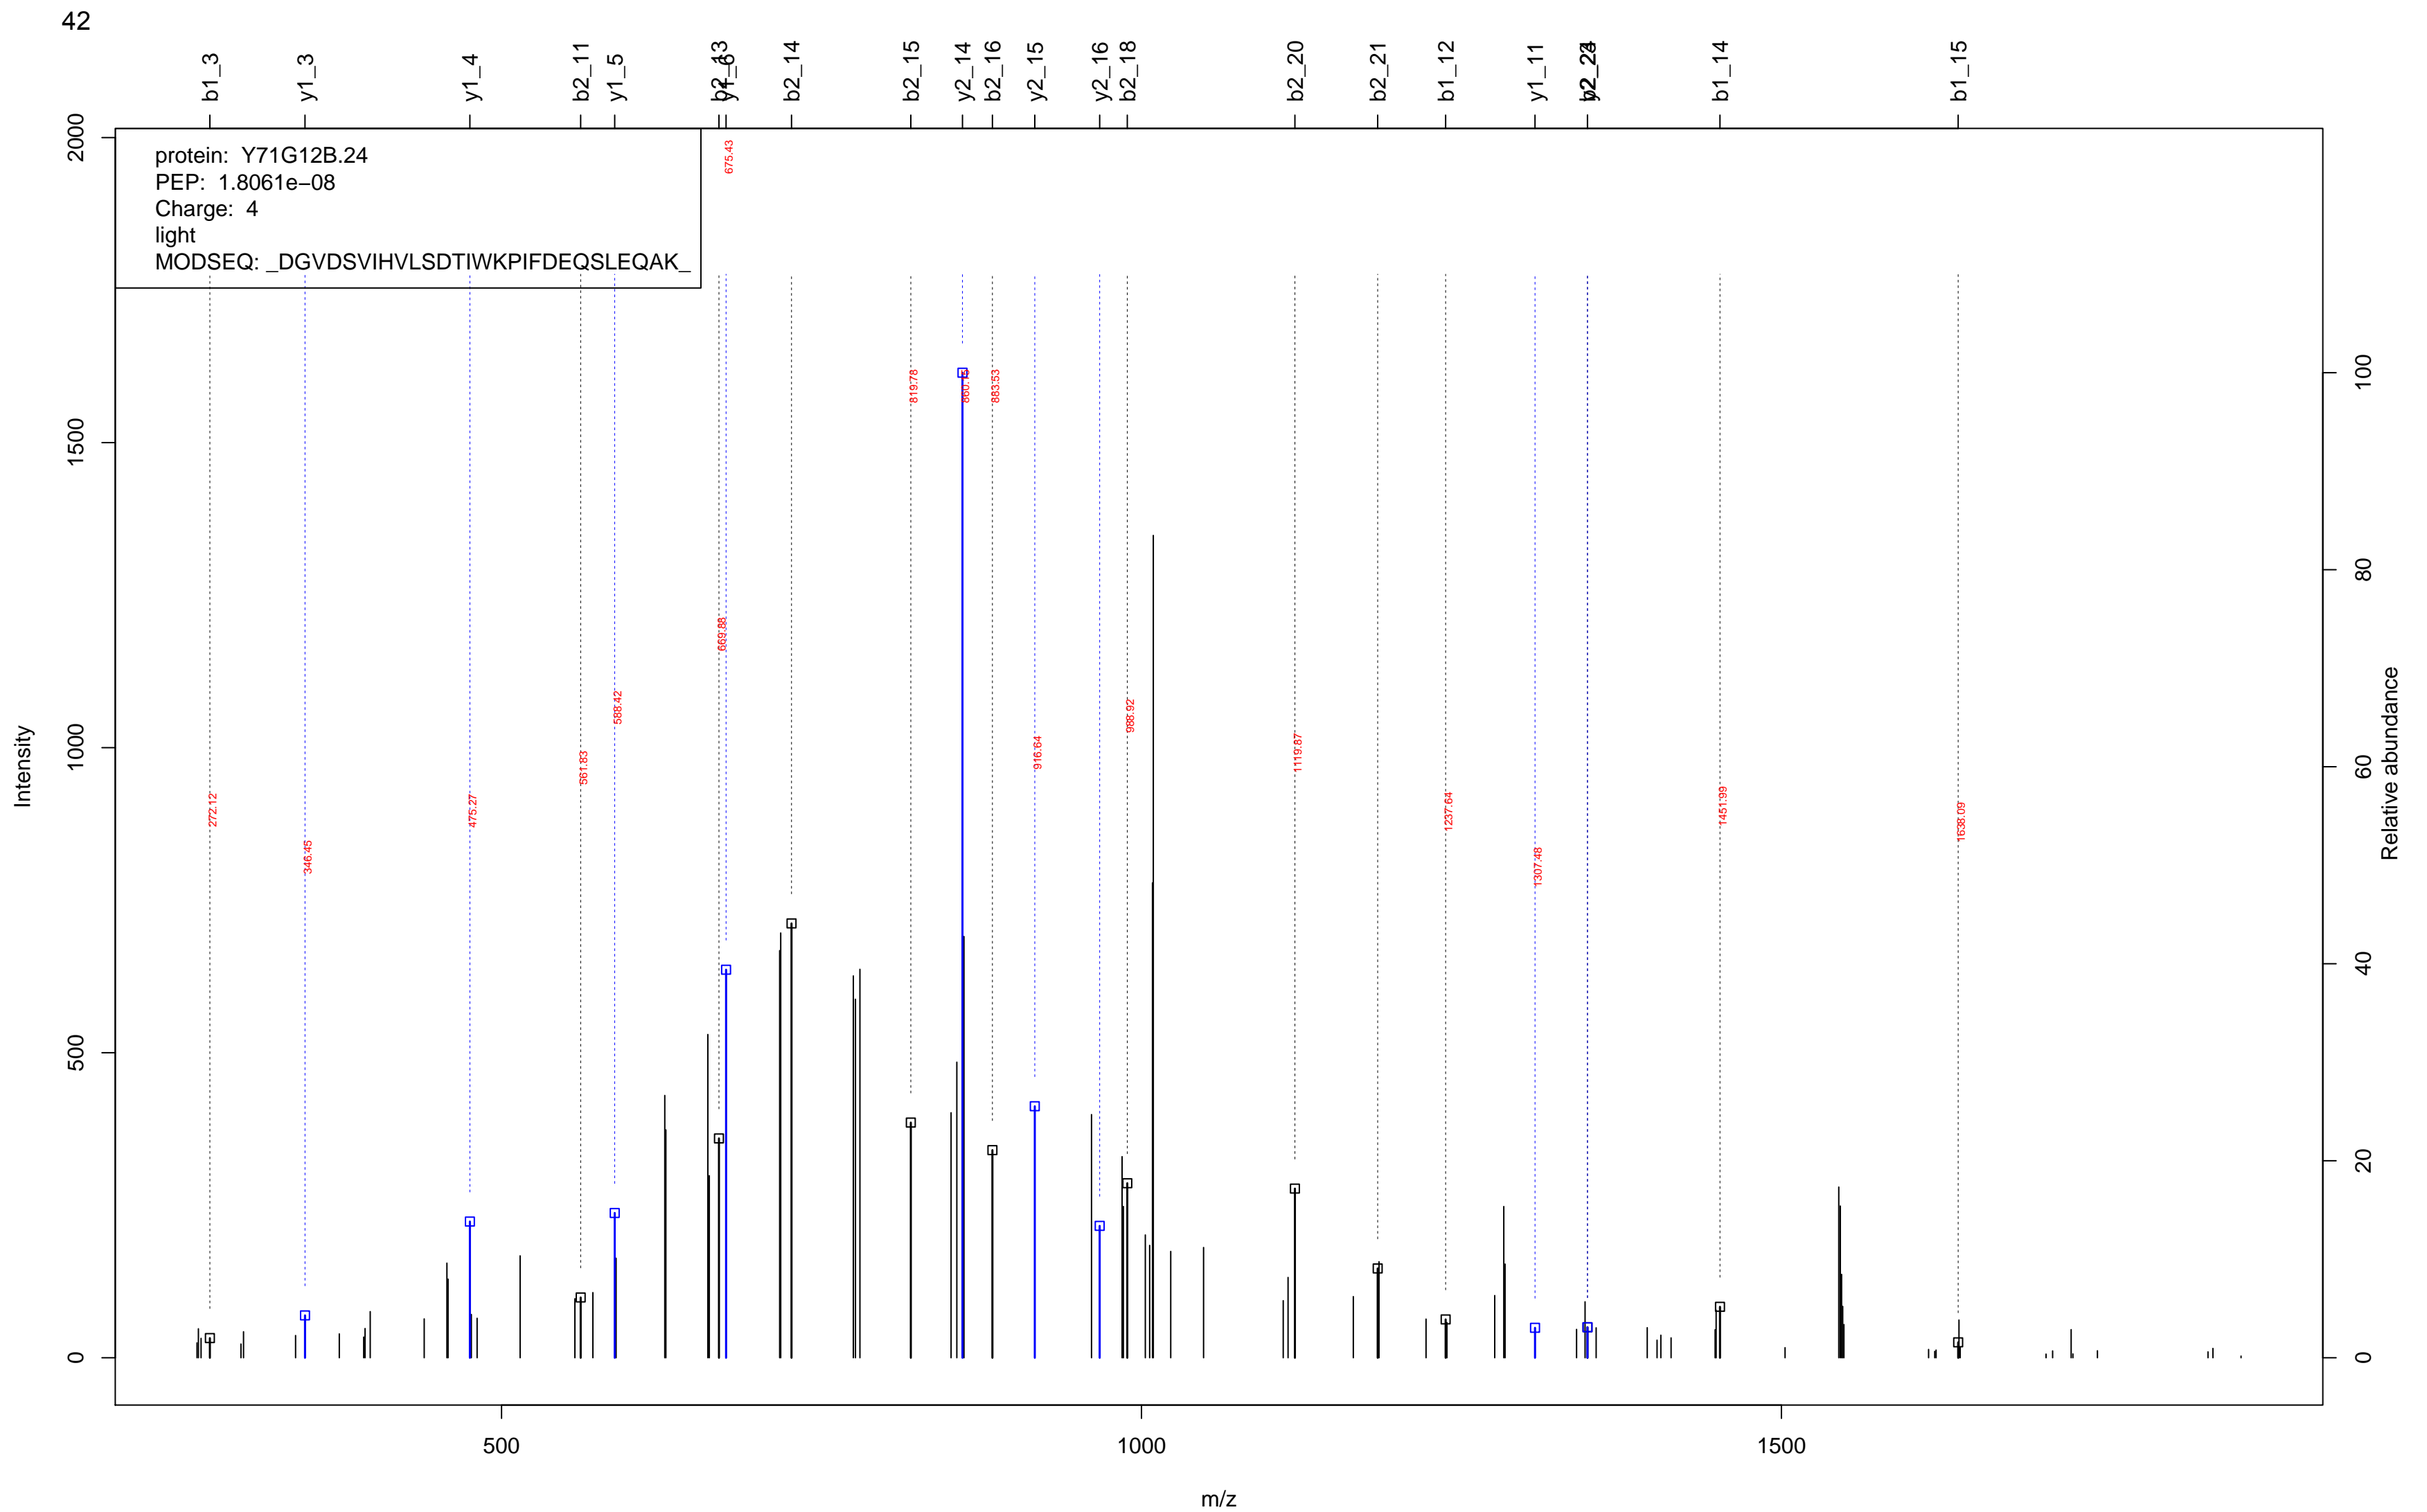

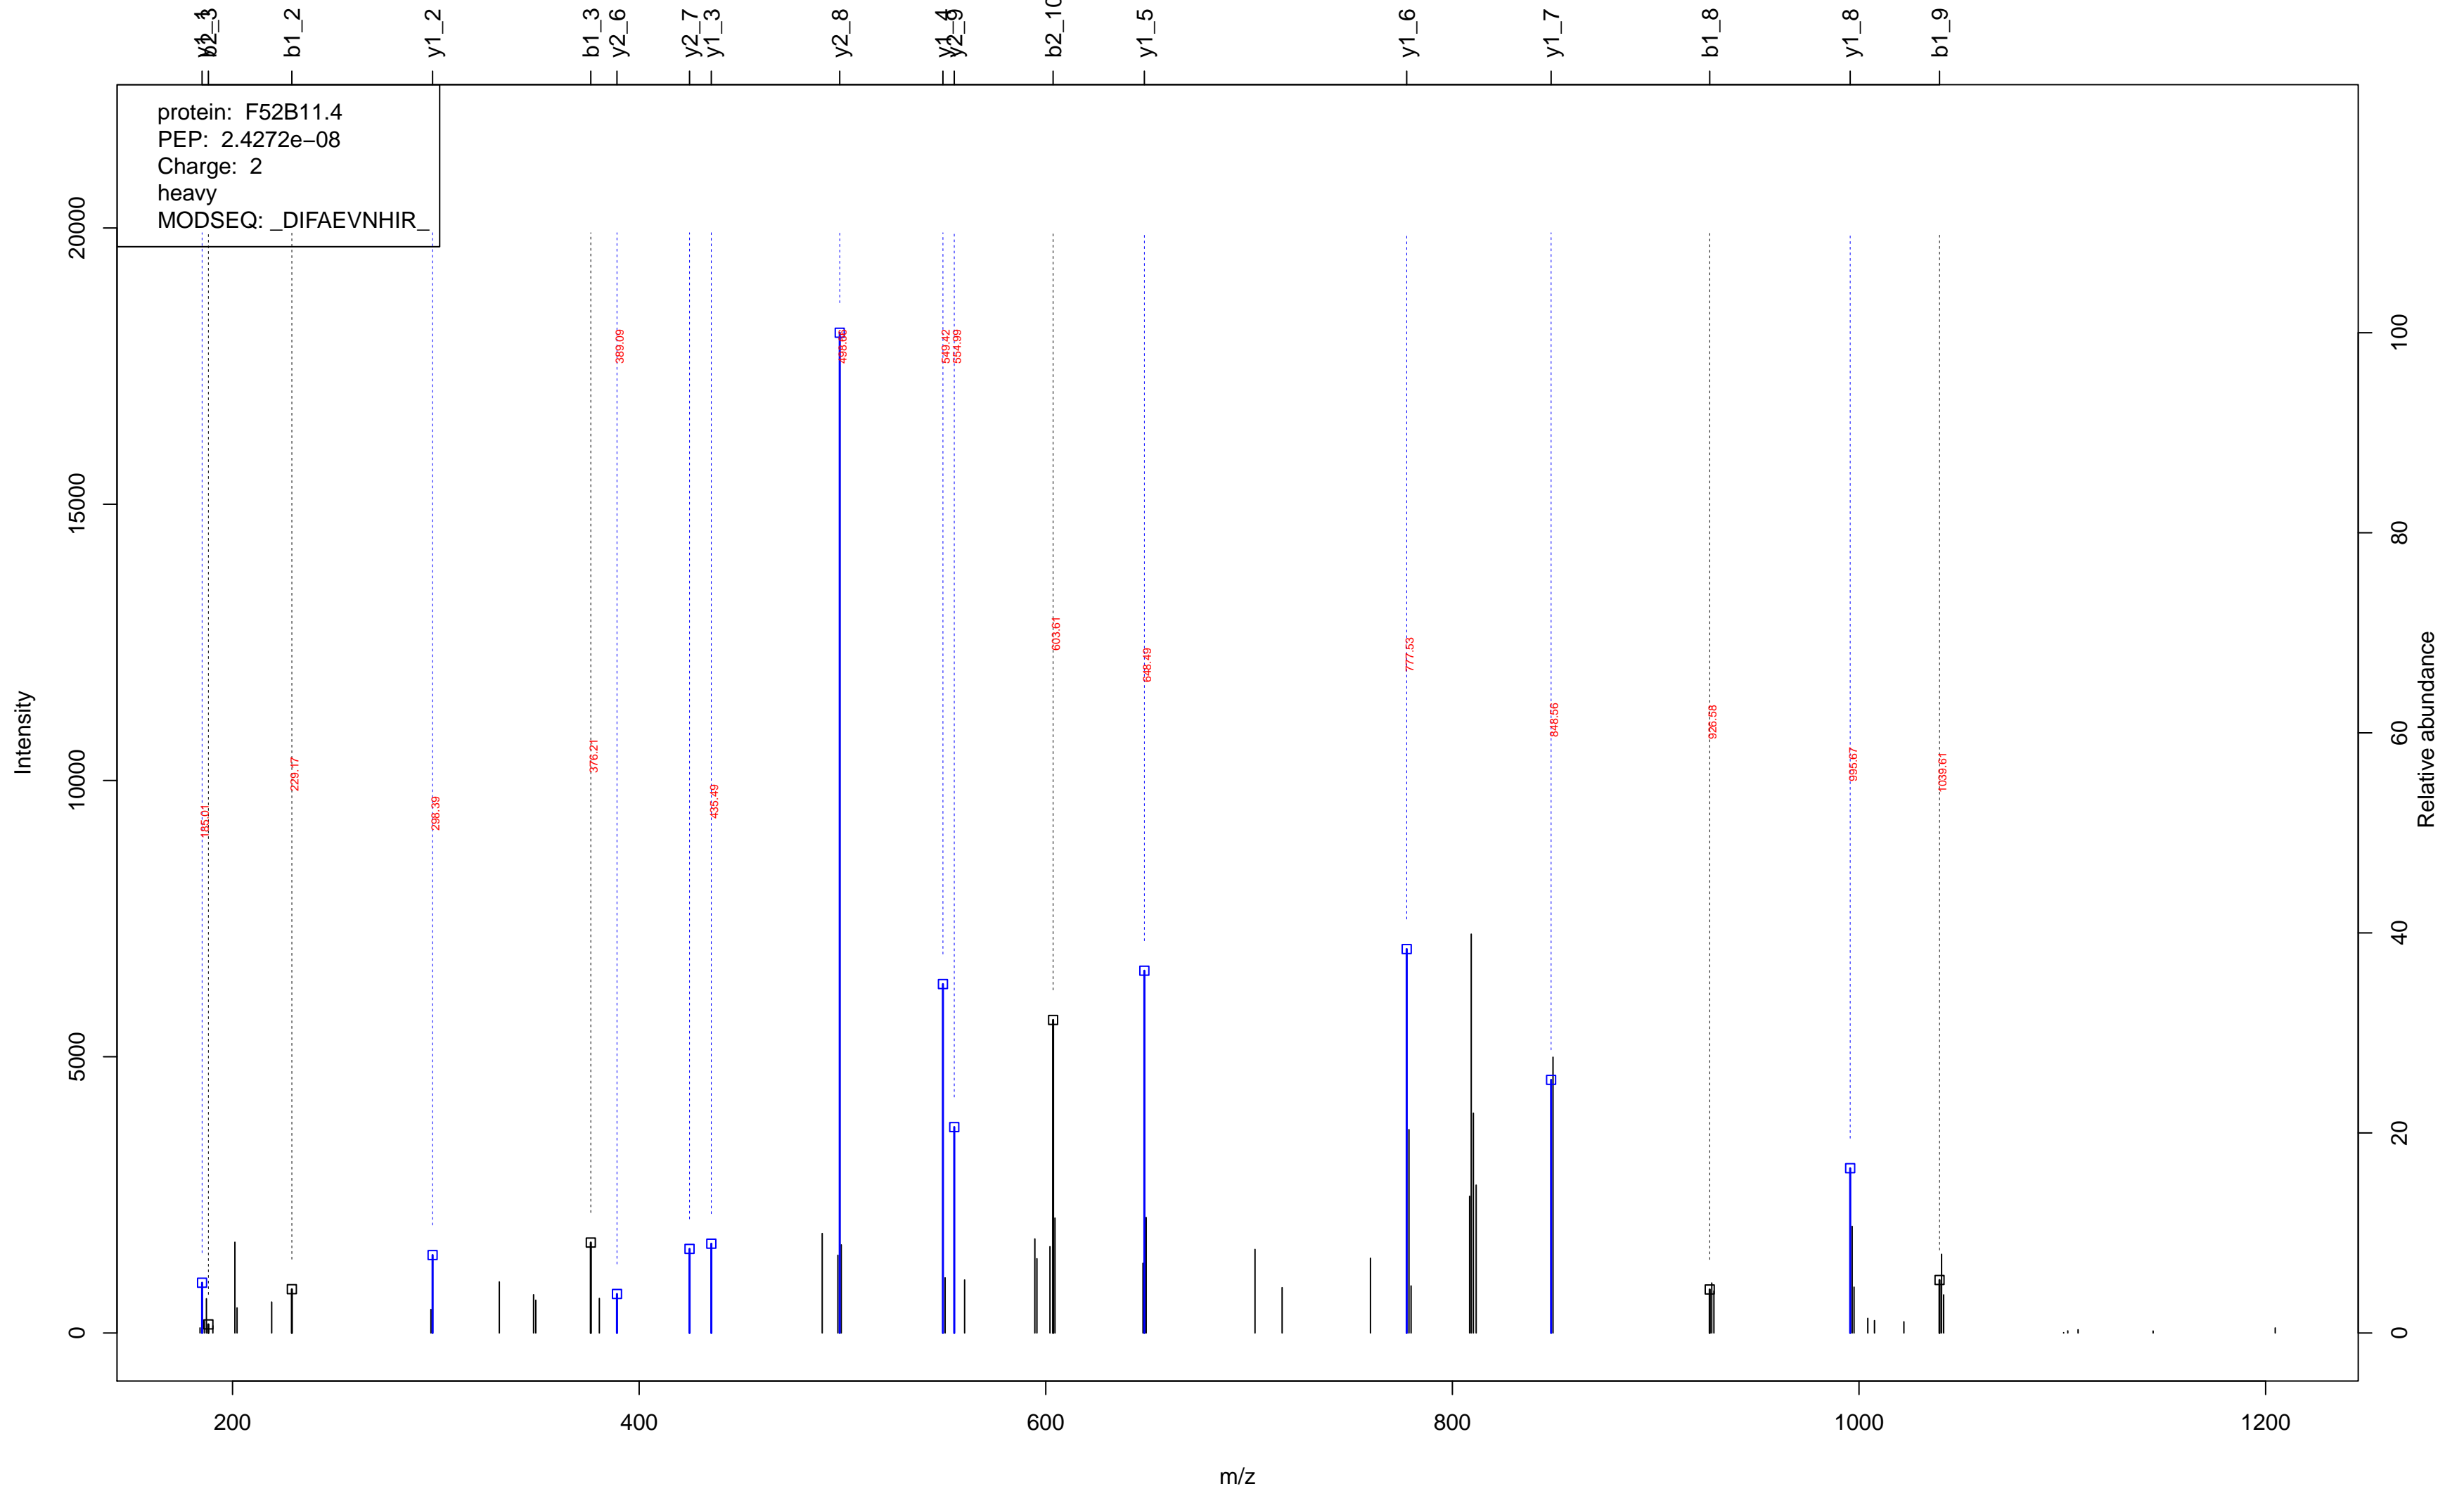

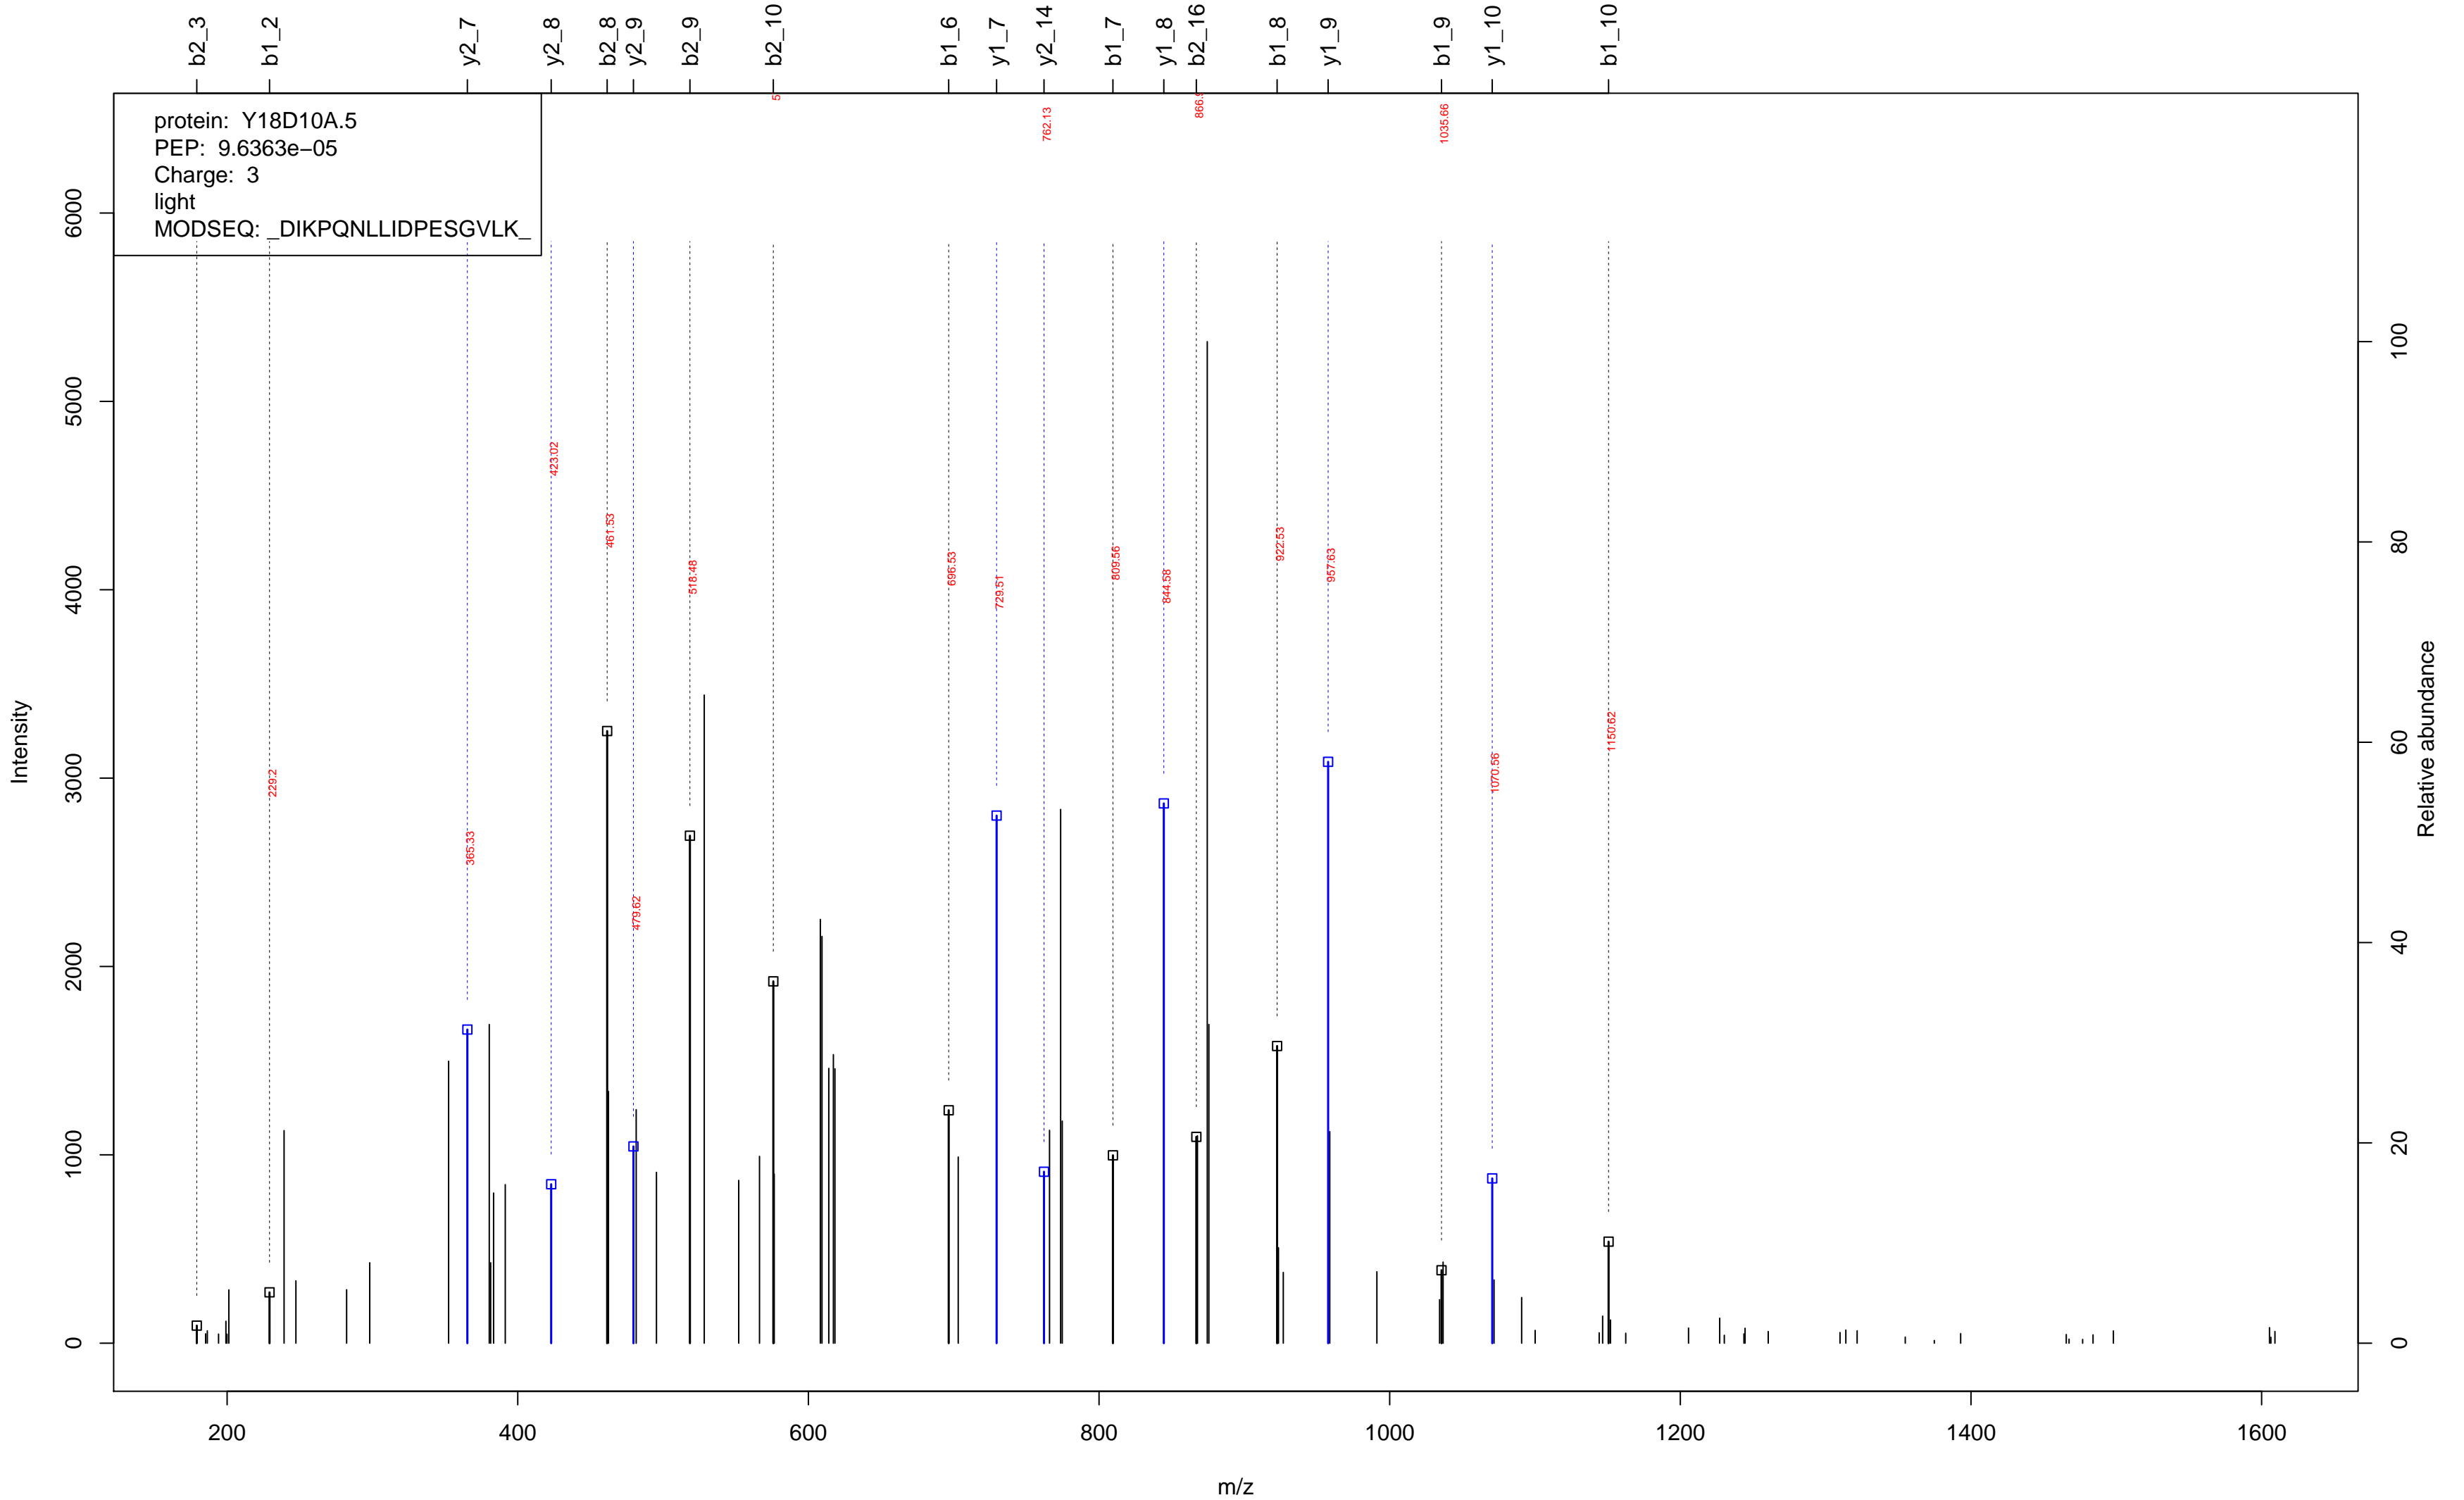

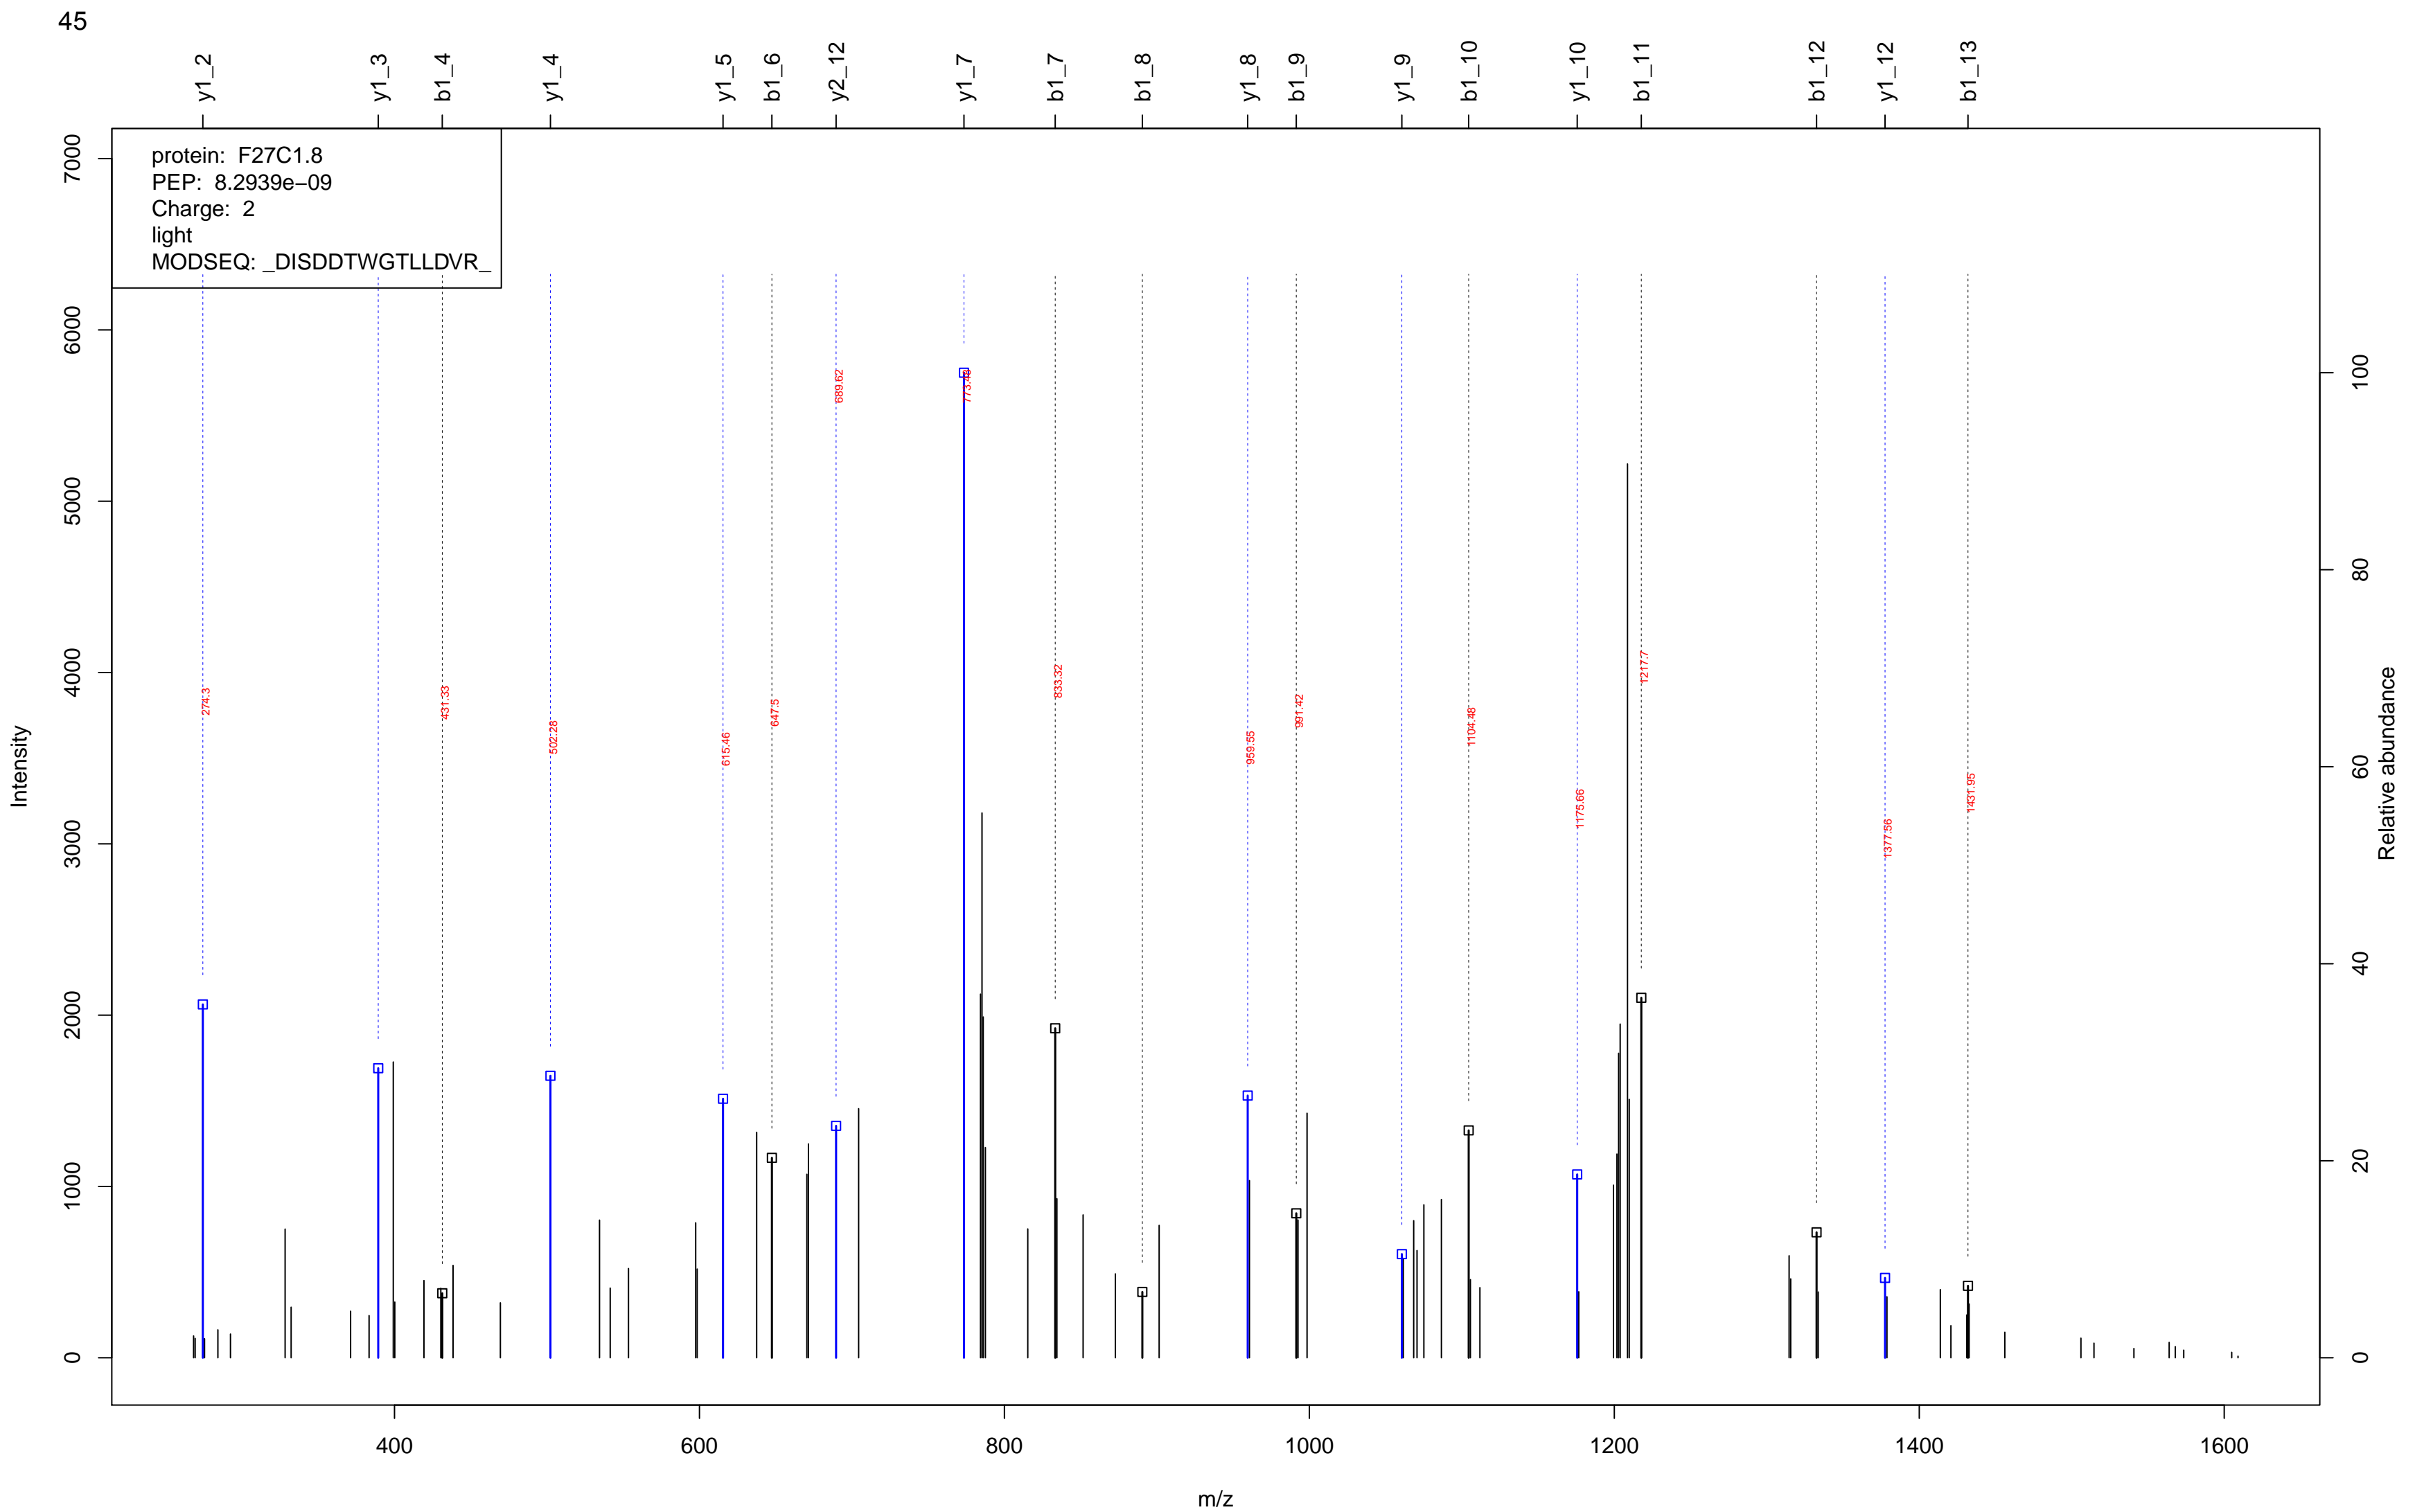

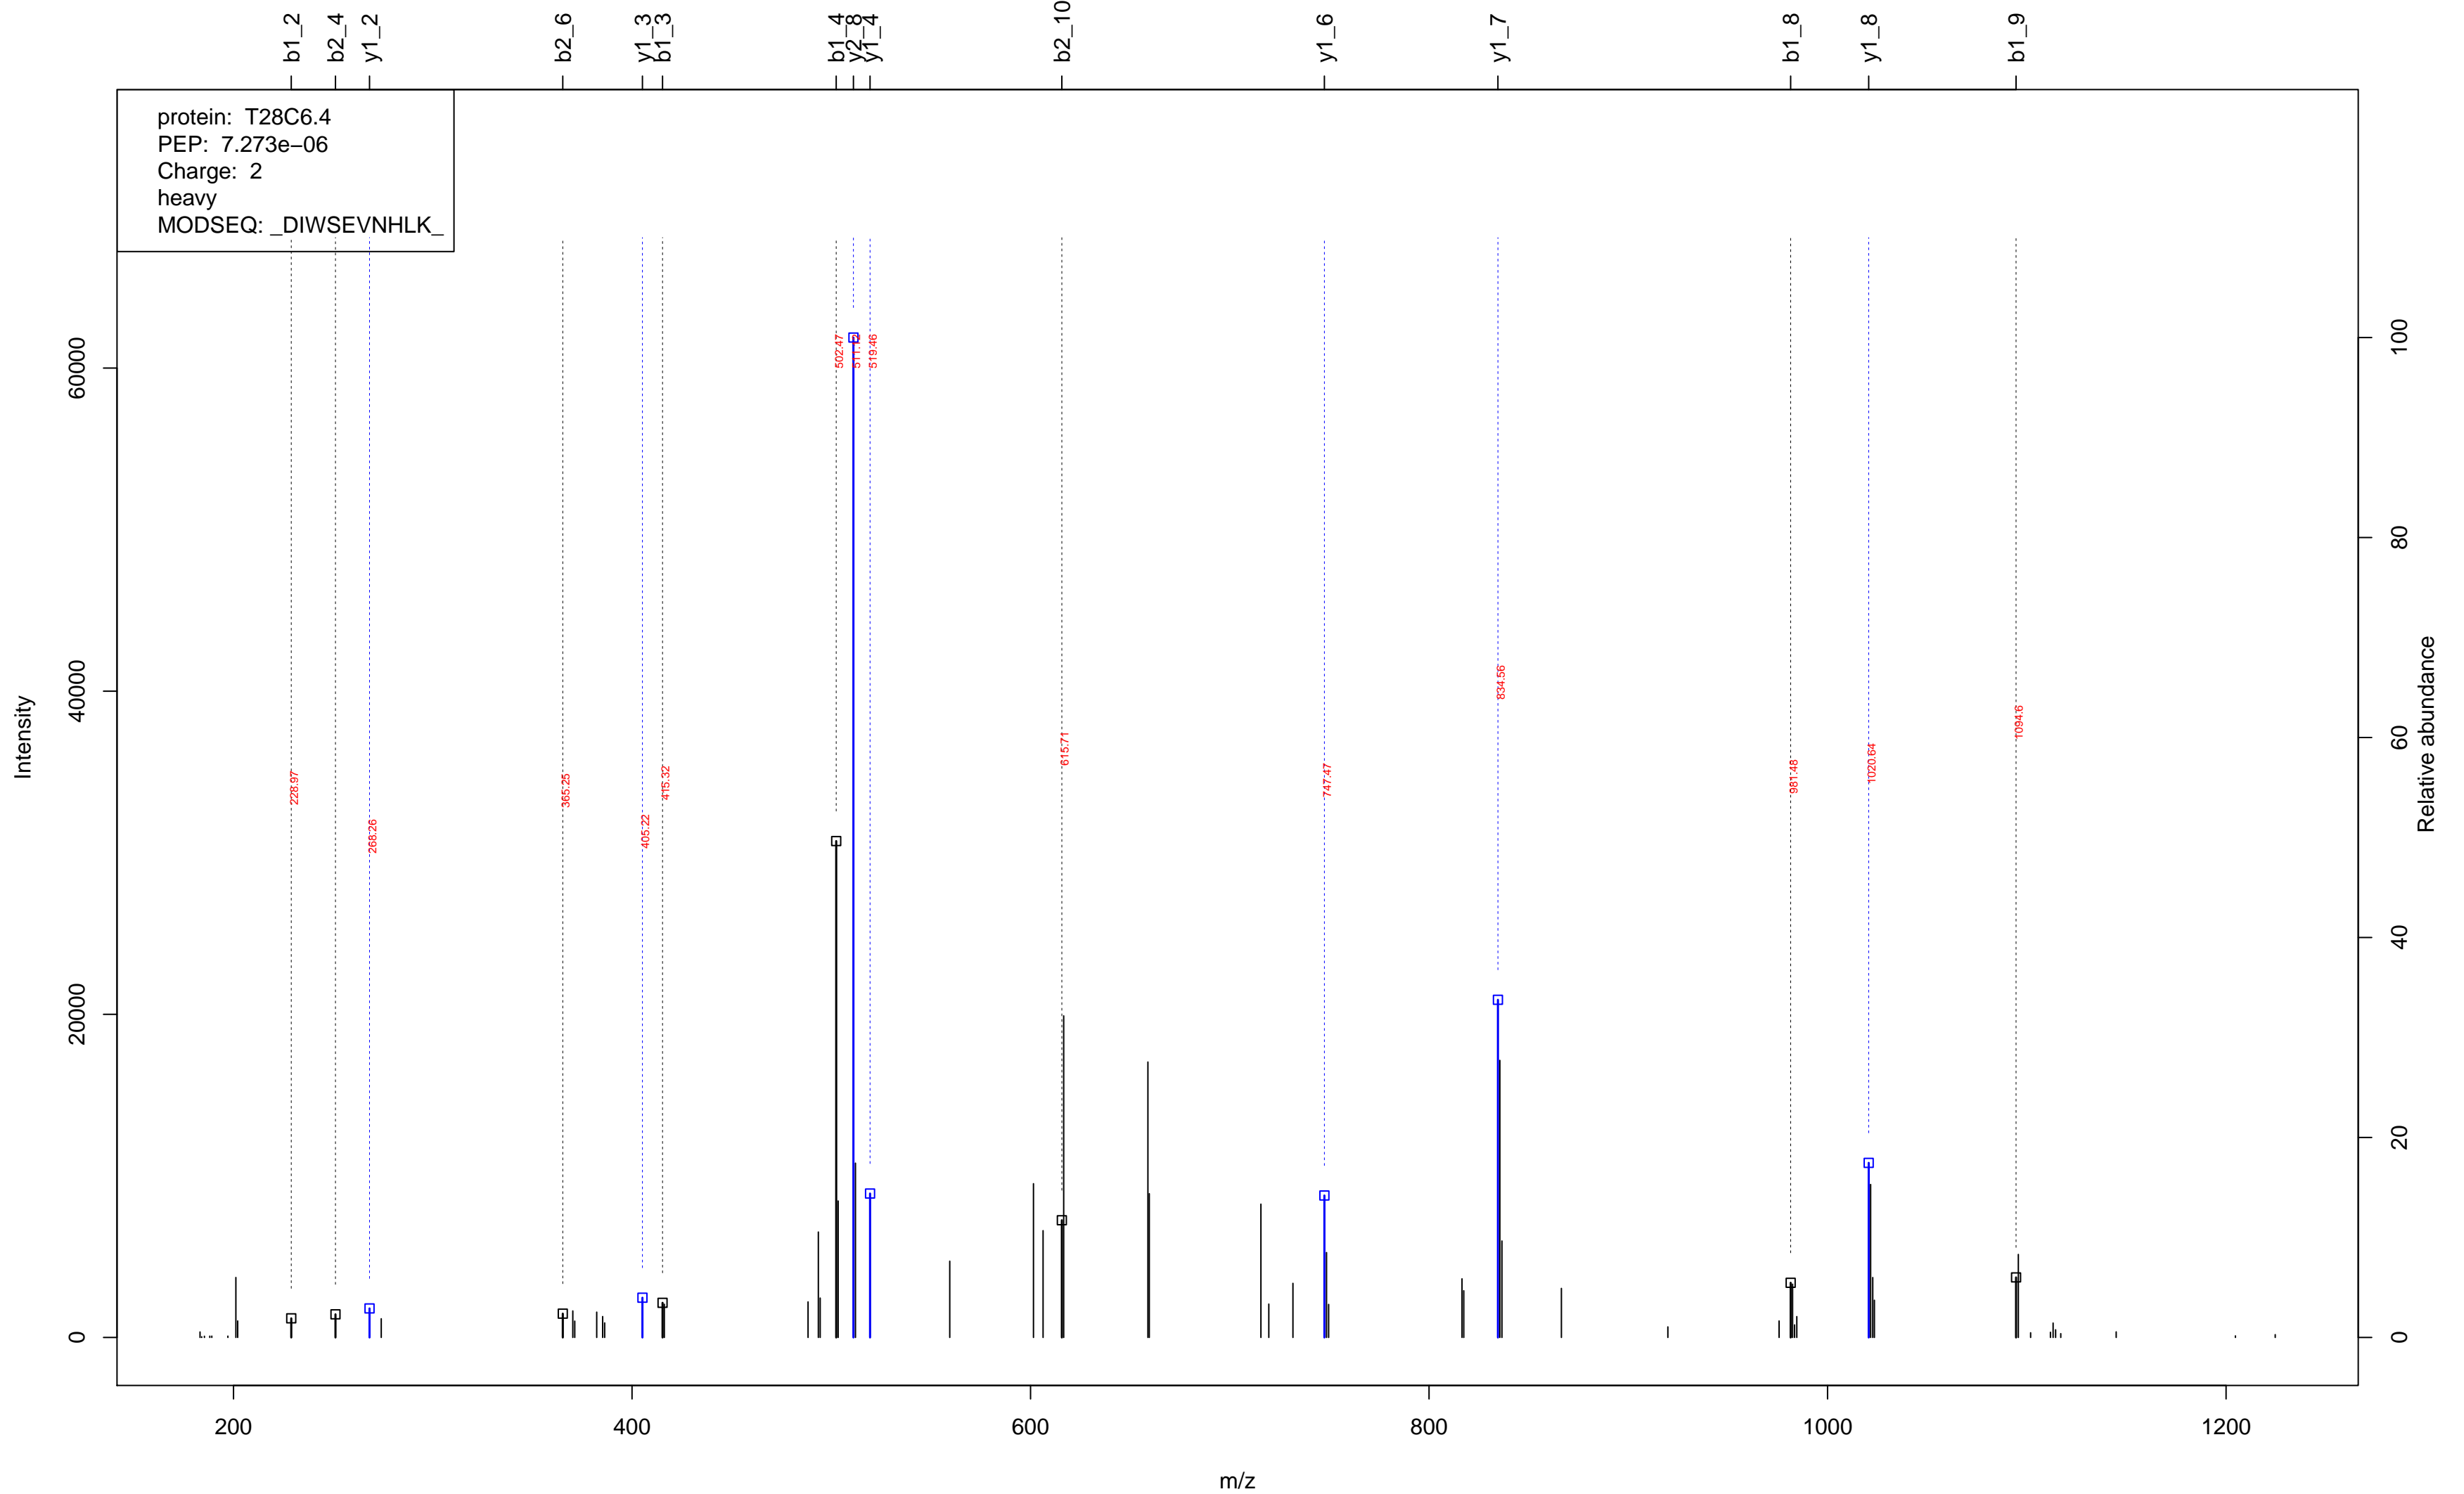

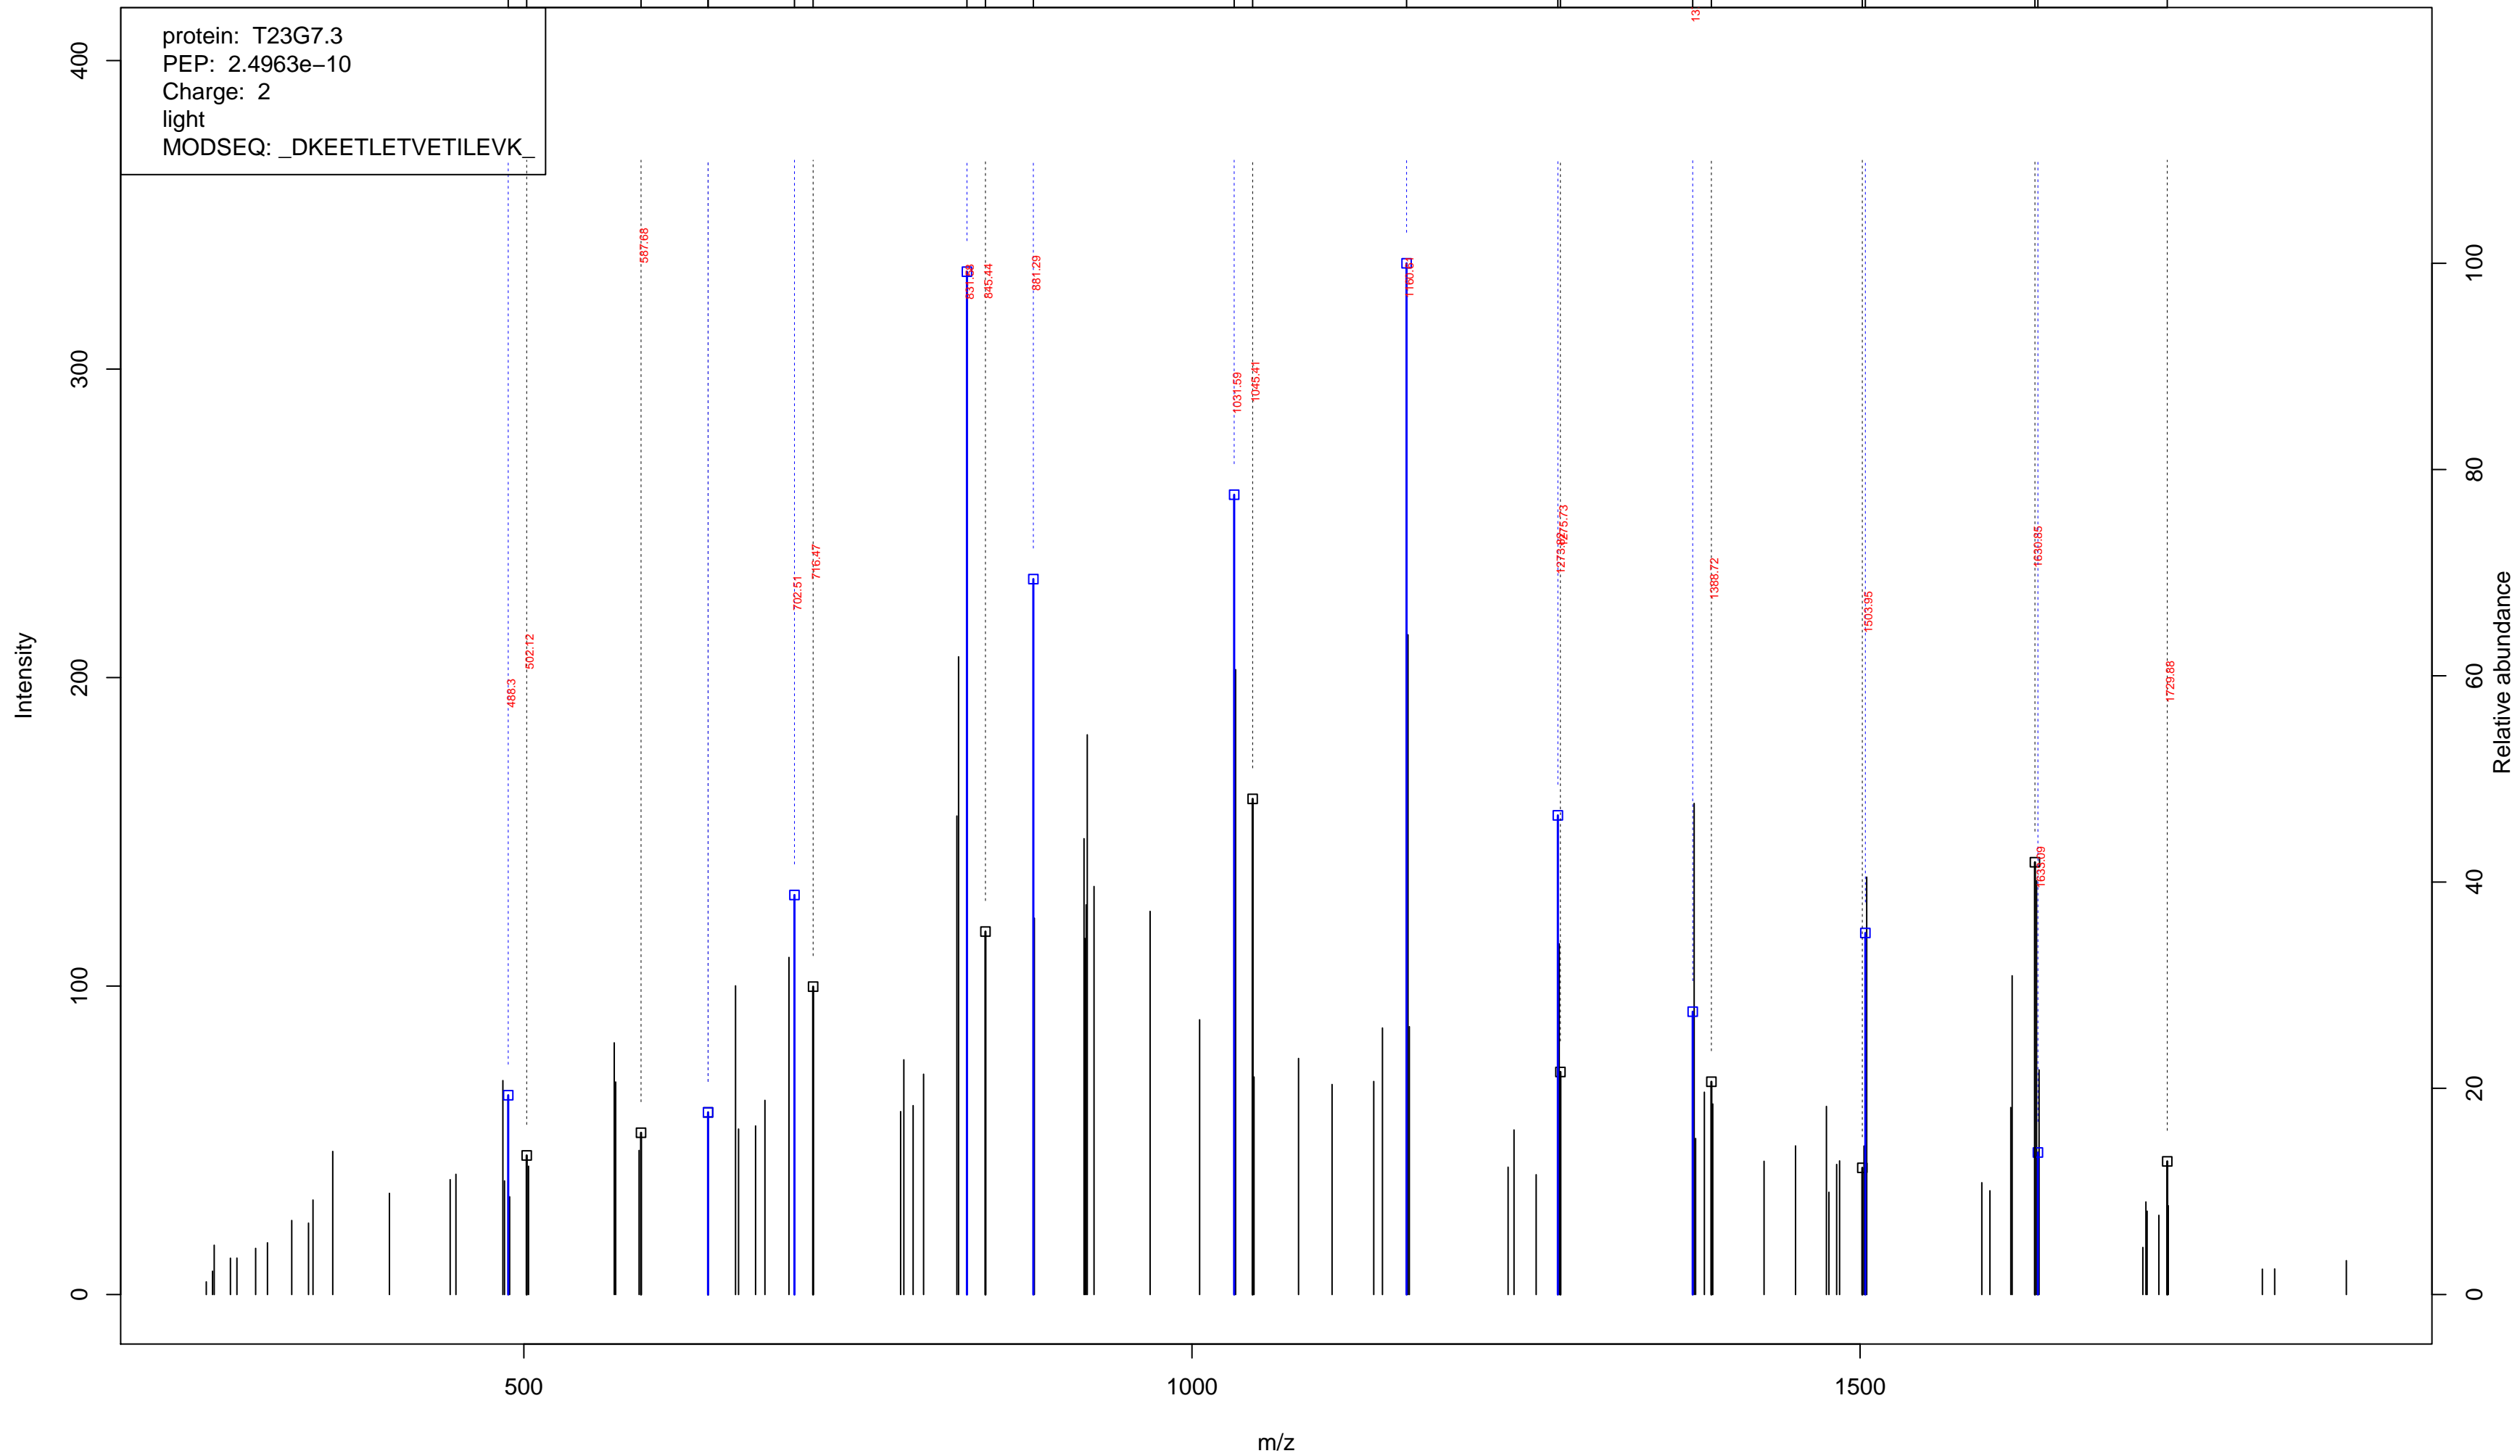

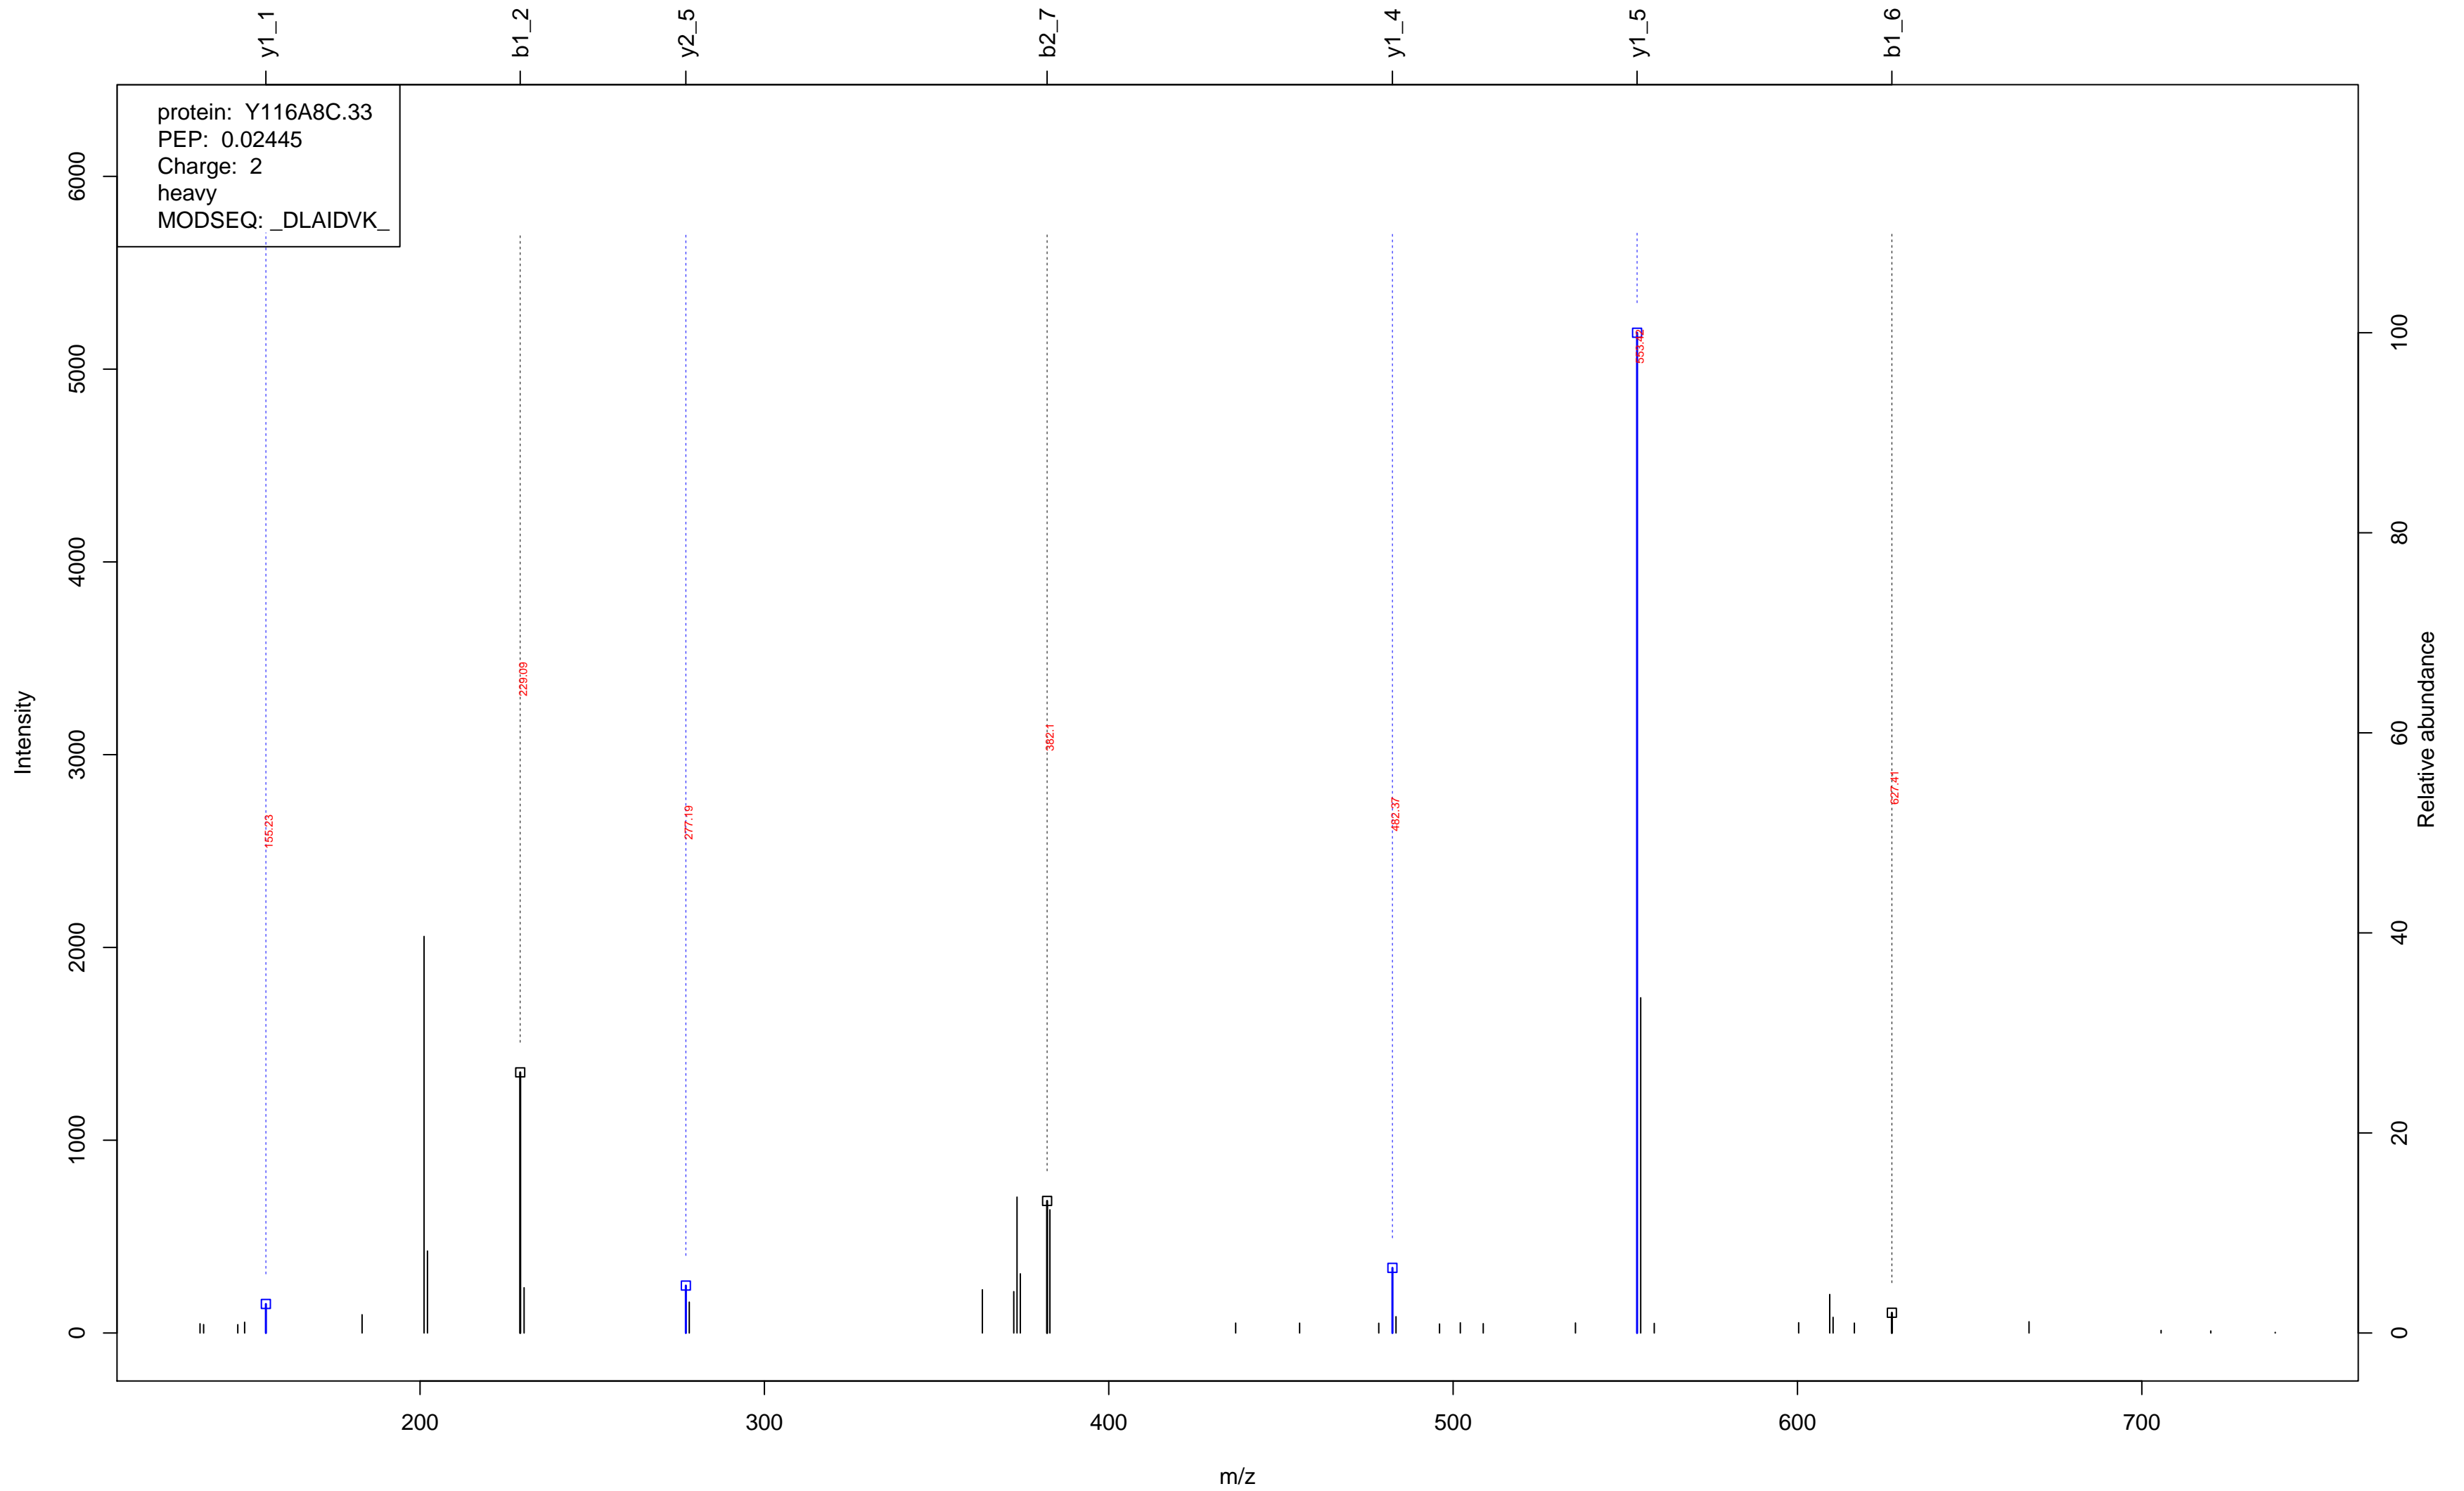



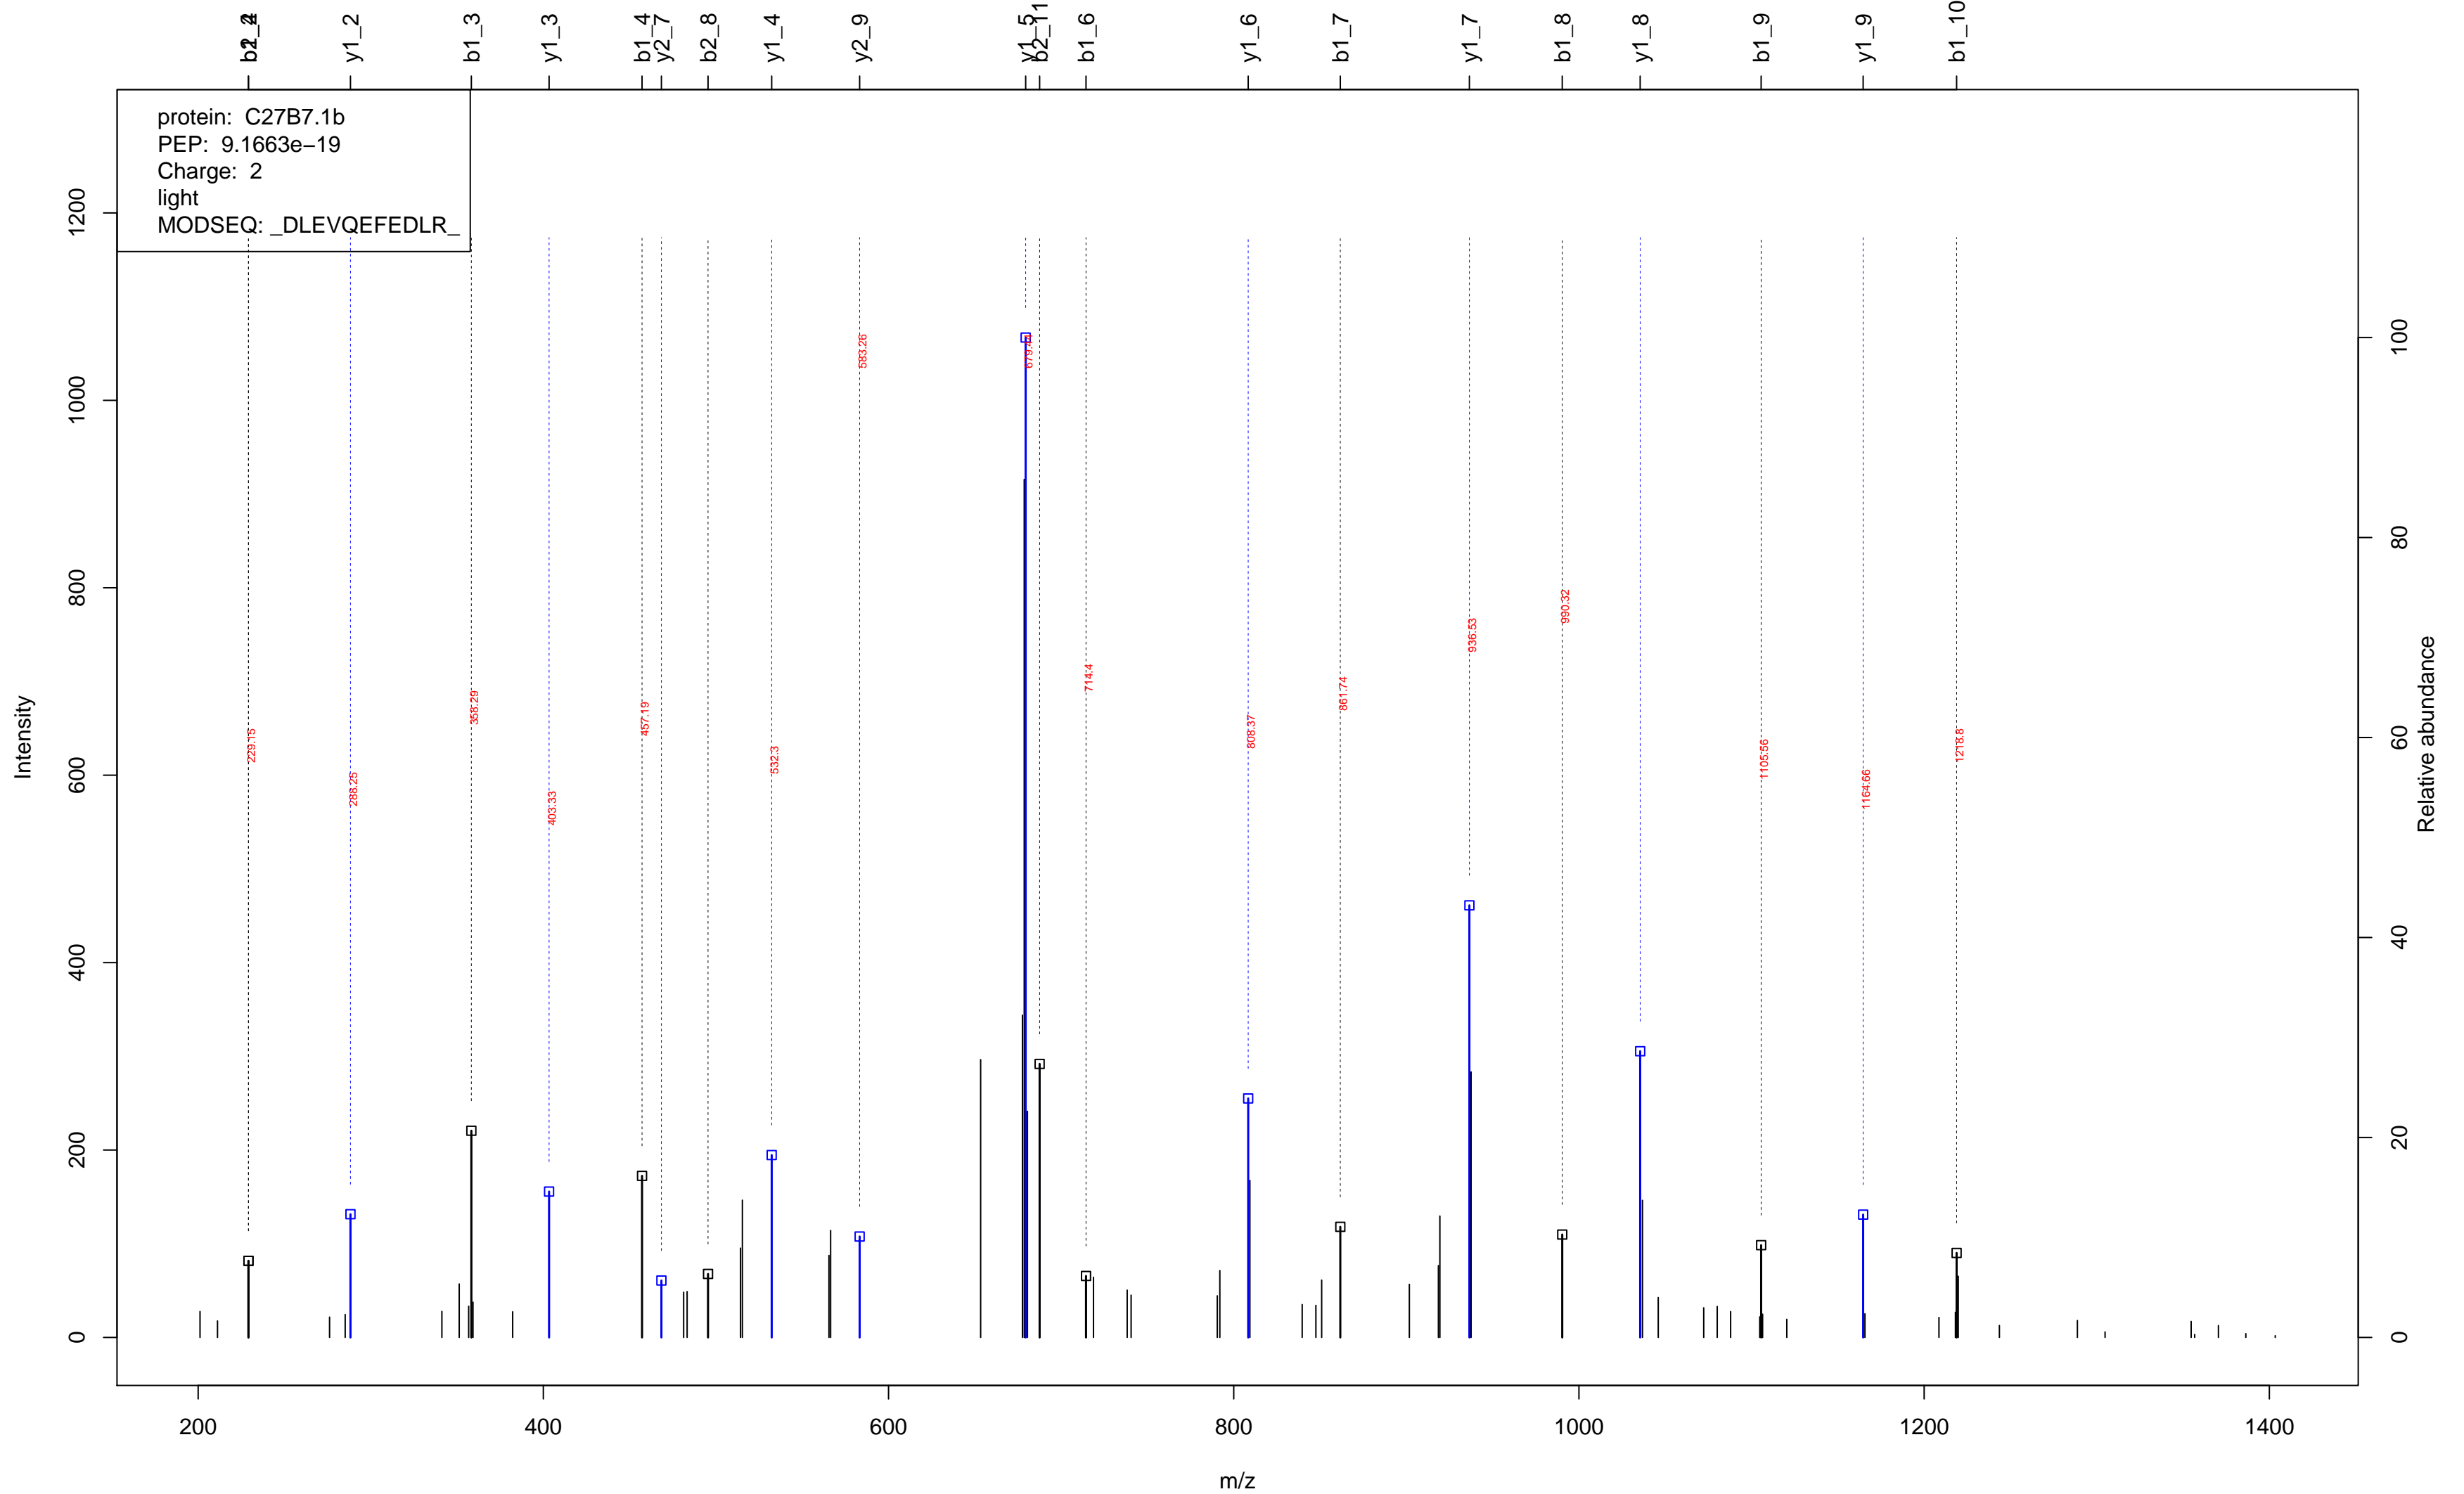

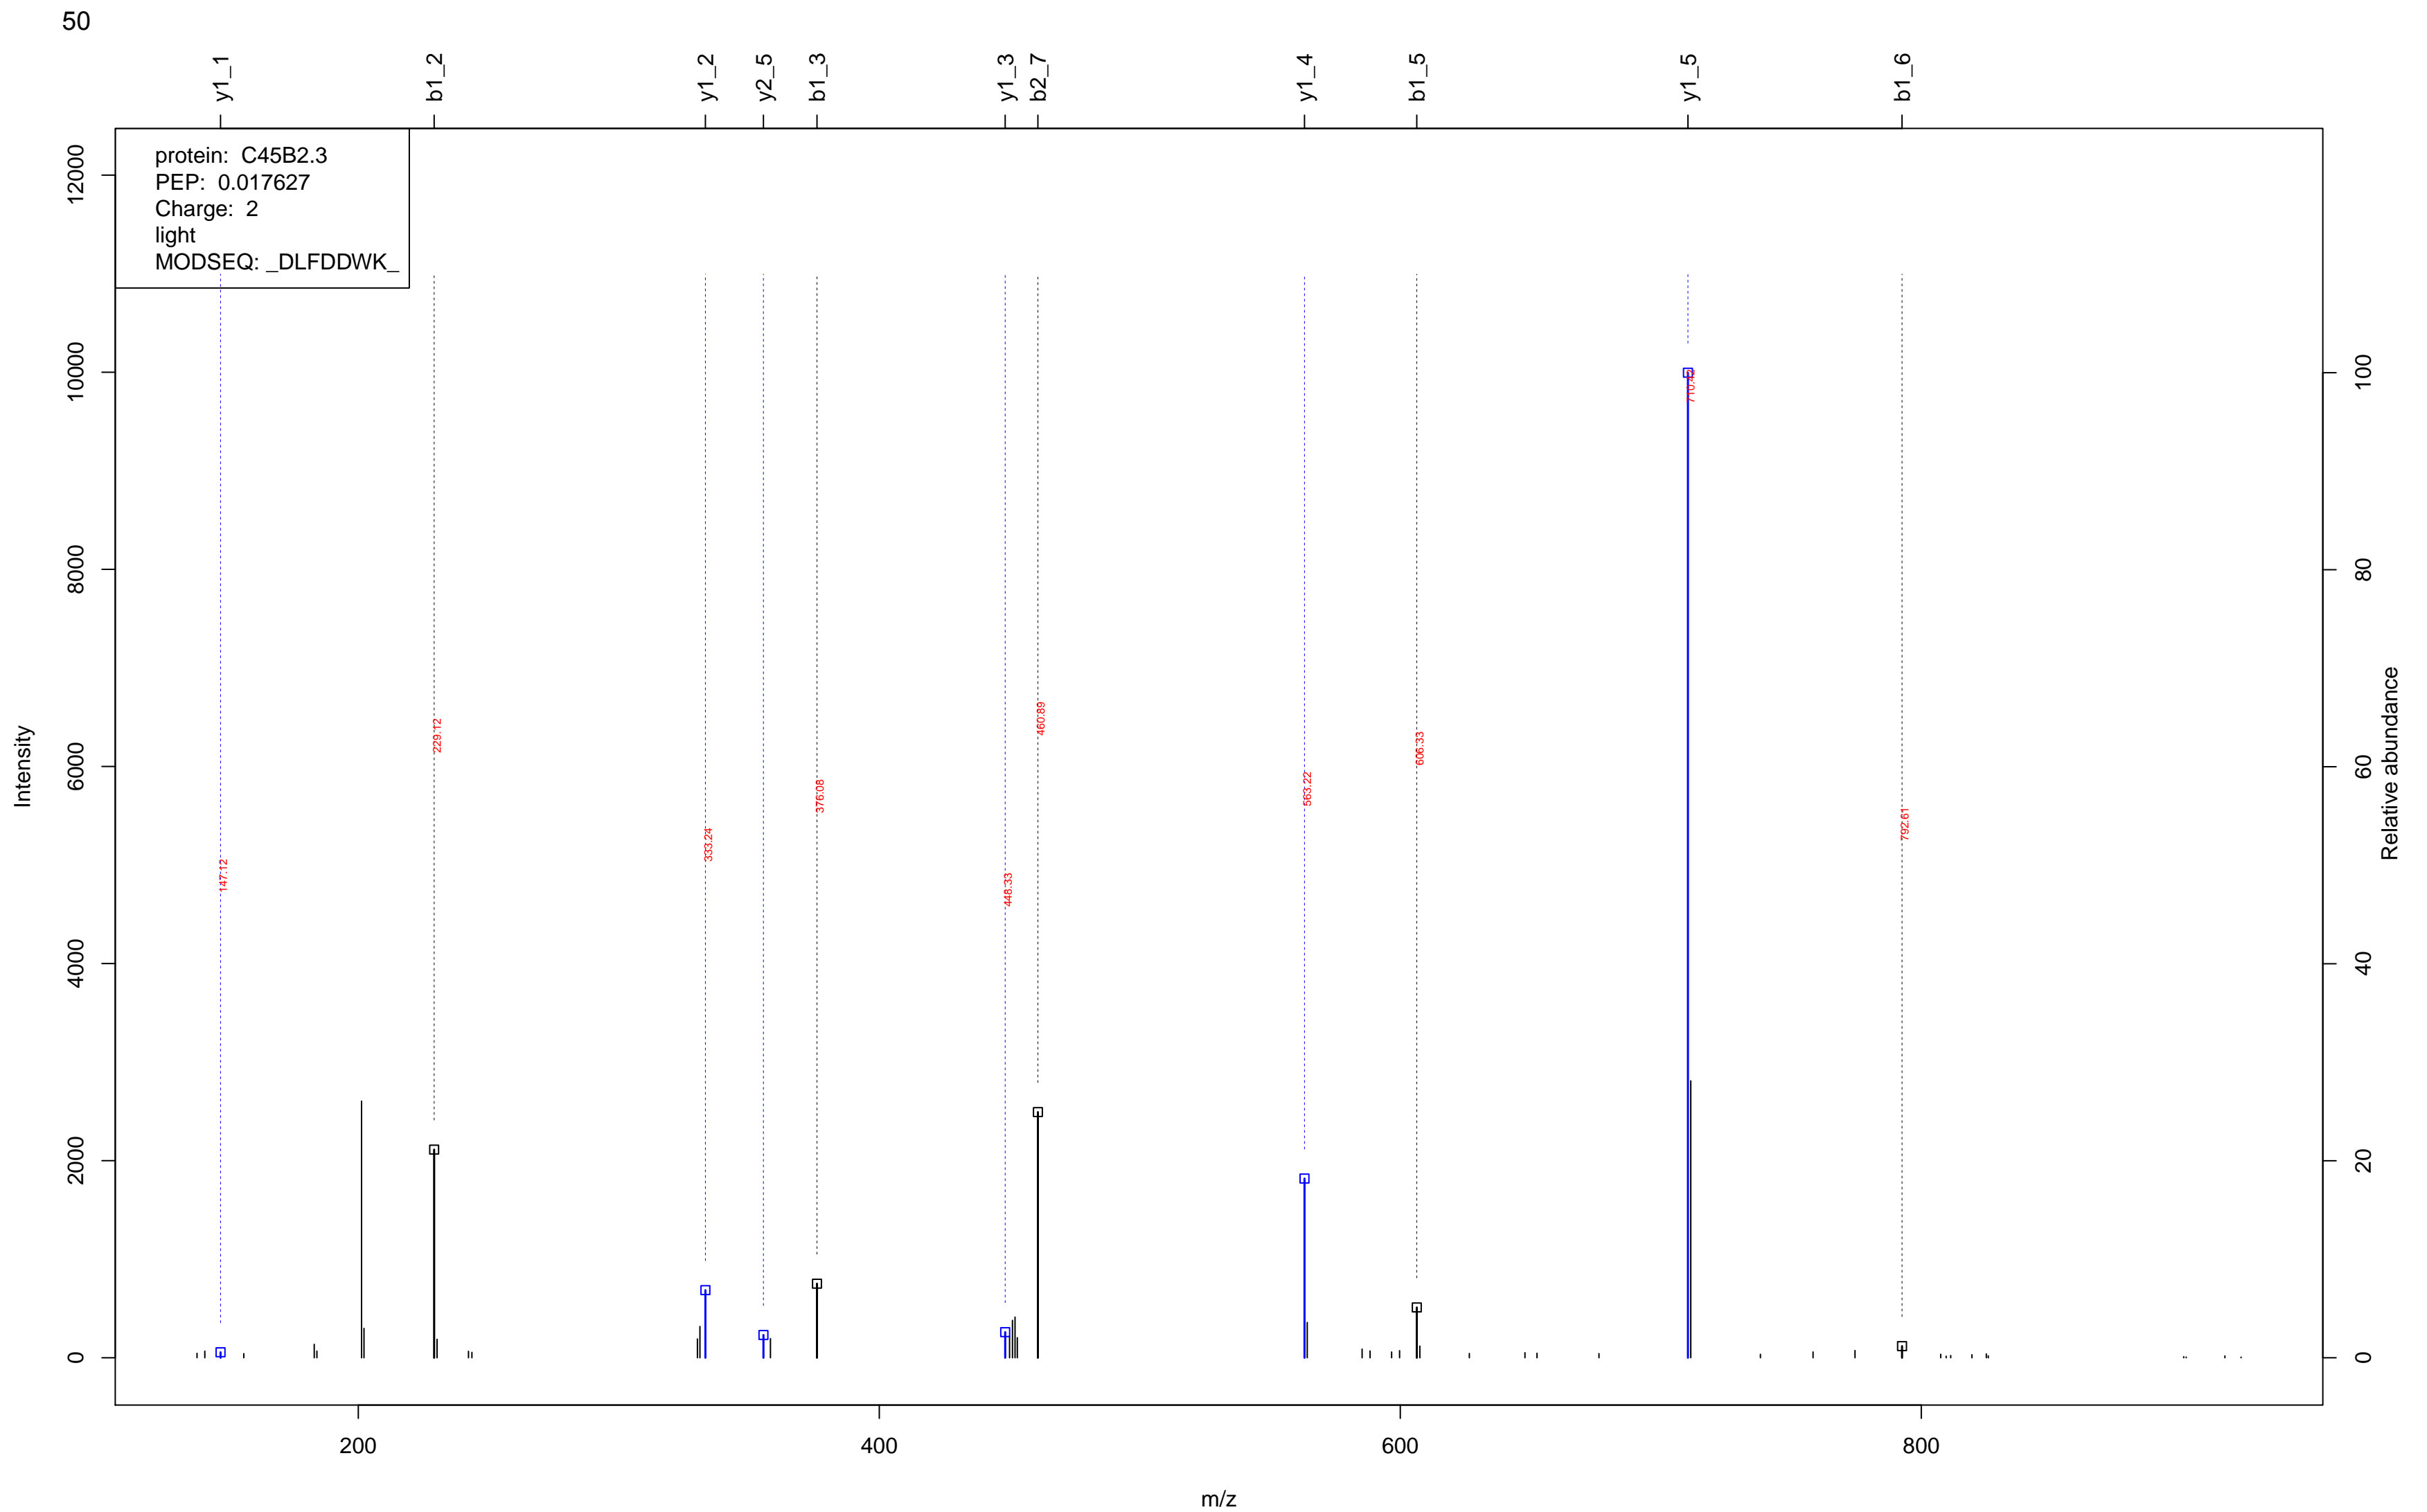

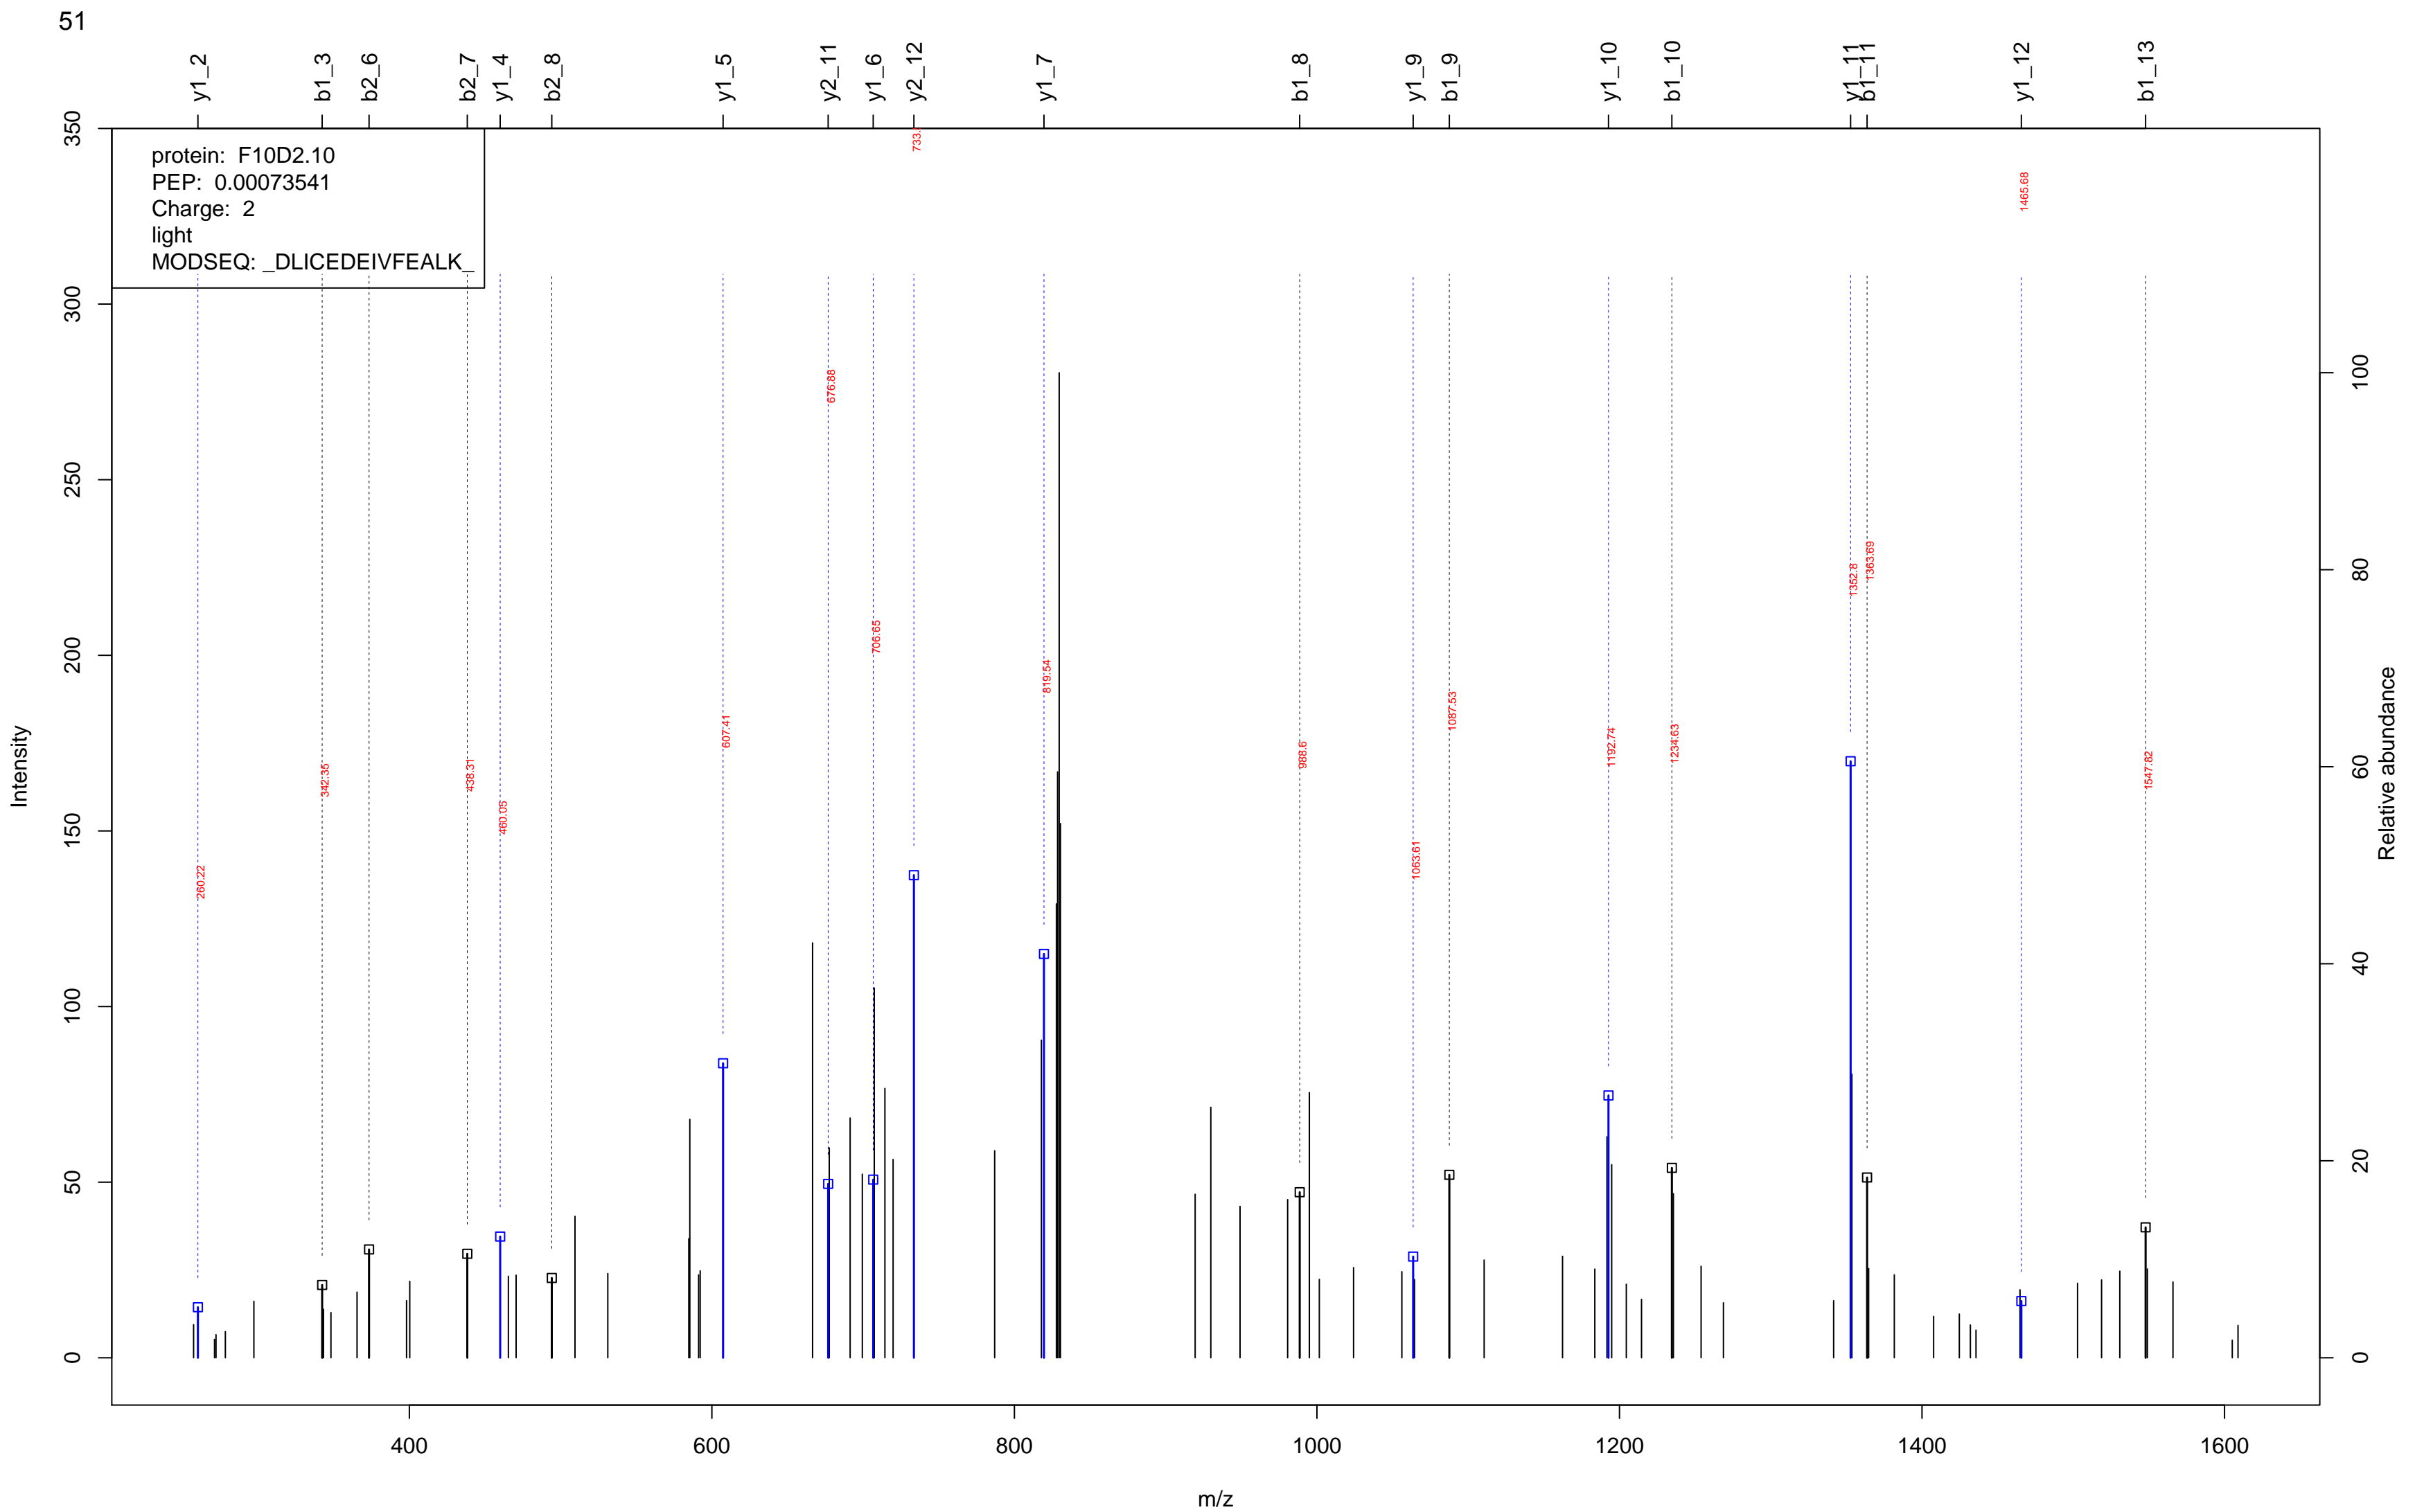

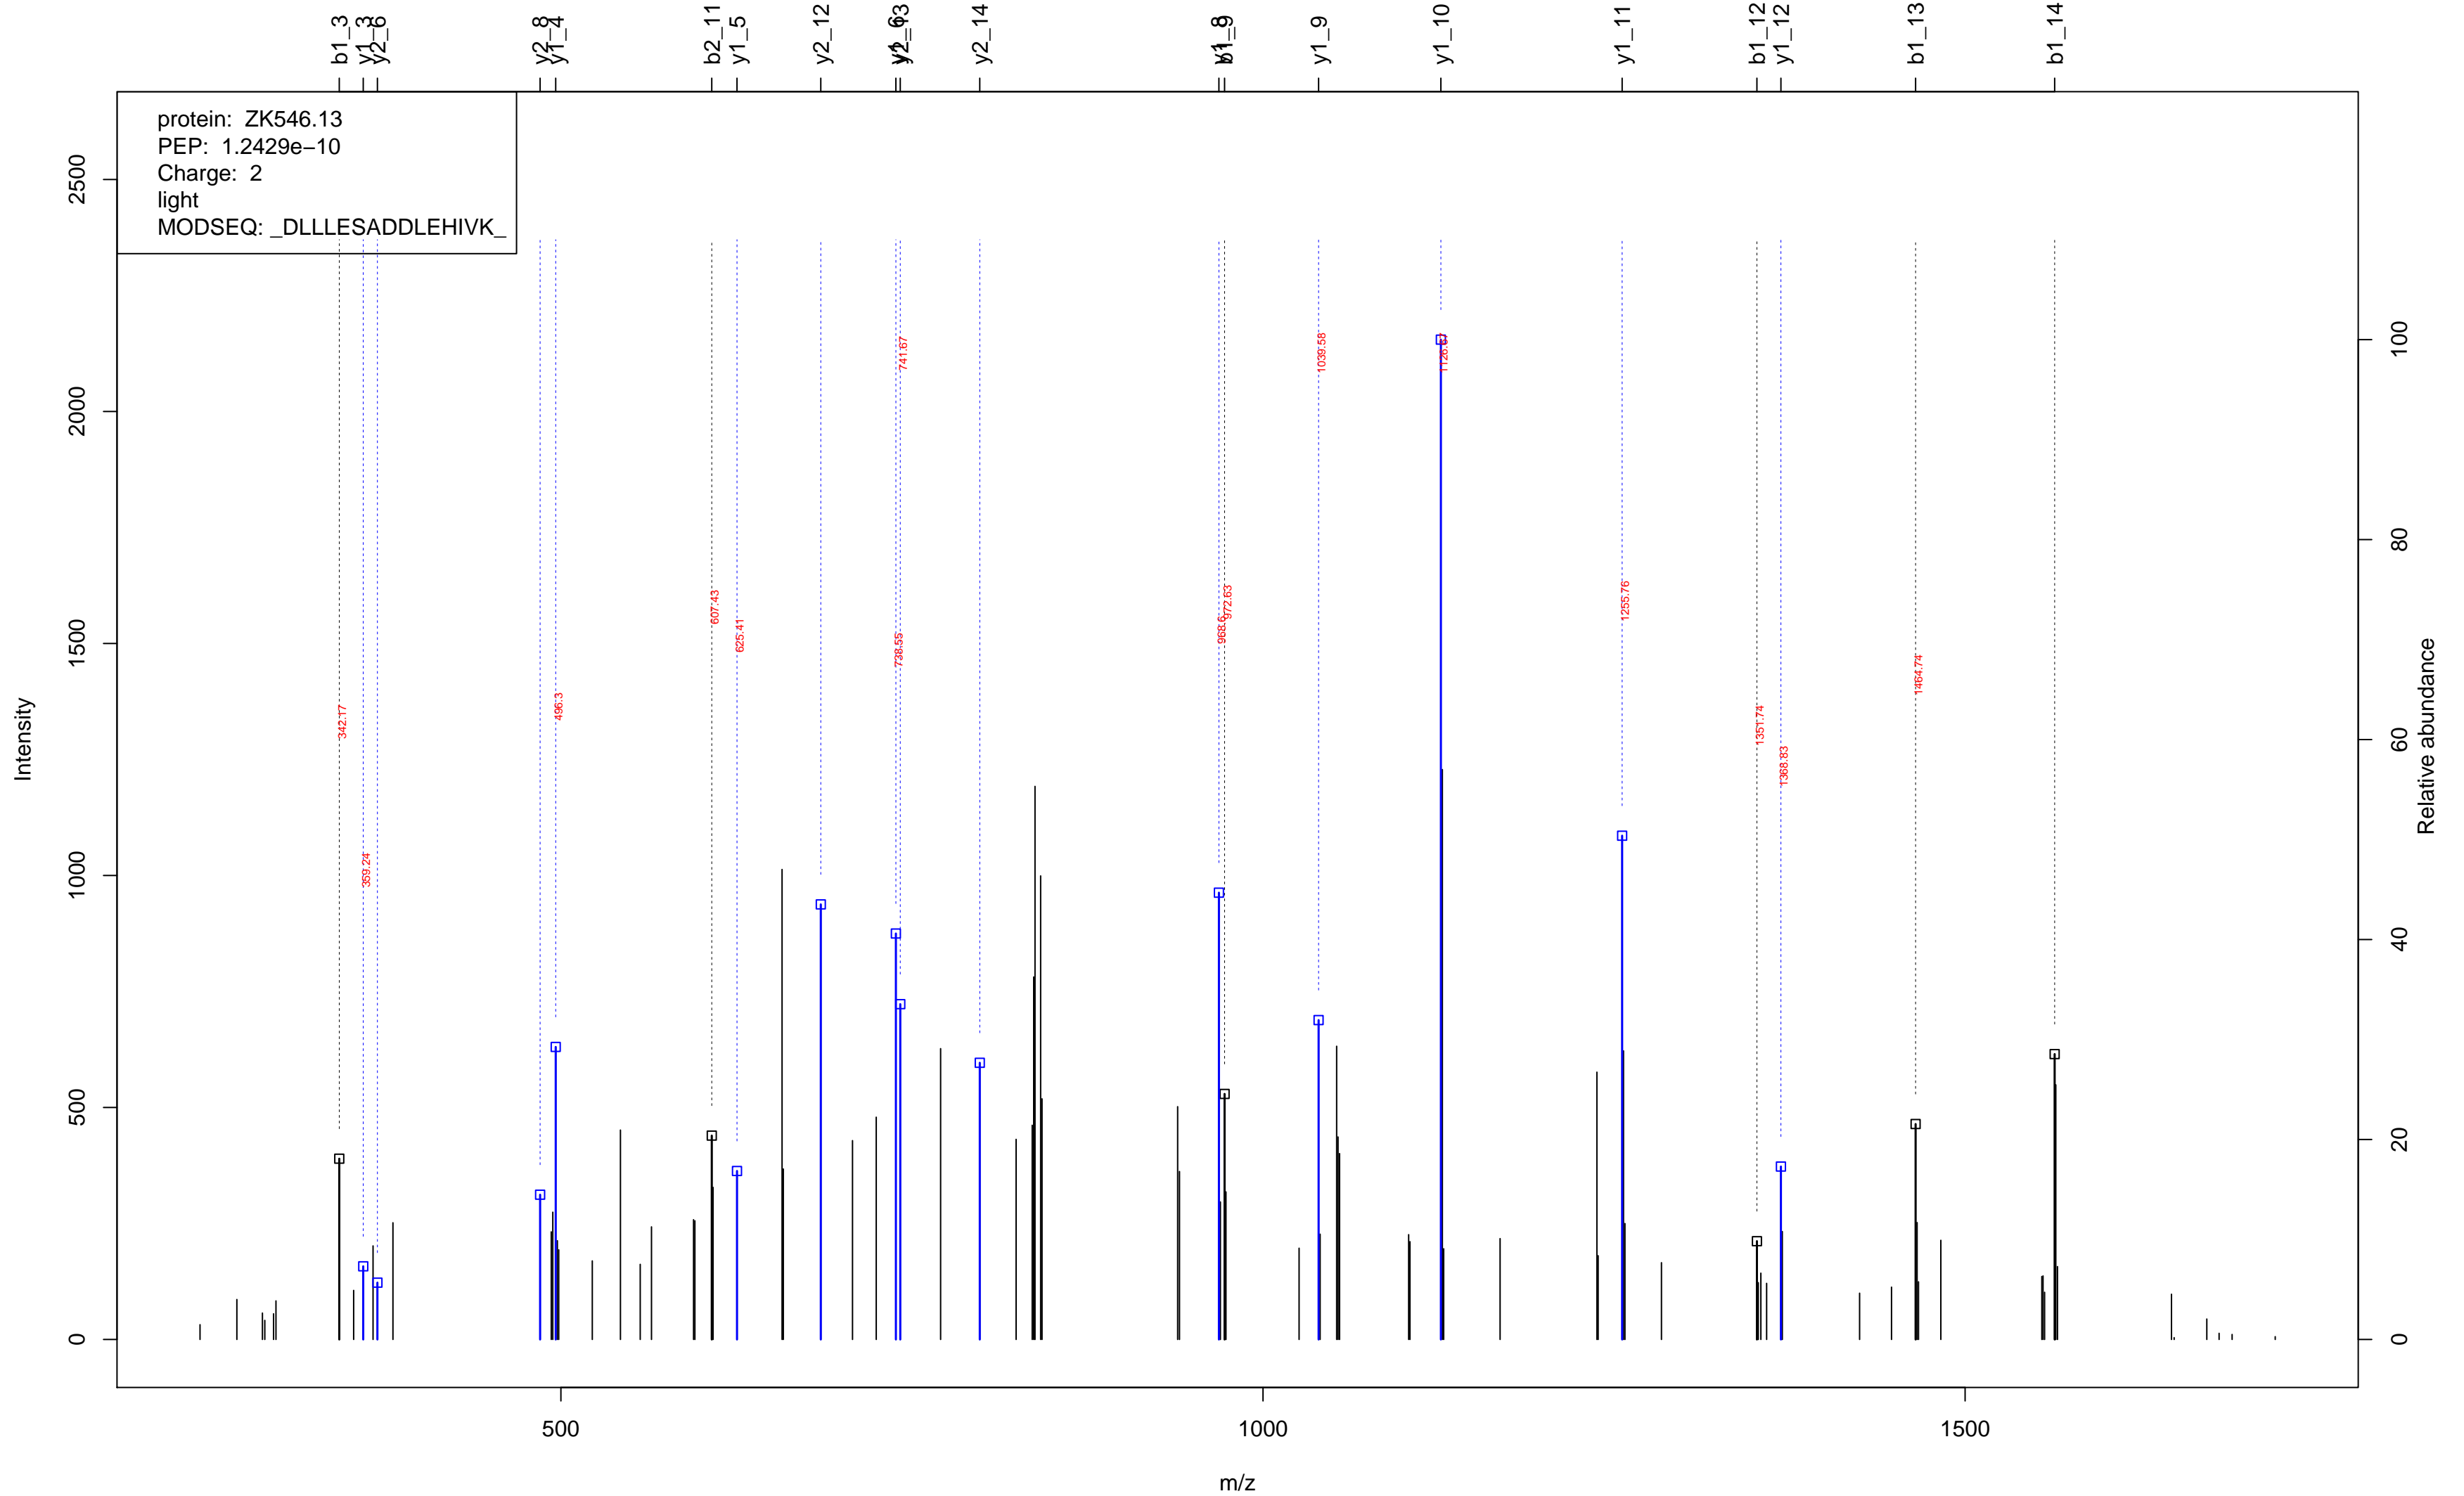

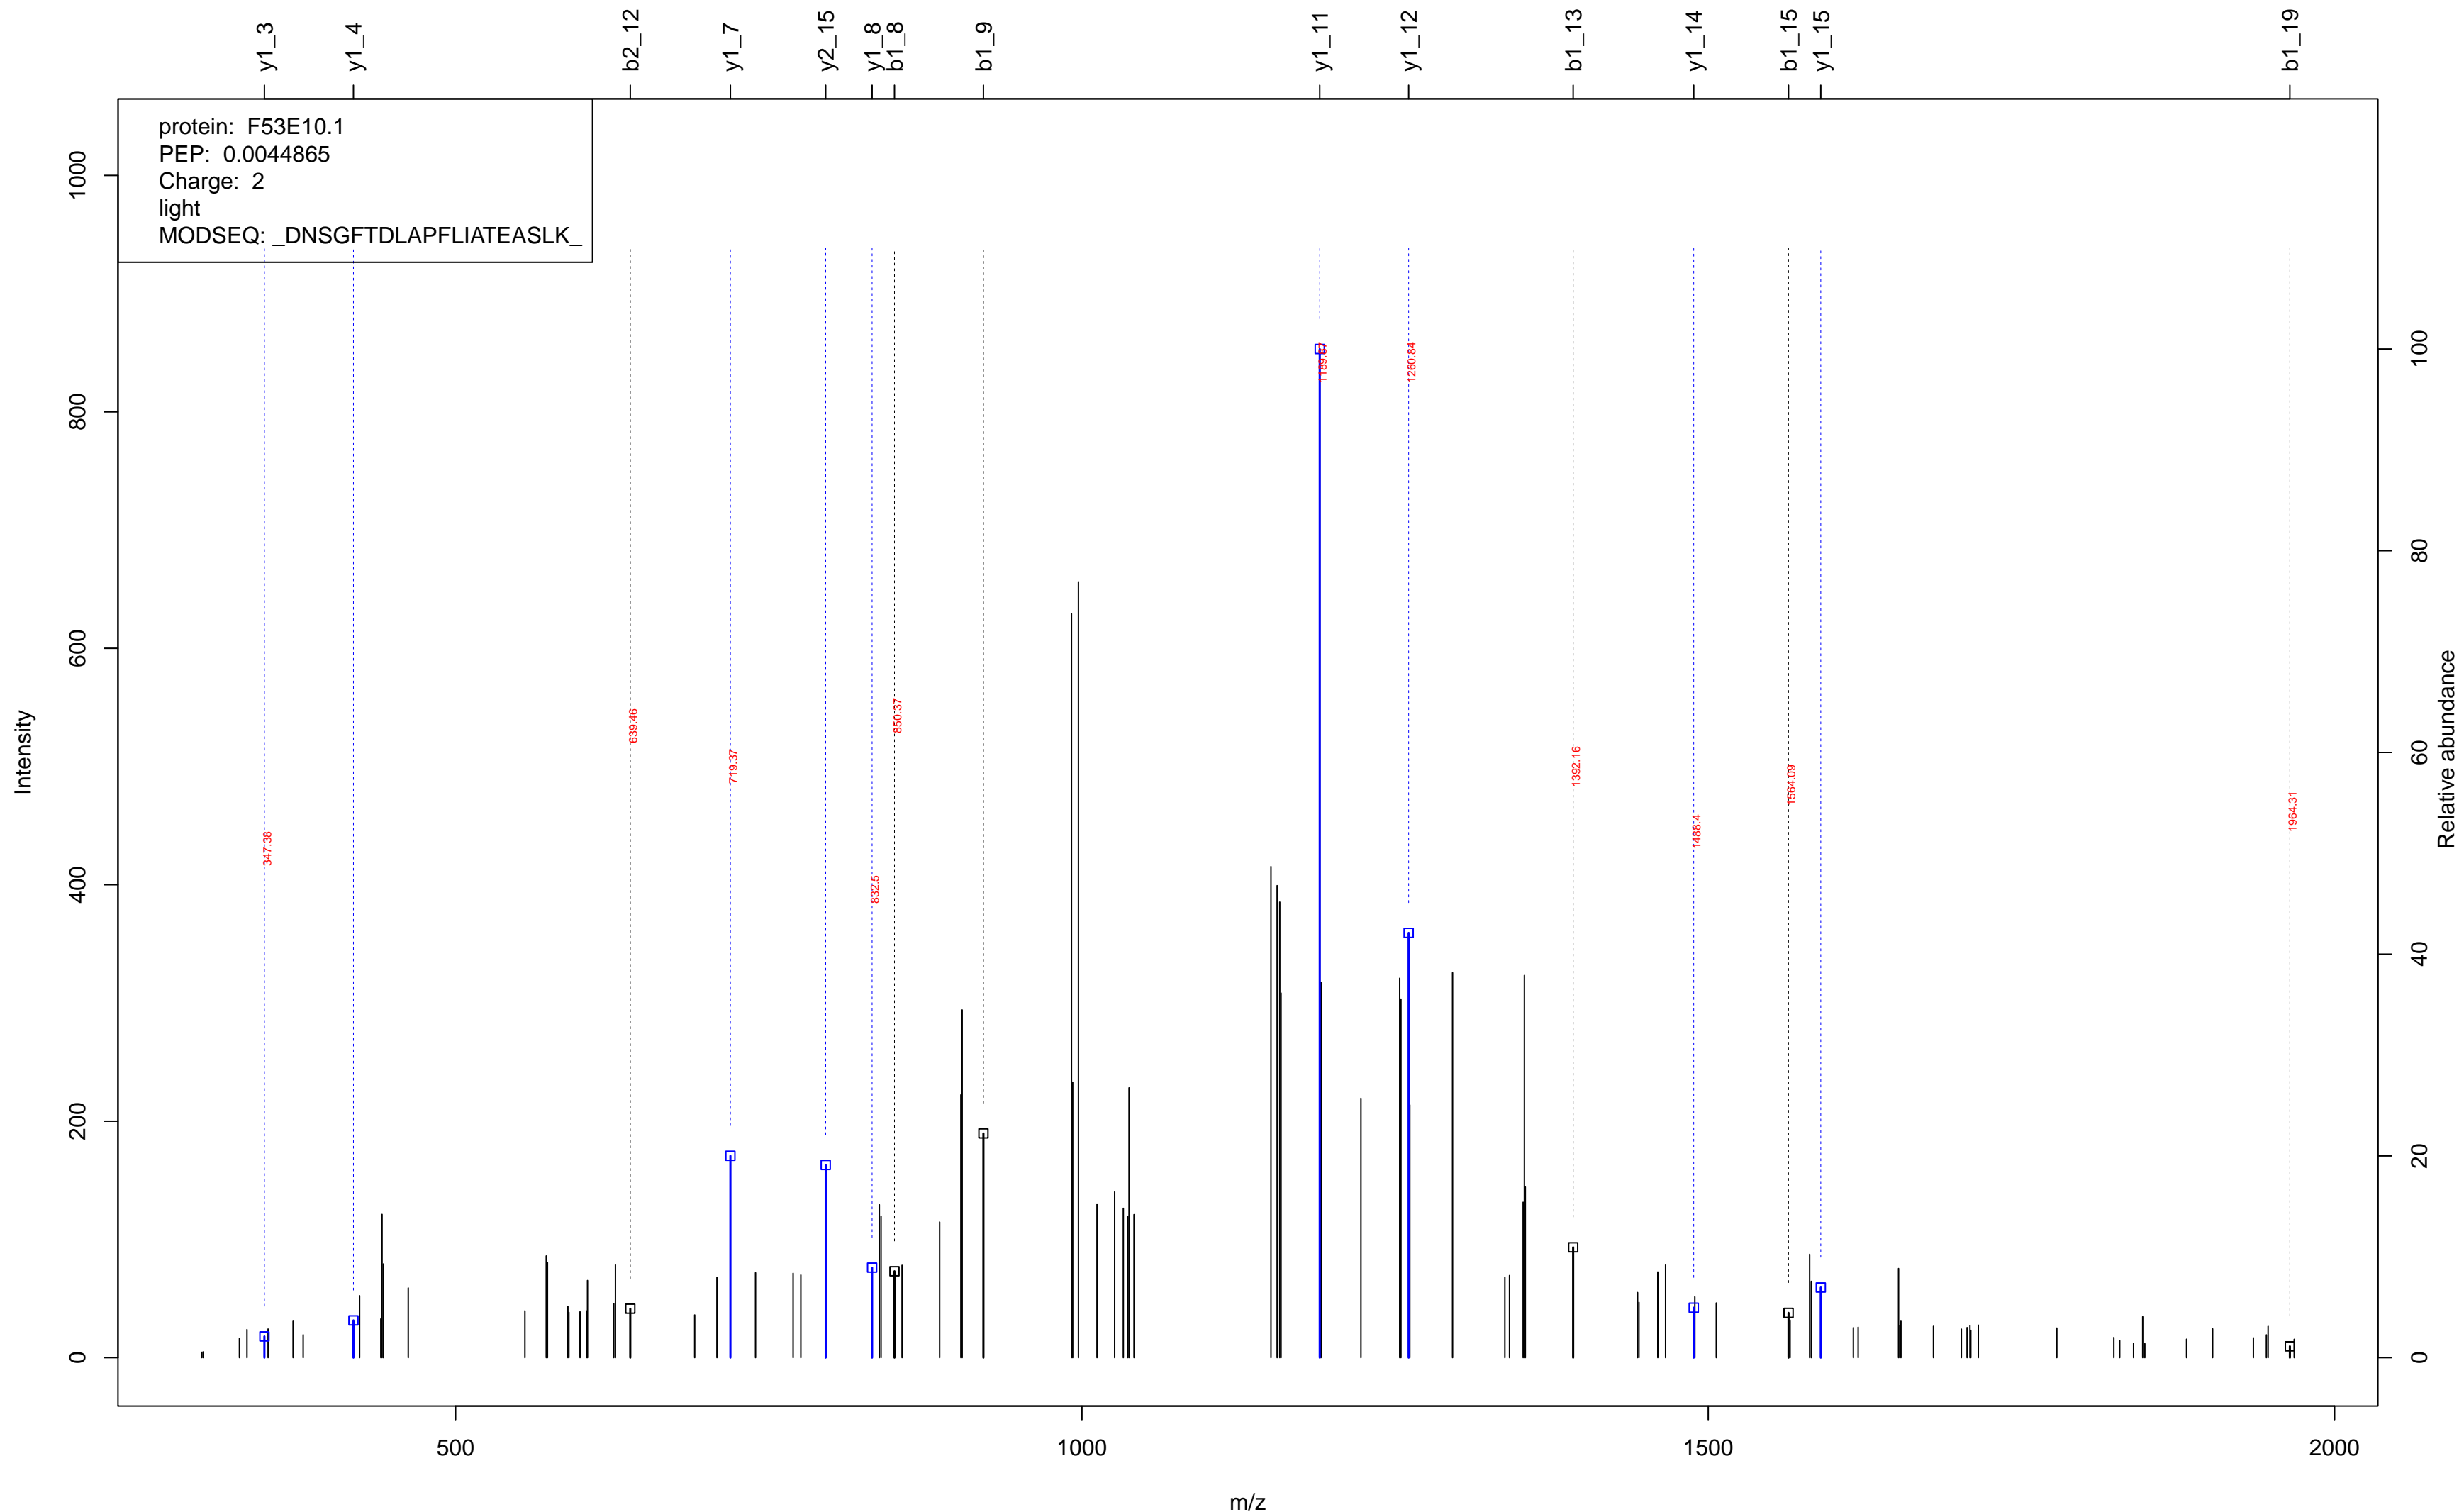

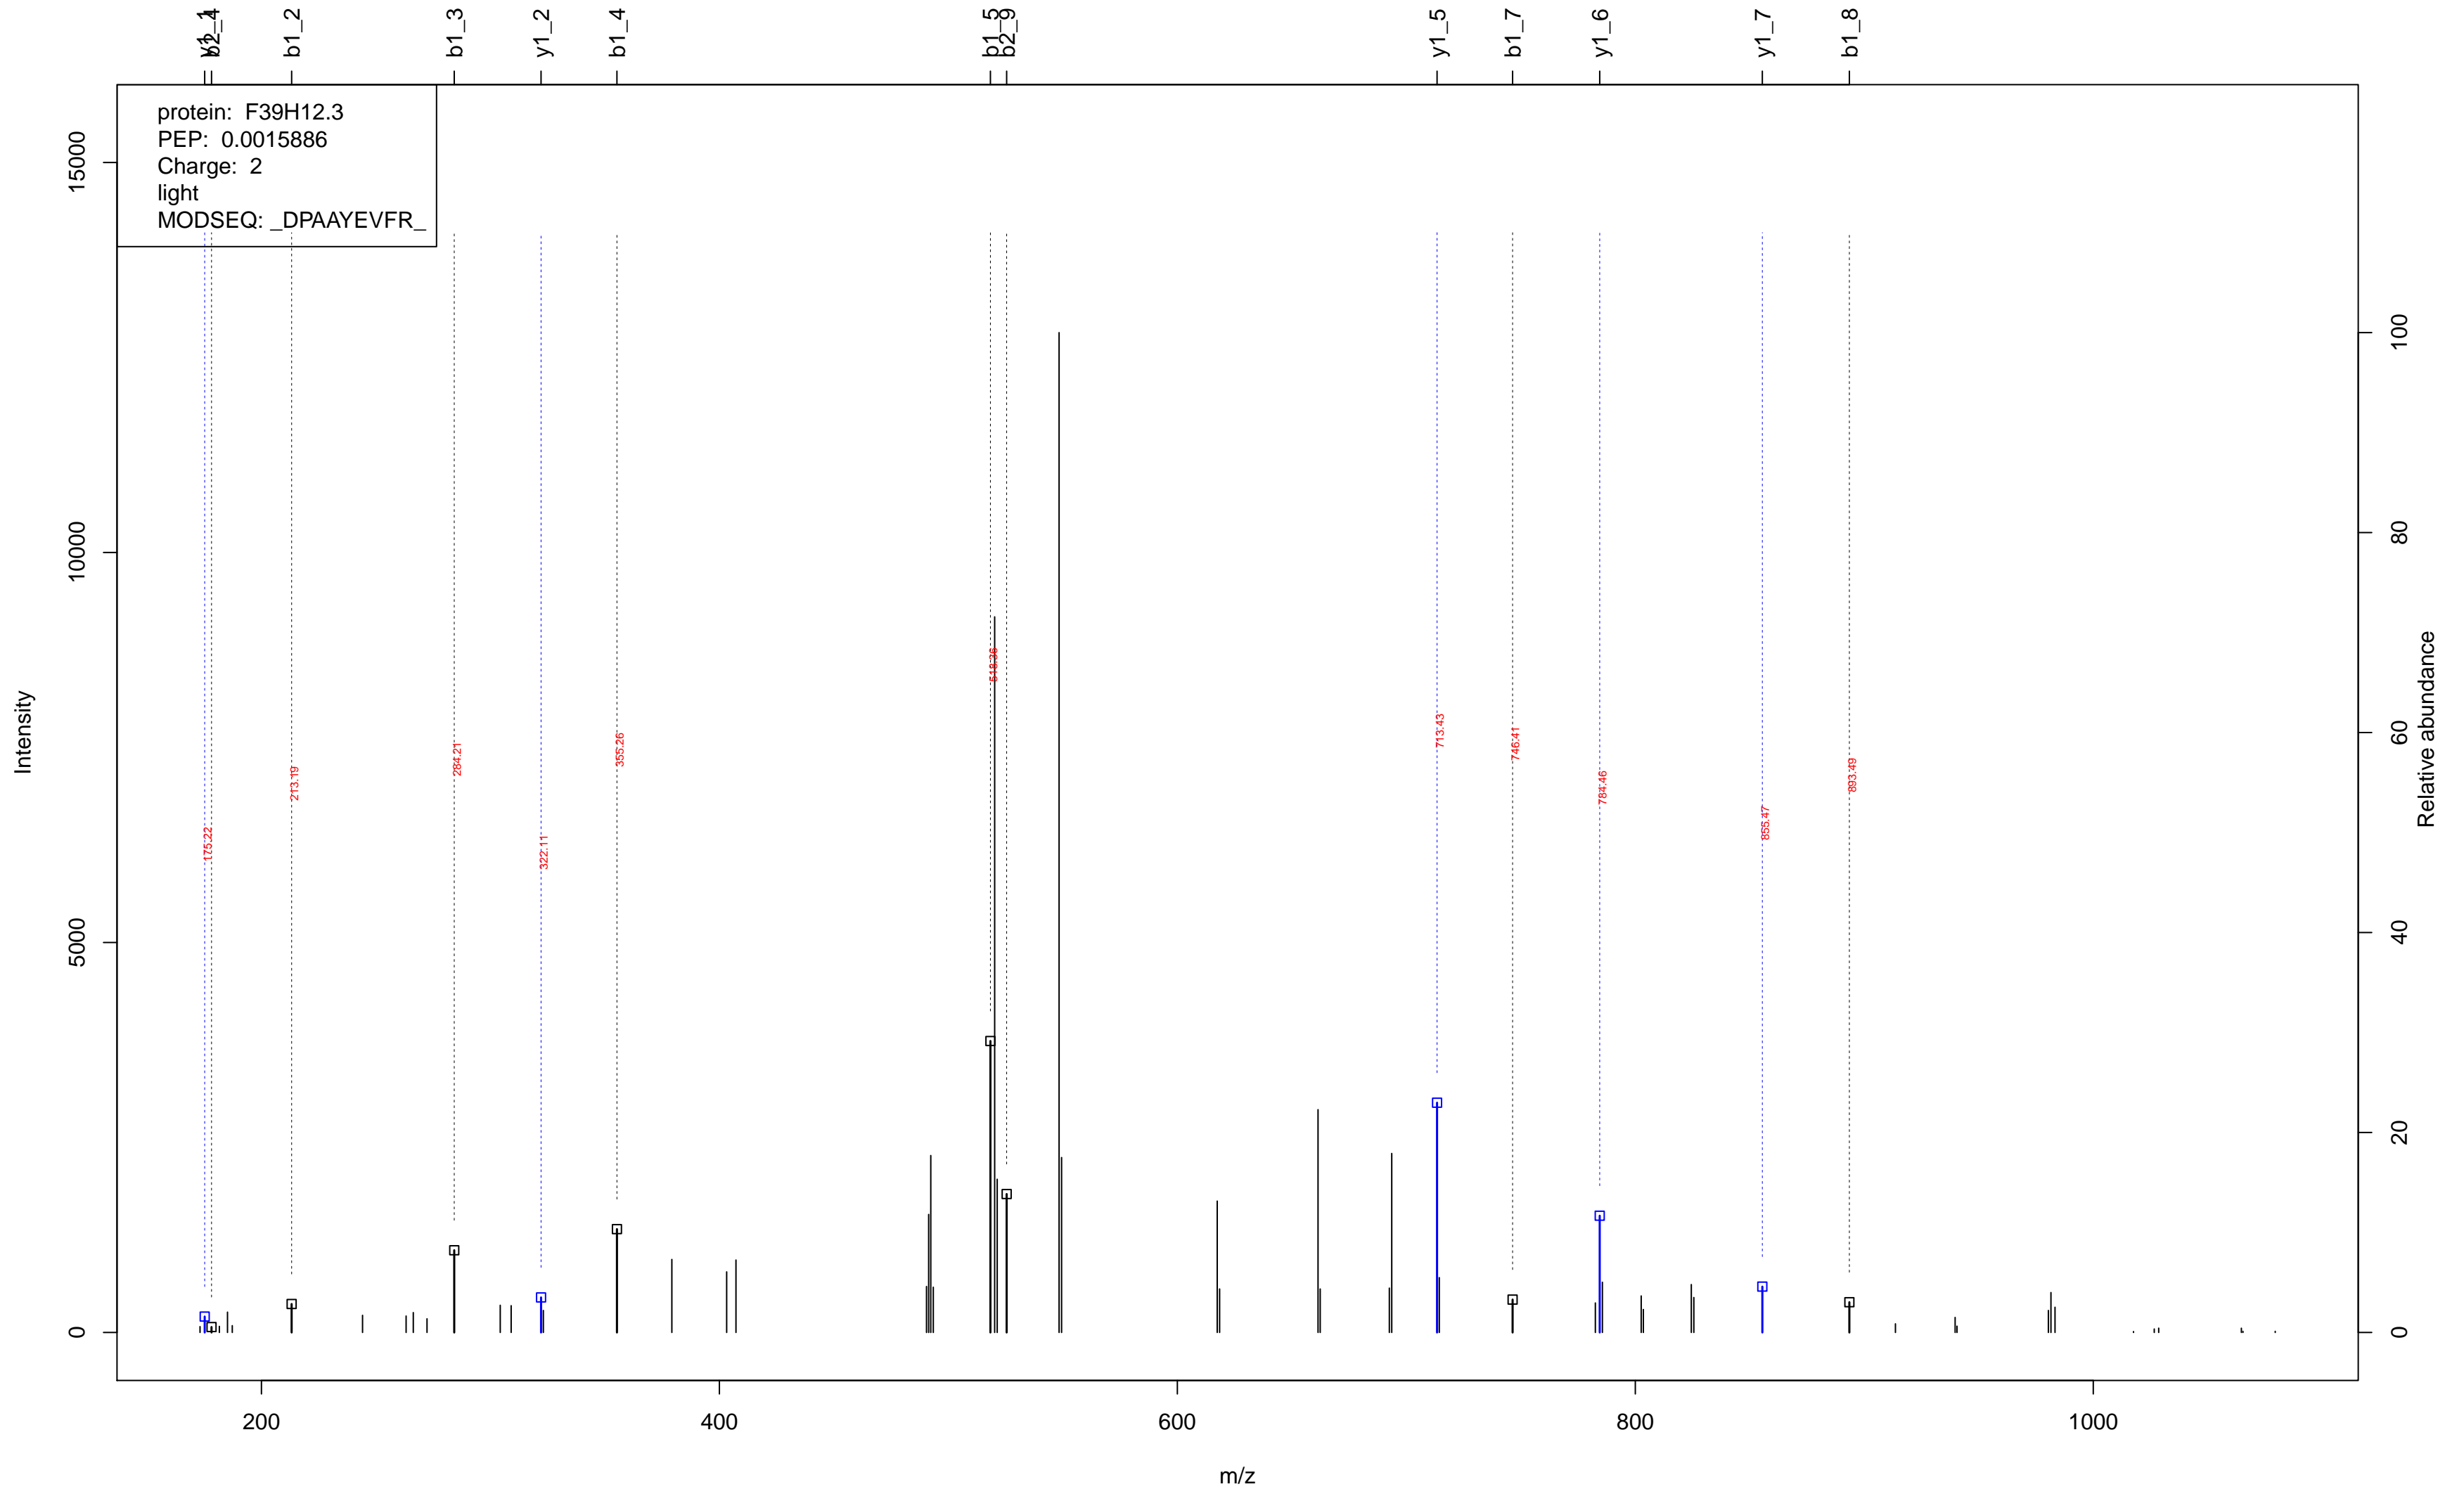

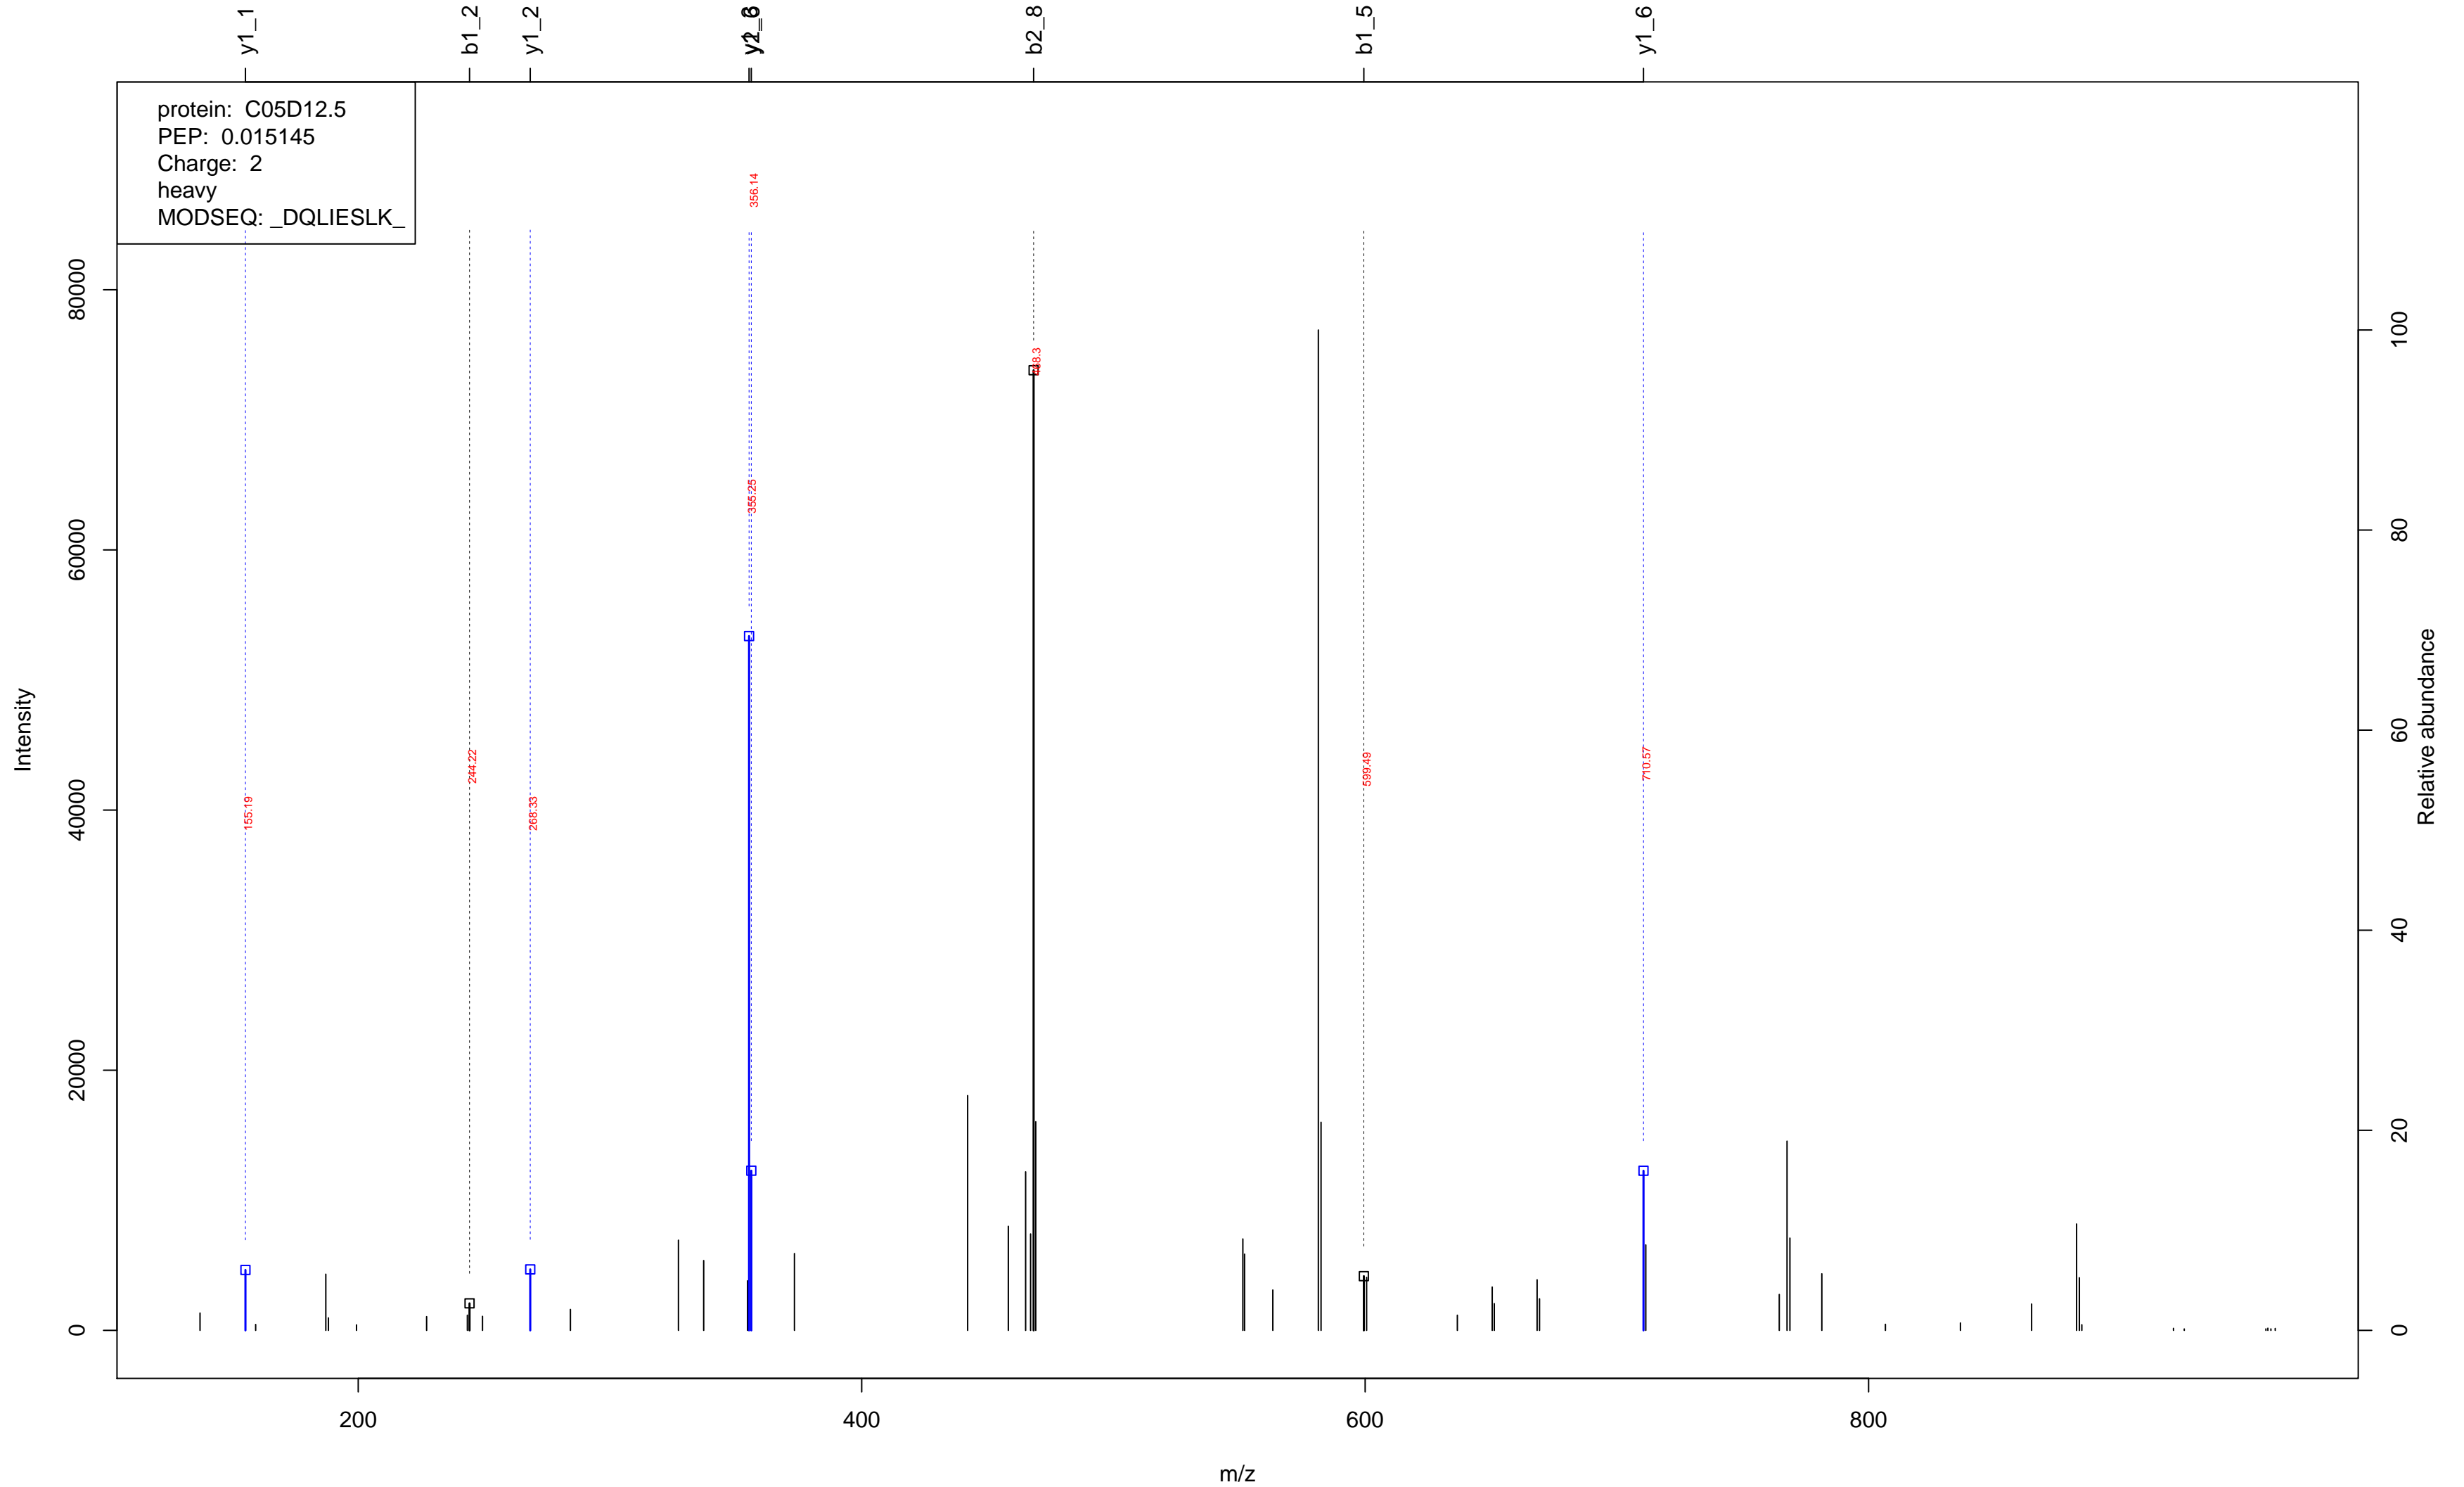

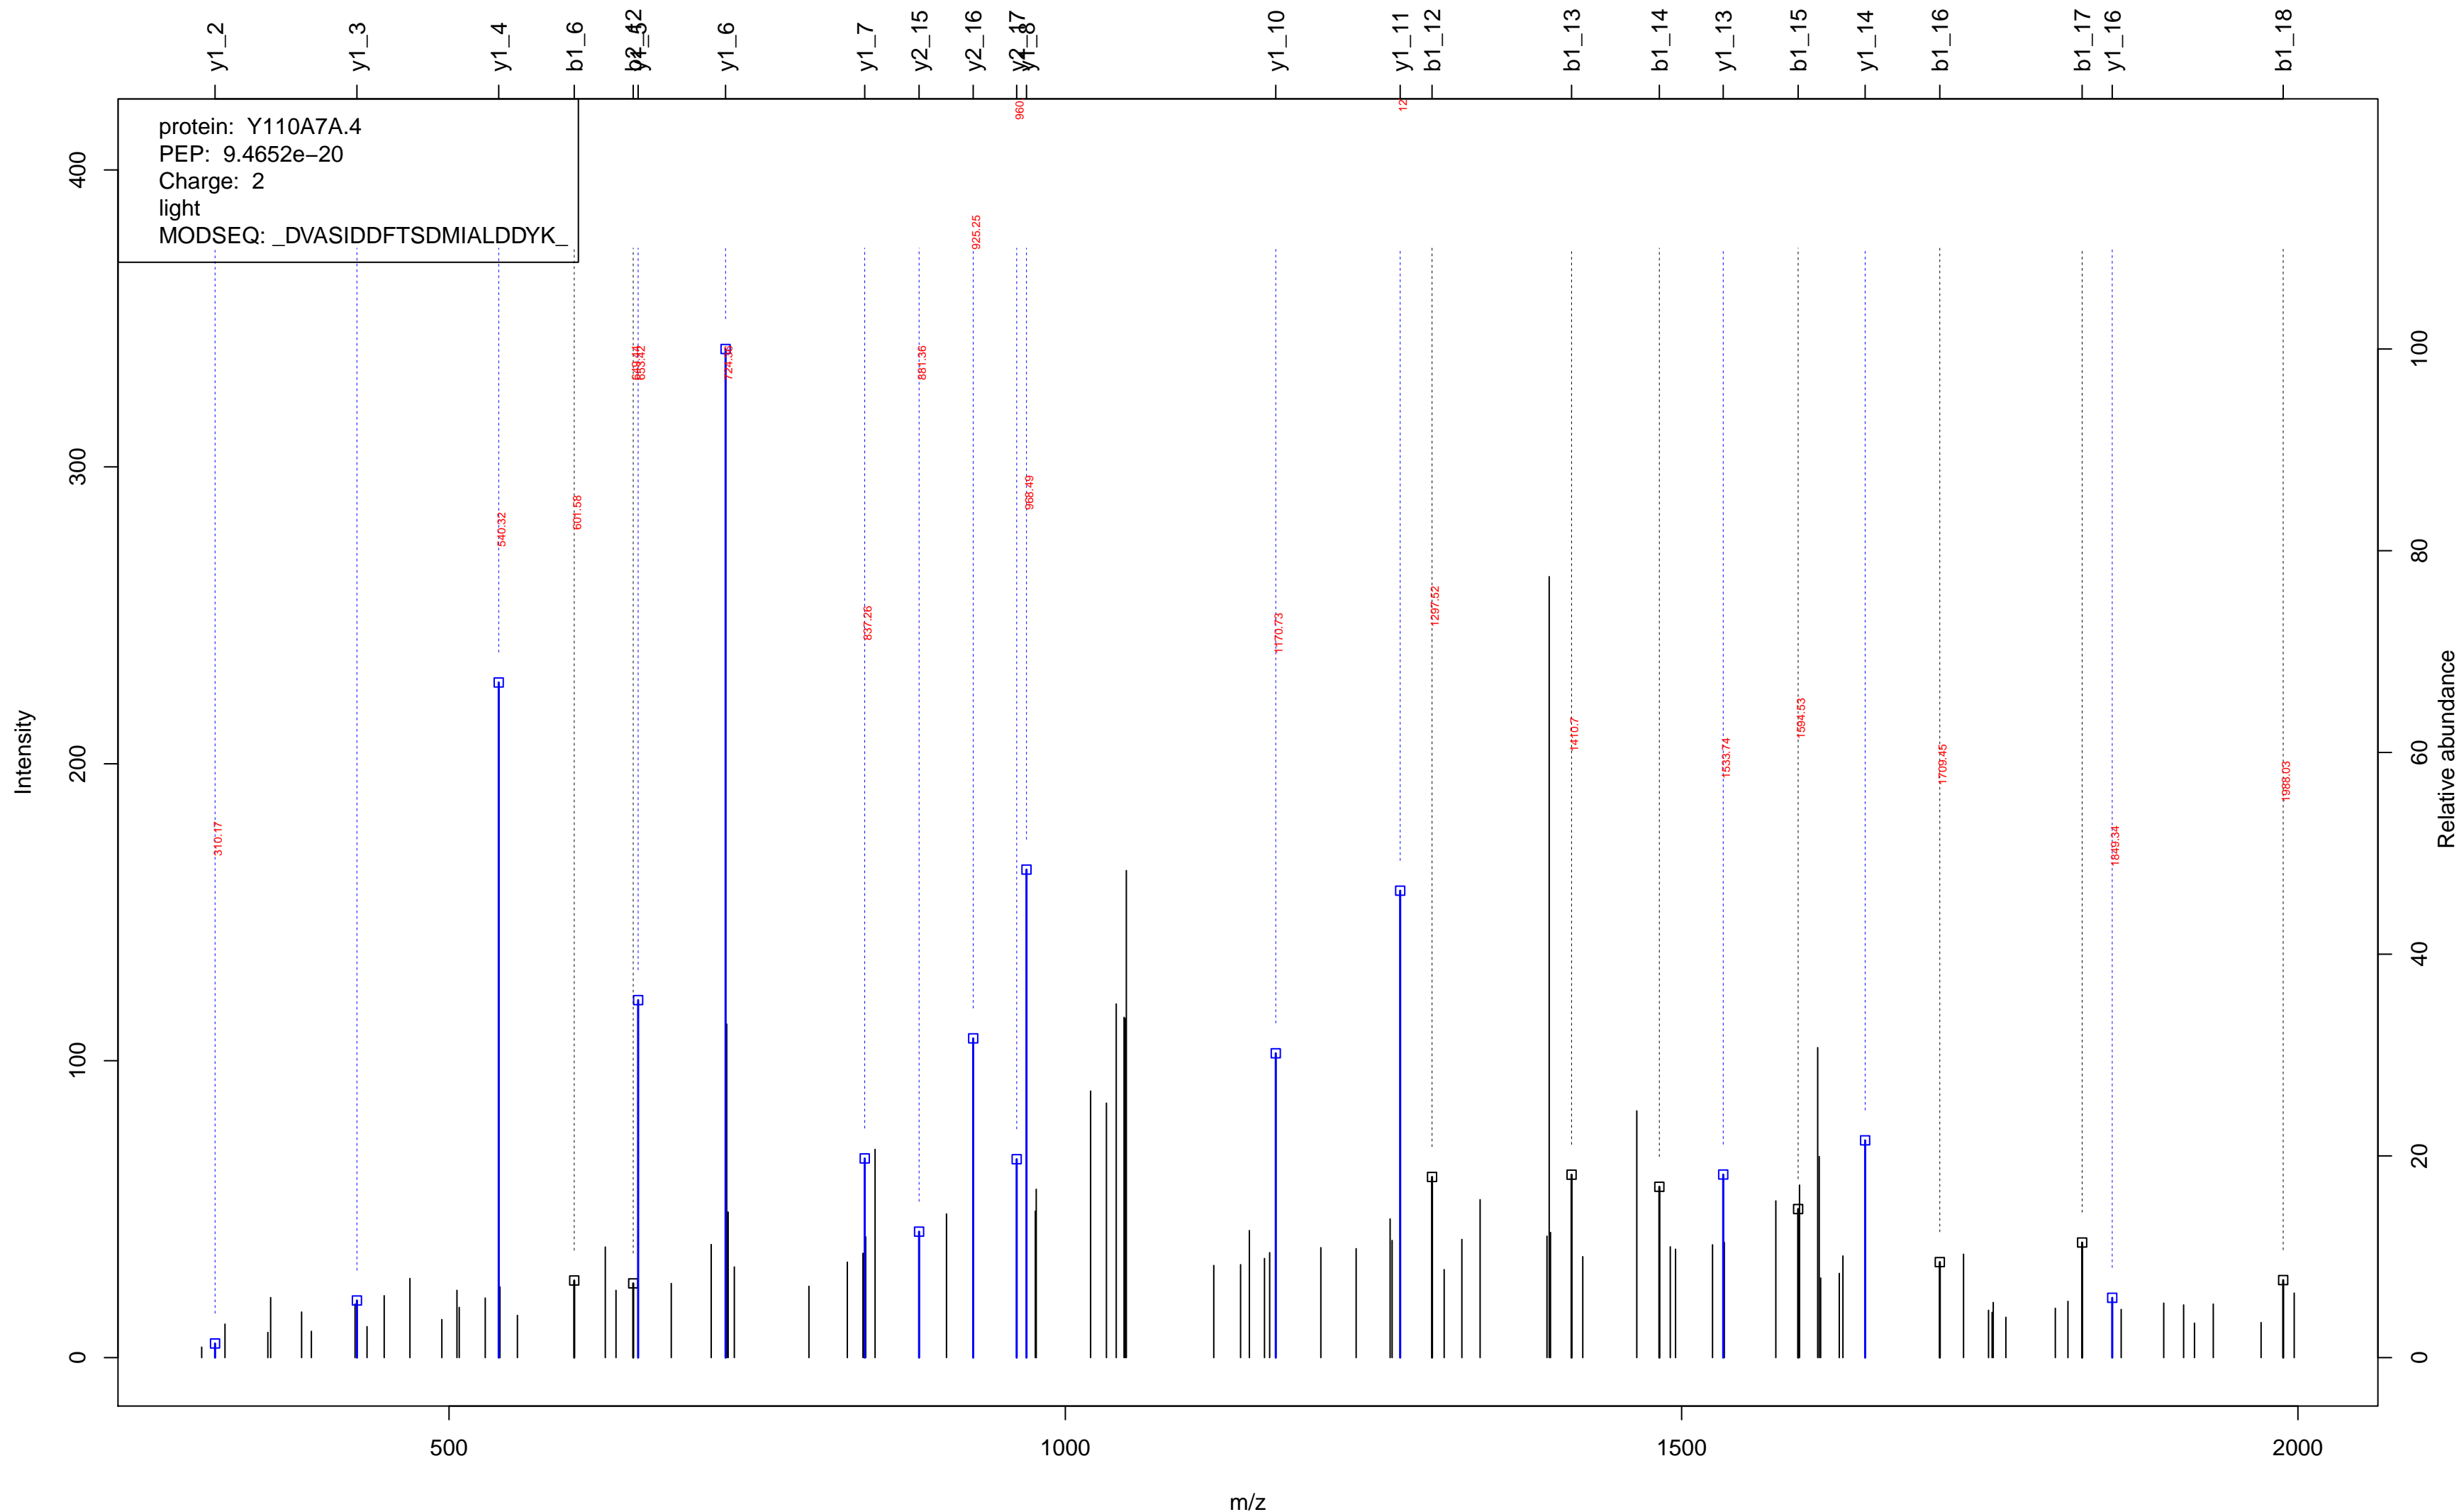



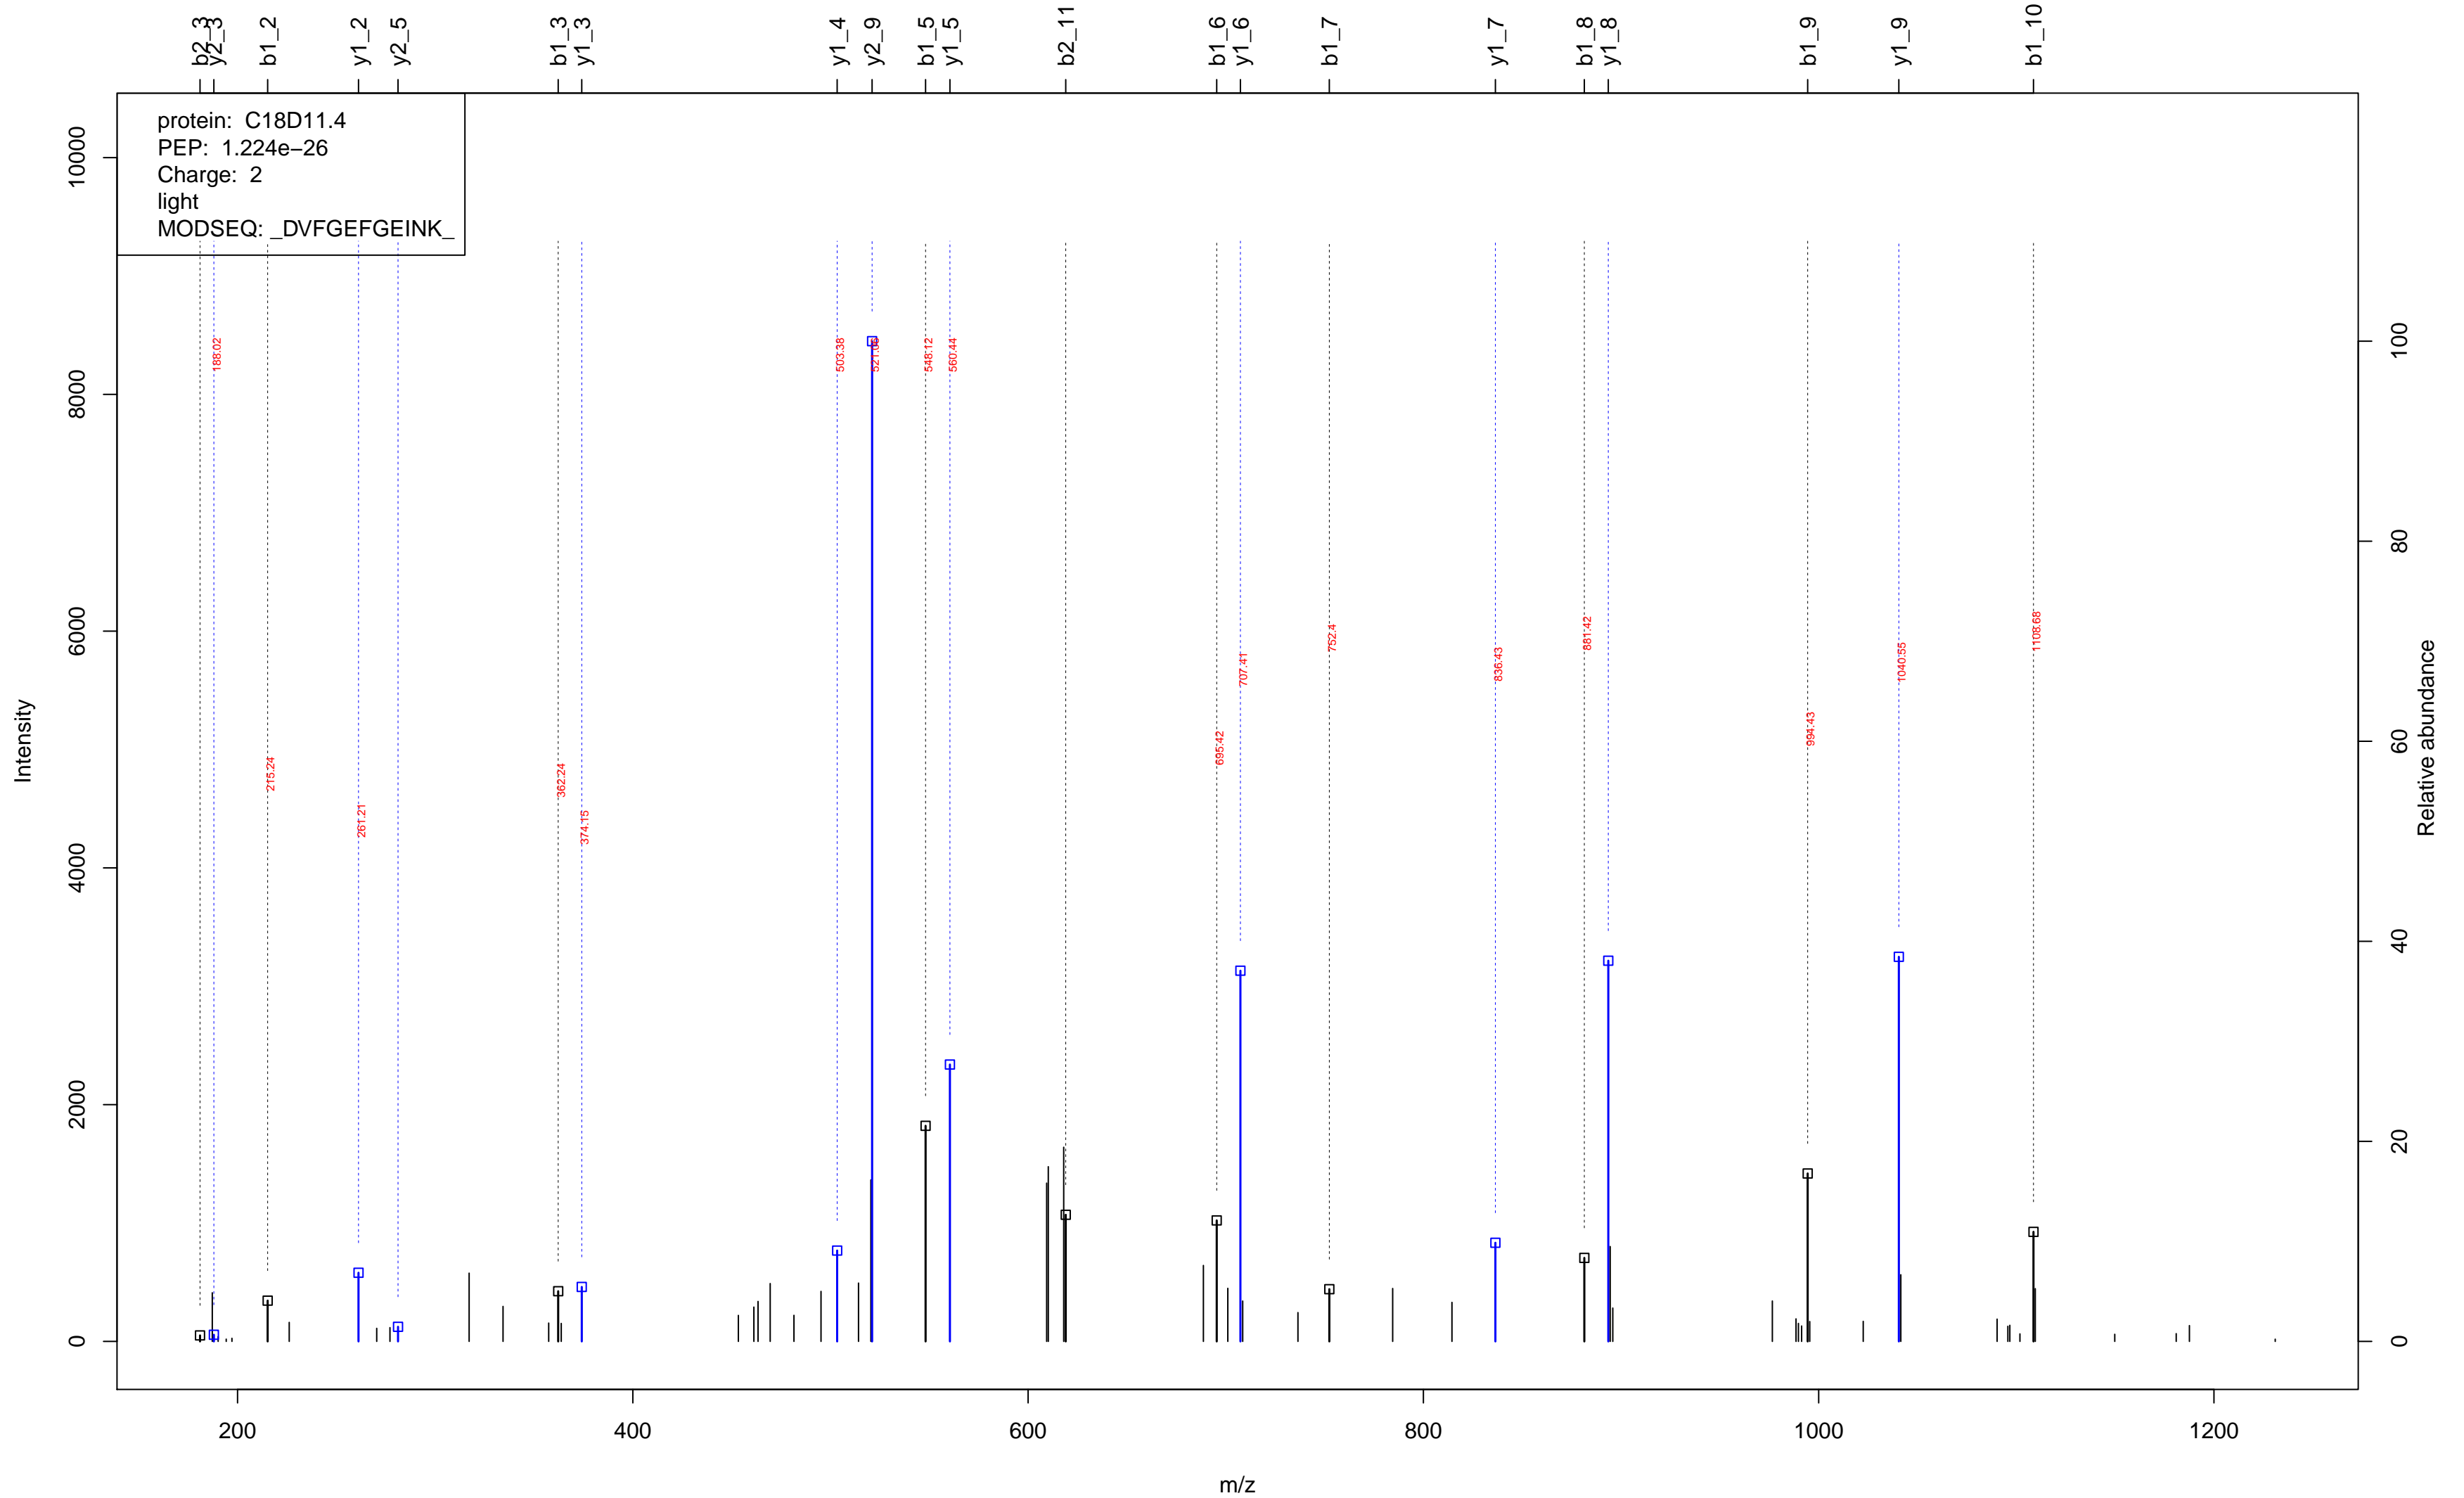

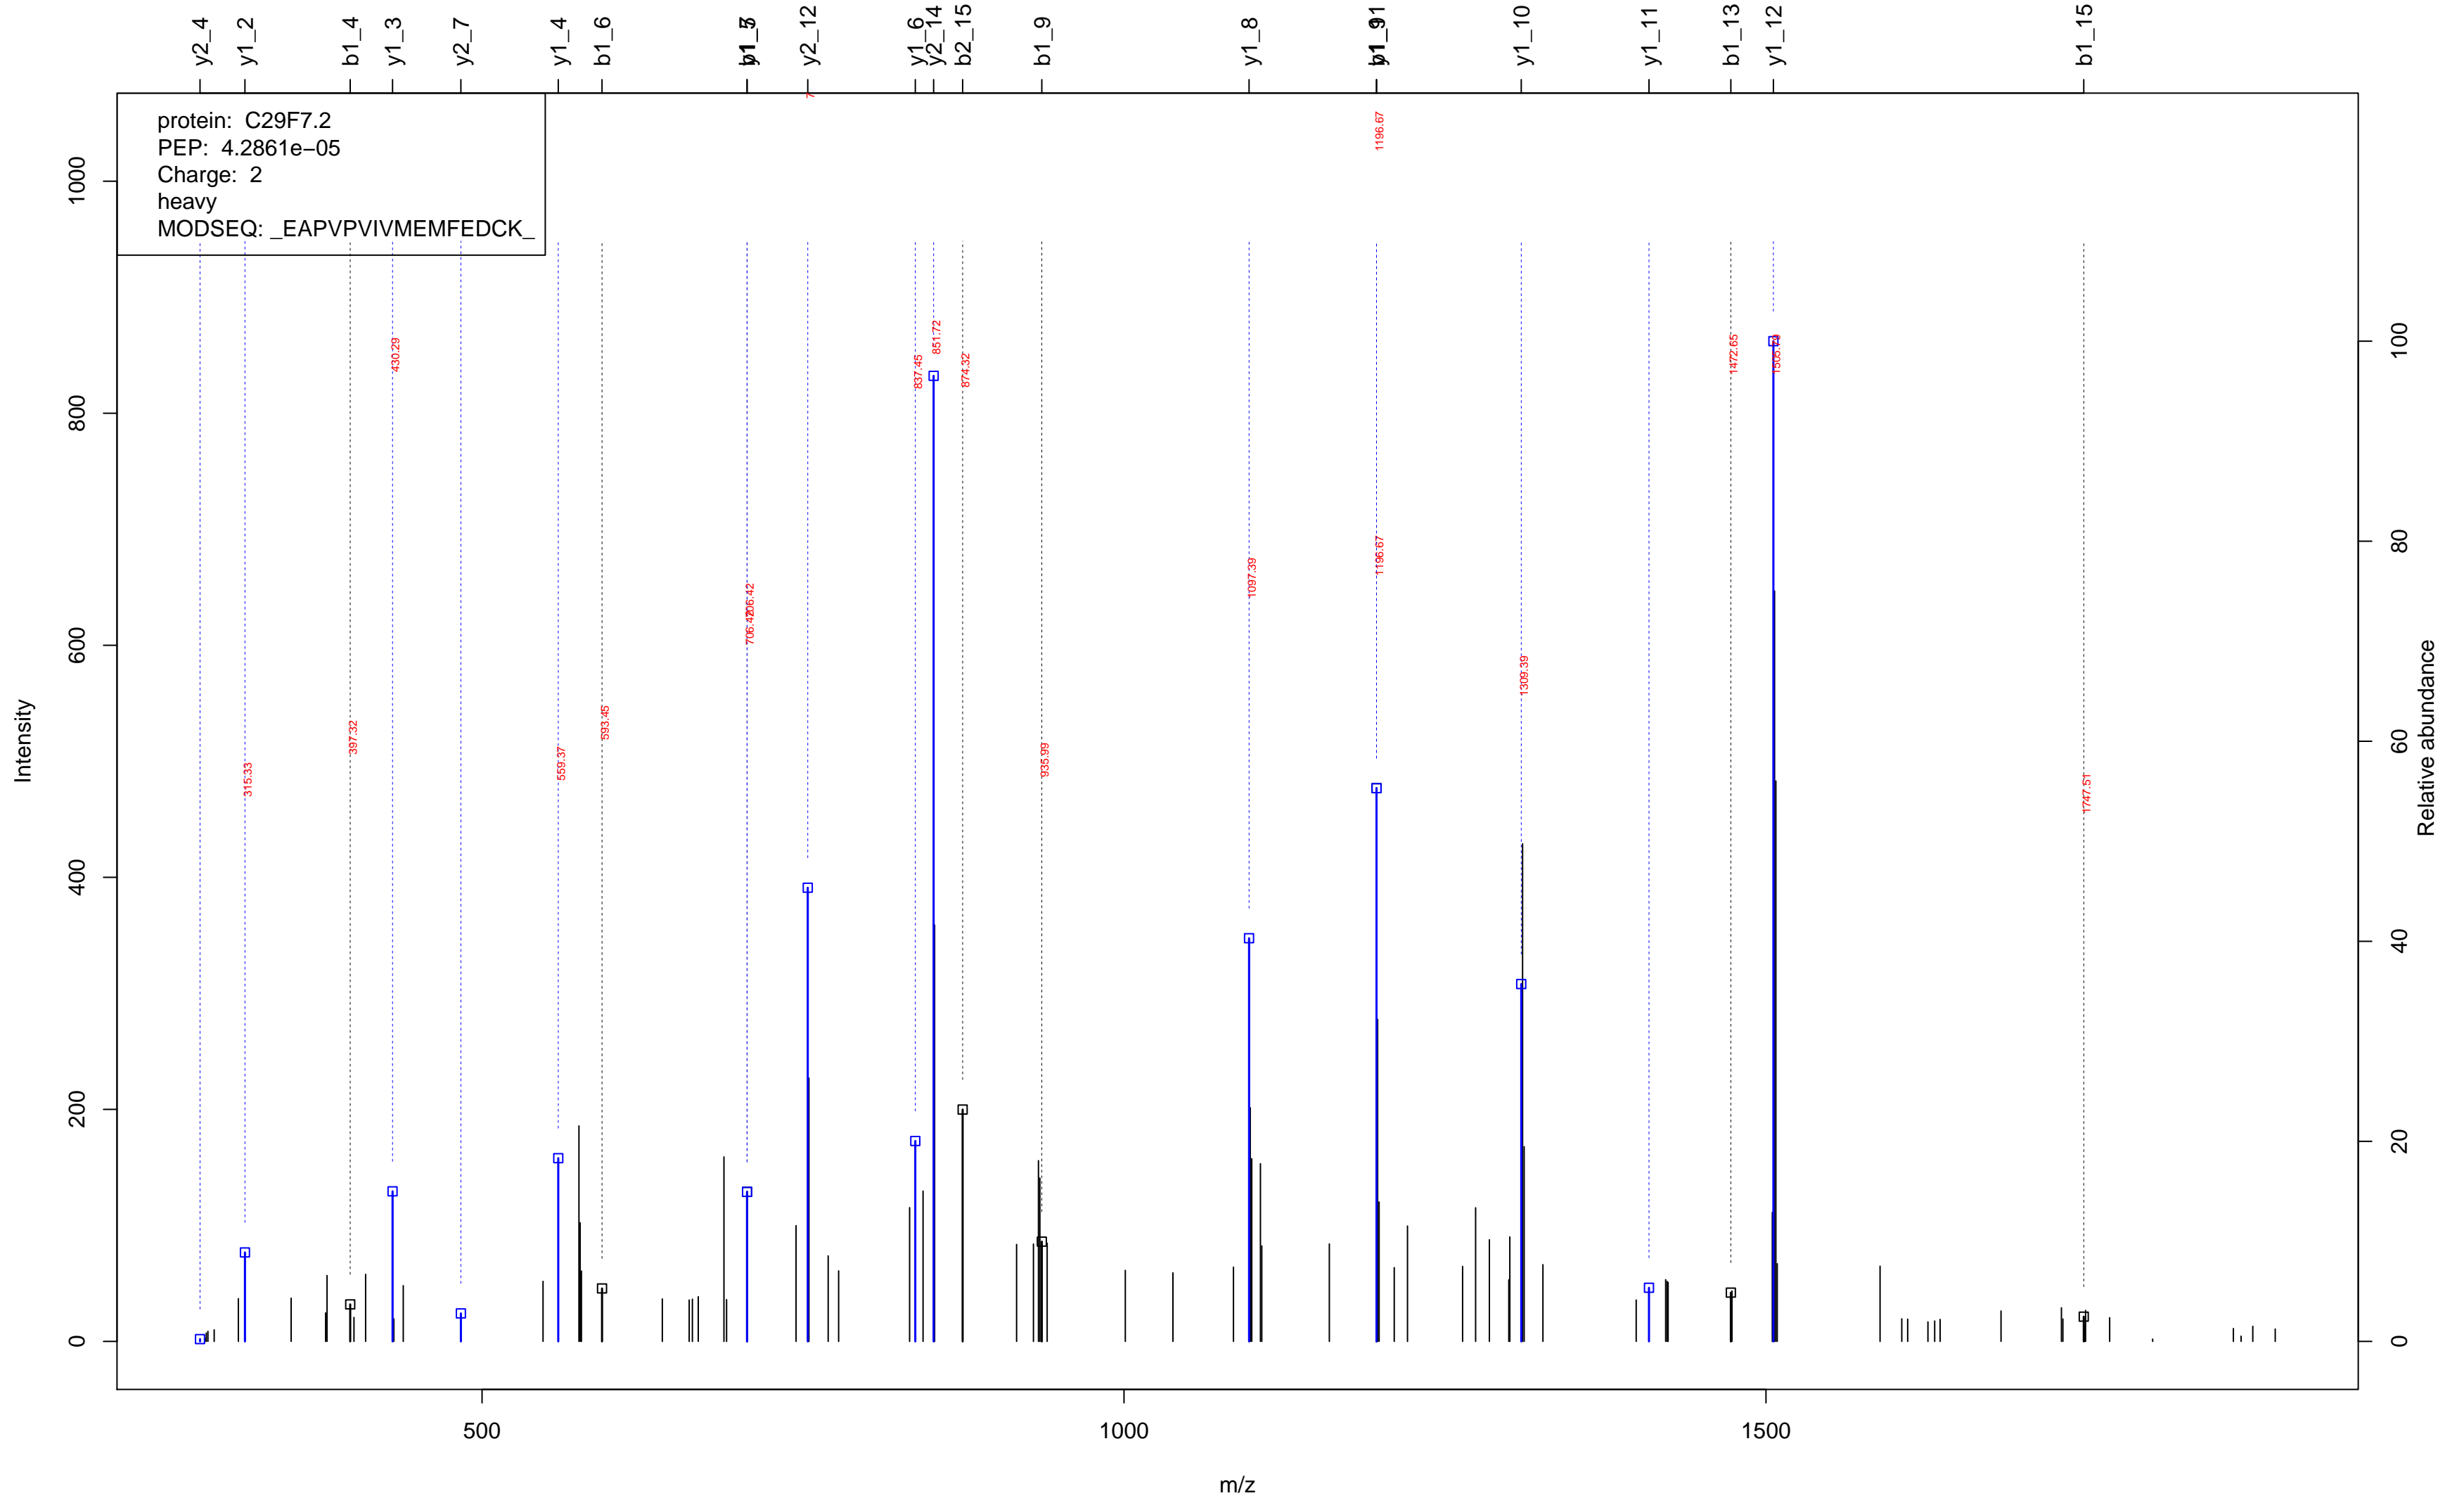

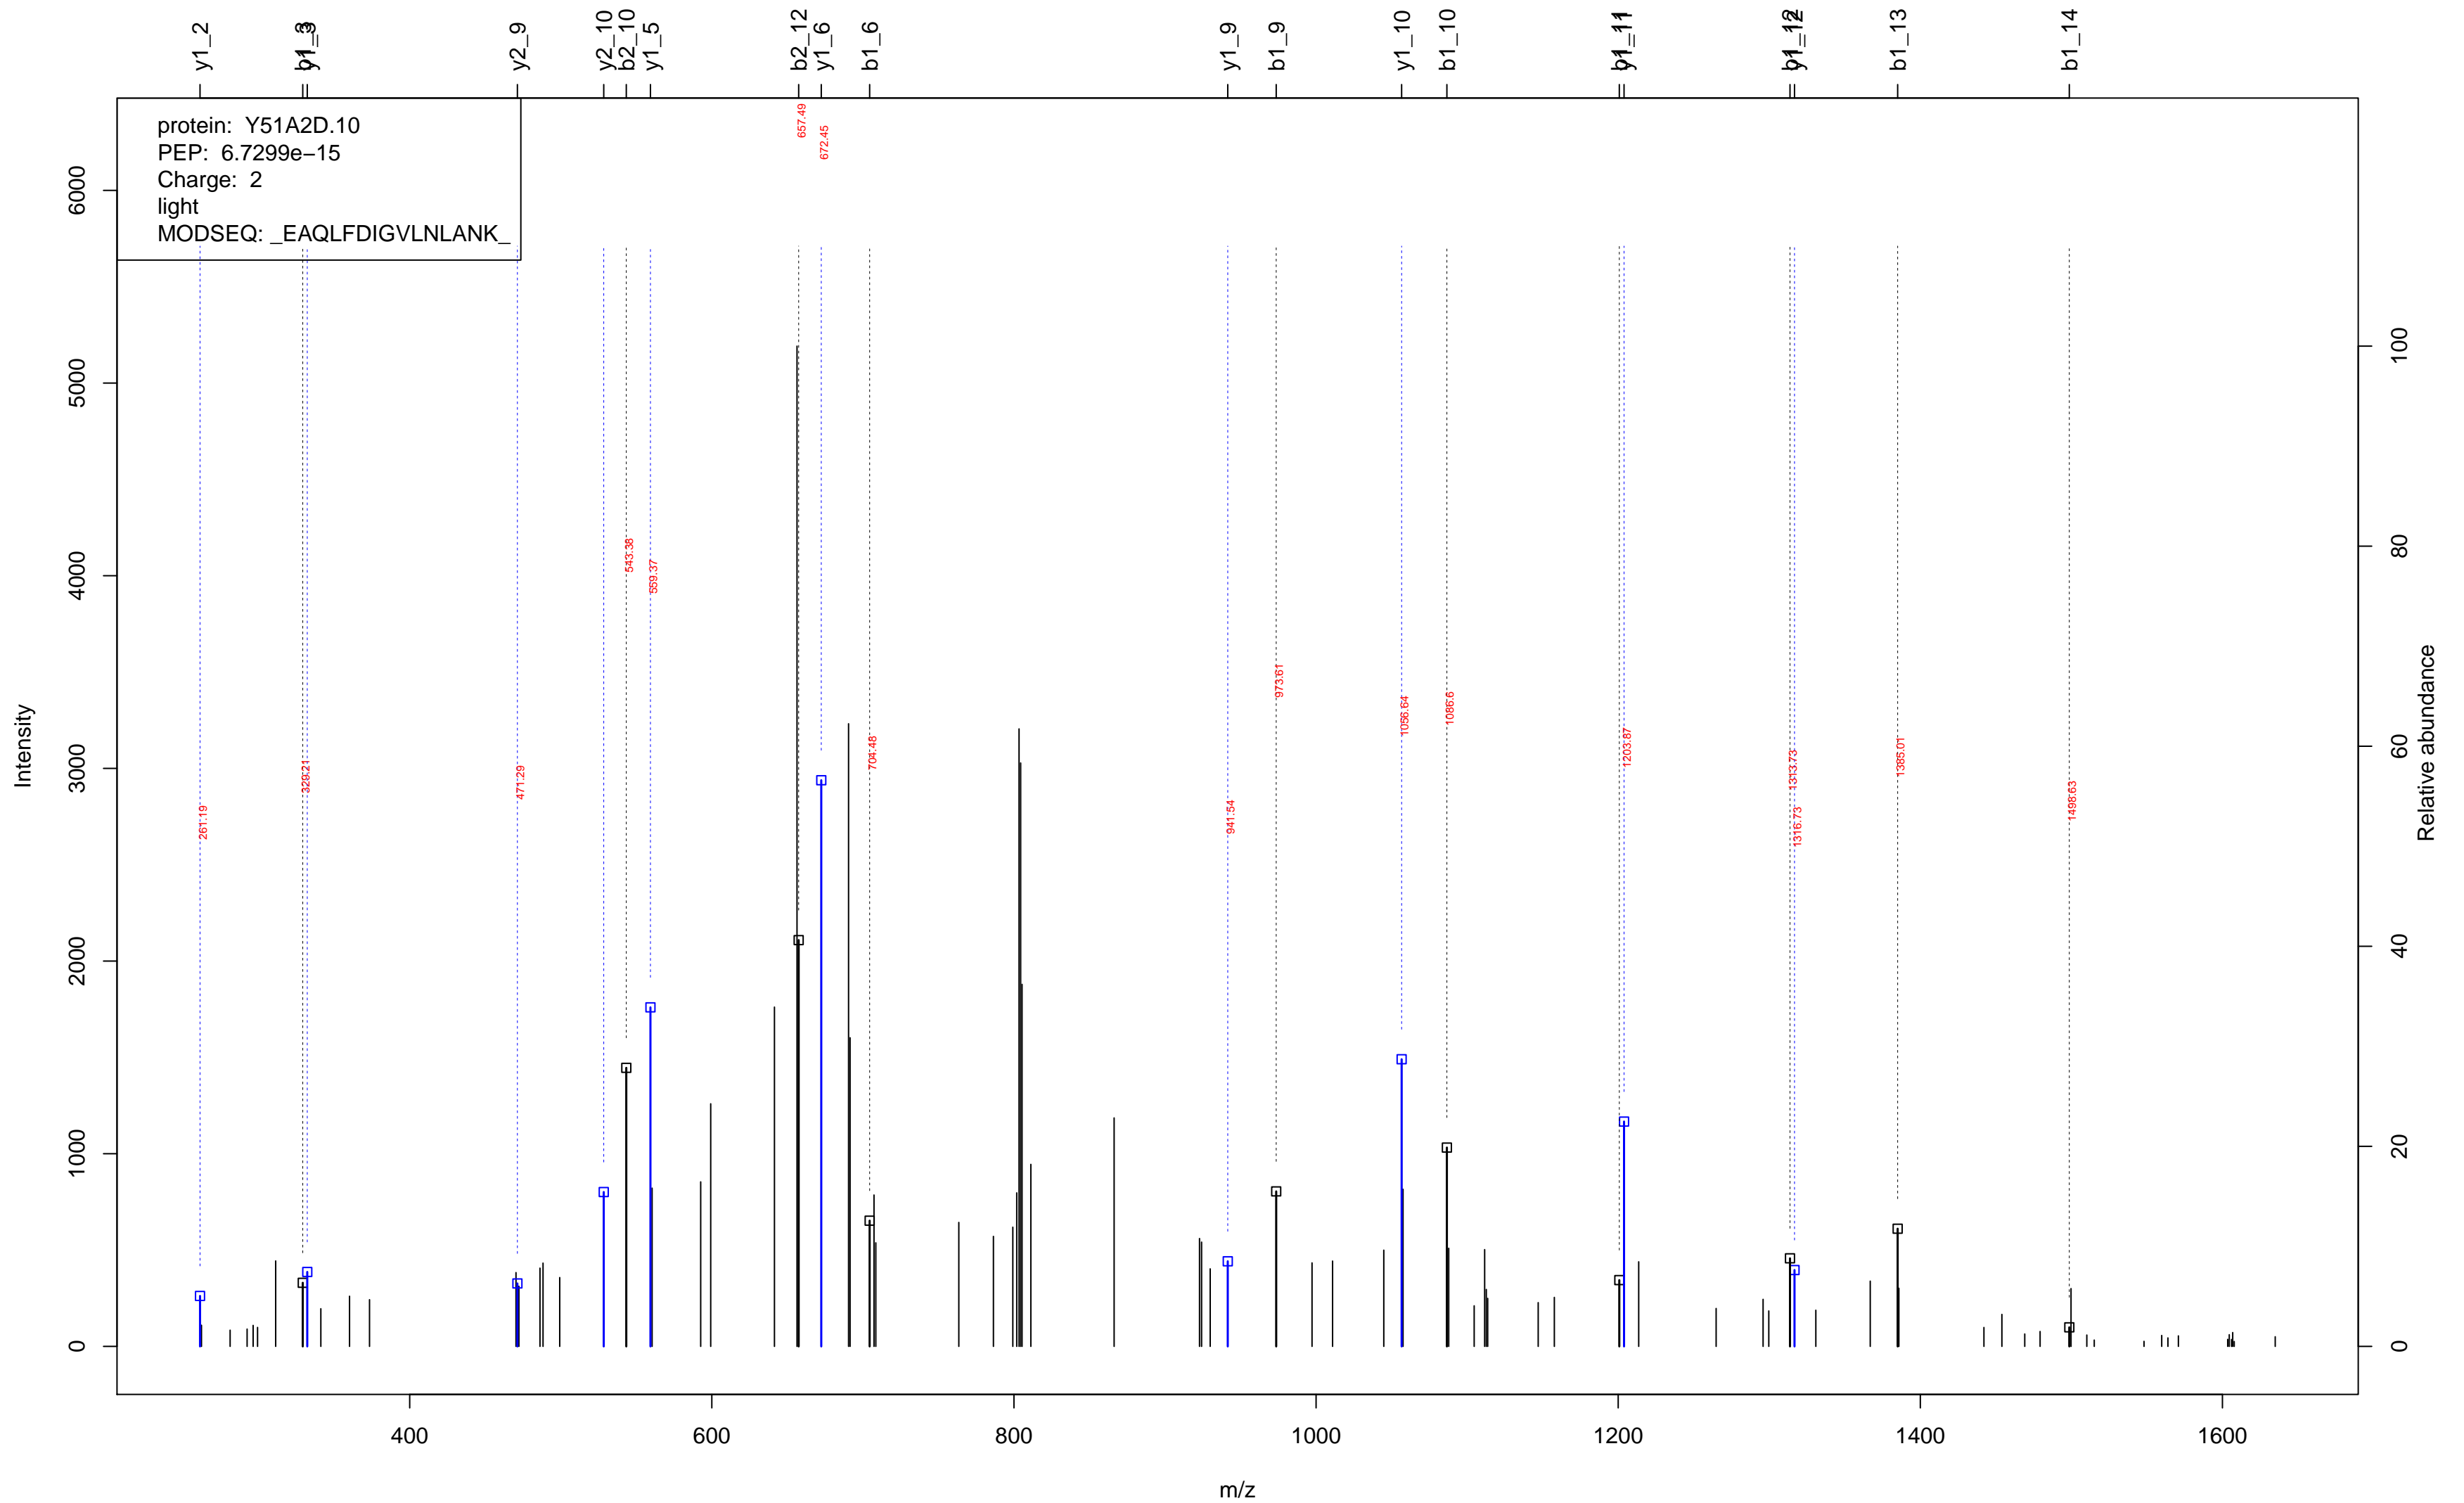

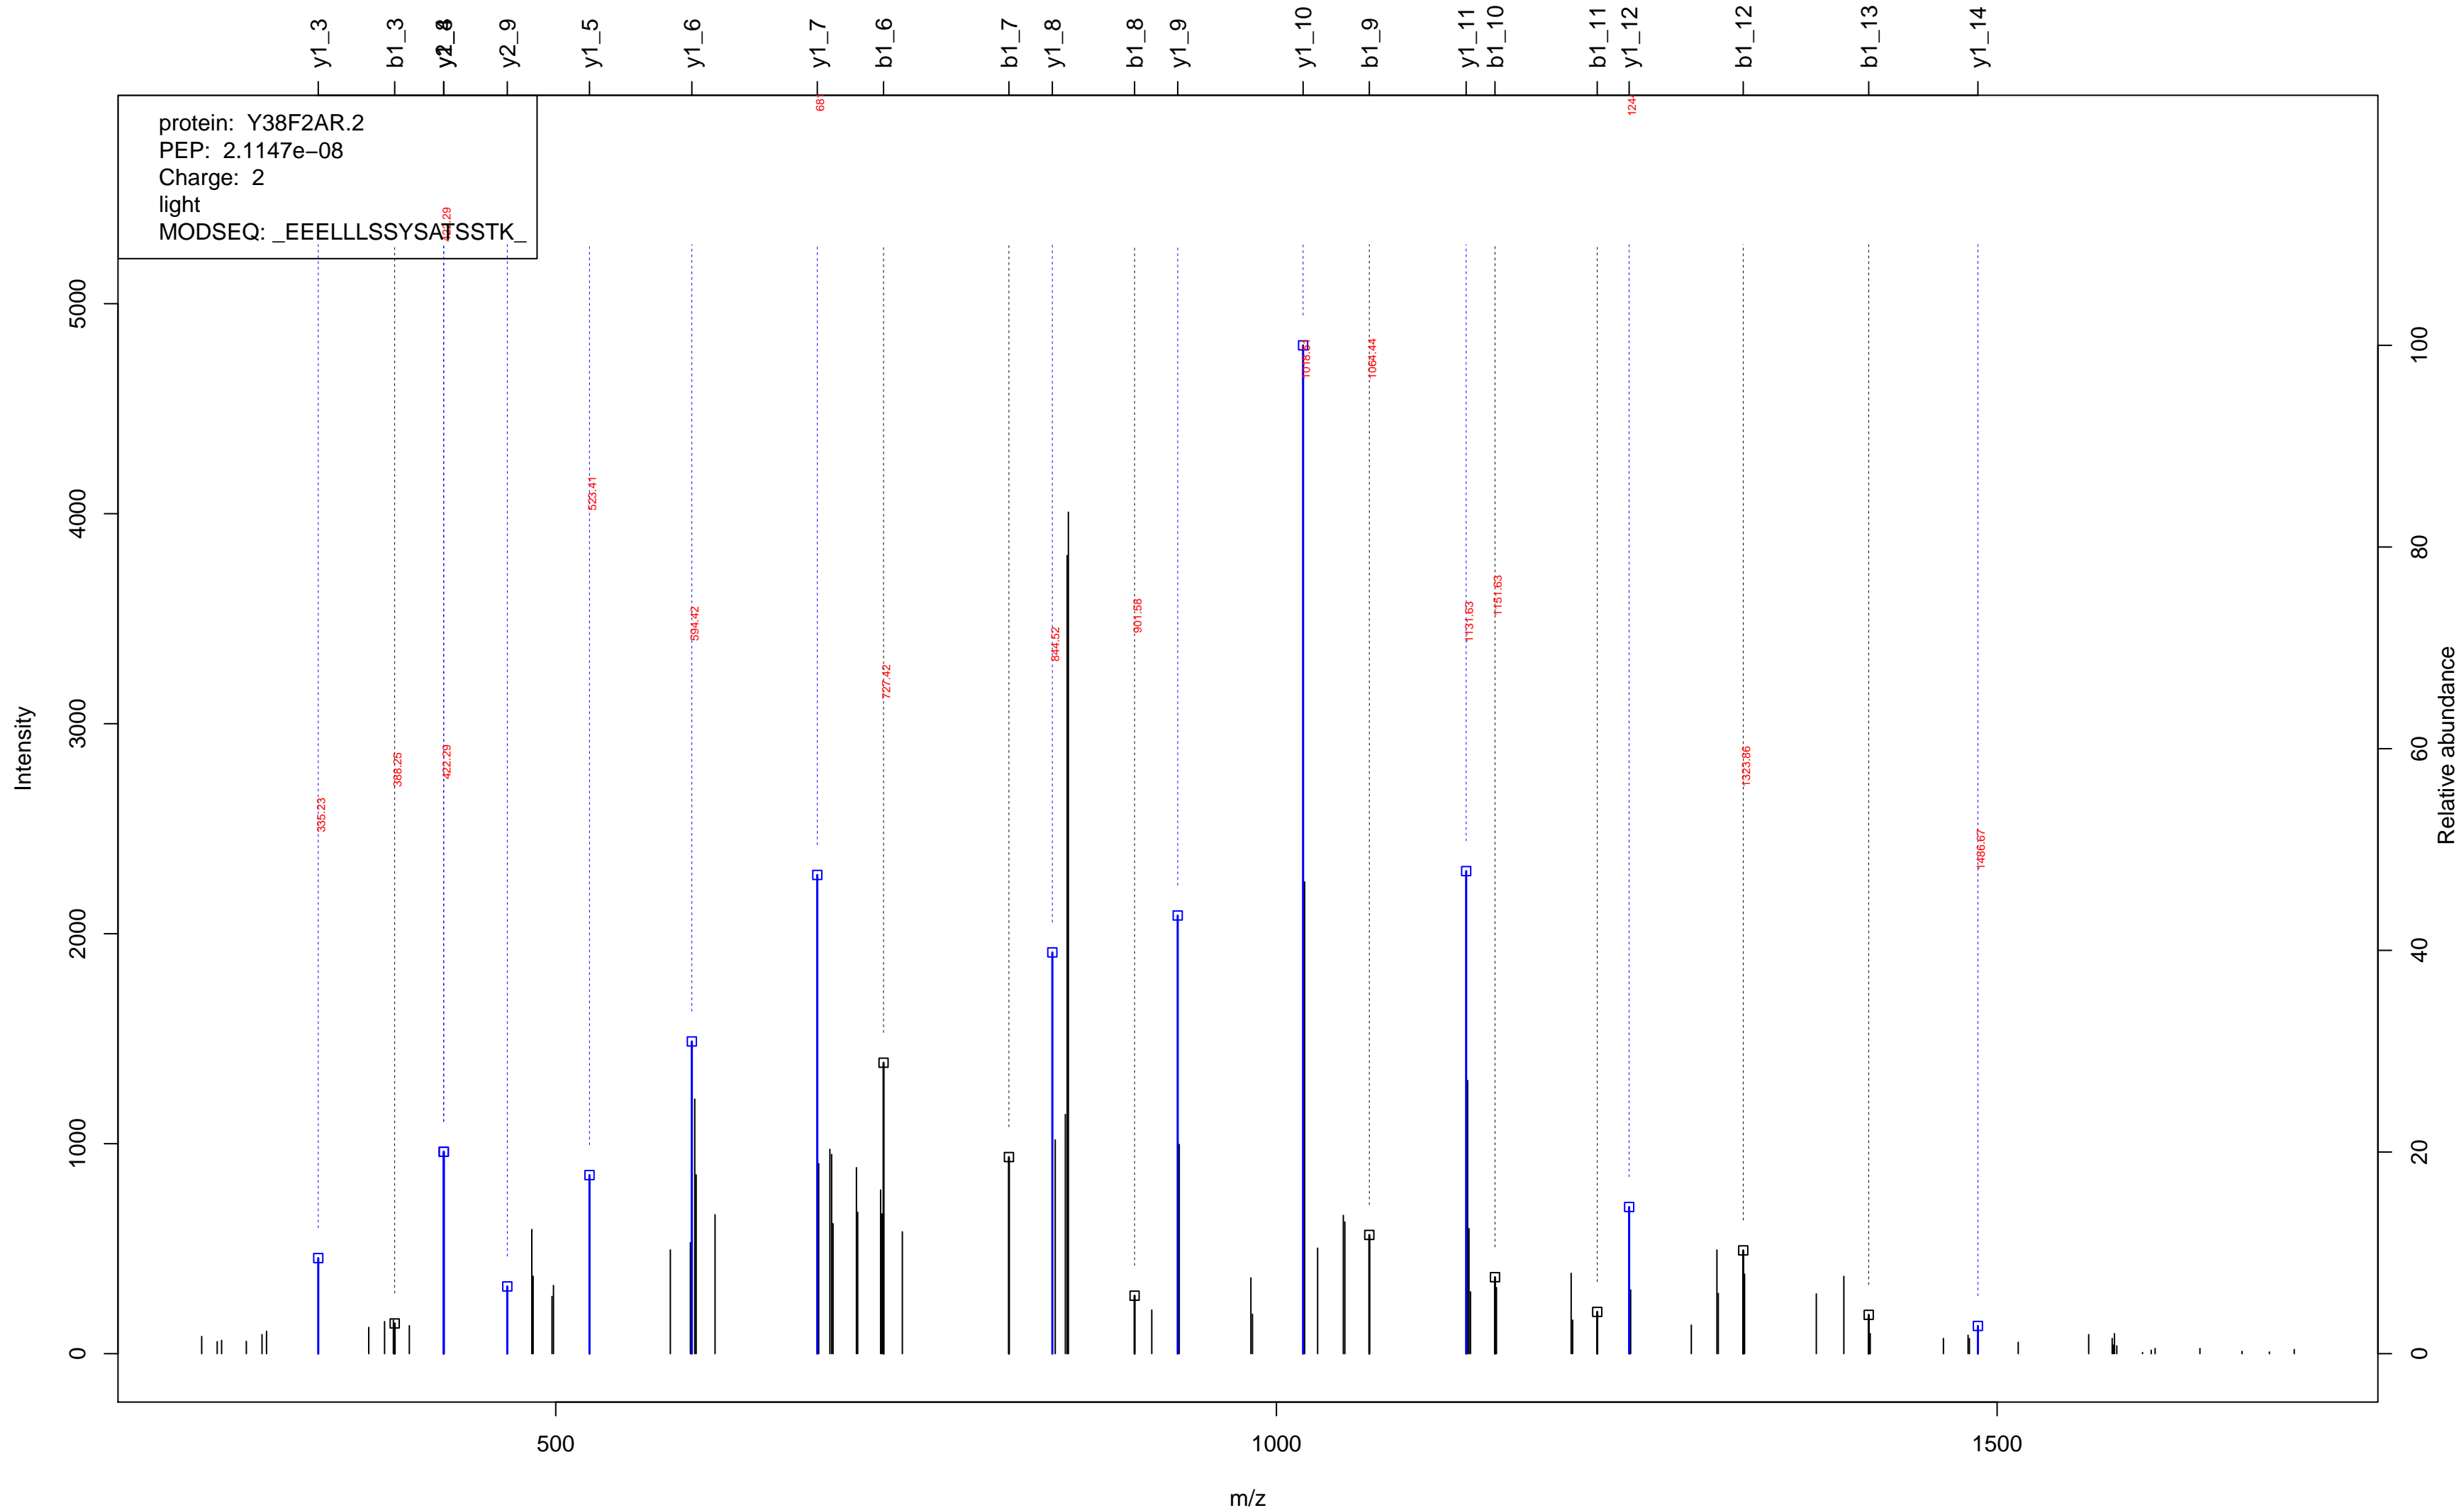

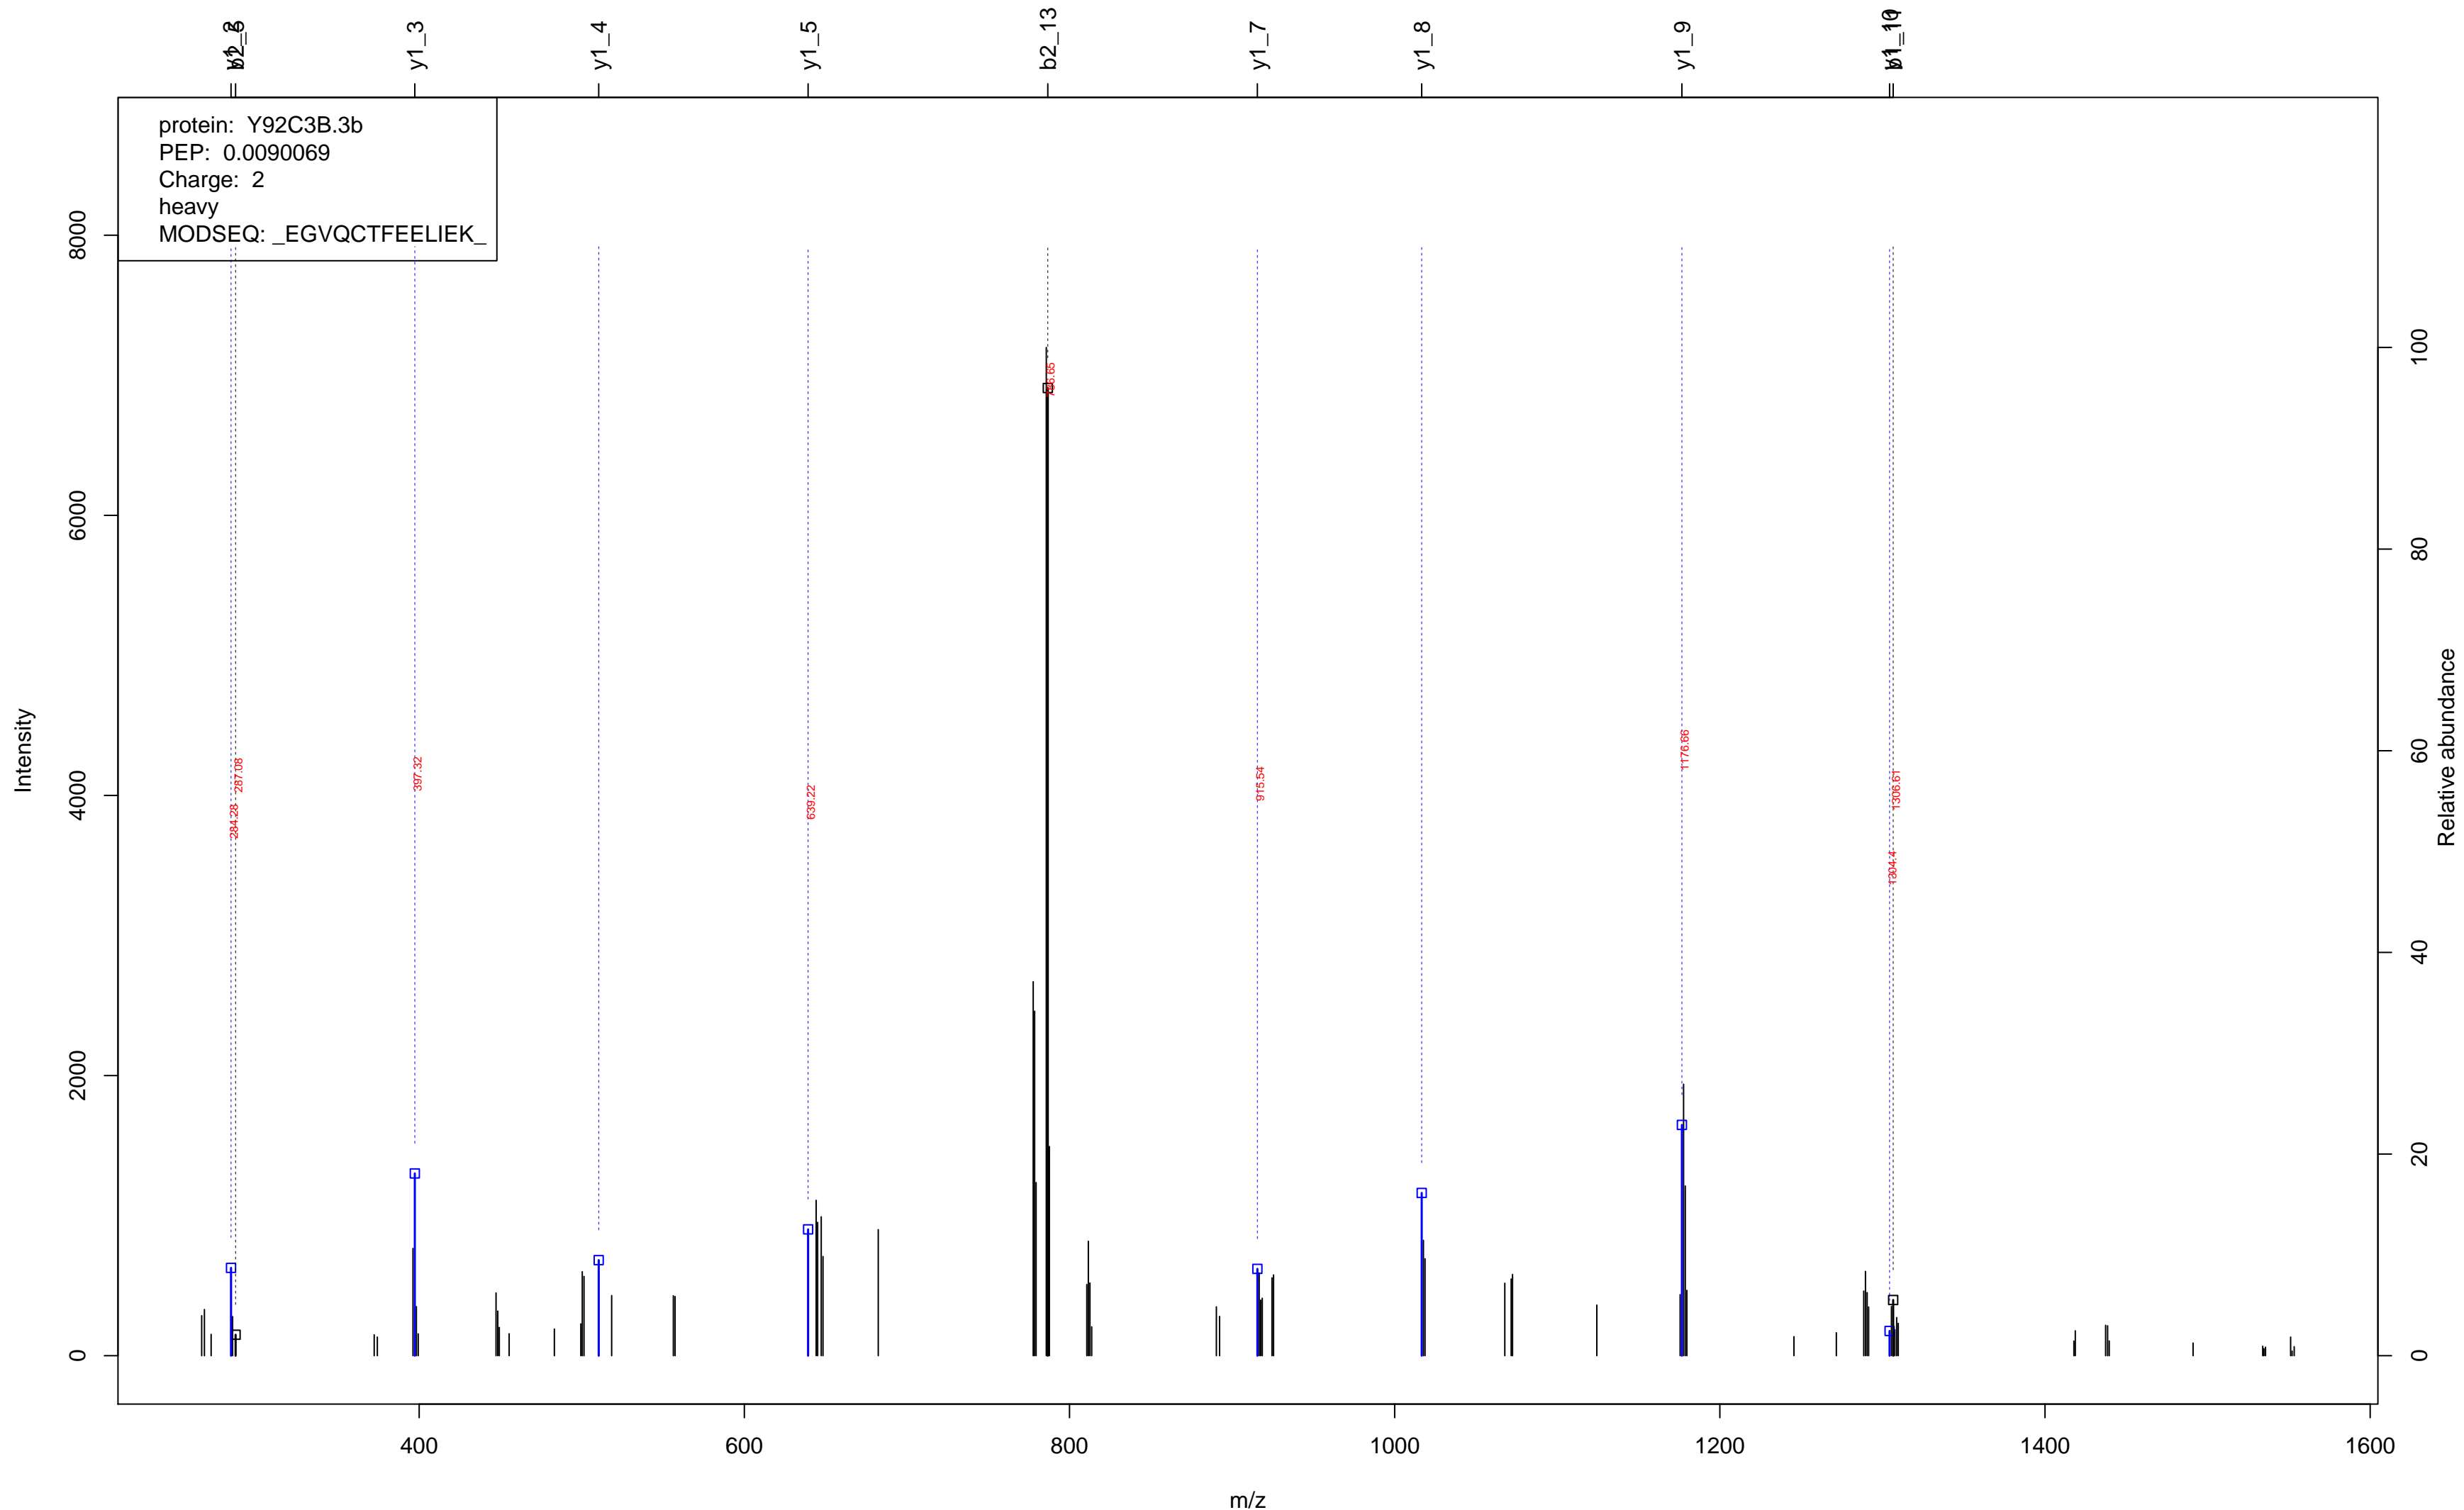

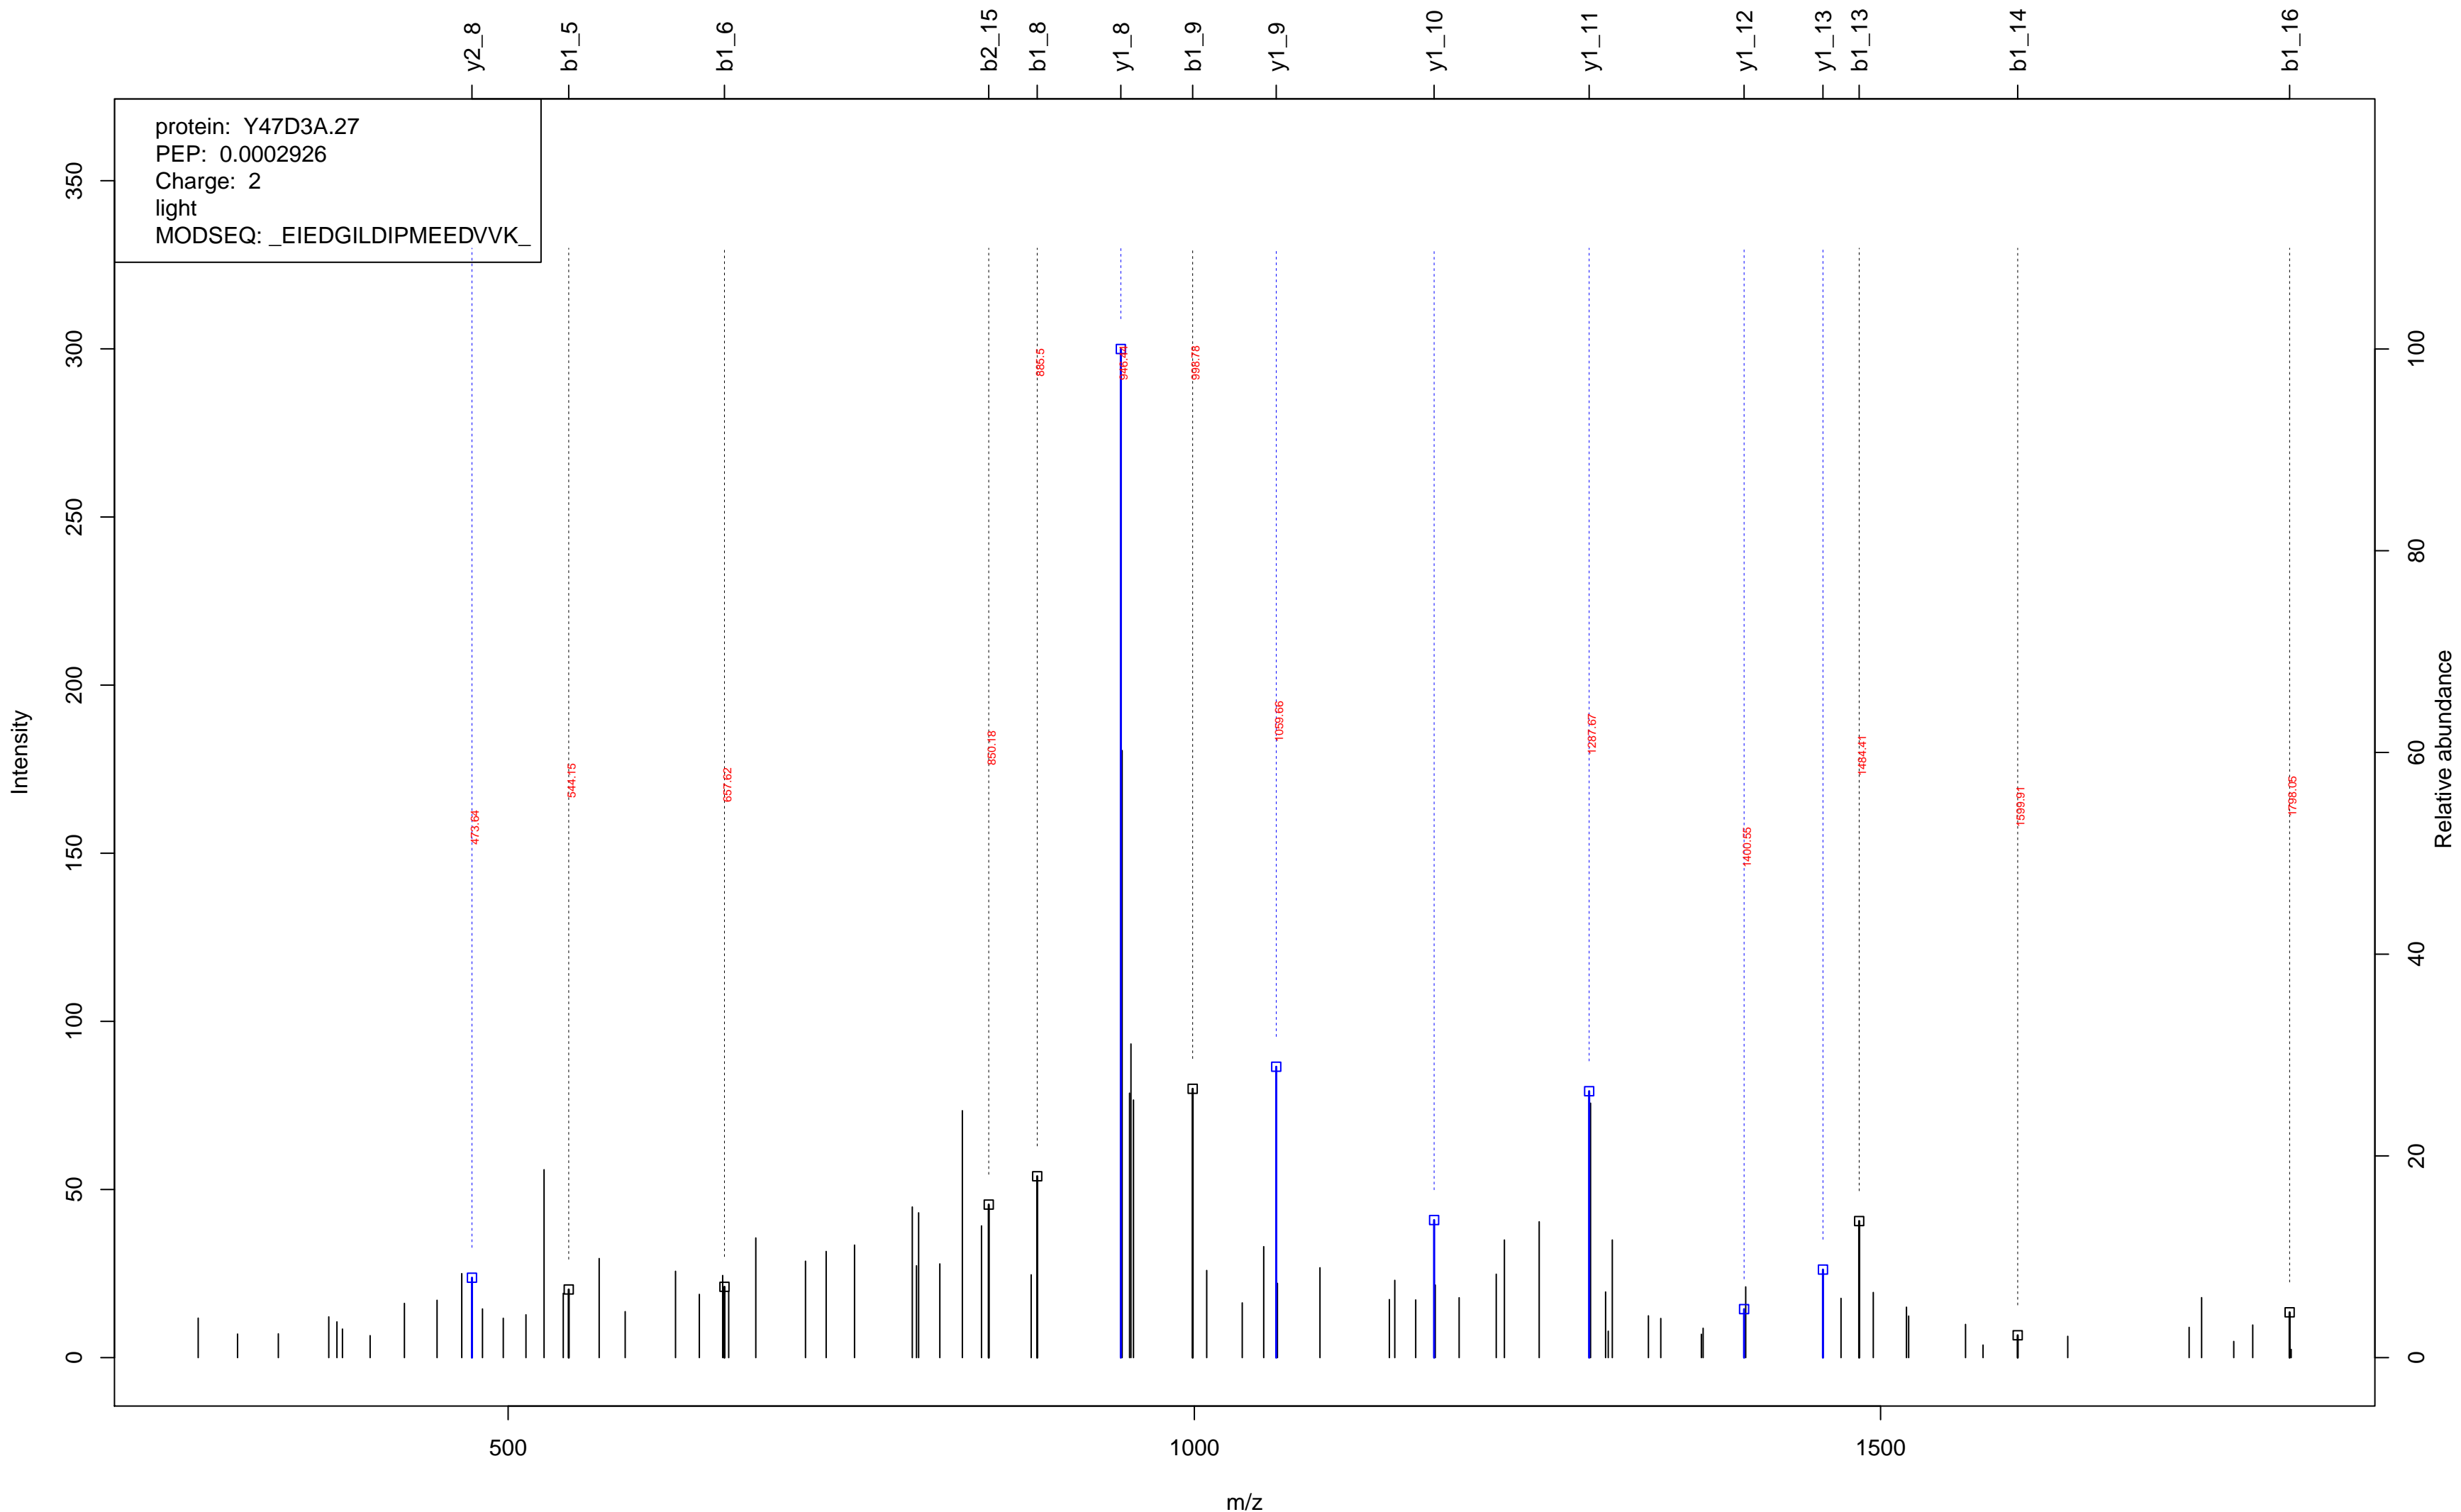

b2\_4  
y2\_7  
y2\_8  
y2\_9  
y2\_10  
y2\_11  
y2\_12

protein: F45H11.2  
PEP: 0.0096471  
Charge: 3  
light  
MODSEQ: \_EIELDIEPNDRVER\_

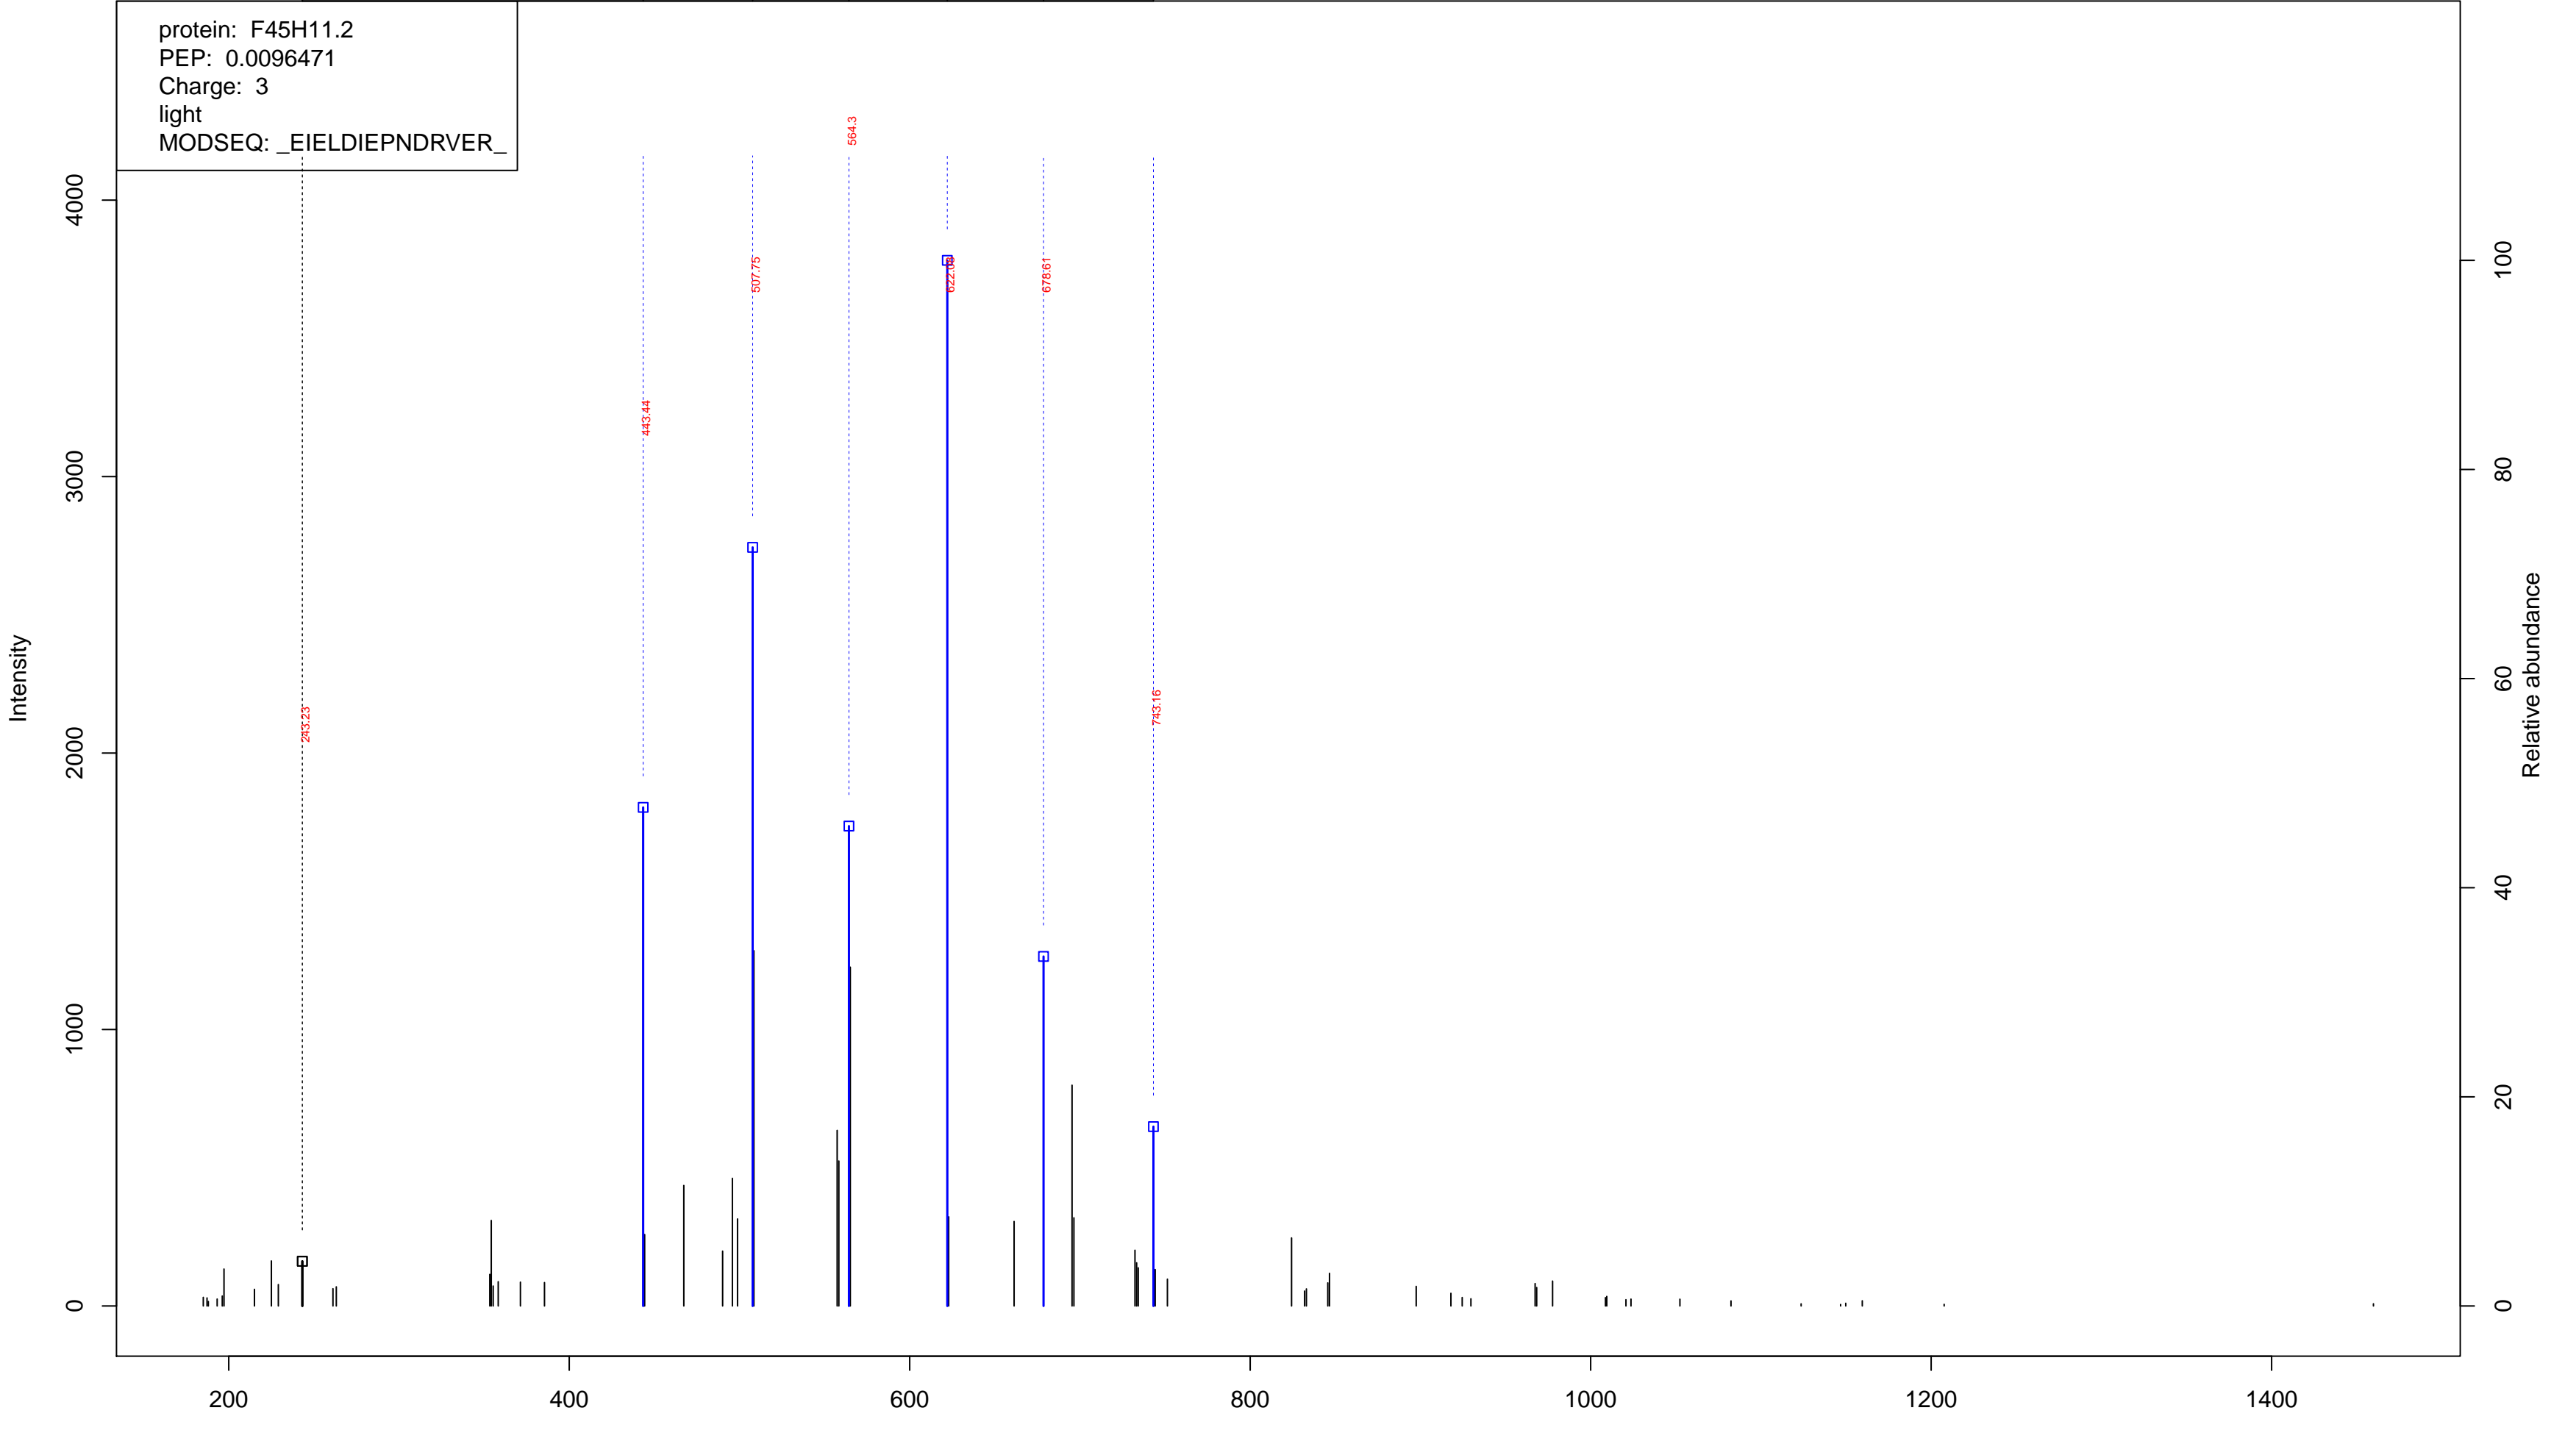

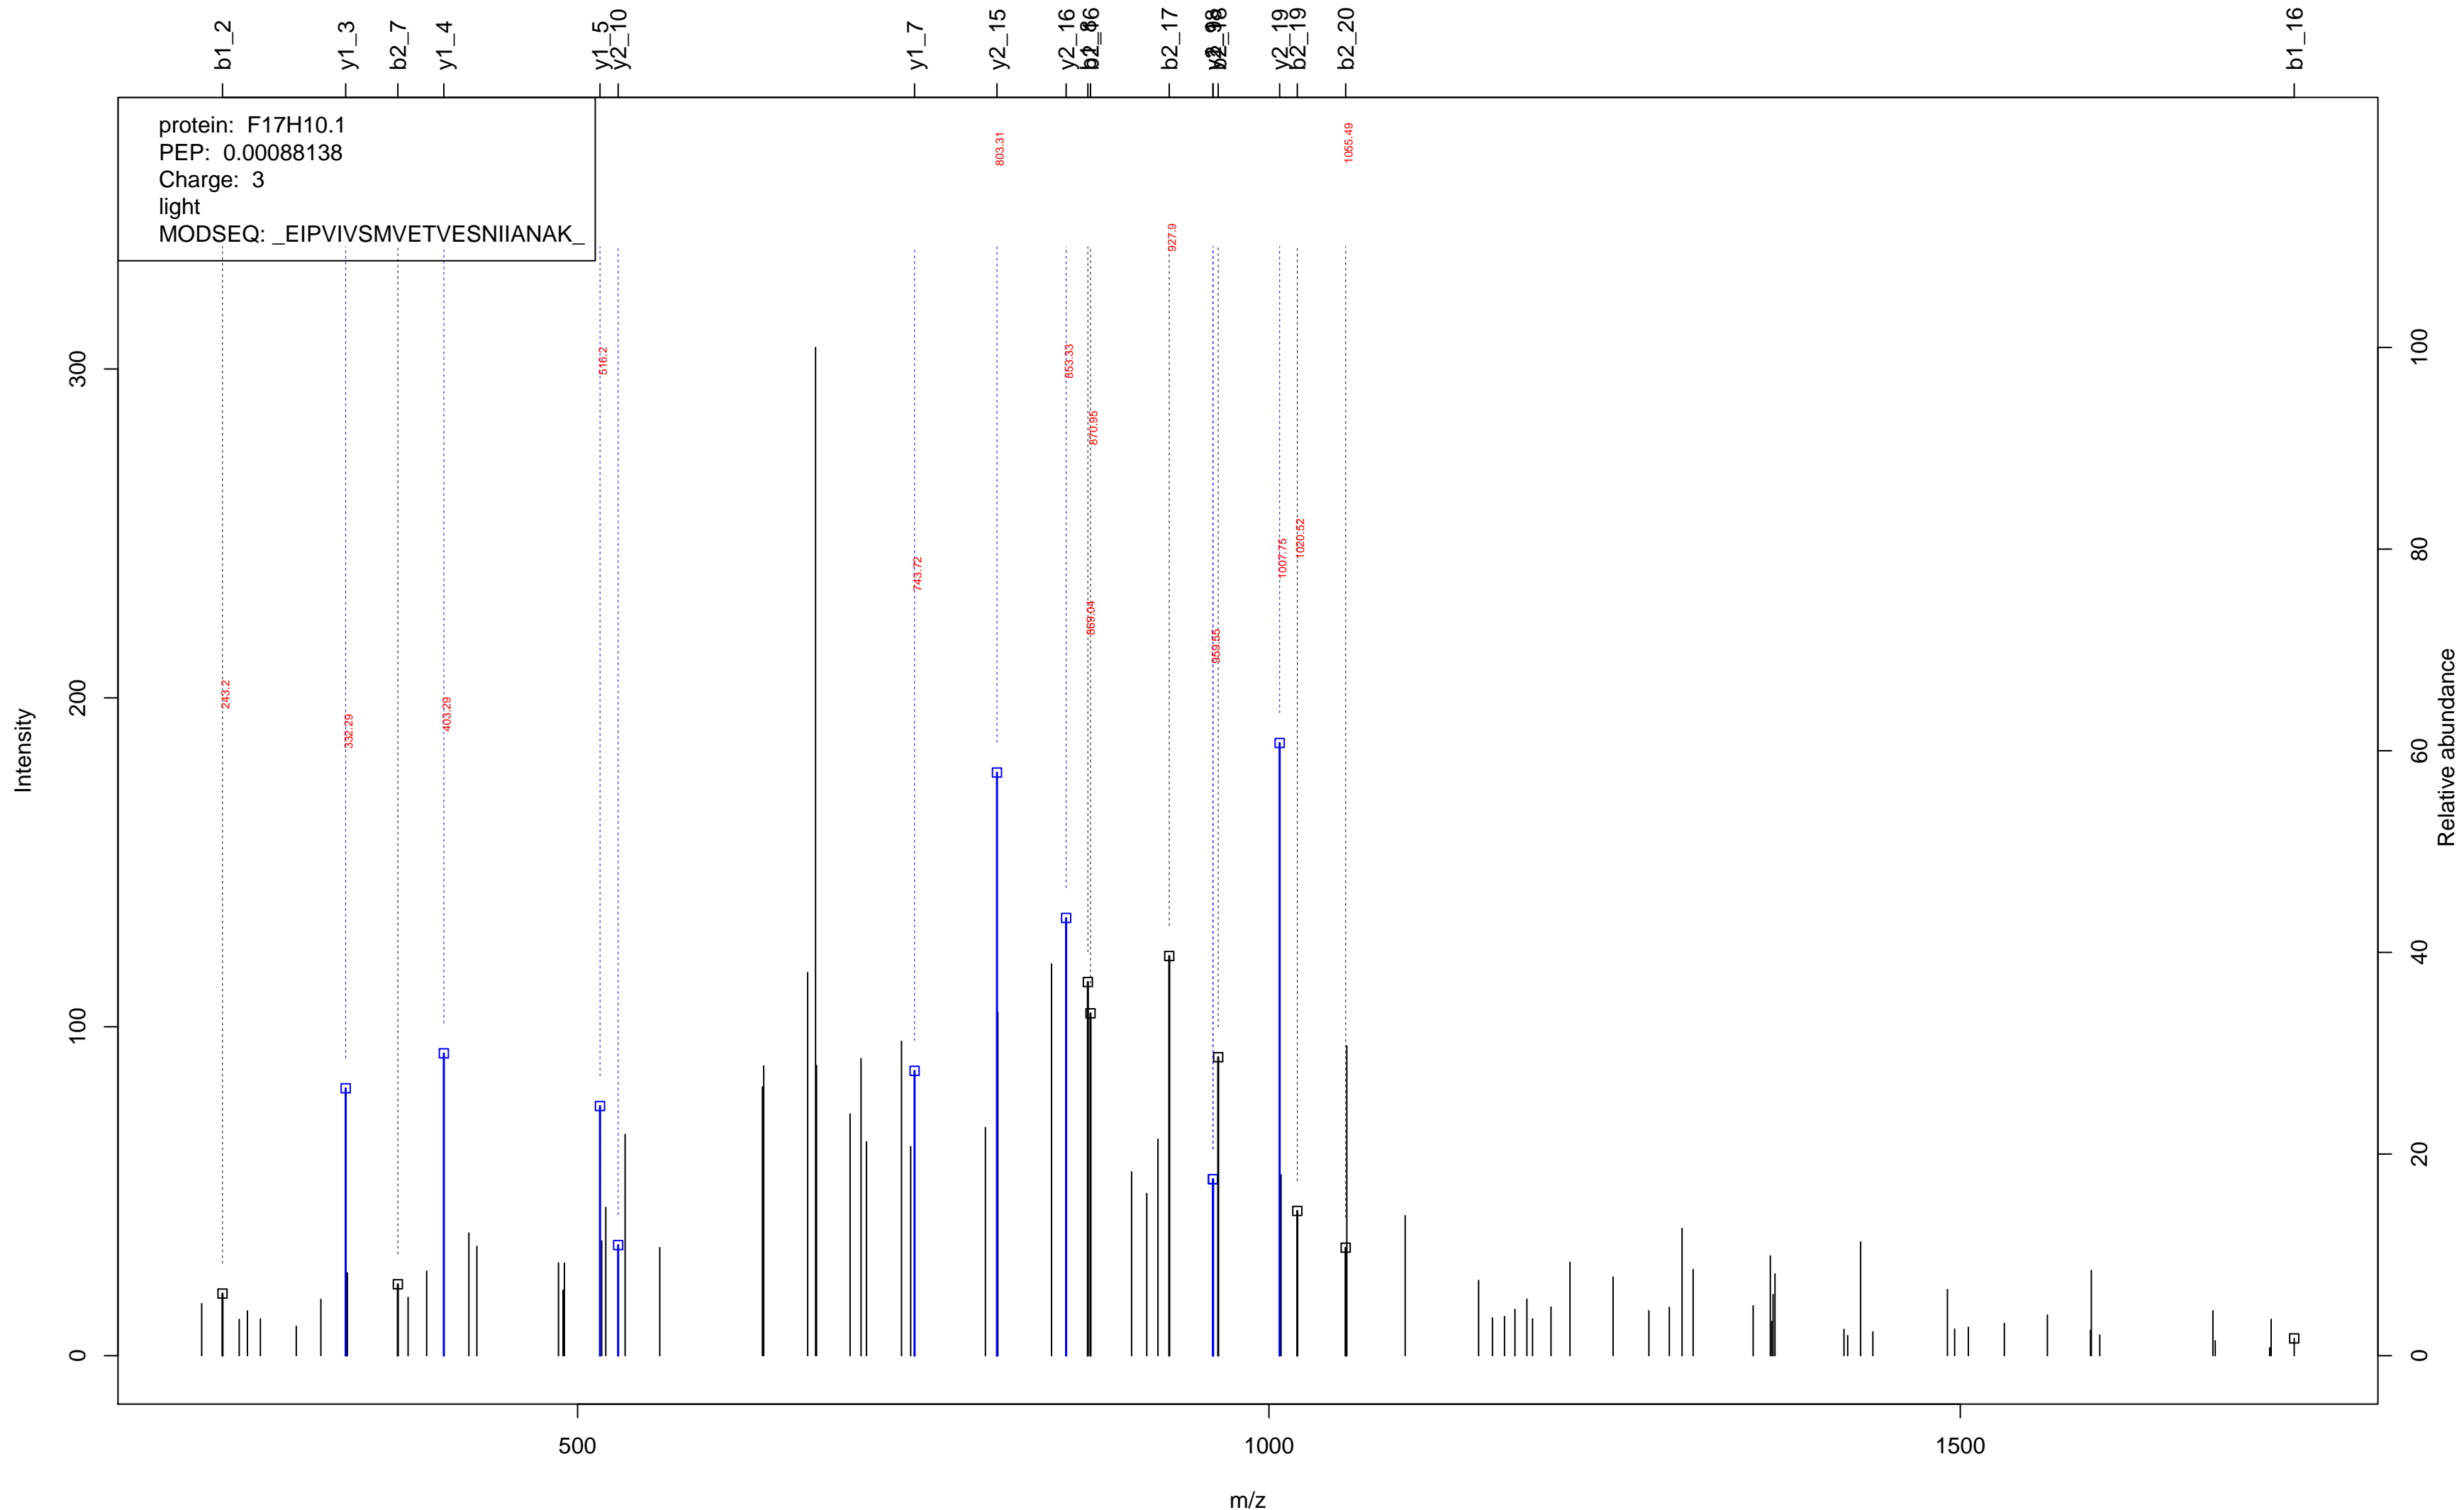



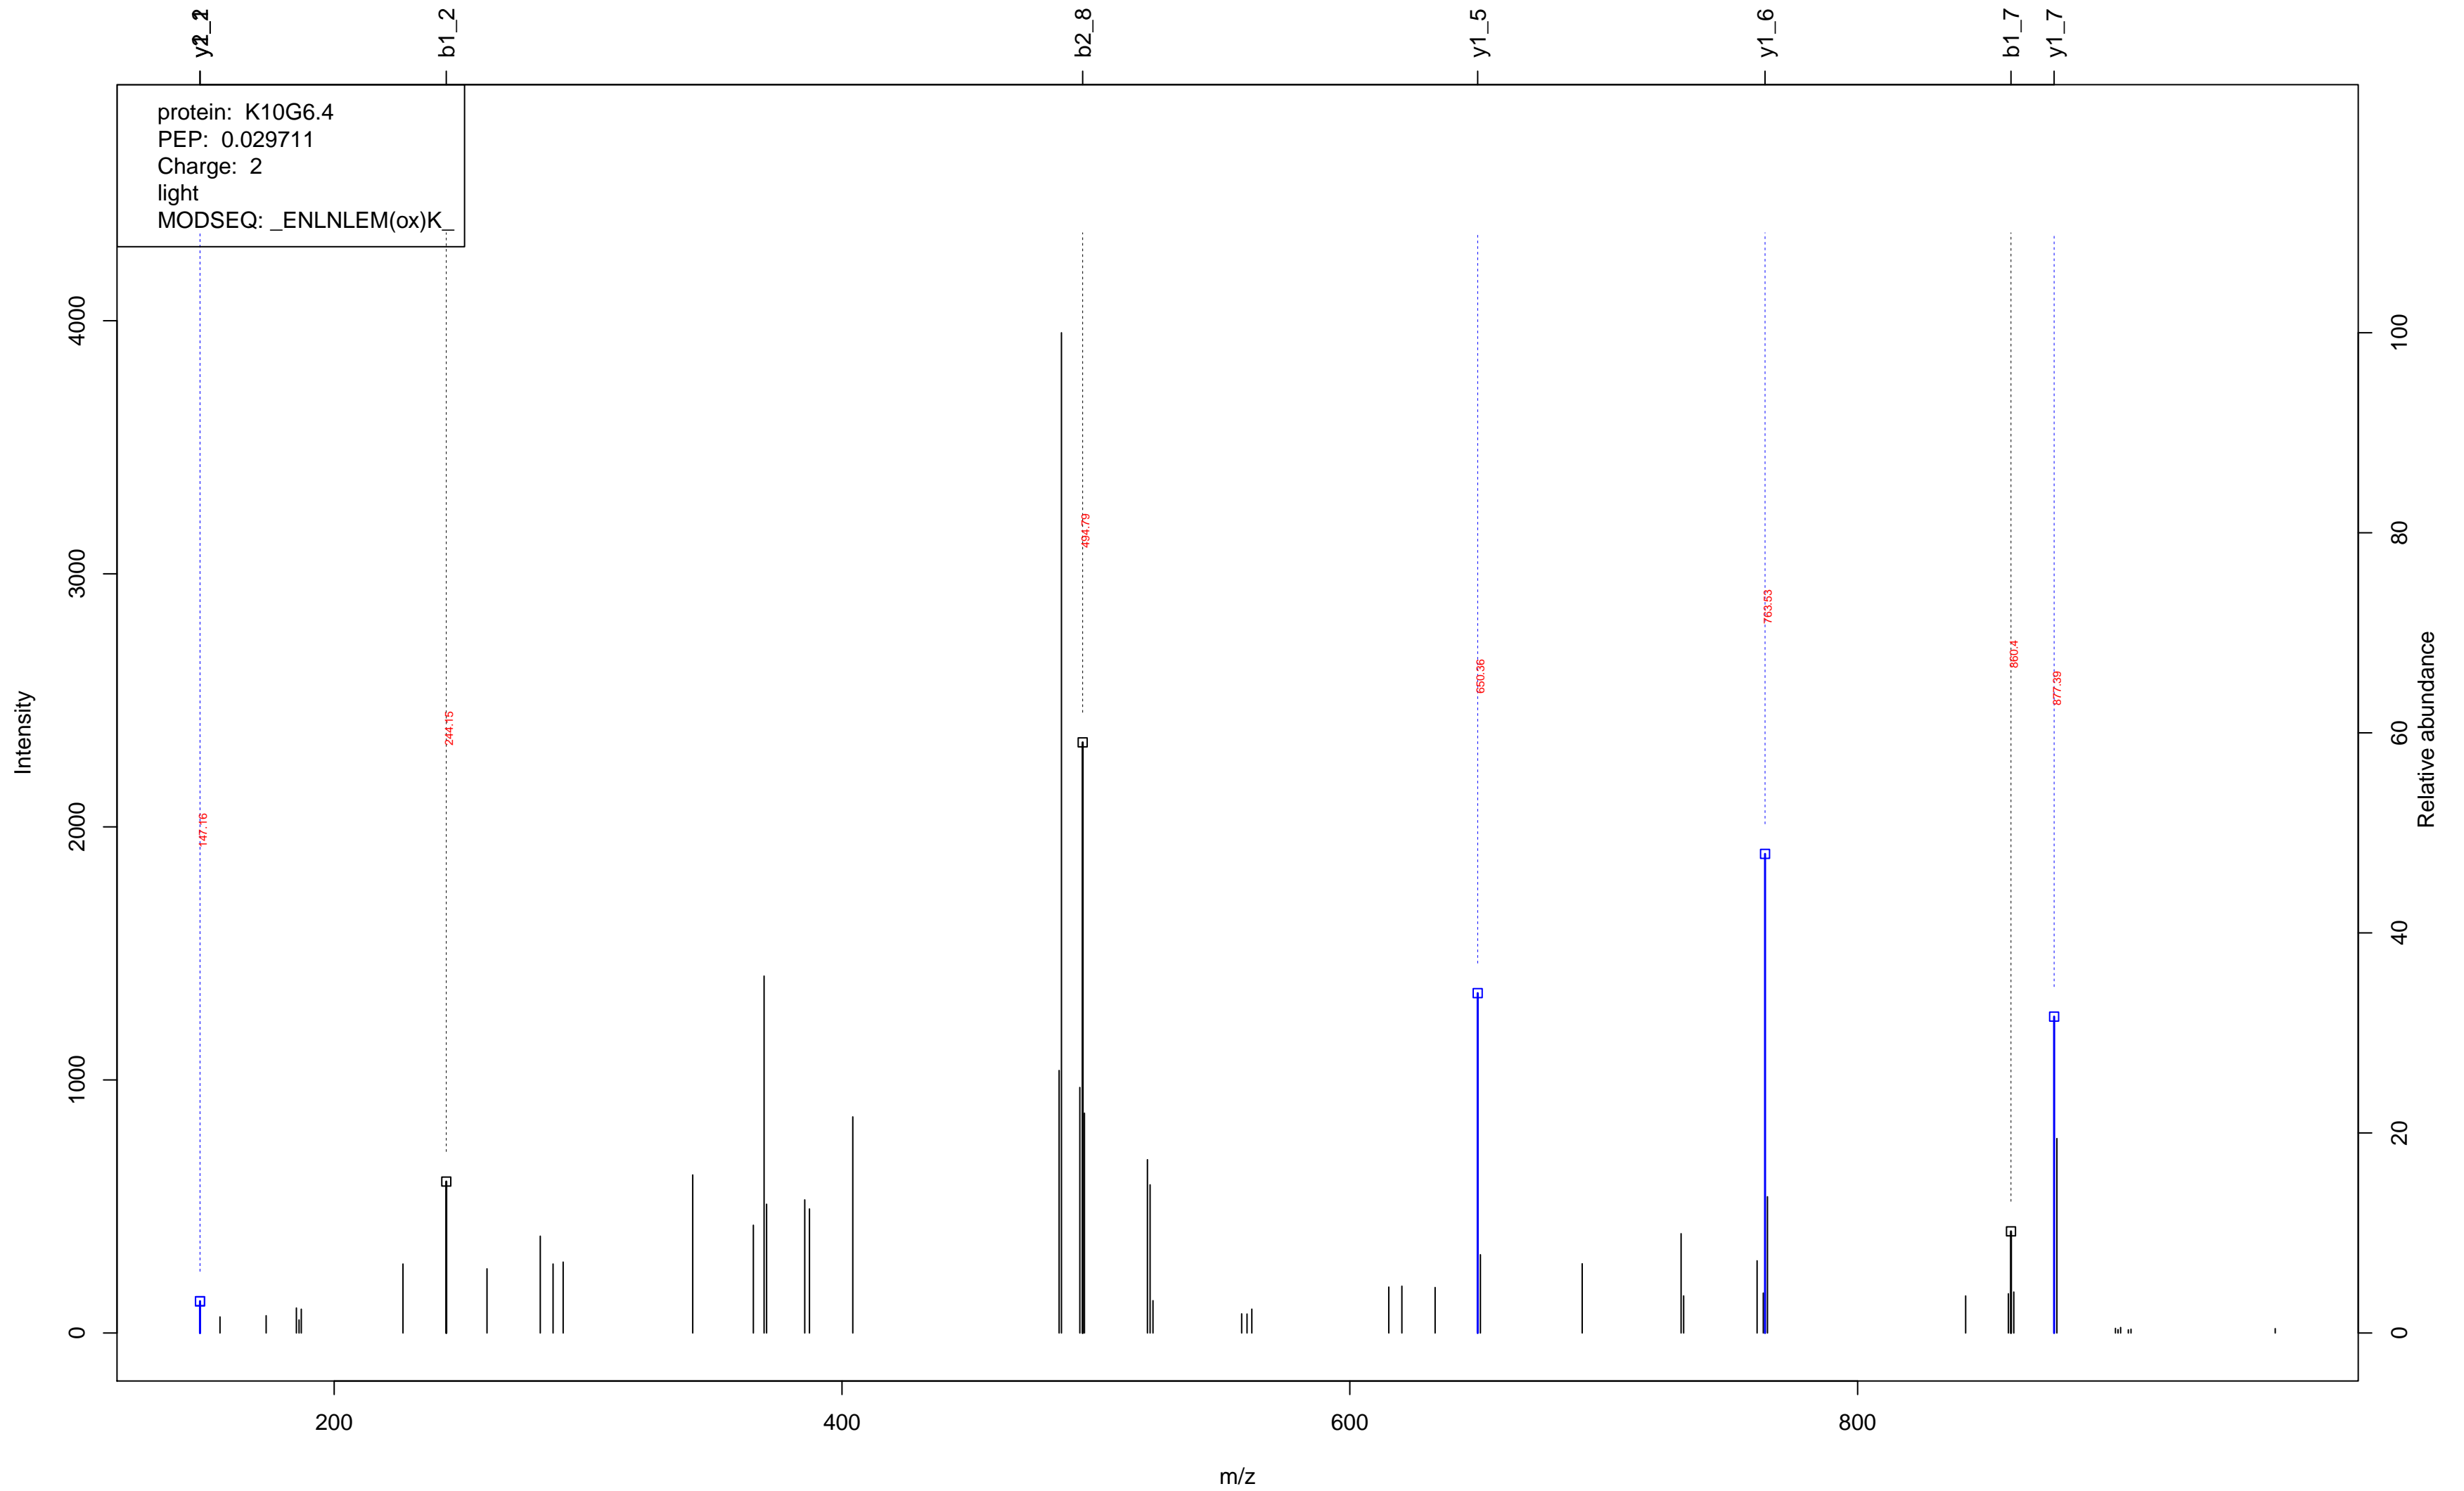

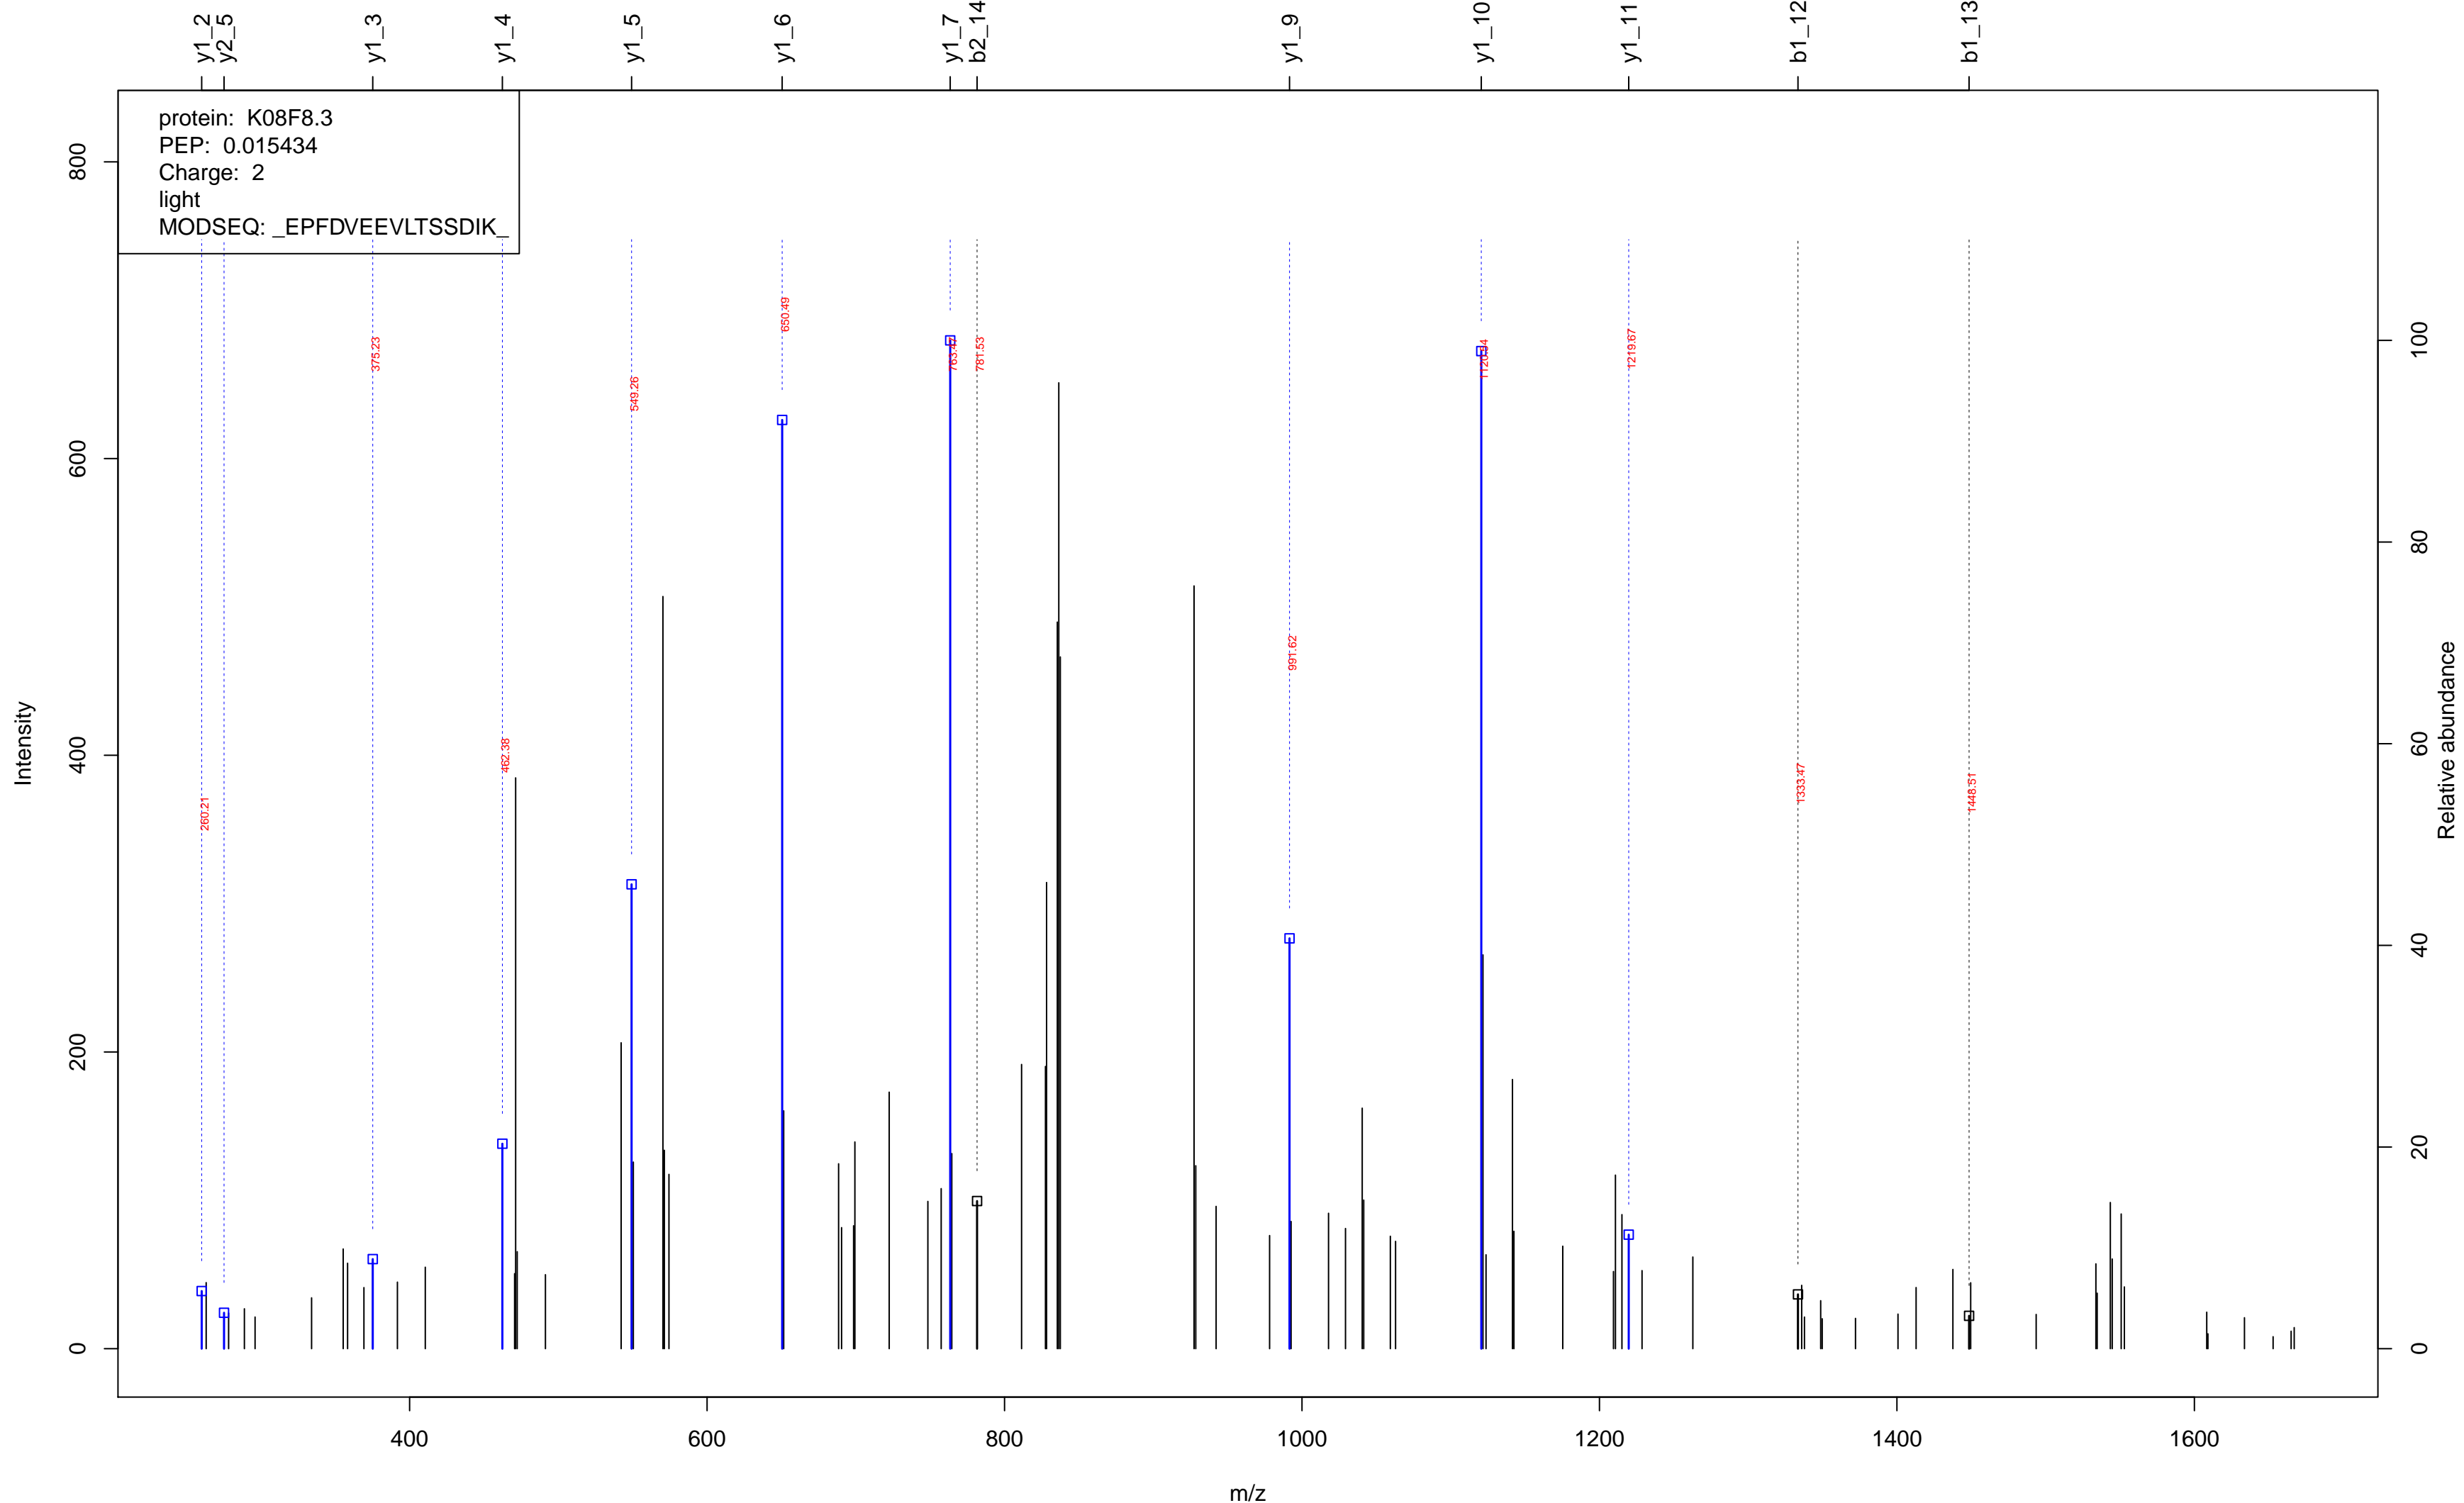

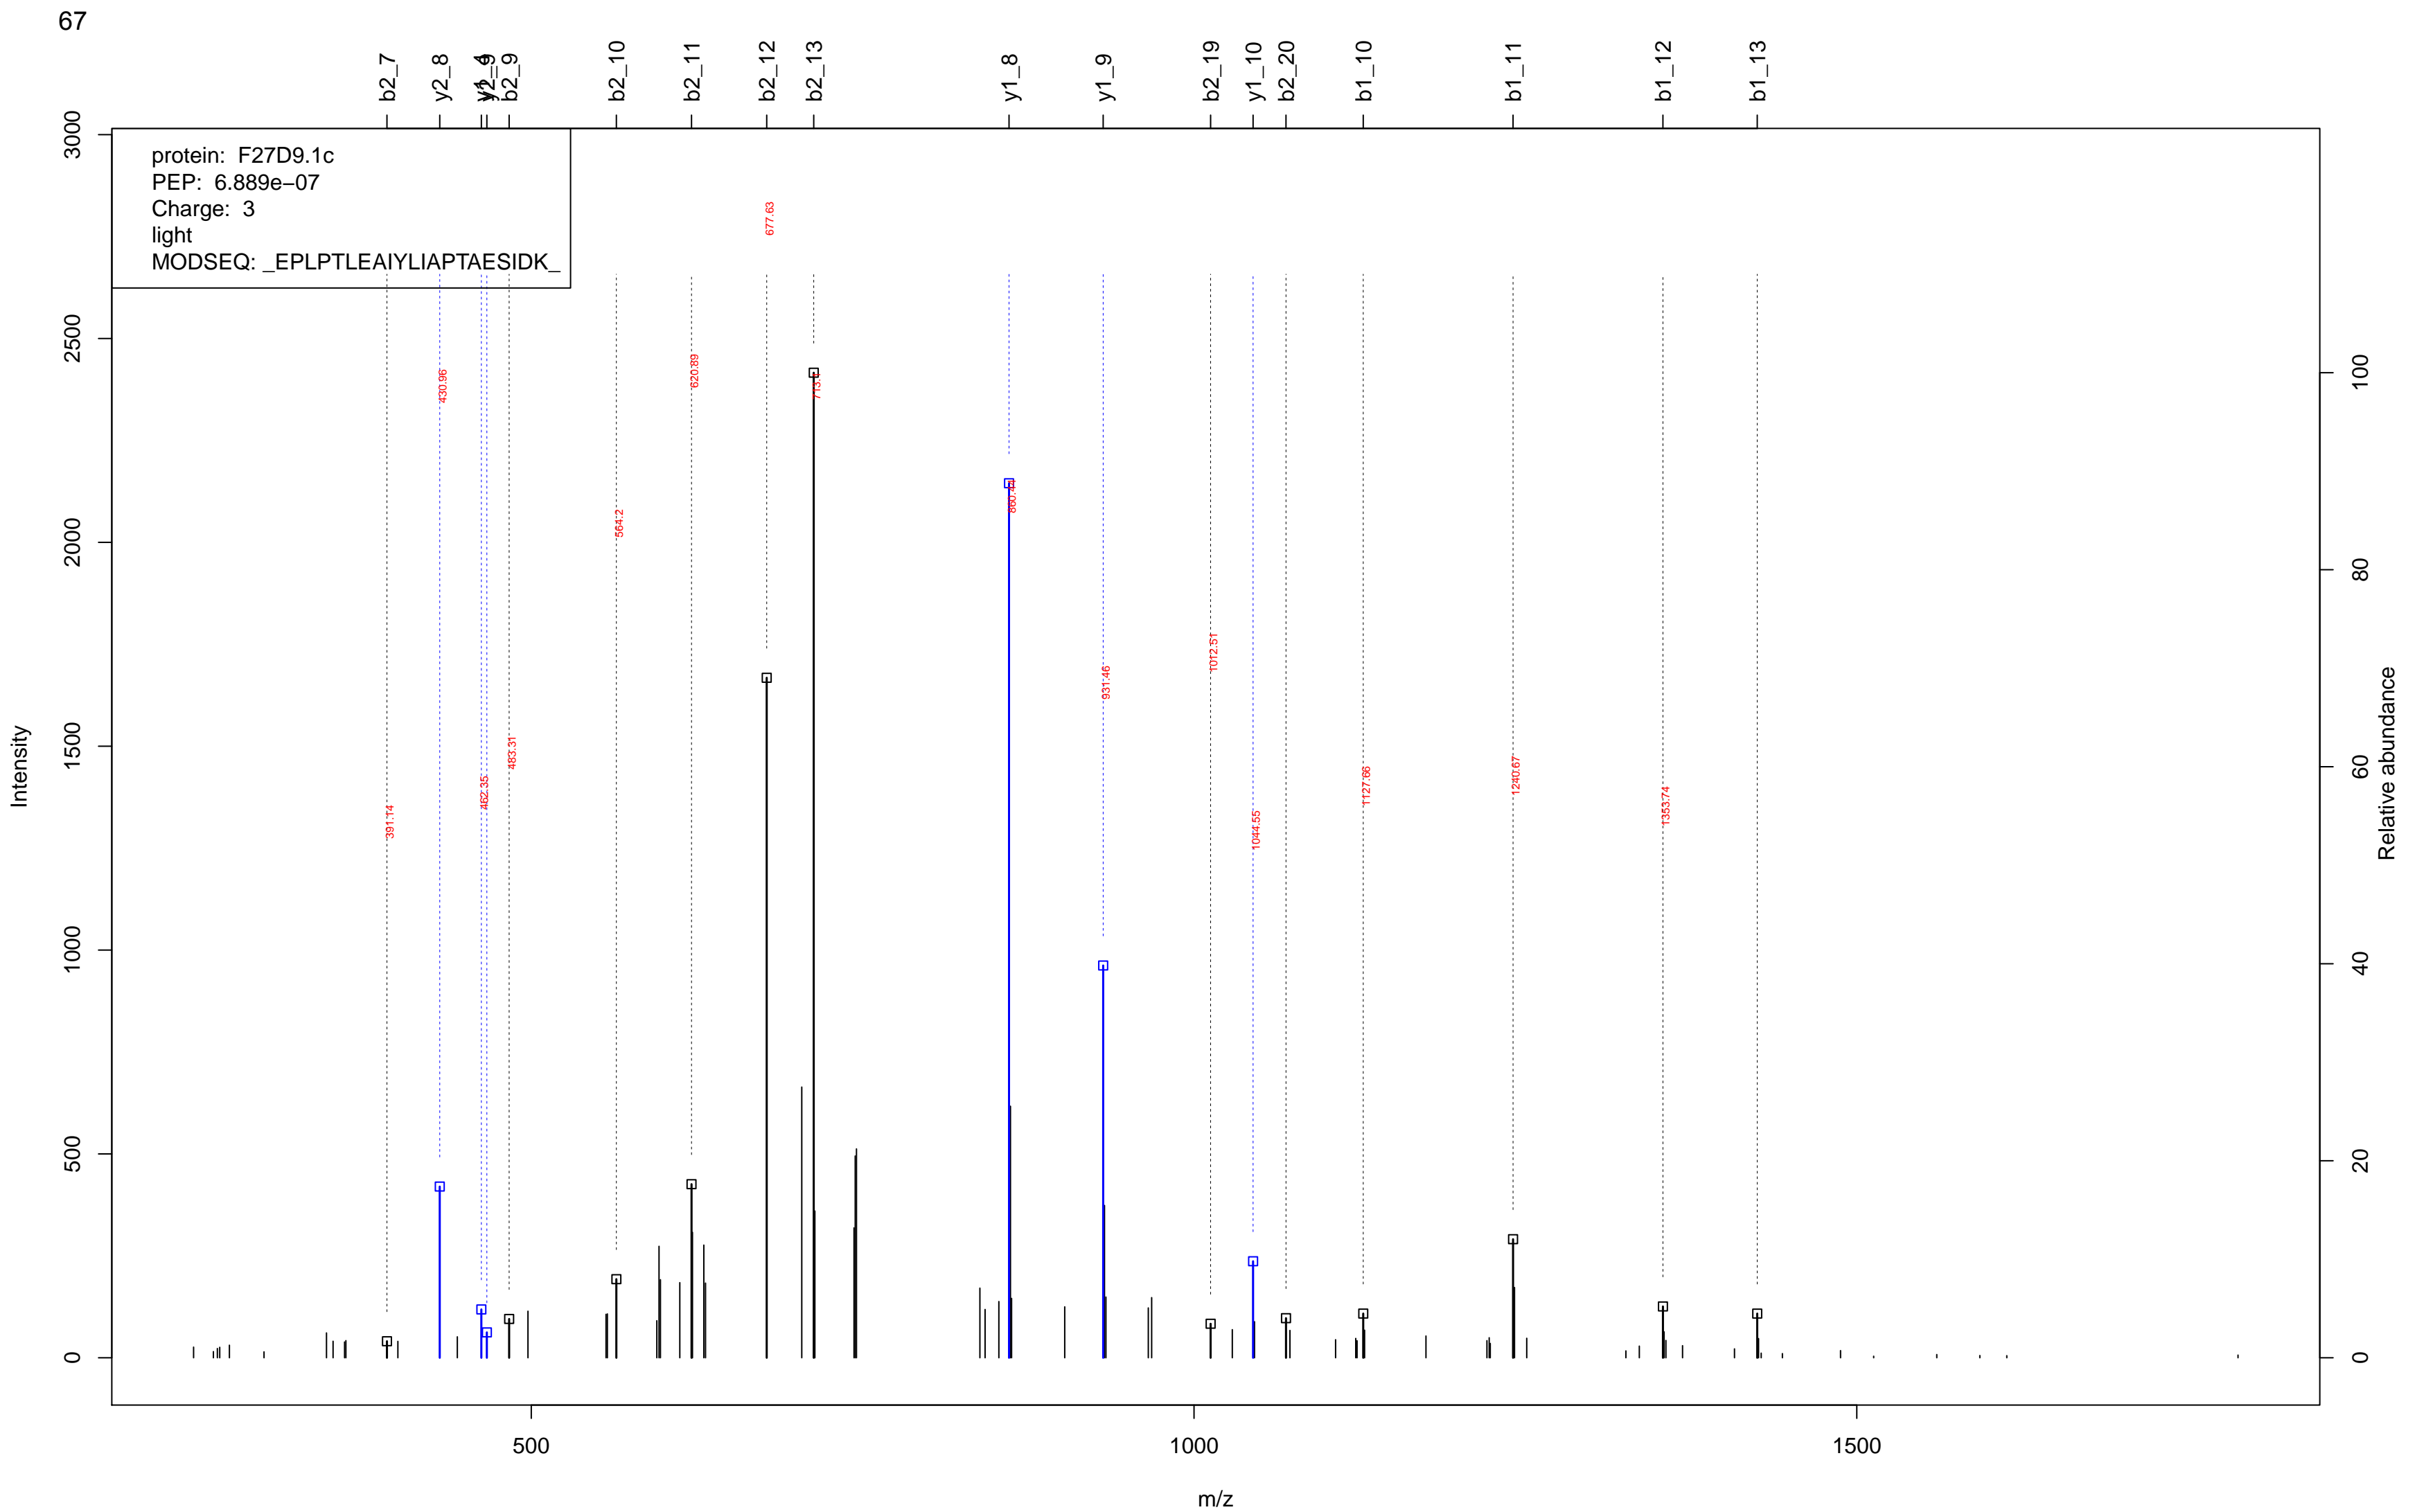

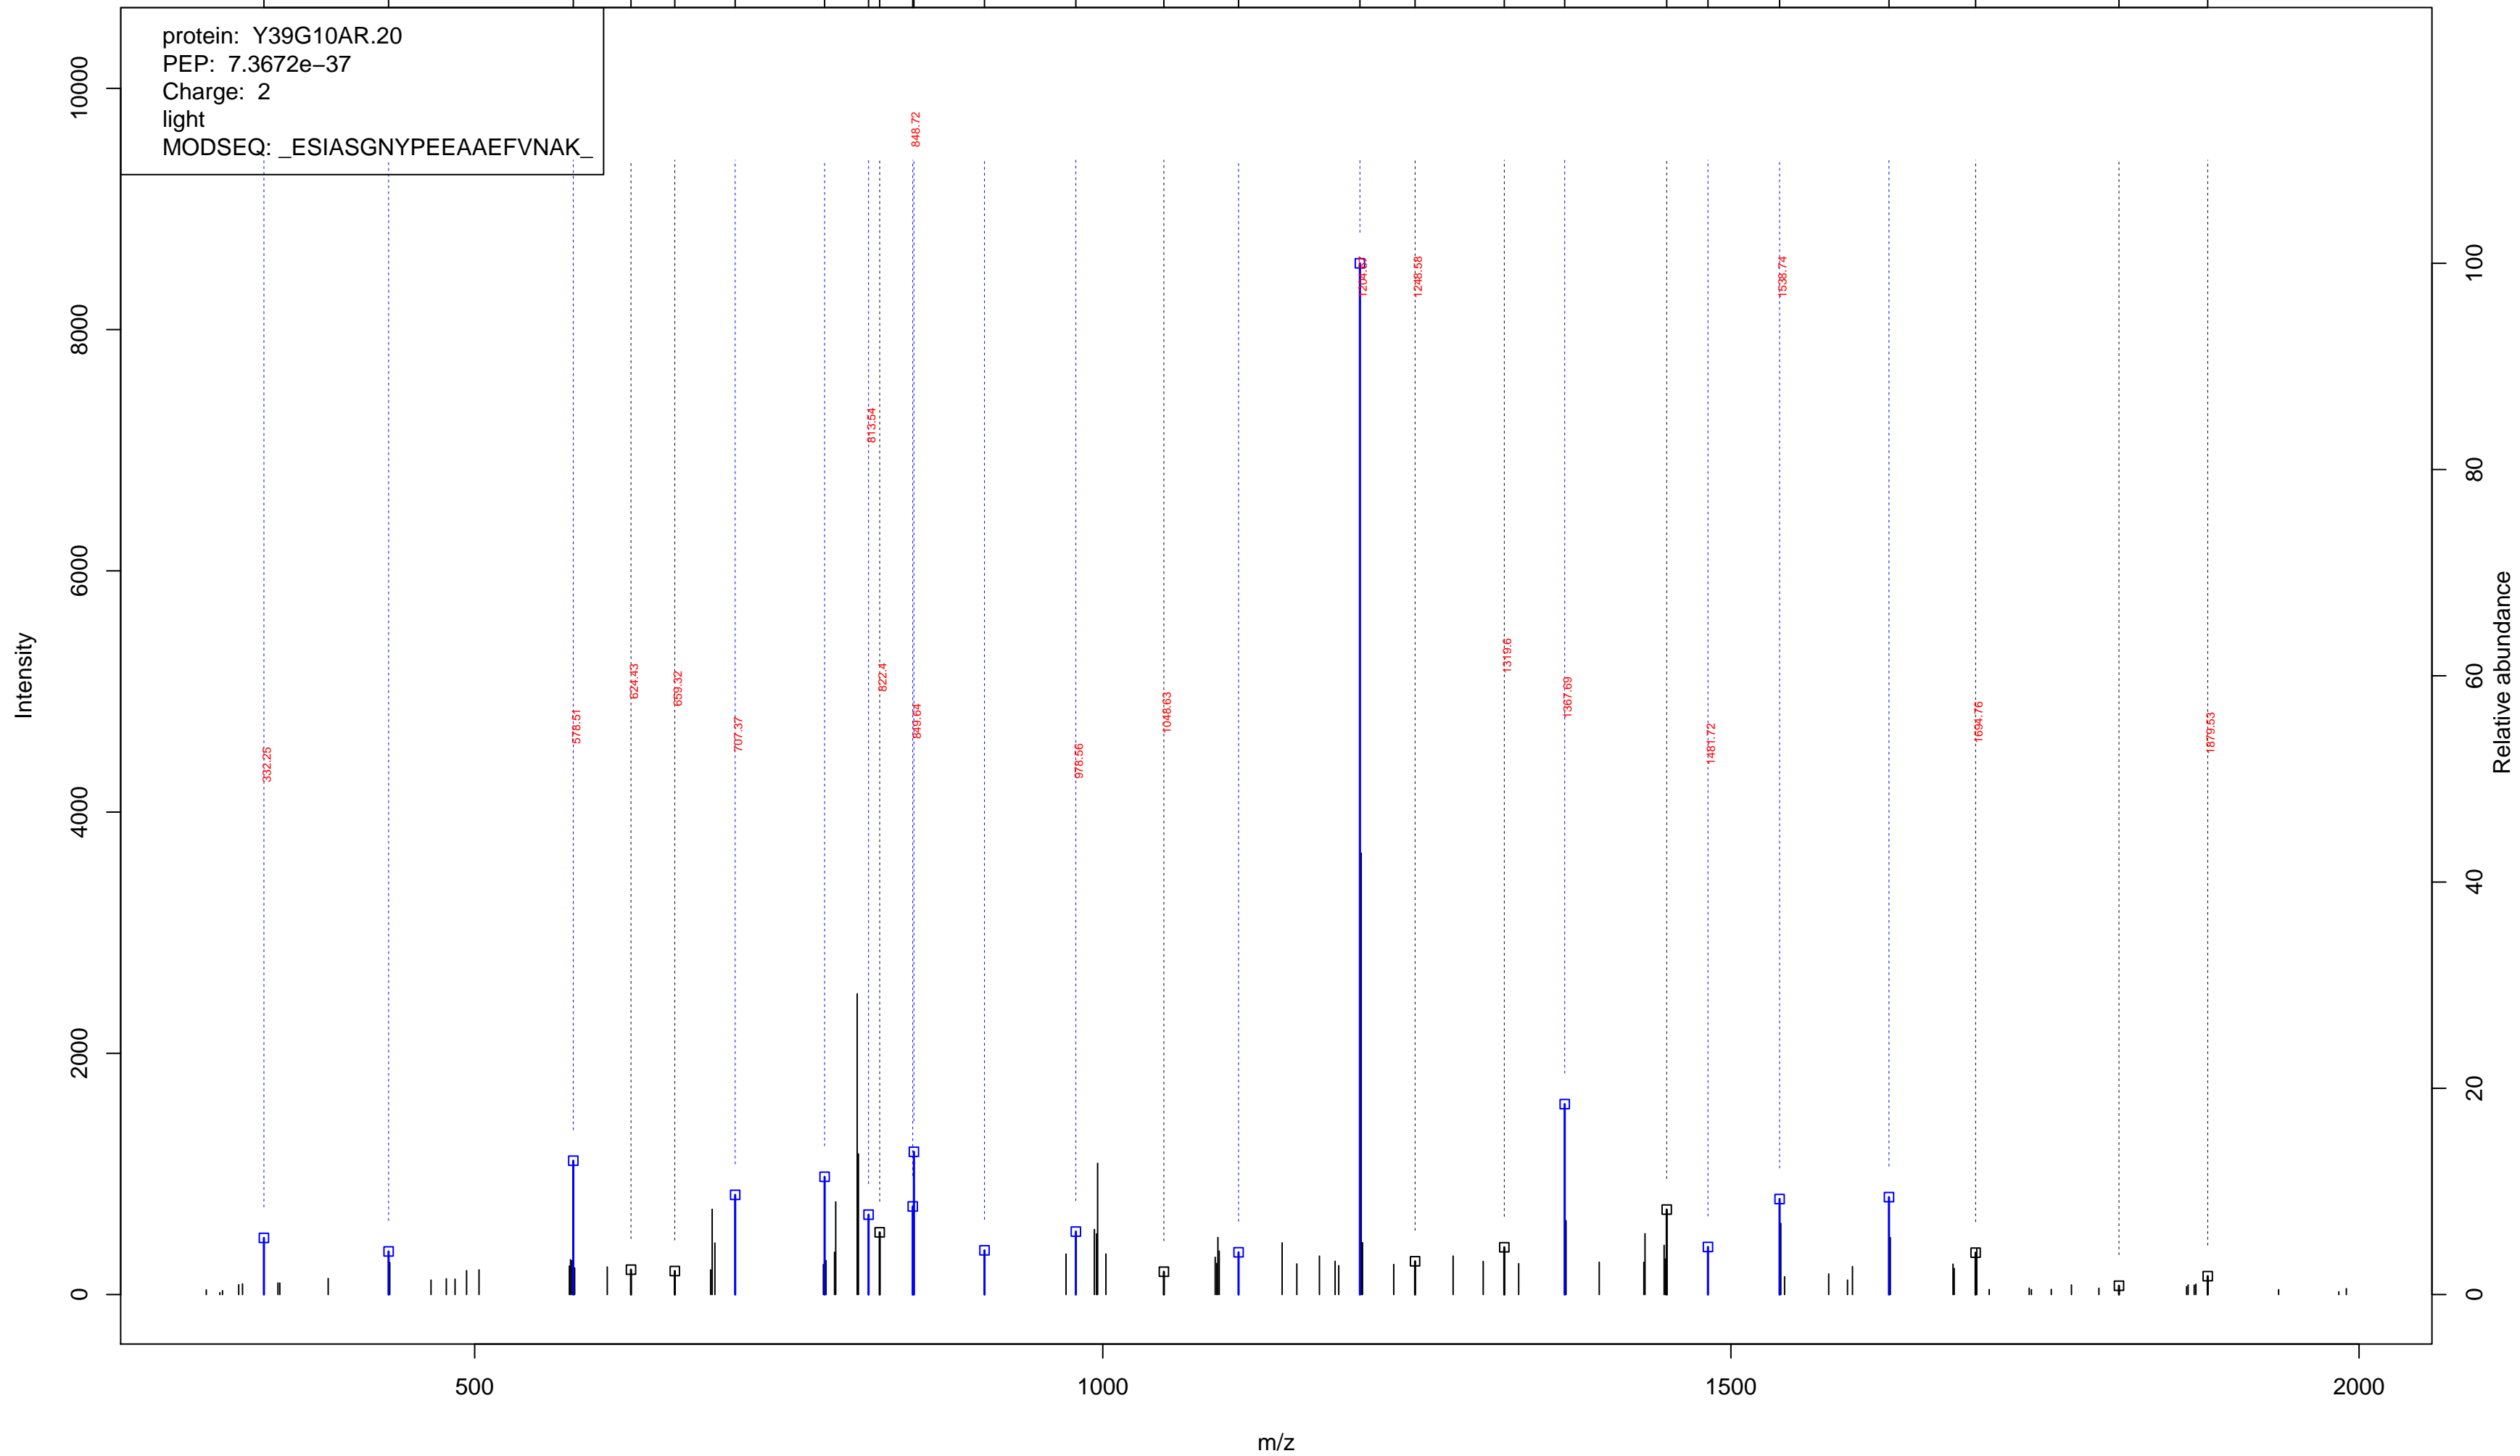

b1\_4 y1\_5 y1\_6 b1\_6 y1\_7 y1\_8 y1\_9 b1\_10 b2\_20 b1\_10 y1\_11 y2\_22 b1\_11 y1\_12 b1\_12 y1\_13 y1\_14 b1\_15 b1\_16 y1\_17 y1\_18 b1\_18

protein: M28.10  
PEP: 1.0471e-24  
Charge: 2  
light  
MODSEQ: \_EVAQAIDEQTLNNEVATIASLSK\_

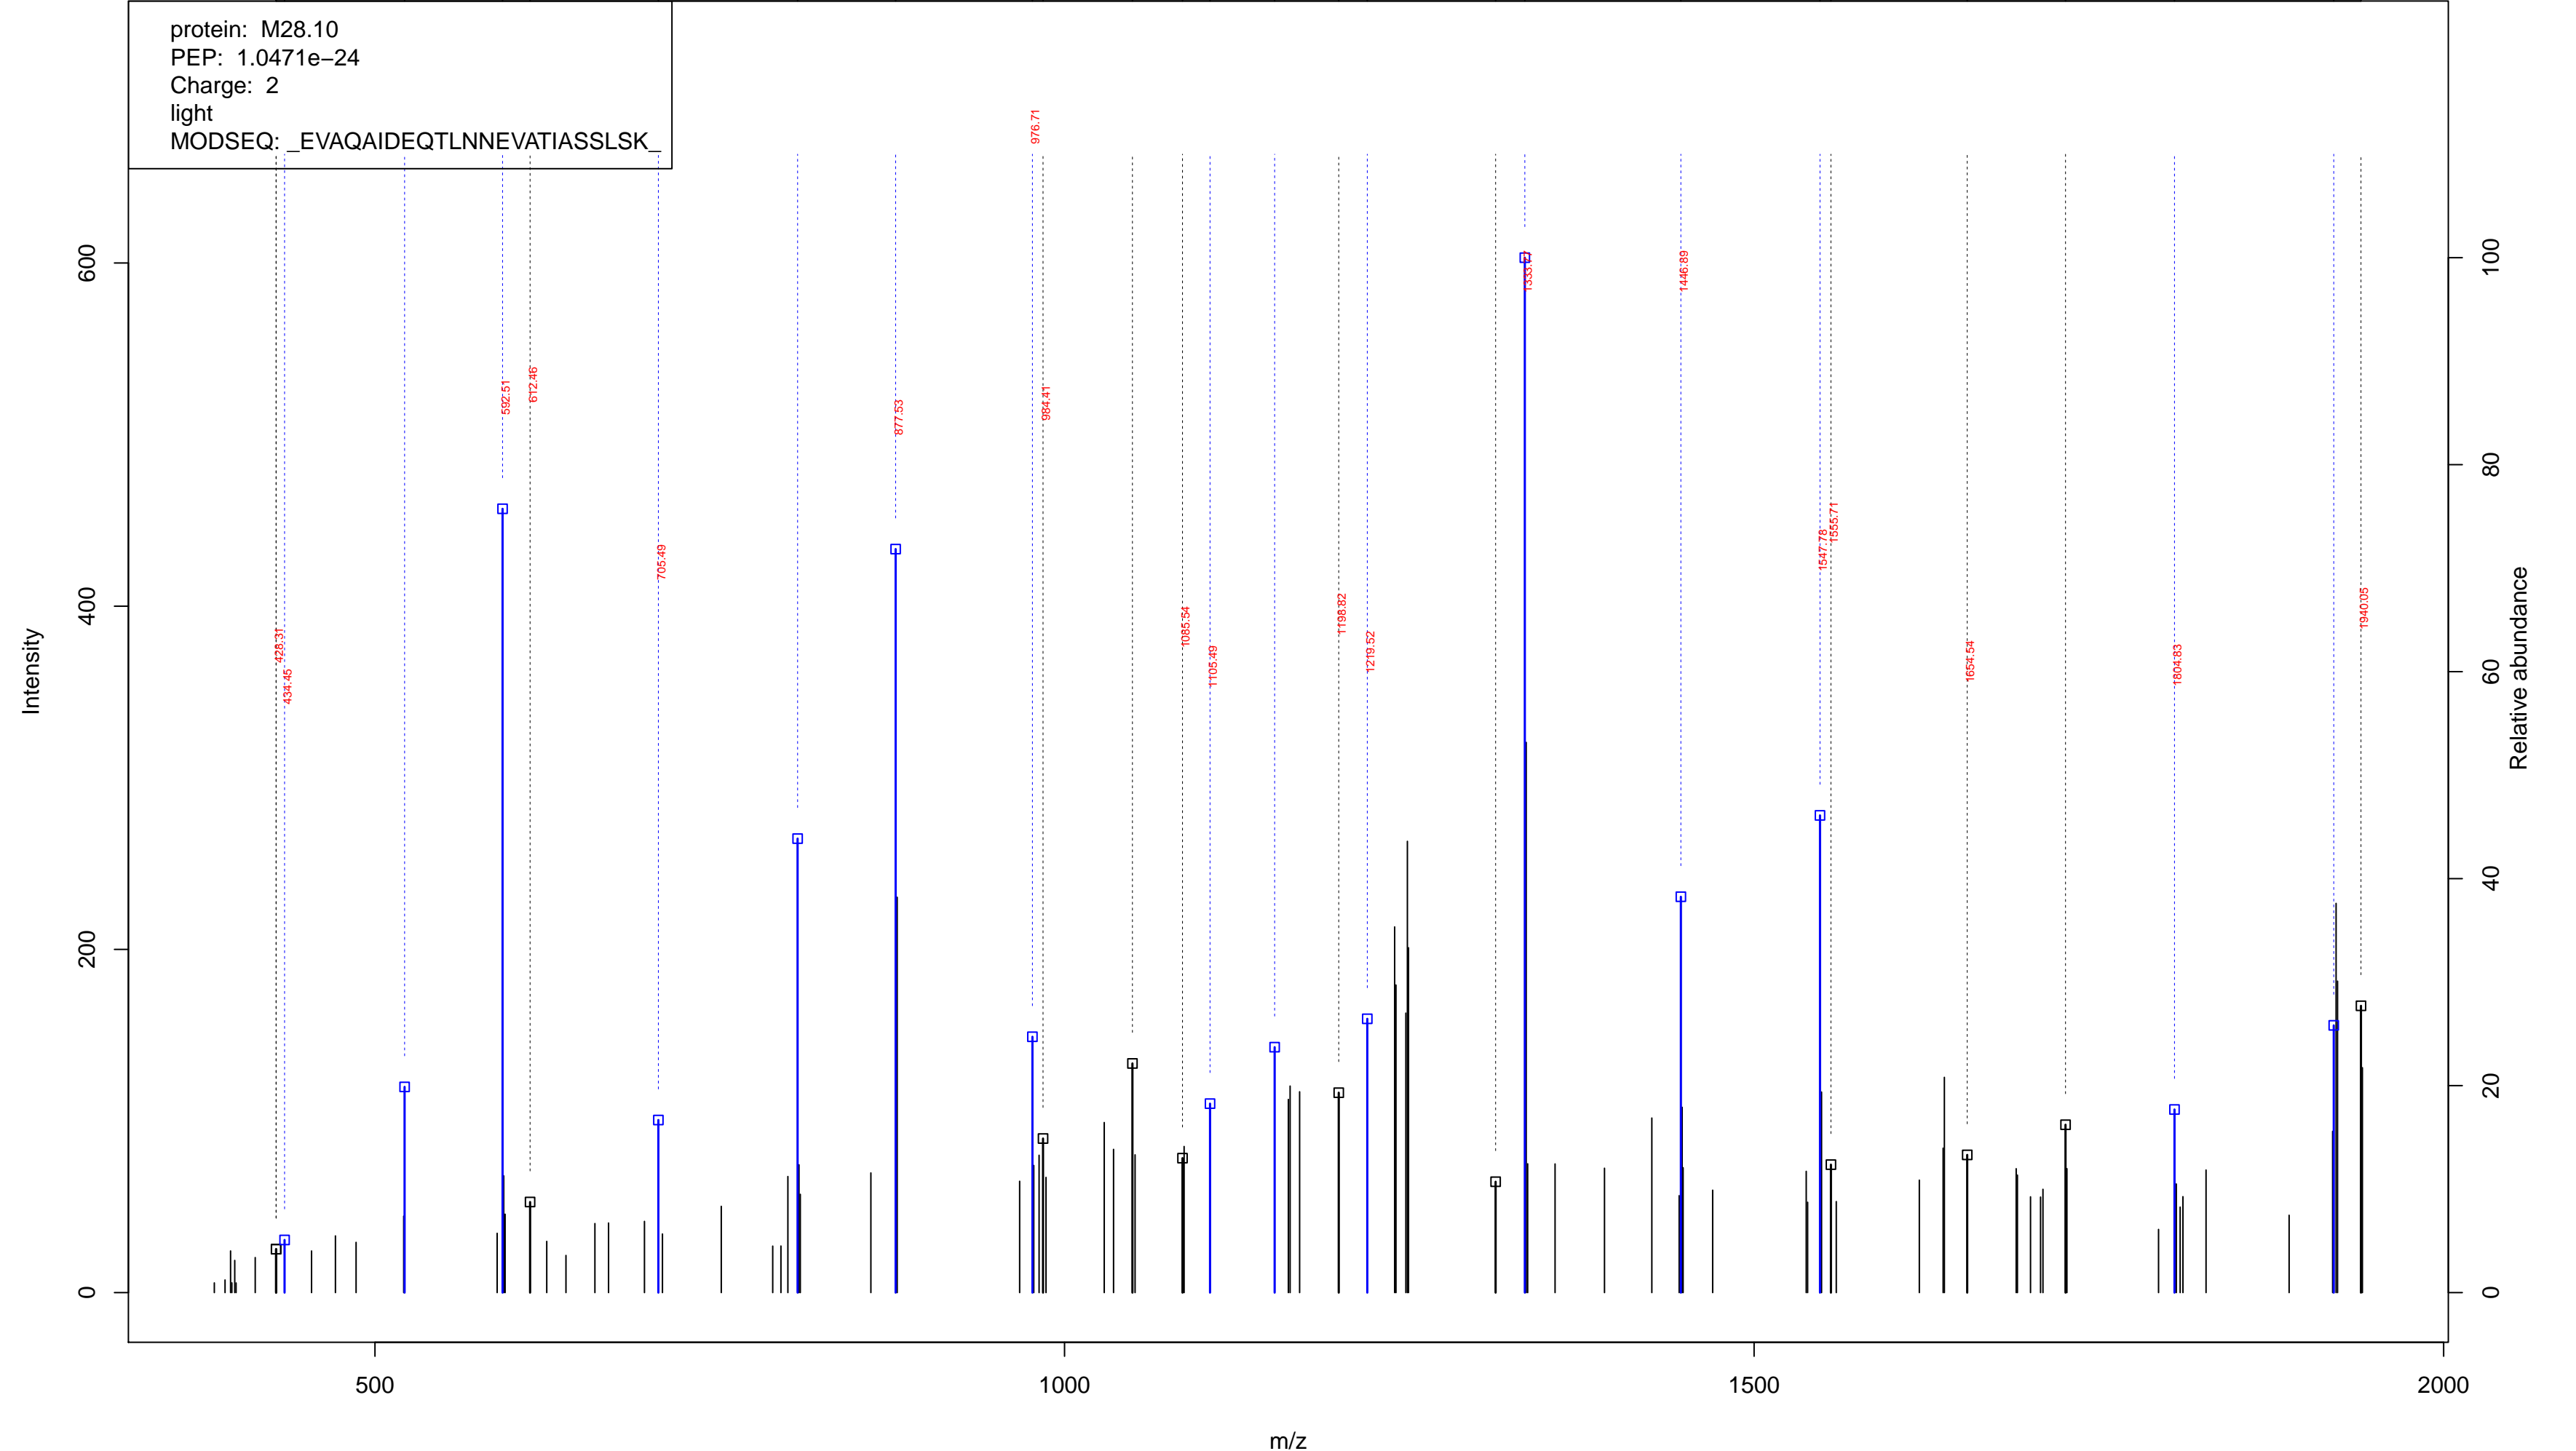

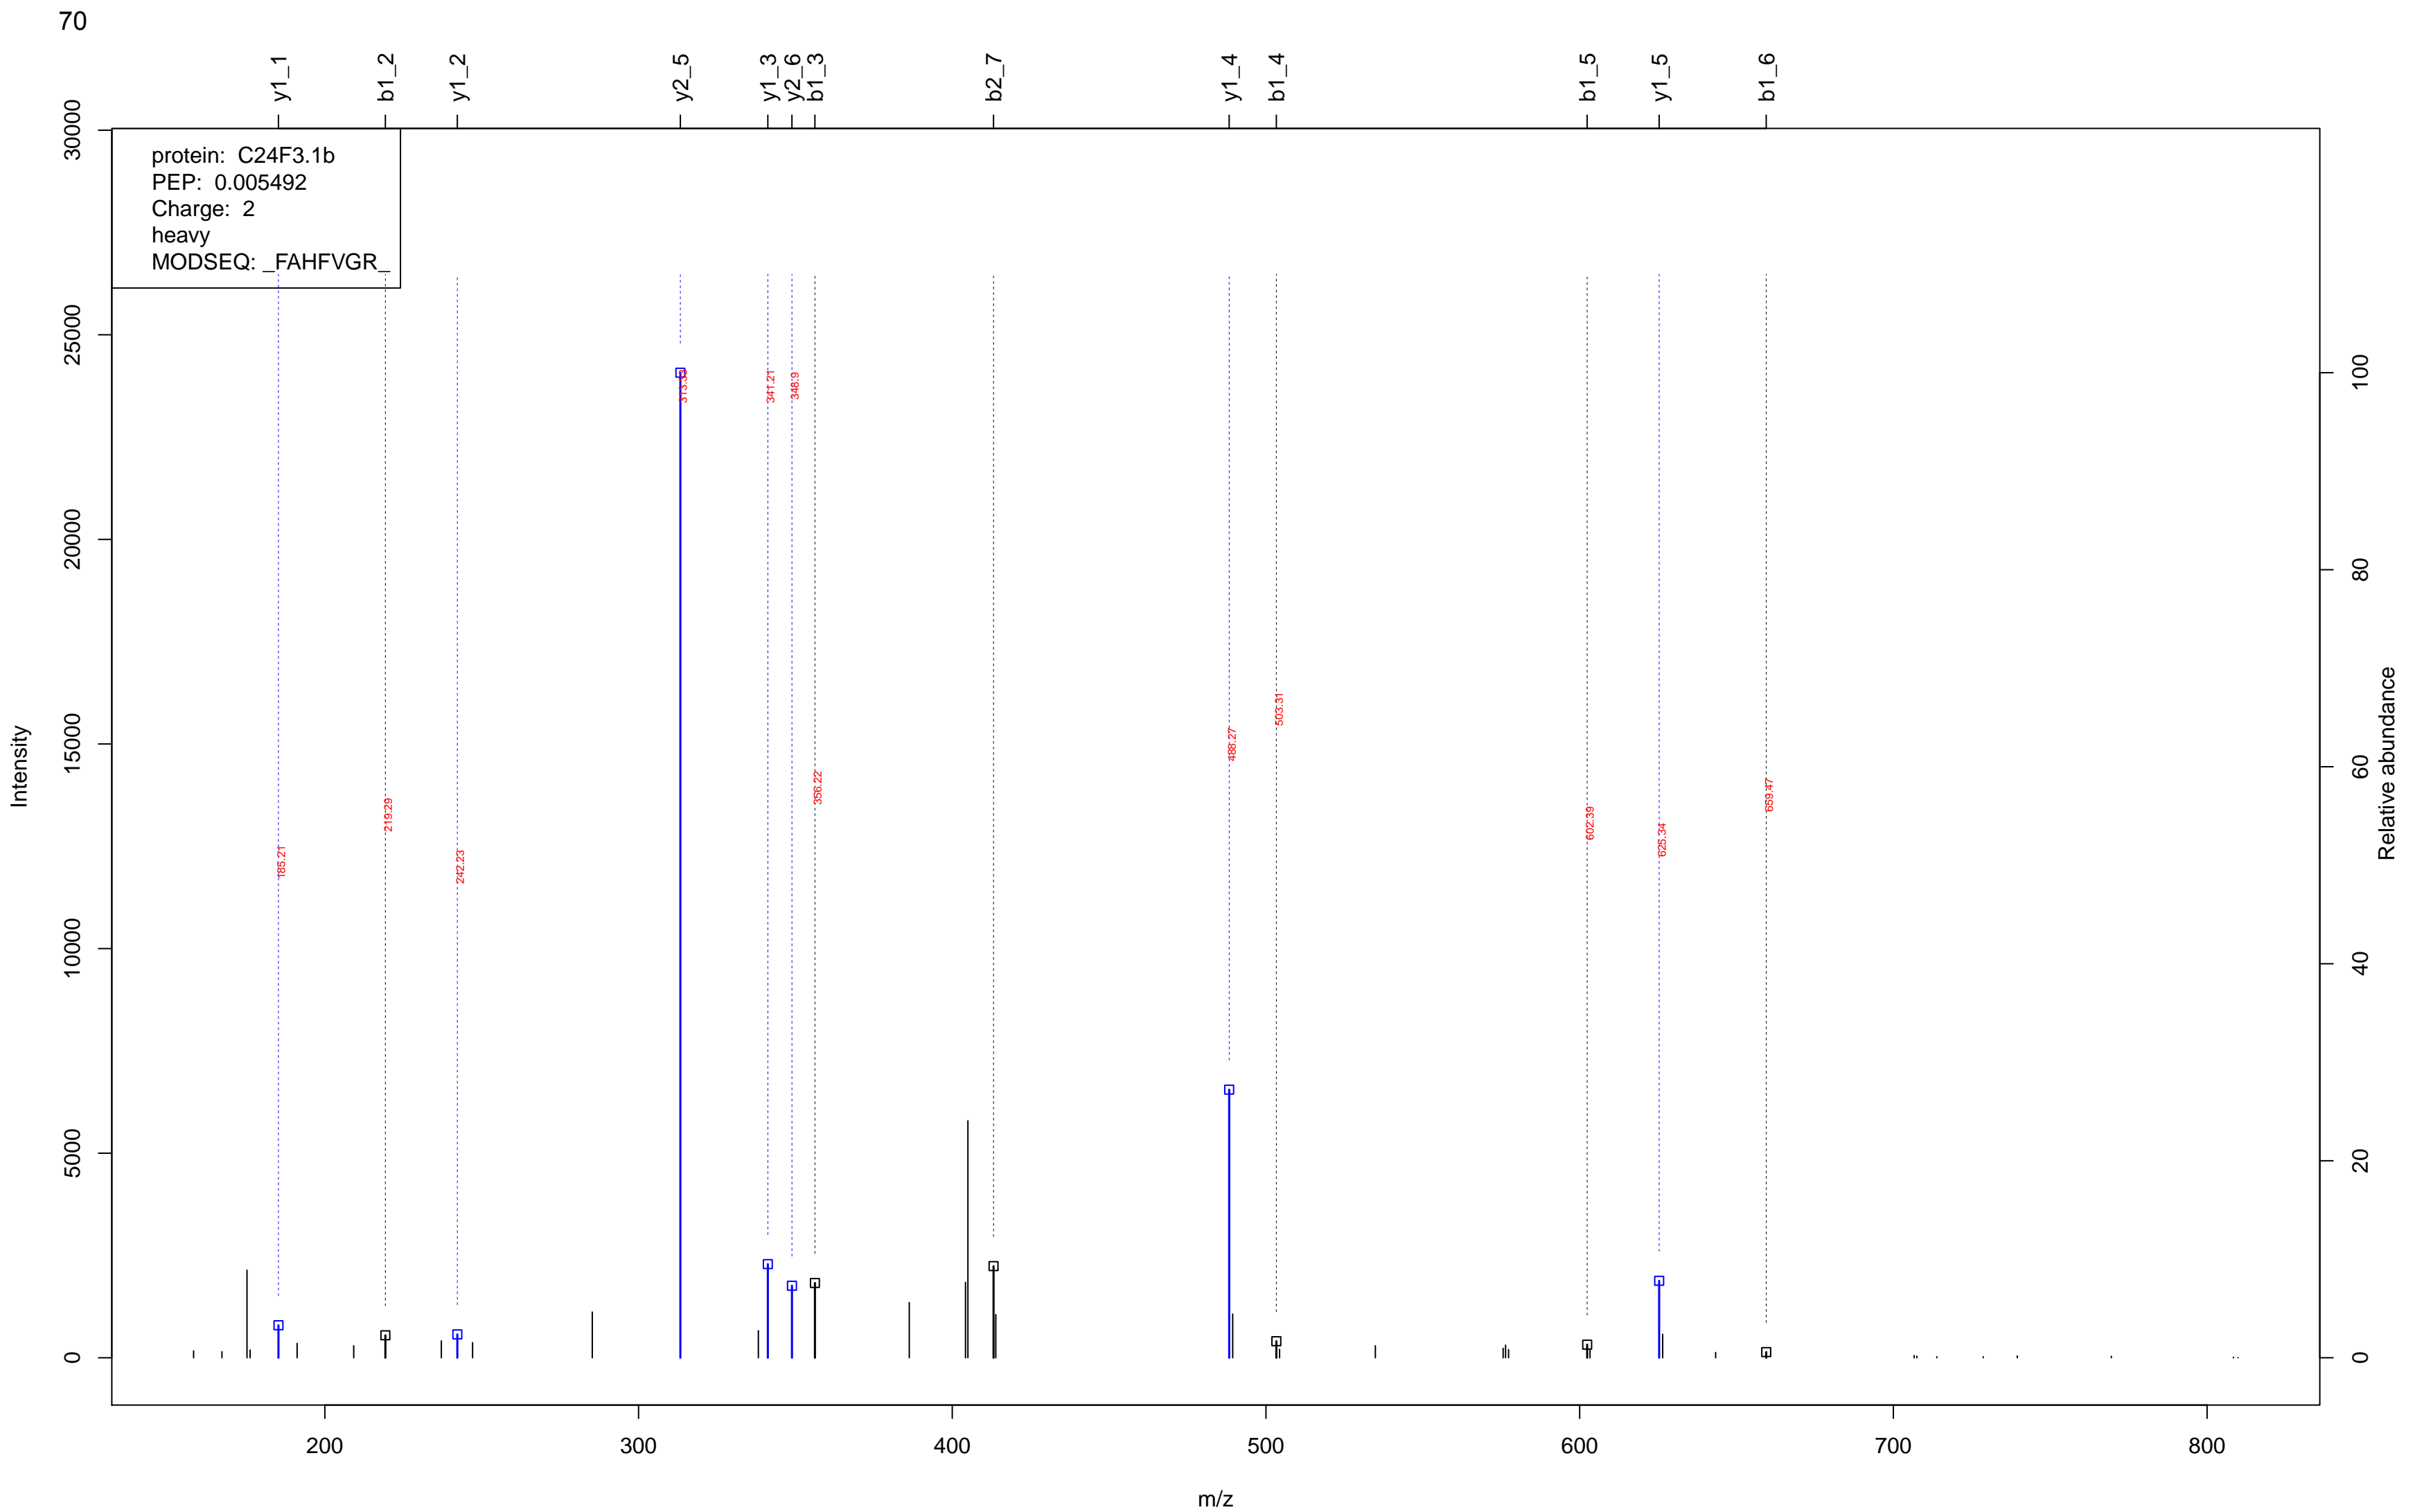

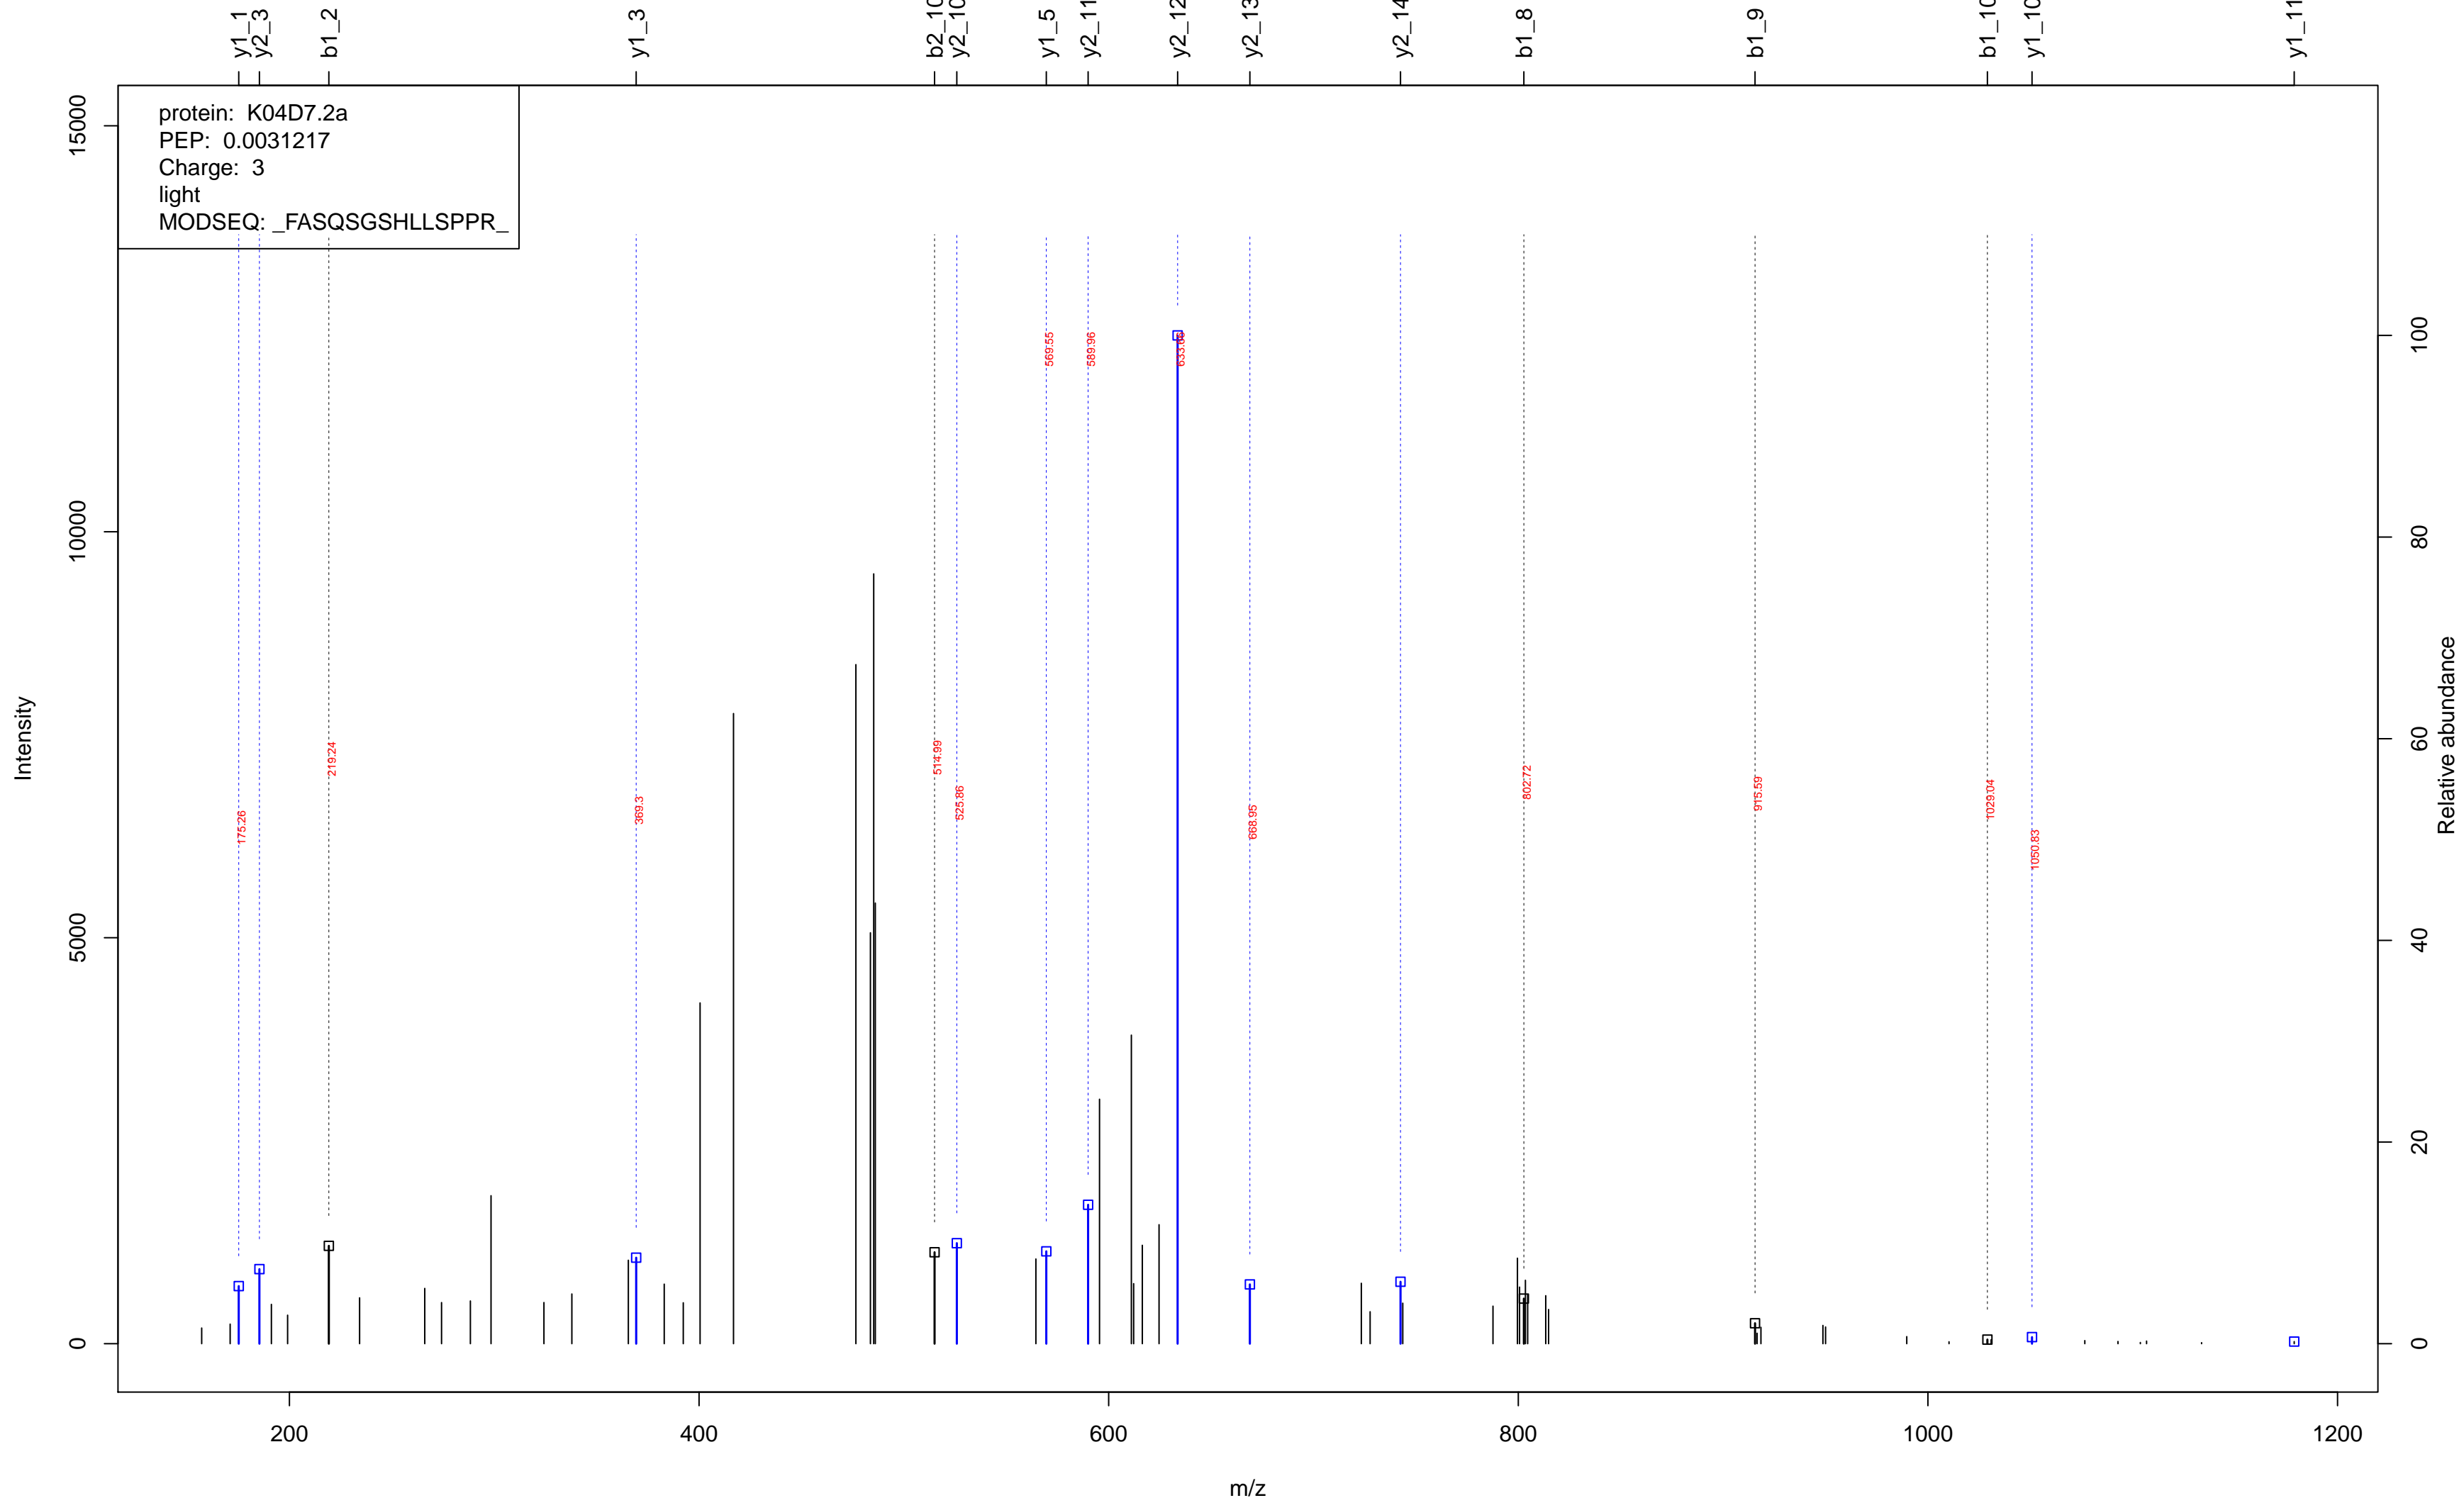

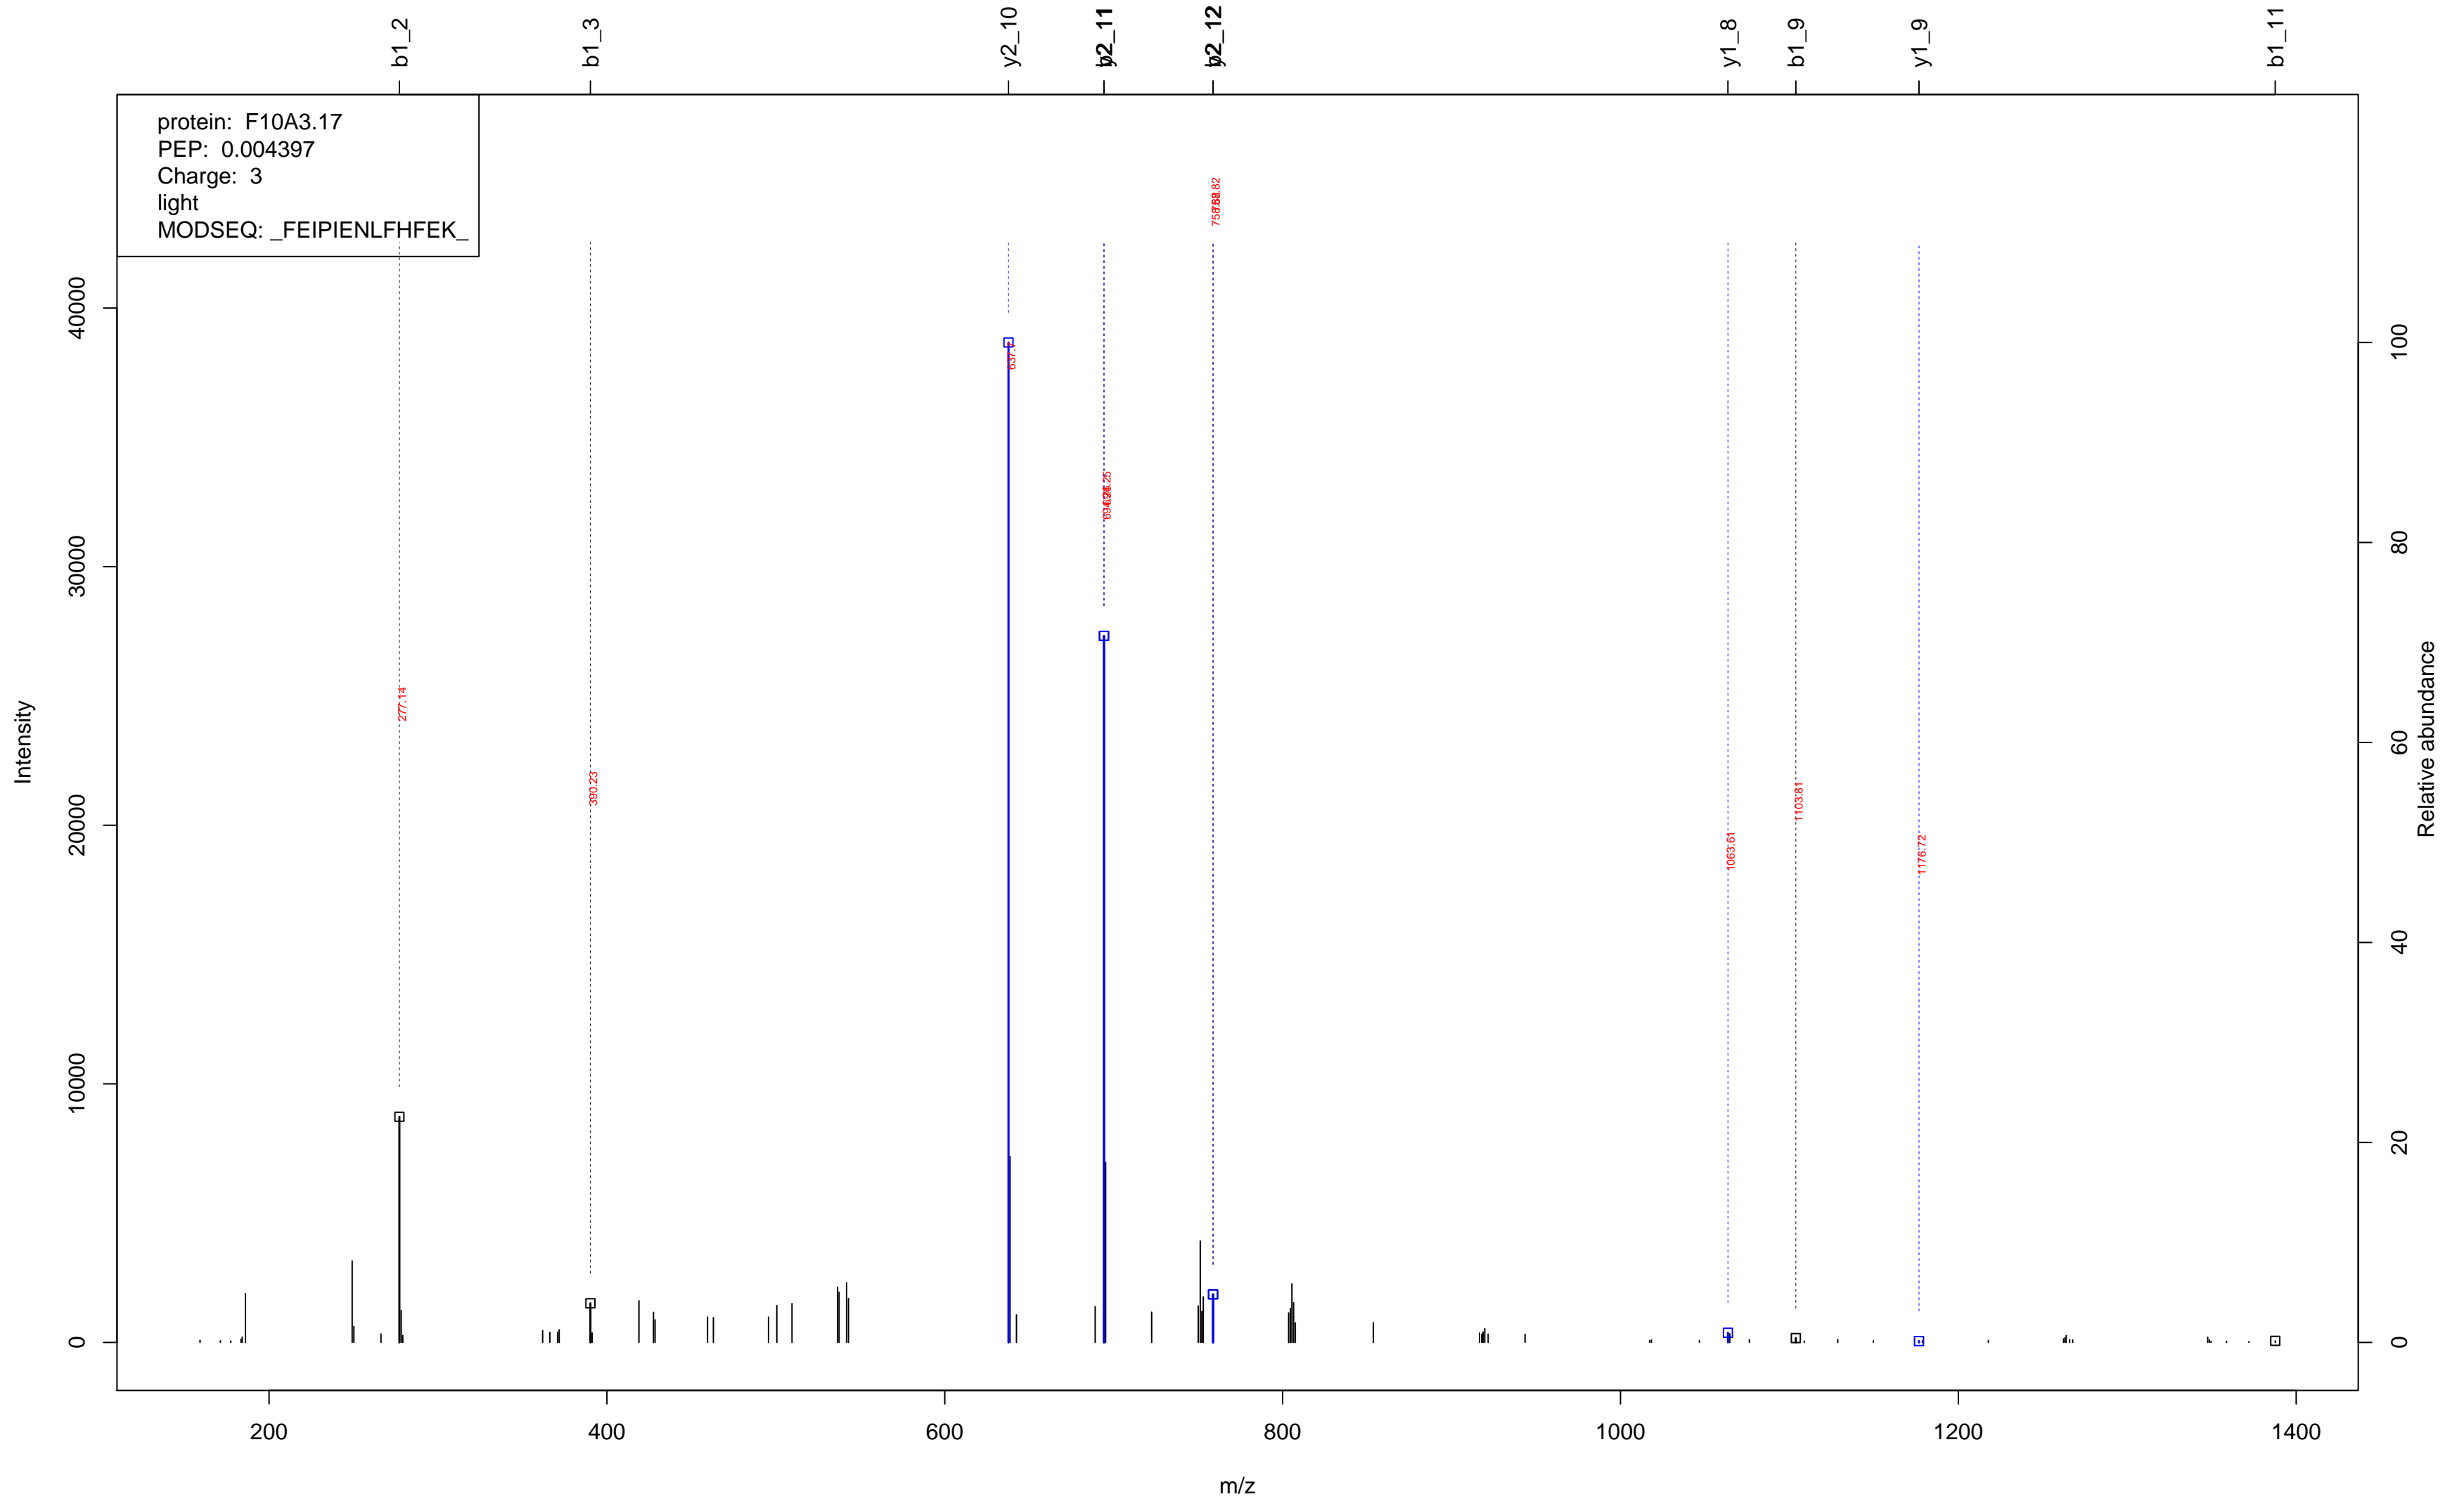



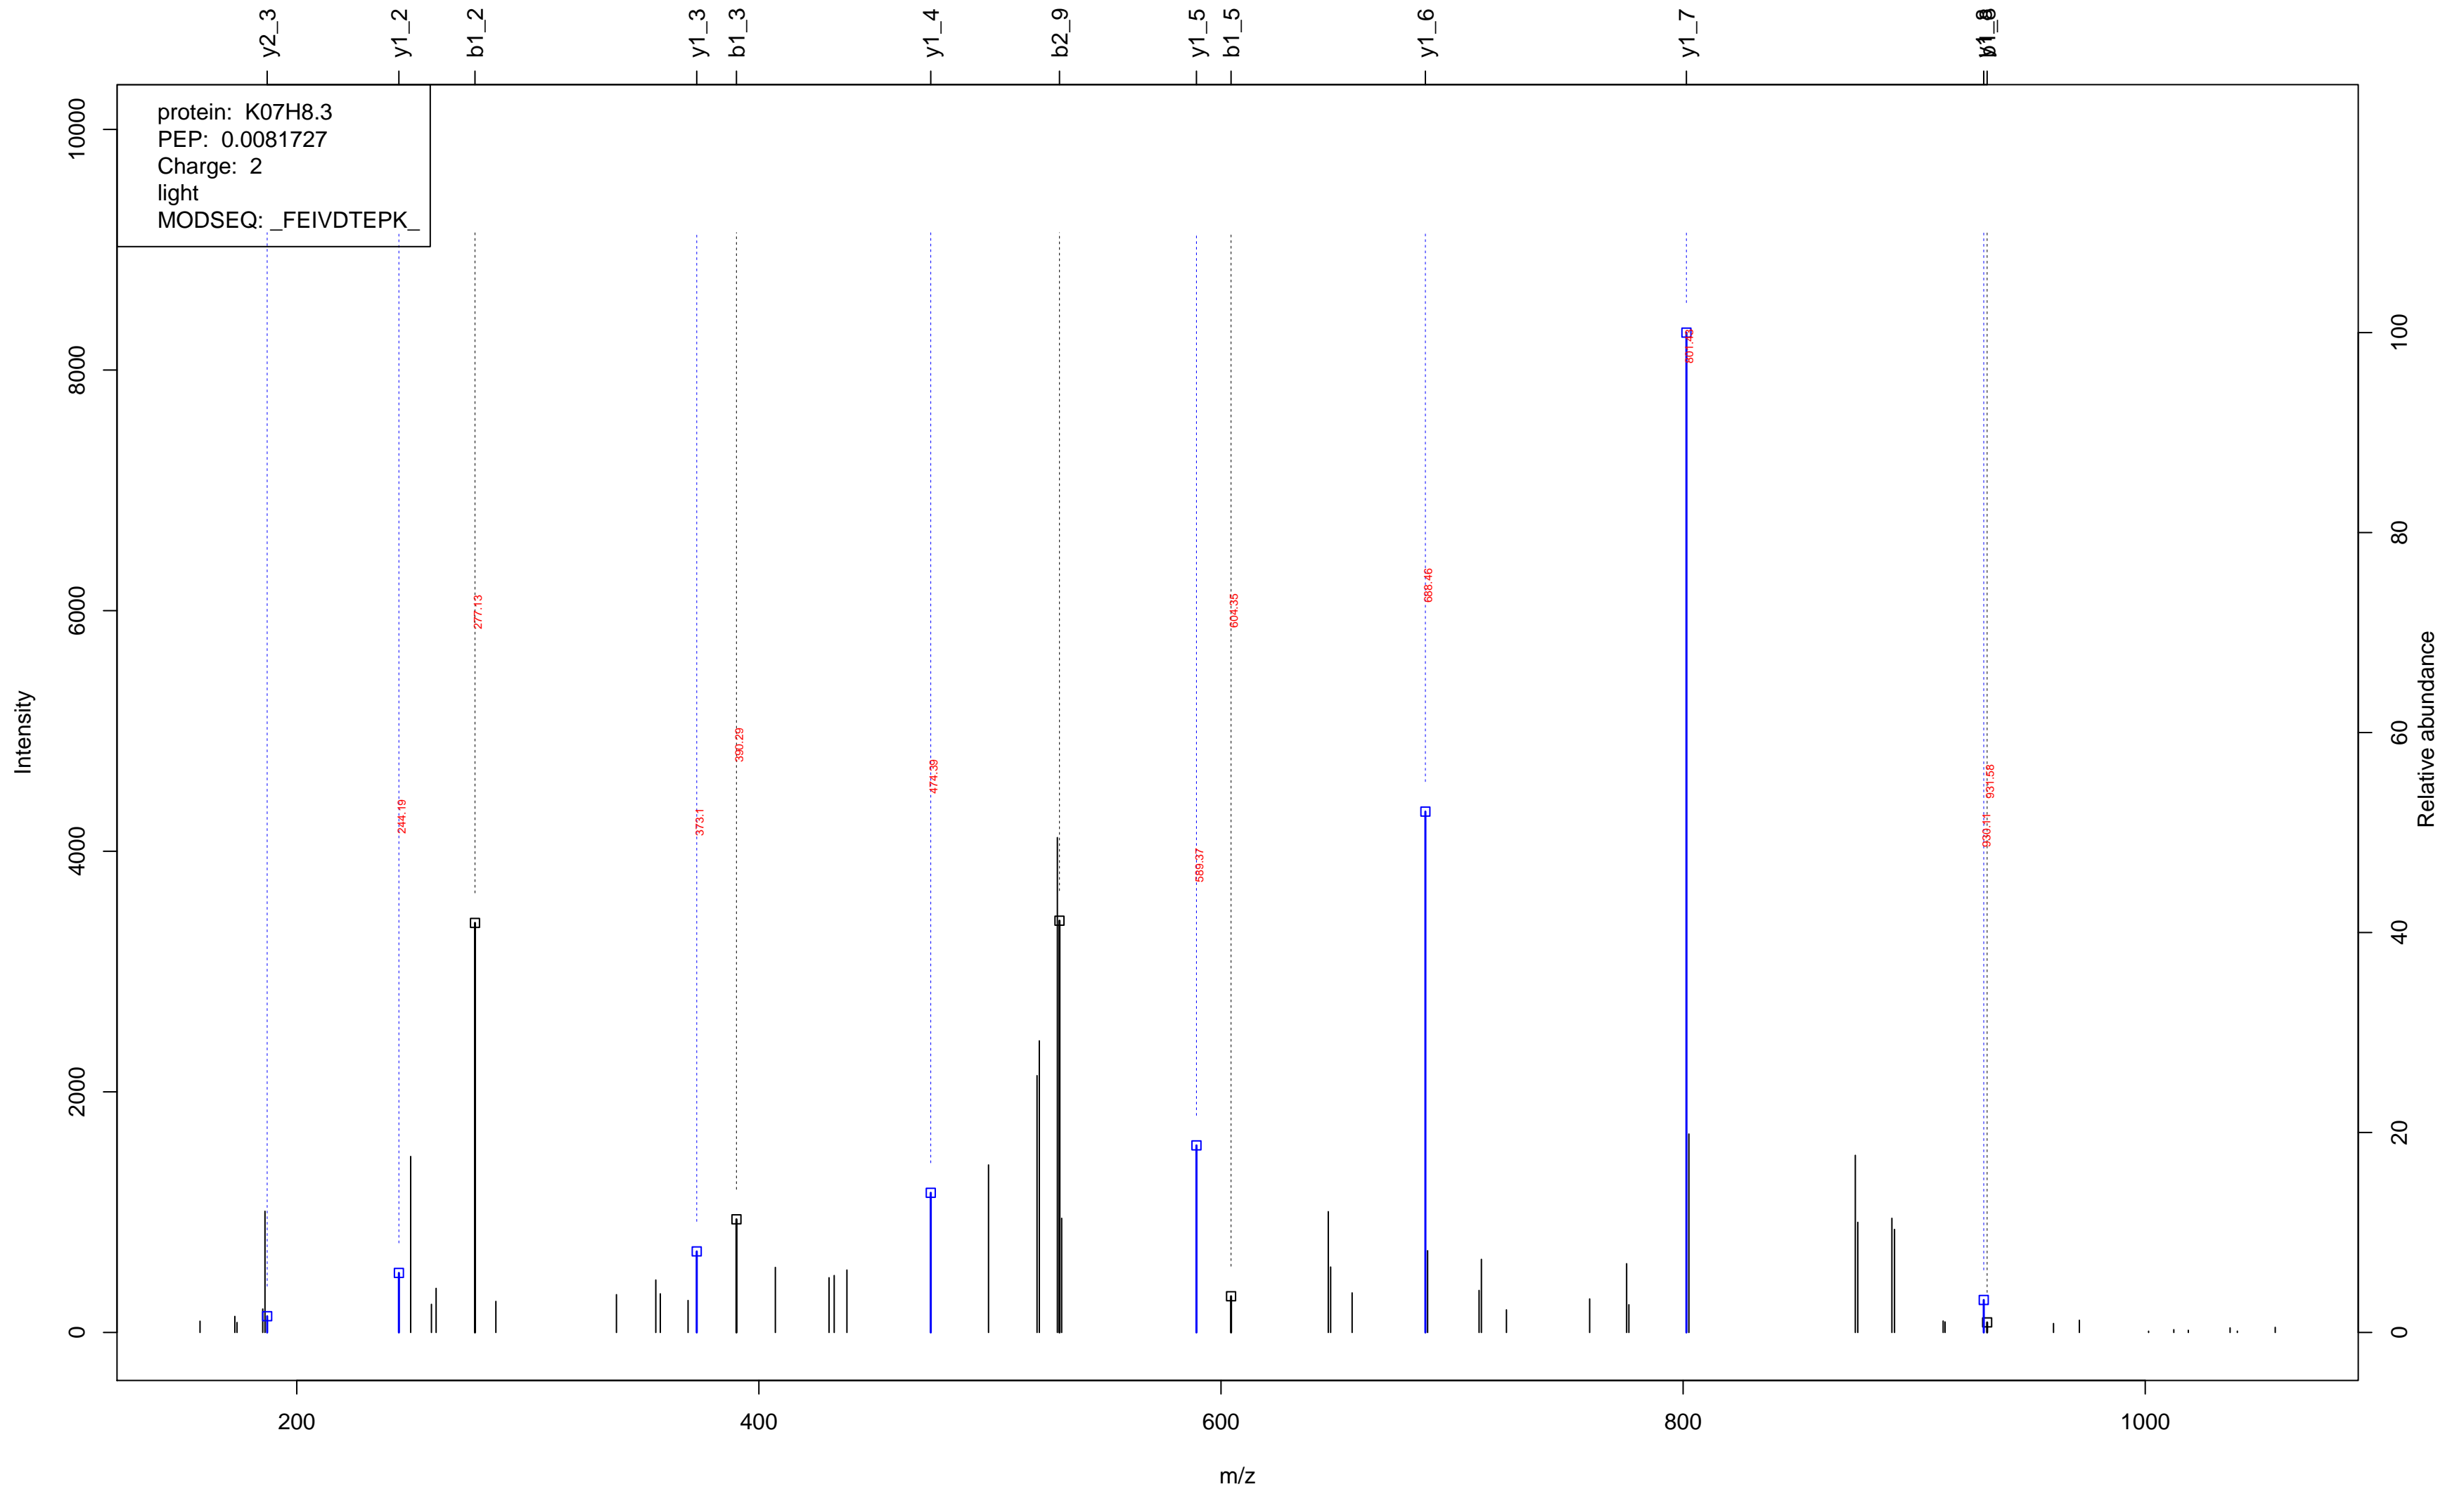

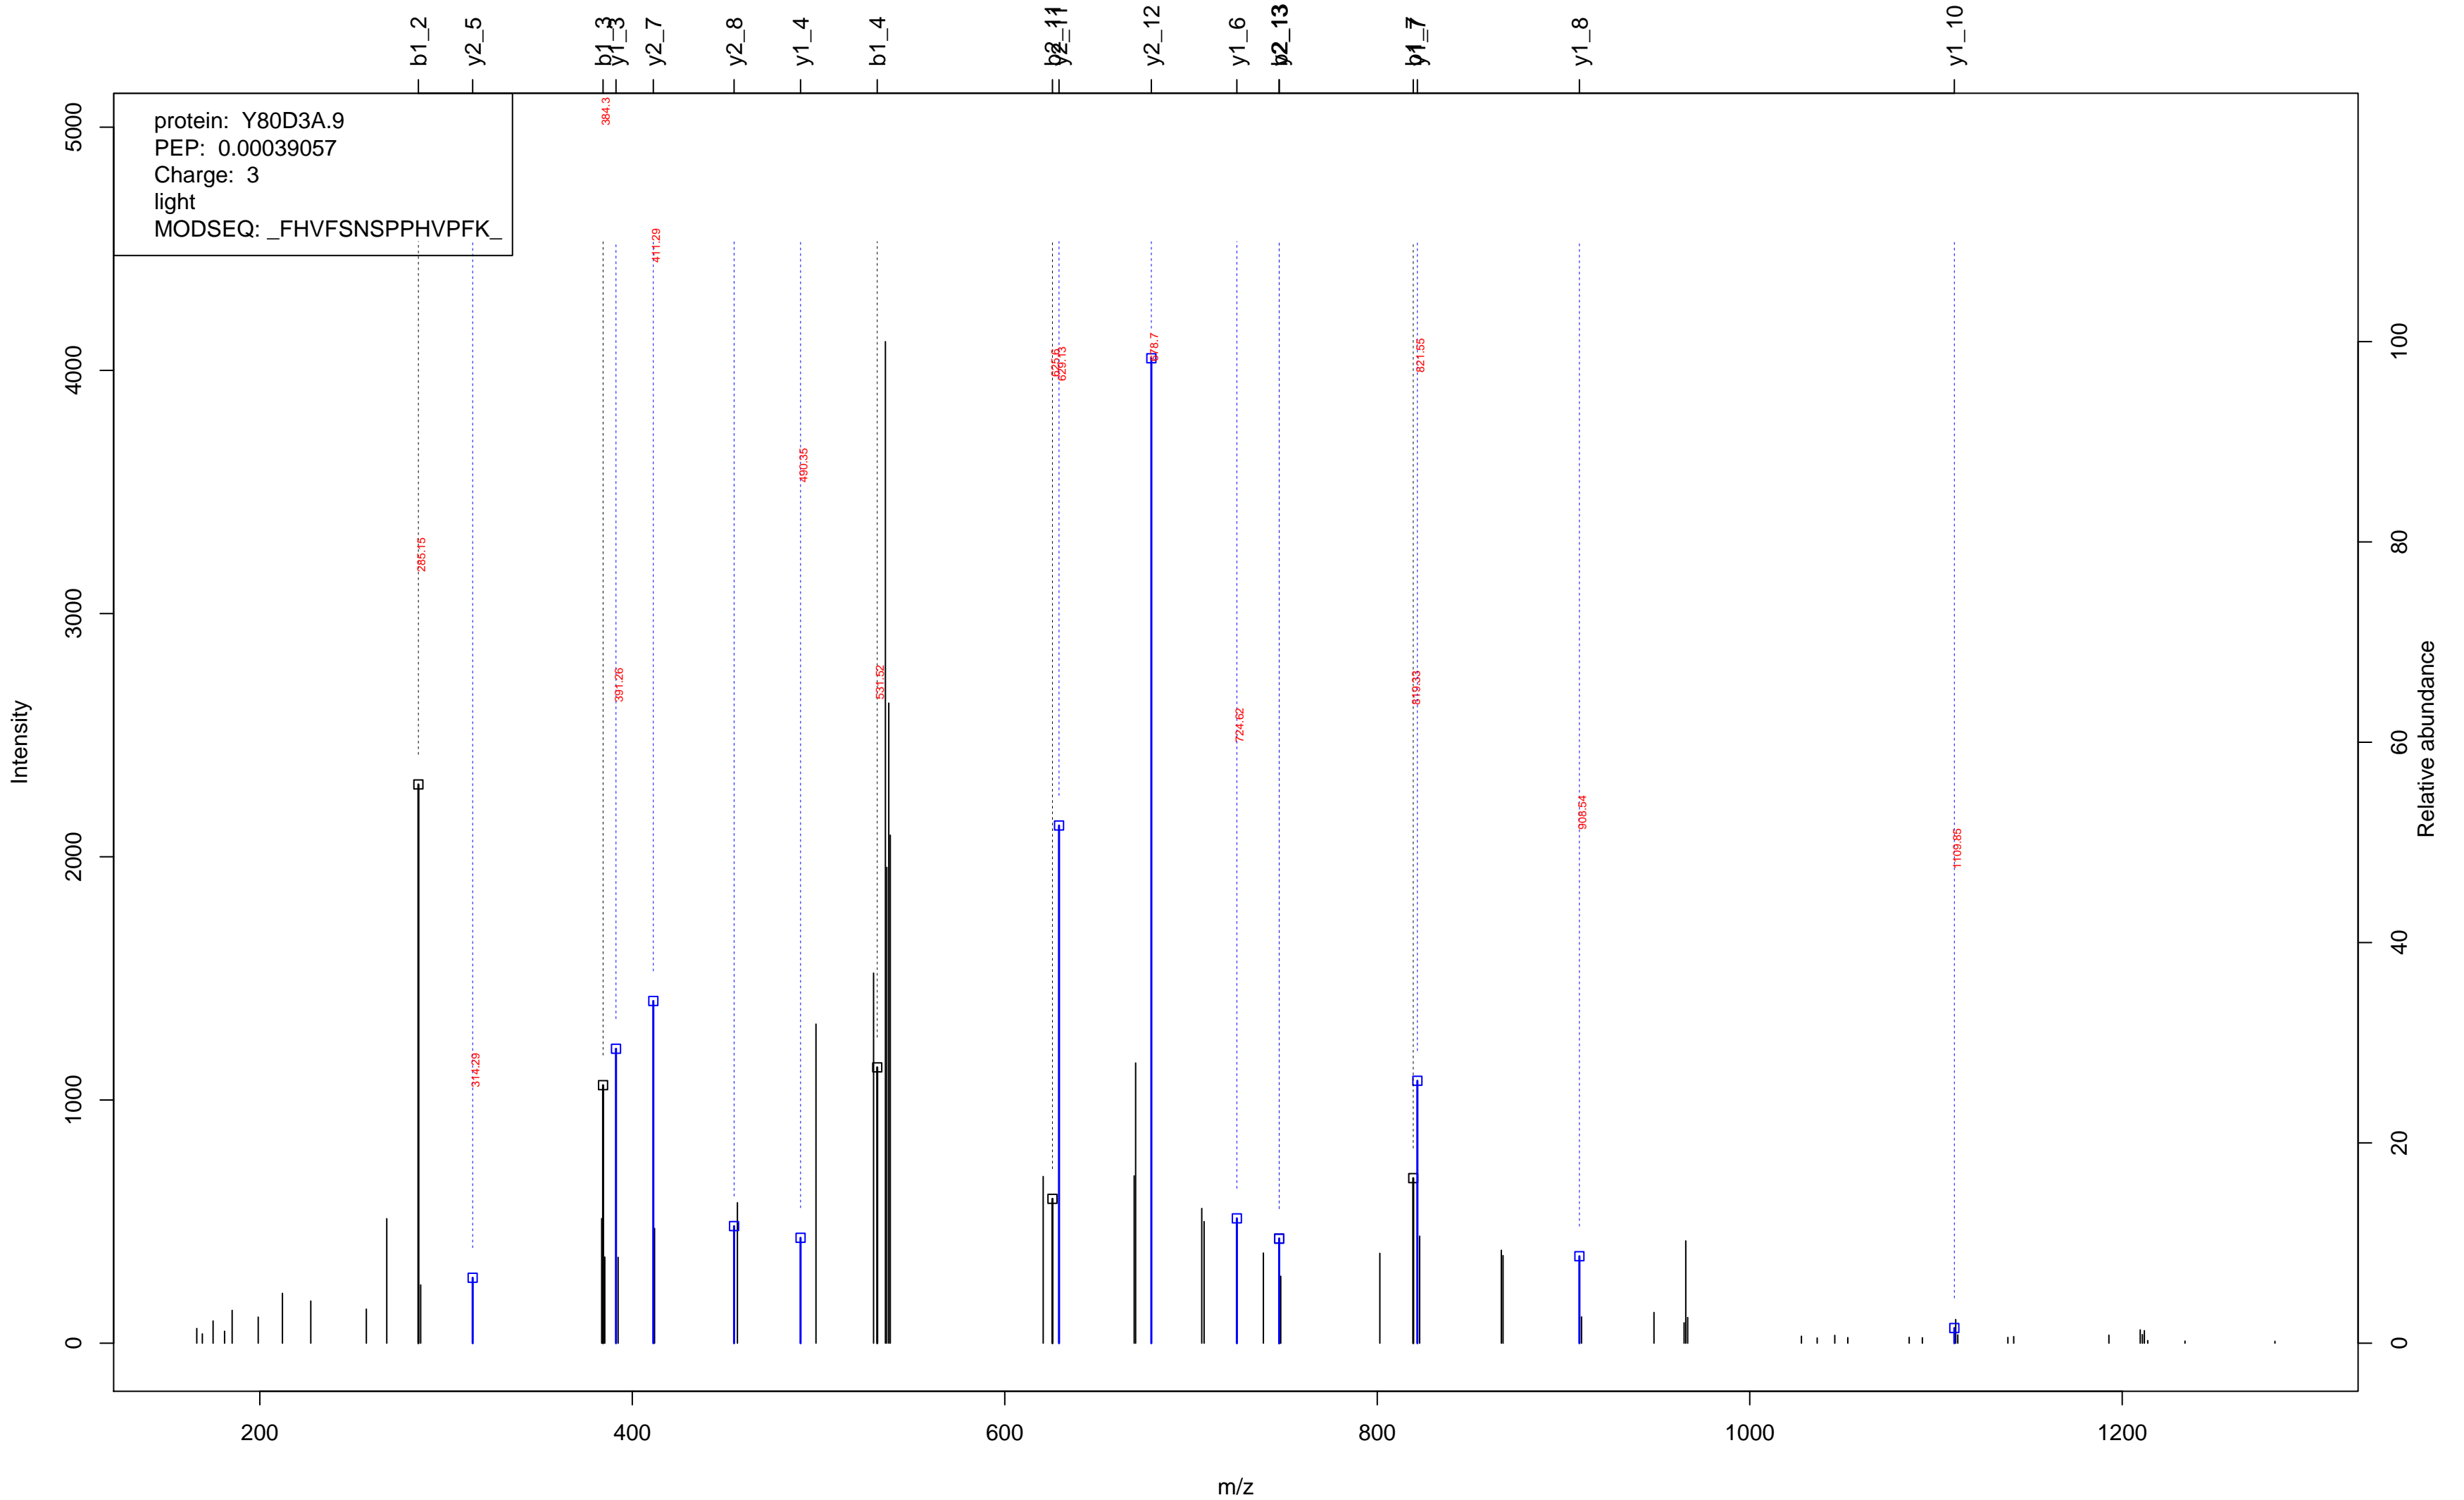

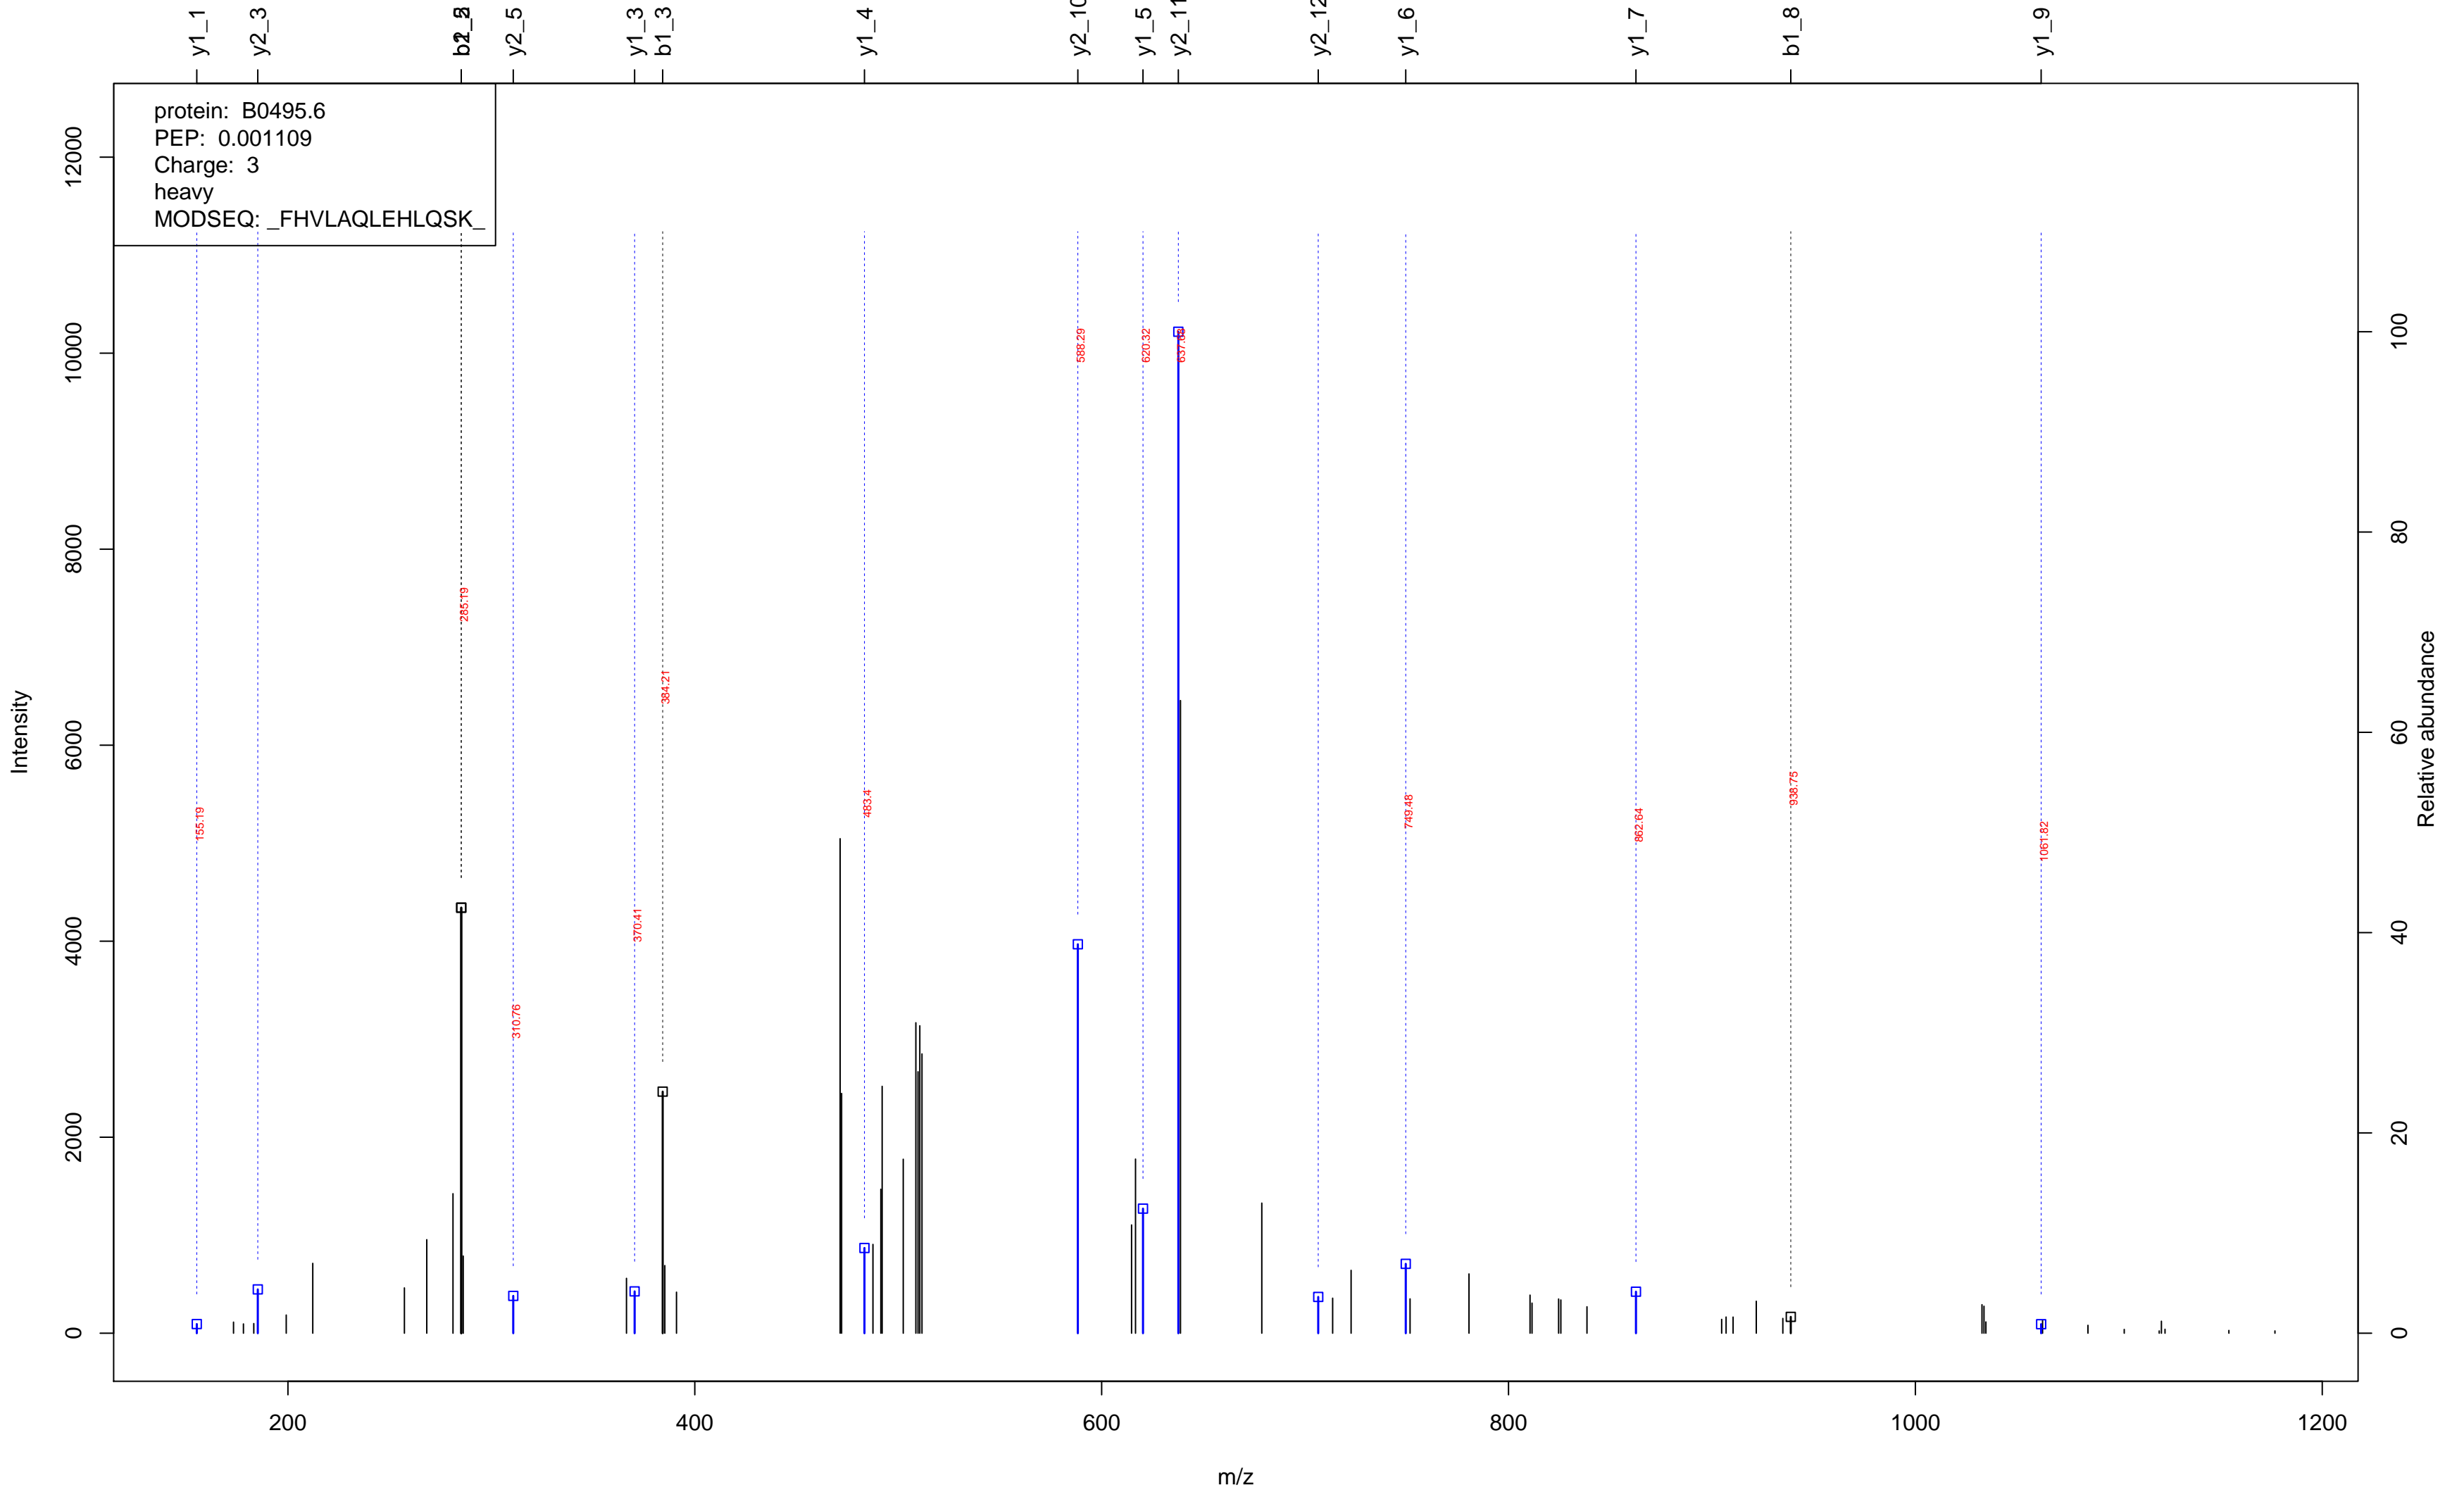

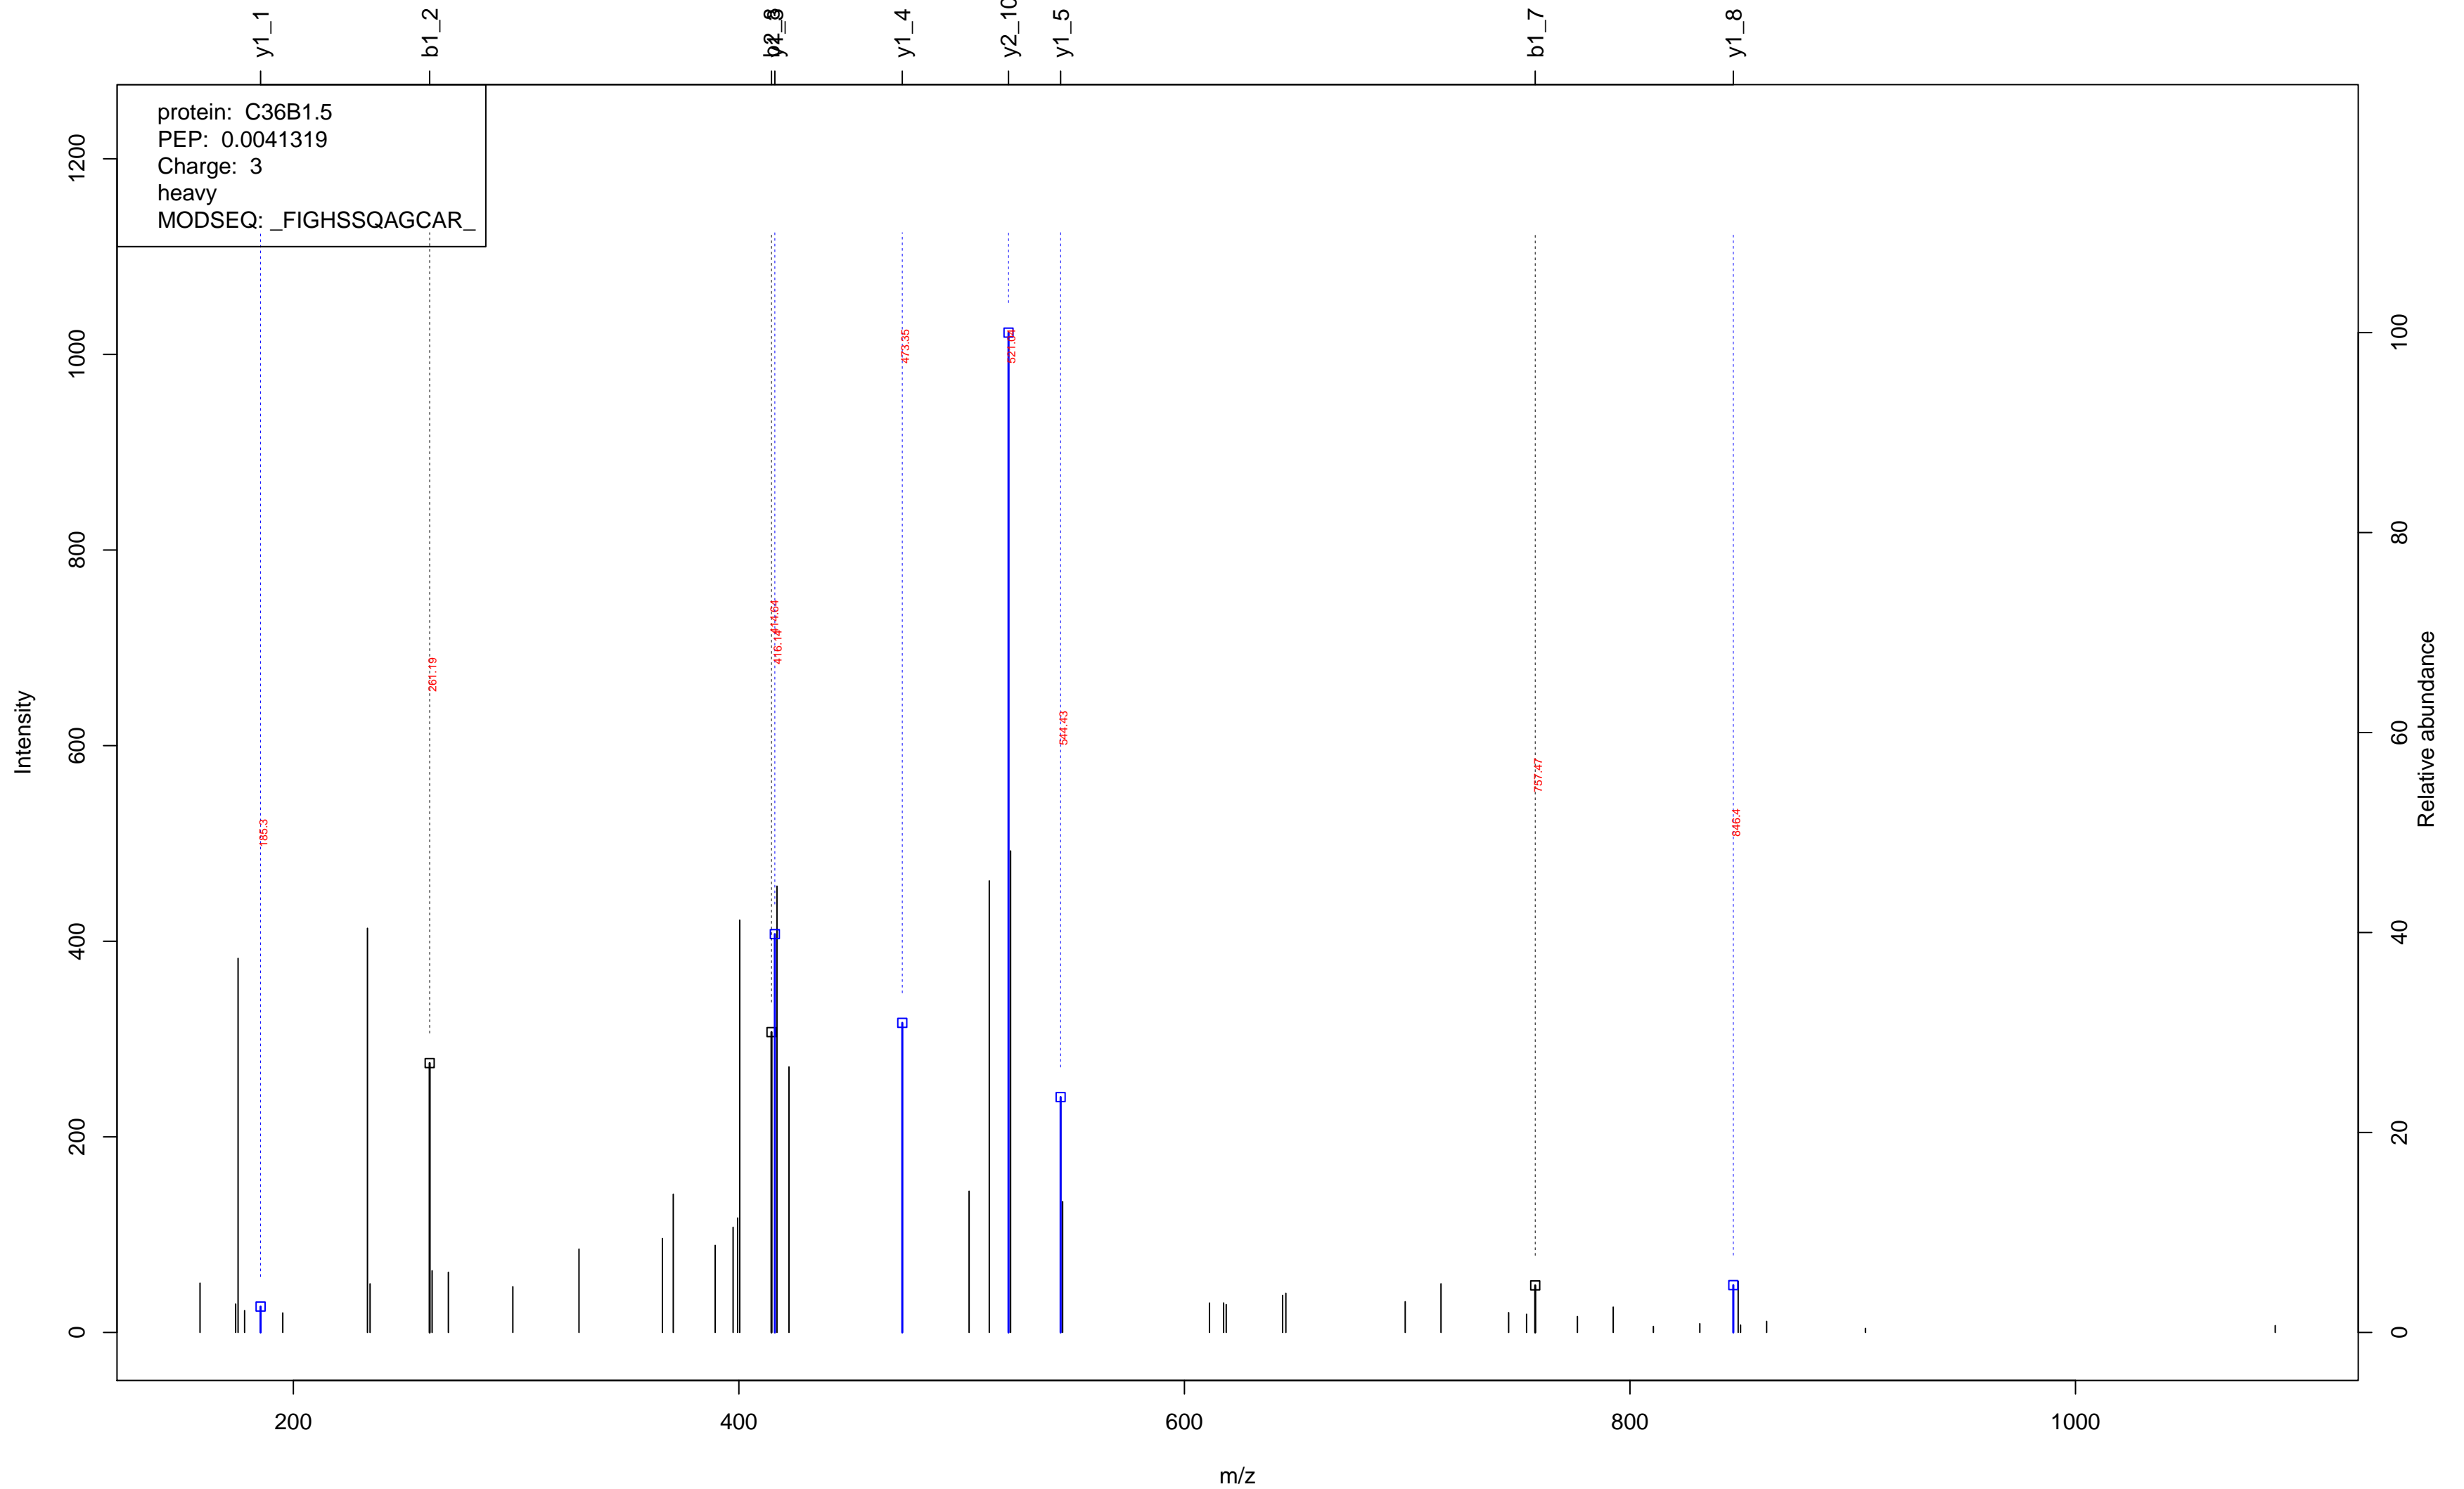

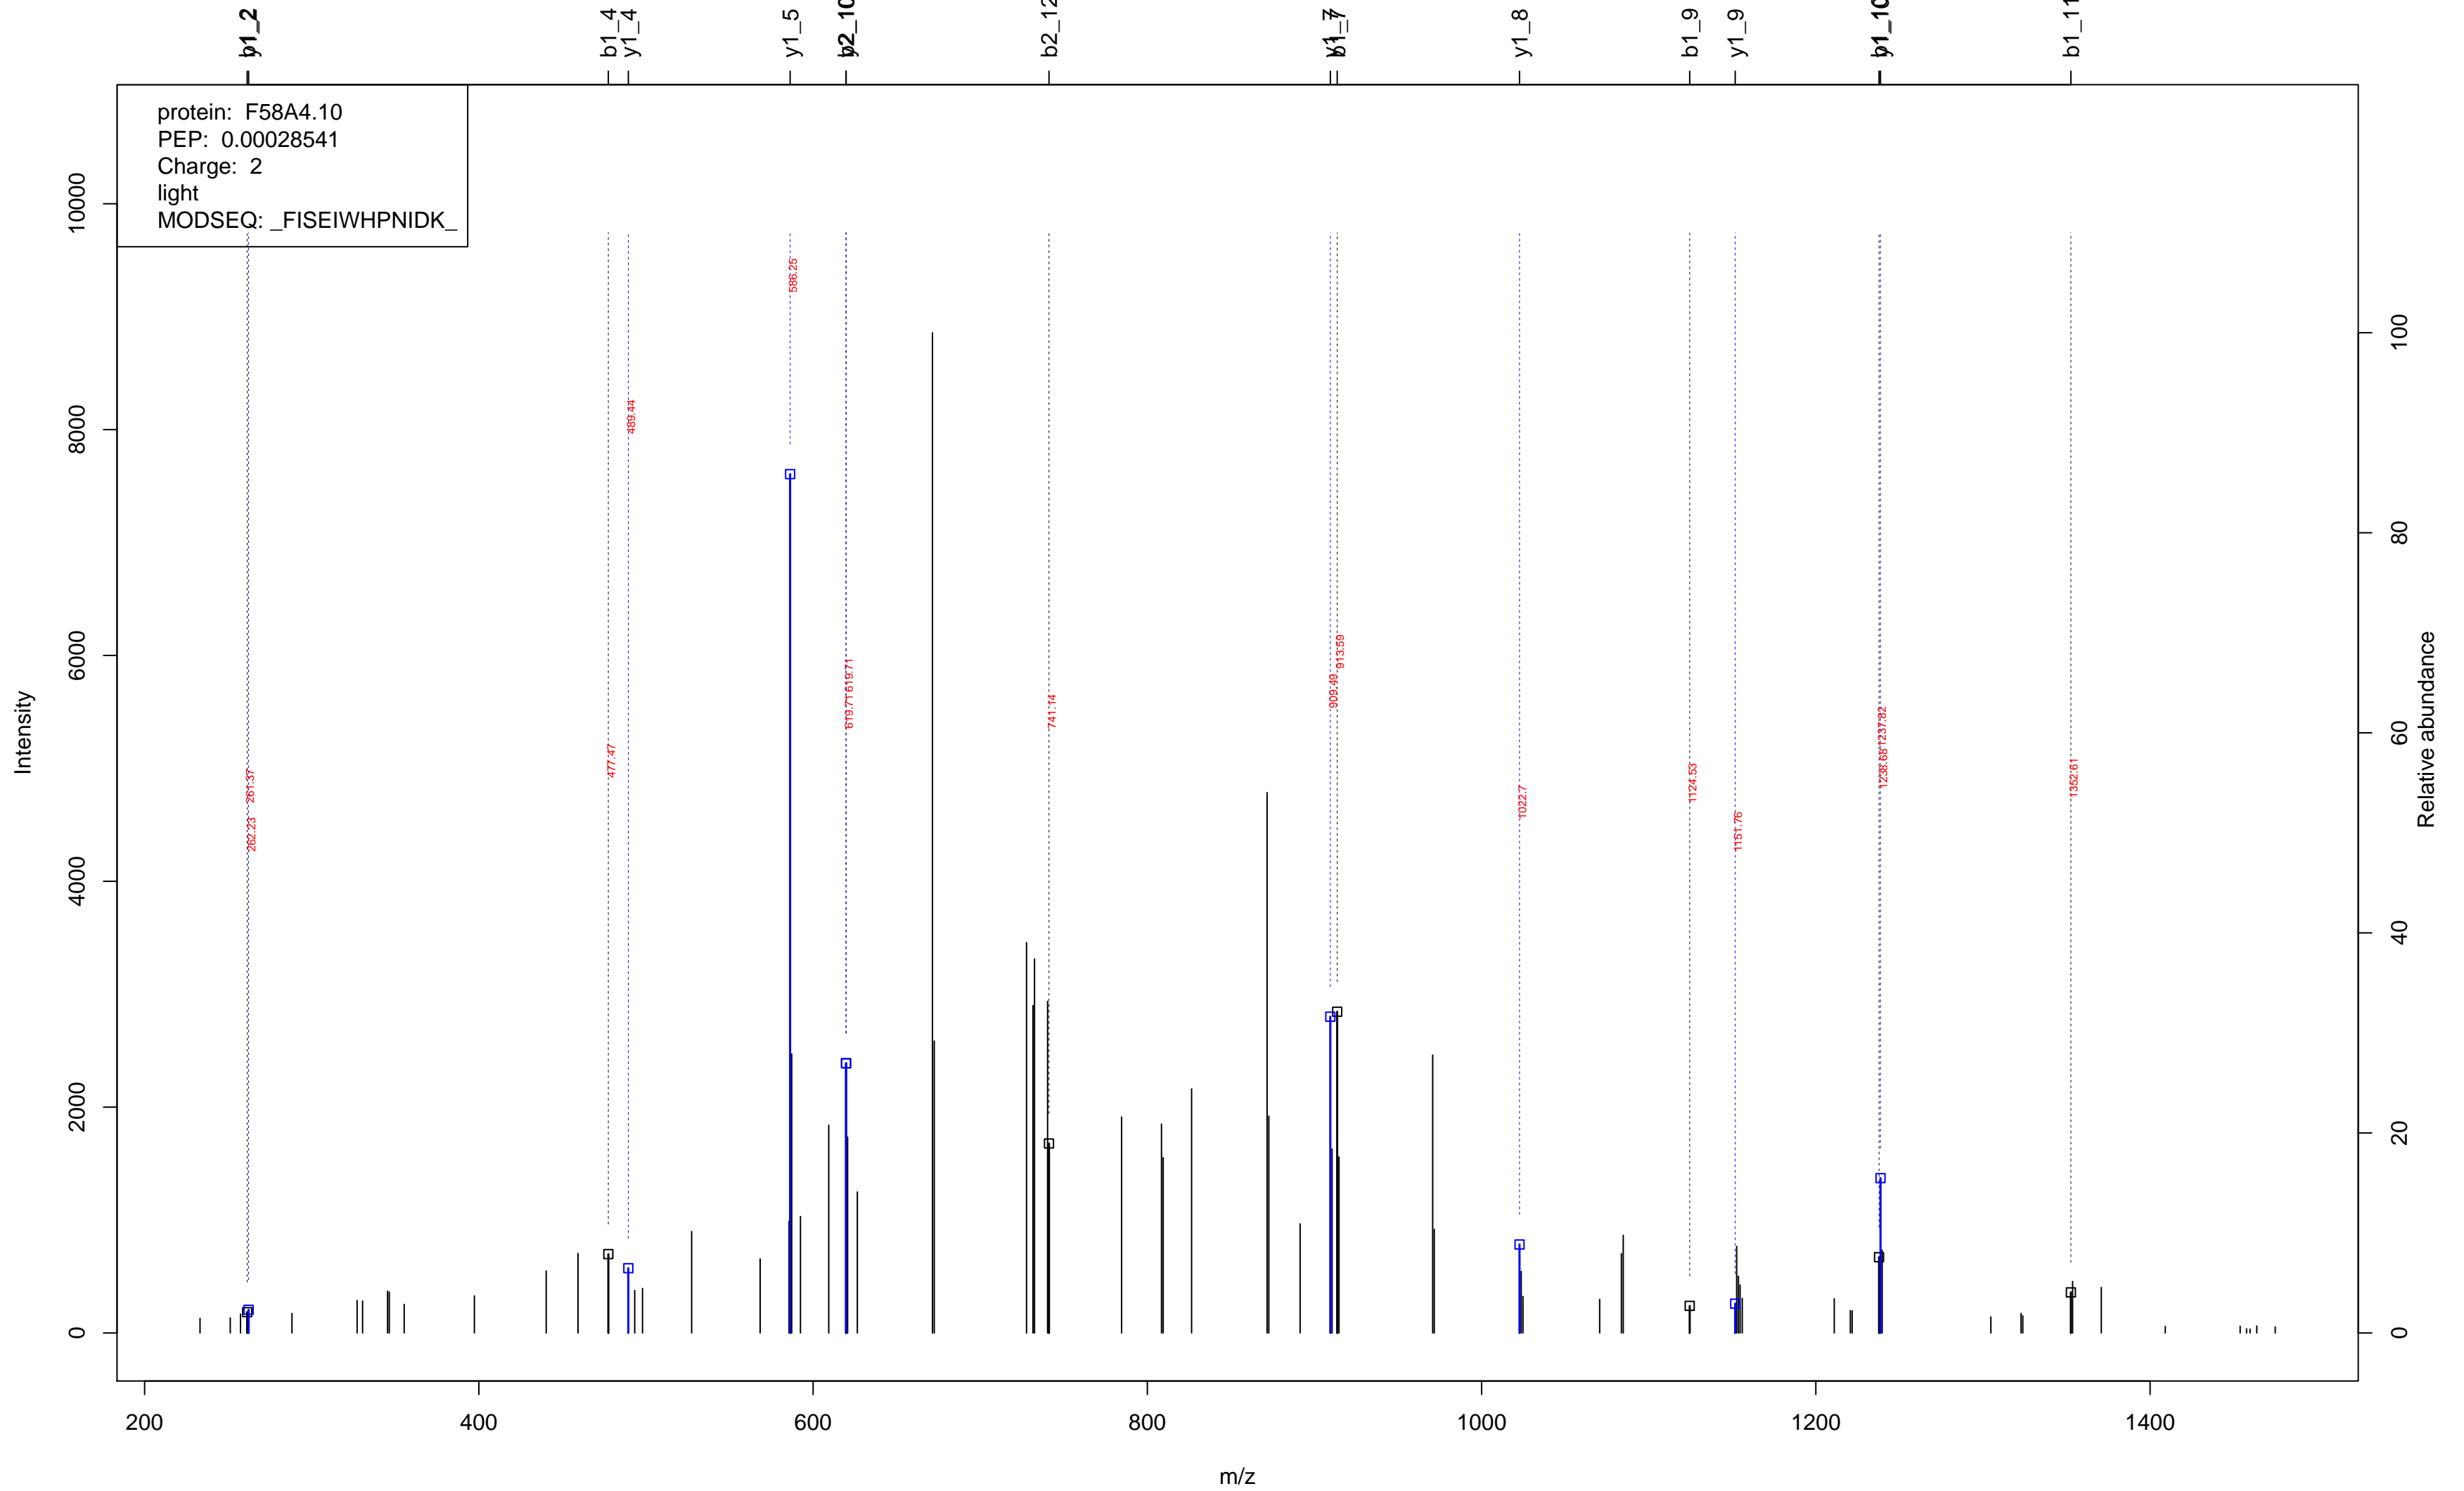

b2\_3

b1\_2

y1\_2

b1\_3

b2\_8

y1\_4

y1\_5

y1\_6

b1\_7

y1\_7

protein: Y71H2AL.1  
PEP: 0.0054815  
Charge: 2  
light  
MODSEQ: \_FISLATHR\_

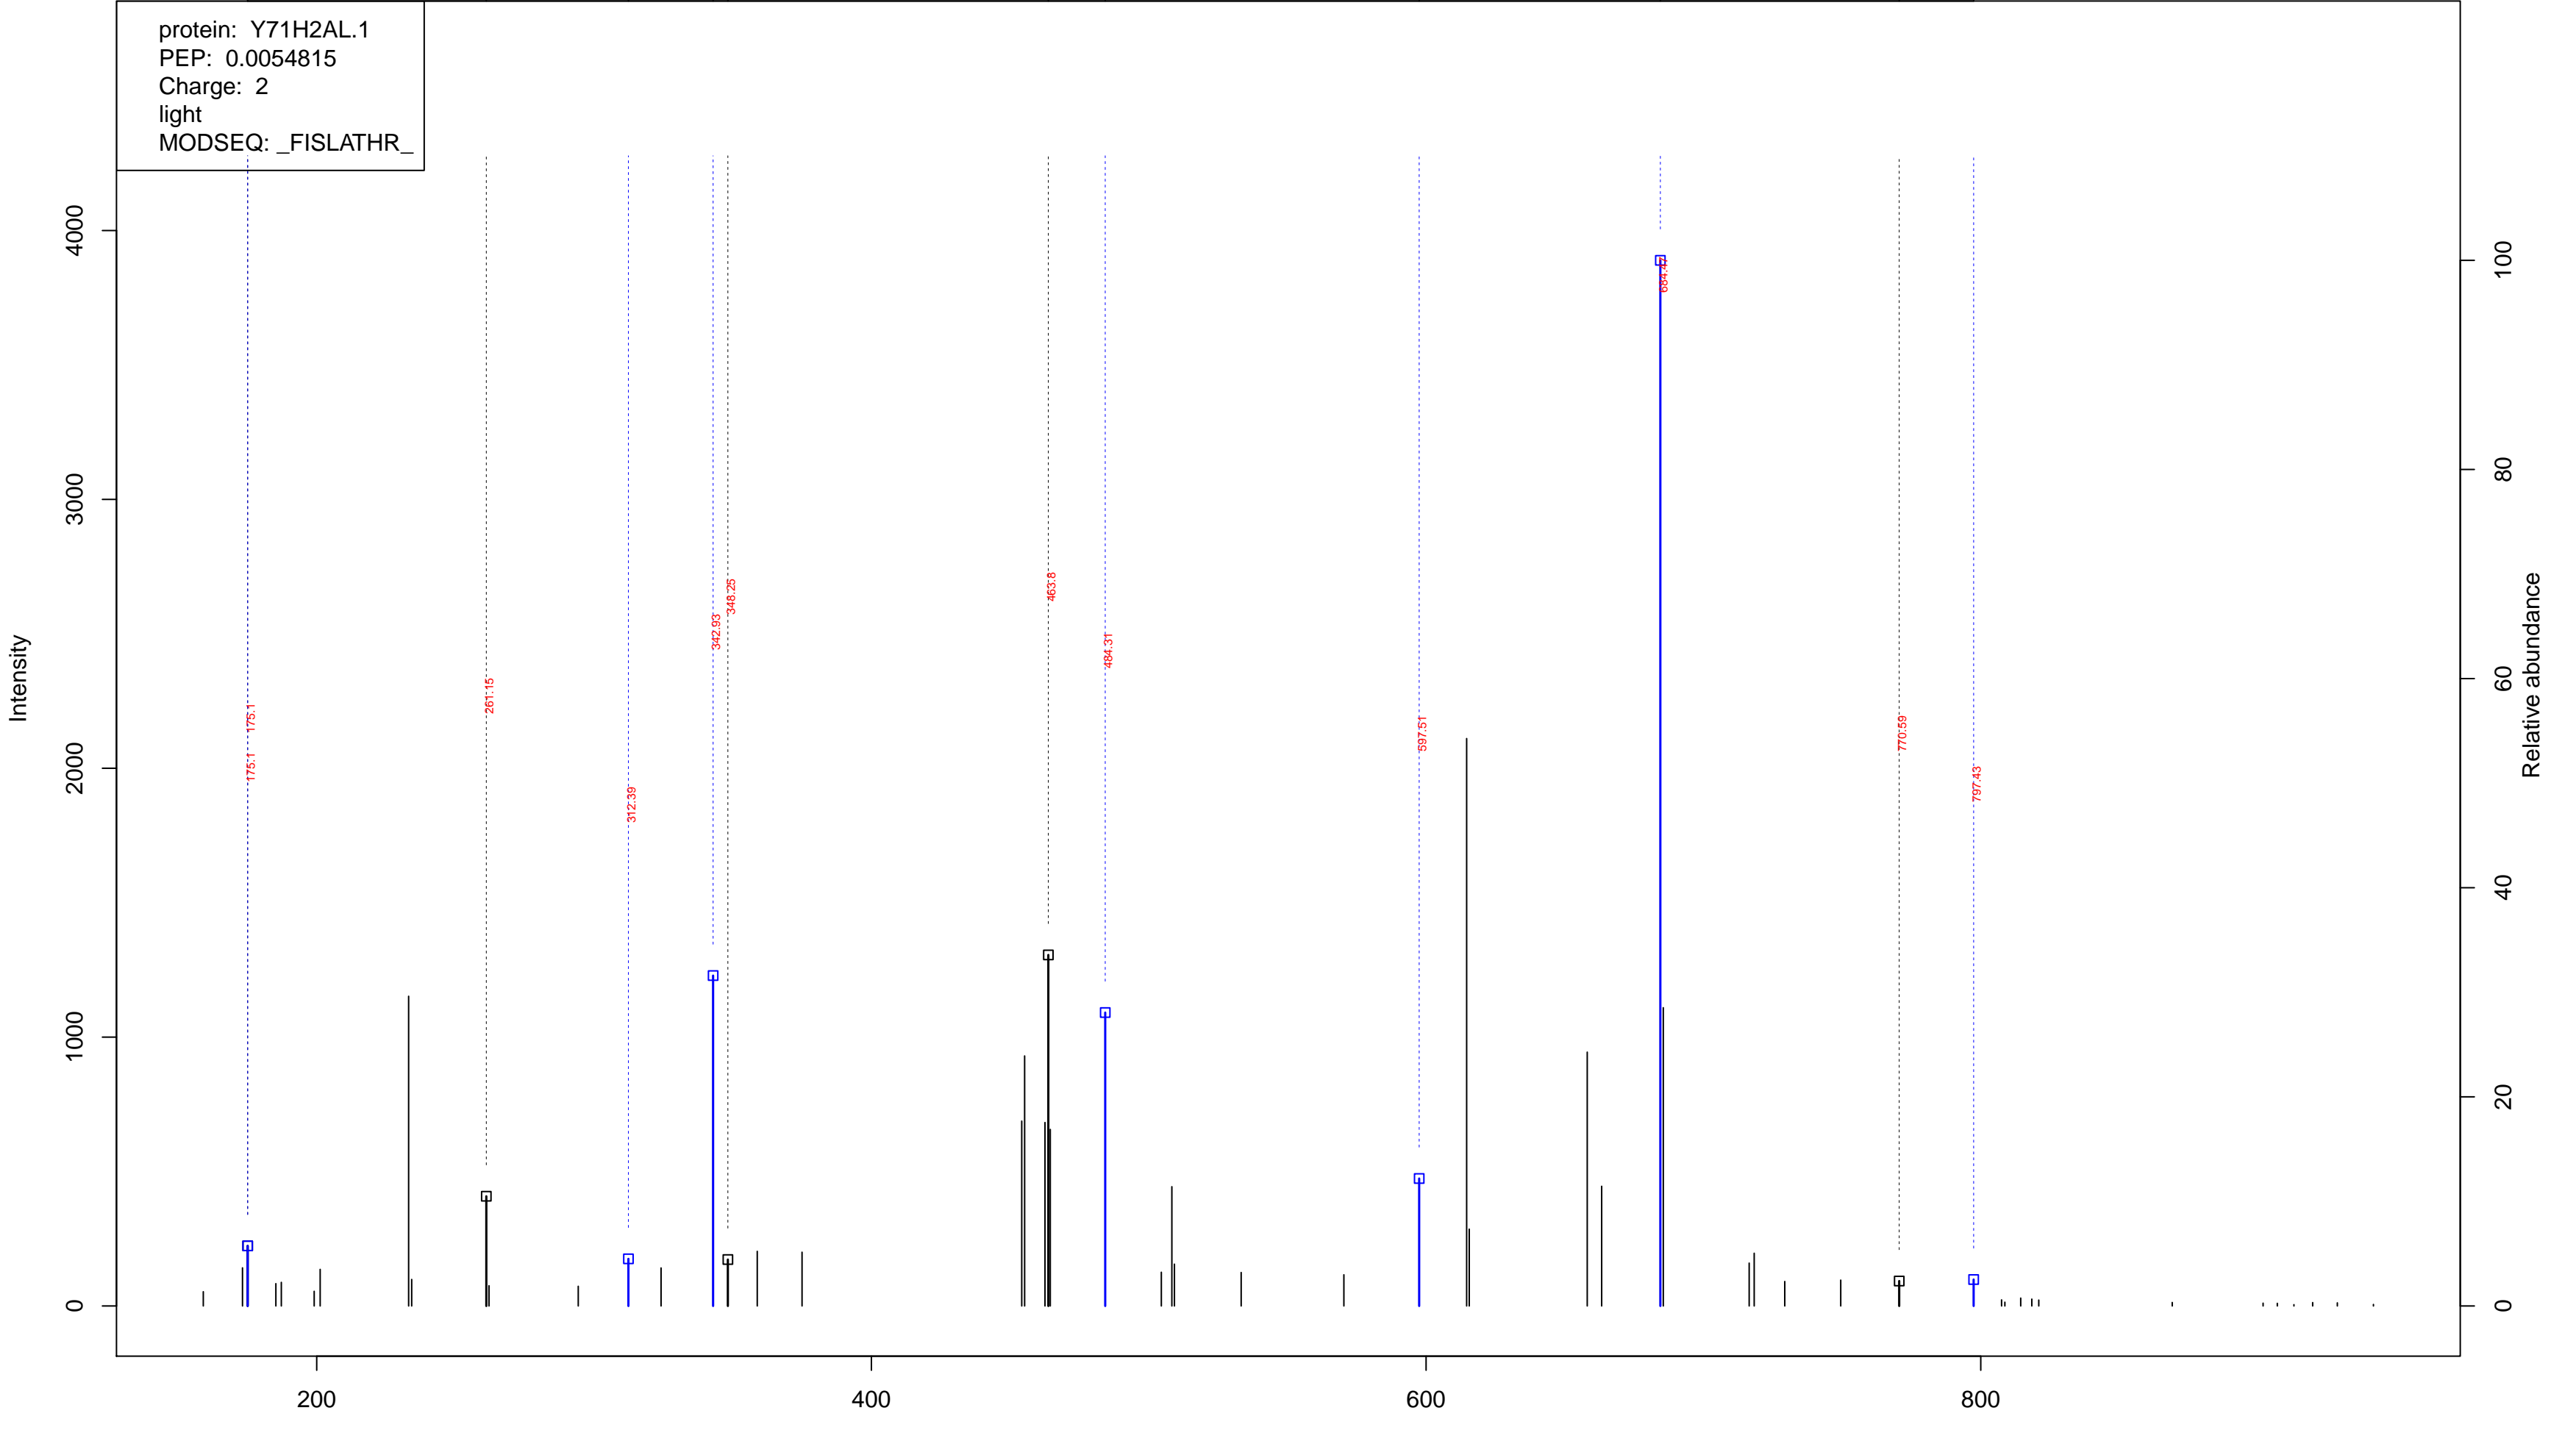

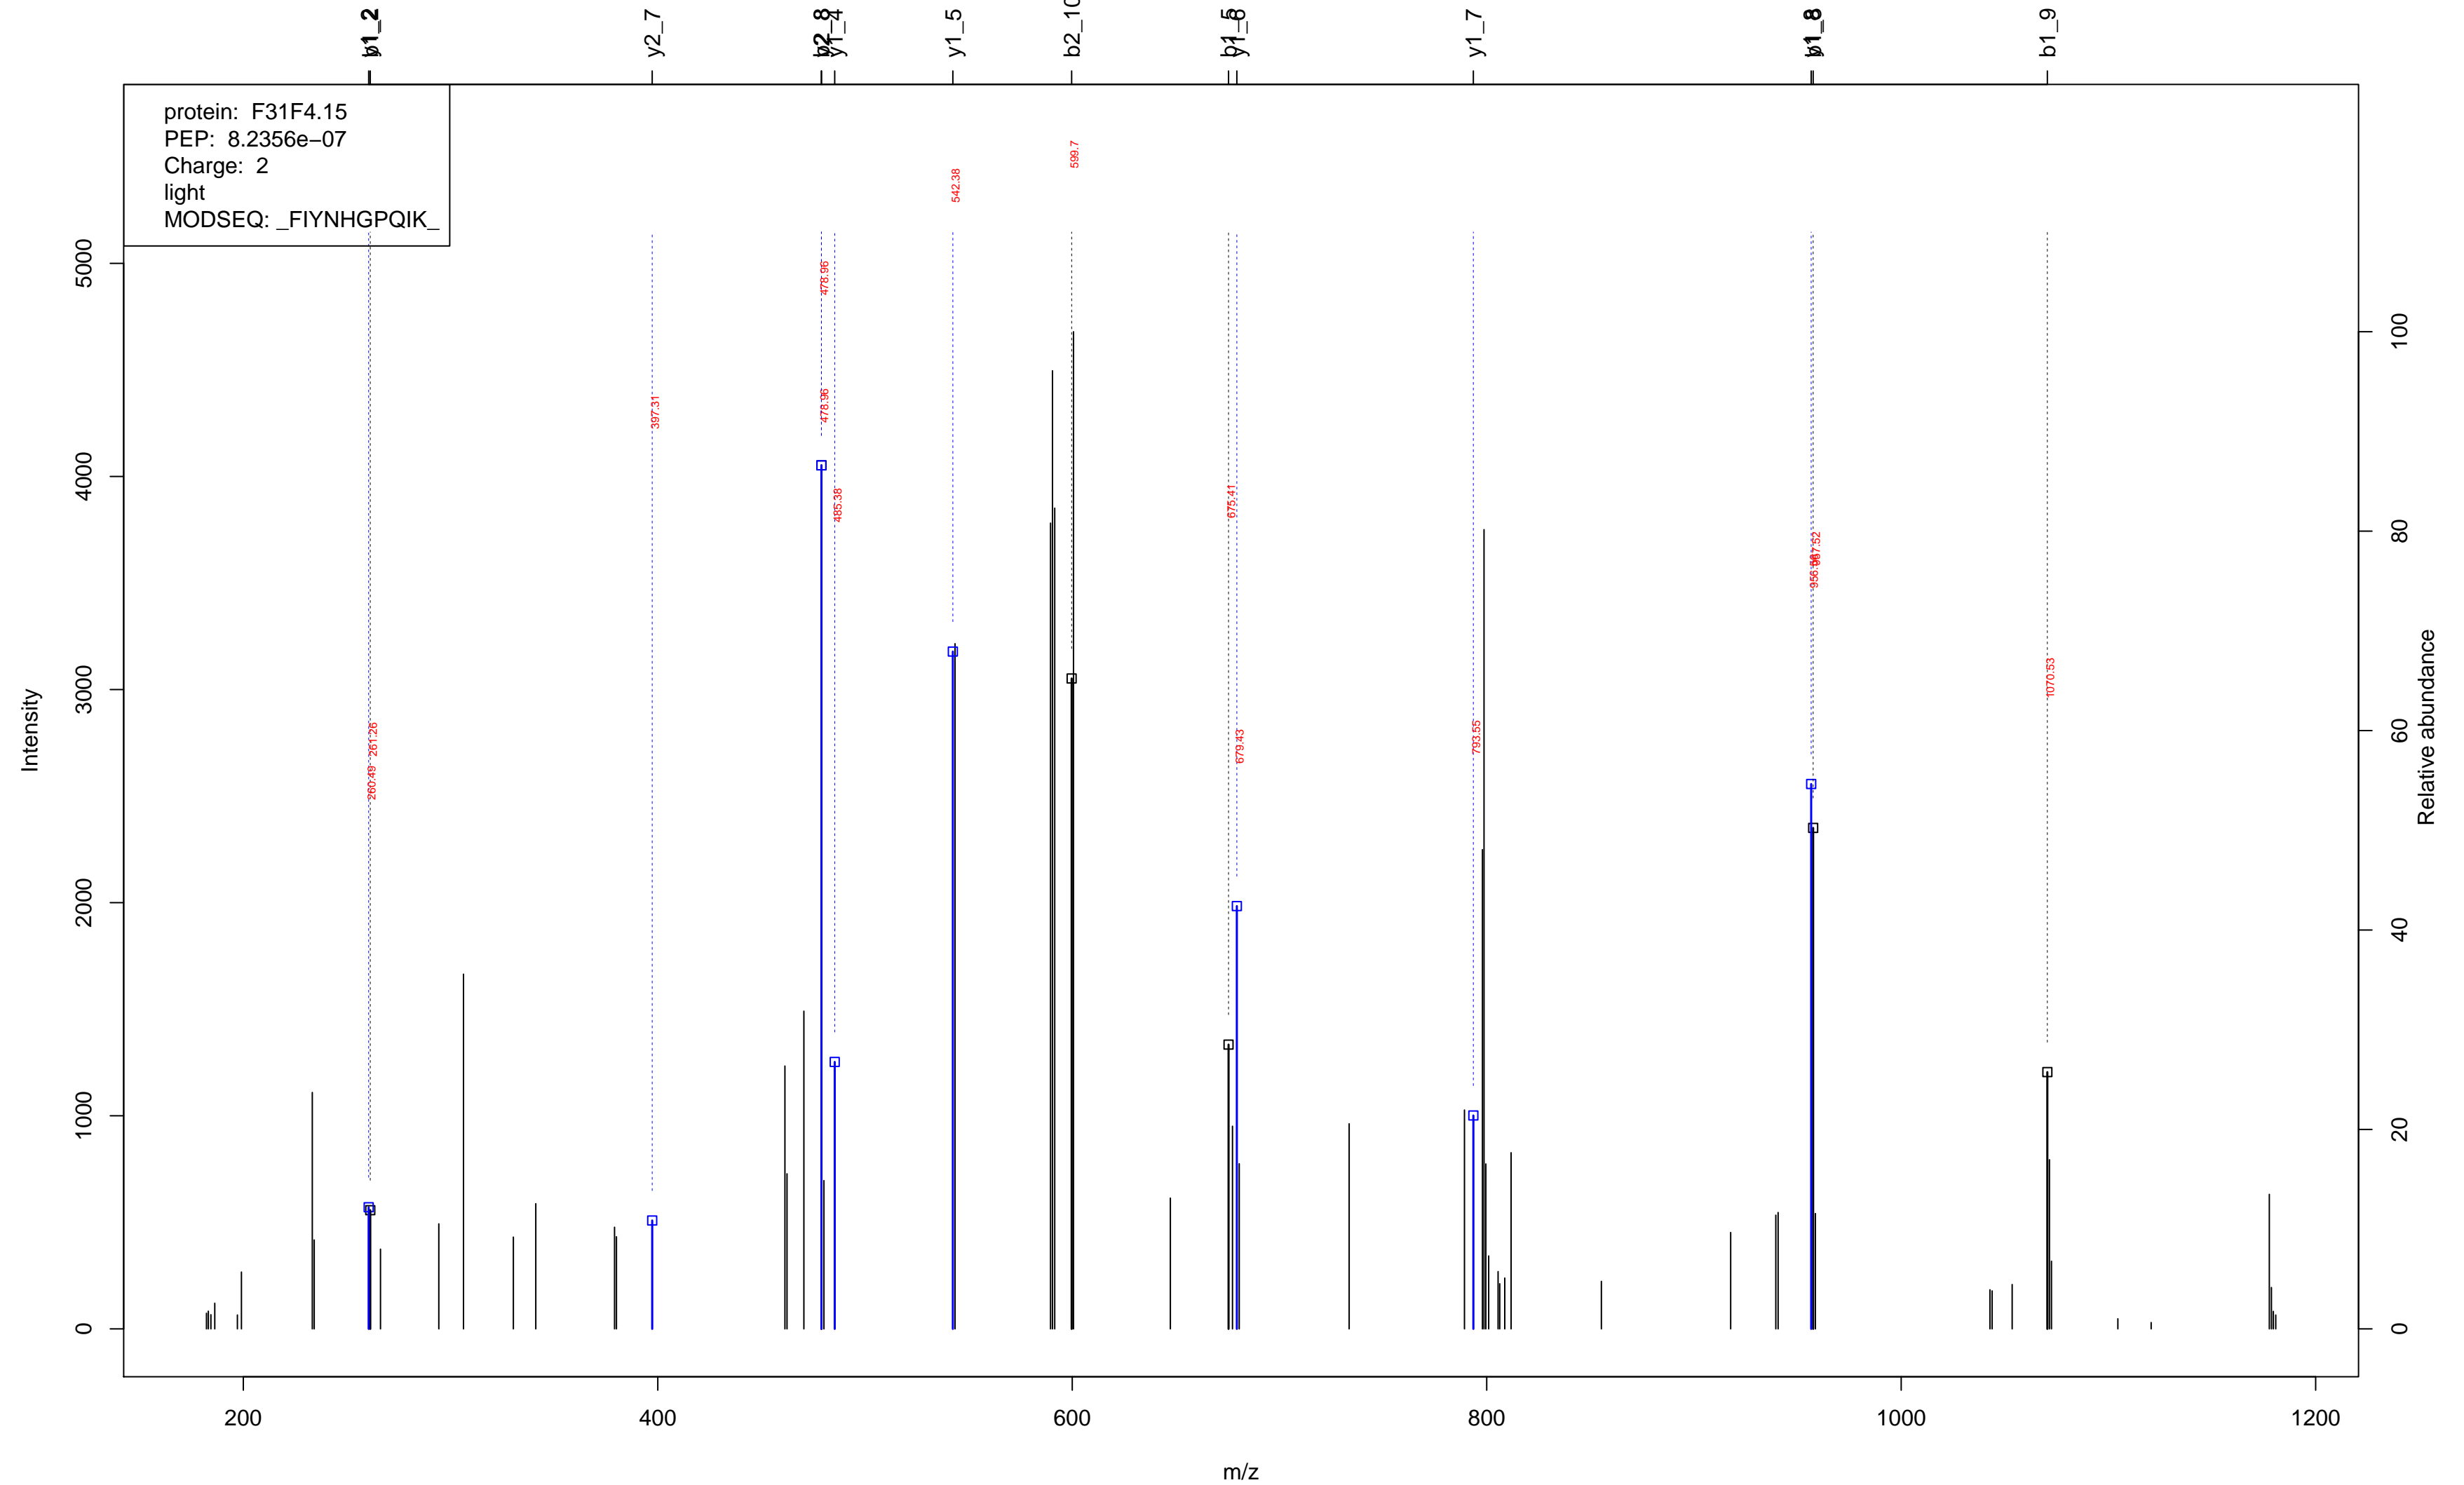

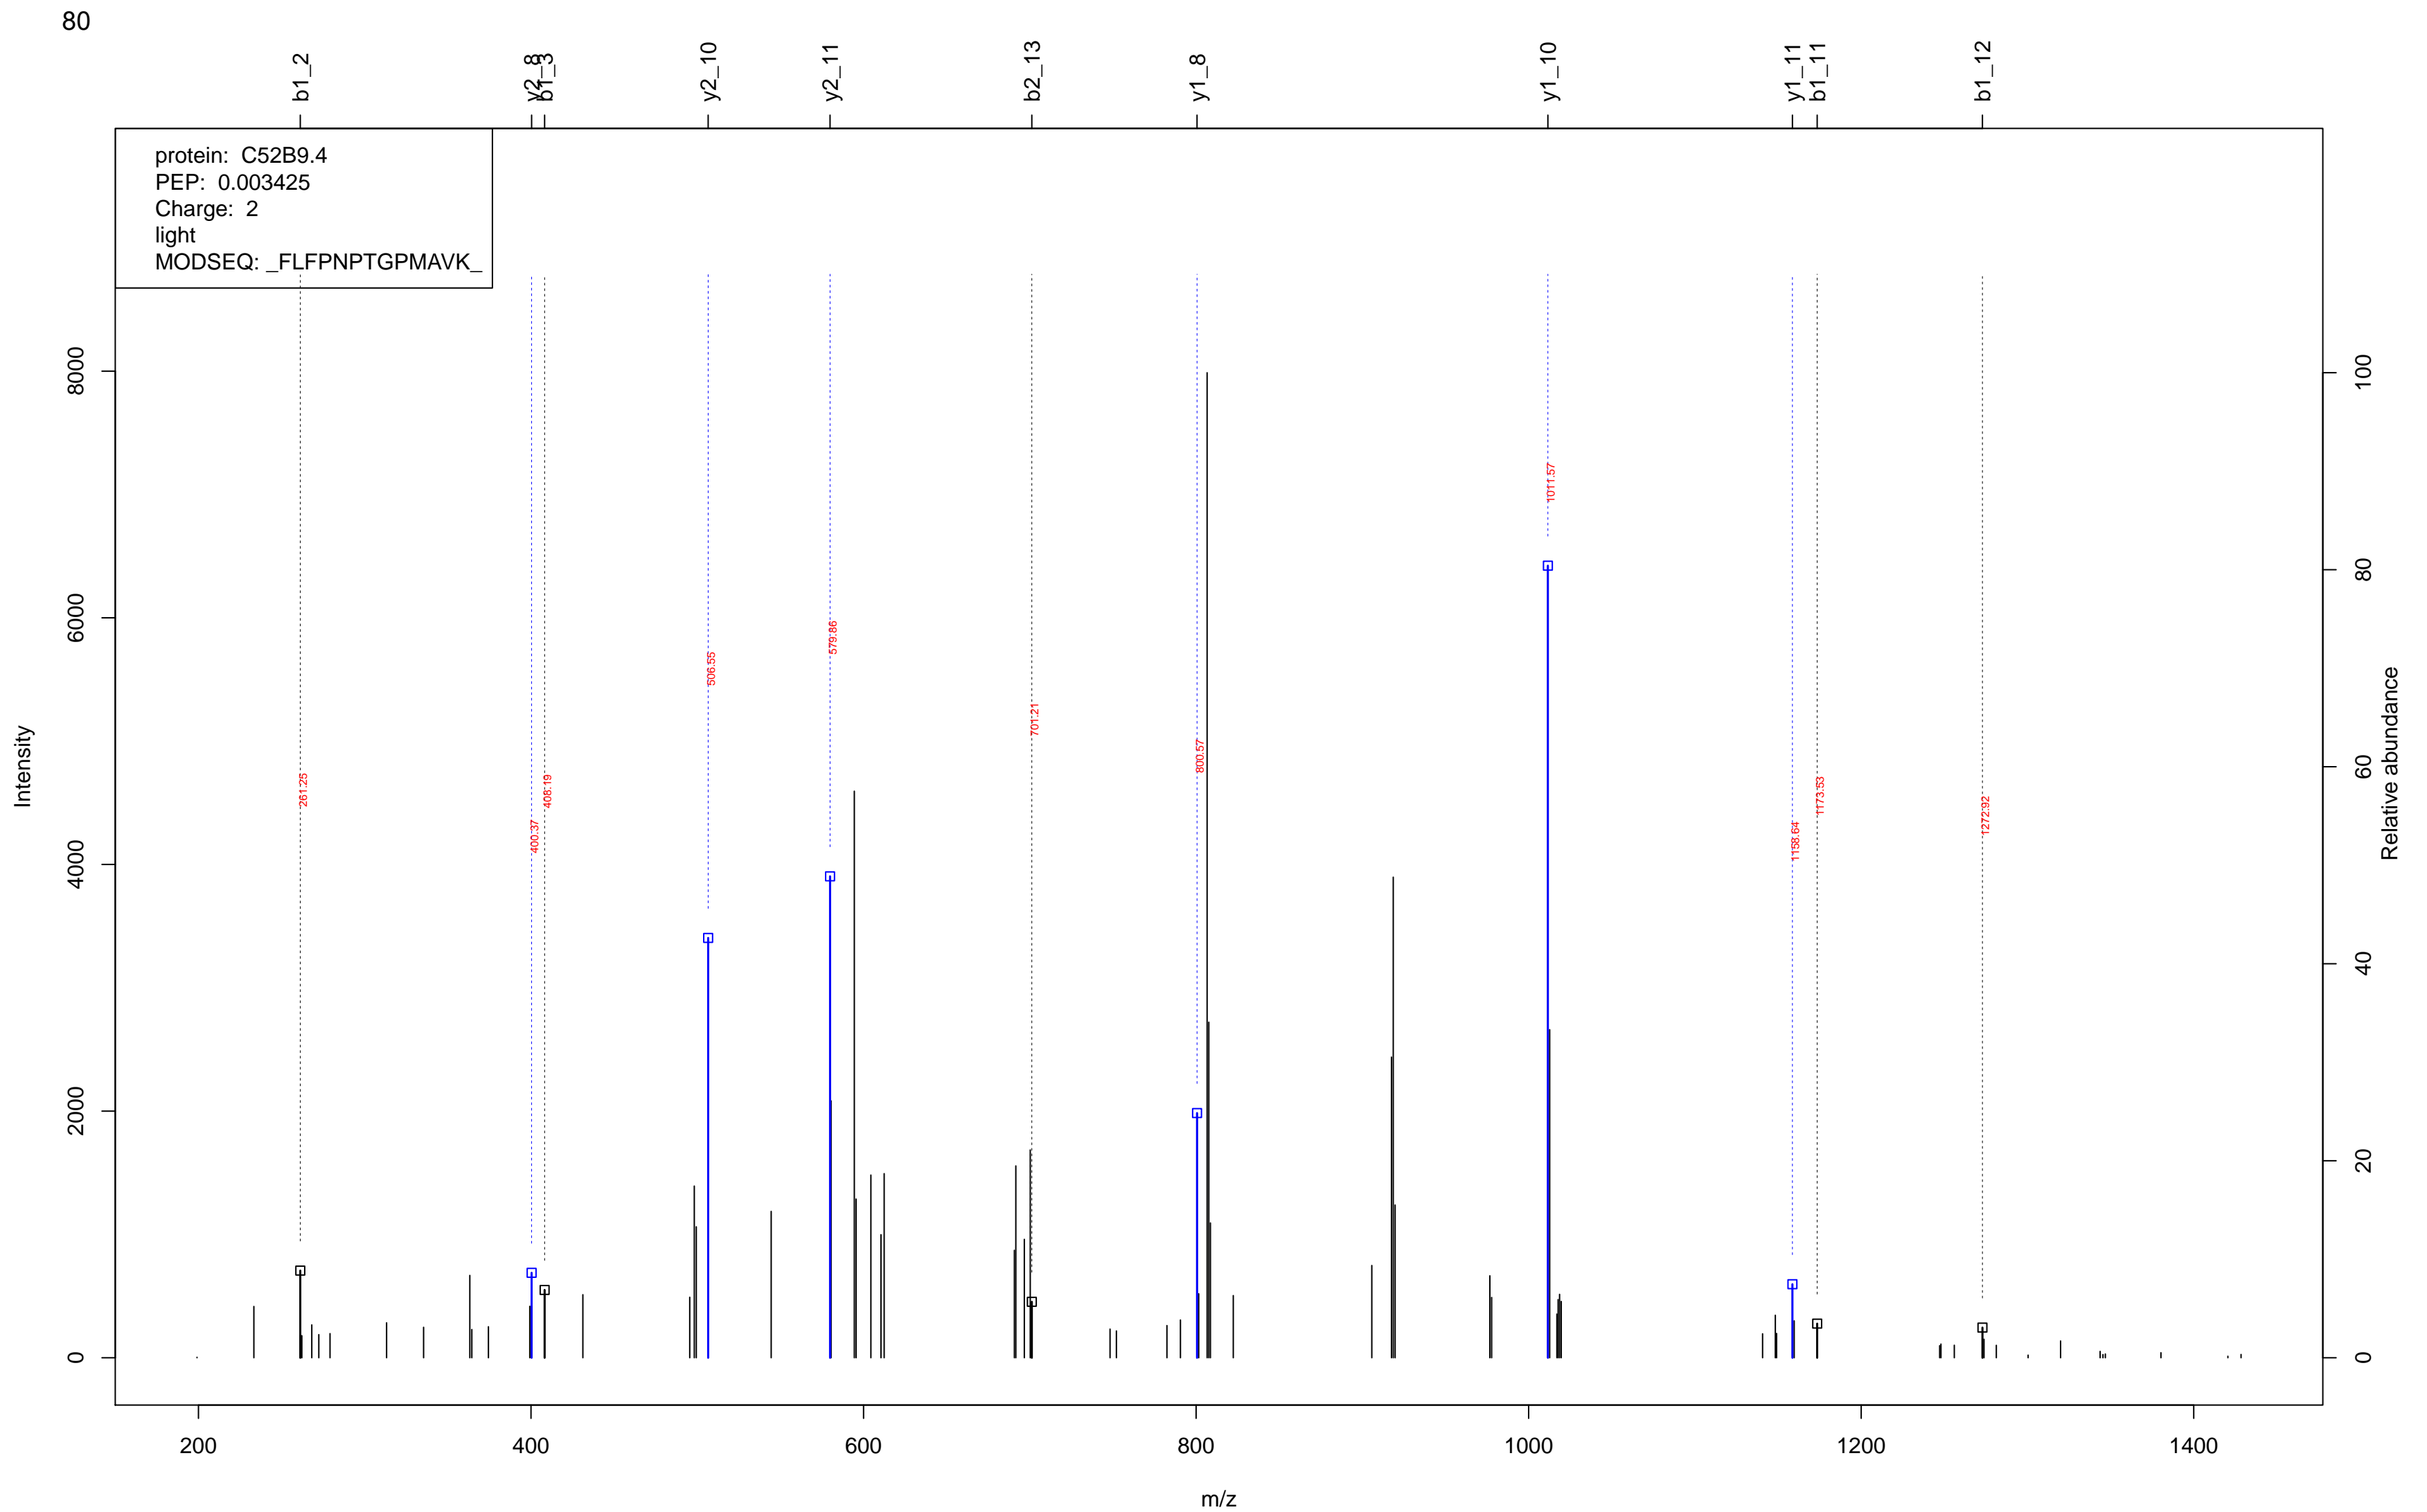



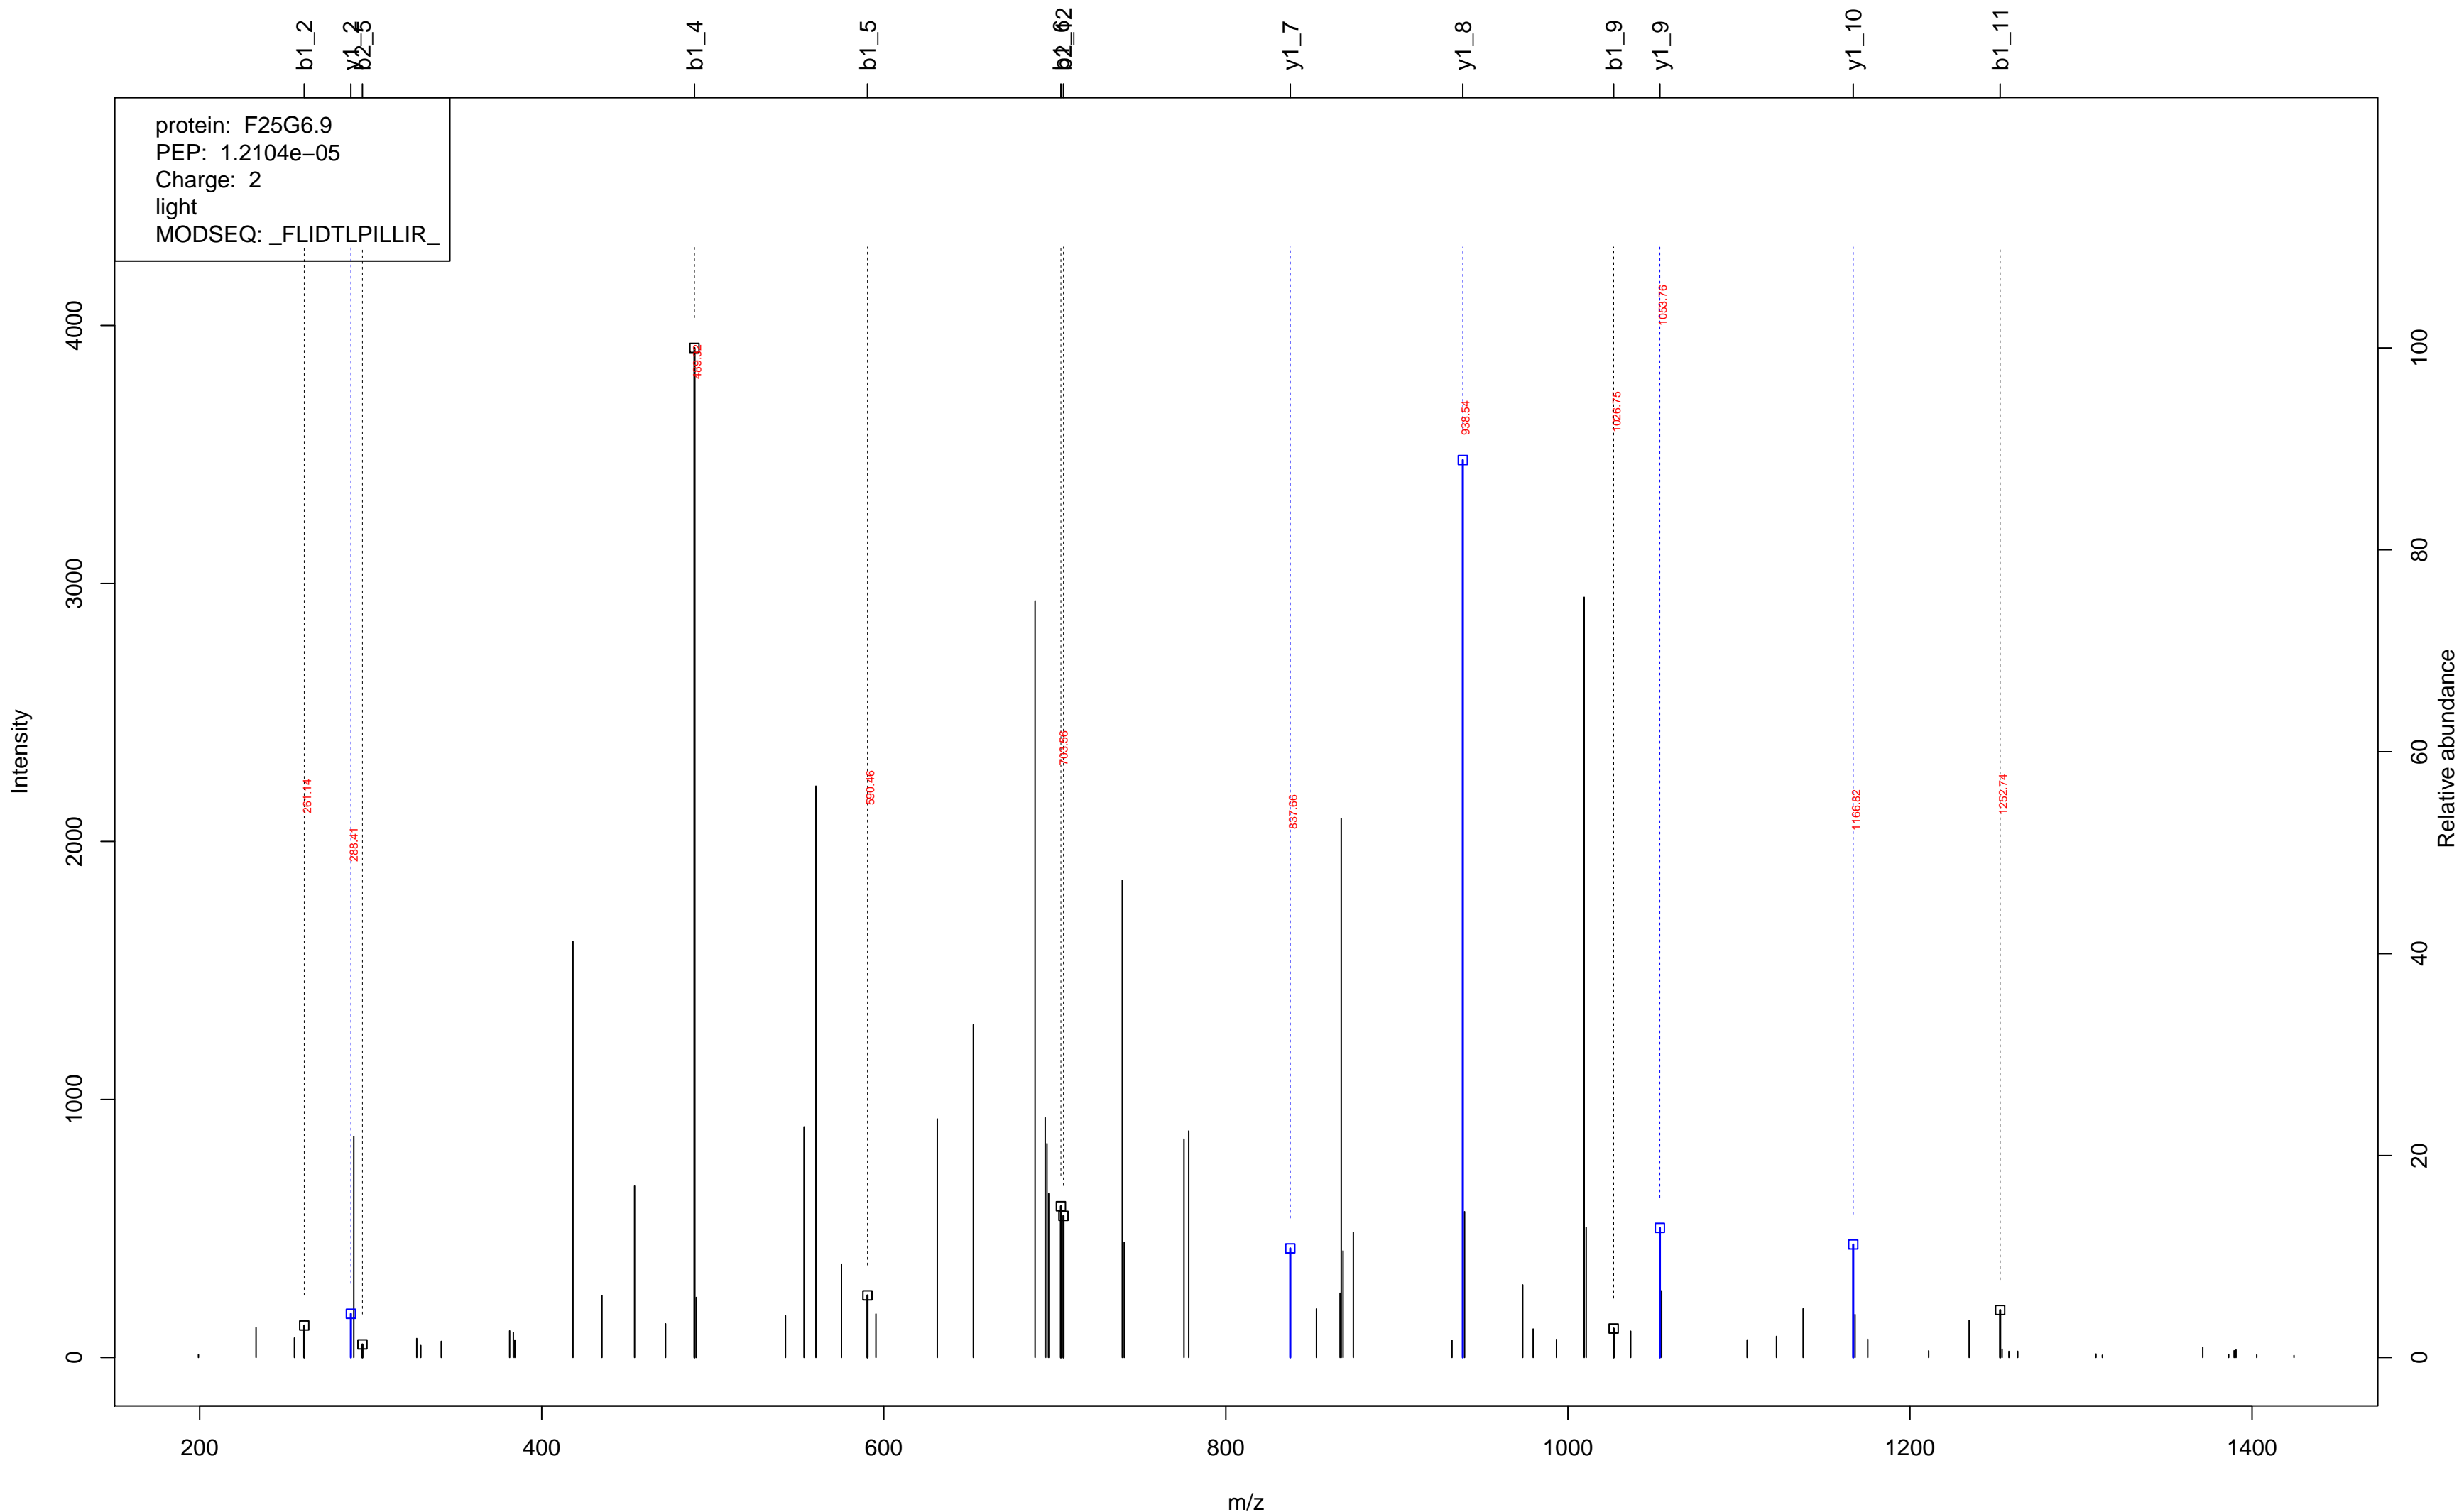

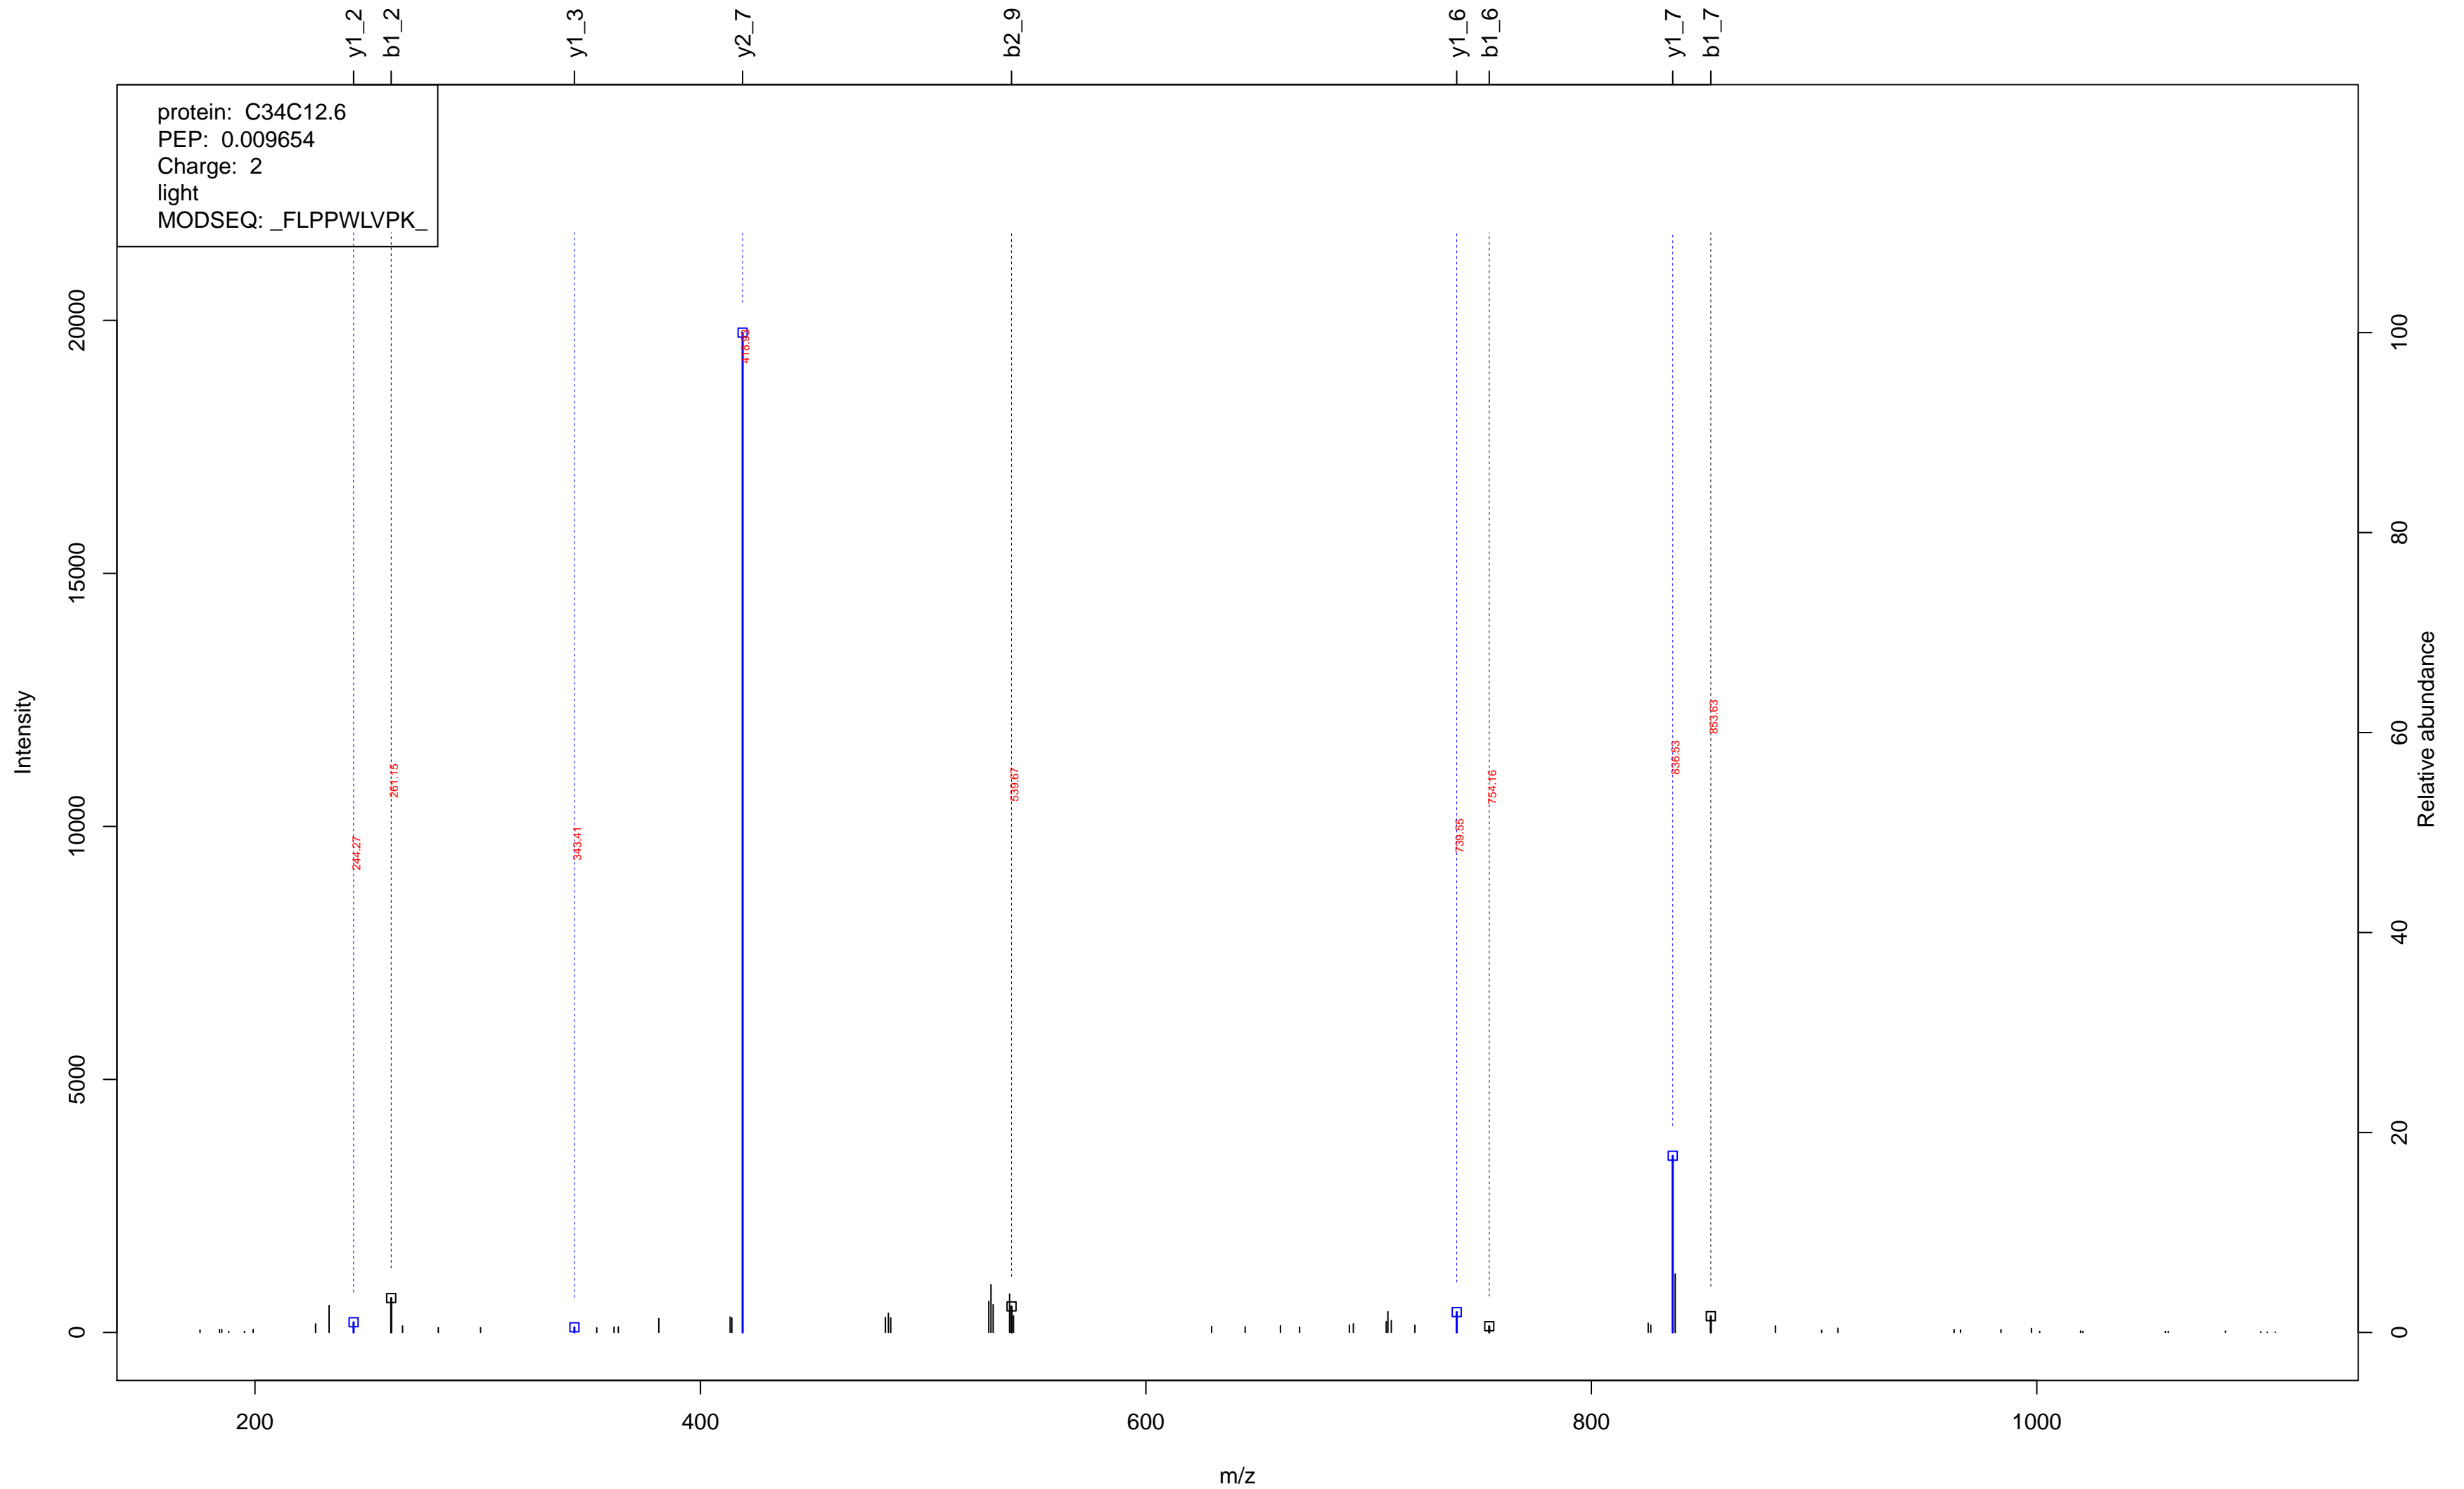

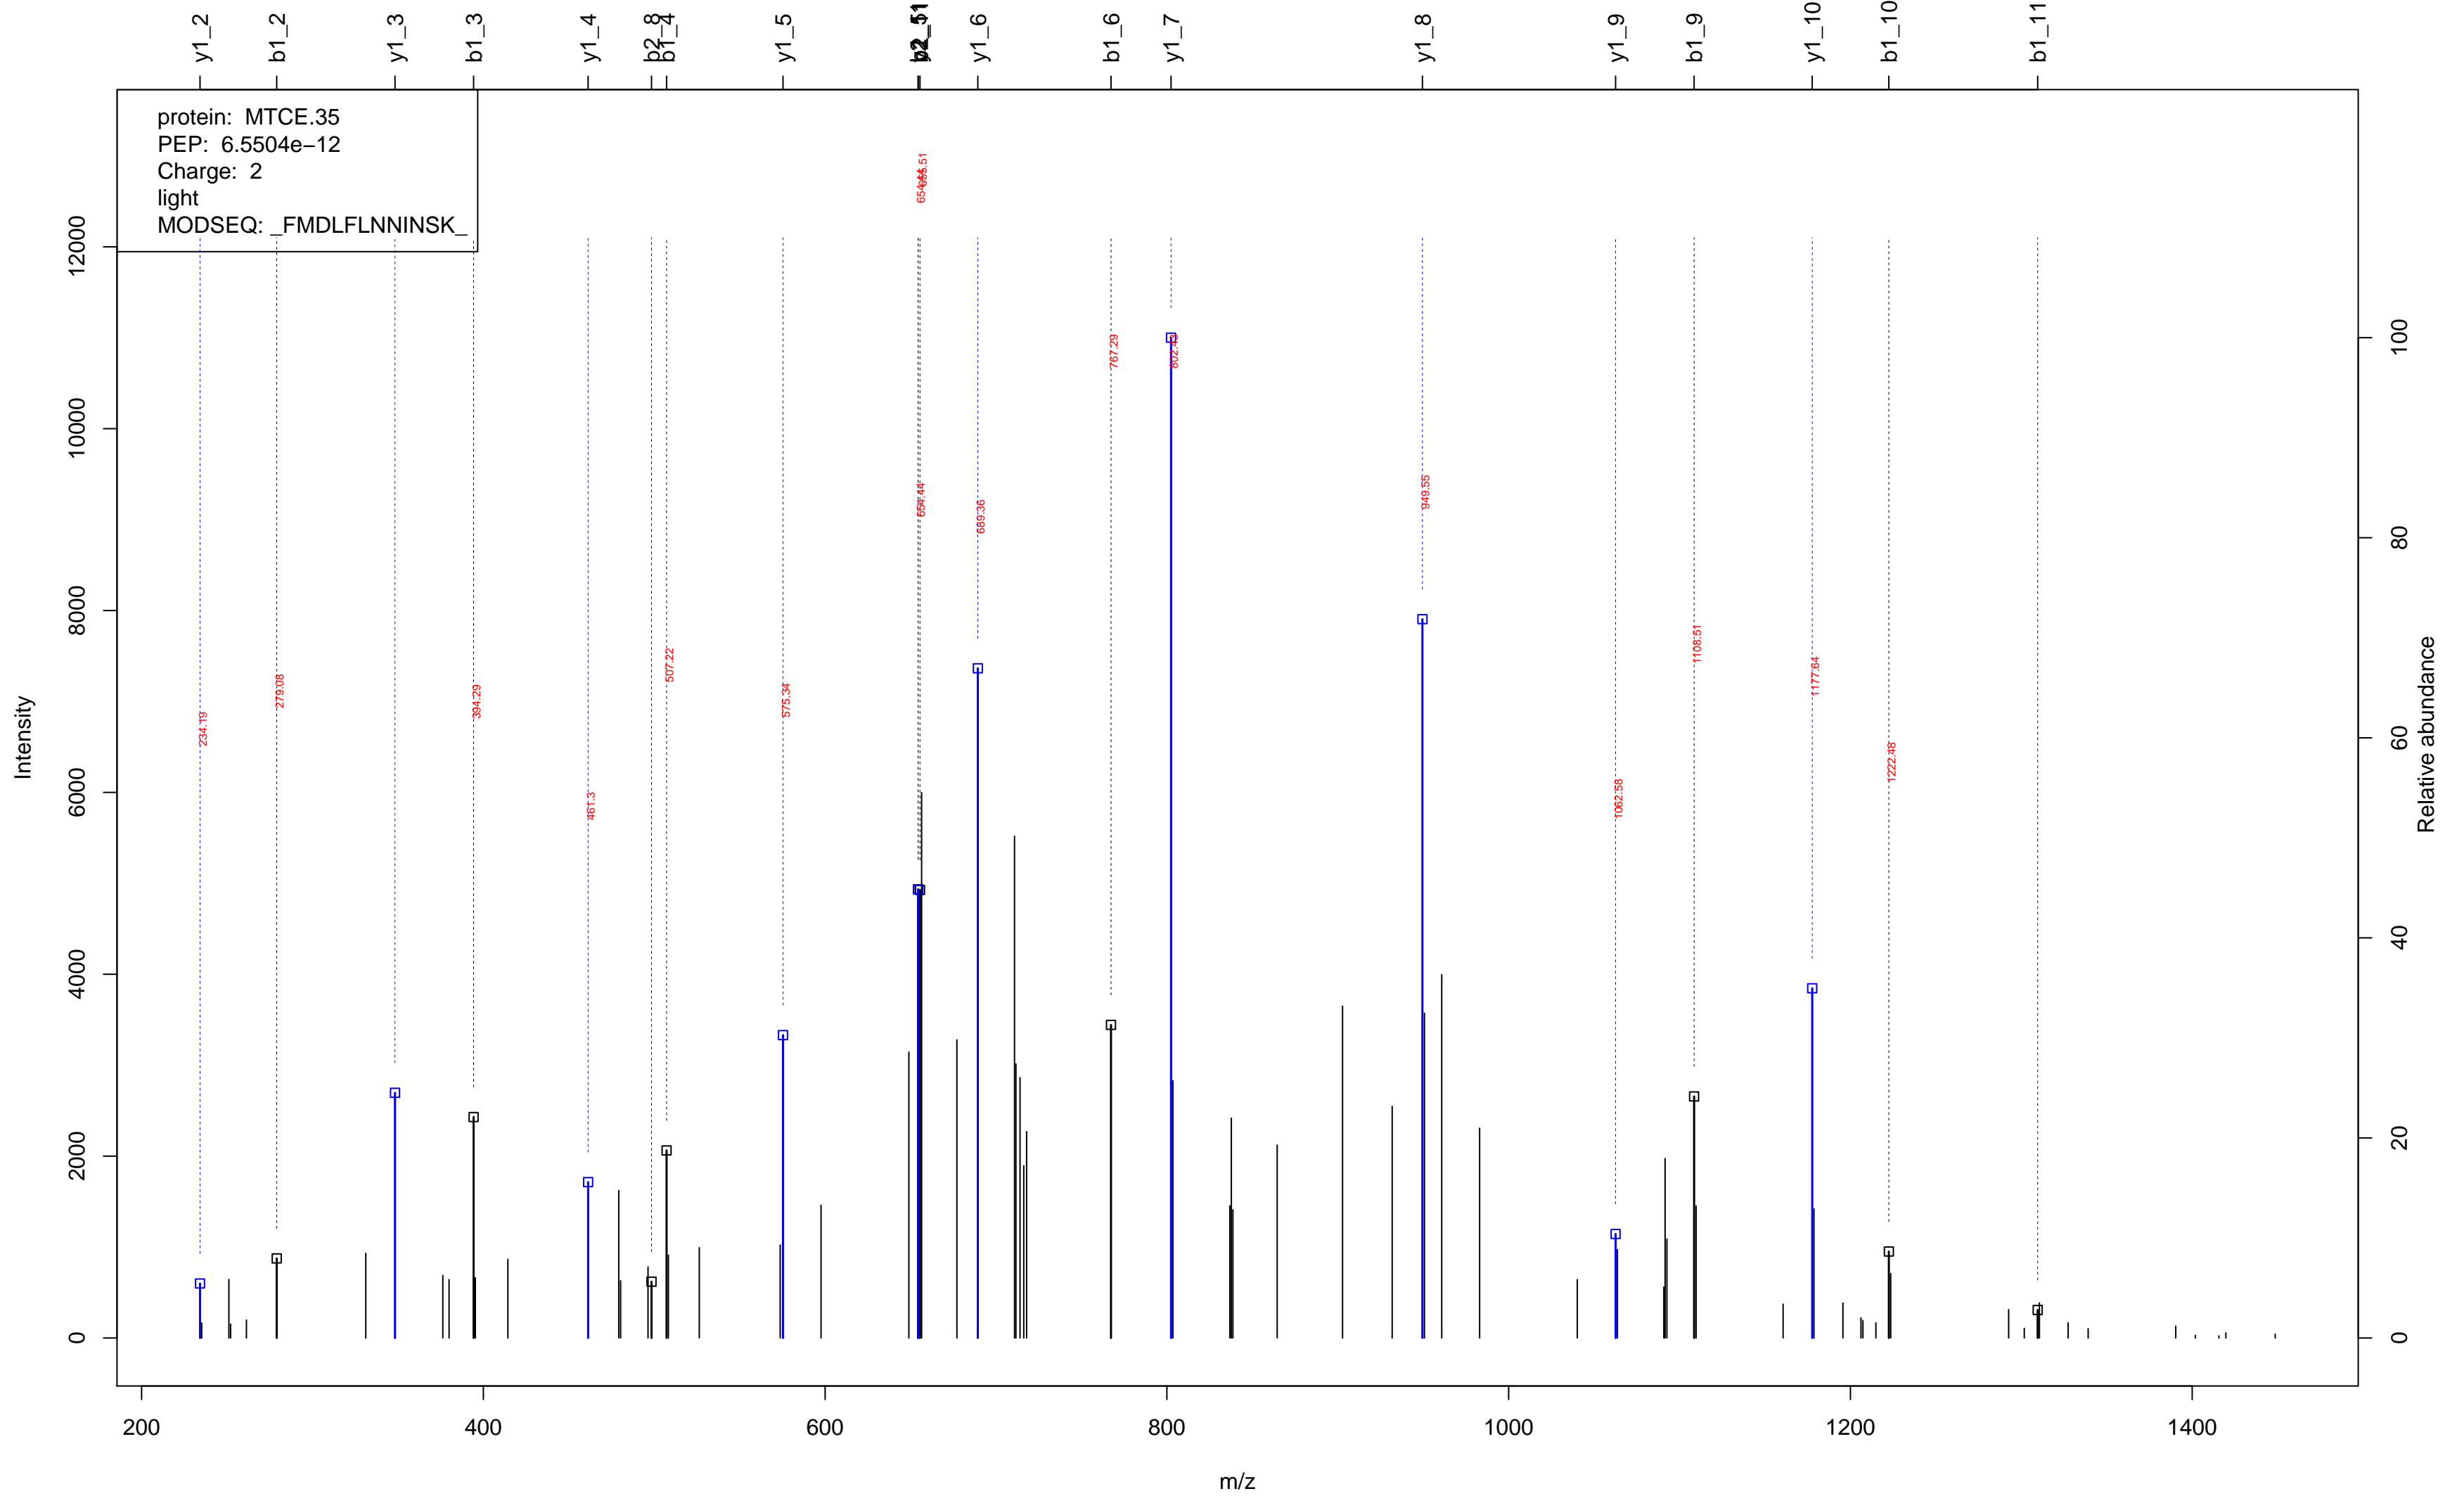

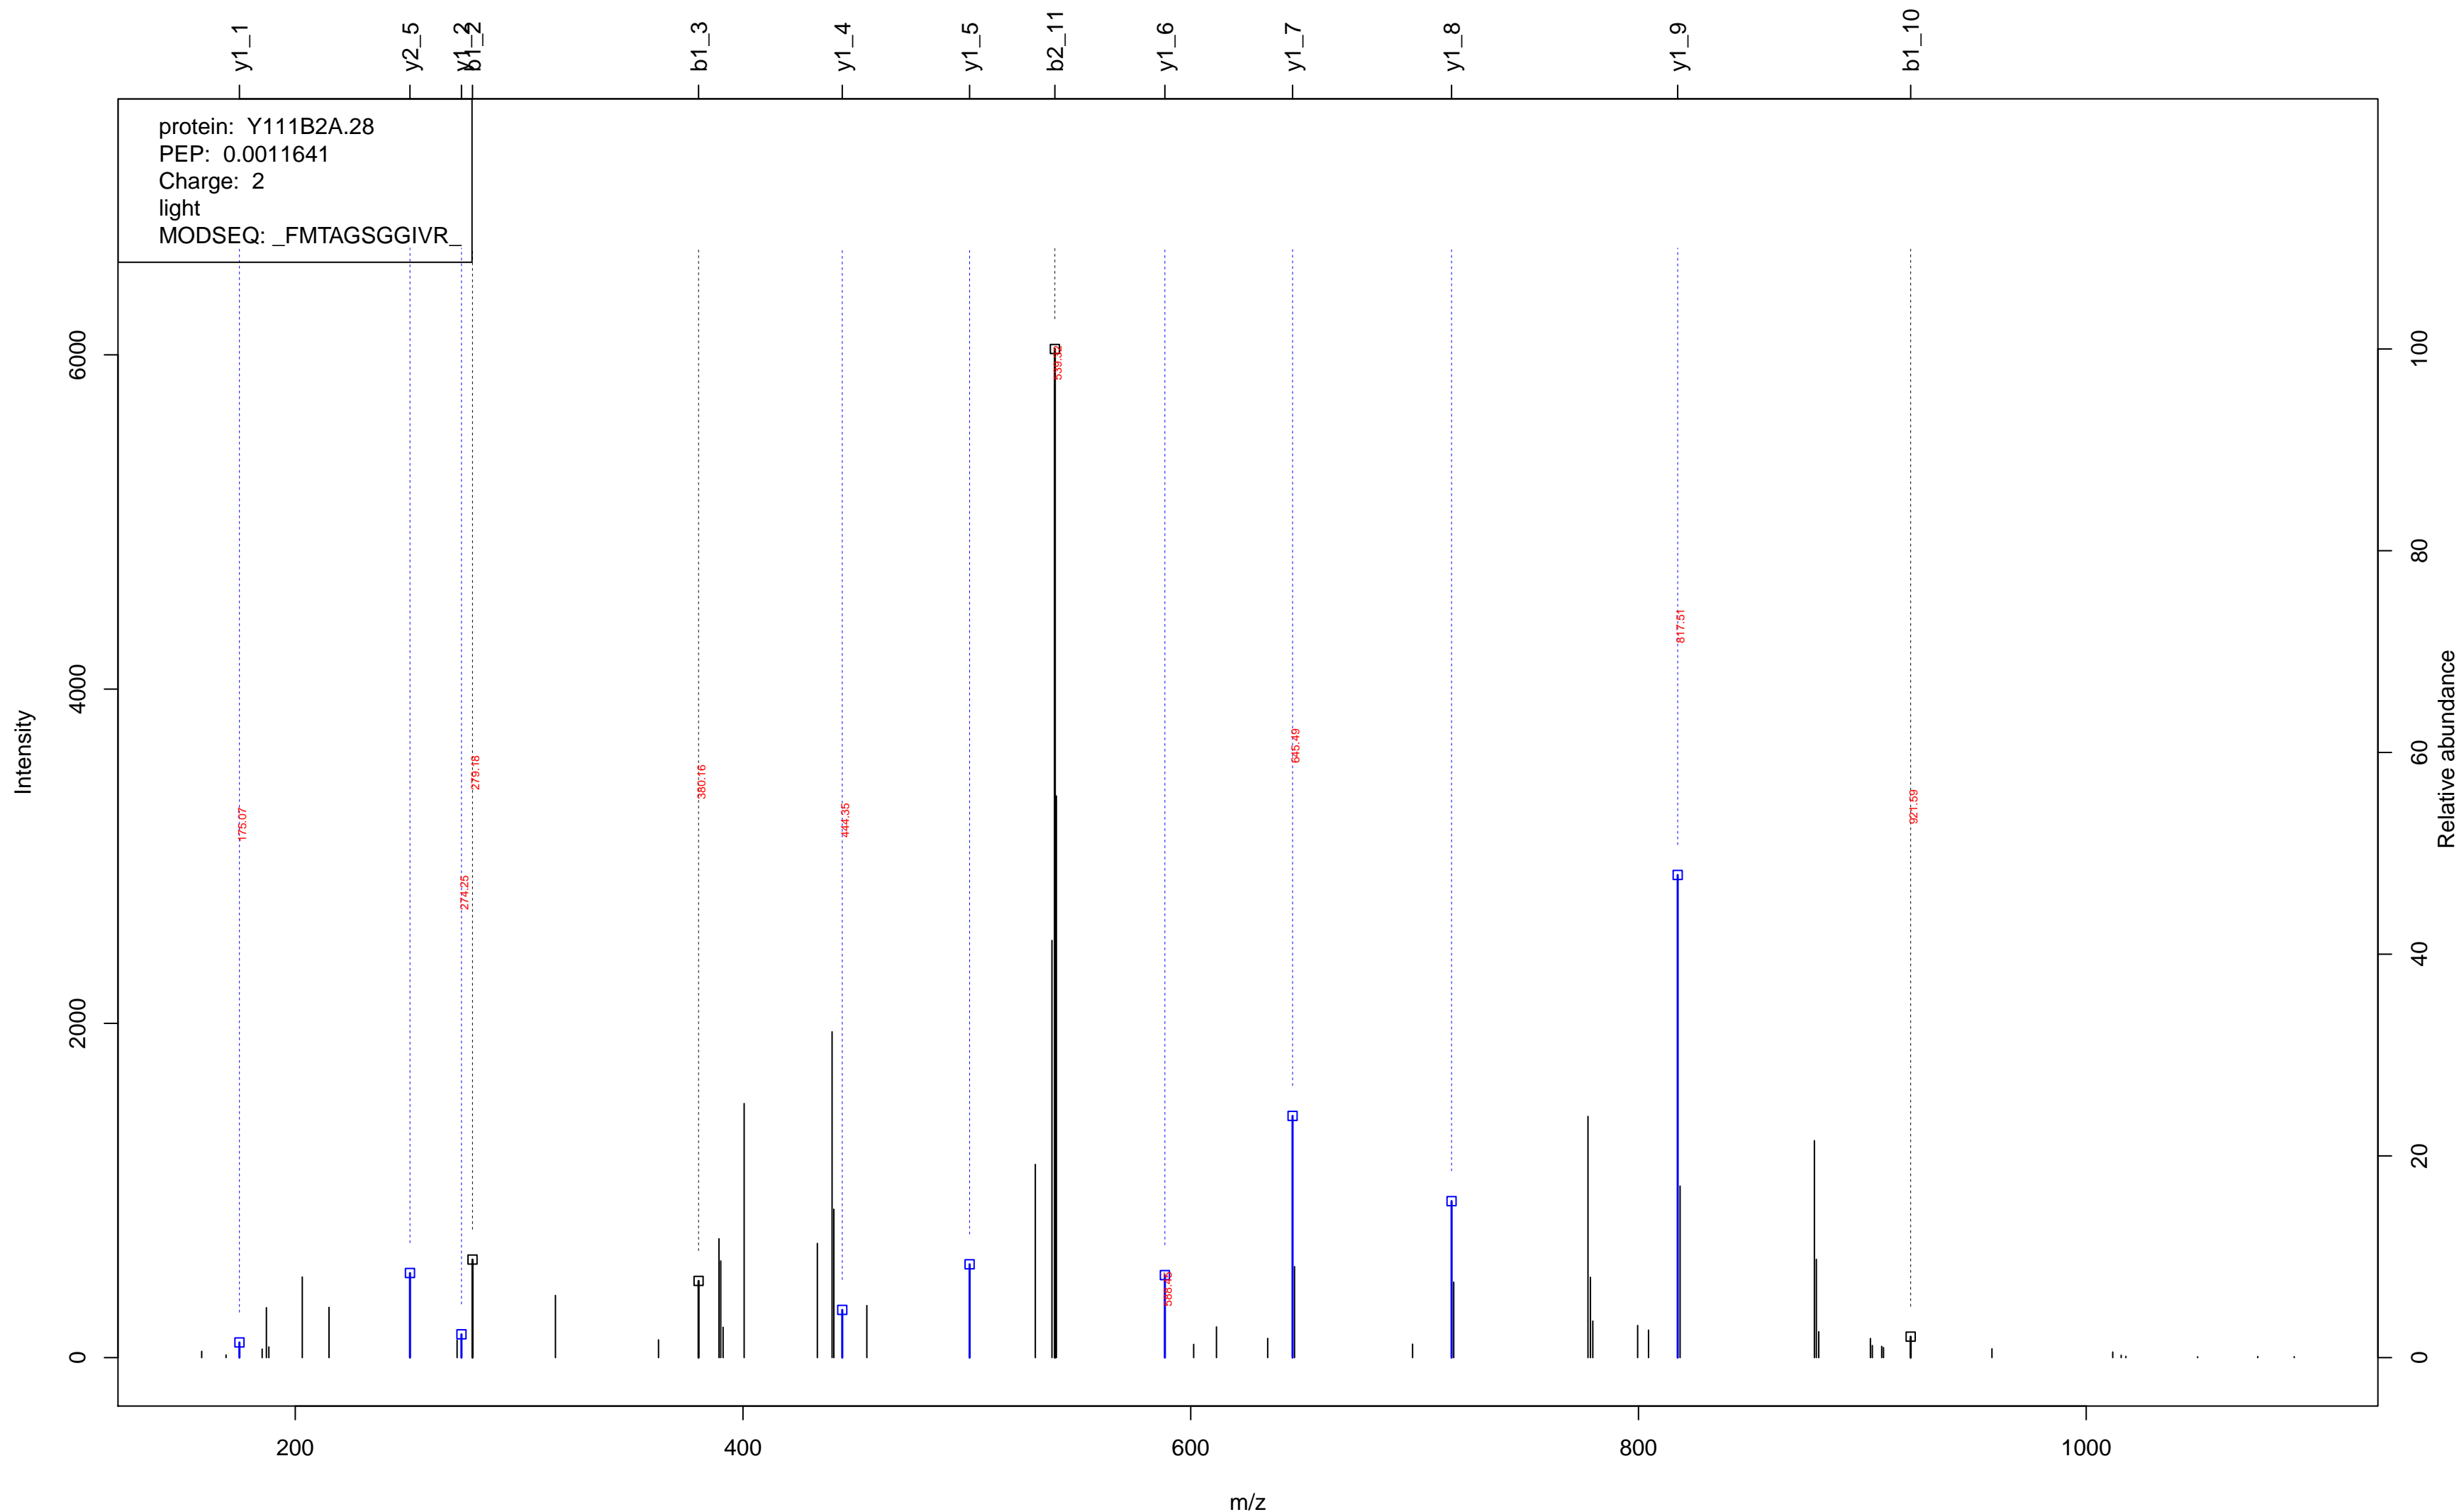

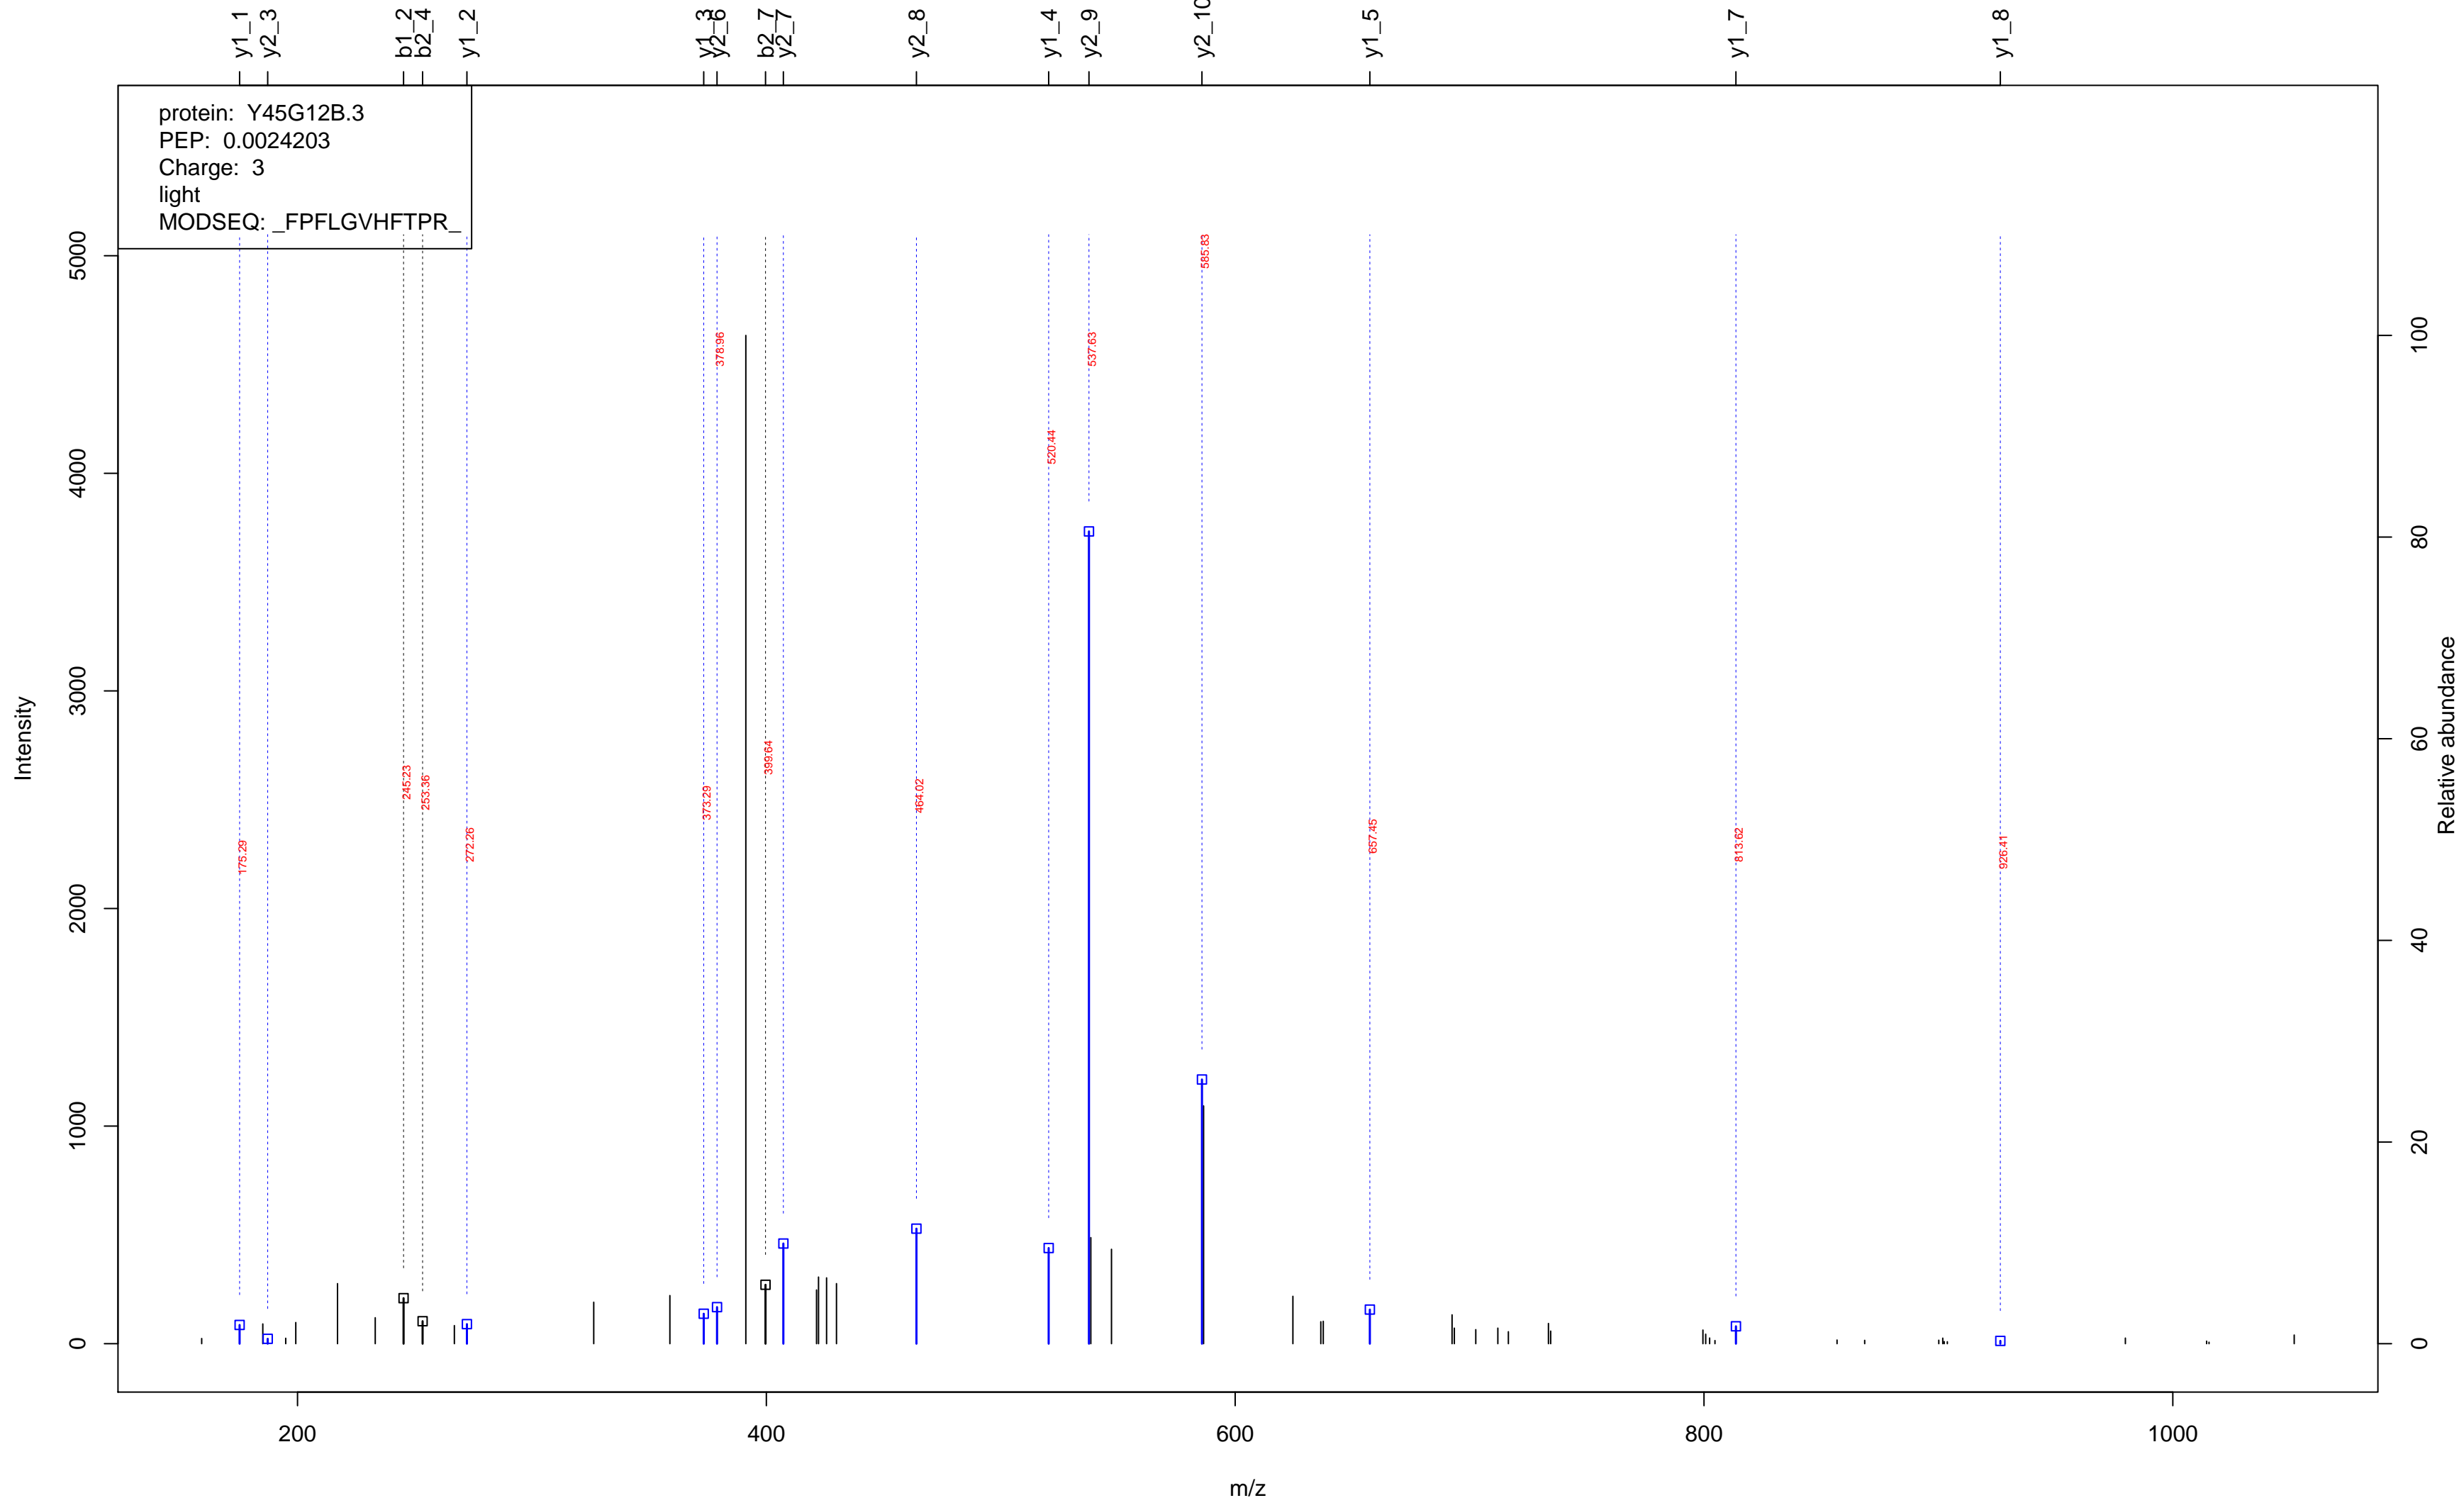

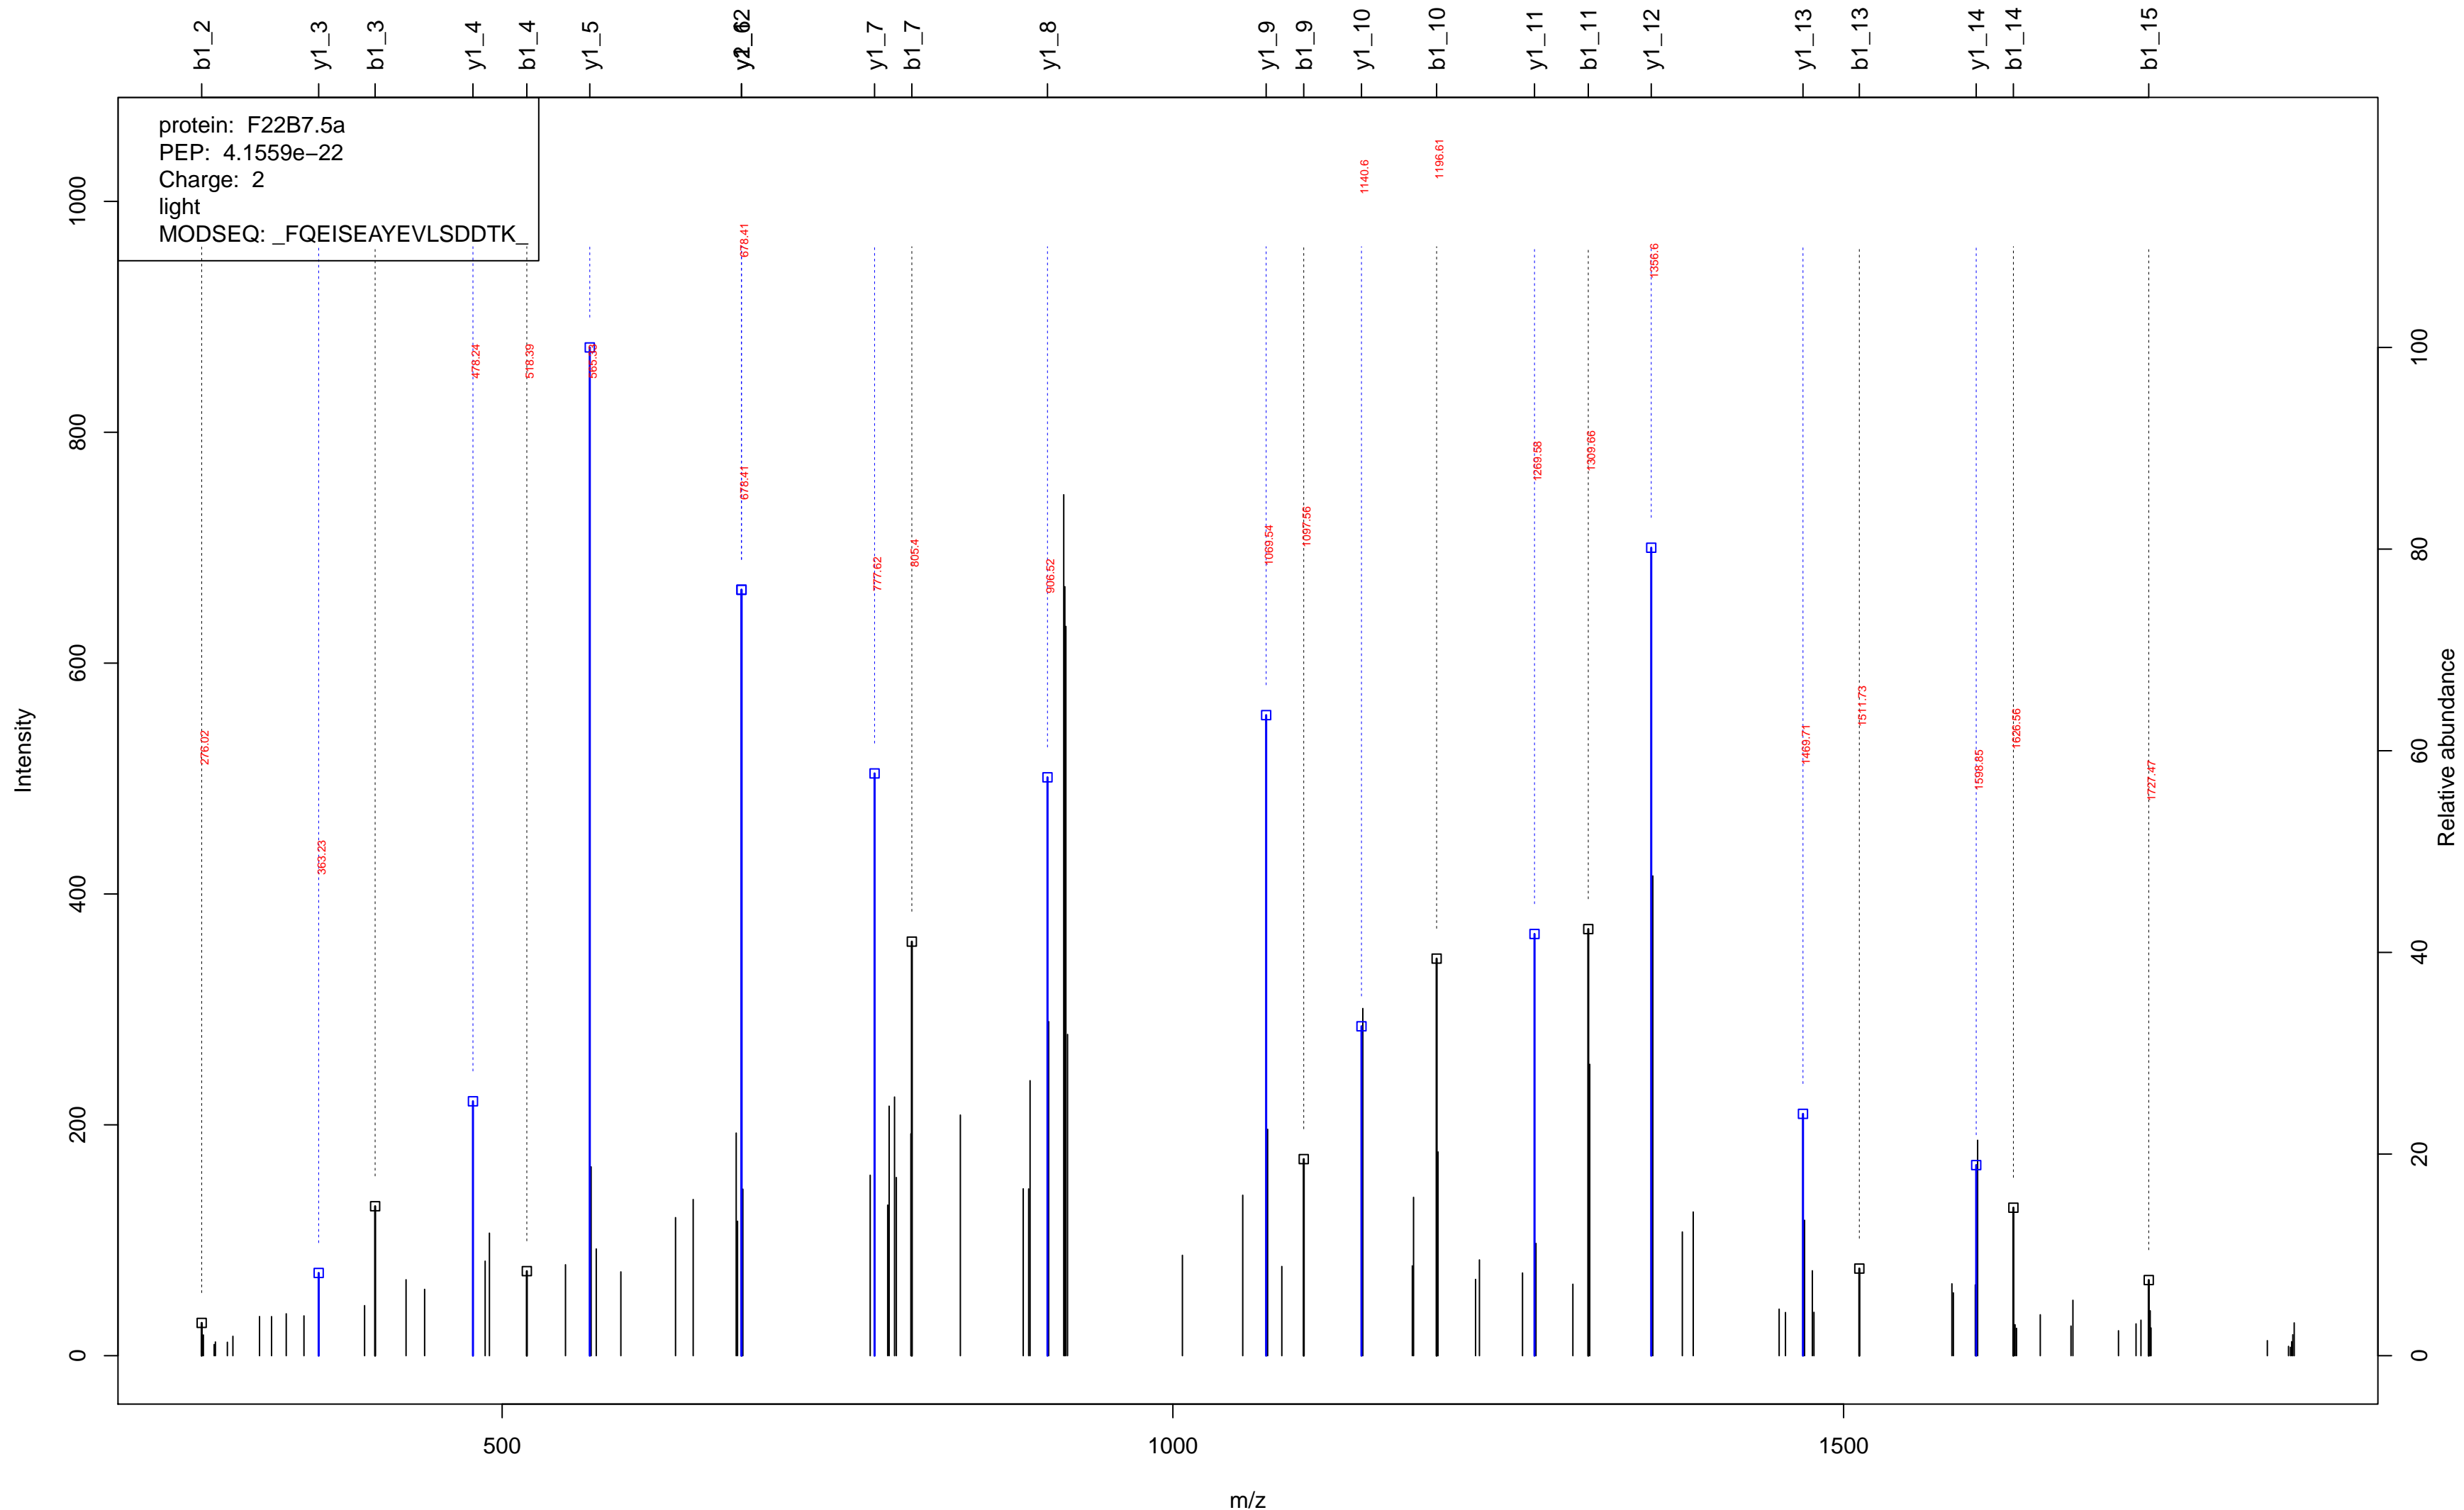

protein: F22B7.5a  
PEP: 4.1559e-22  
Charge: 2  
light  
MODSEQ: \_FQEISEAYEVLSDDTK\_

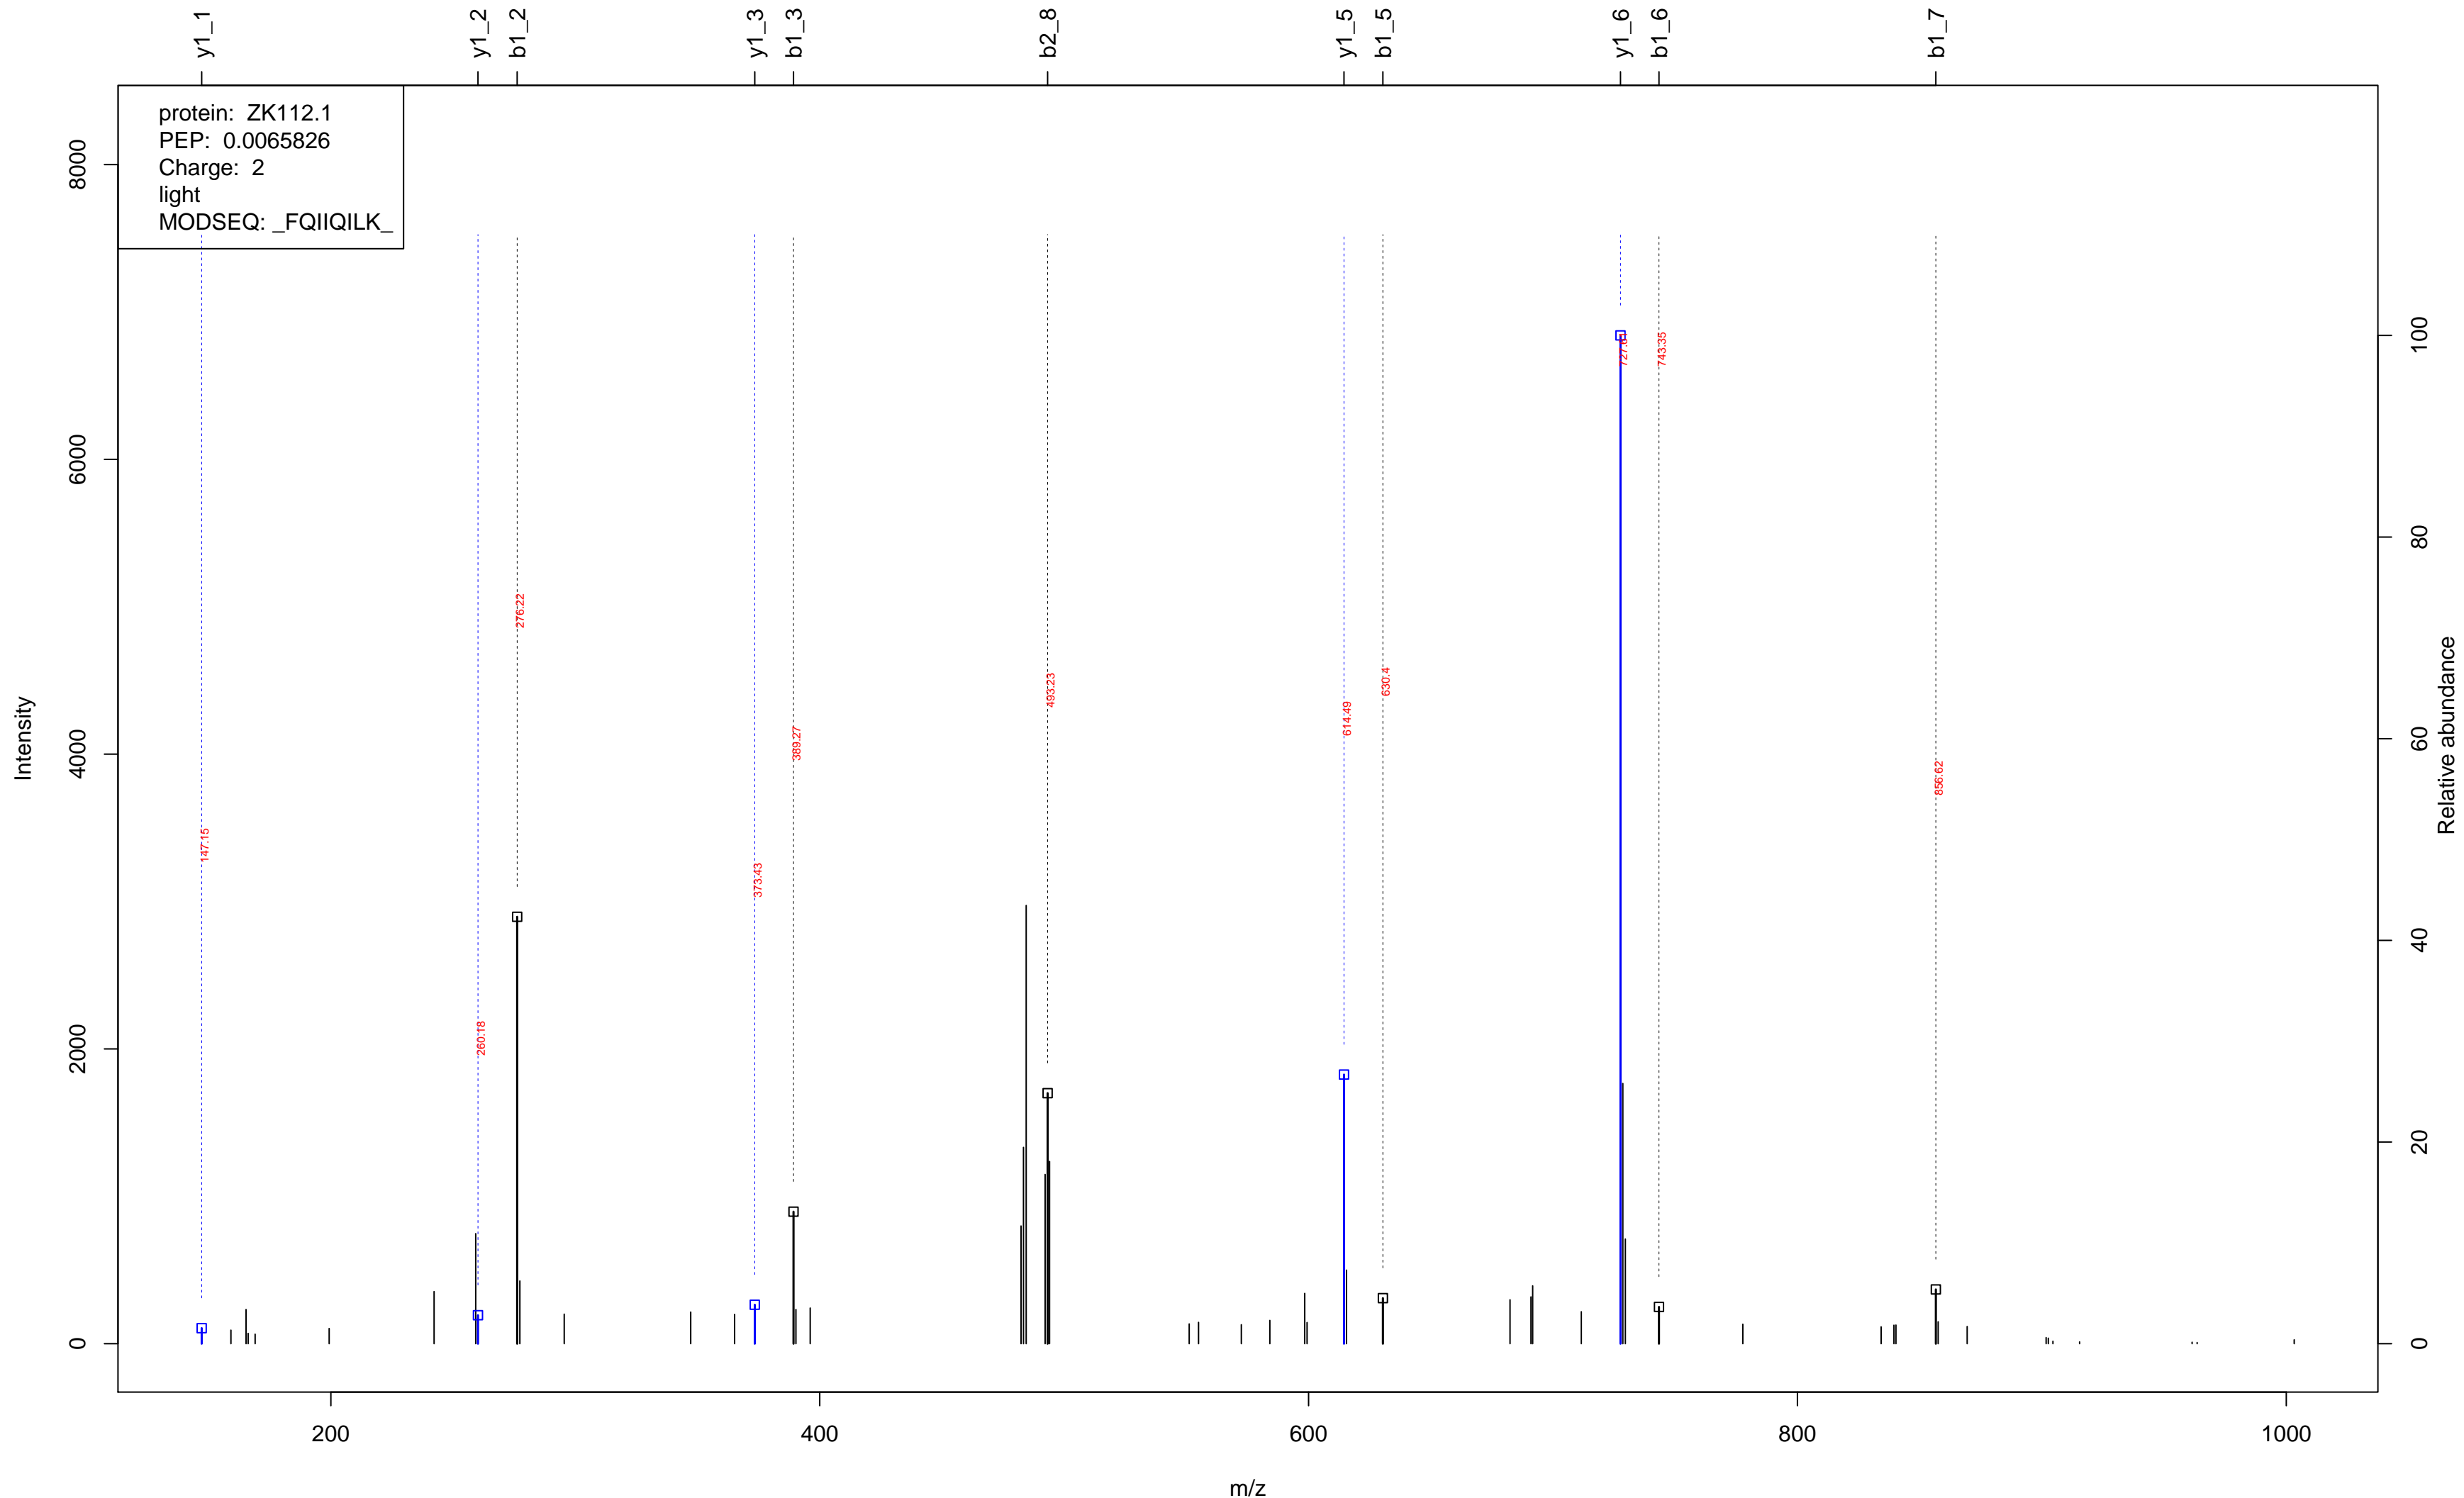

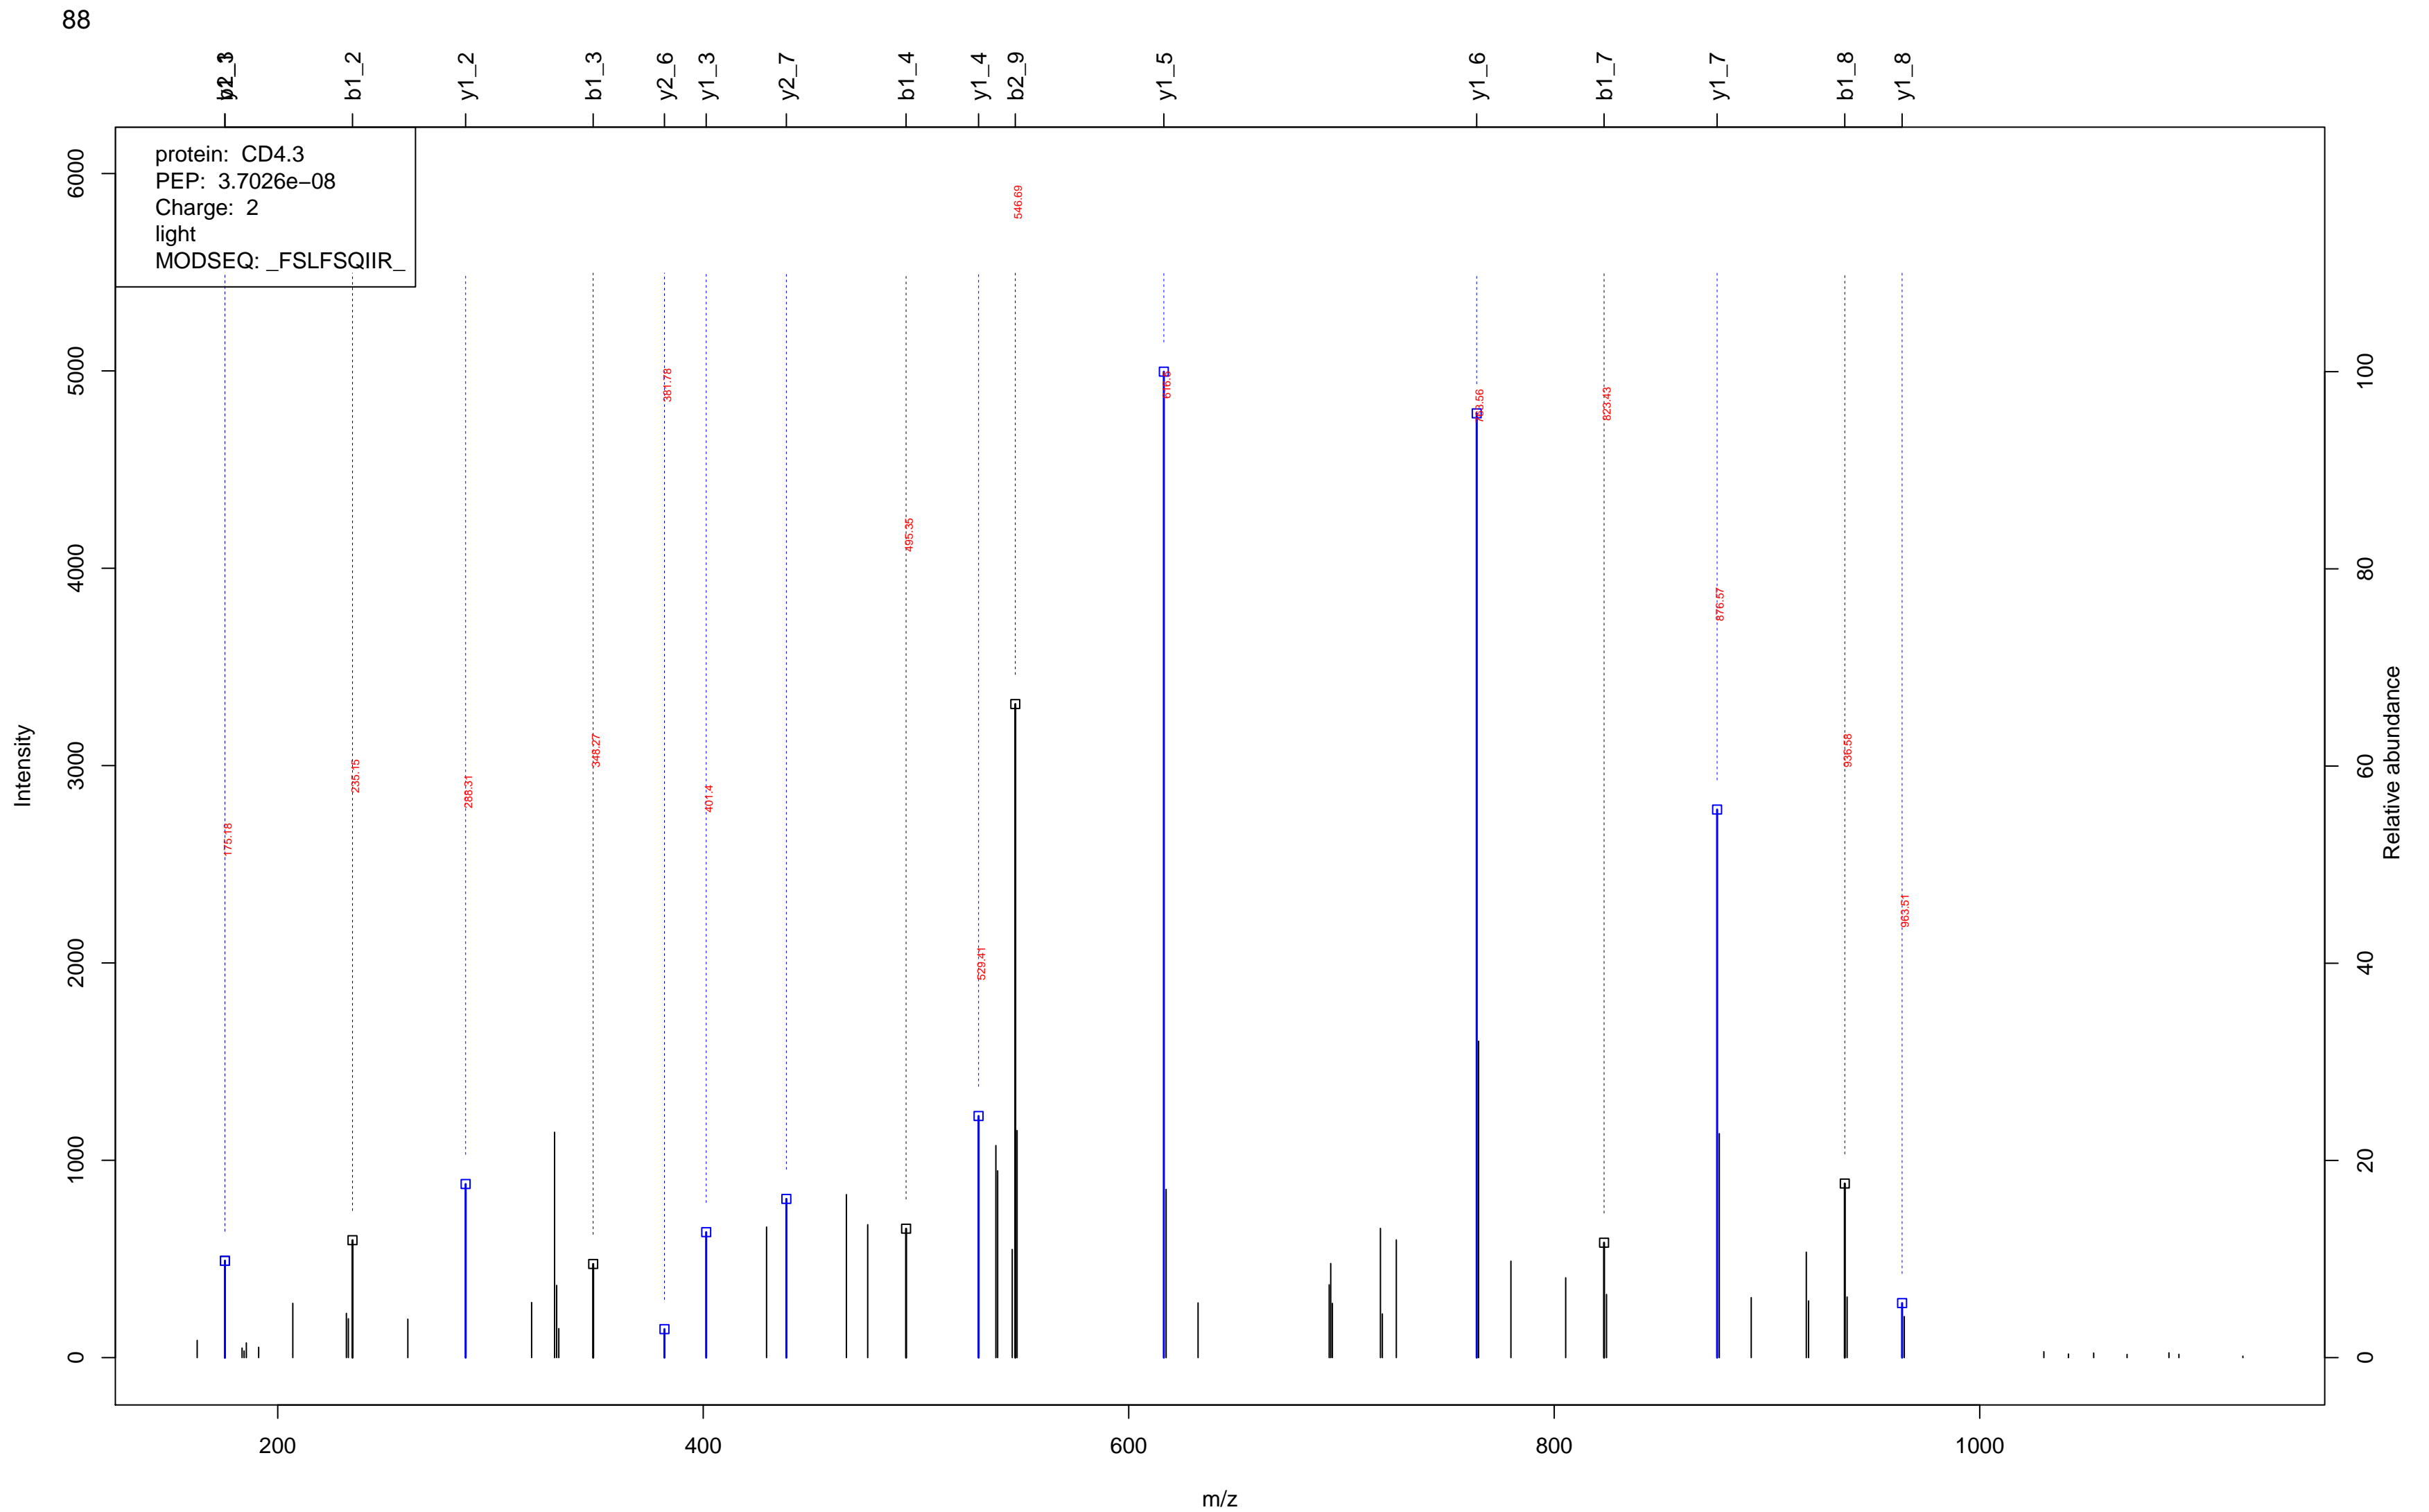



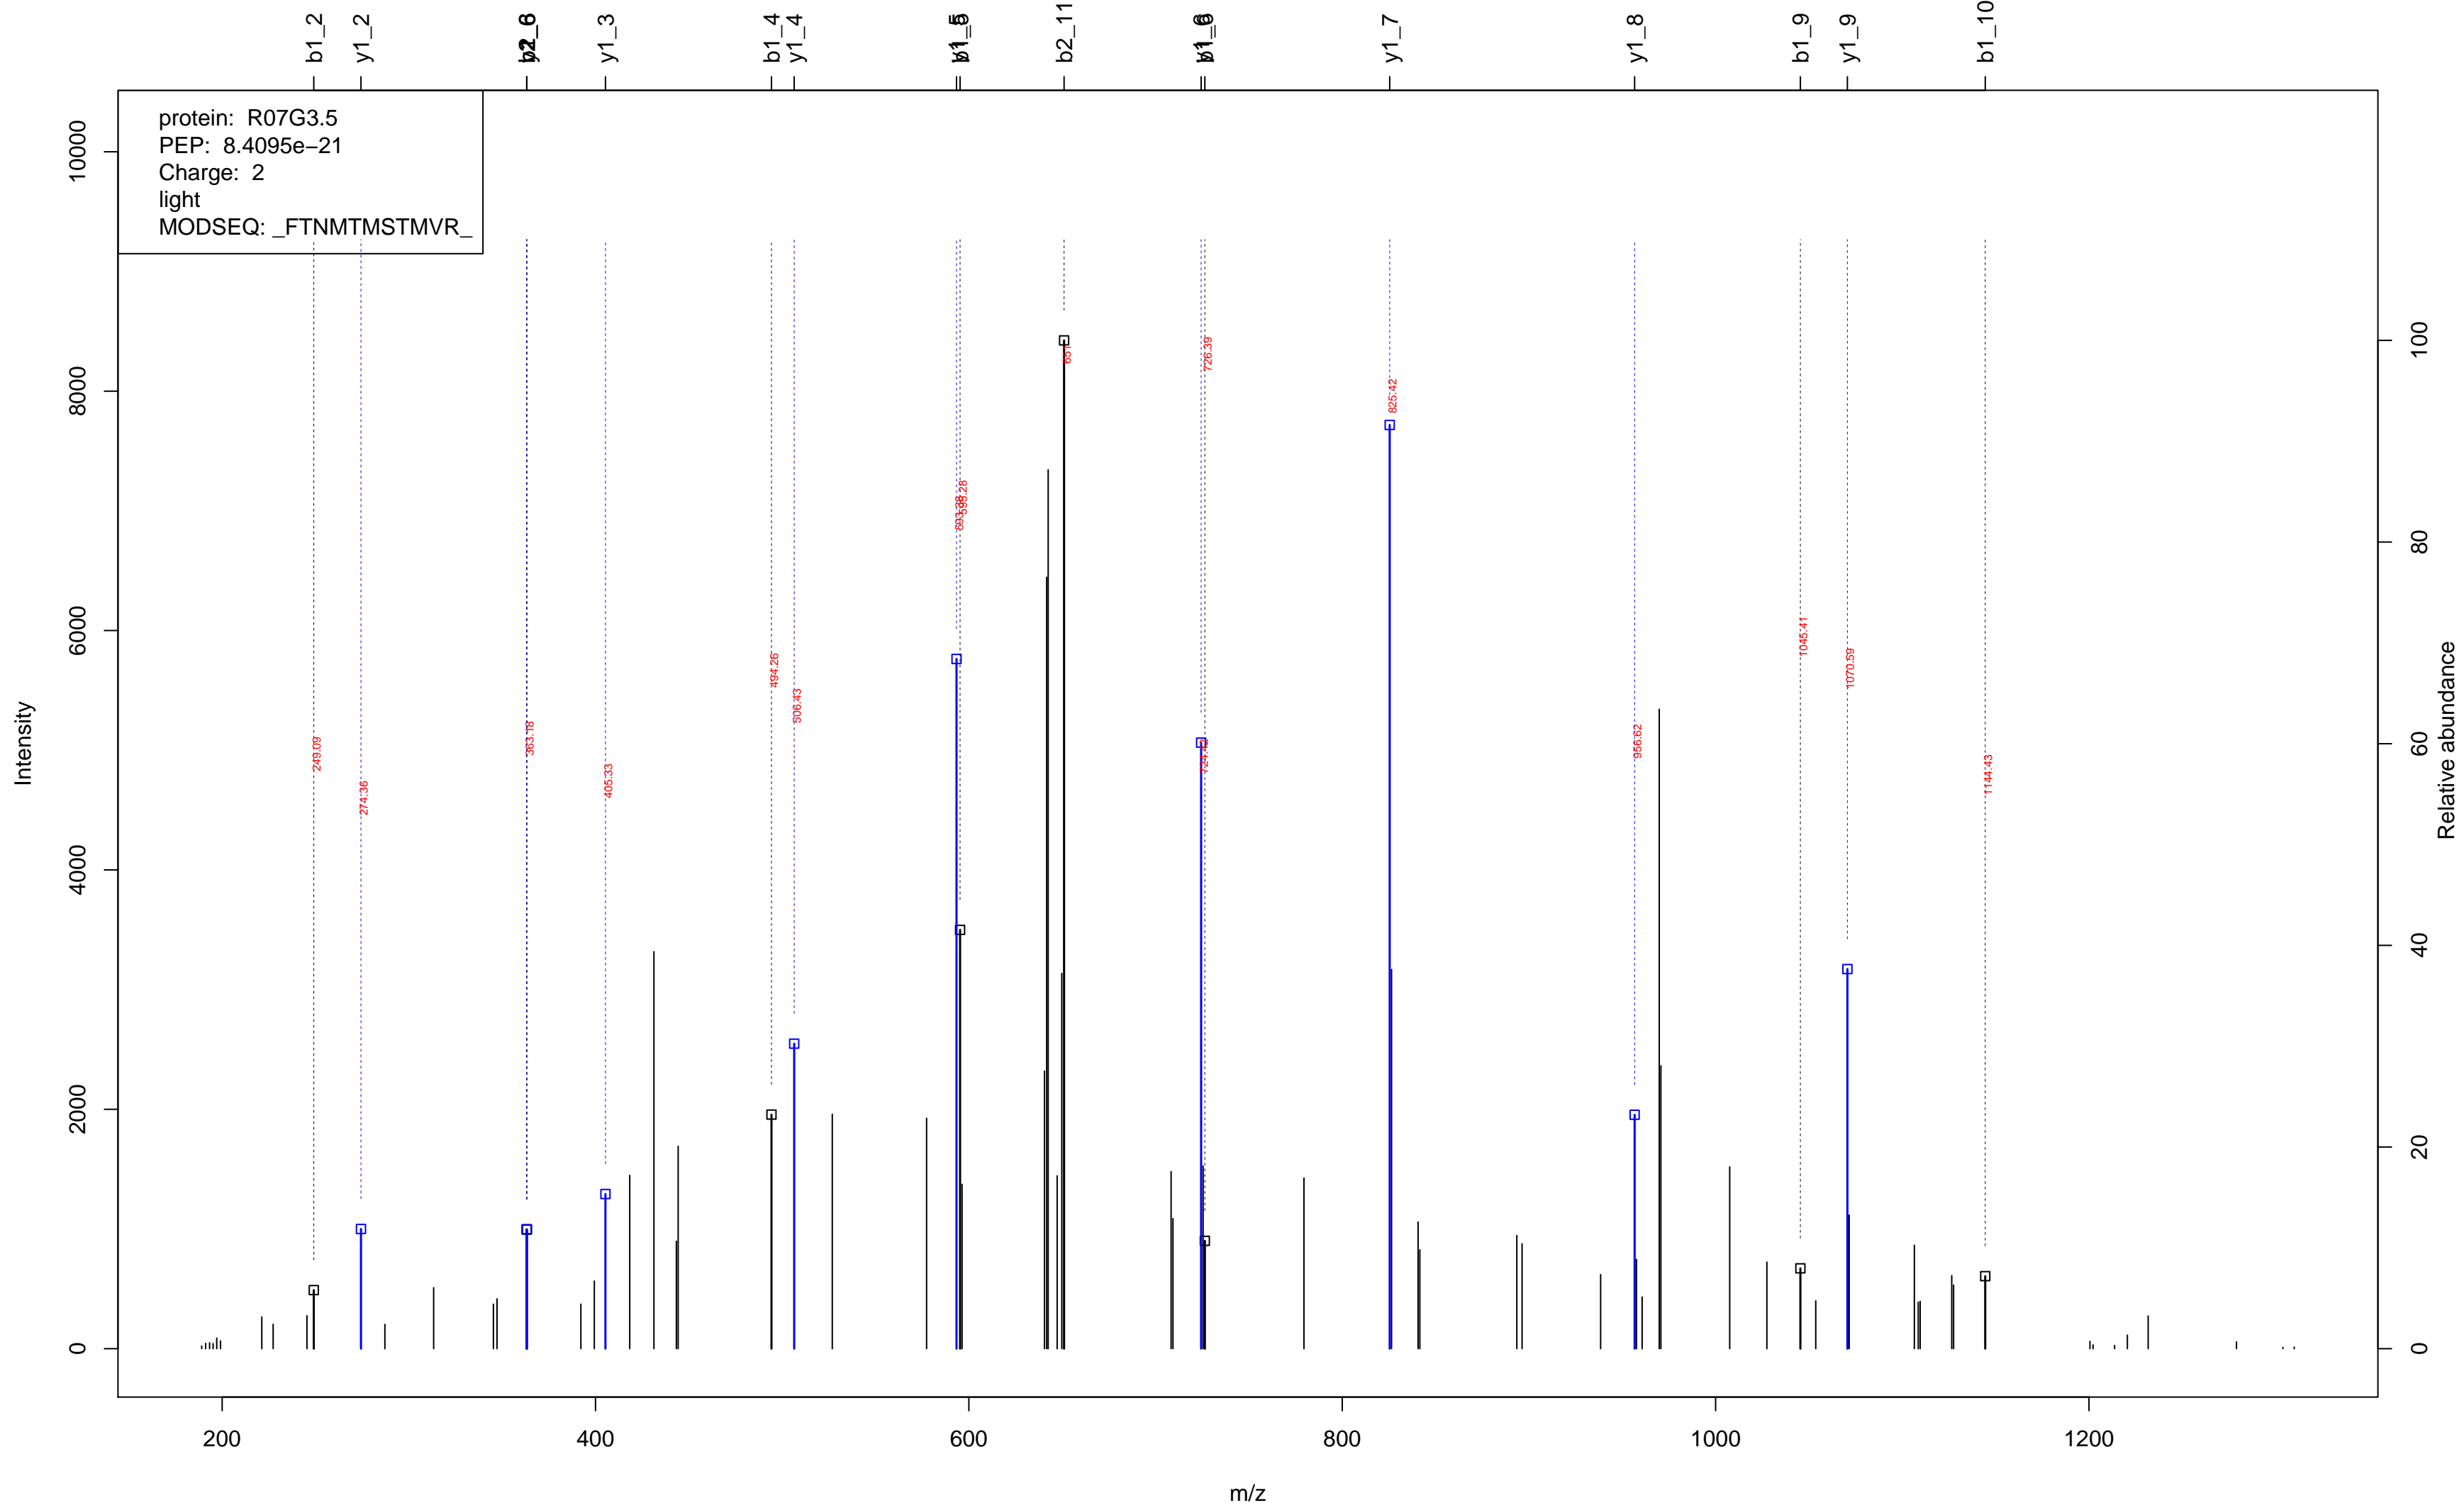

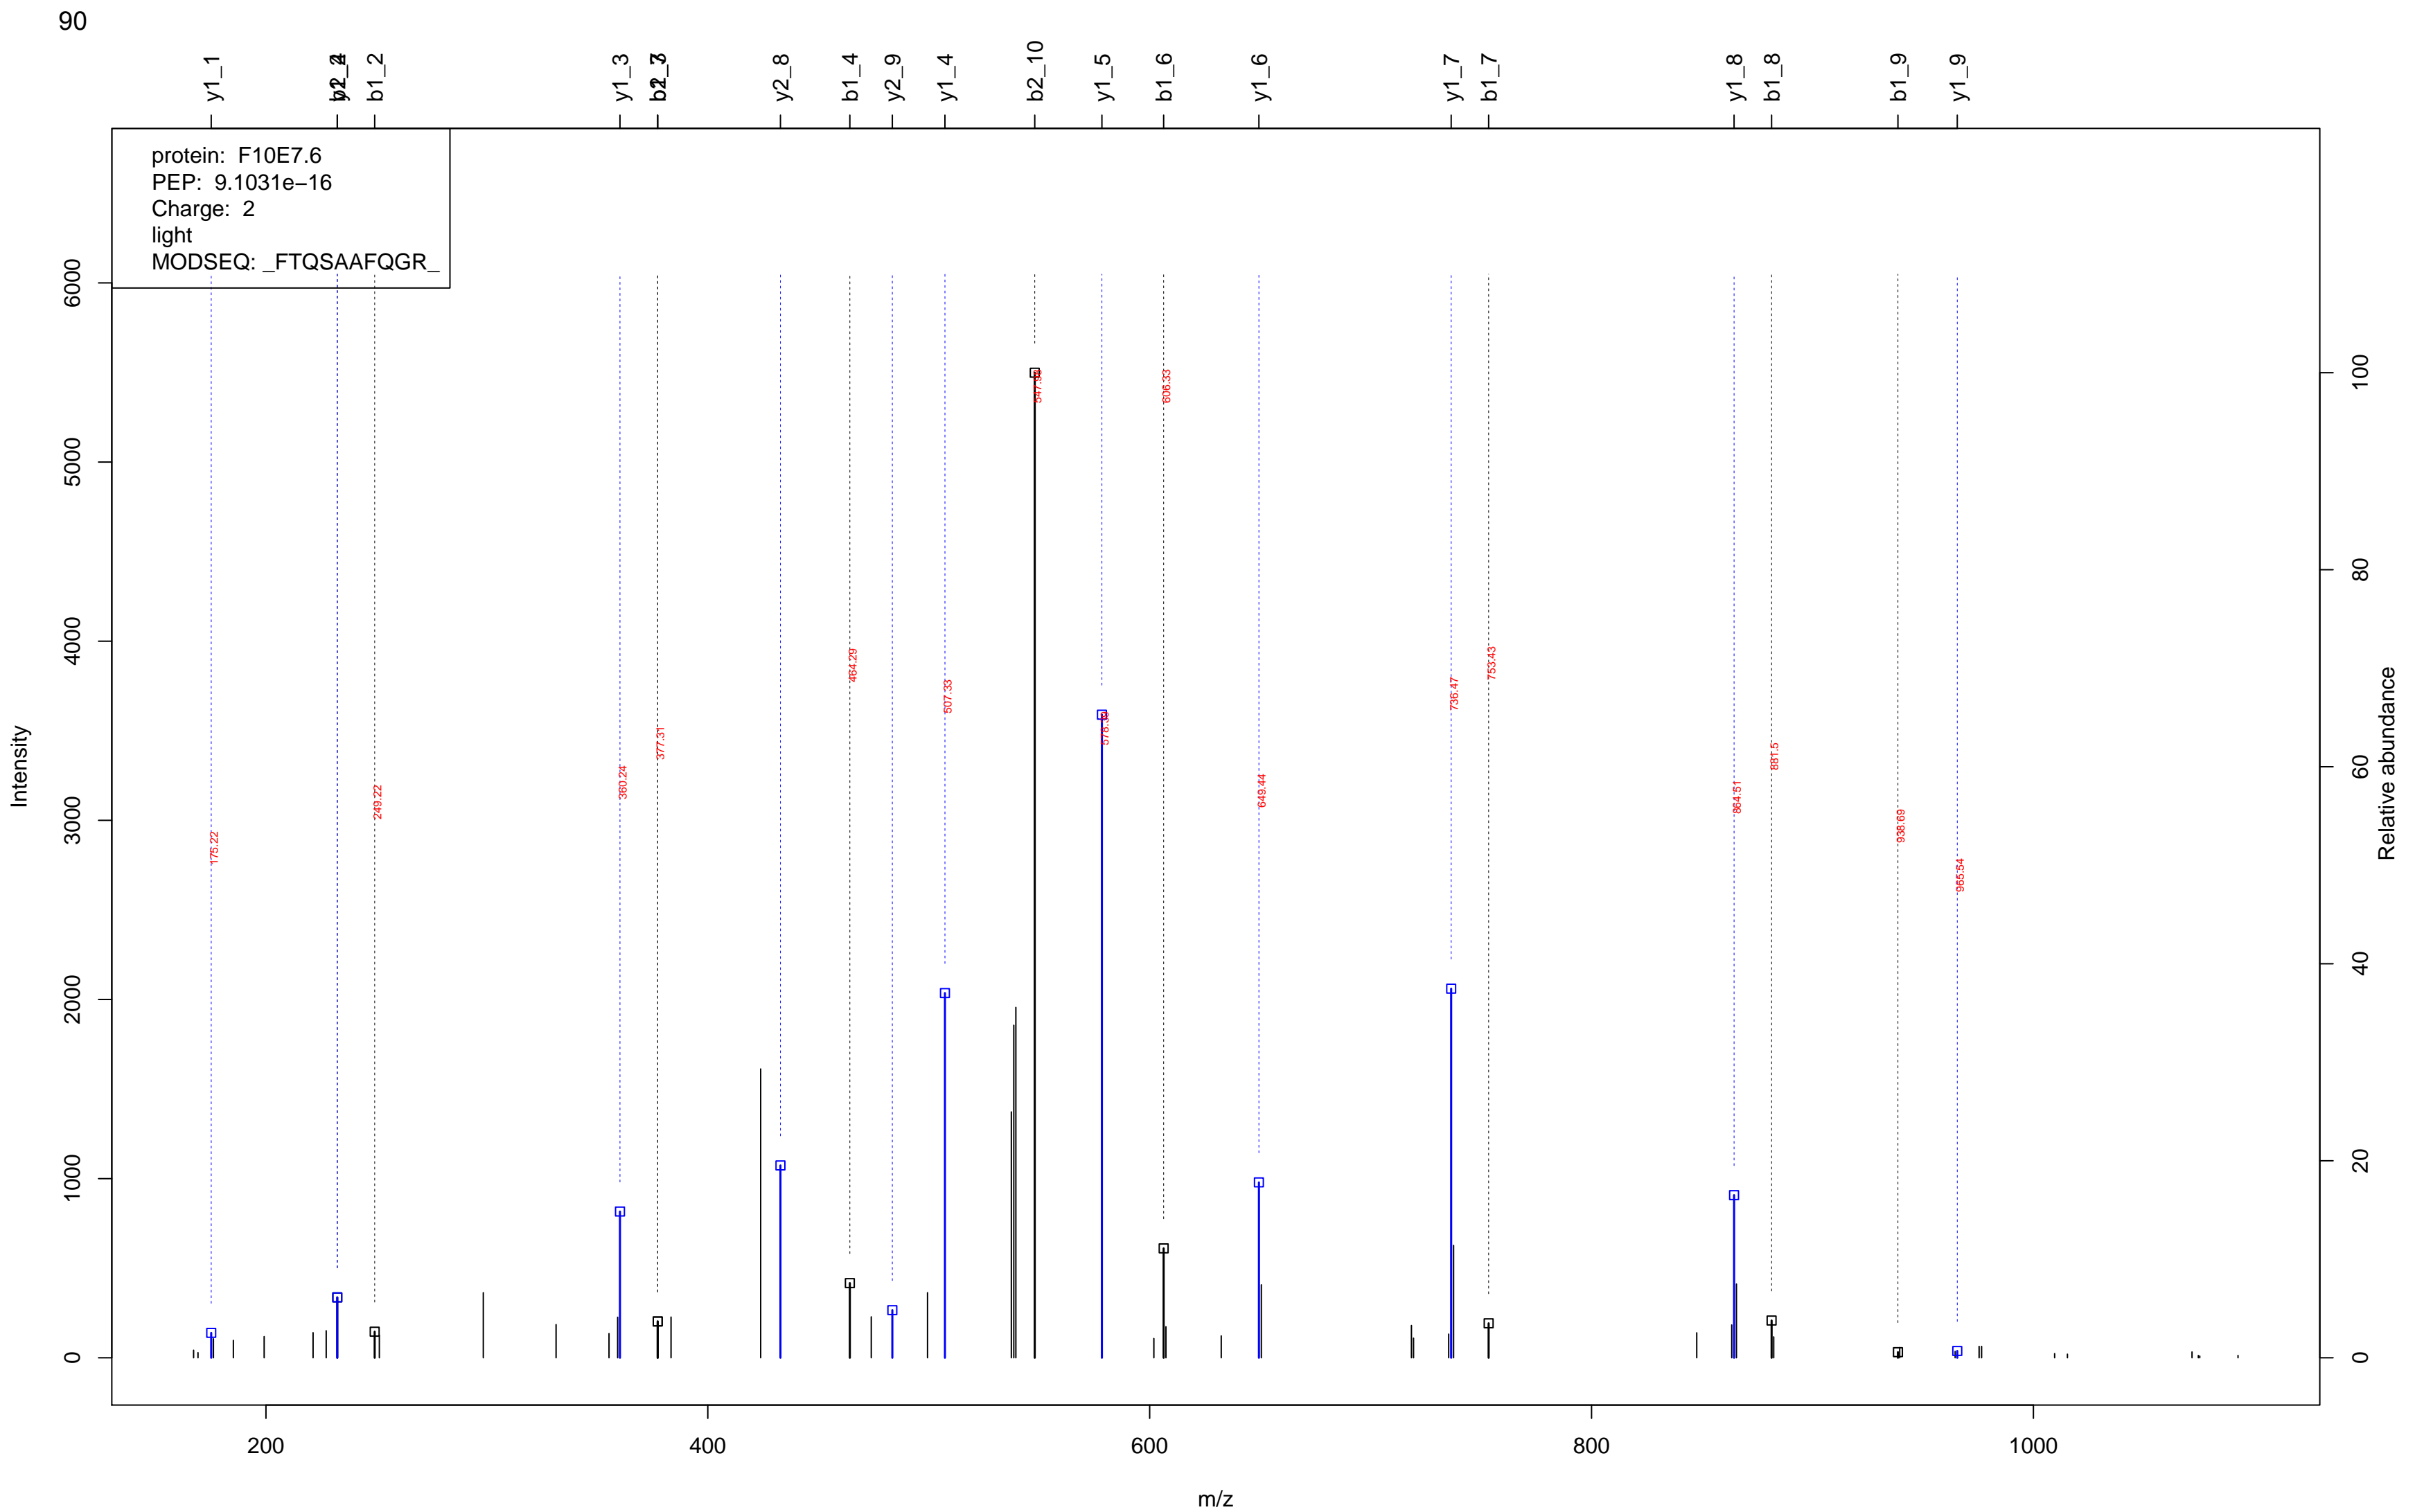

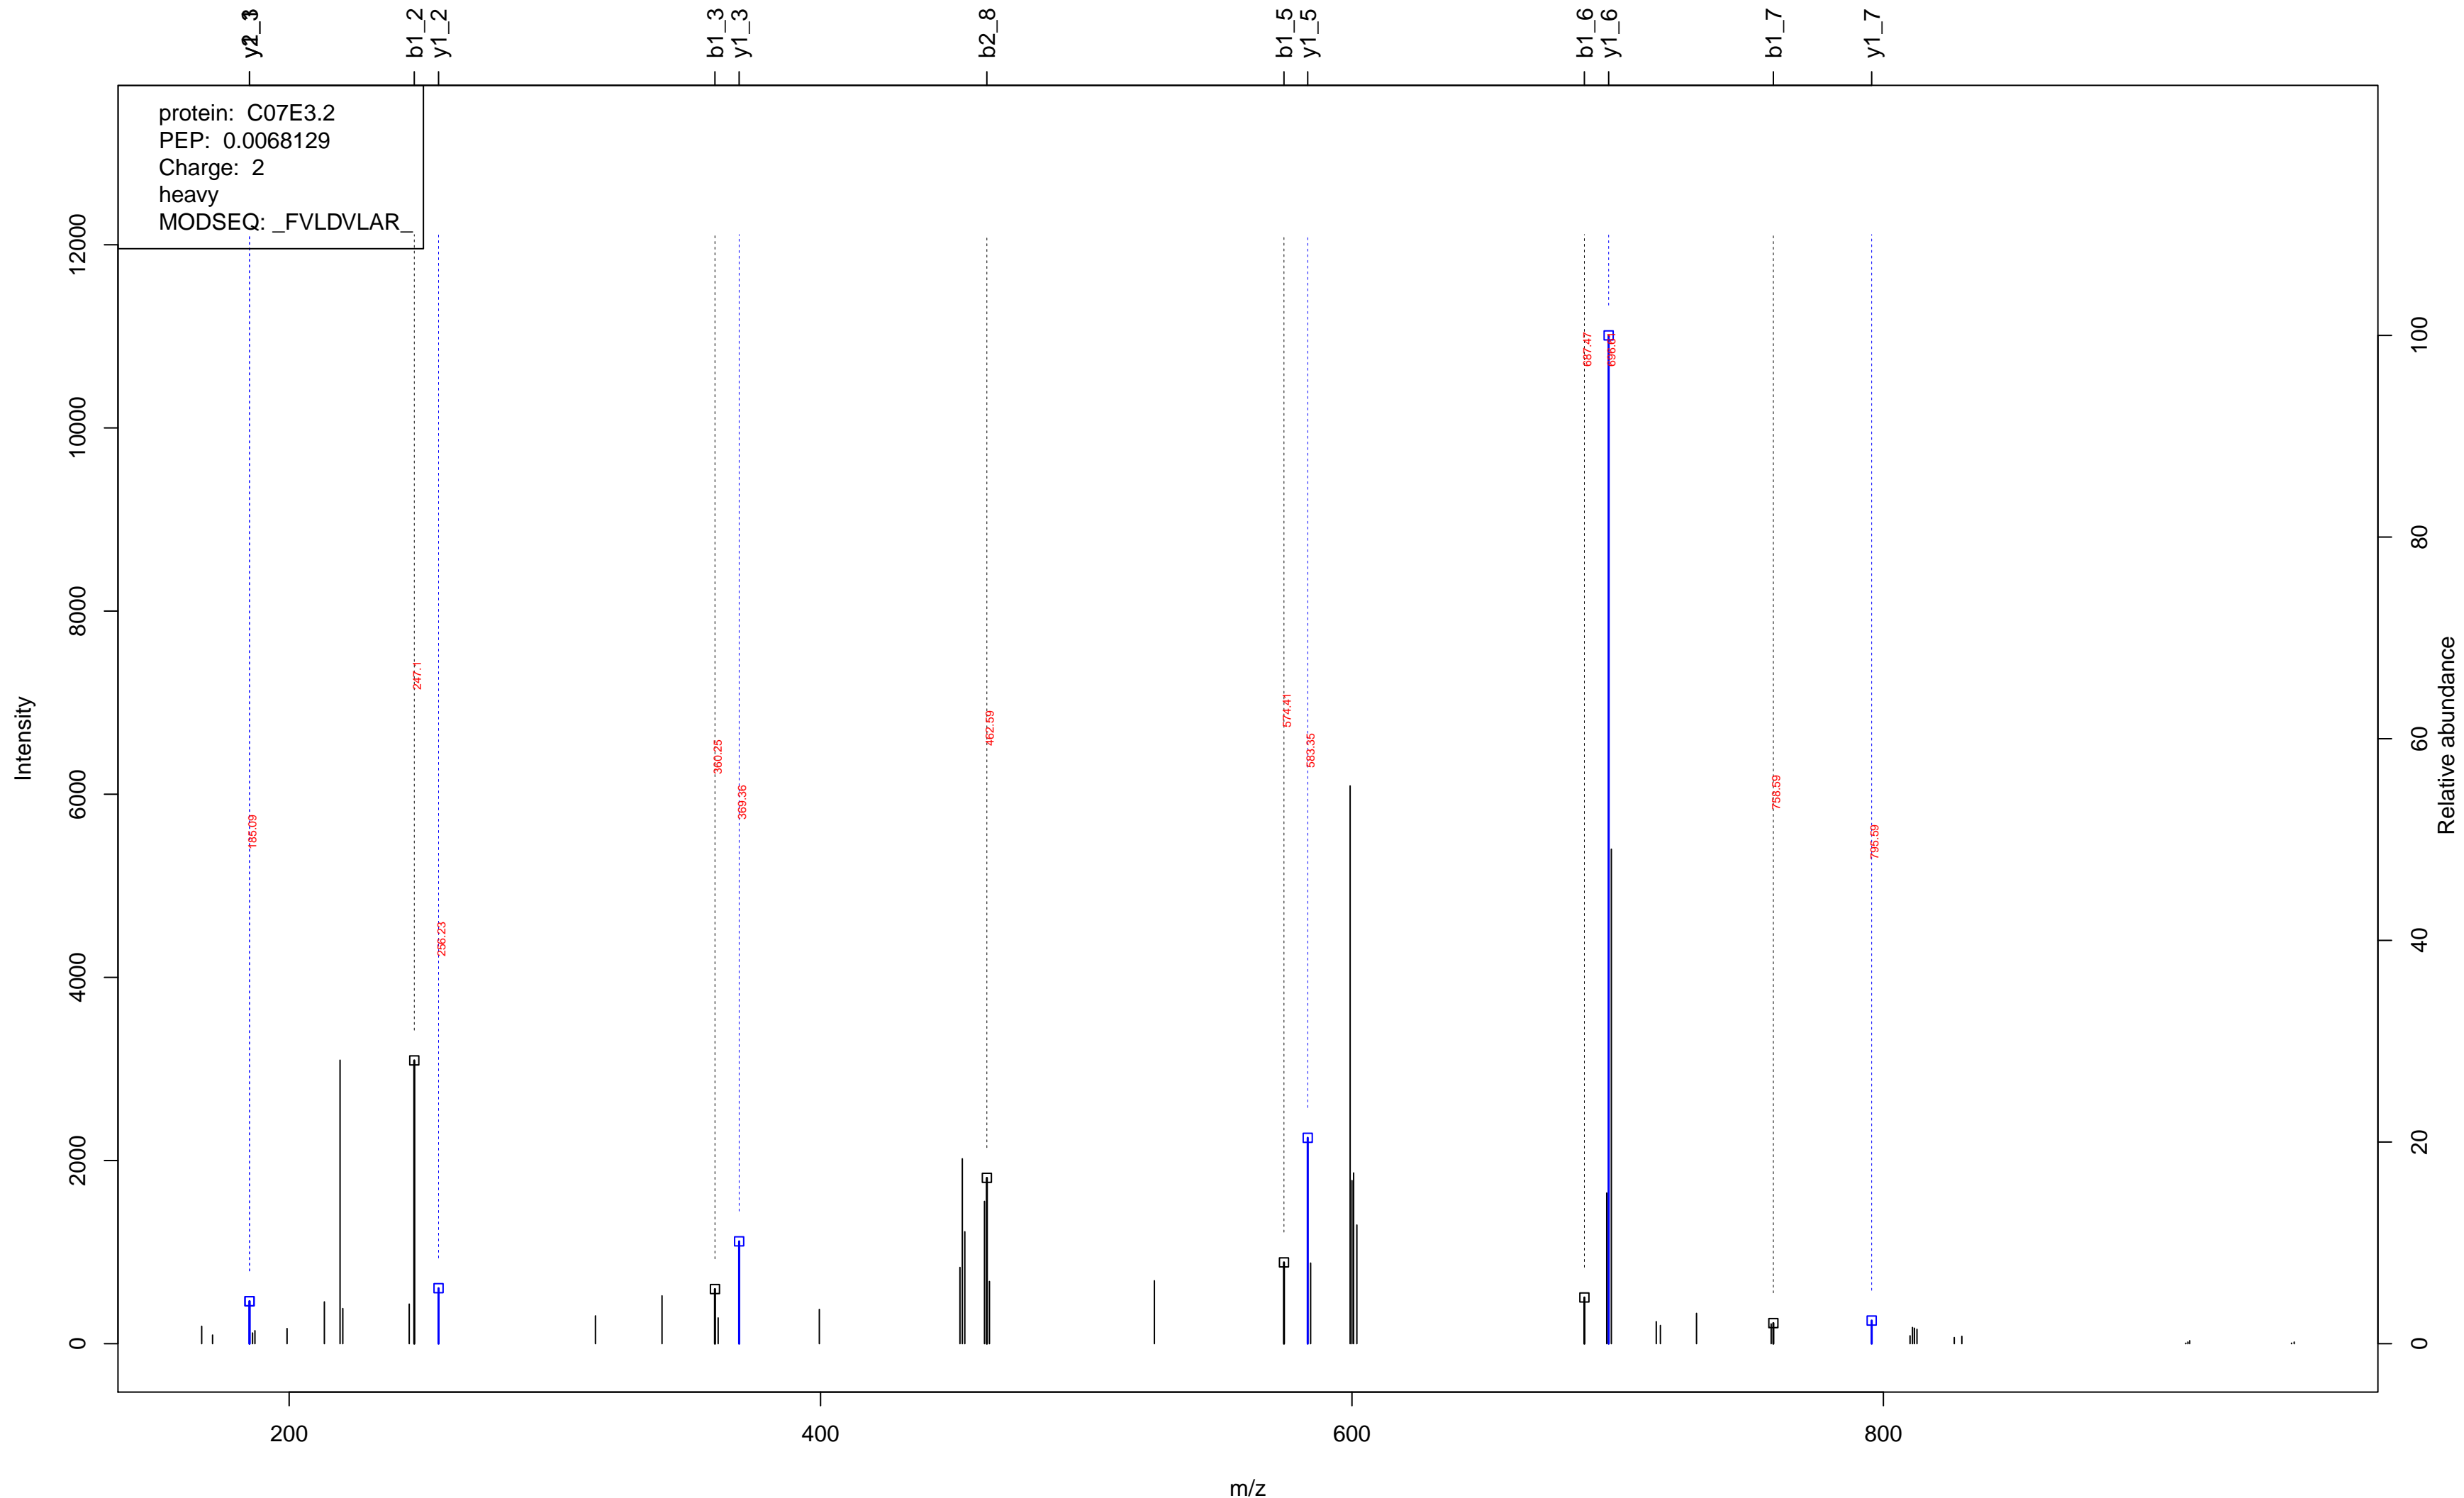

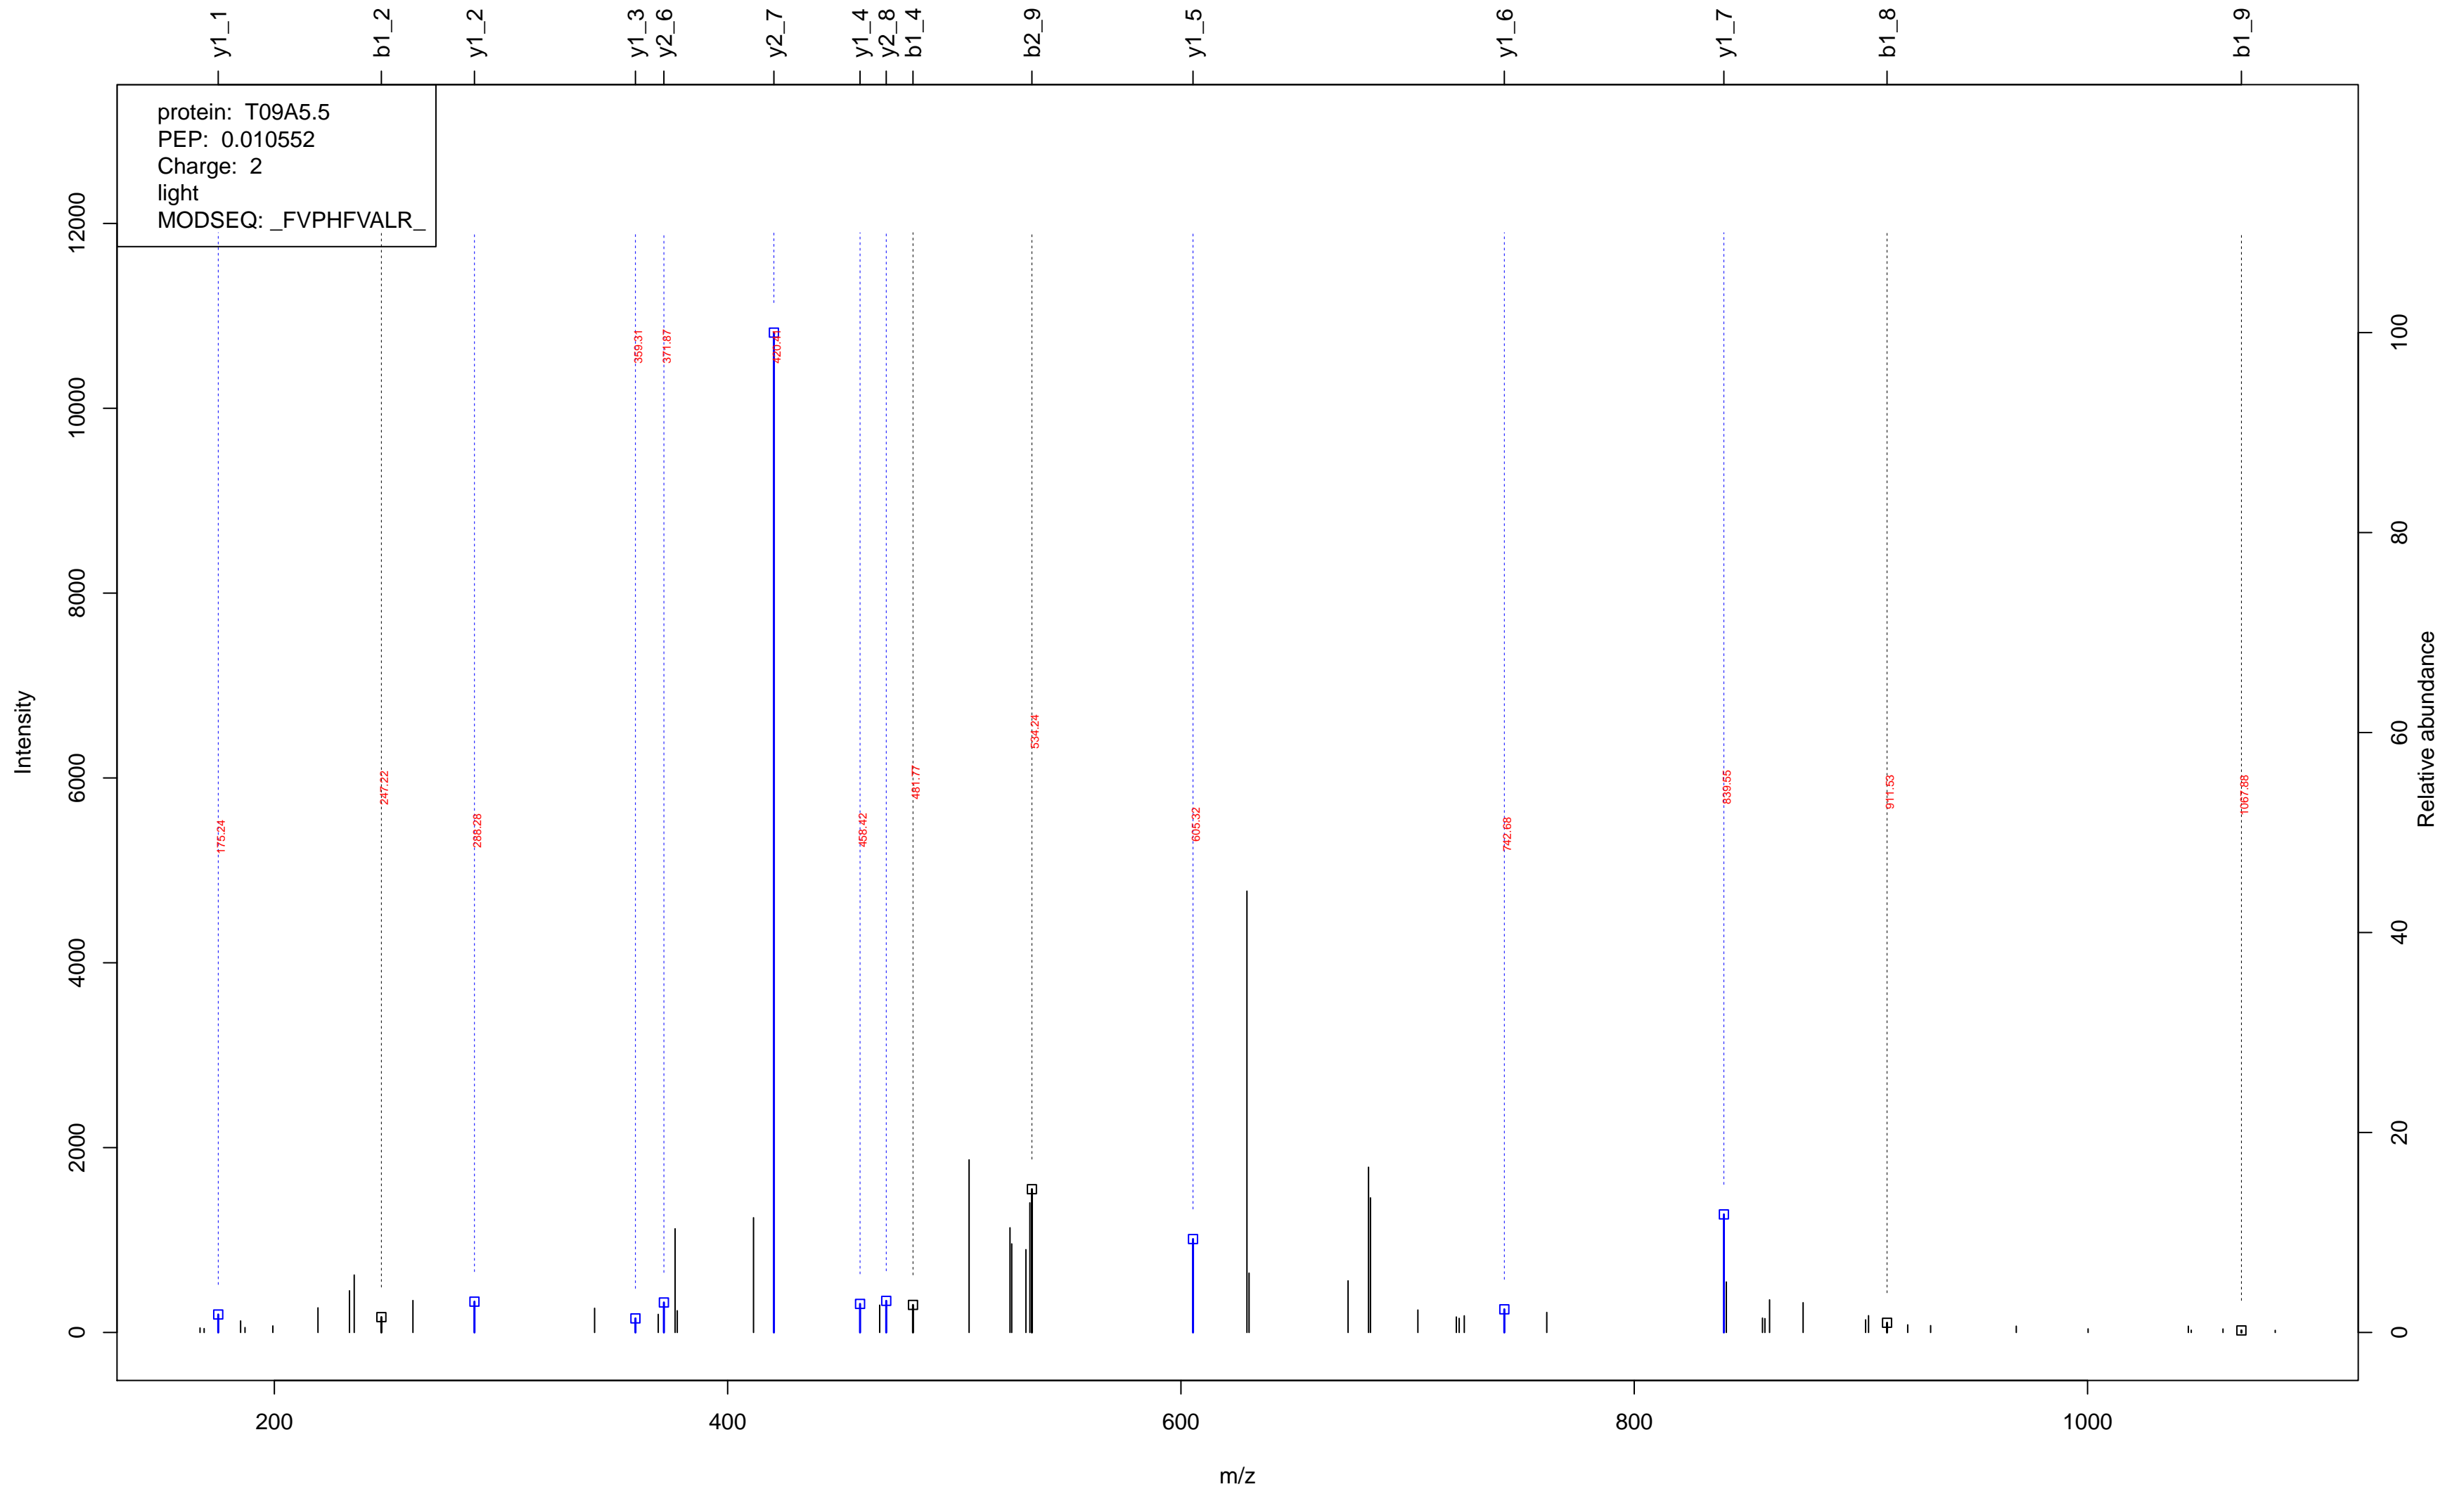



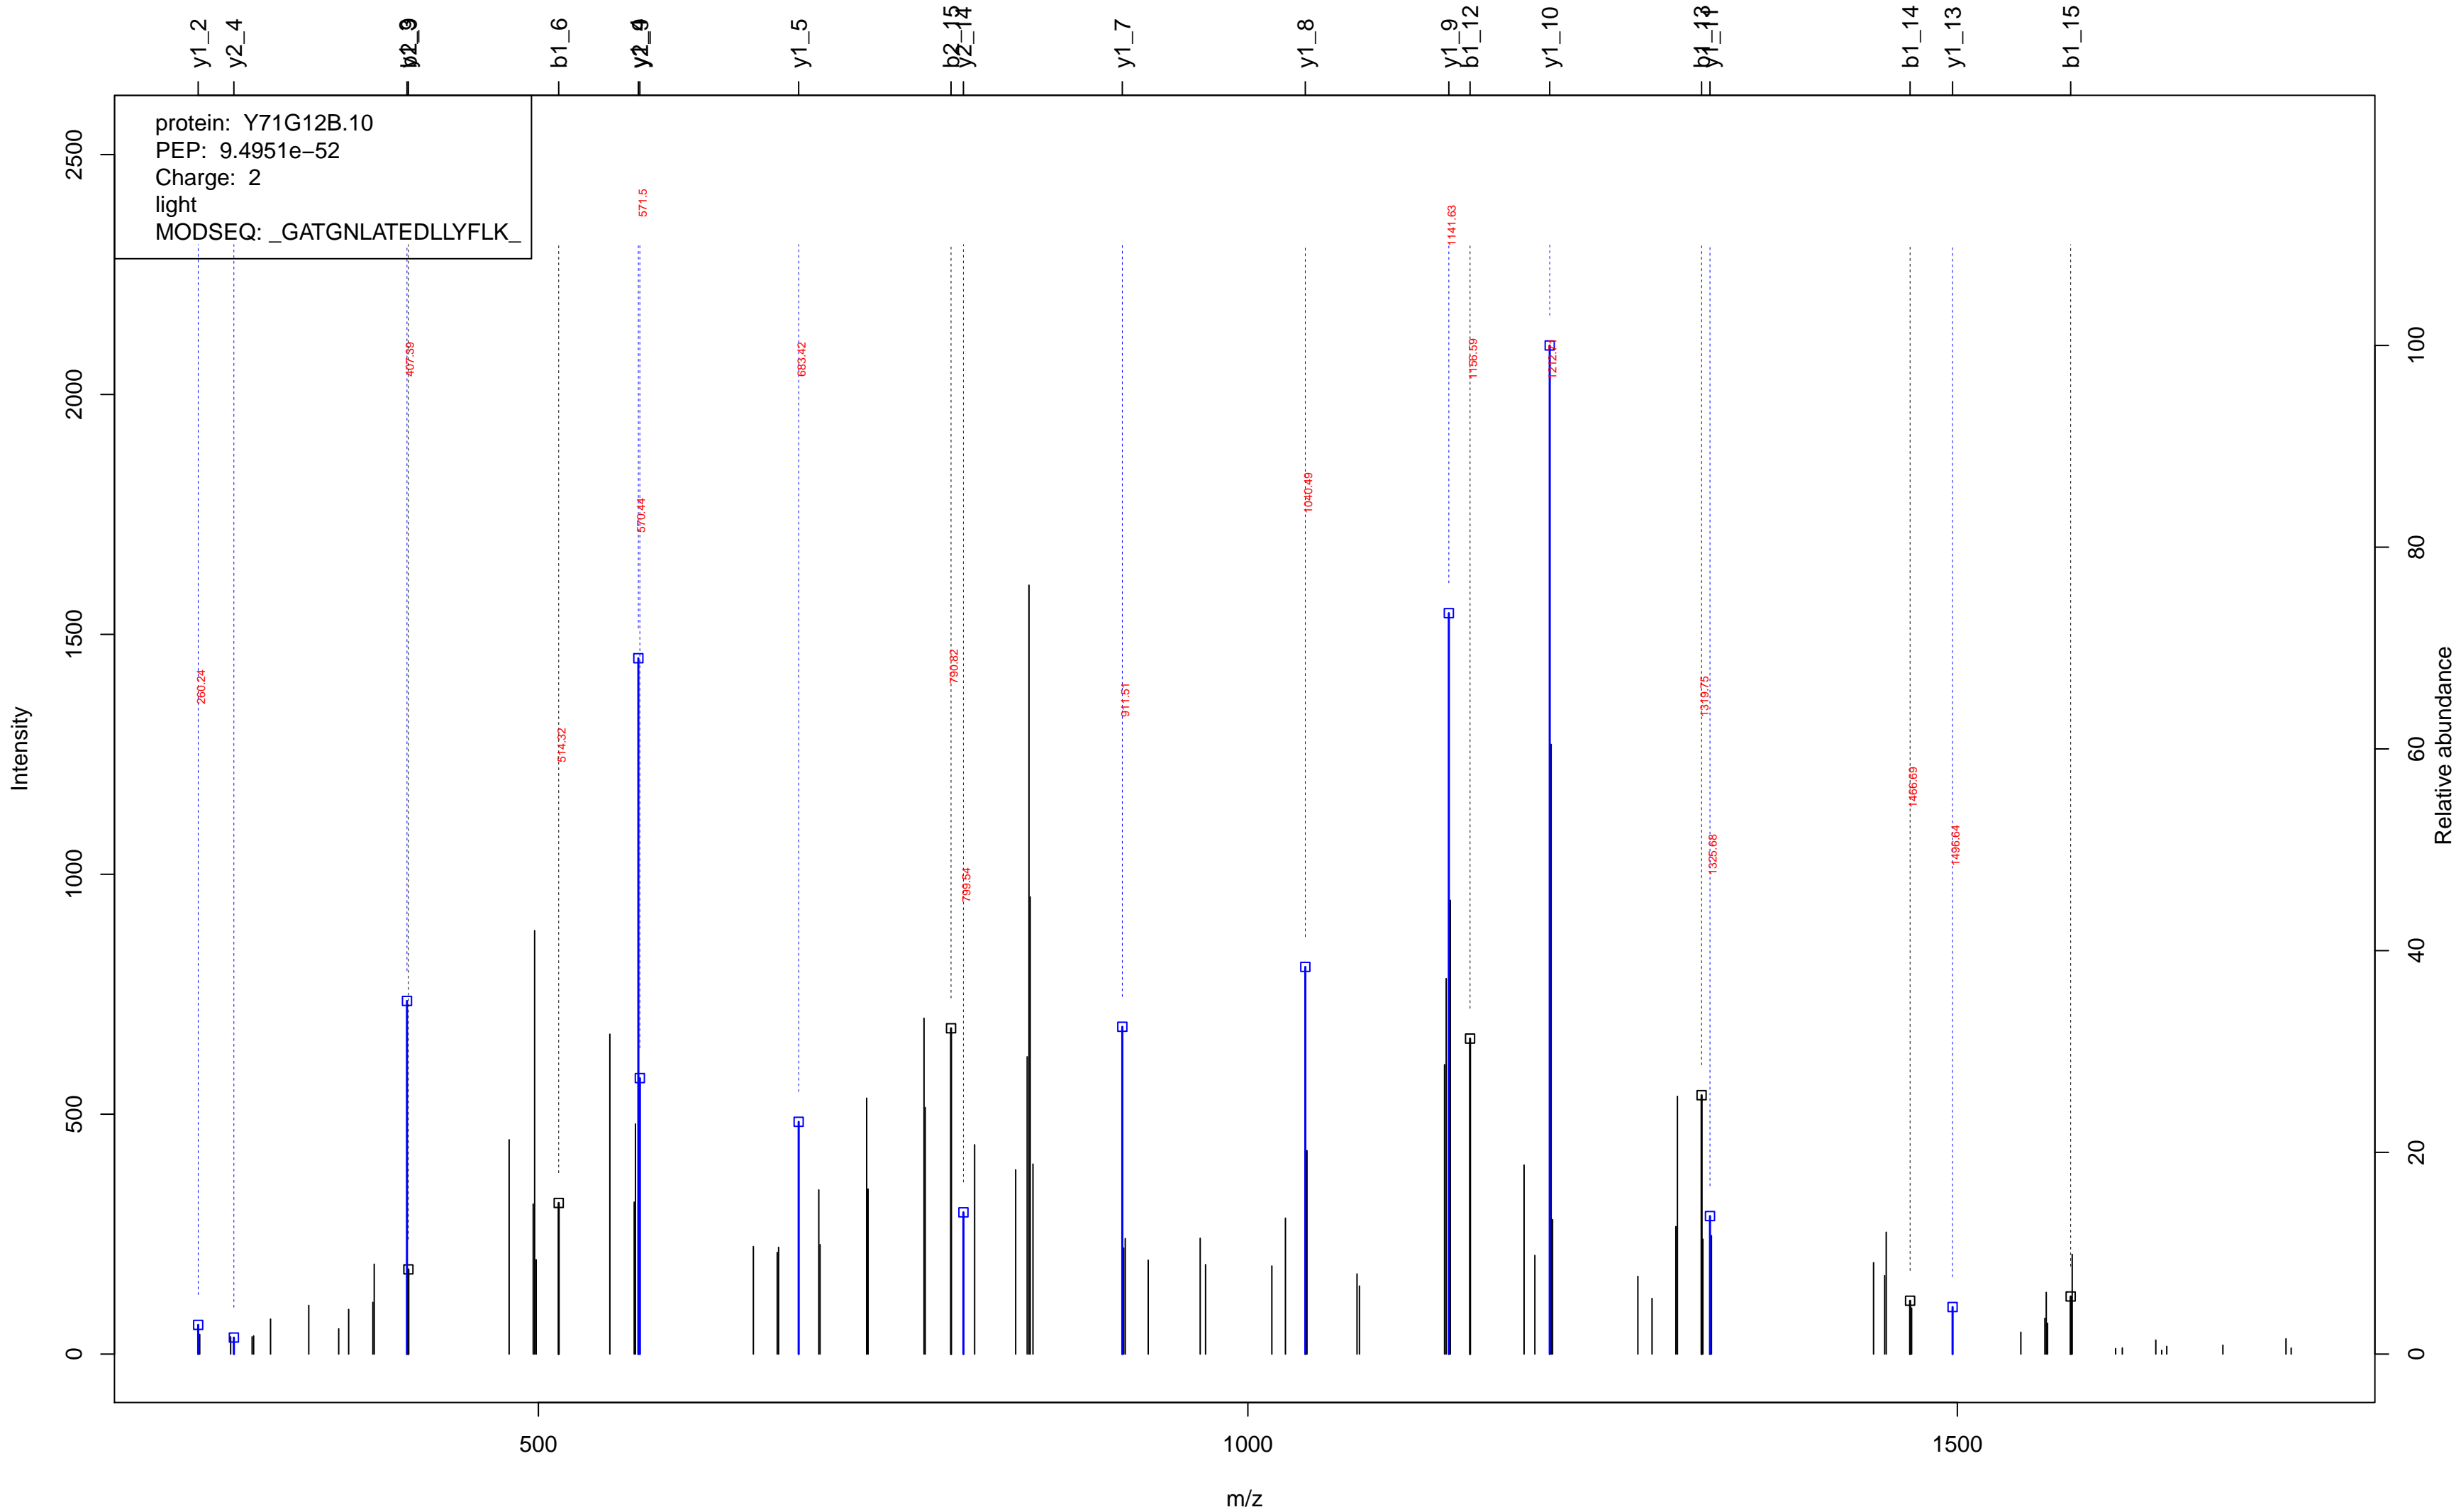

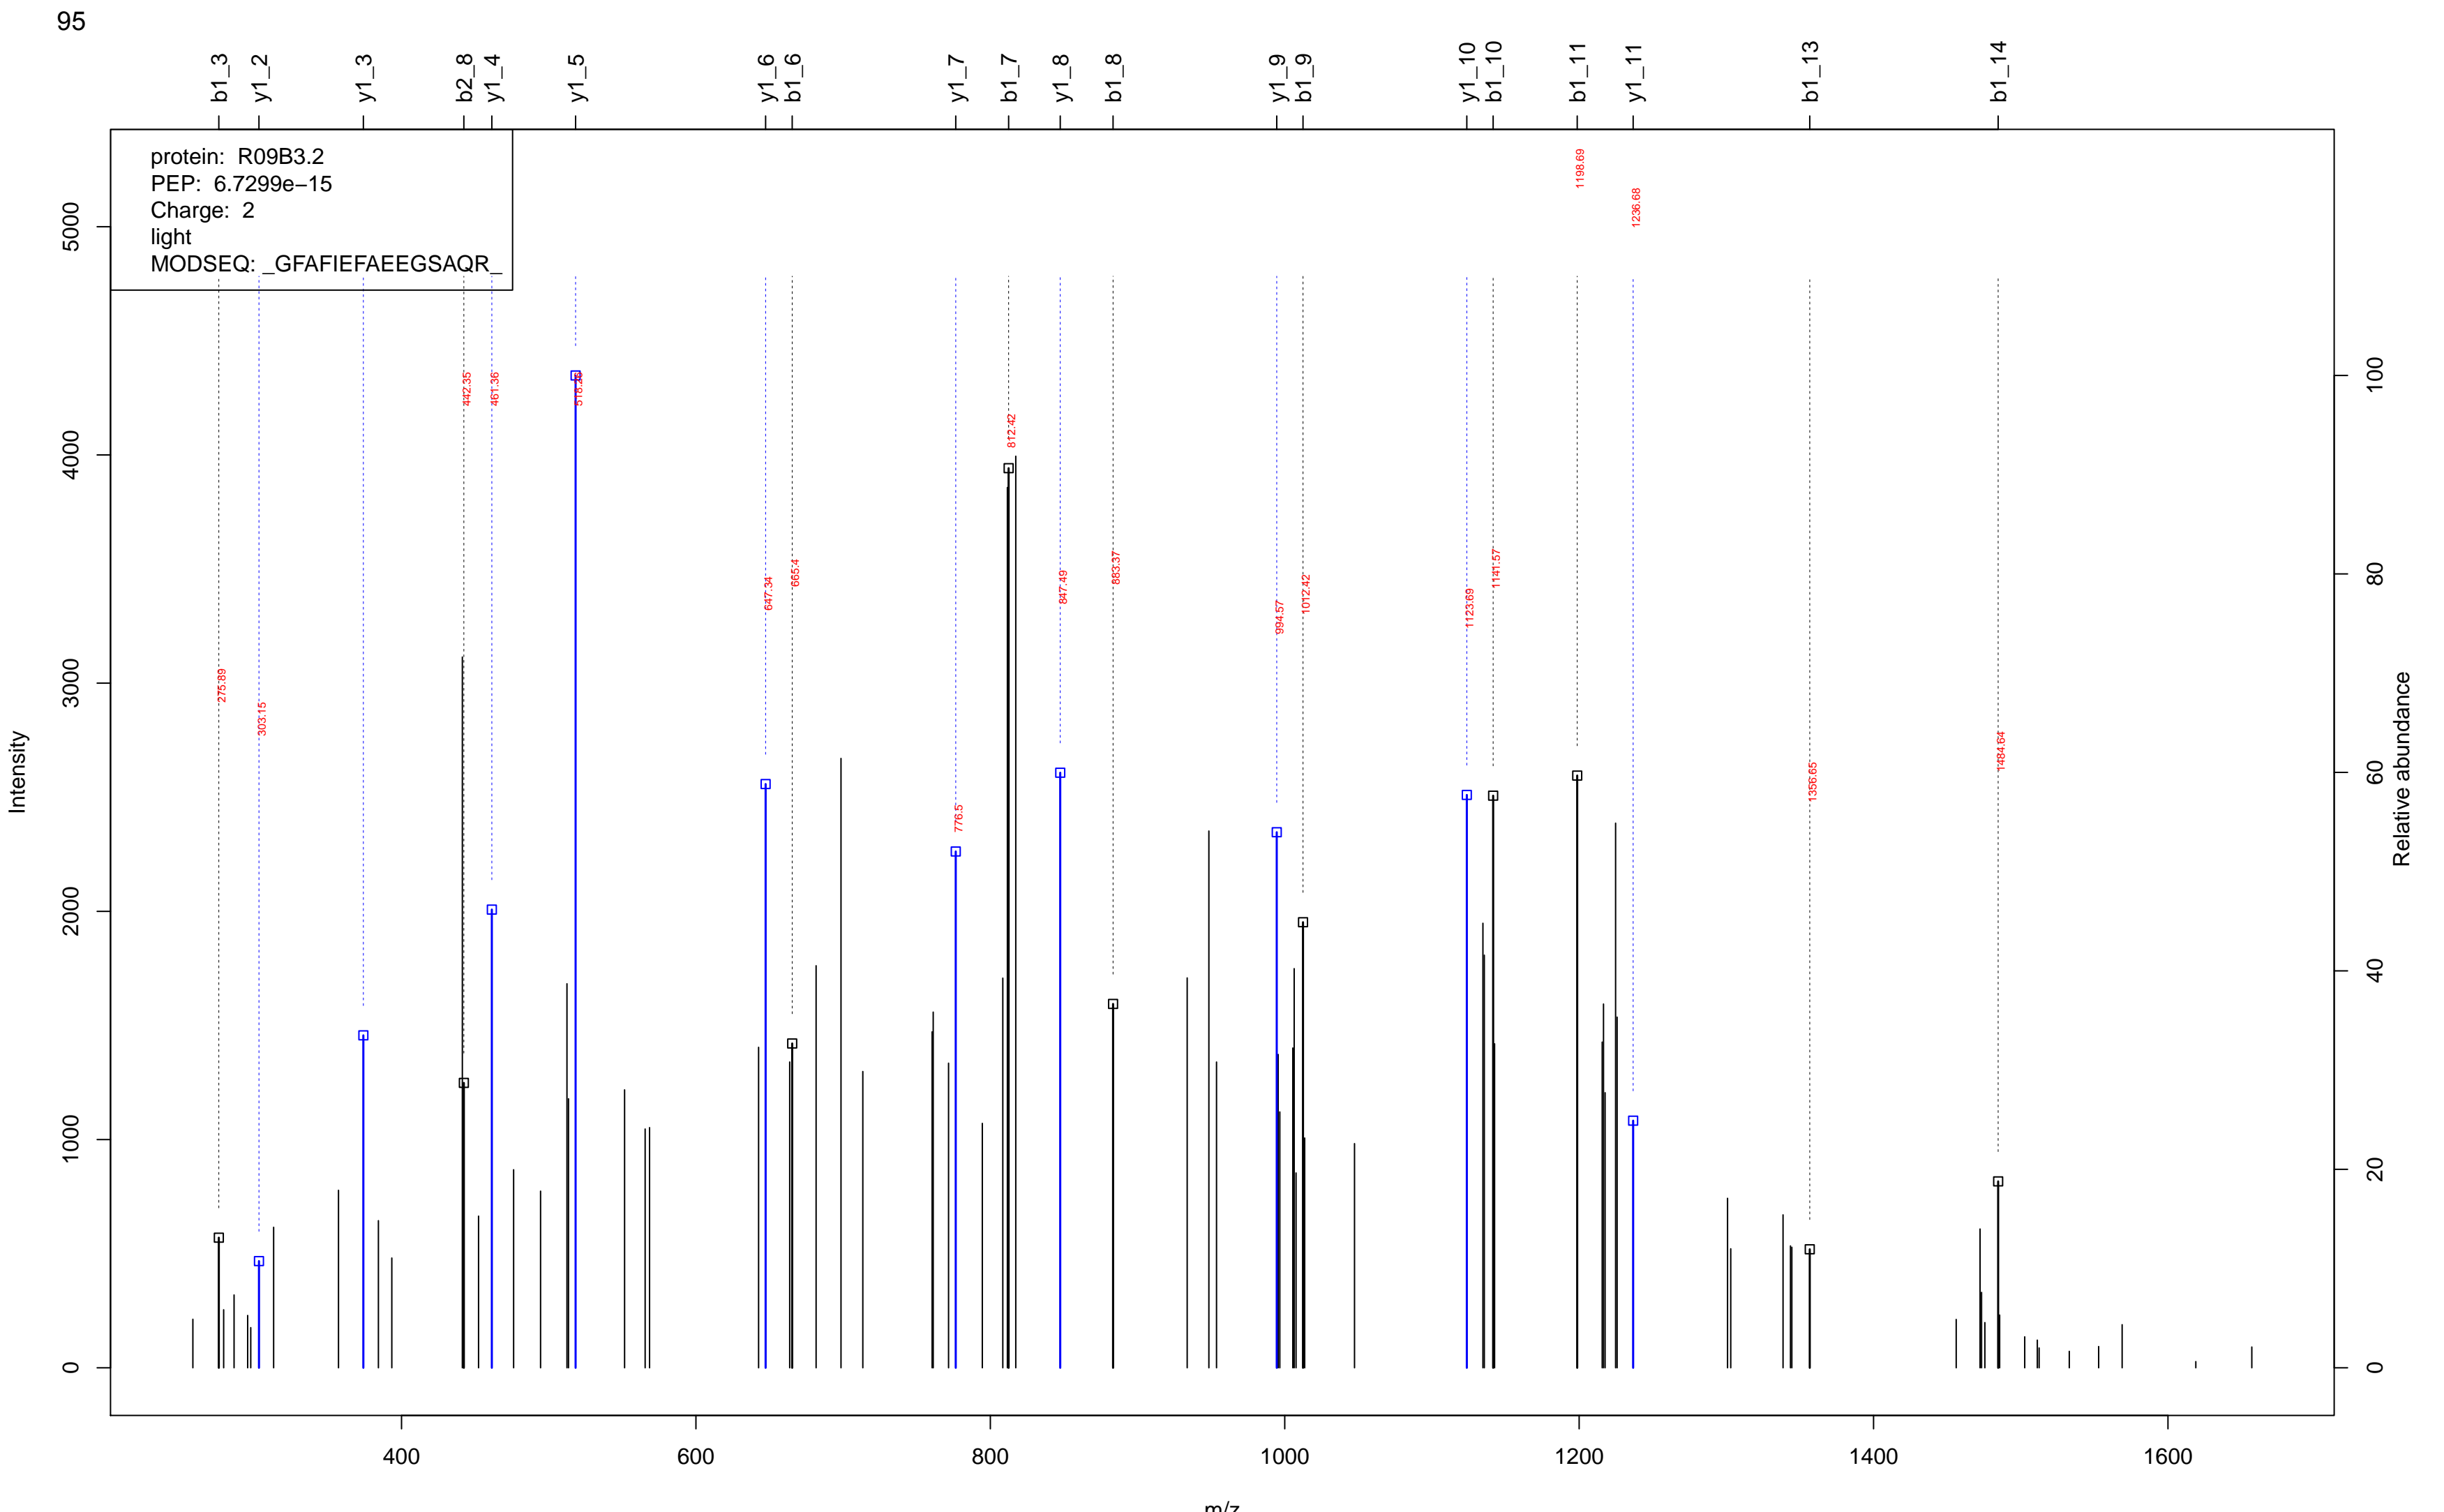

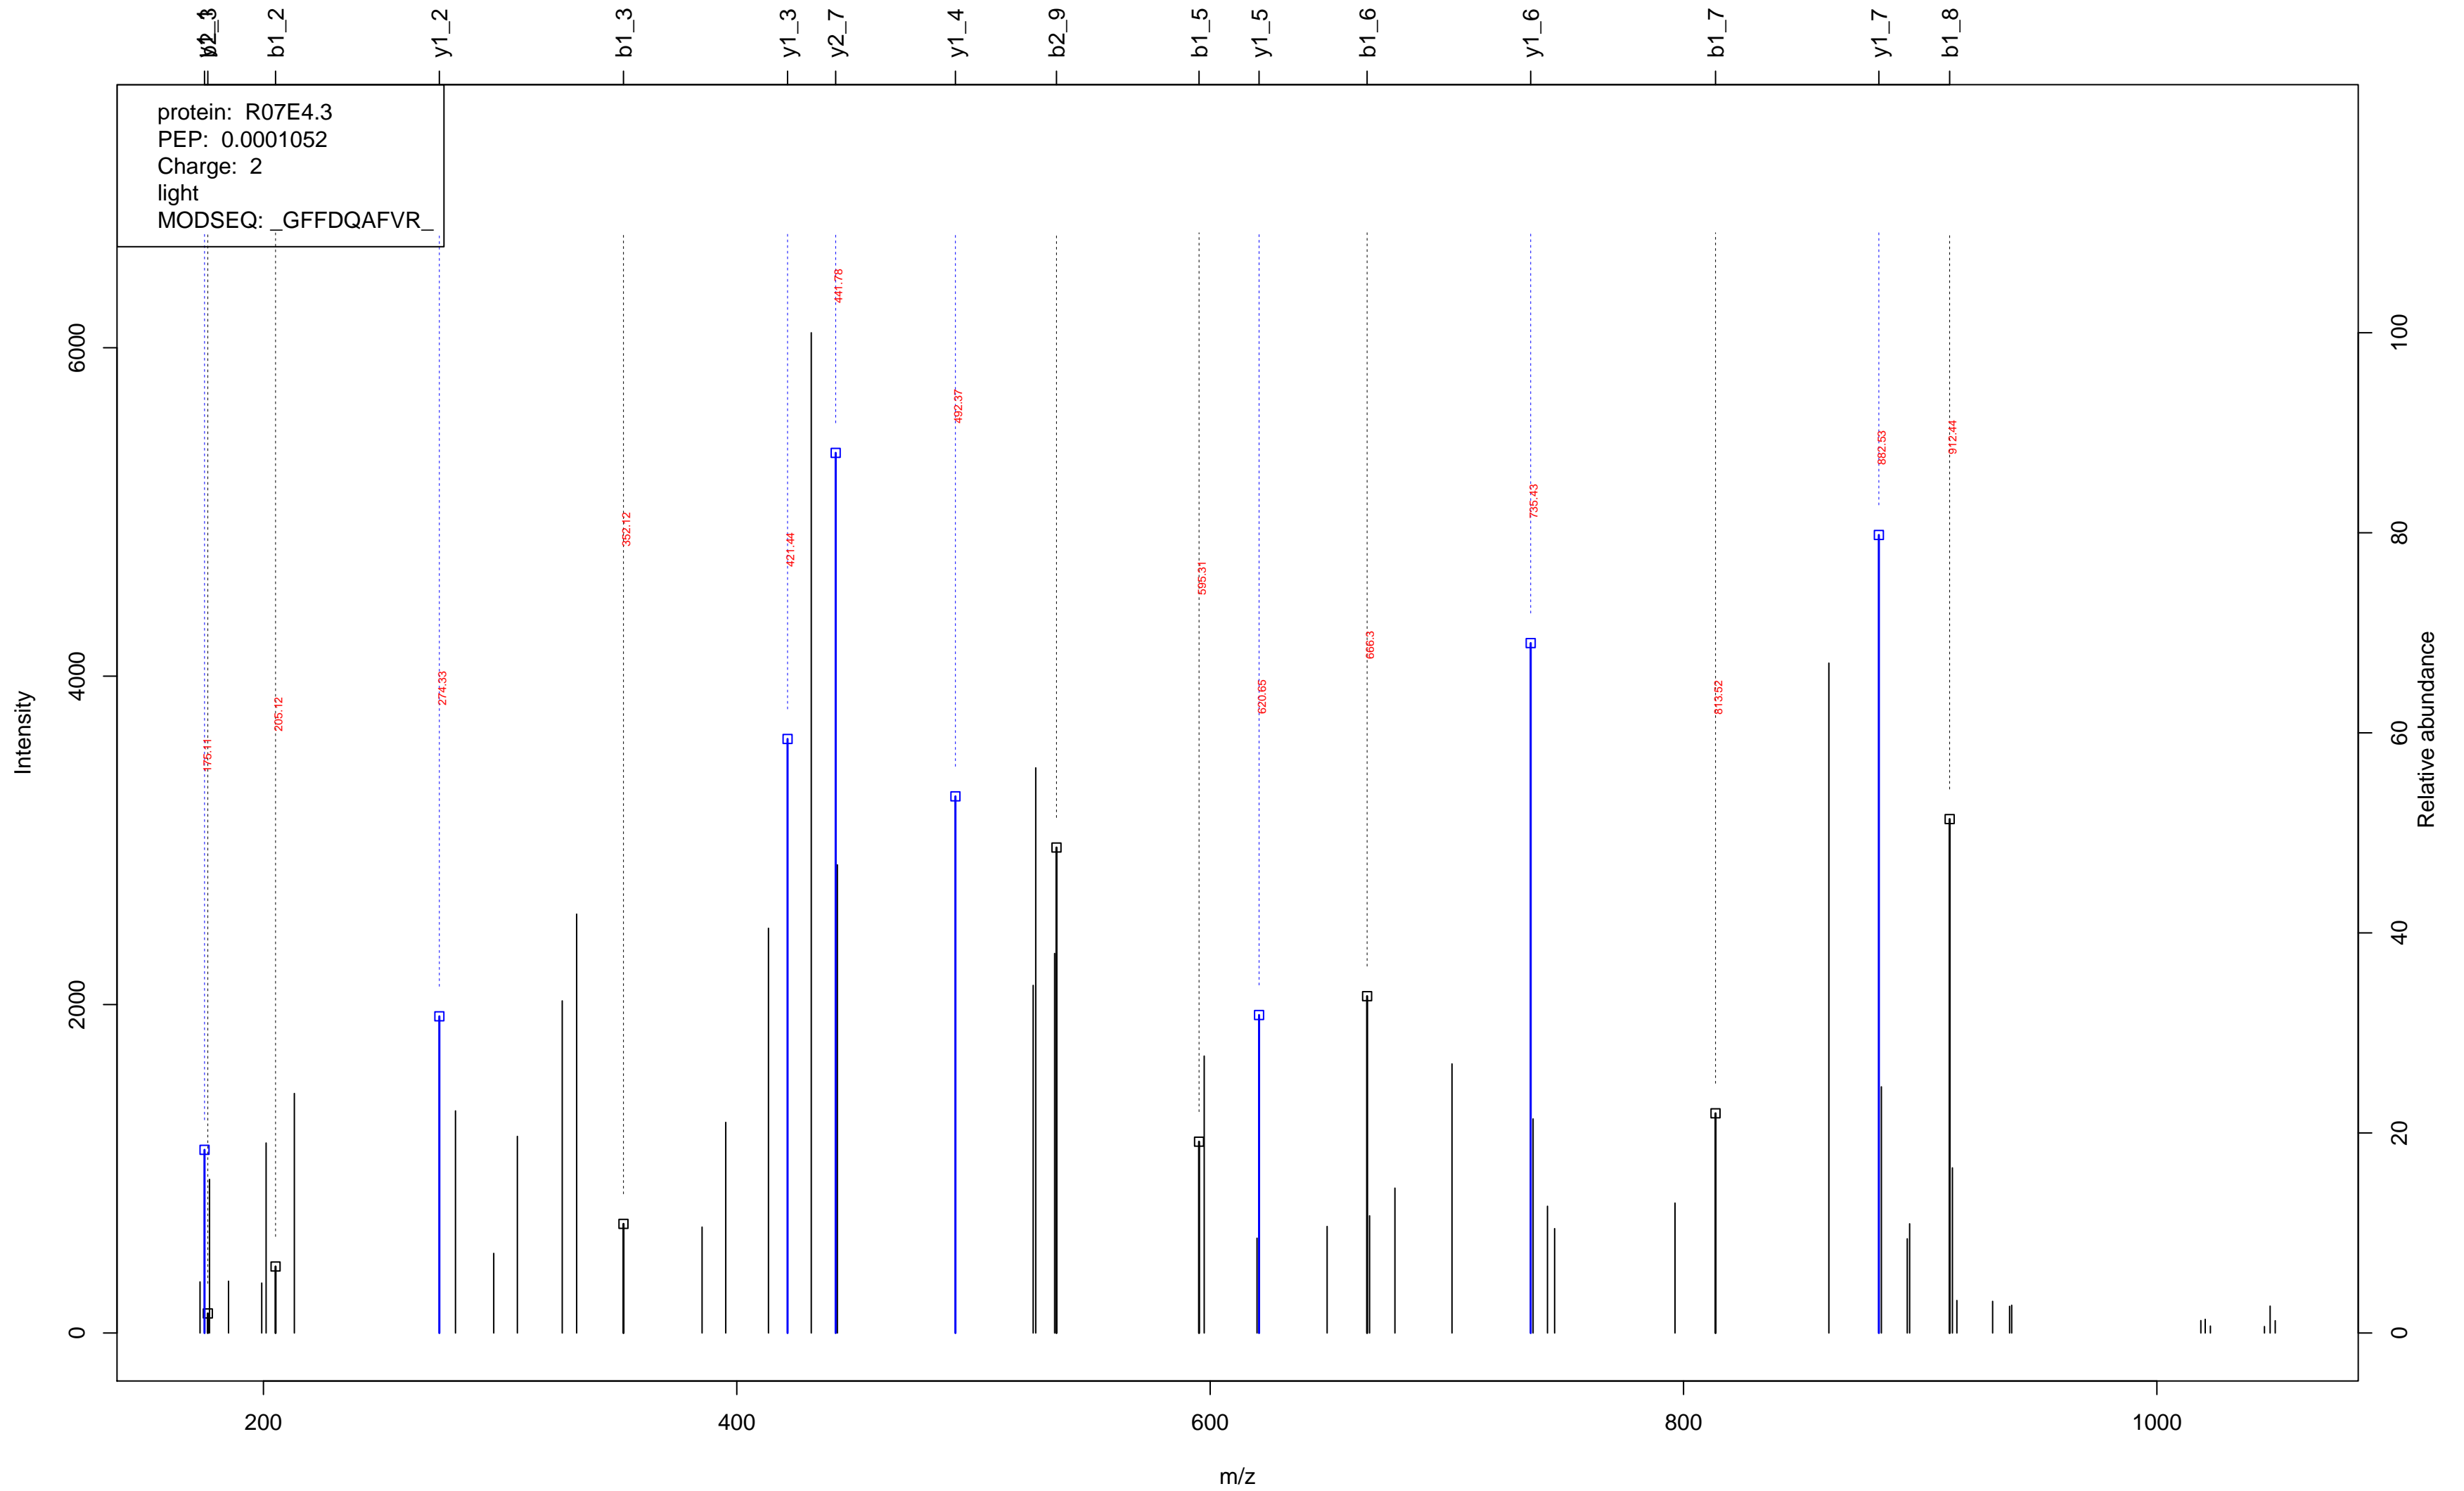



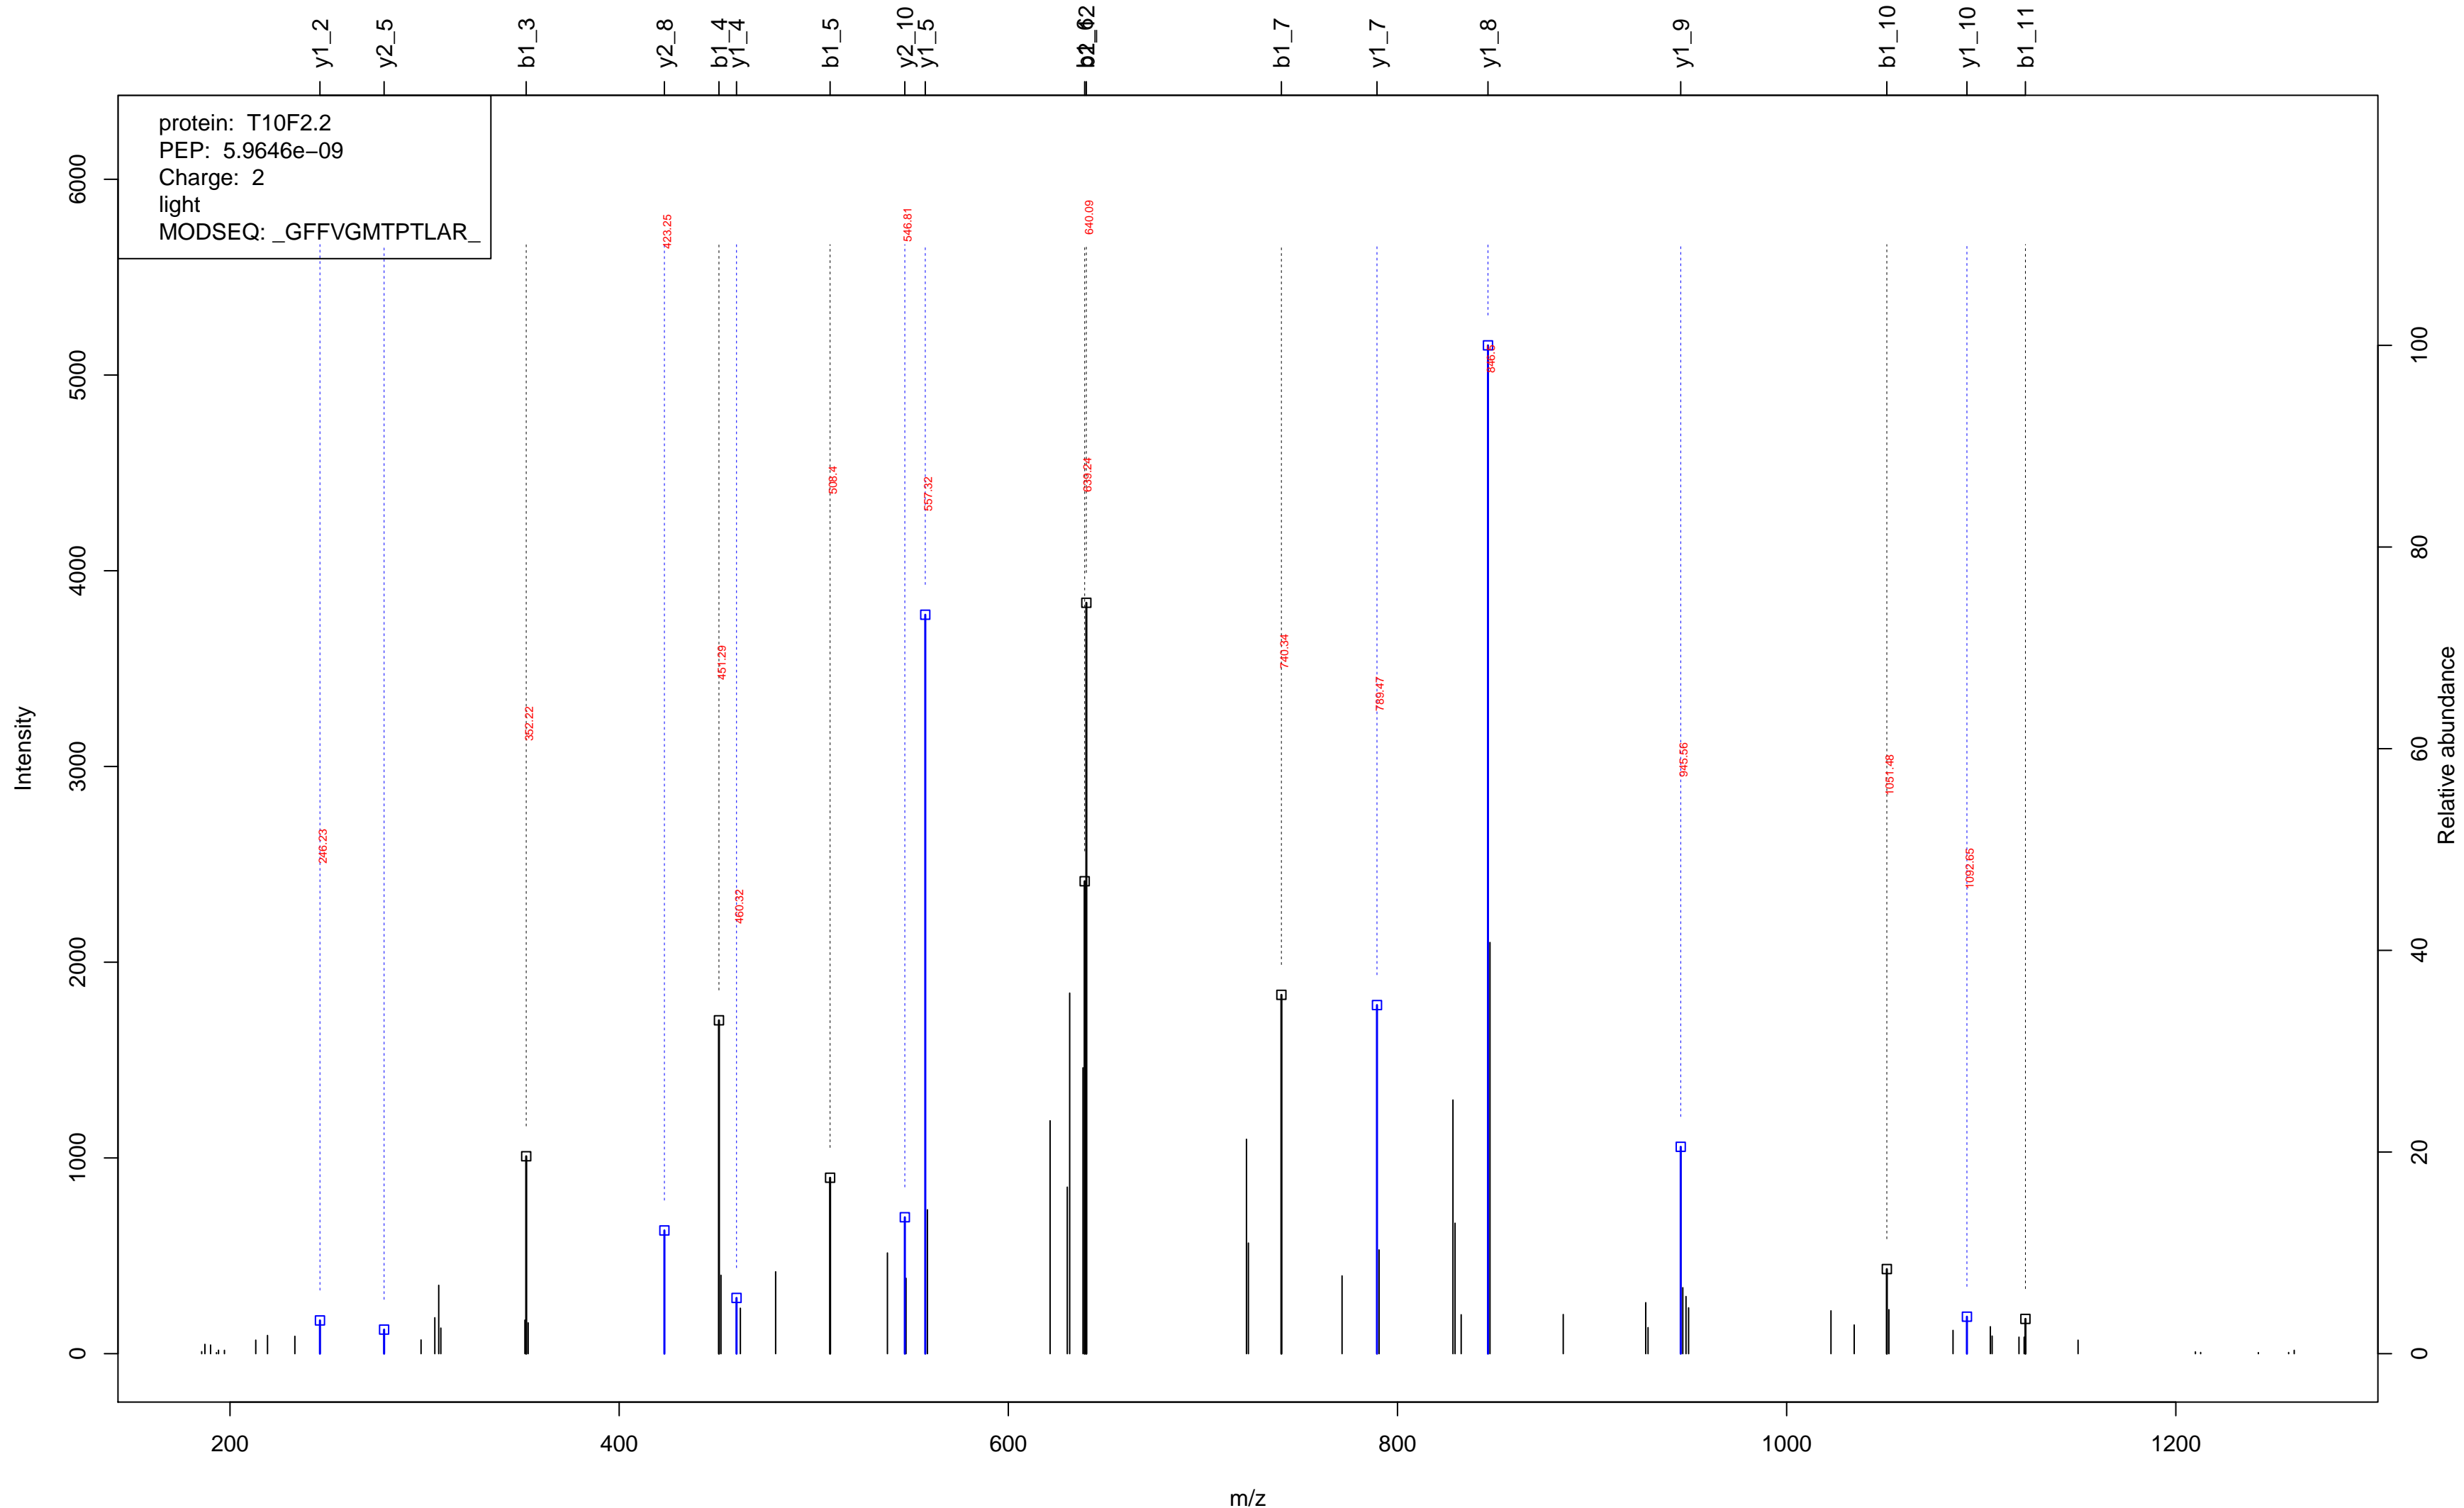

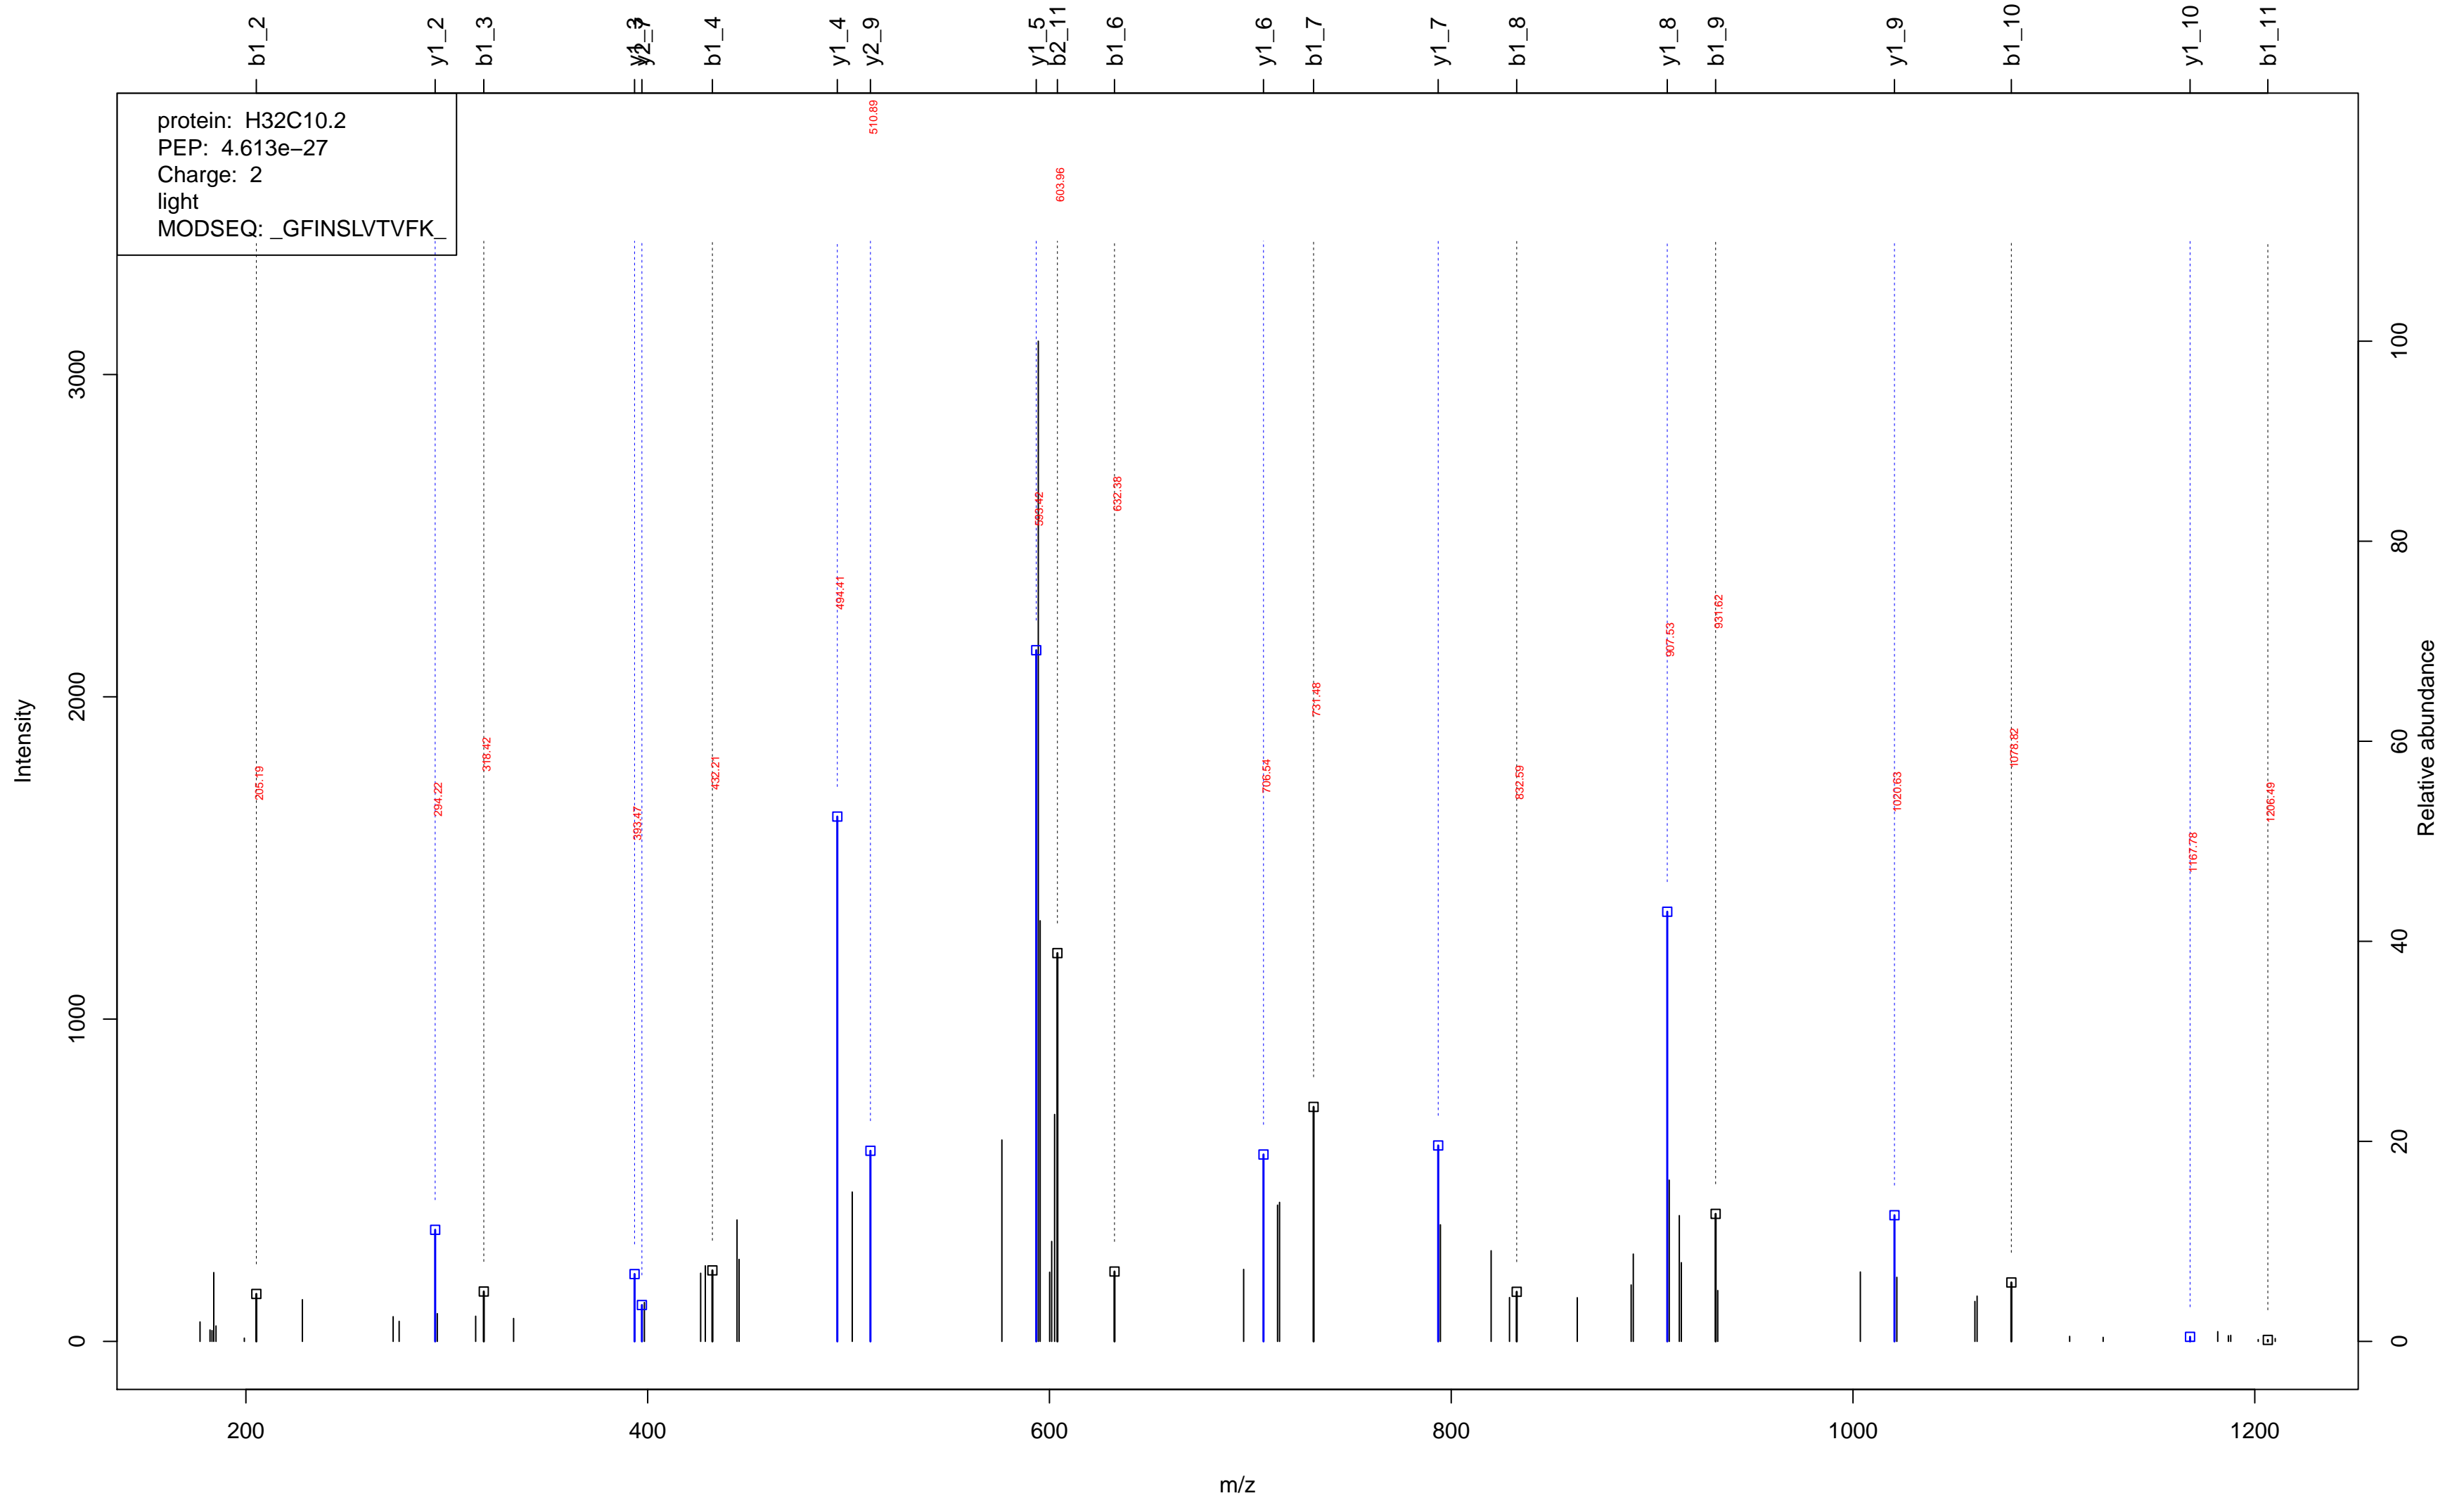

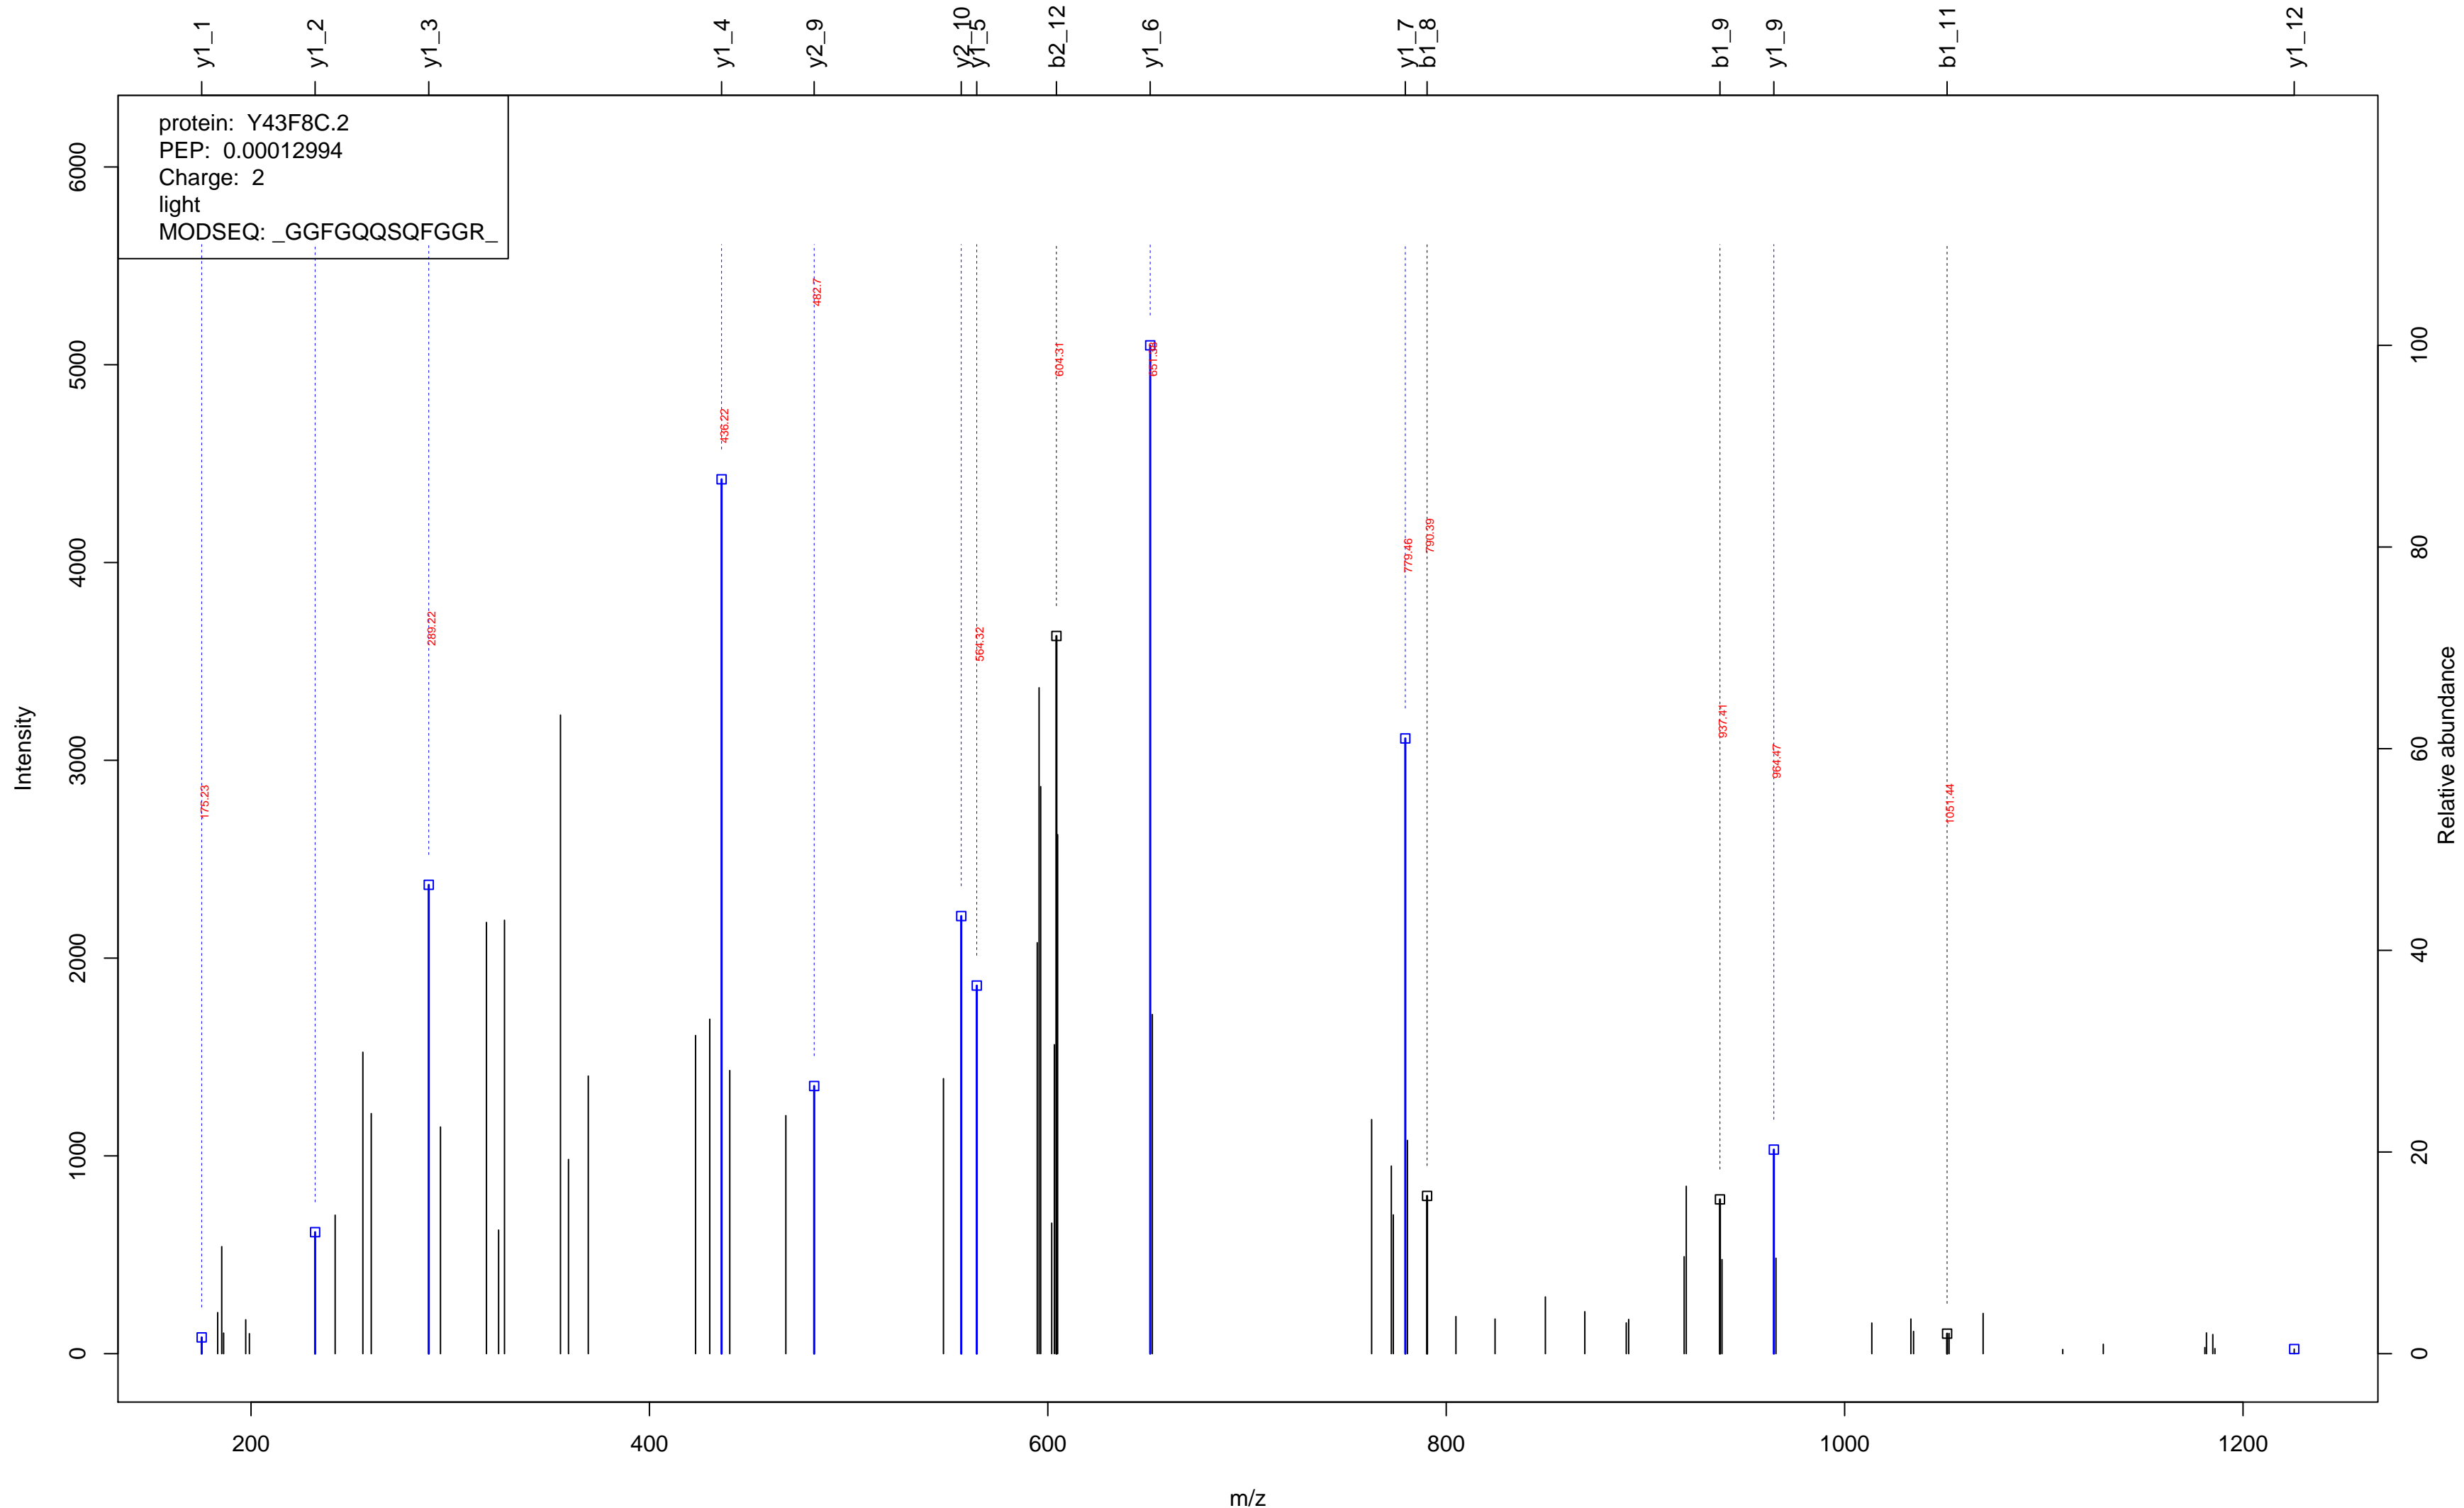

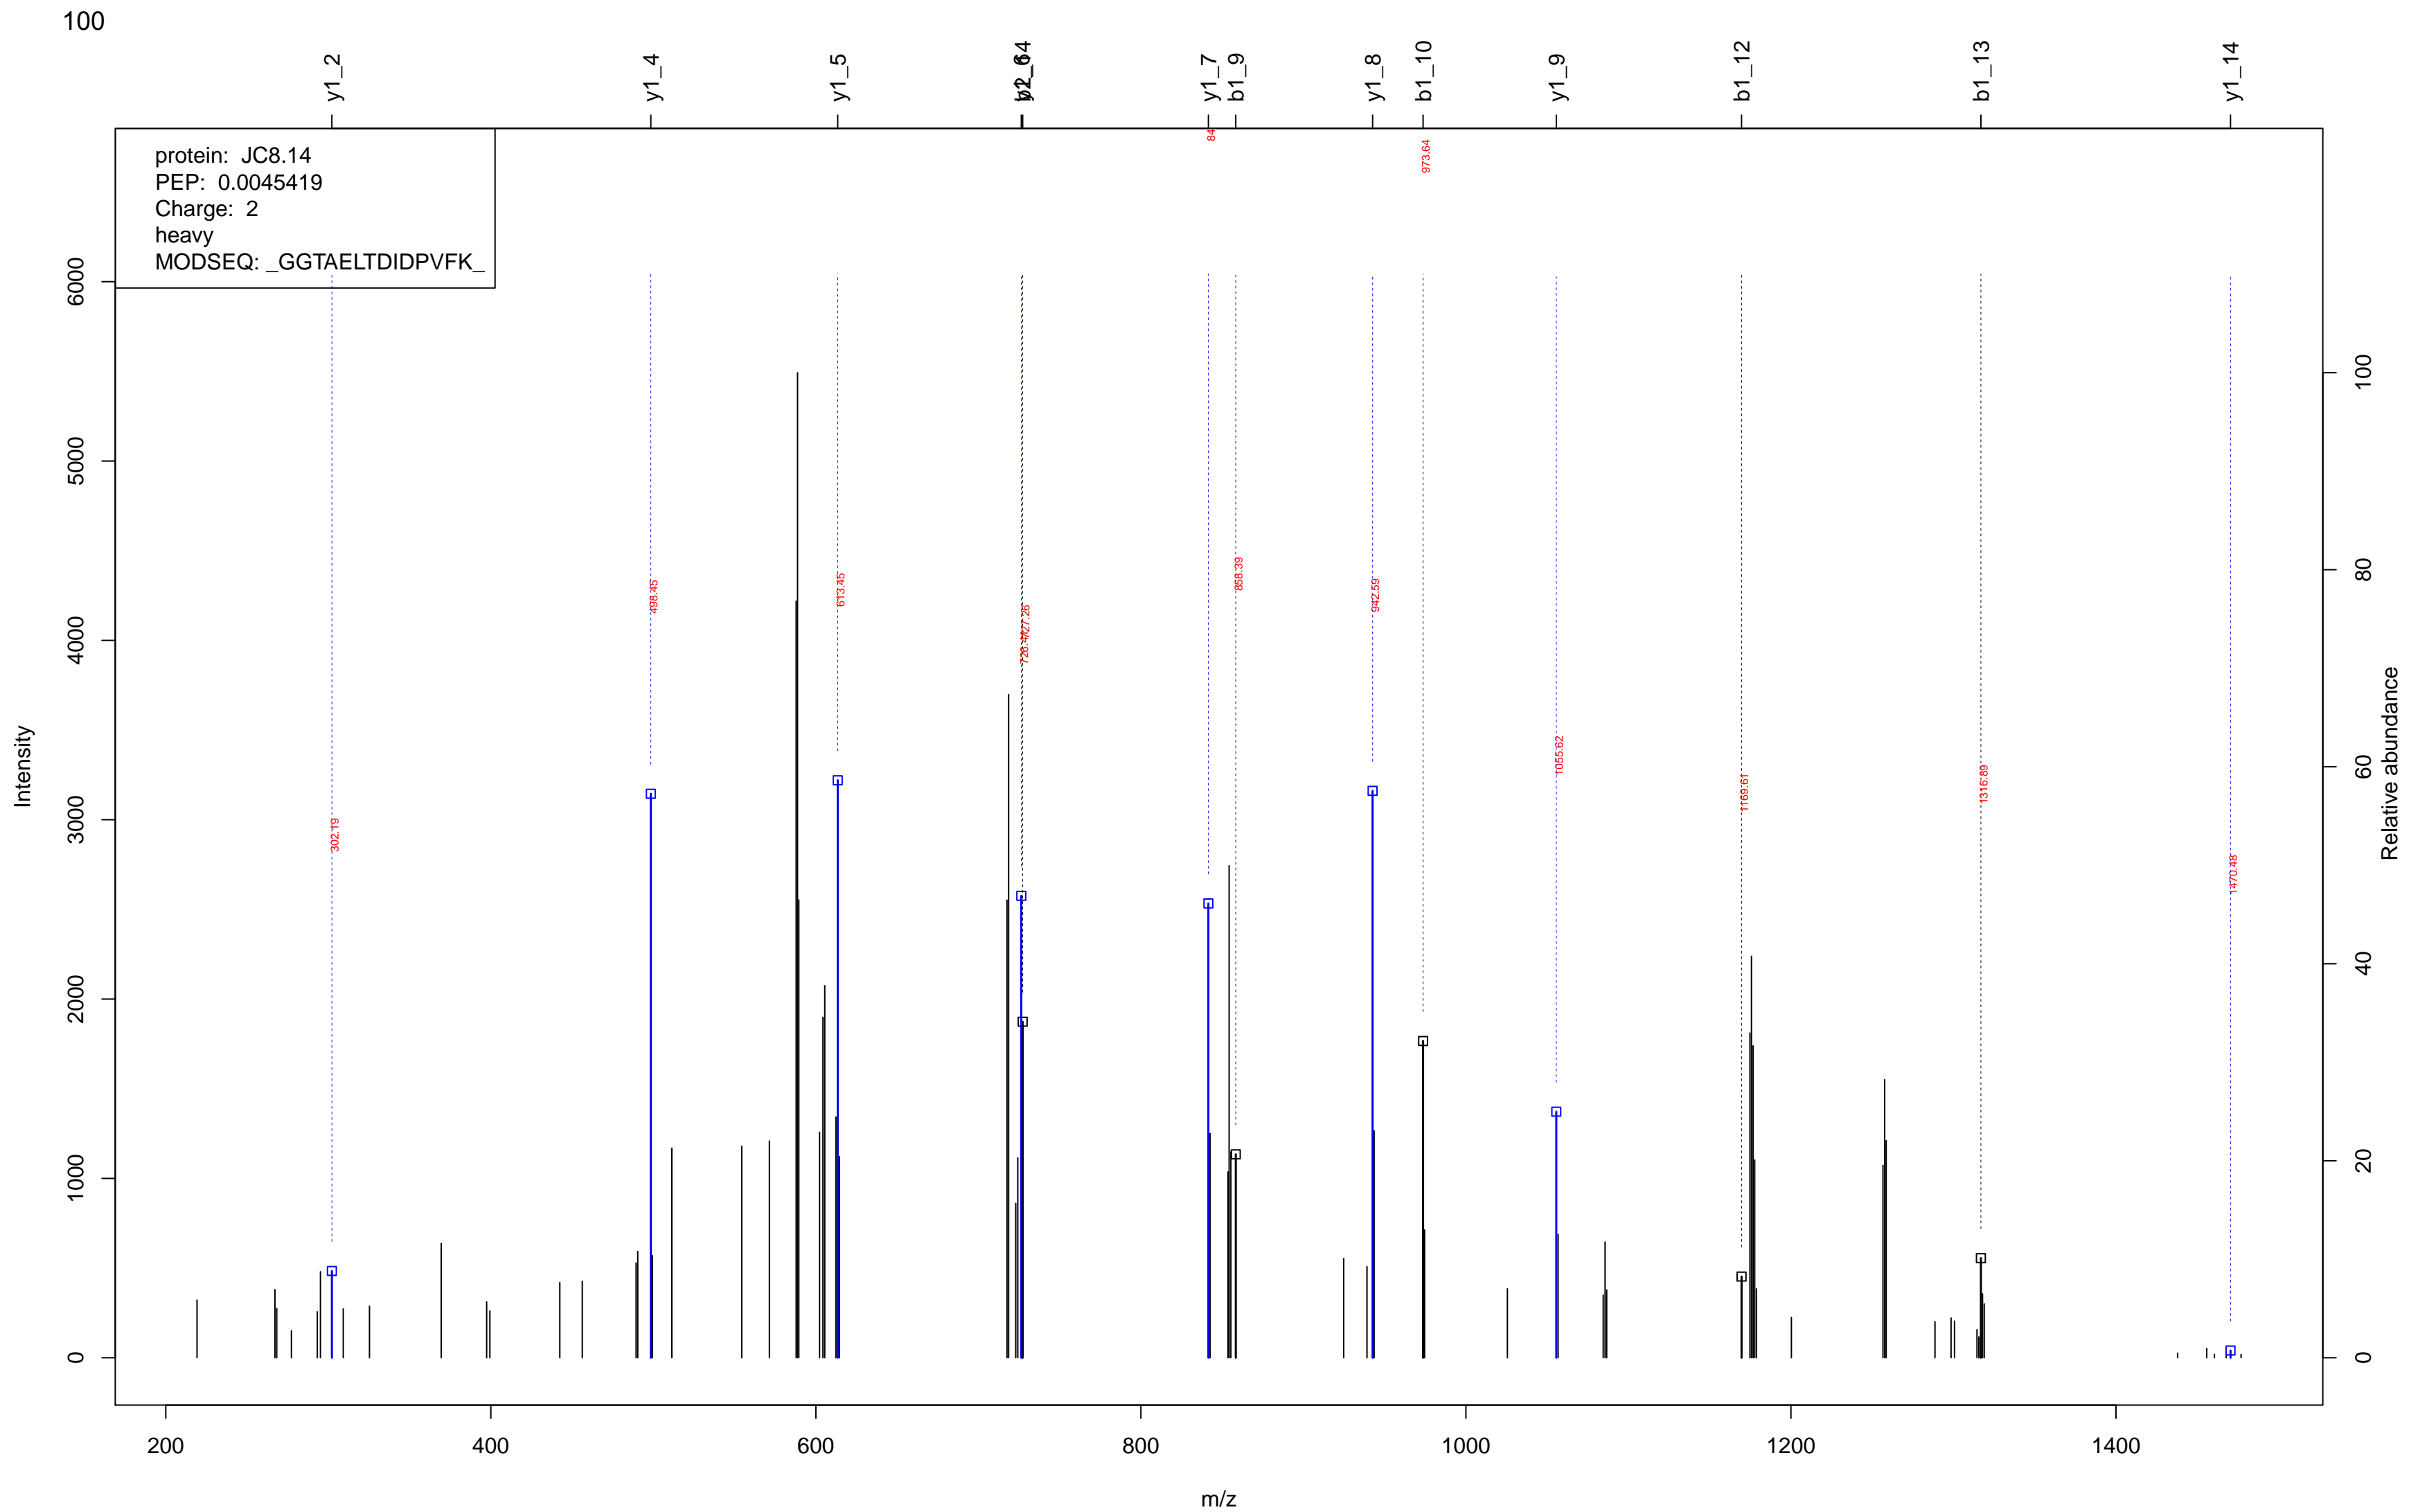

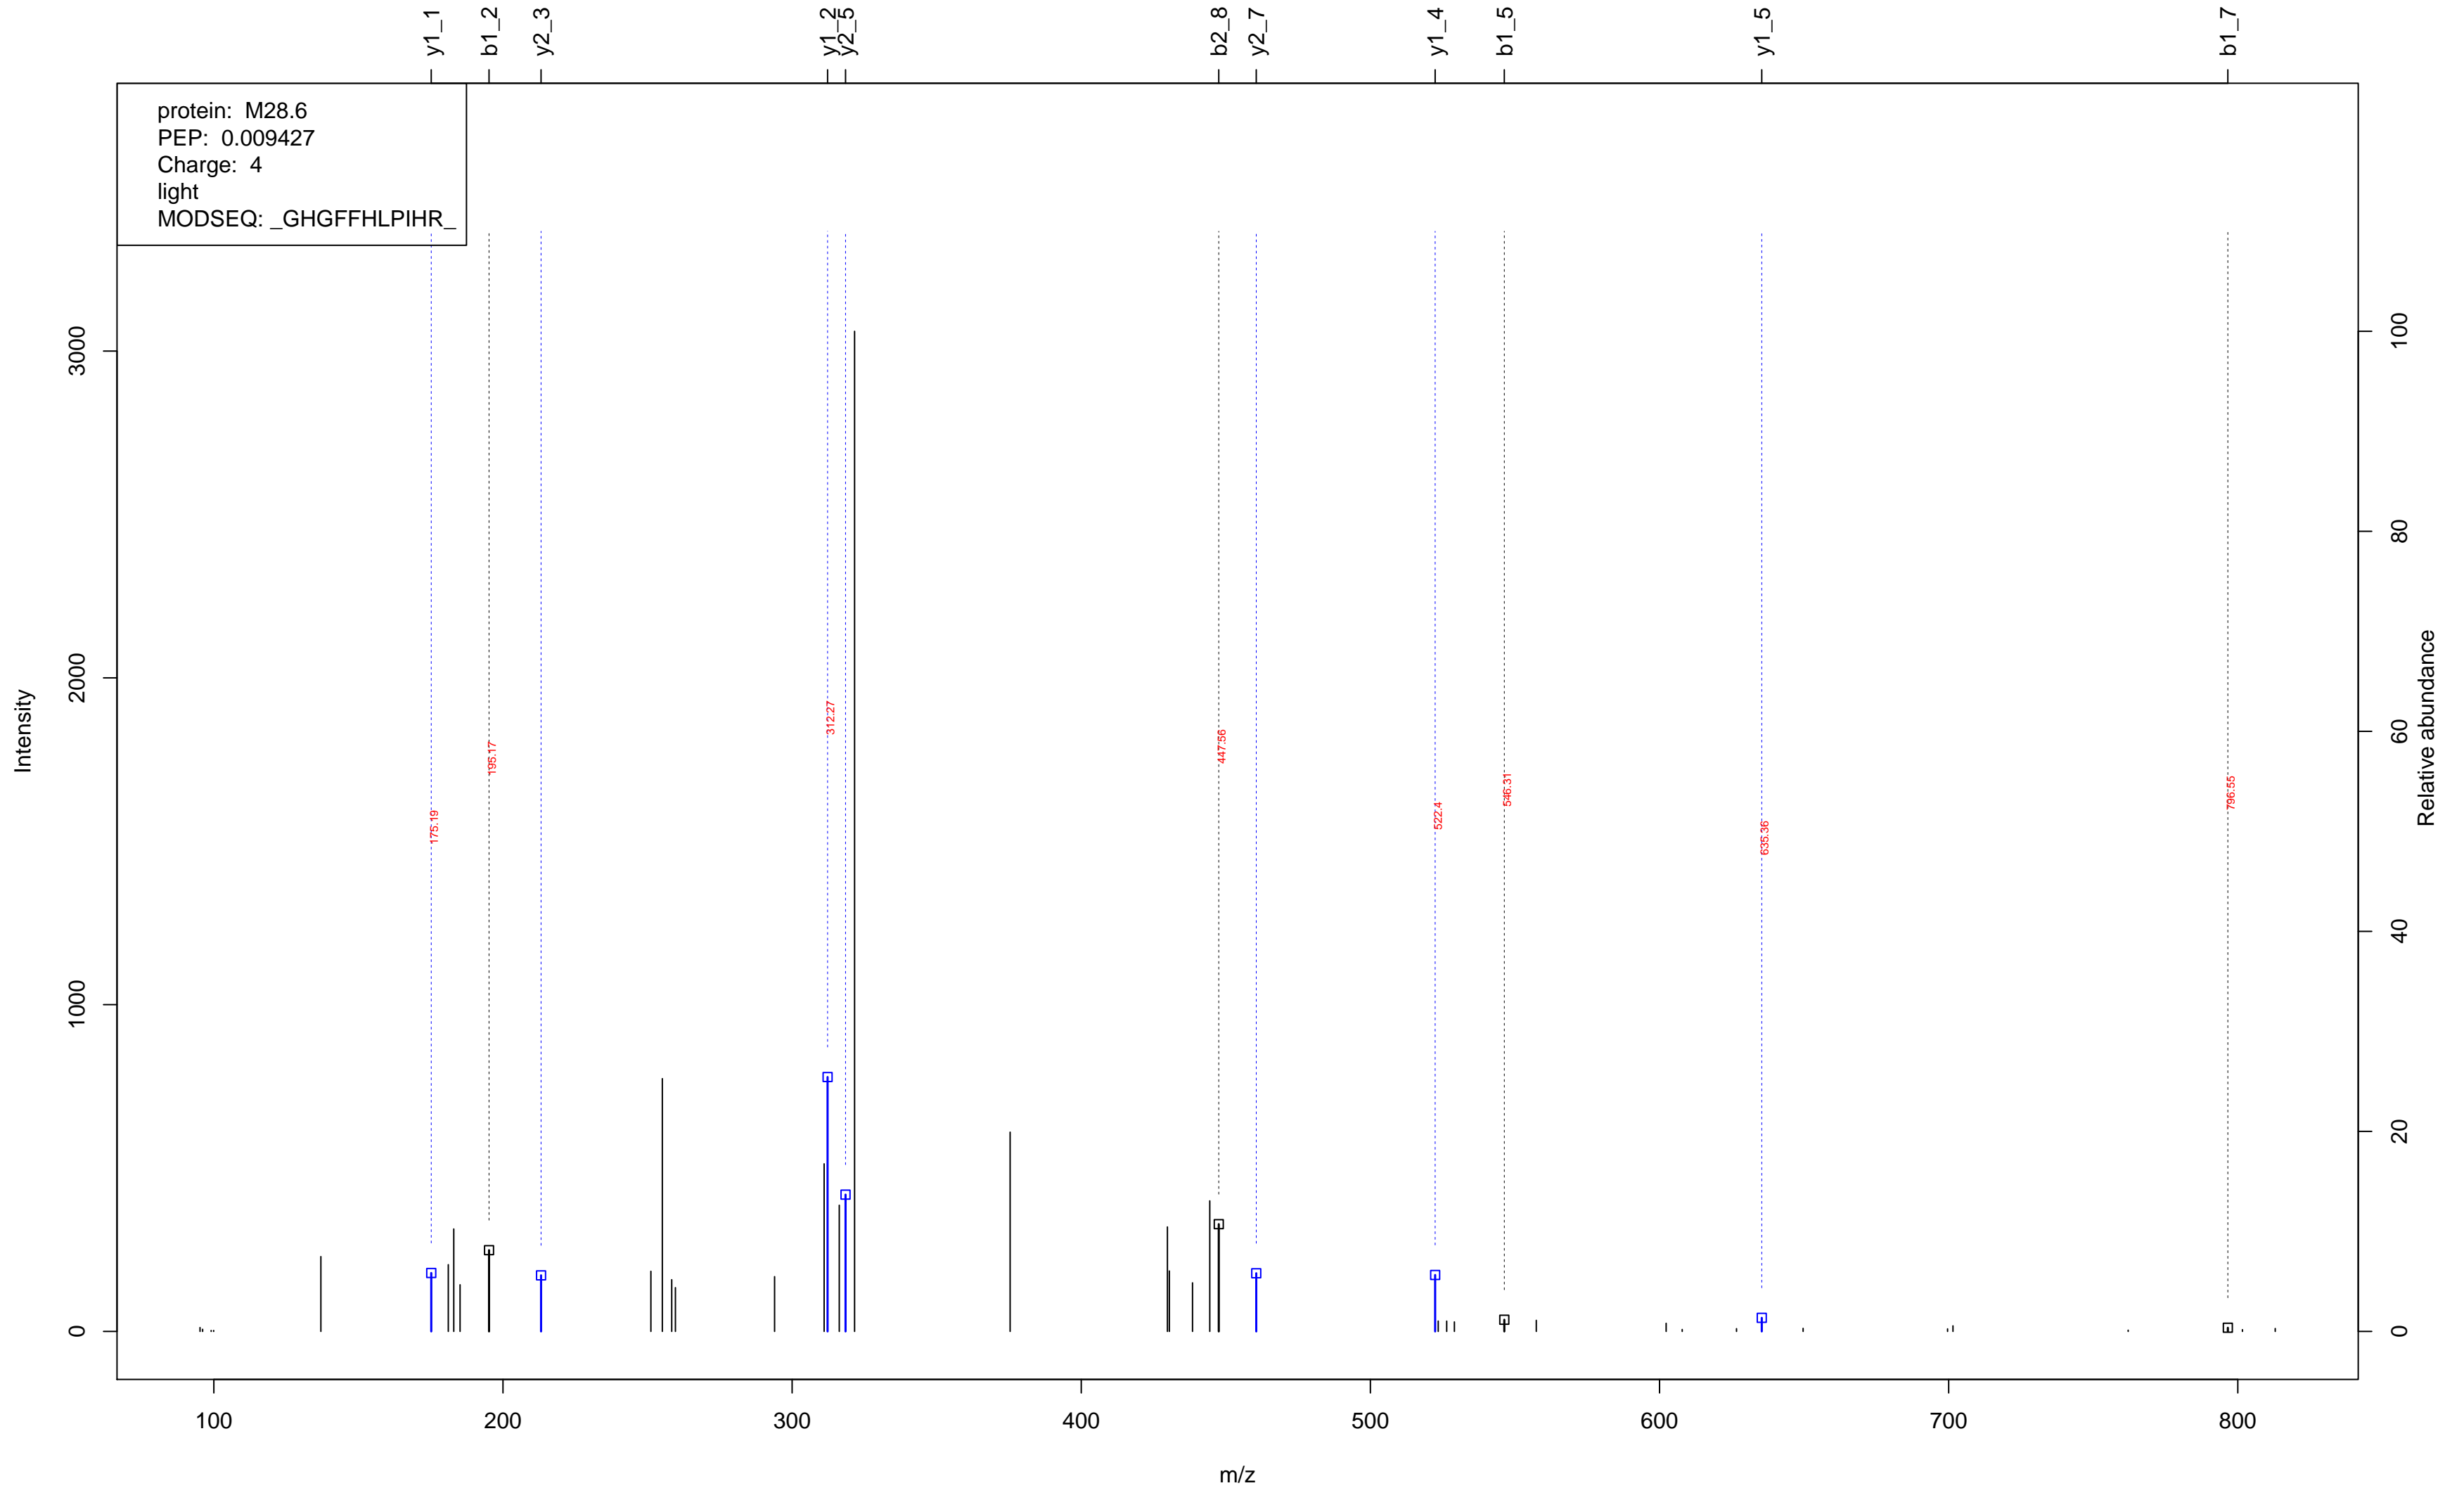

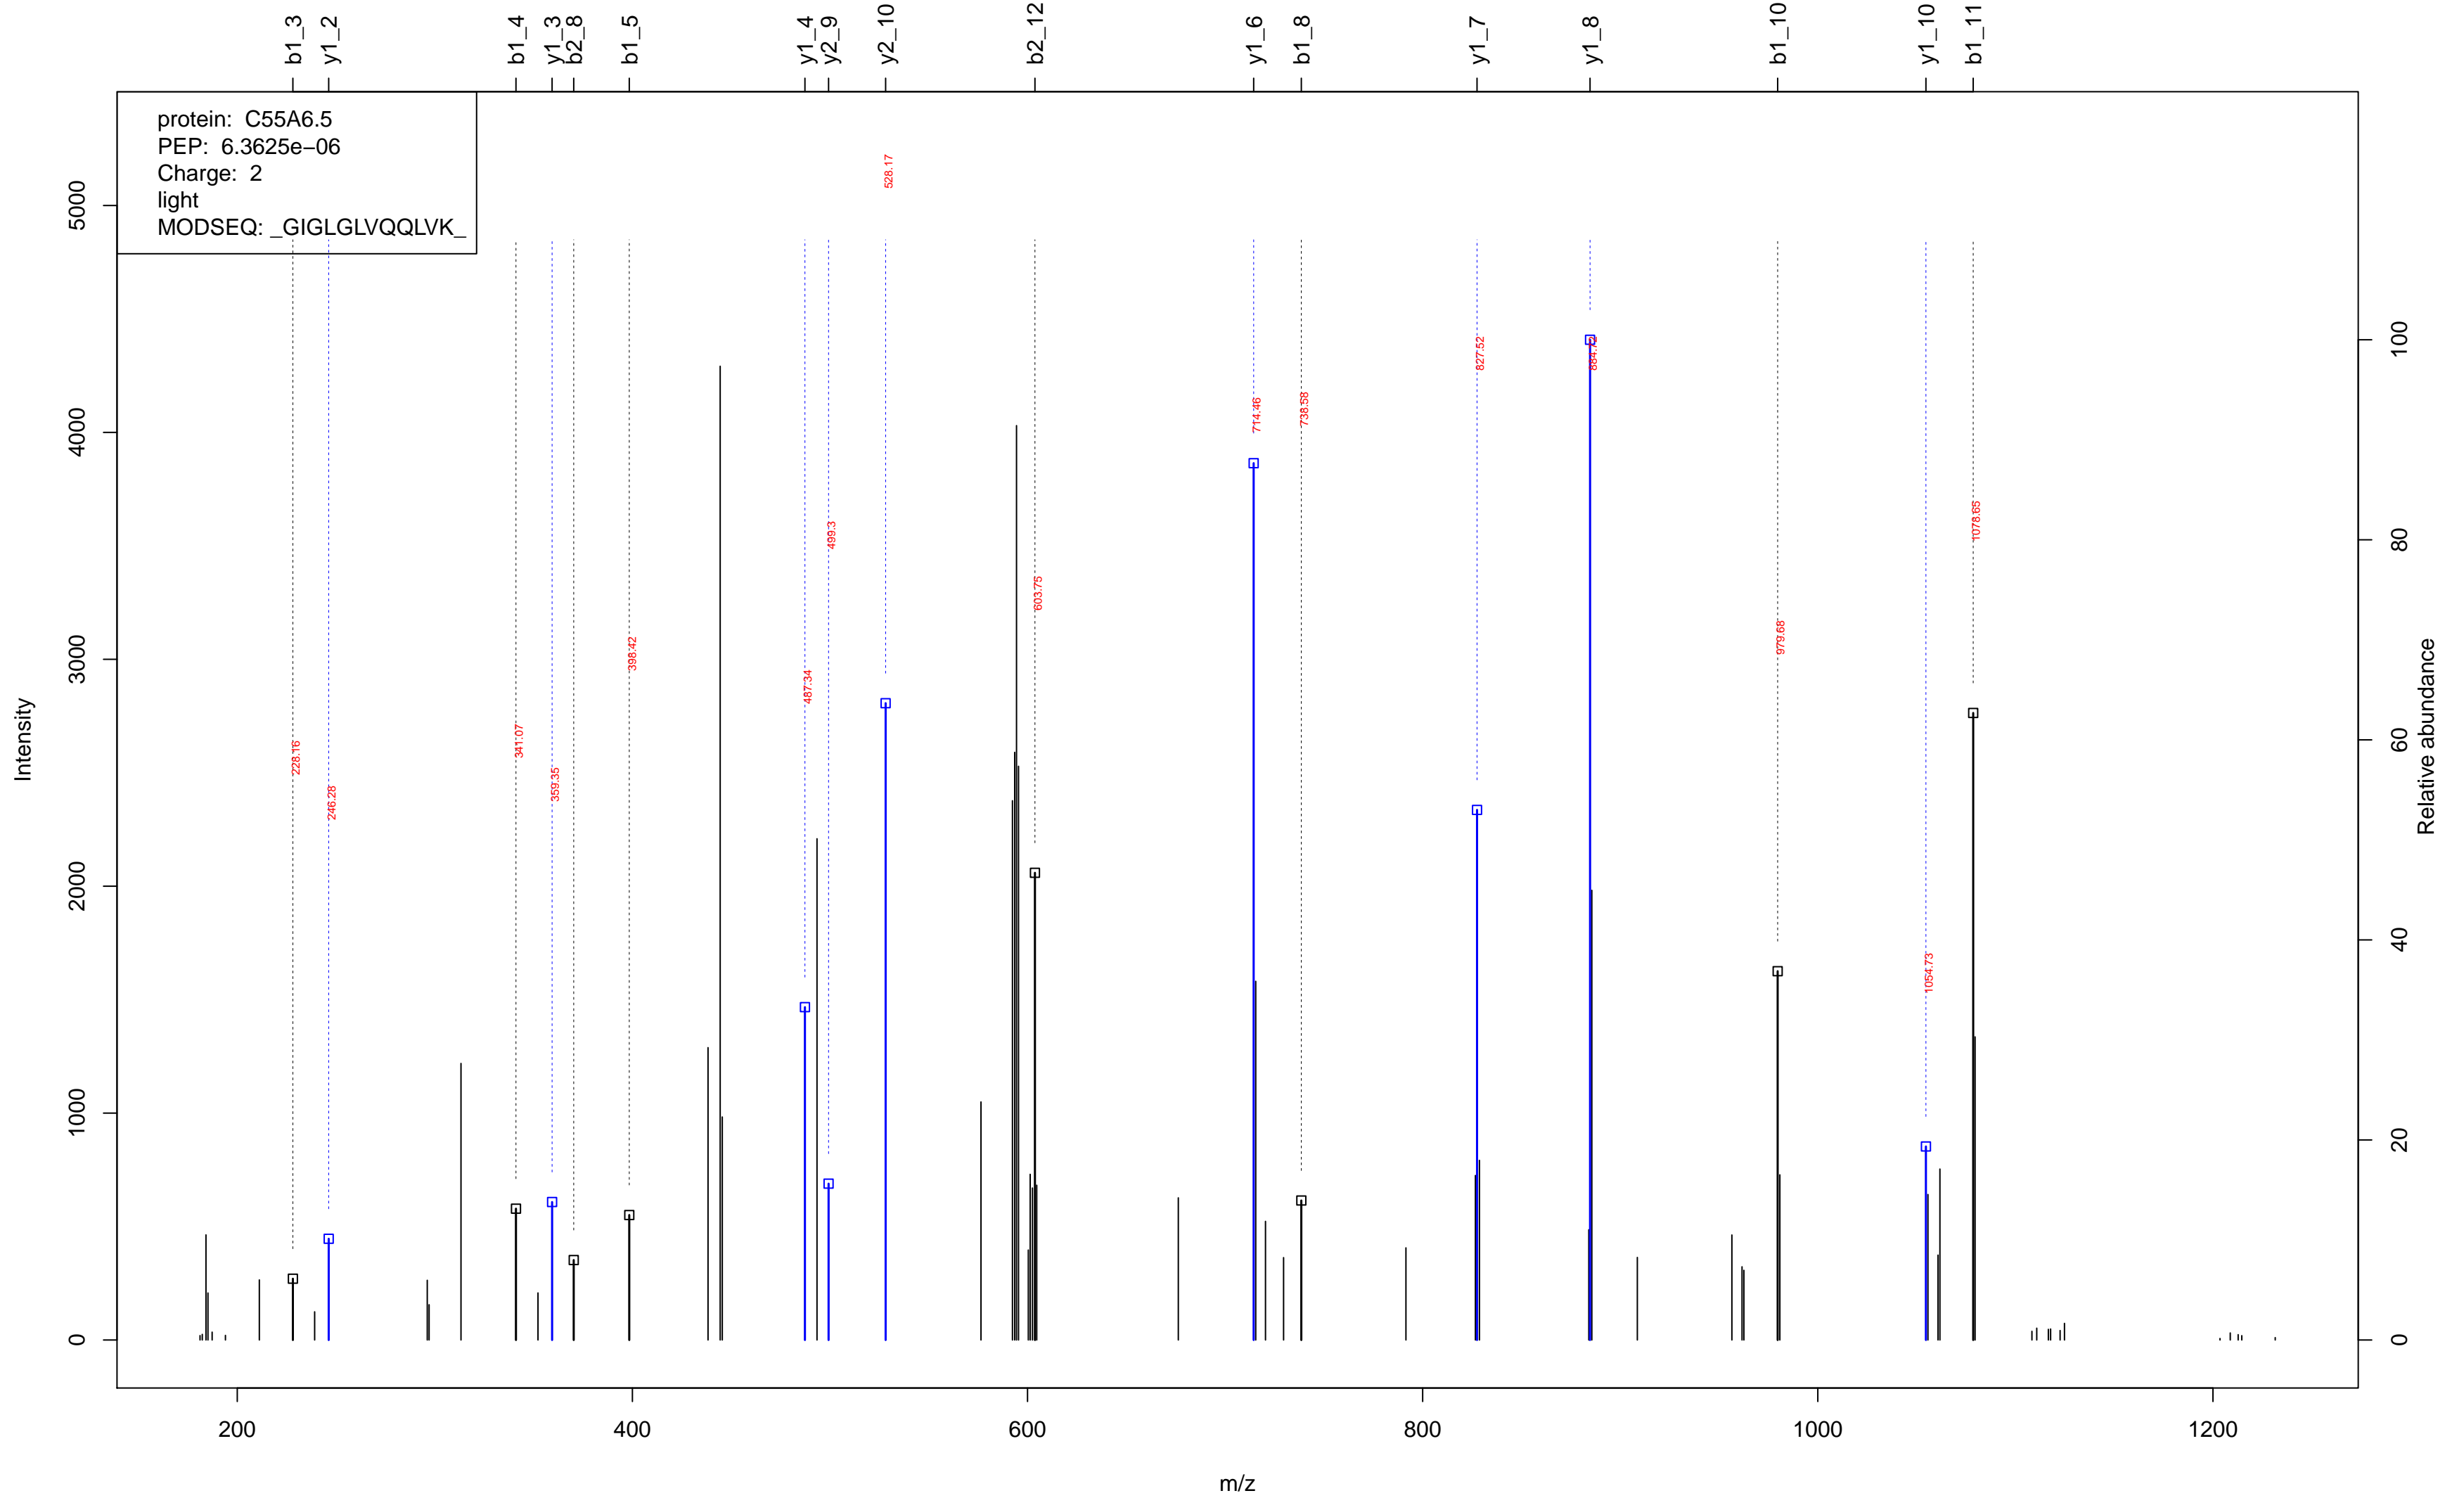

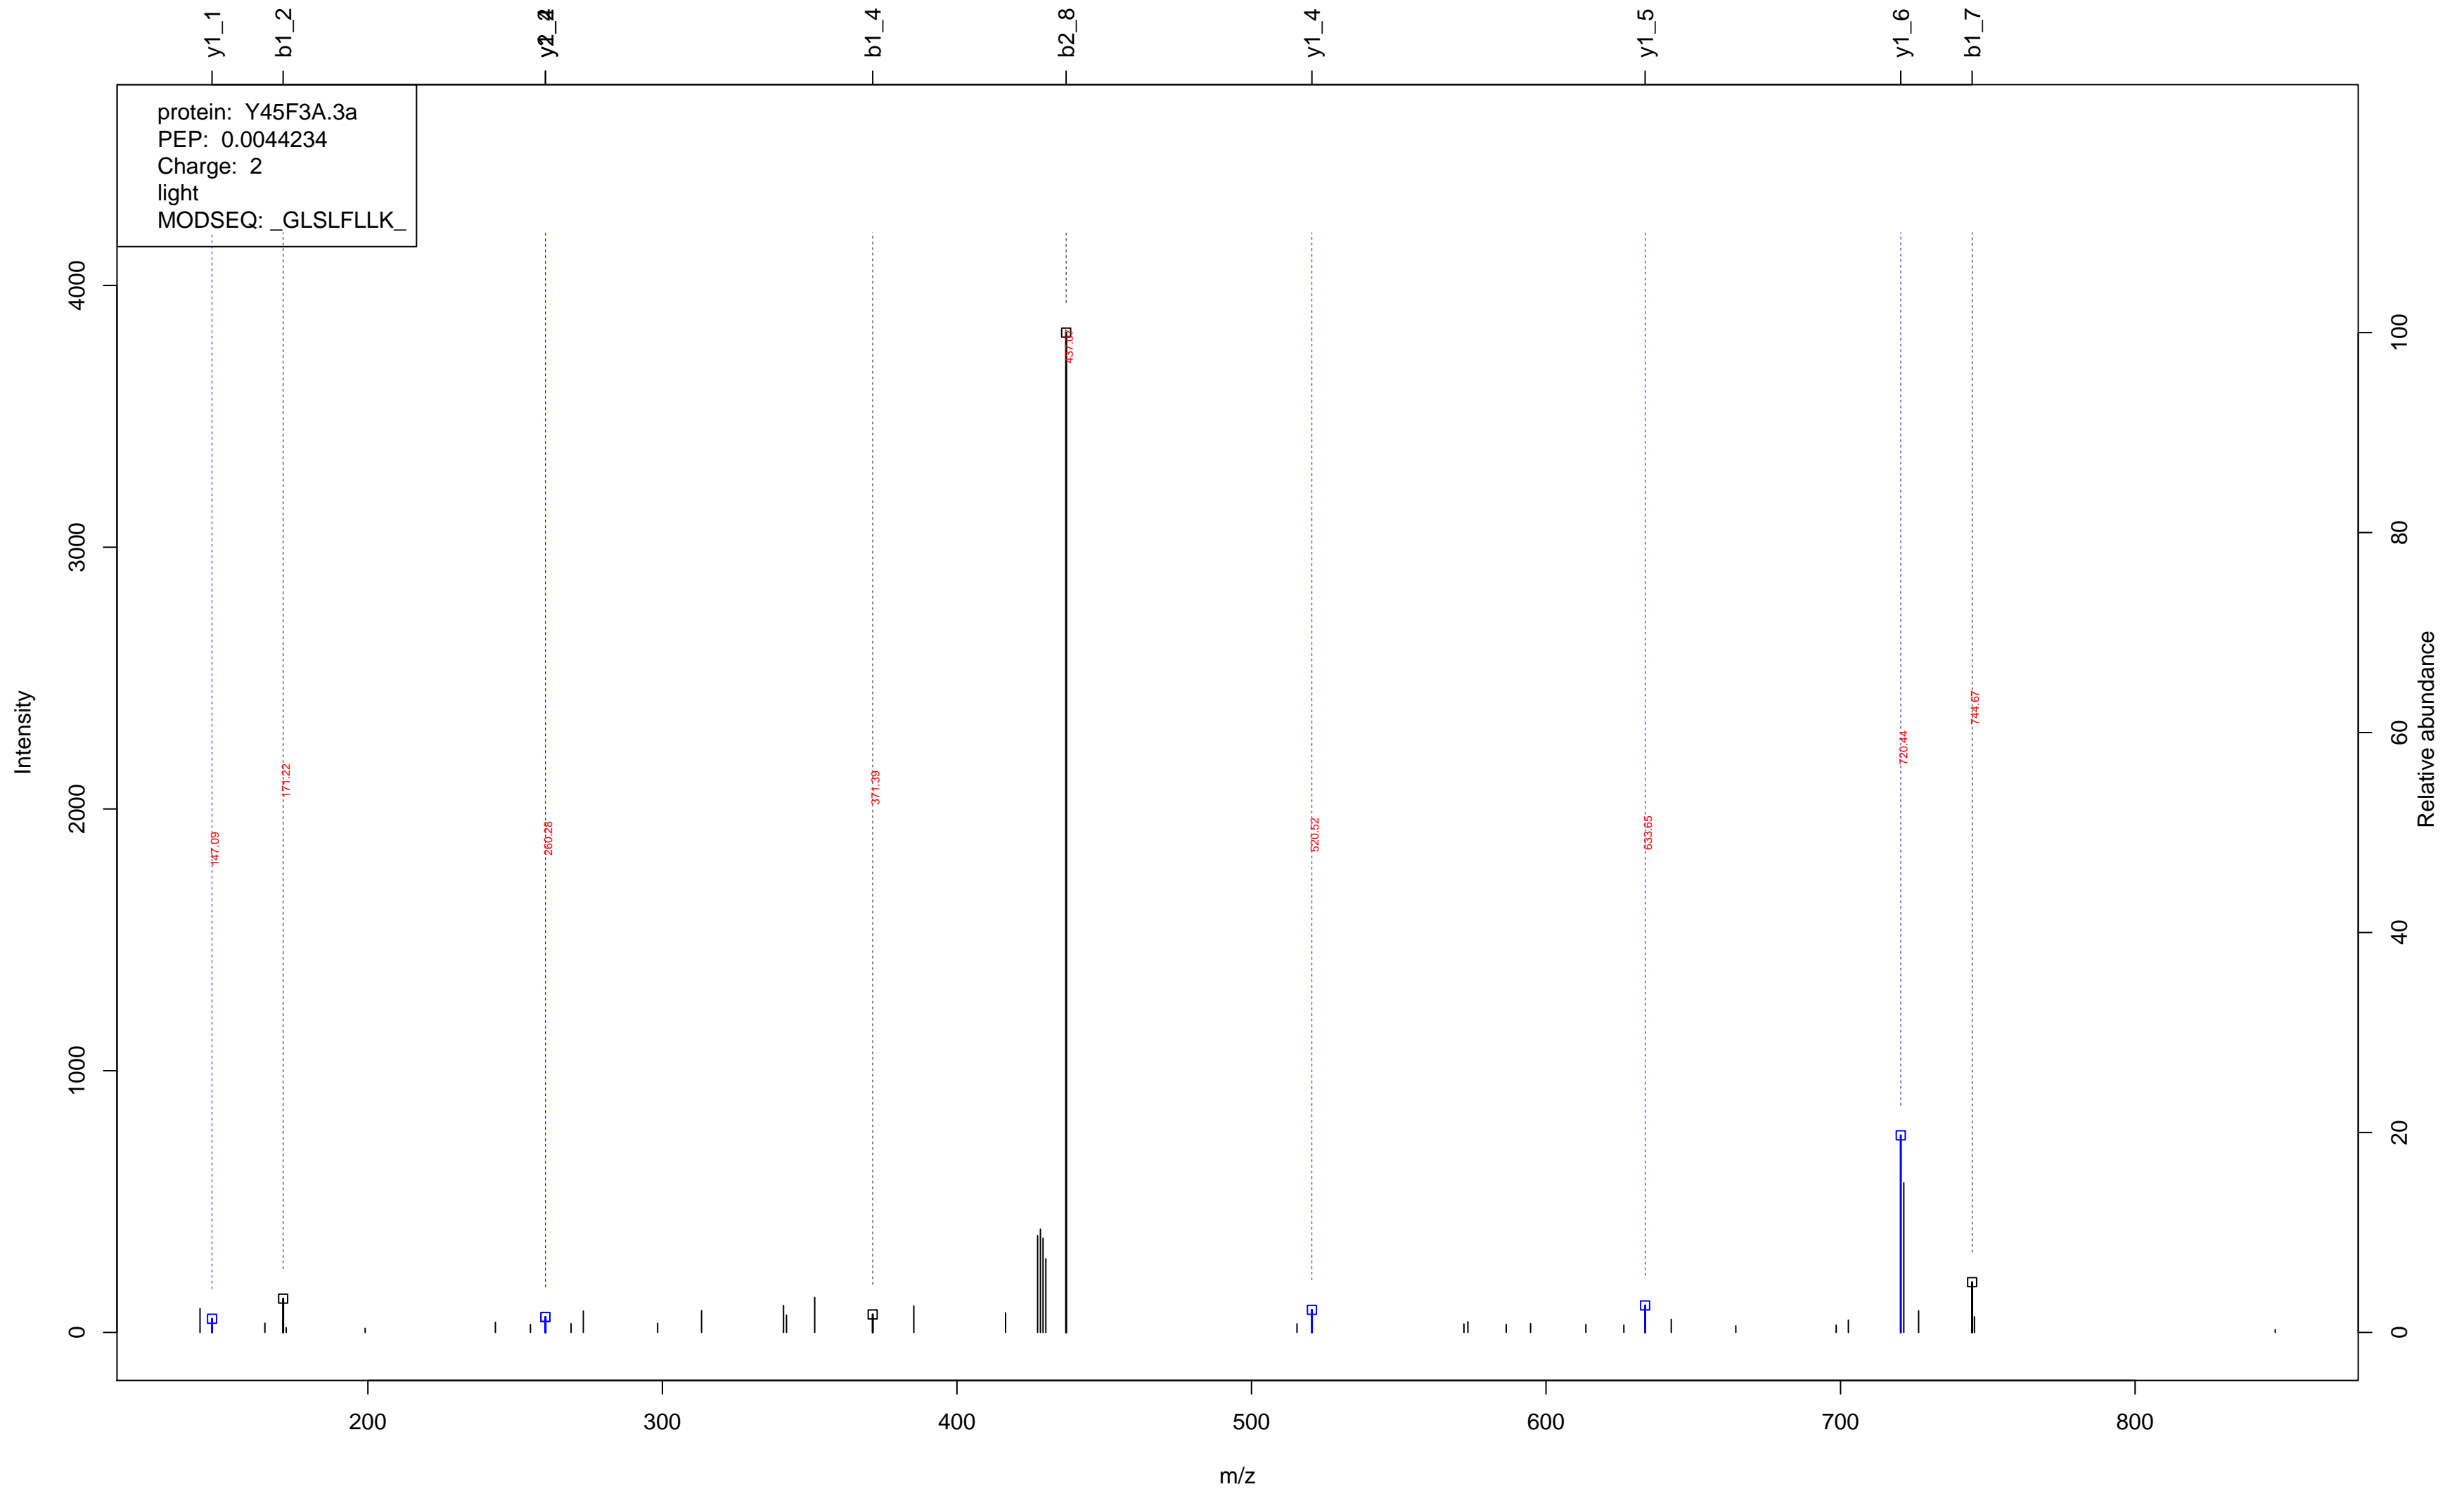

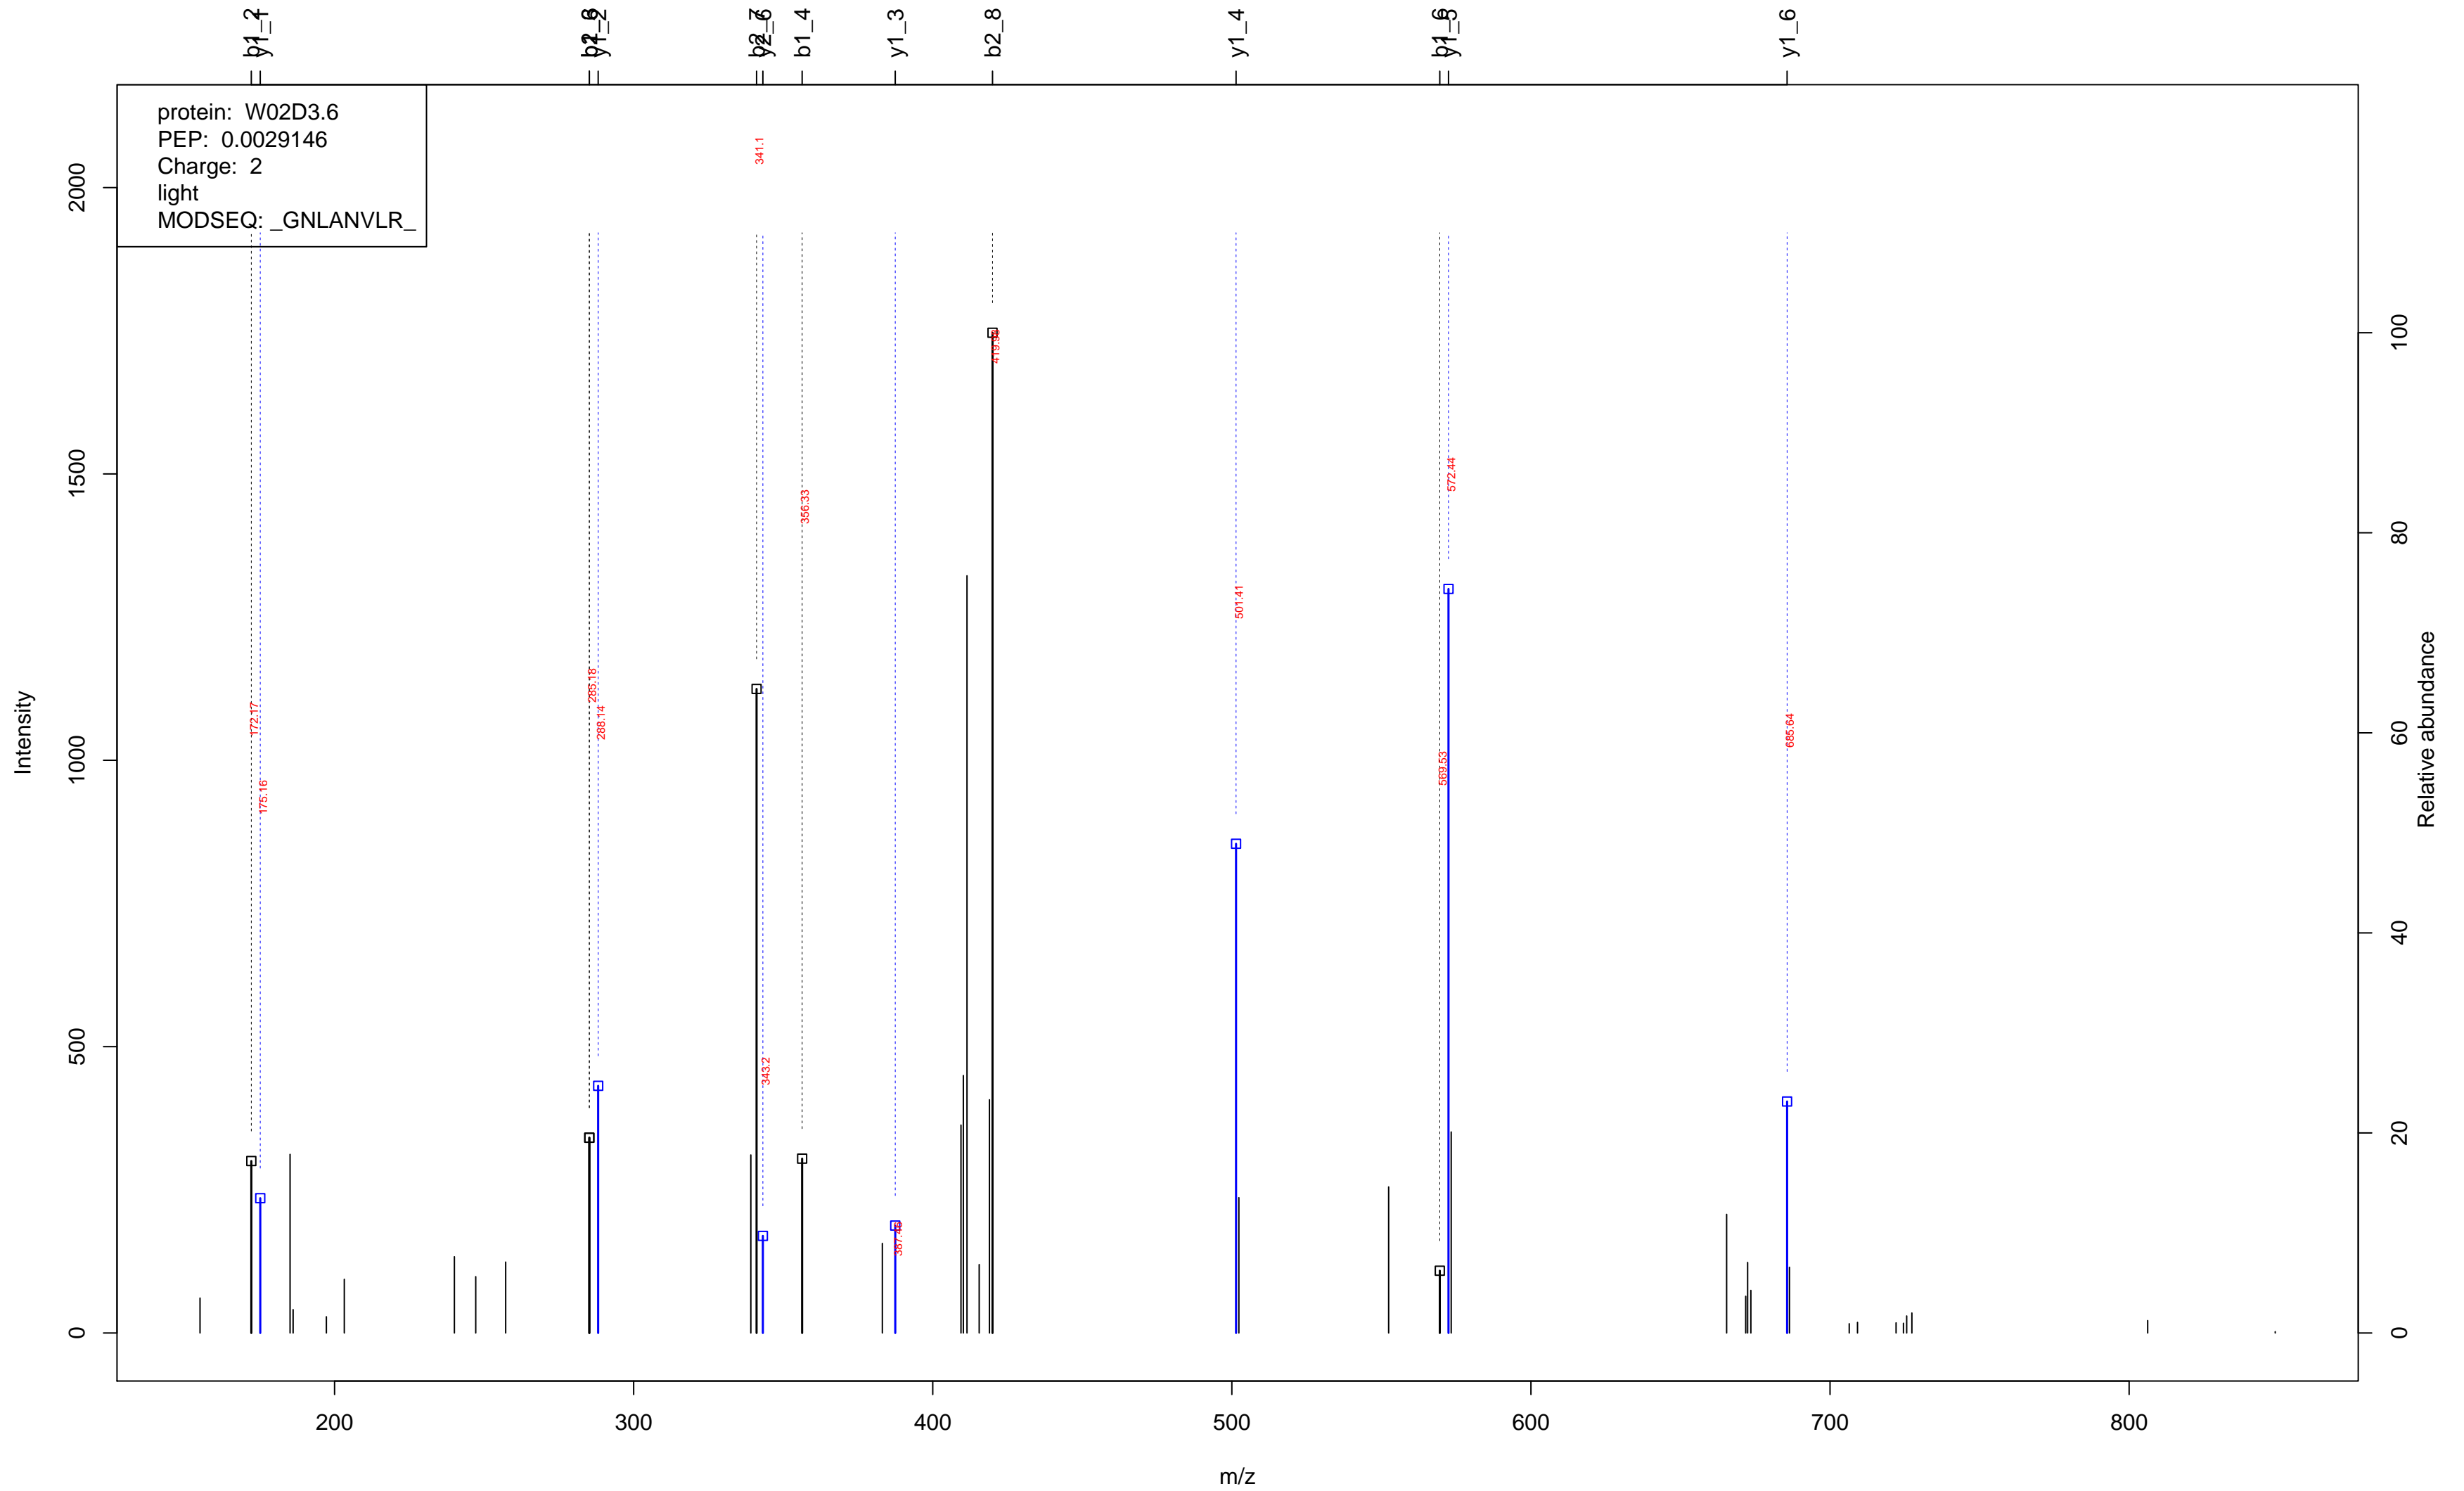



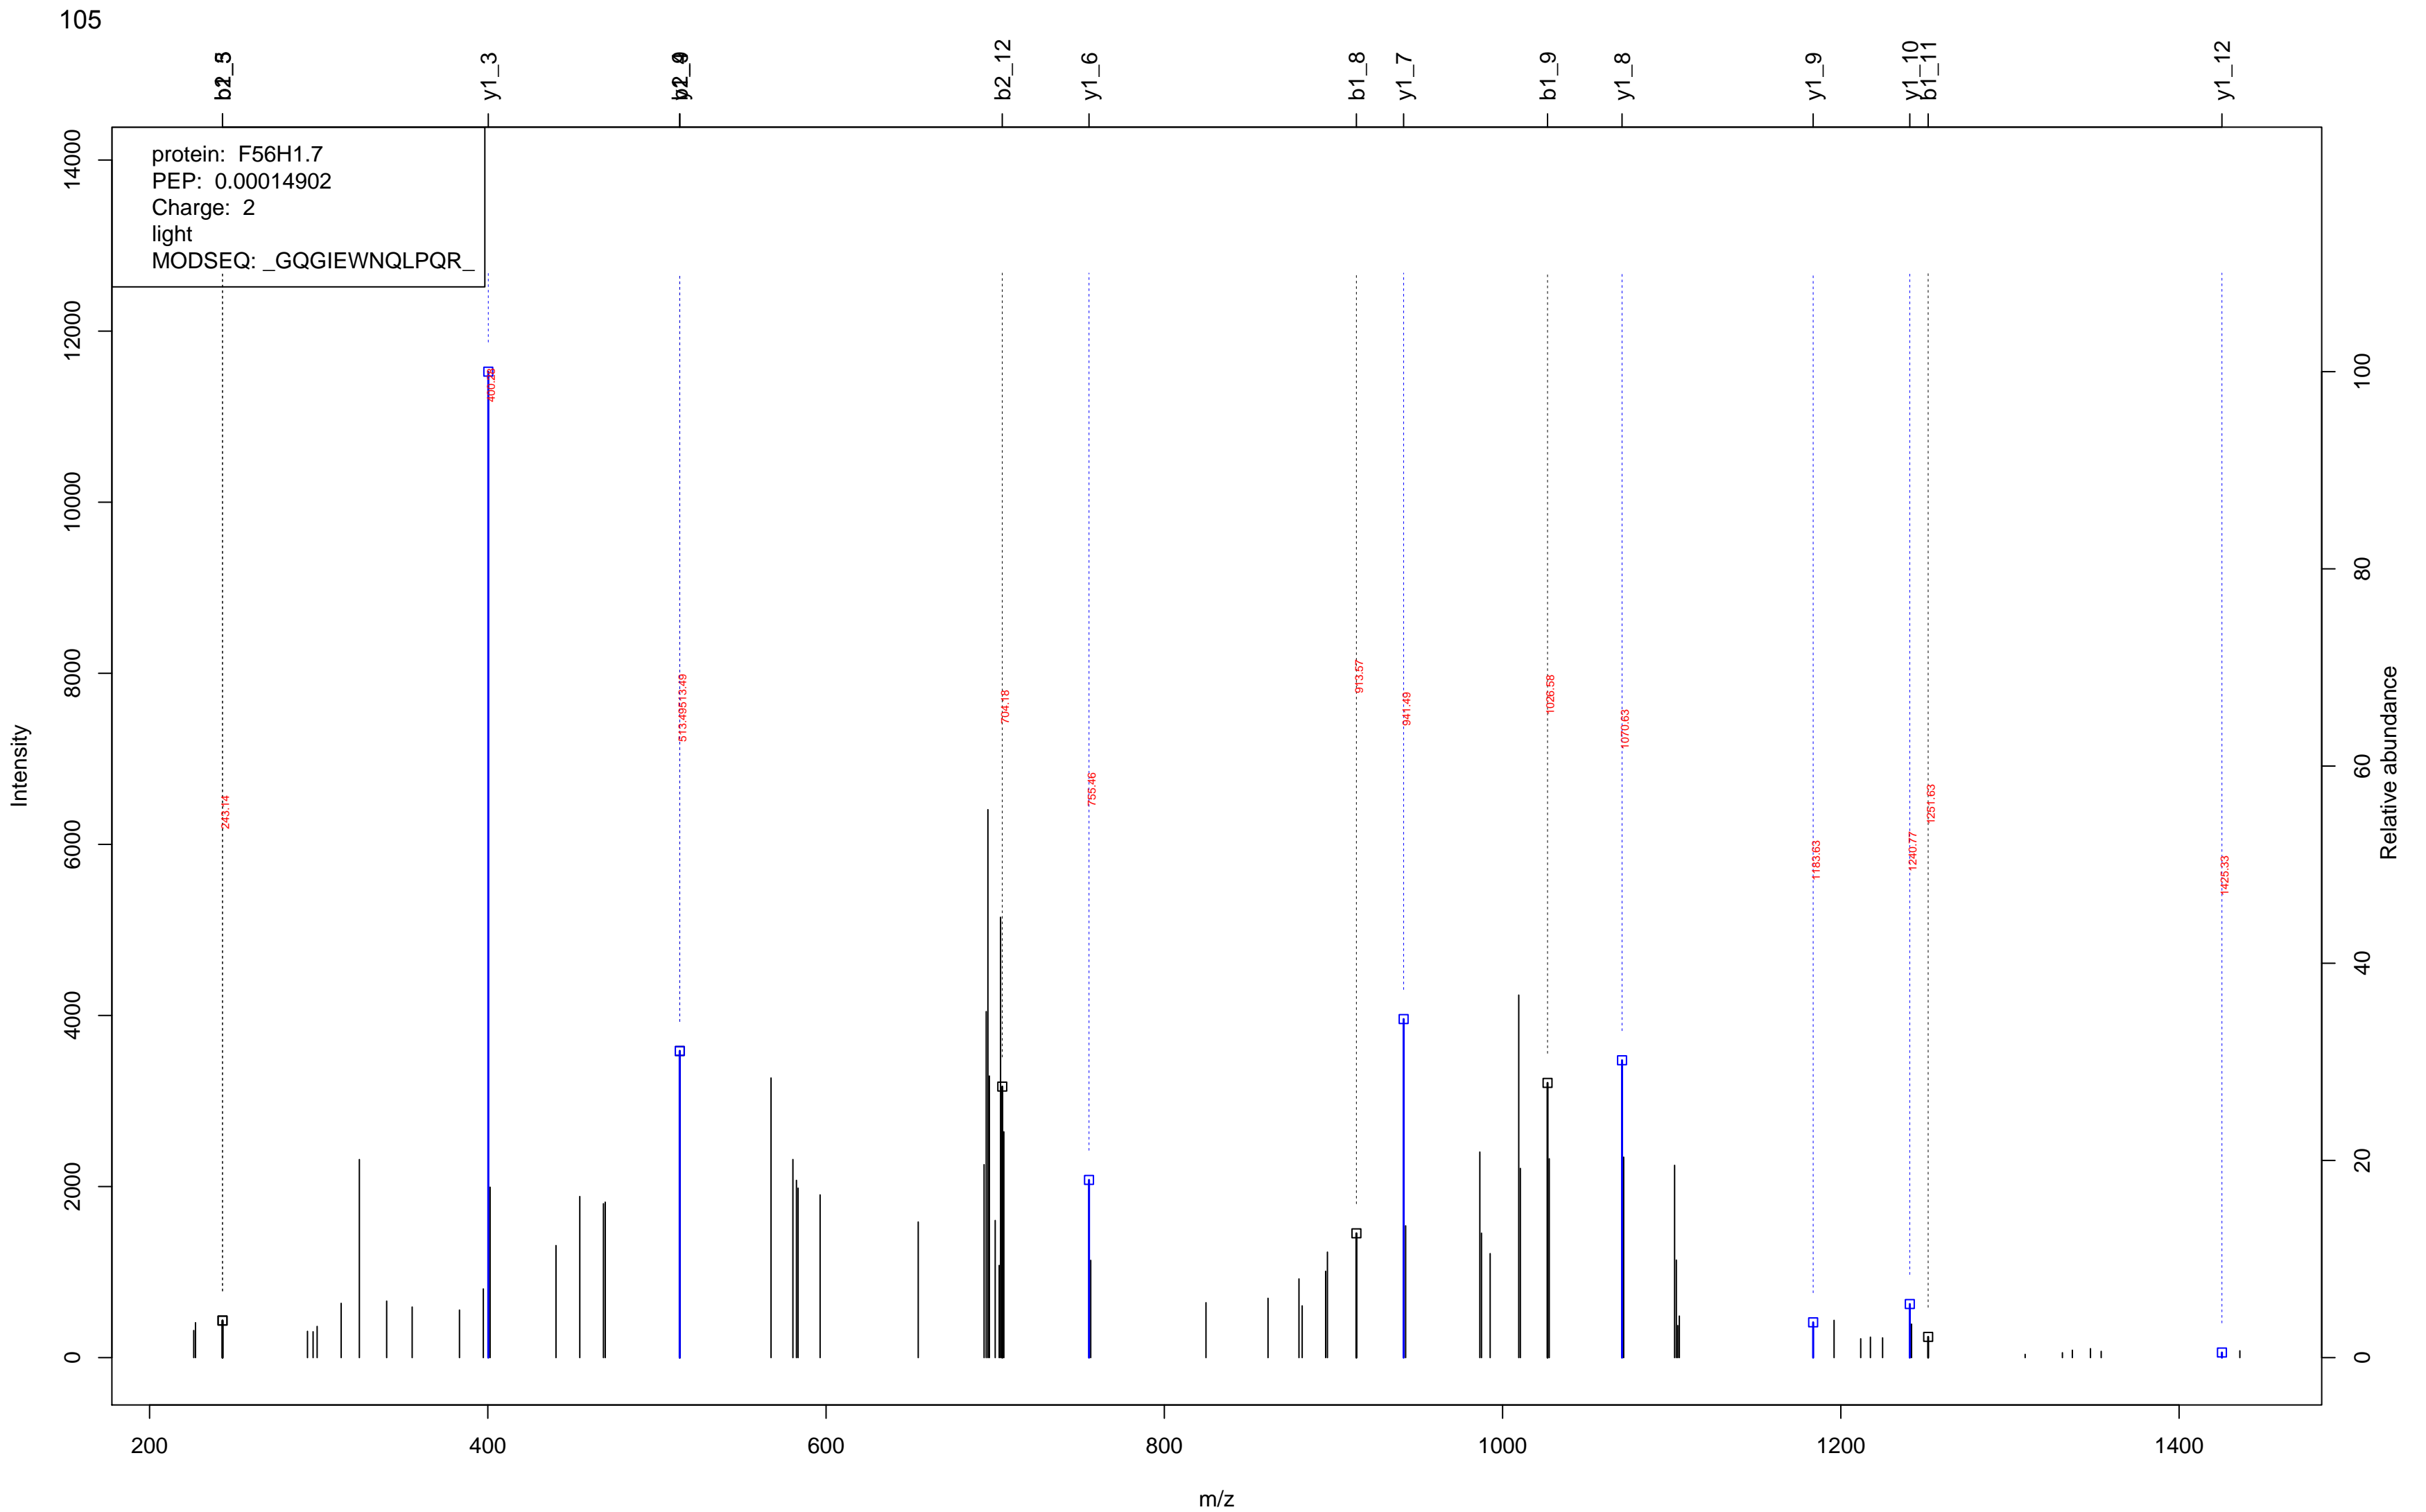

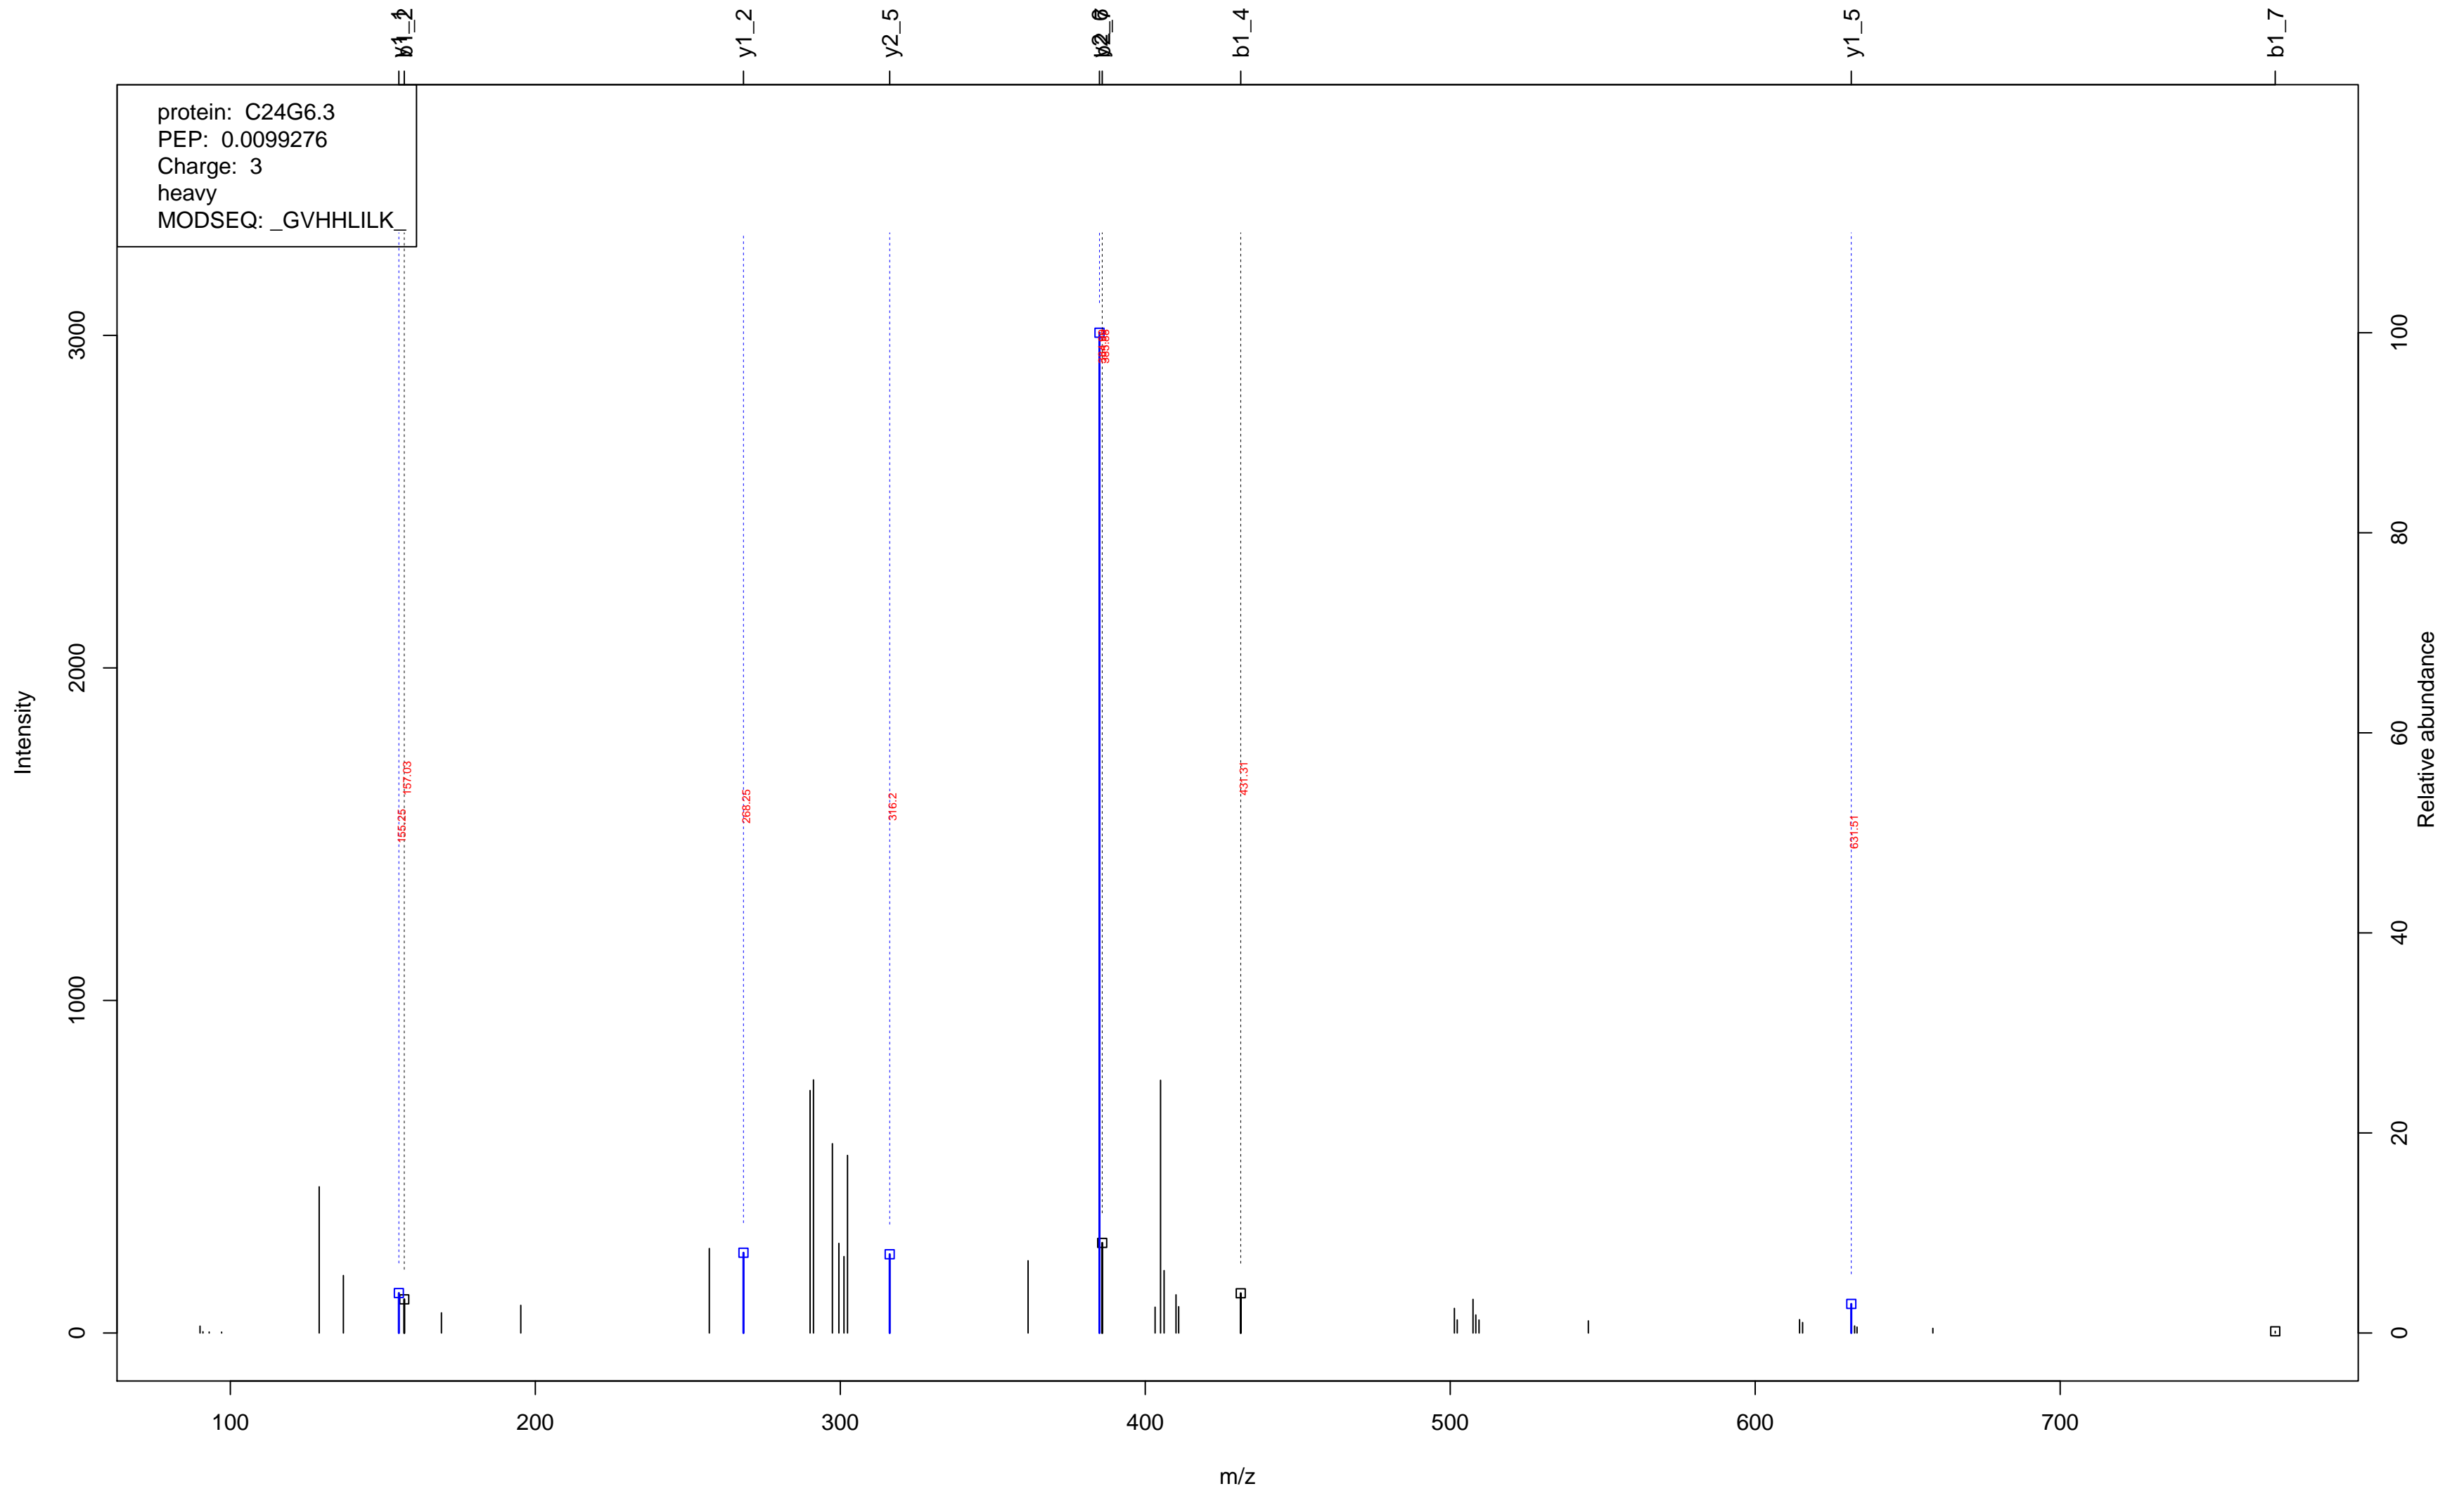

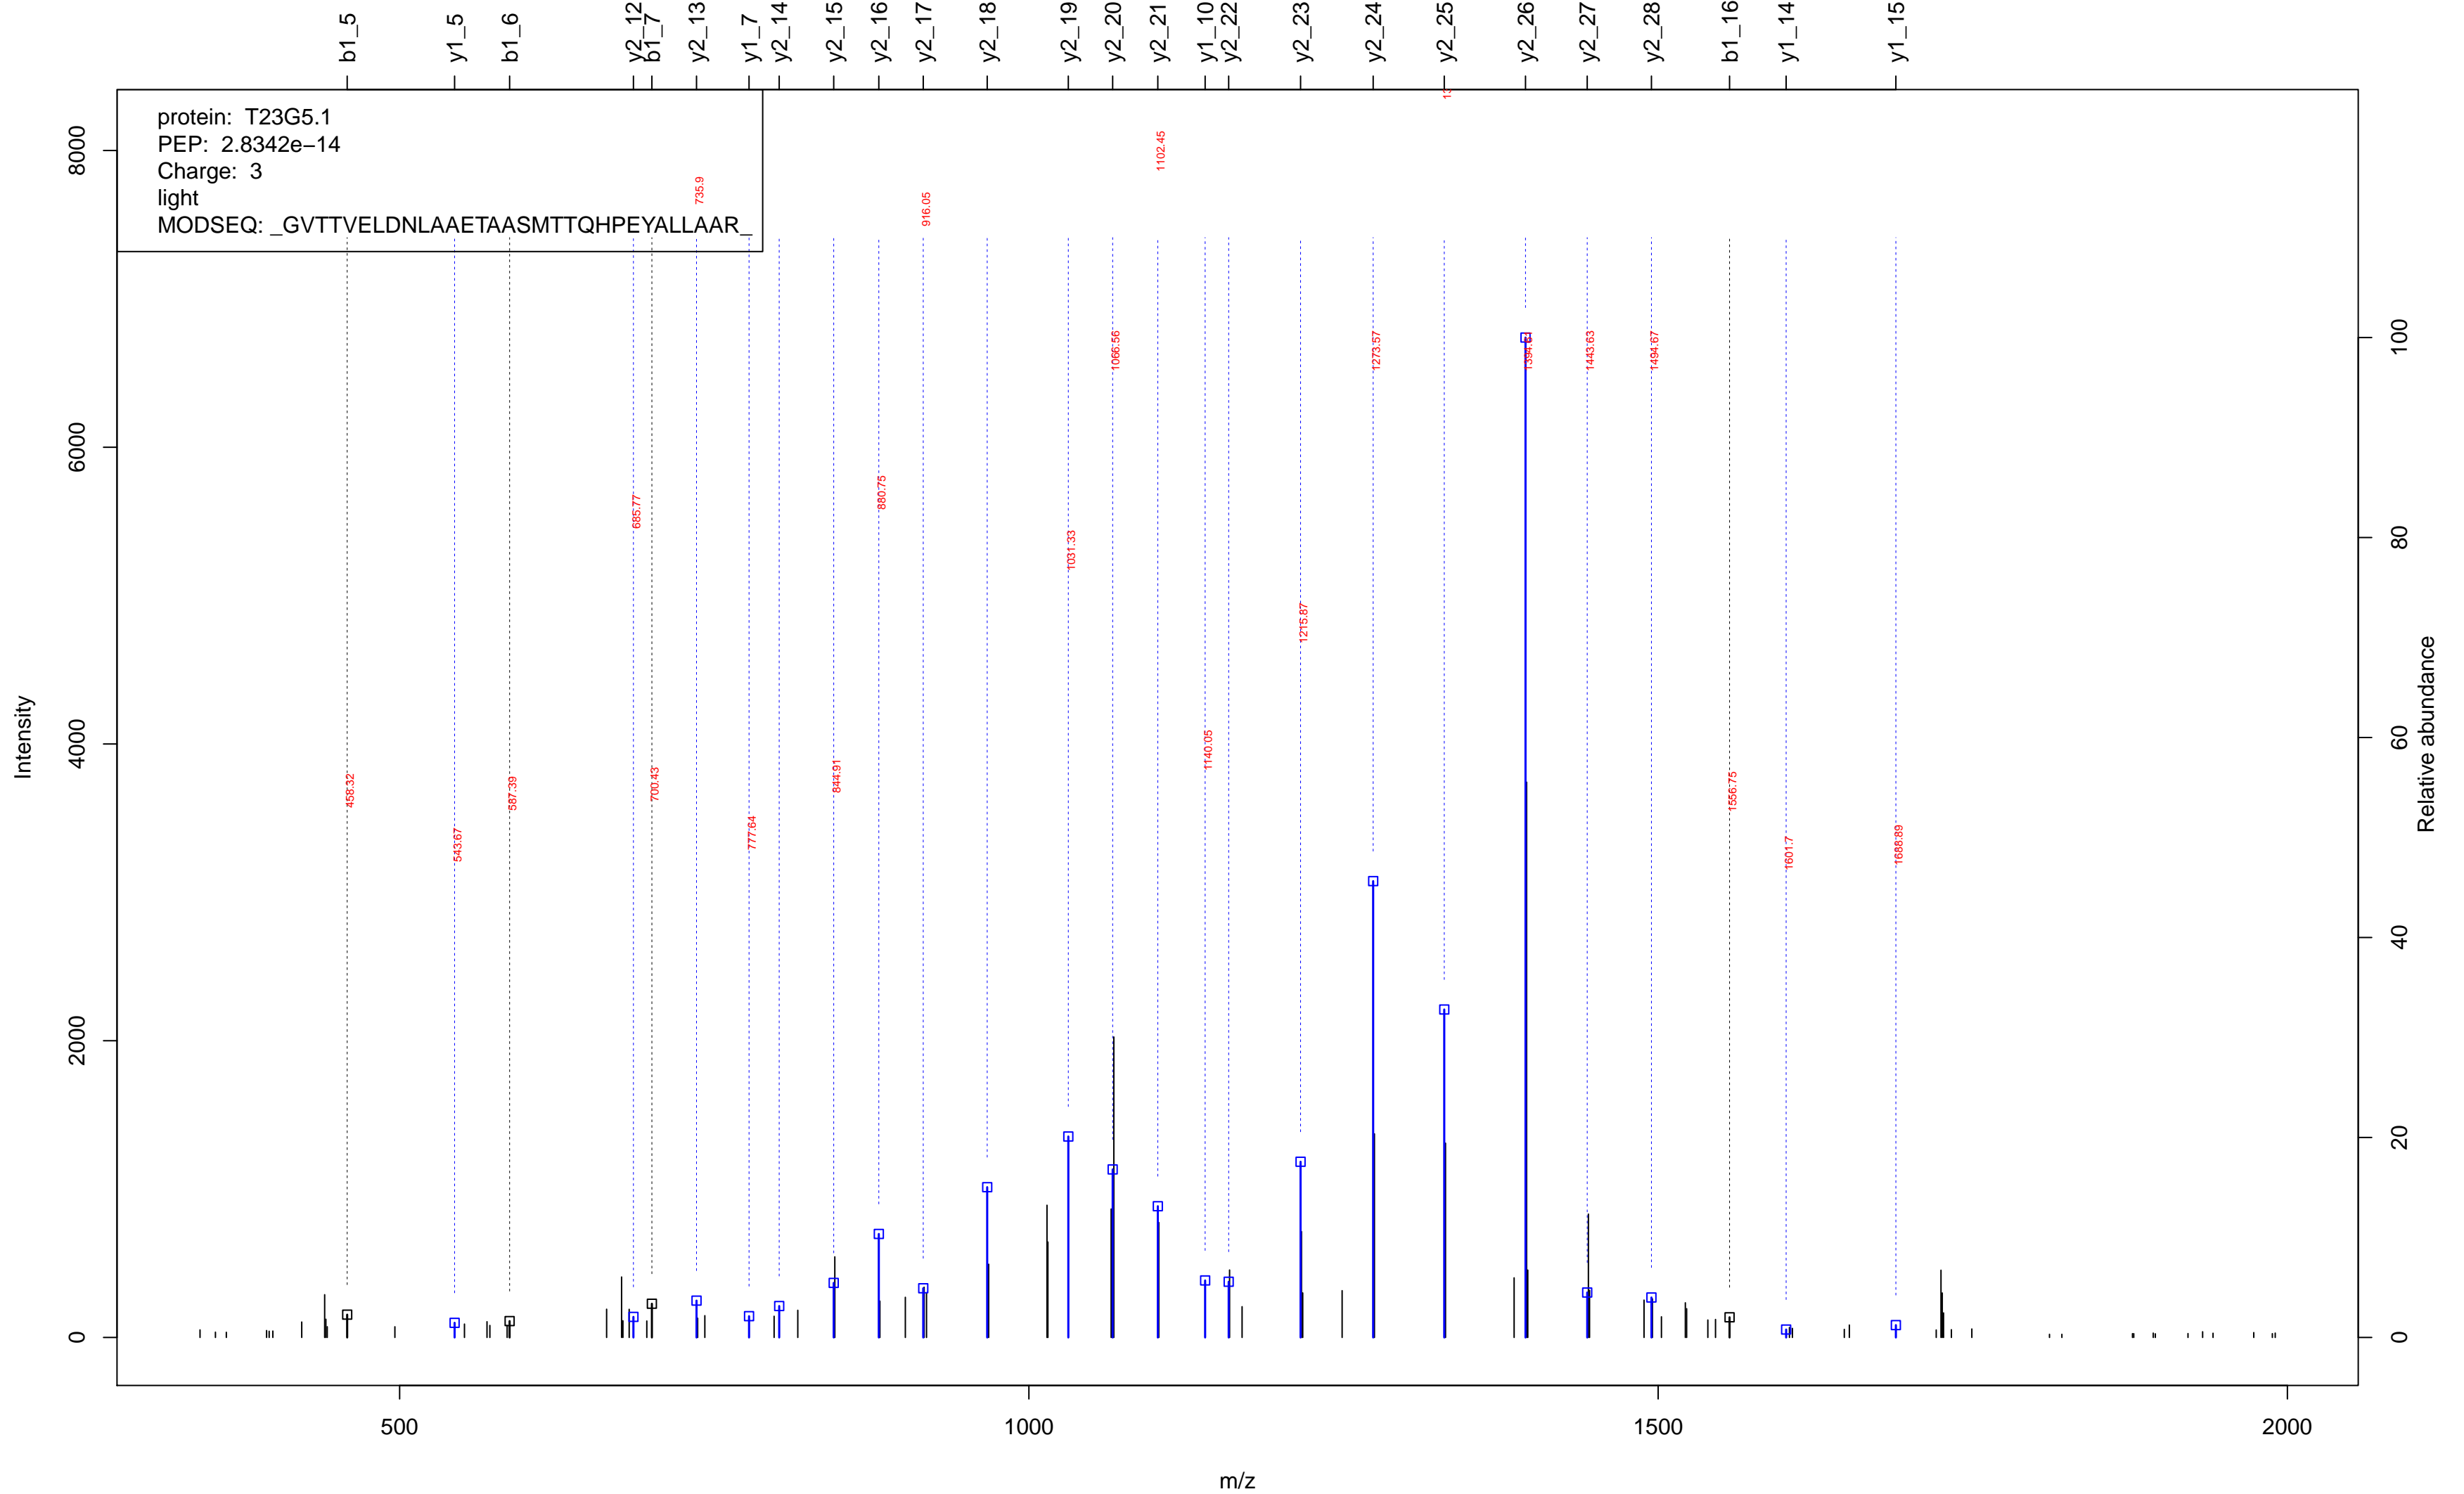

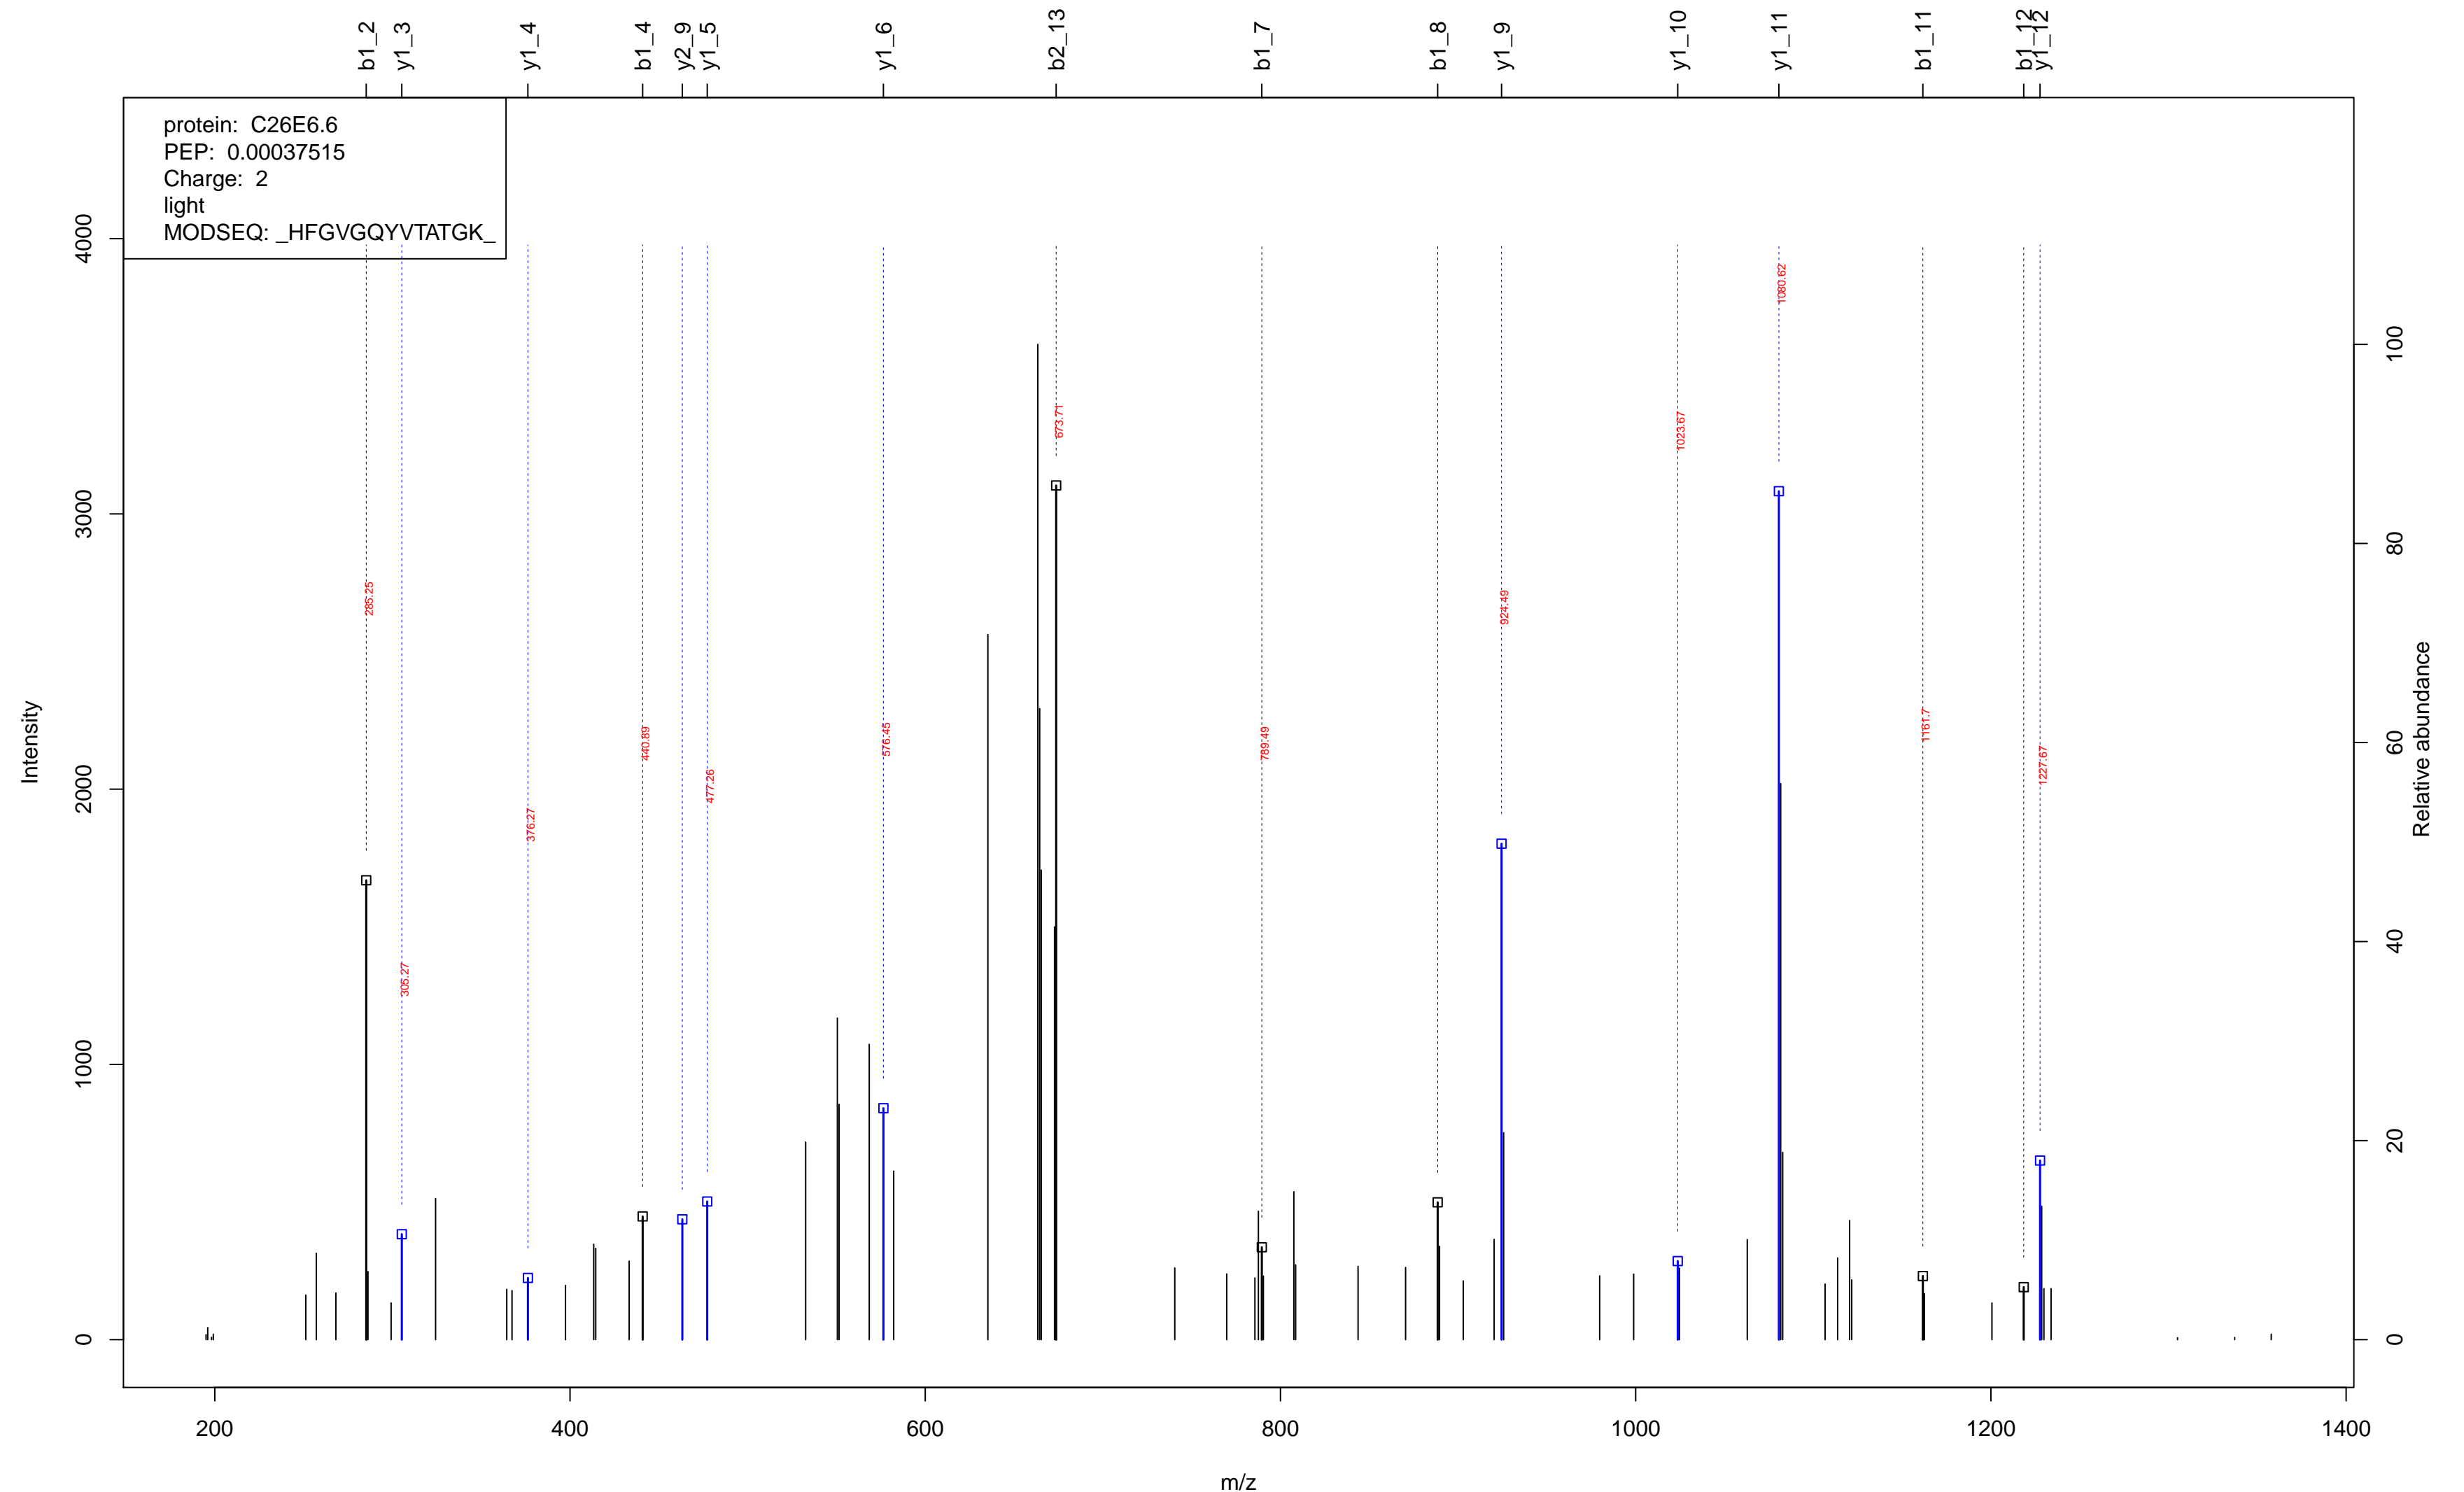

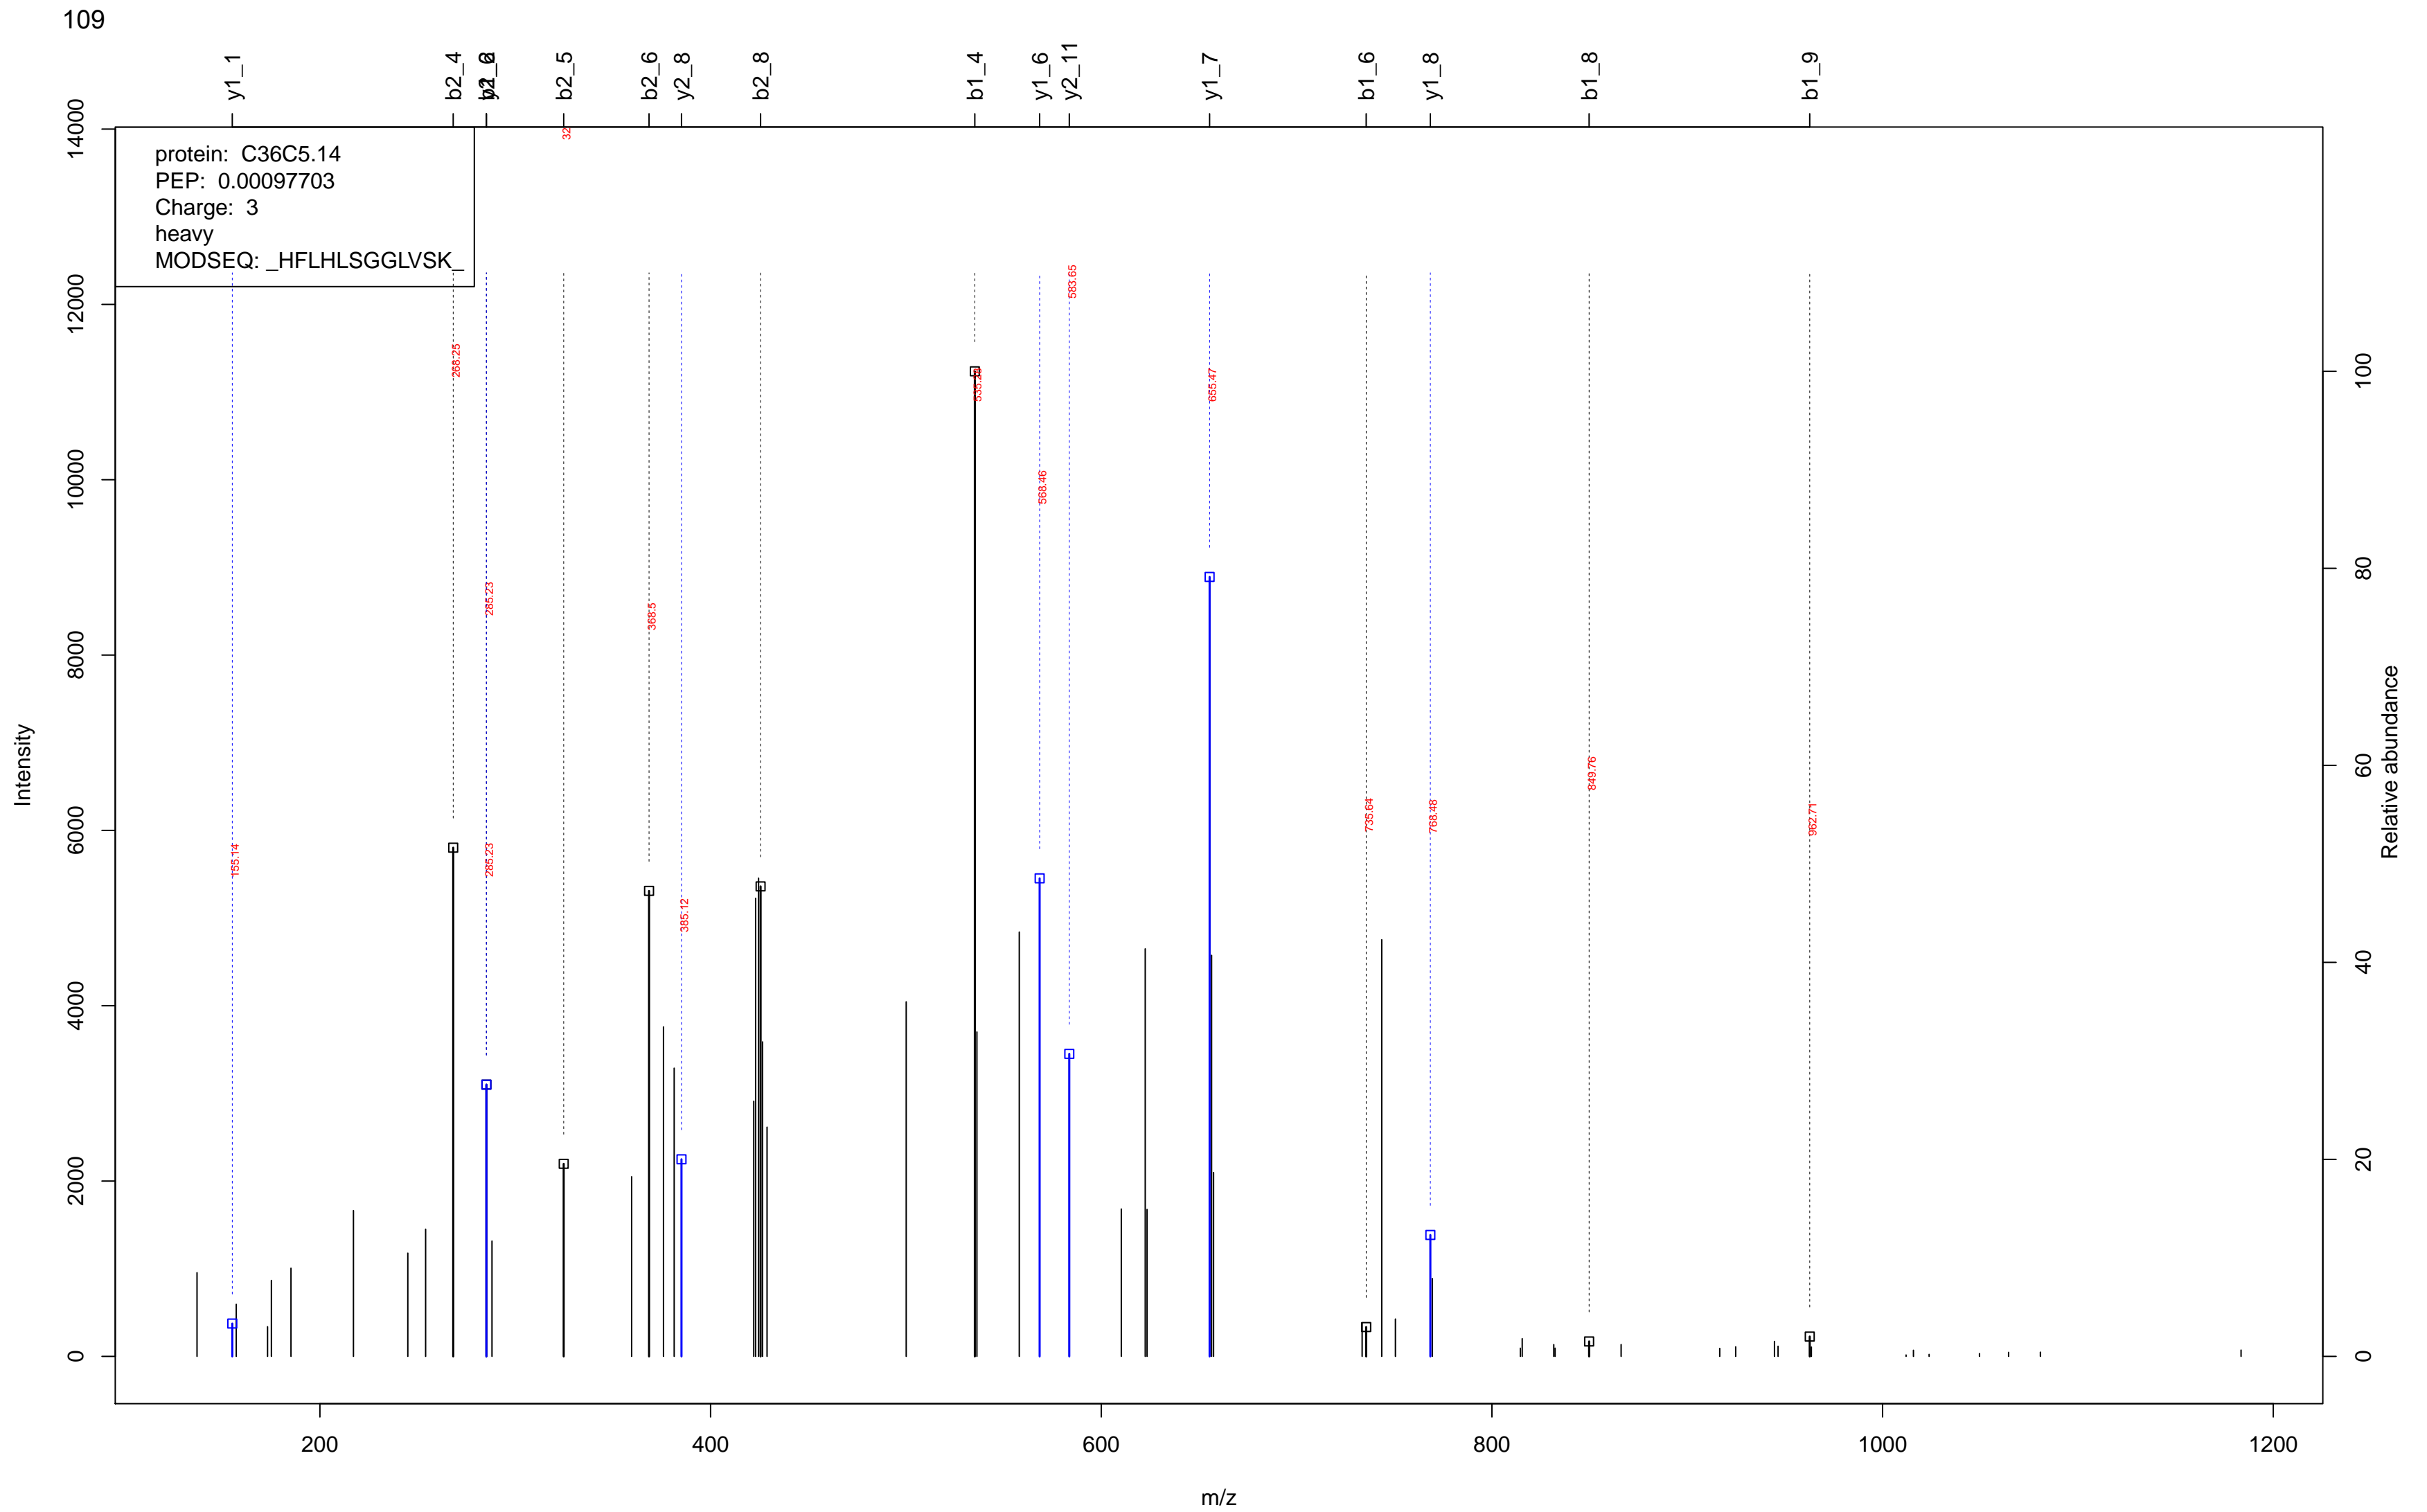

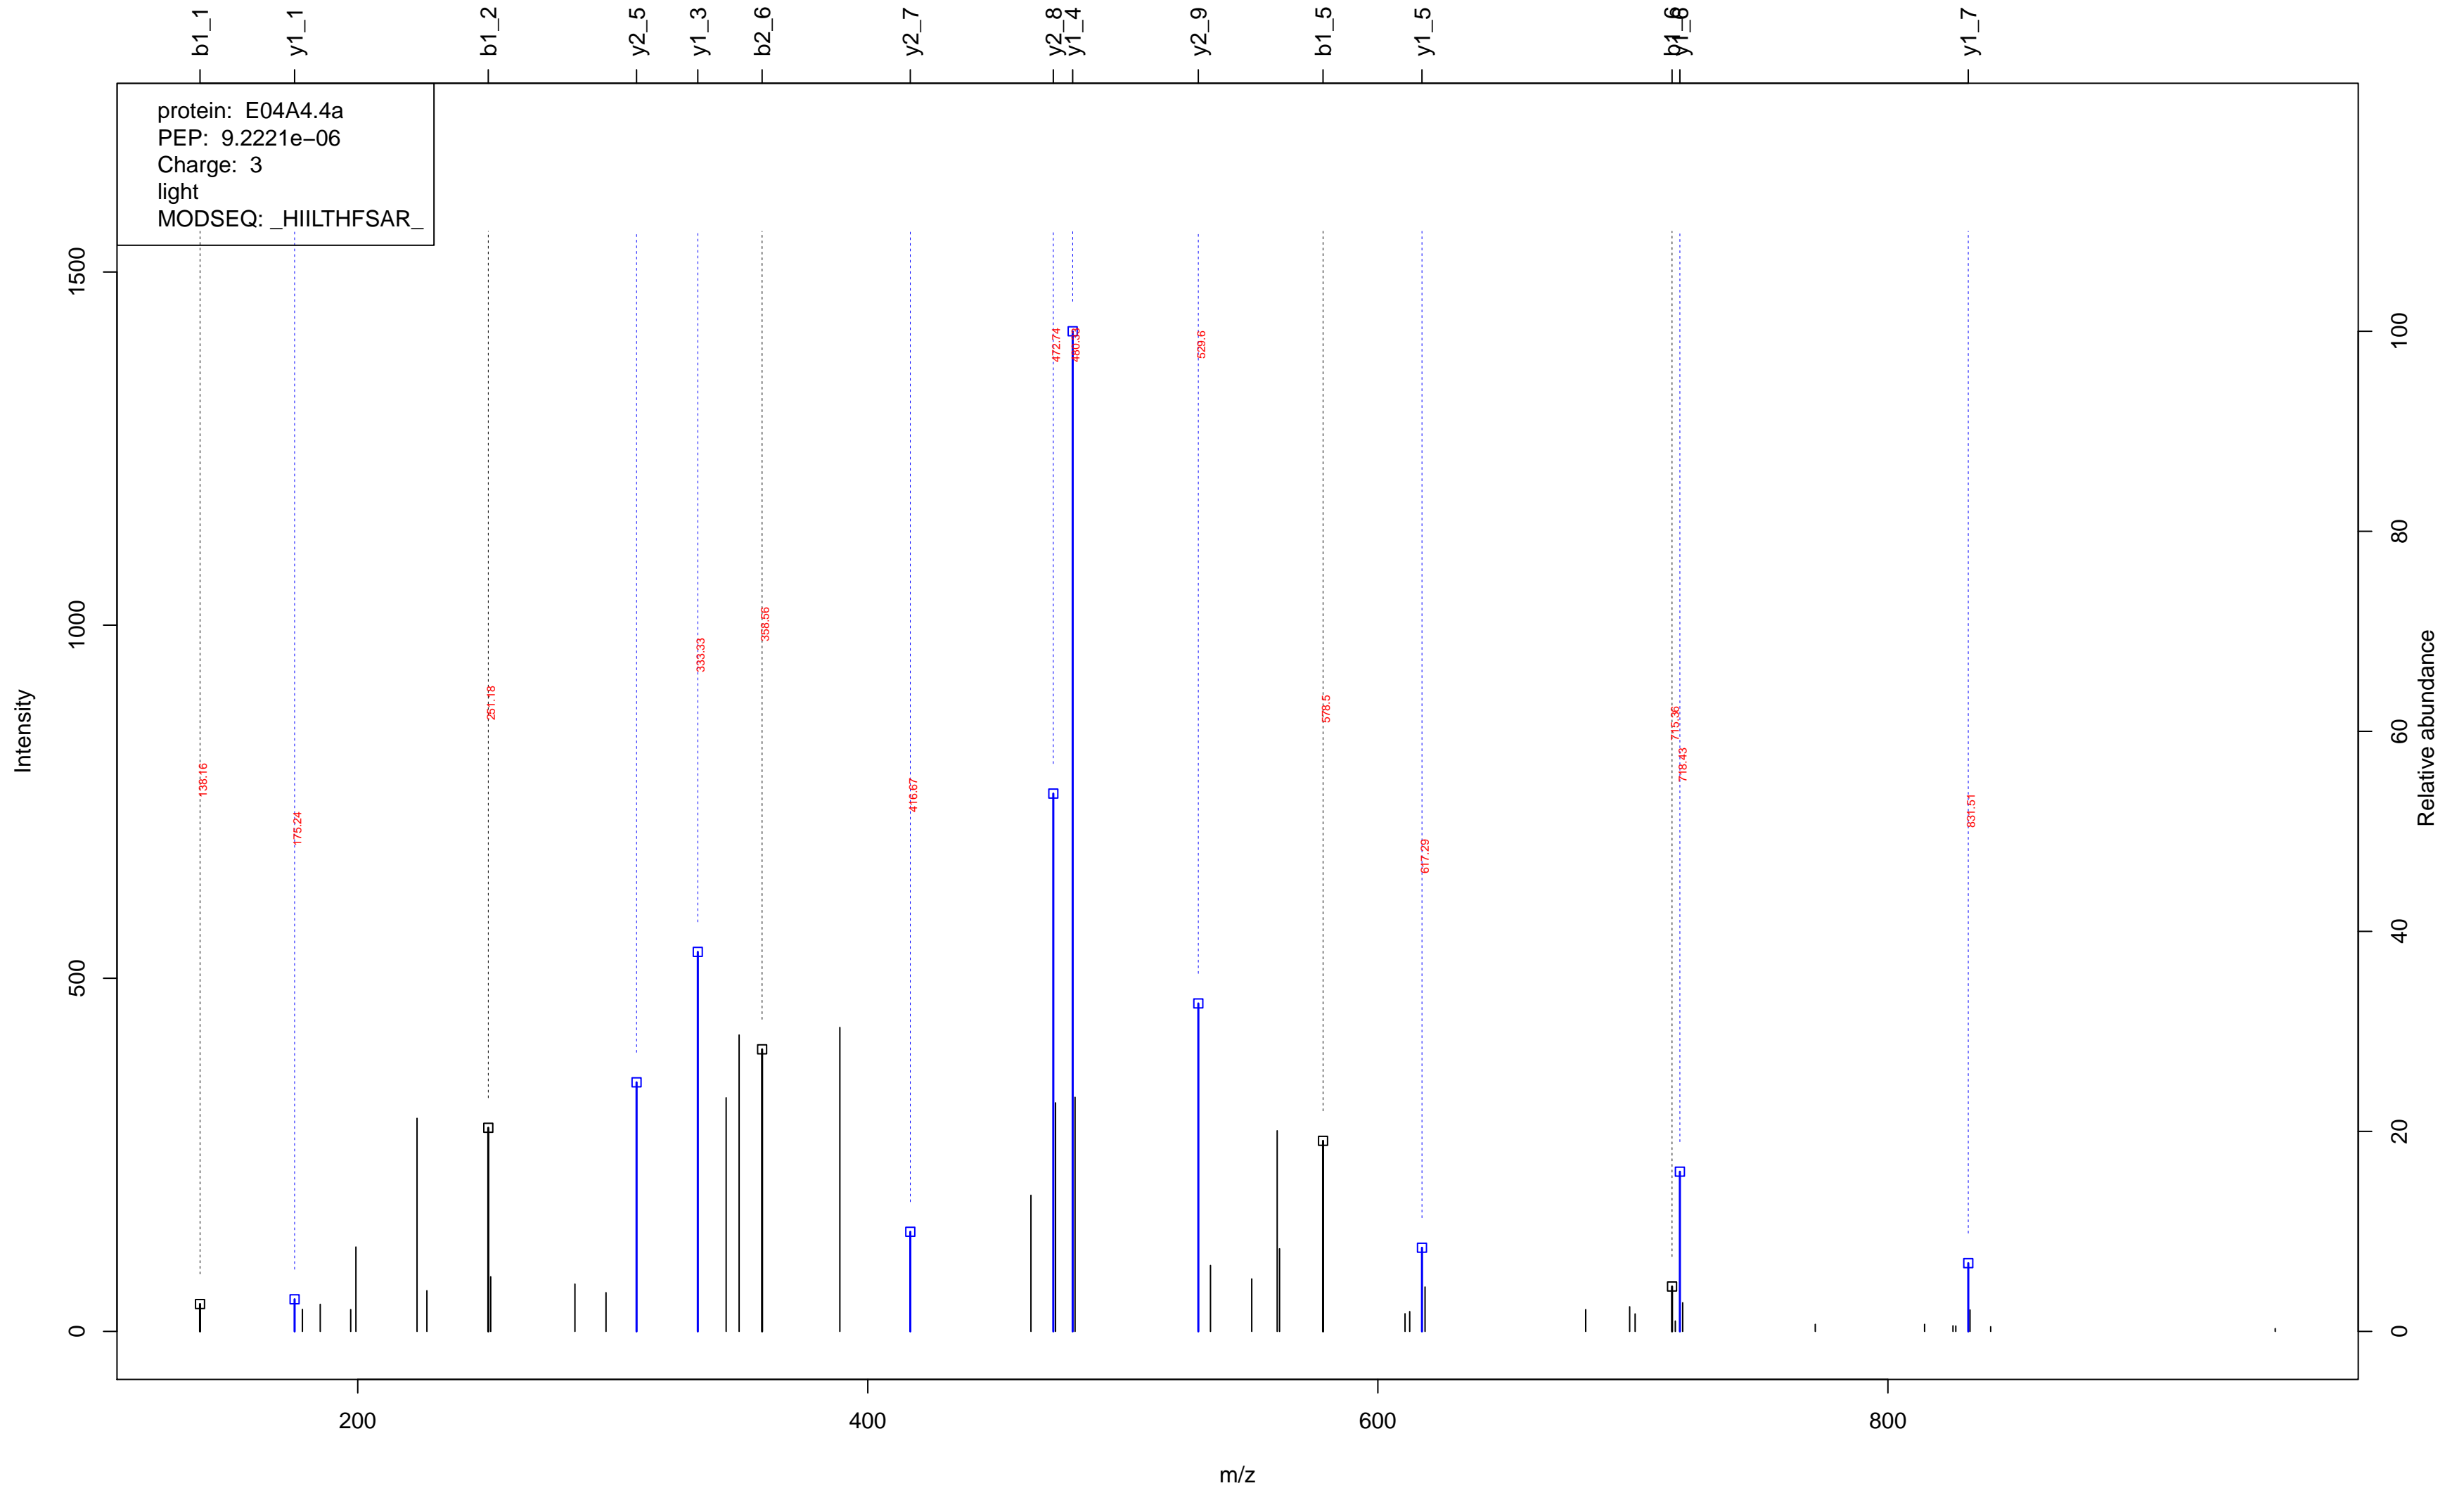

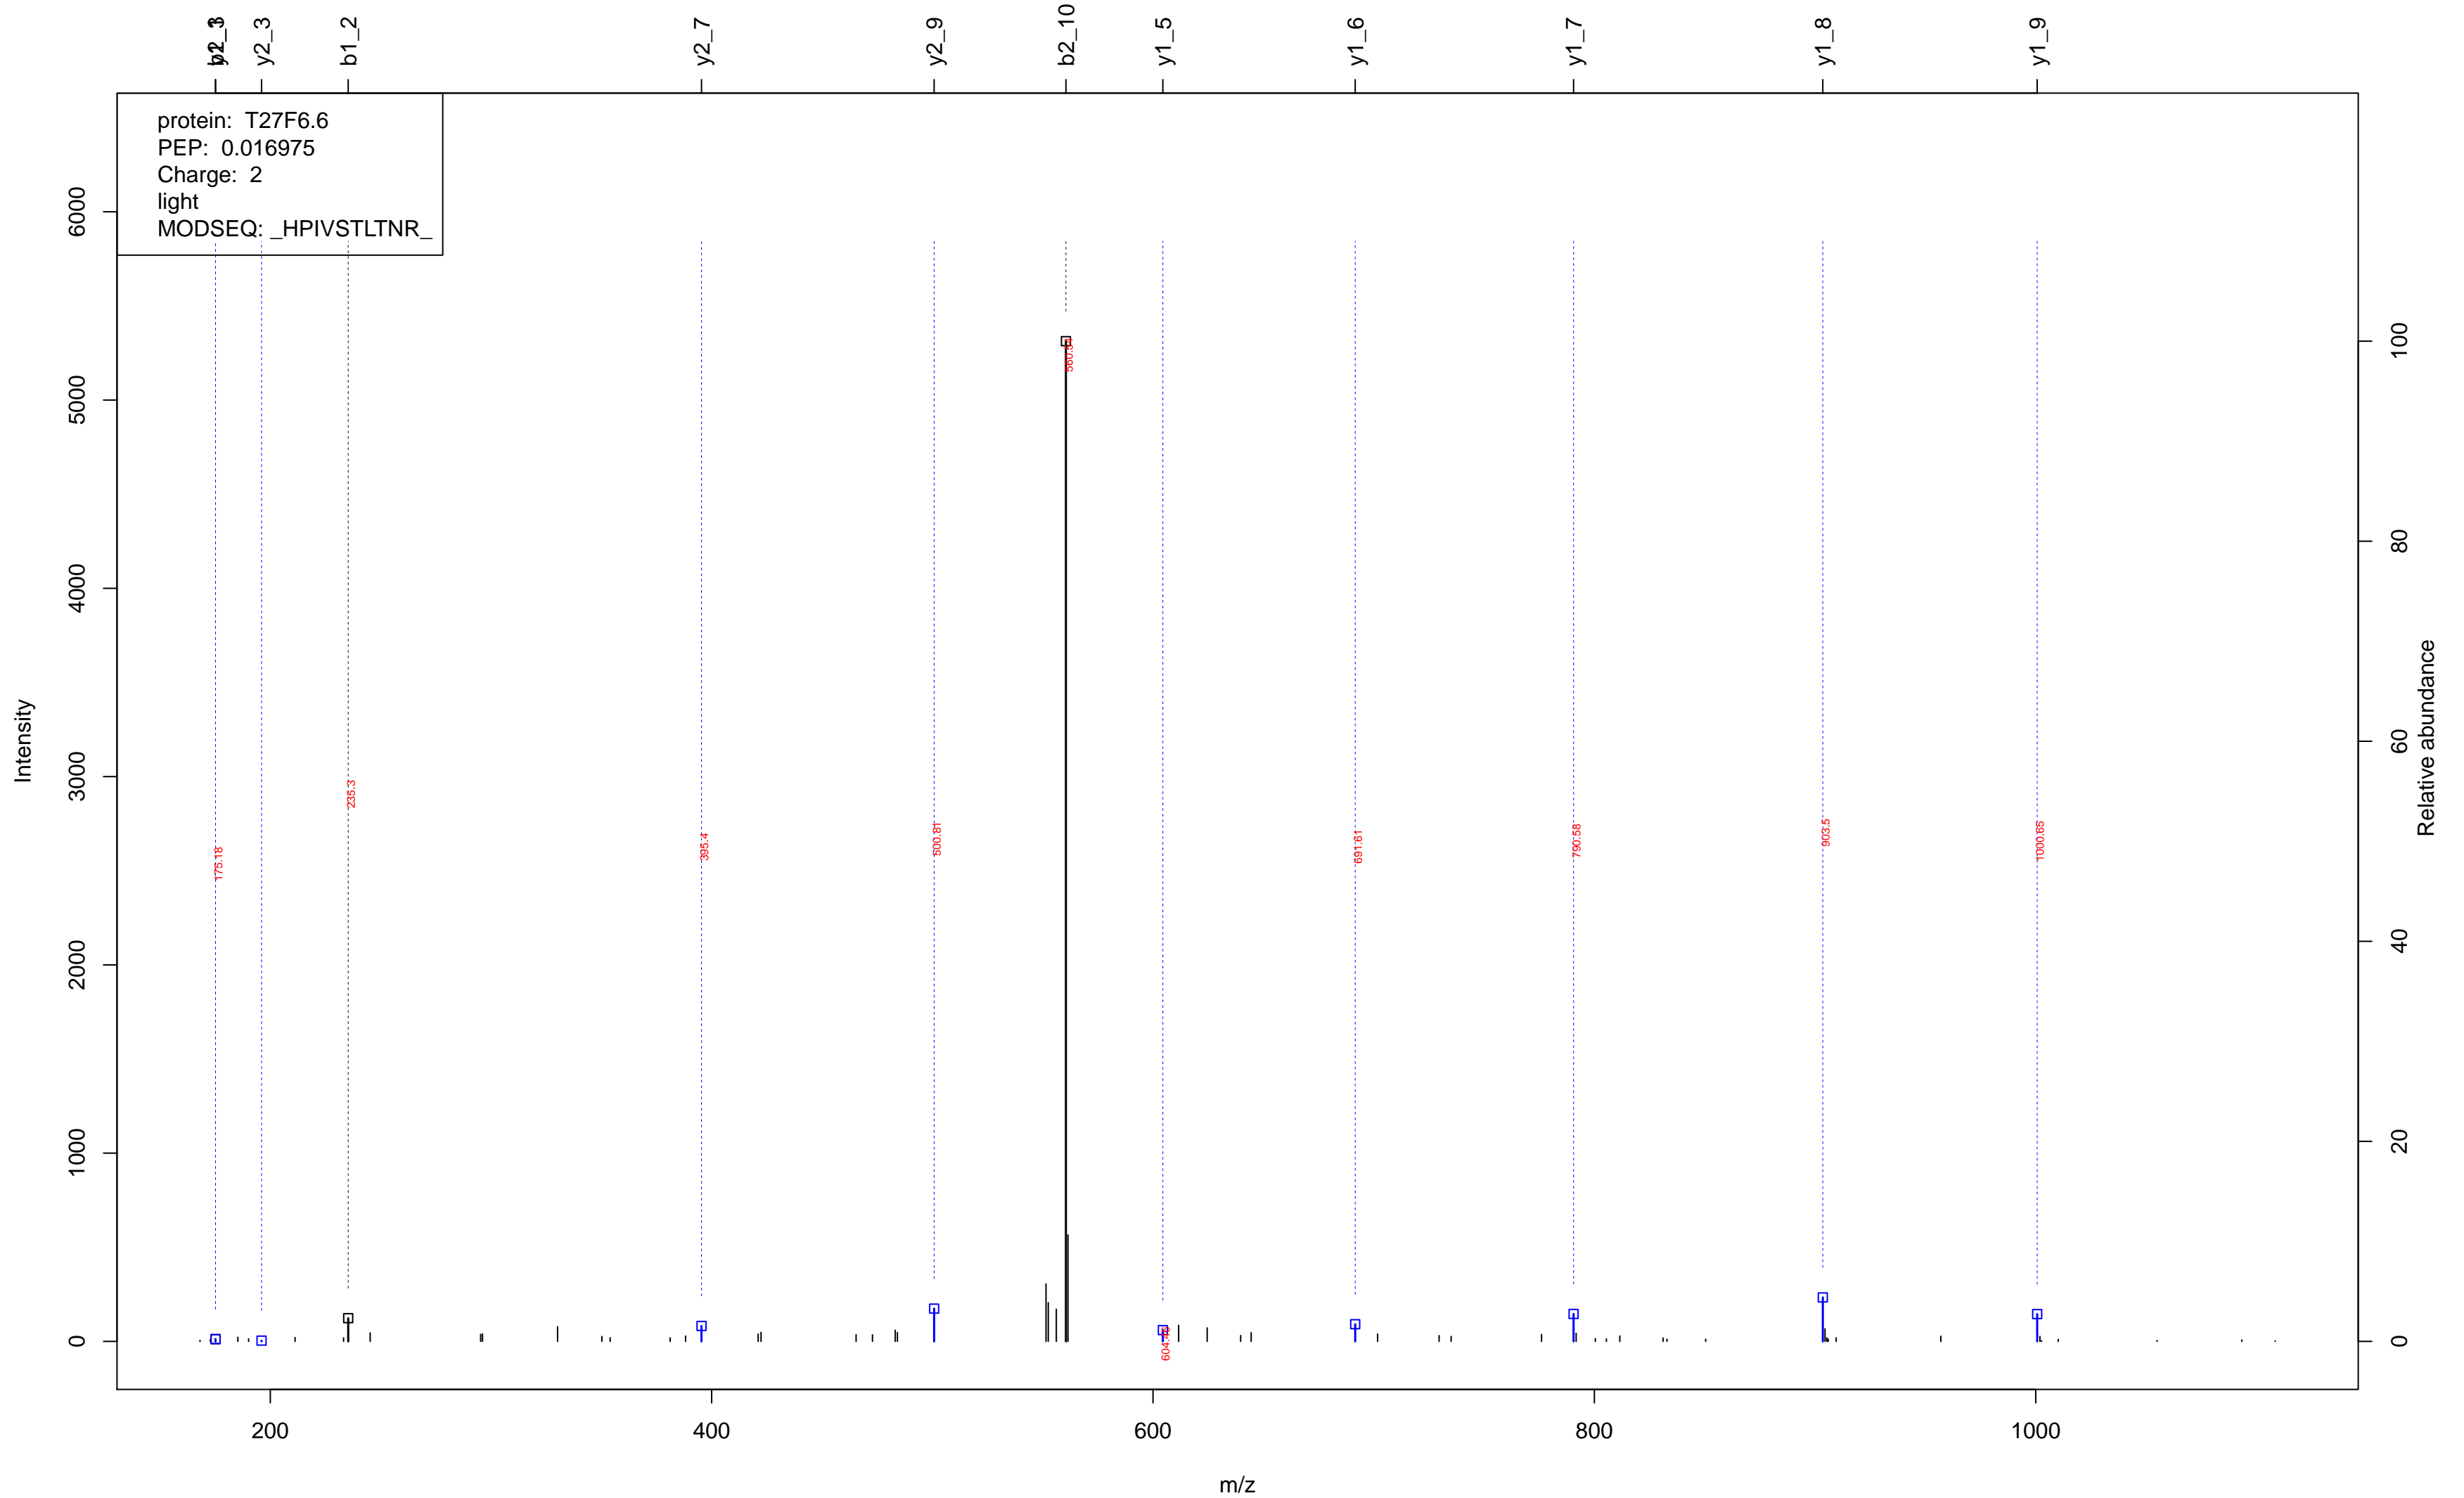

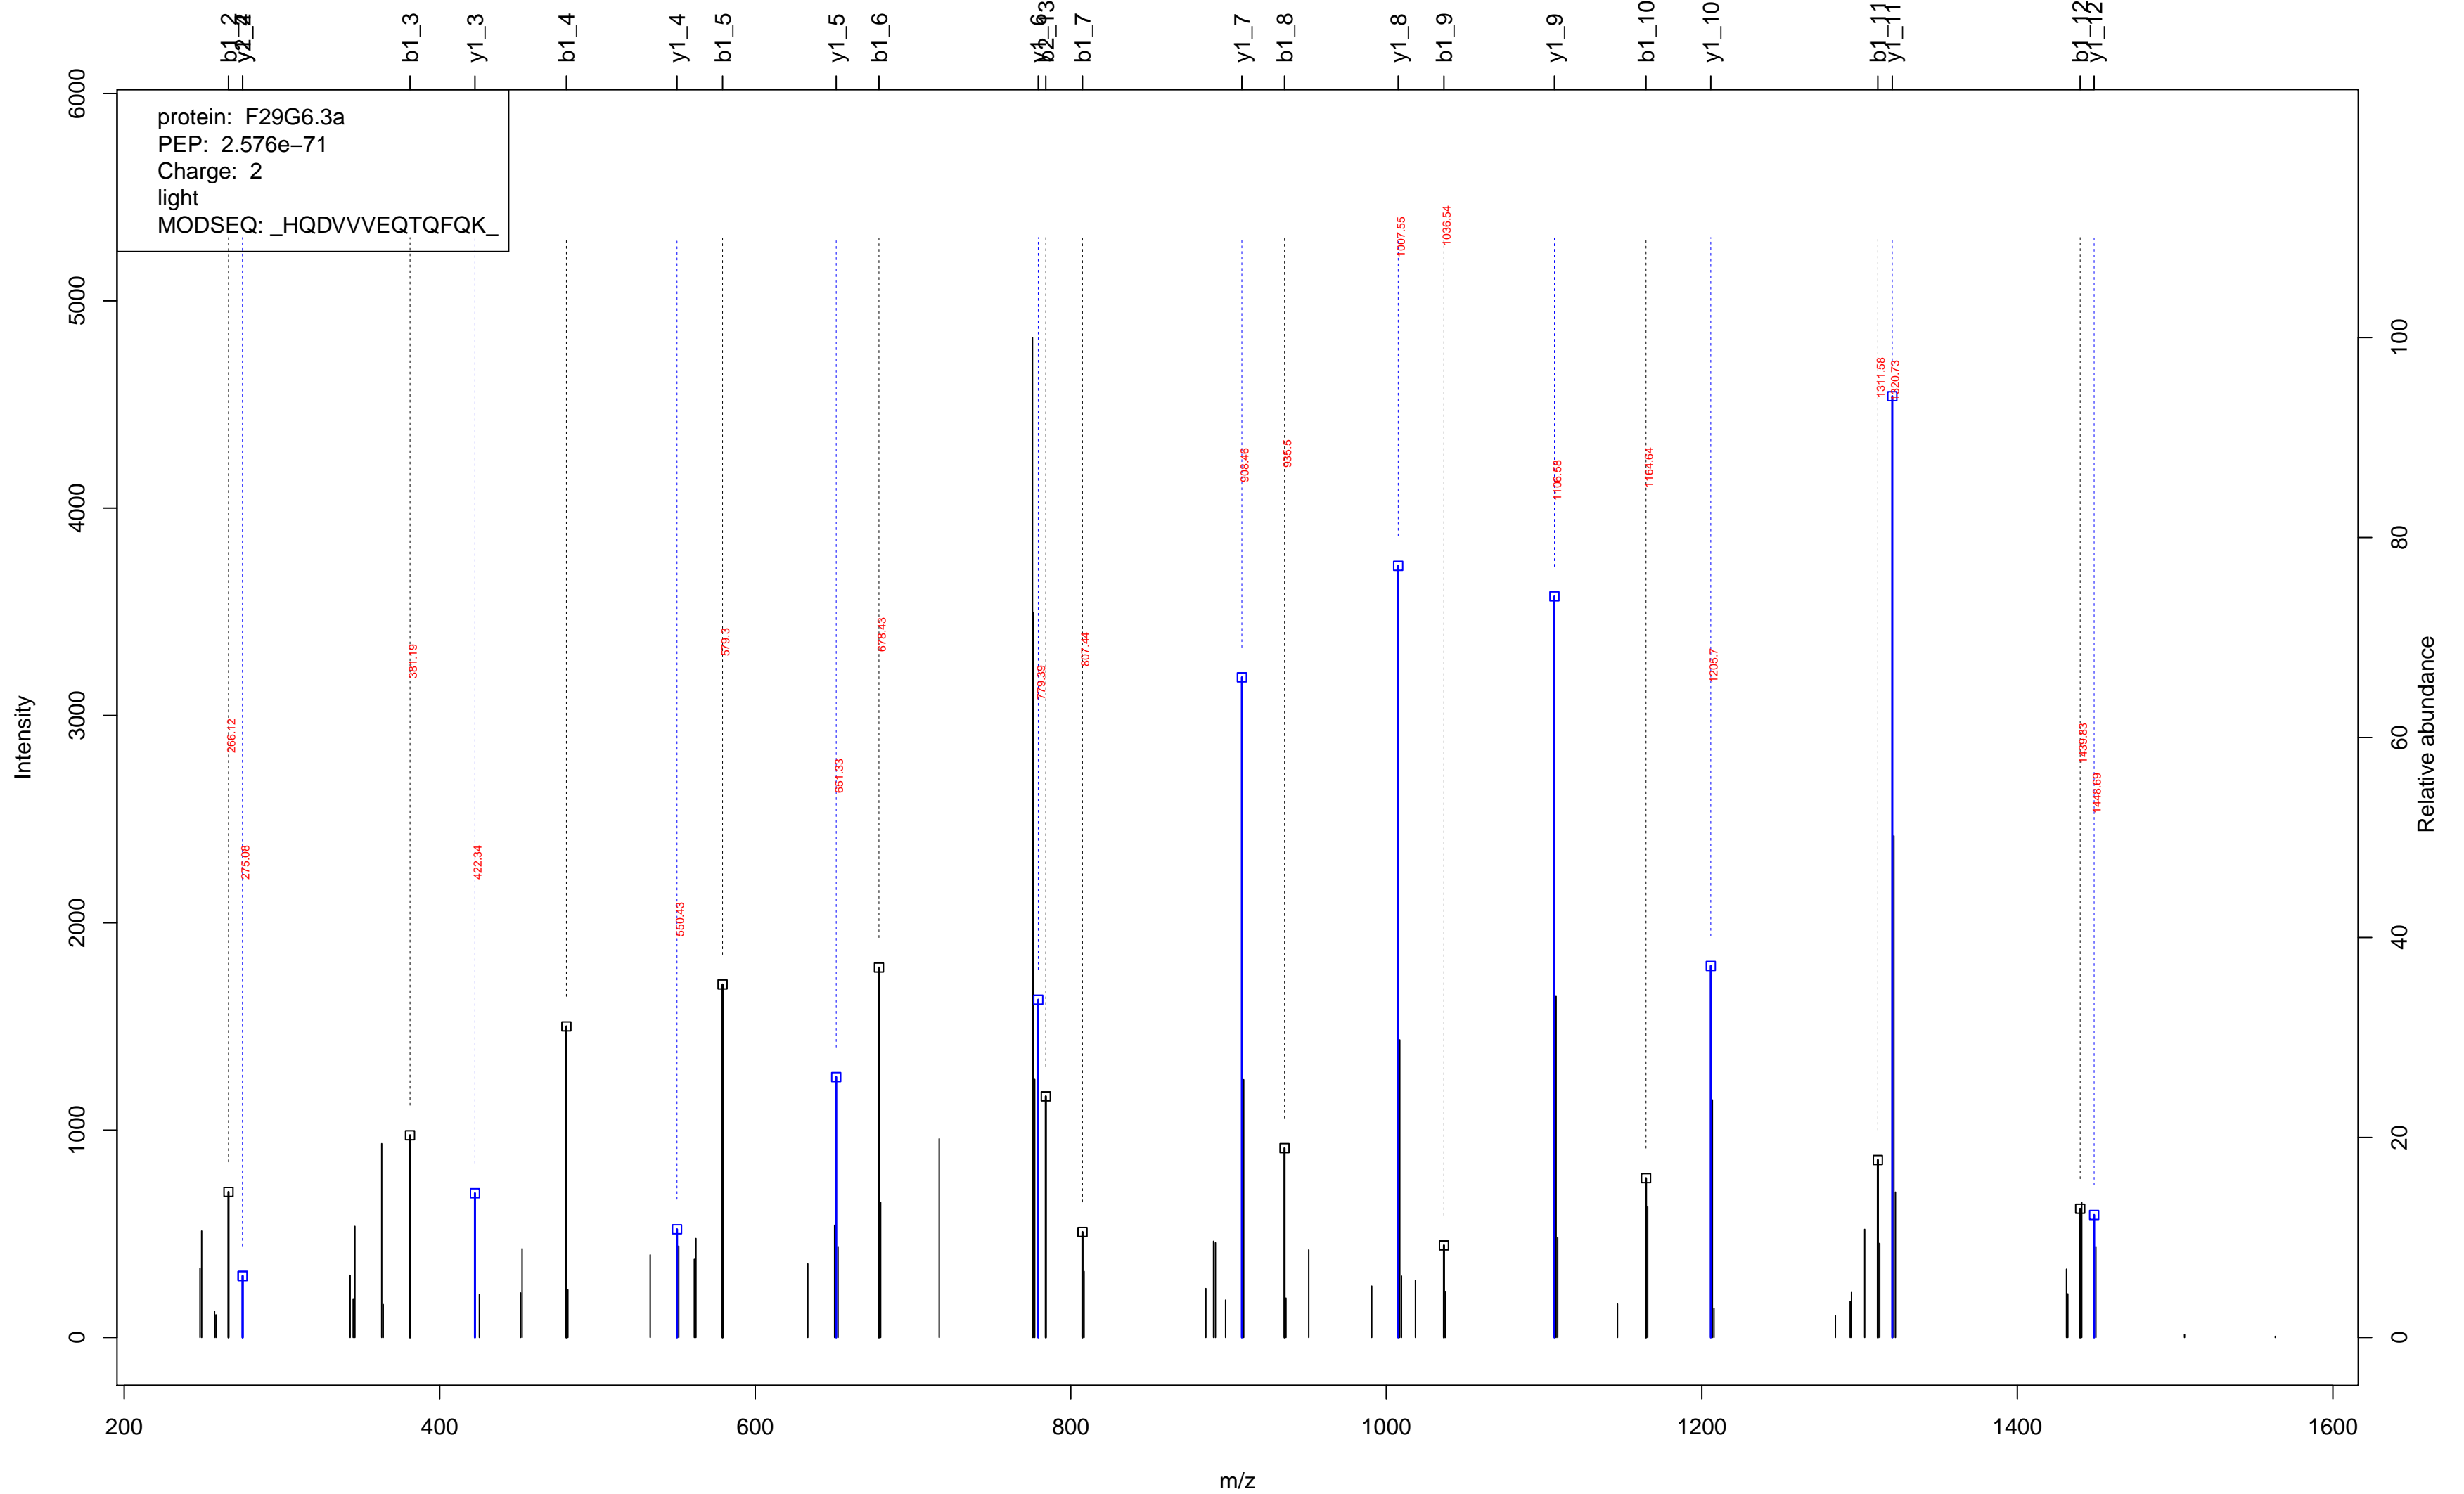

protein: F29G6.3a  
PEP: 2.576e-71  
Charge: 2  
light  
MODSEQ: \_HQDVVVEQTQFQK\_



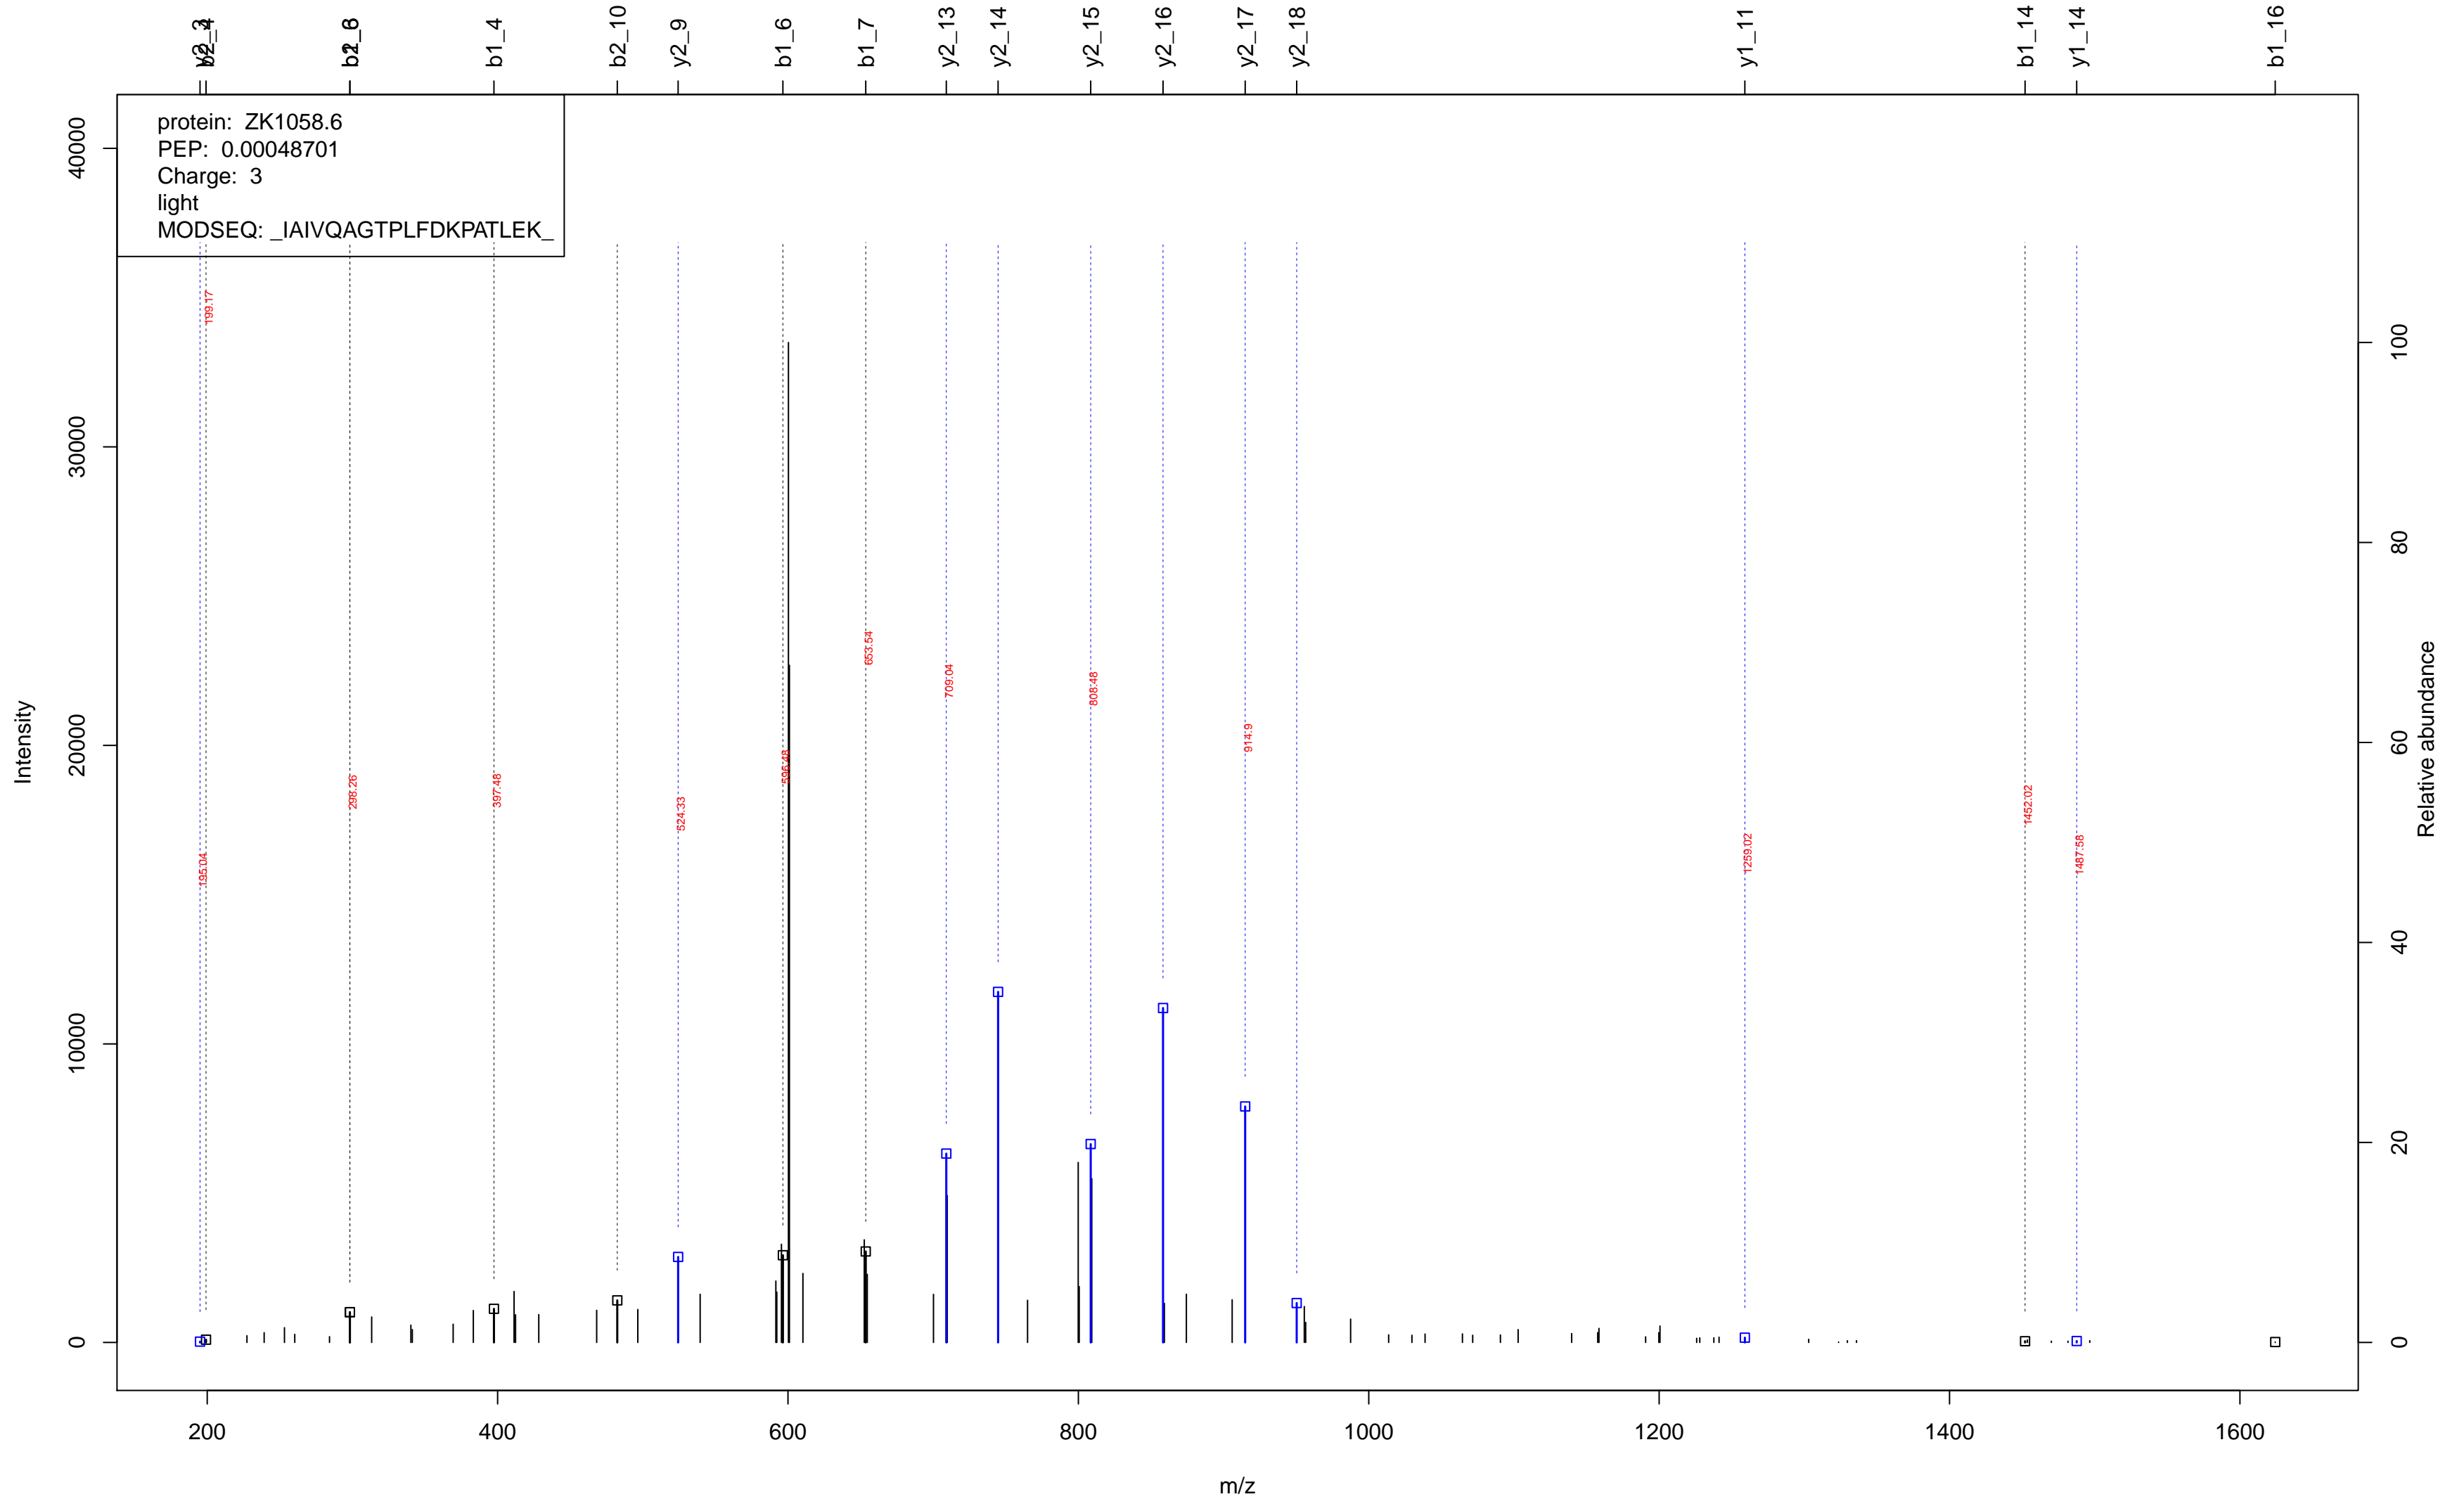

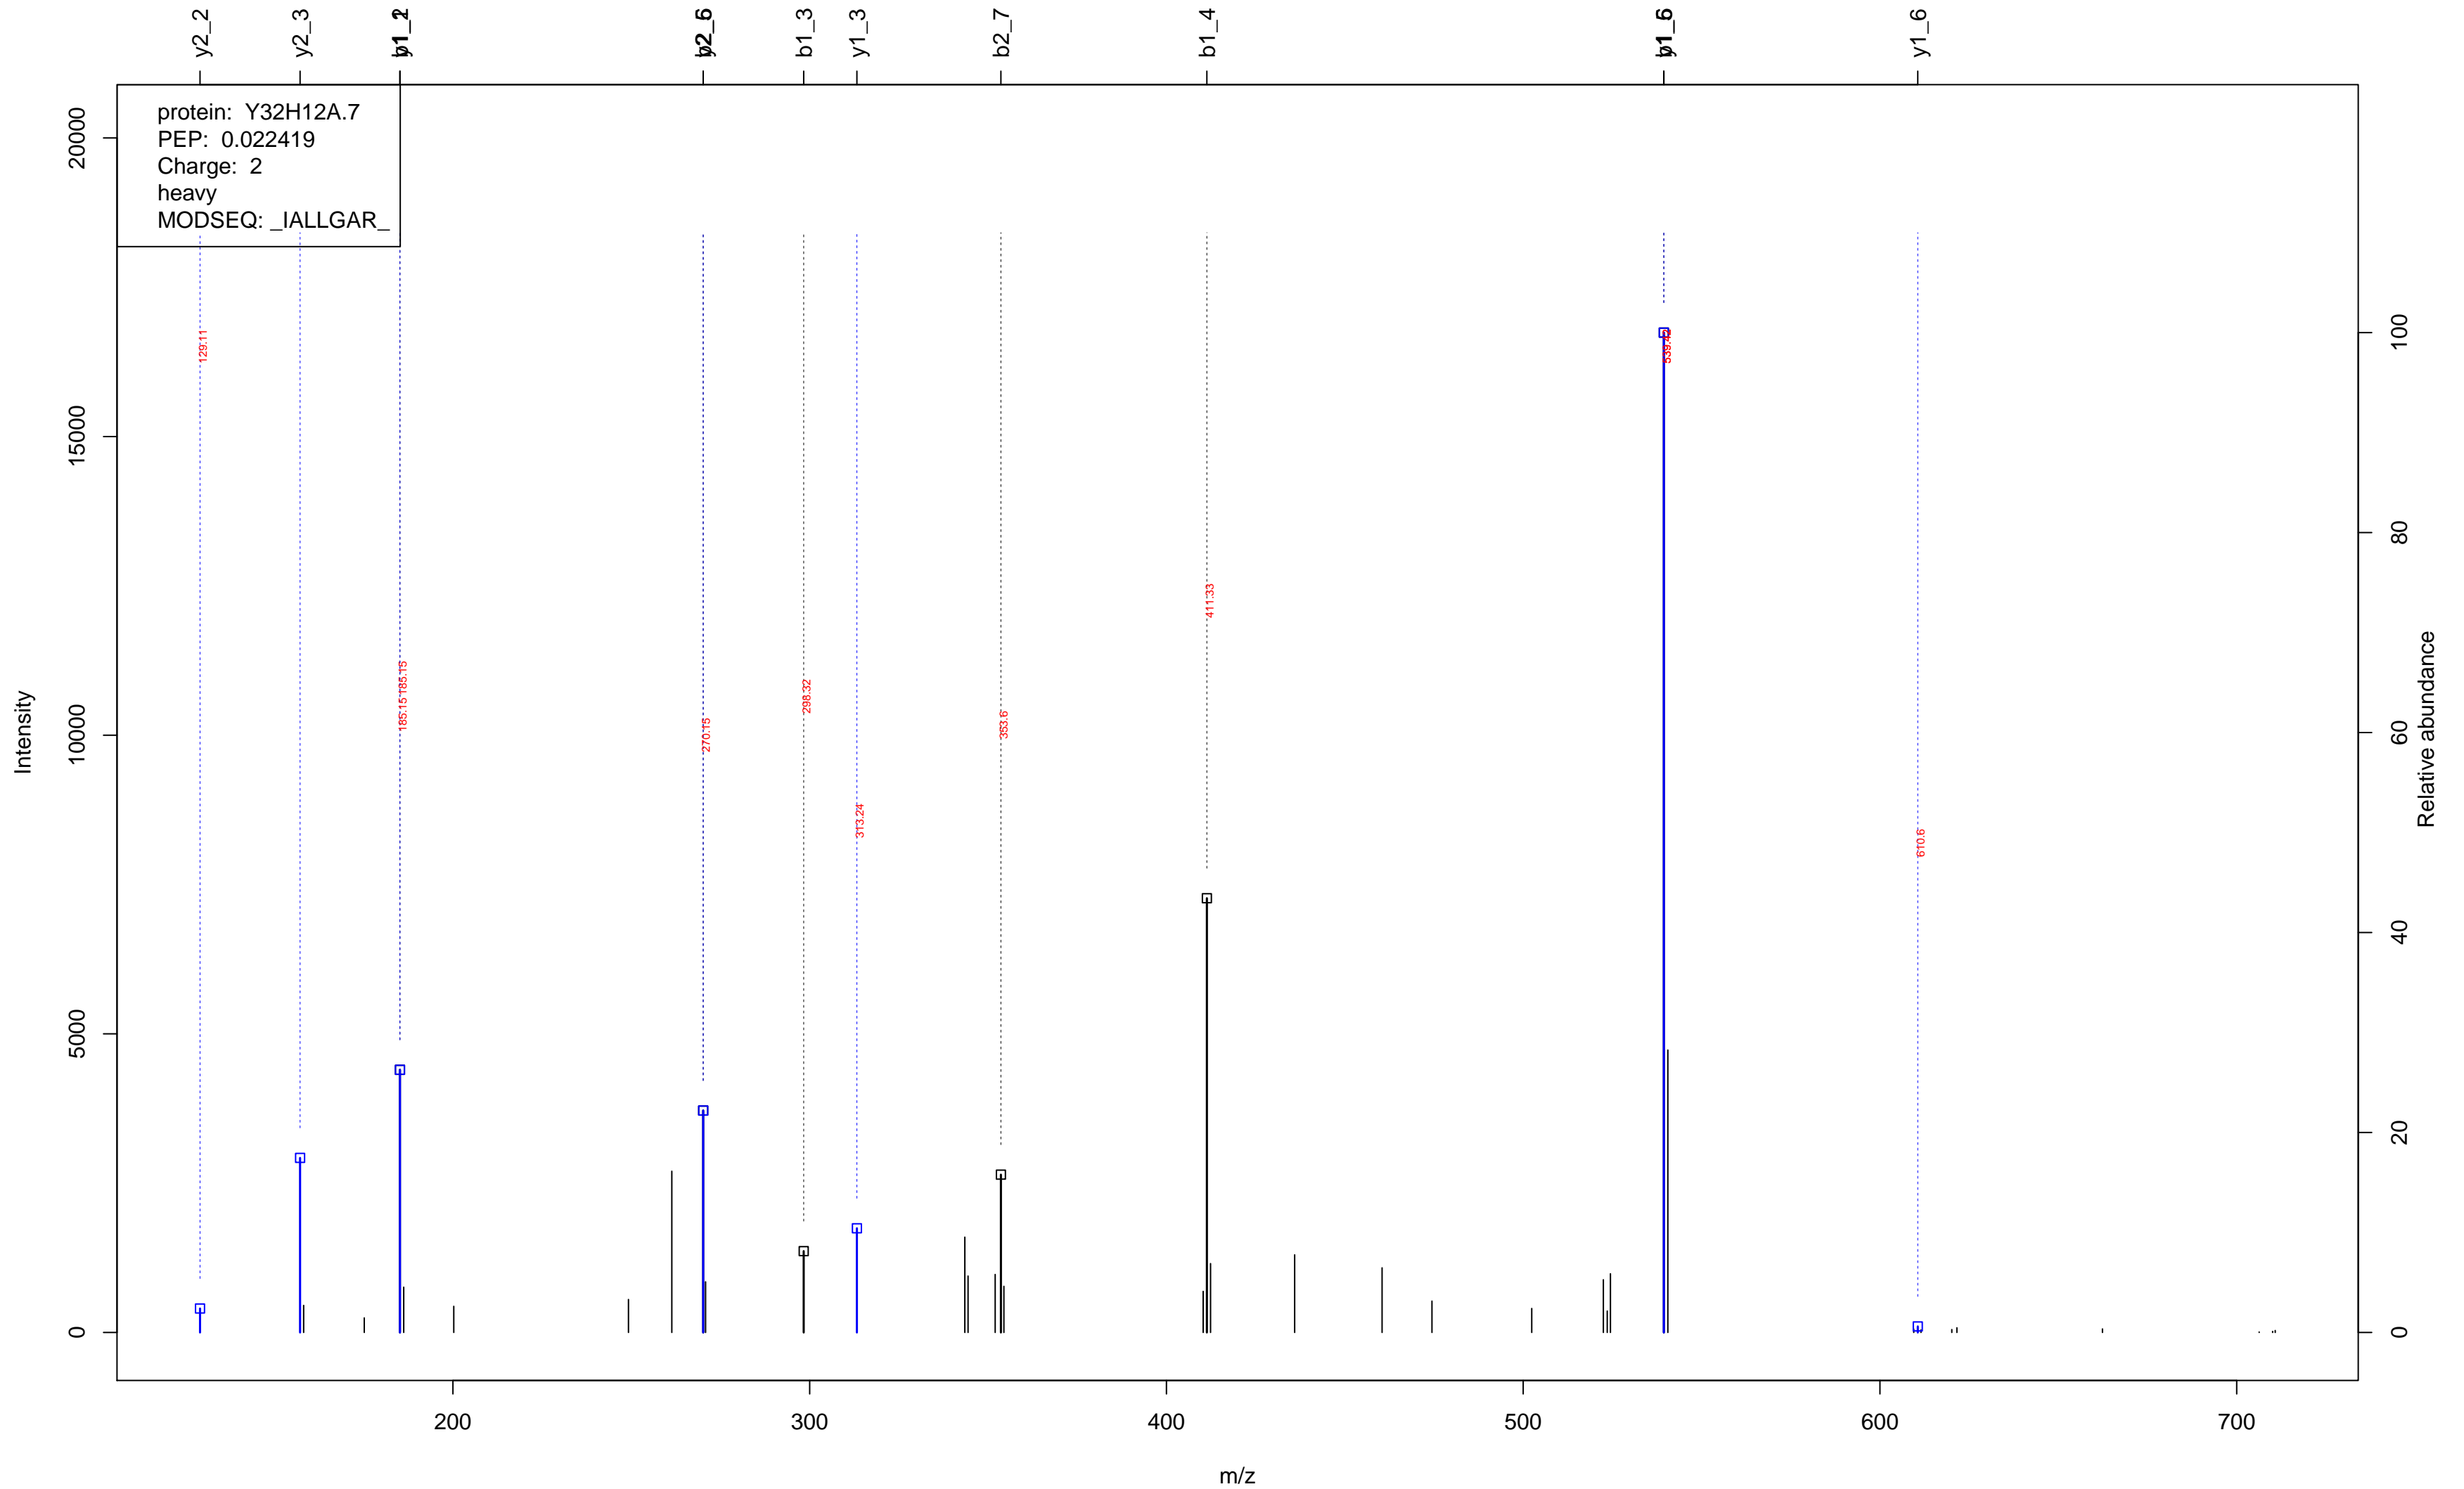

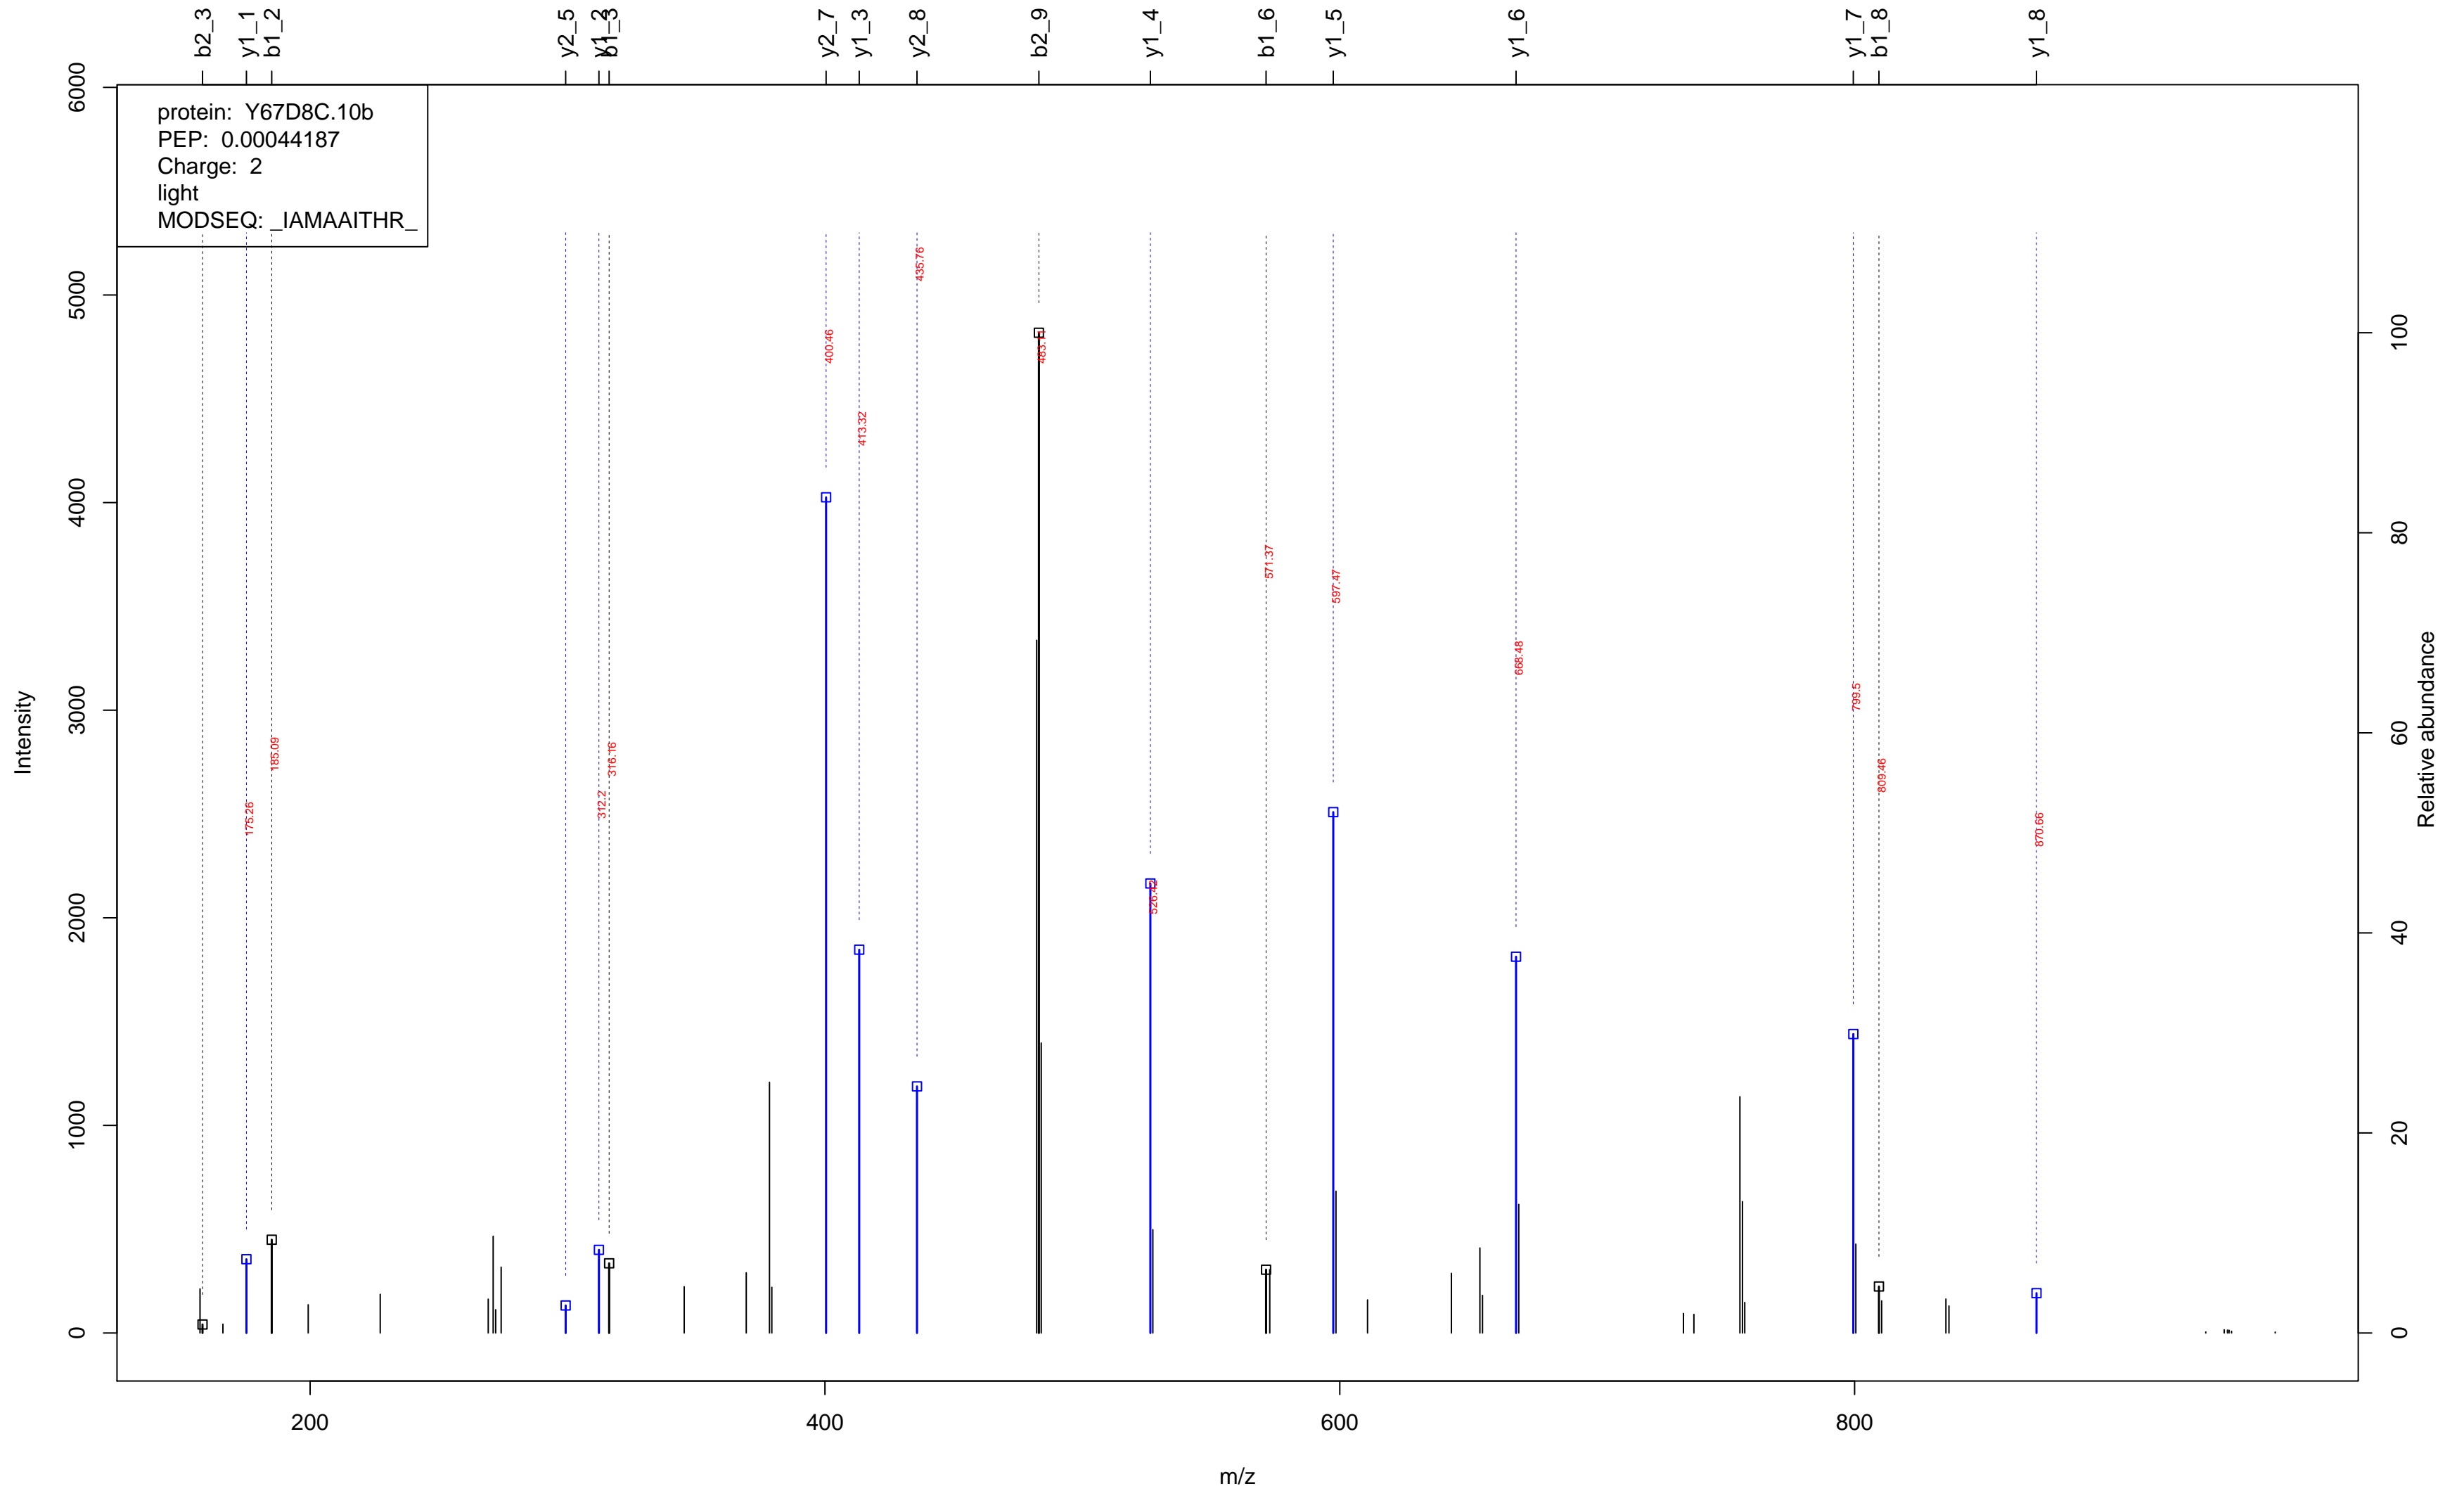

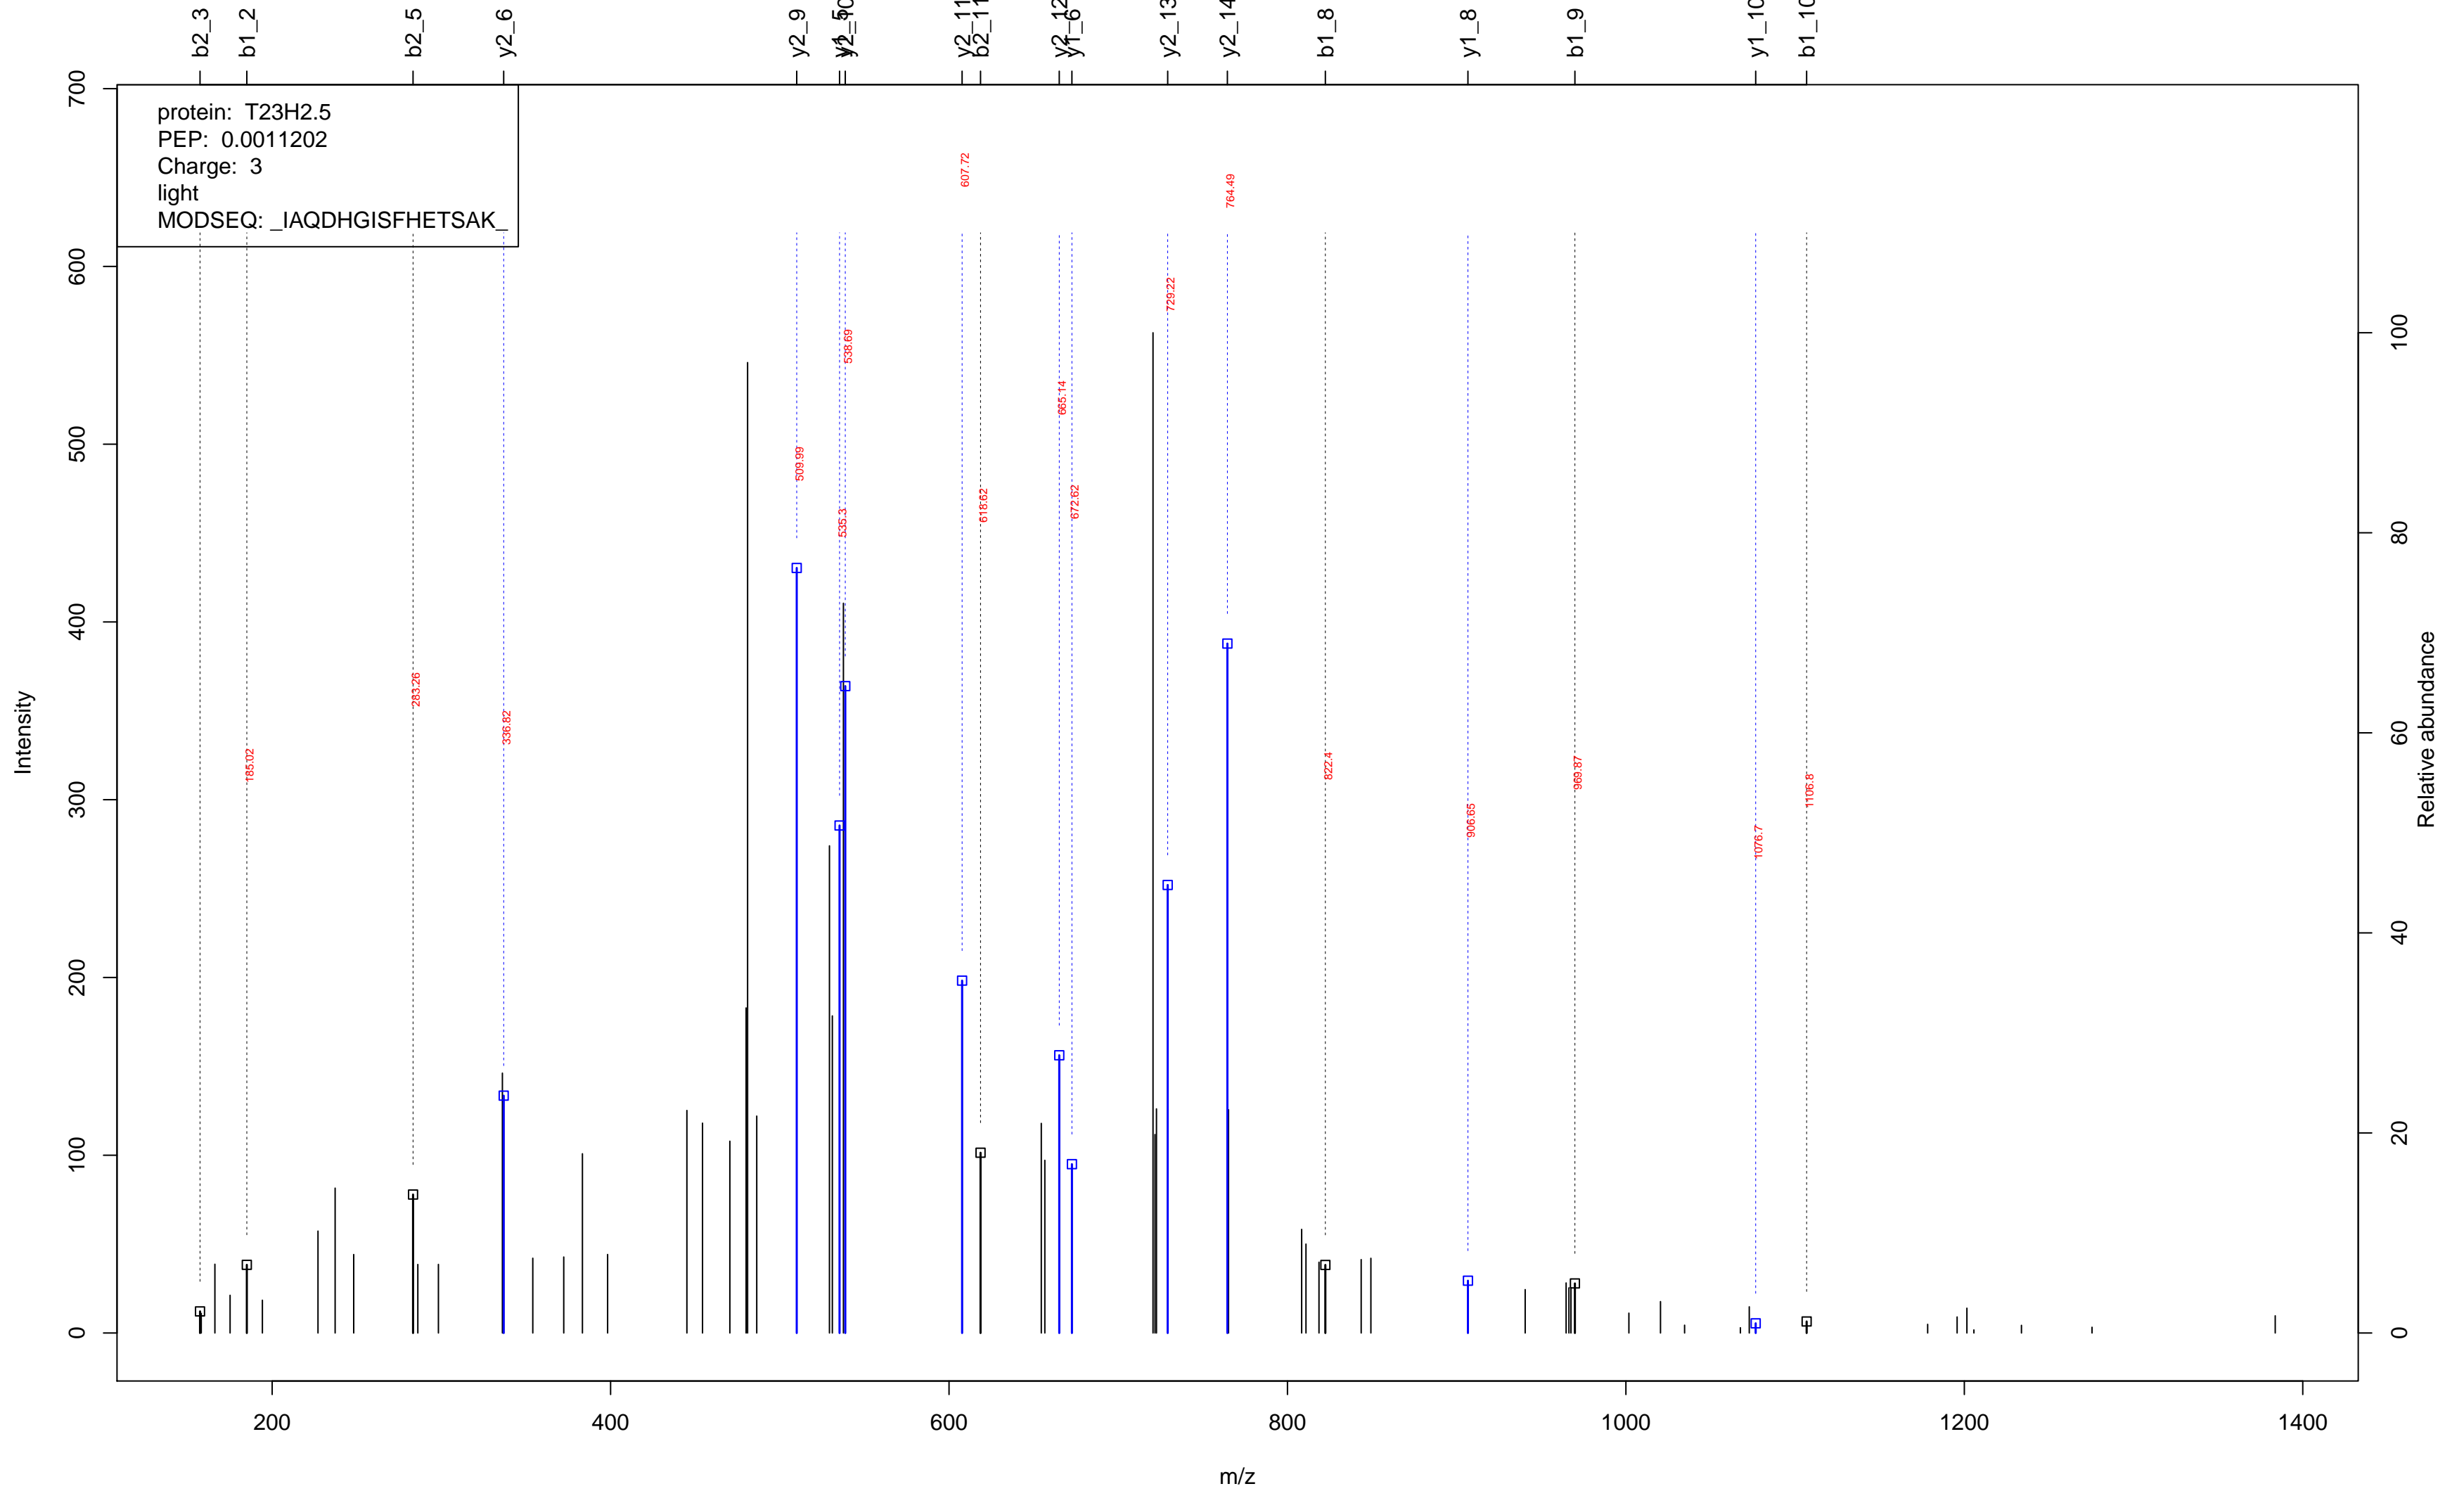

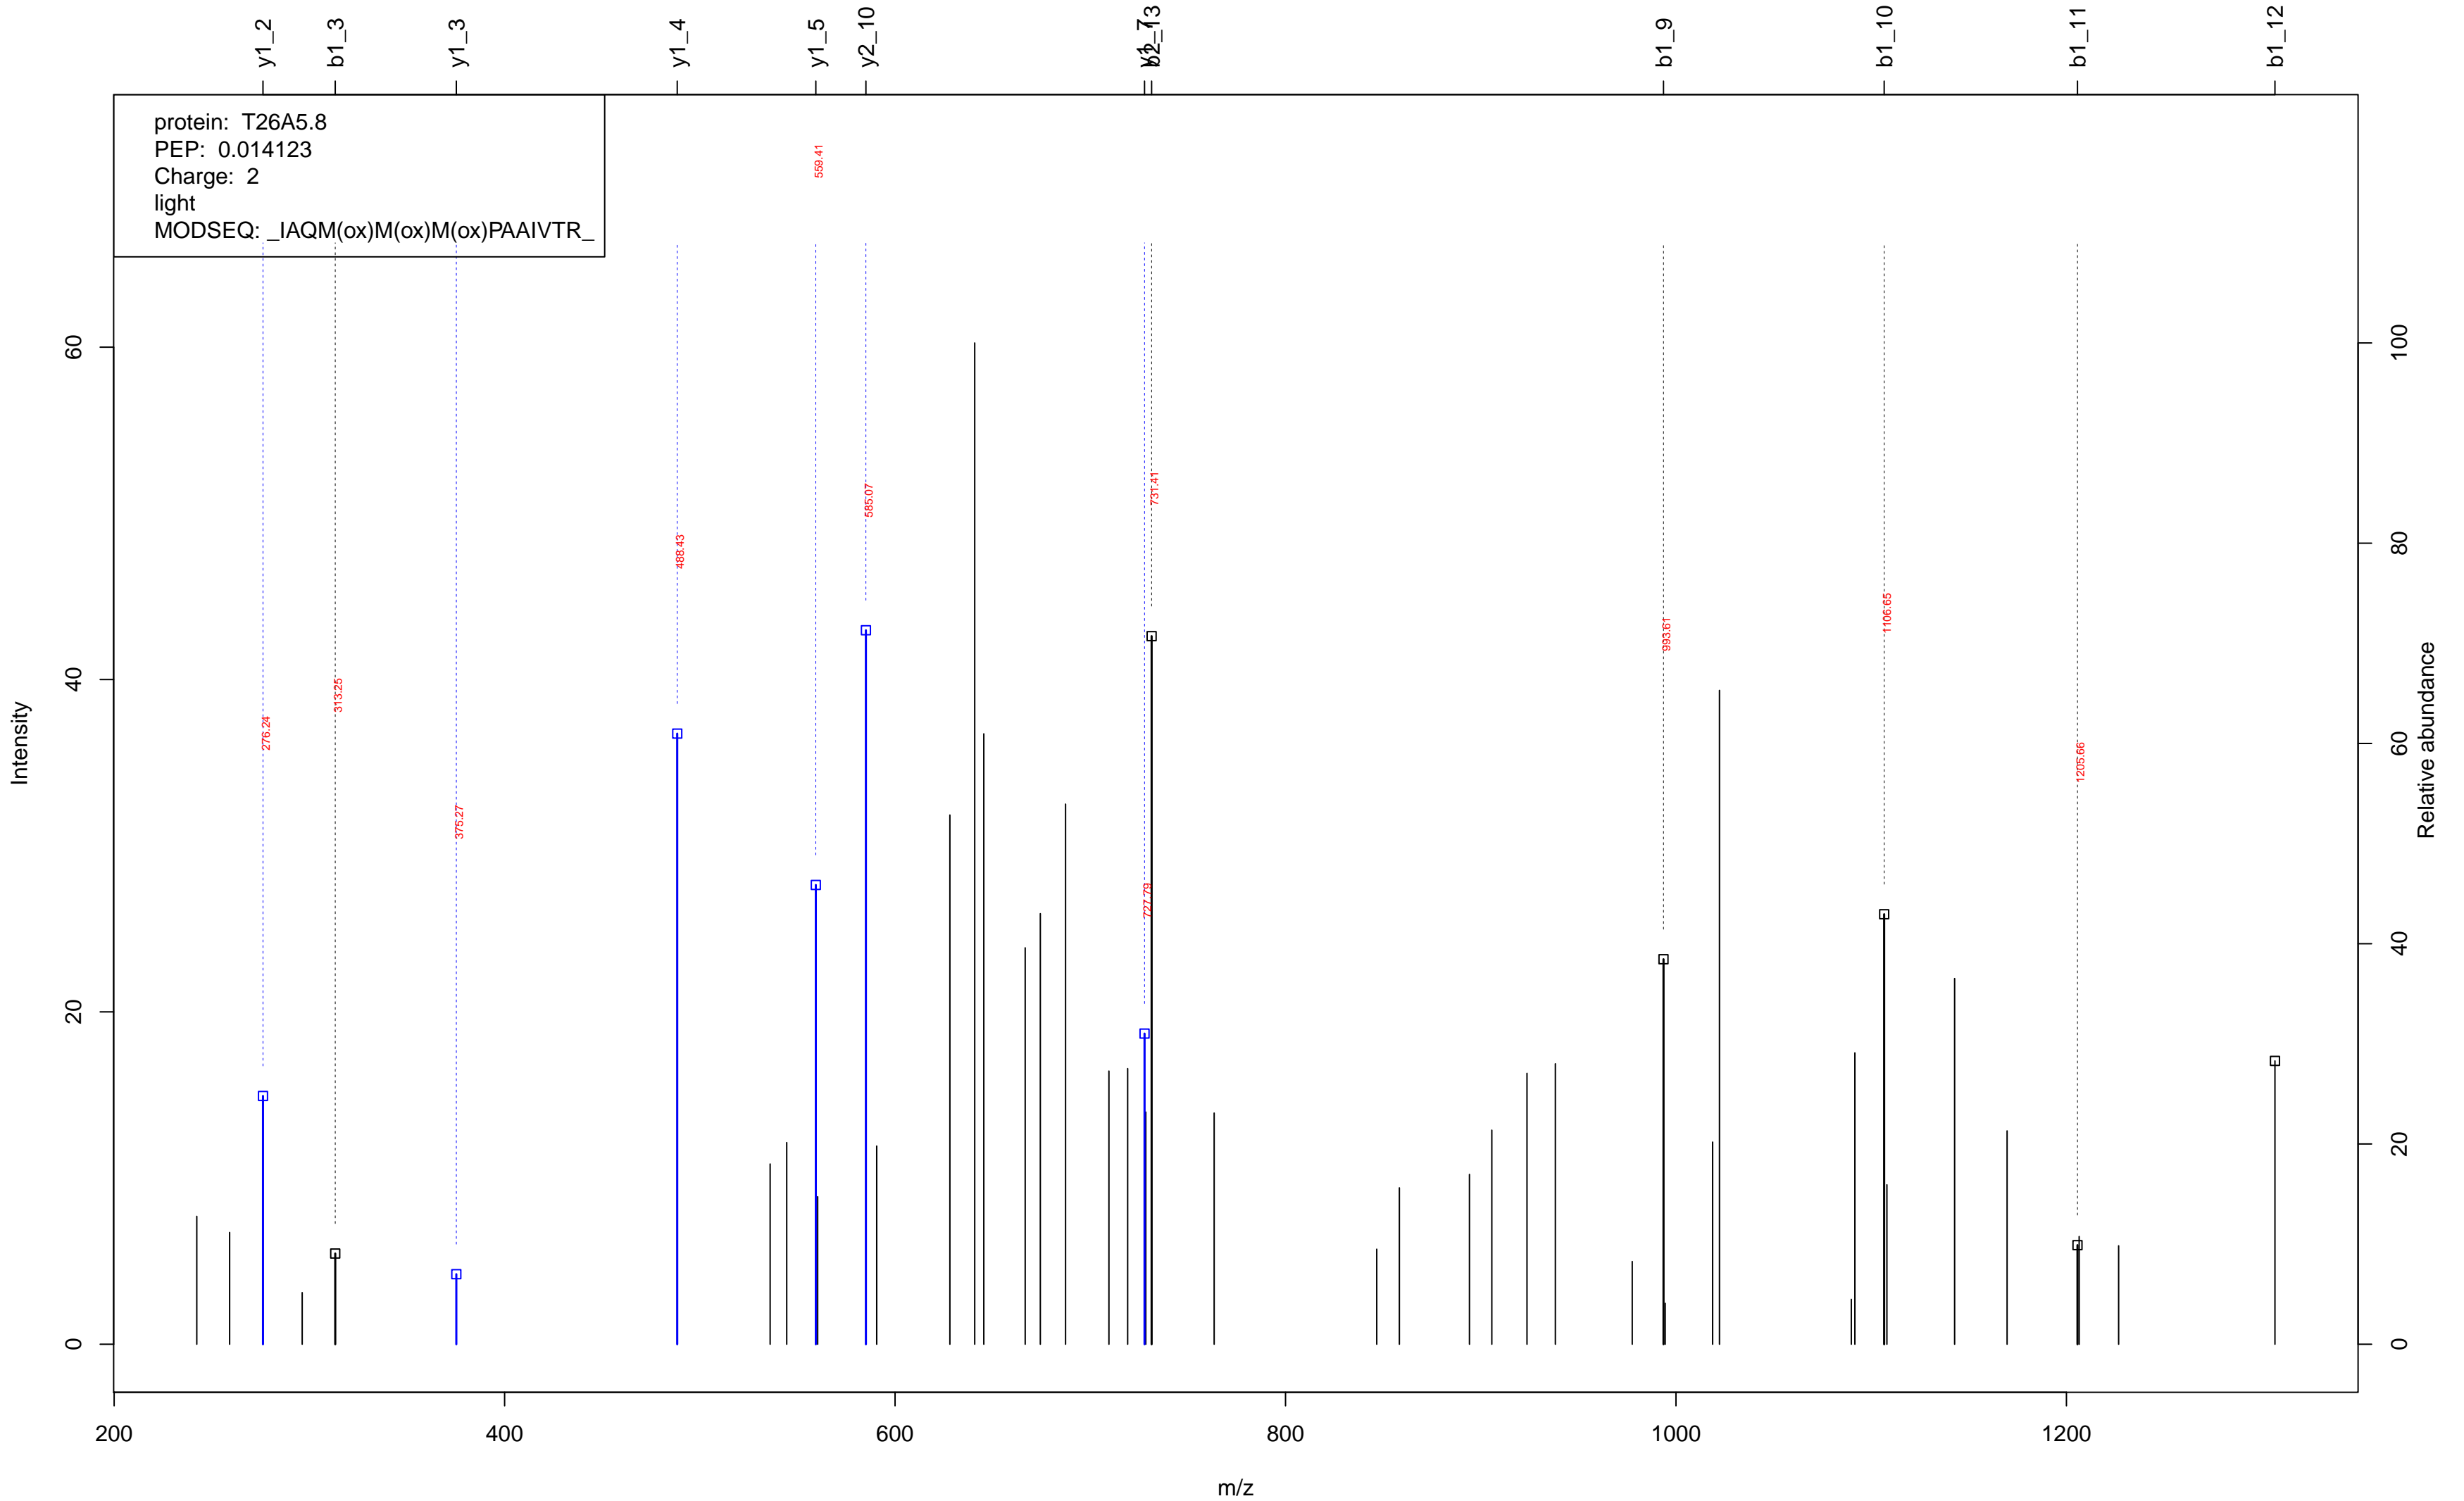

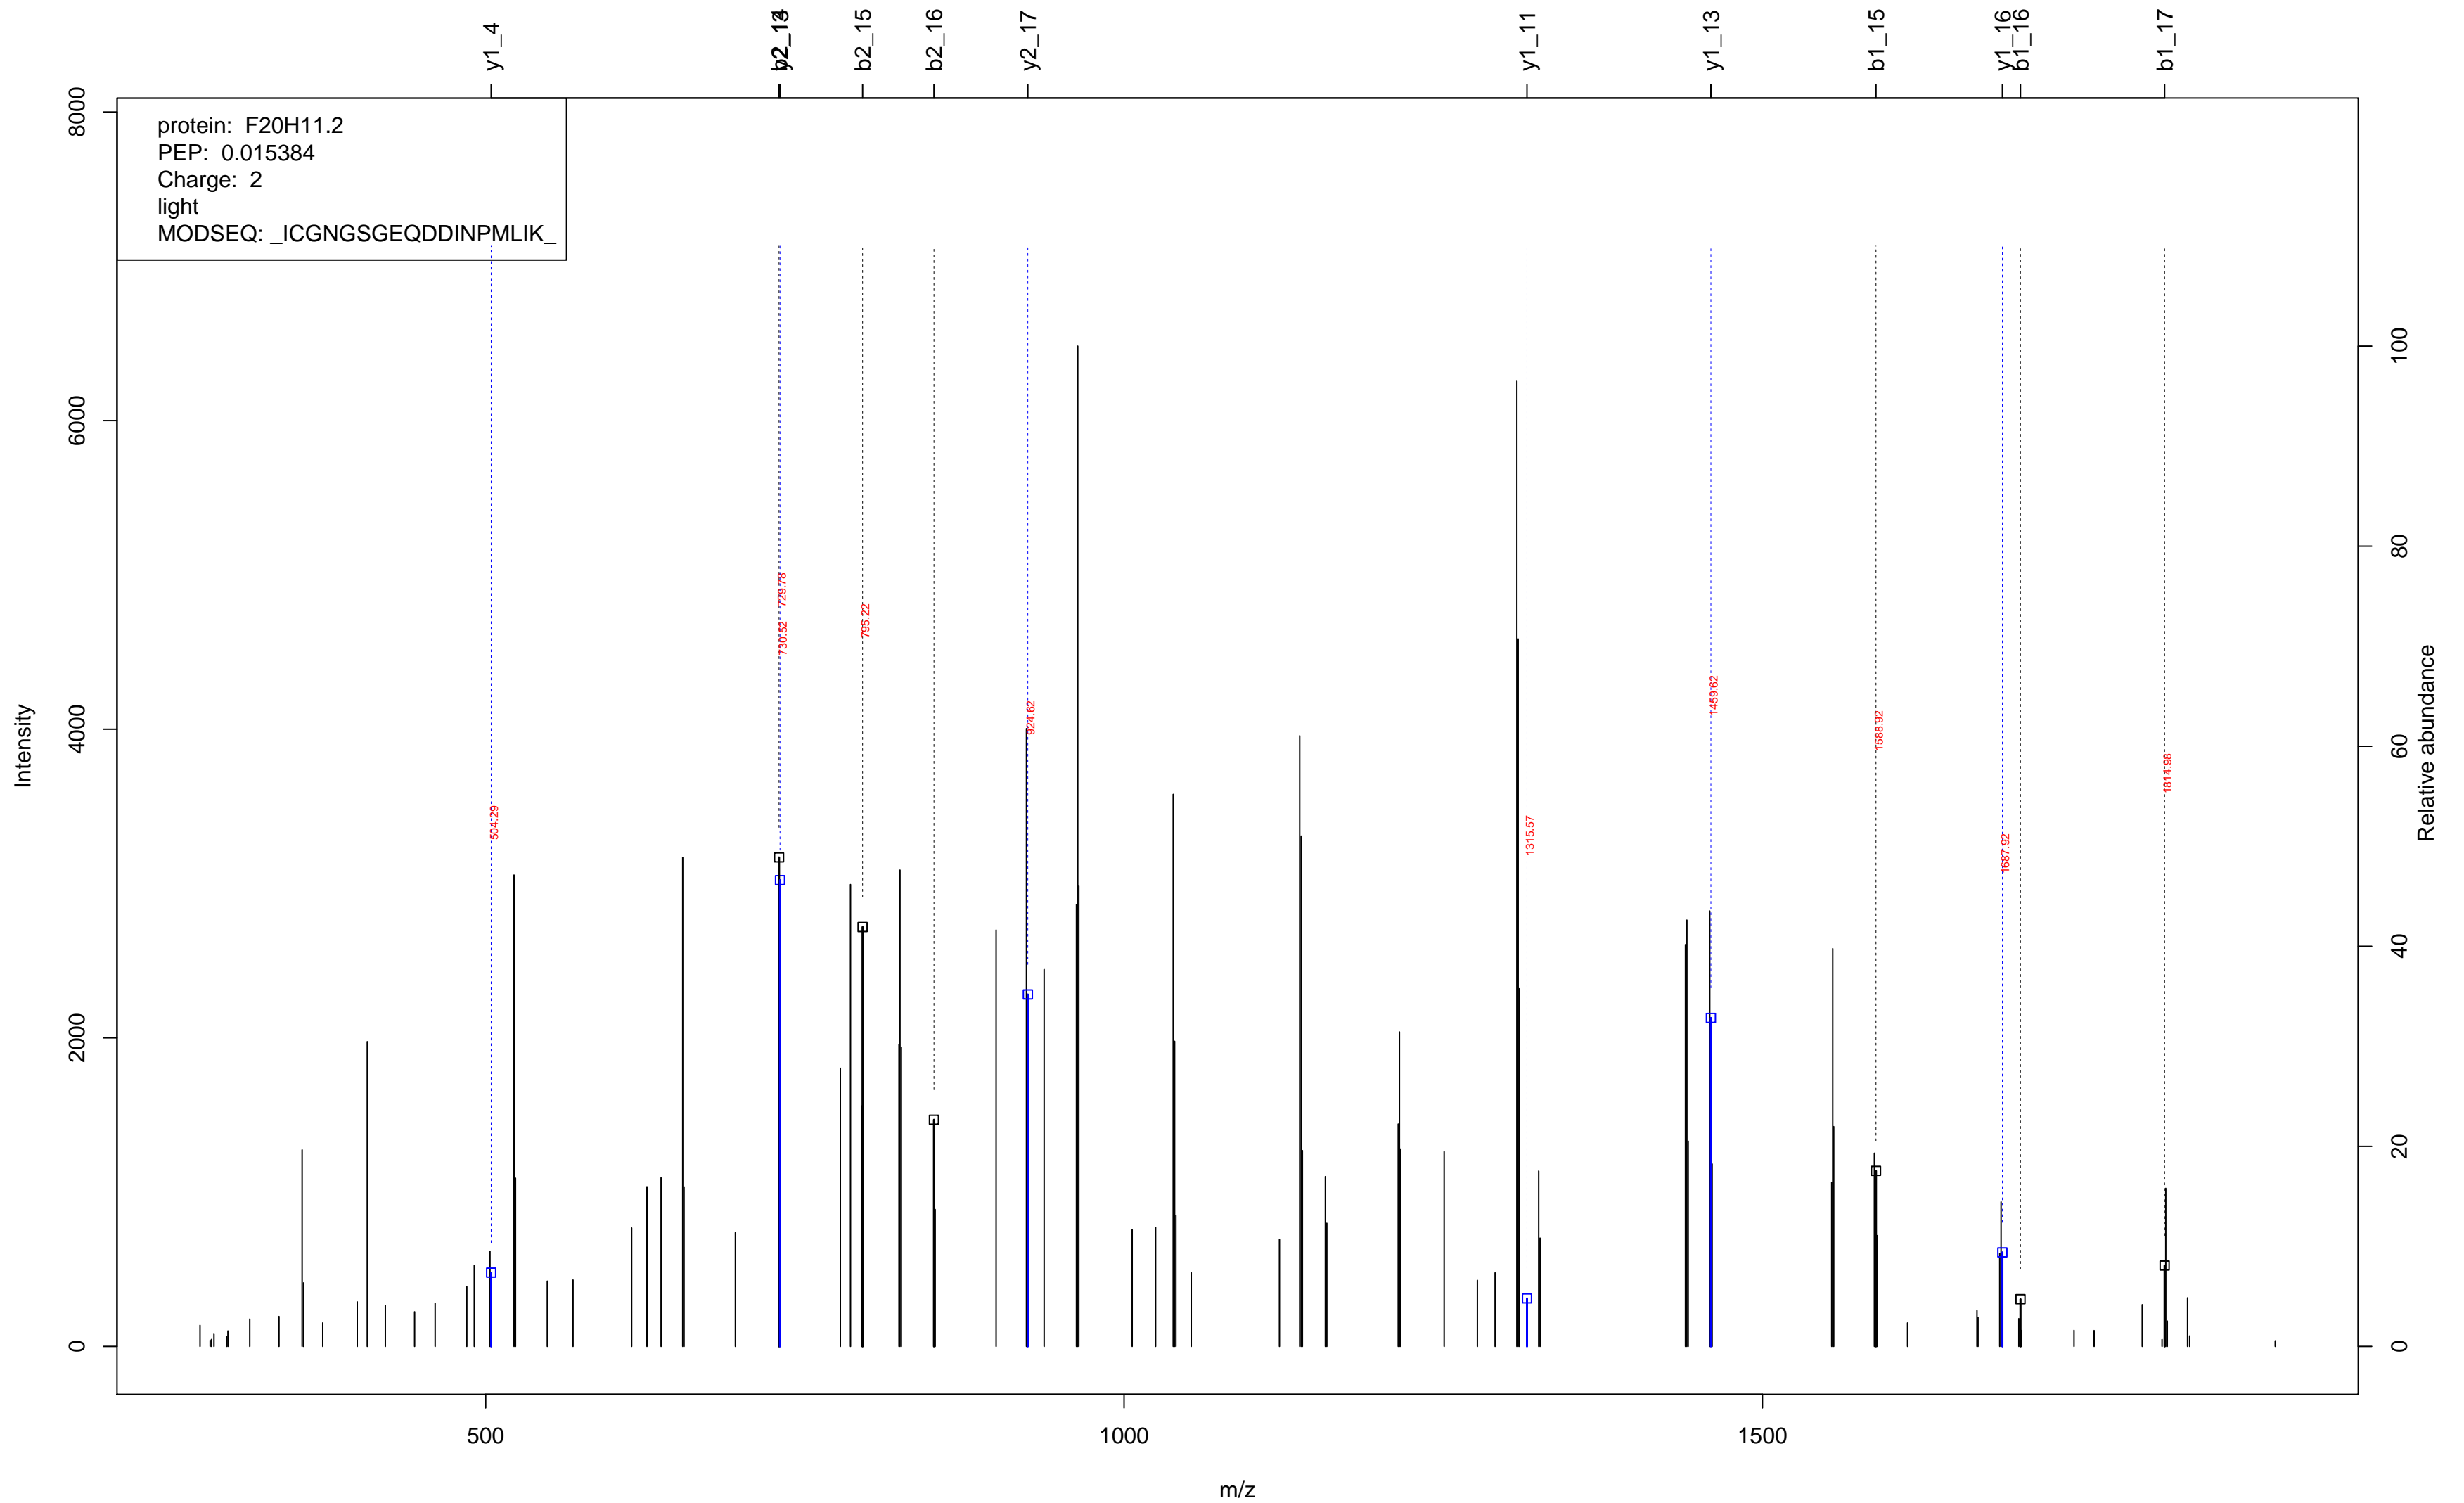

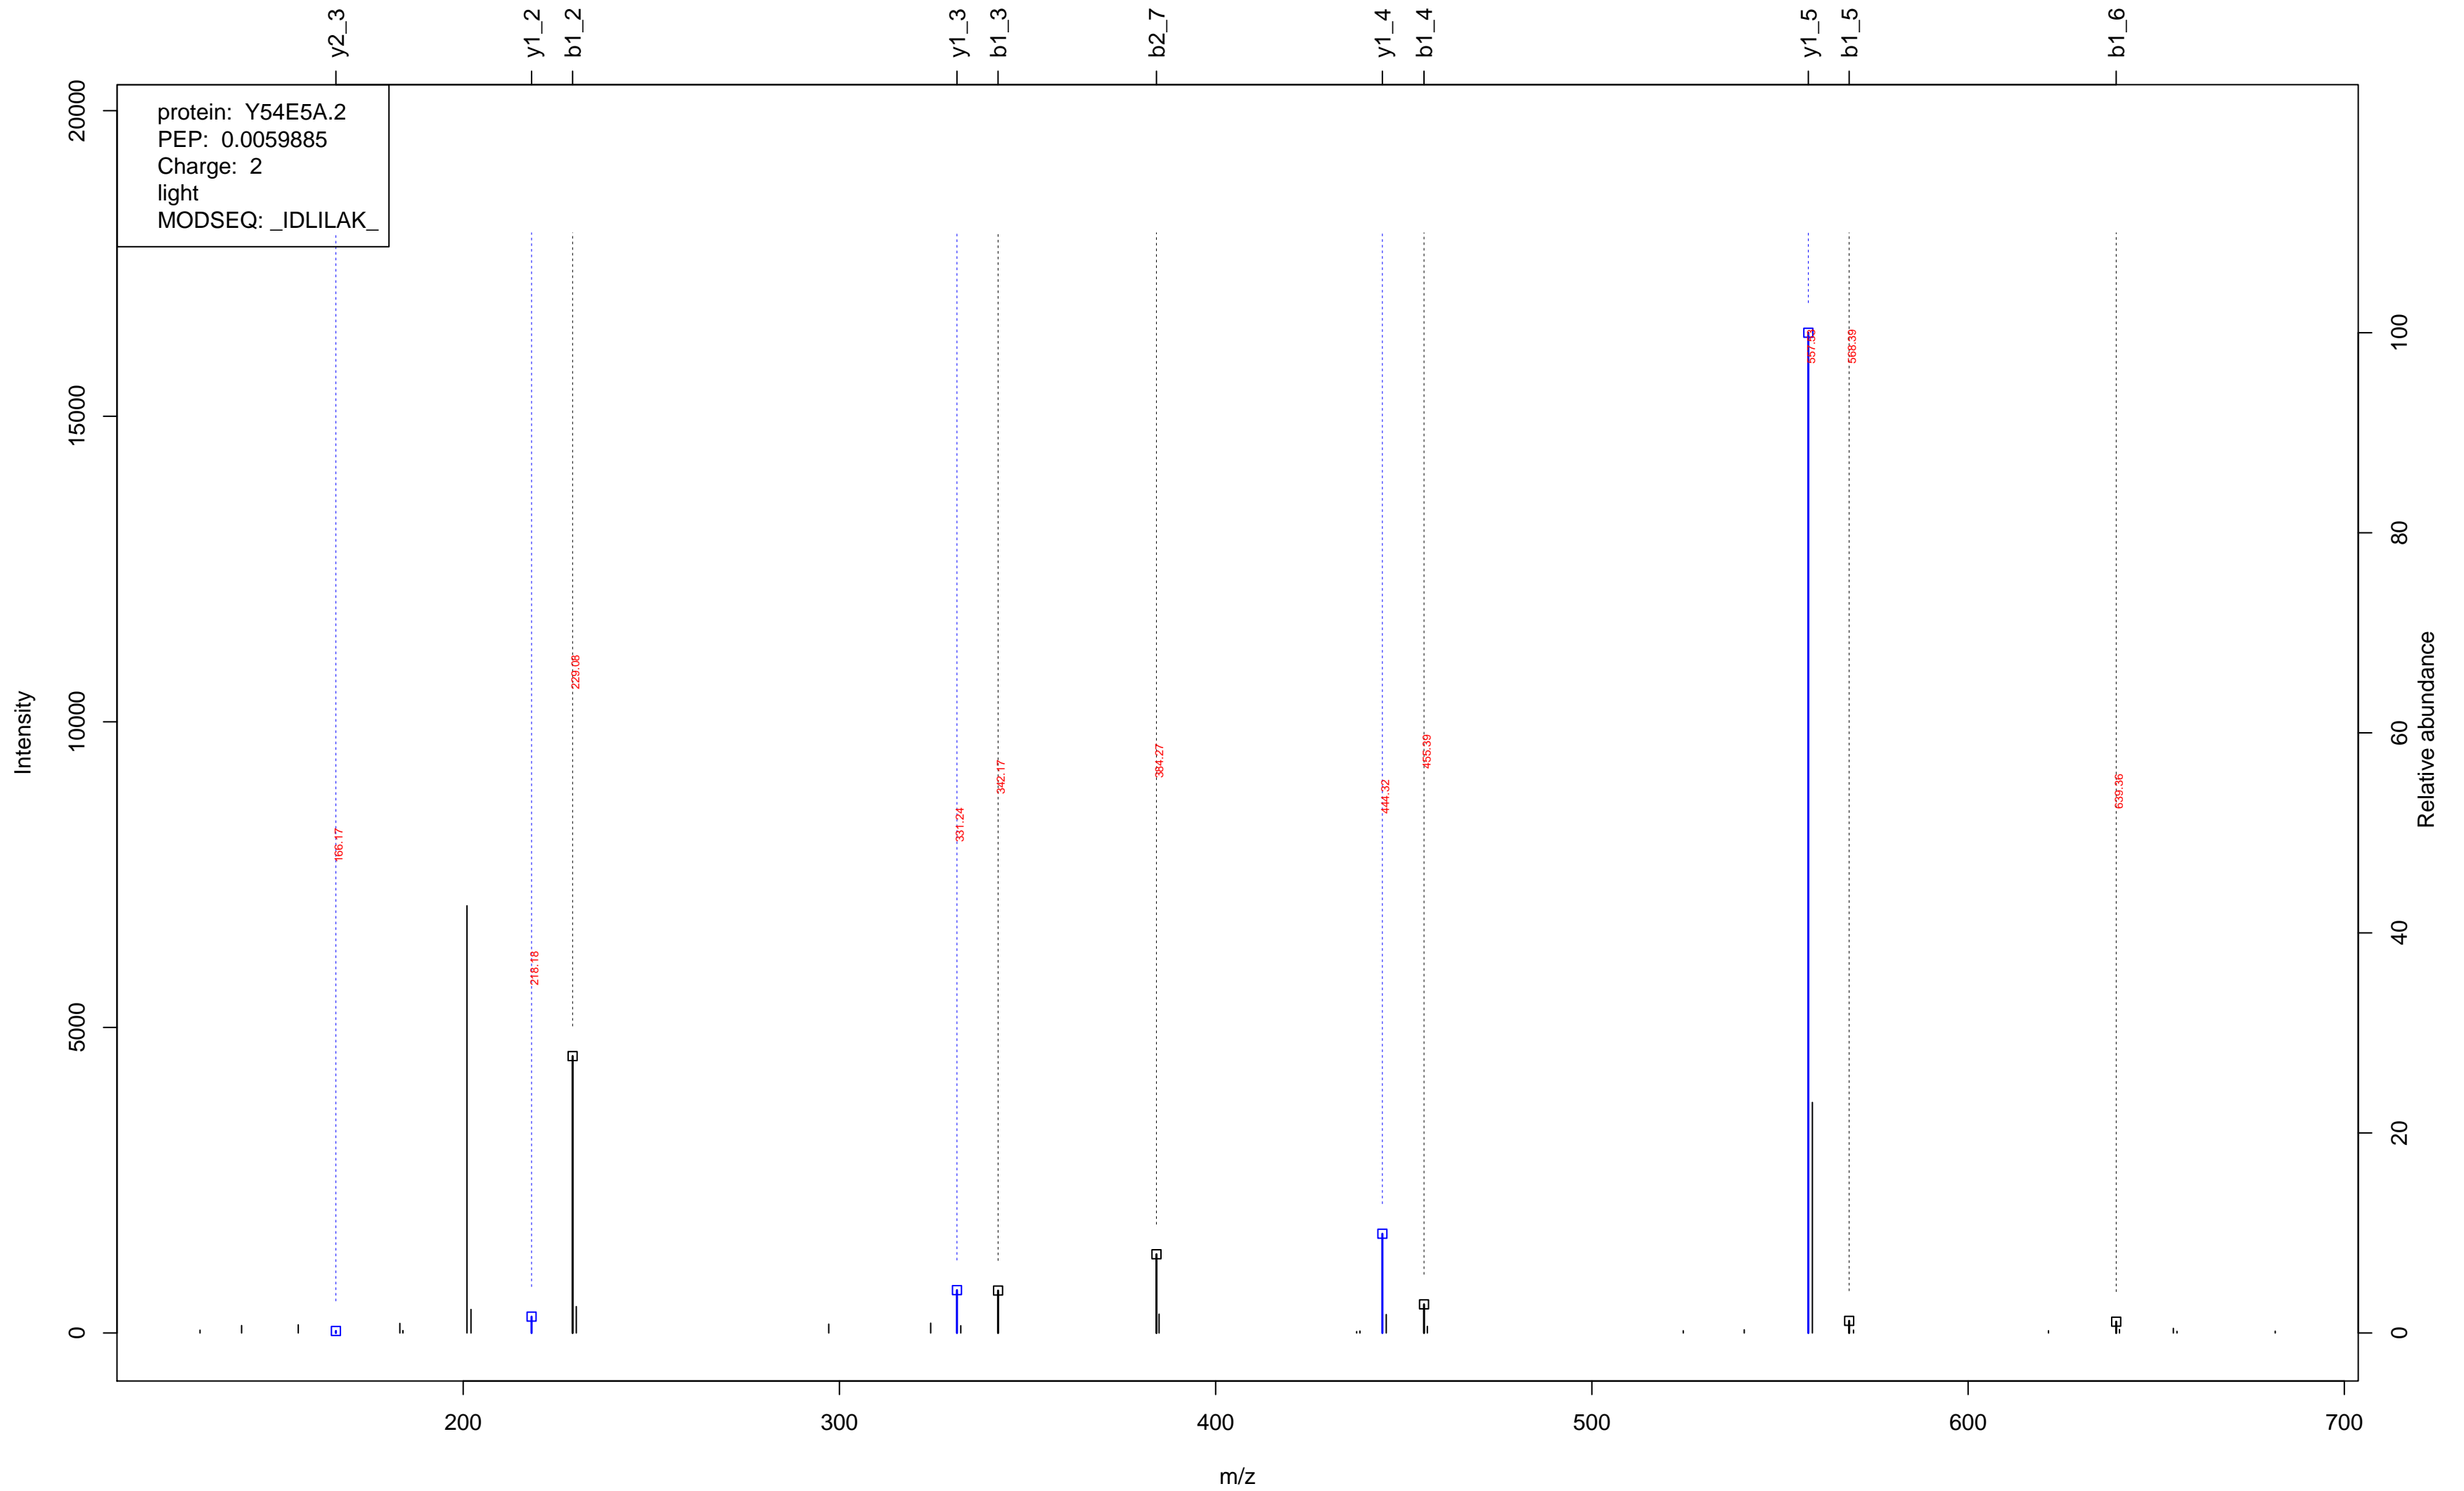

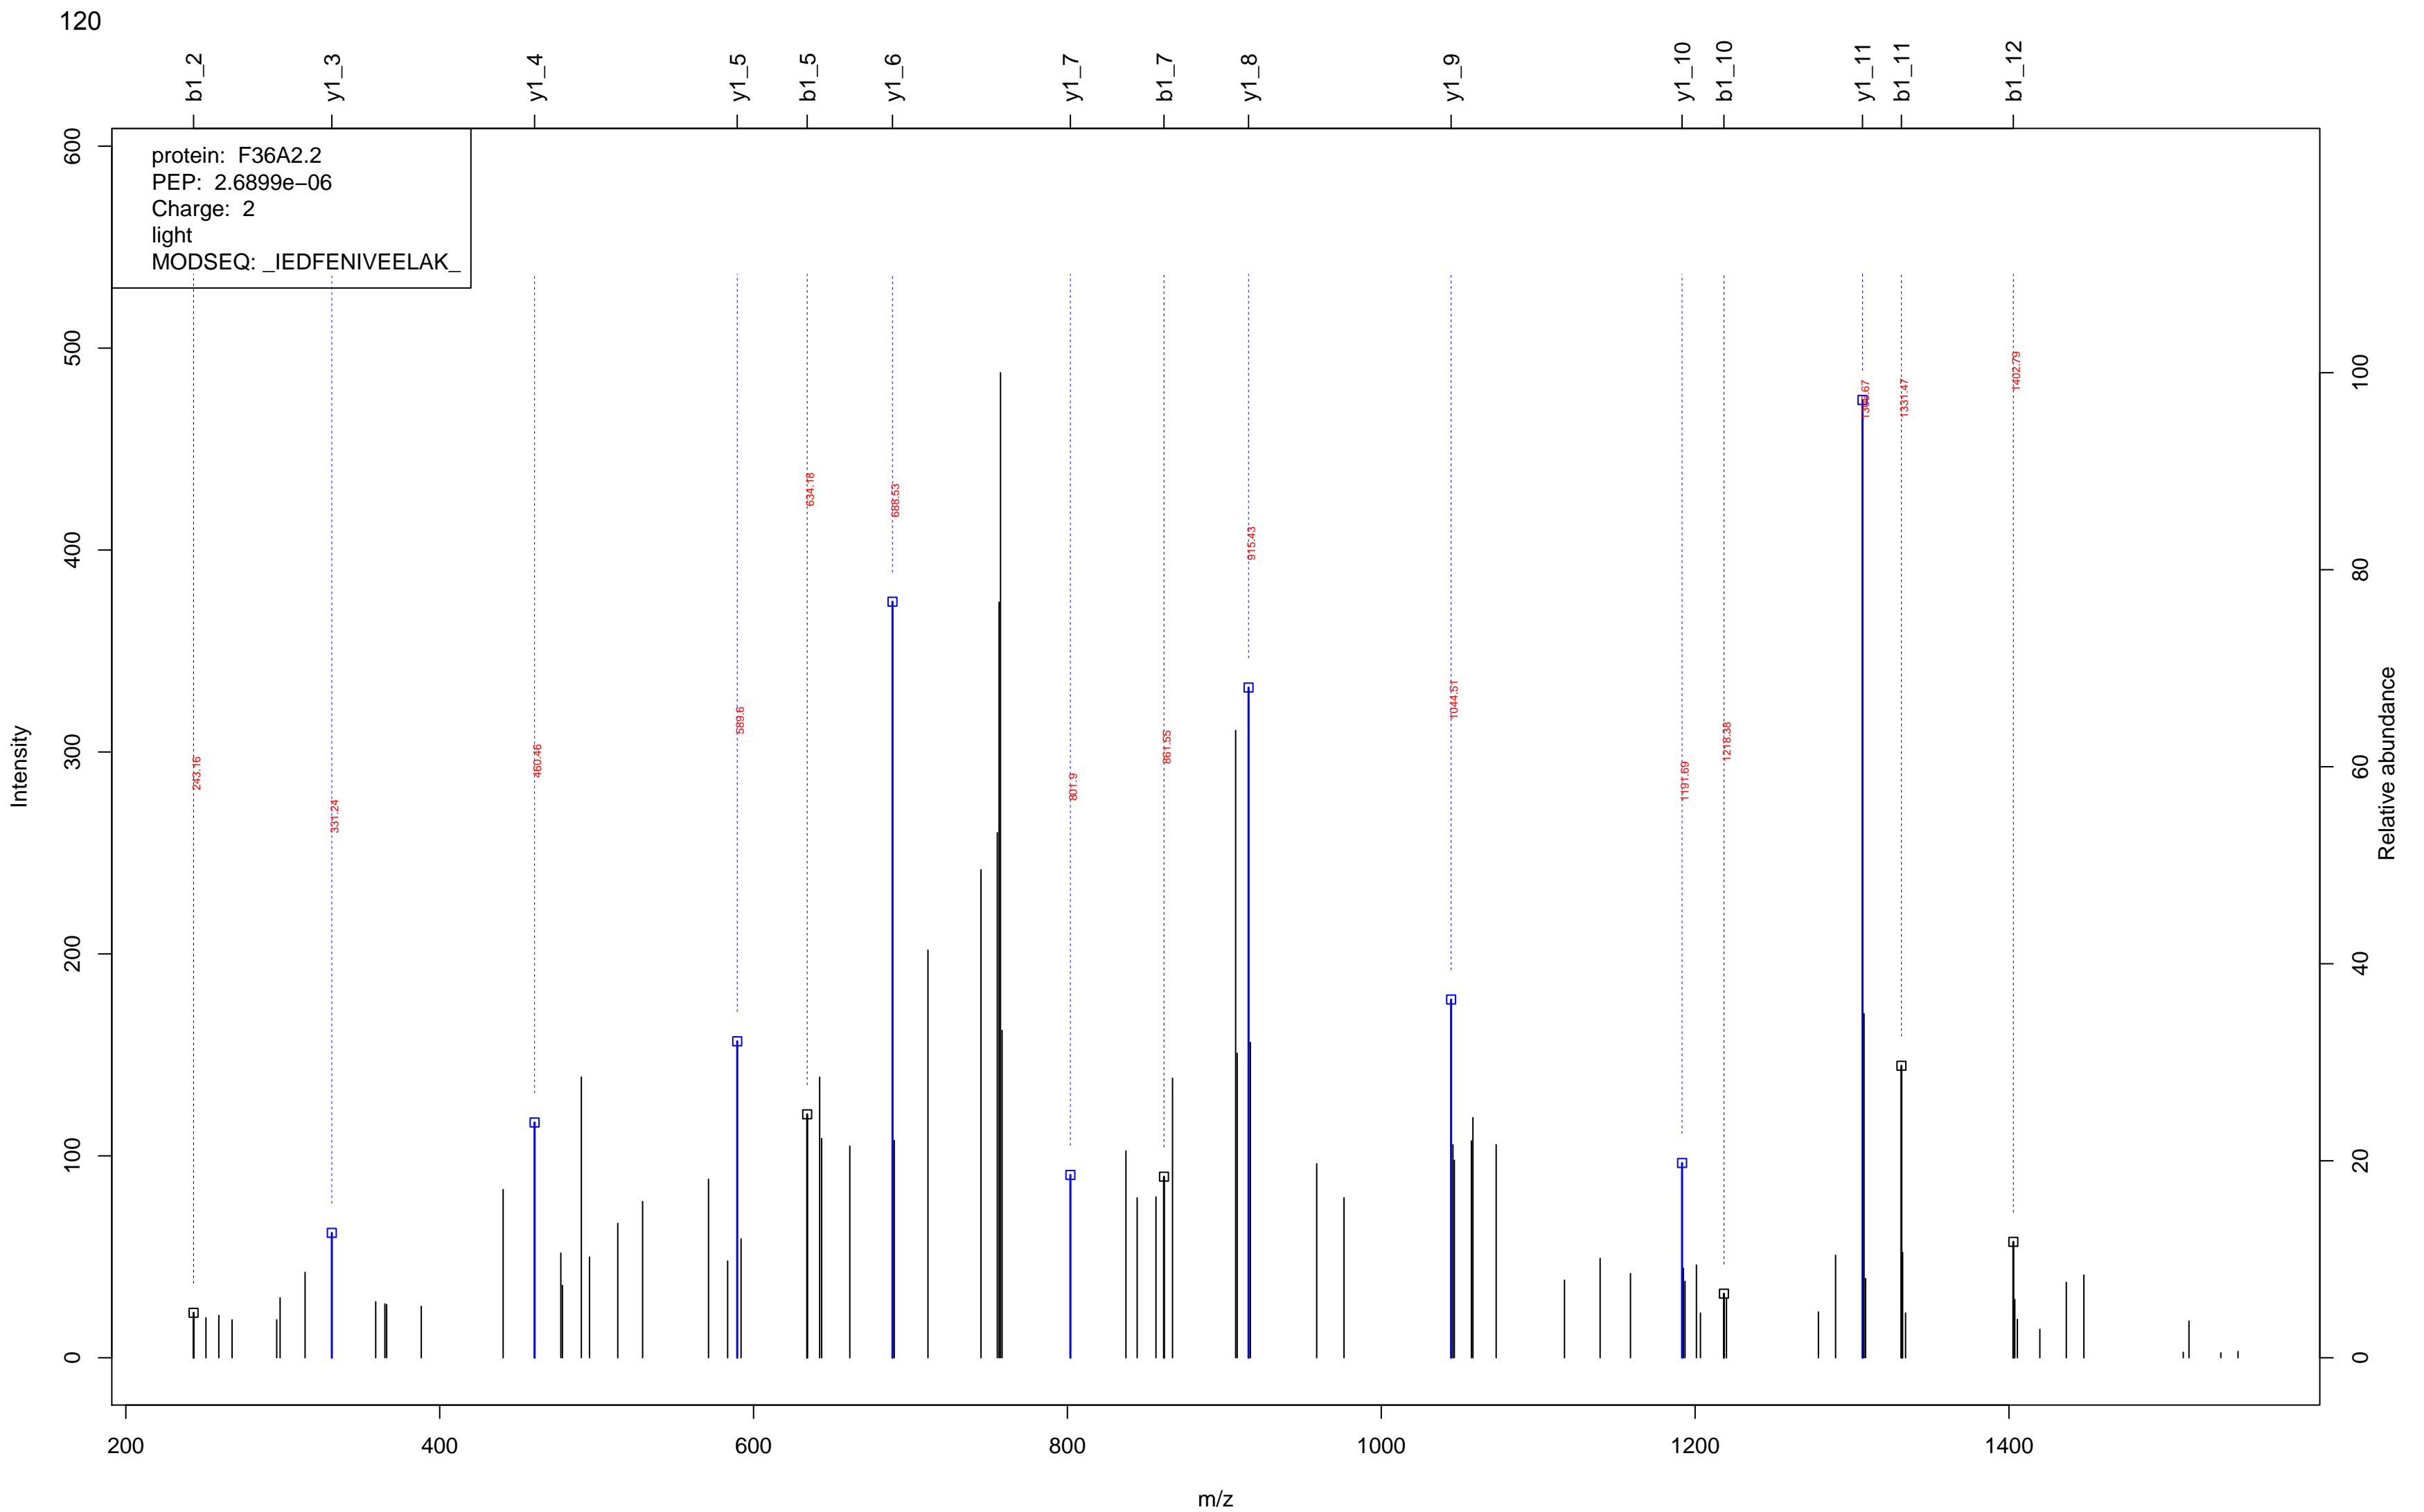



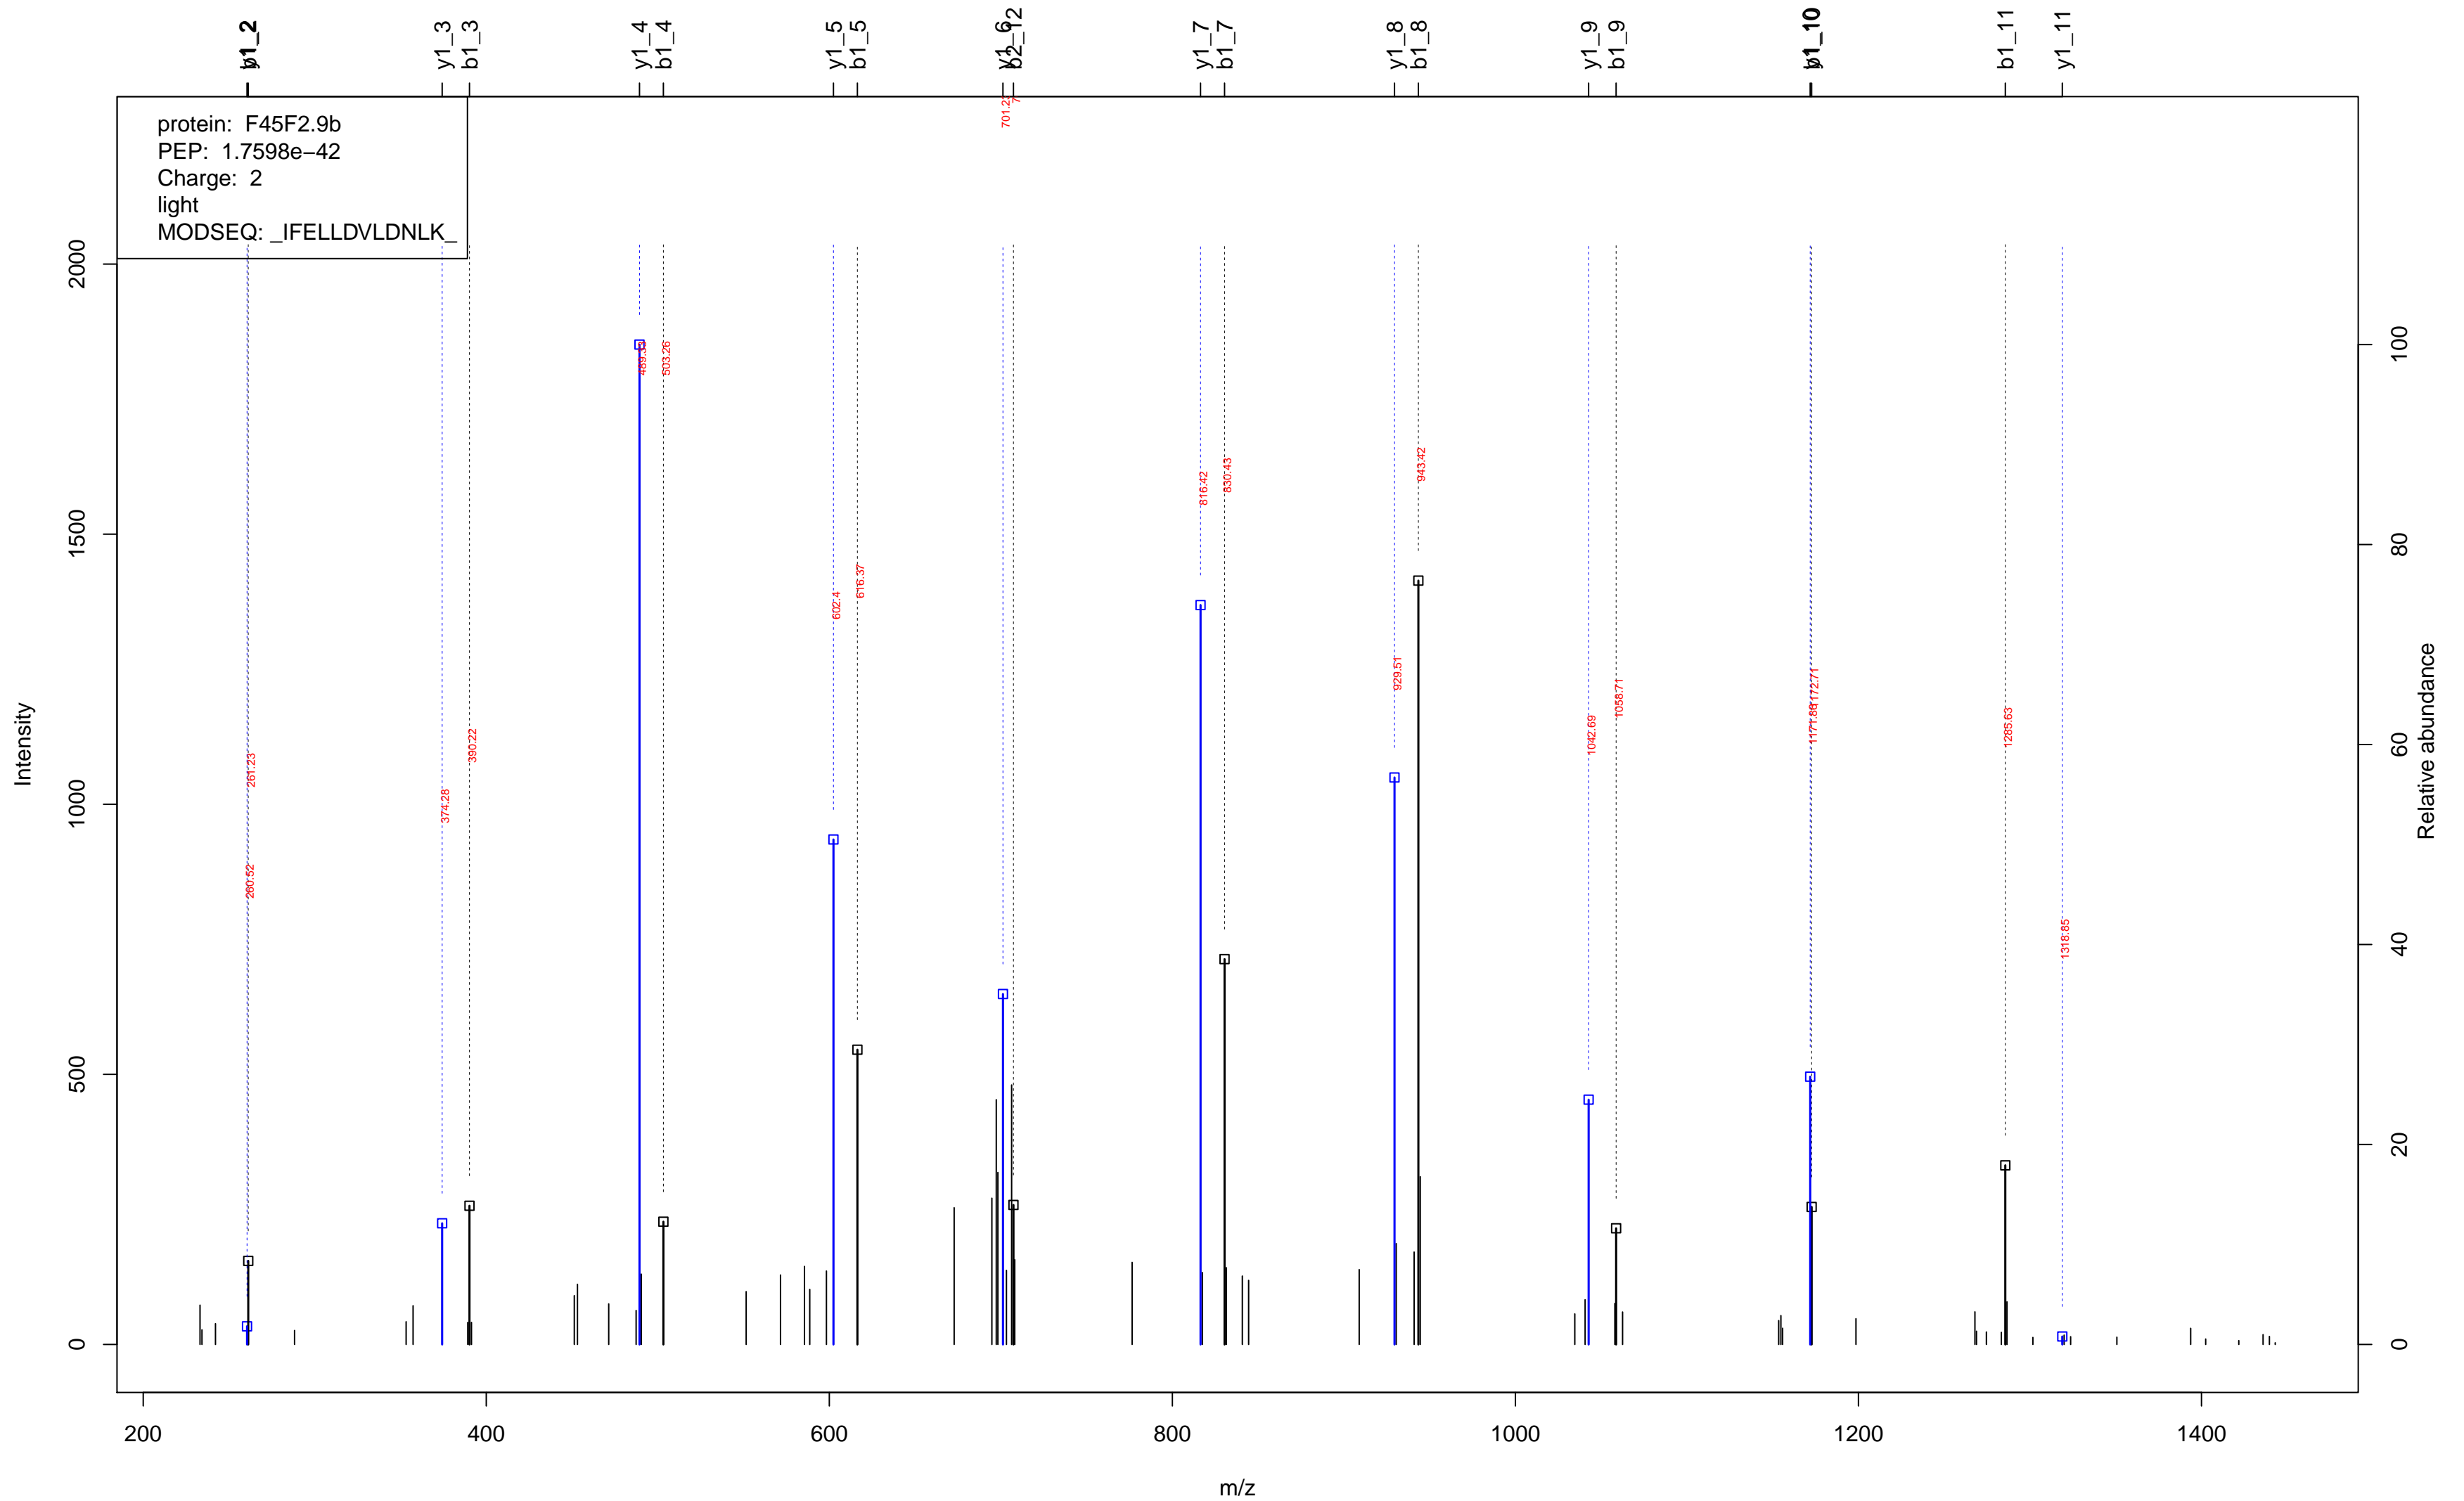

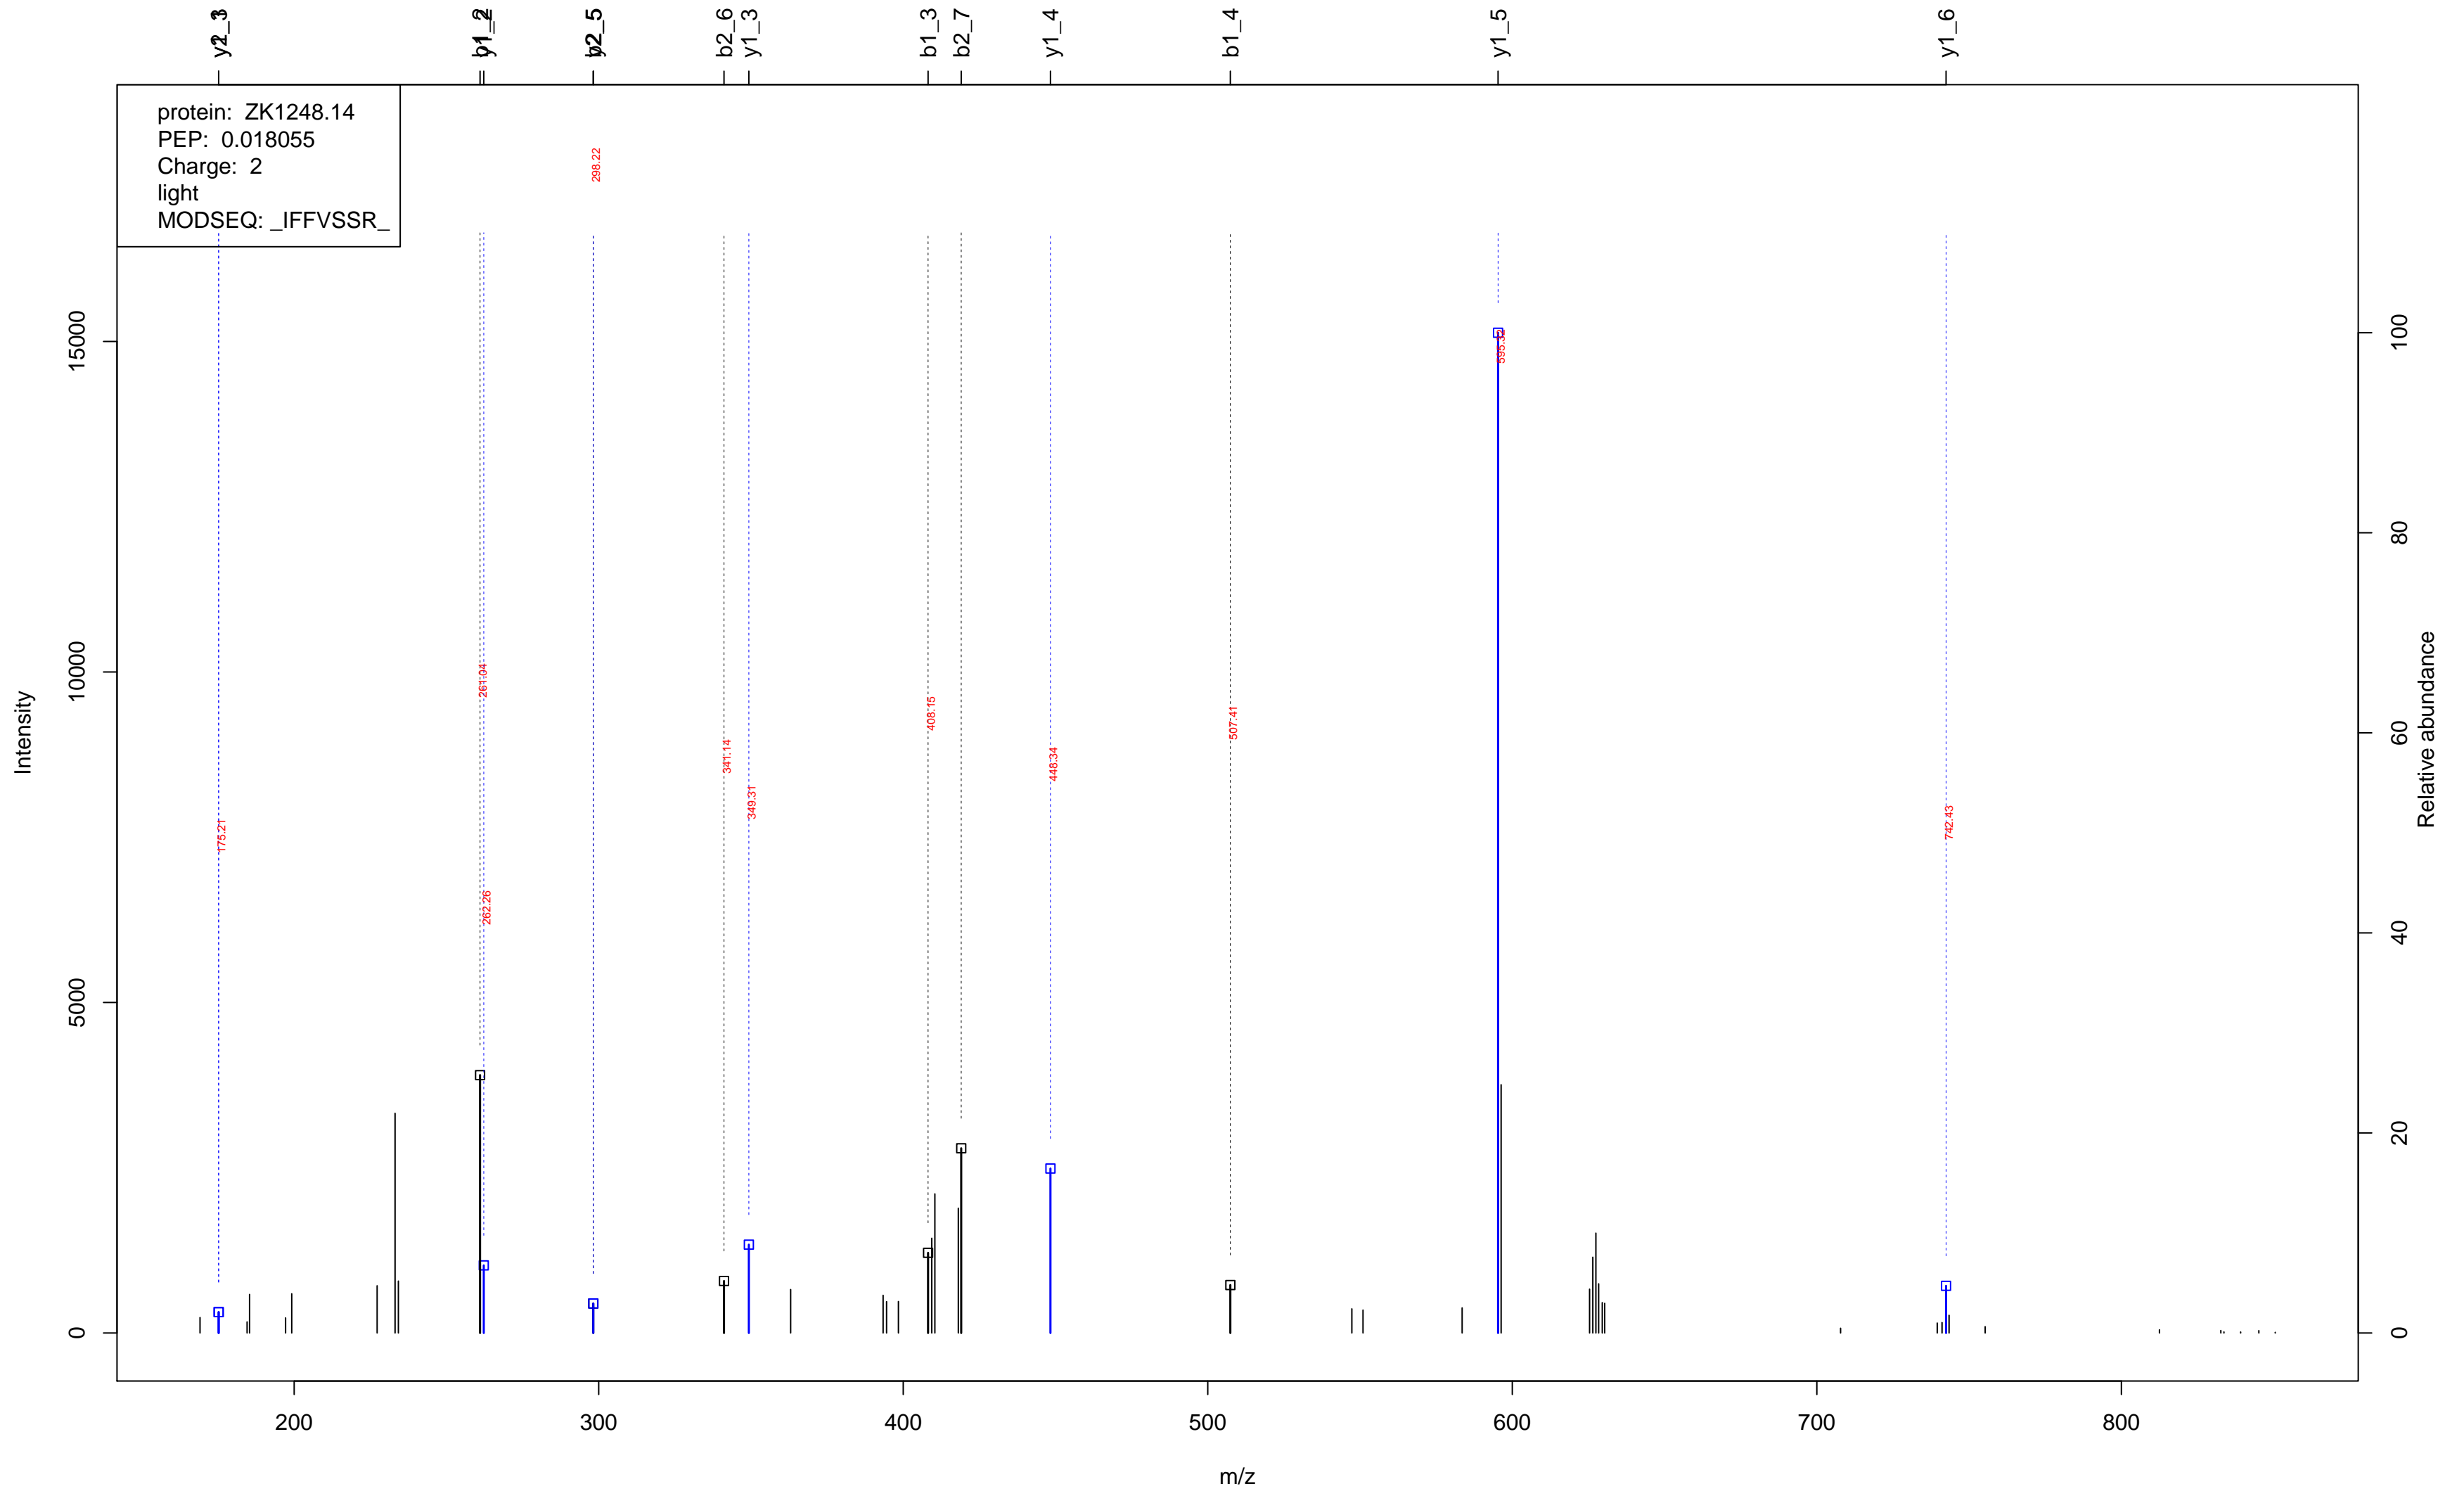

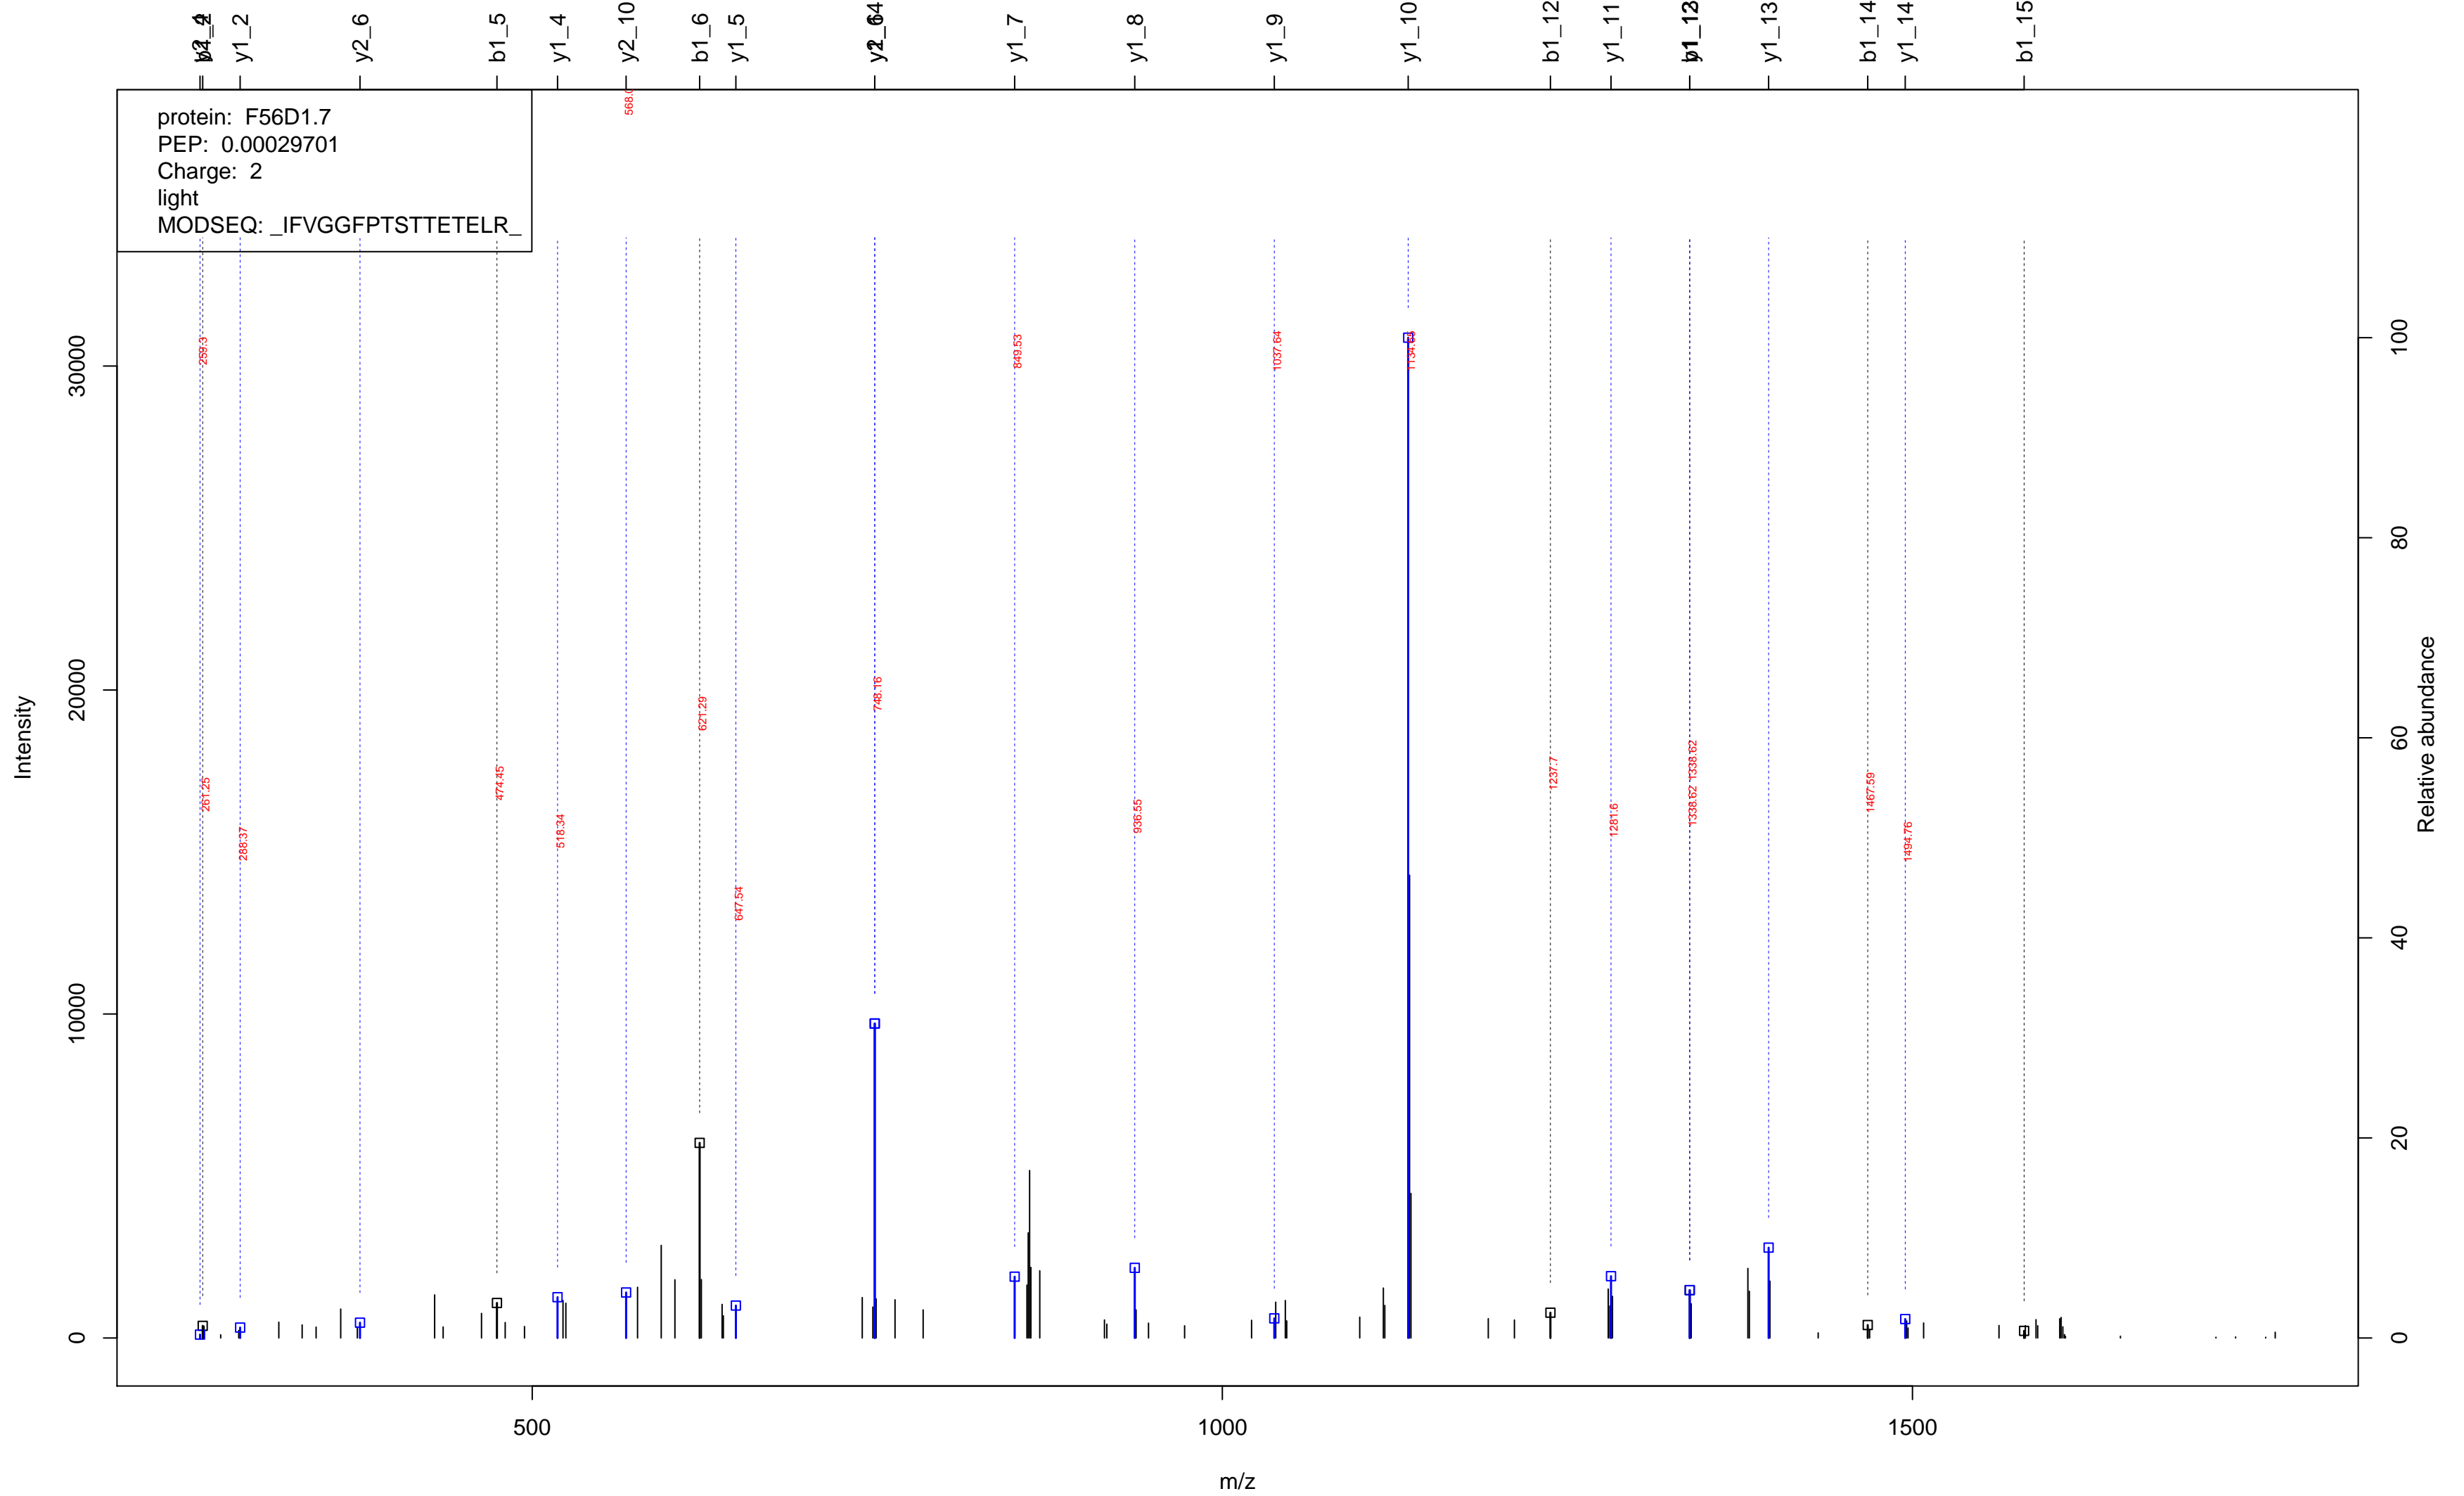

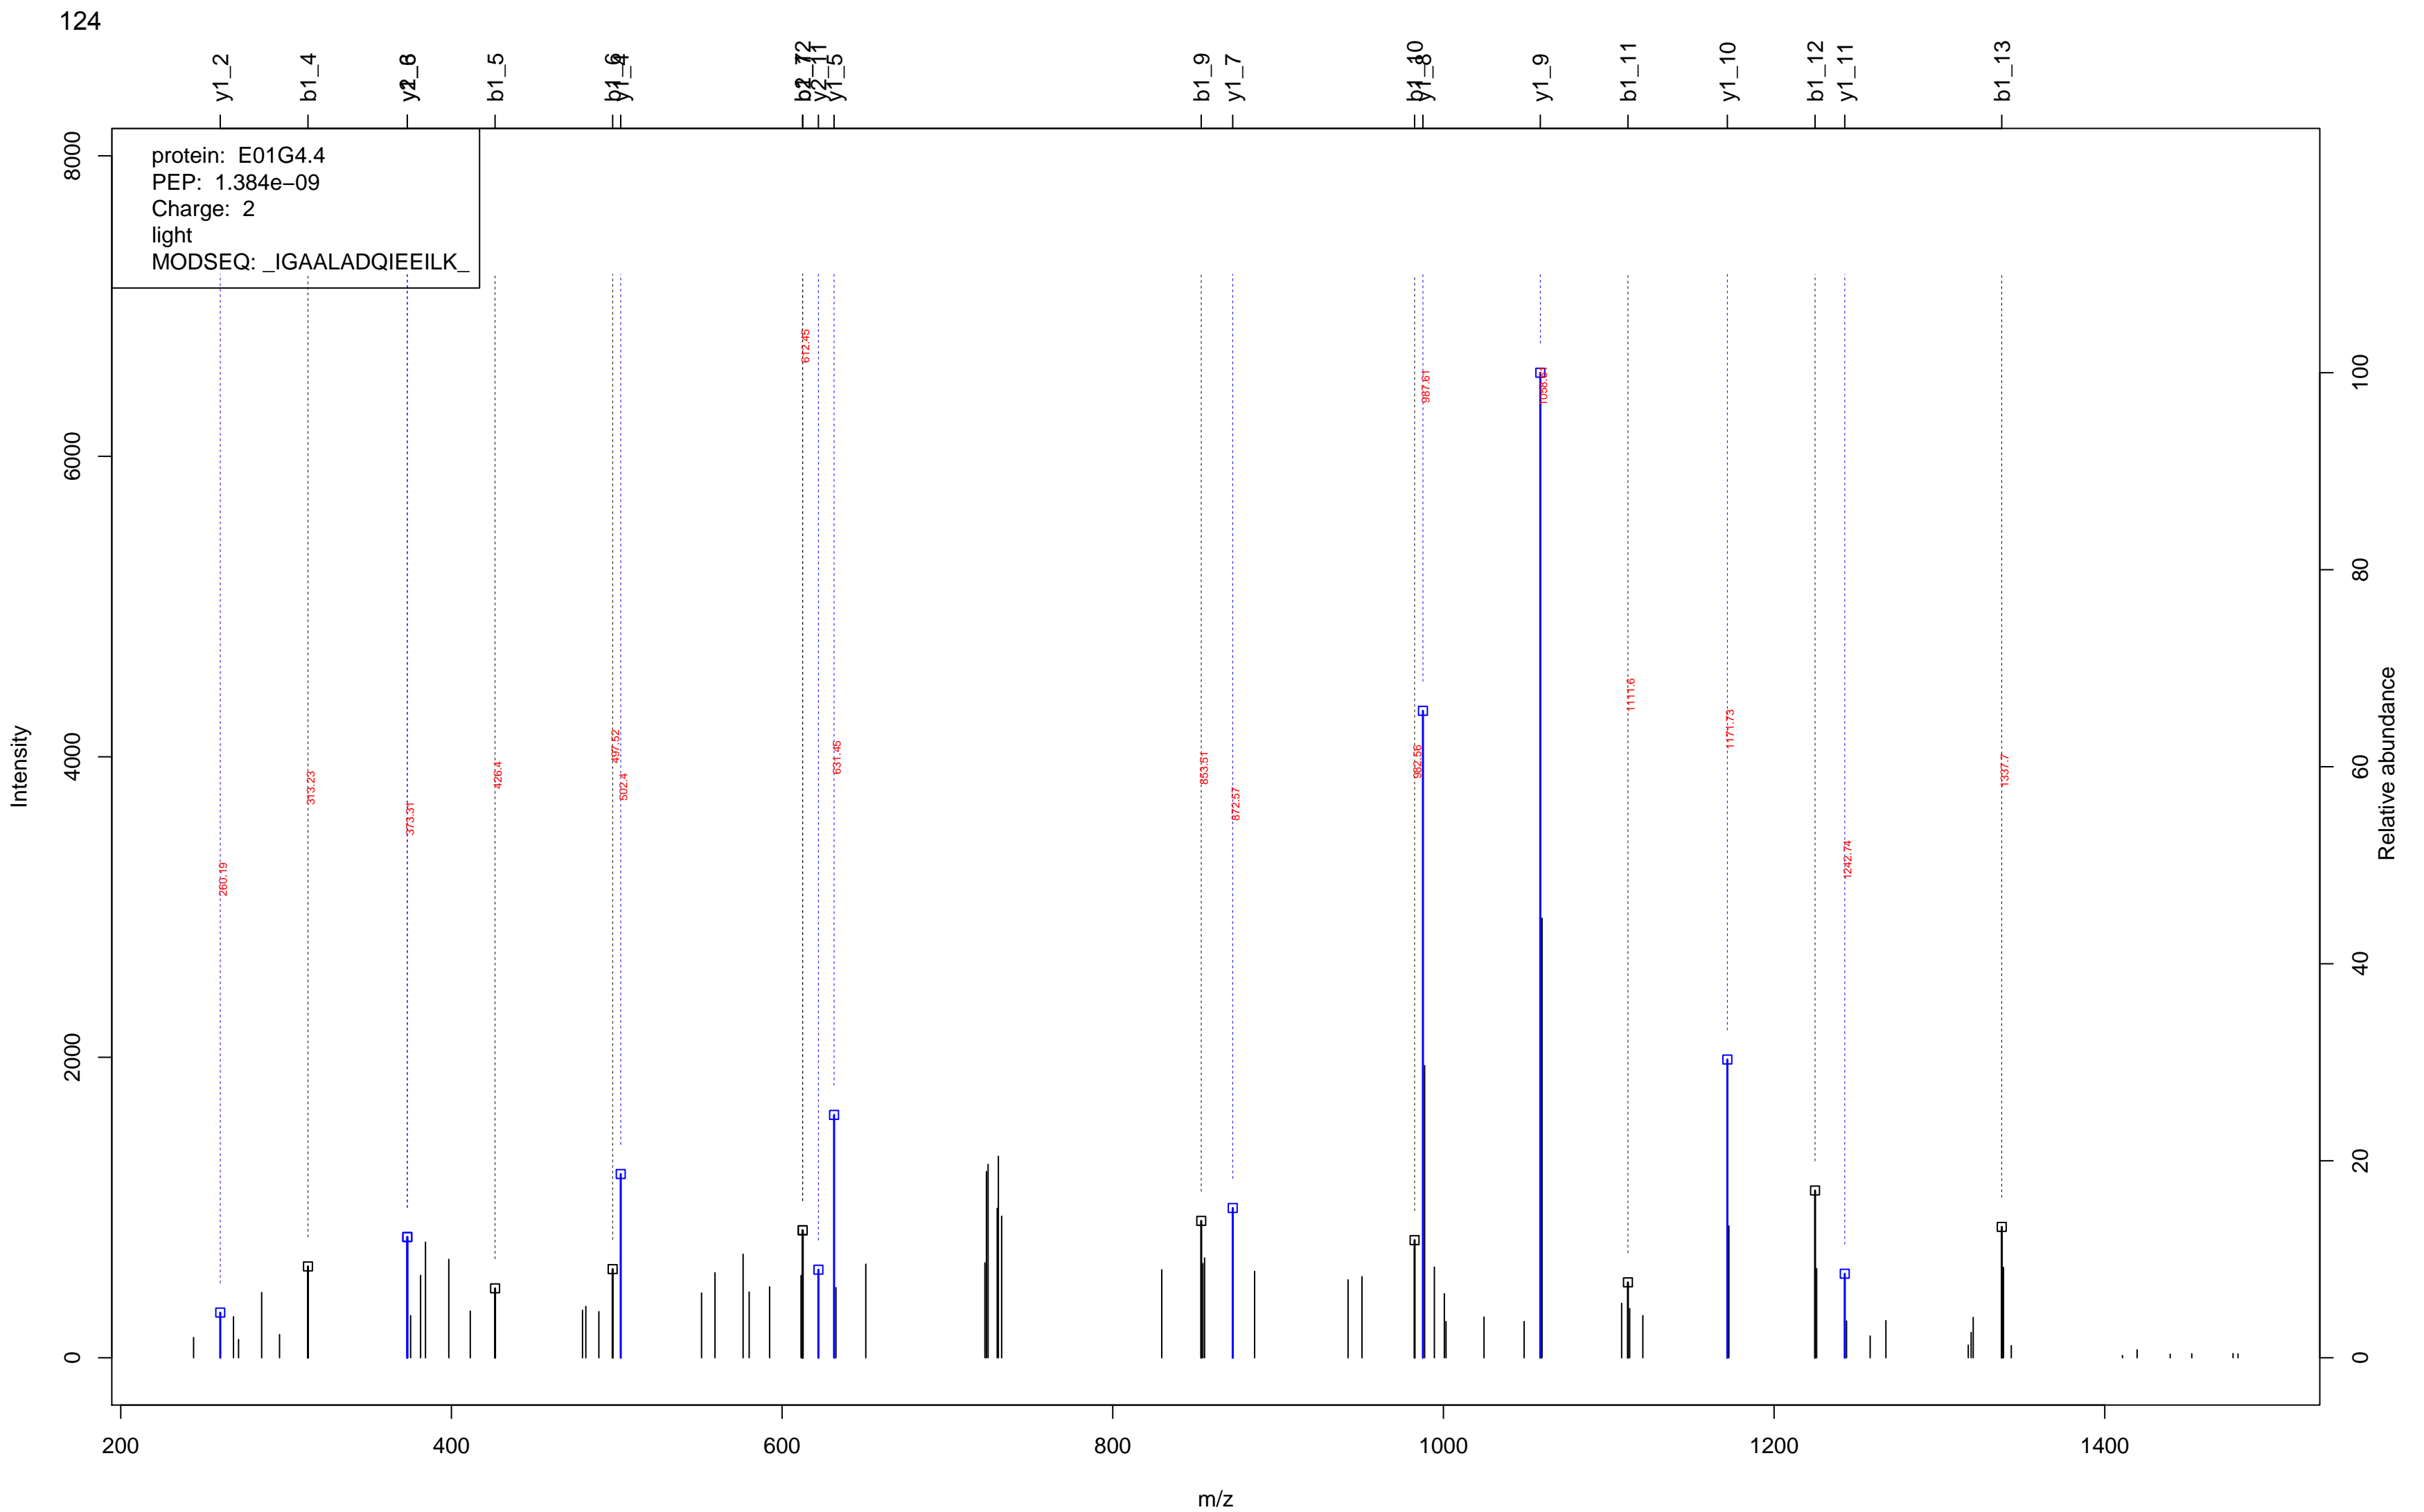

125

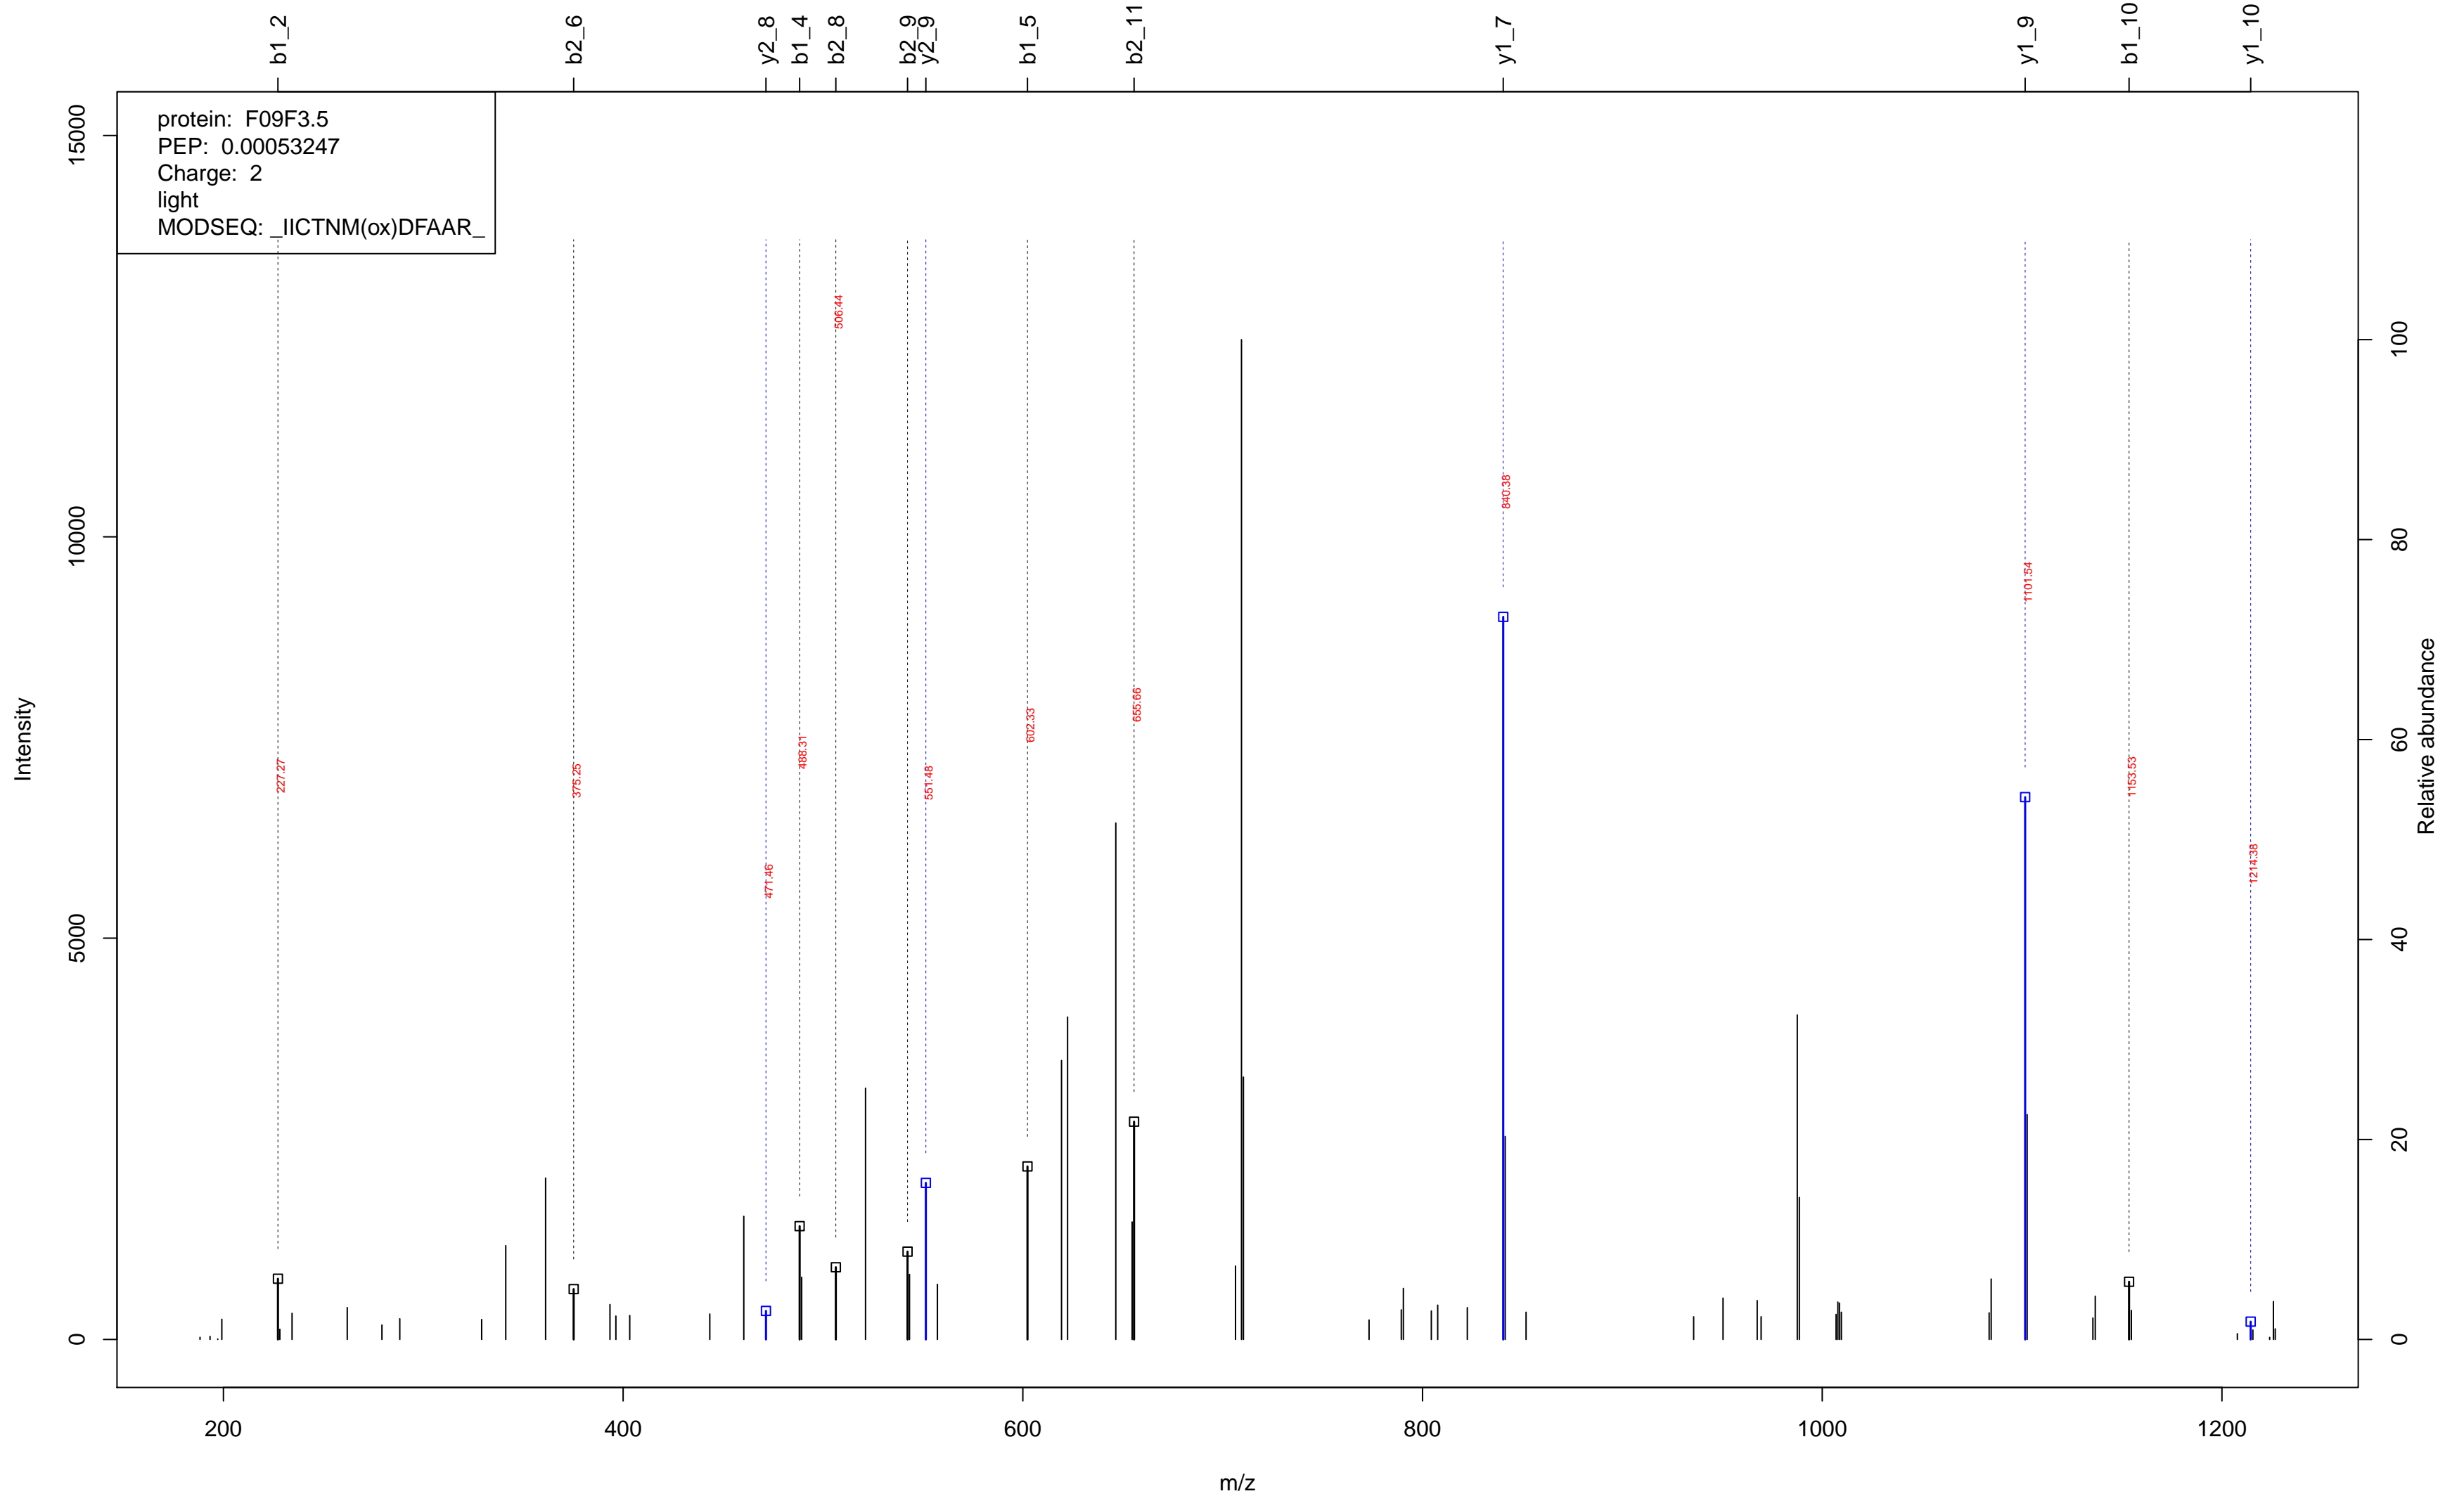

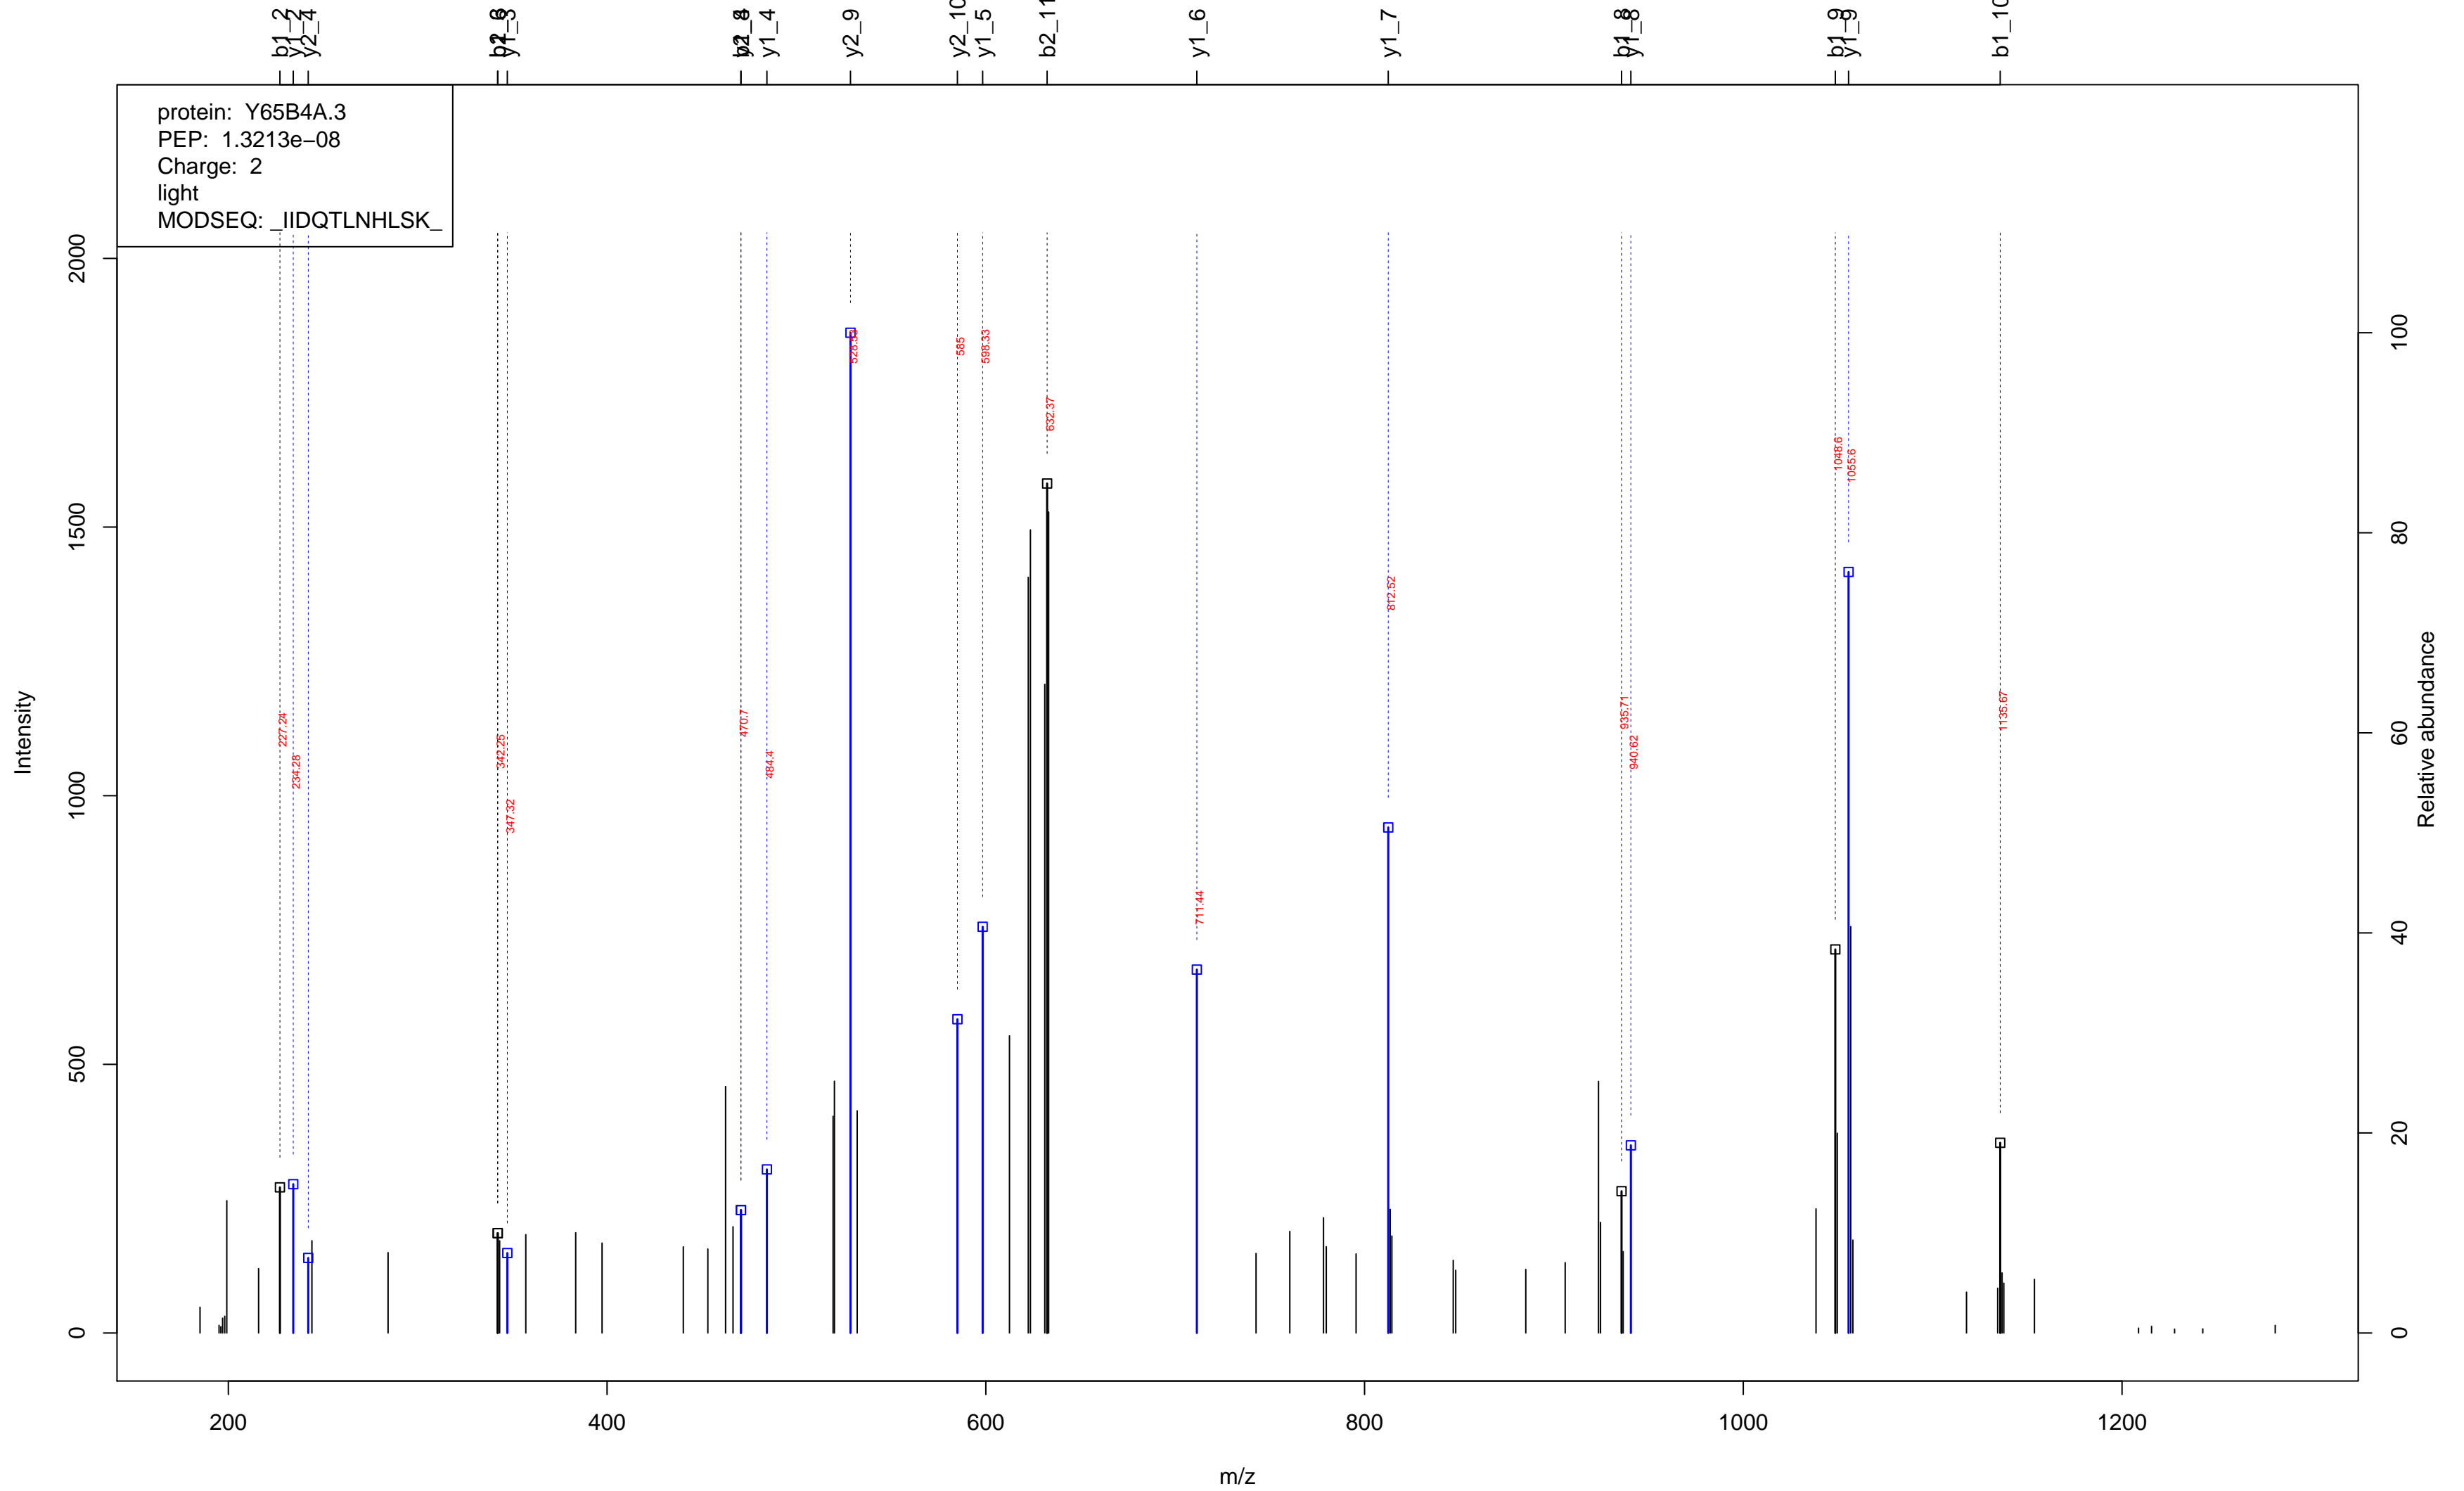

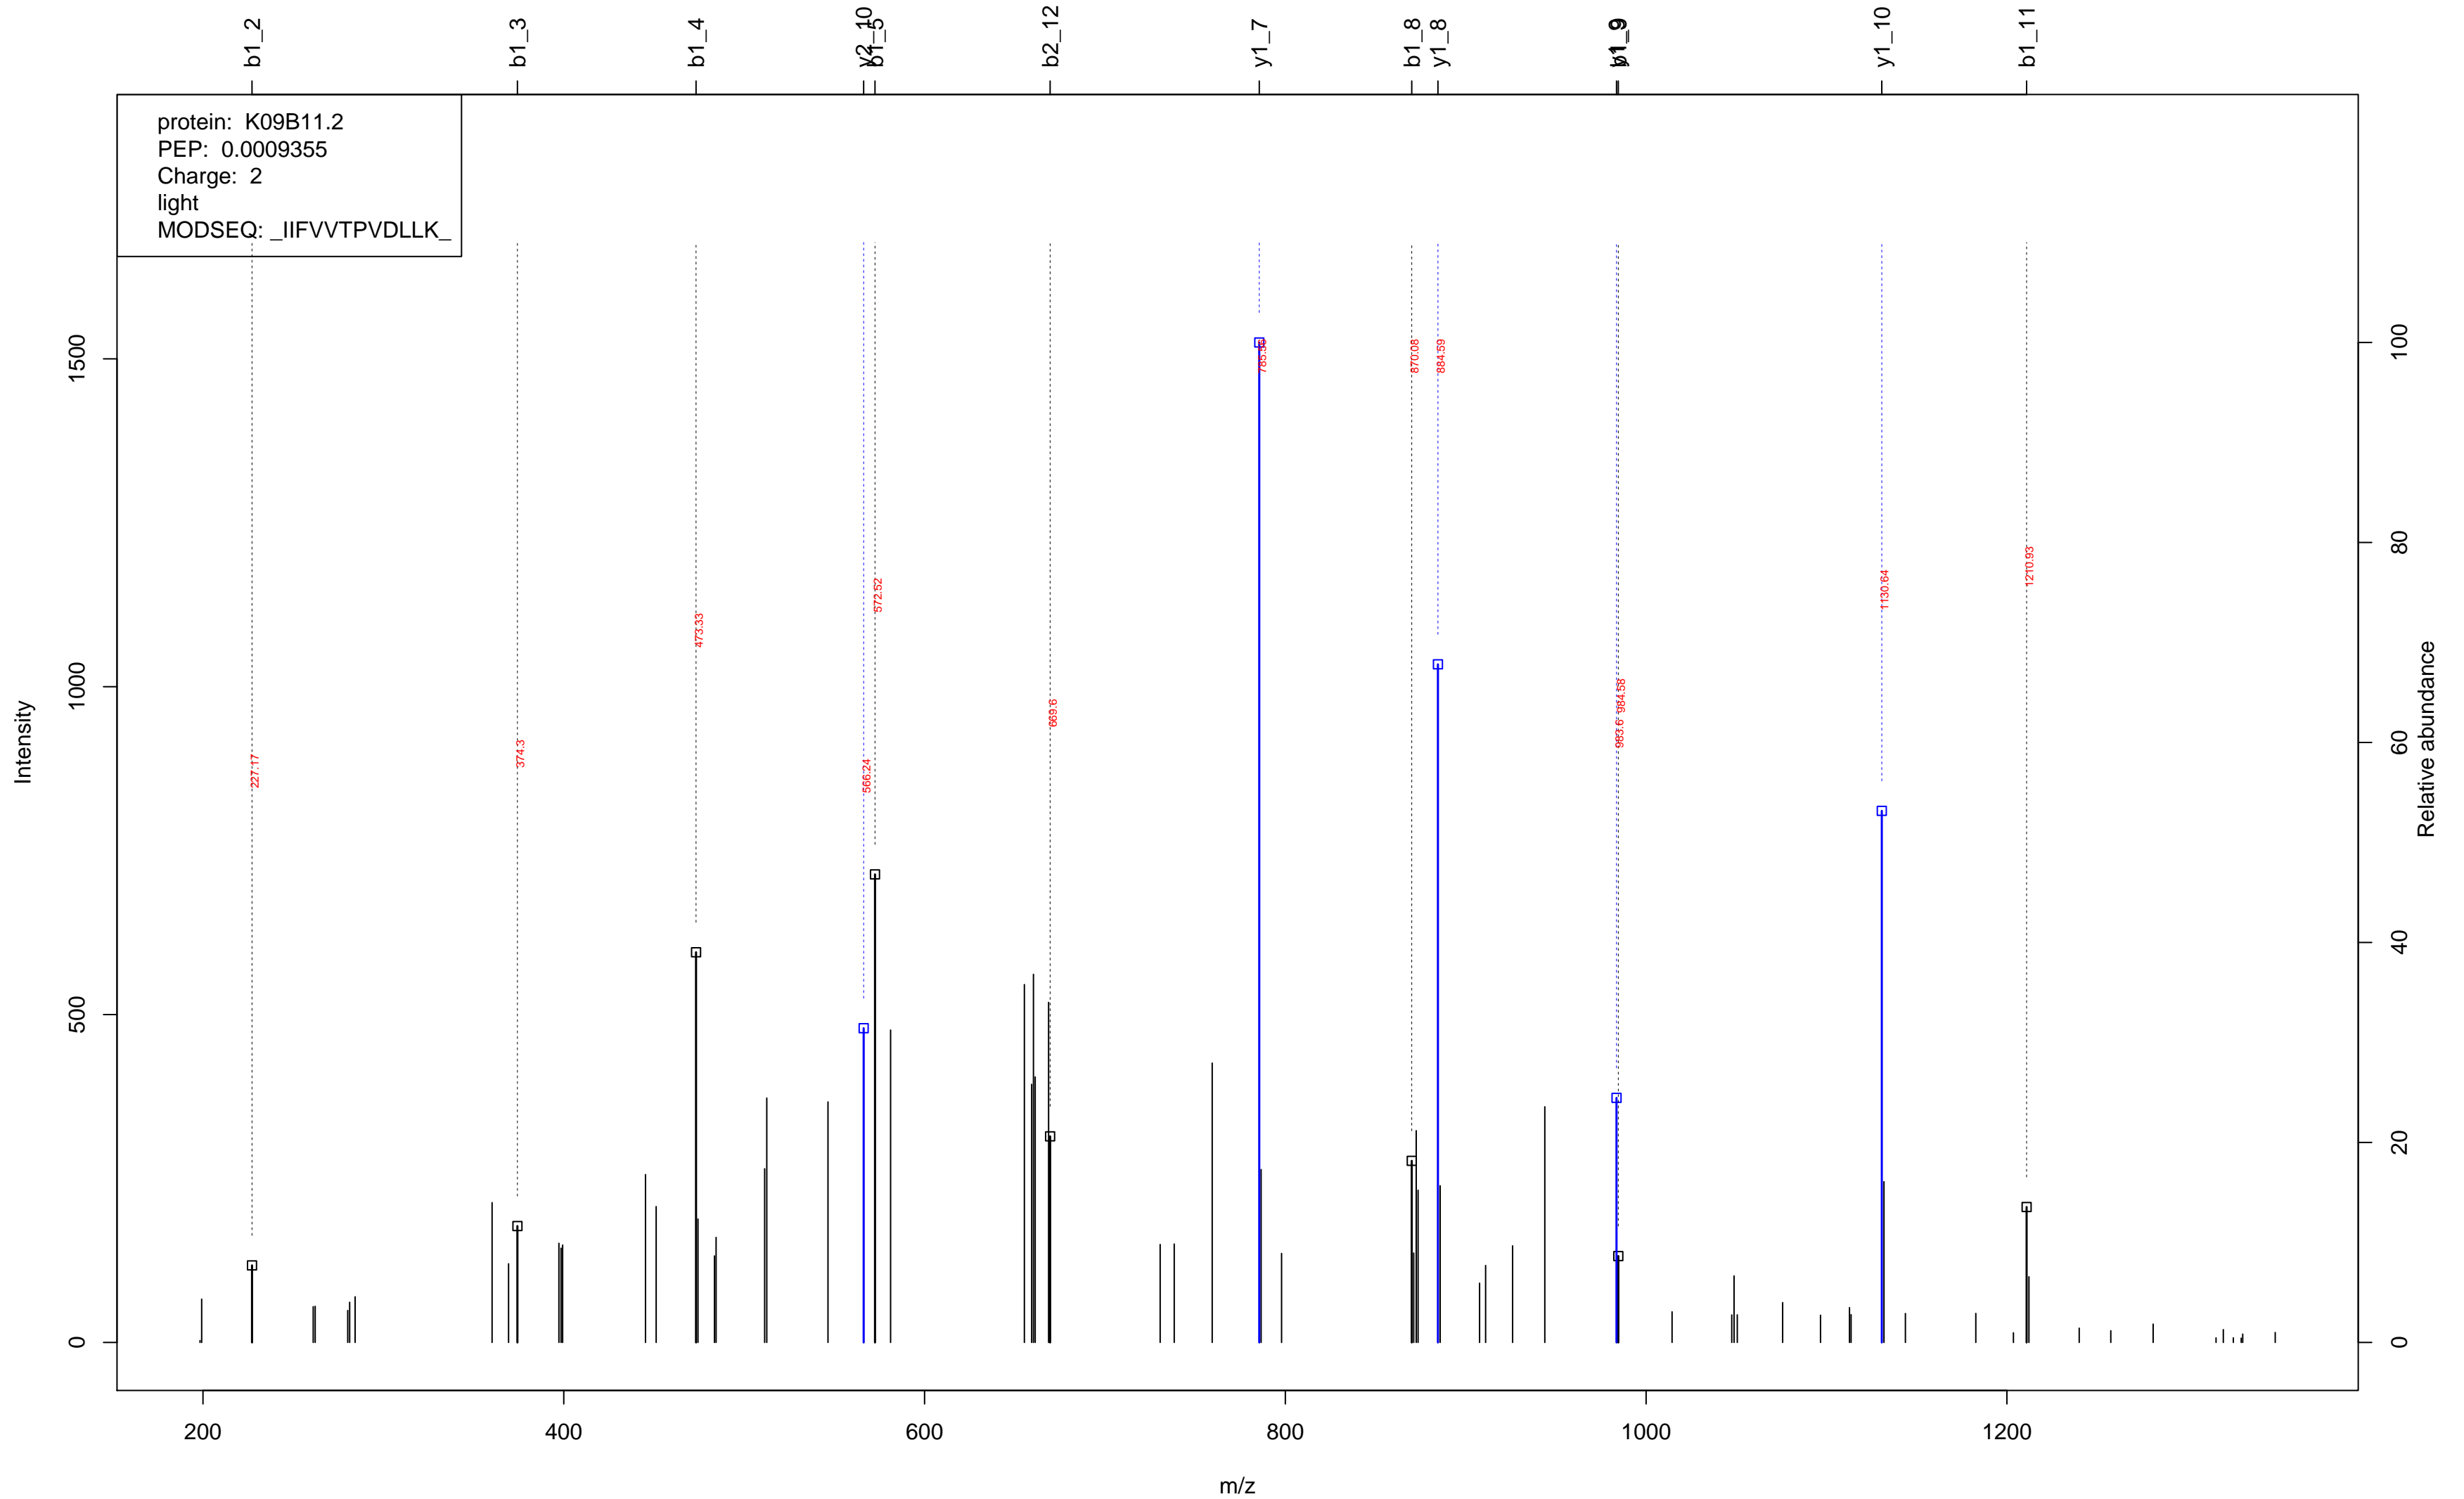

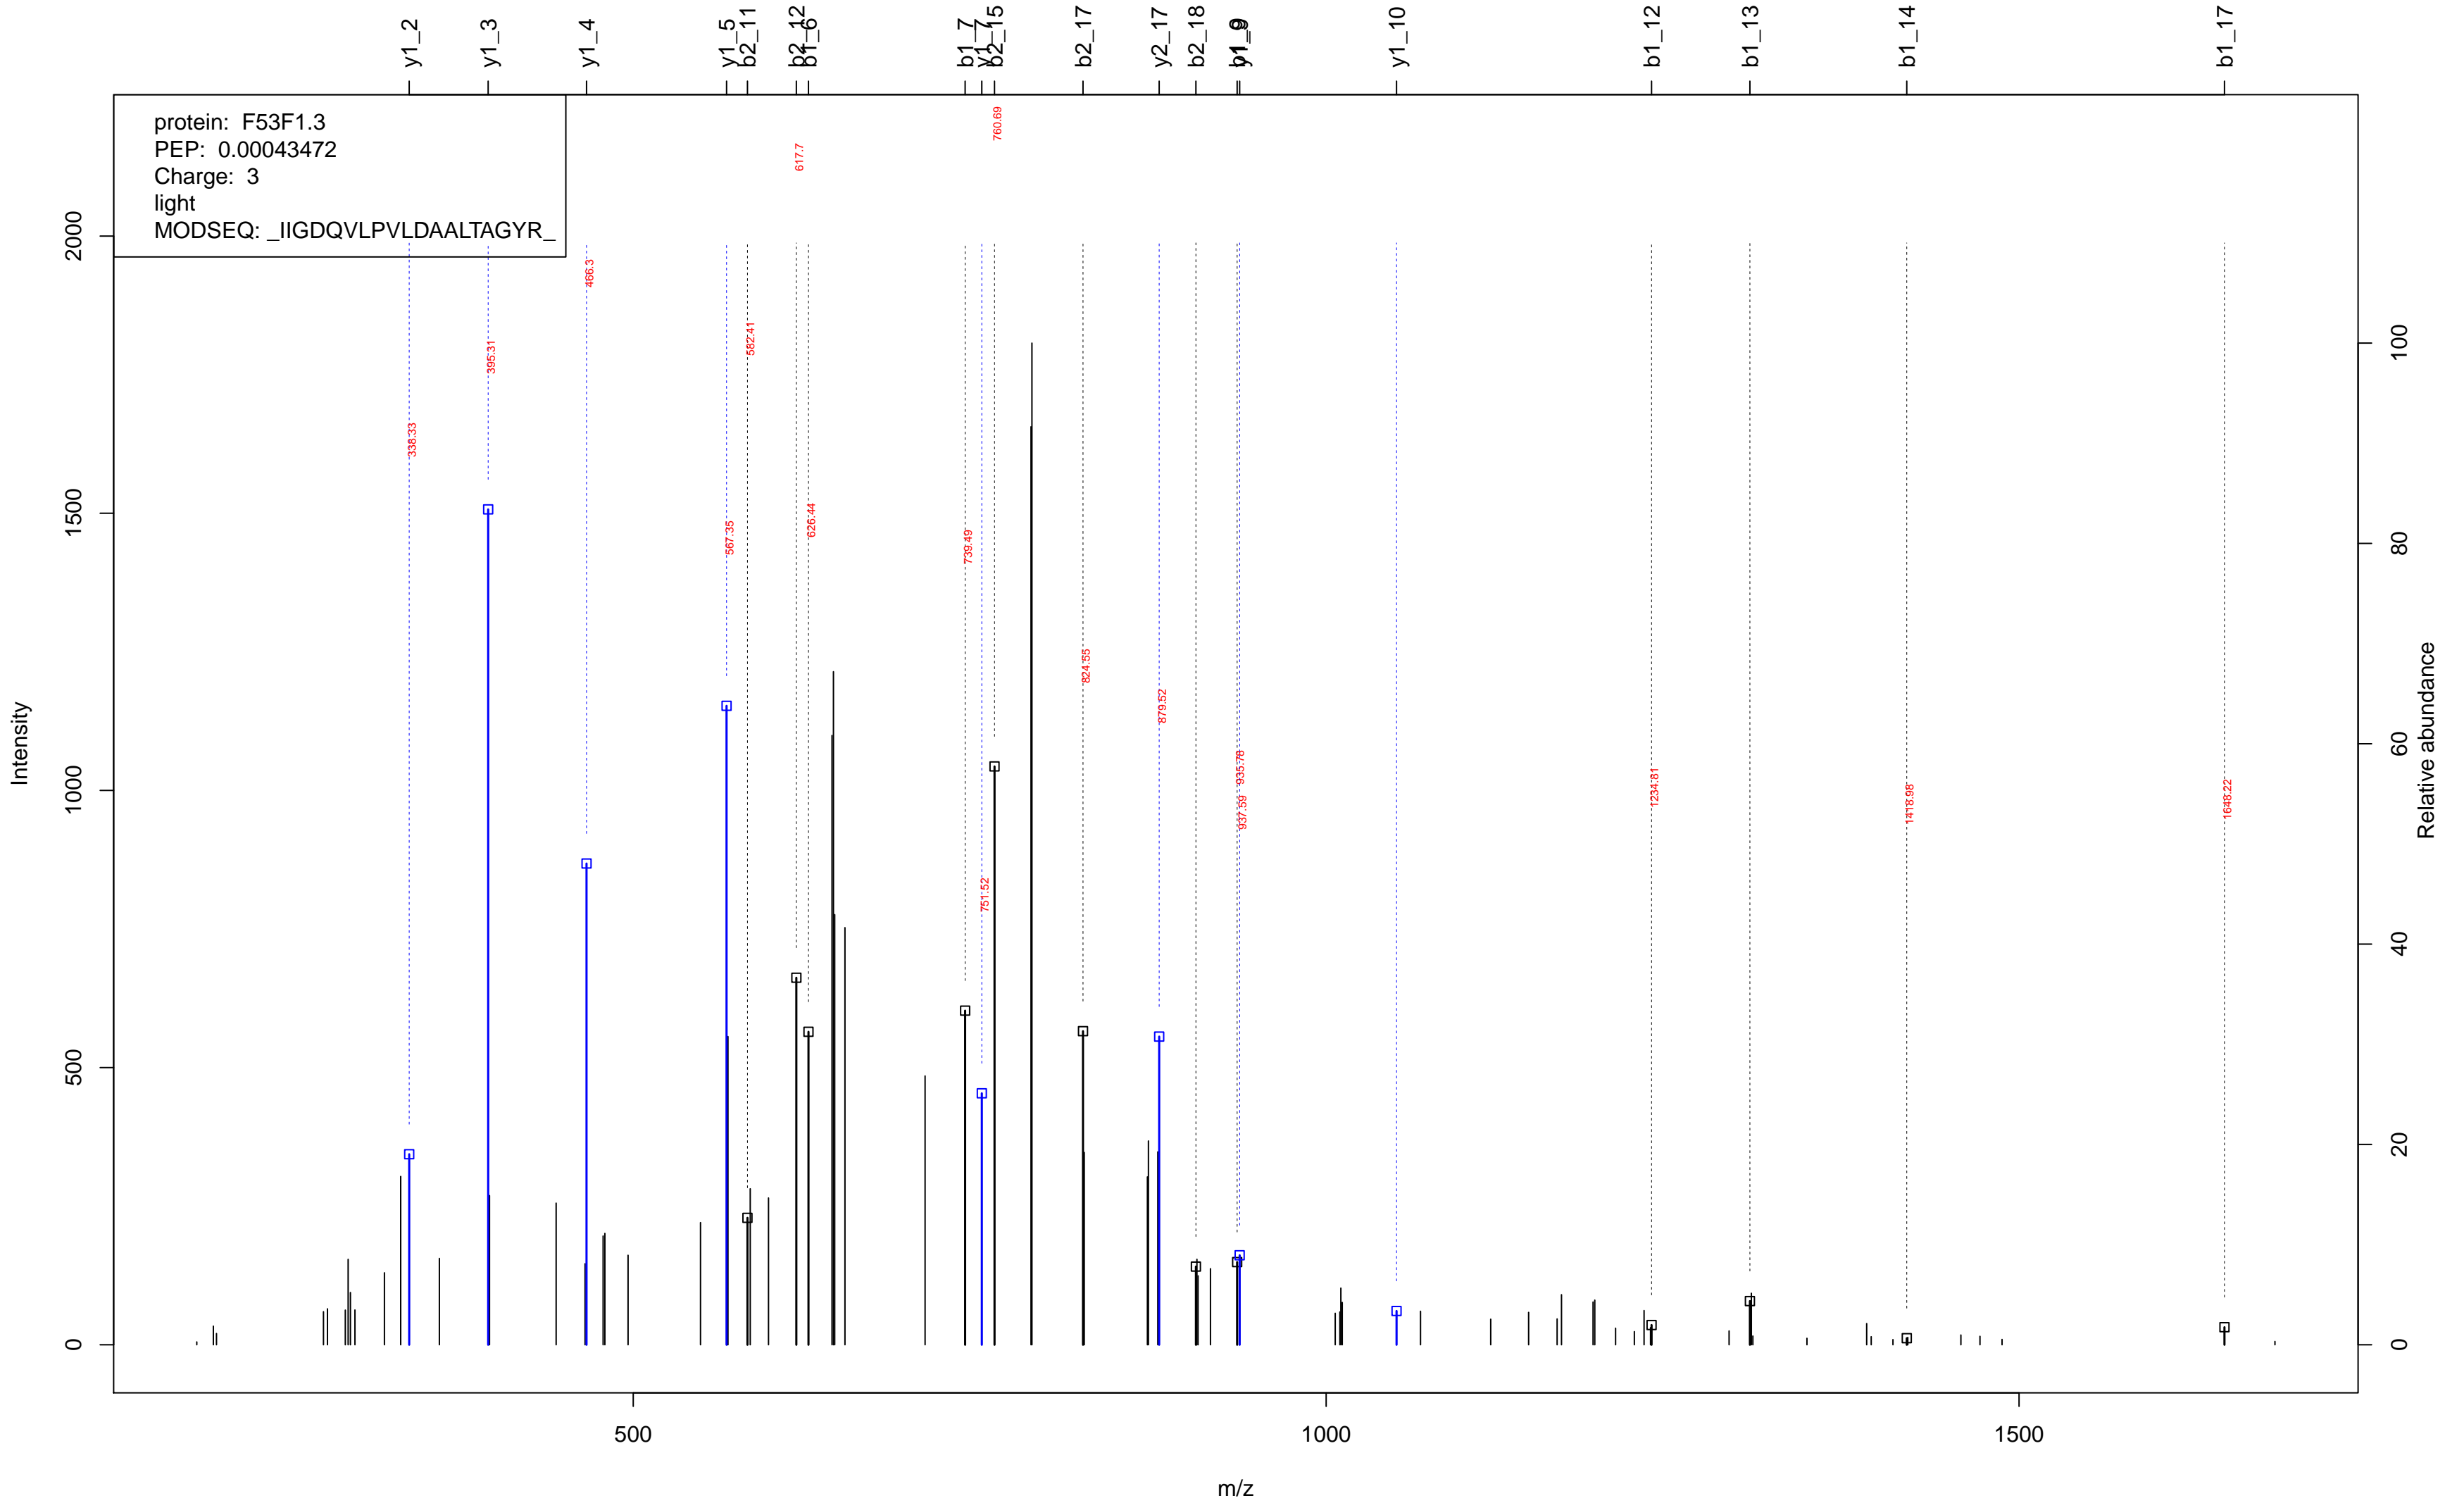



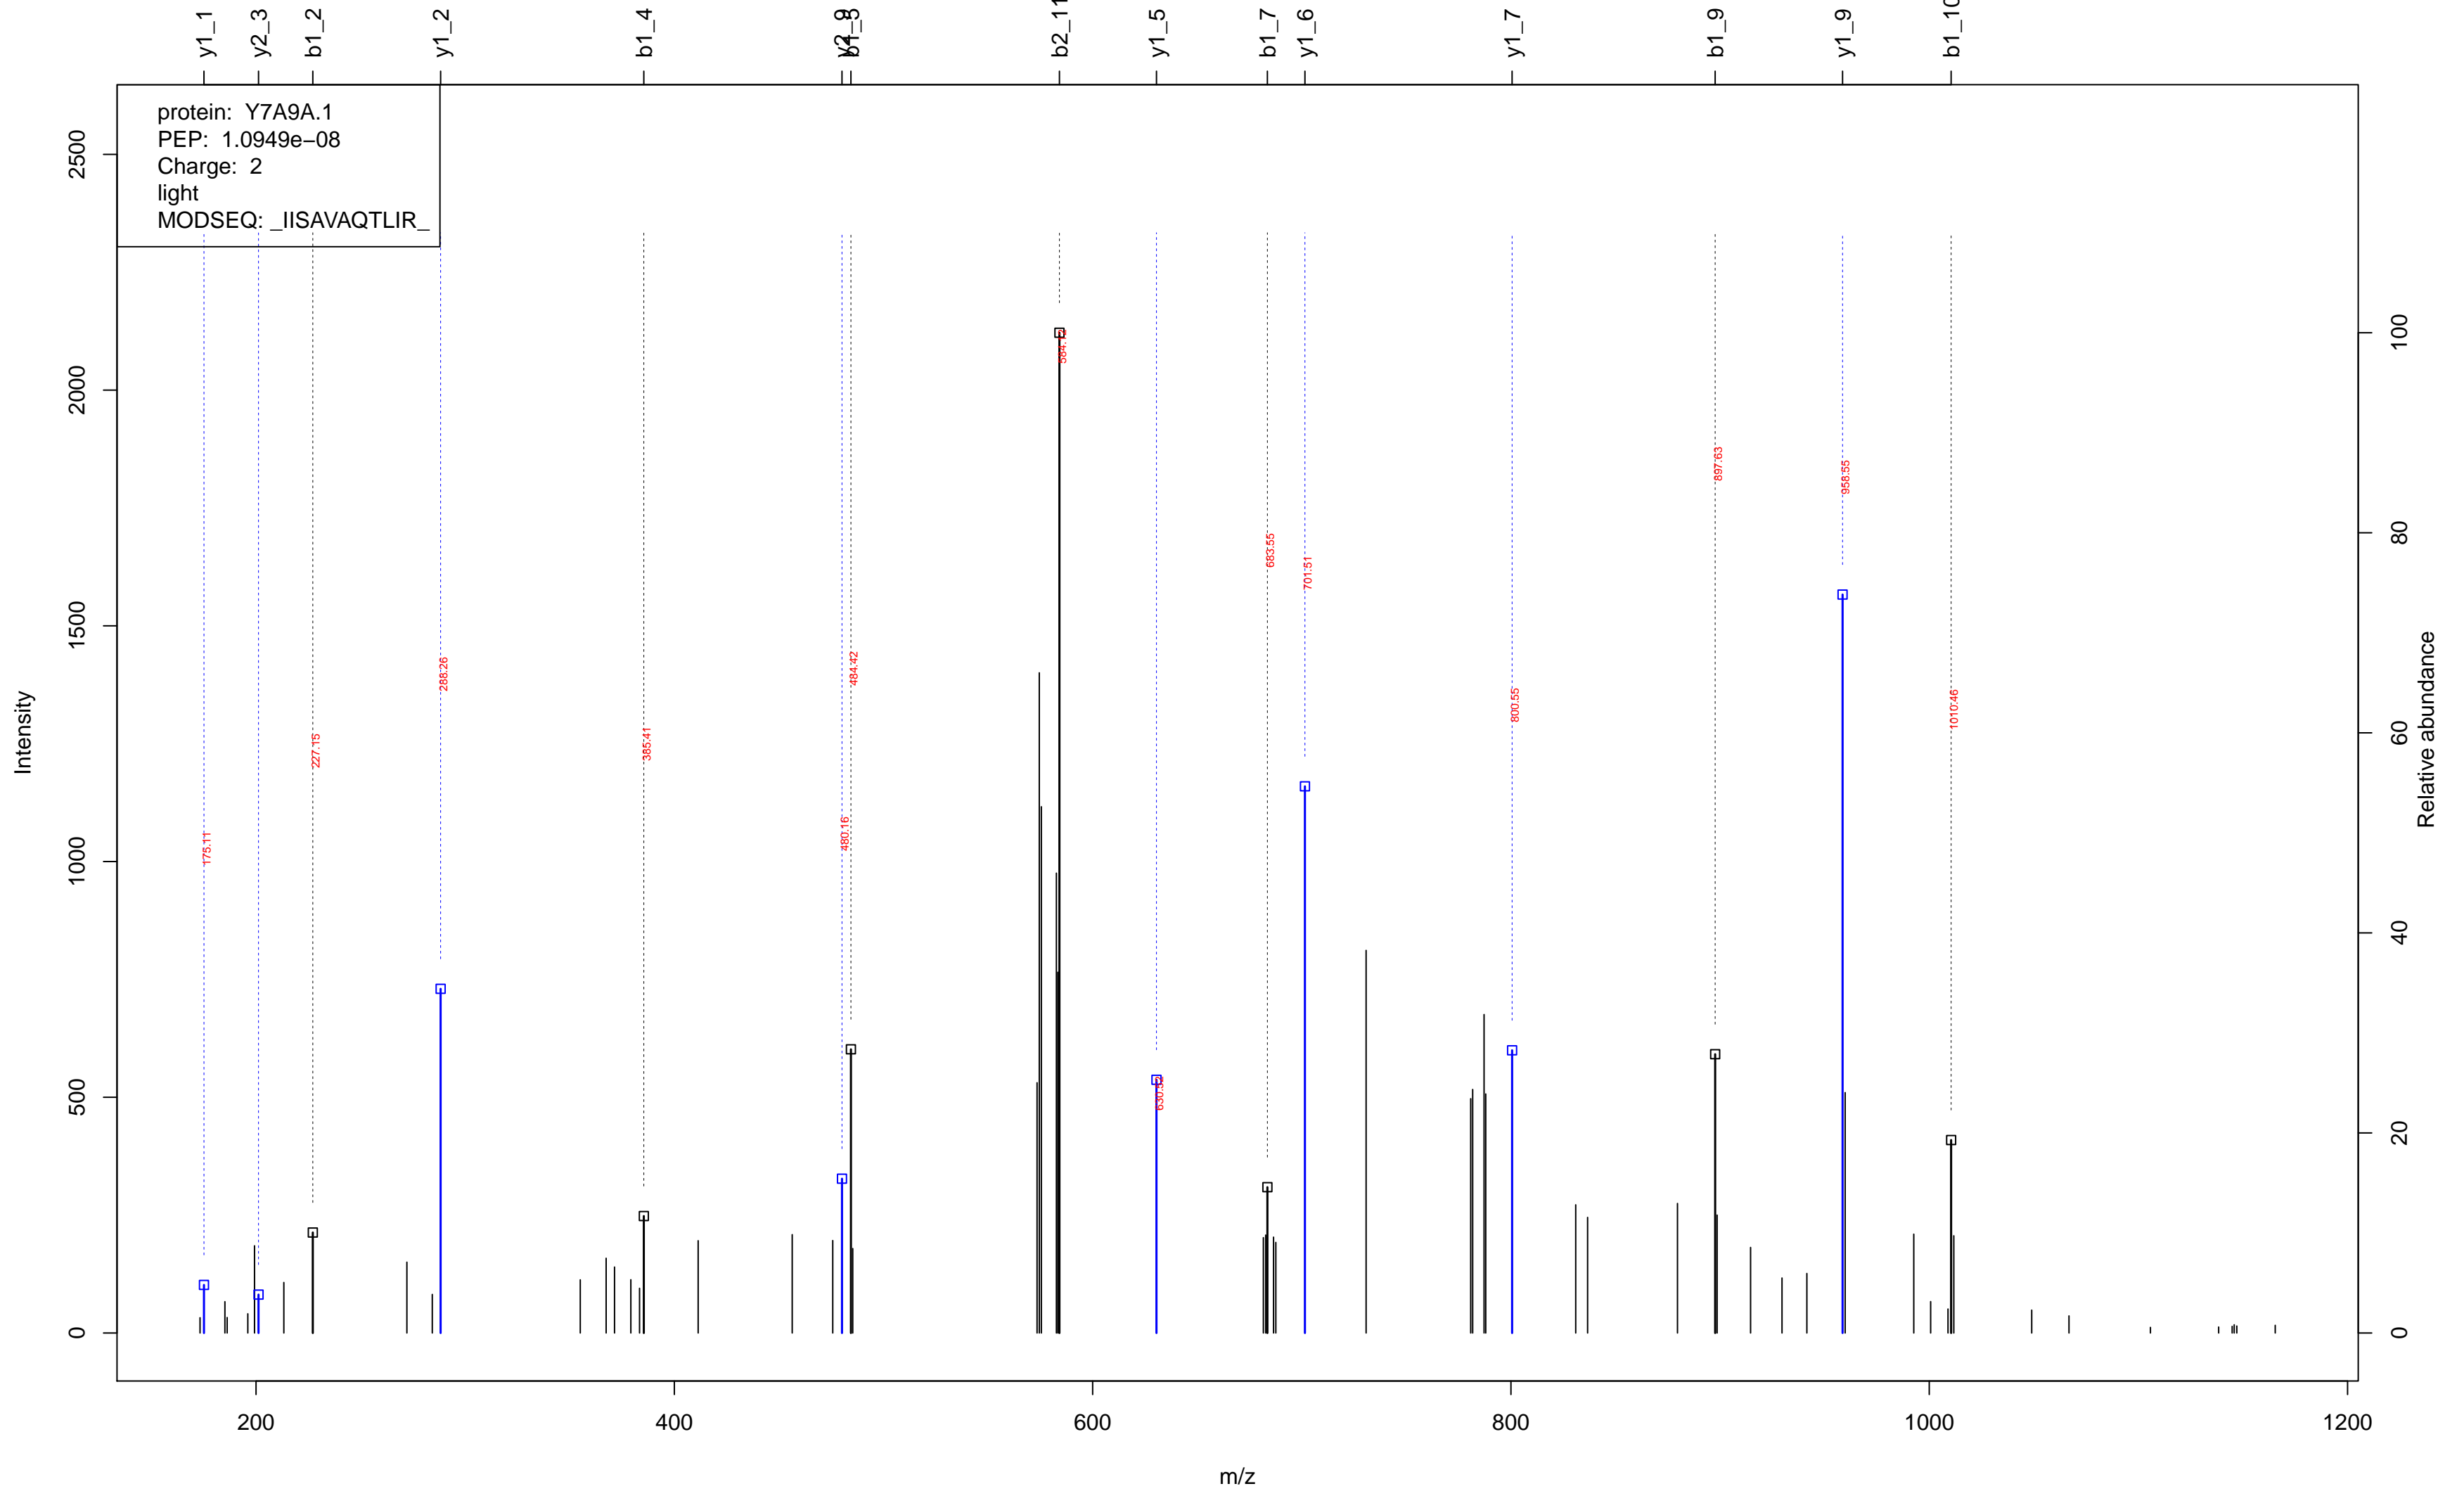

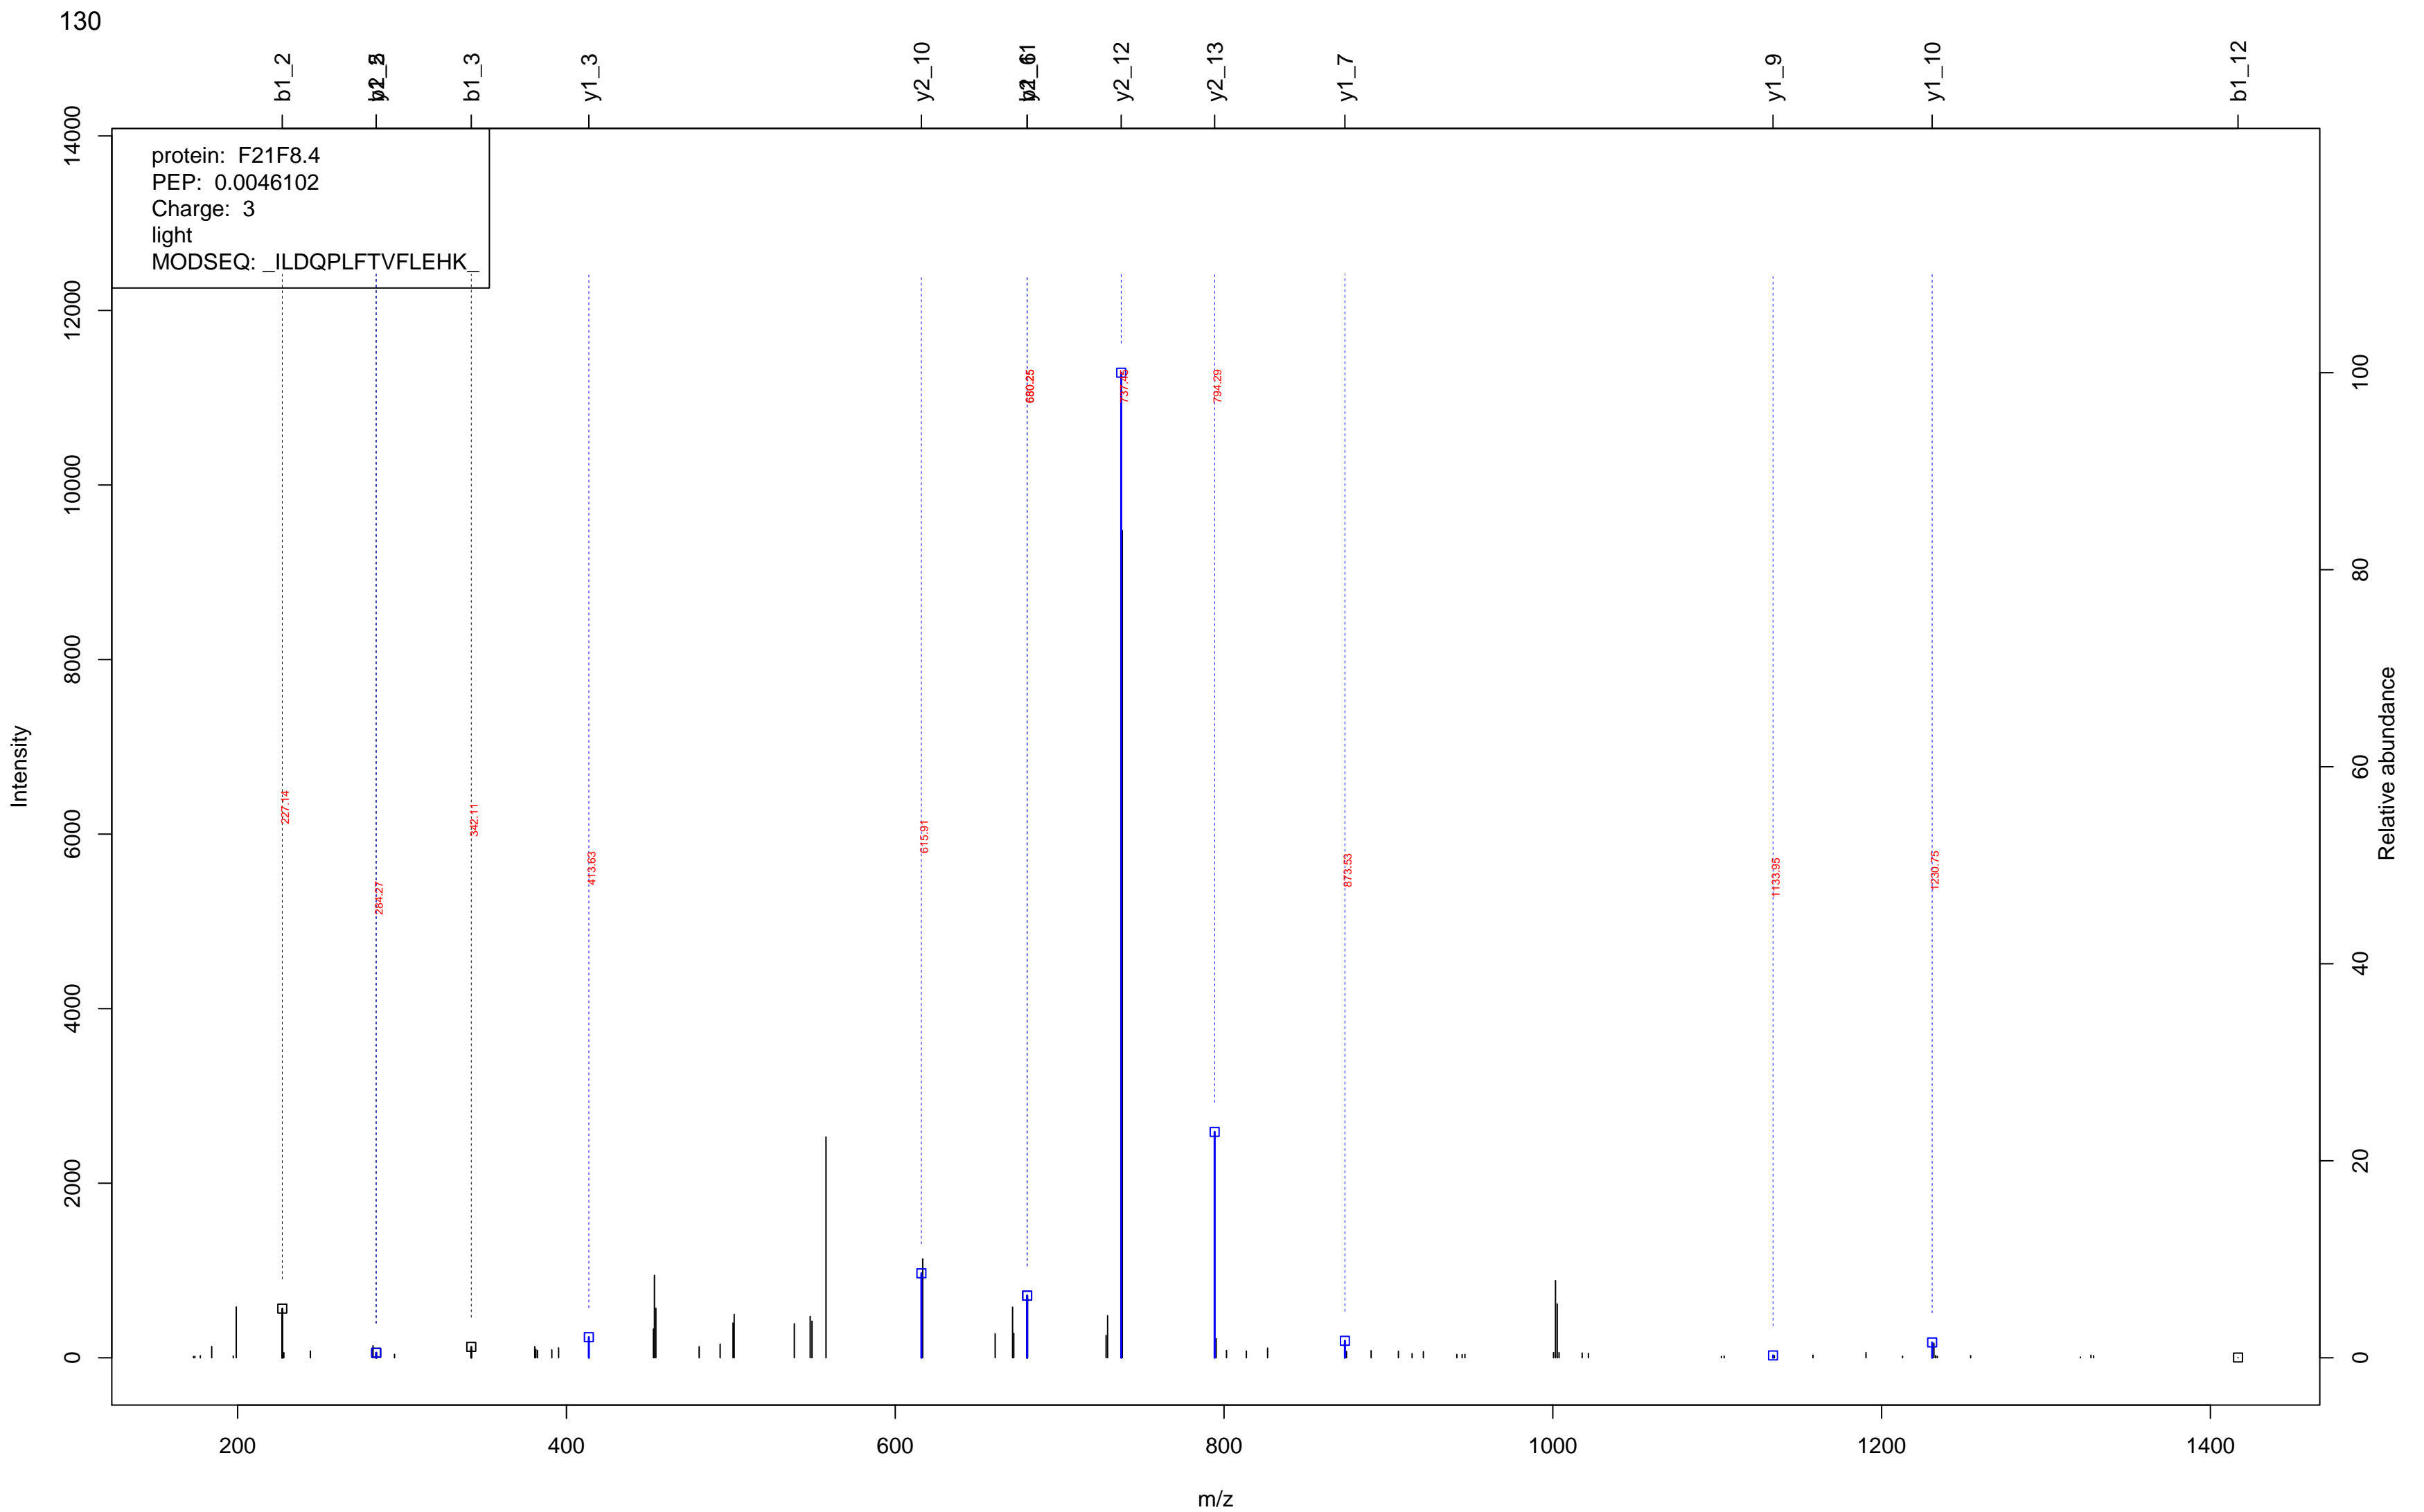

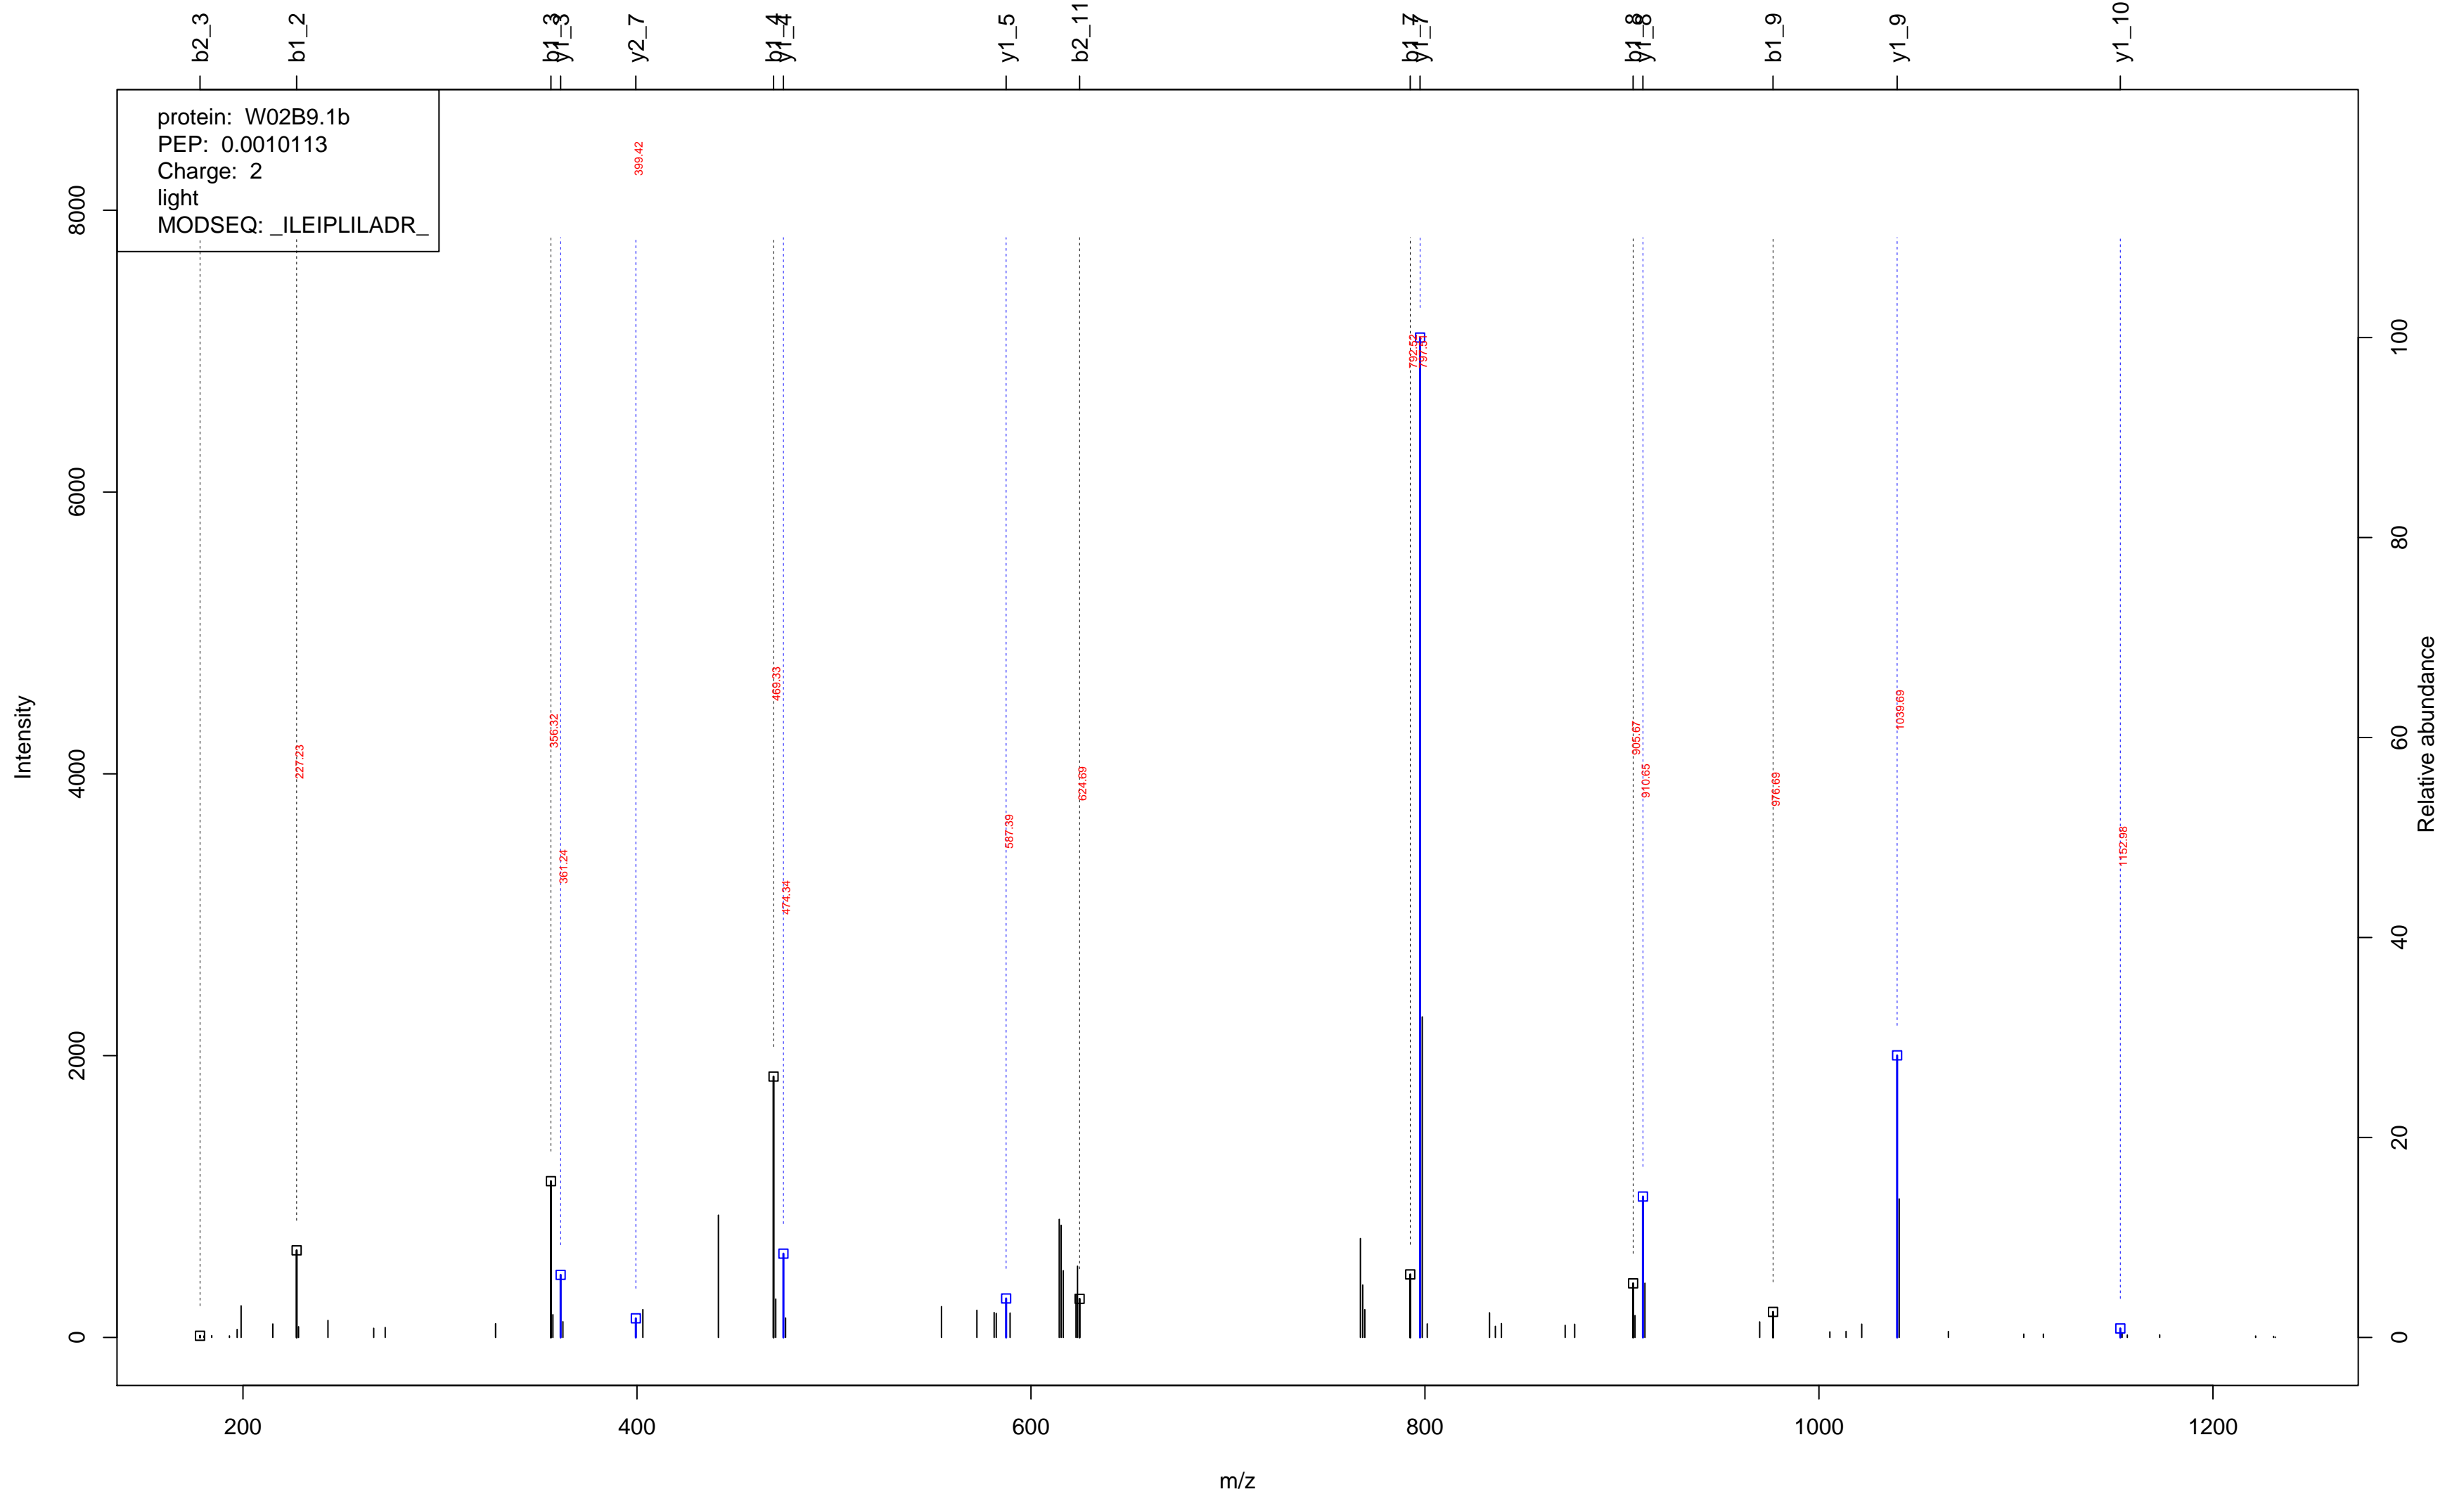

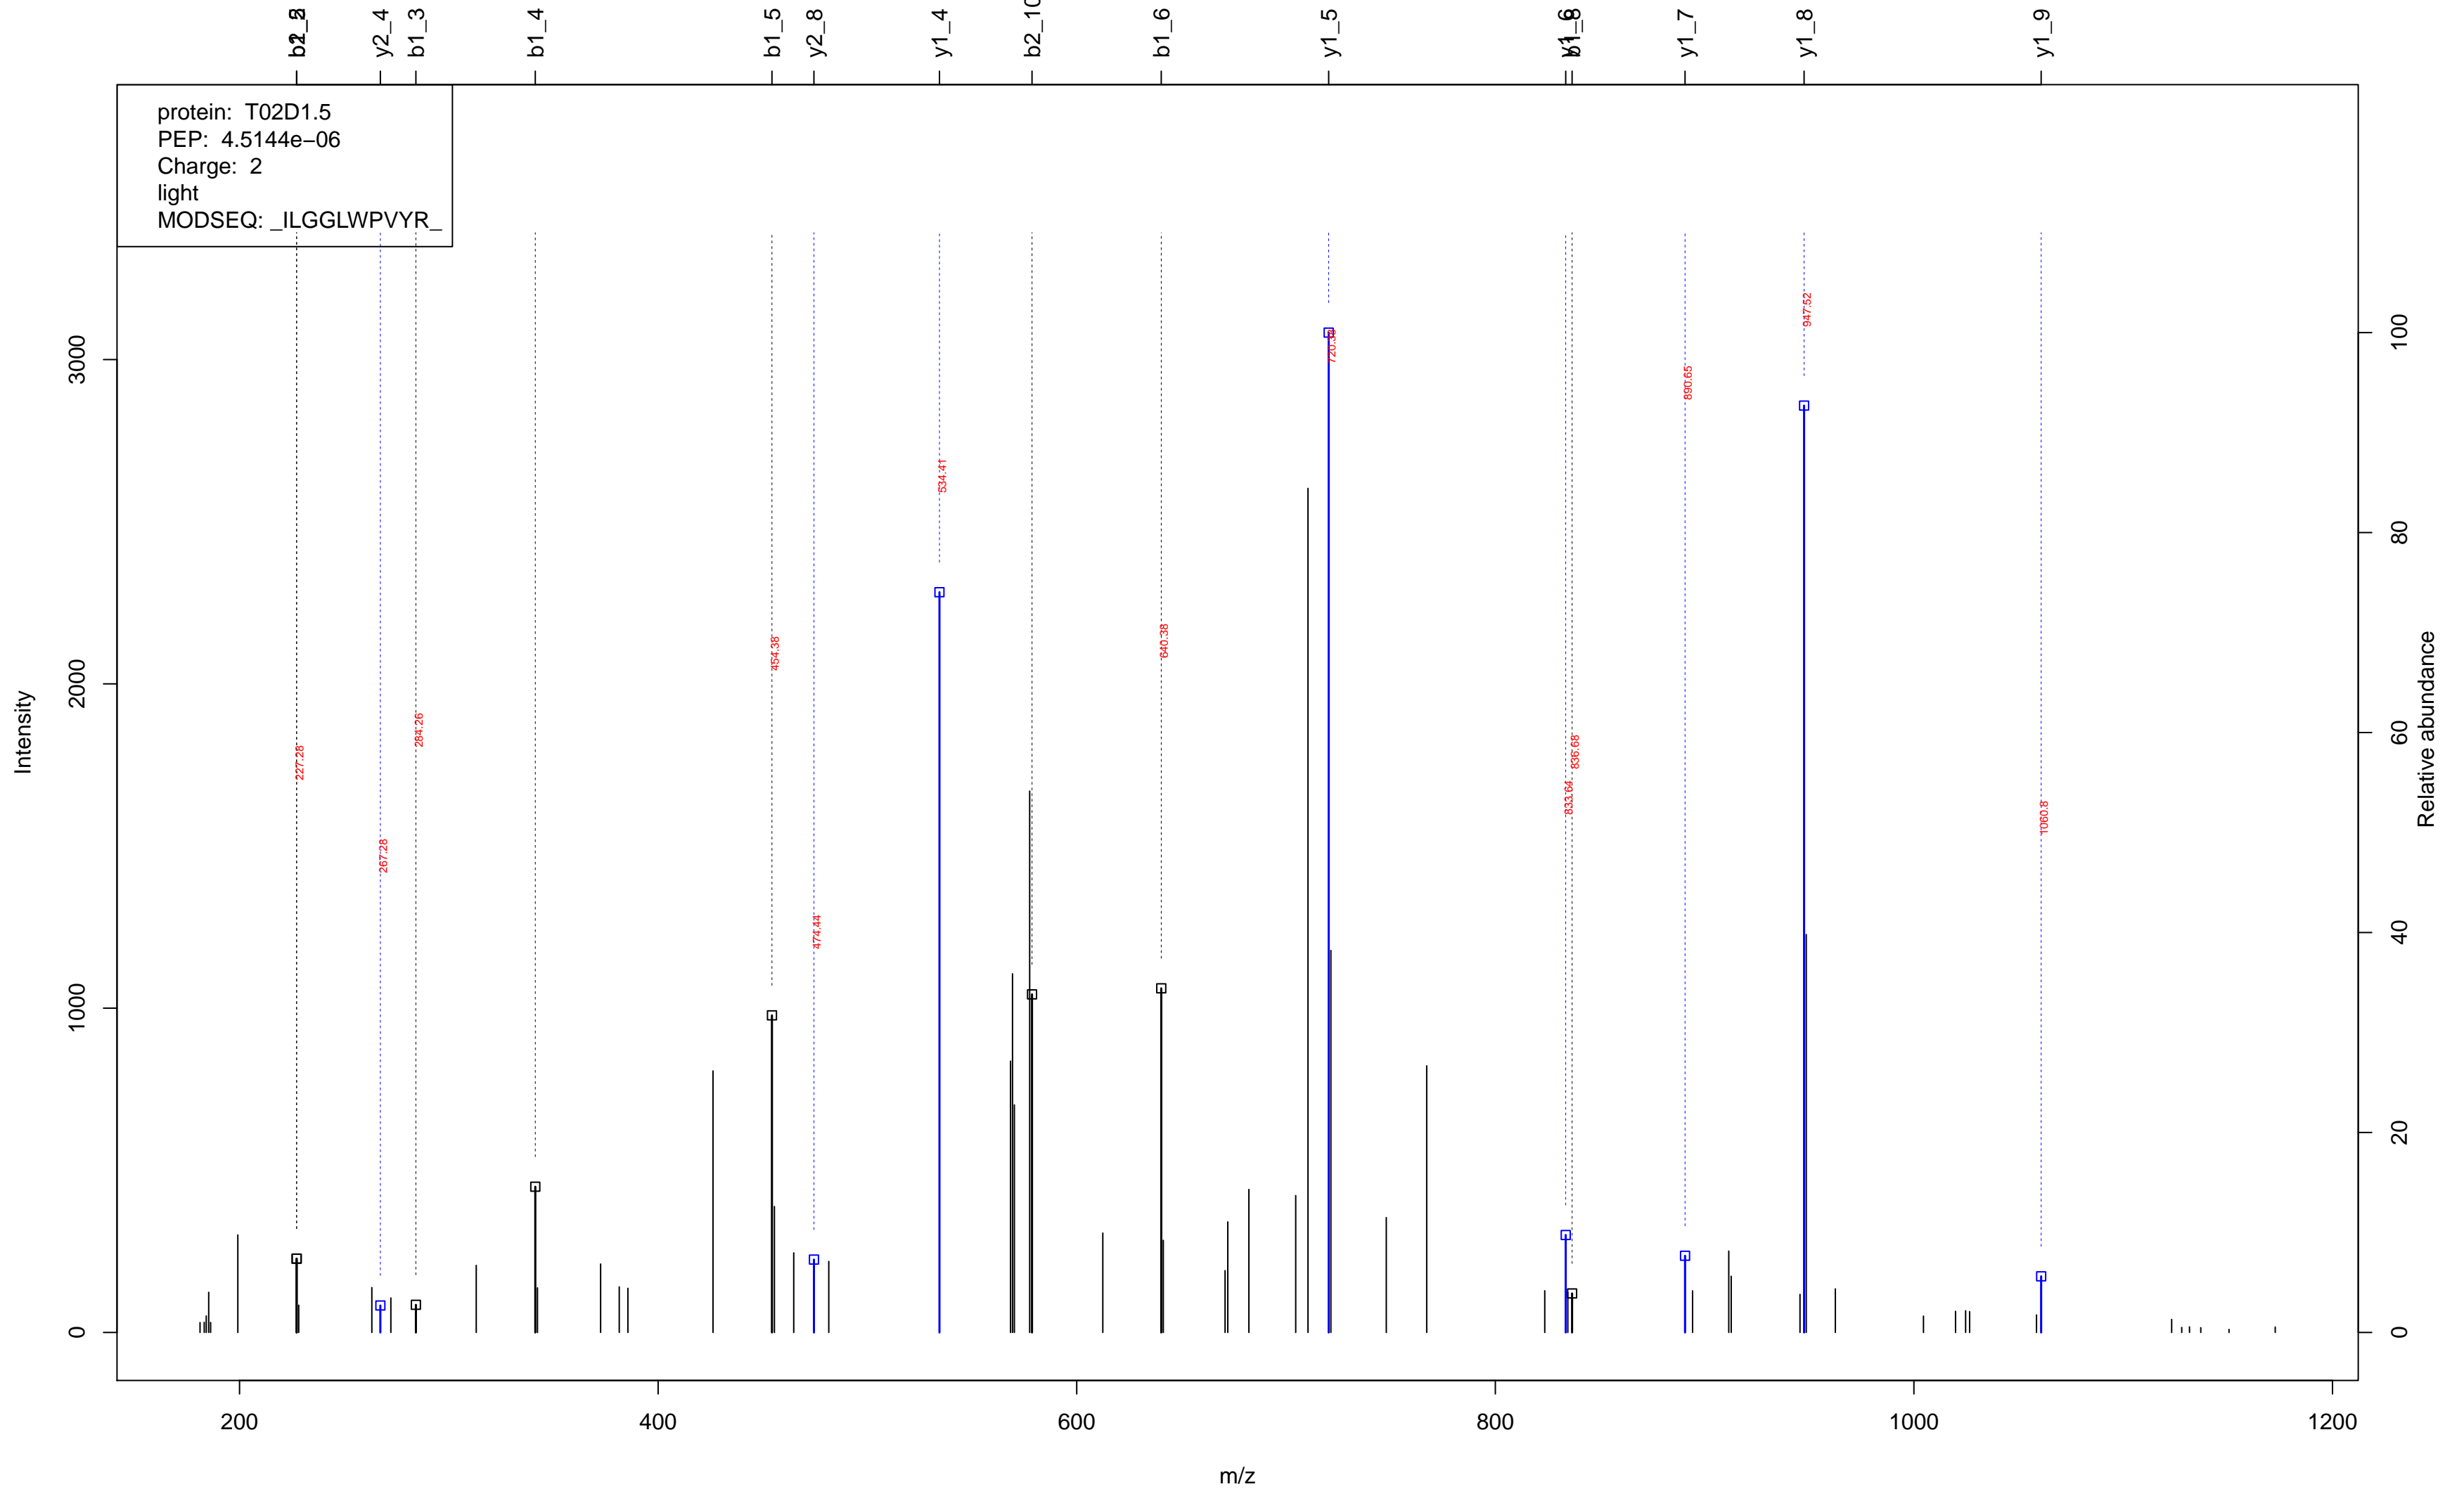

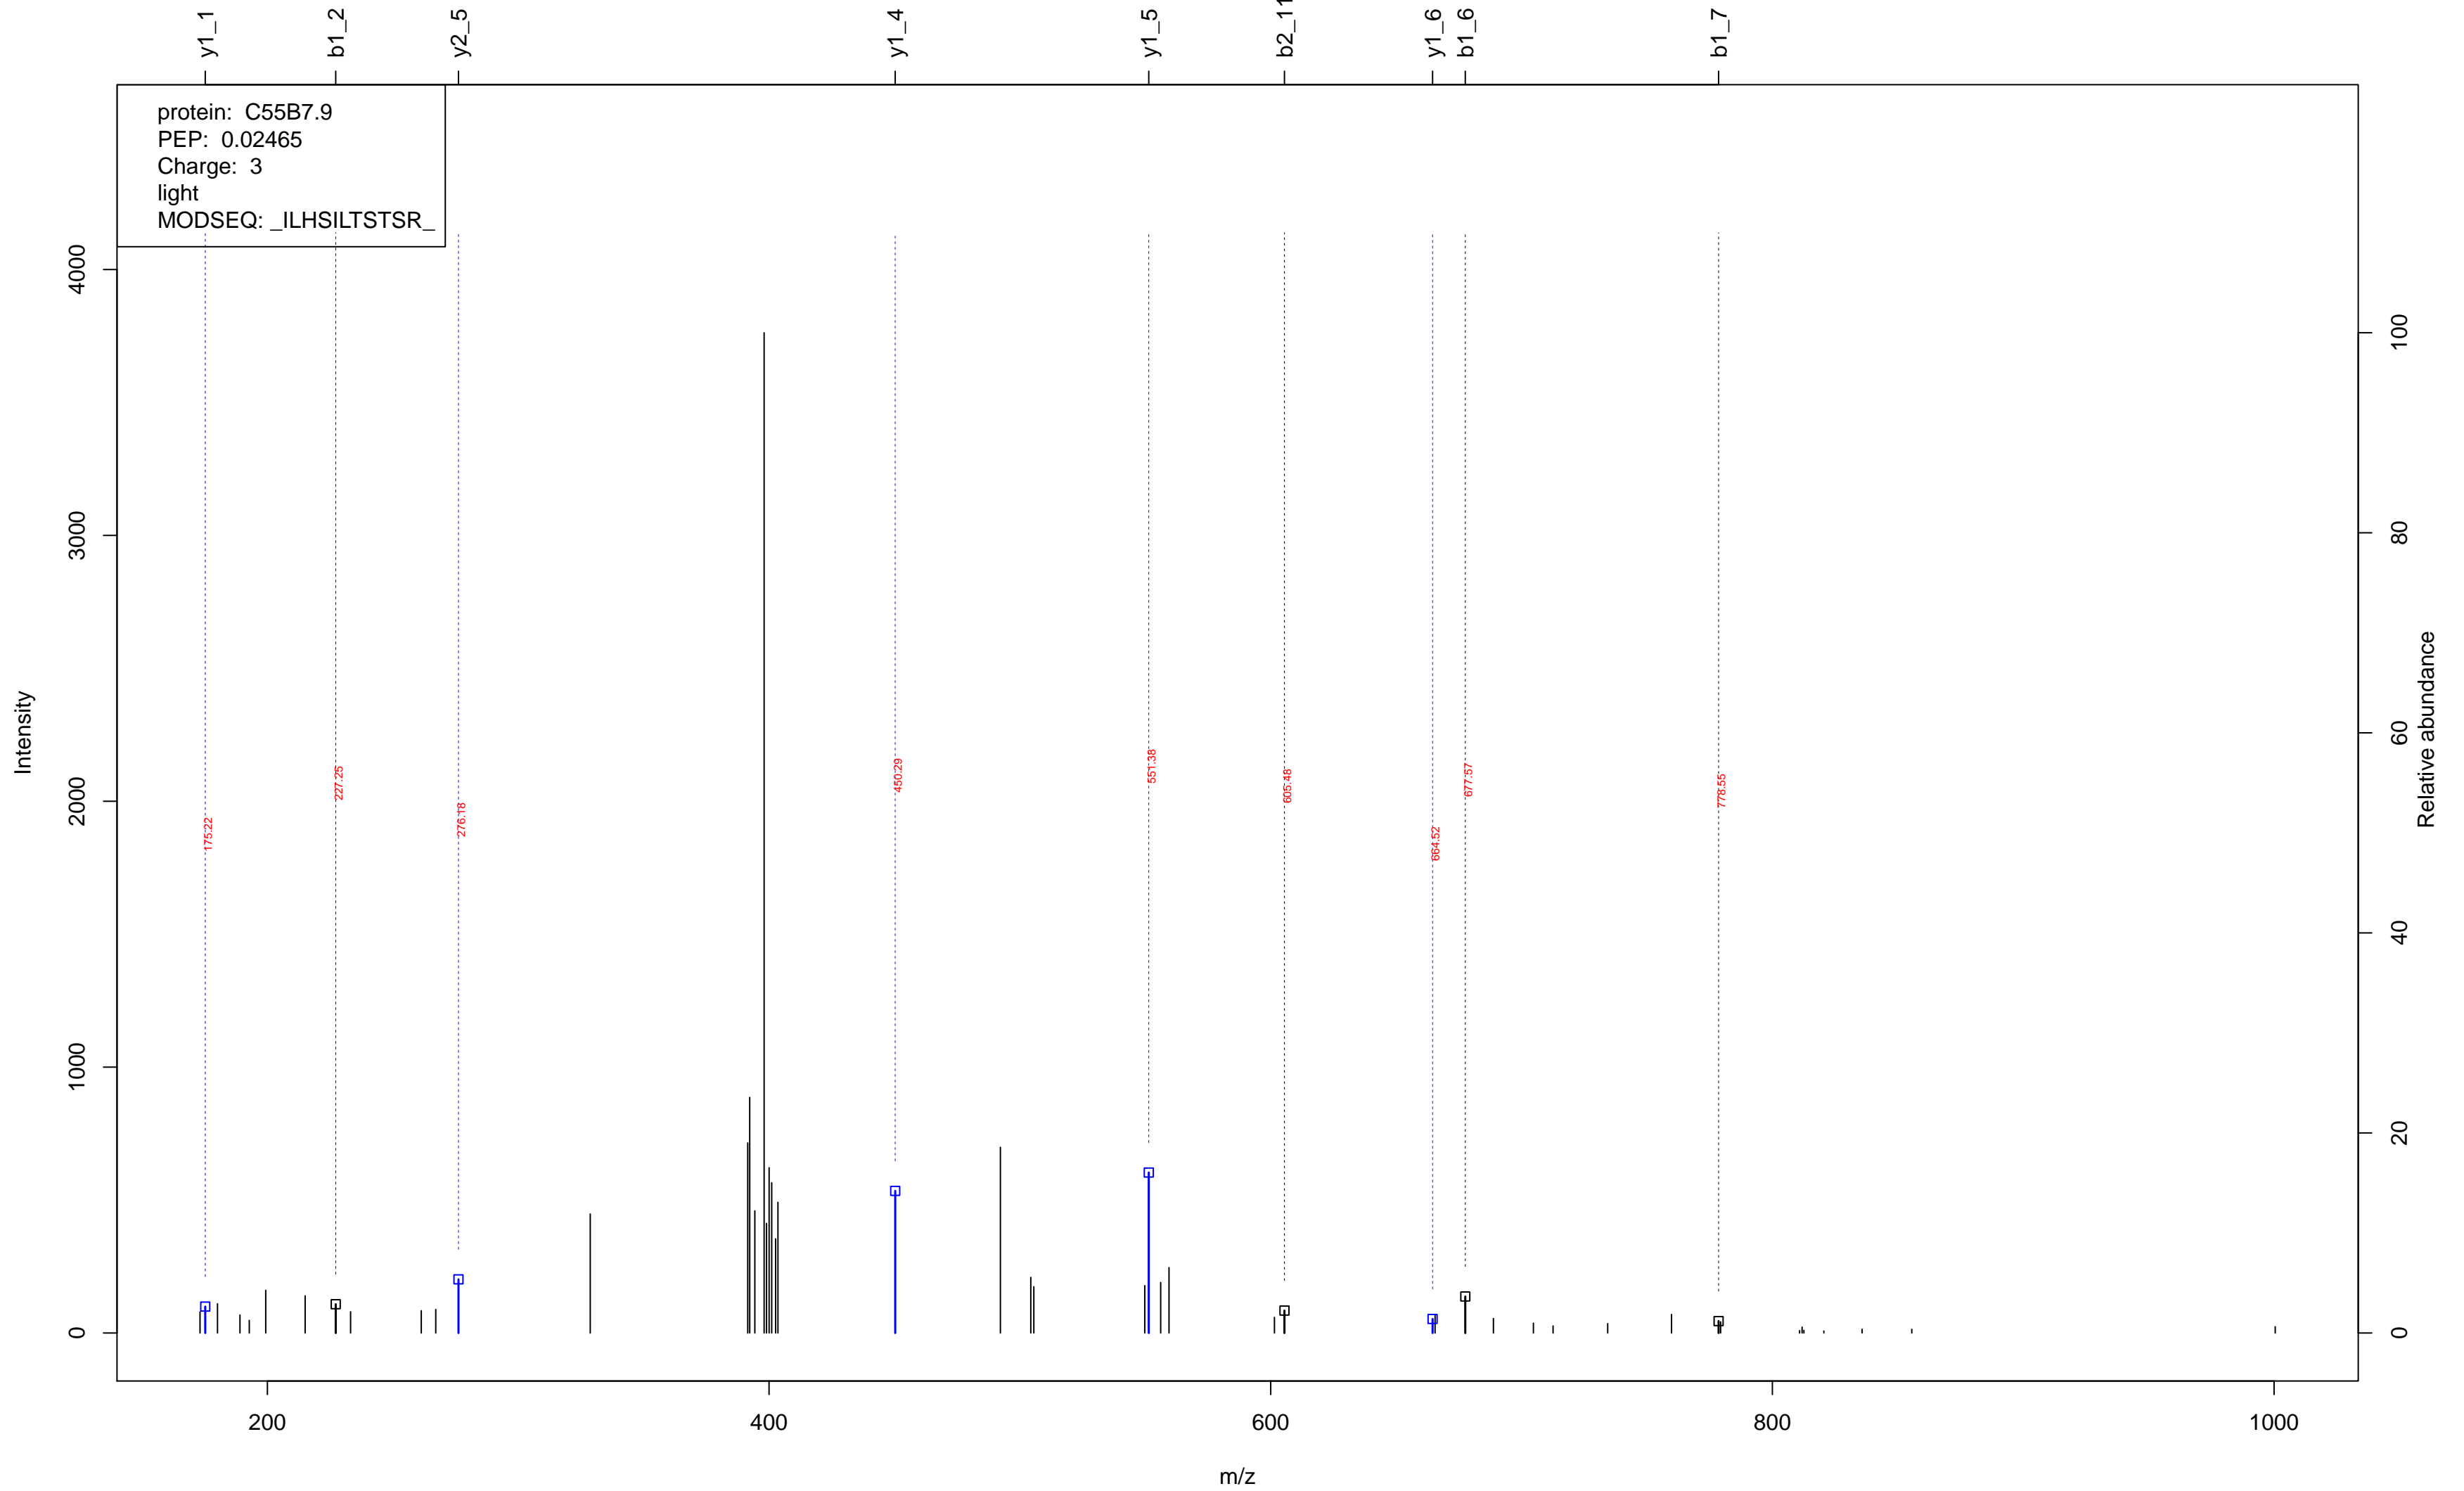

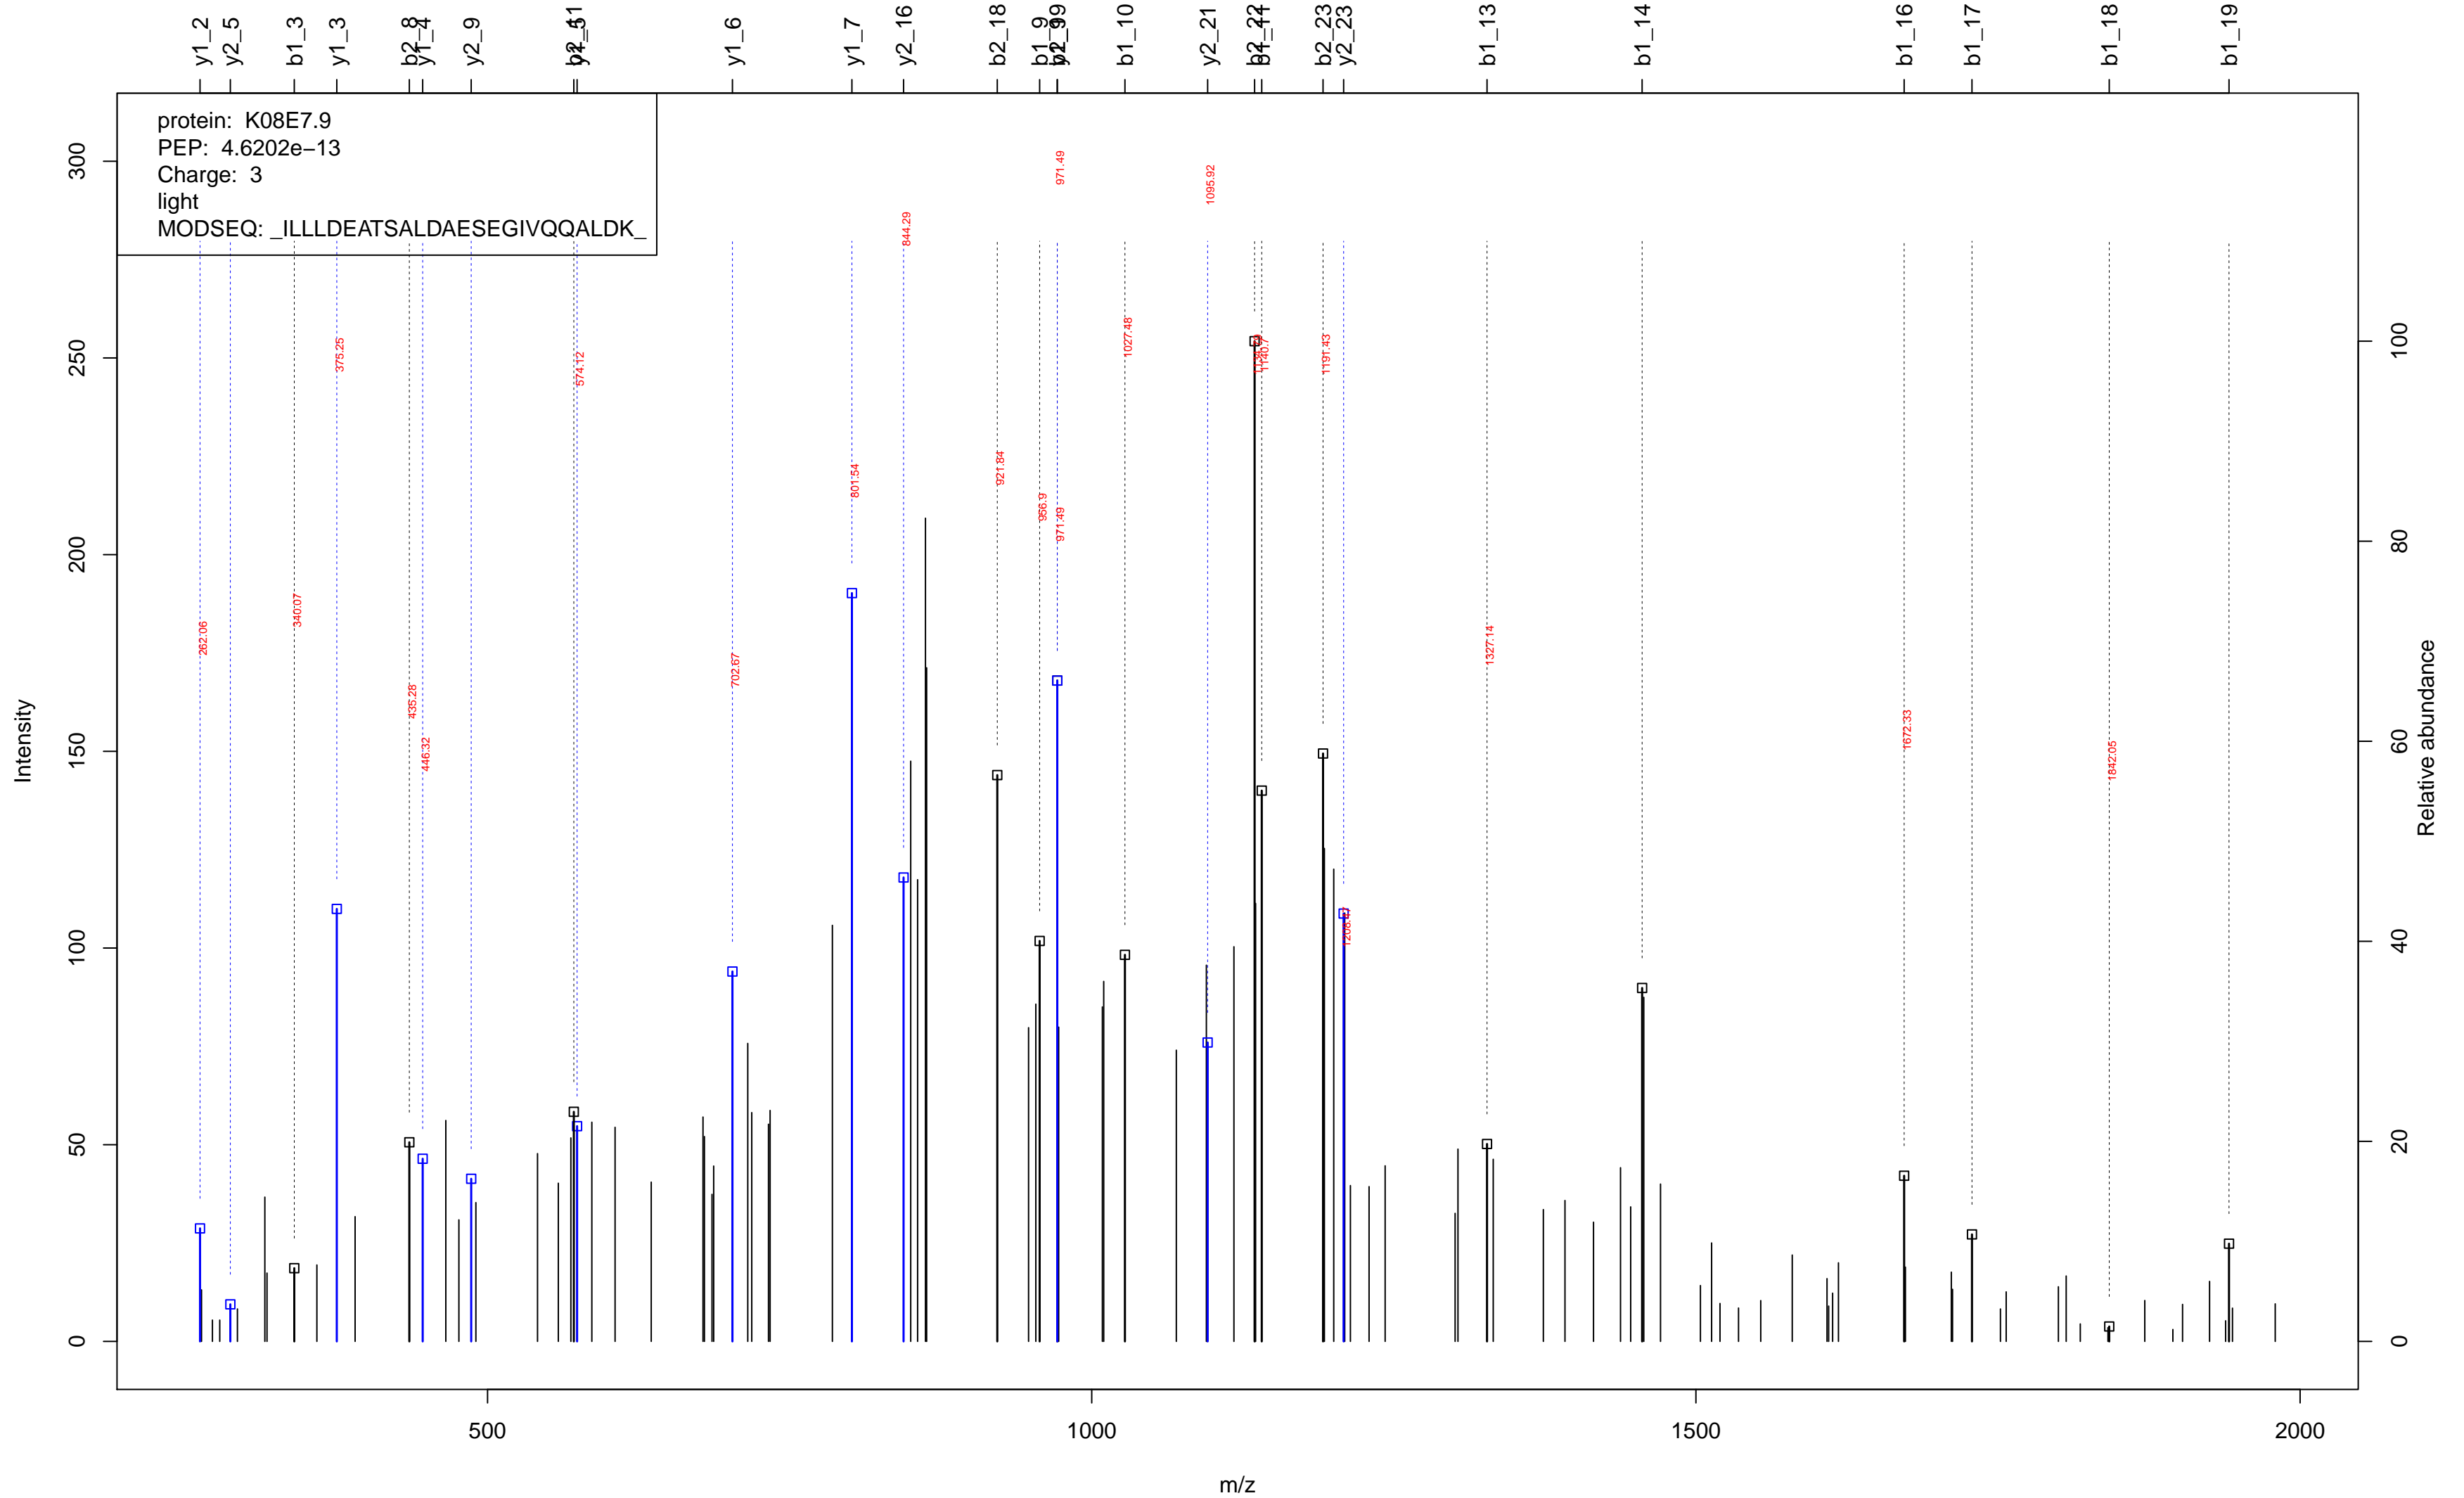

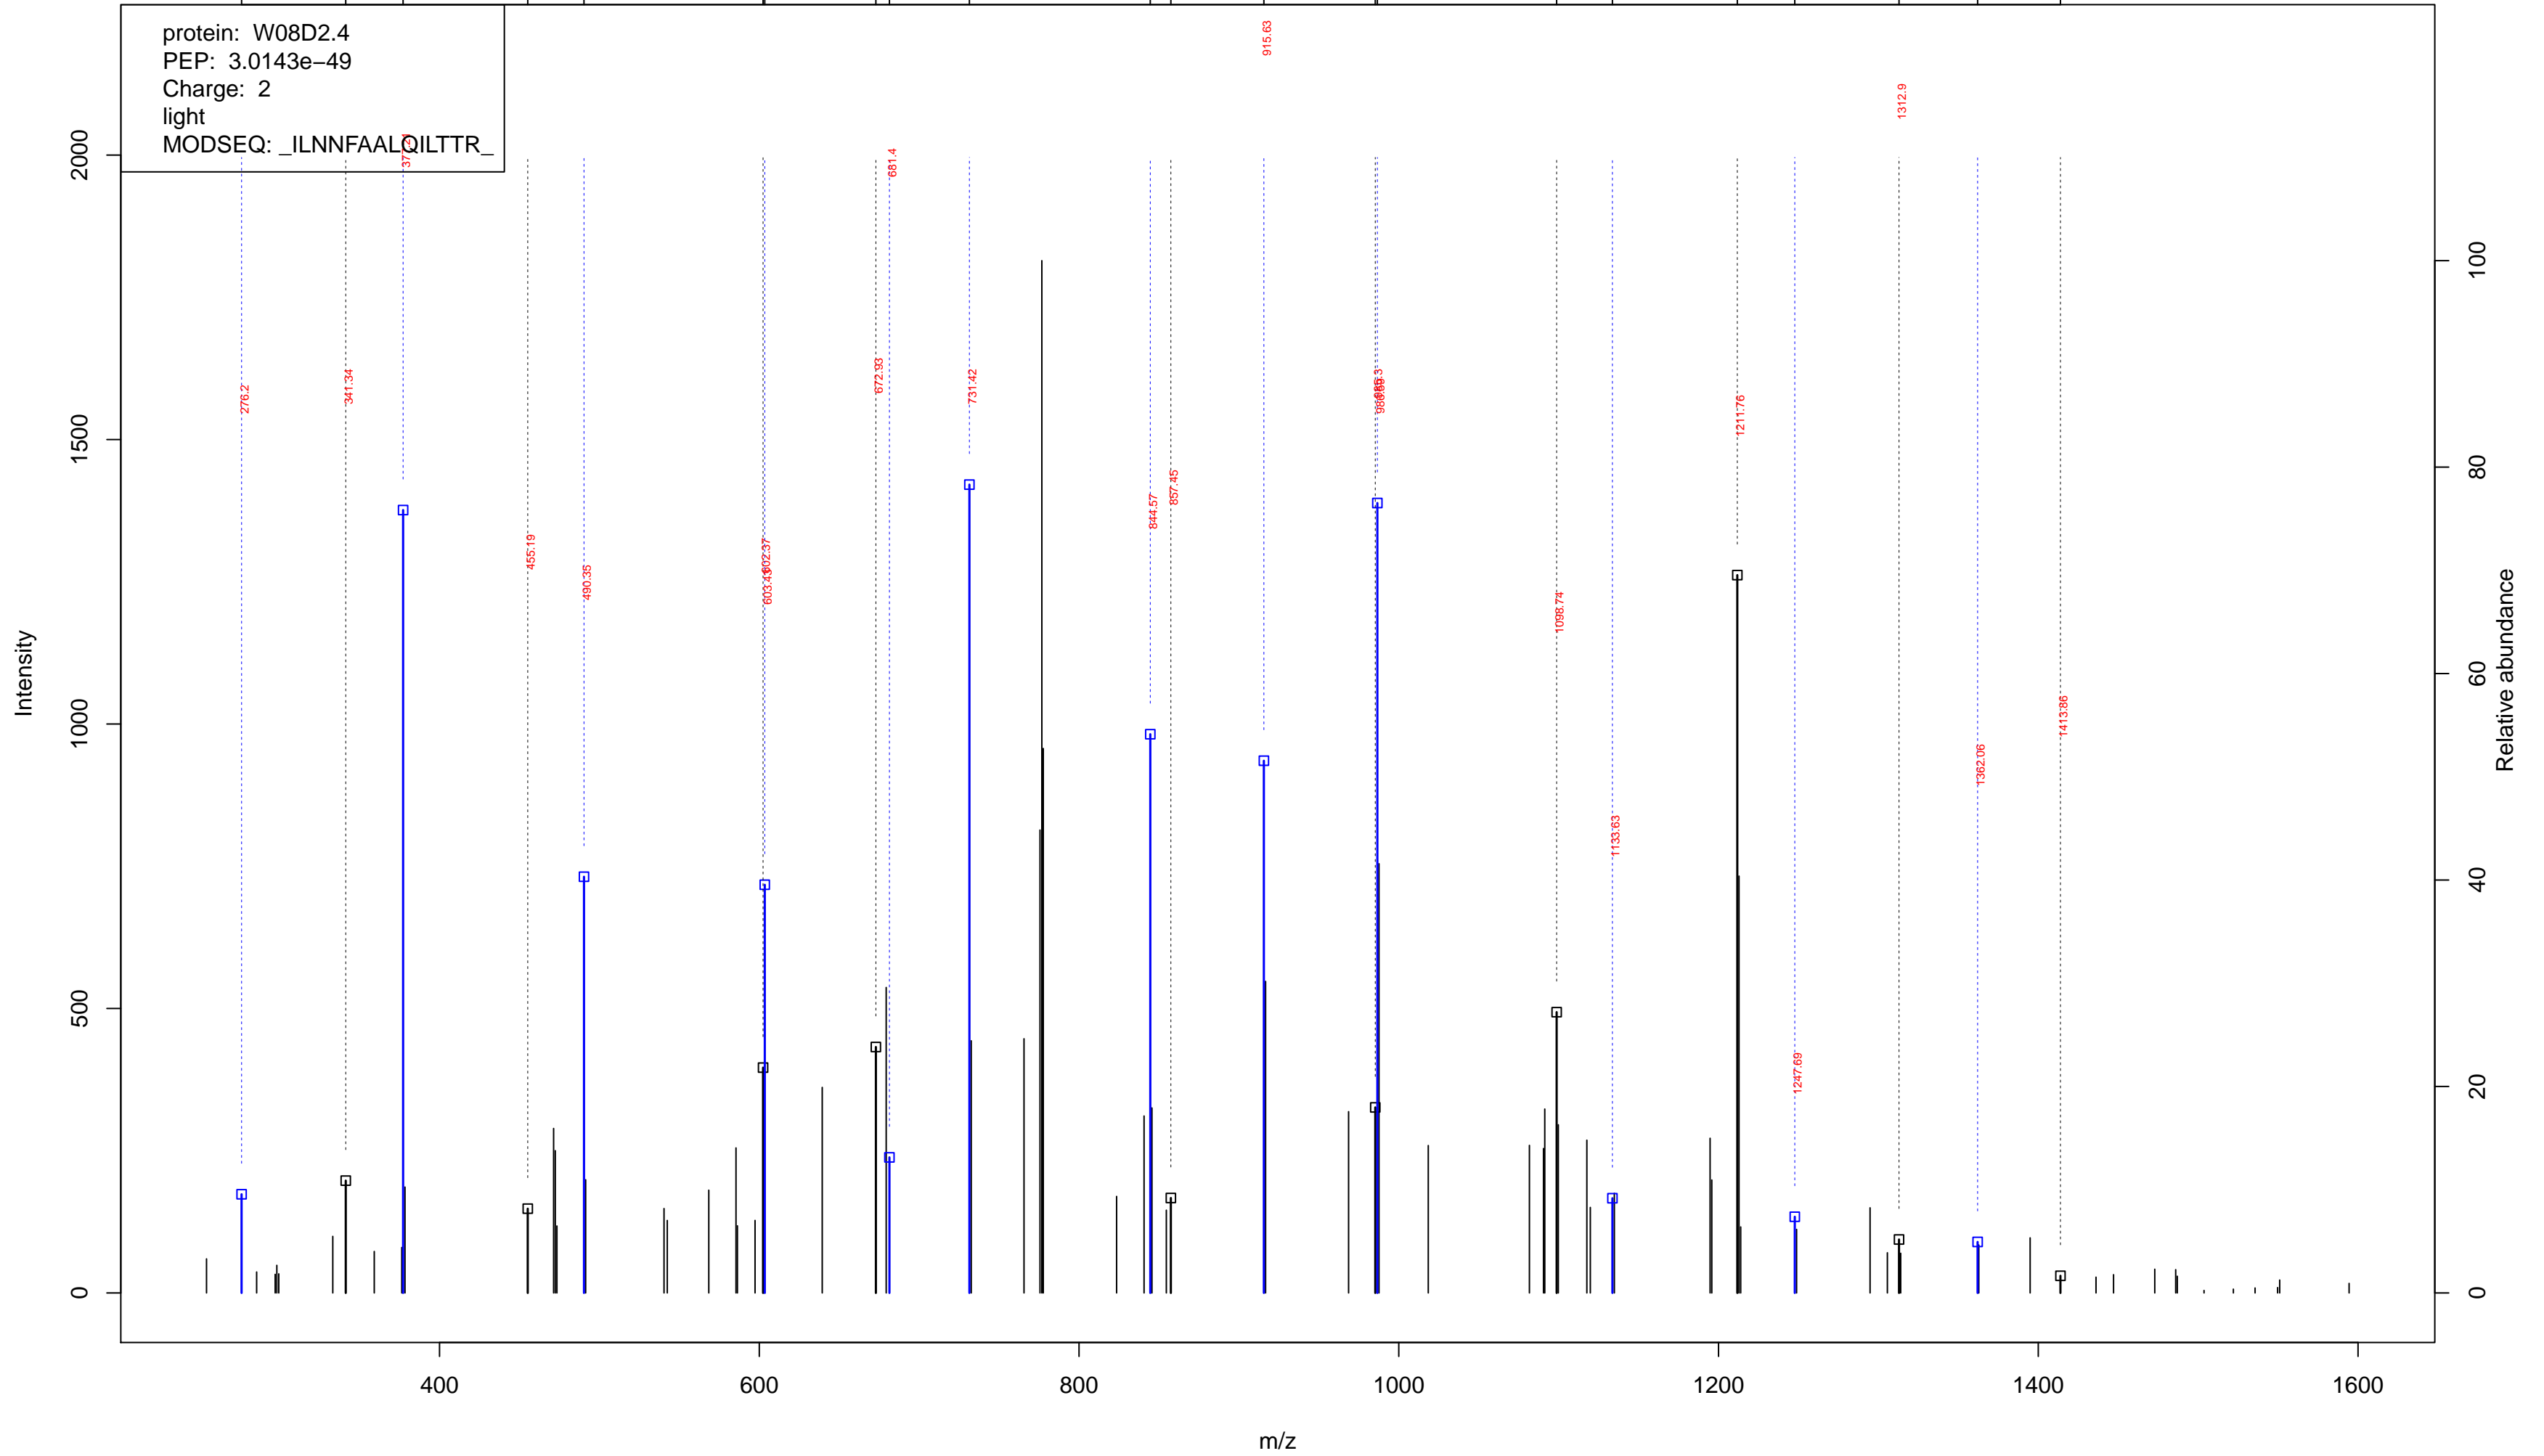

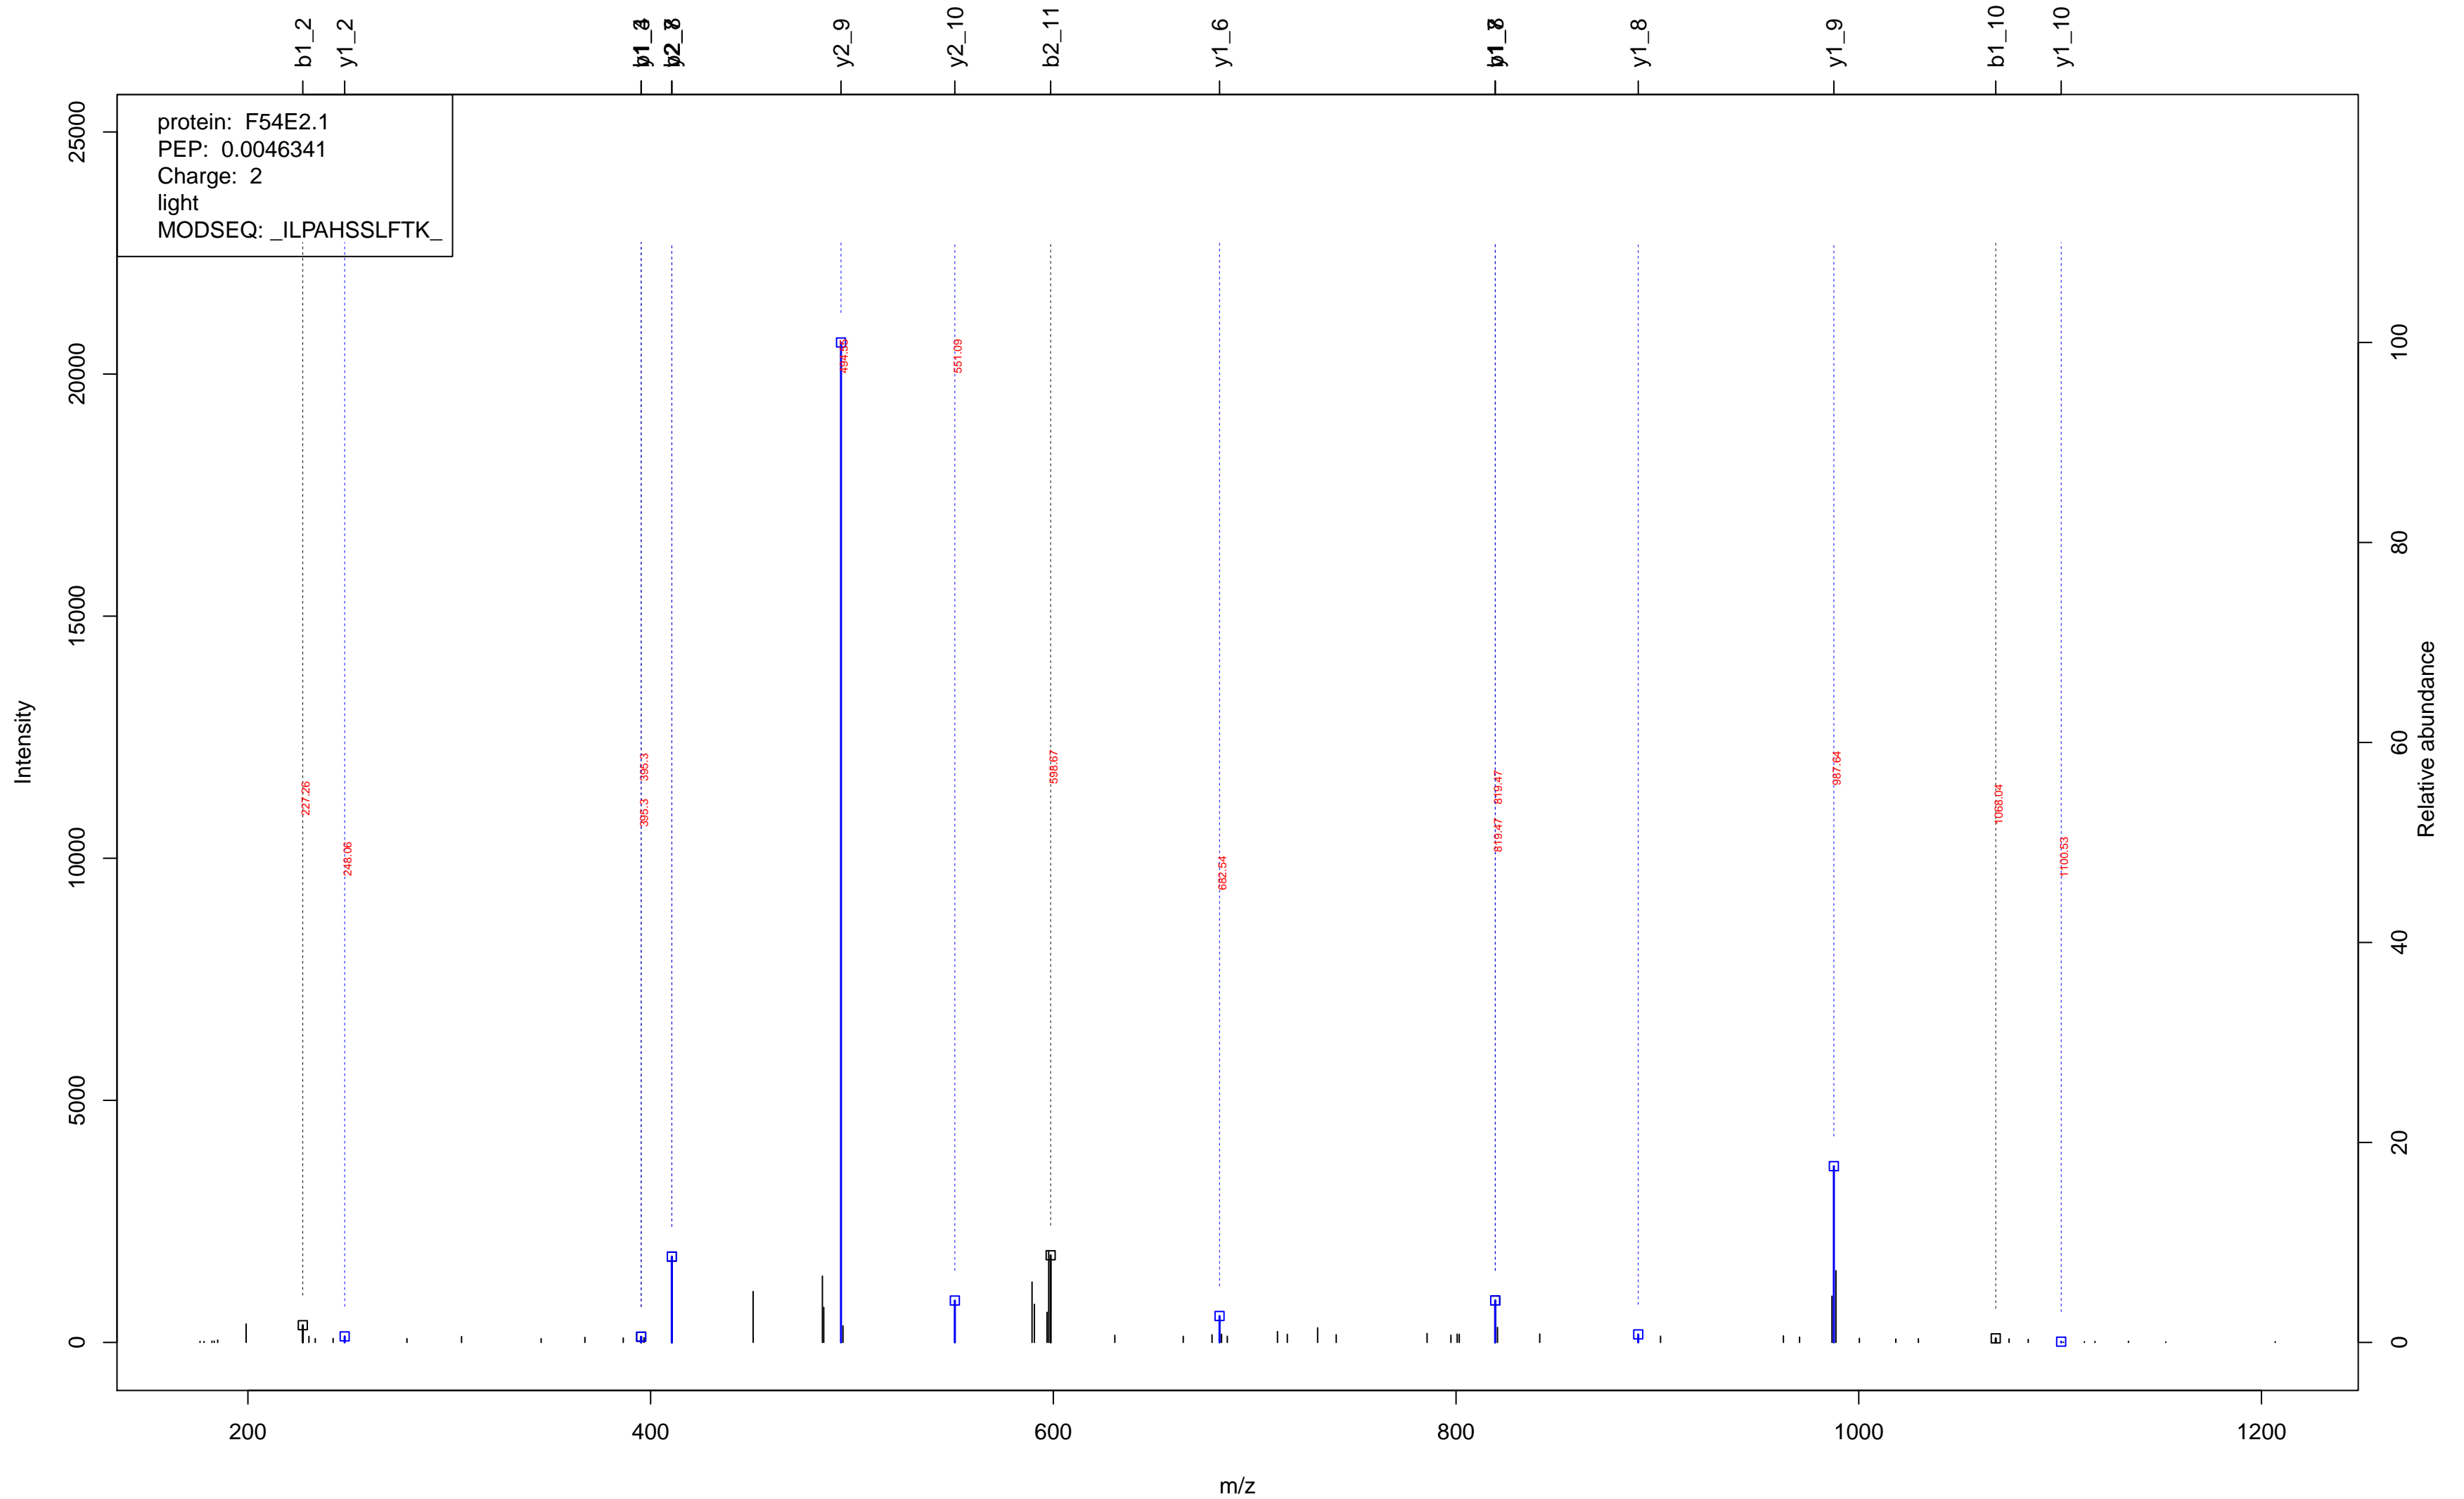



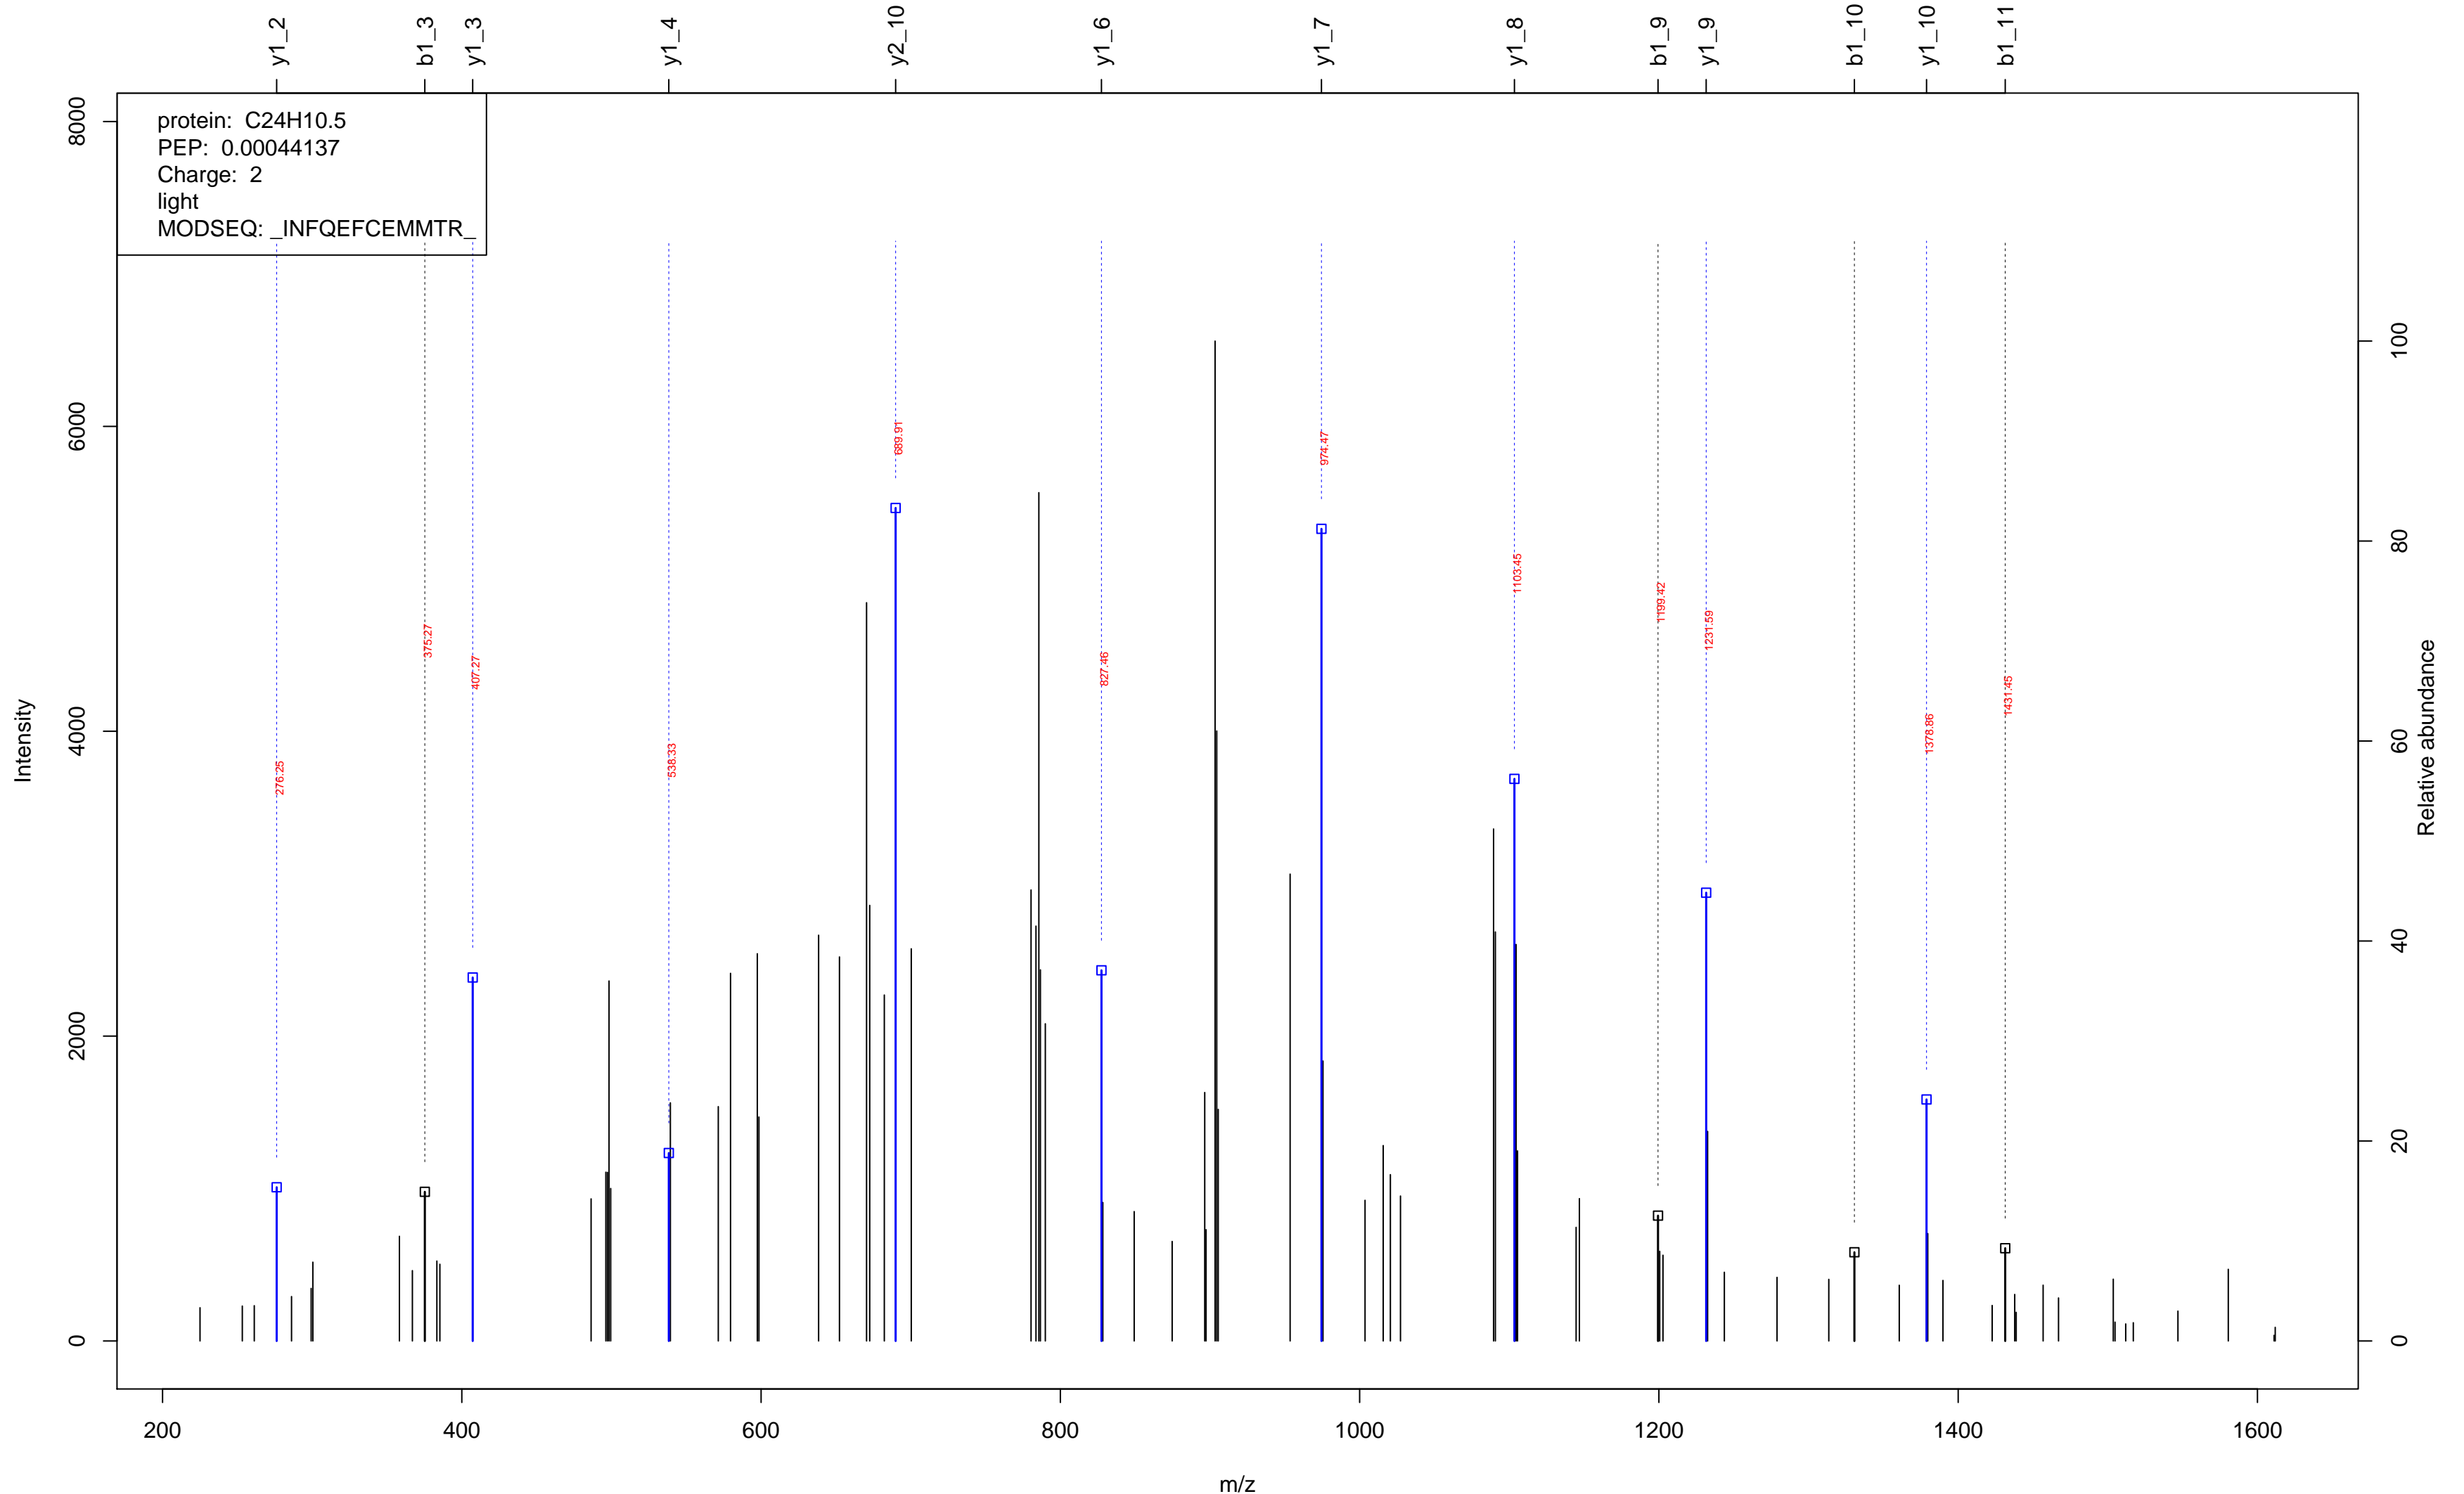

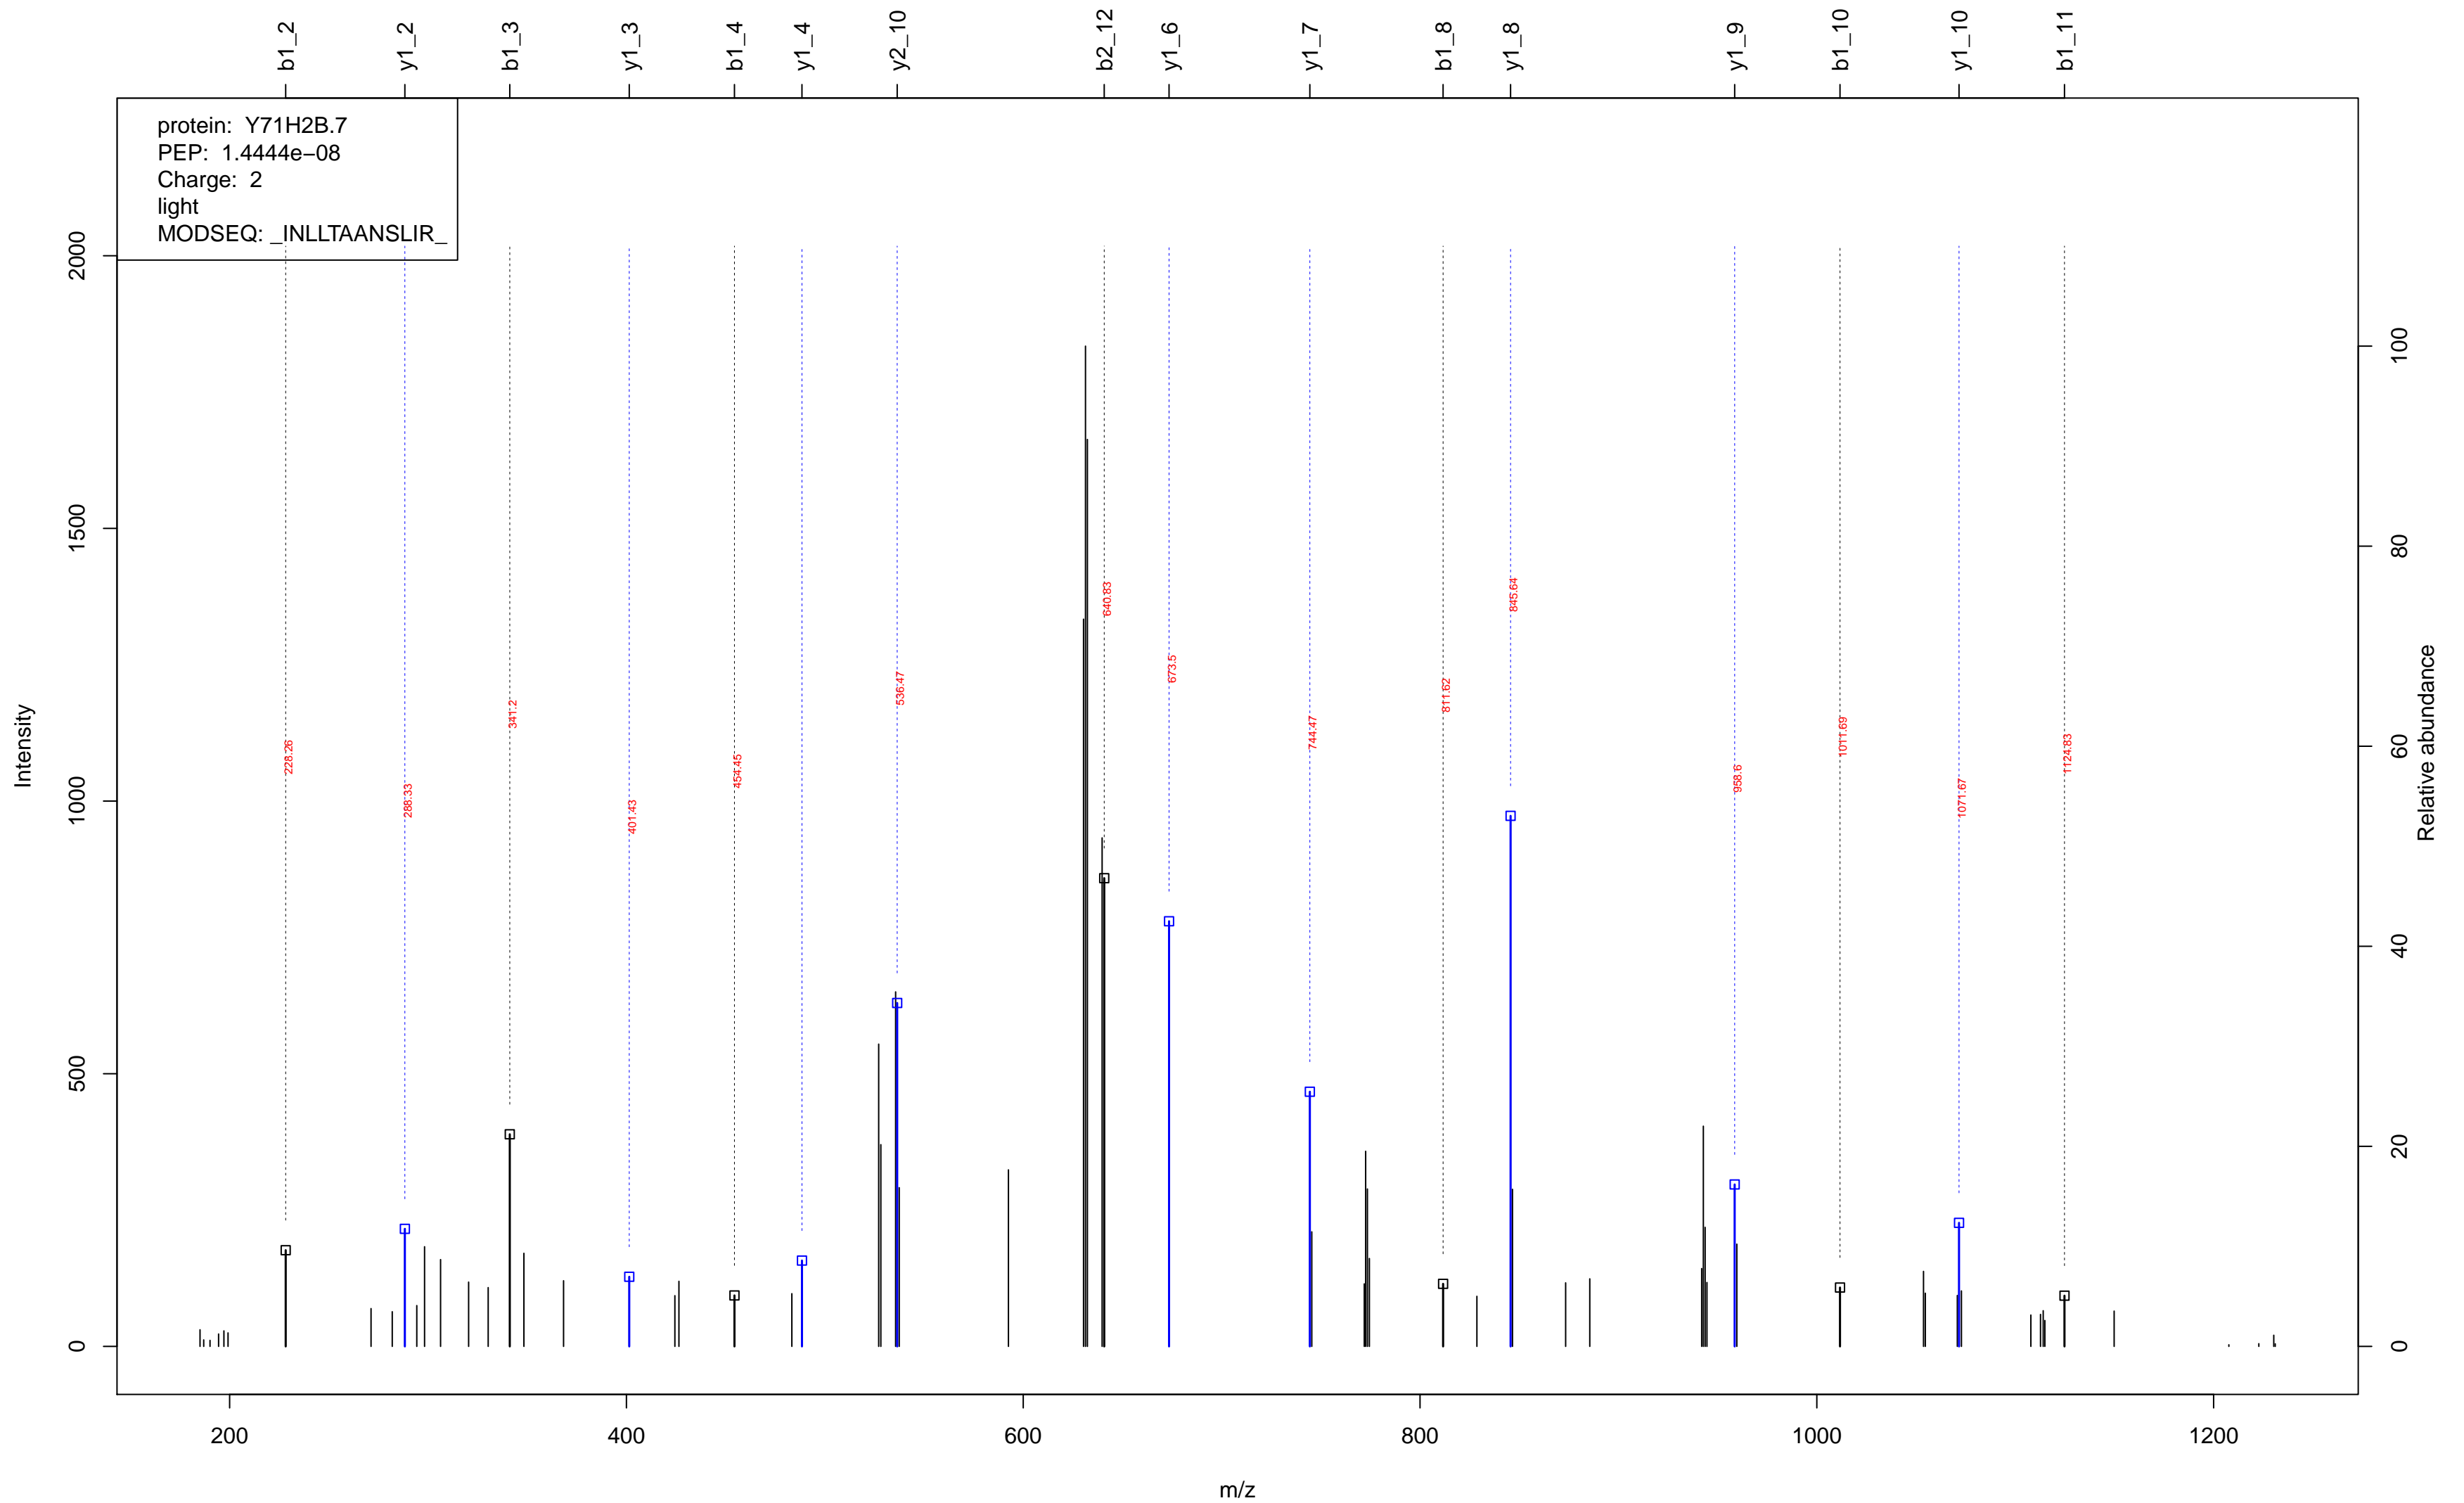

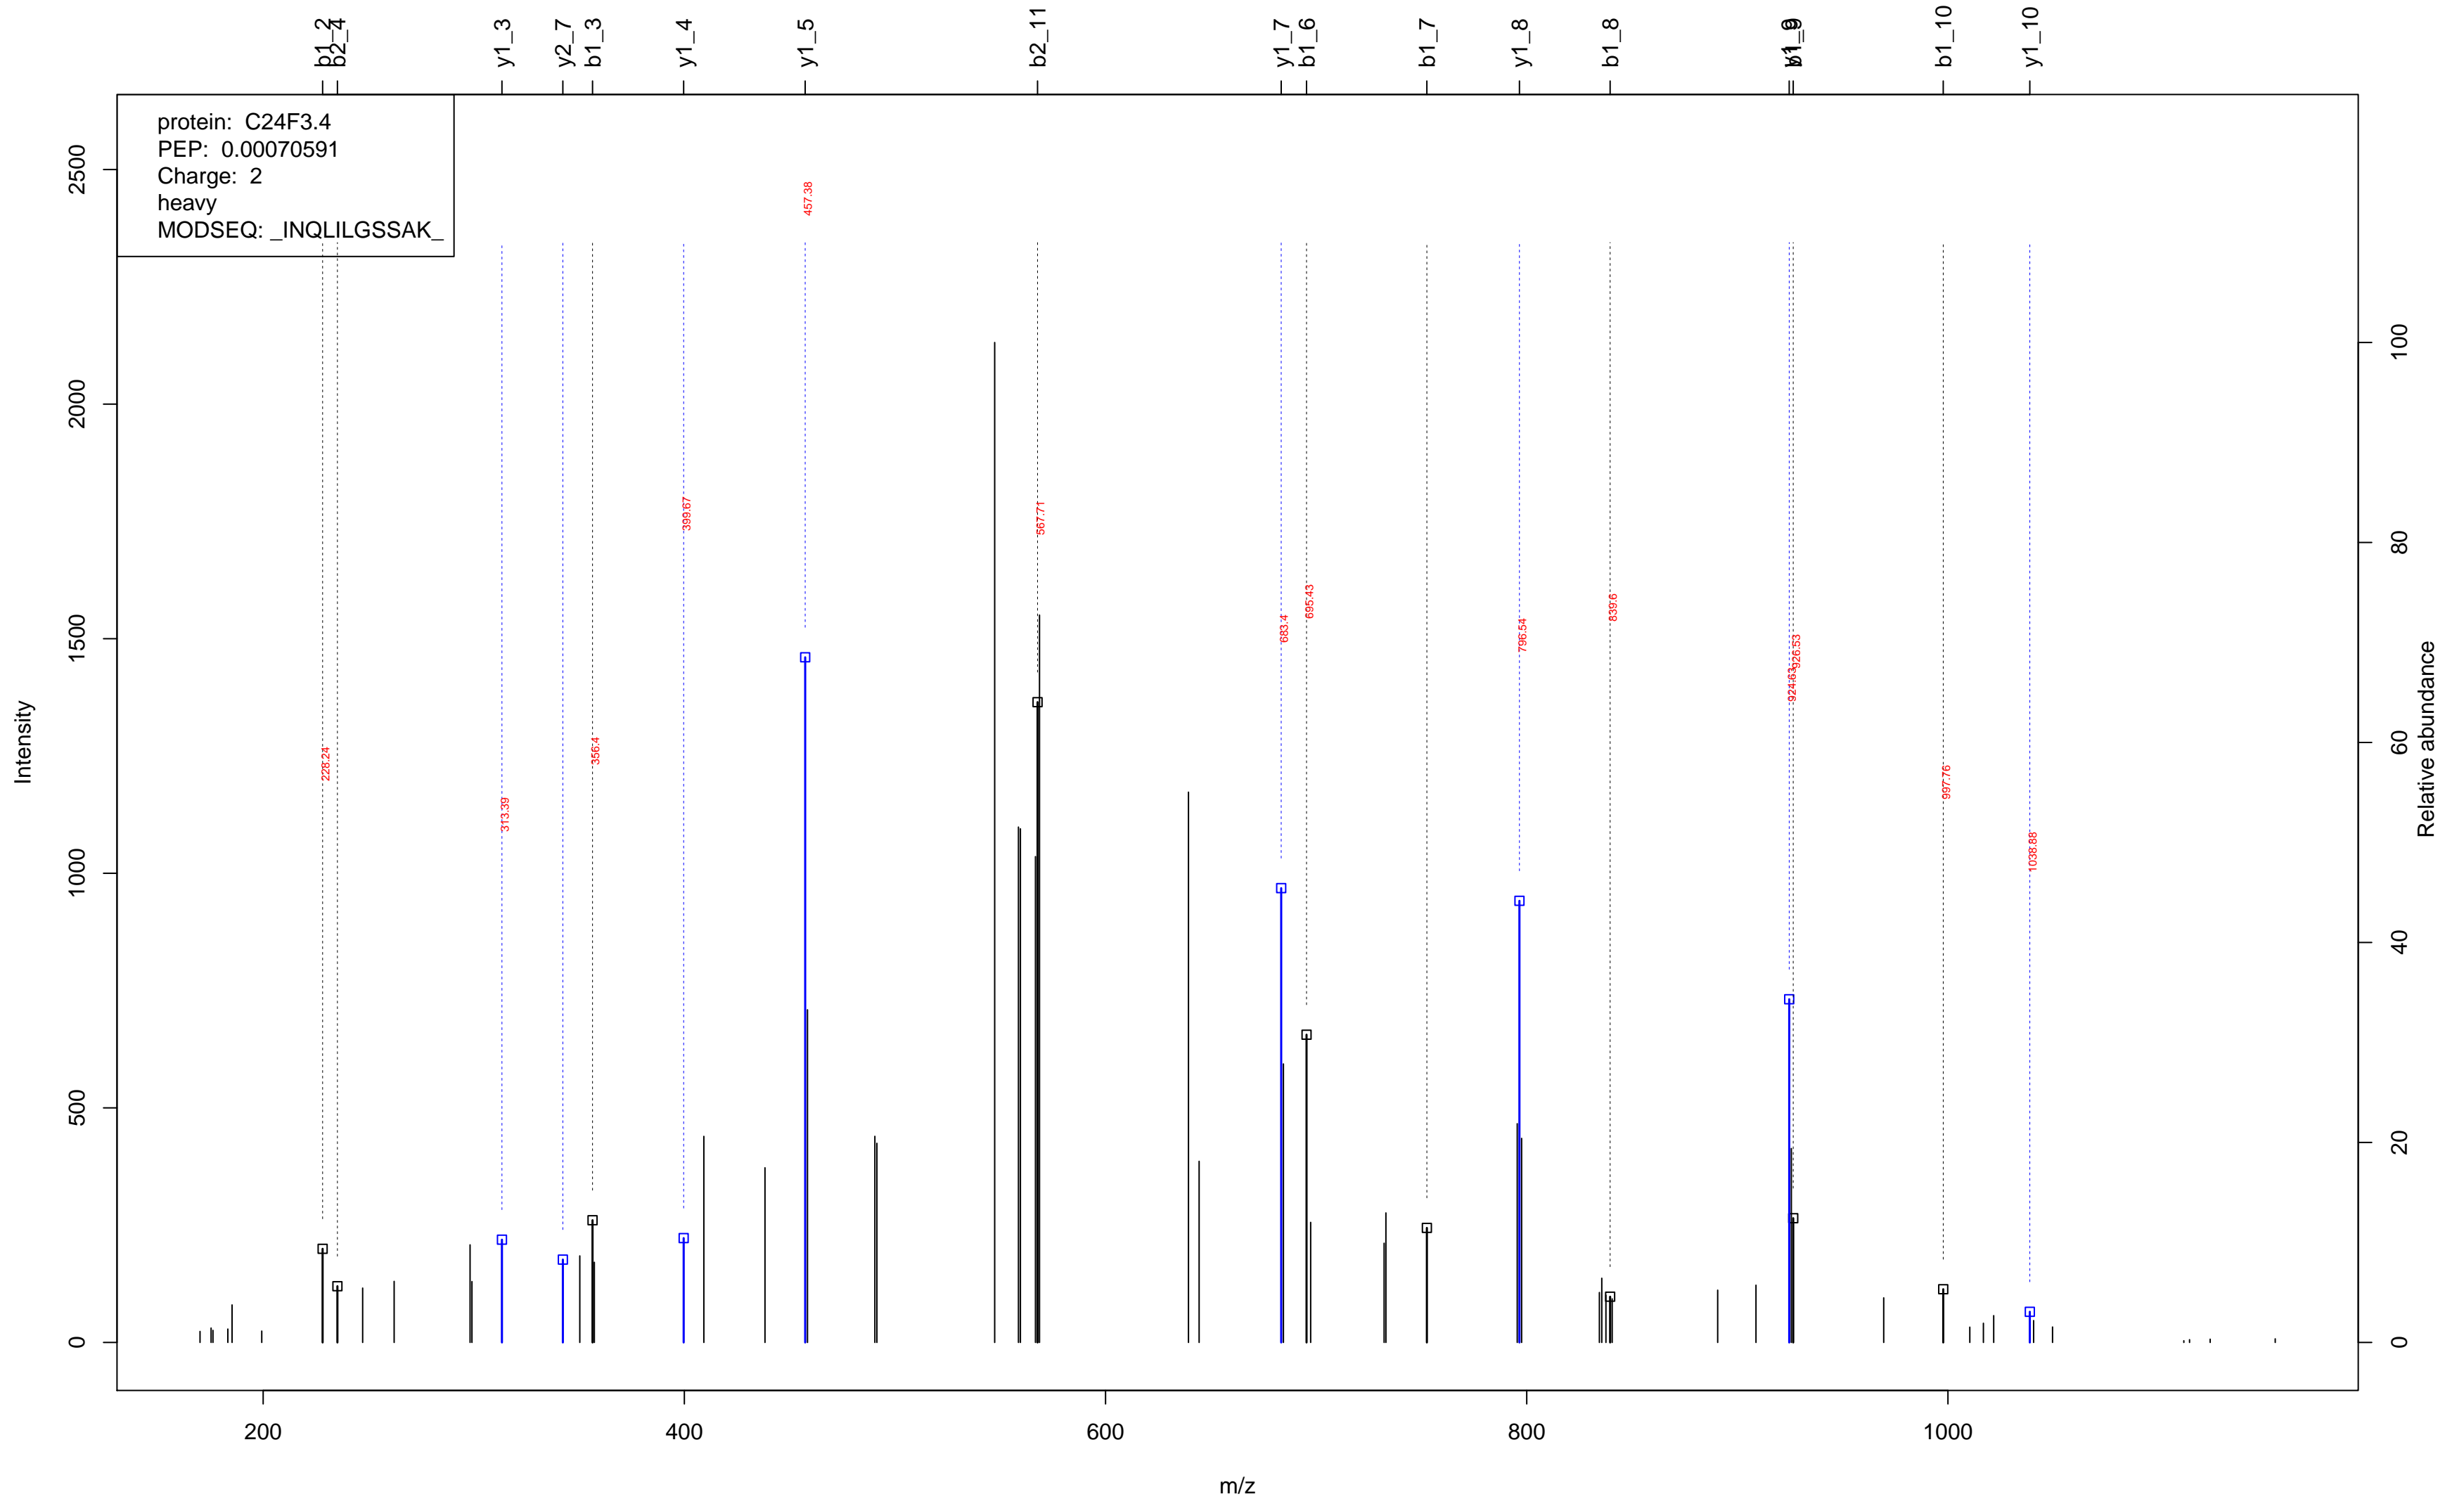

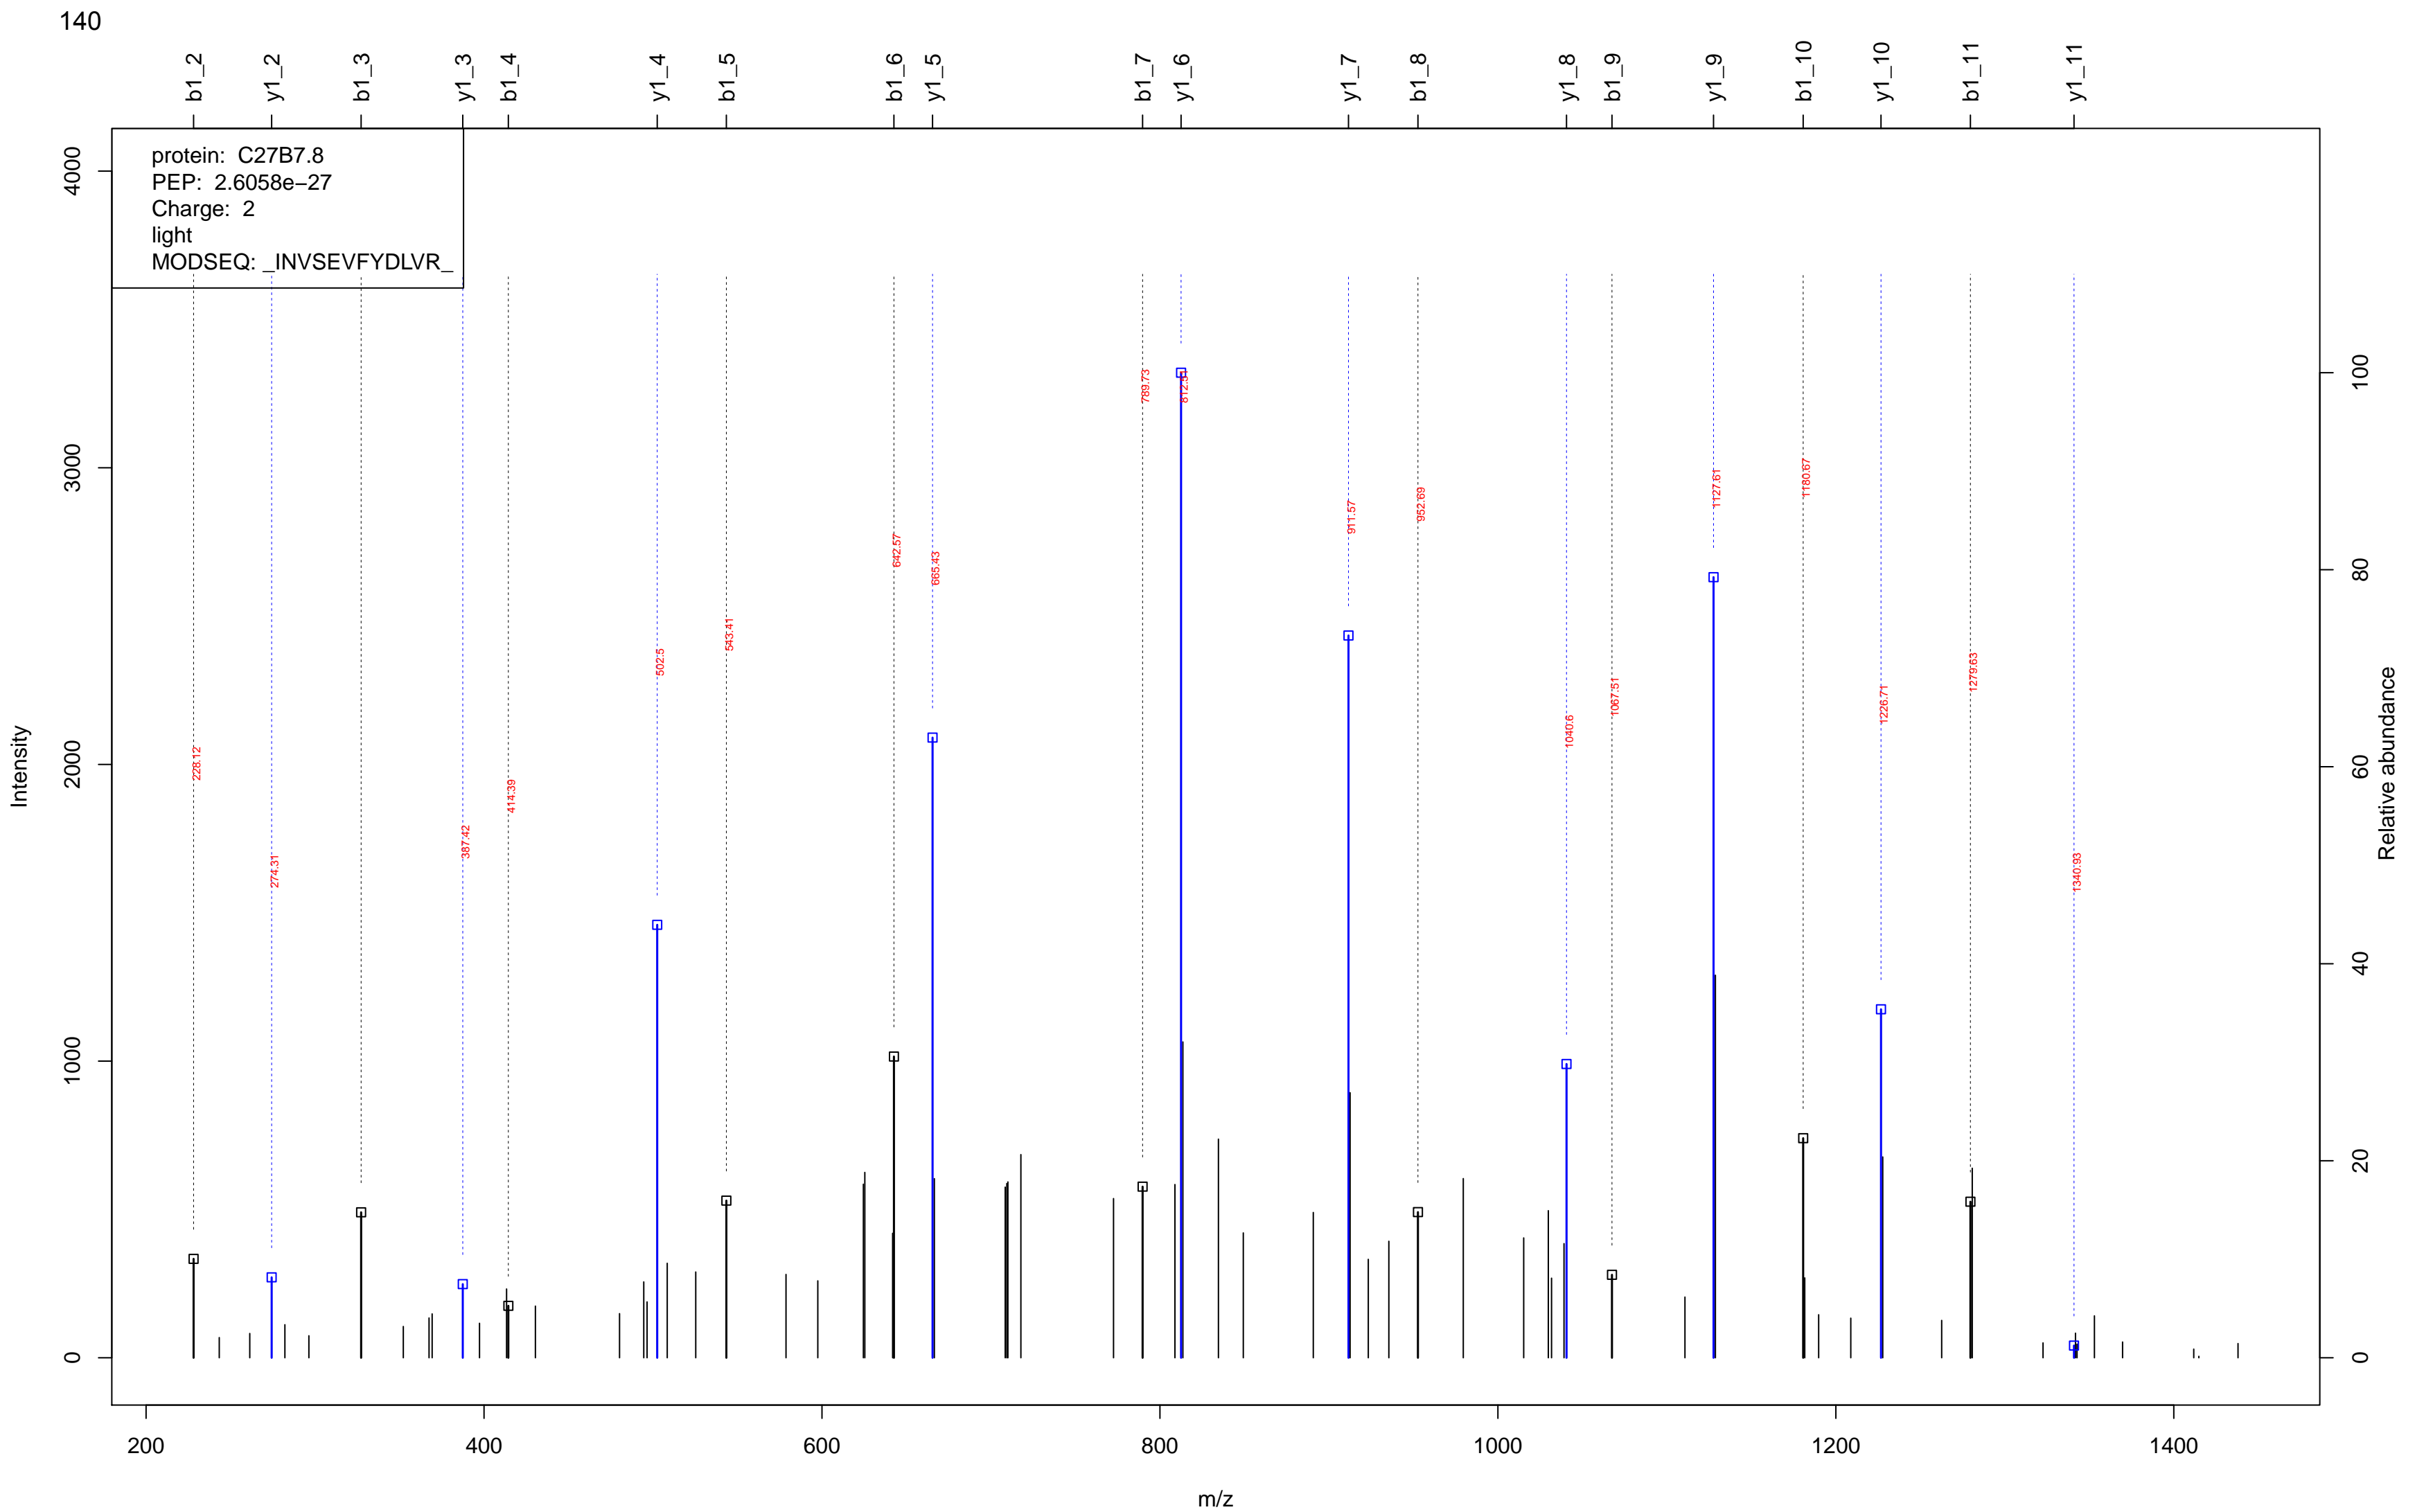

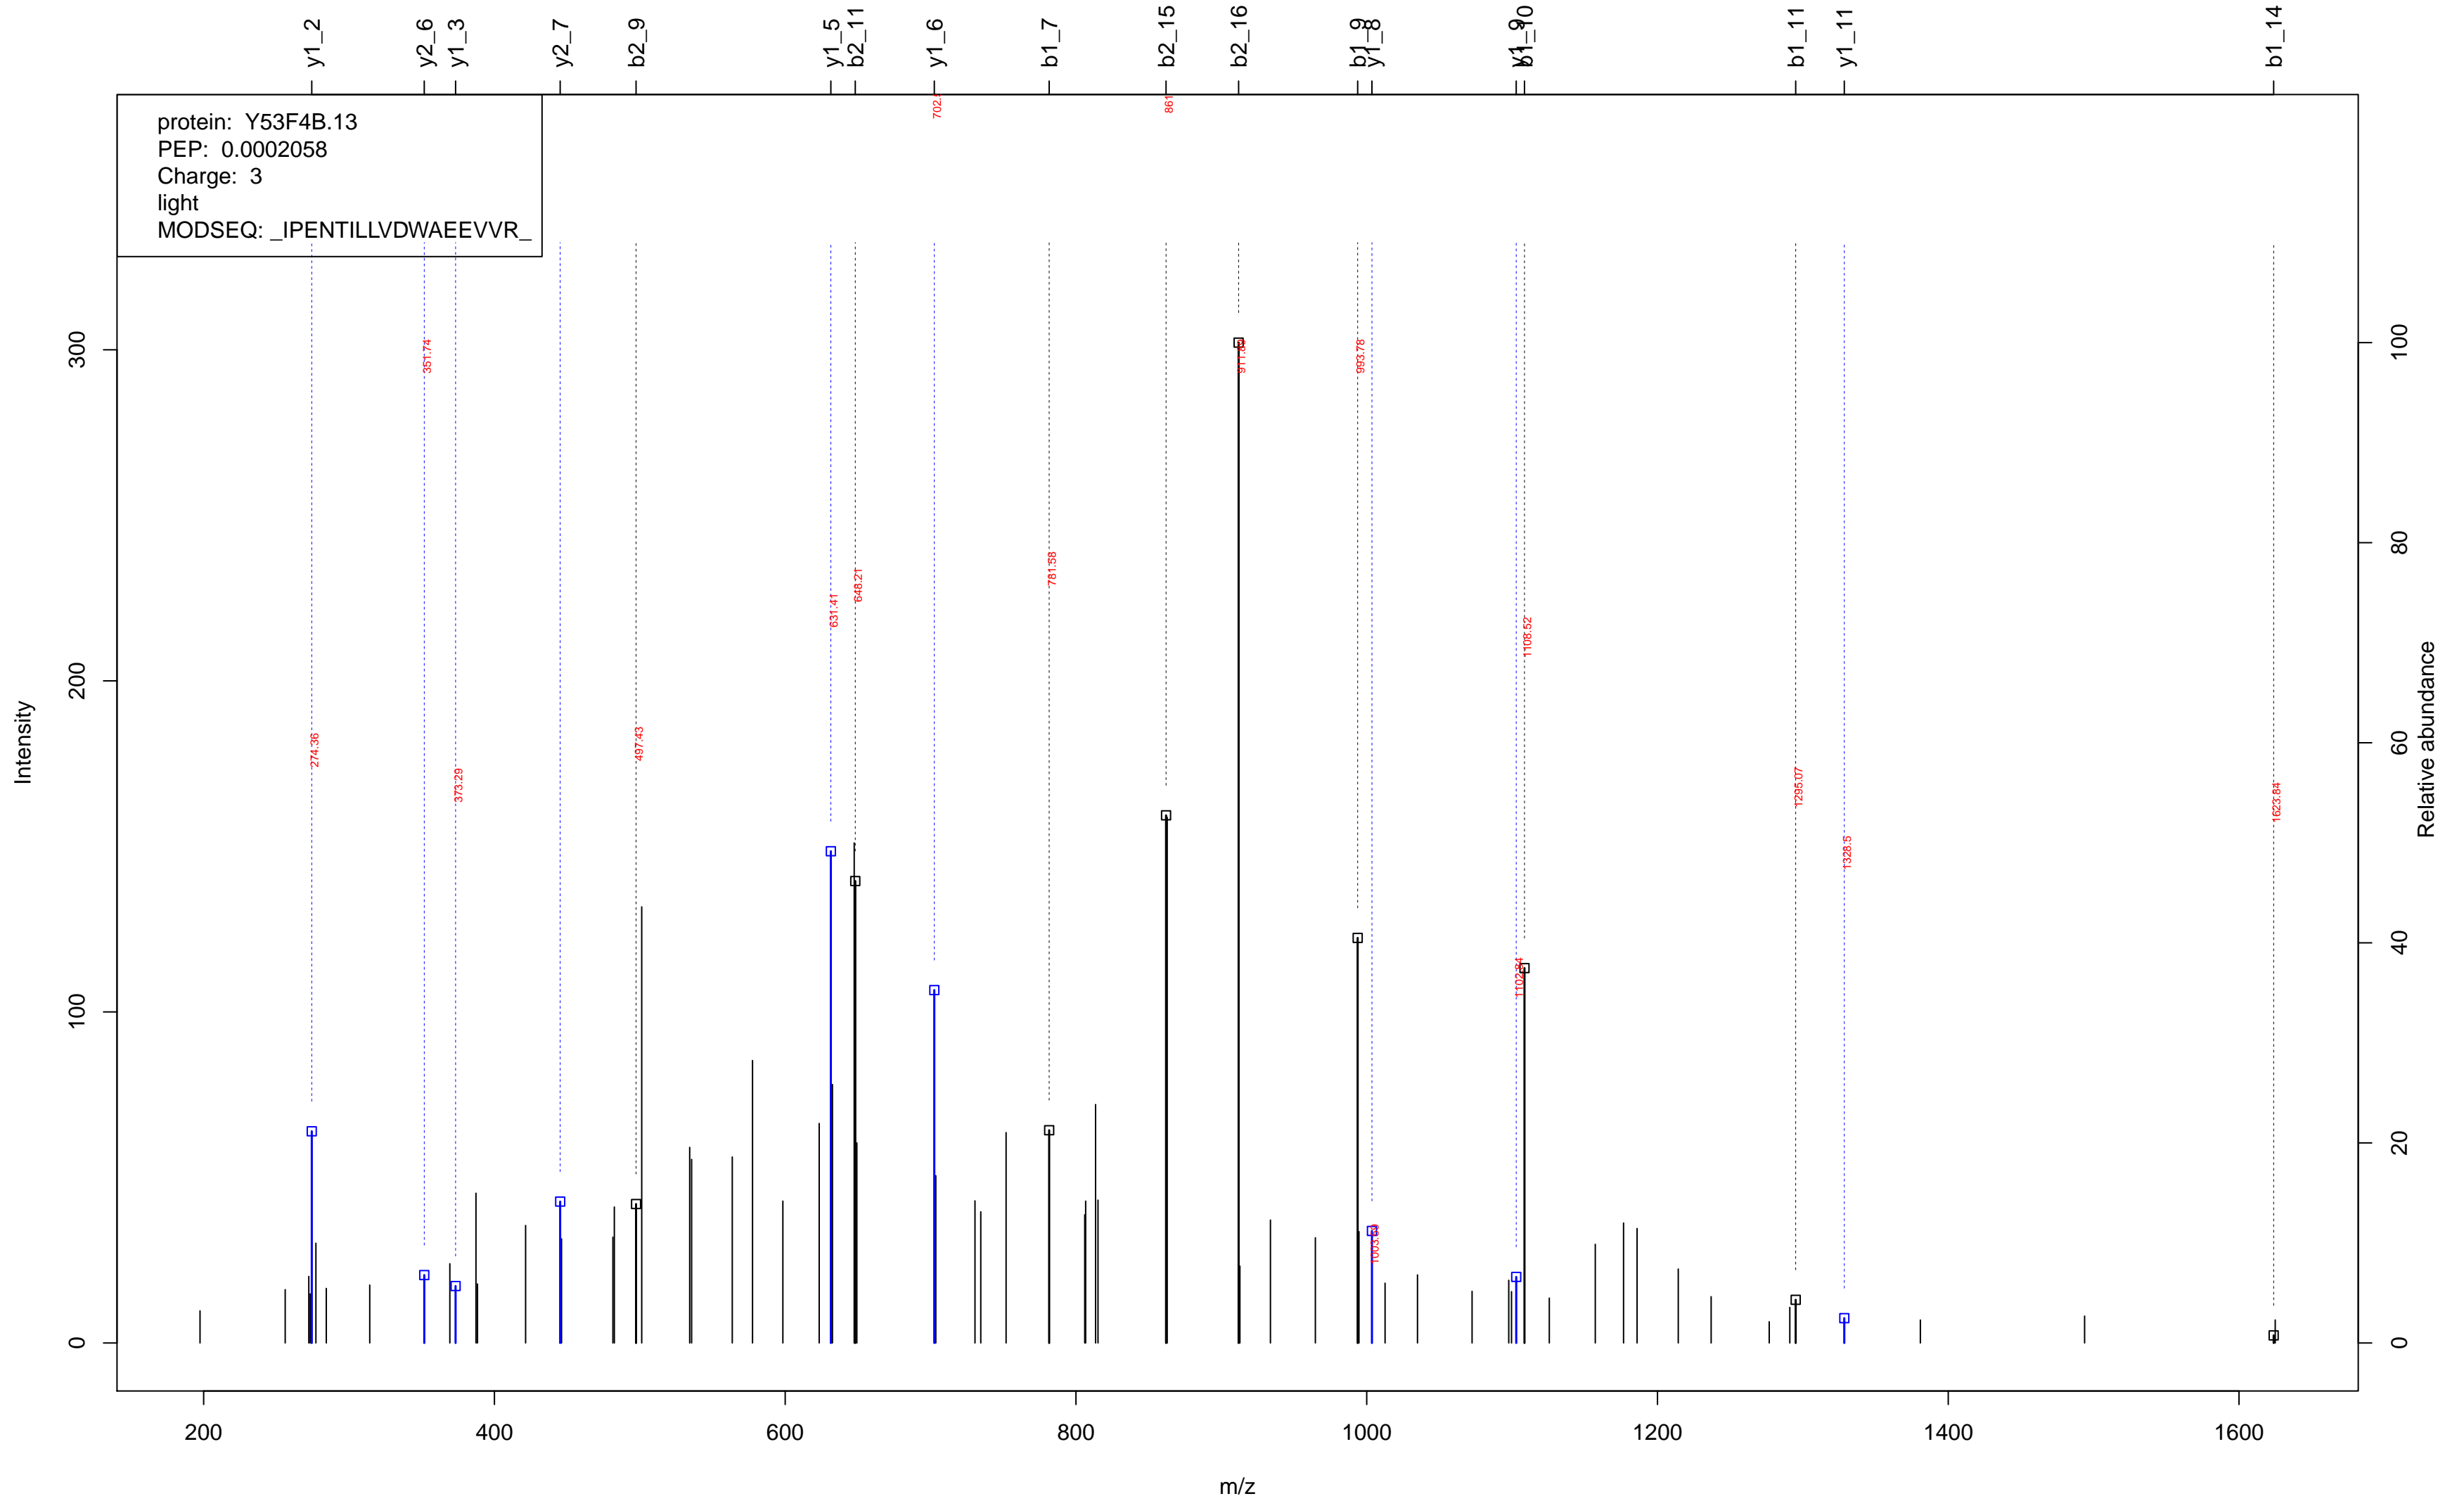

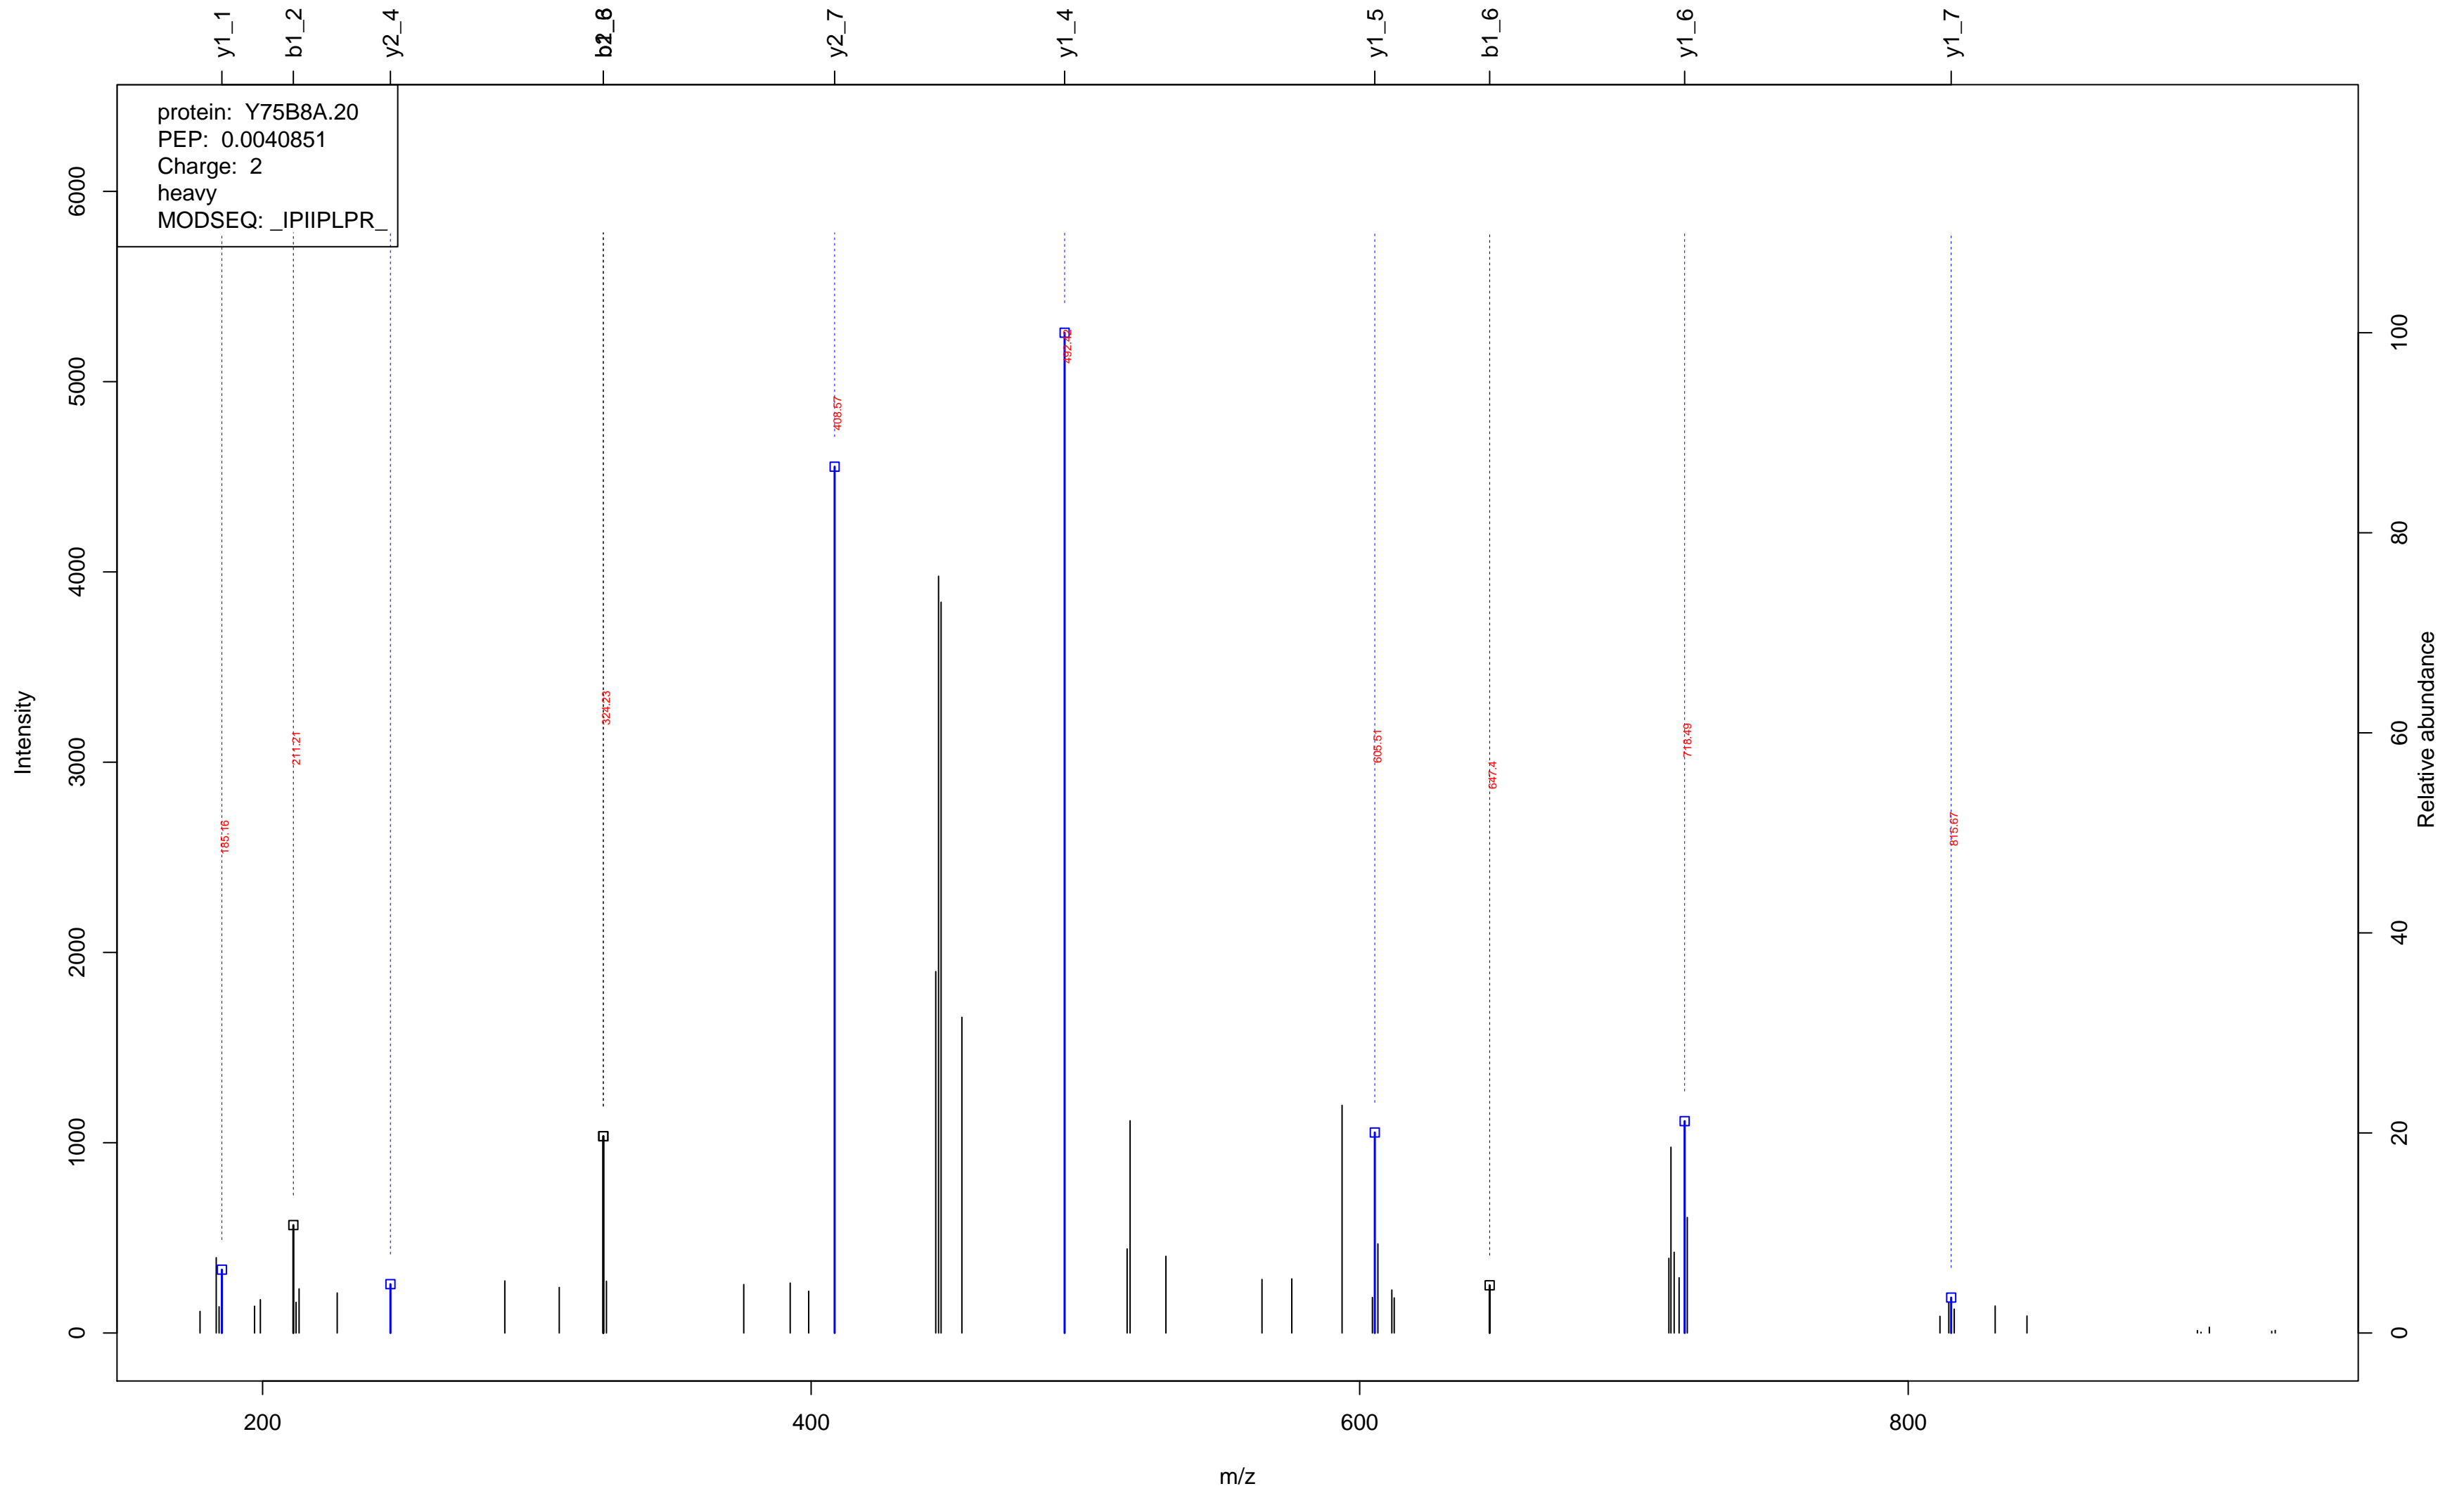

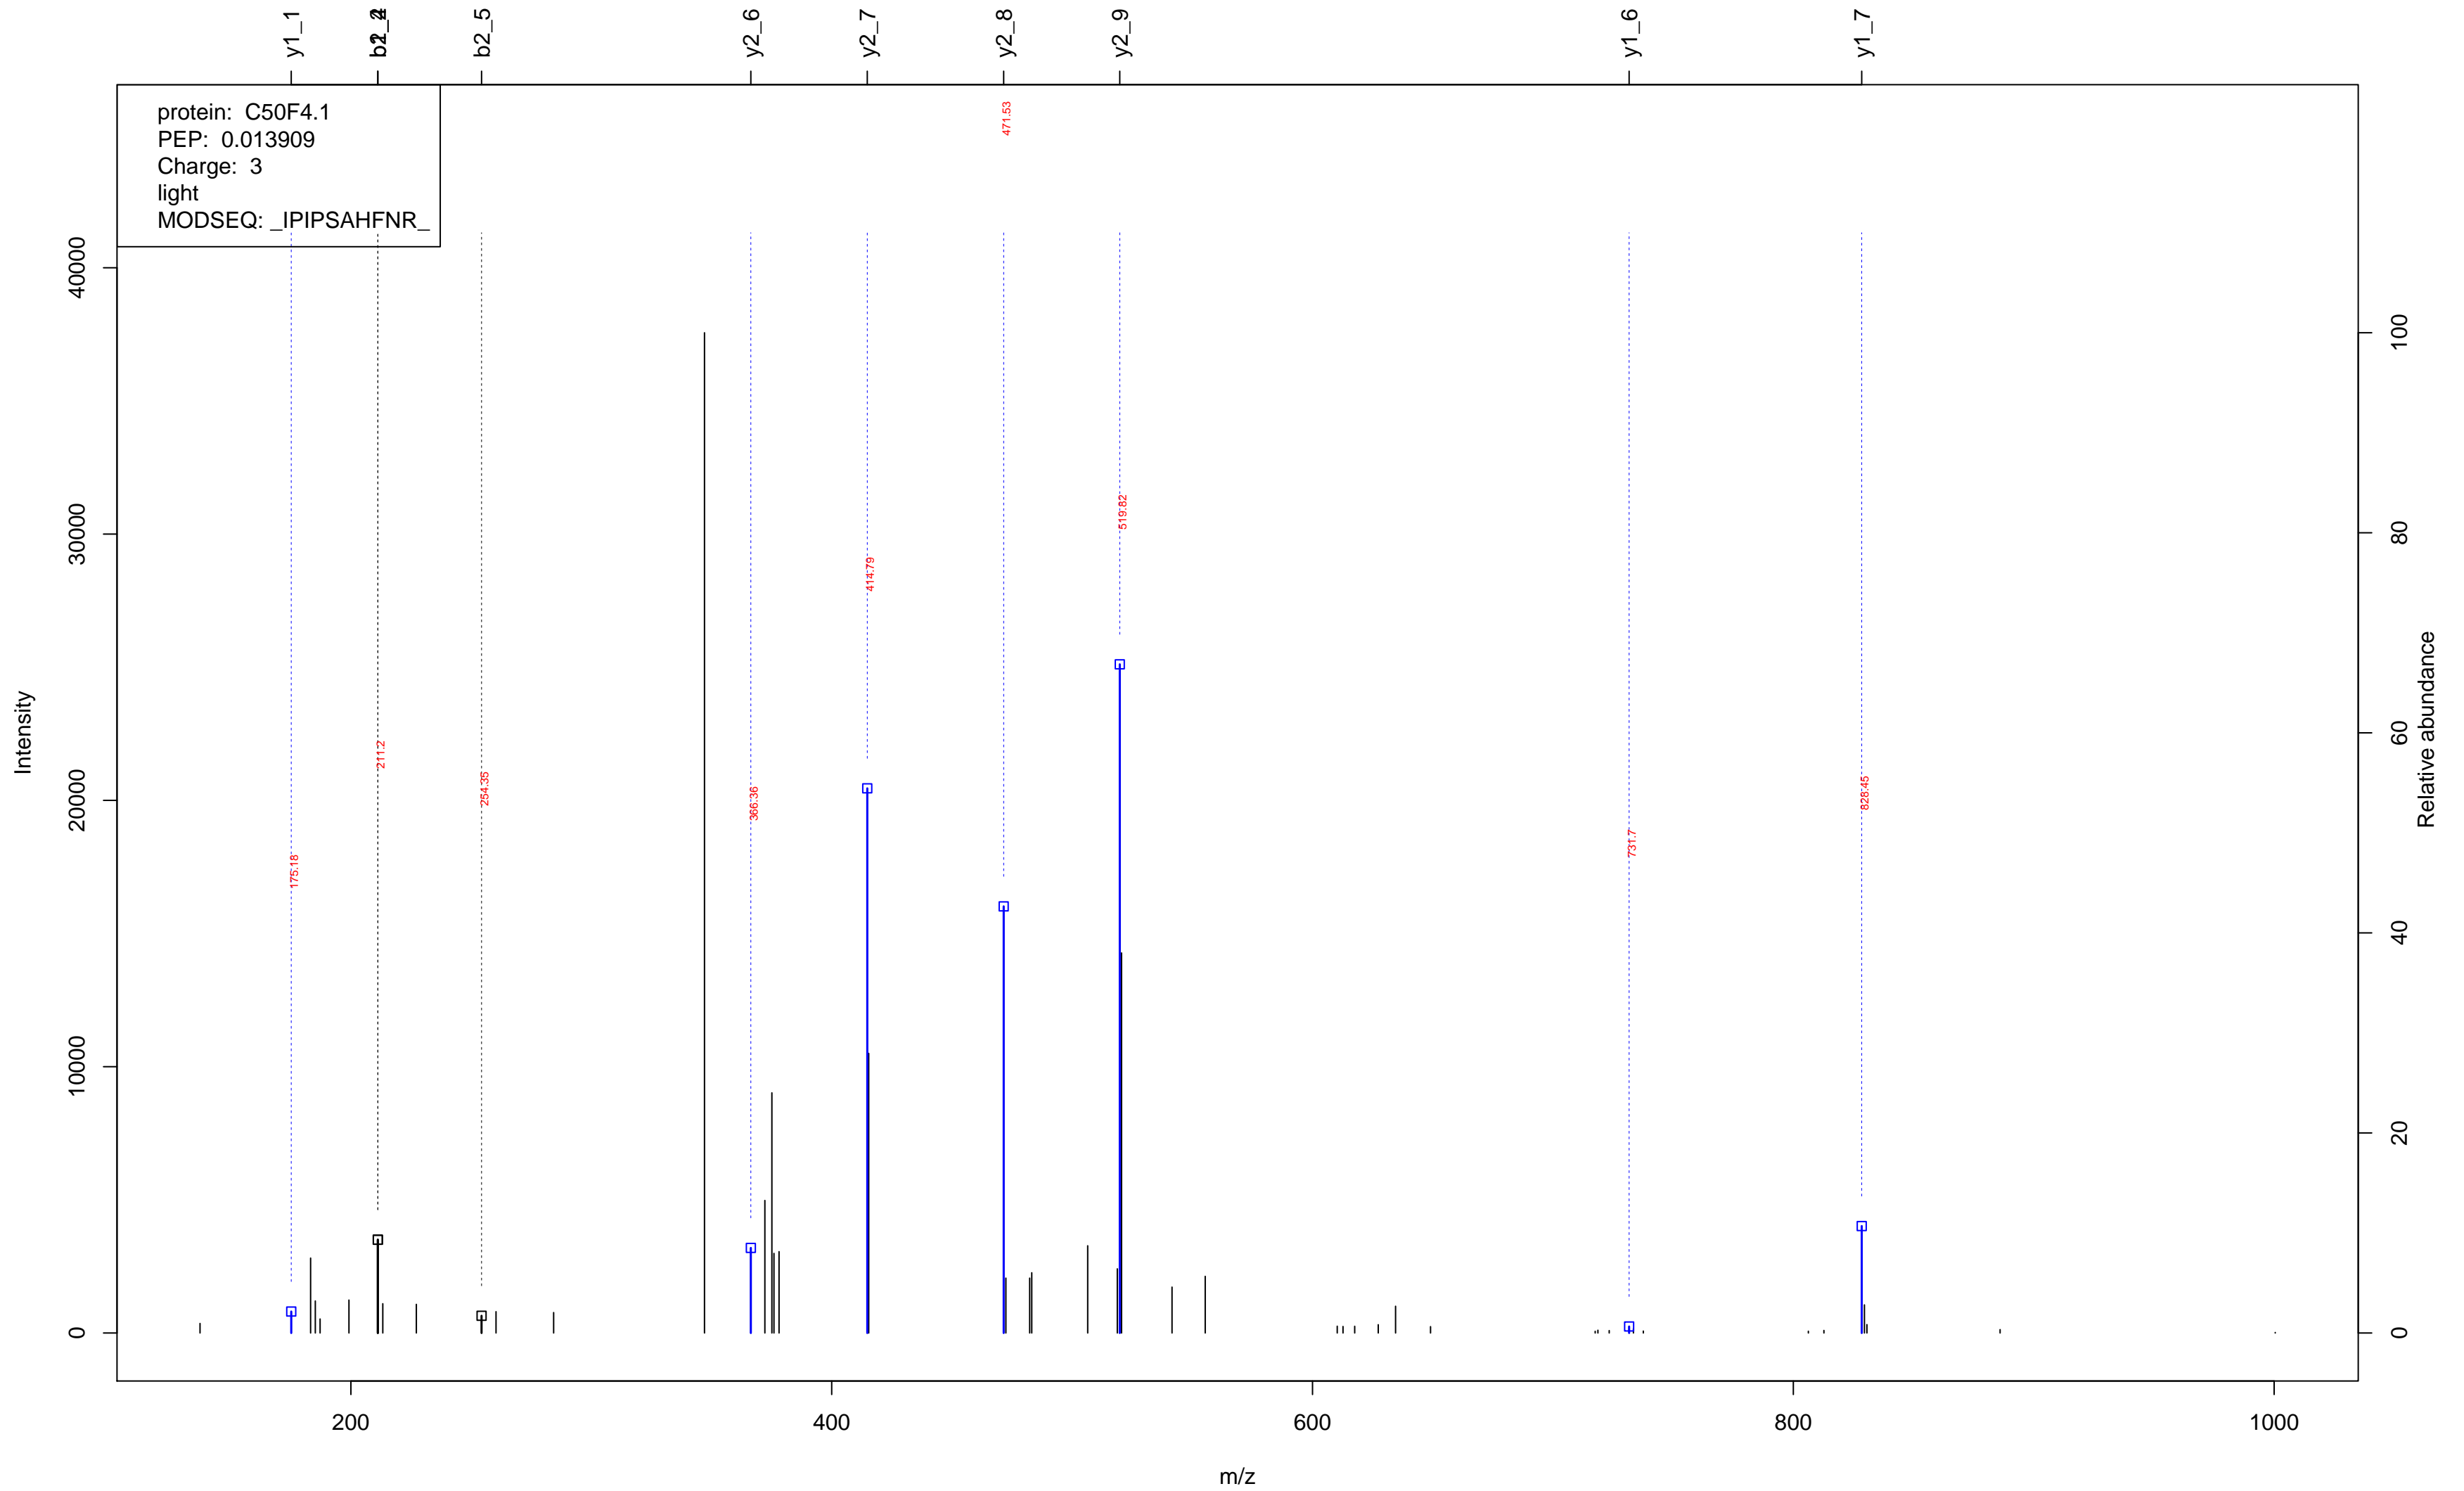

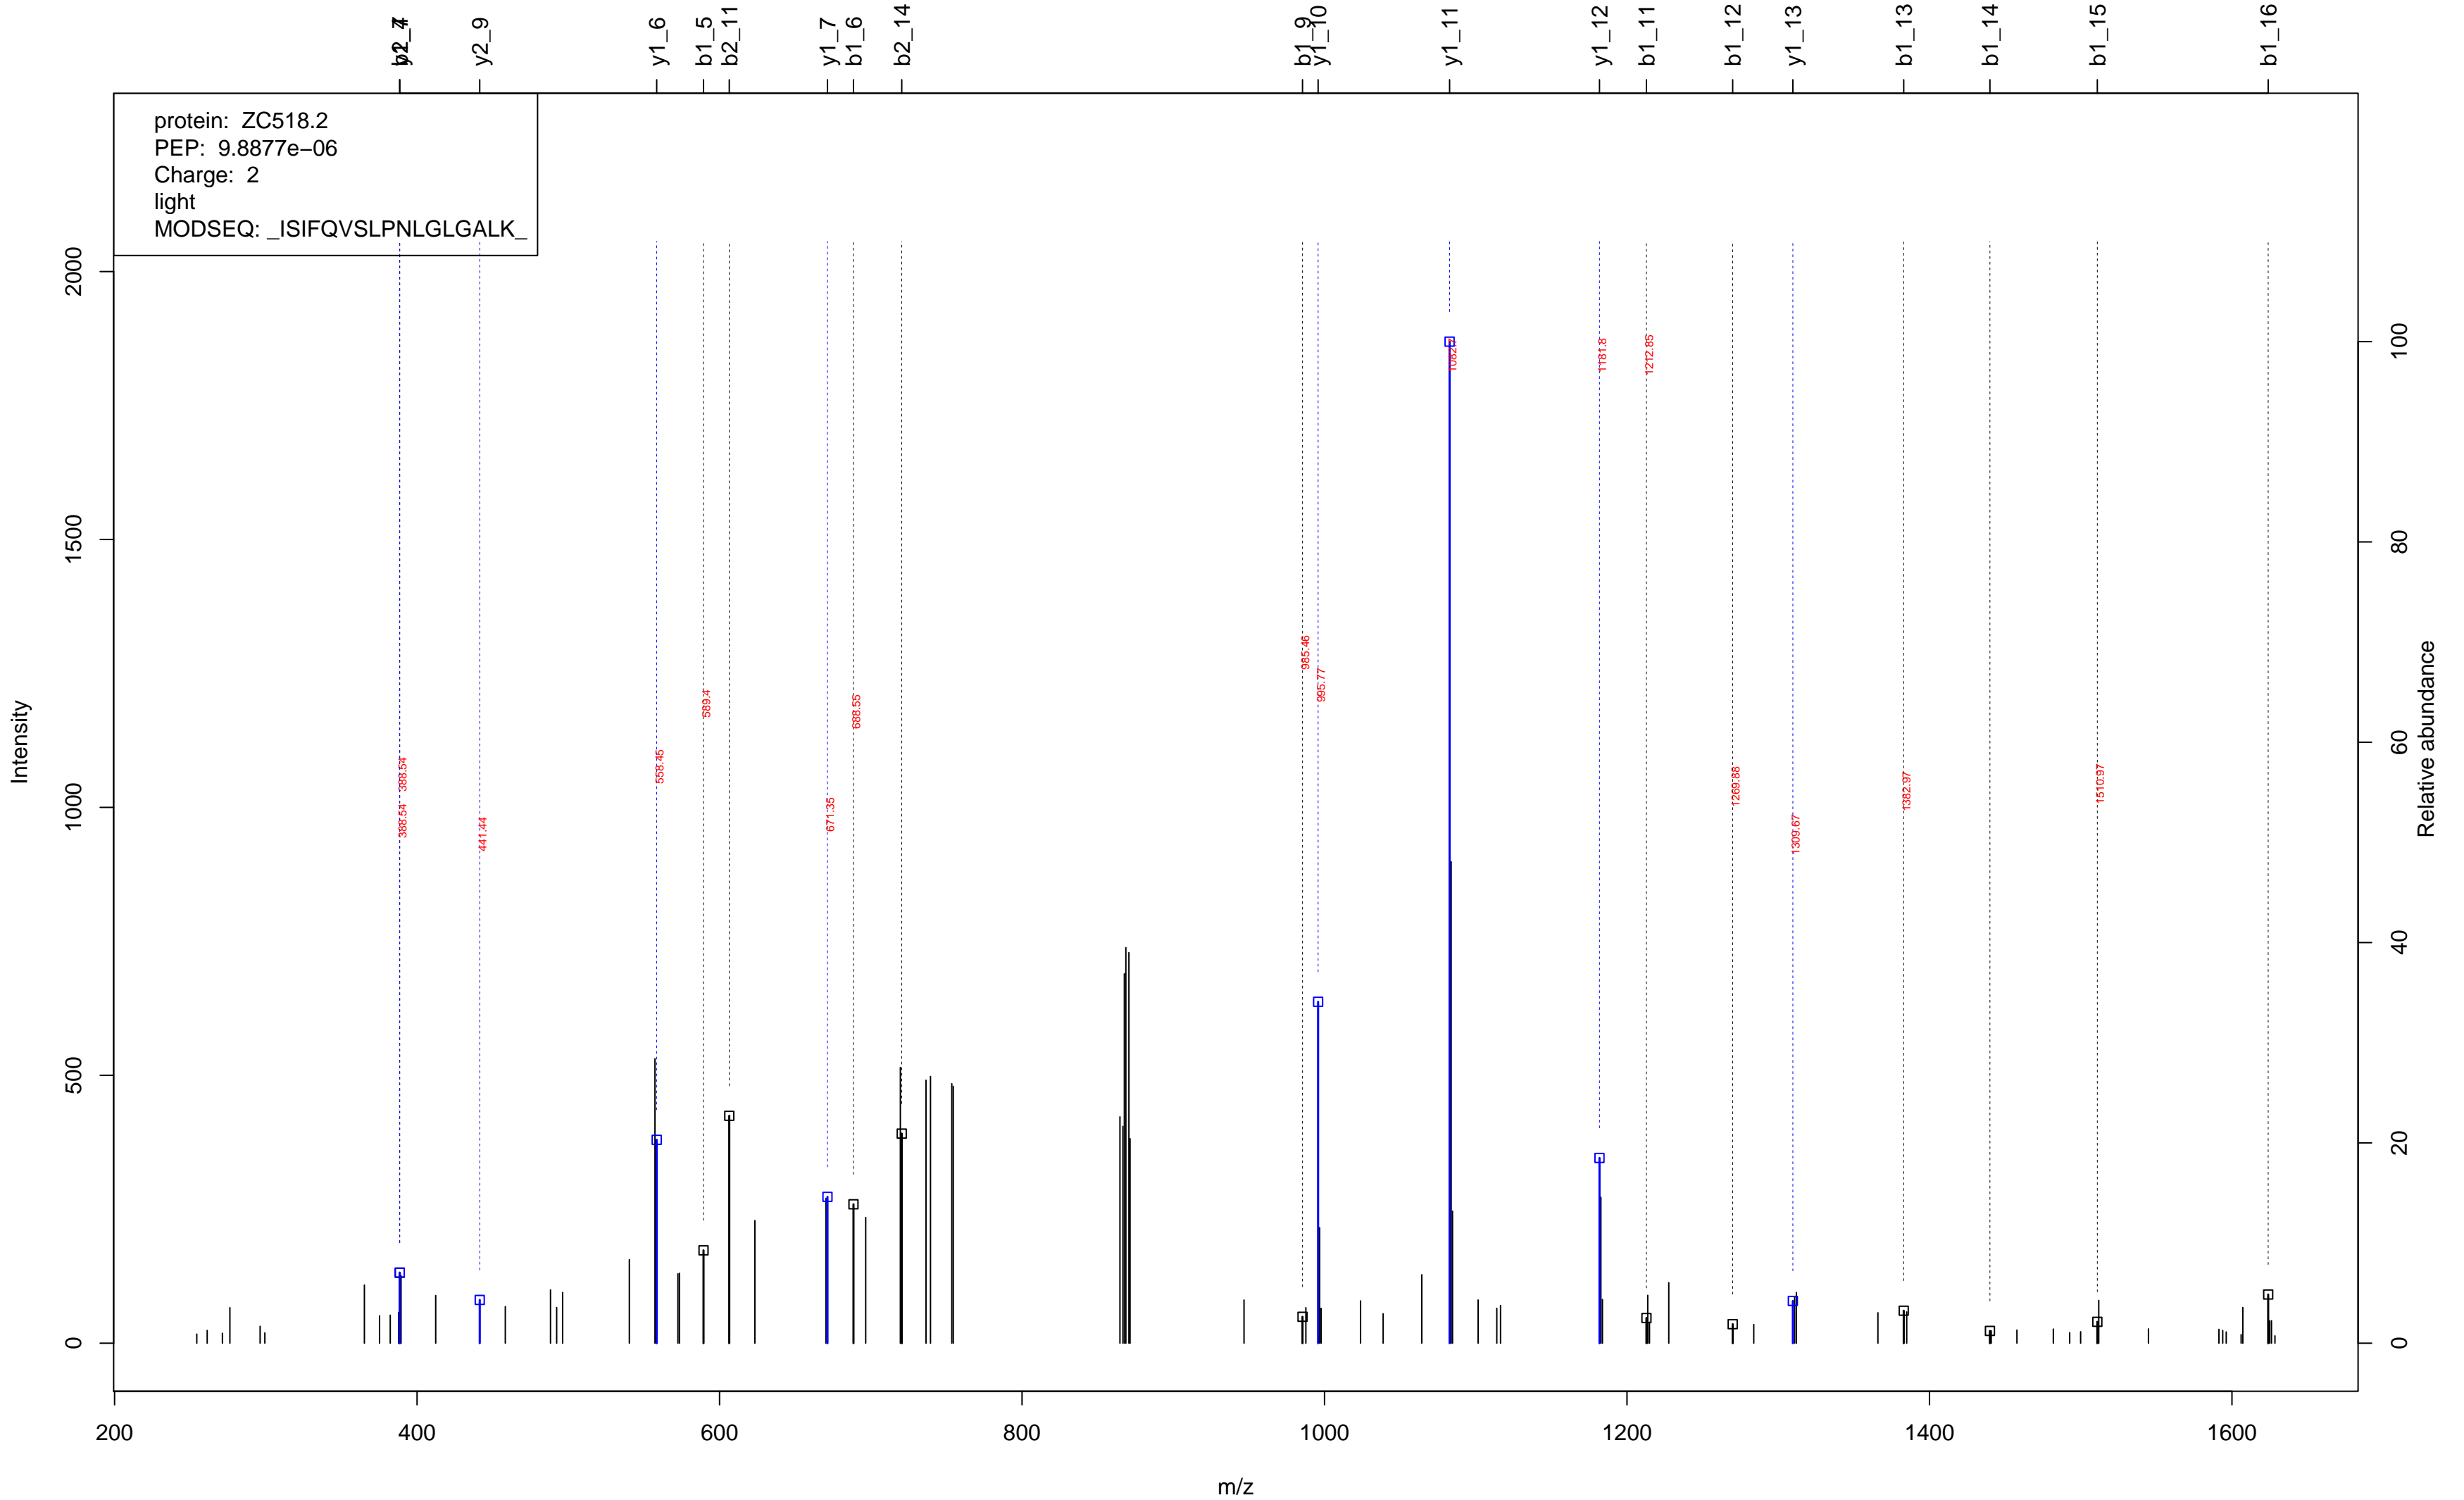



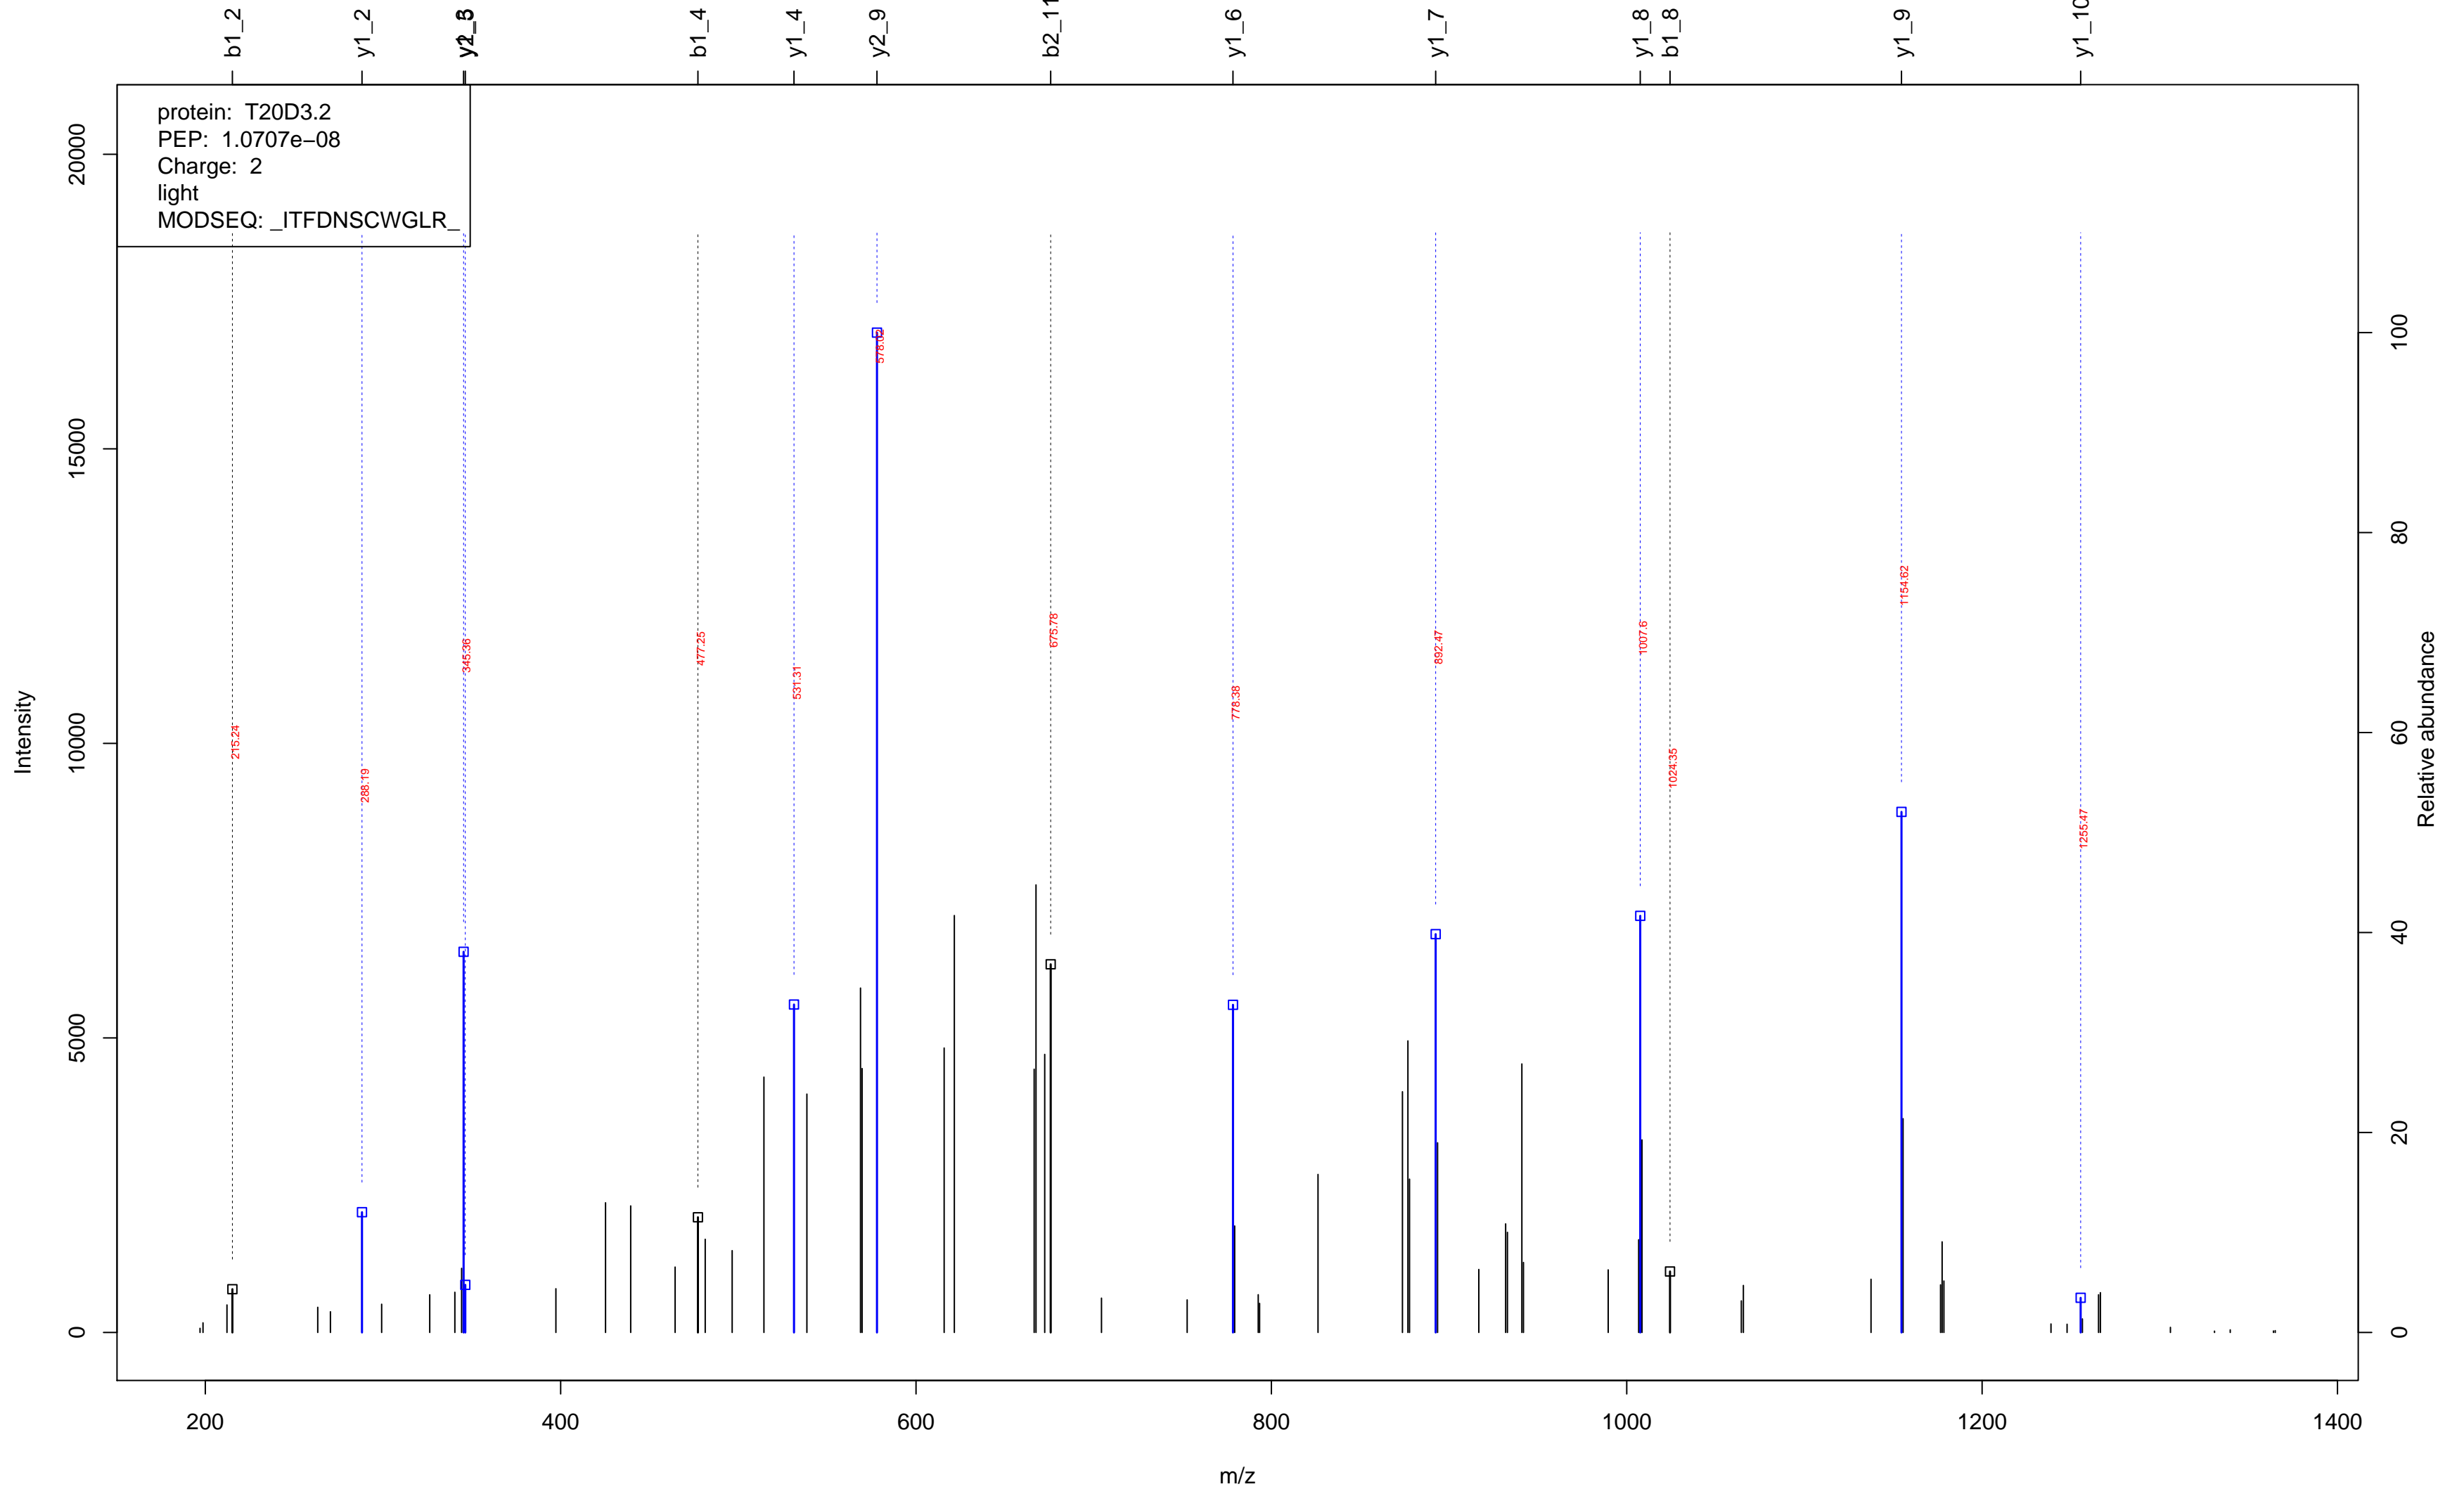

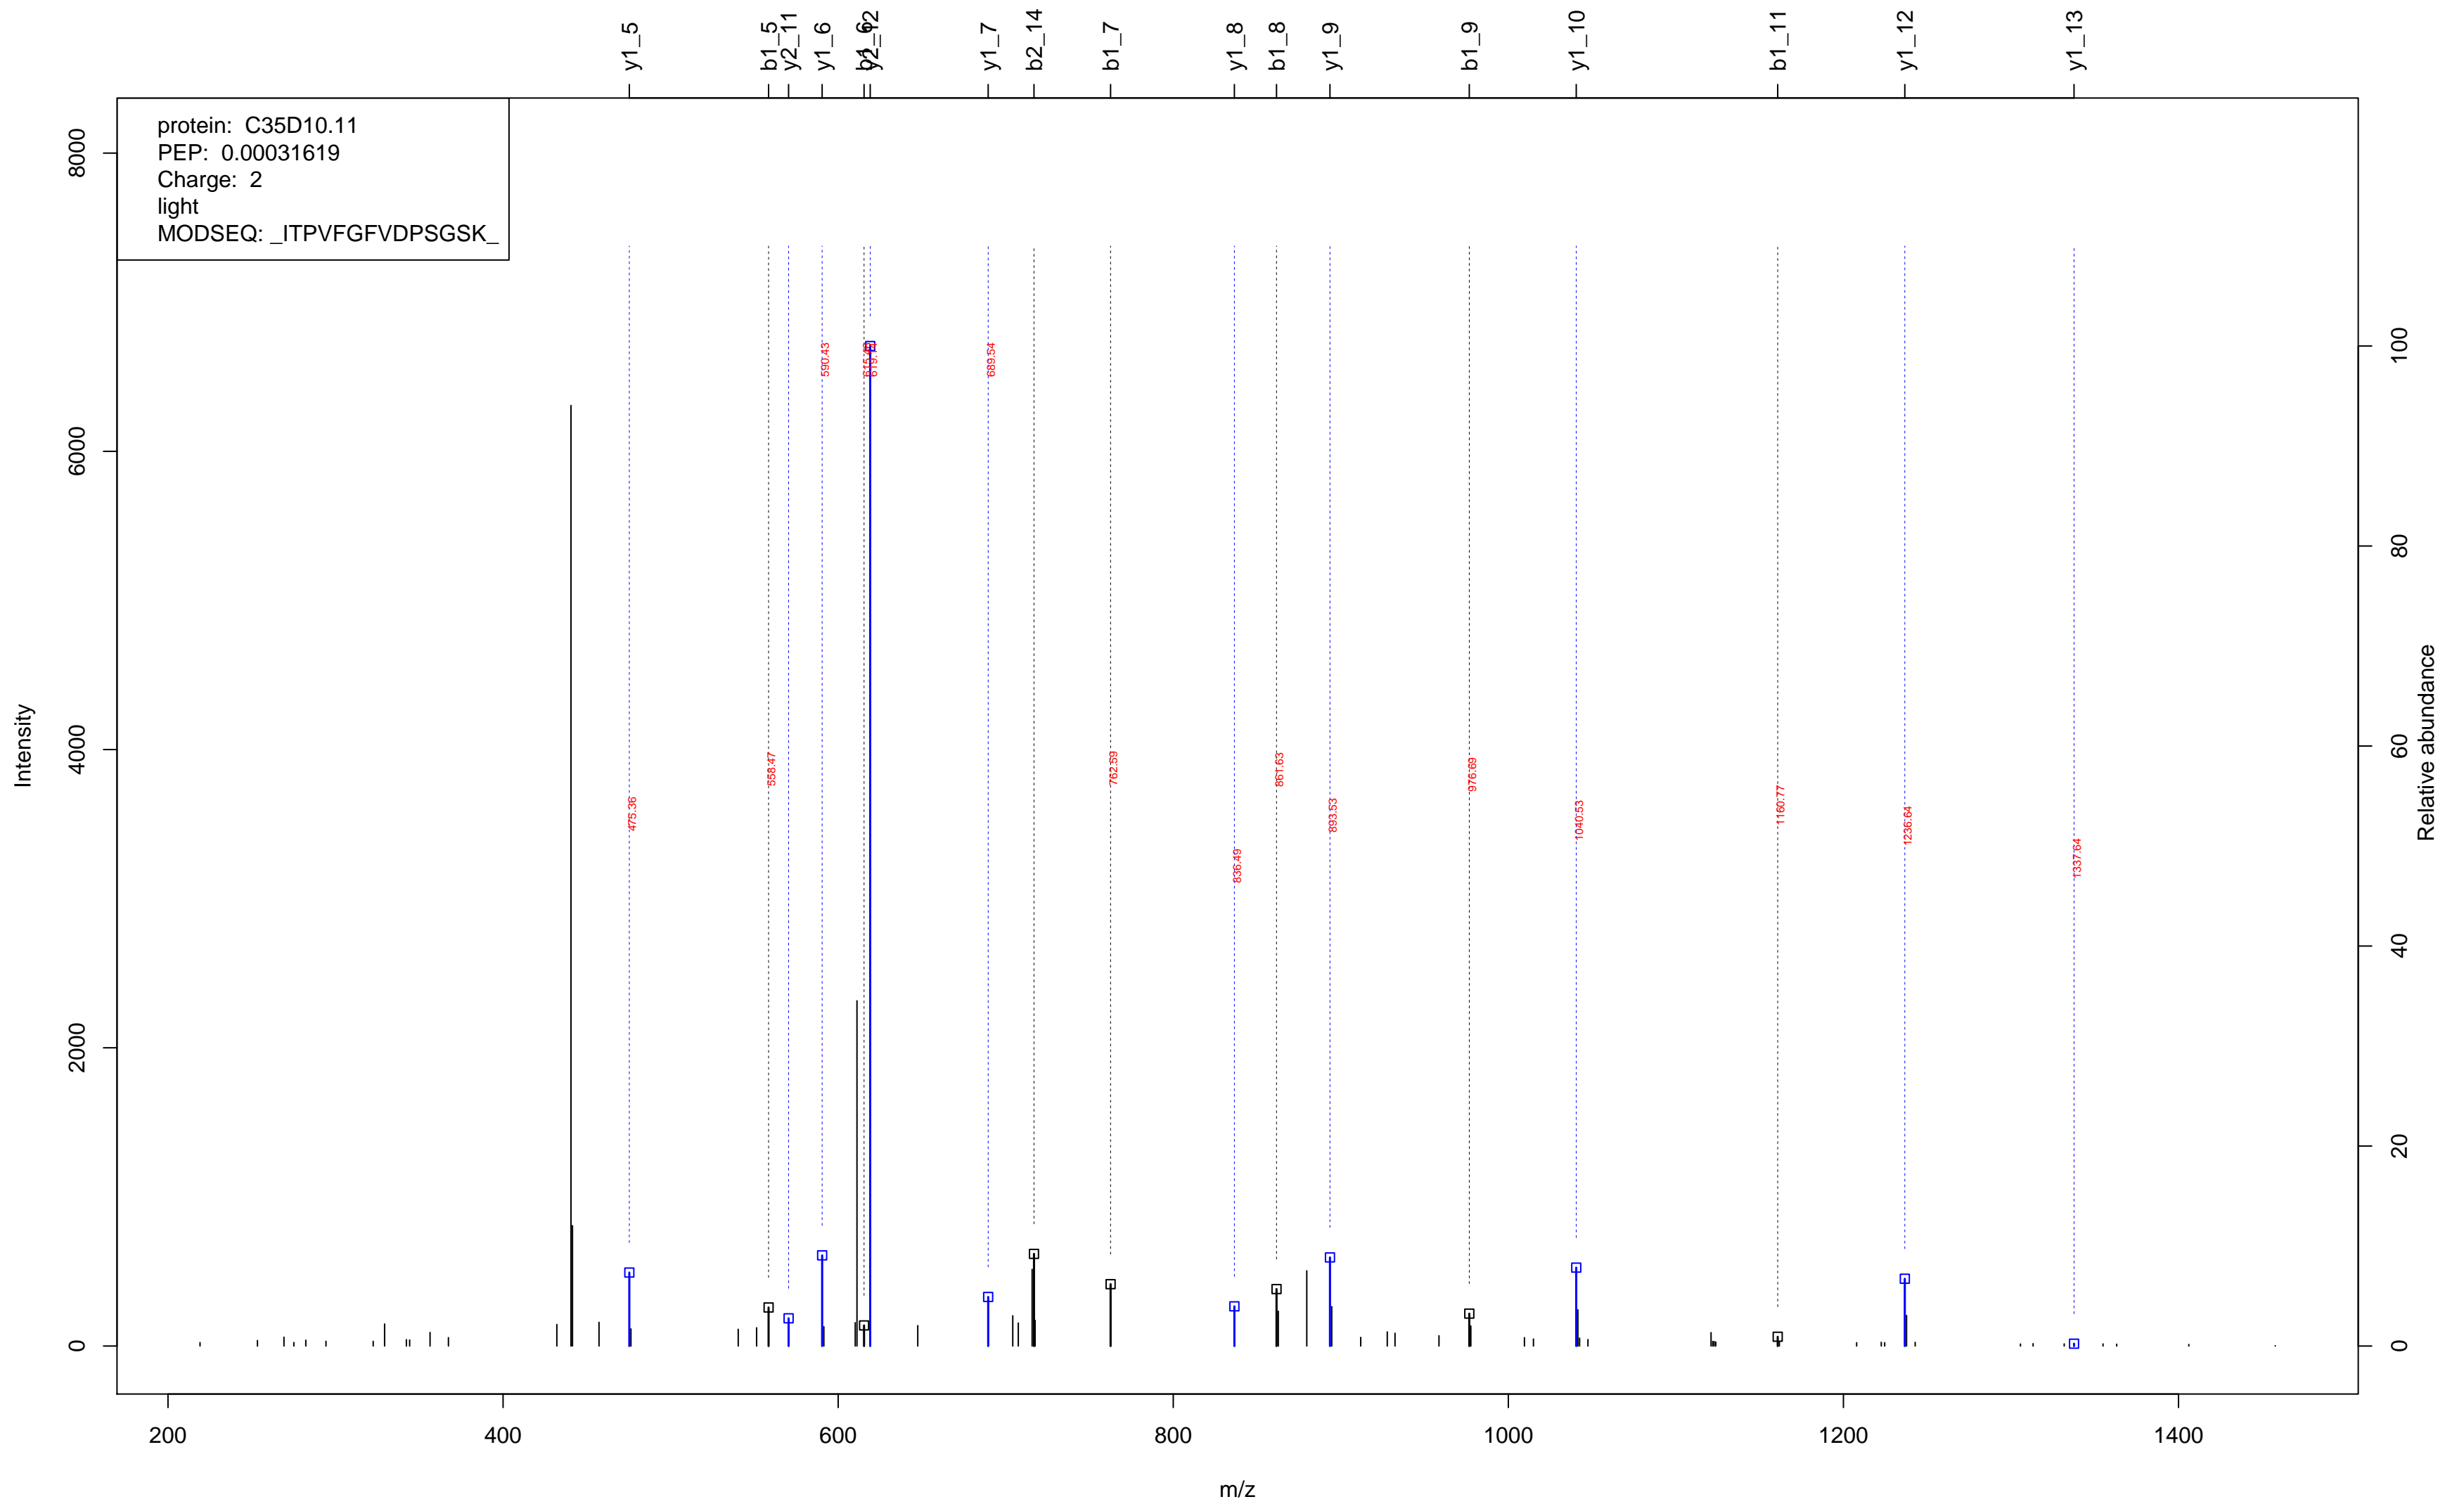



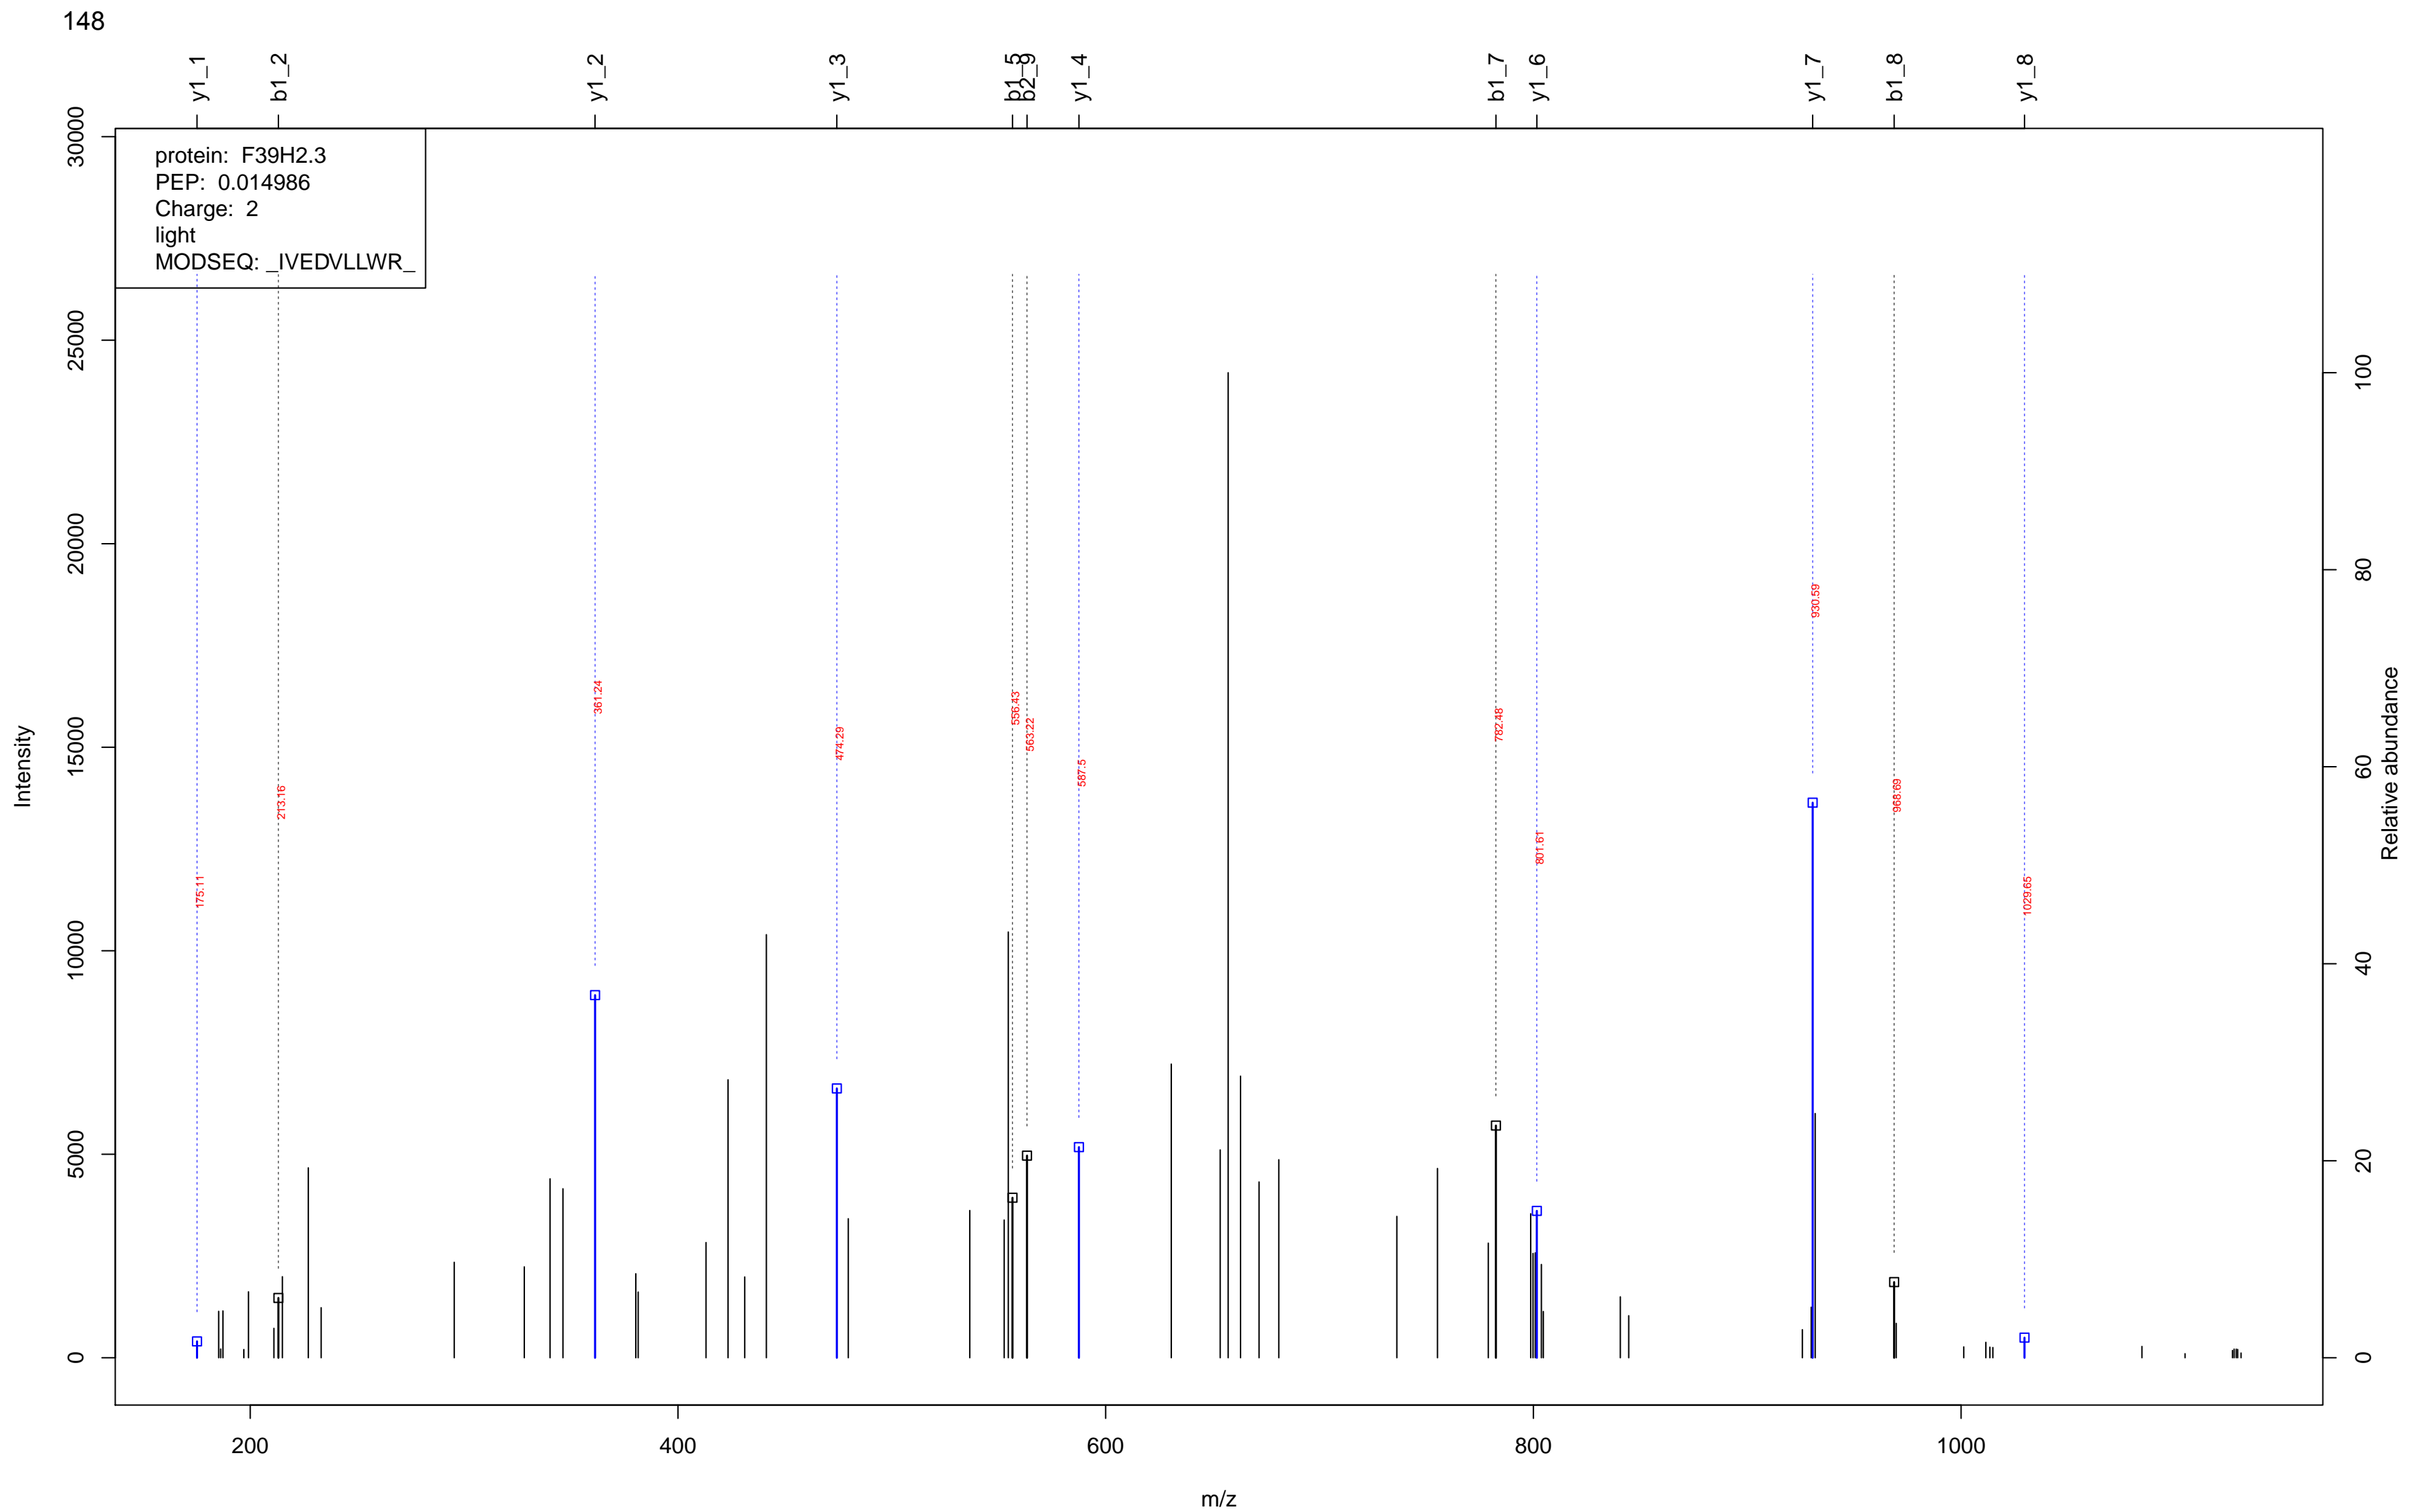

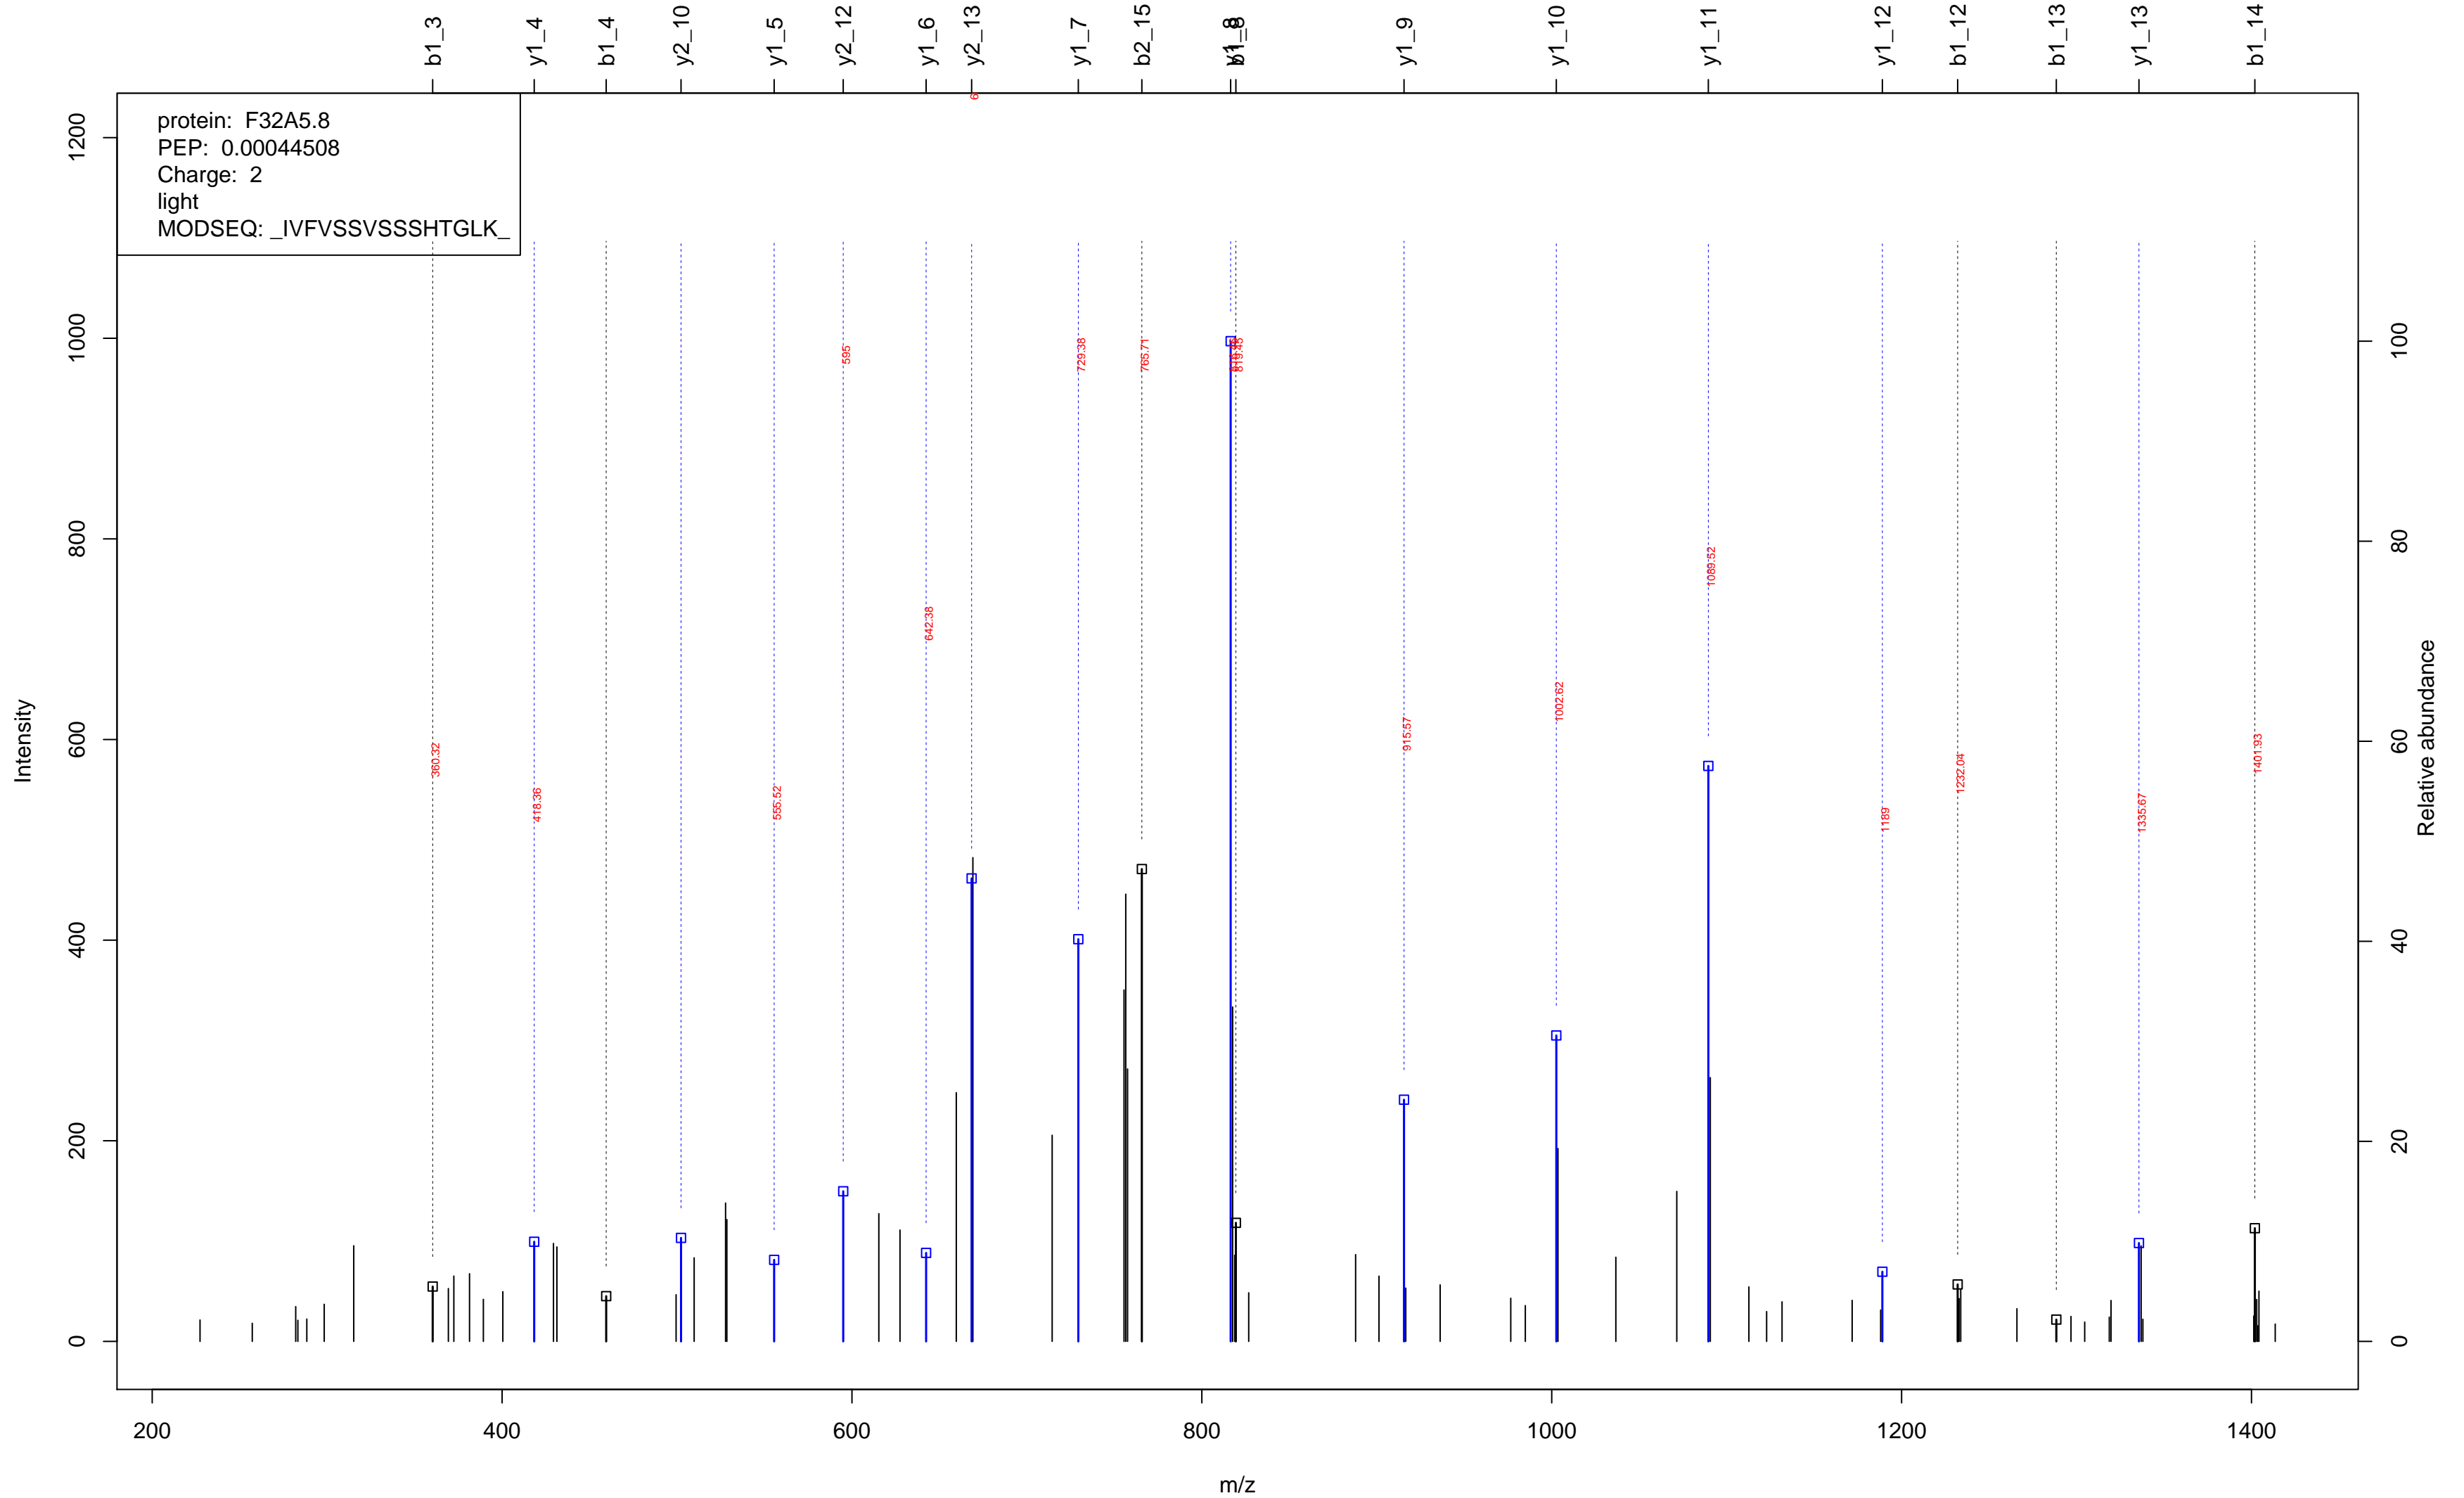

150

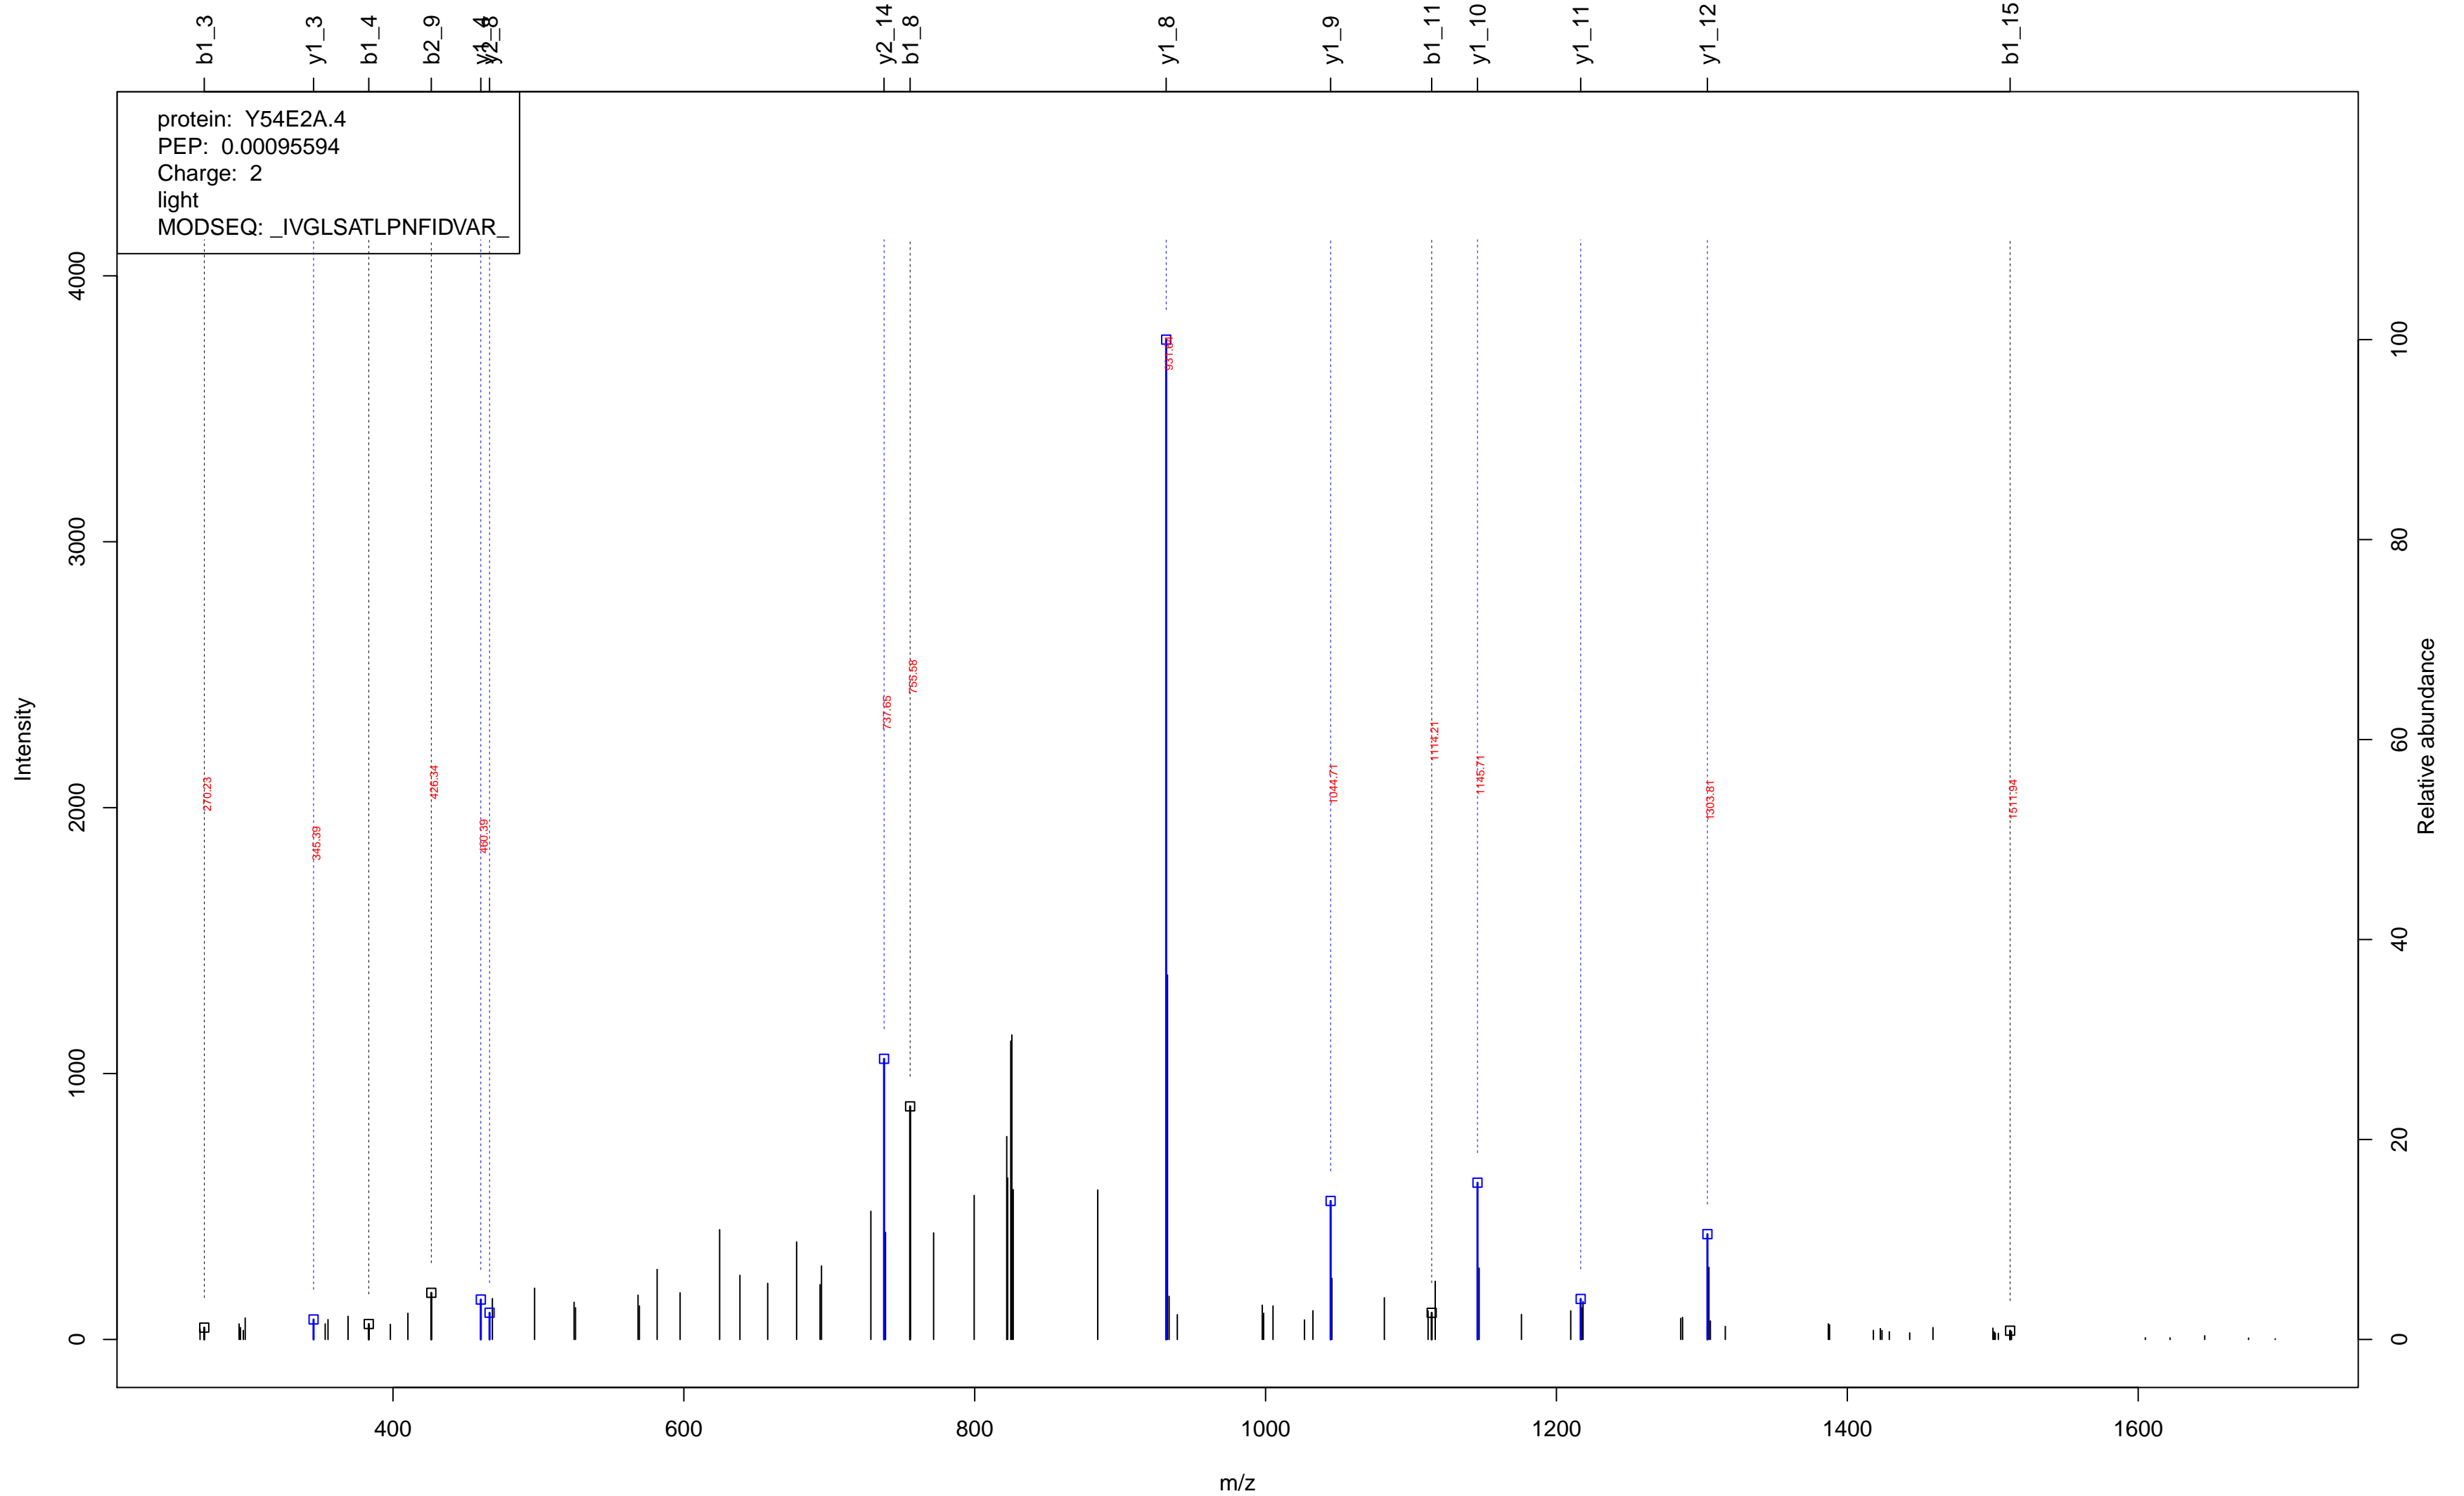

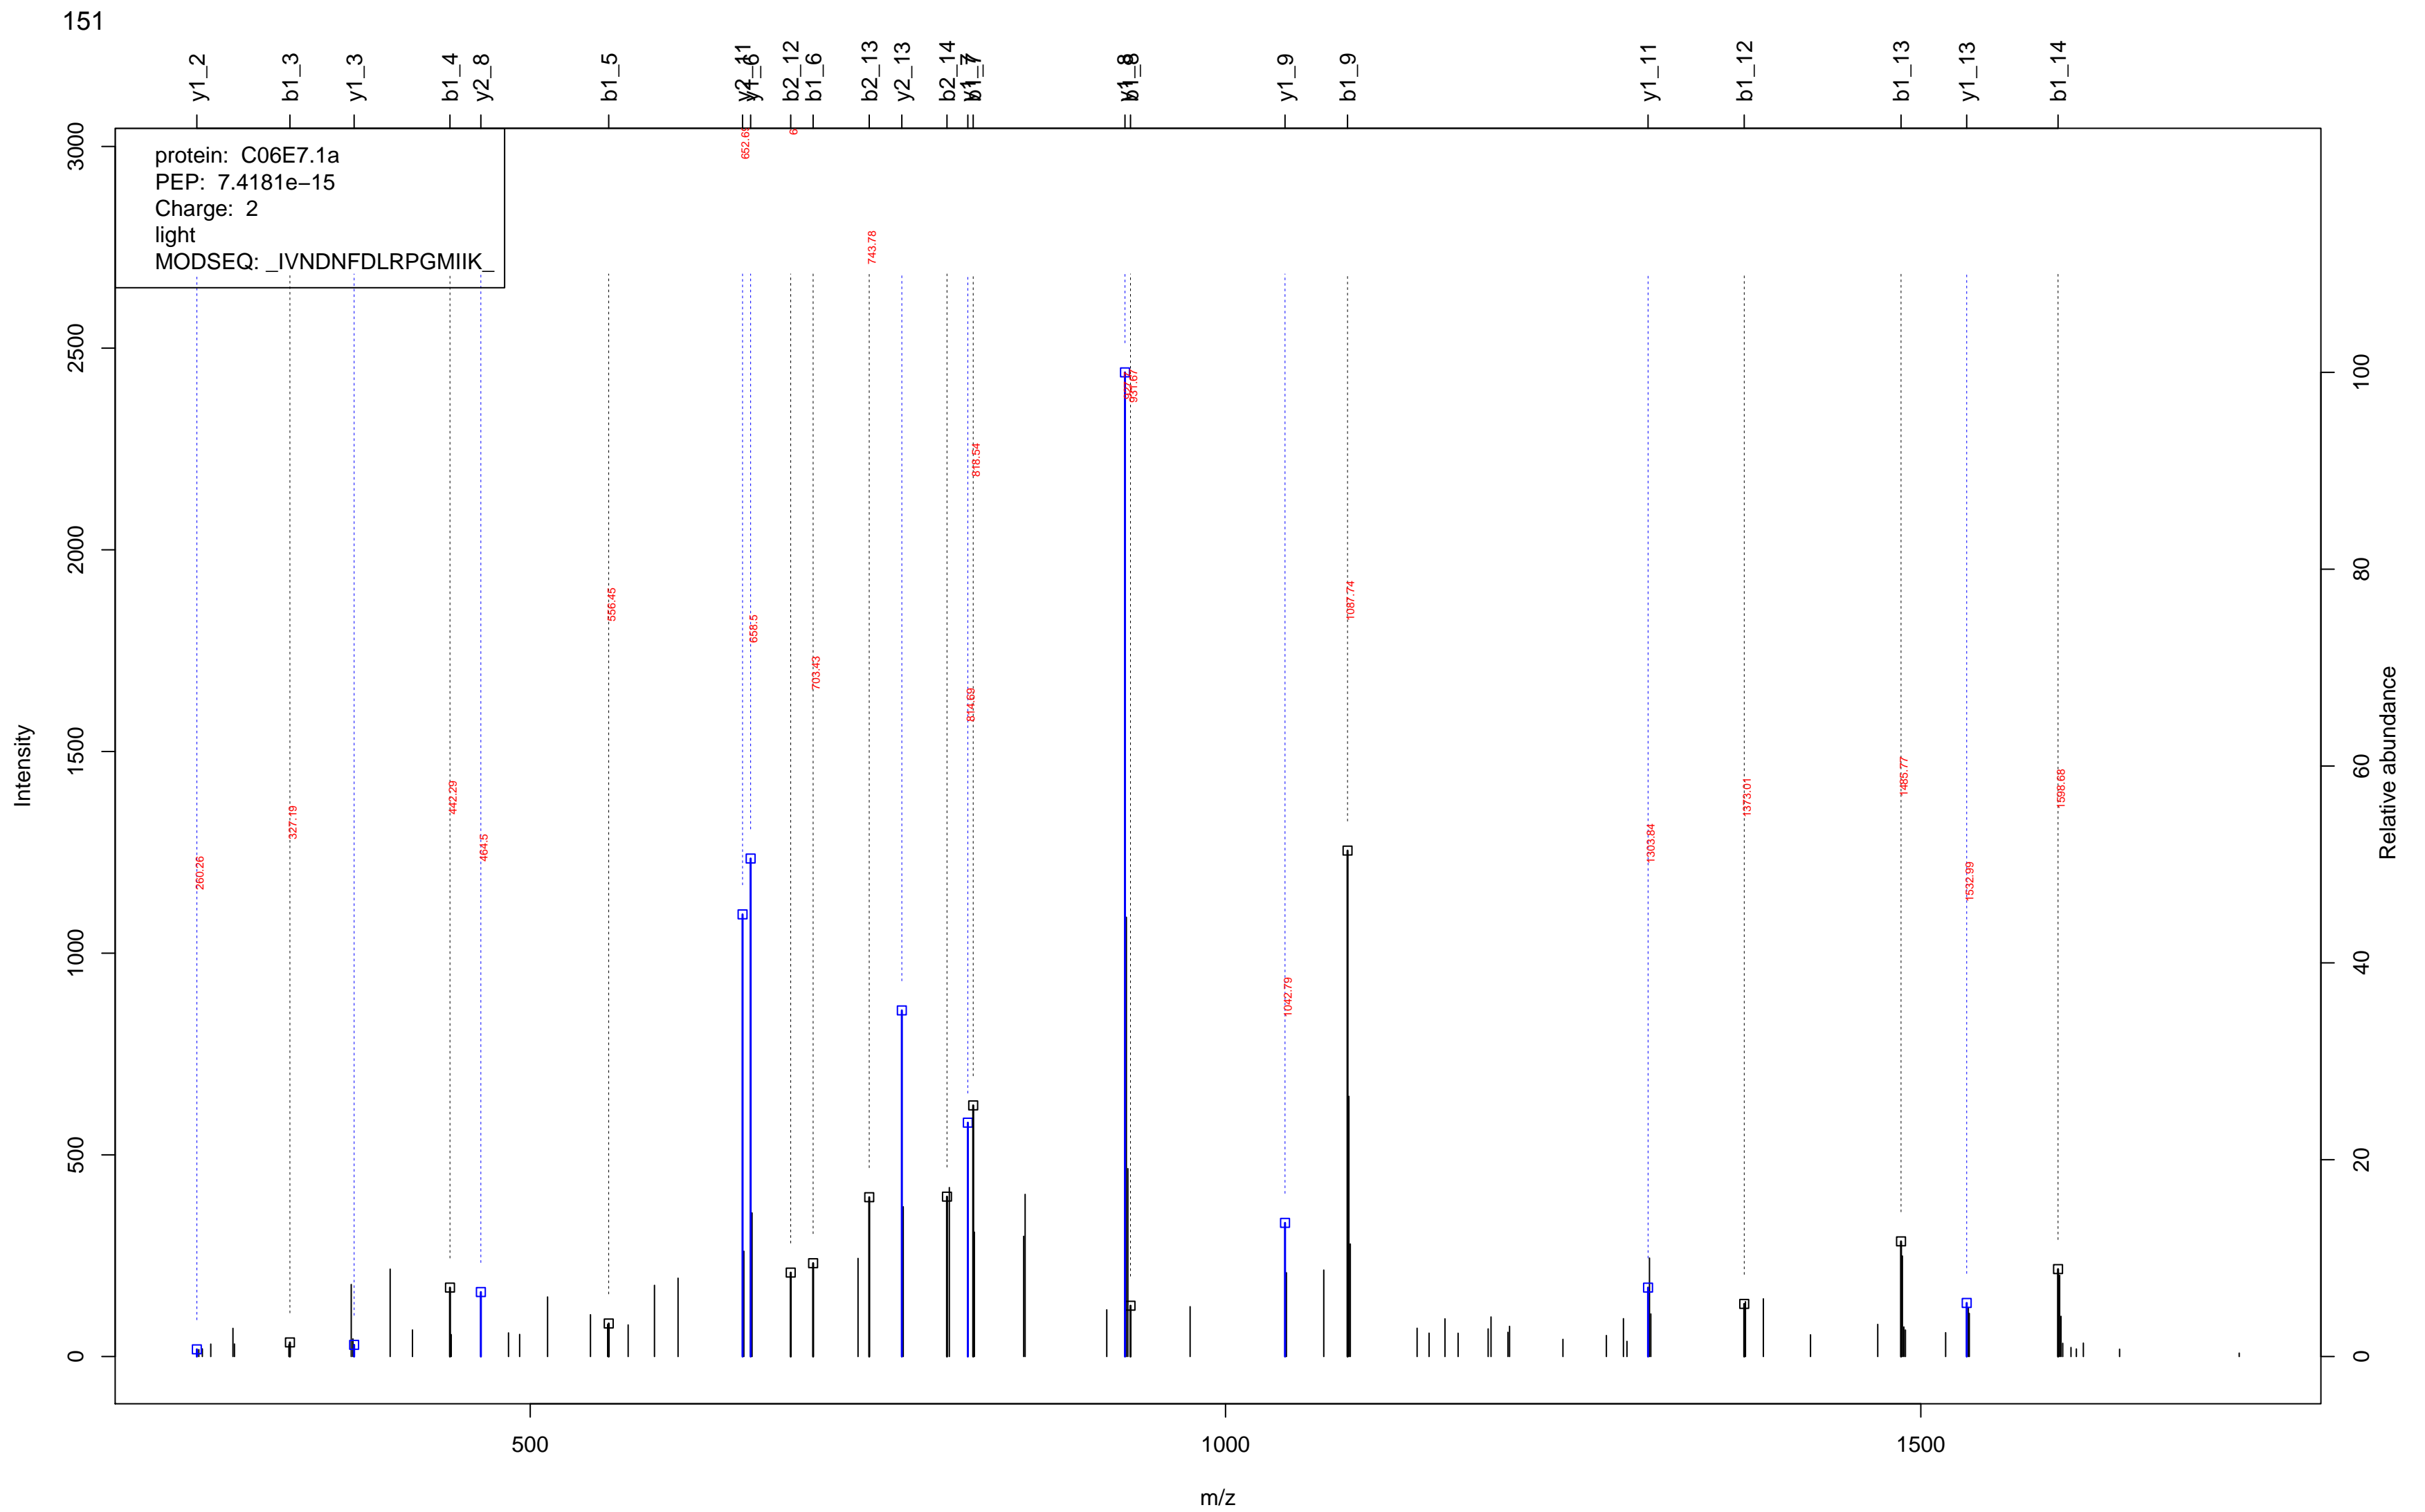

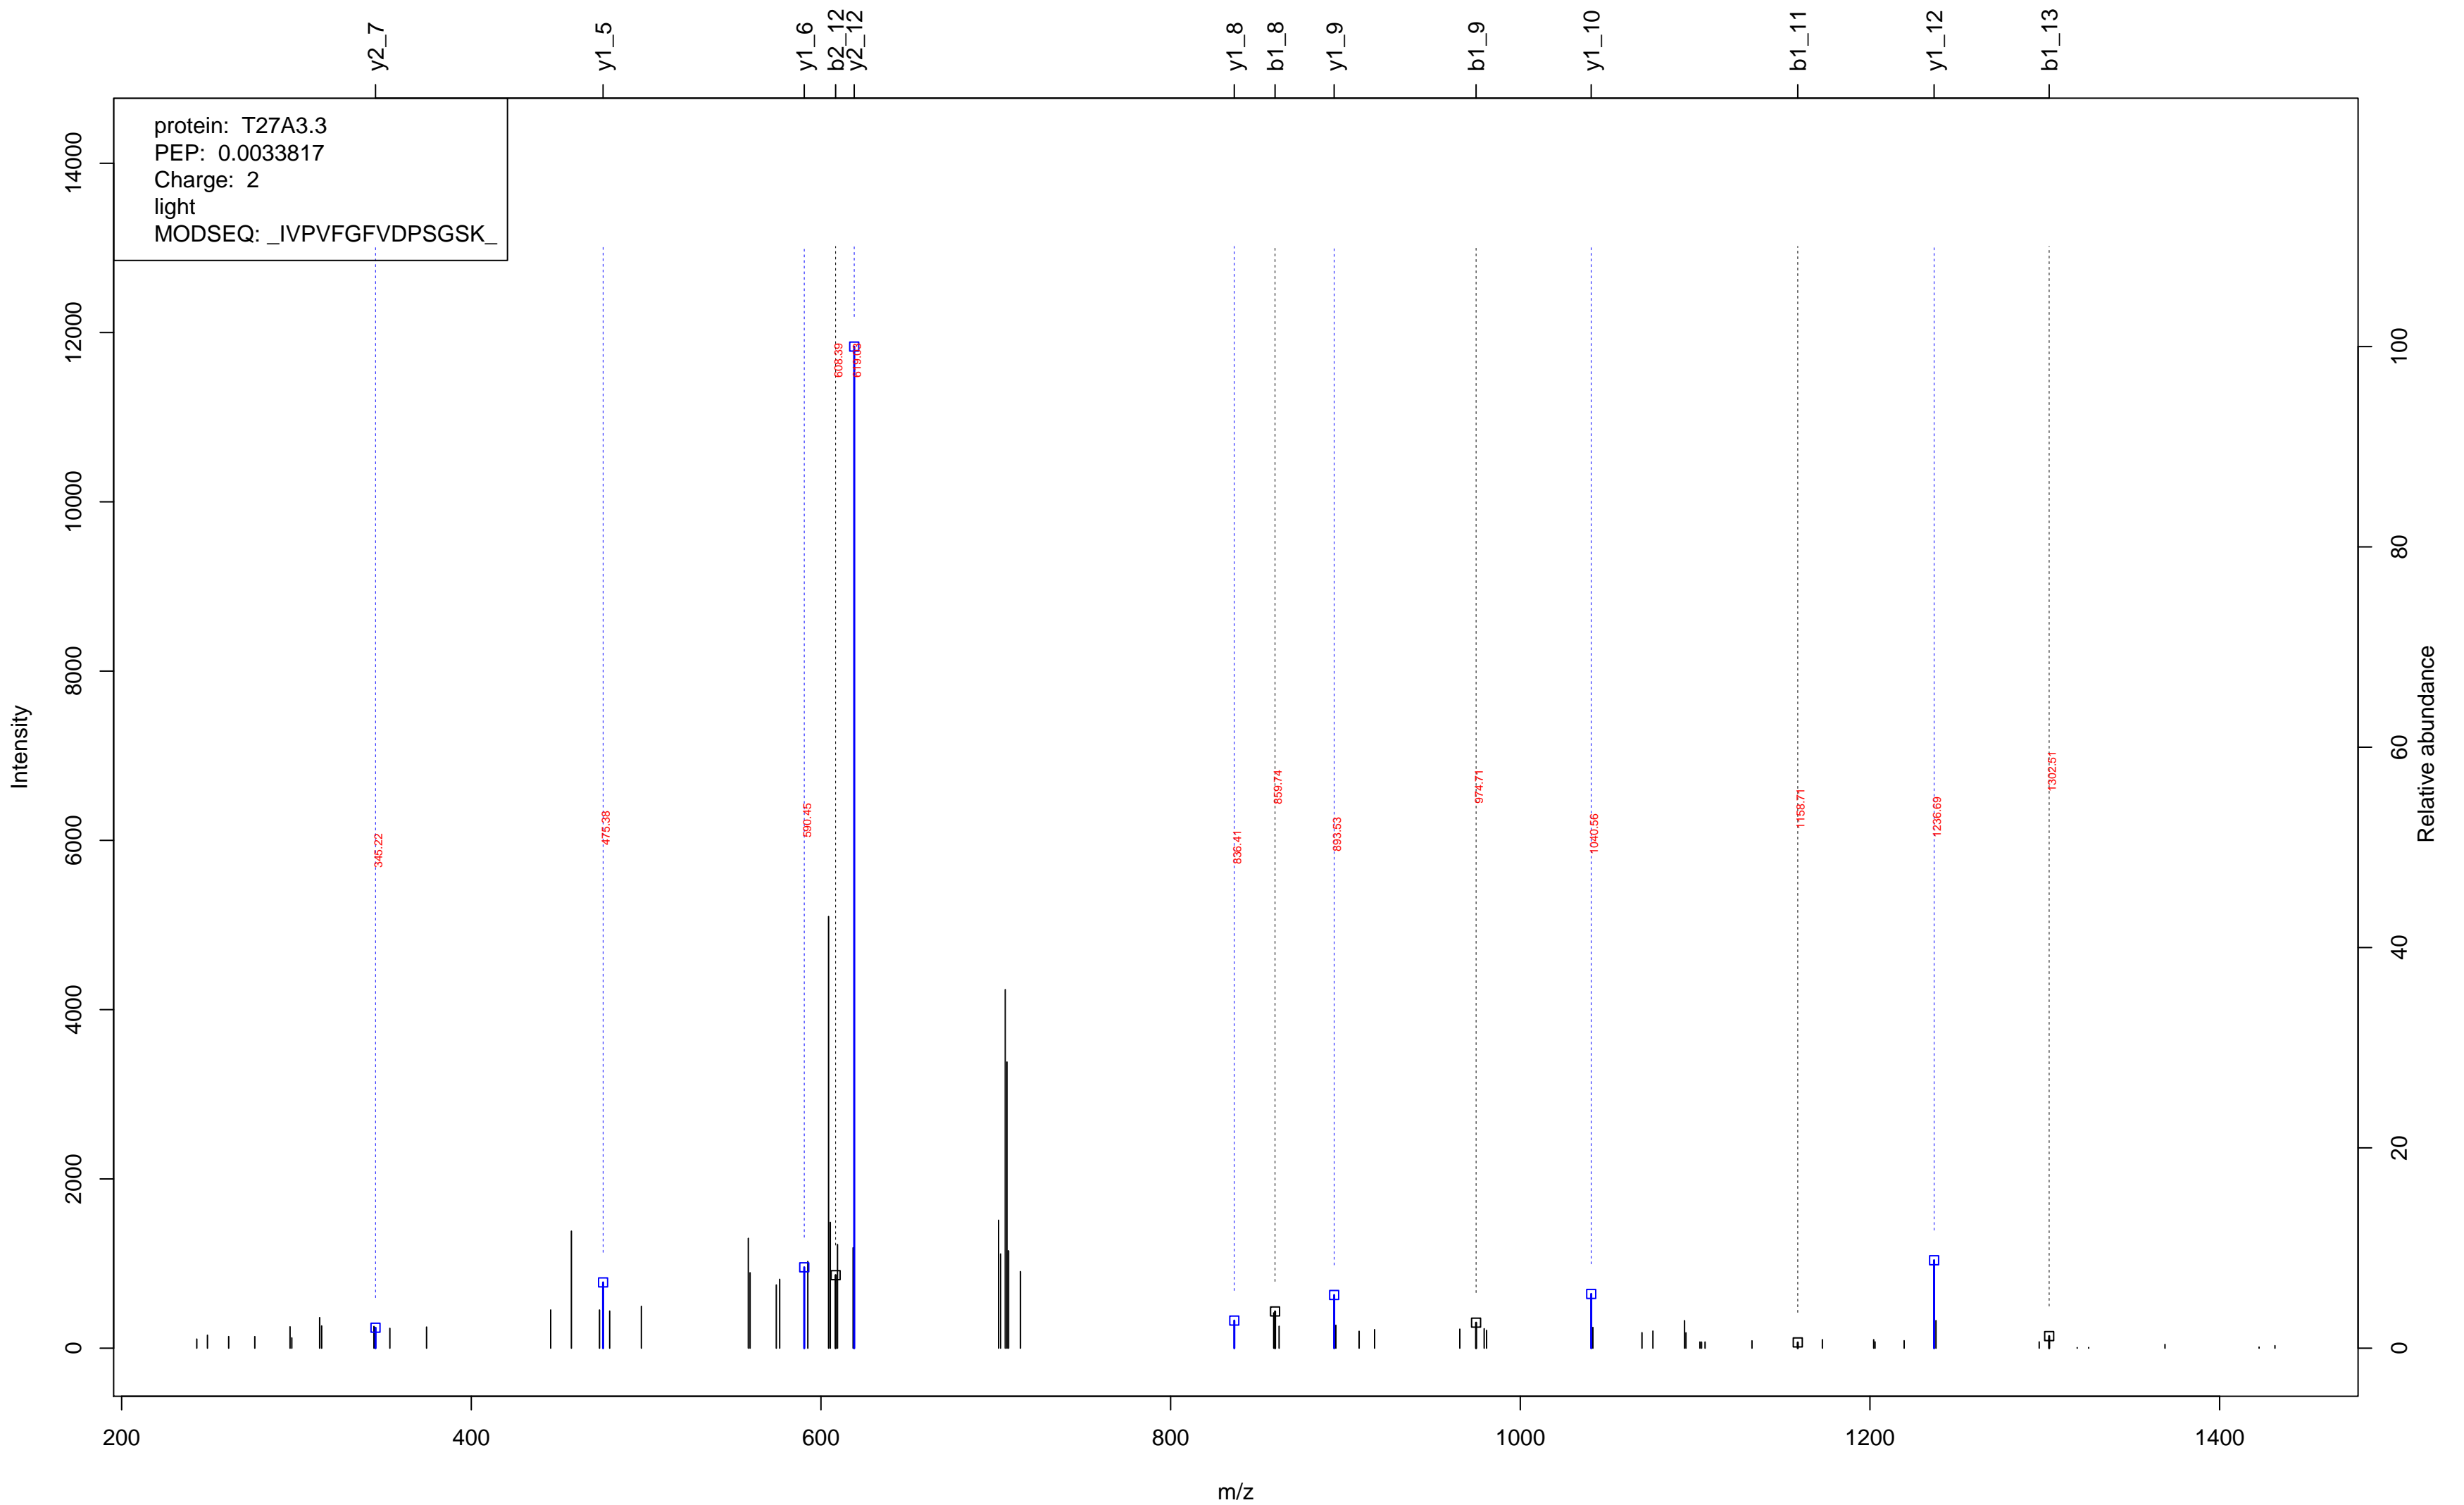



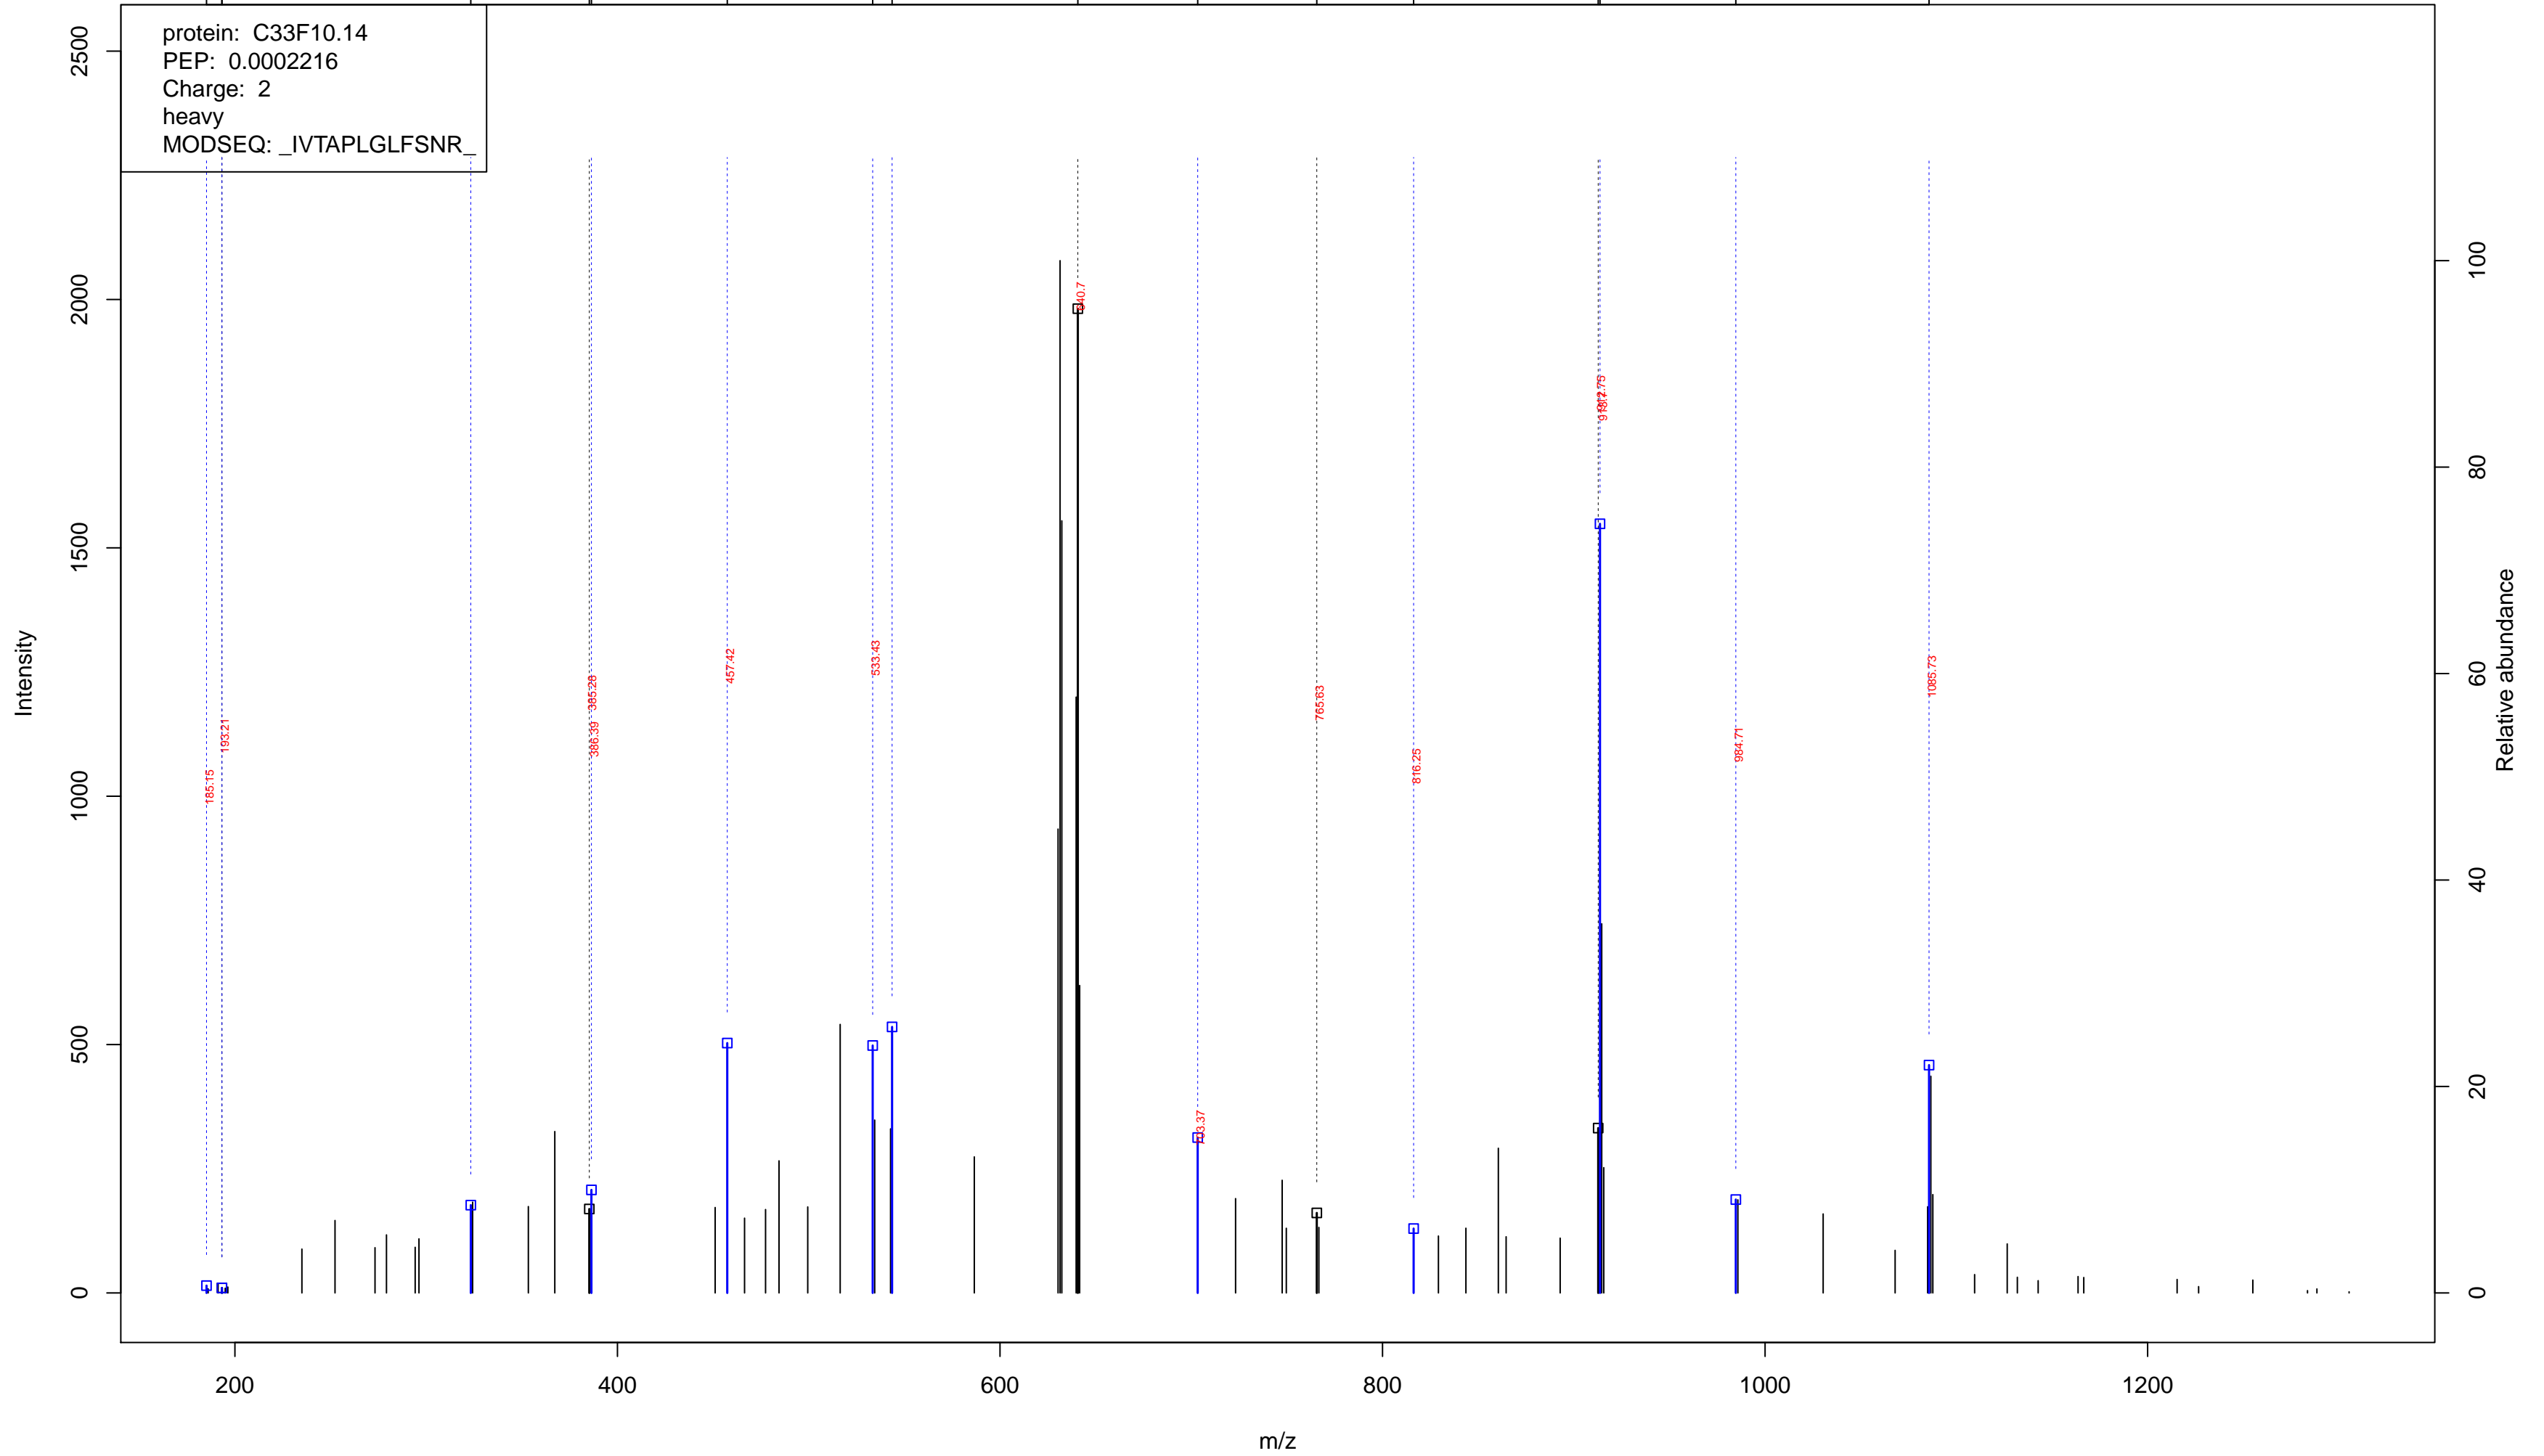

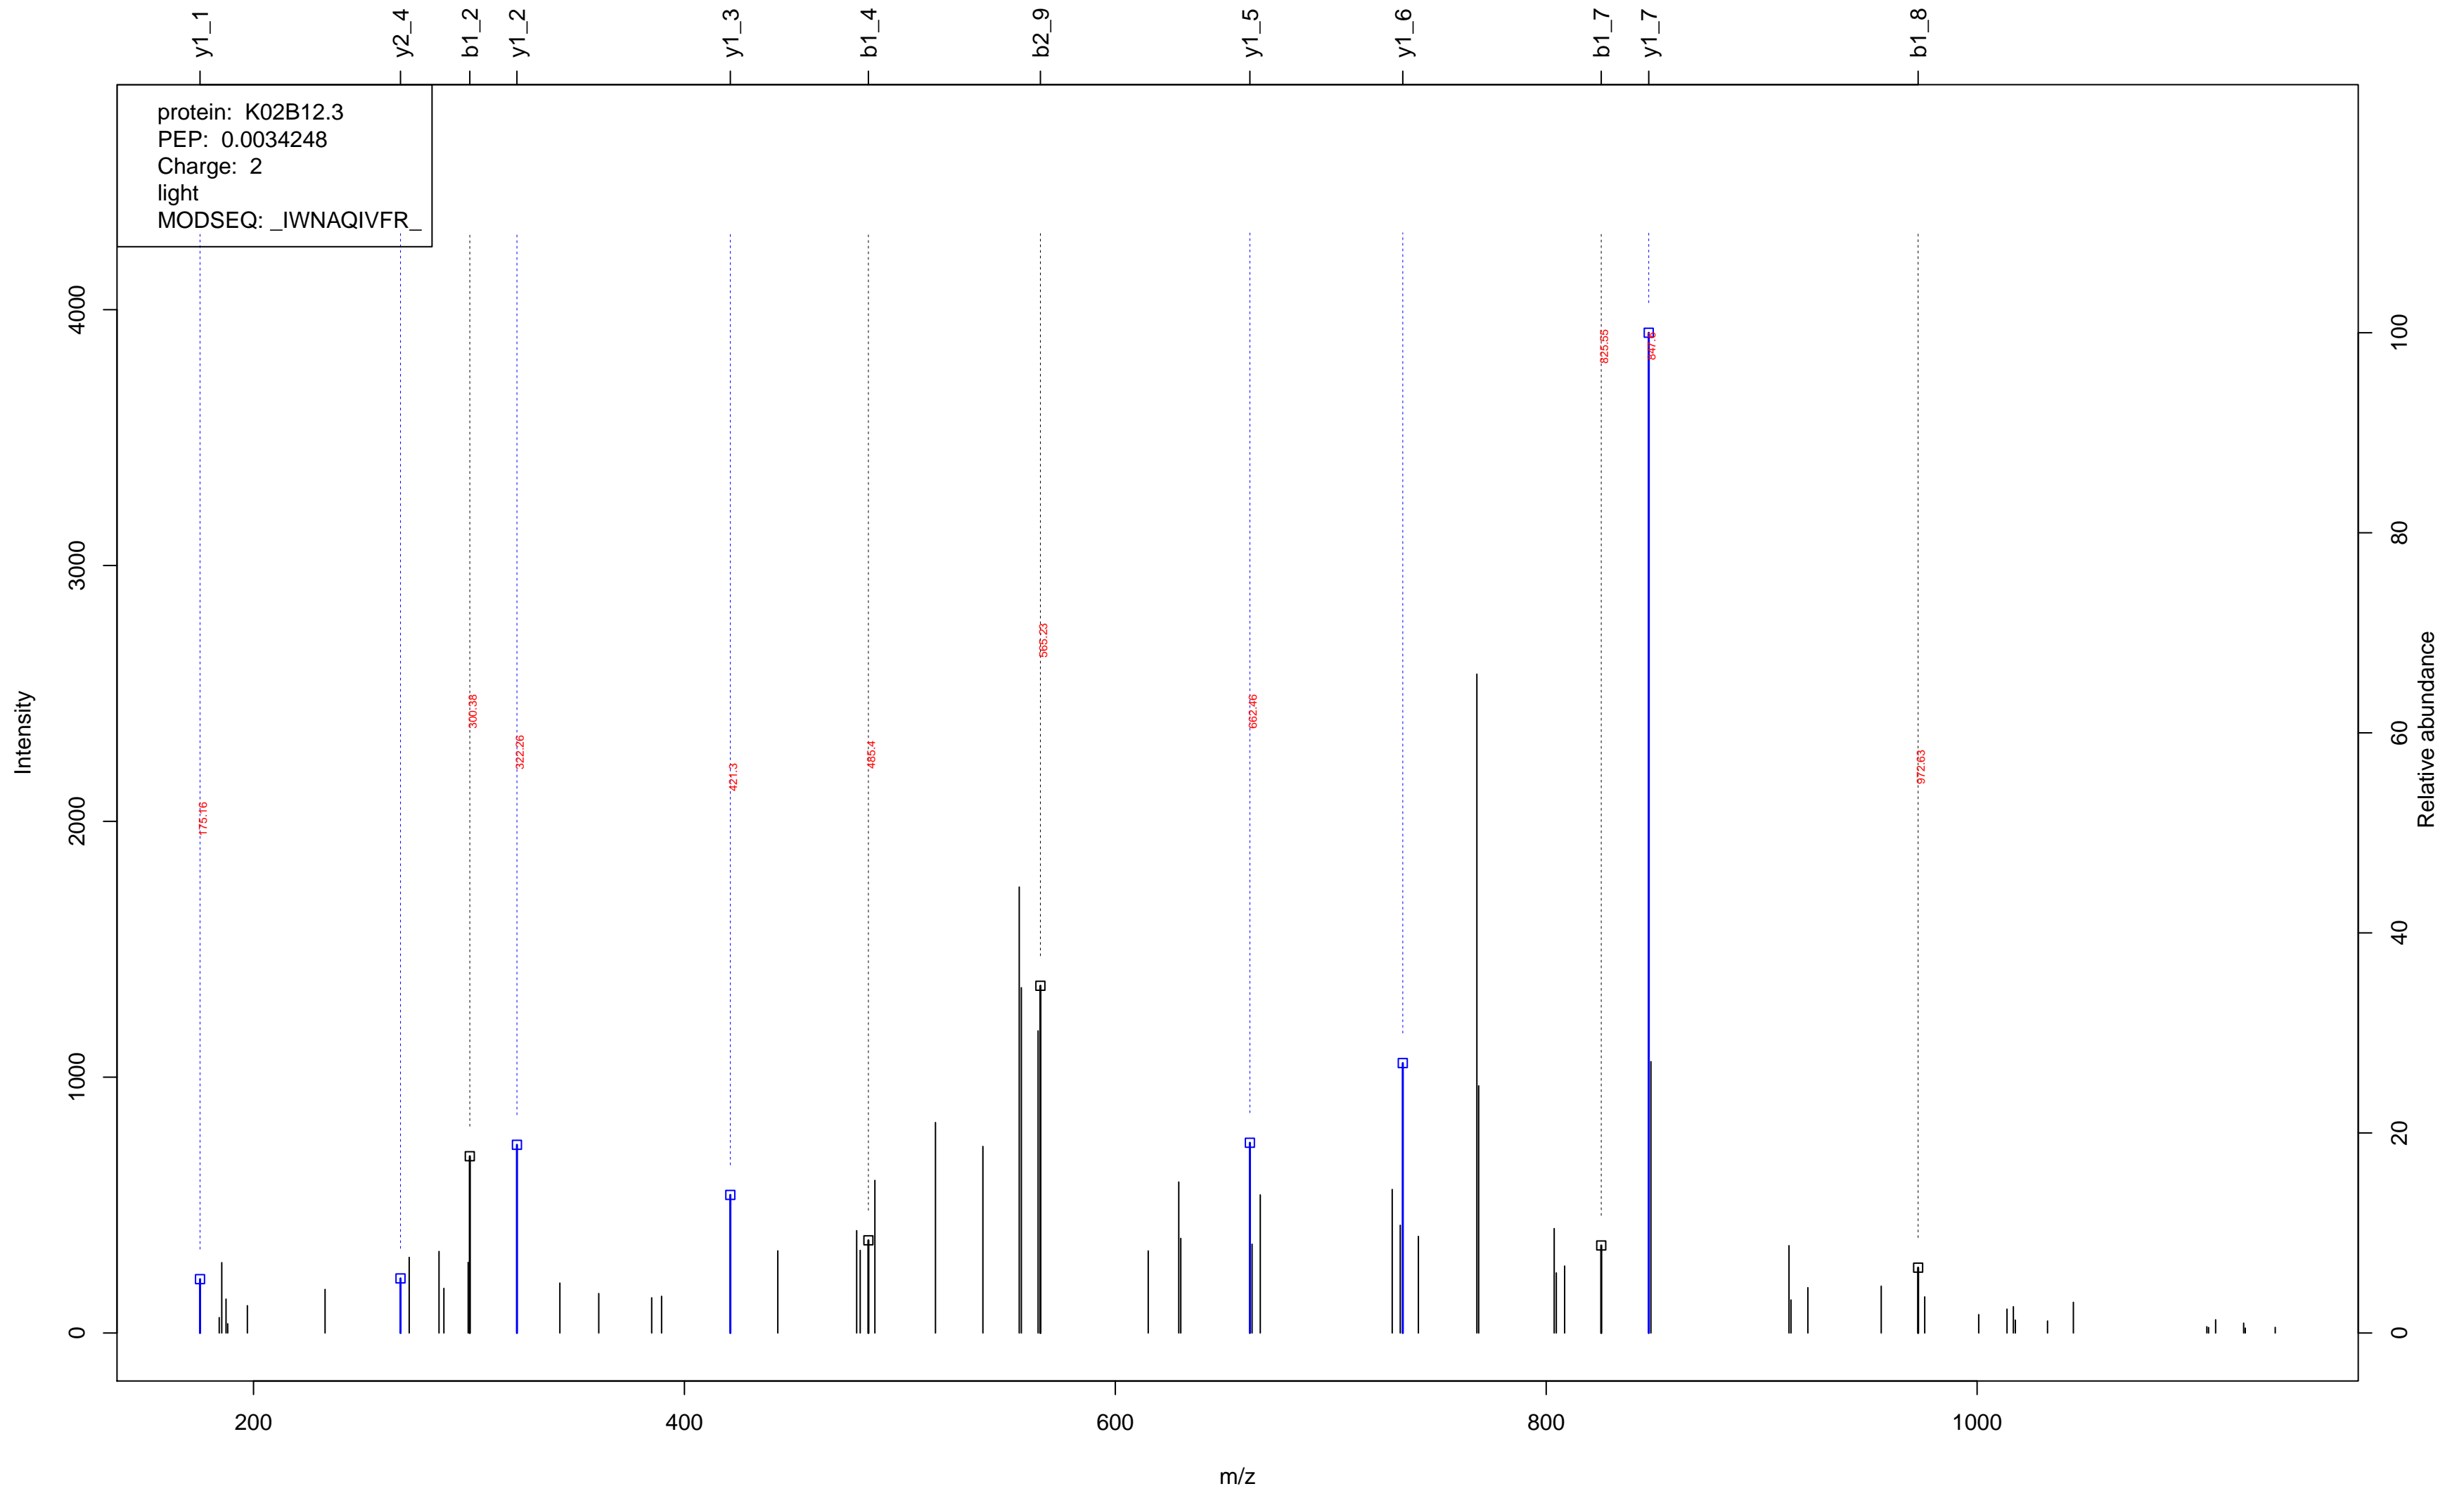

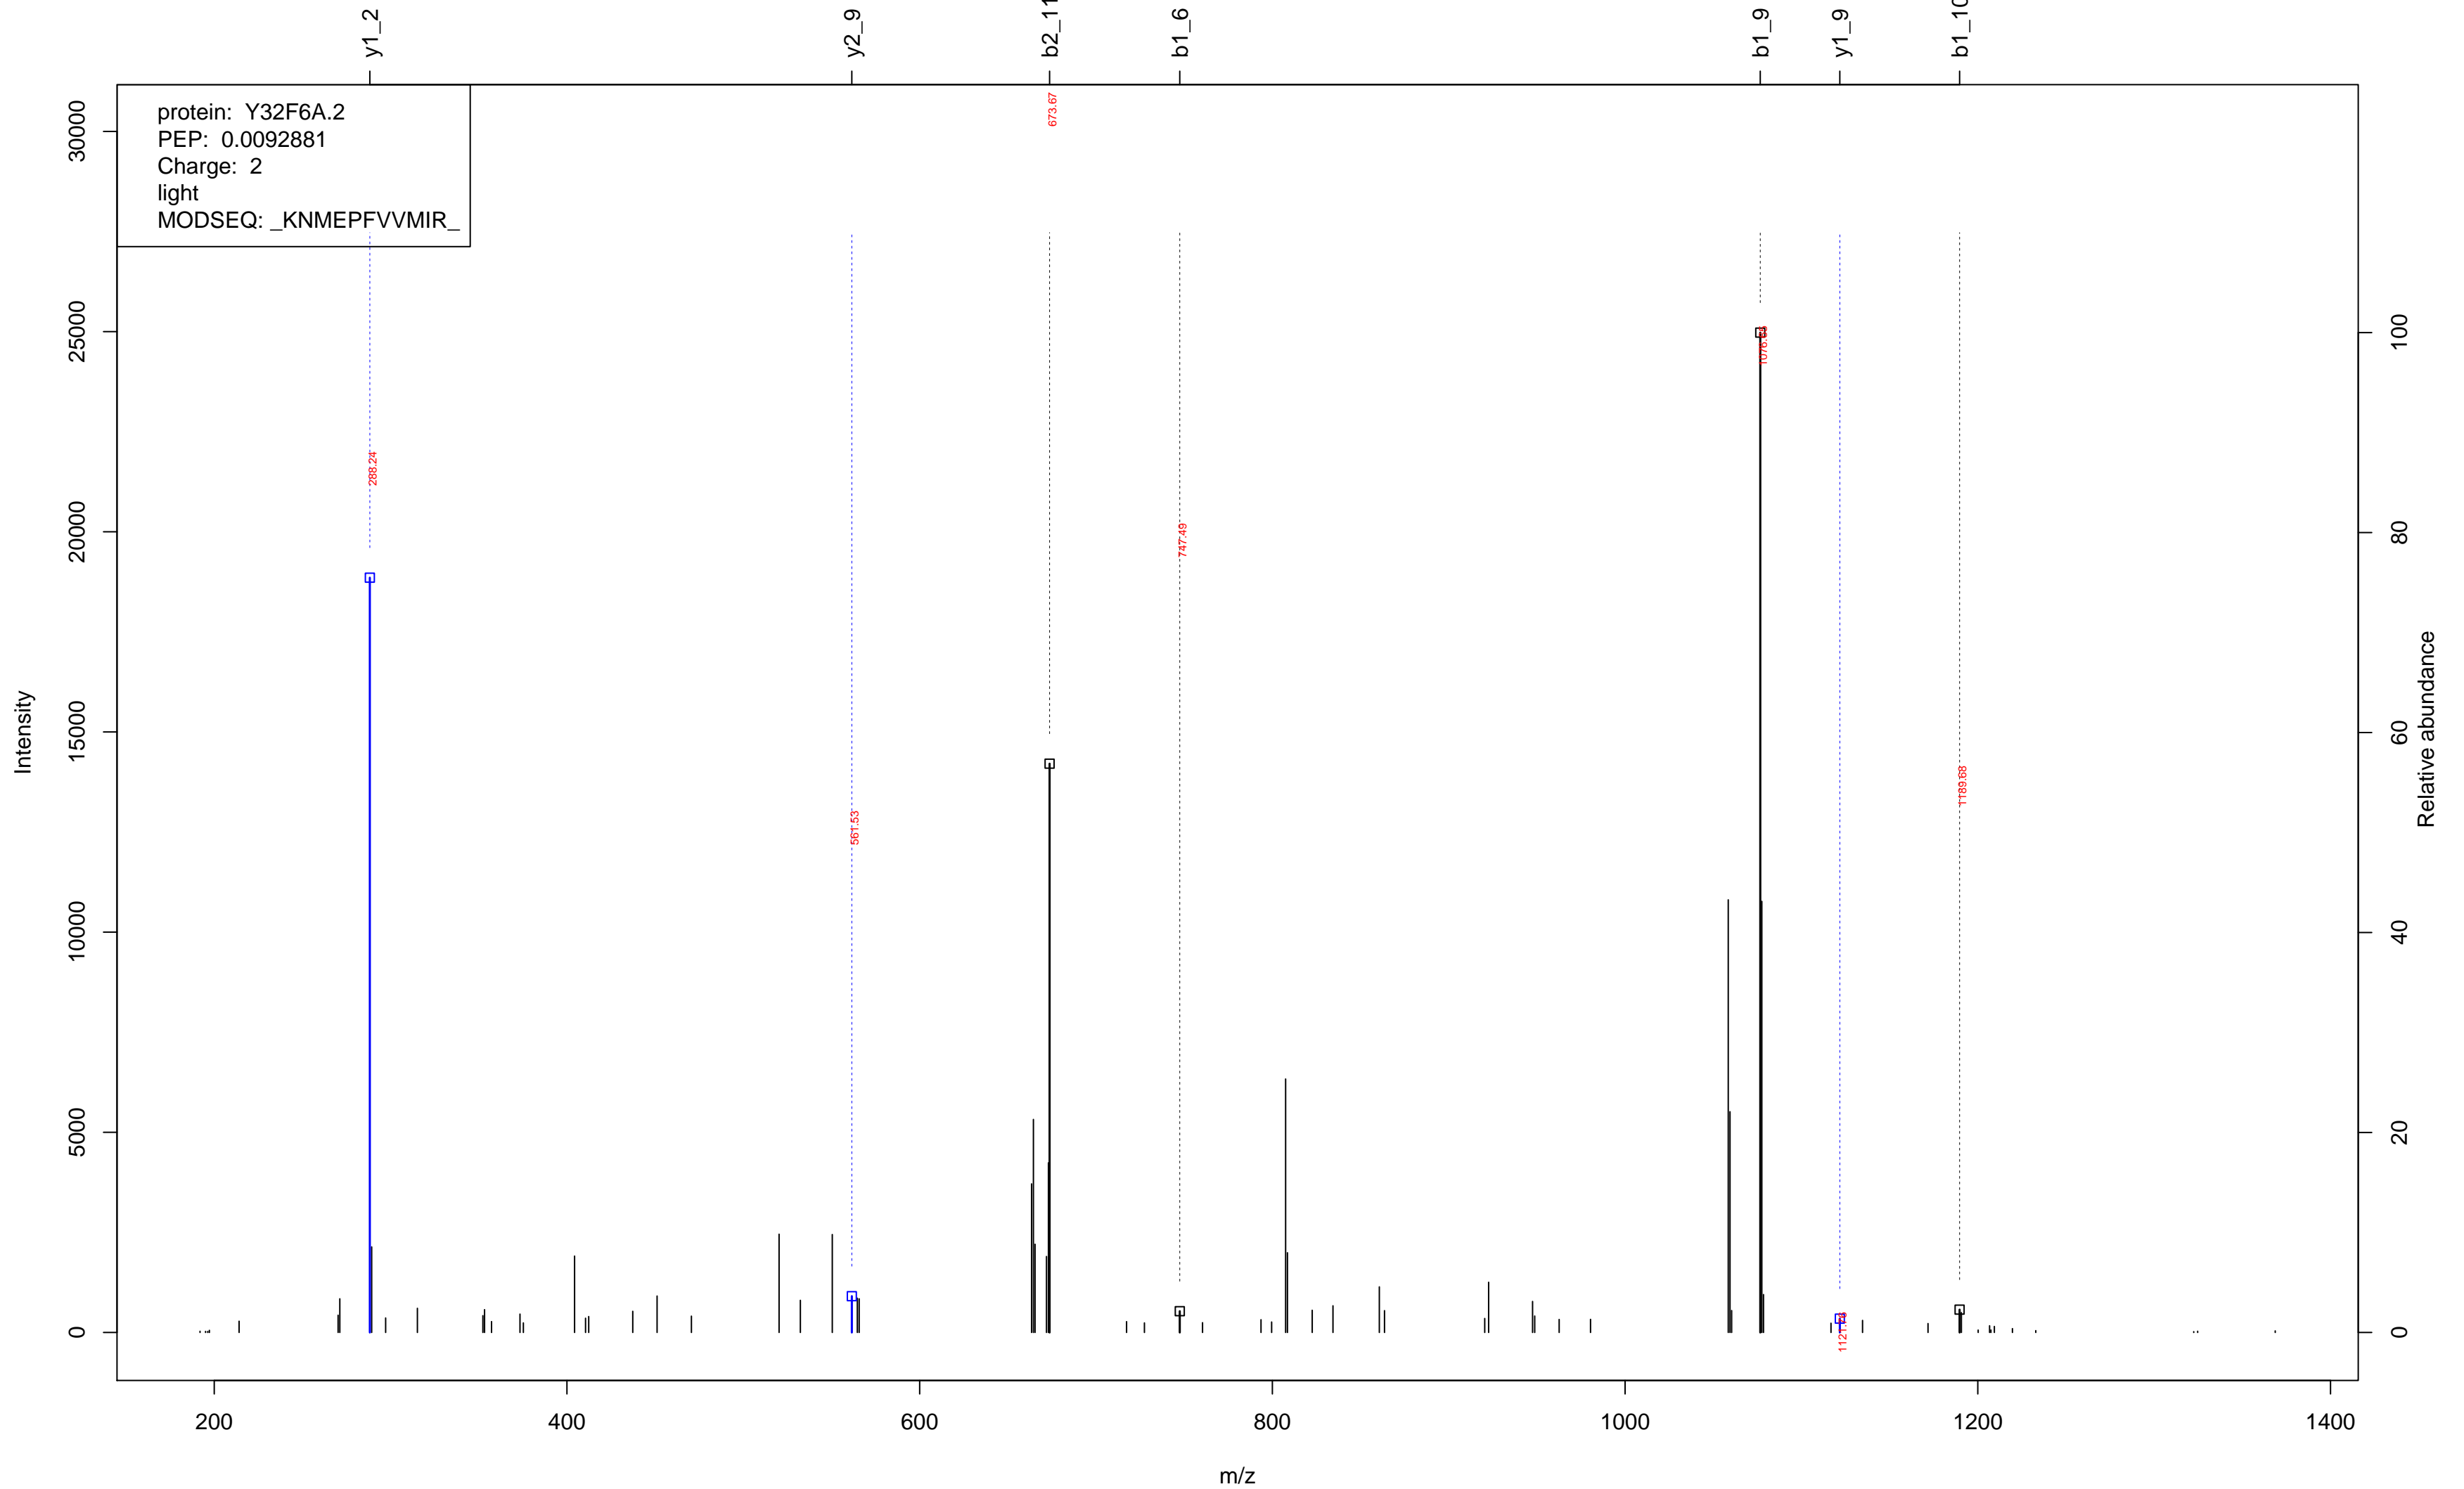

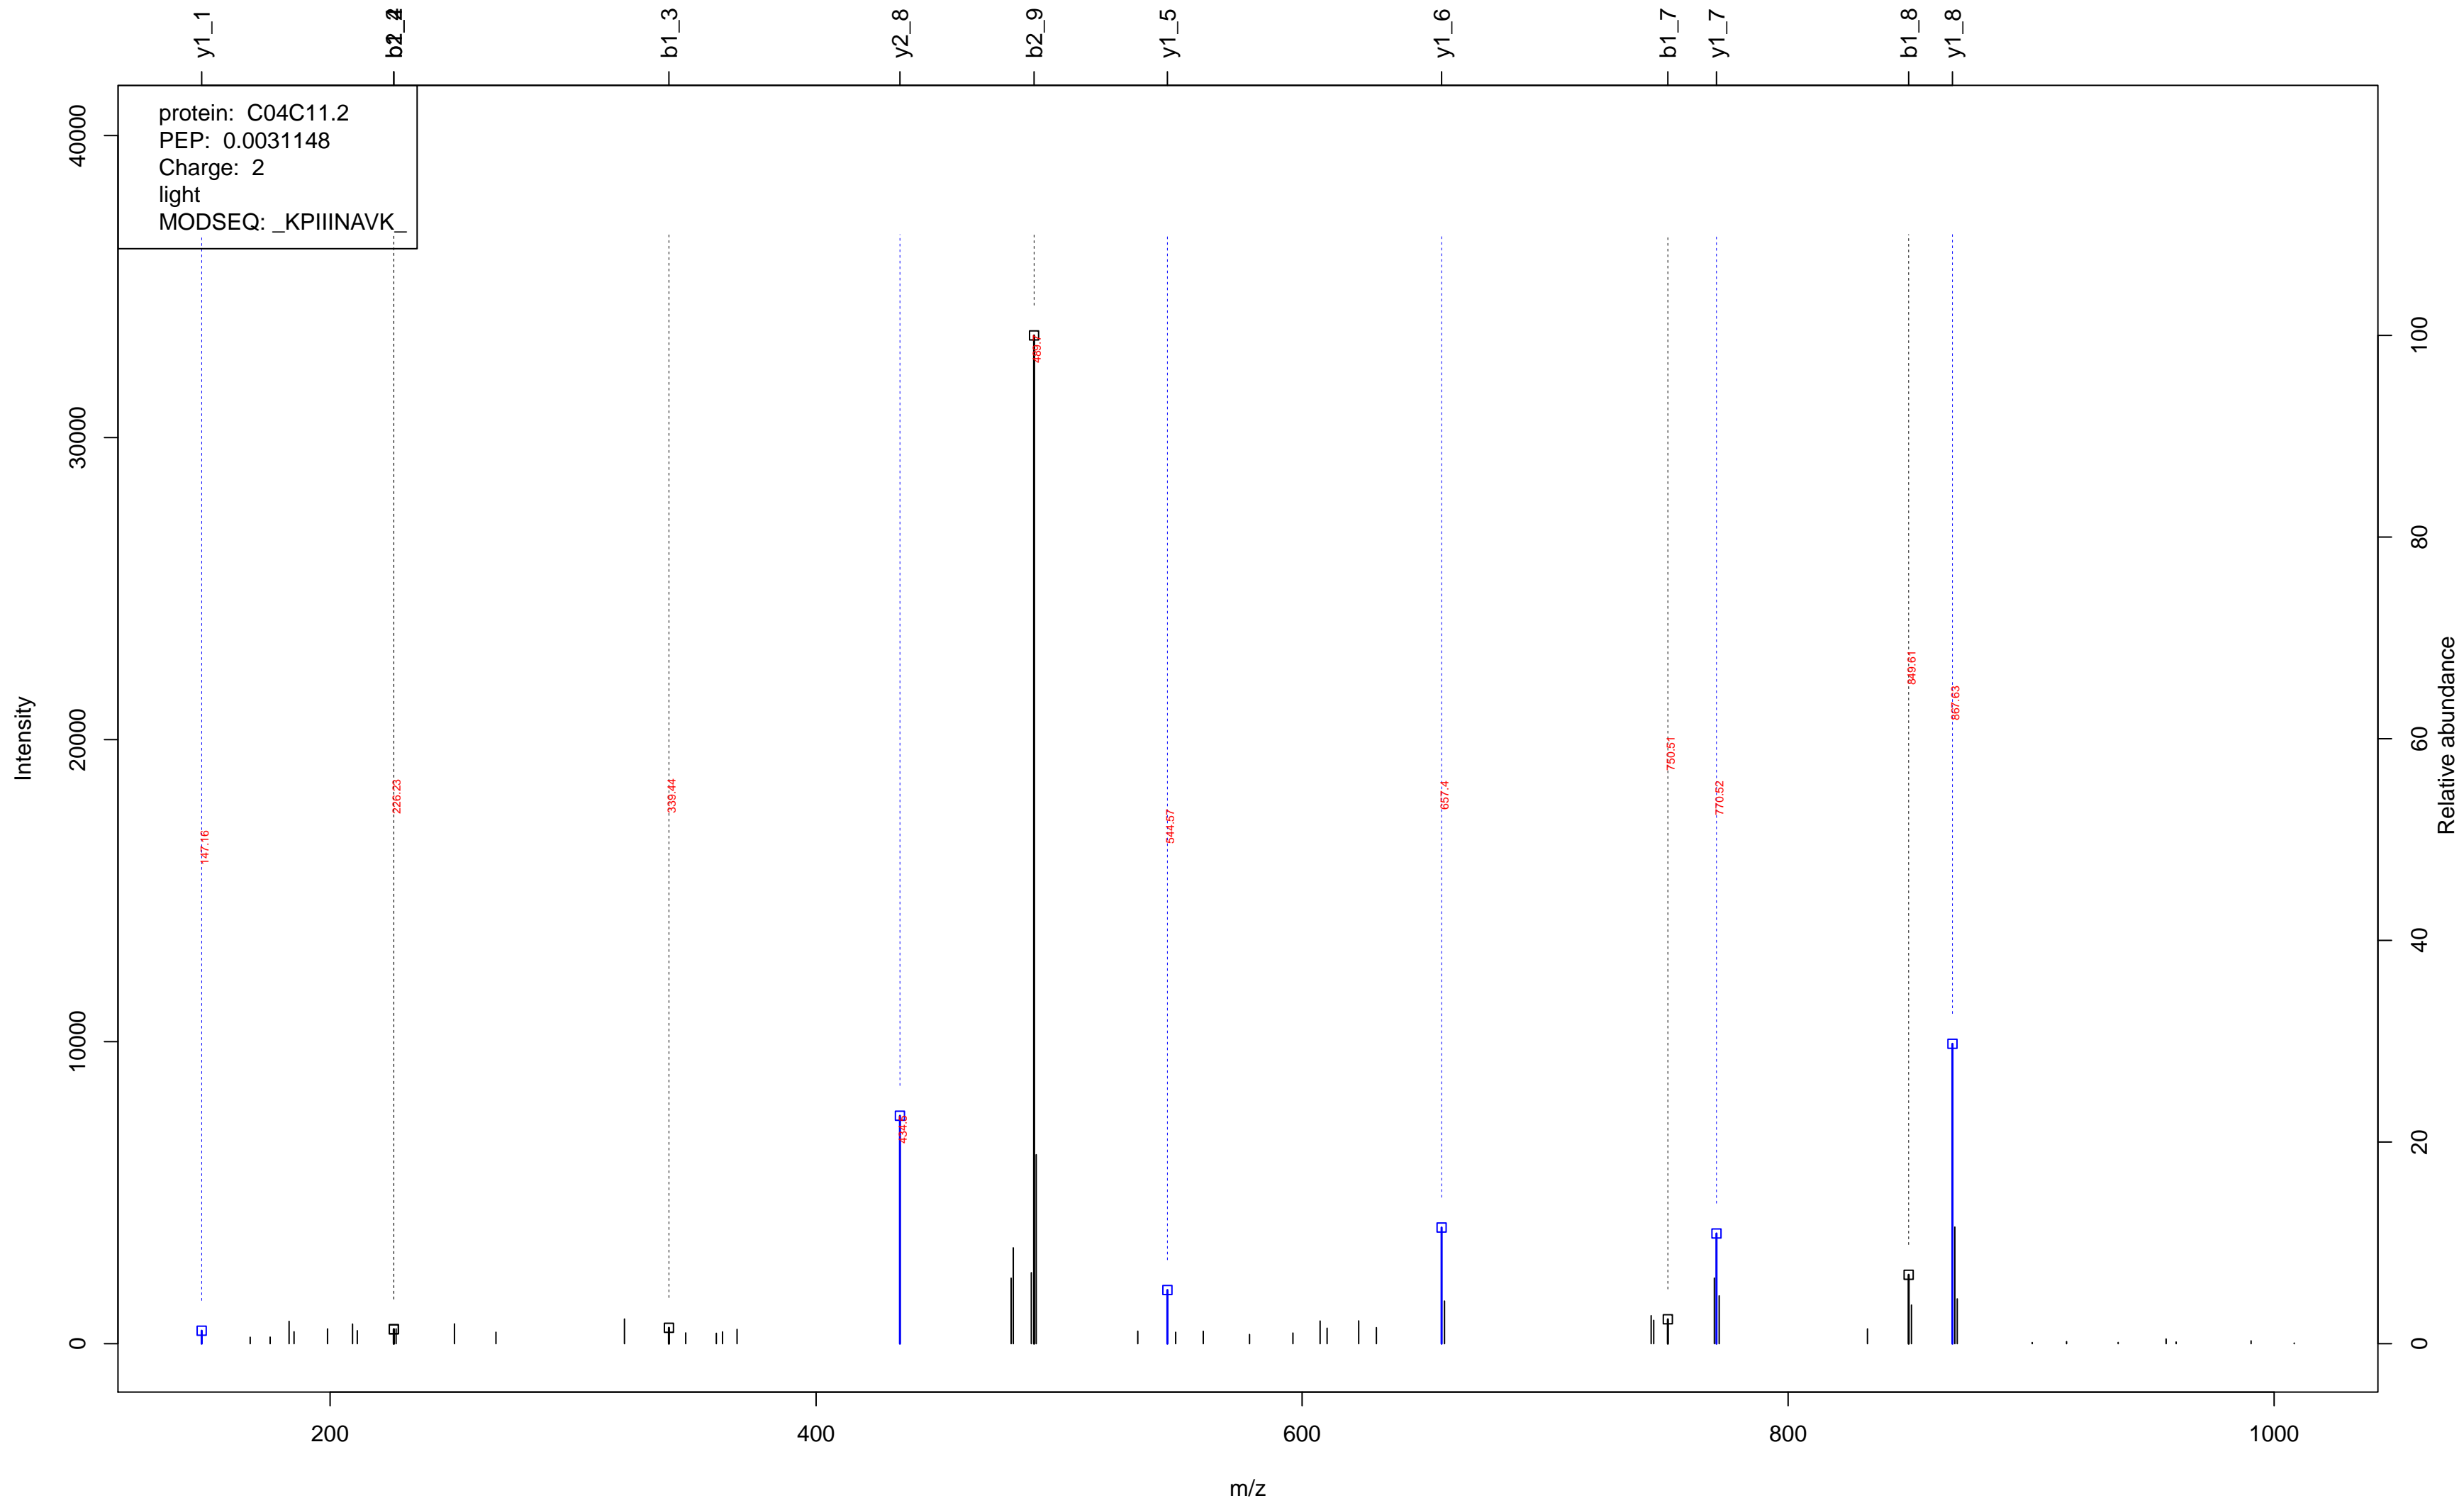

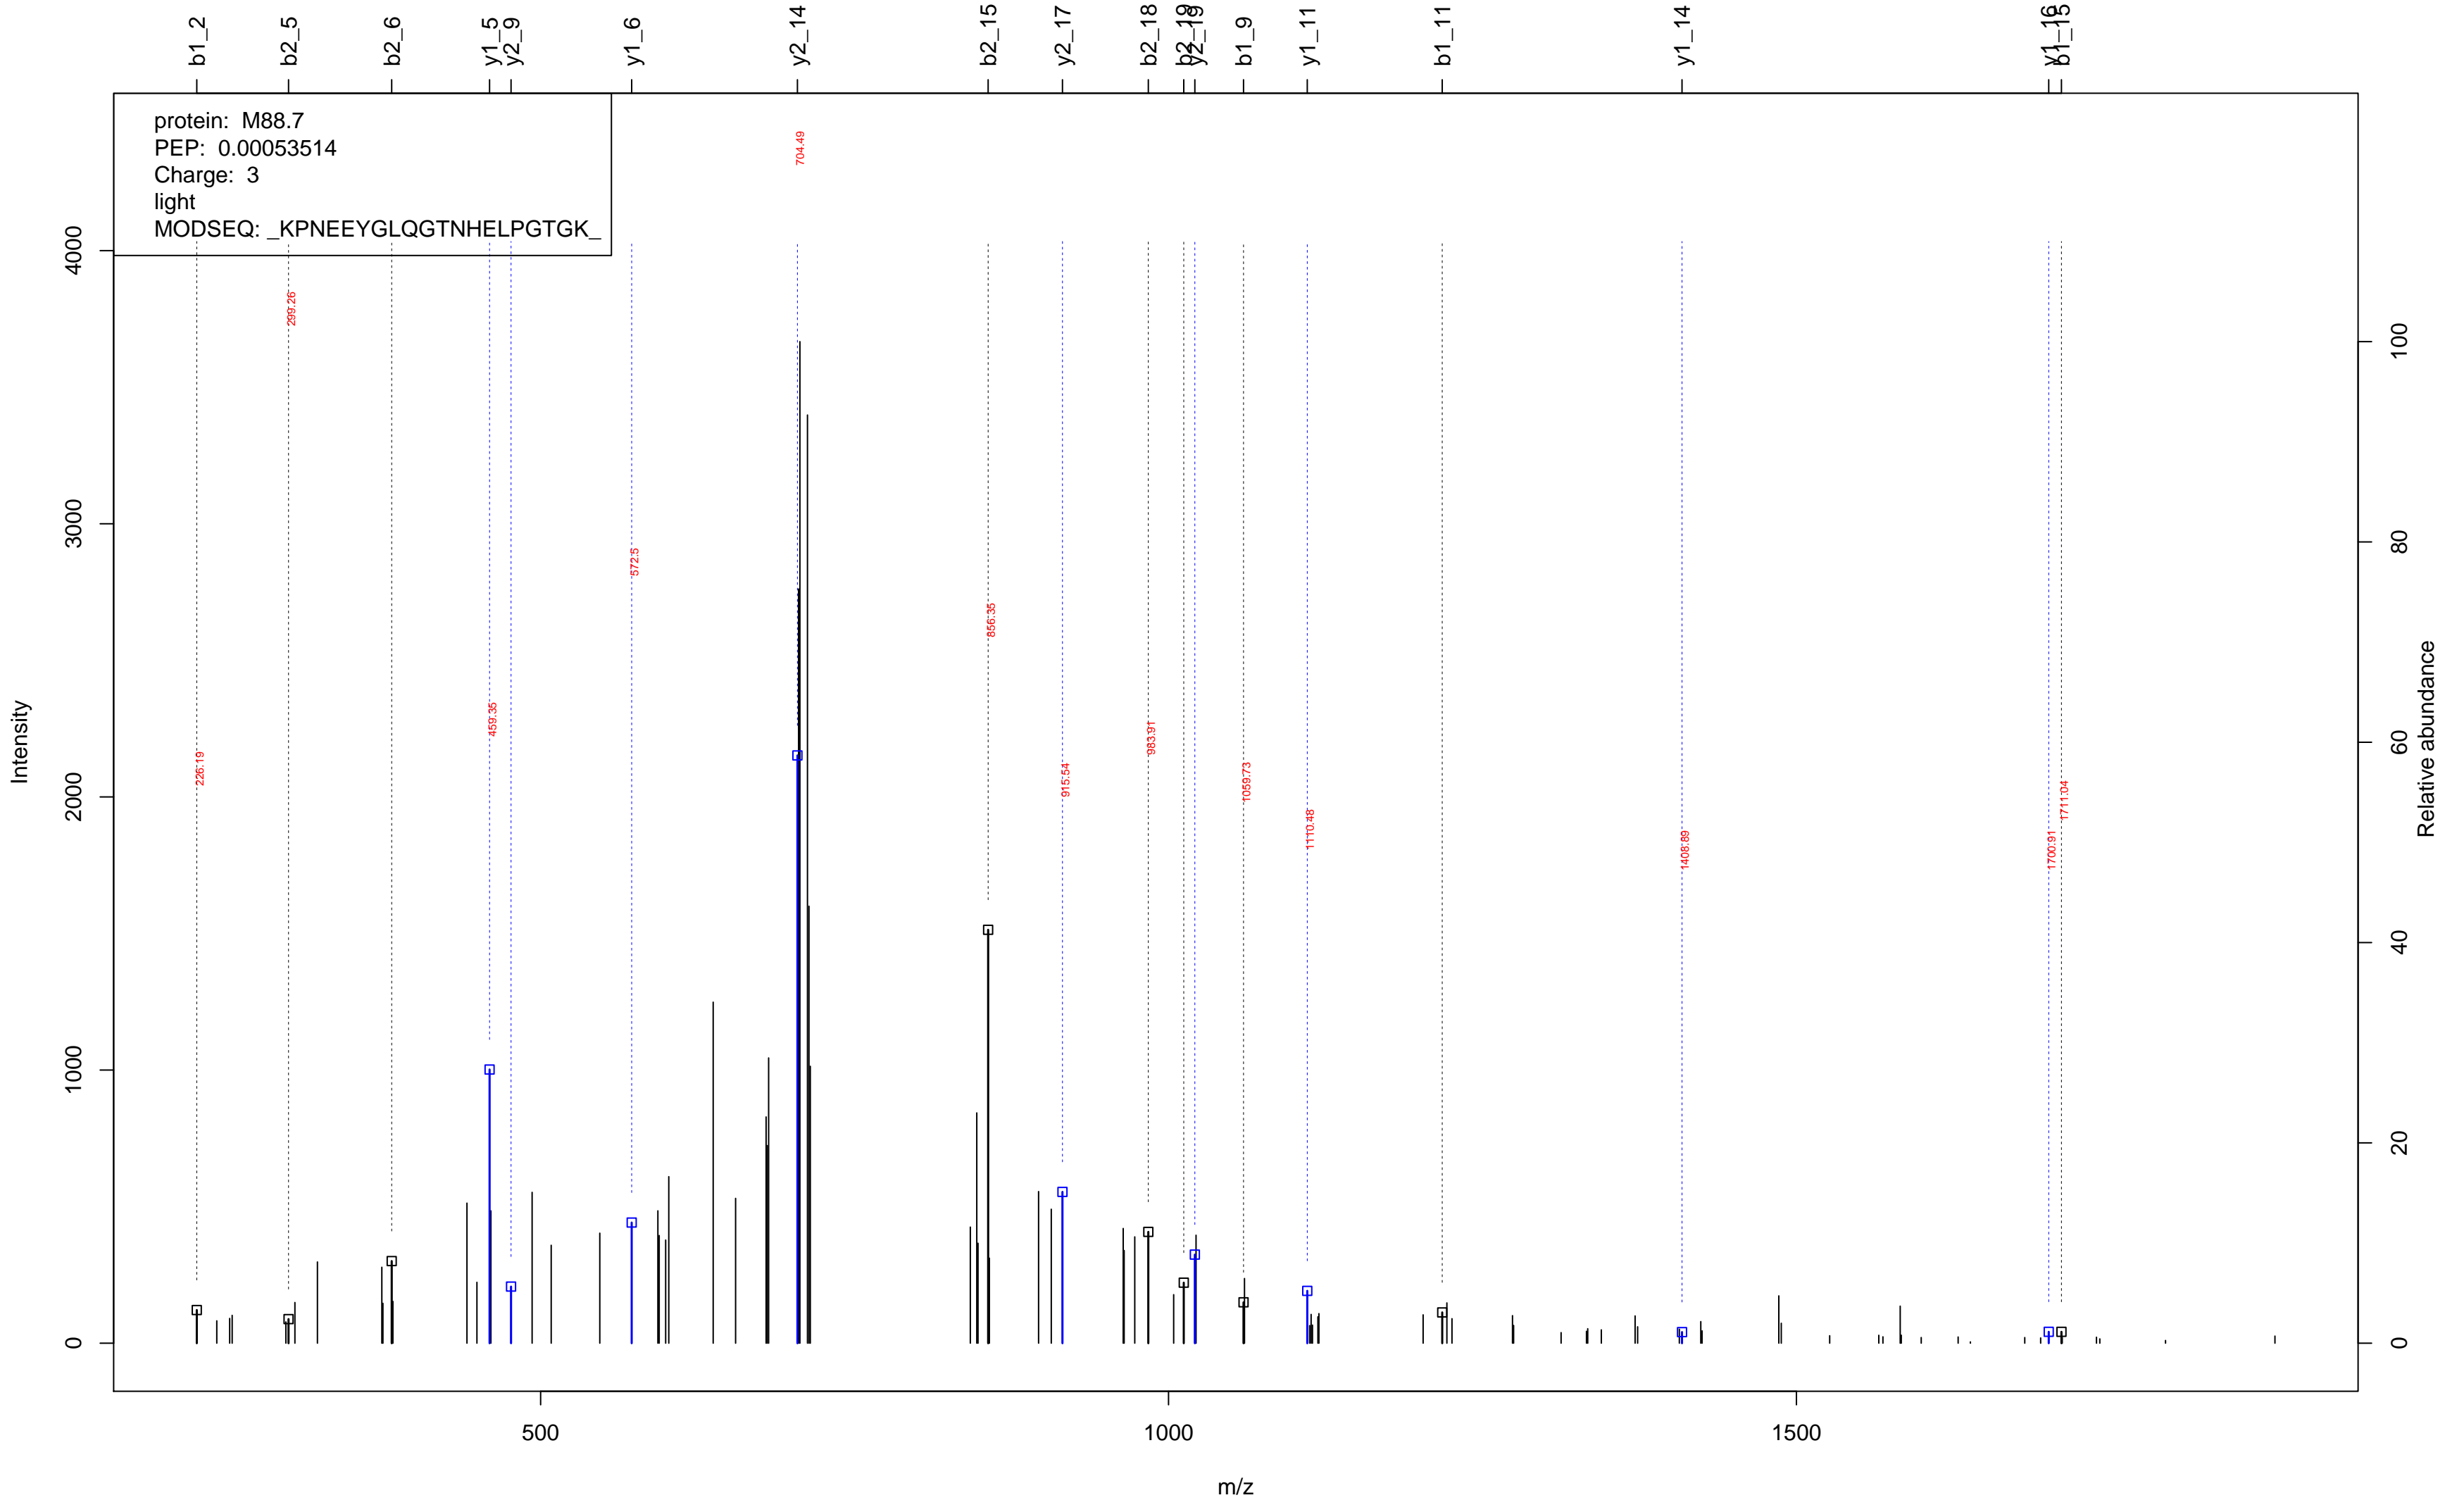

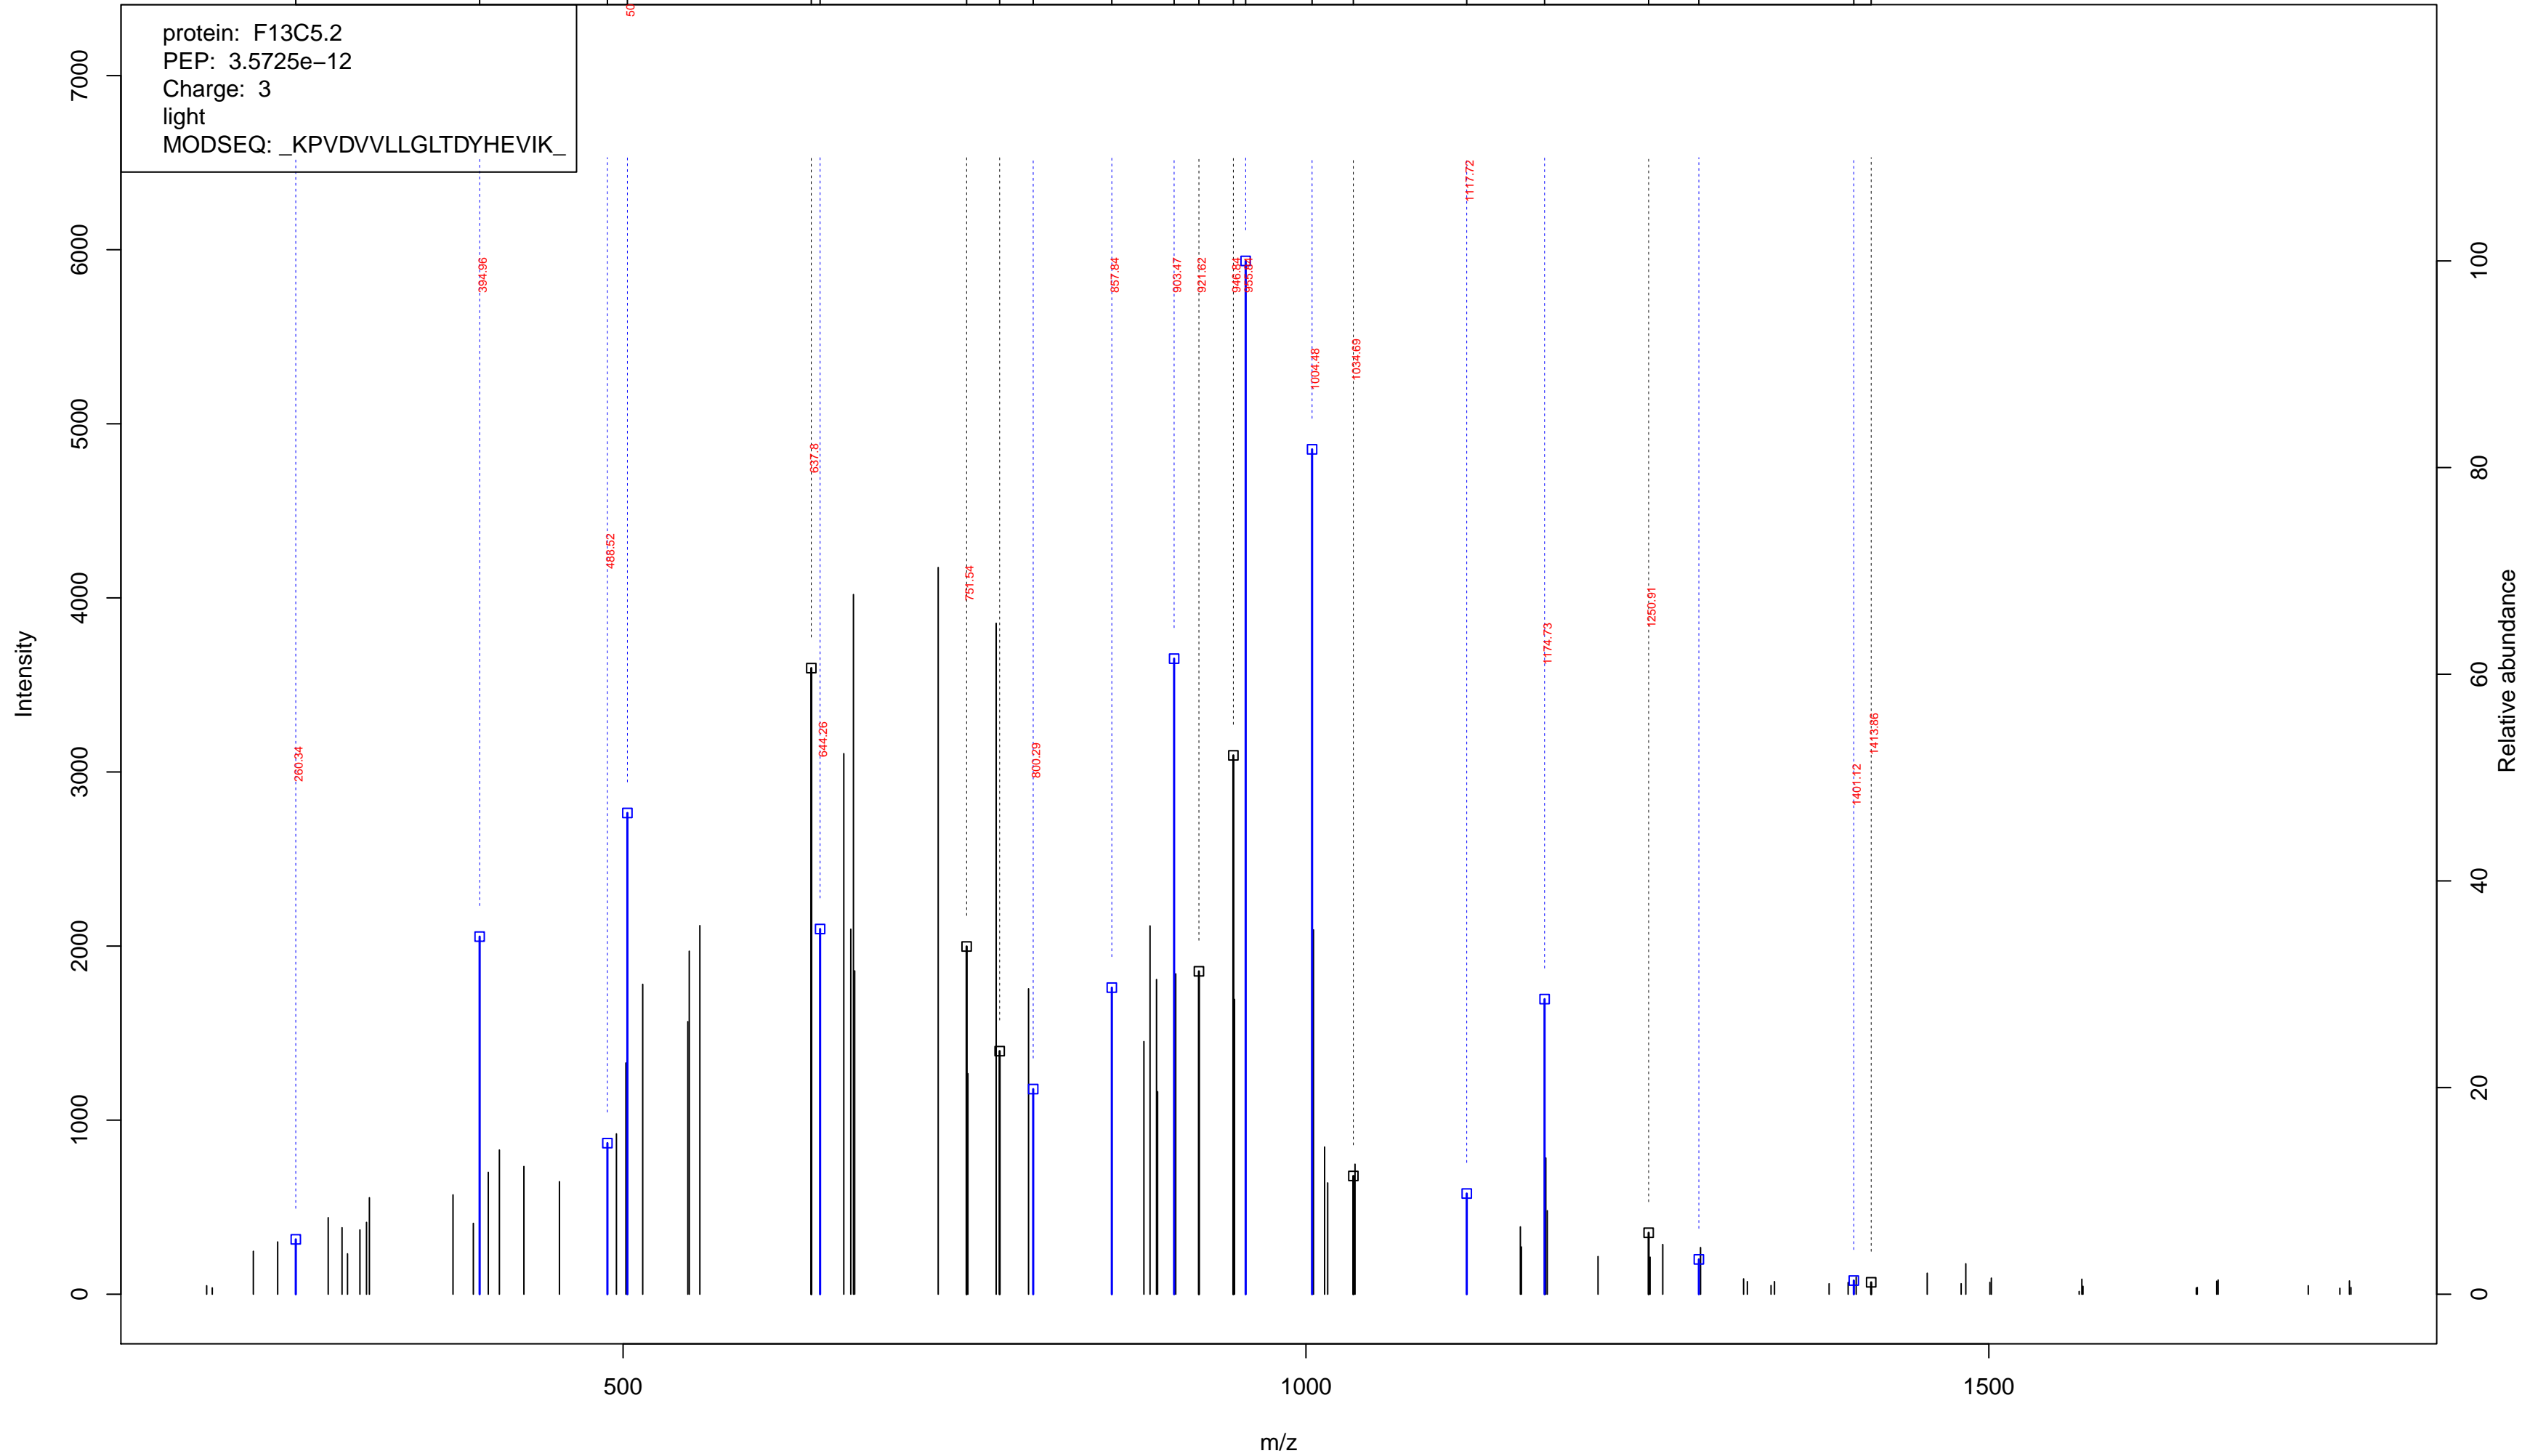

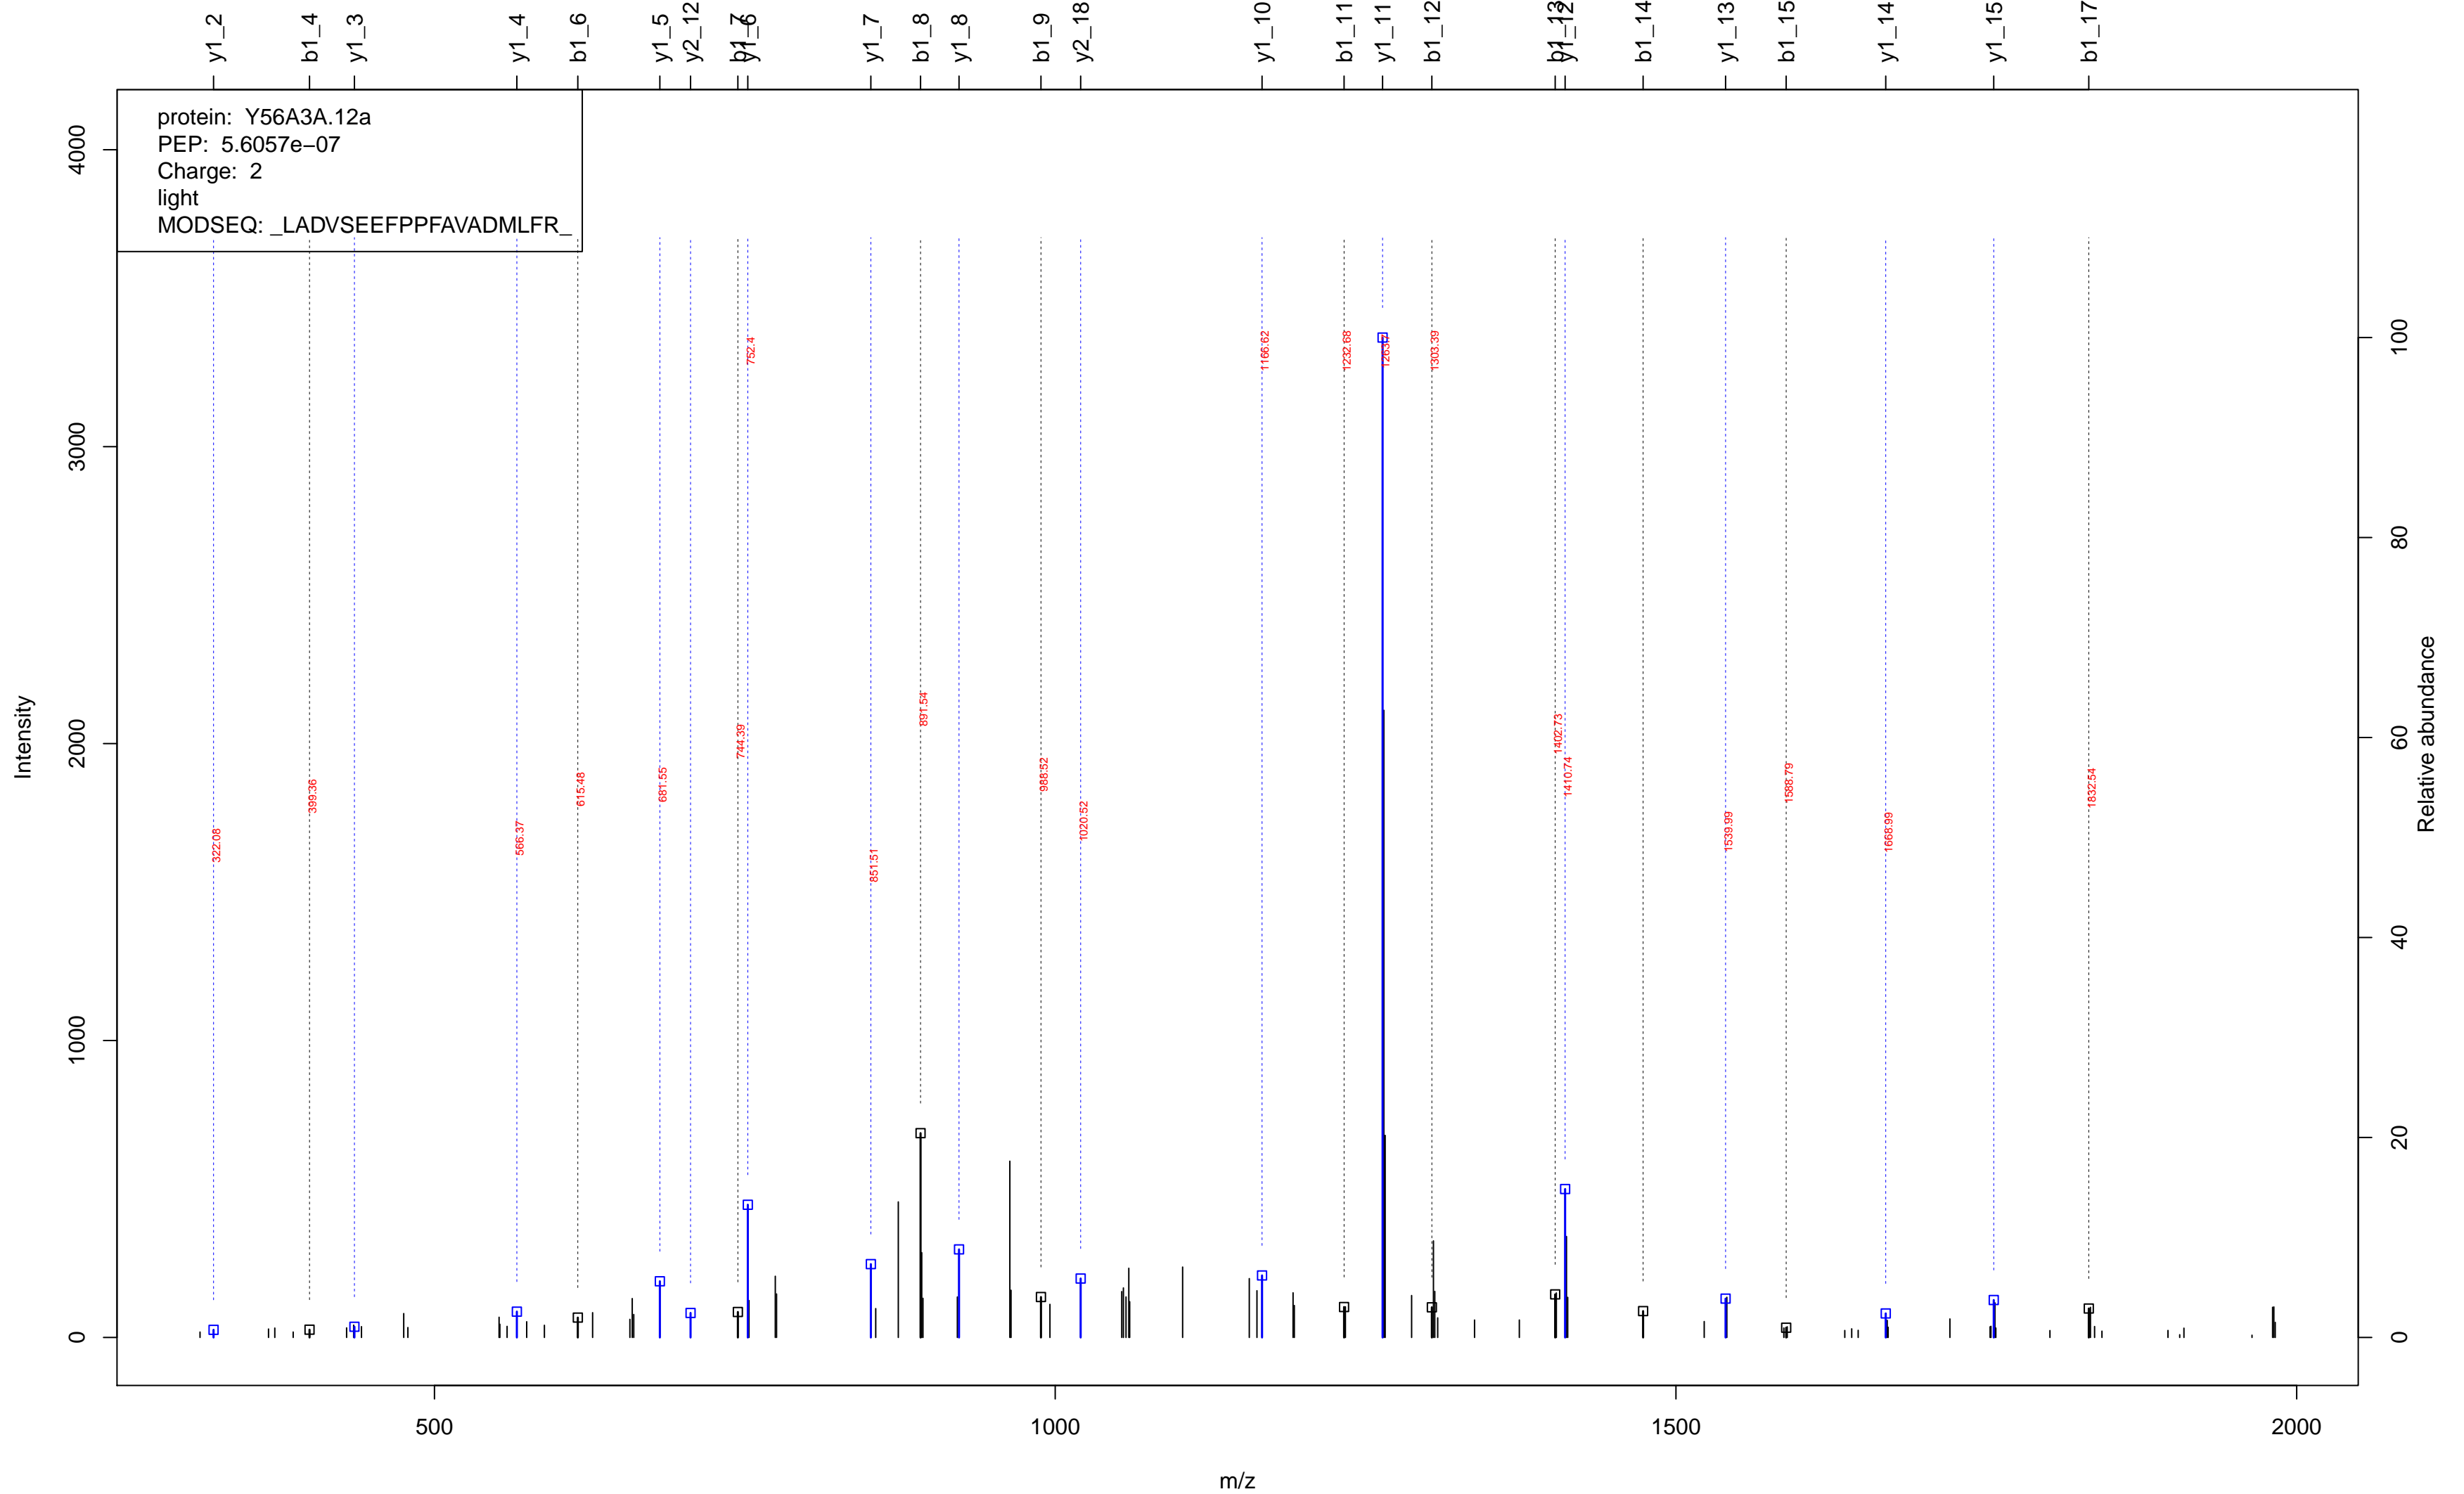

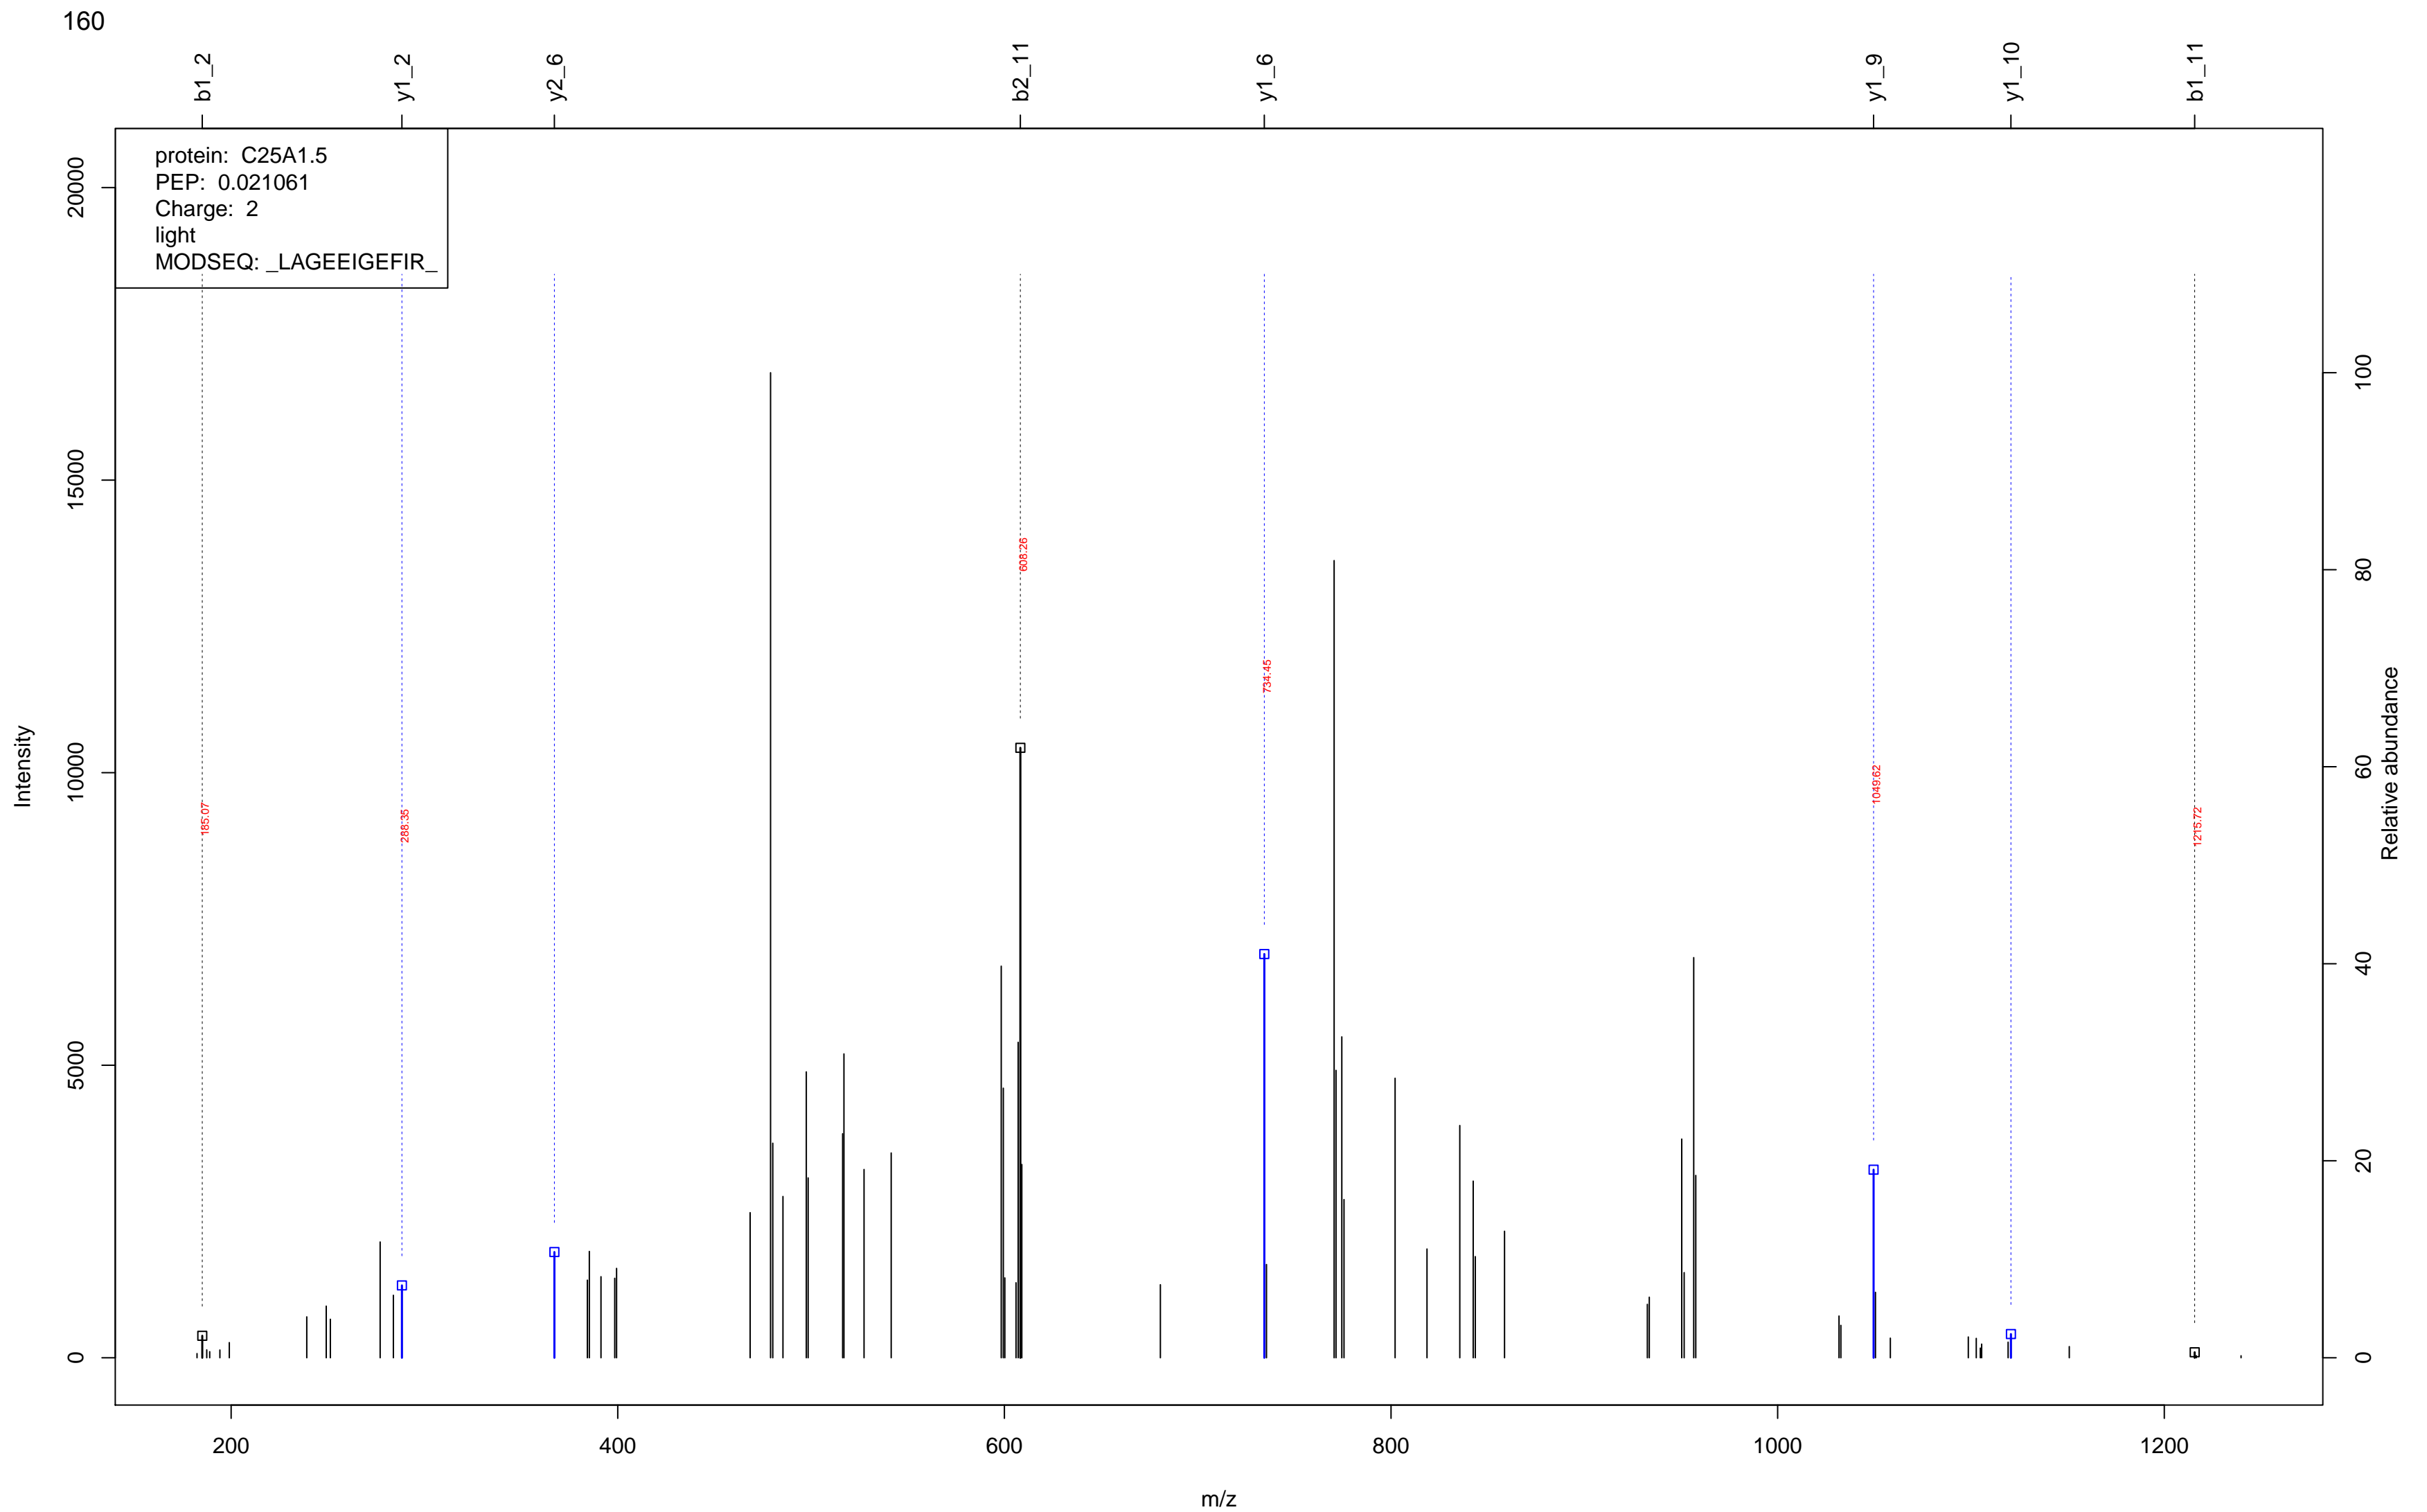



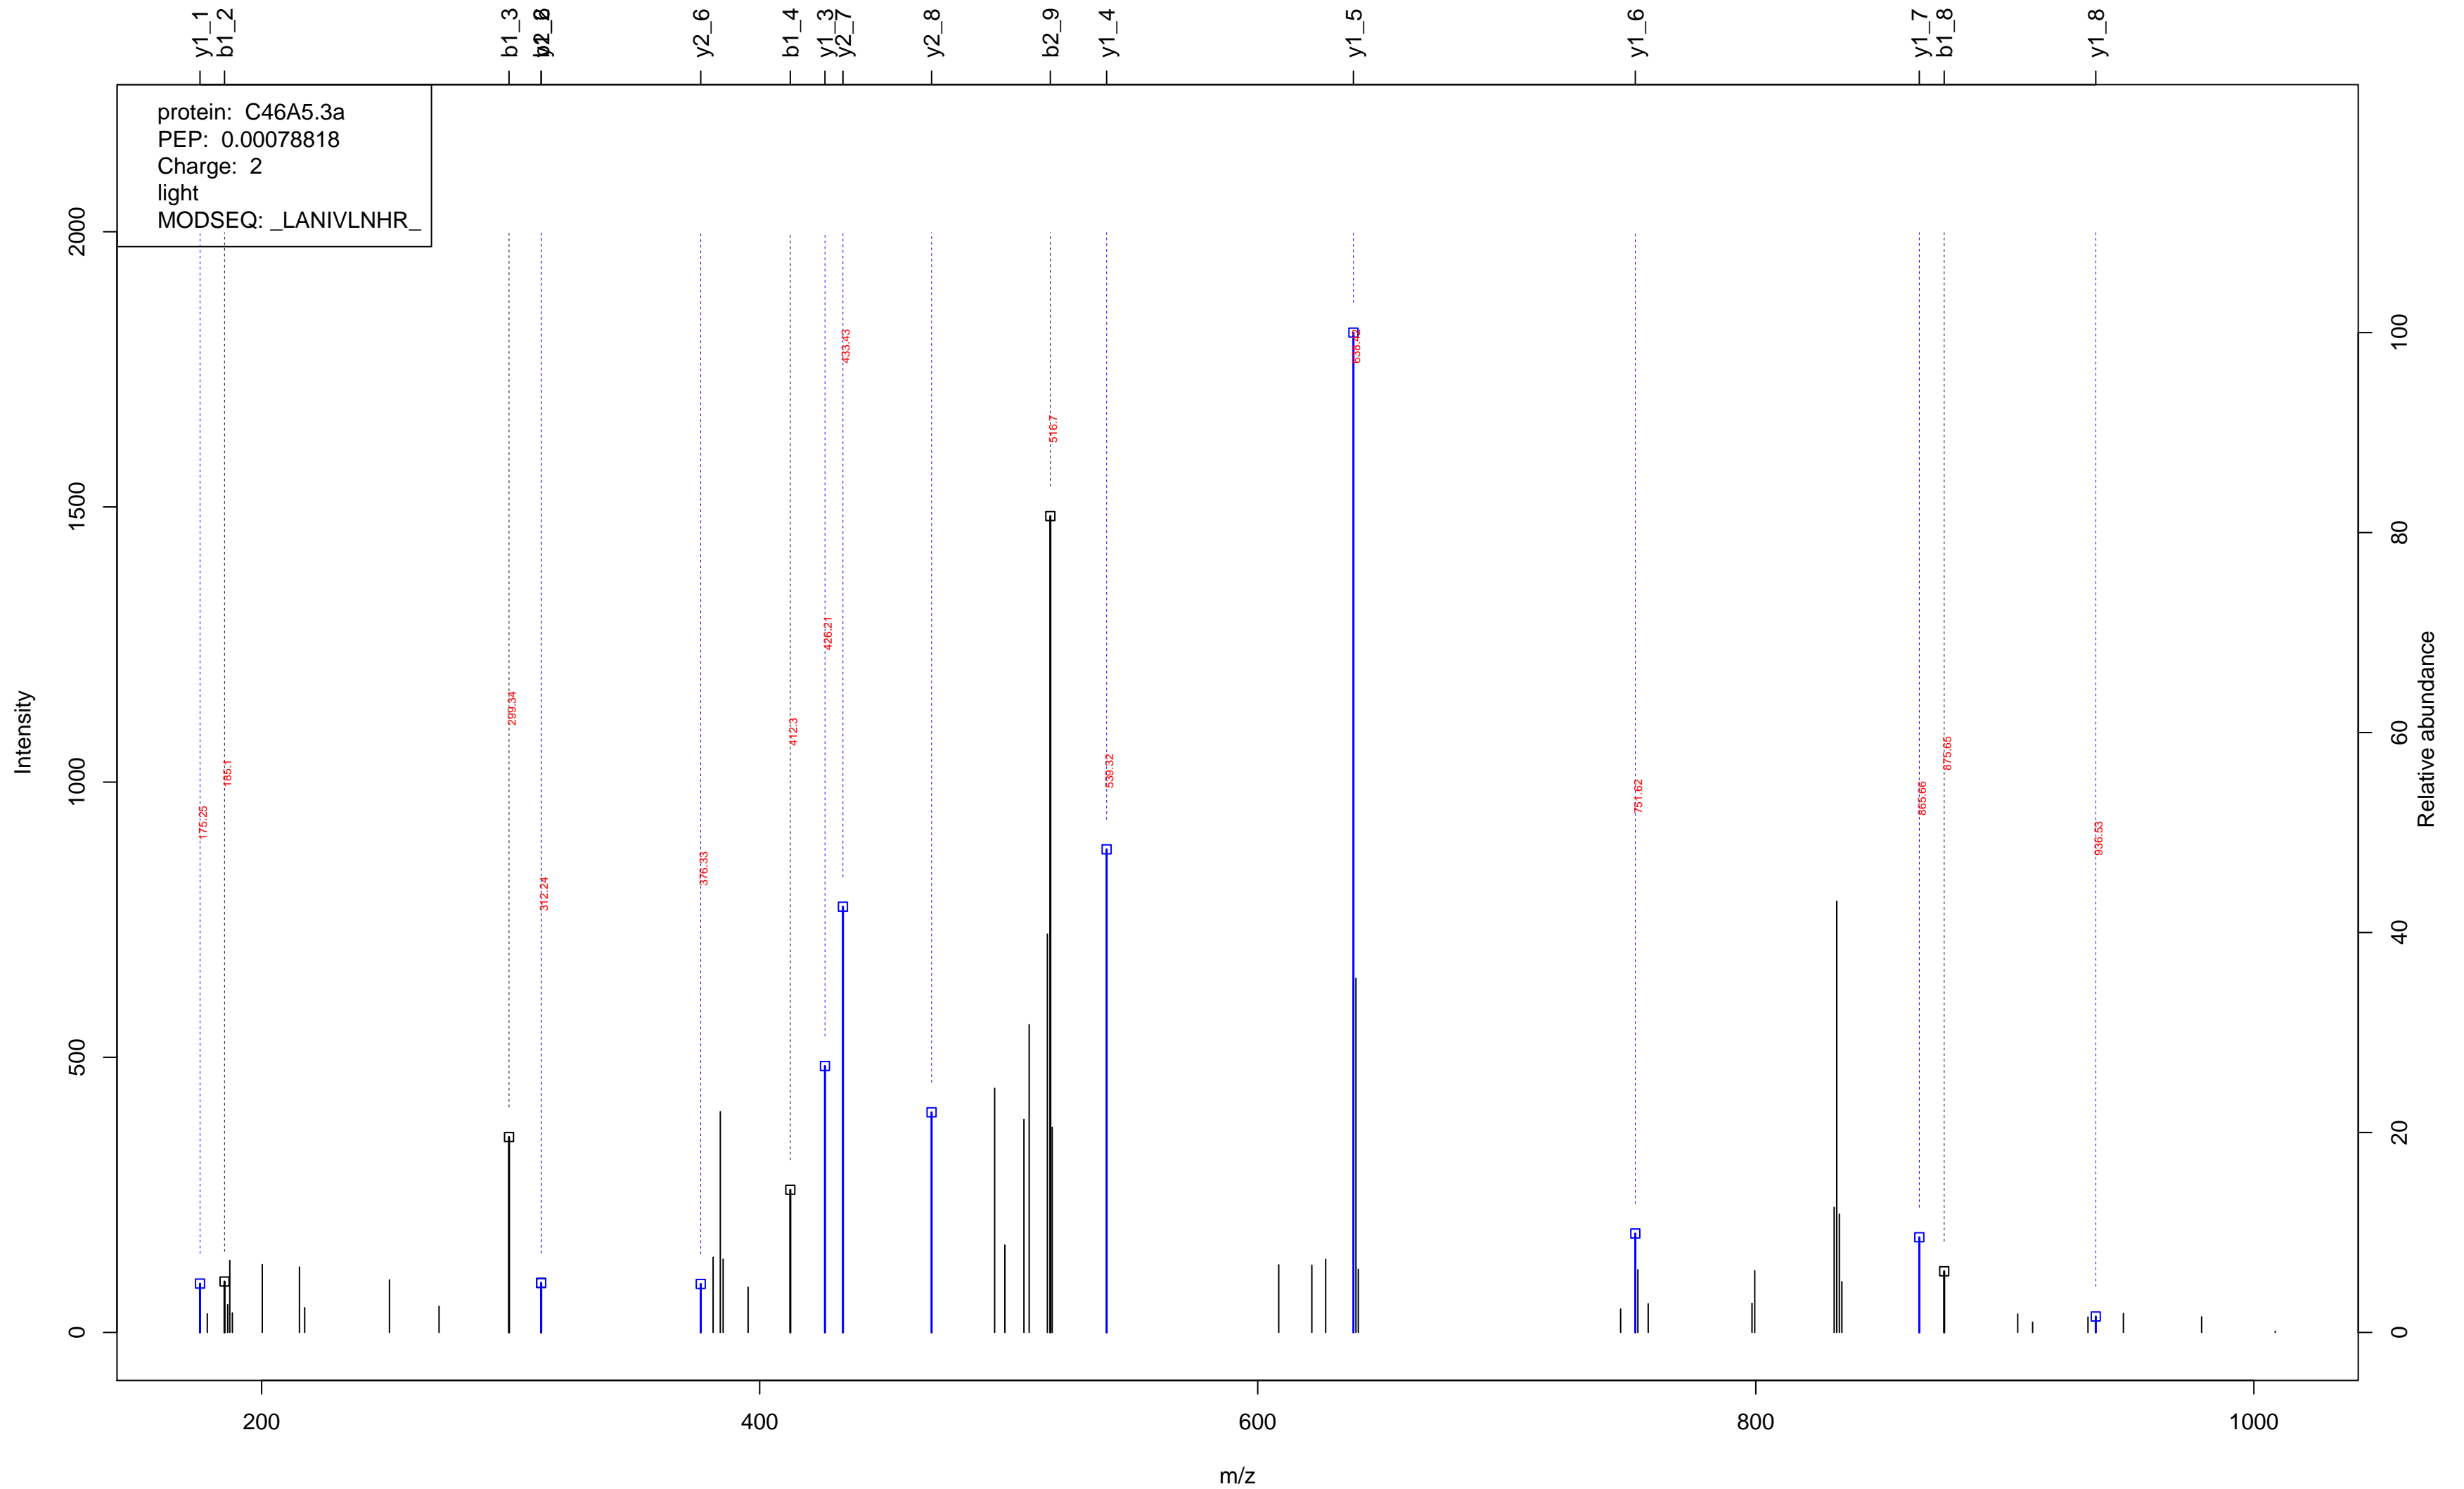

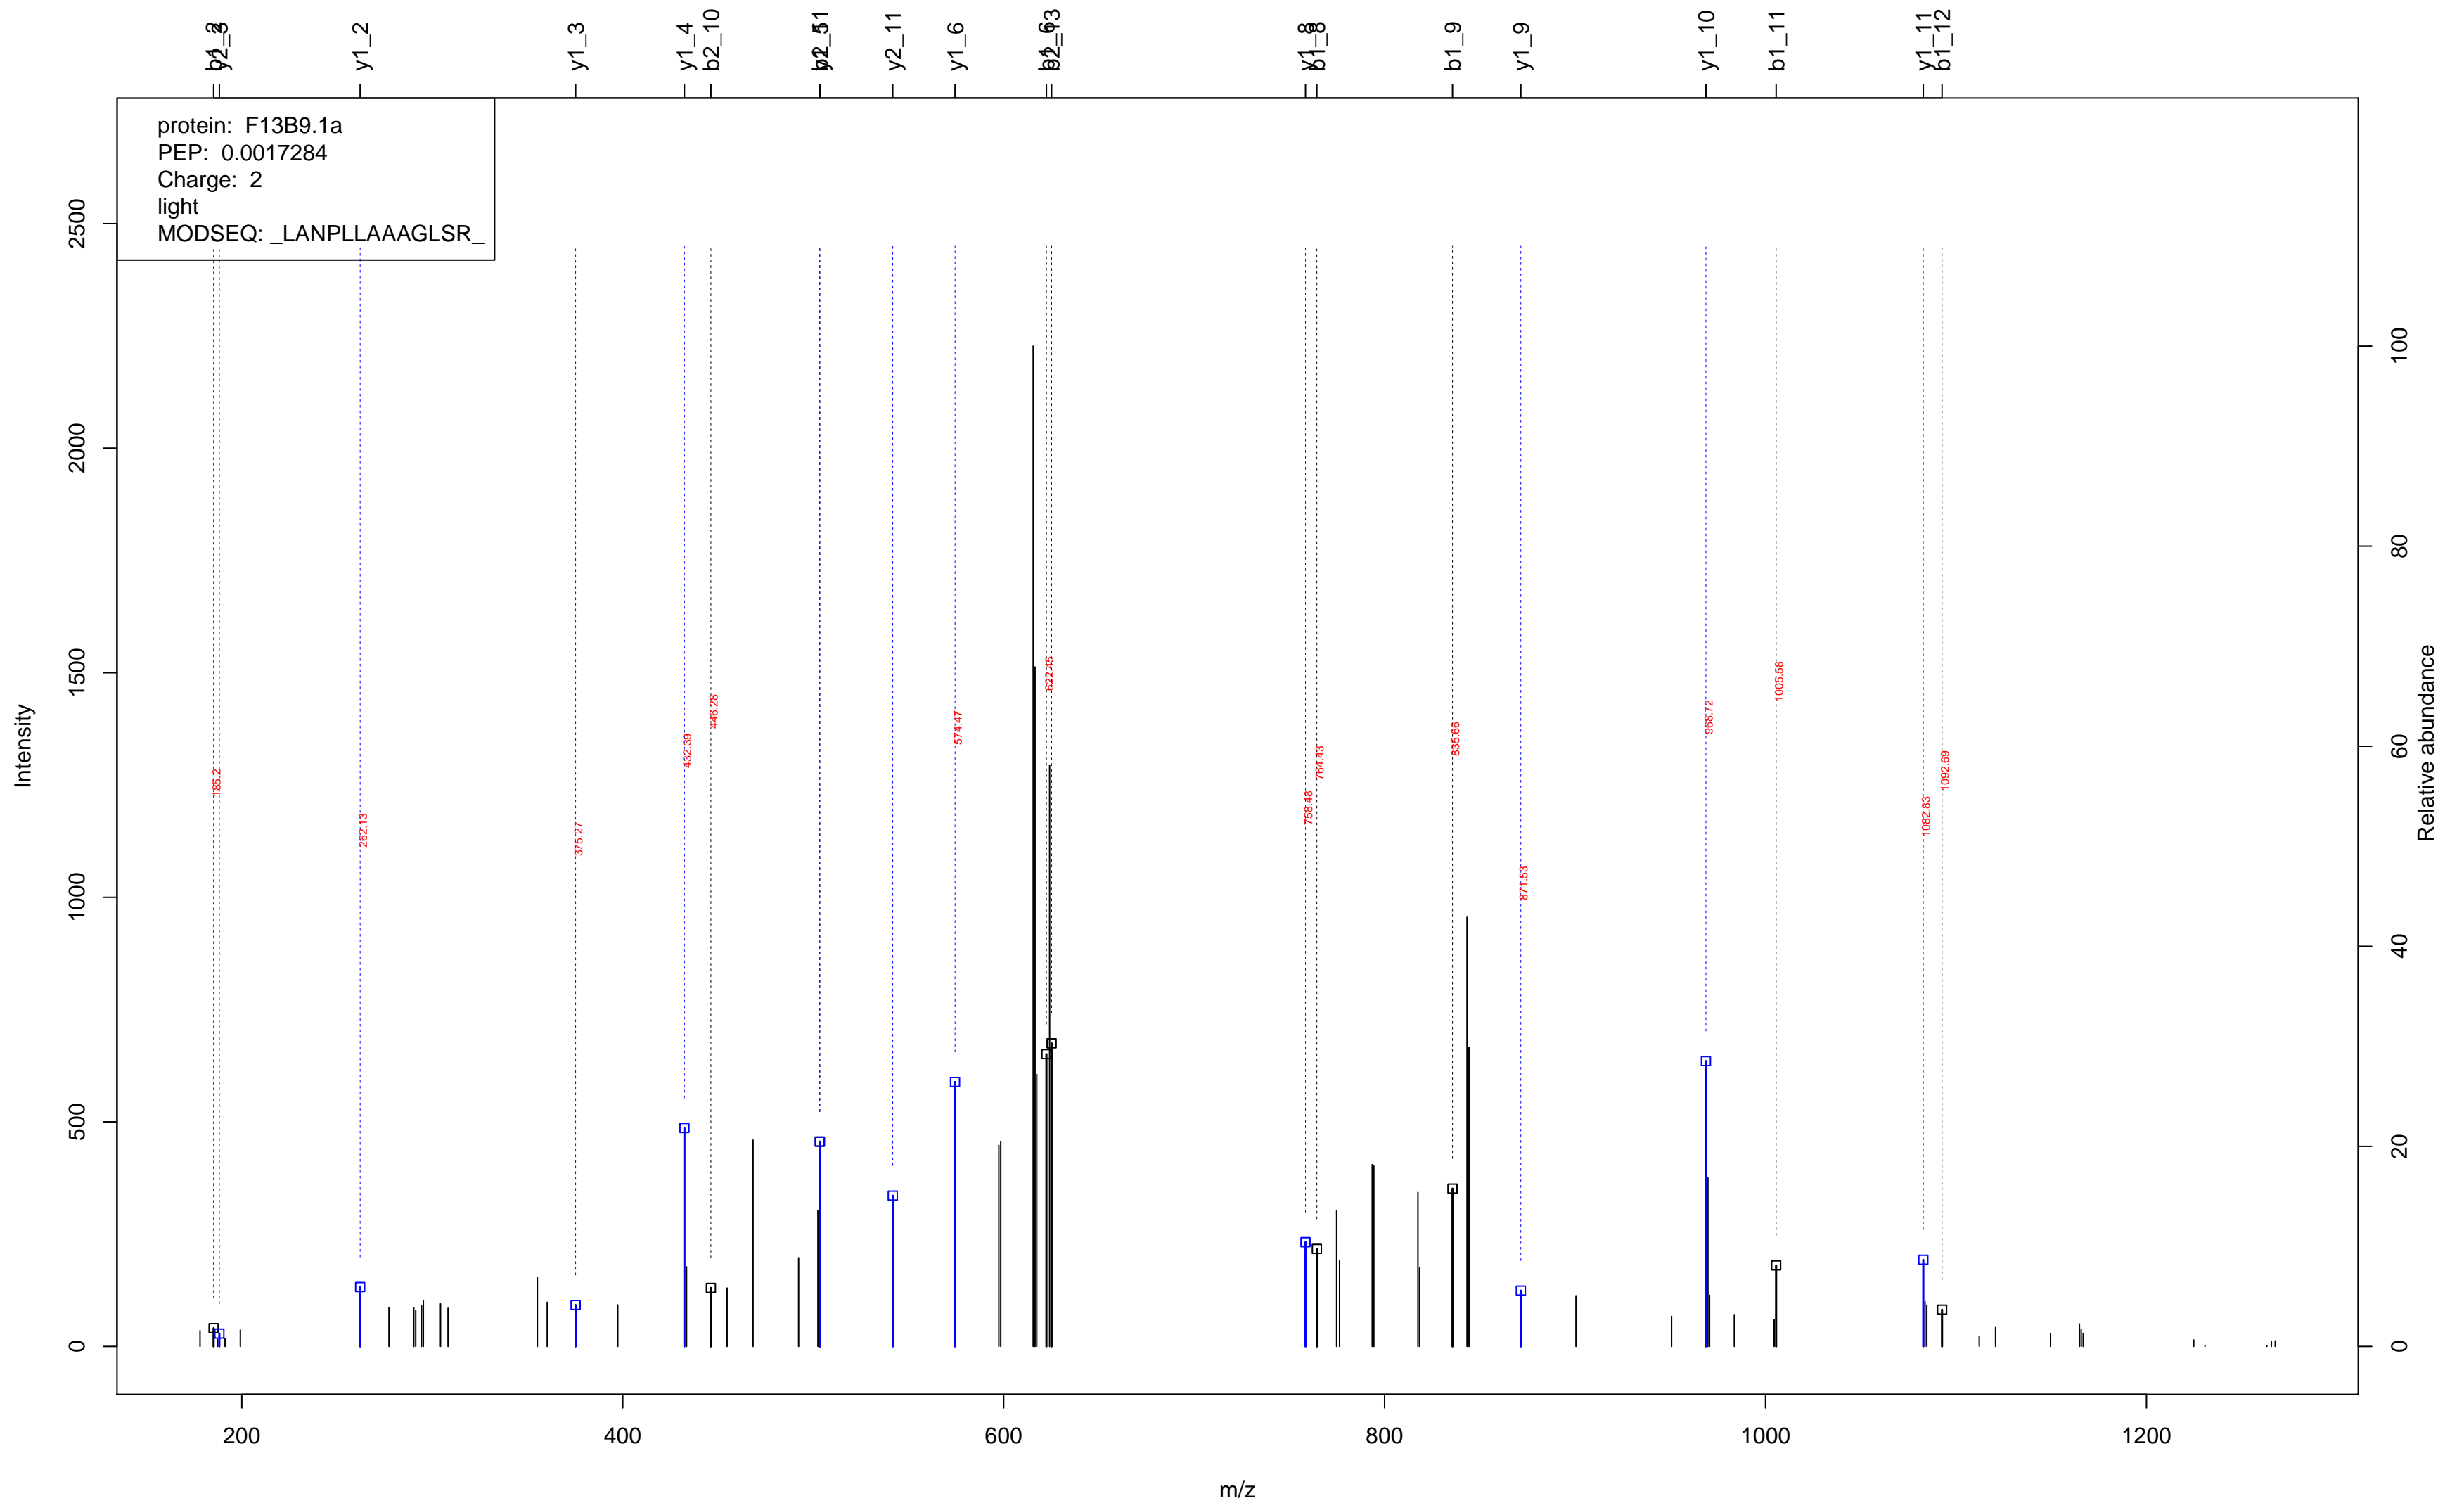

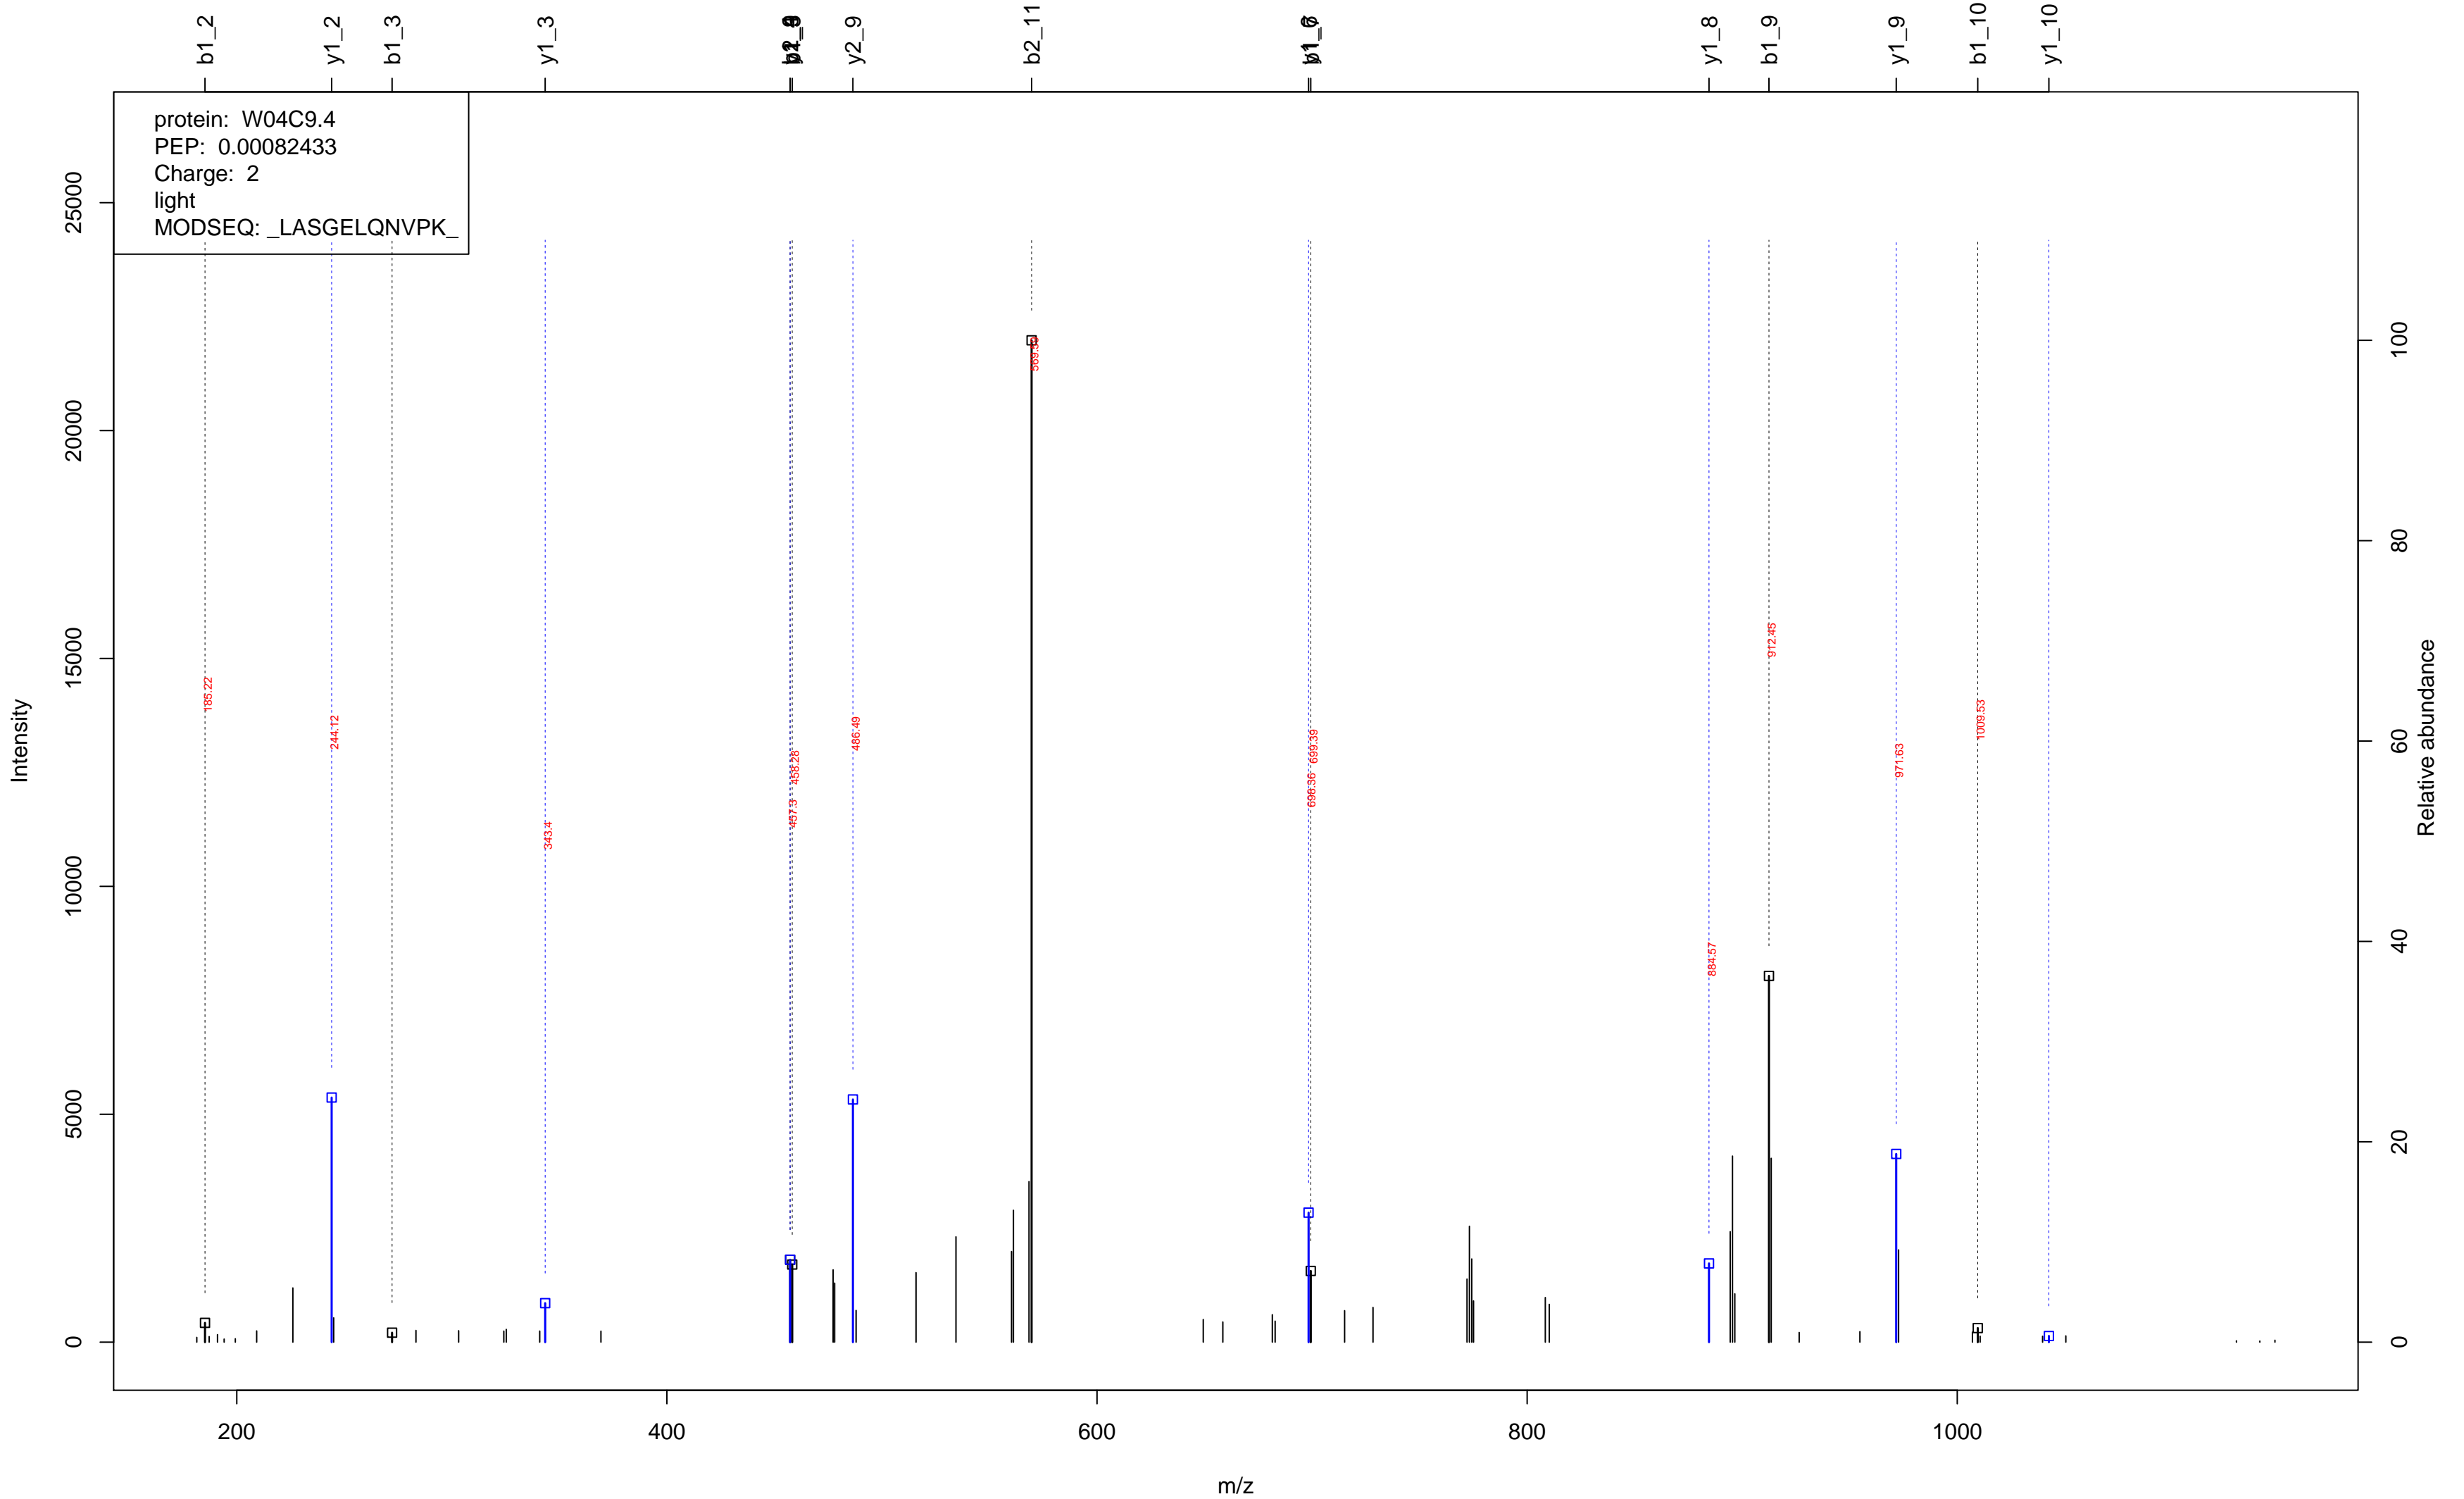

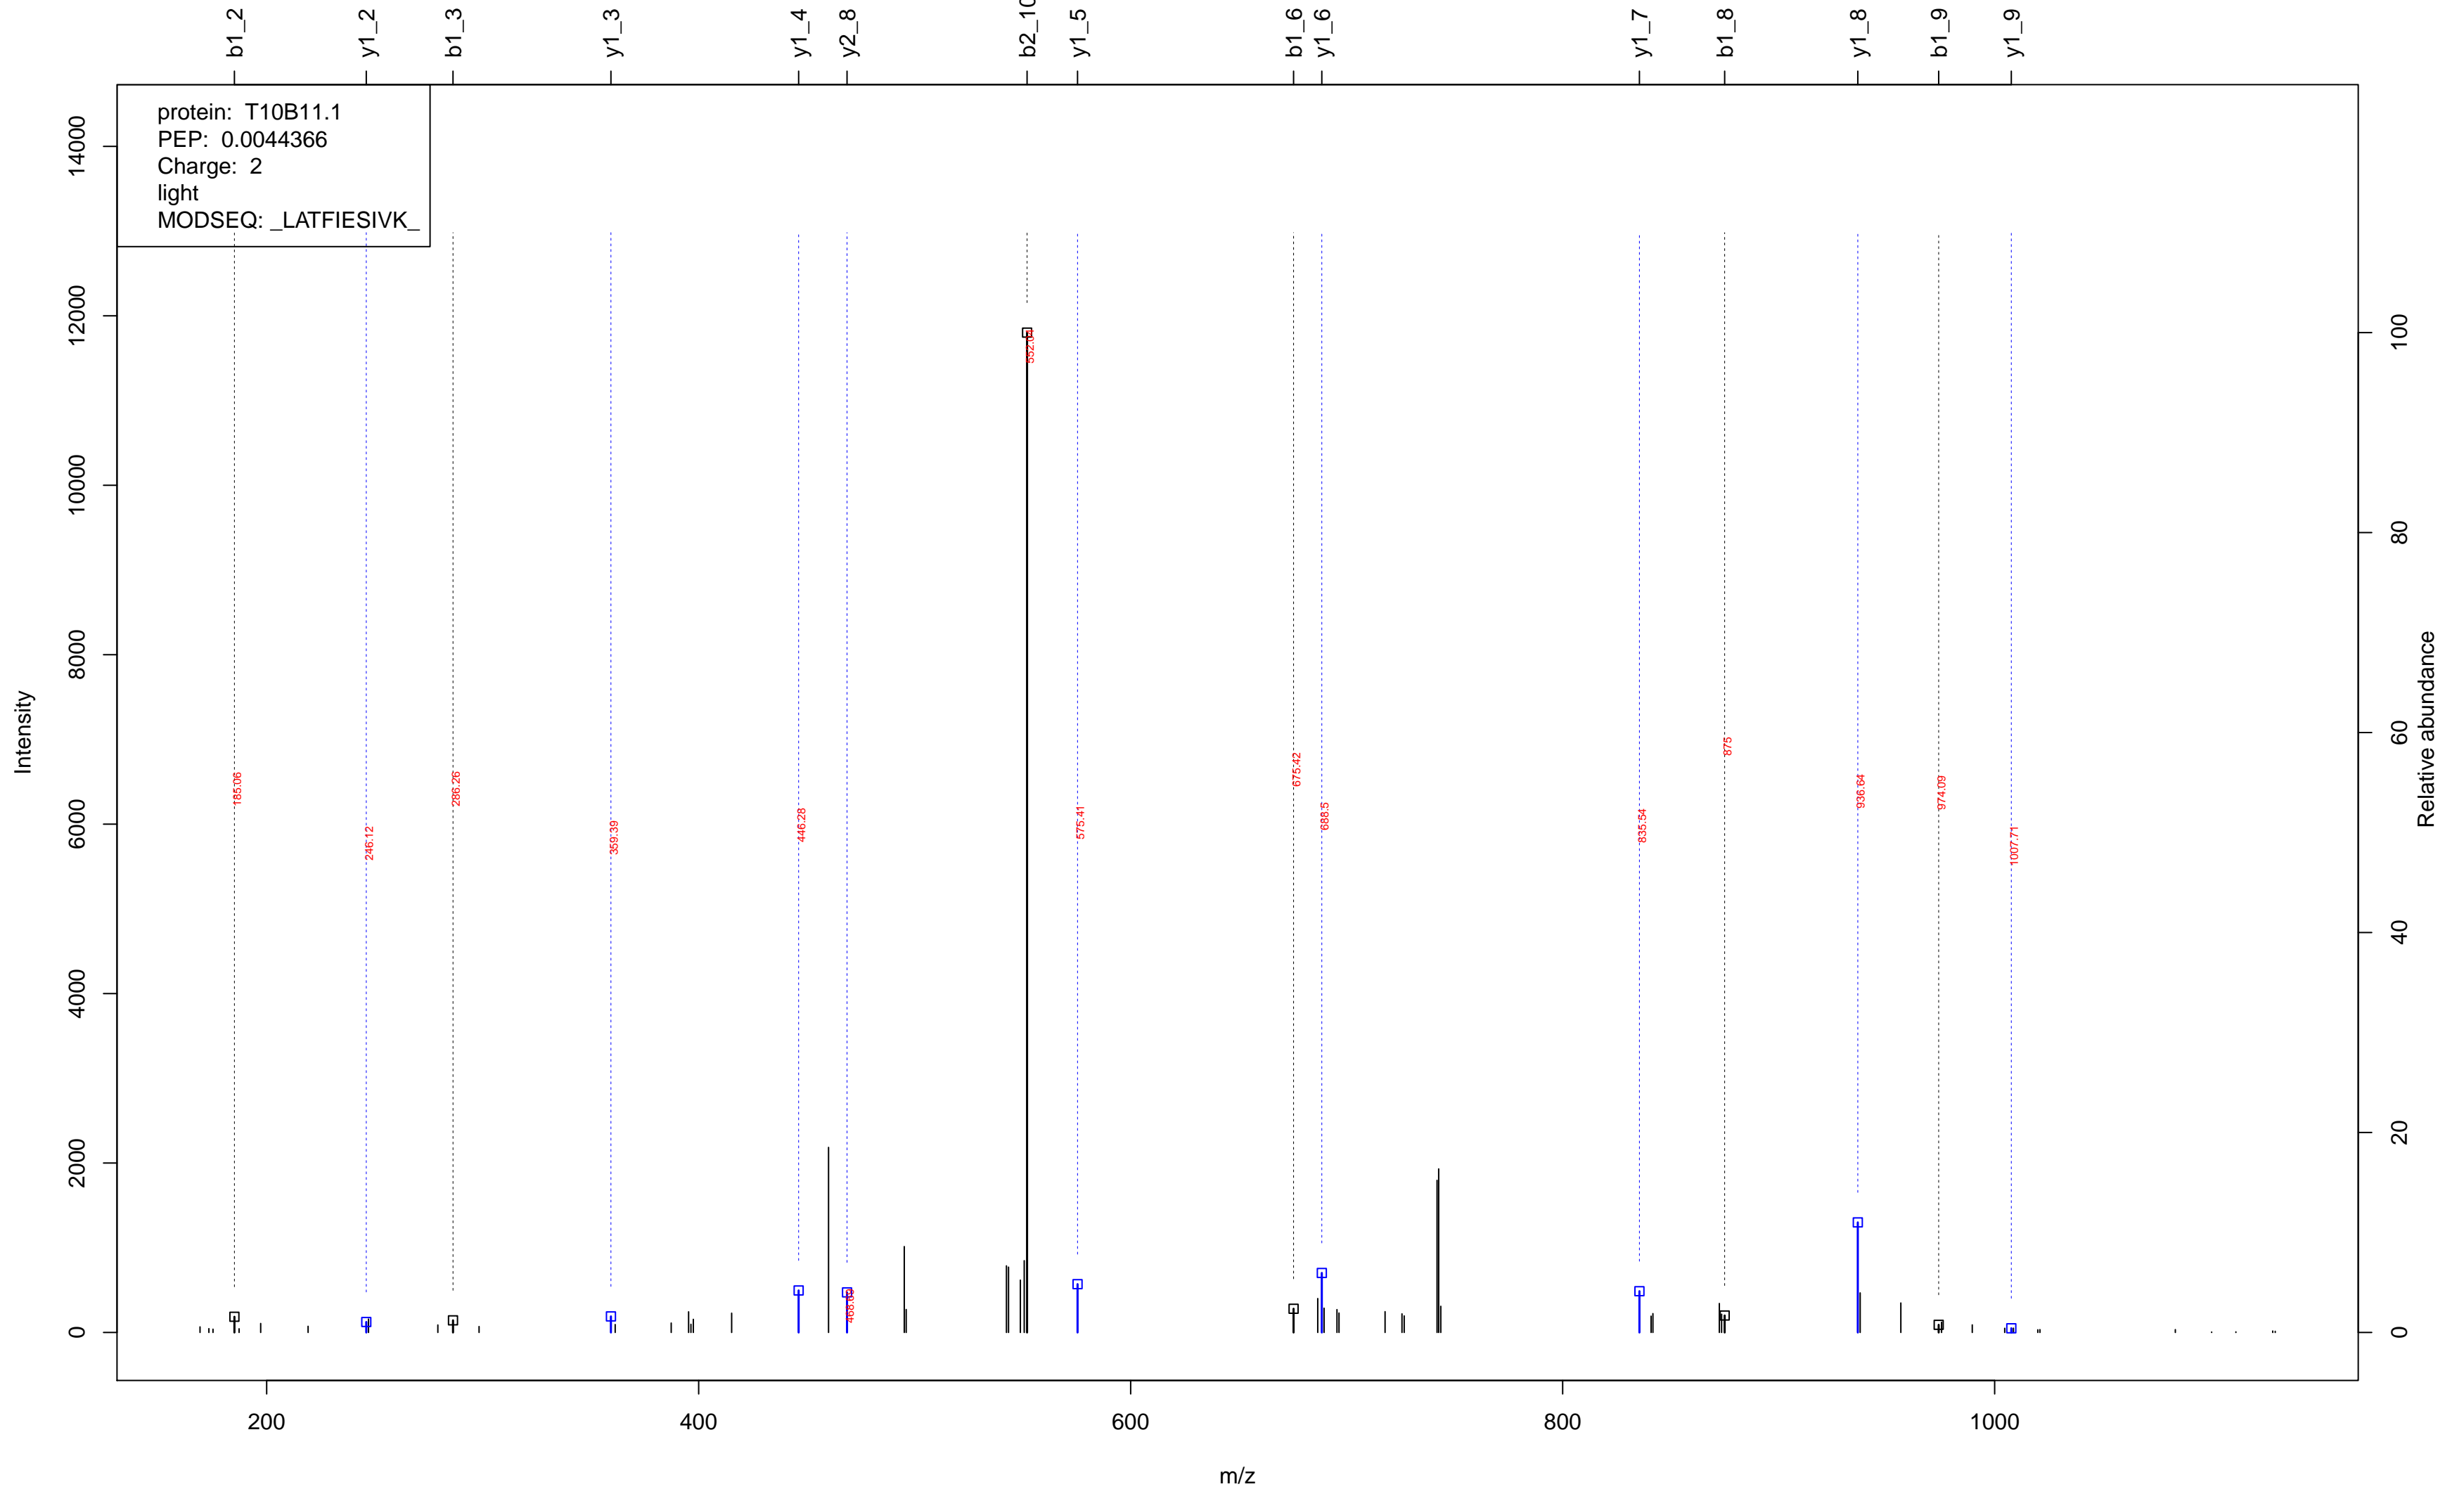

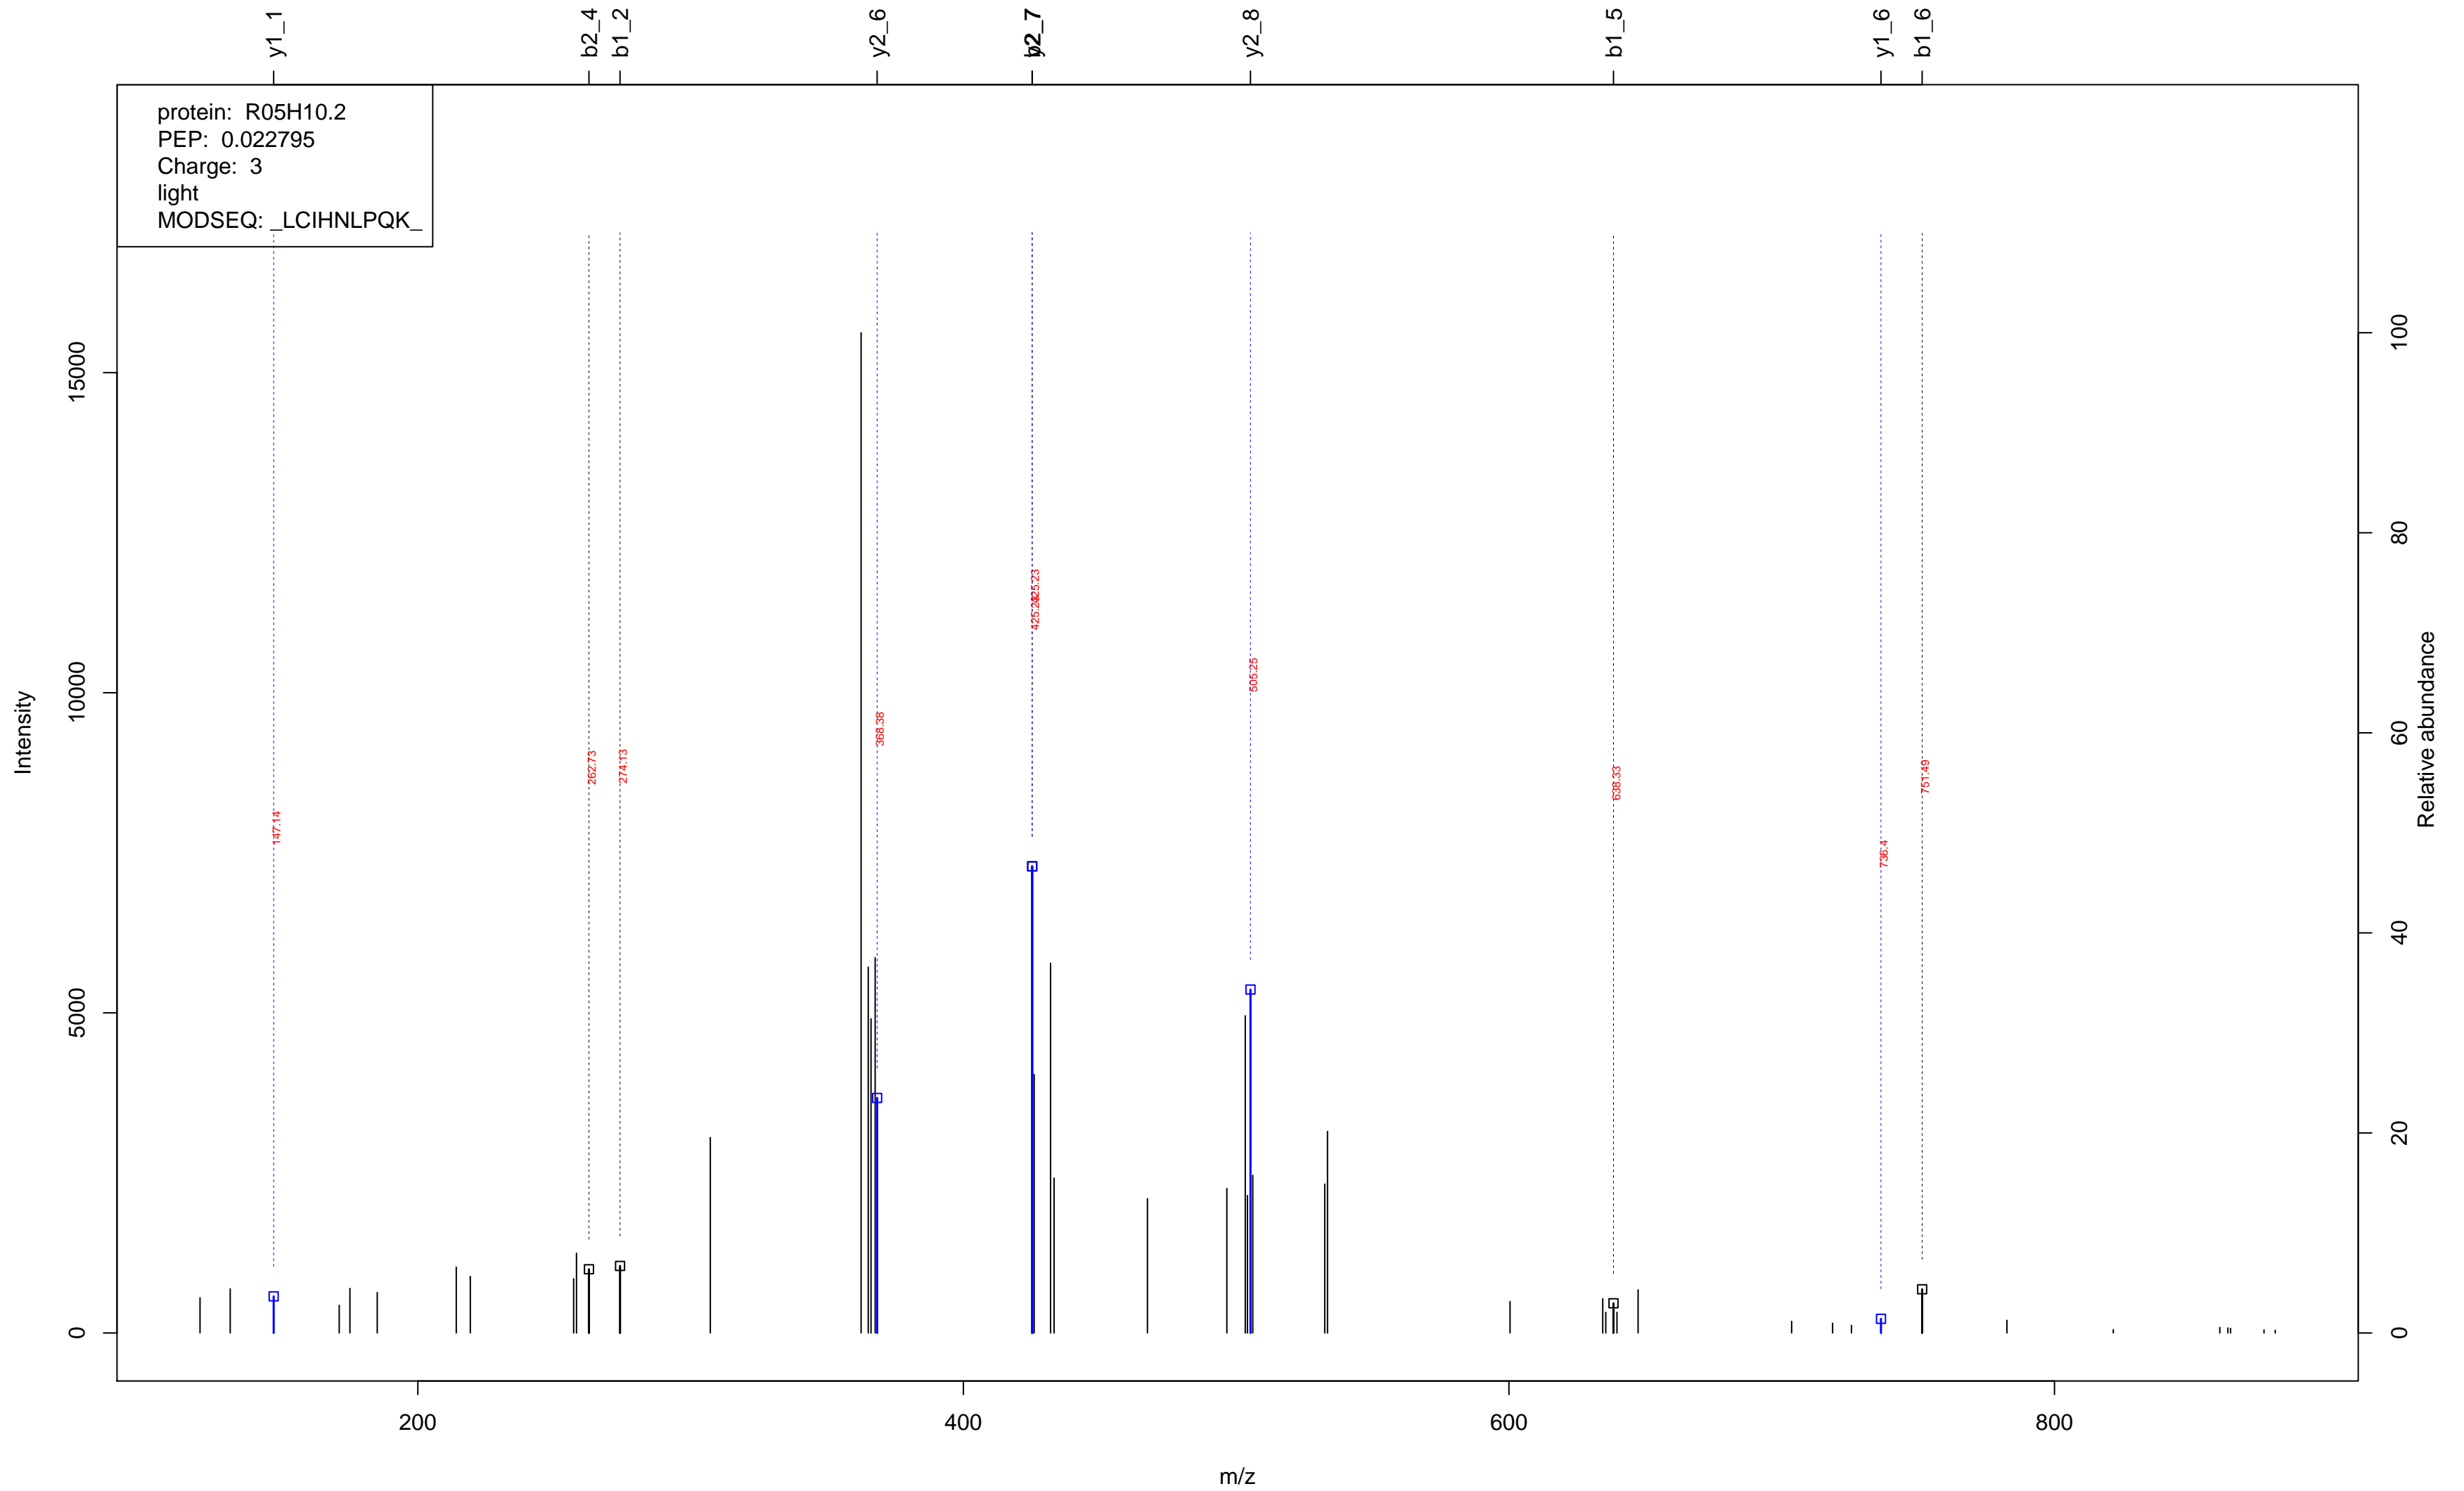

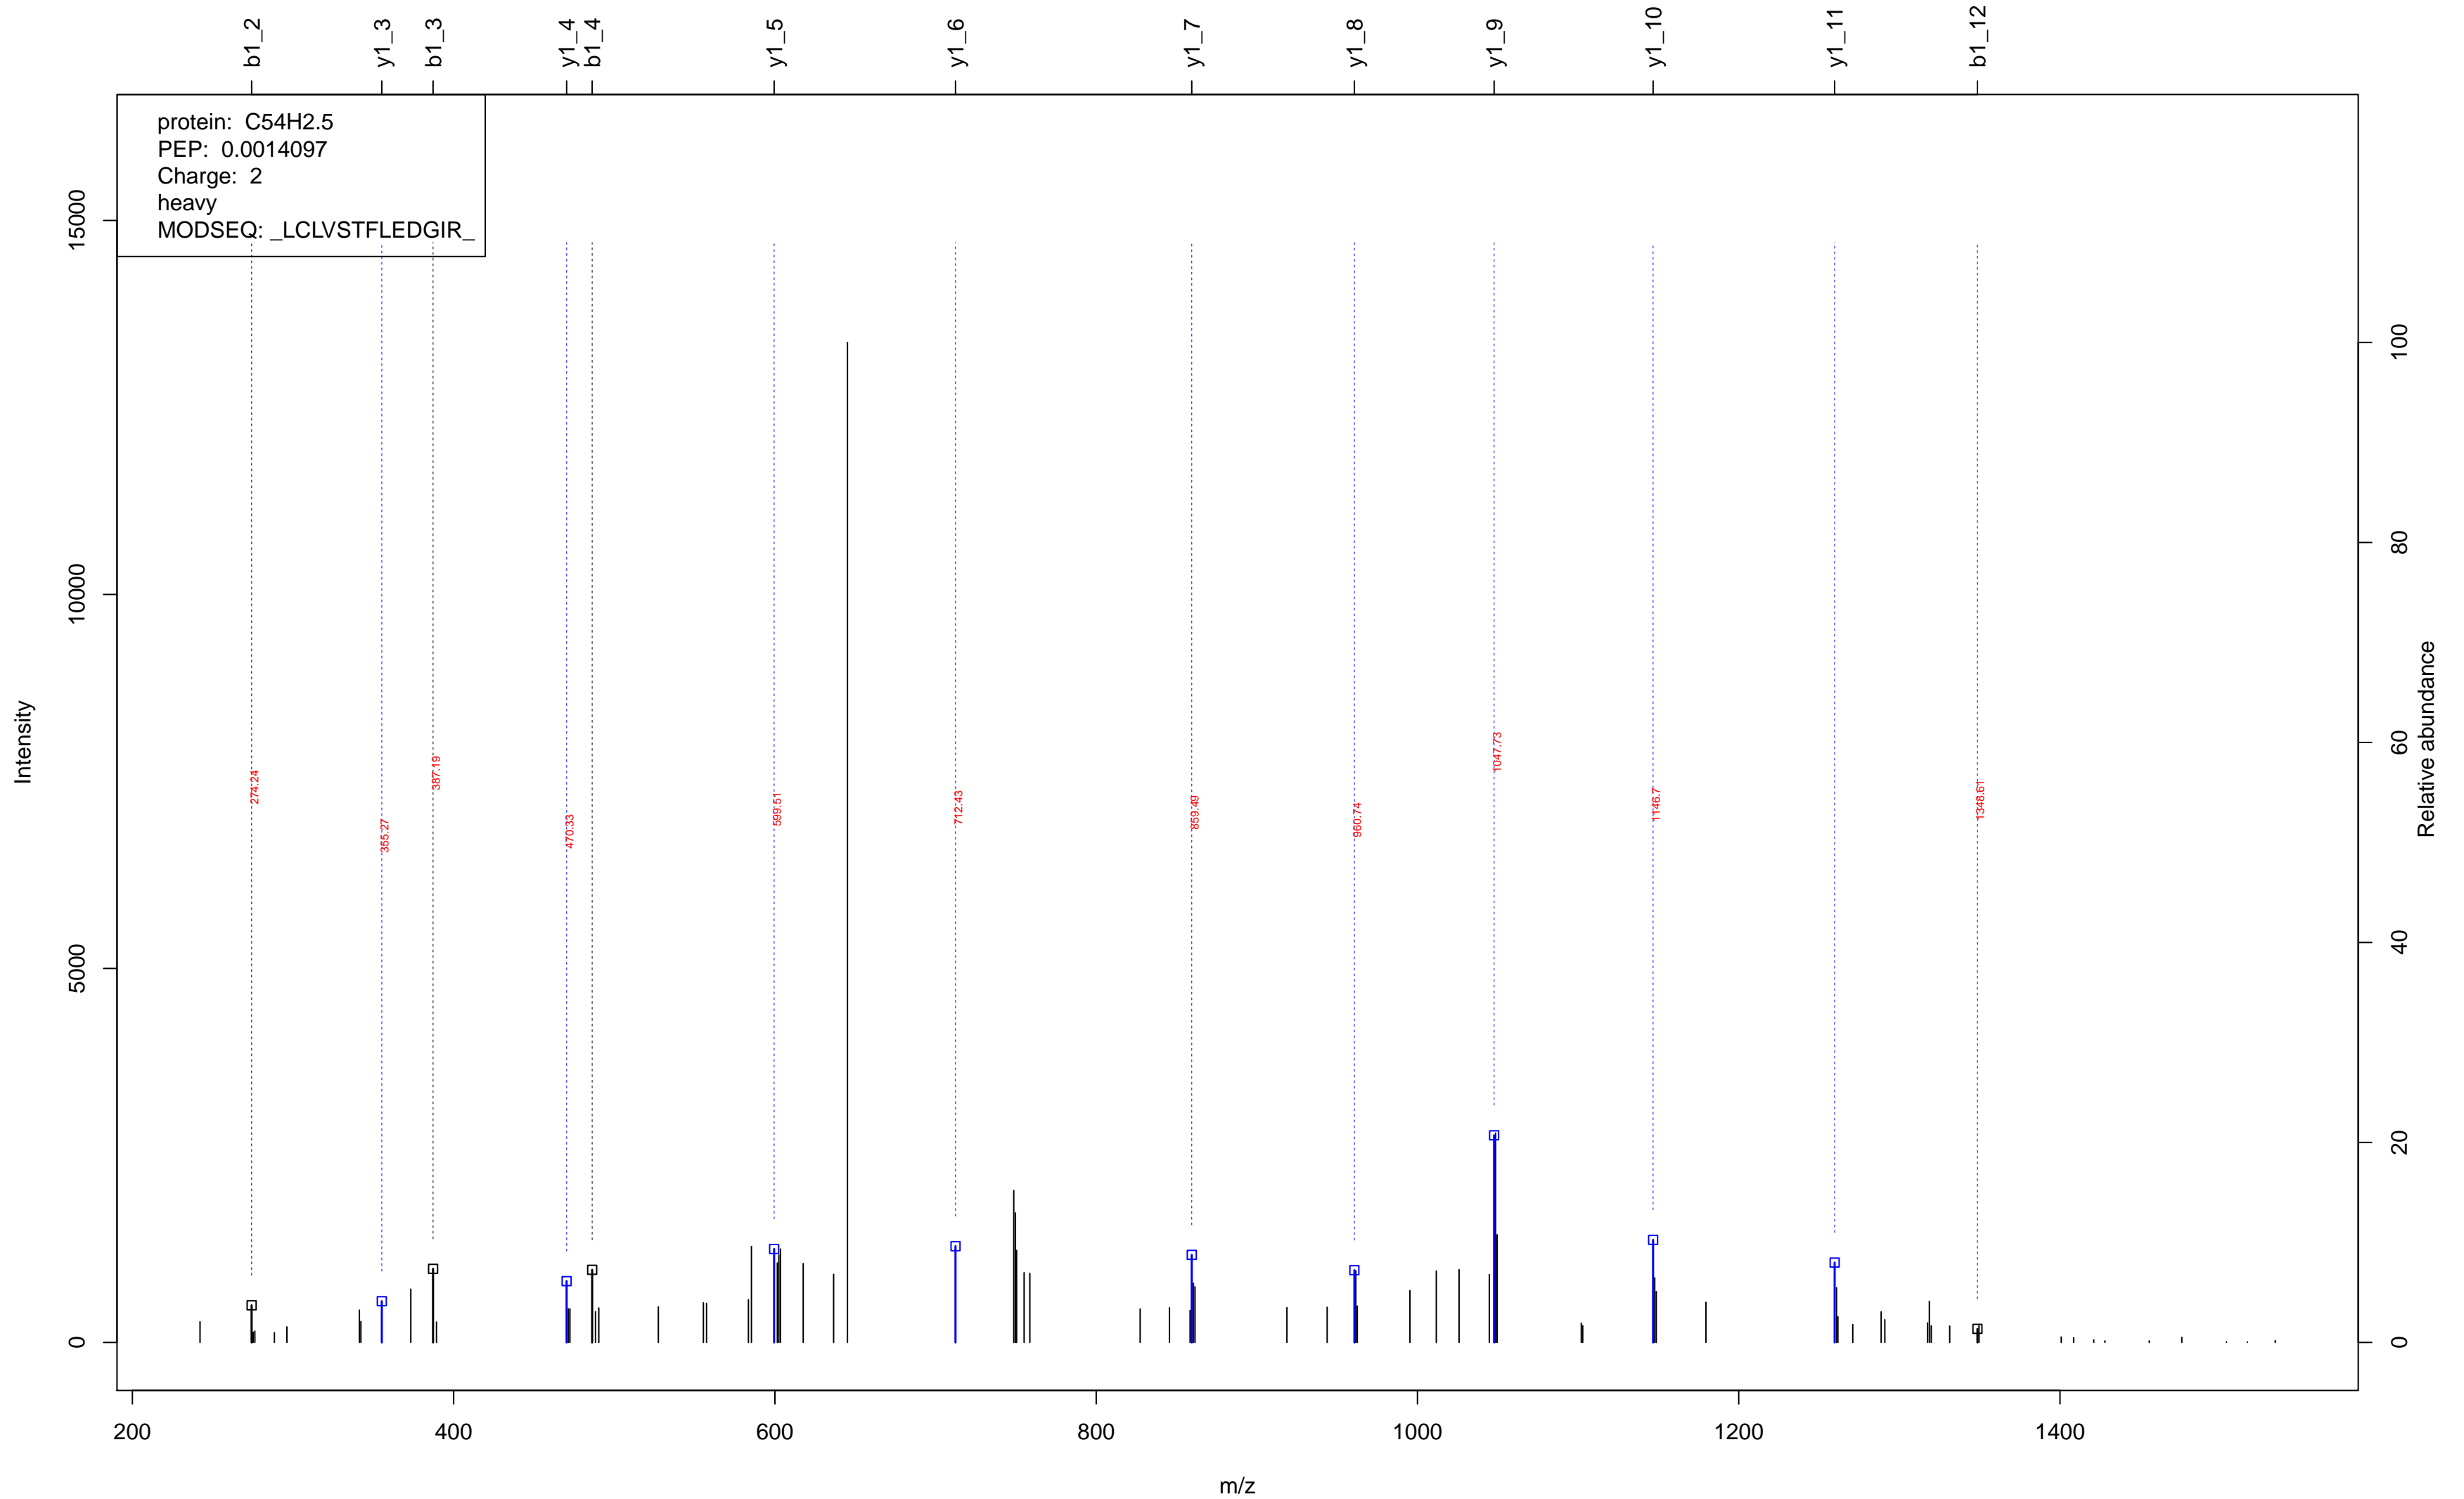

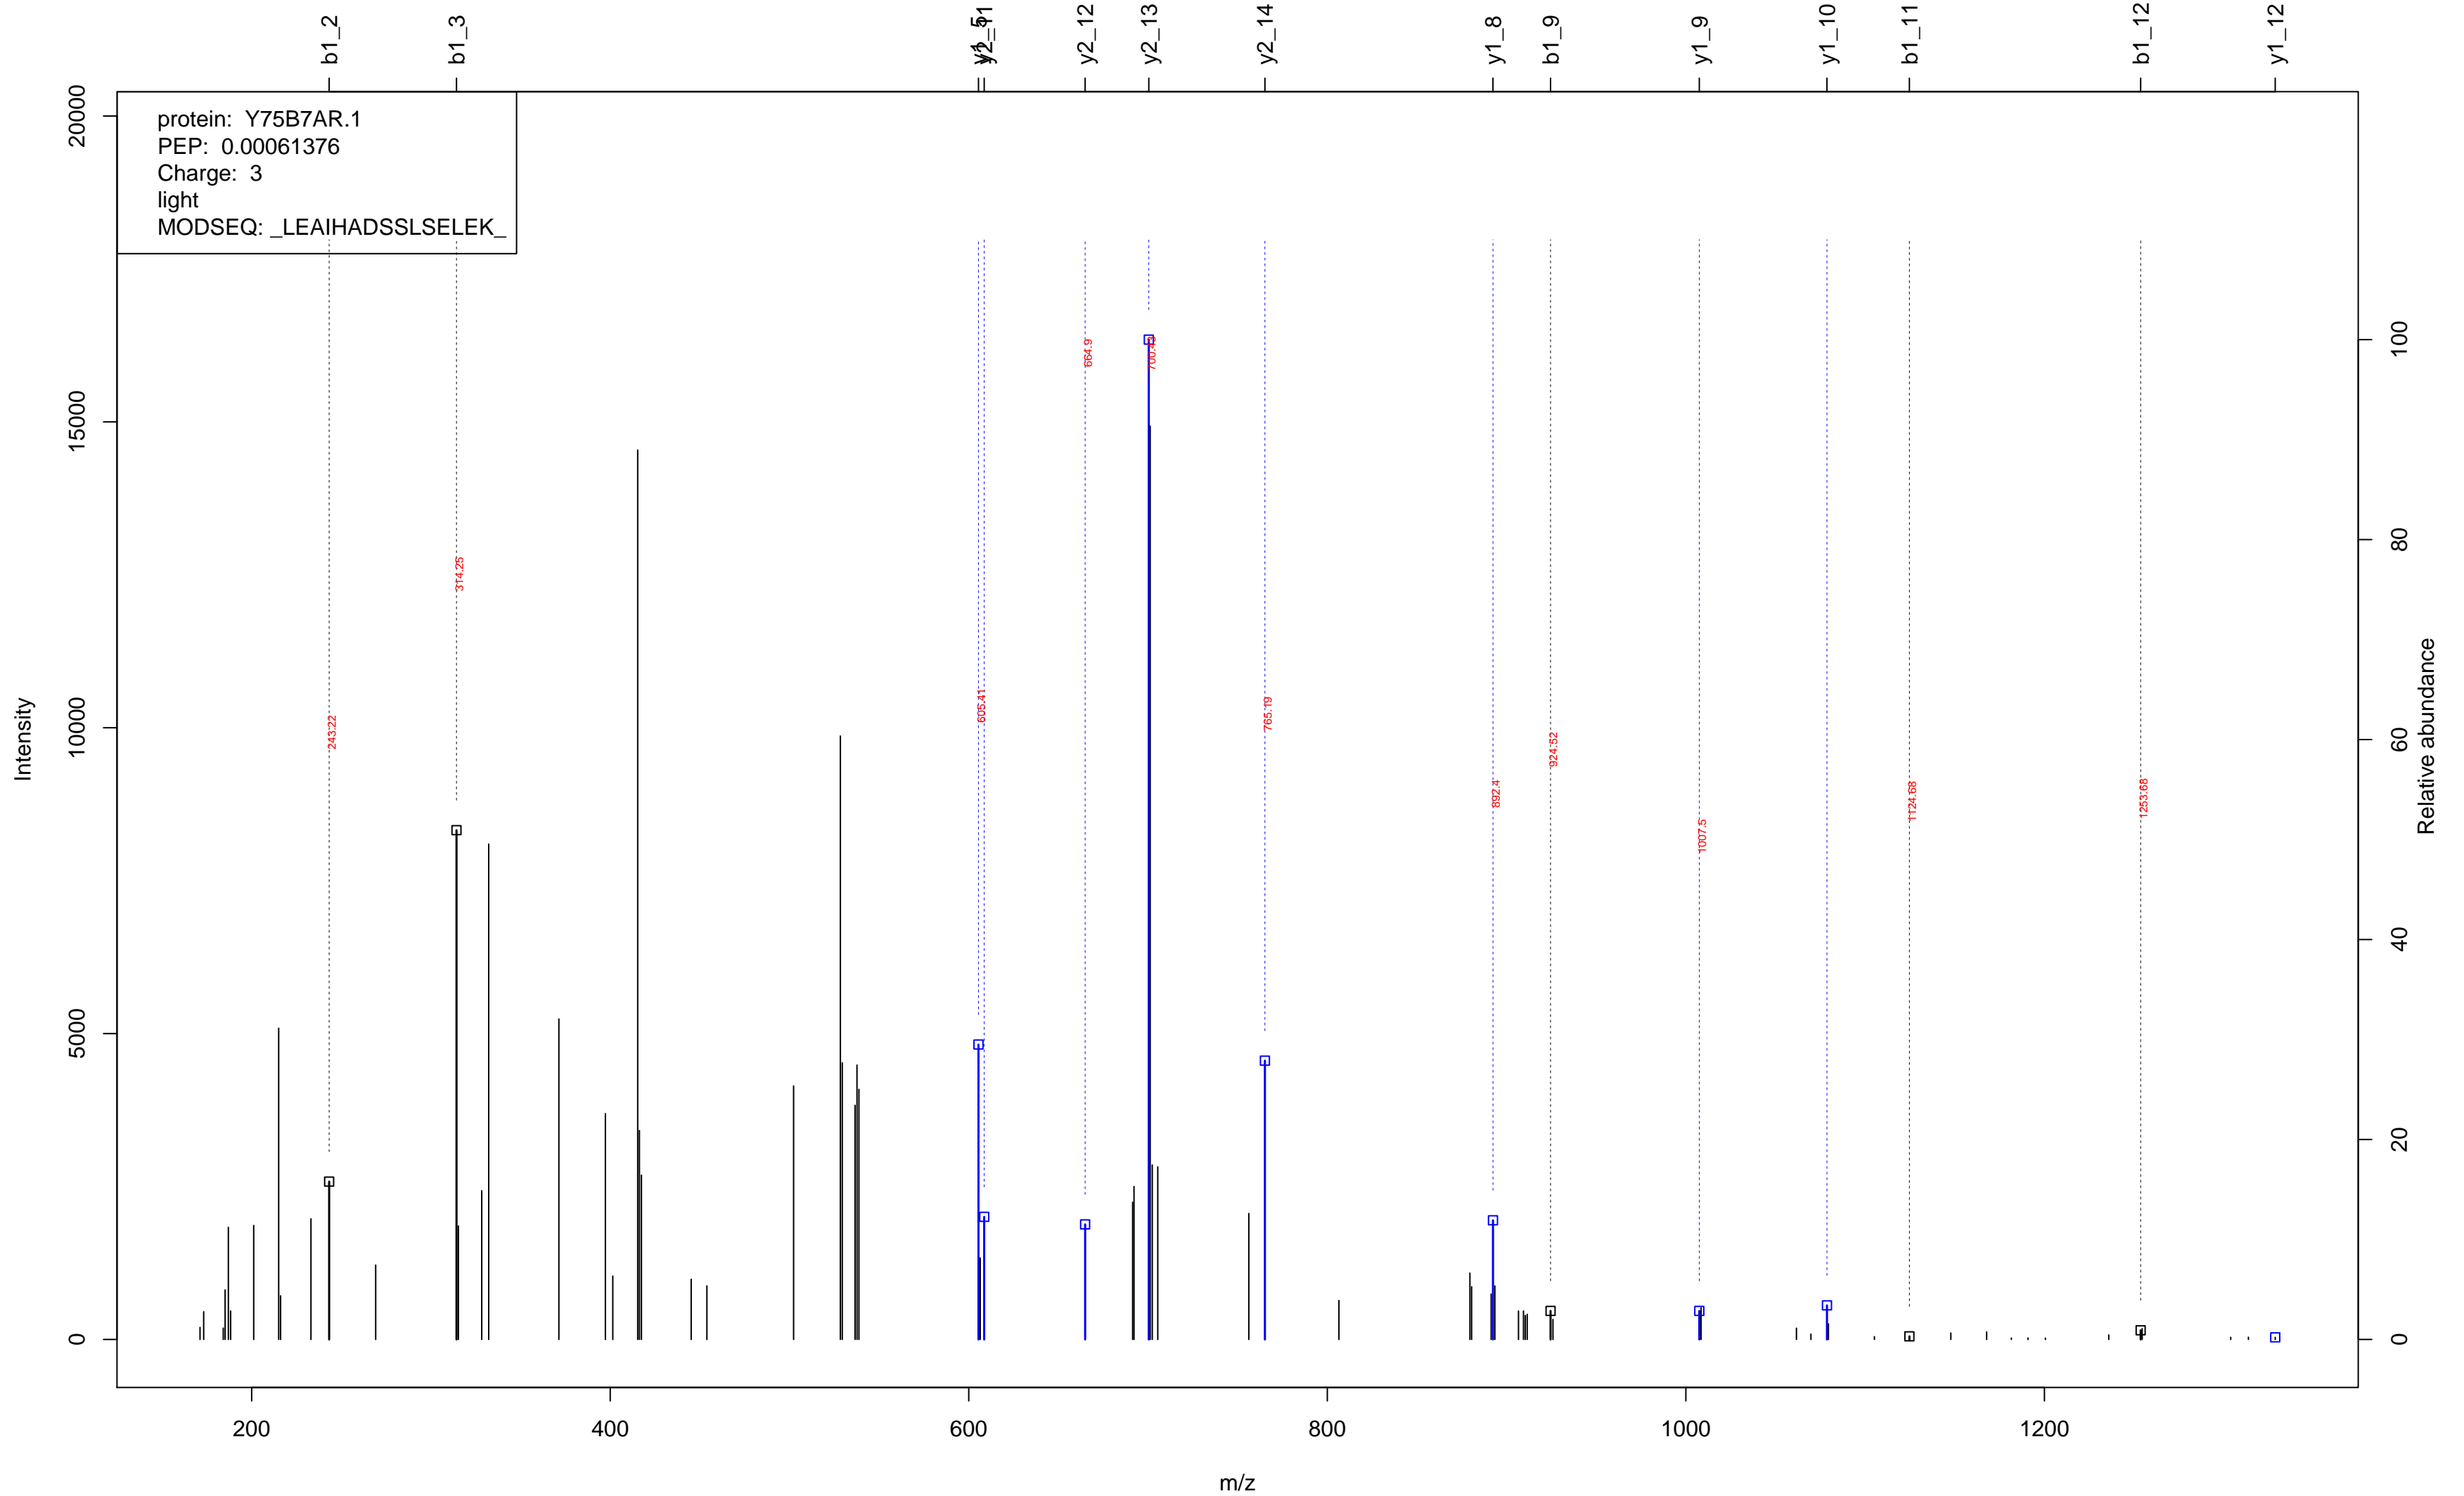

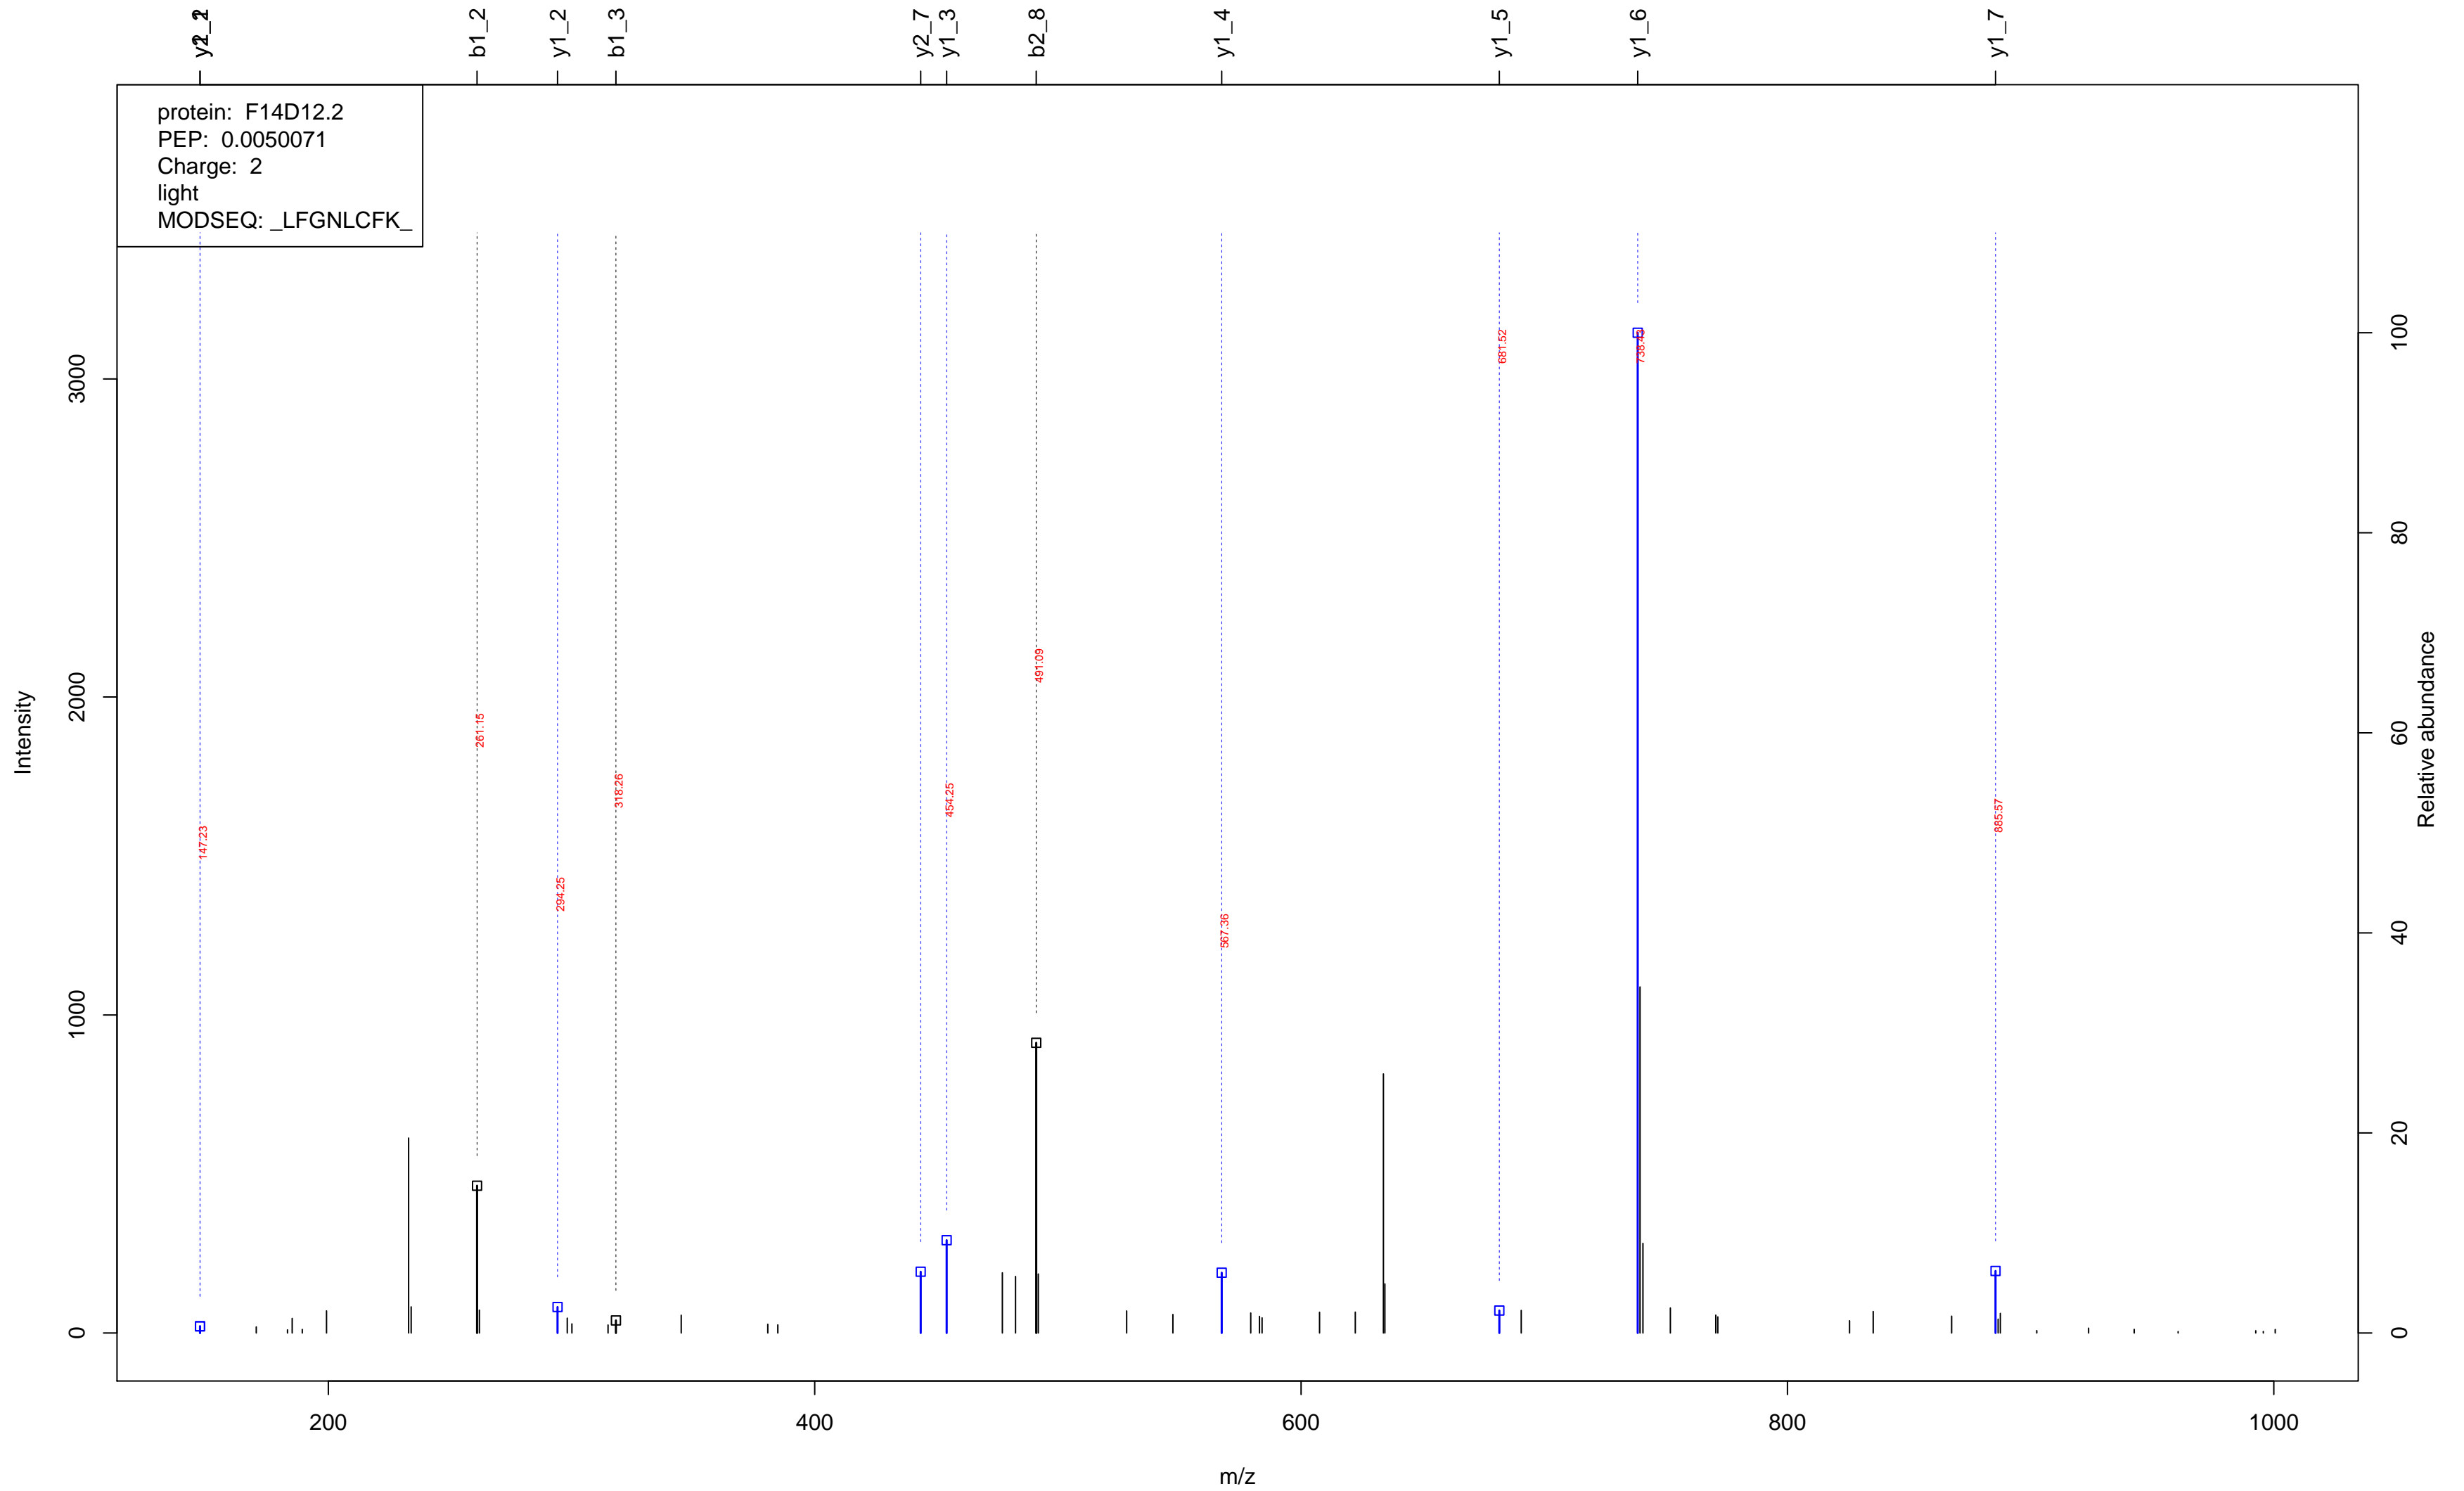



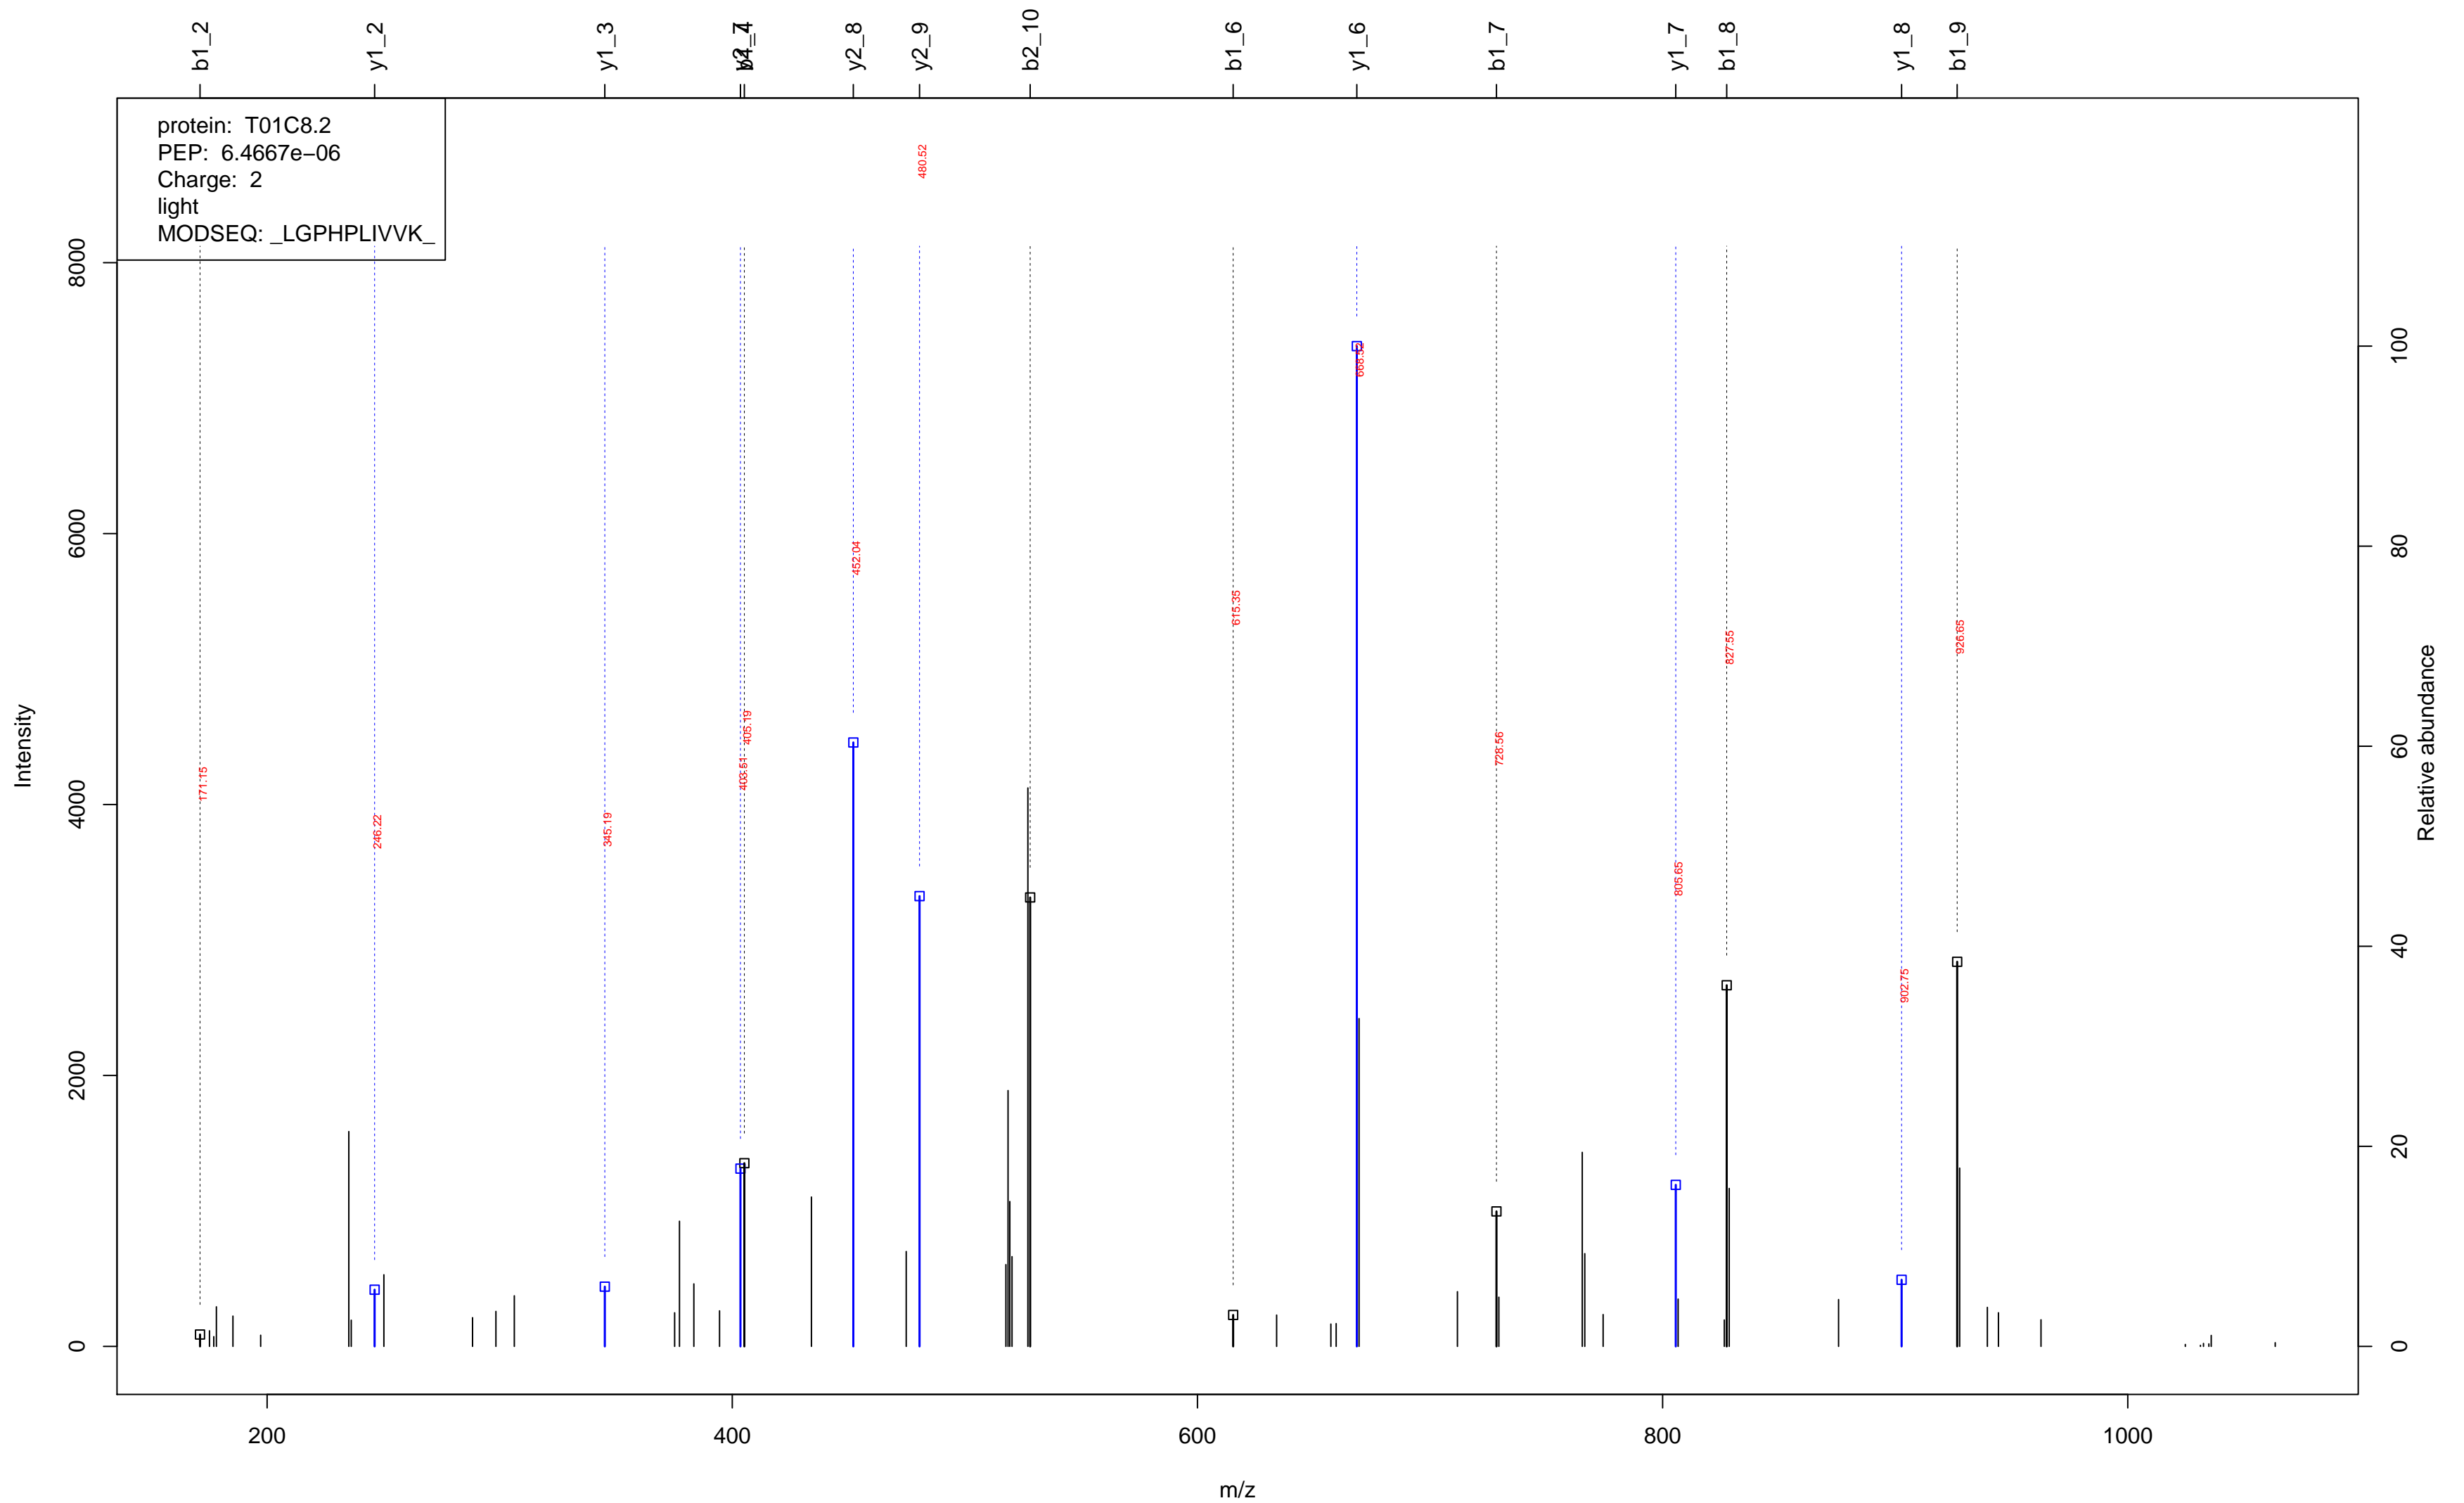

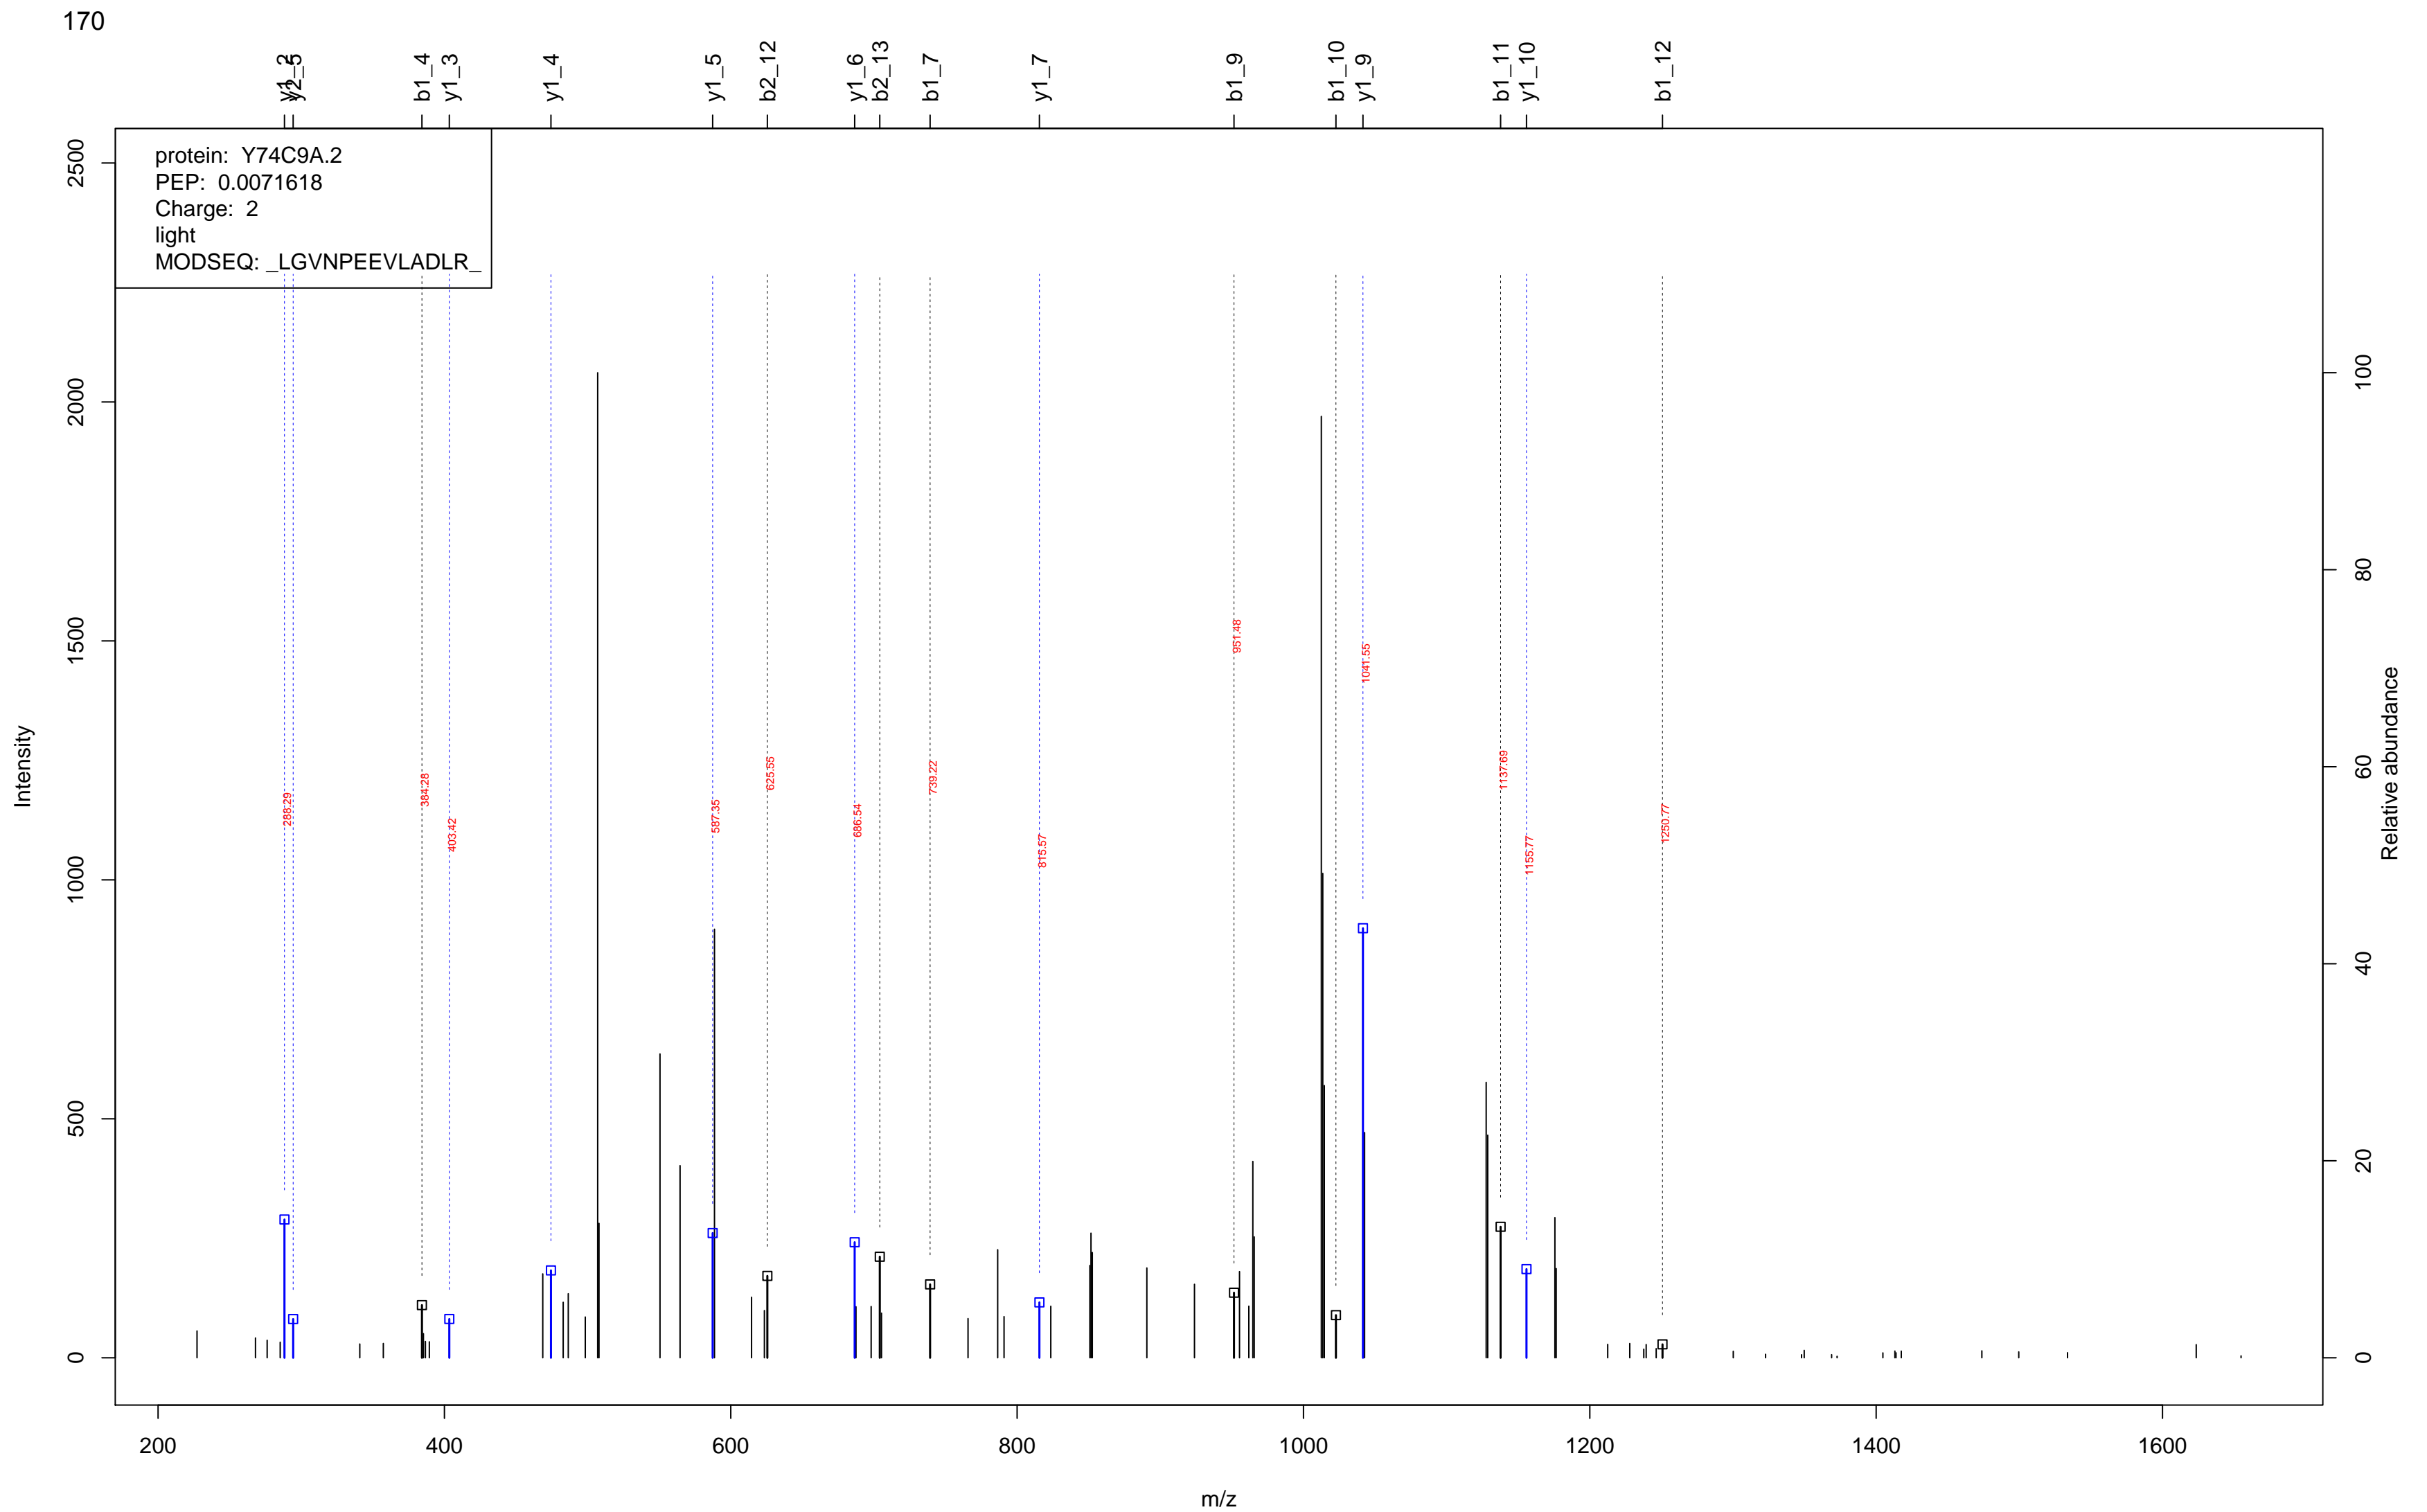

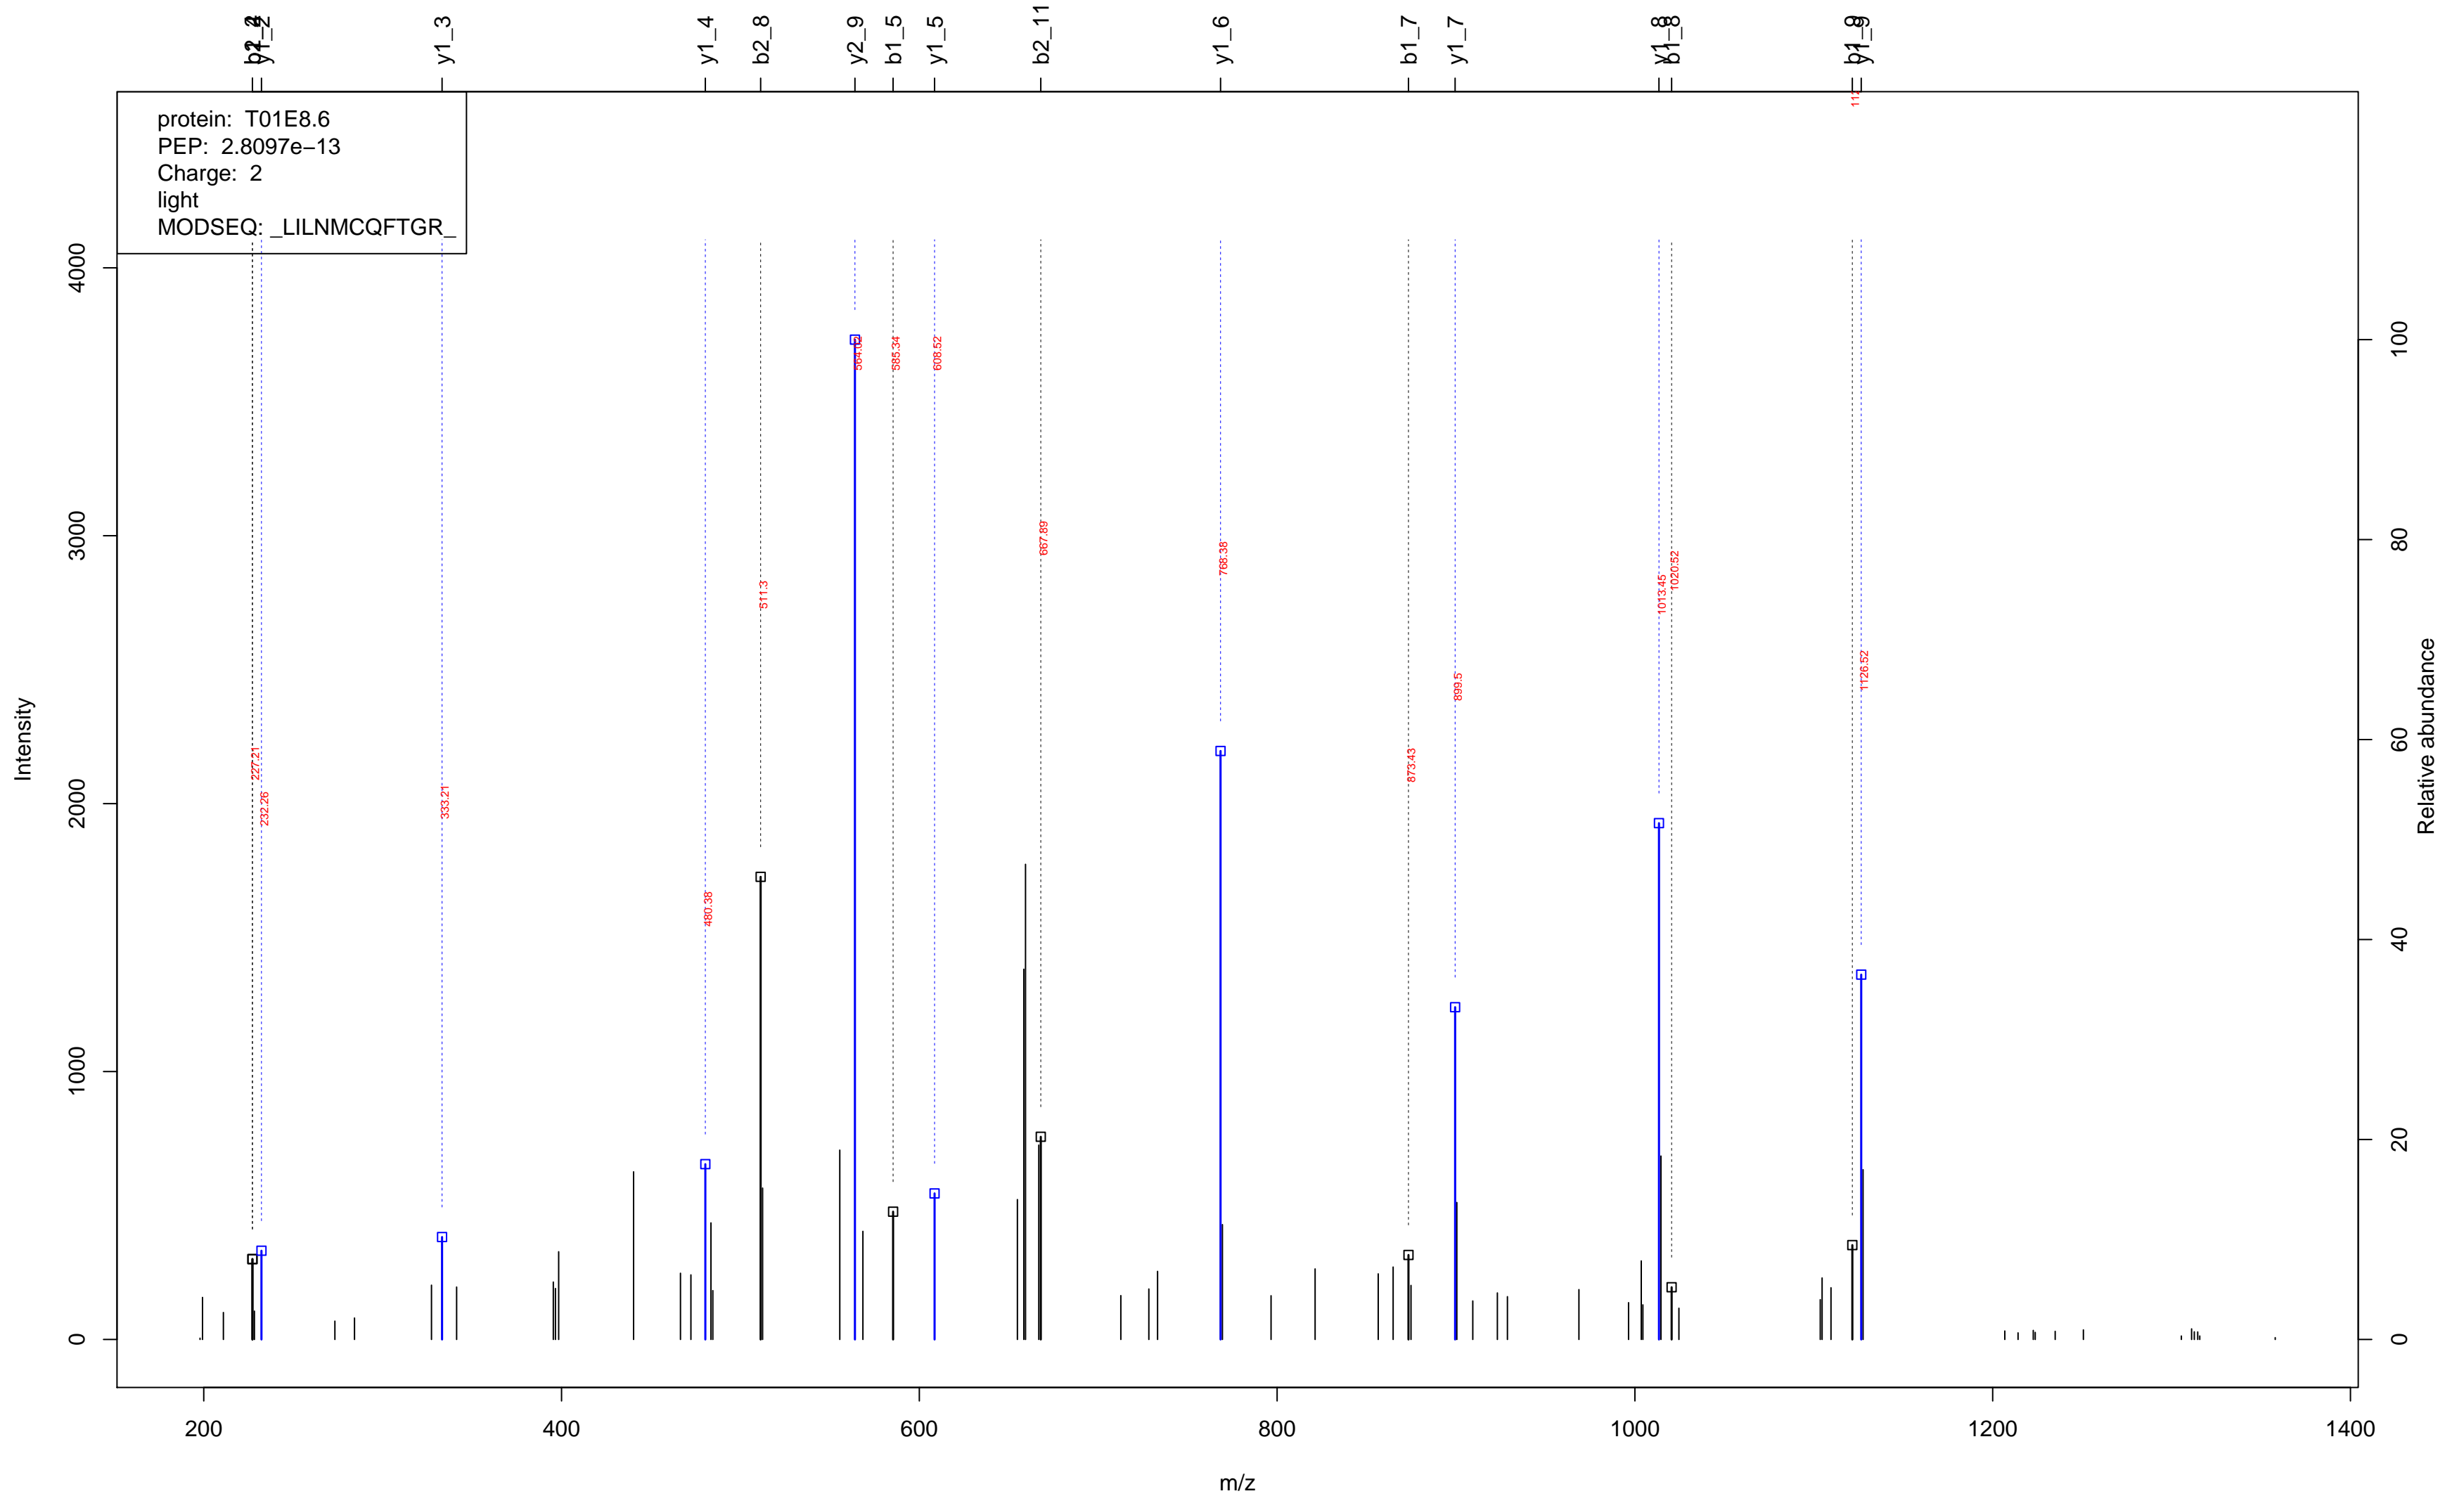

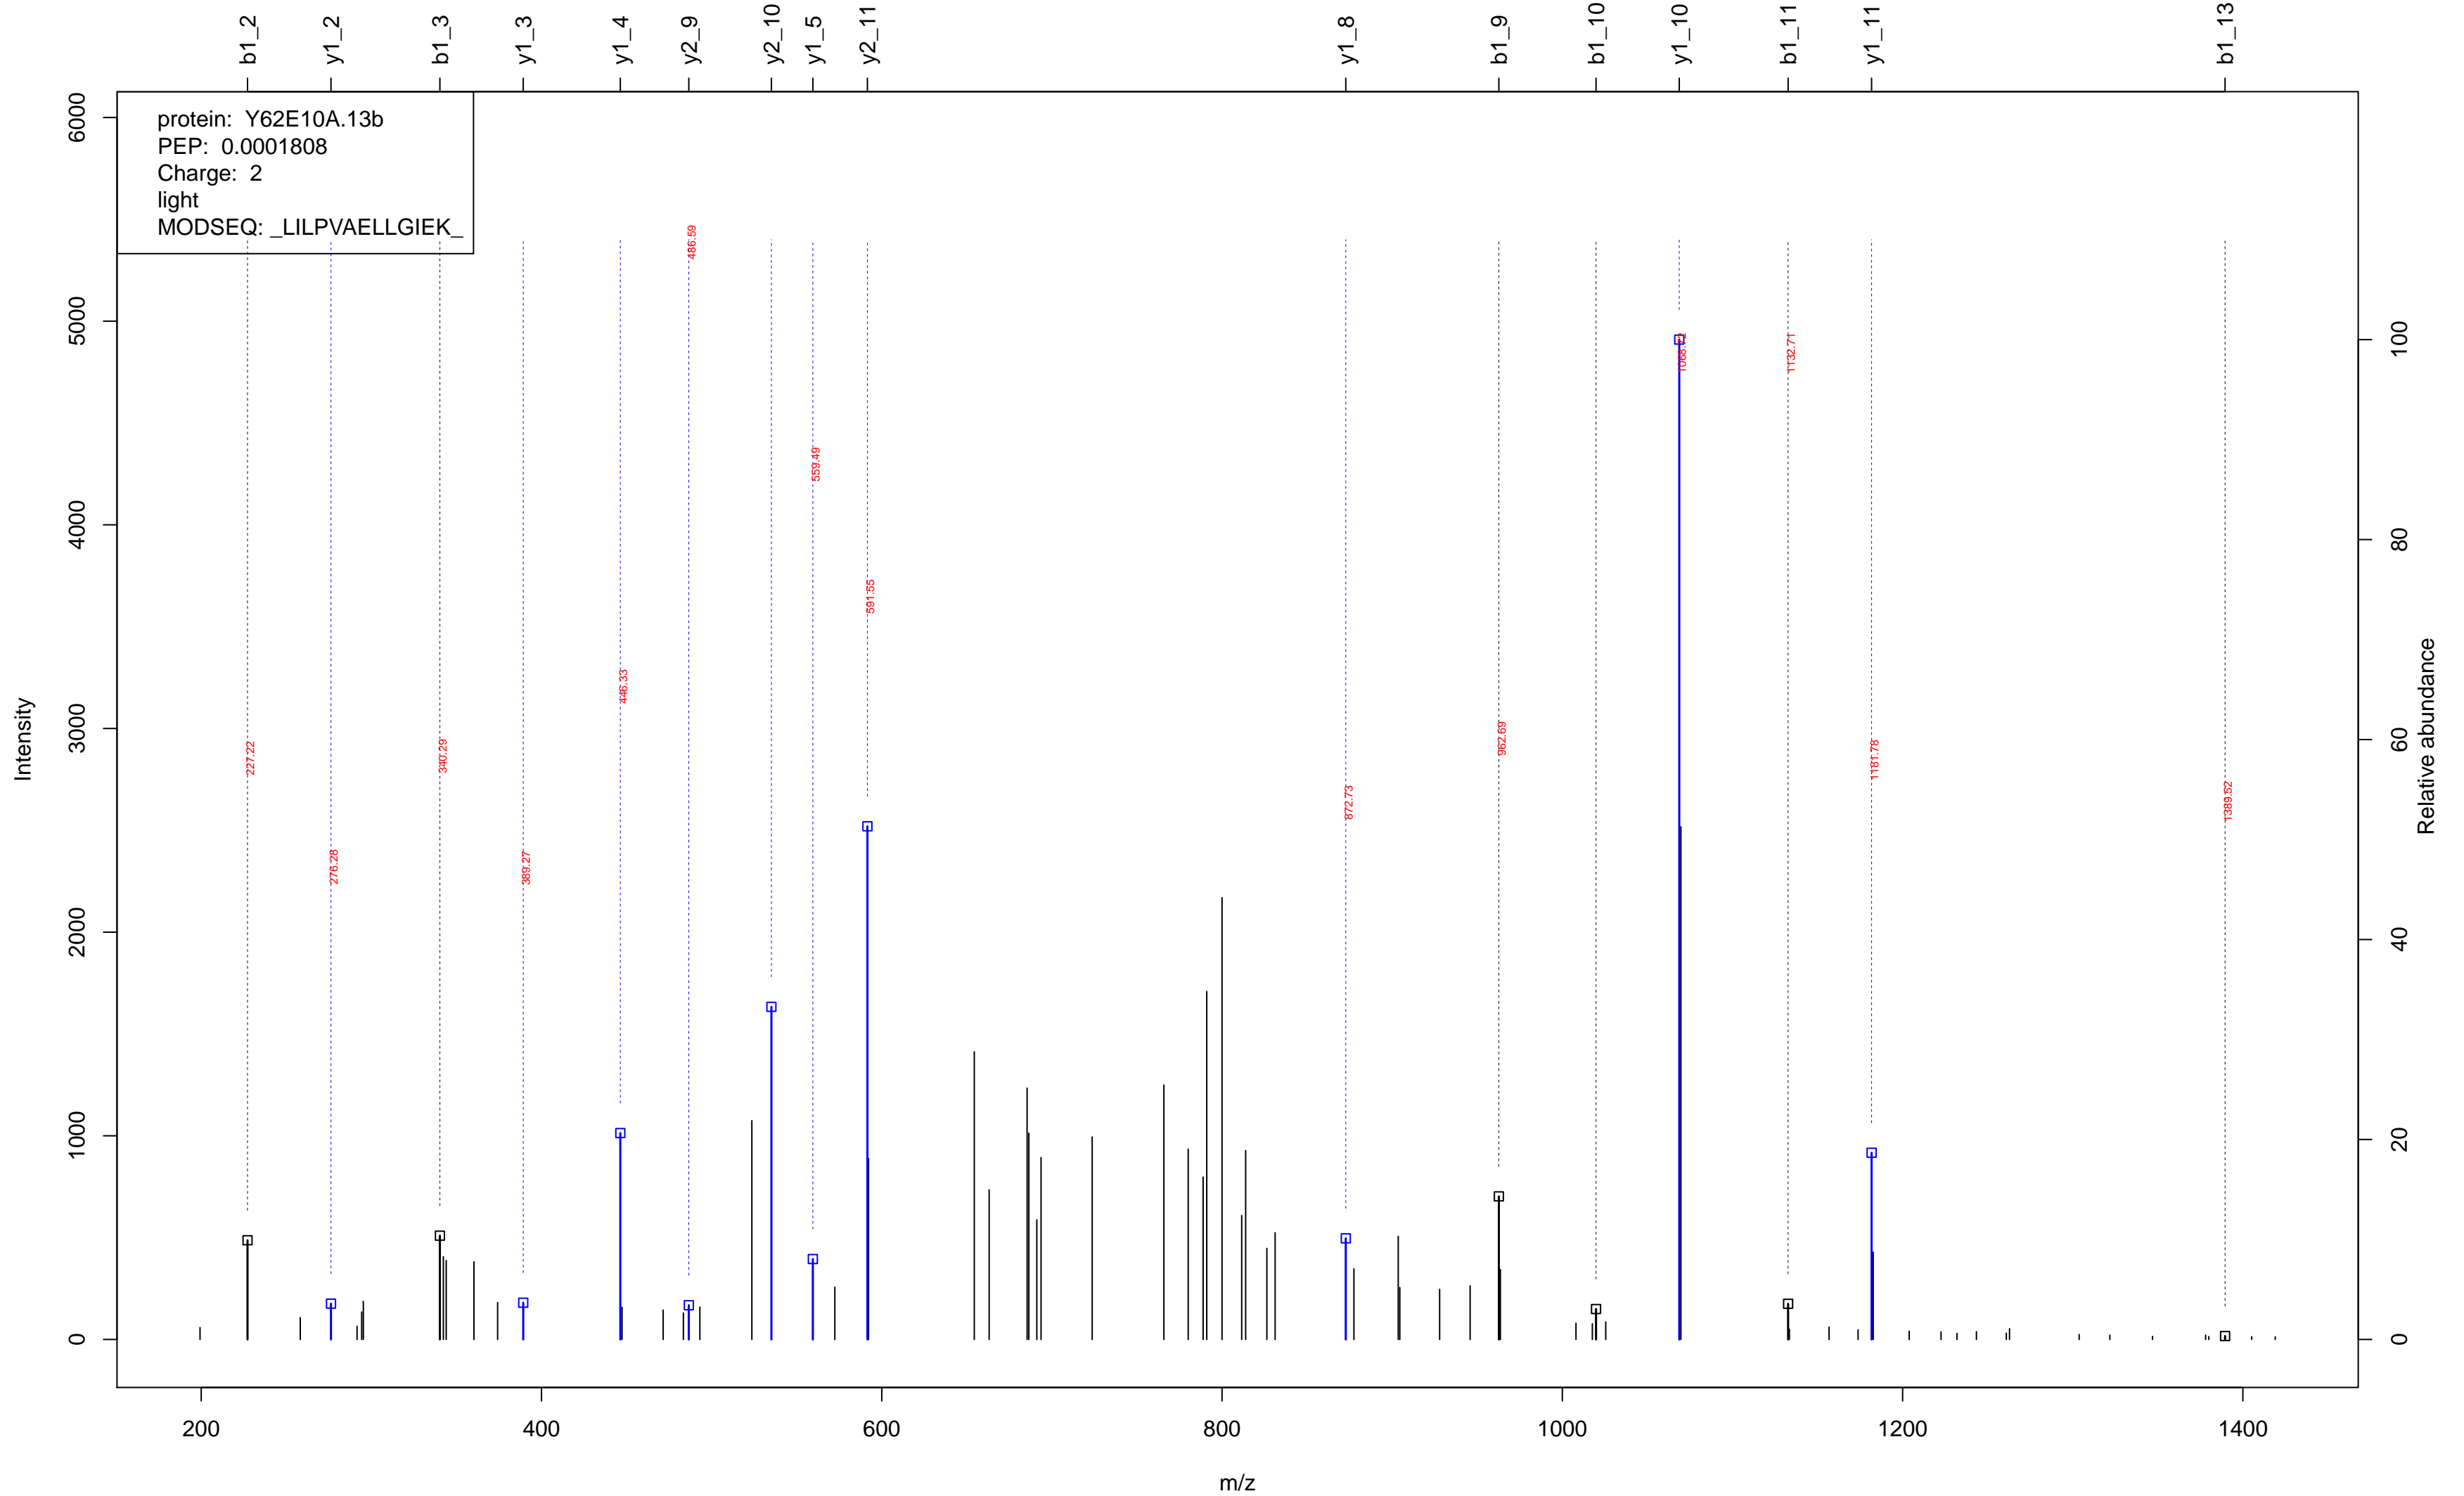

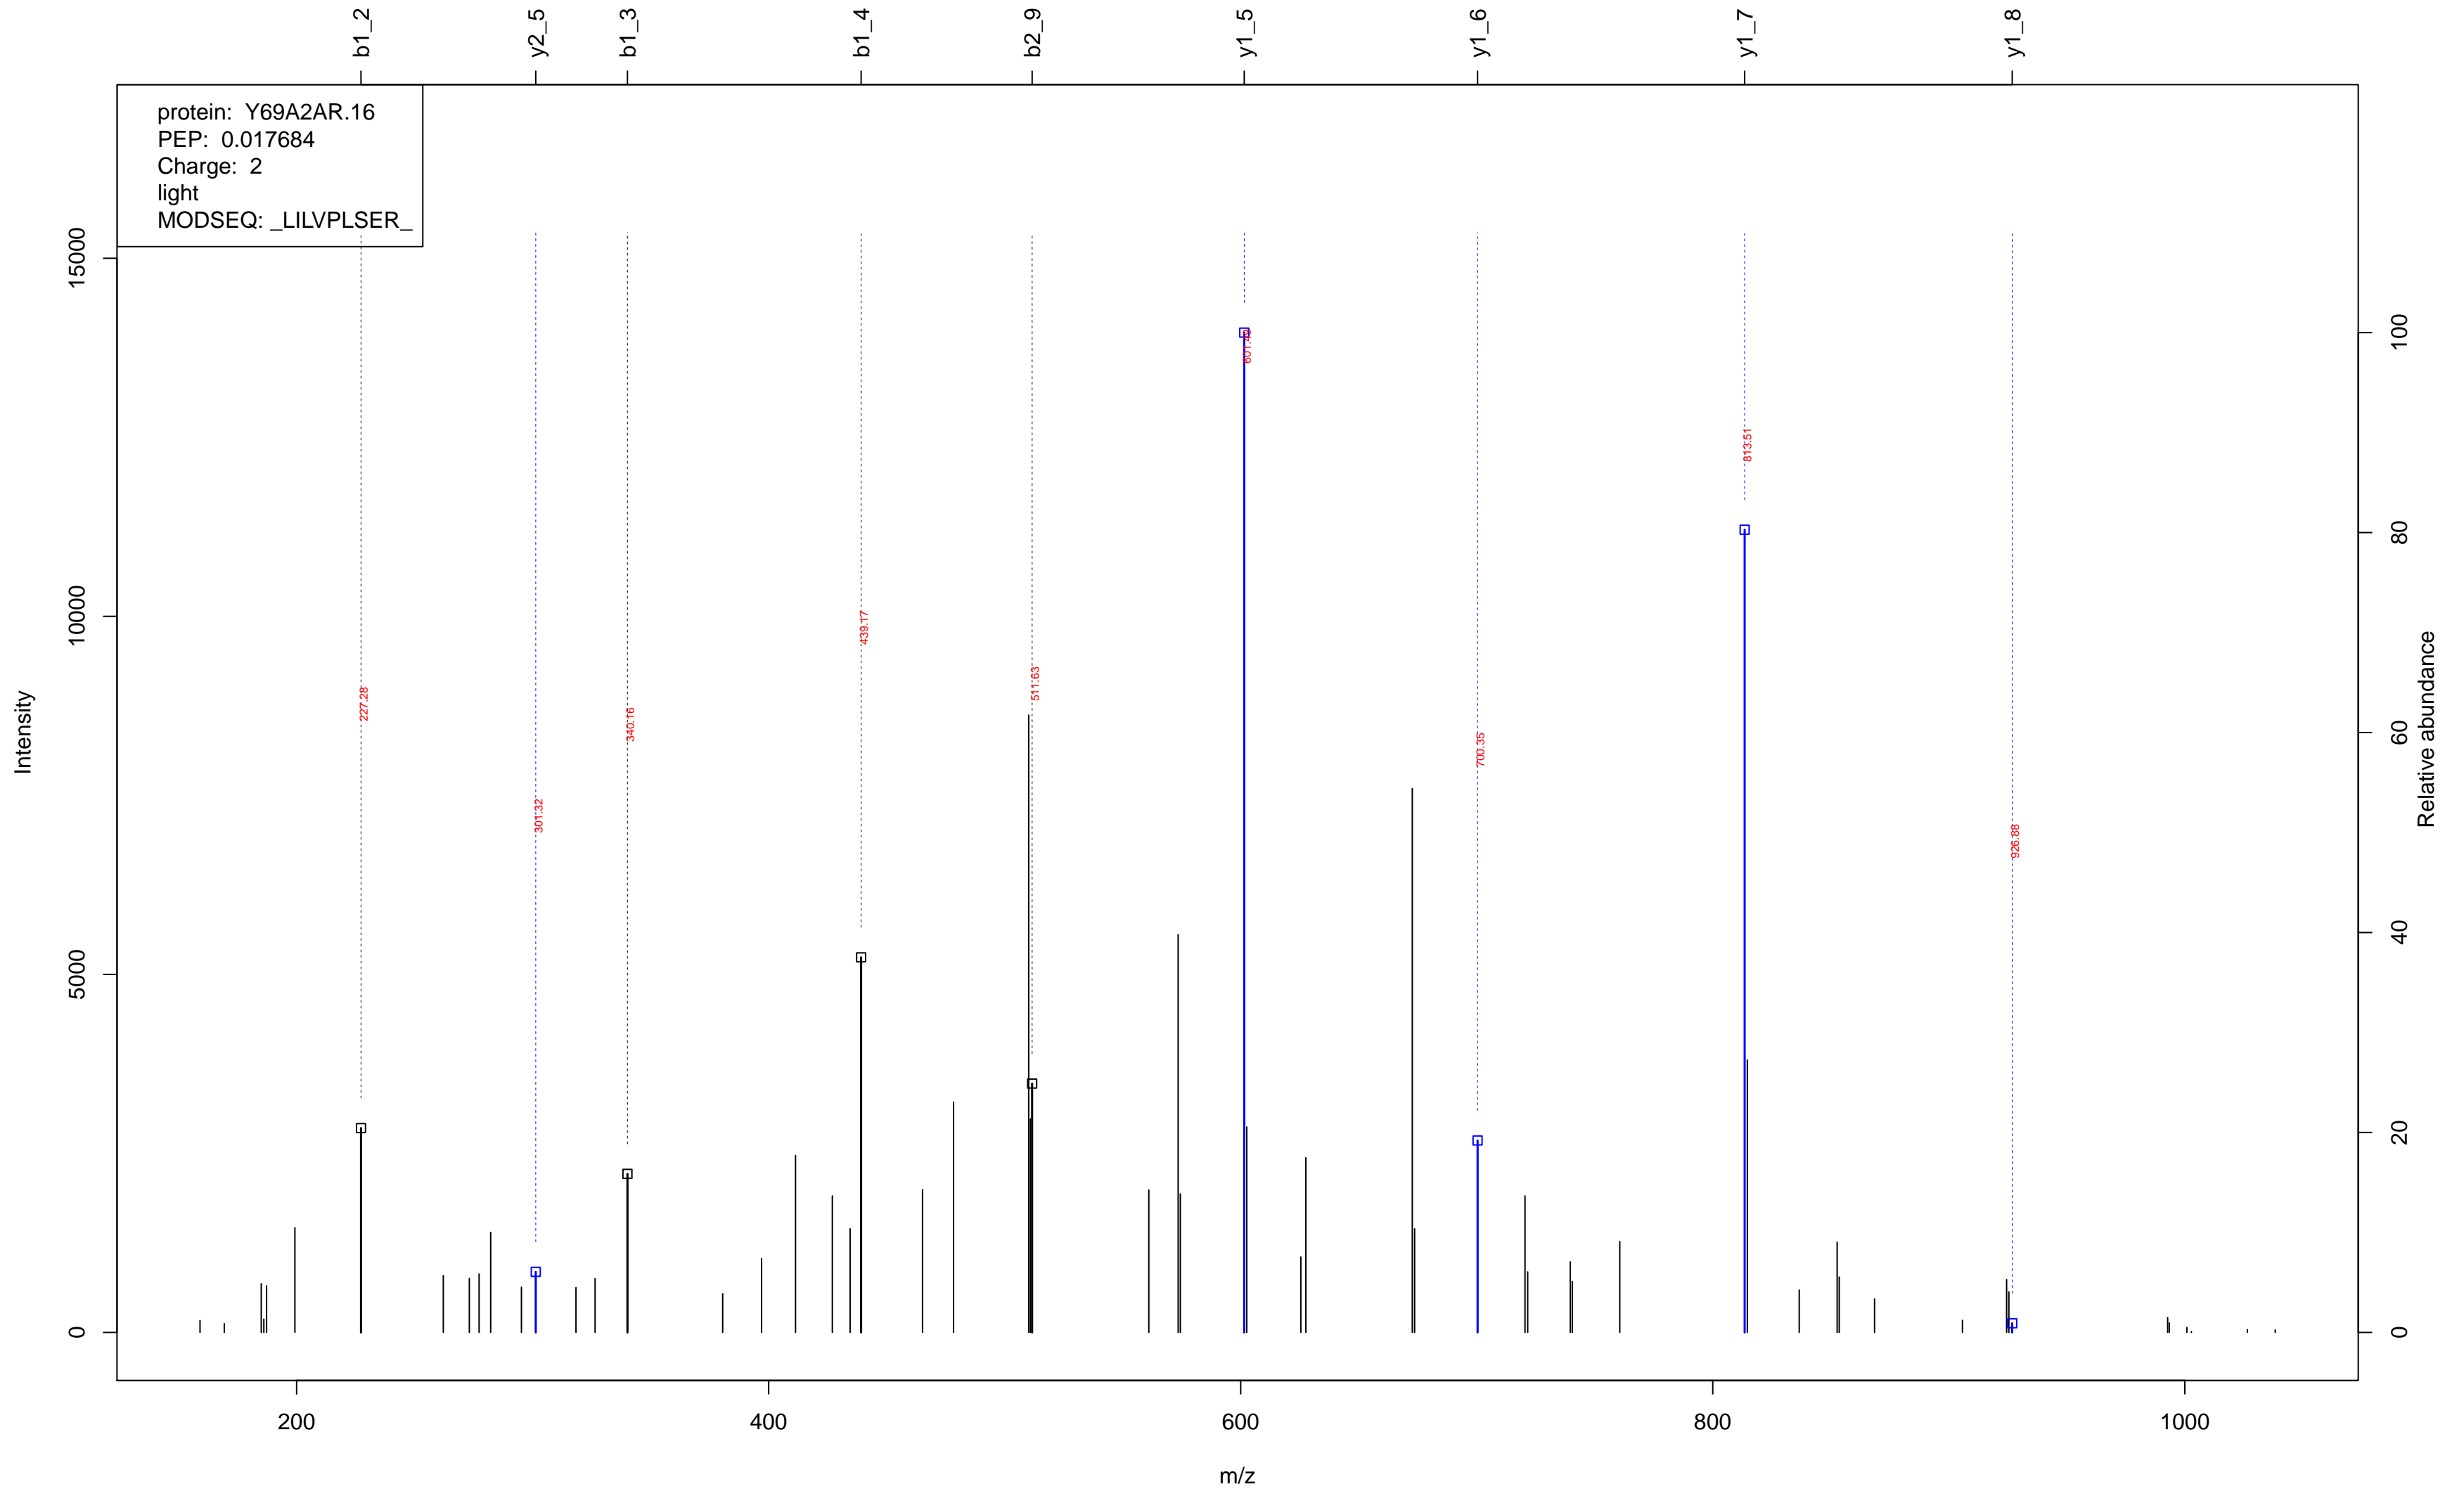

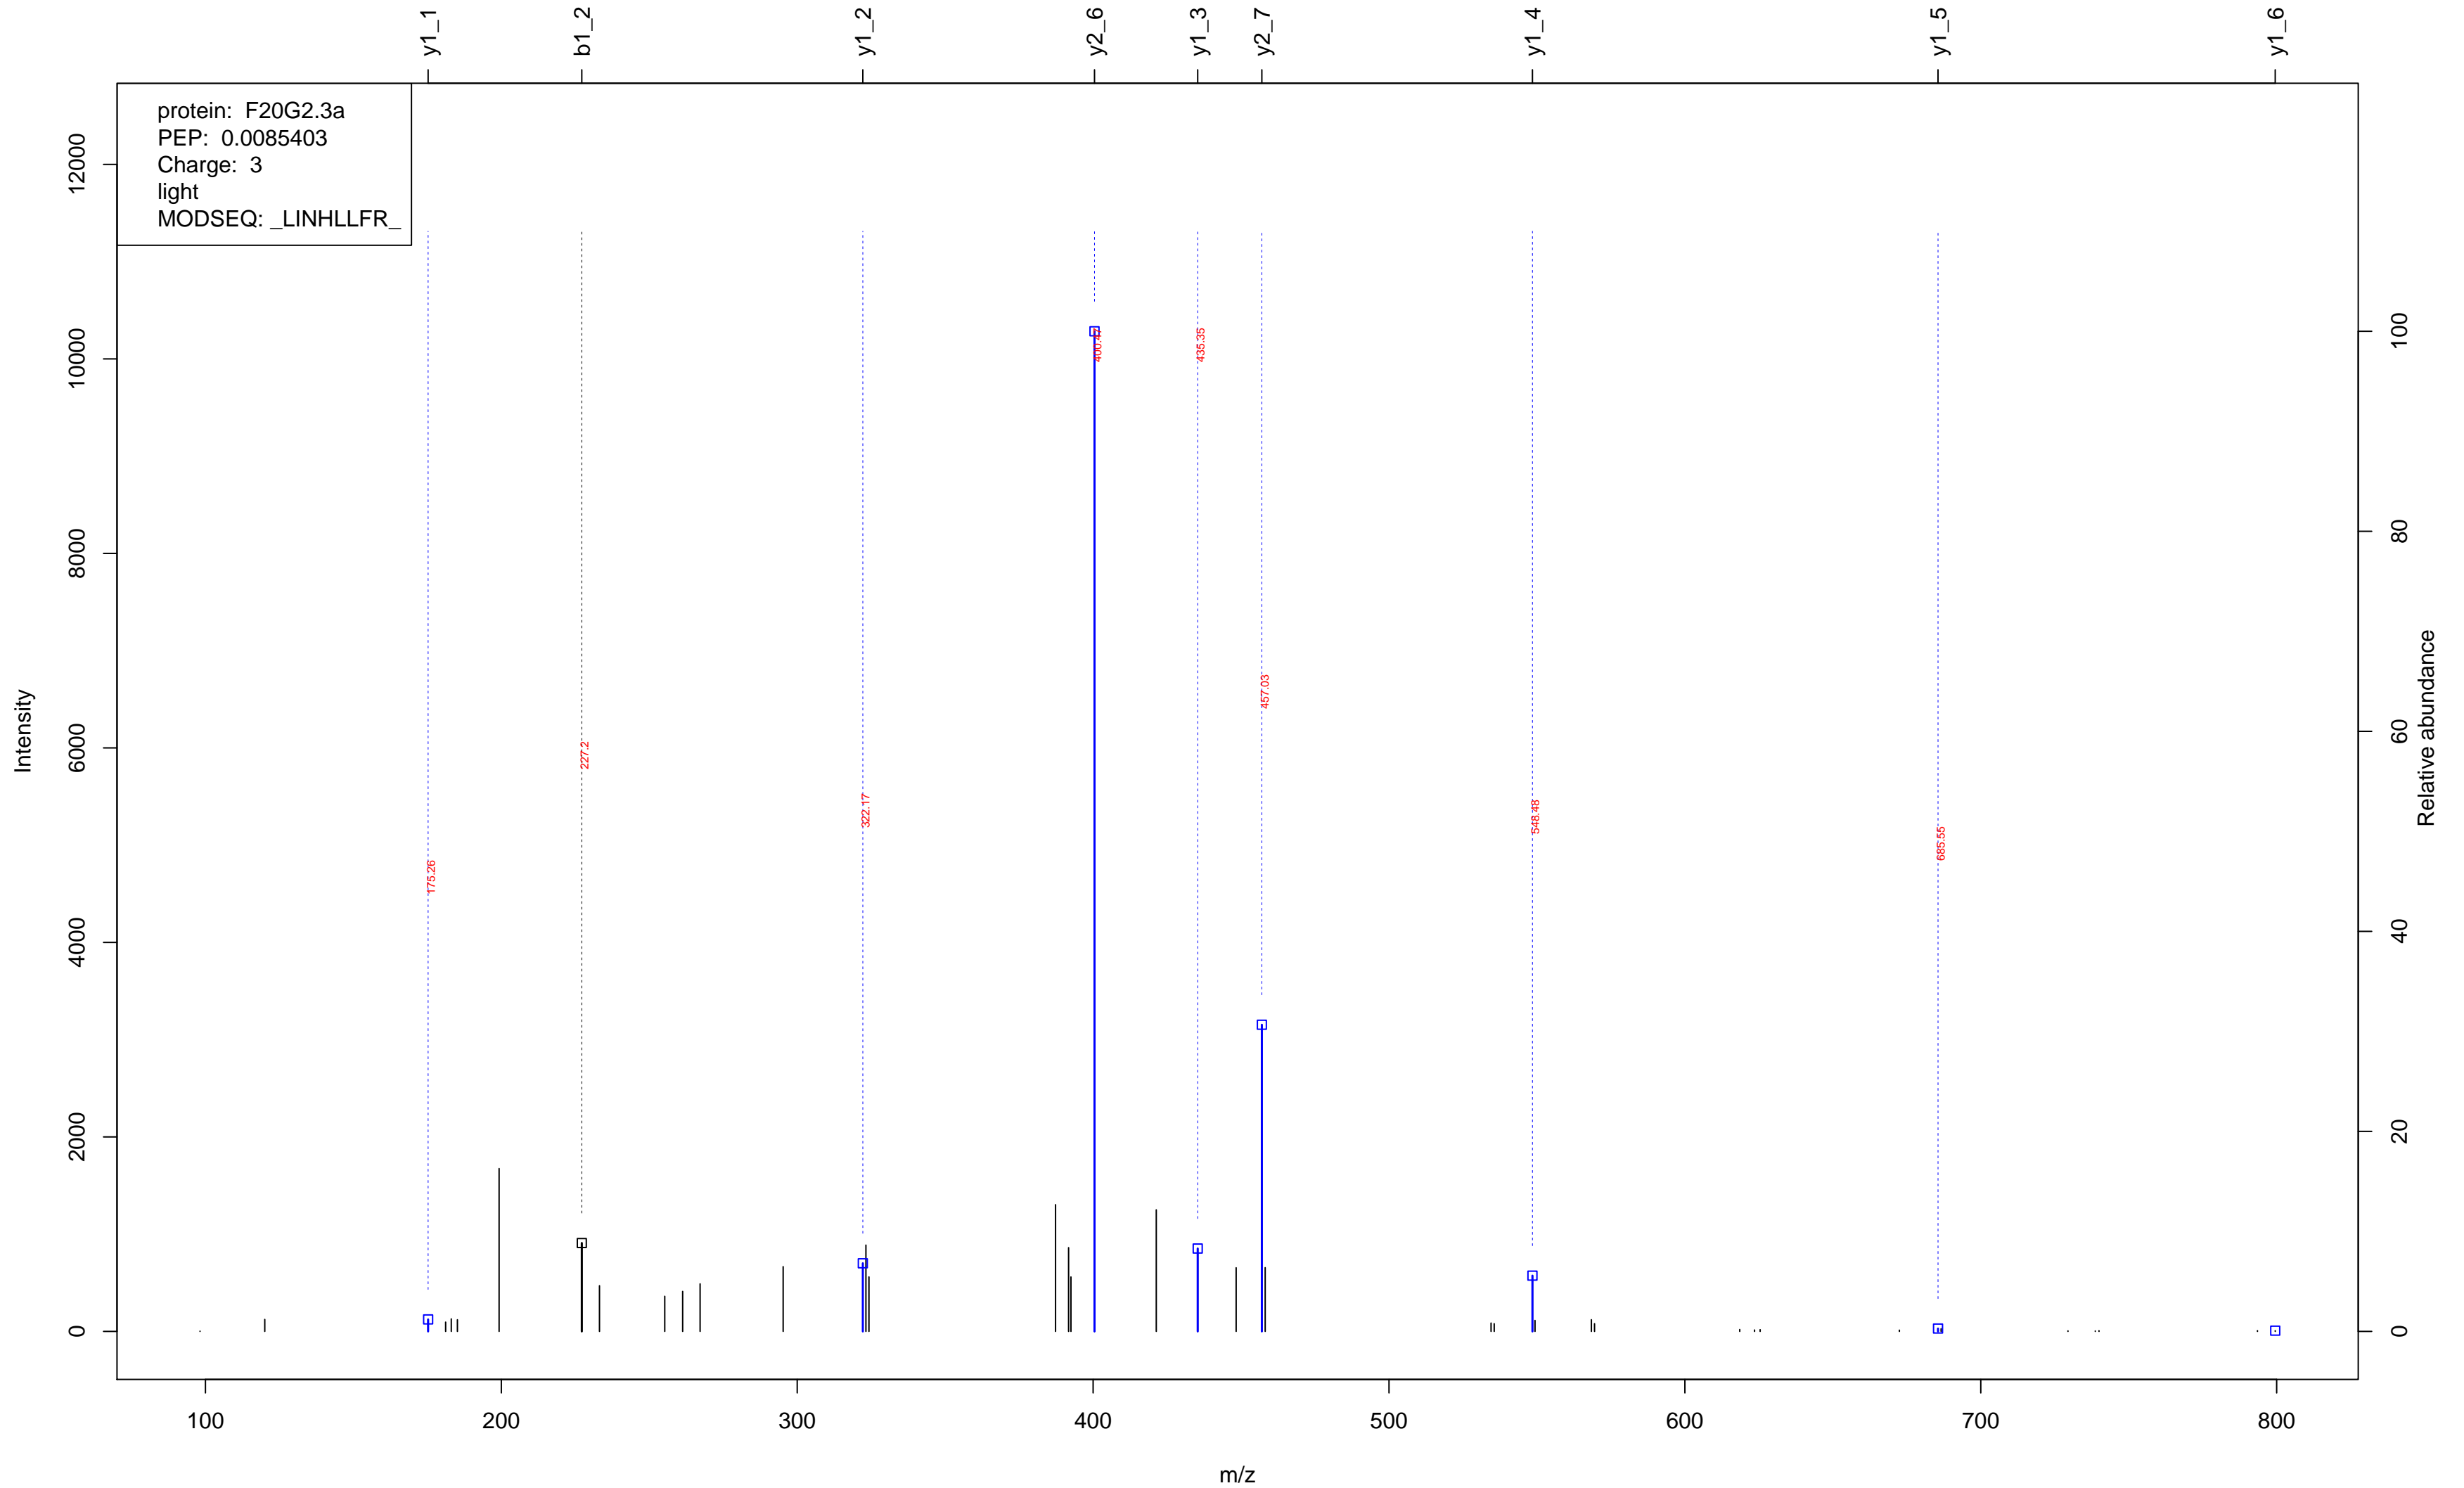

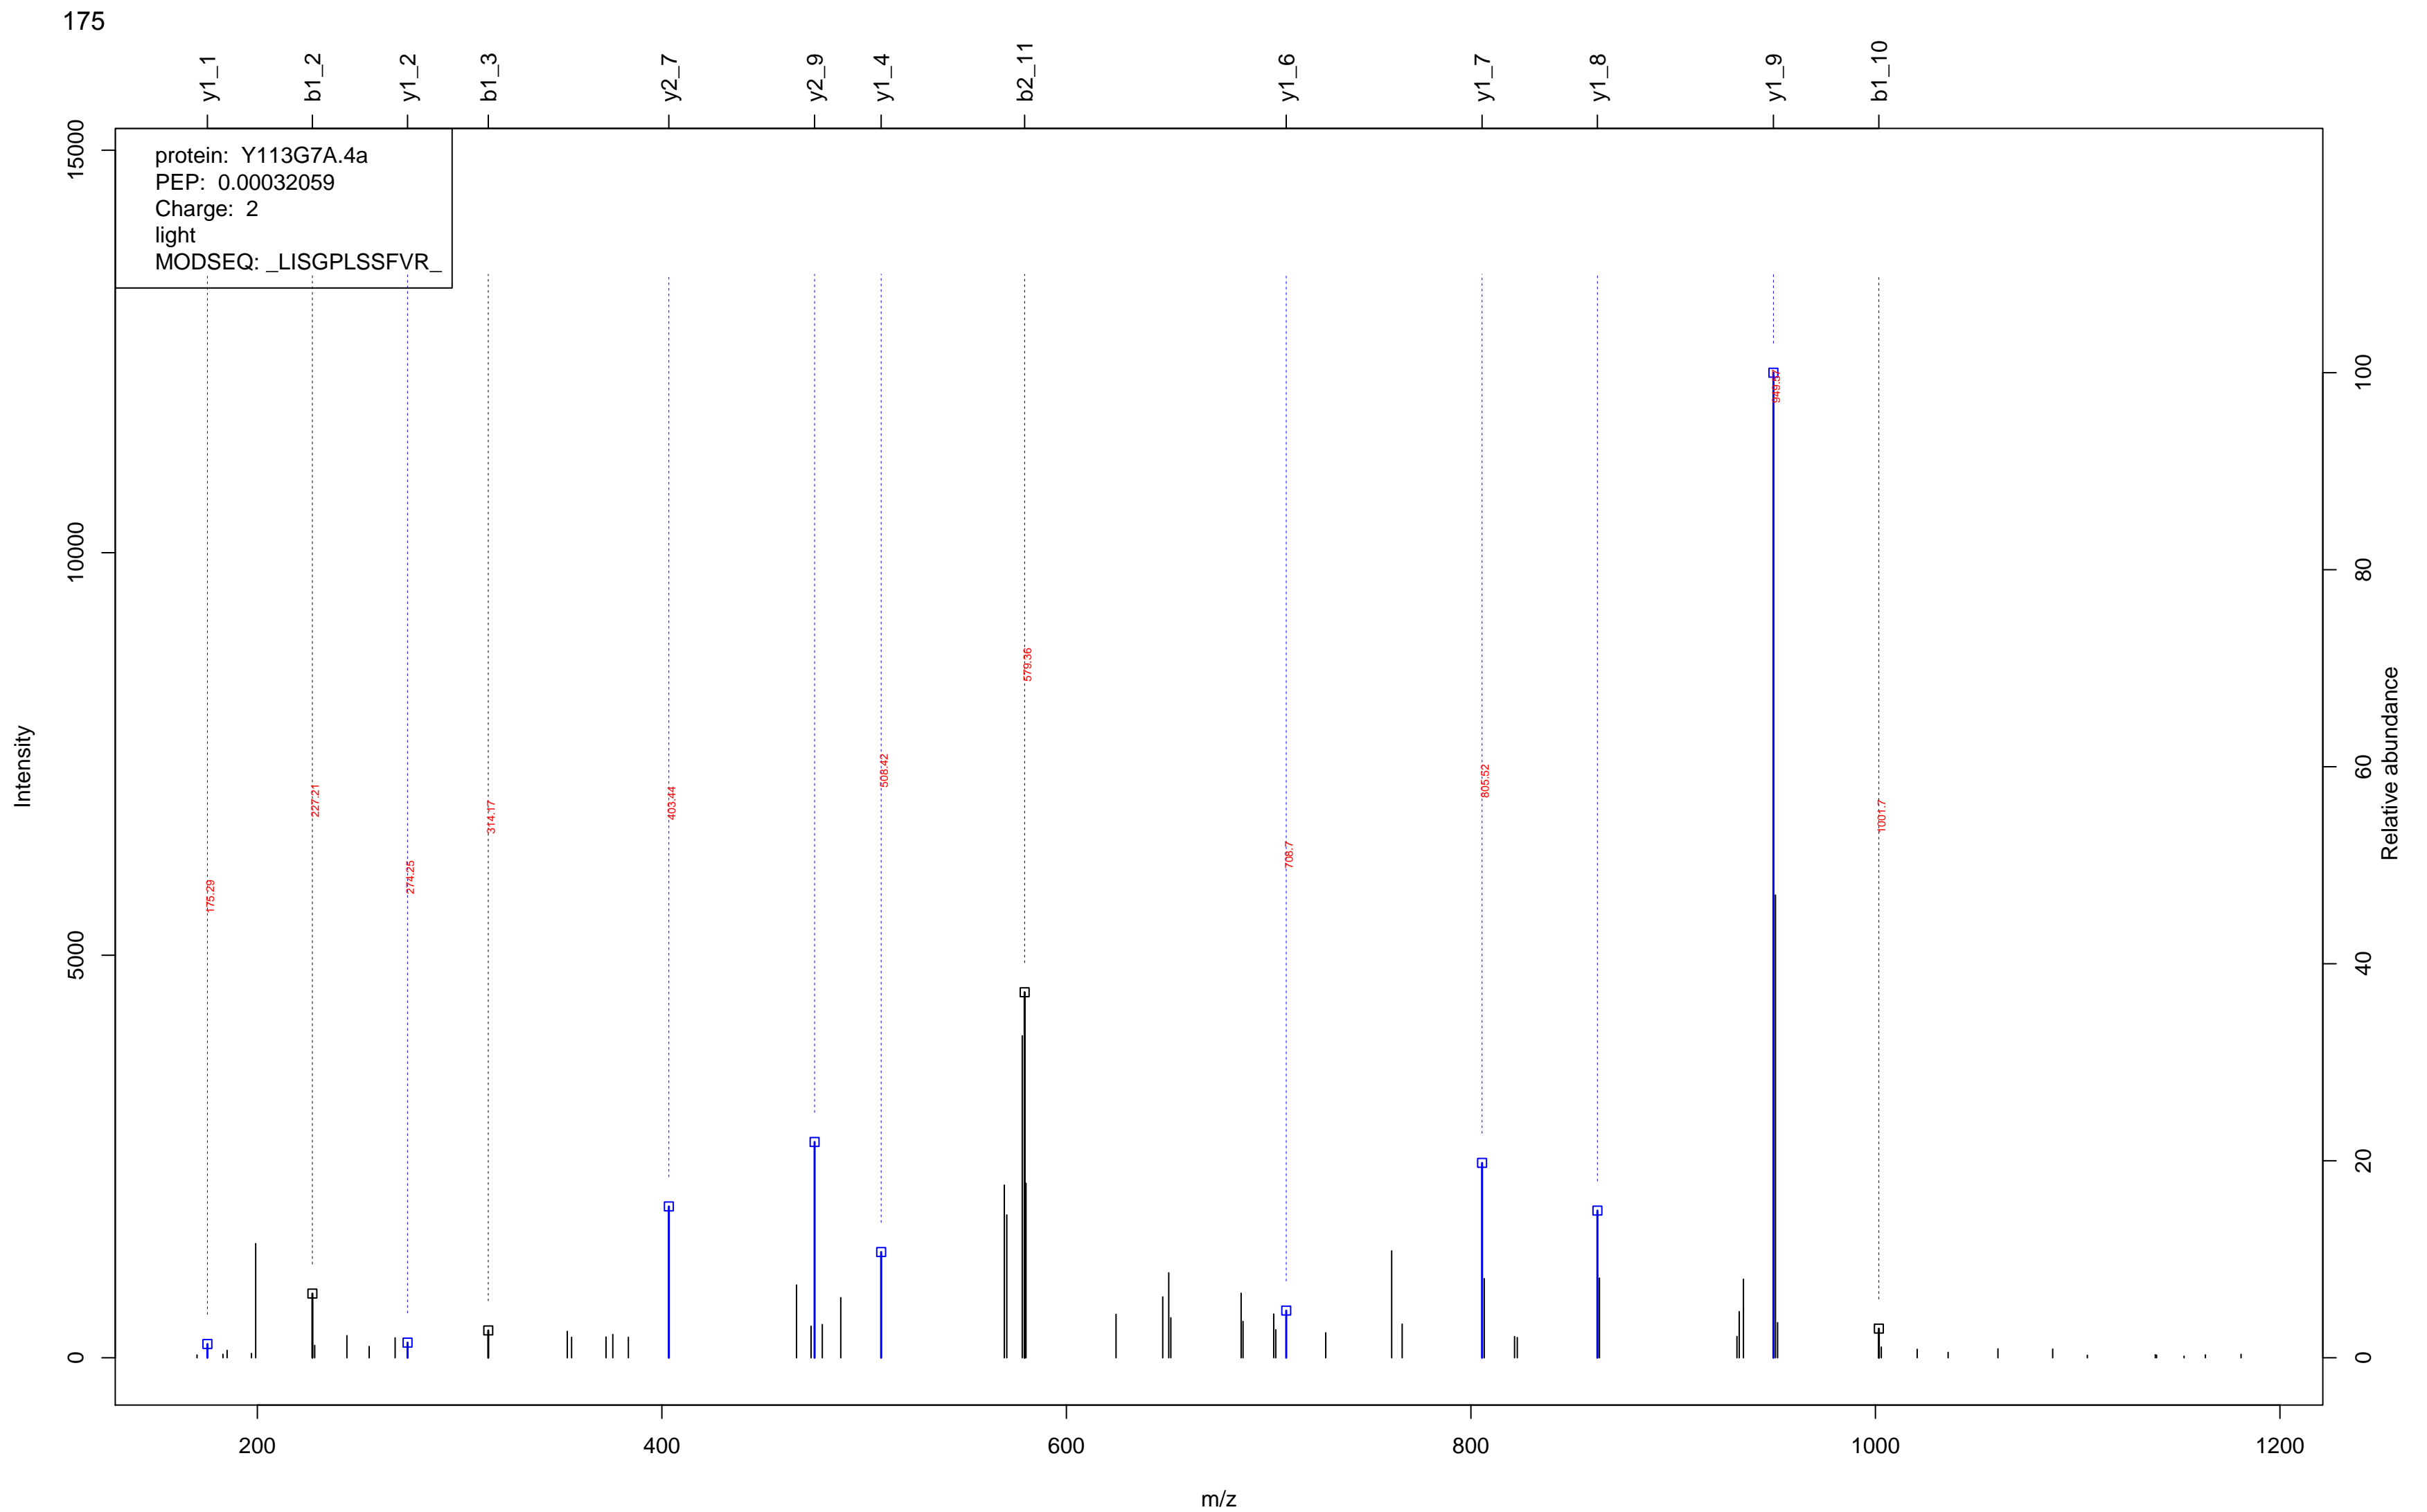

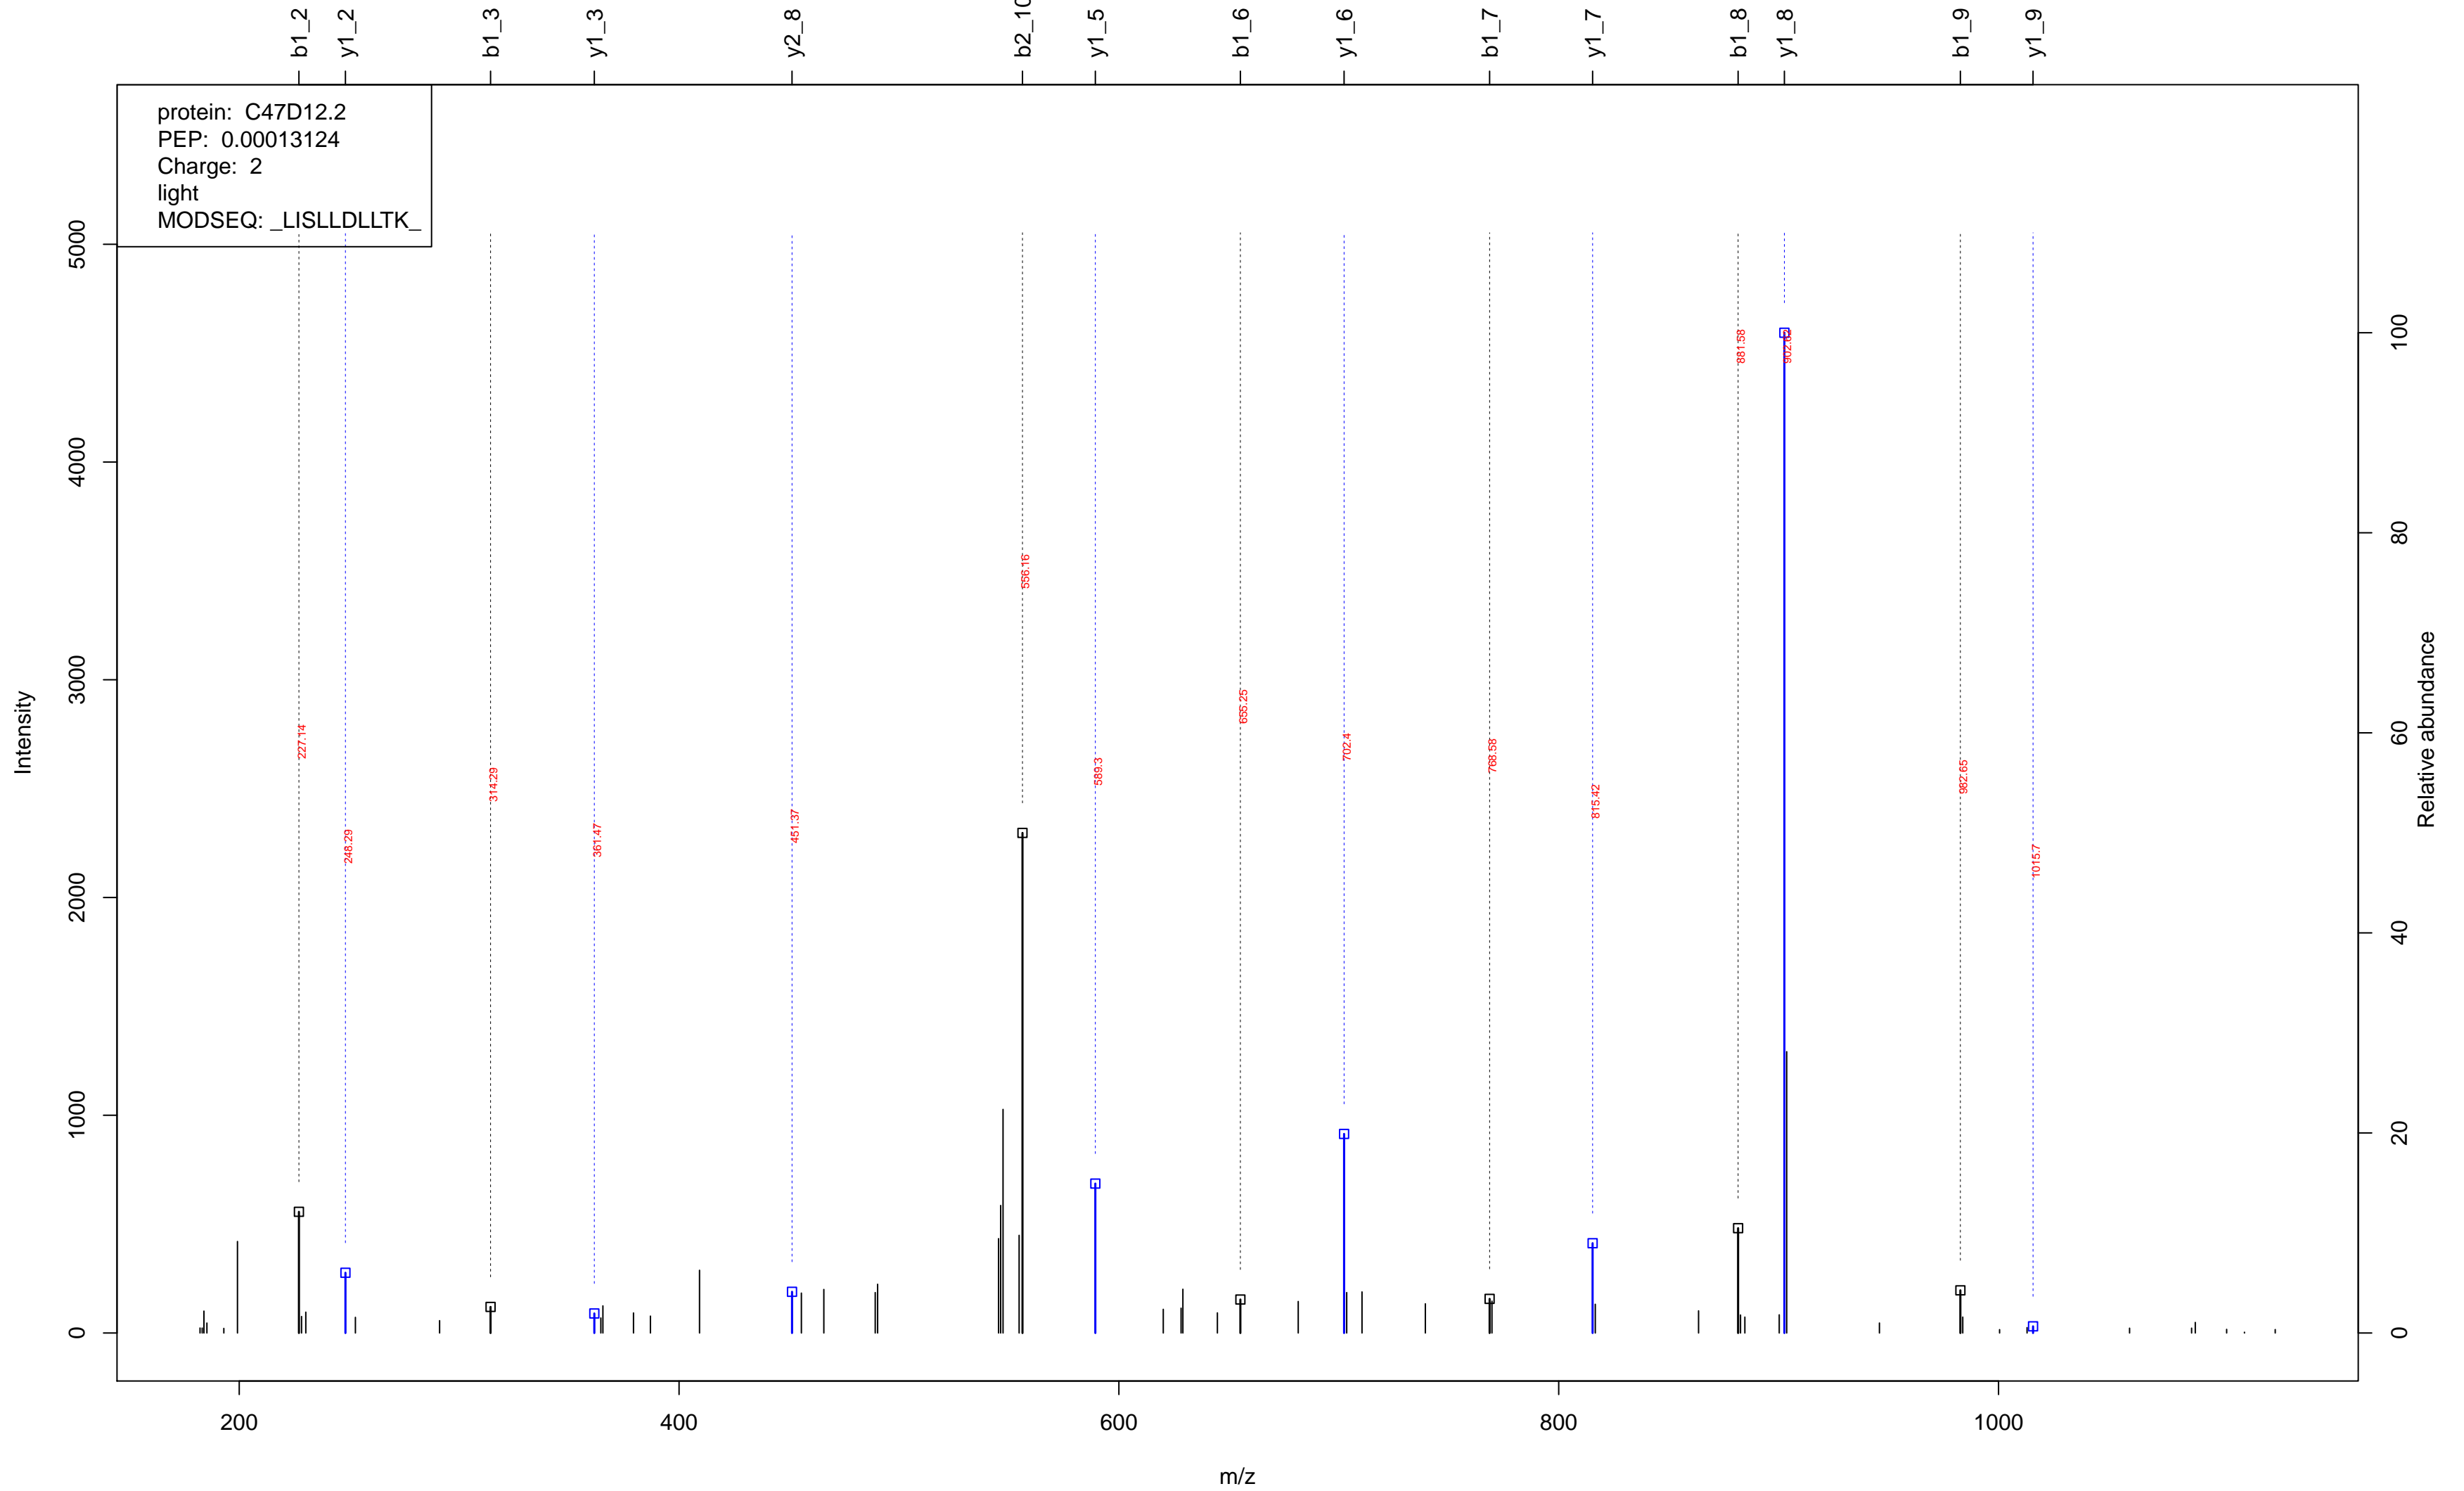



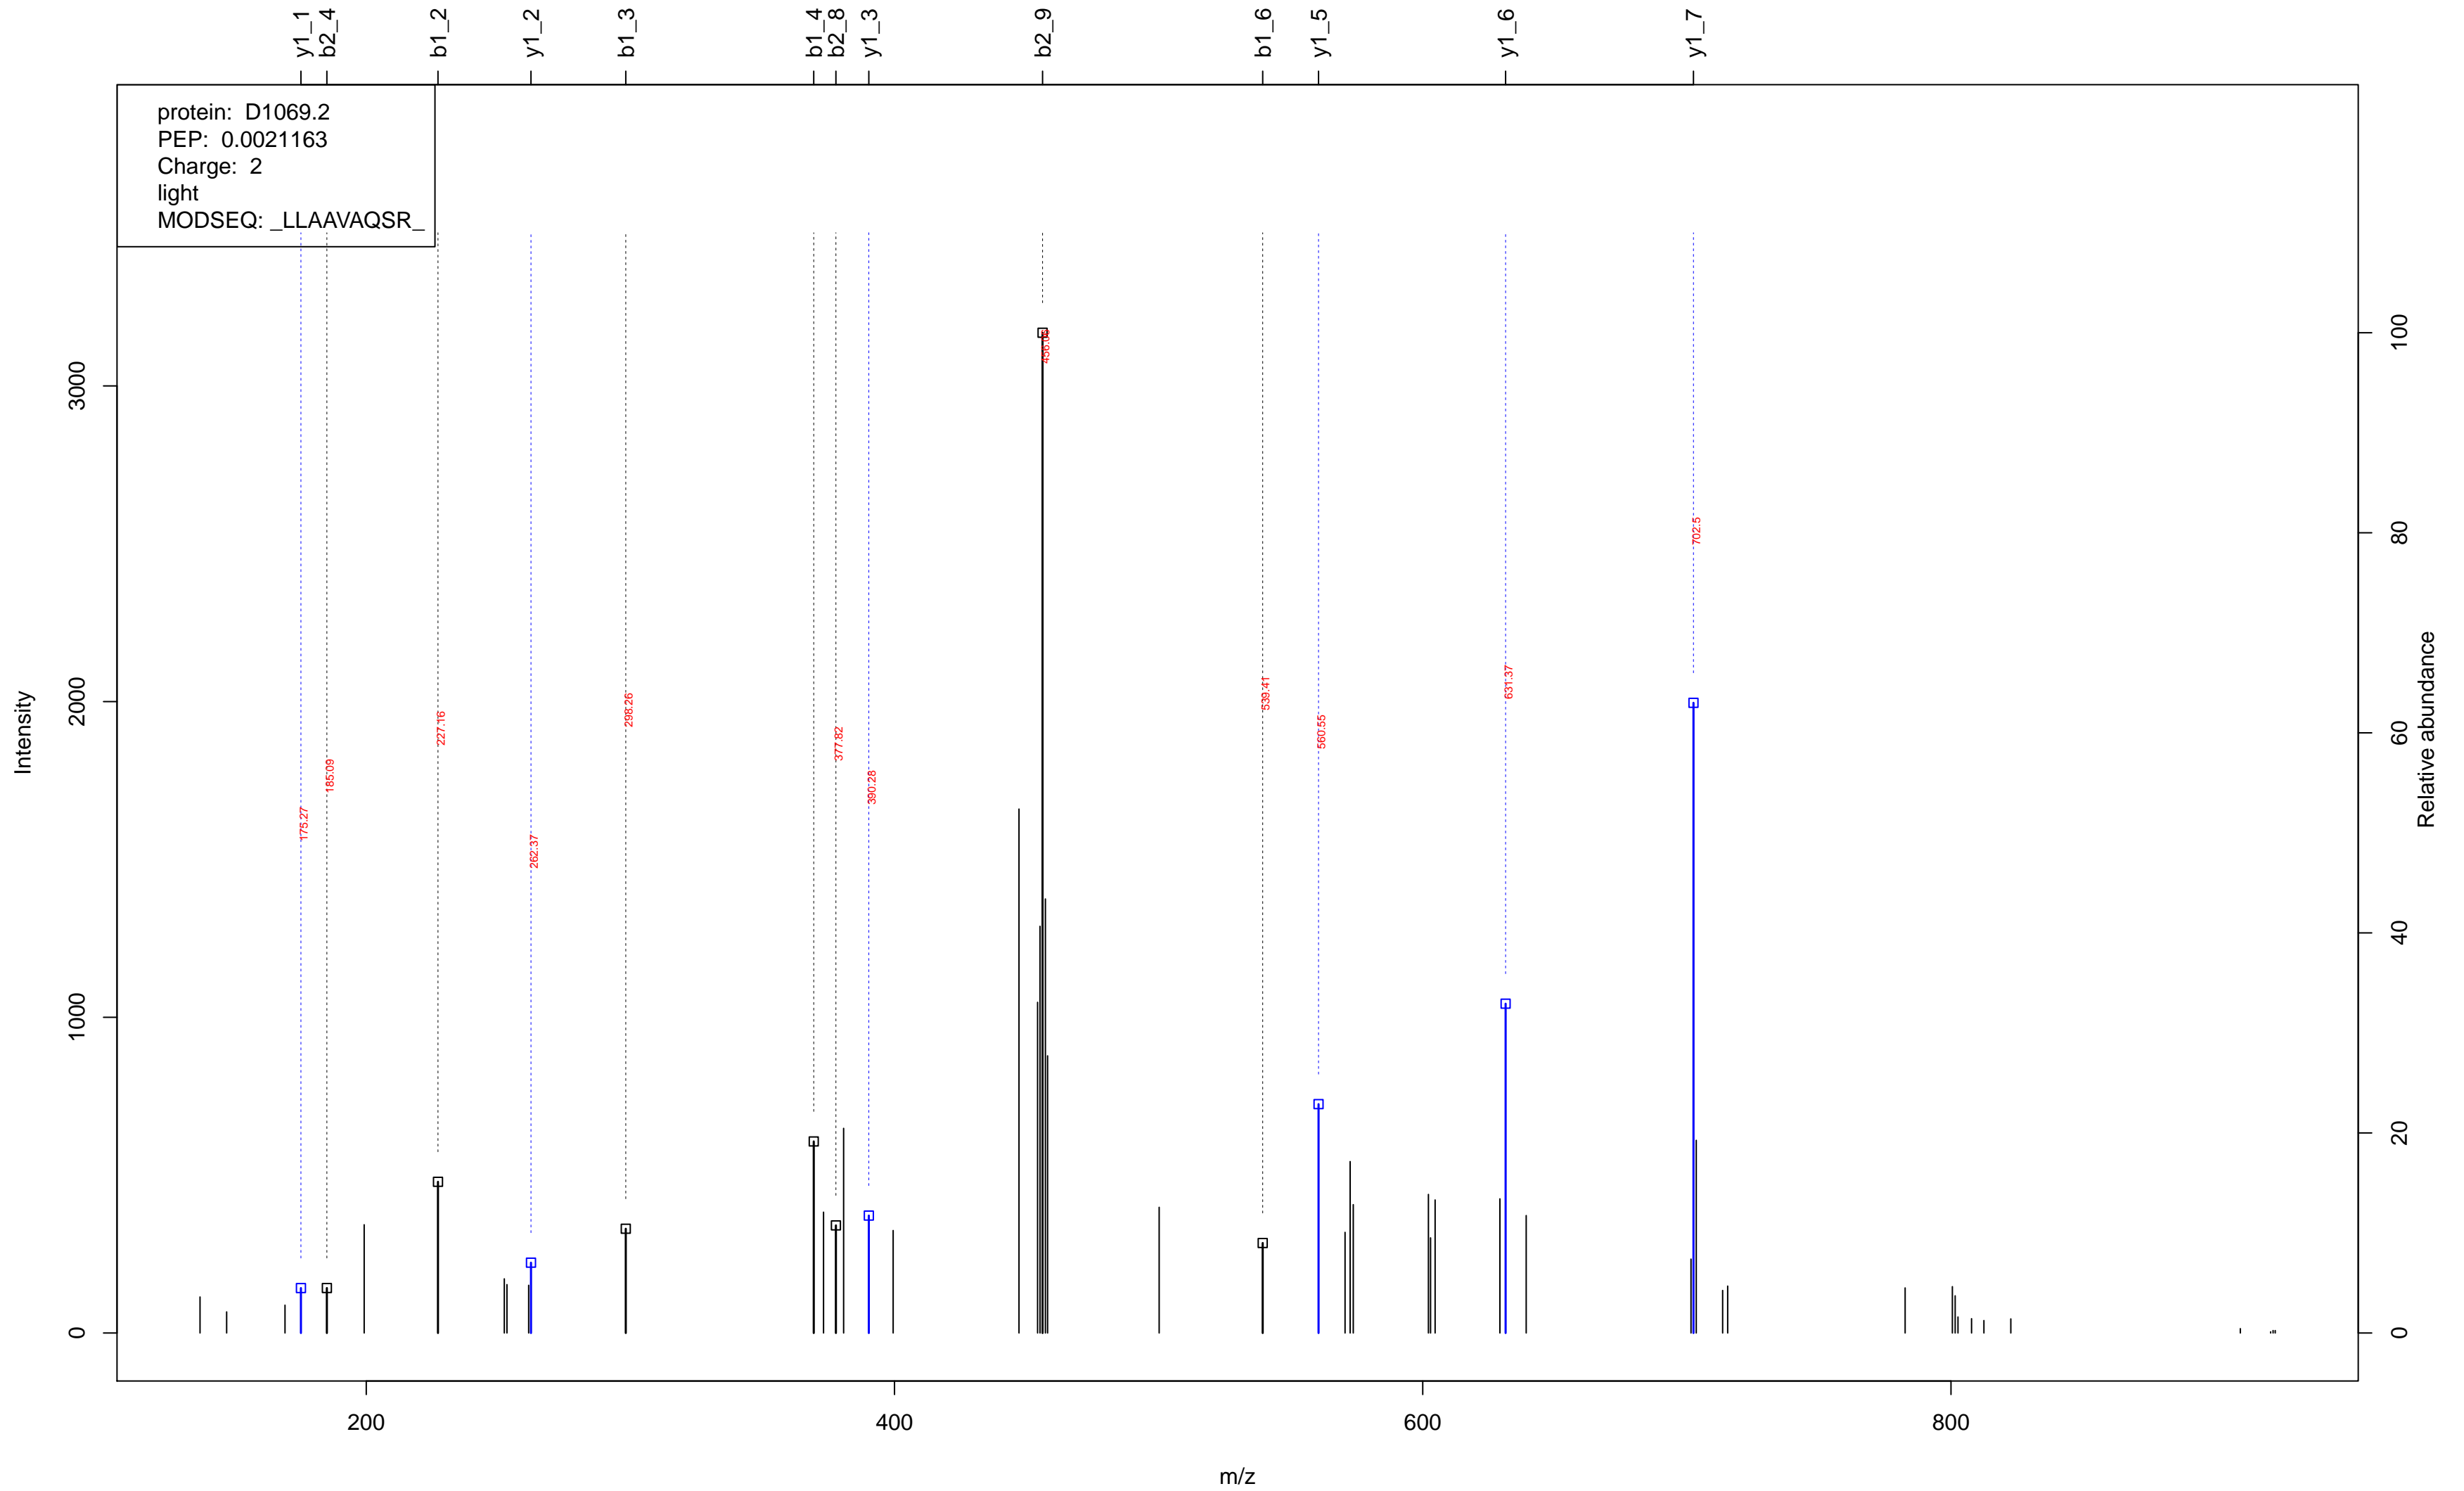

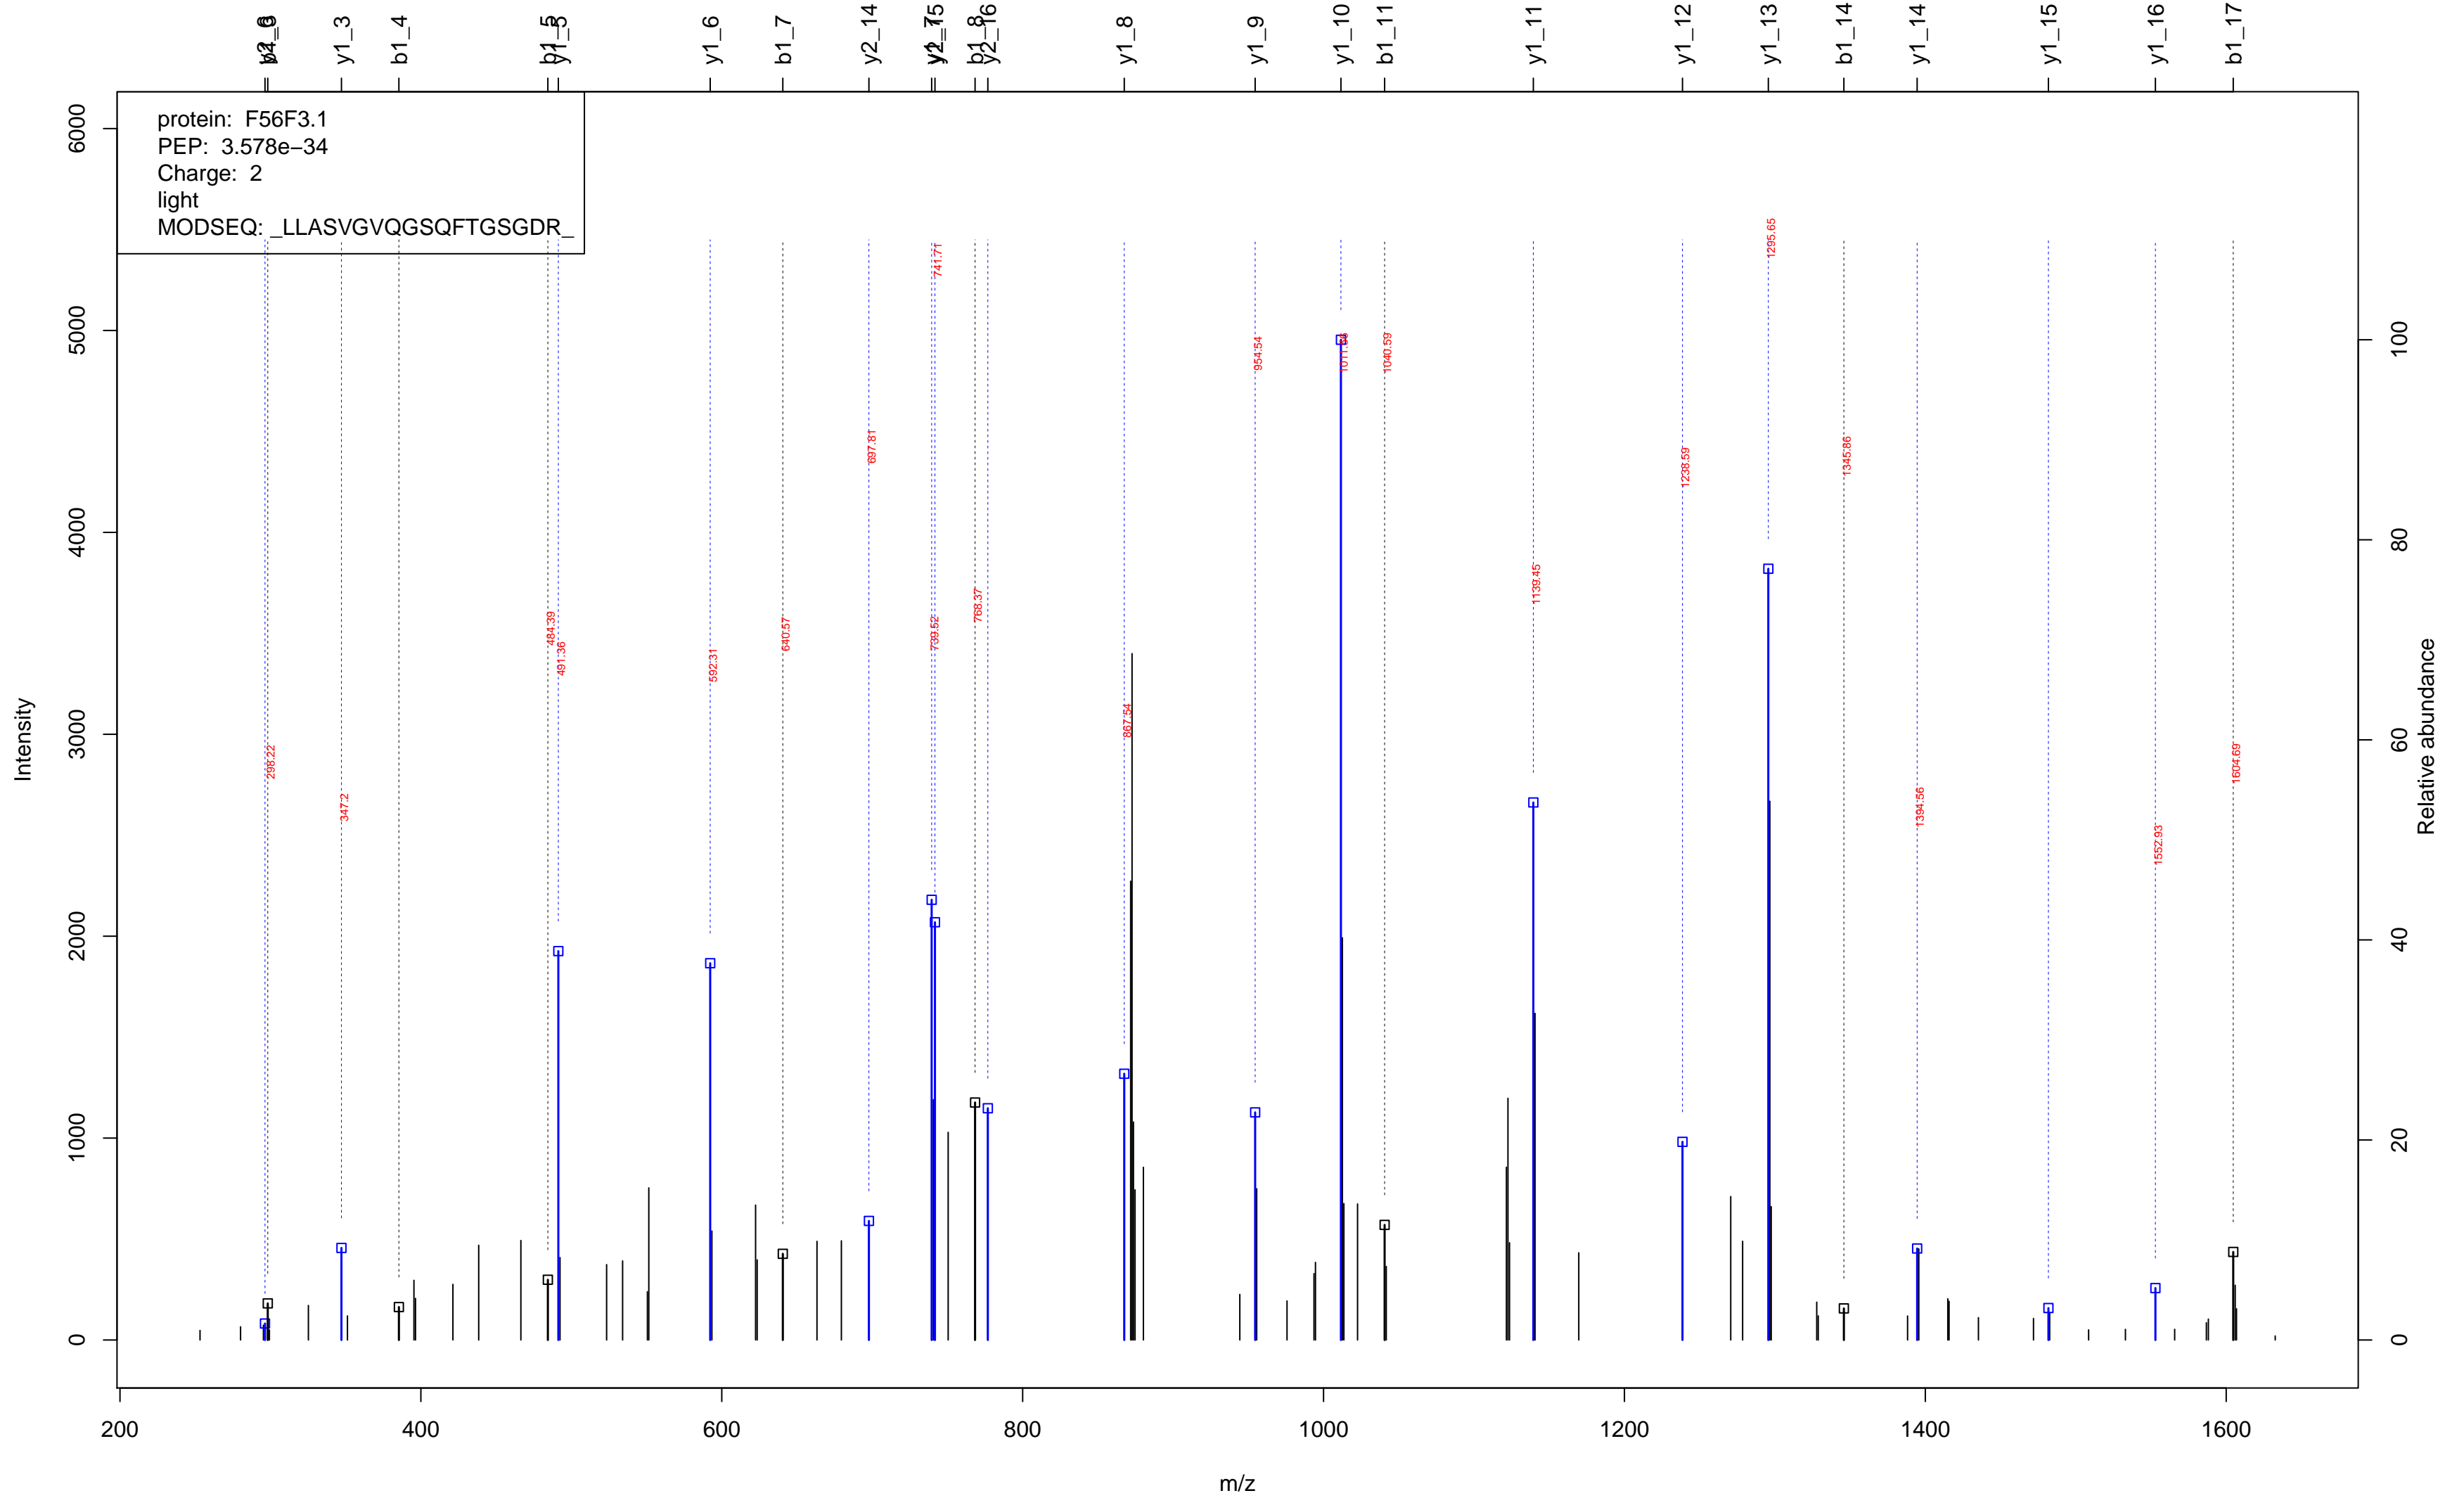

y2\_5 y1\_3 y2\_10 y1\_5 y1\_6 y2\_13 y1\_7 y2\_14 b2\_17 b2\_20 b2\_21 b1\_12 y1\_12 y1\_14 b1\_16 b1\_17

protein: F27C8.4  
PEP: 1.4685e-05  
Charge: 3  
light  
MODSEQ: \_LLIDDIHAVIEDTDQNPTGVCQK\_

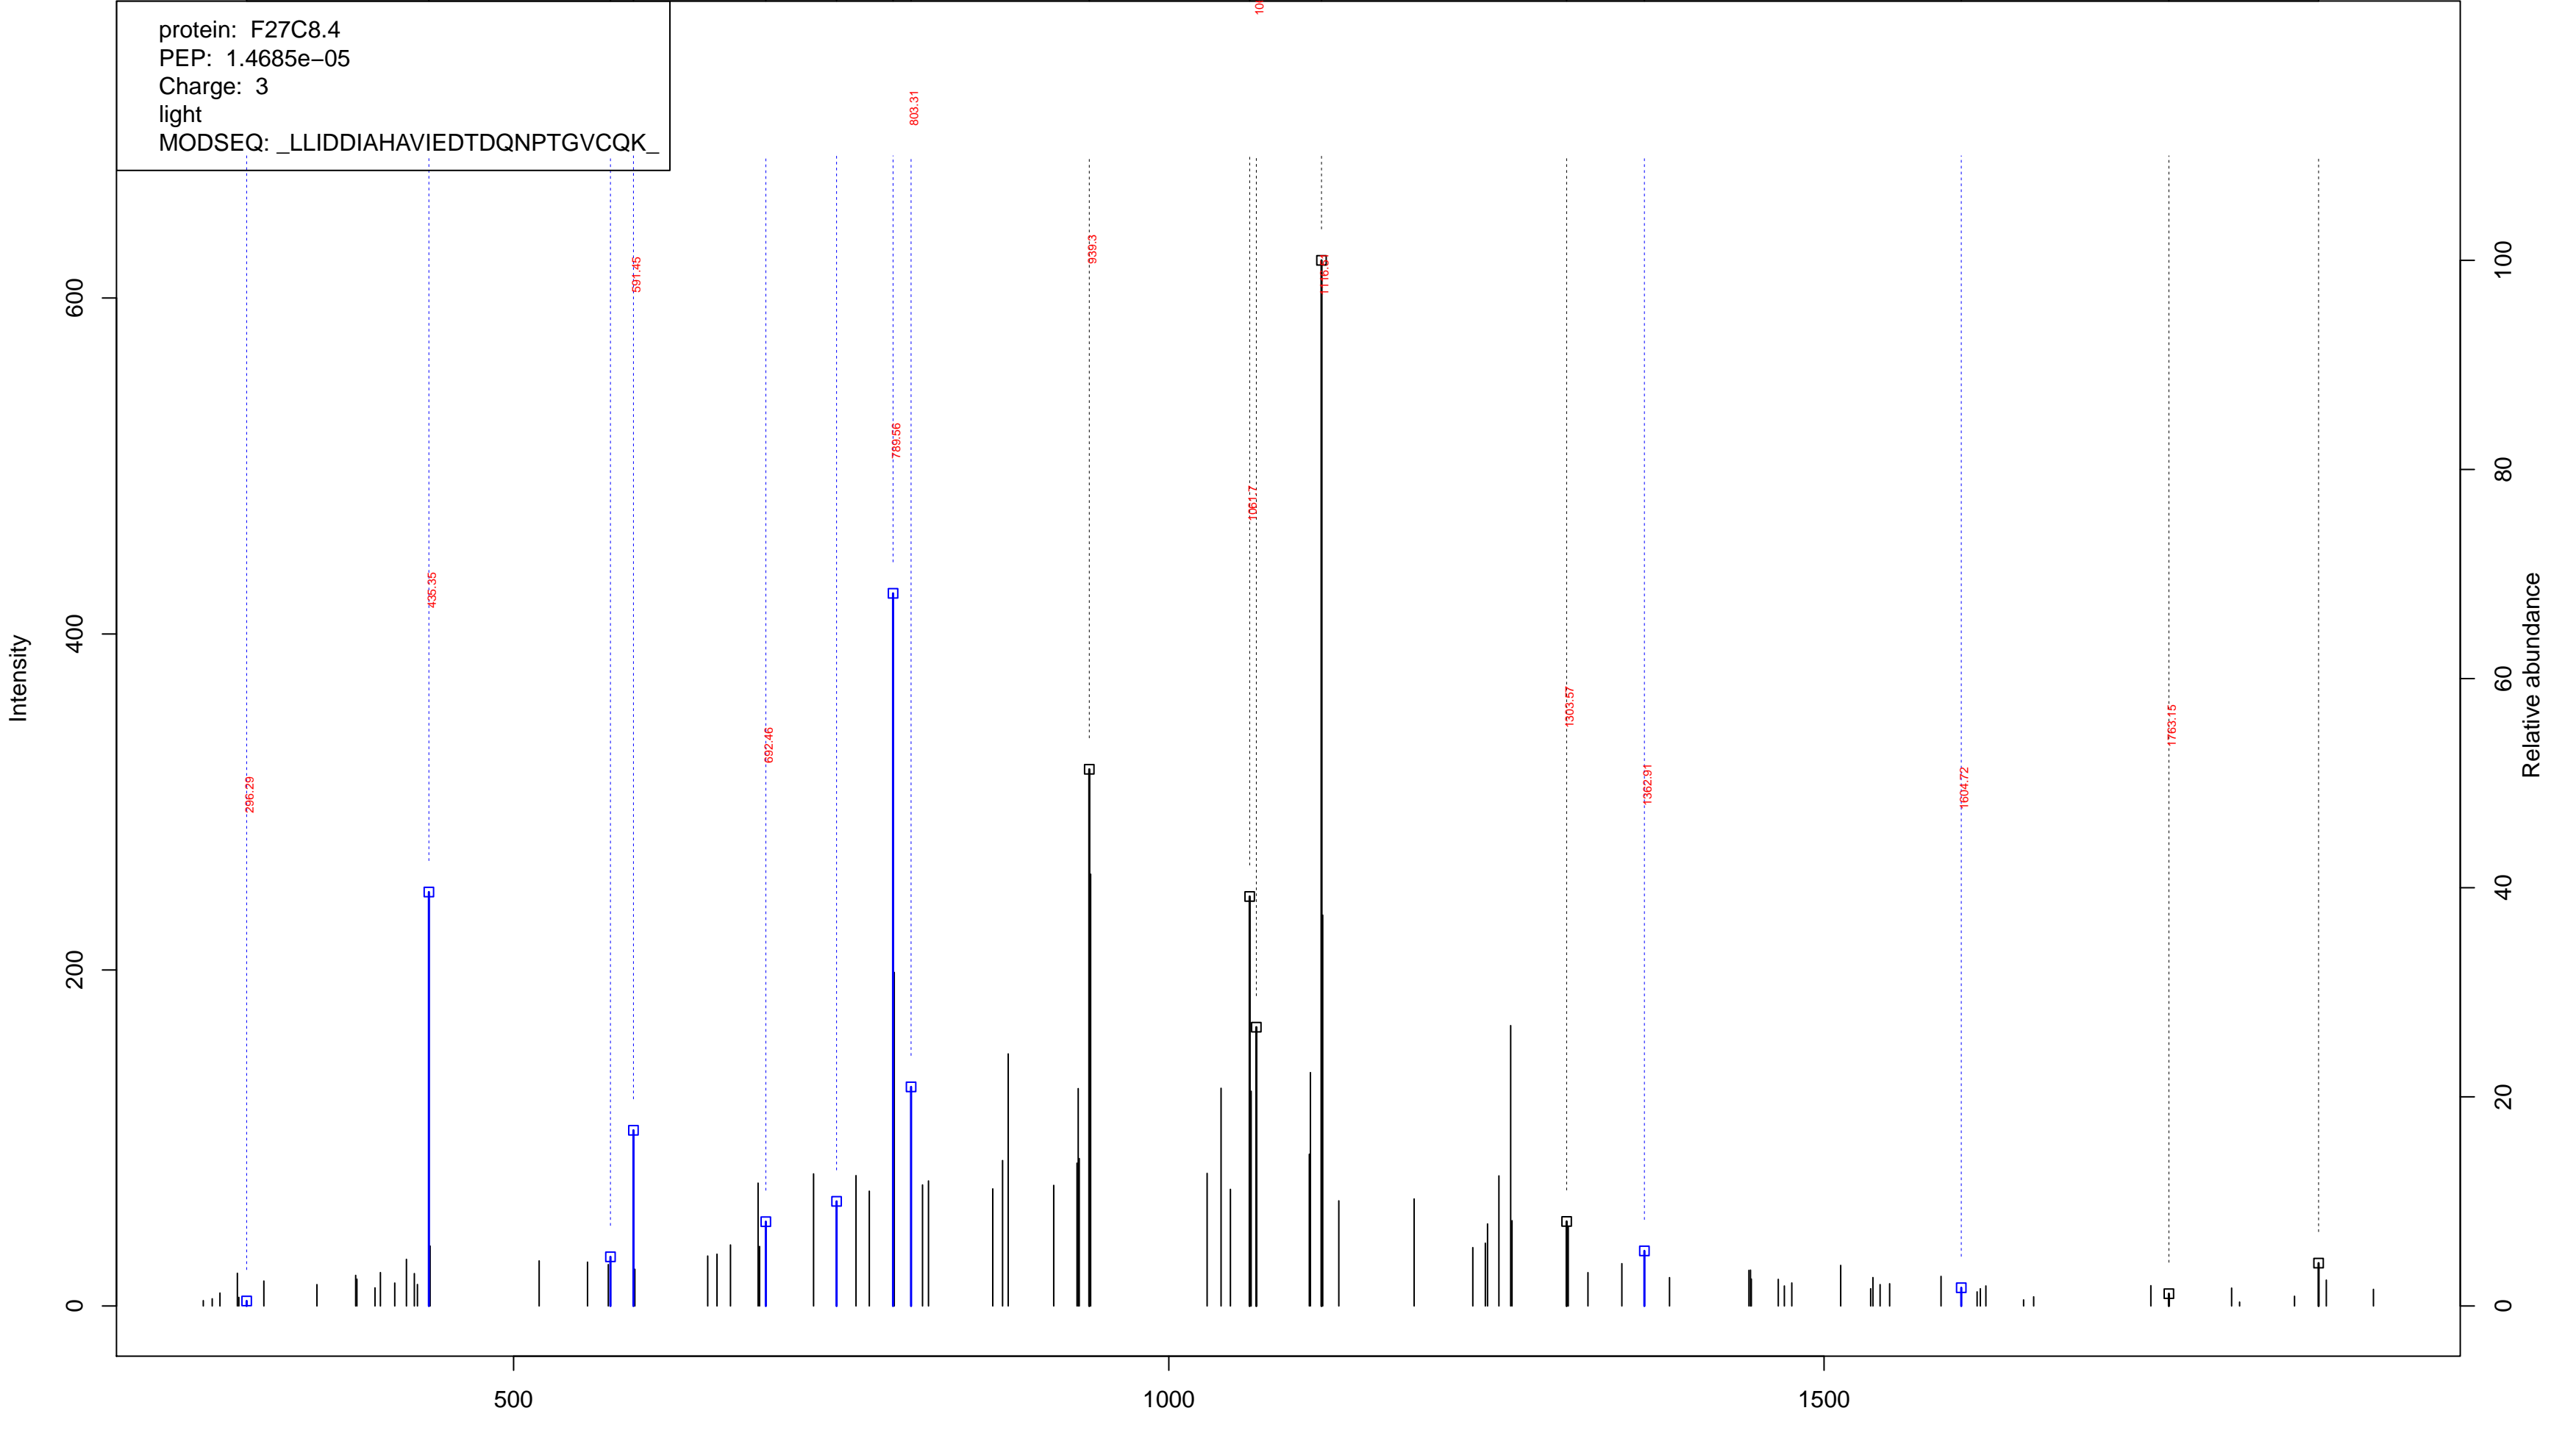

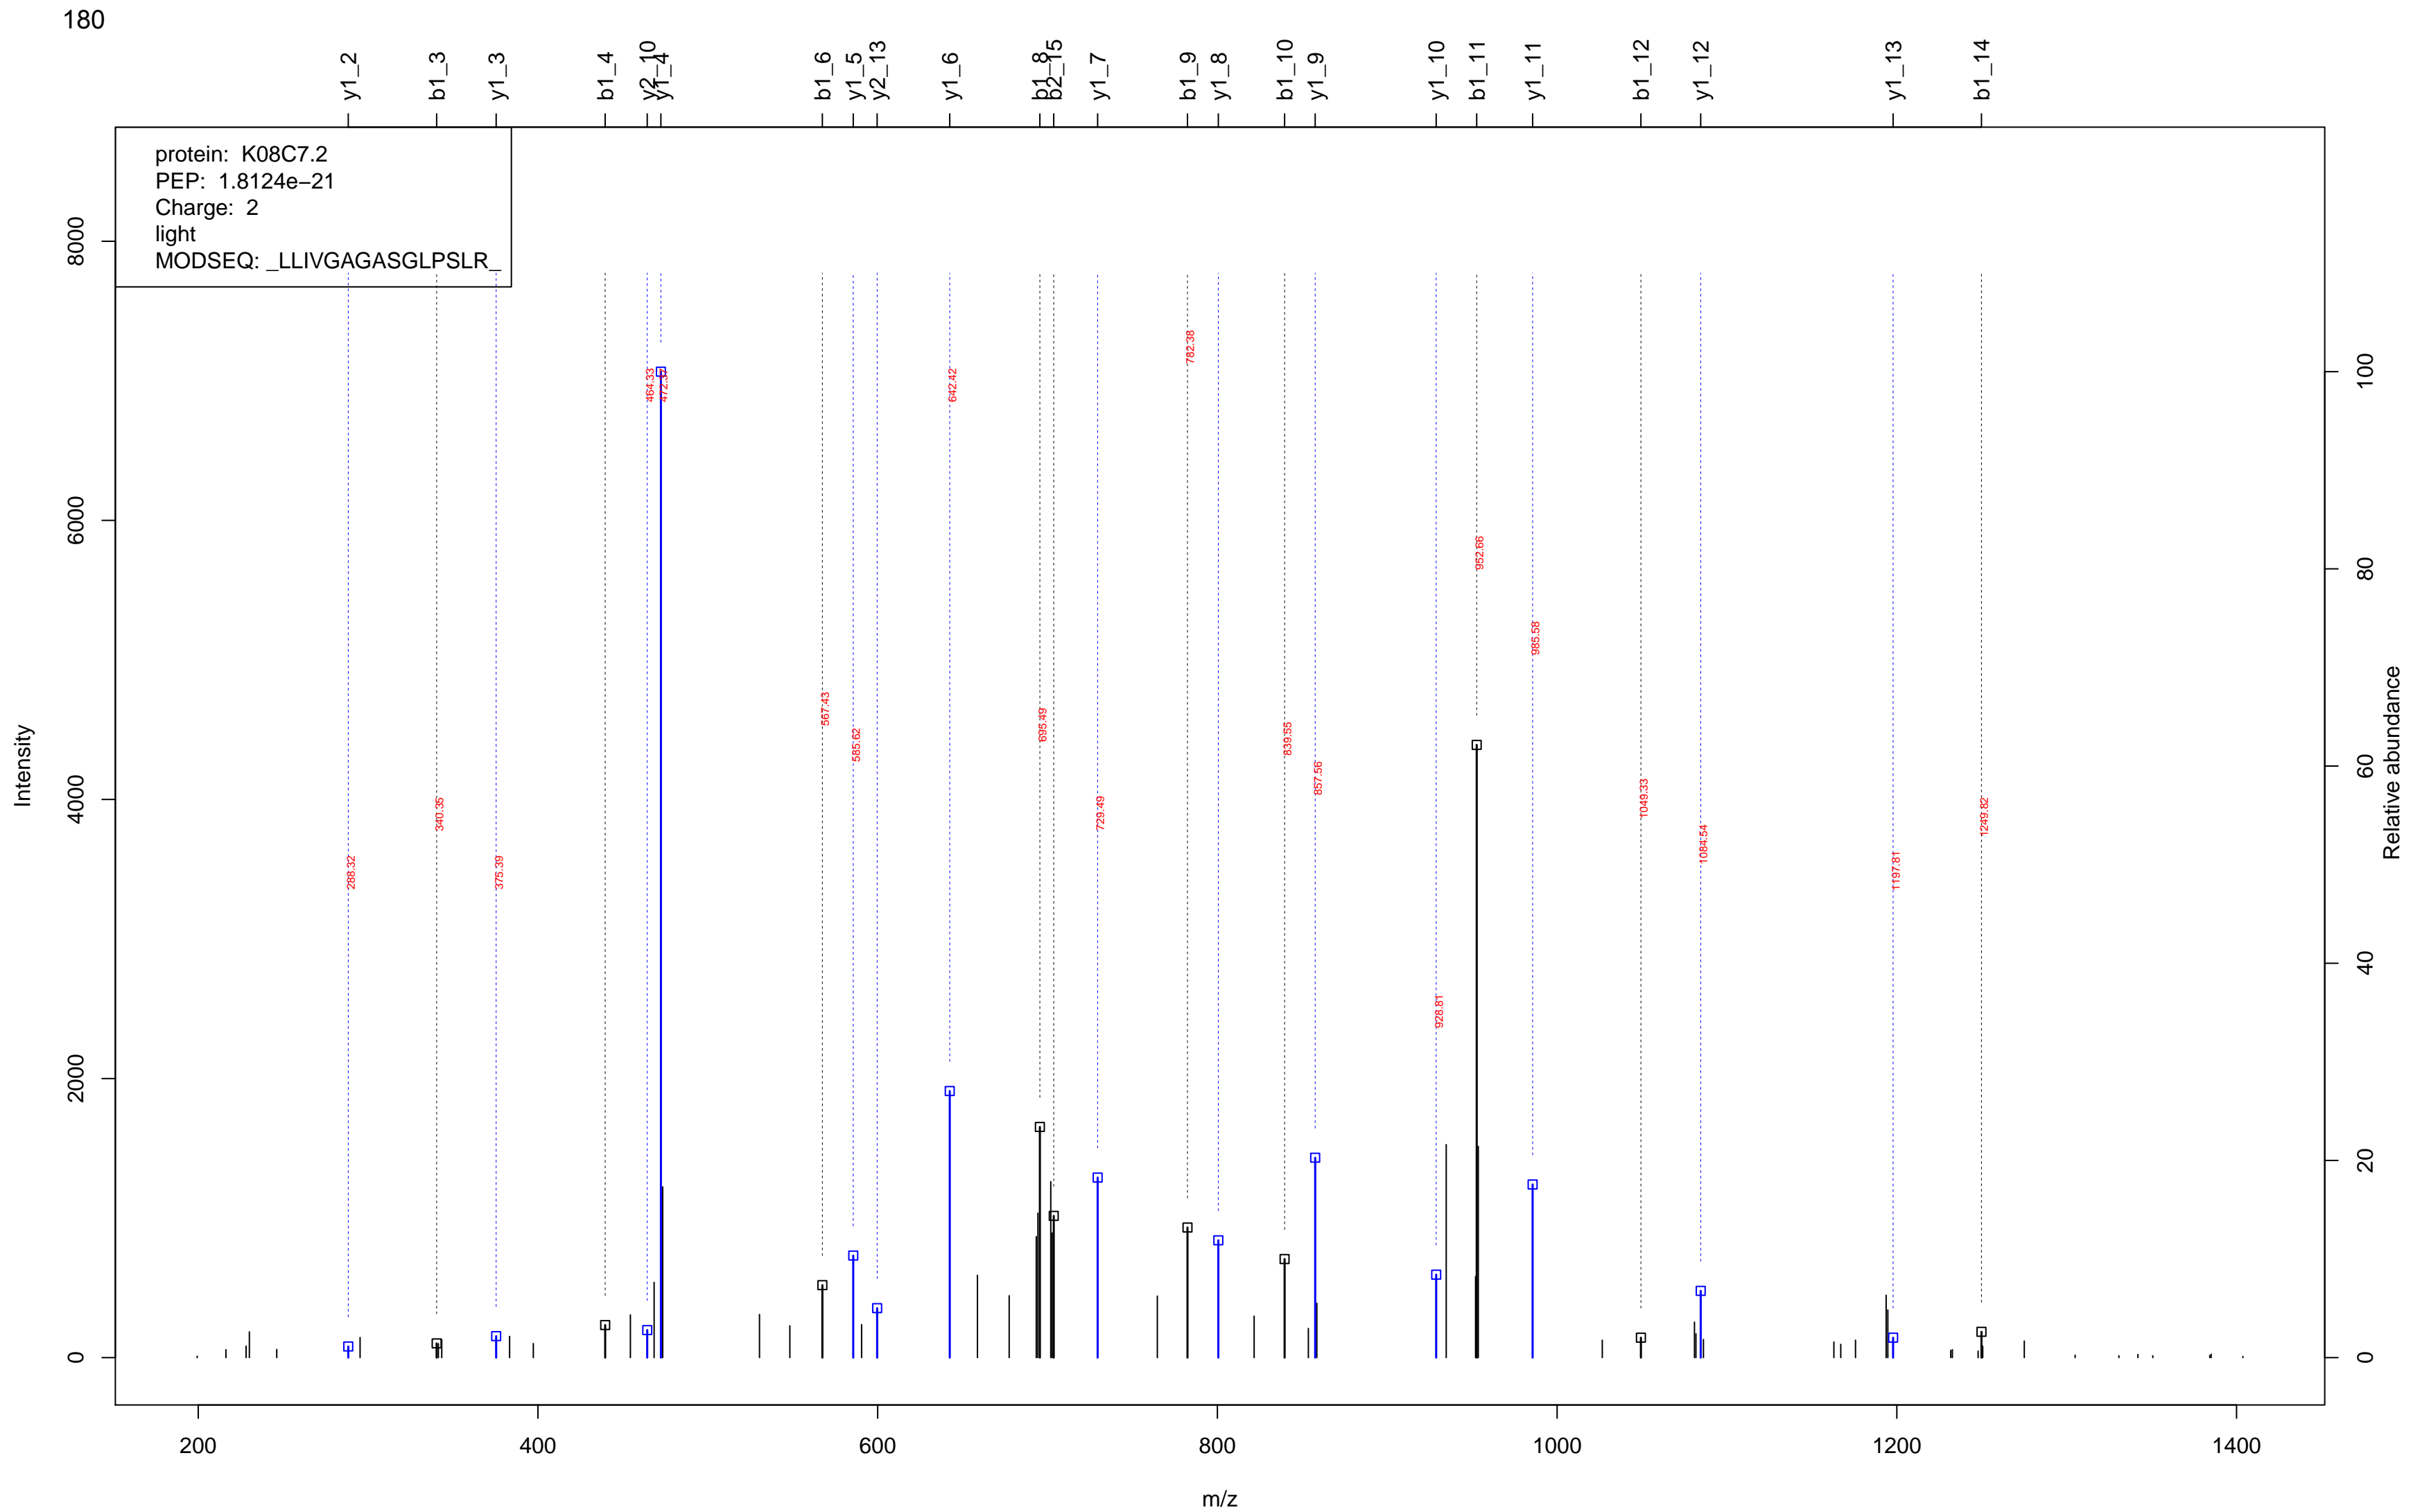

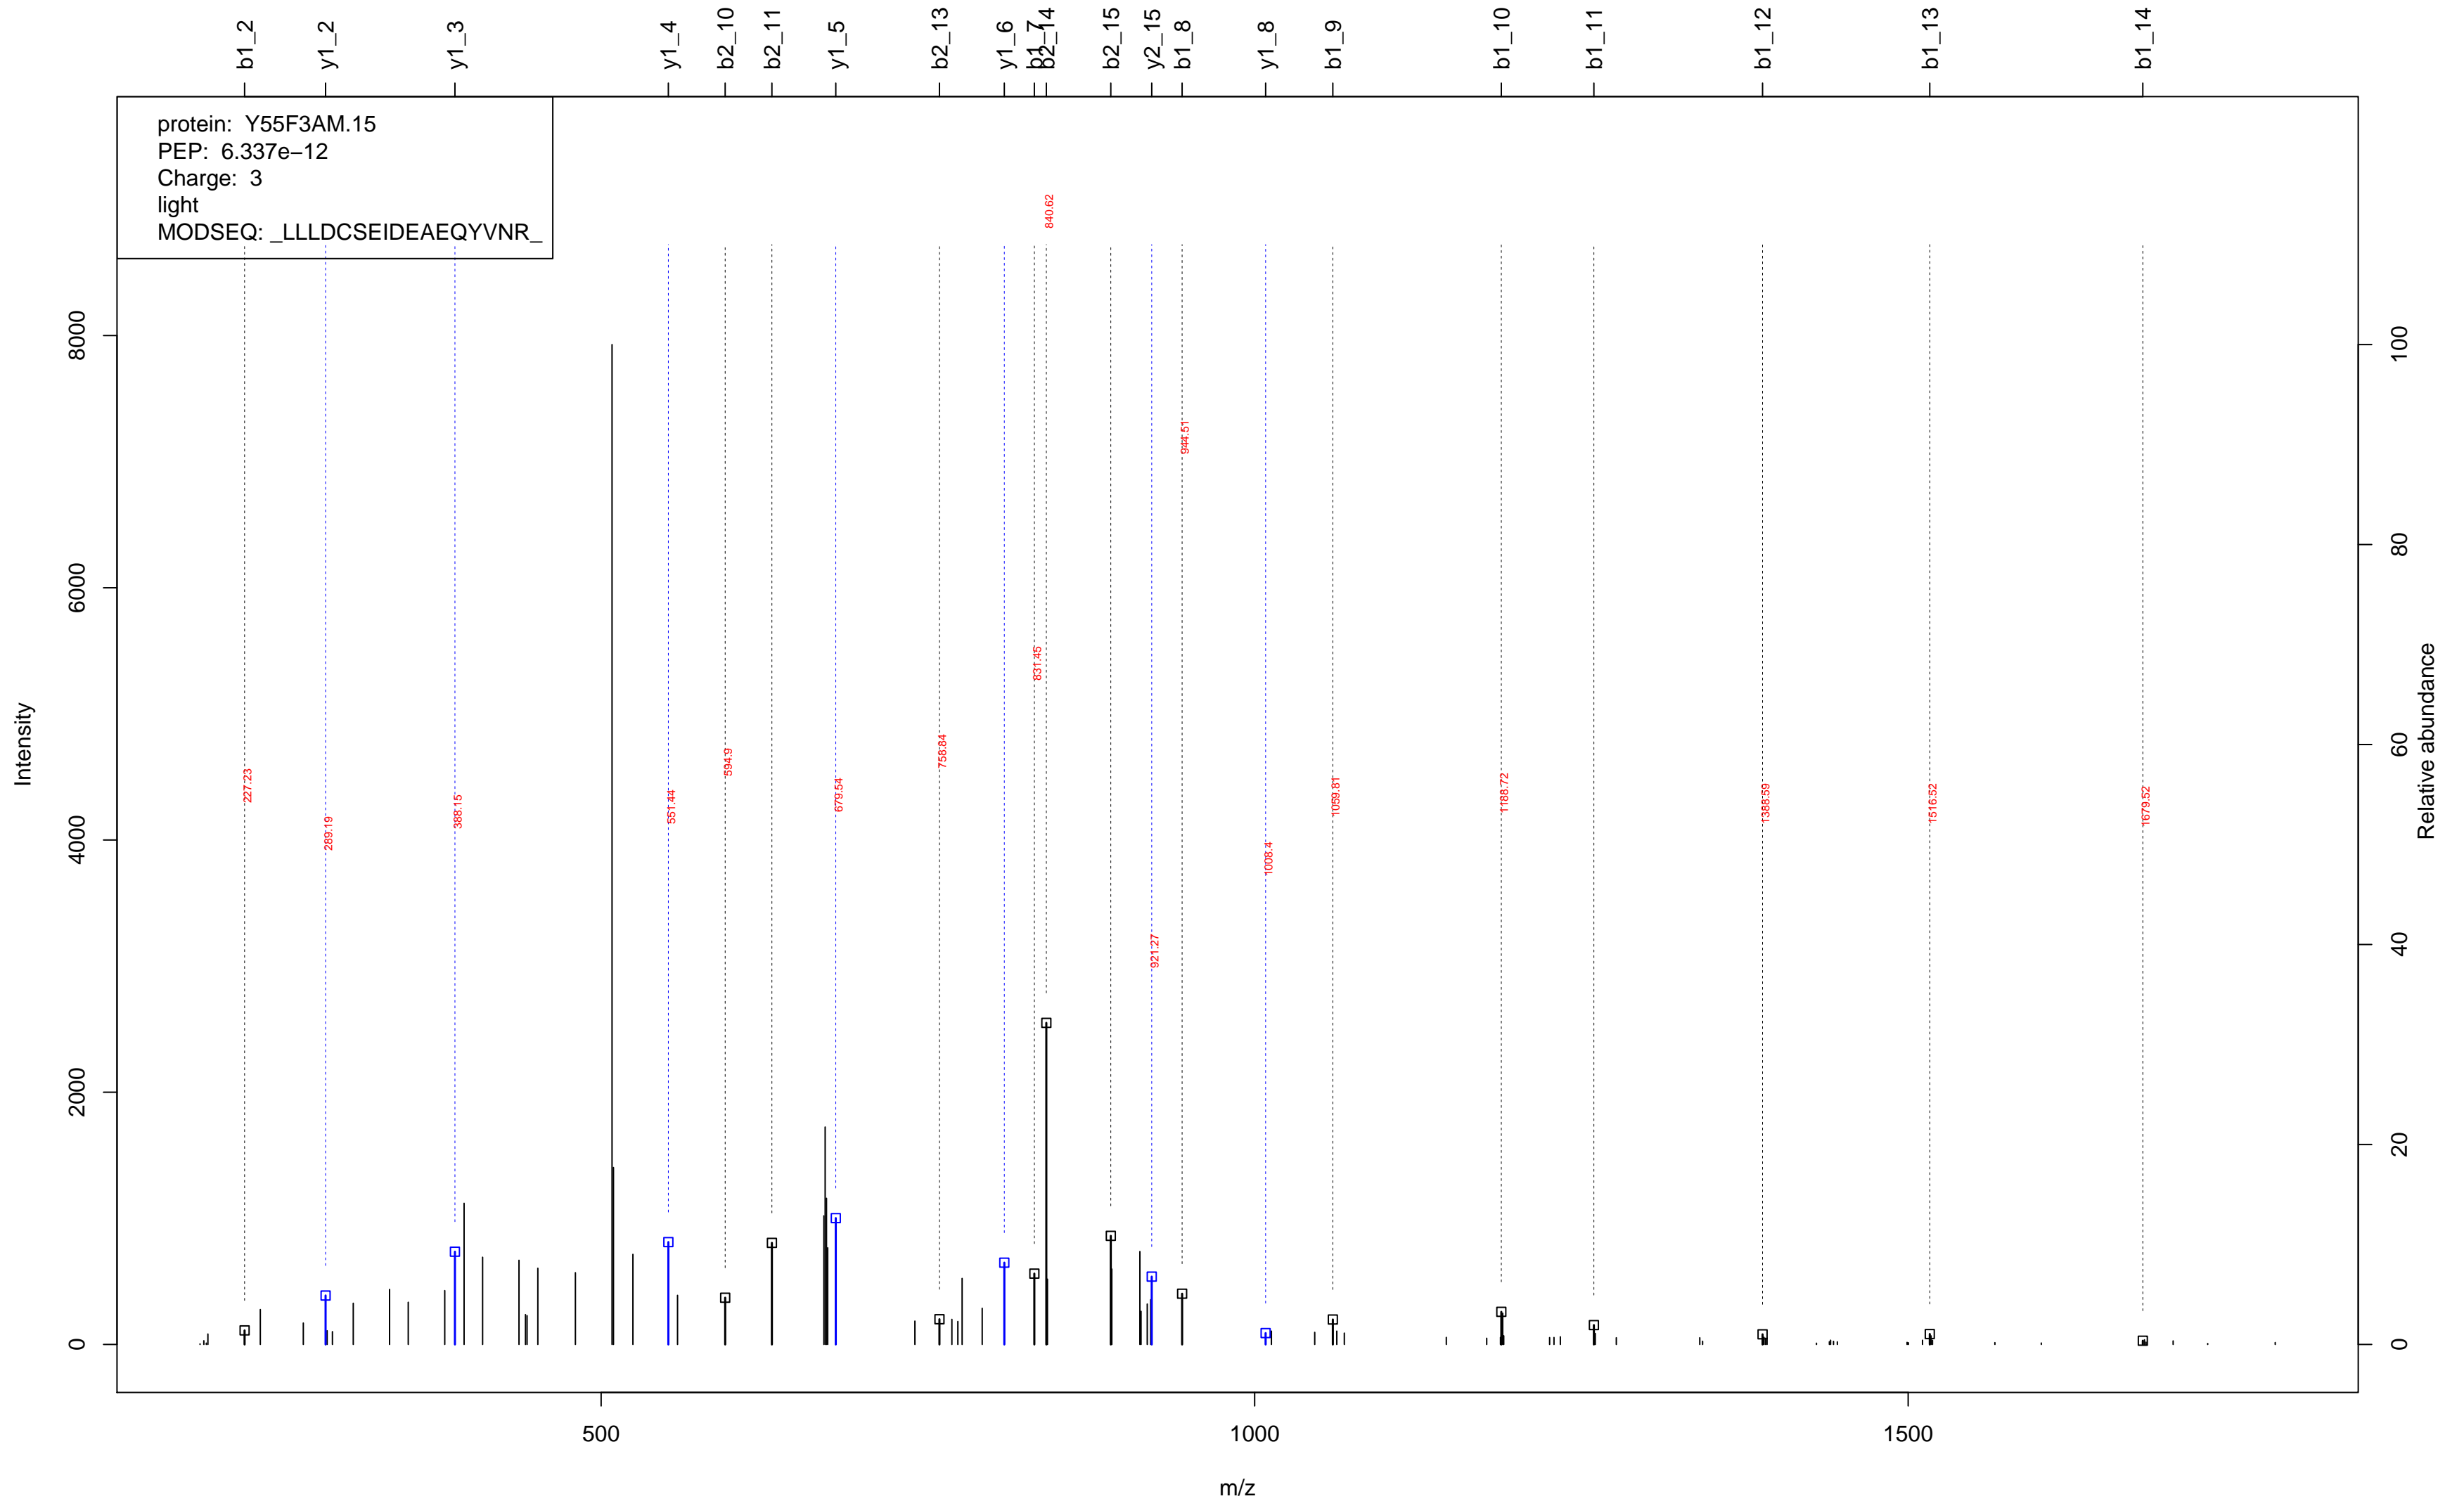

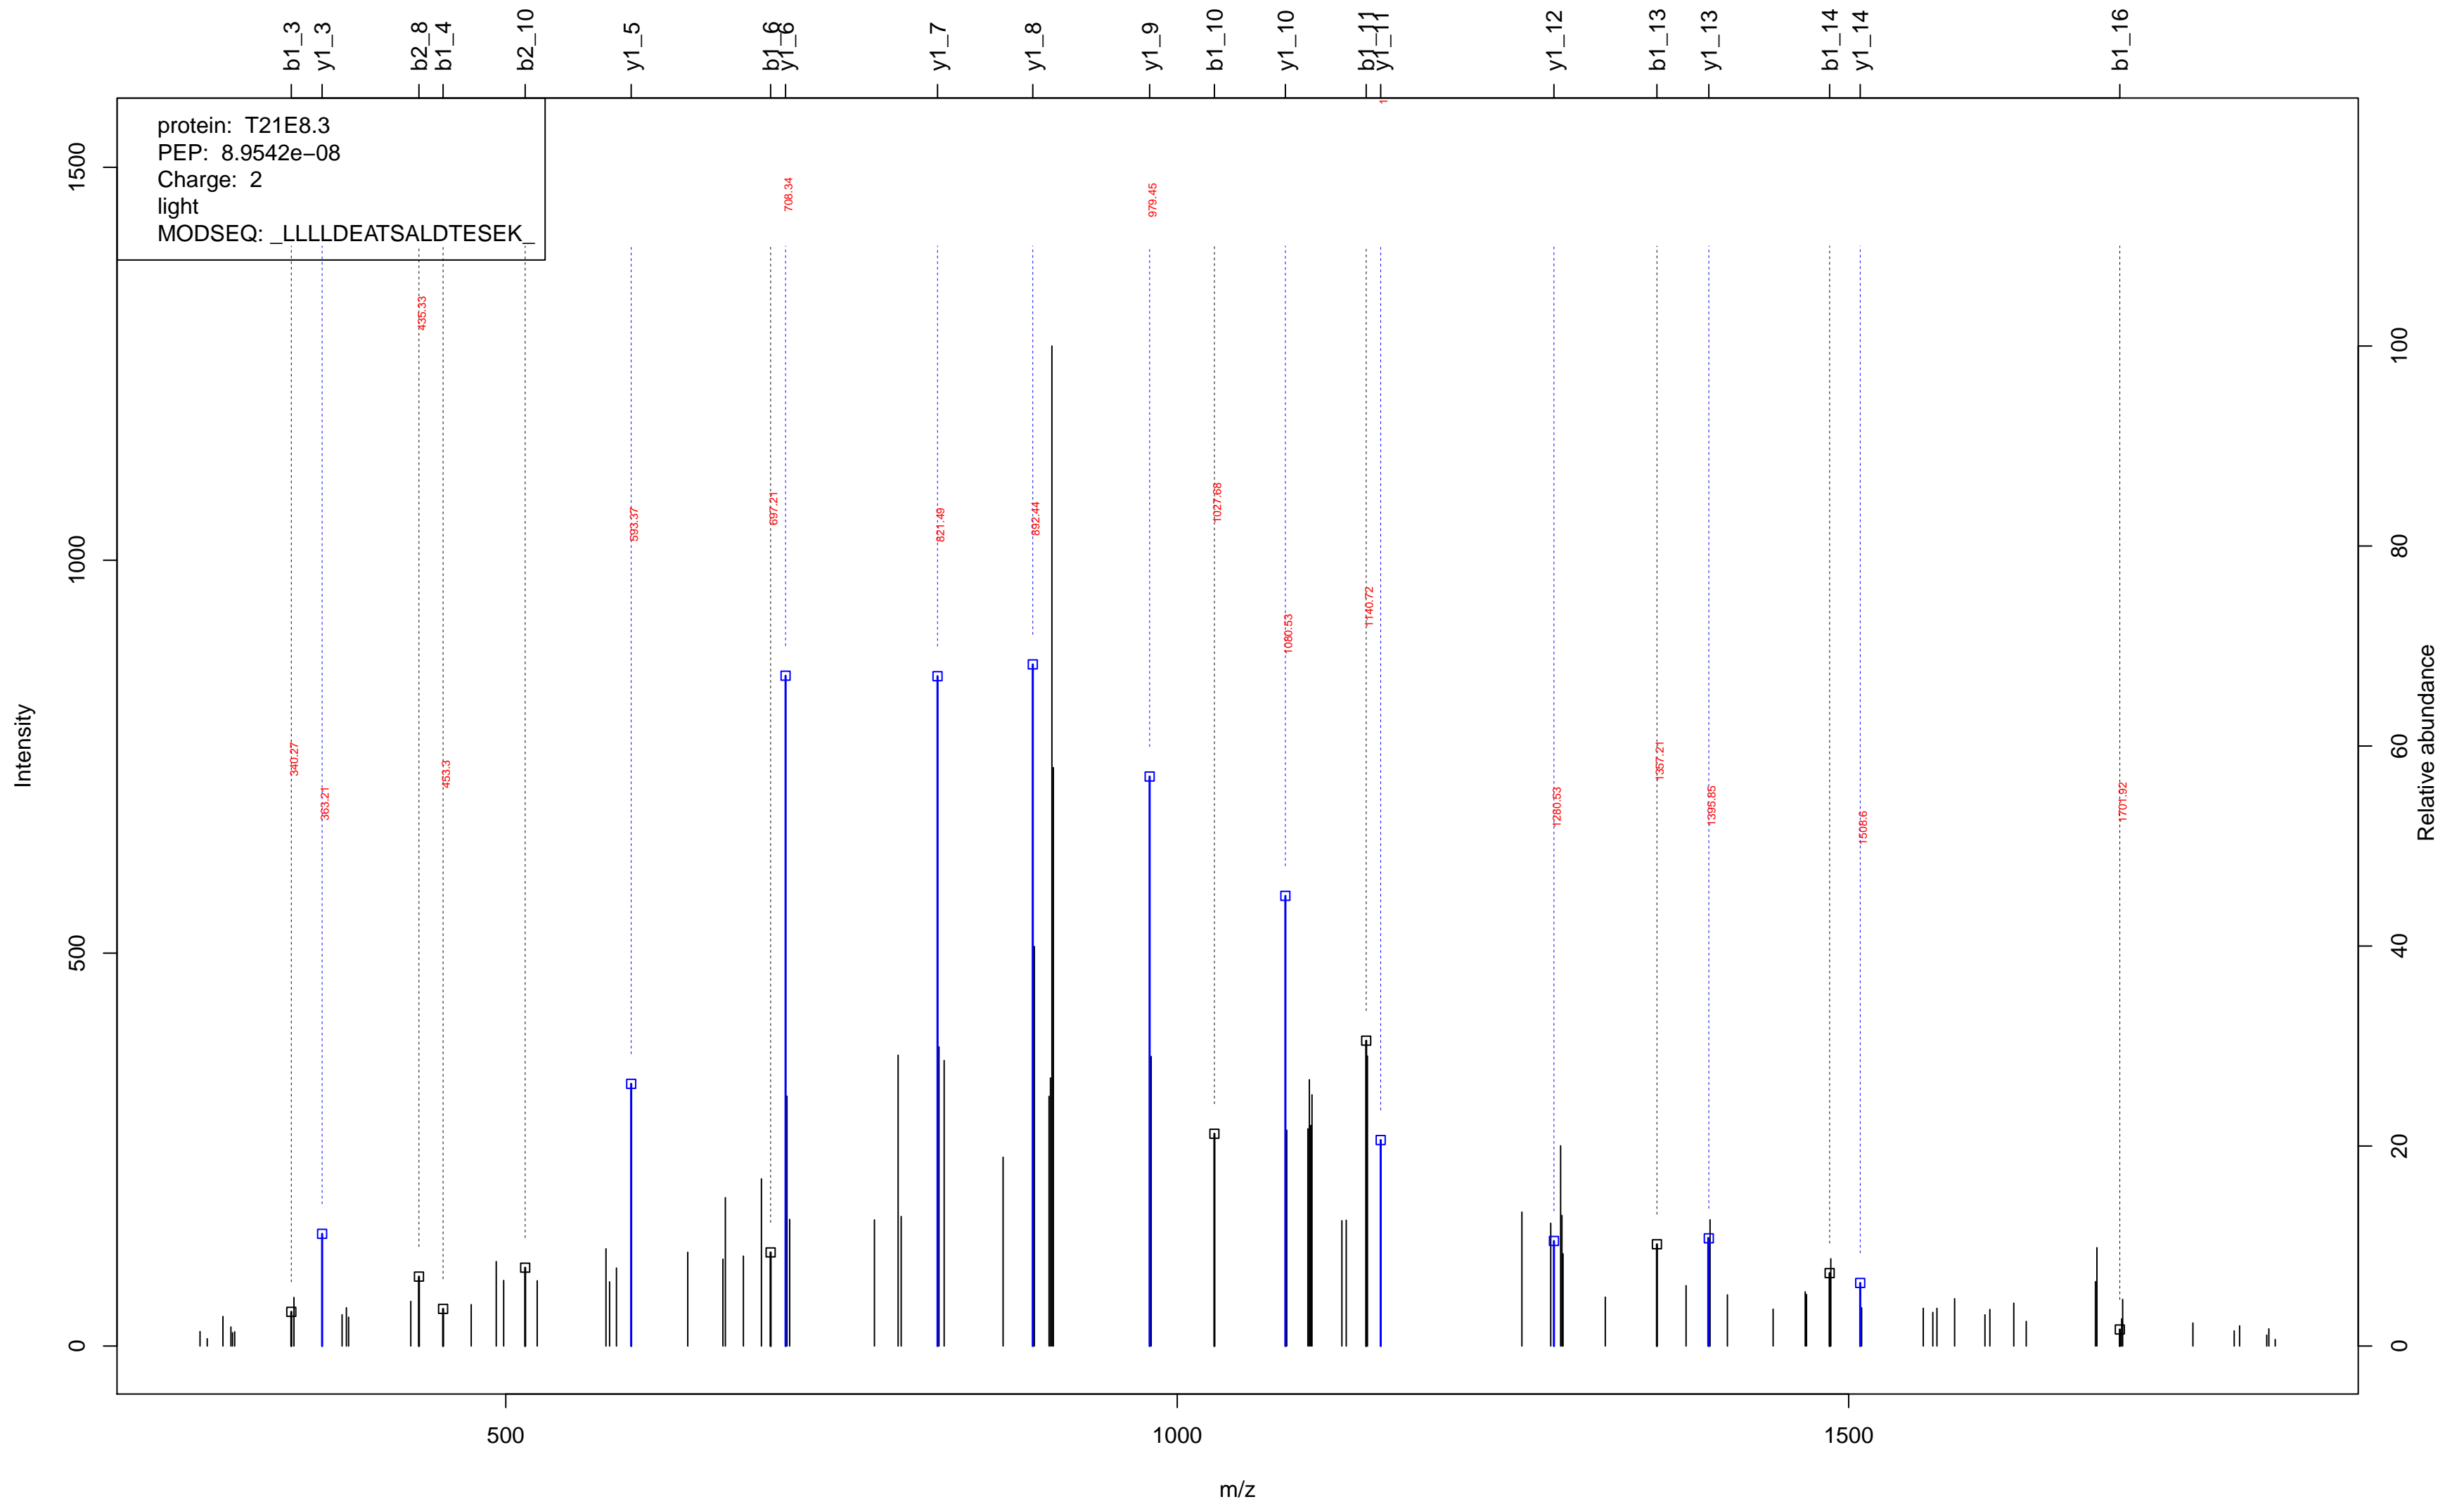

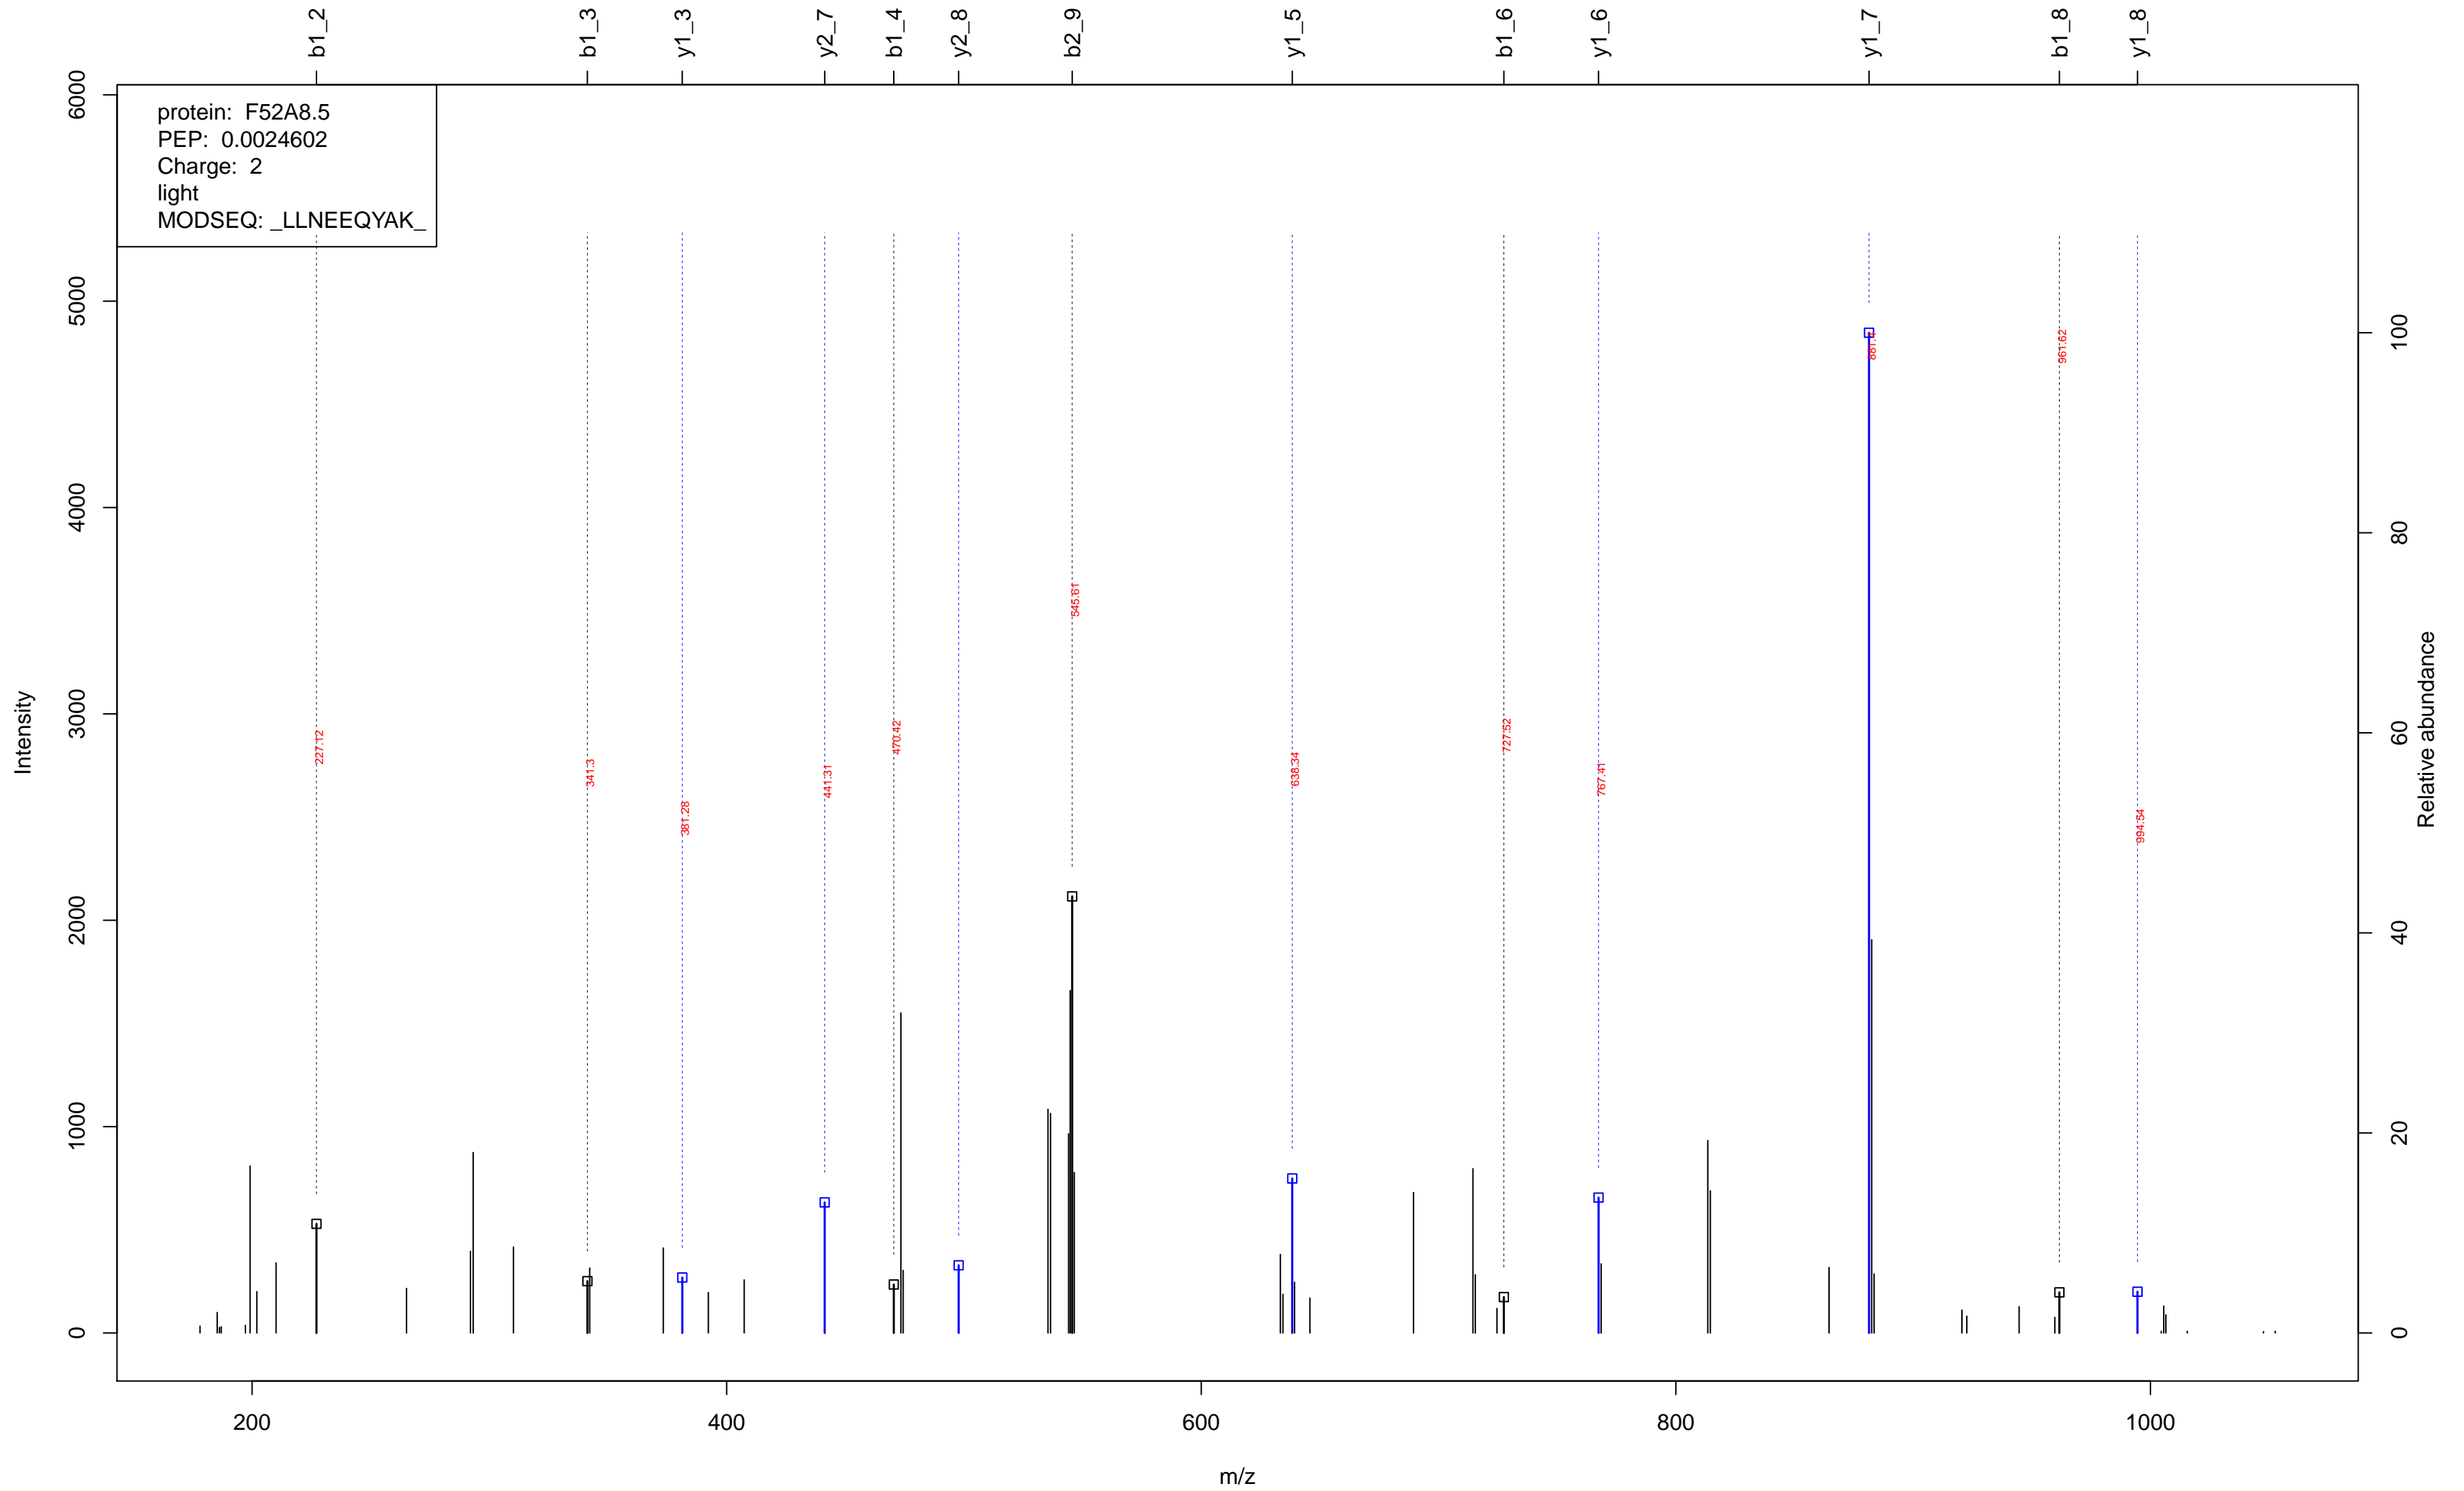

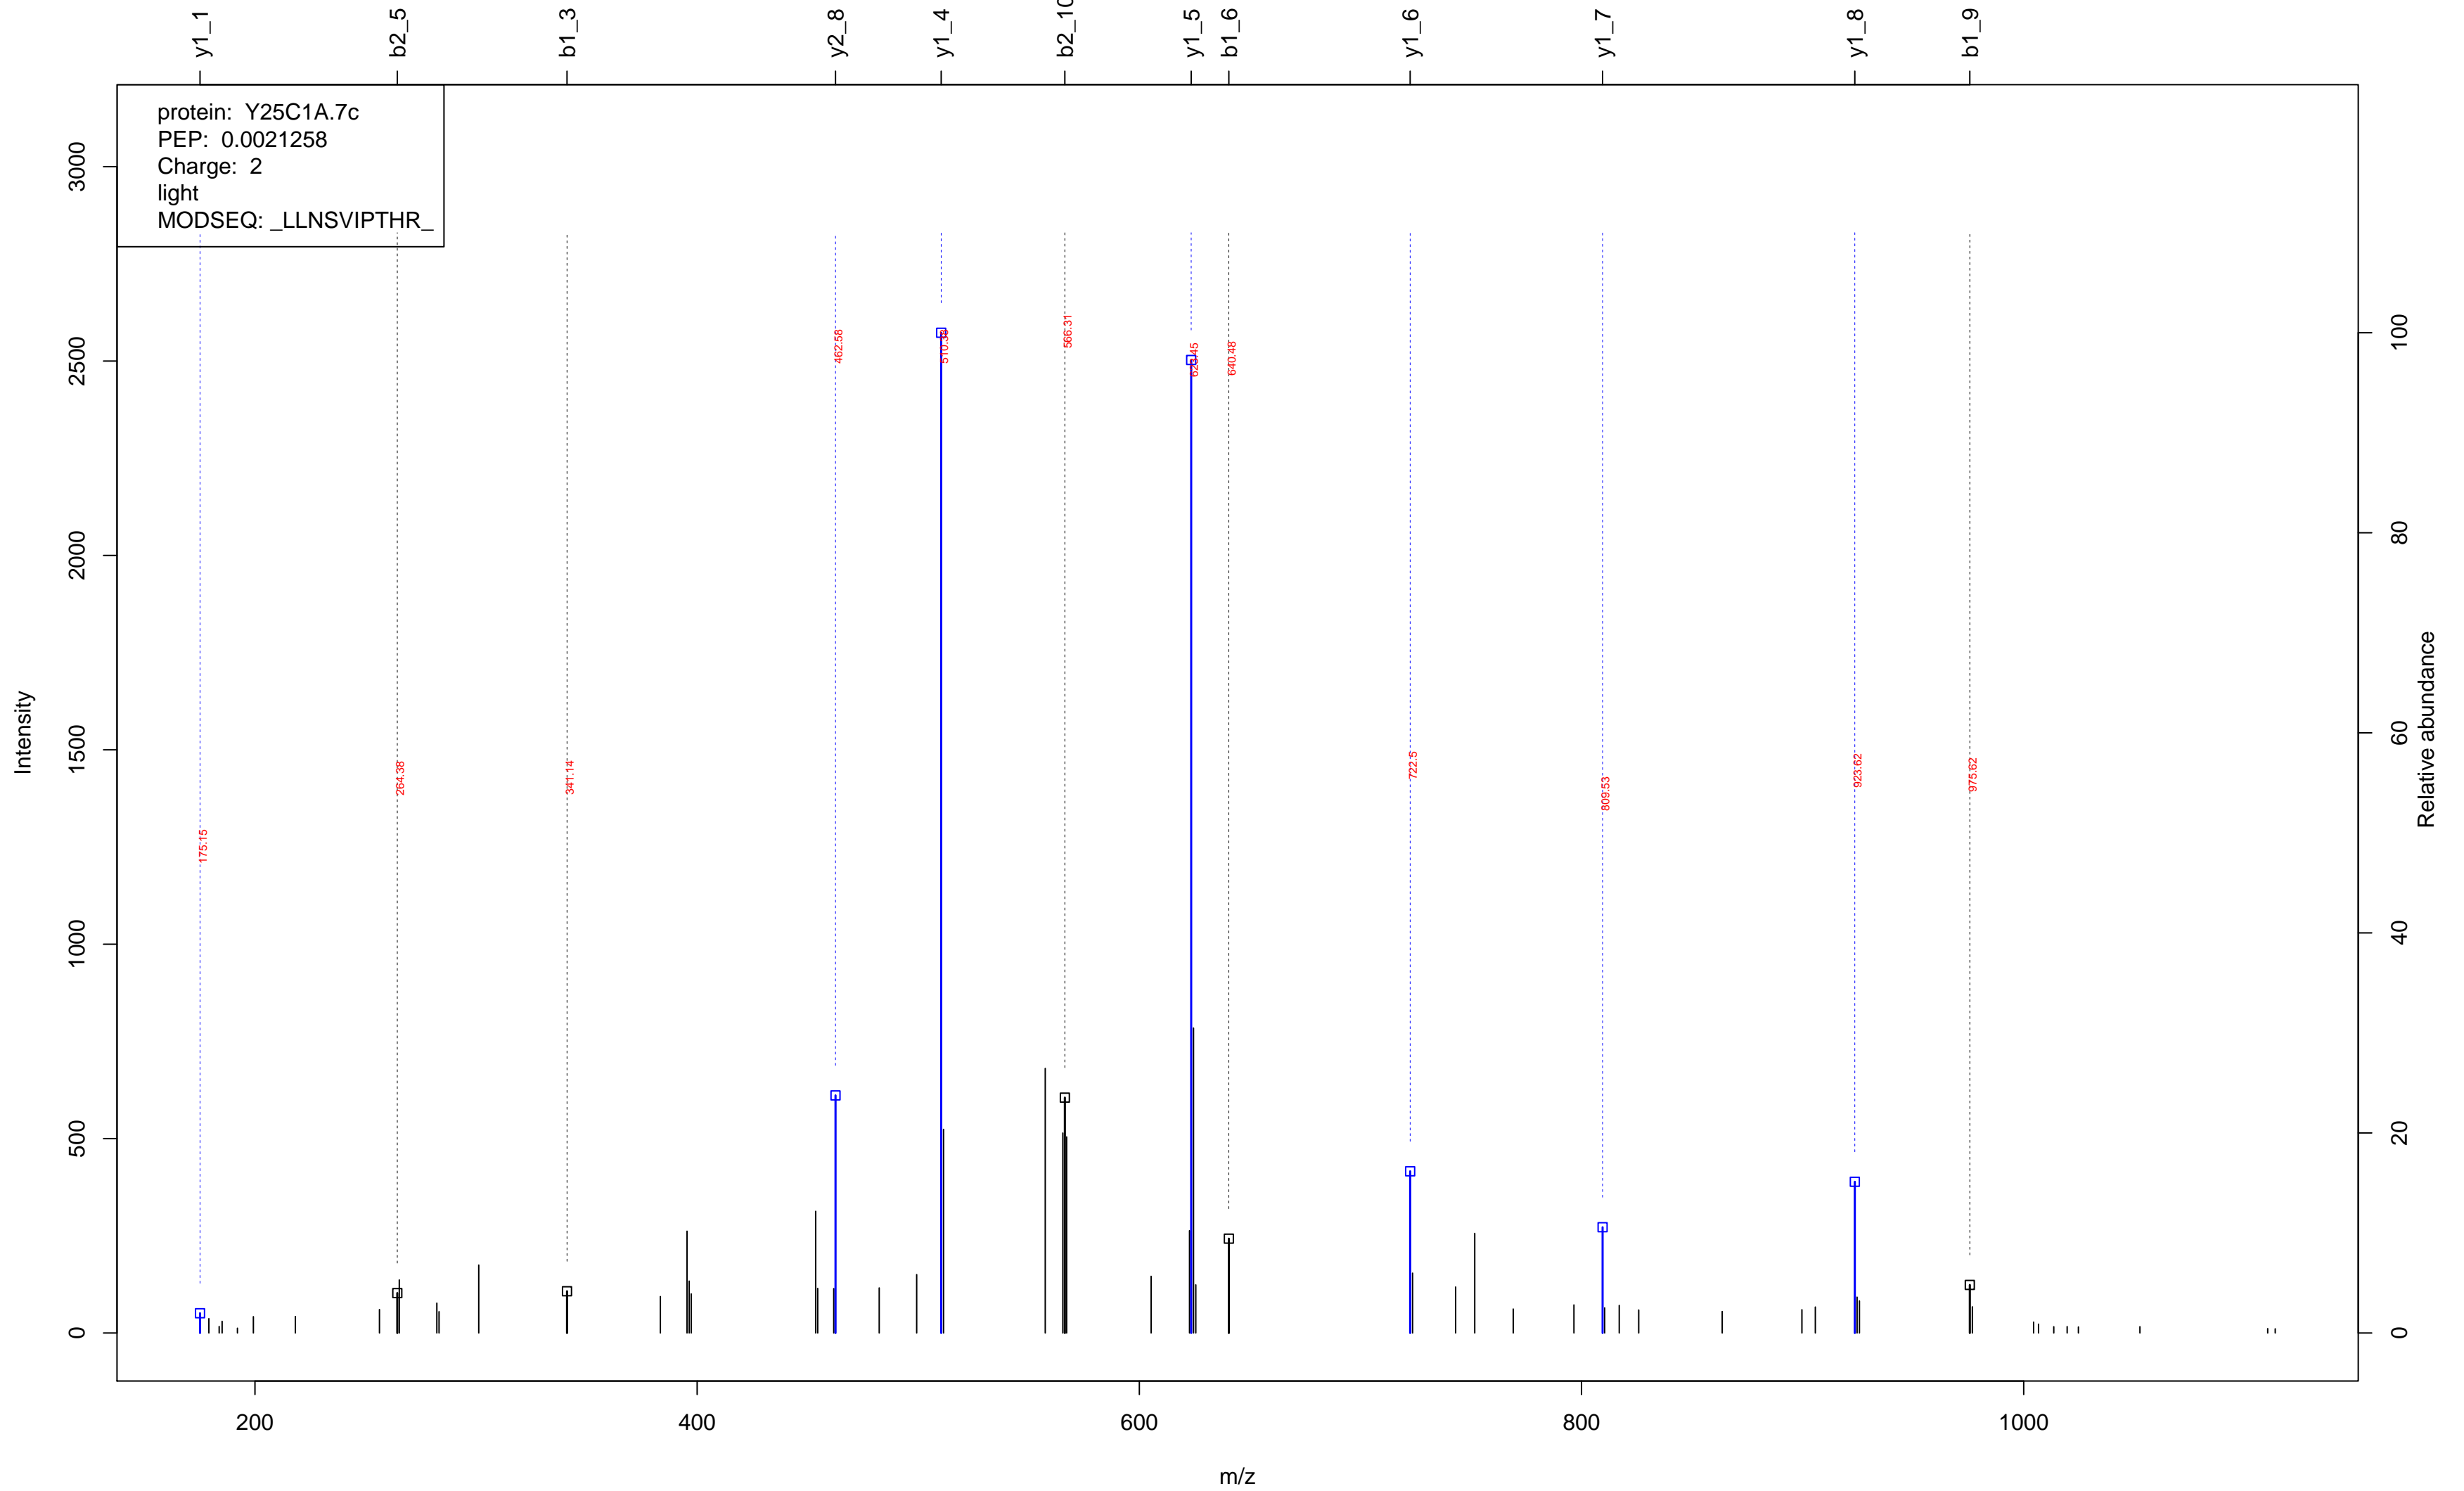



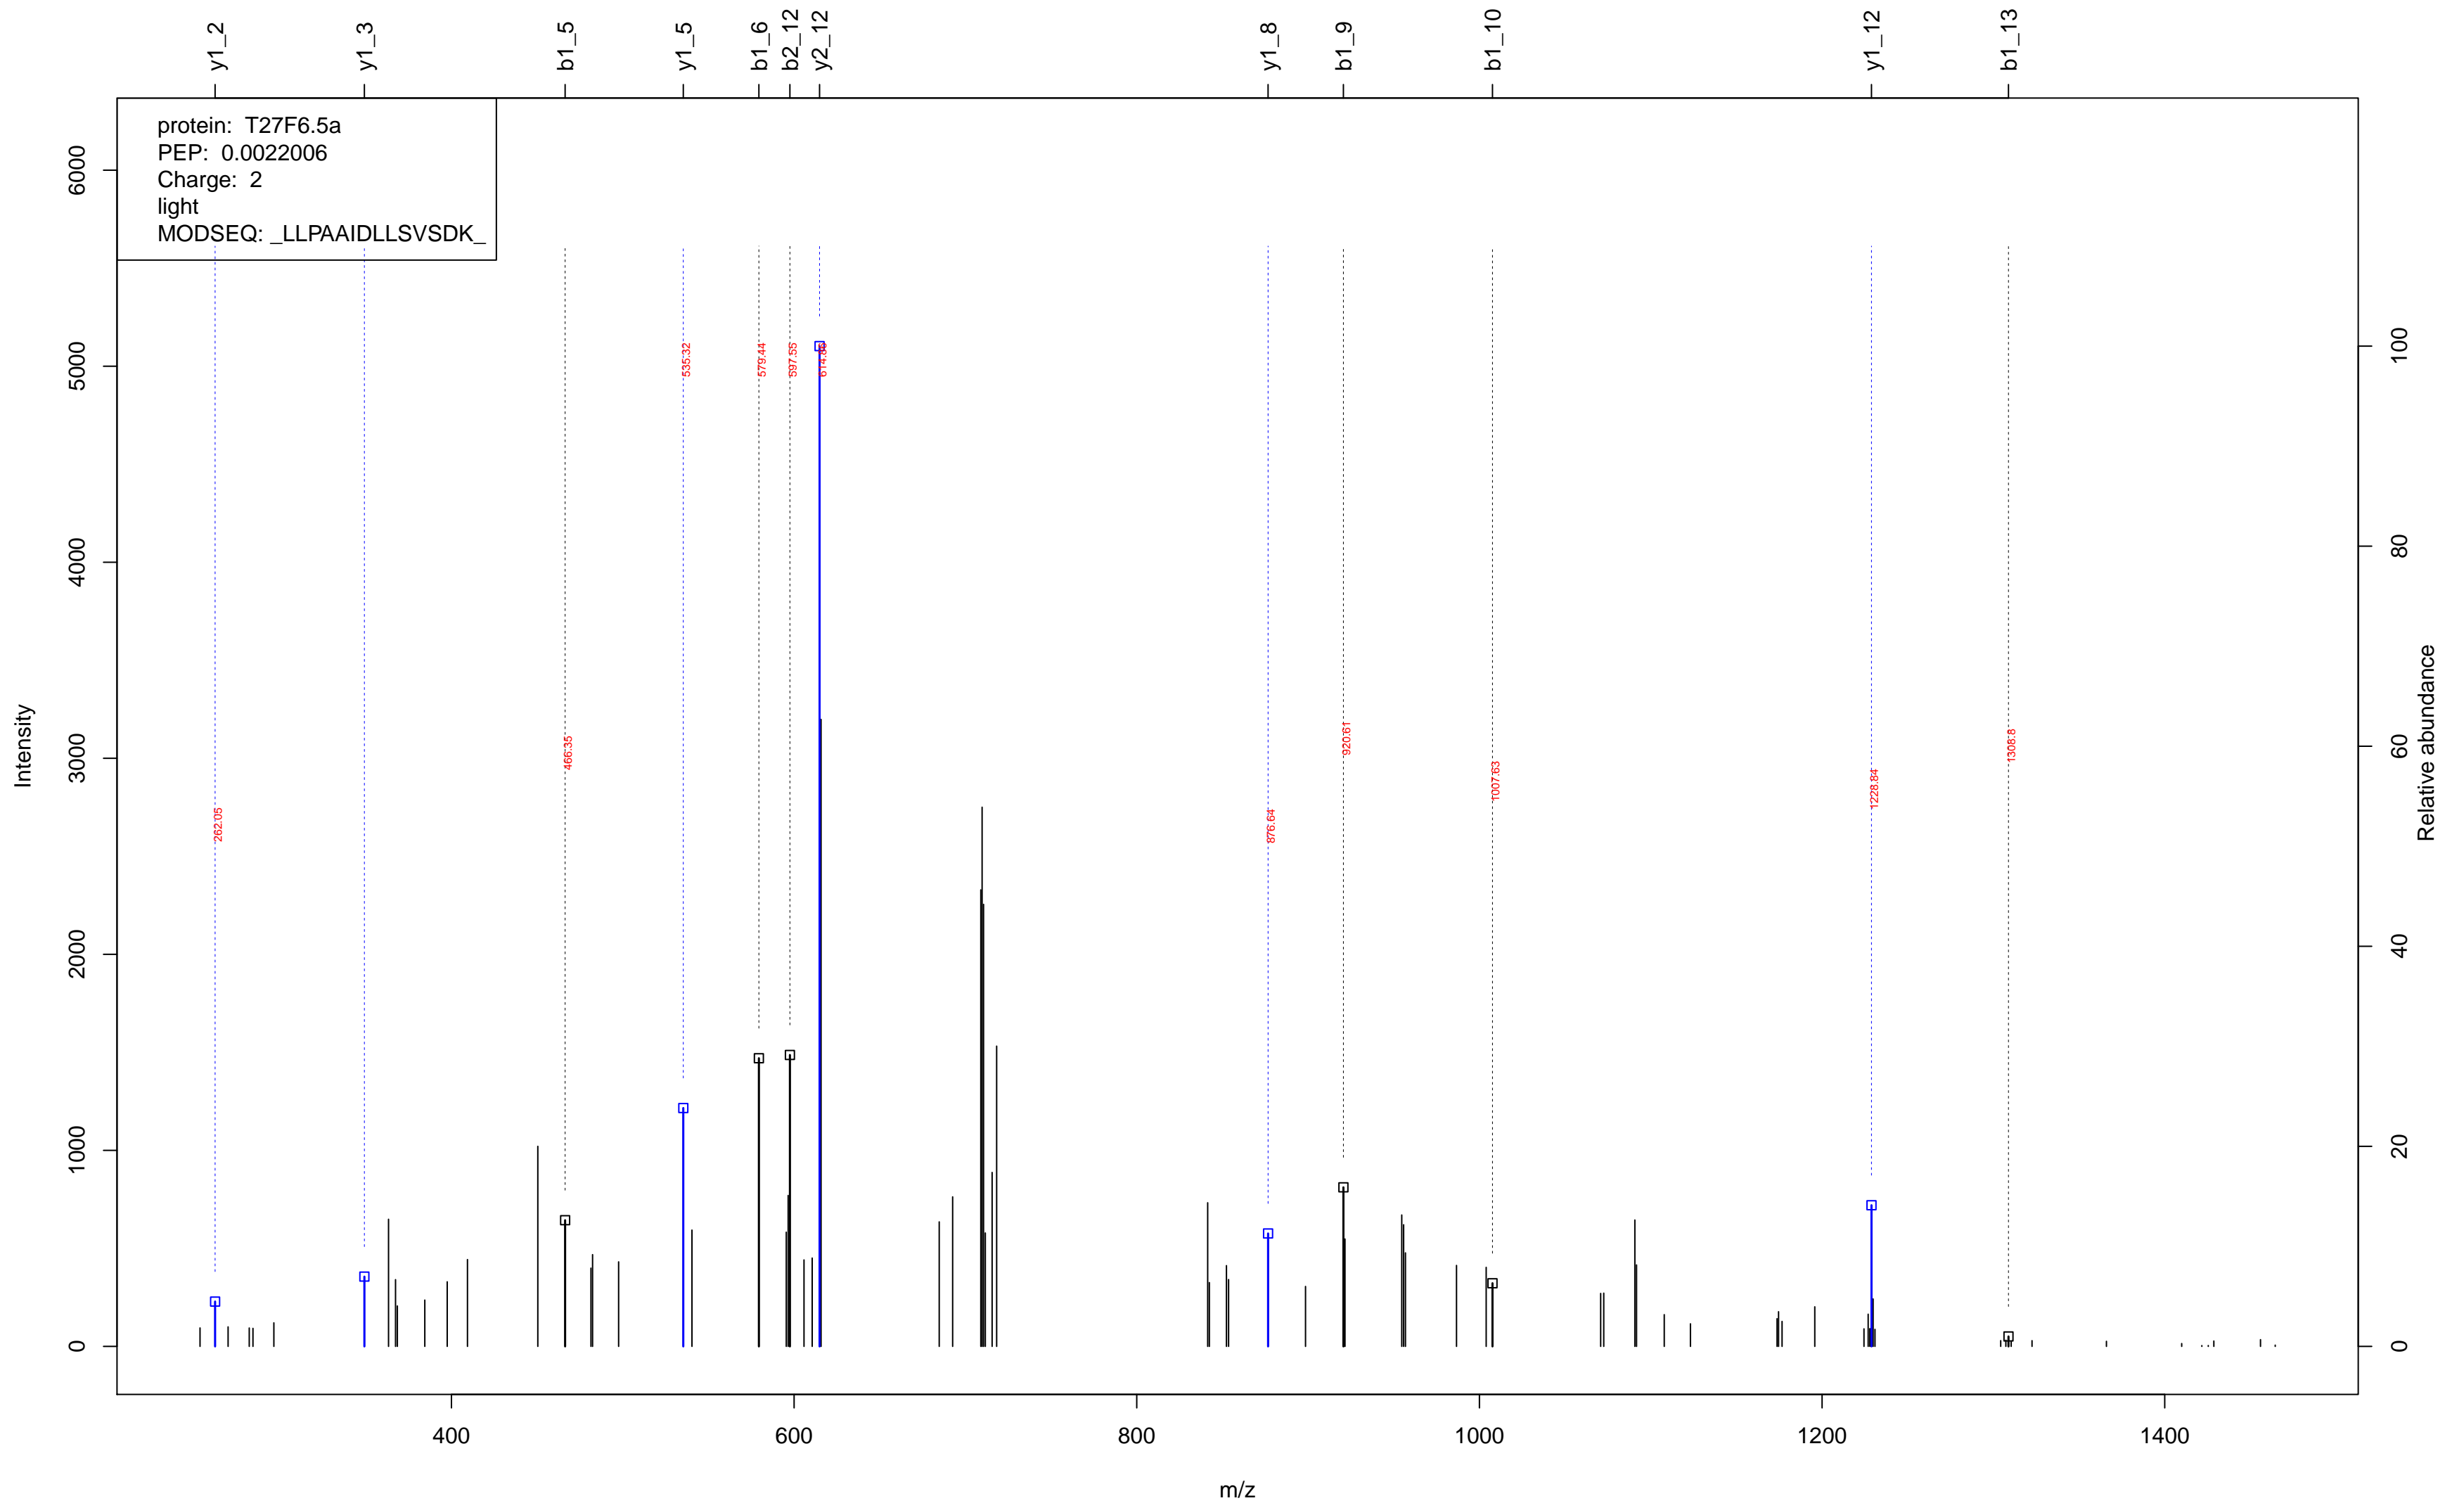

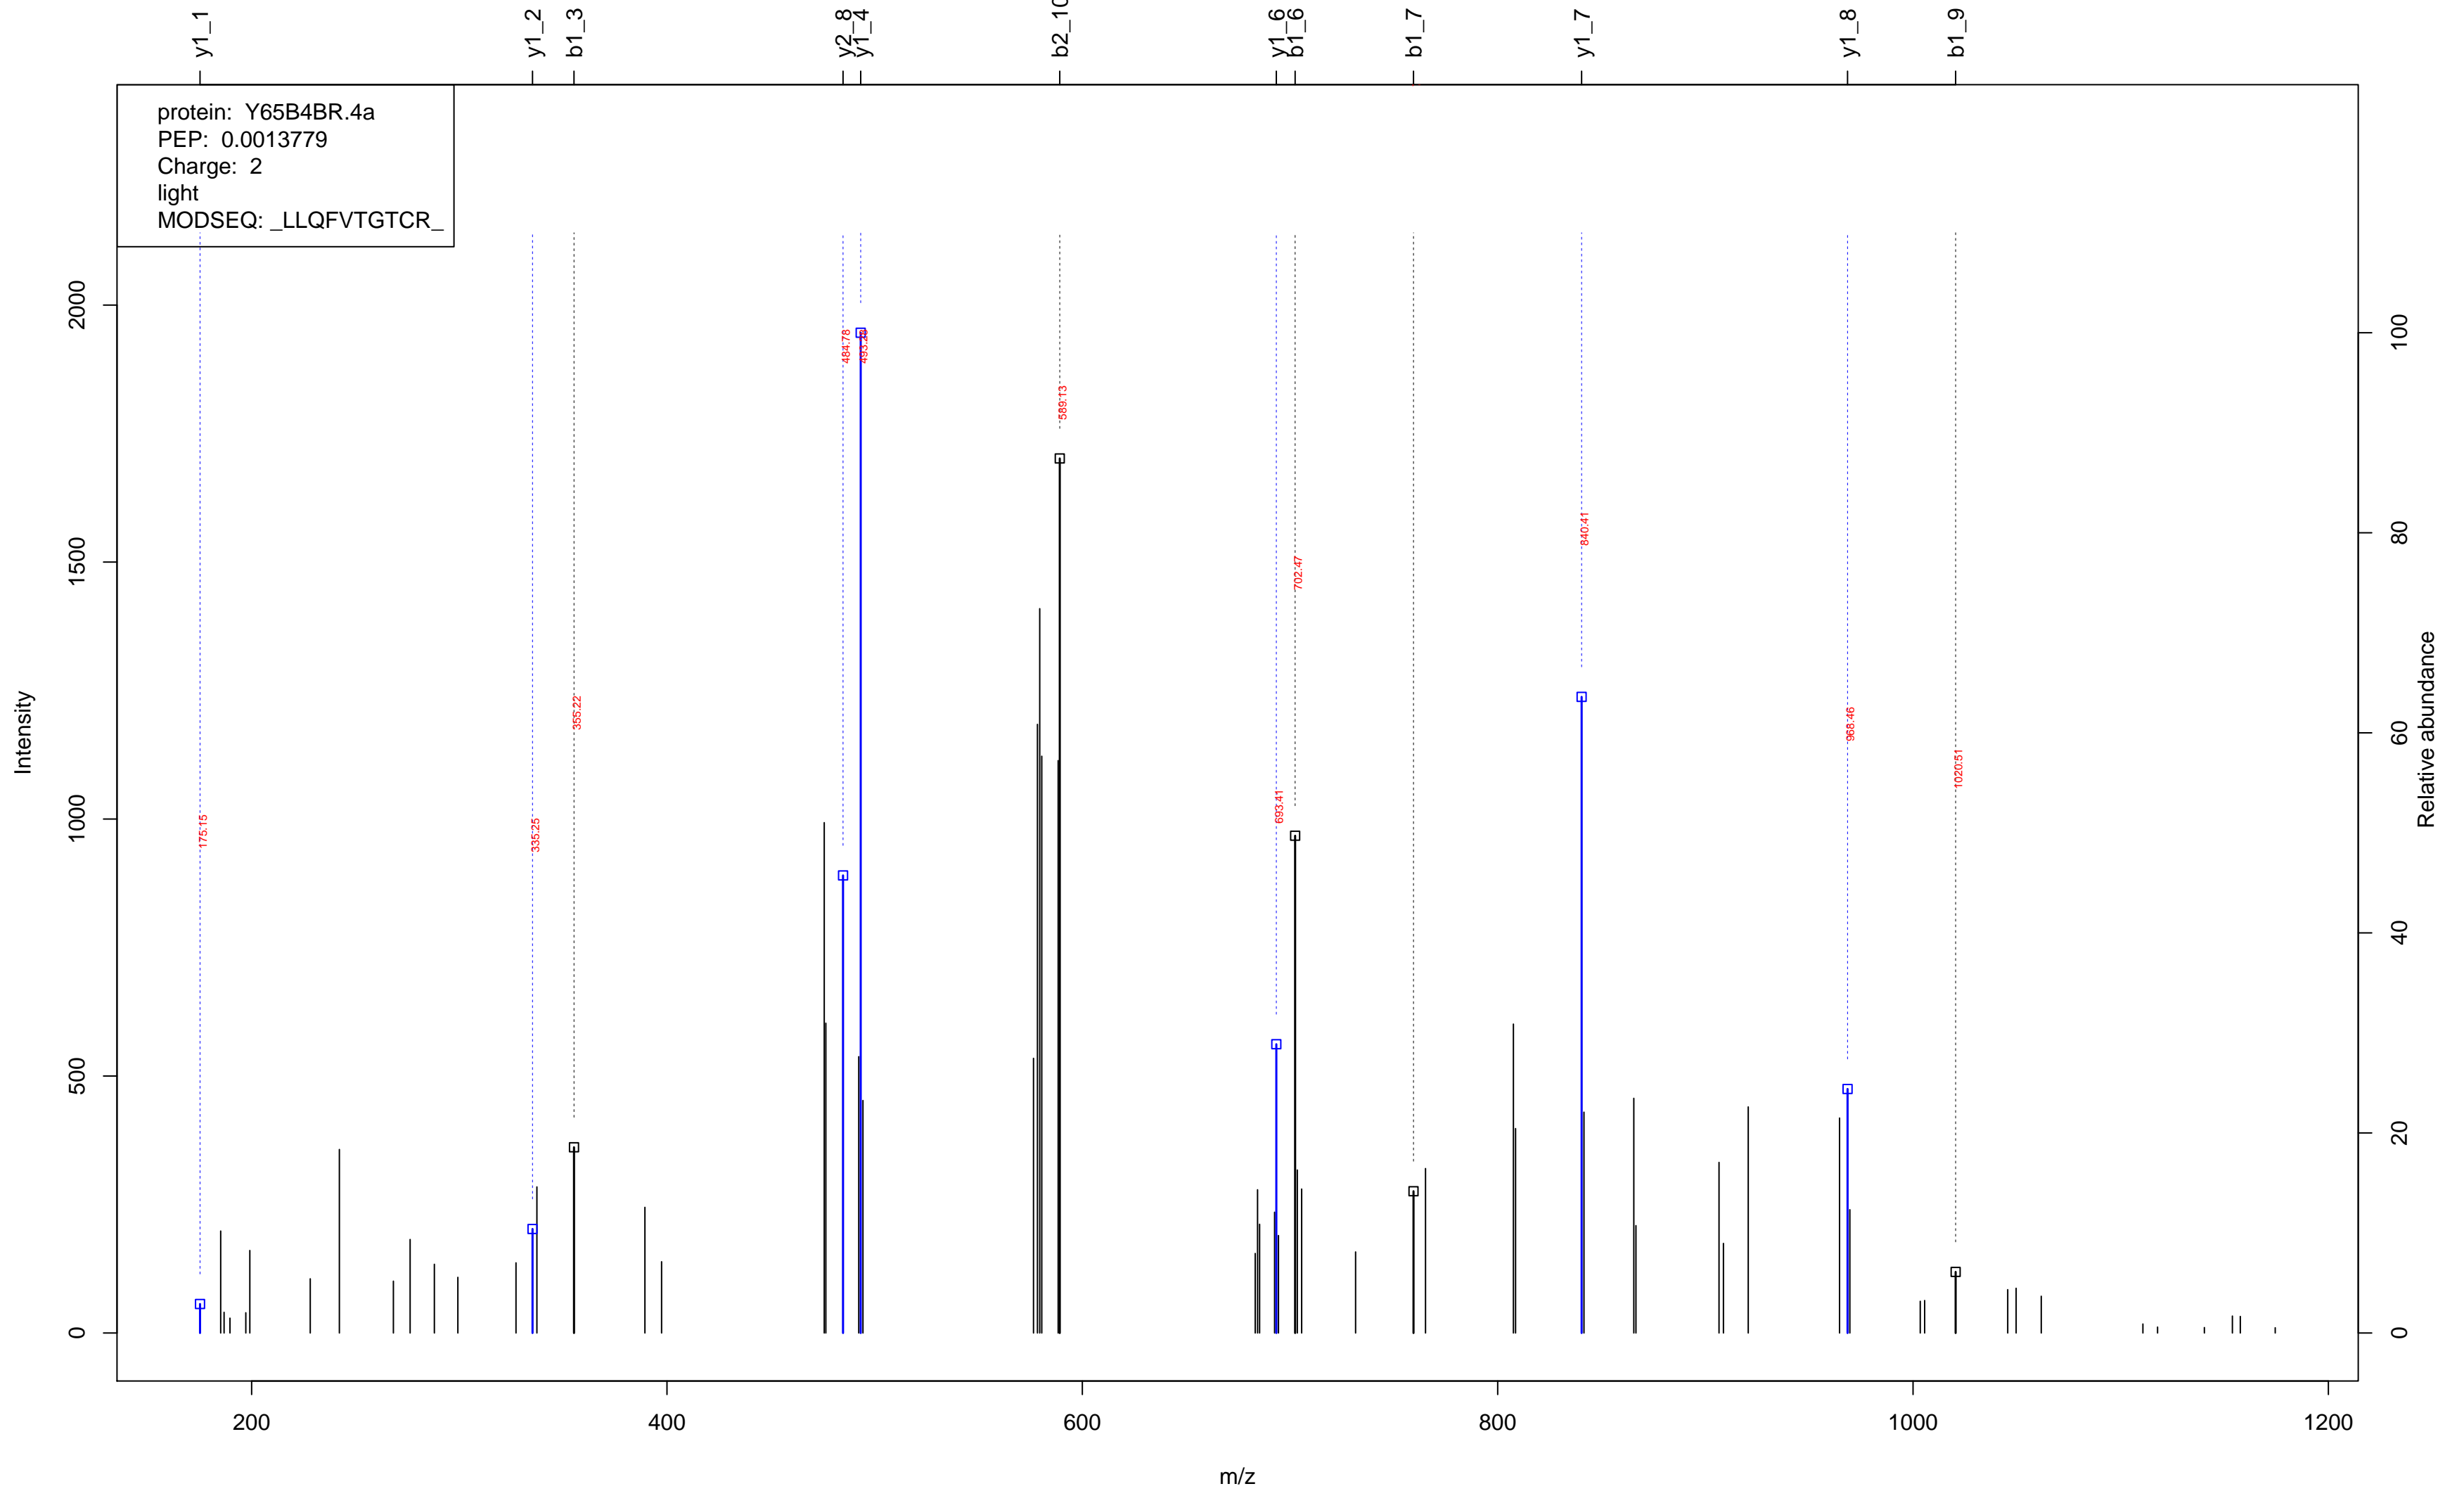

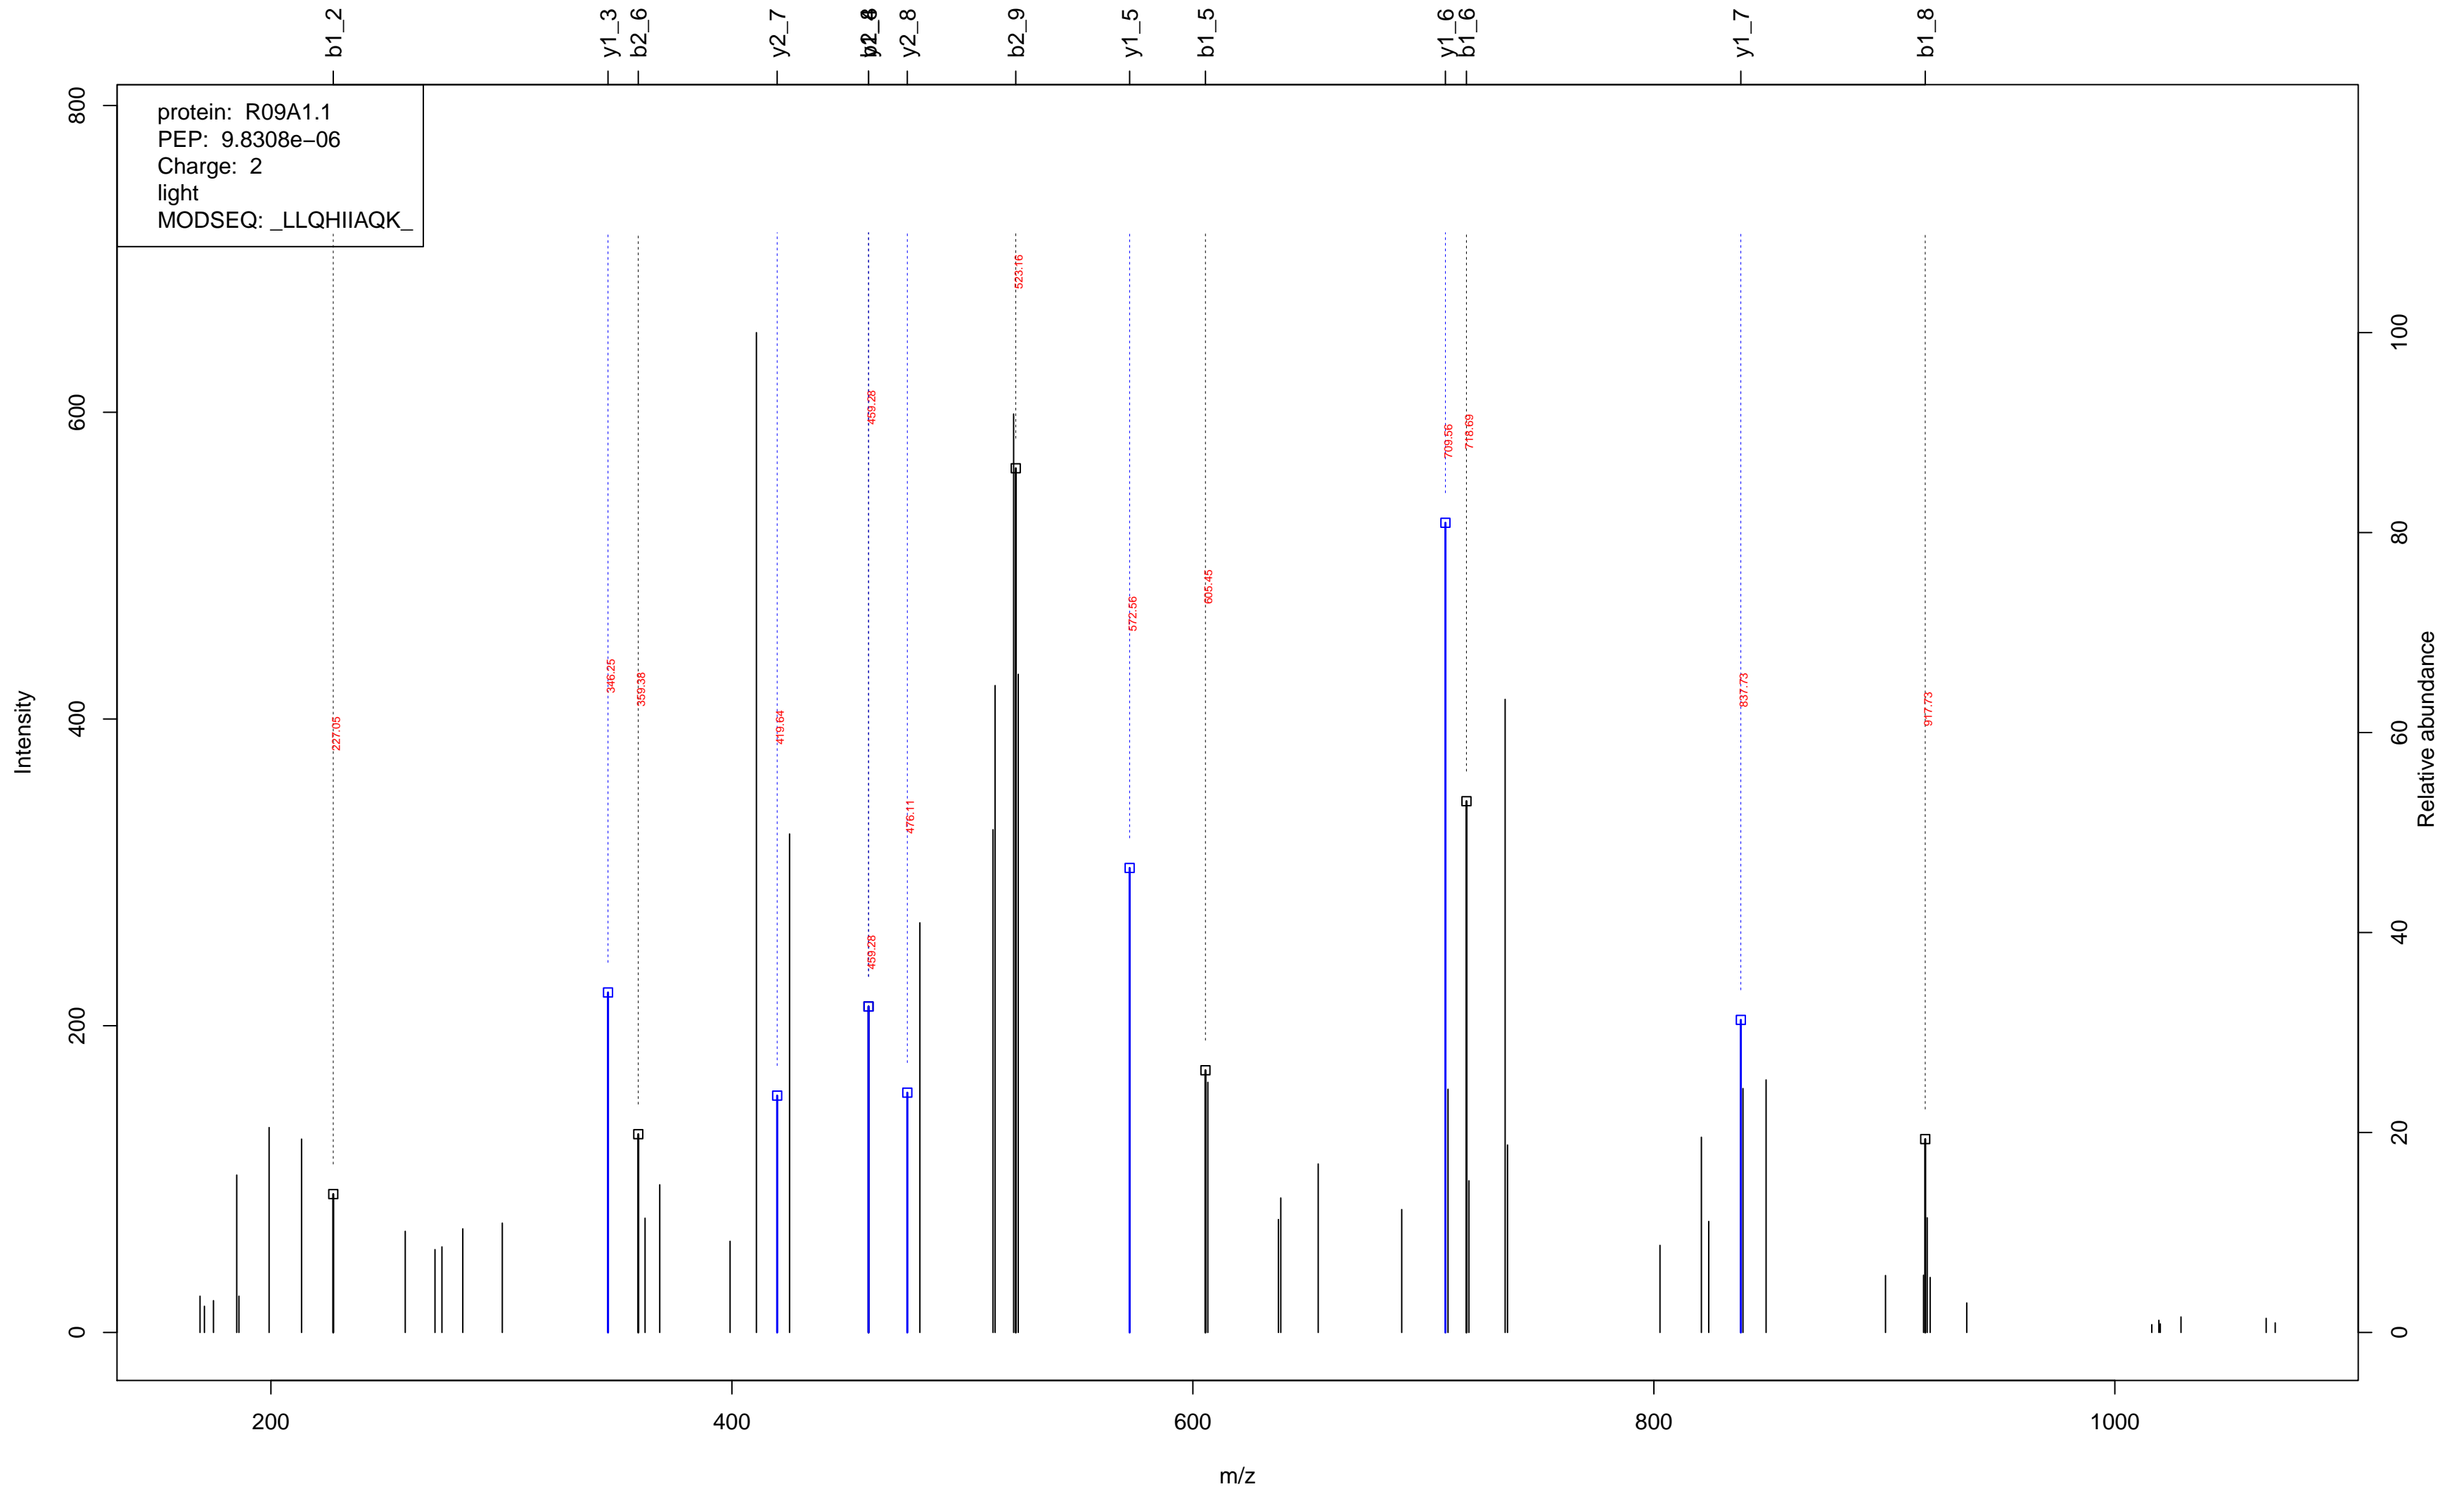

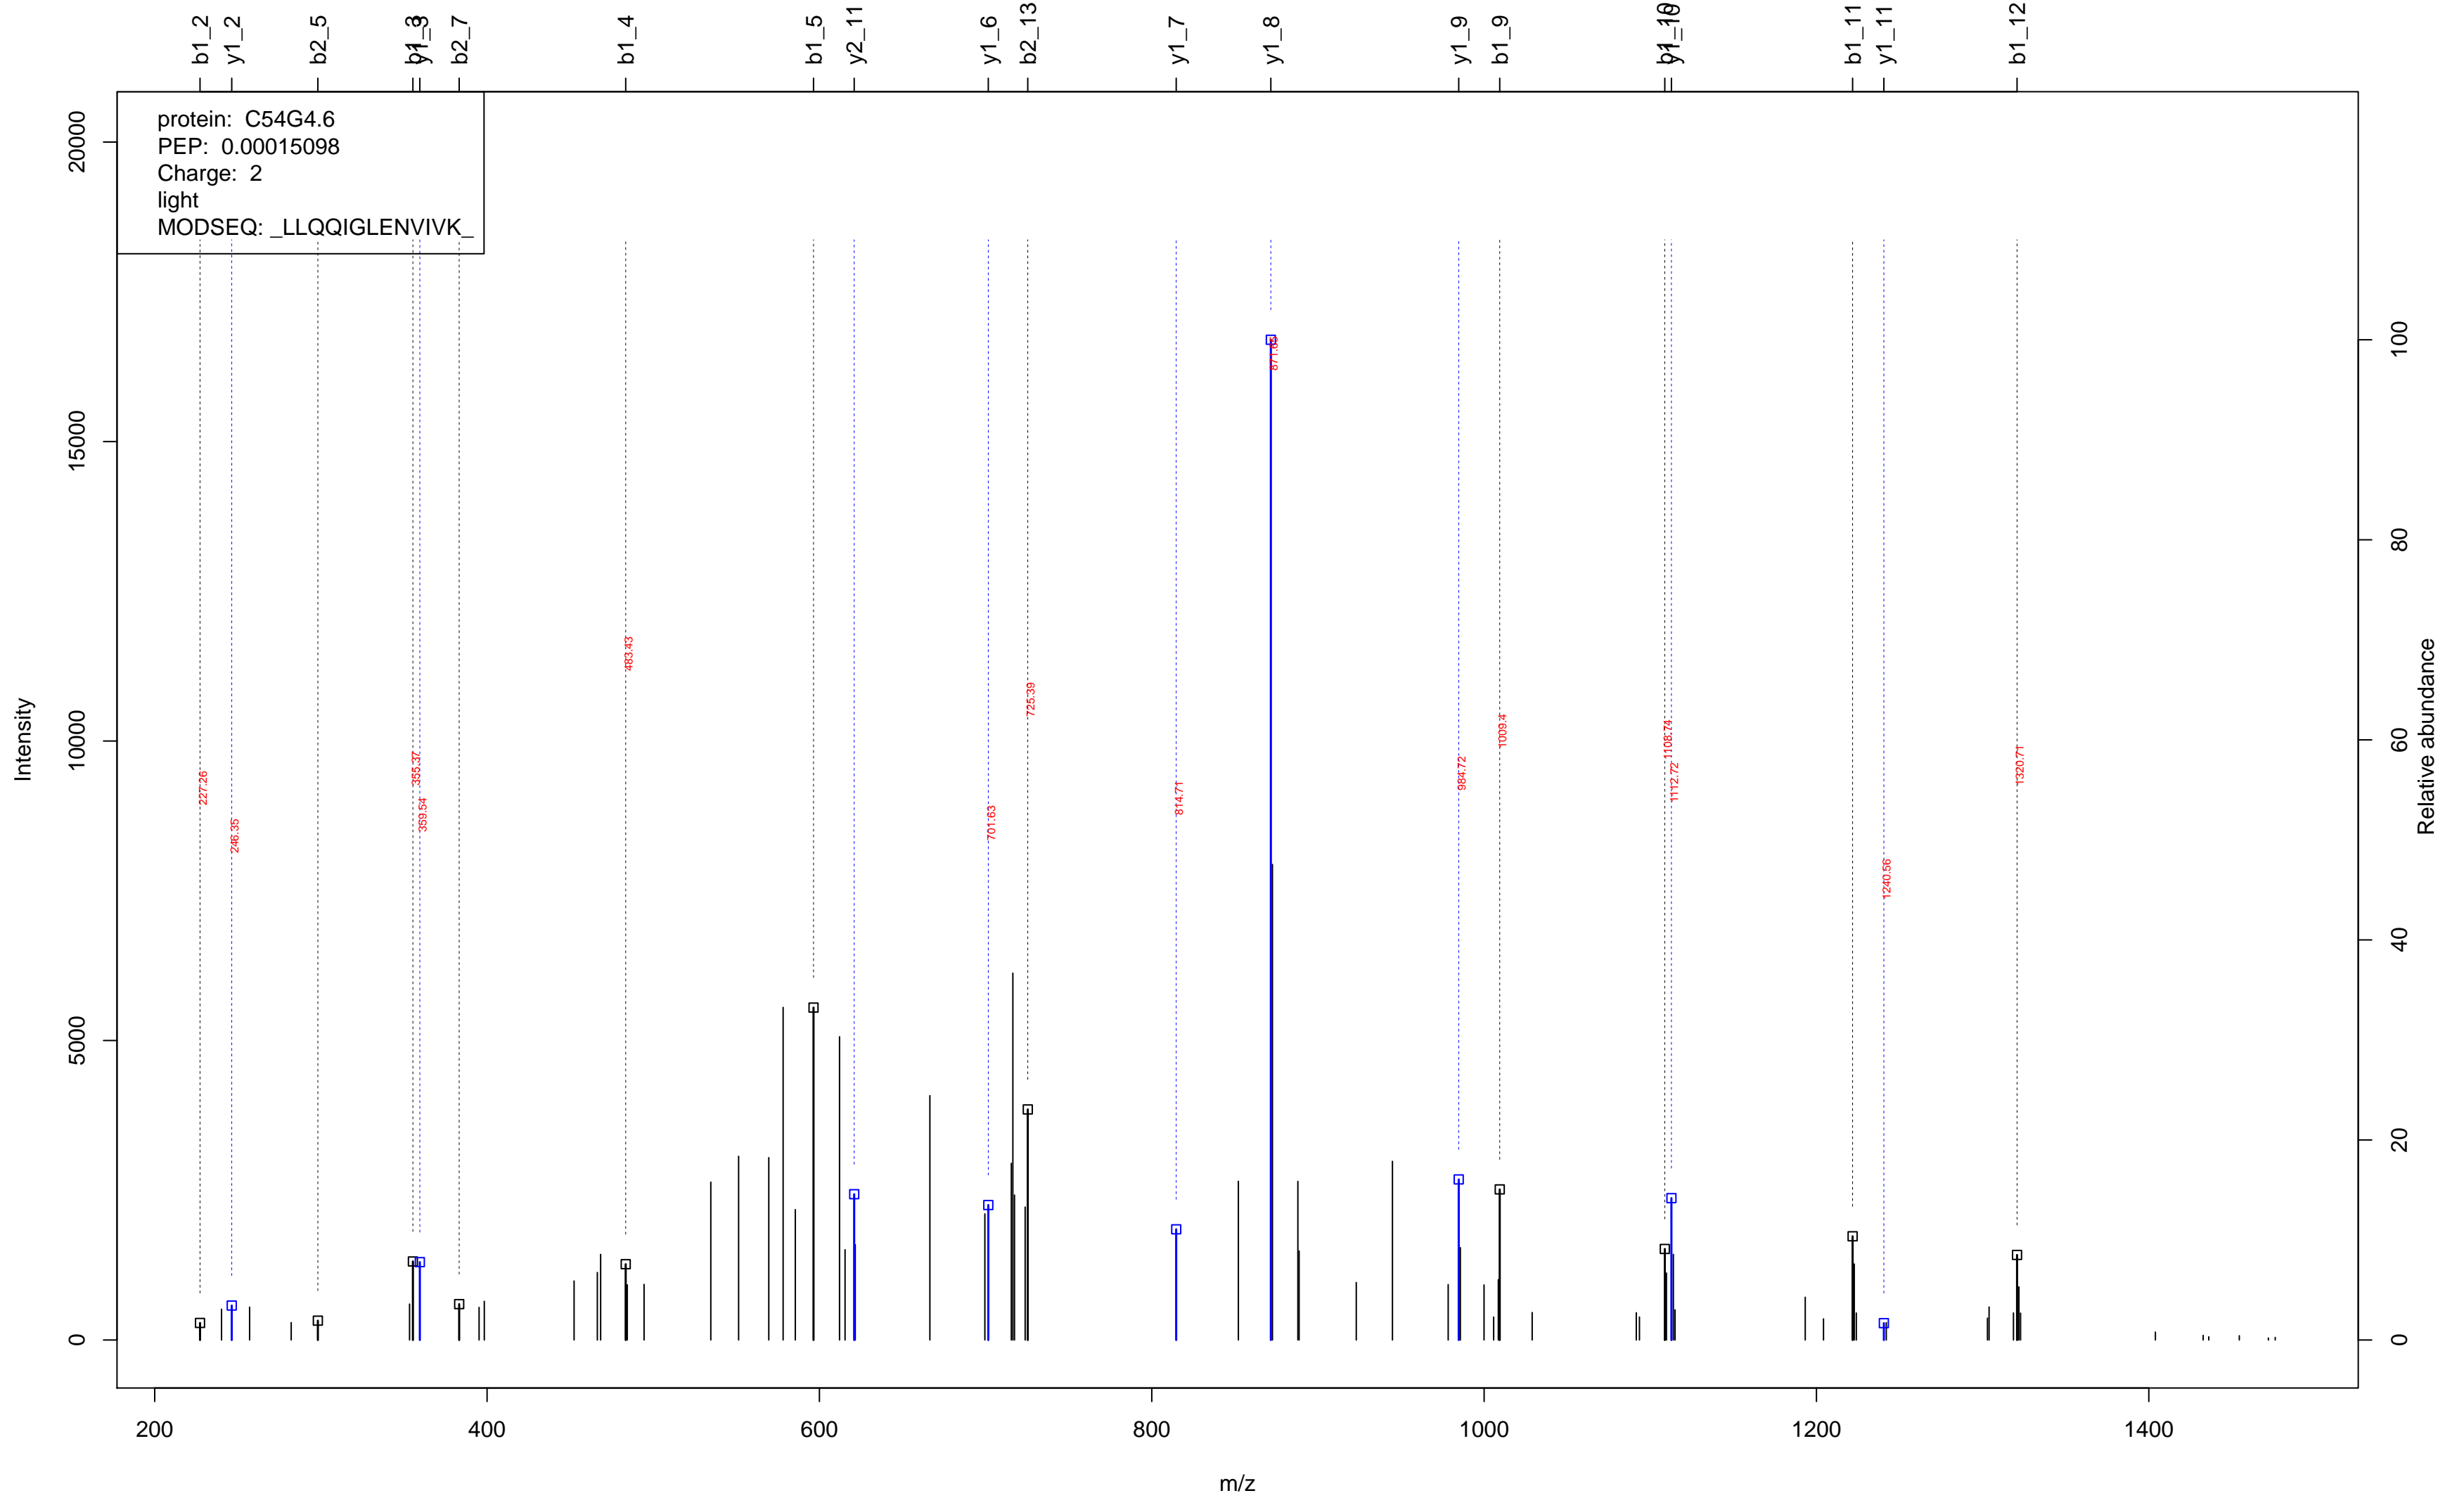

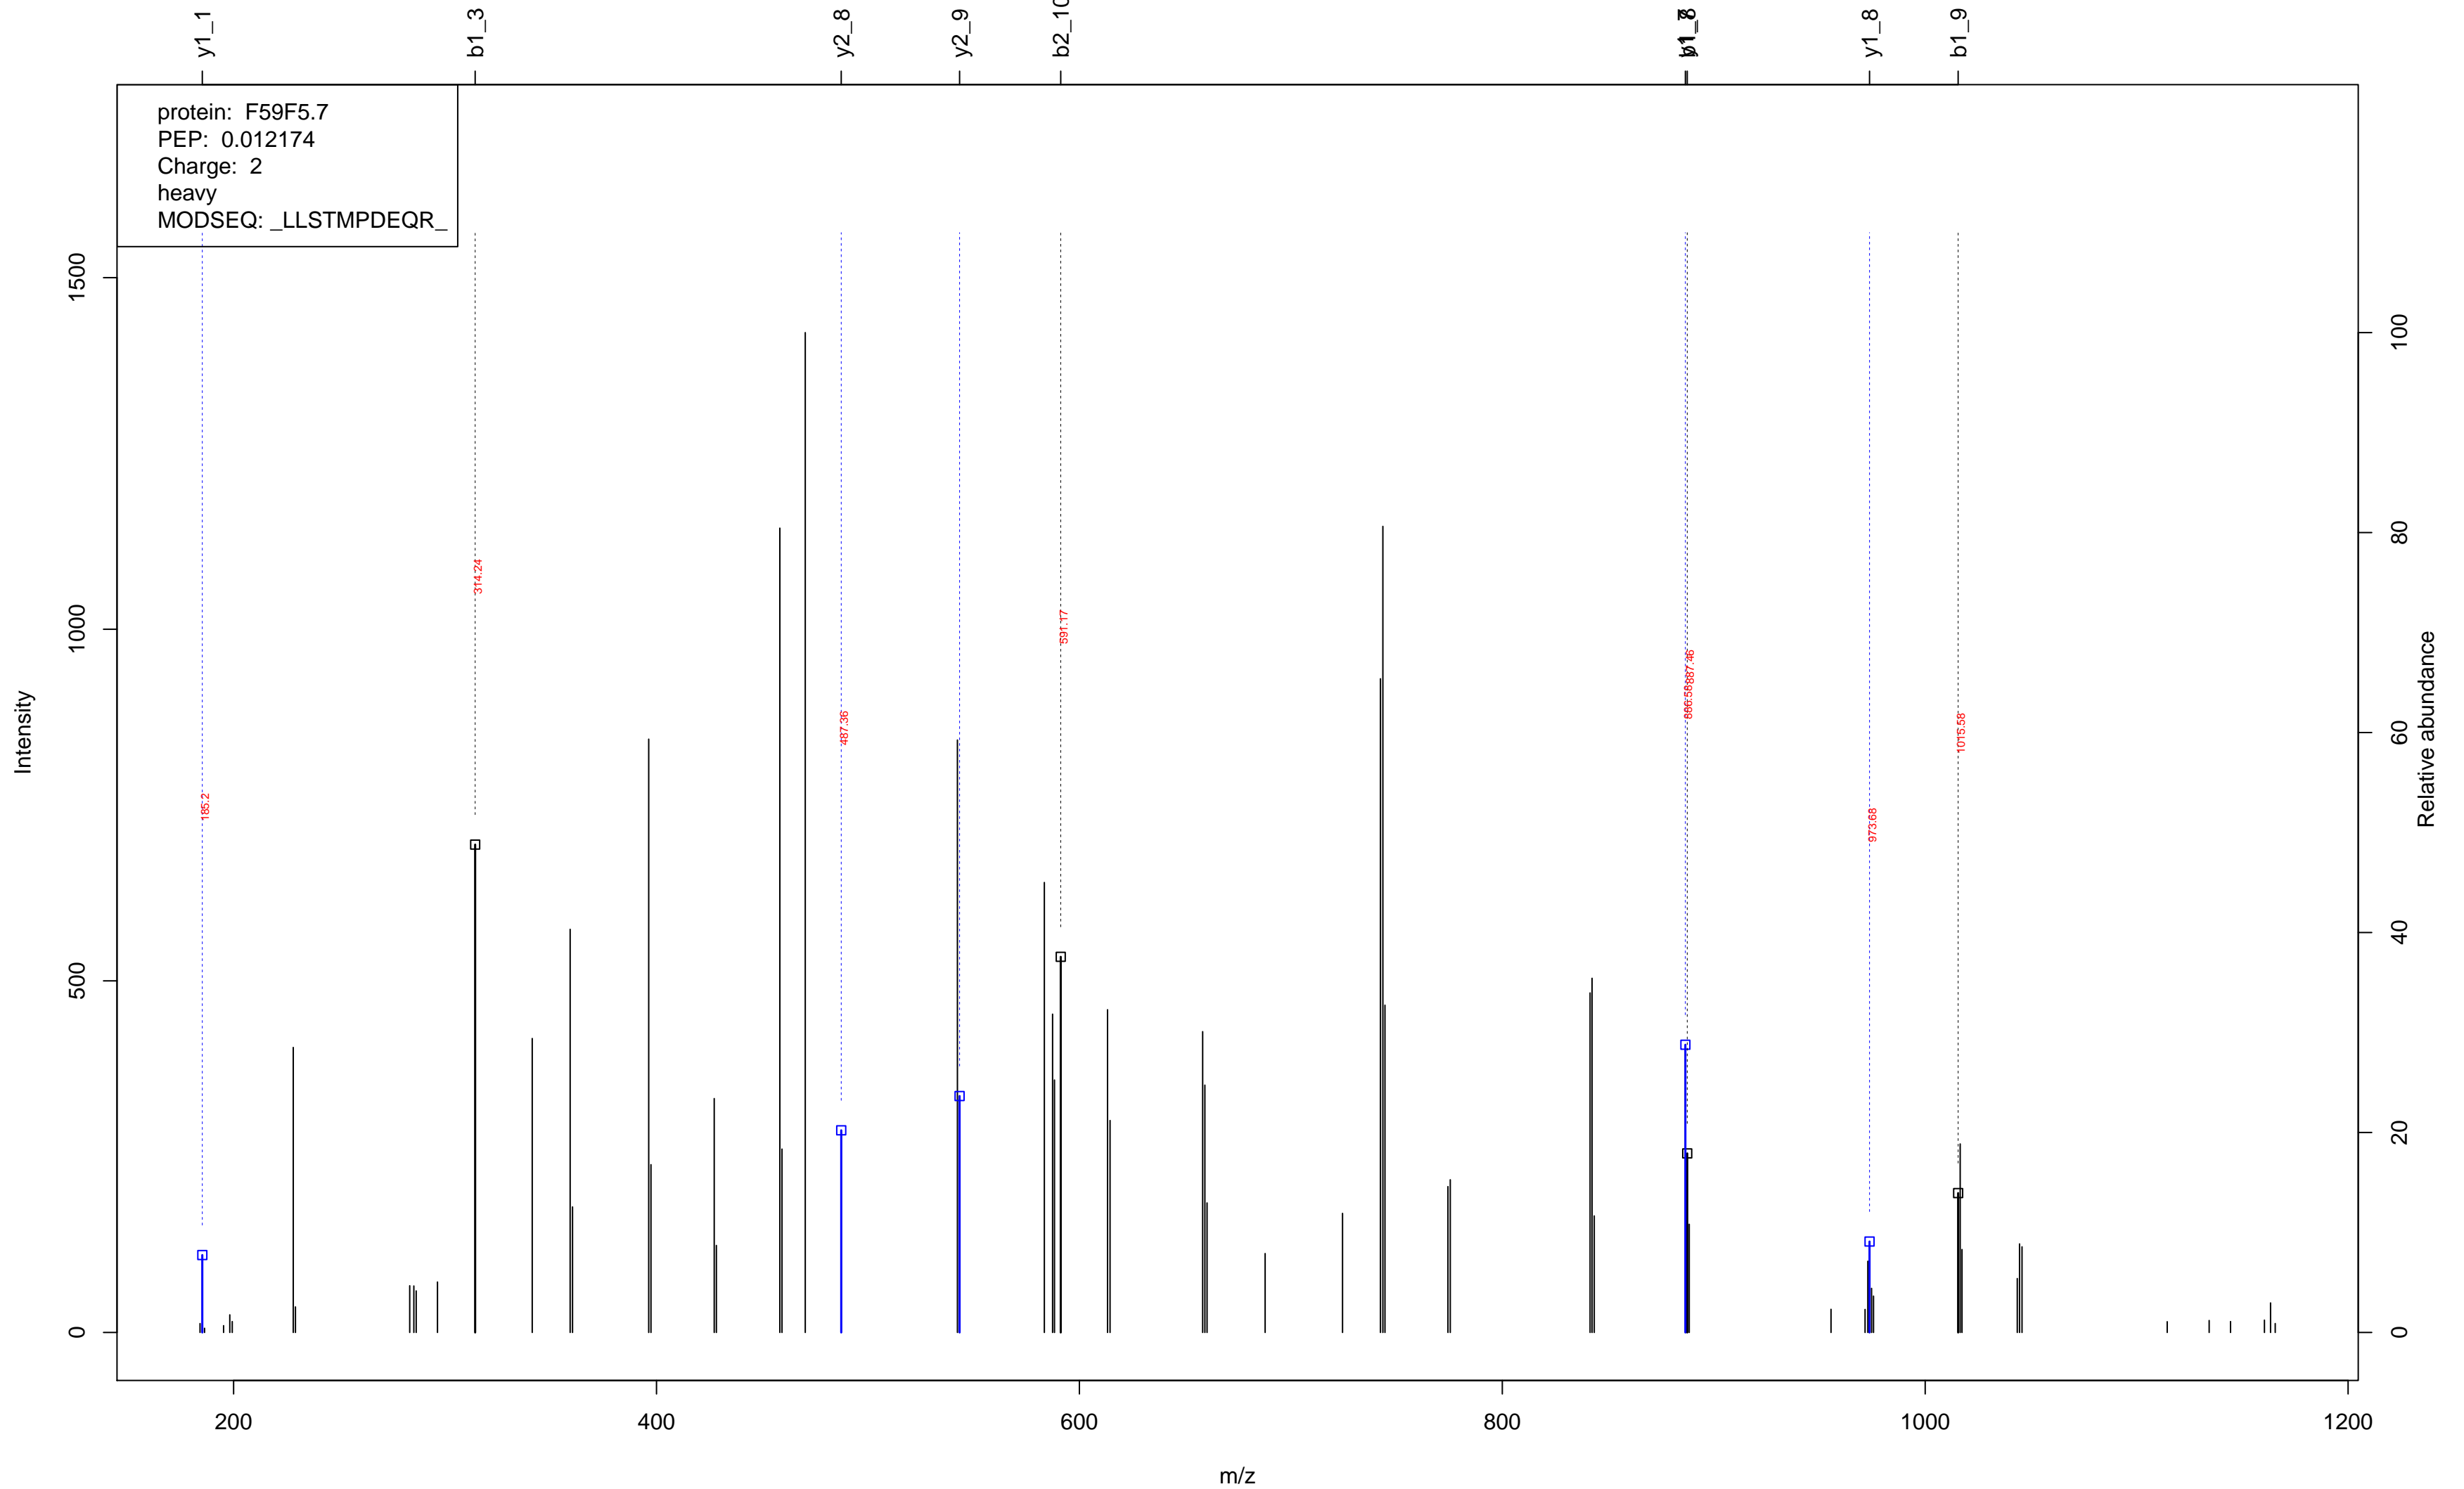

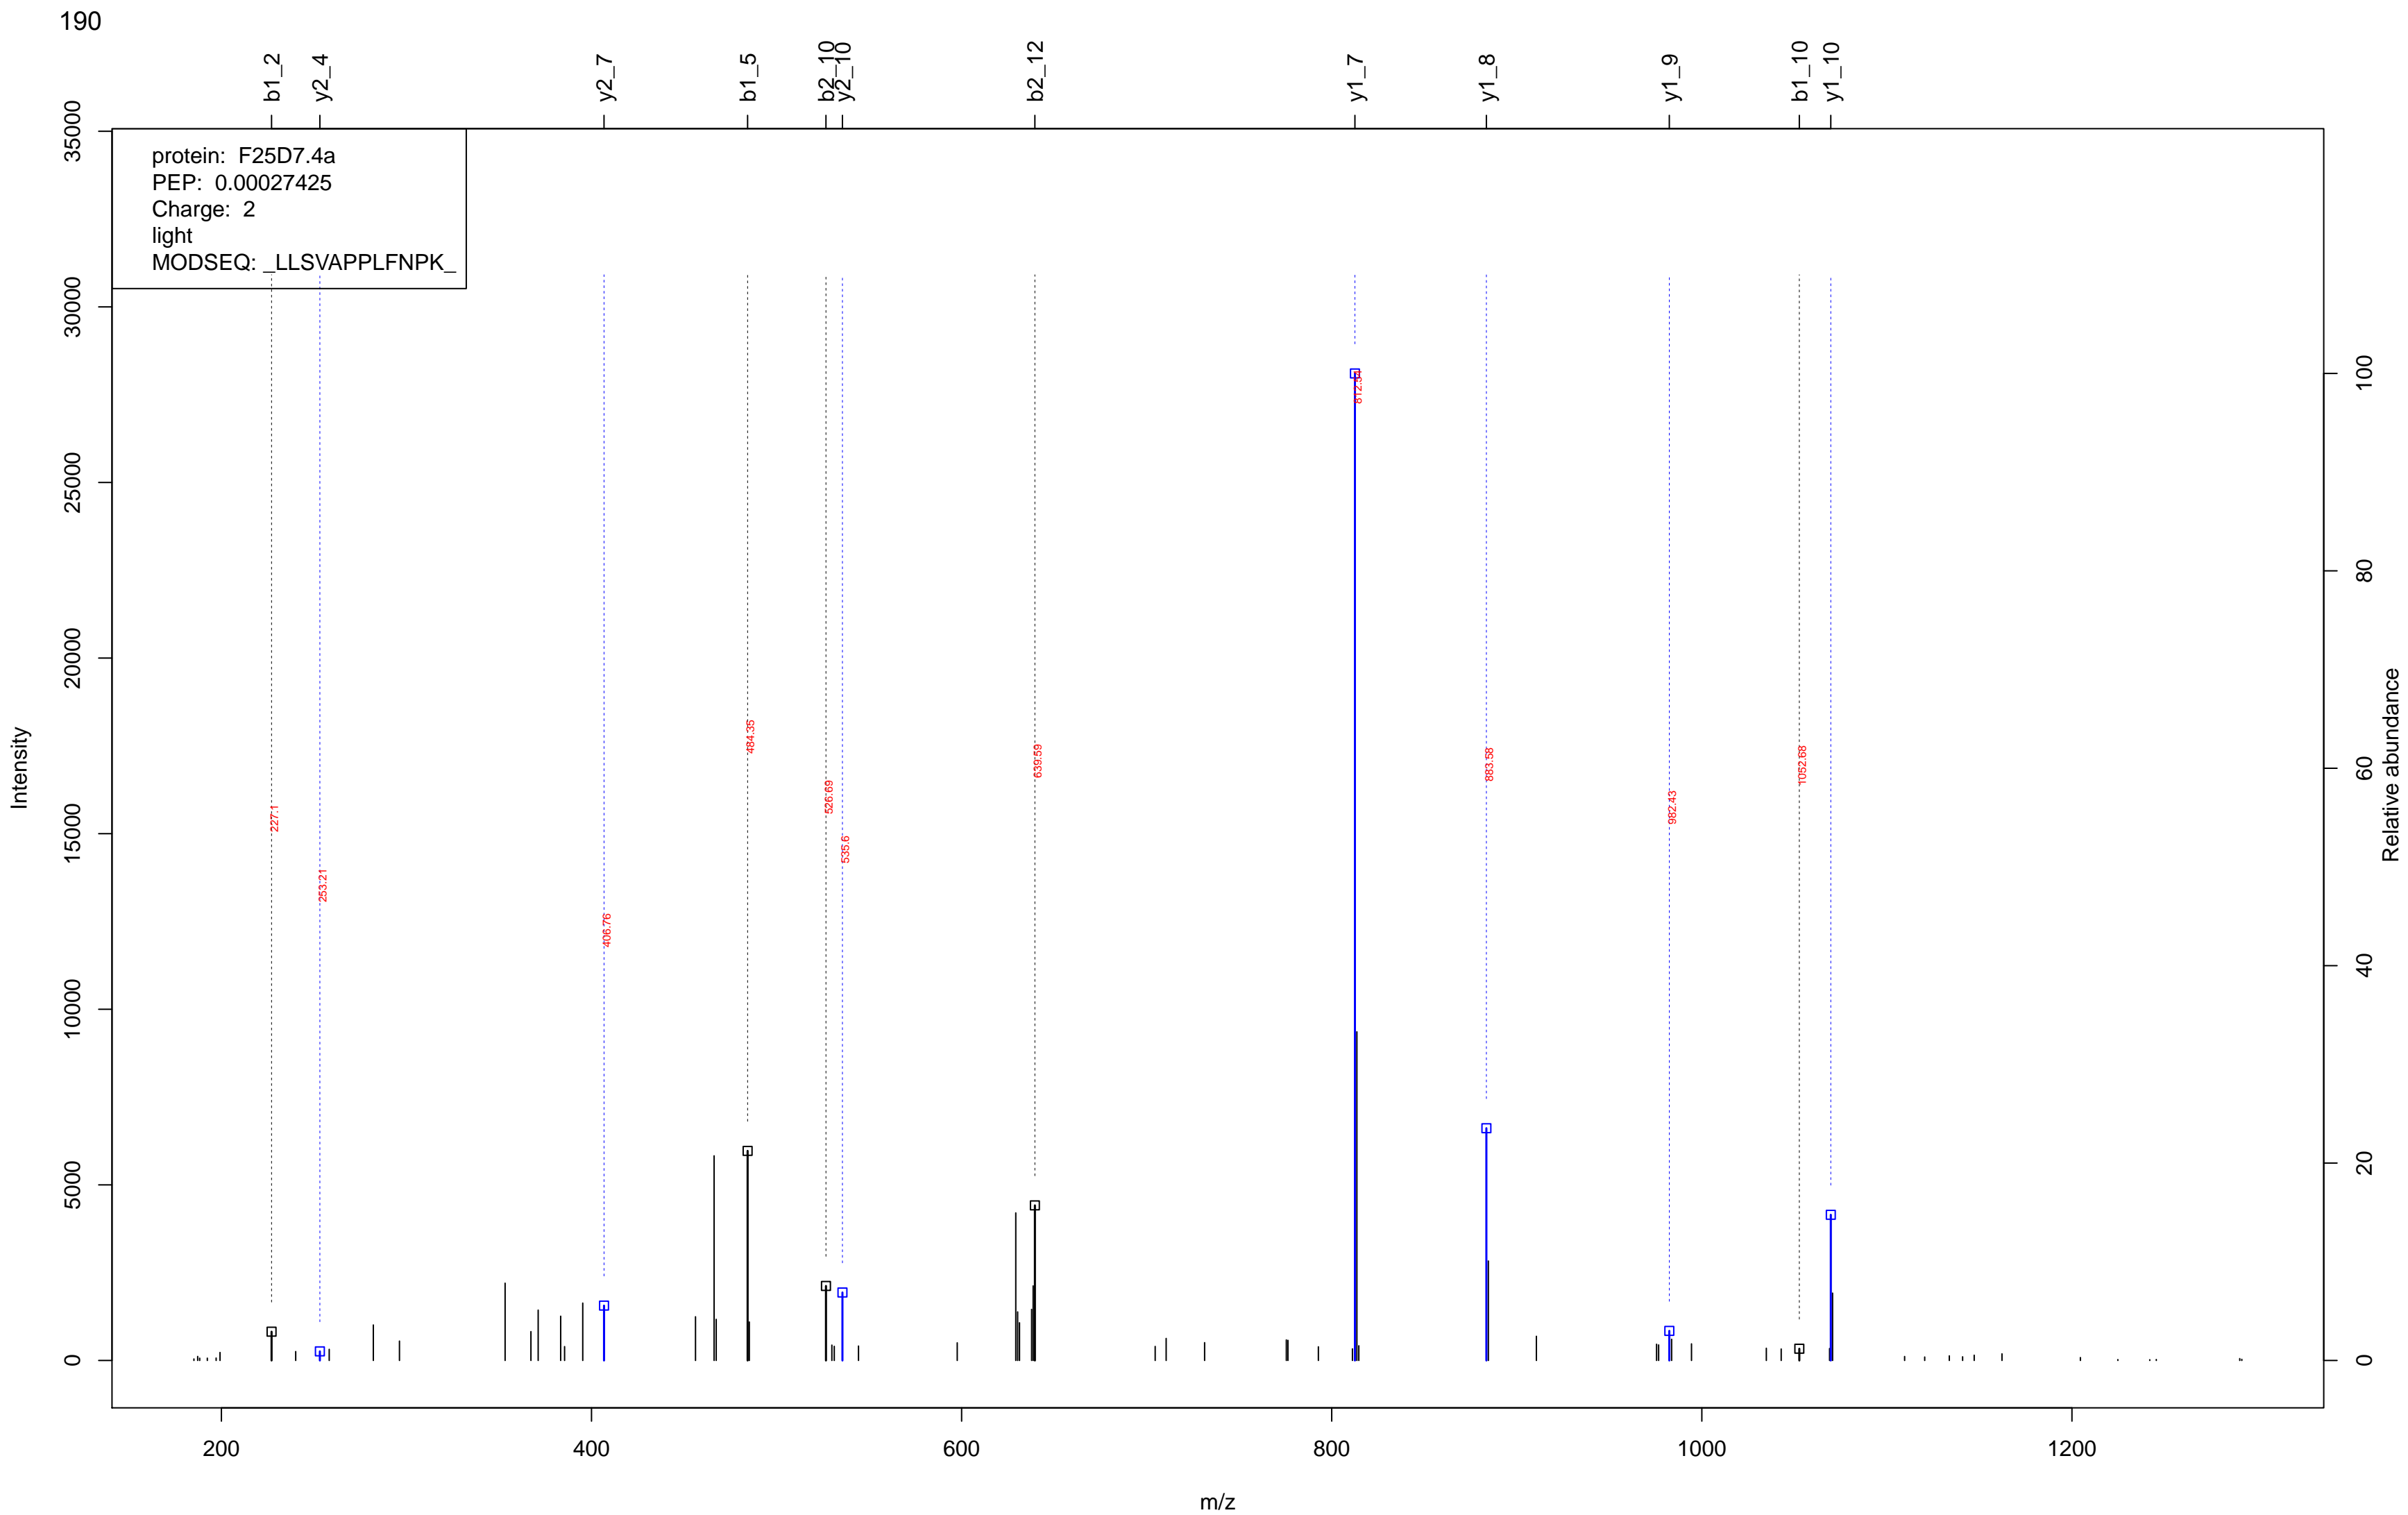

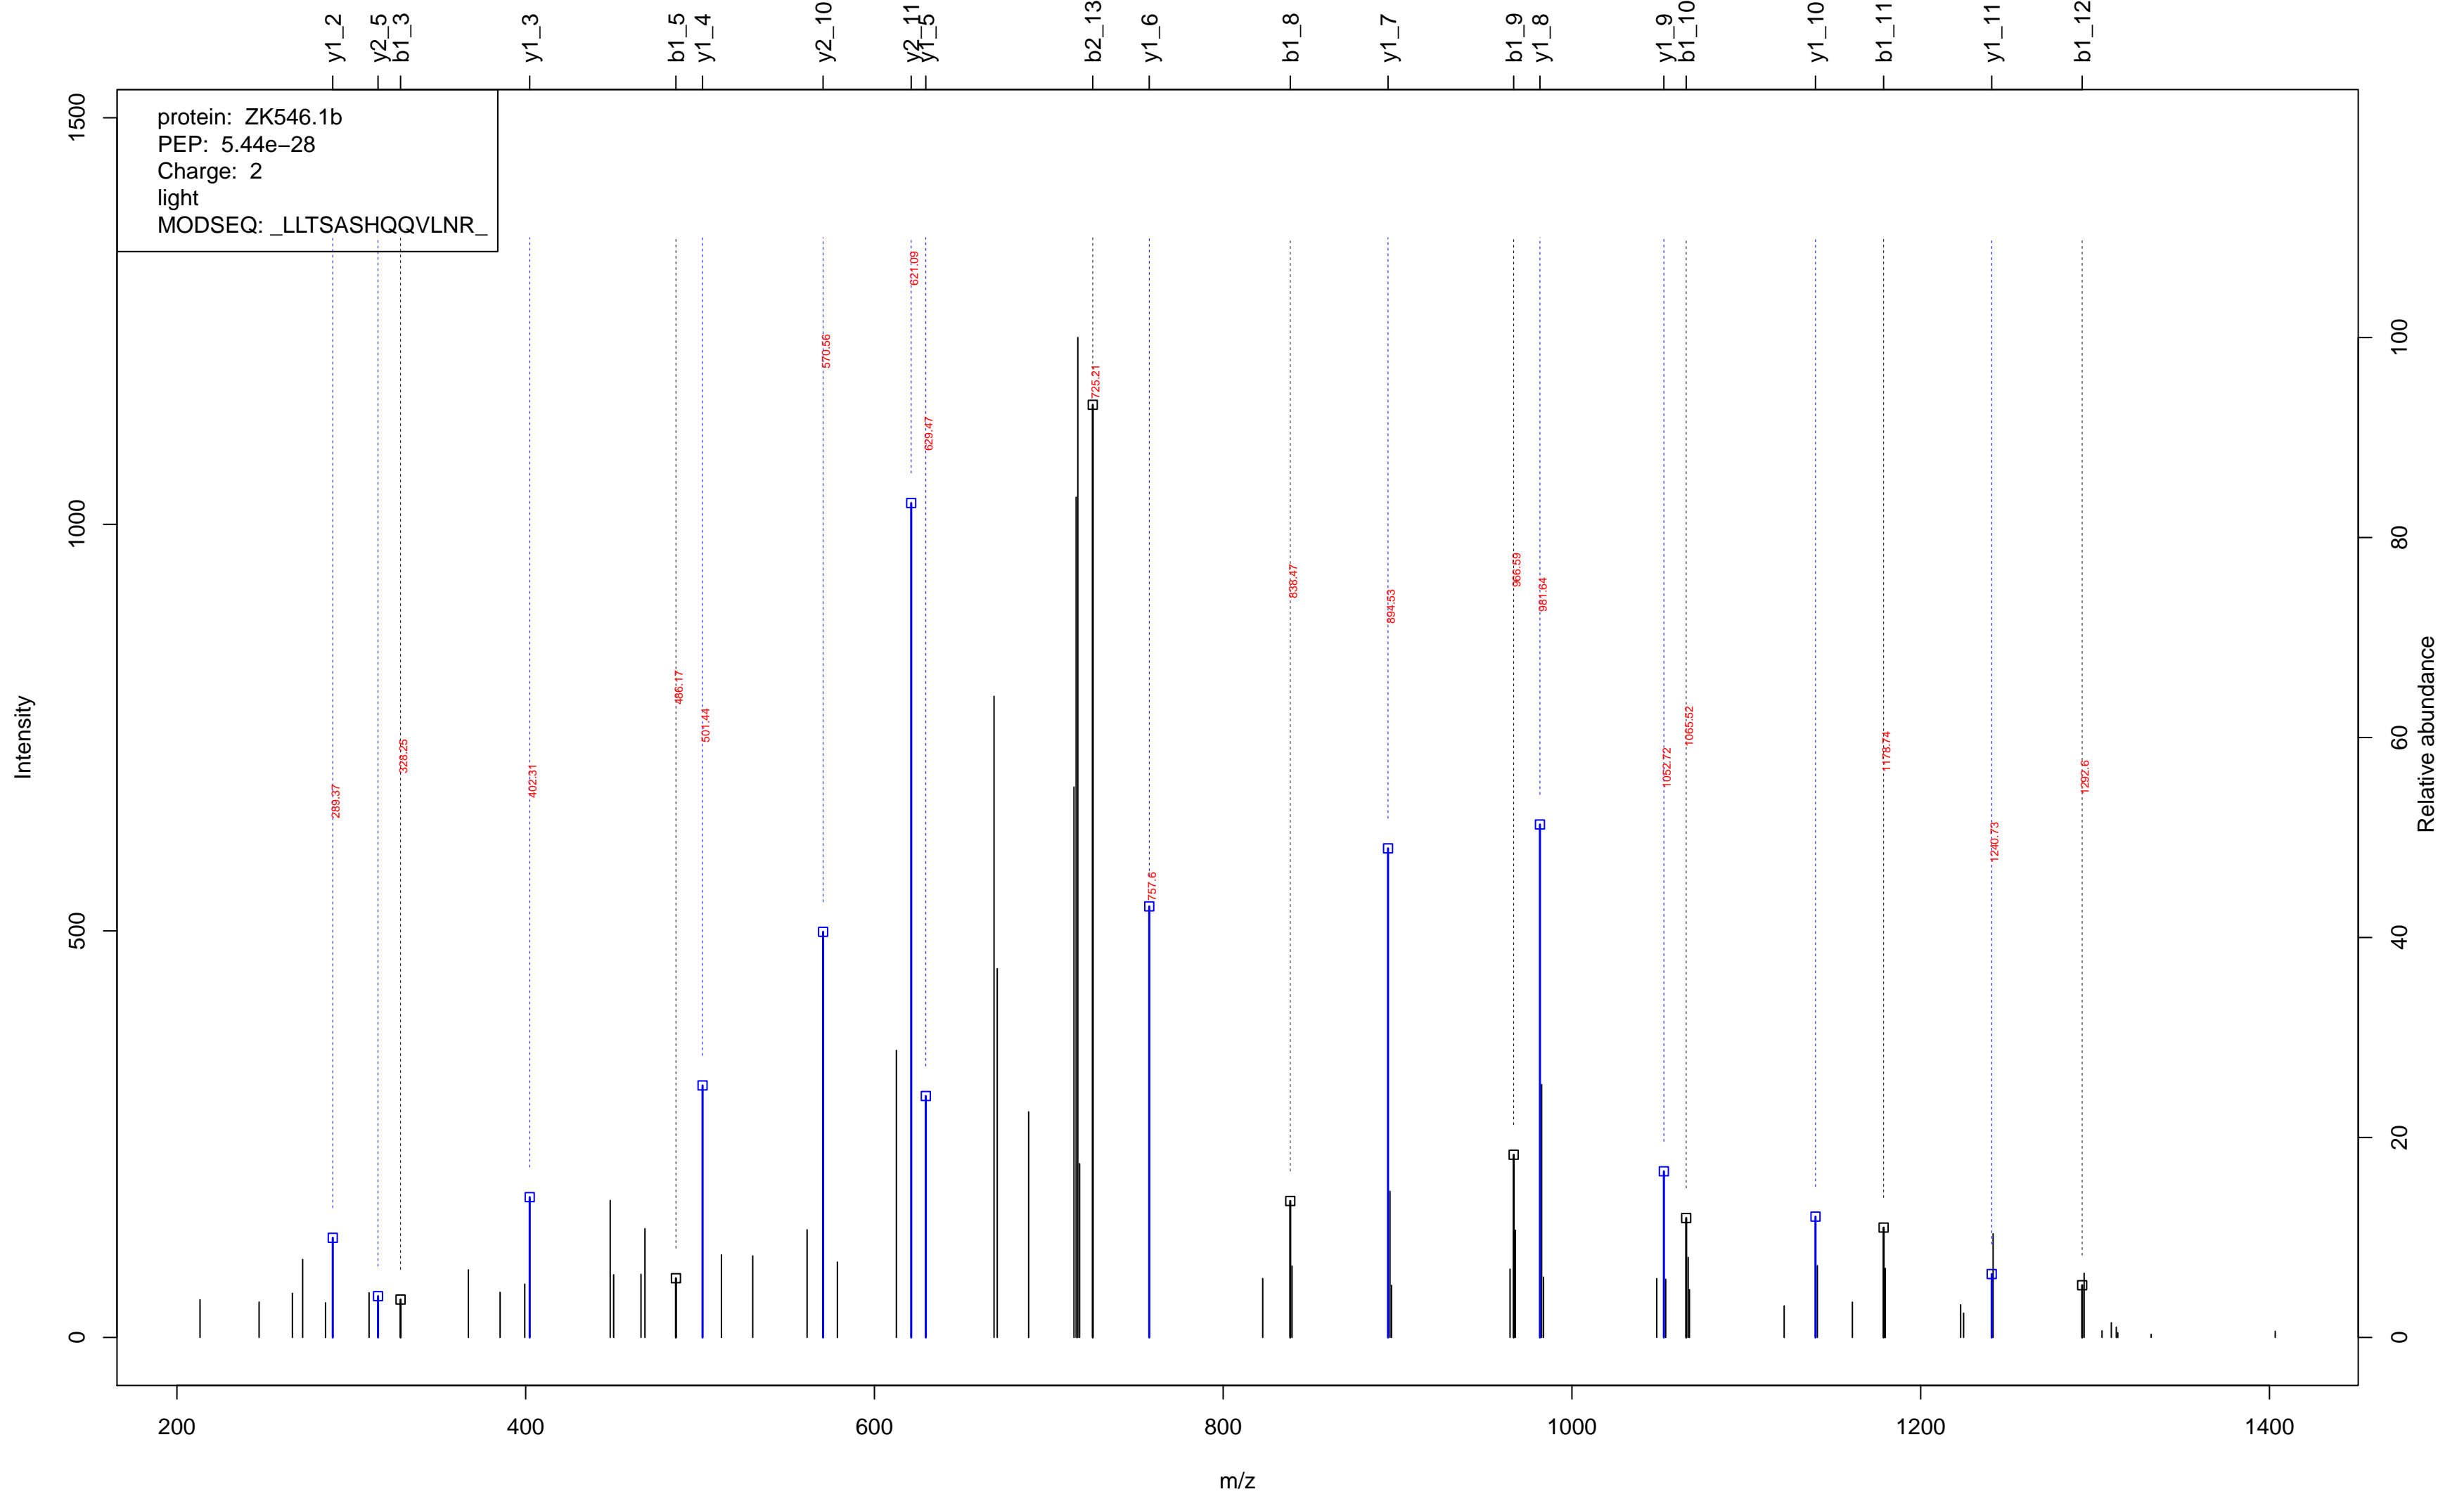

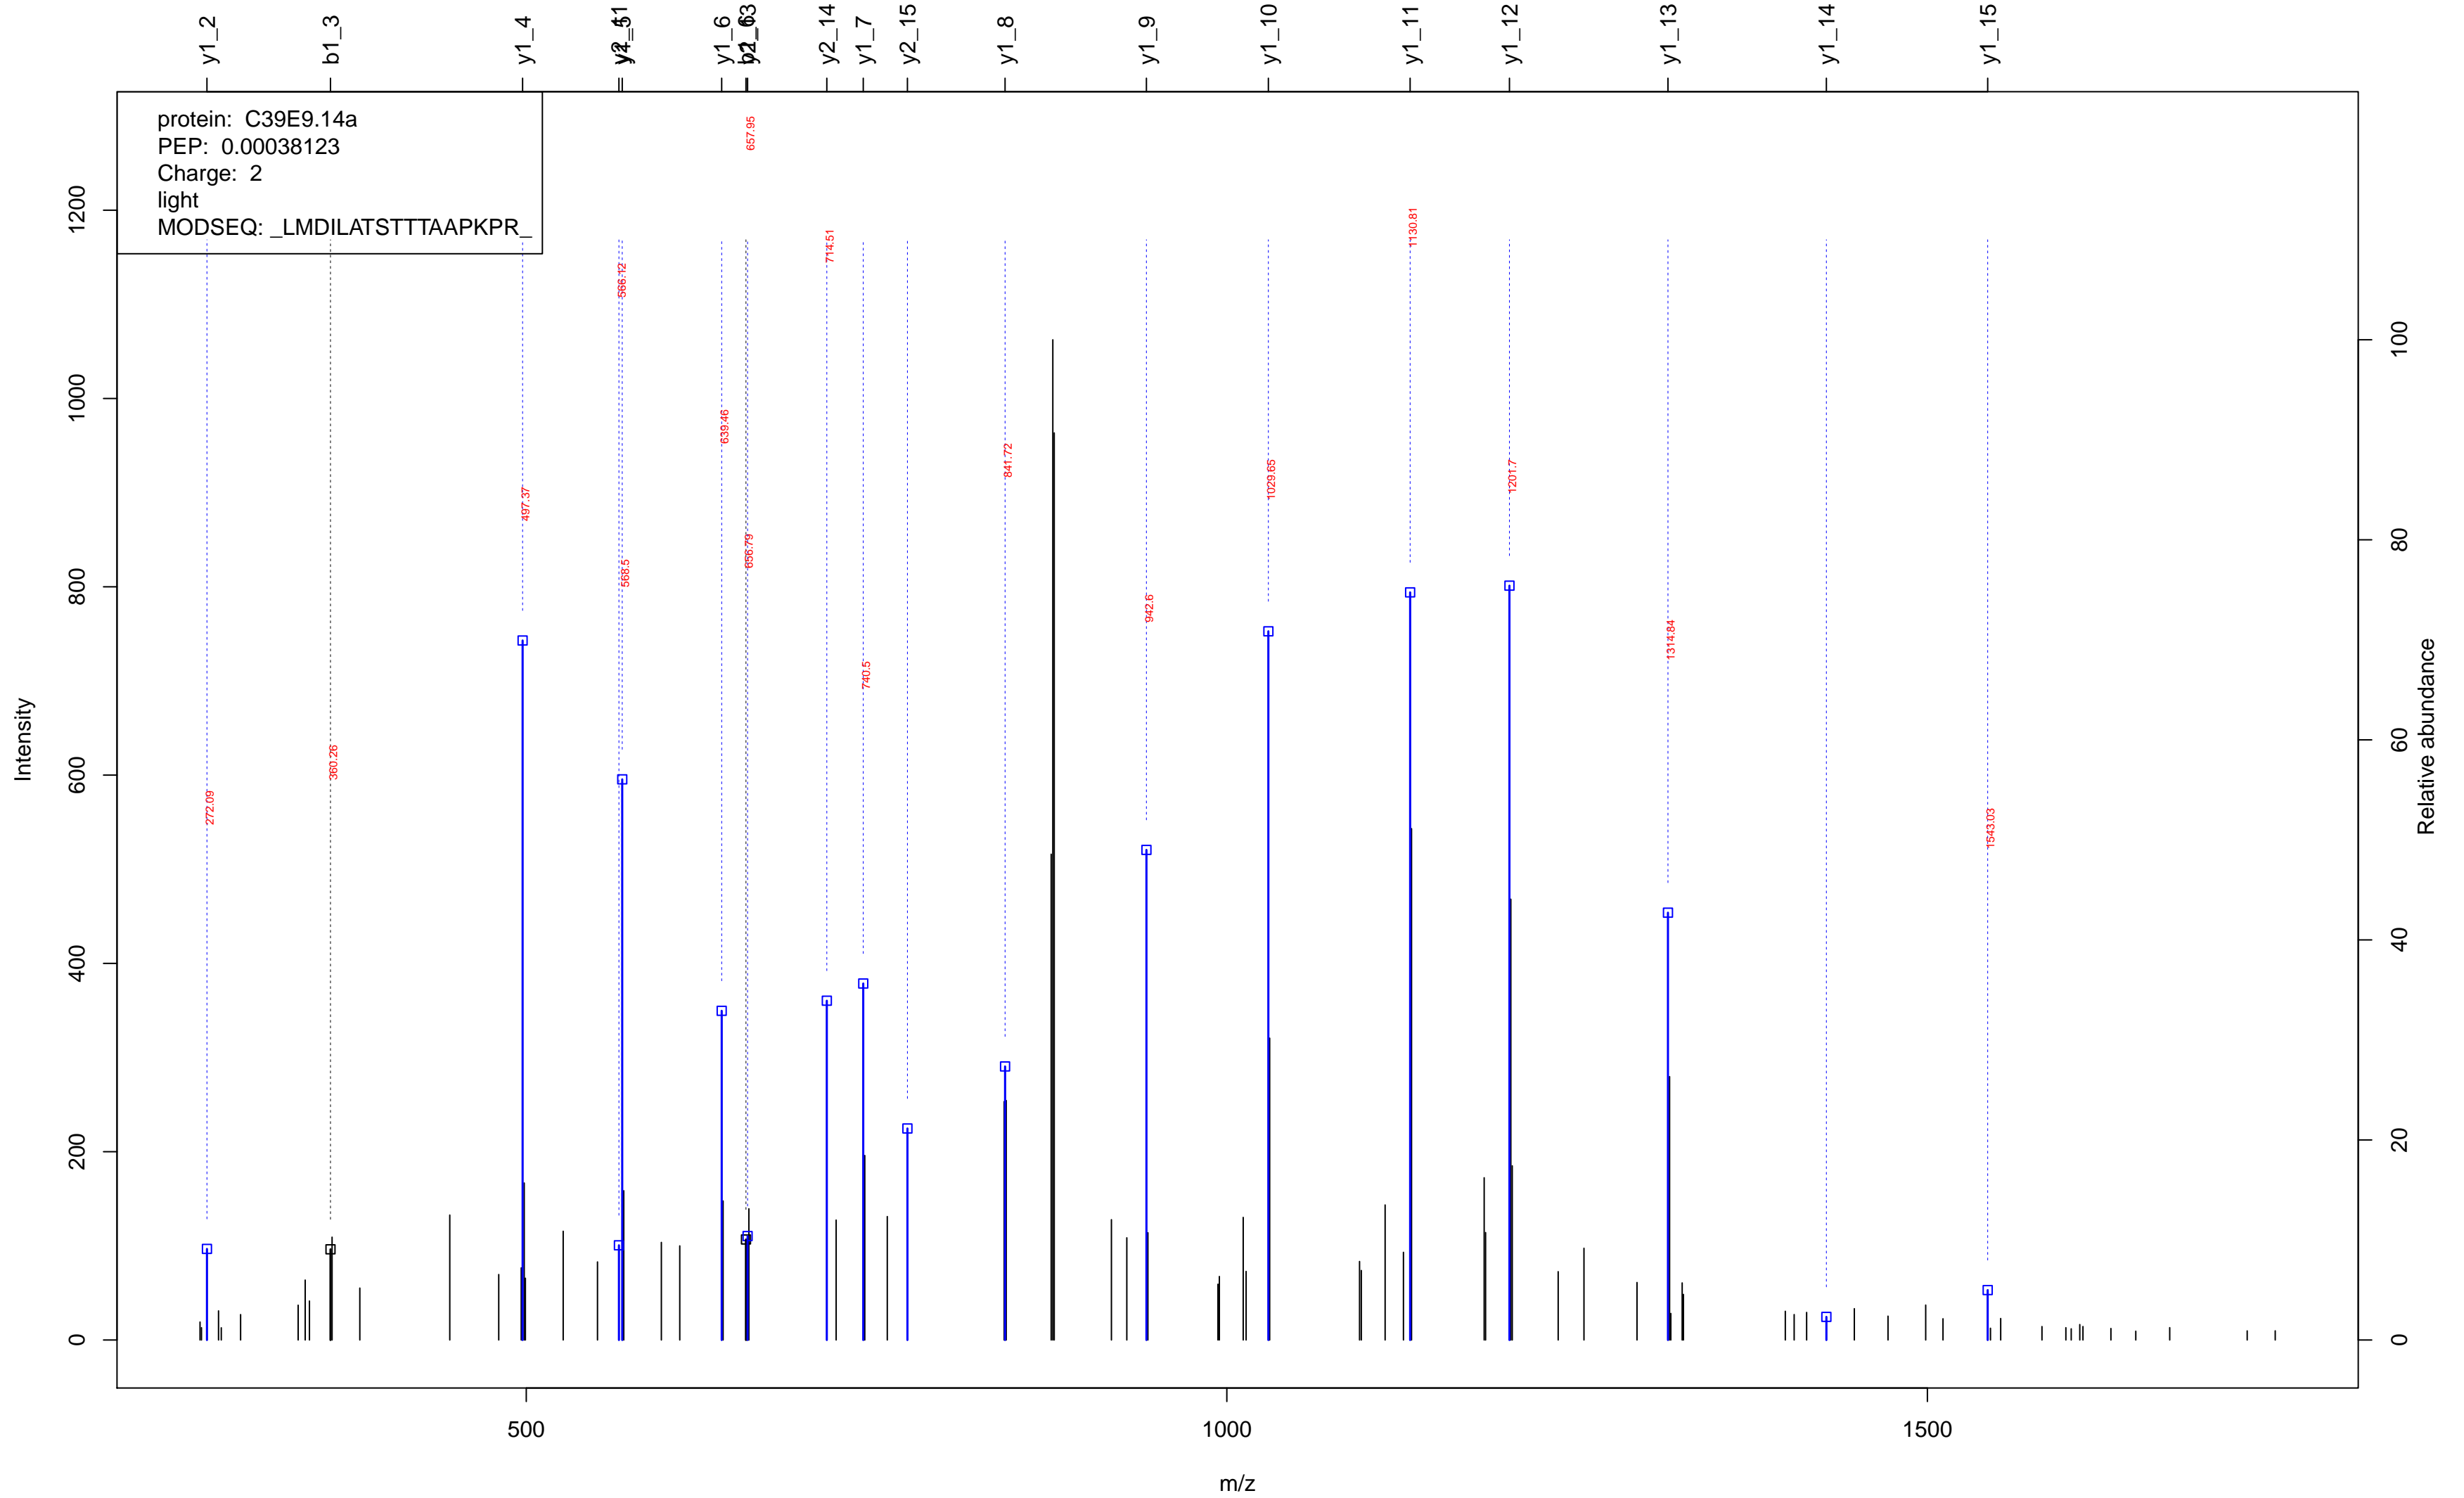



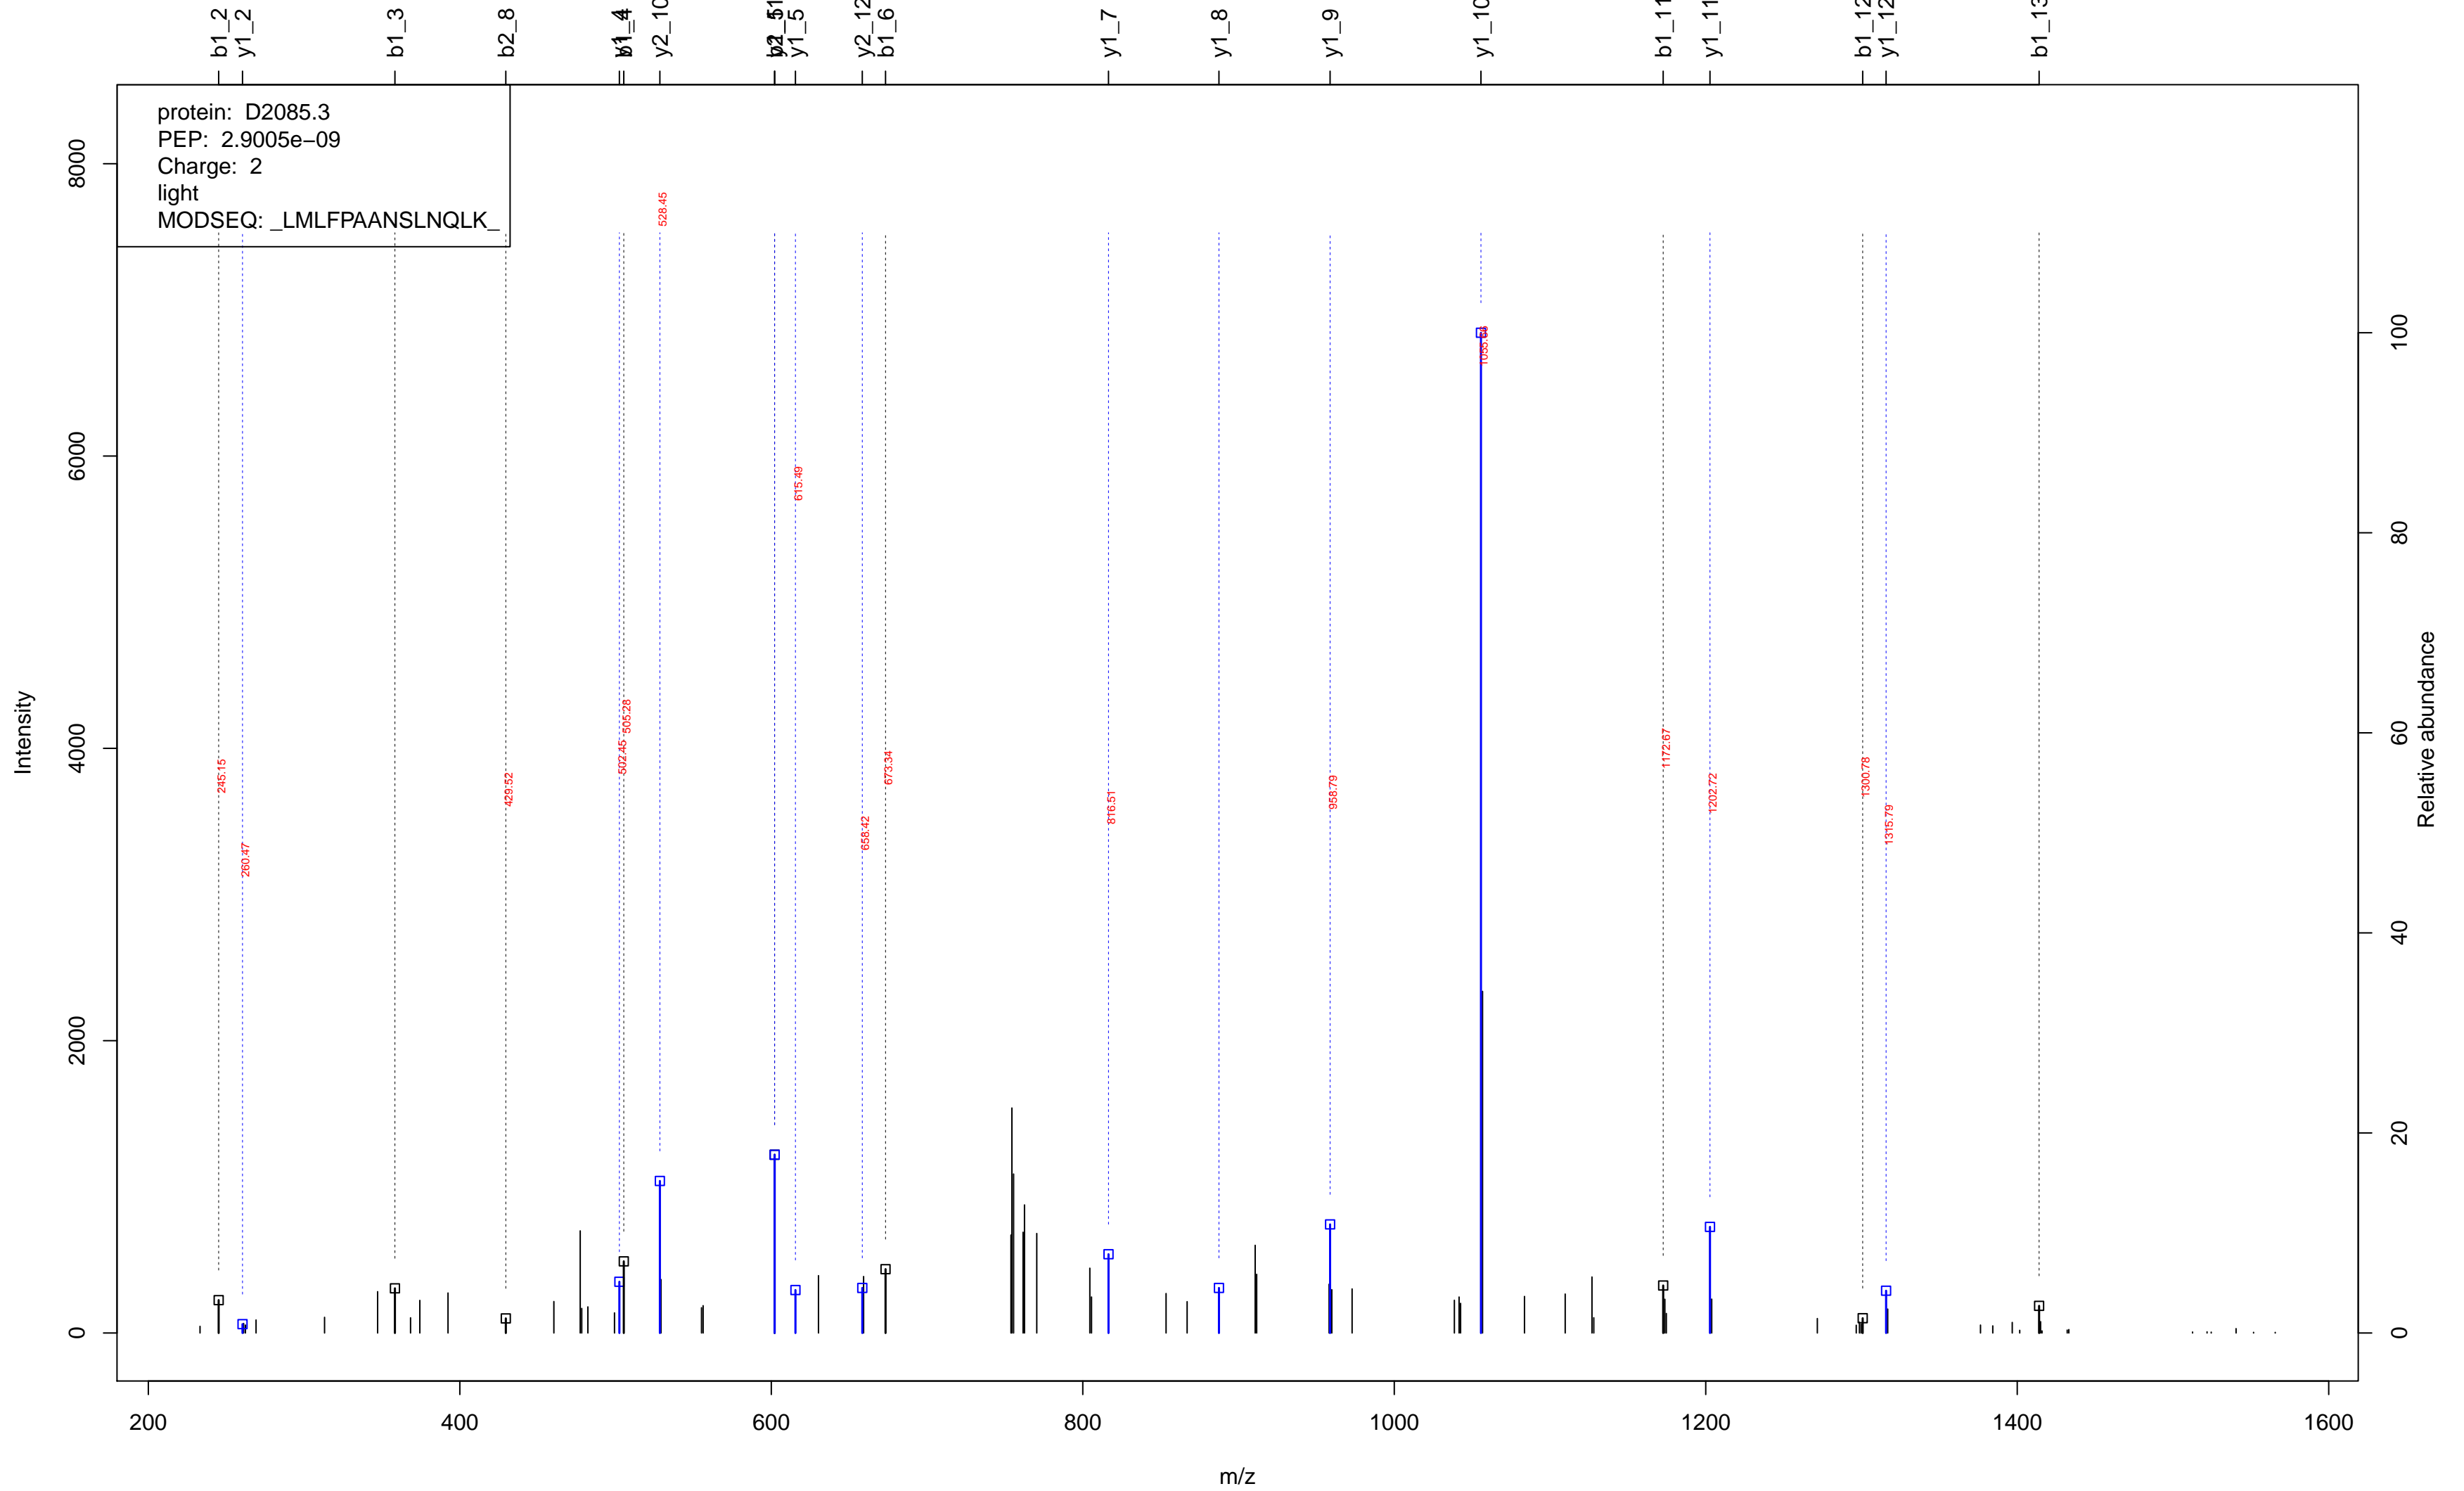

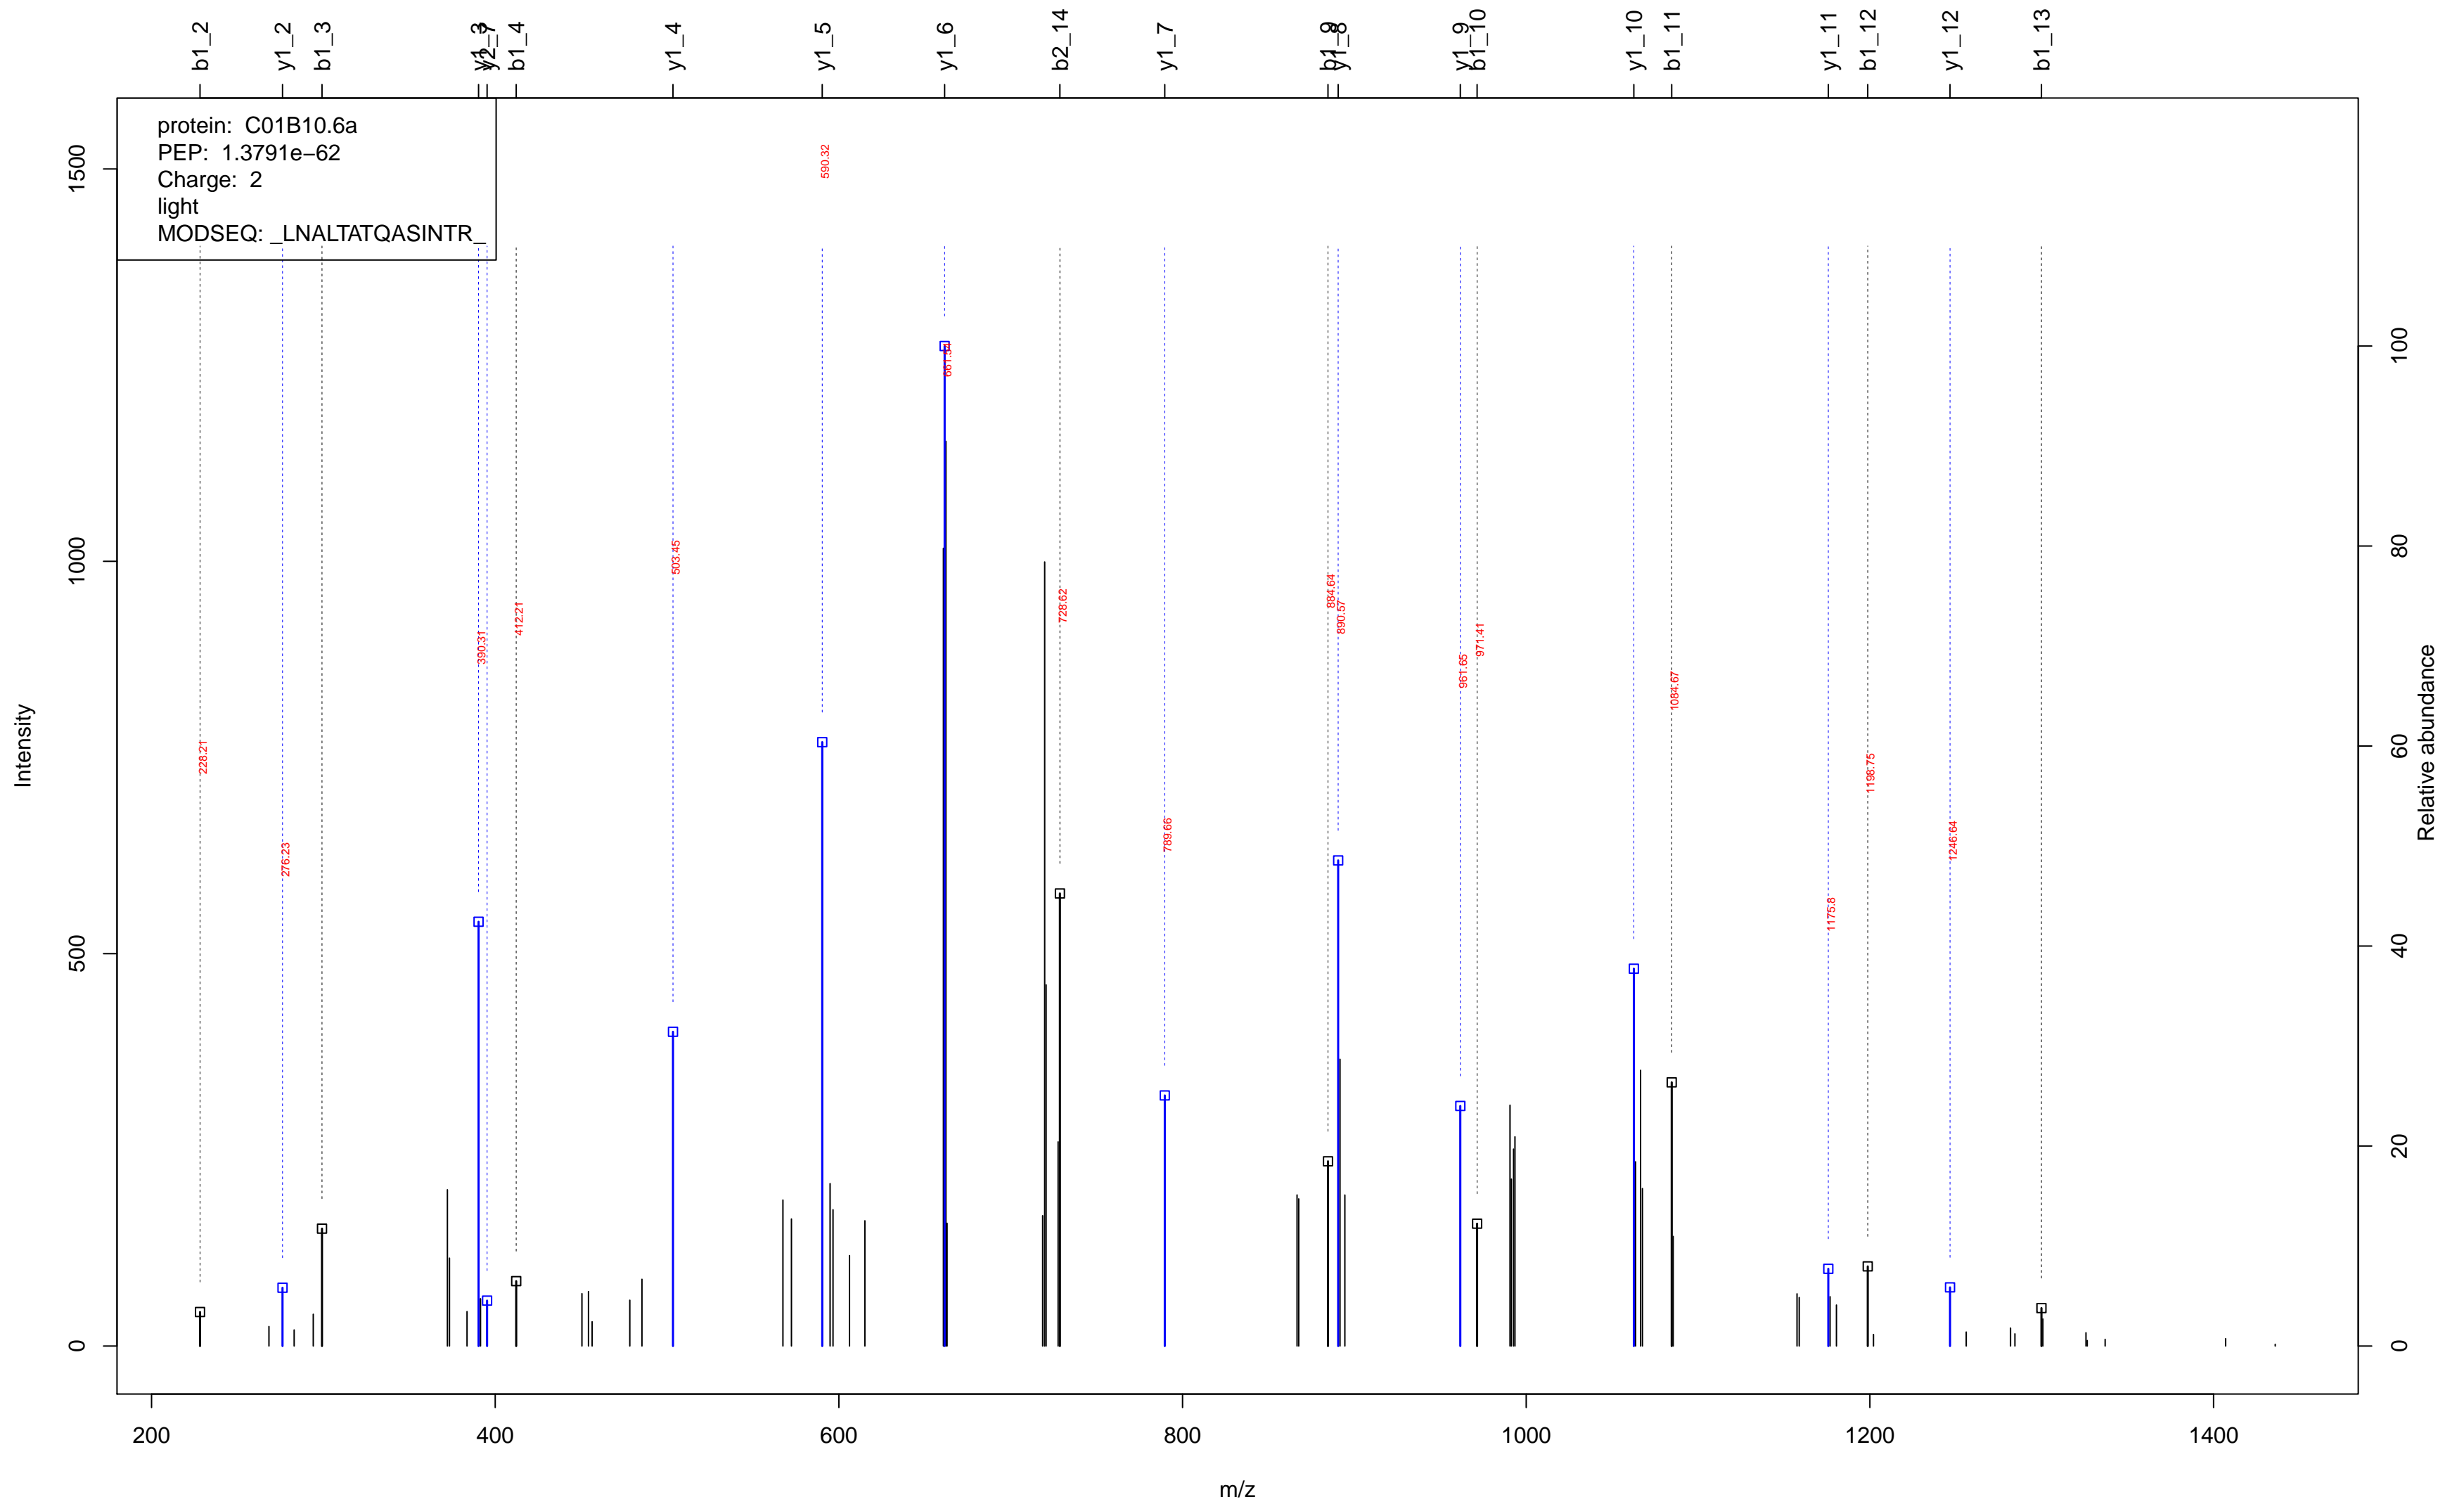

protein: C01B10.6a  
PEP: 1.3791e-62  
Charge: 2  
light  
MODSEQ: \_LNALTATQASINTR\_

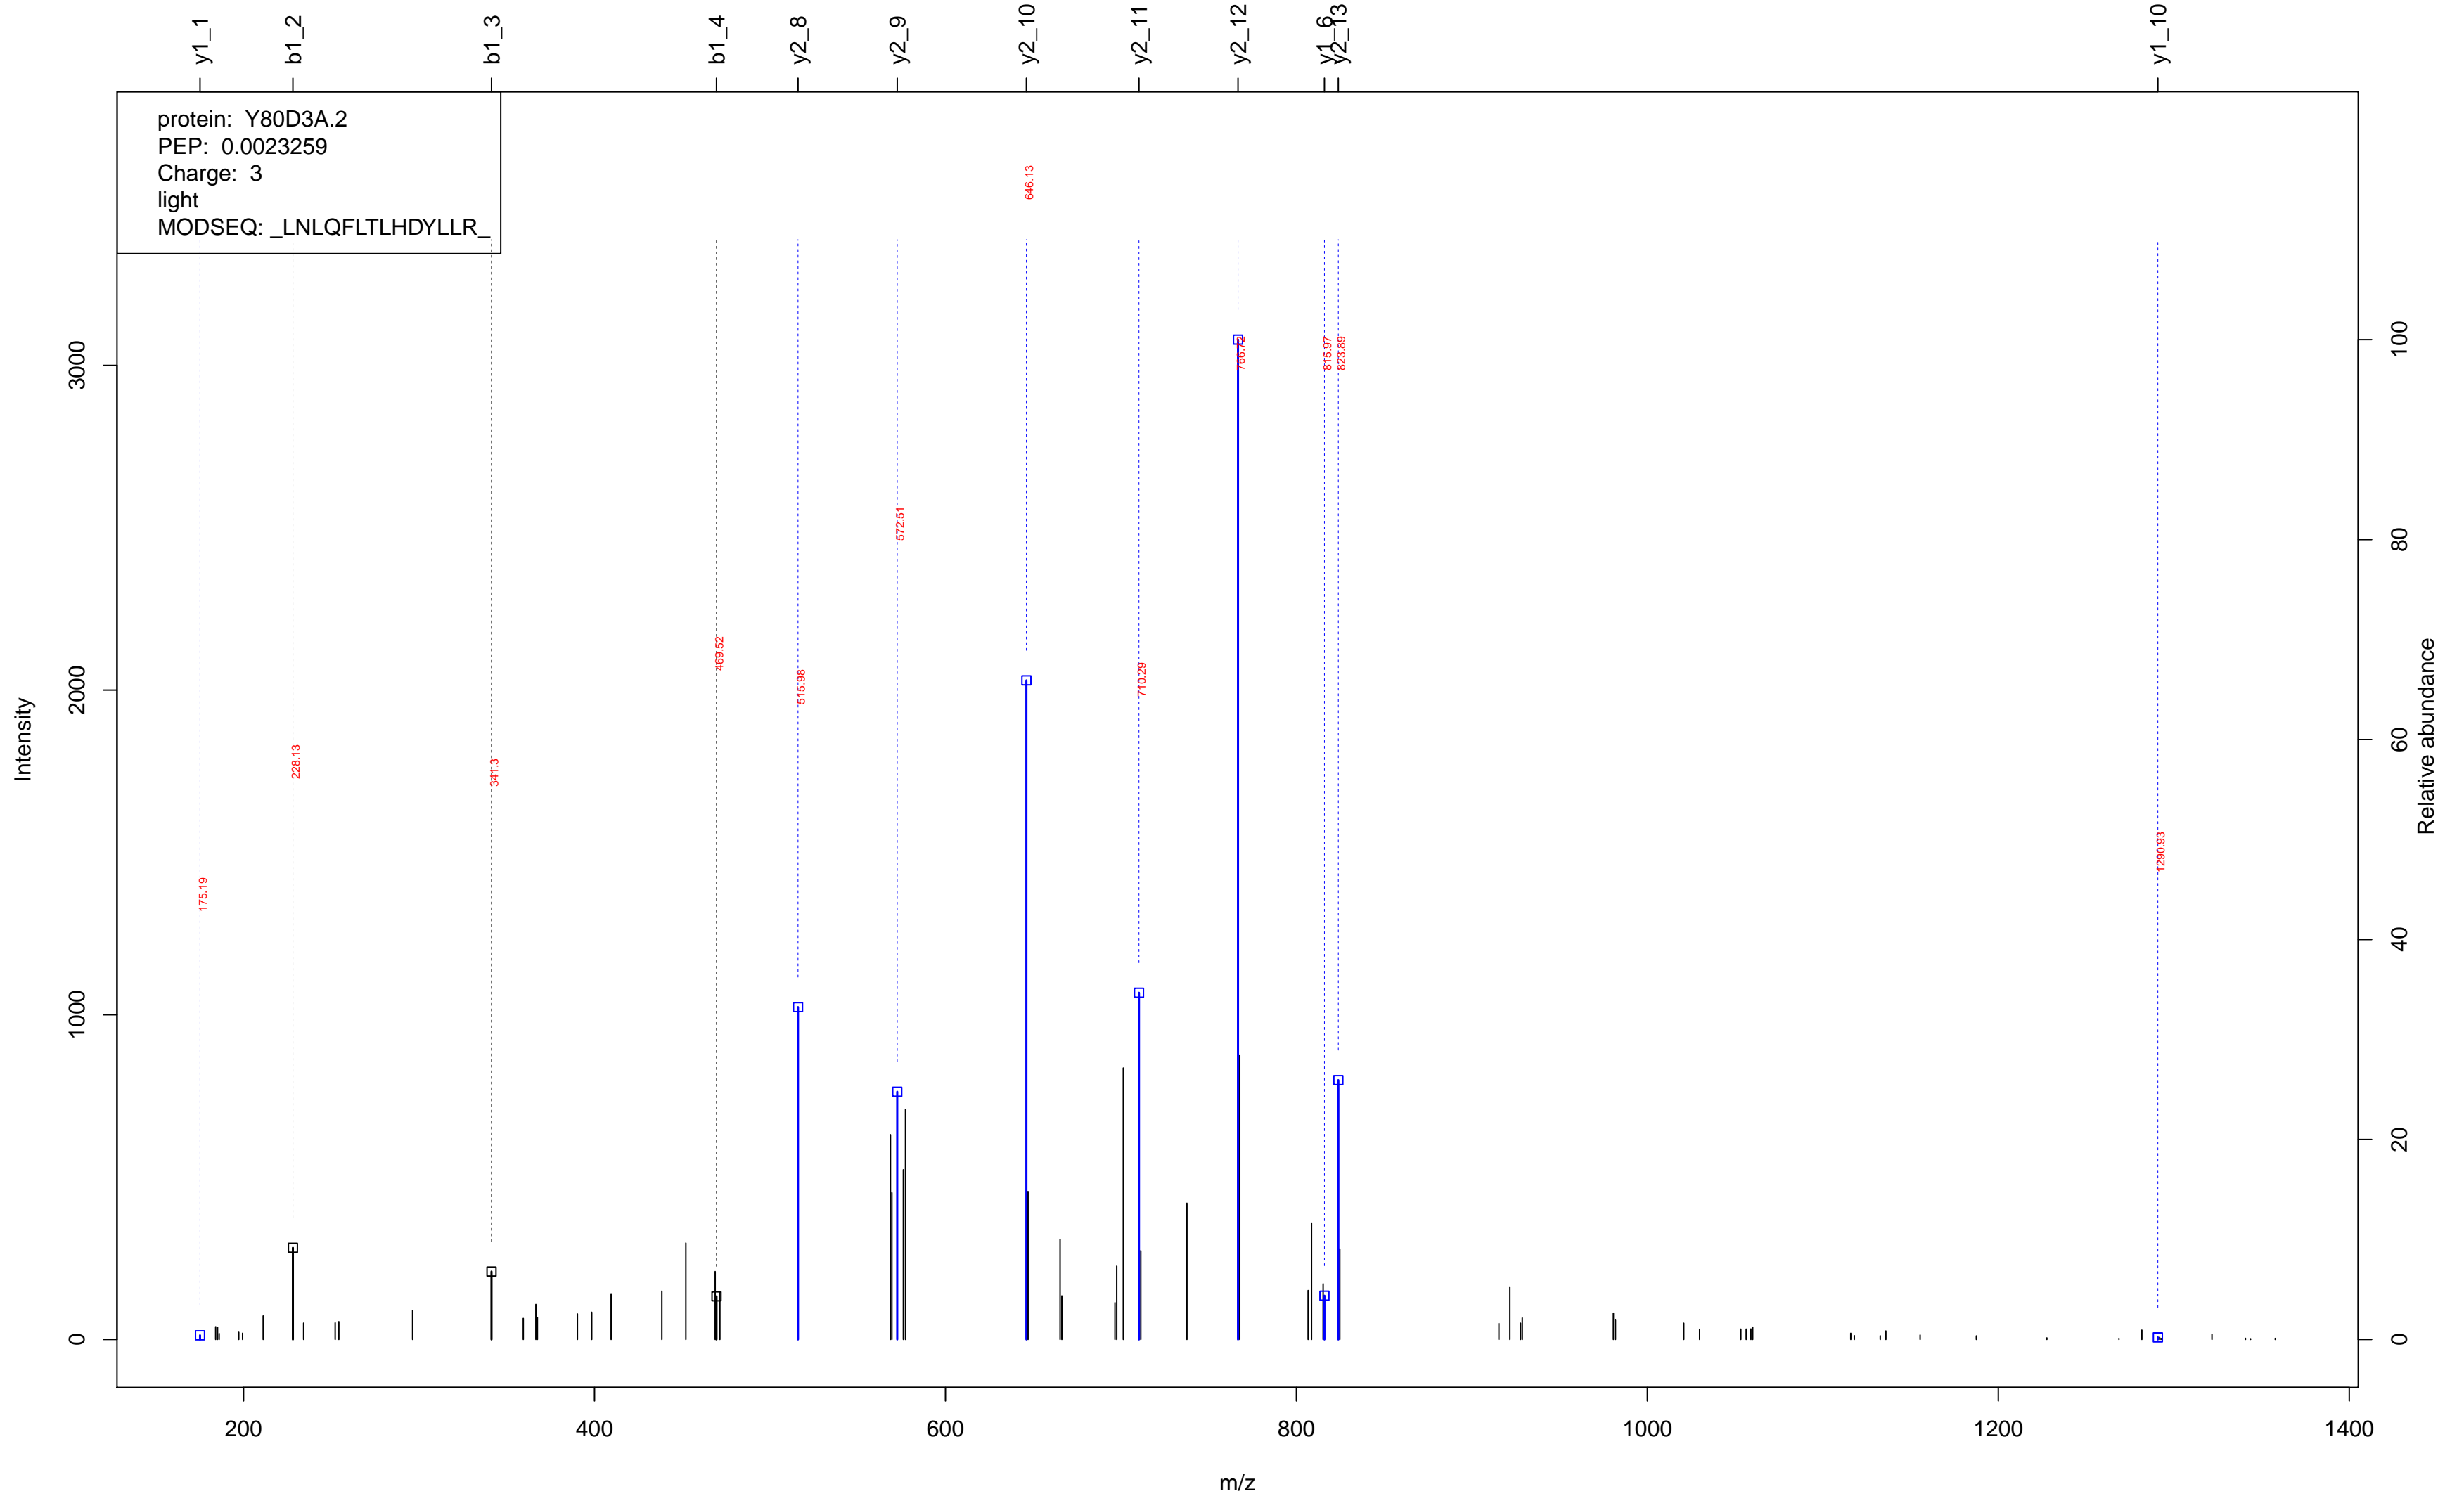

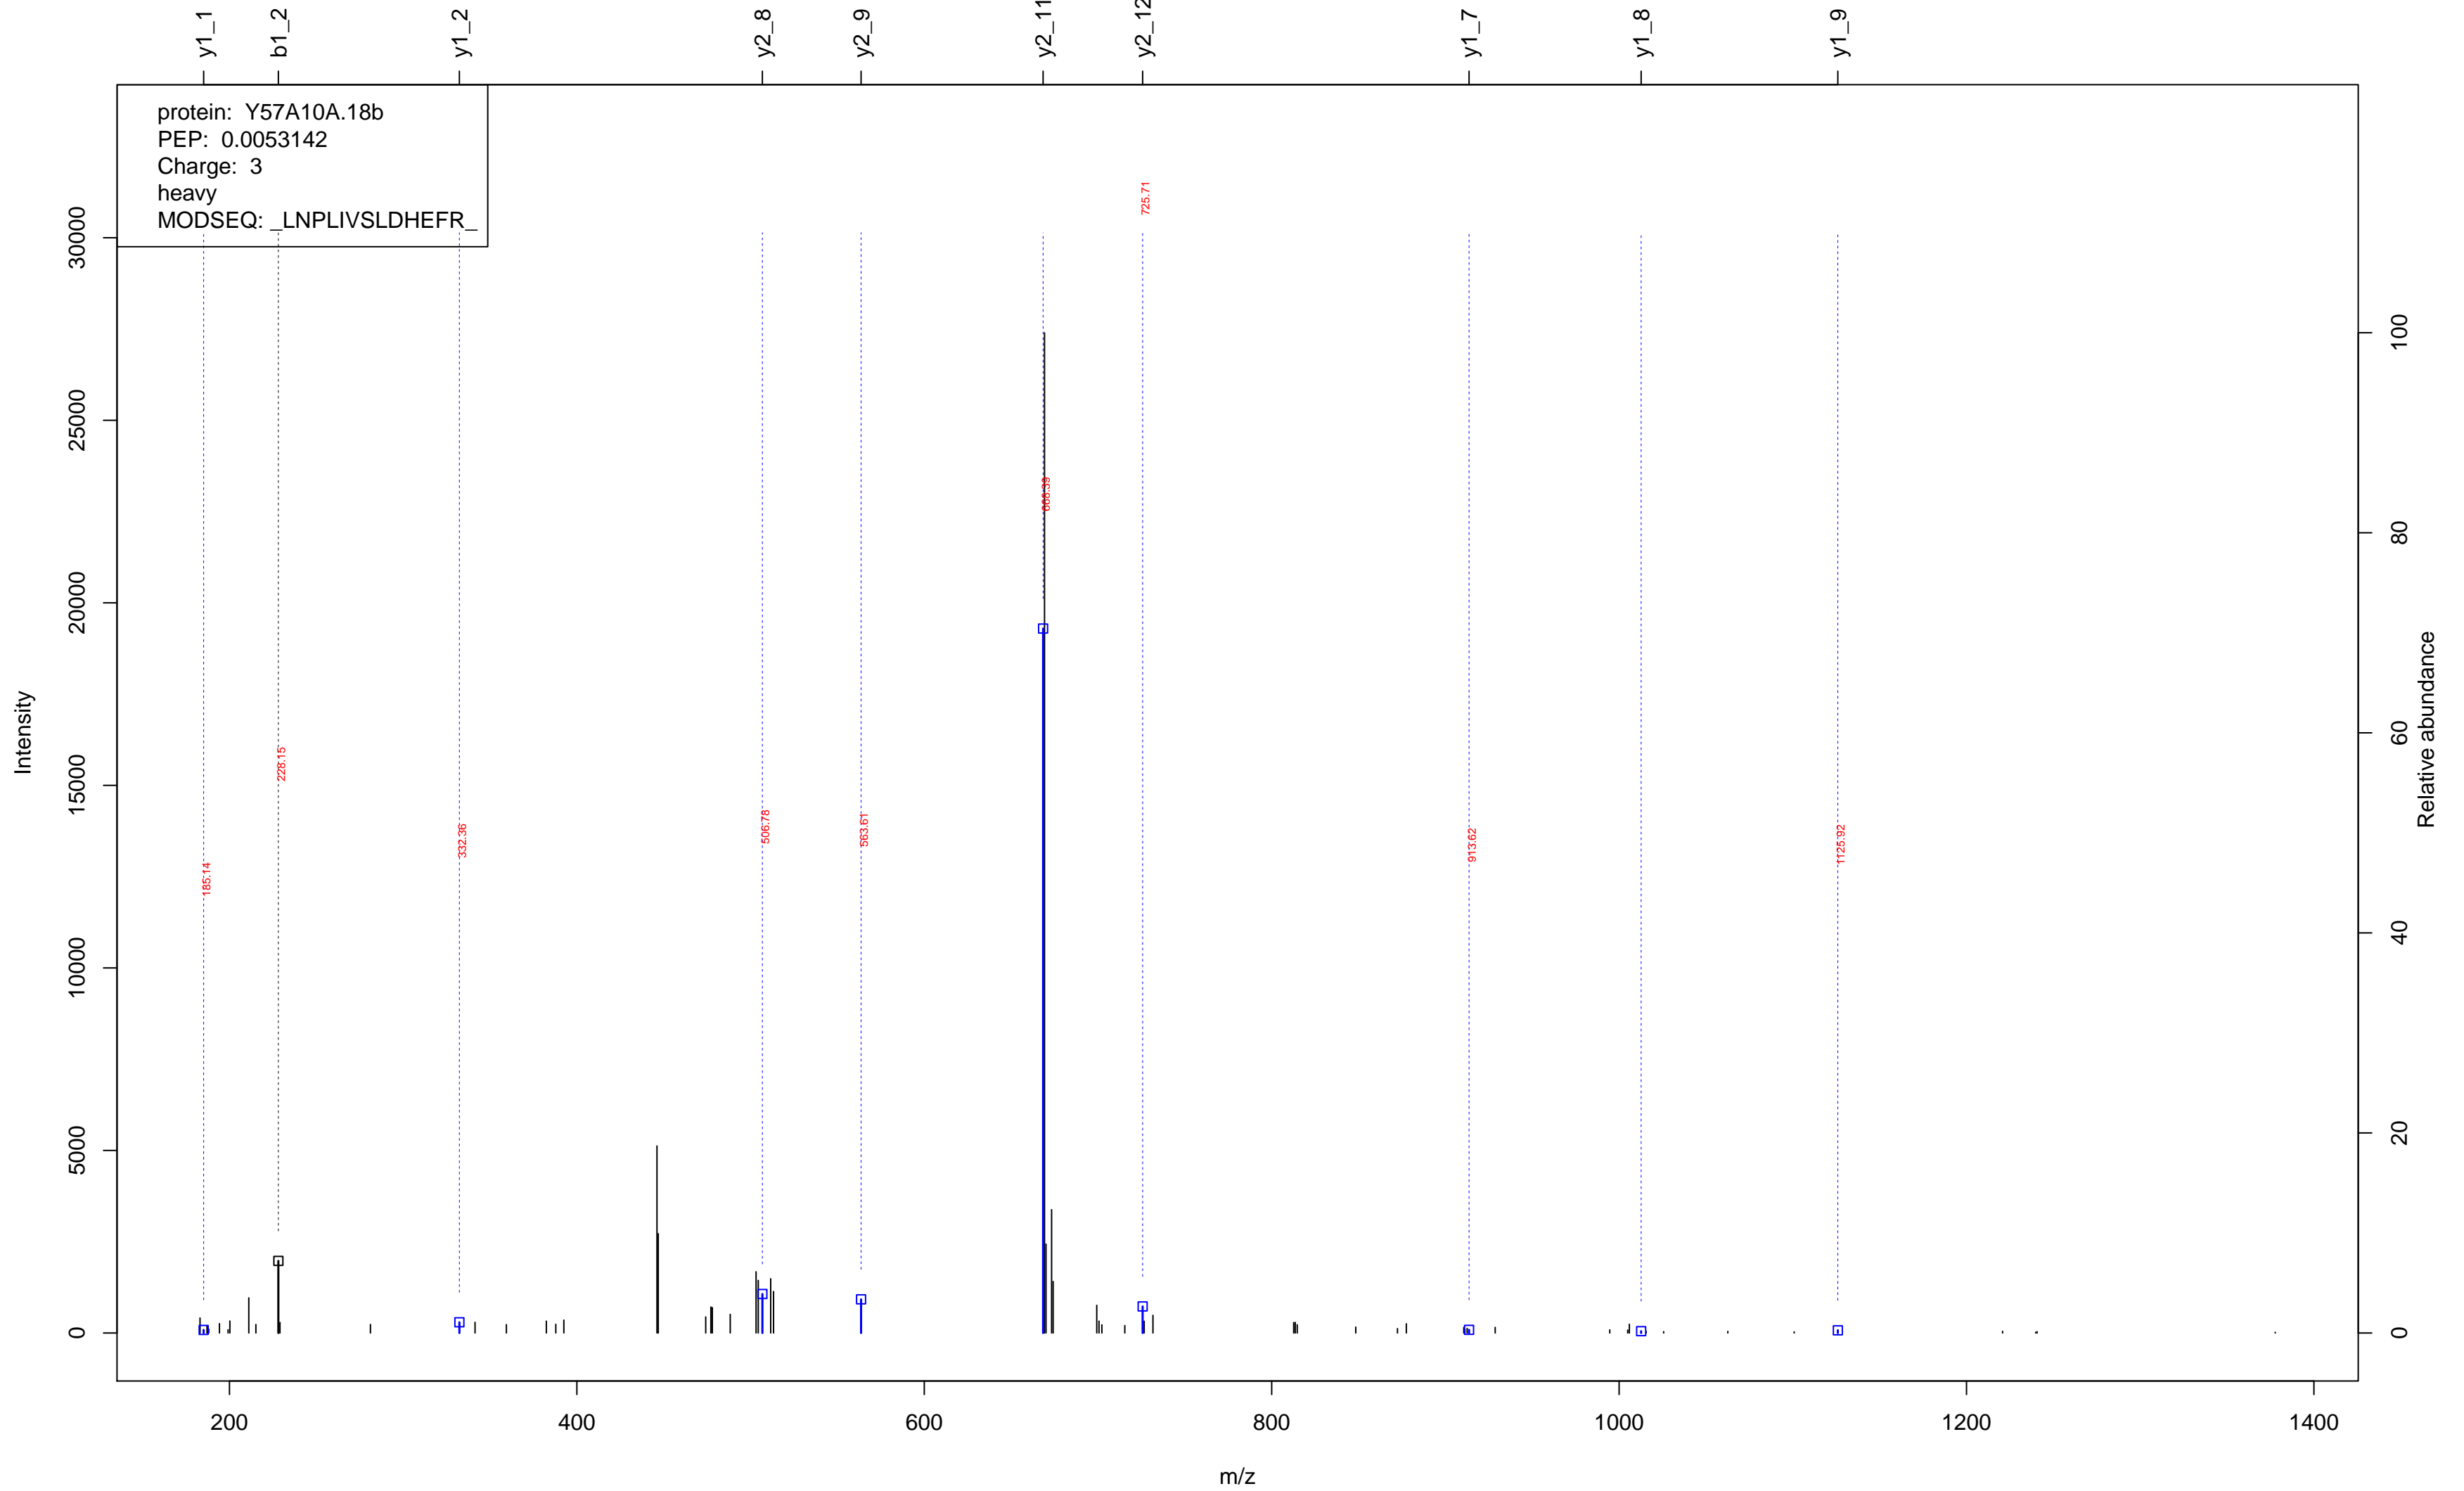

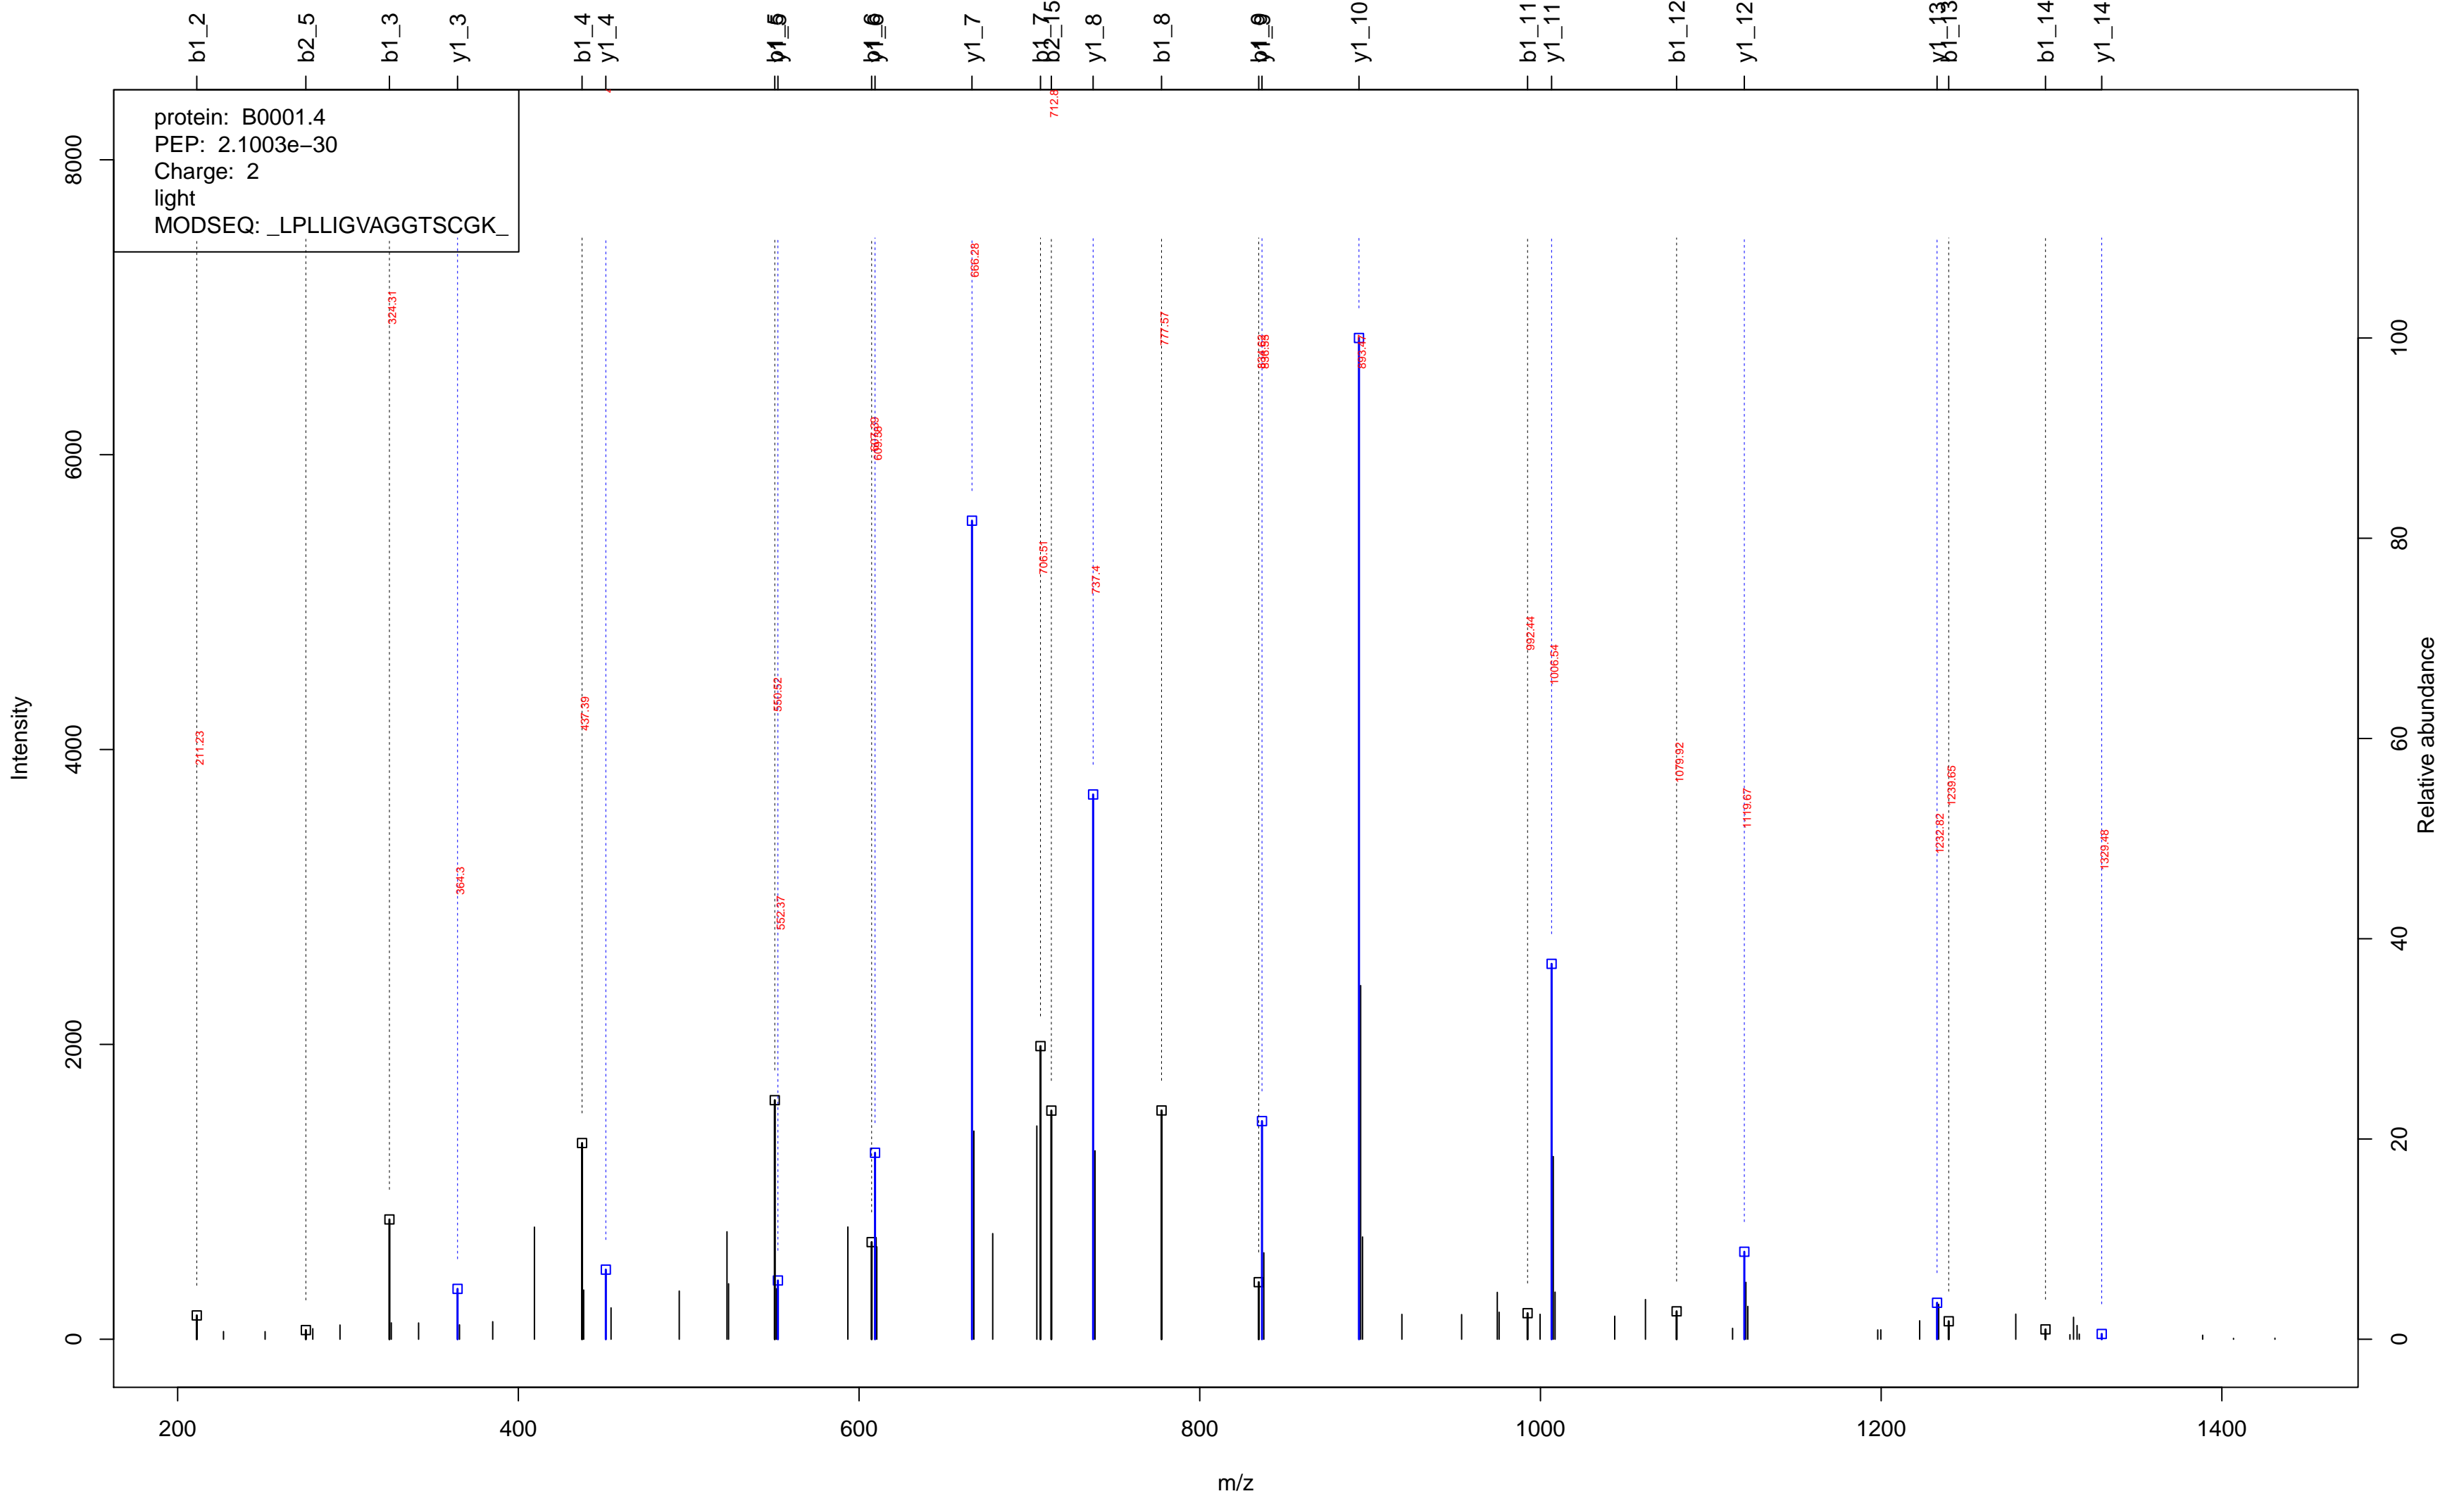

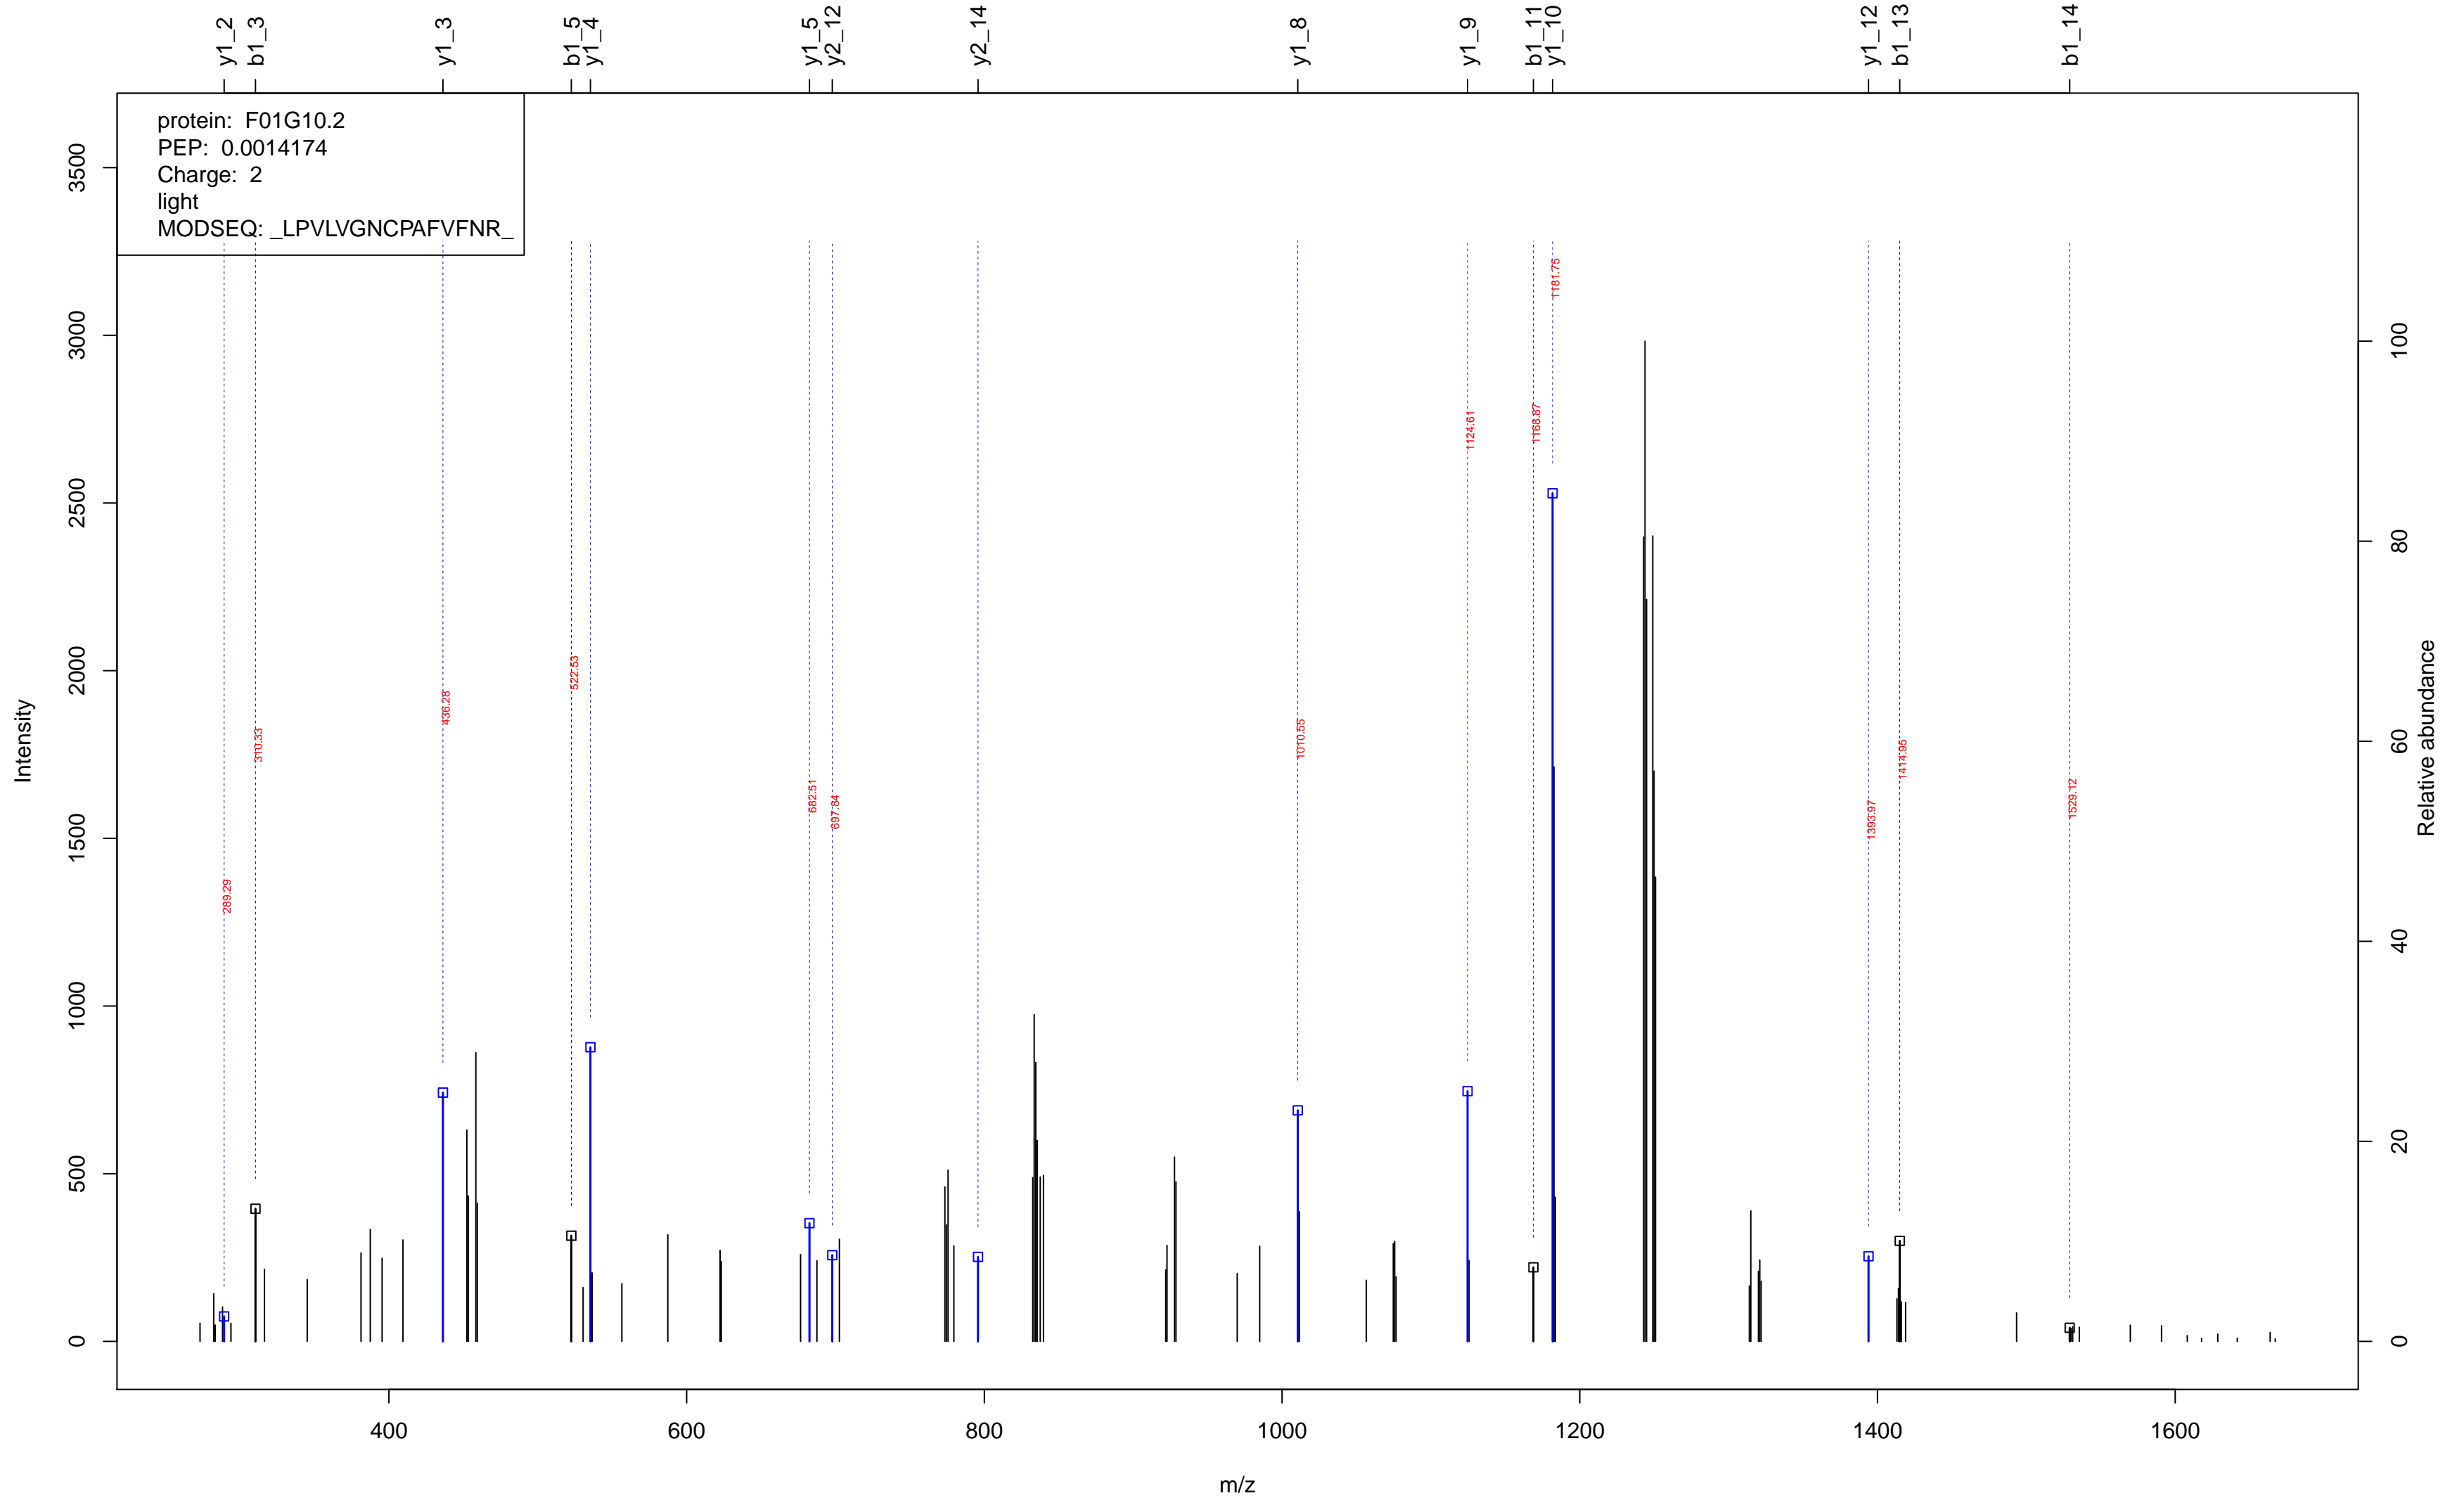

y1\_1      b2\_5      b1\_3      b1\_4      y2\_9      y2\_10      b2\_12      y2\_12      y1\_9

protein: F47G6.4  
PEP: 0.018747  
Charge: 3  
heavy  
MODSEQ: \_LQLENDELAEVER\_

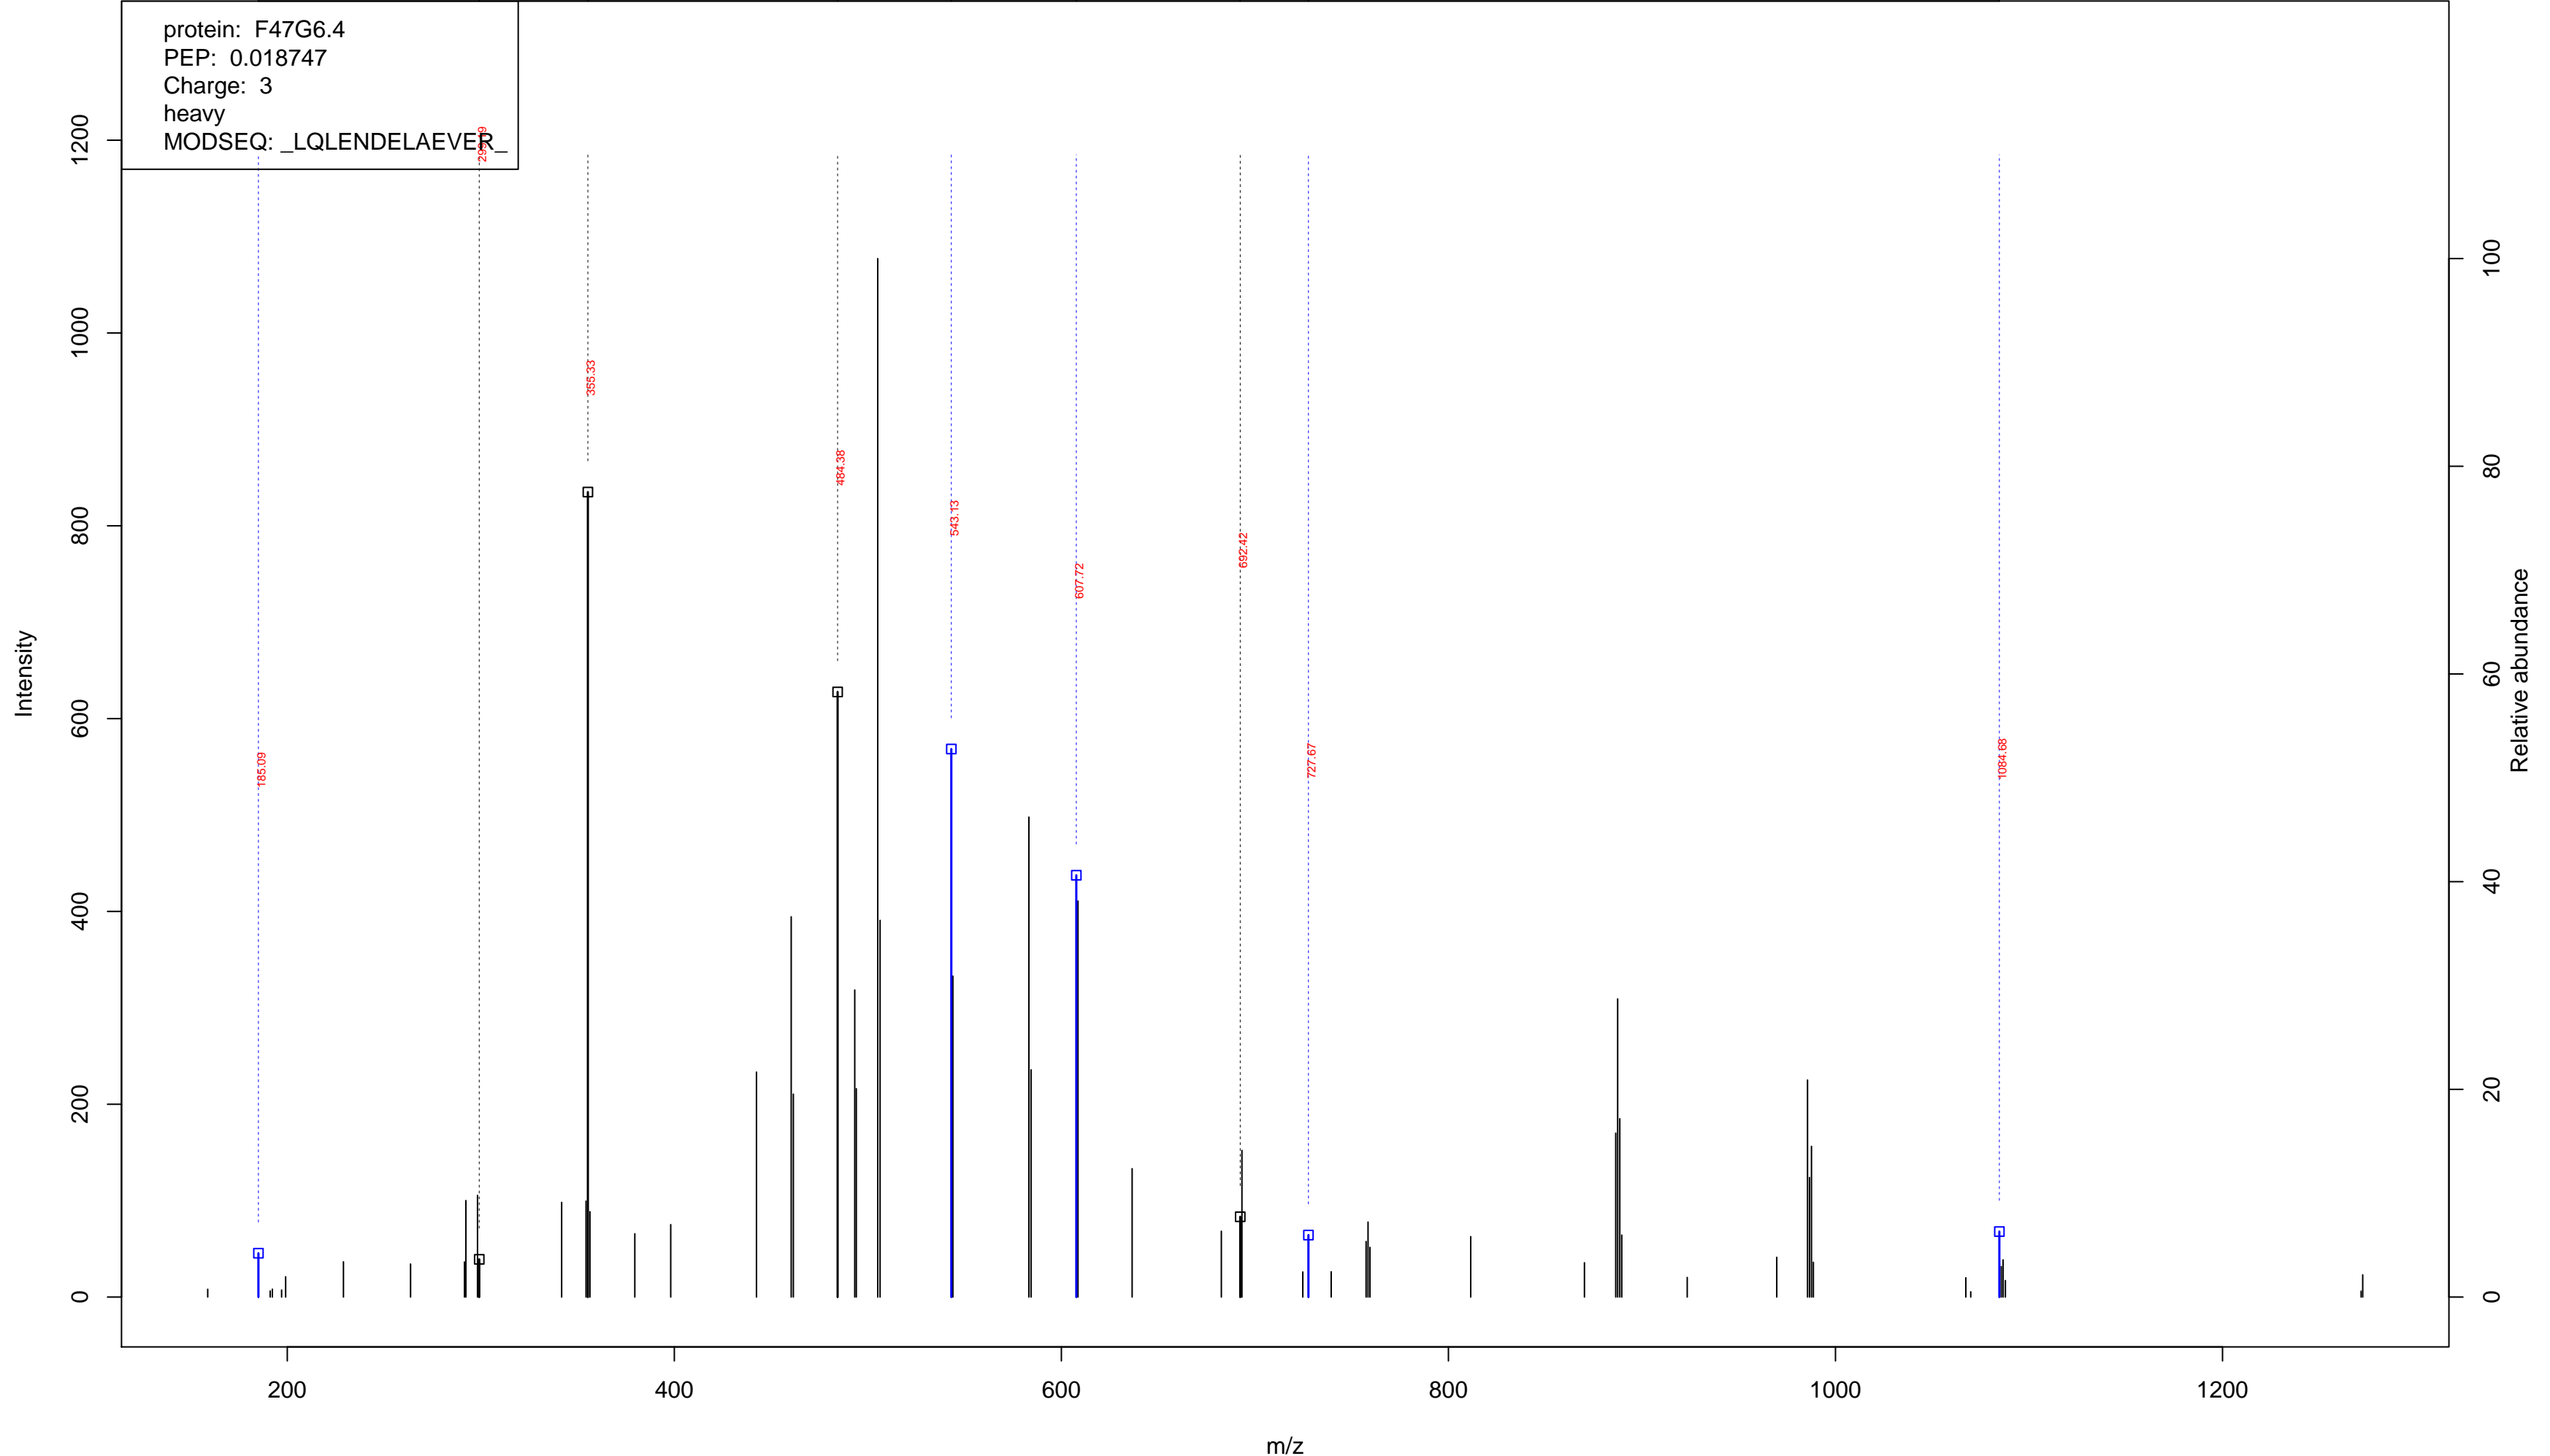

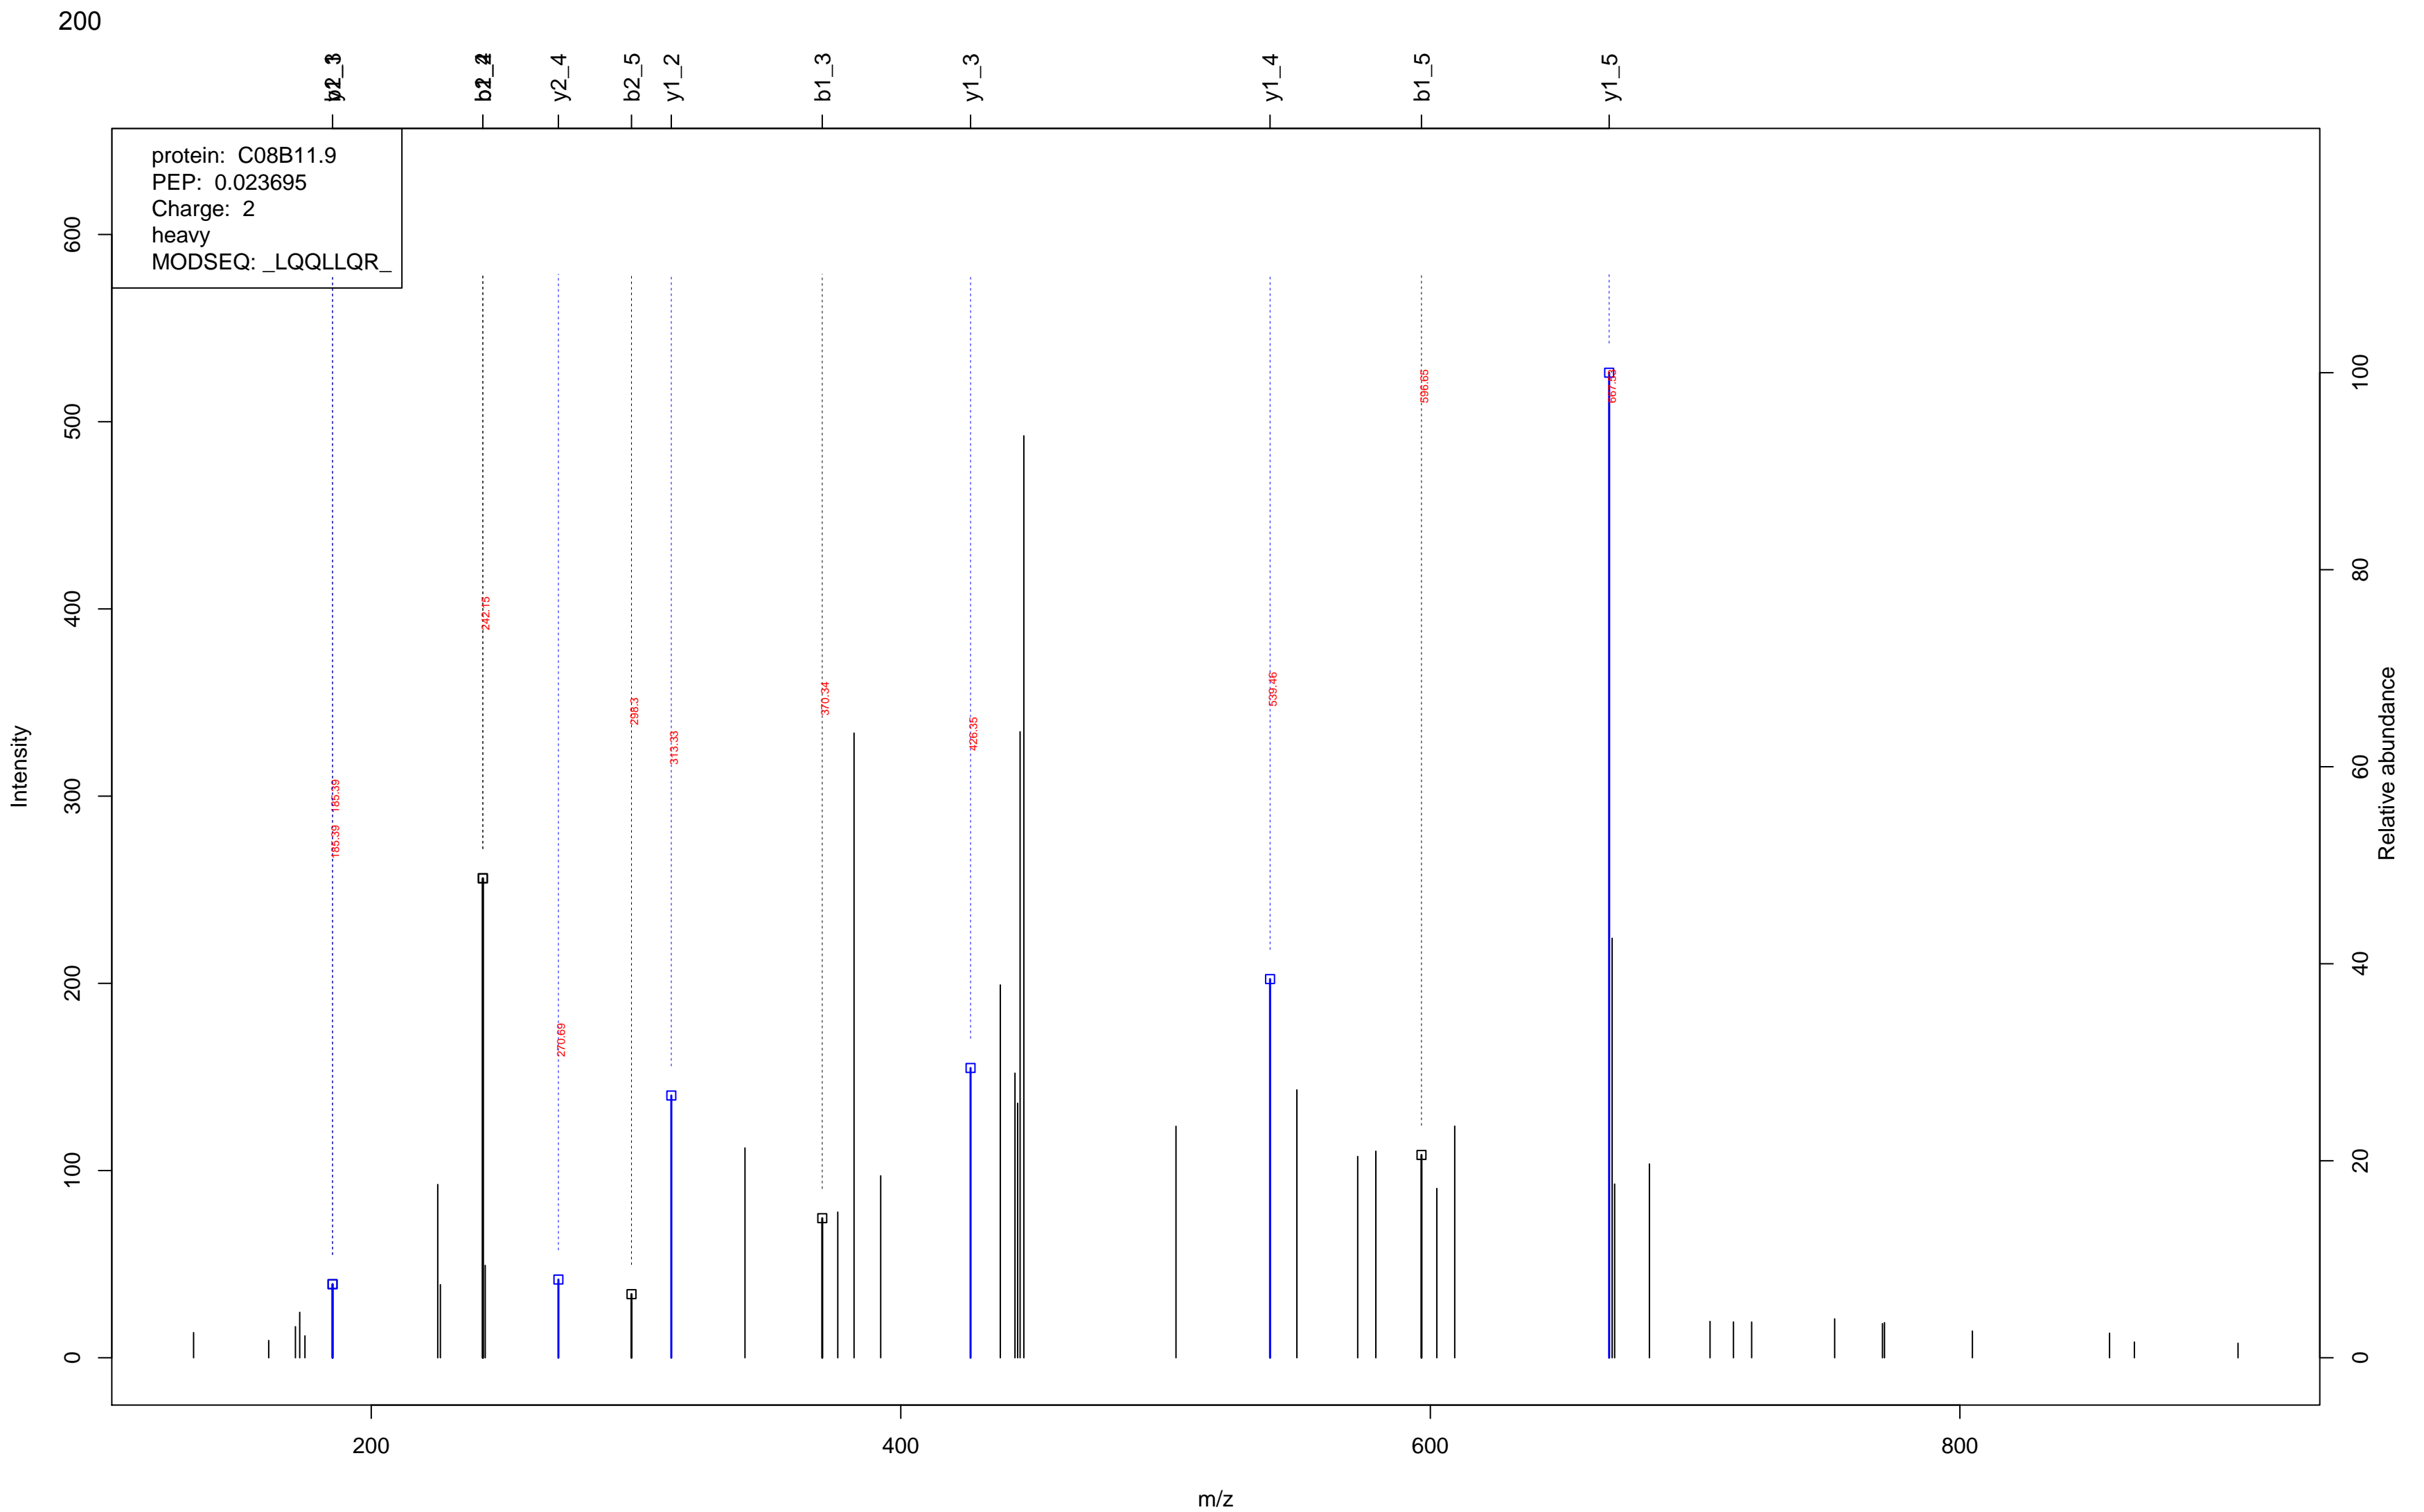



y2\_5 y2\_6 b1\_5 y2\_11 ~~y2\_62~~ b1\_7 y1\_8 y1\_9 ~~y1\_10~~ b1\_11 y1\_11 b1\_12

protein: C06A6.5  
PEP: 0.0013654  
Charge: 2  
light  
MODSEQ: \_LSFFDPDSNEEAK\_

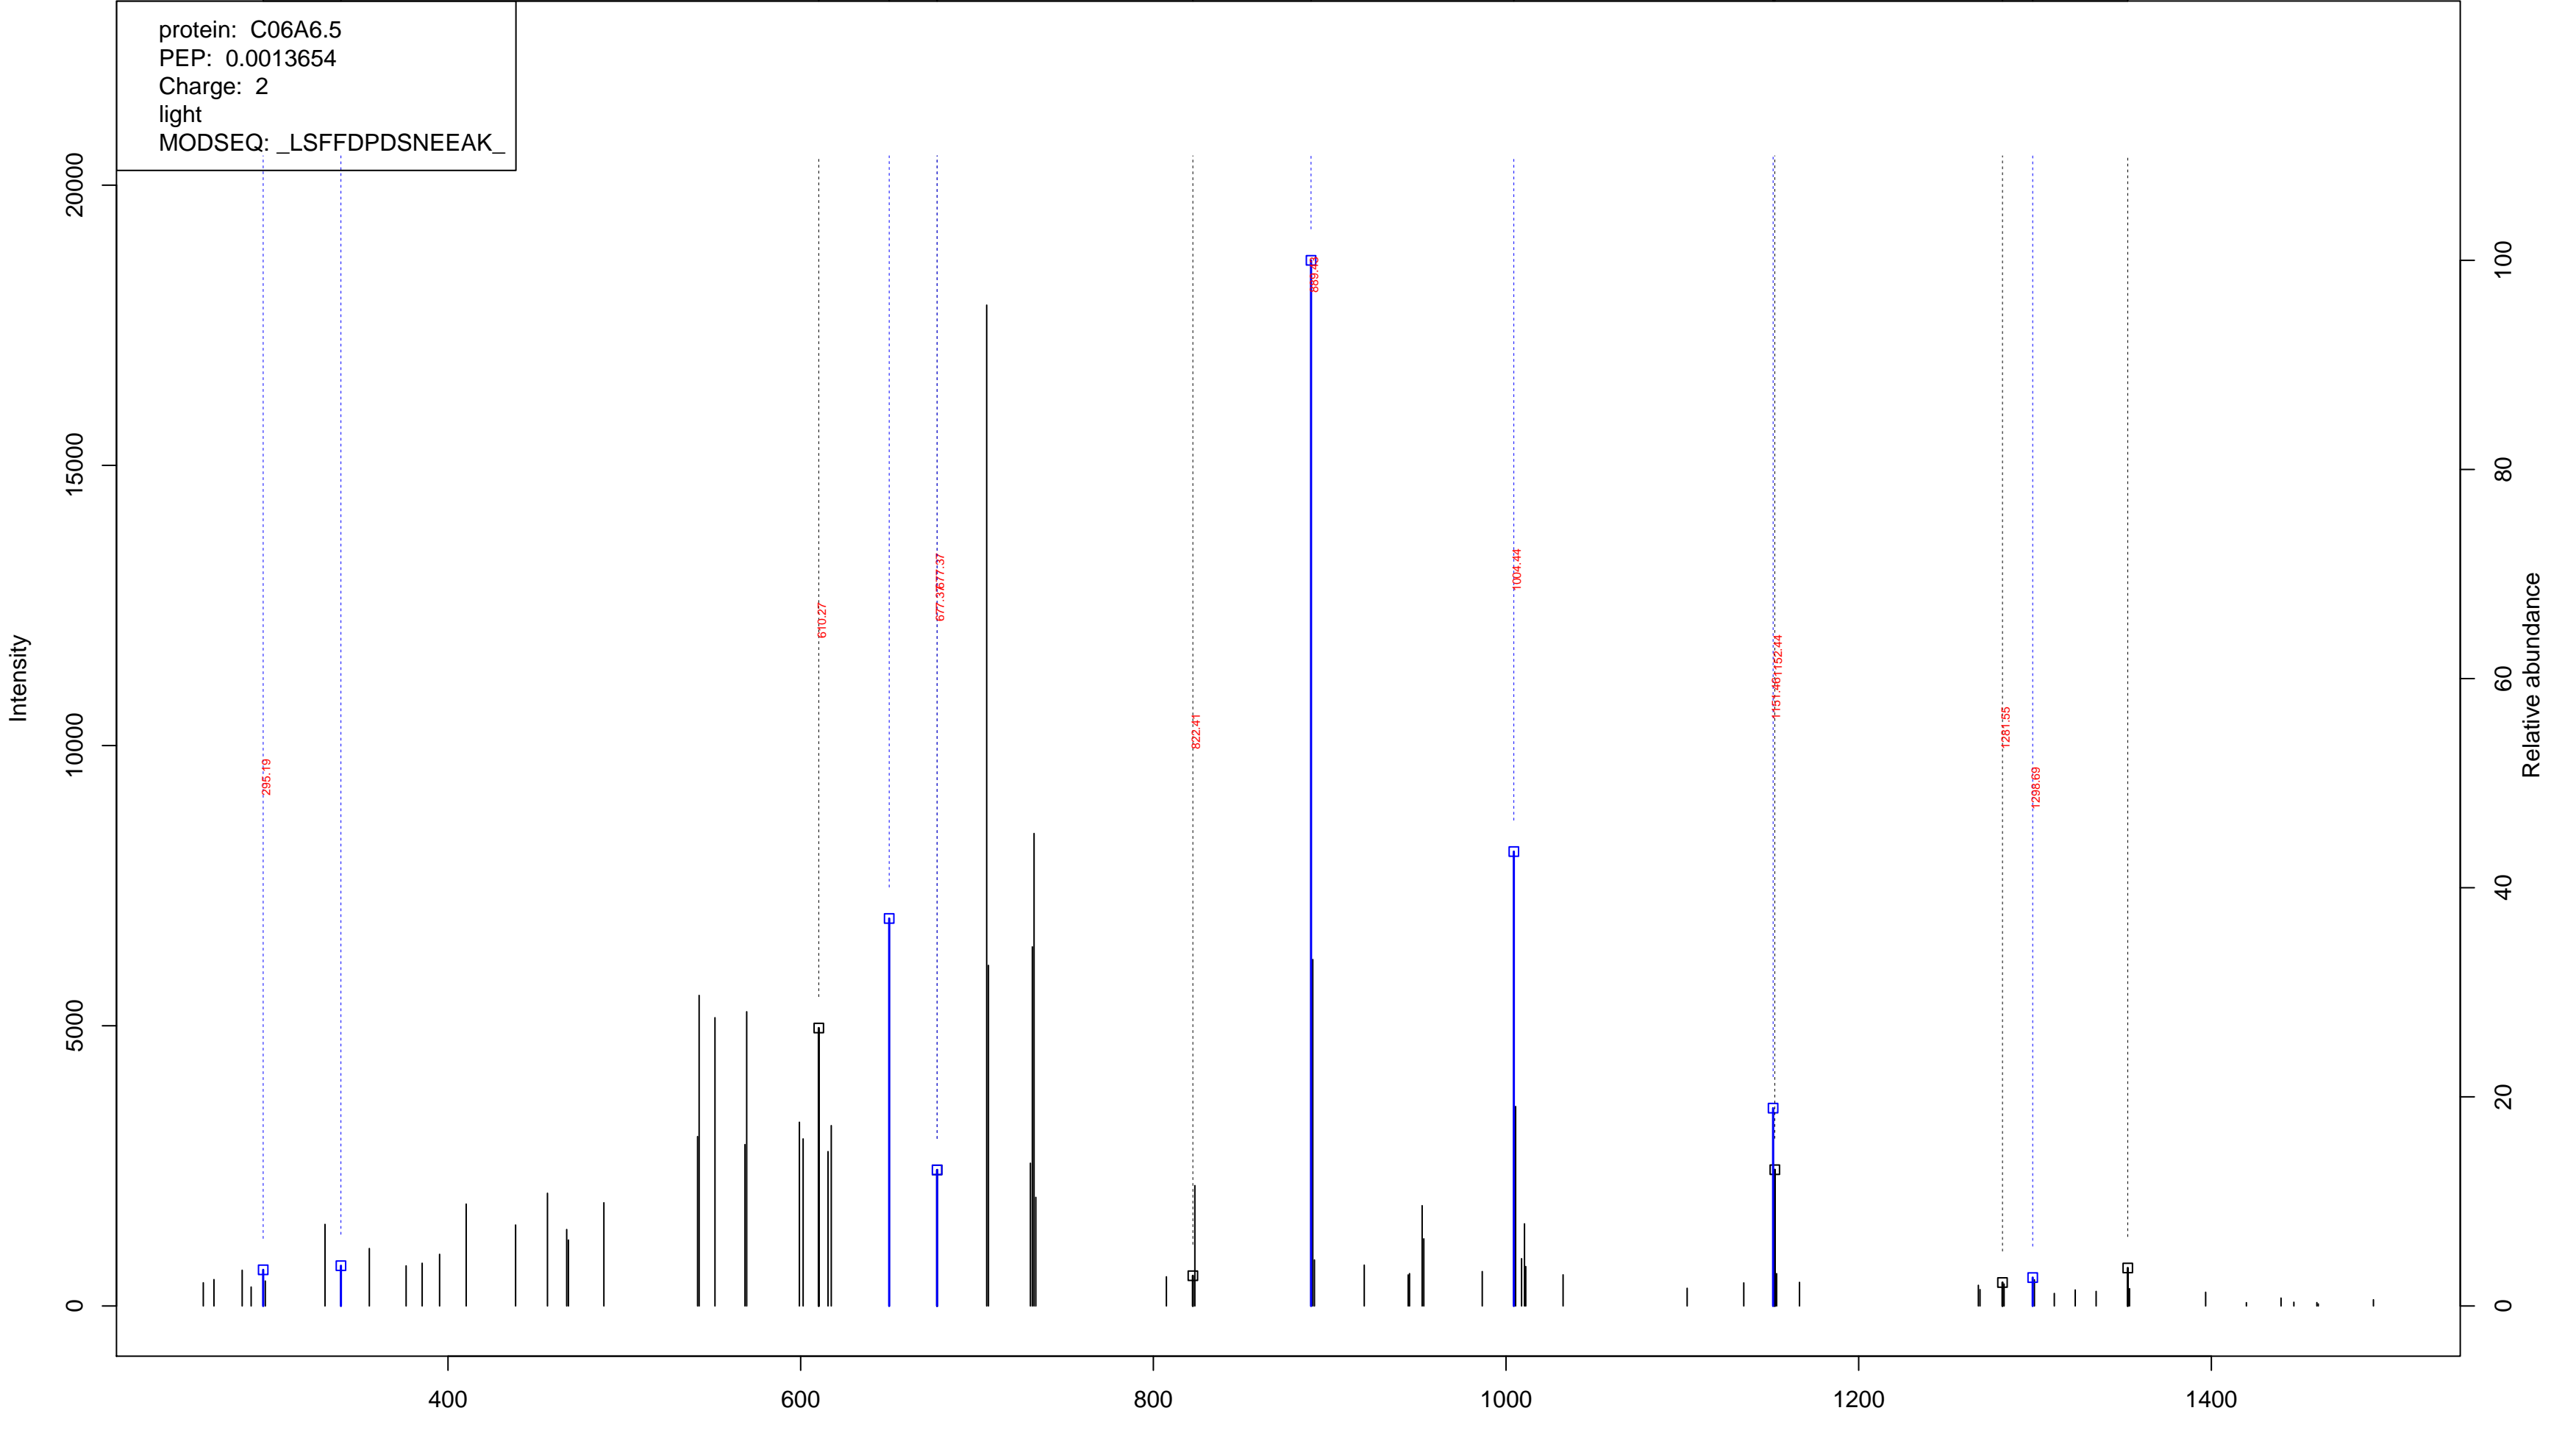

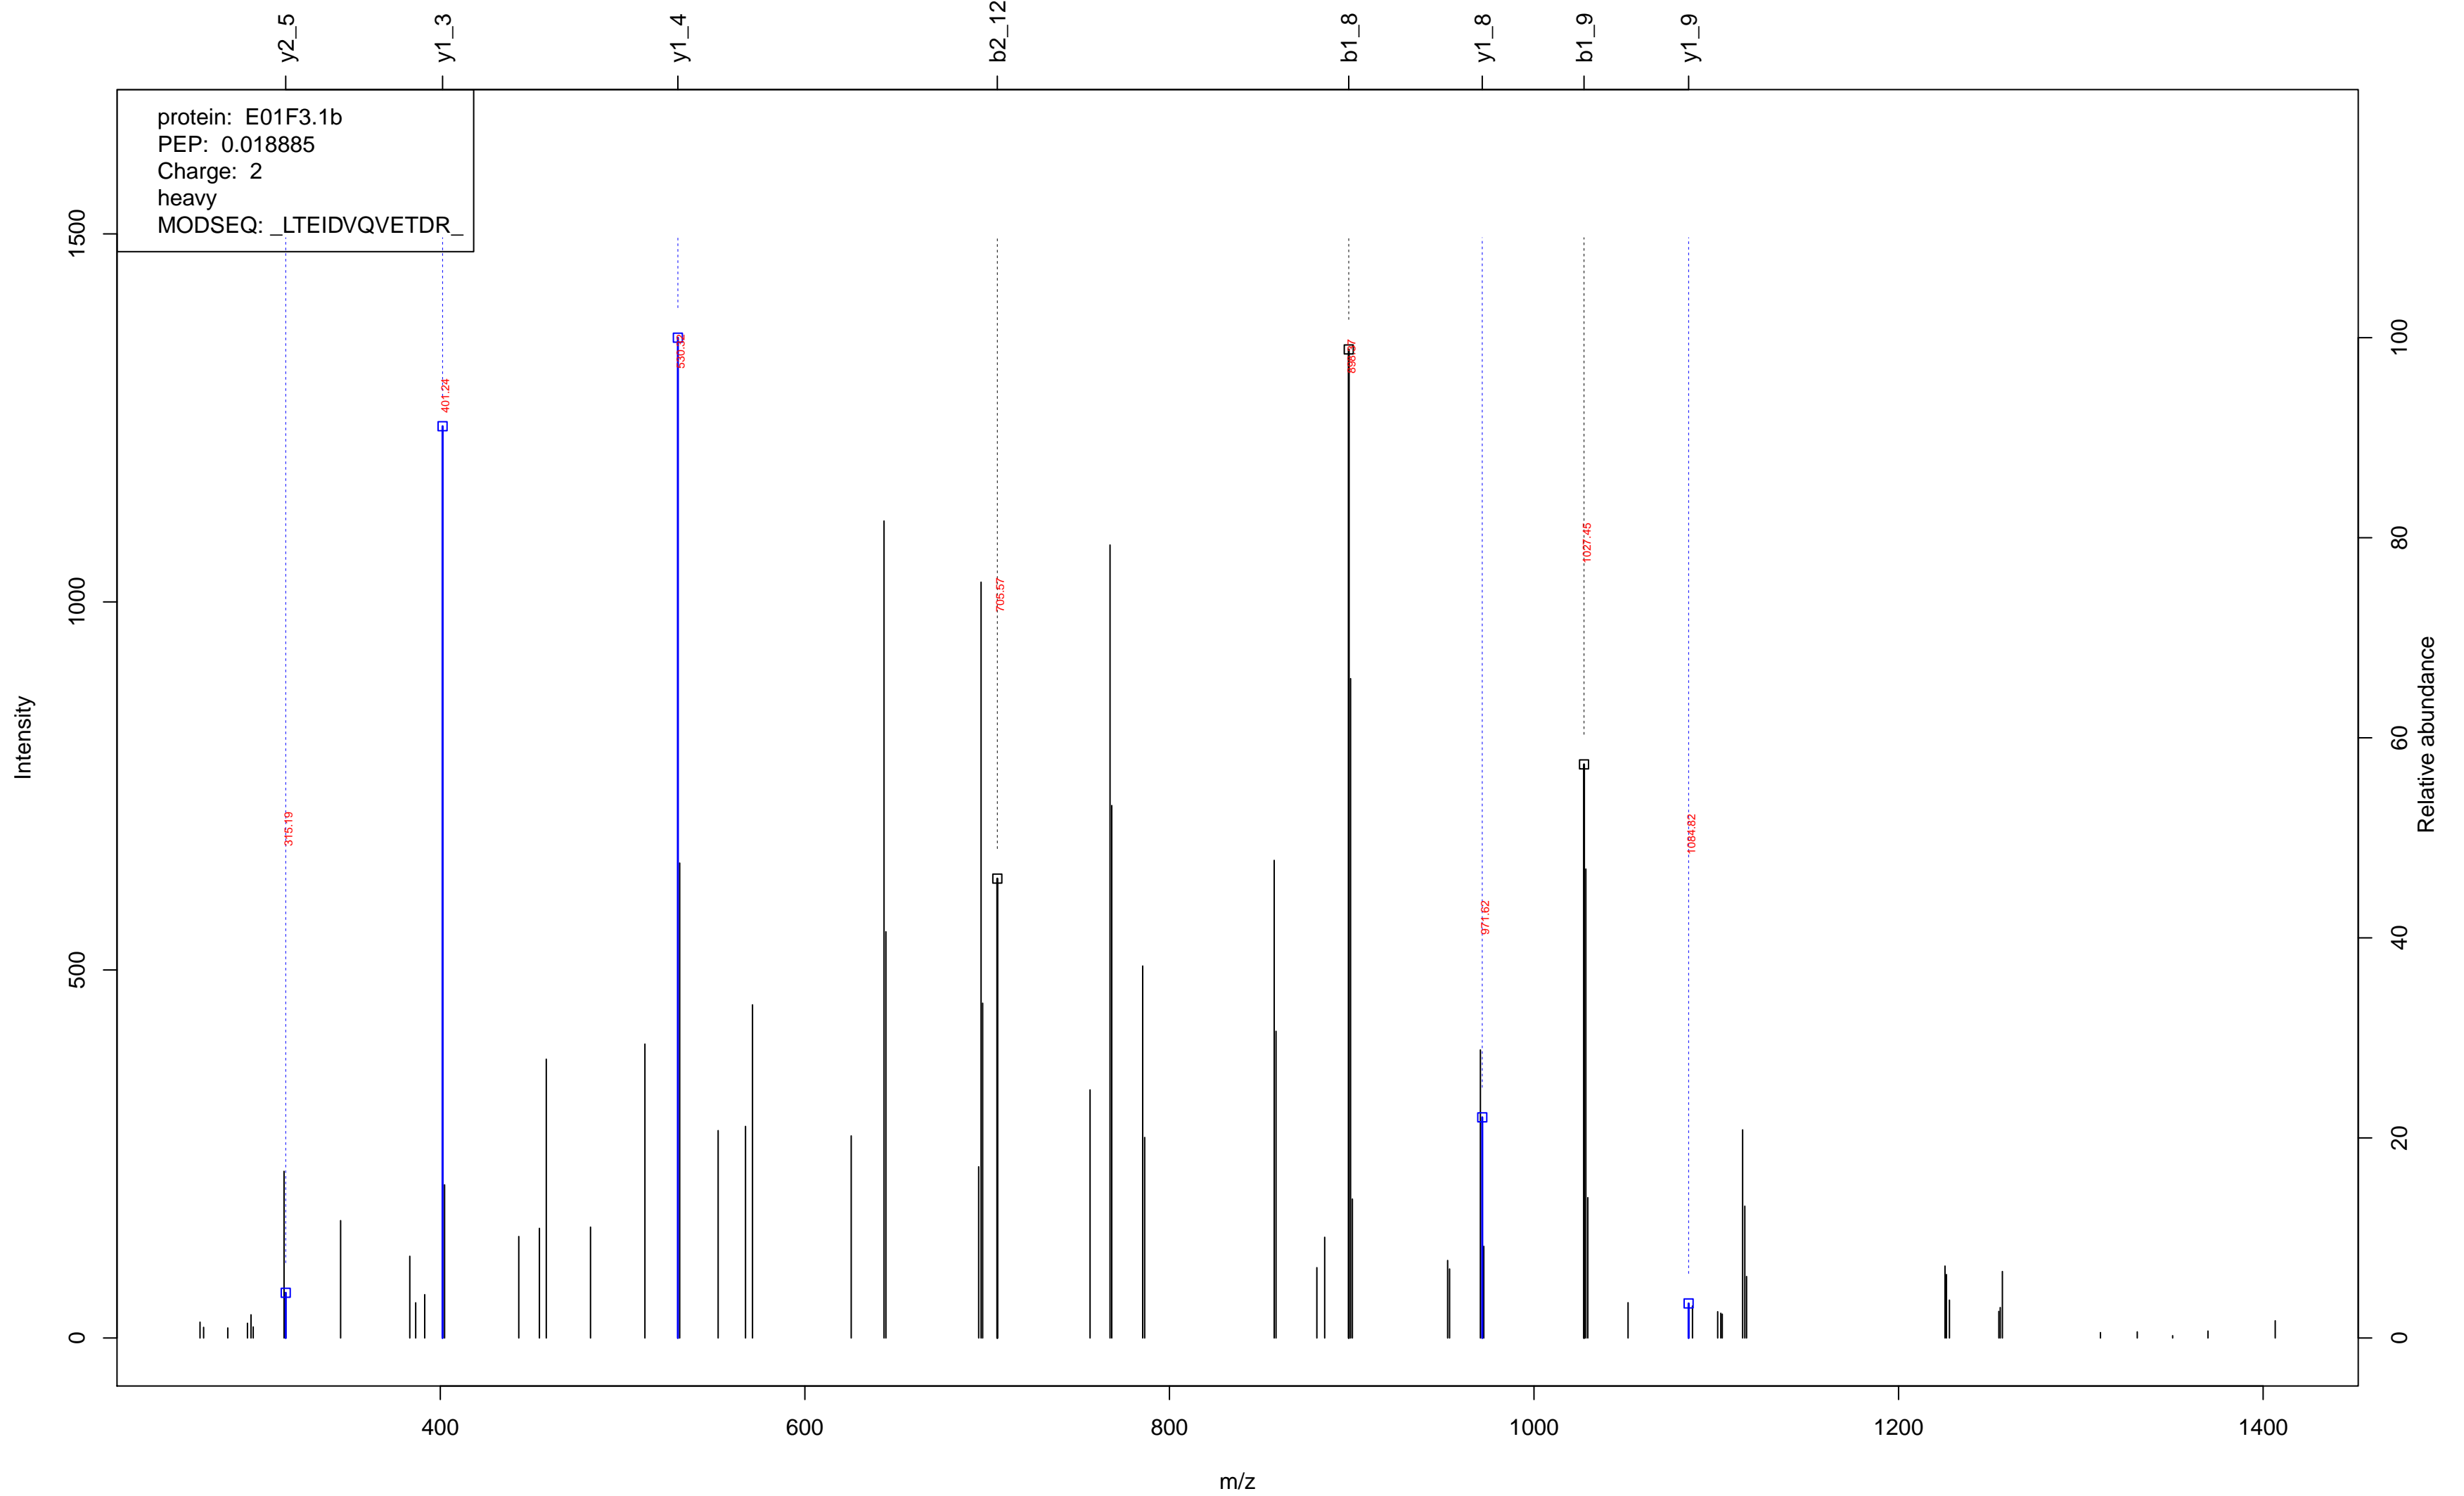

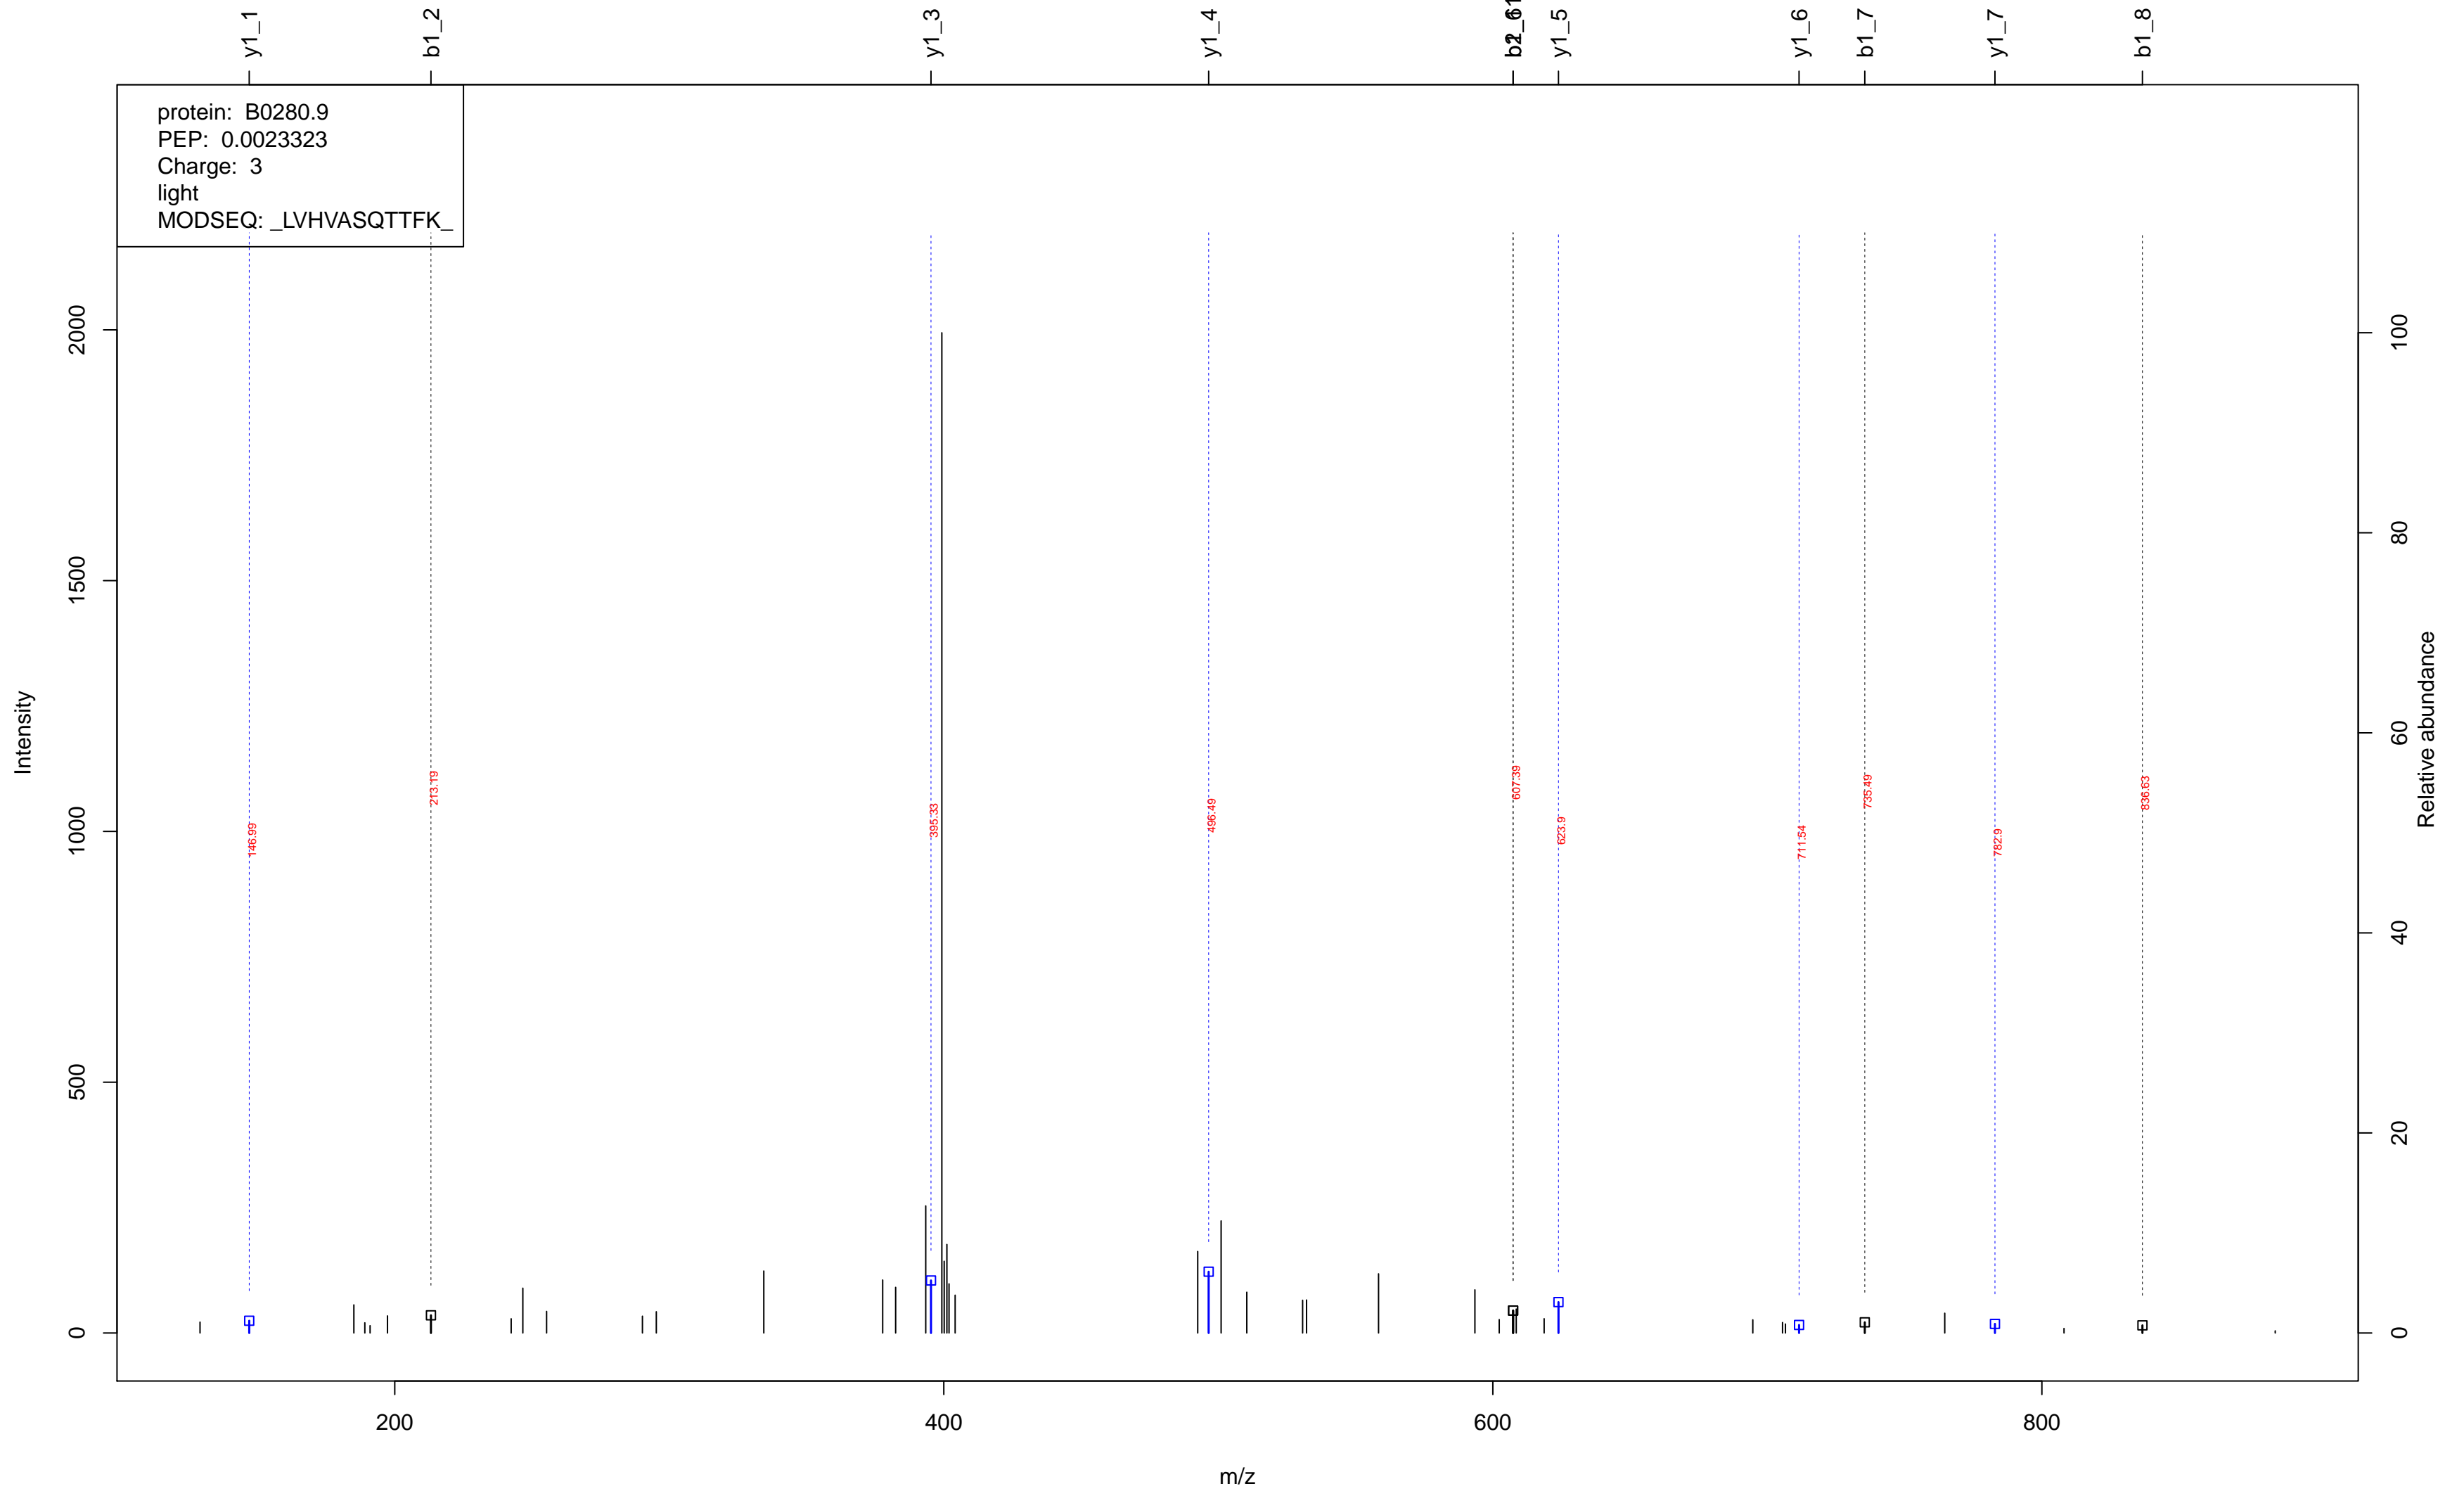

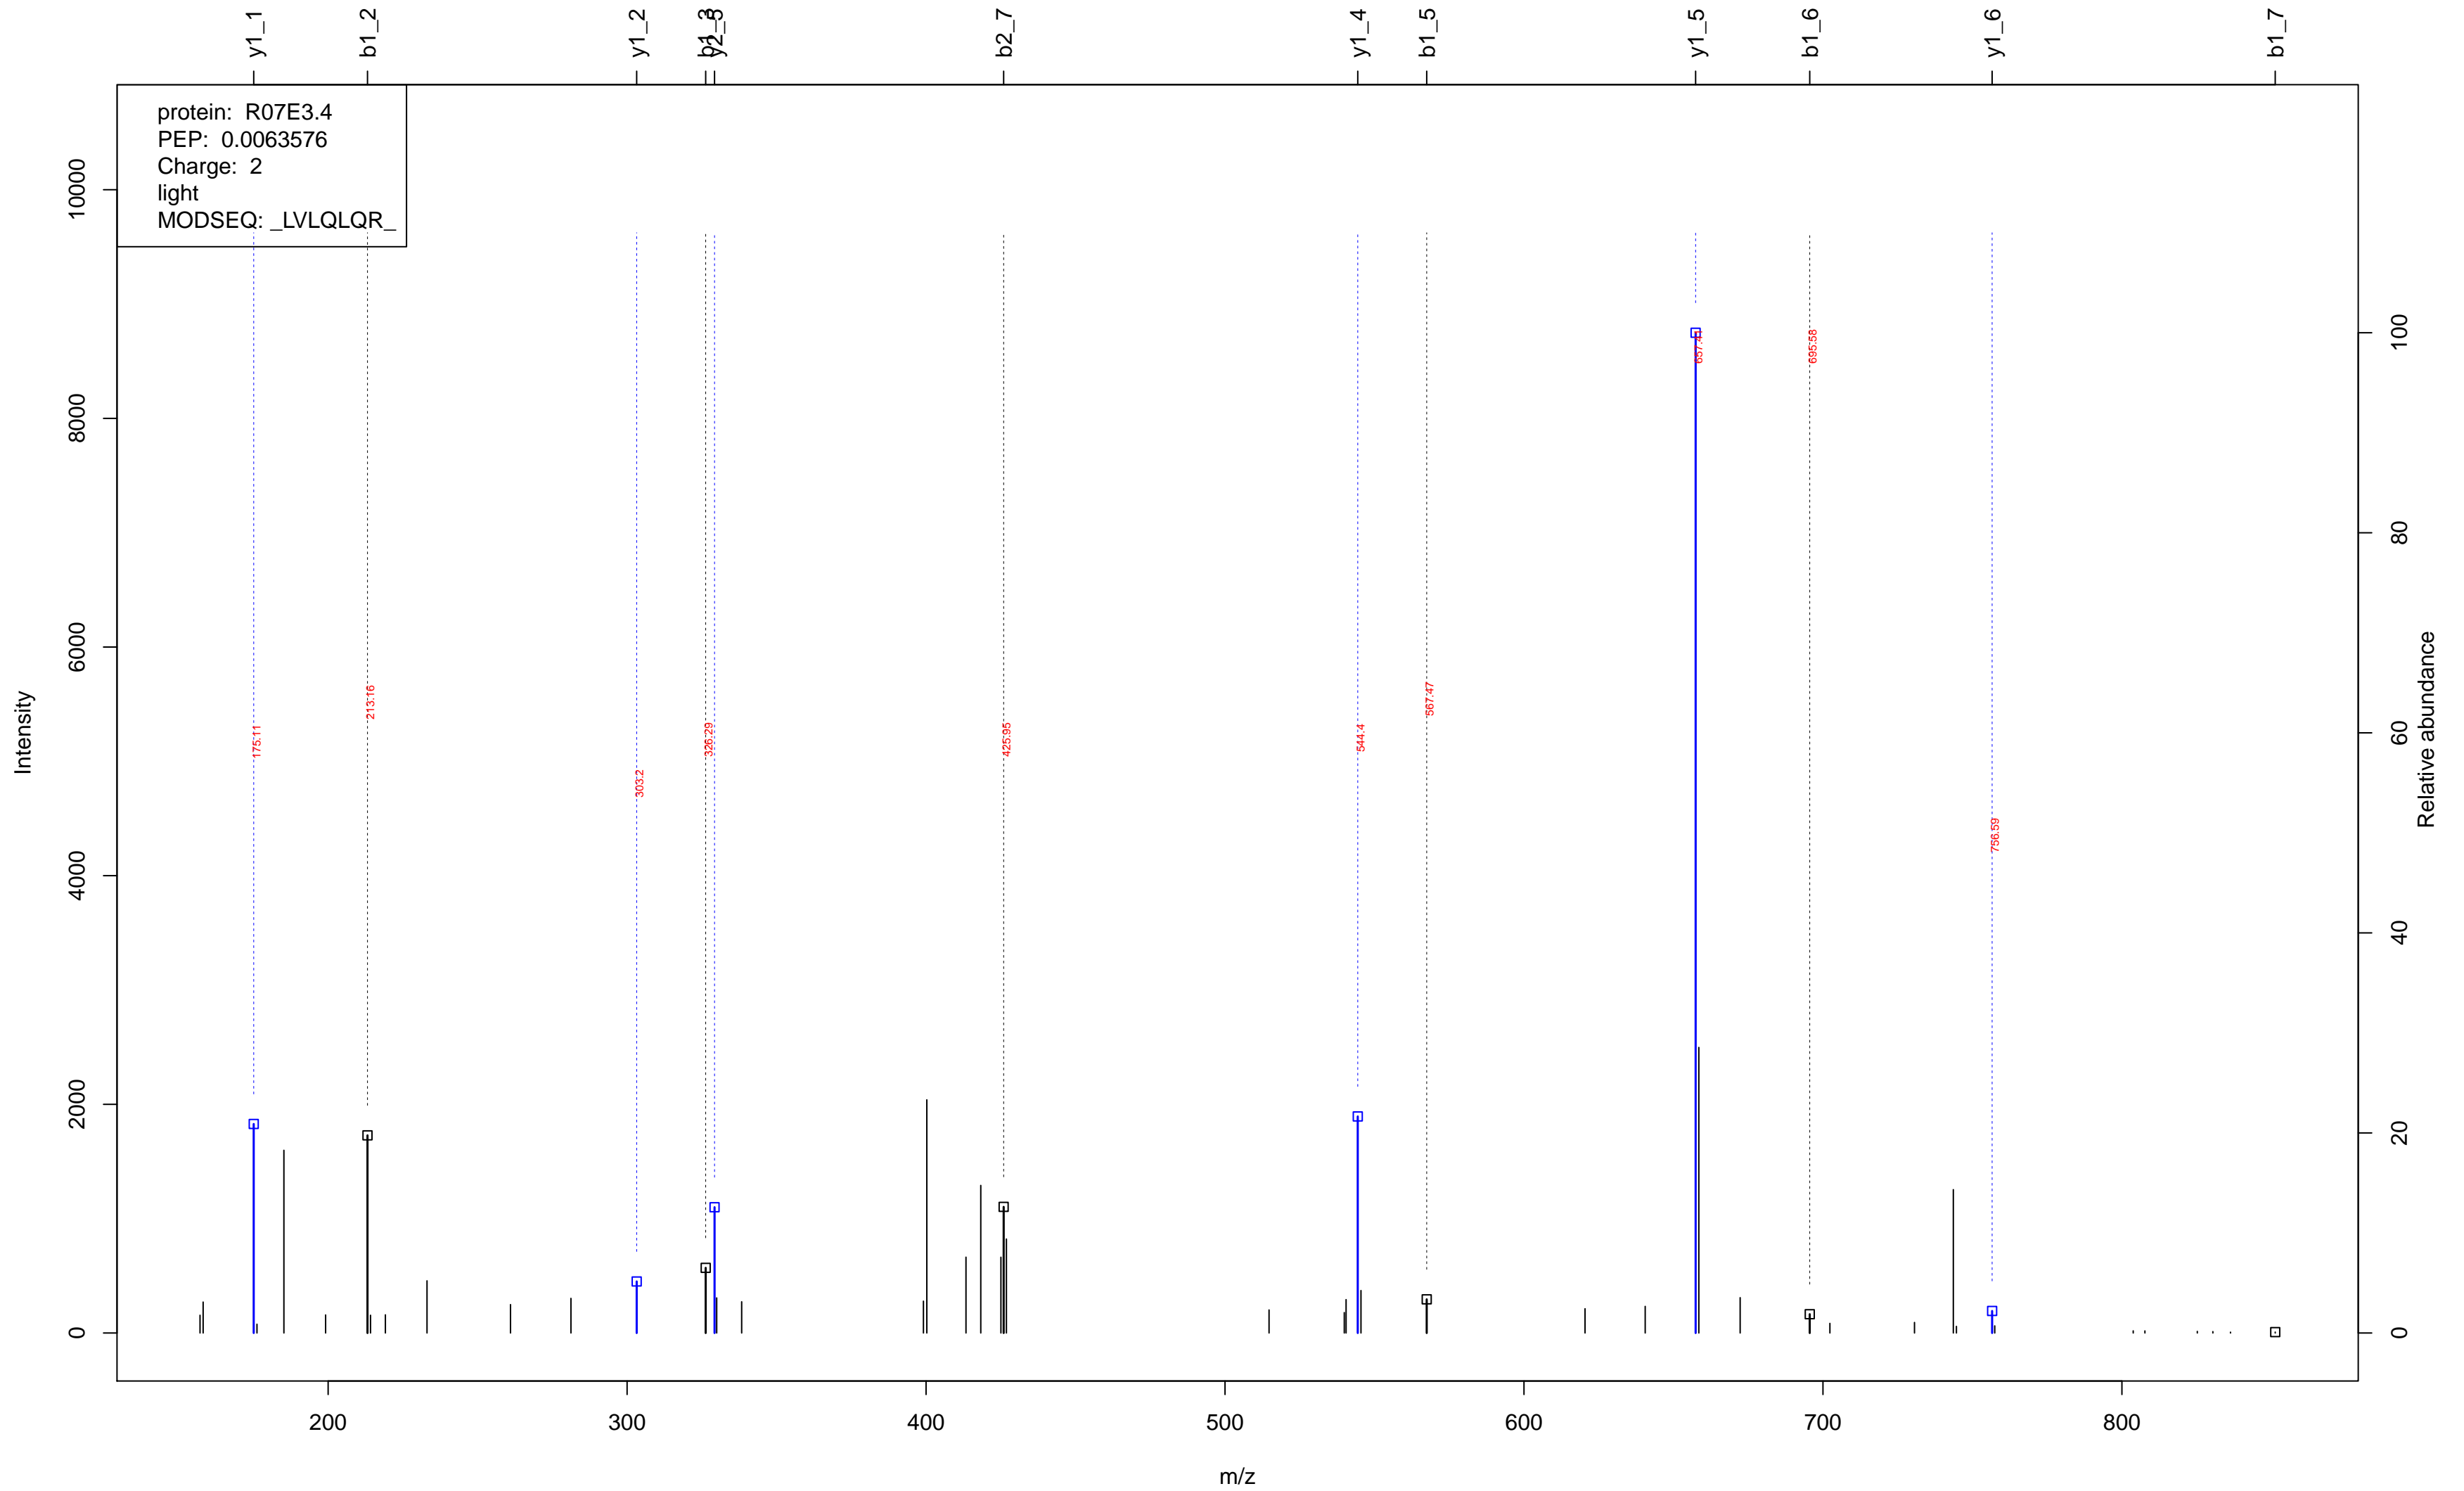

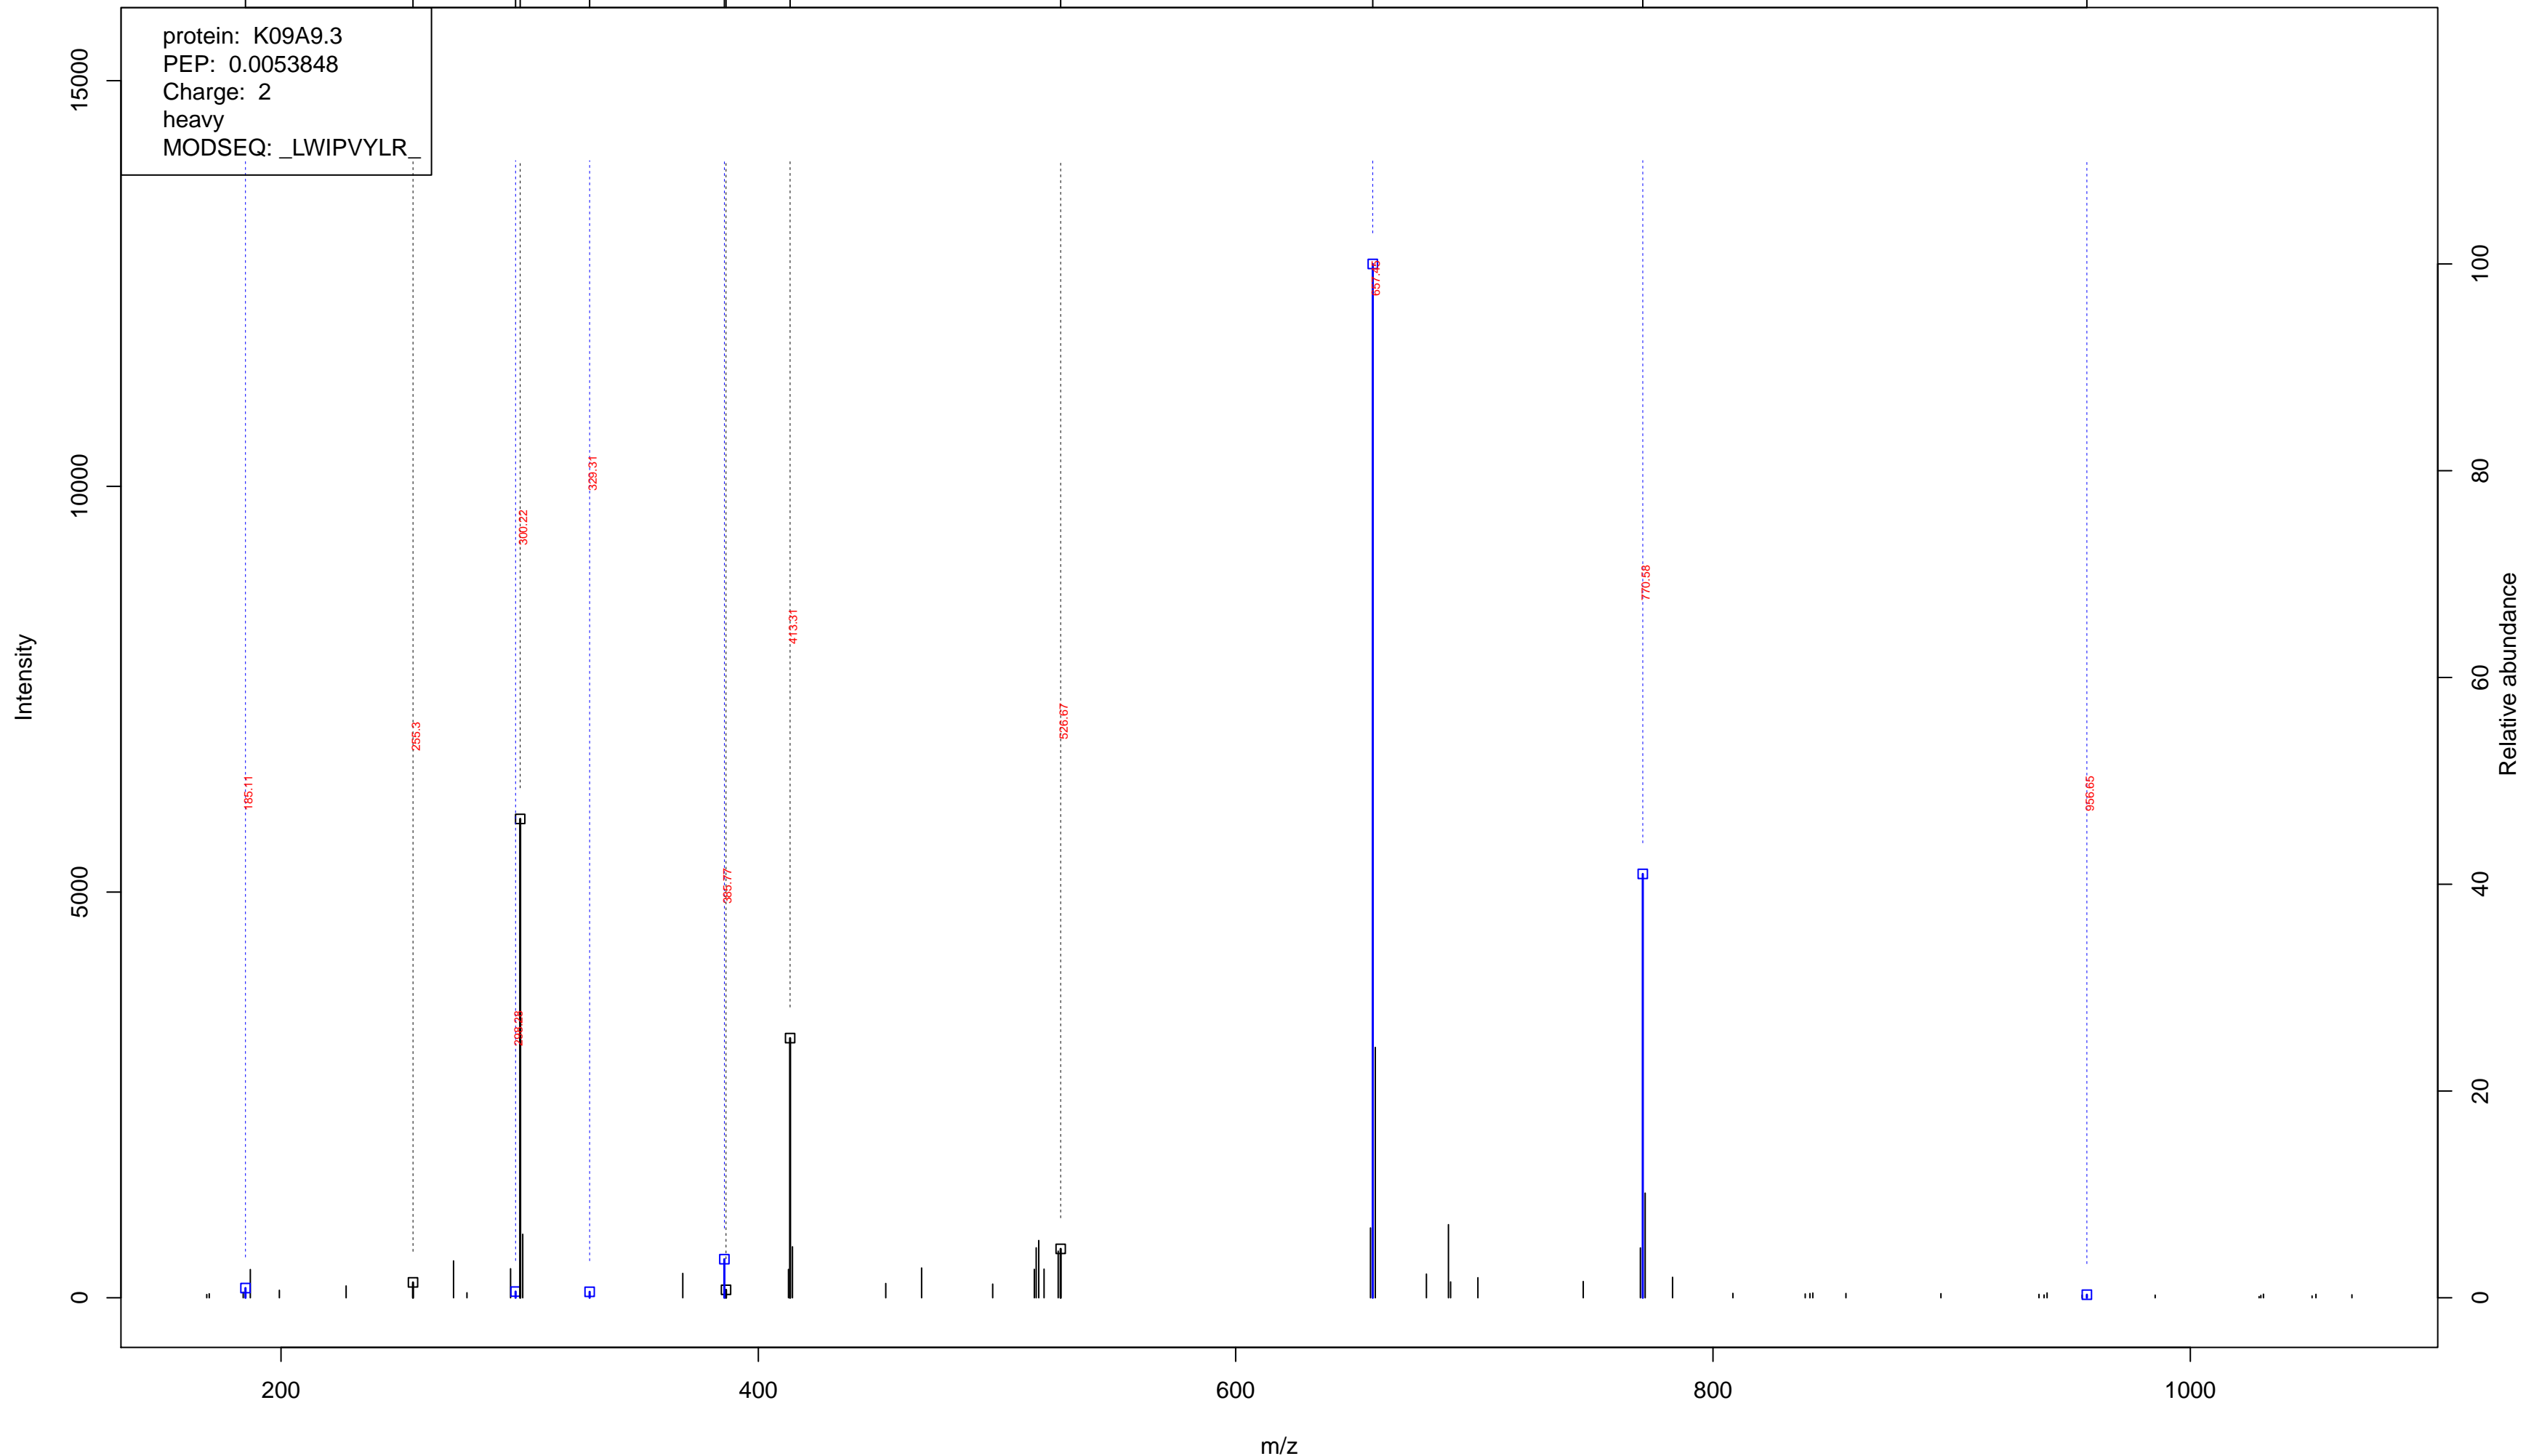

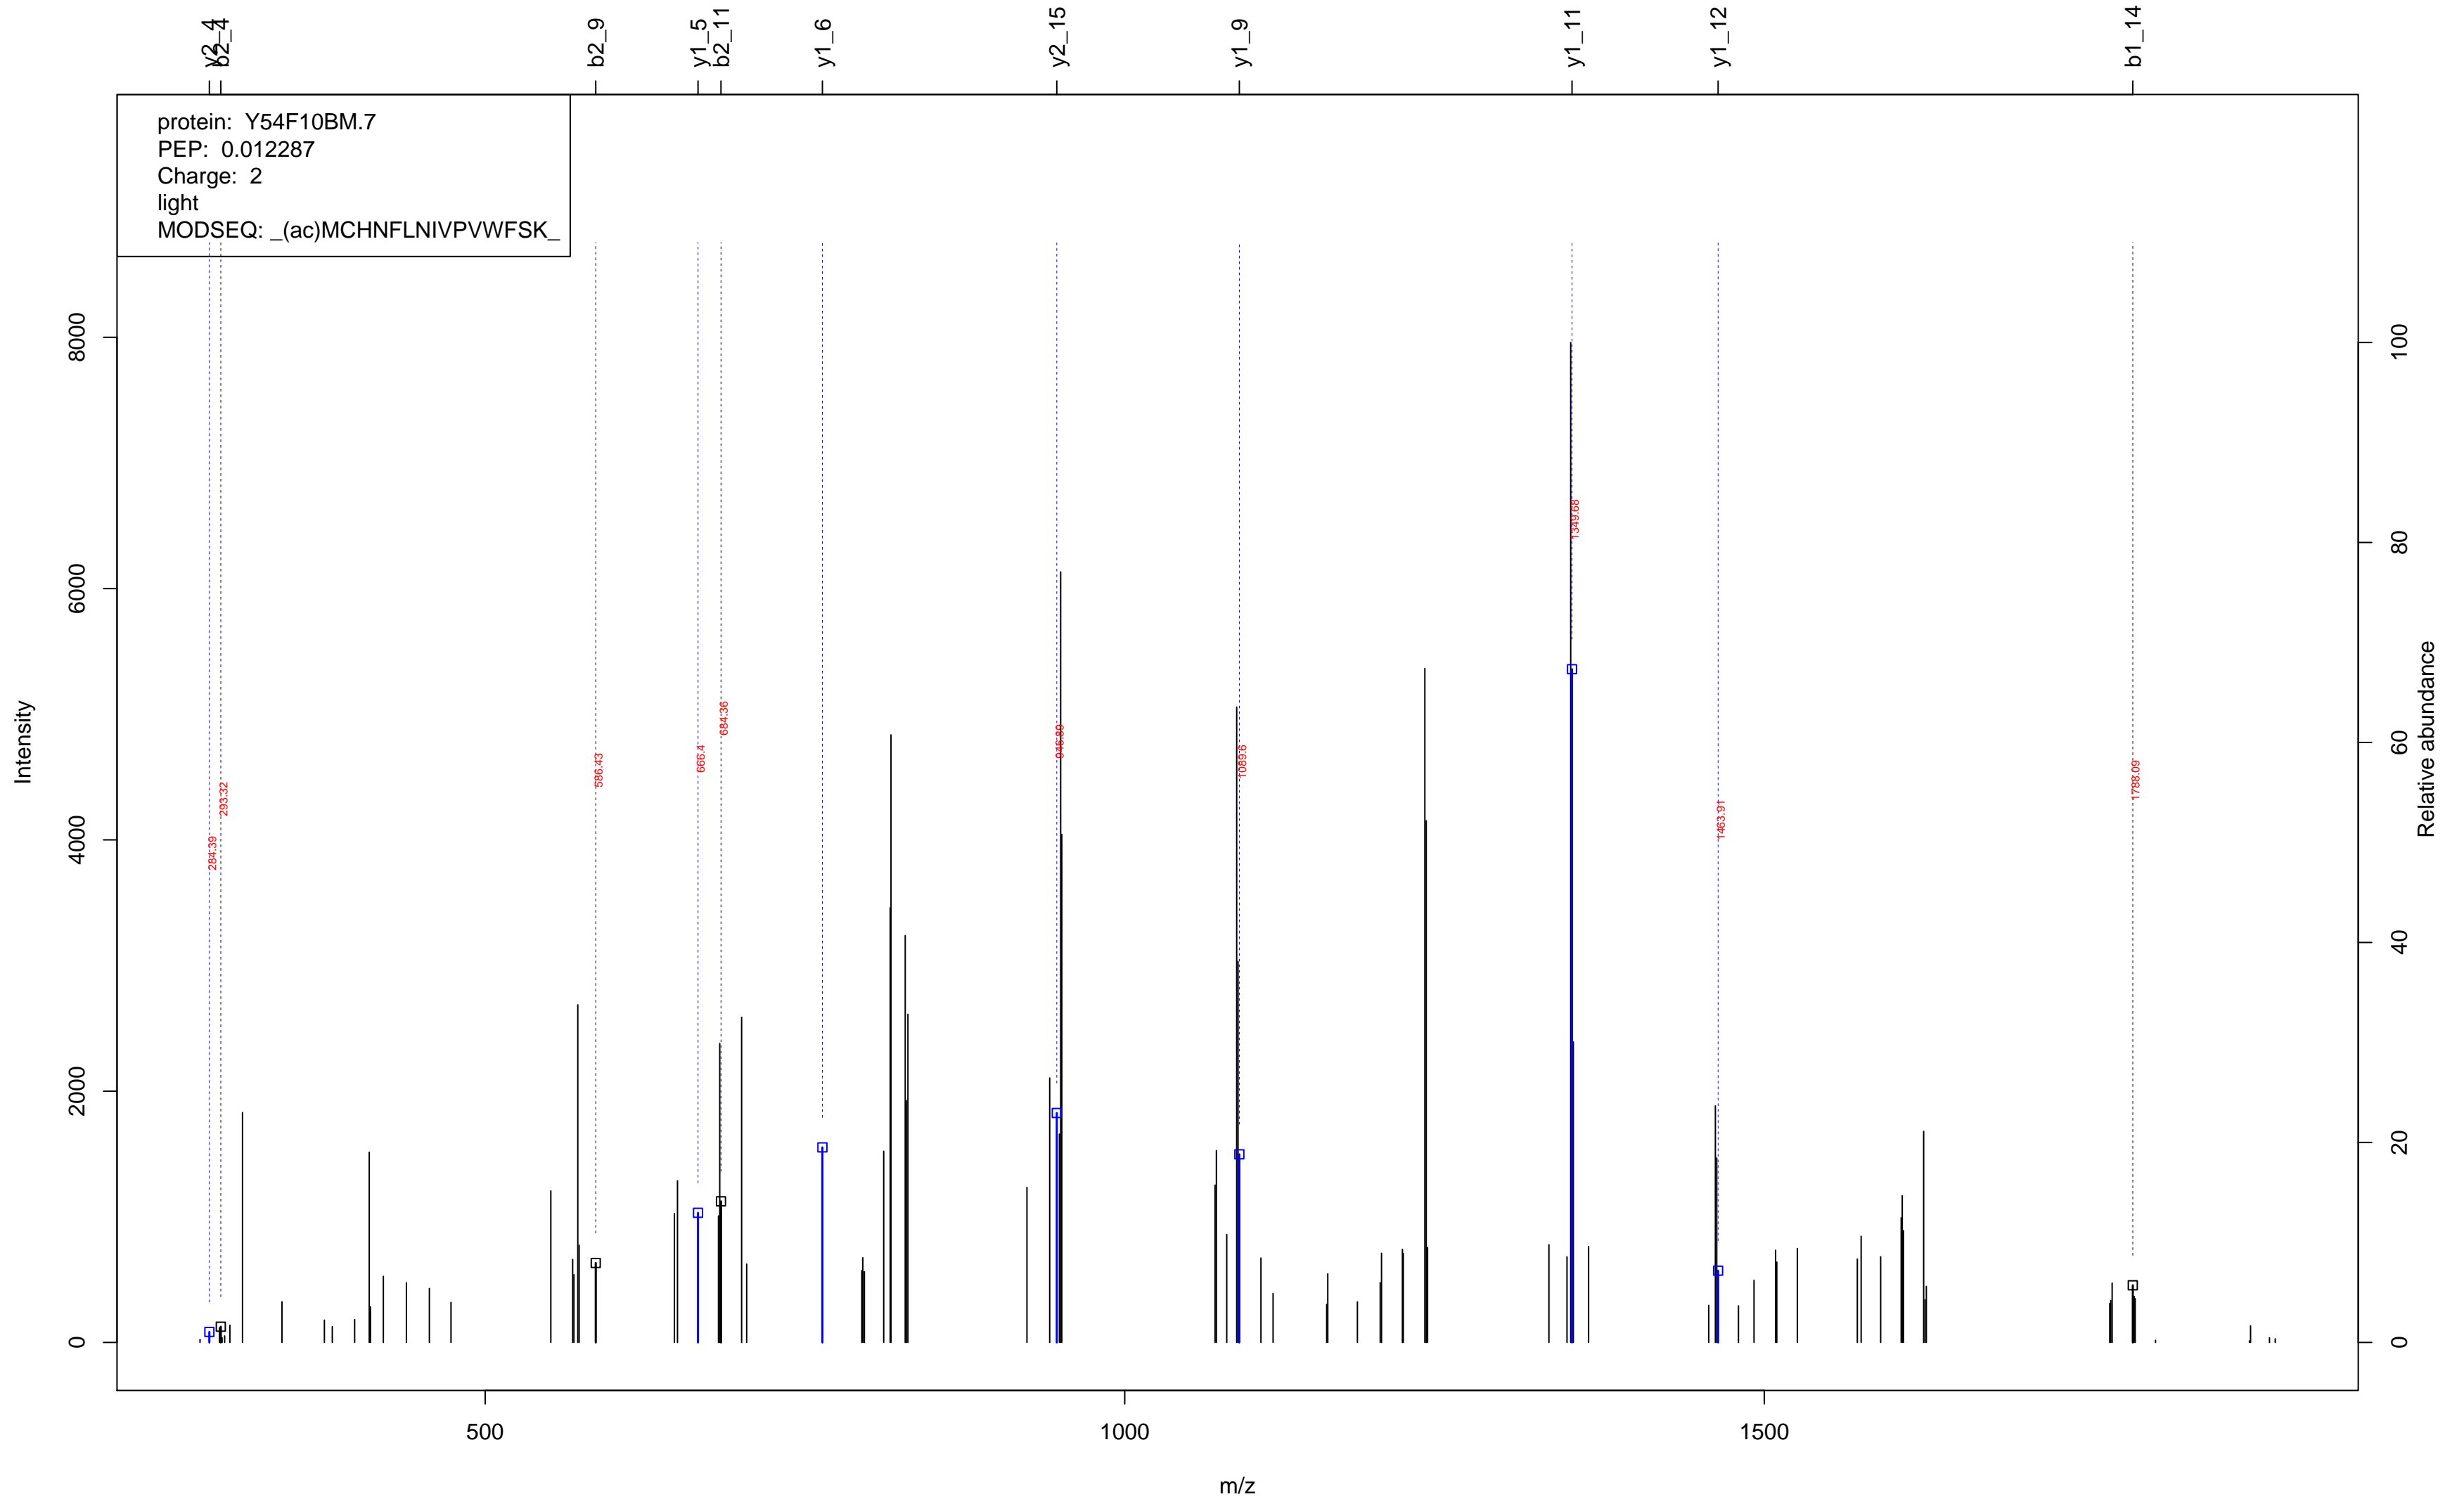

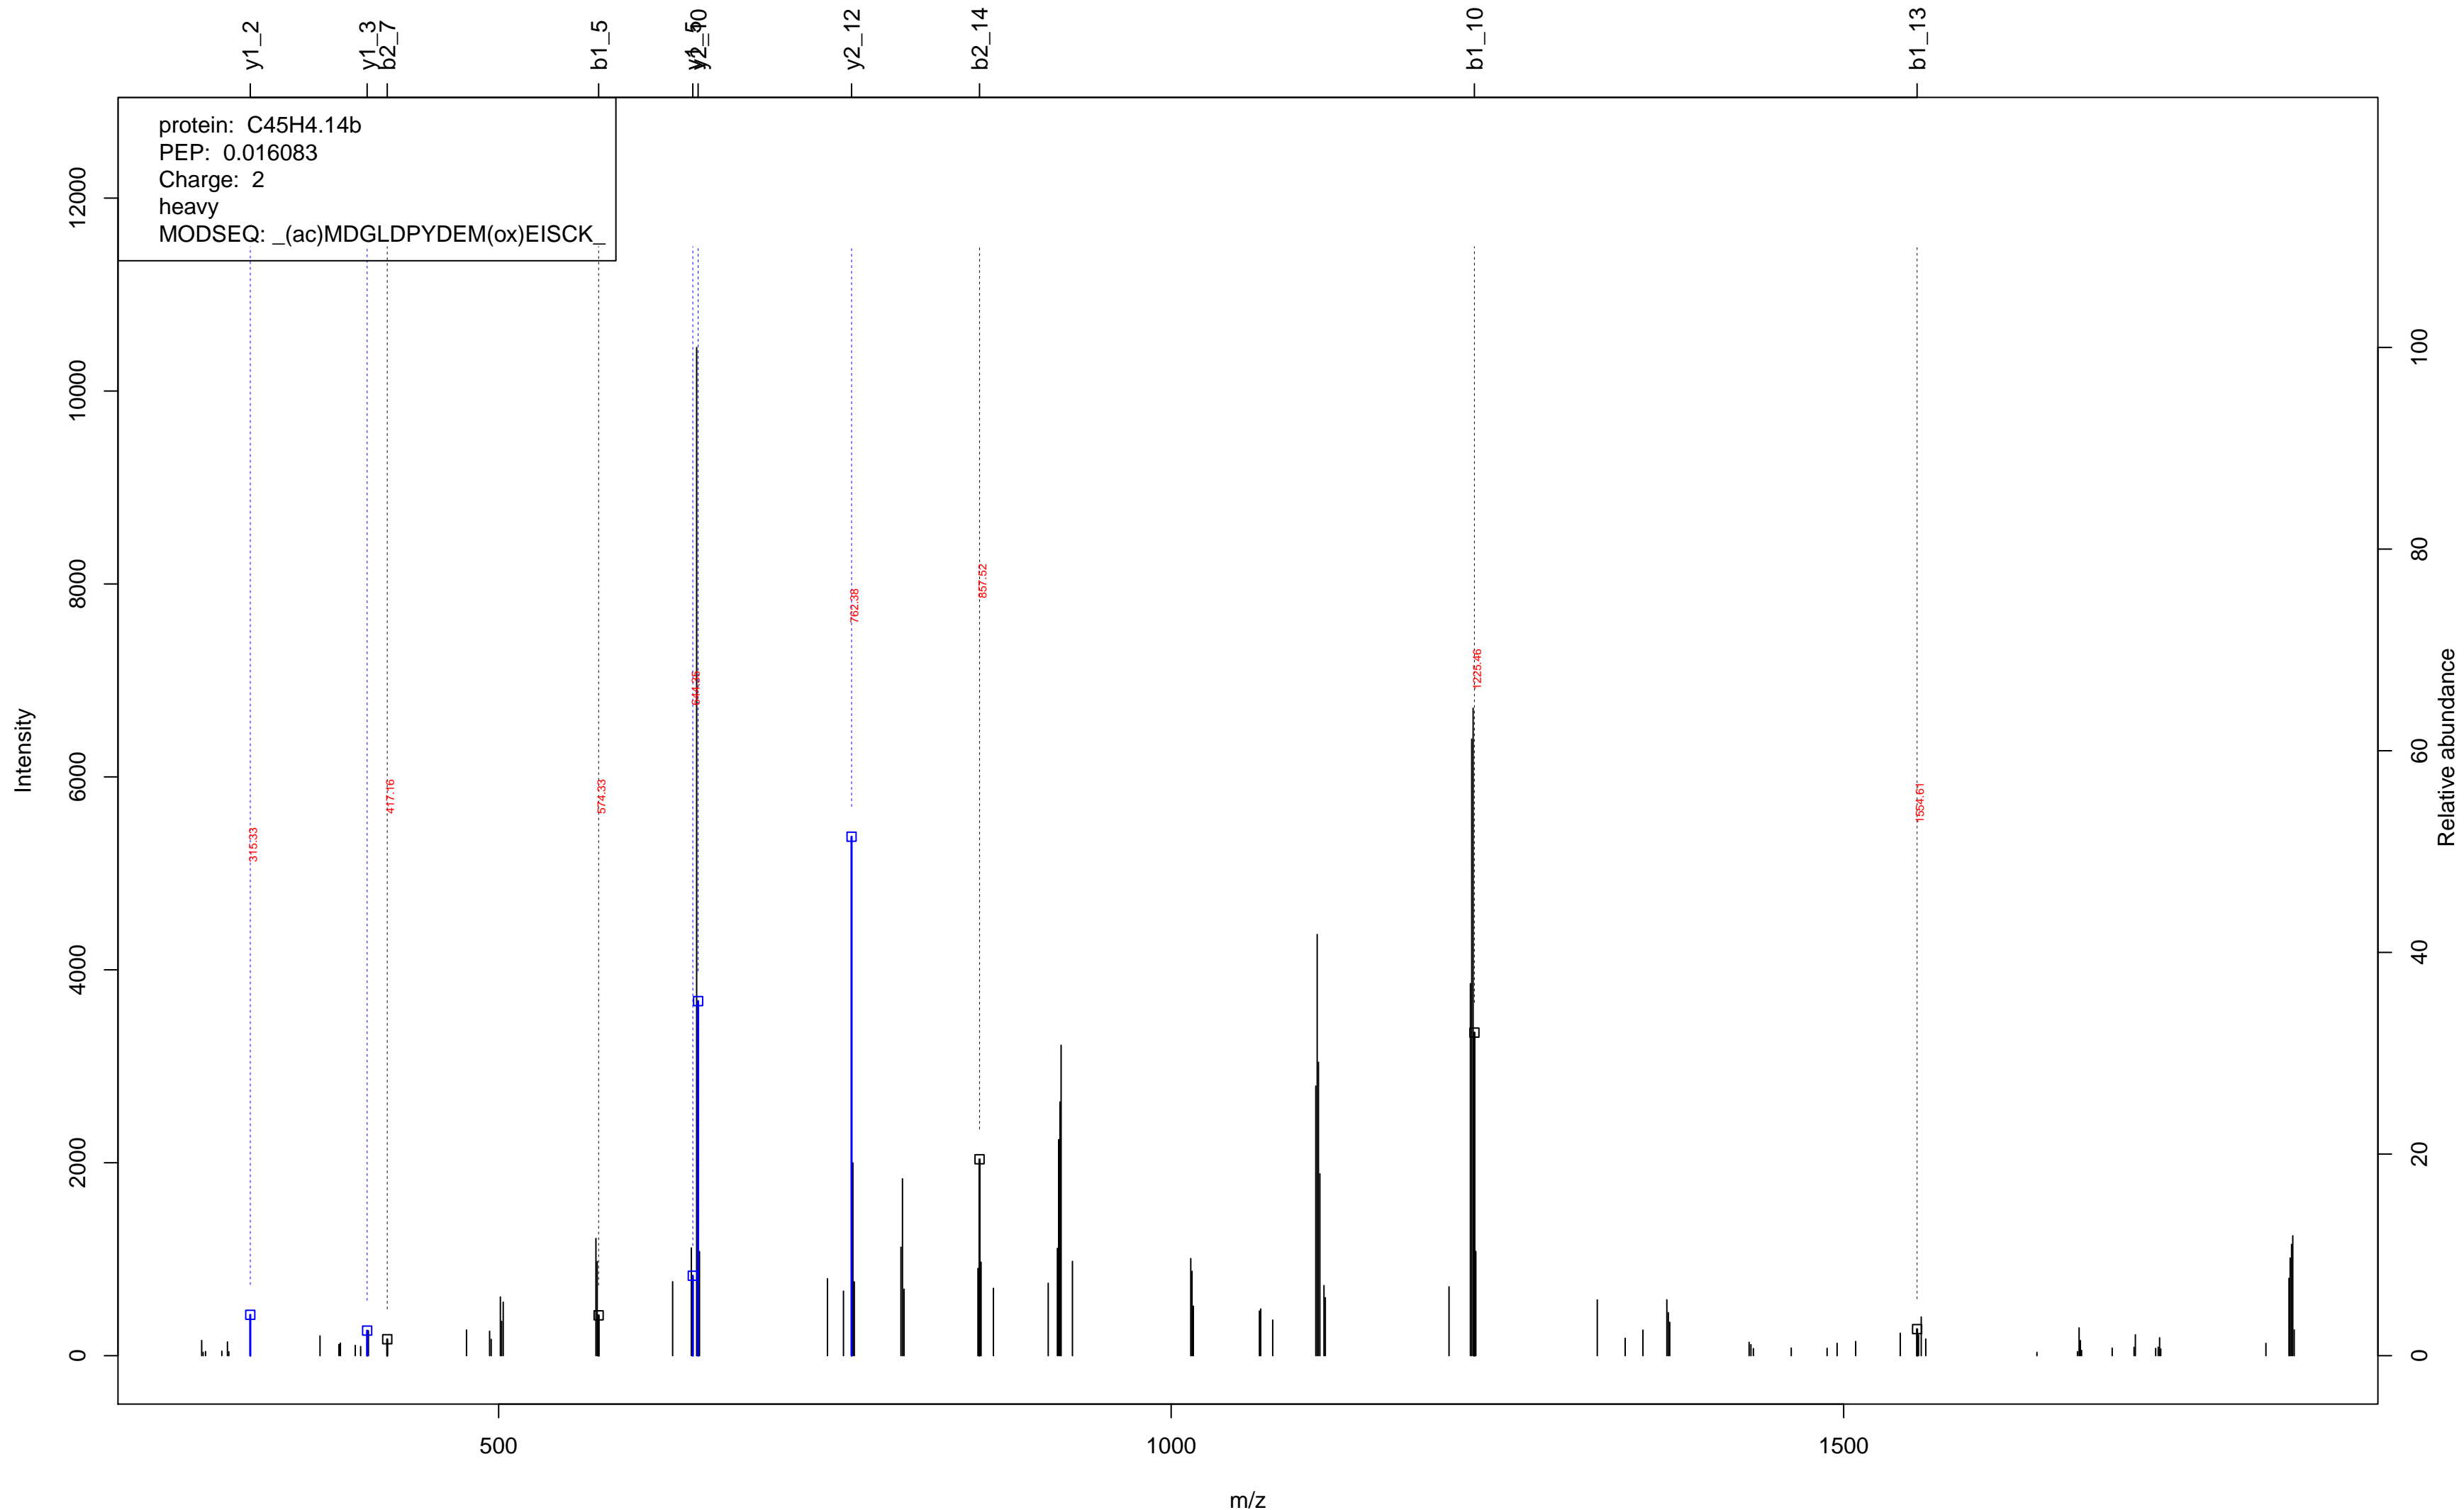

y1\_2 y1\_3 b2\_7 y1\_5 y1\_6 y1\_7 y1\_8 b2\_15 b1\_7 b1\_8 b1\_9 b1\_10 b1\_12 b1\_13 y1\_14

protein: F25D7.1  
PEP: 0.0010873  
Charge: 2  
light  
MODSEQ: \_(ac)MDLENFLLGIPIVTR\_

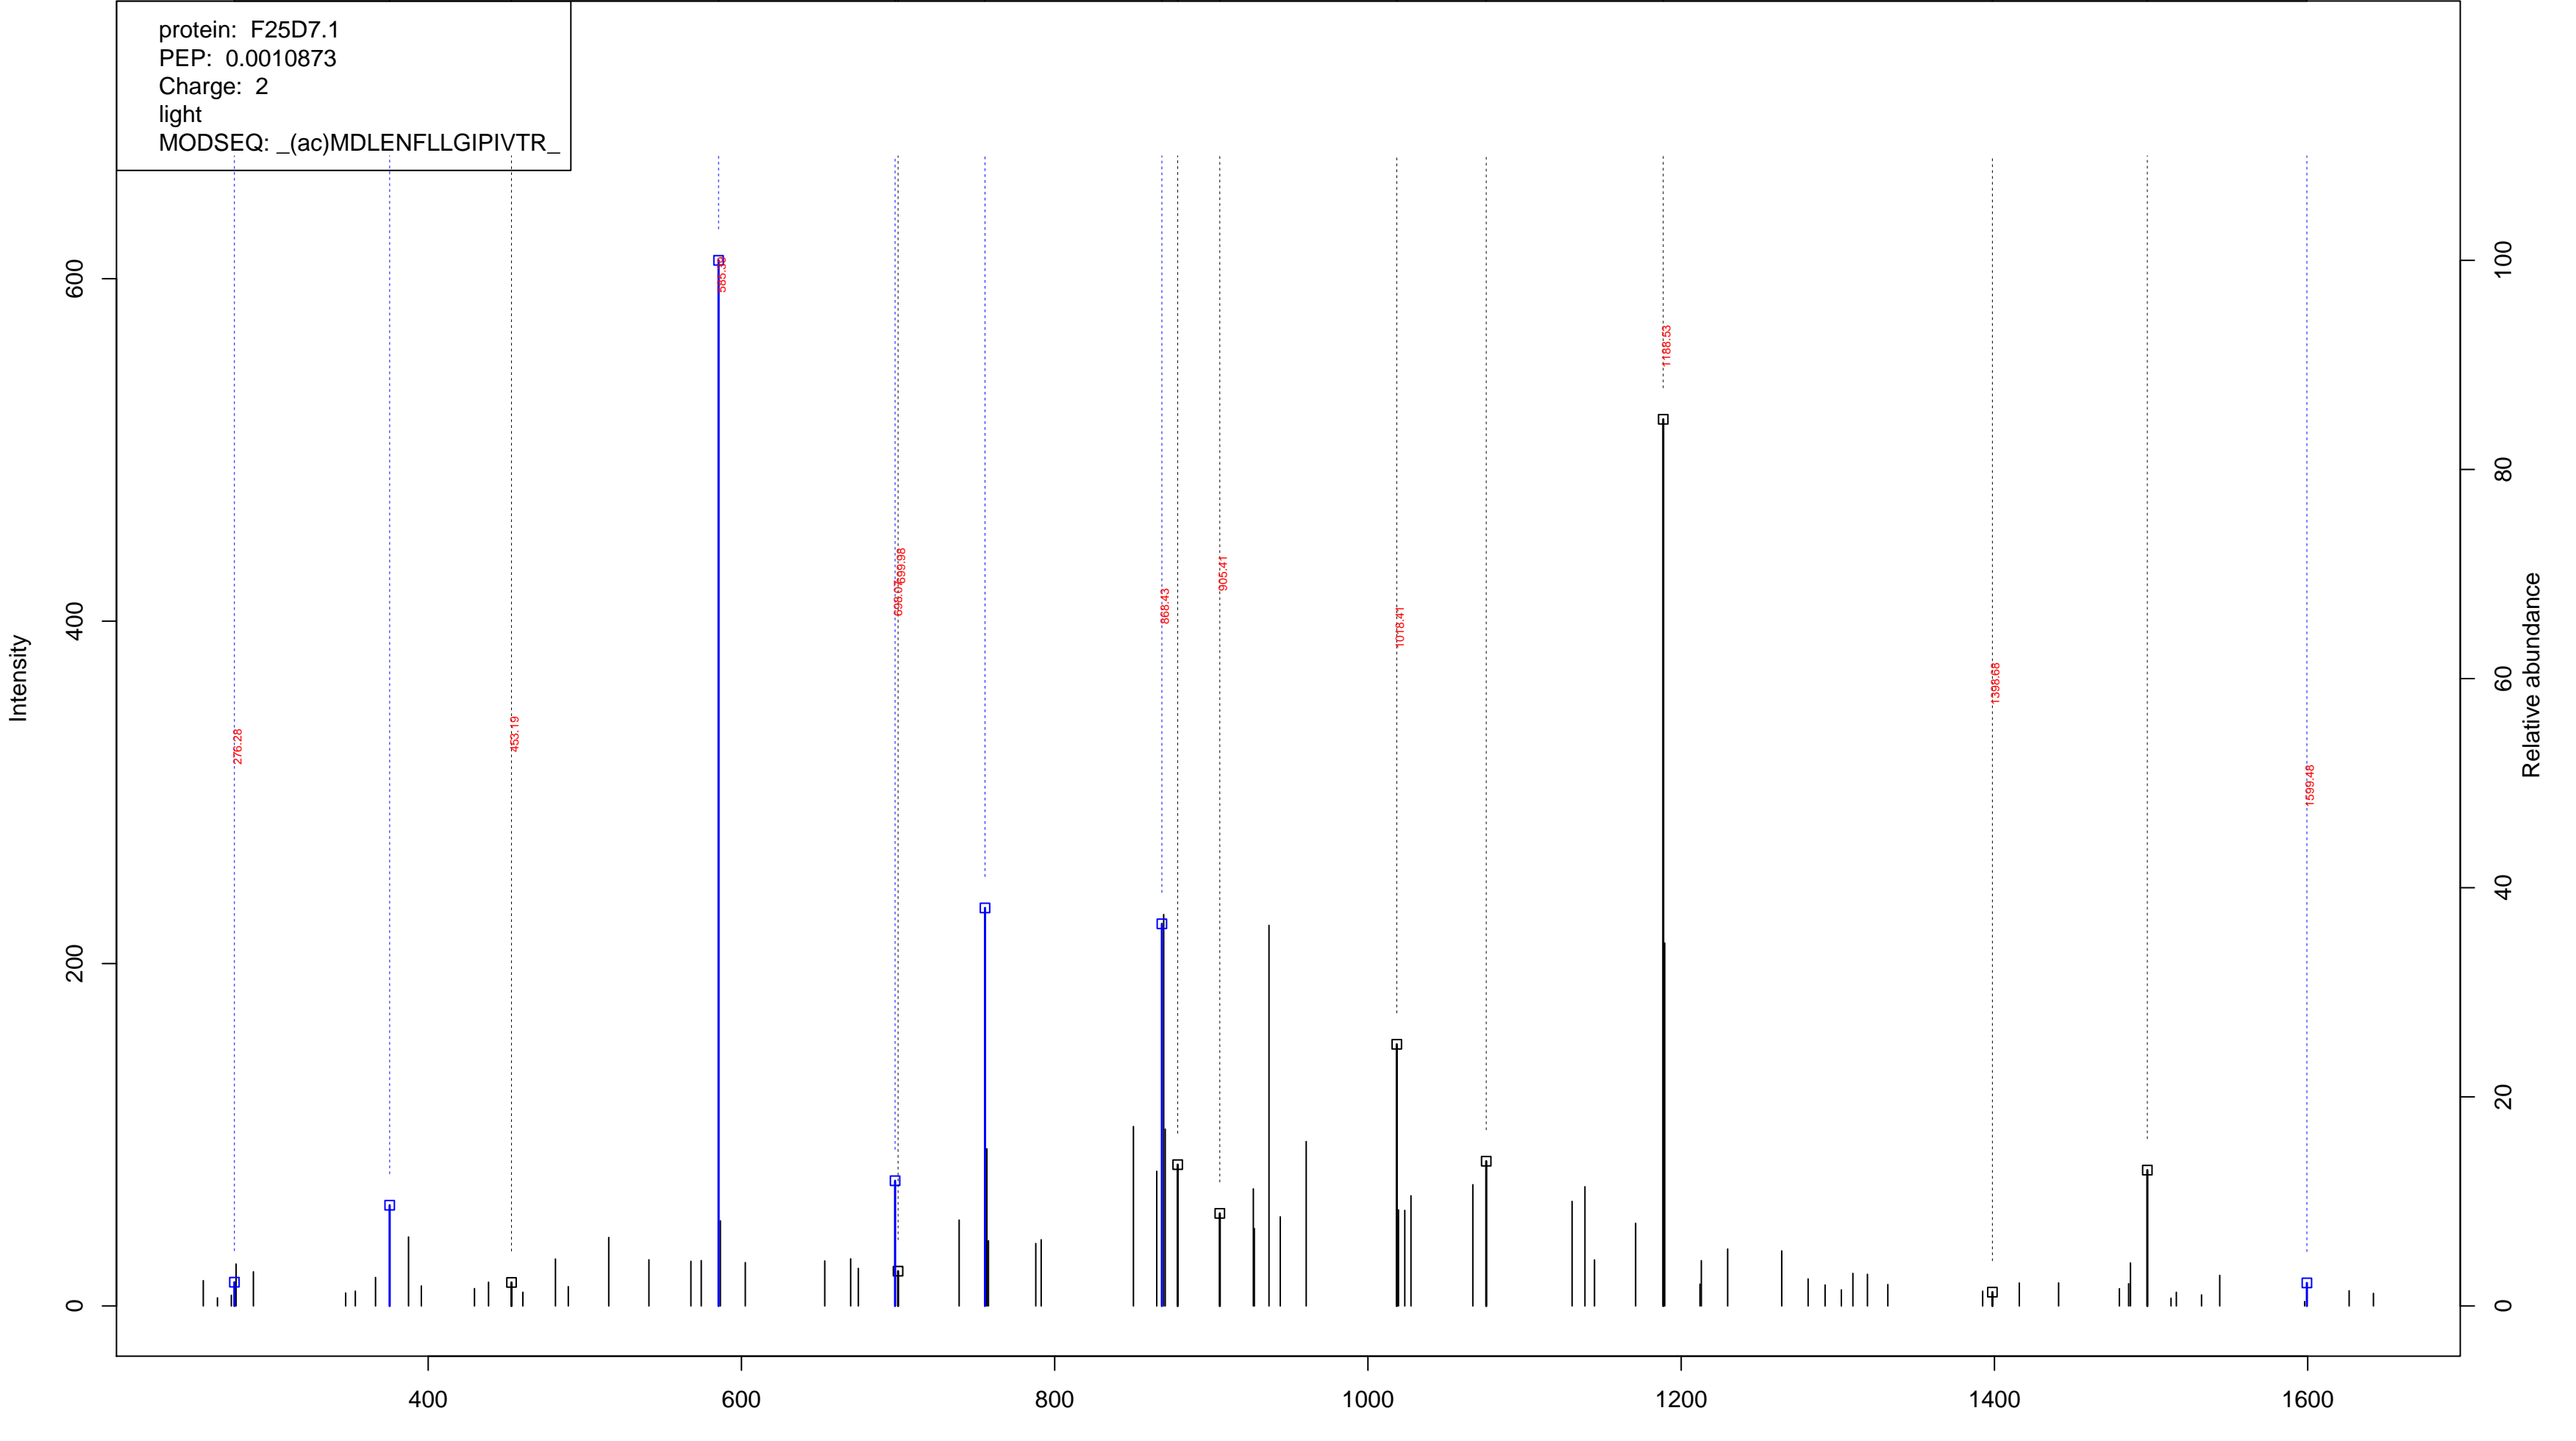



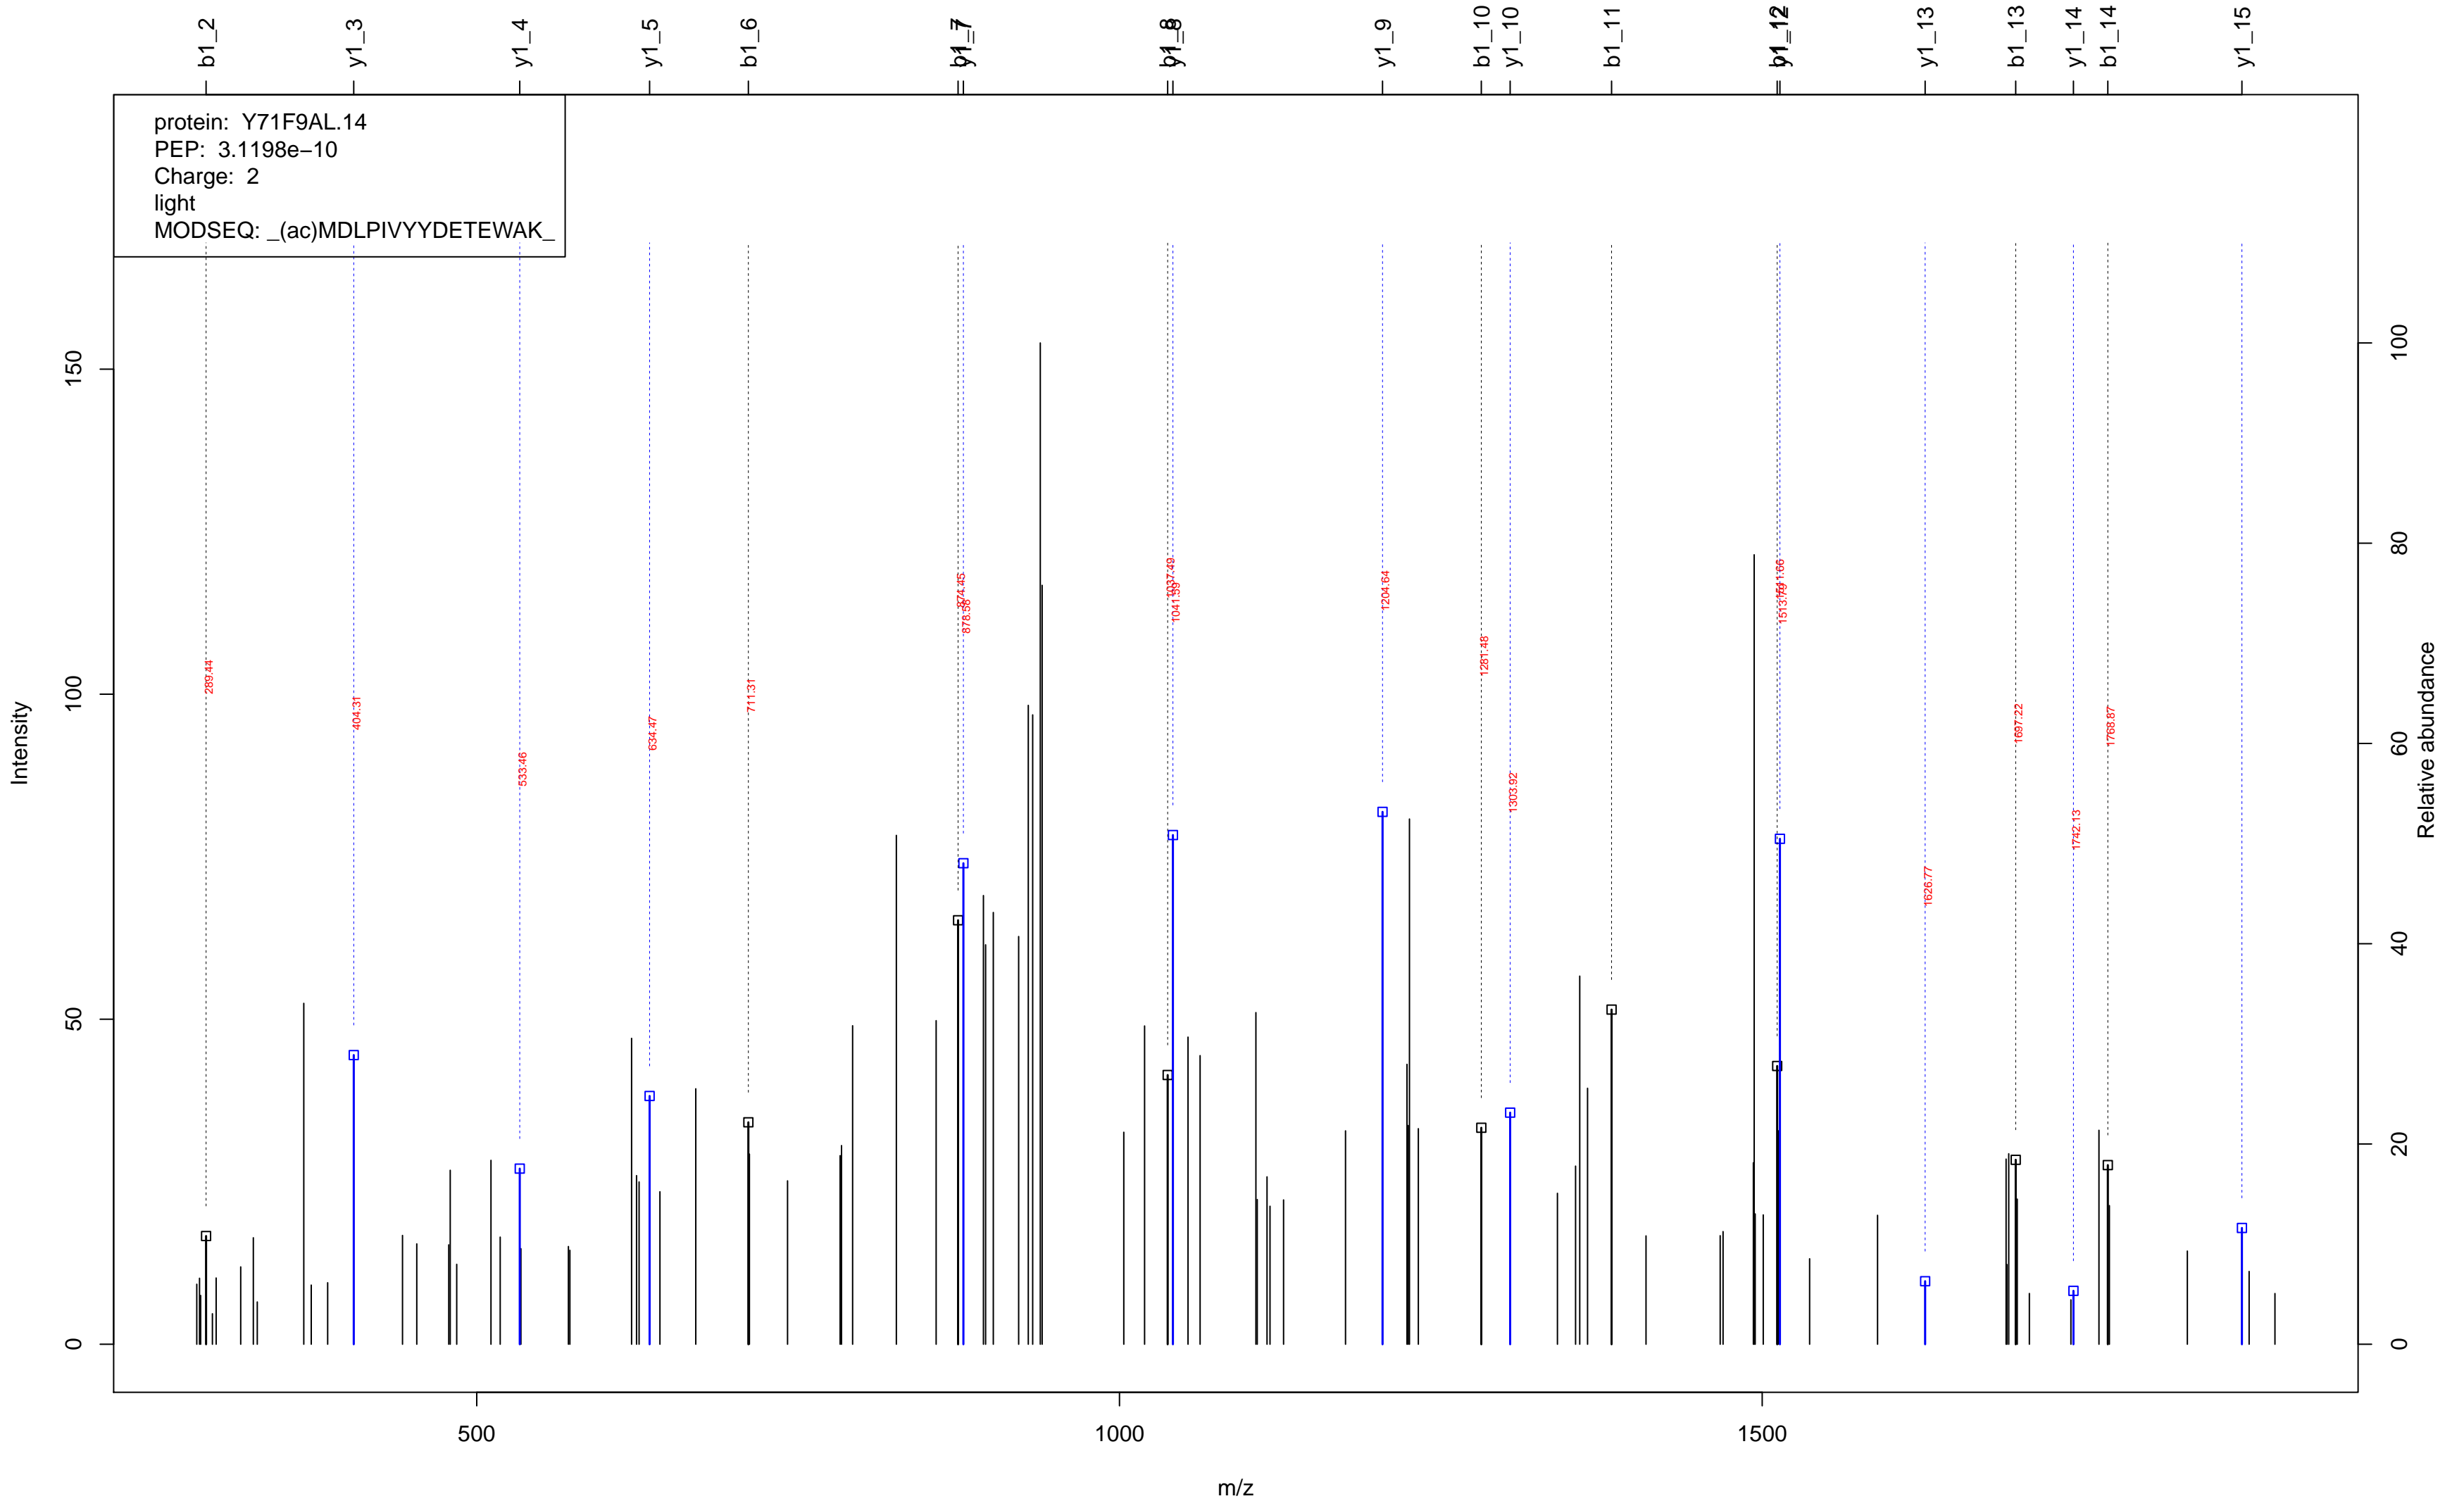

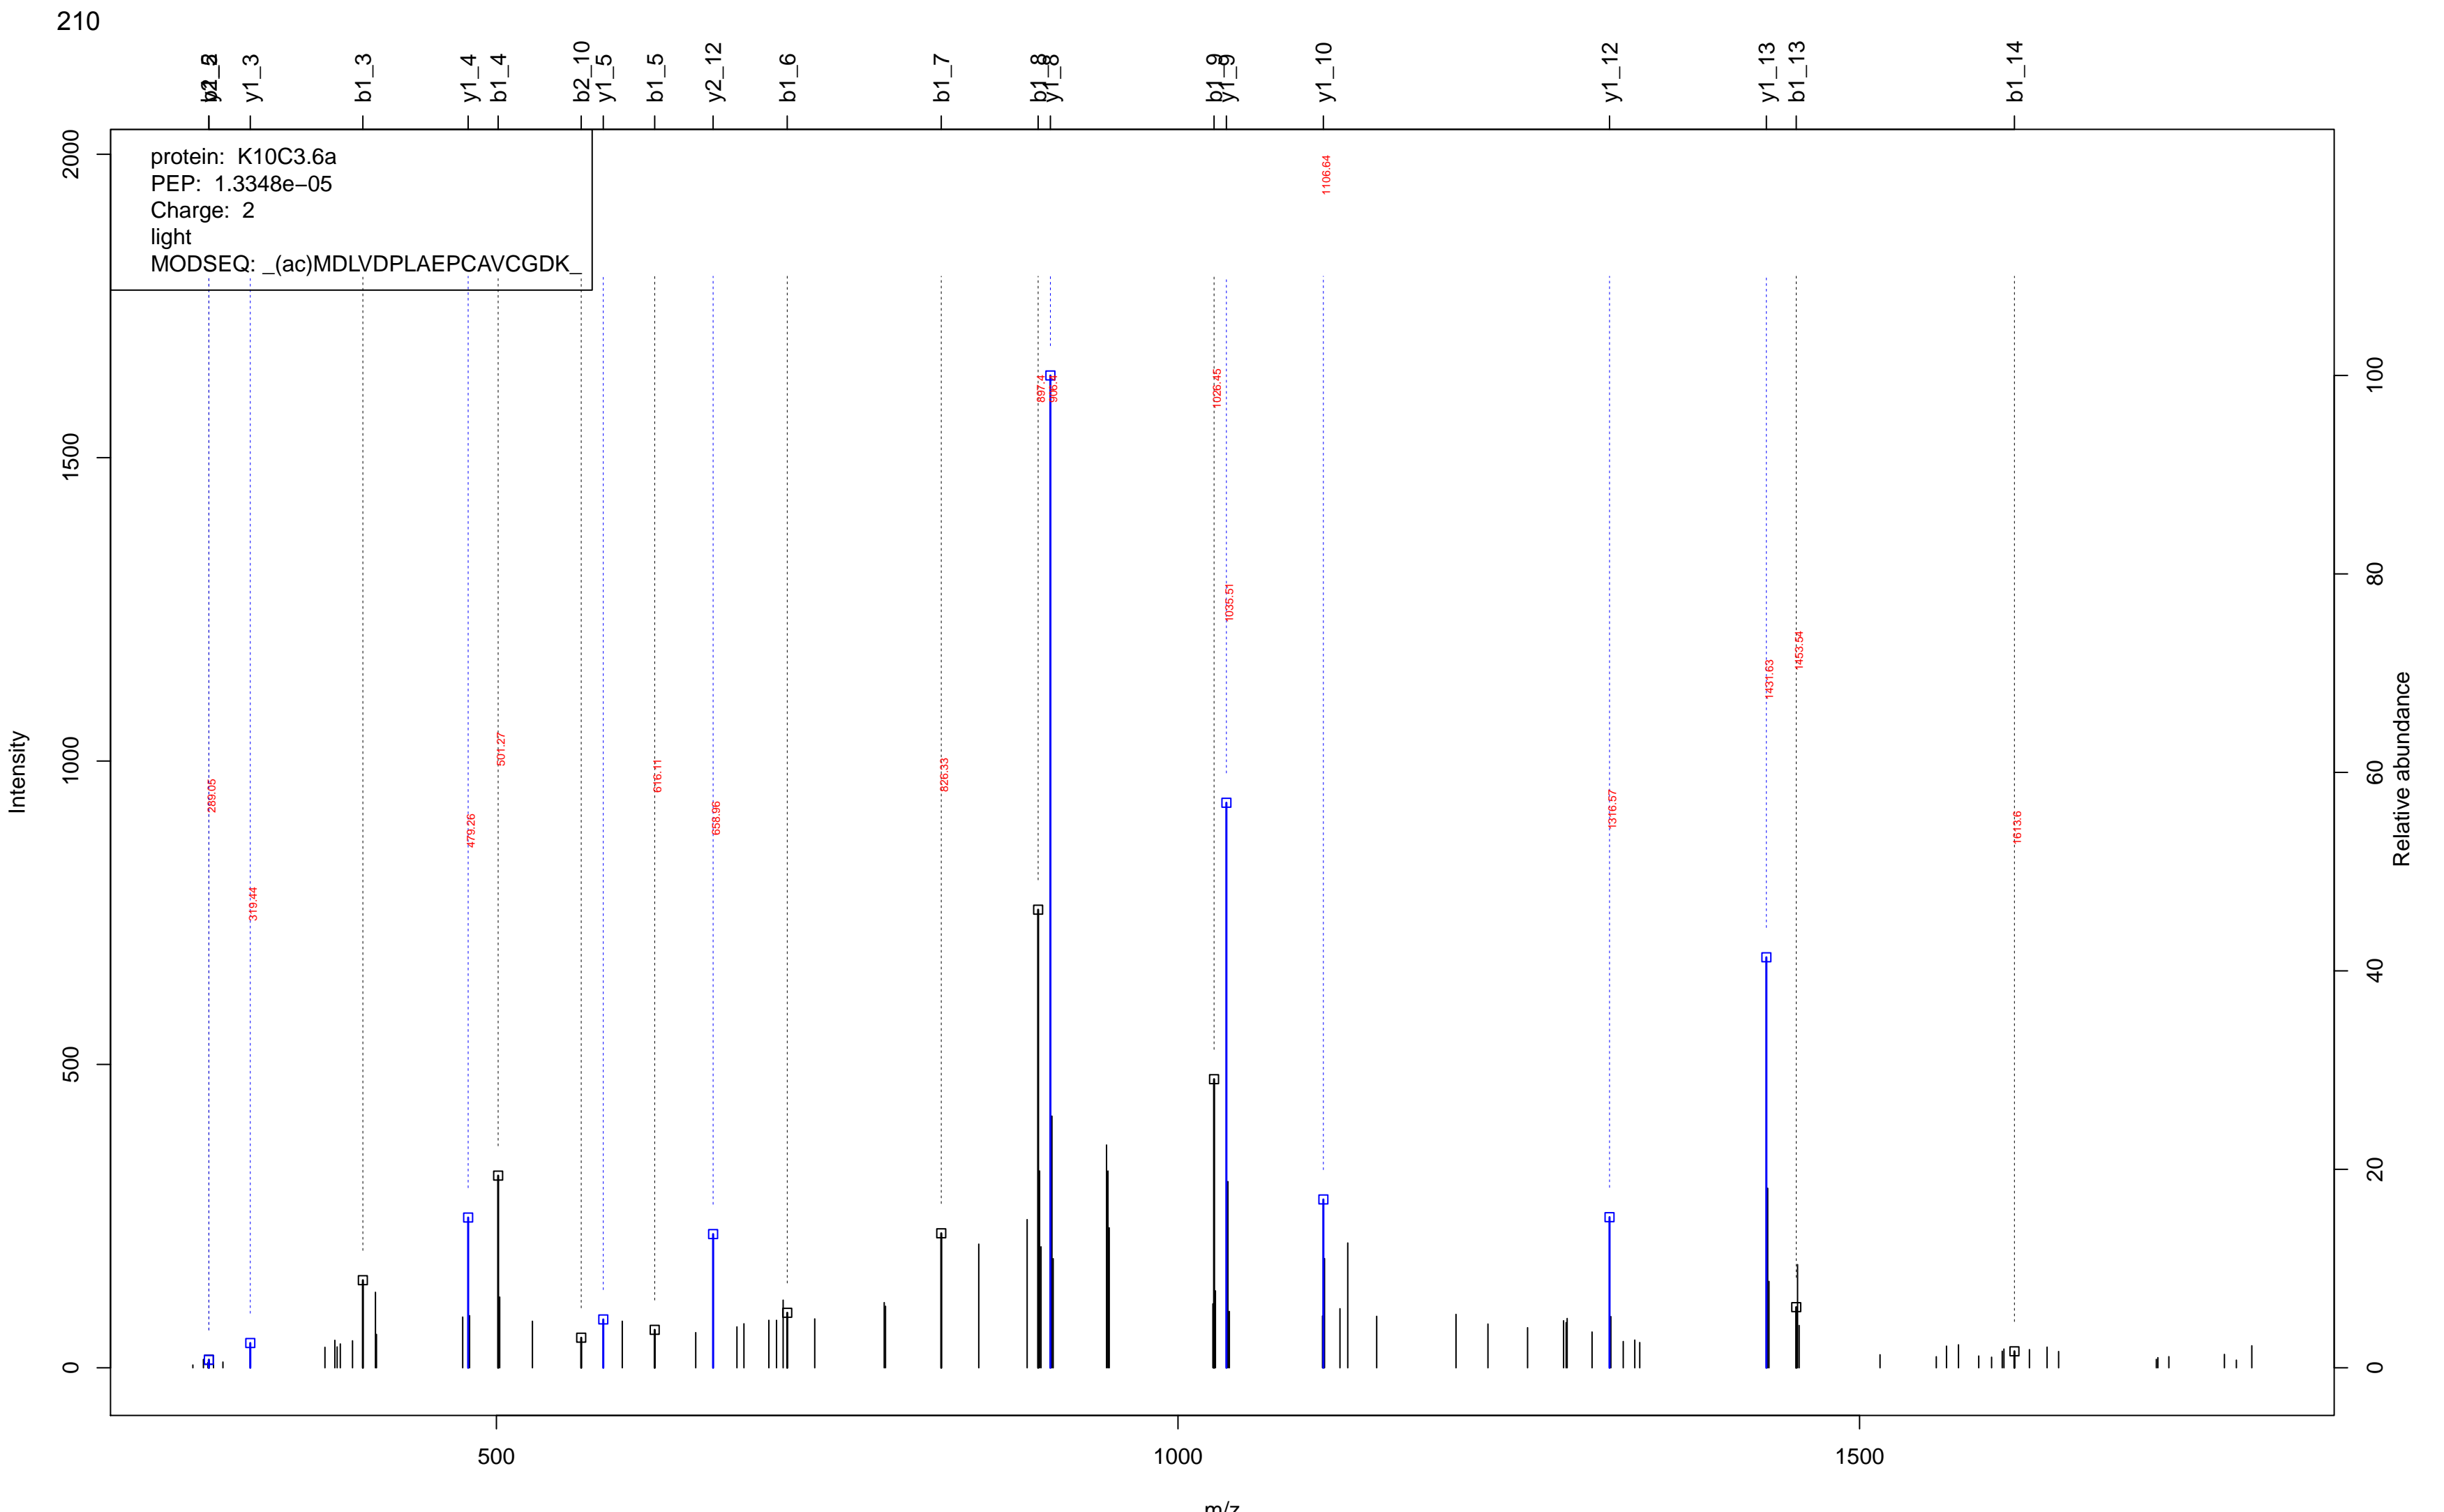

y1\_3 b2\_6 y1\_4 y1\_5 y1\_6 y1\_7 b1\_6 b1\_8 y1\_11 b1\_11 b1\_12 ~~y1\_13~~ b1\_14 b1\_15 ~~b1\_16~~

protein: R186.7  
PEP: 6.8259e-05  
Charge: 2  
light  
MODSEQ: (ac)MDQM(ox)LVEELESDITAAR\_

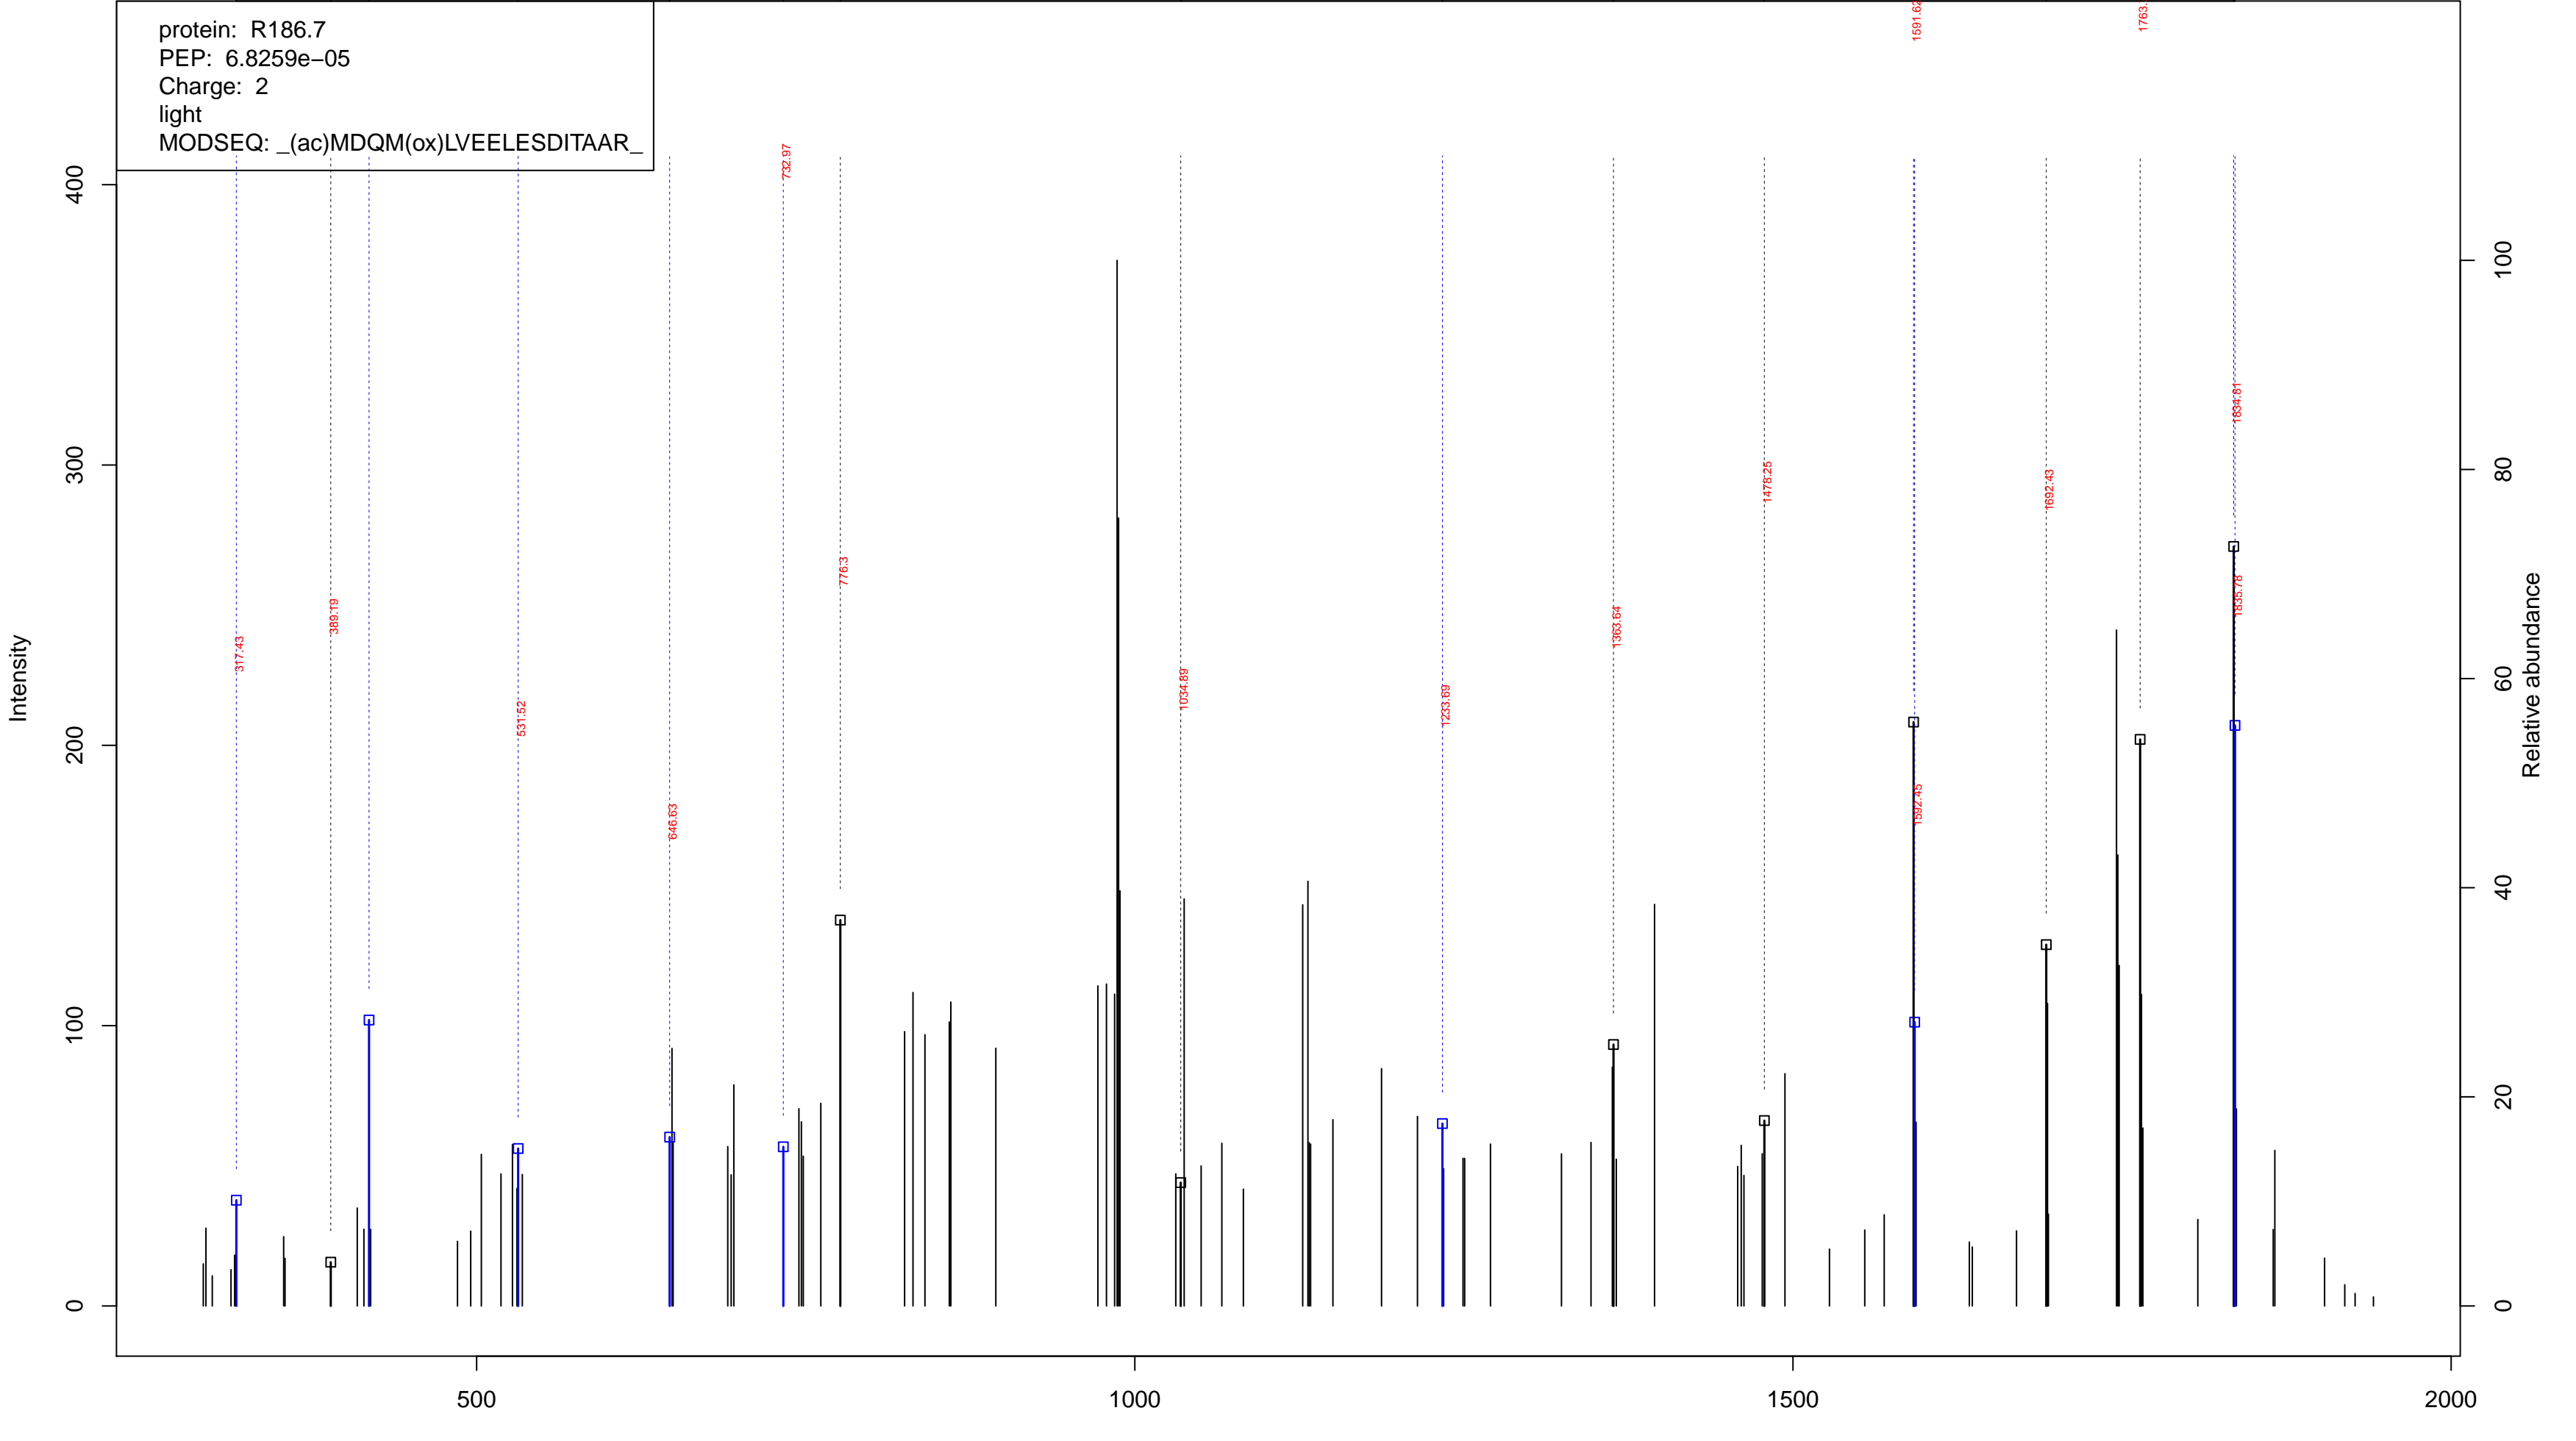

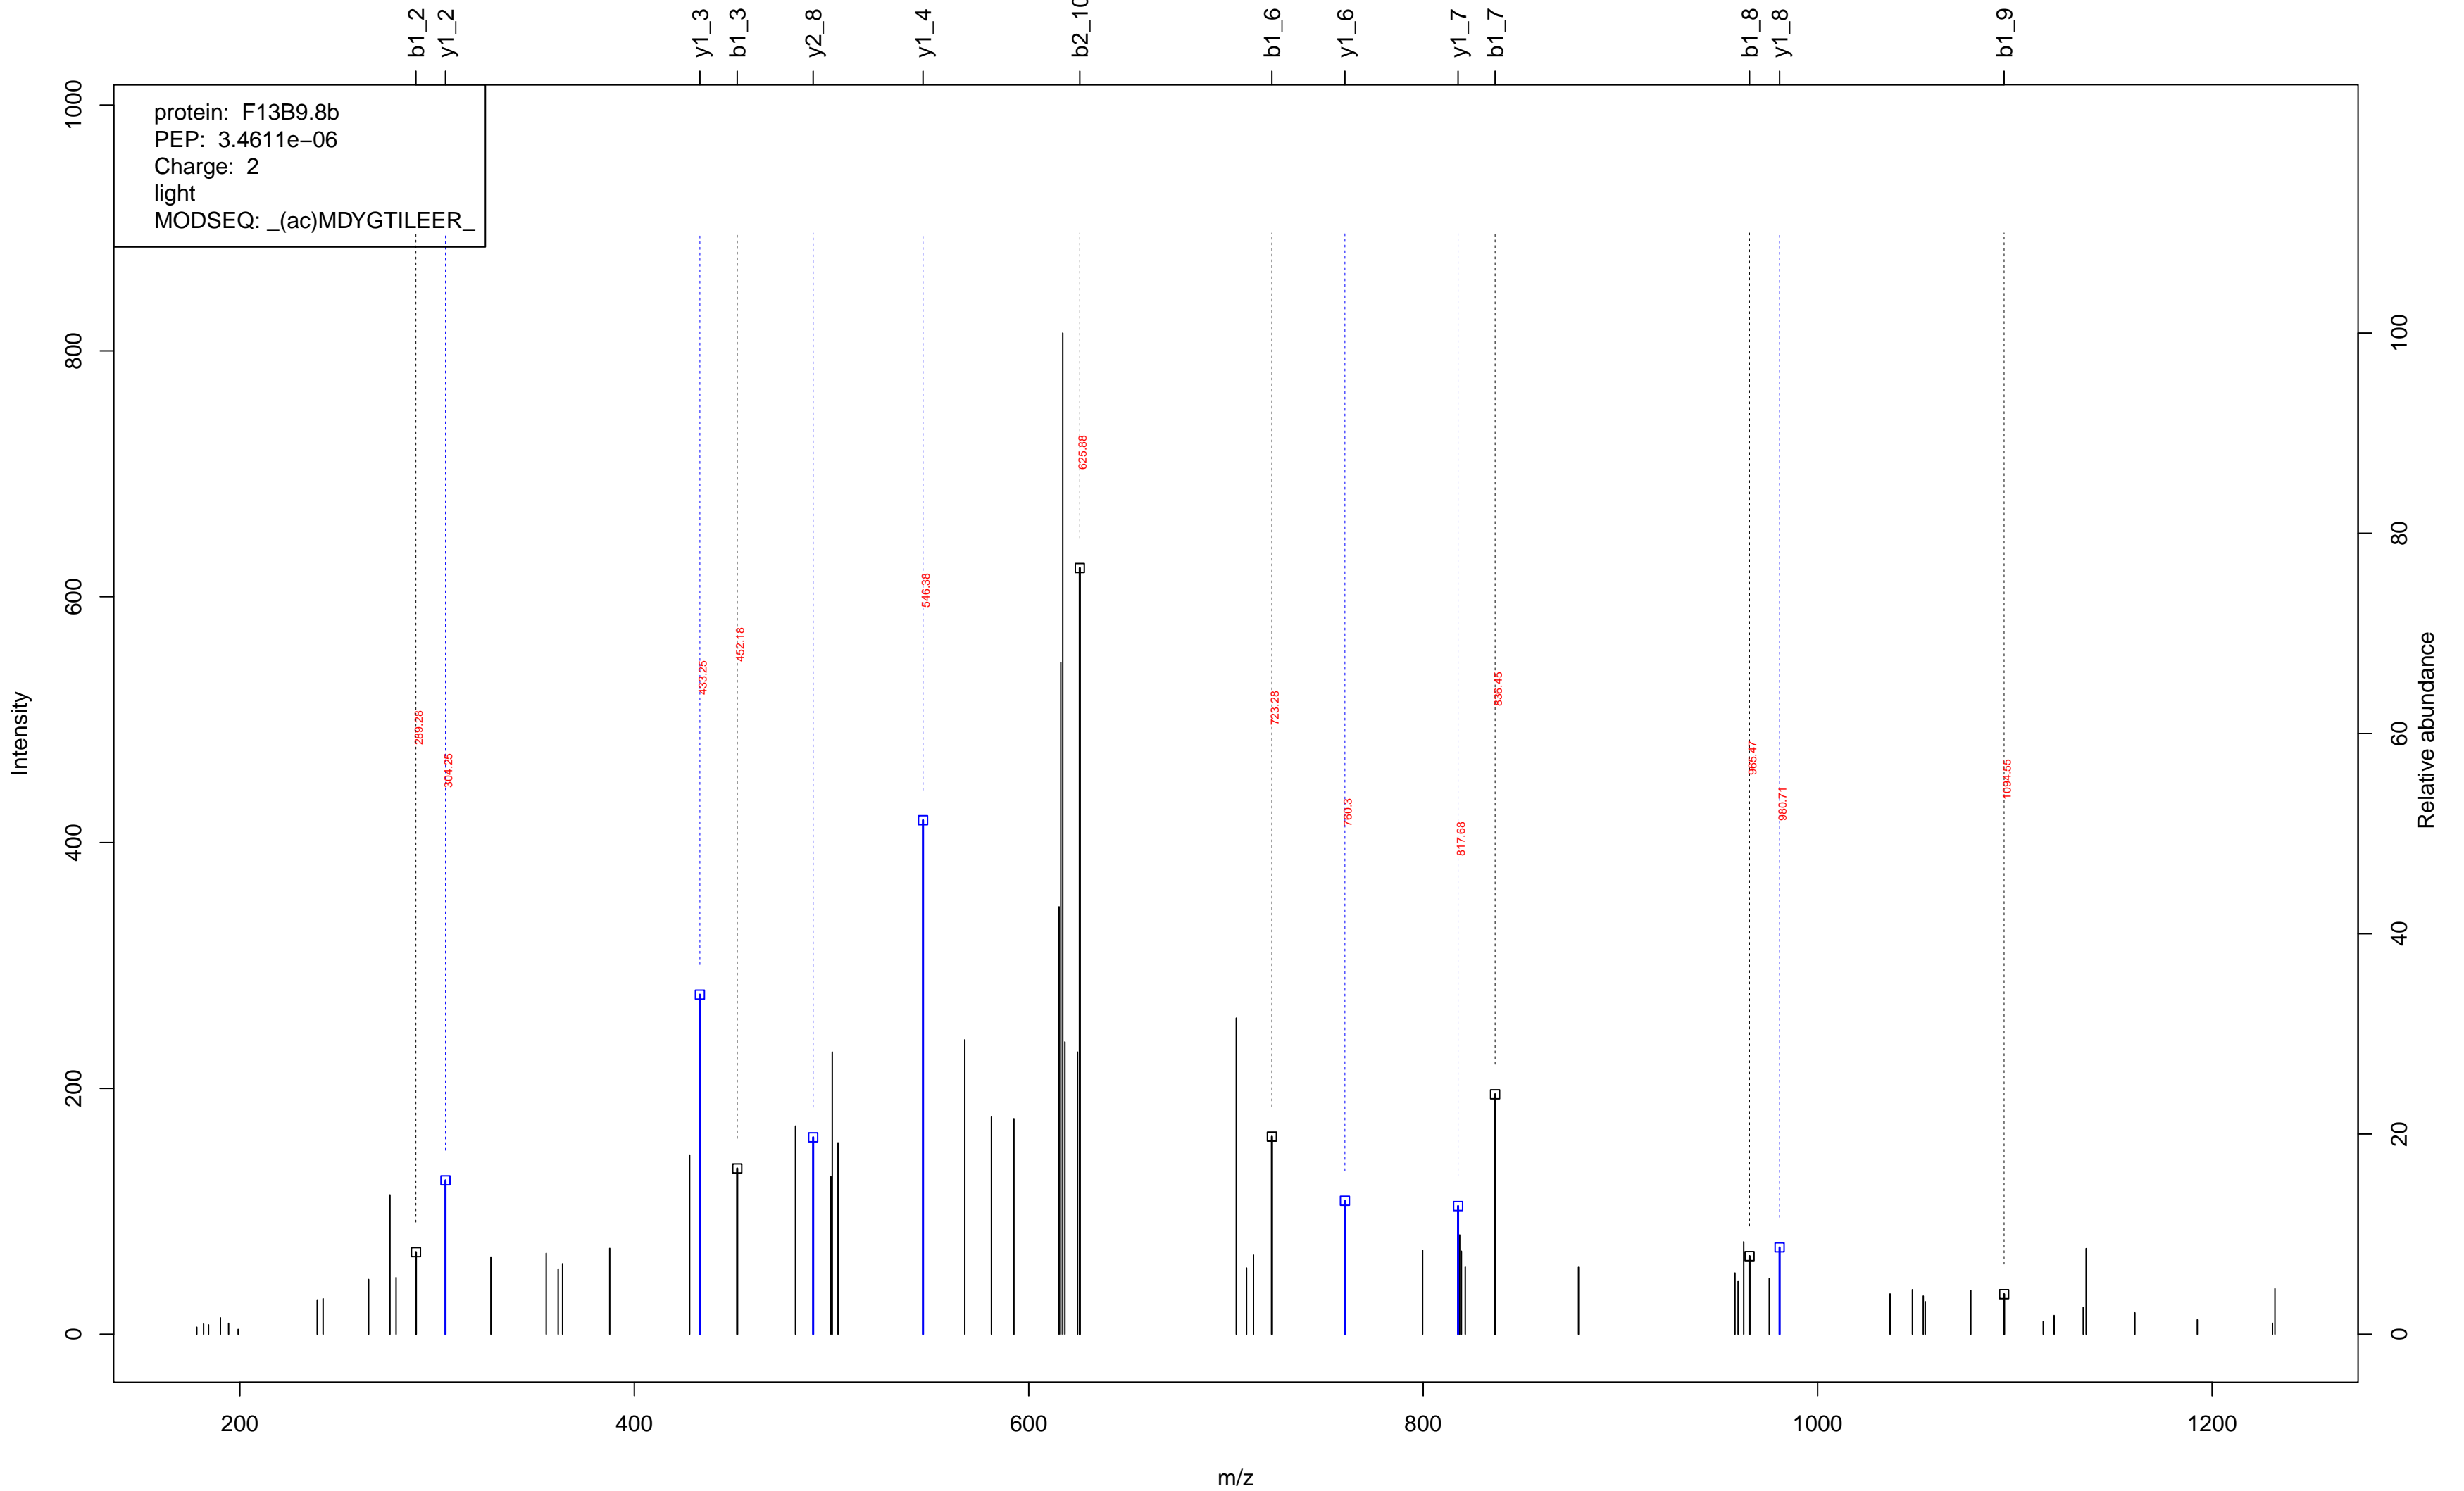

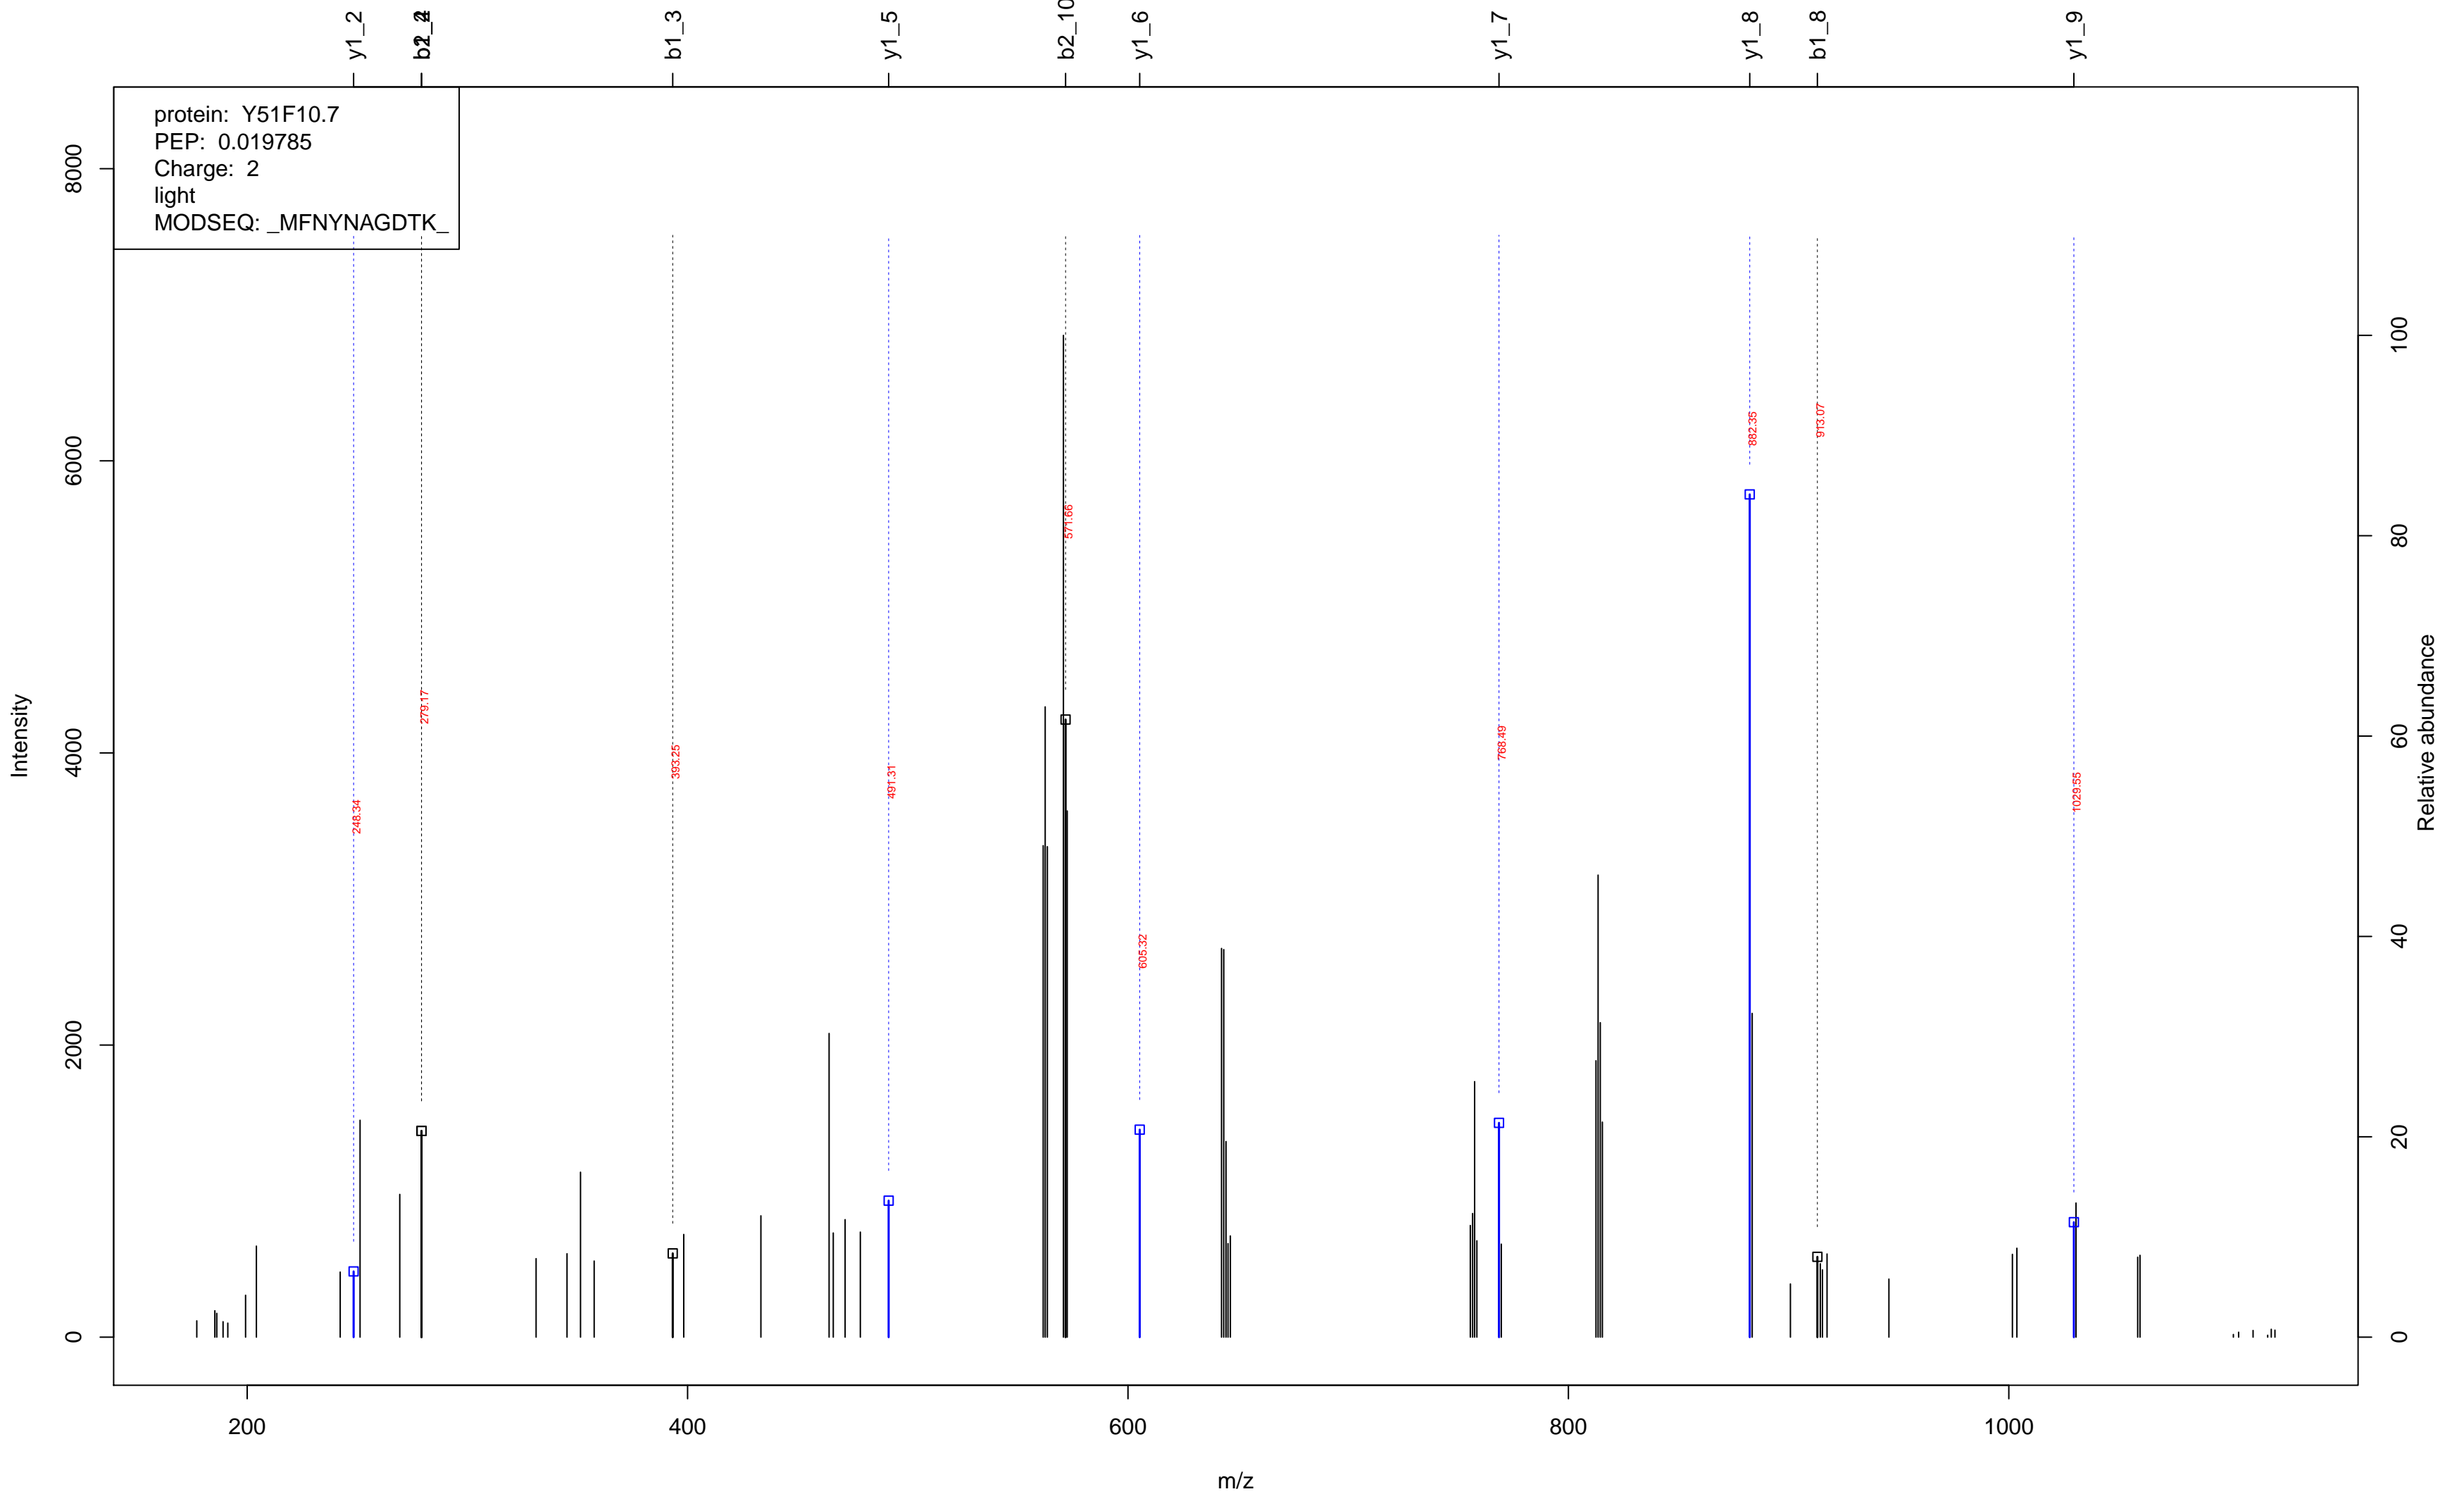

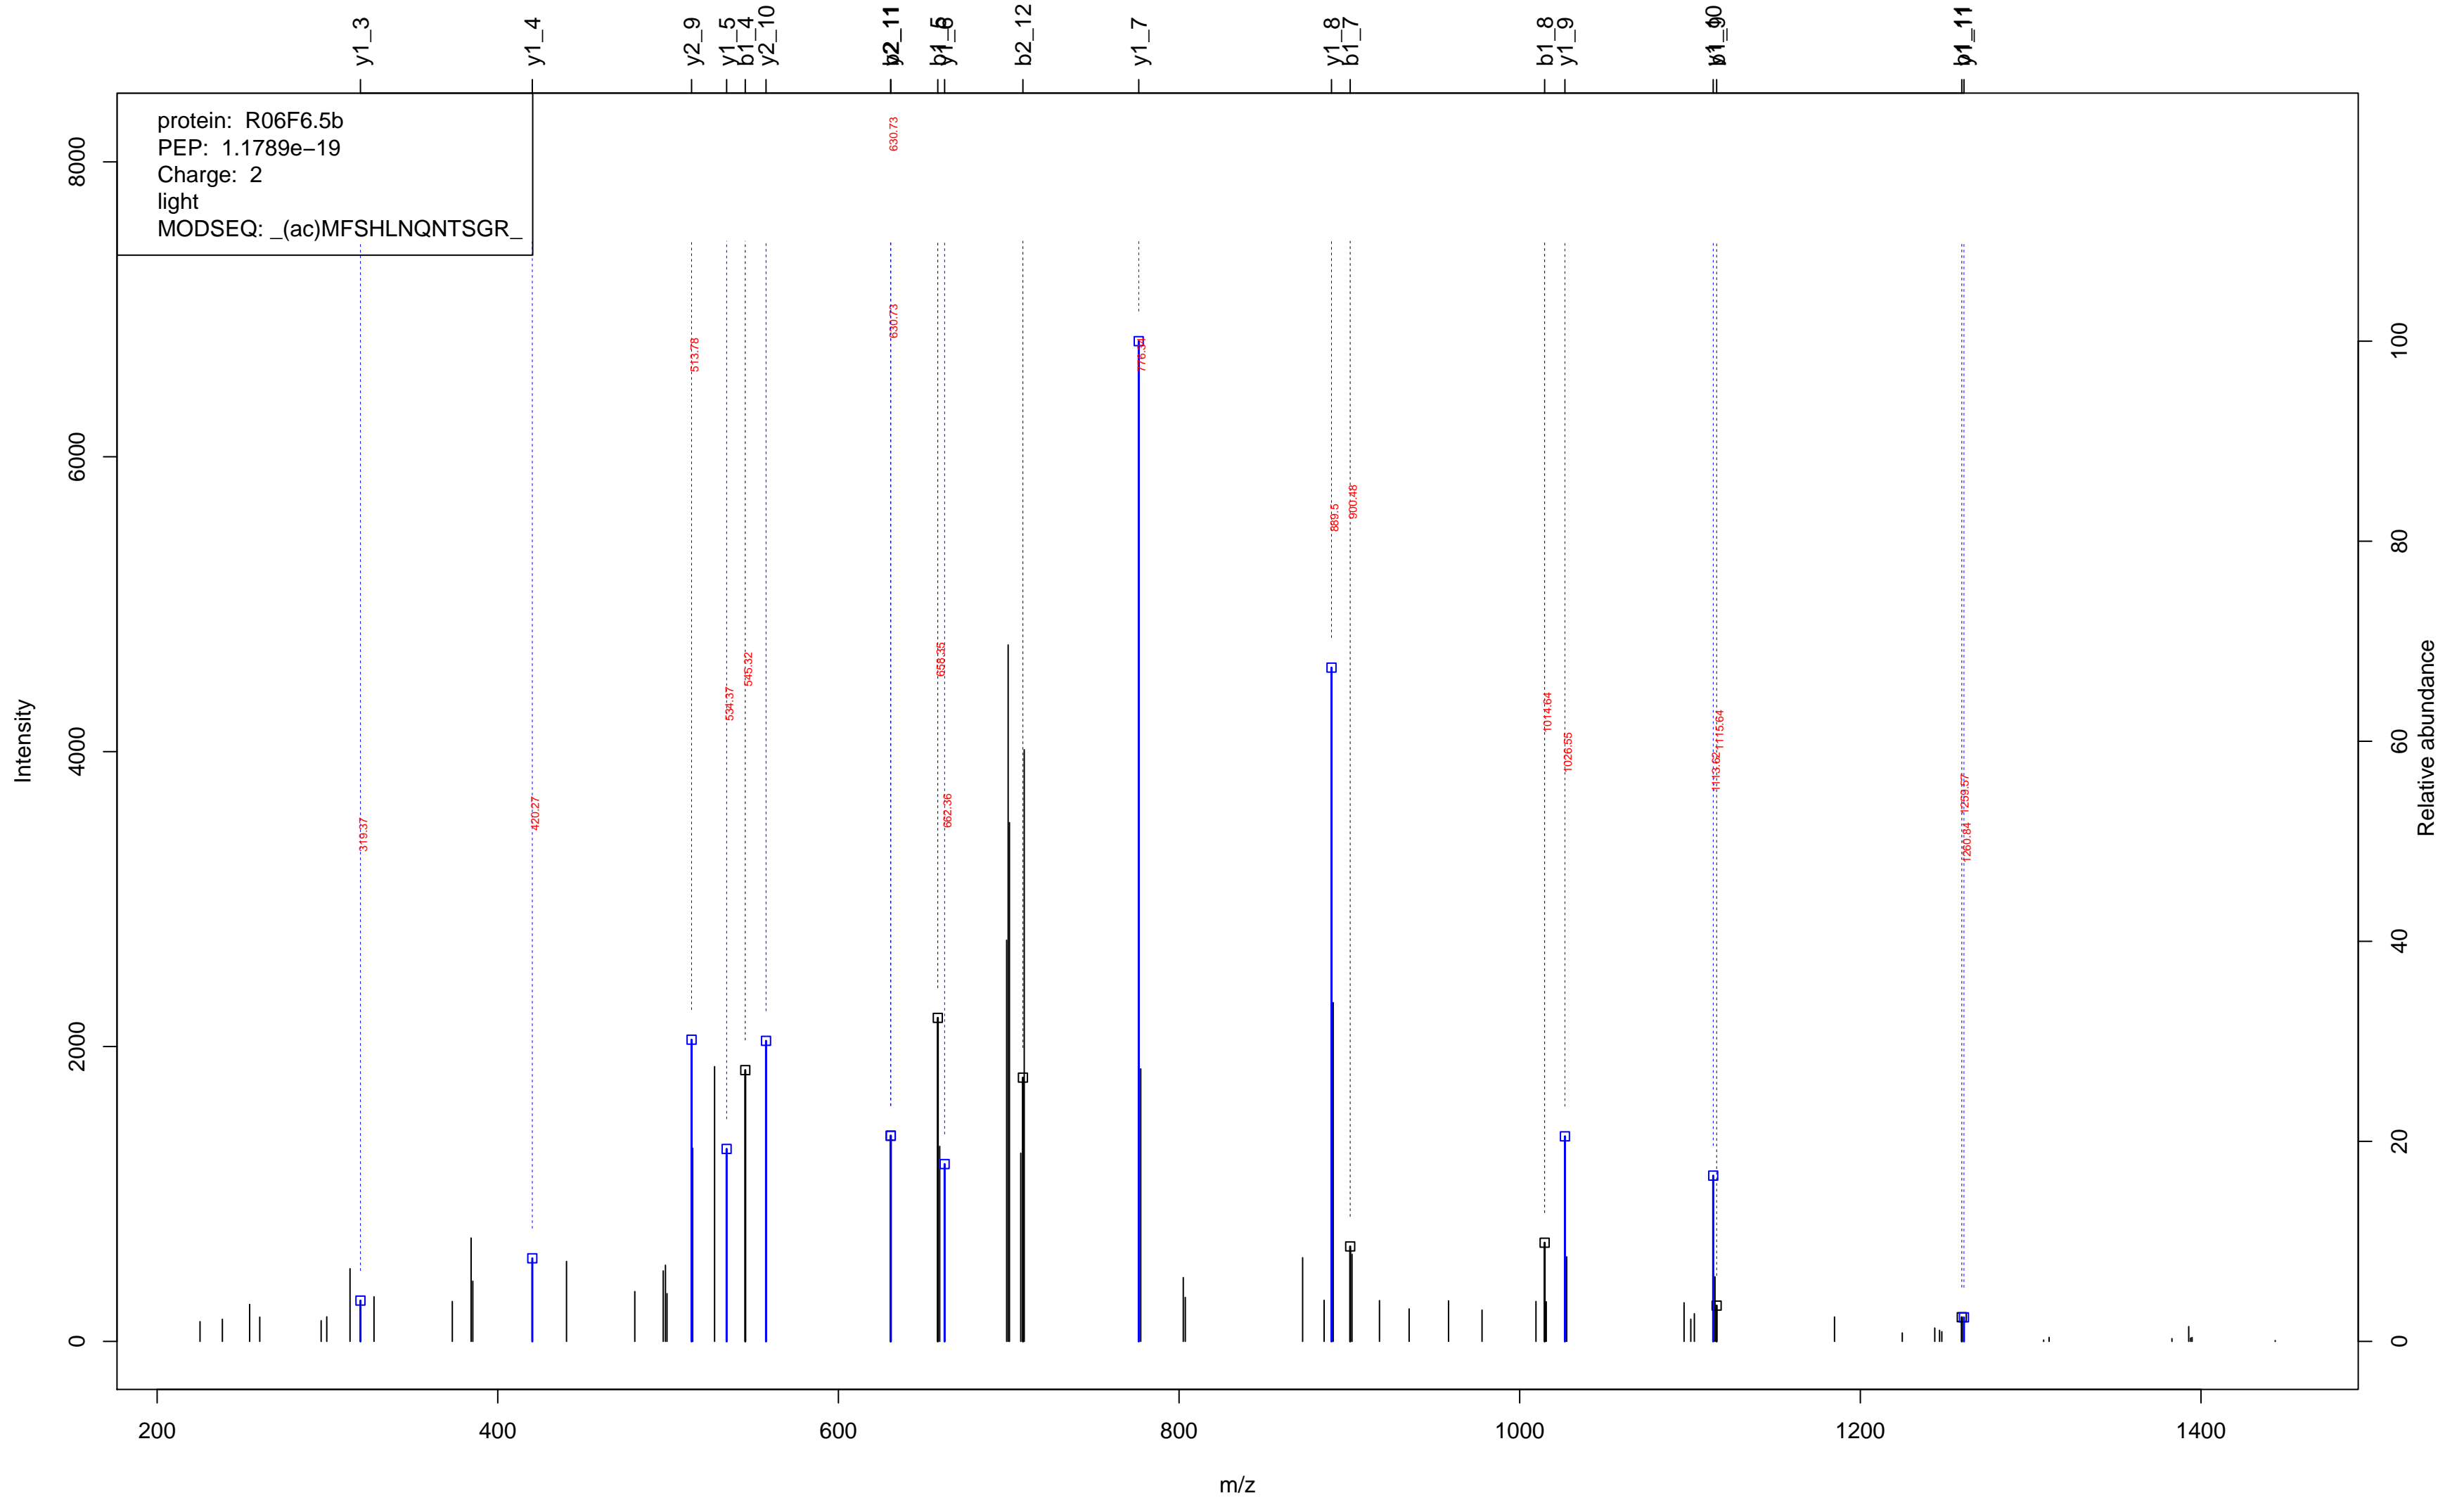

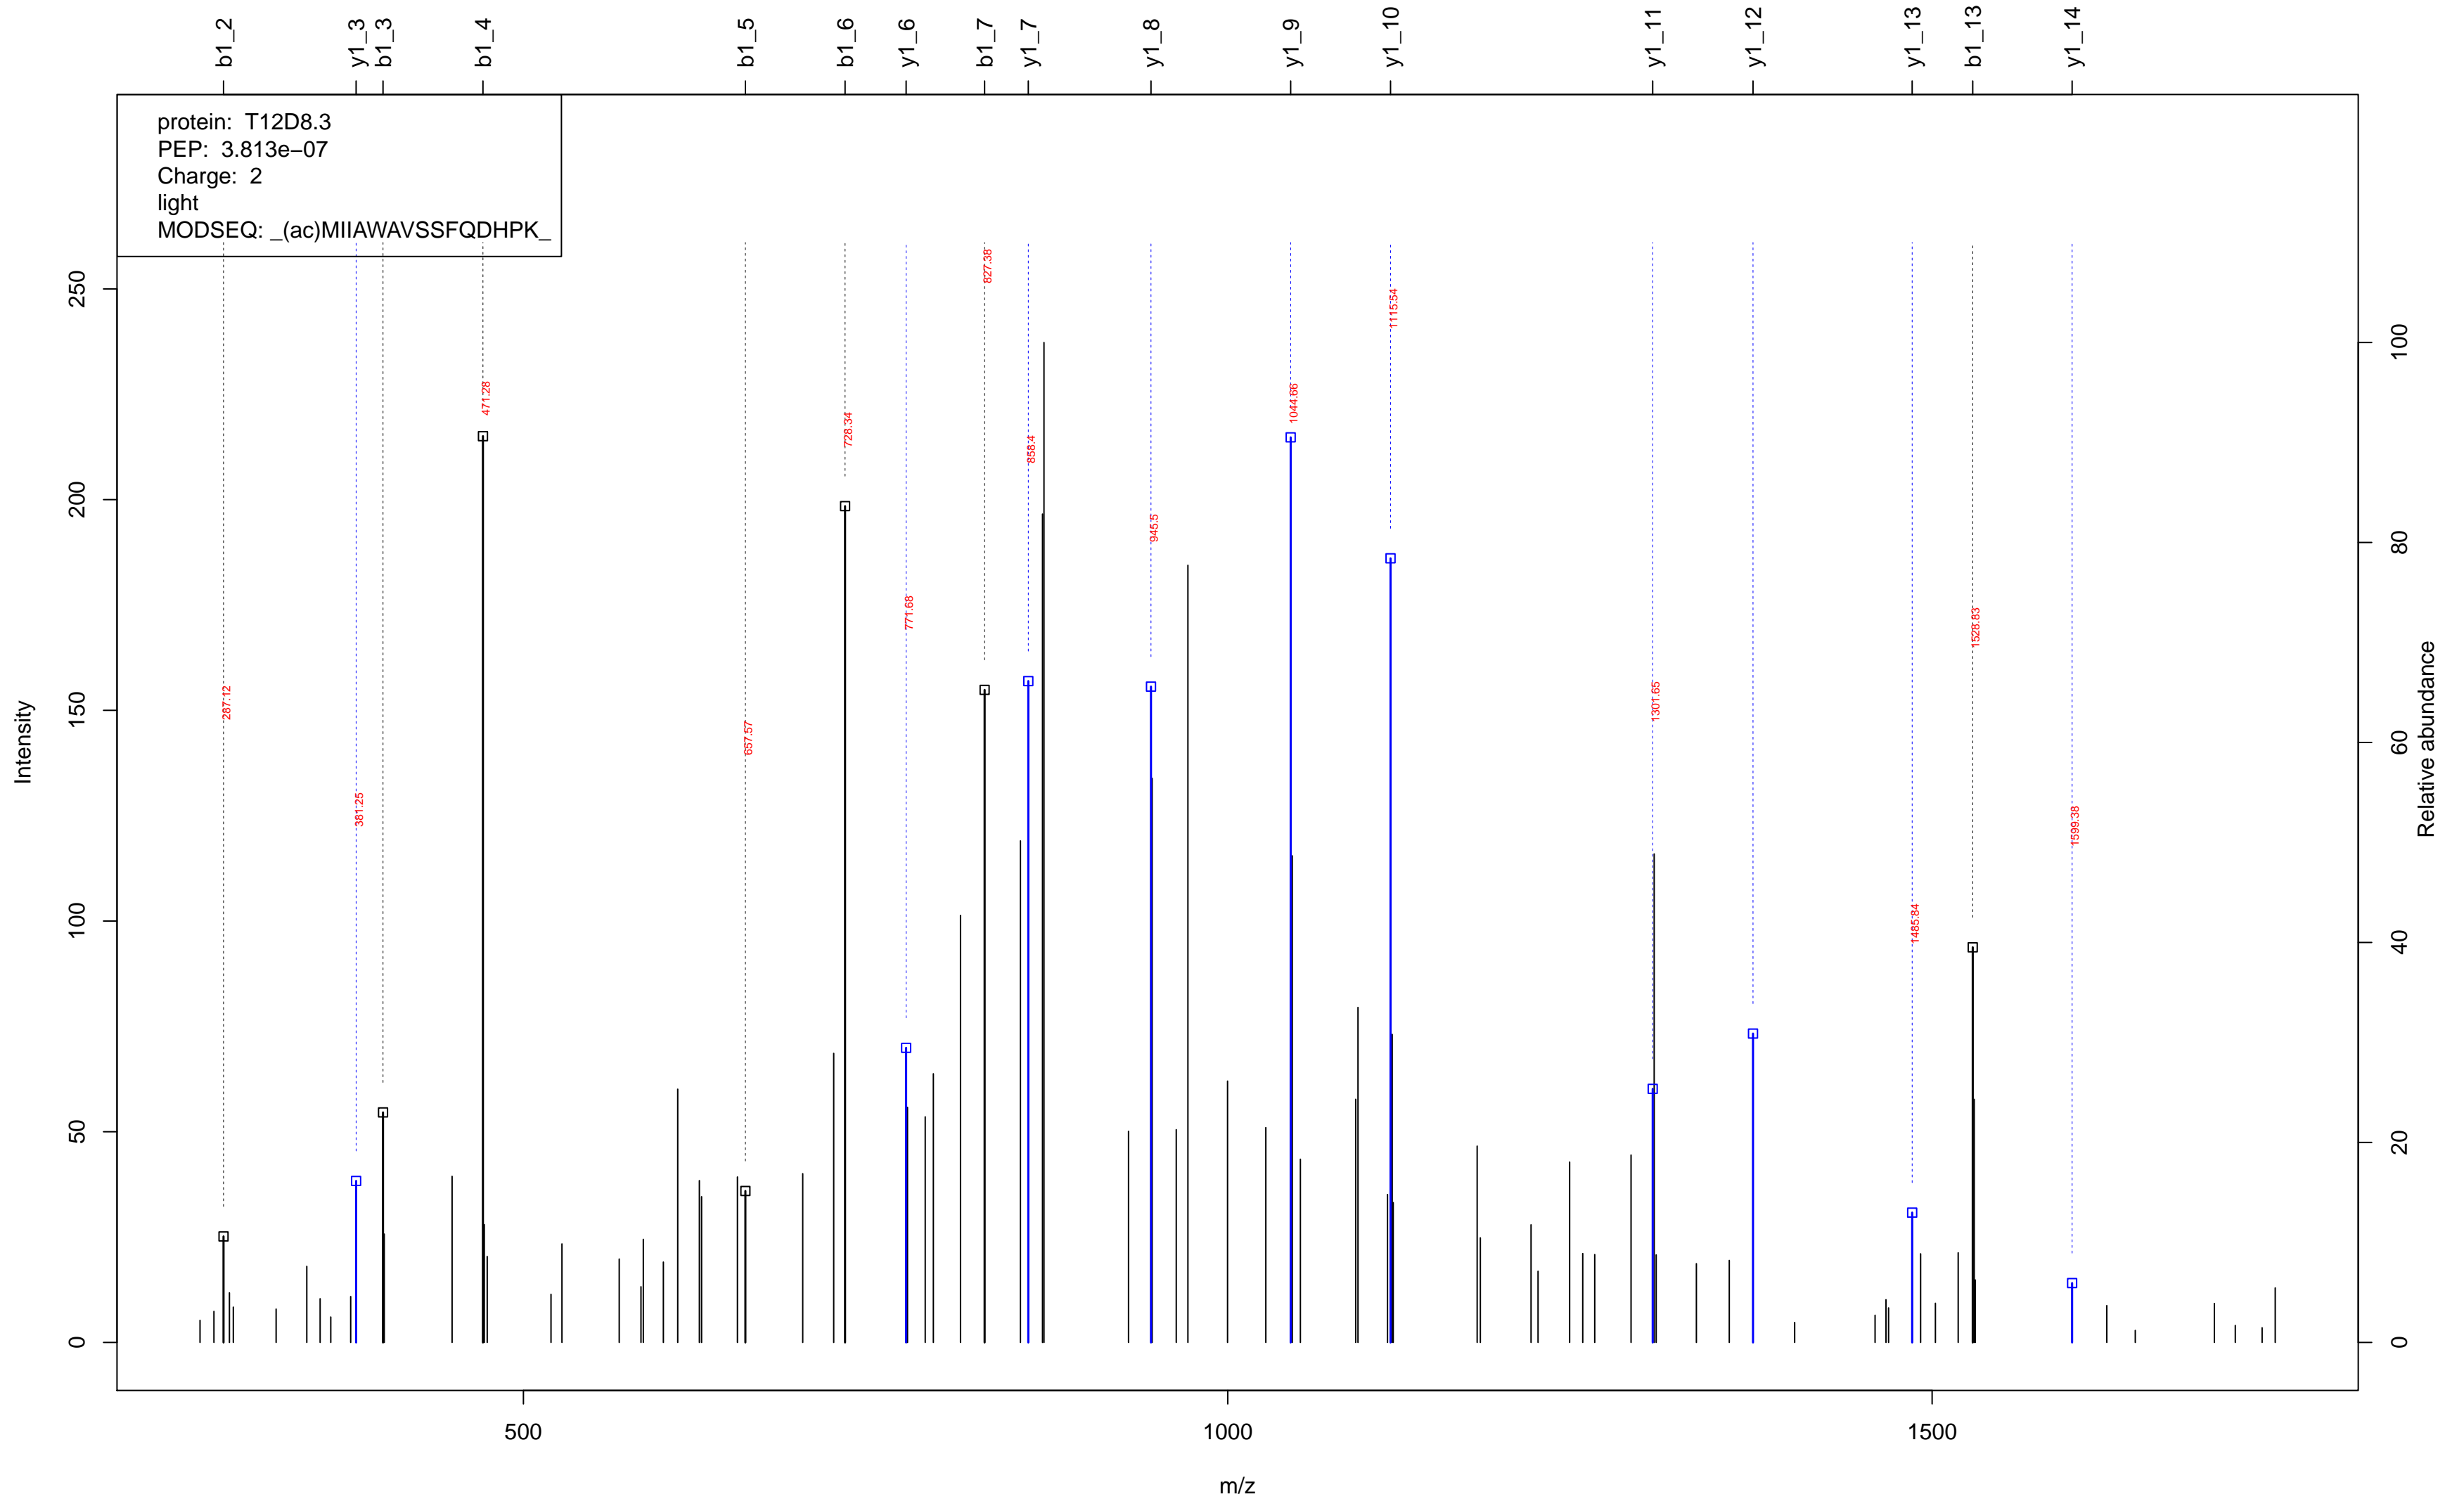

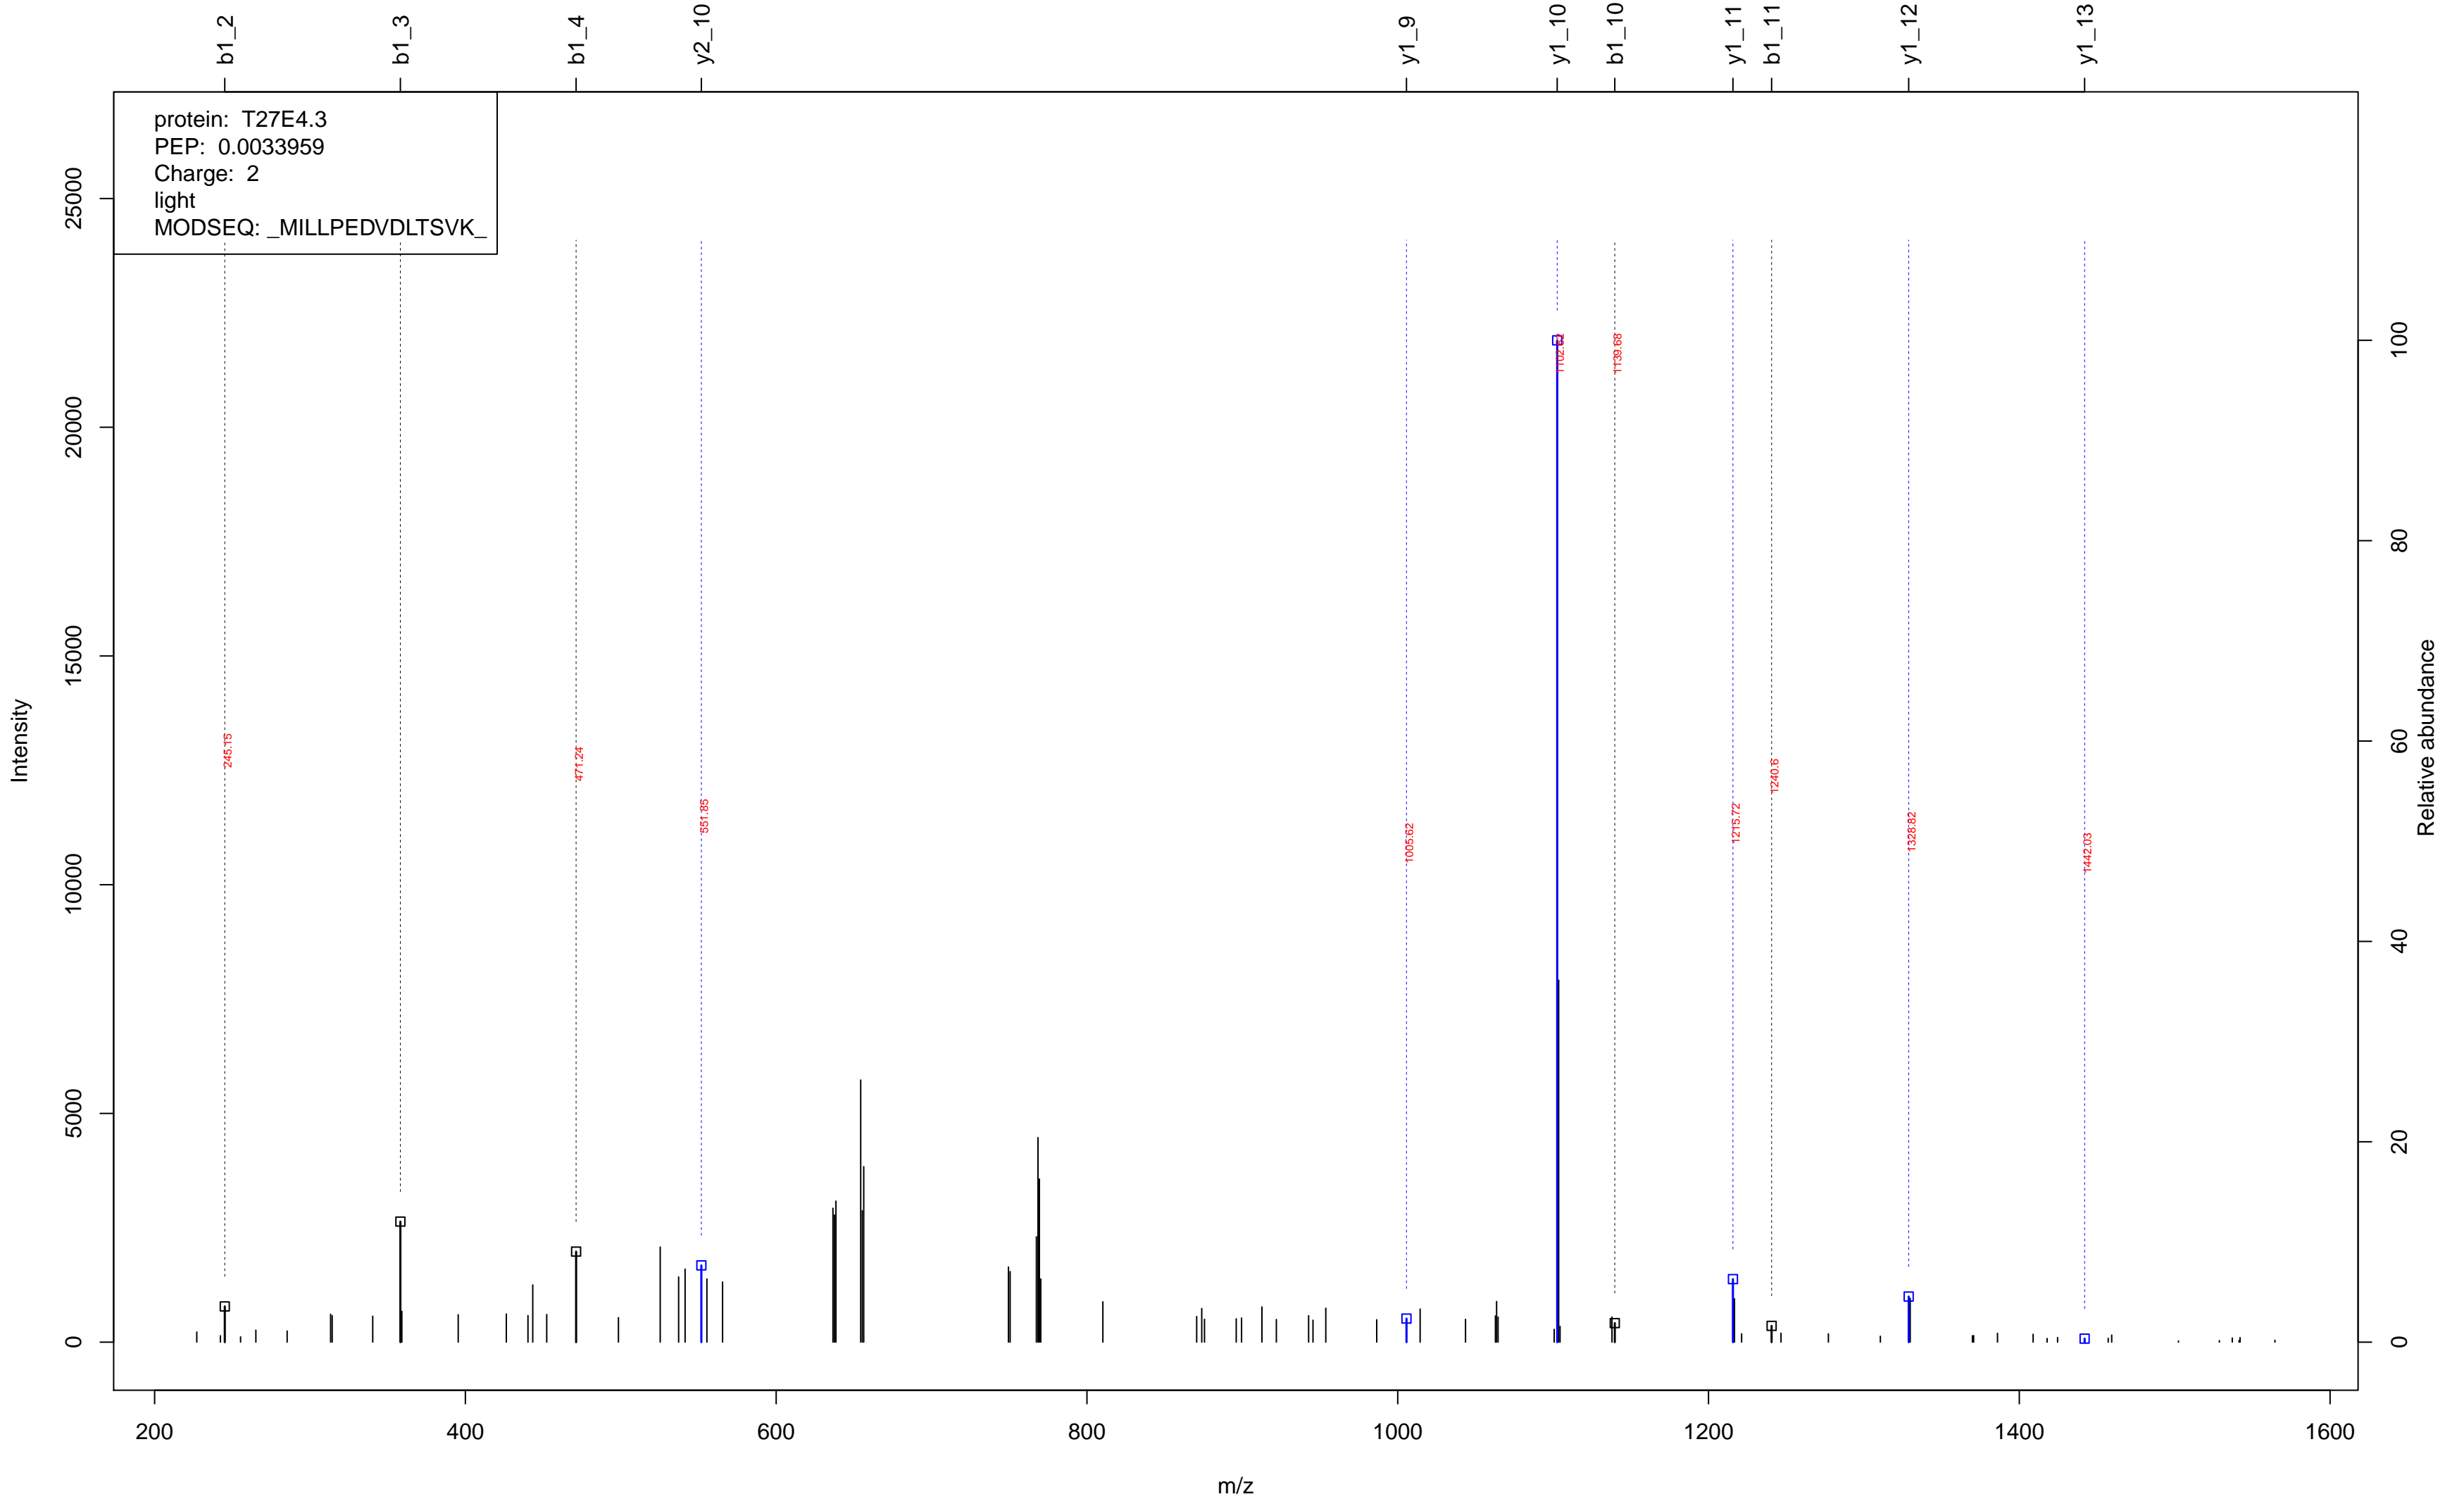



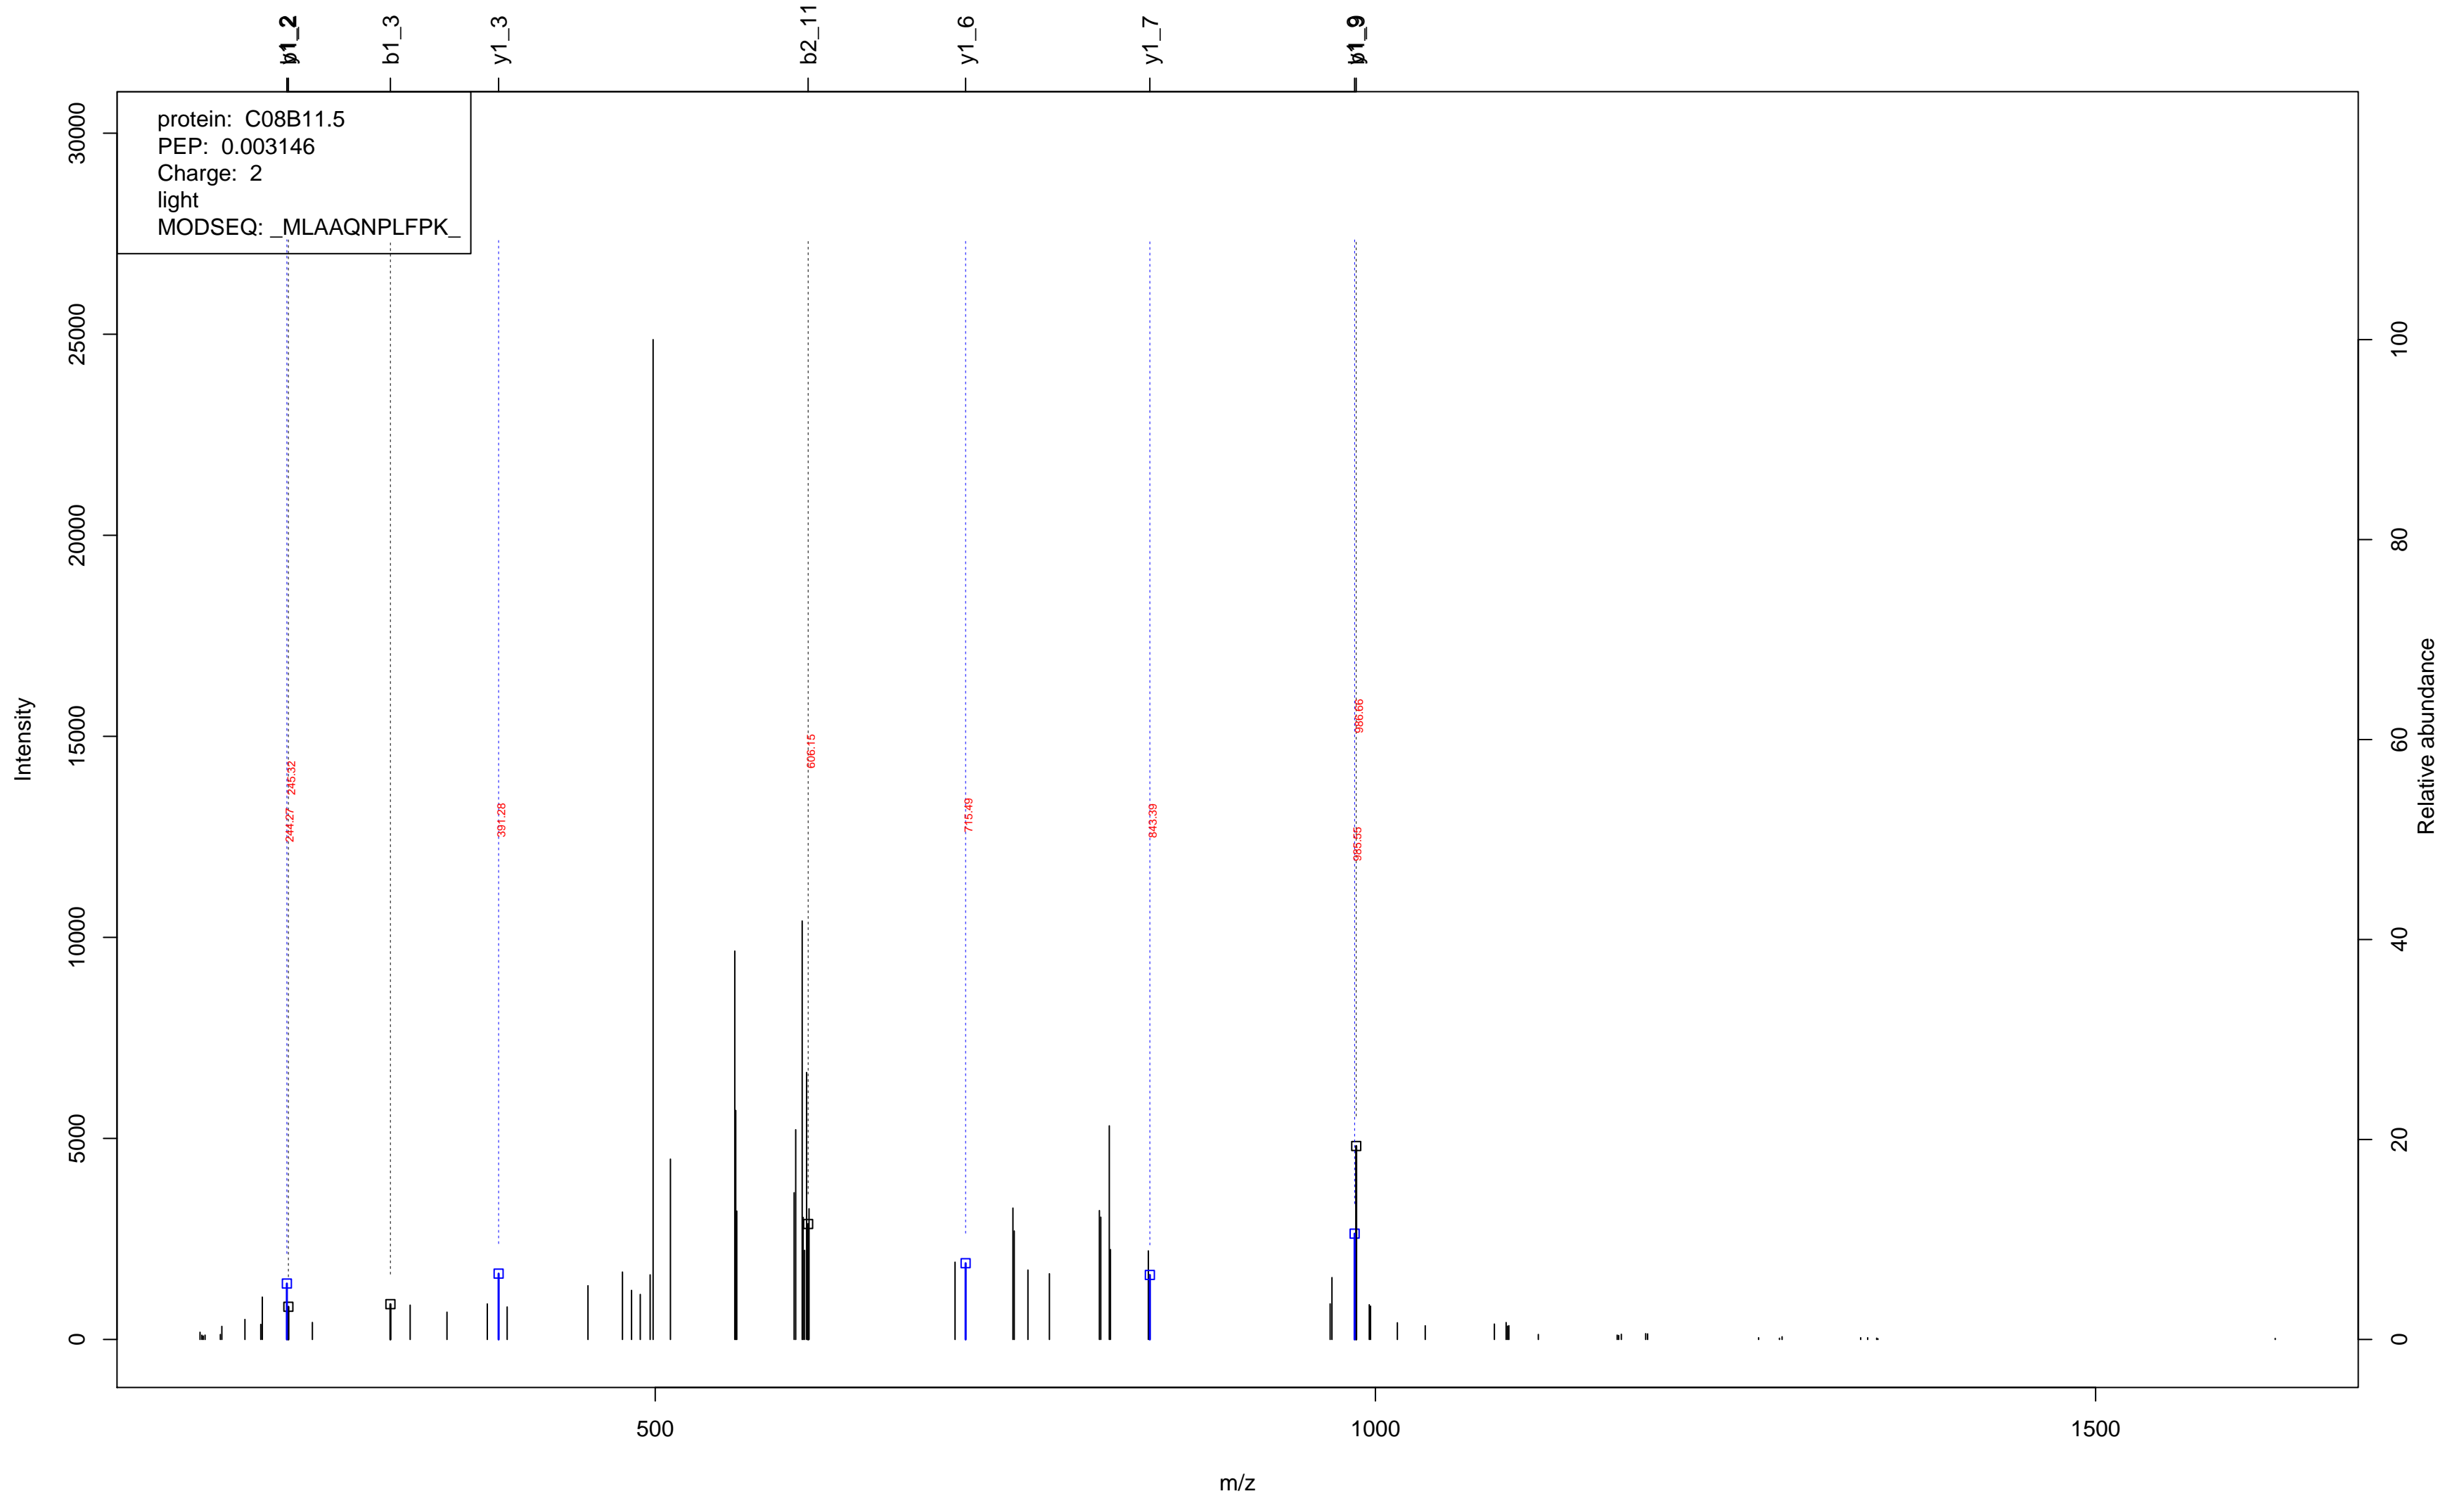

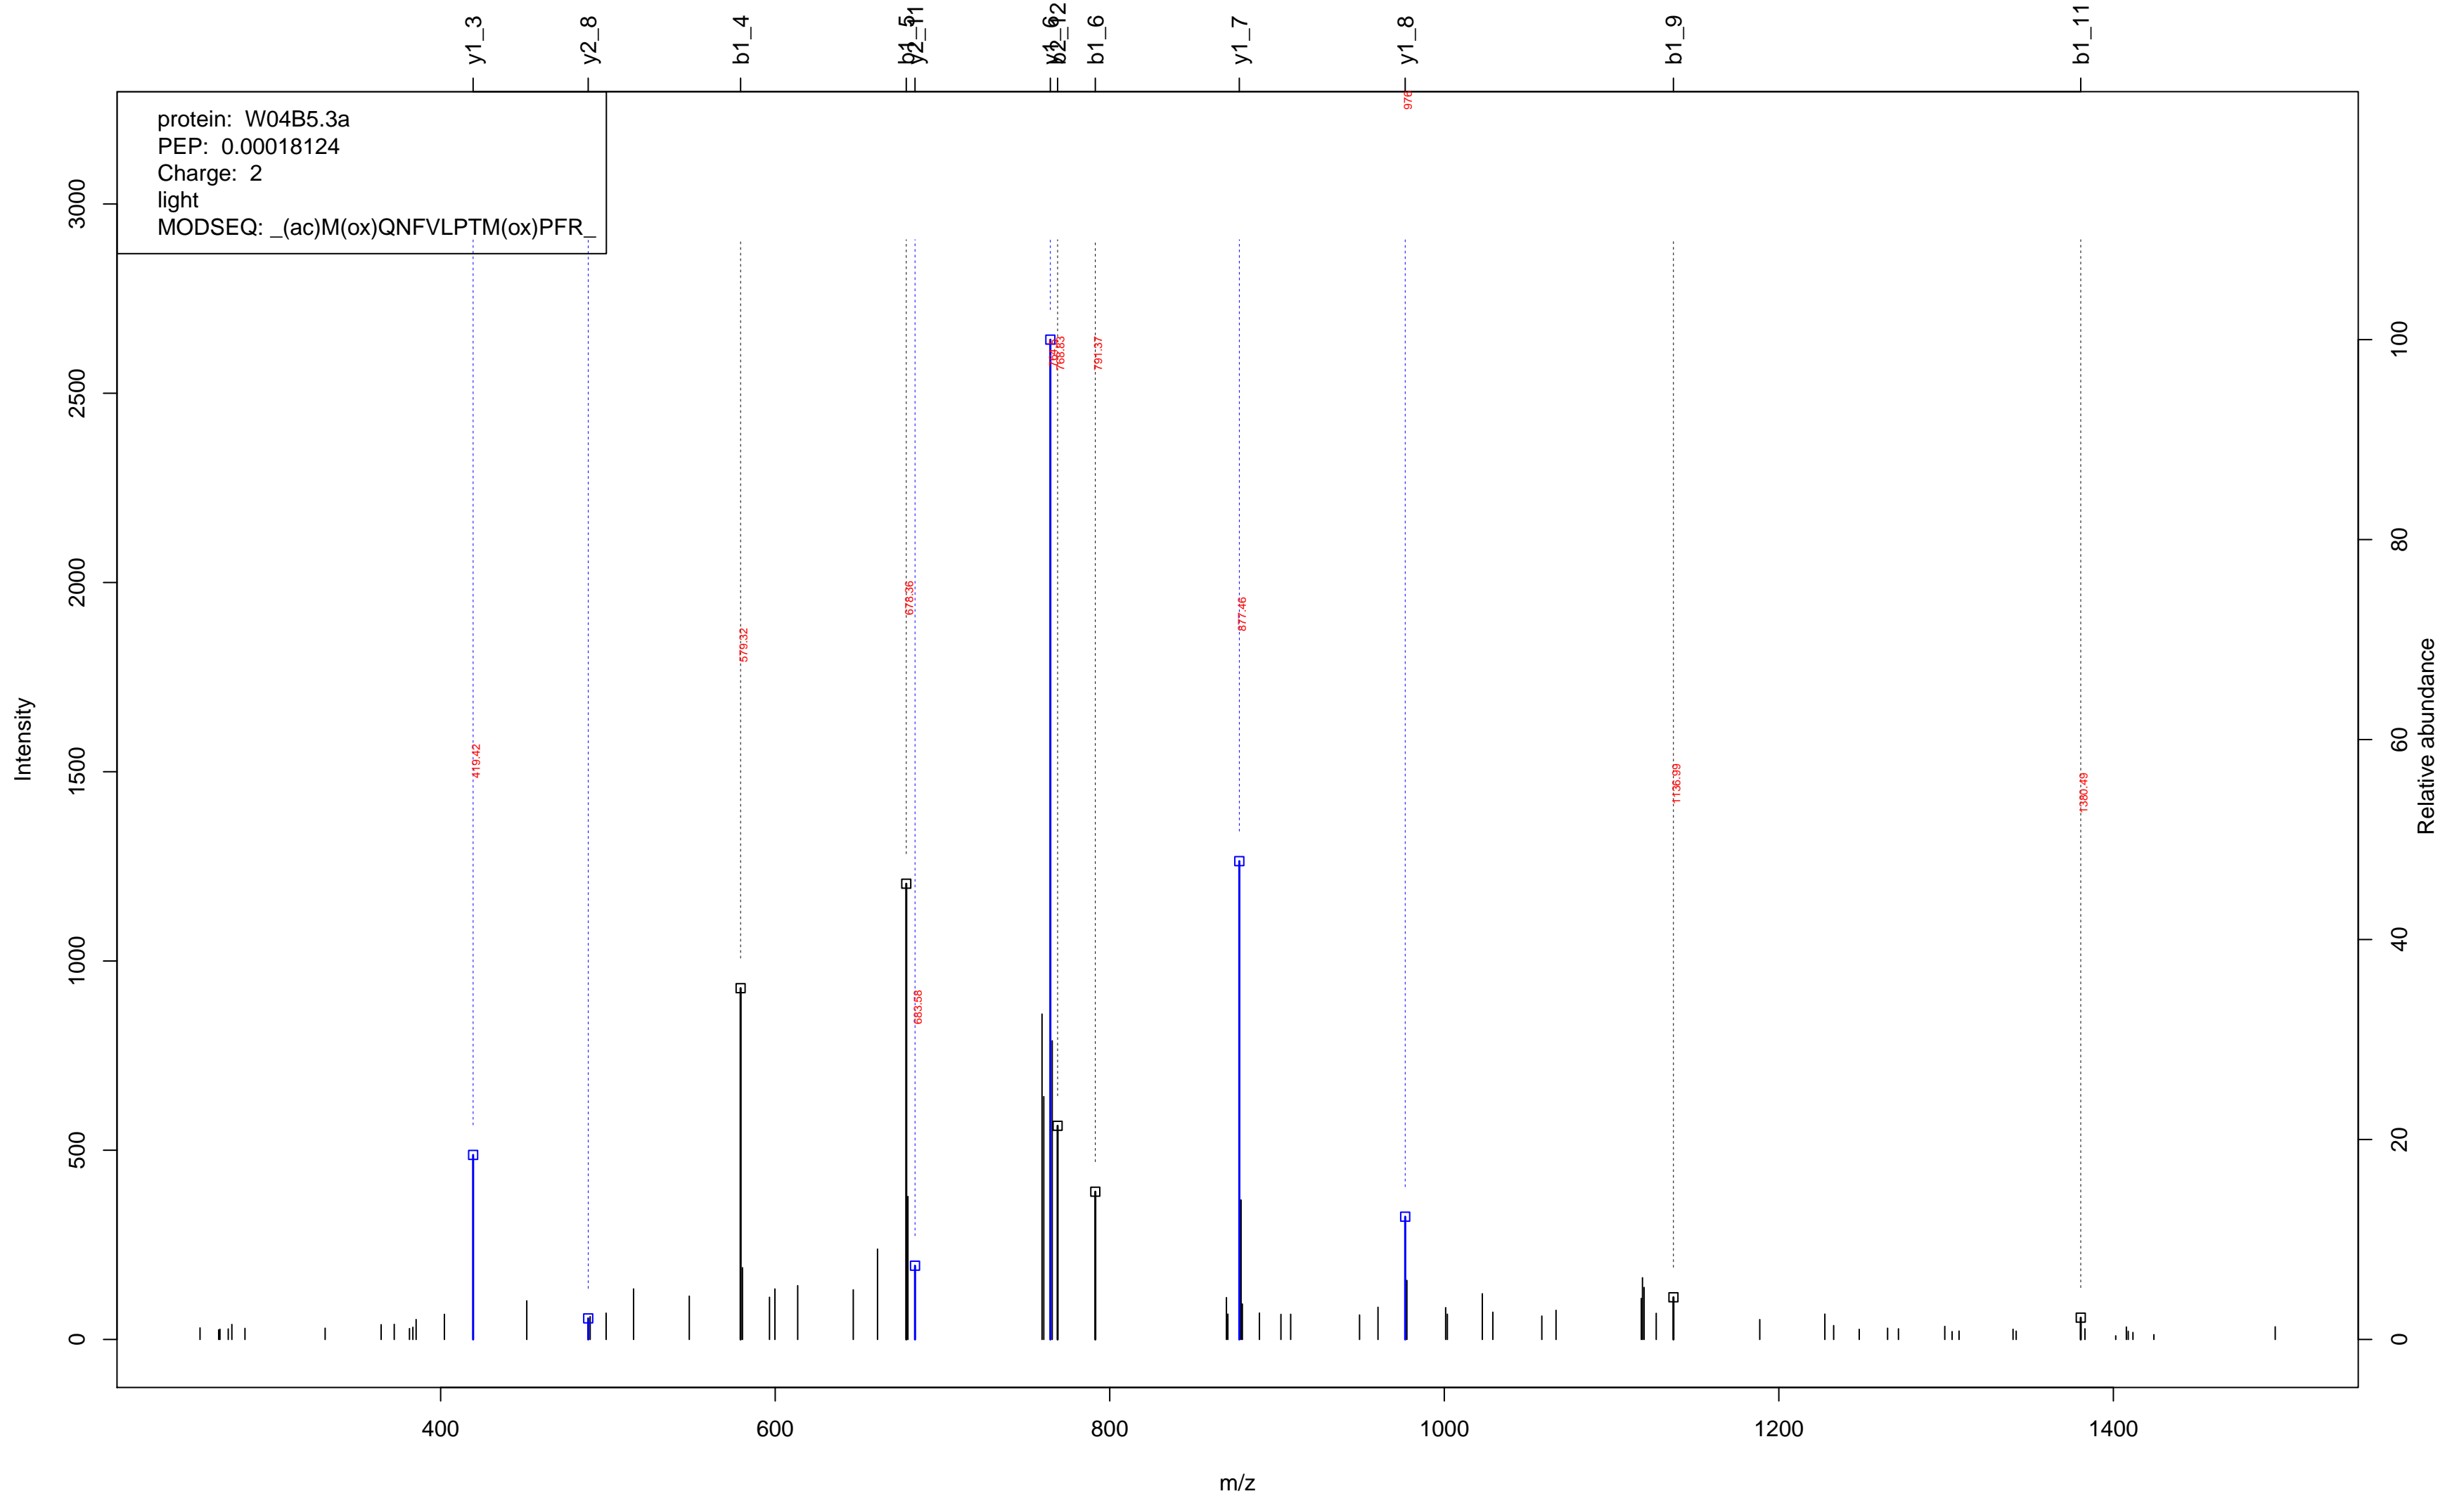

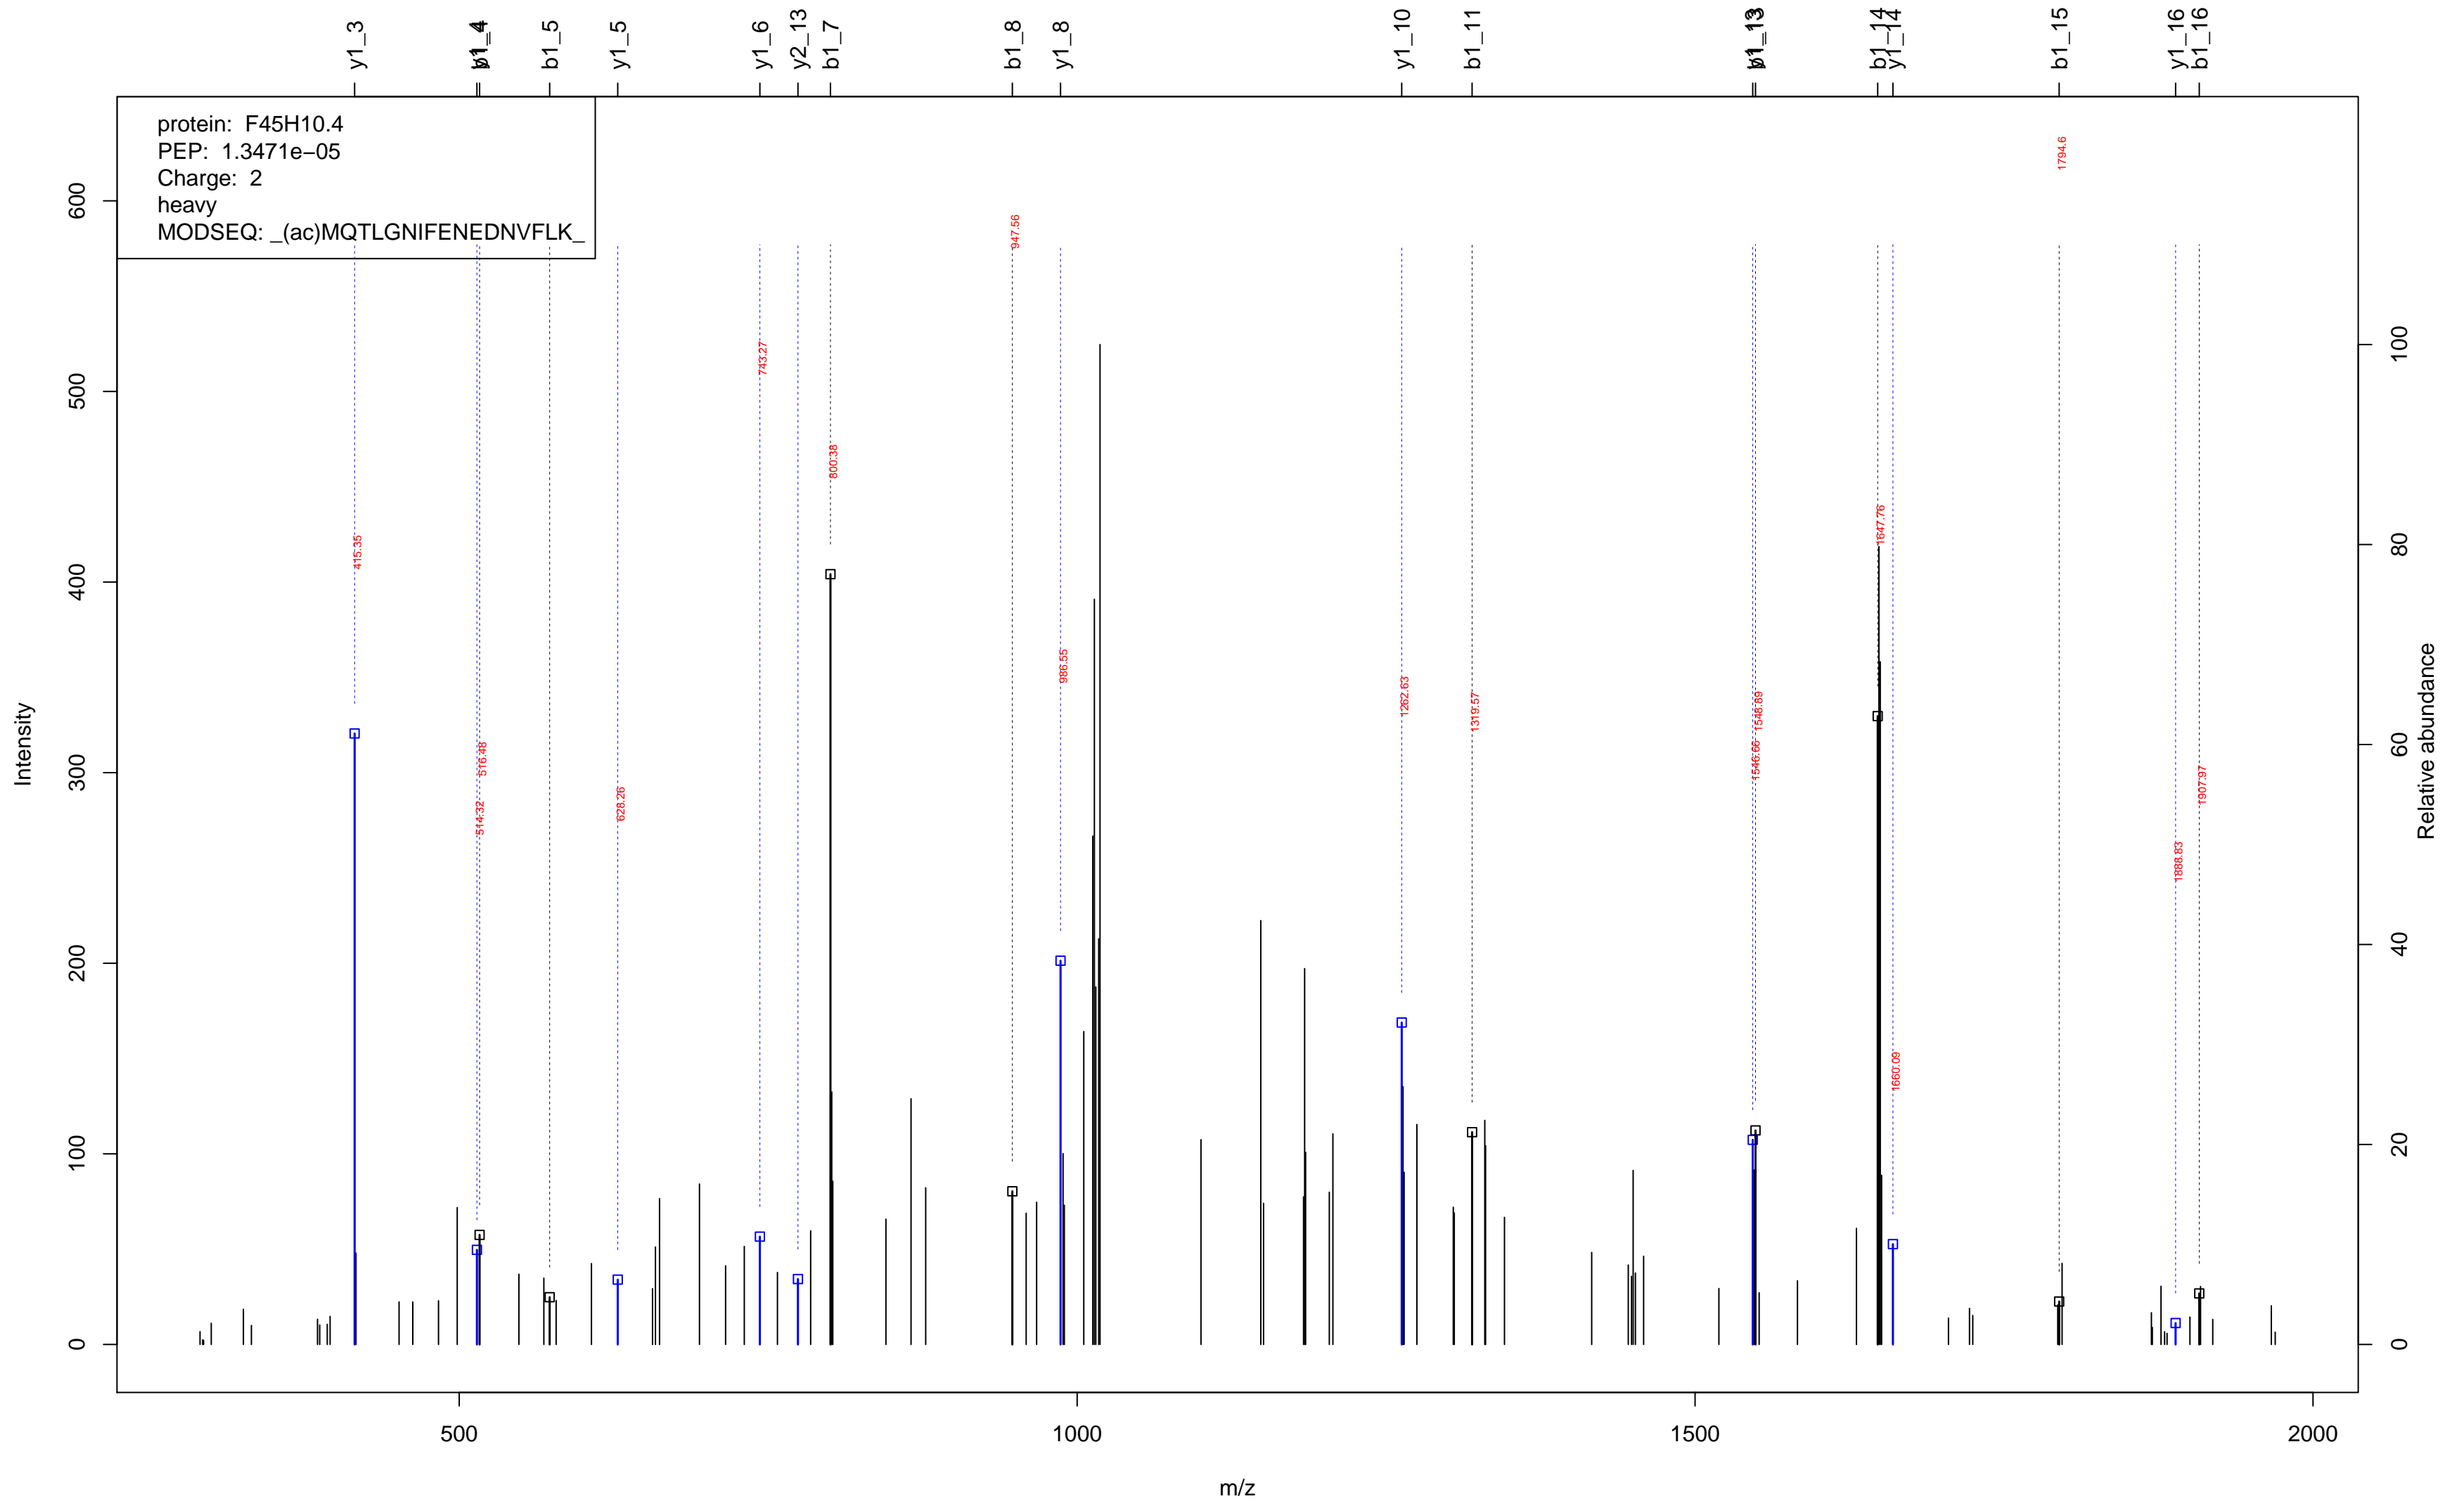

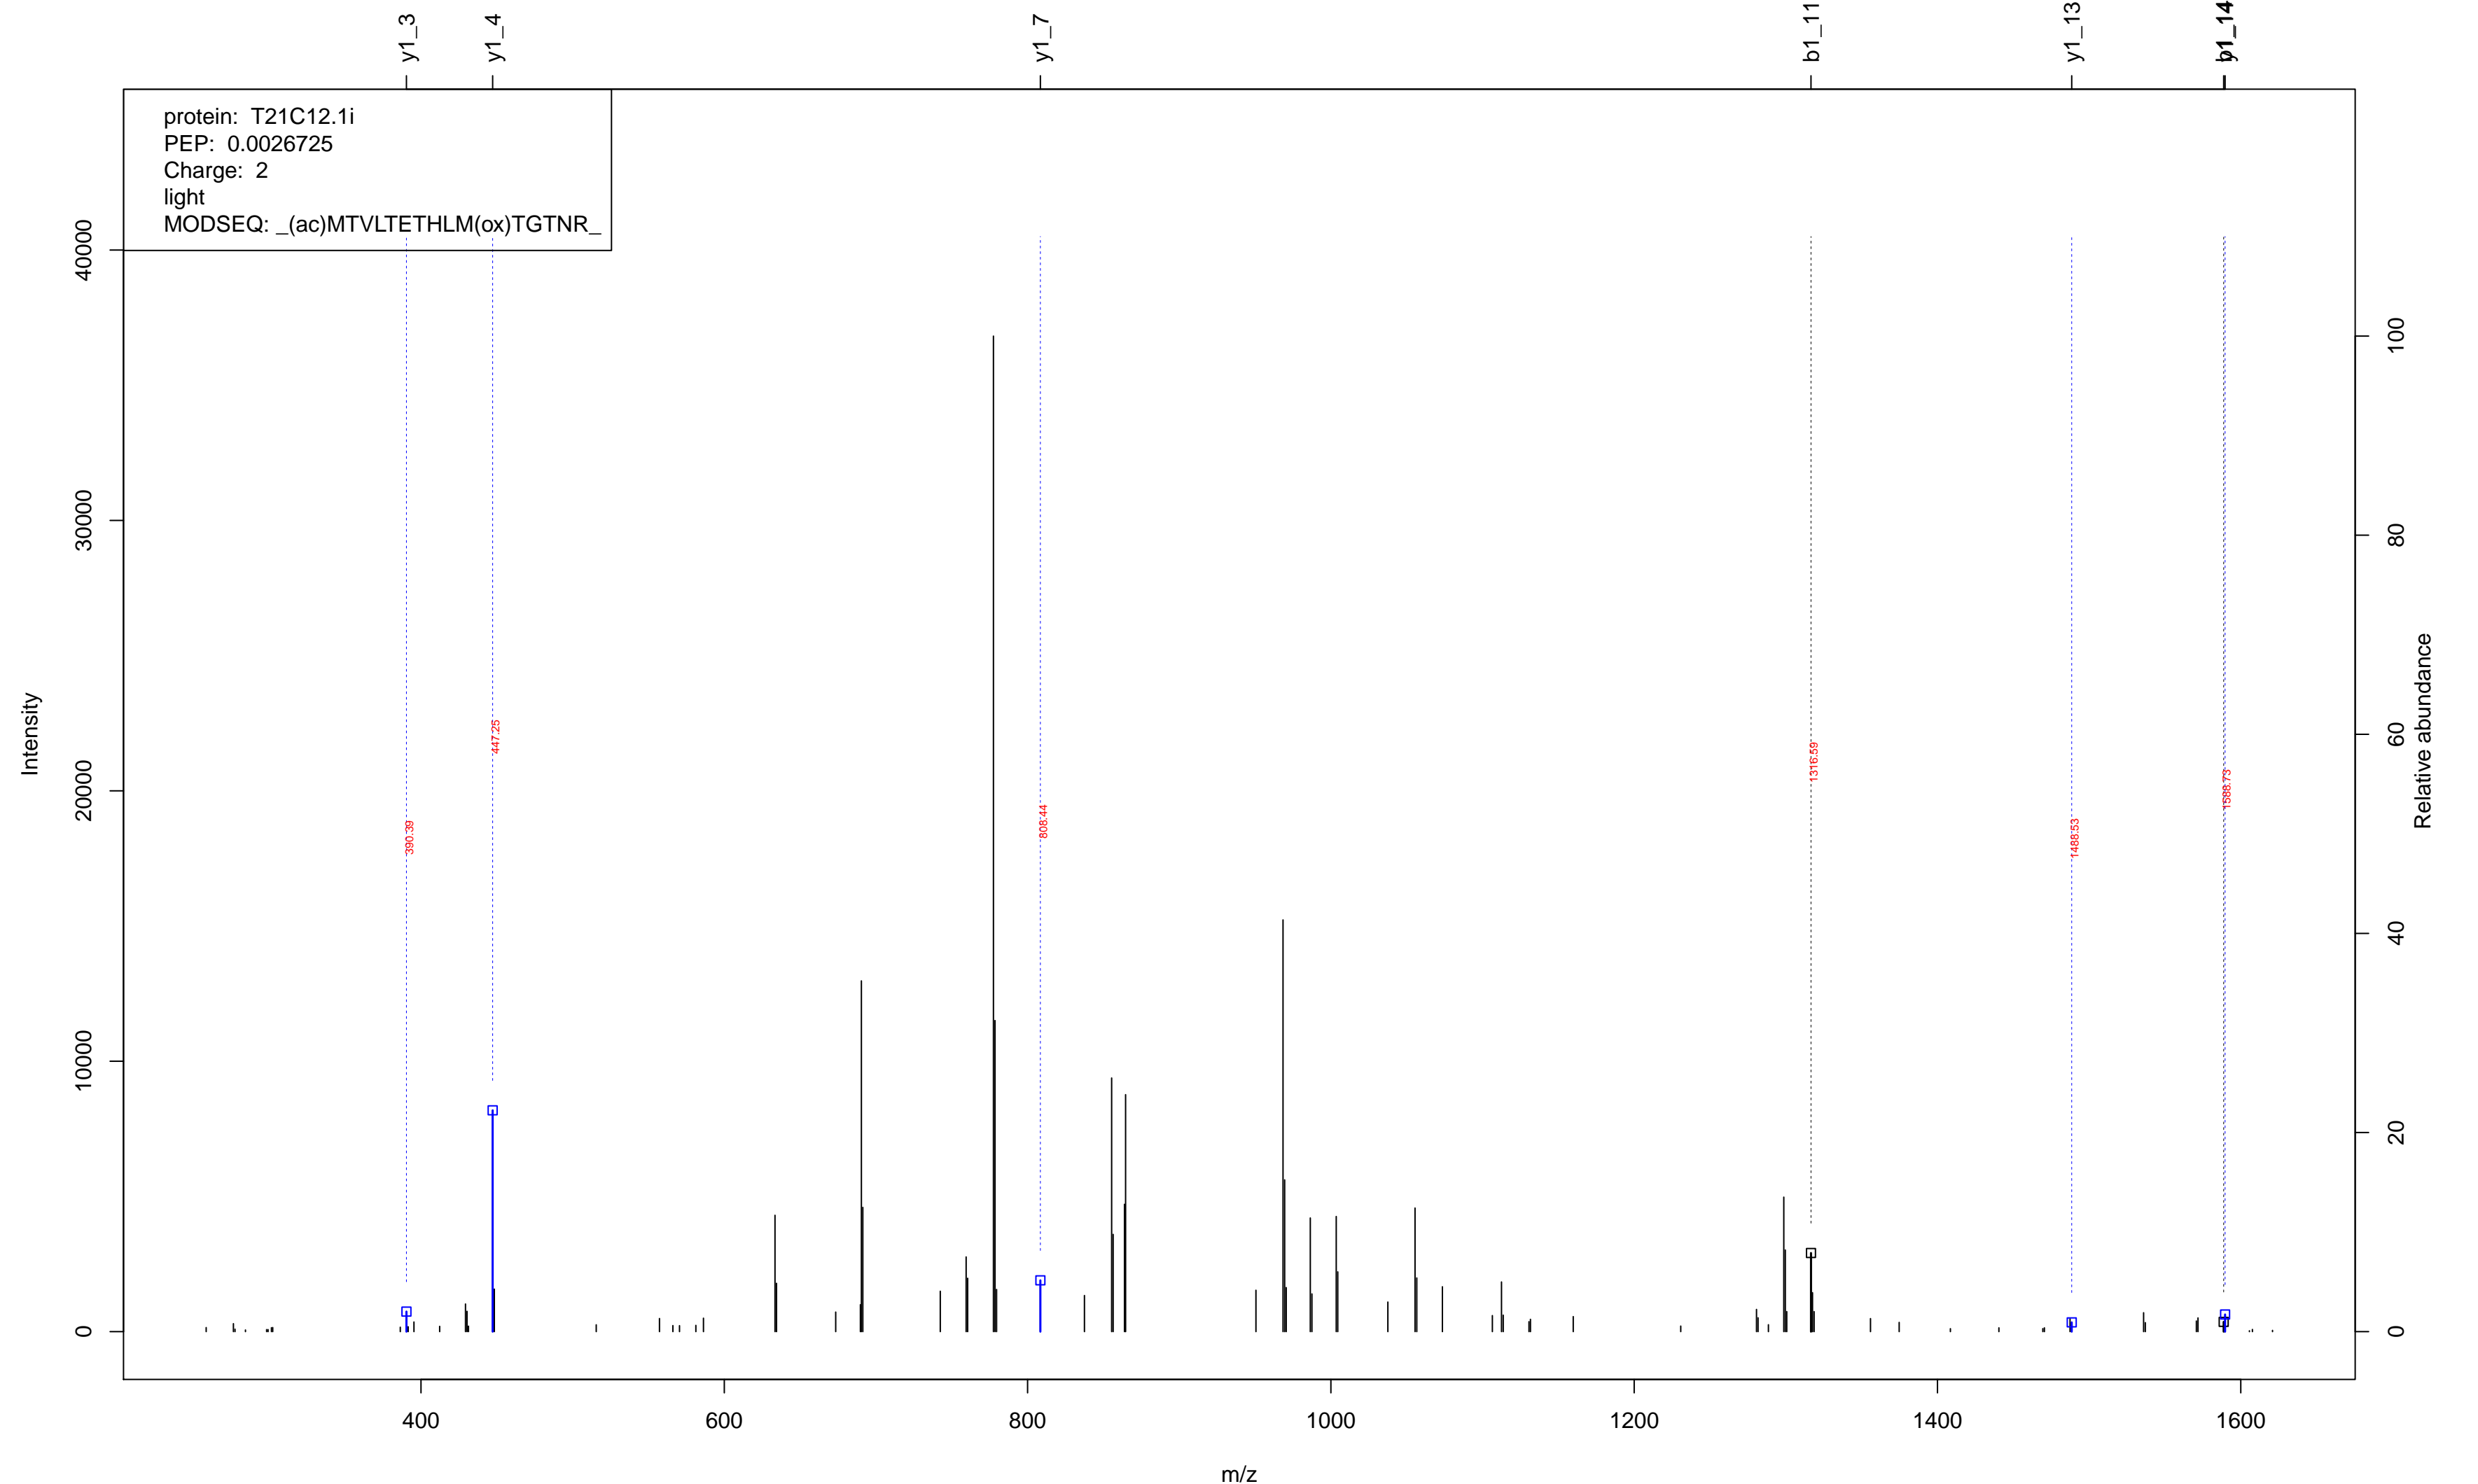

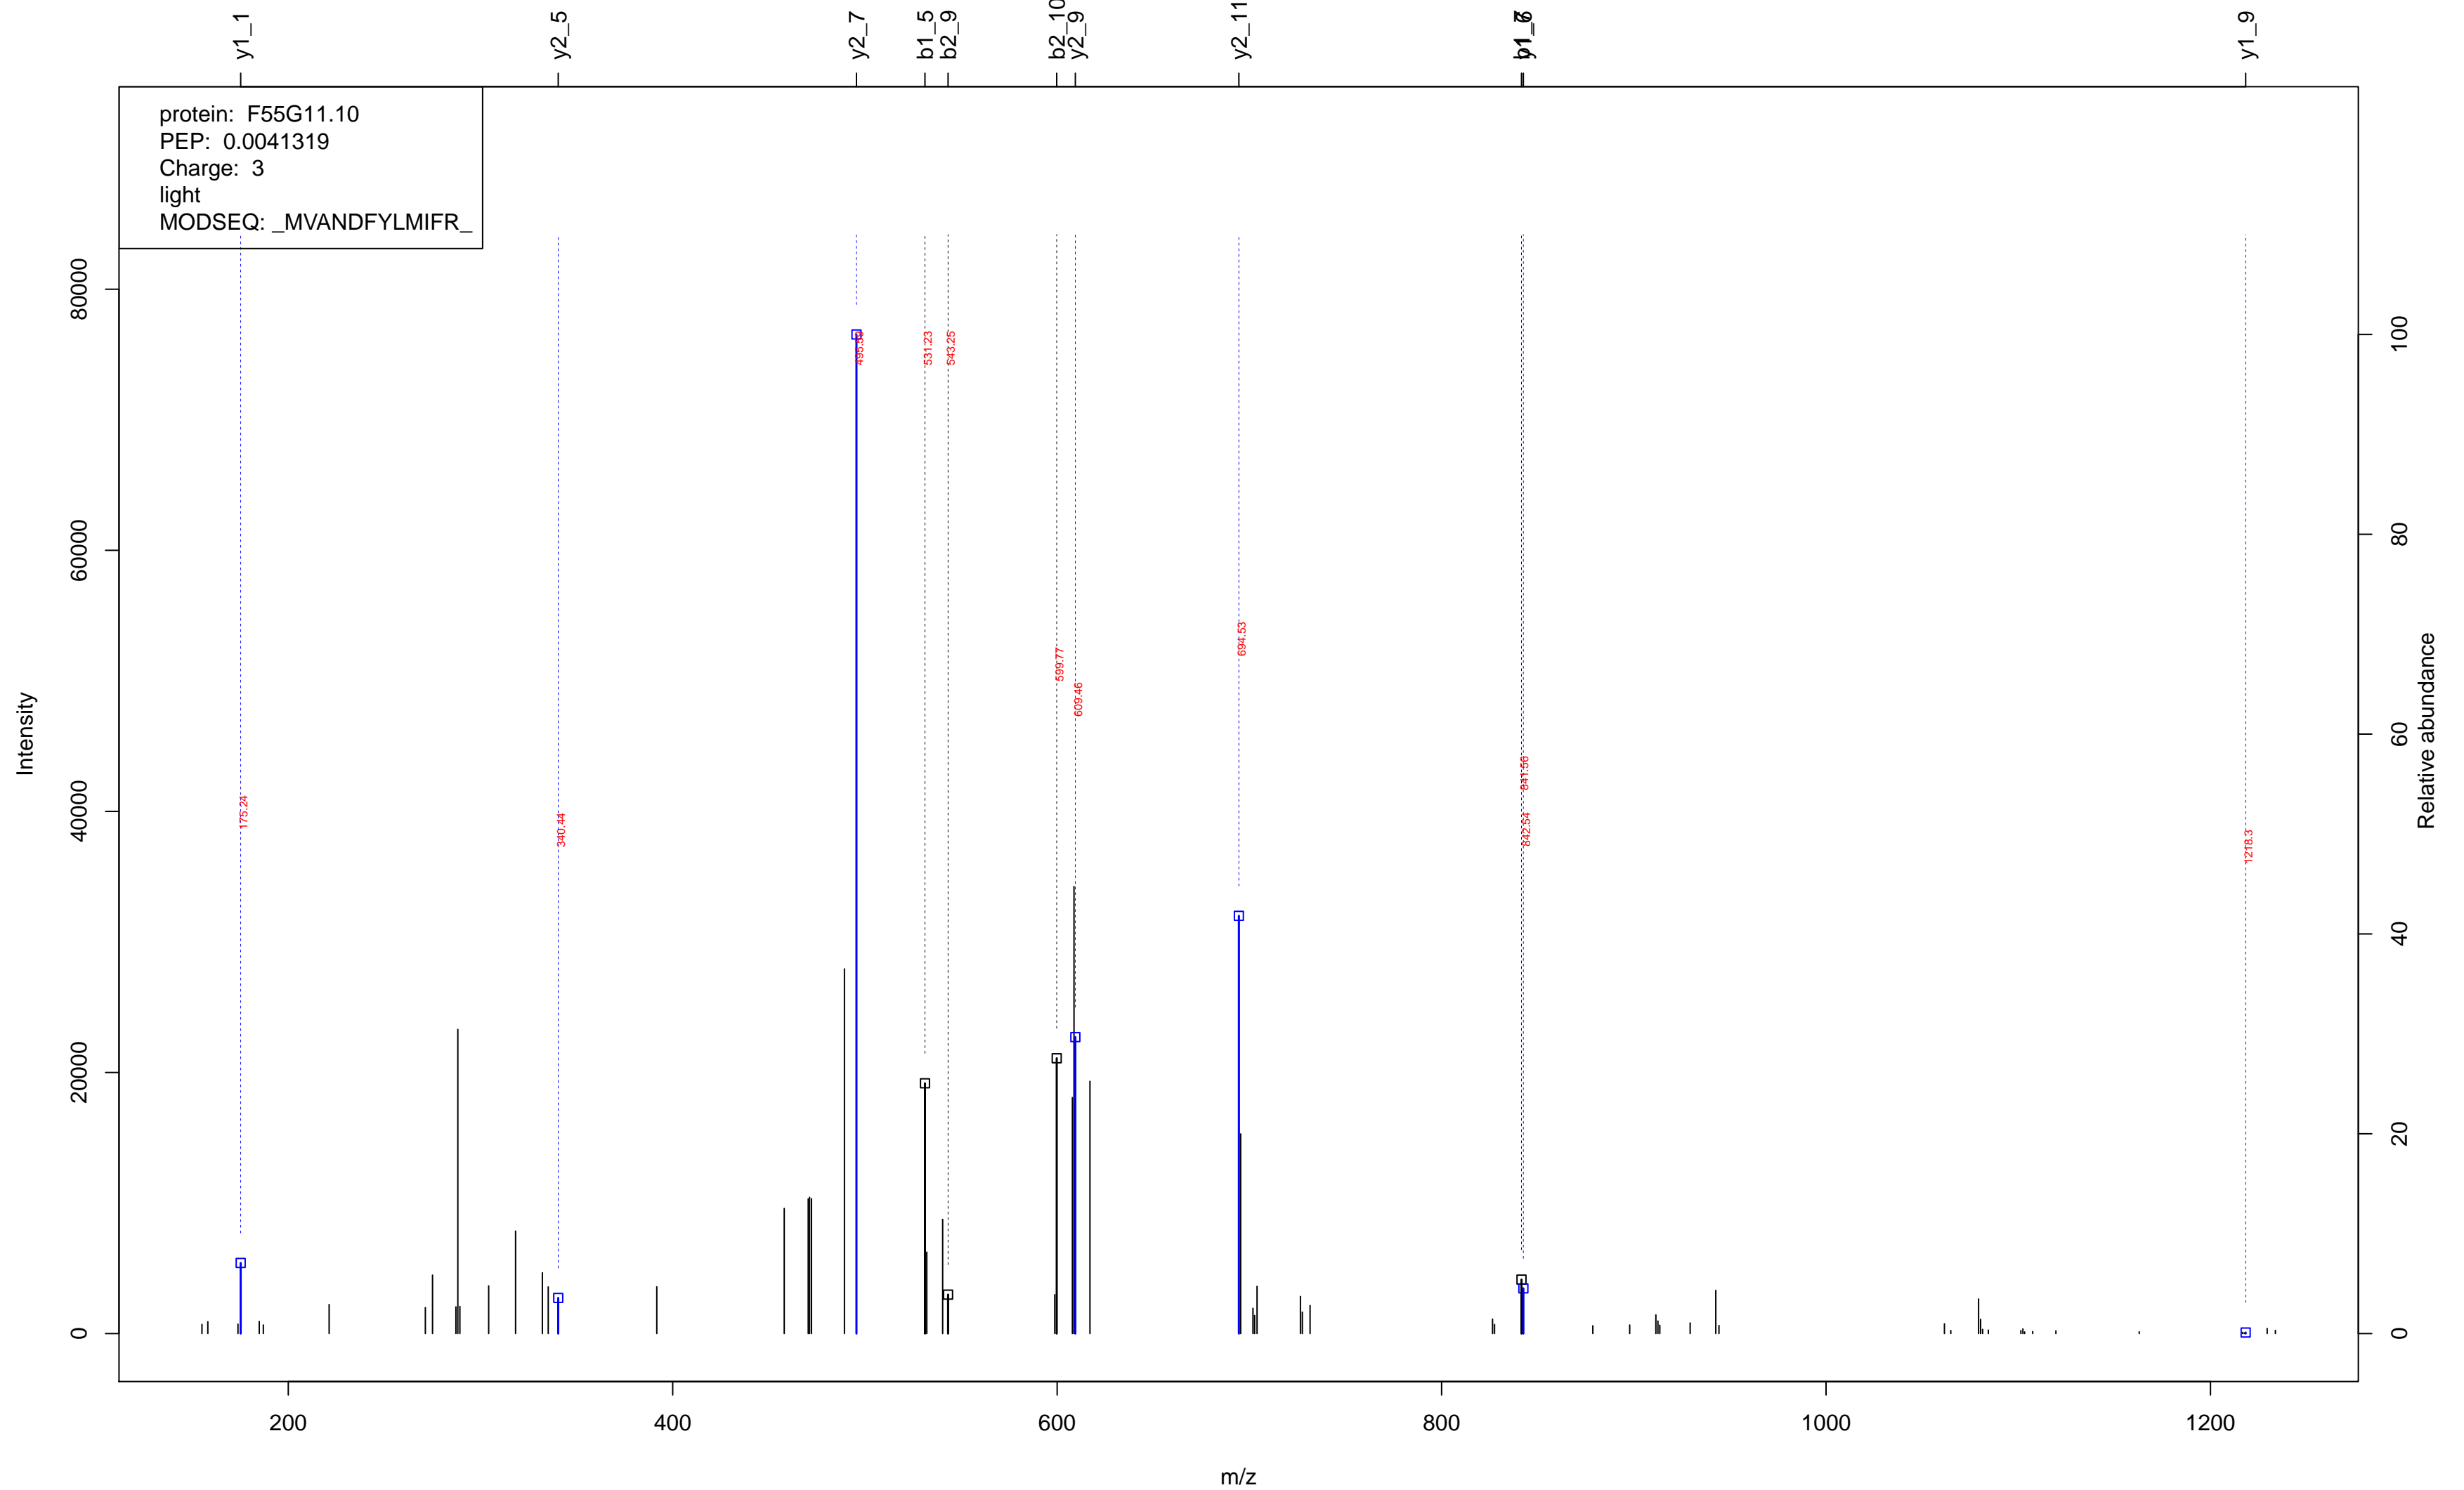

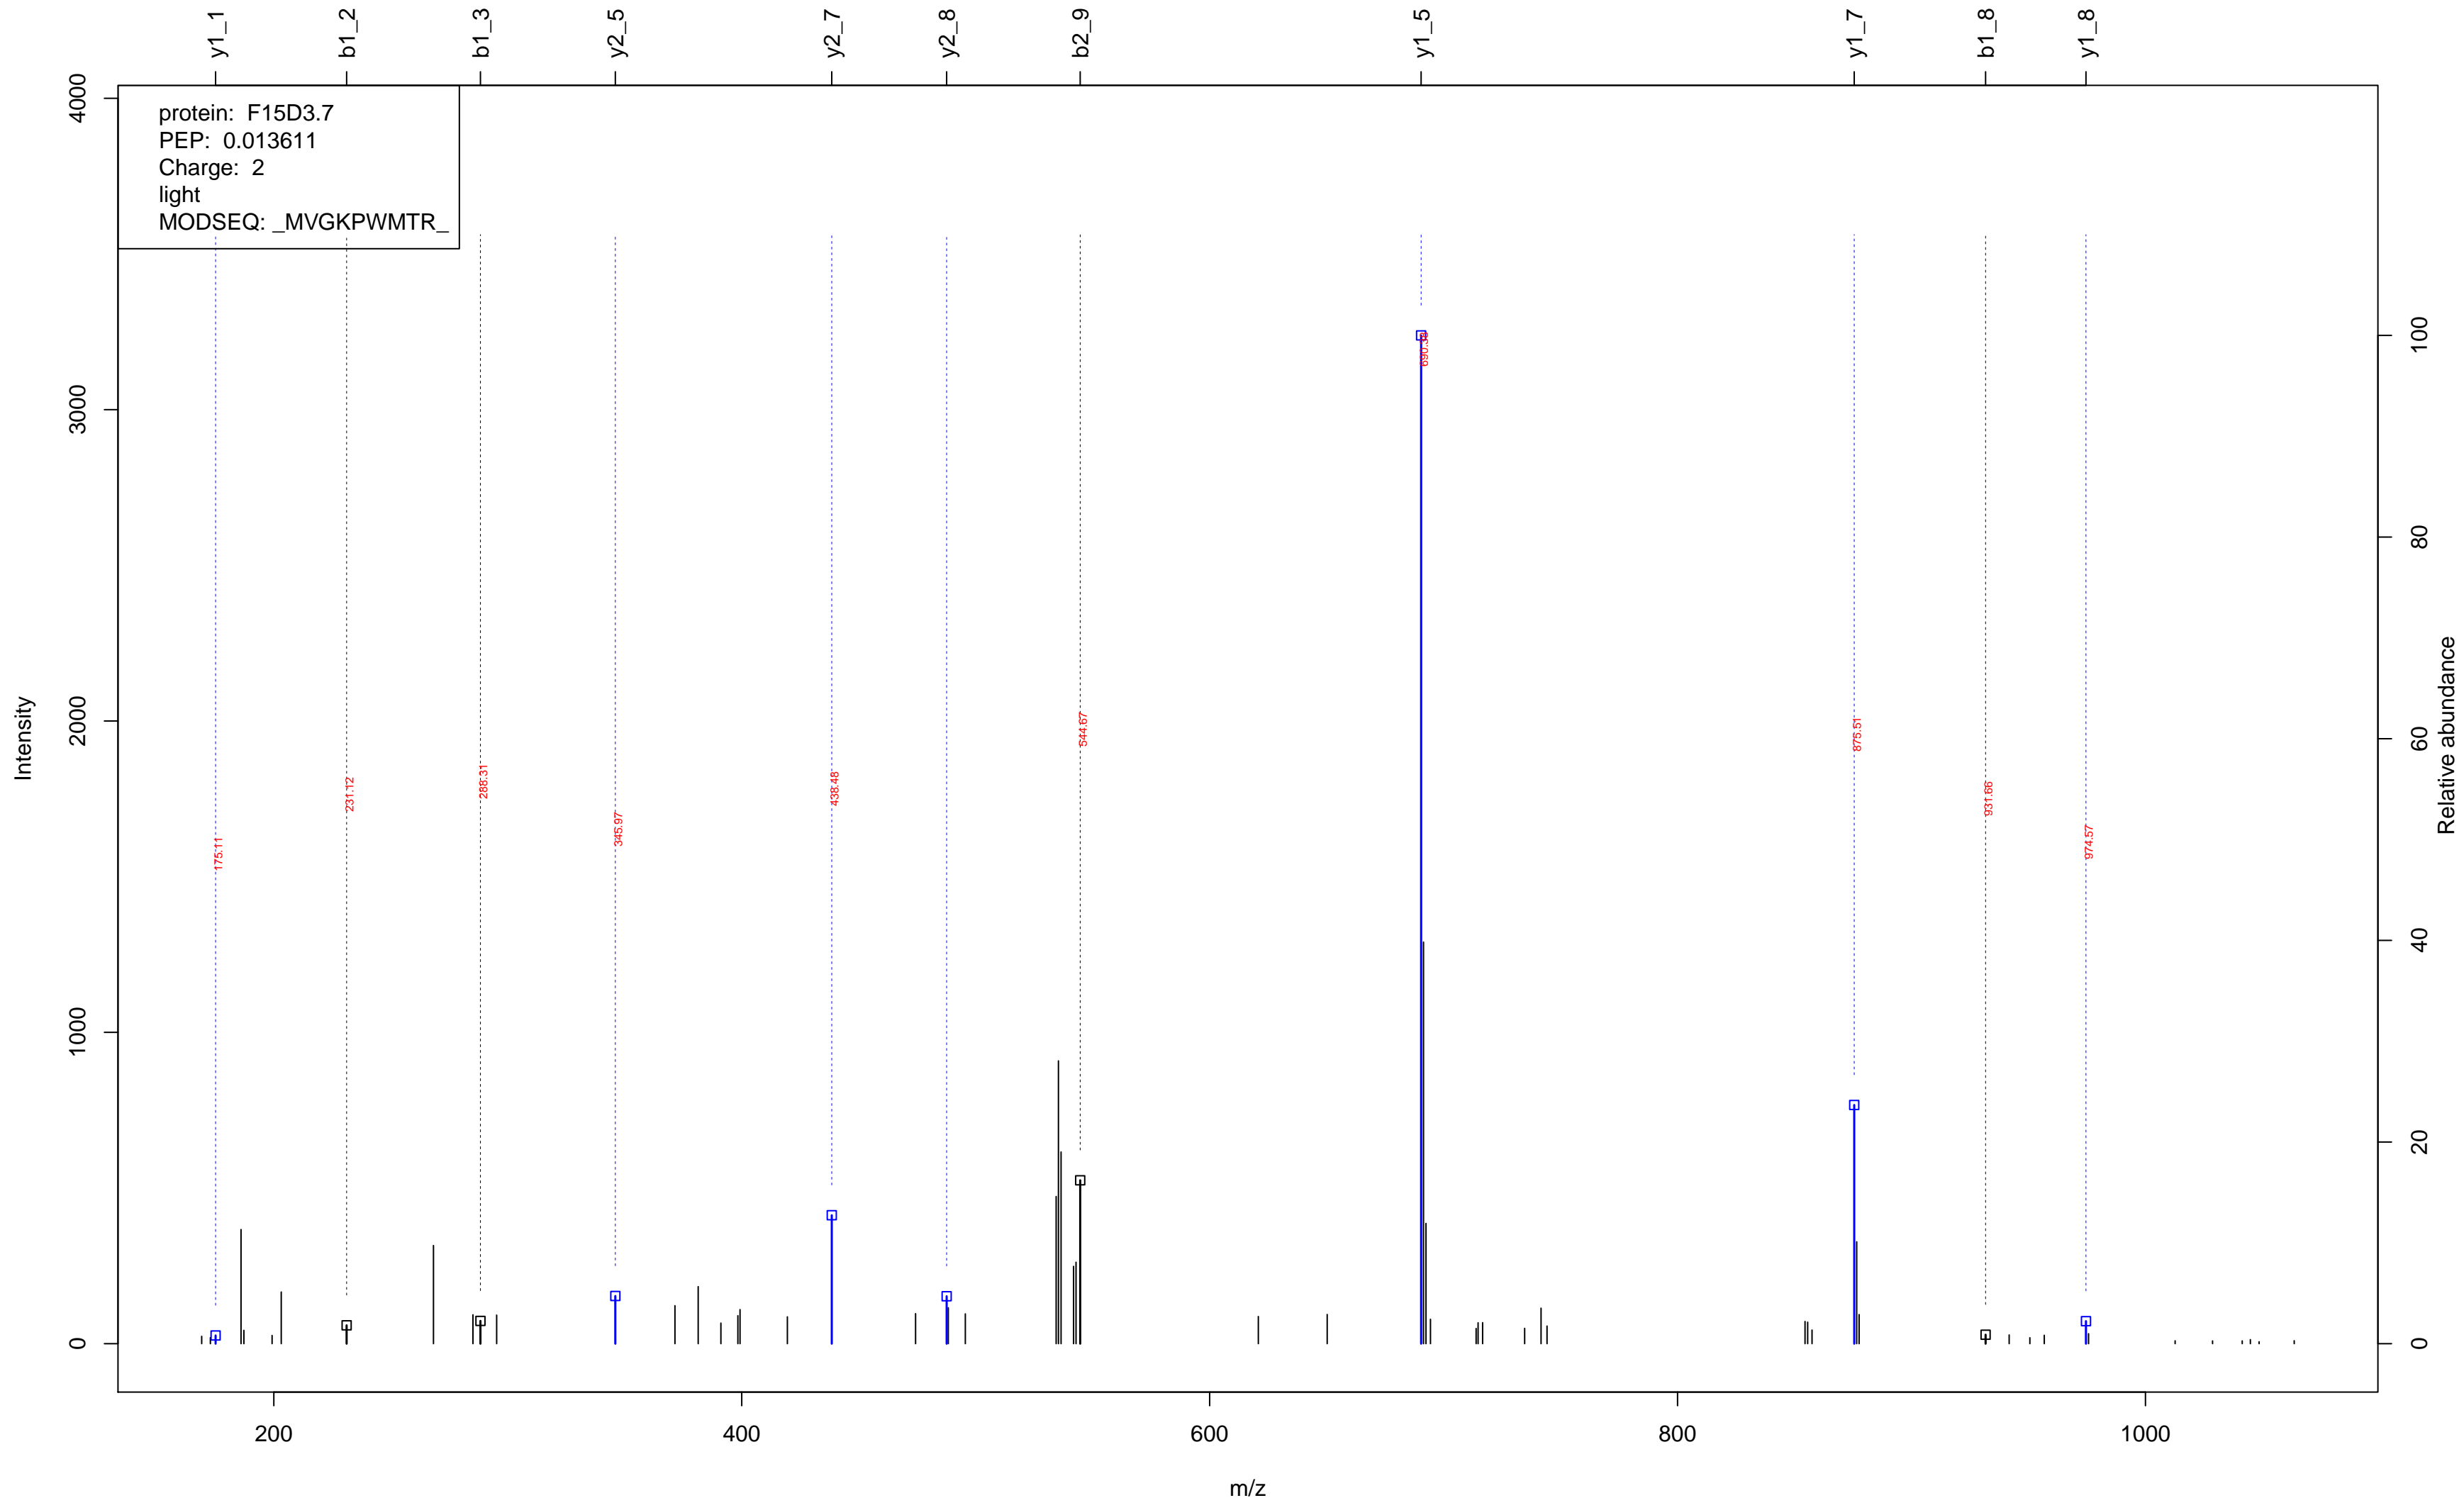

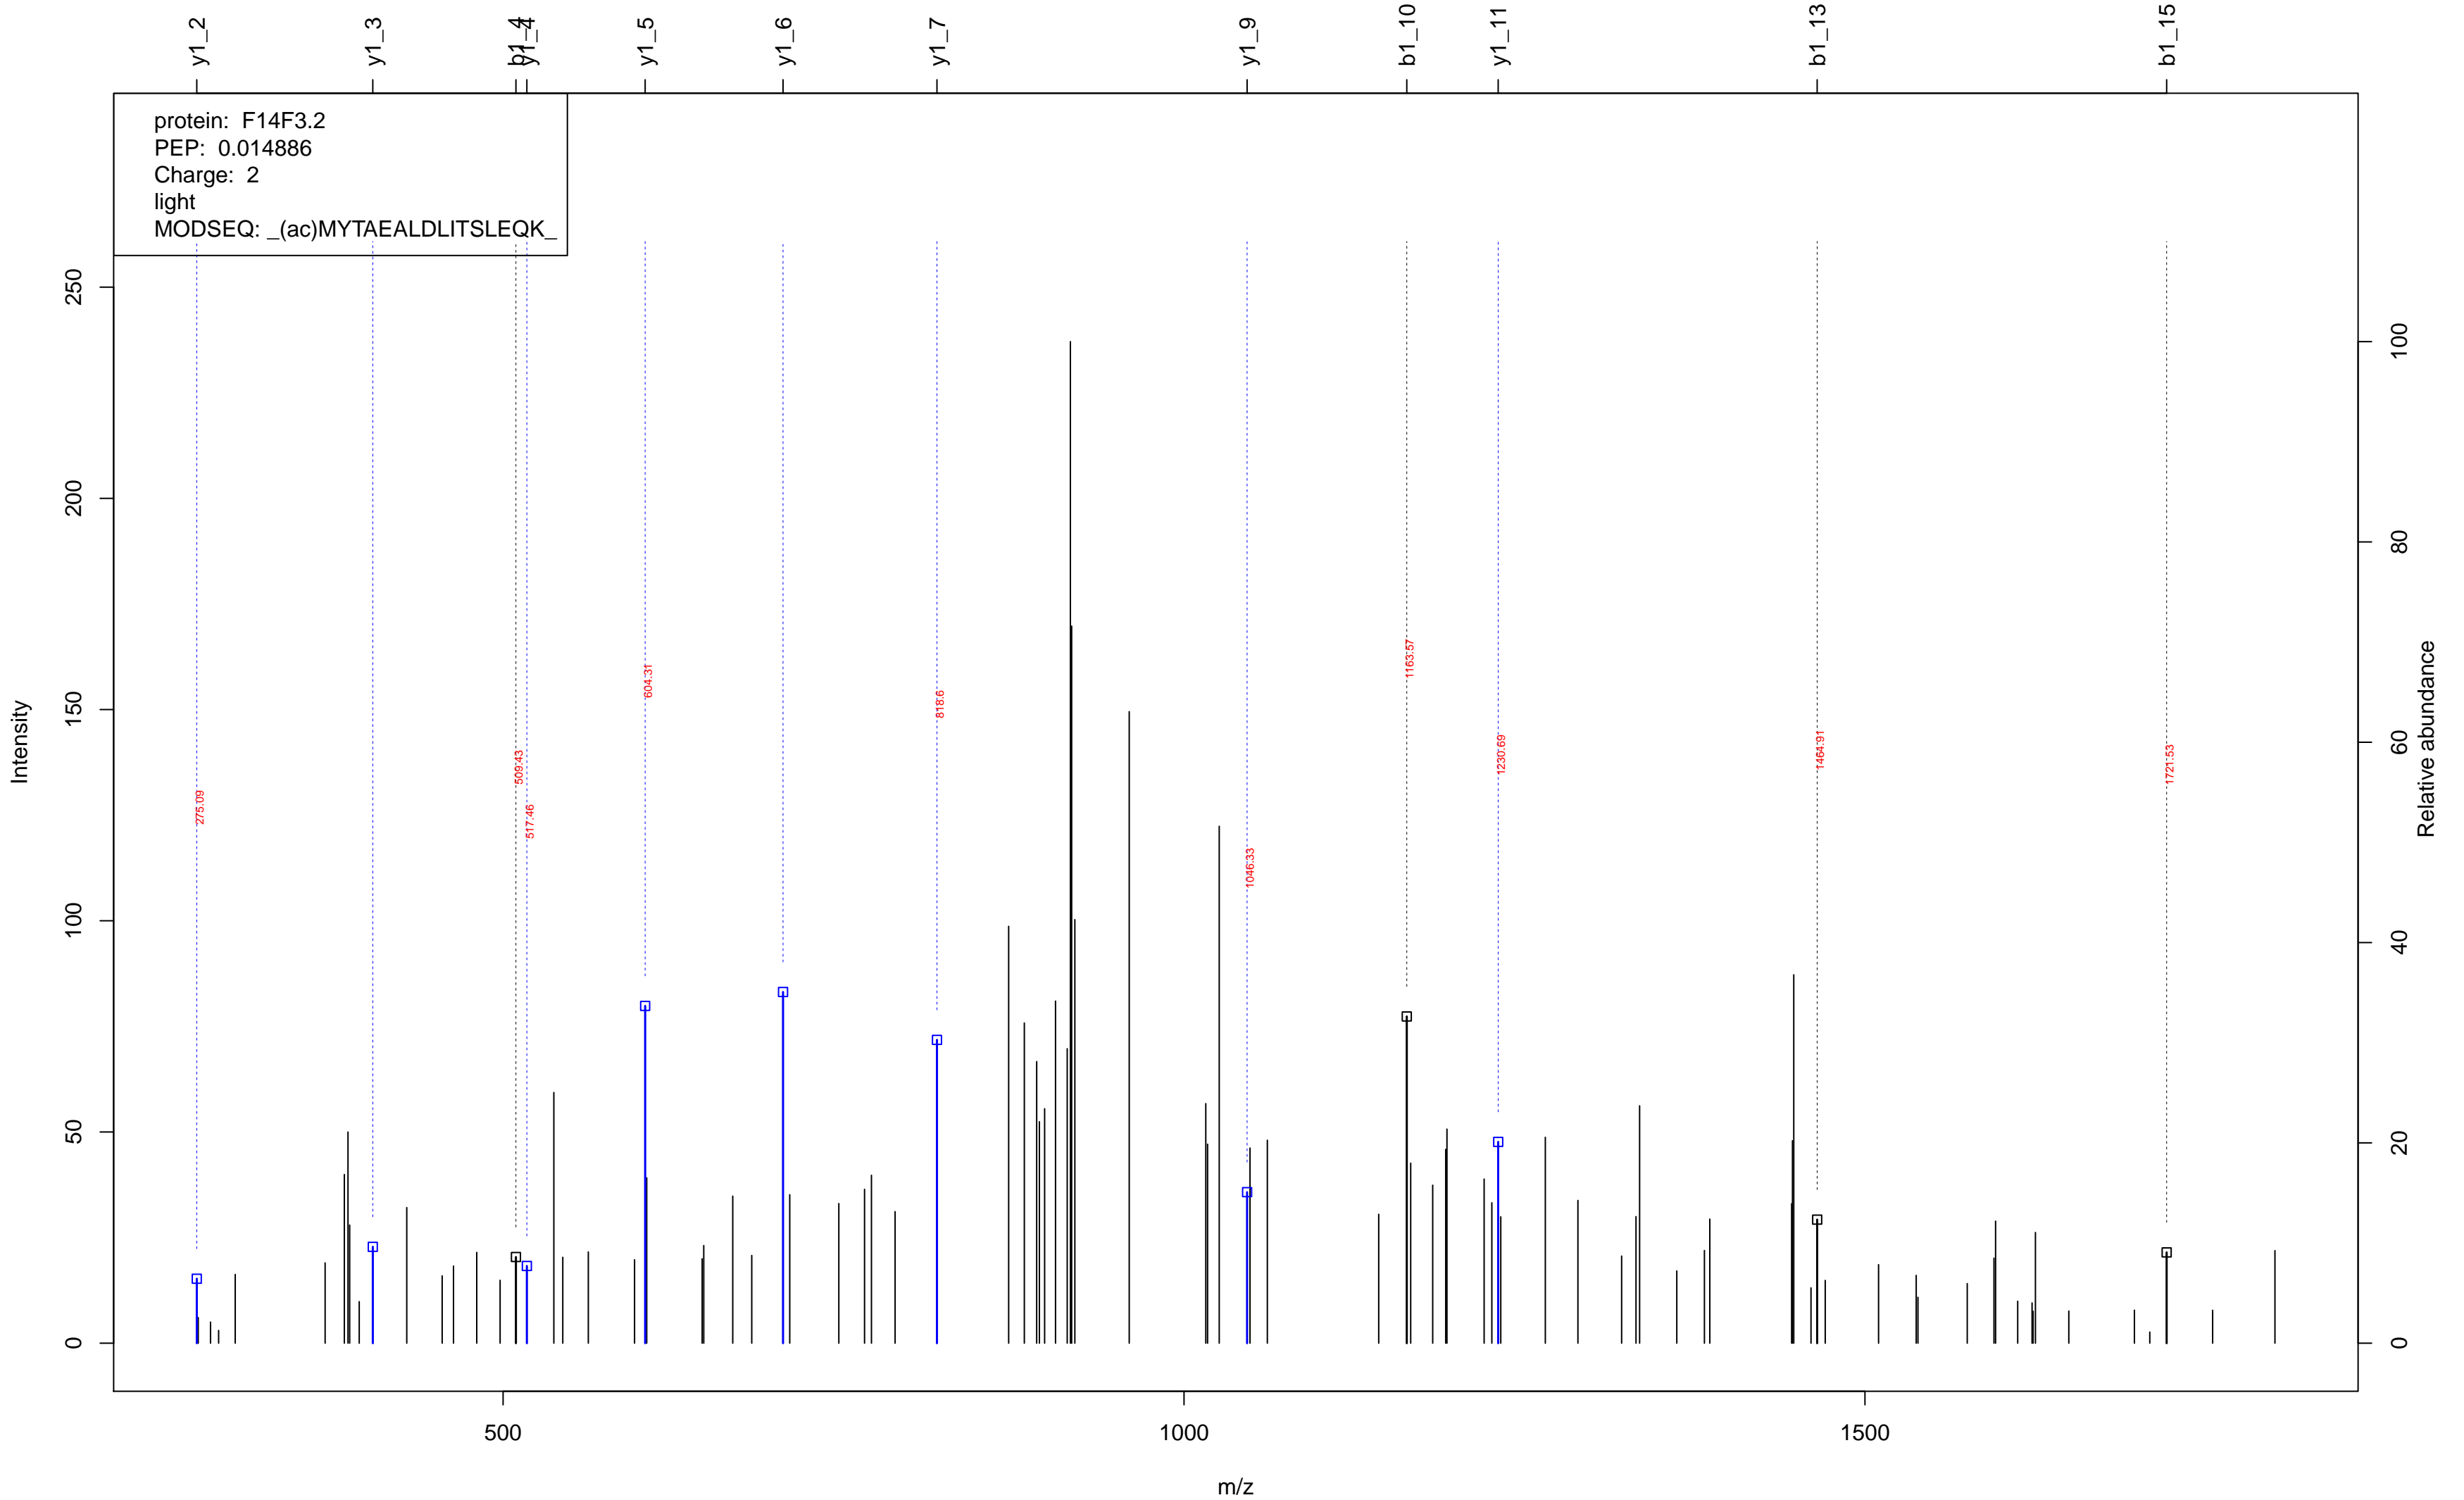

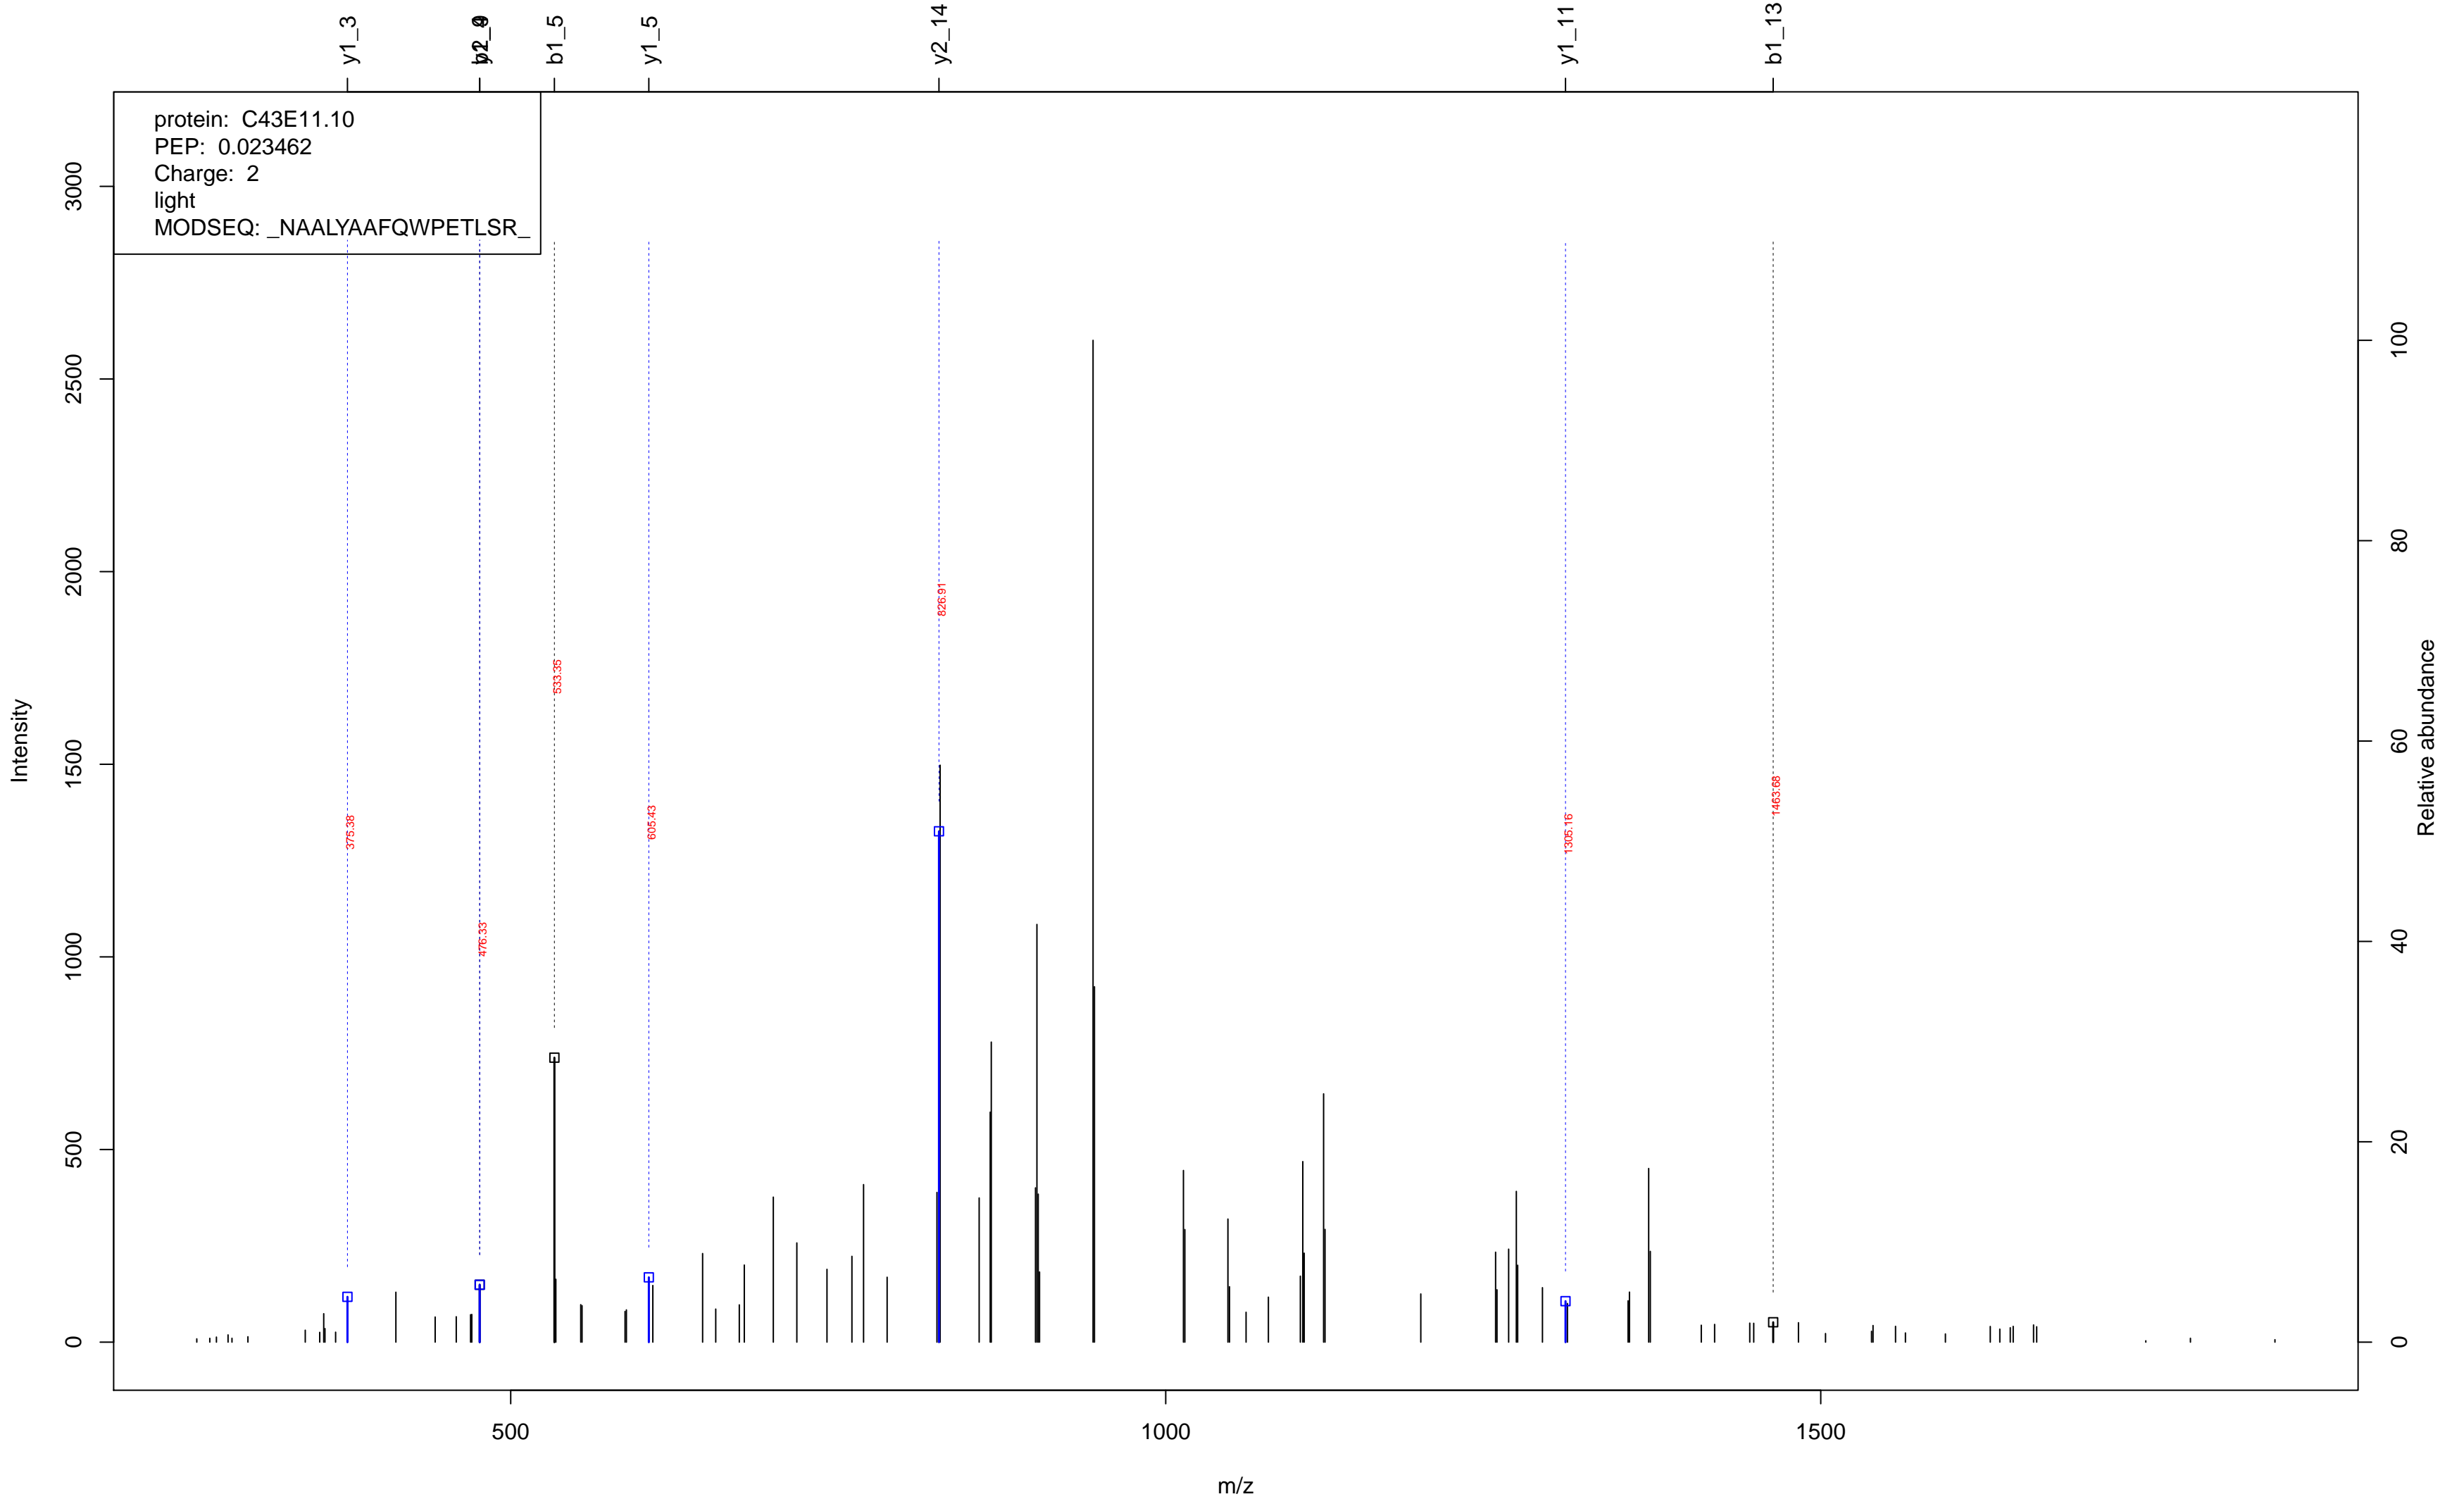



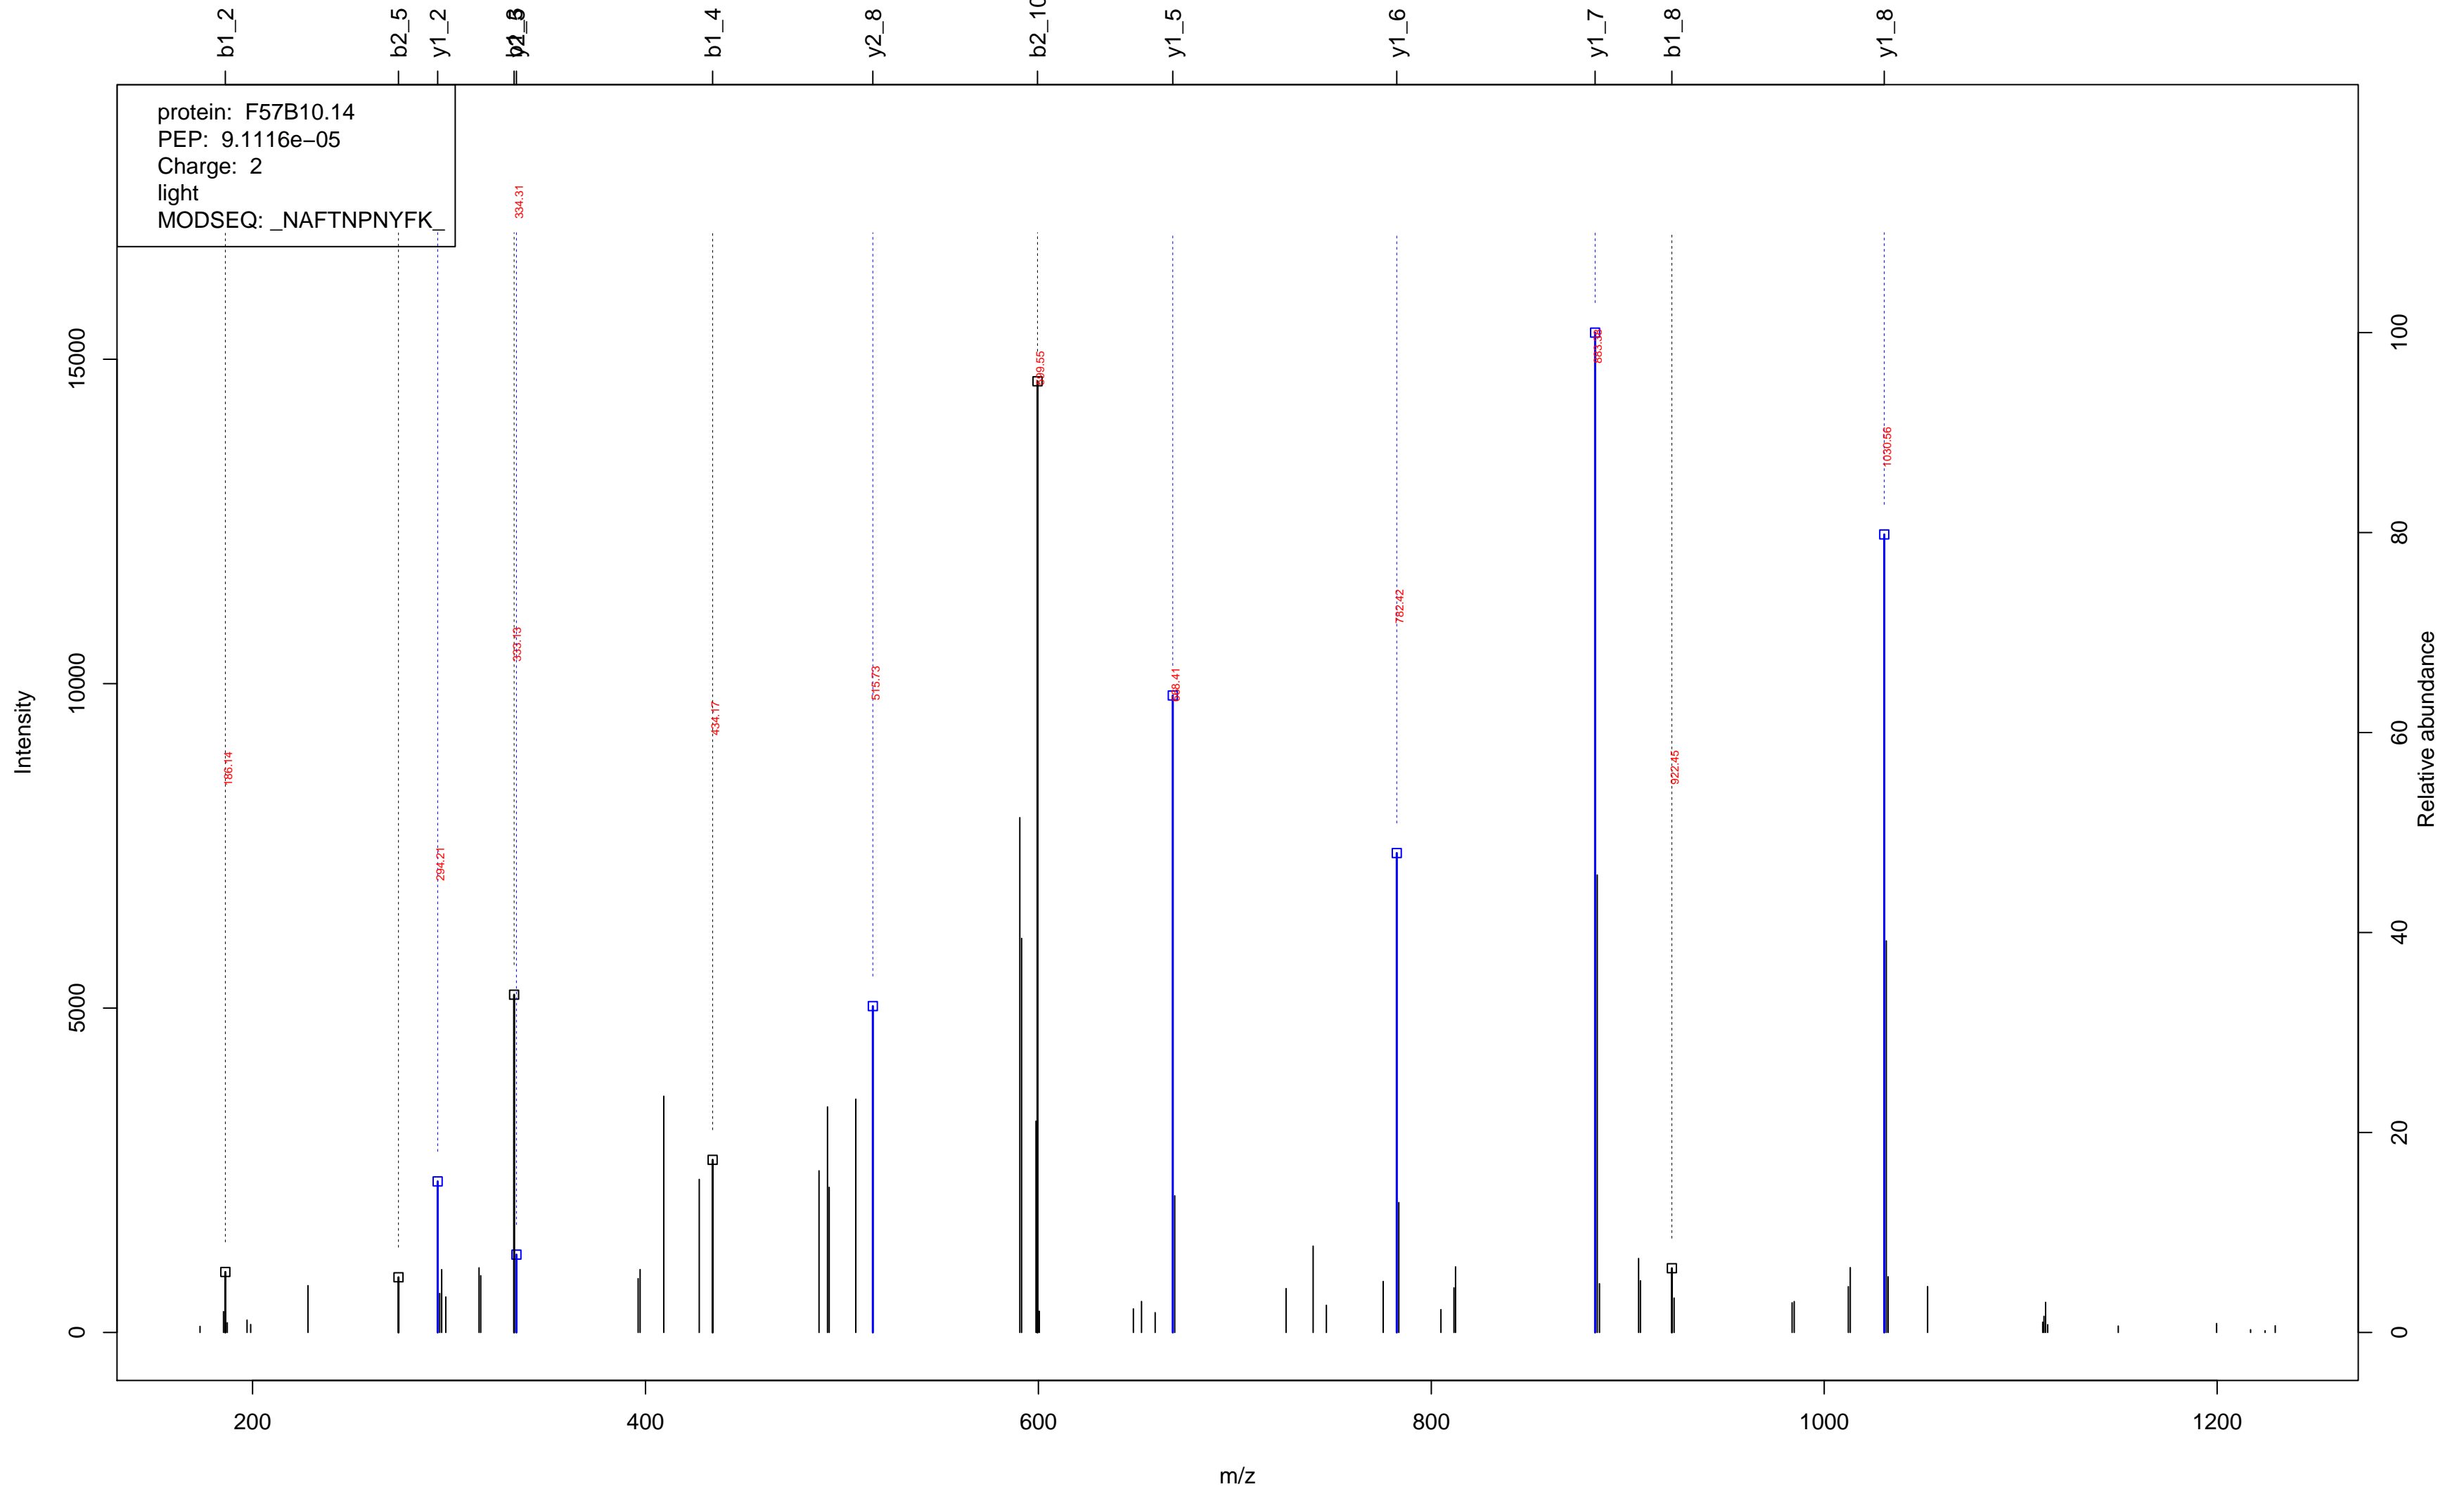

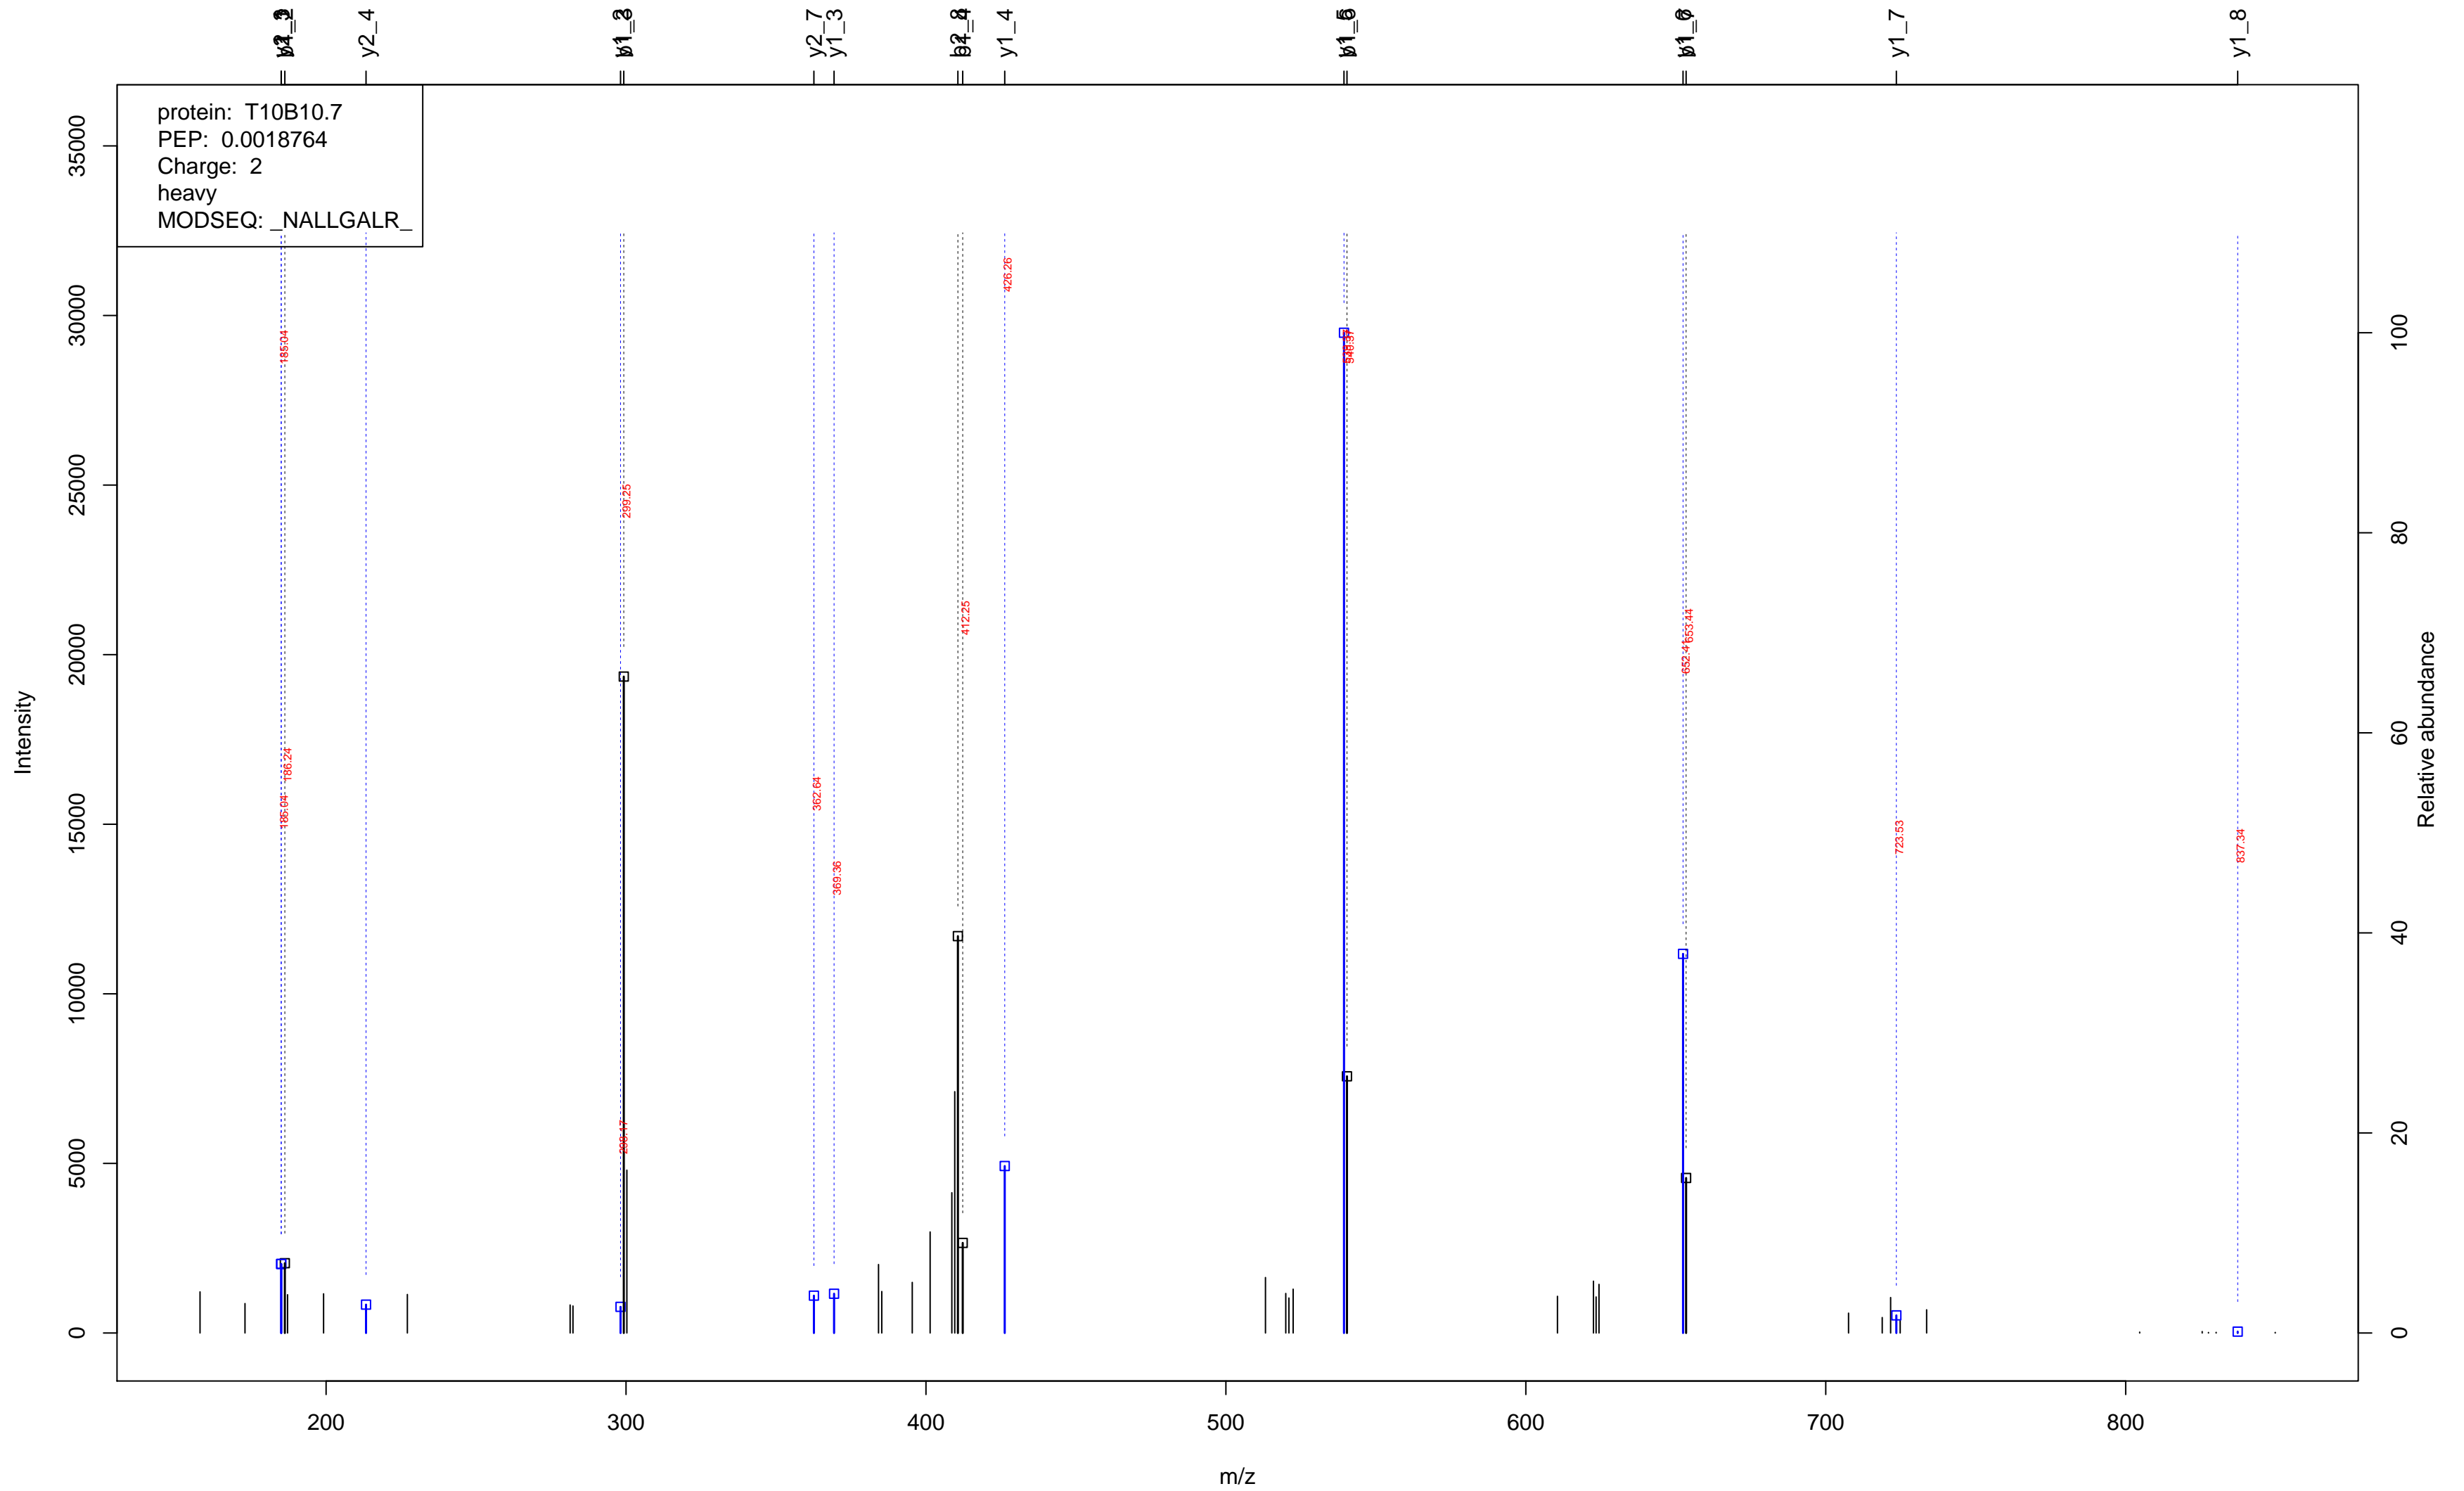

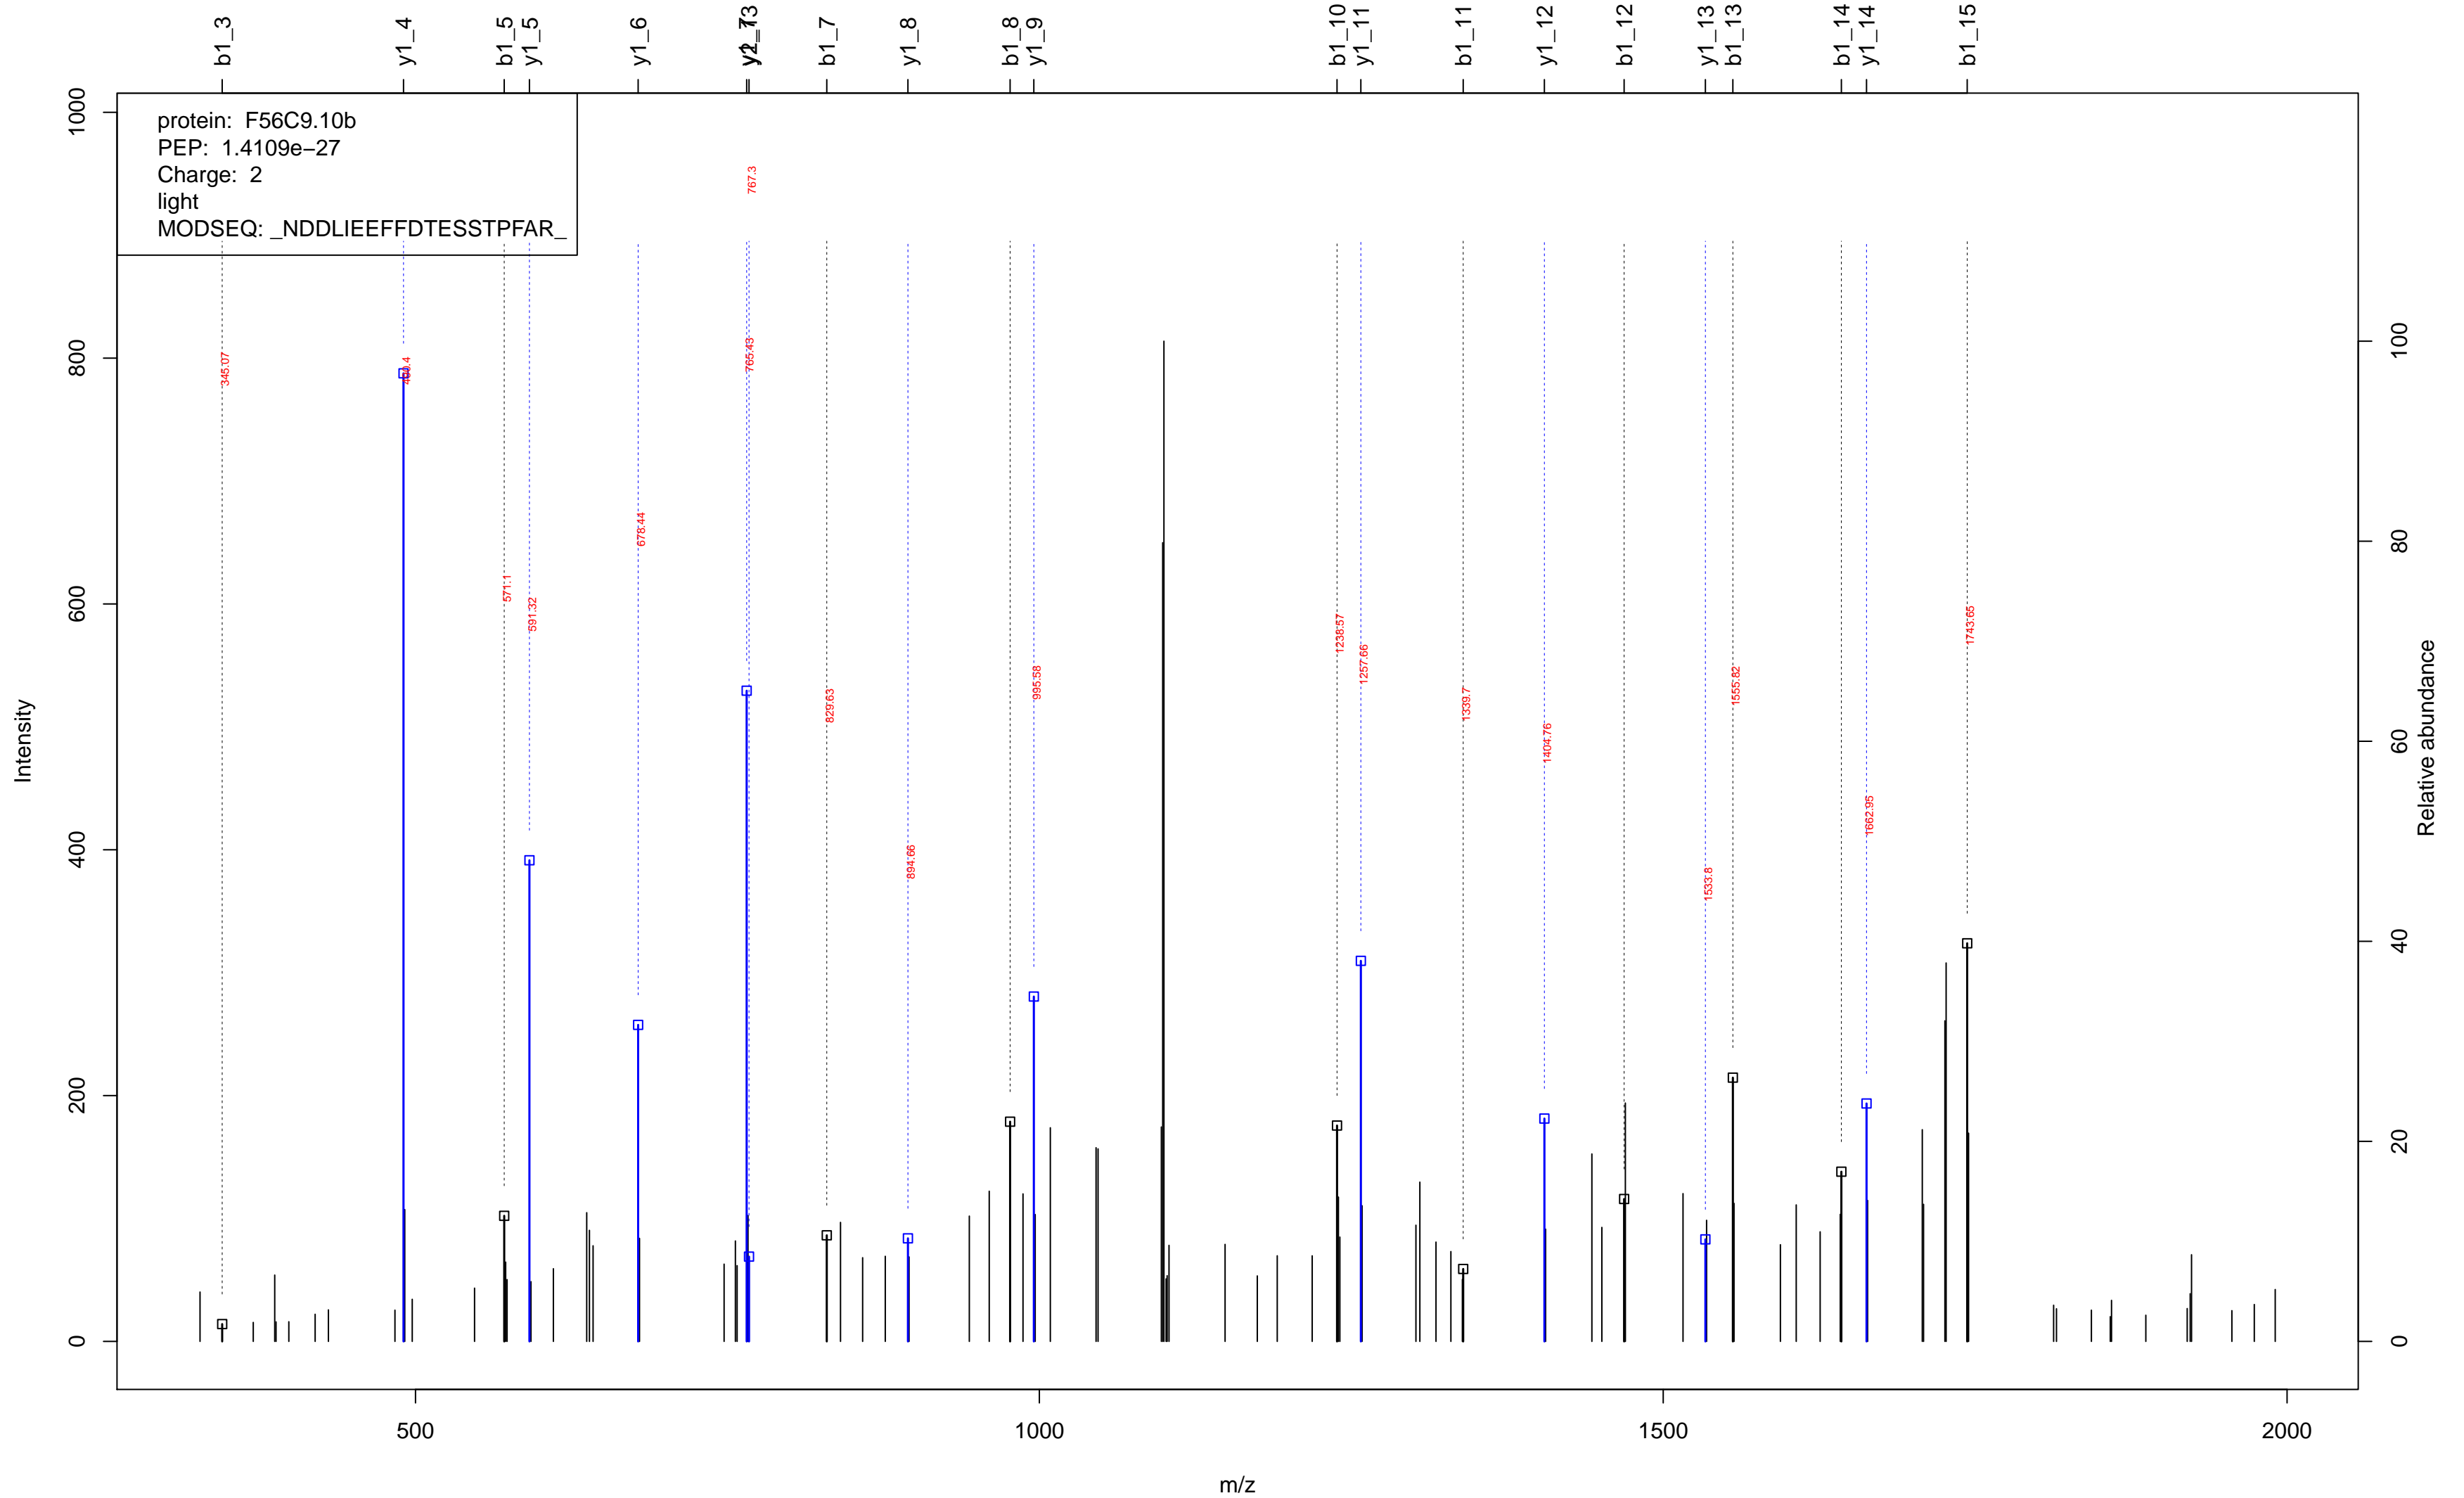

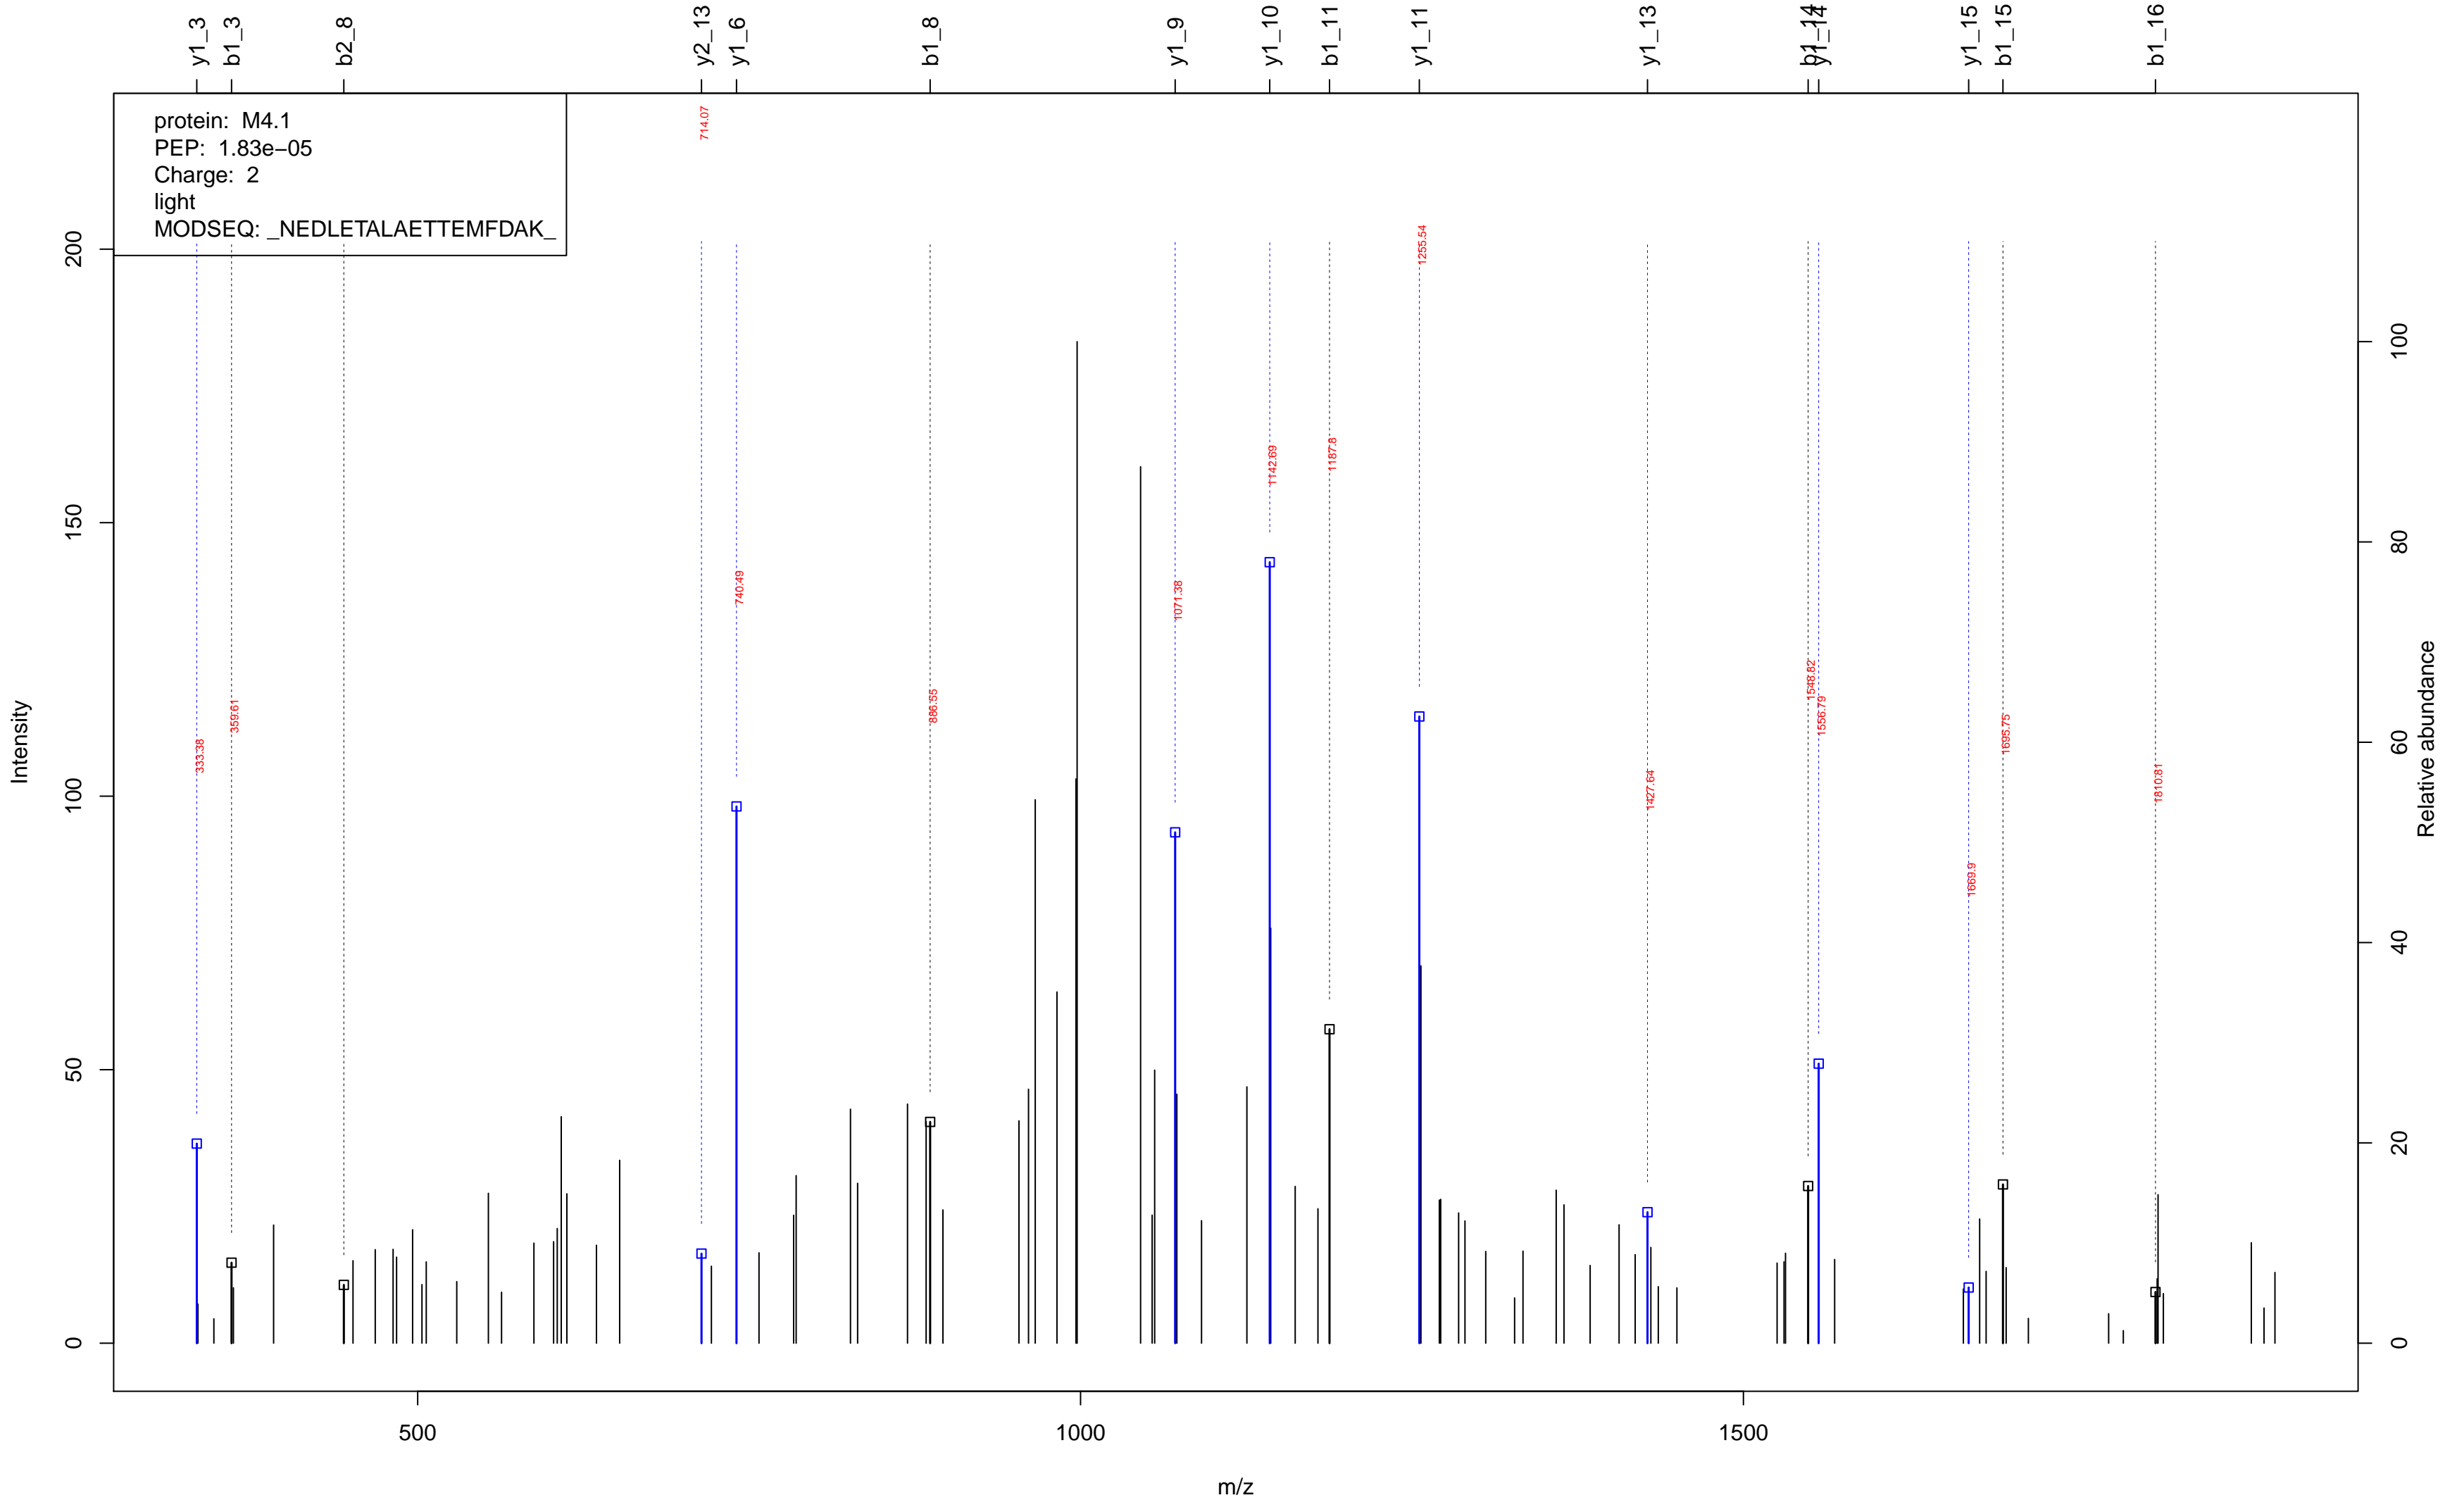

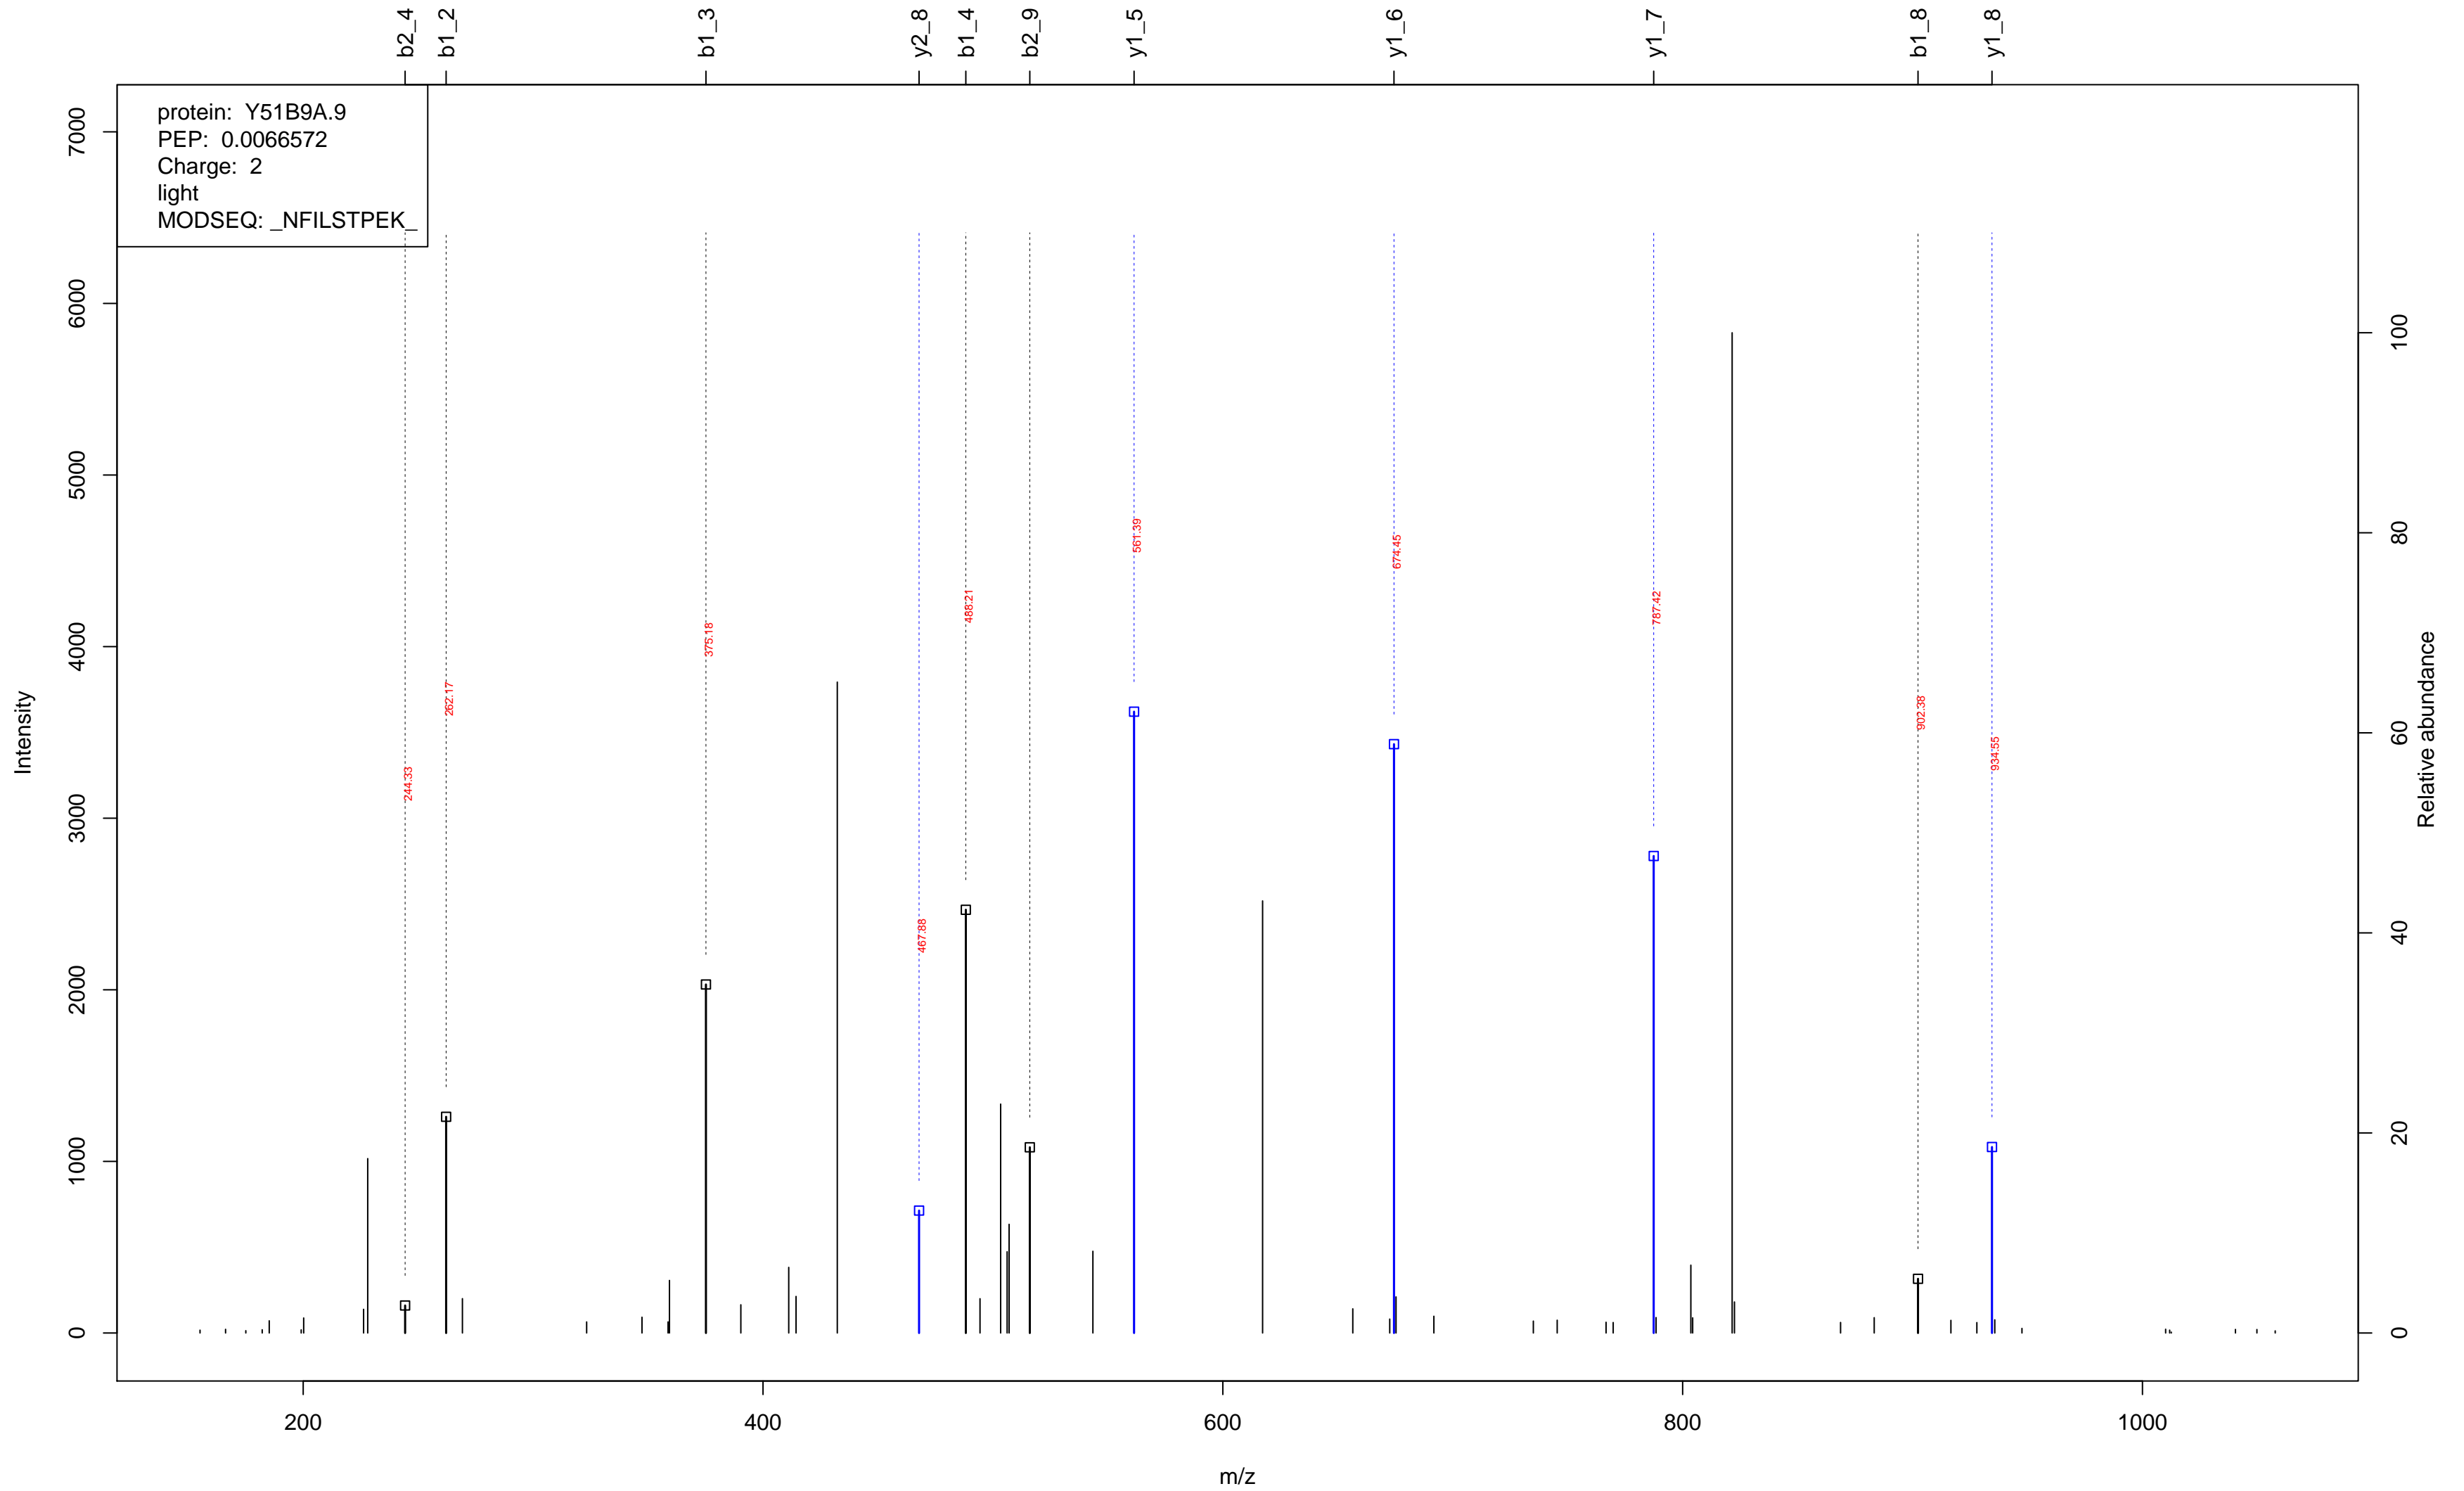

y1\_2

y1\_4

b1\_6  
b2\_12

b1\_9

b1\_10

b1\_11

protein: F42G10.1  
PEP: 0.0059803  
Charge: 2  
light  
MODSEQ: \_NHFYHGLFDEIR\_

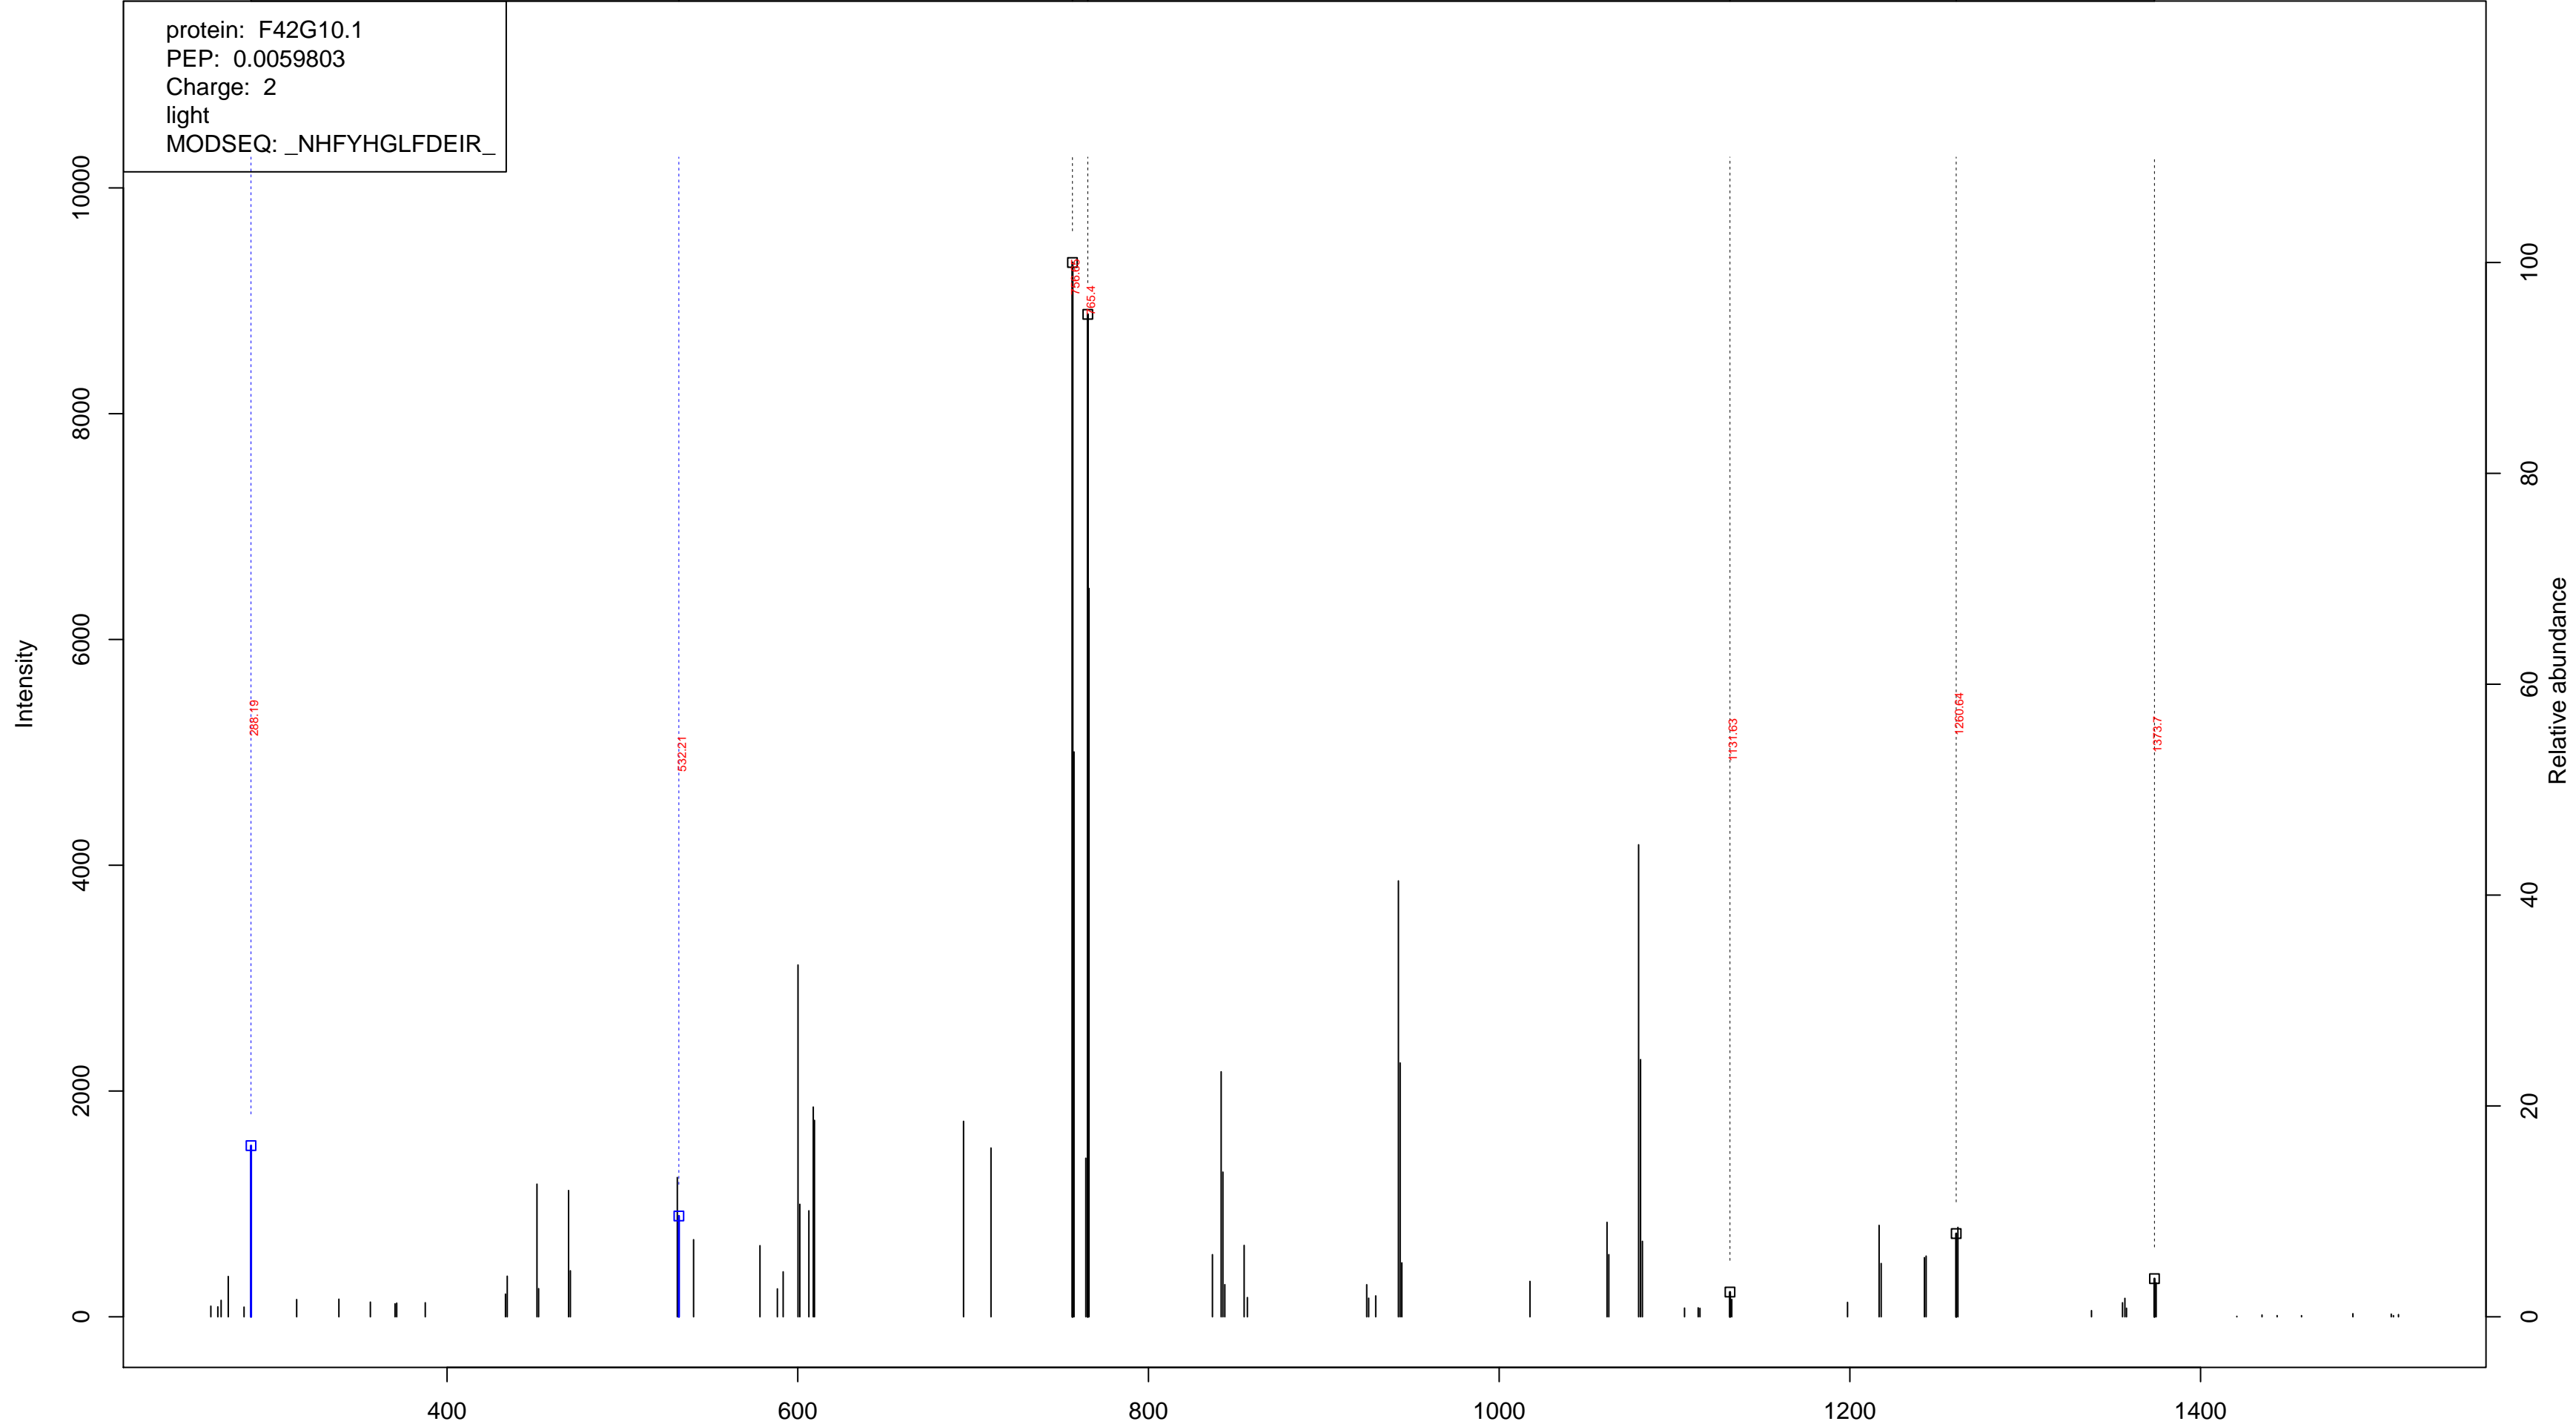

y1\_2 b1\_3 y1\_3 y1\_4 y2\_11 b2\_14 b1\_8 y1\_9 b1\_13 b1\_16

protein: F13A7.2  
PEP: 0.026859  
Charge: 2  
heavy  
MODSEQ: \_NIDNTHSM(ox)ALLCDGFCK\_

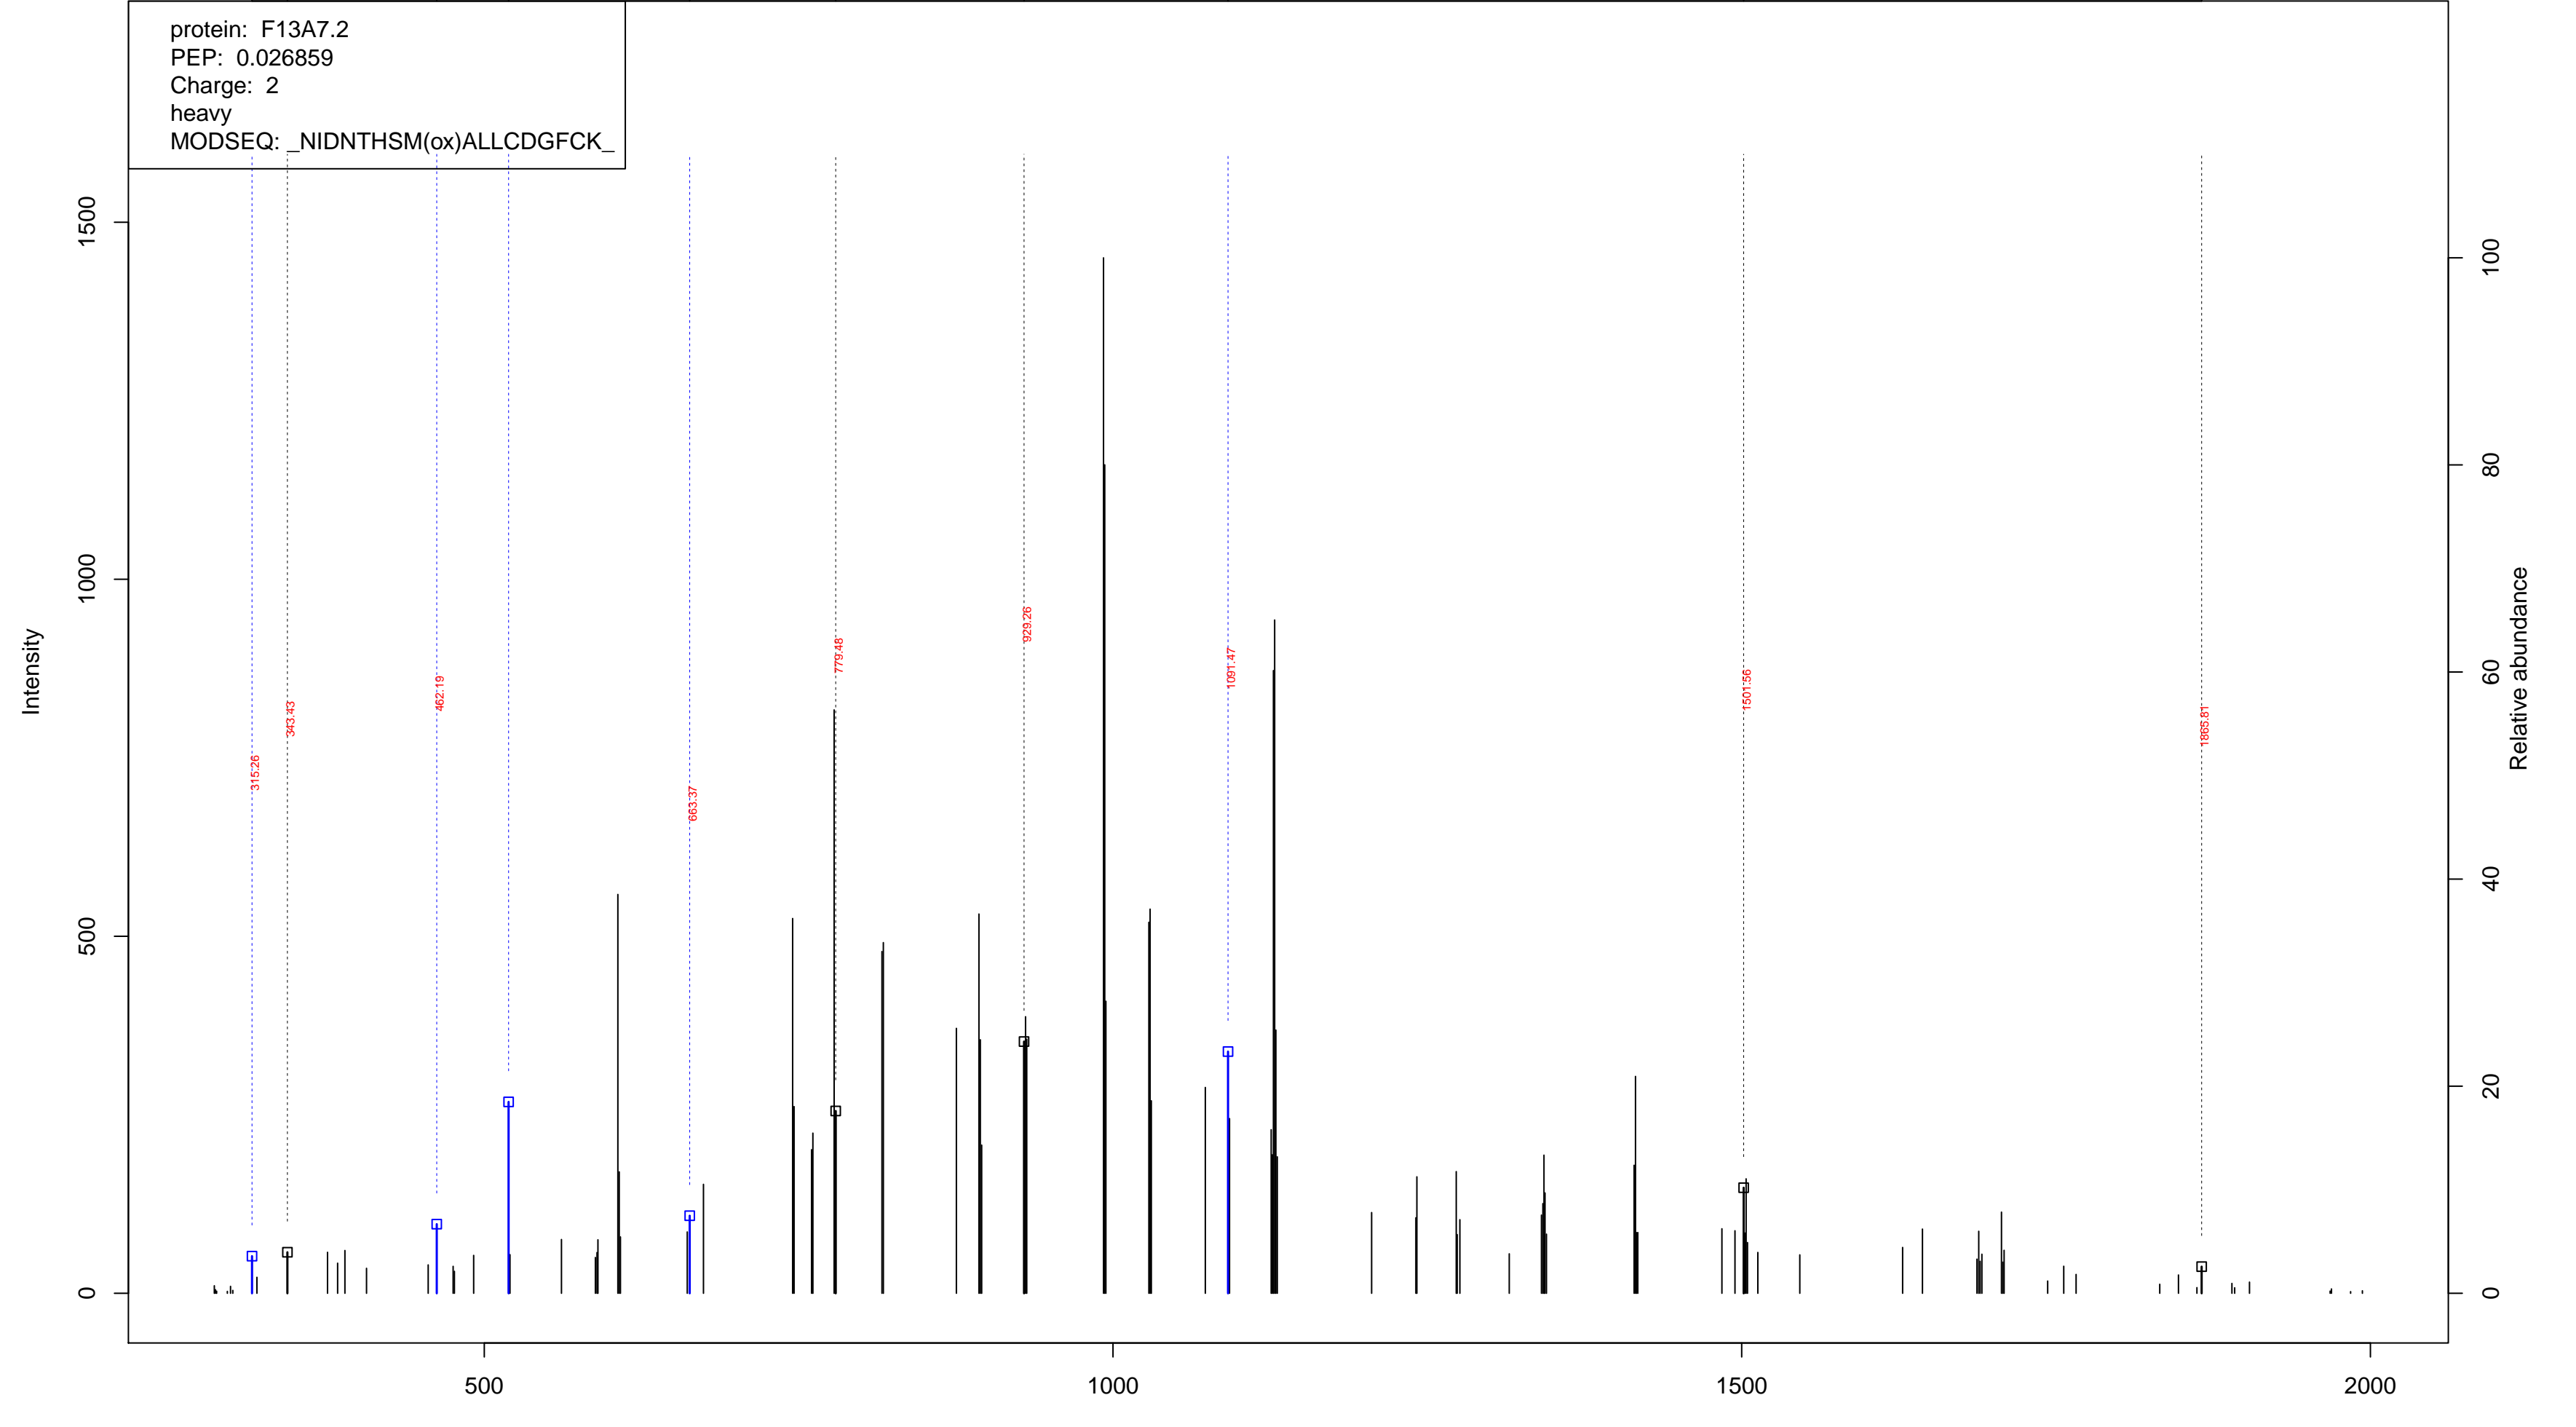

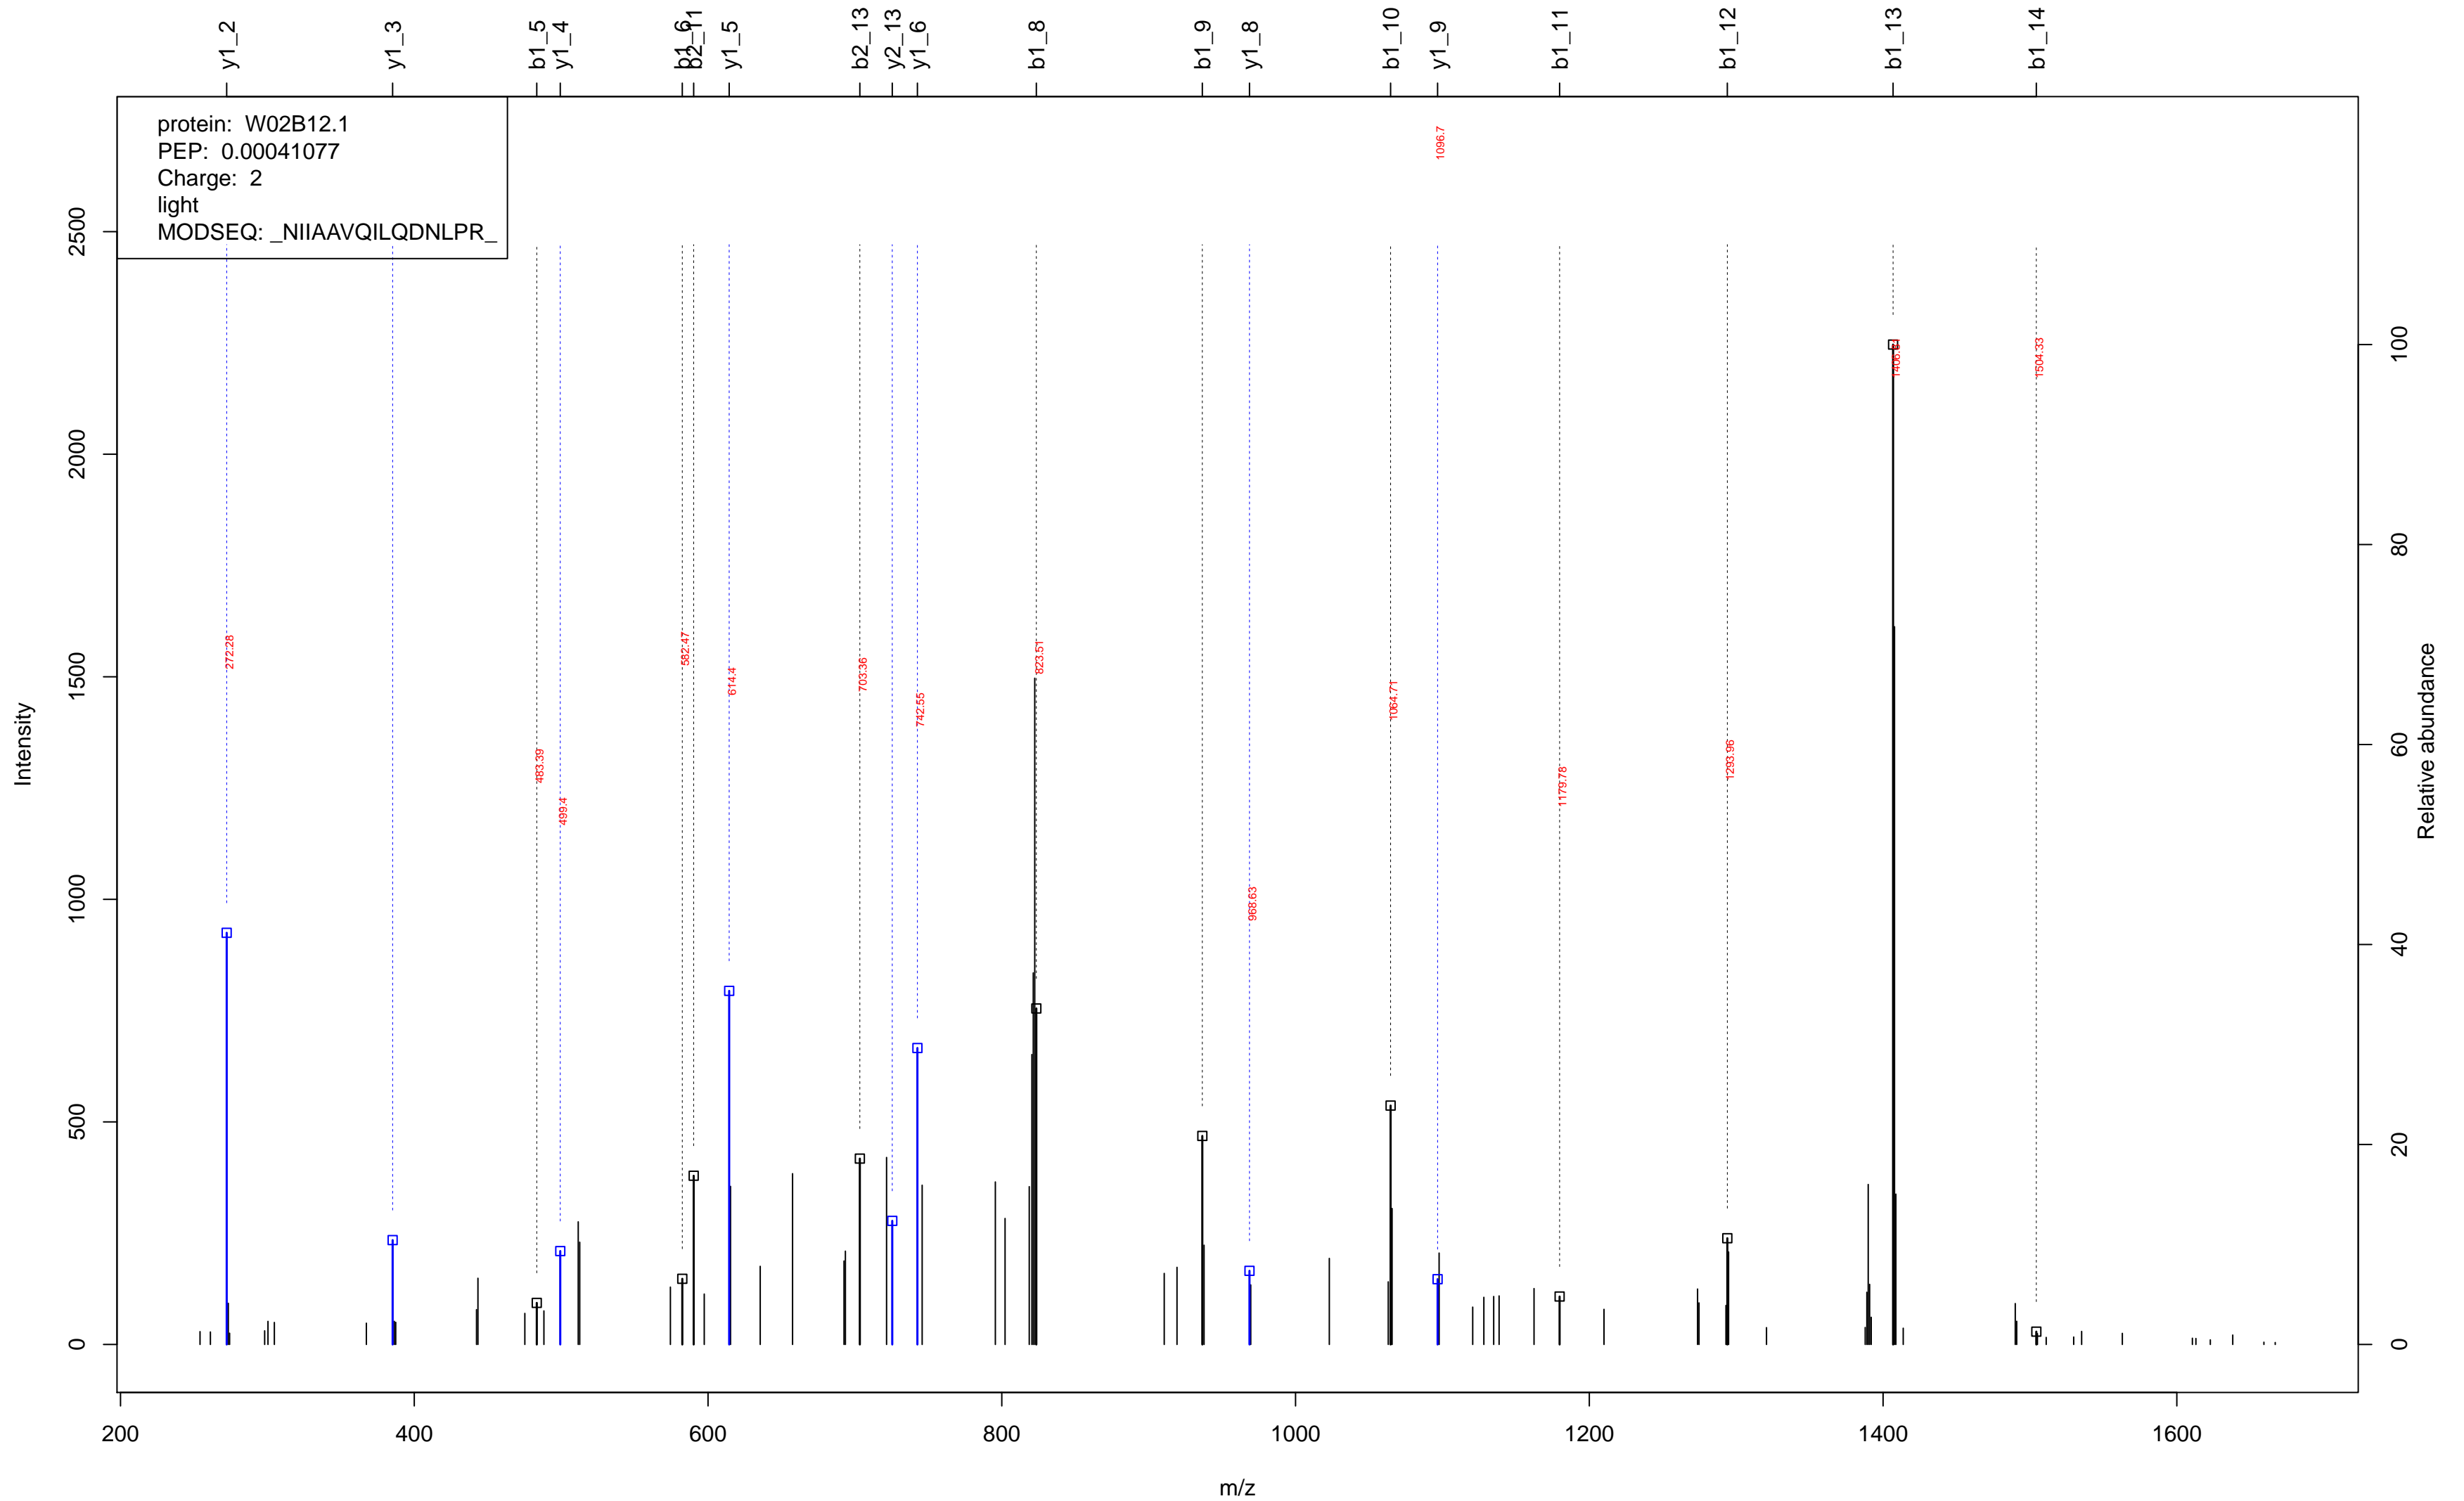



y2\_6 y1\_4 b2\_61 y1\_5 y1\_6 y1\_7 y1\_8 y1\_9 y1\_10 y1\_11 y1\_14 b1\_16 y1\_16 b1\_18

protein: F31E8.2b  
PEP: 0.0025383  
Charge: 2  
light  
MODSEQ: \_NIQGMAQDLEELGDAMEQNEK\_

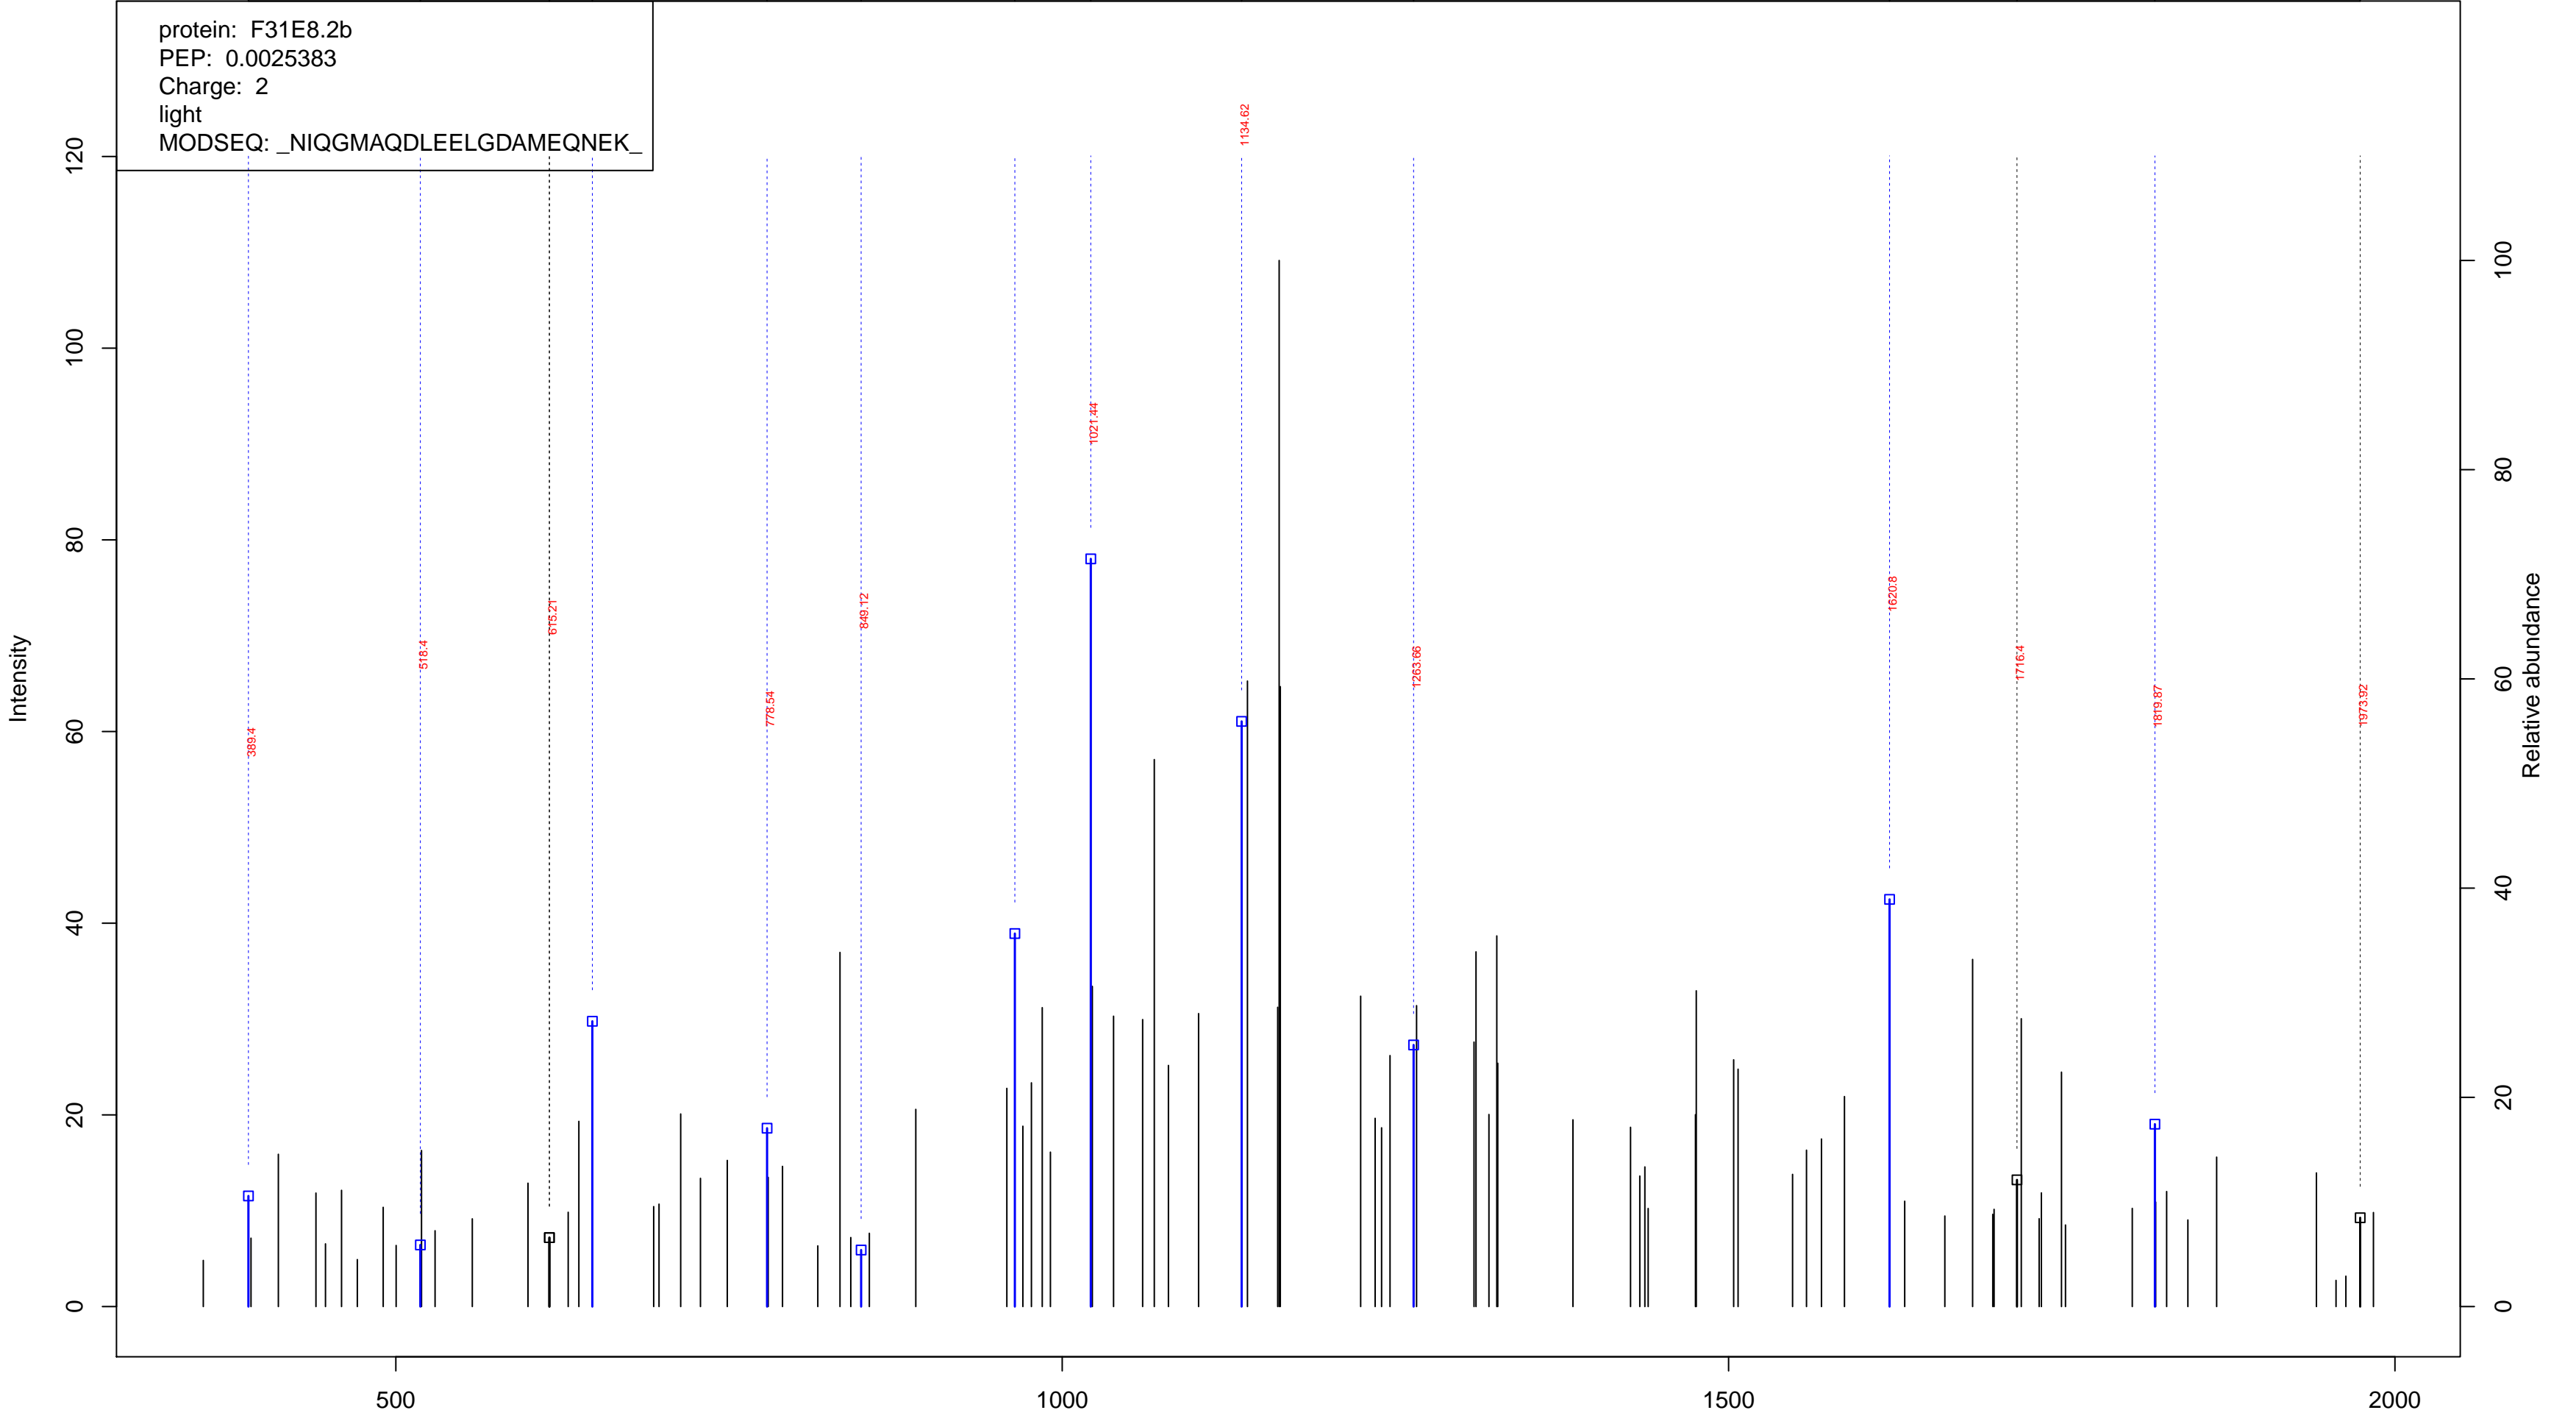

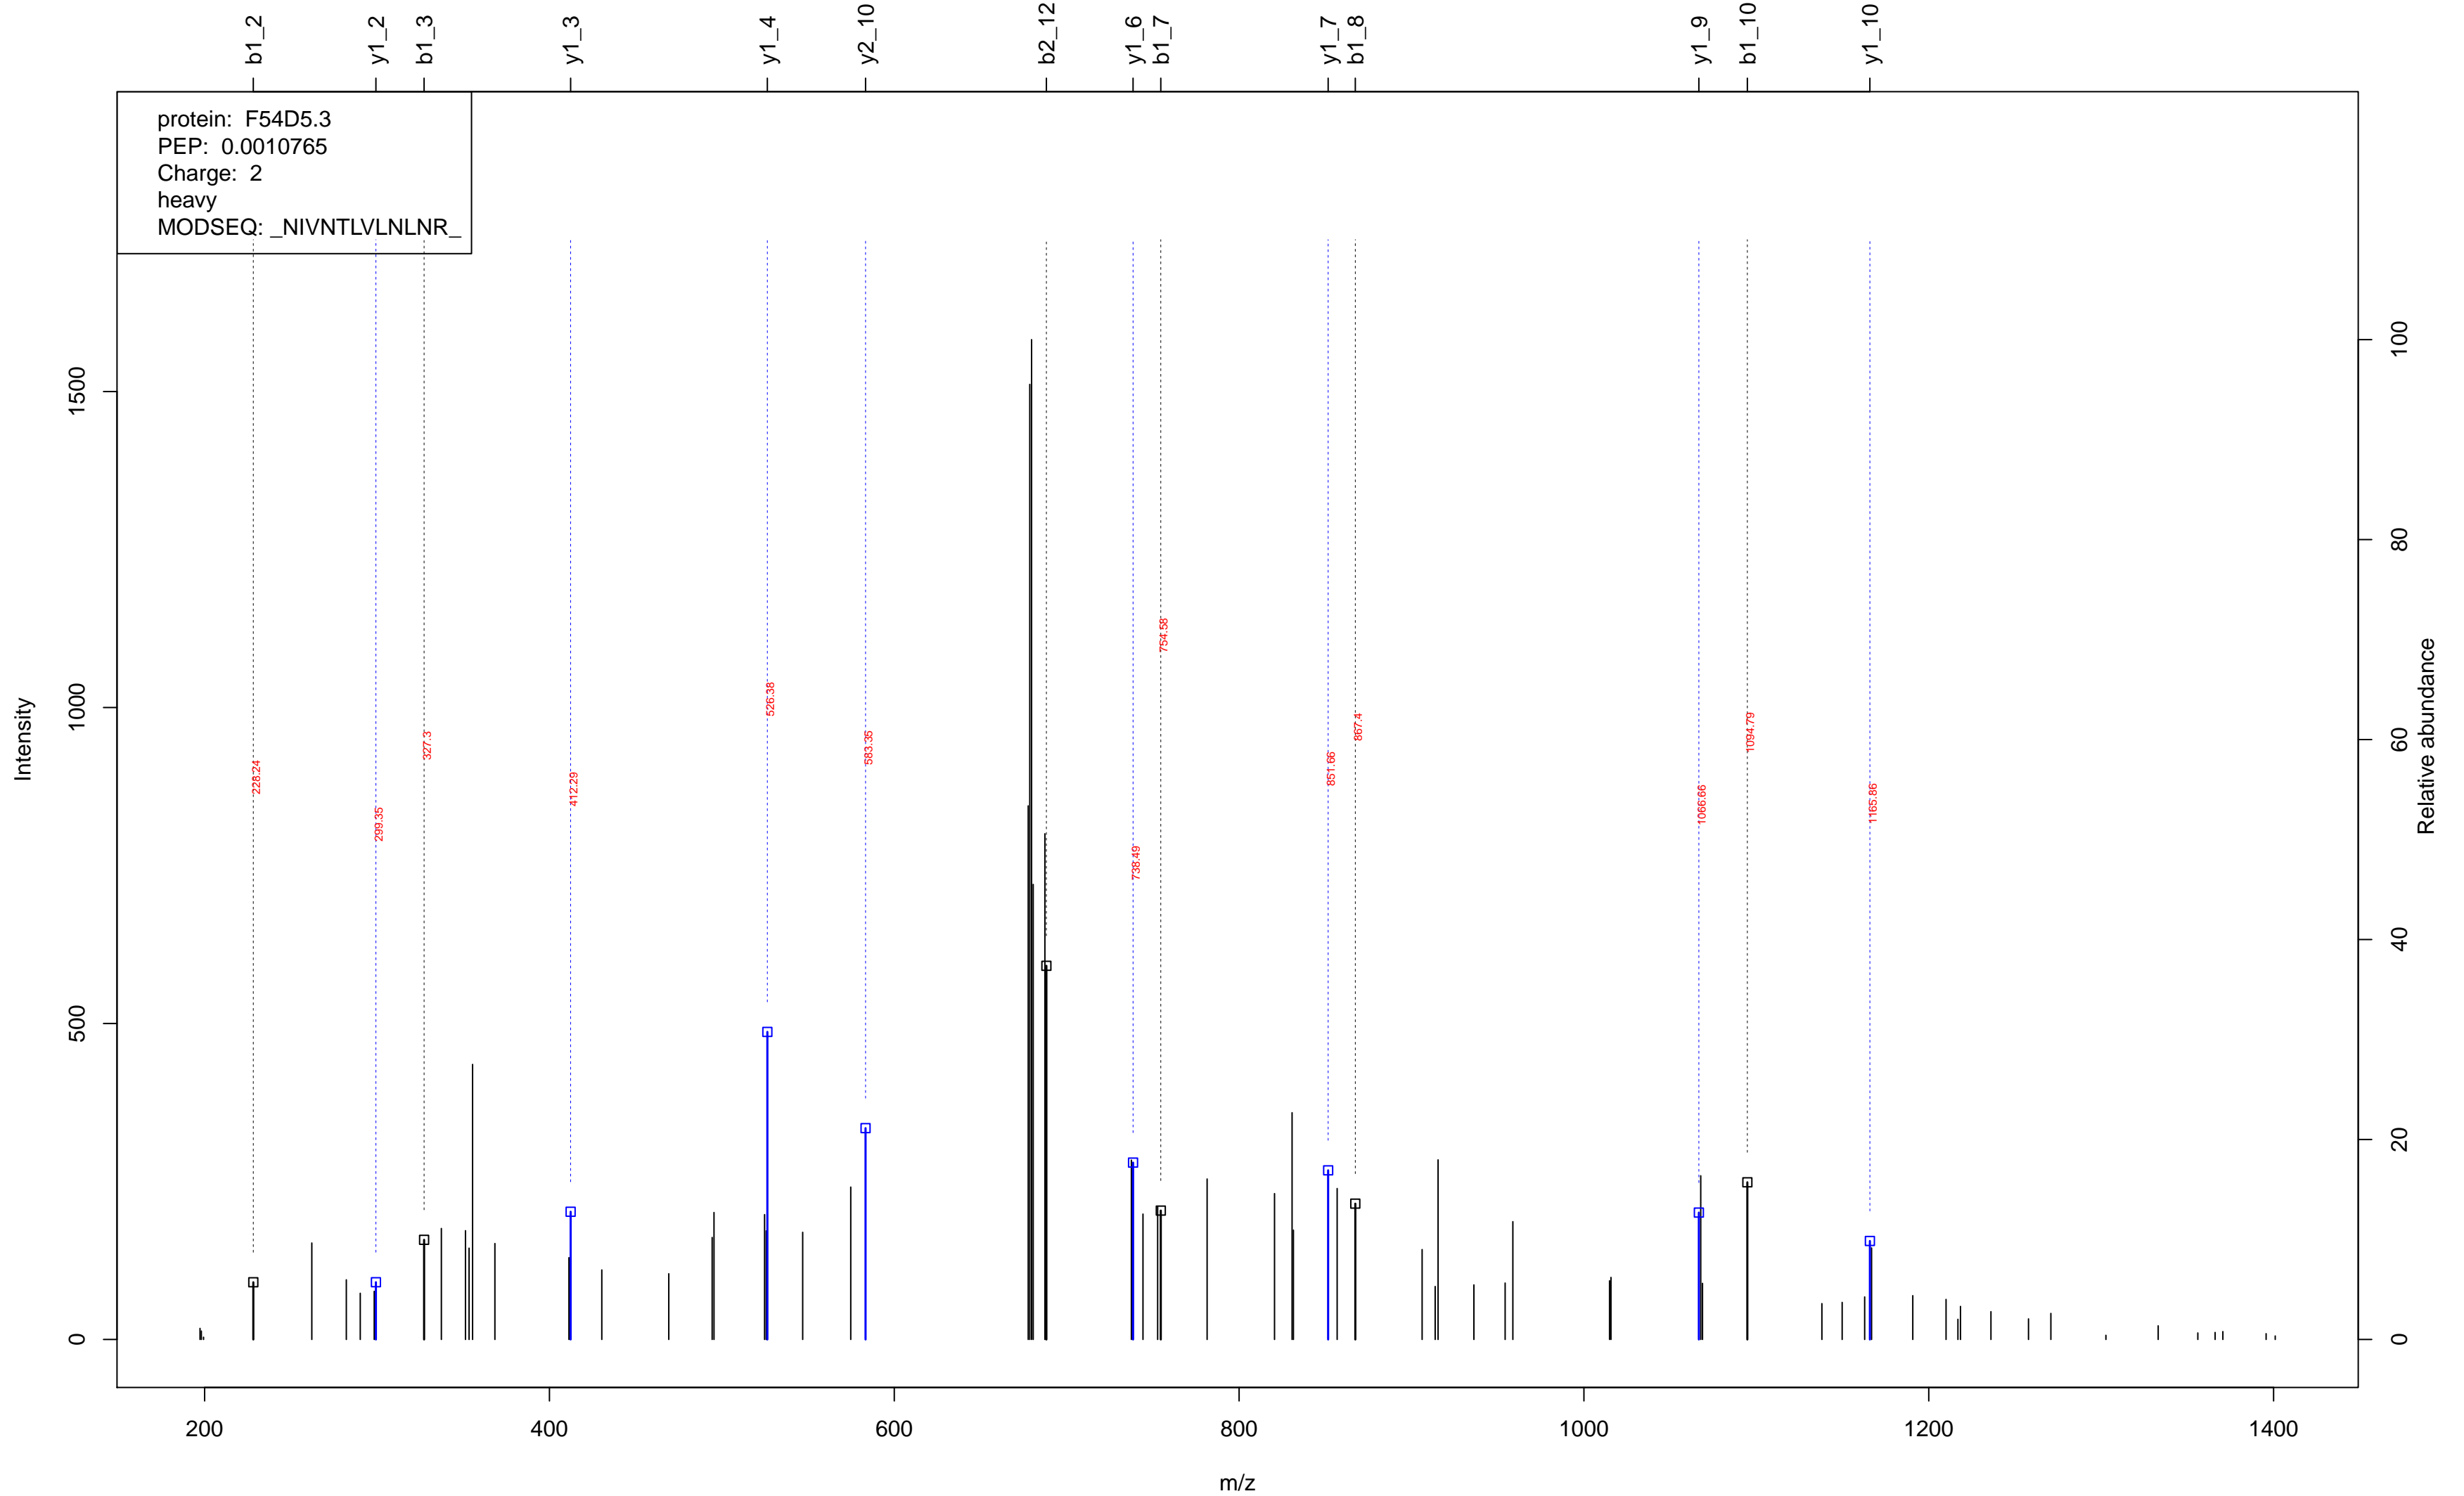

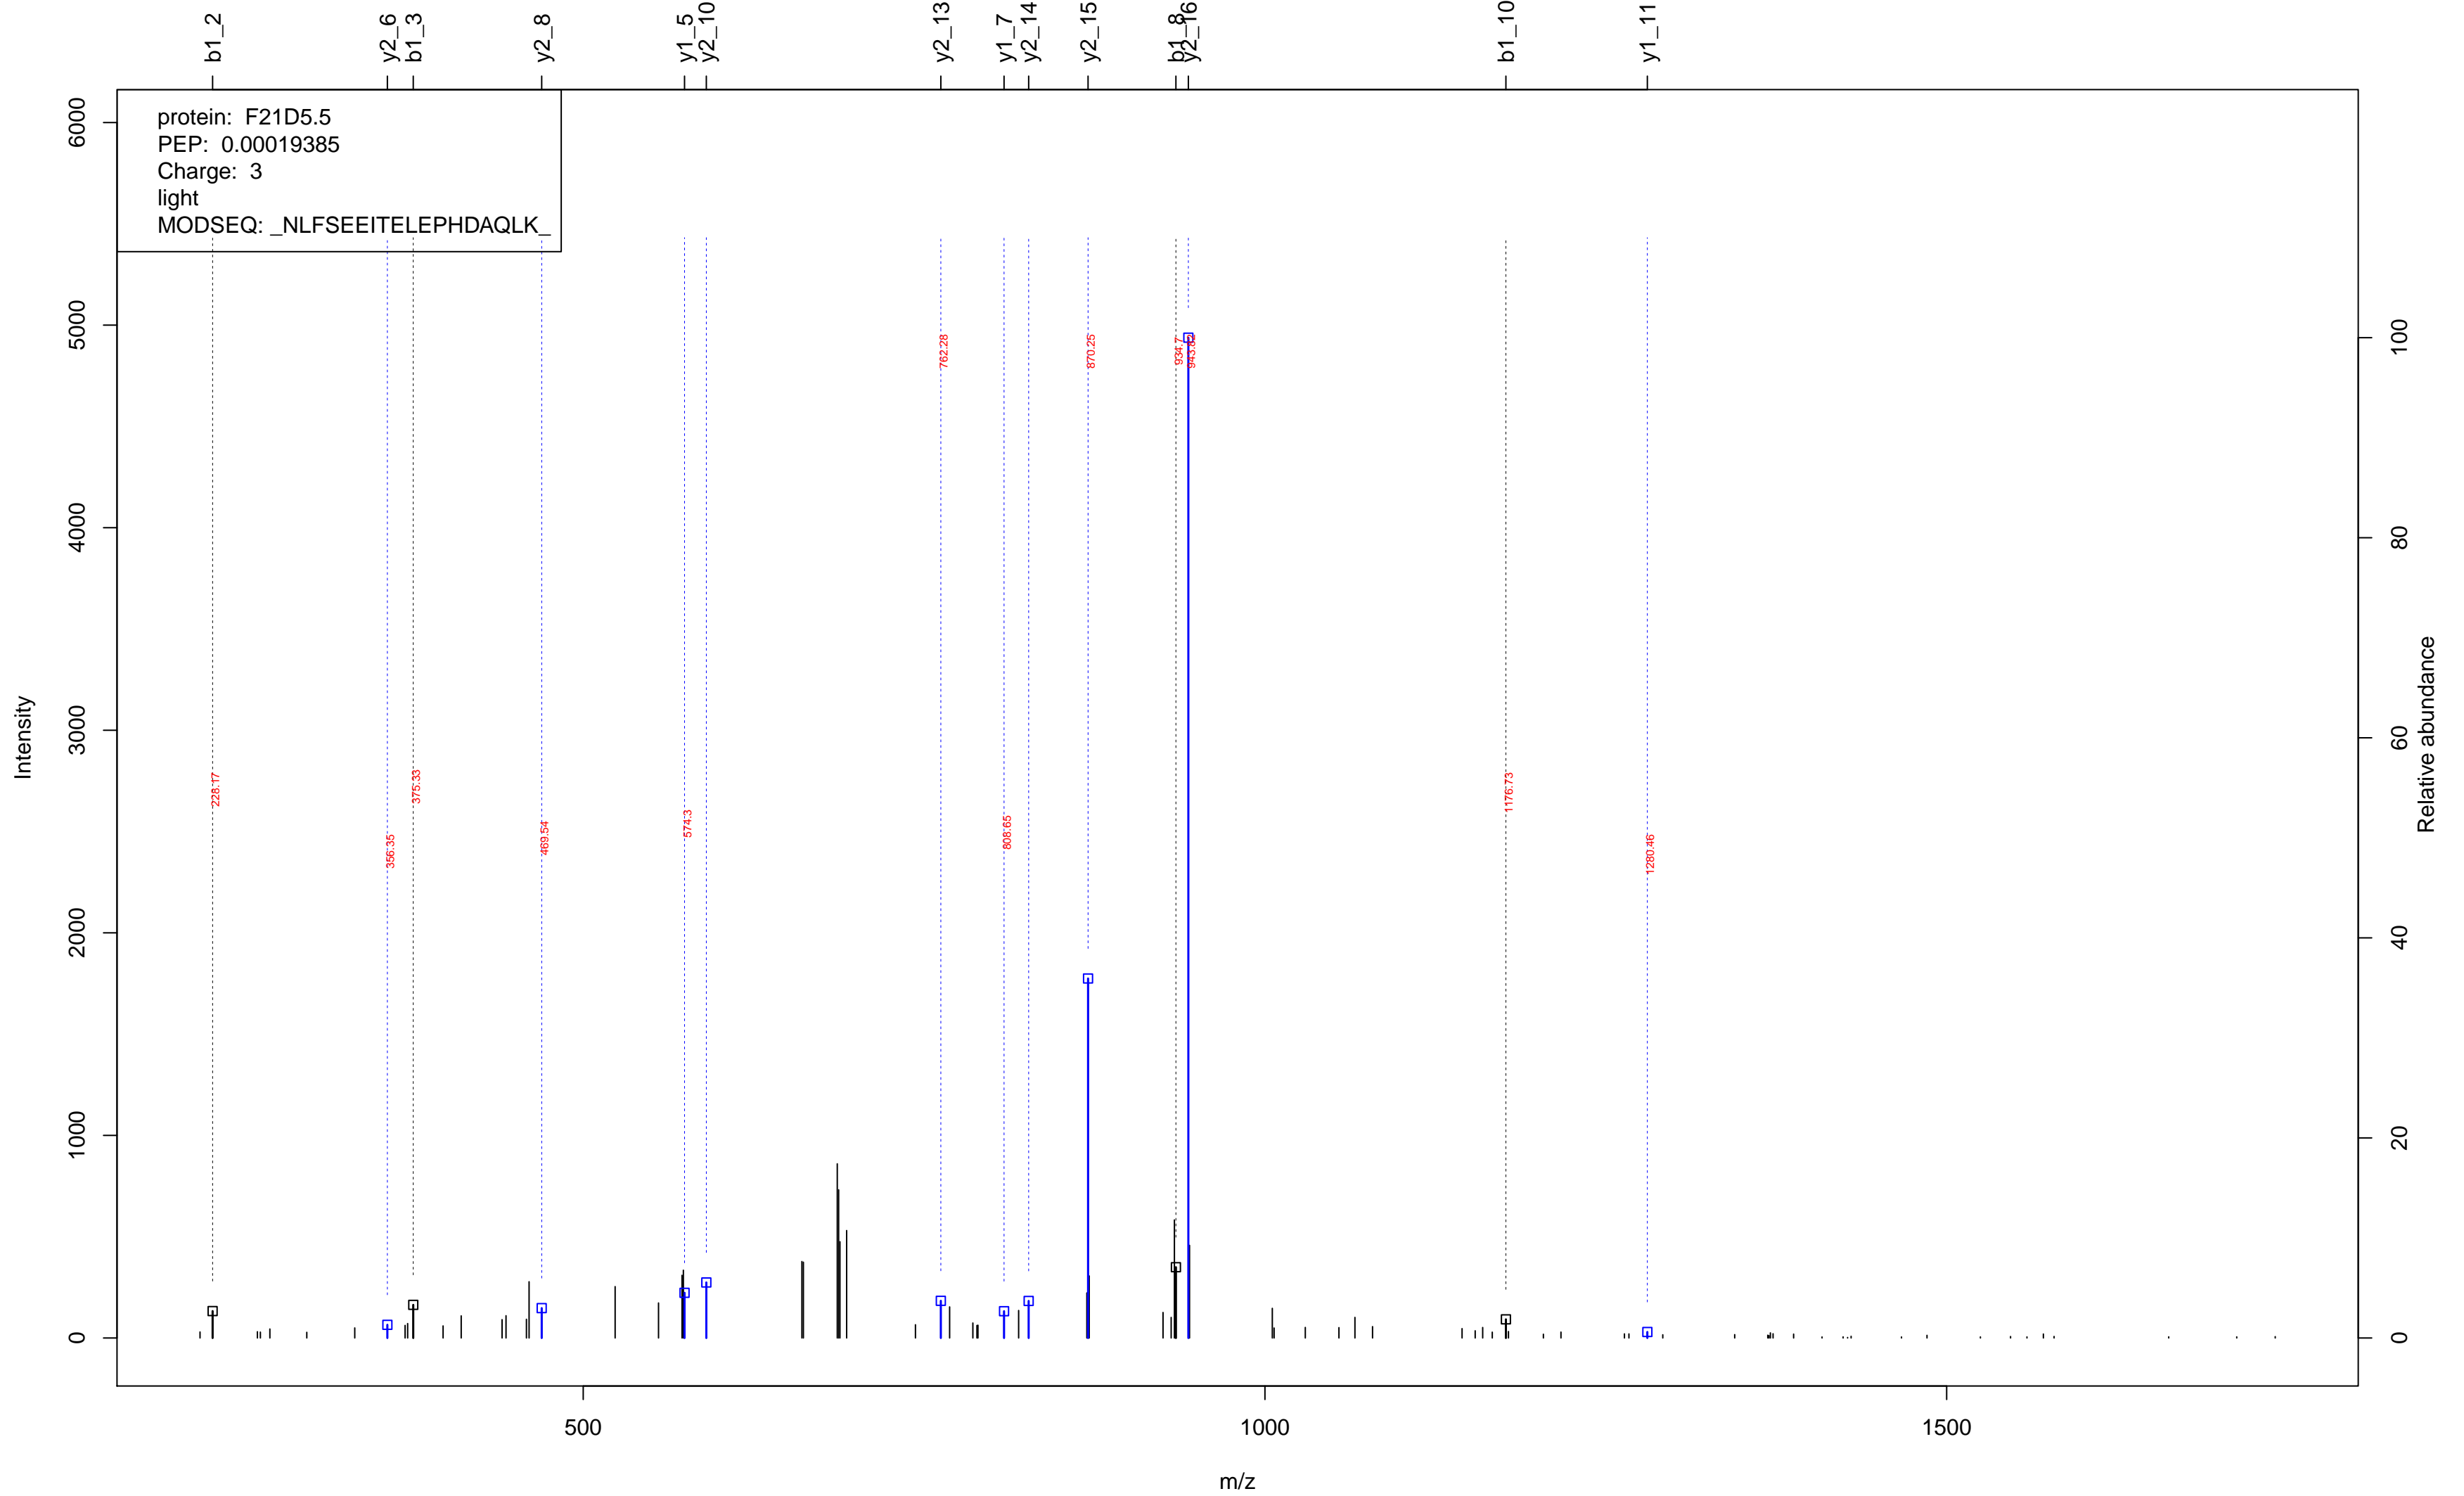

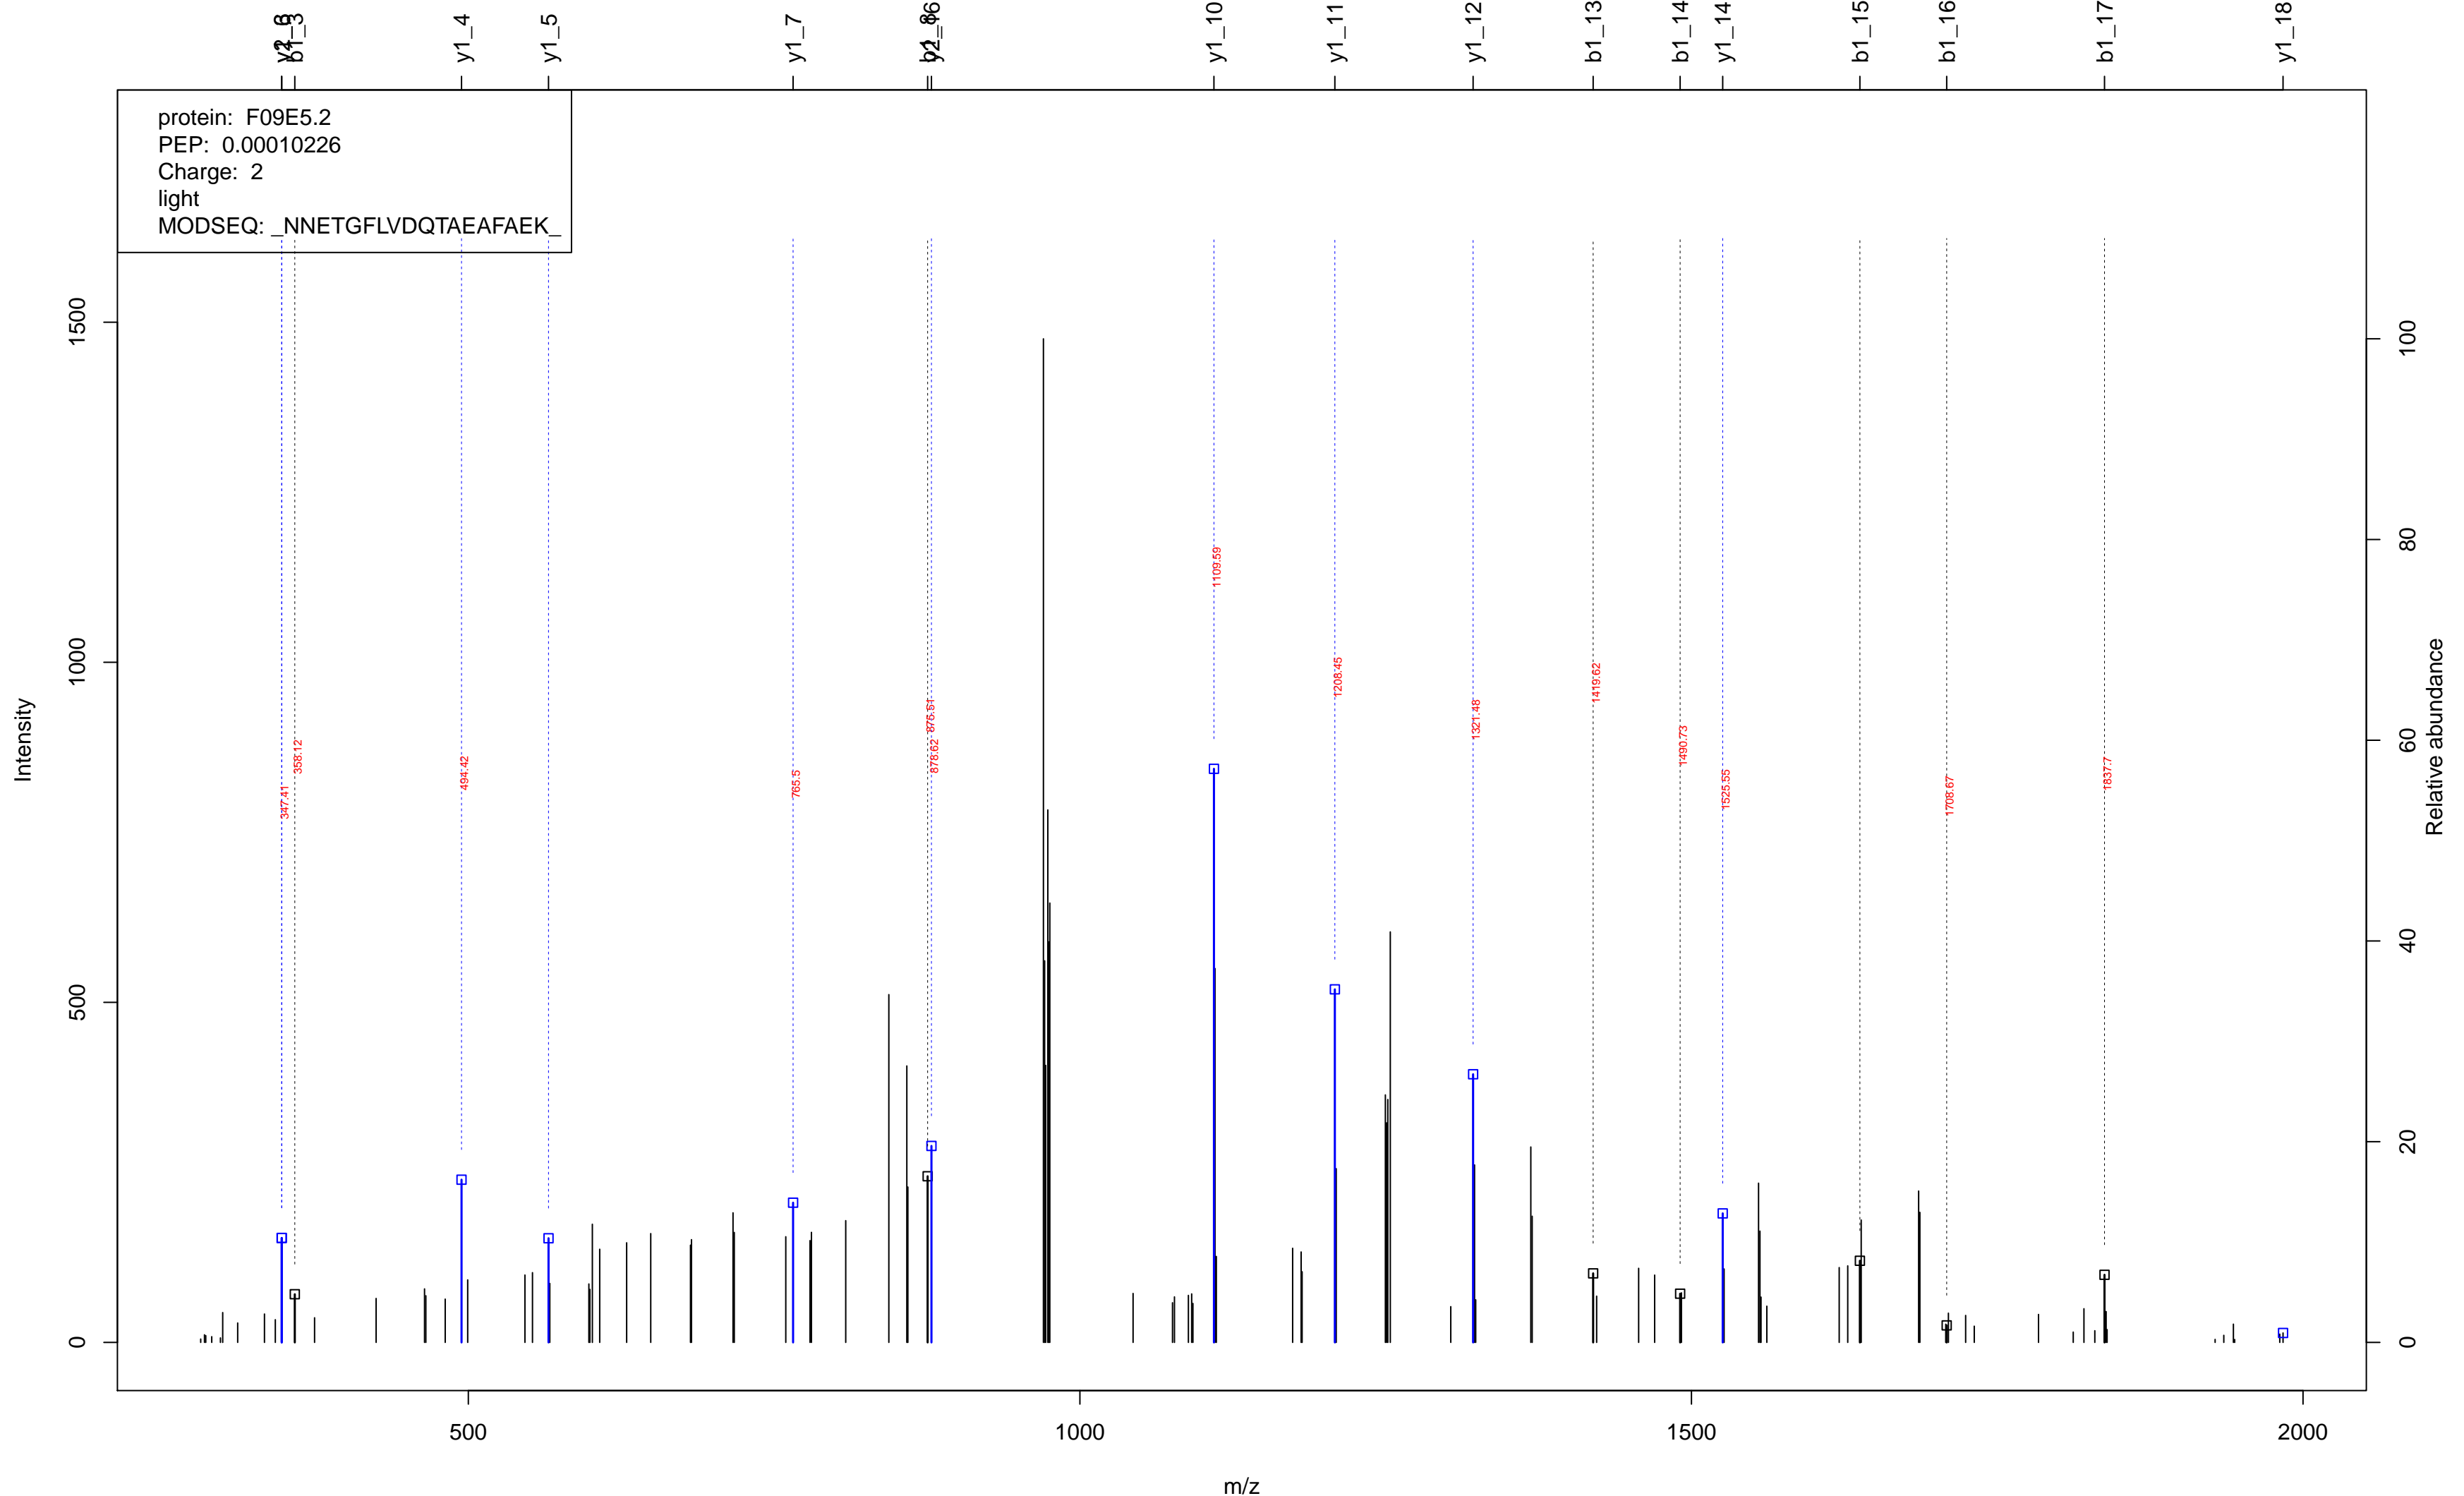

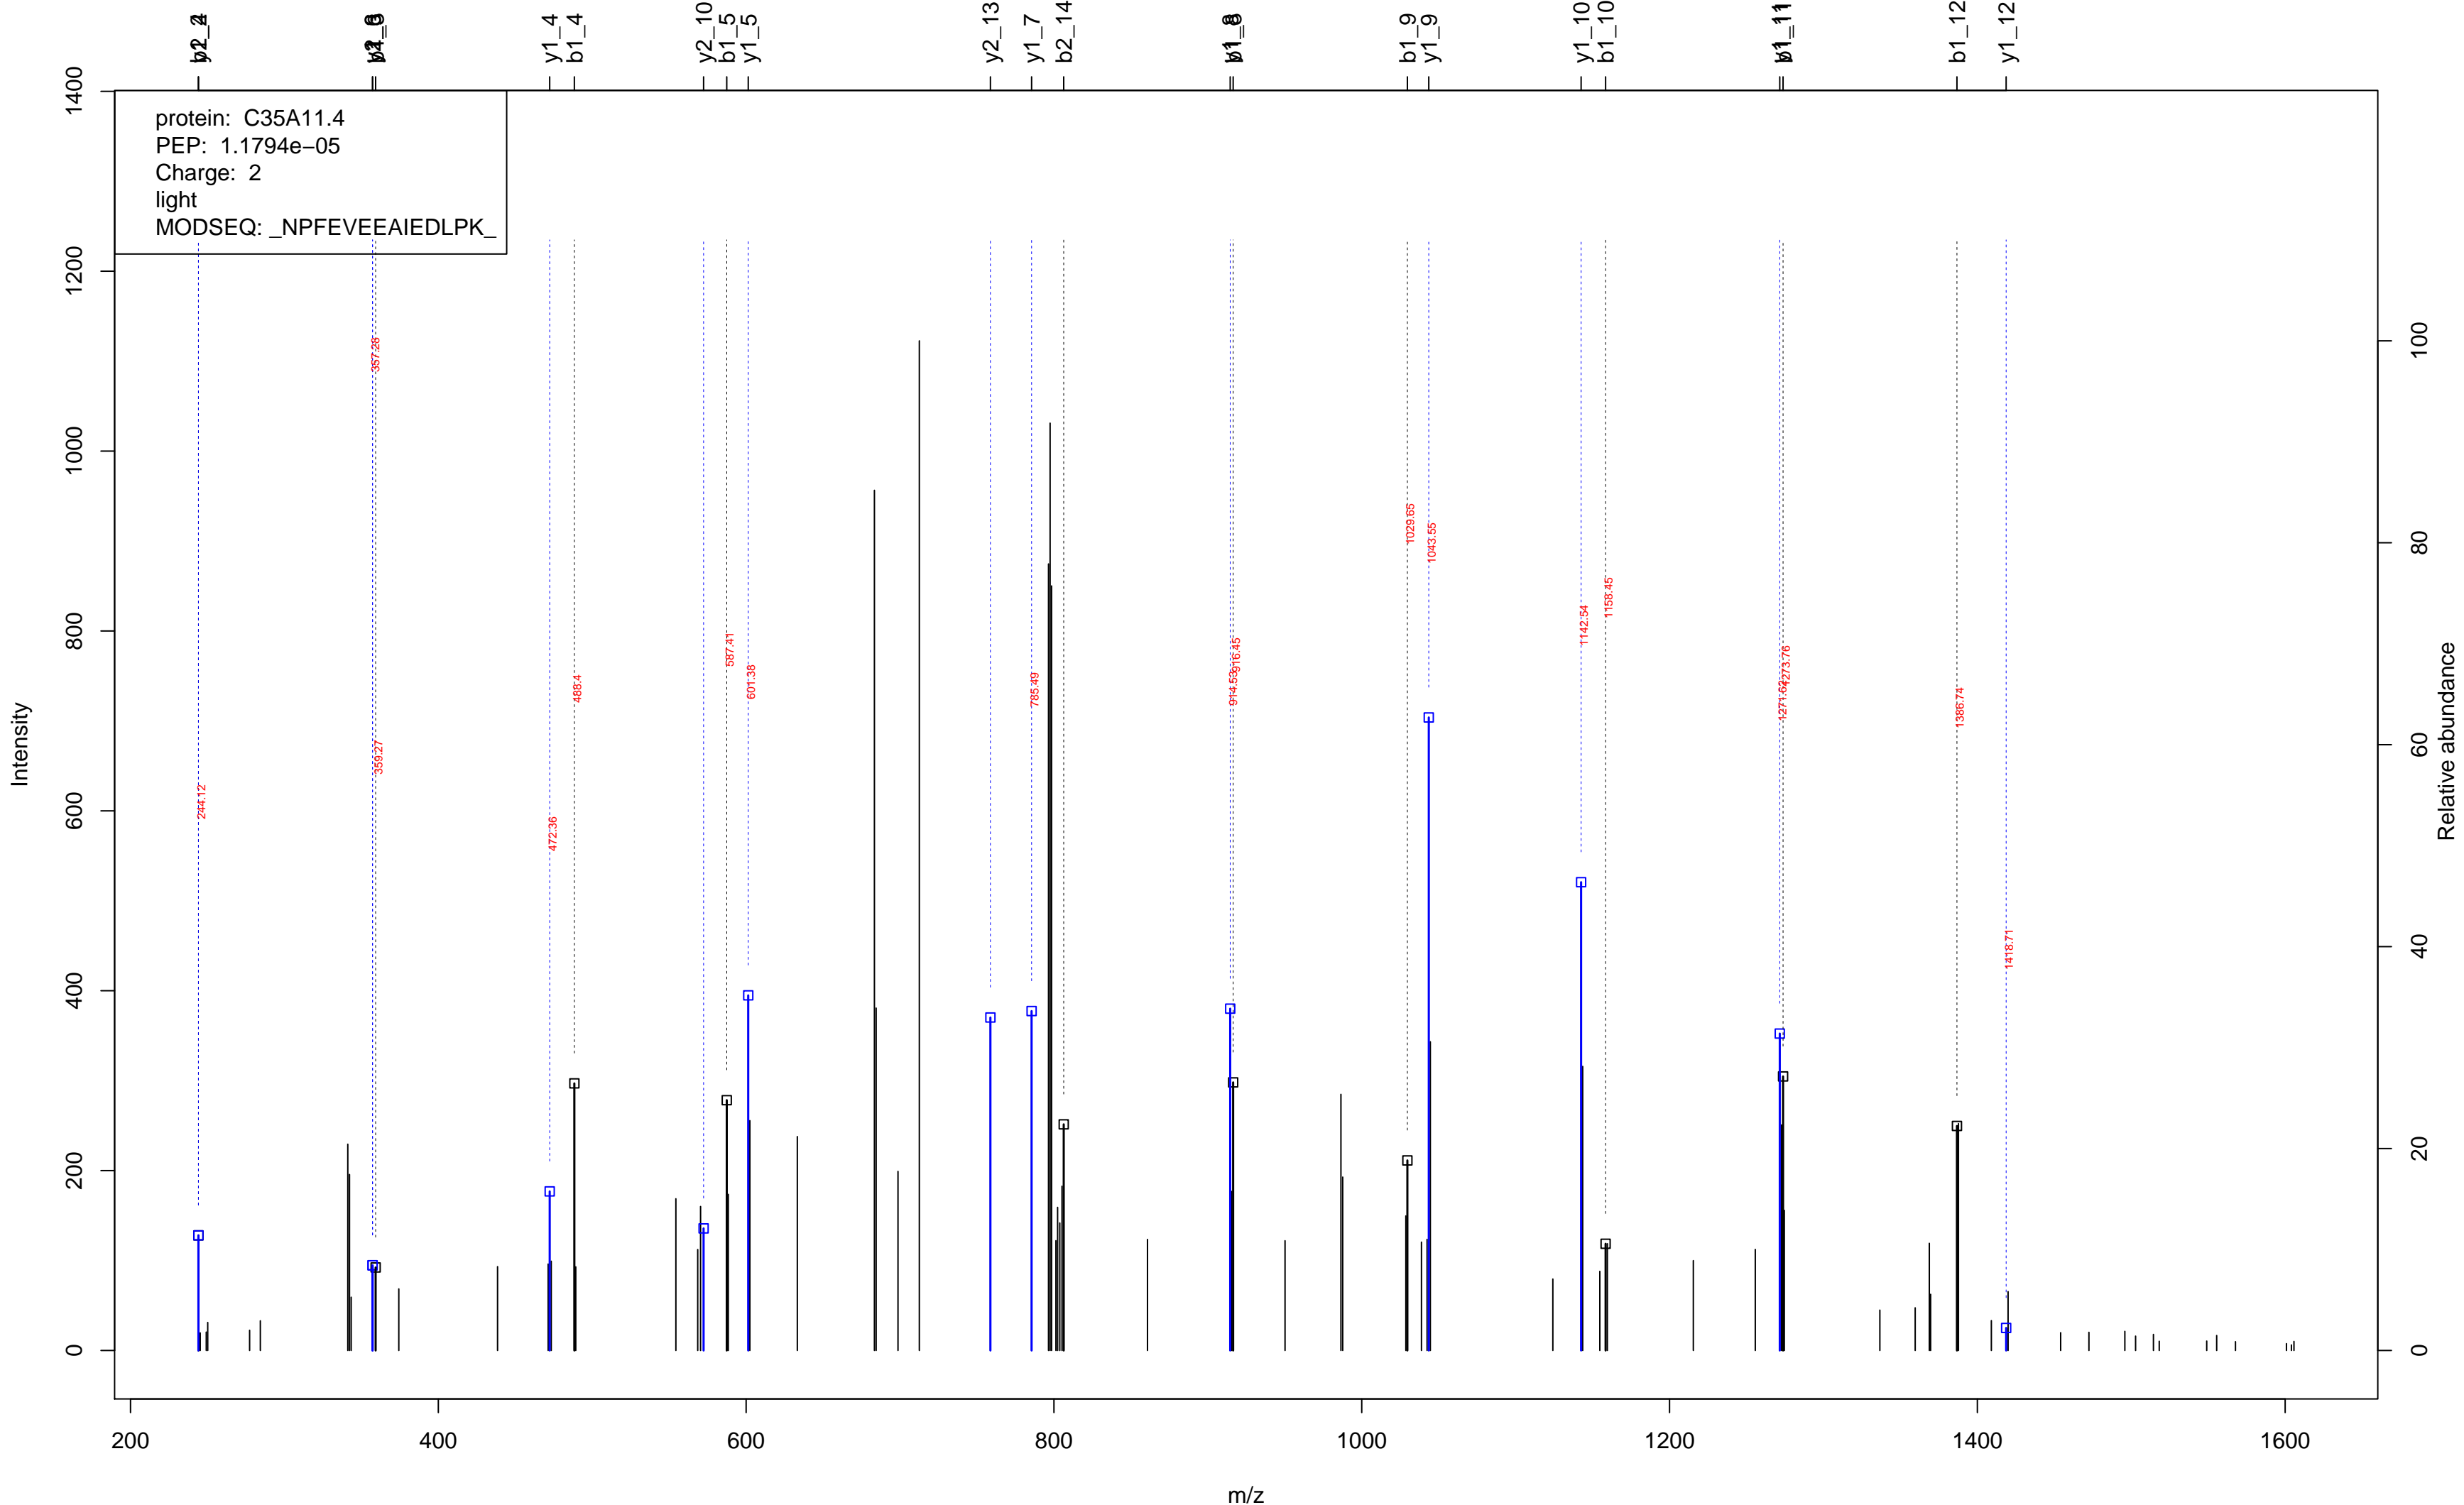

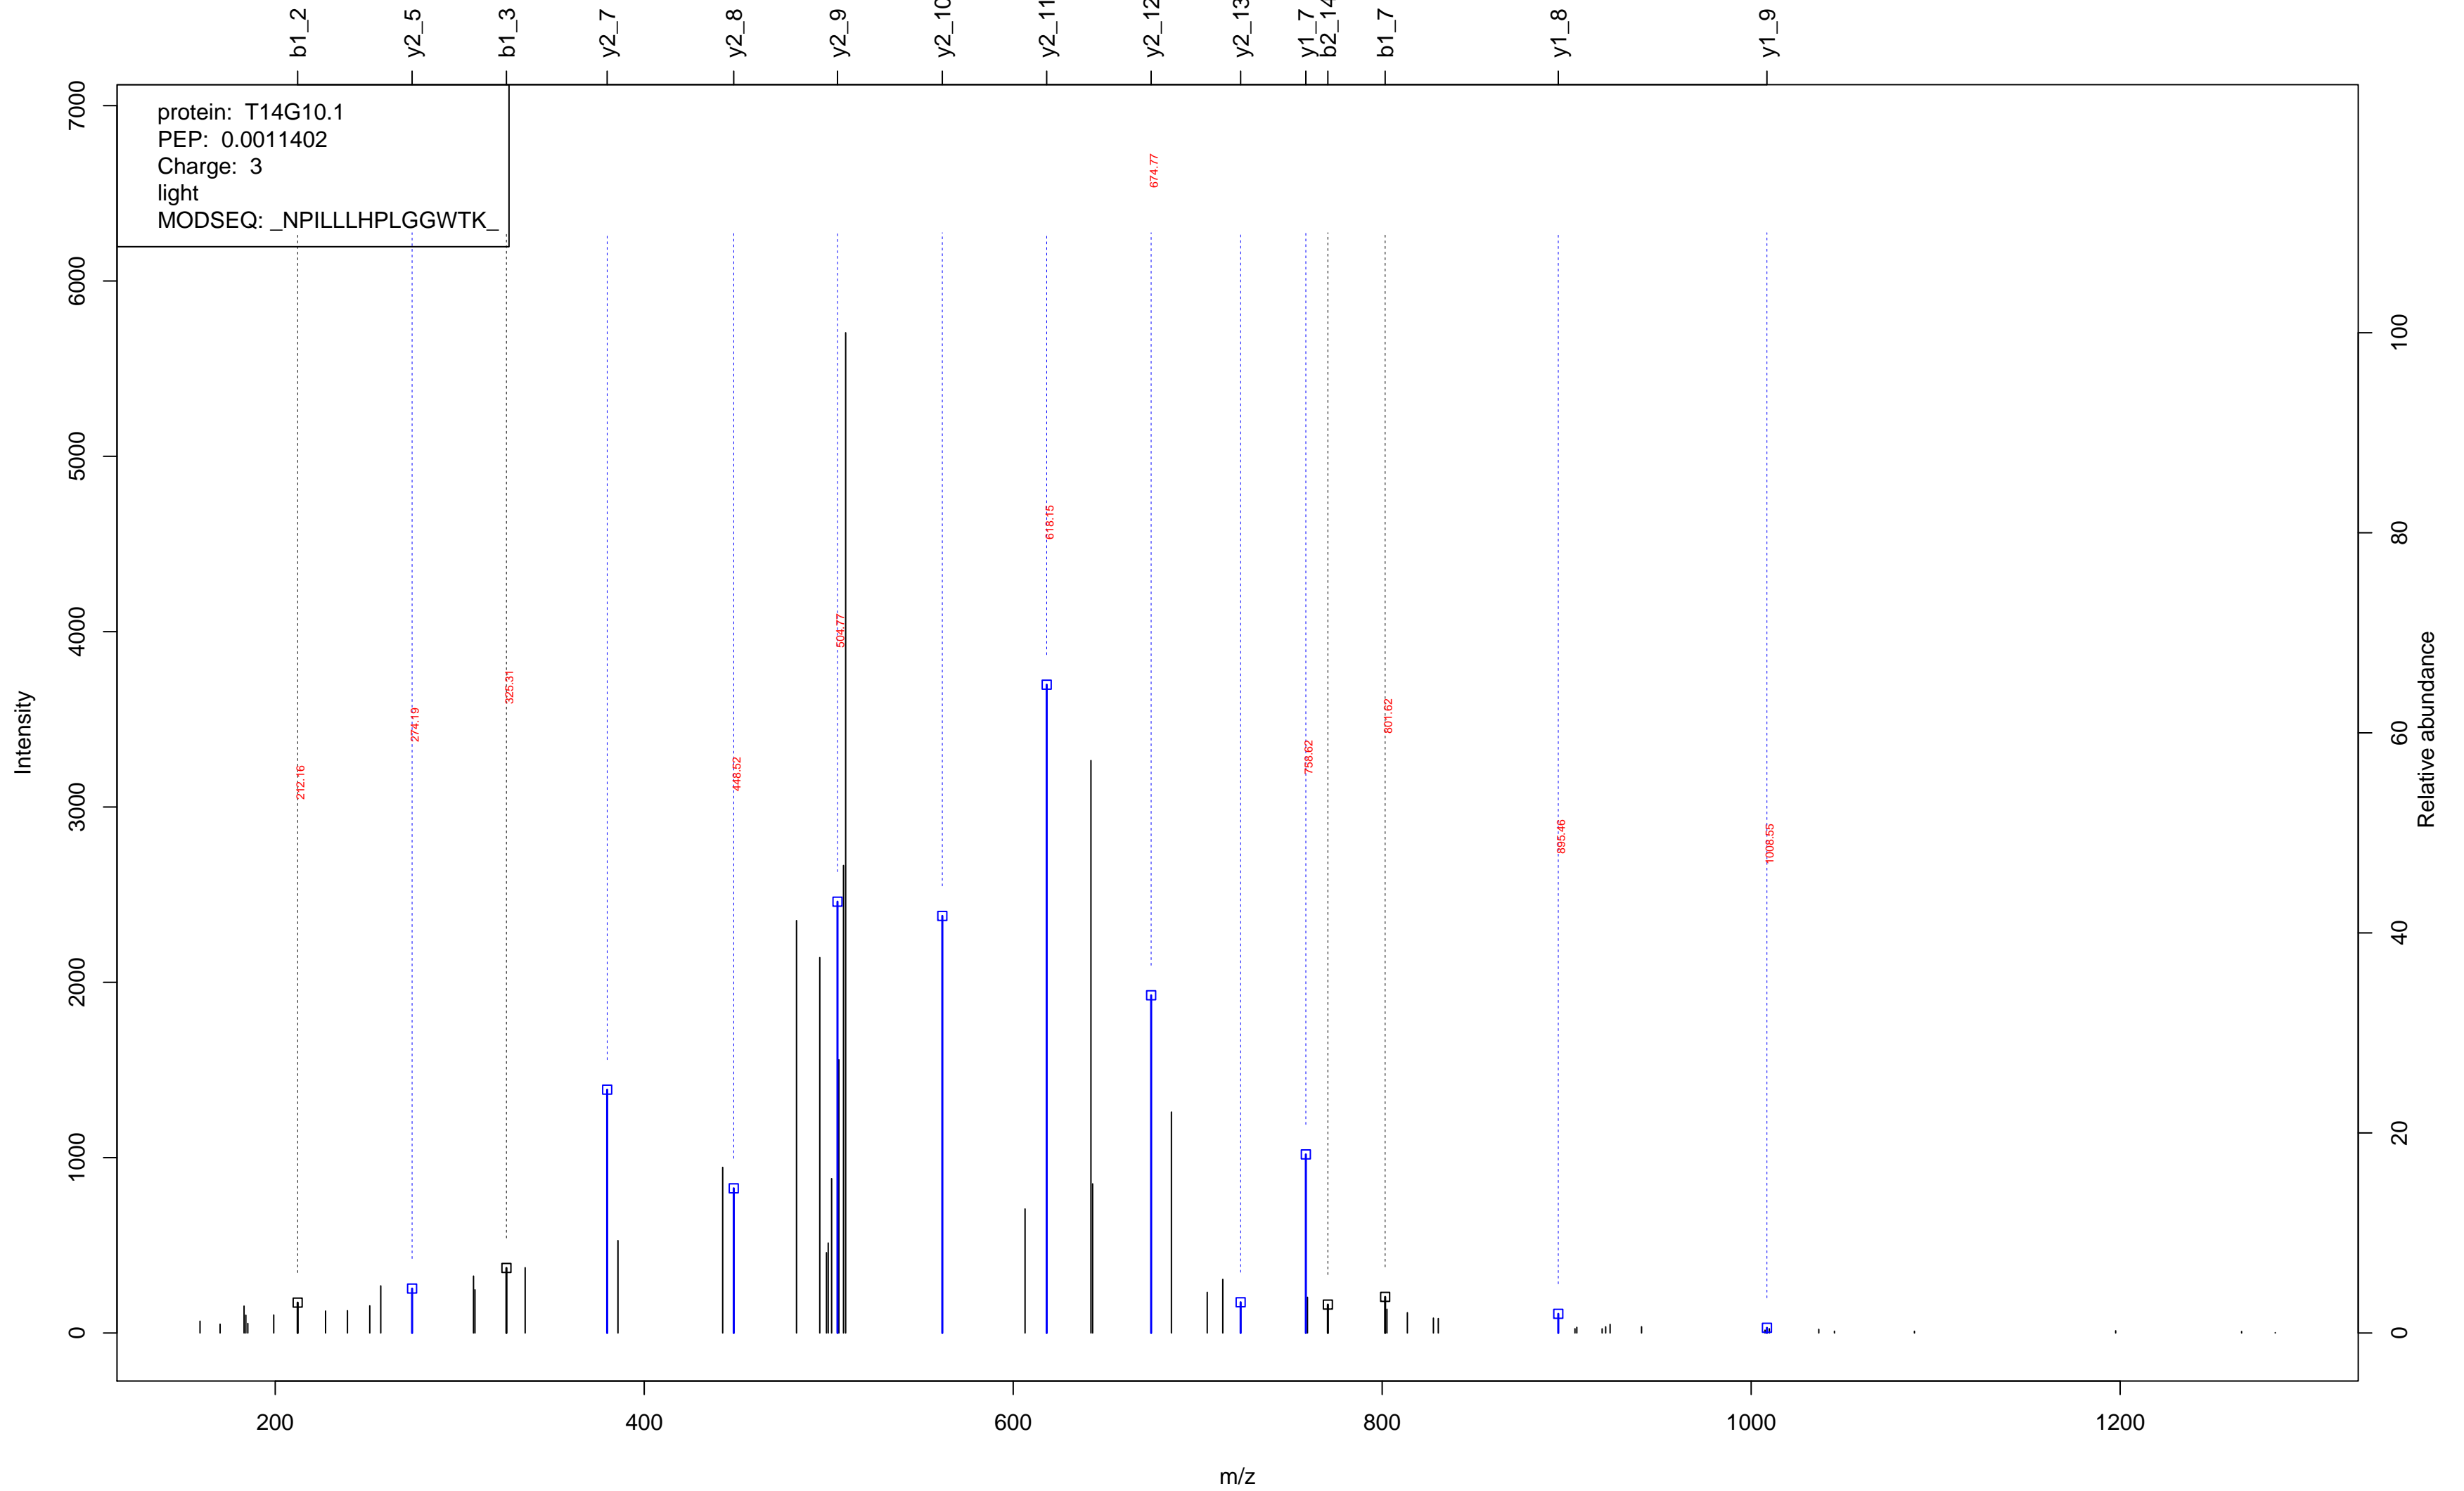

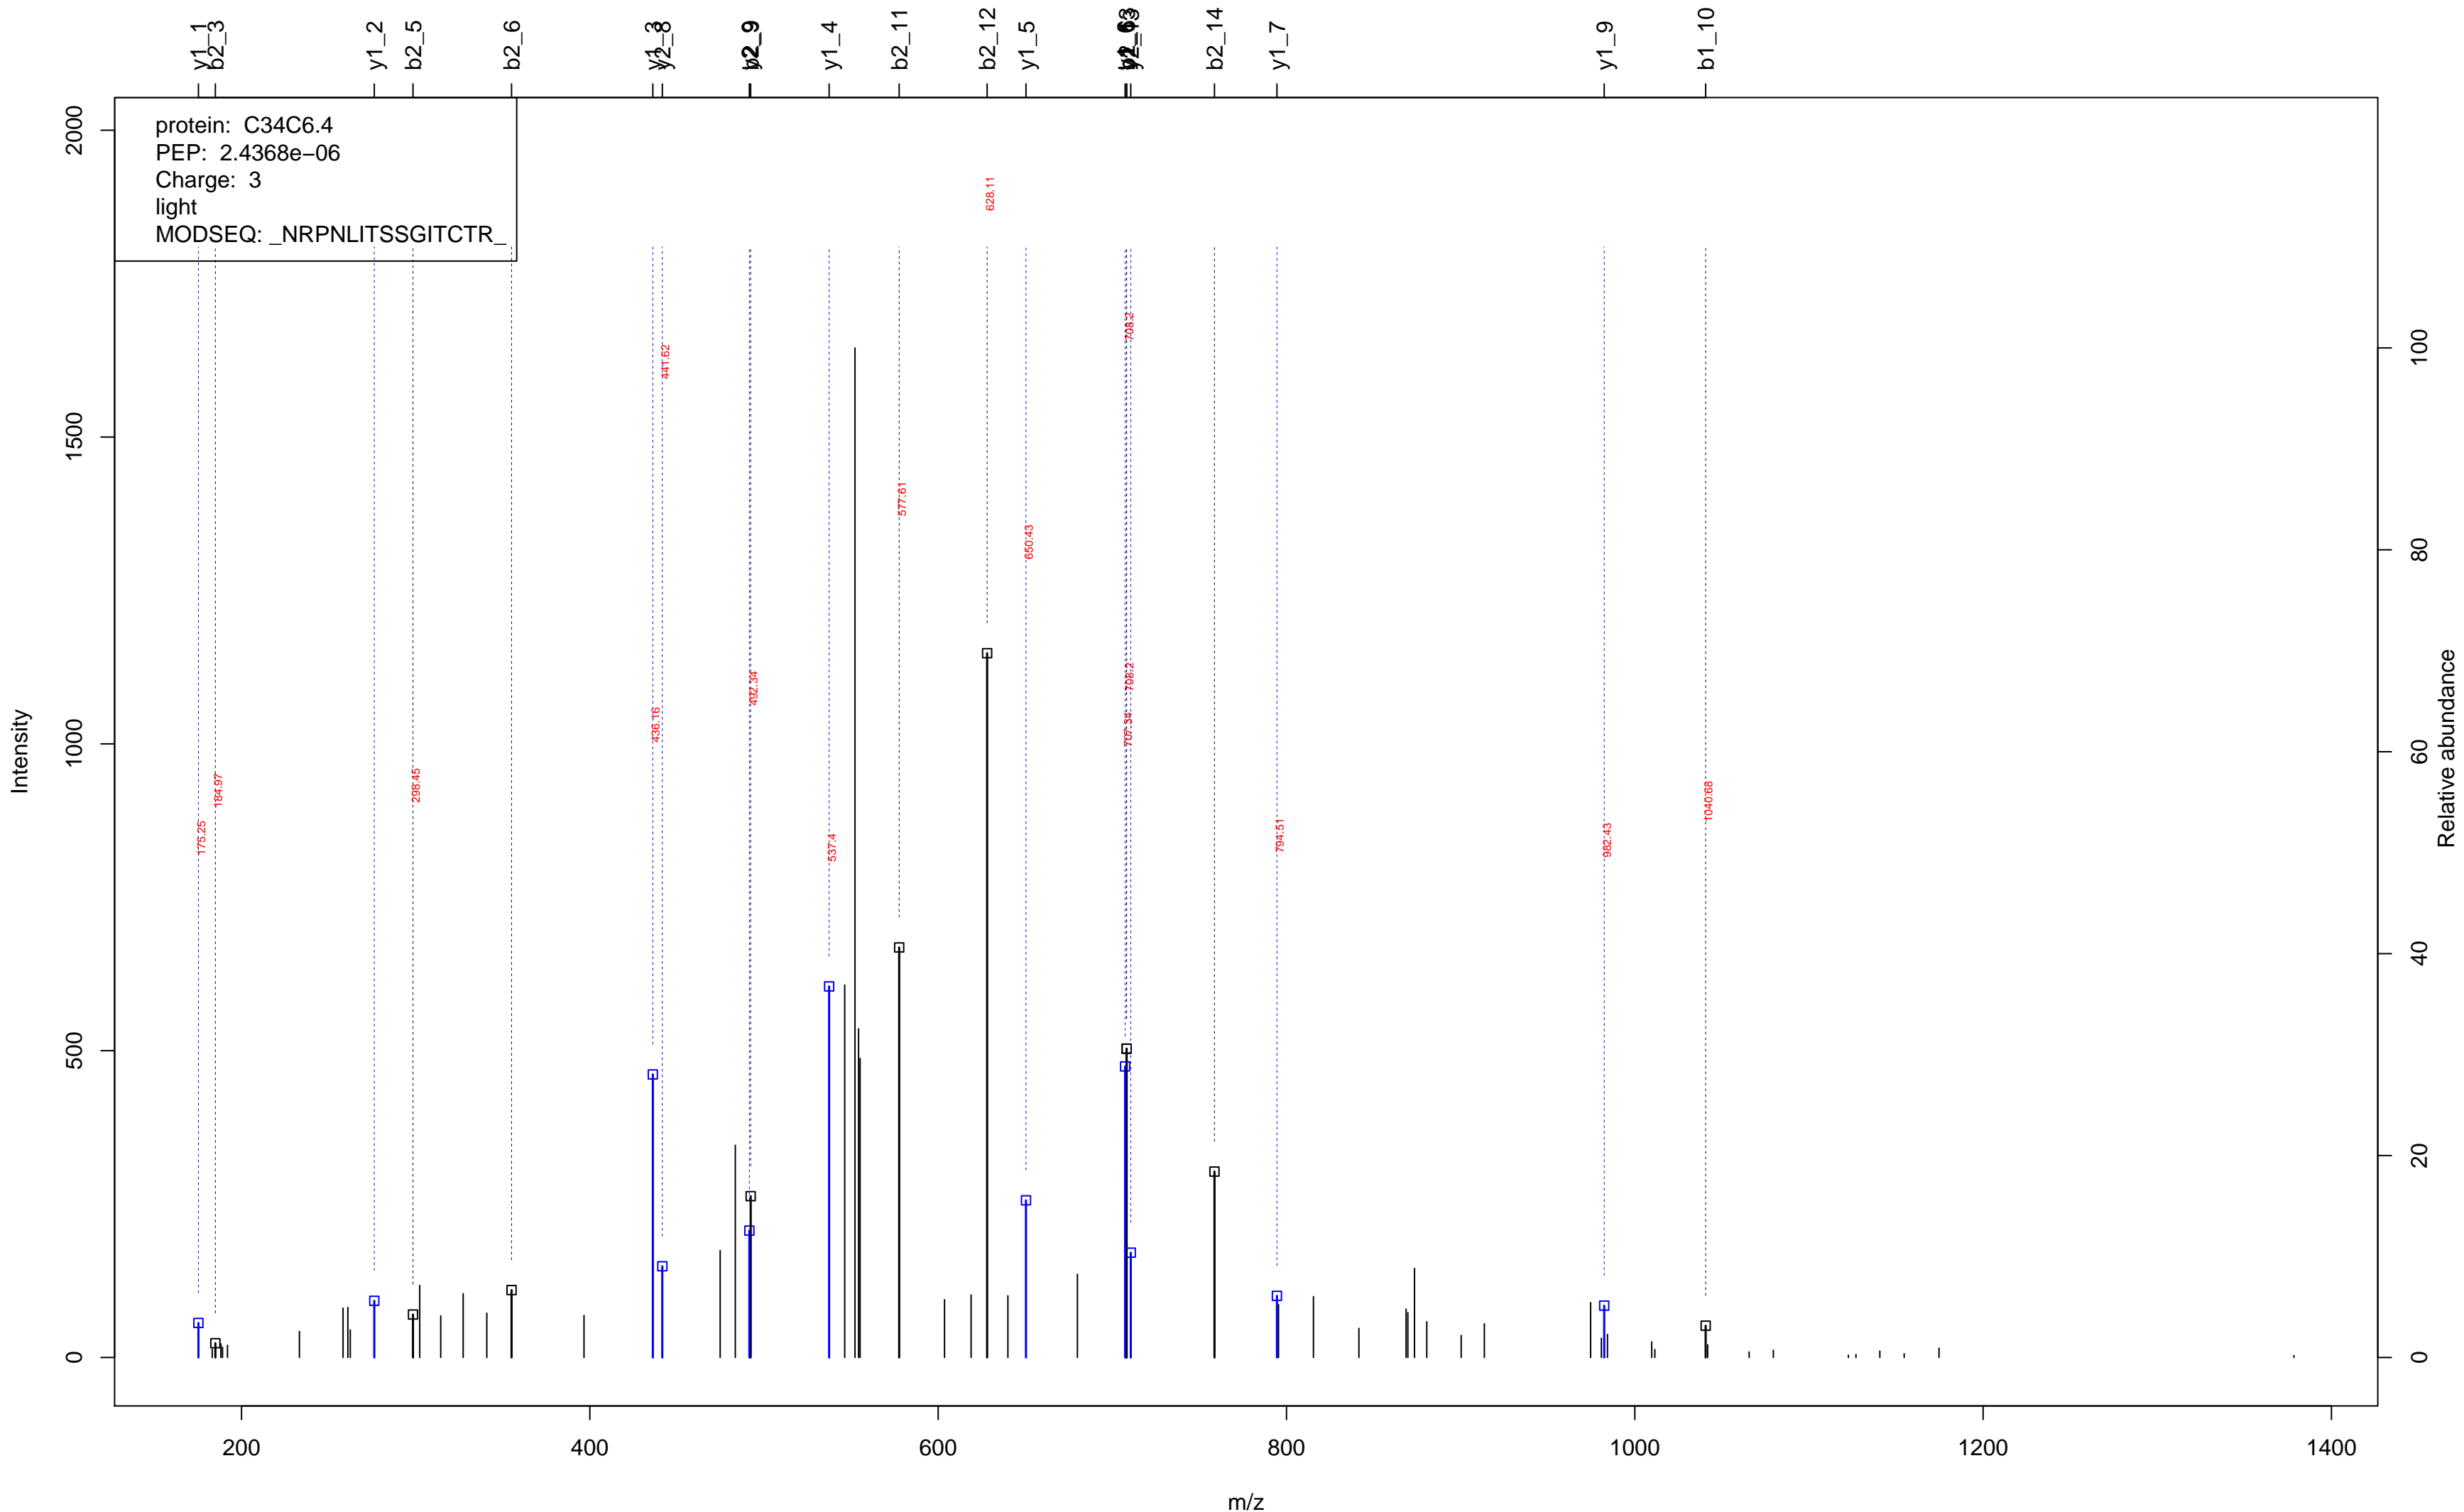

240

y1\_3 b1\_4 y1\_4 y2\_9 y1\_5 b1\_6 y1\_6 b1\_7 y1\_7 y1\_8 b1\_9 y1\_9 b1\_10 y1\_10 b1\_11 y1\_11 b1\_12 y1\_12 y1\_13 b1\_14 y1\_14 b1\_15

protein: F33H2.6  
PEP: 1.5235e-27  
Charge: 2  
light  
MODSEQ: \_NSDELYDNYLIDNCYNILK\_

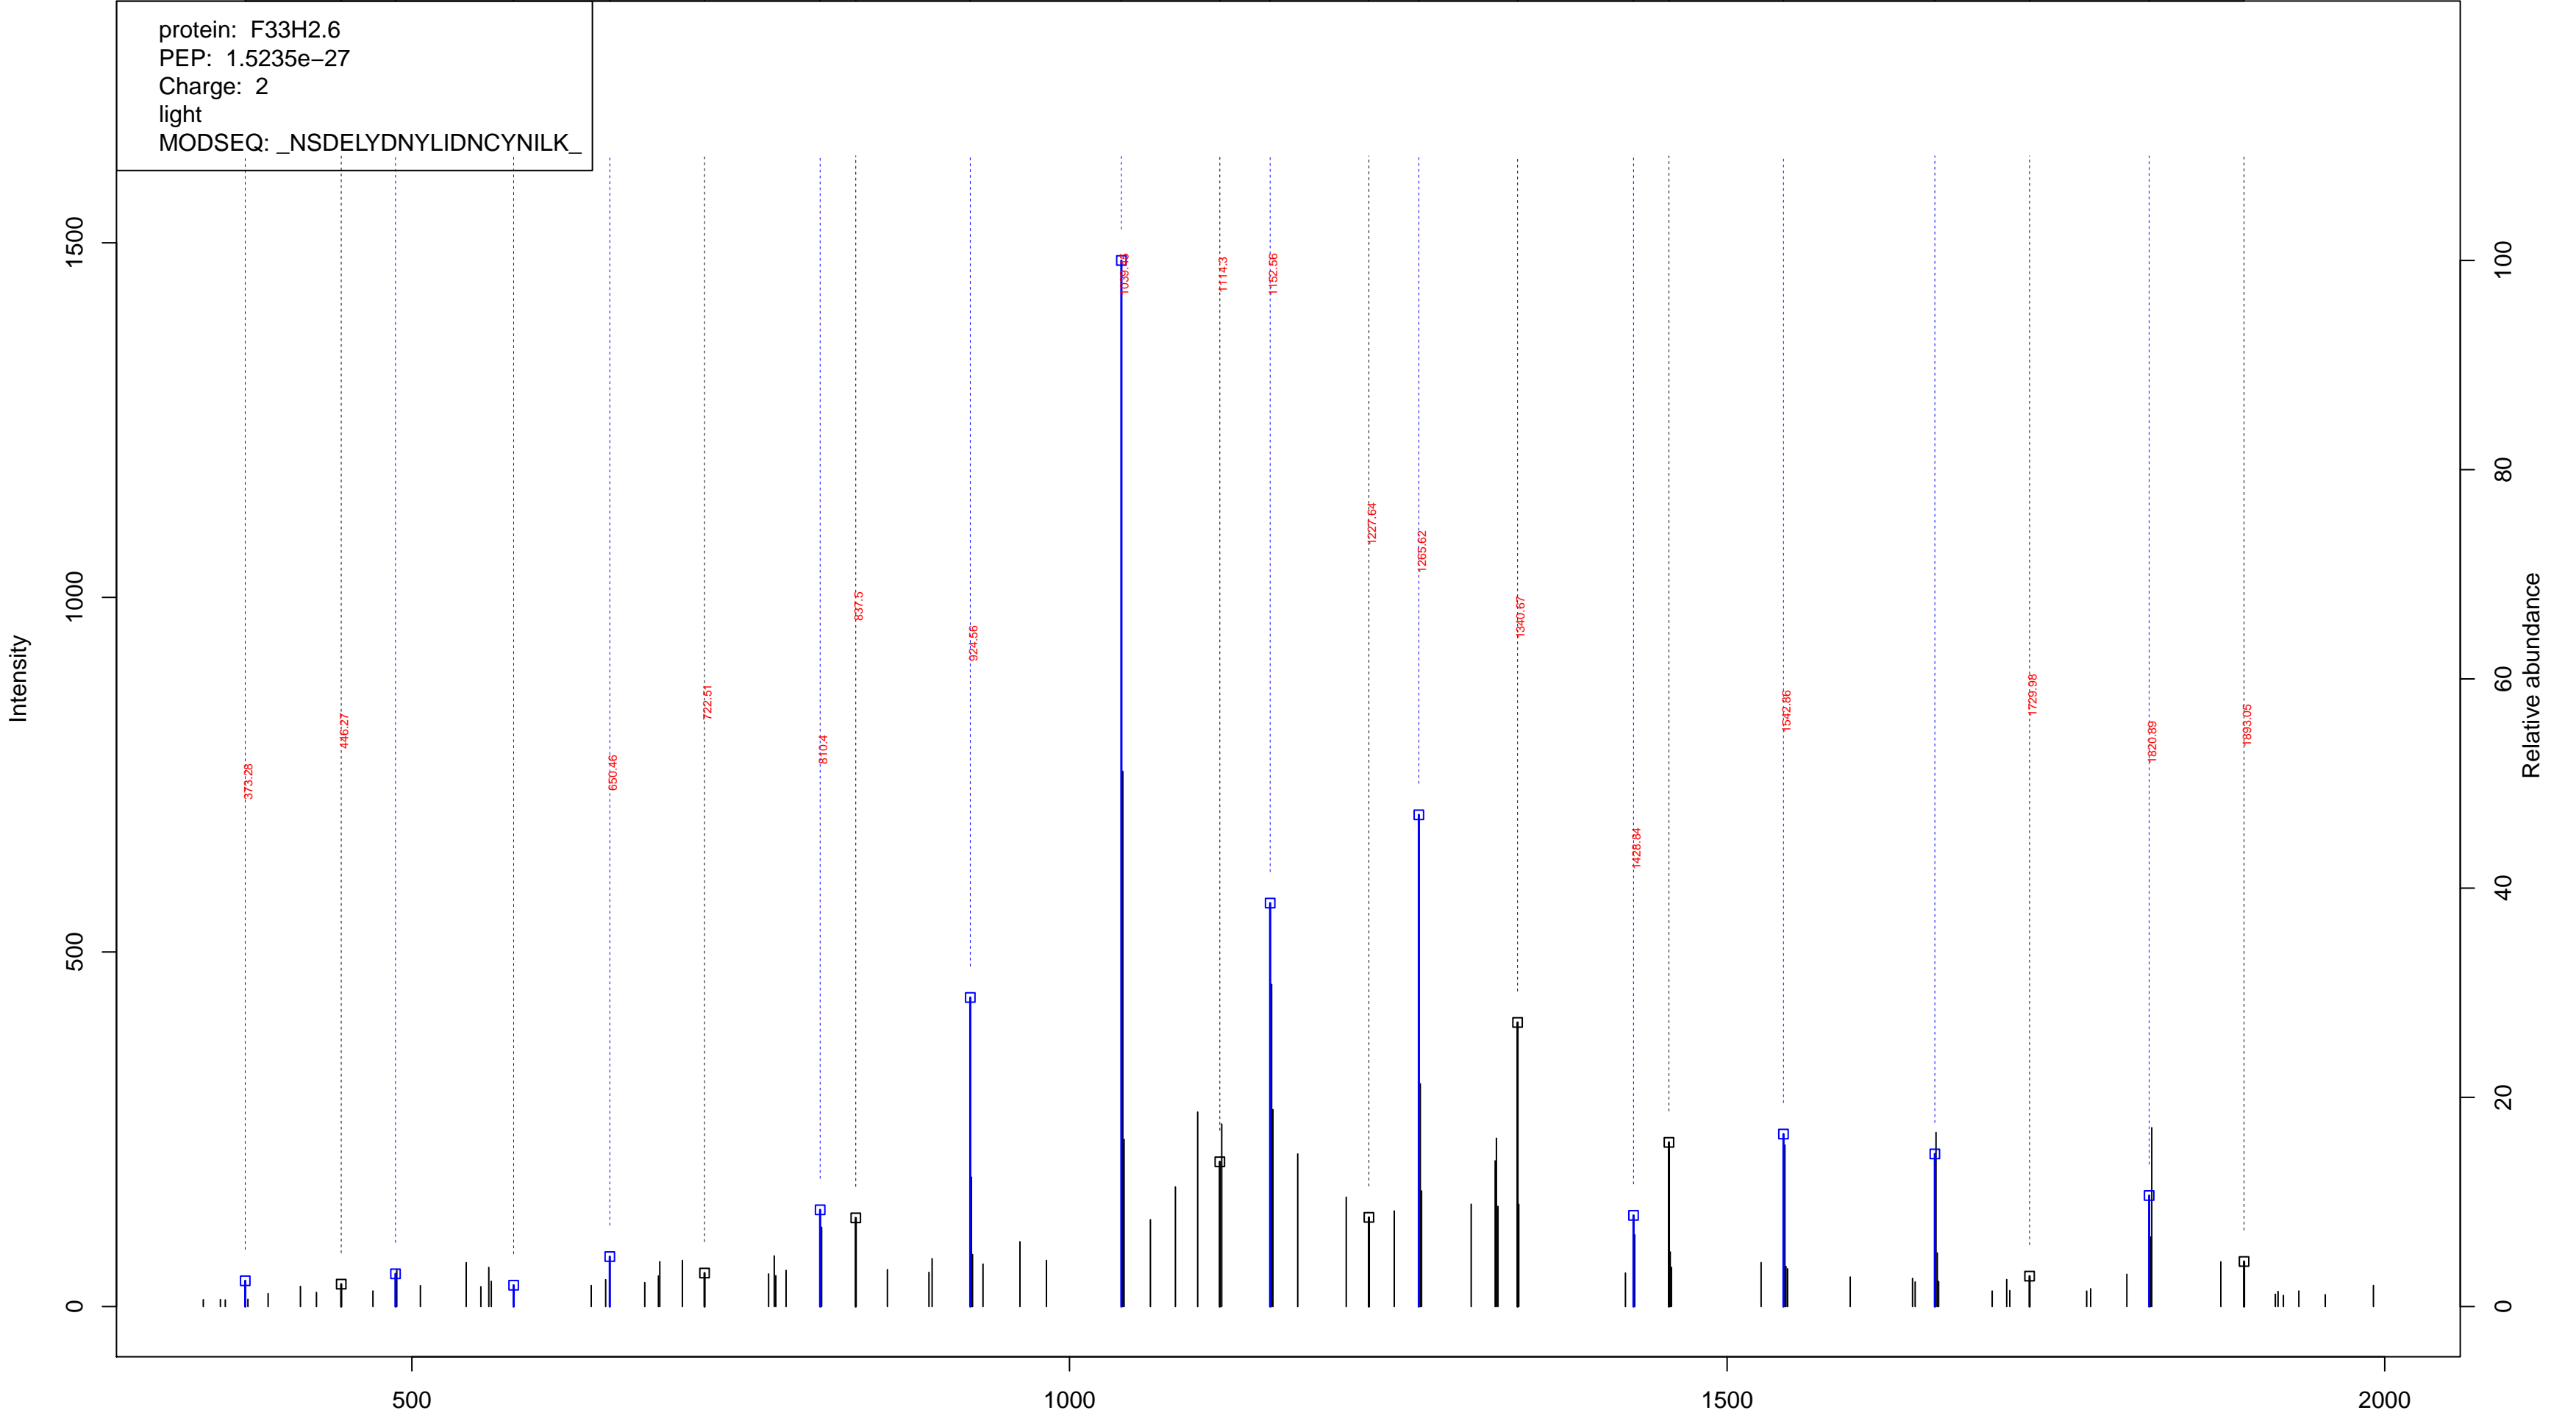



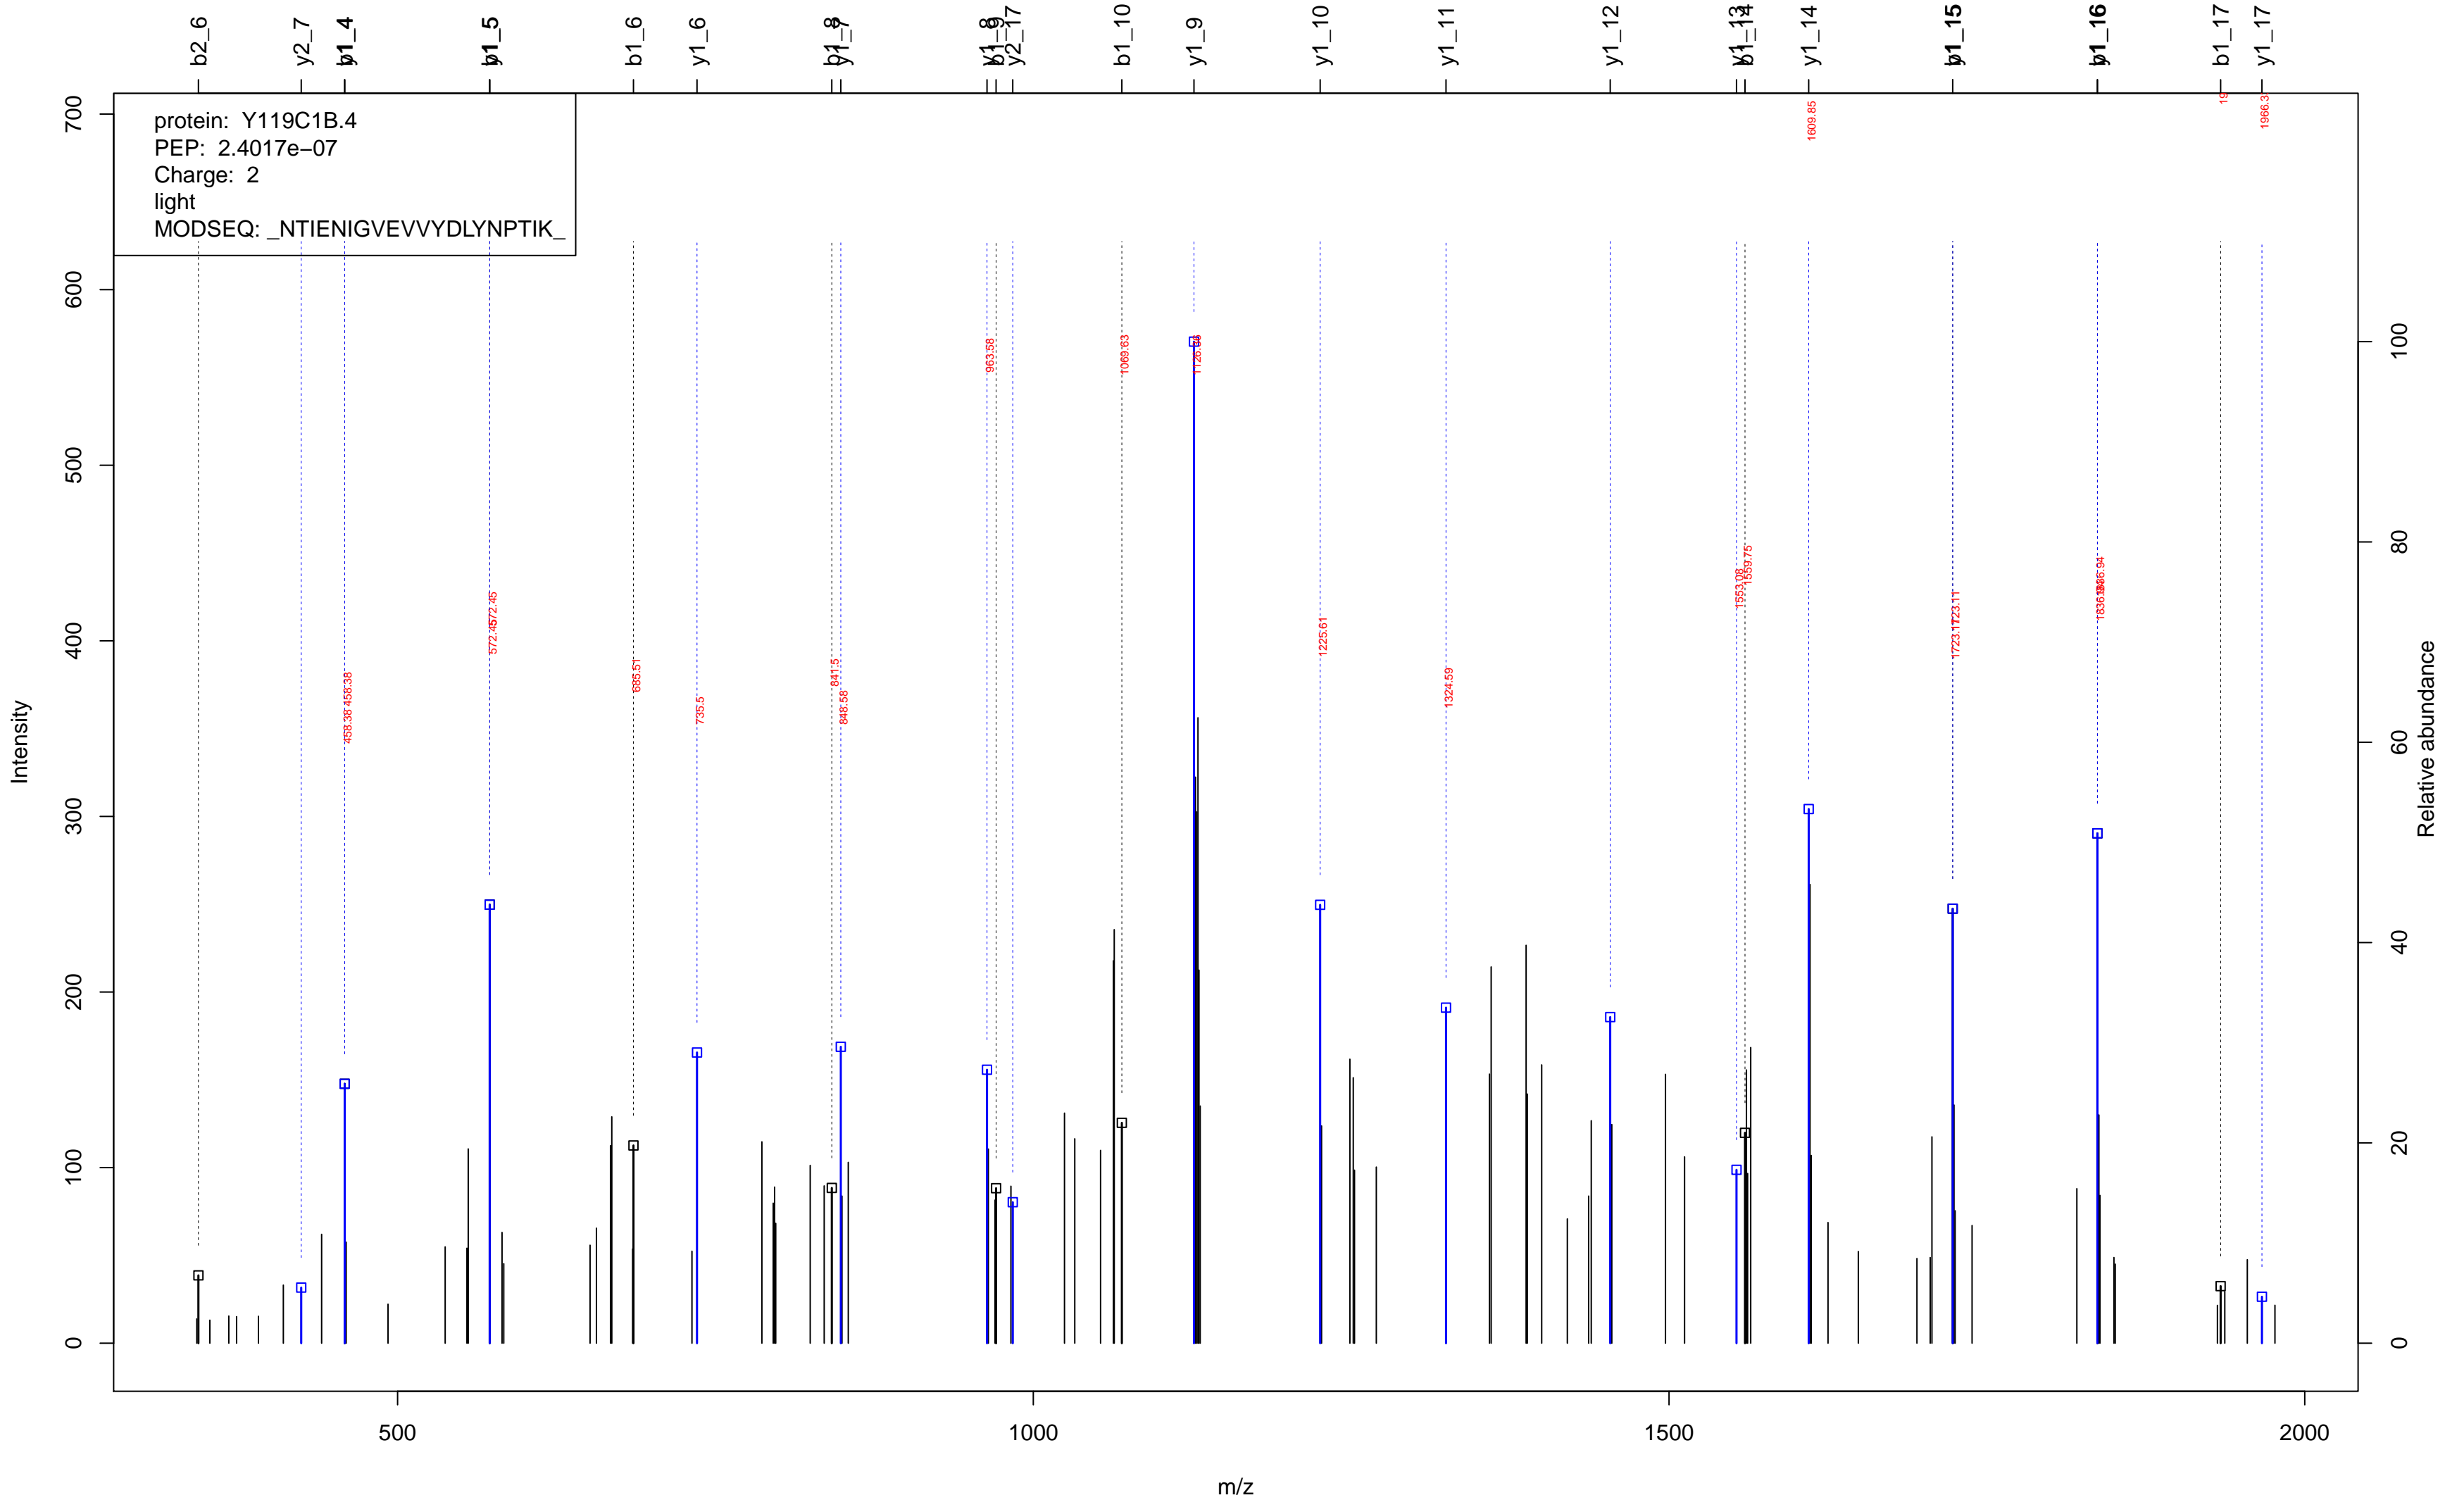

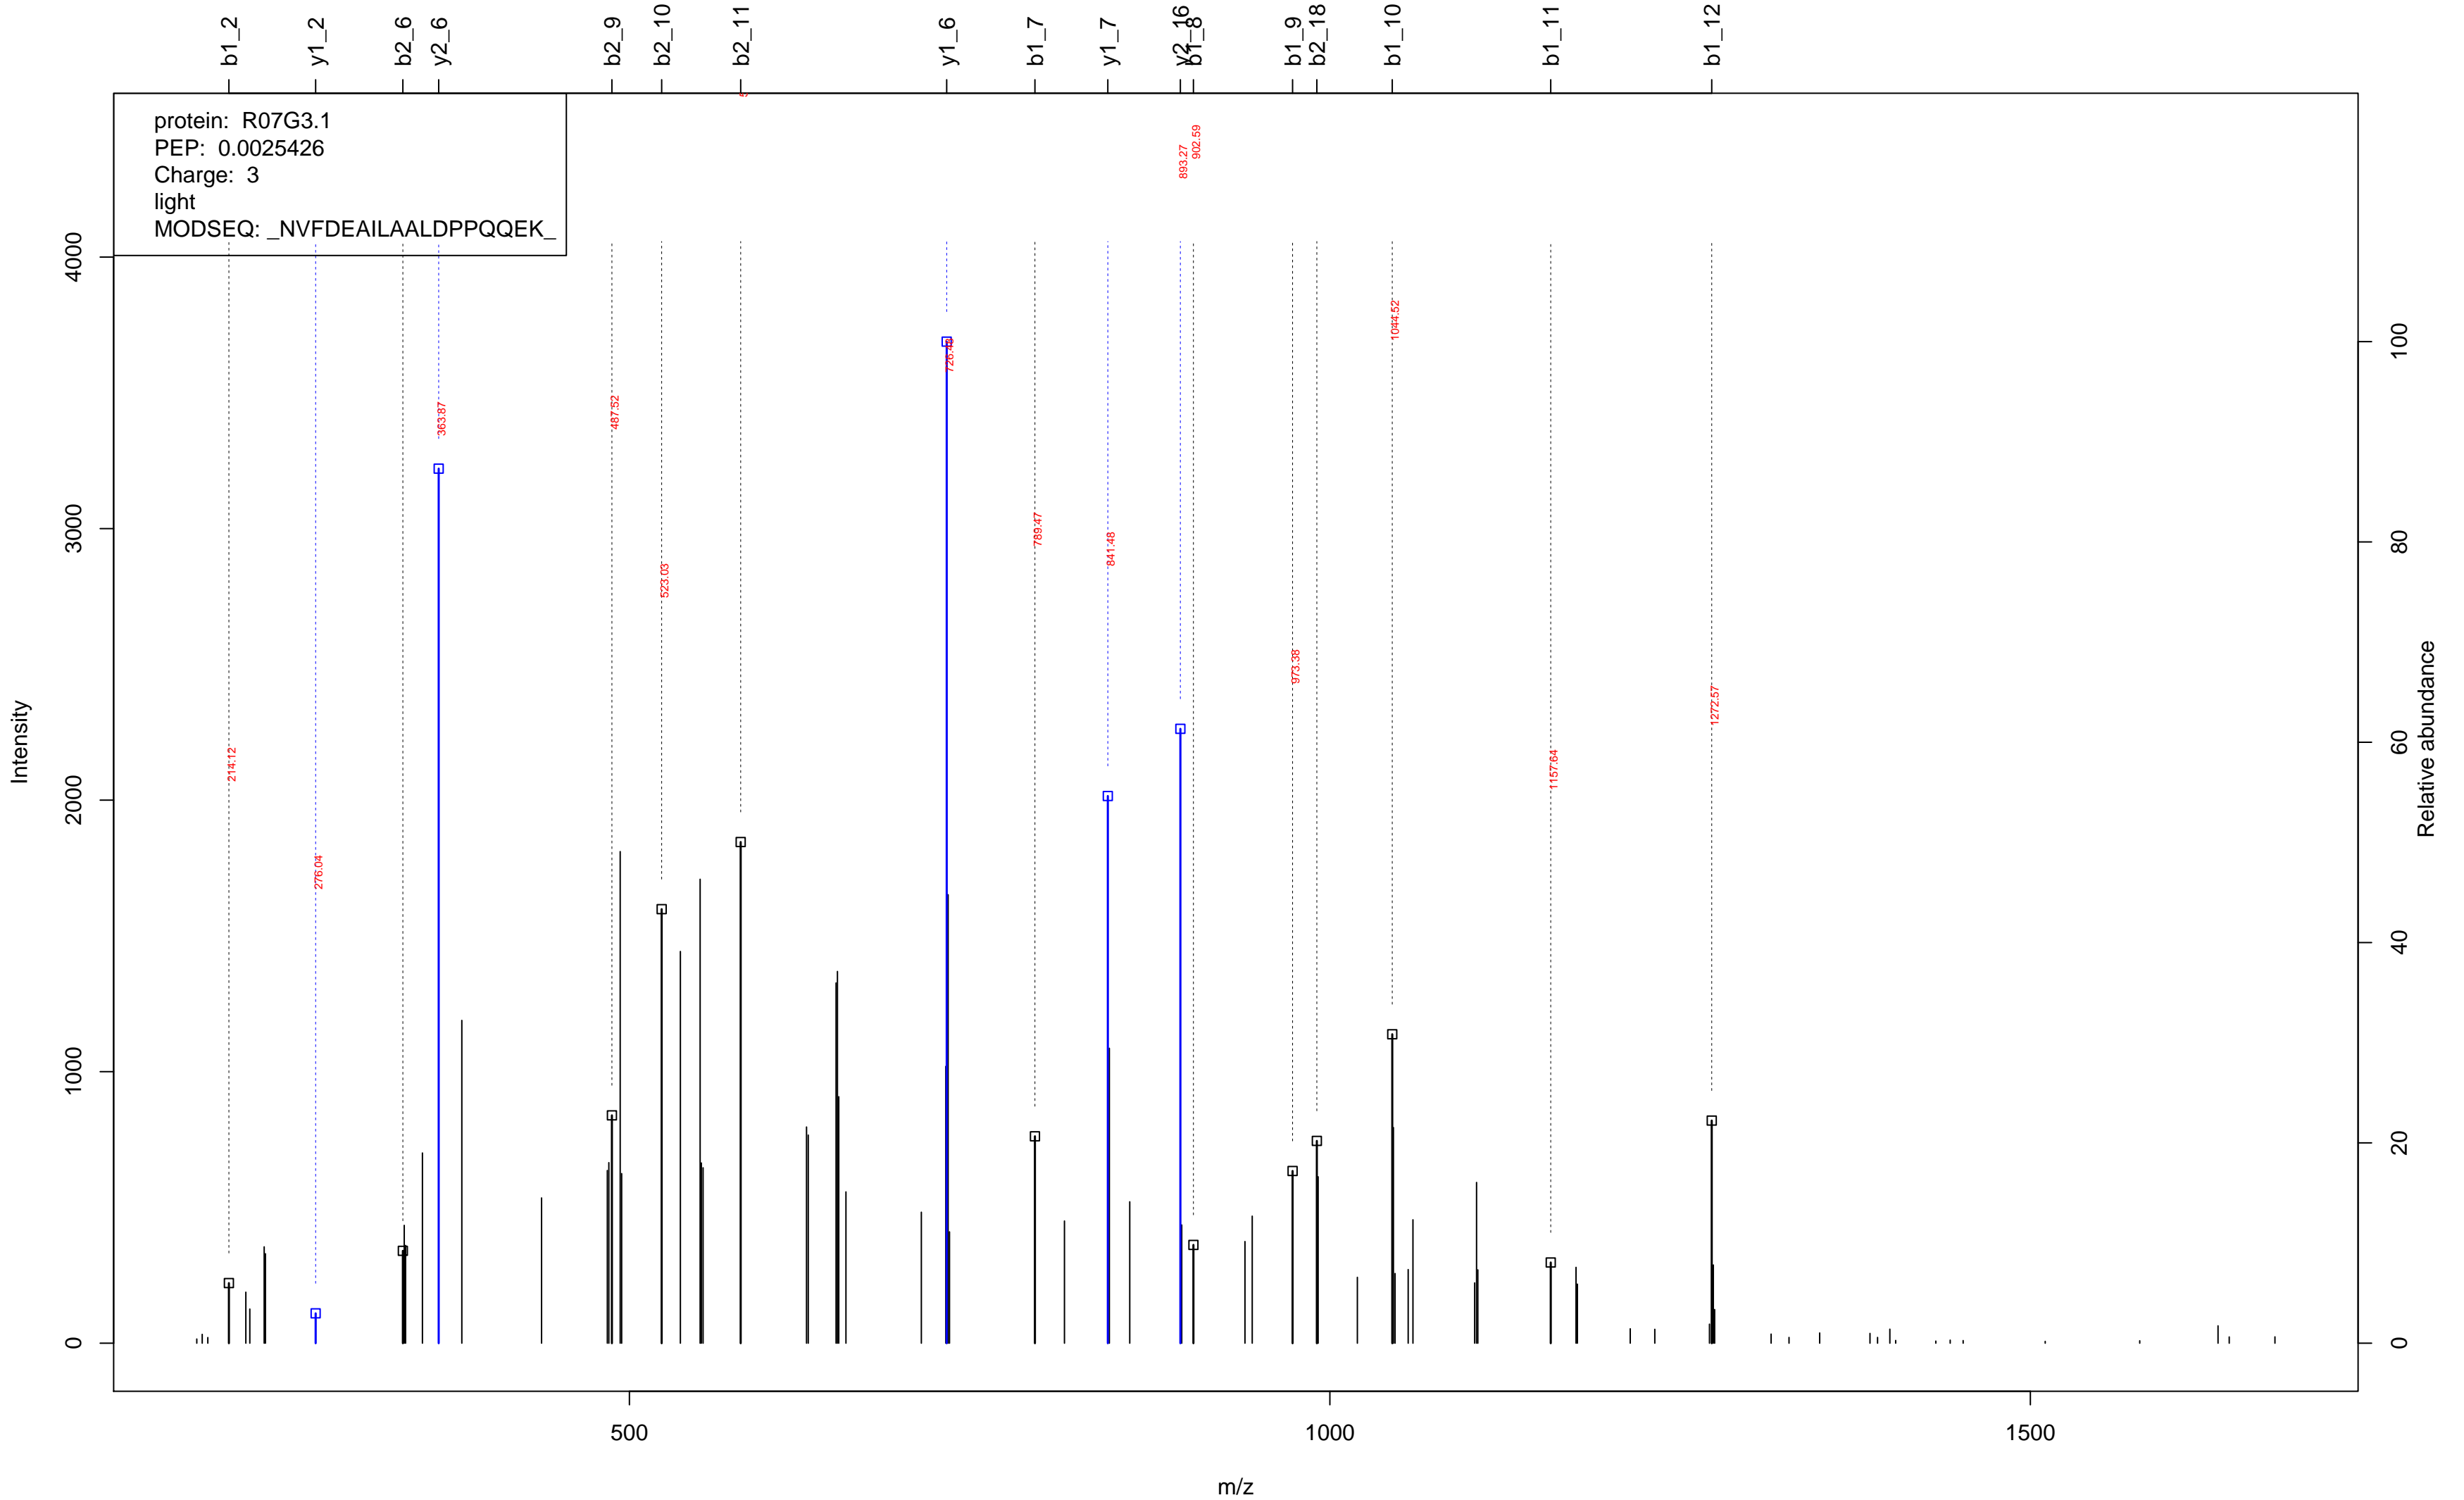

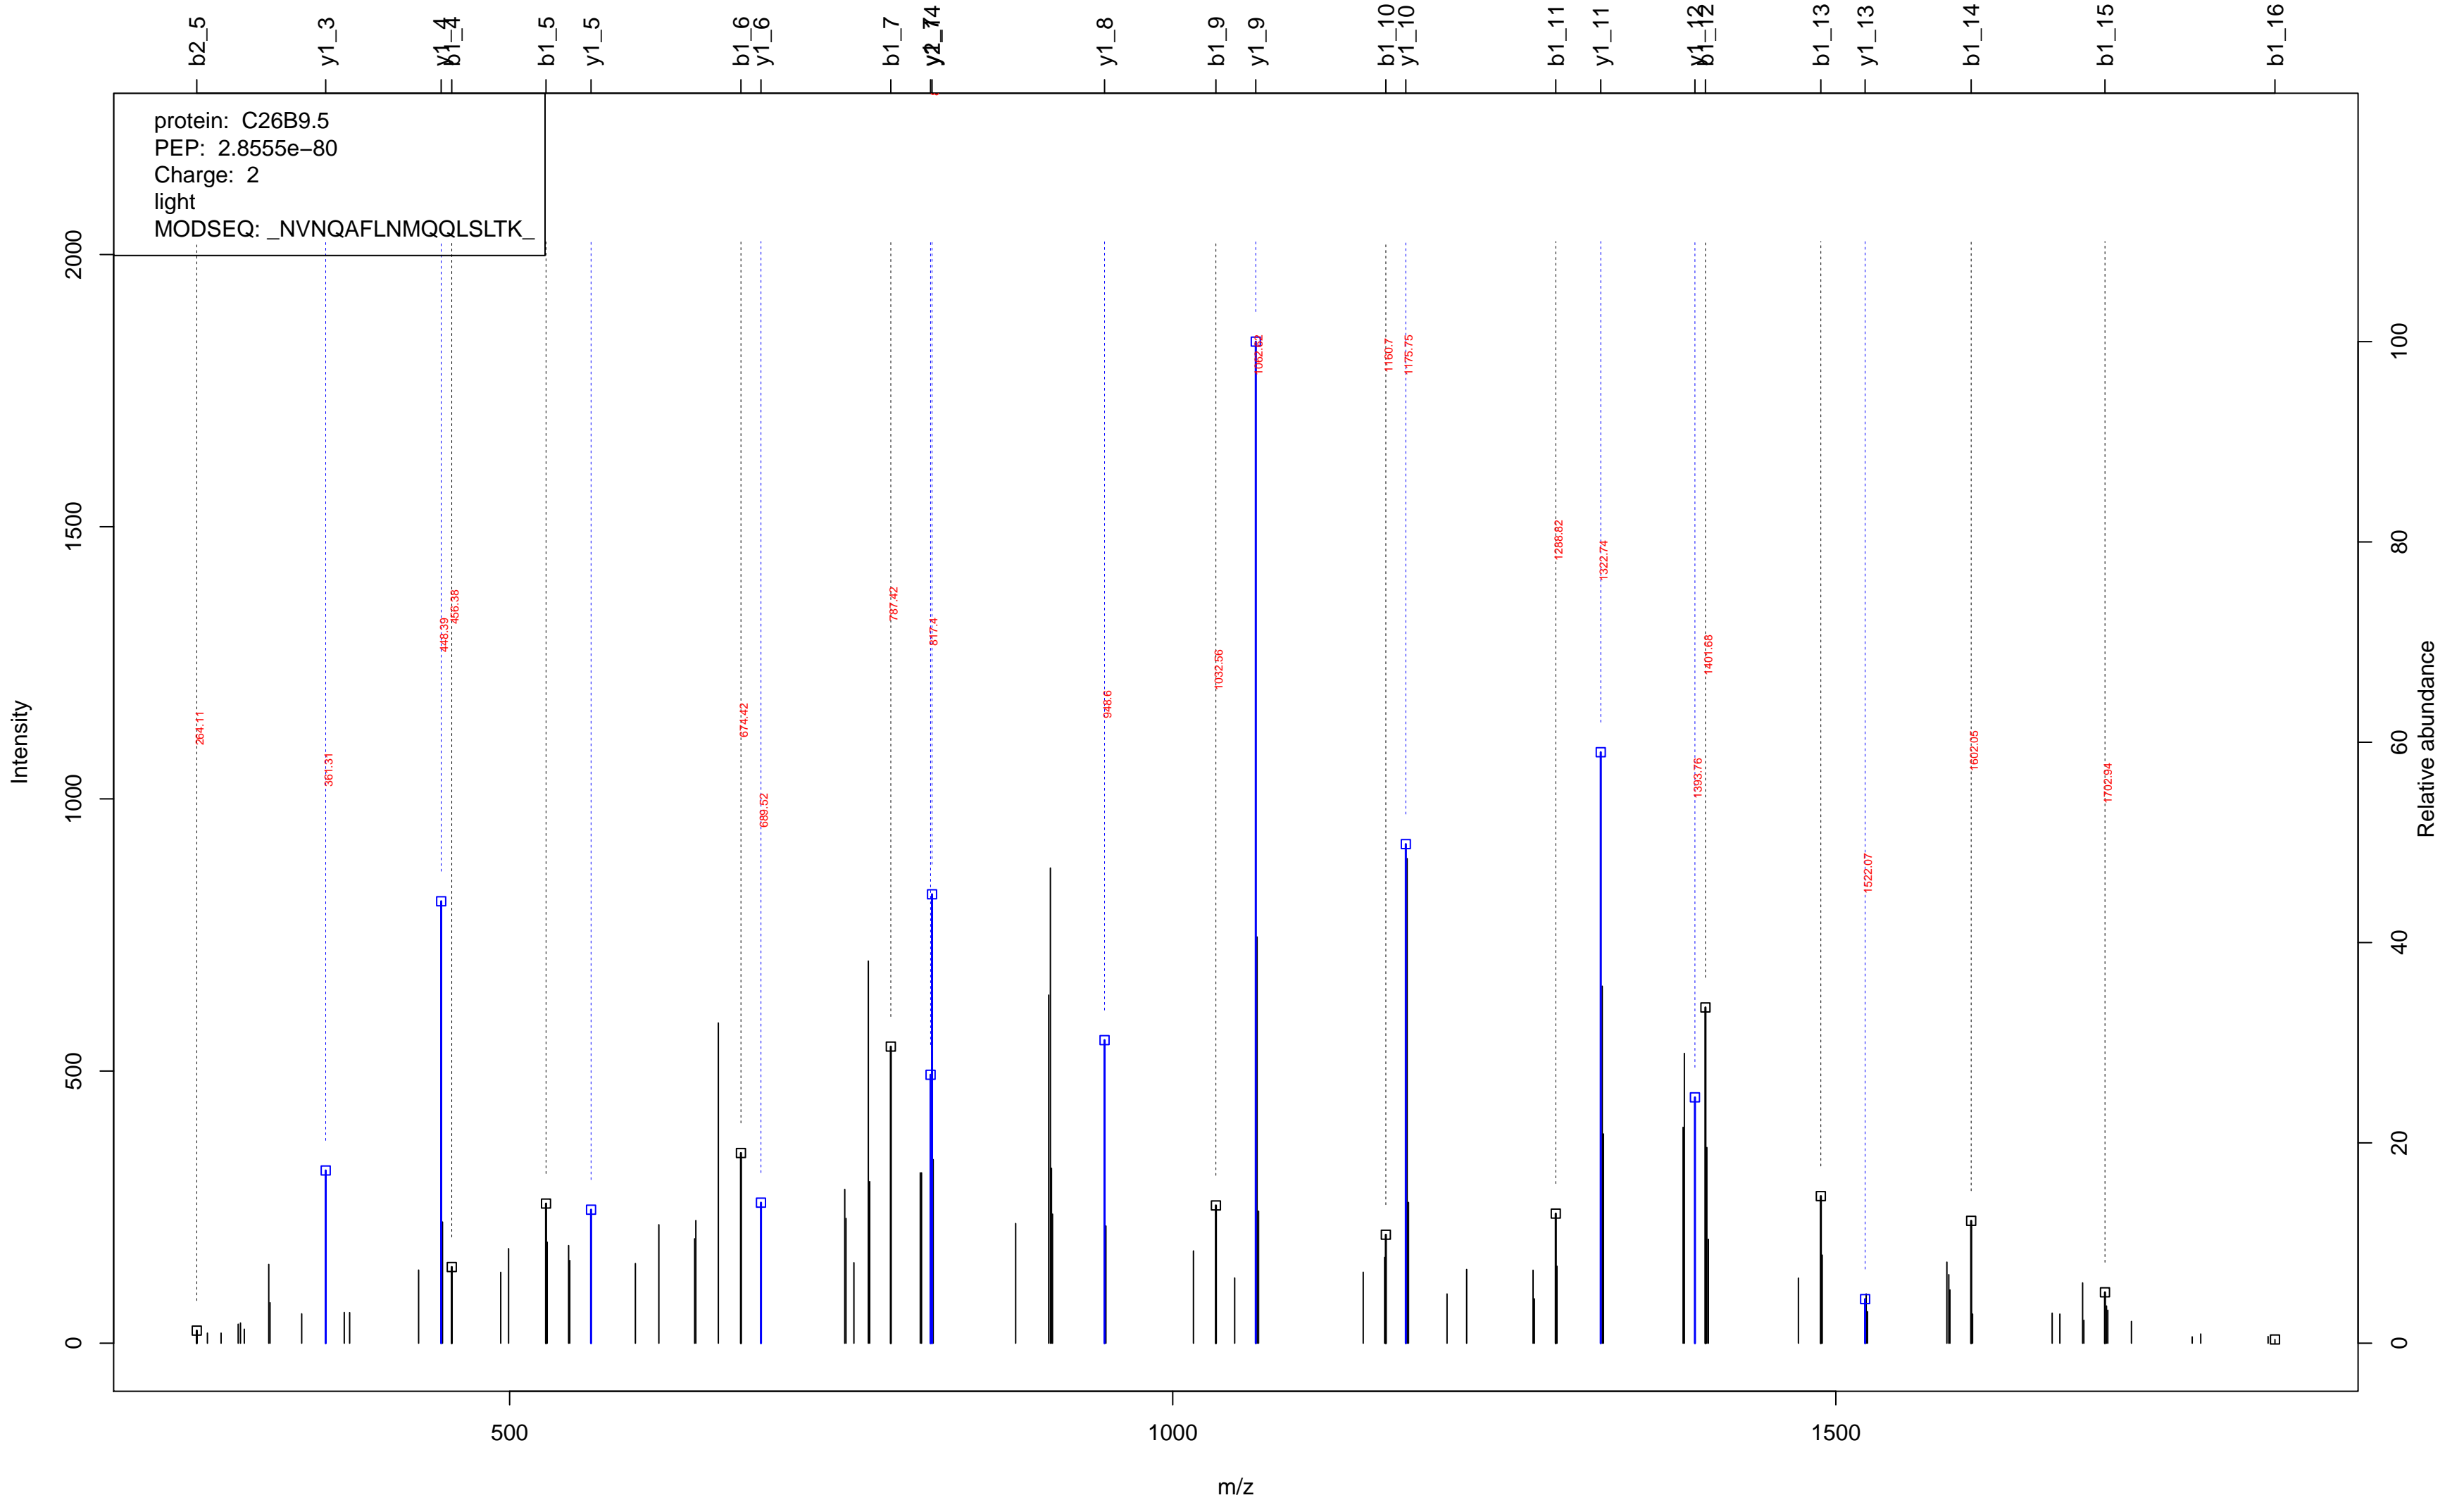

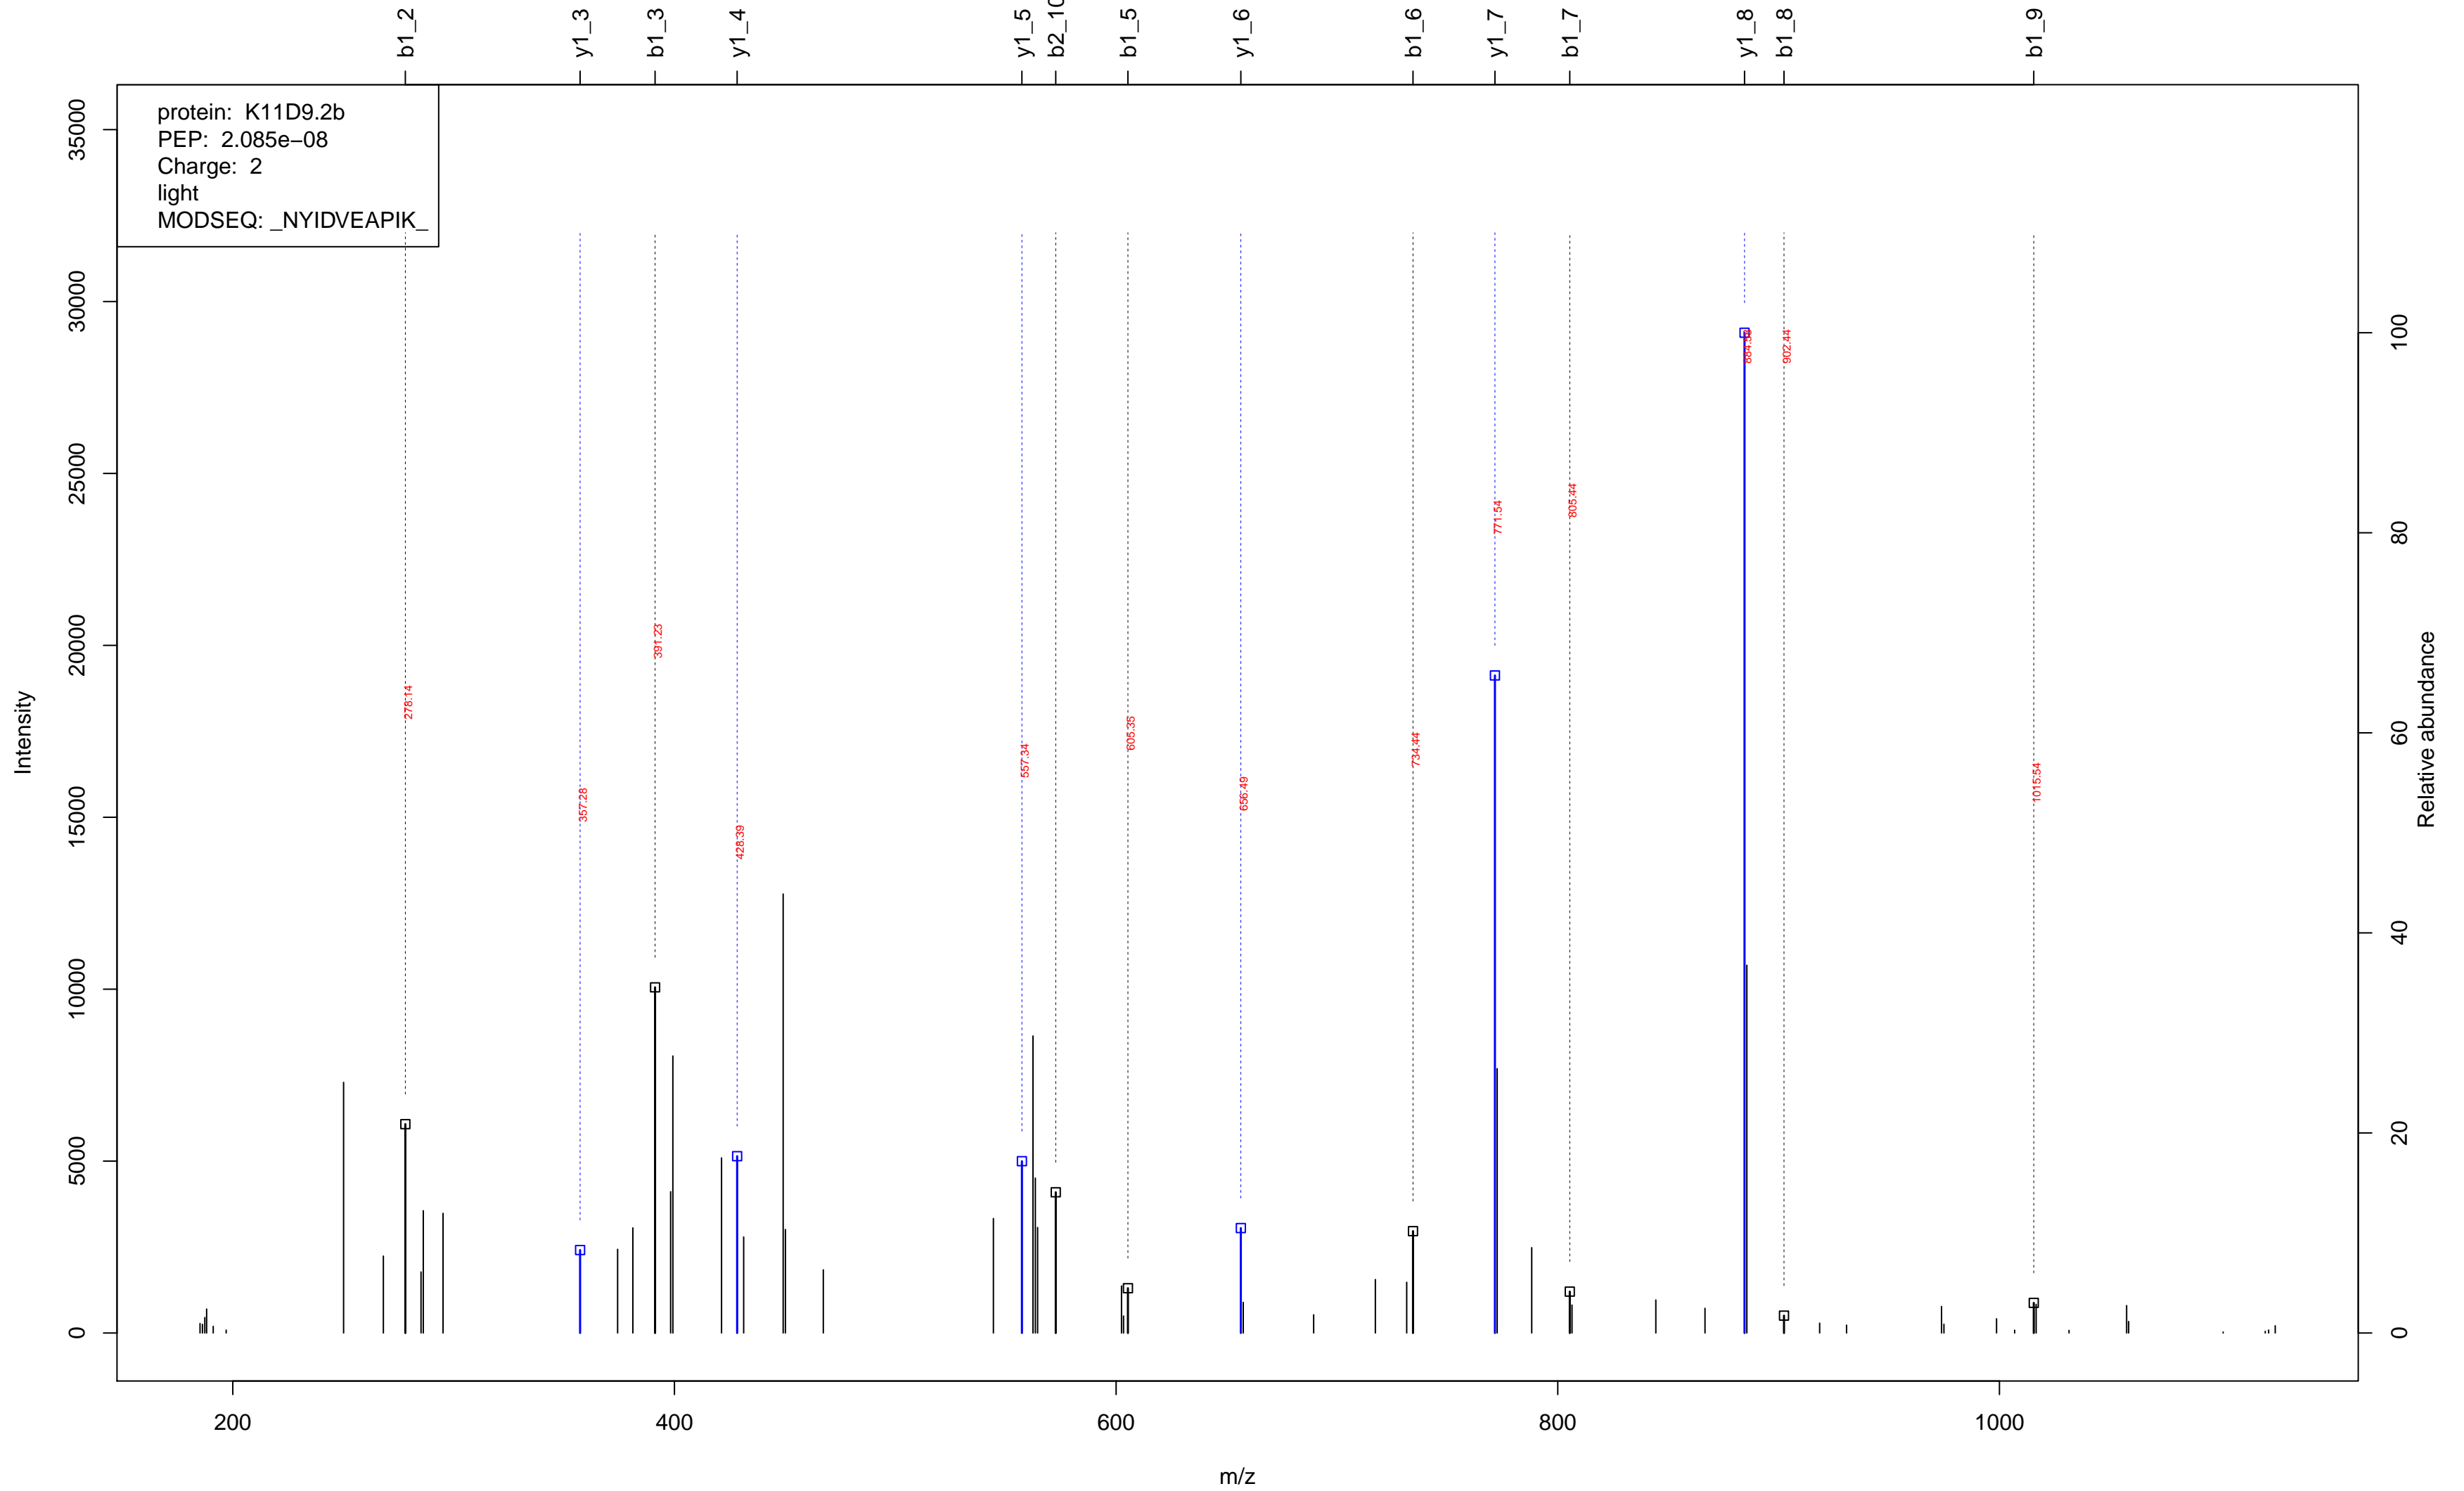

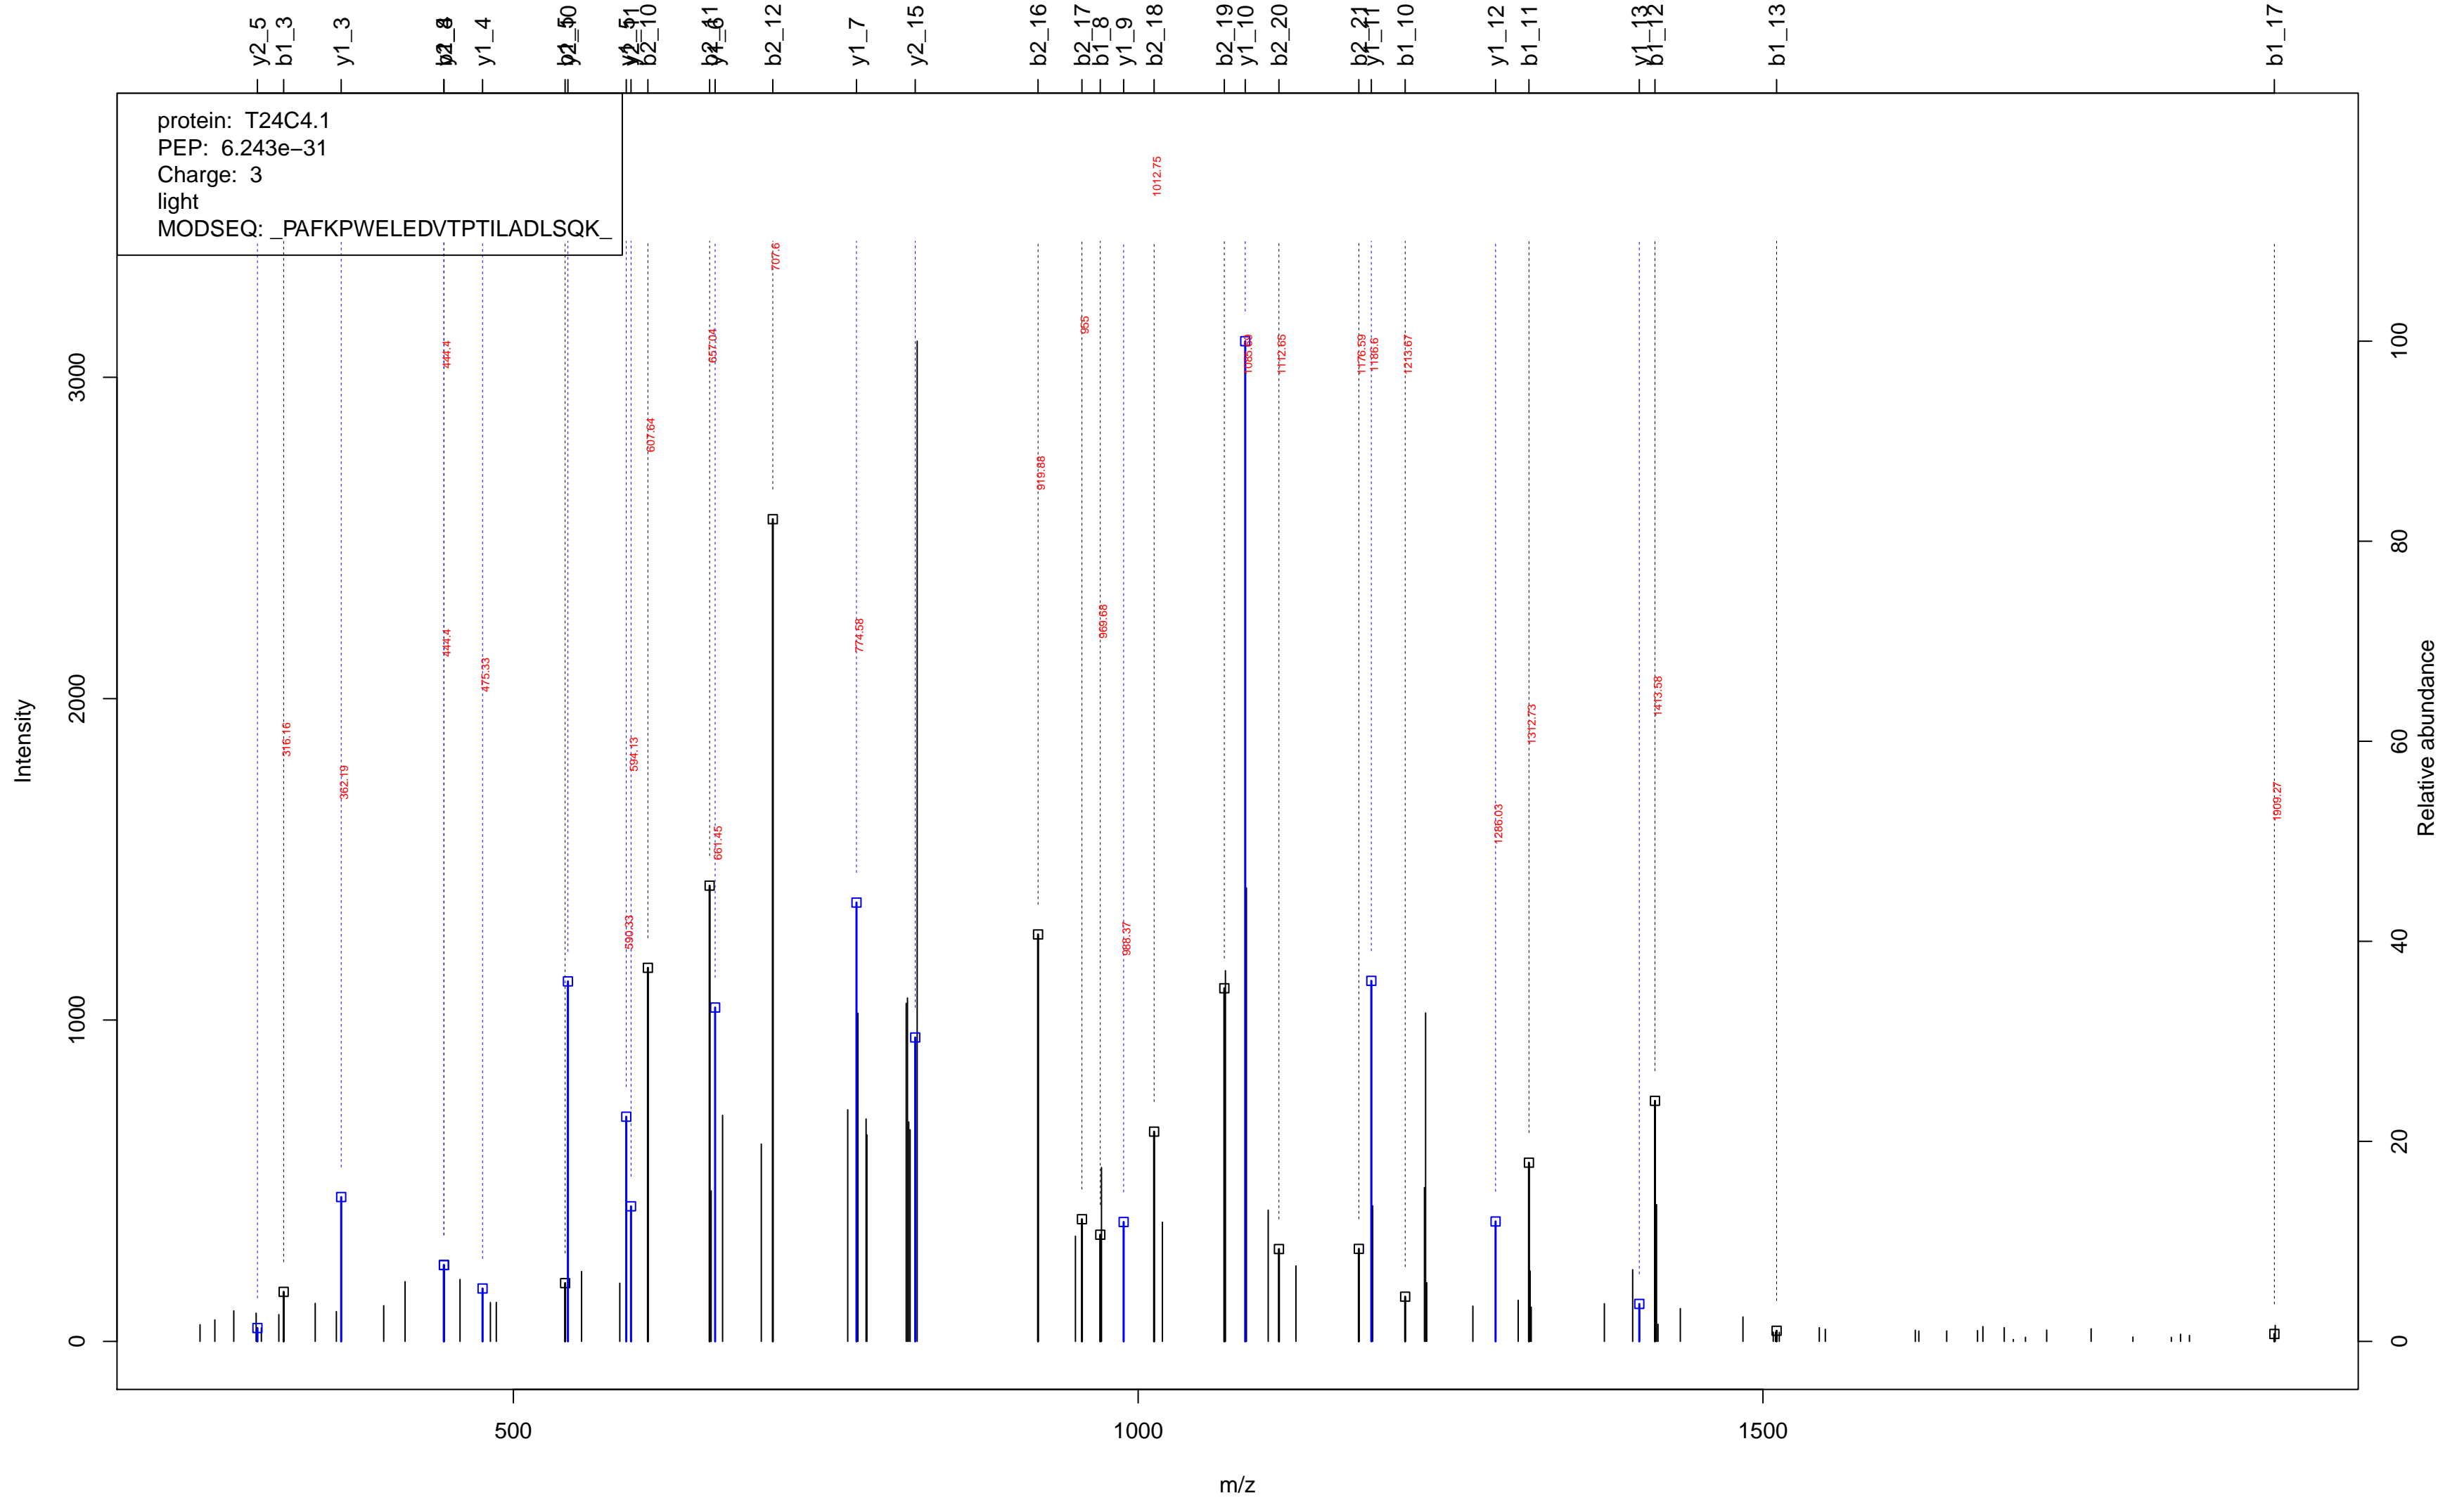

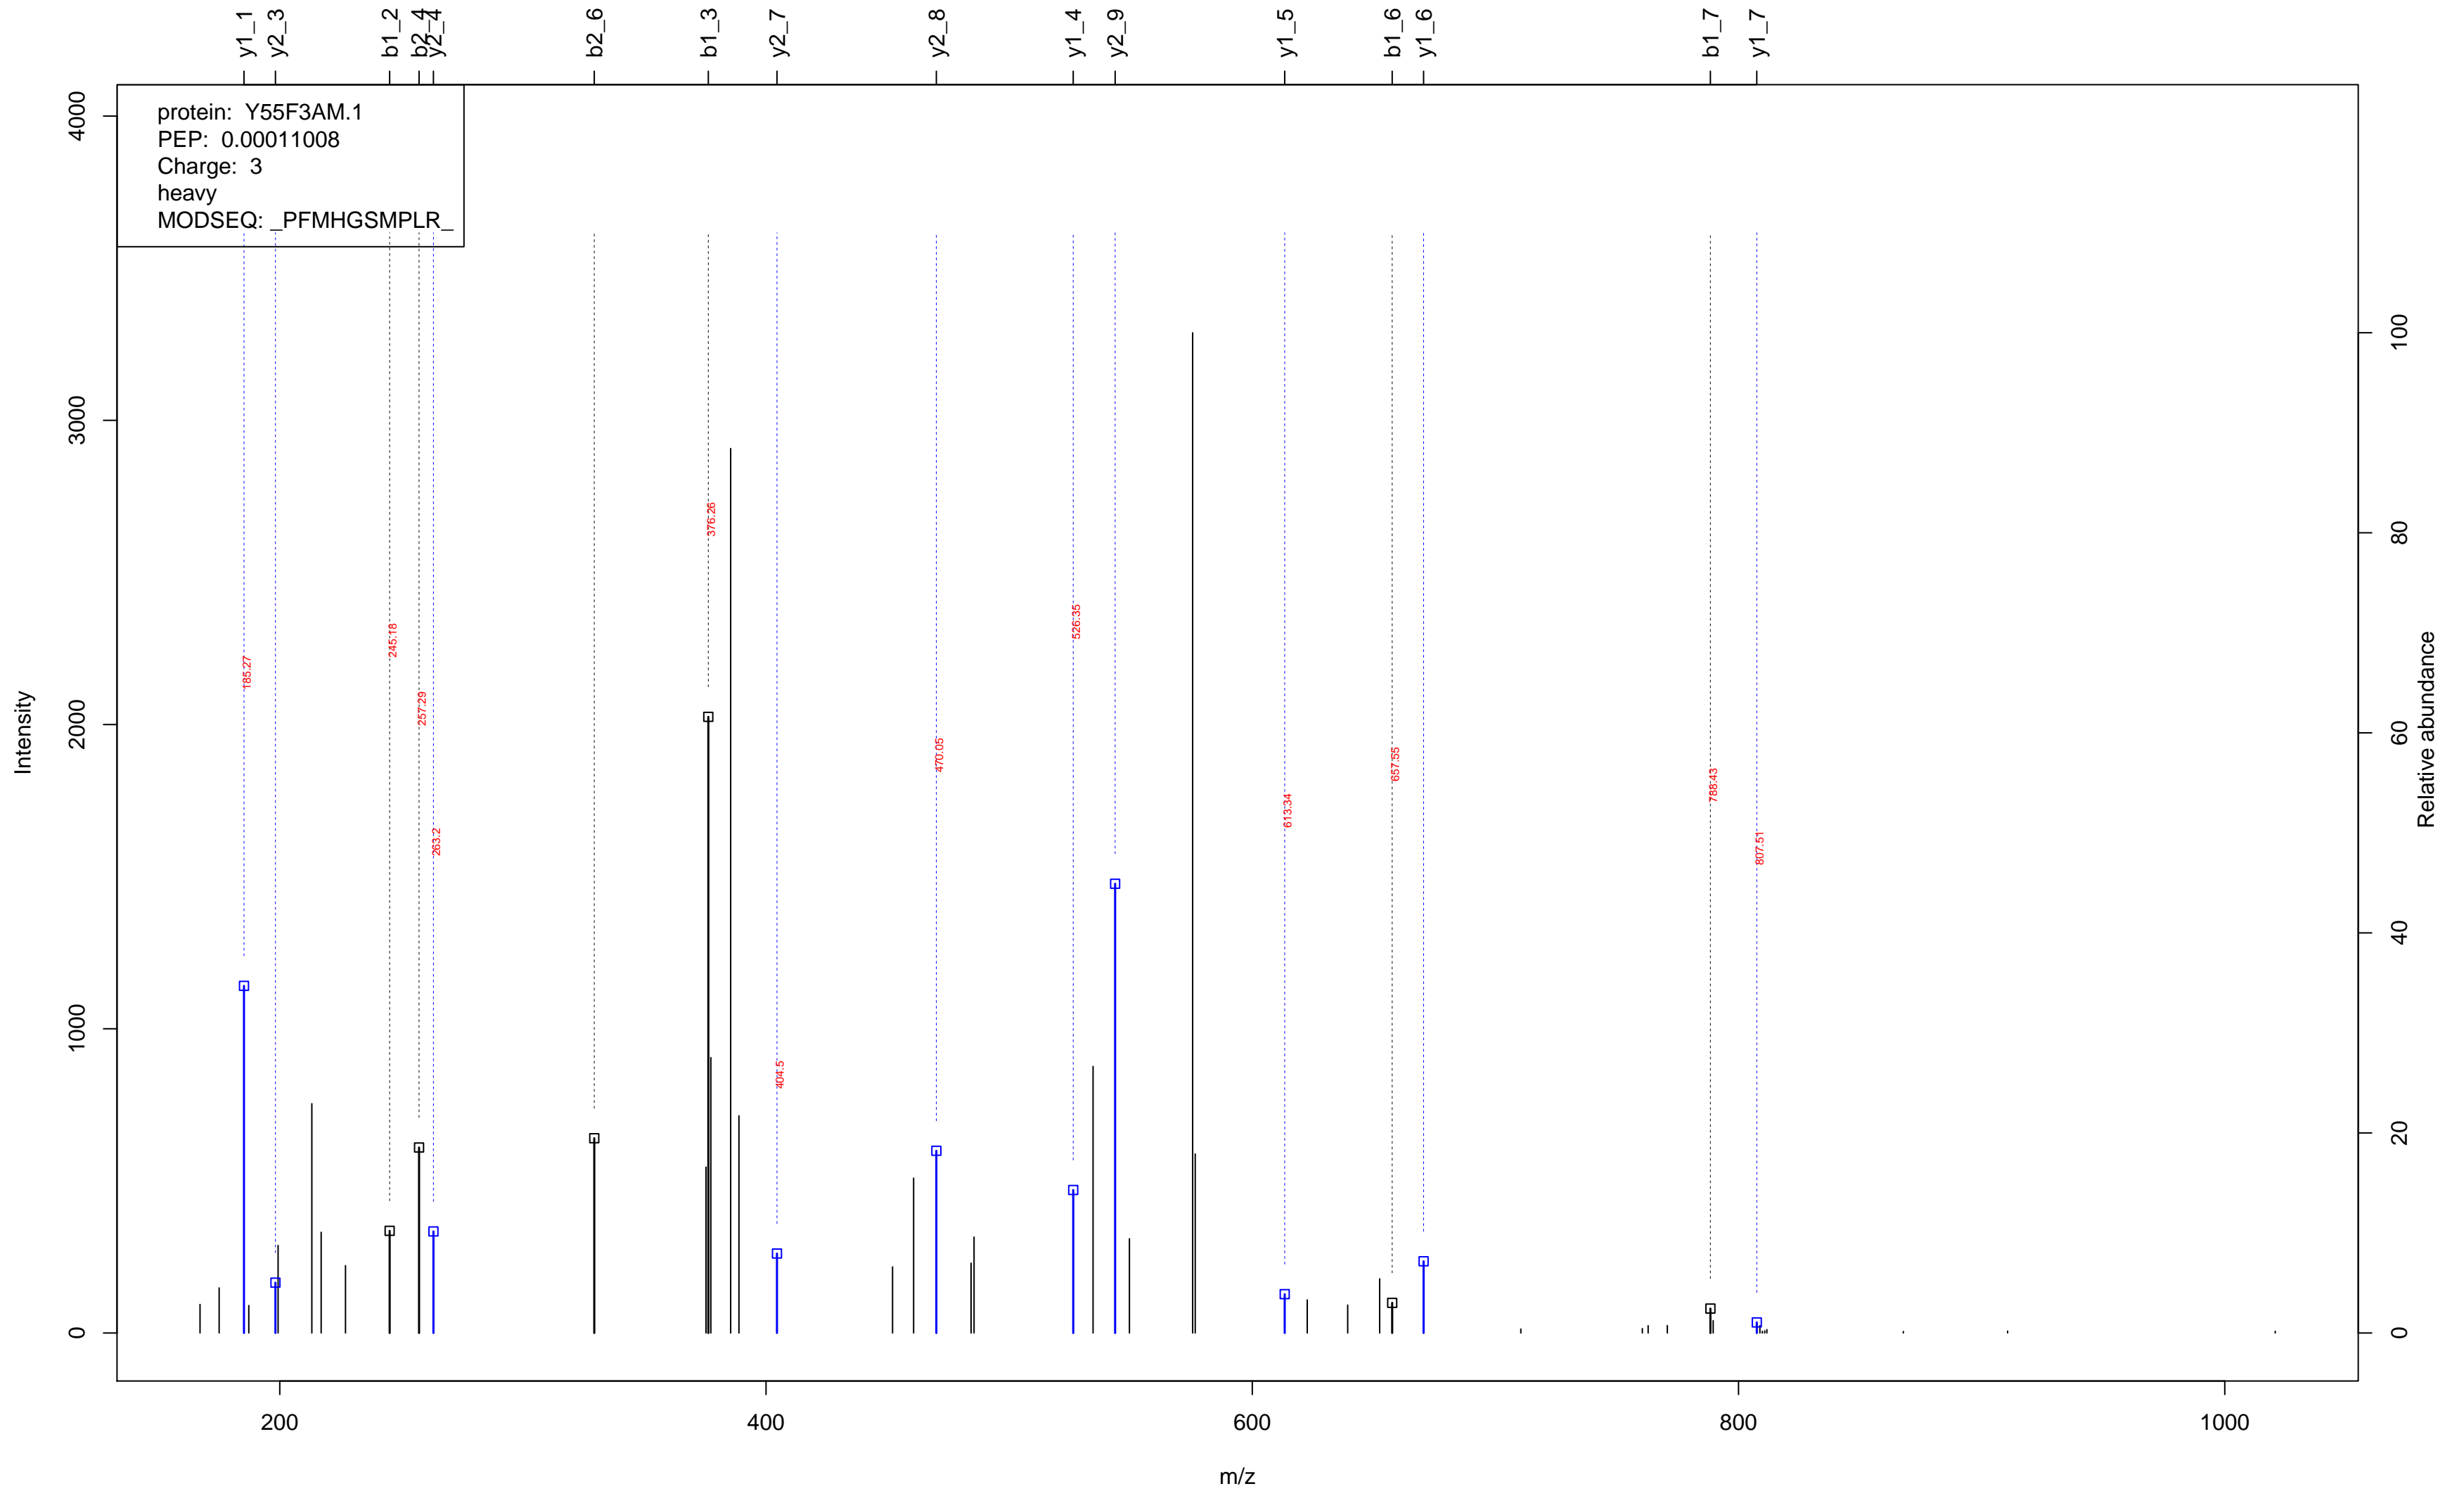

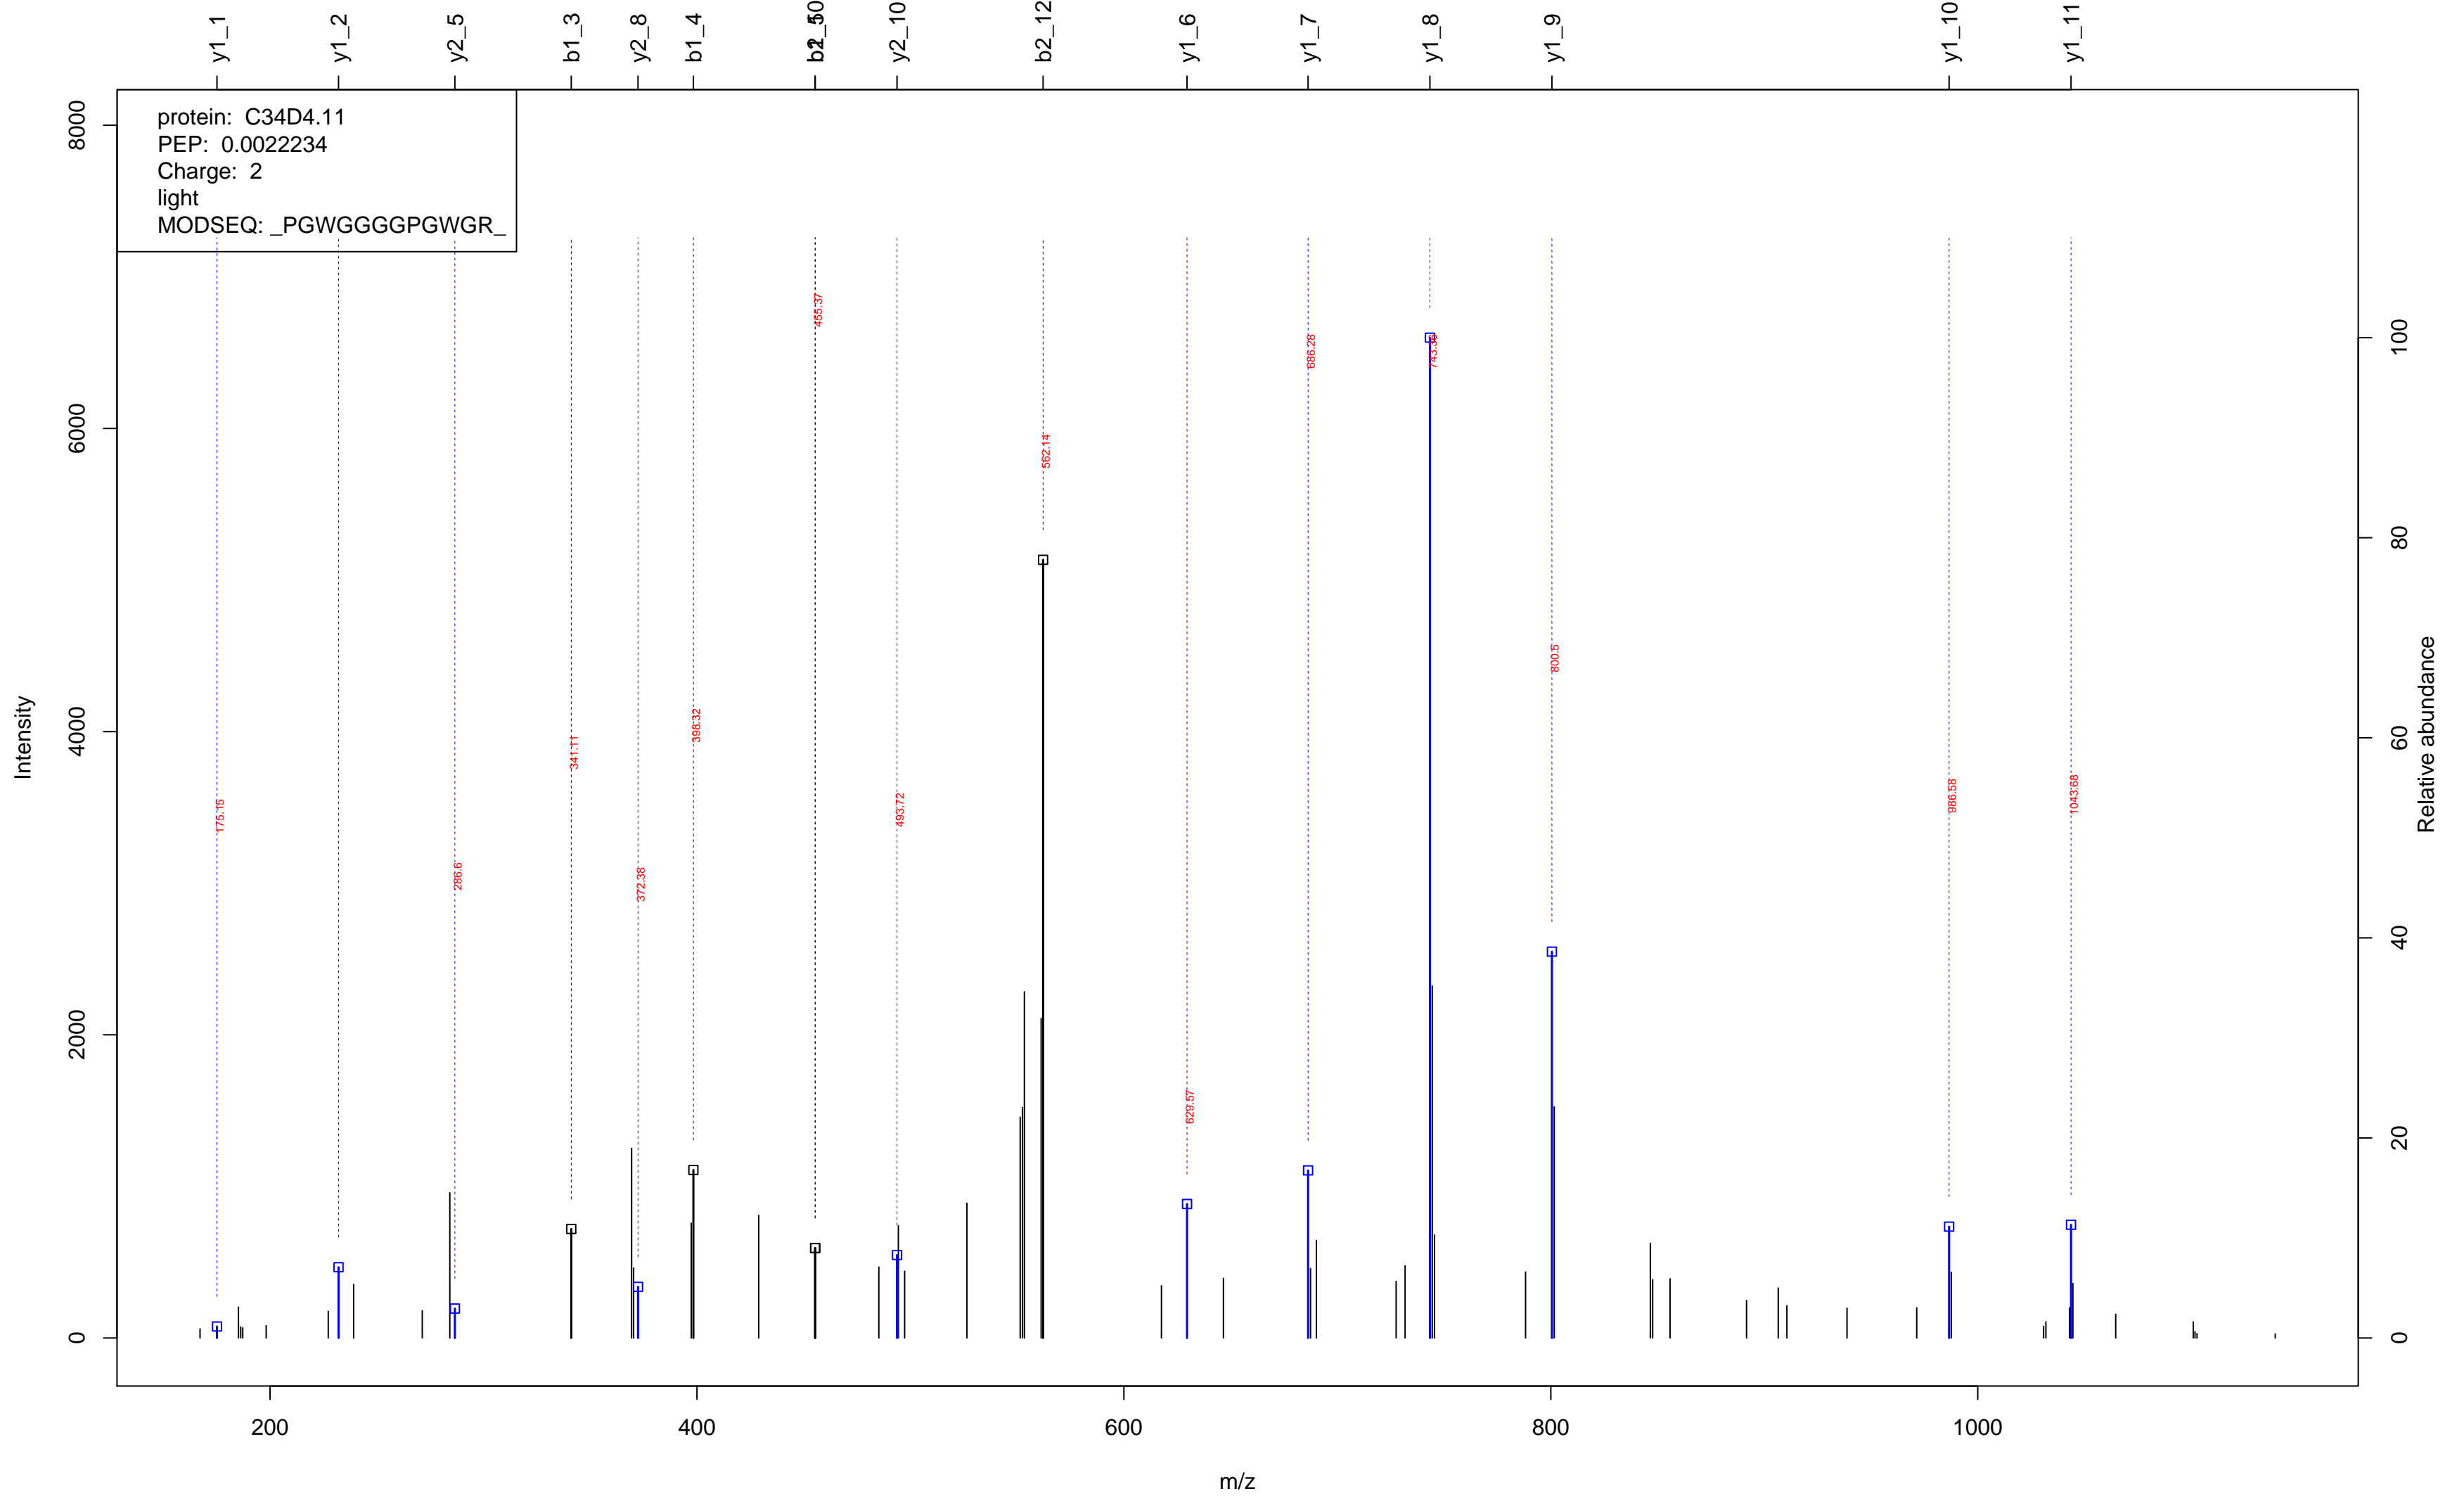

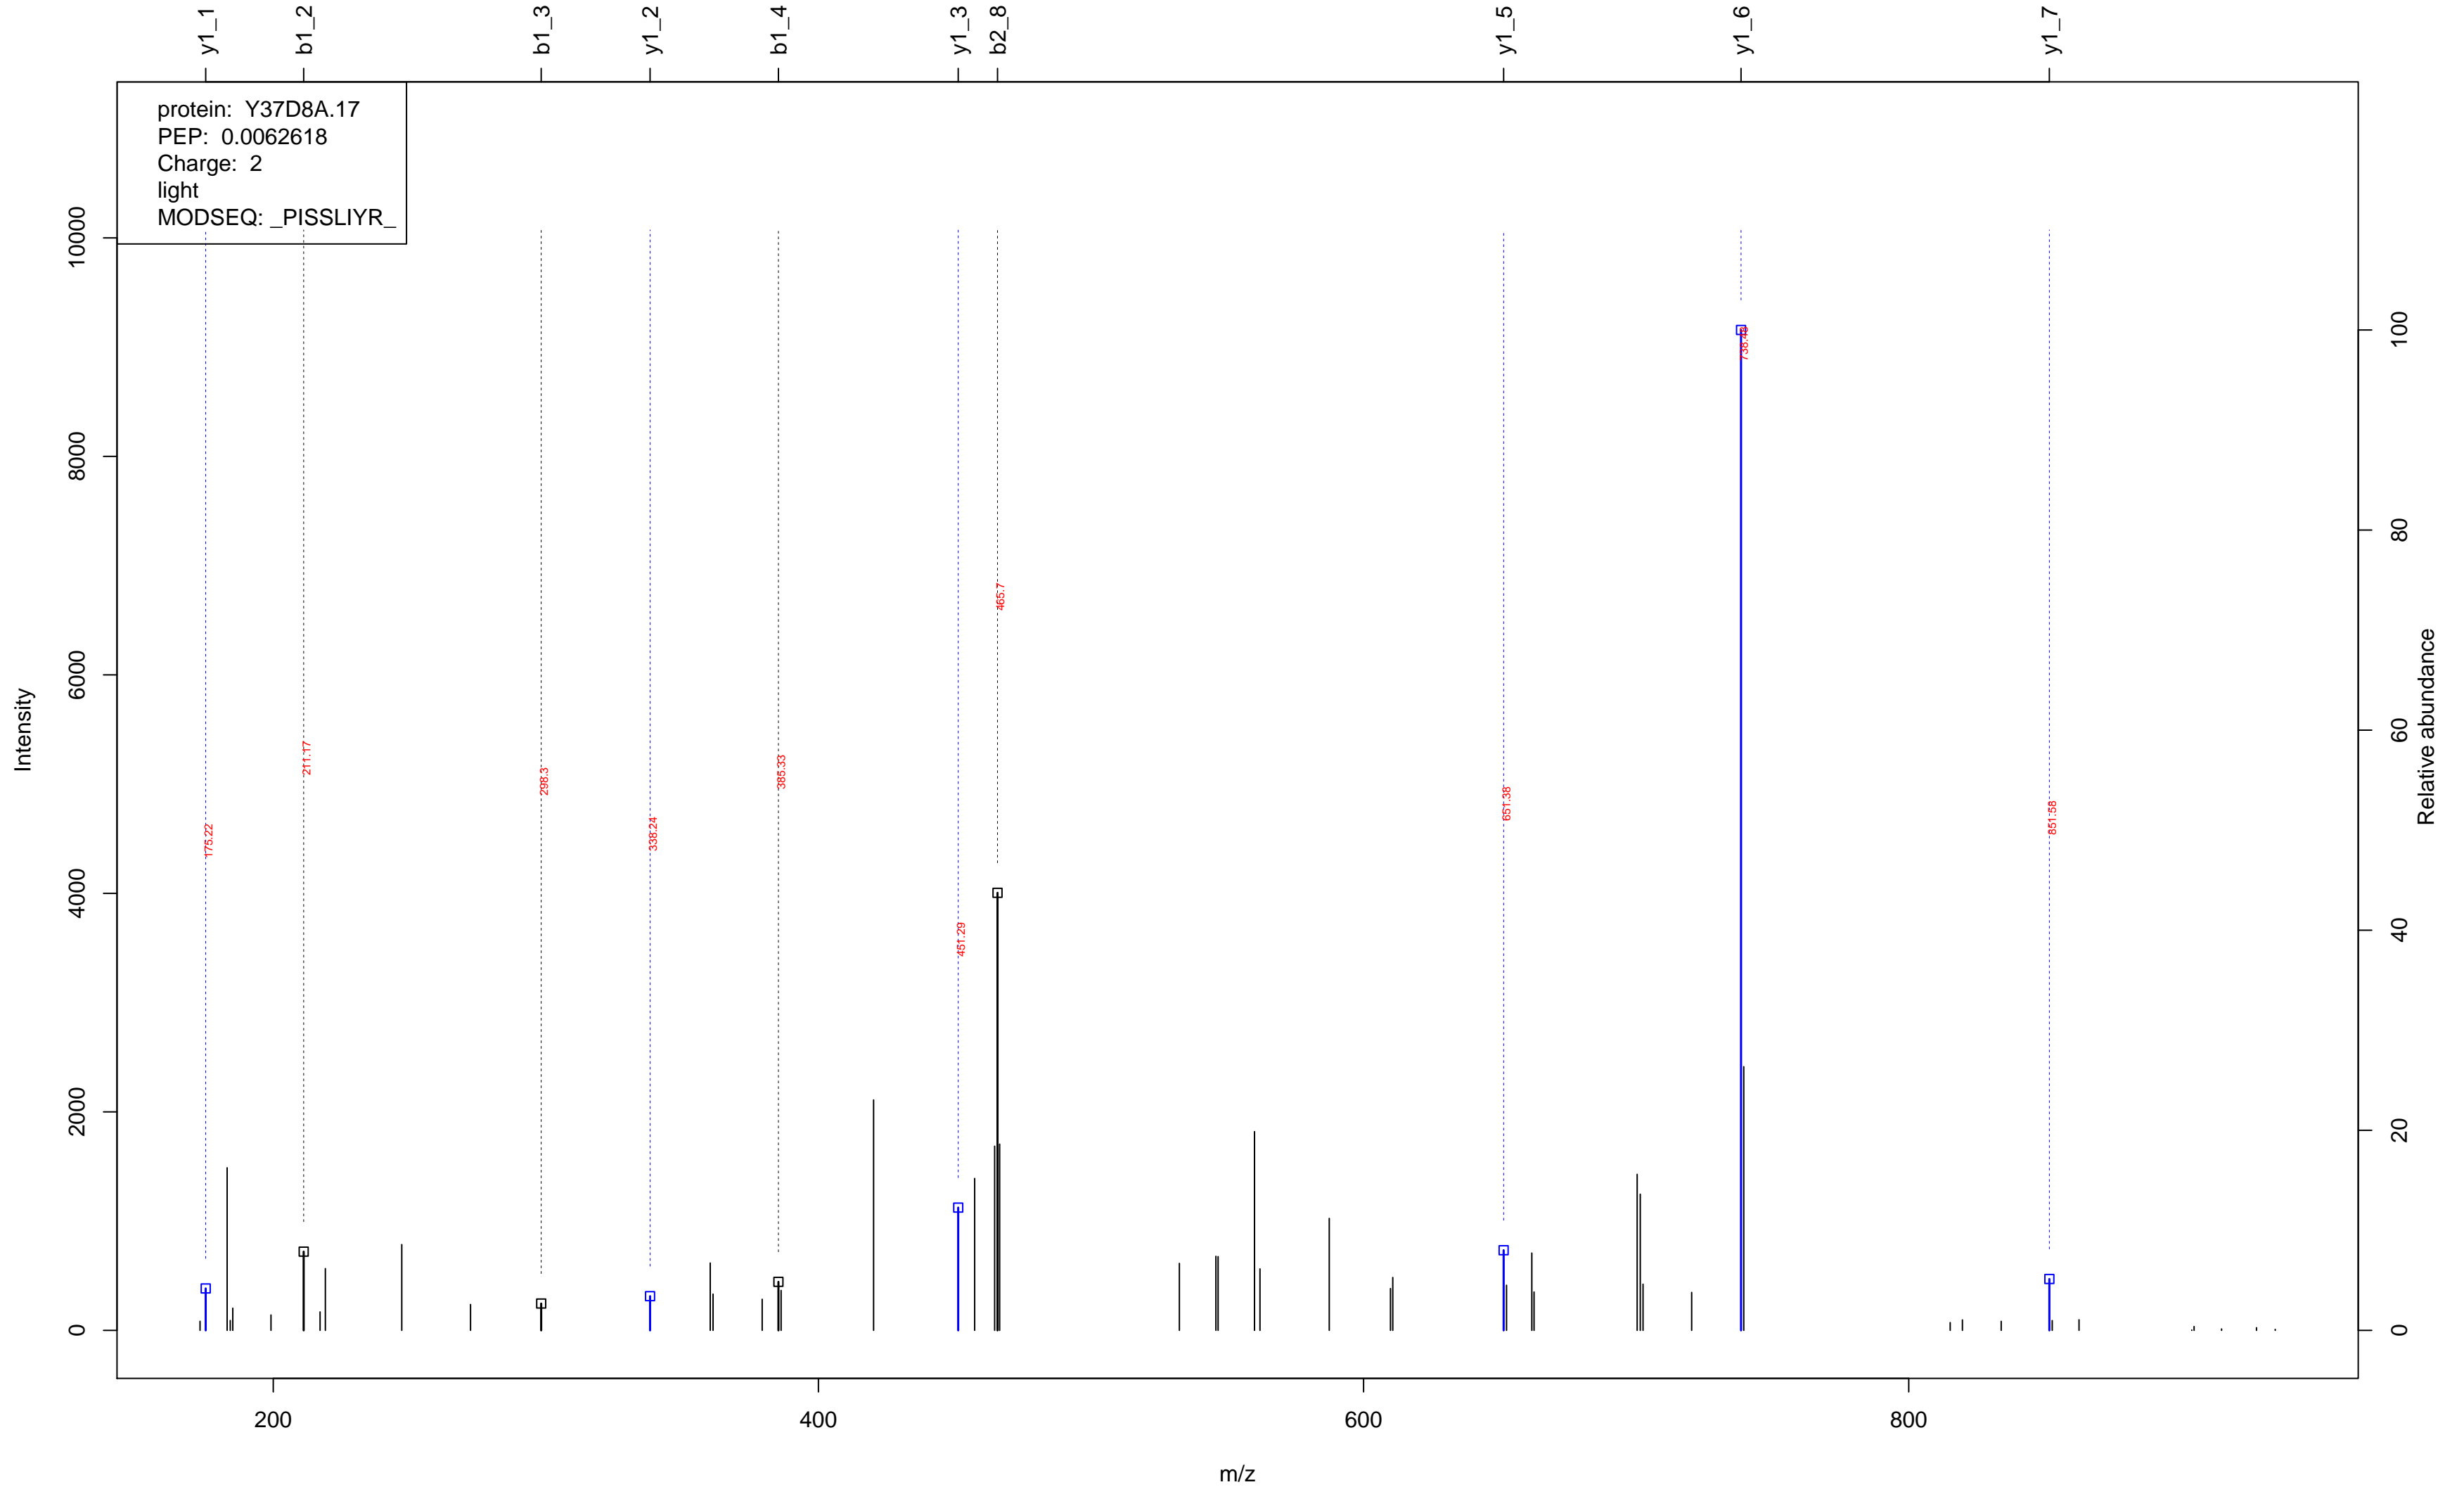



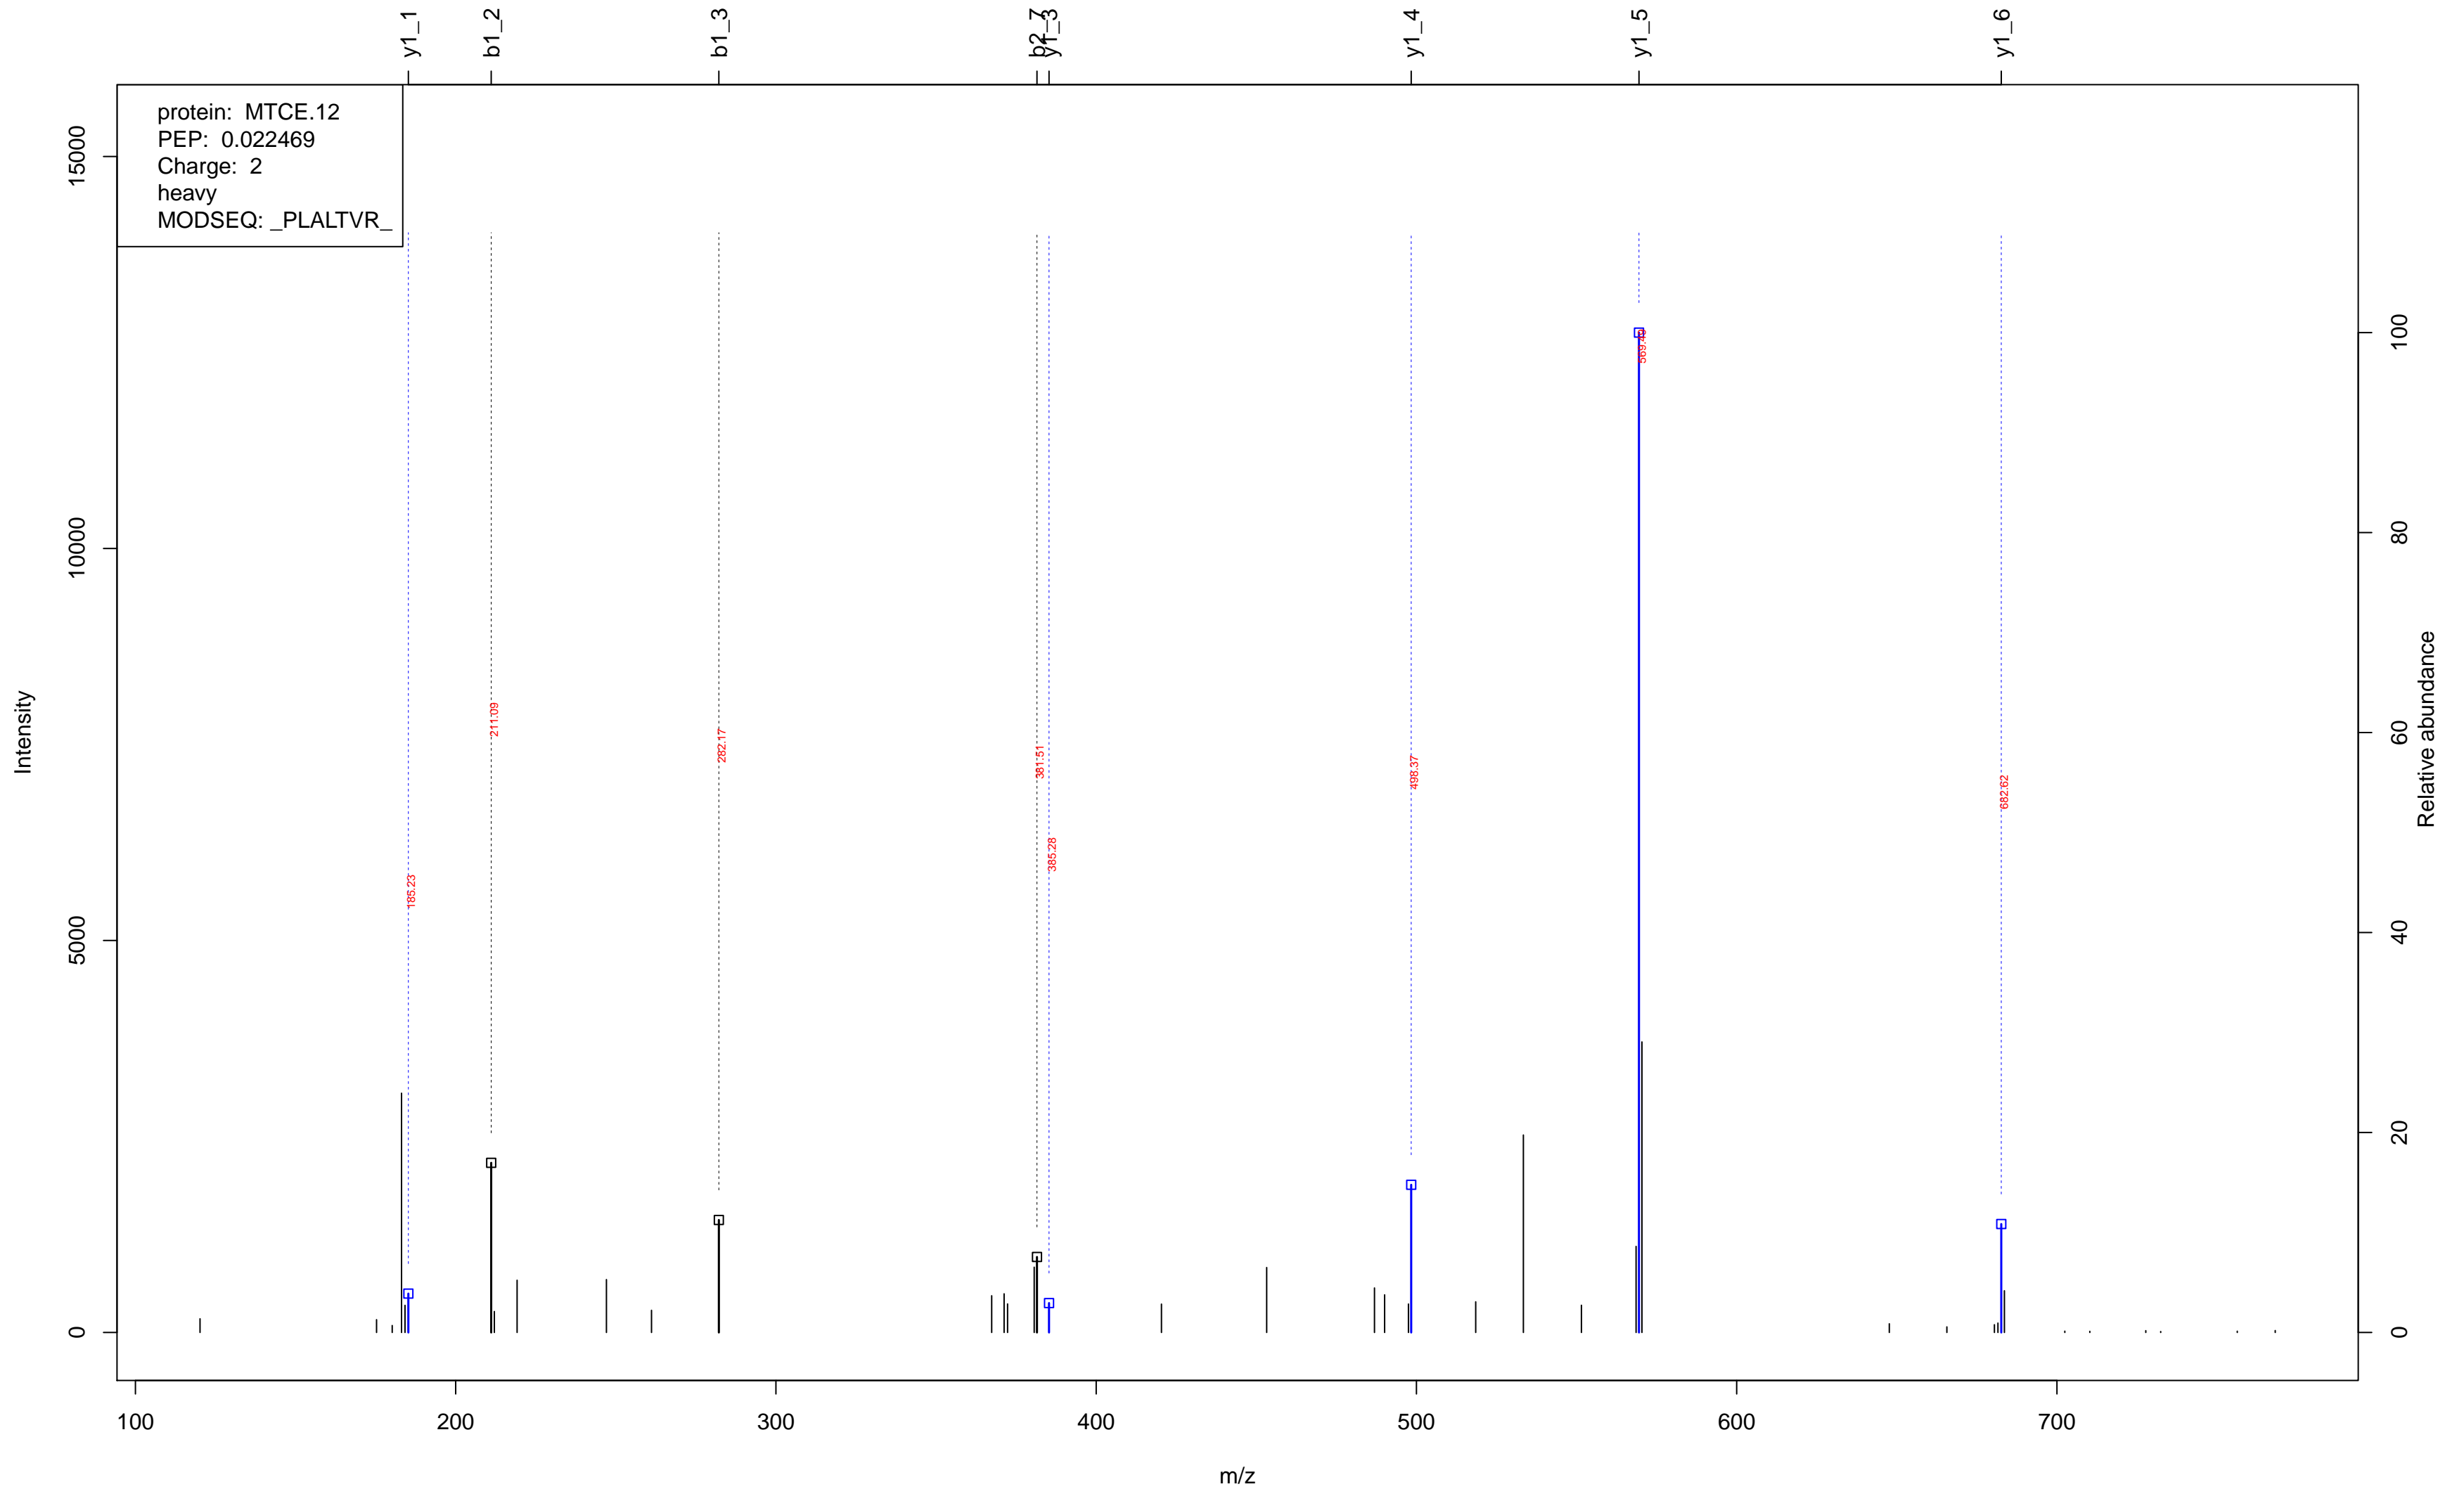

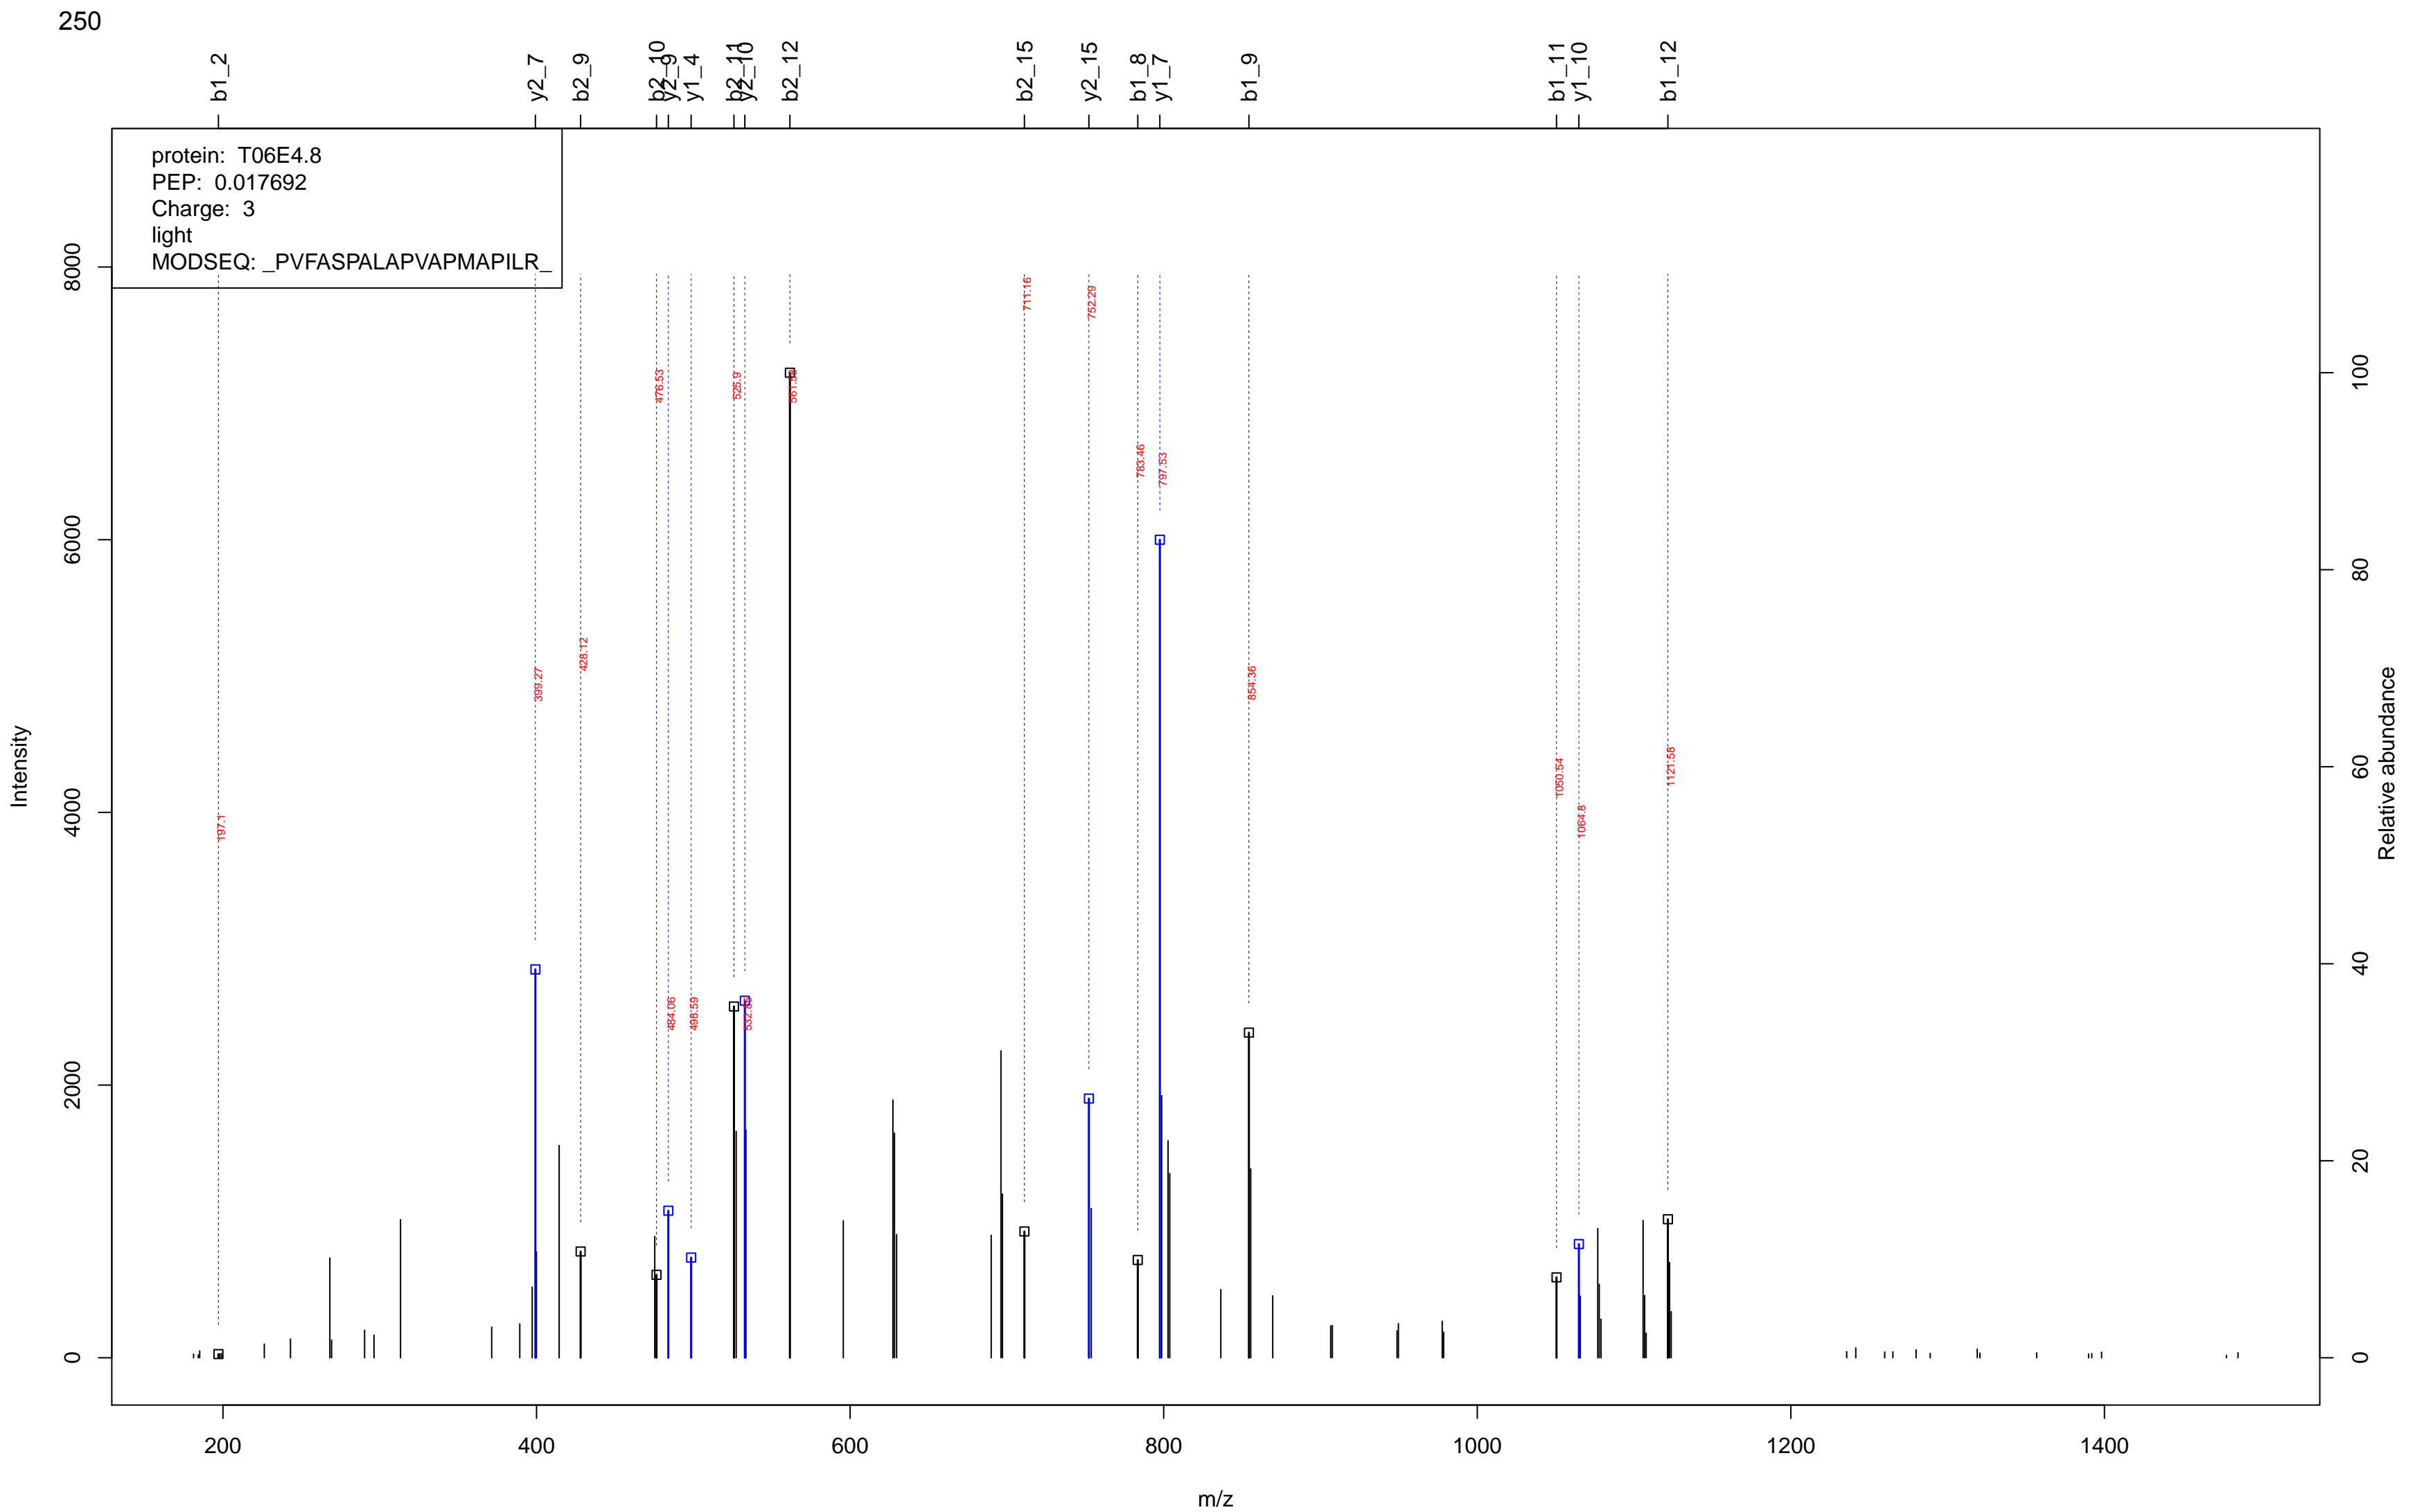

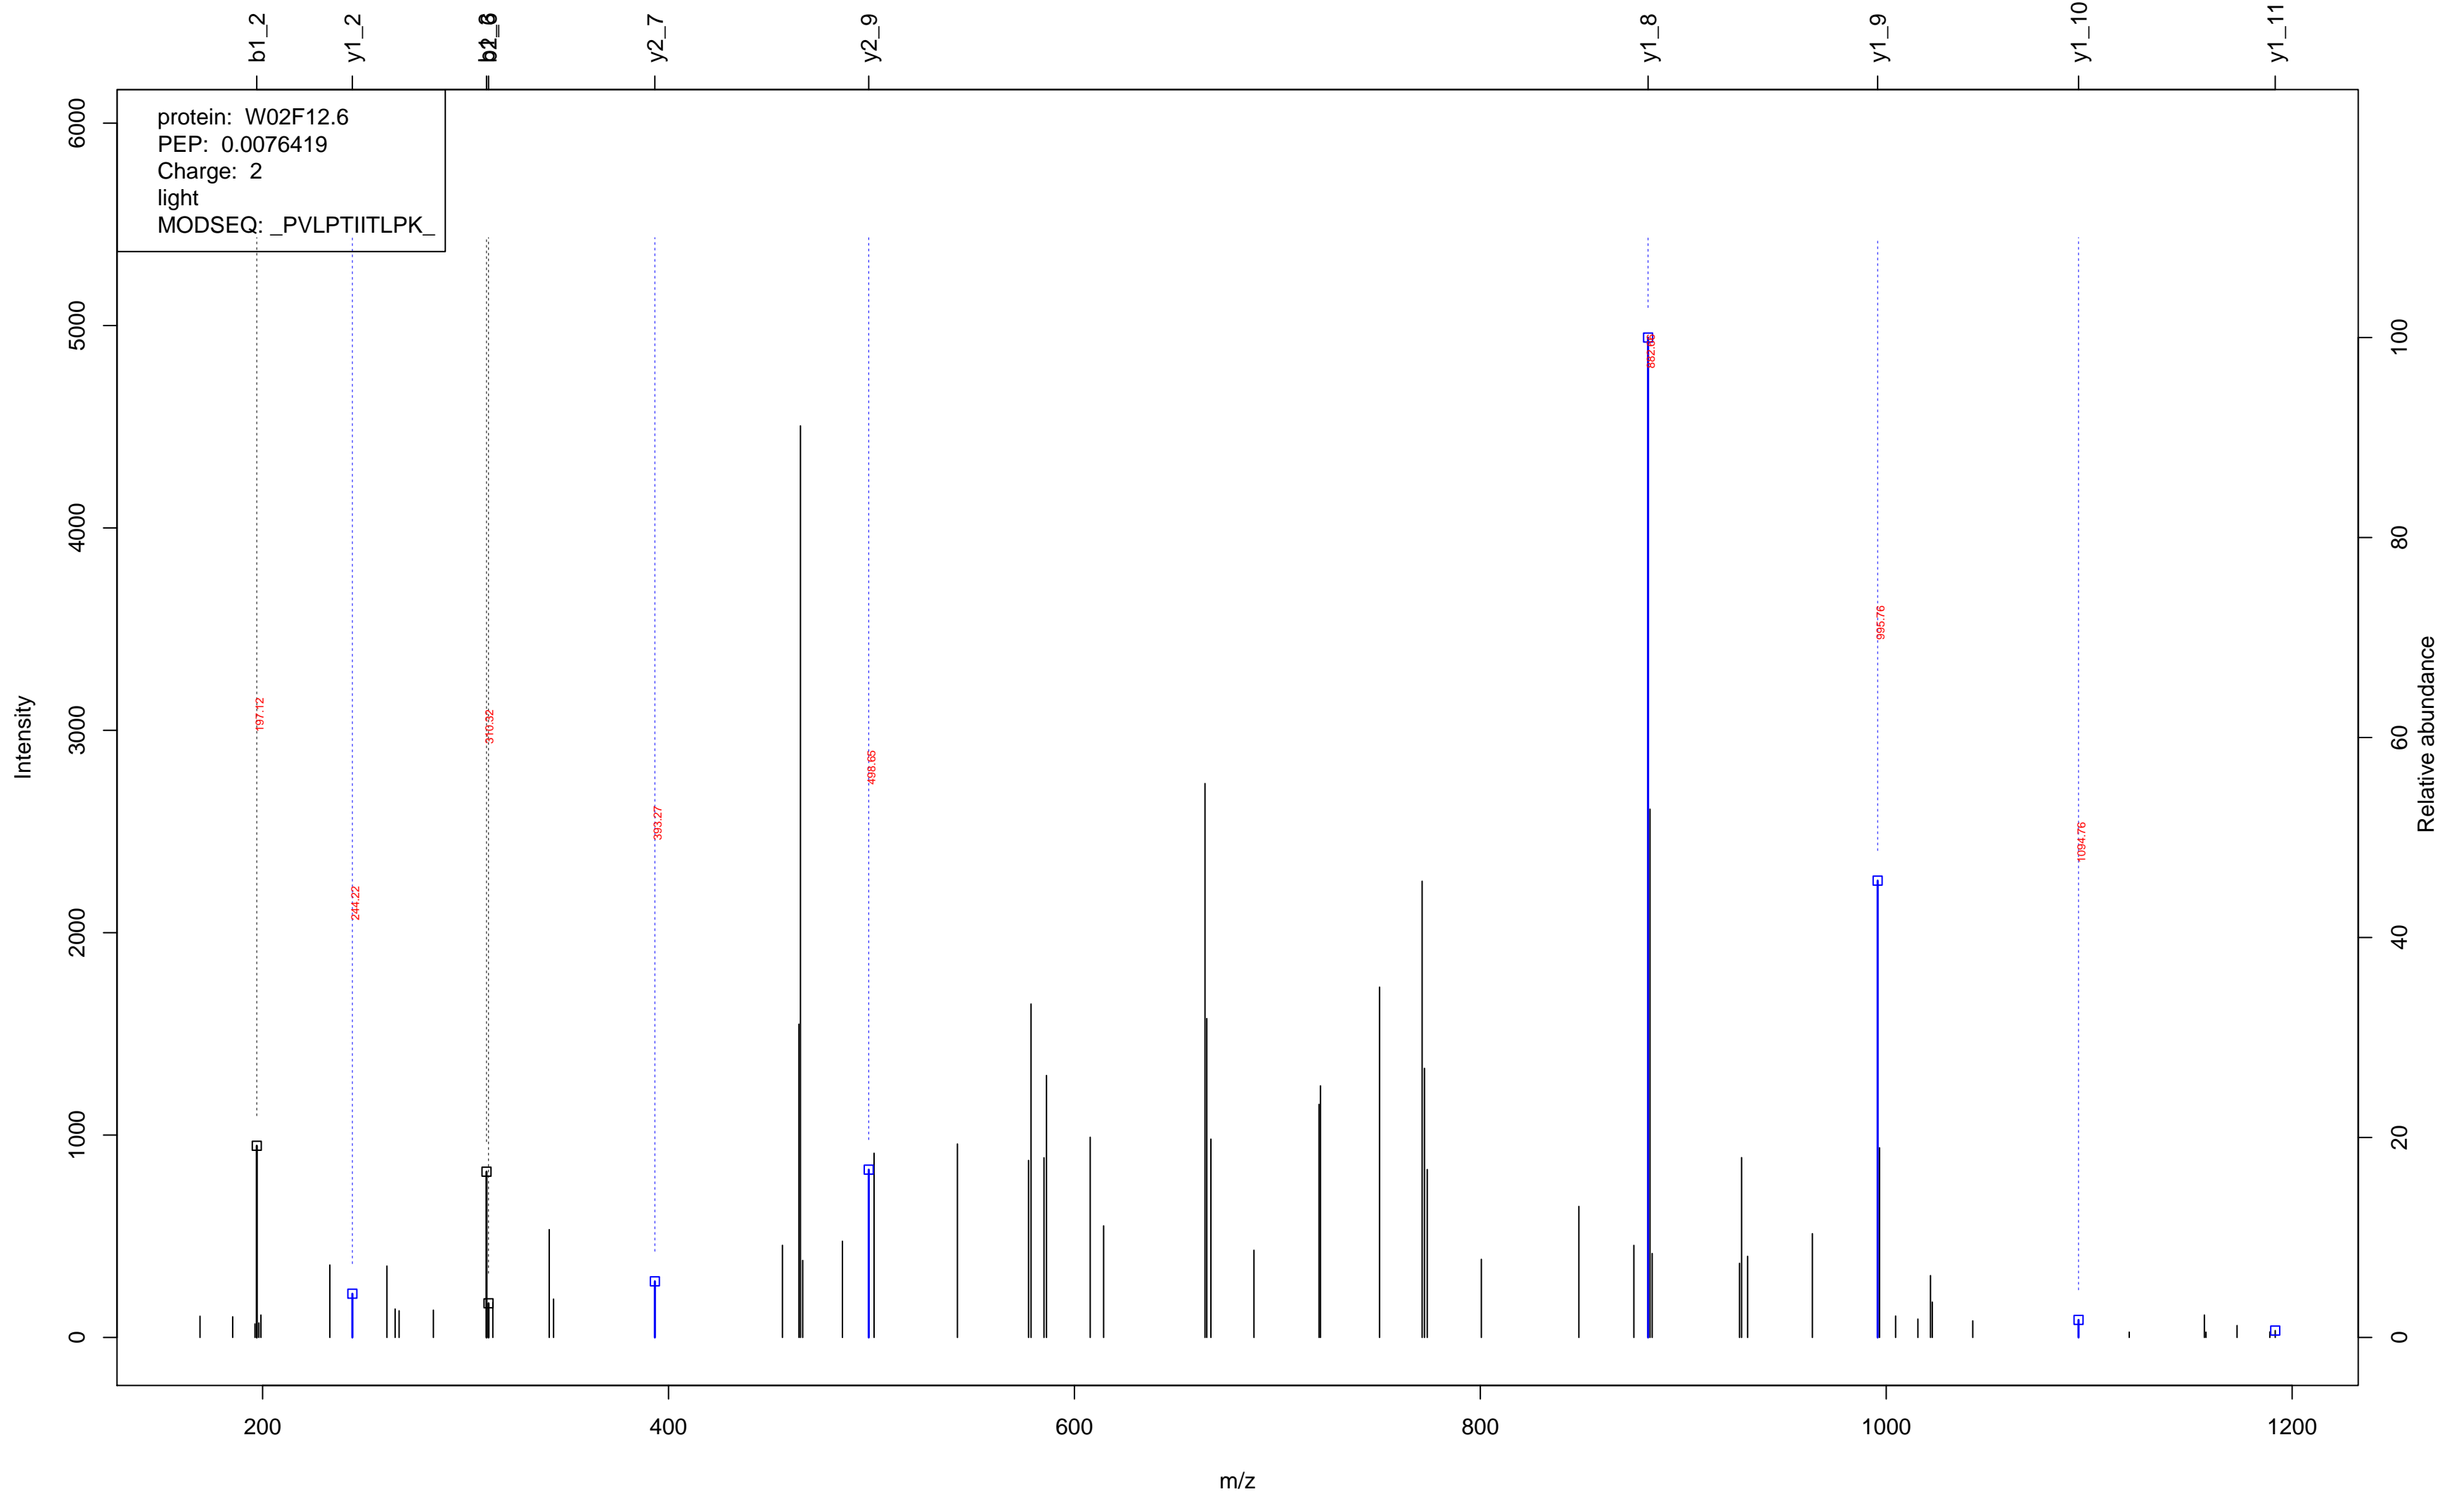

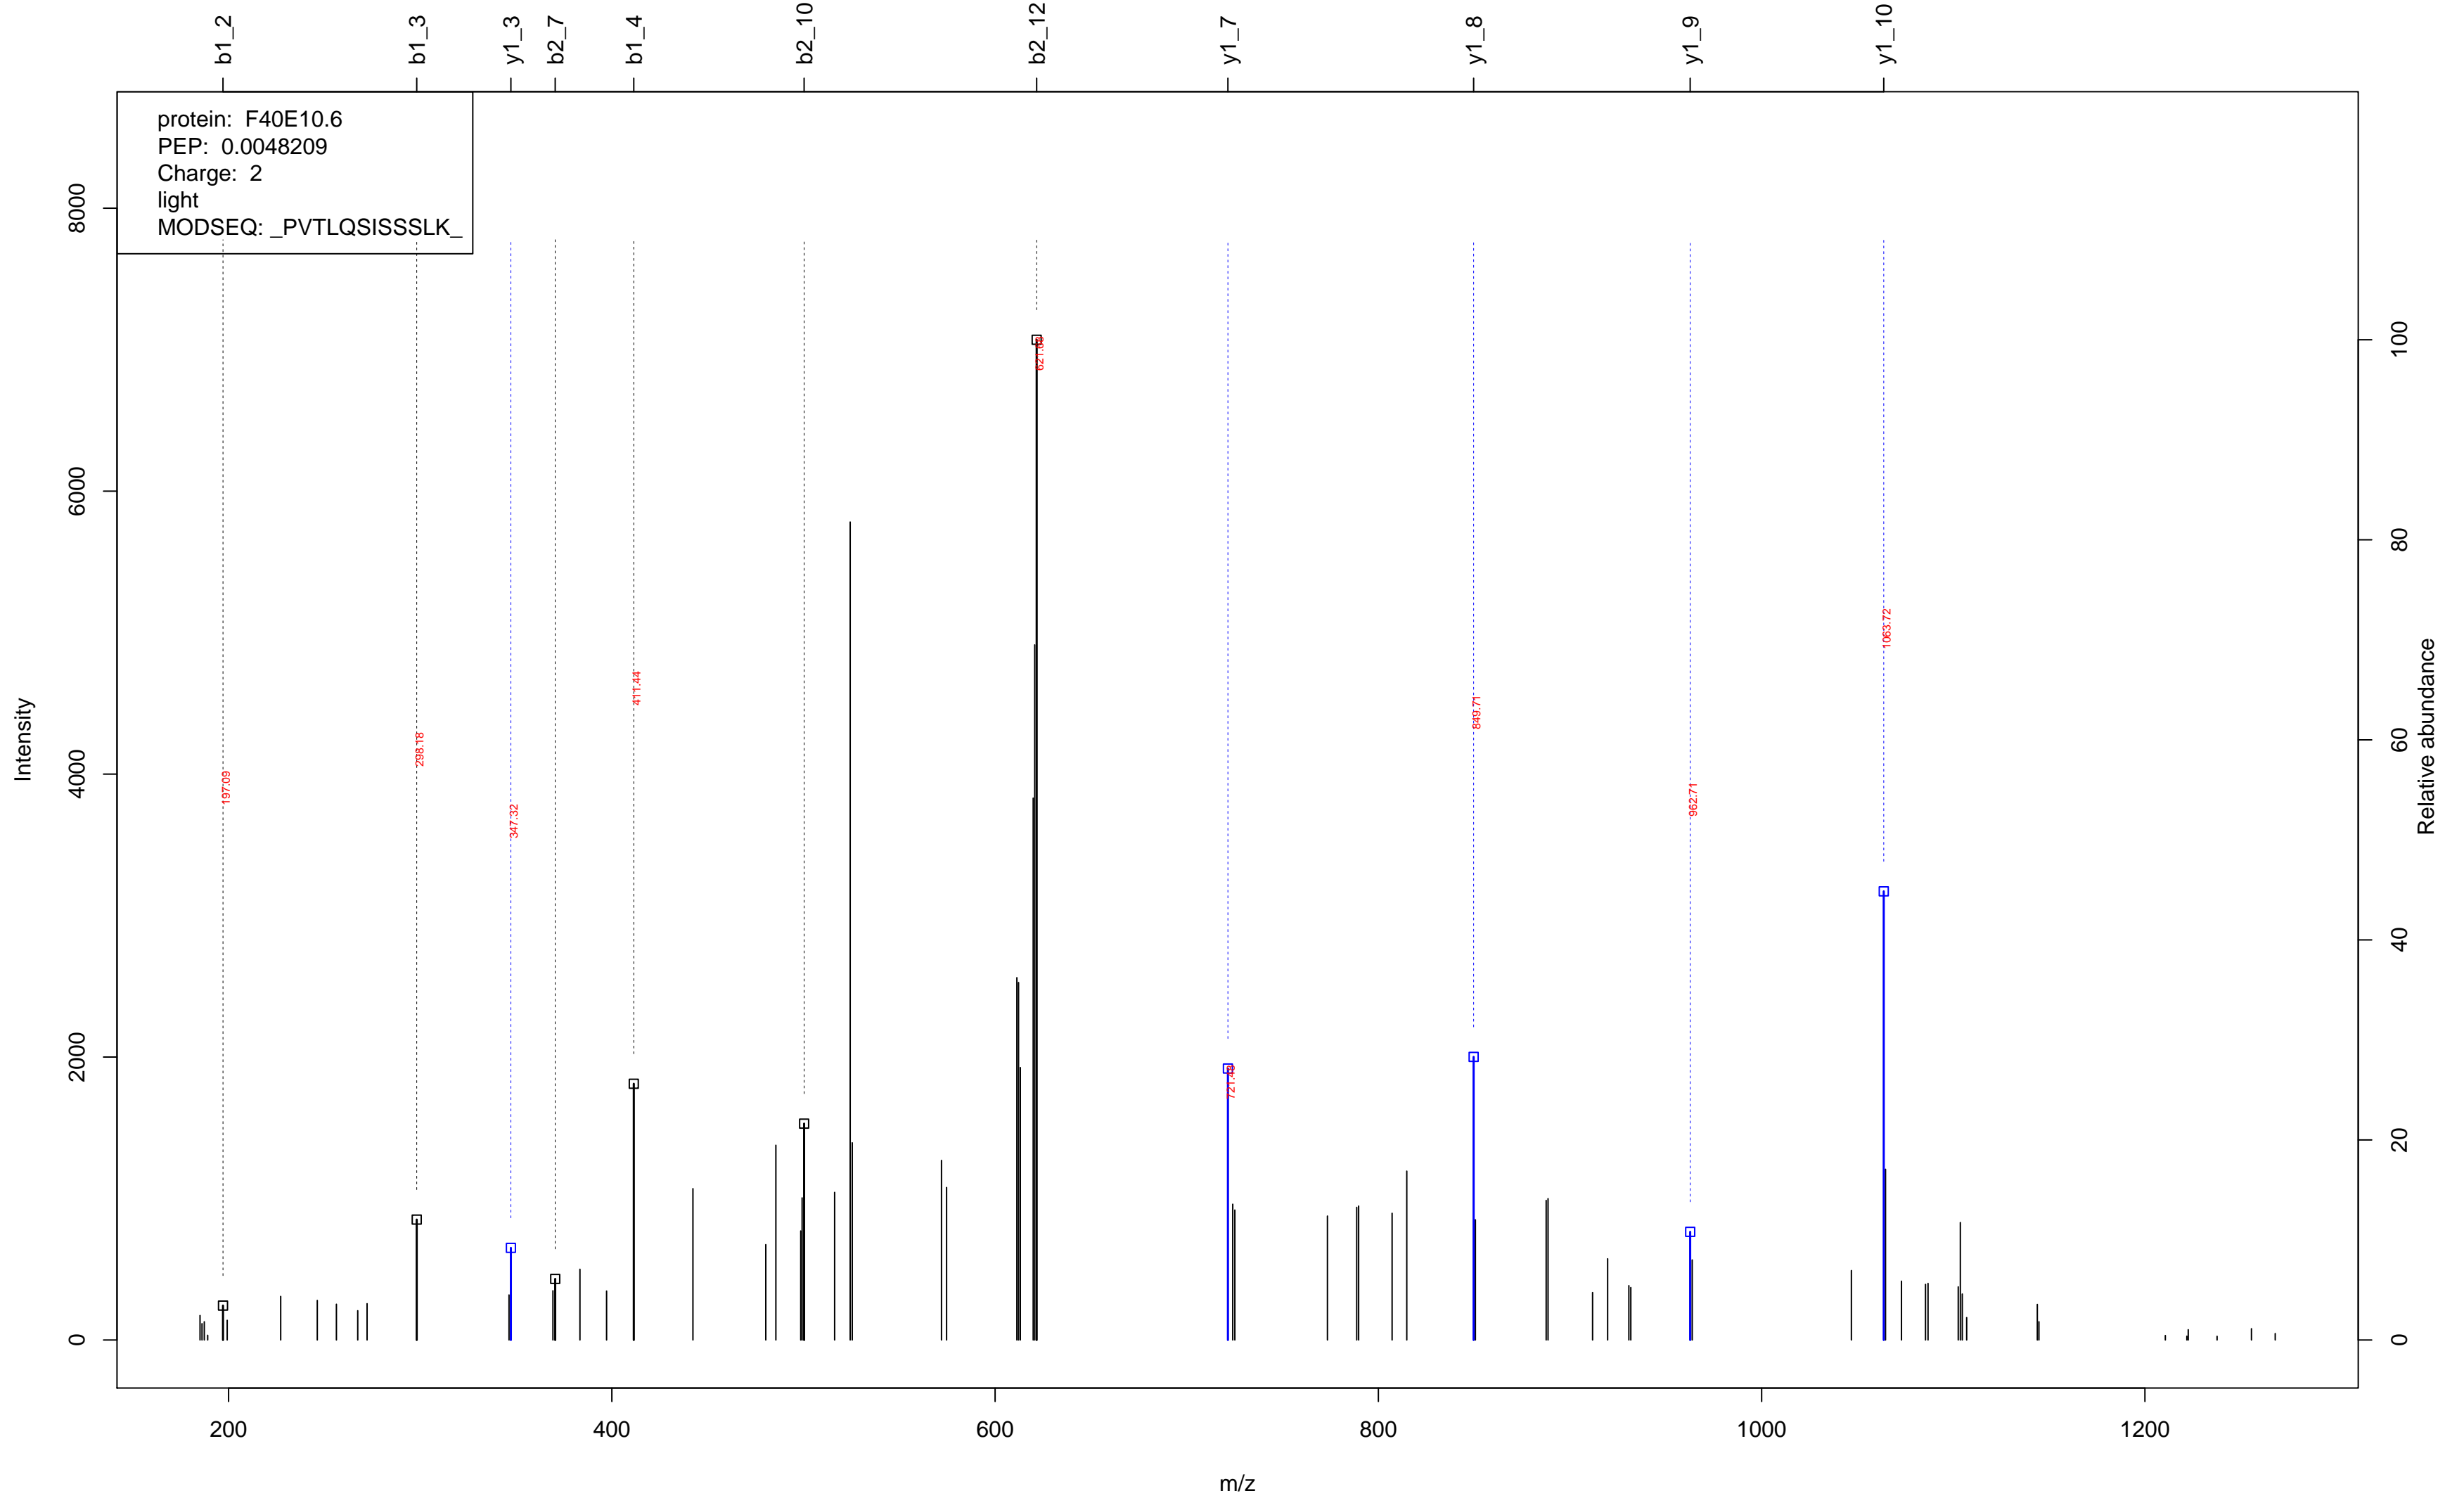

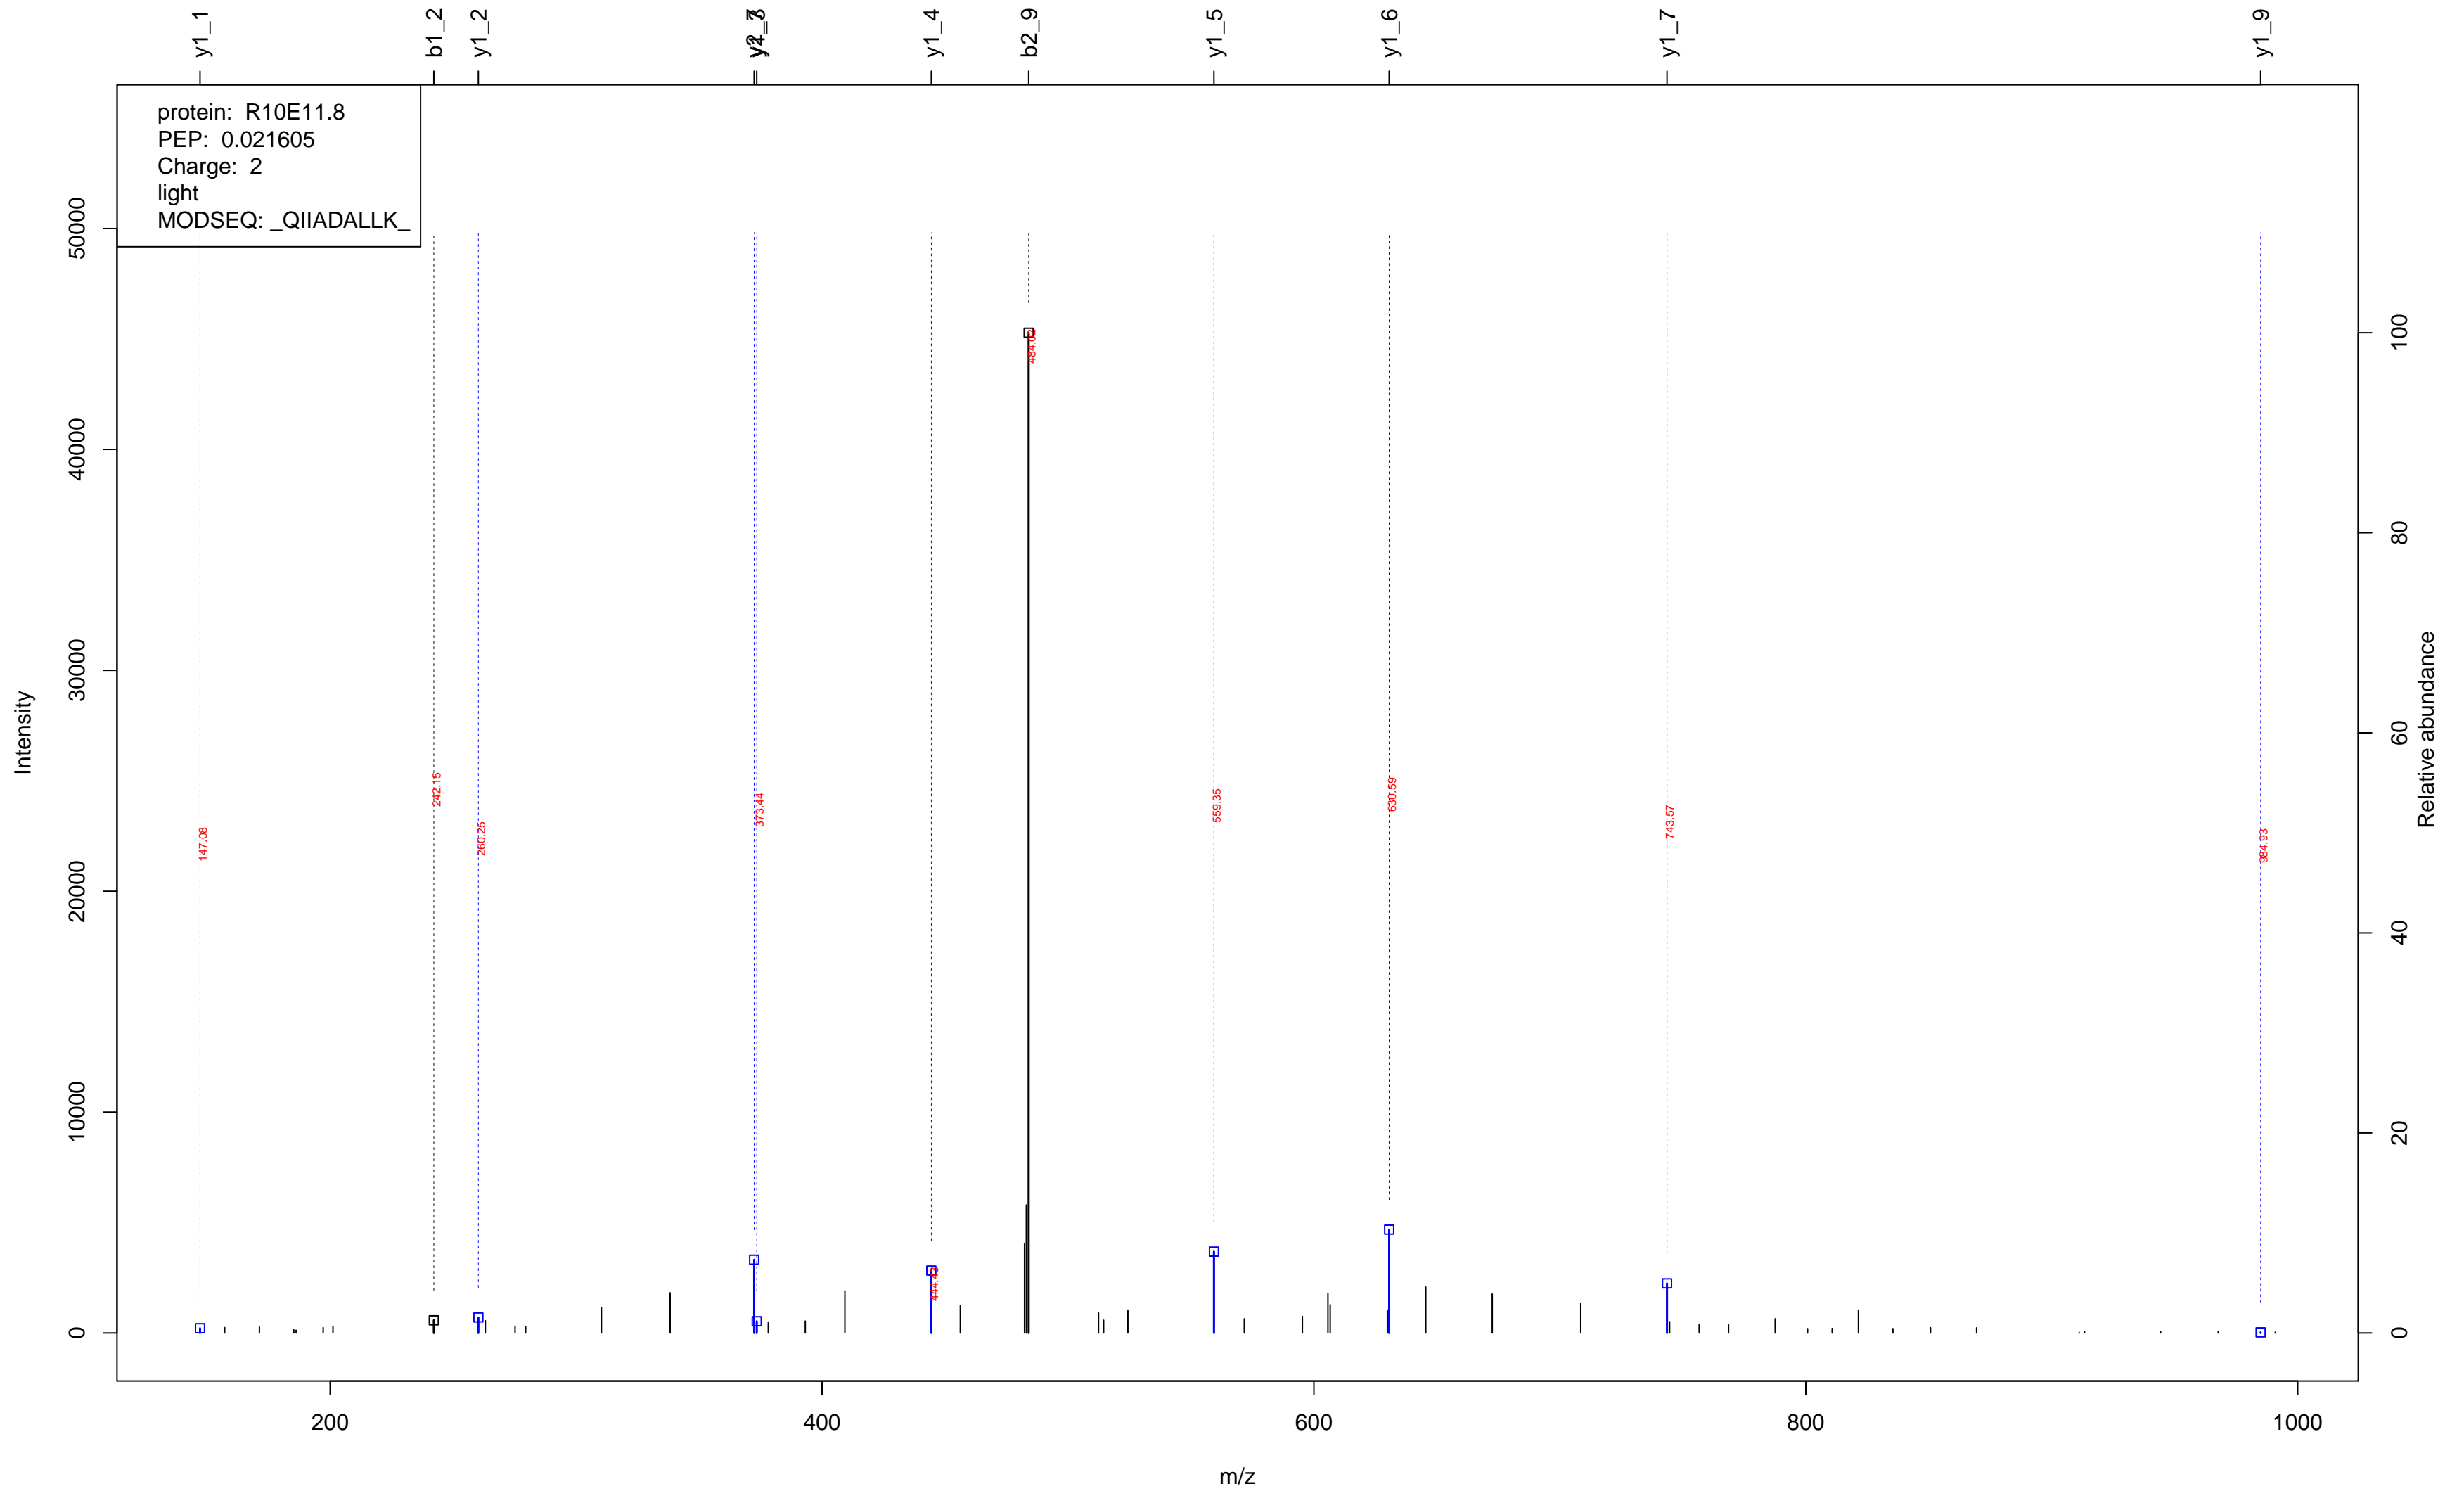

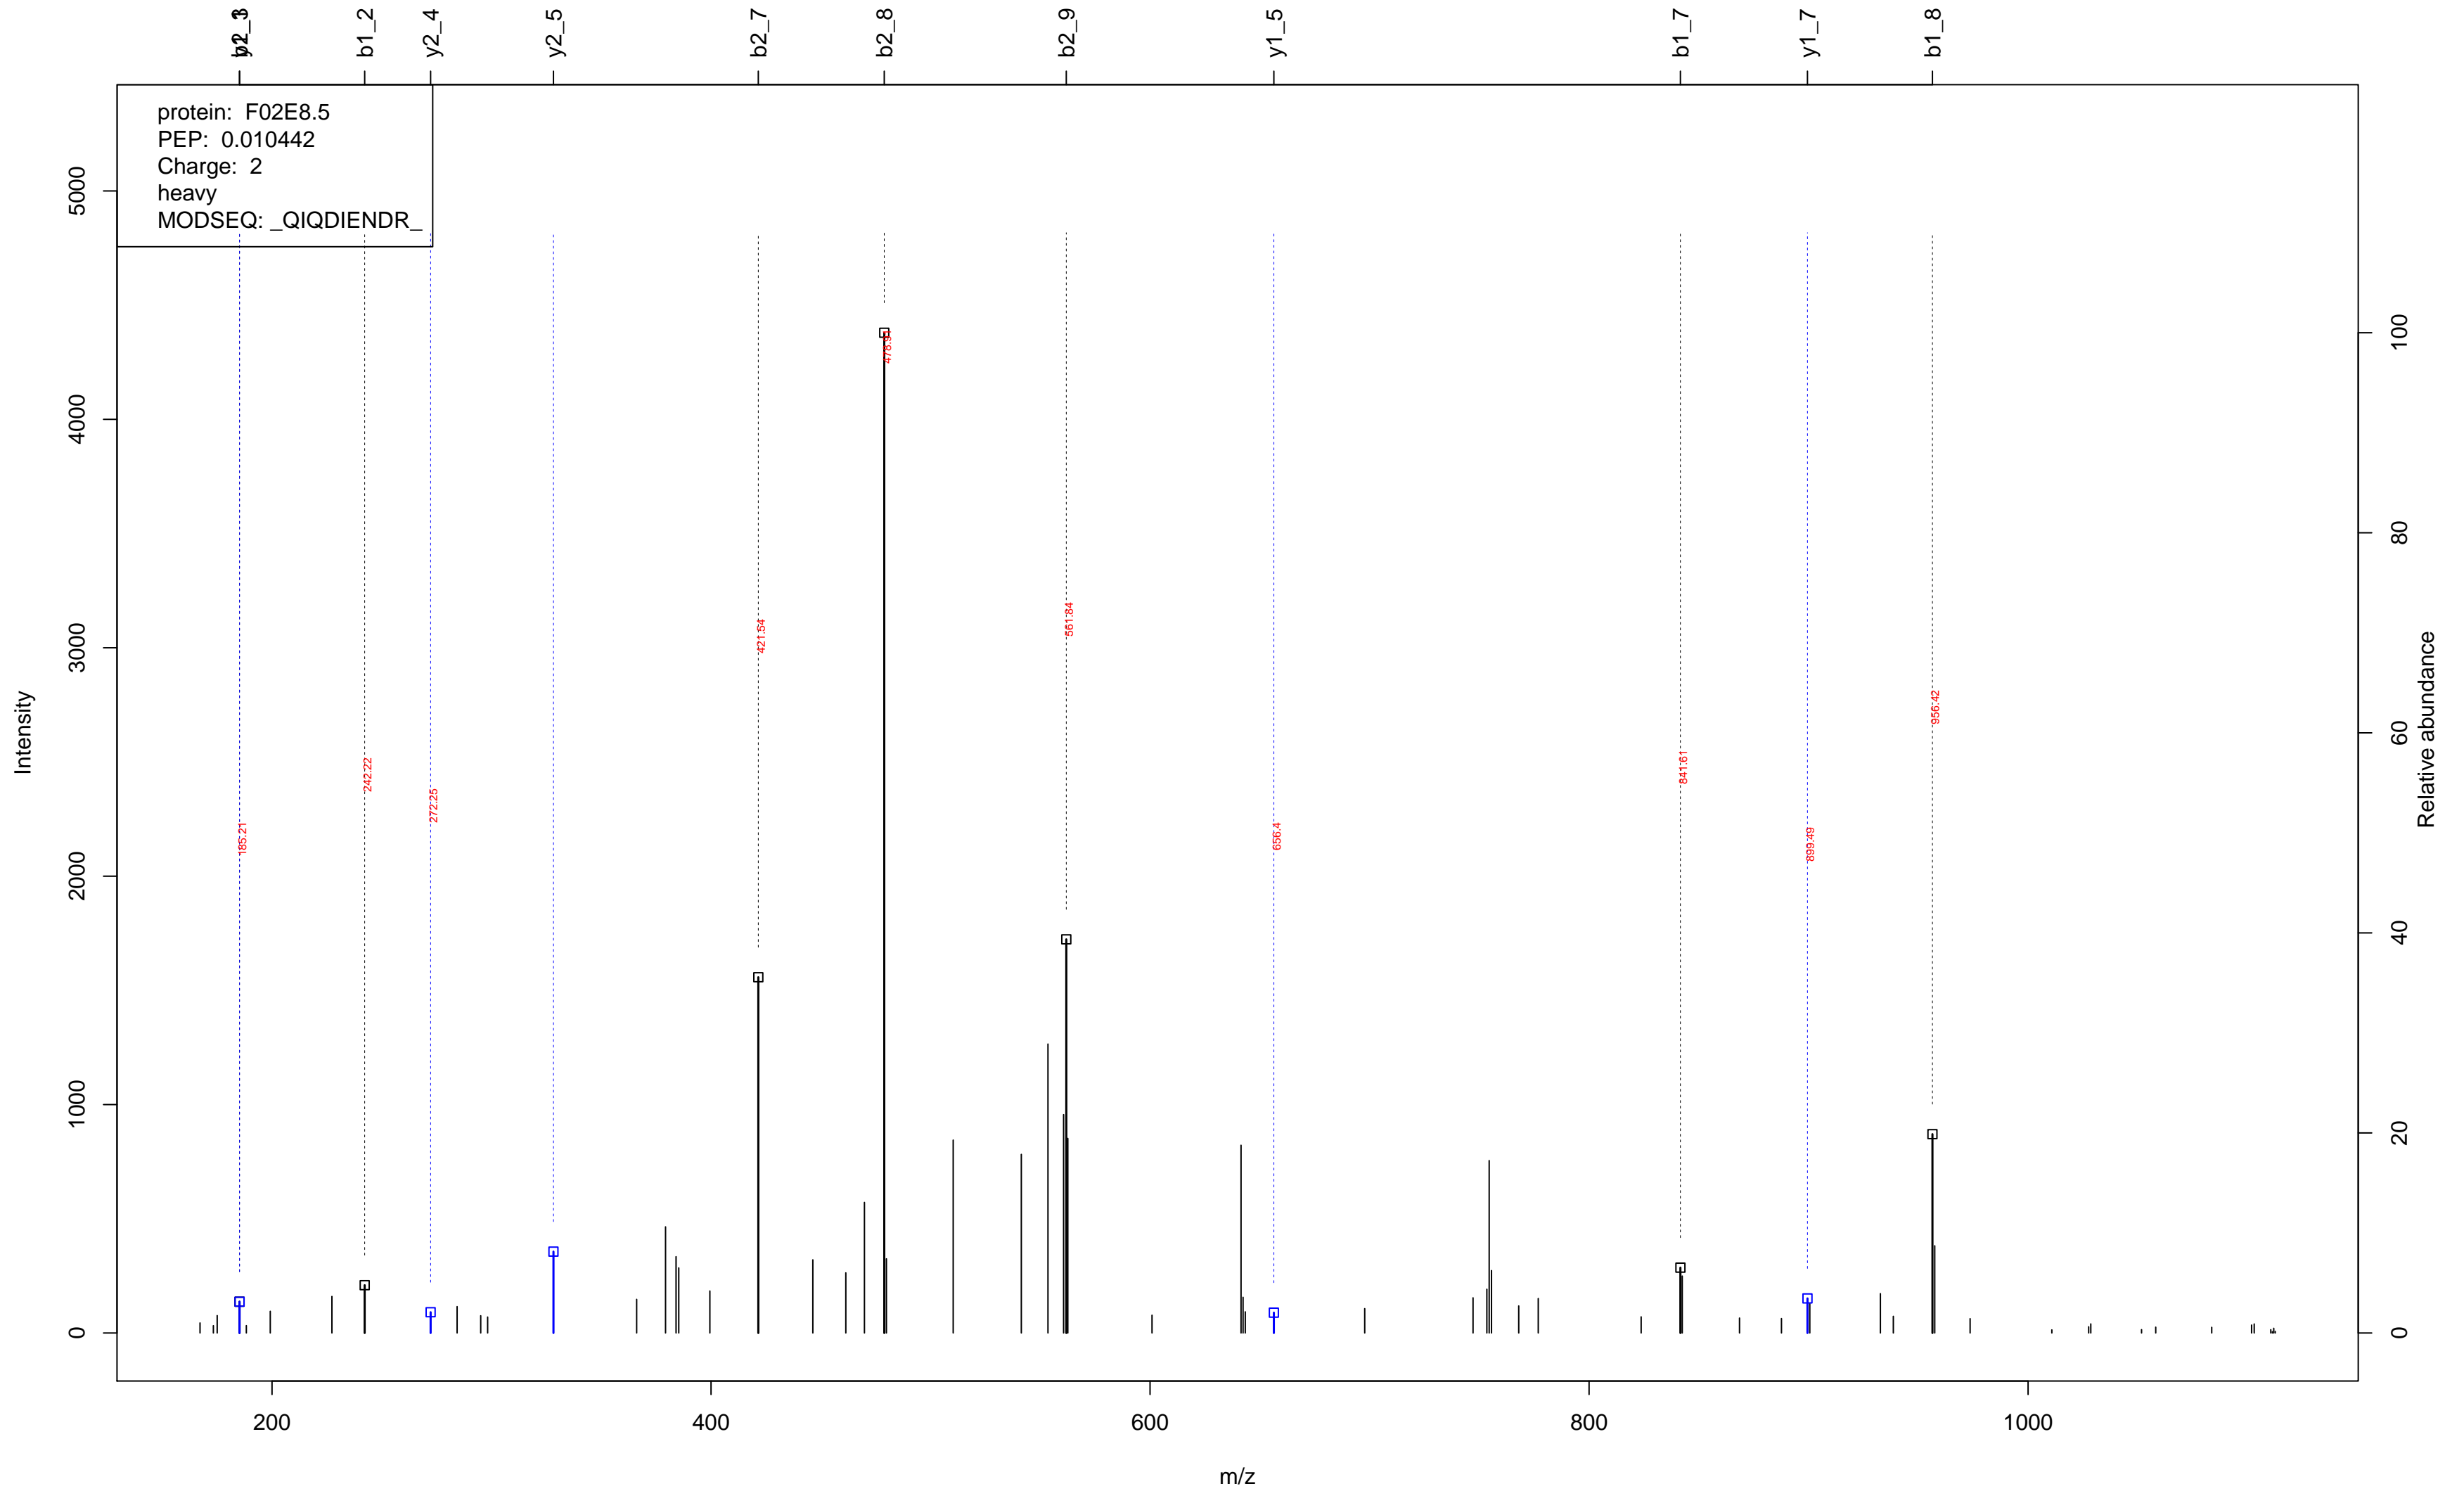

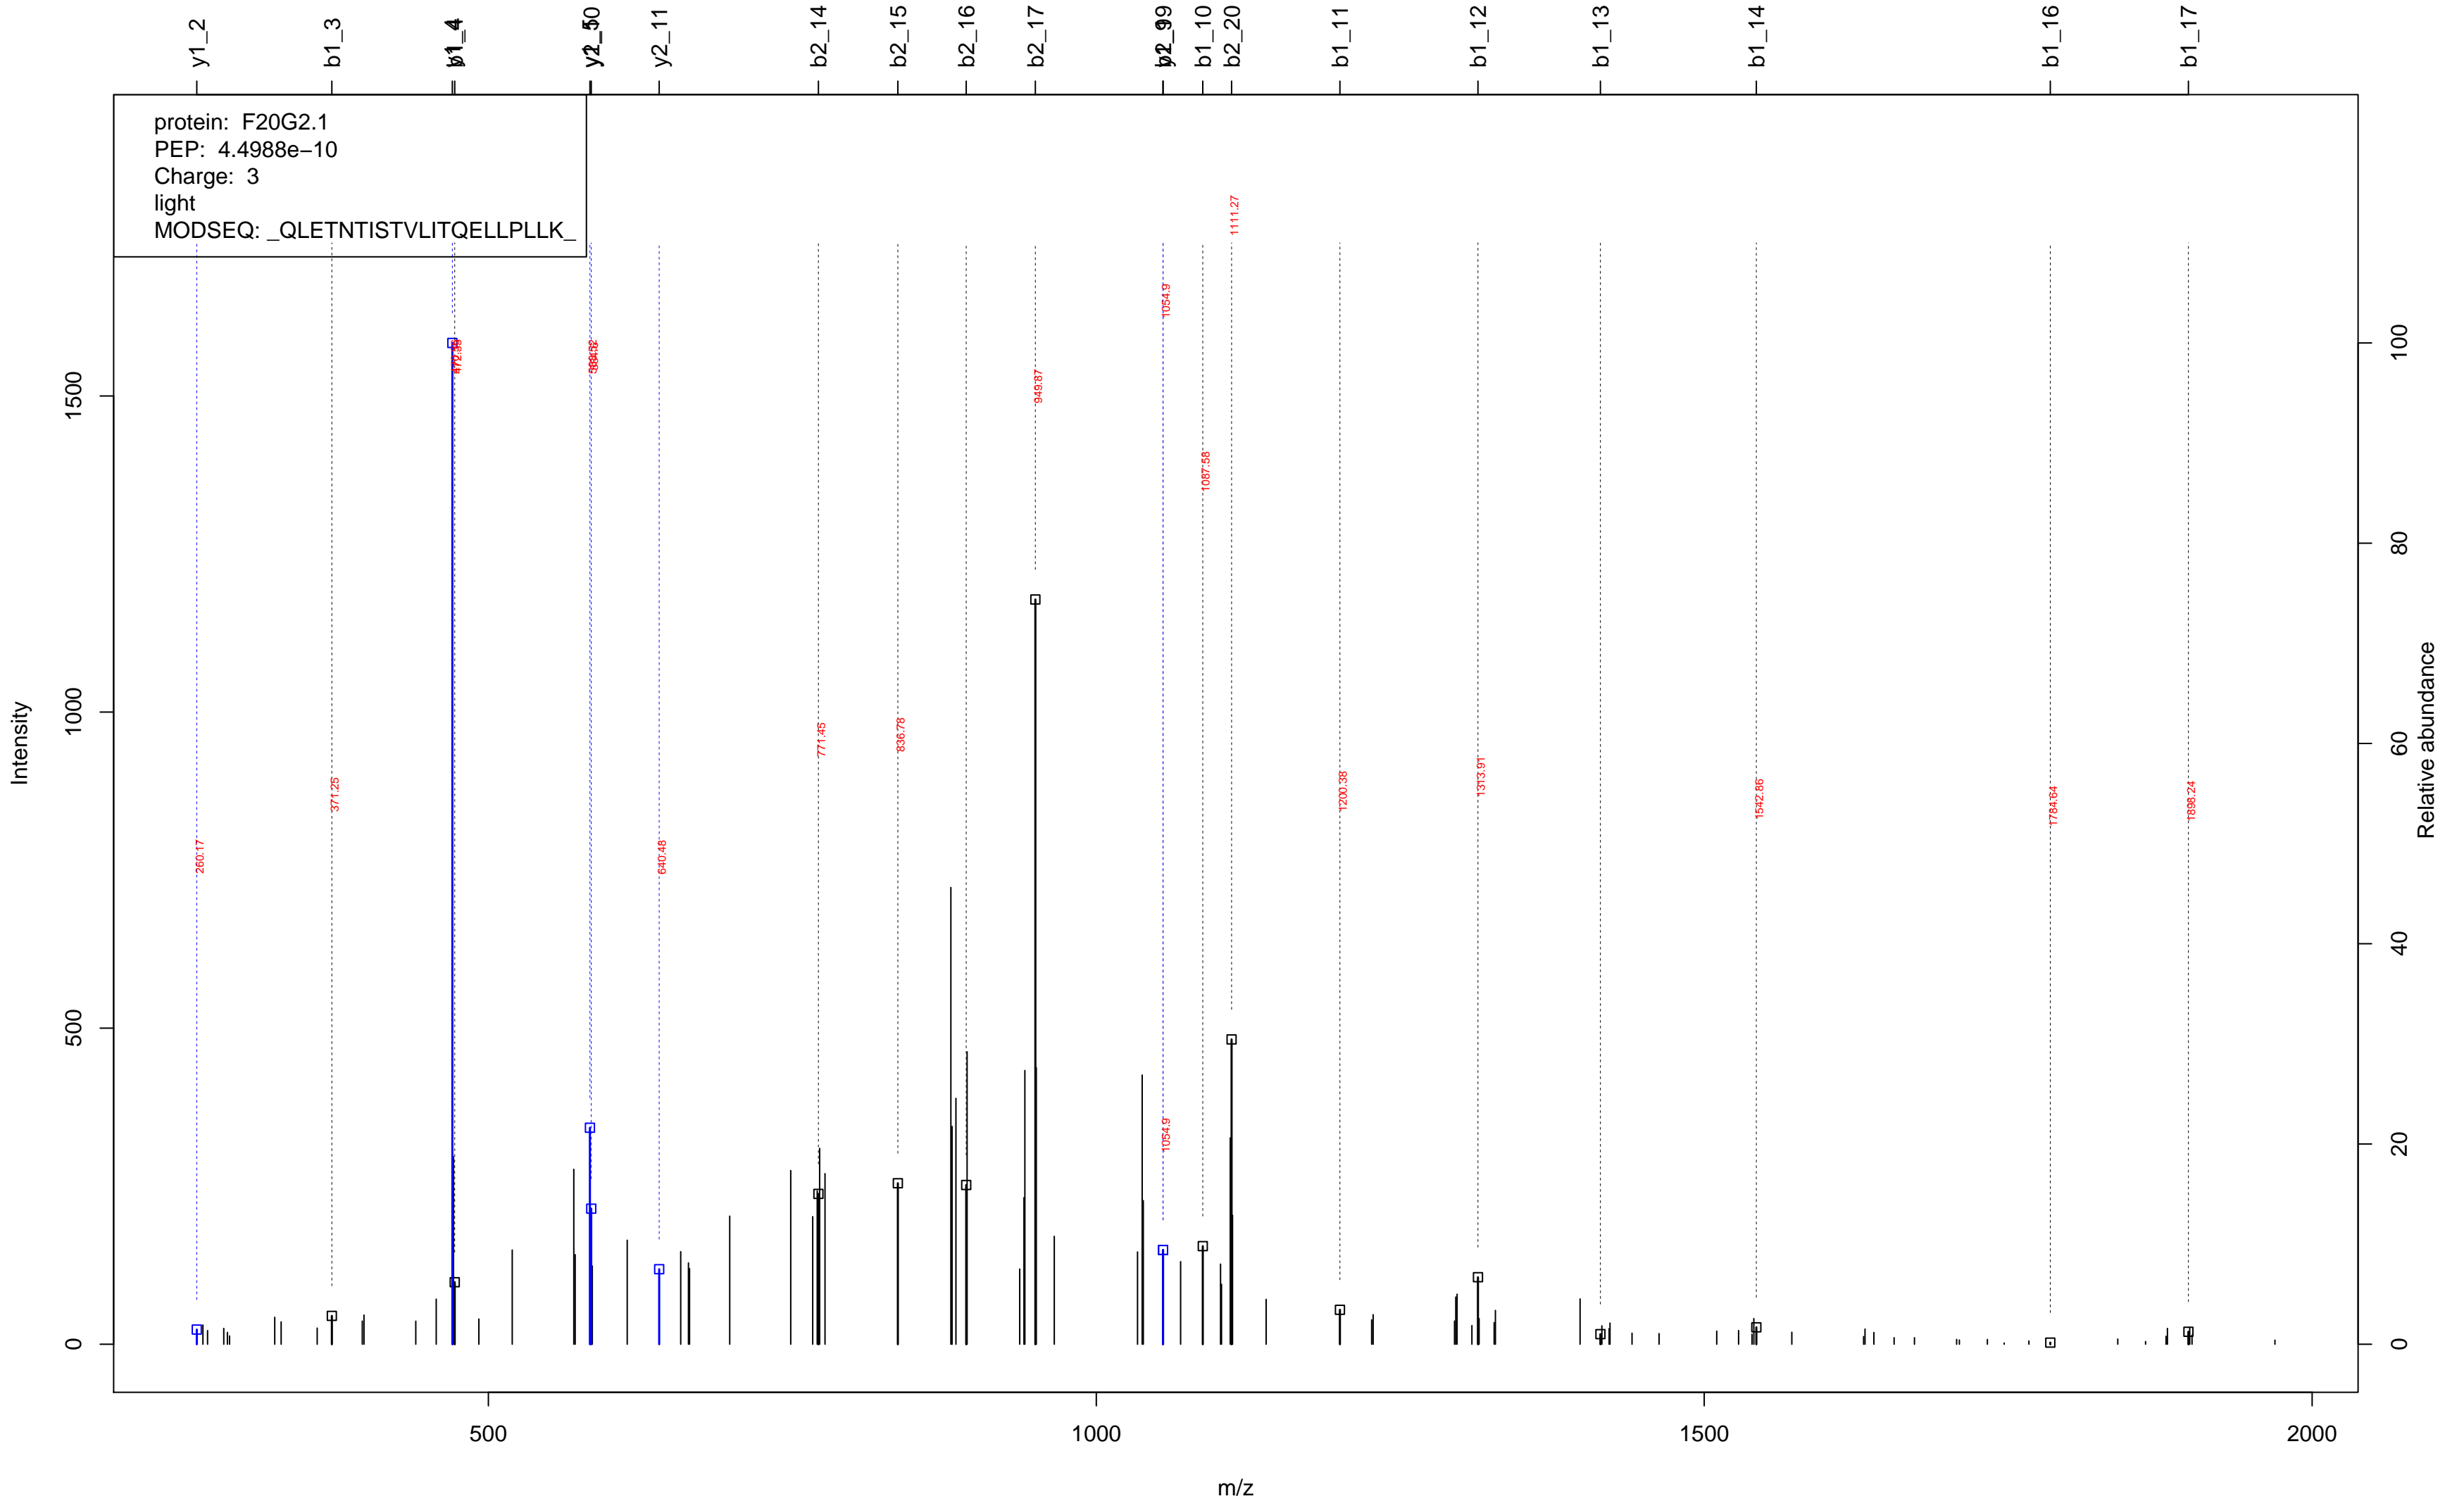

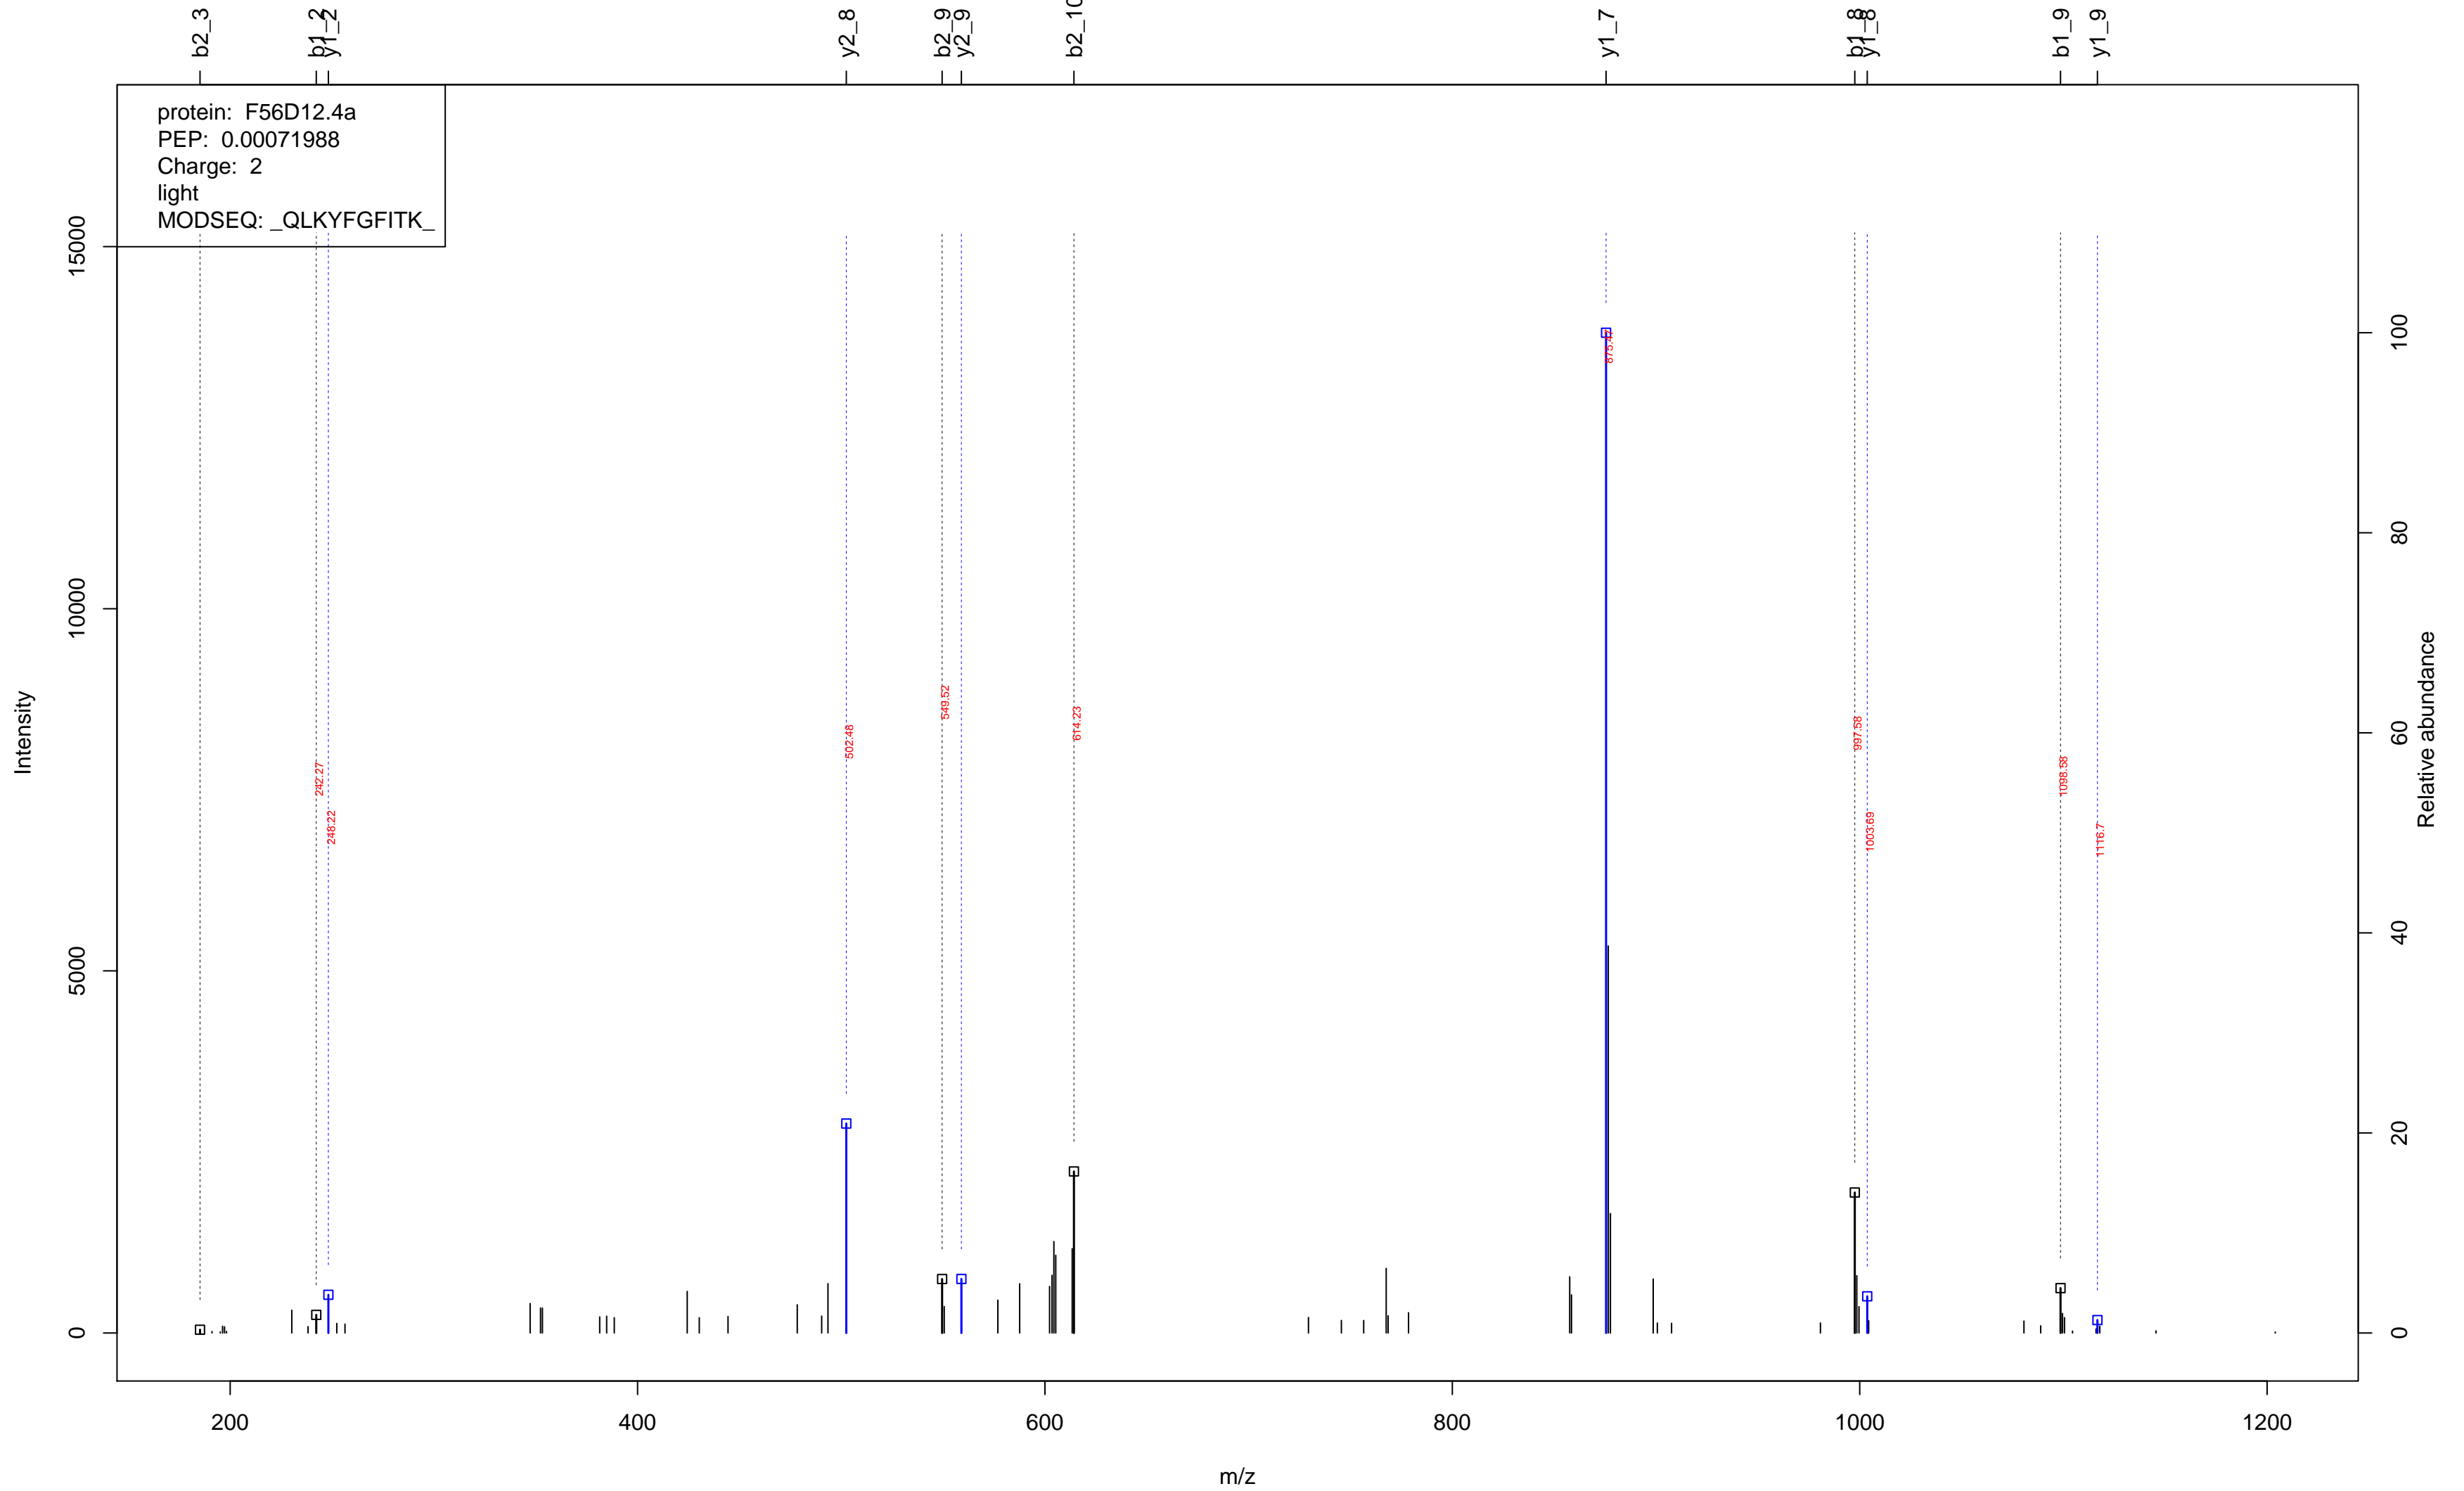



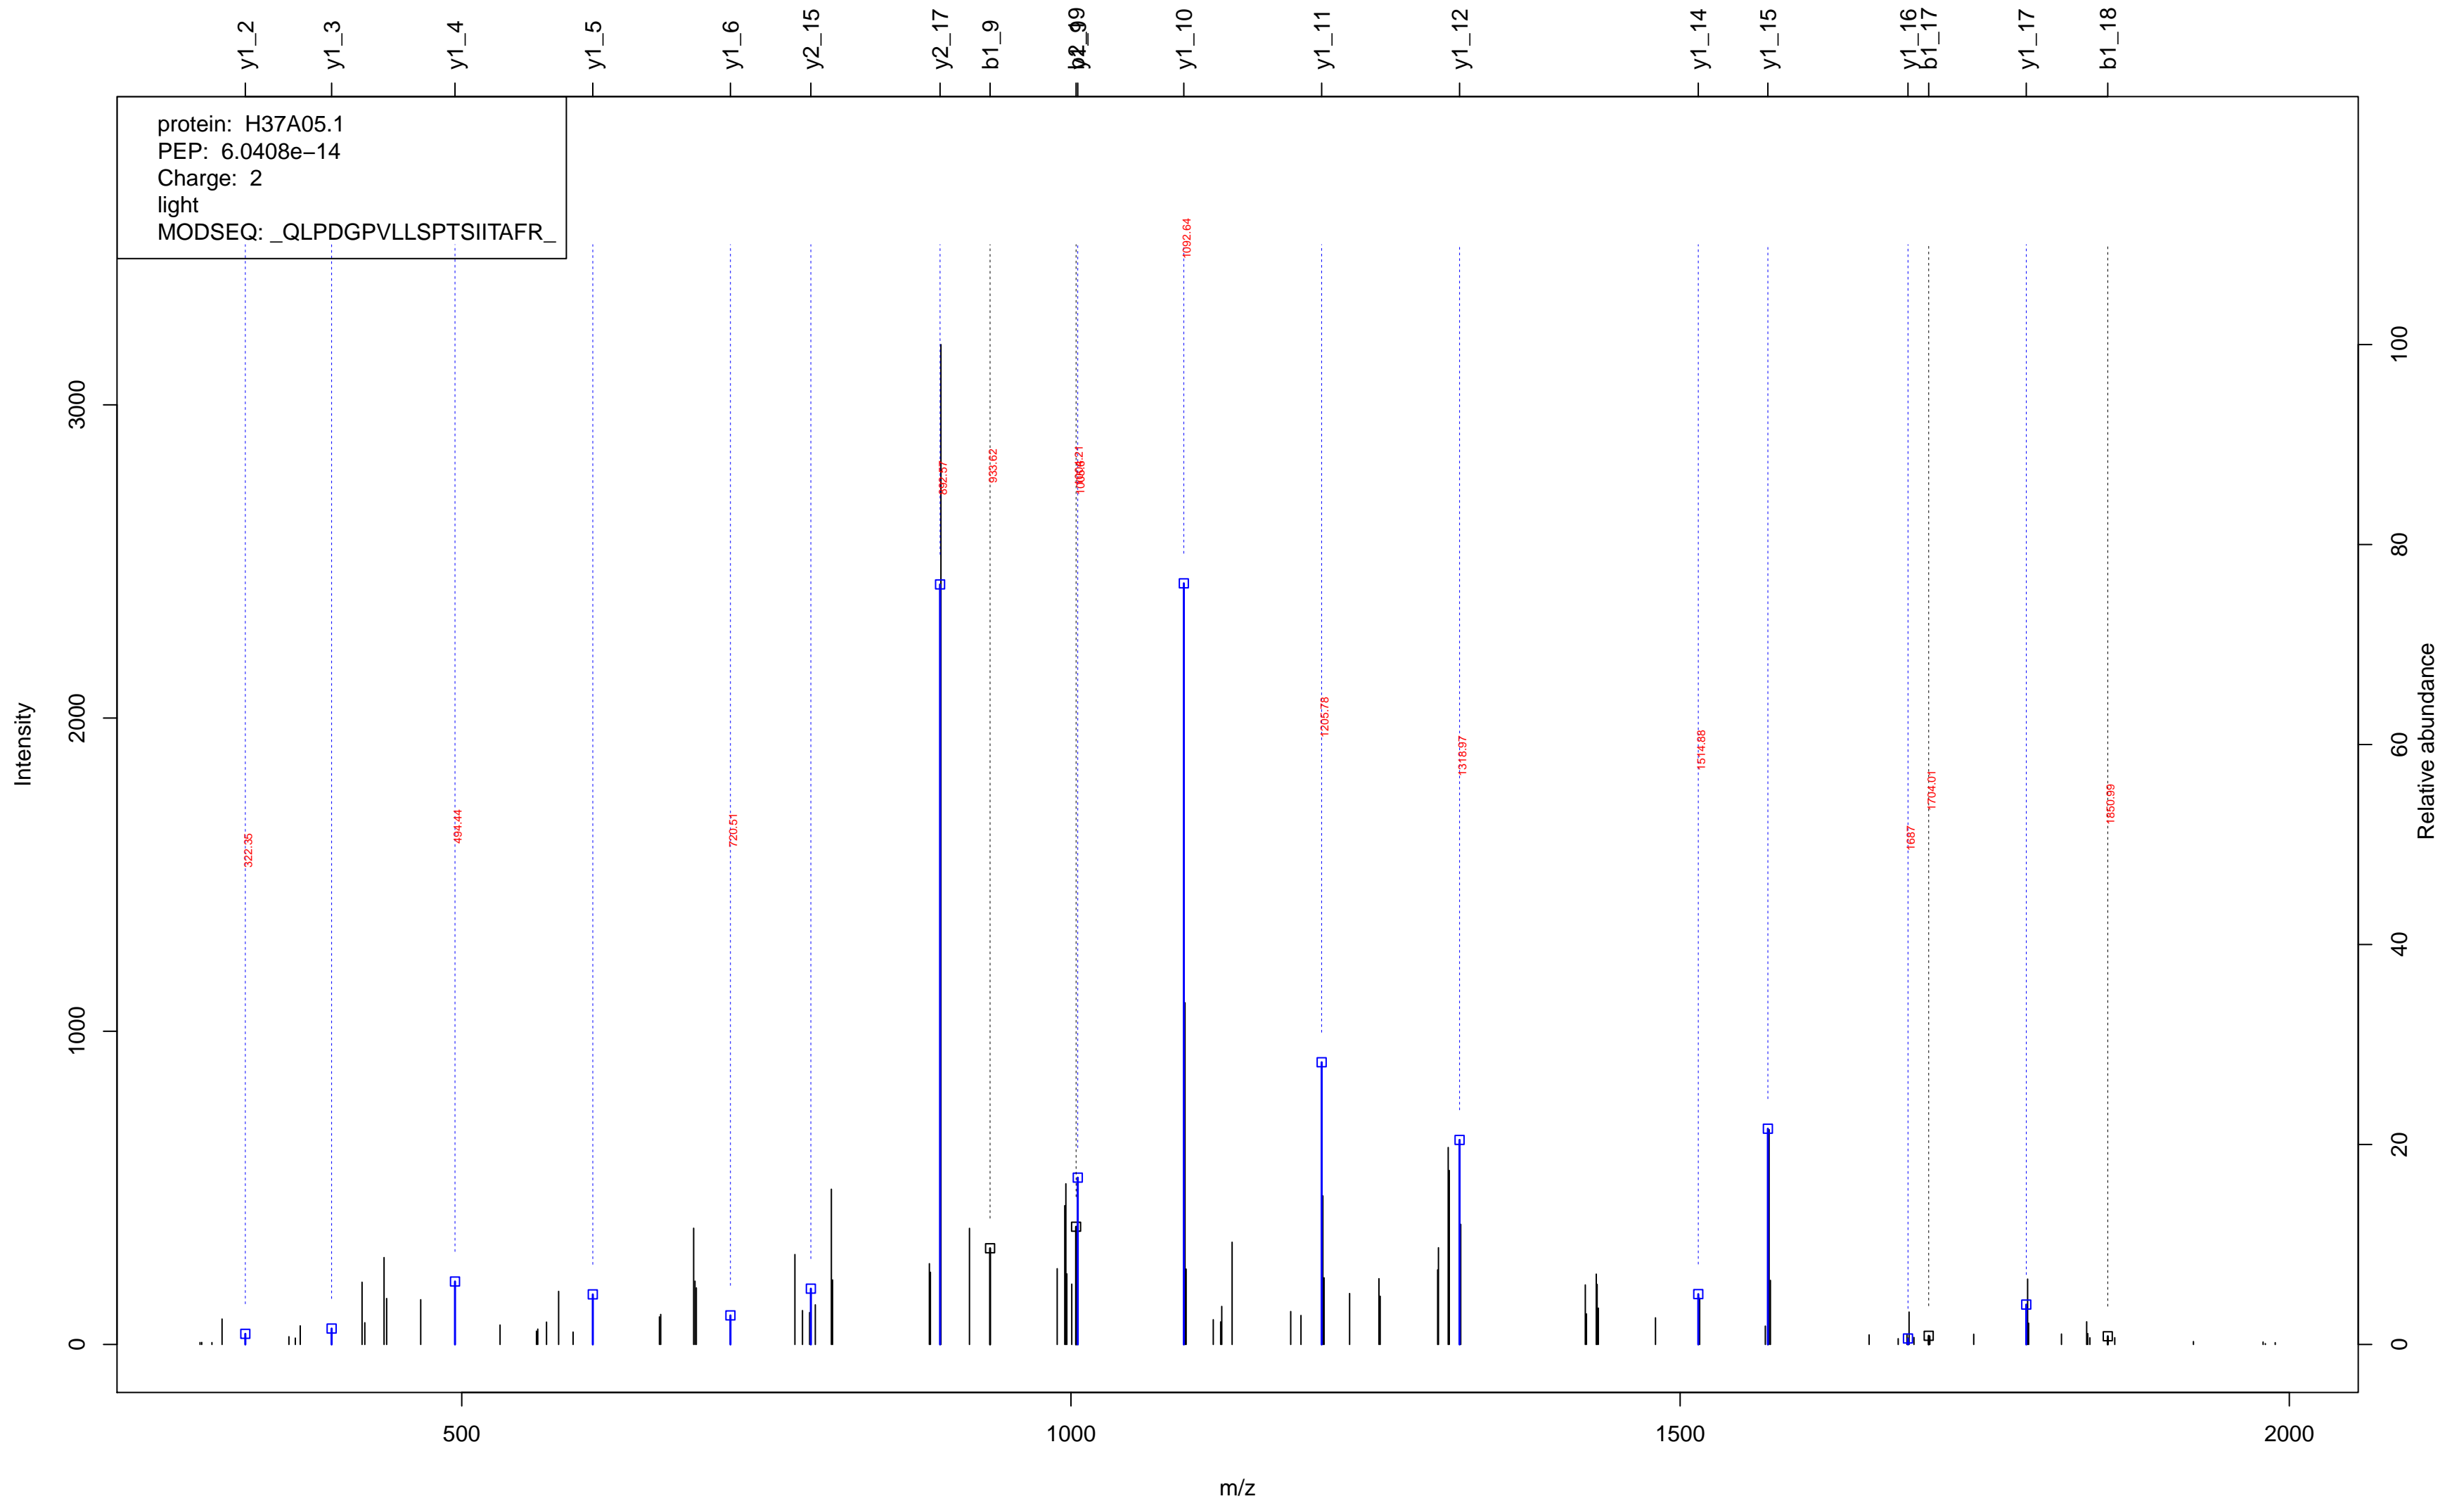

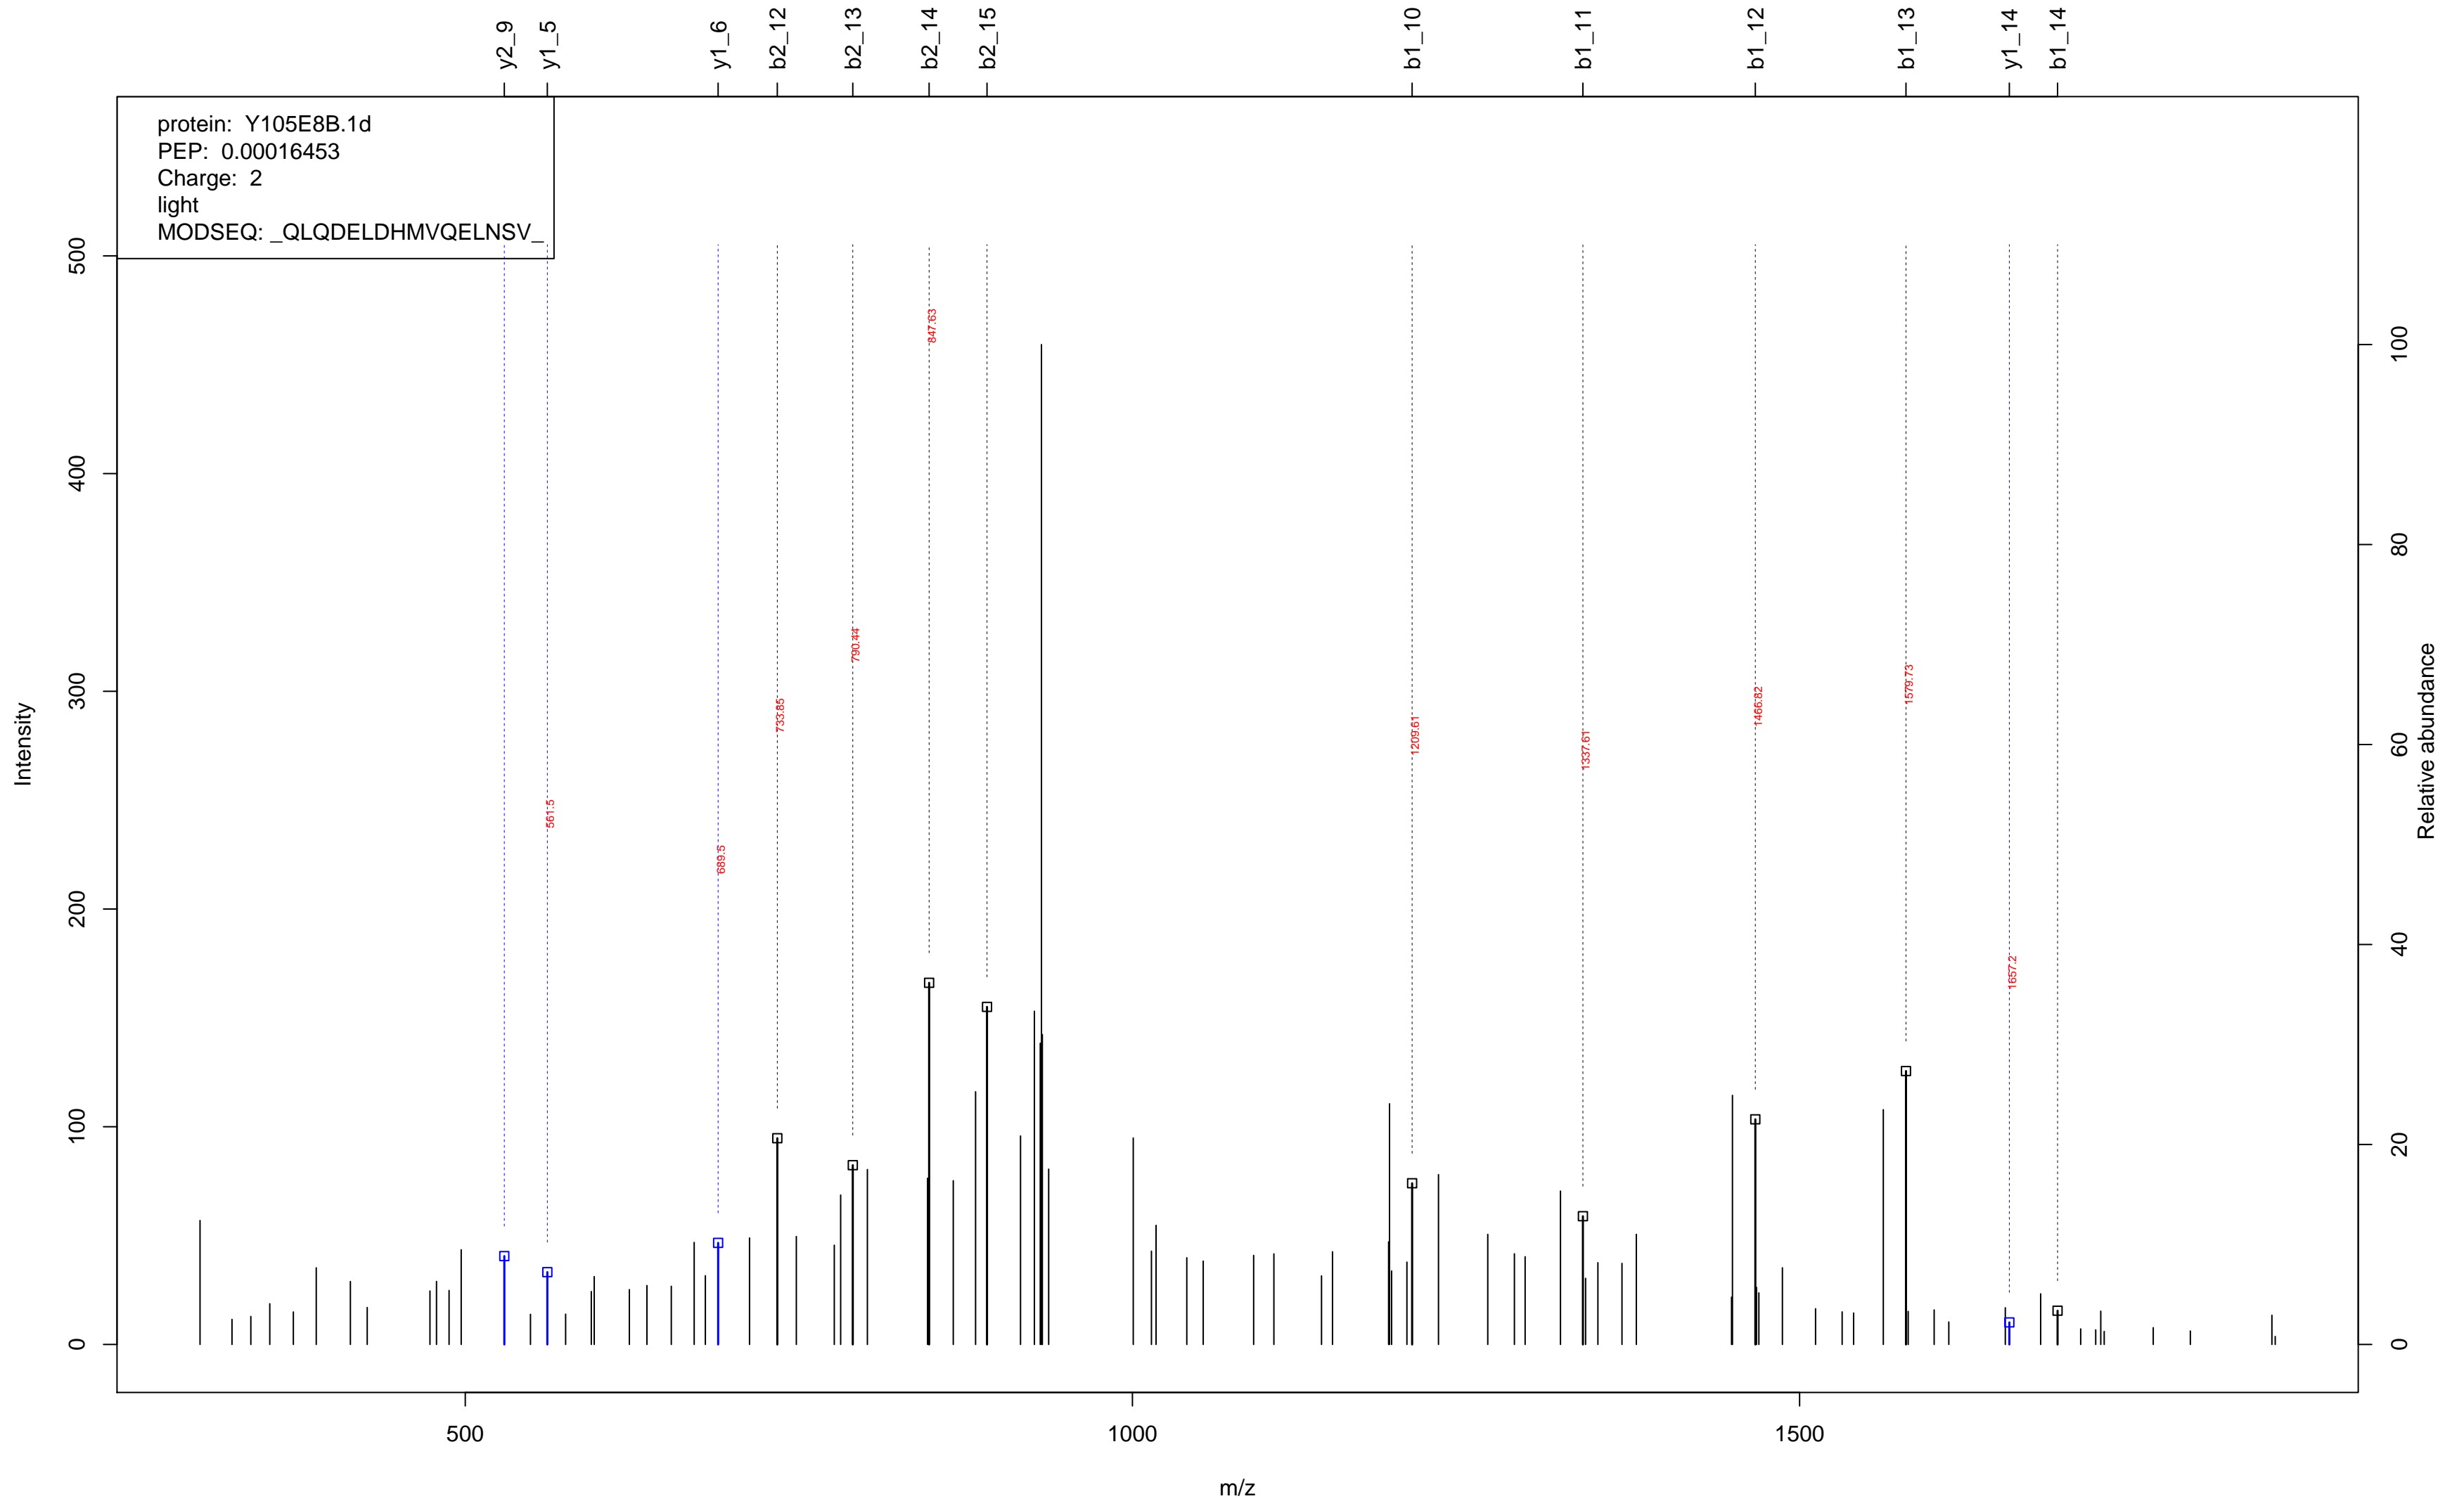

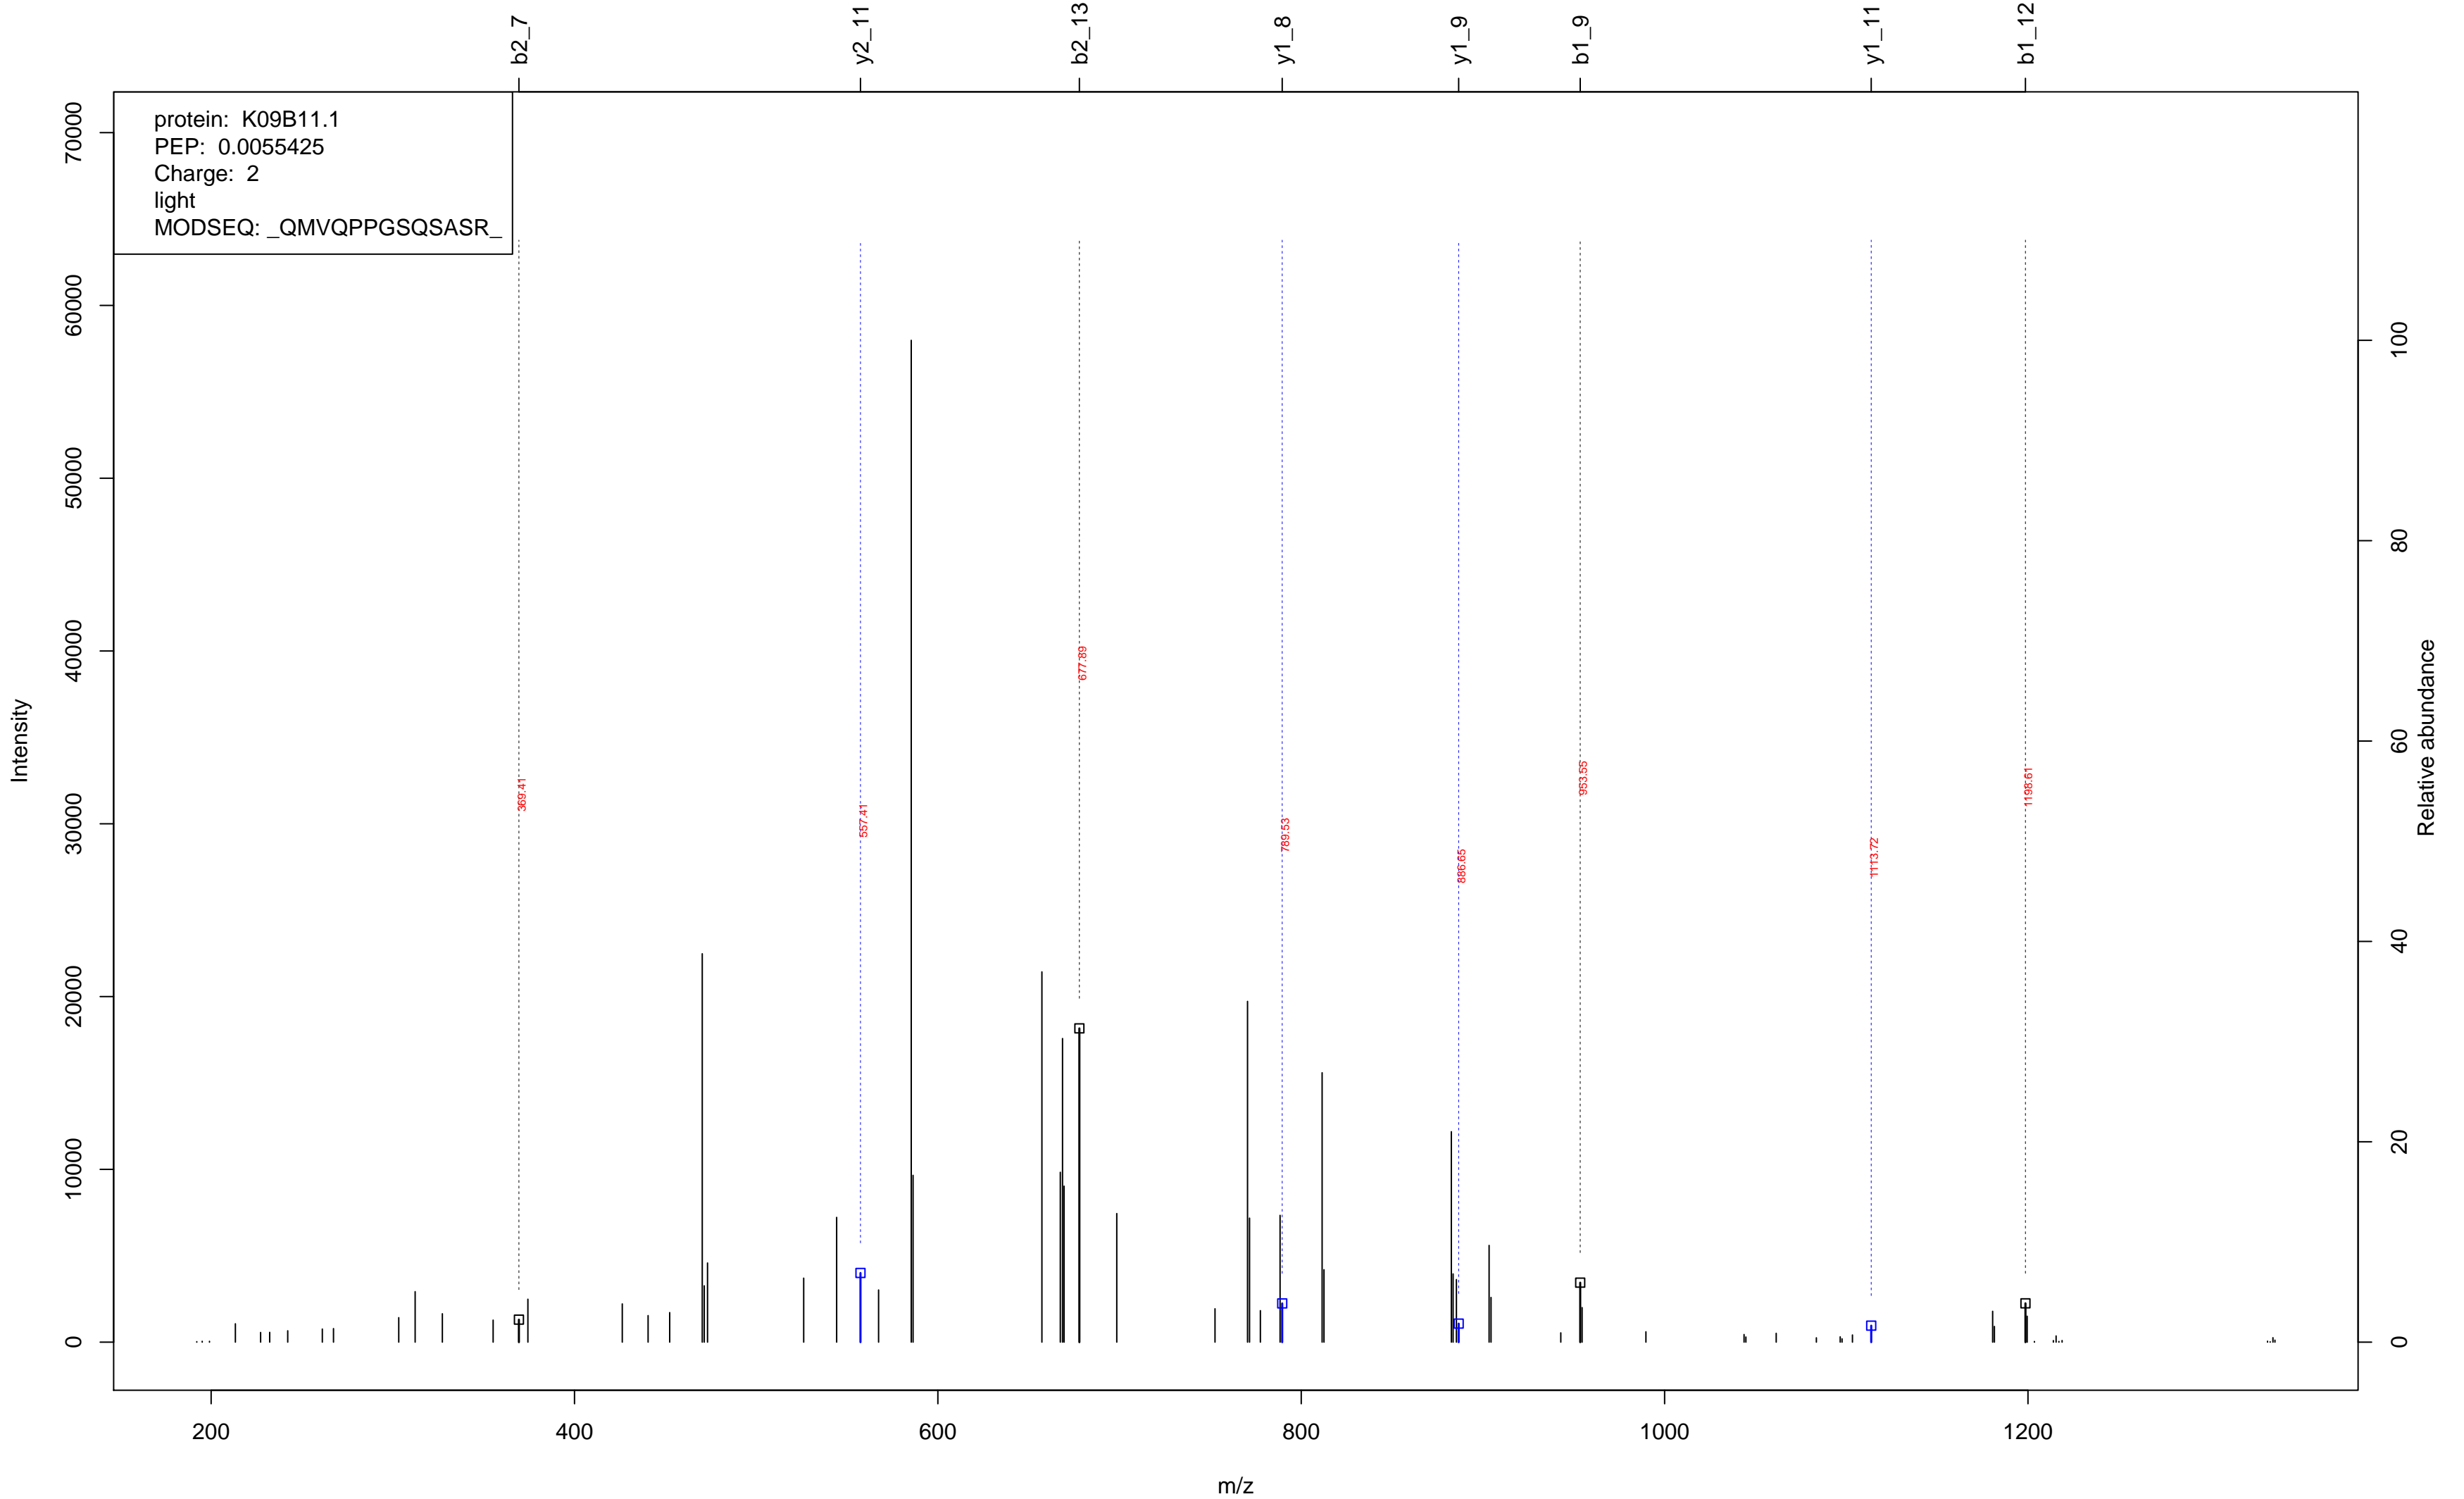

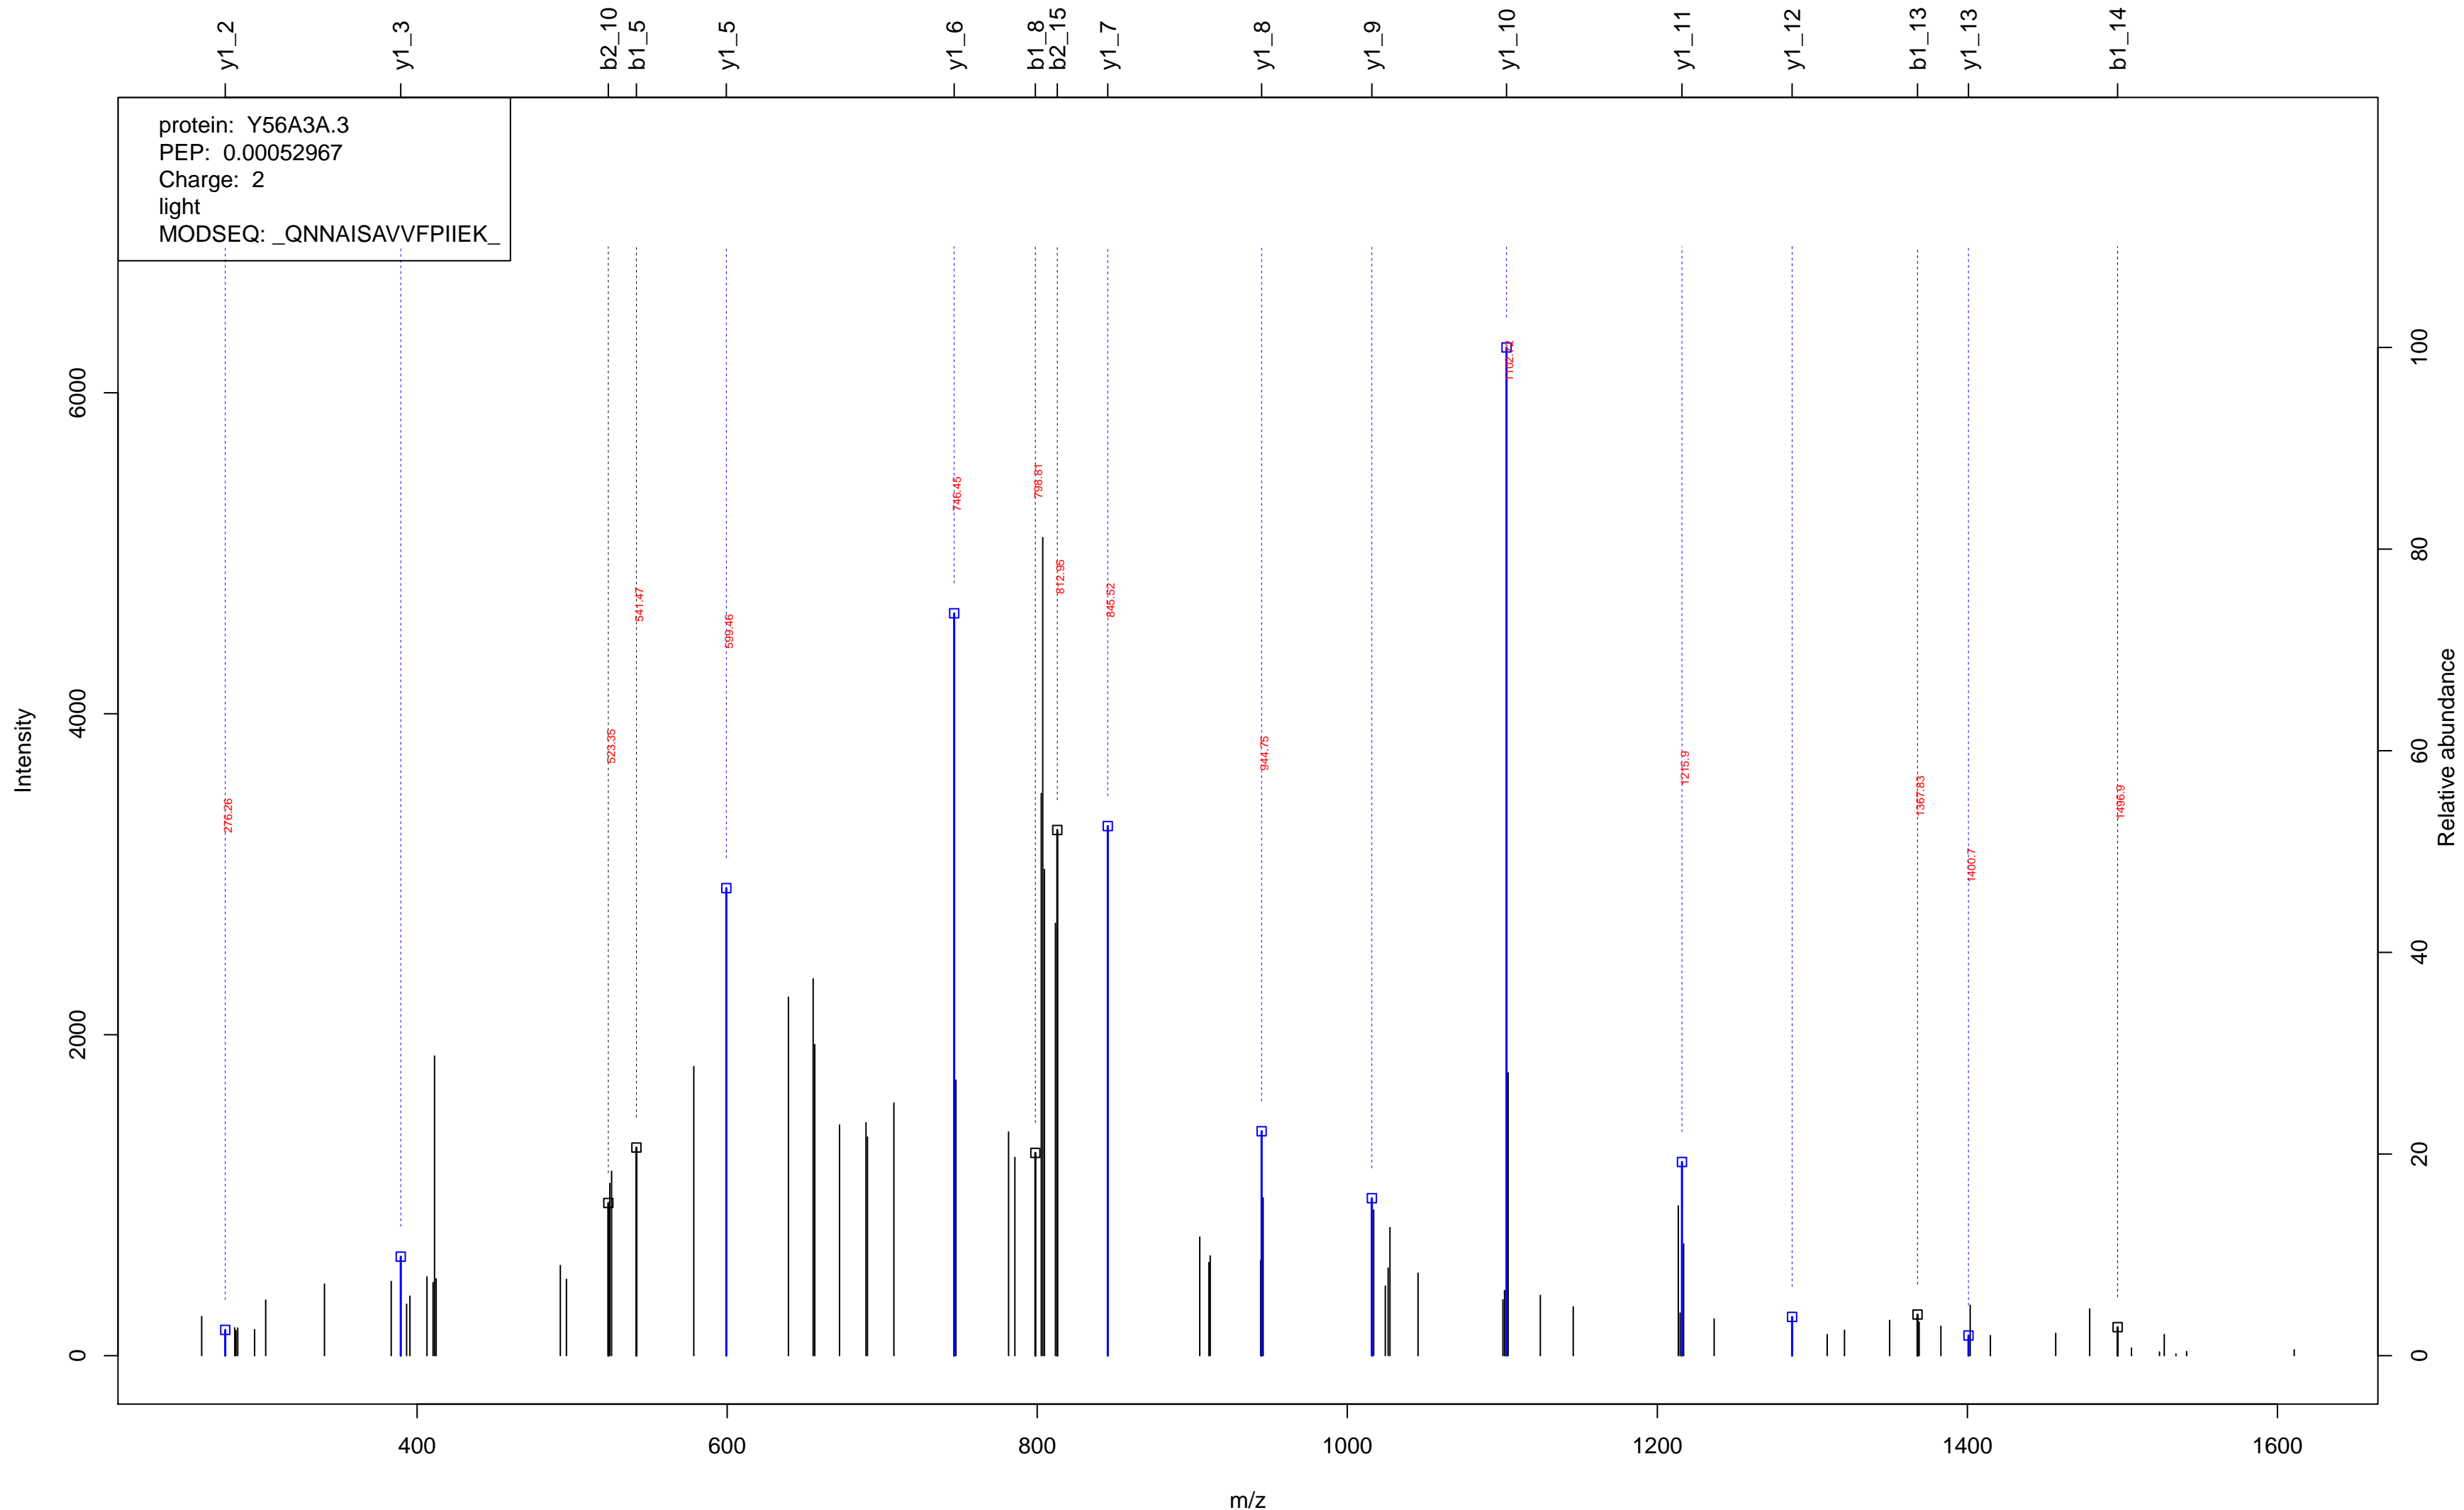

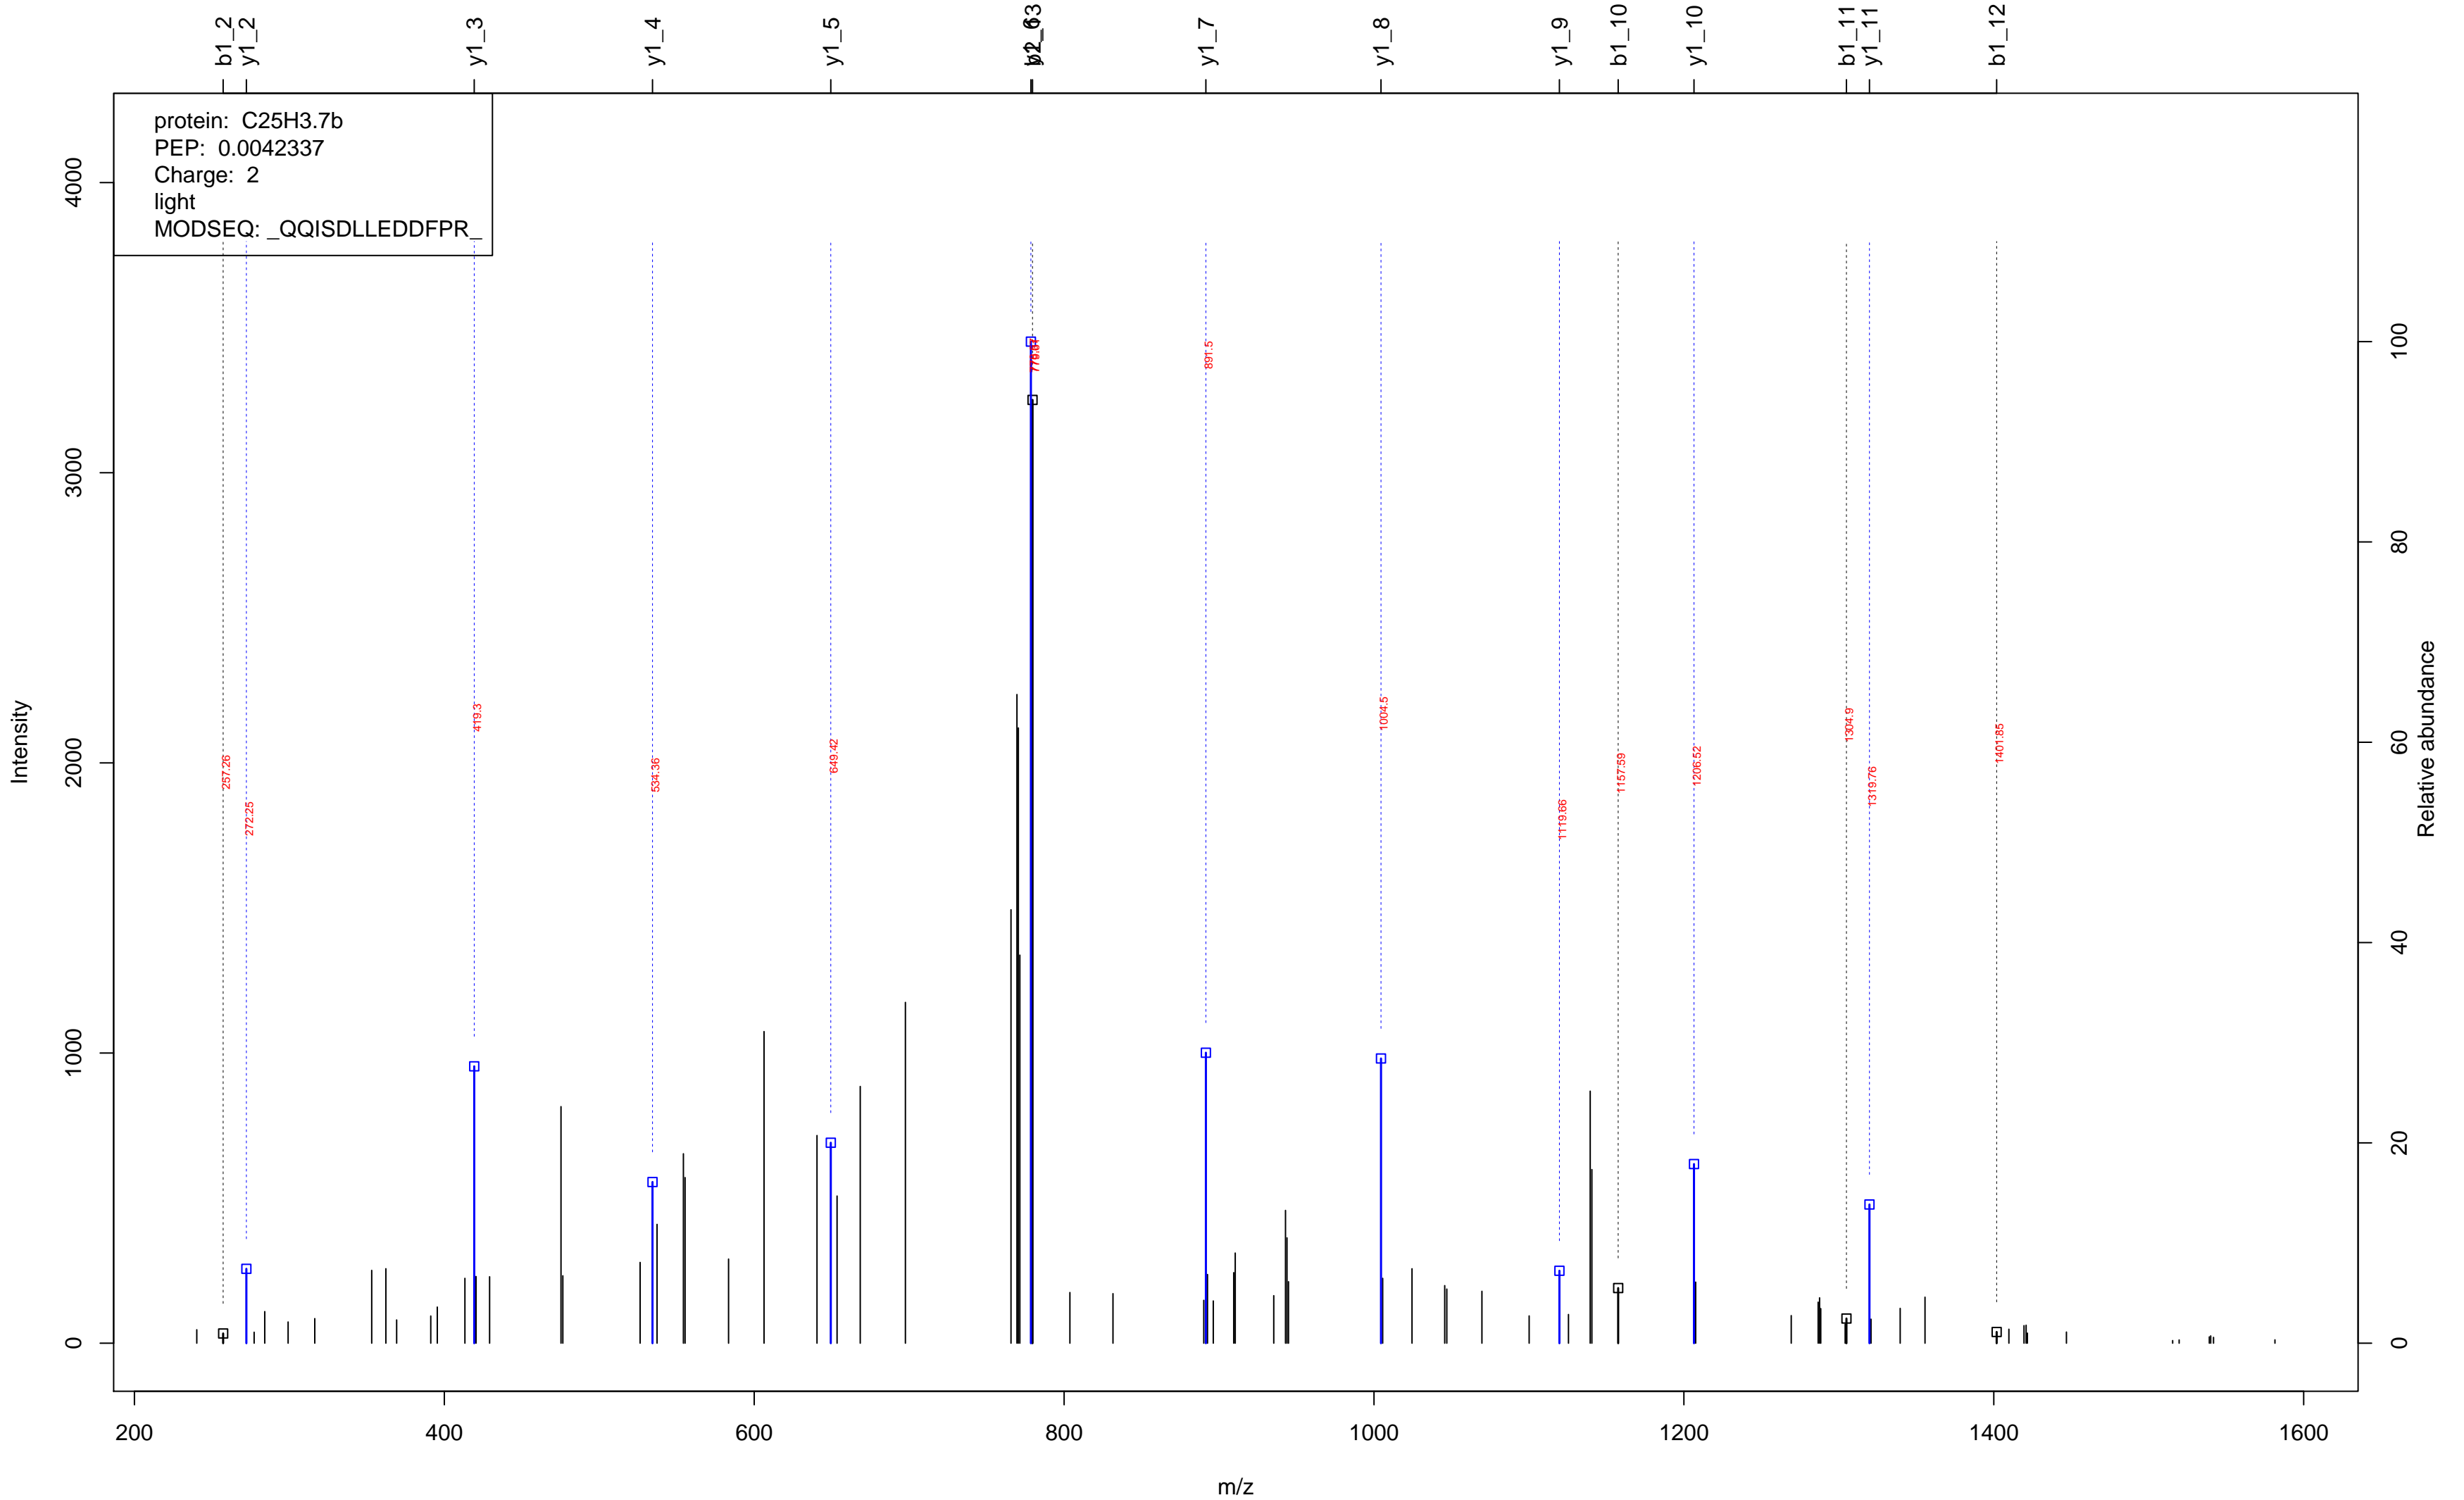

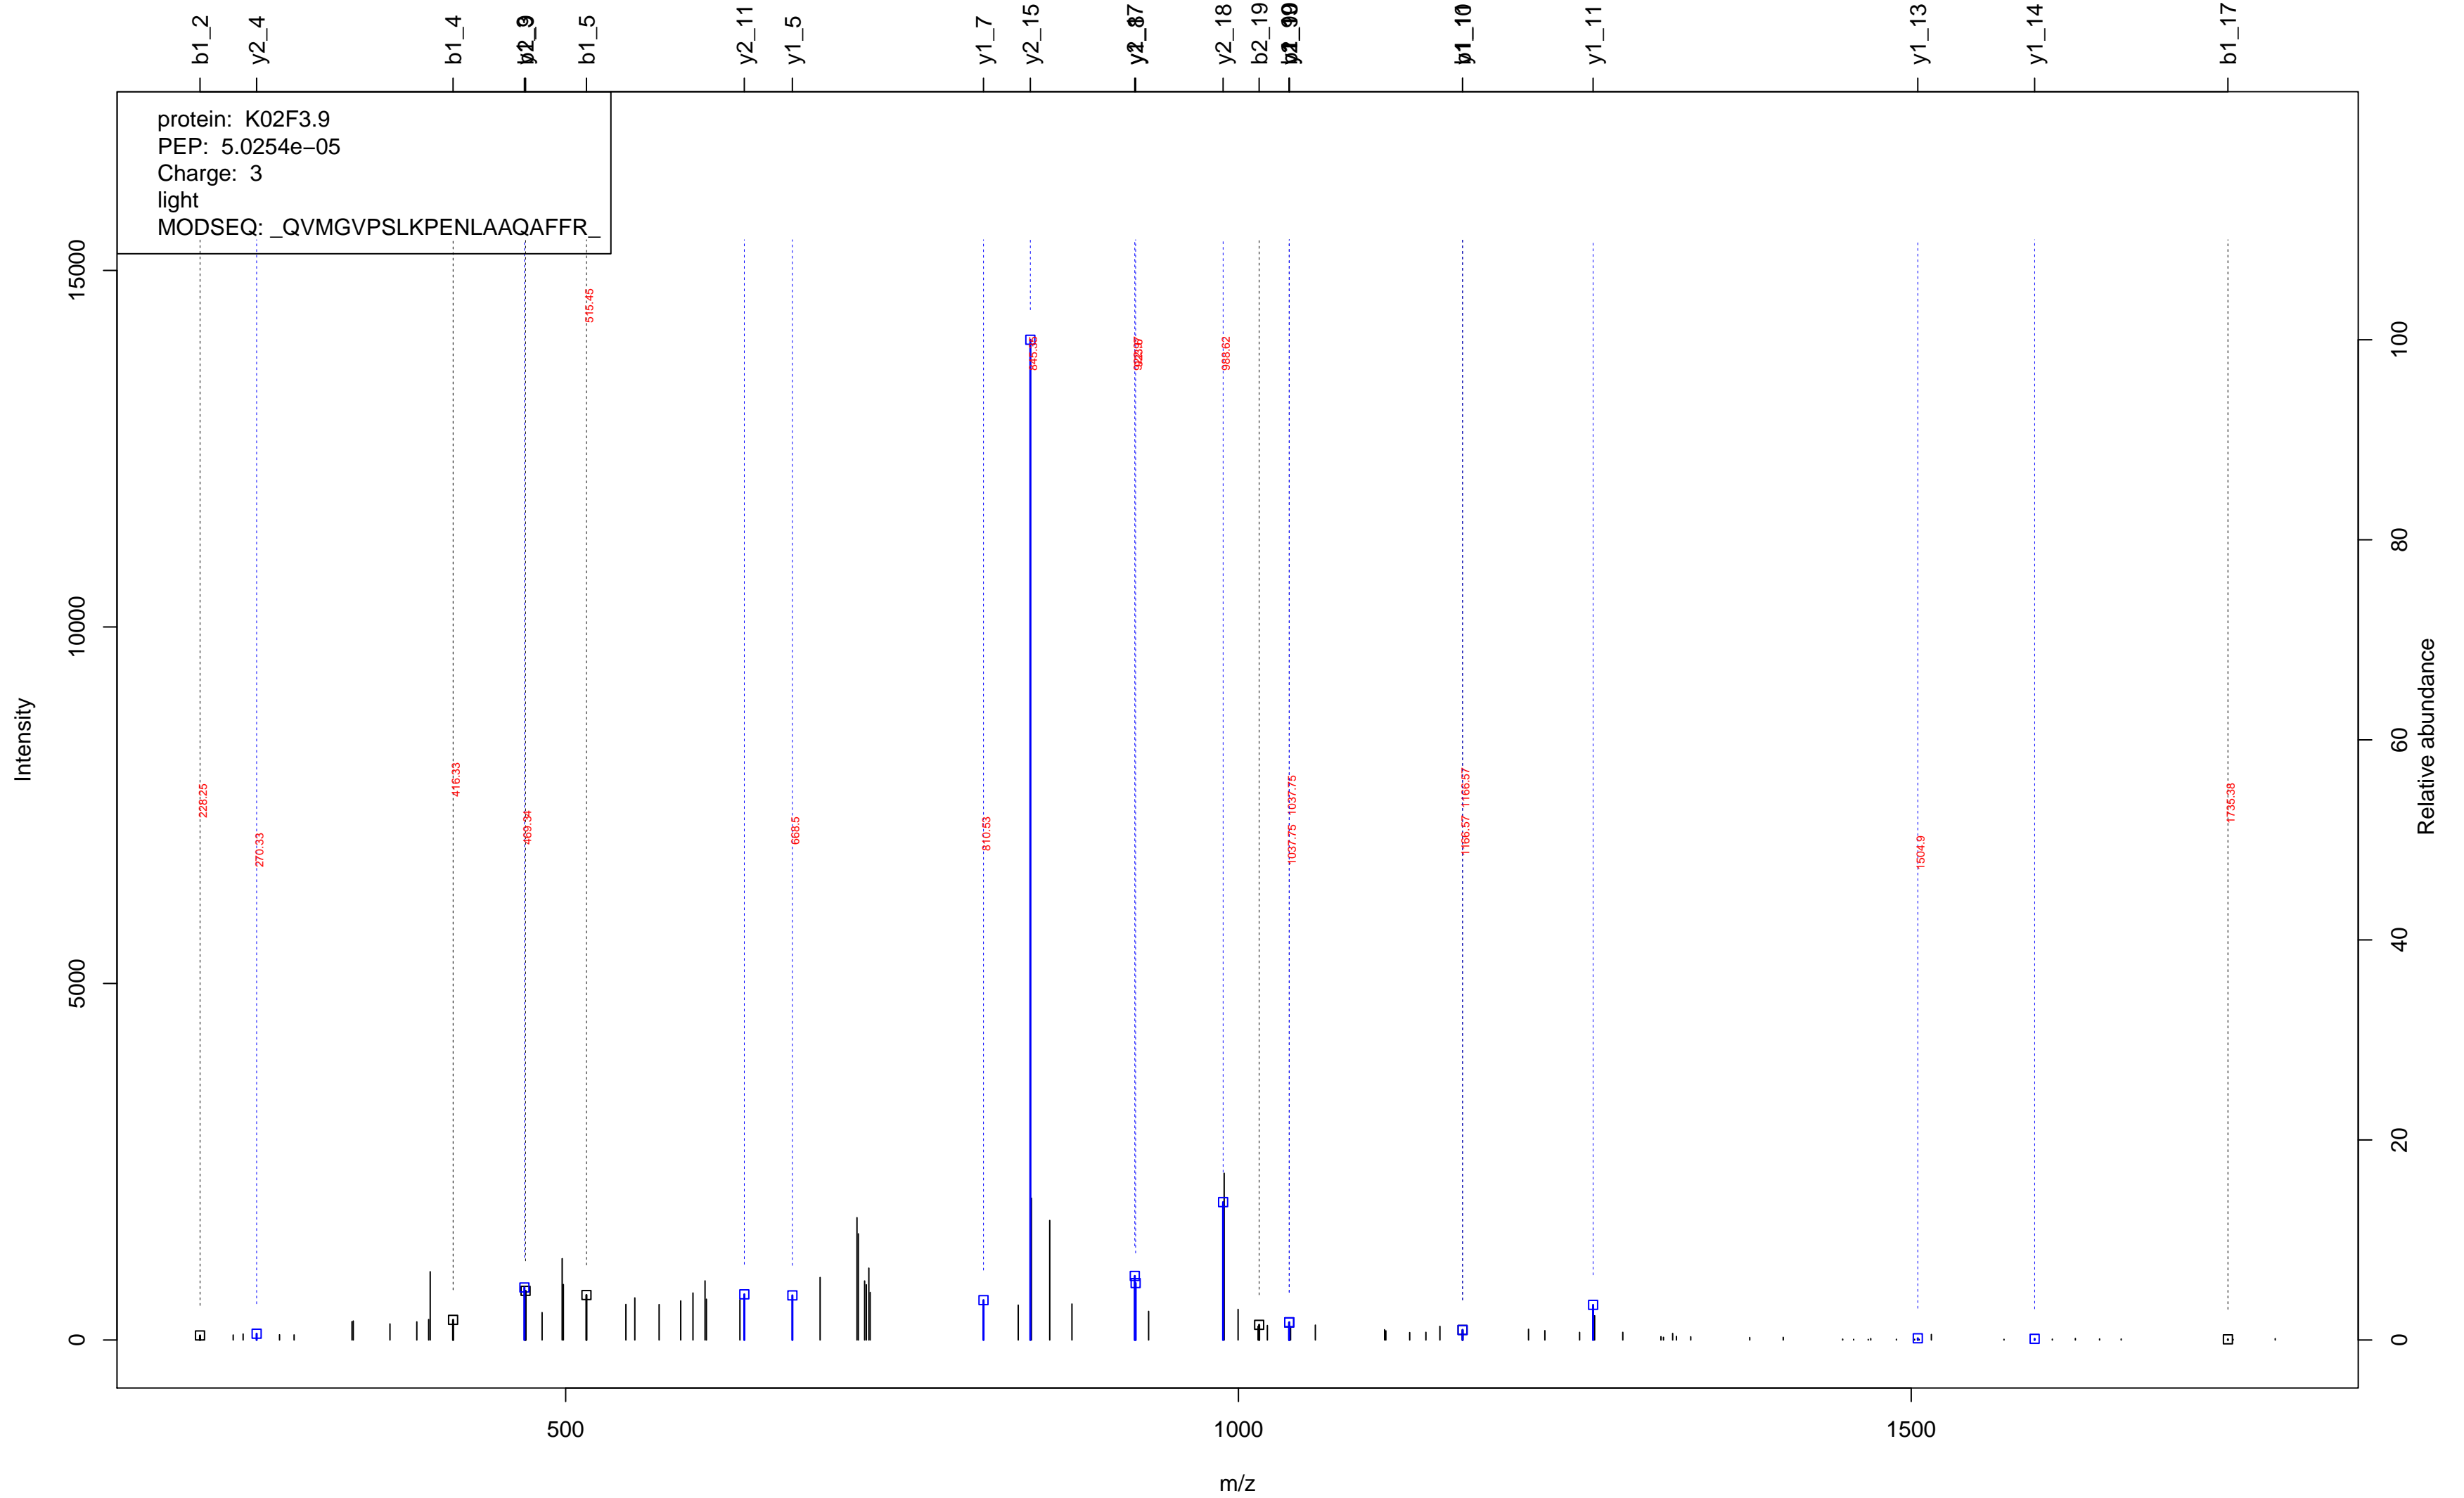



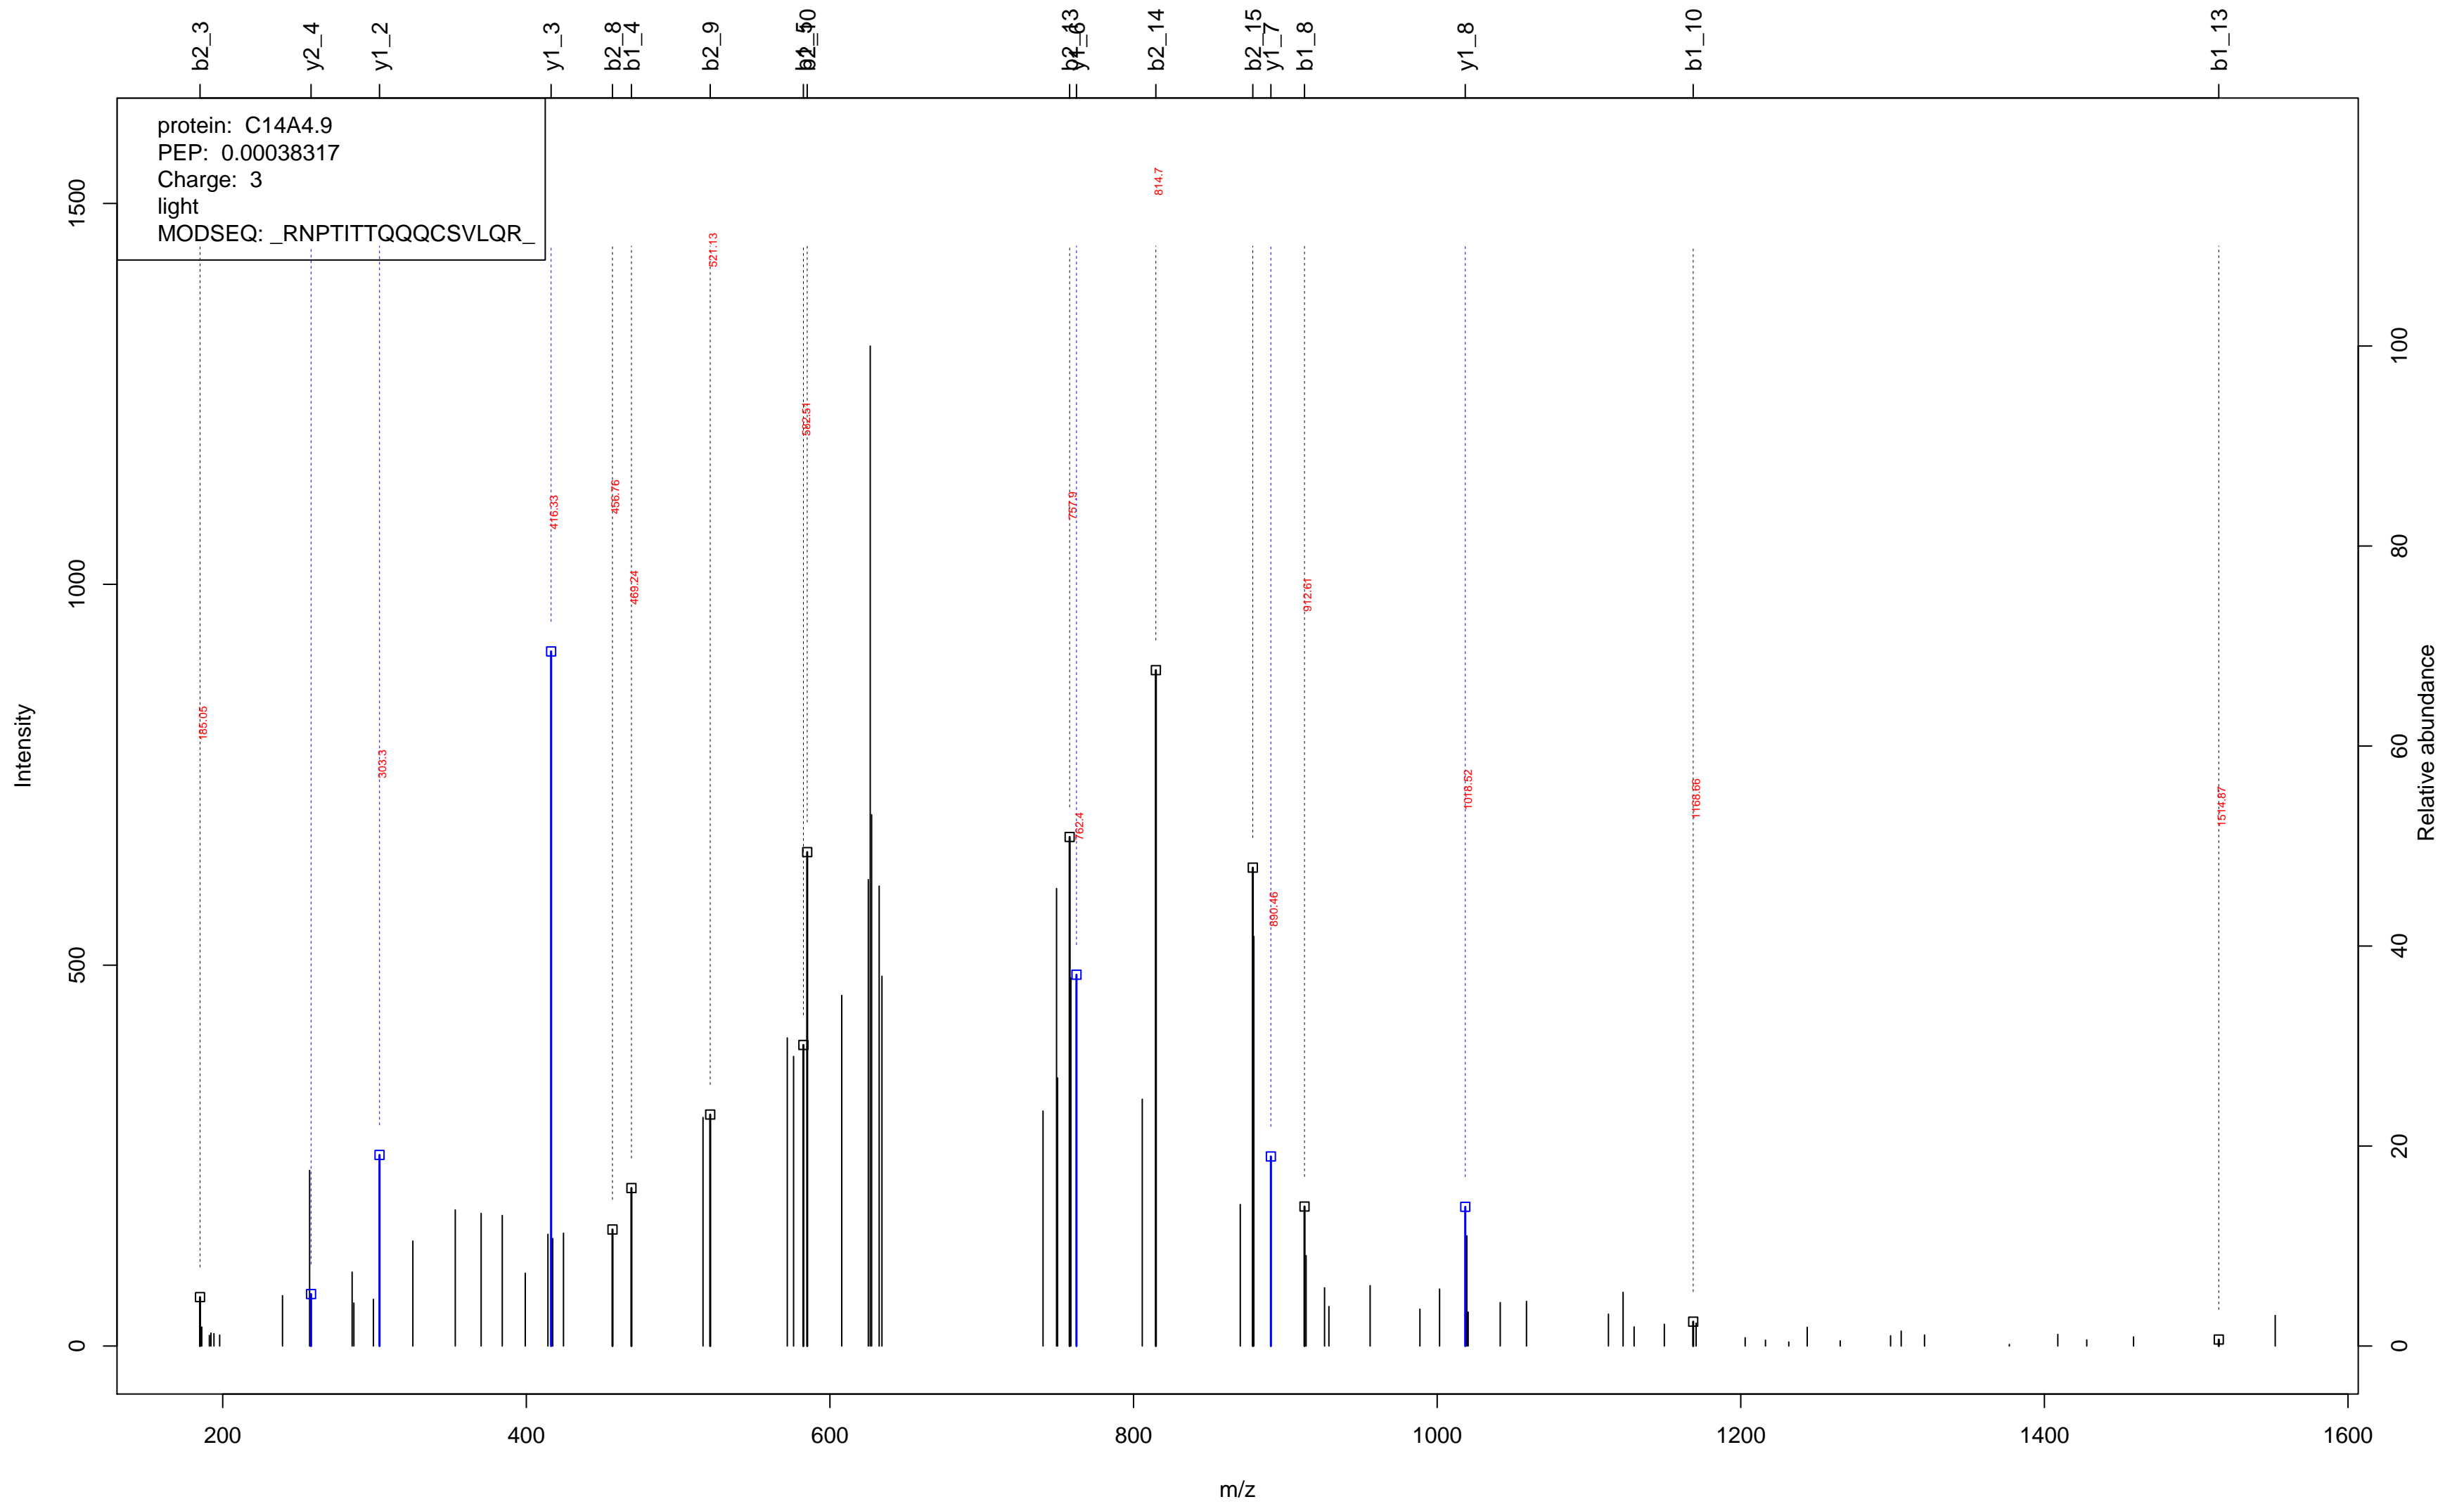



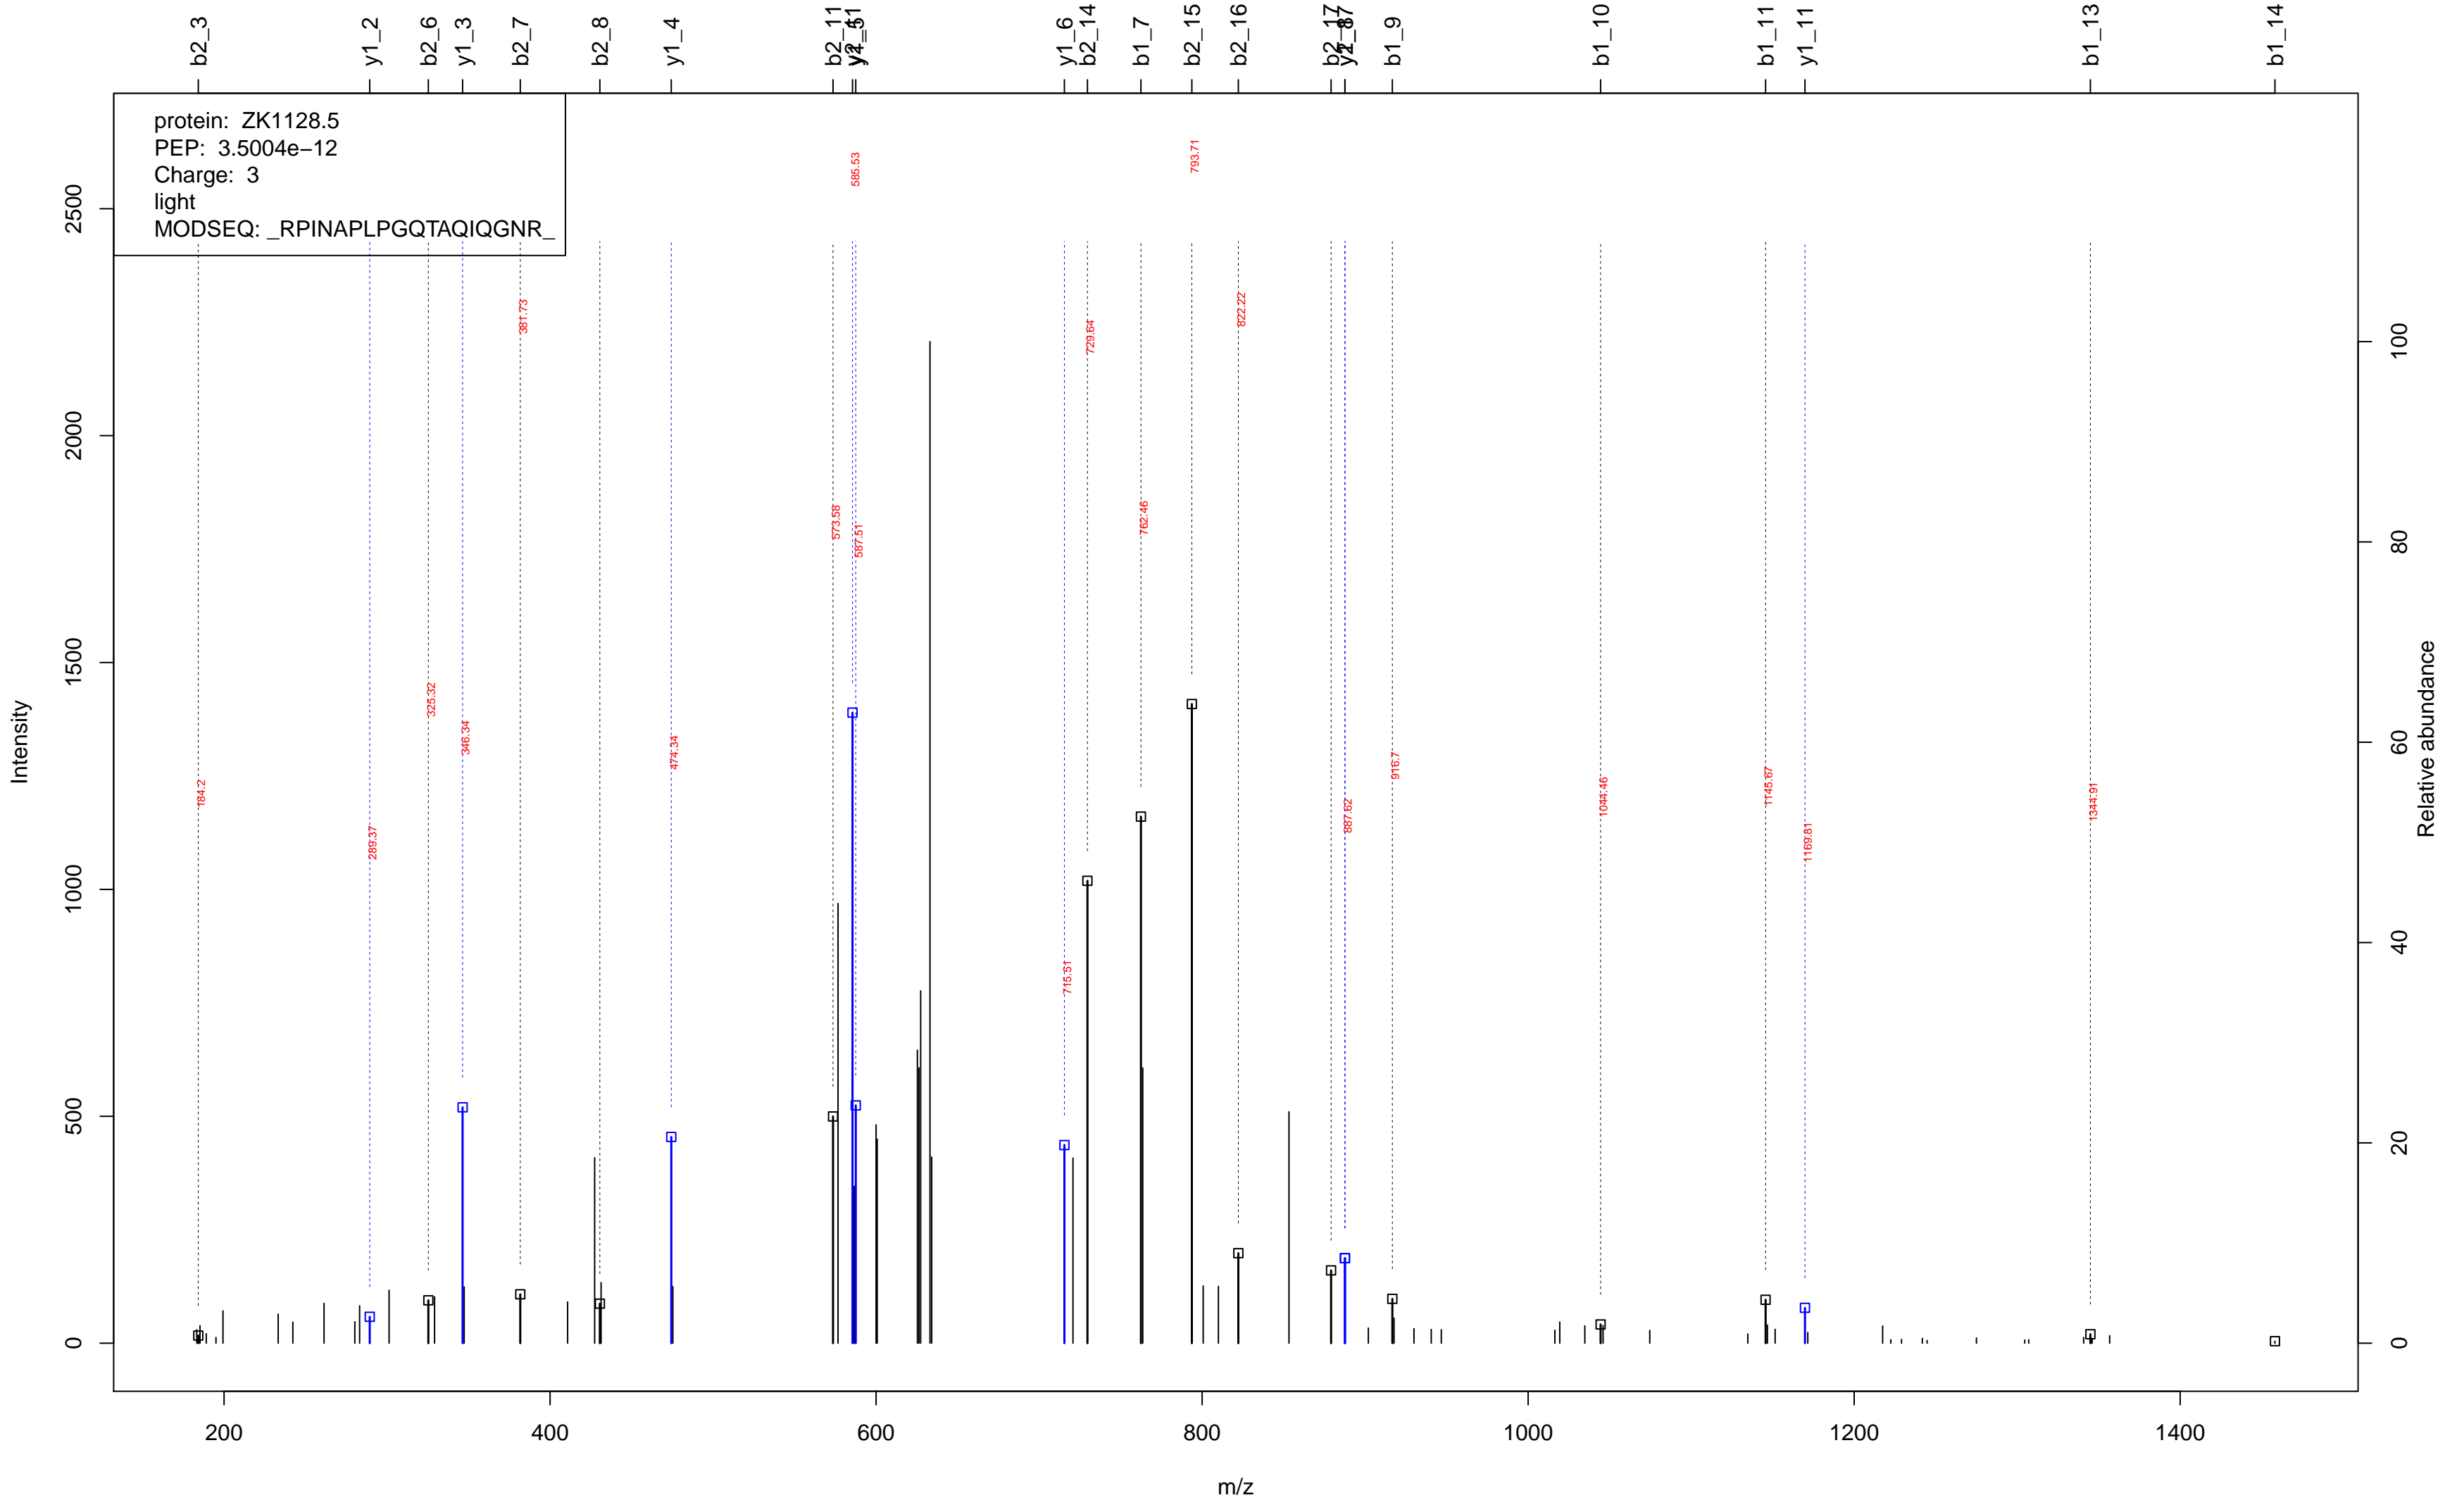

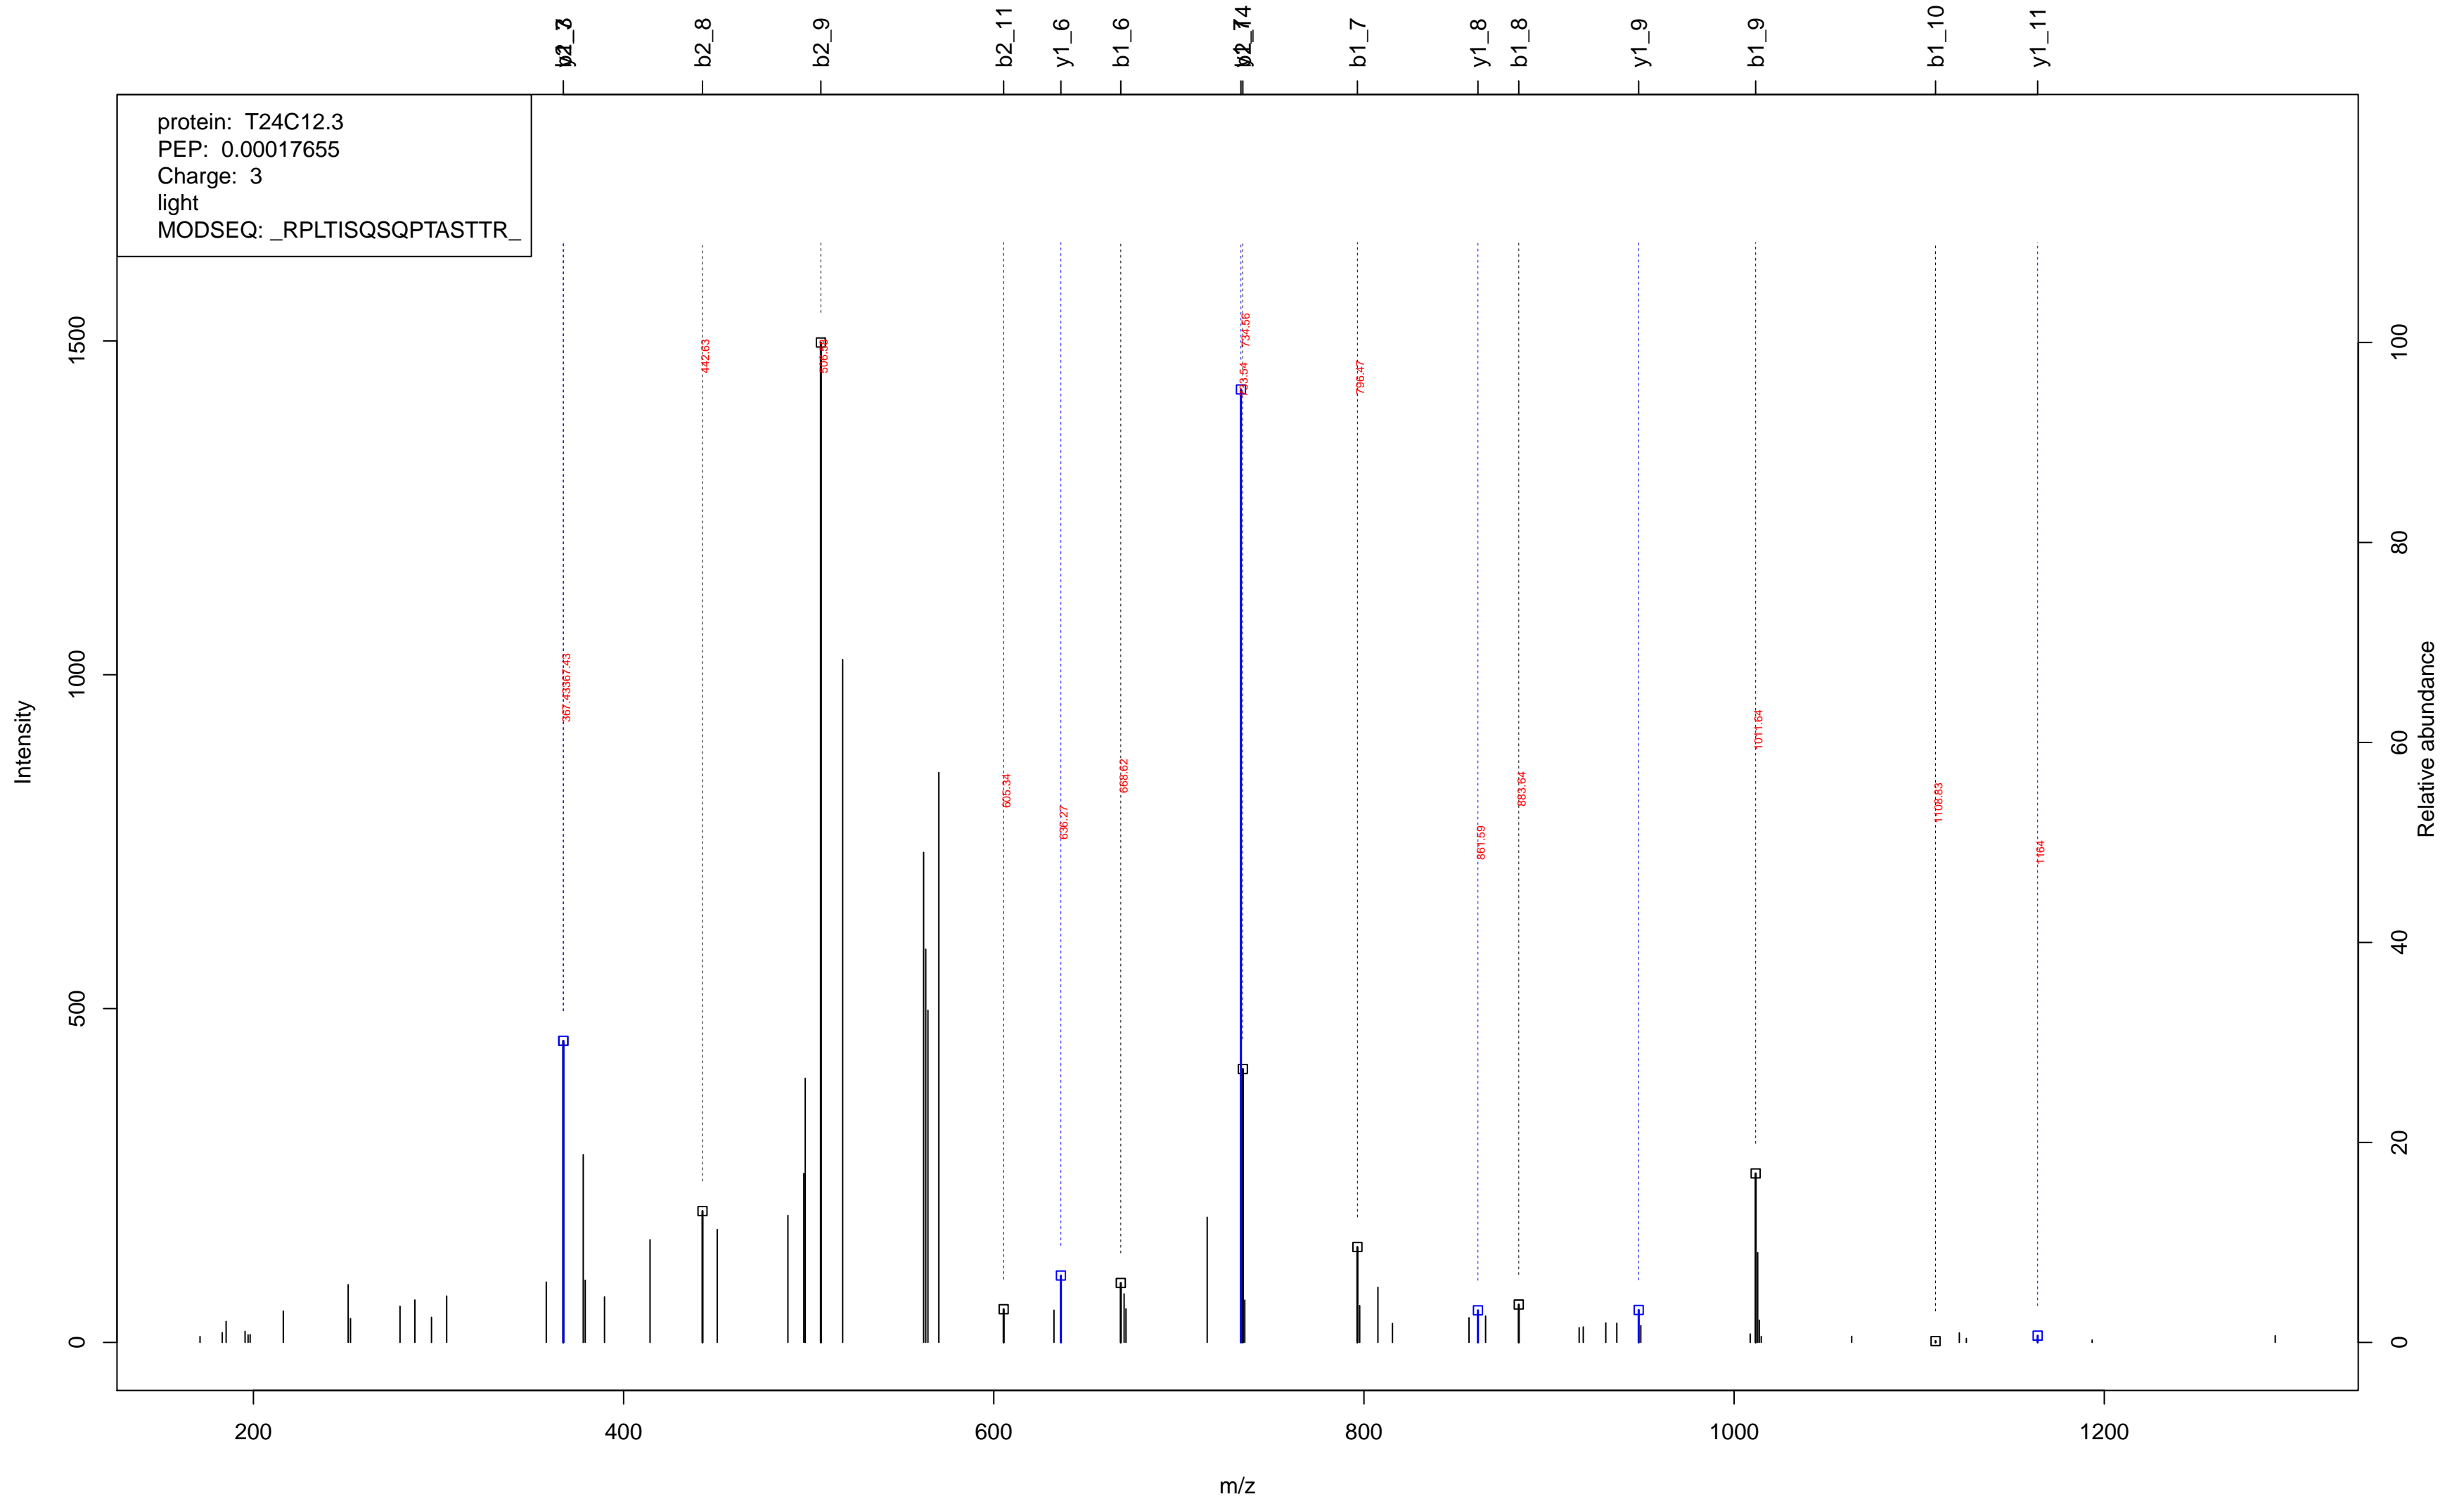

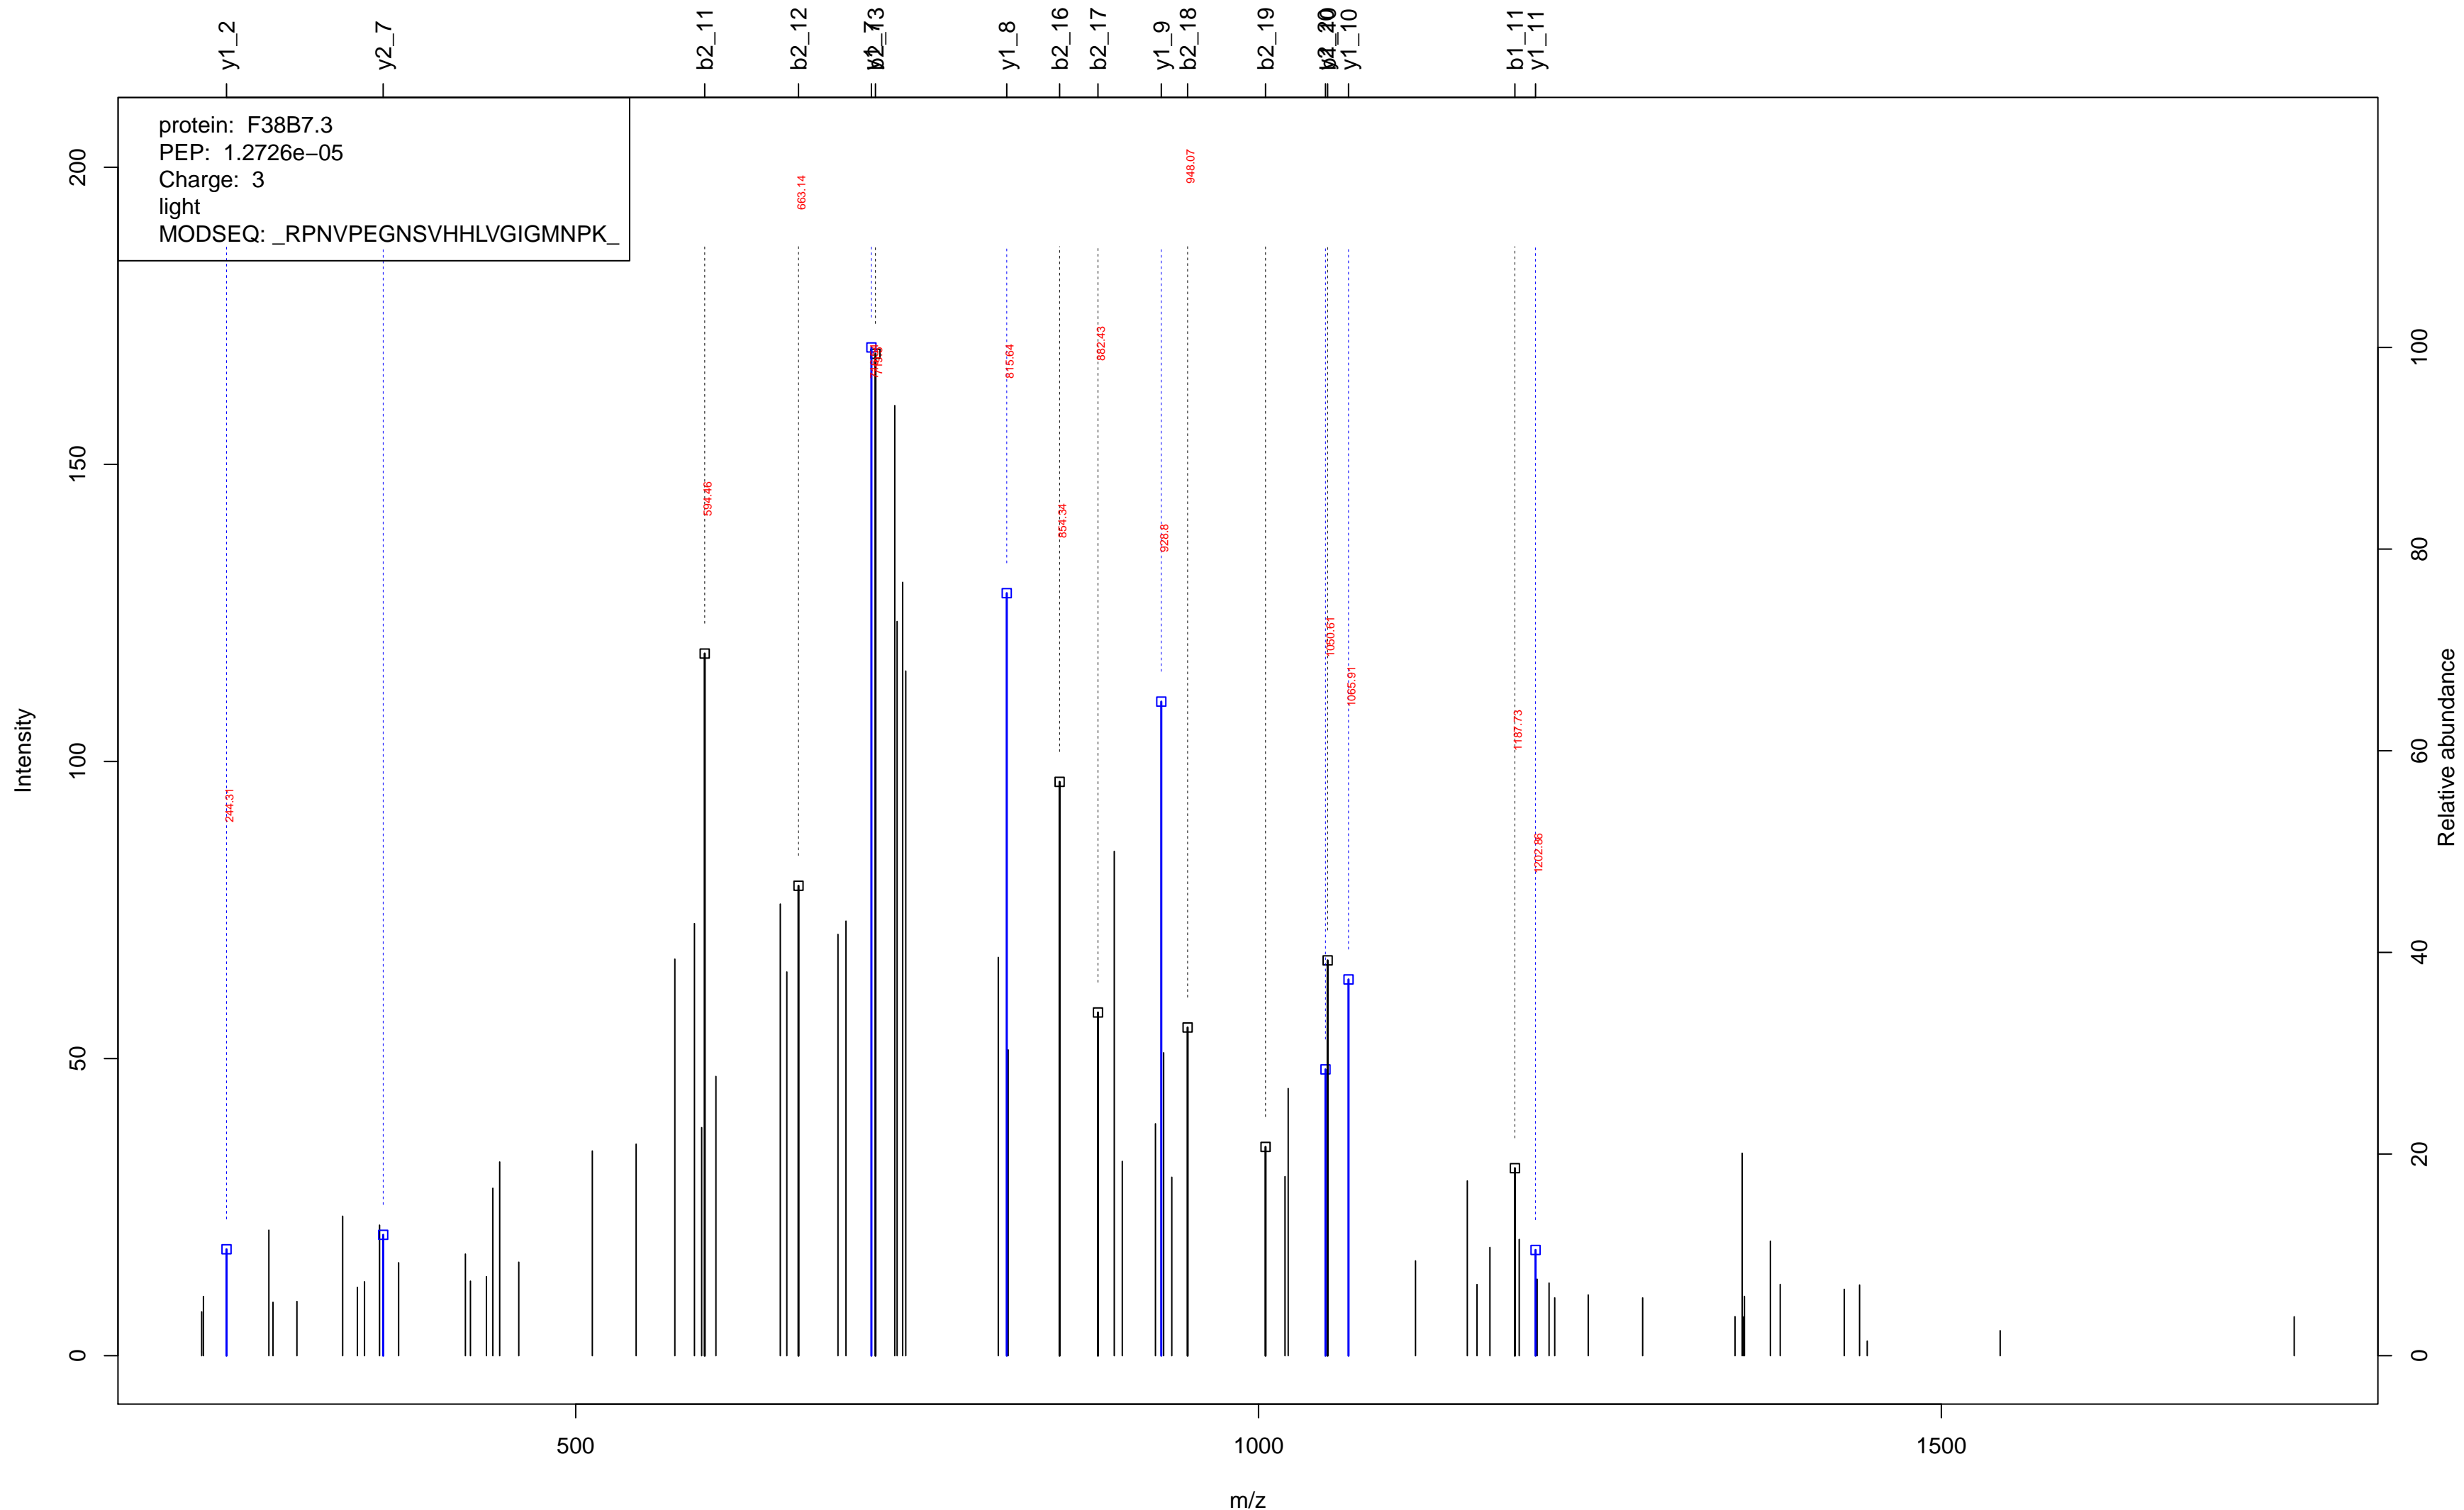

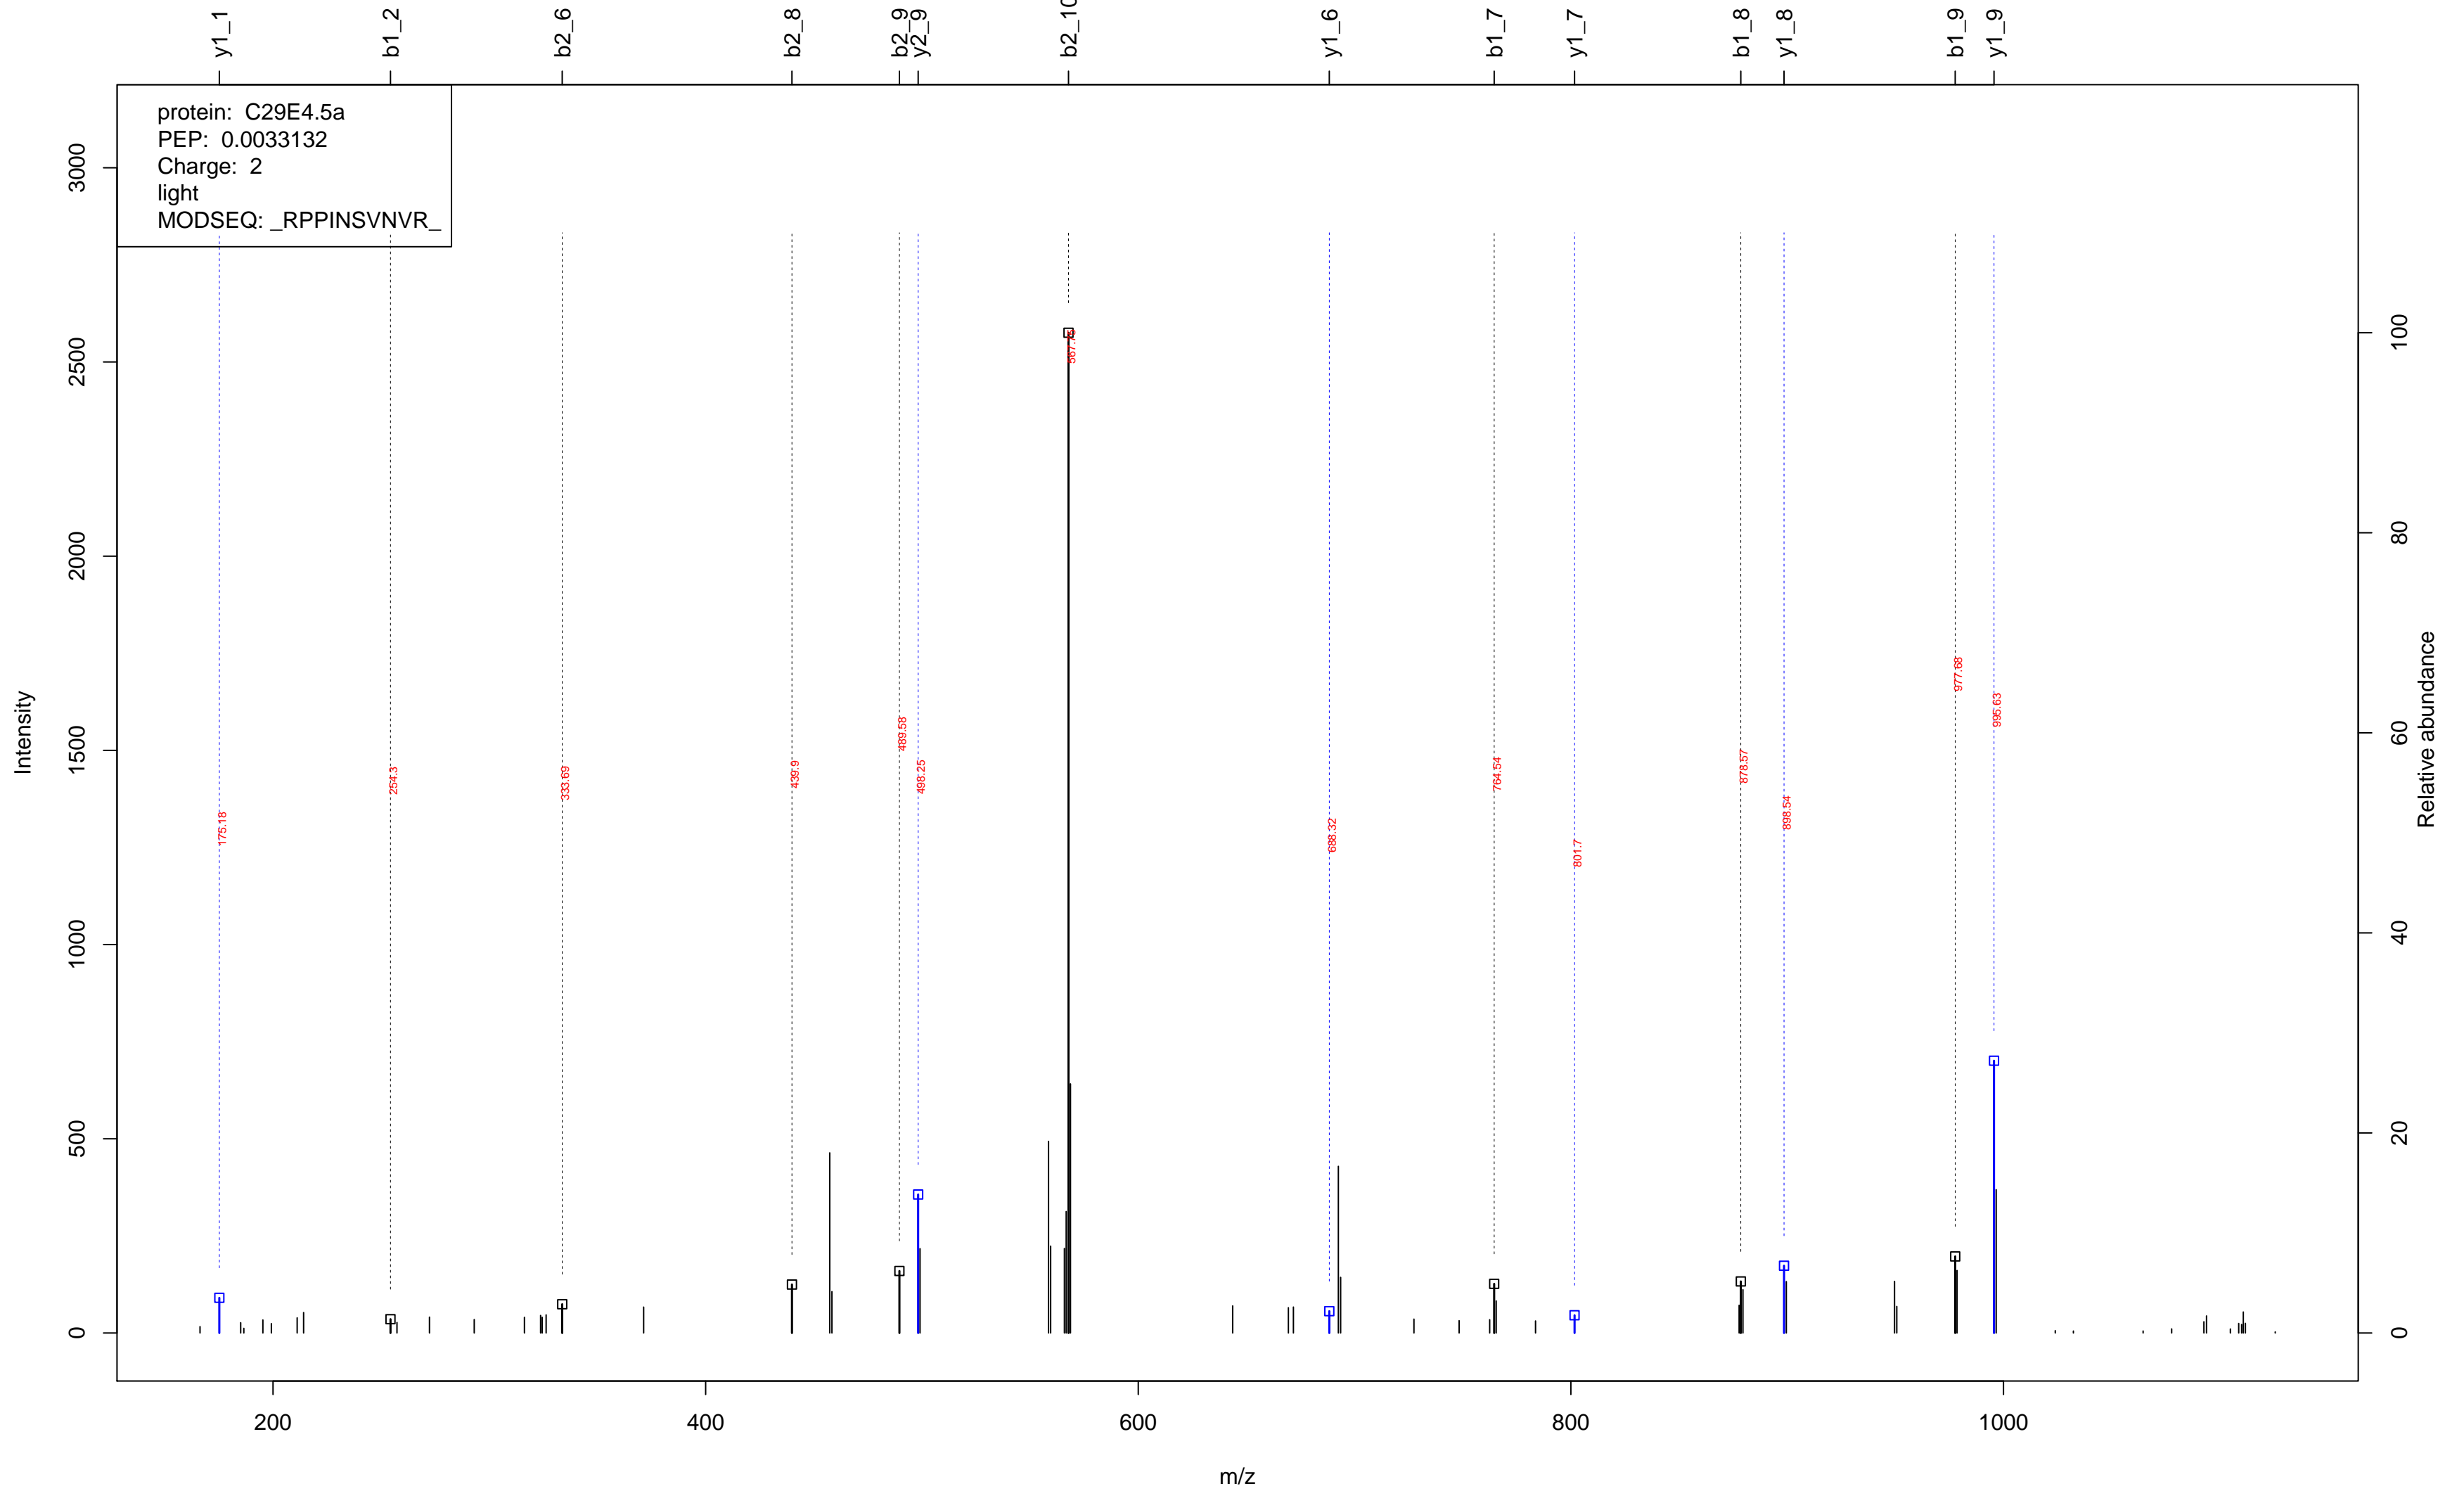

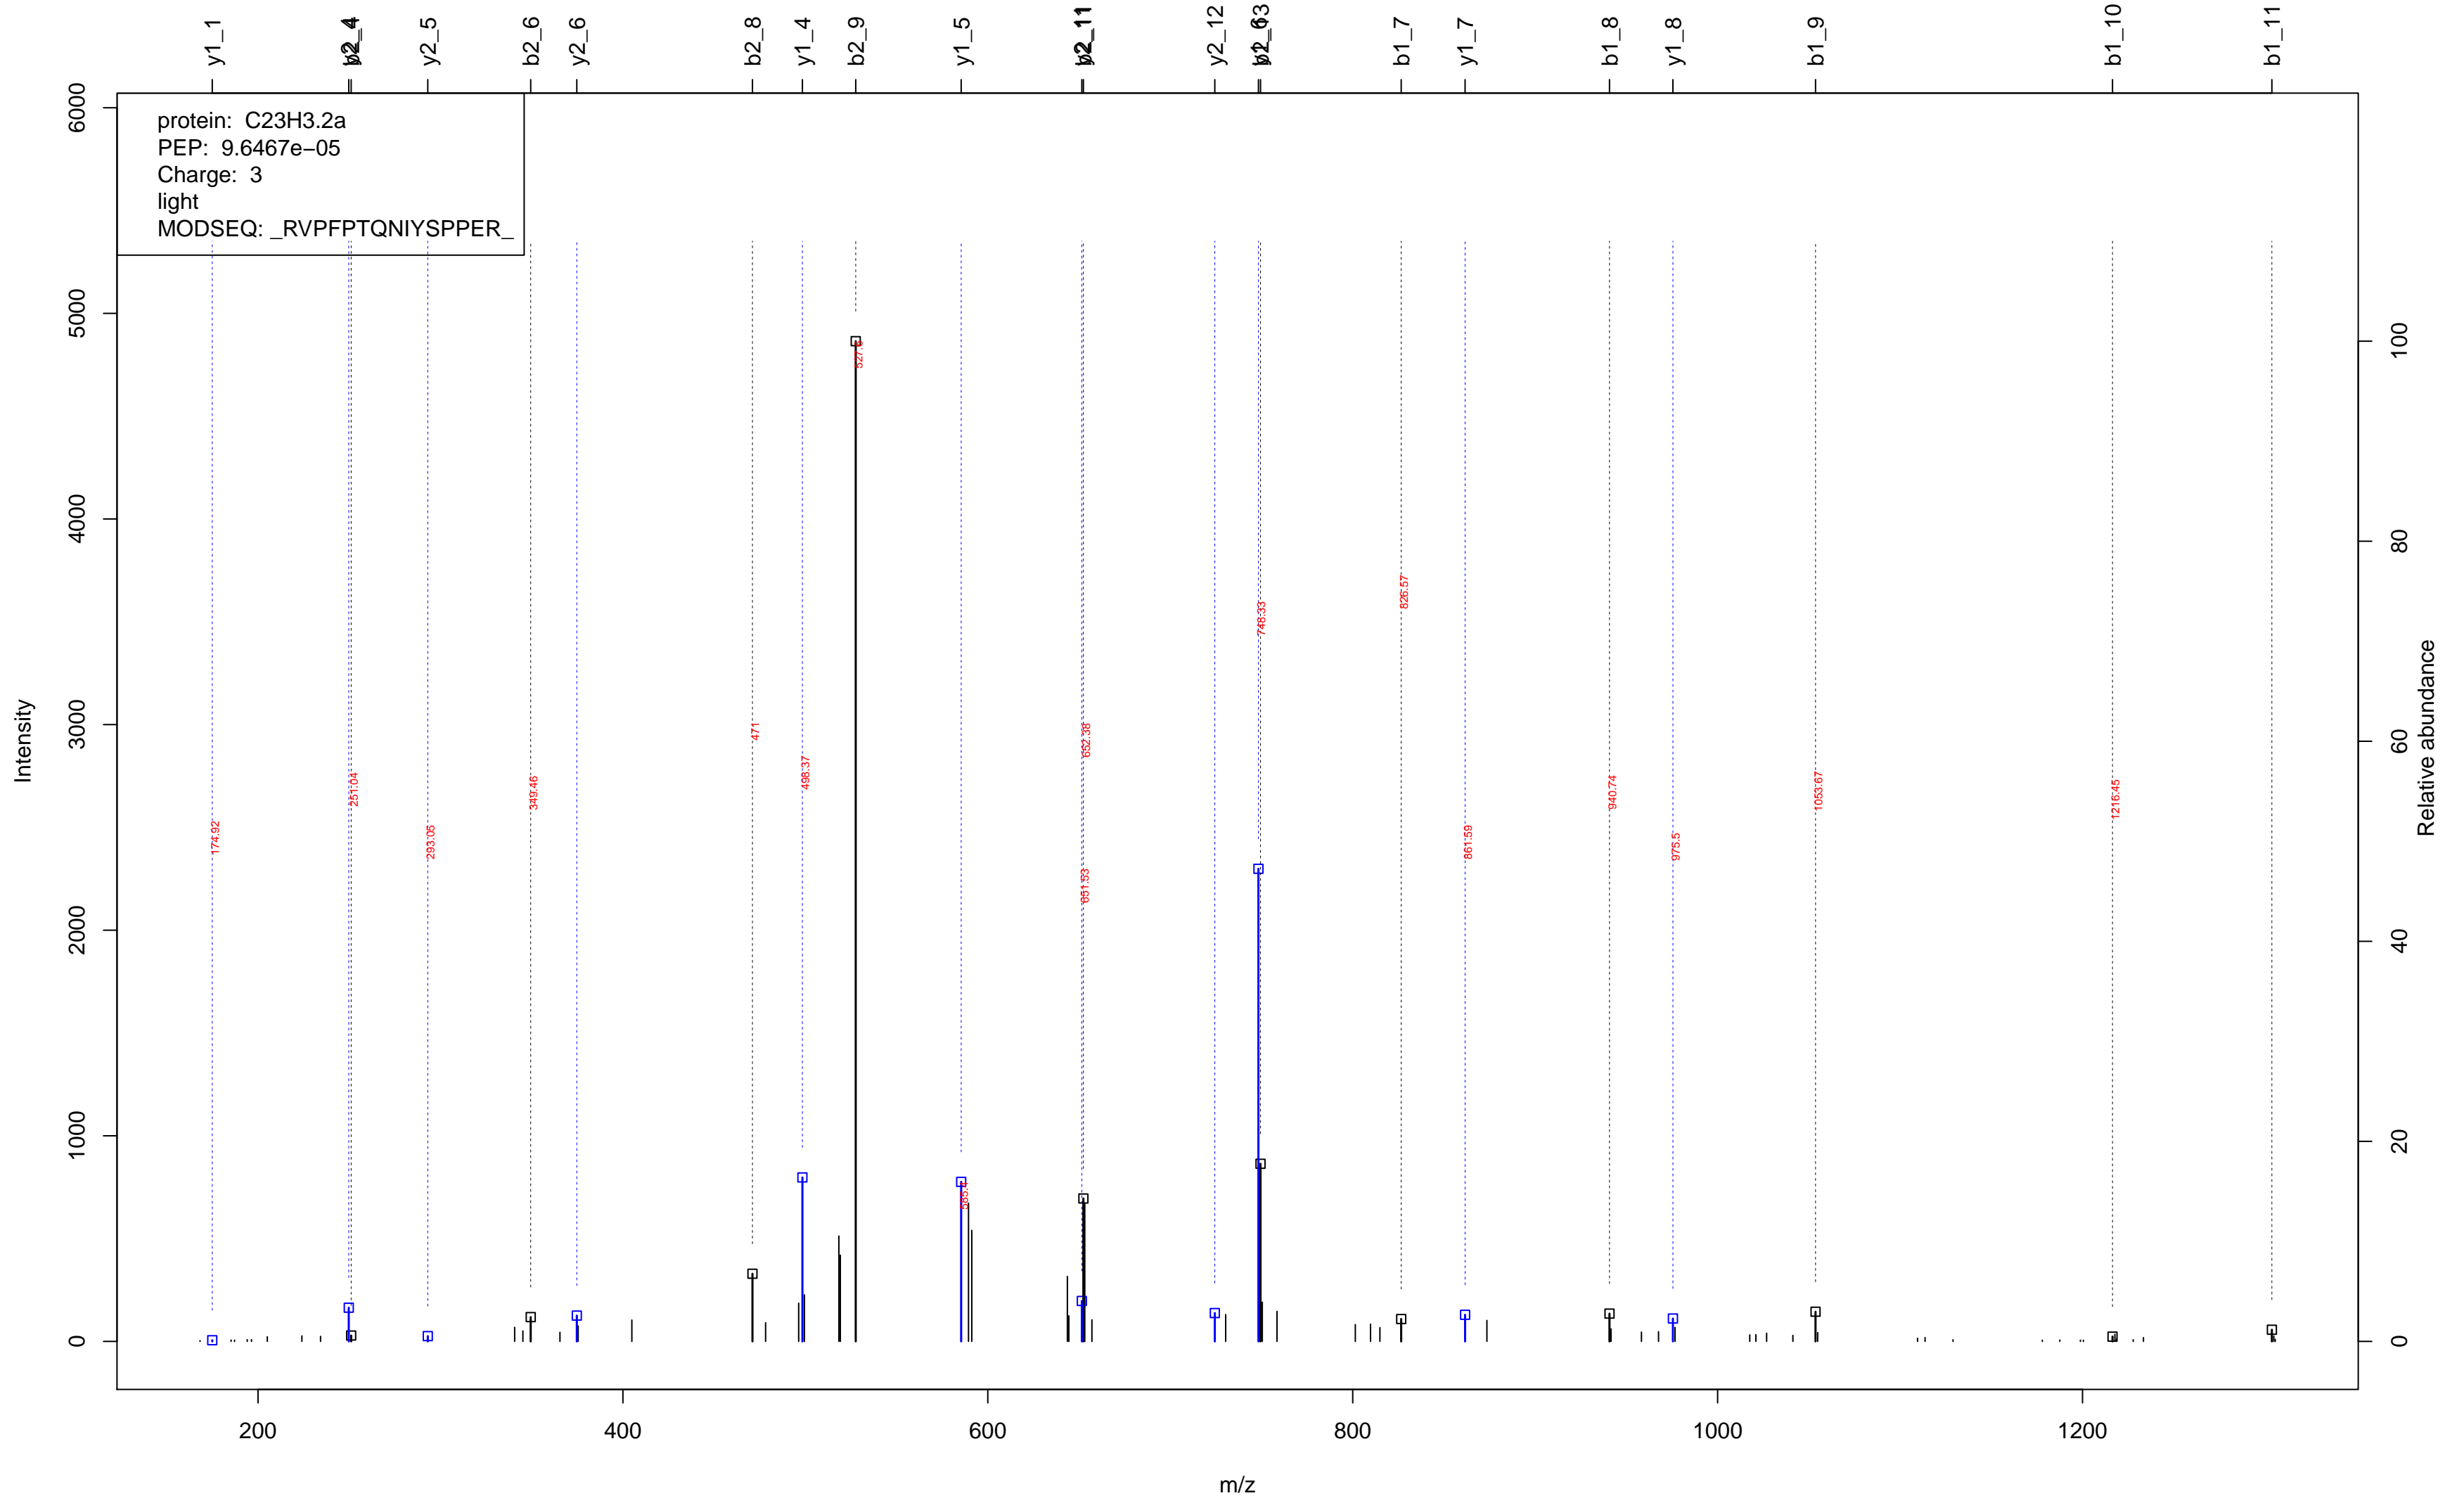

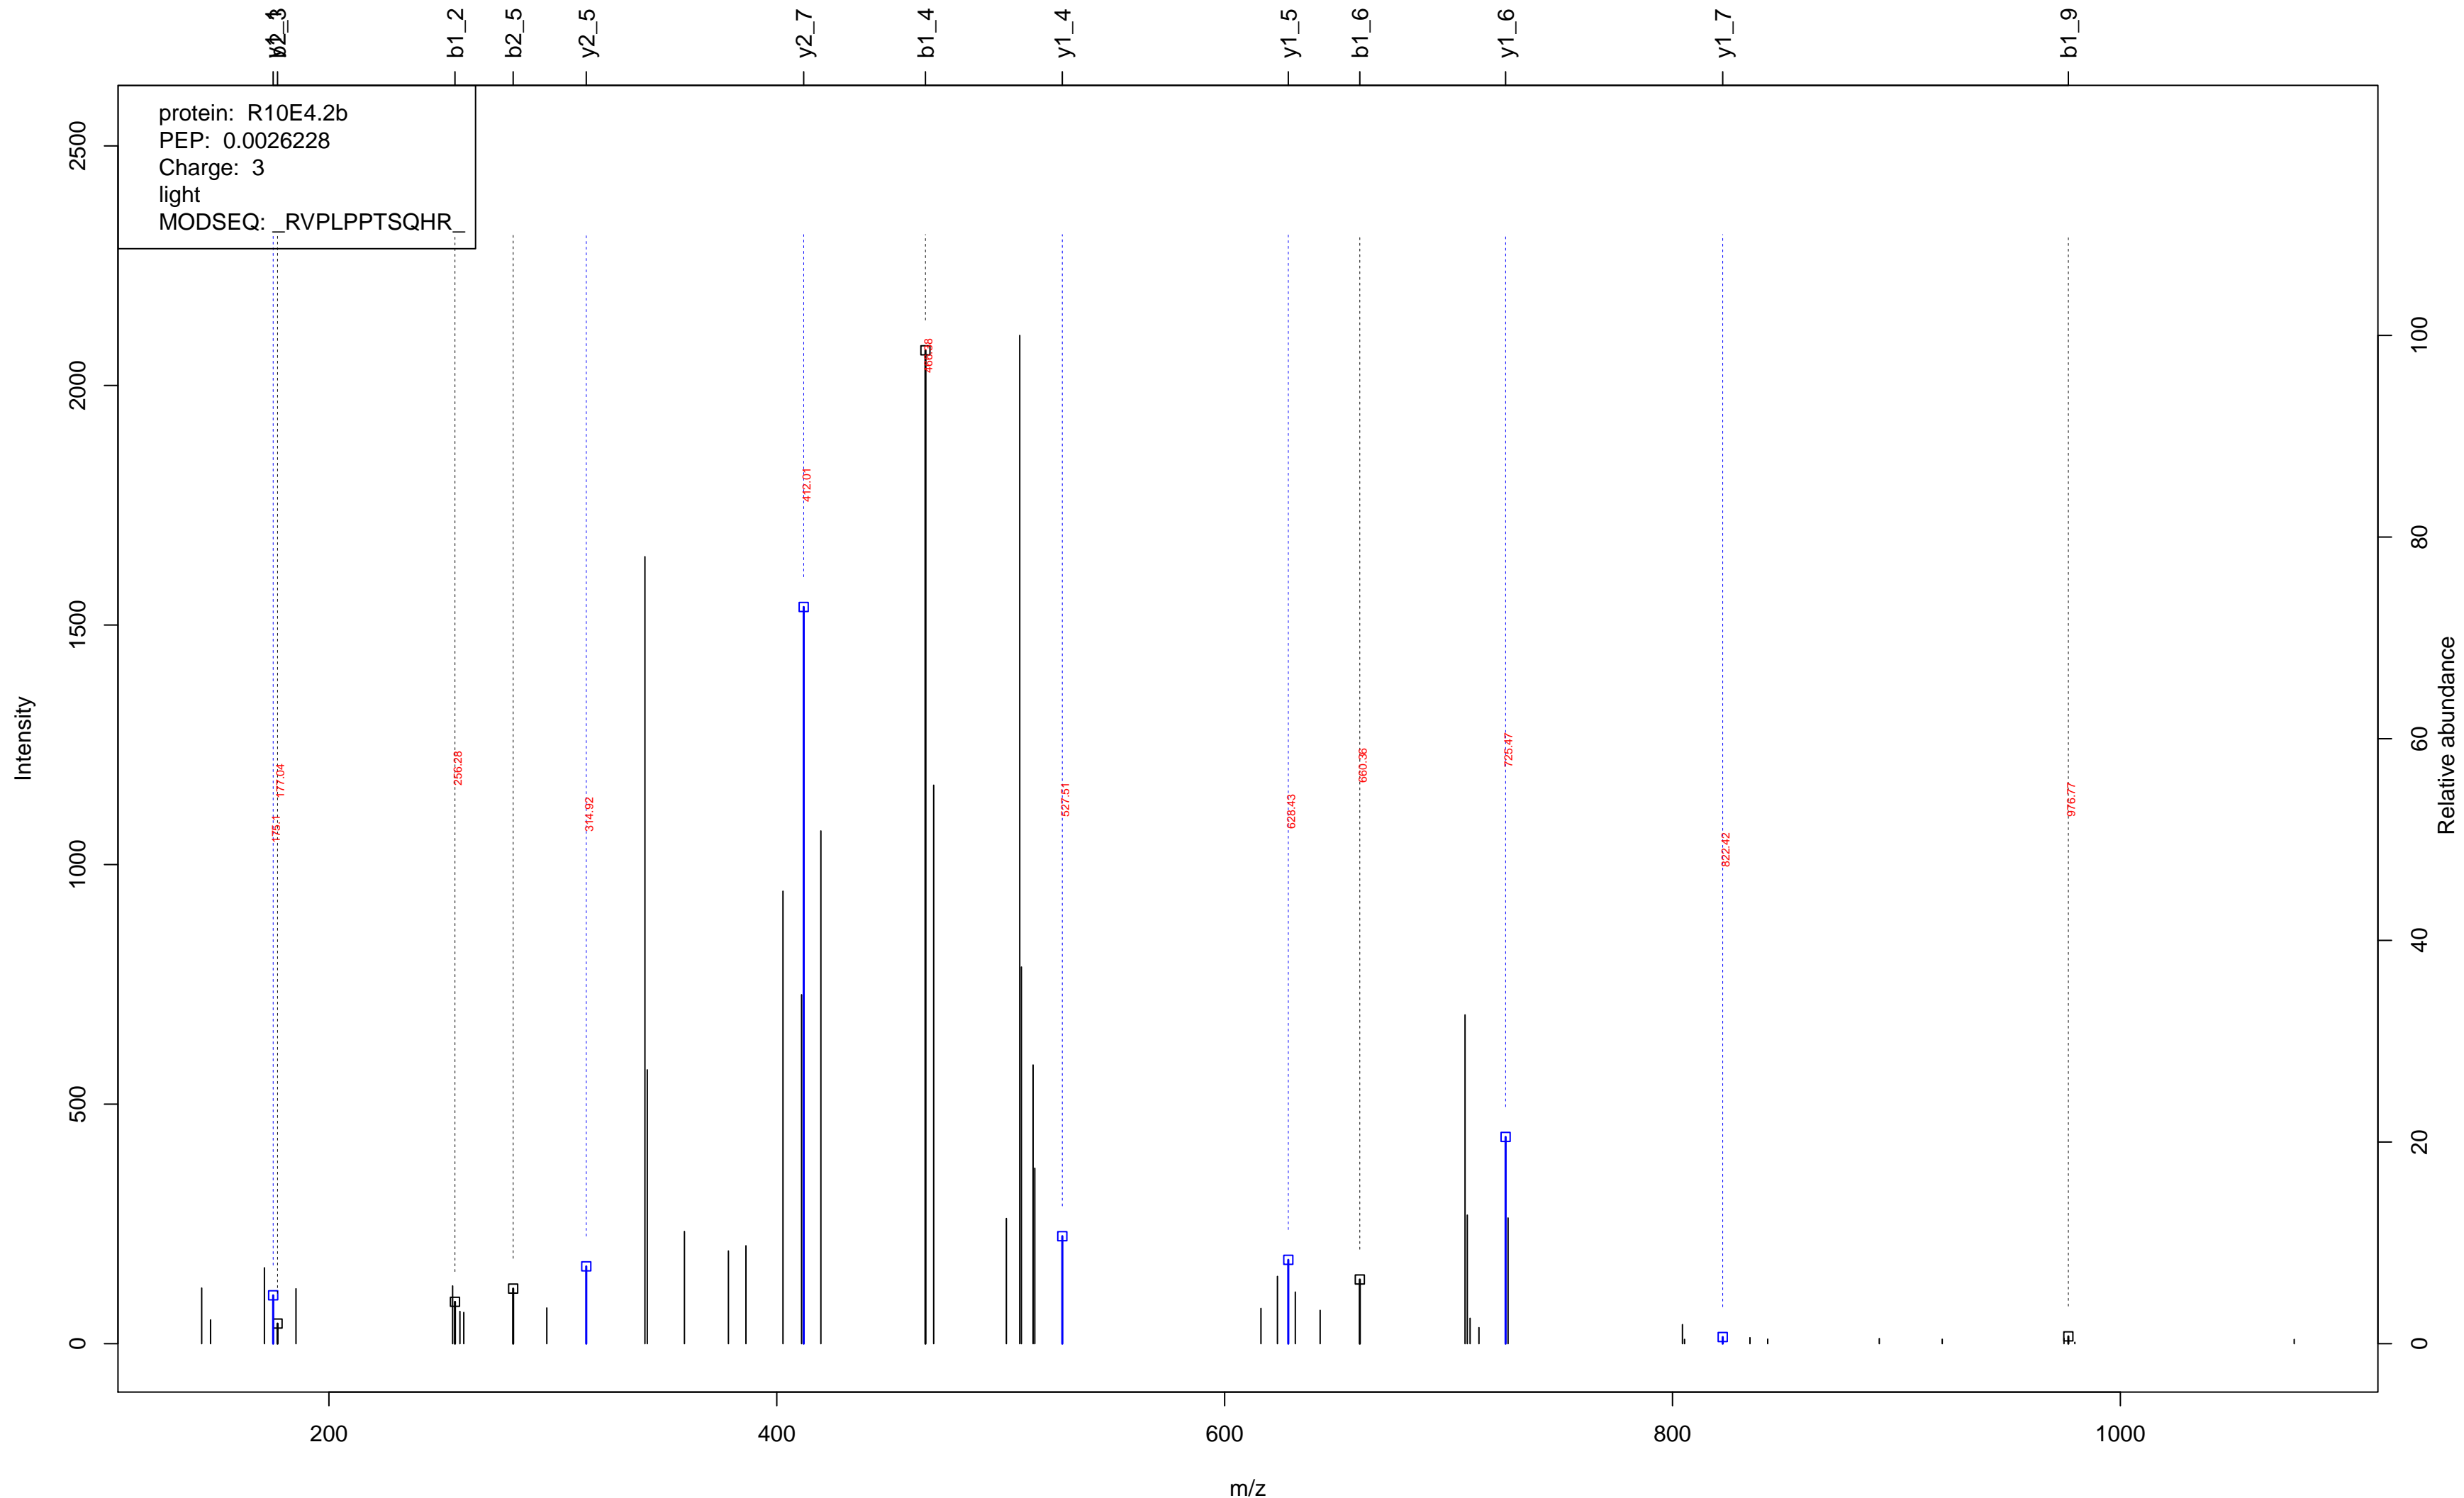

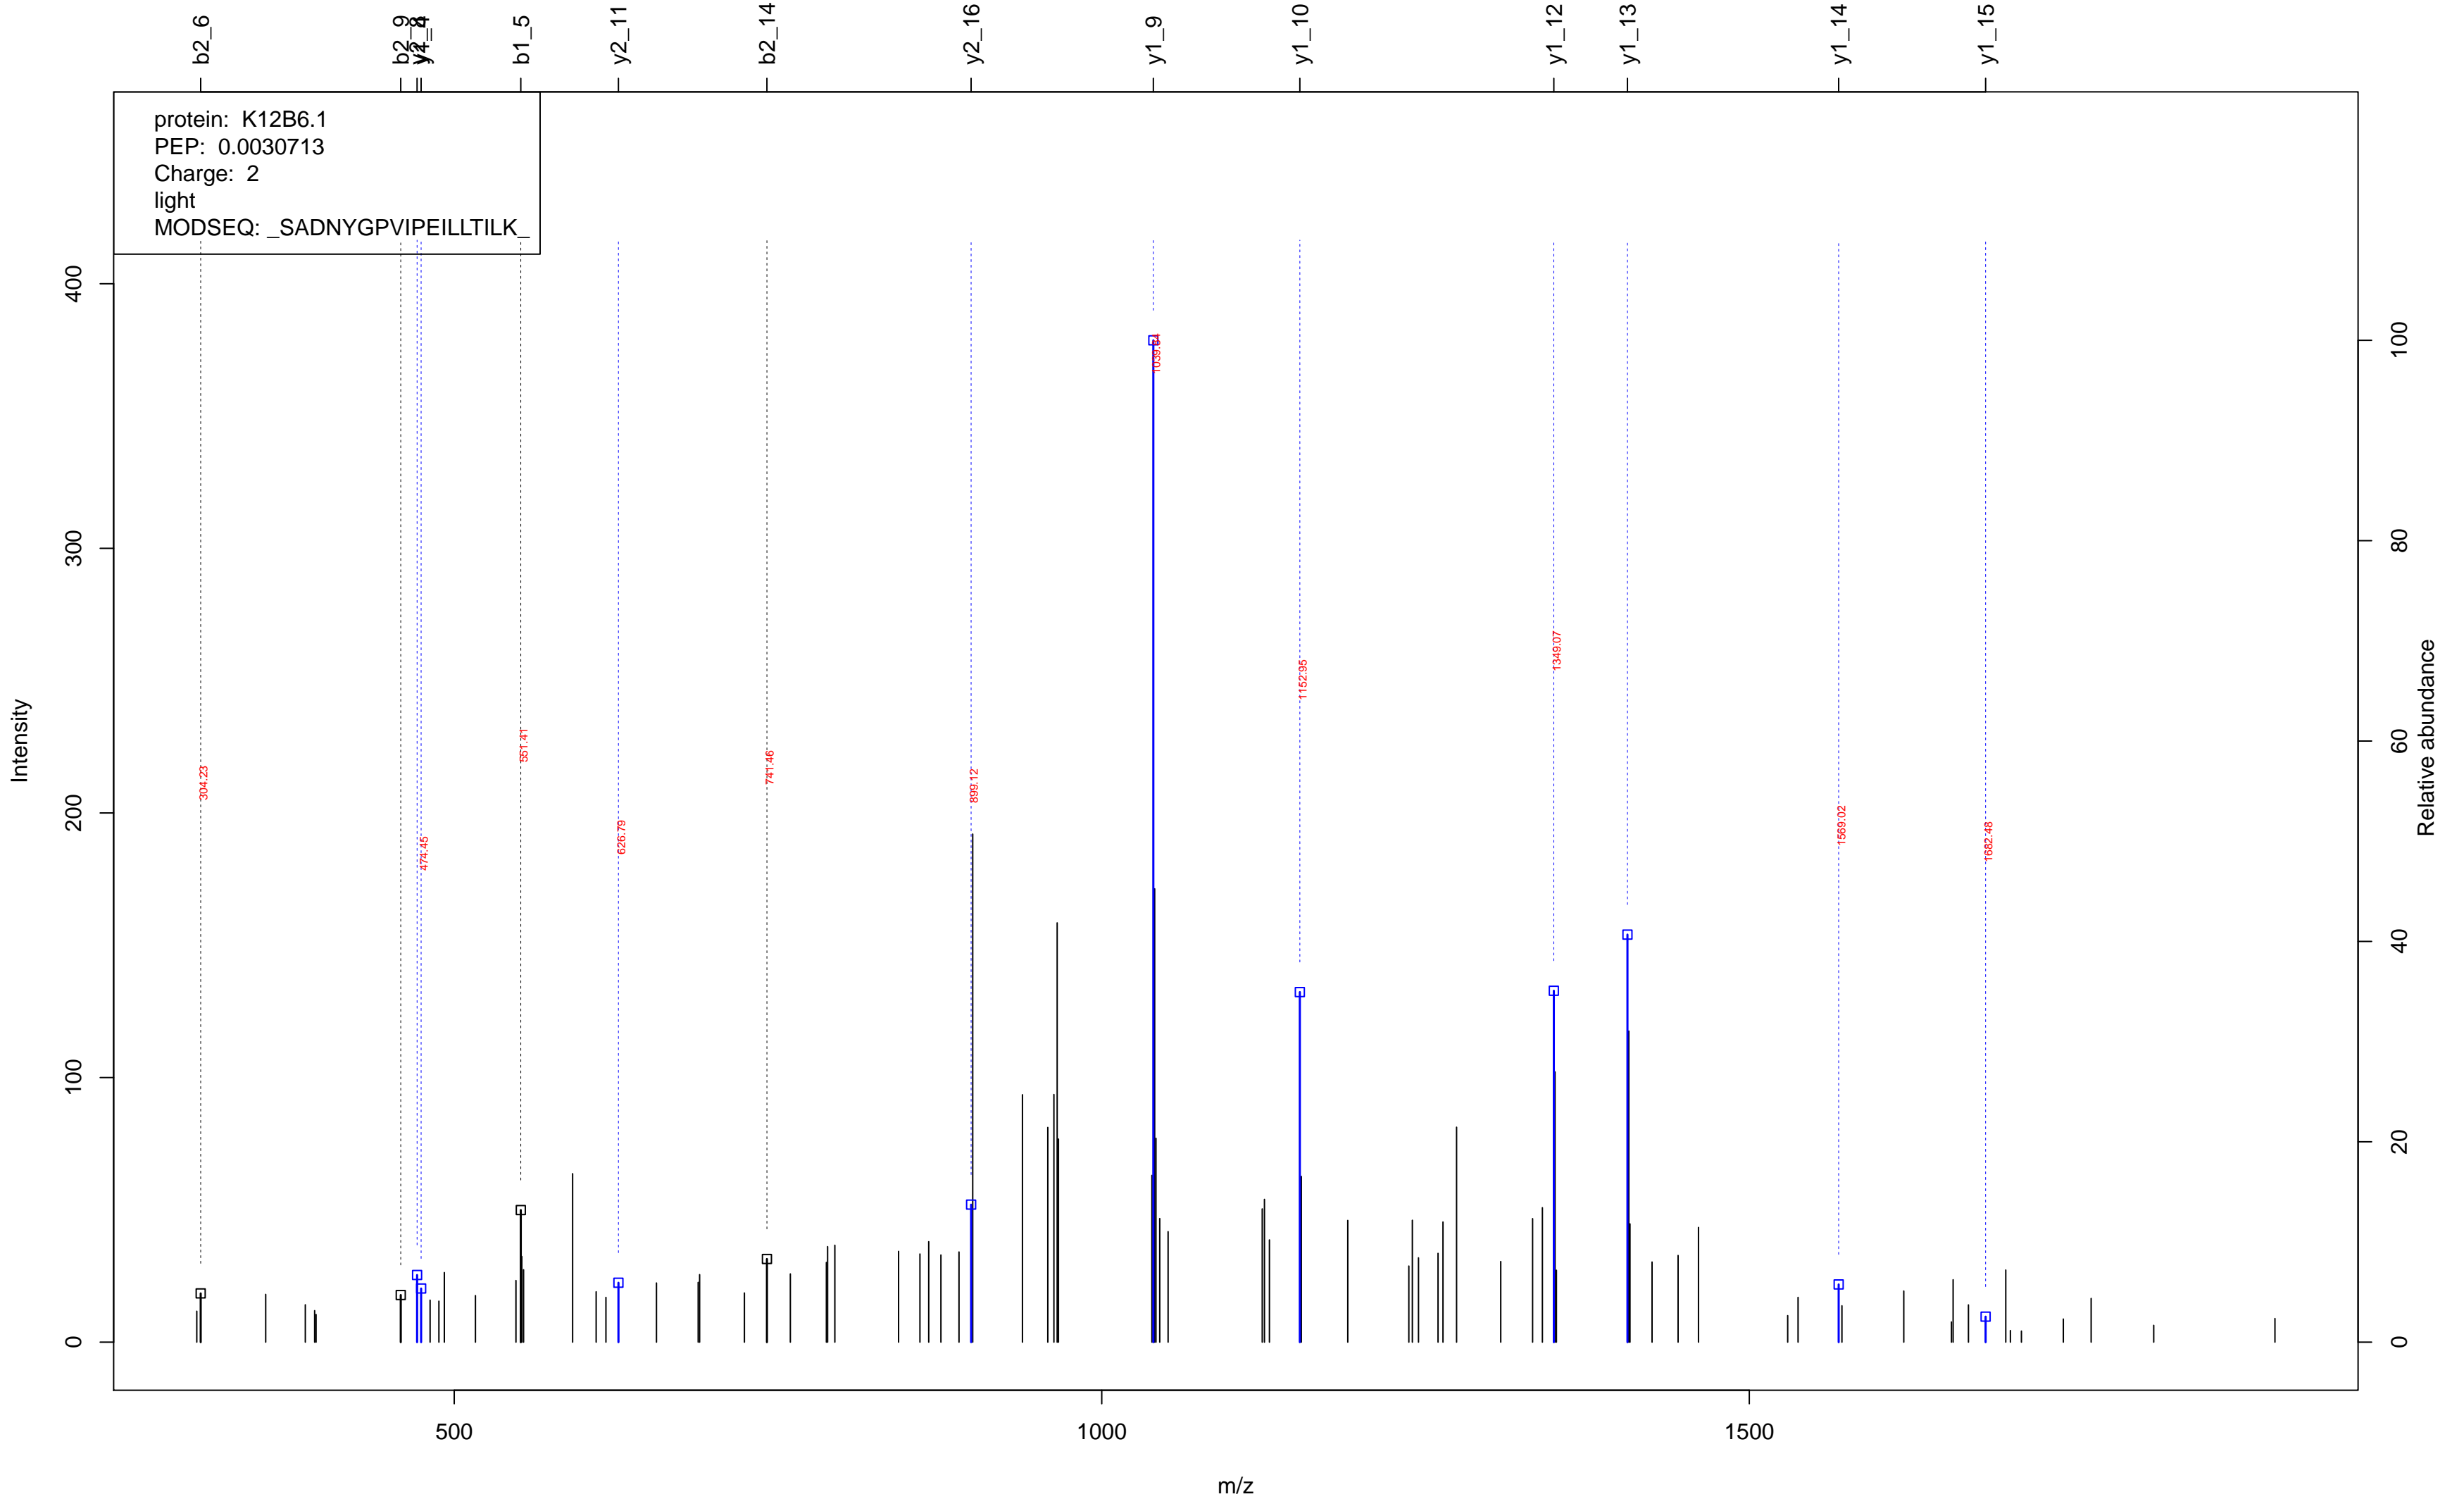

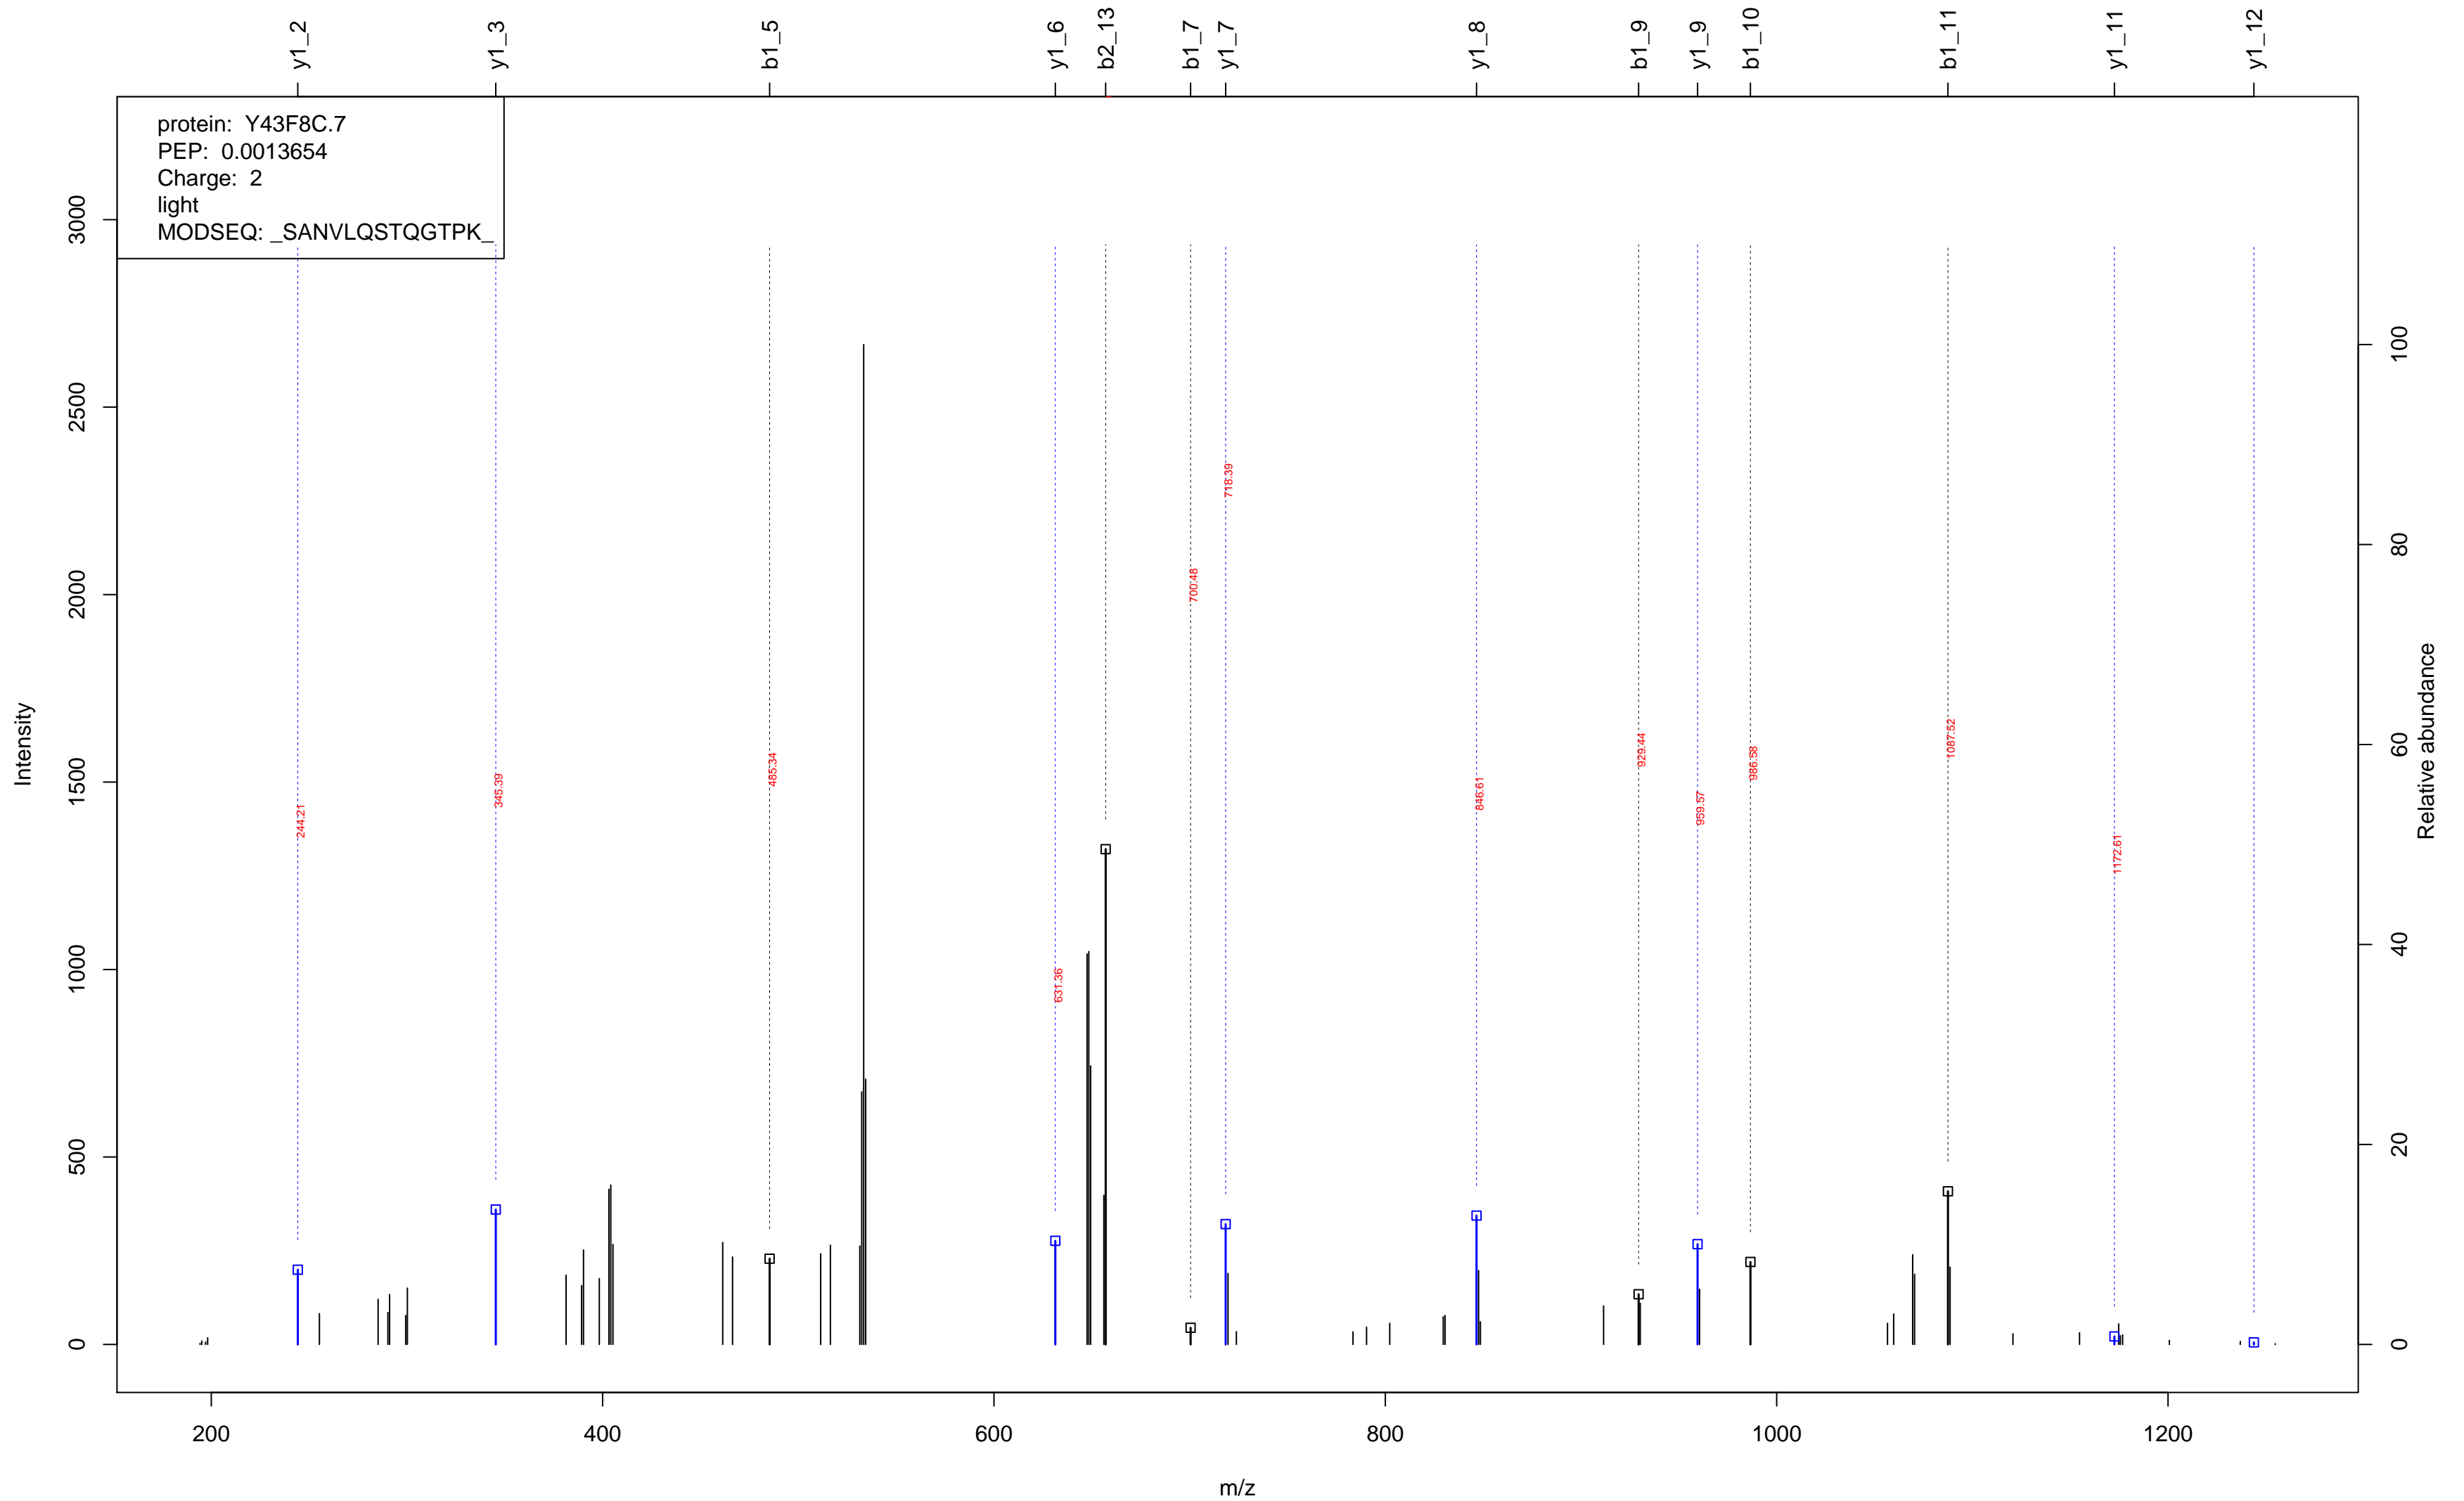



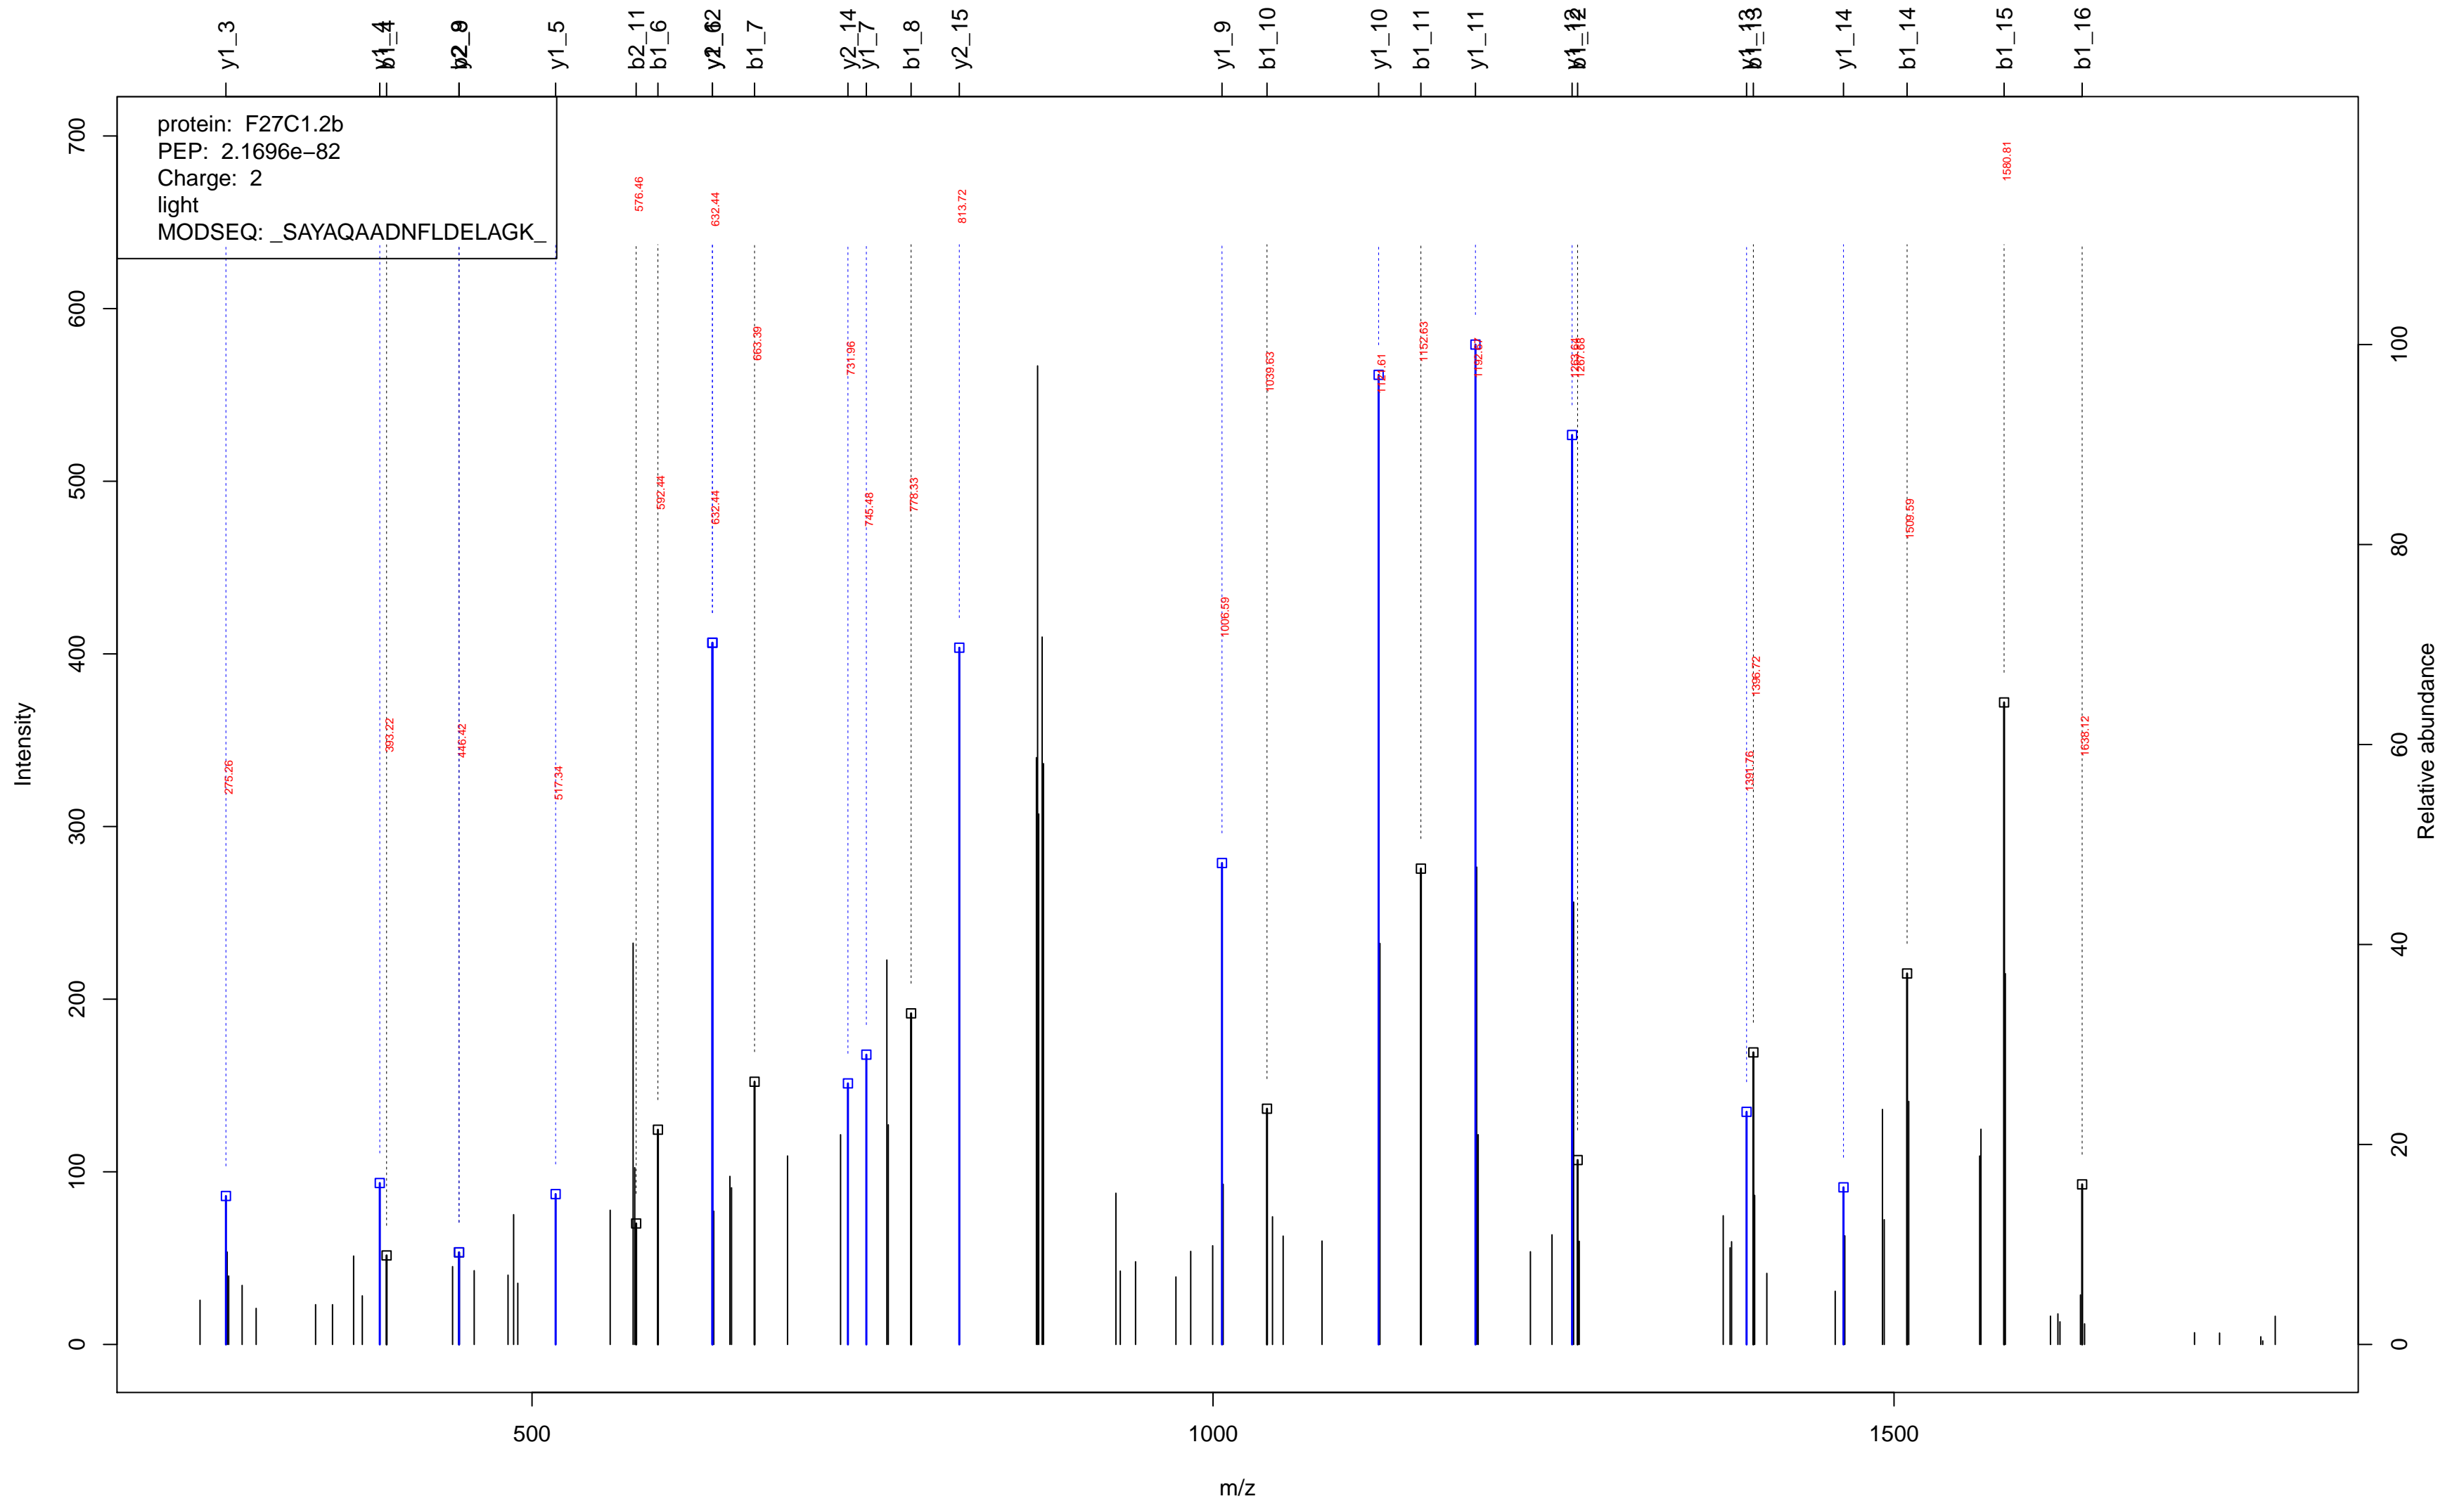

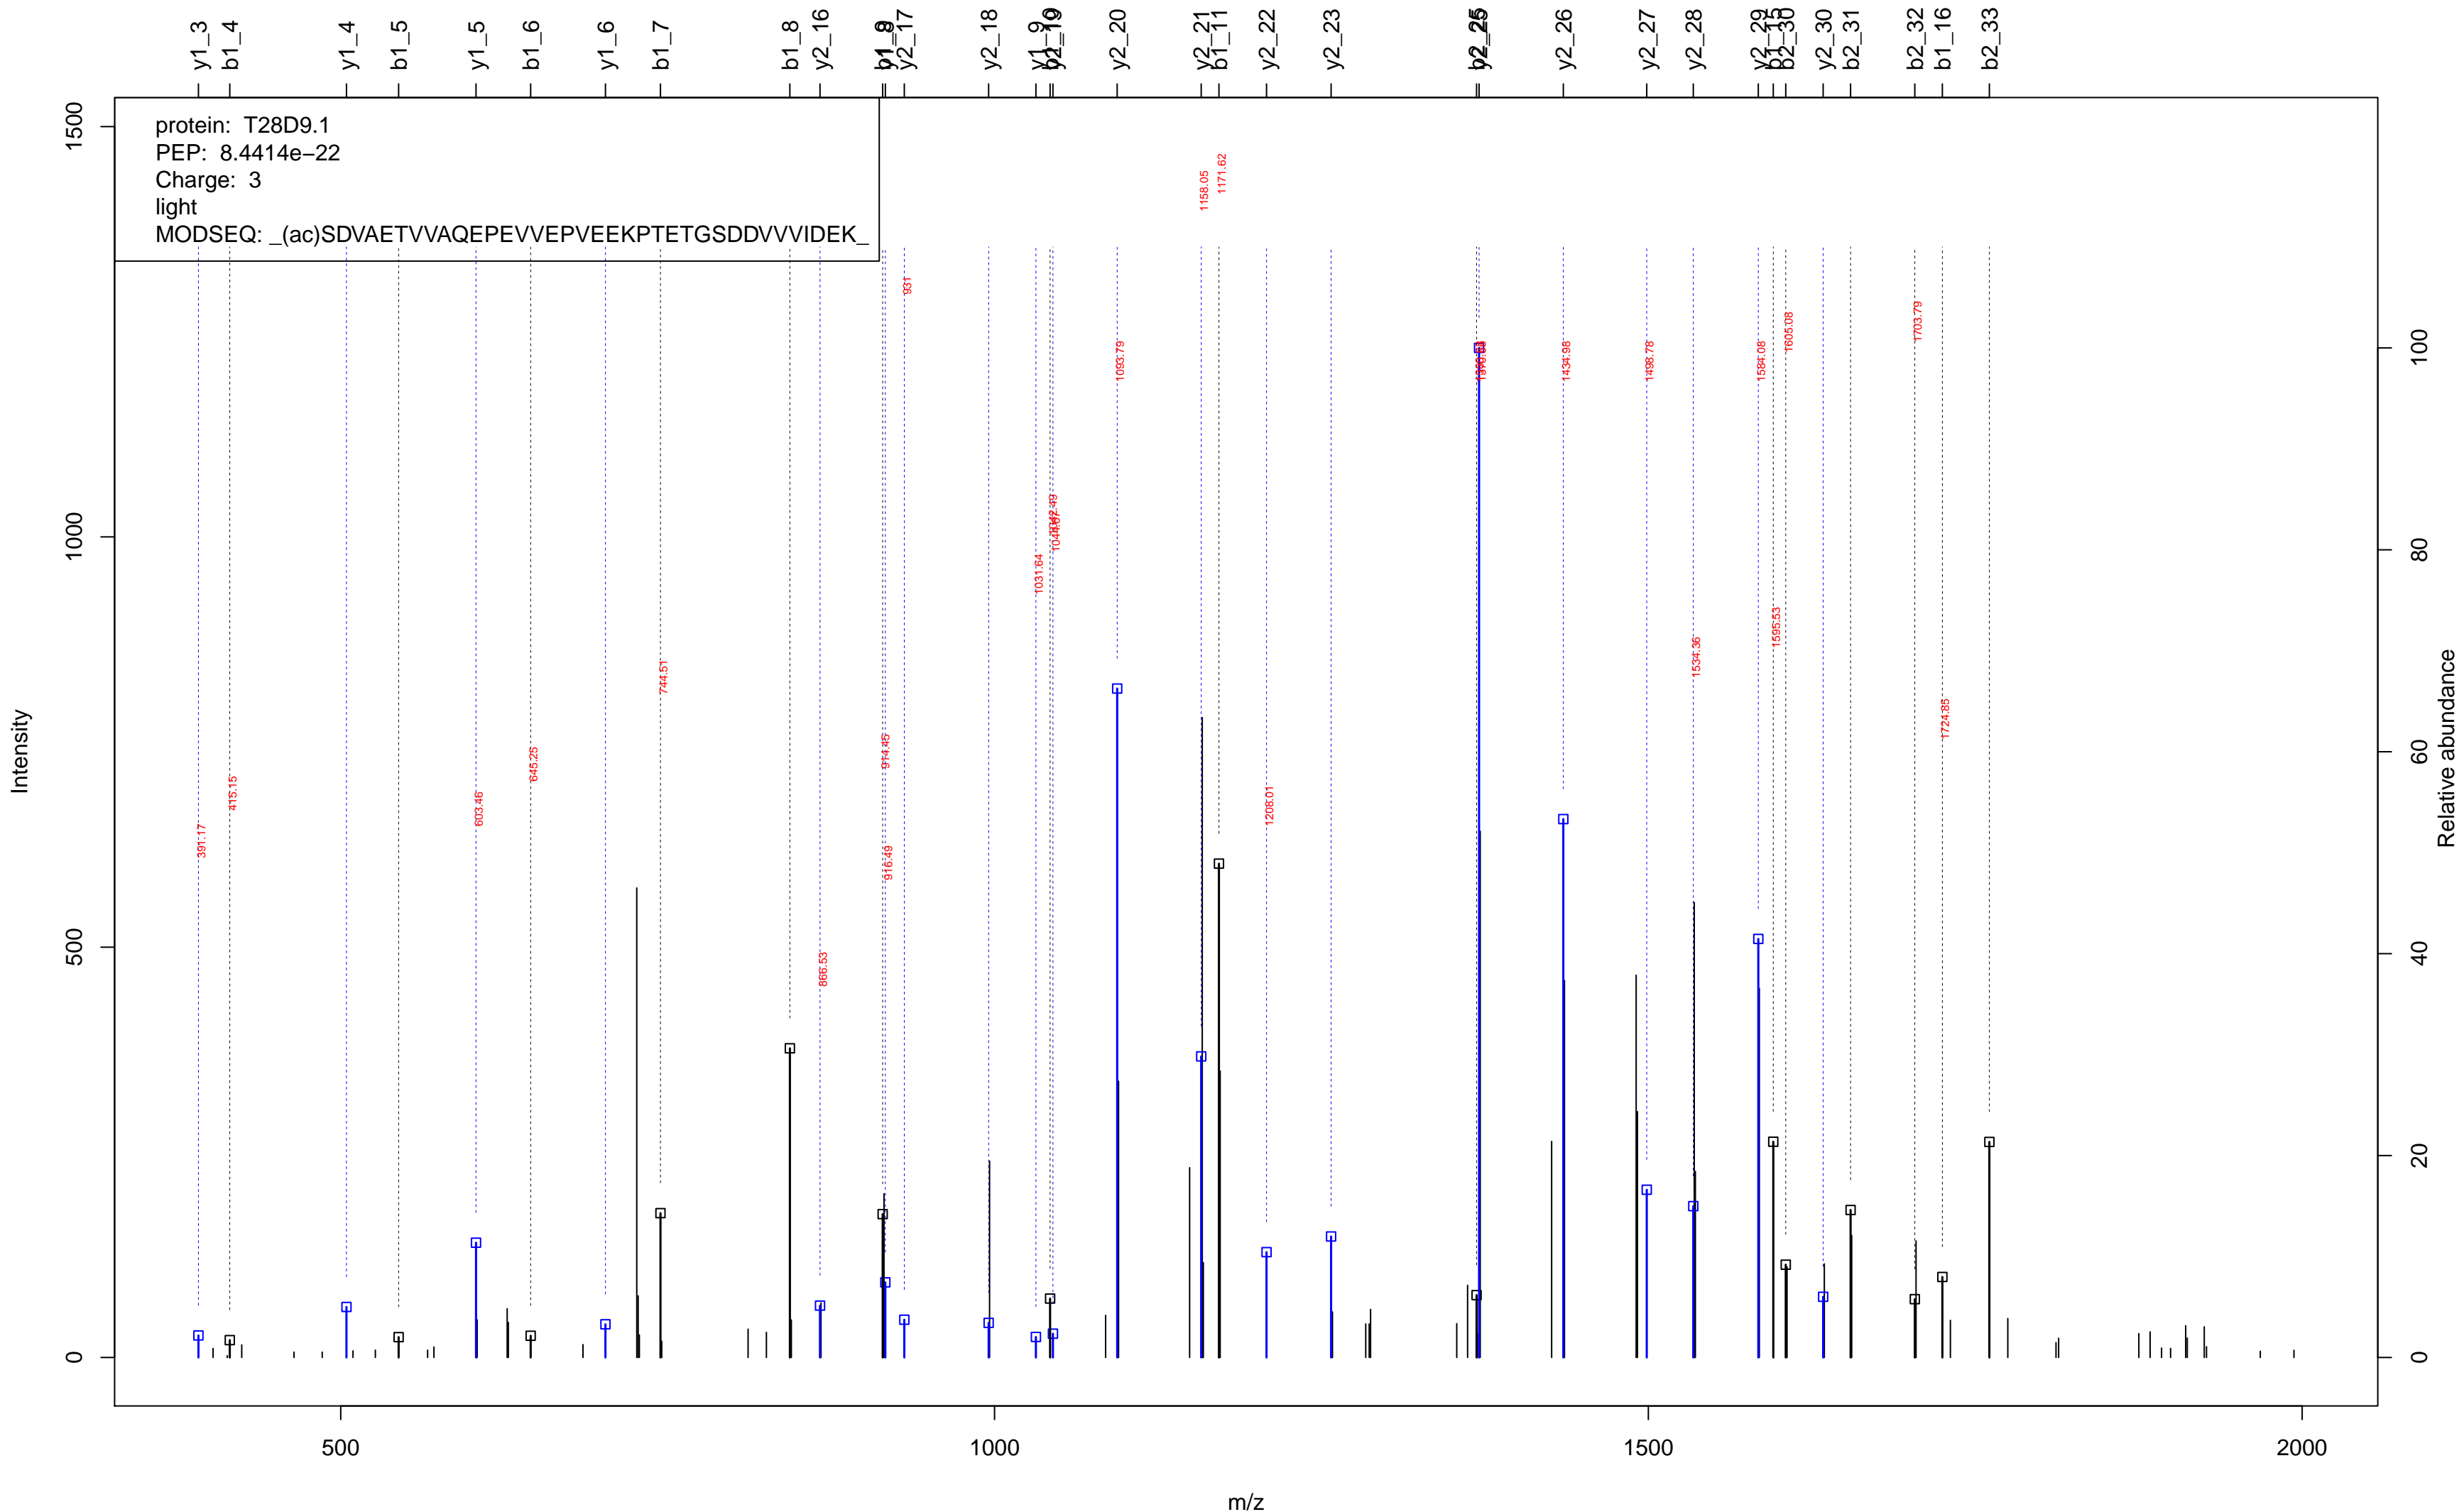

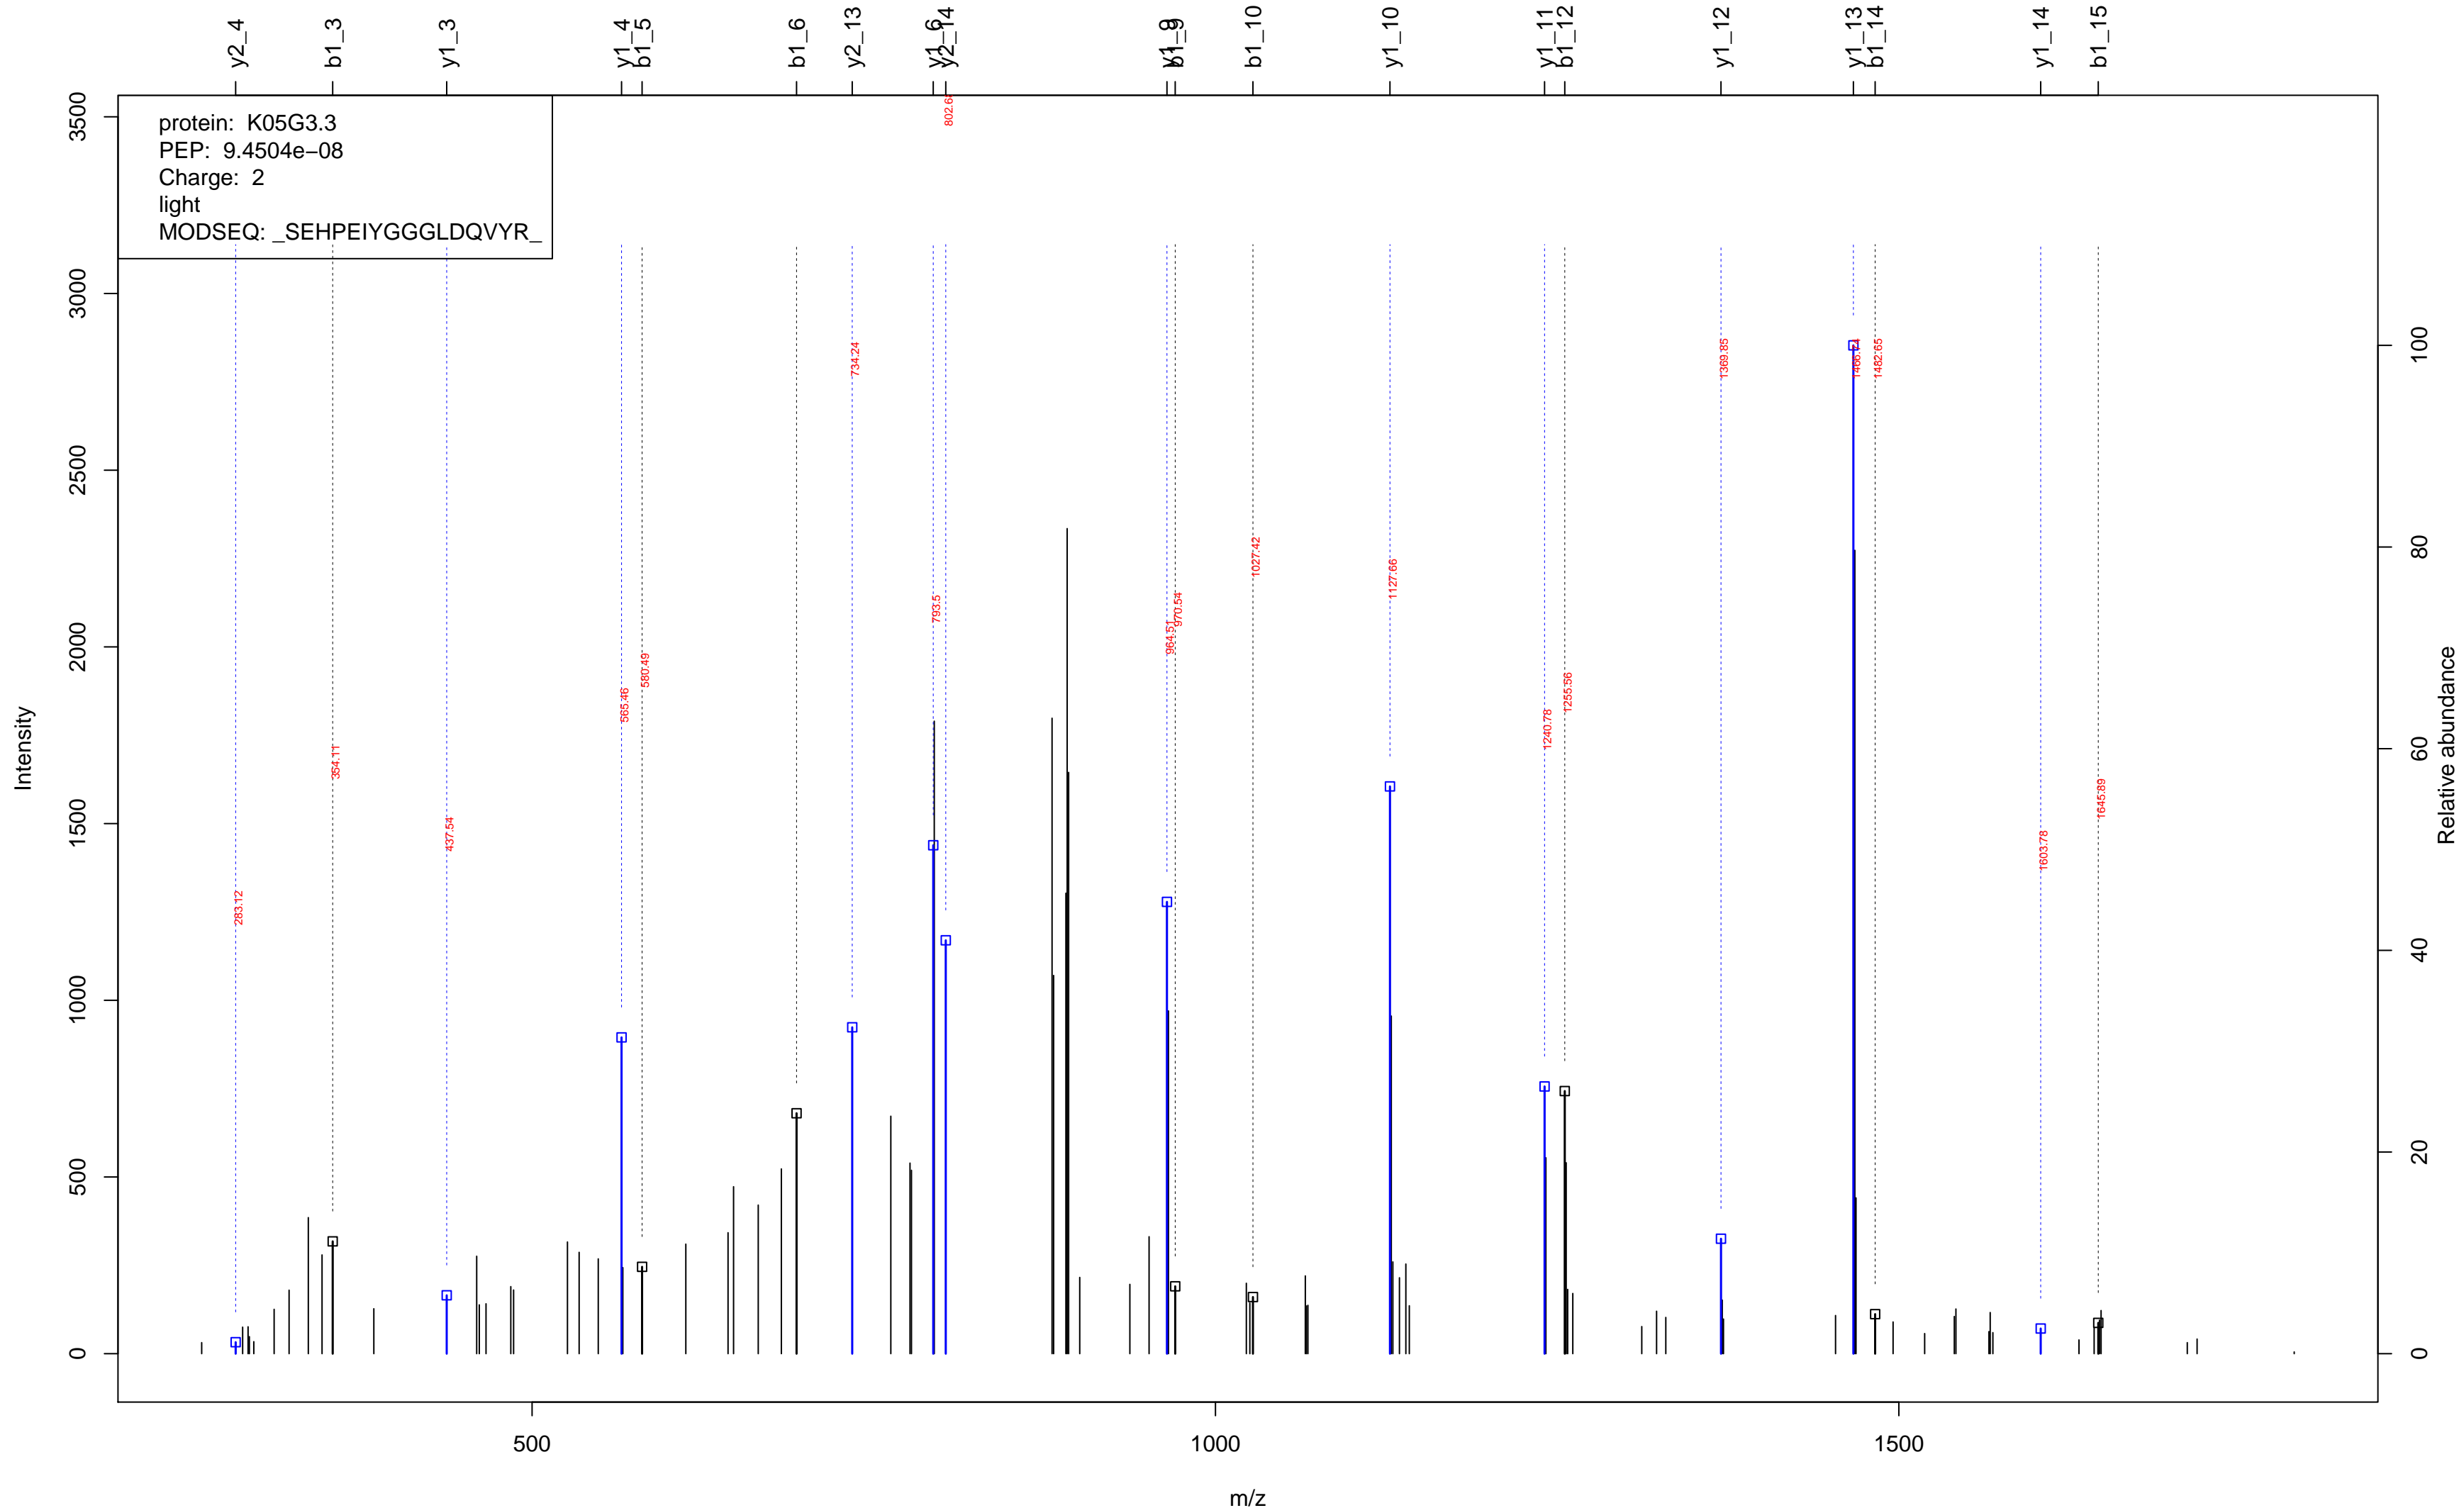

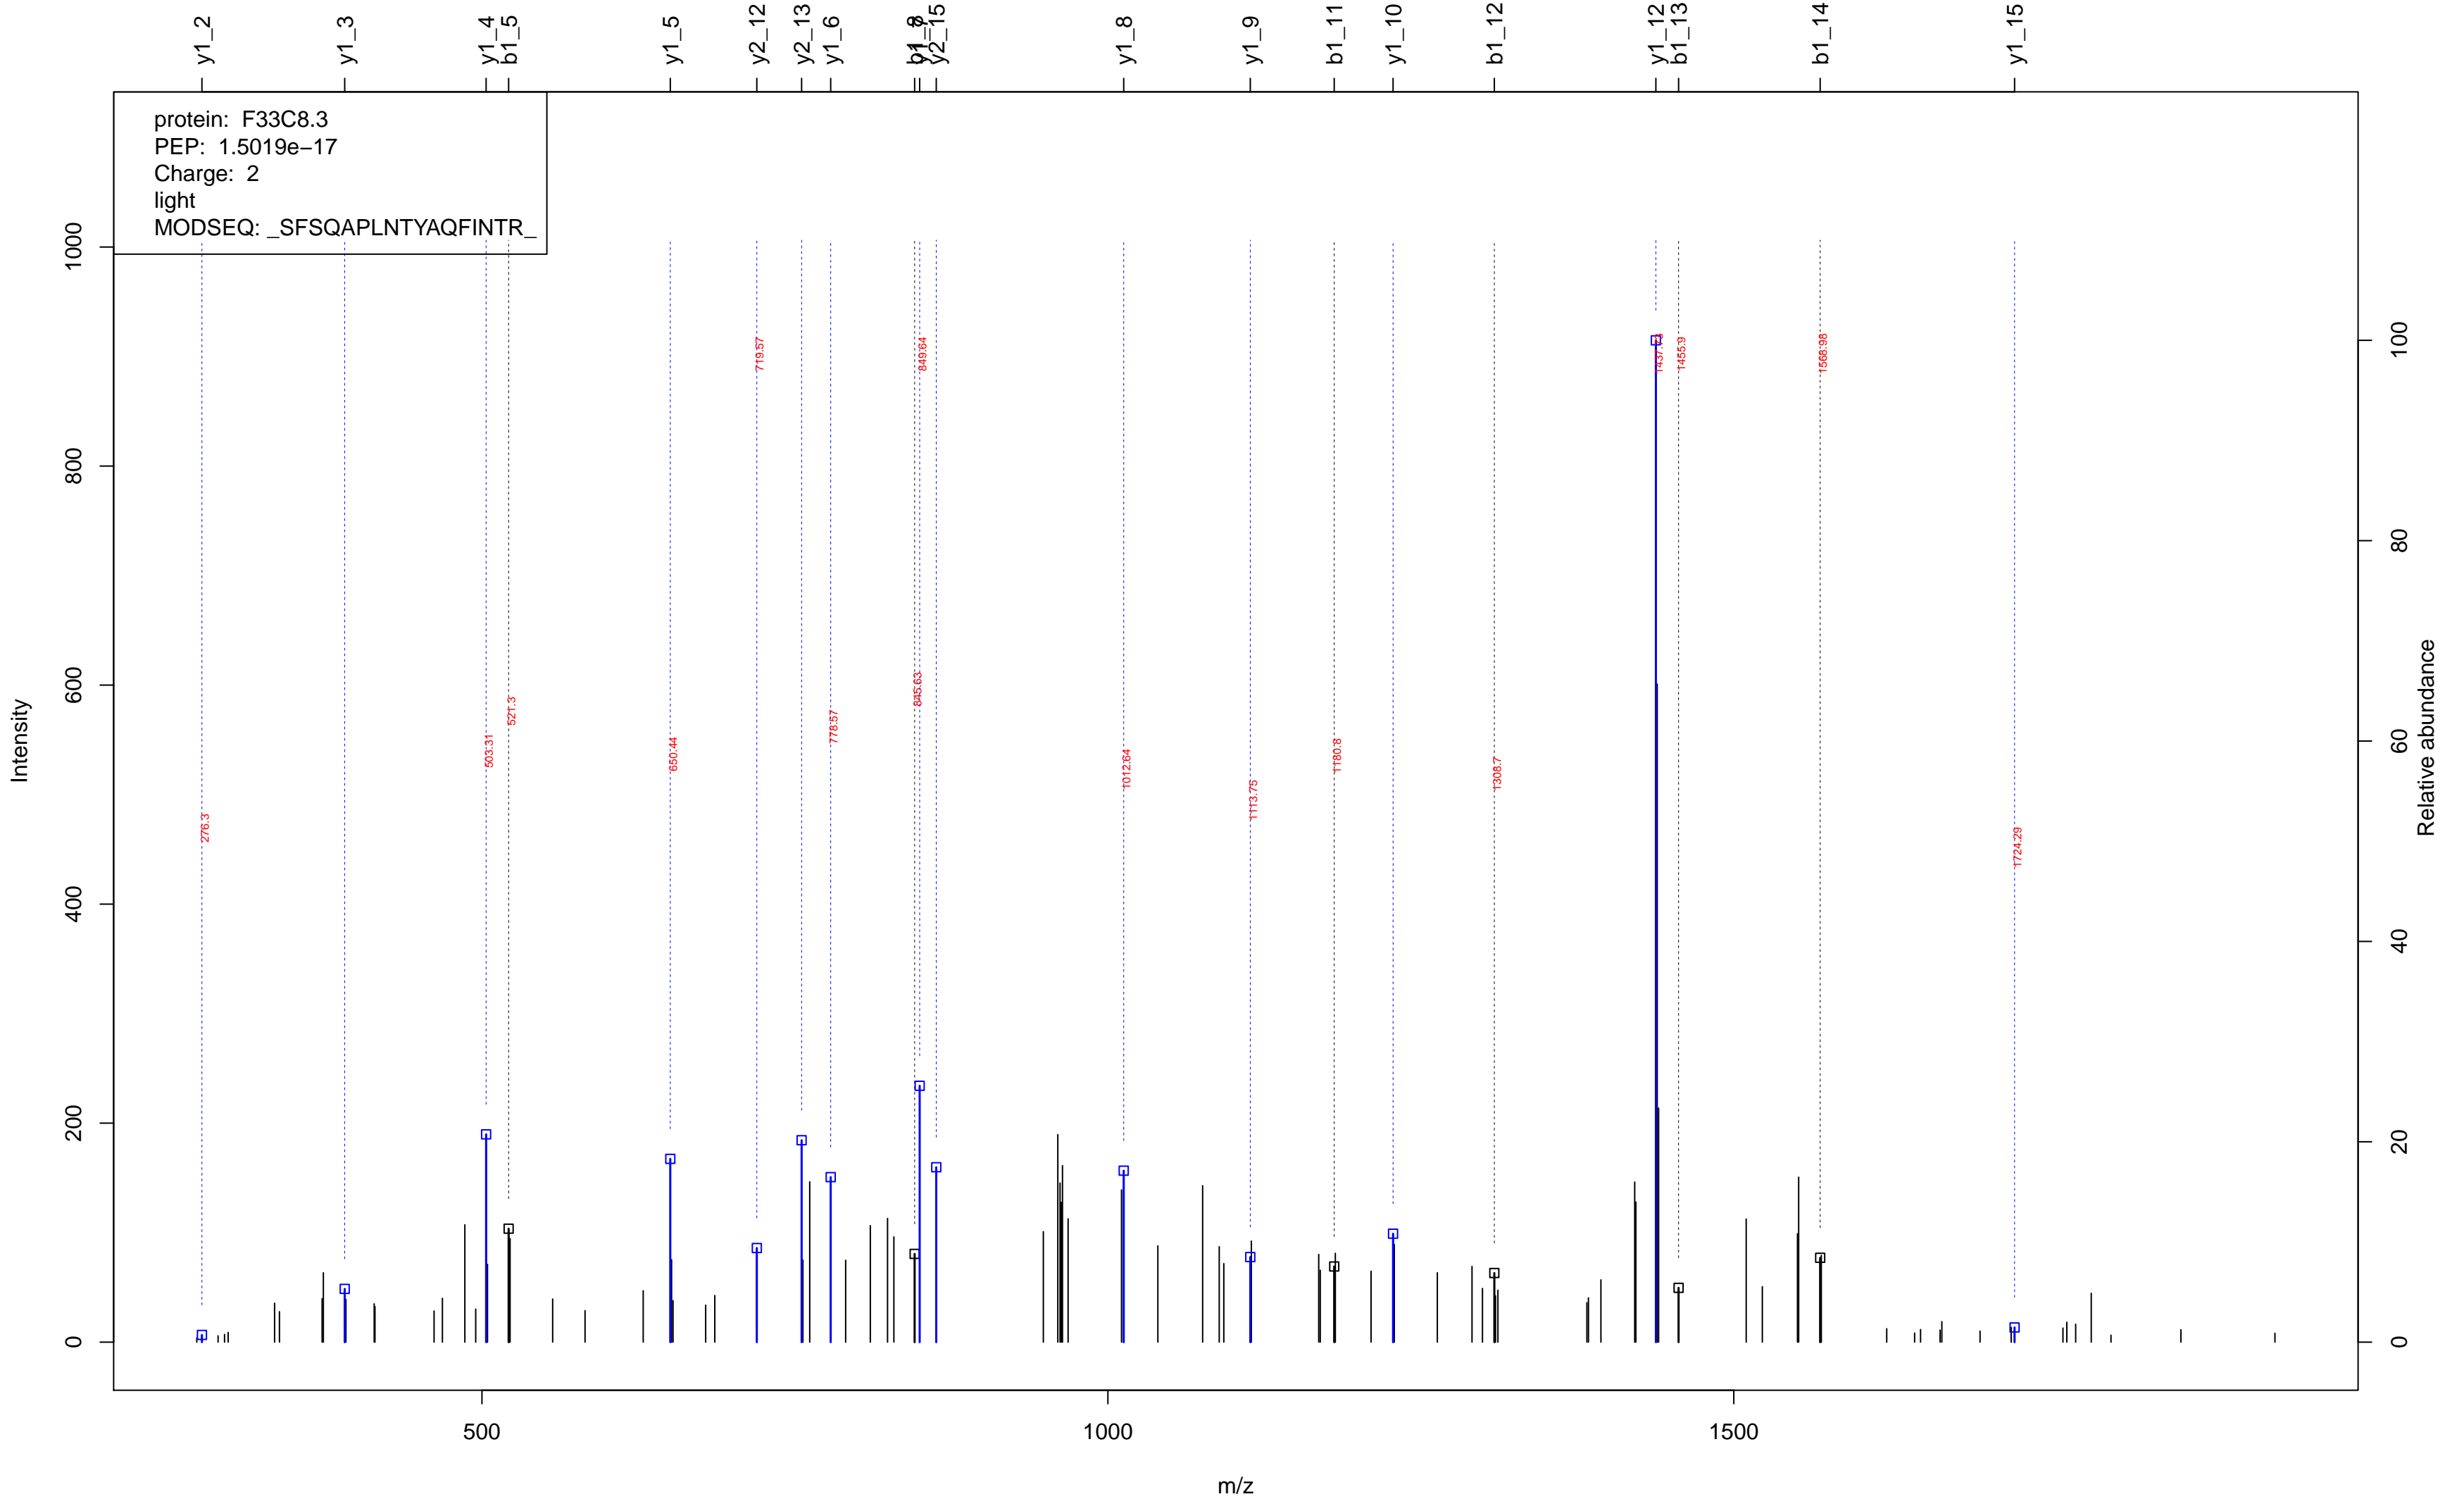

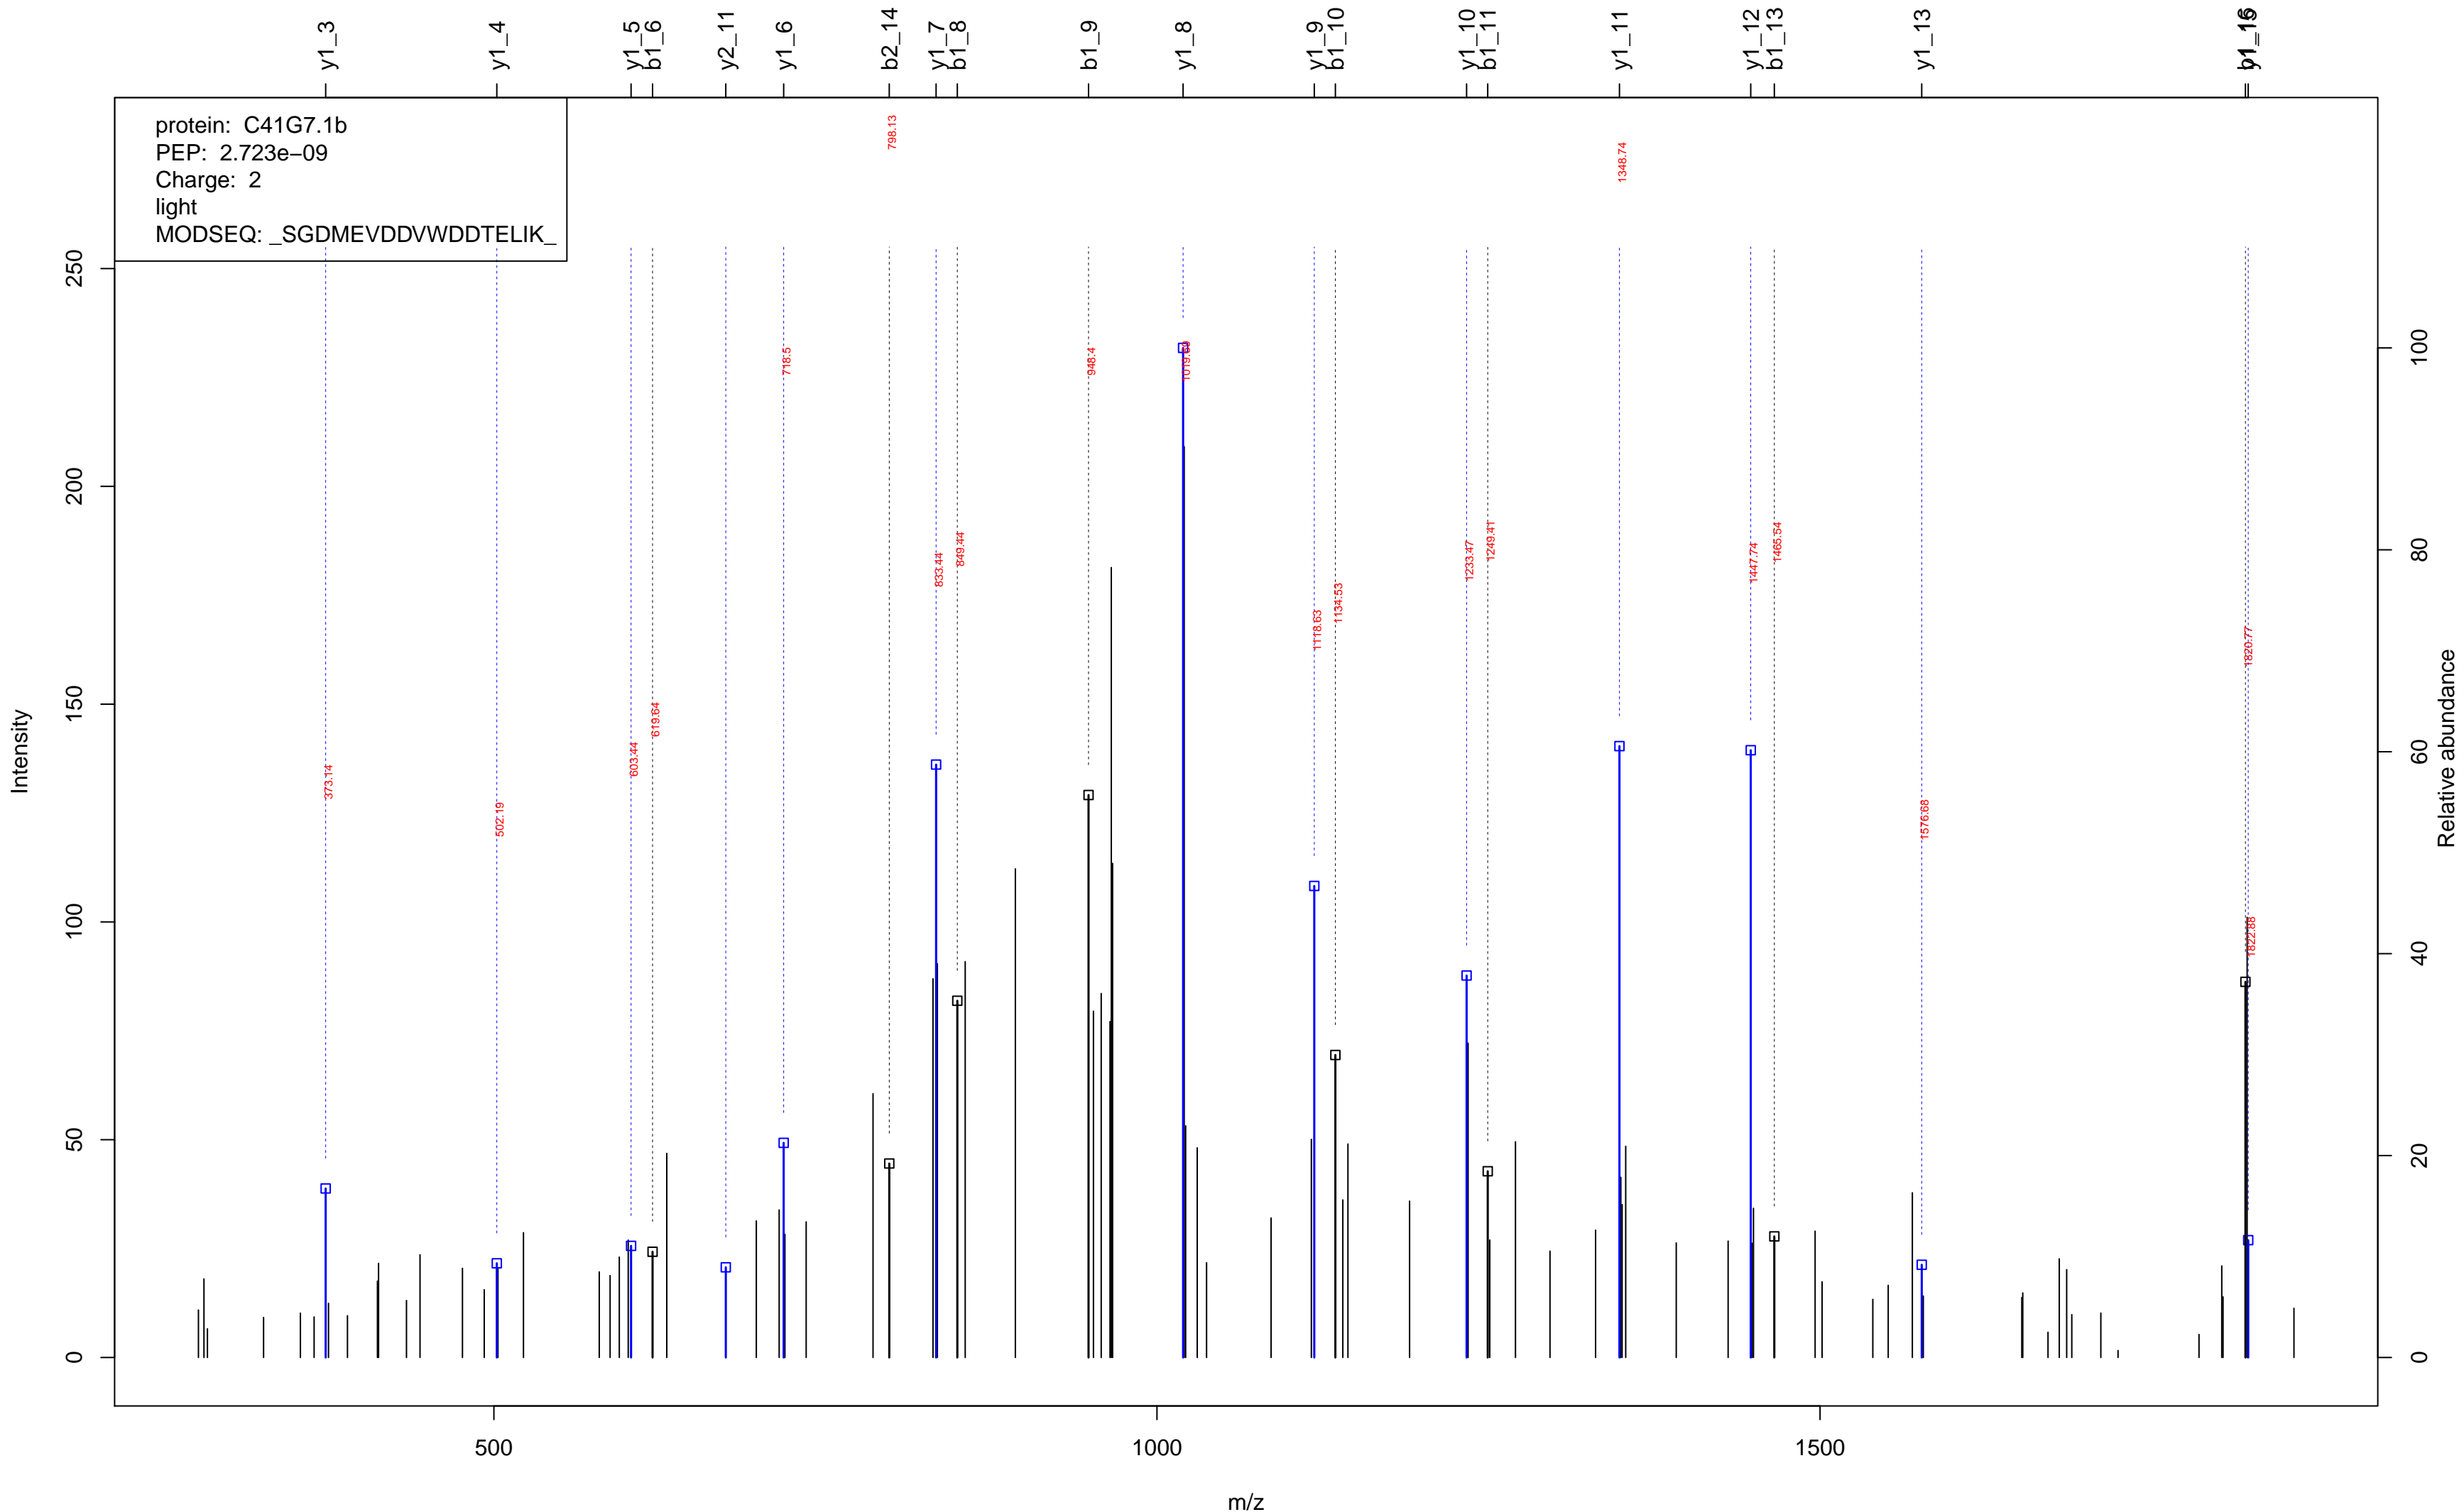

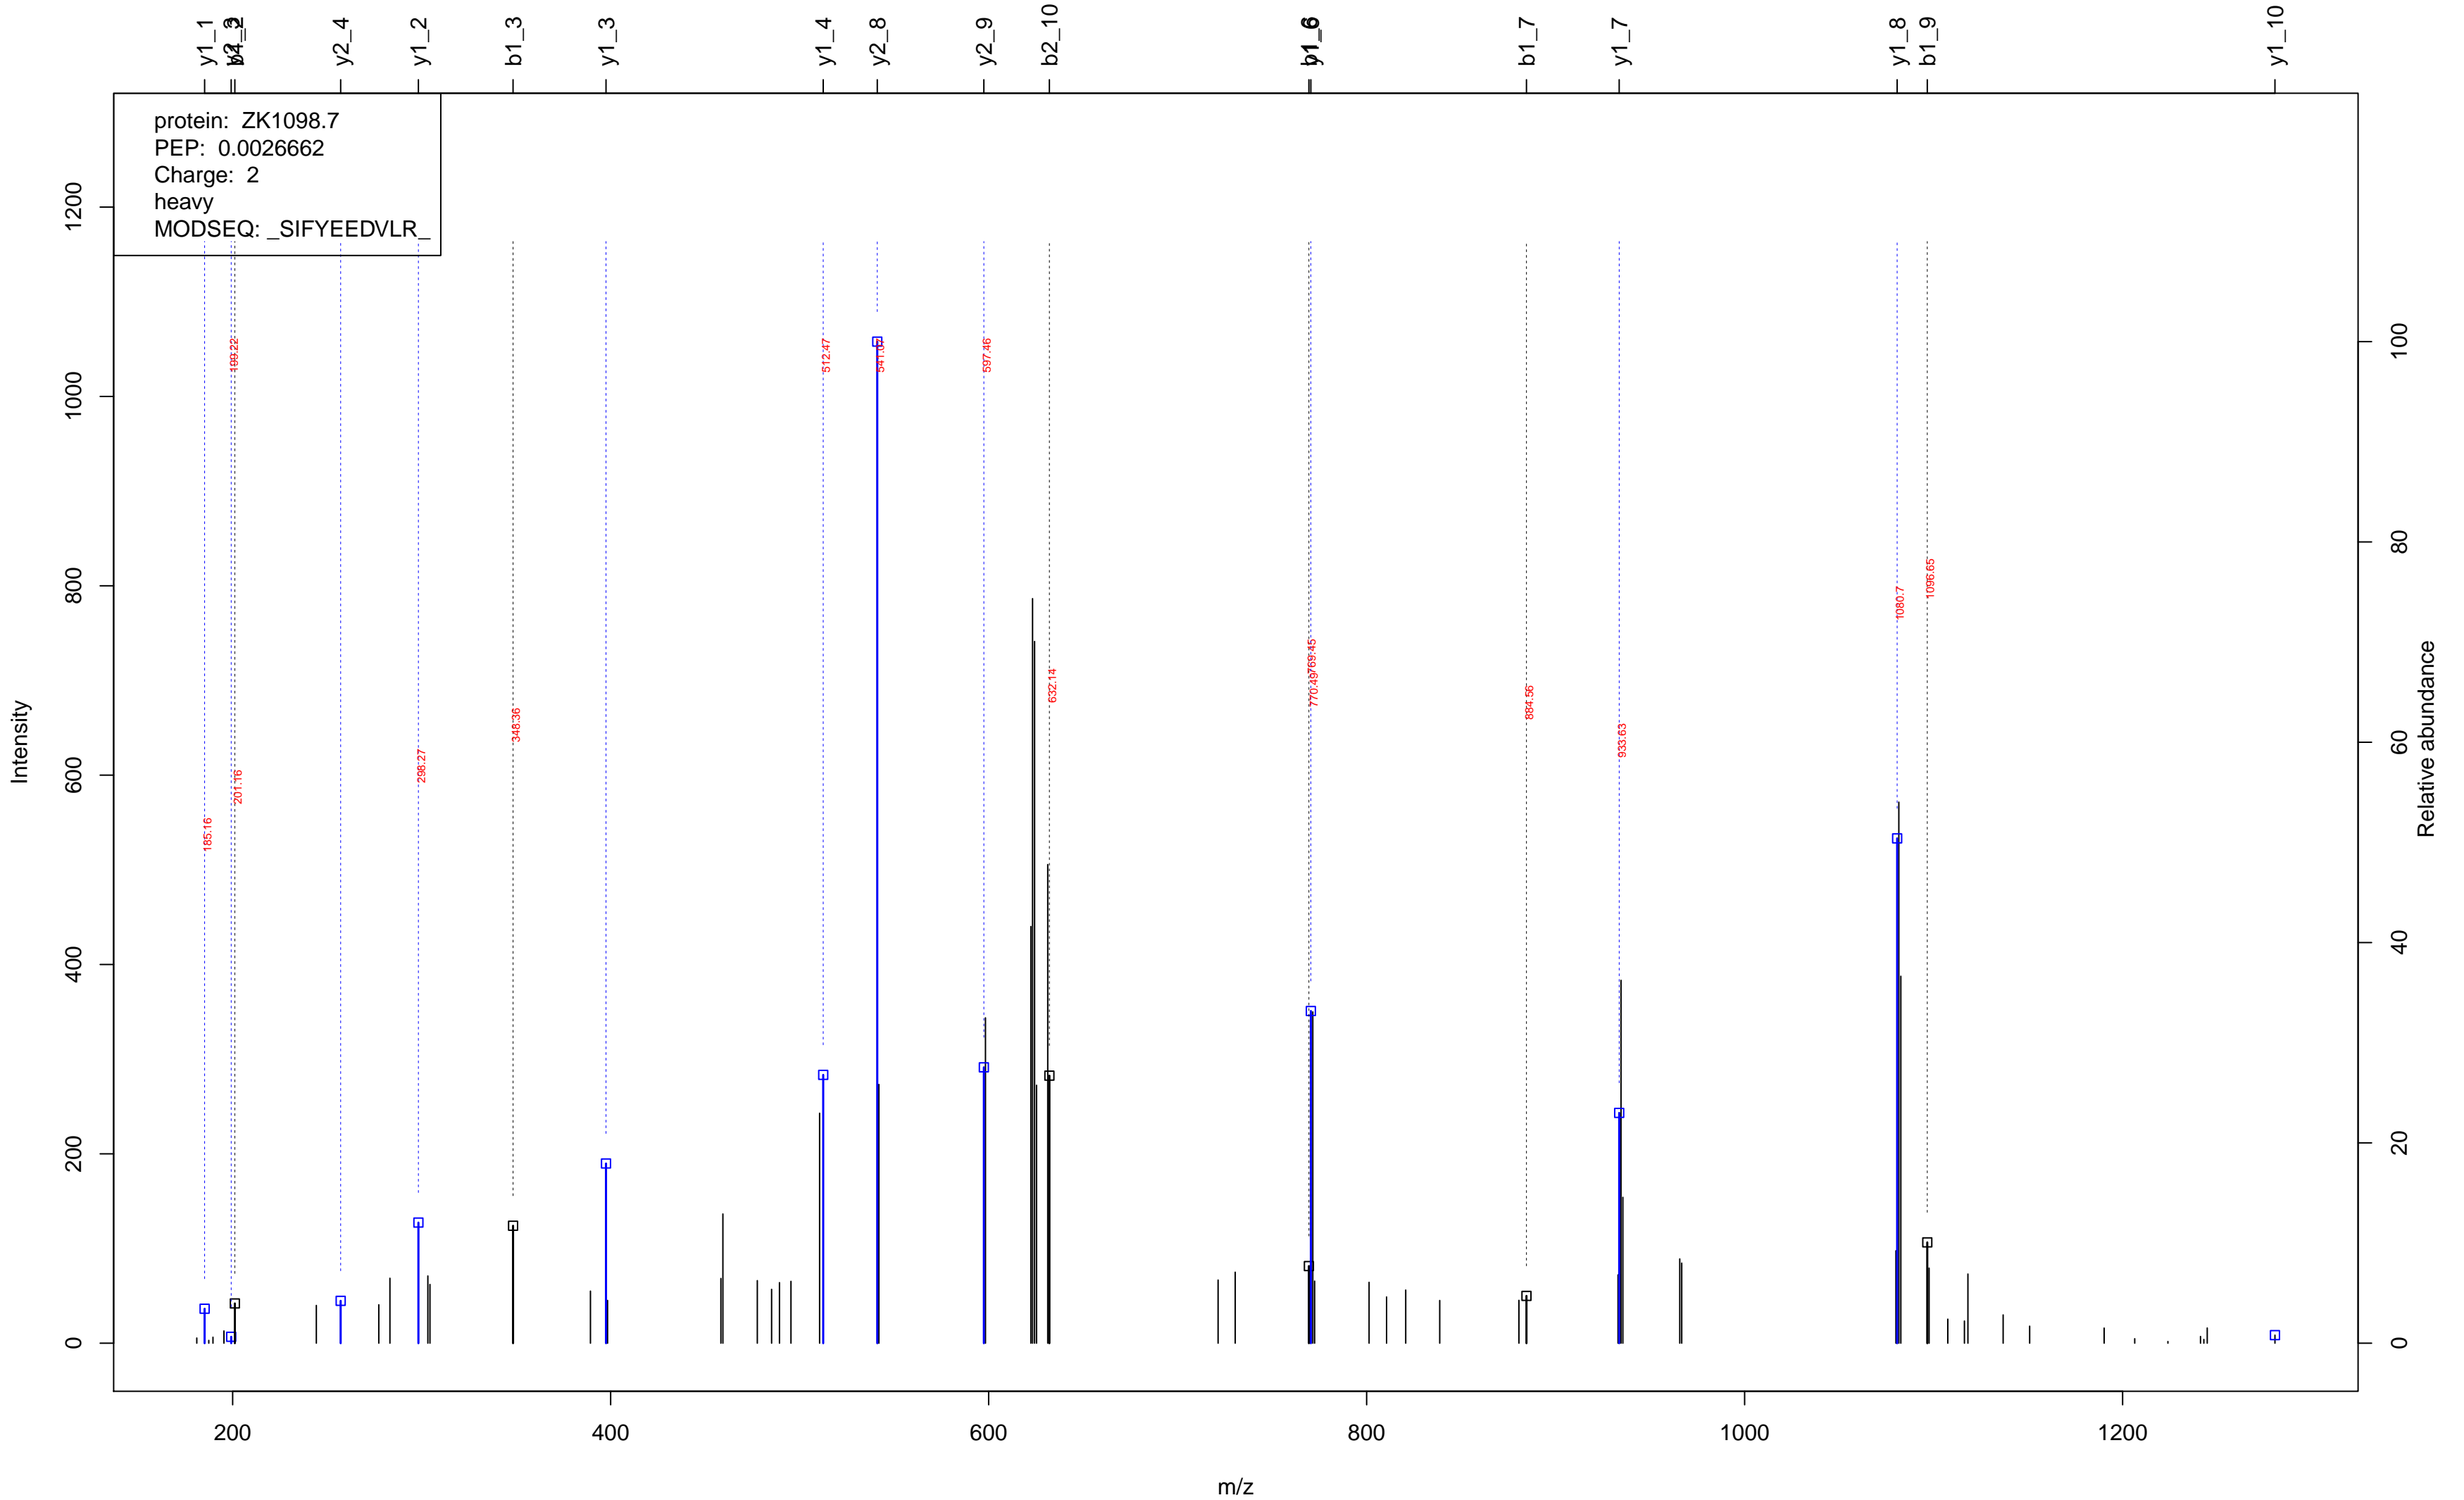

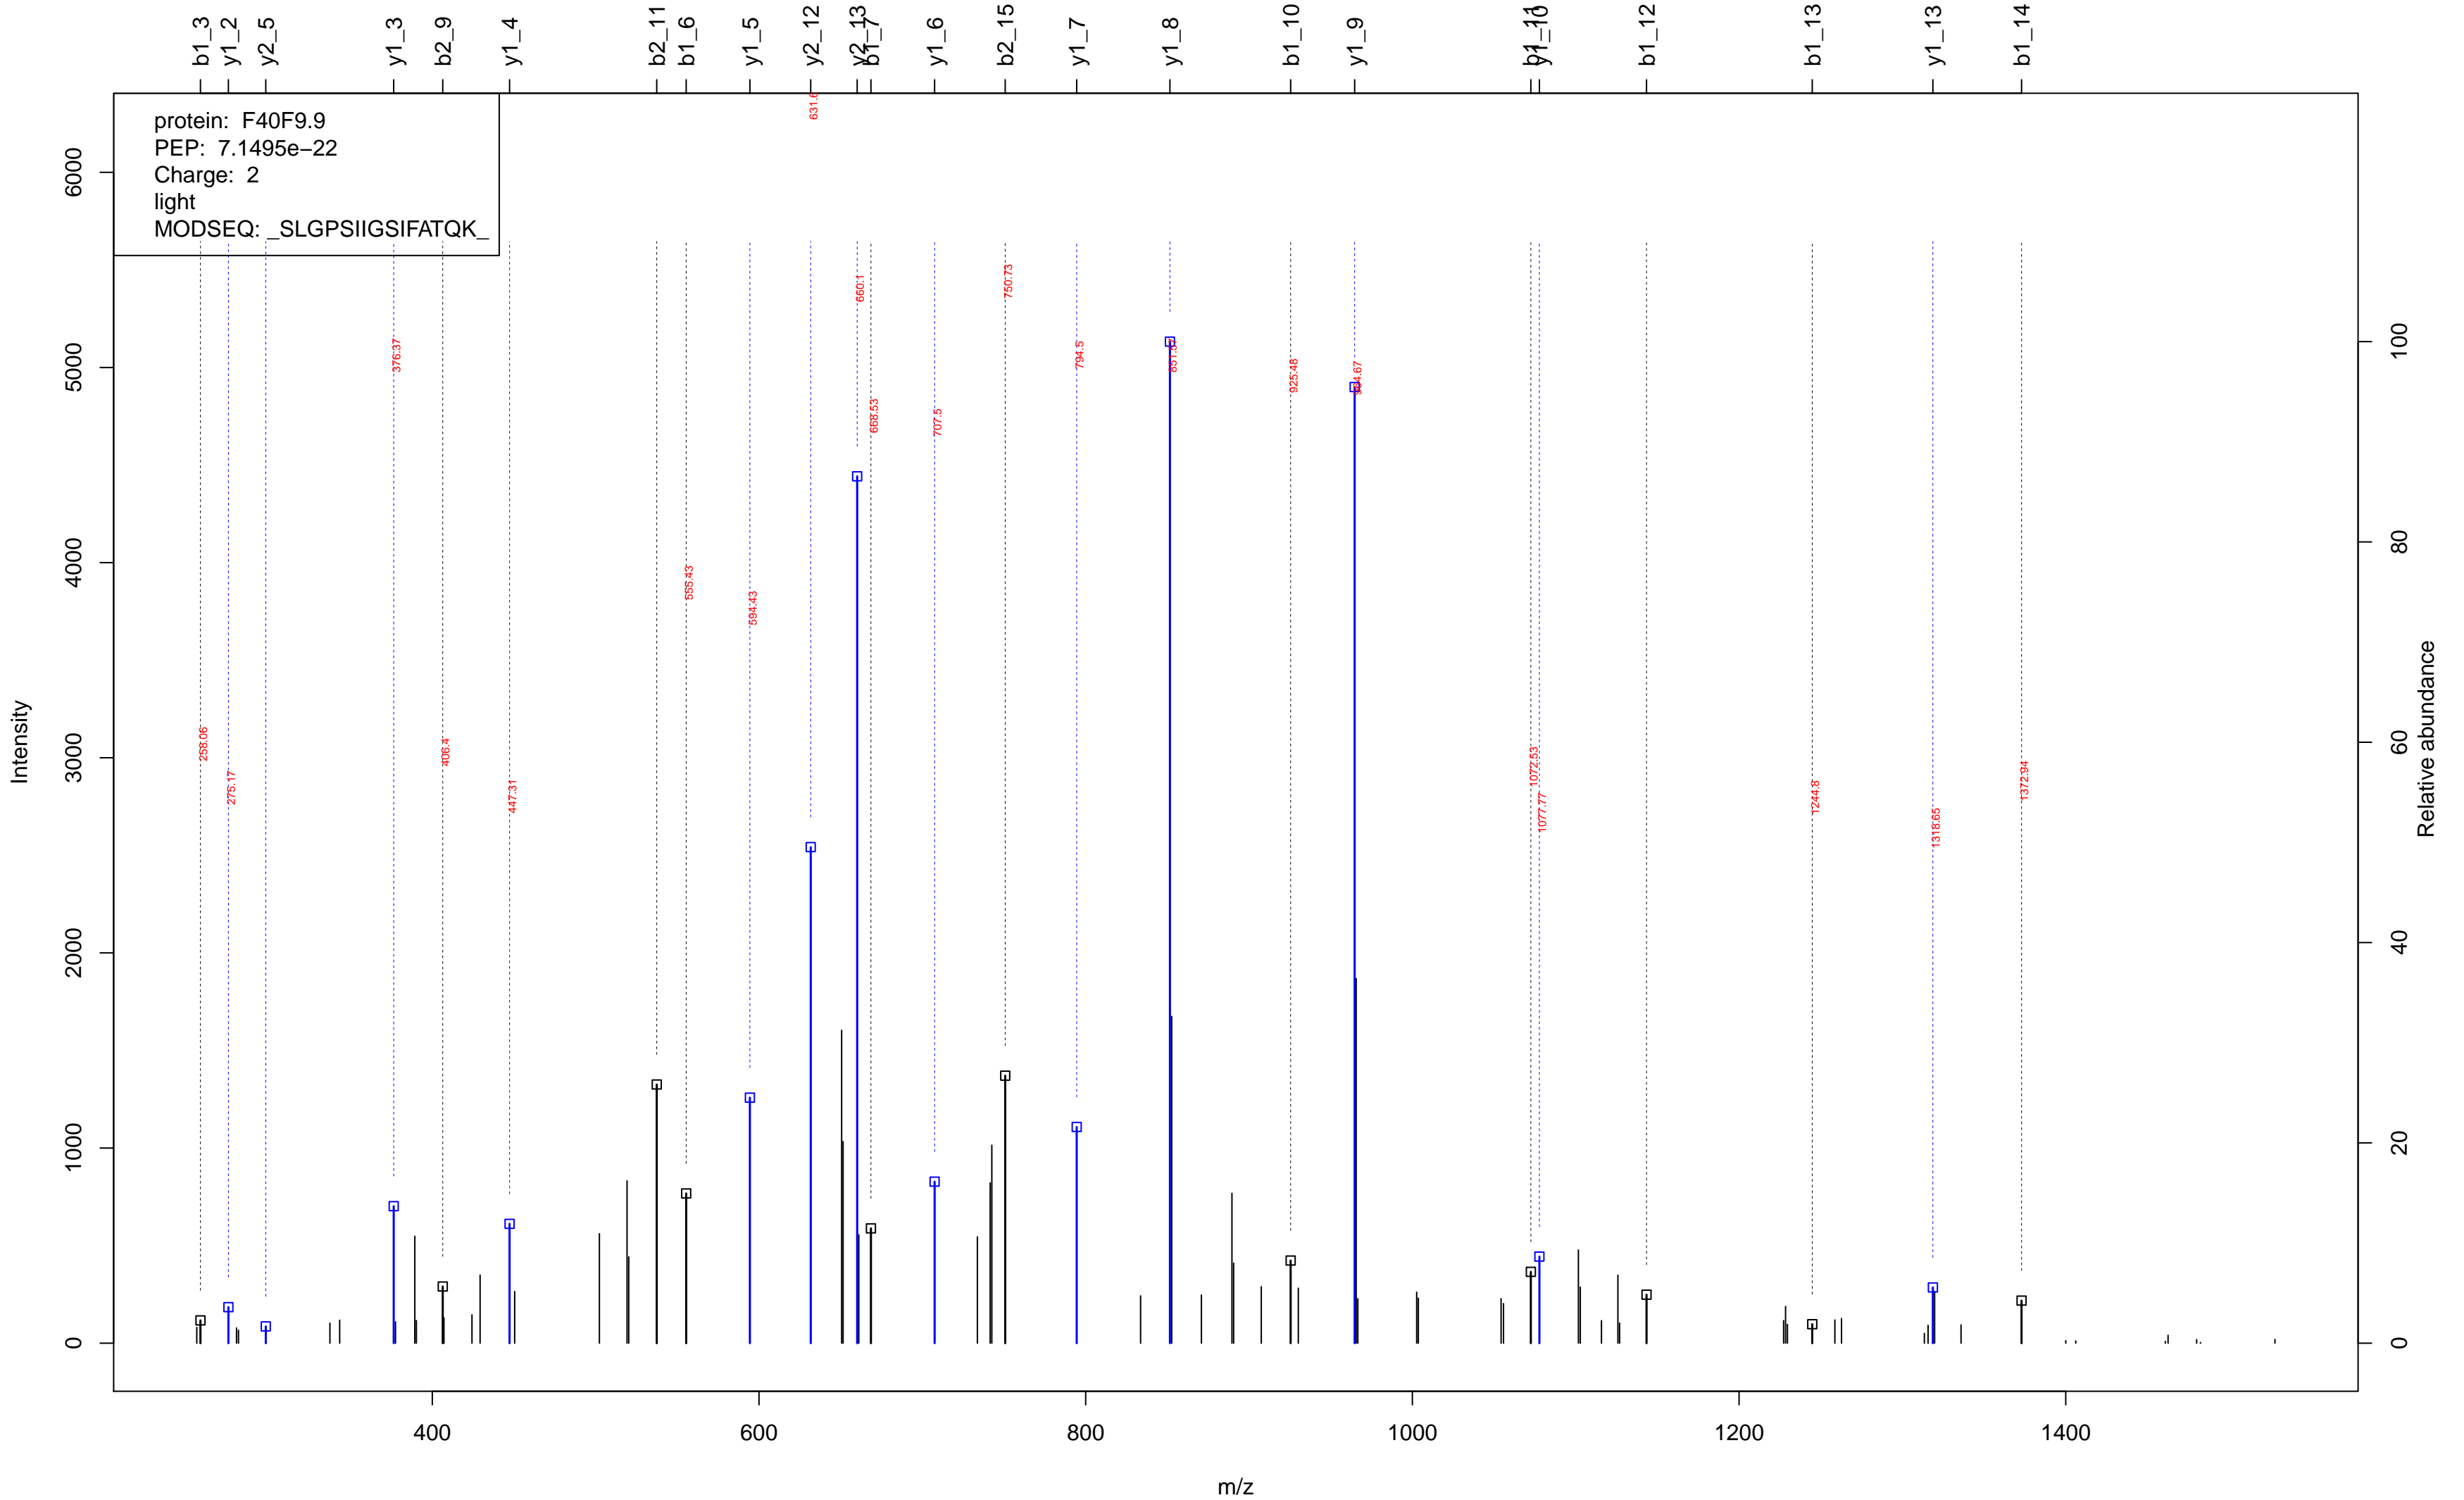

280

y2\_5 y1\_3 y1\_4 y1\_5 b1\_7 b2\_14 y1\_7 y1\_8 y1\_9 y1\_10 y1\_12 y1\_12 b1\_13

protein: T12A2.15a  
PEP: 0.0051883  
Charge: 2  
light  
MODSEQ: \_SLGSLNIPLTLLK\_

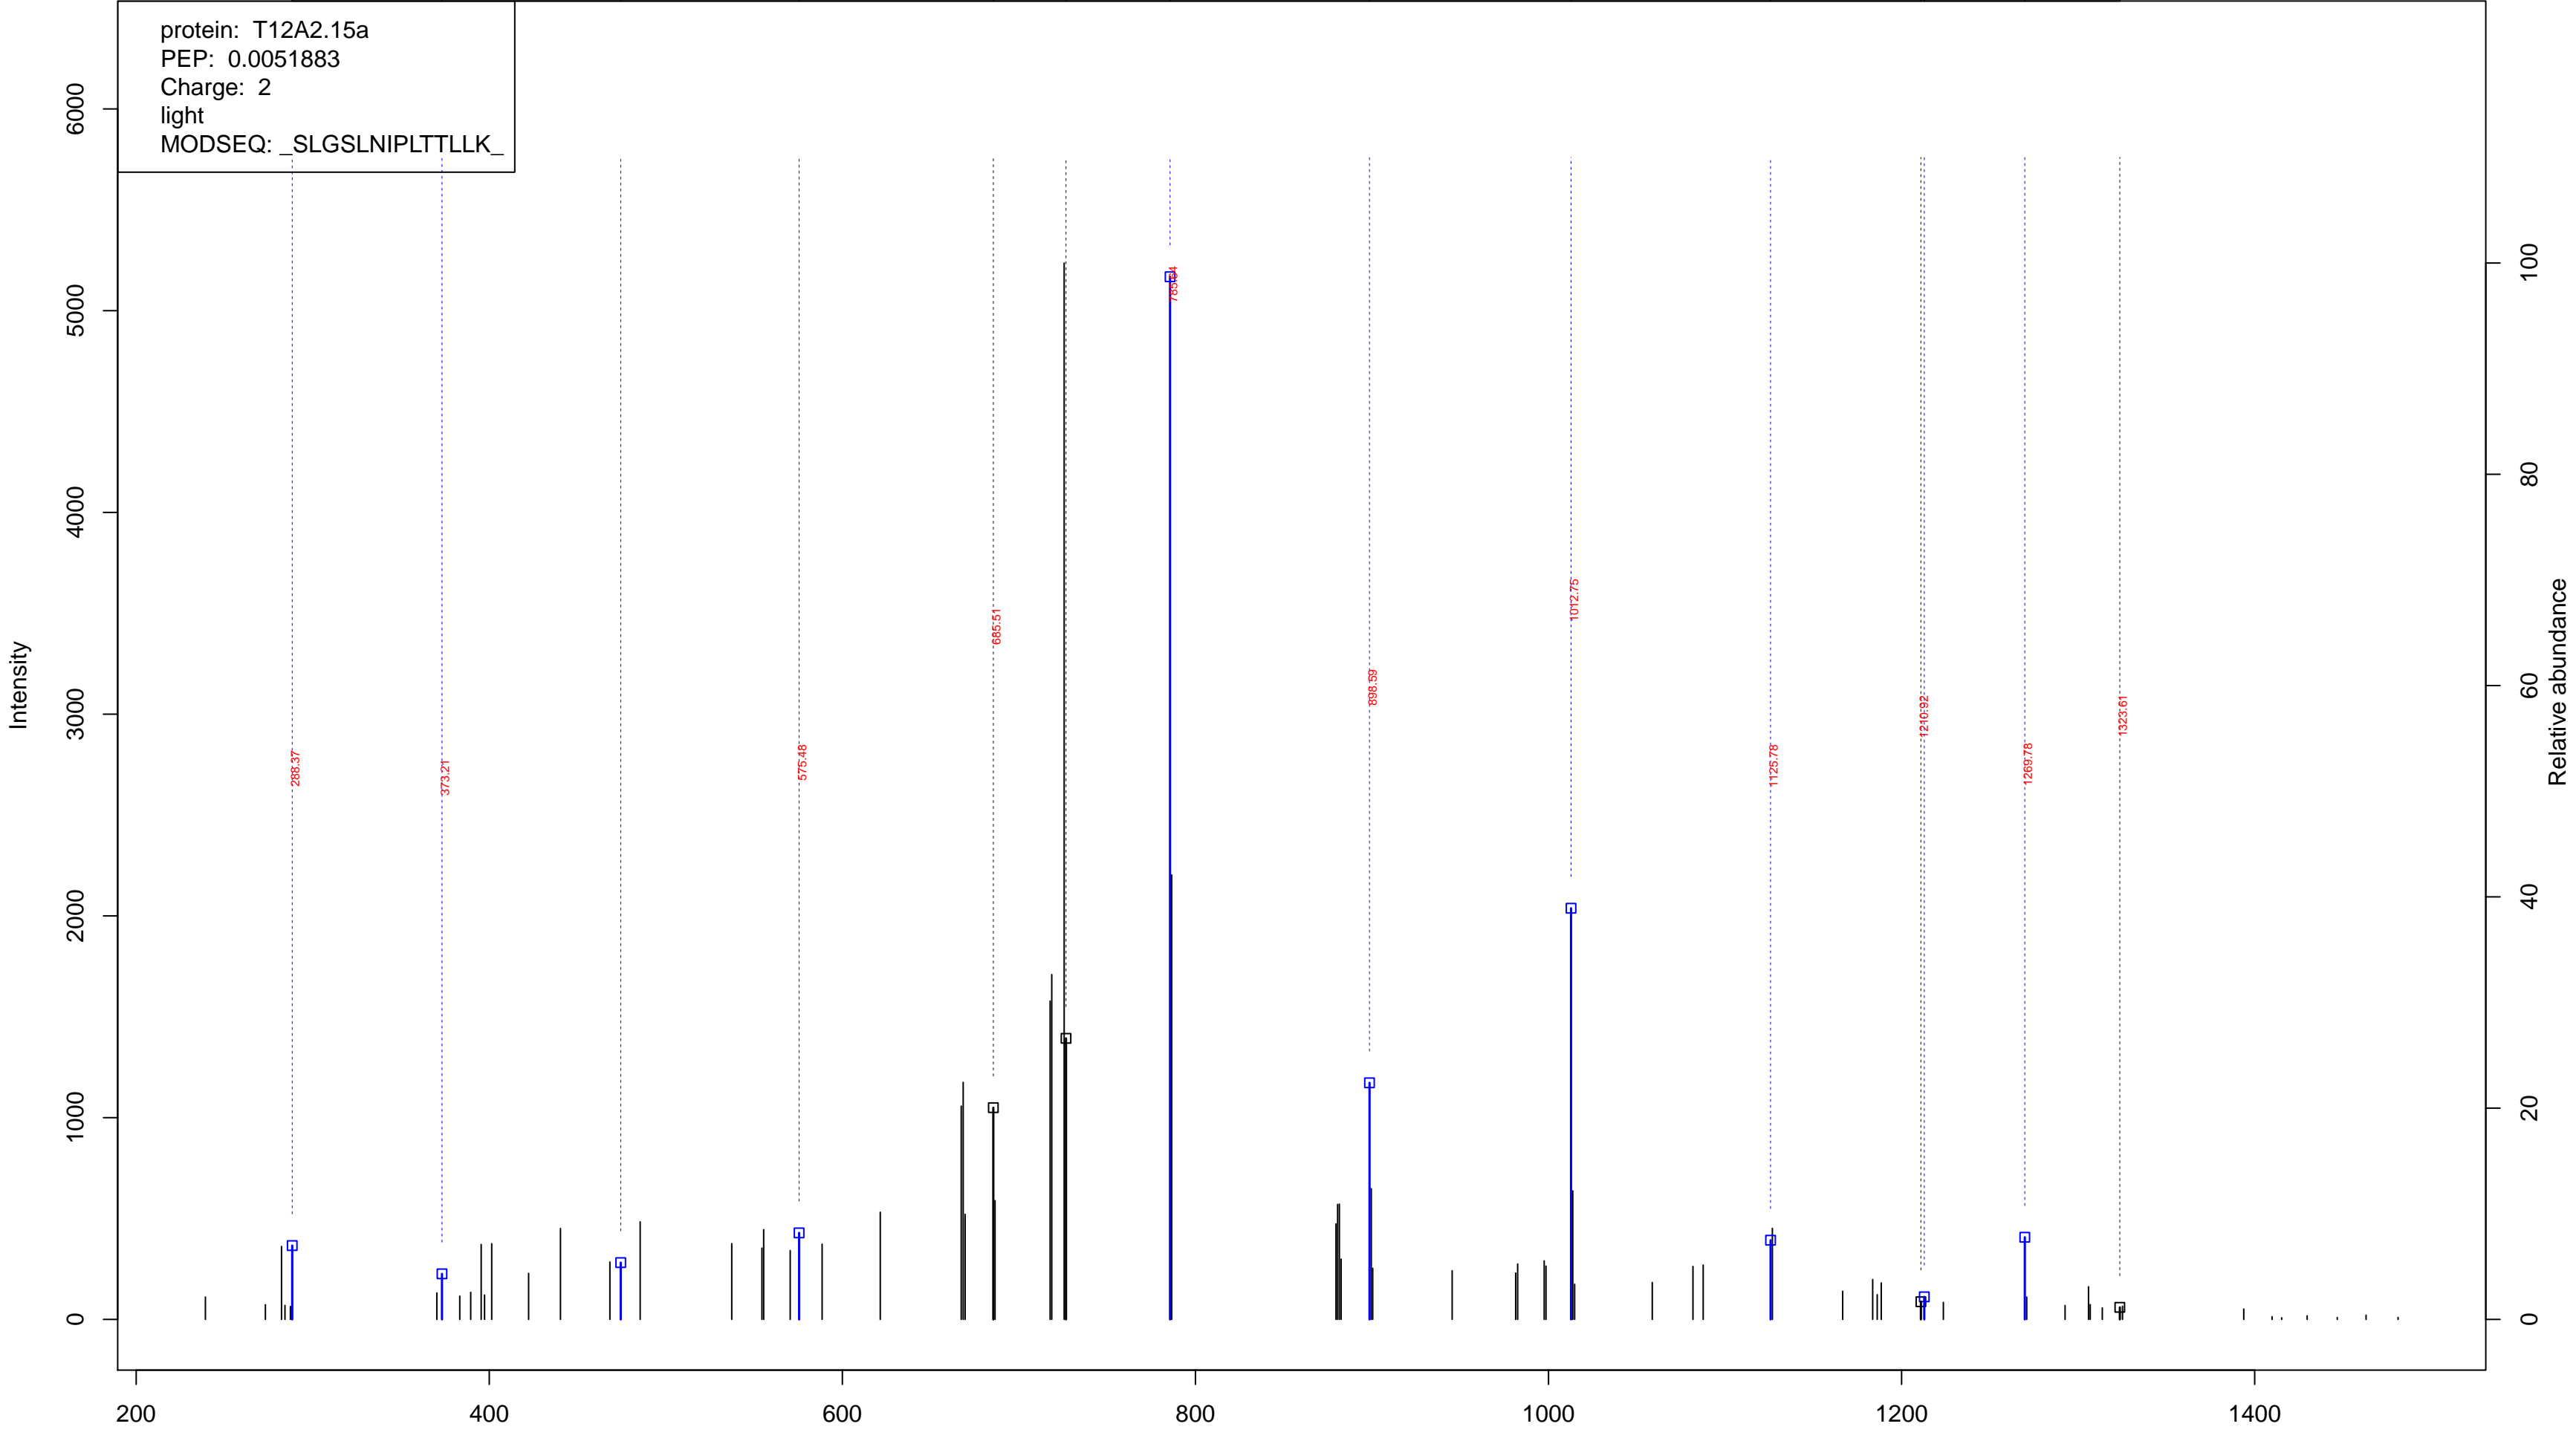



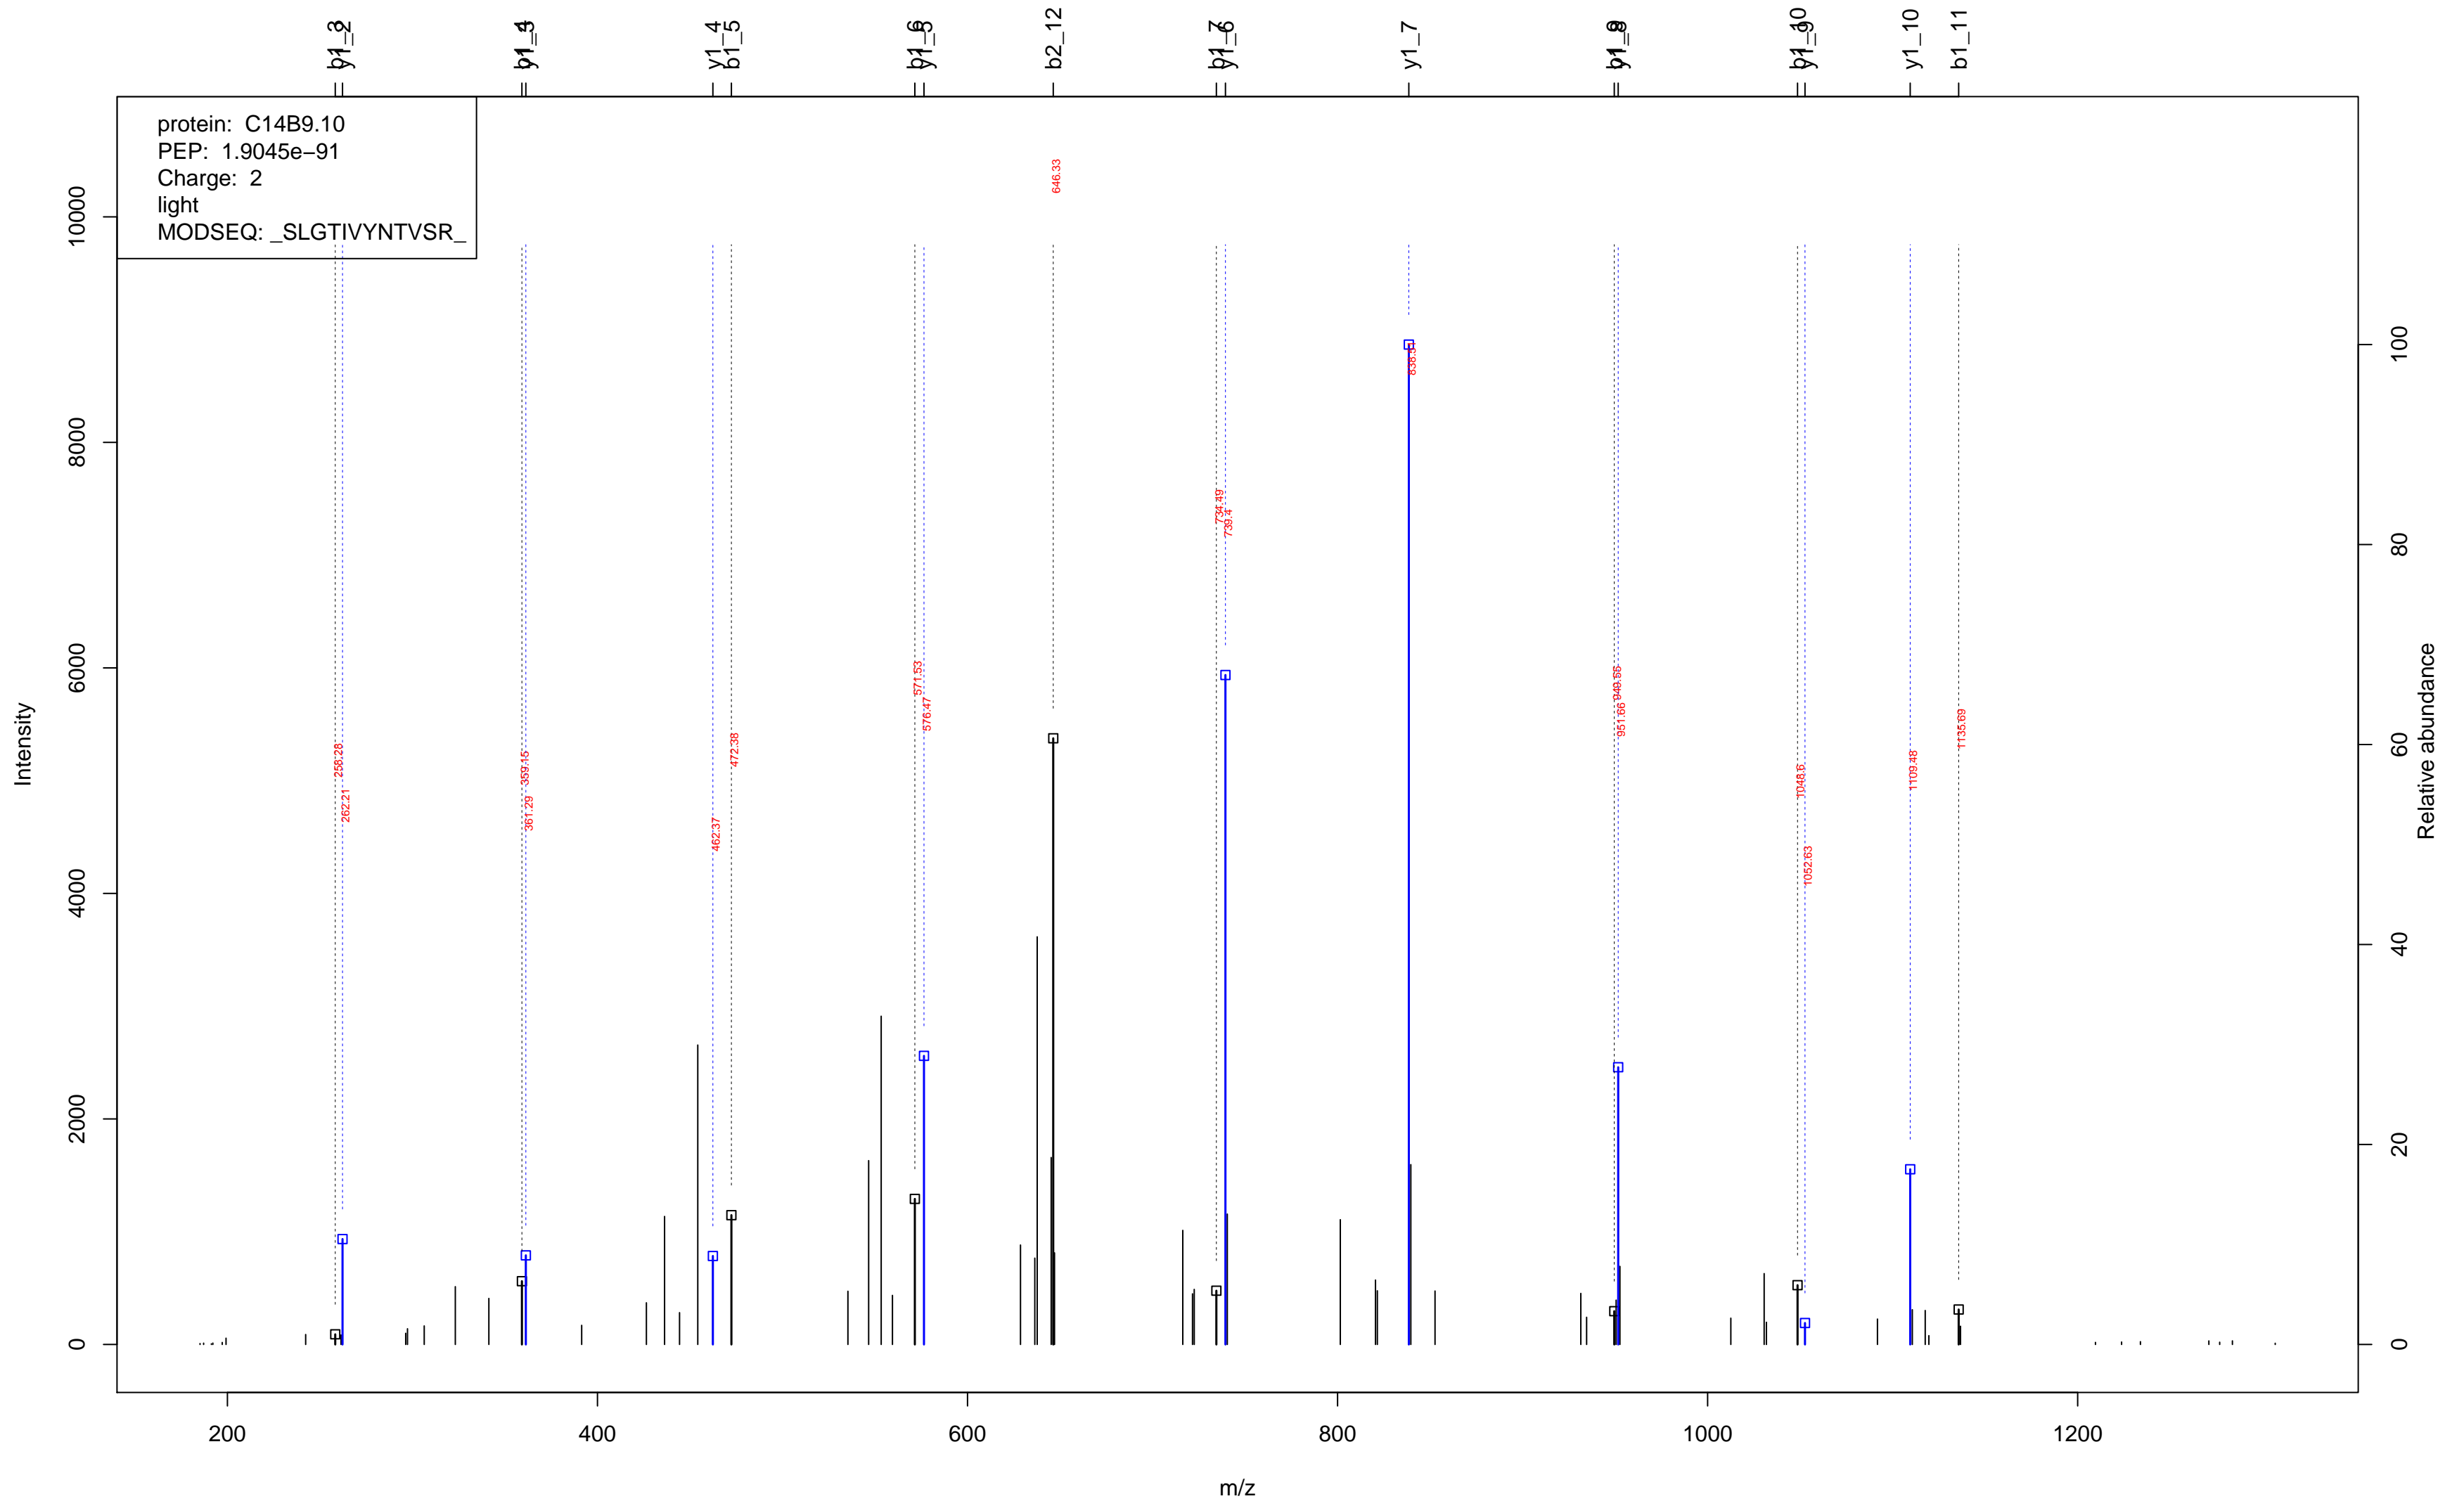

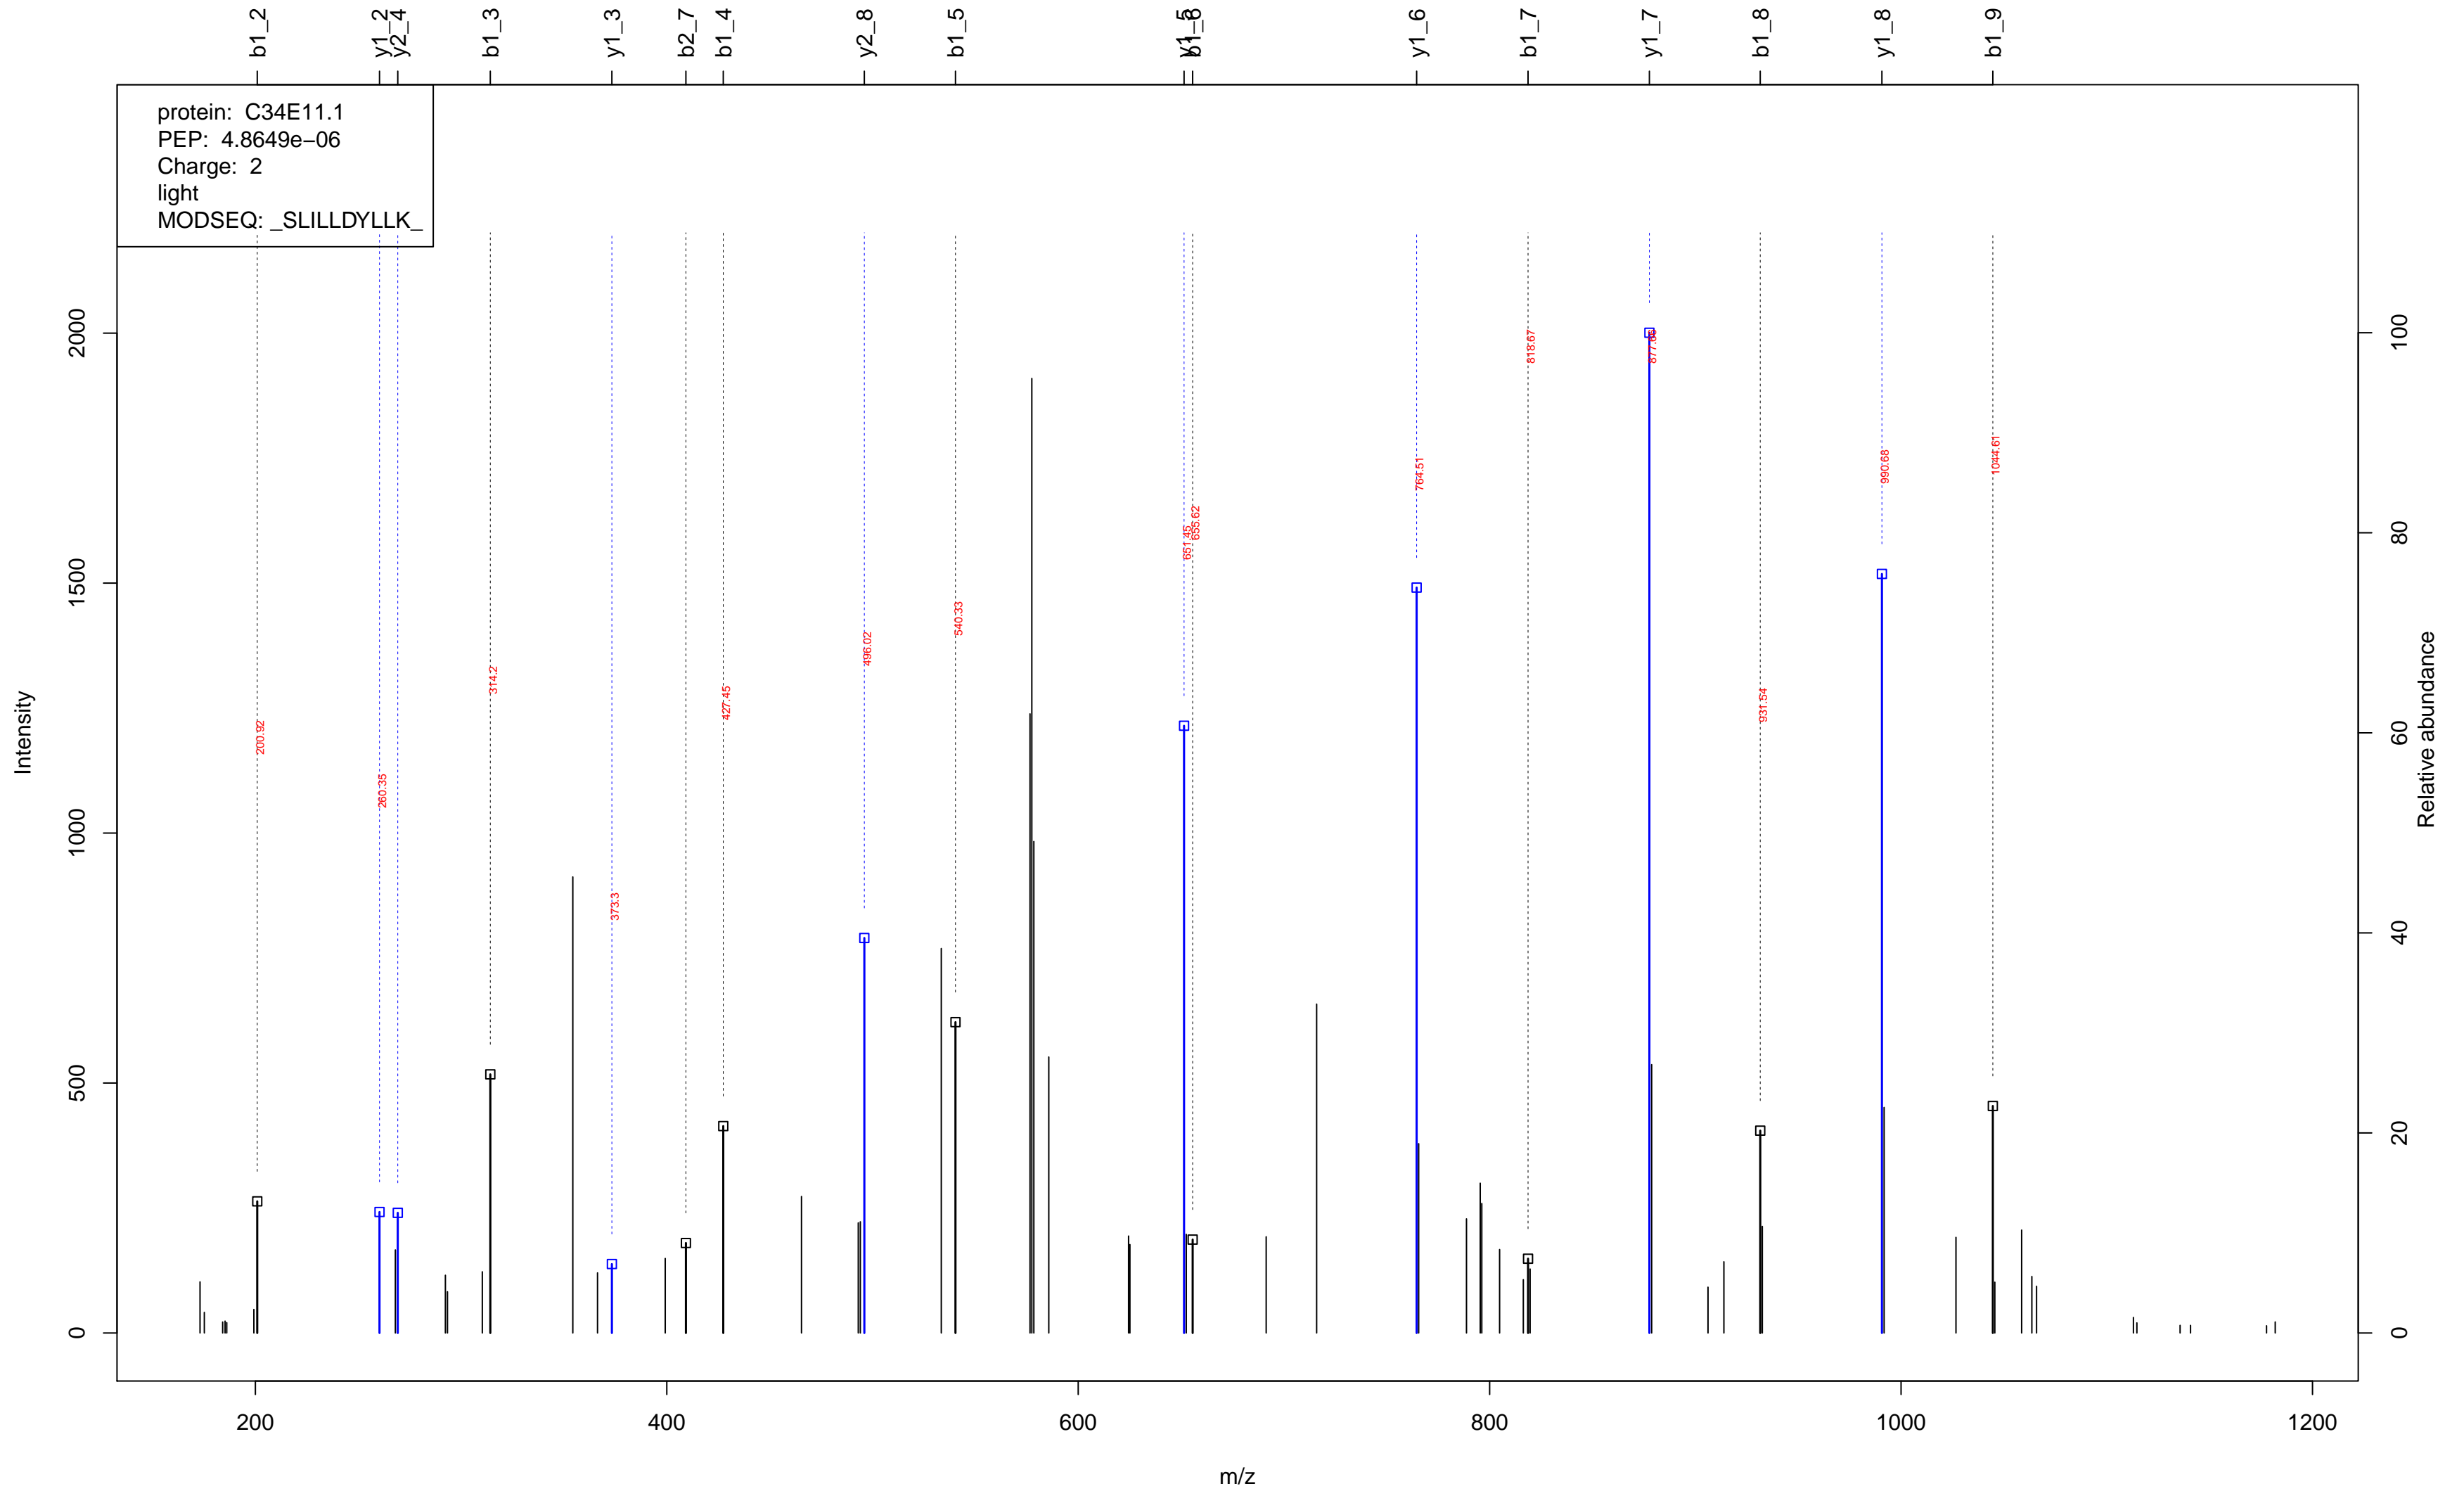

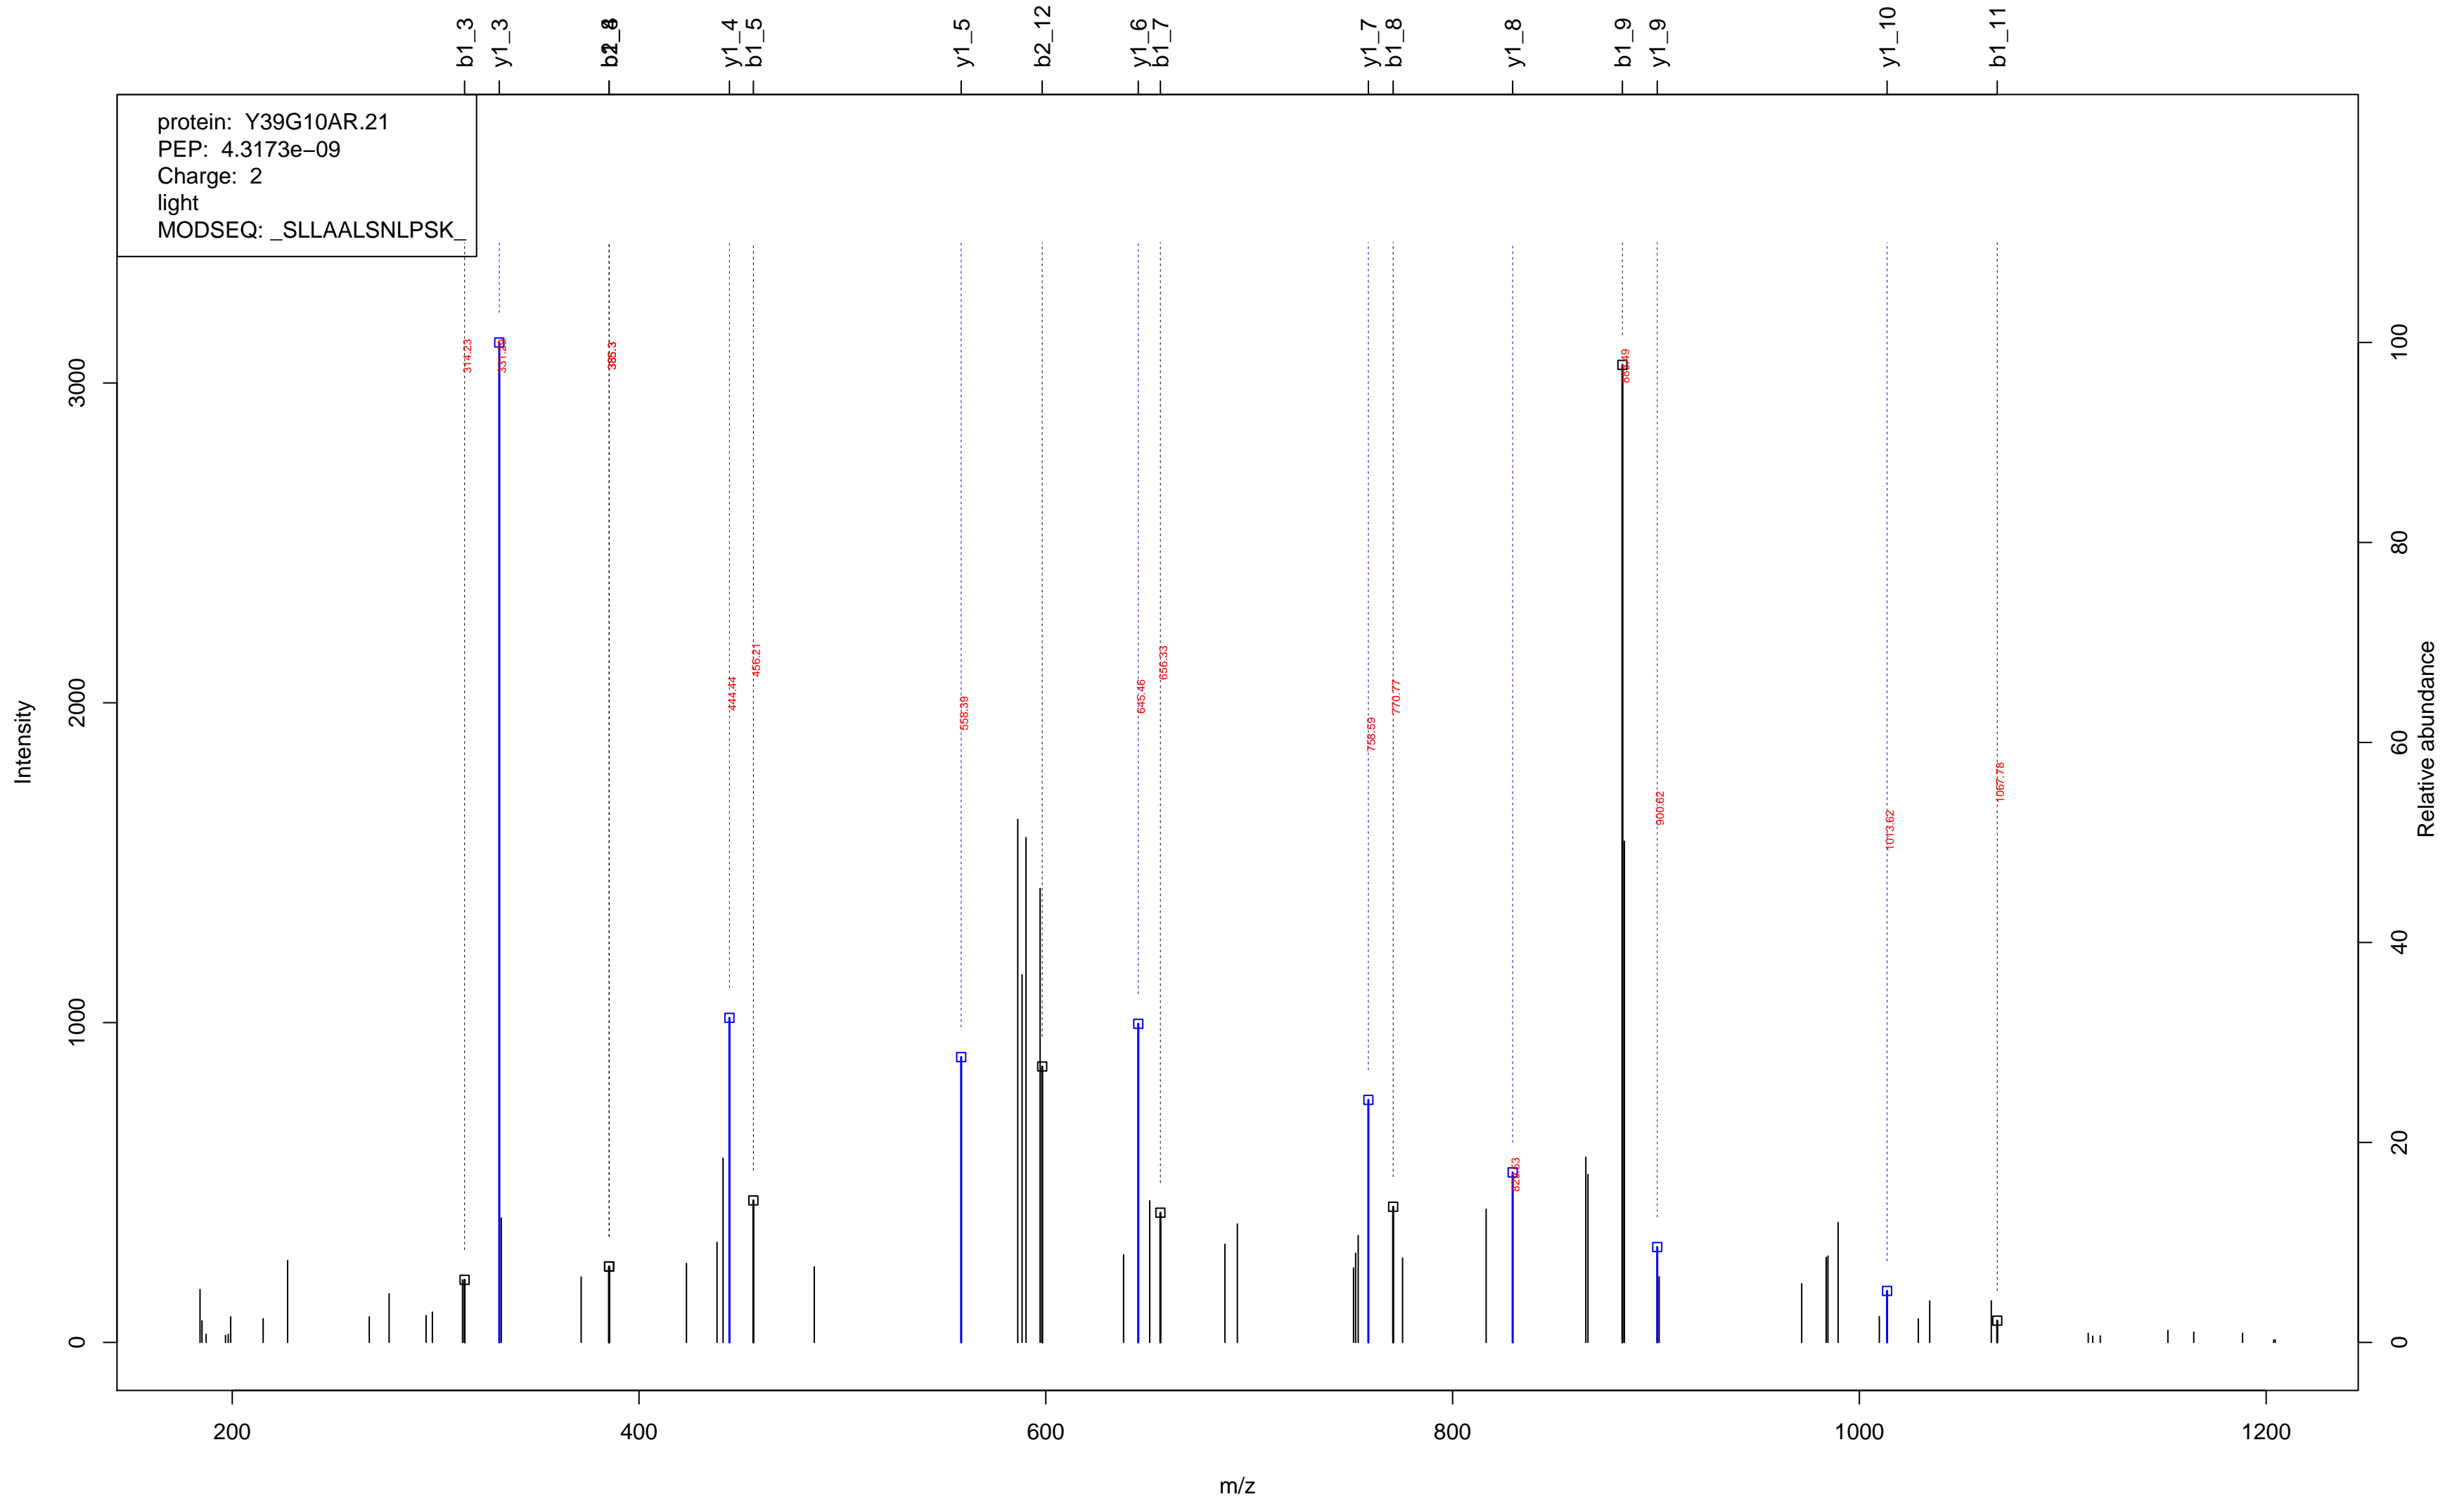

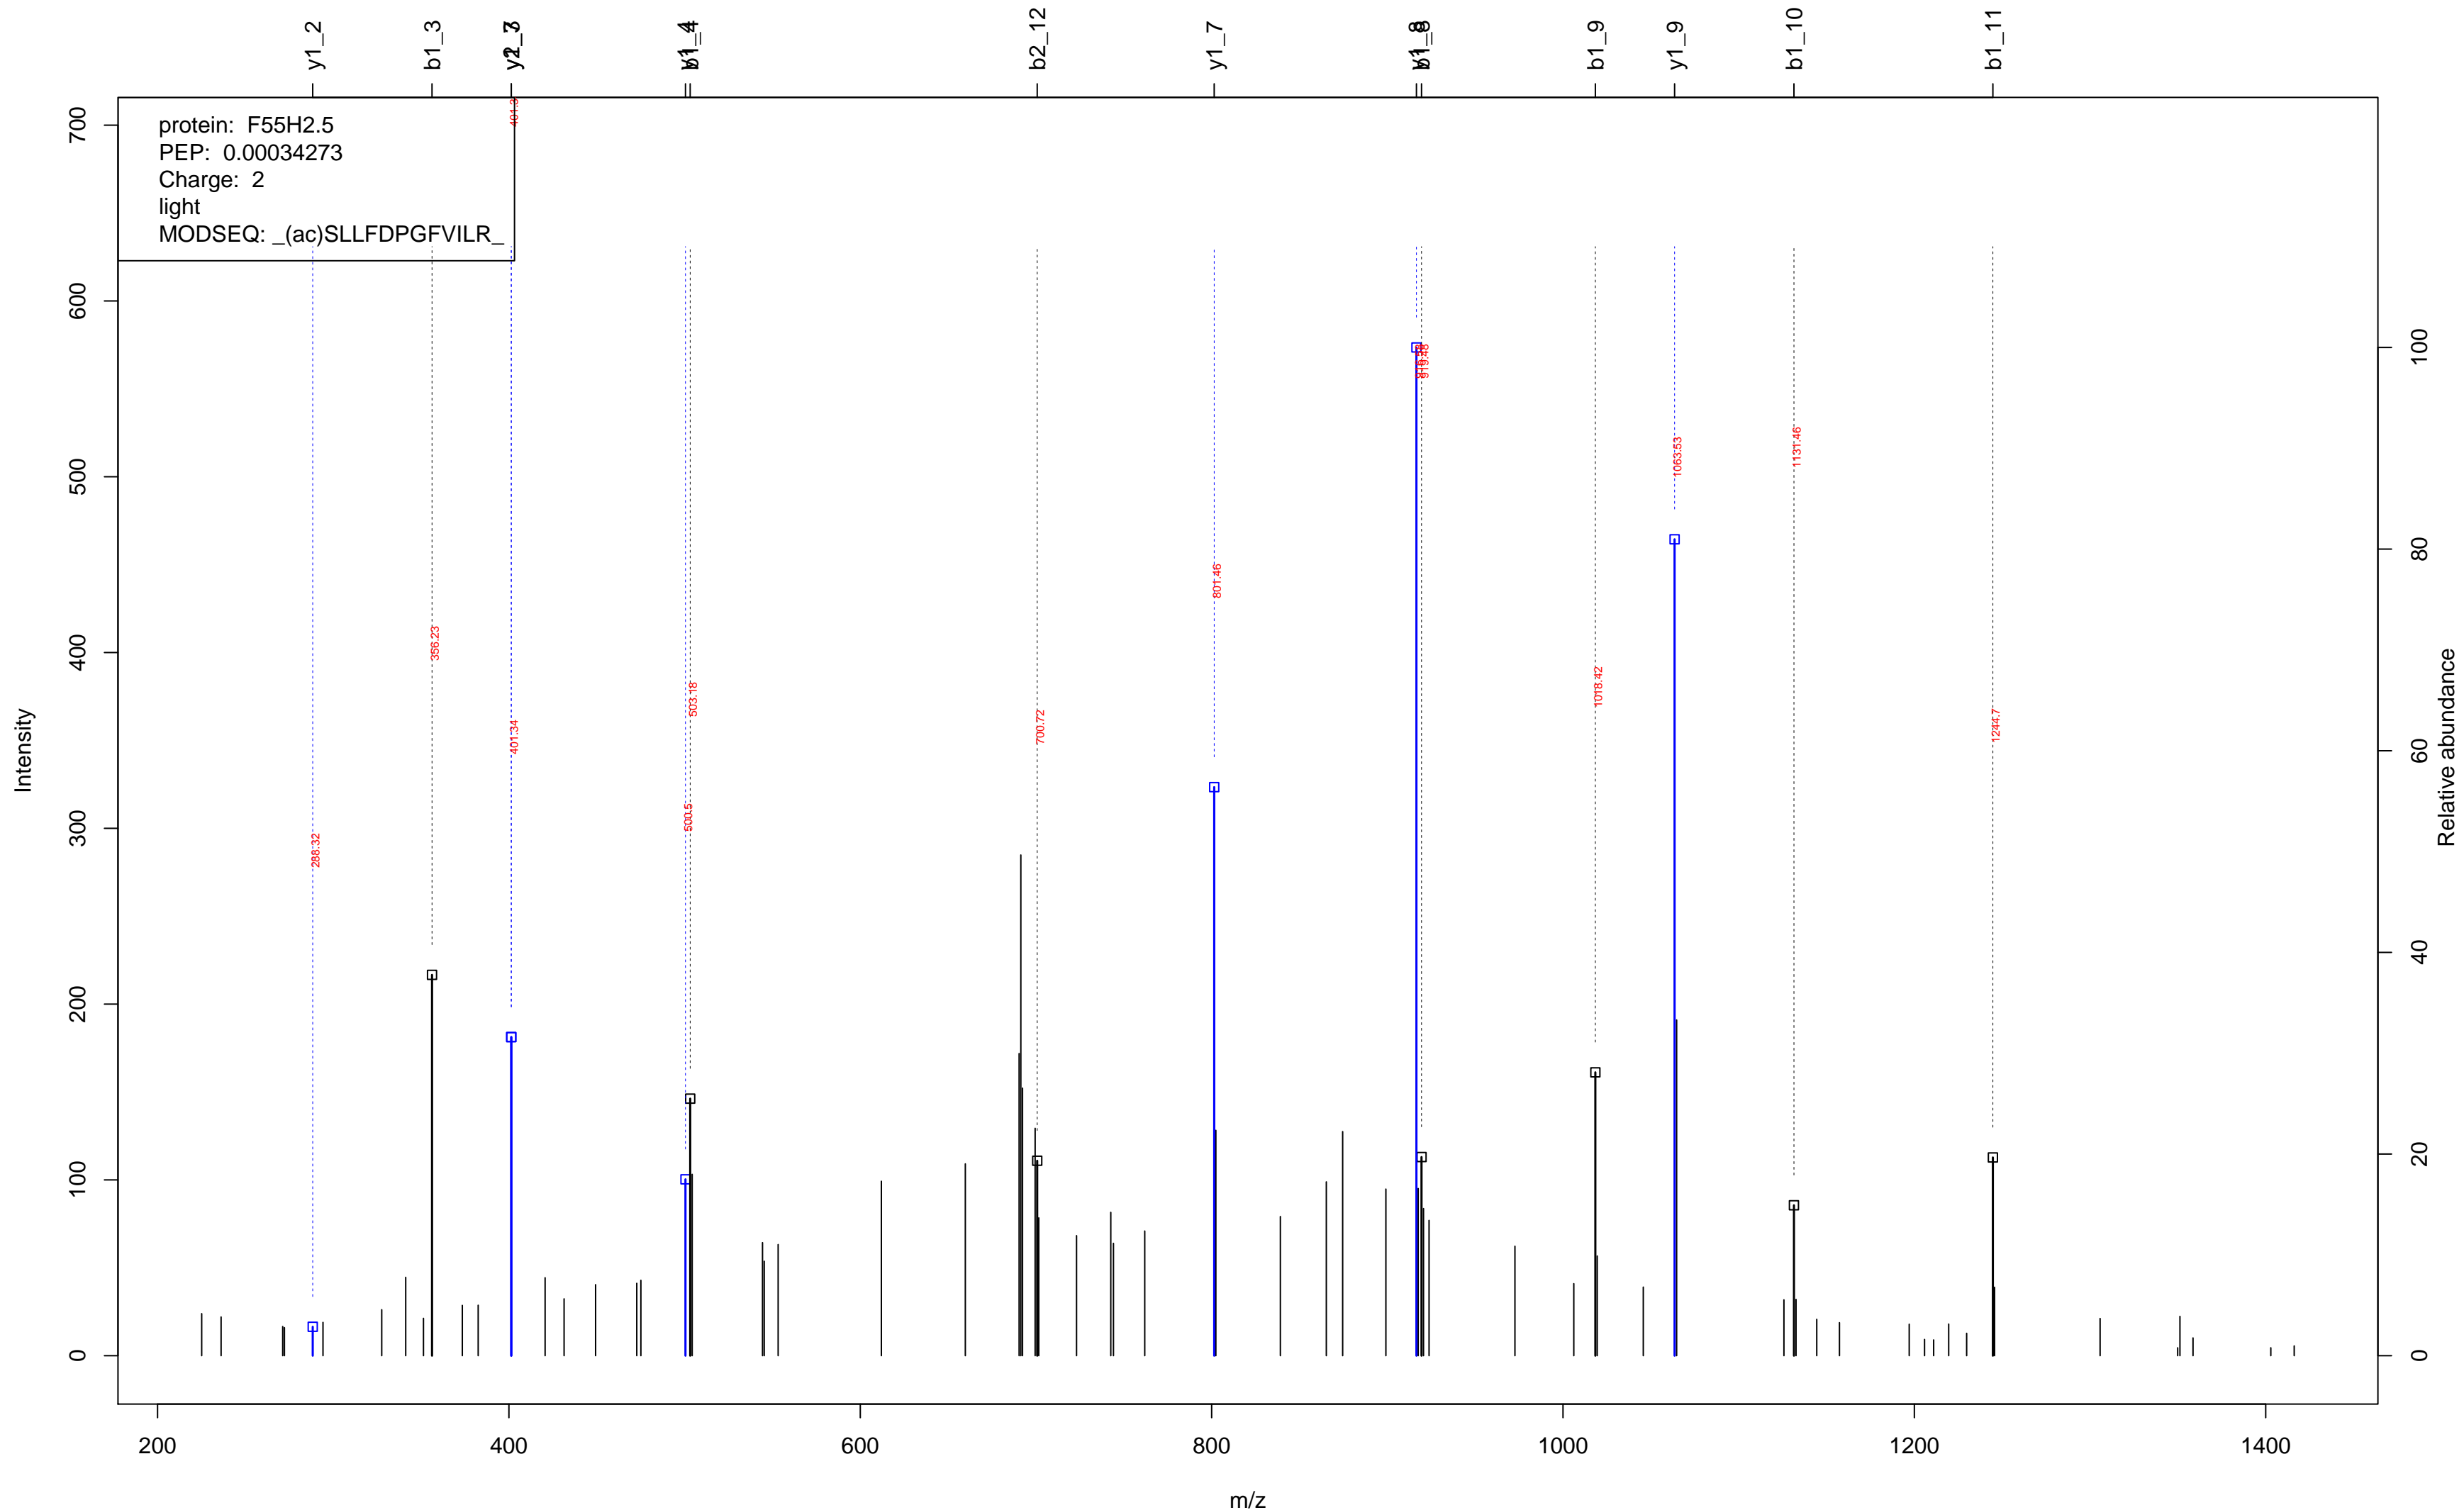

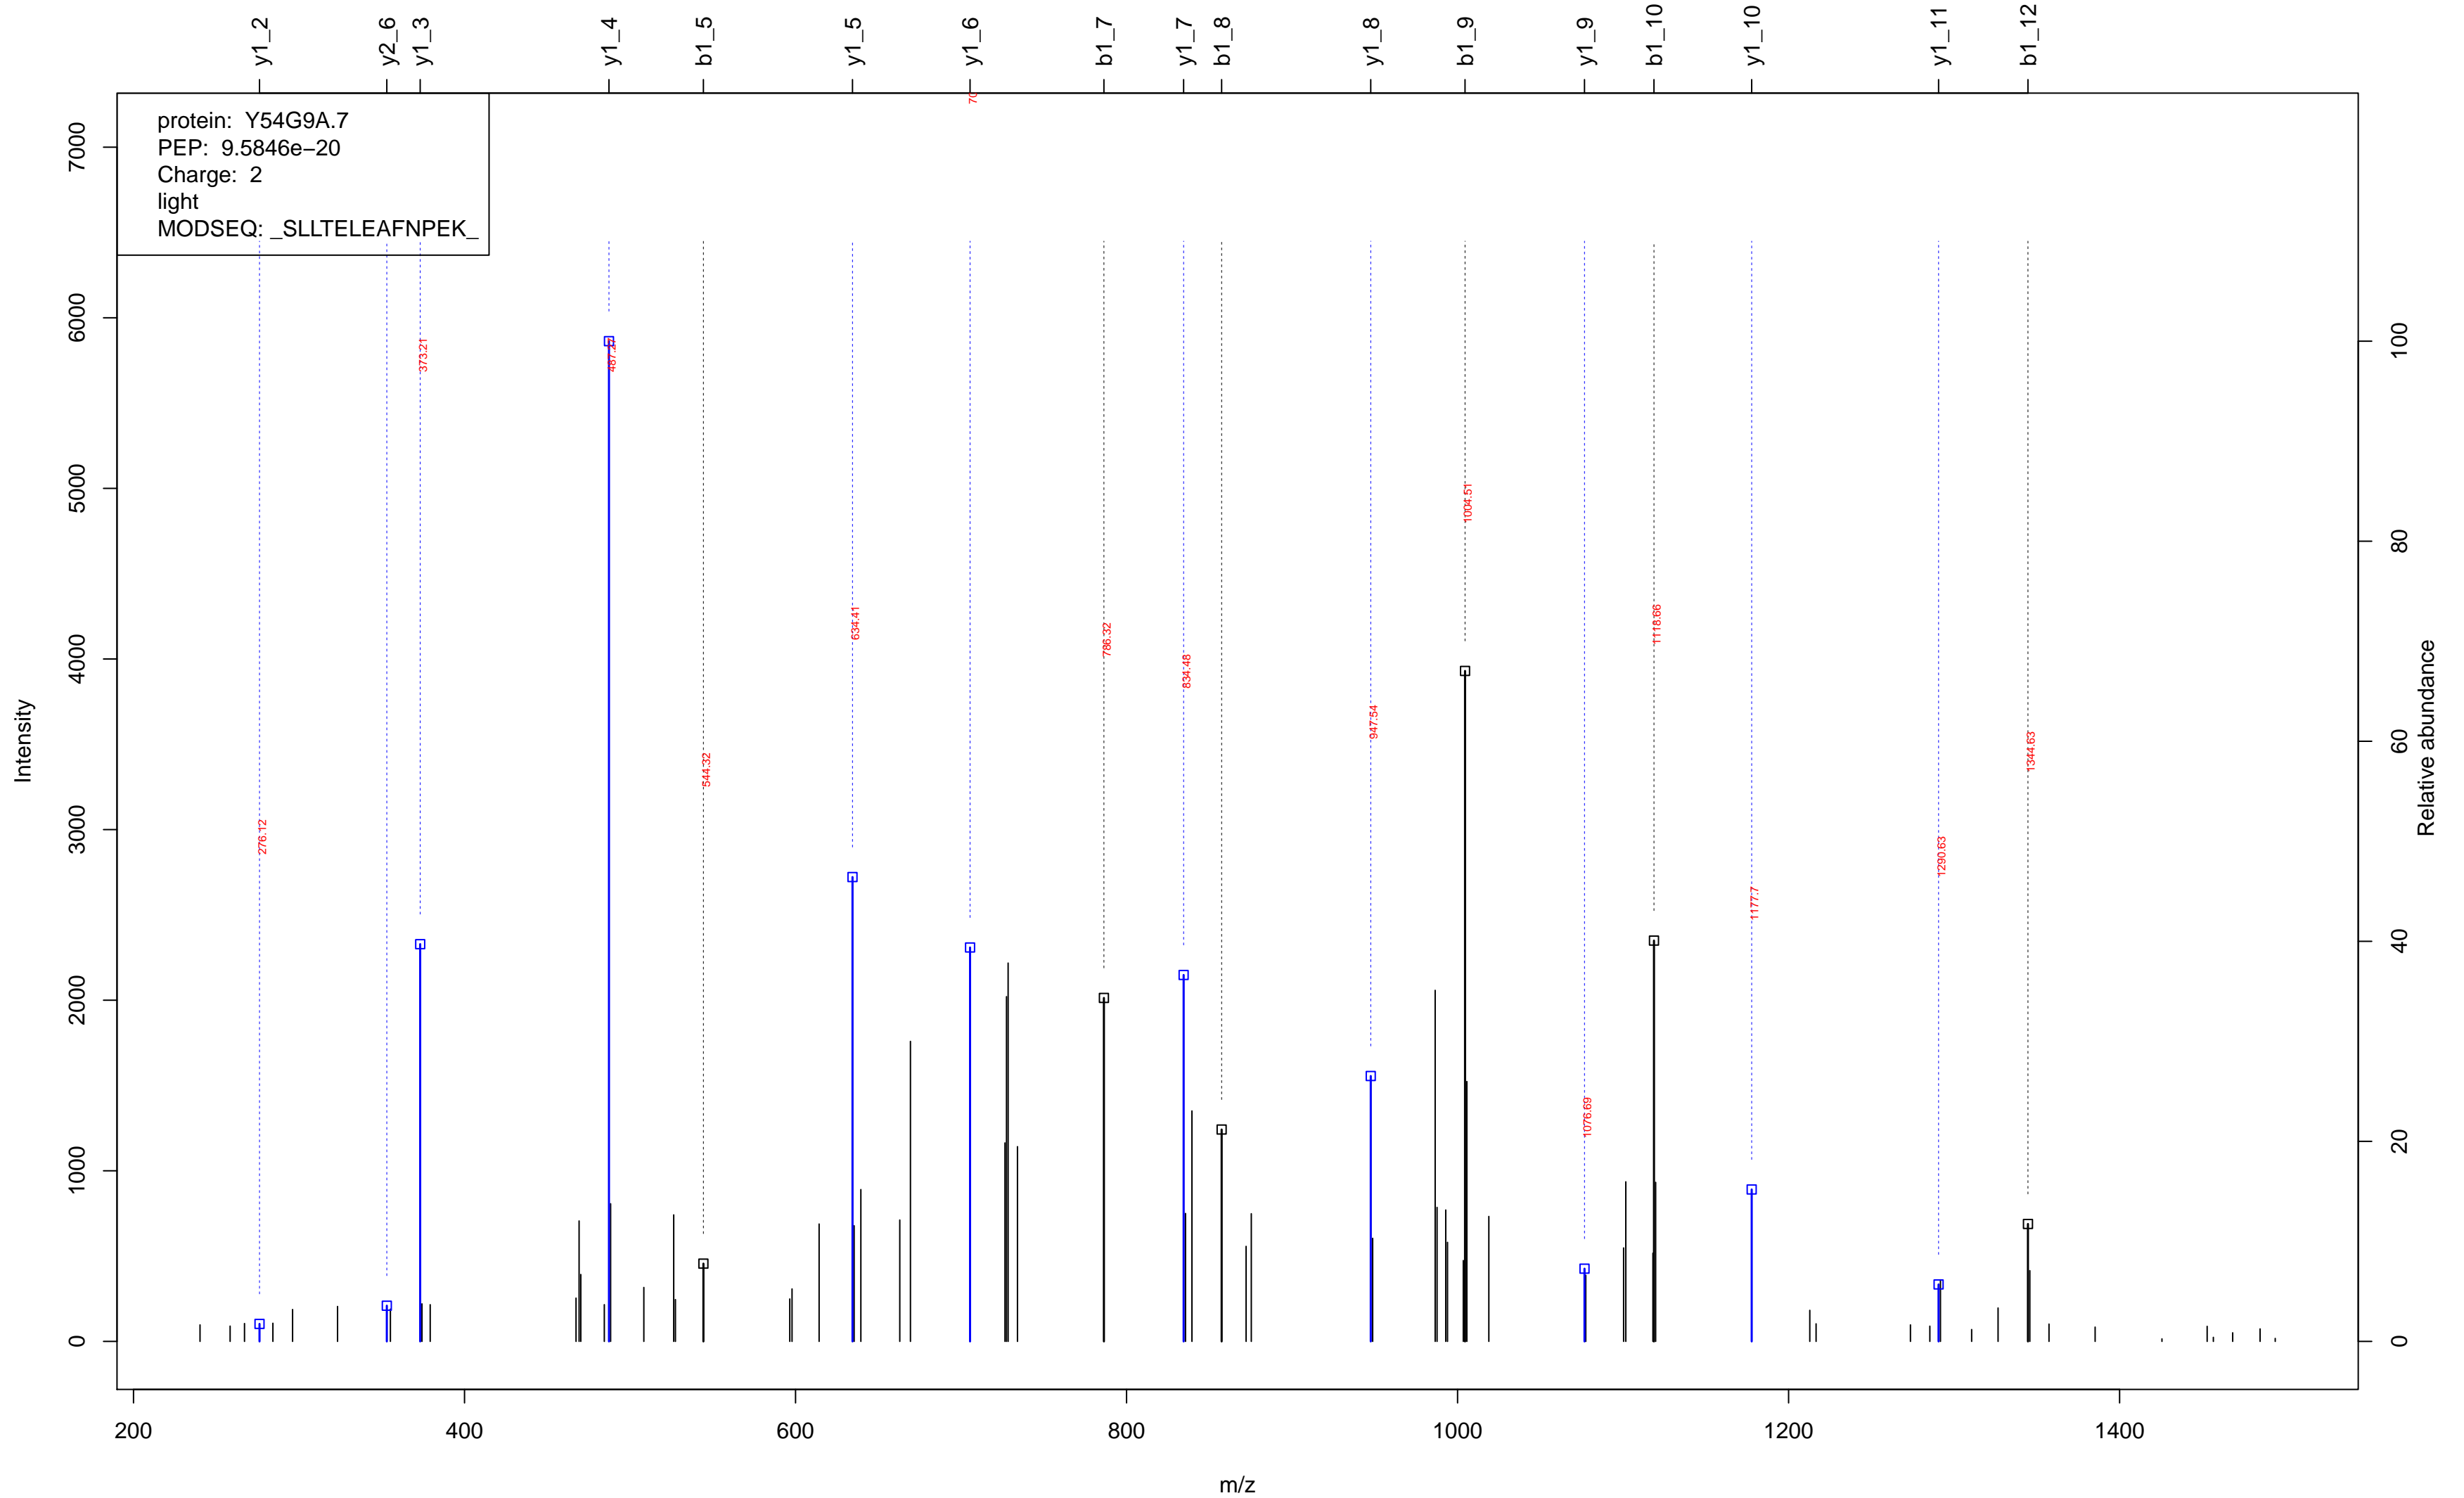

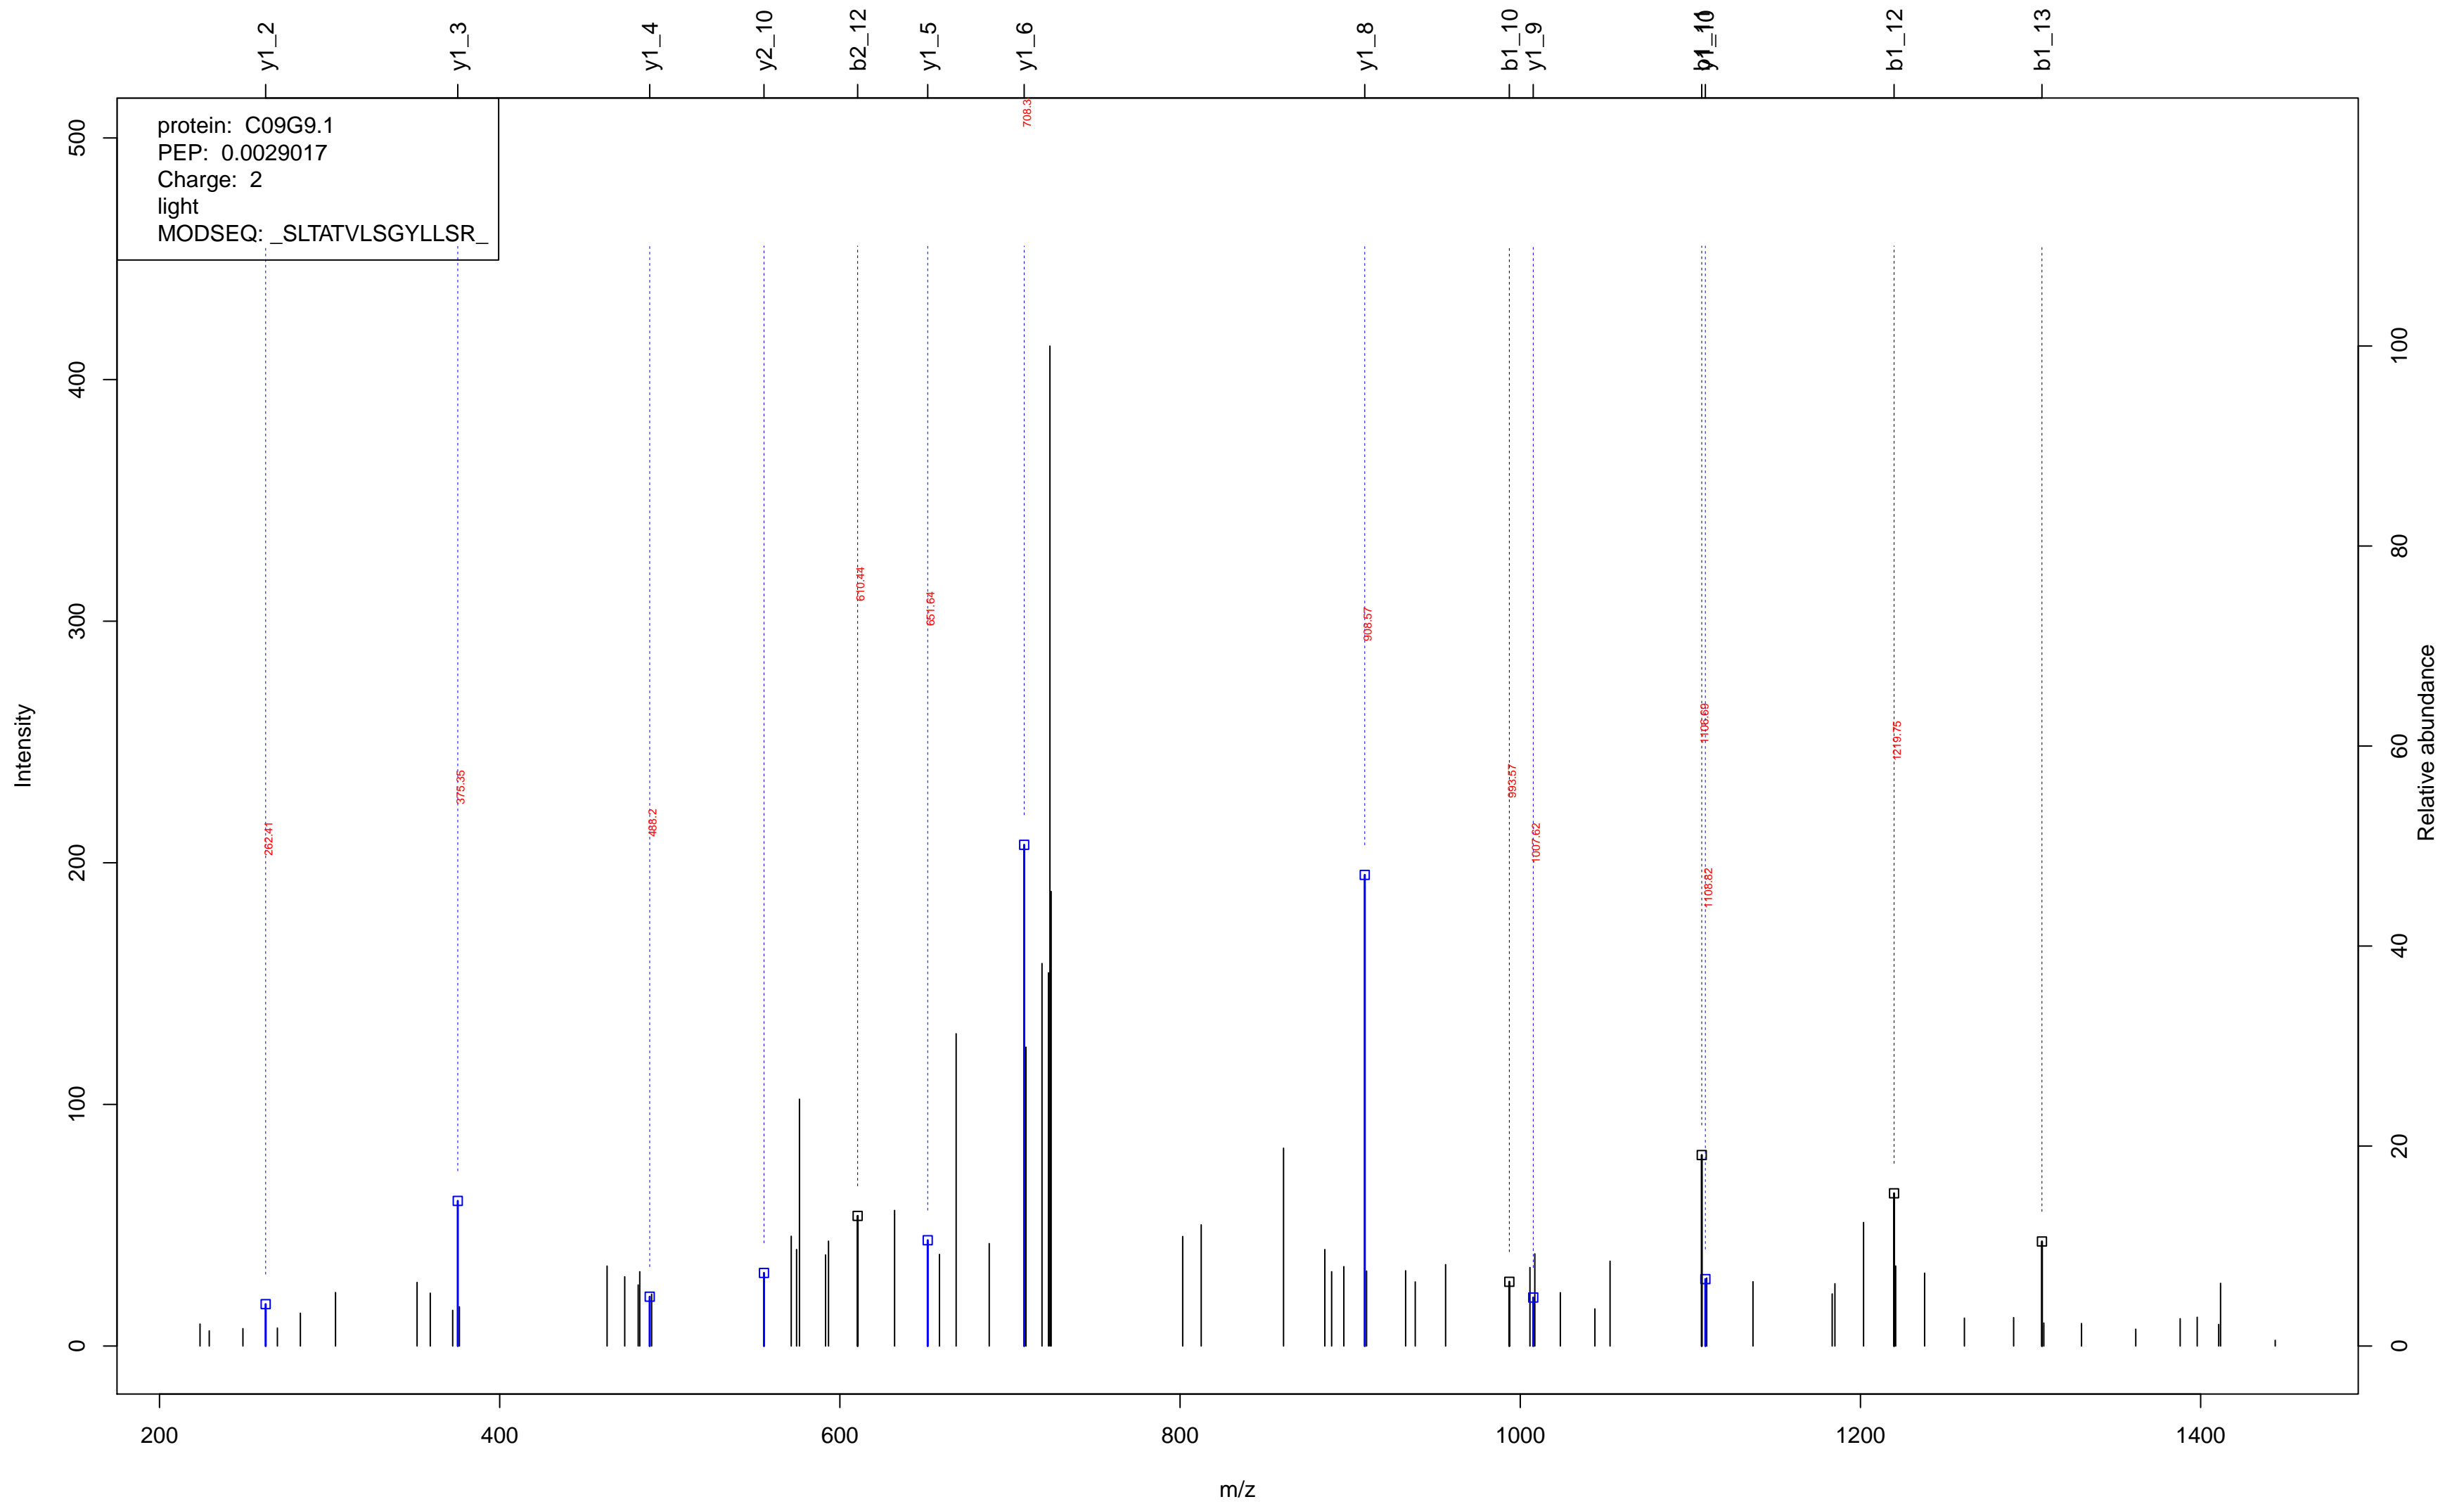

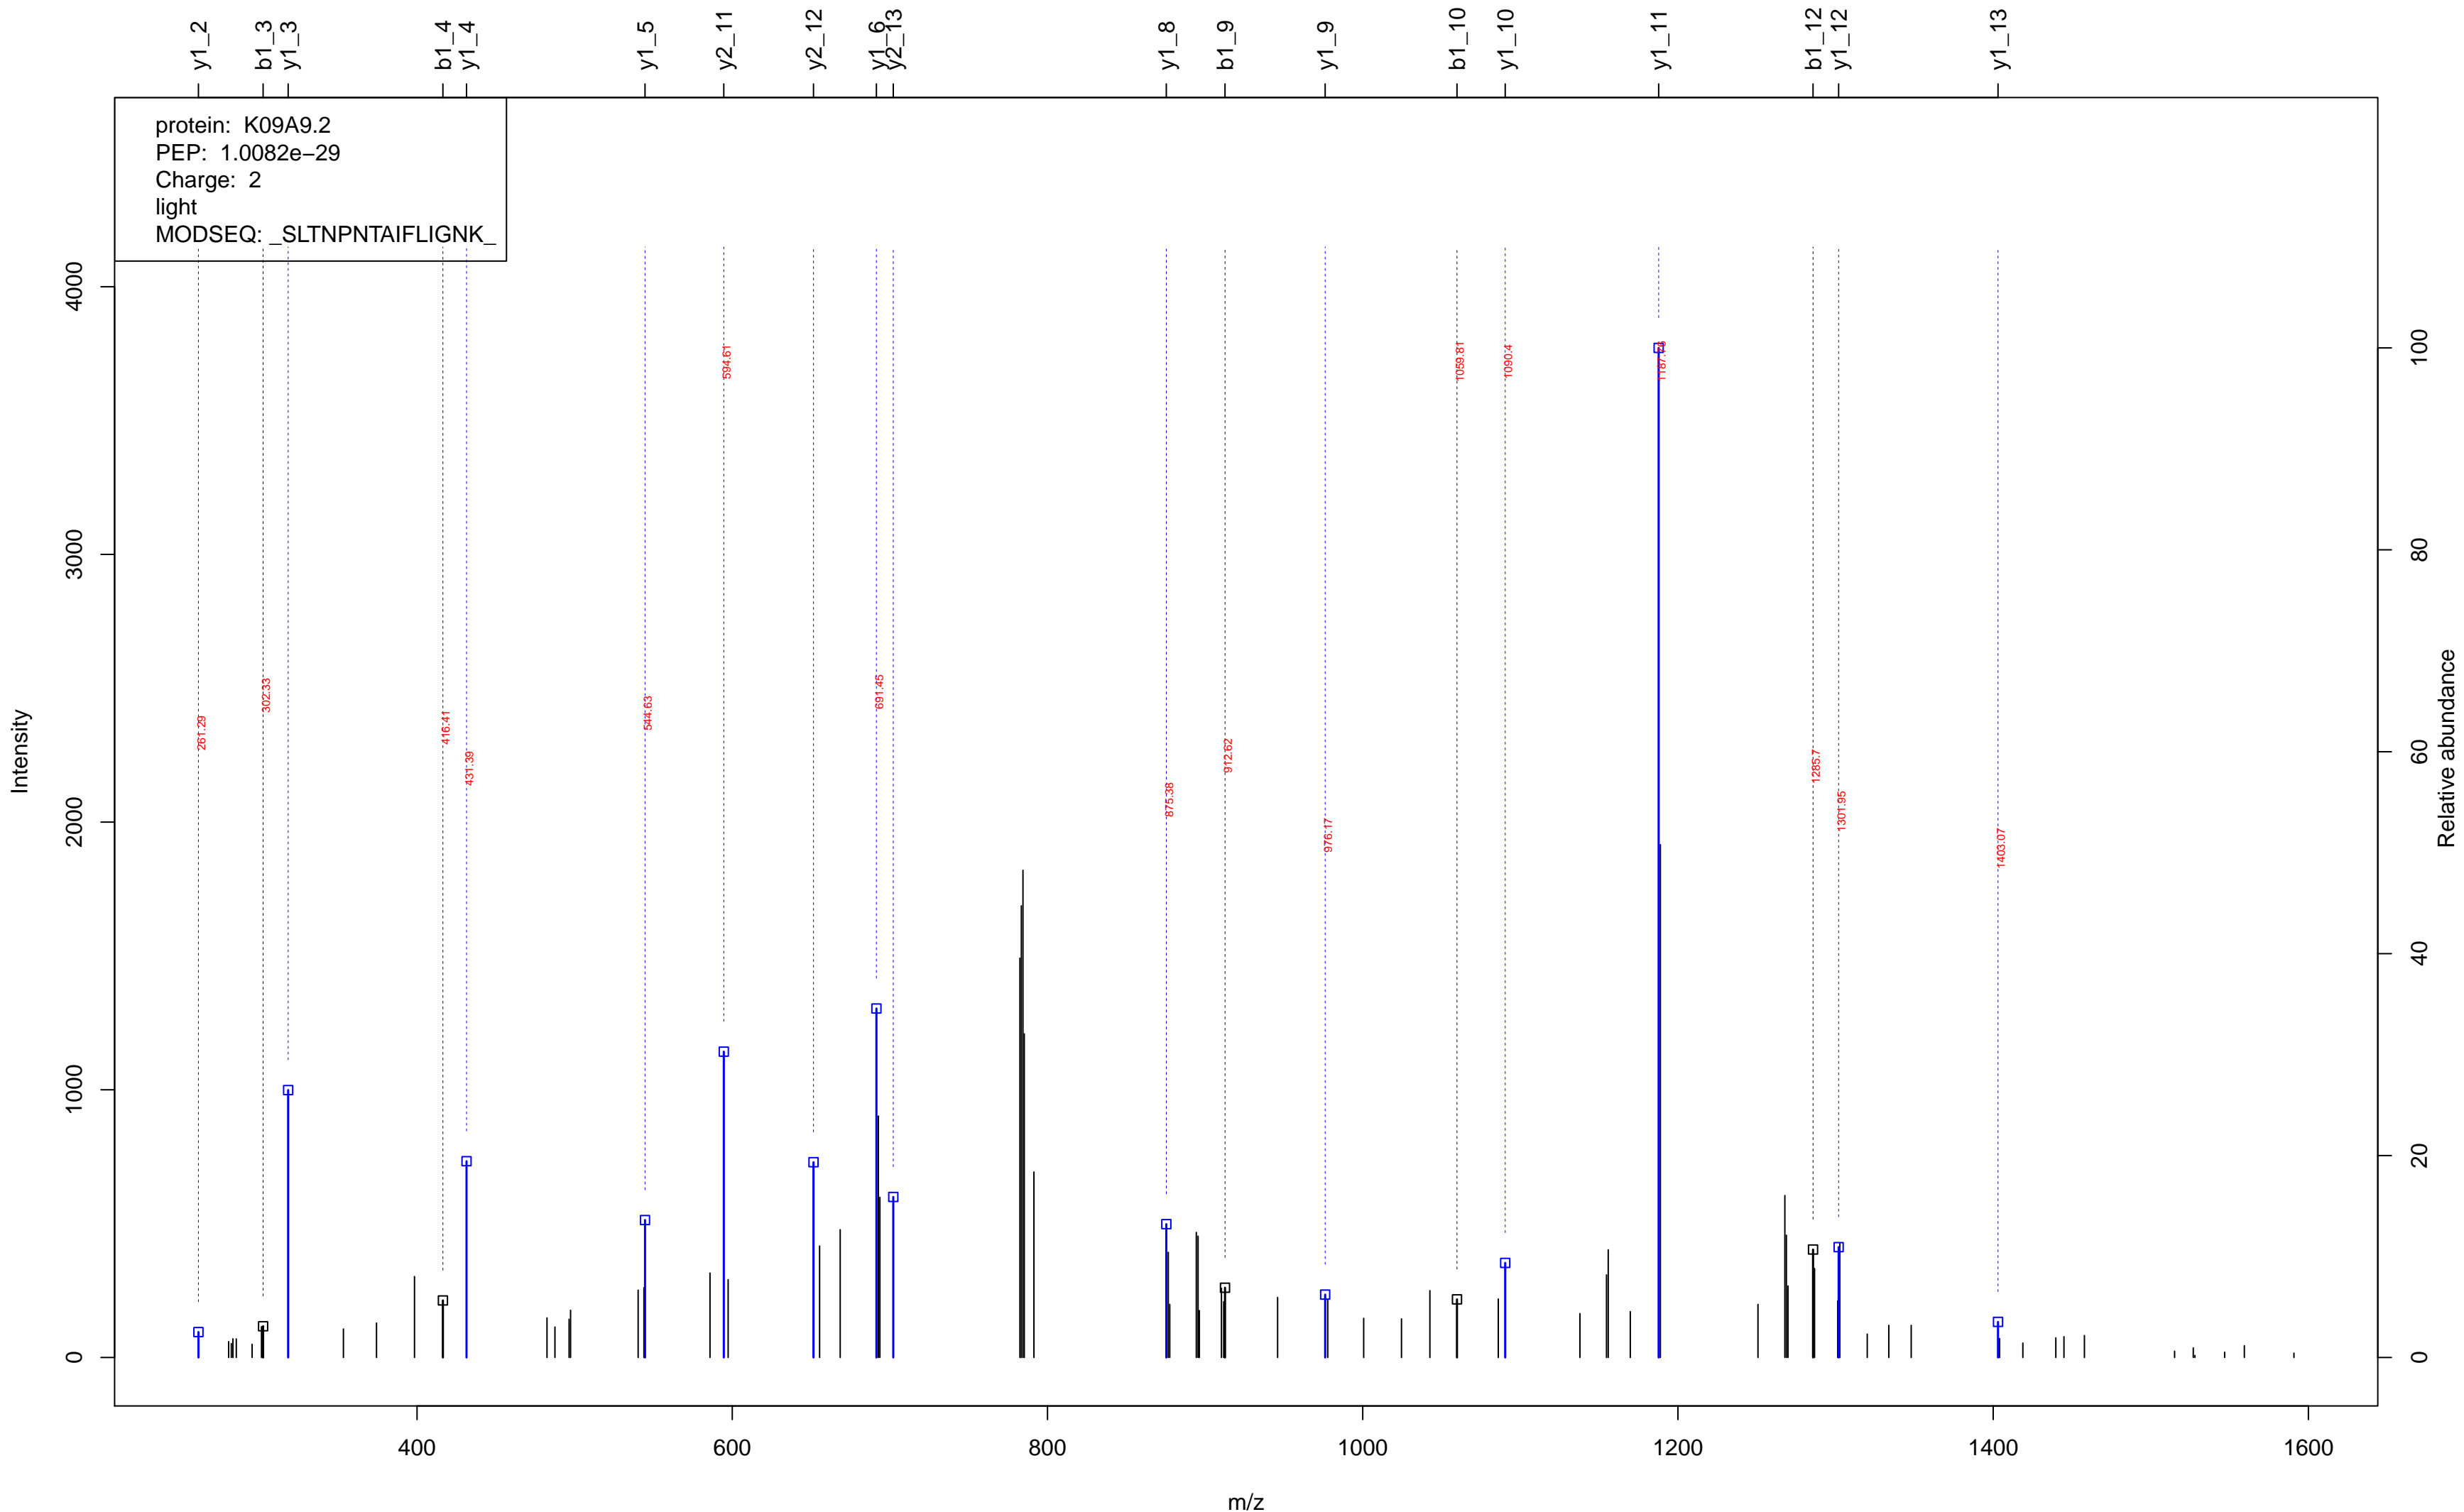

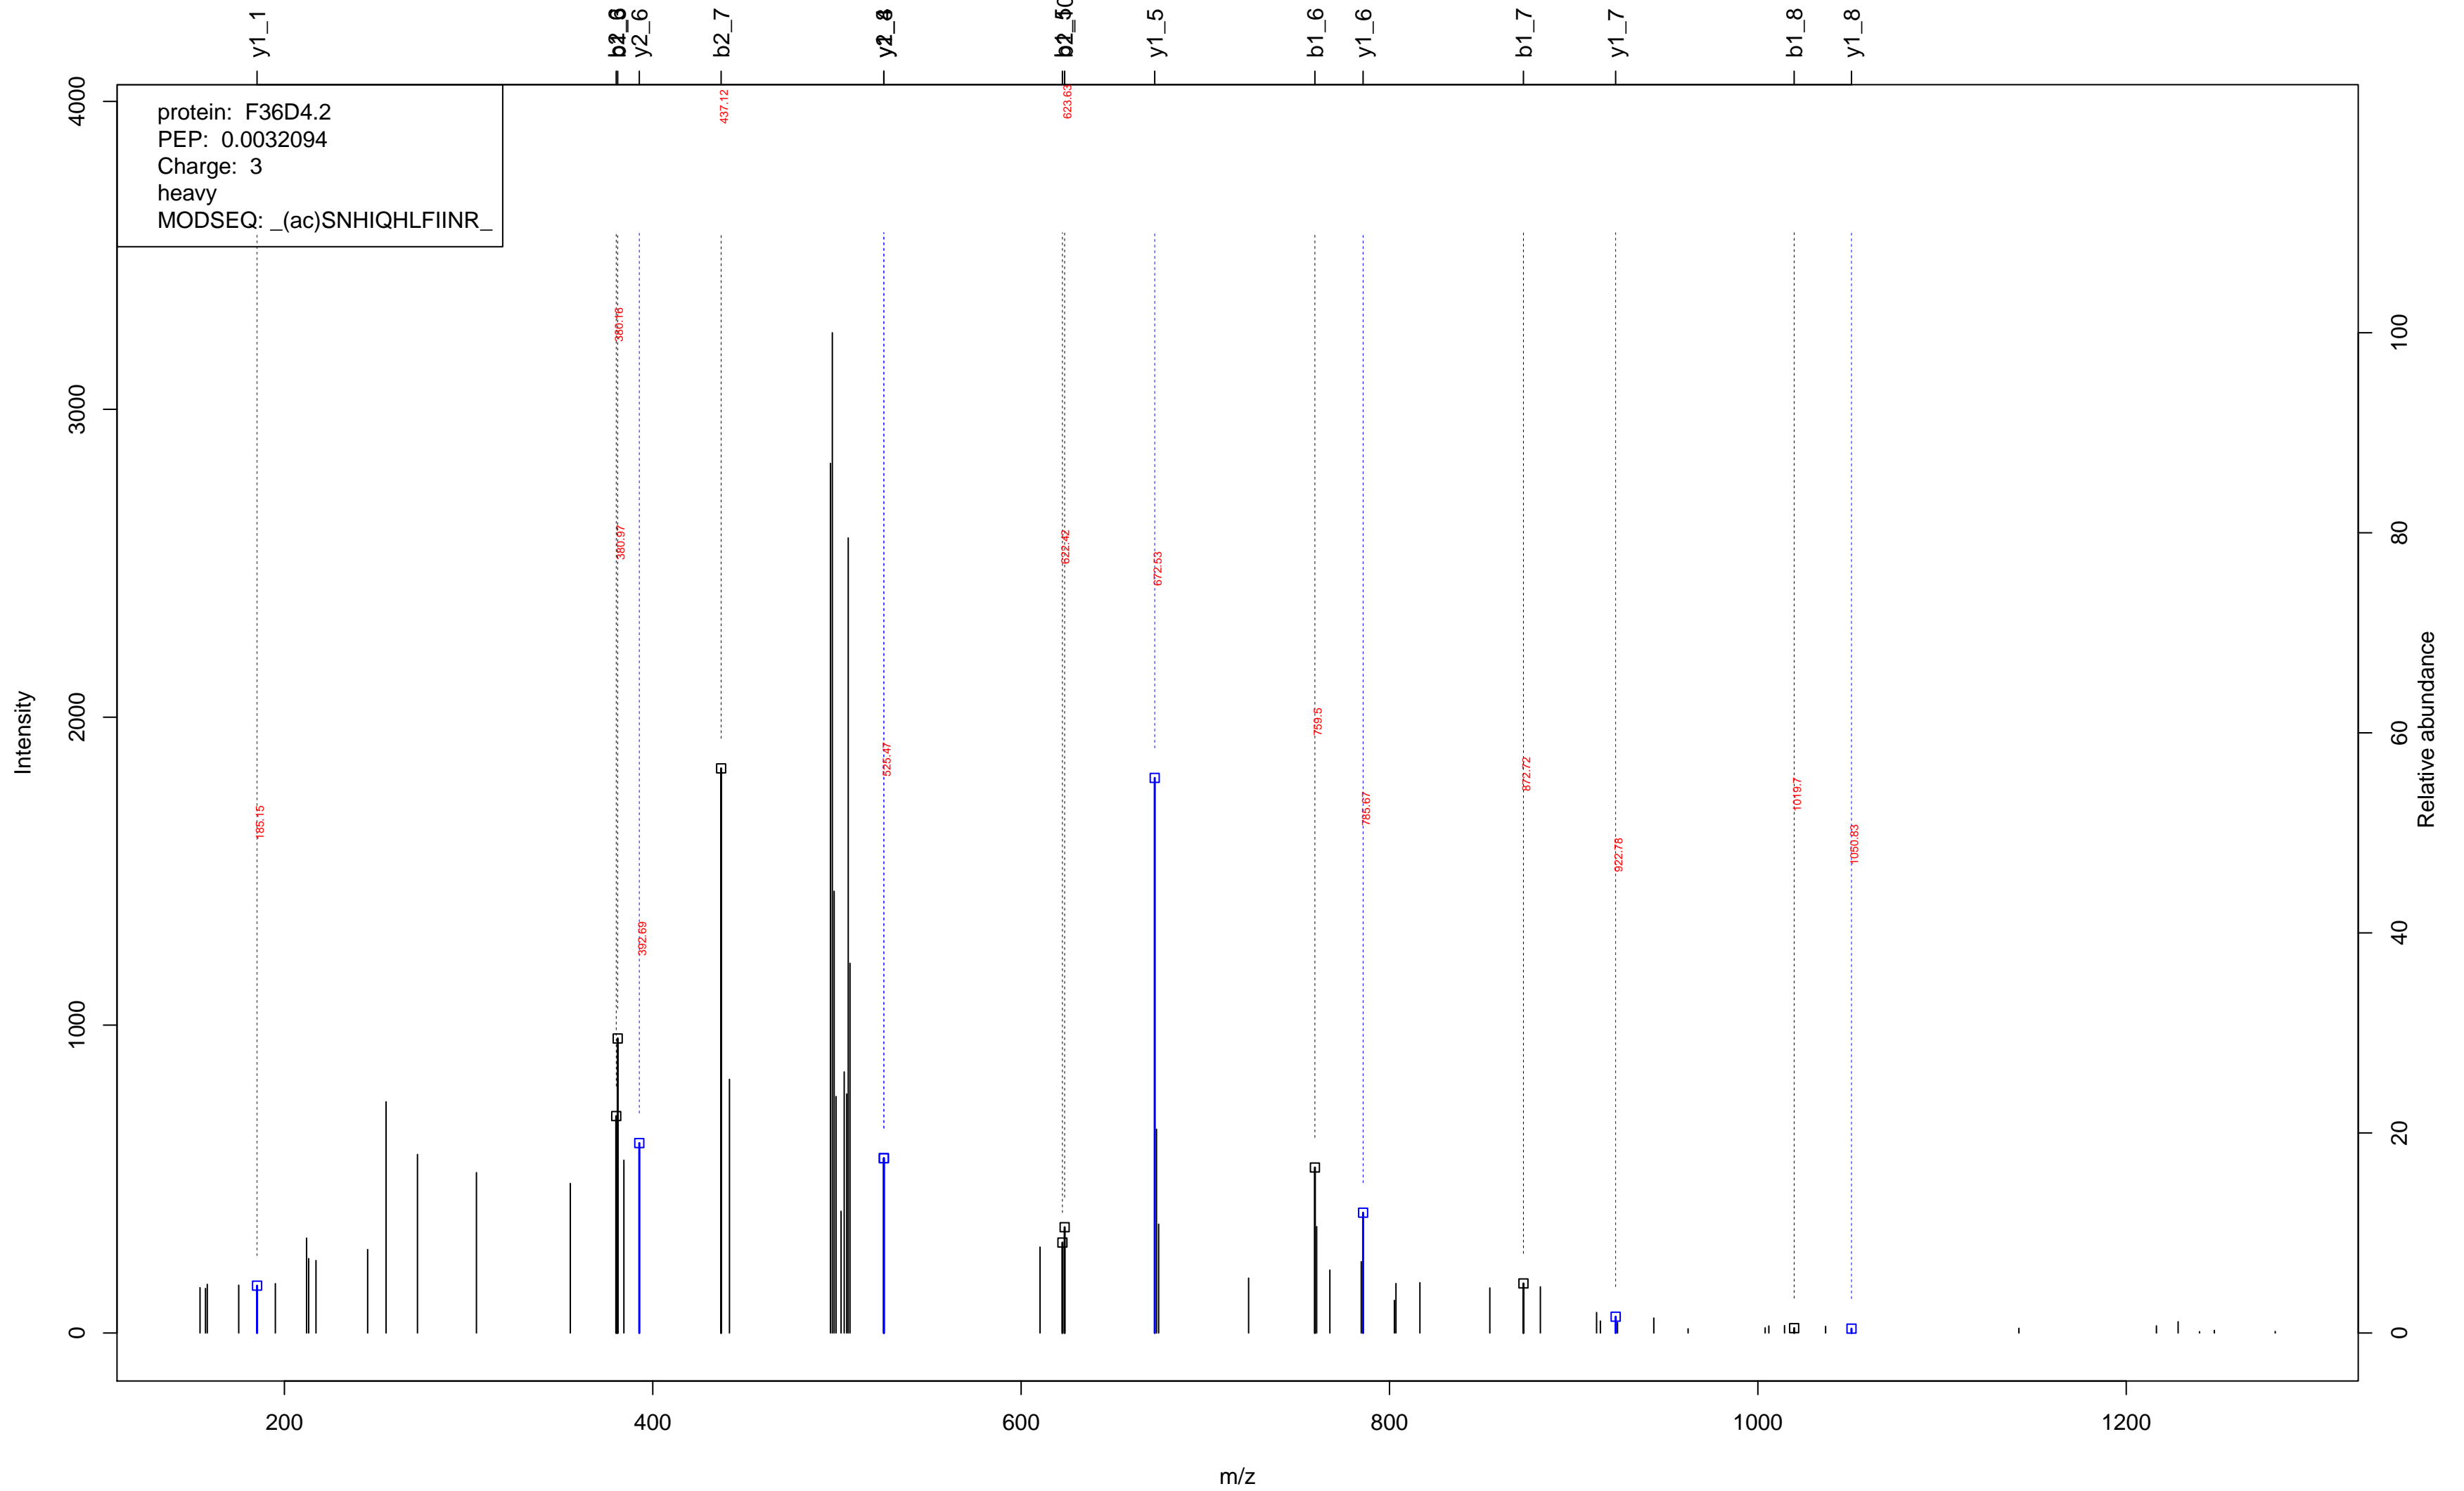



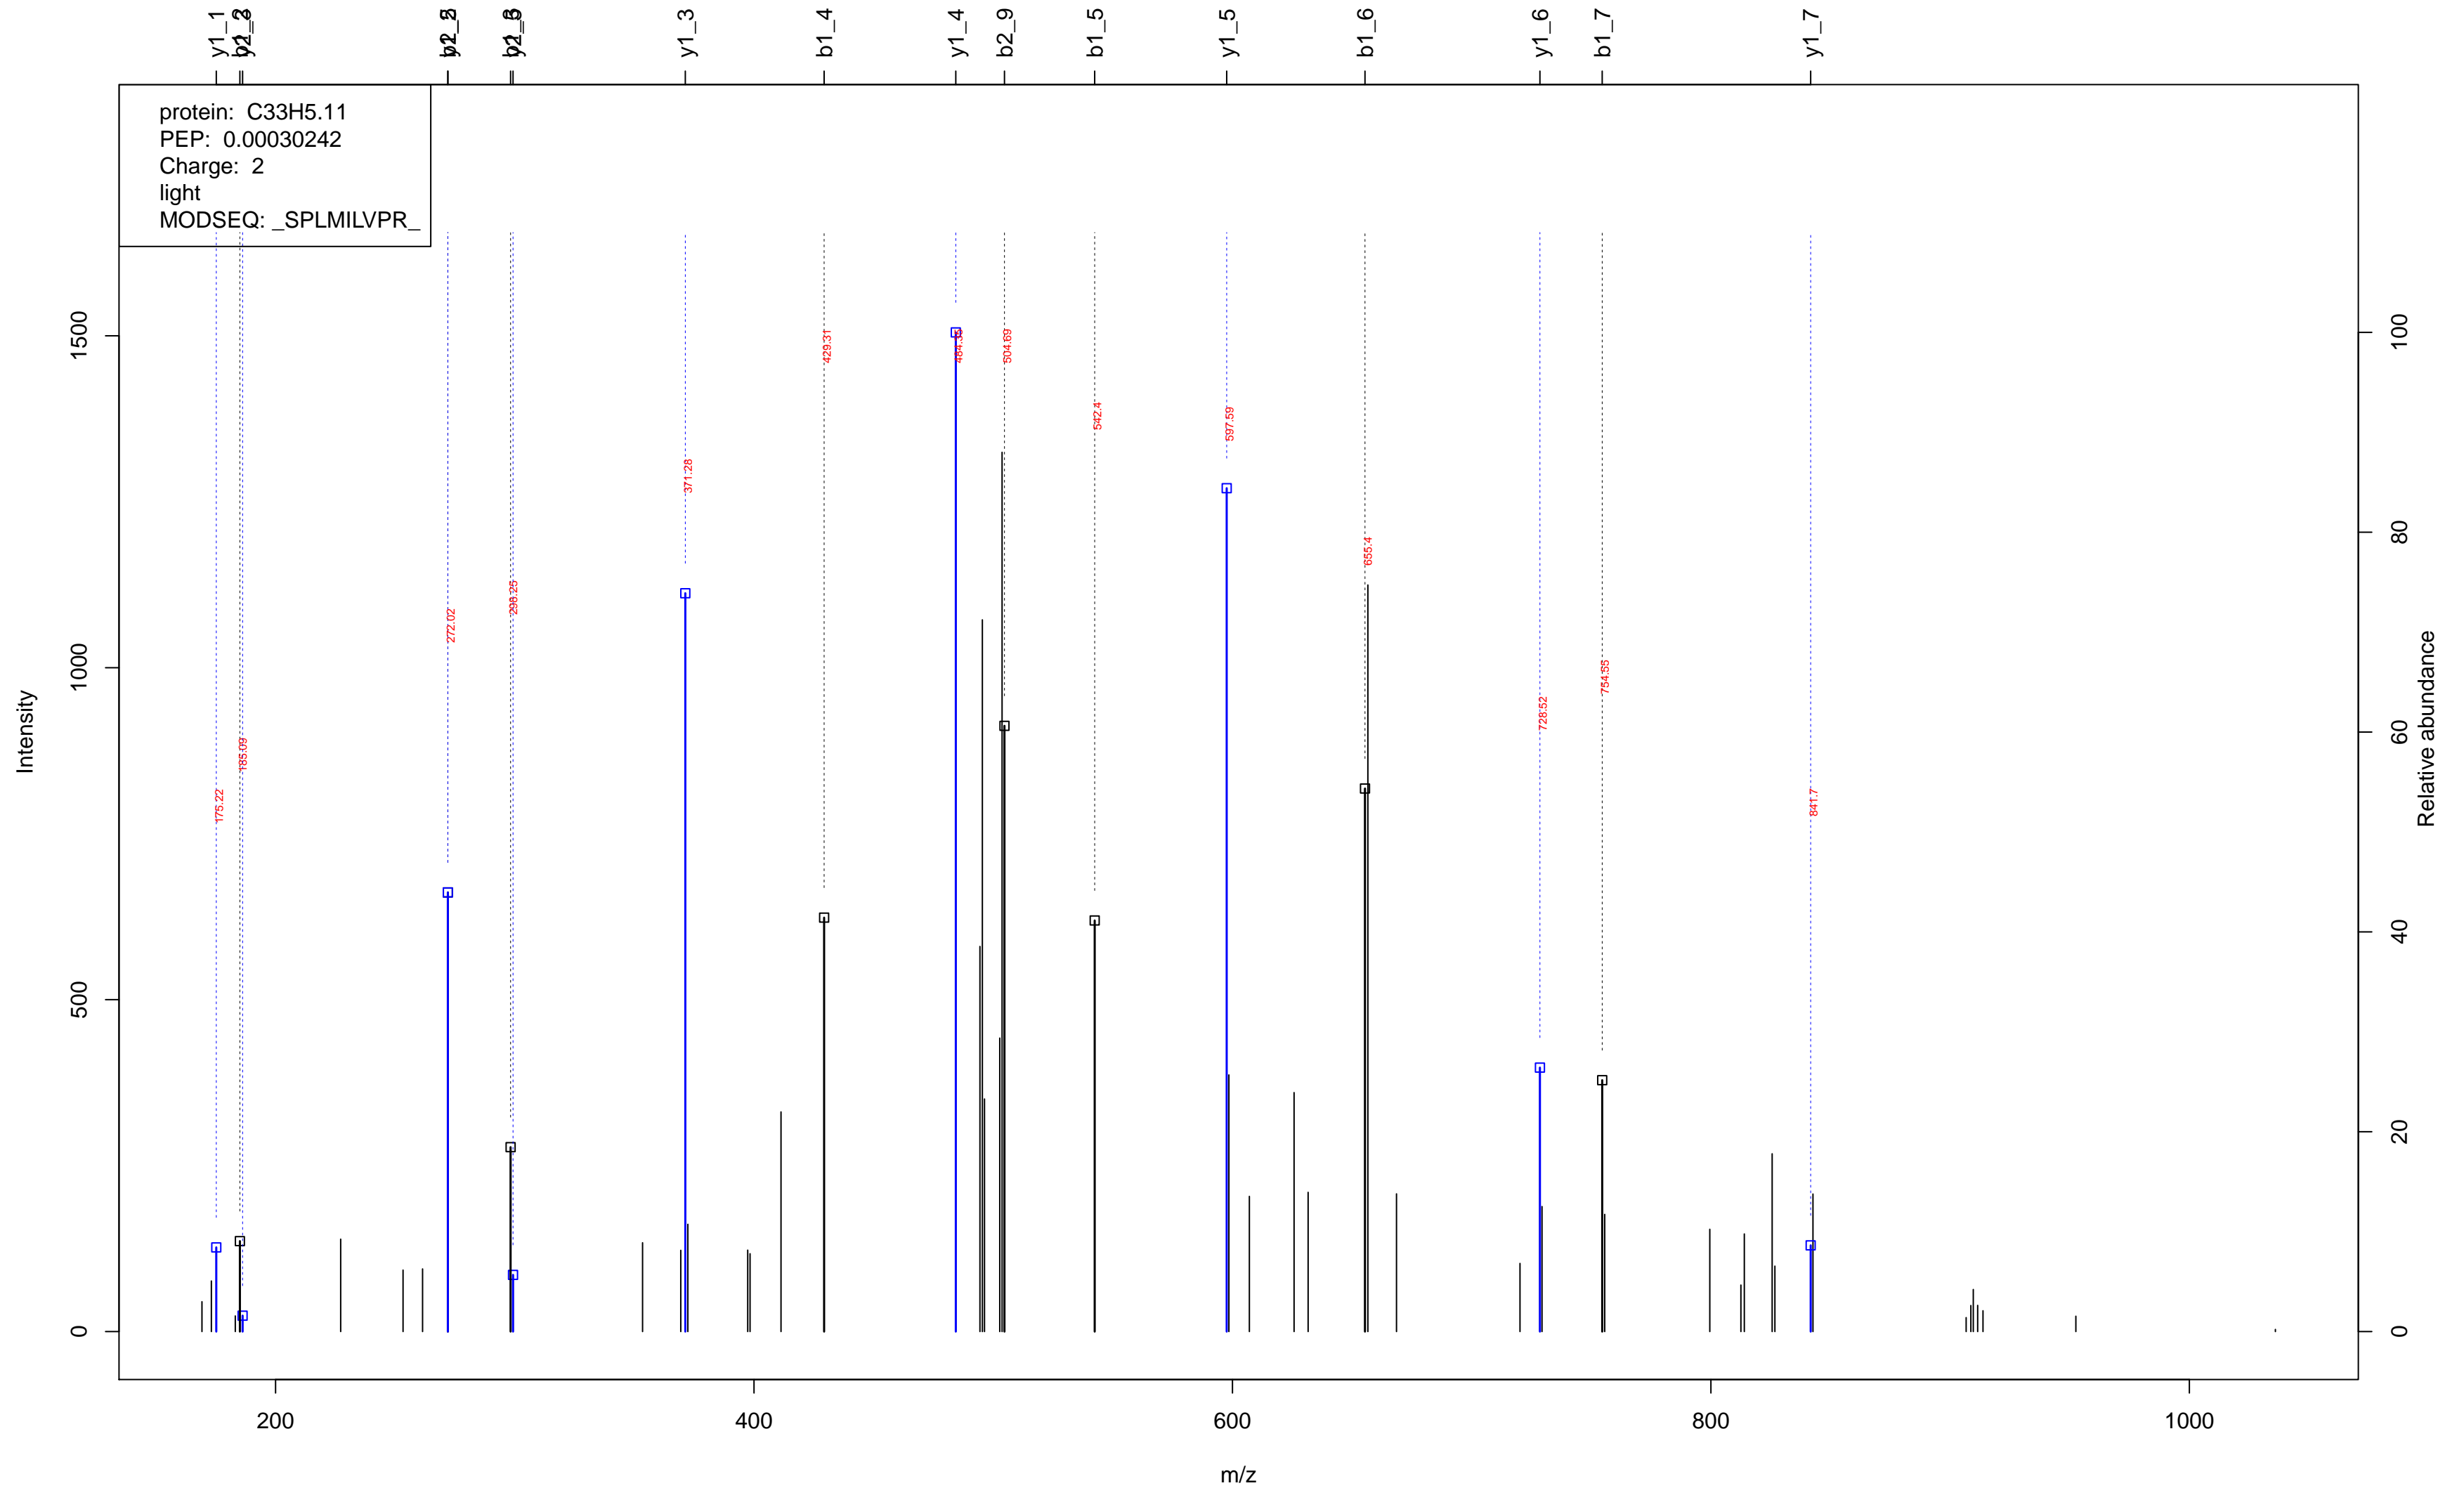

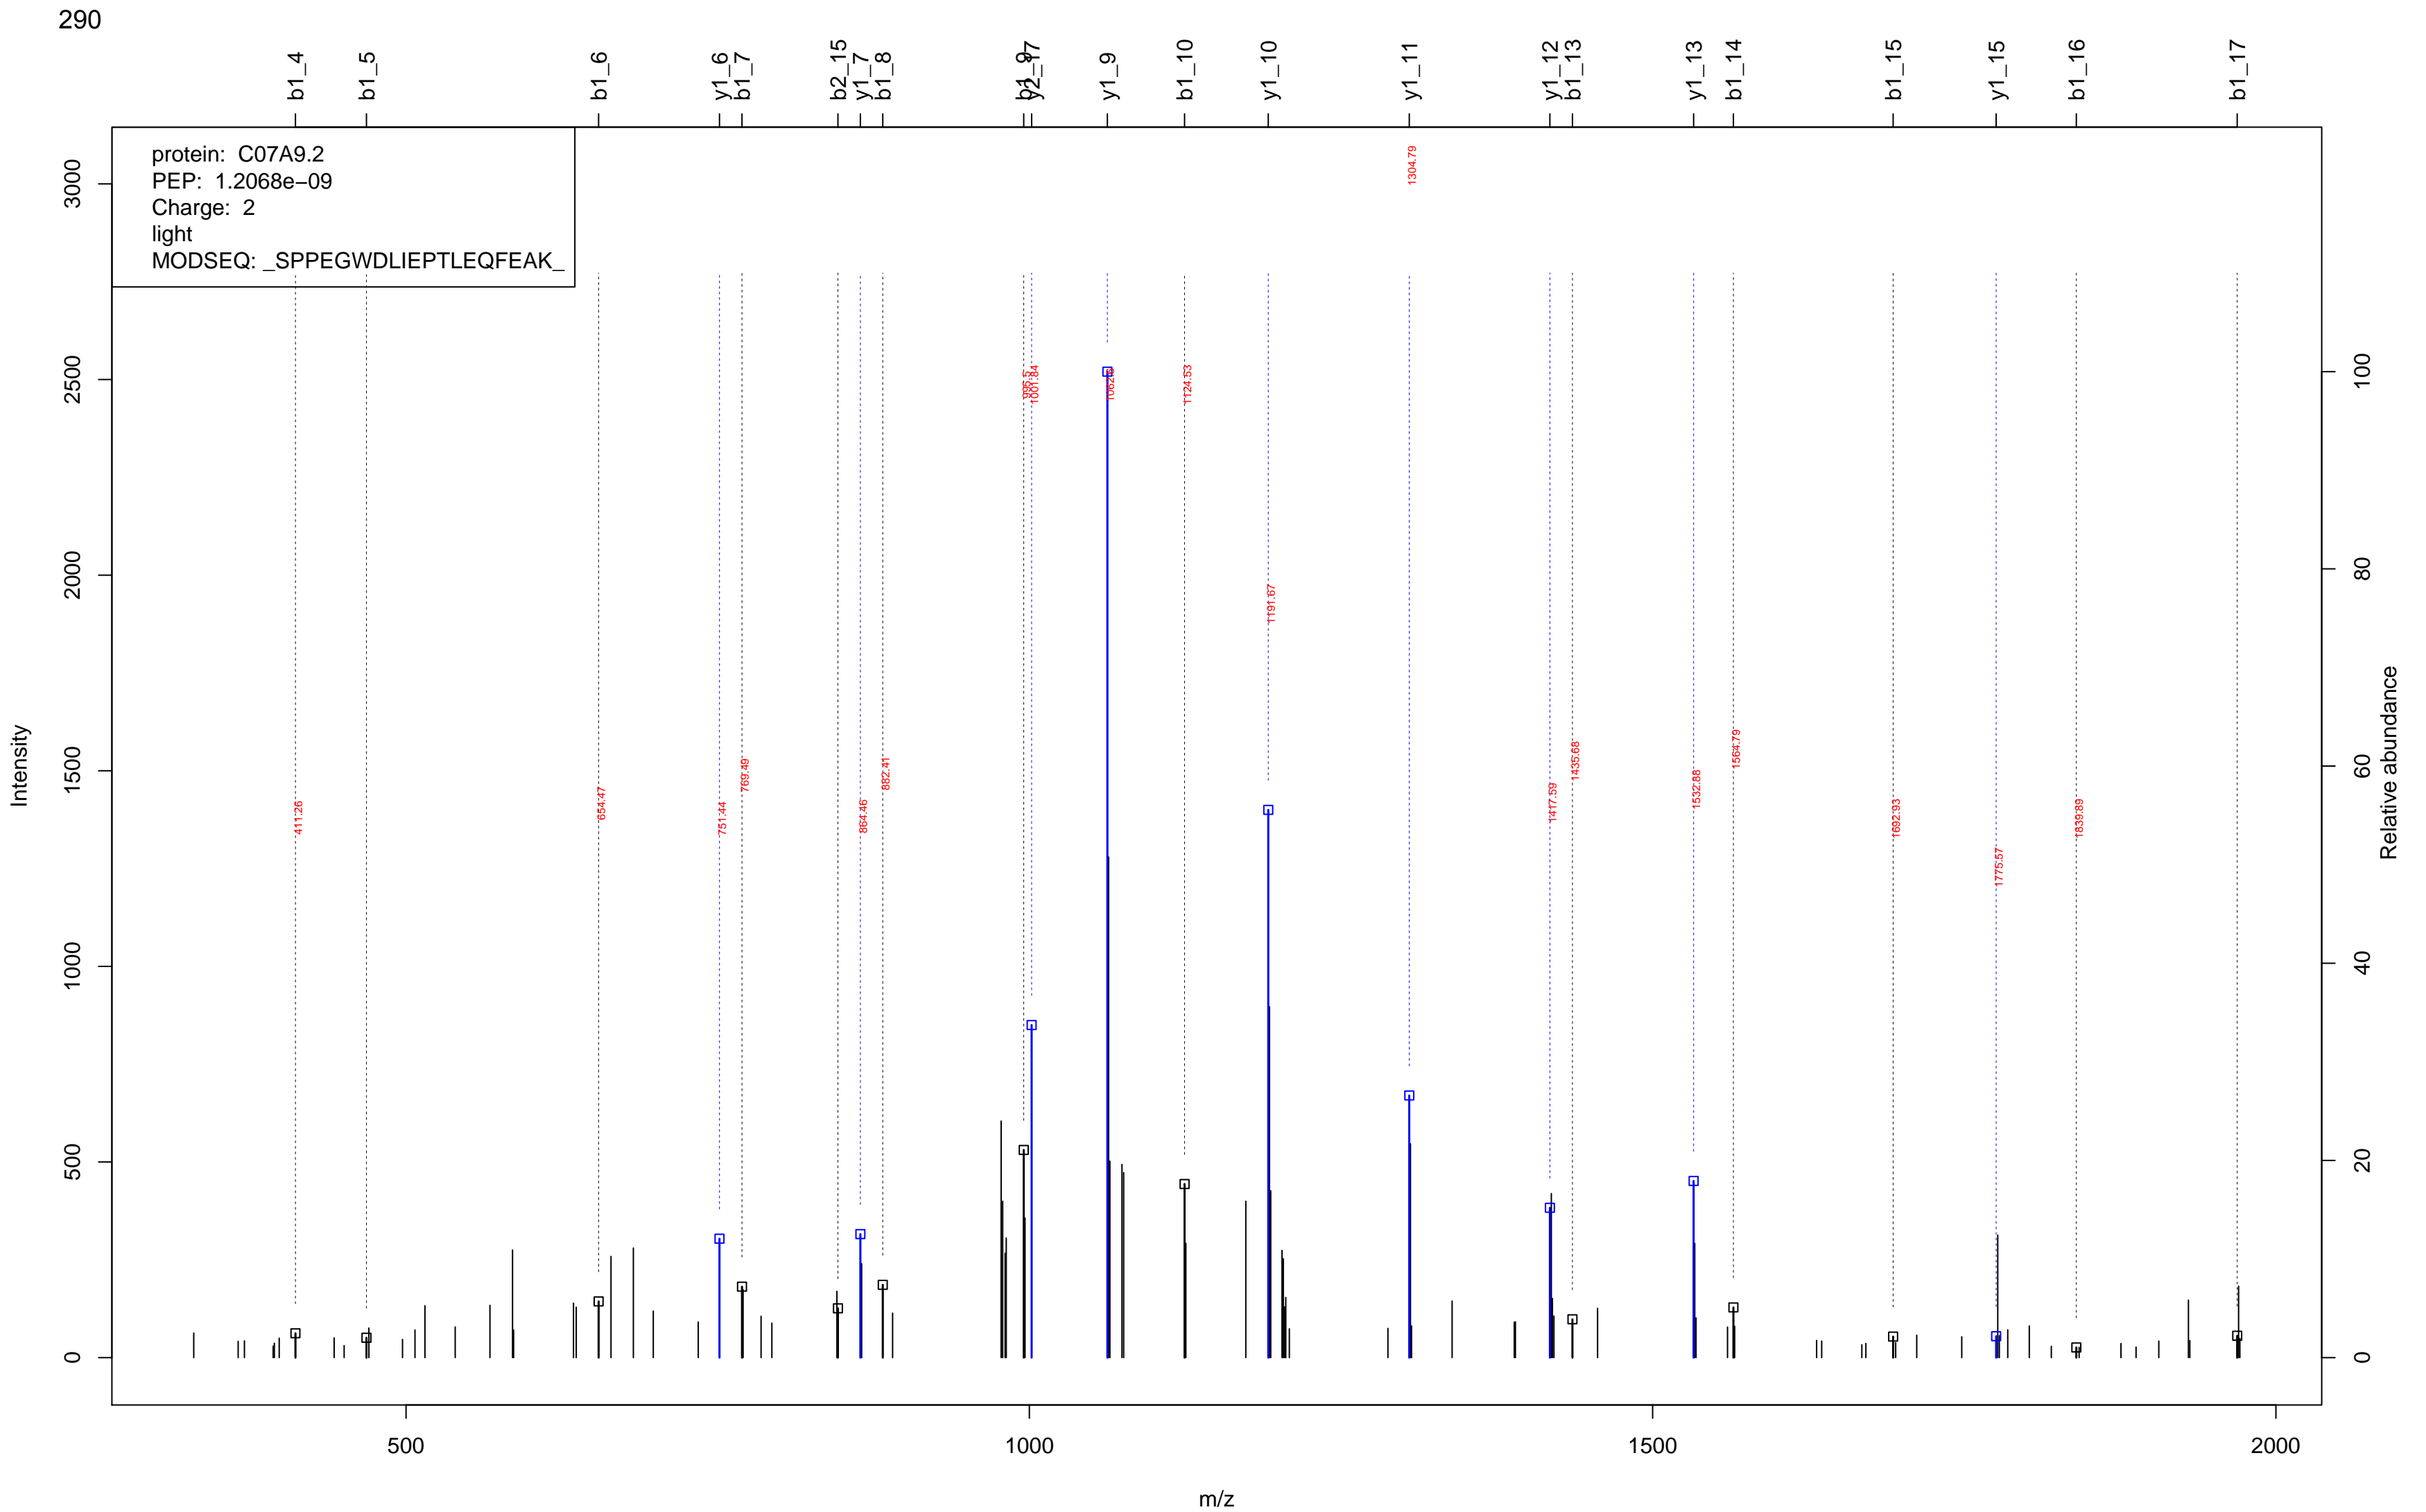

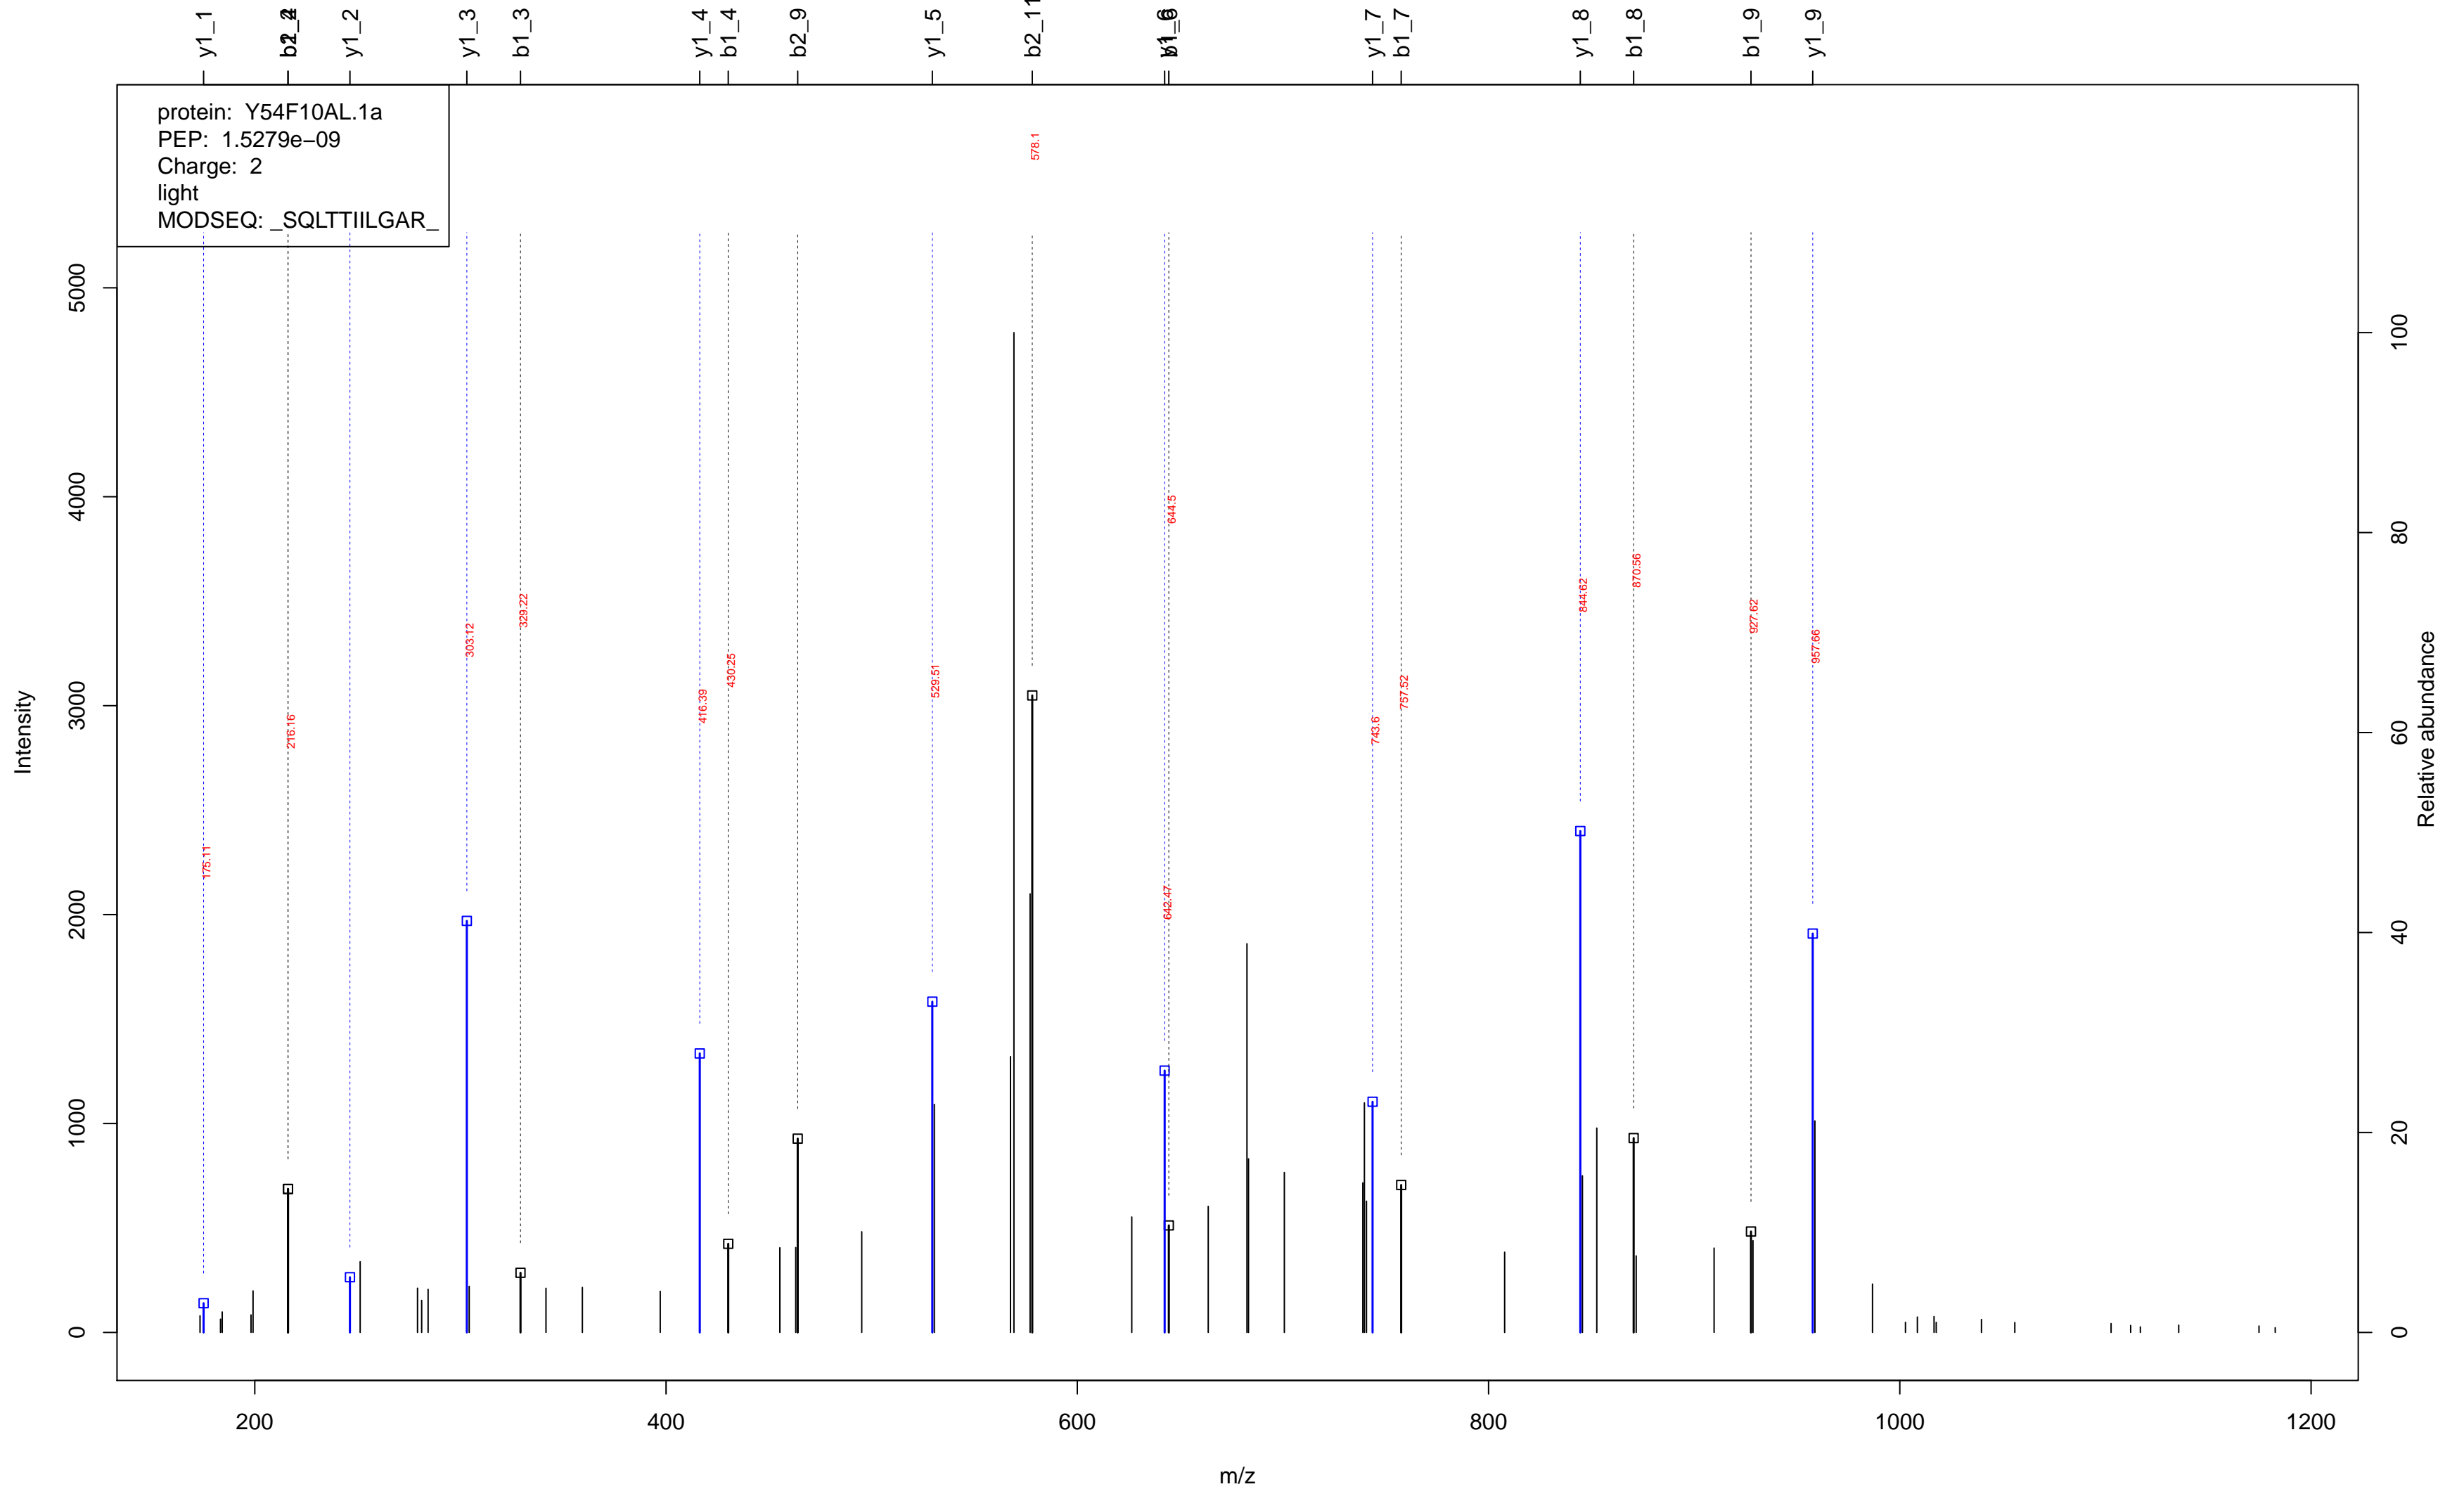

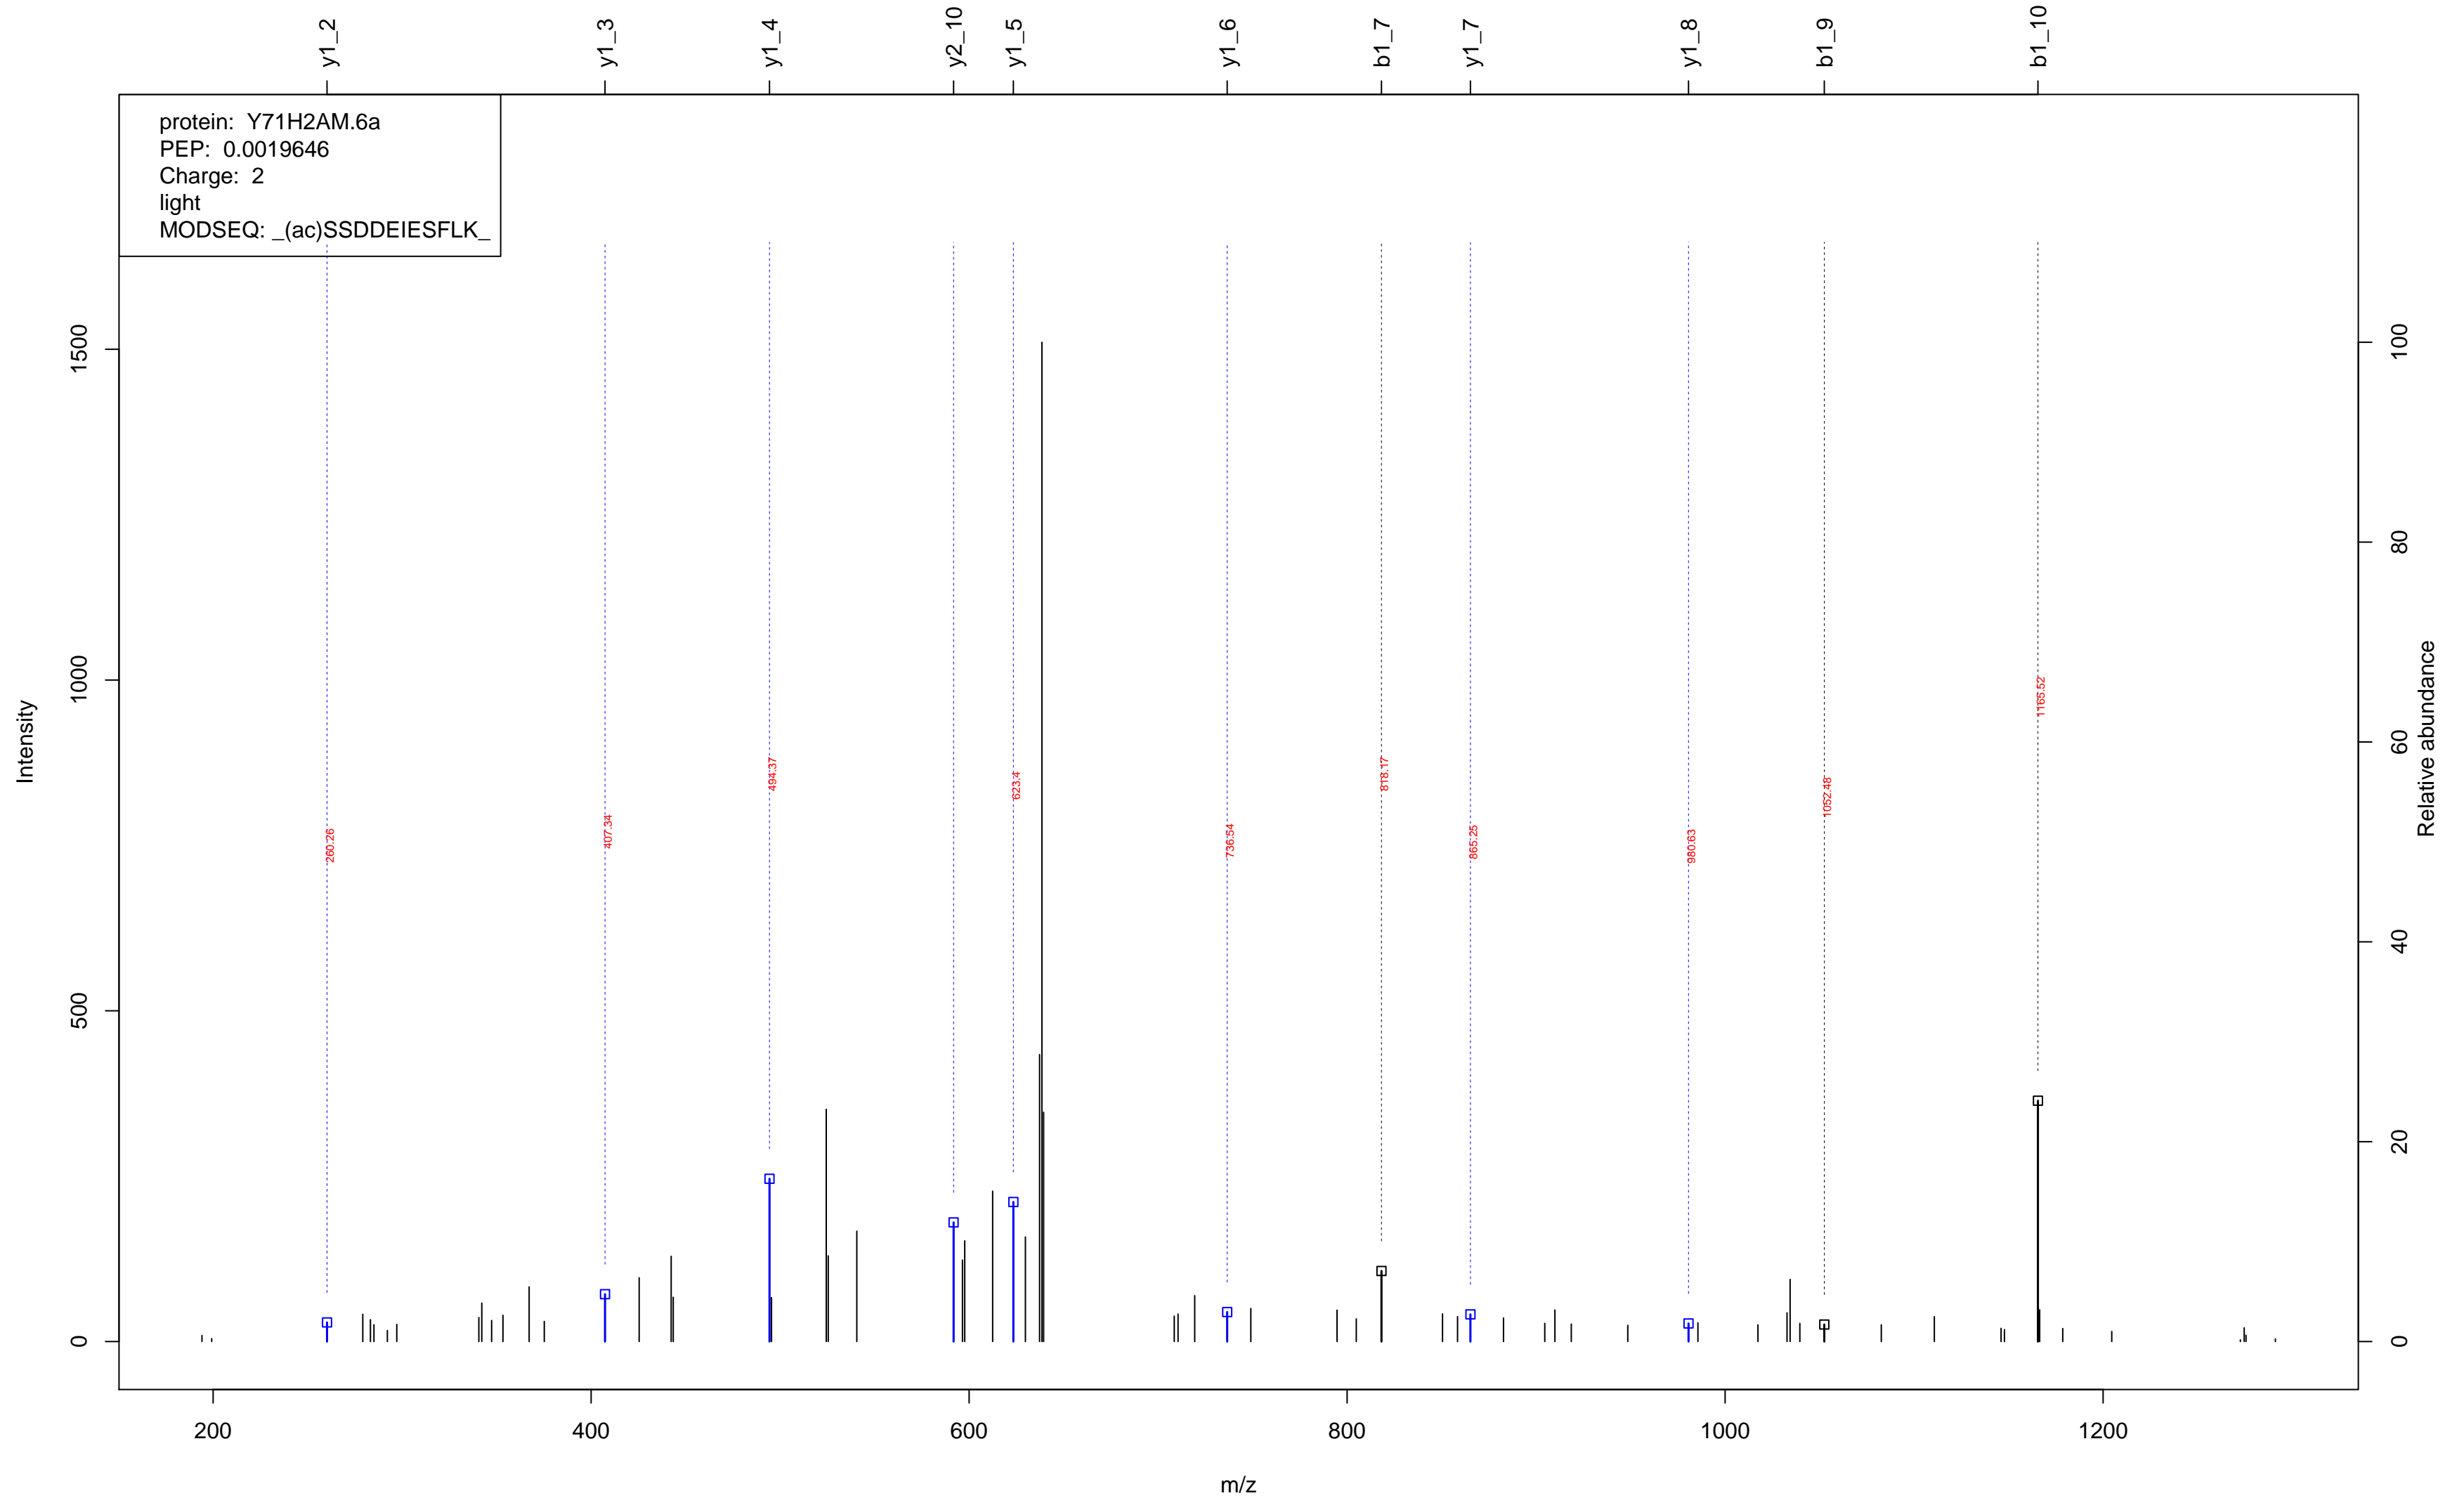

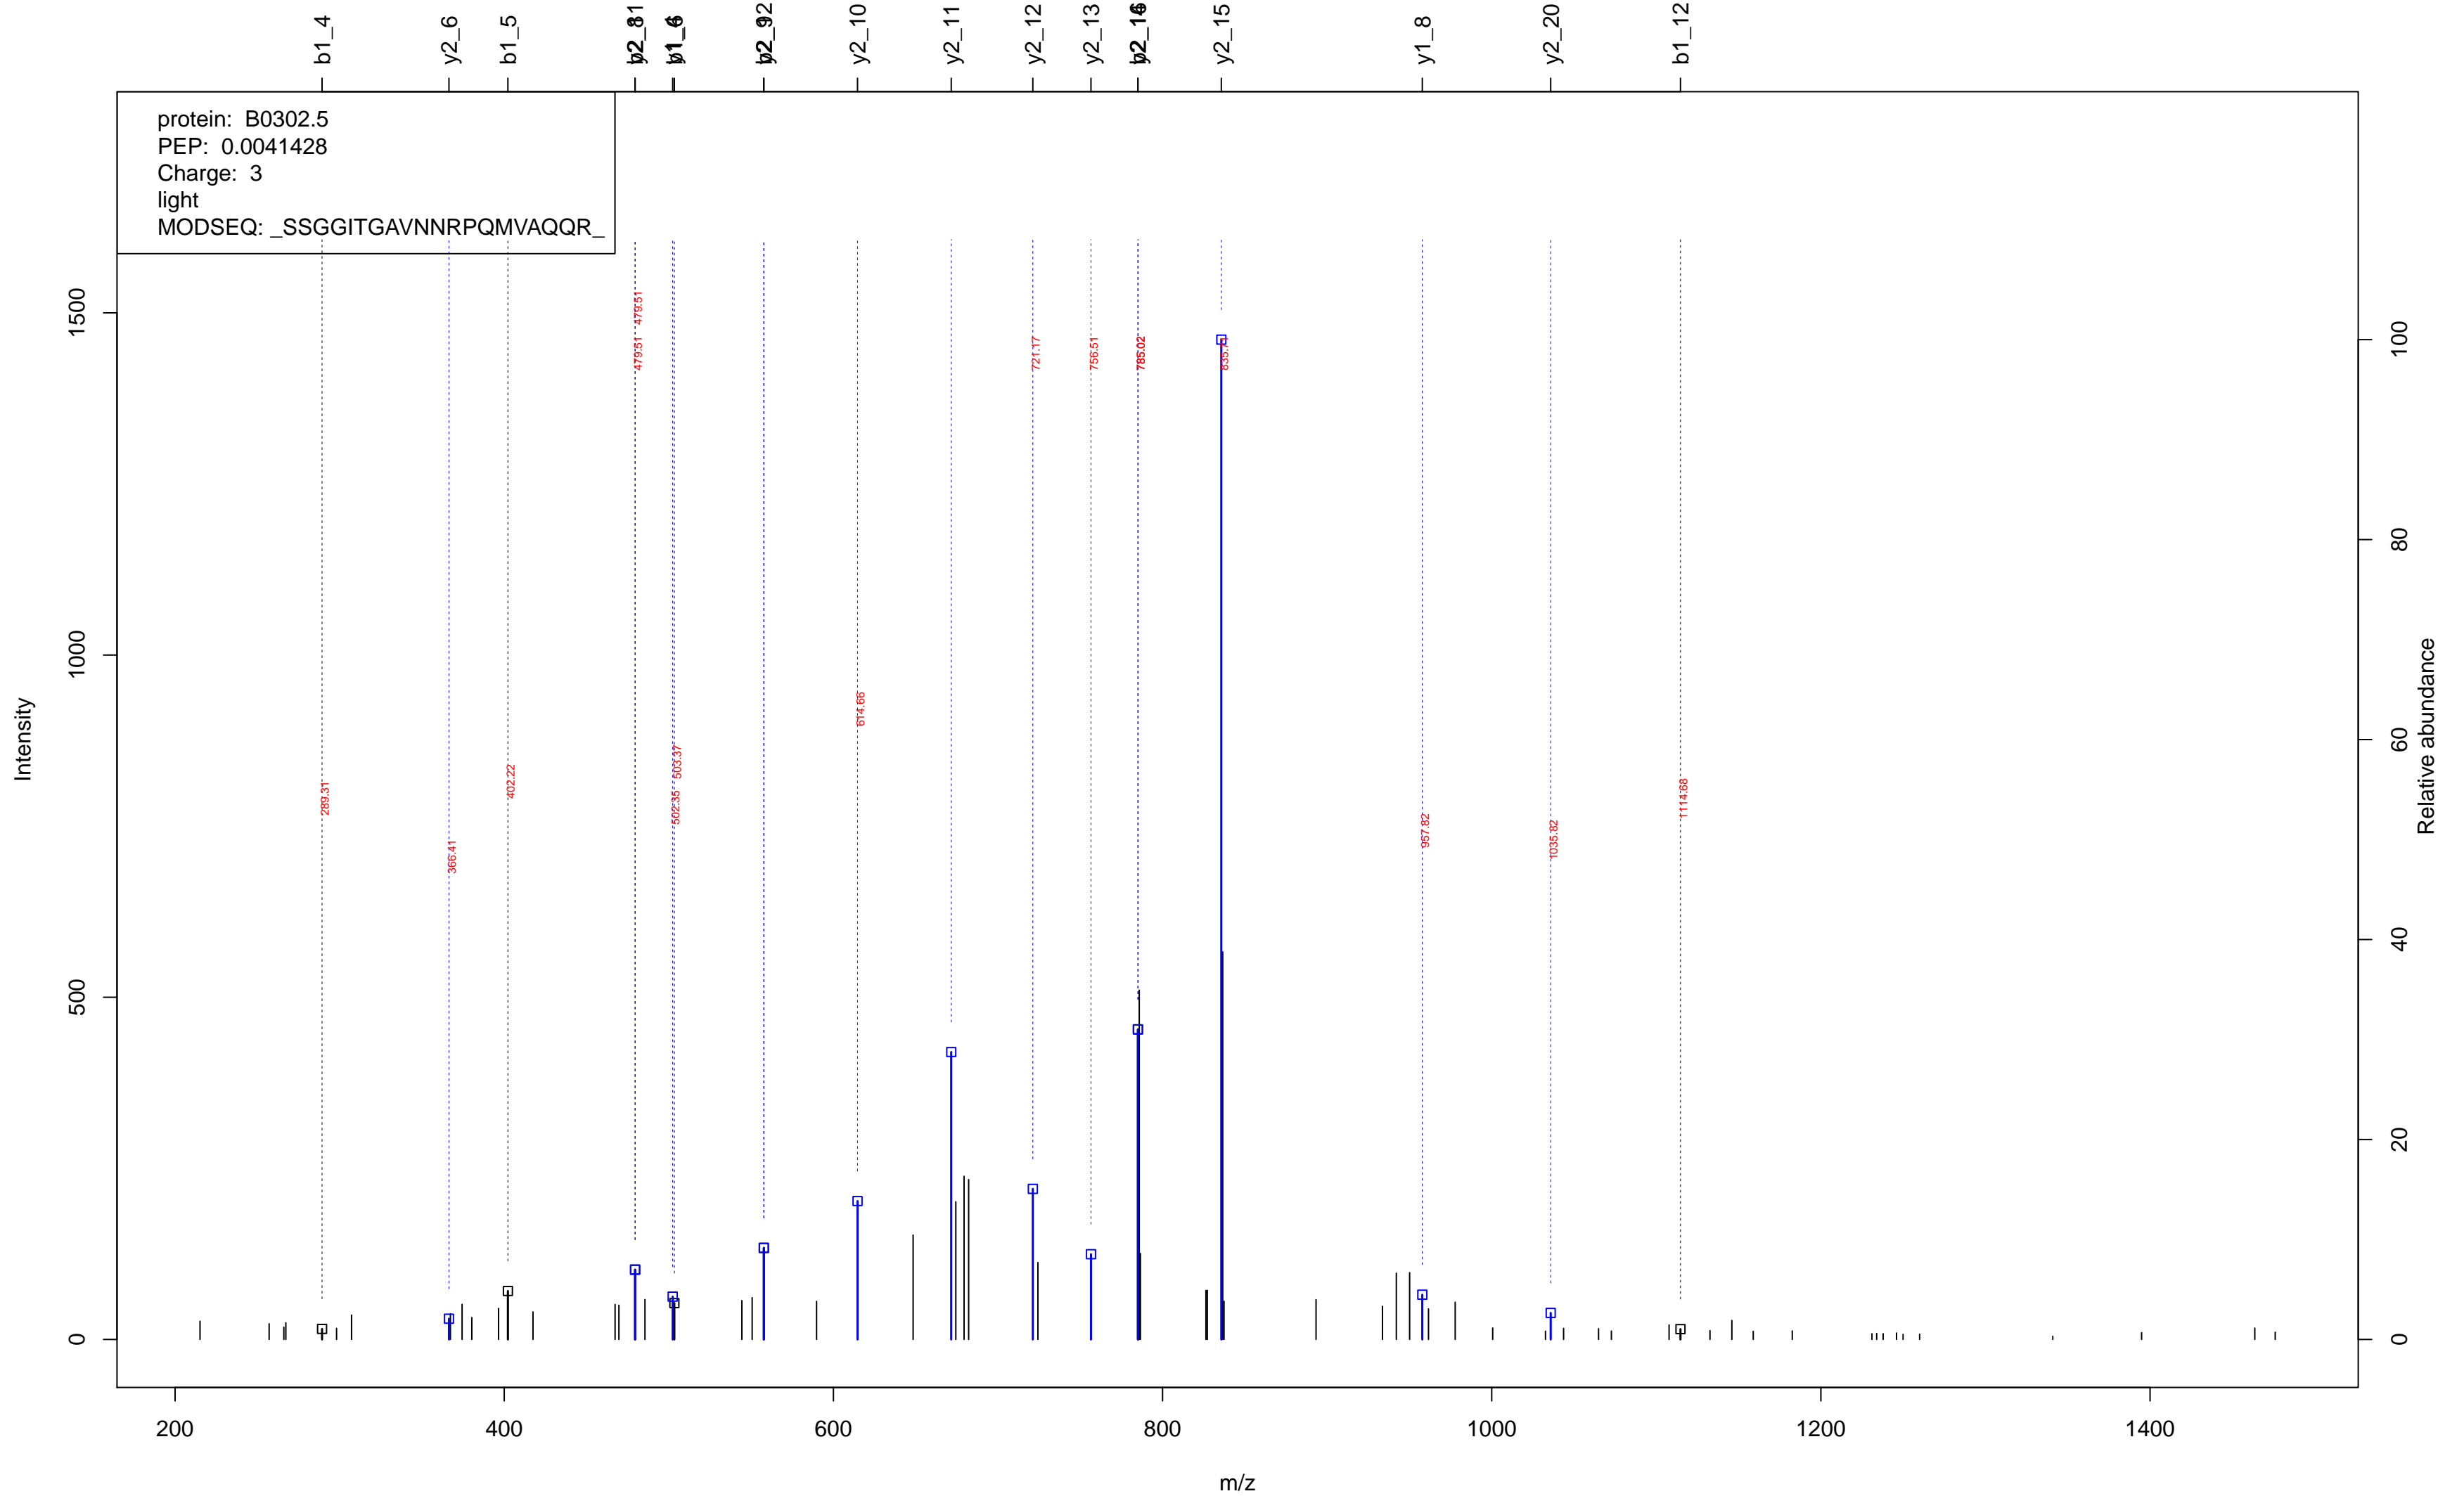

b2\_3 y1\_4 y1\_5 b2\_11 y1\_6 b1\_7 b2\_16 y1\_8 y1\_9 y1\_10 y1\_11 b1\_12 y1\_12 b1\_13 y1\_13 b1\_14 y1\_14 y1\_15 b1\_16

protein: B0564.7  
PEP: 2.8287e-08  
Charge: 2  
light  
MODSEQ: \_SSIDQNVIESIATSLISR\_

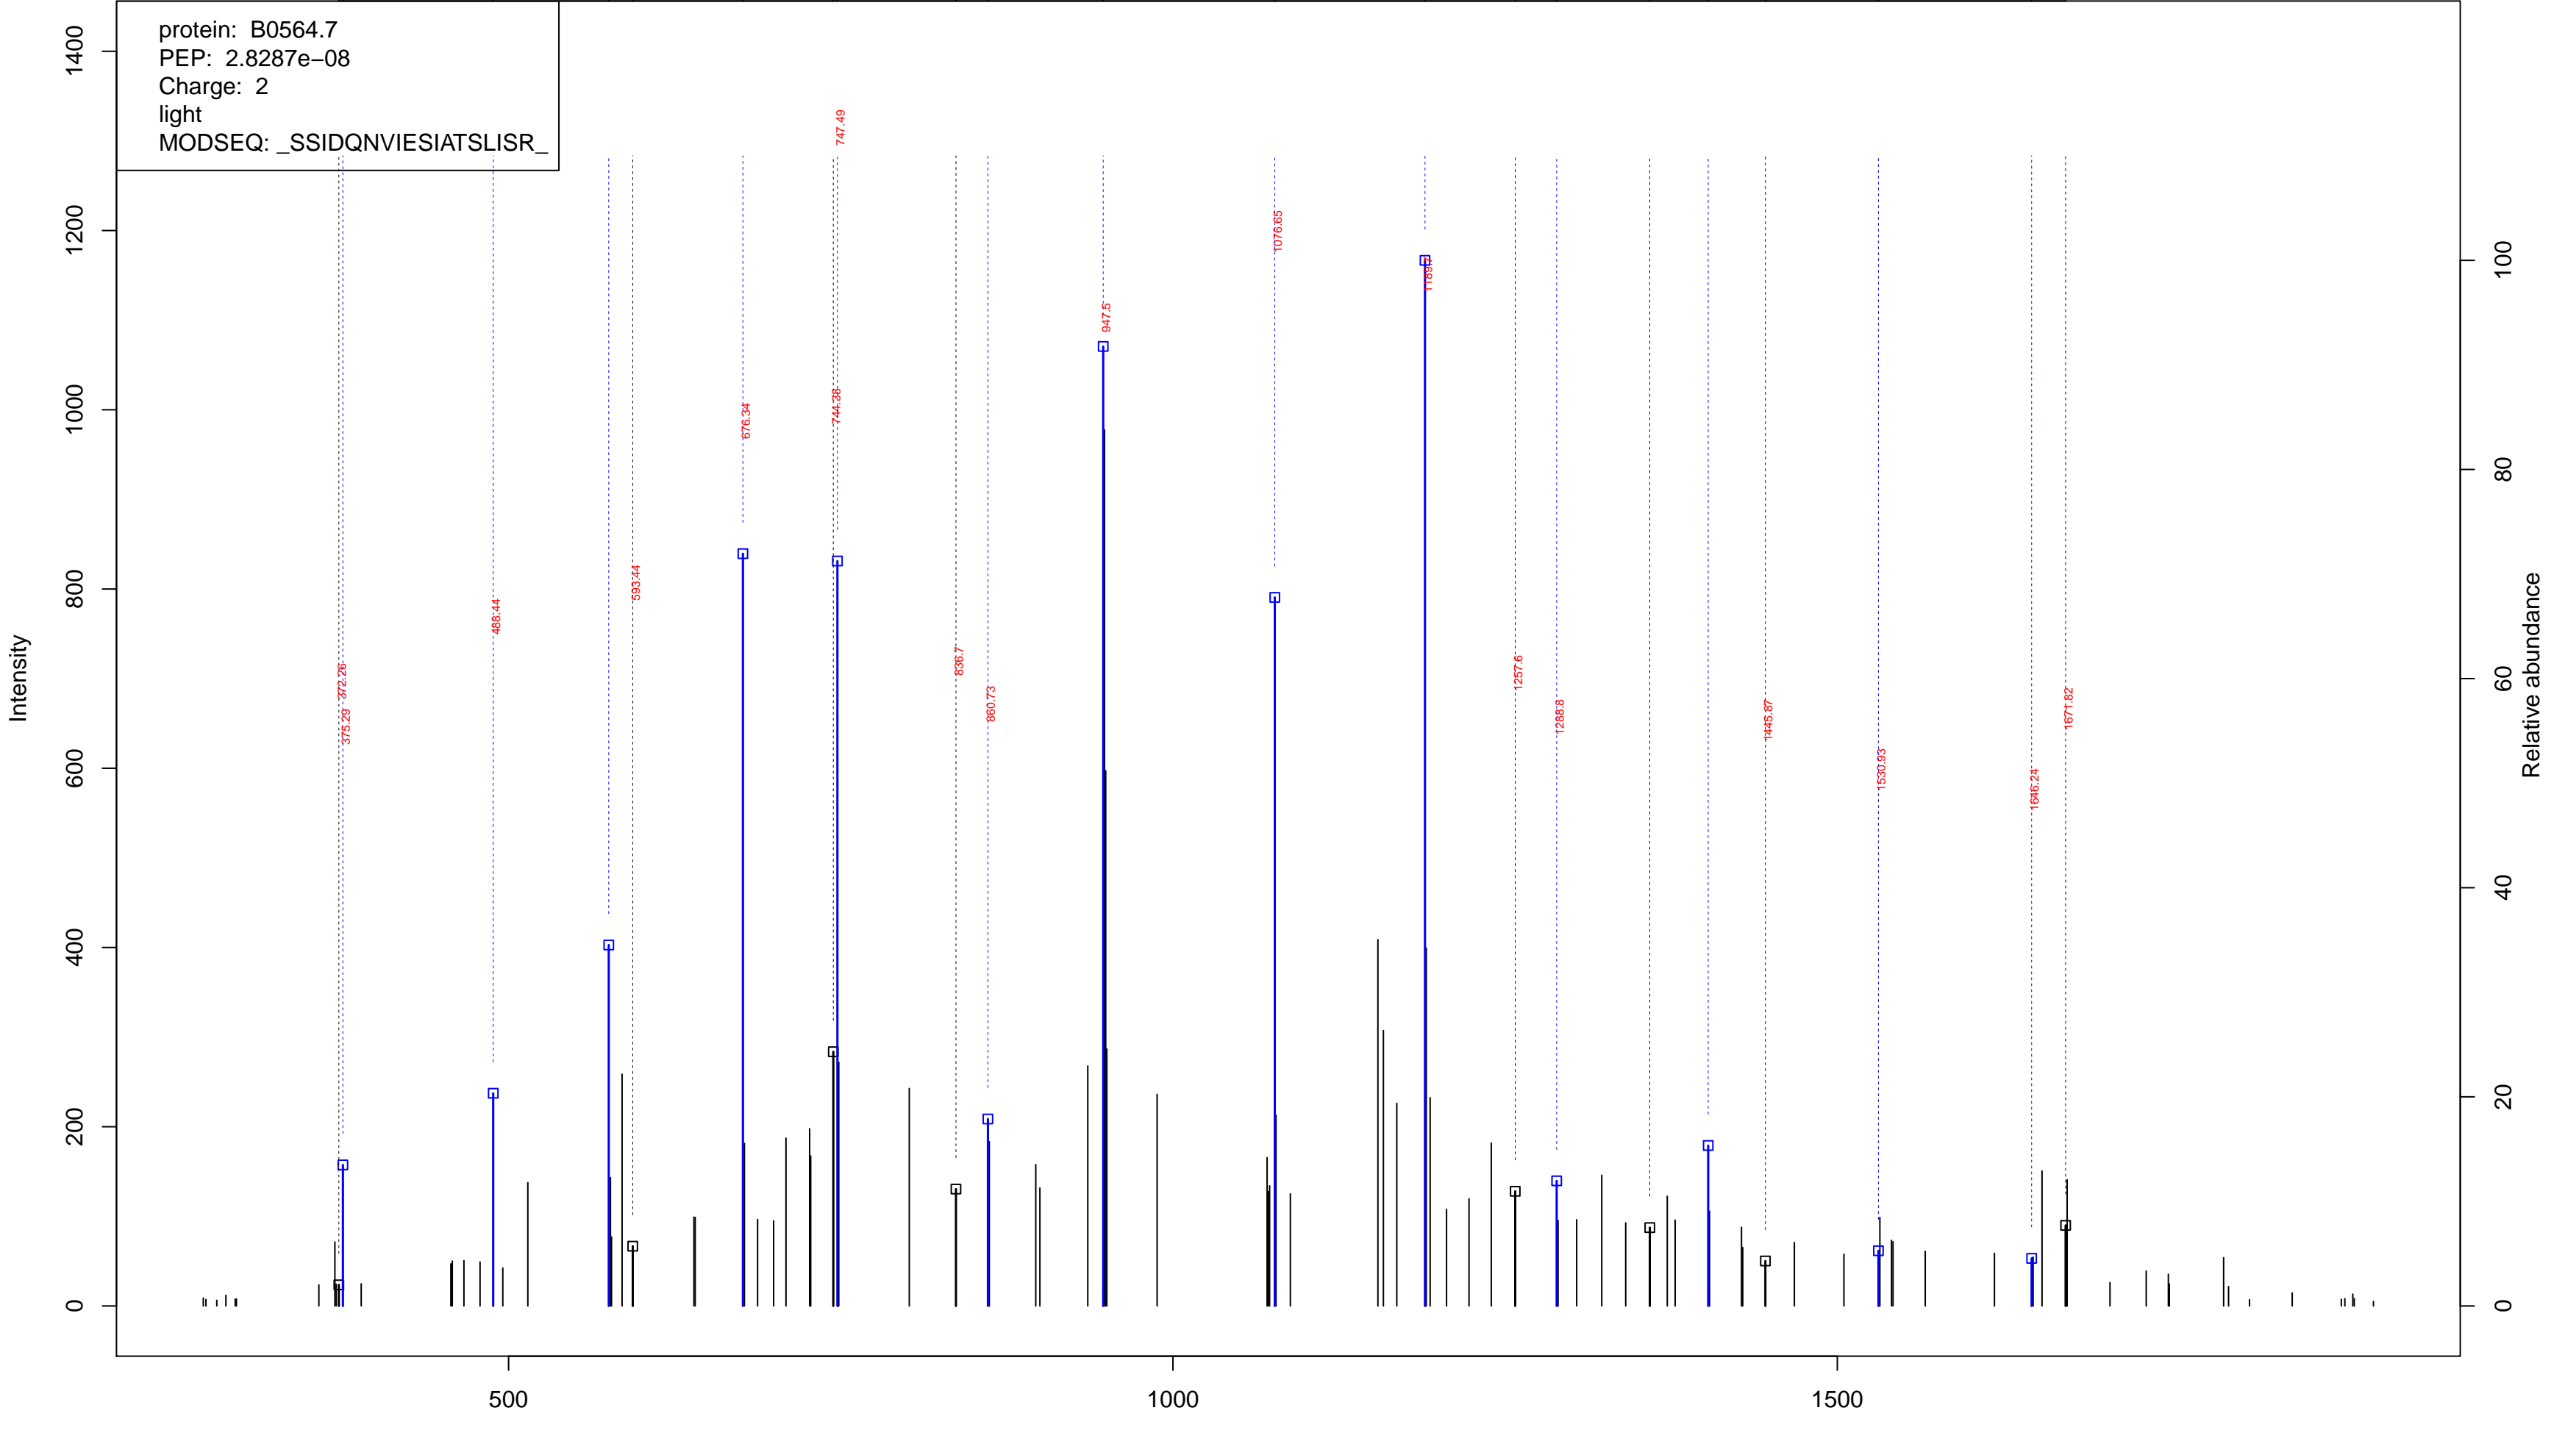

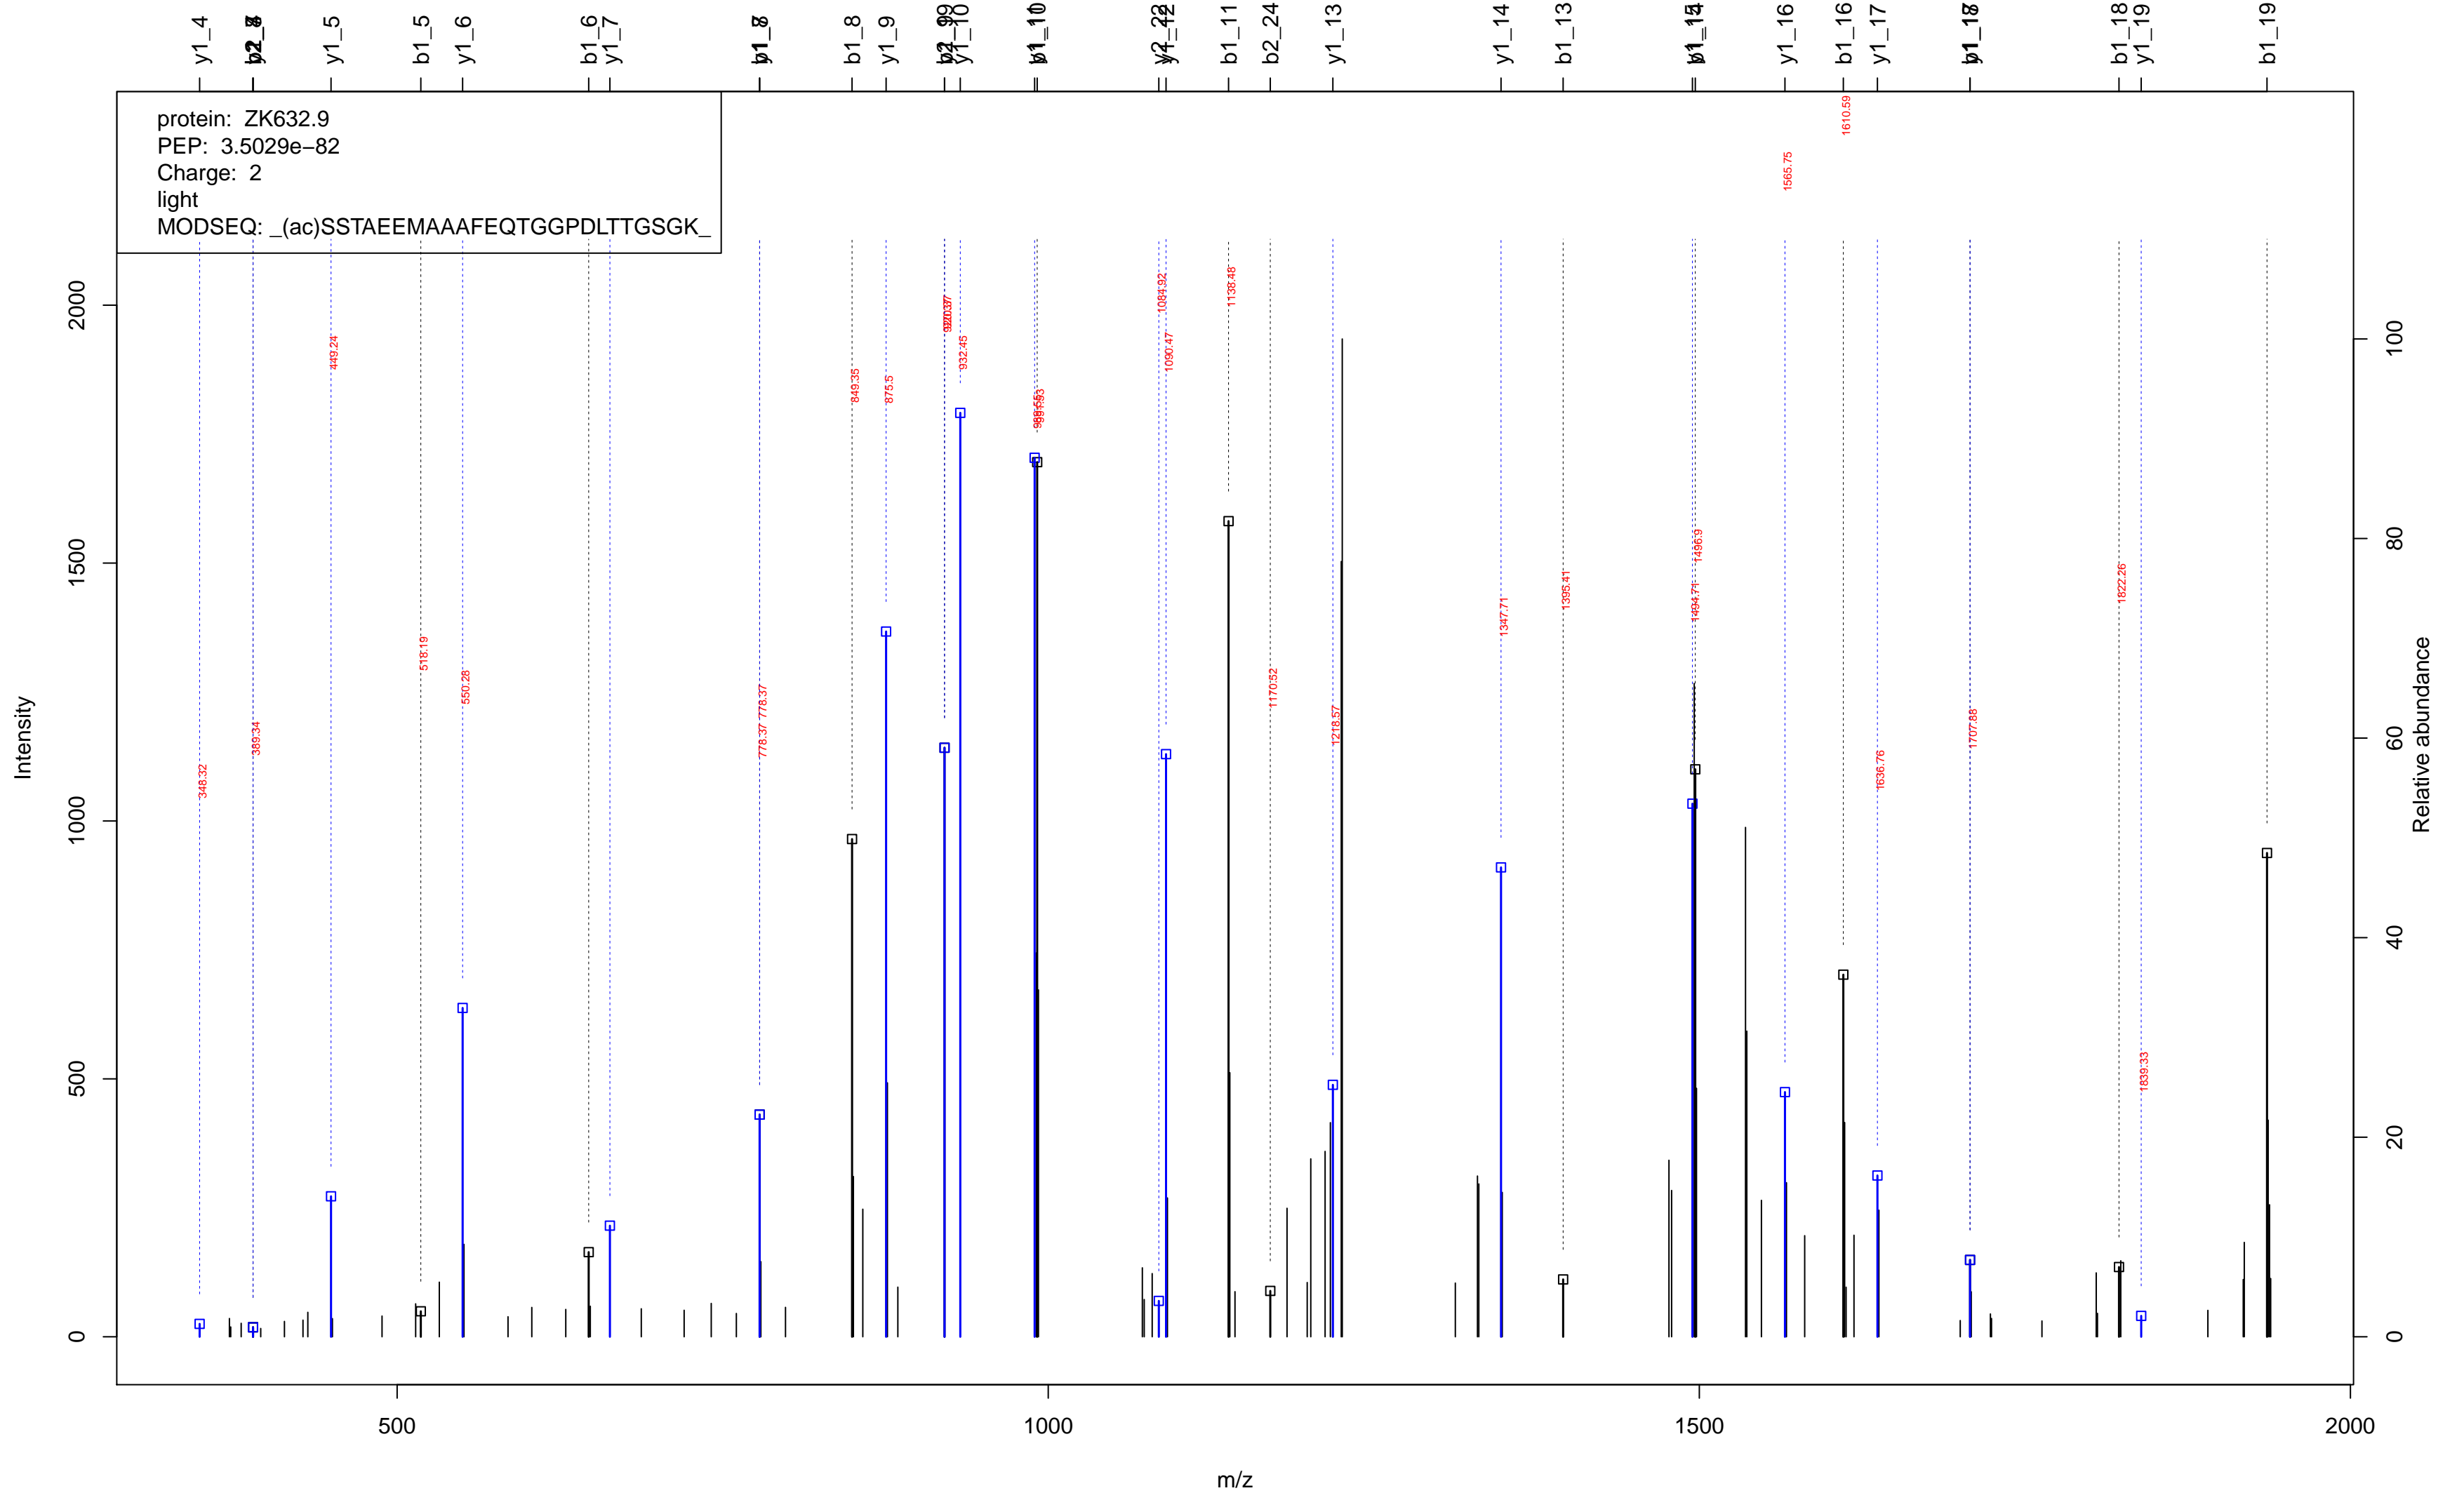

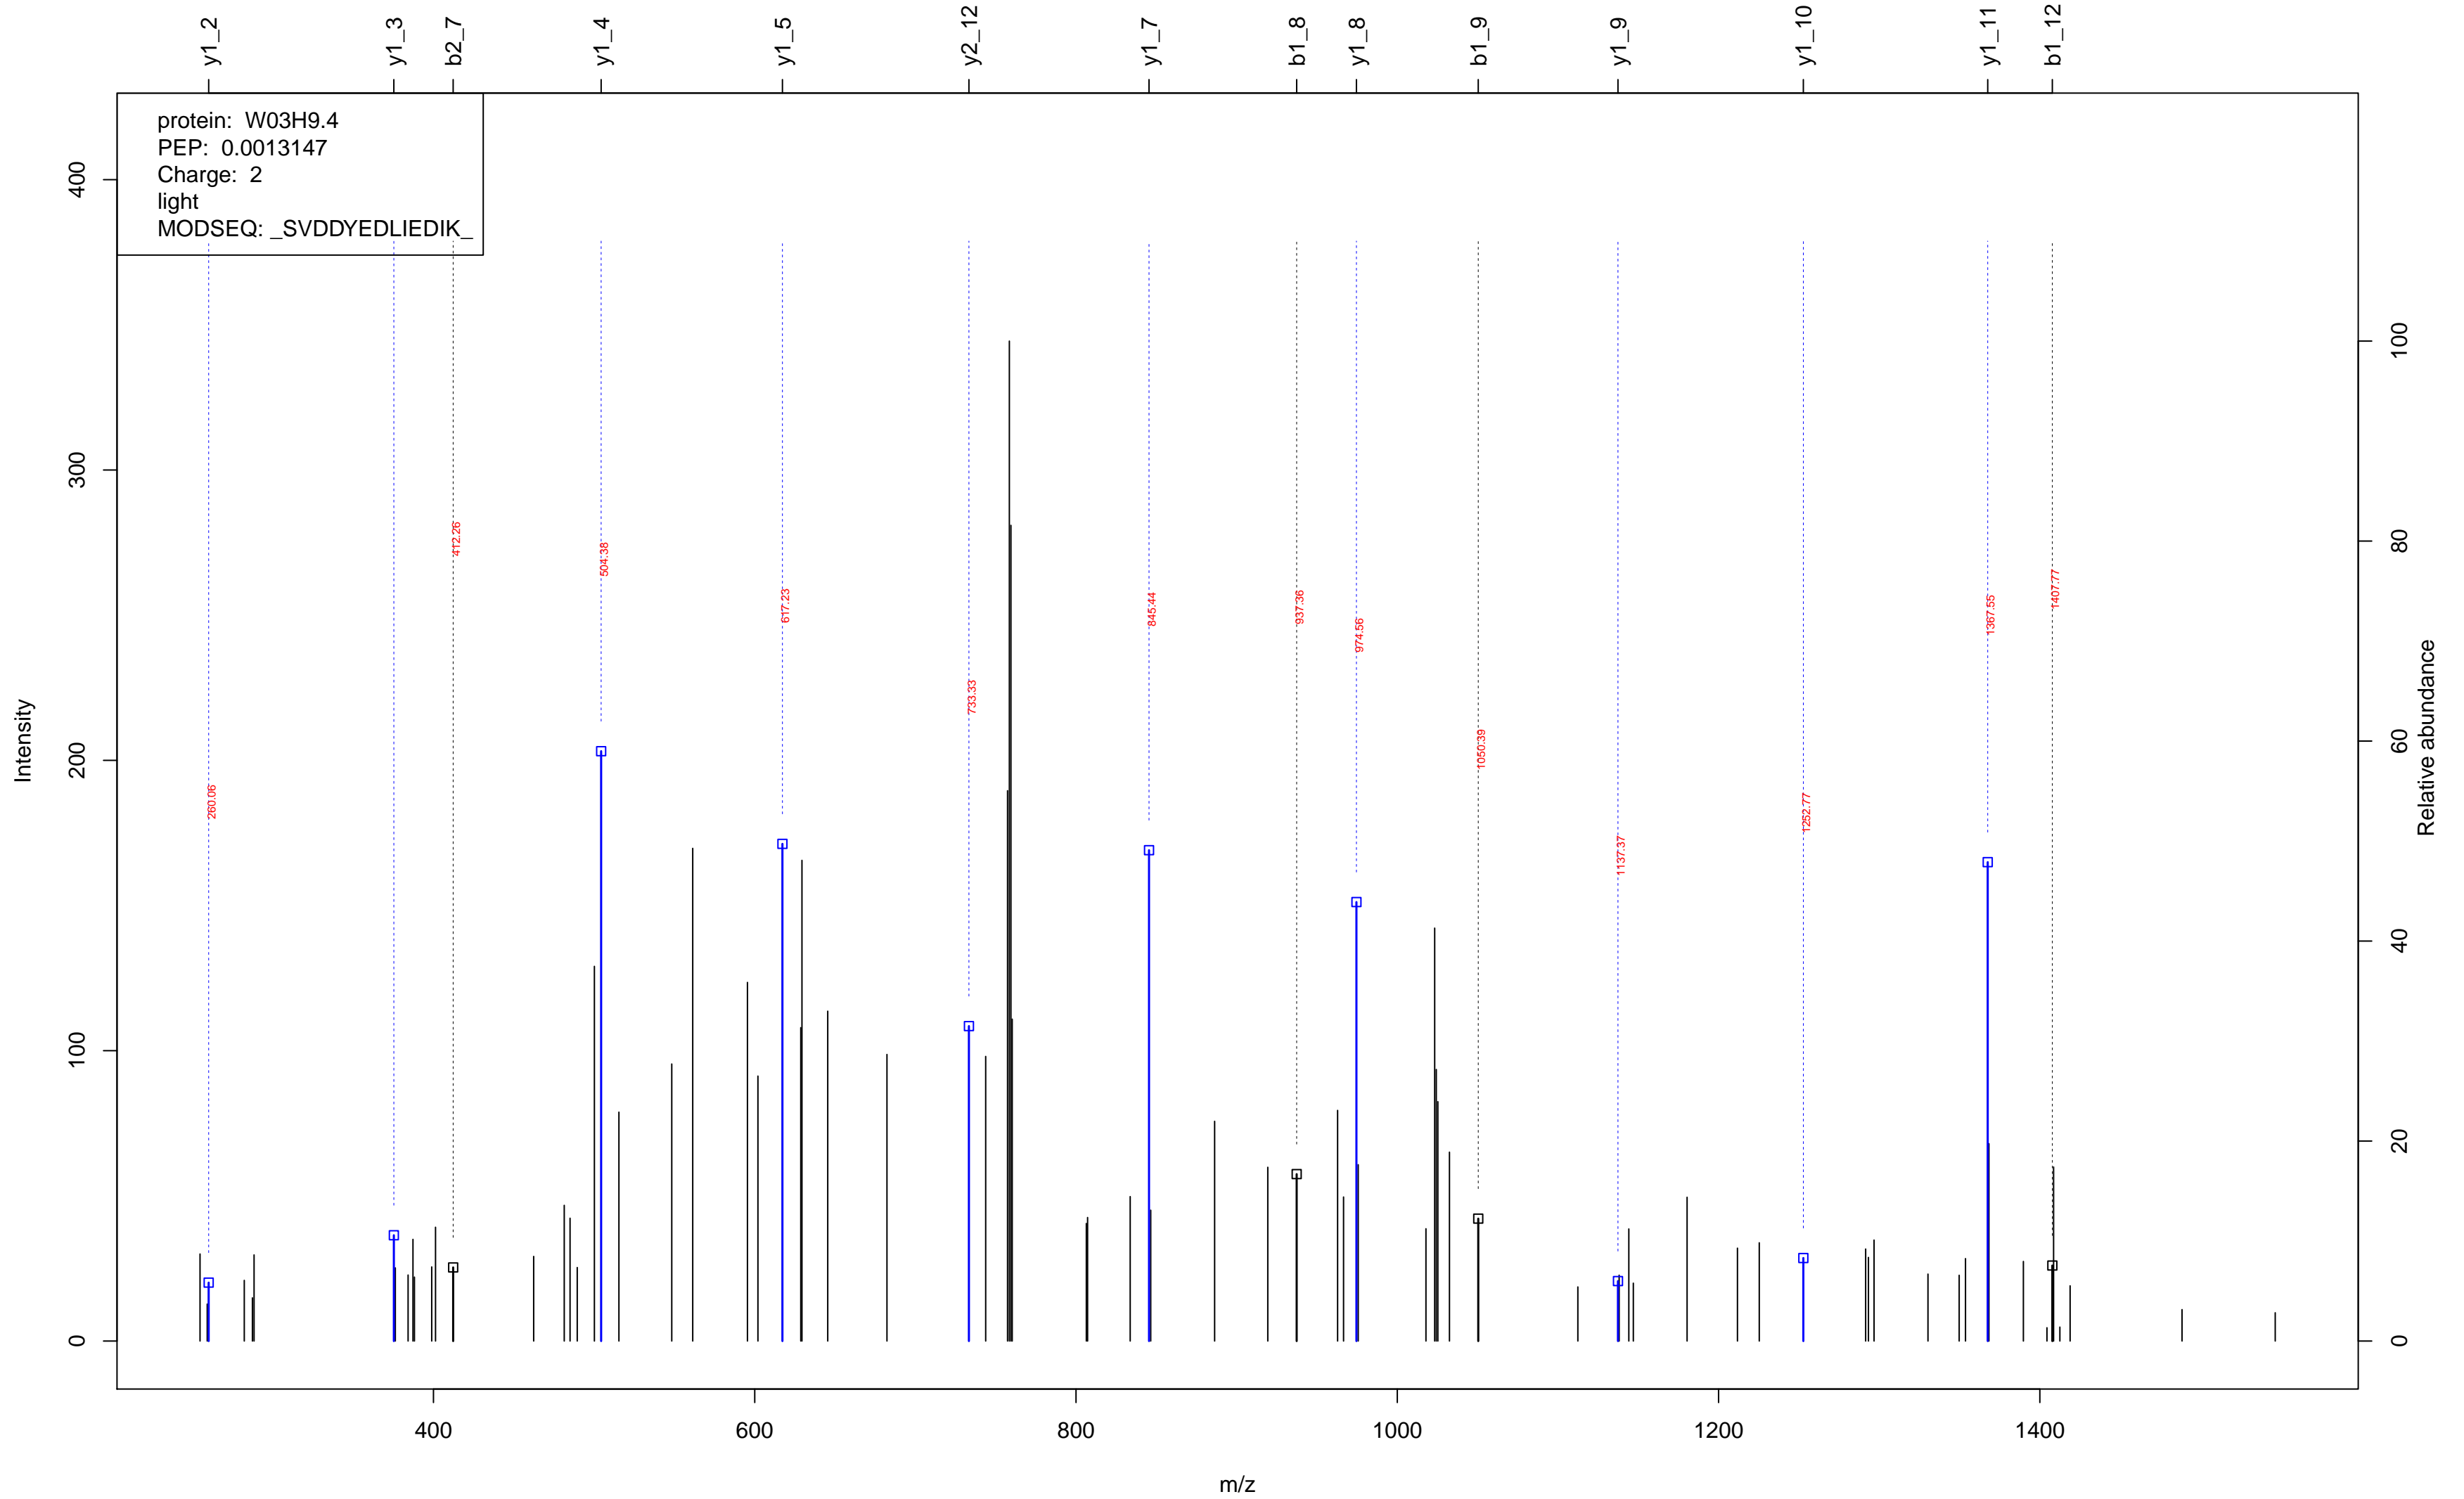



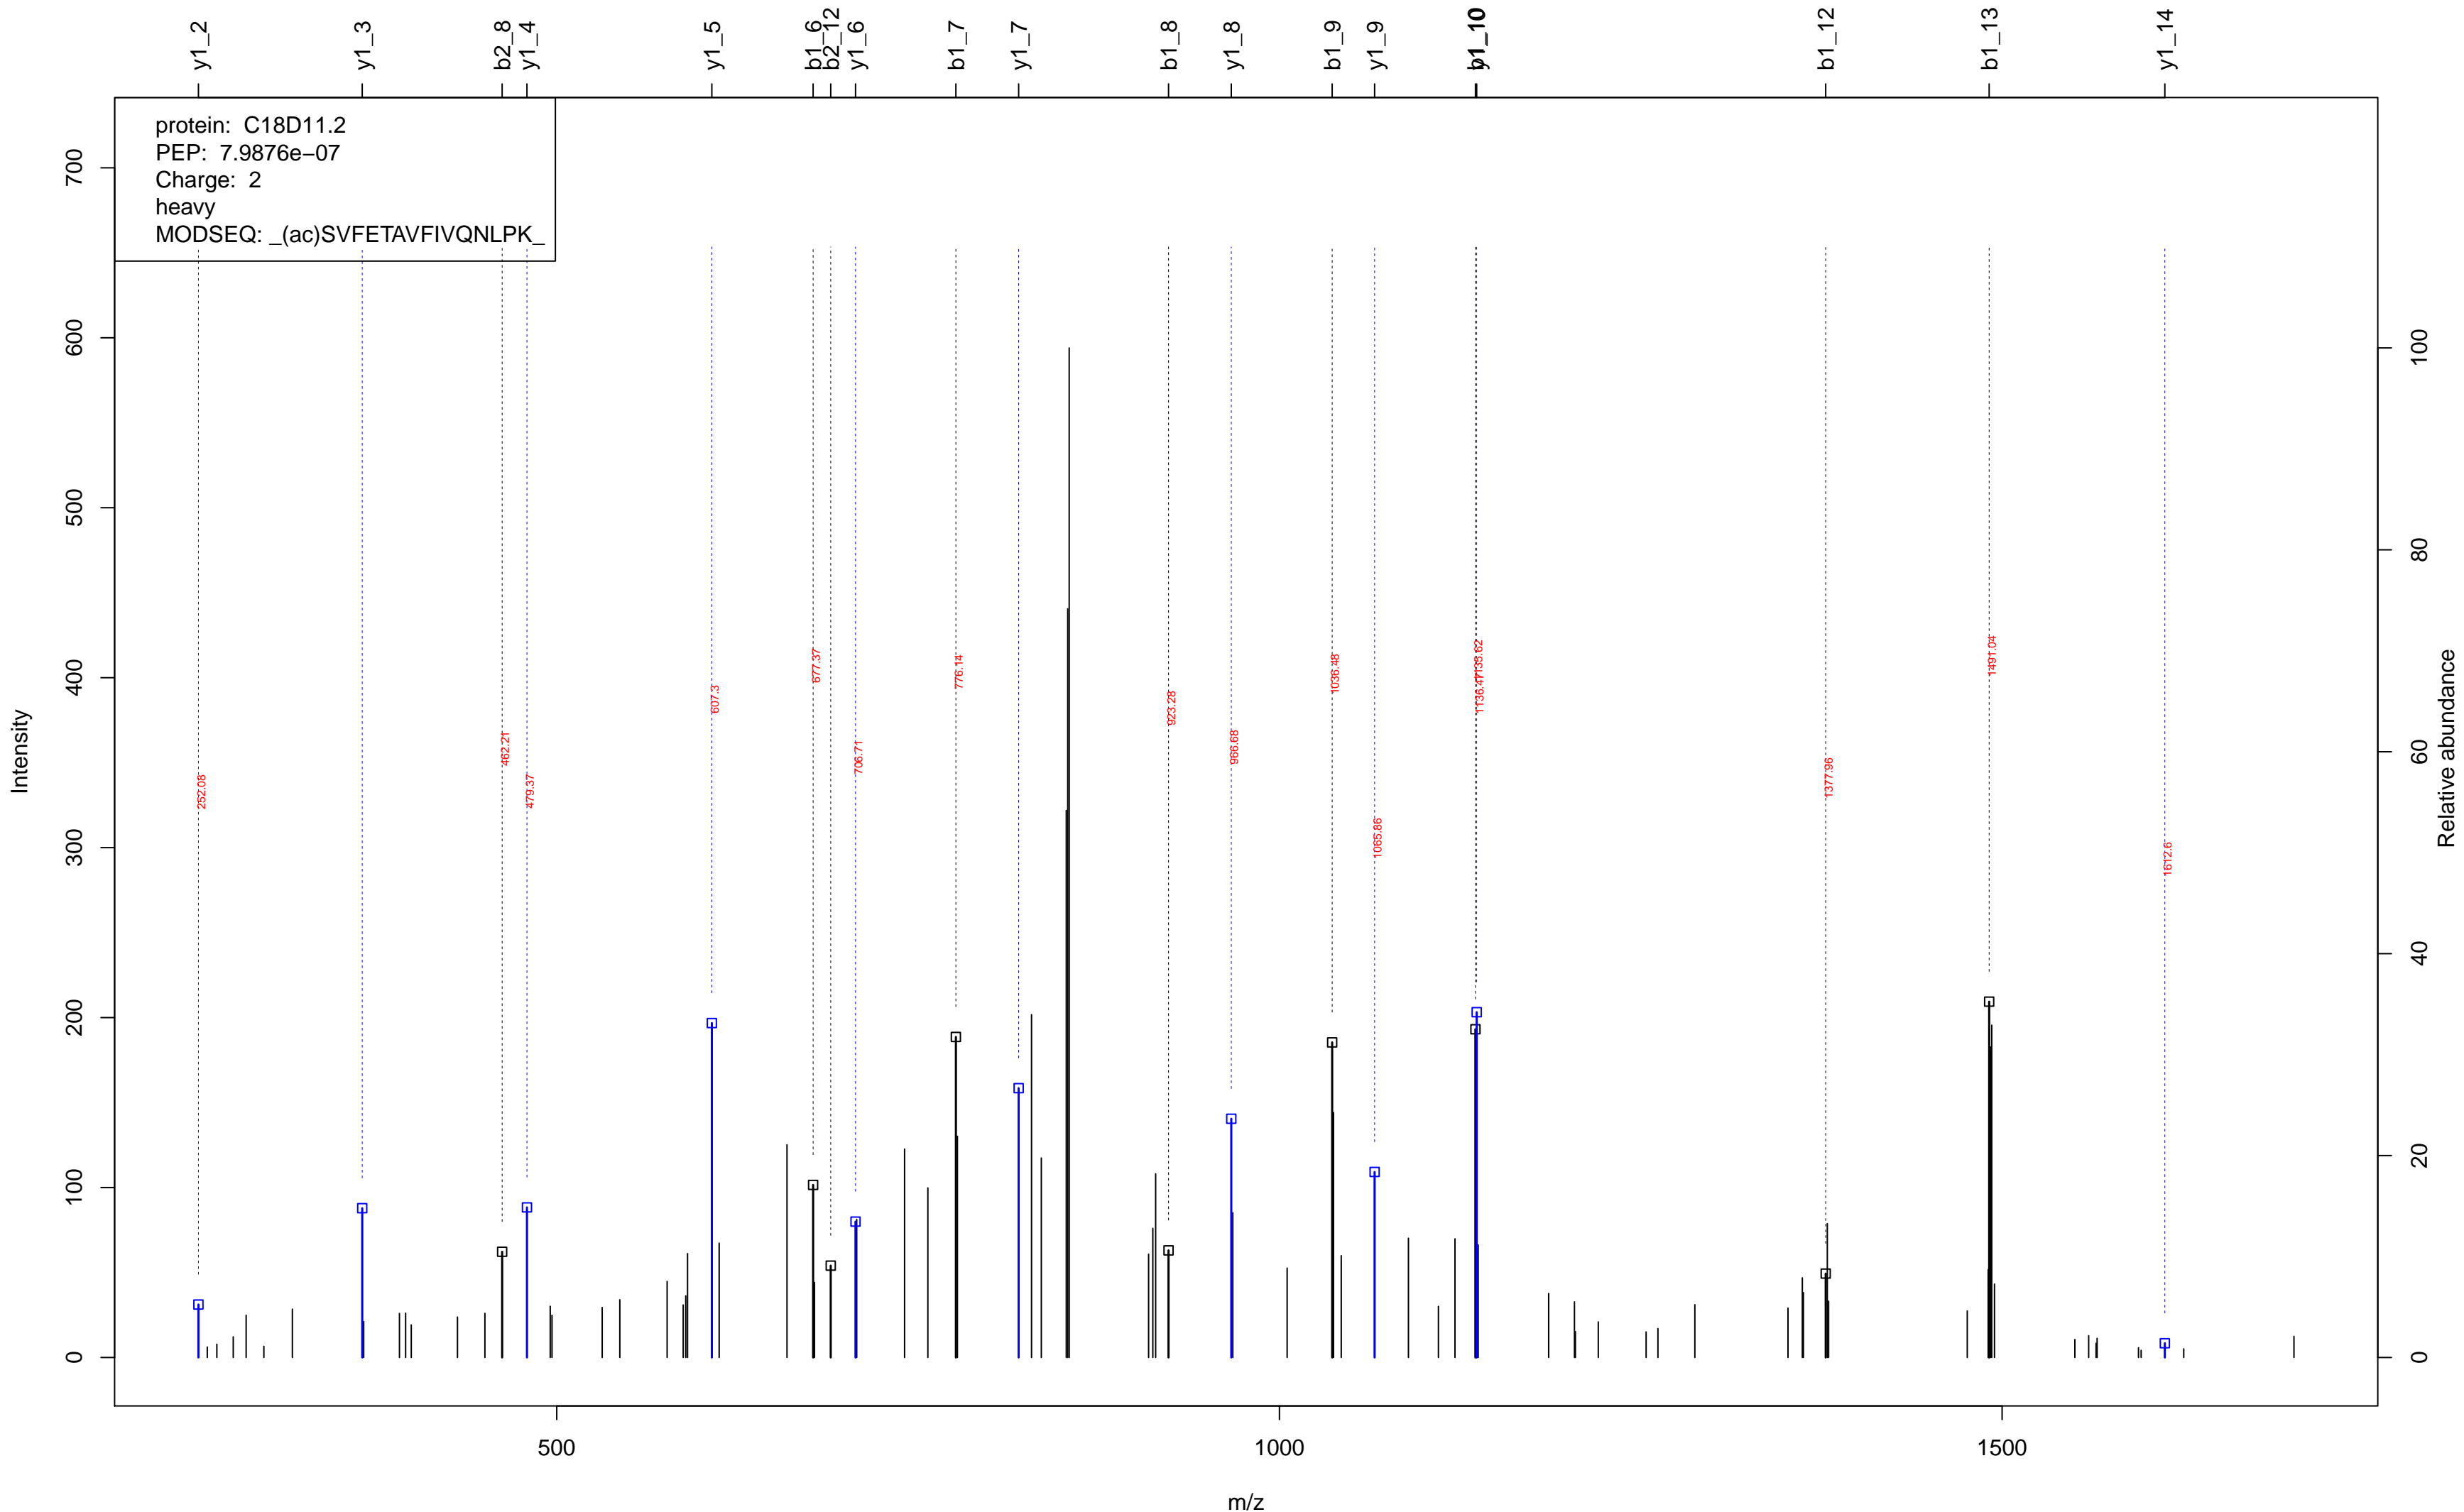

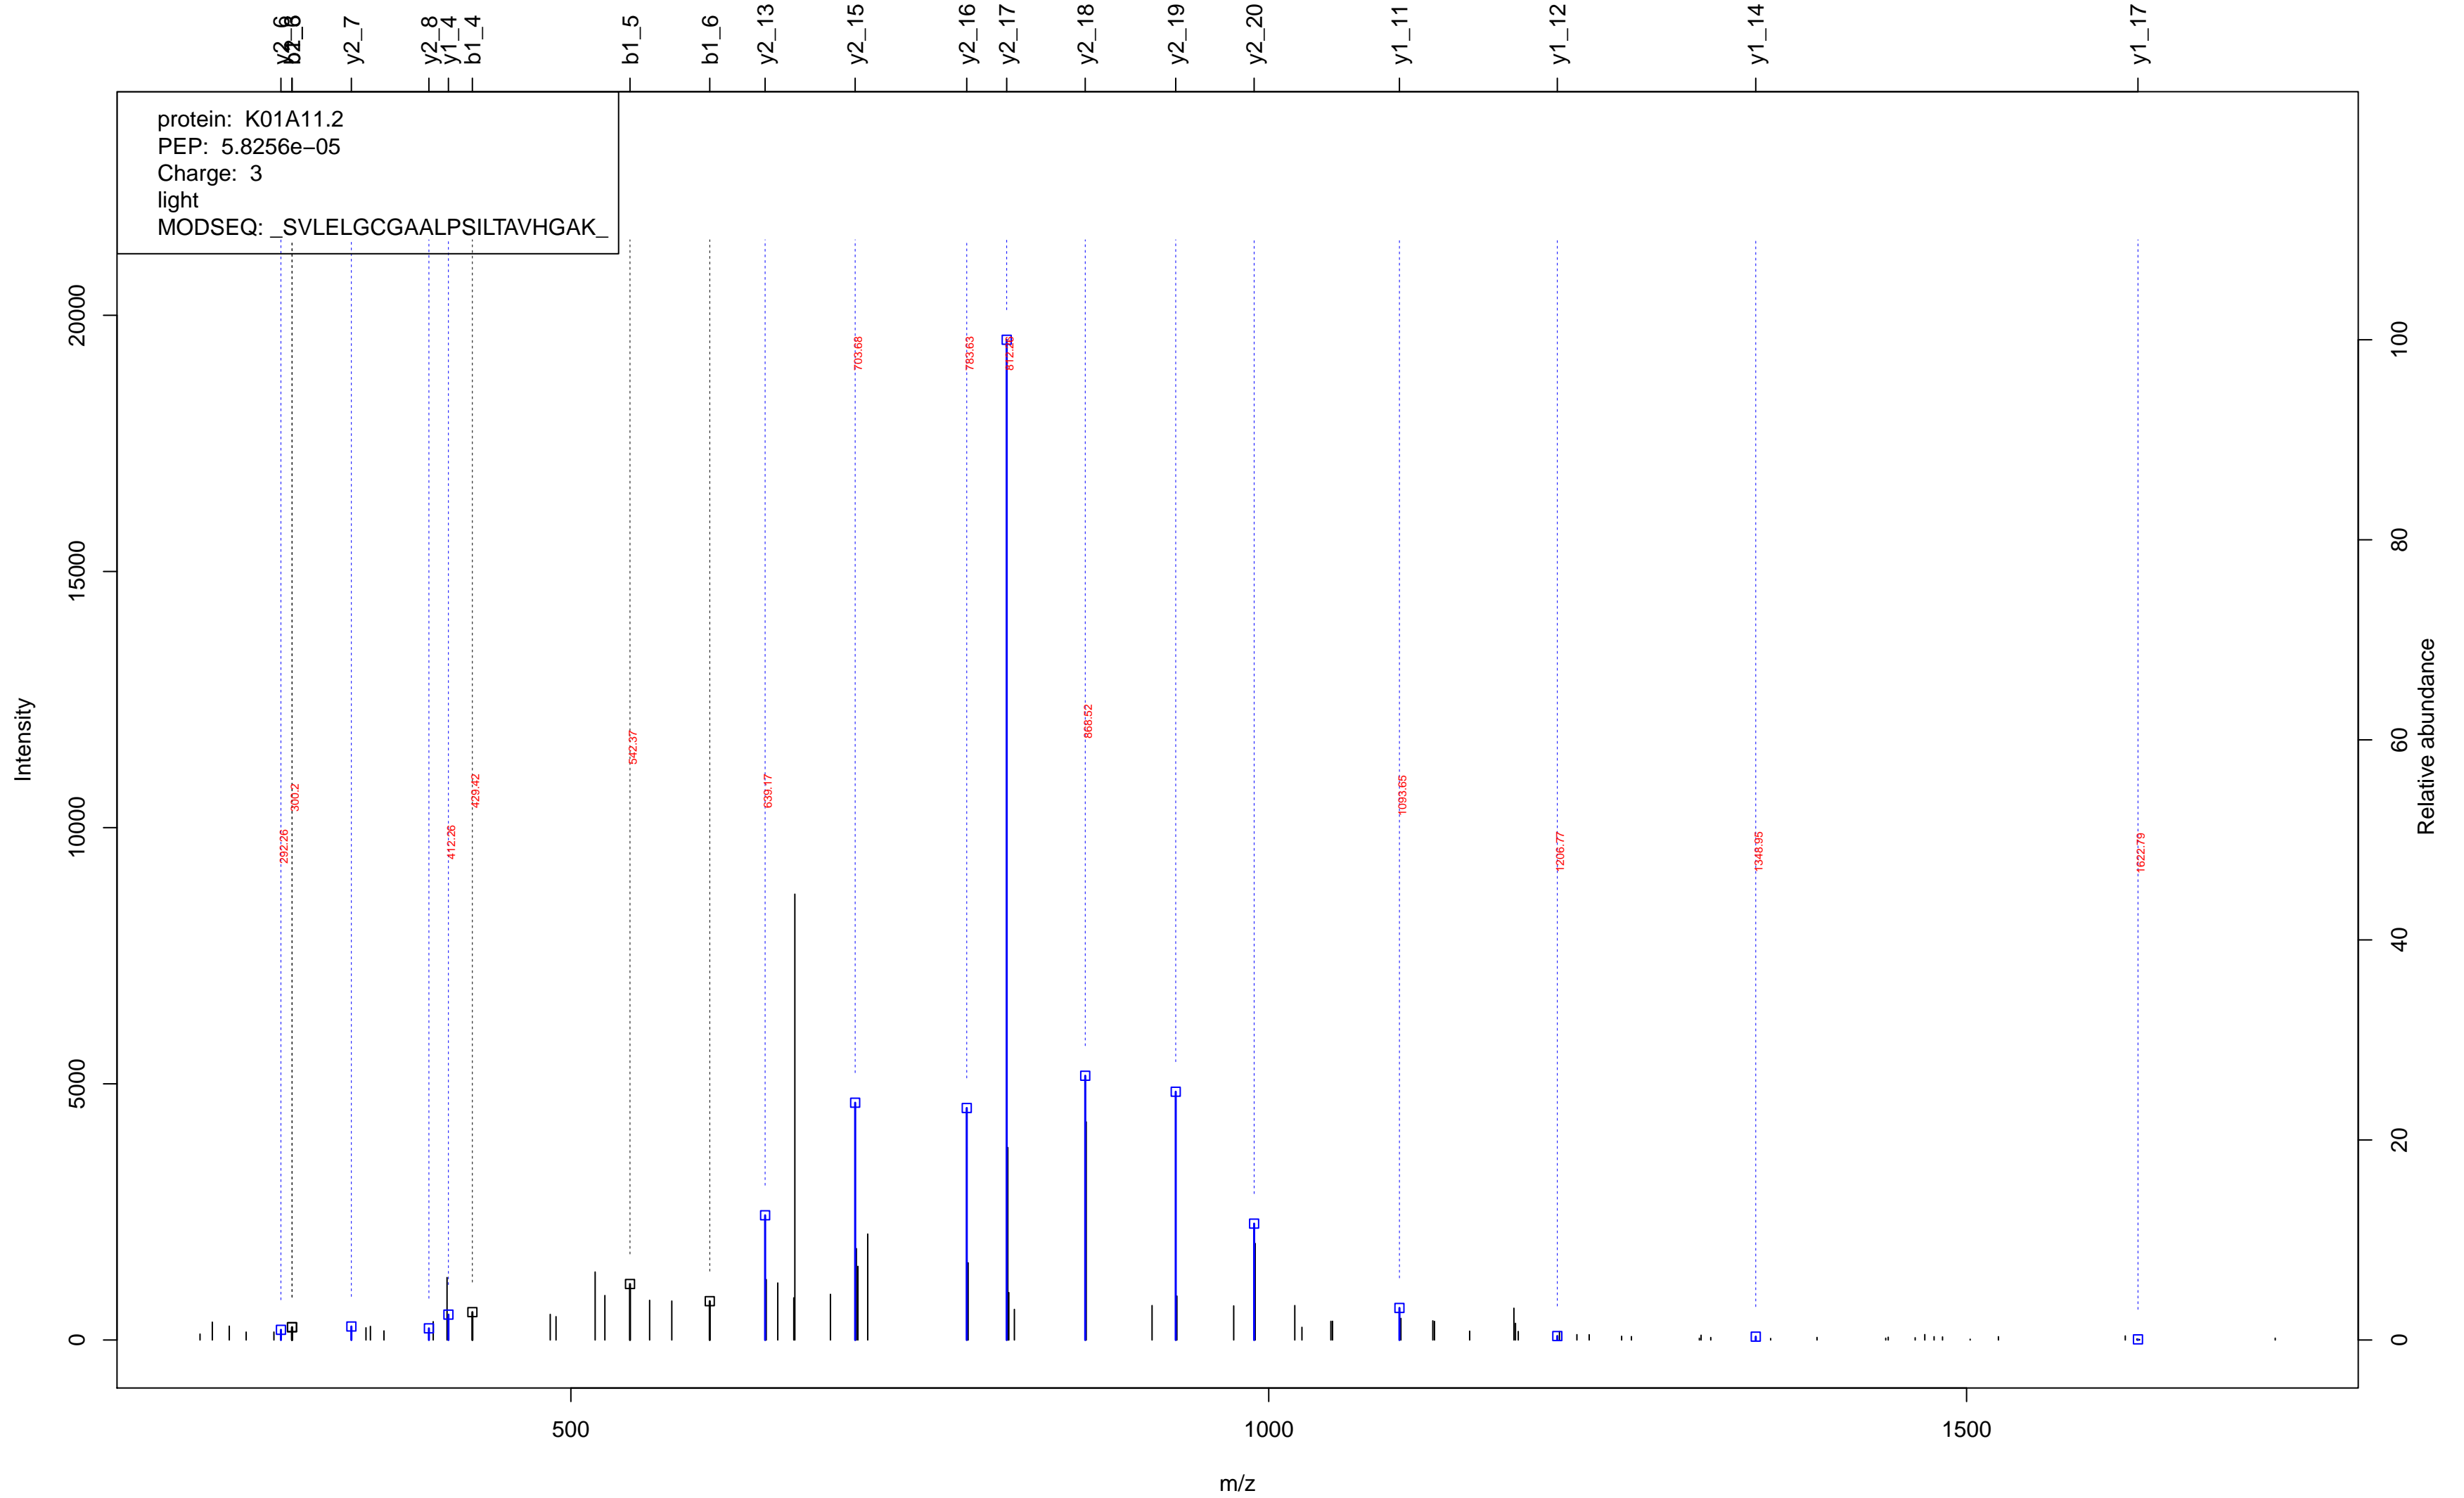

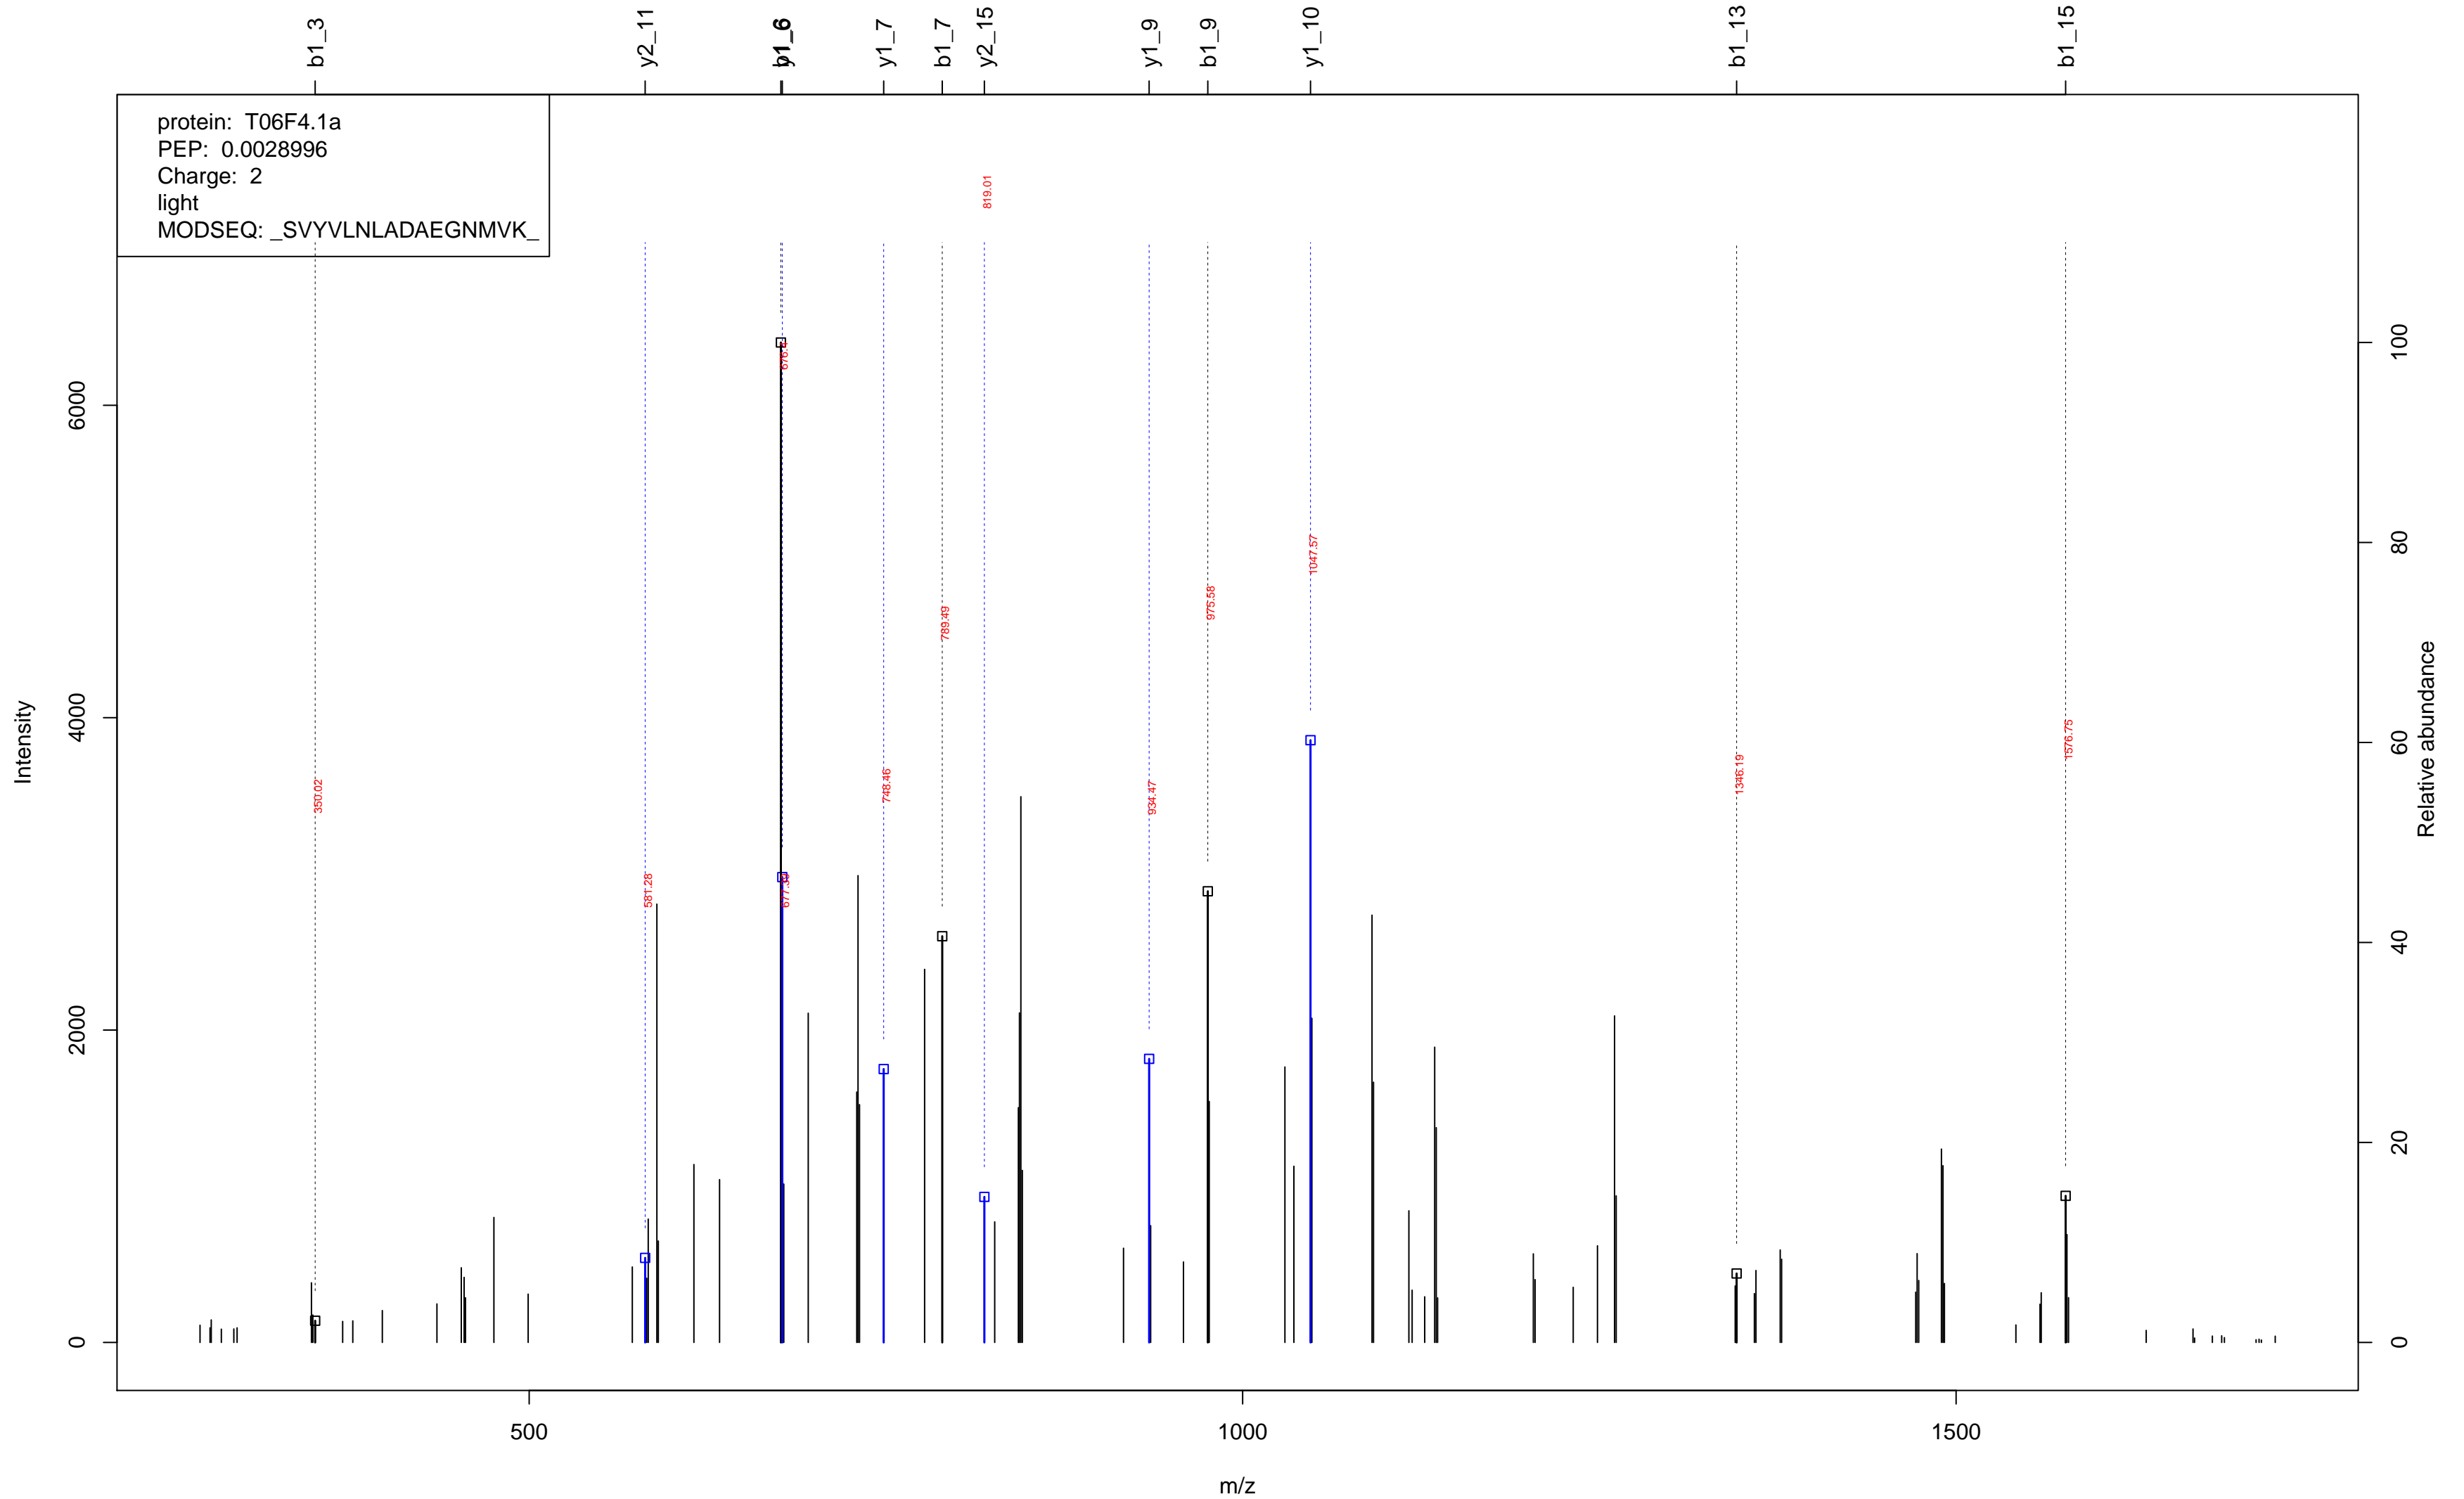

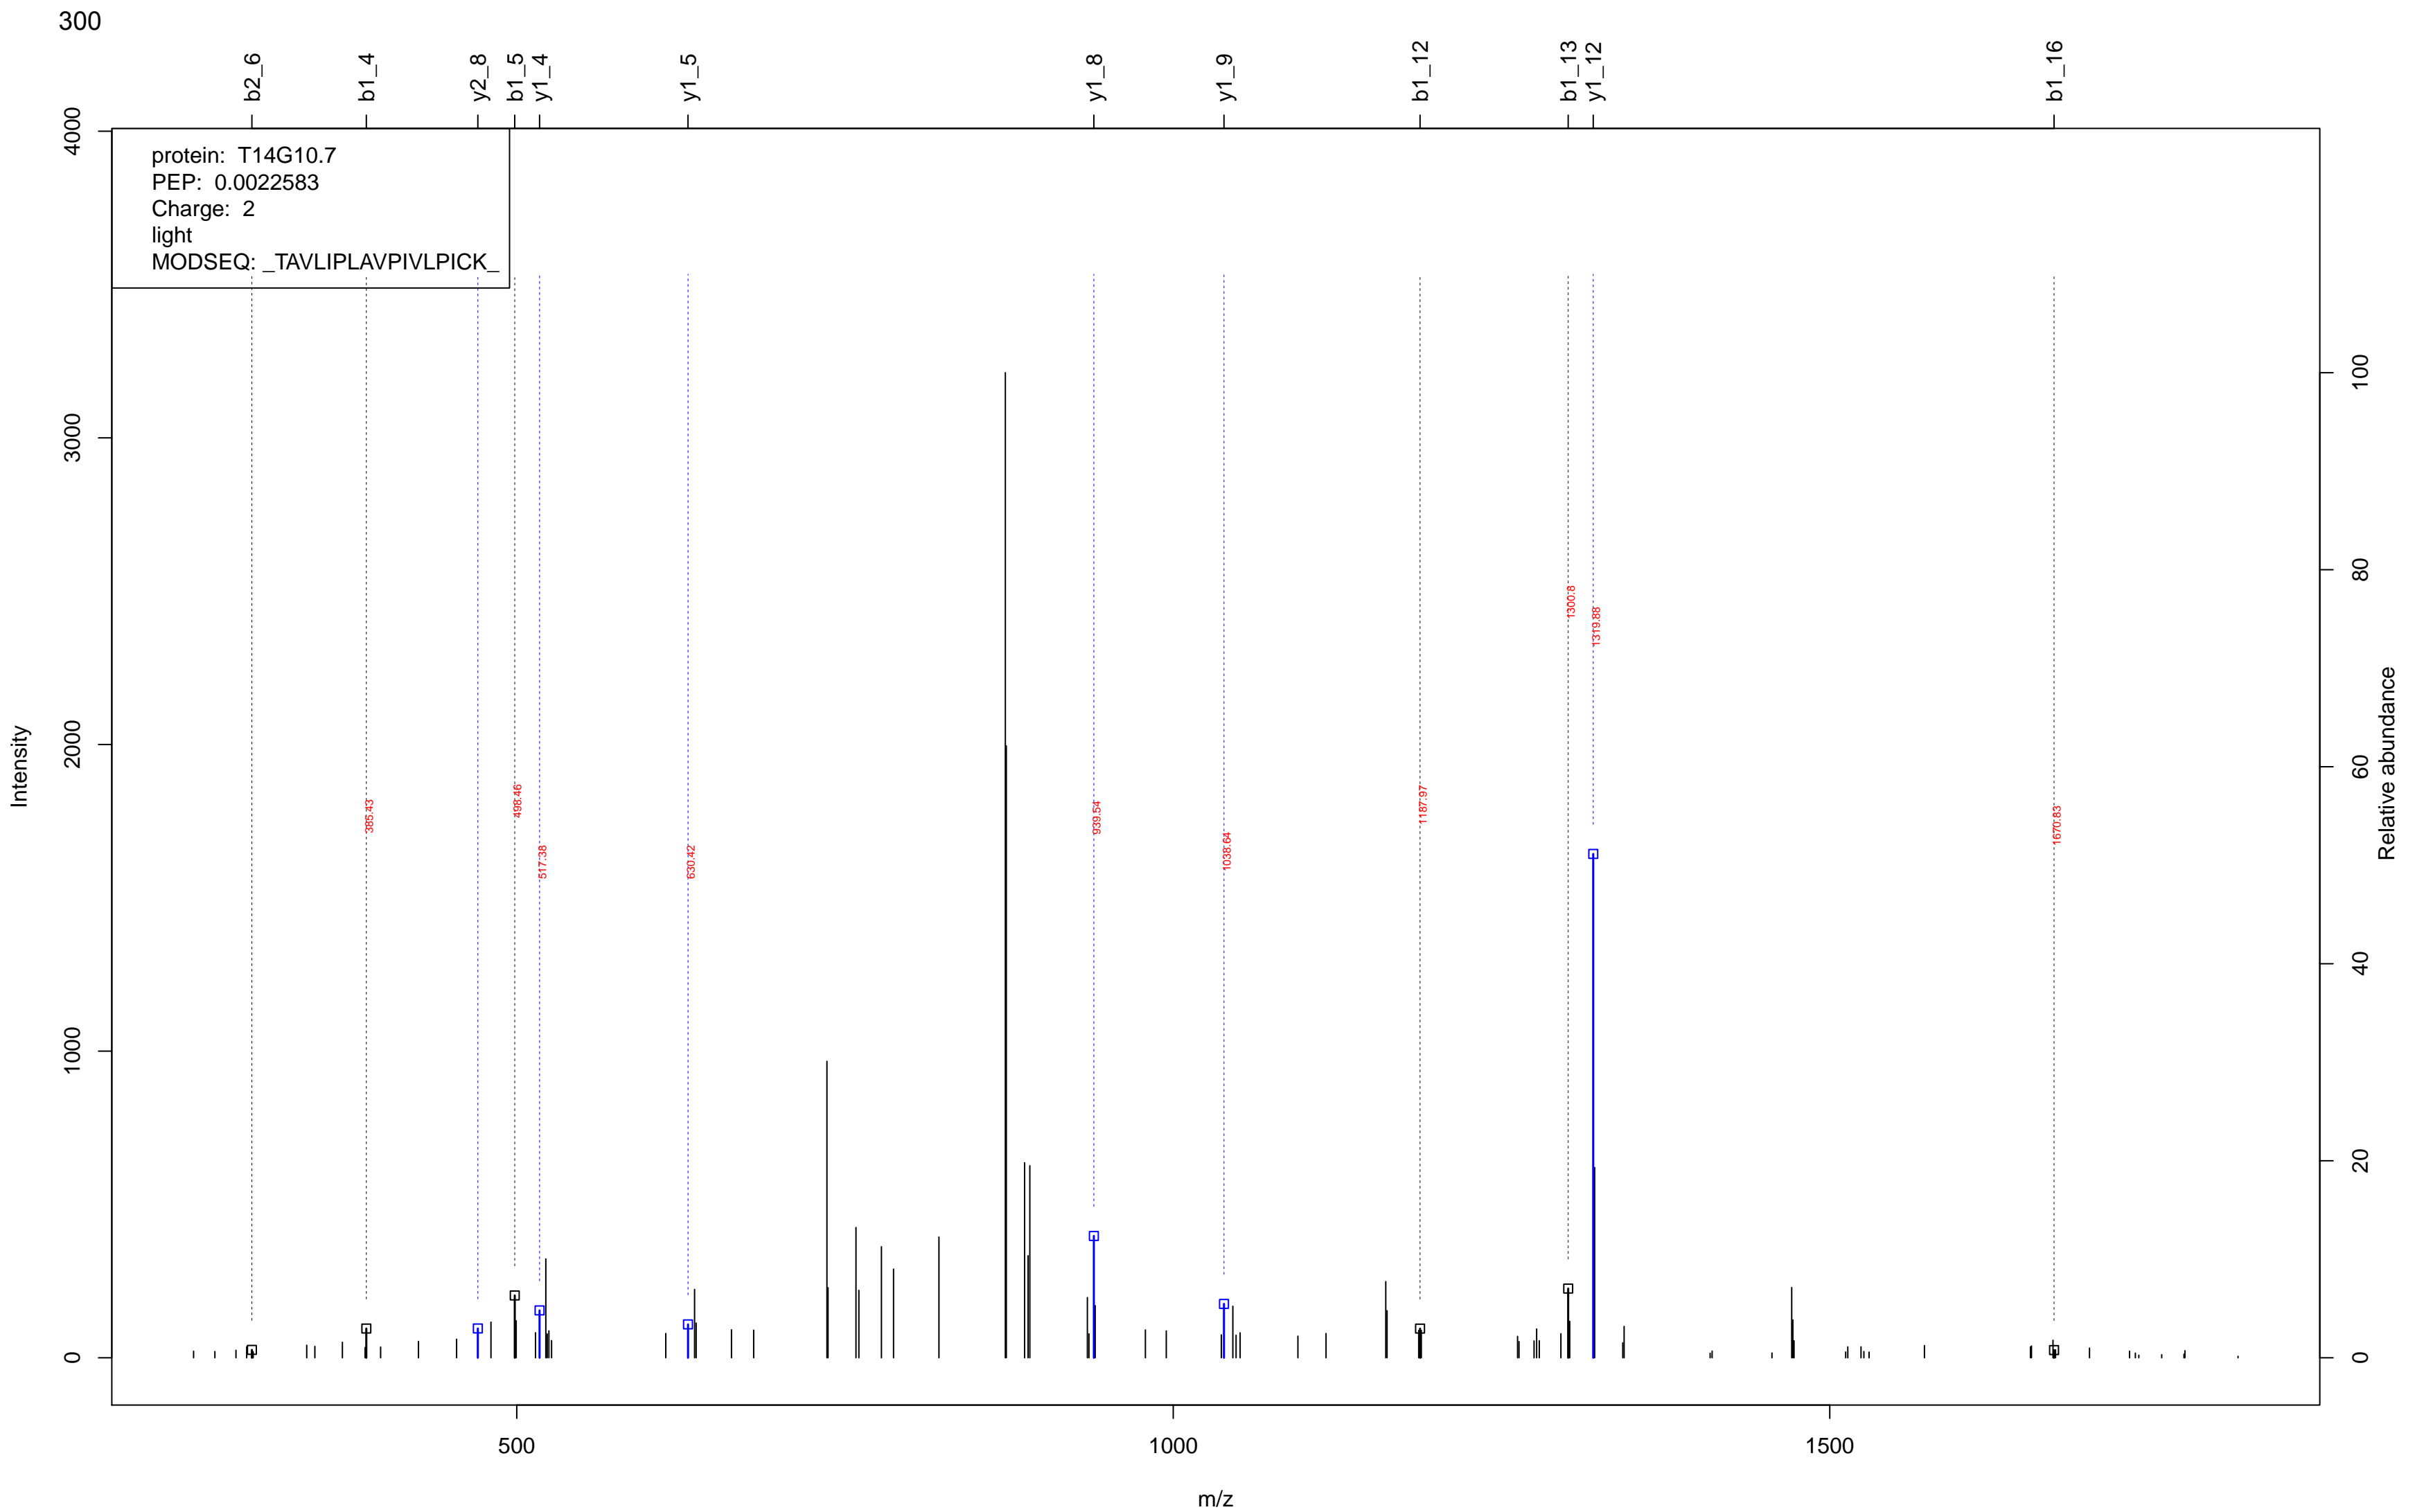

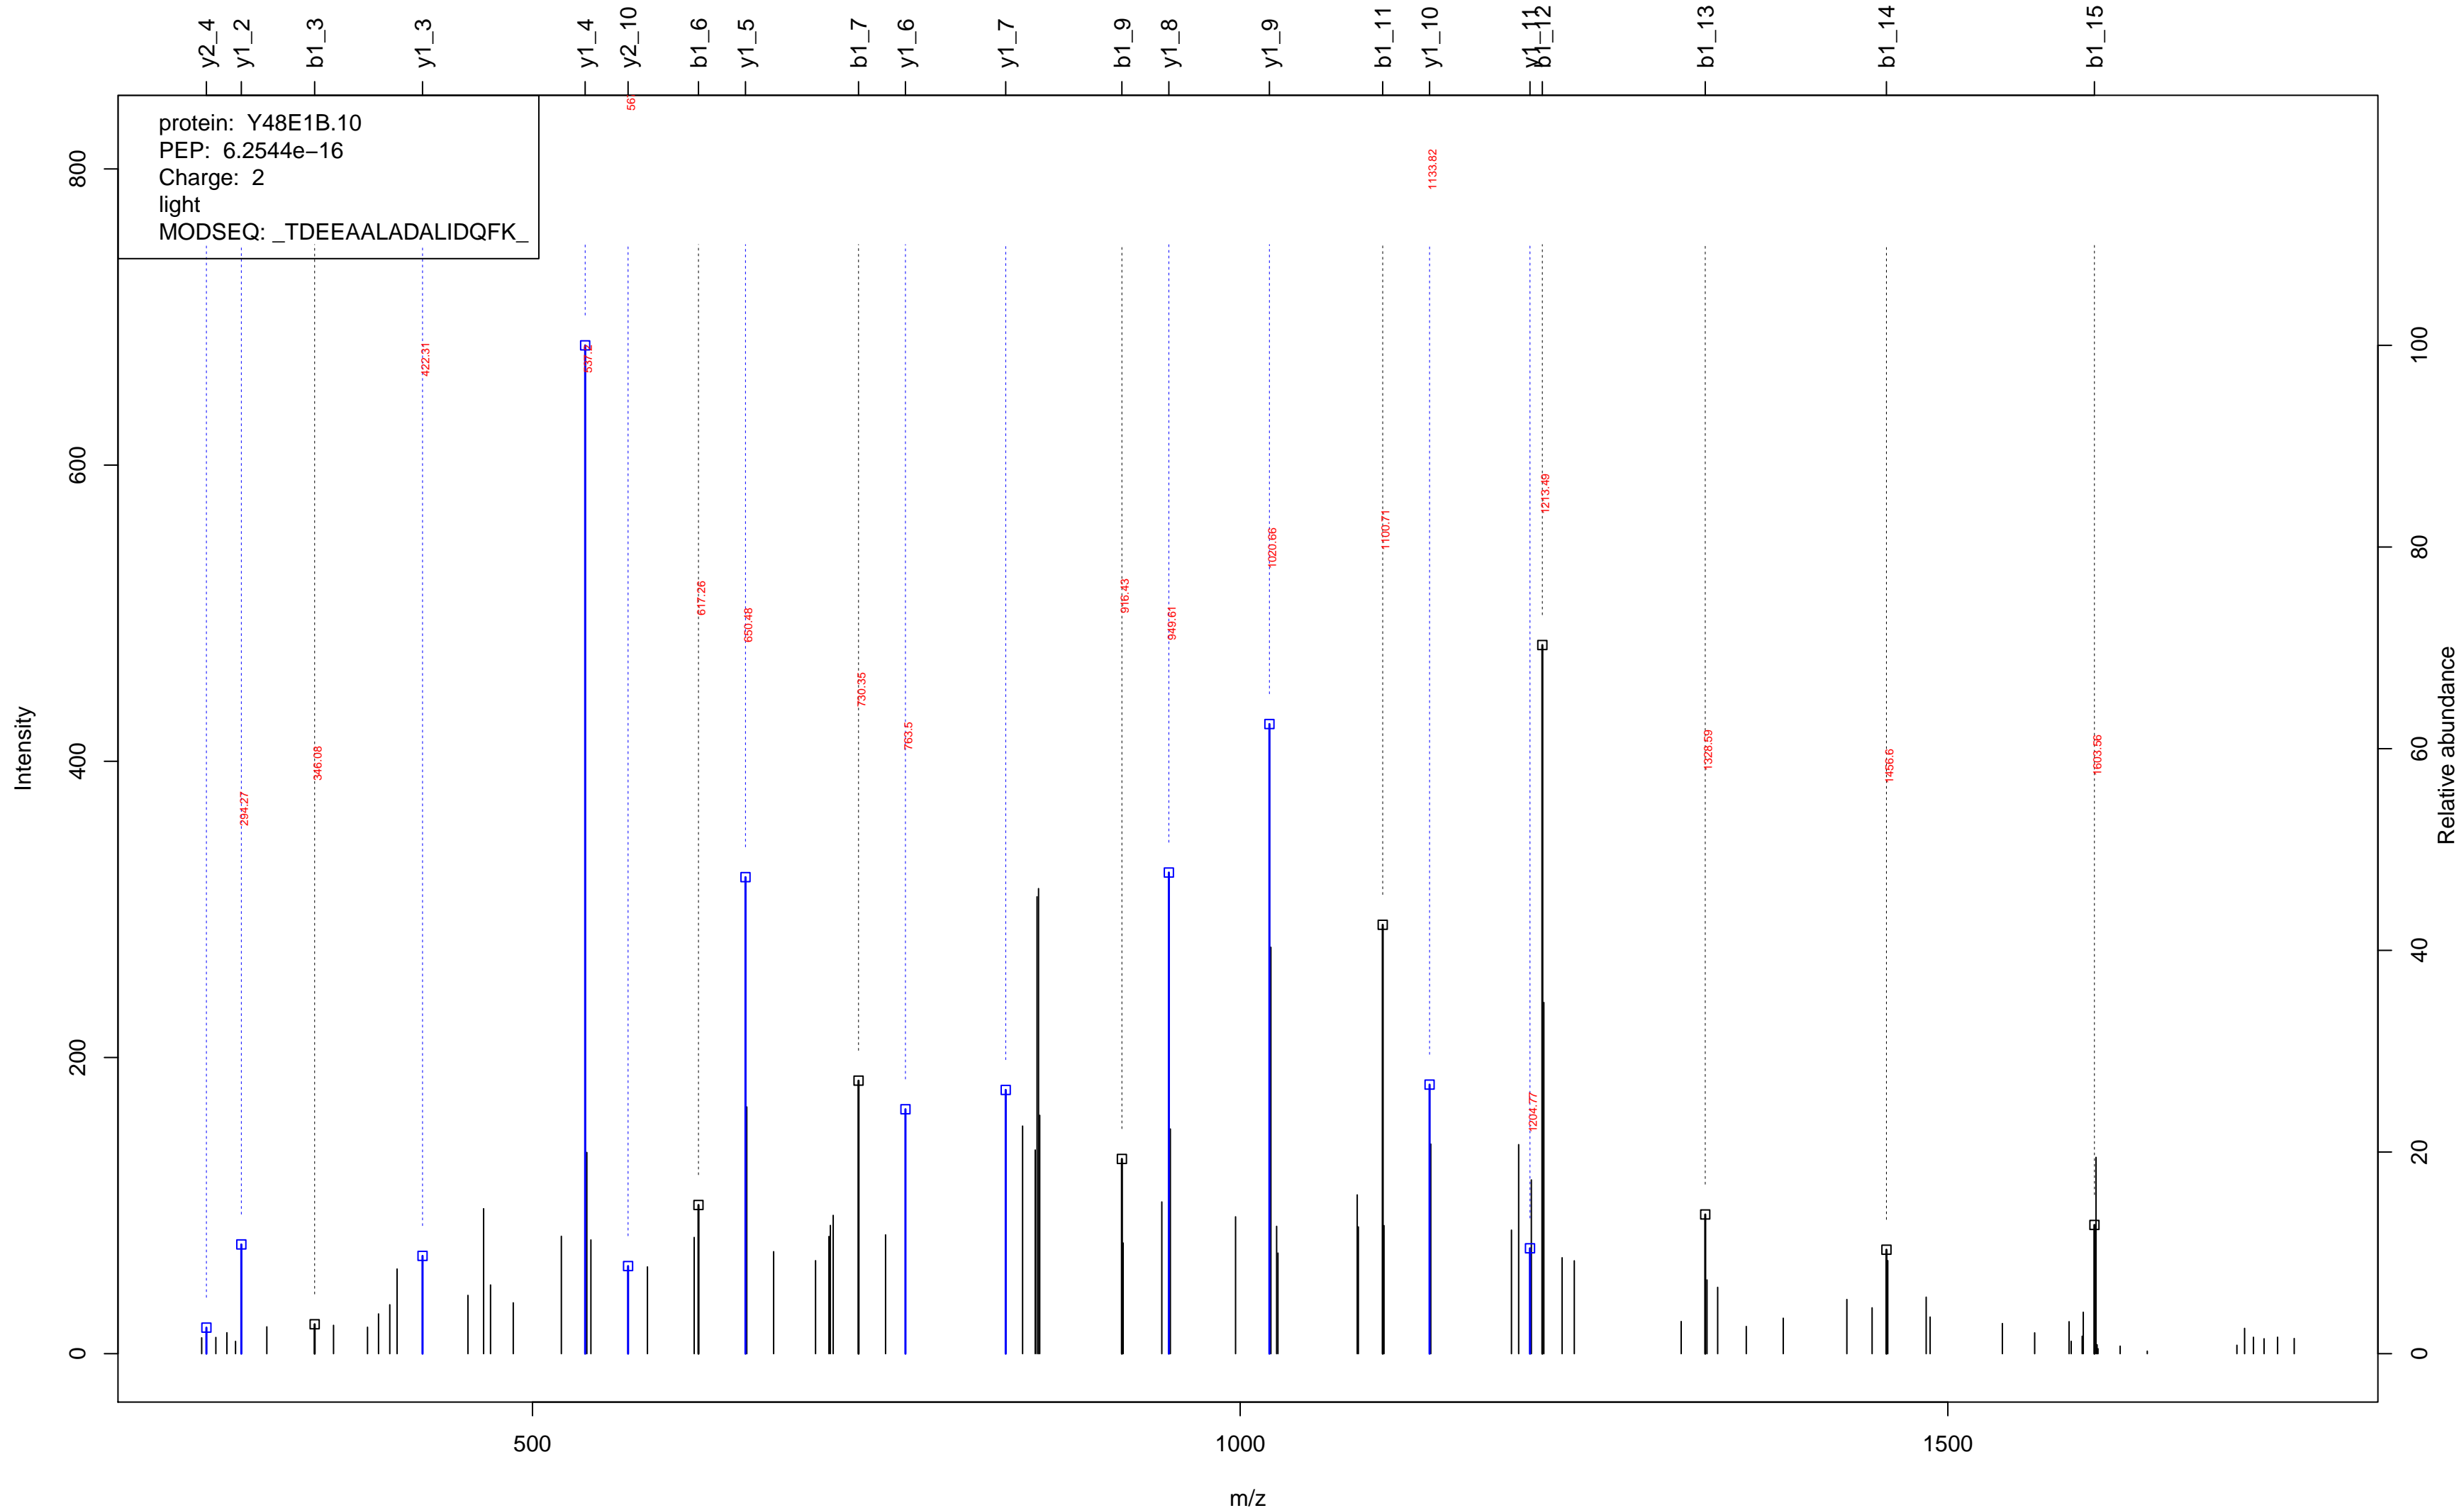

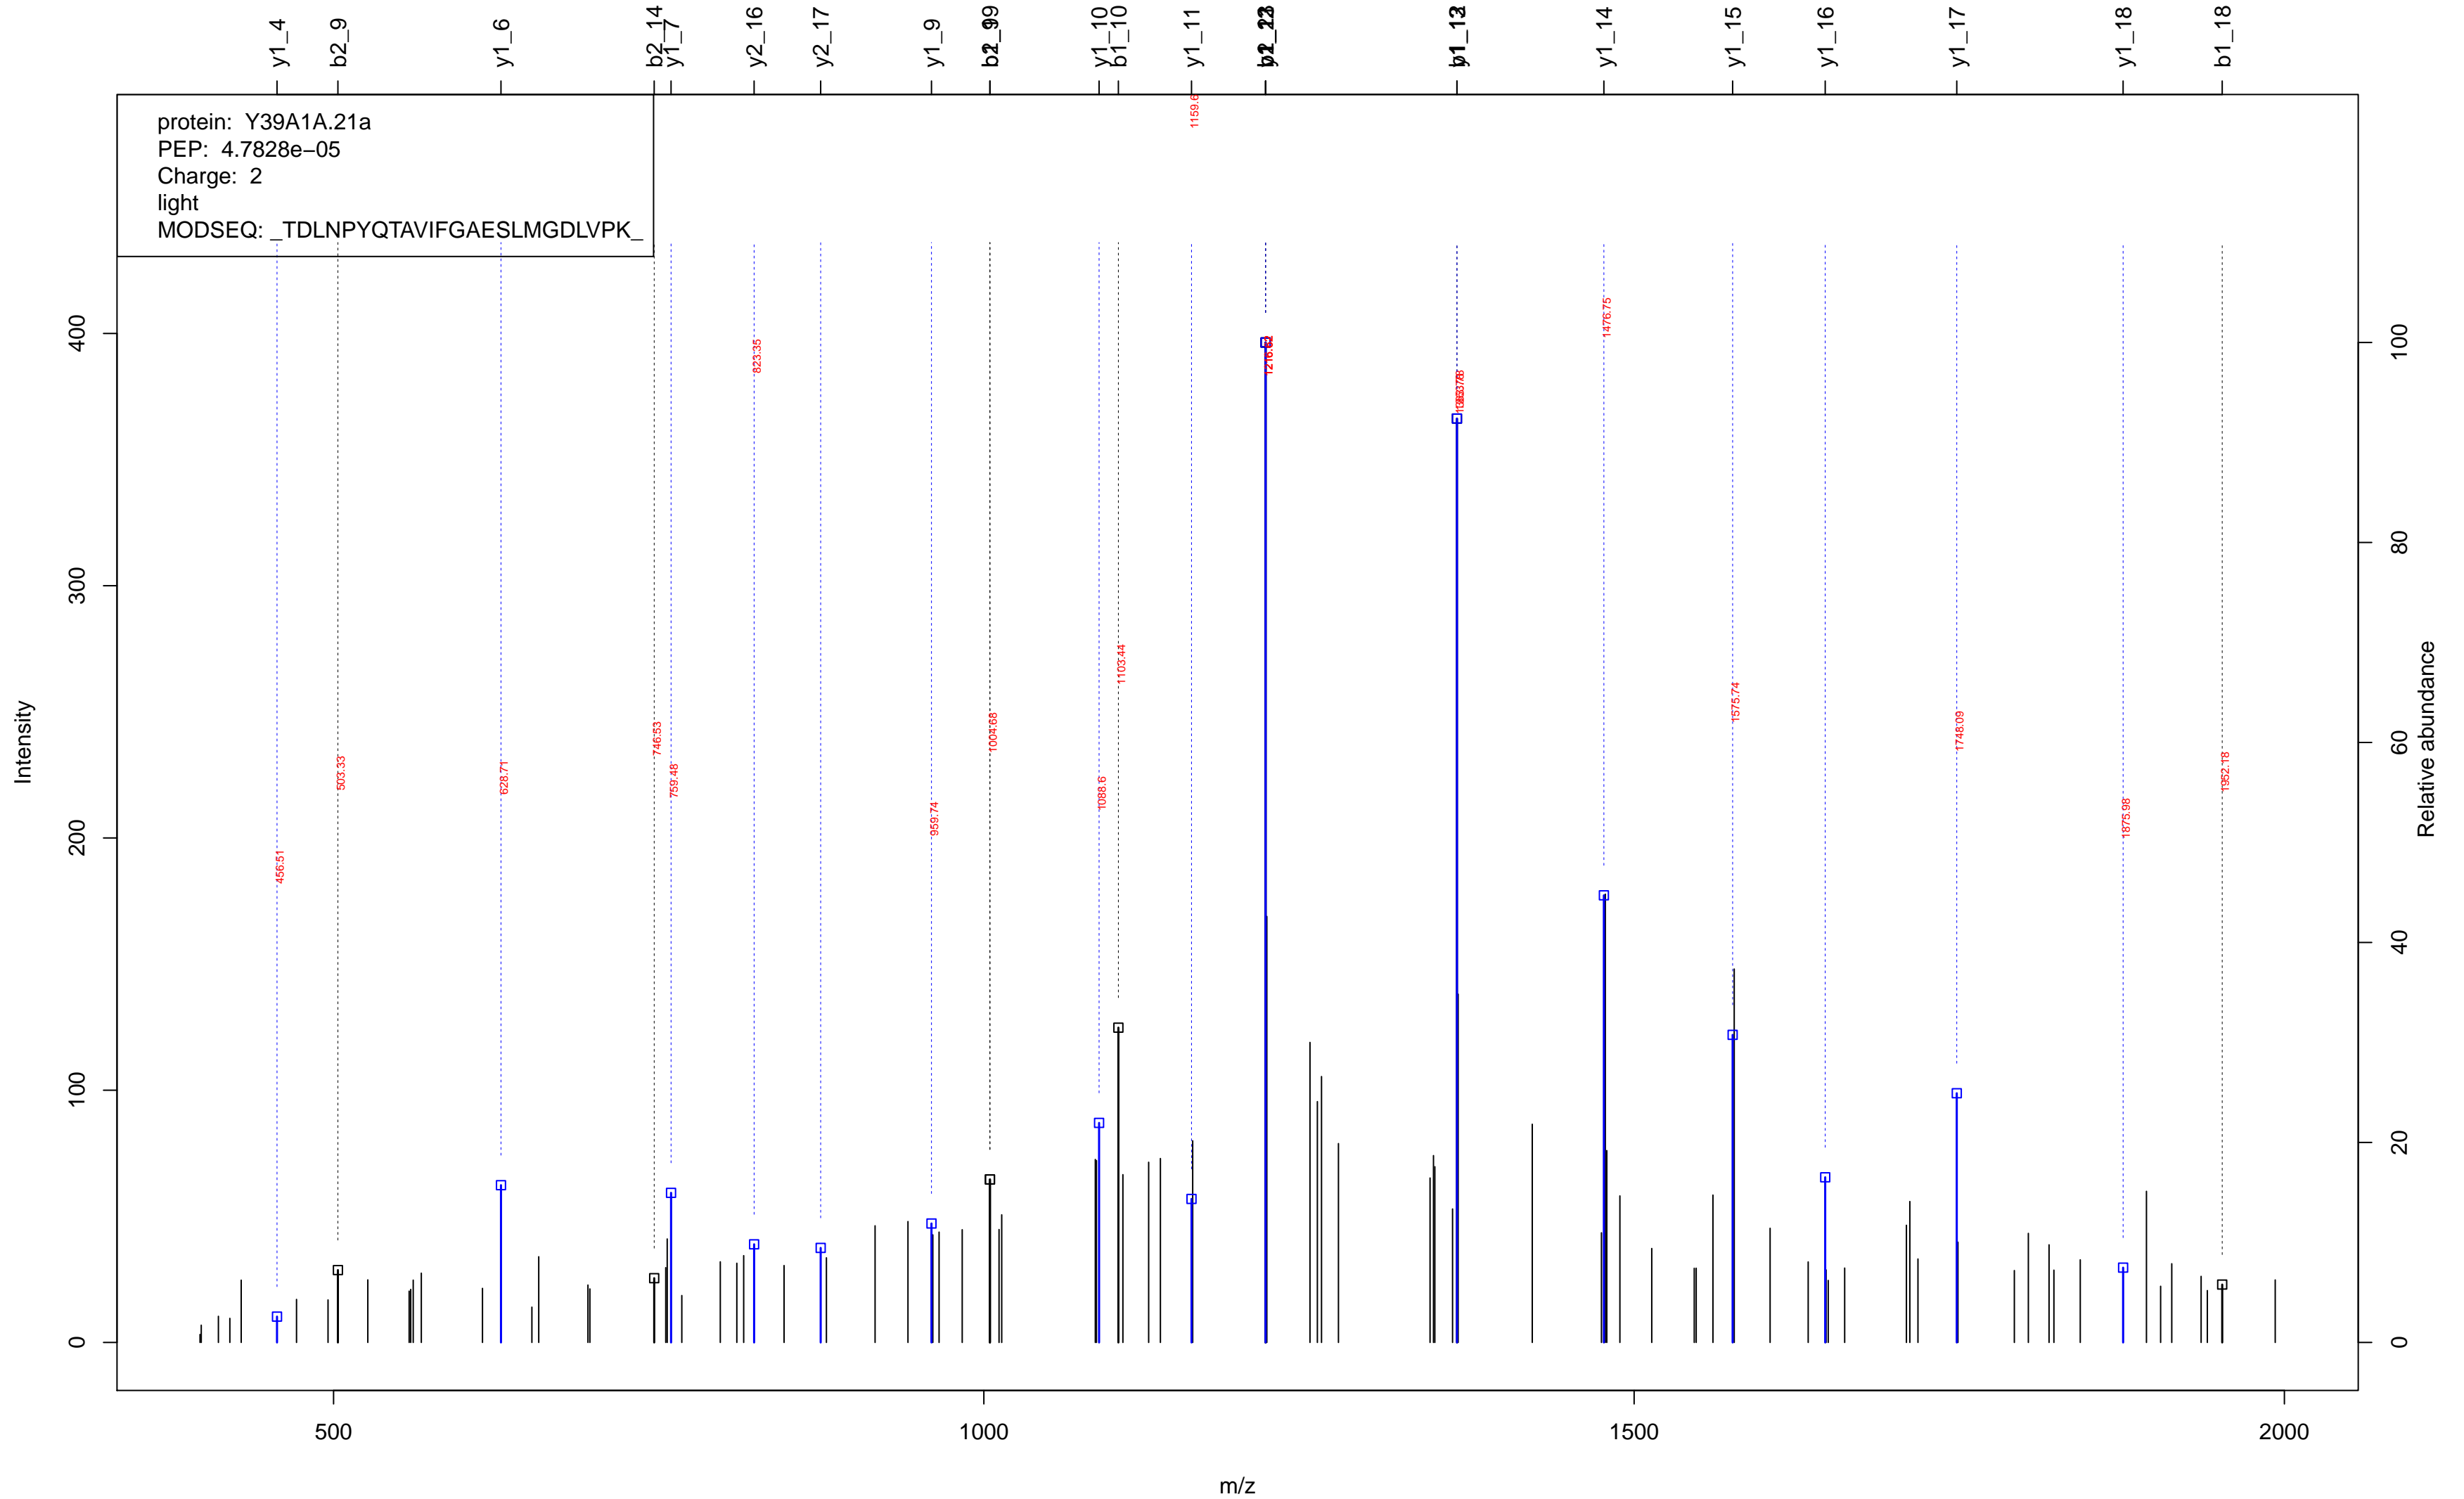

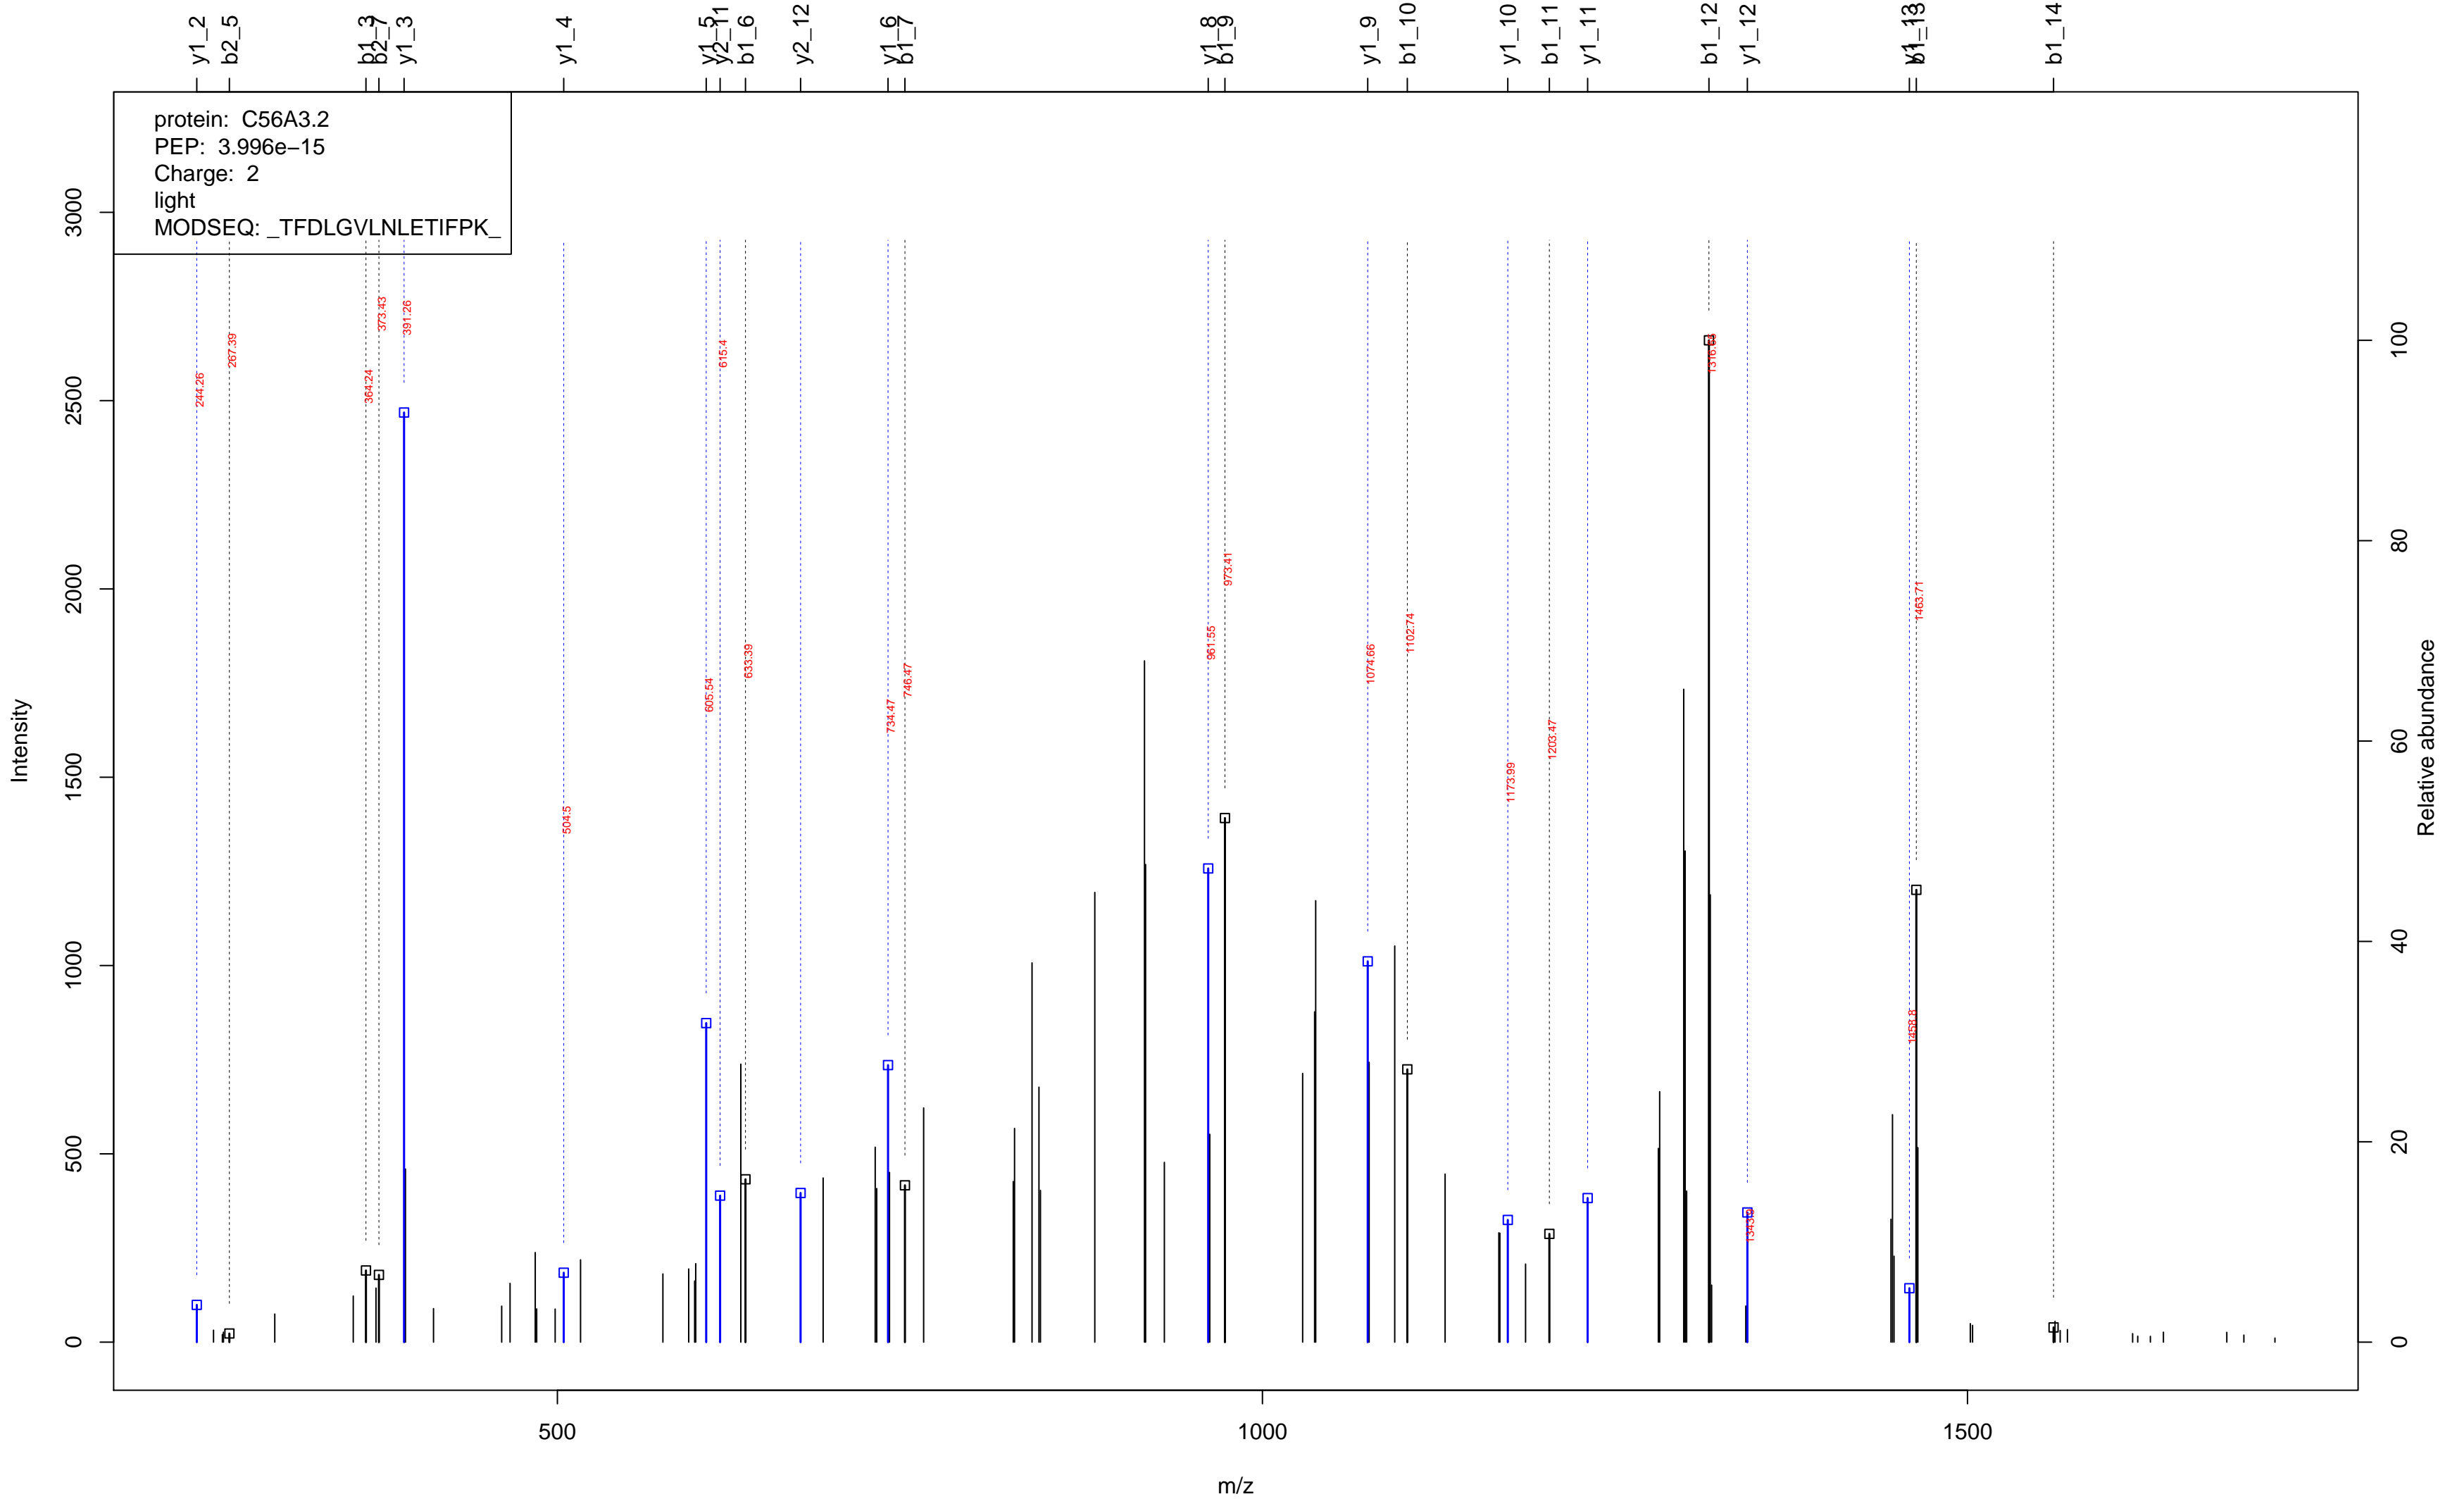

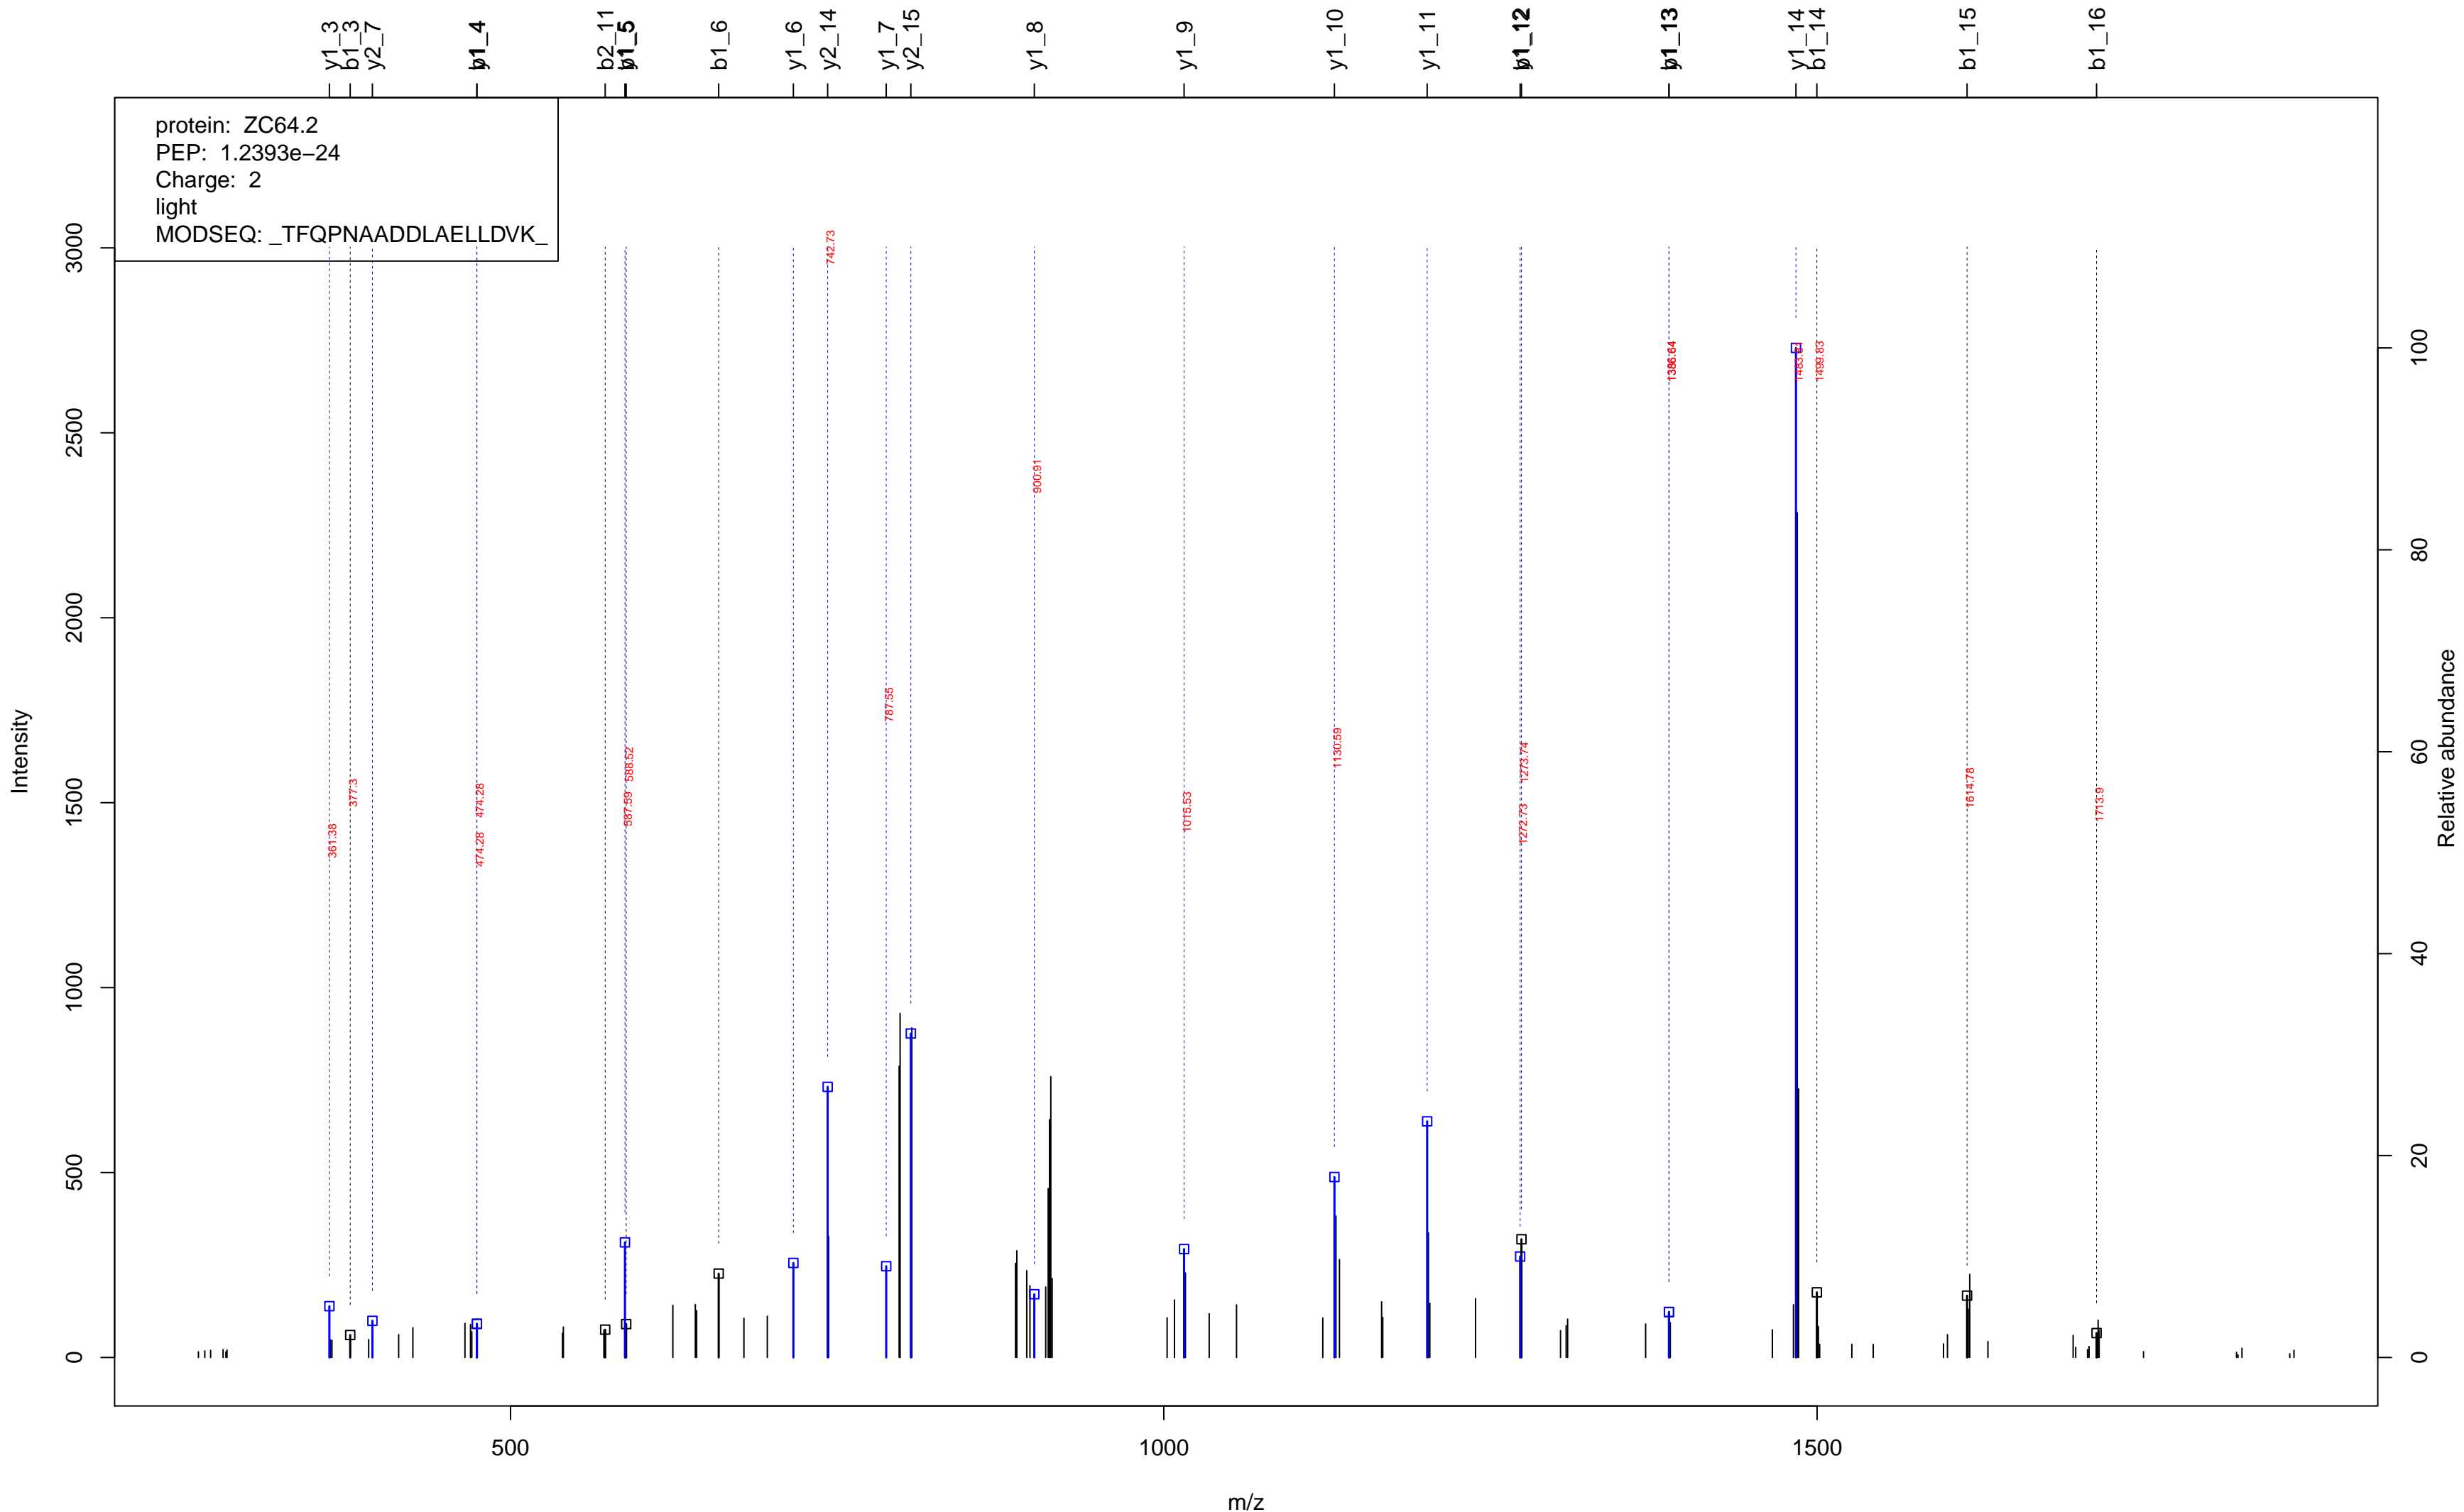



y1\_3 y2\_6 y1\_4 b1\_5 b2\_13 y1\_6 b1\_8 y1\_7 b1\_9 y1\_8 y1\_9 y1\_10 b1\_12 y1\_11 y1\_12 y1\_13 b1\_14 b1\_15 b1\_16 b1\_17

protein: D2030.1  
PEP: 2.0232e-12  
Charge: 2  
light  
MODSEQ: \_TGATIIDAIDTLYLVGLK\_

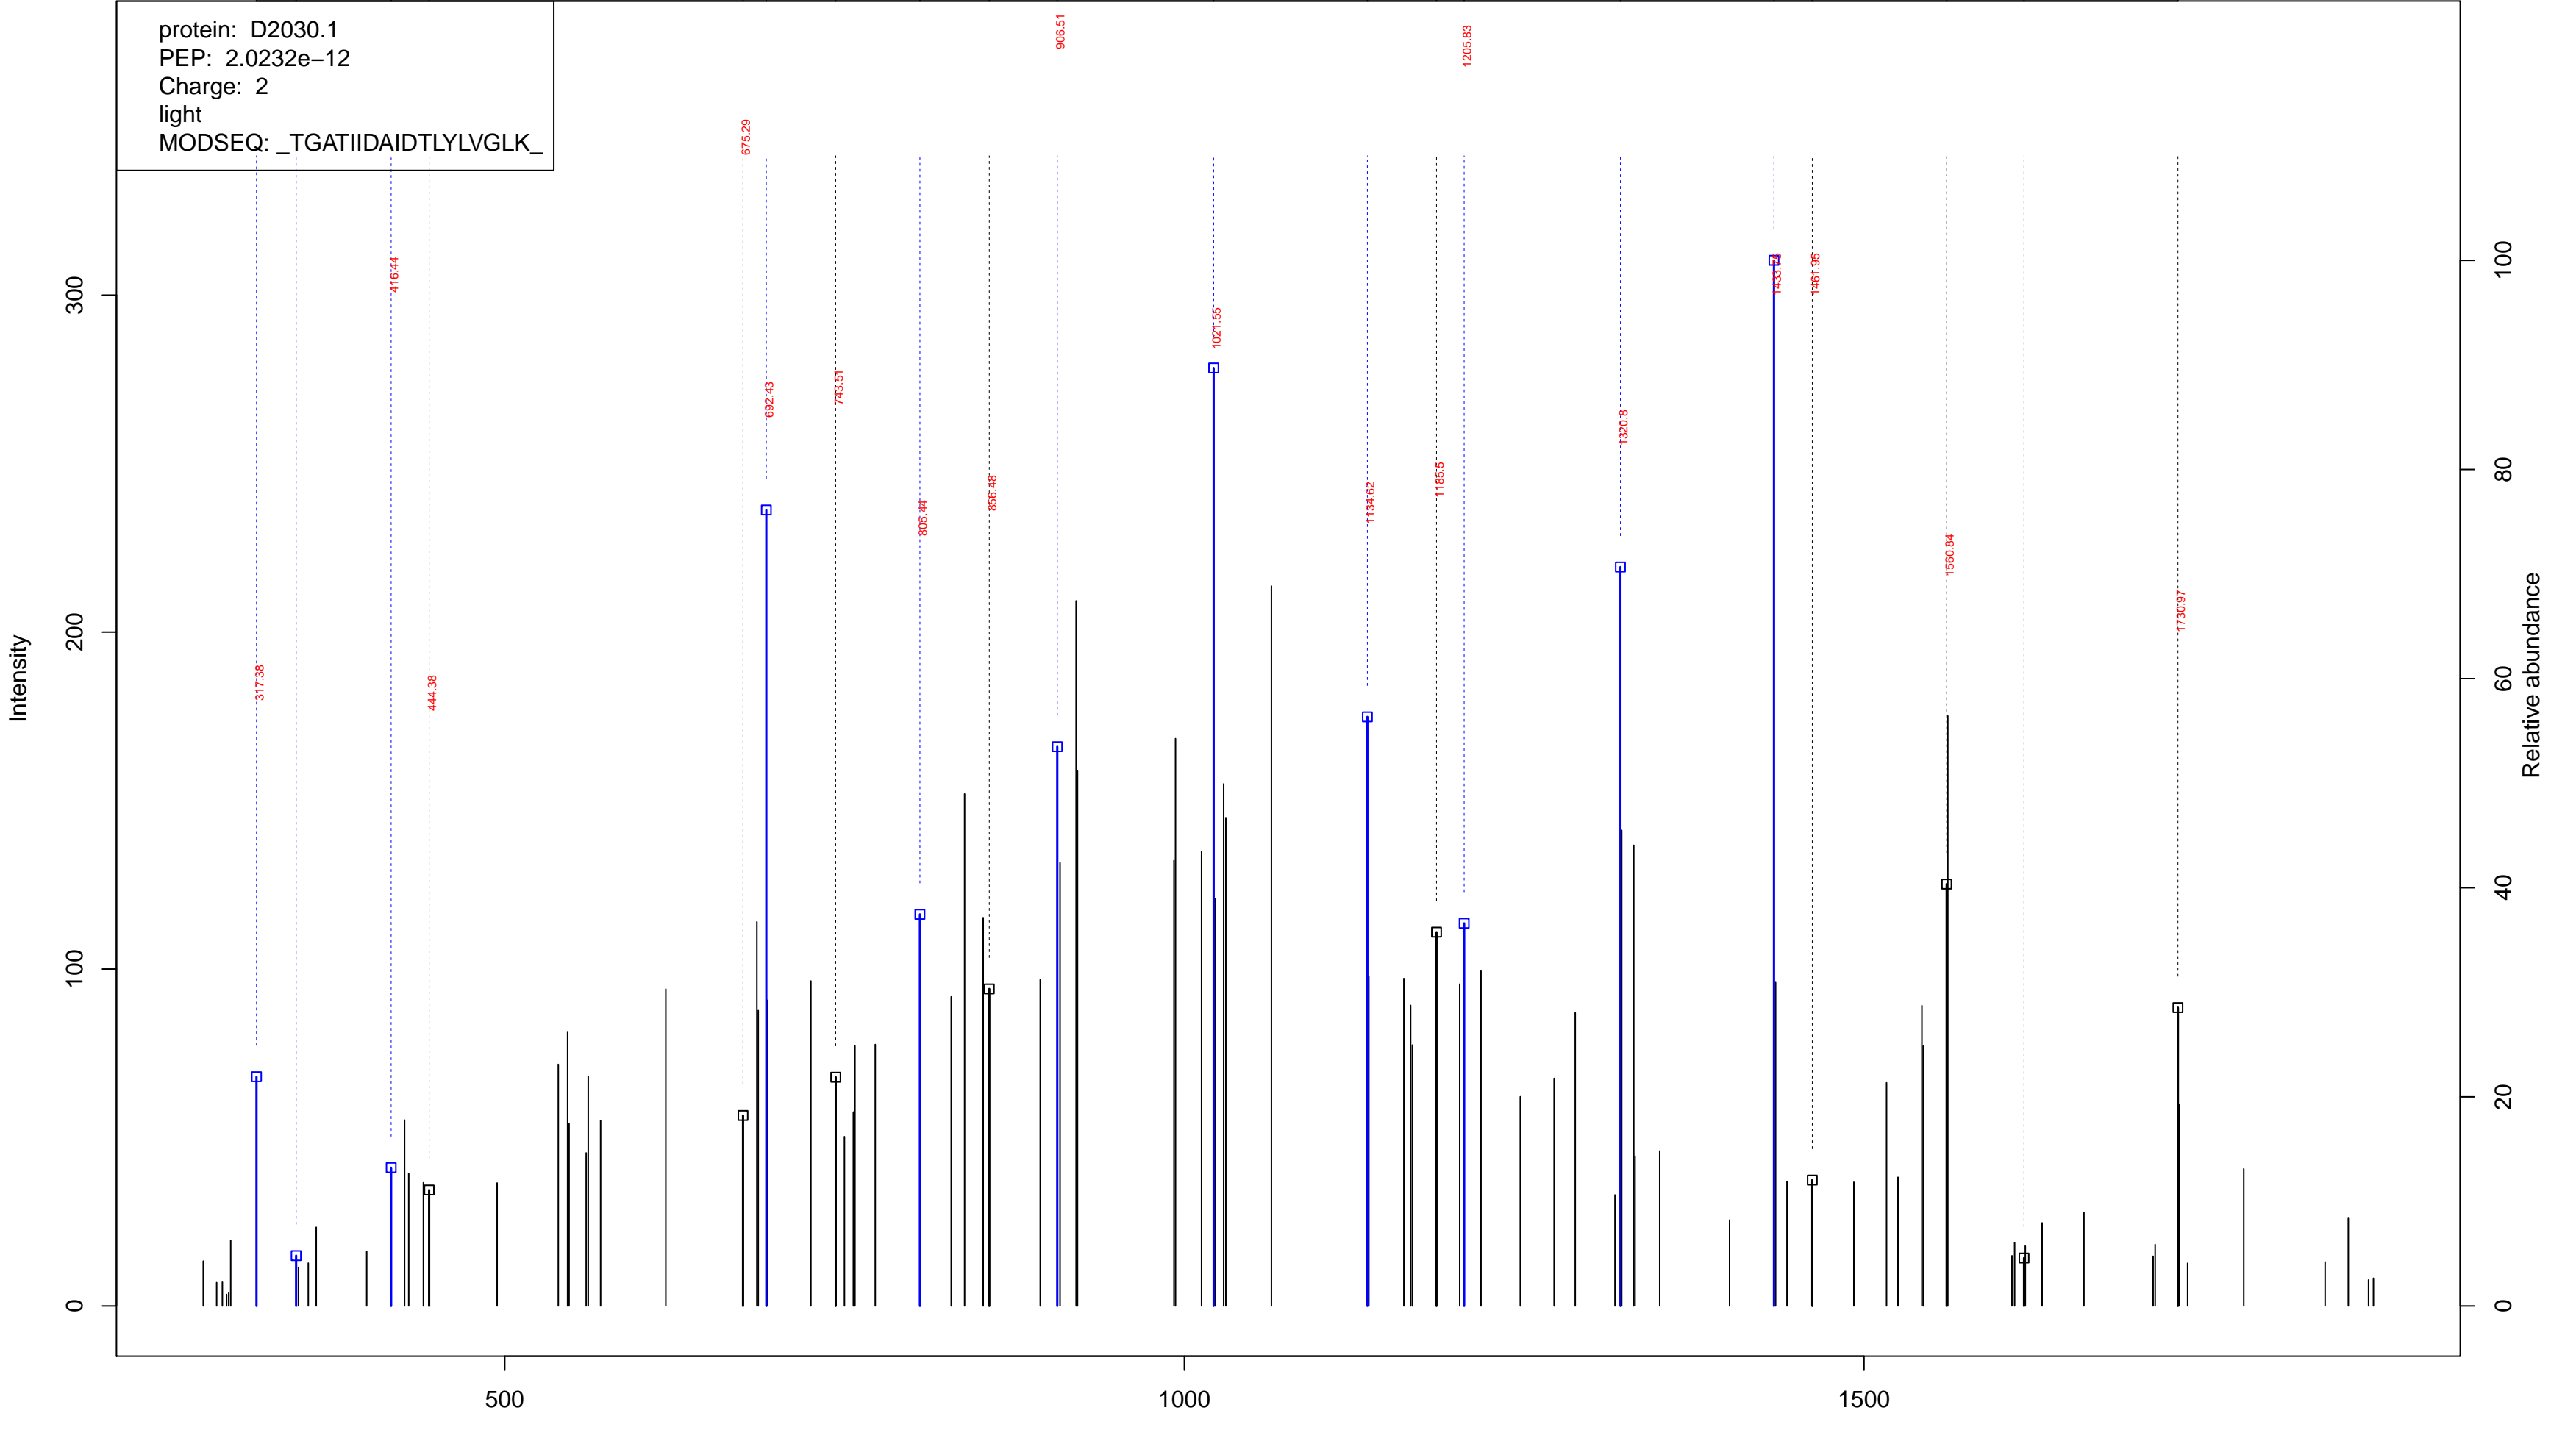

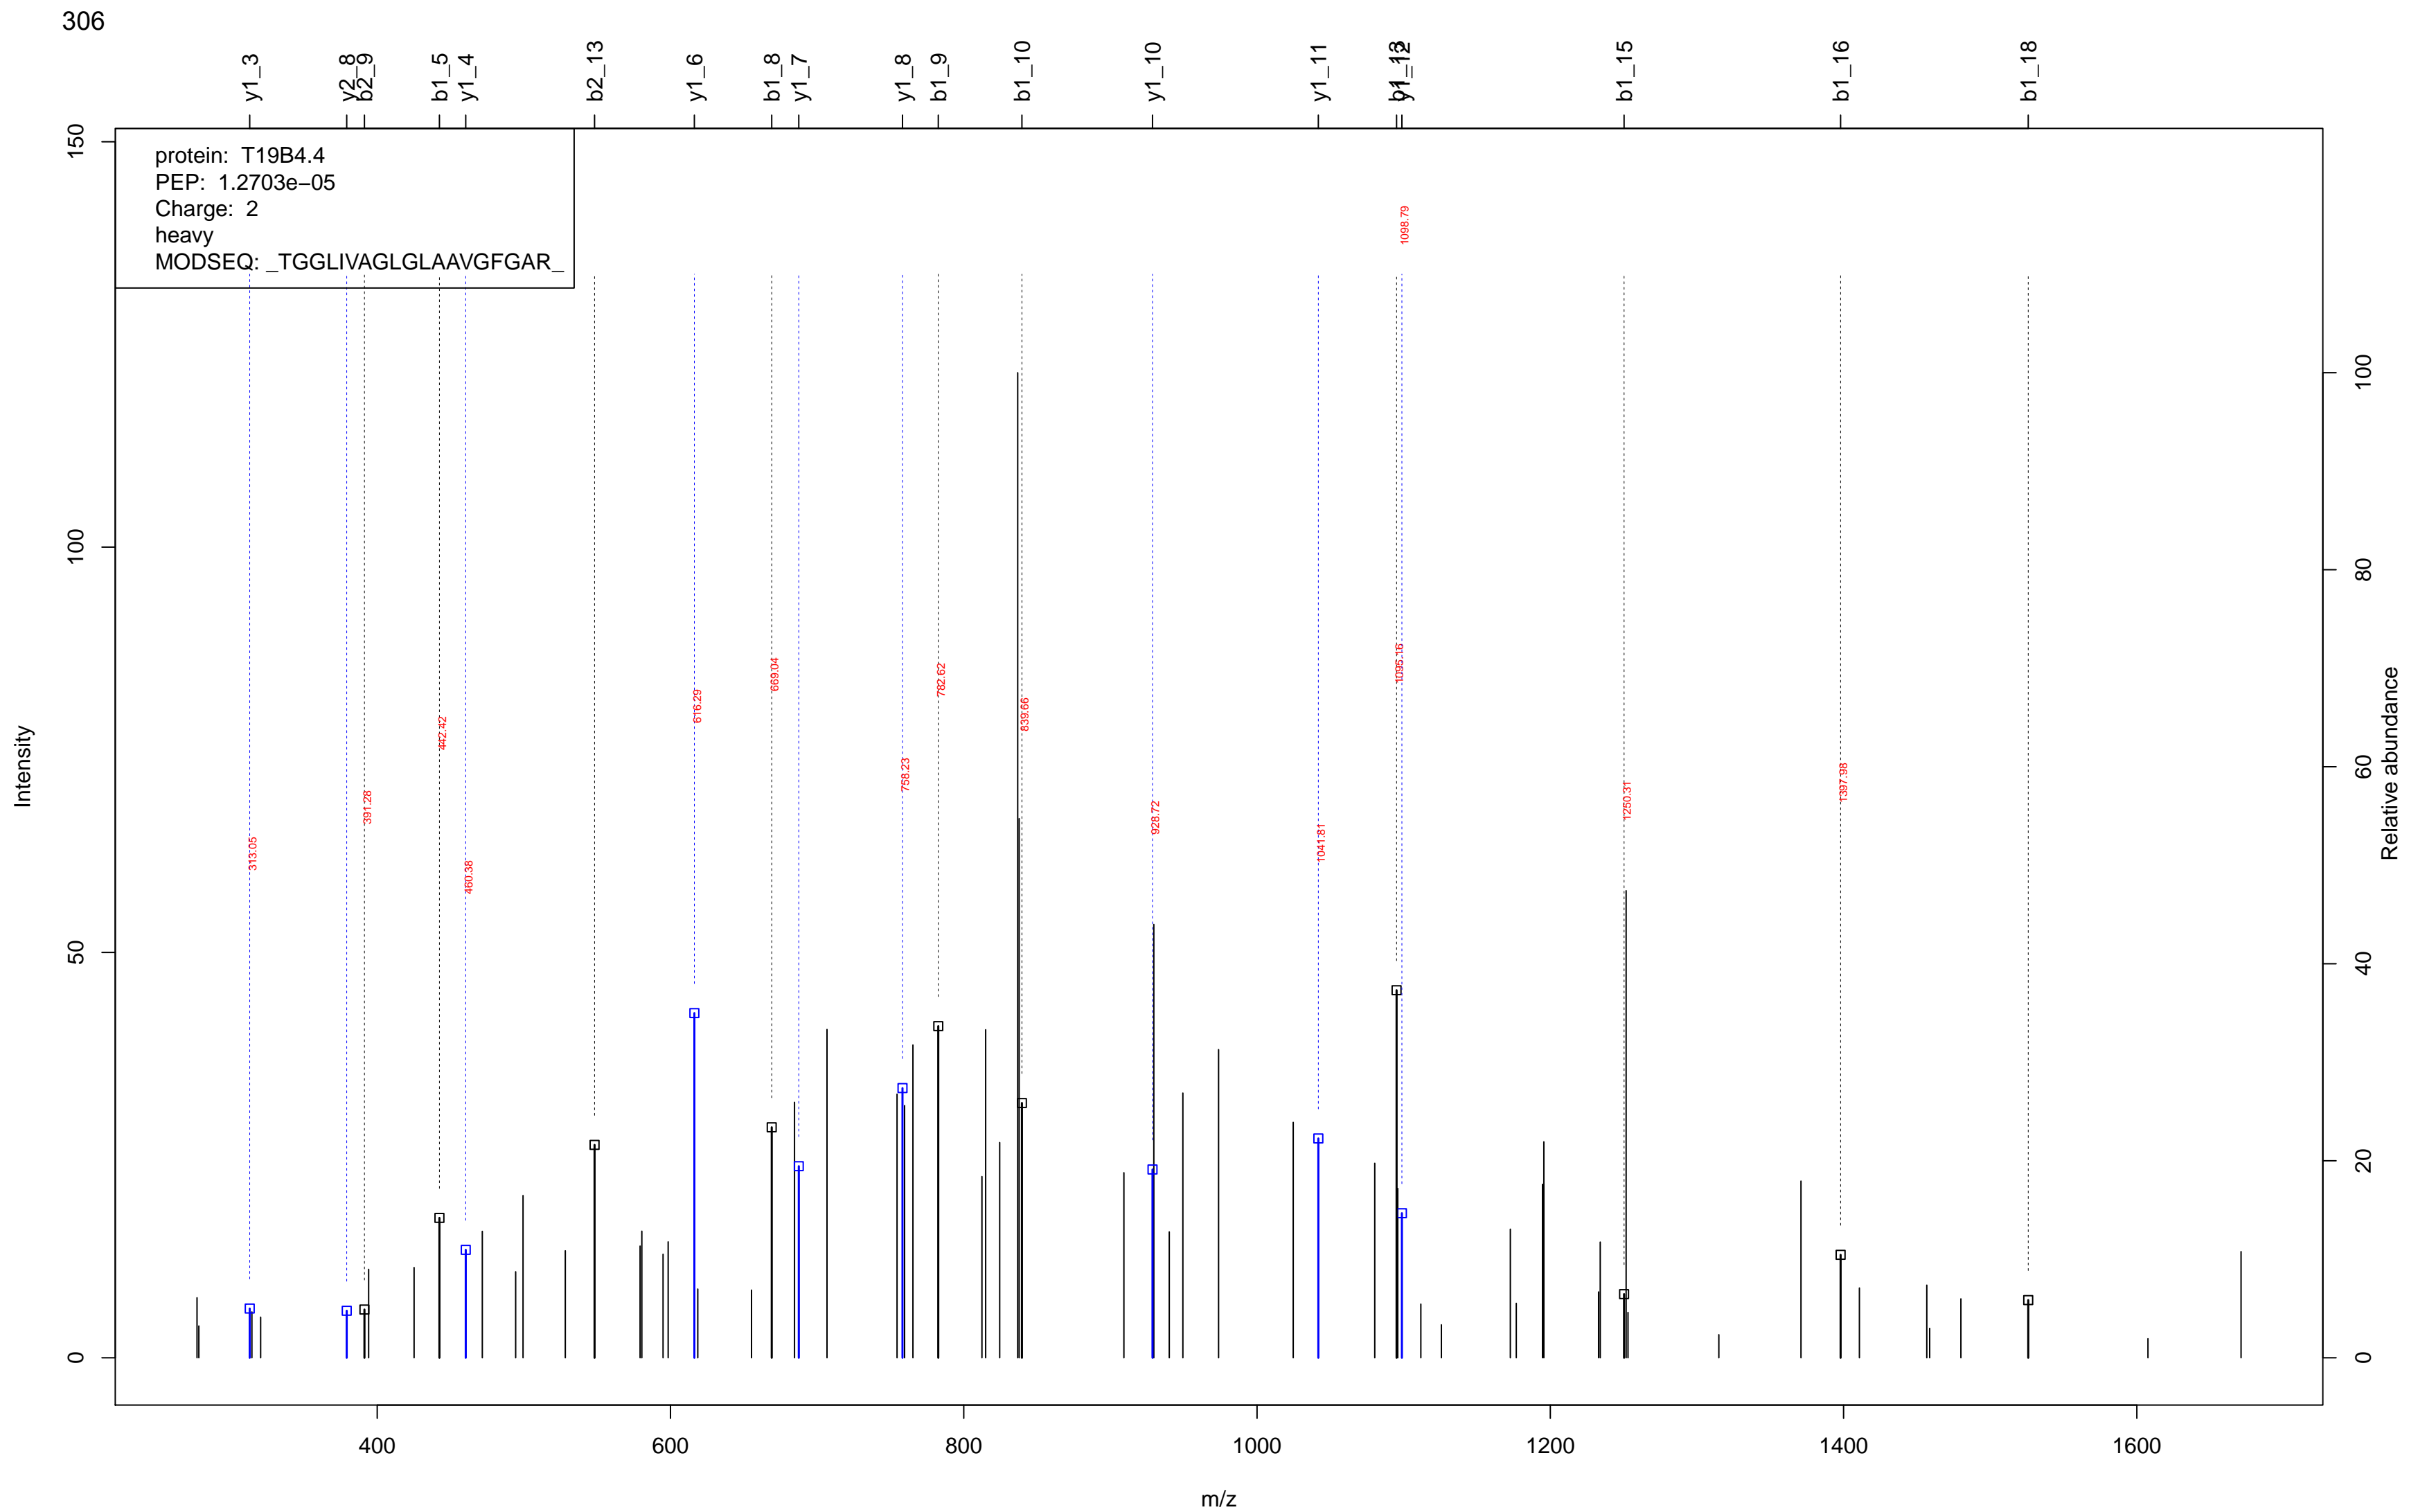

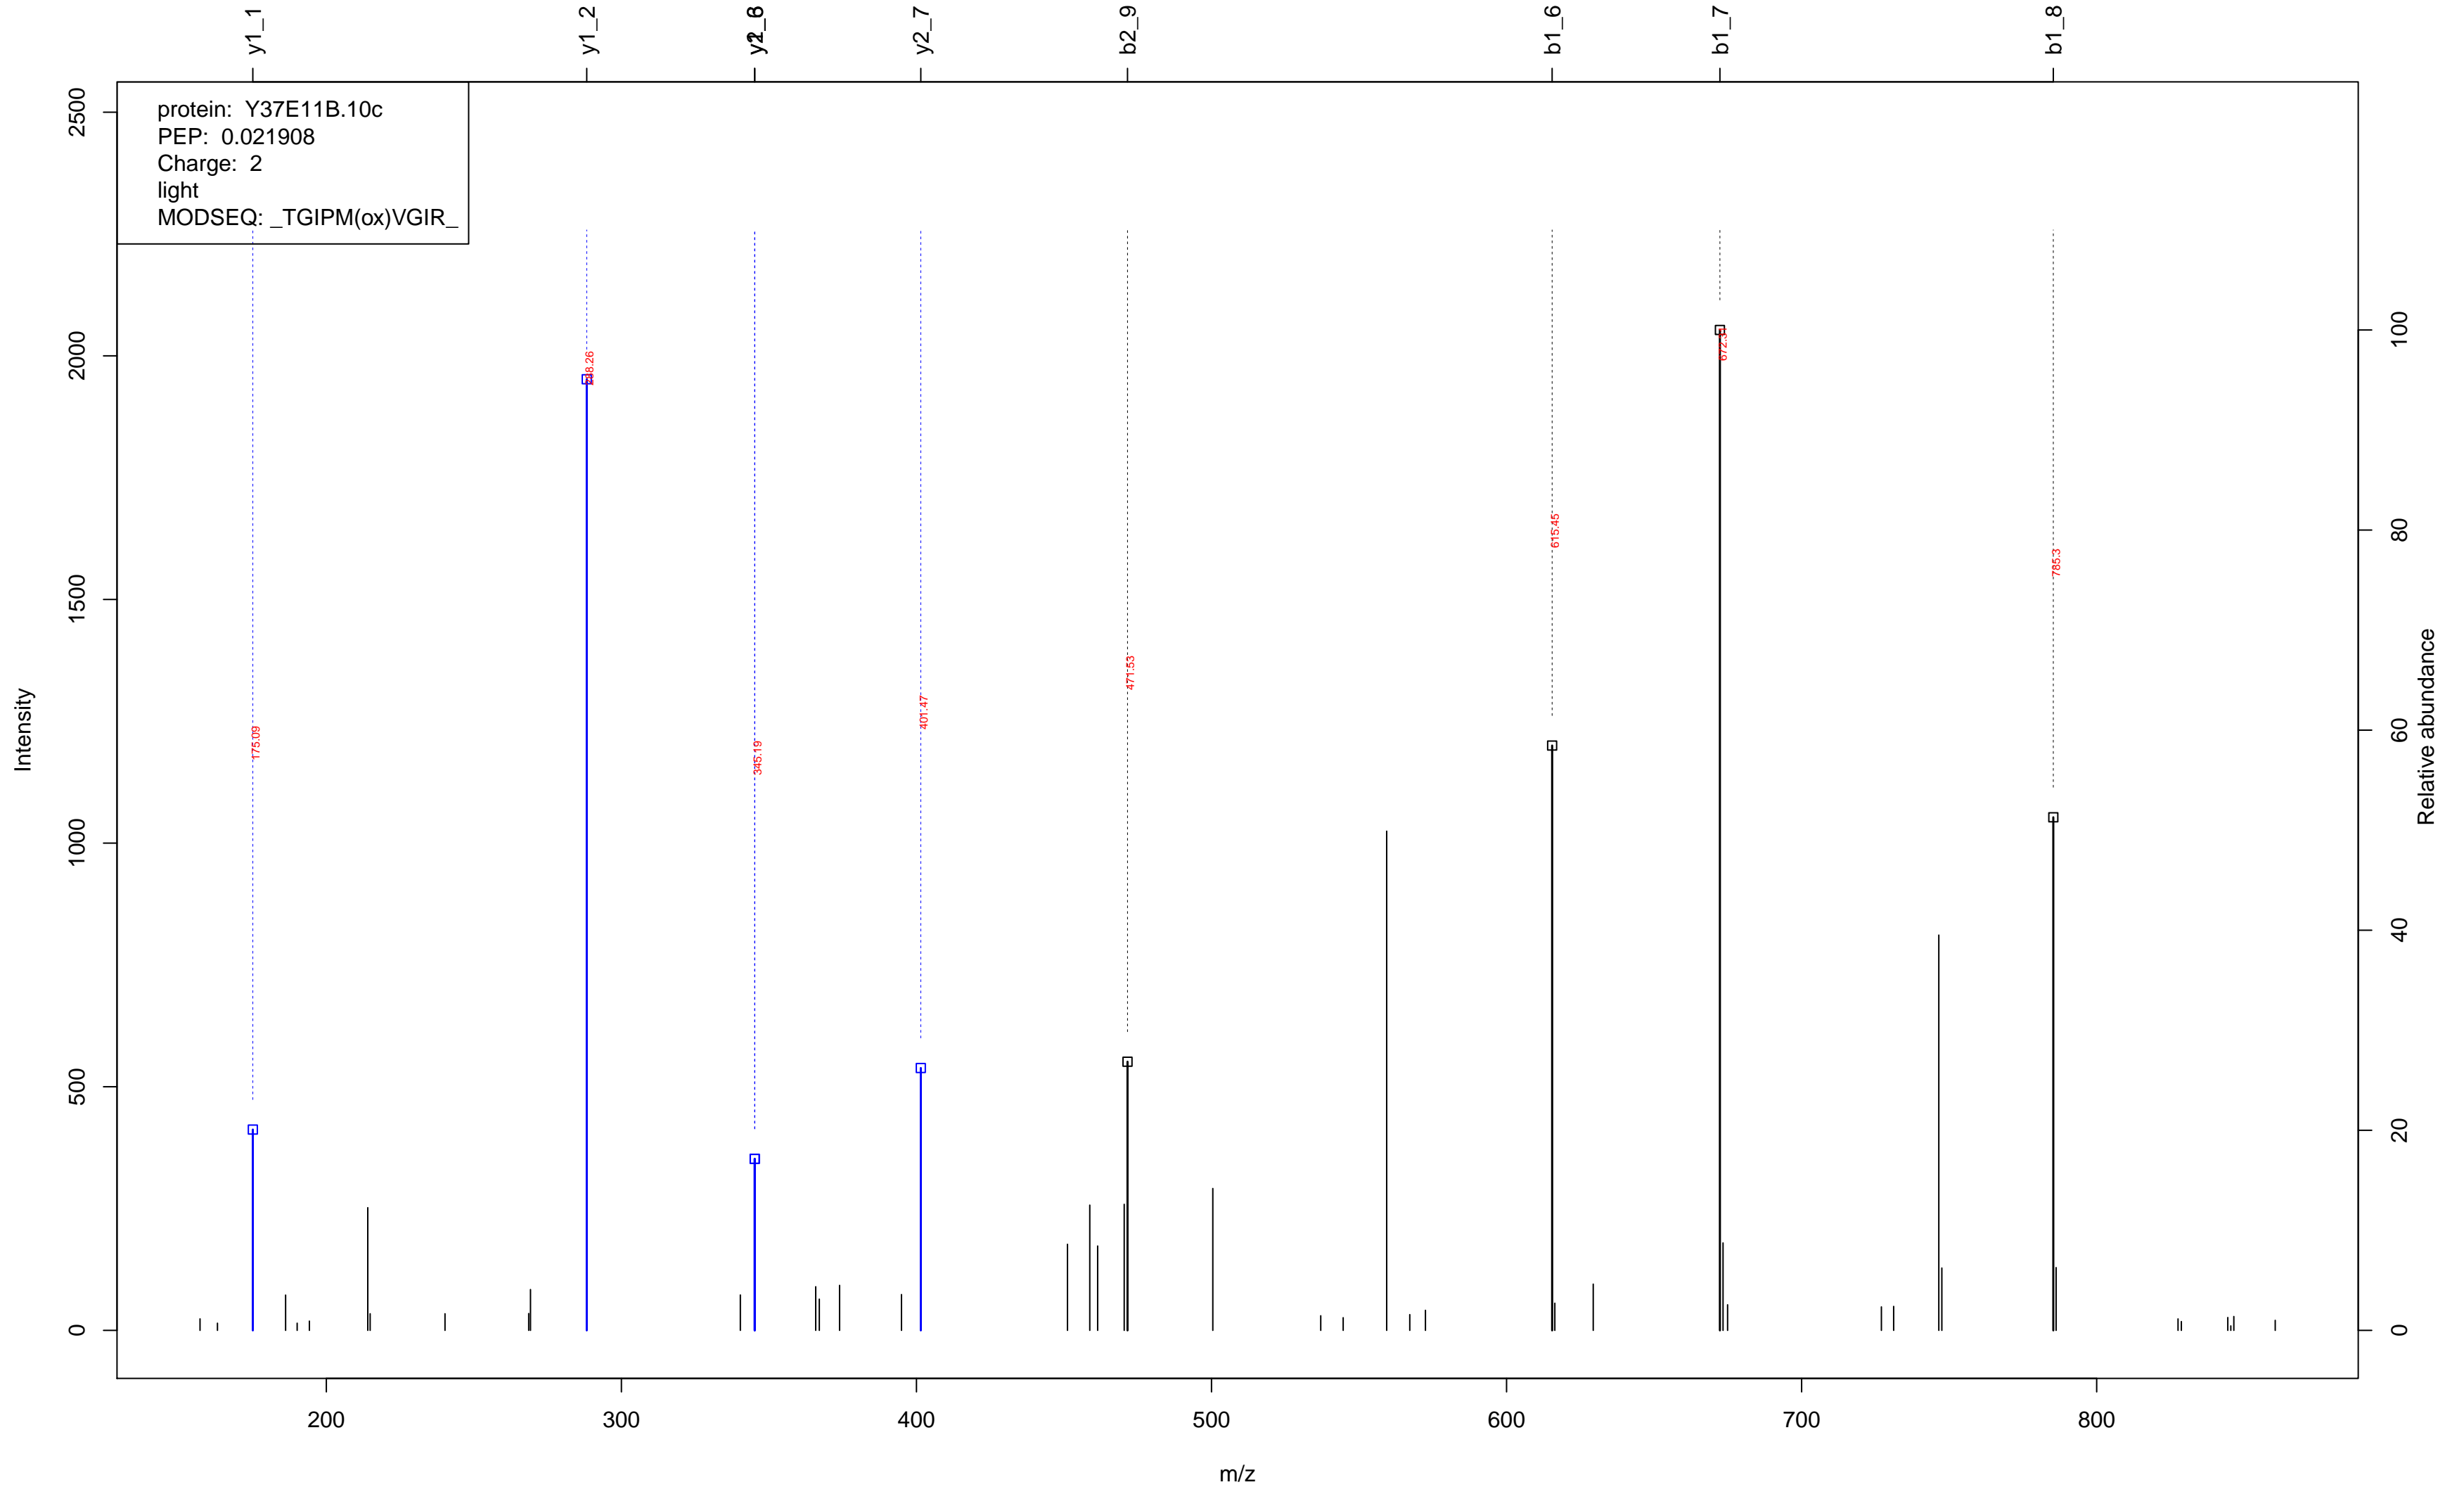

y1\_1  
b2\_4  
b1\_2  
y1\_2  
y2\_6  
y2\_8  
y1\_4  
b1\_5  
y2\_11  
y2\_12  
b1\_8  
y1\_6  
y1\_8  
y1\_9  
b1\_11  
y1\_11

protein: W02G9.1  
PEP: 0.00038132  
Charge: 3  
heavy  
MODSEQ: \_THTGQVGWQSVHR\_

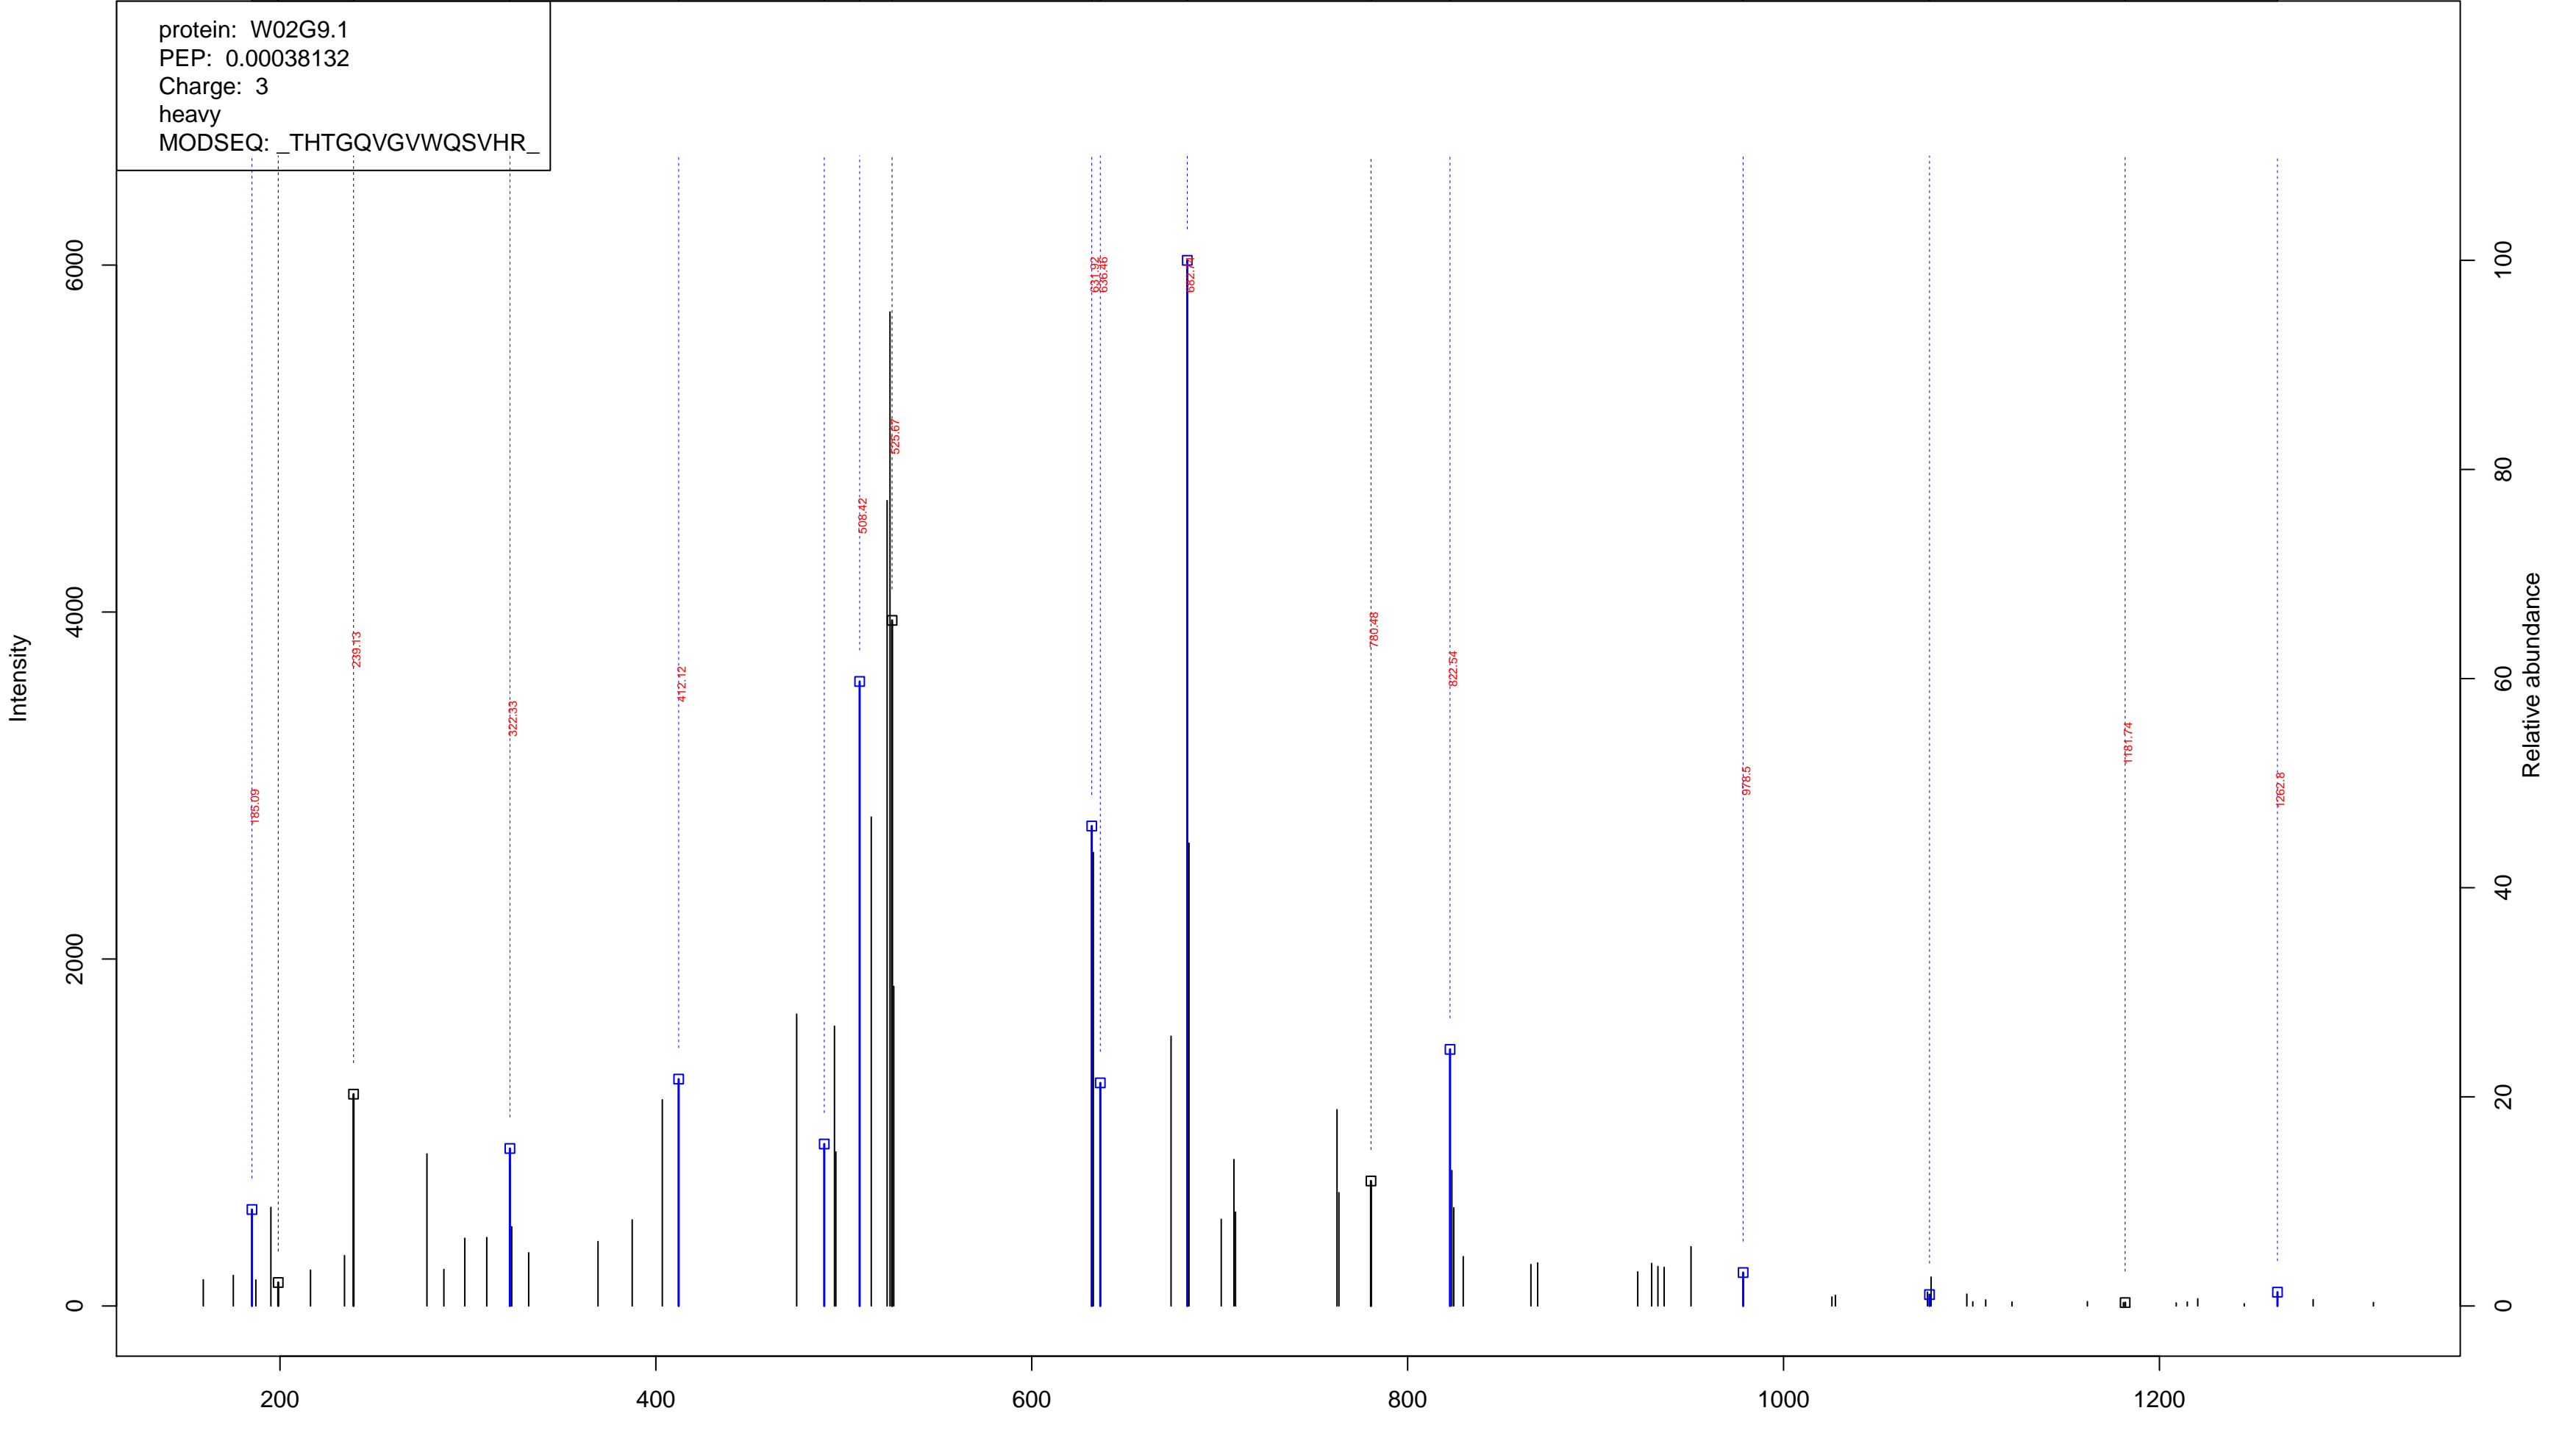

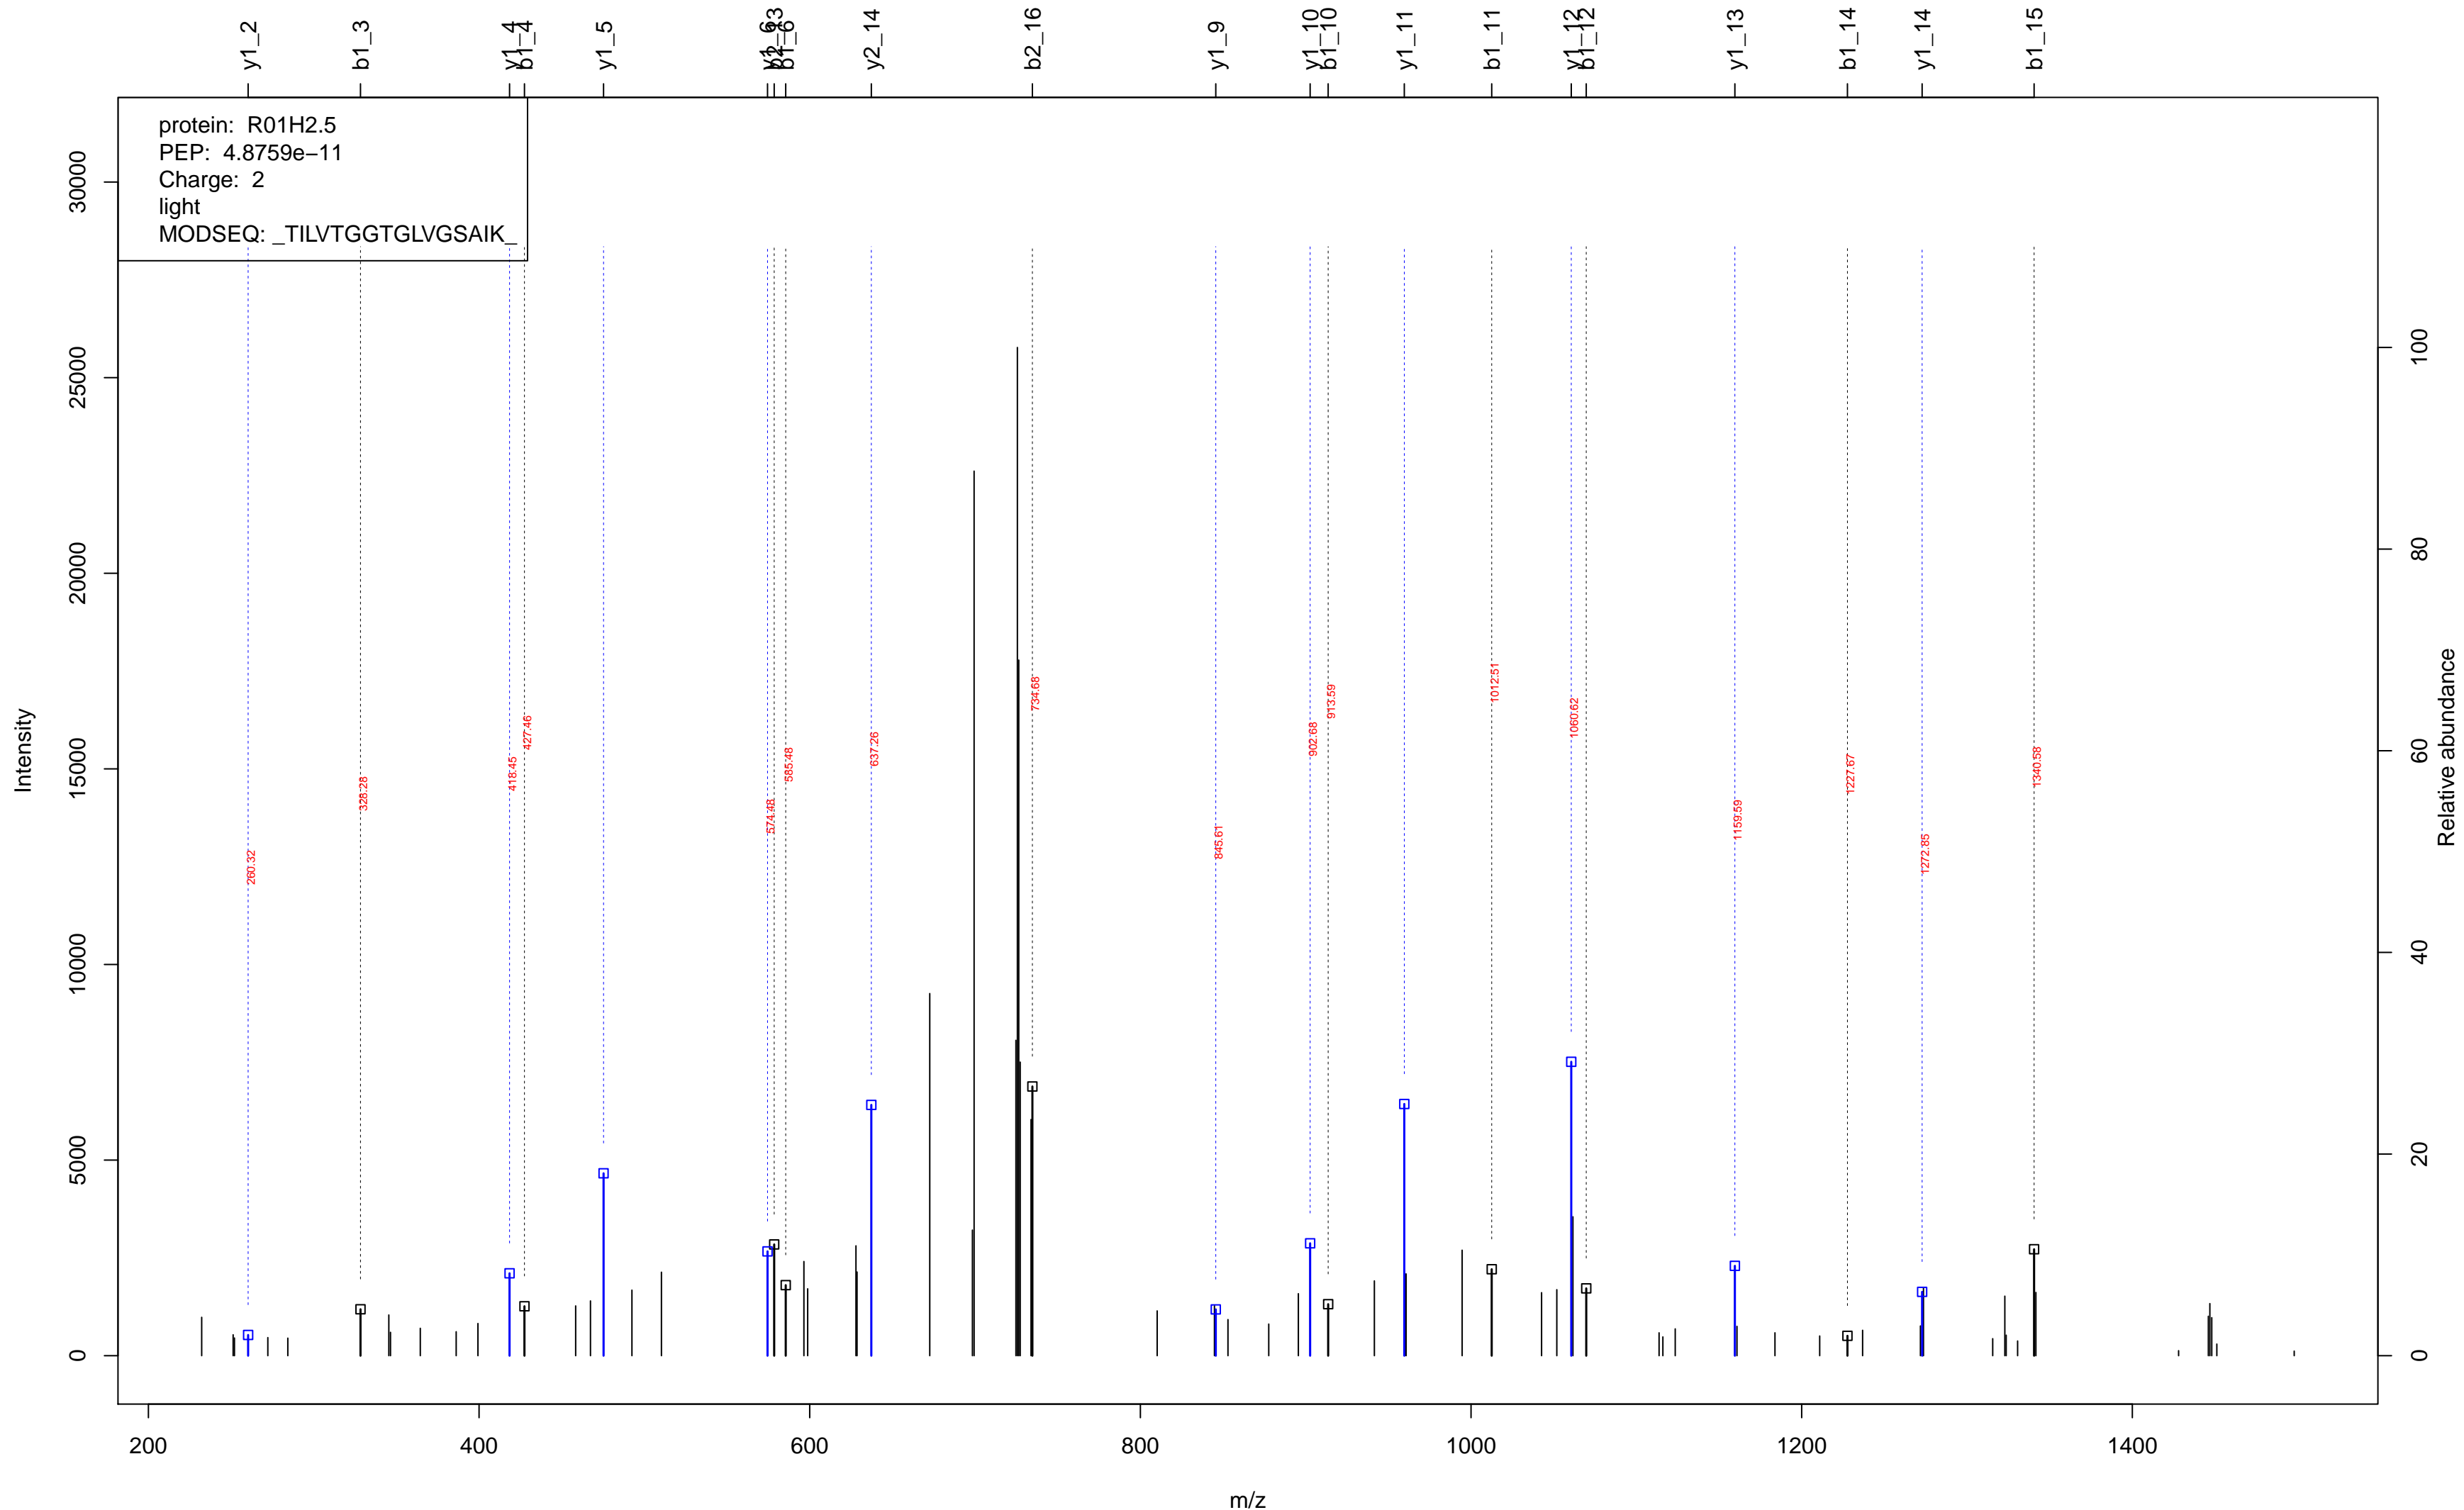

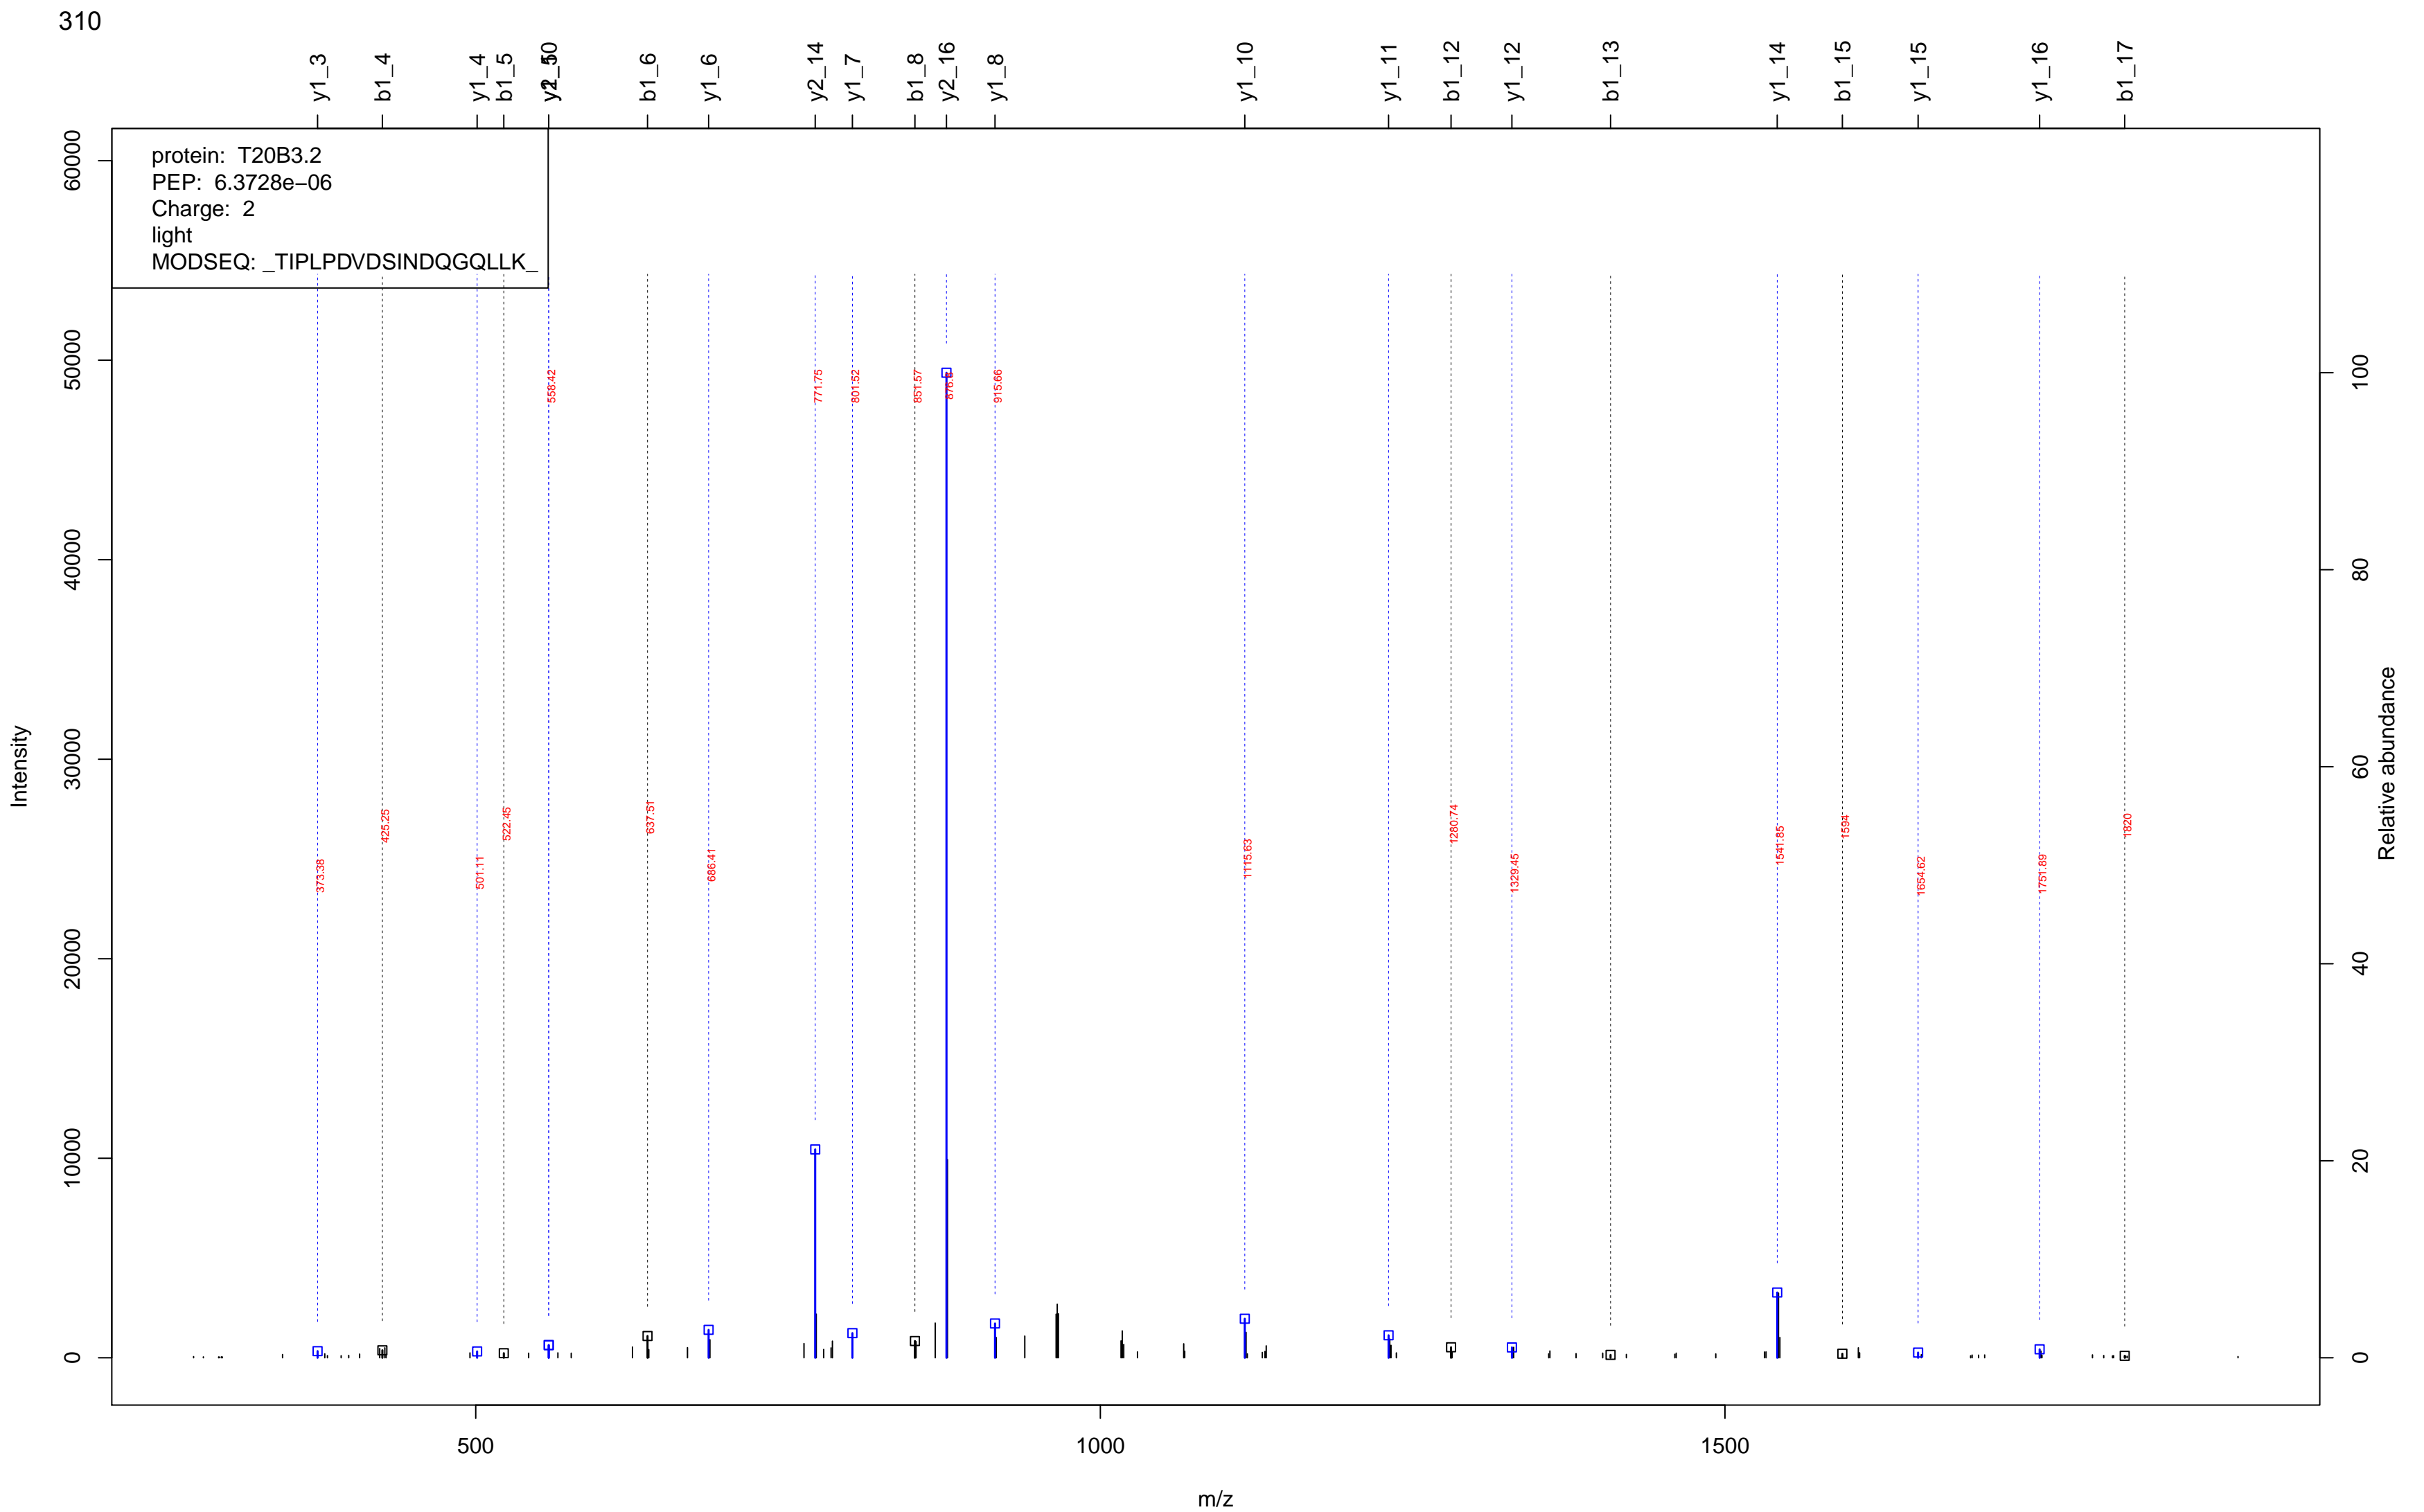

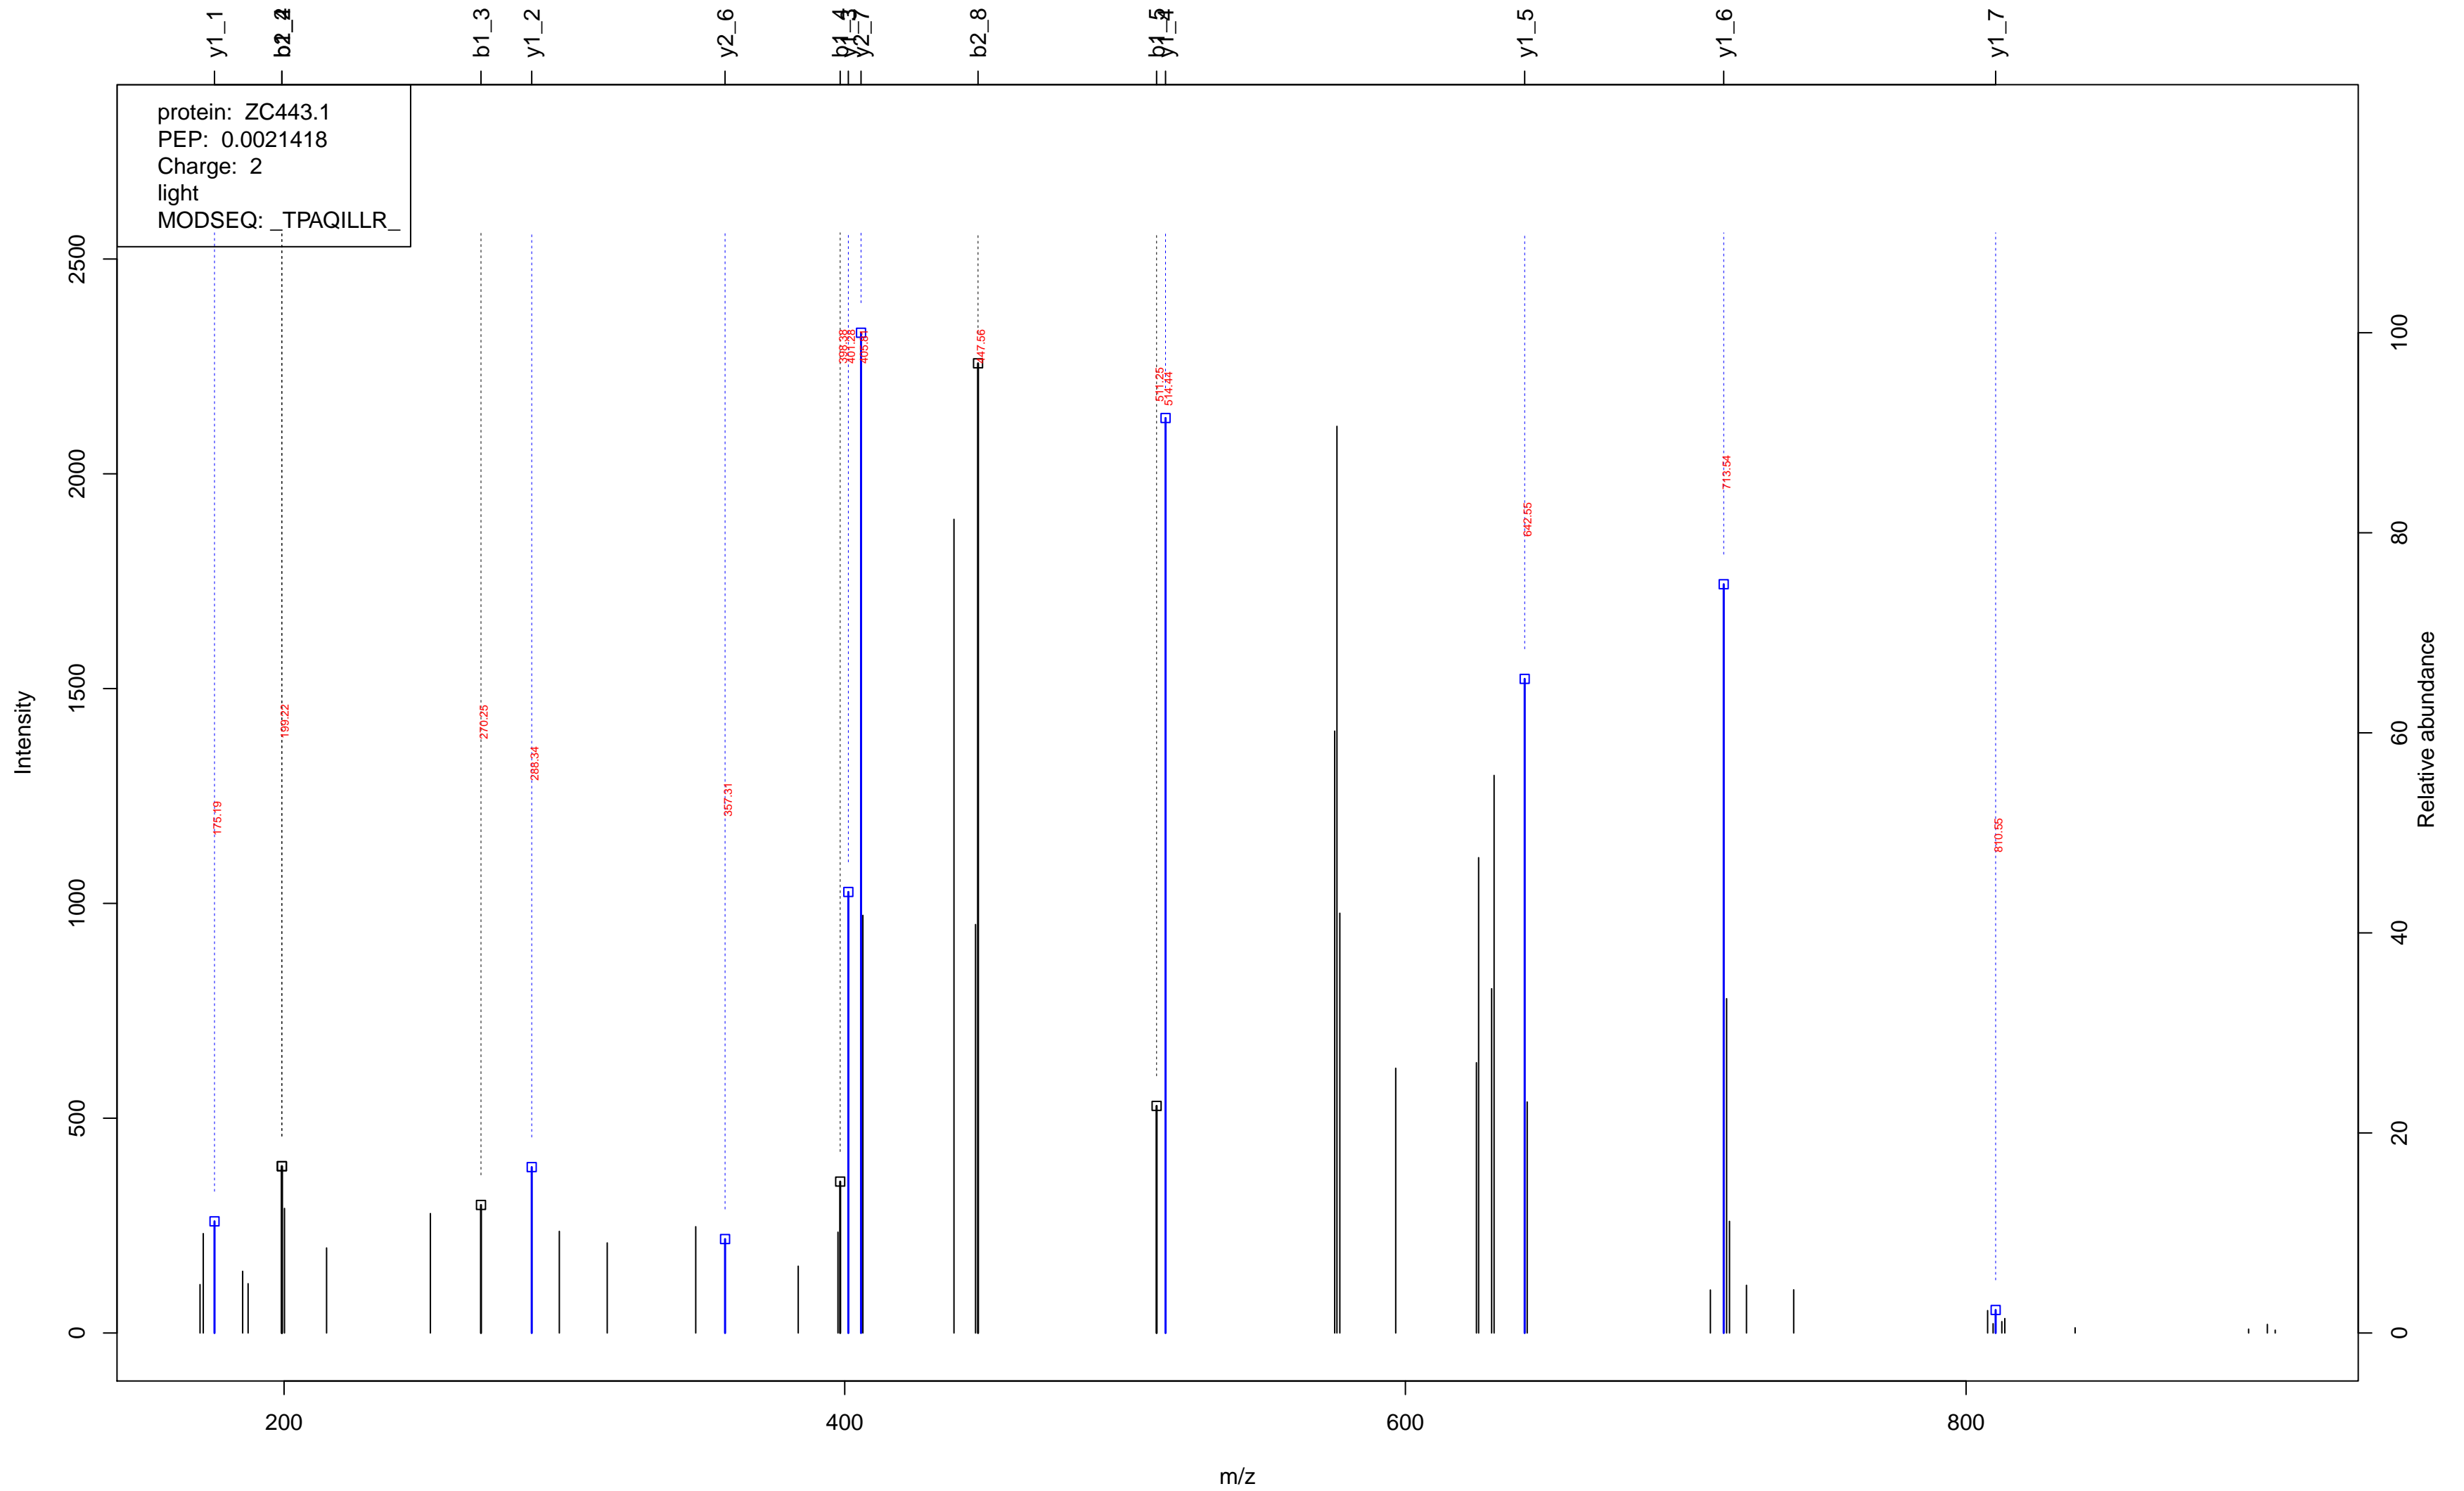

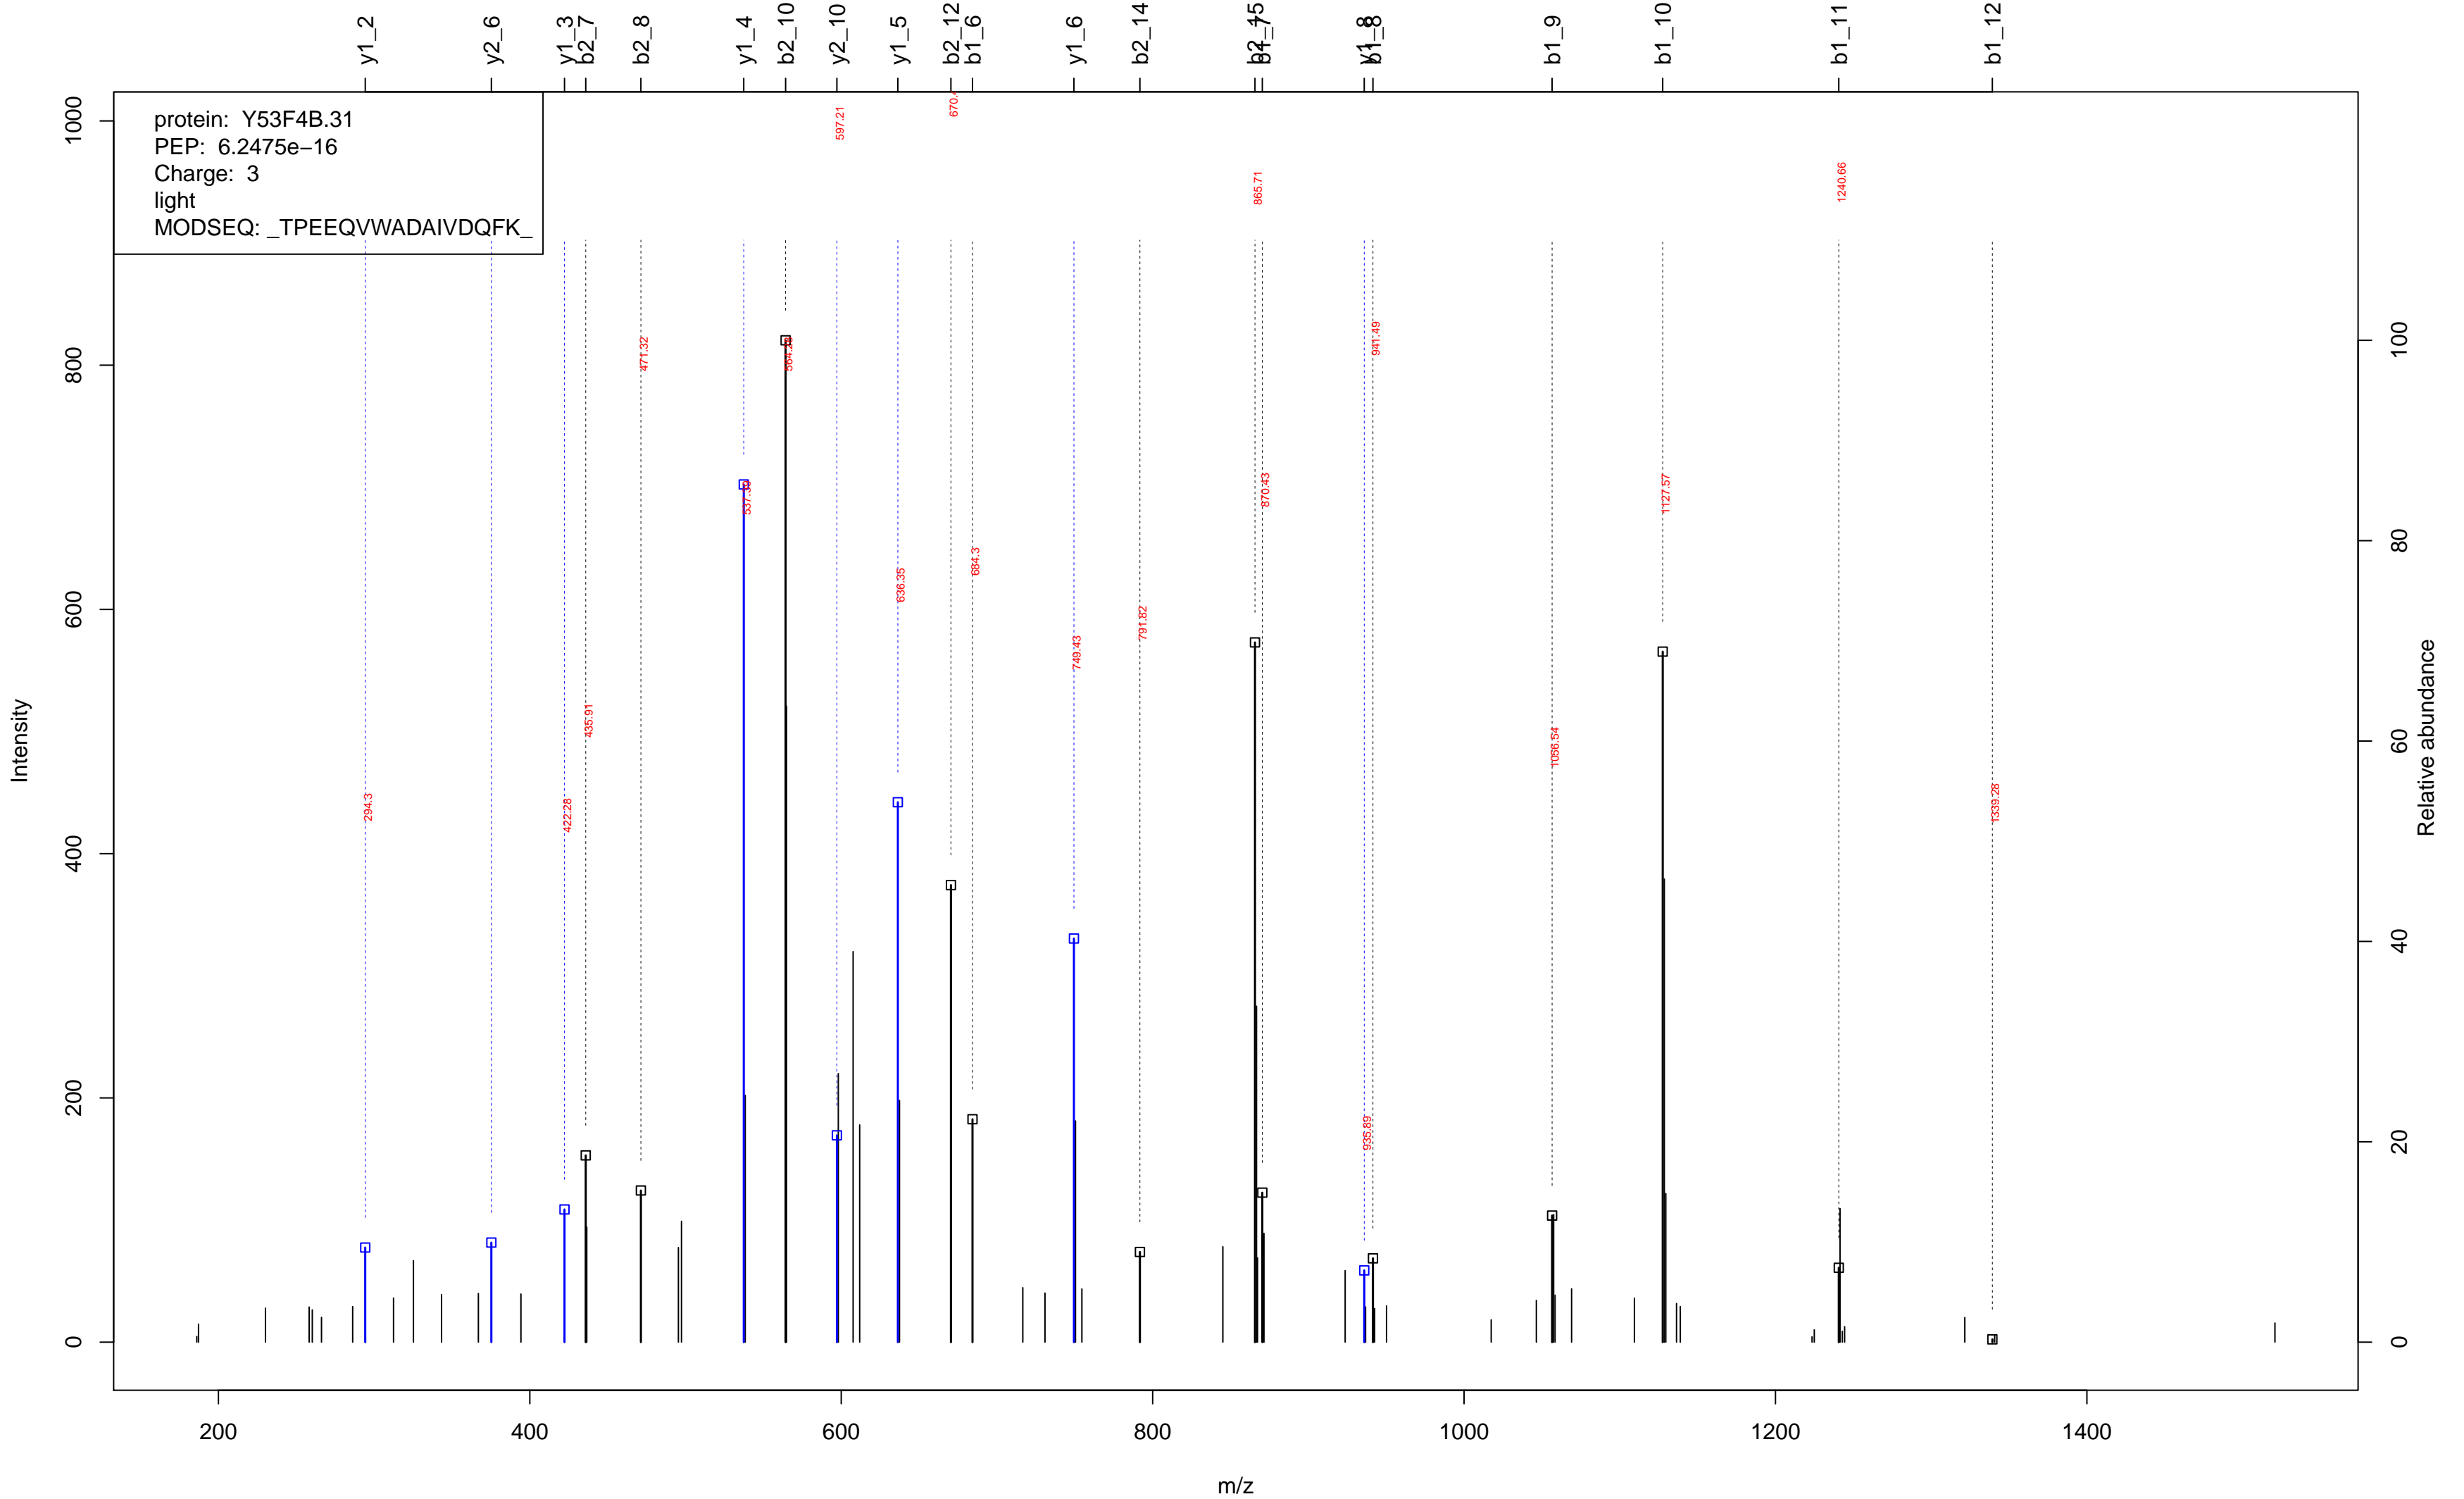



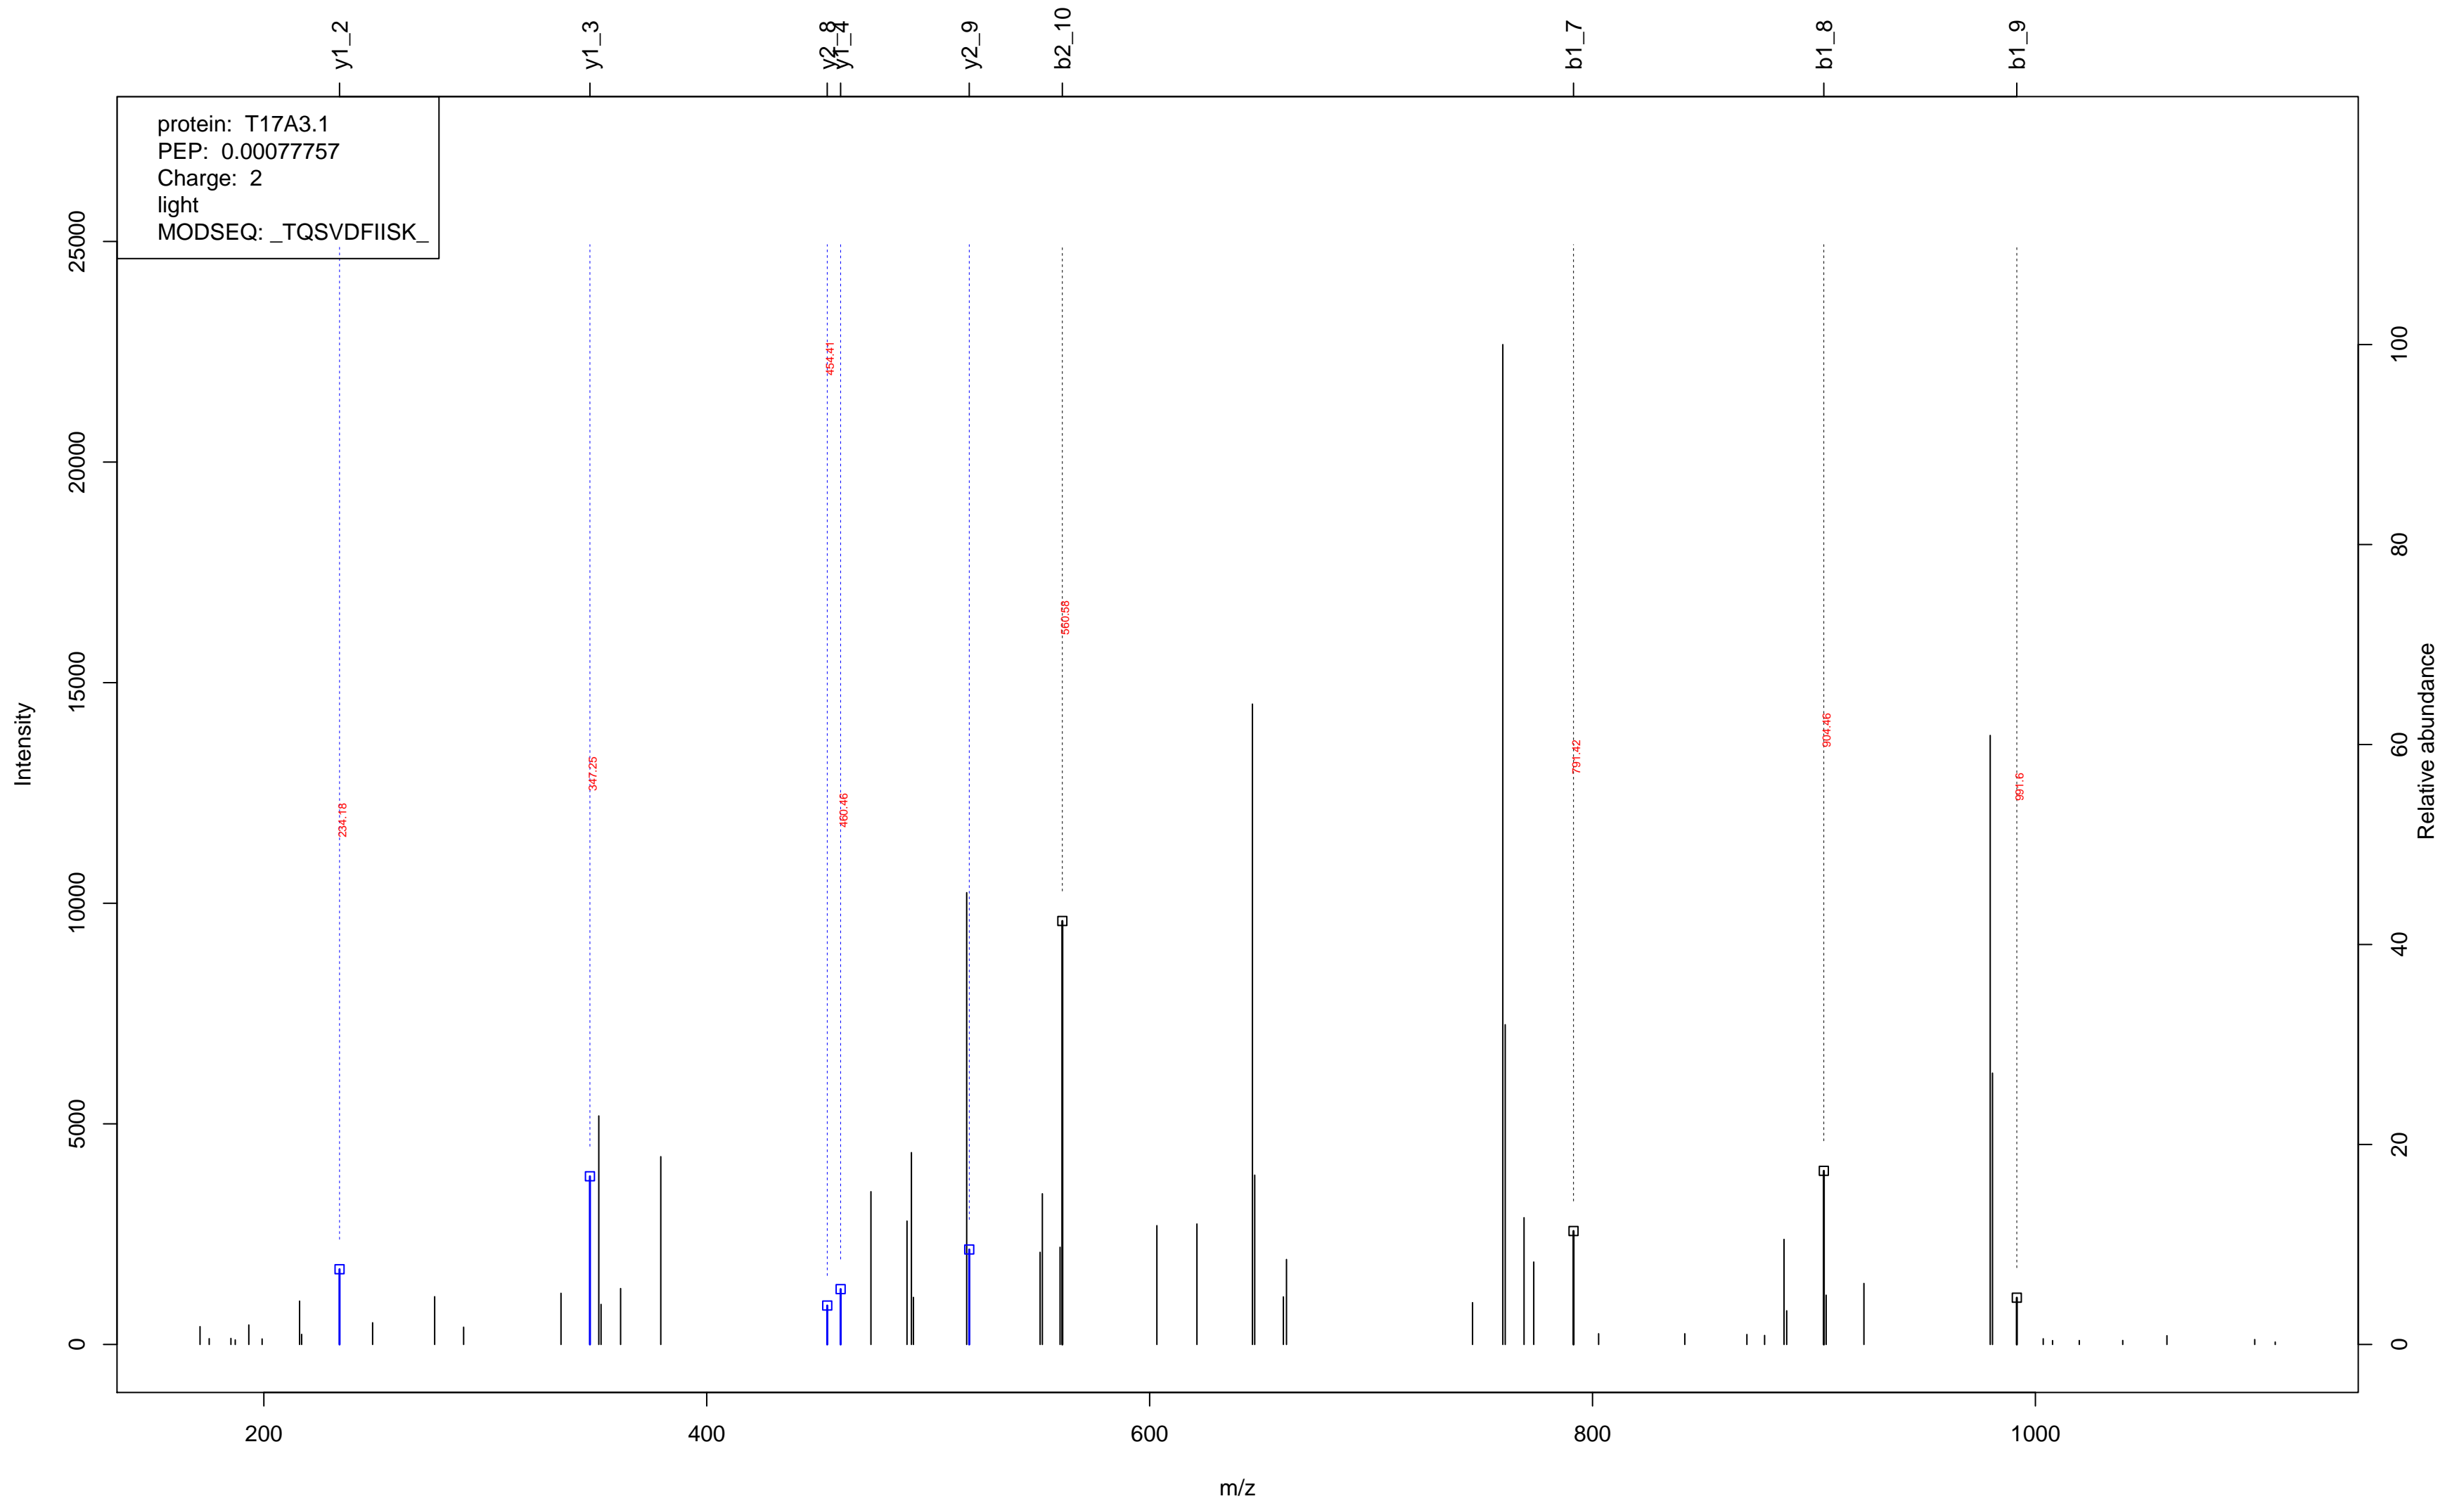

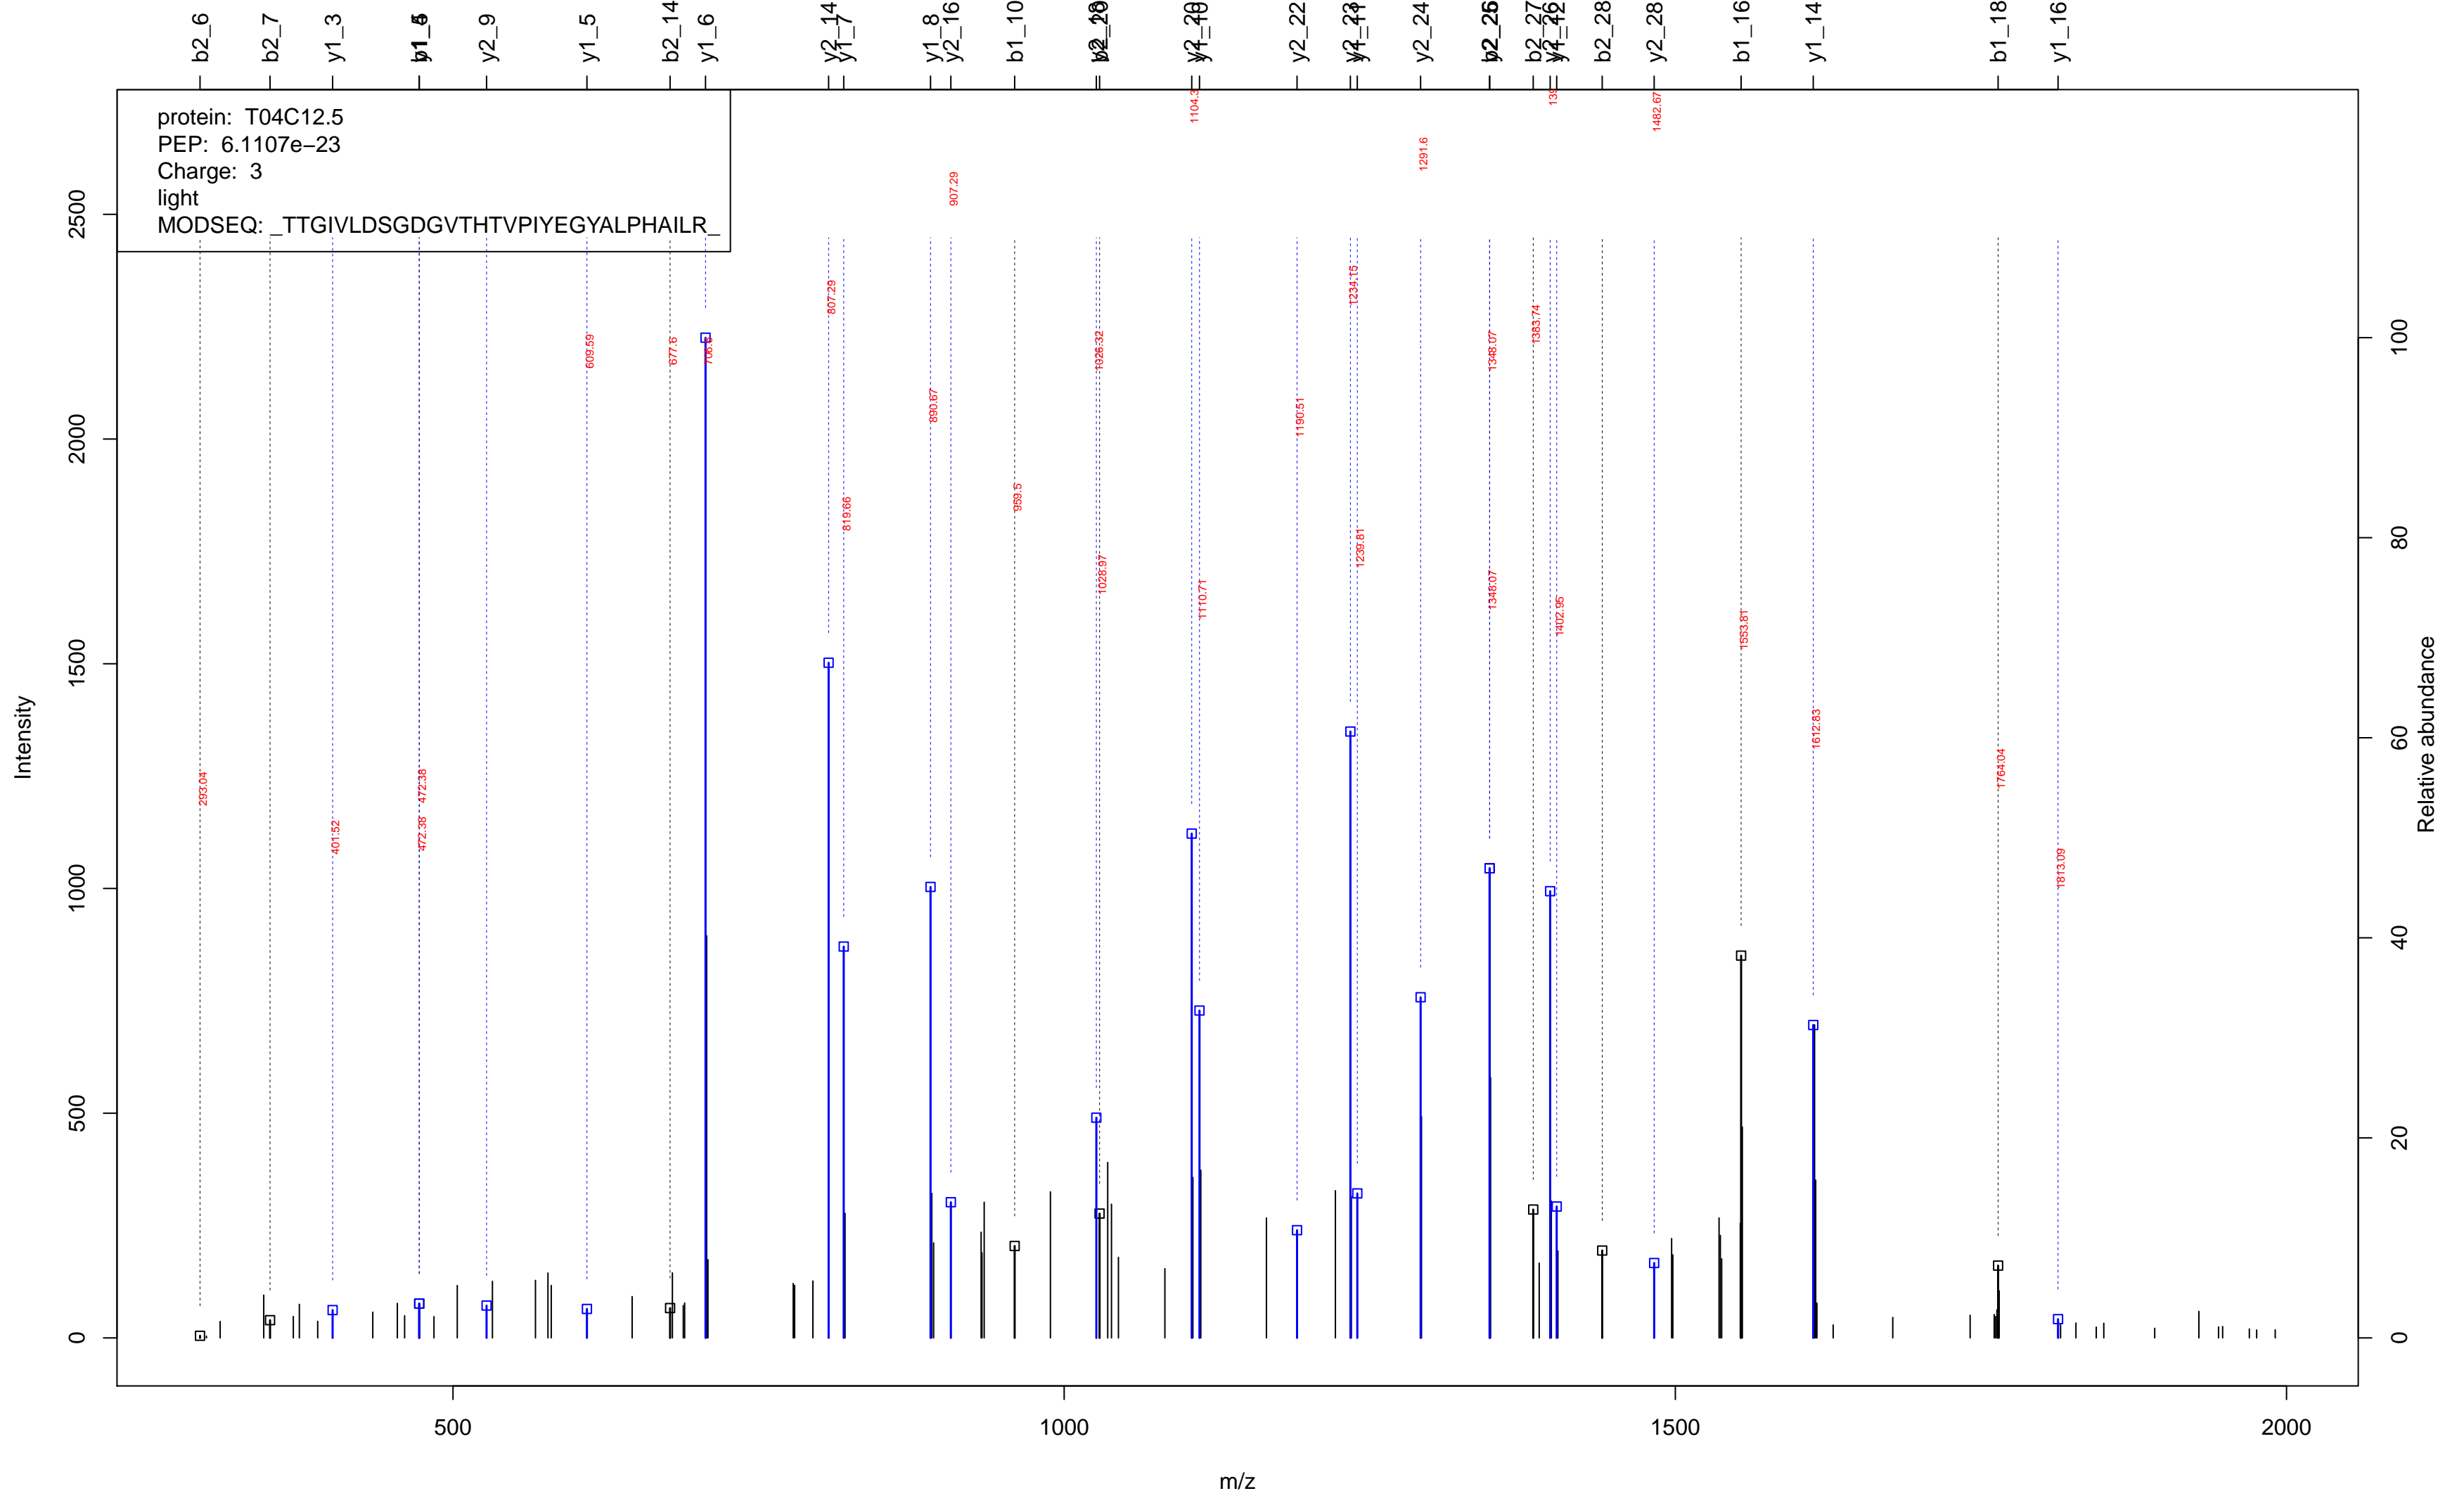

protein: T04C12.5  
PEP: 6.1107e-23  
Charge: 3  
light  
MODSEQ: \_TTGIVLDSGDGVTHTVPIYEGYALPHAILR\_

315

protein: Y37D8A.9b  
PEP: 0.00044741  
Charge: 2  
light  
MODSEQ: \_TVDDLLIEYEEADIK\_

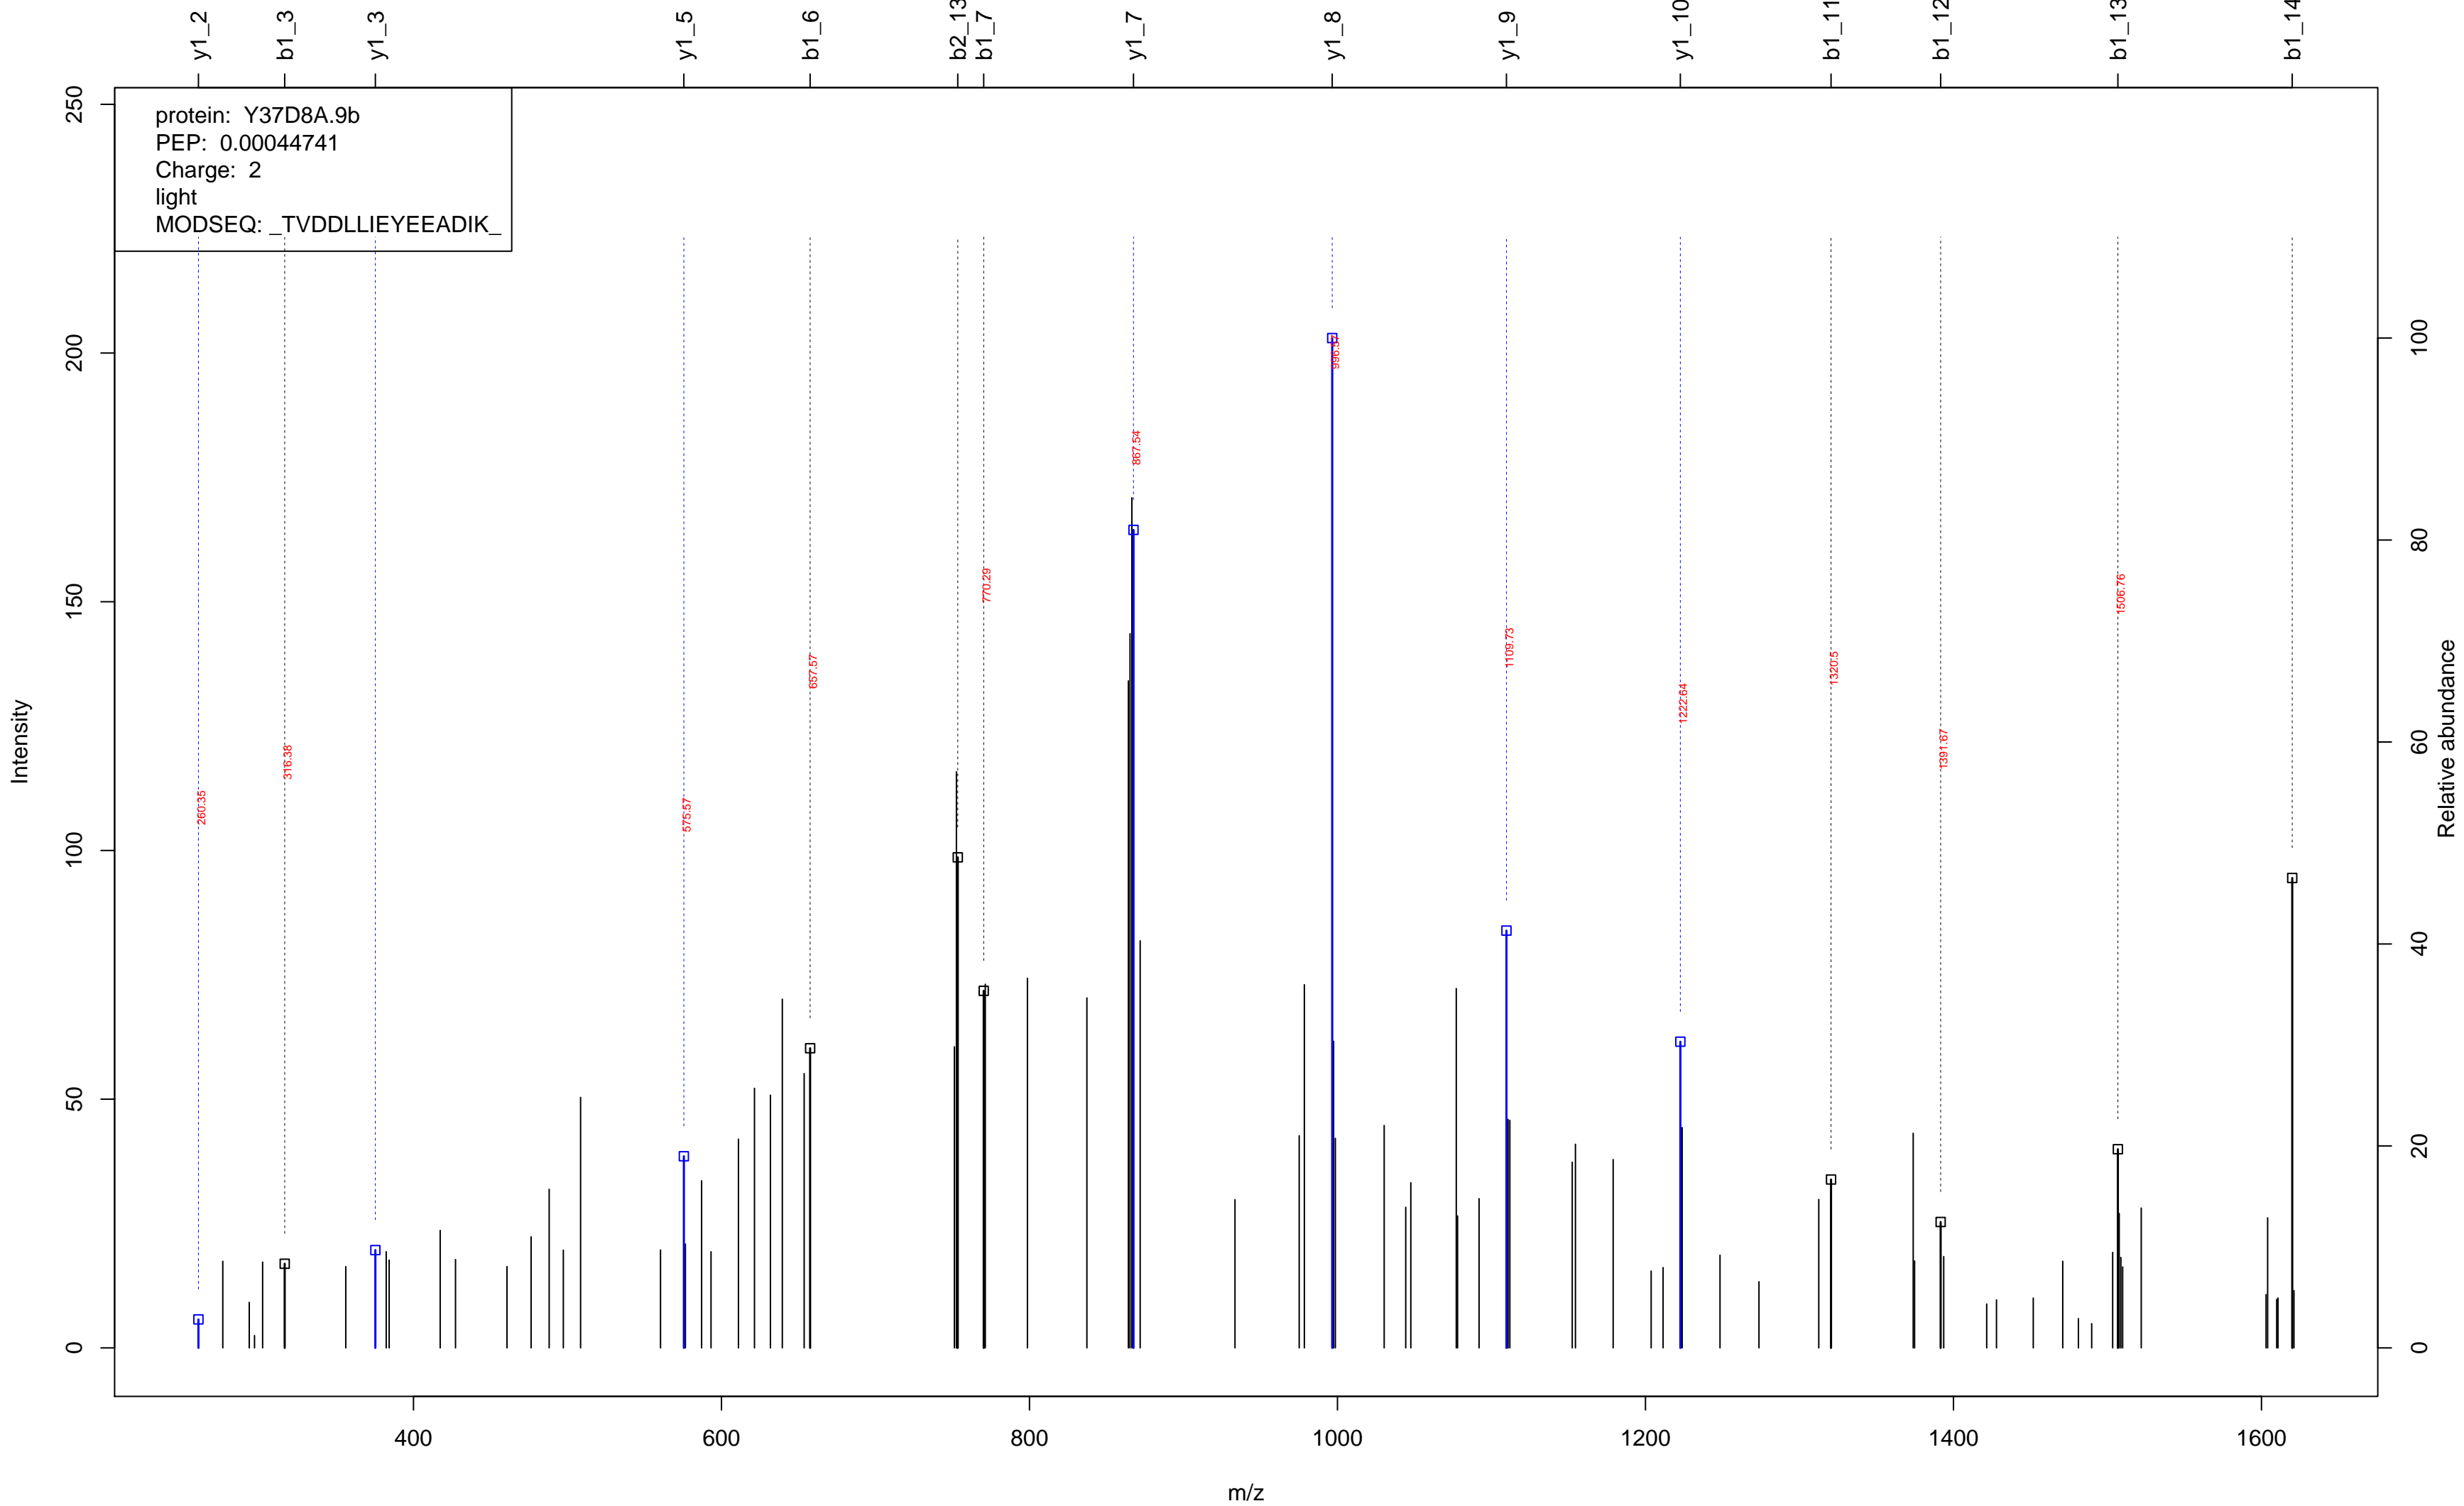

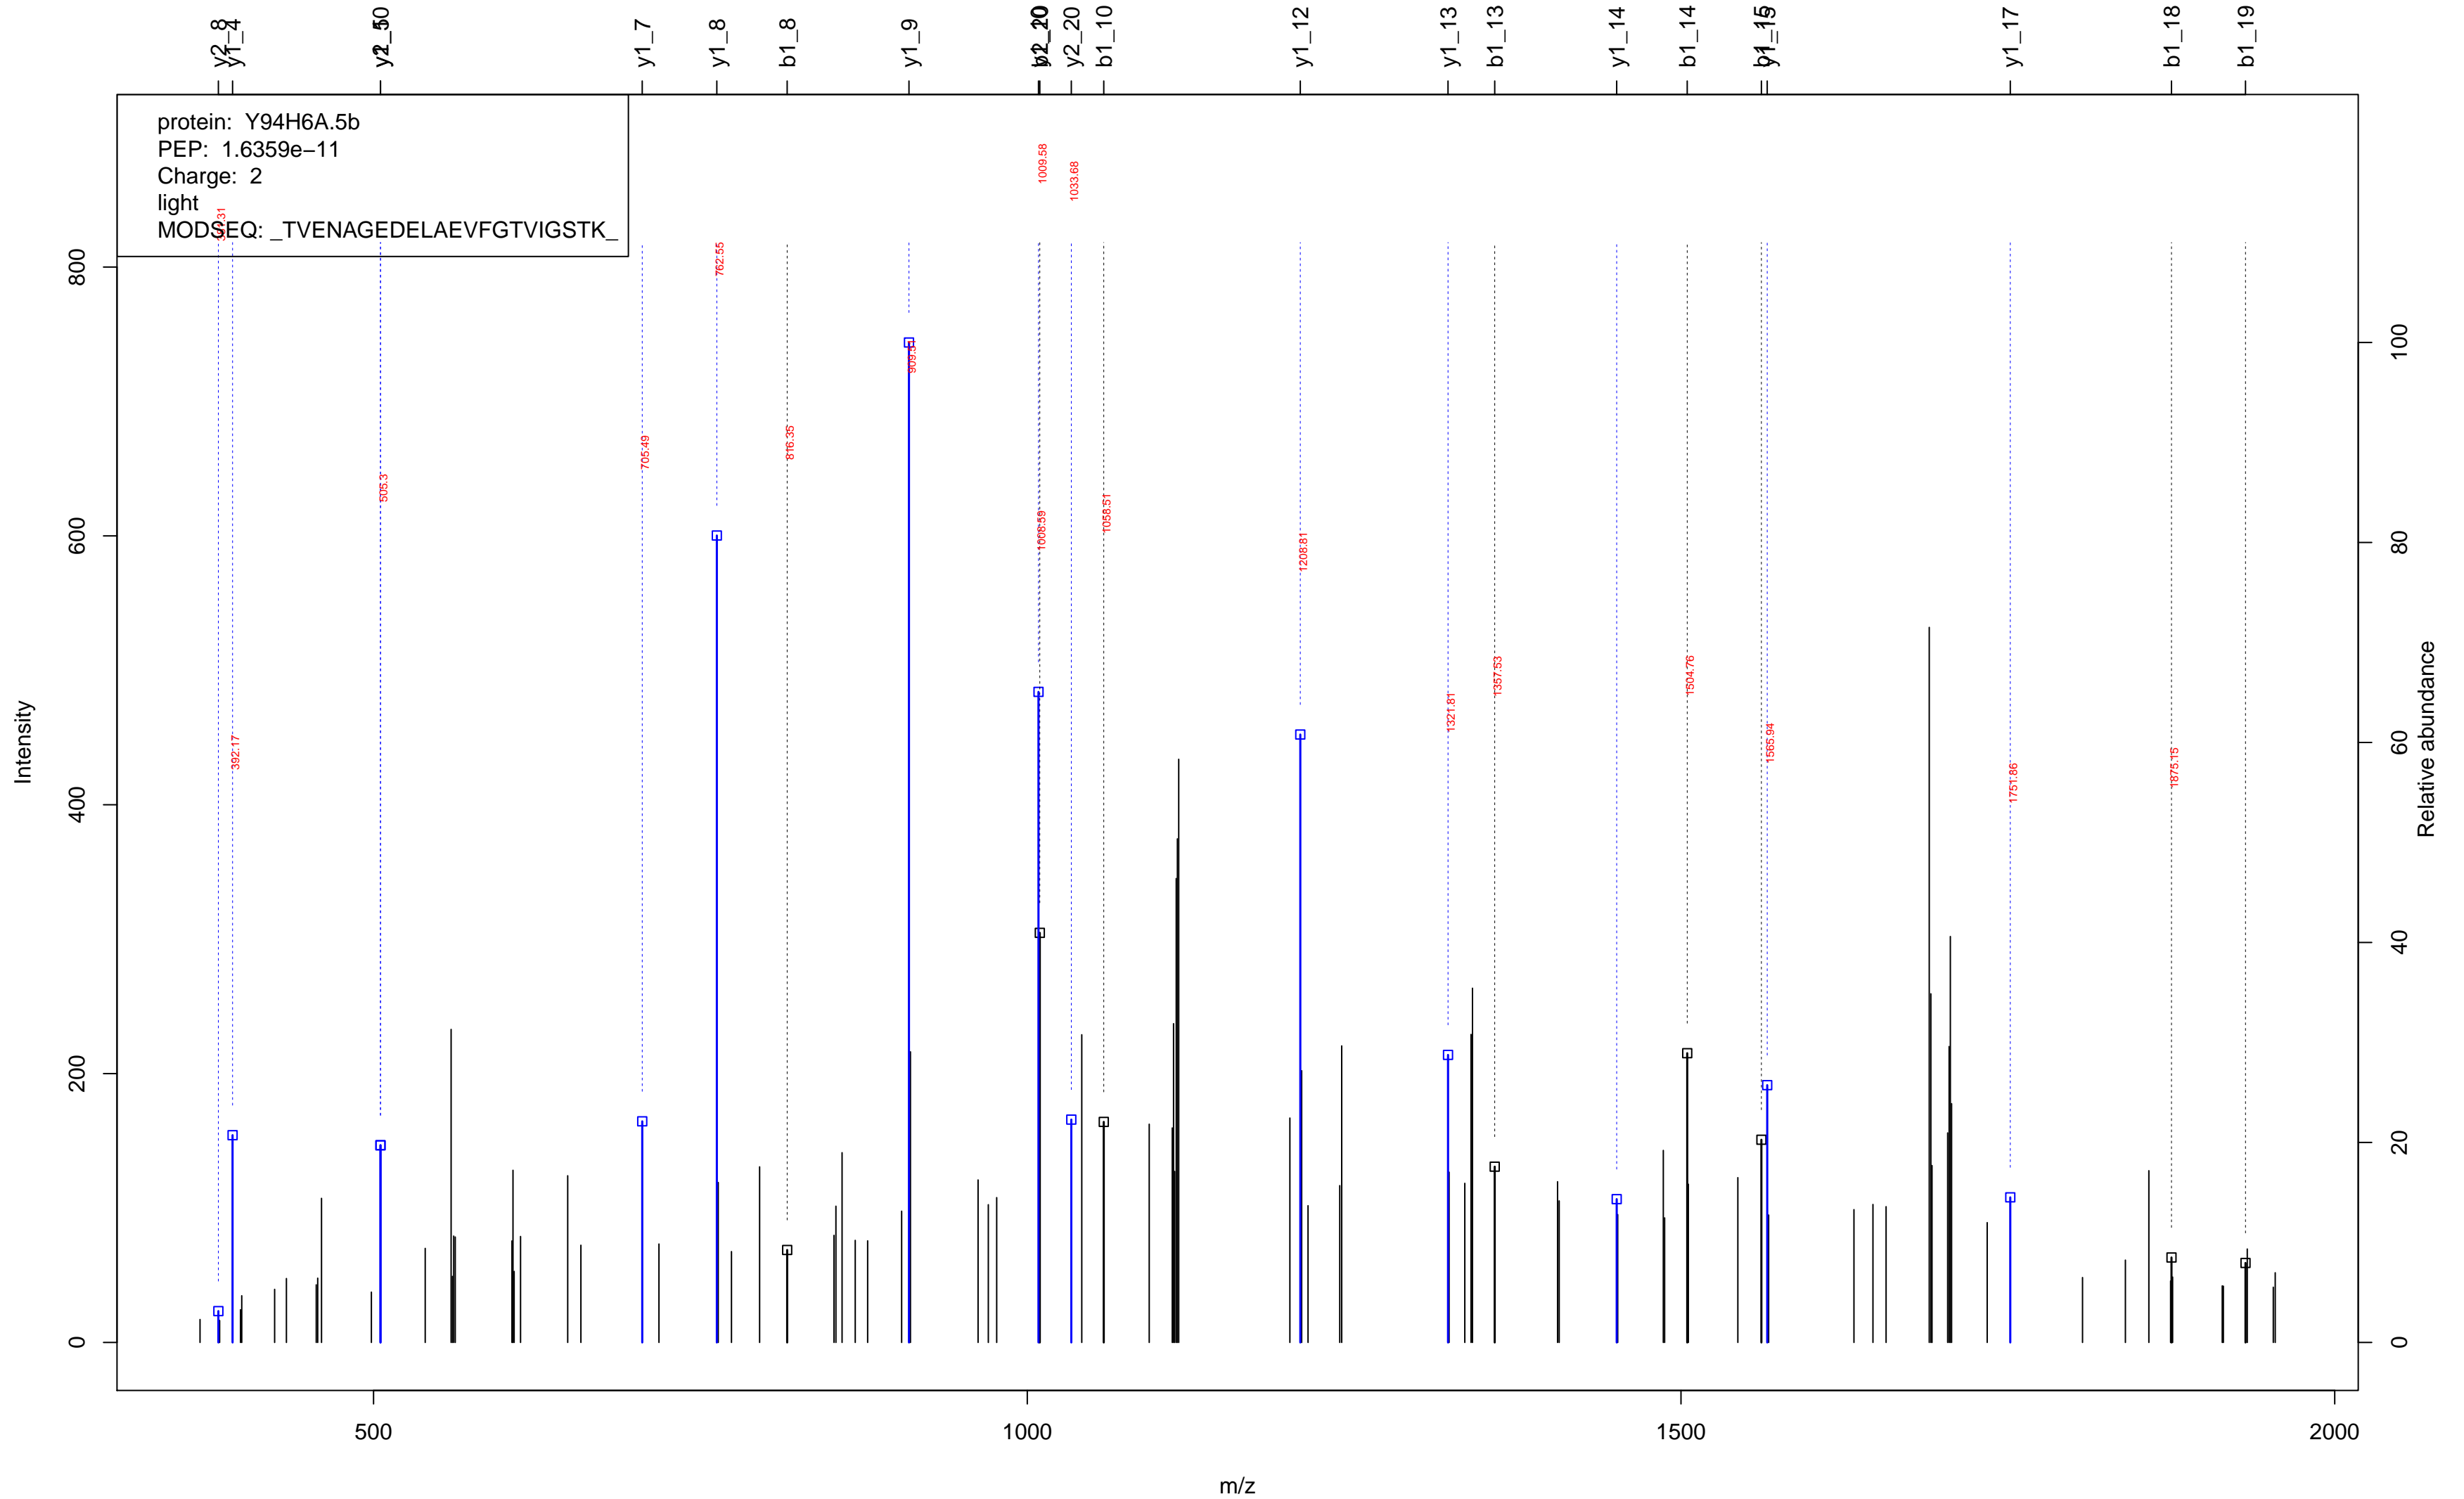

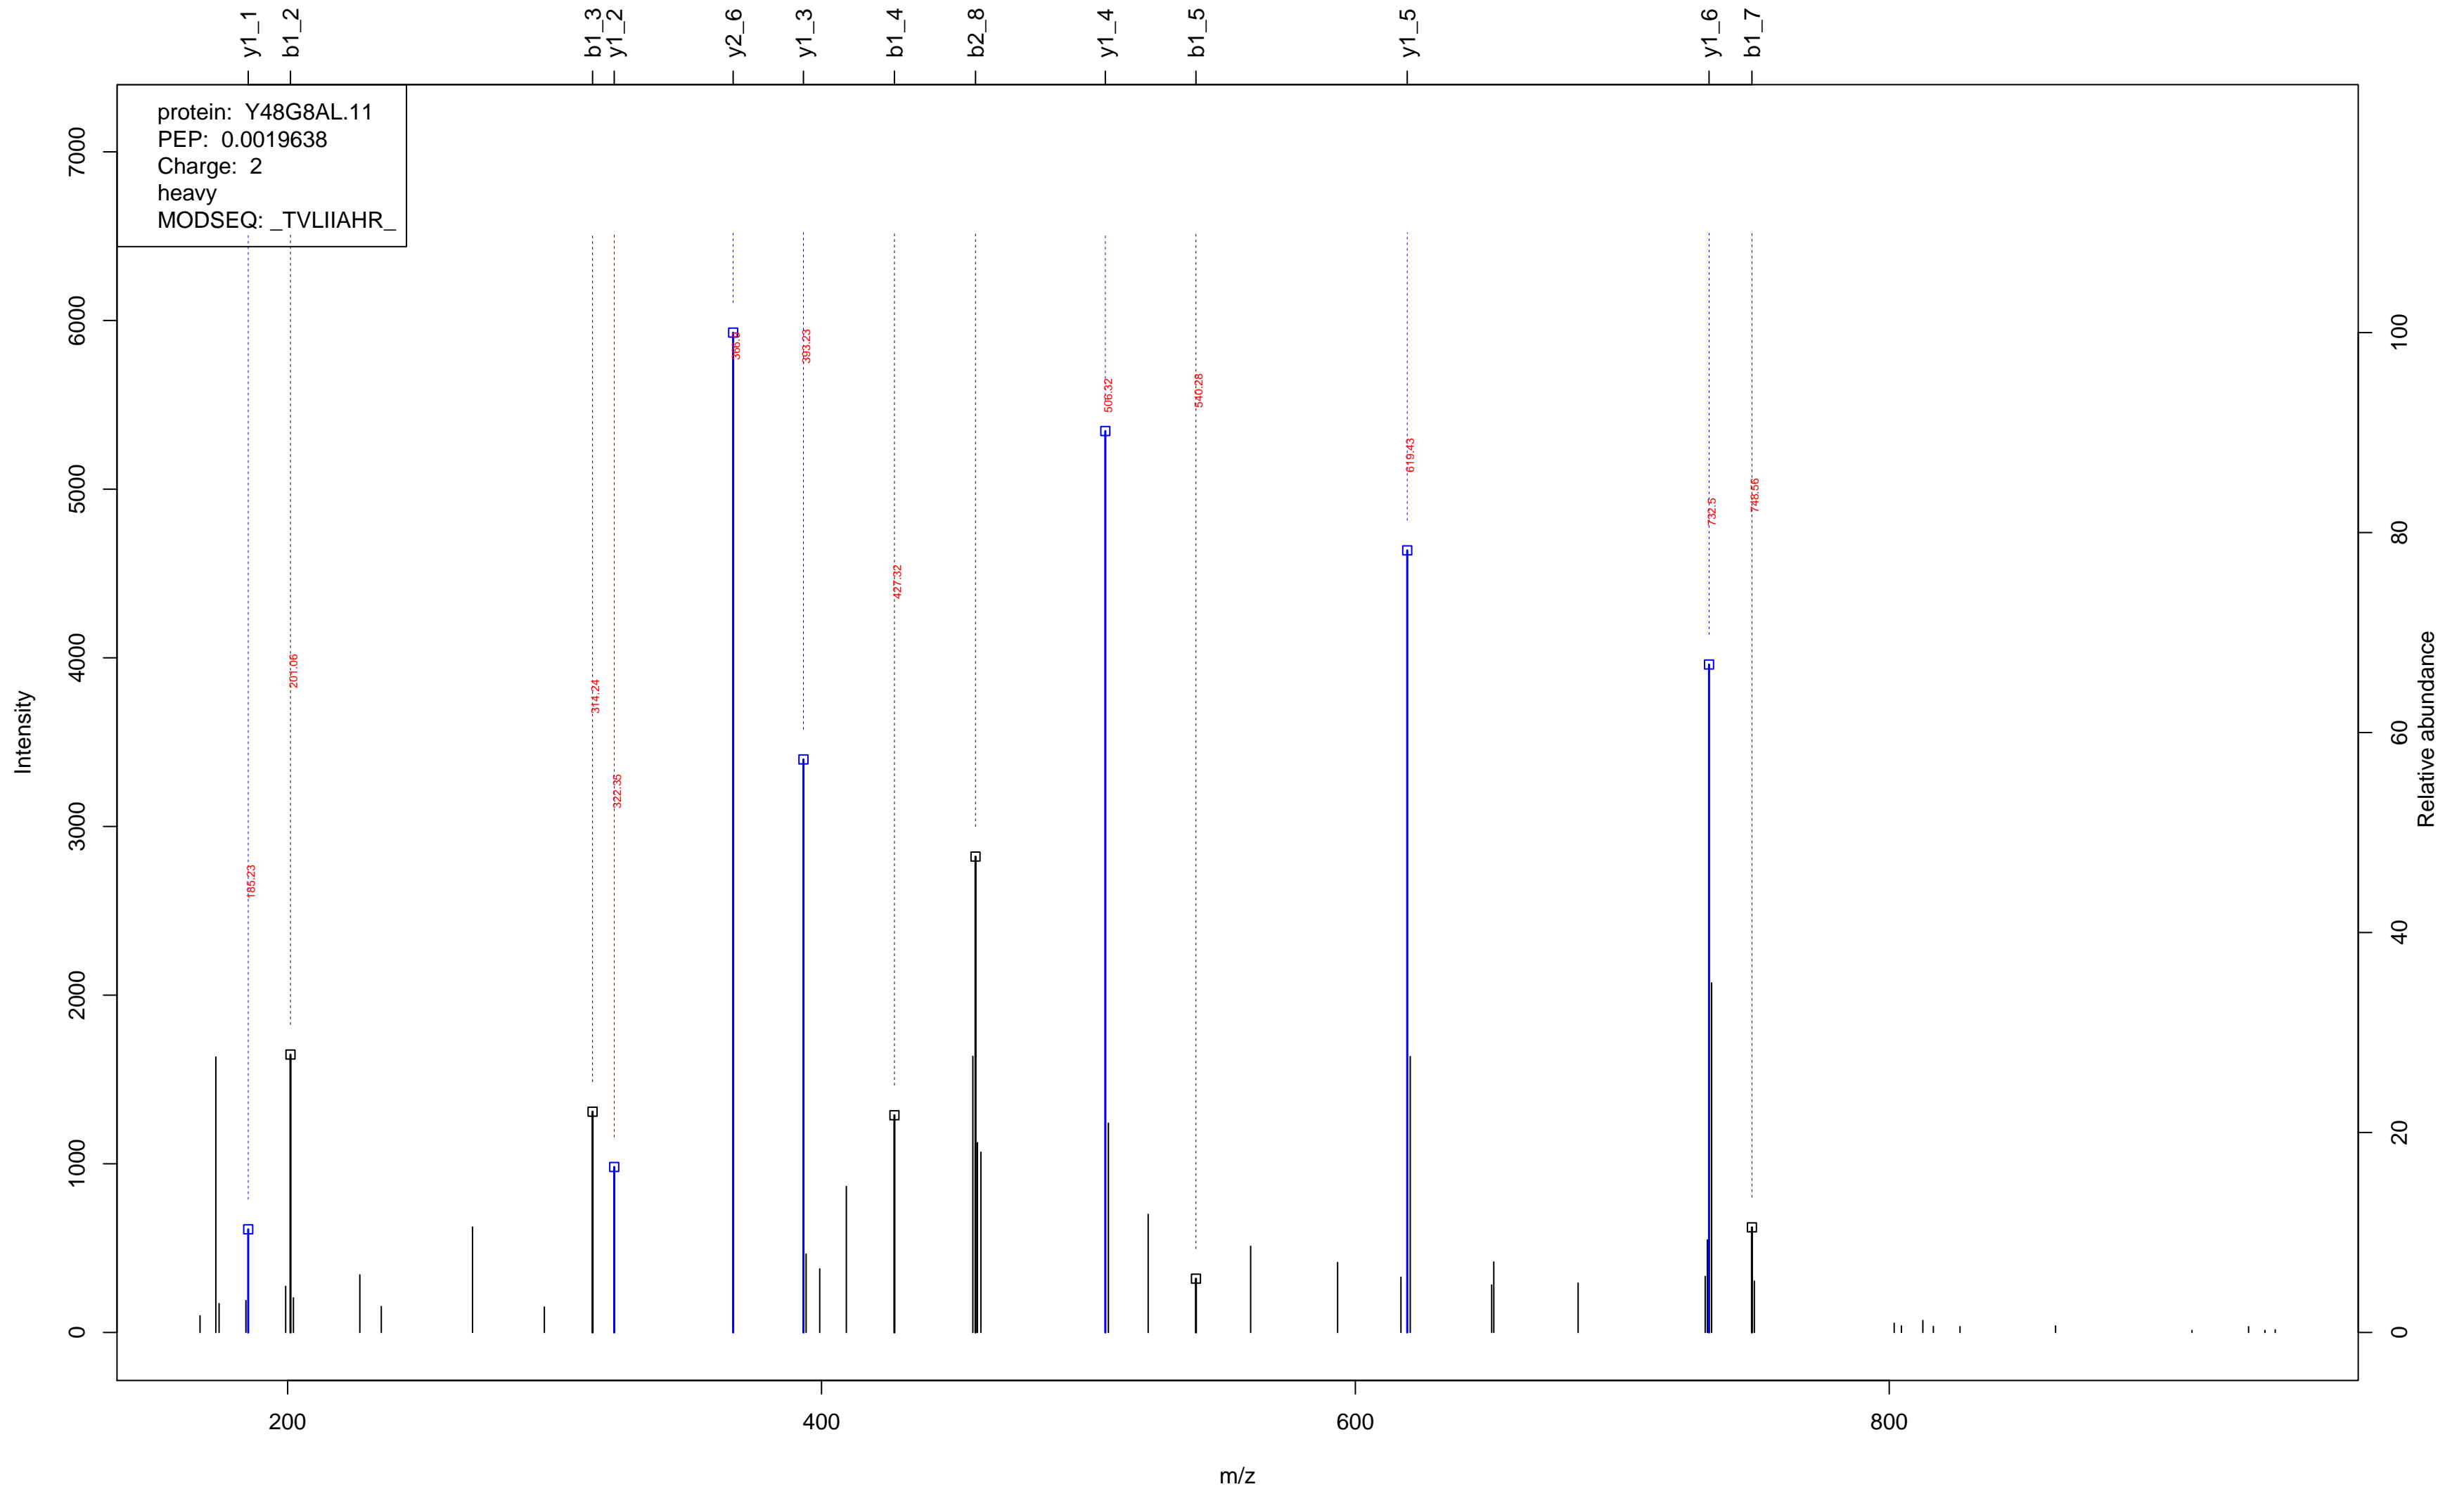

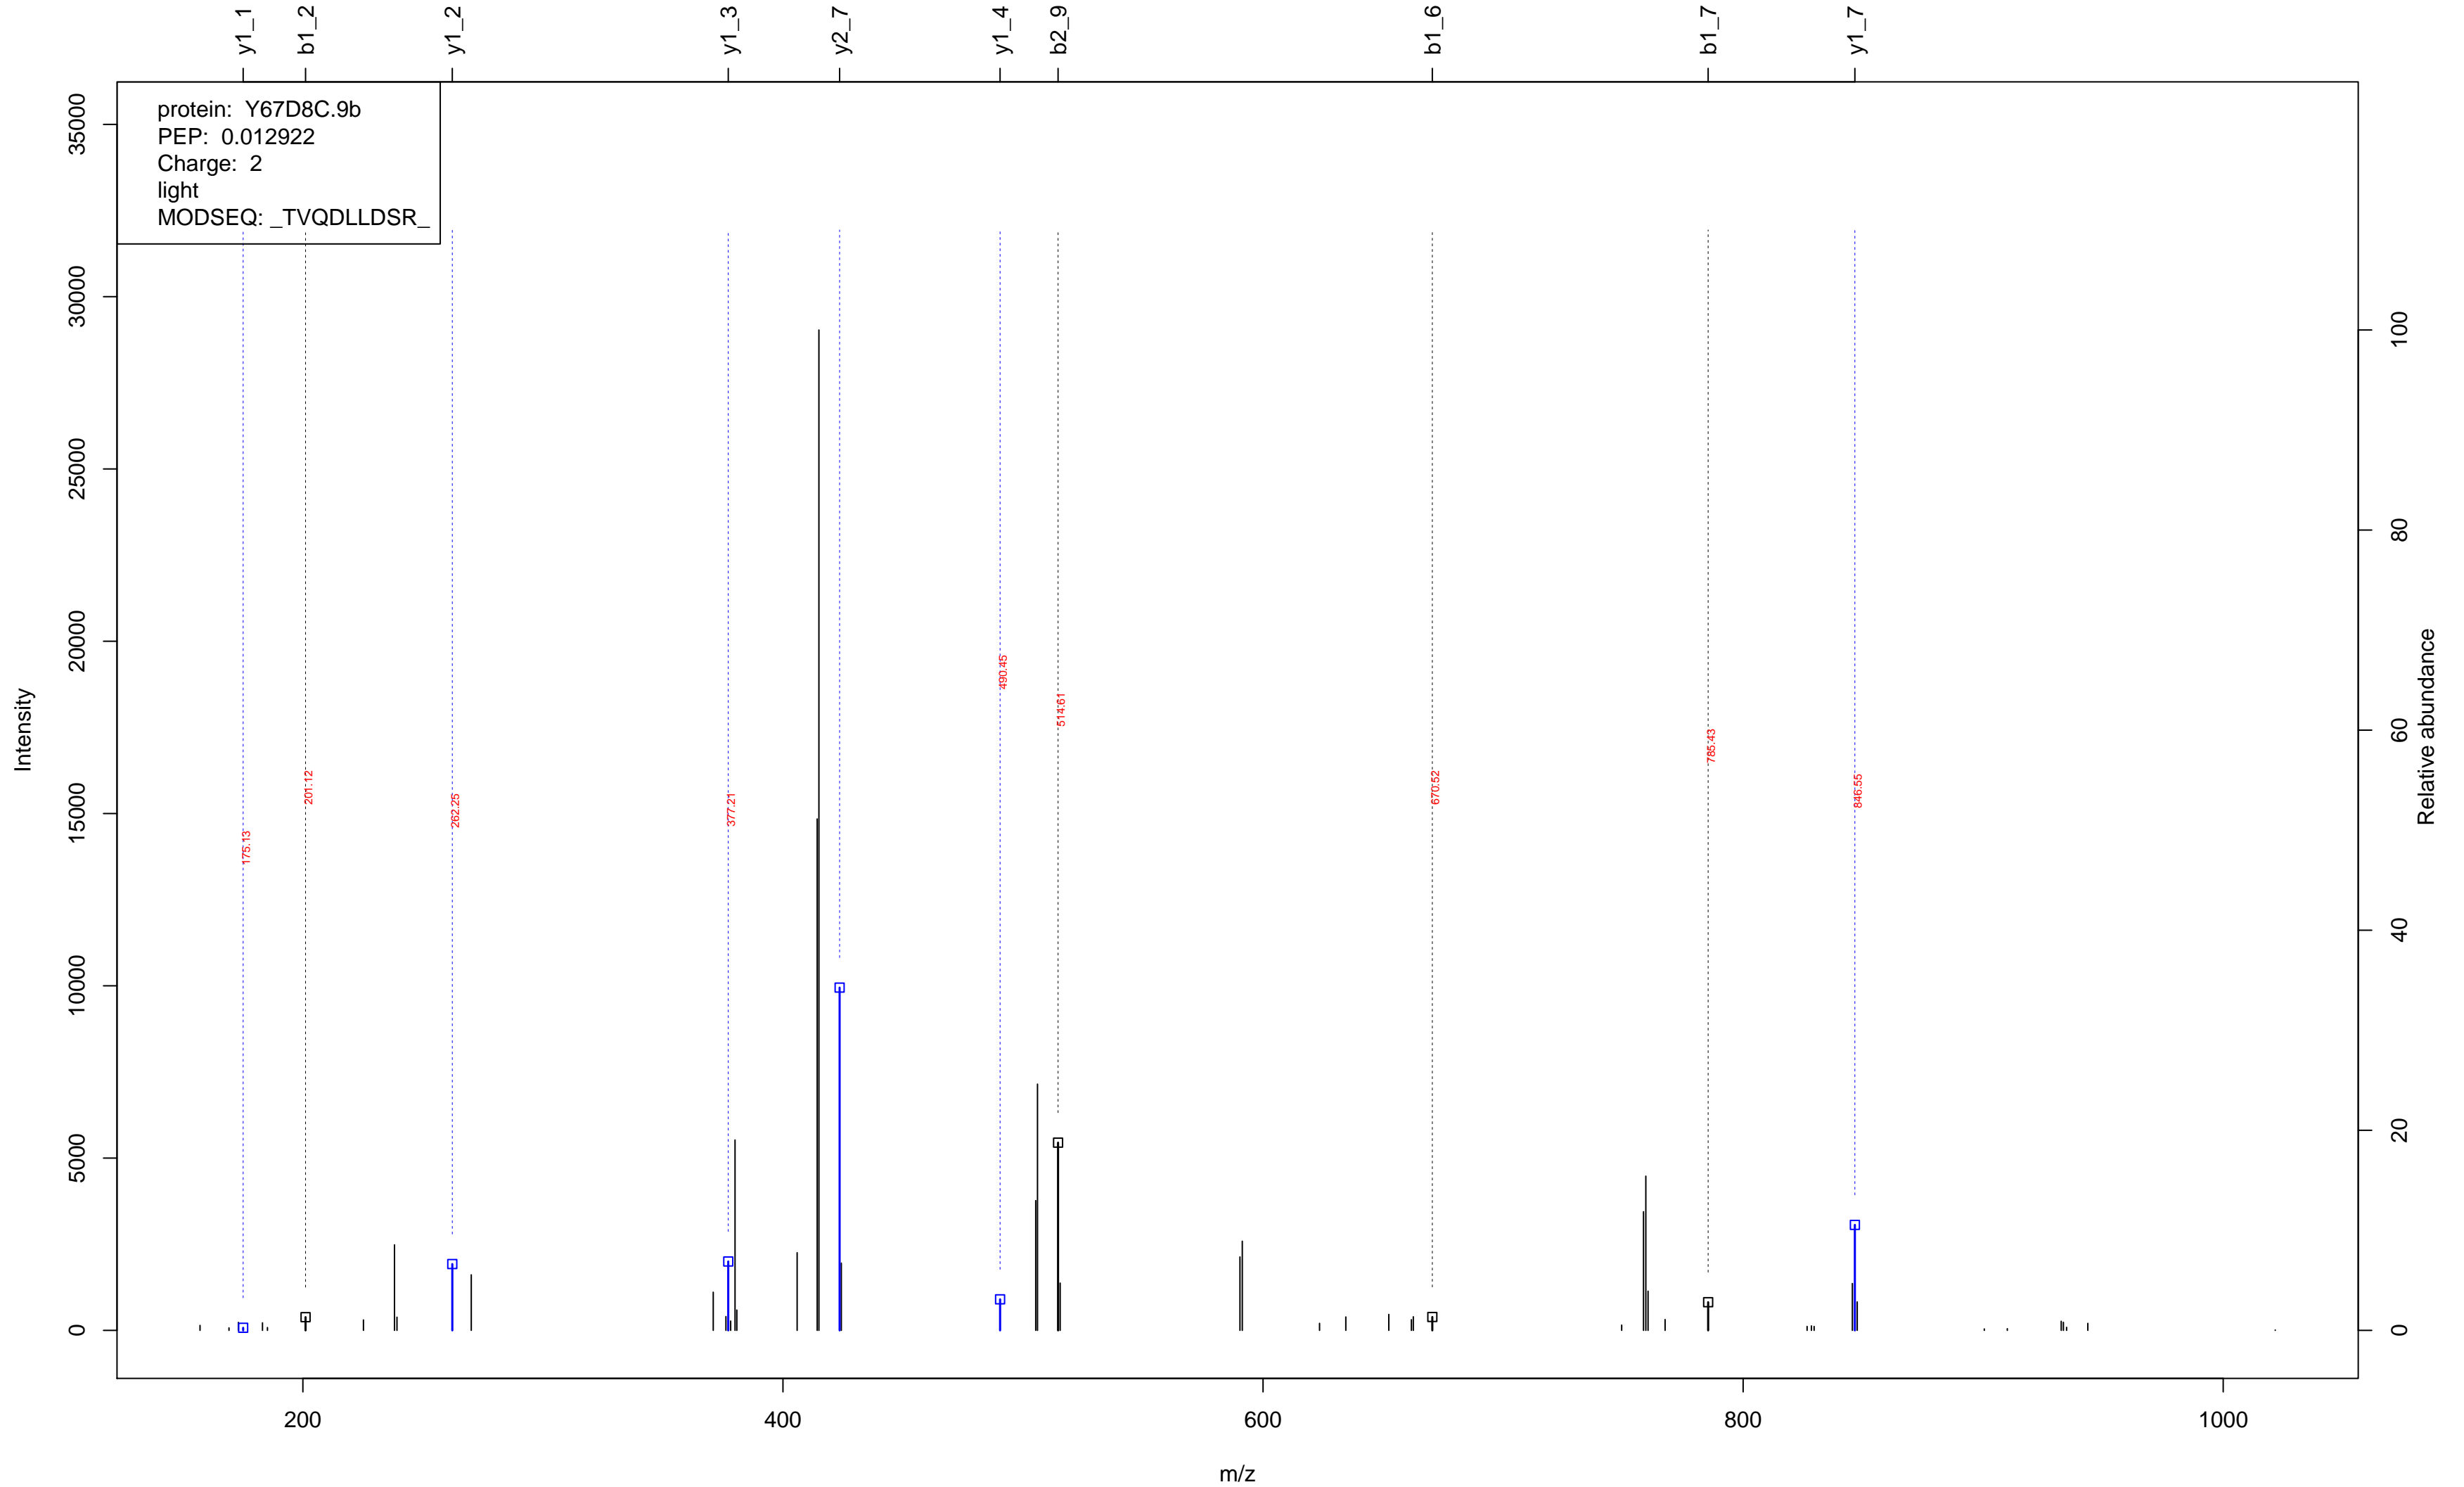

y2\_4 p1\_3 b2\_7 y2\_6 y1\_3 b1\_5 y1\_4 y2\_5 y1\_5 b1\_7 y1\_6 b1\_8 y1\_7 b1\_9 y1\_8 b1\_10 y1\_9 p1\_10 y1\_11 b1\_12

protein: C12D12.2a  
PEP: 8.5217e-09  
Charge: 2  
light  
MODSEQ: \_TVSTVDTLLDLLR\_

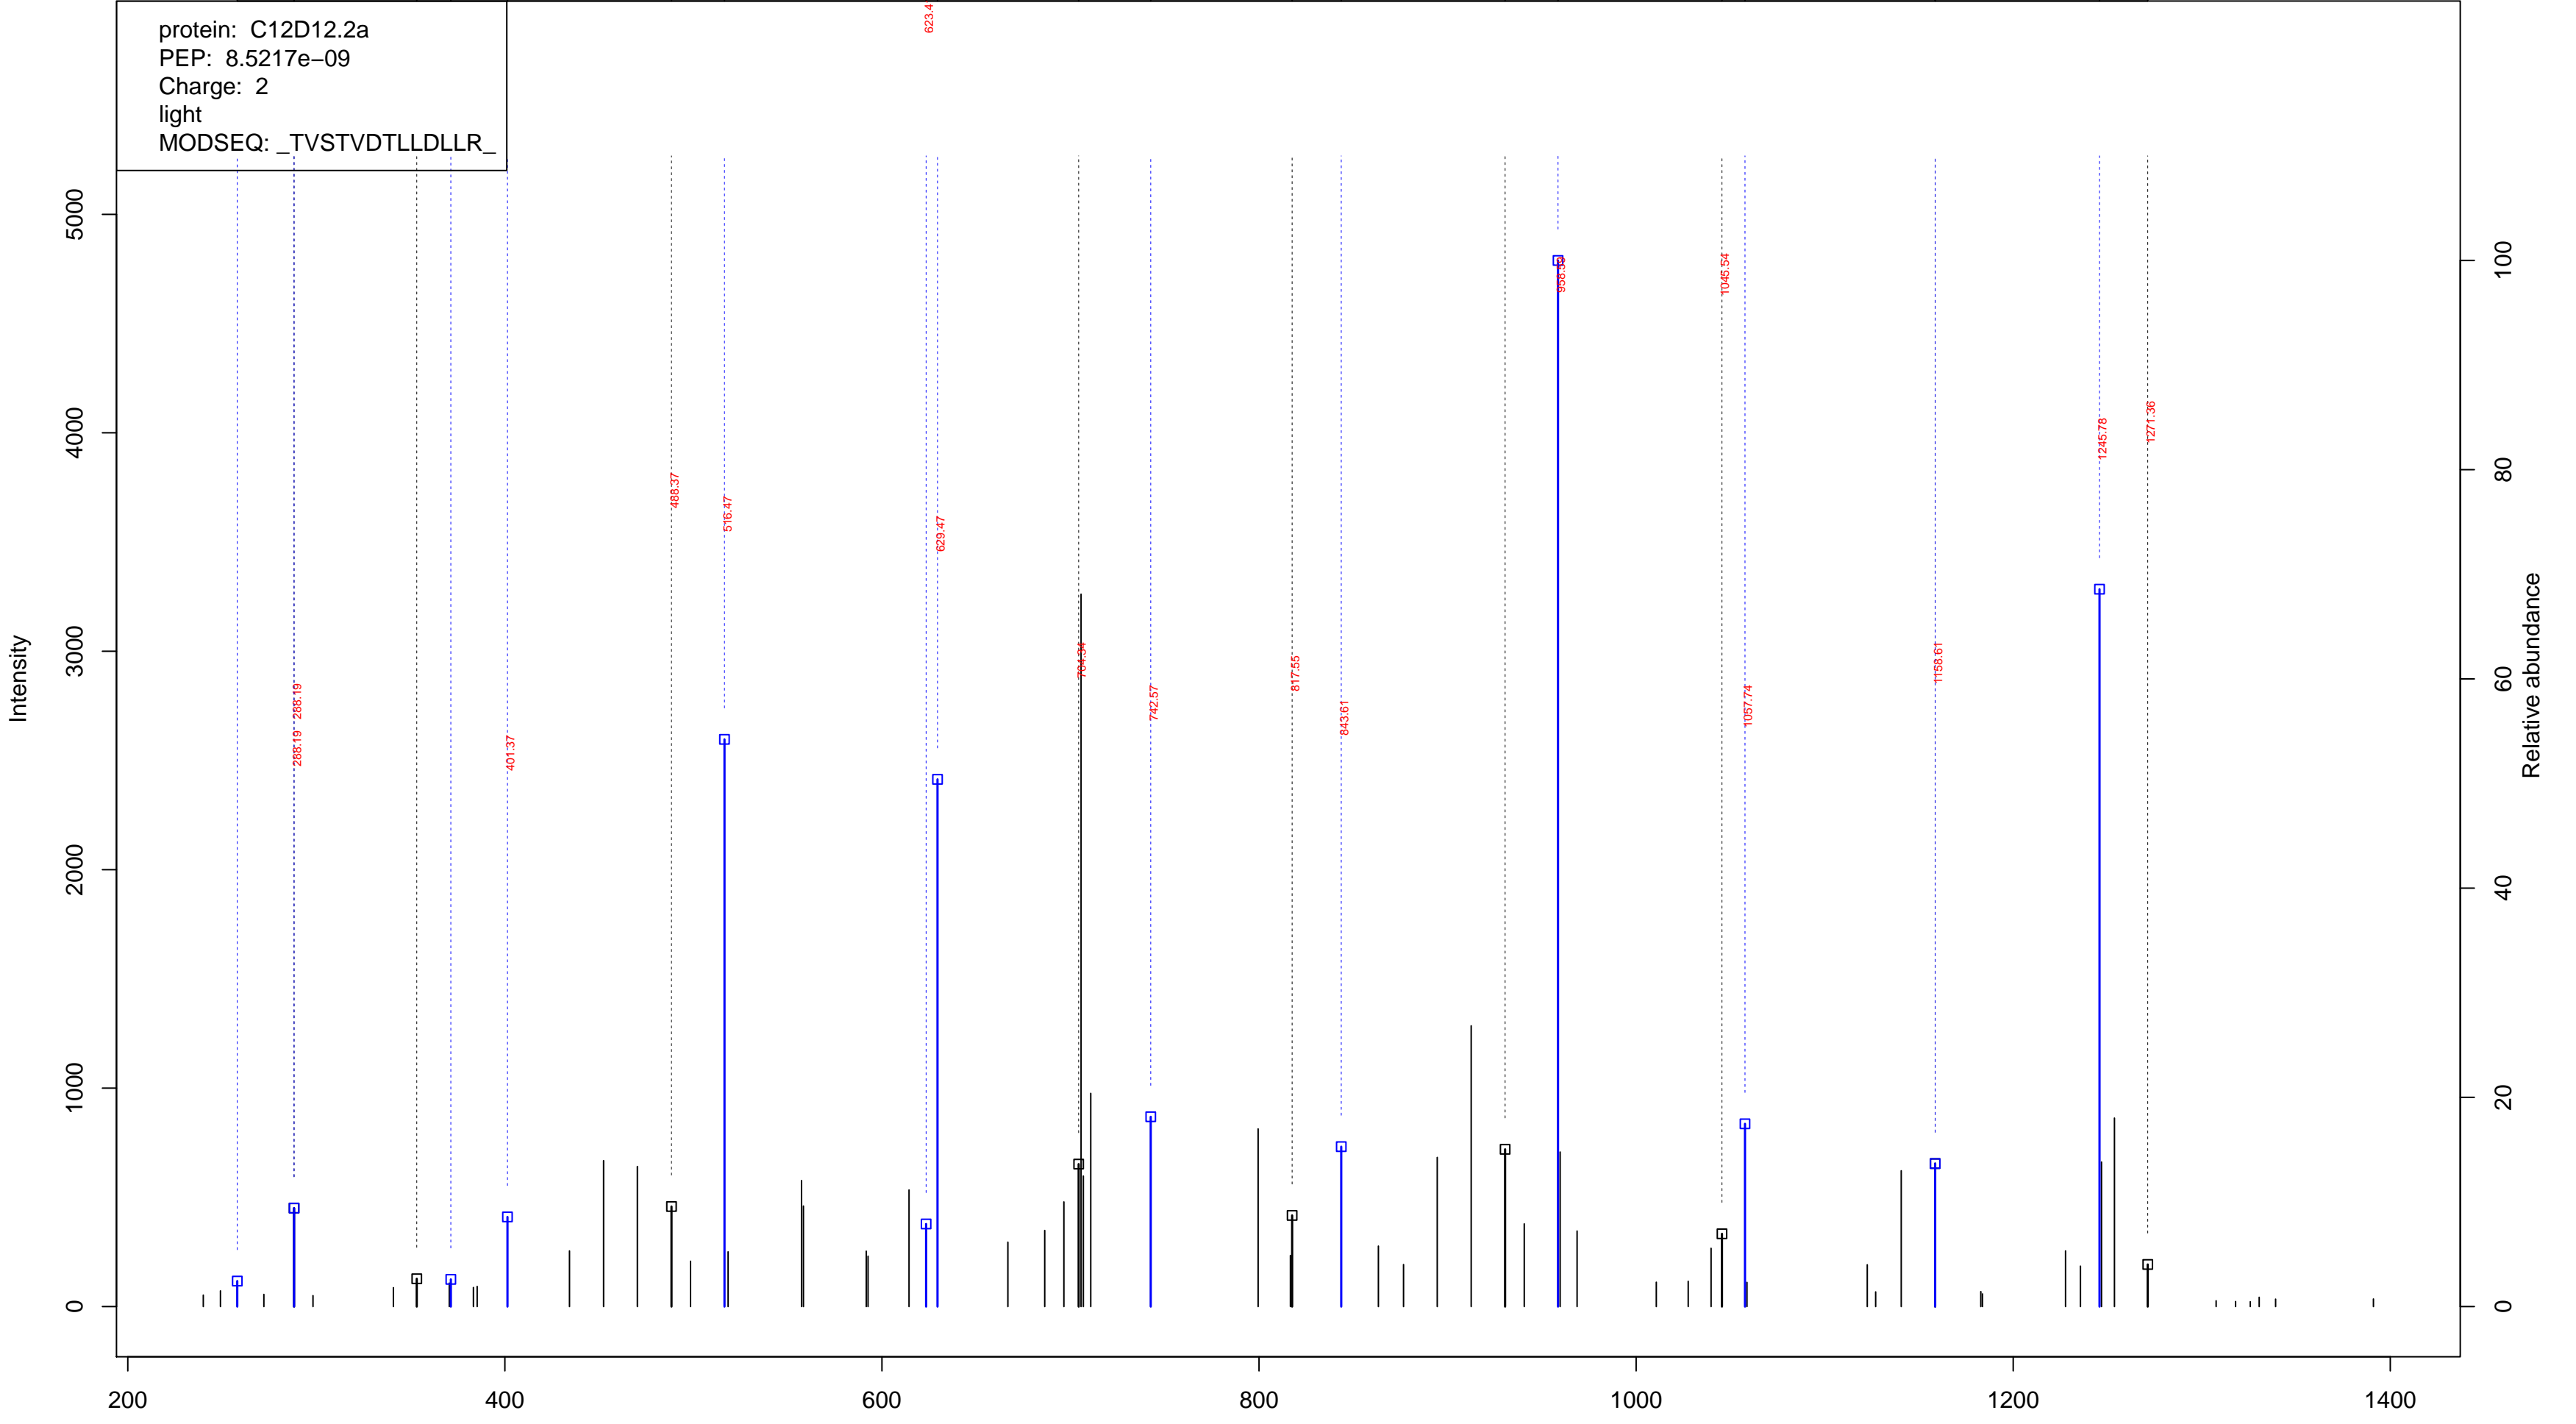

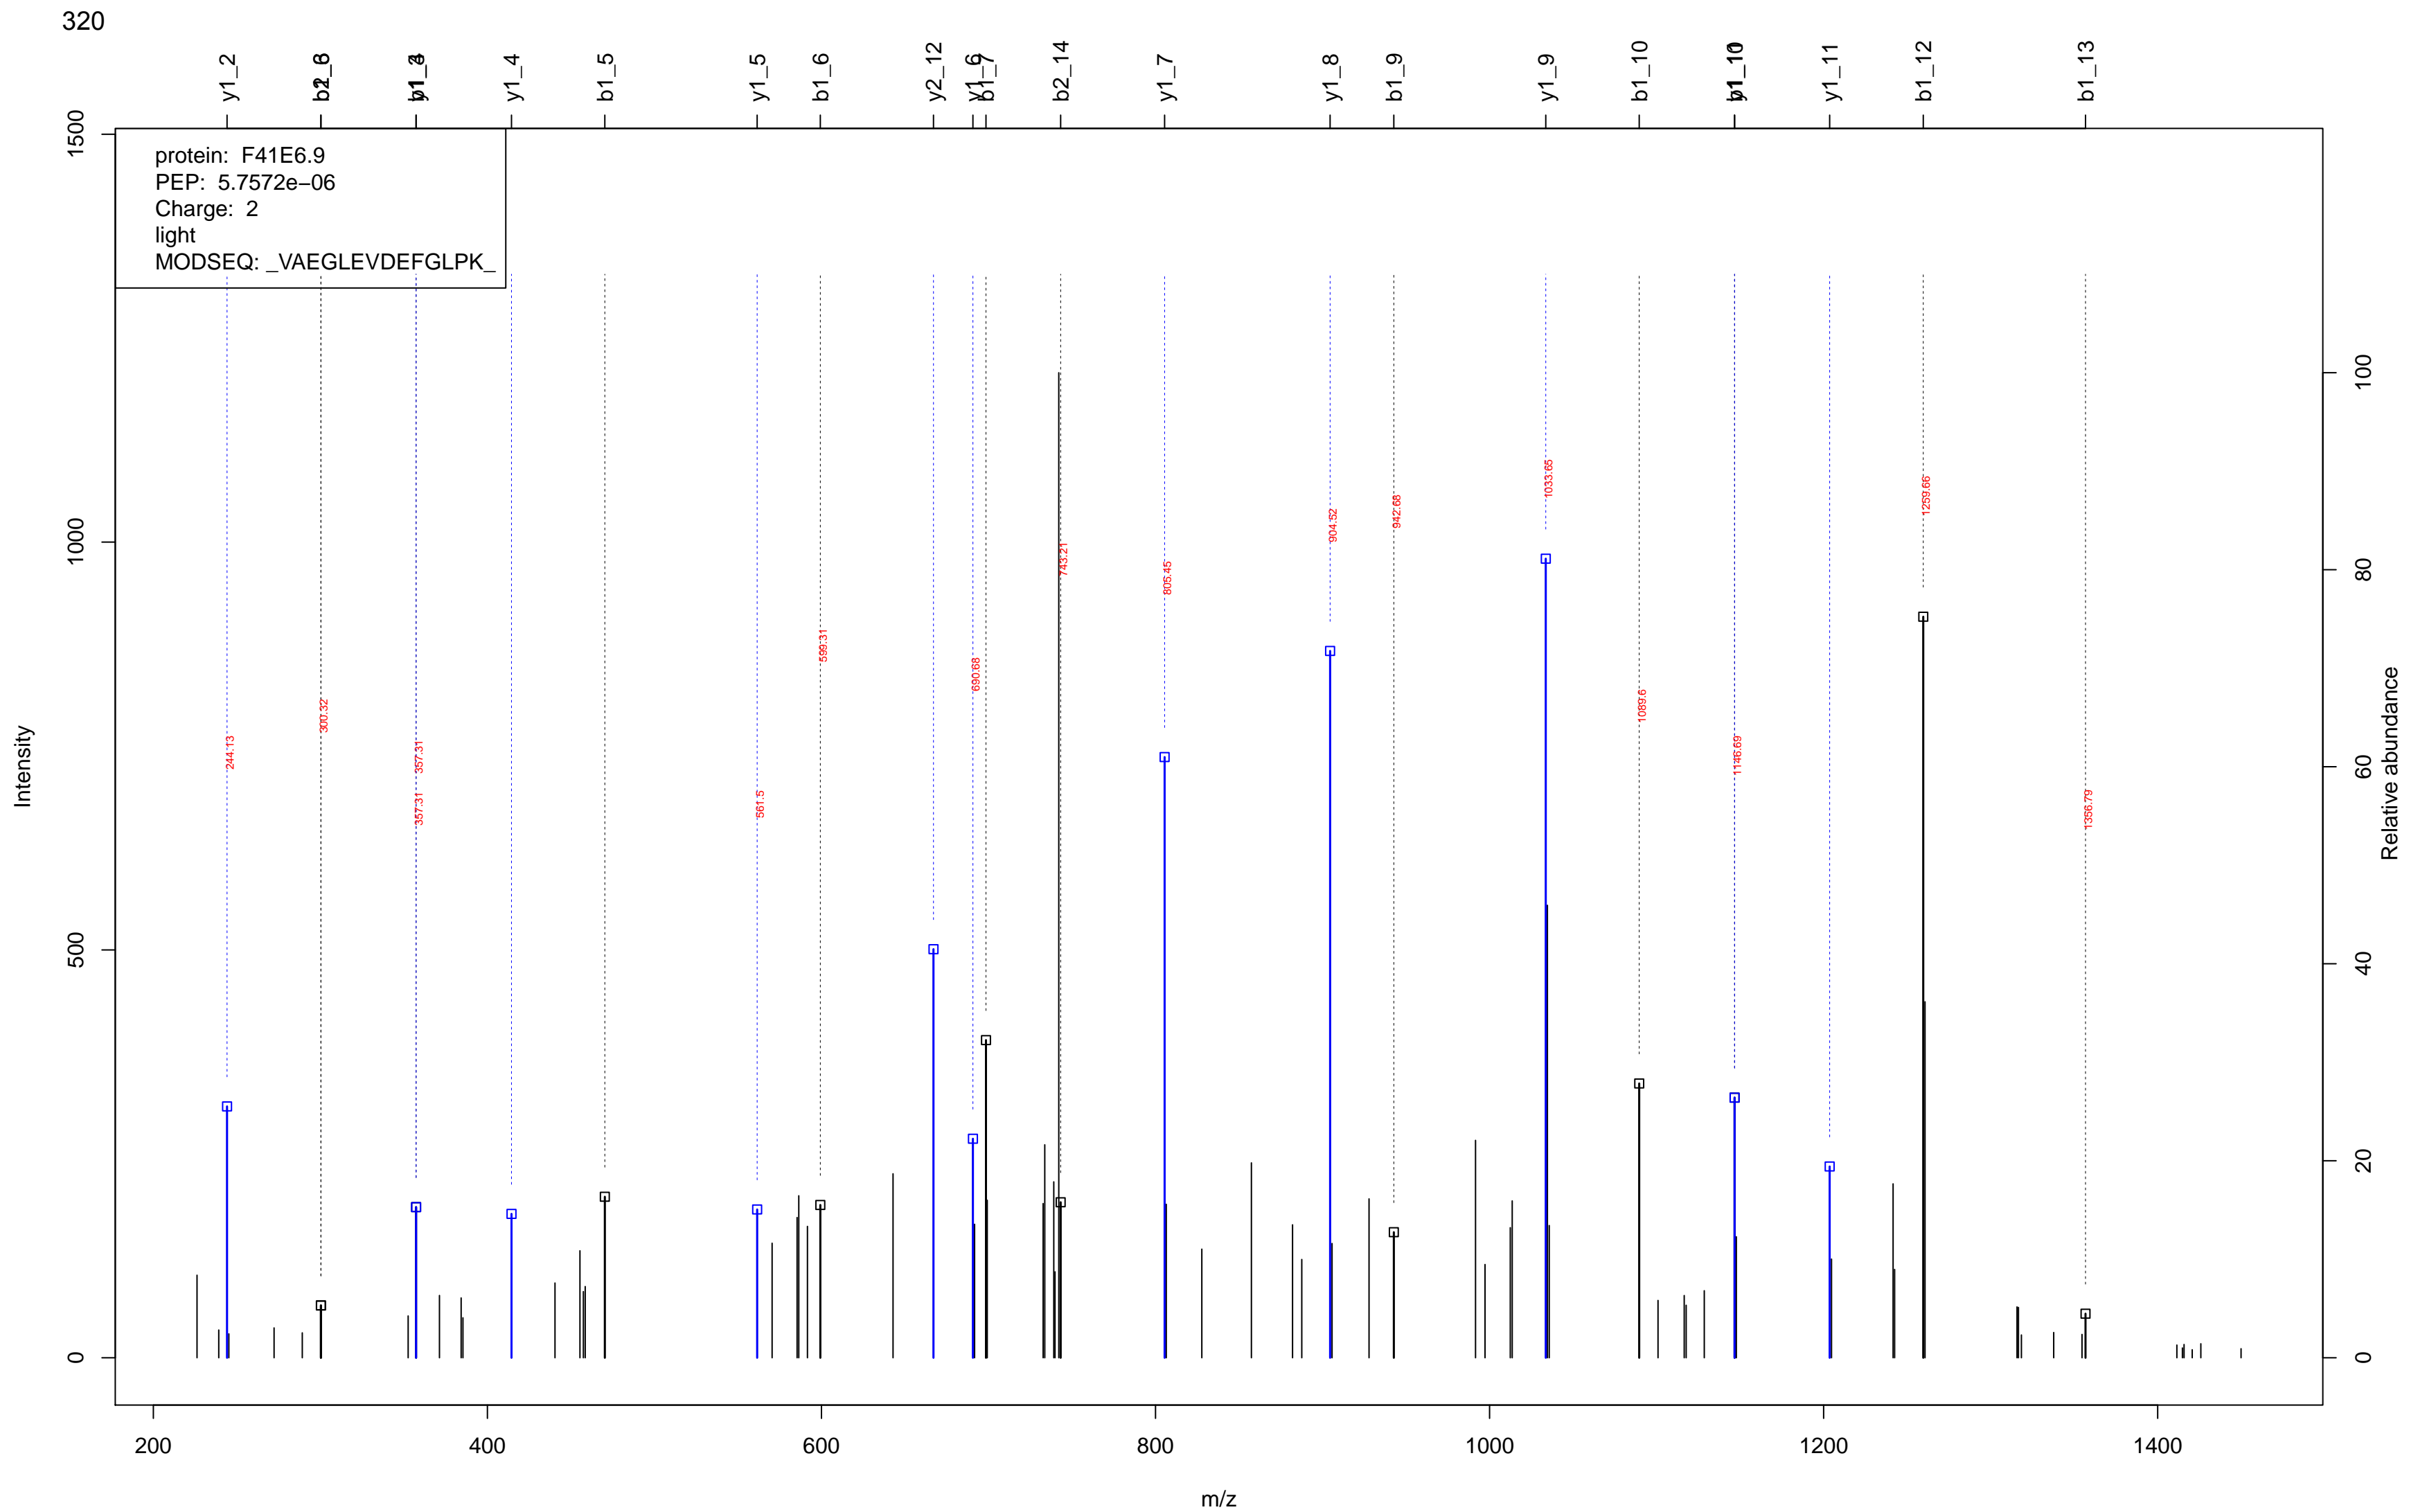



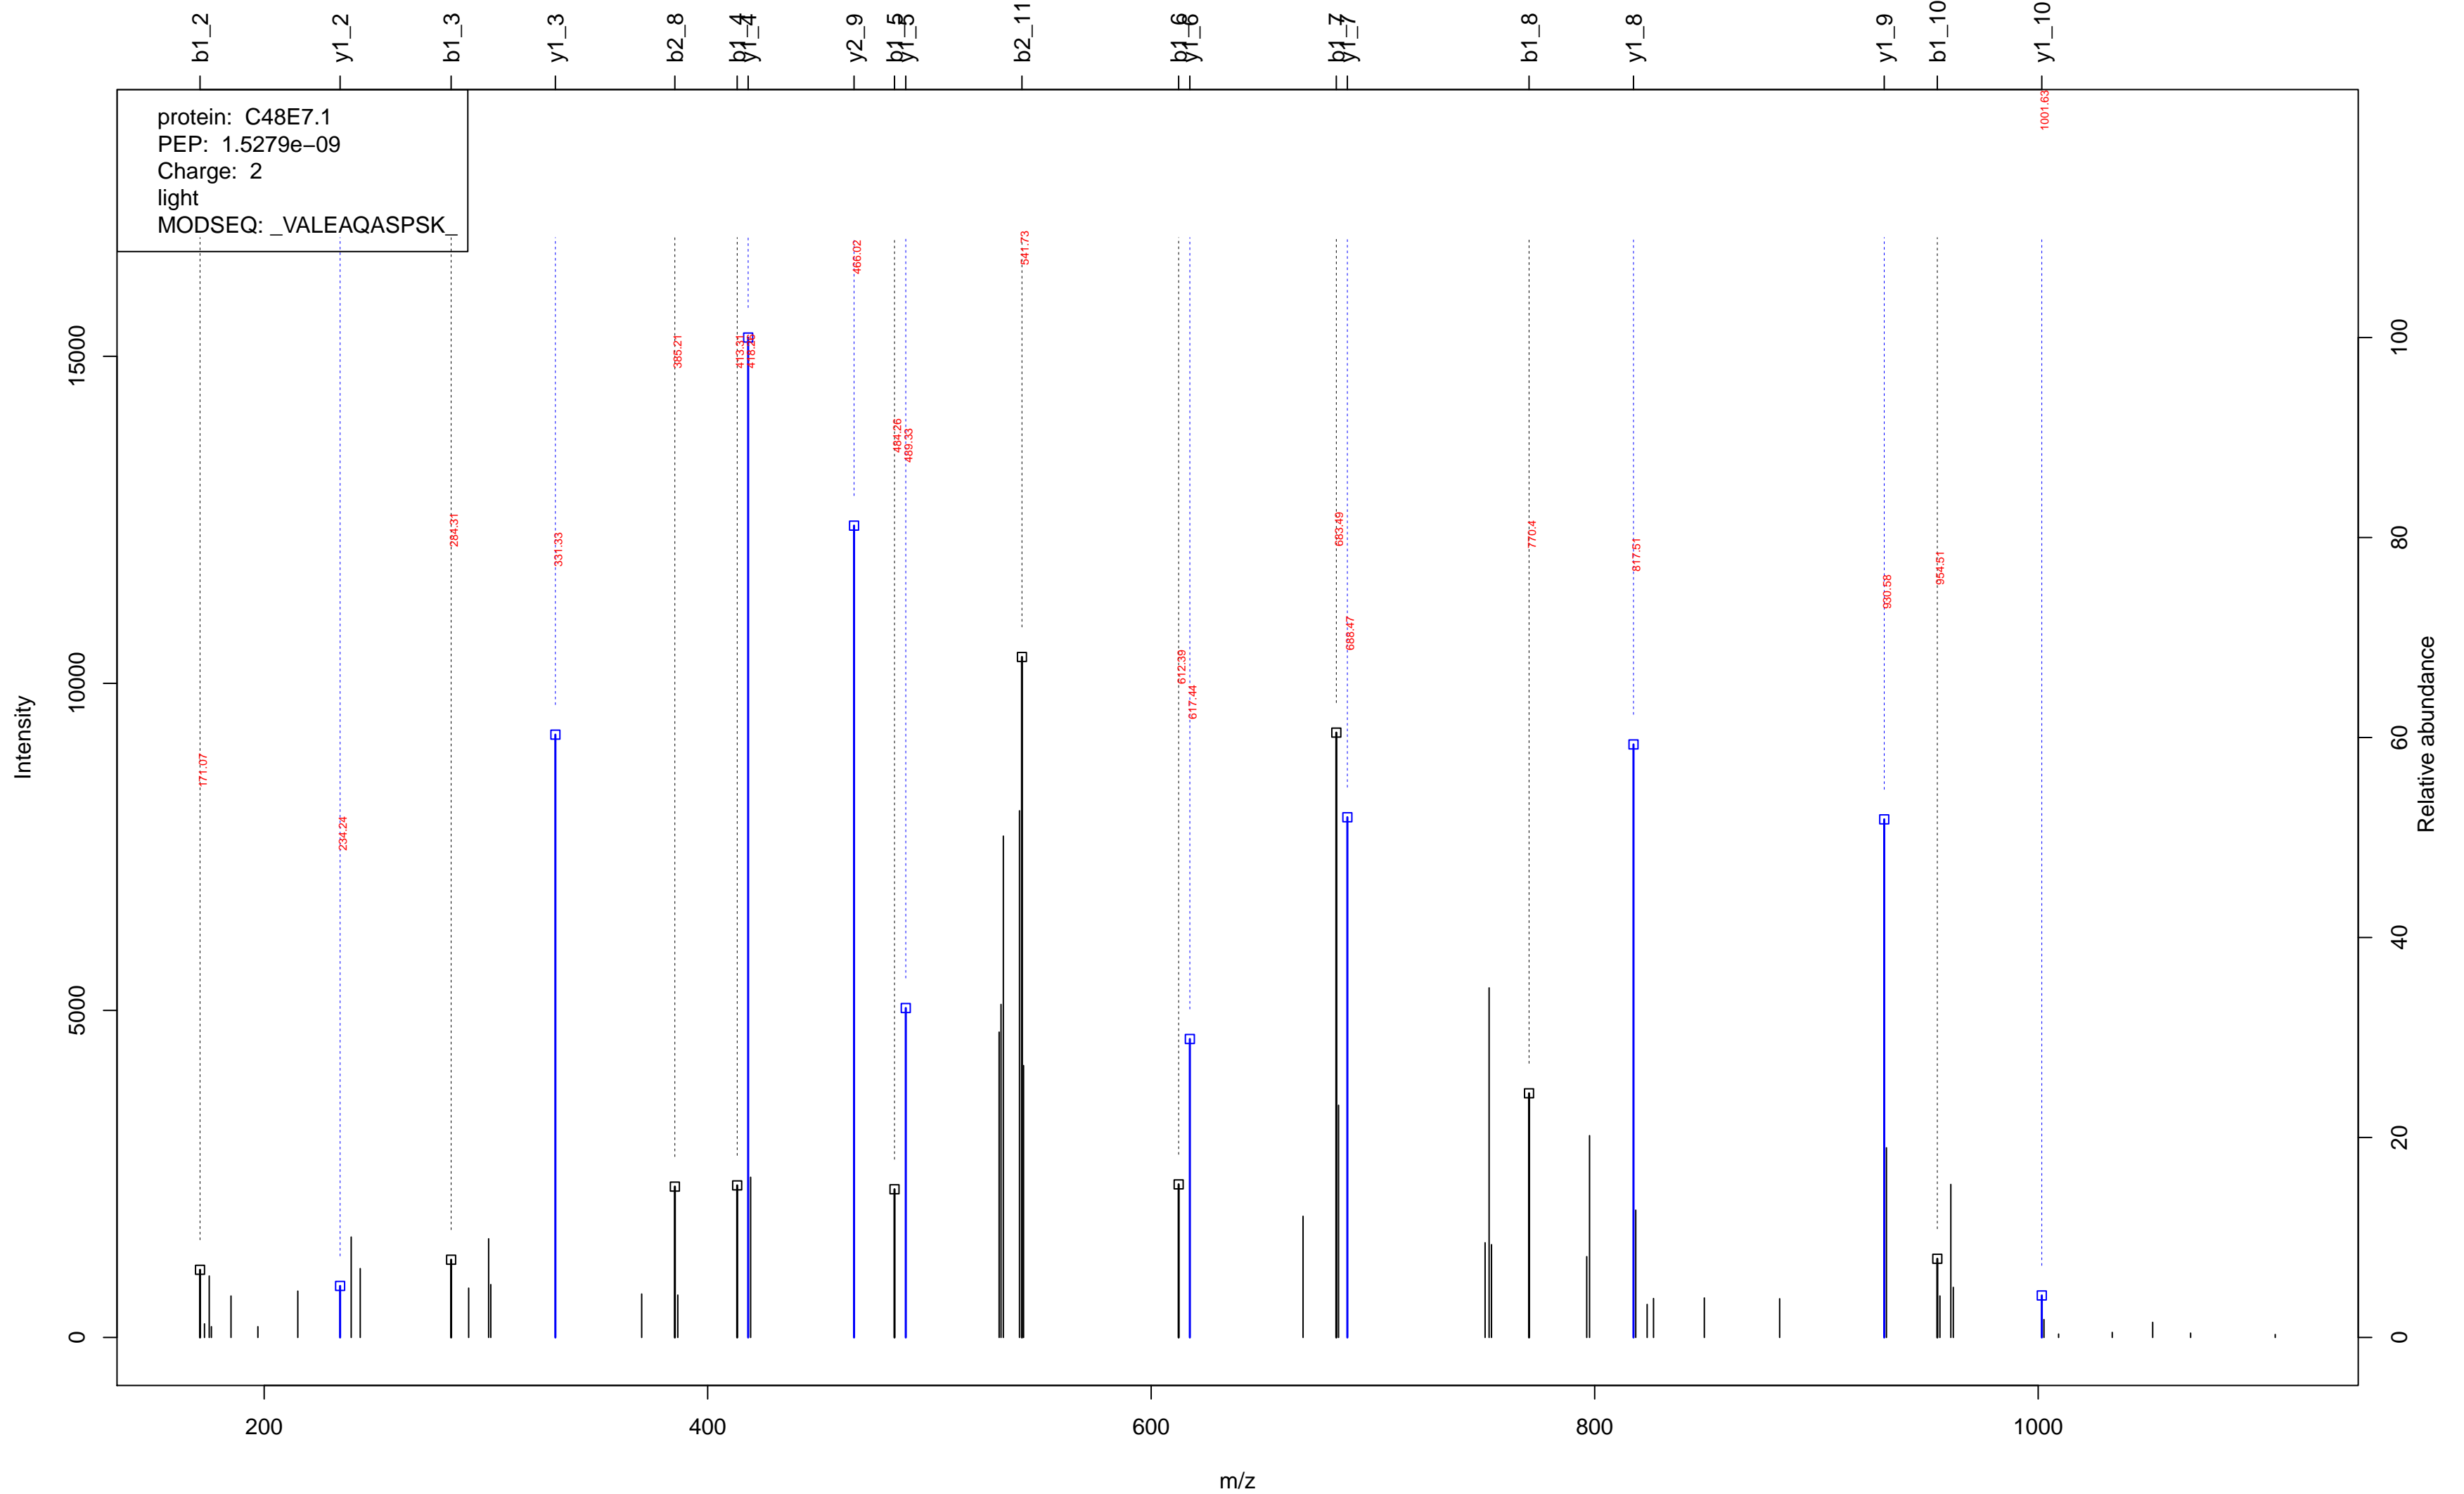

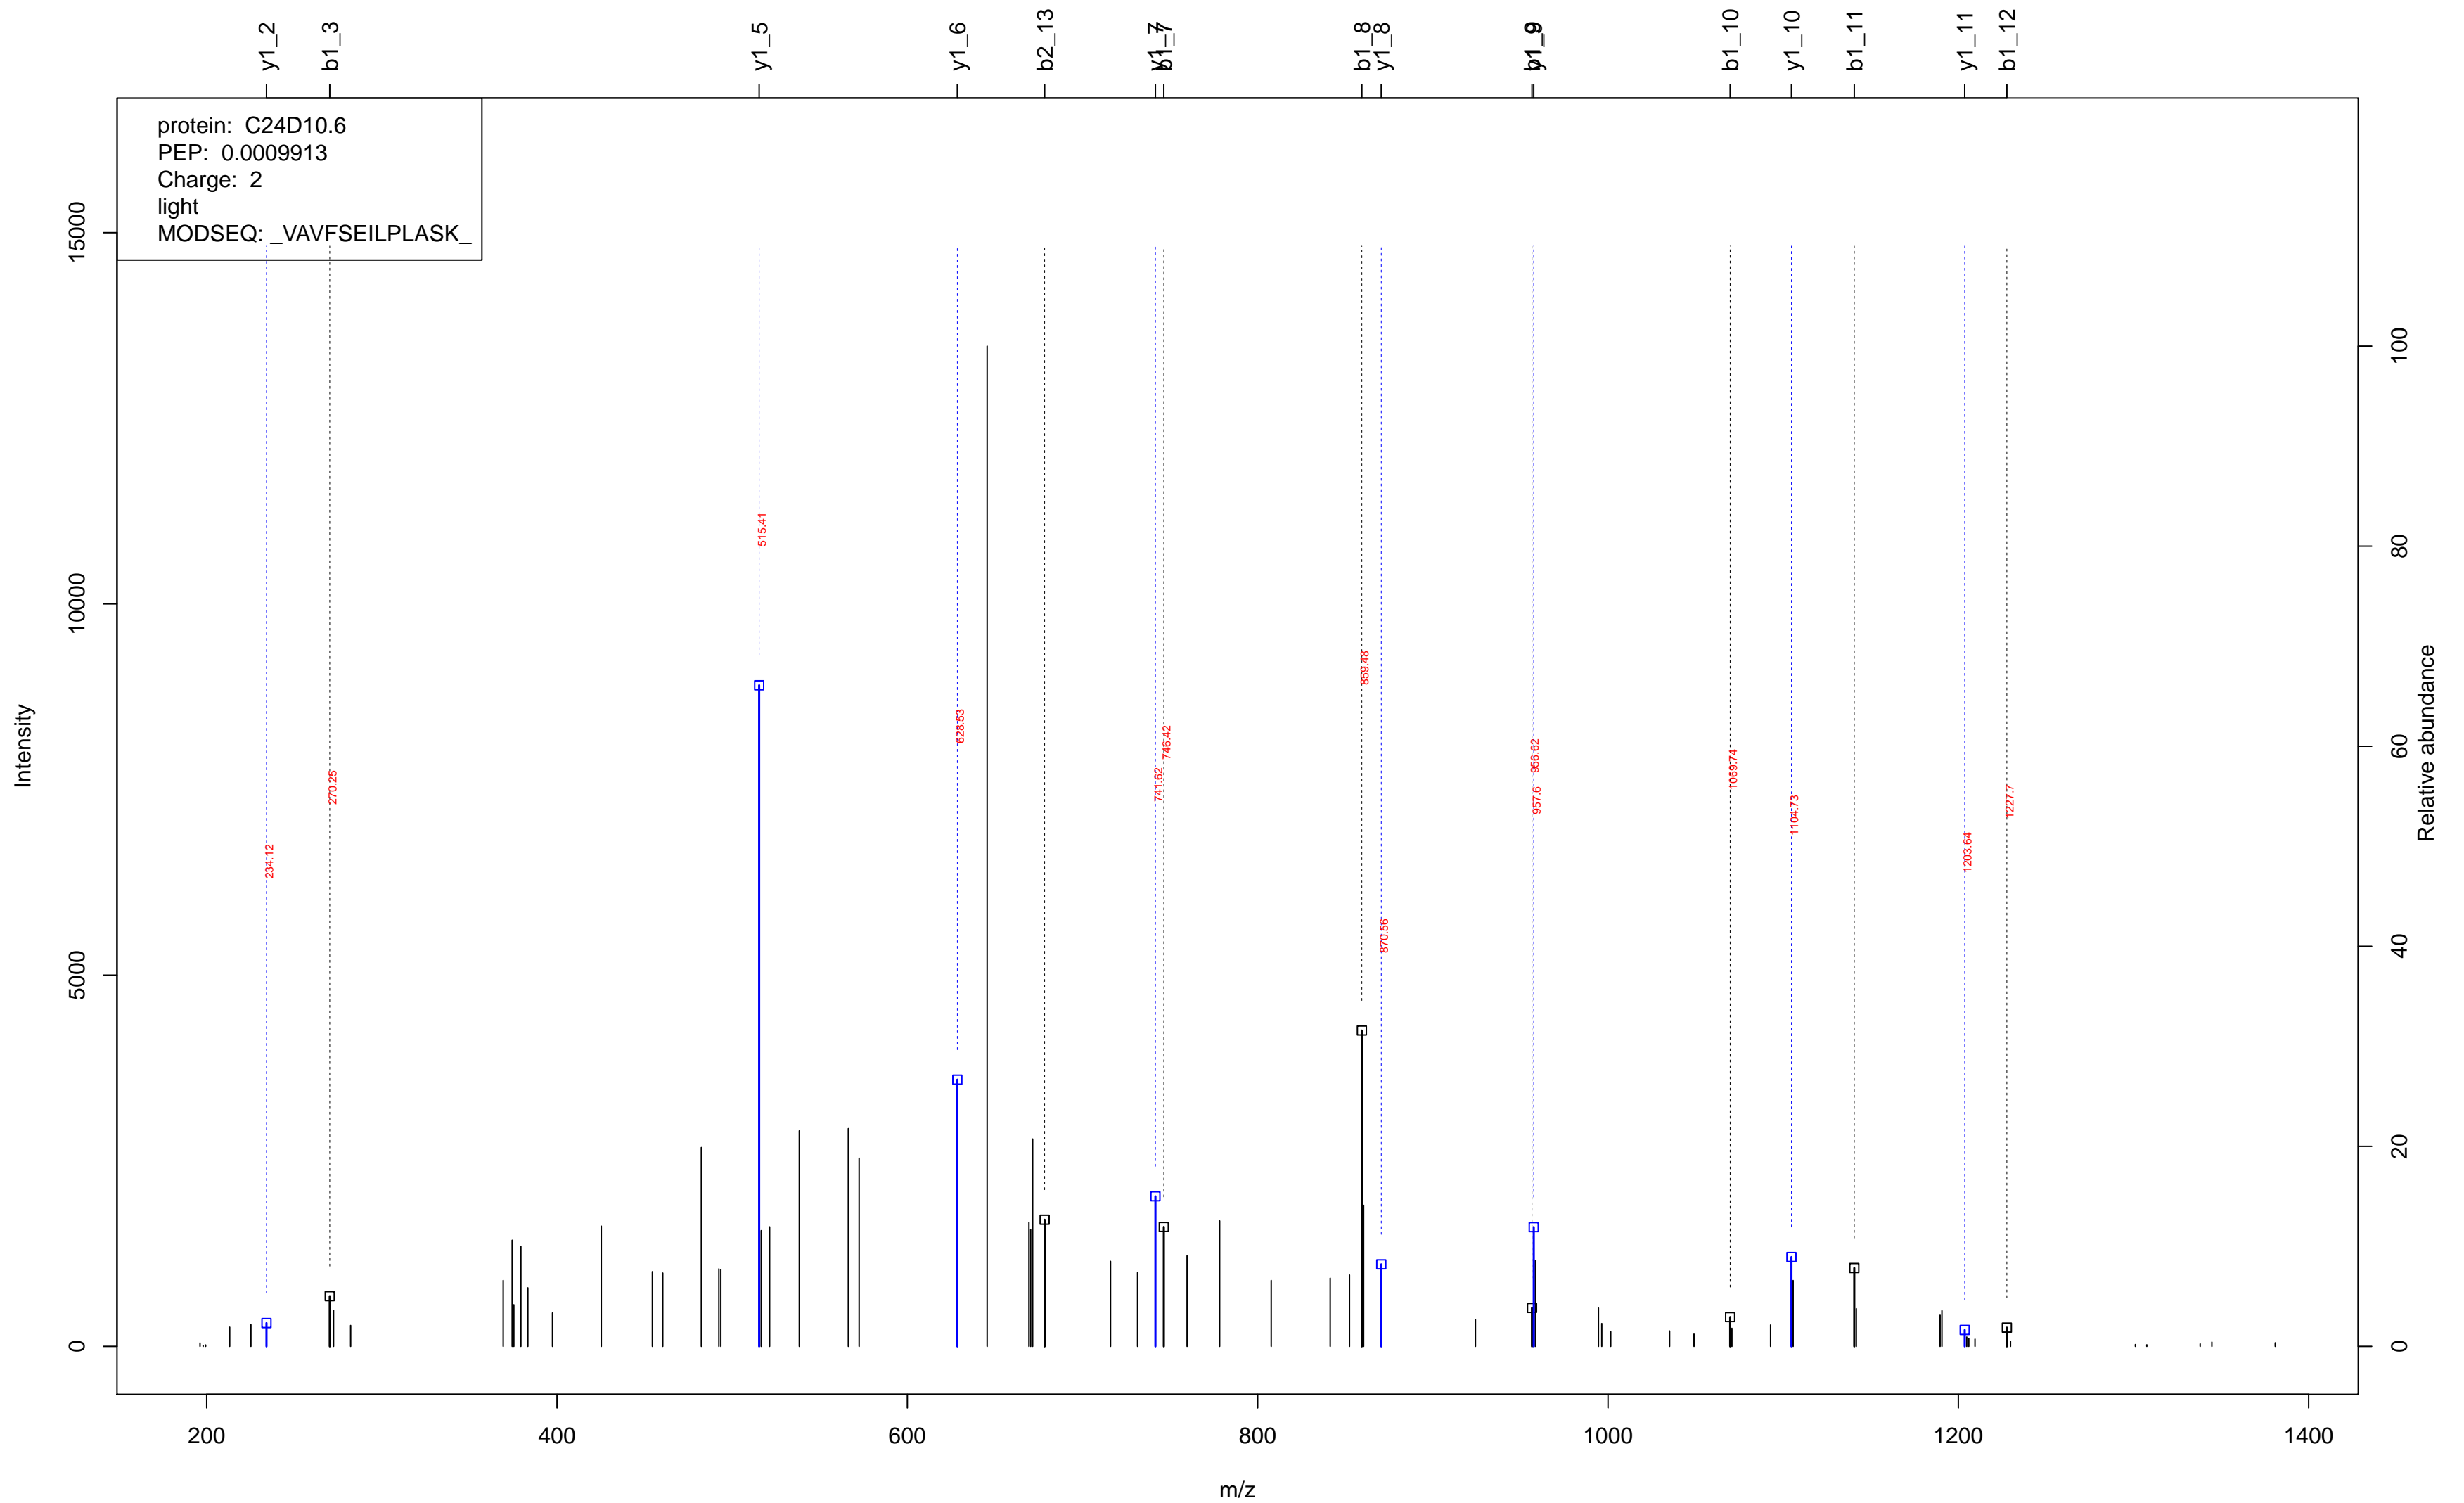

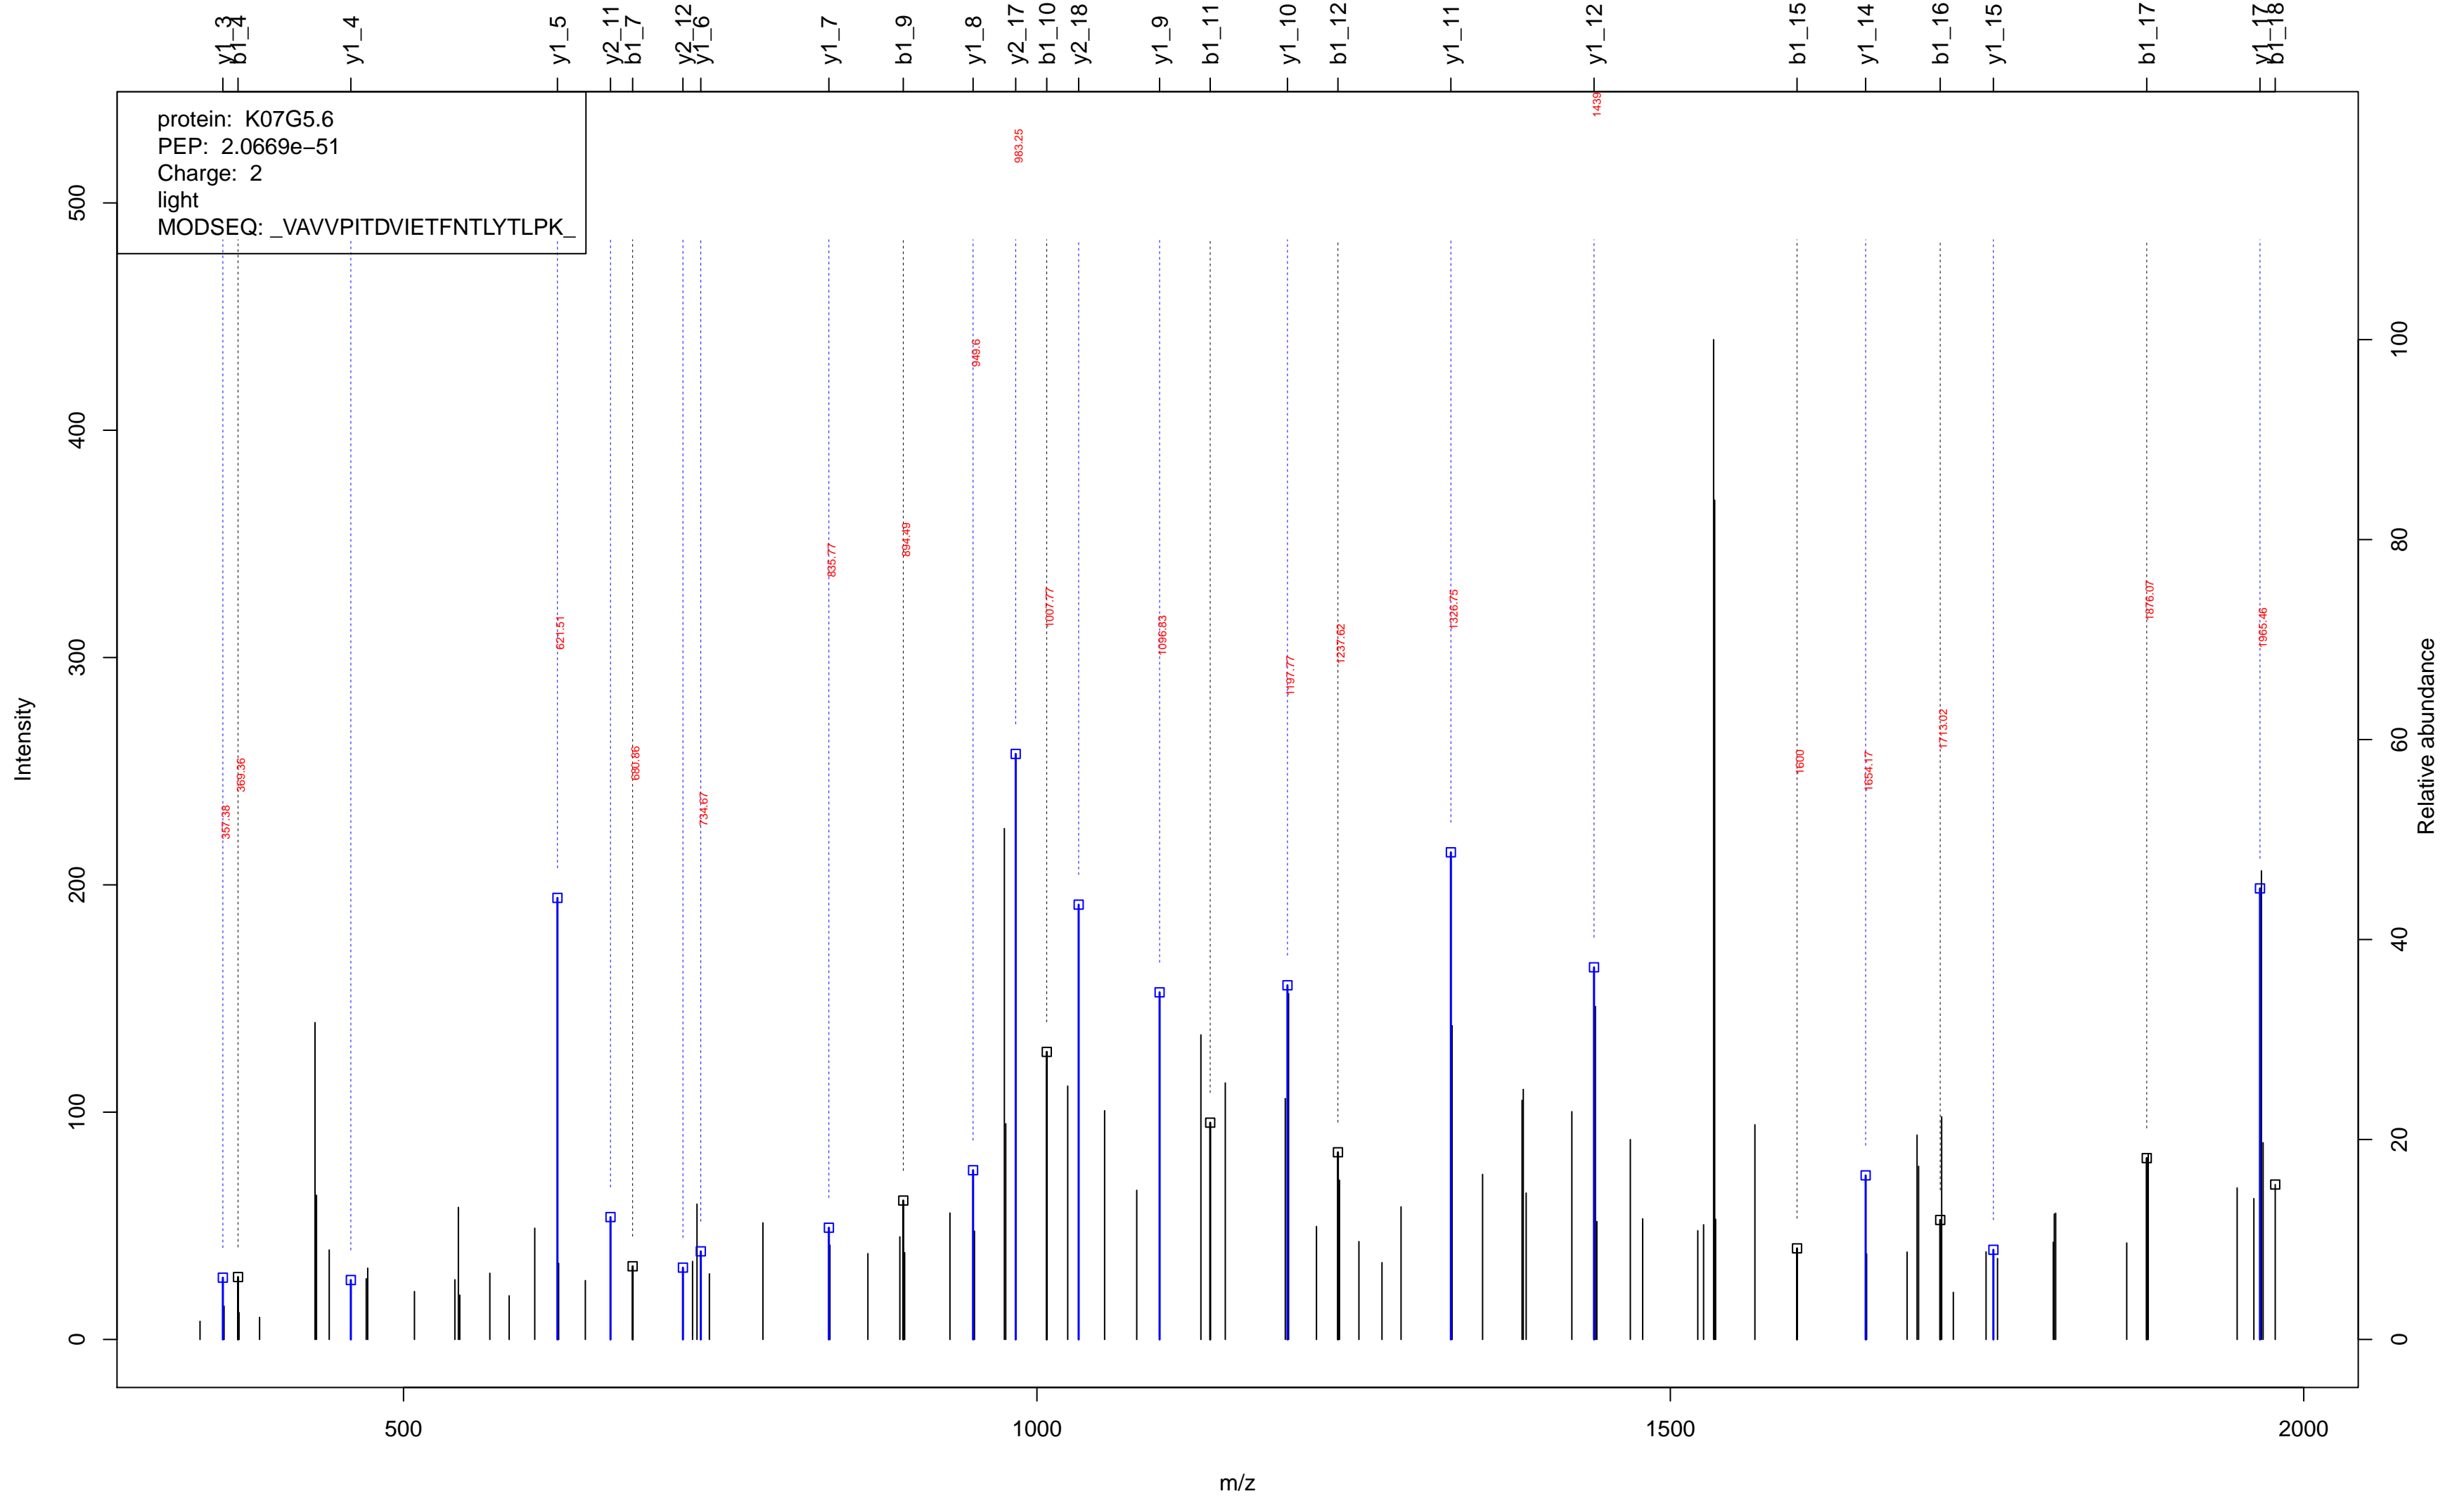

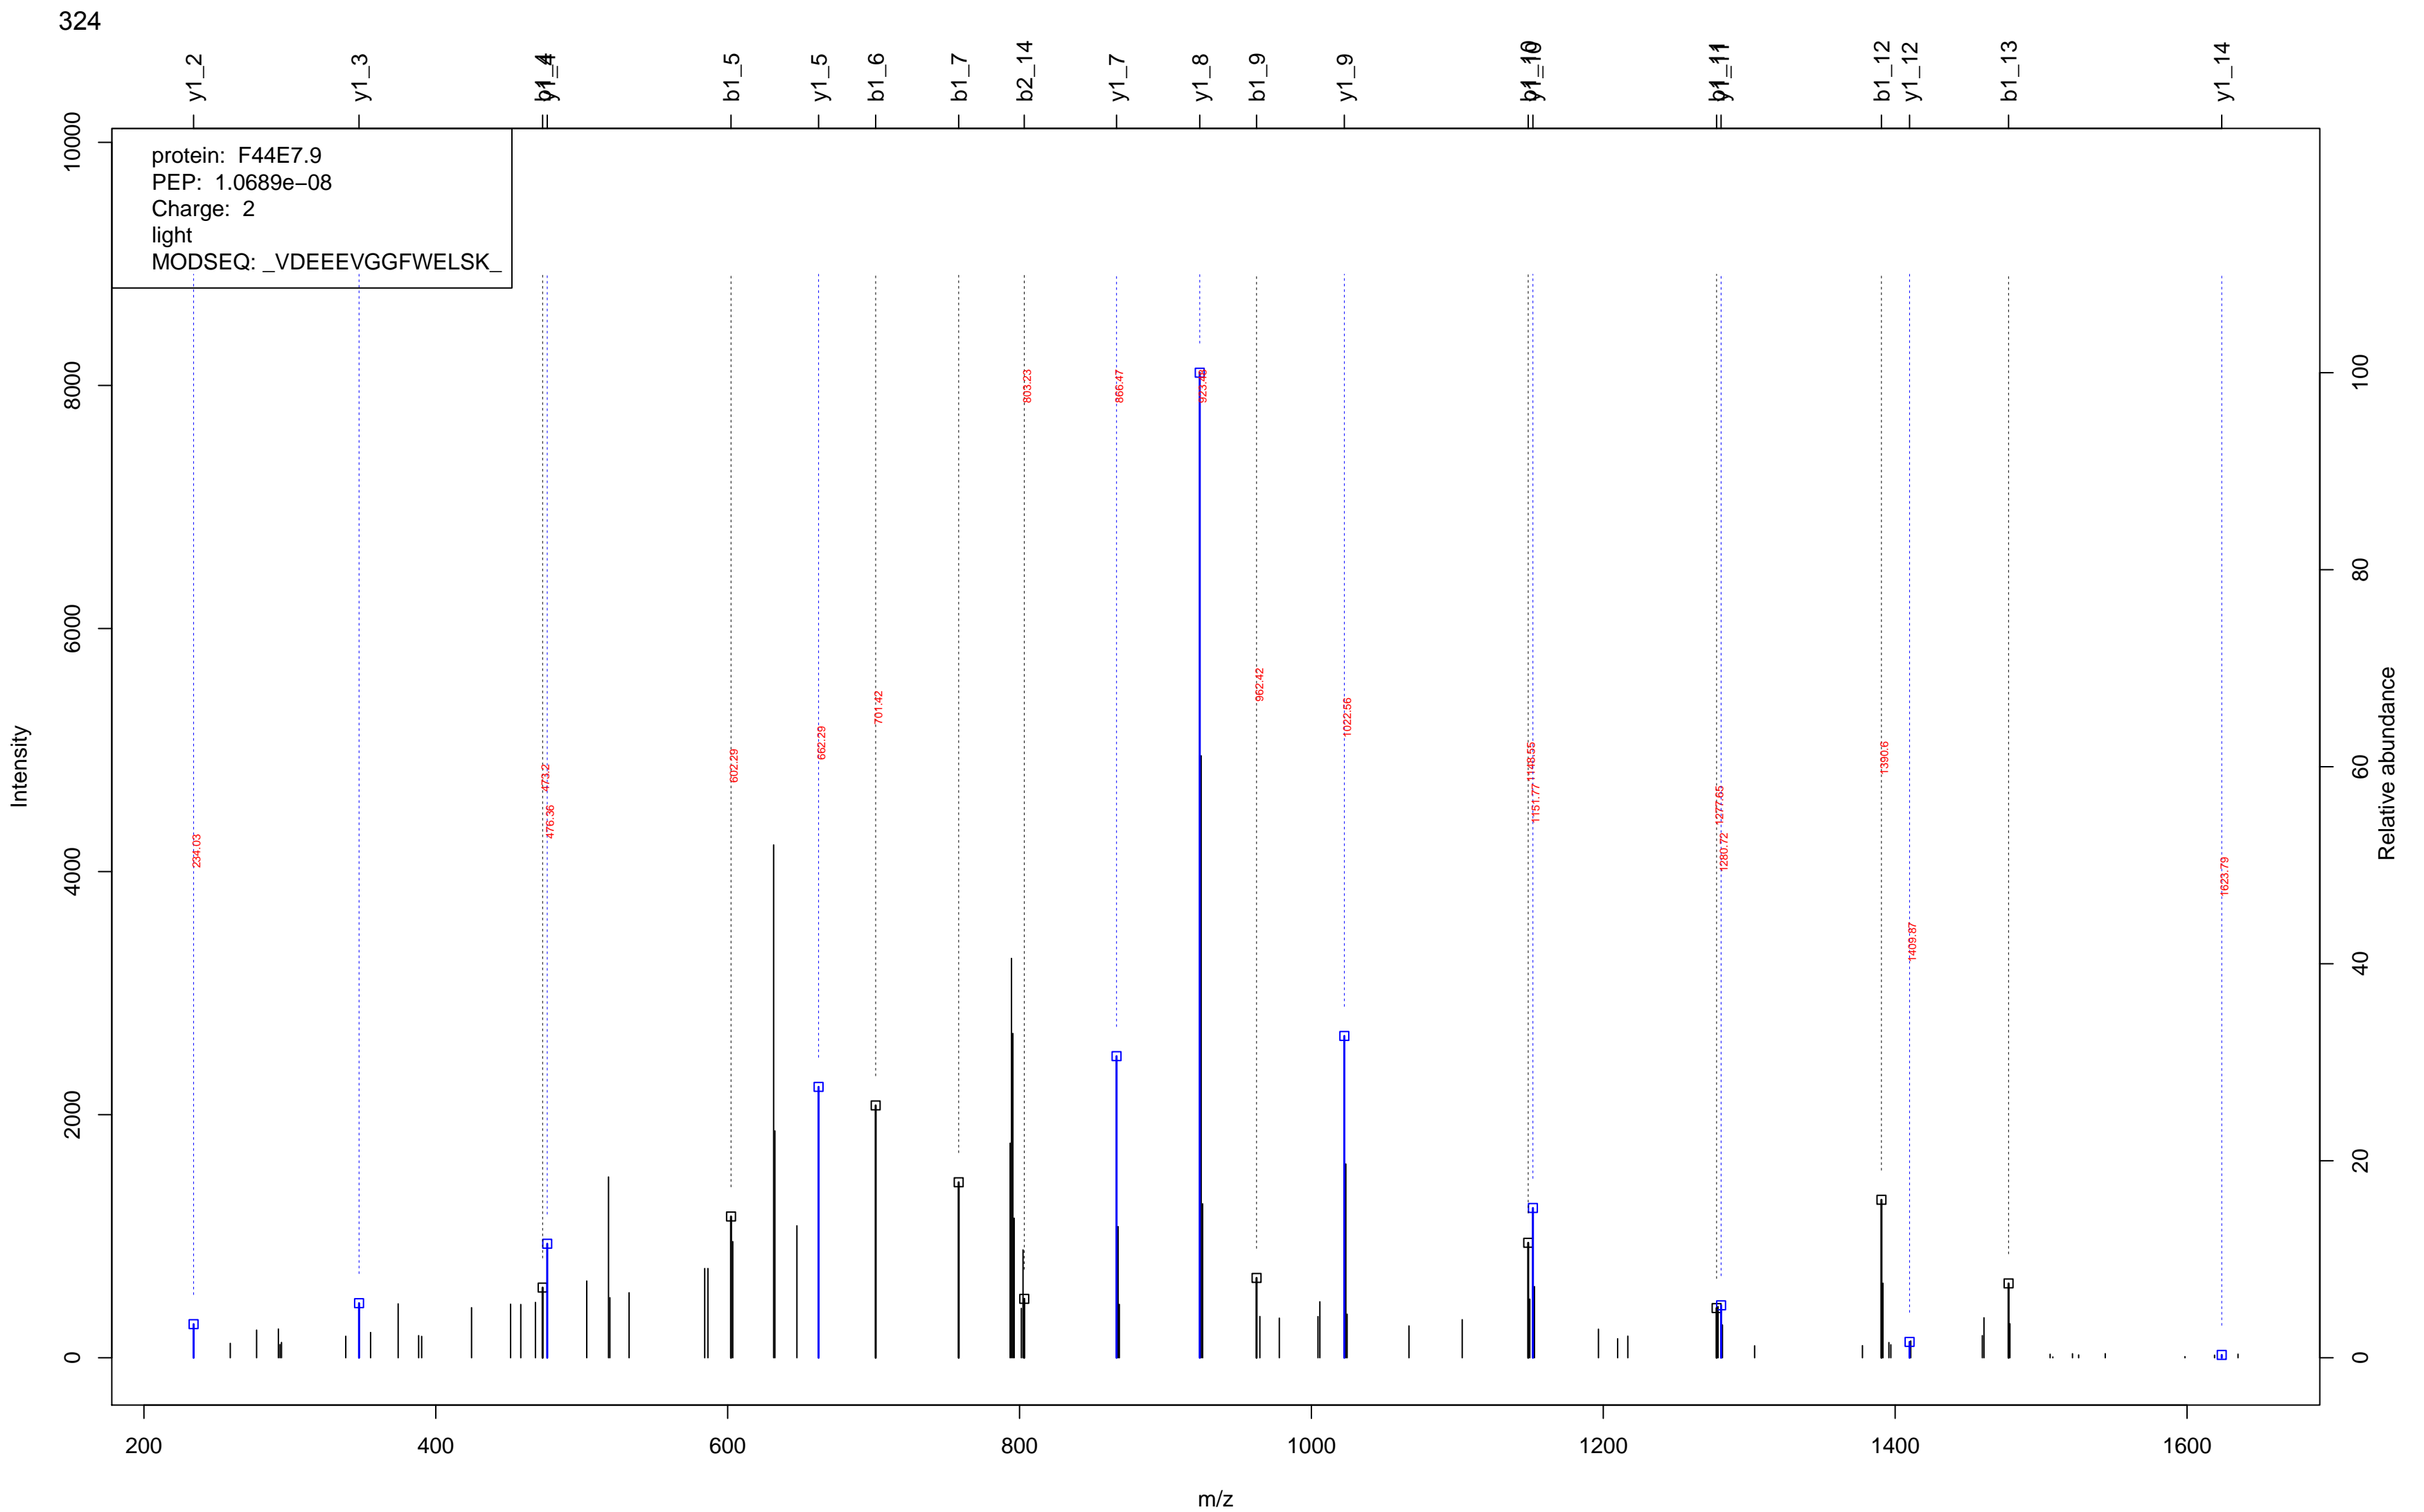

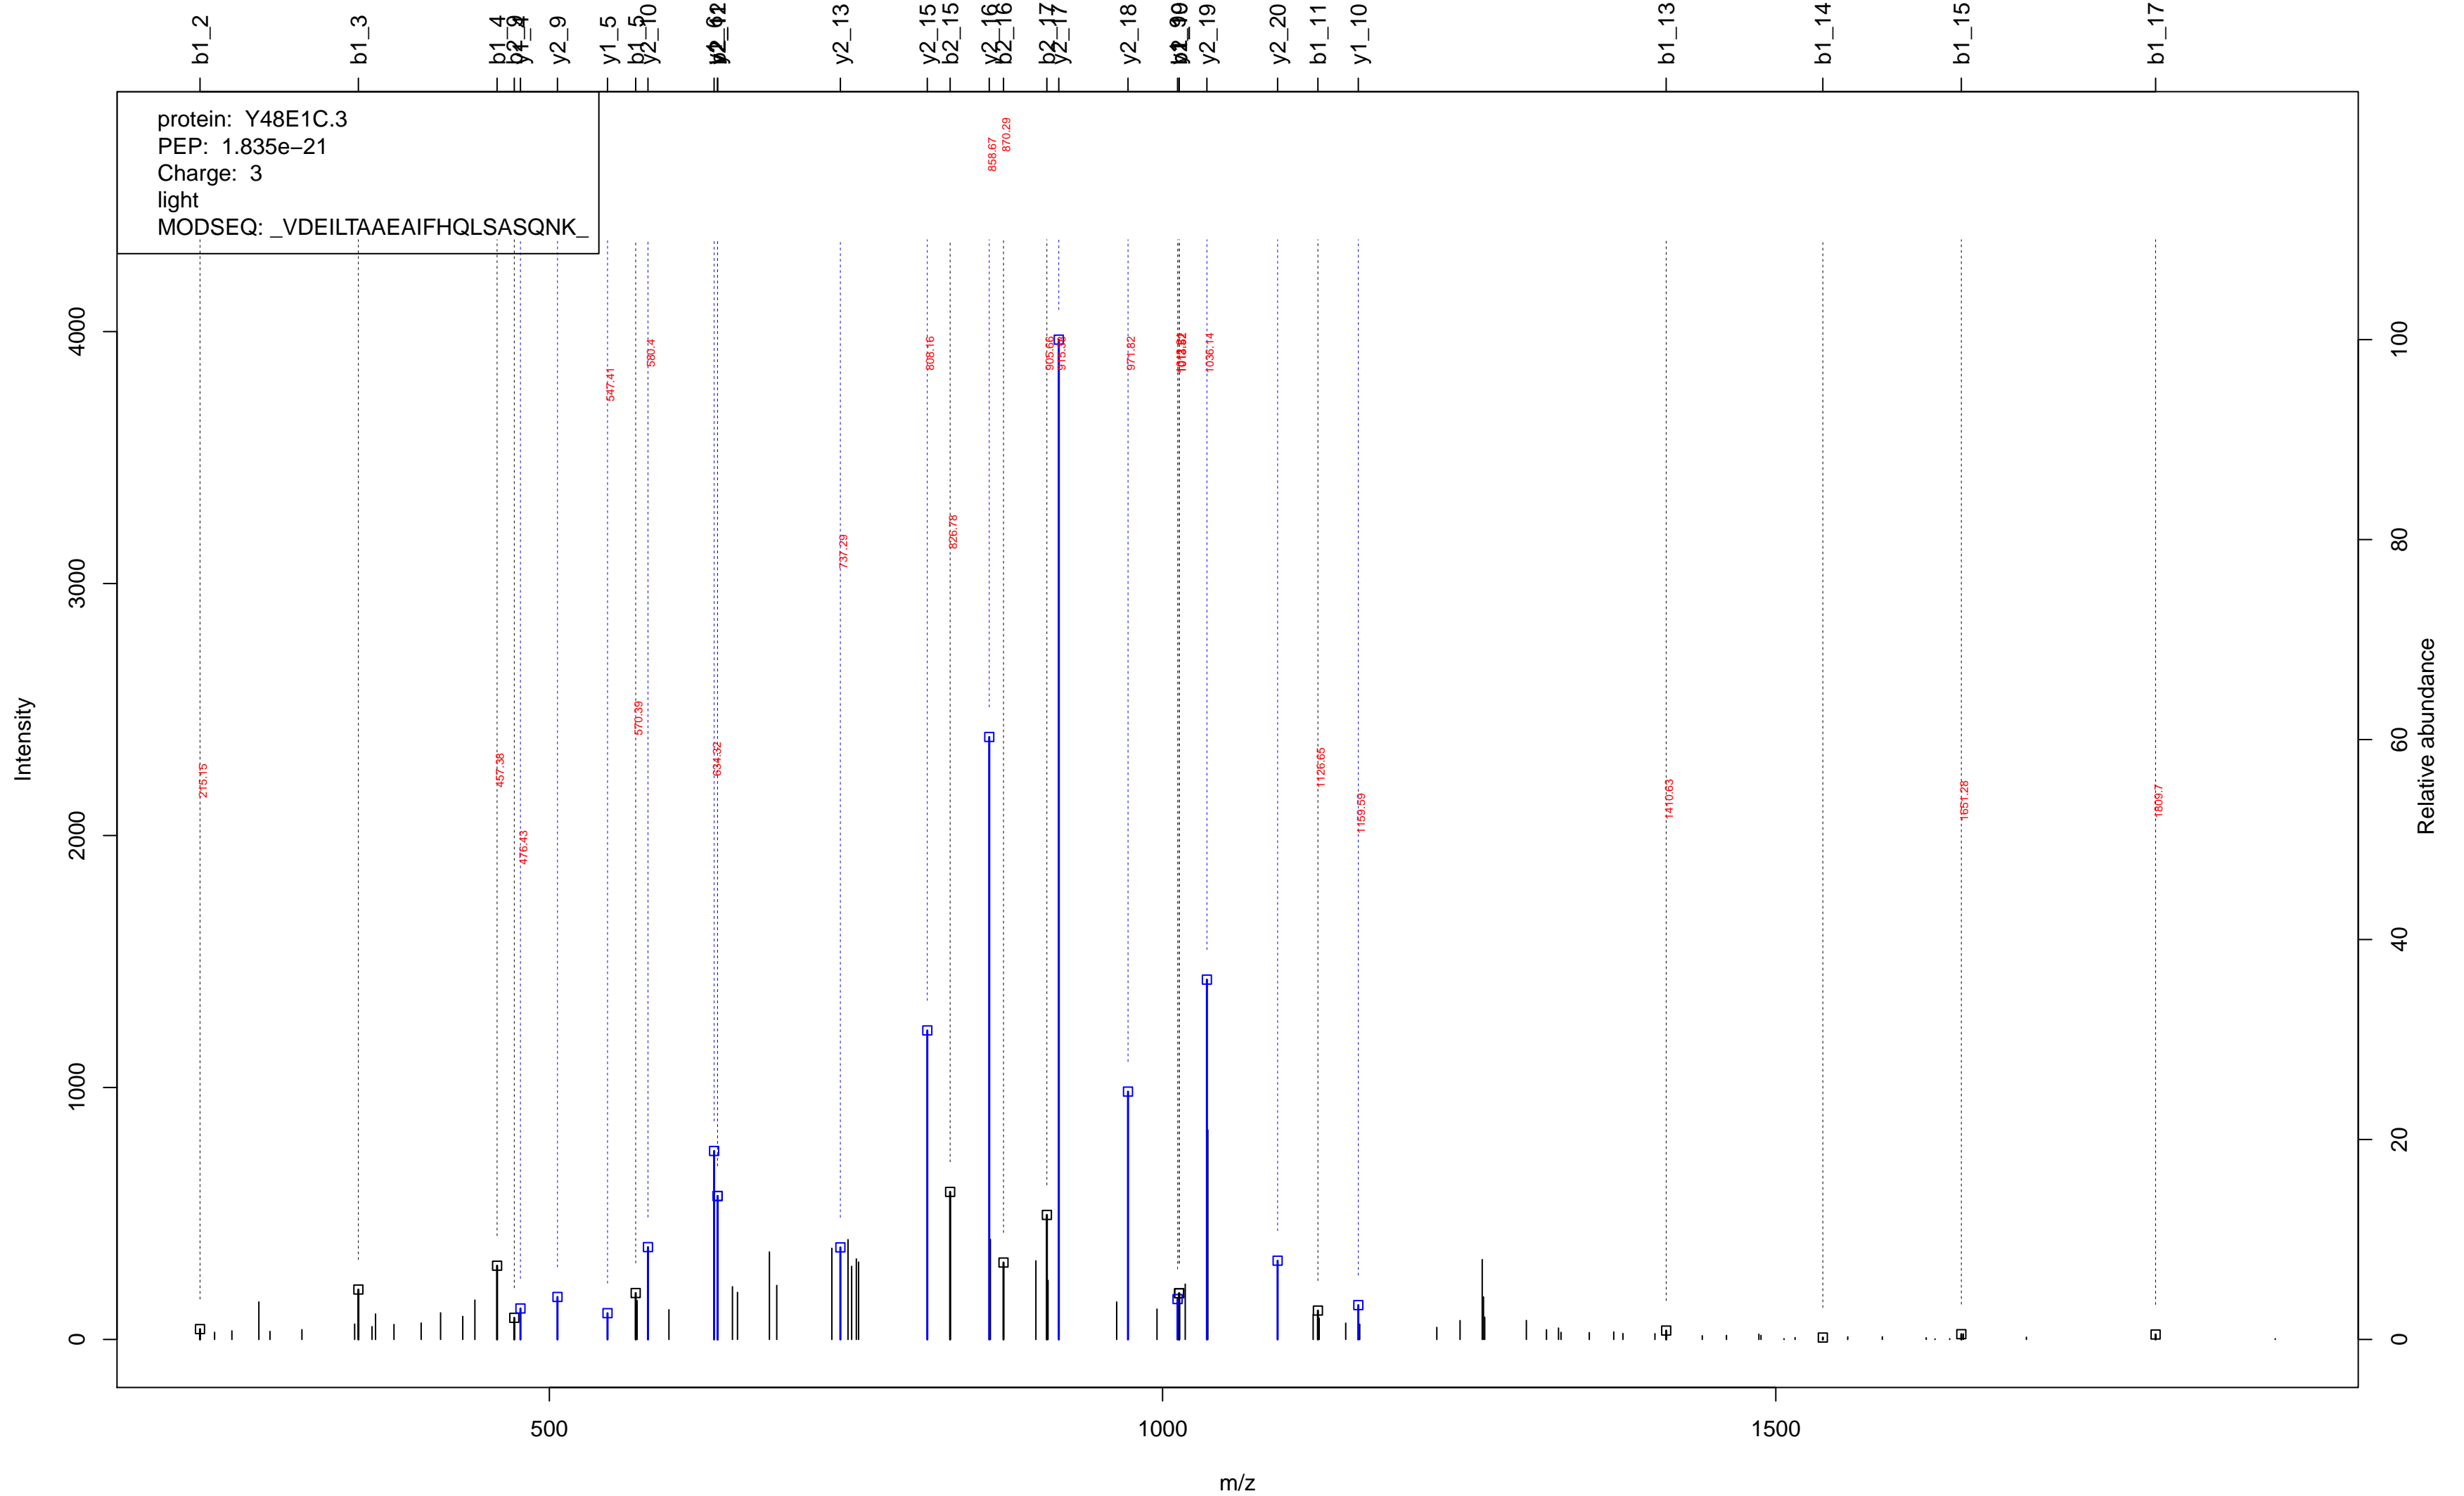

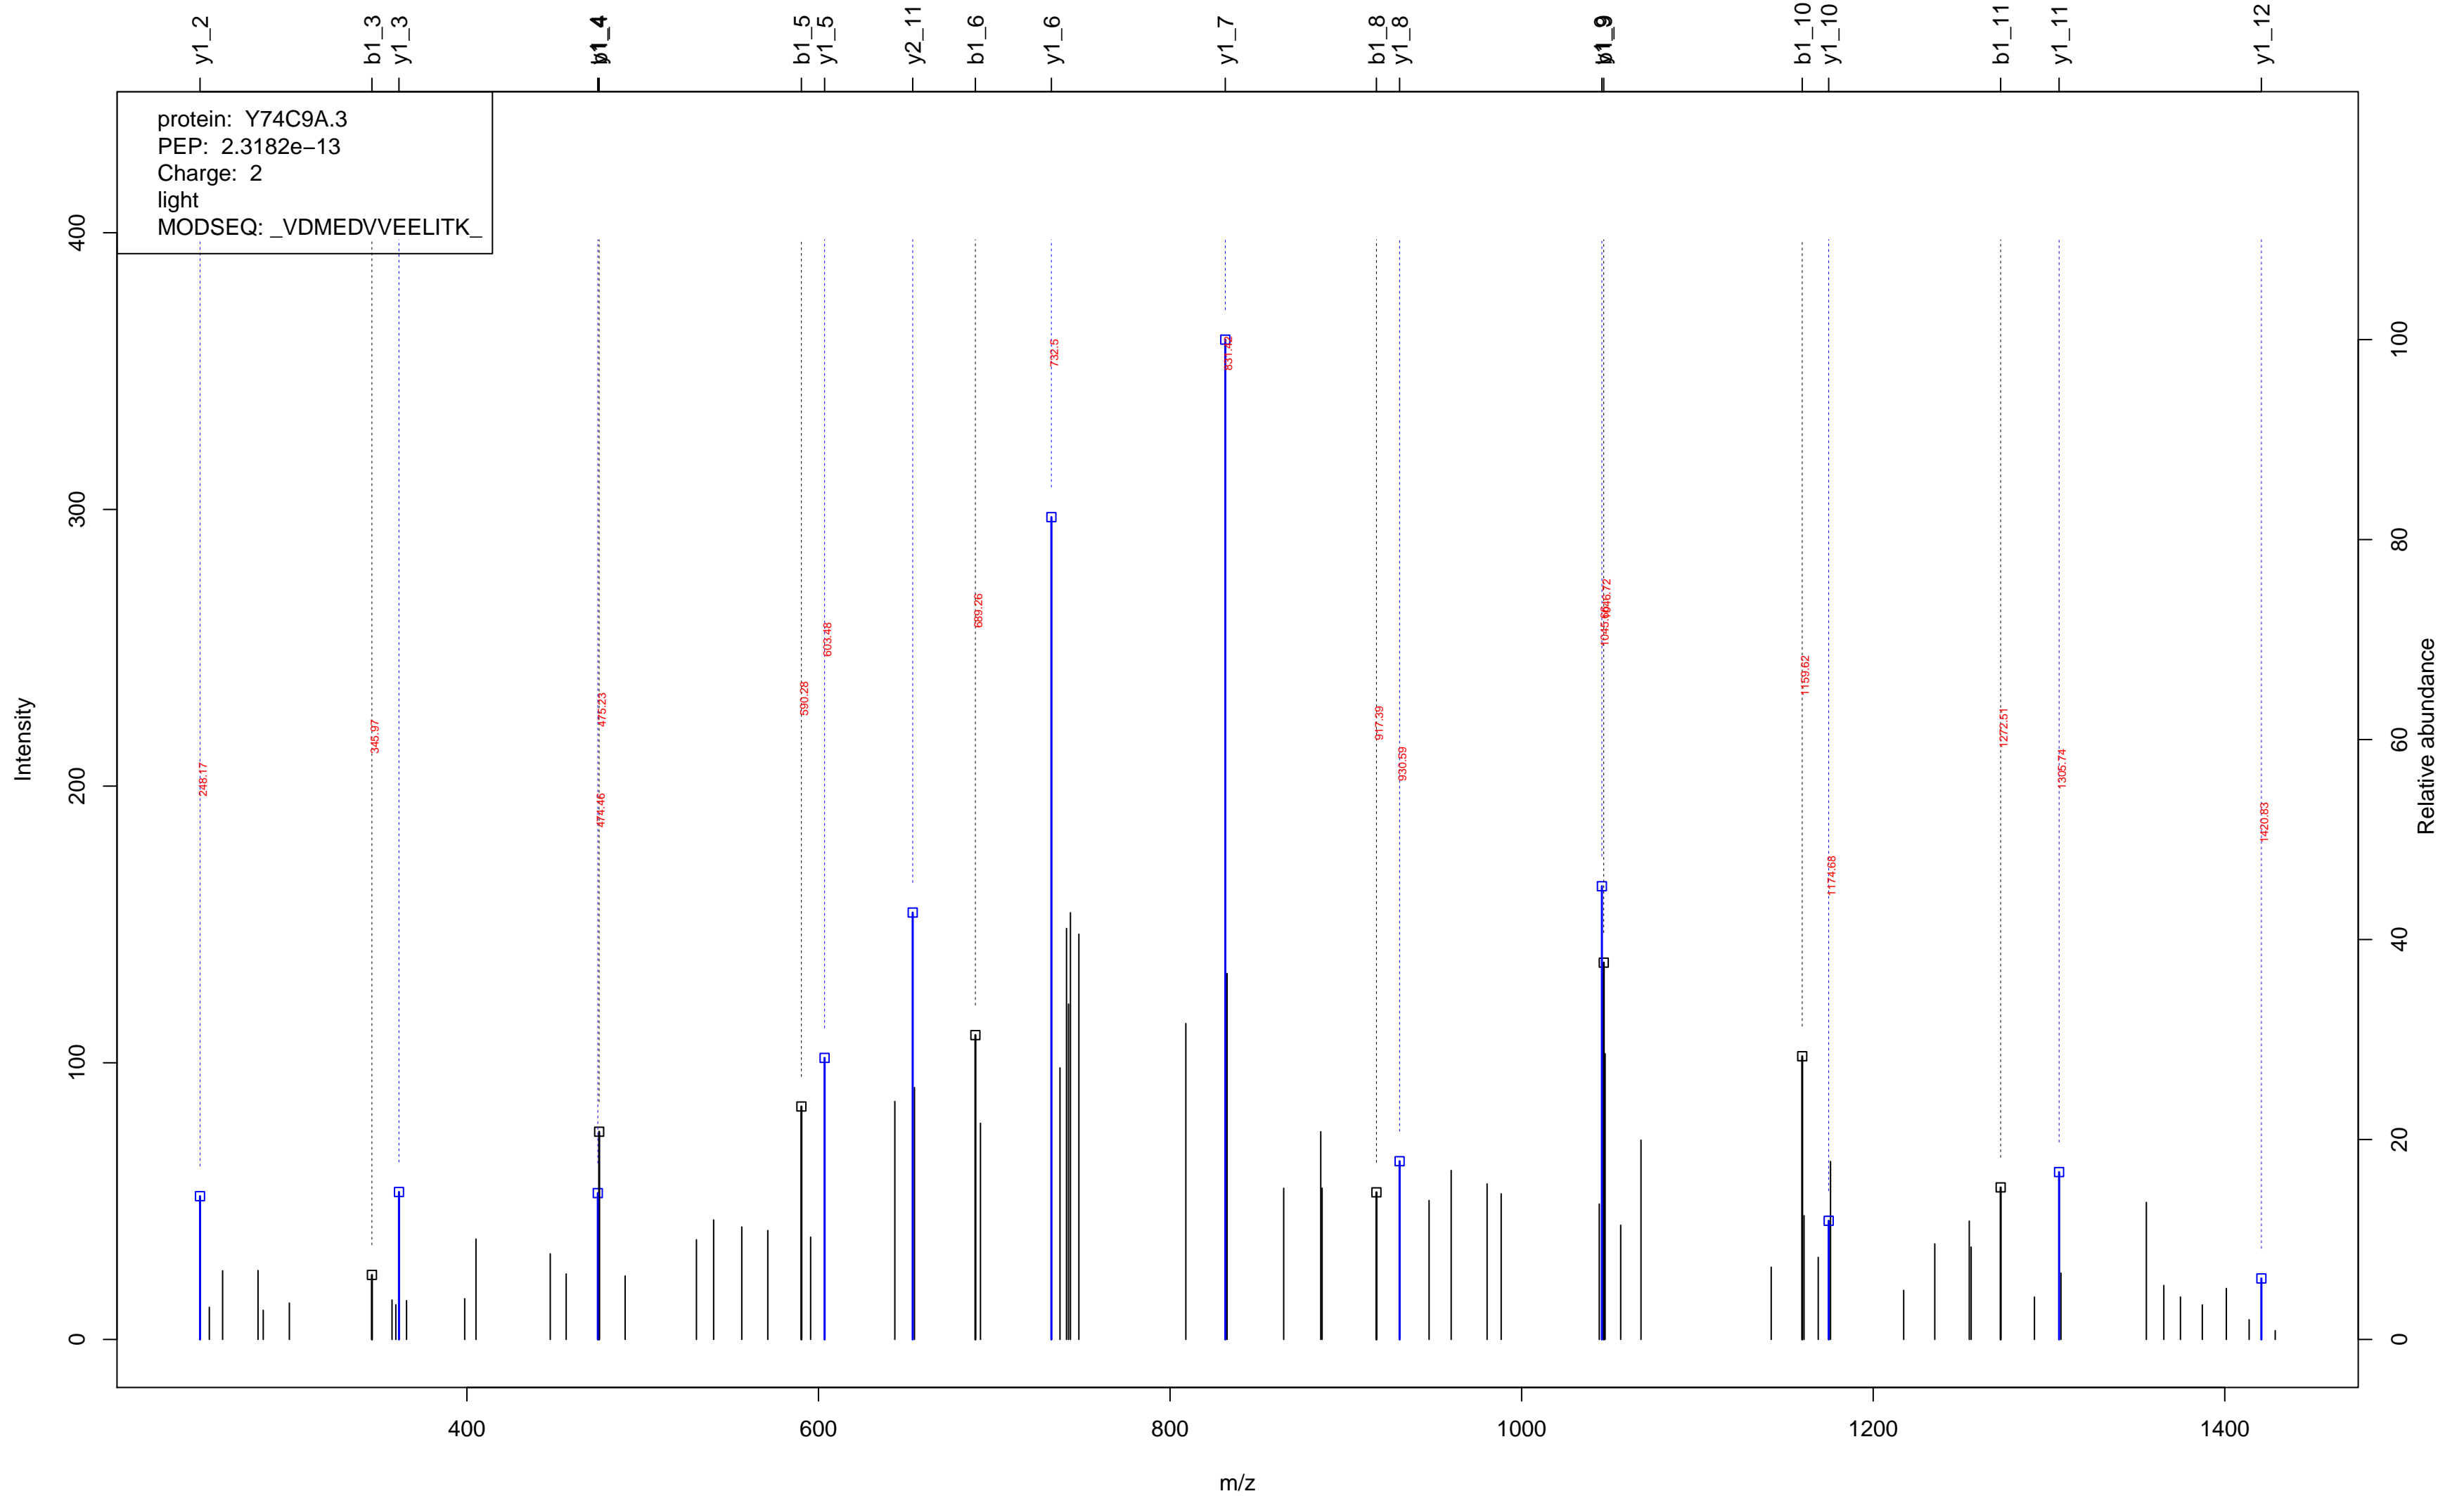

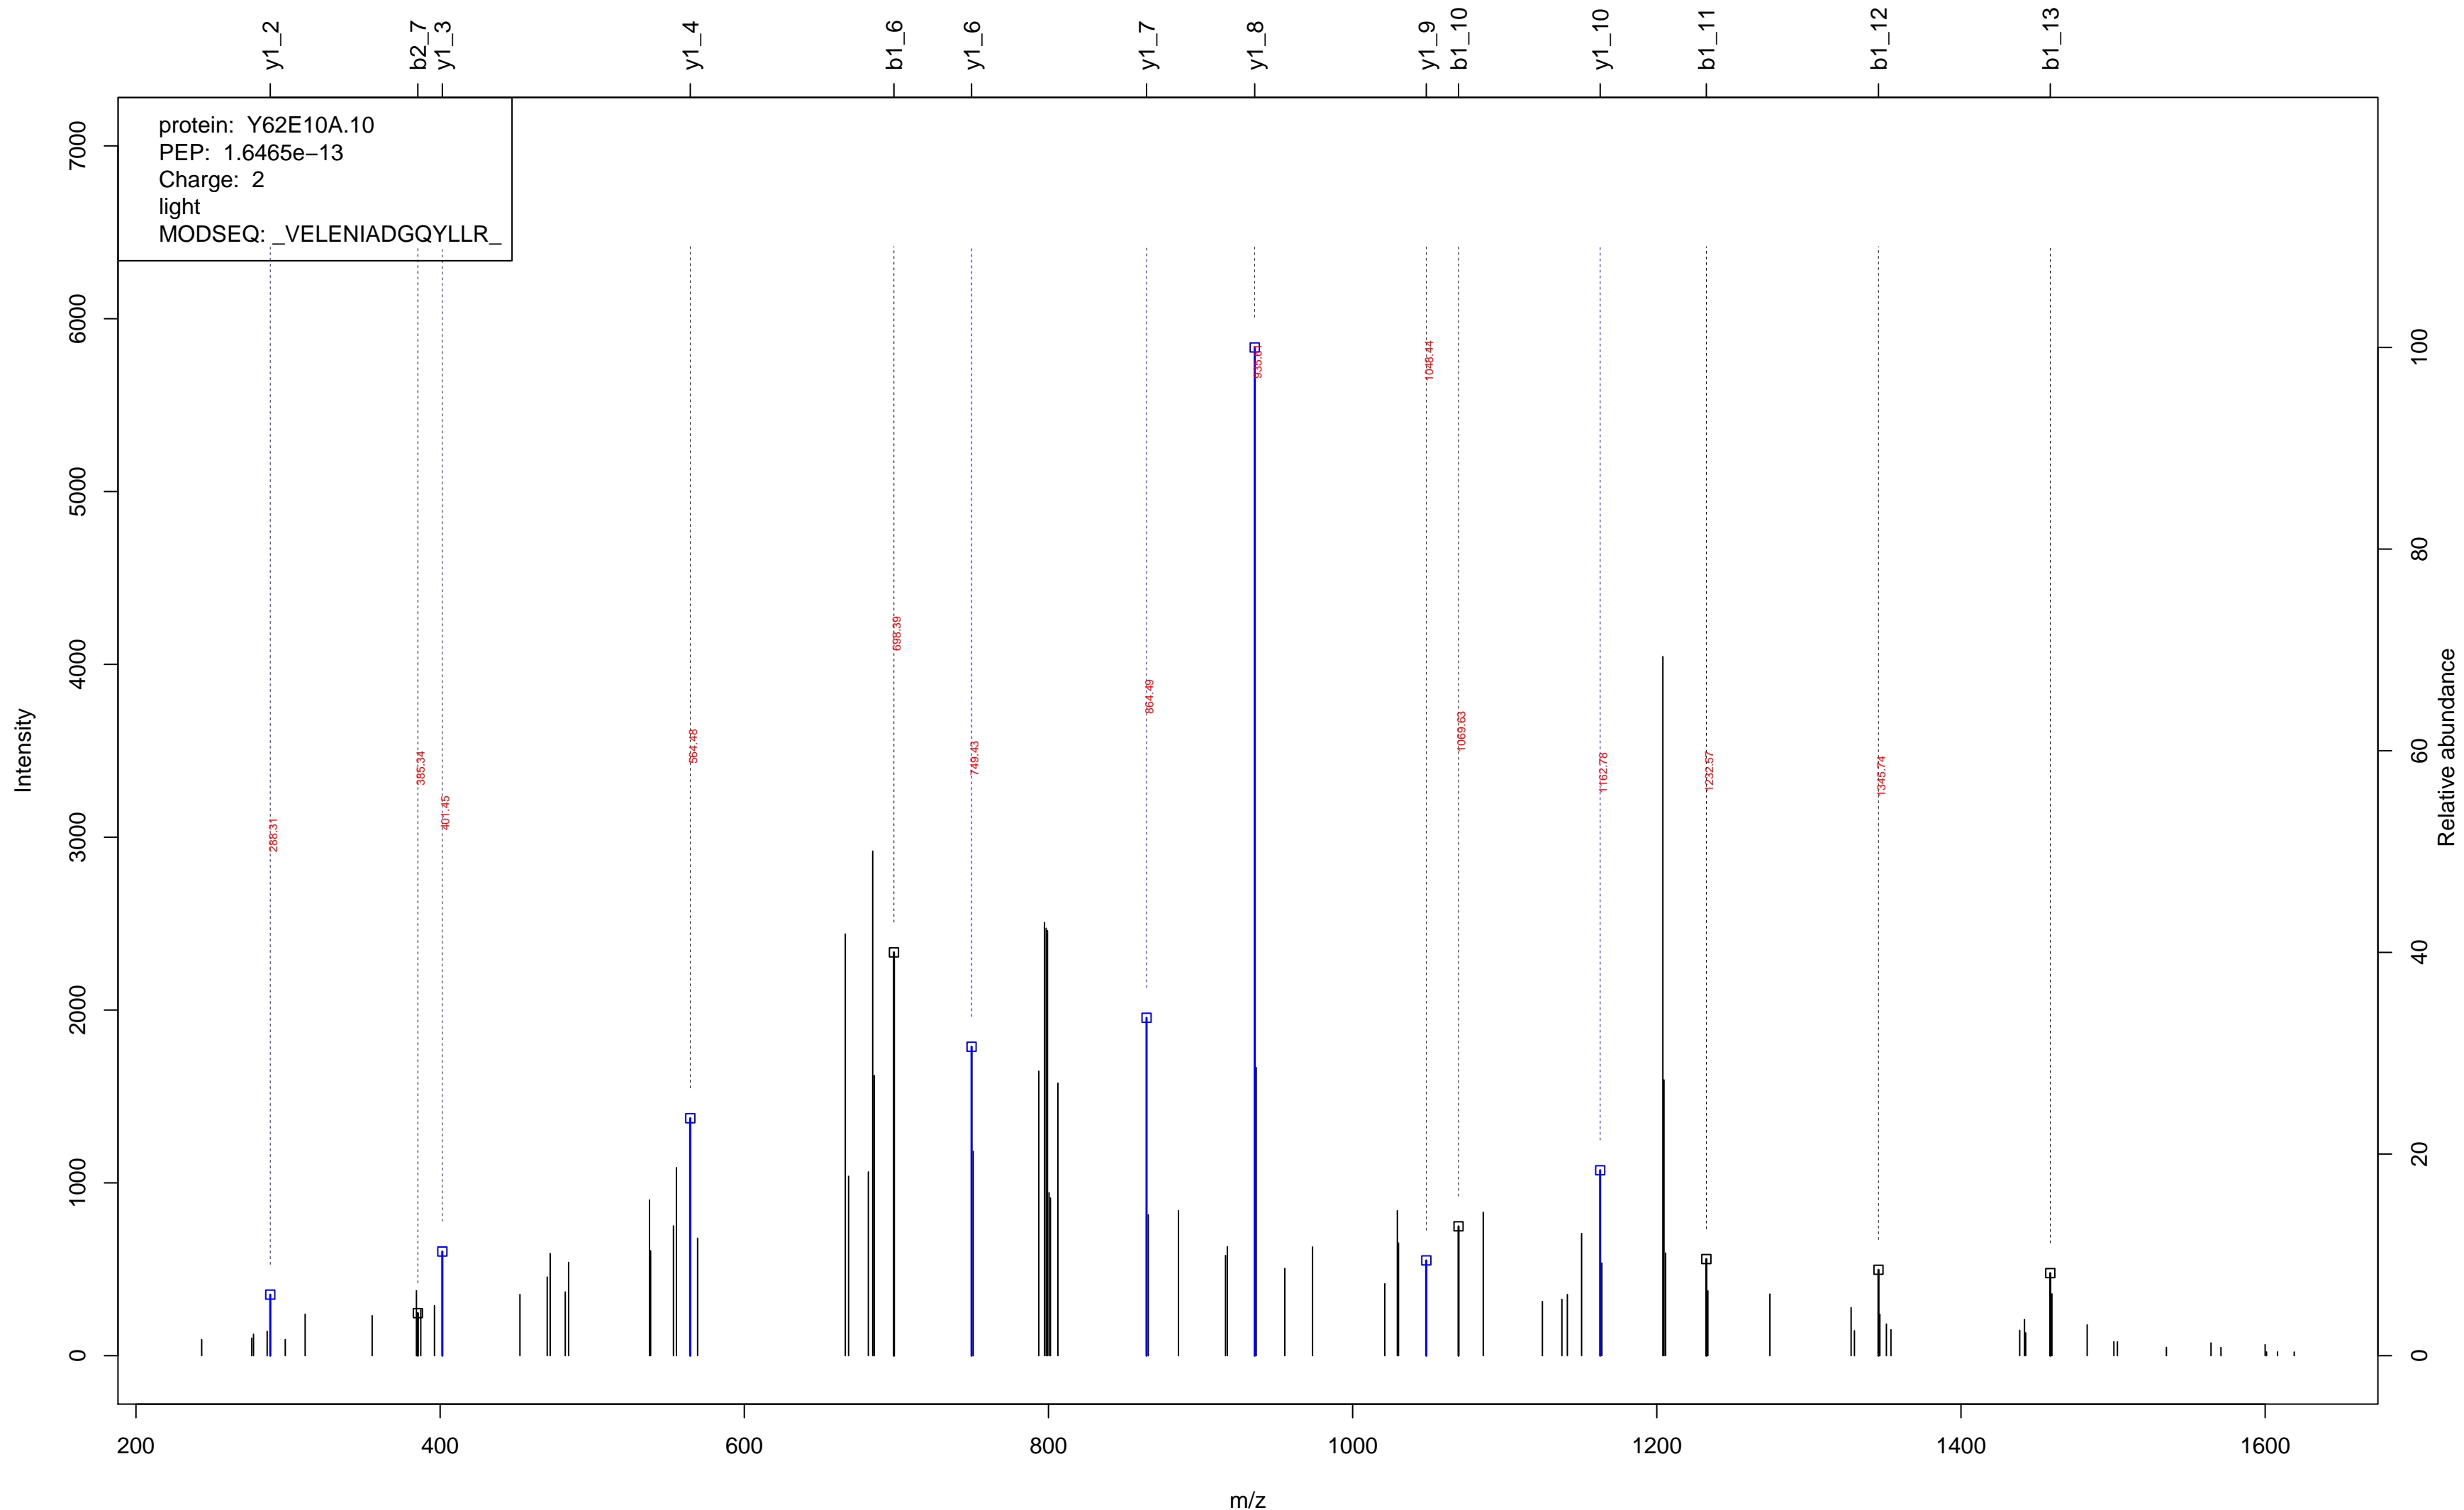

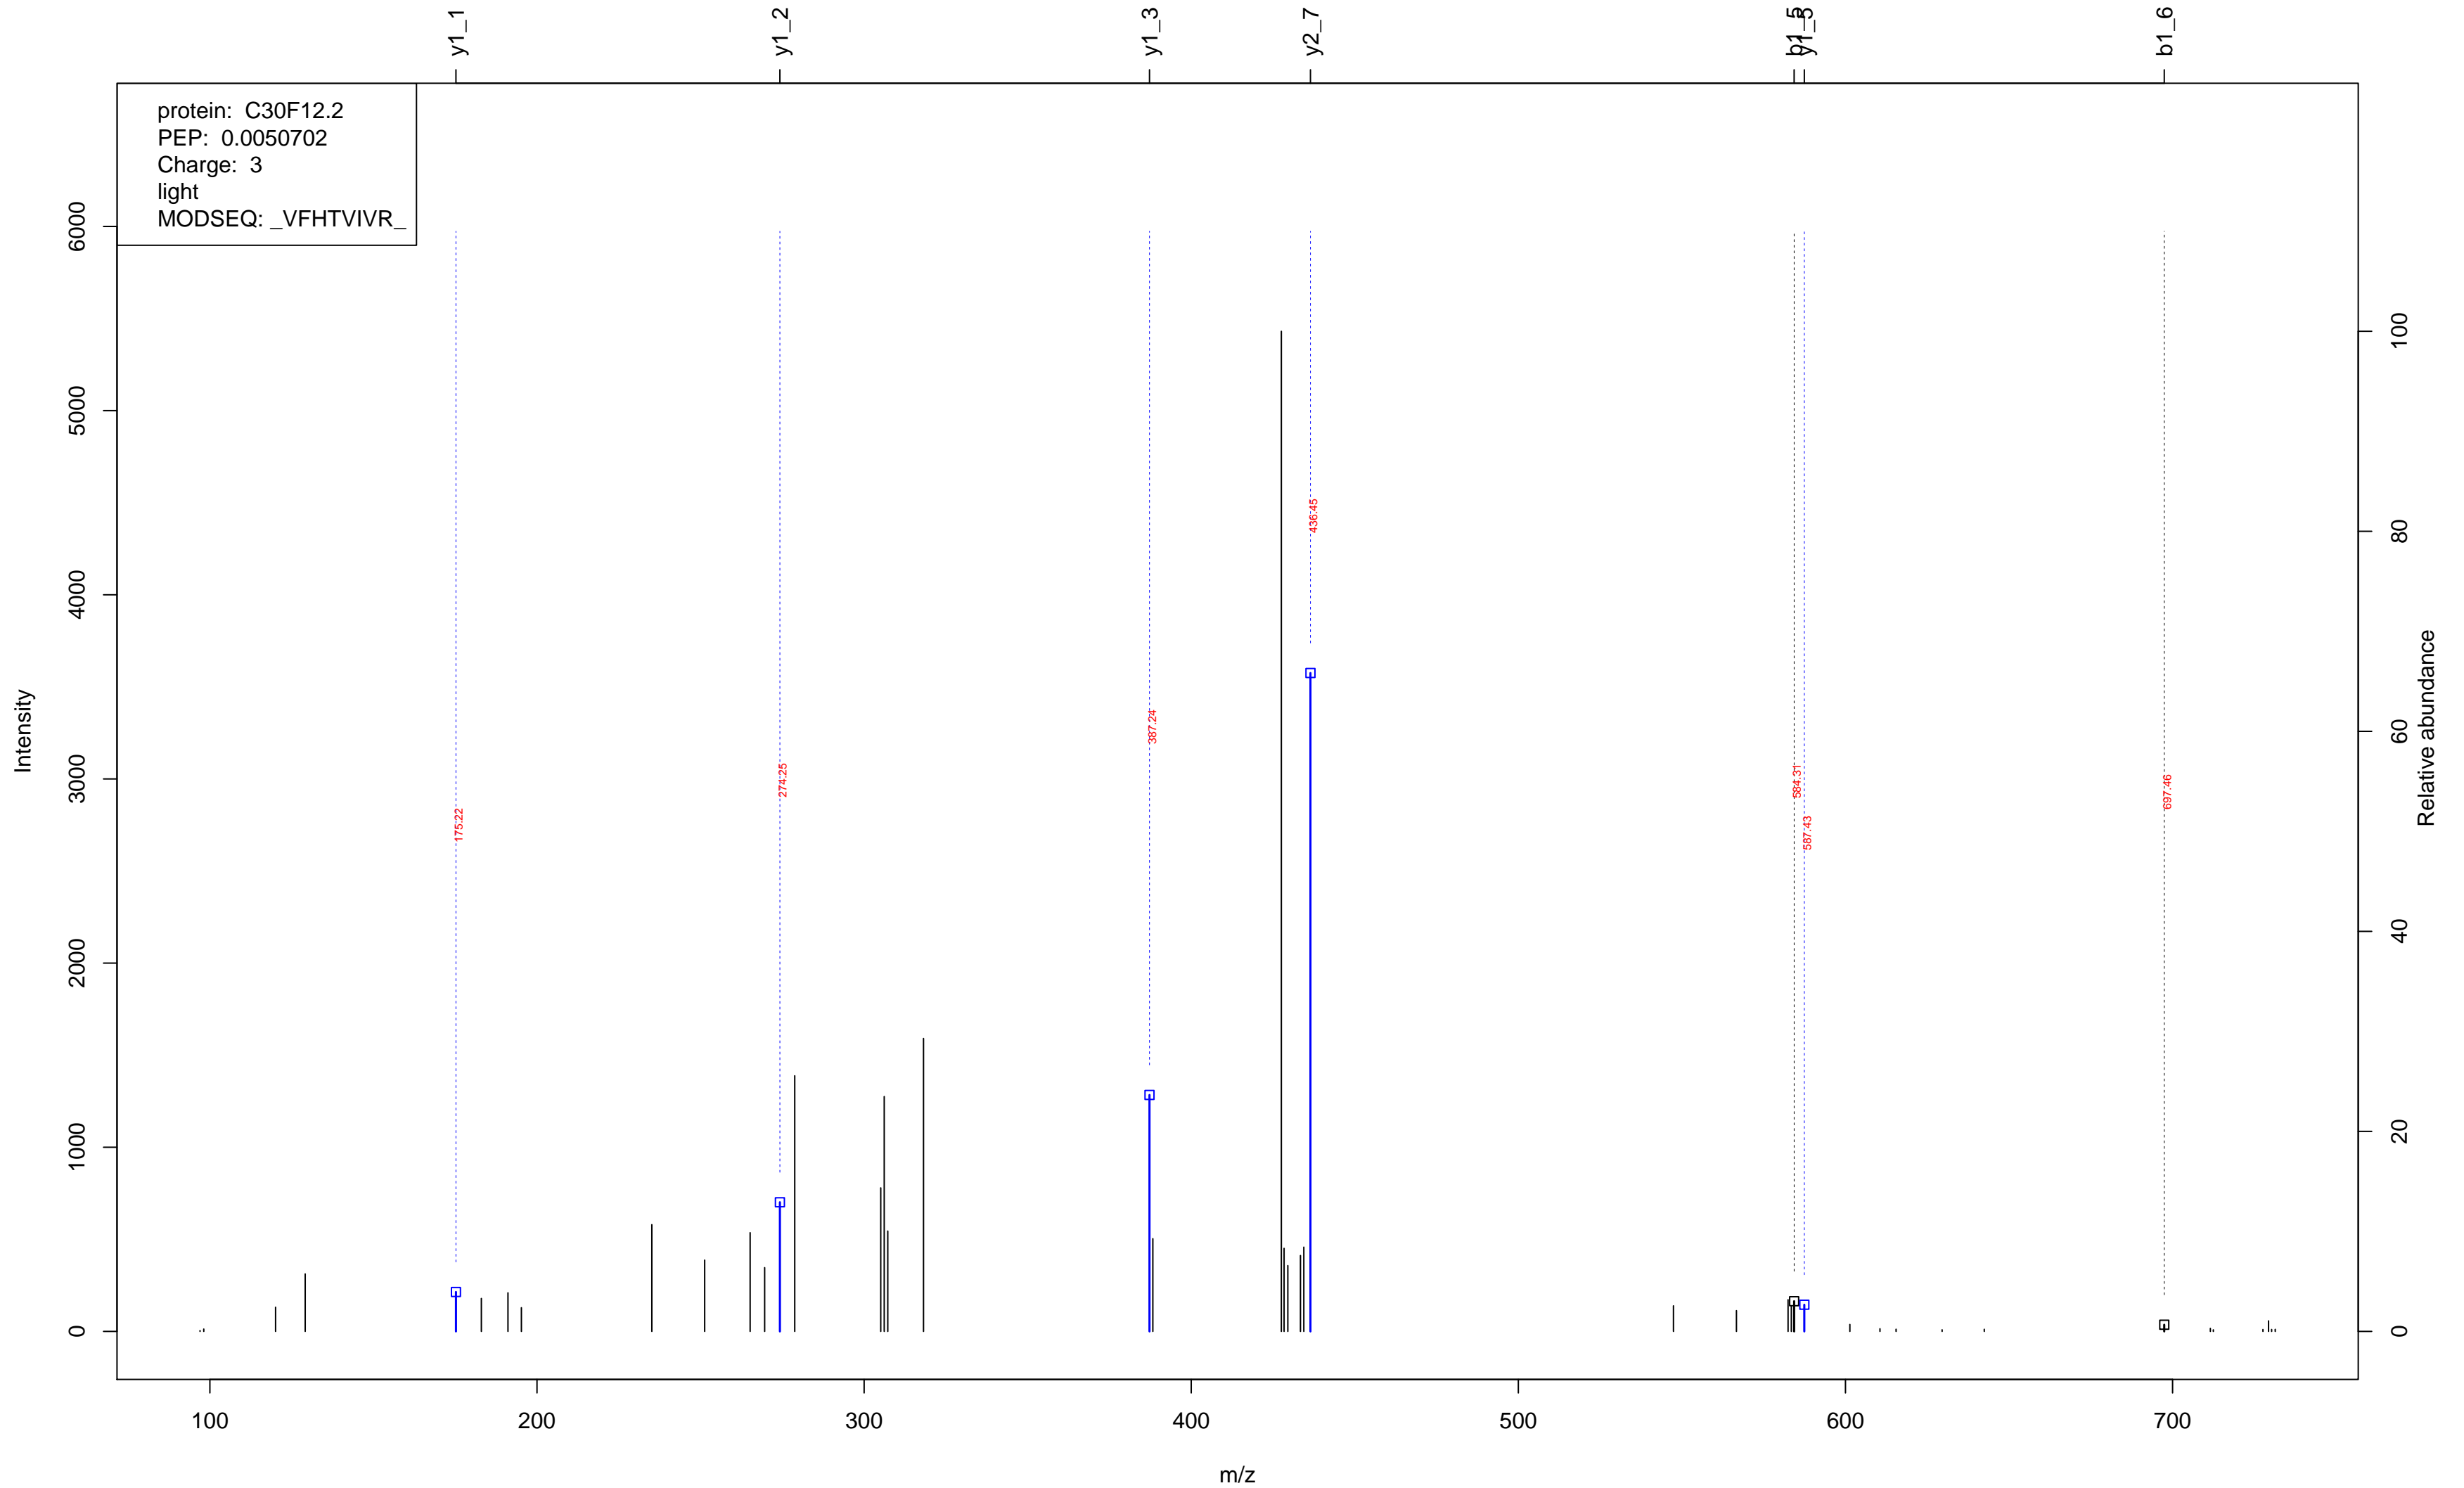



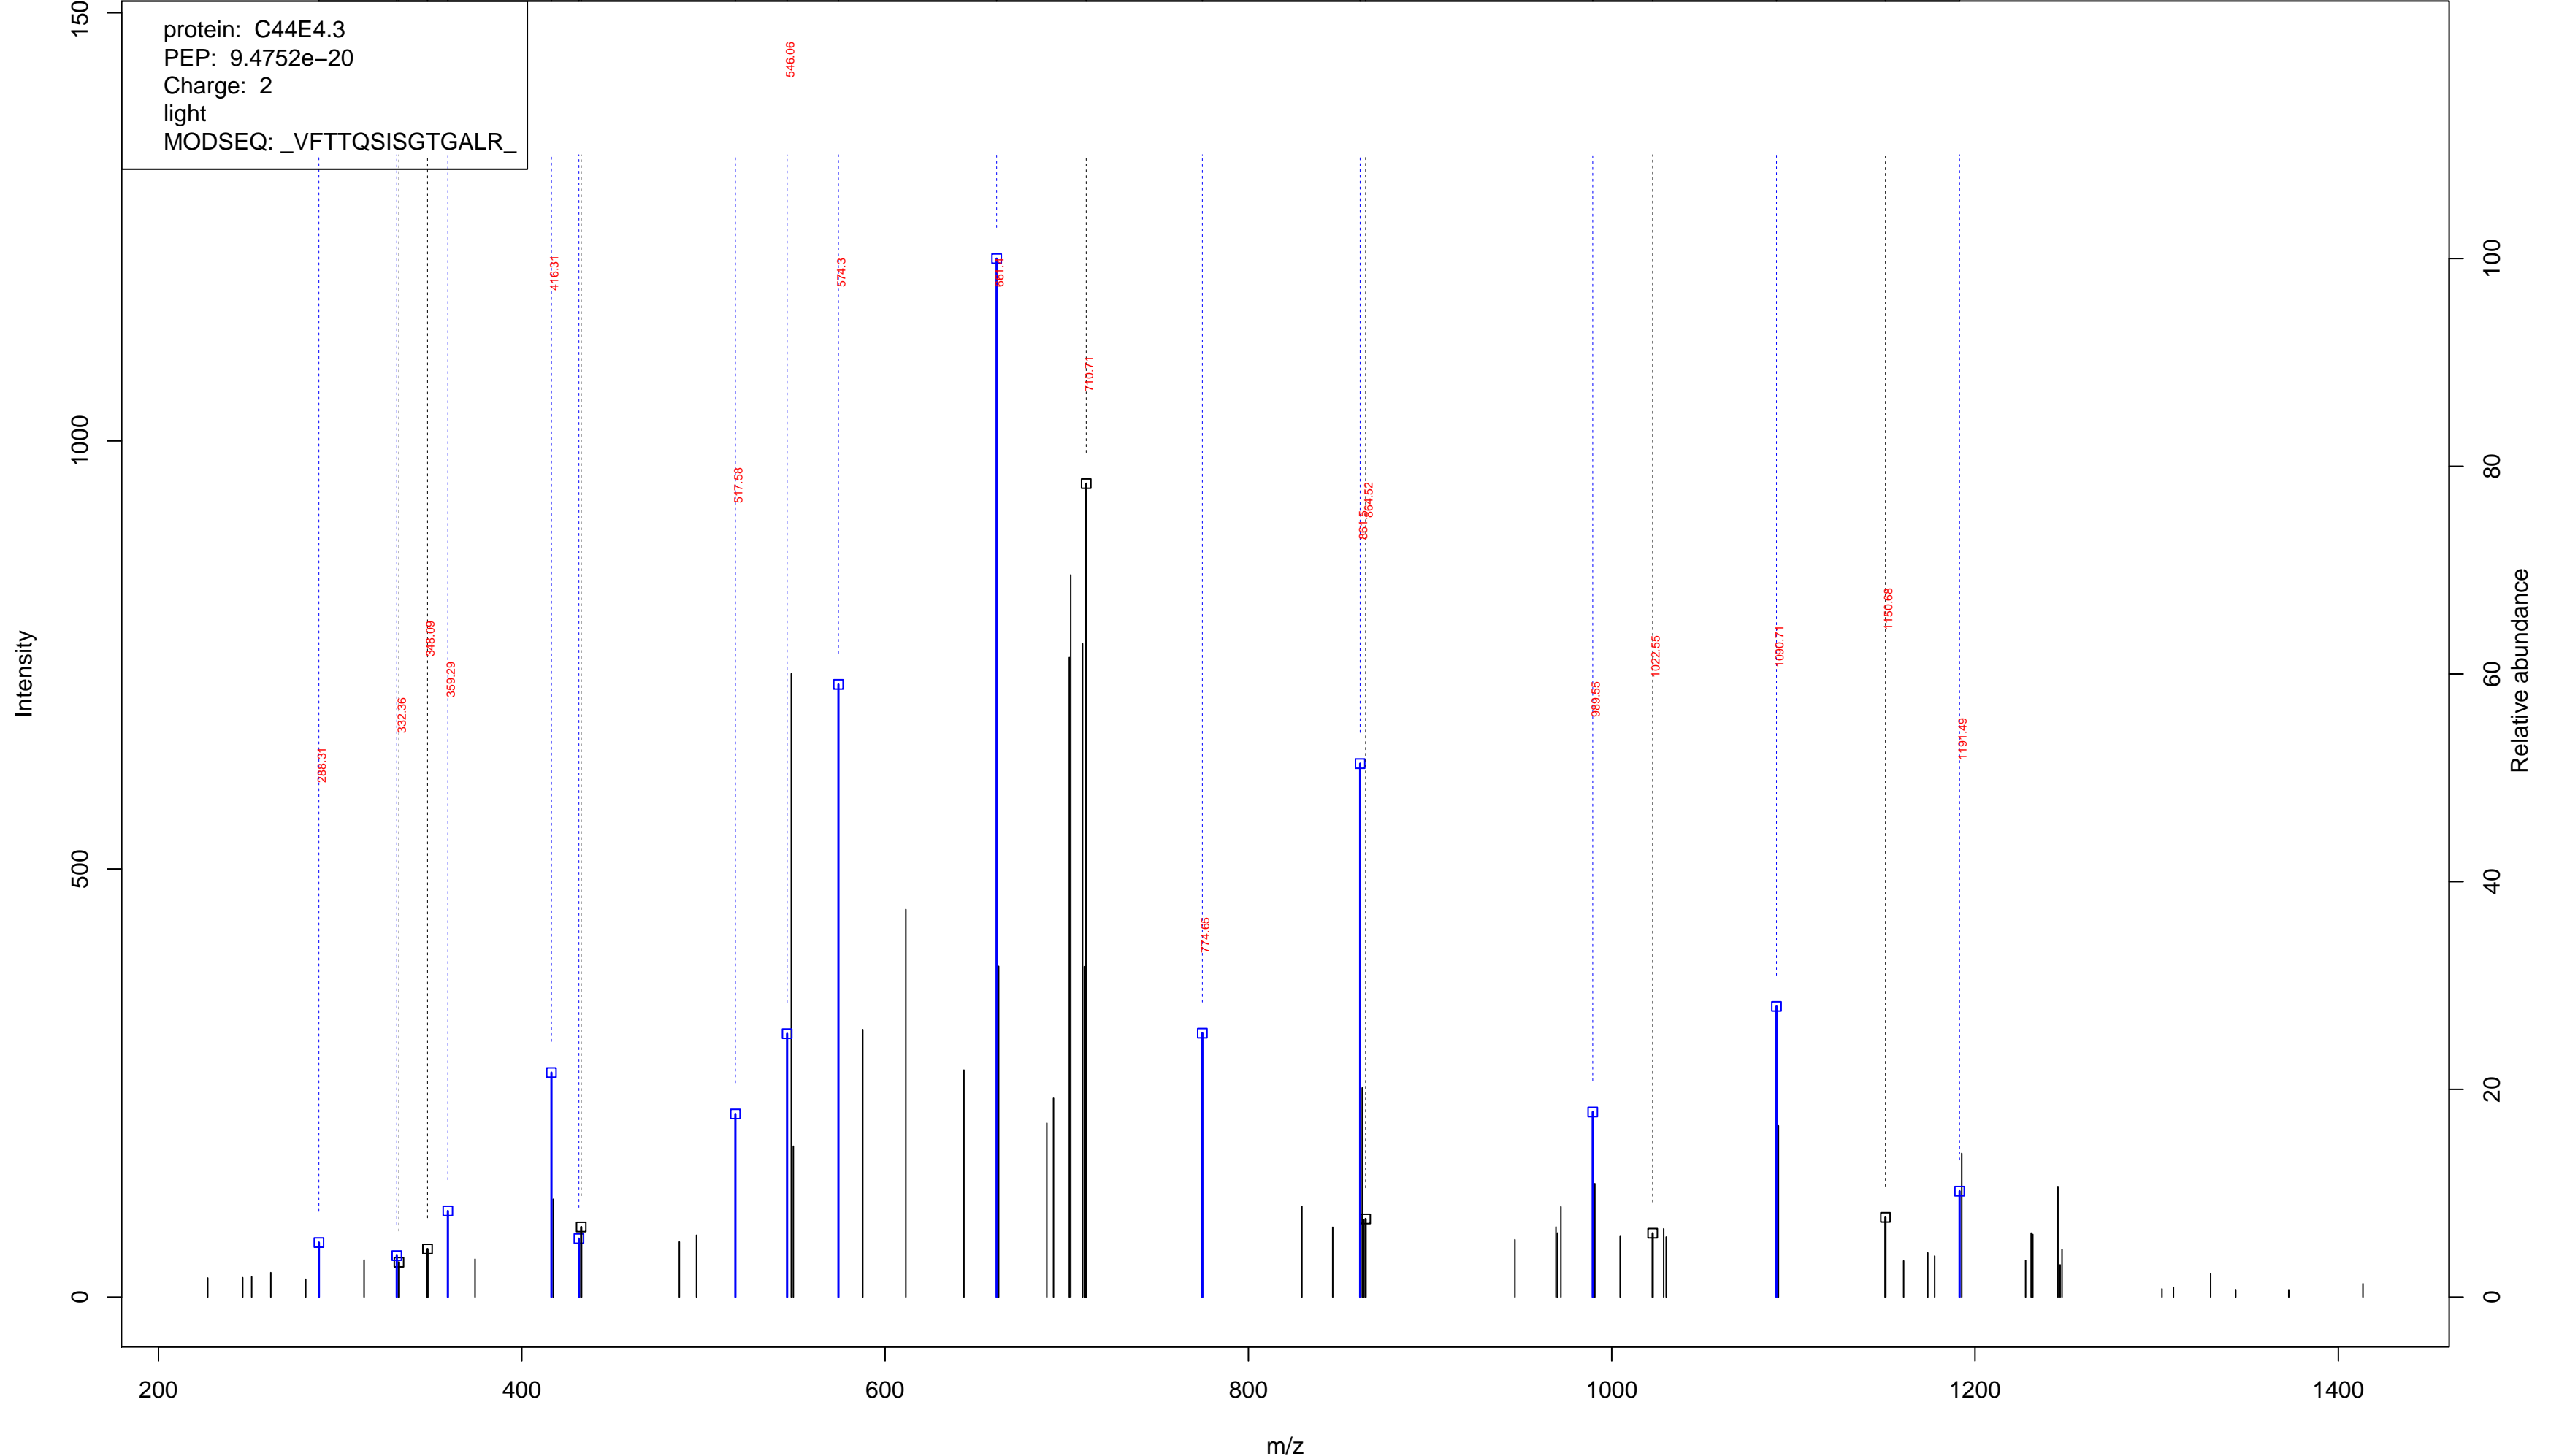

330

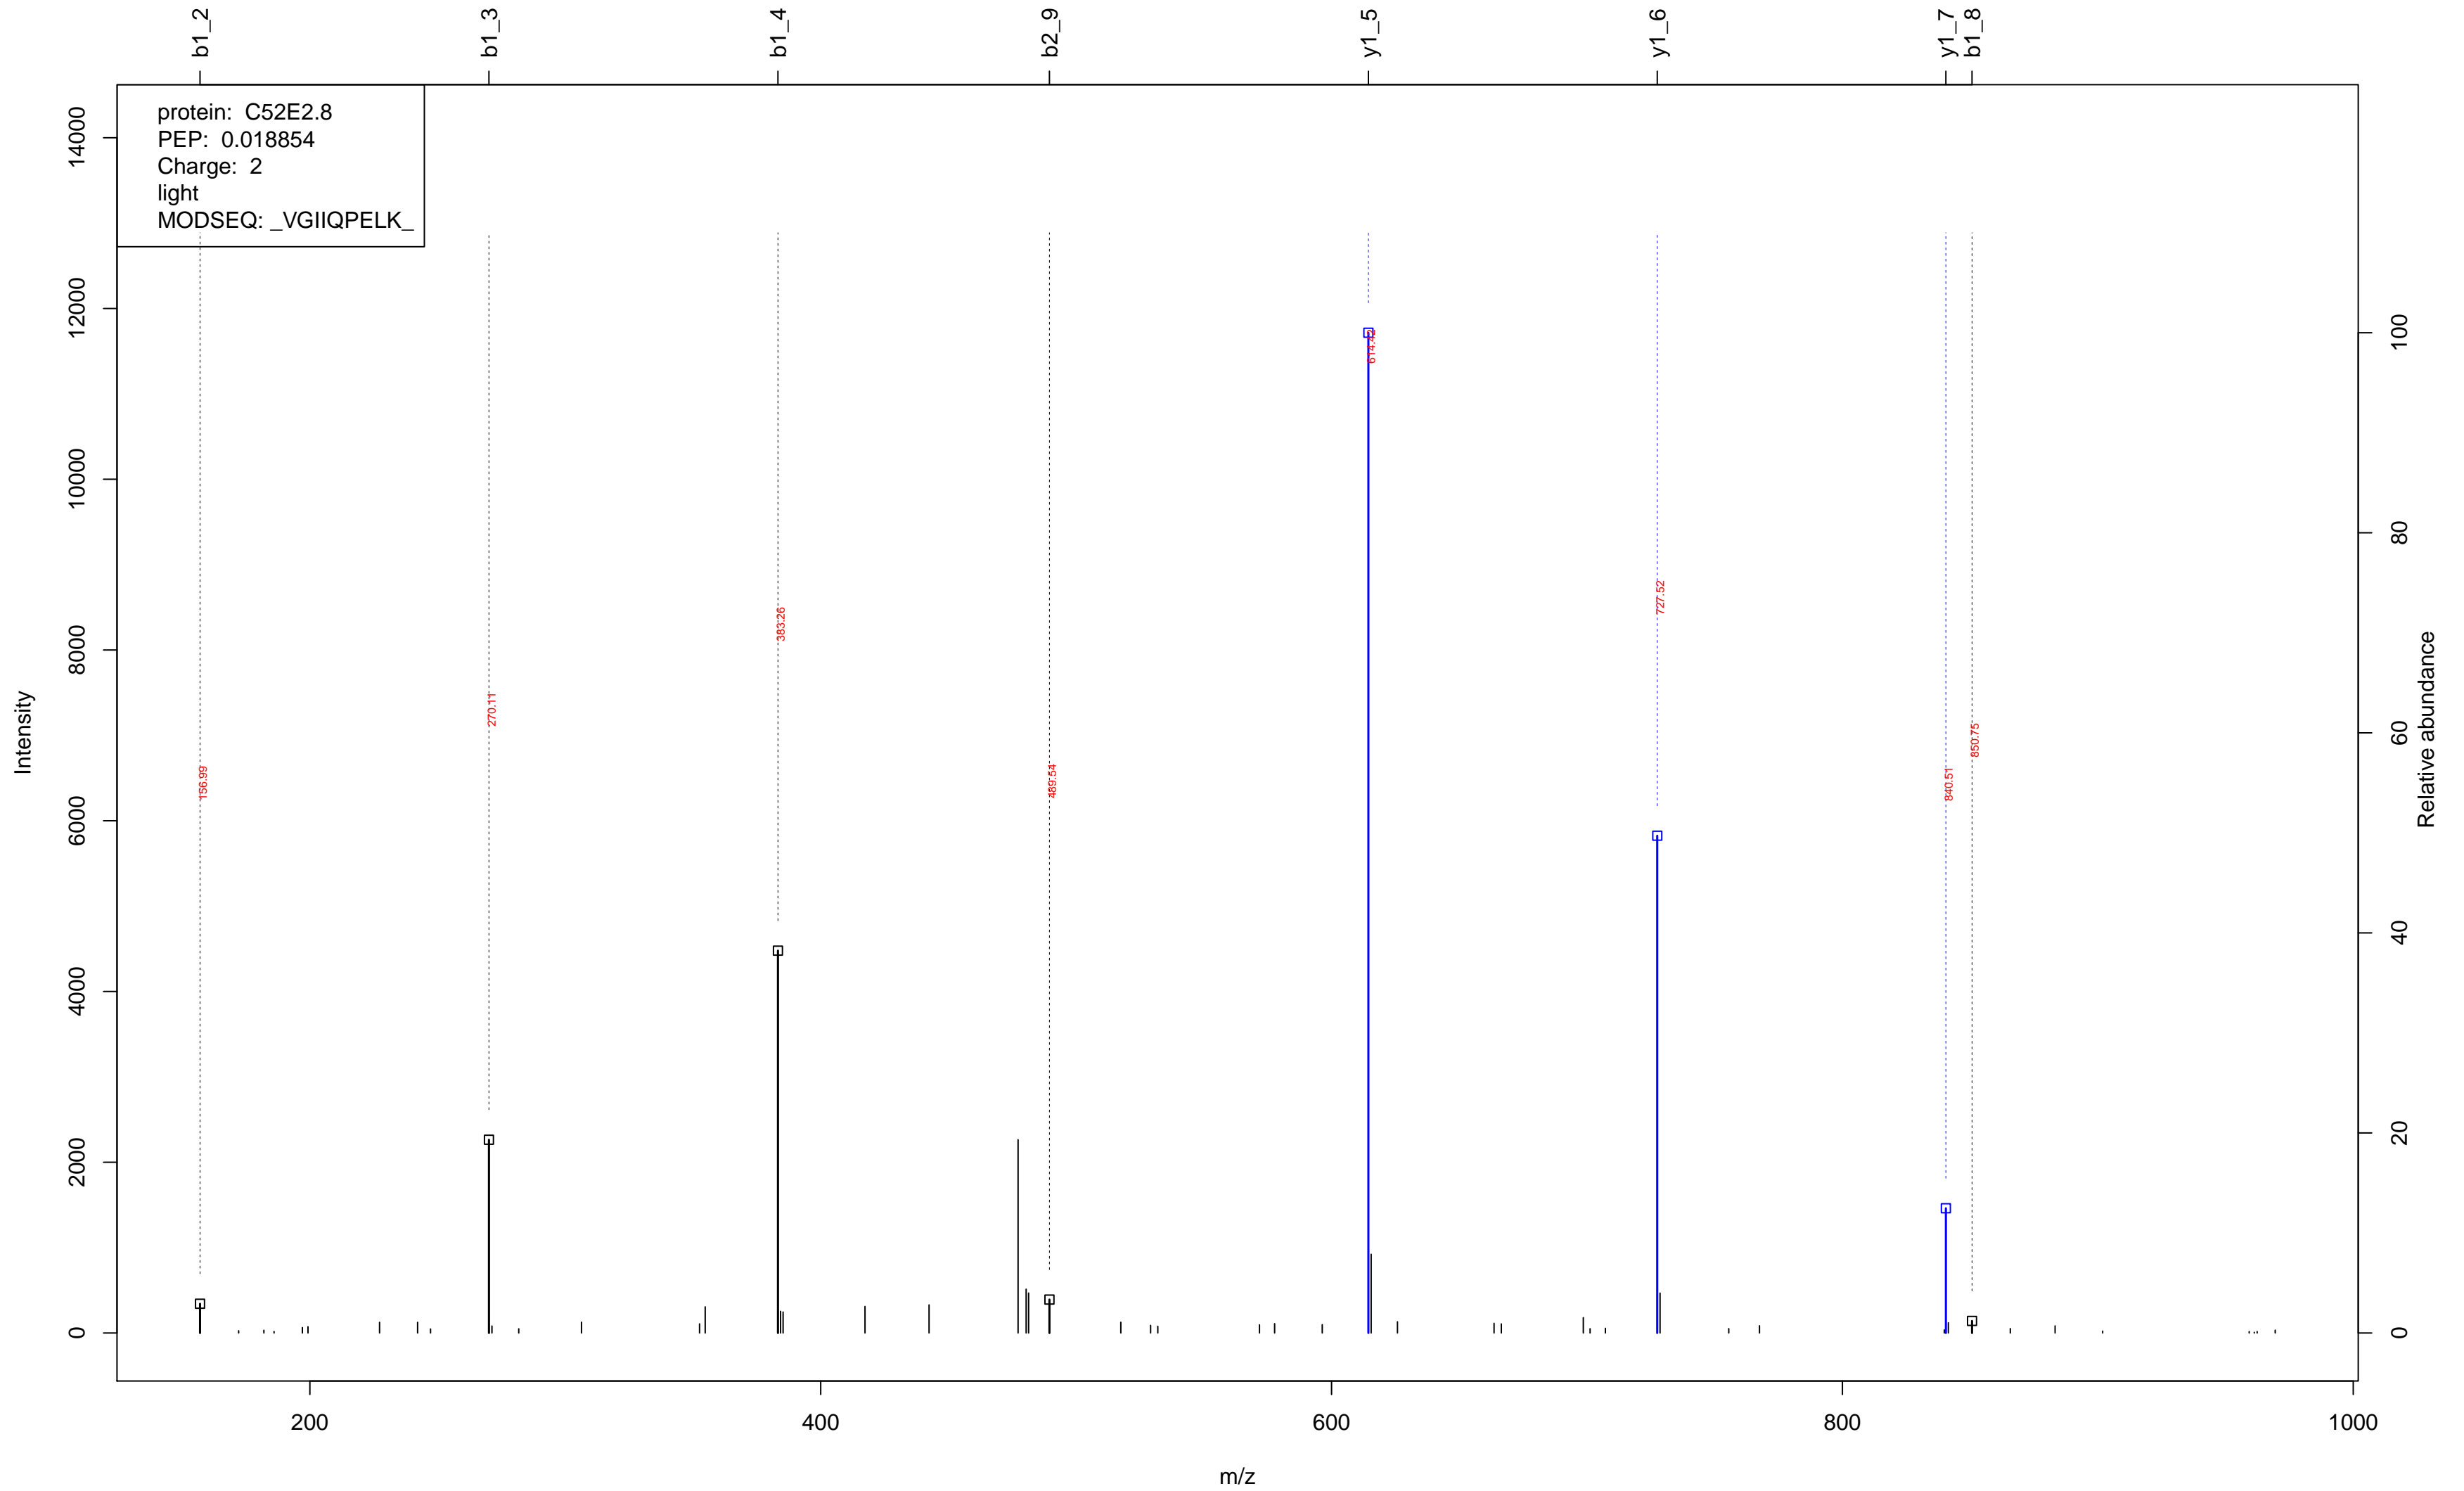

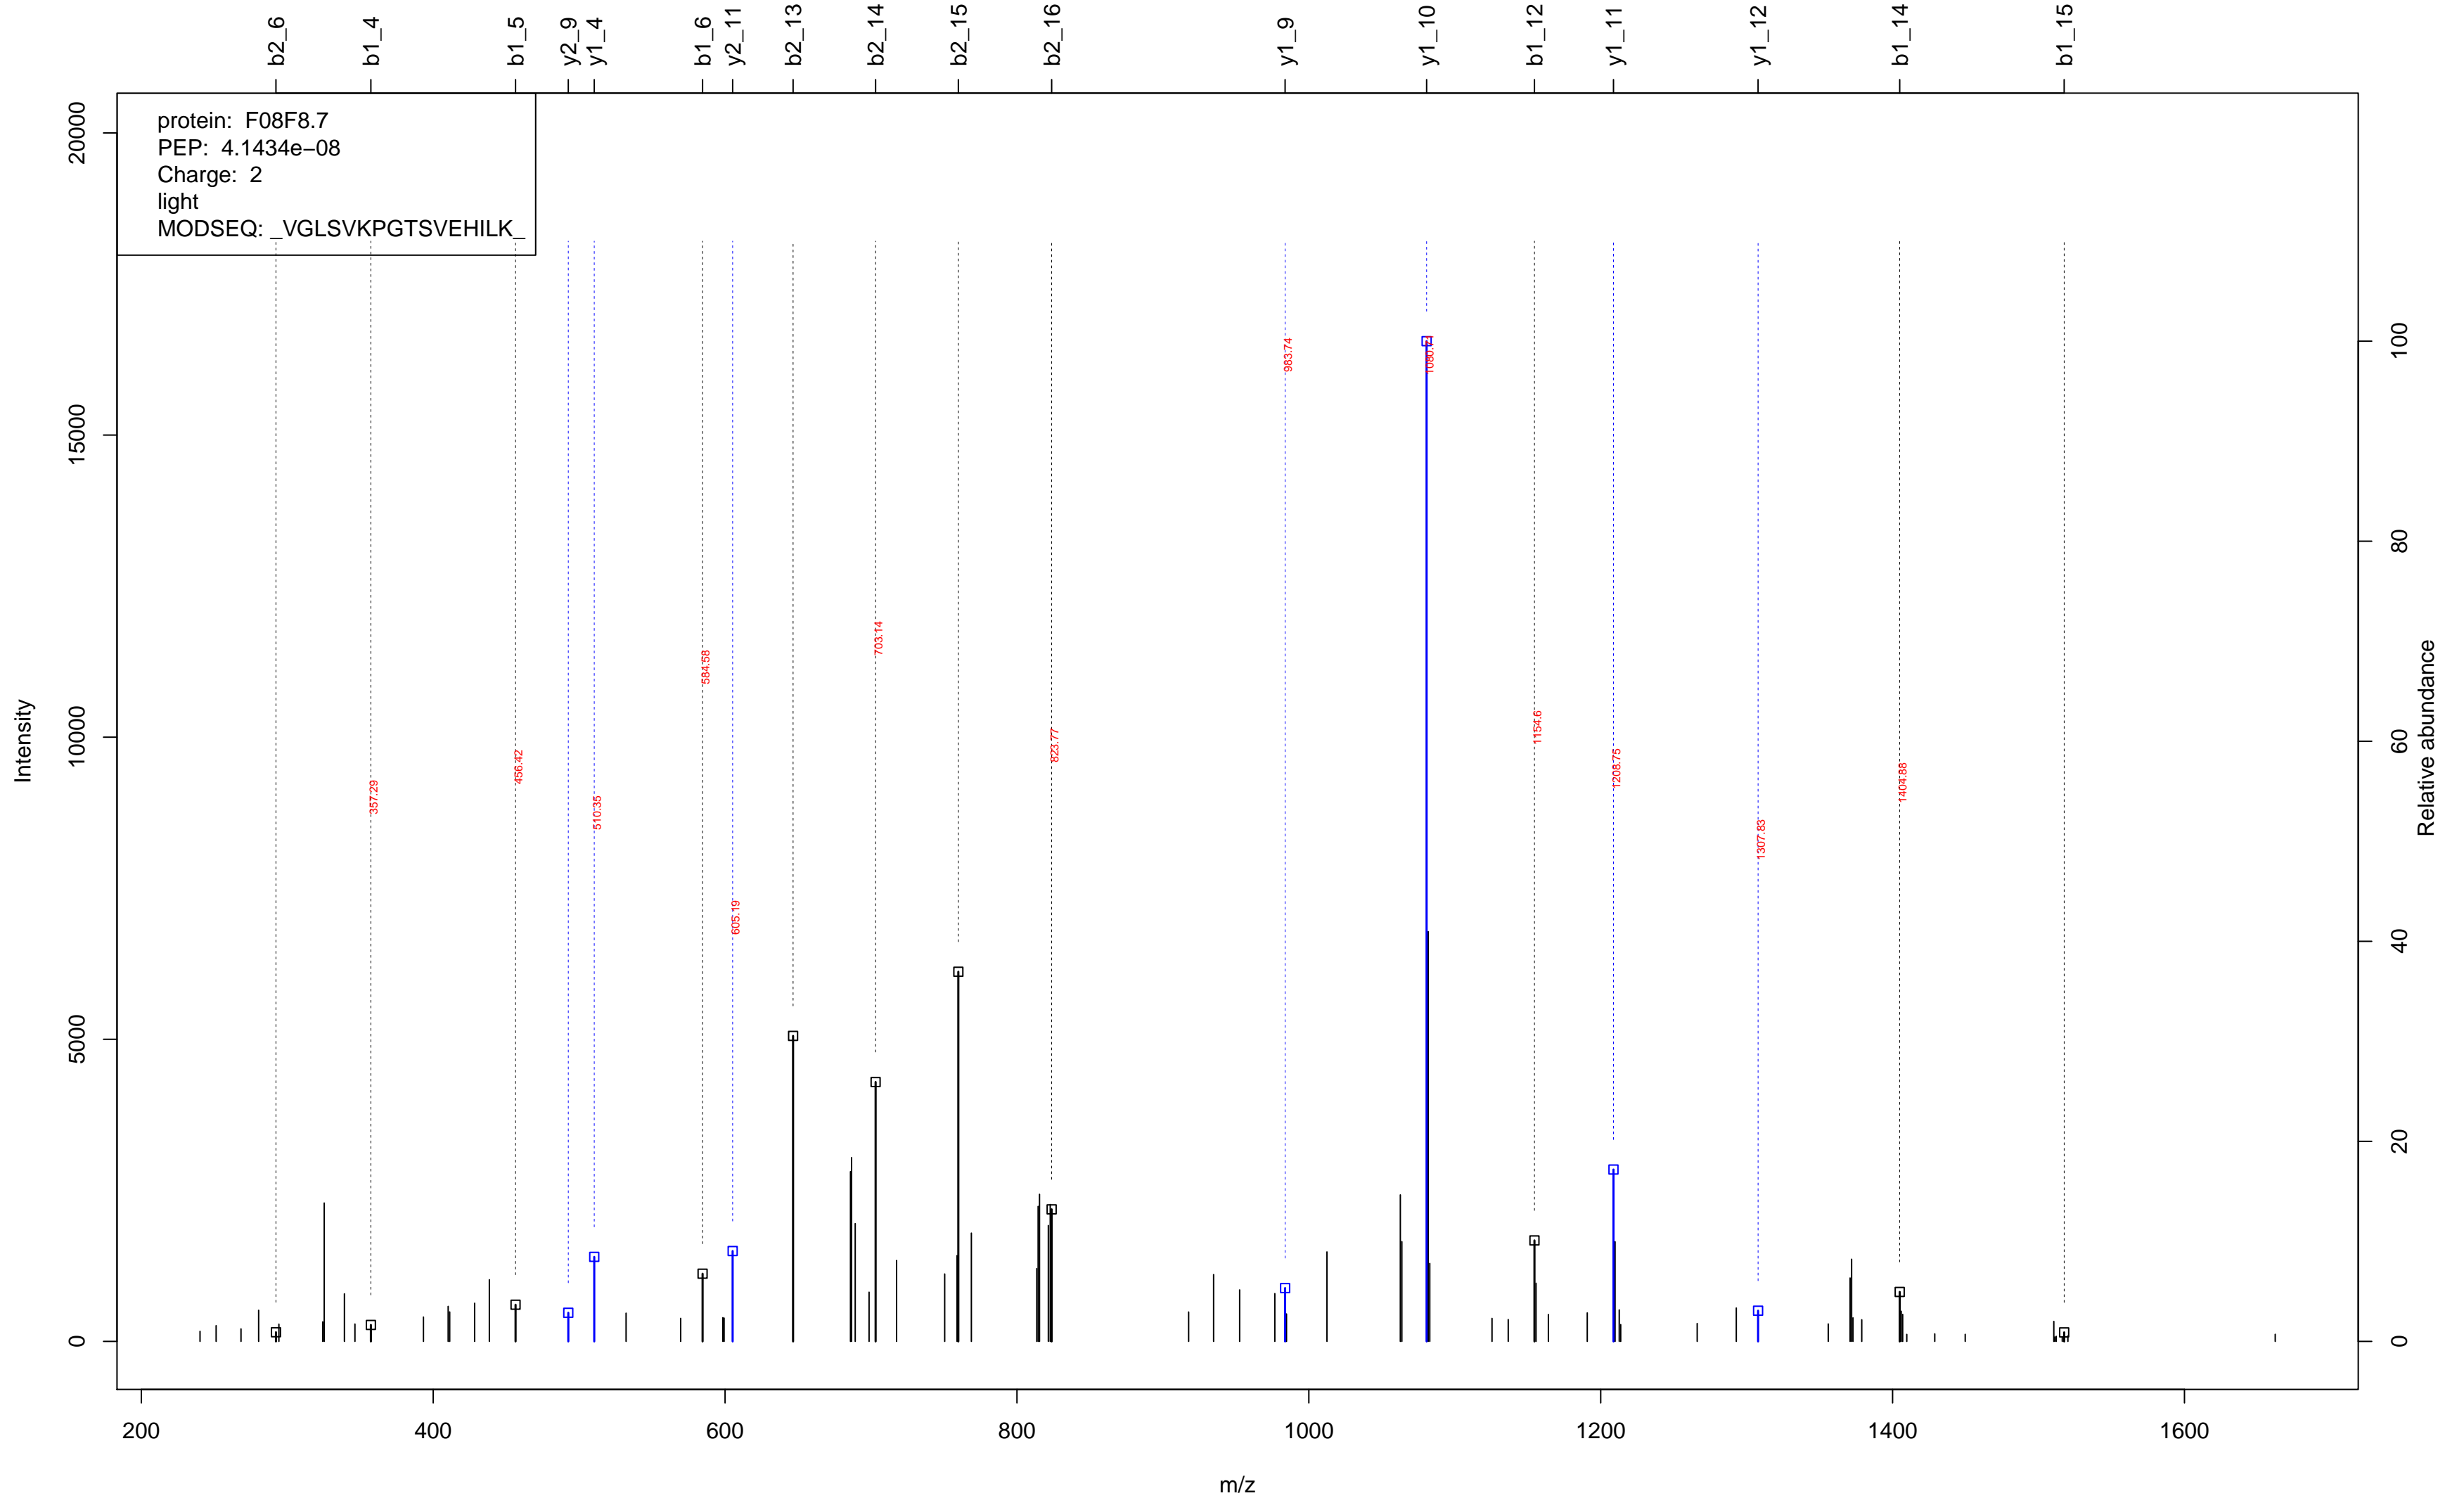

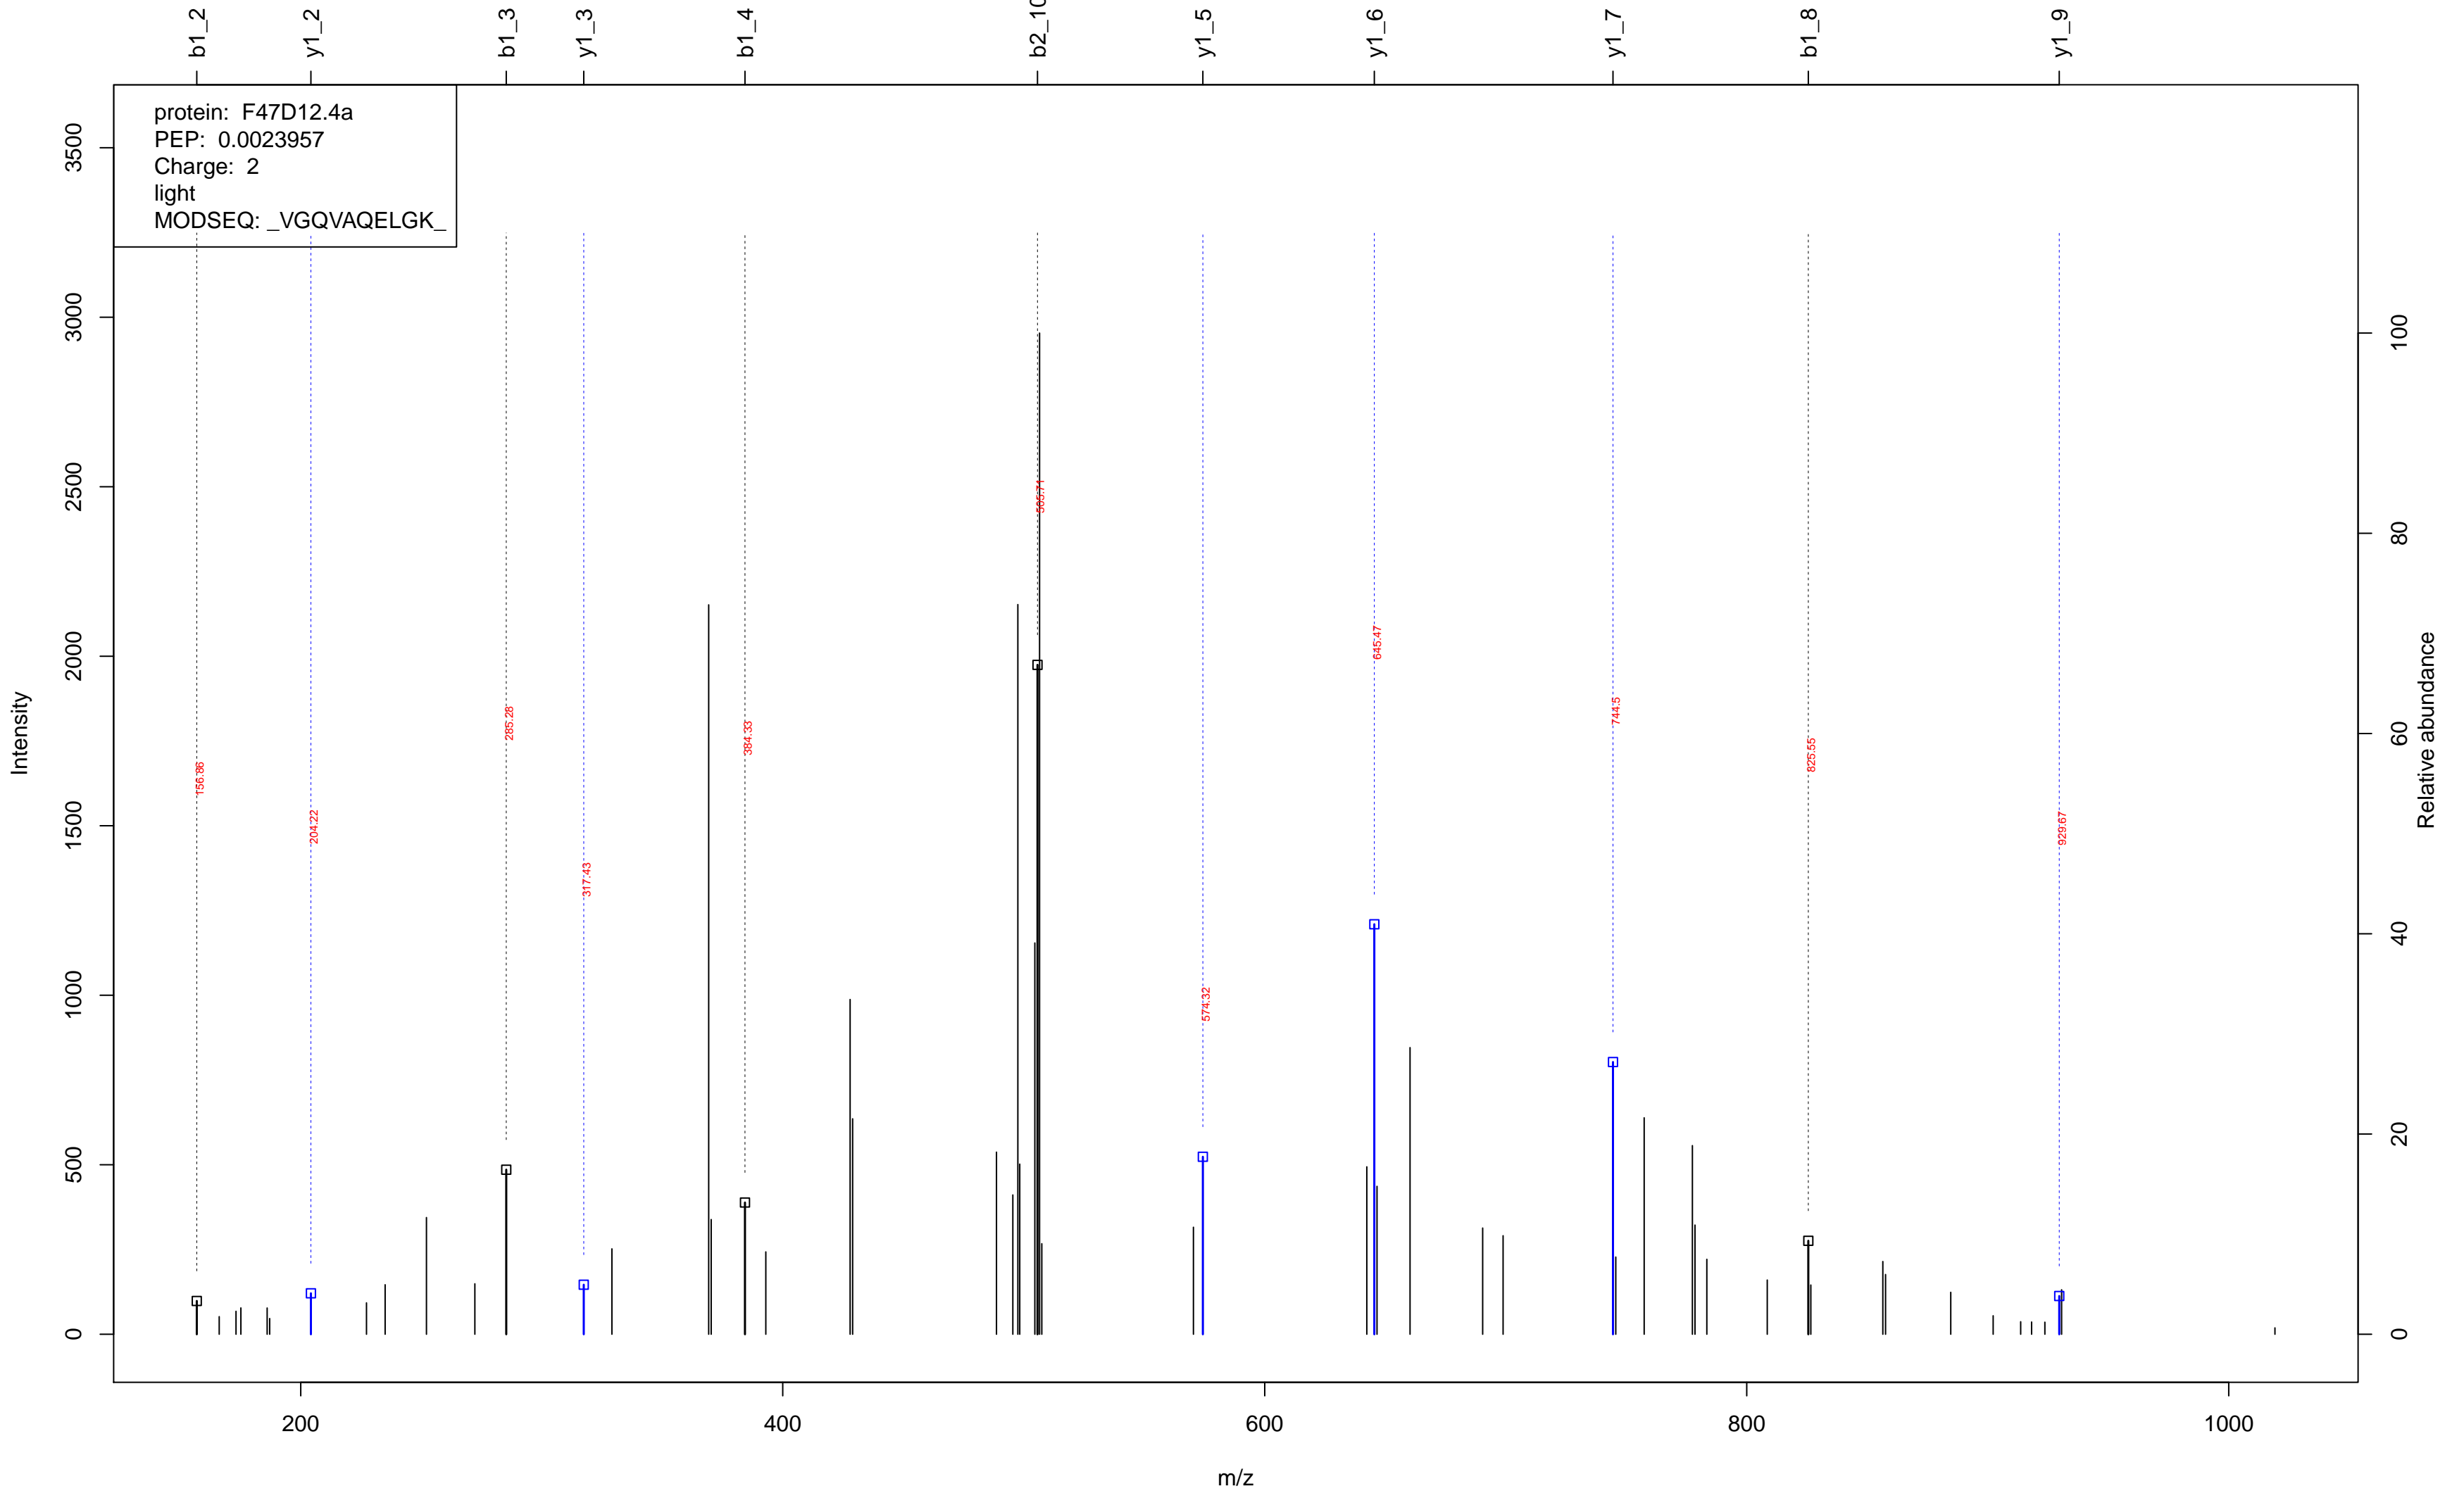

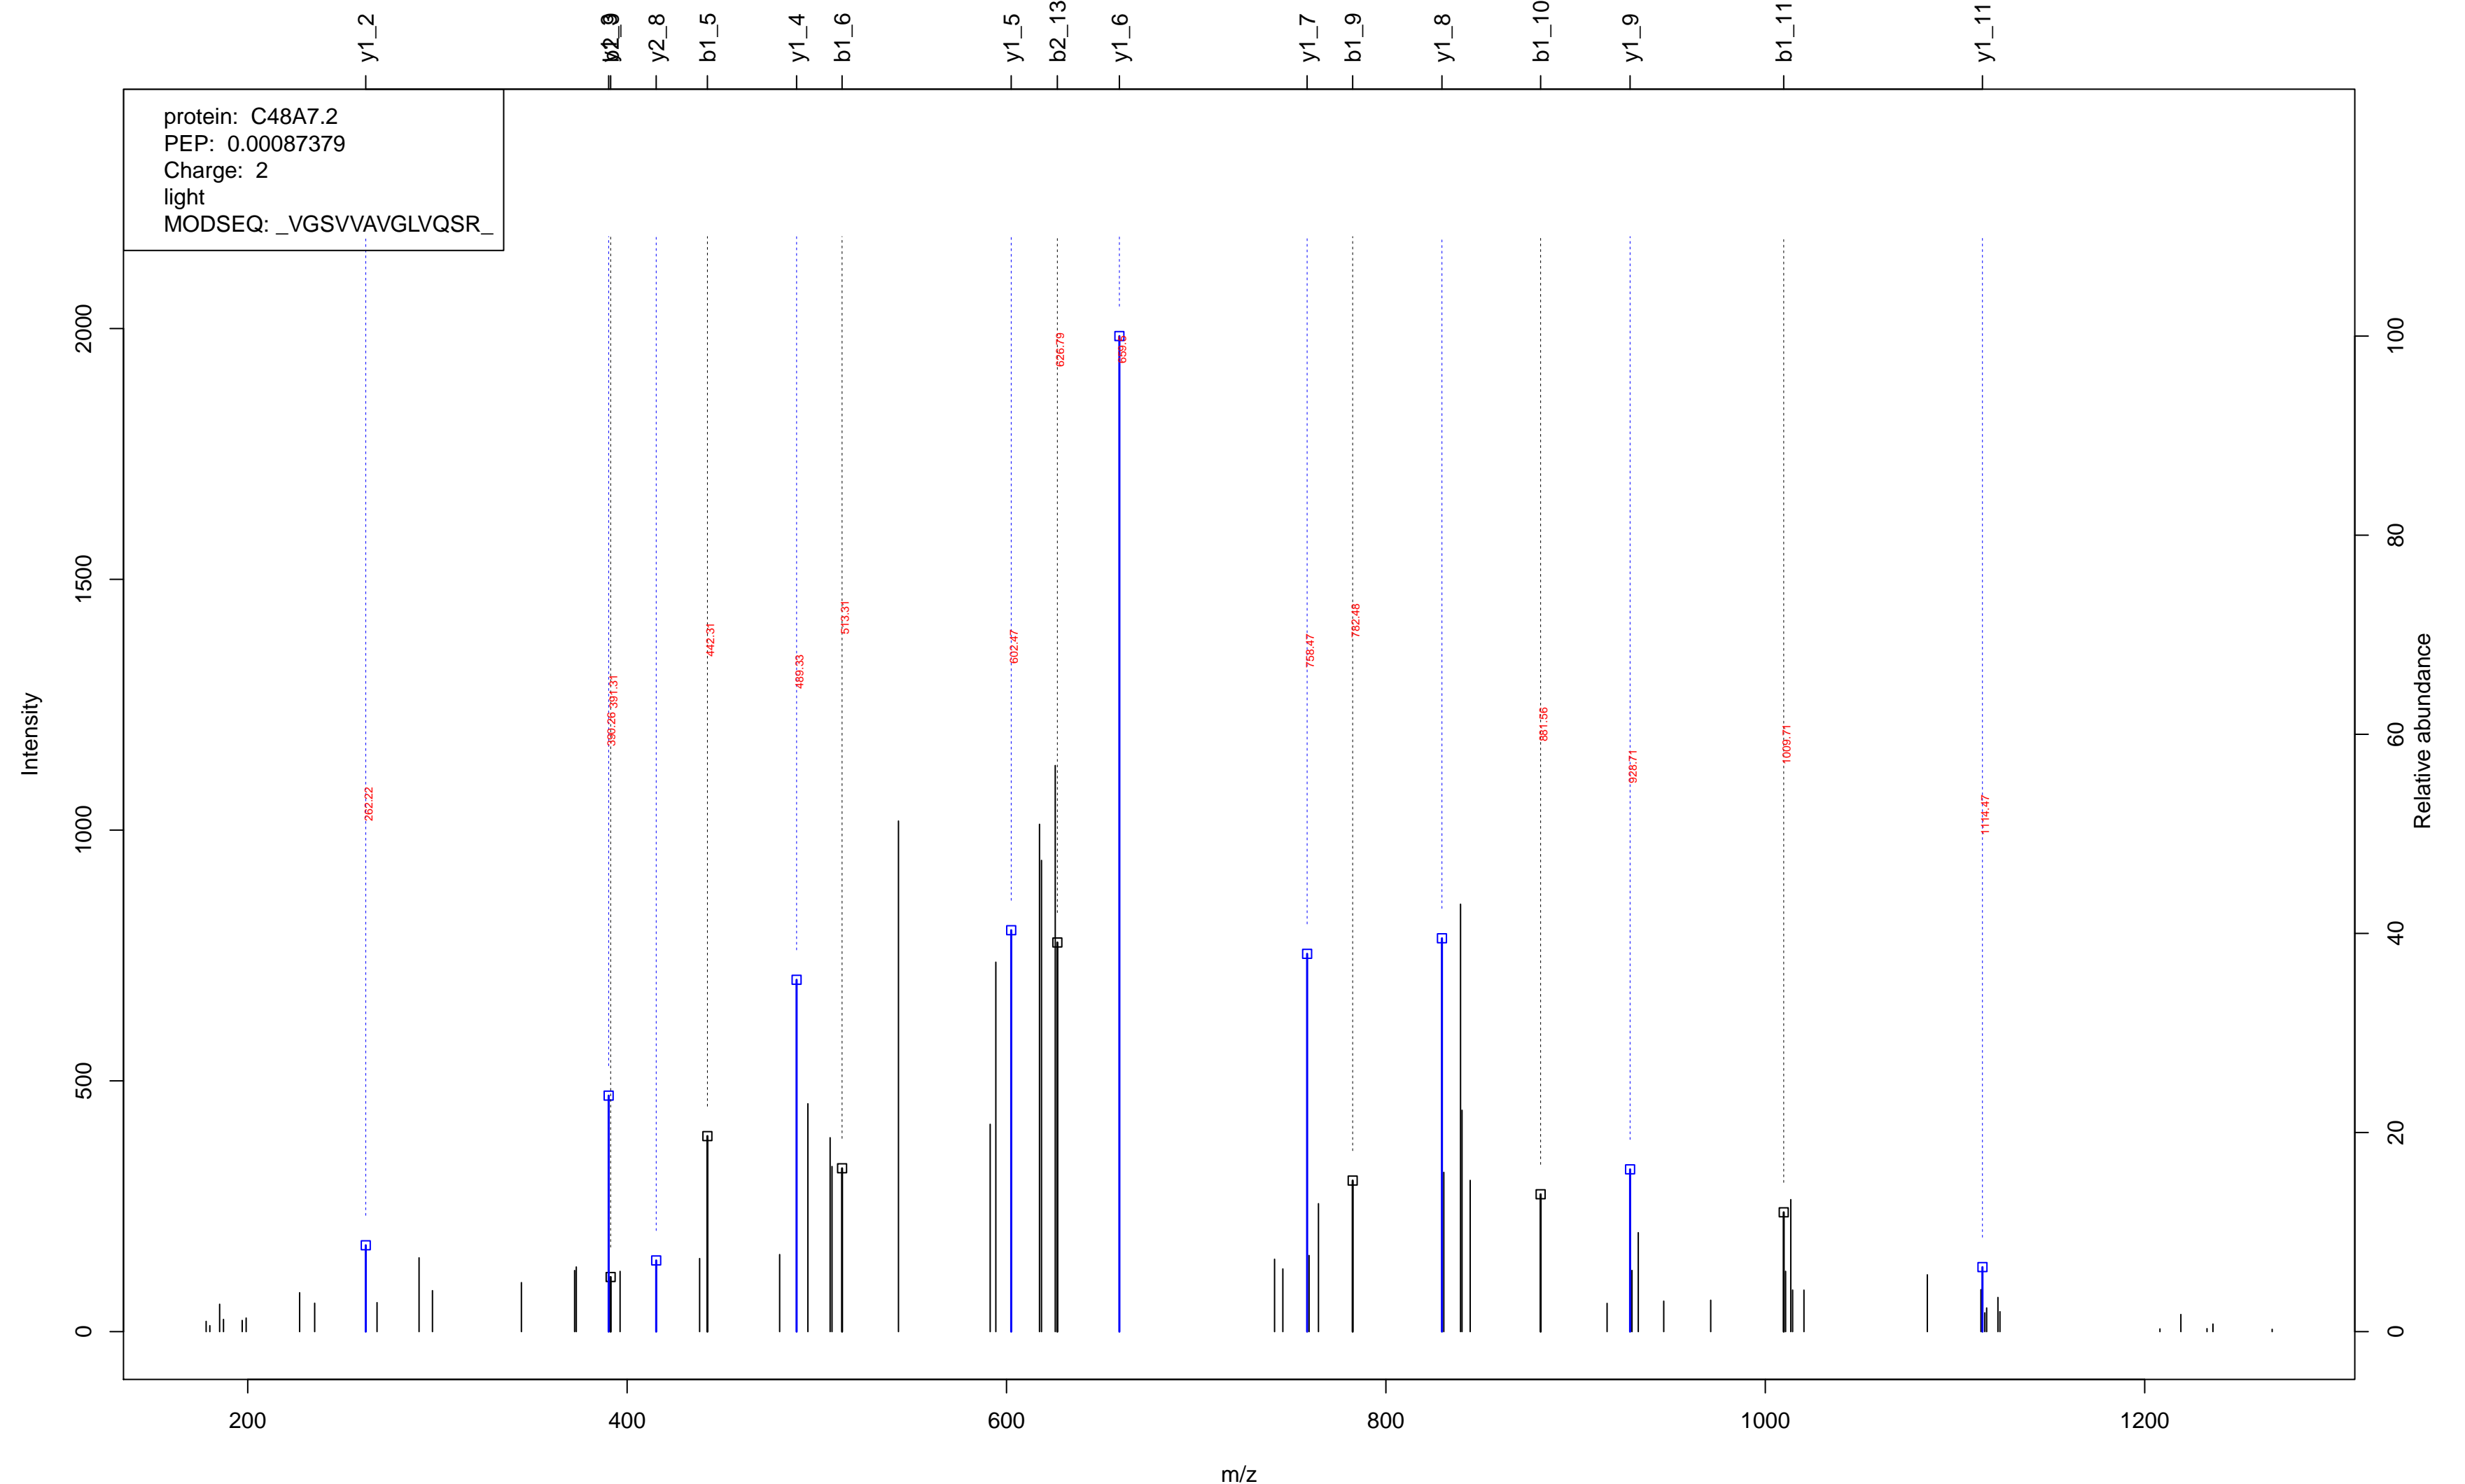

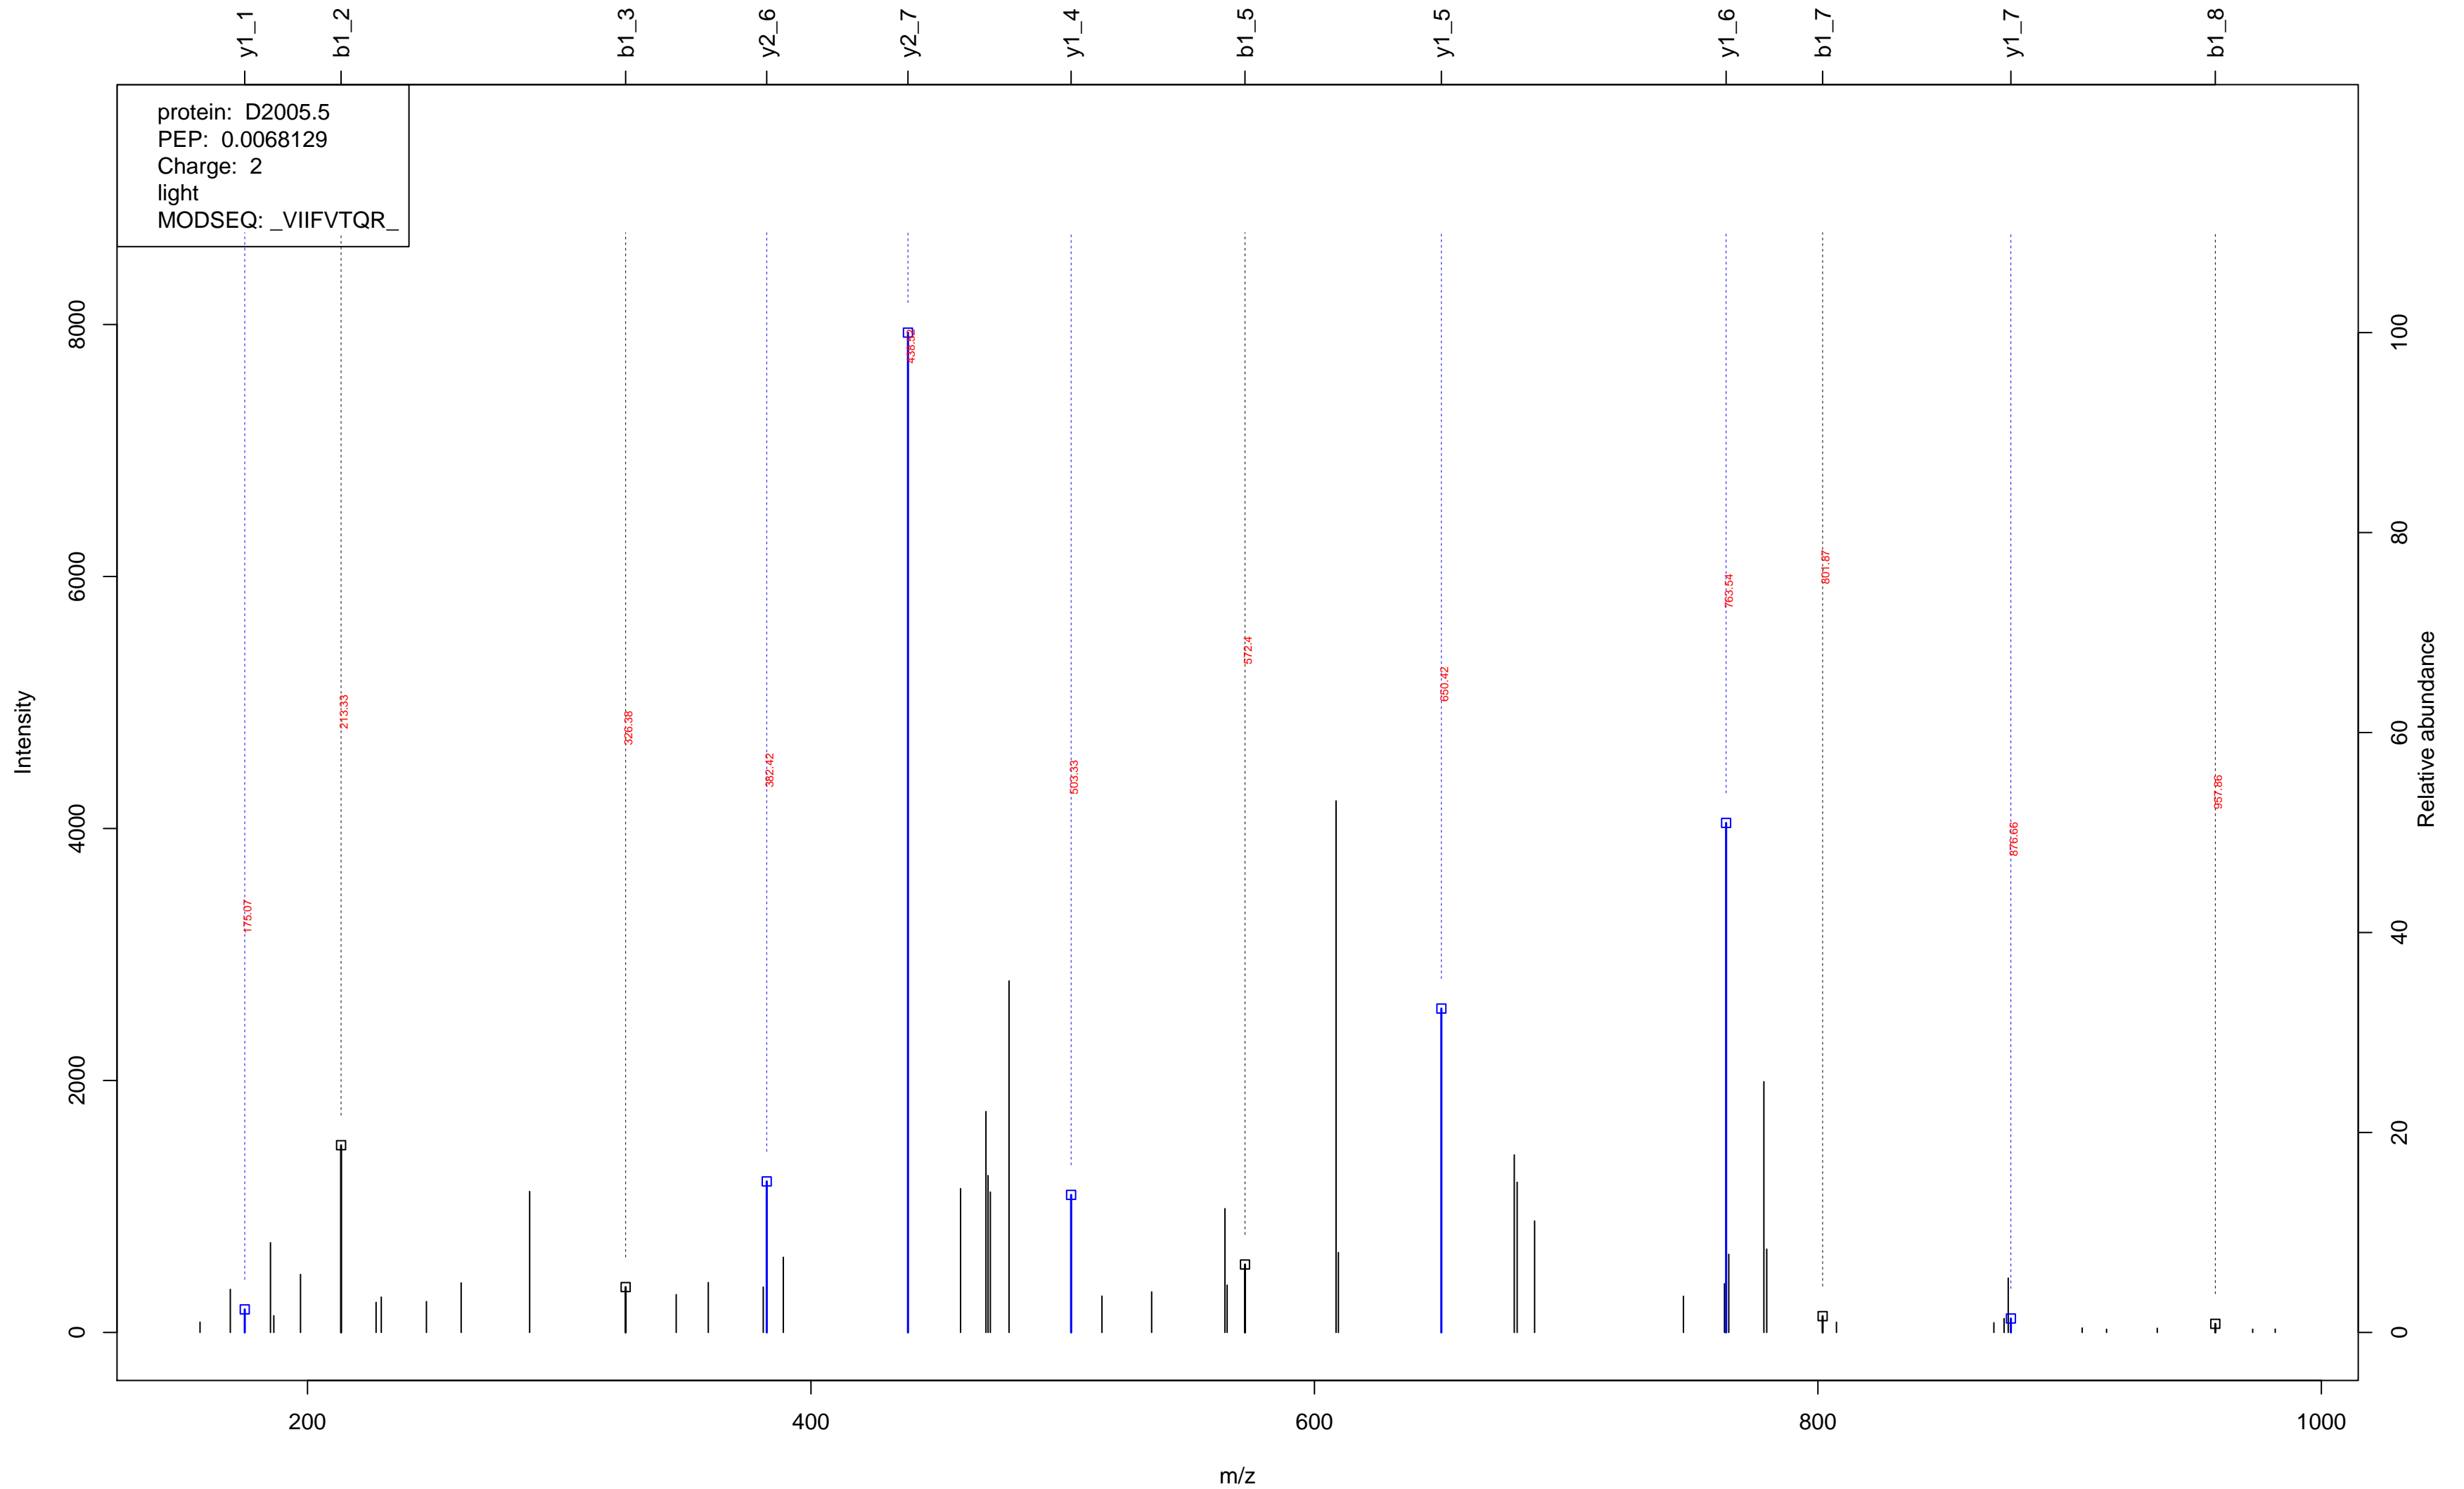

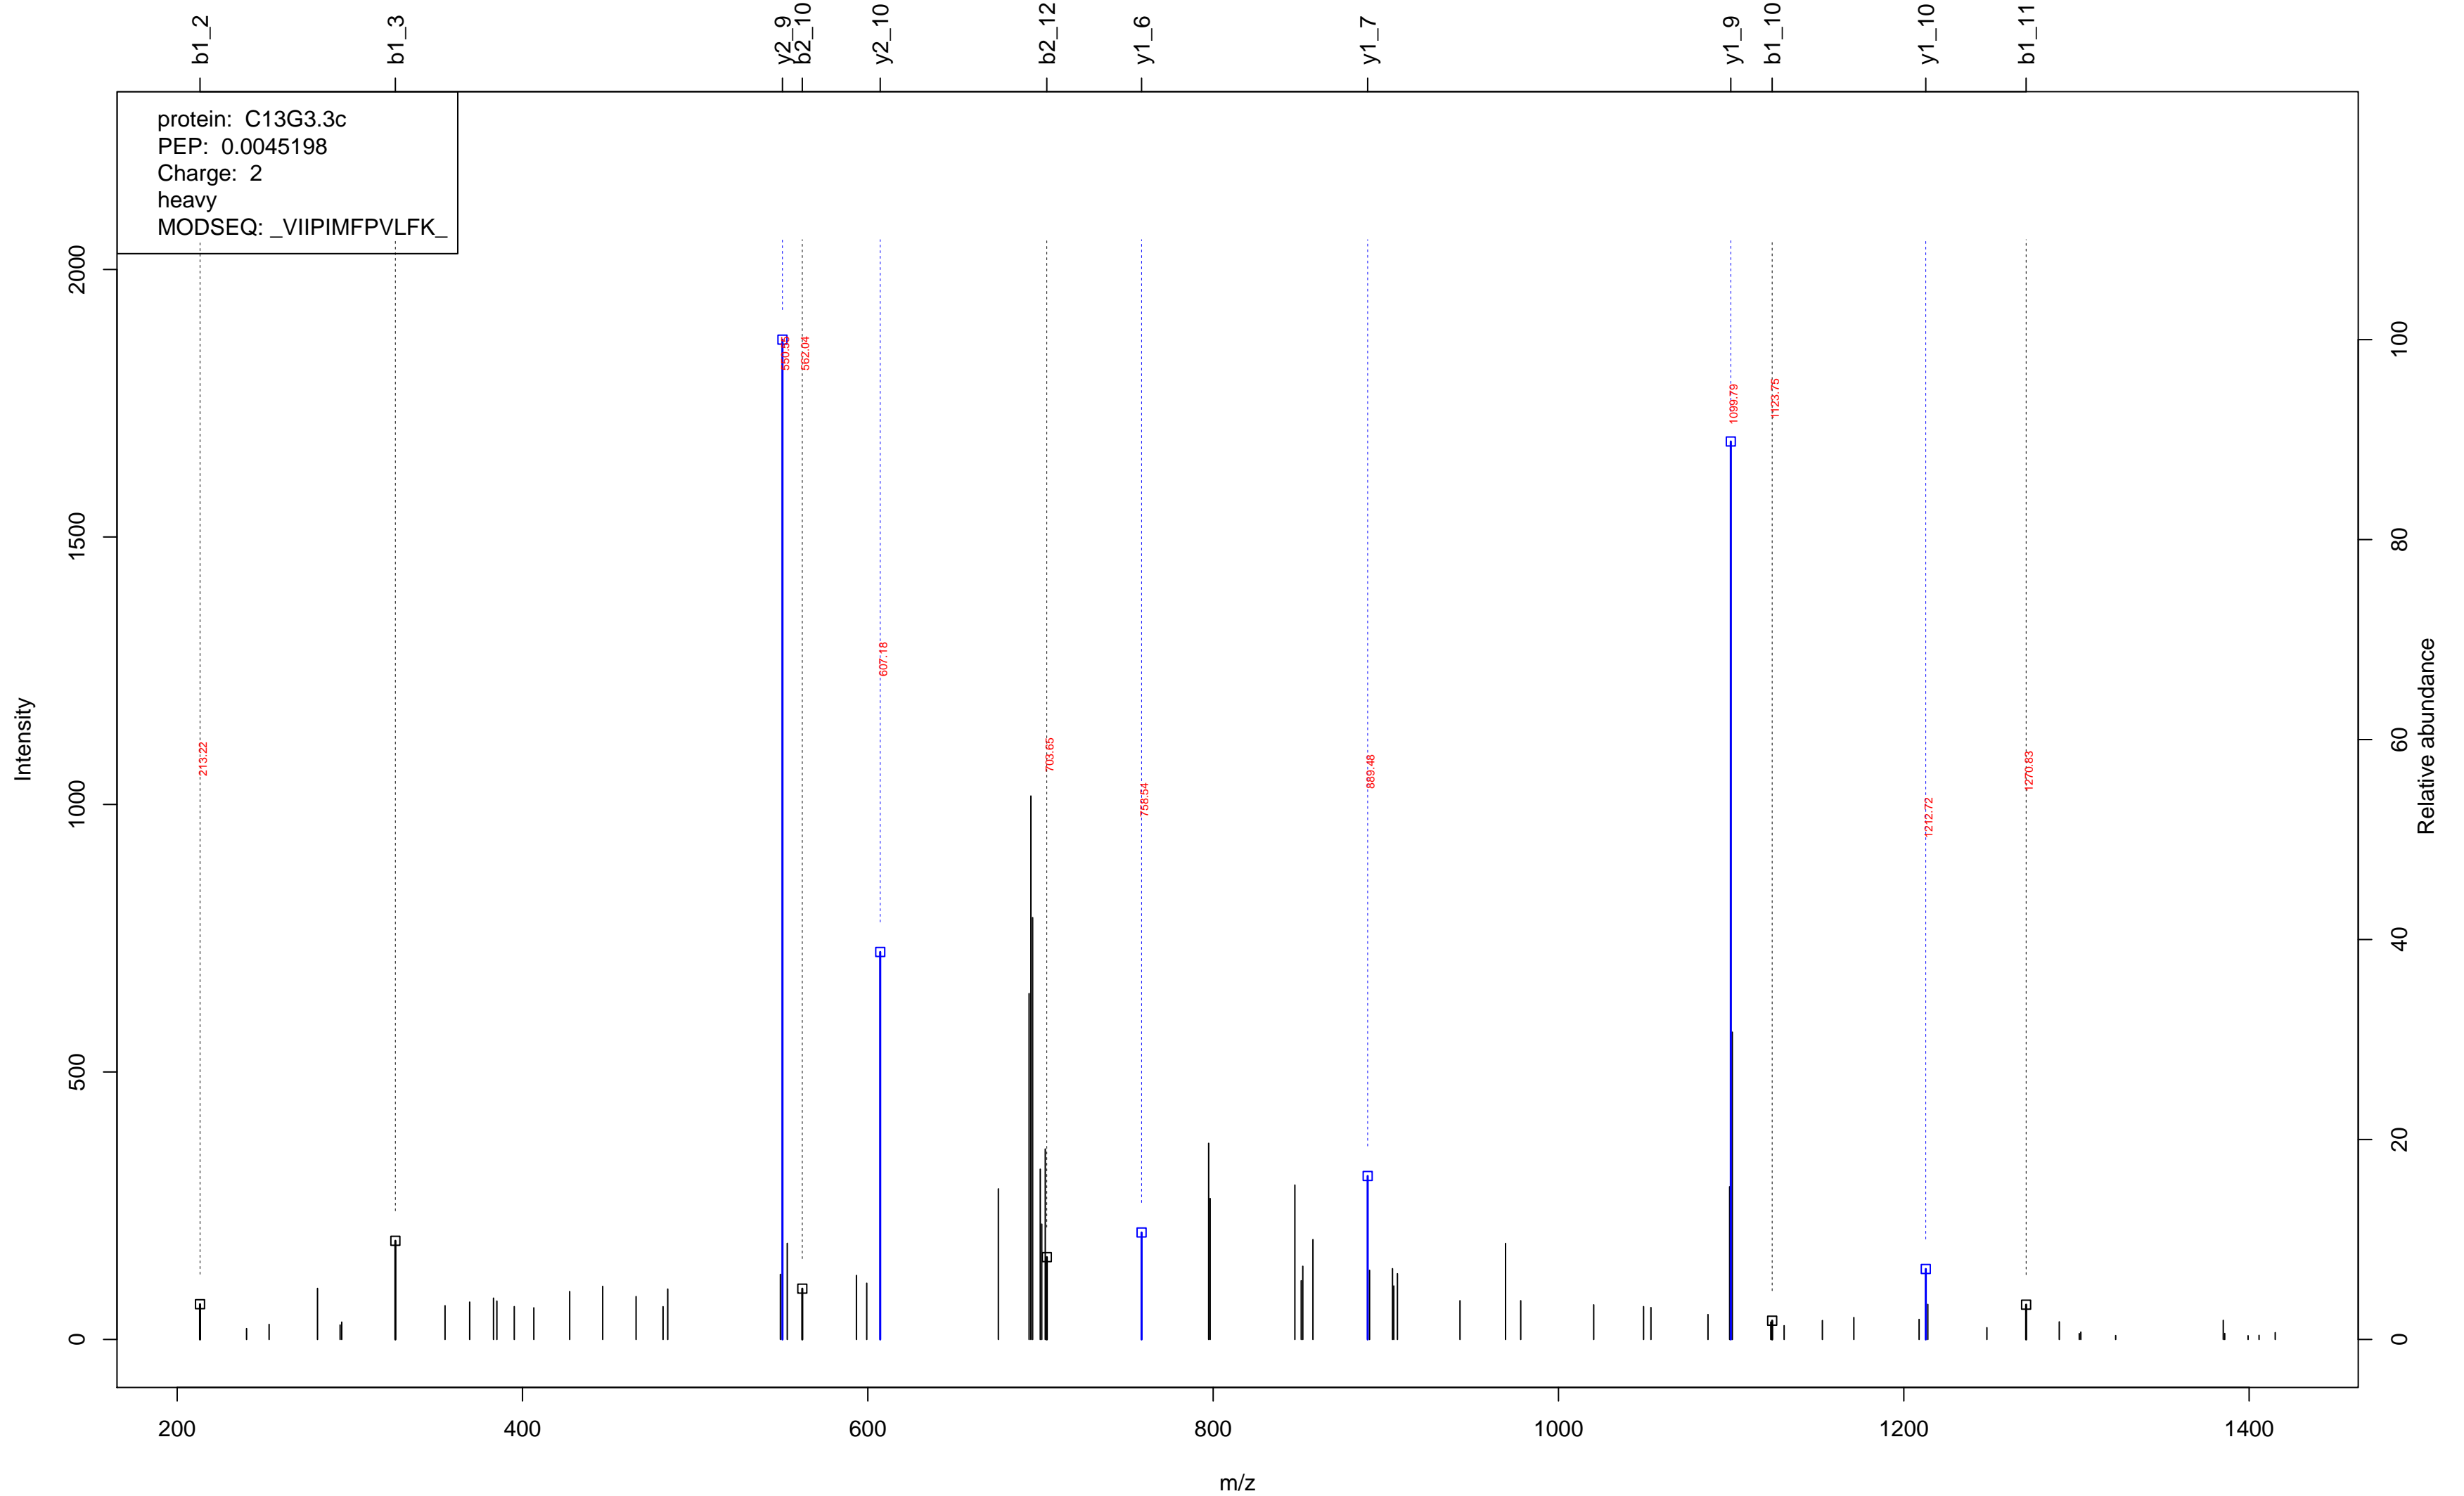

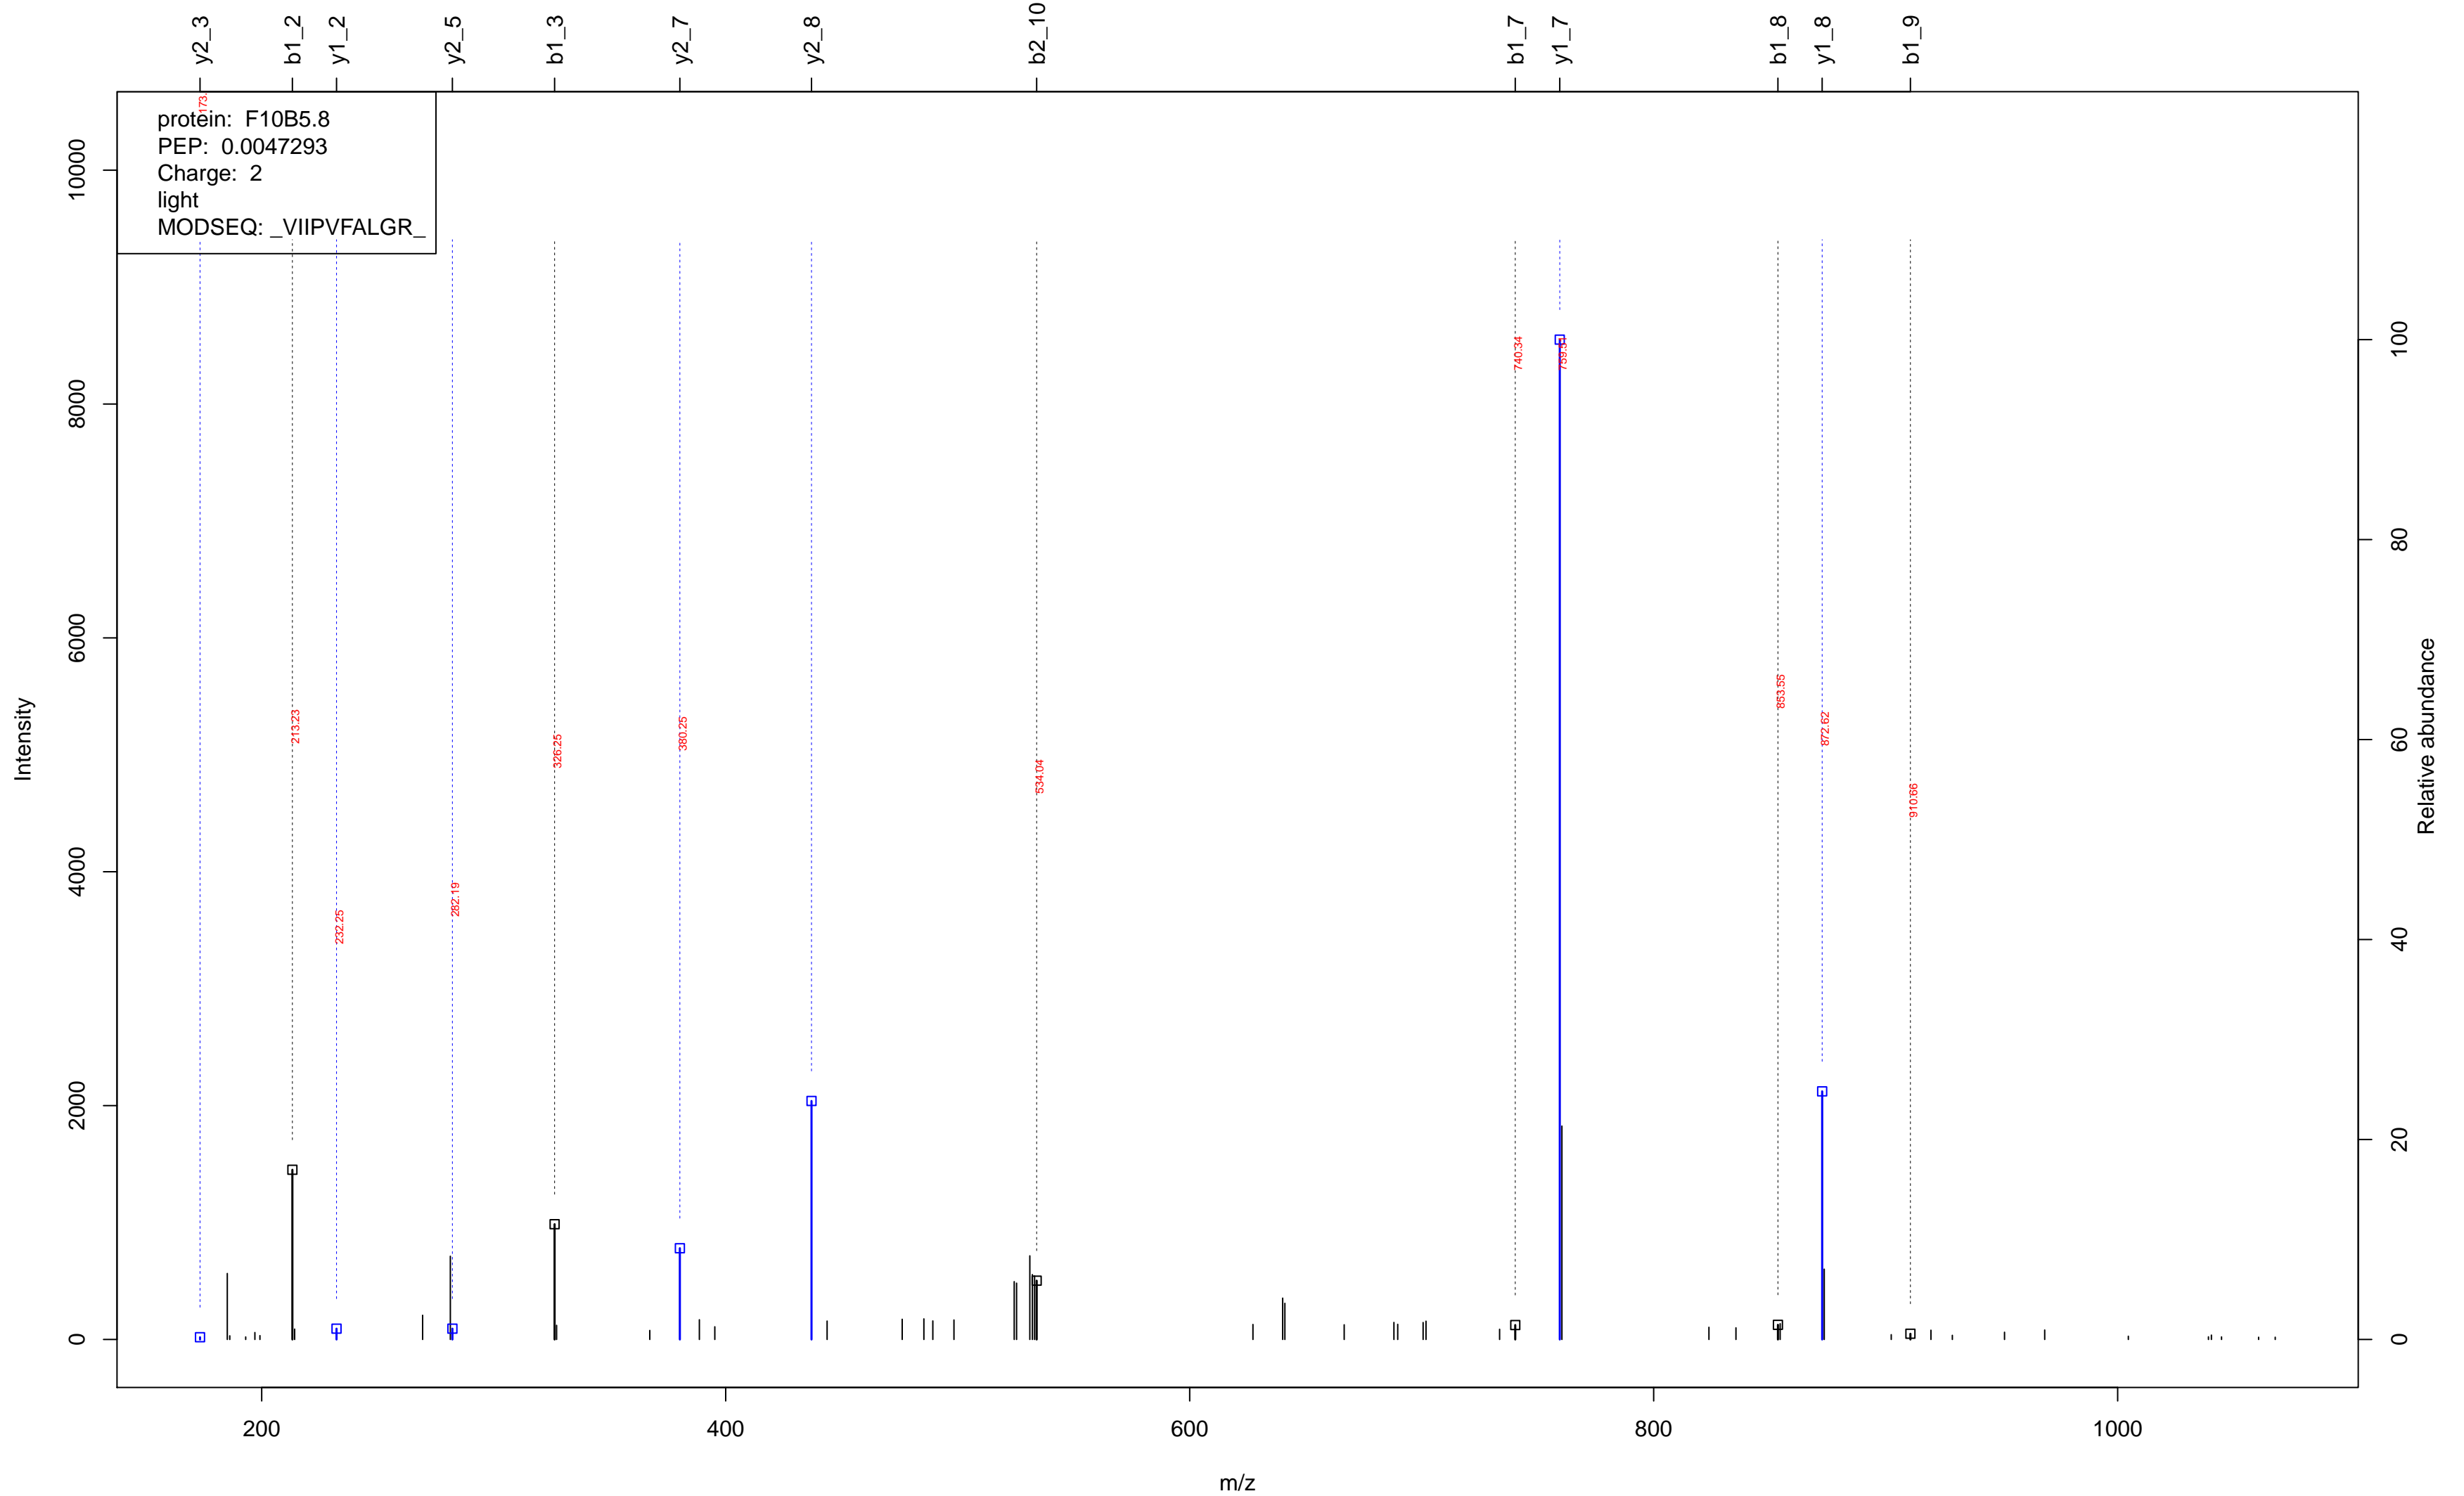



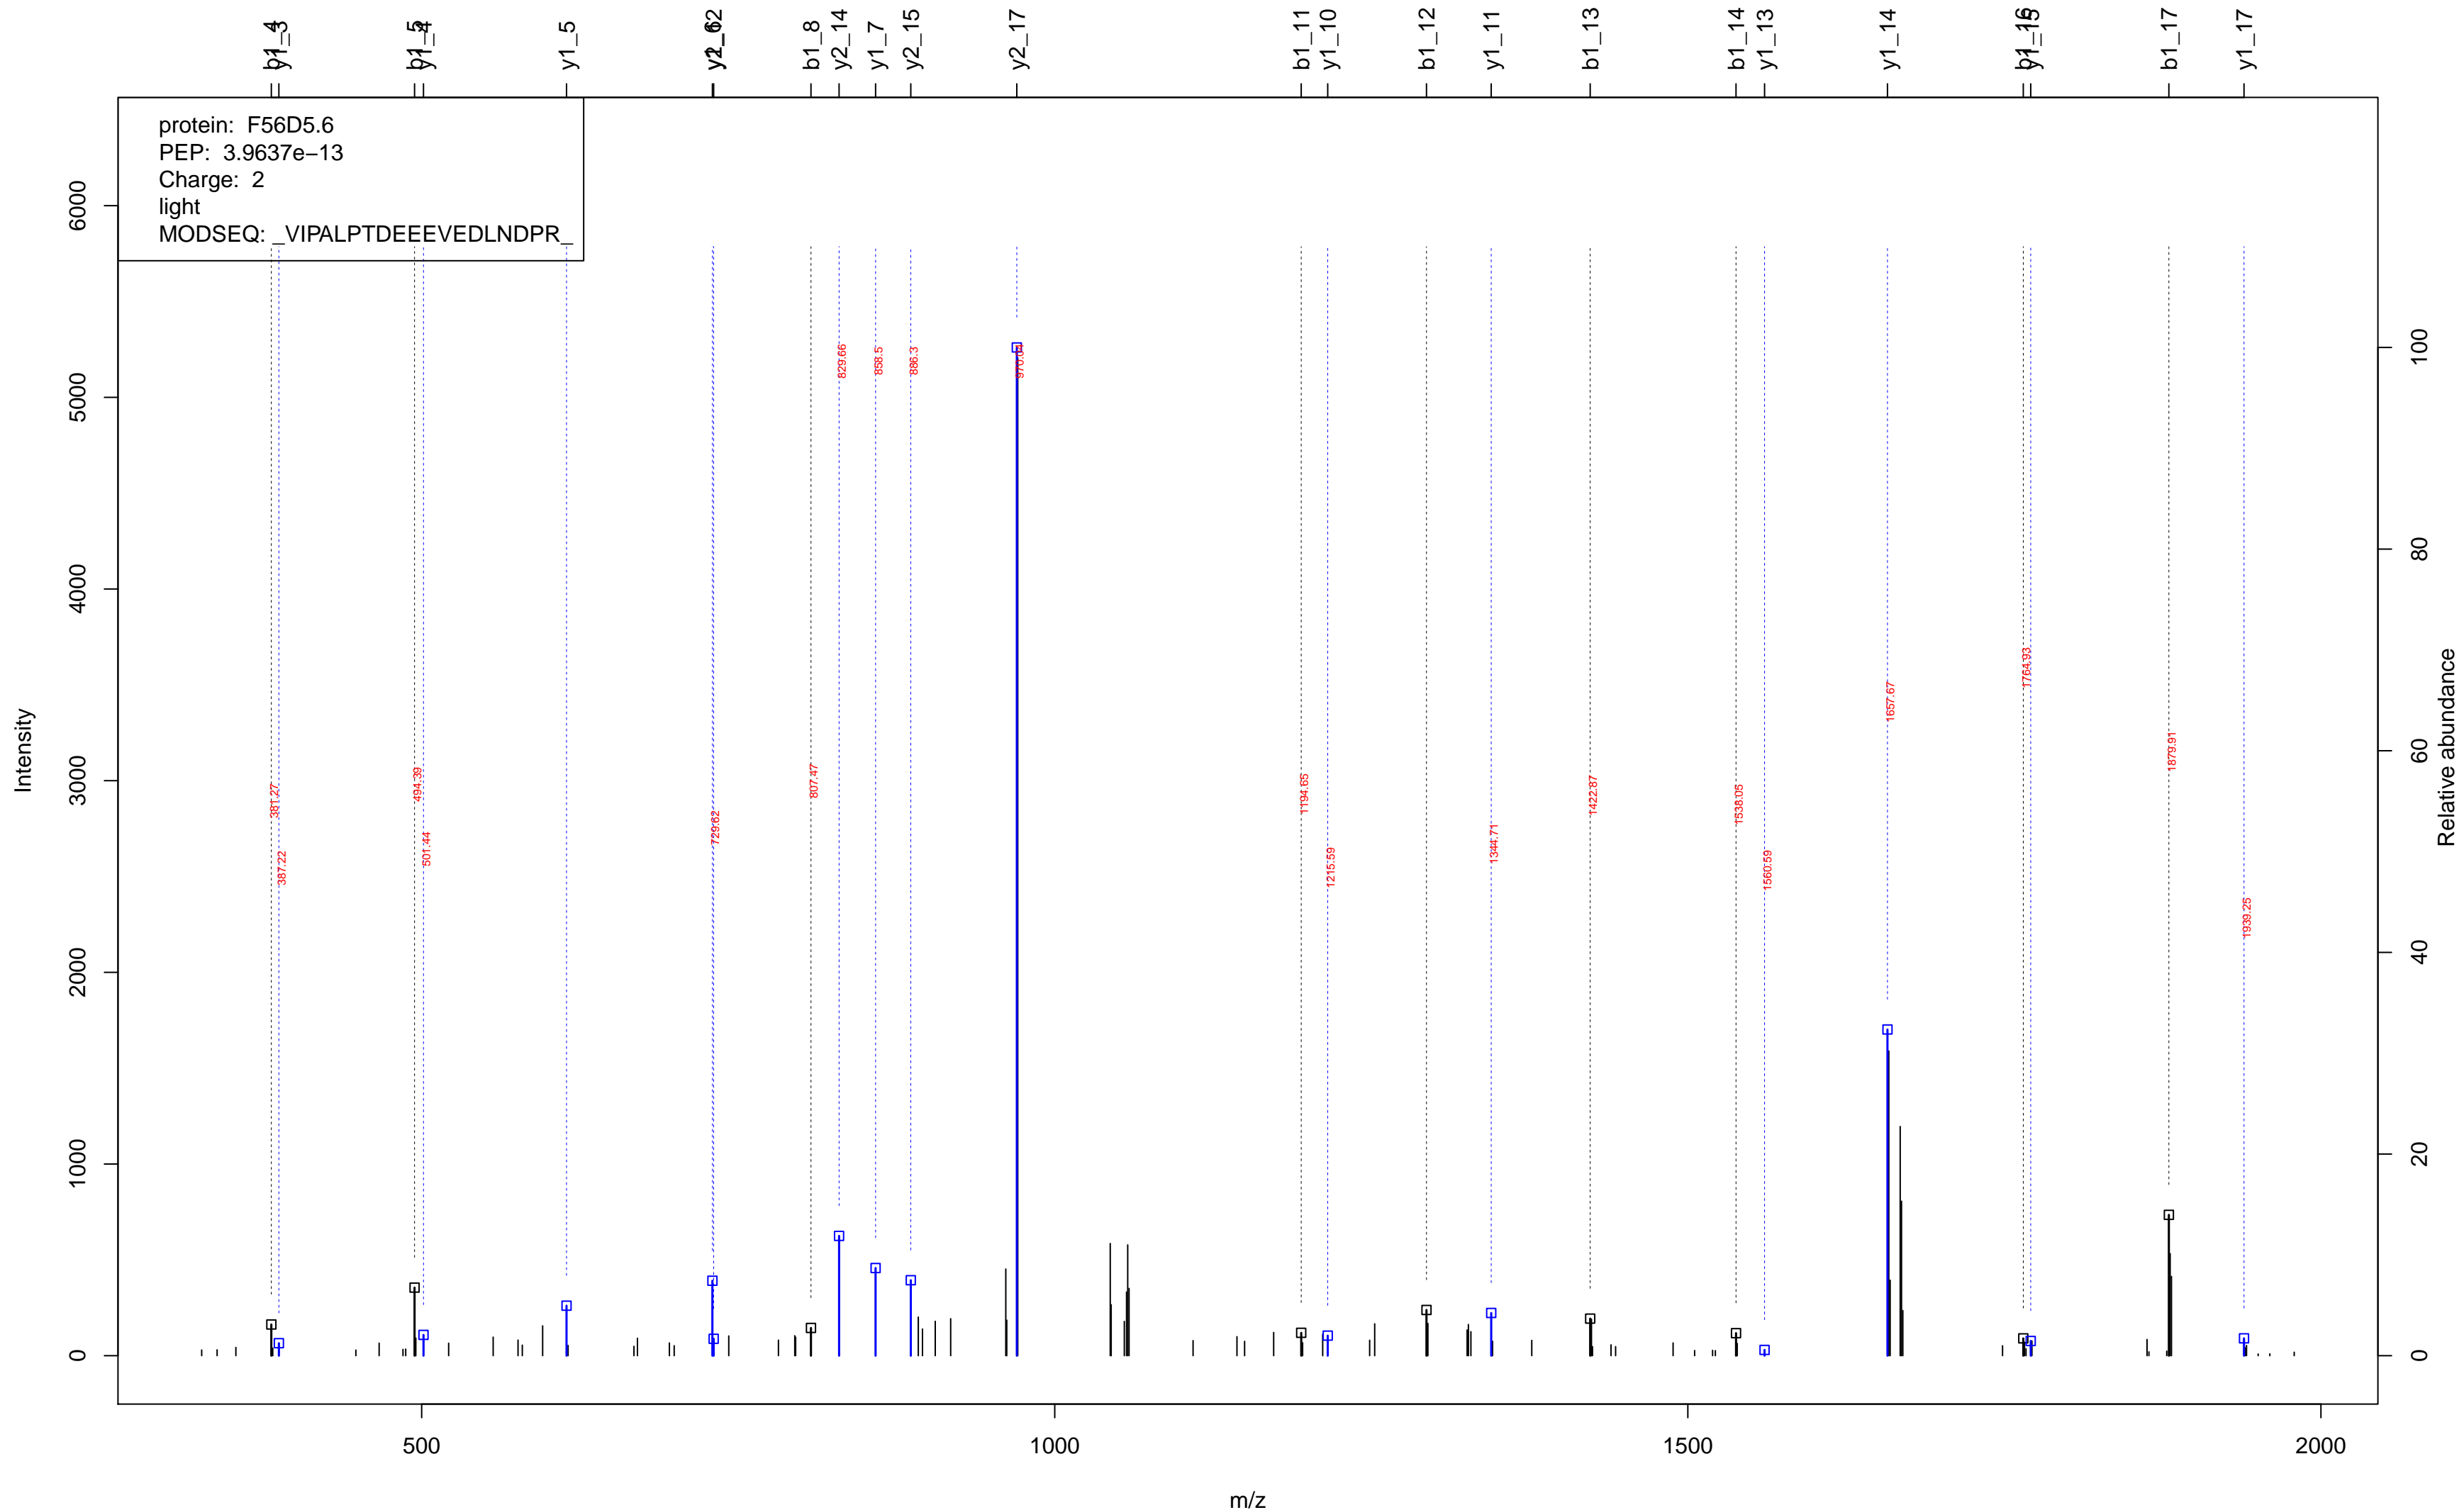

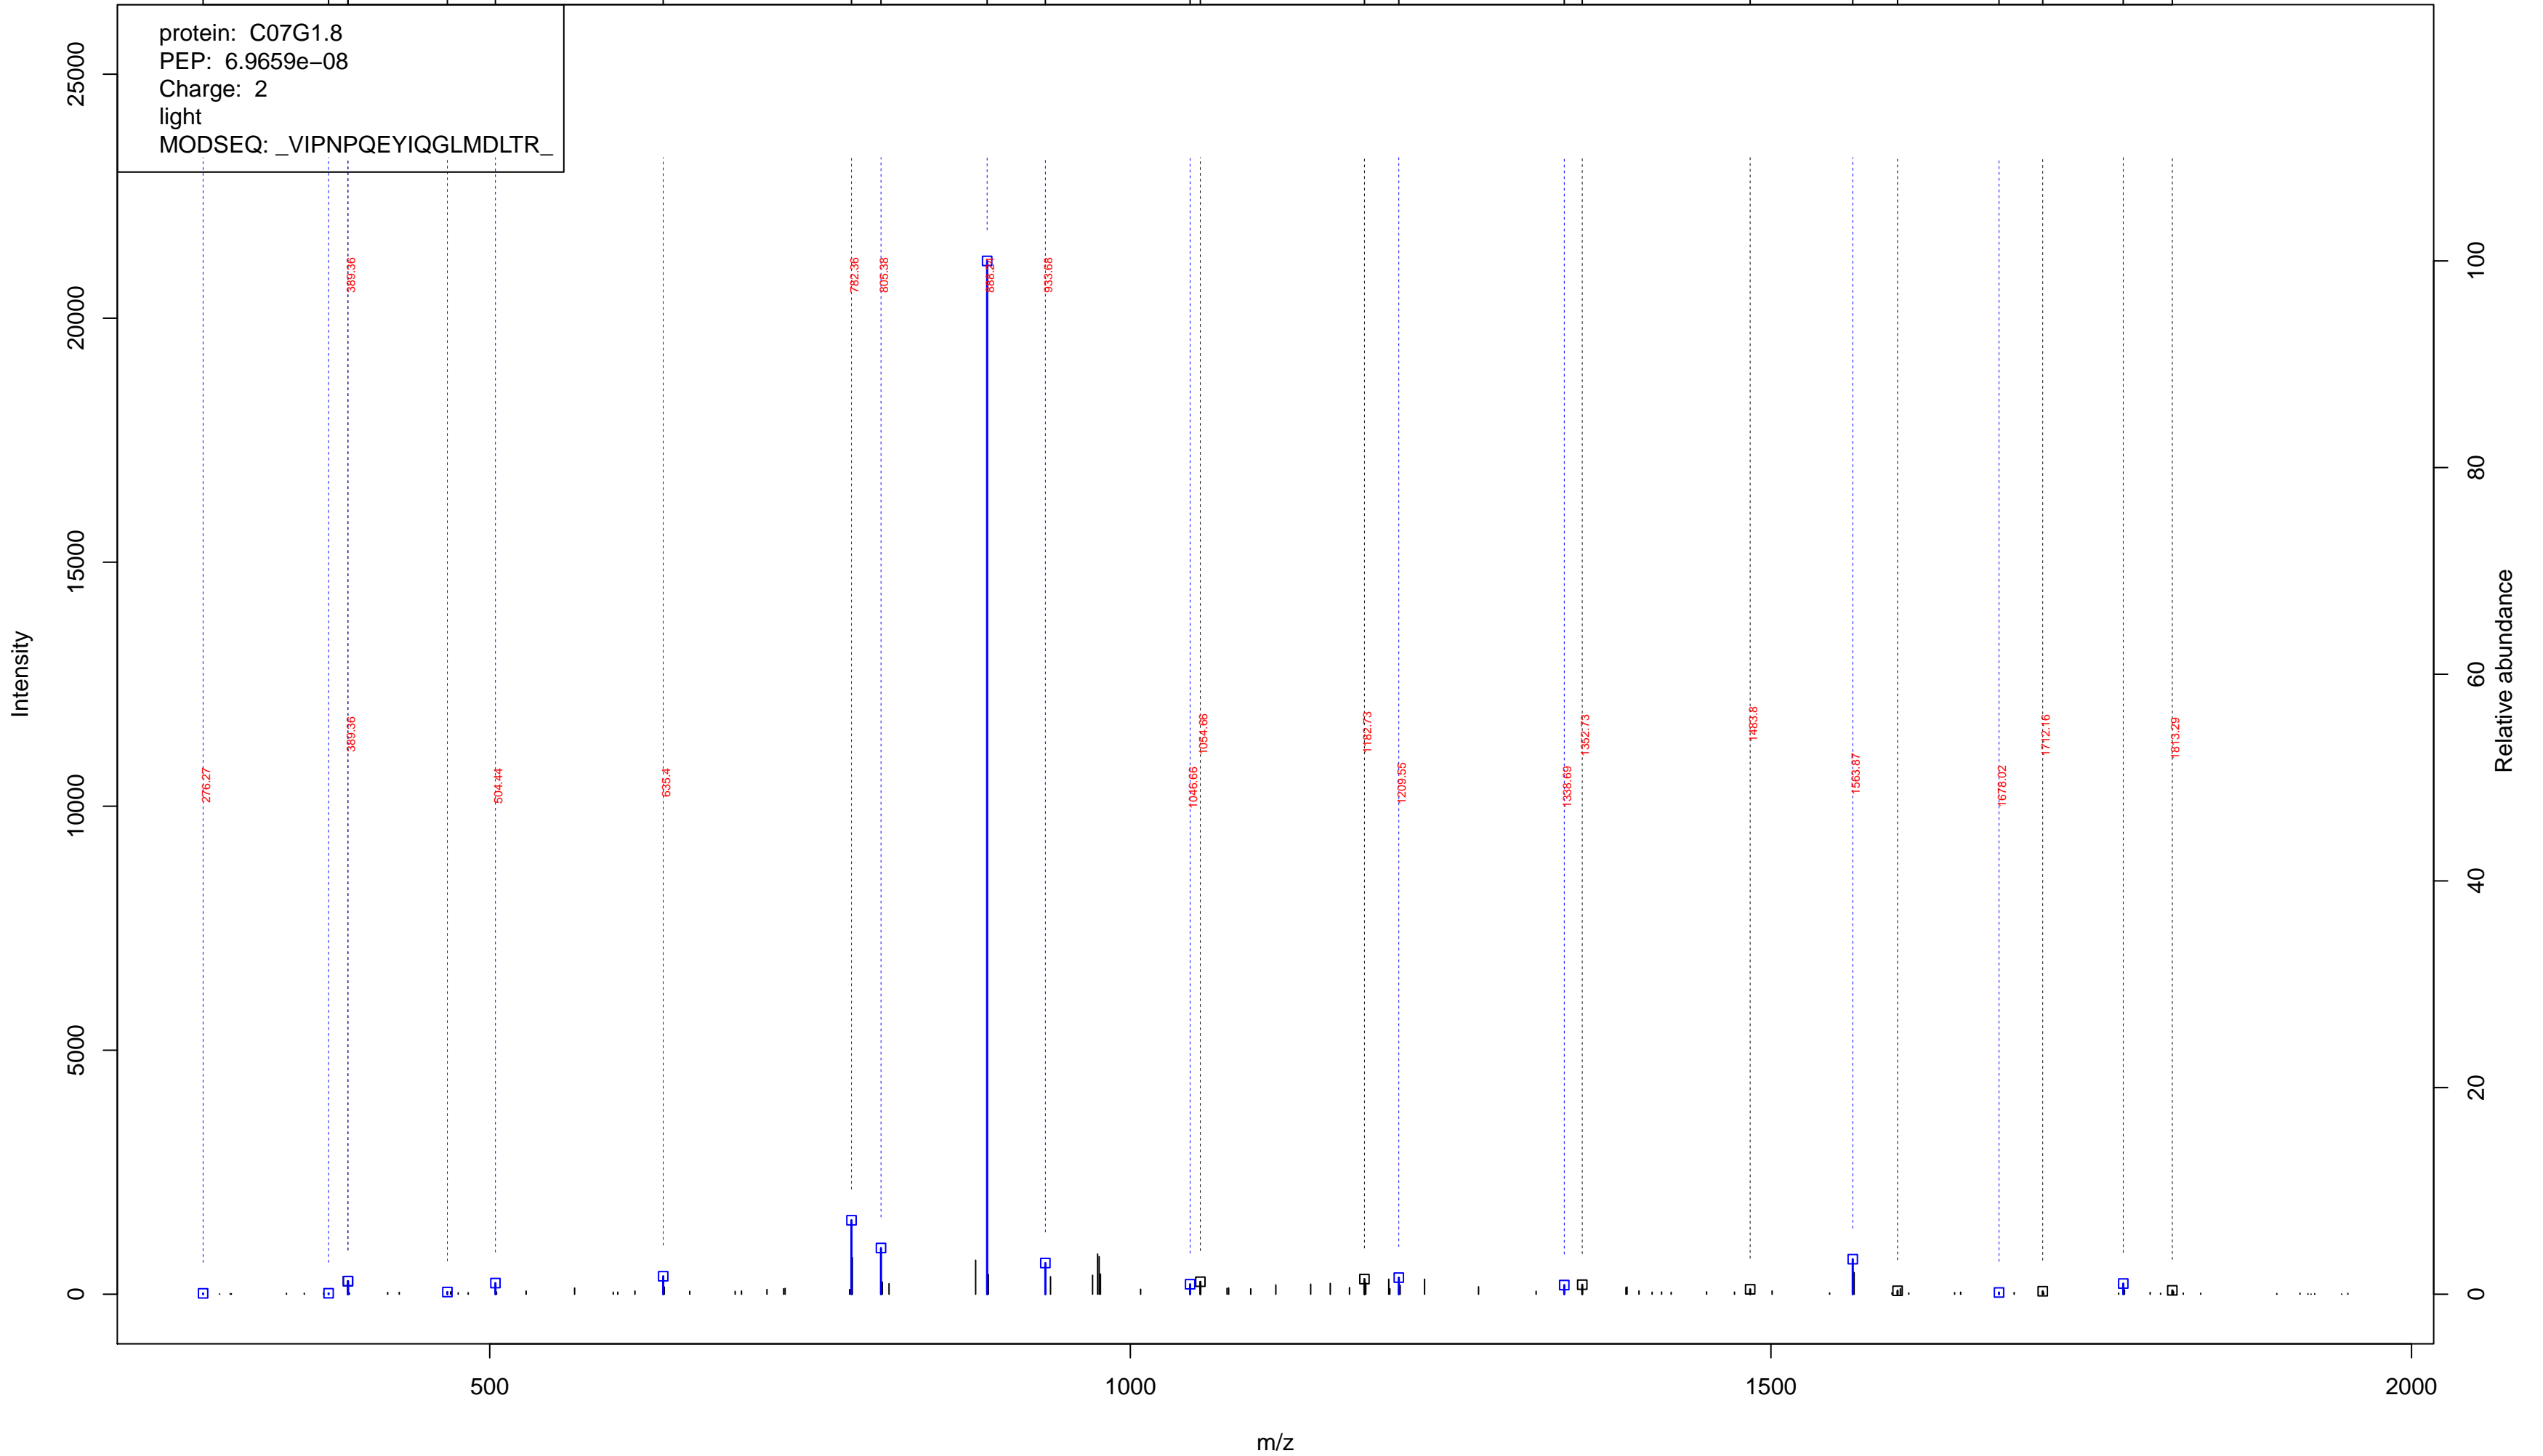

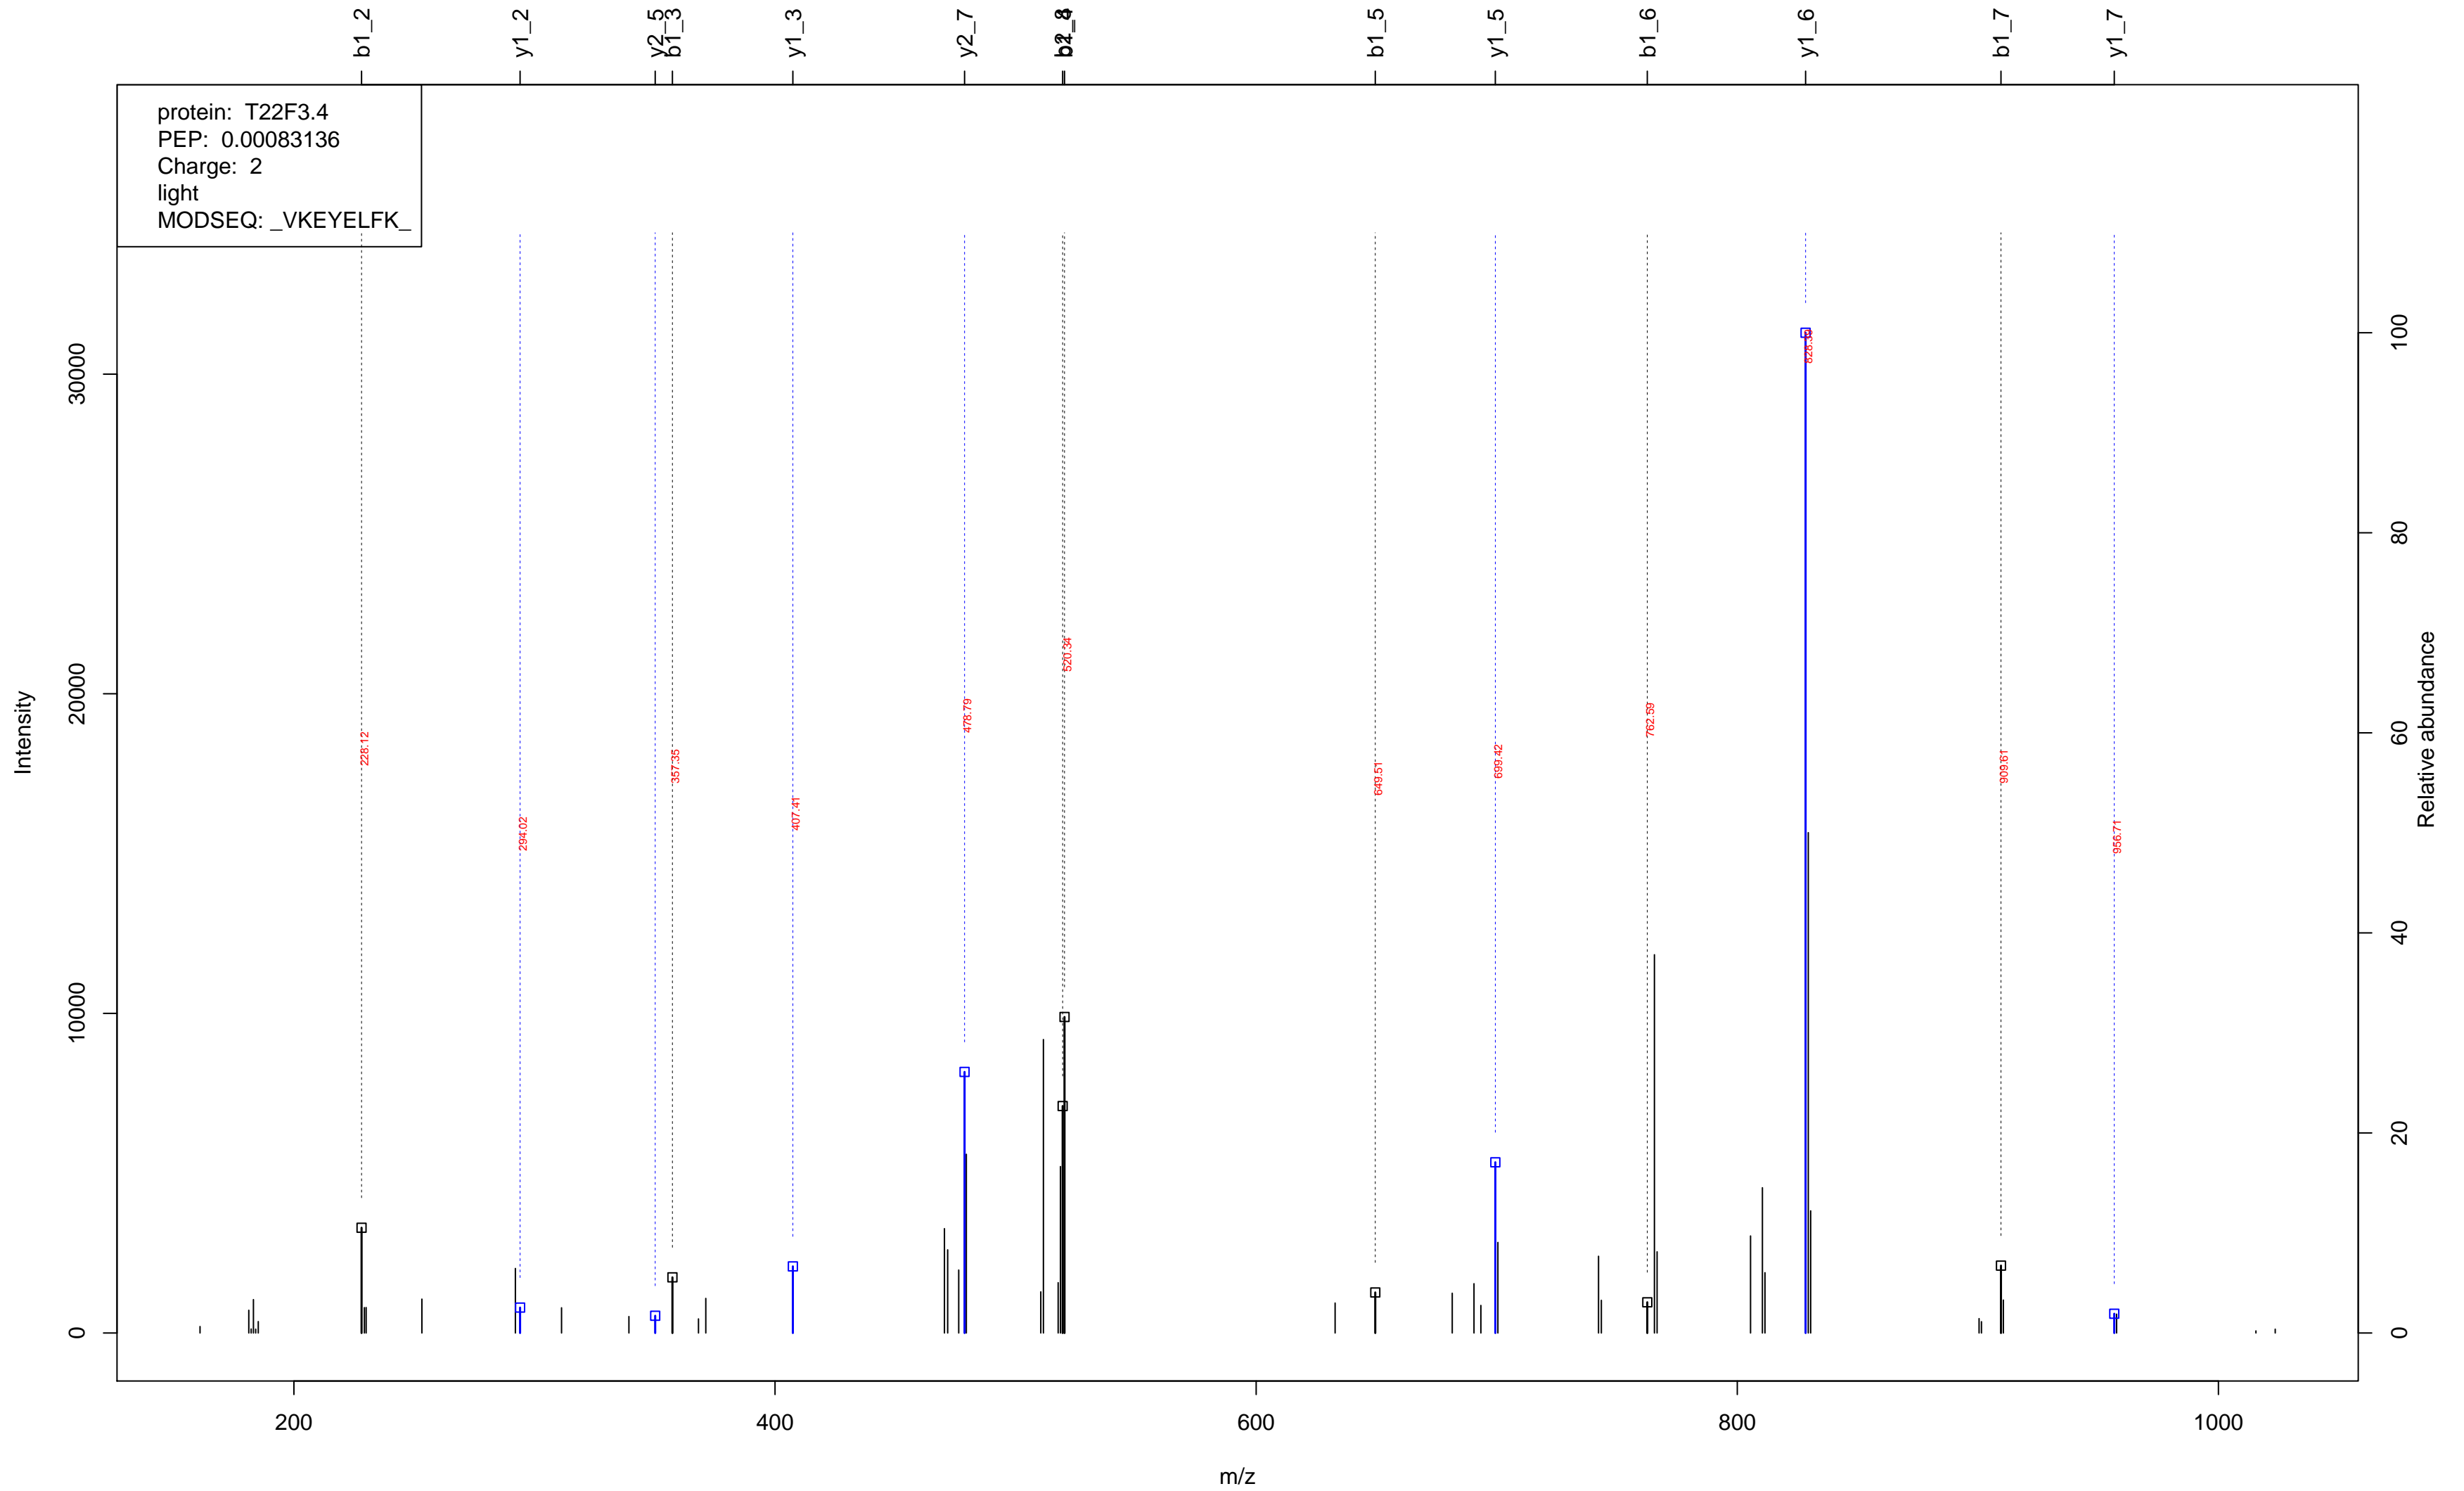

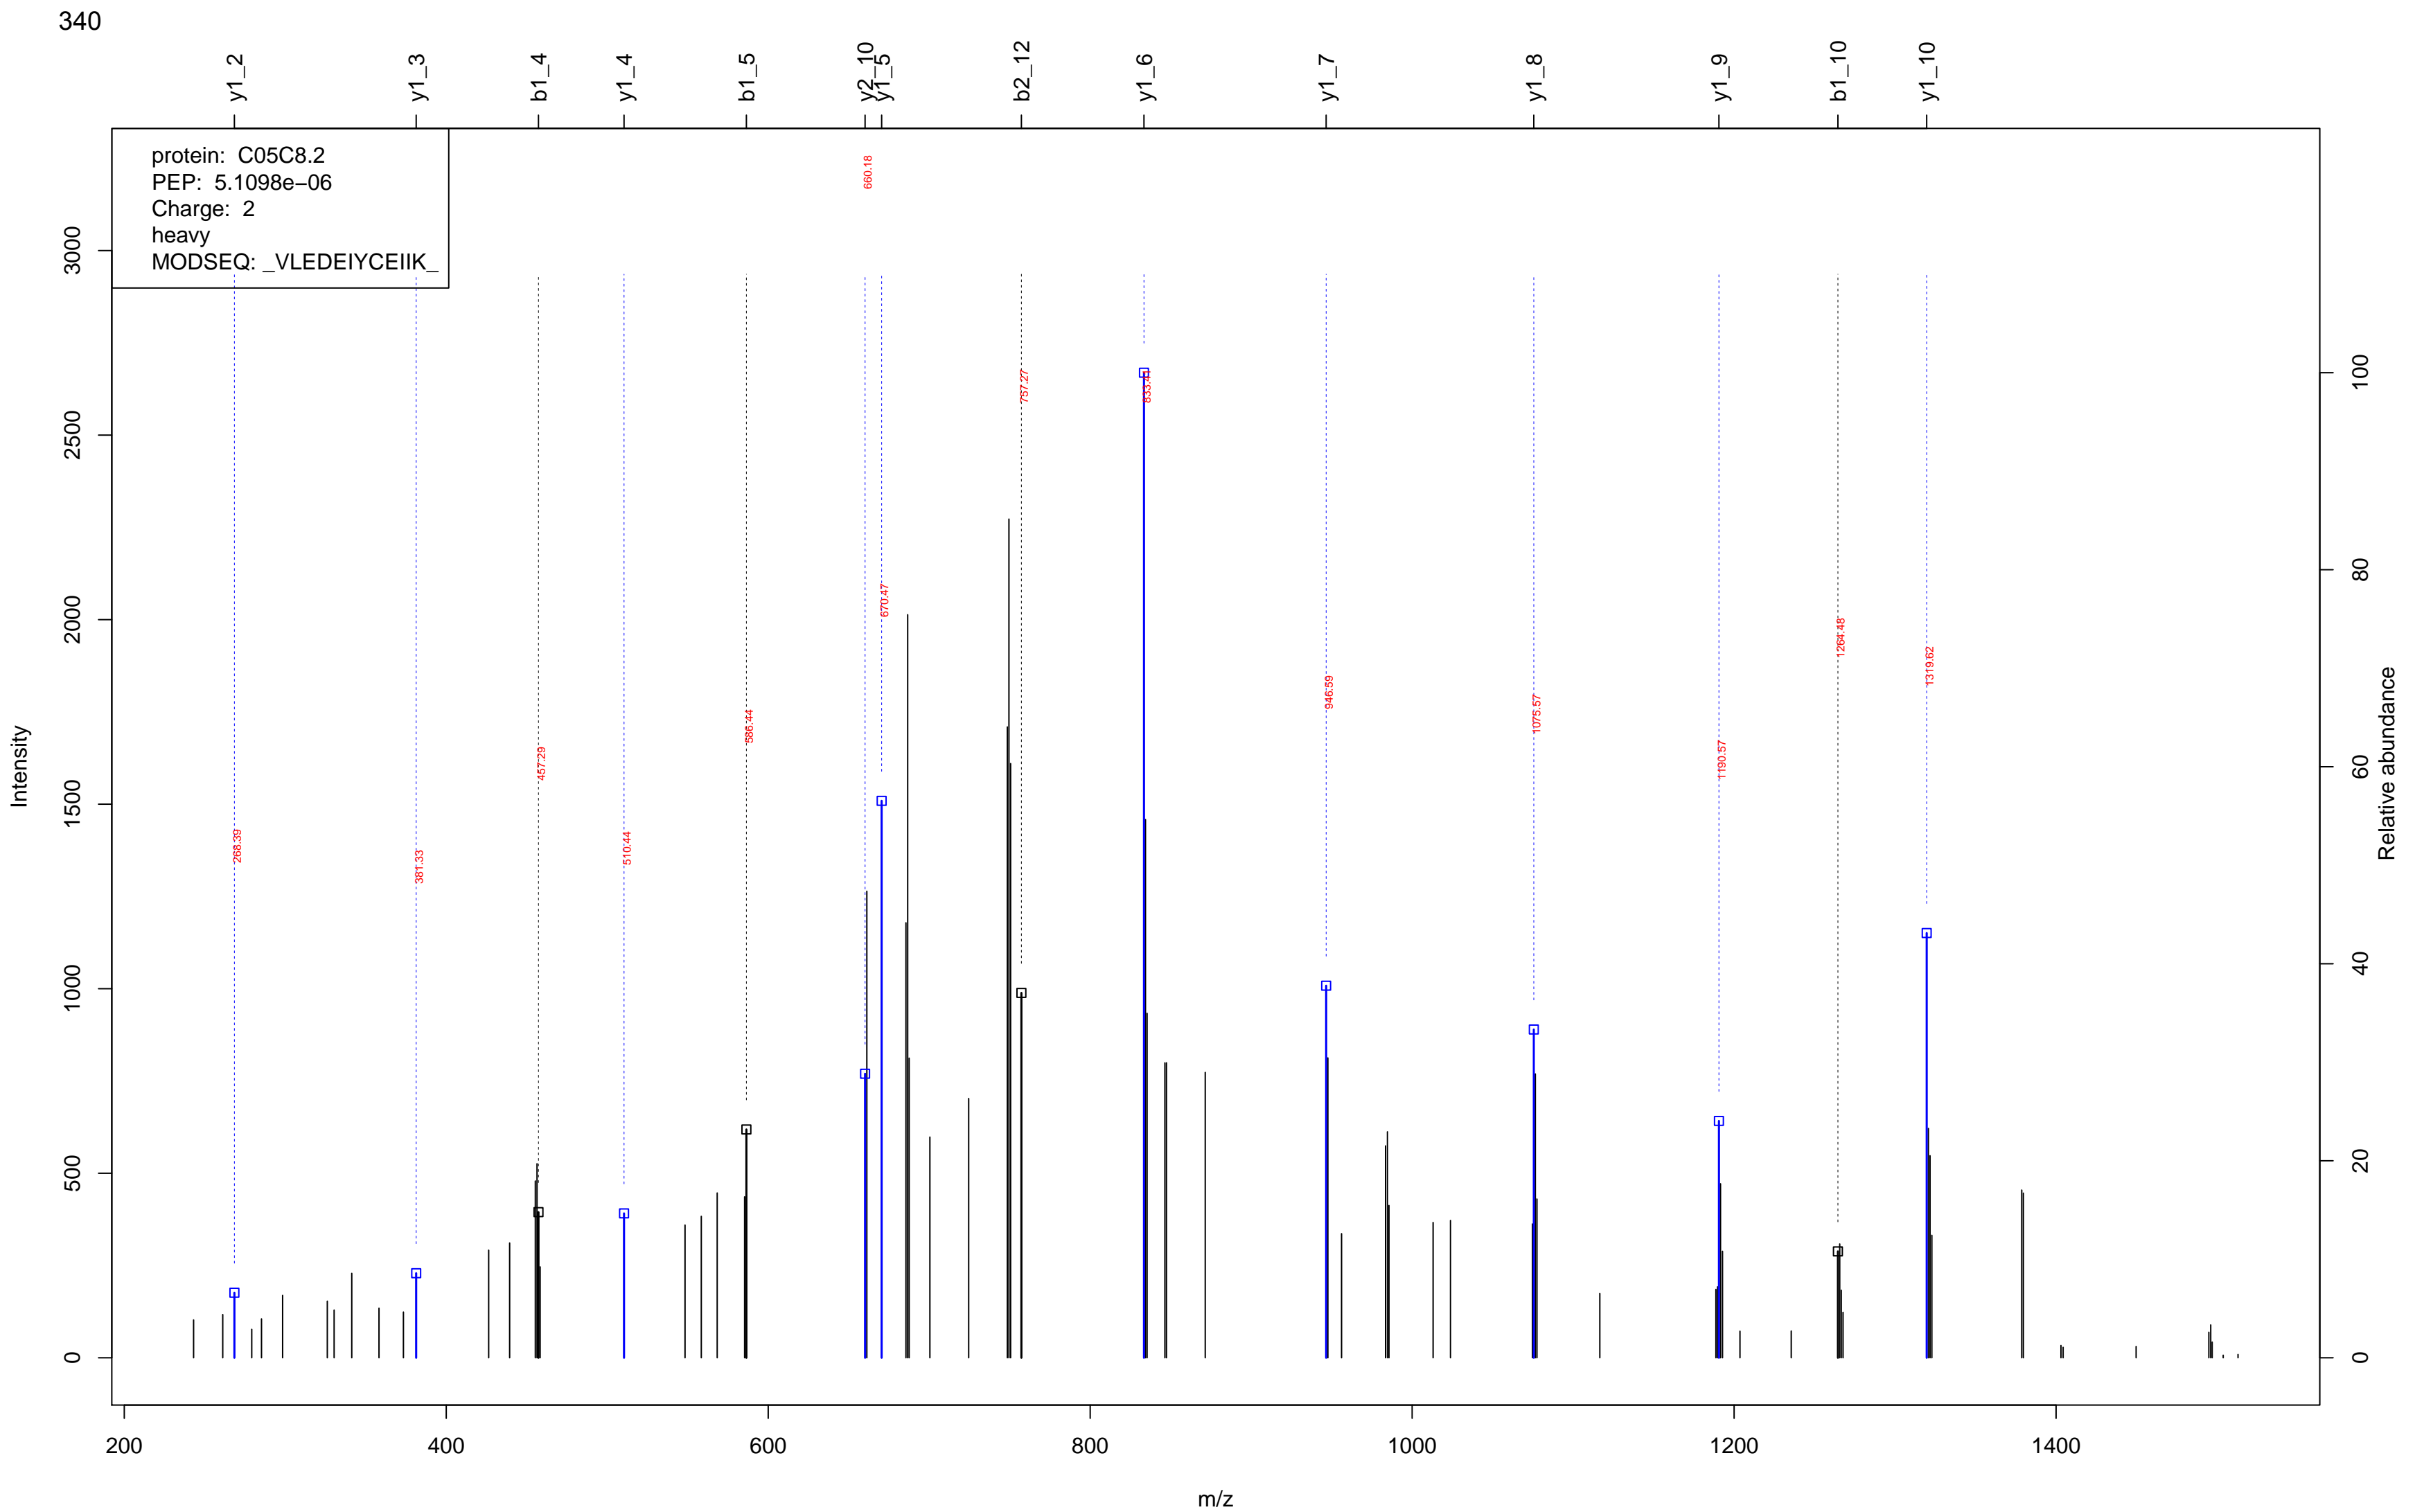

y1\_2 b2\_5 b1\_3 y1\_3 b2\_7 y1\_4 b2\_9 y2\_9 b2\_10 y1\_5 b2\_12 y1\_6 y1\_7 y1\_8 y1\_9 b1\_10 y1\_10 b1\_11 y1\_11 b1\_12

protein: Y54E10A.11  
PEP: 0.00028183  
Charge: 2  
light  
MODSEQ: \_VLENPAEFFDLLK\_

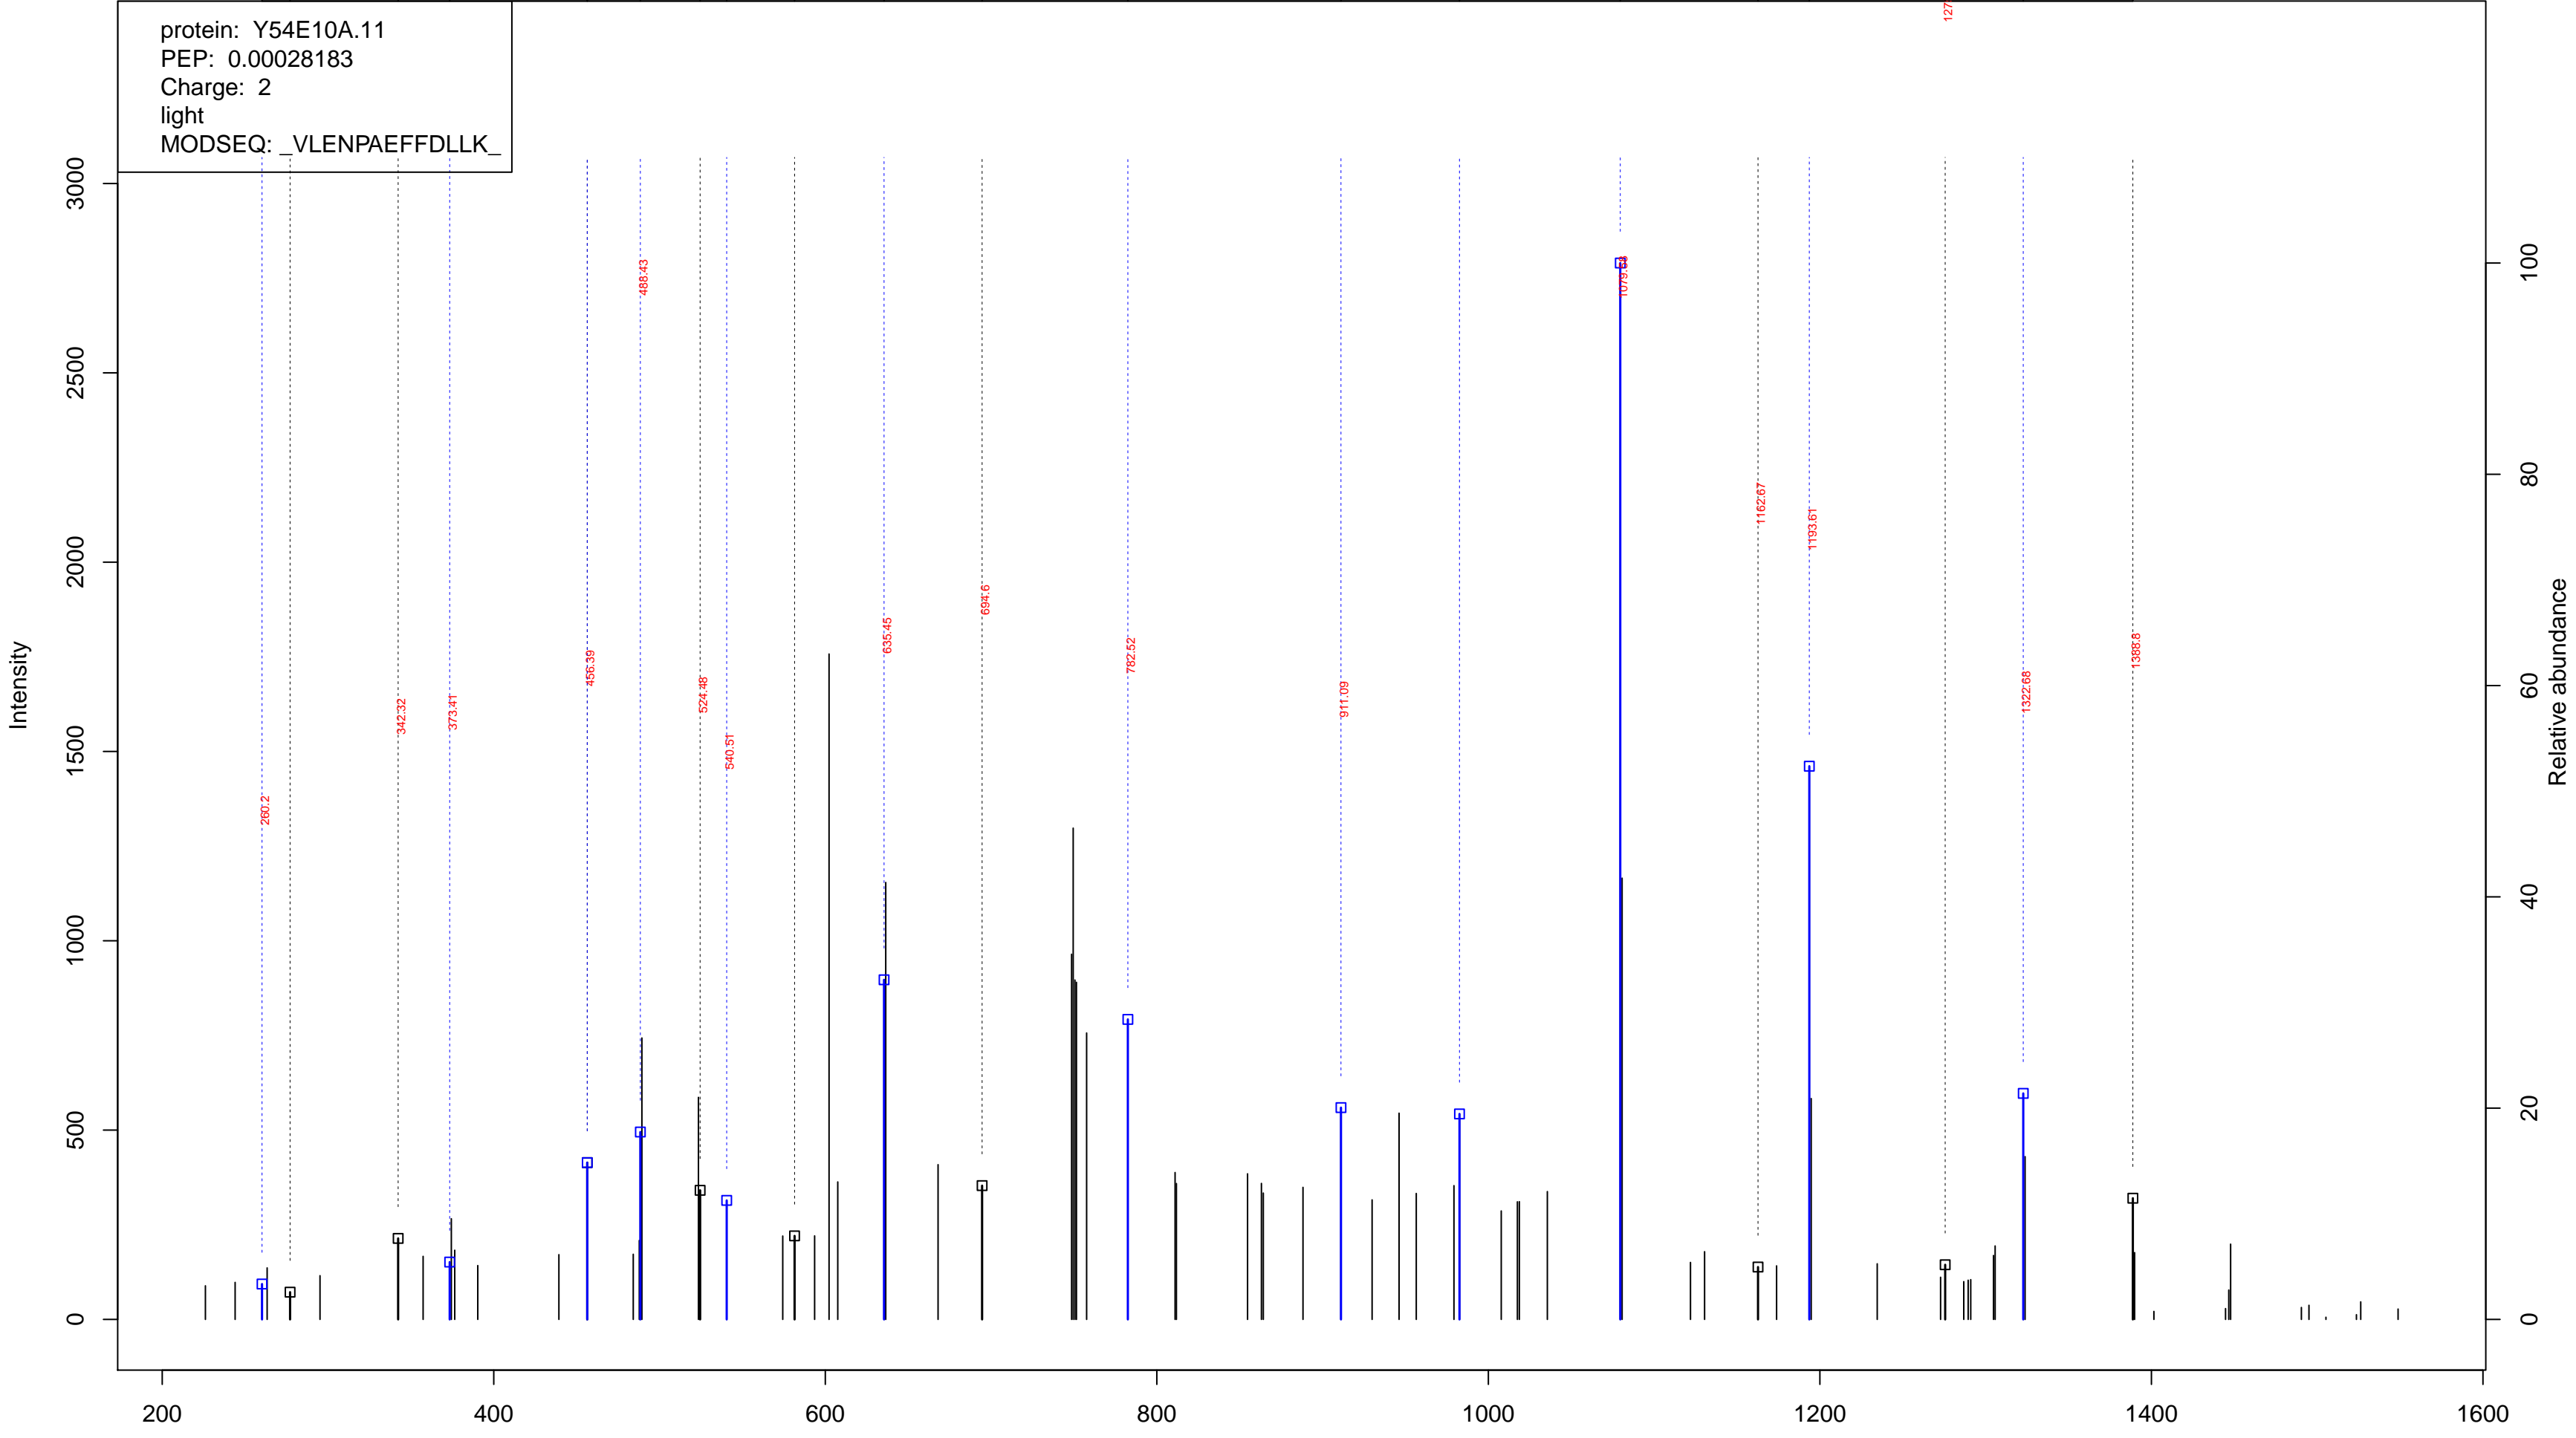

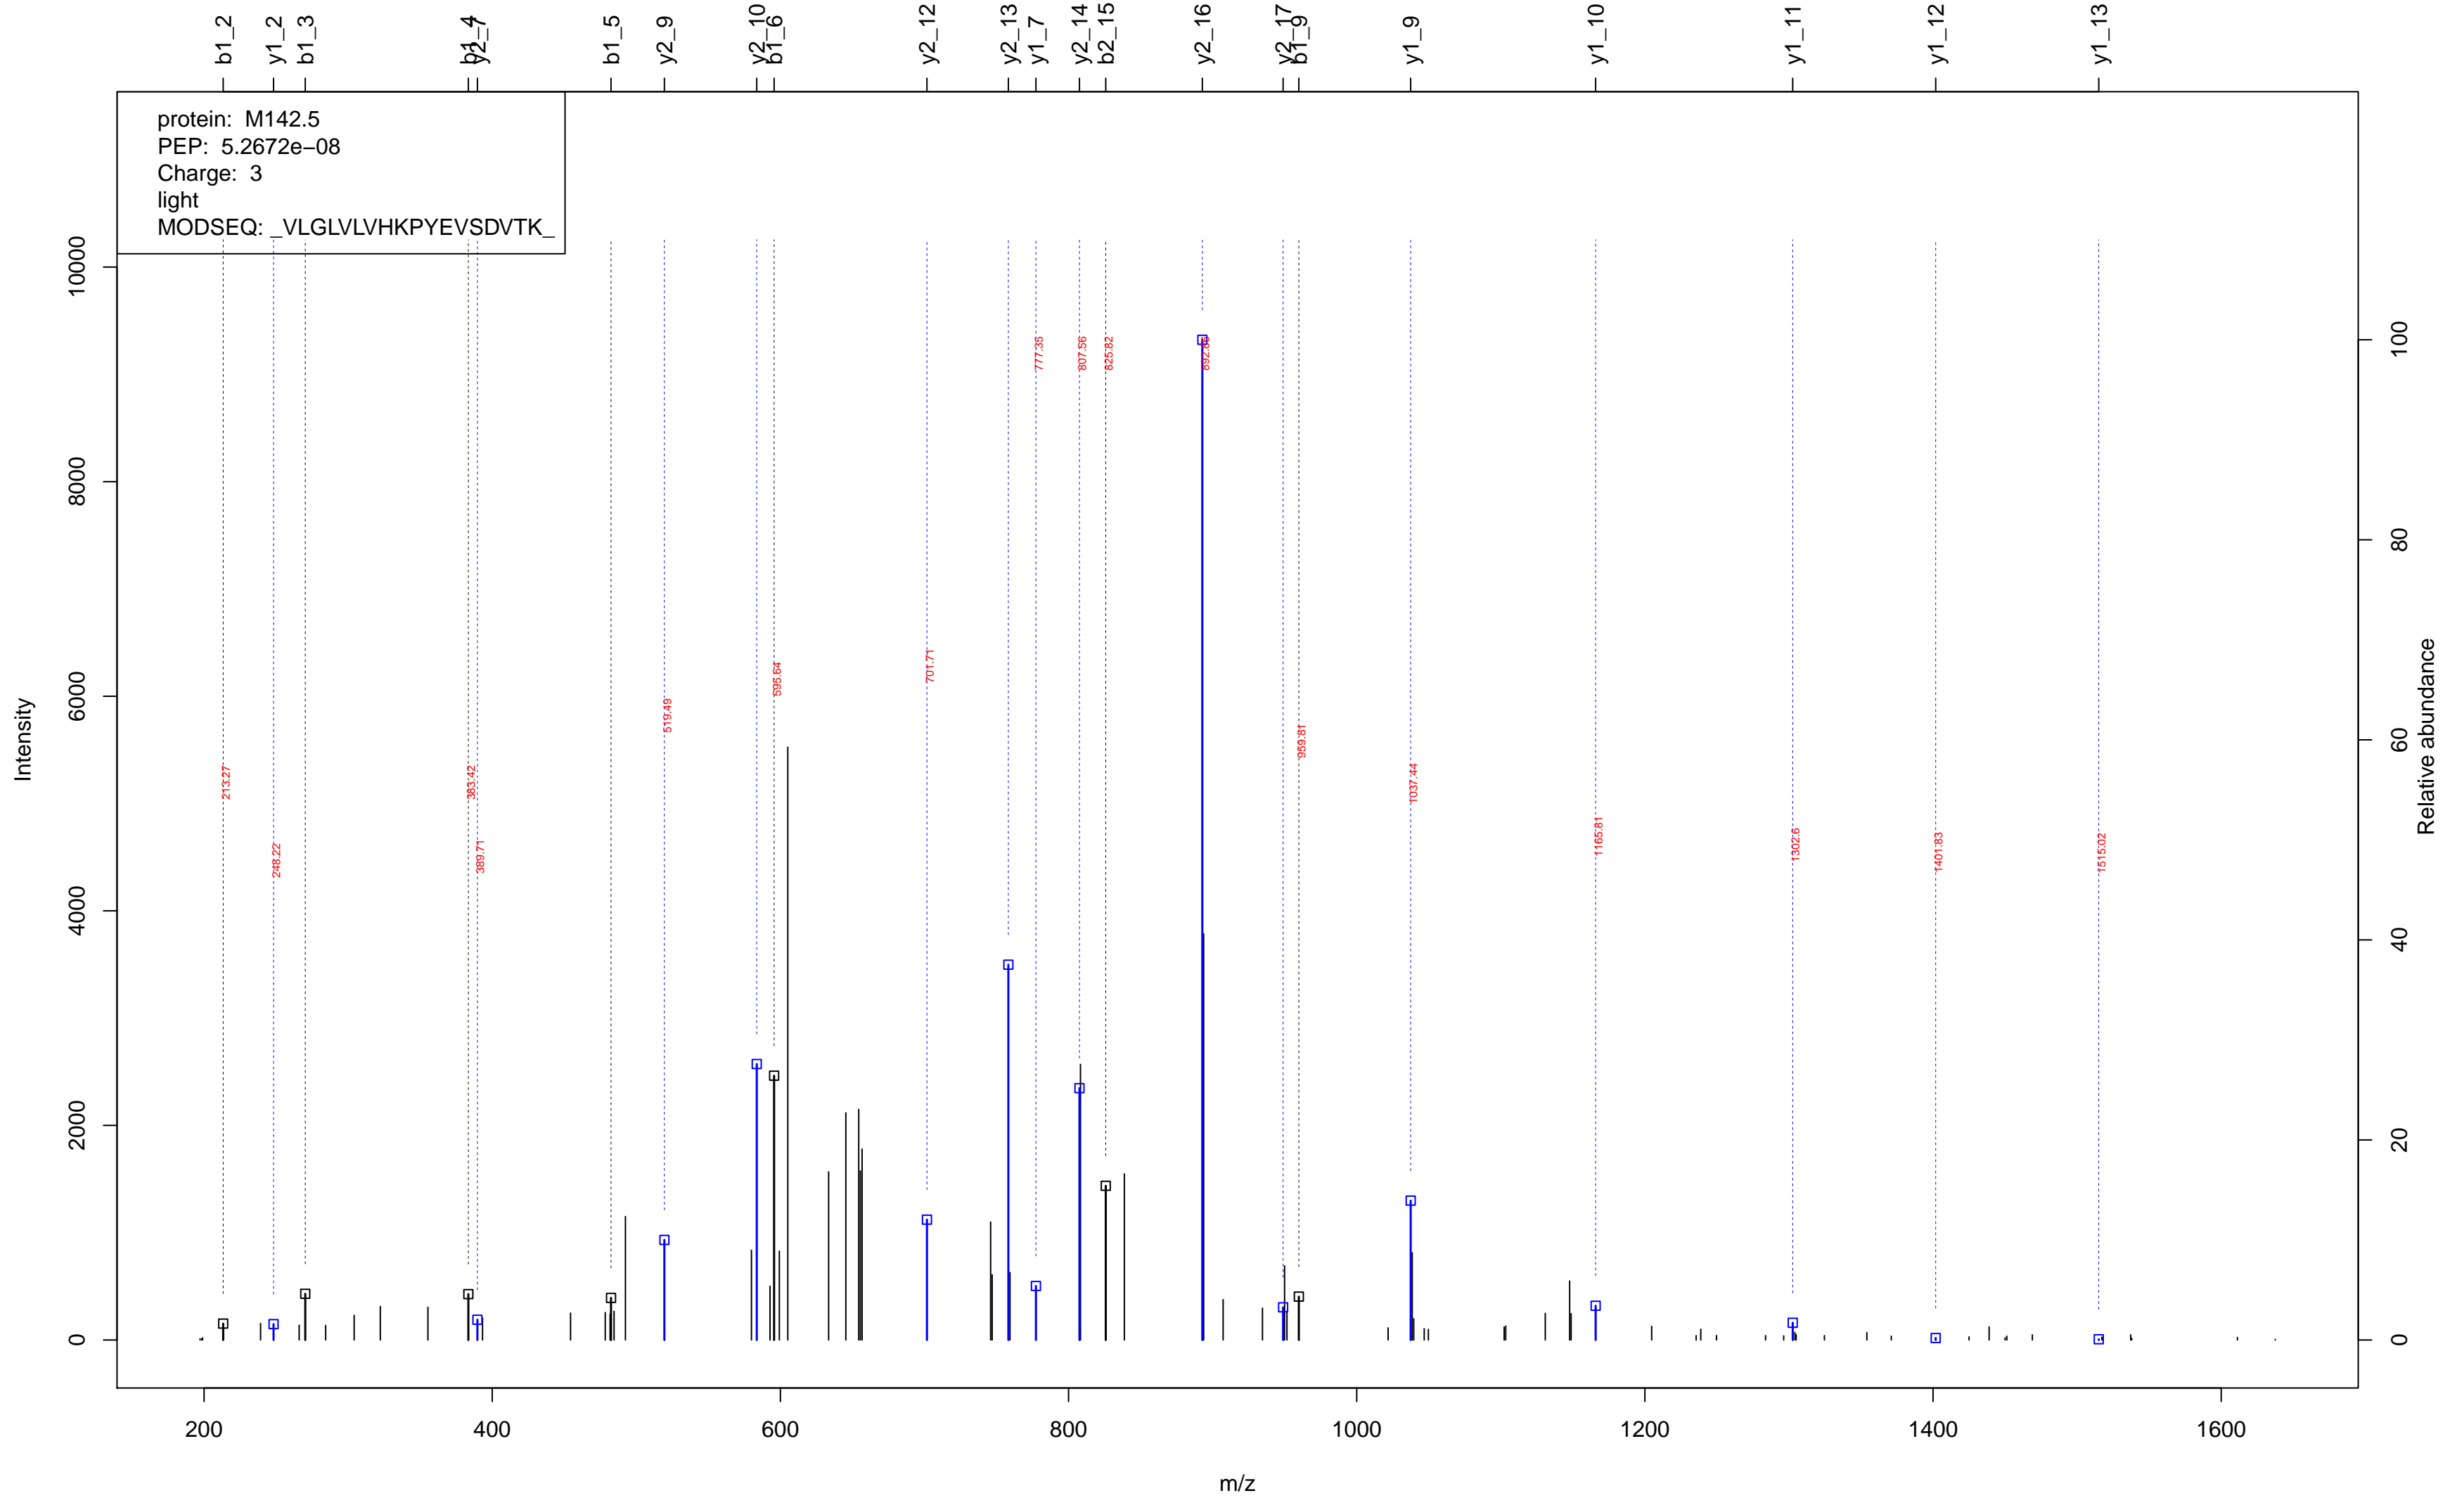

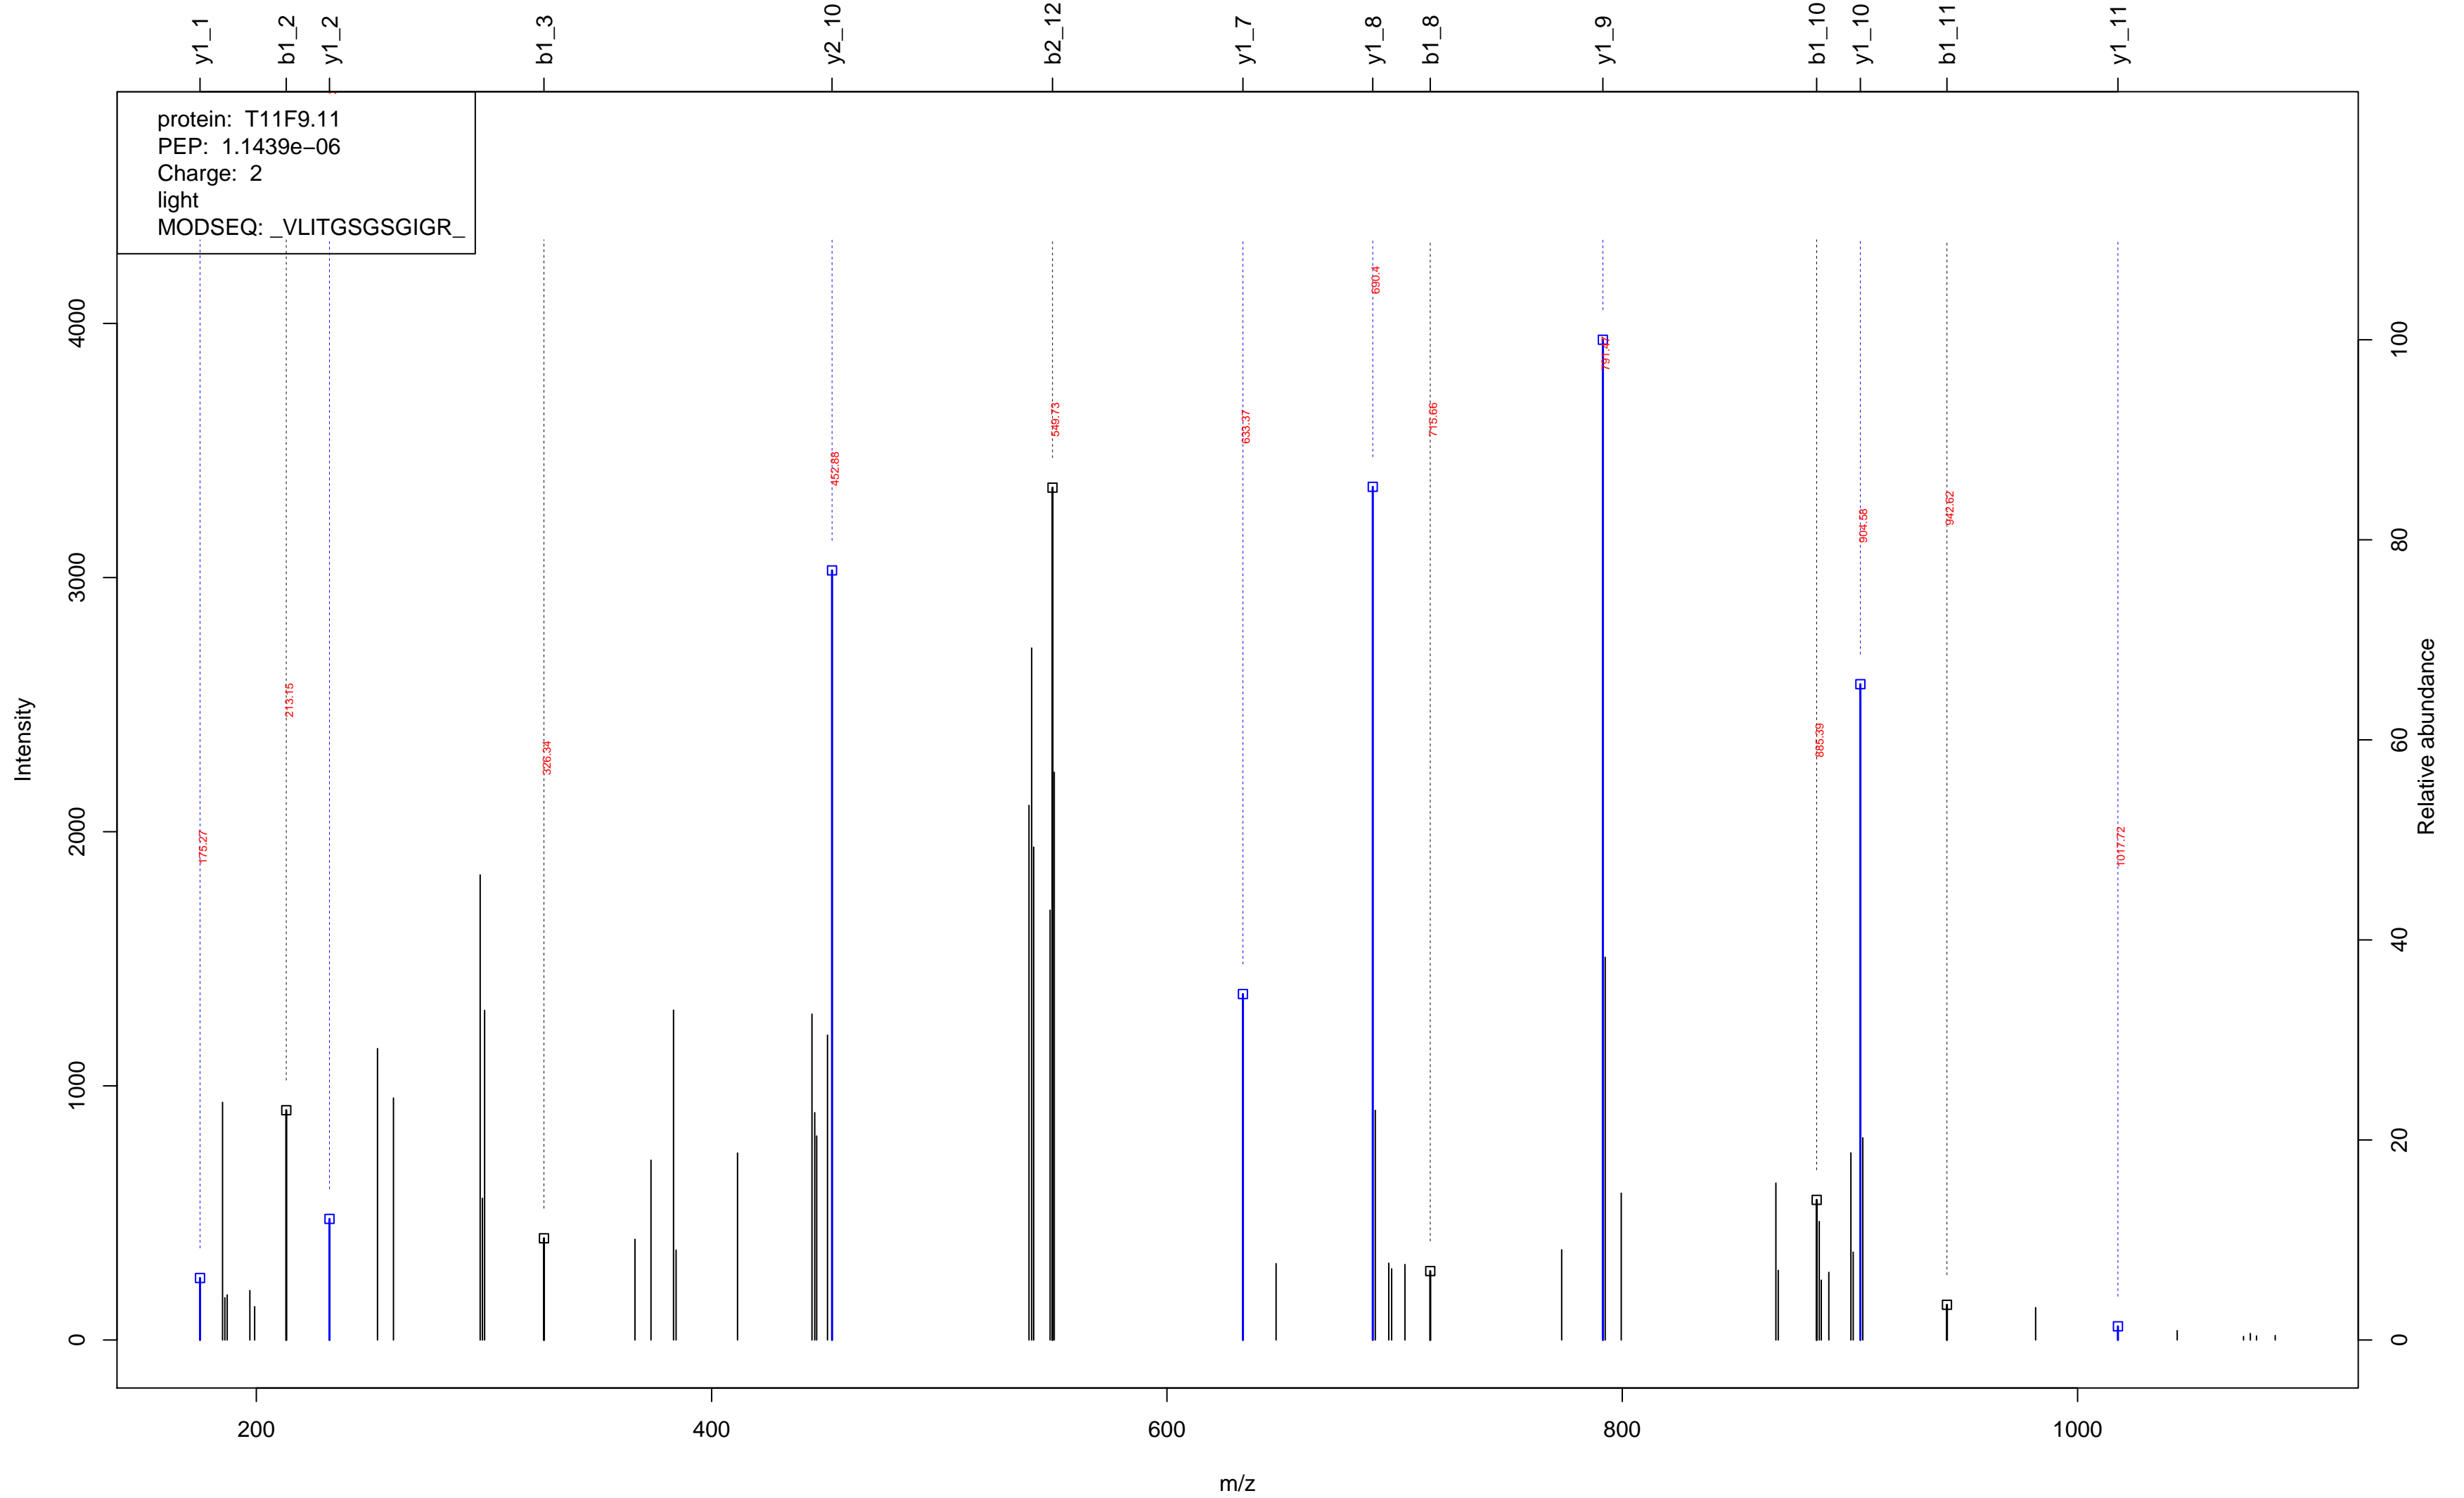

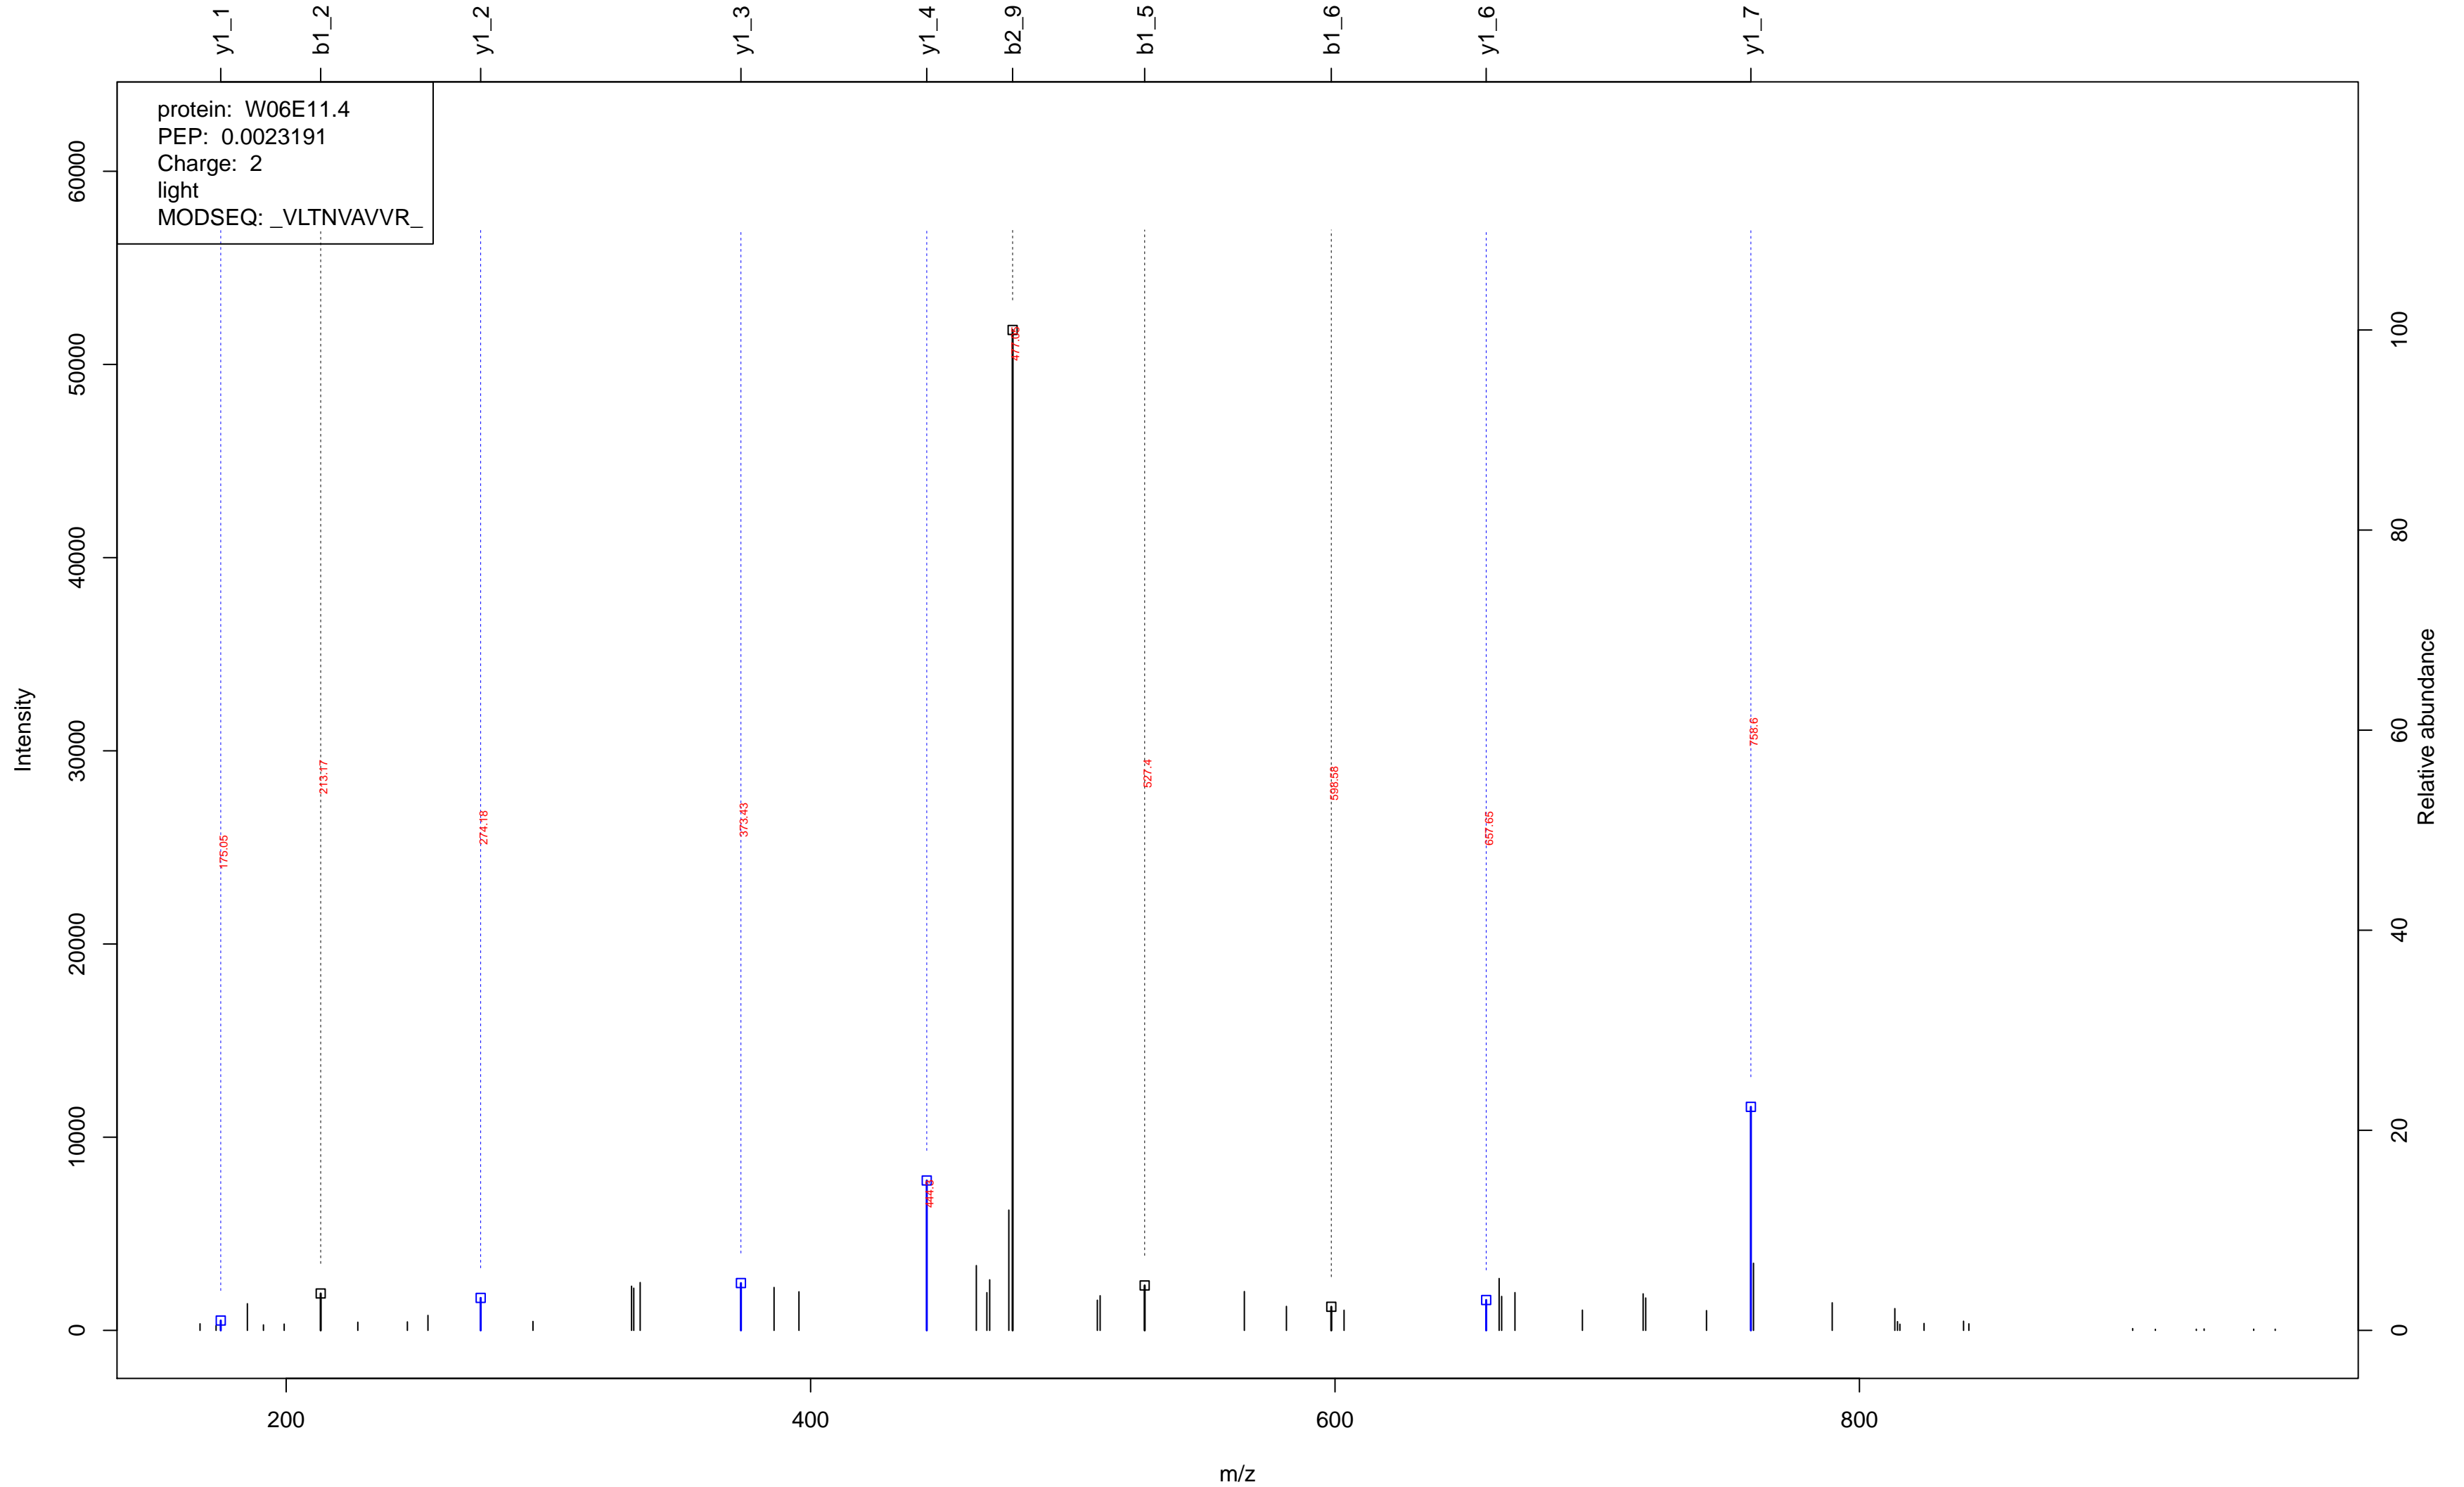



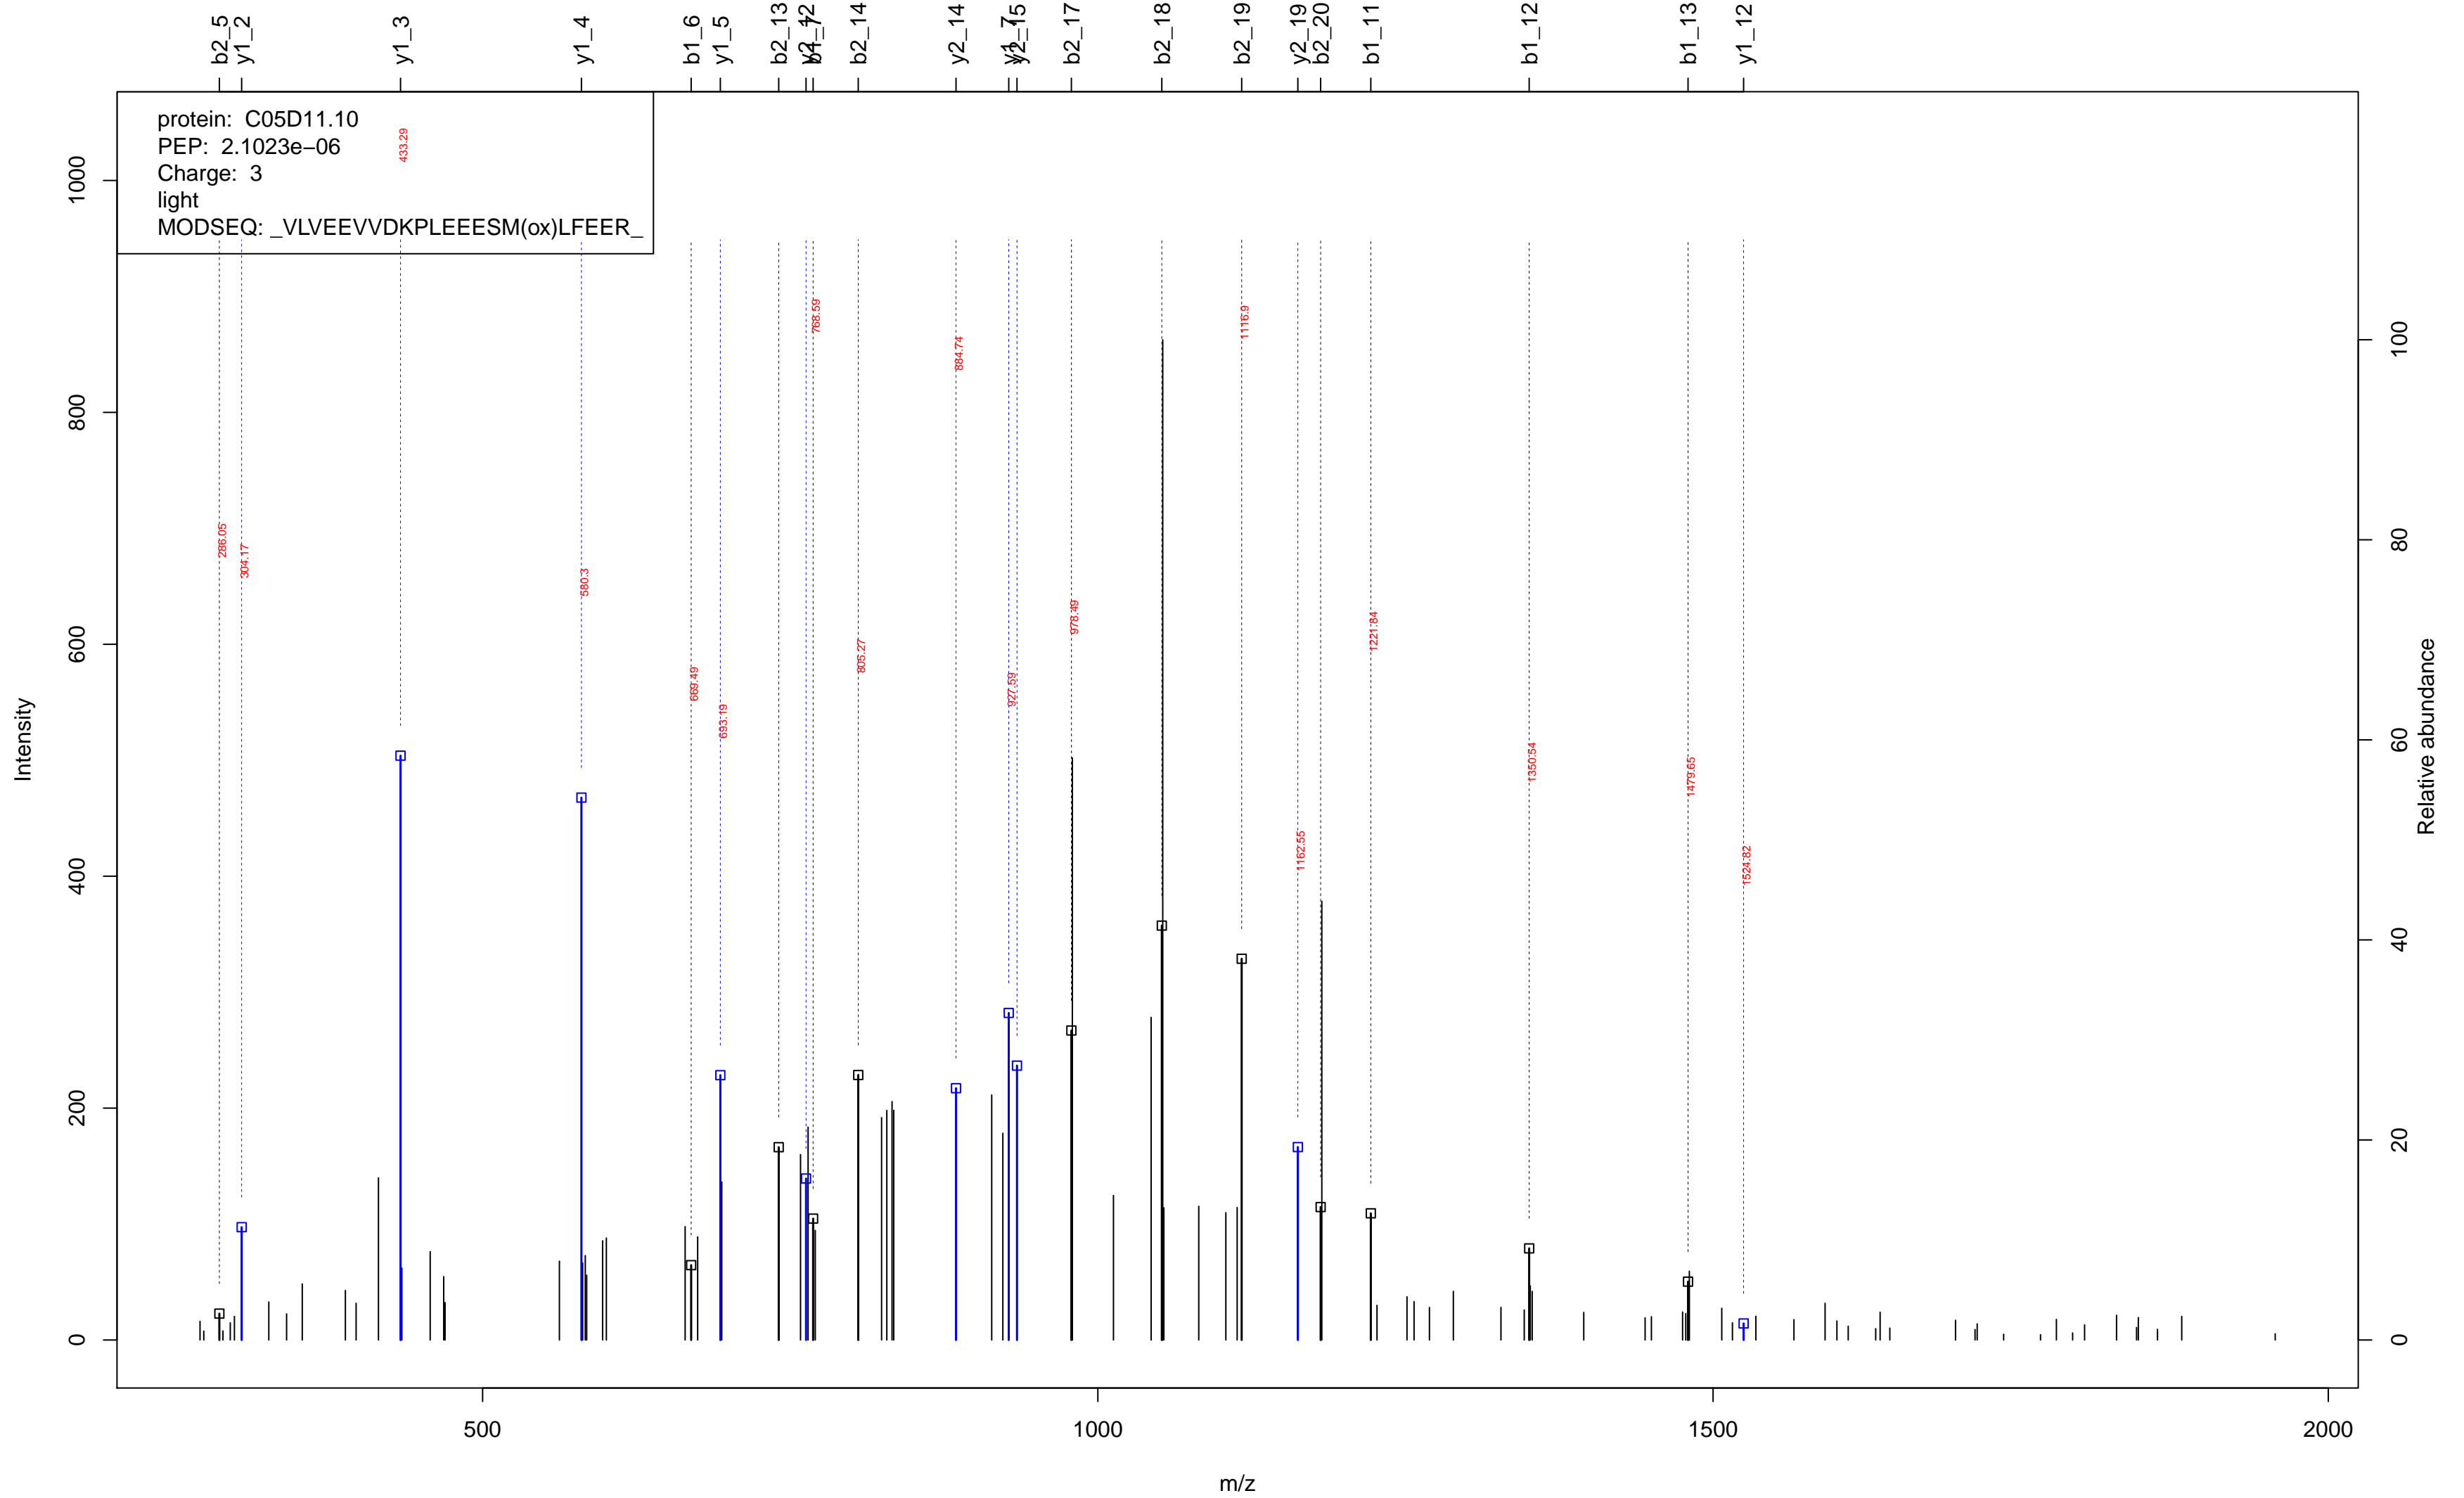

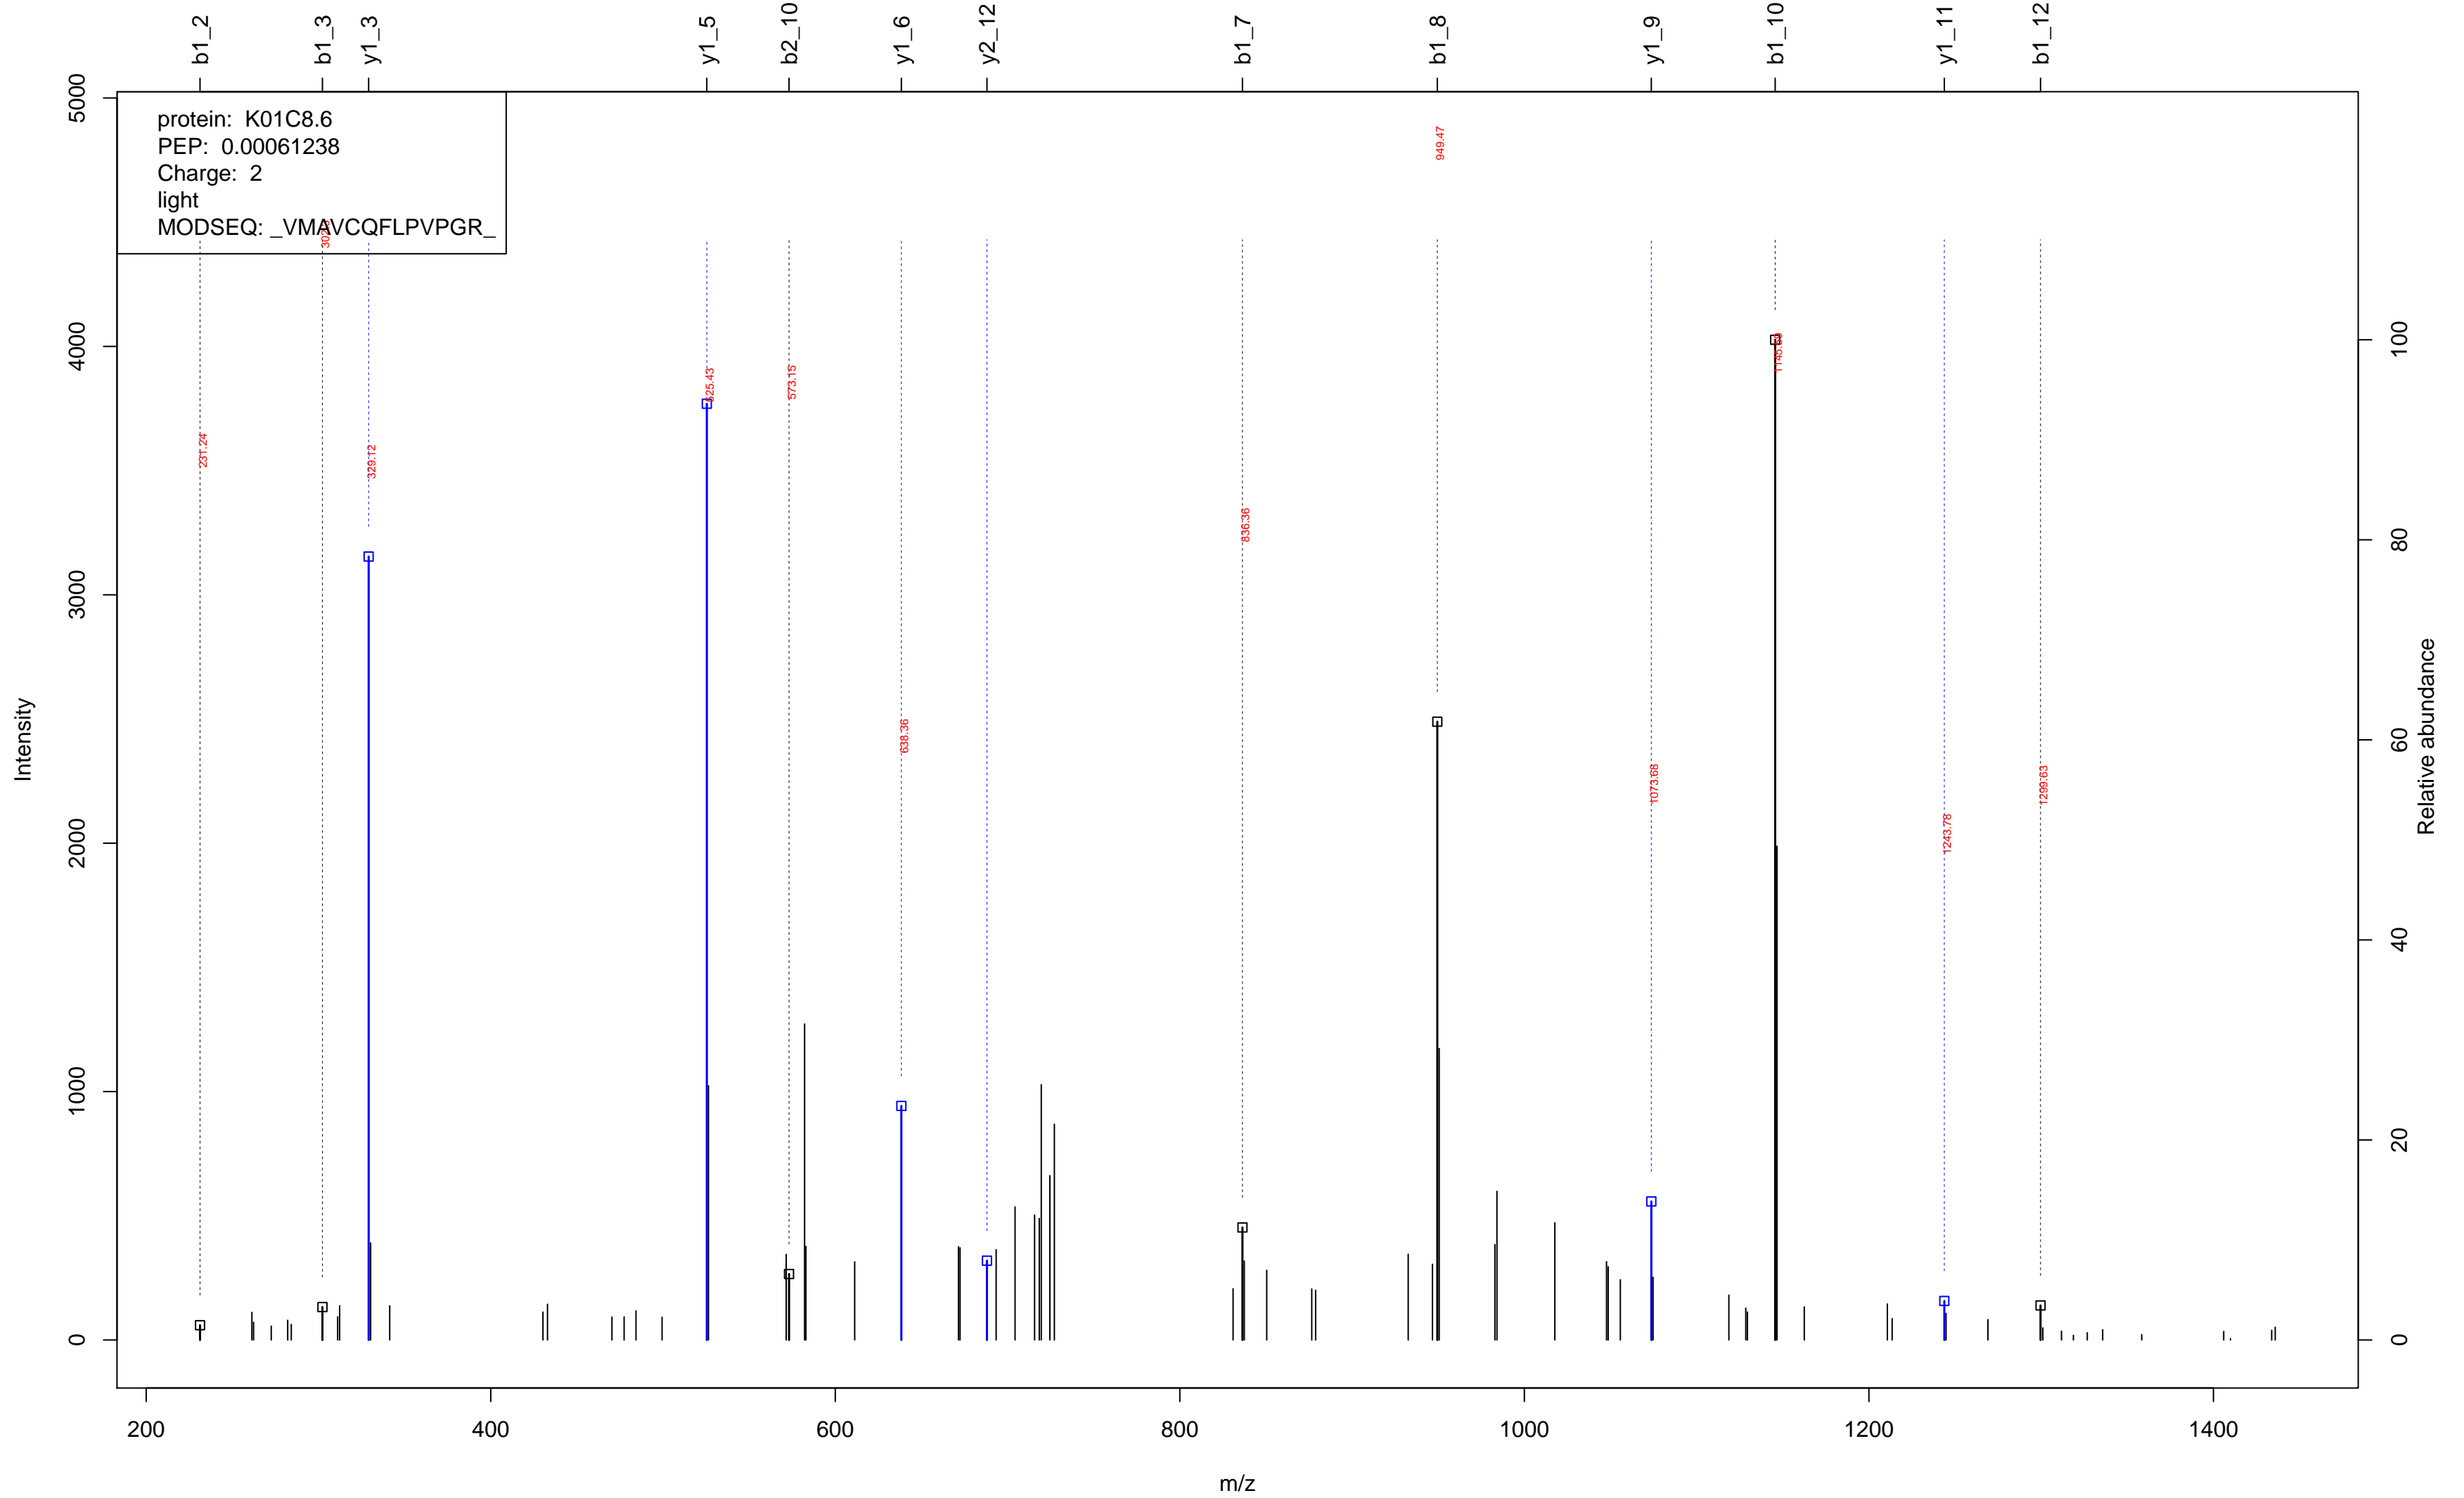

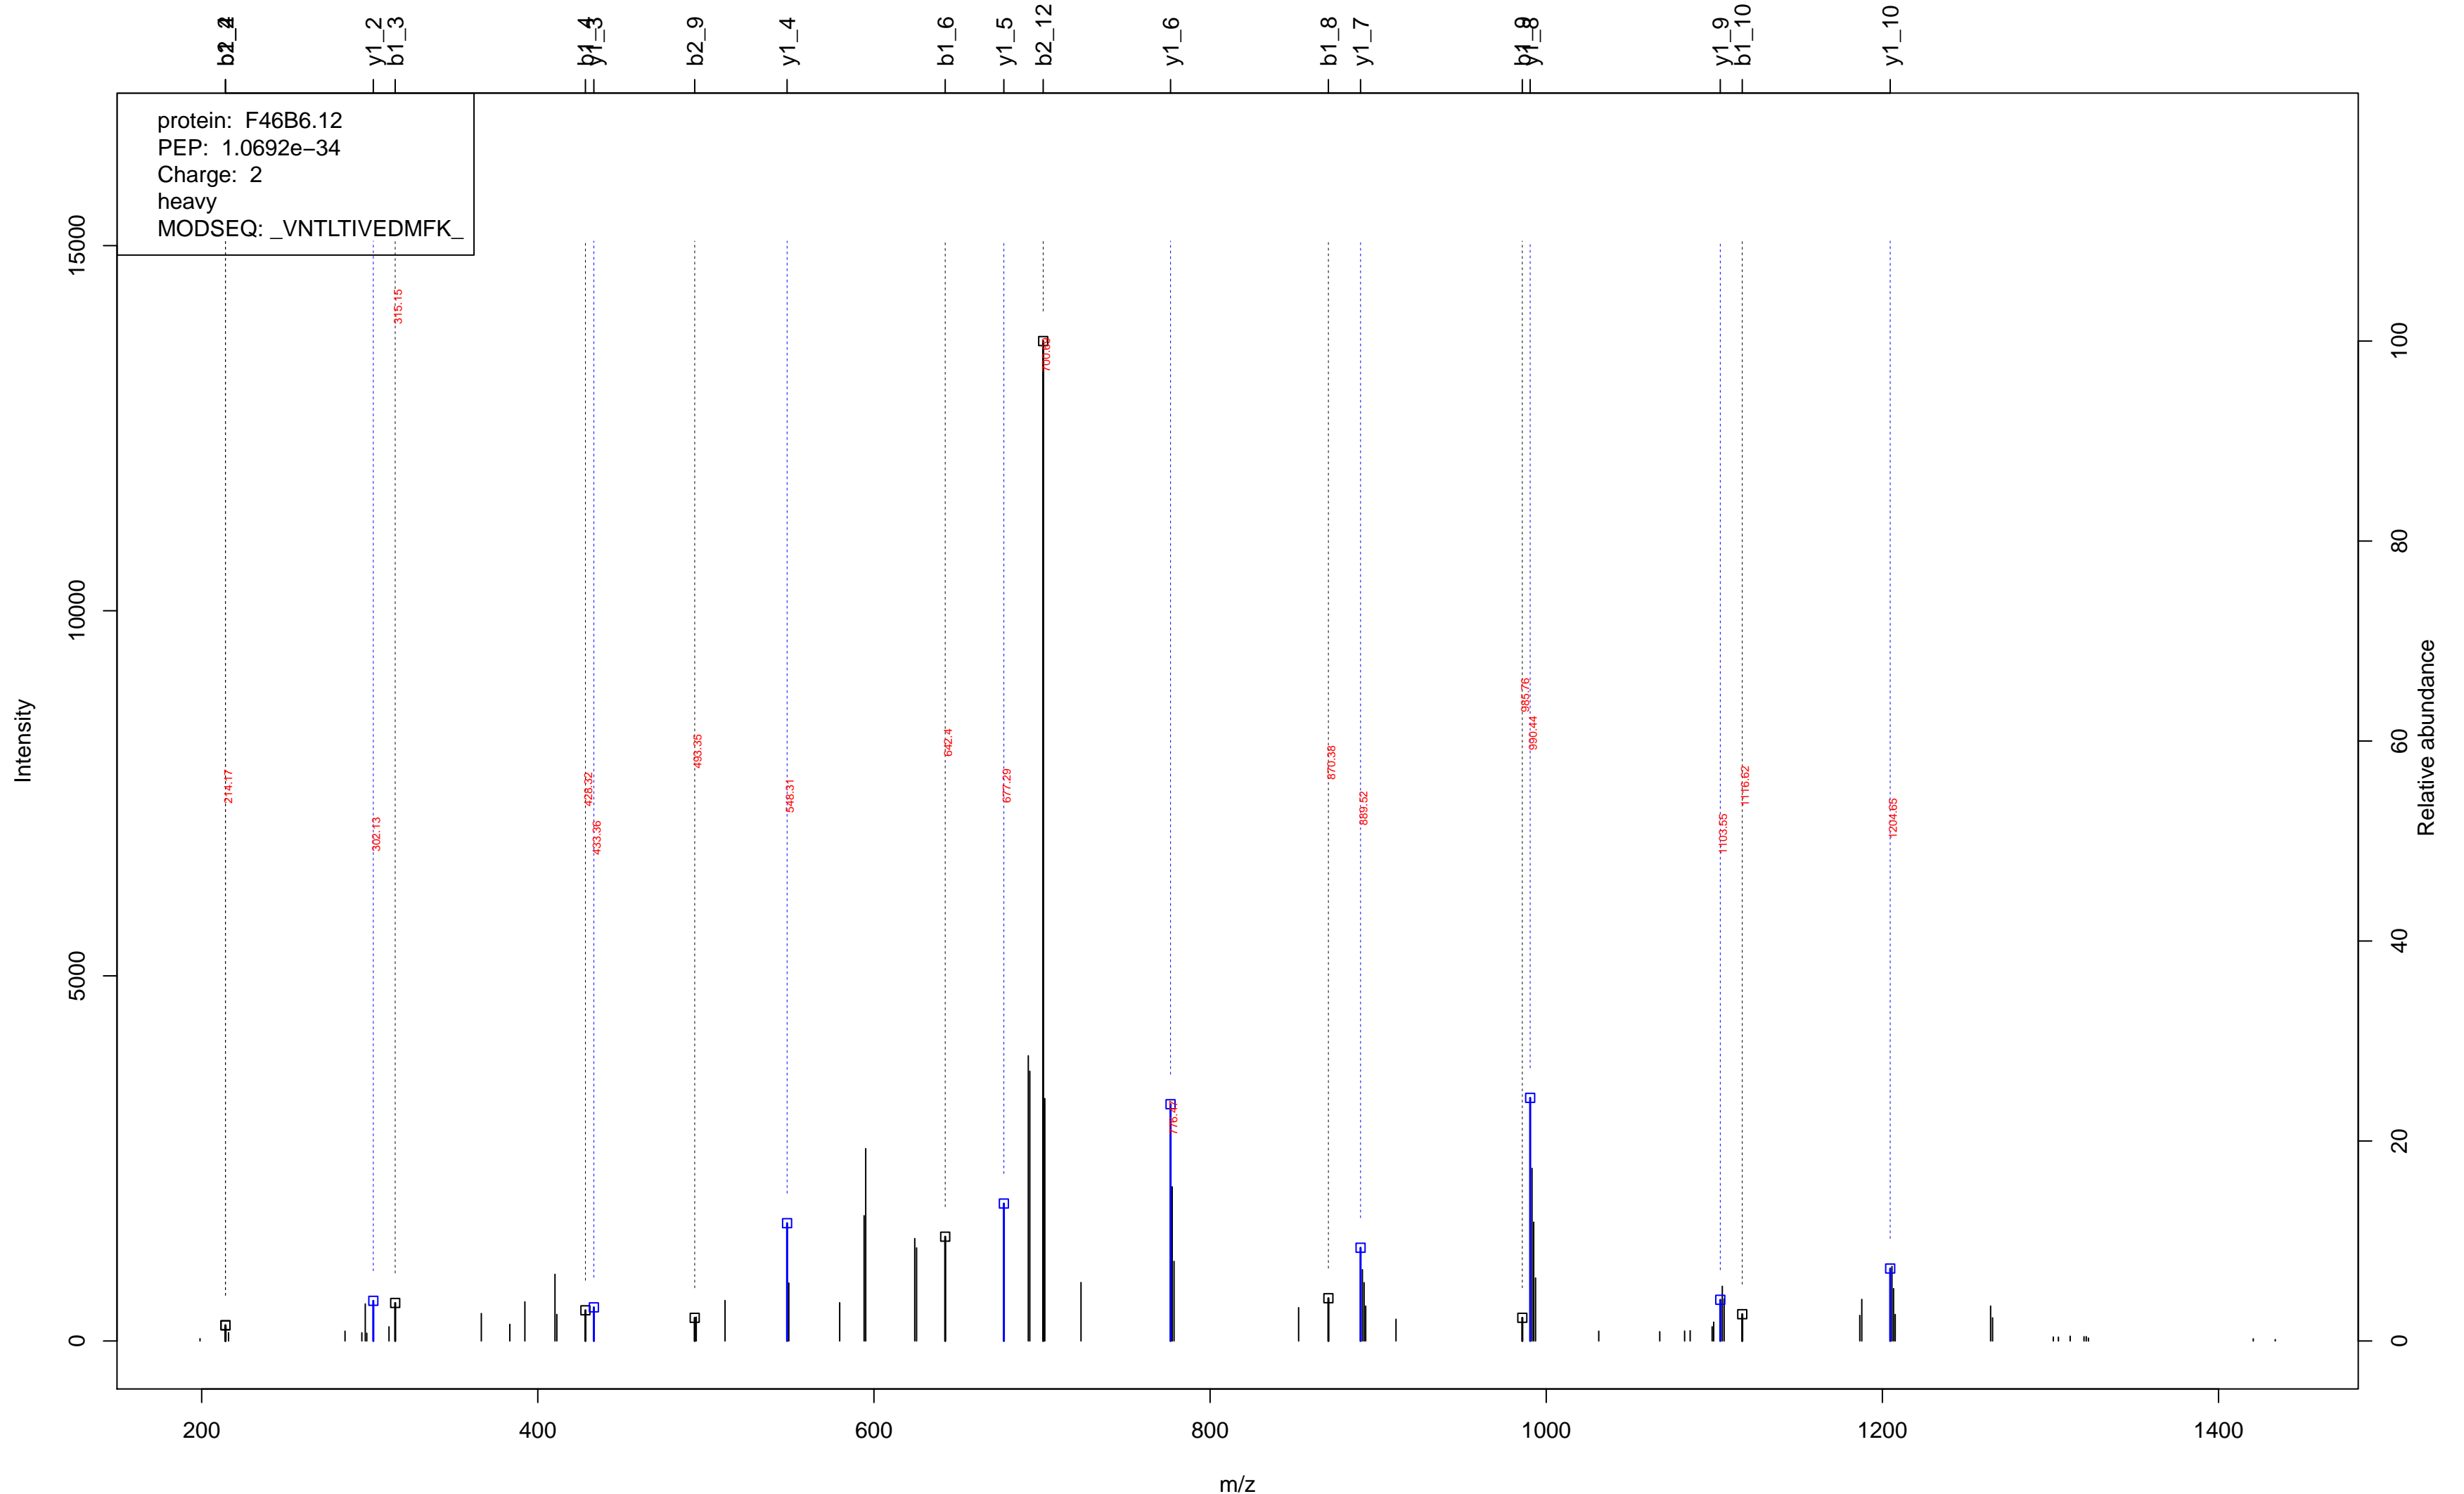

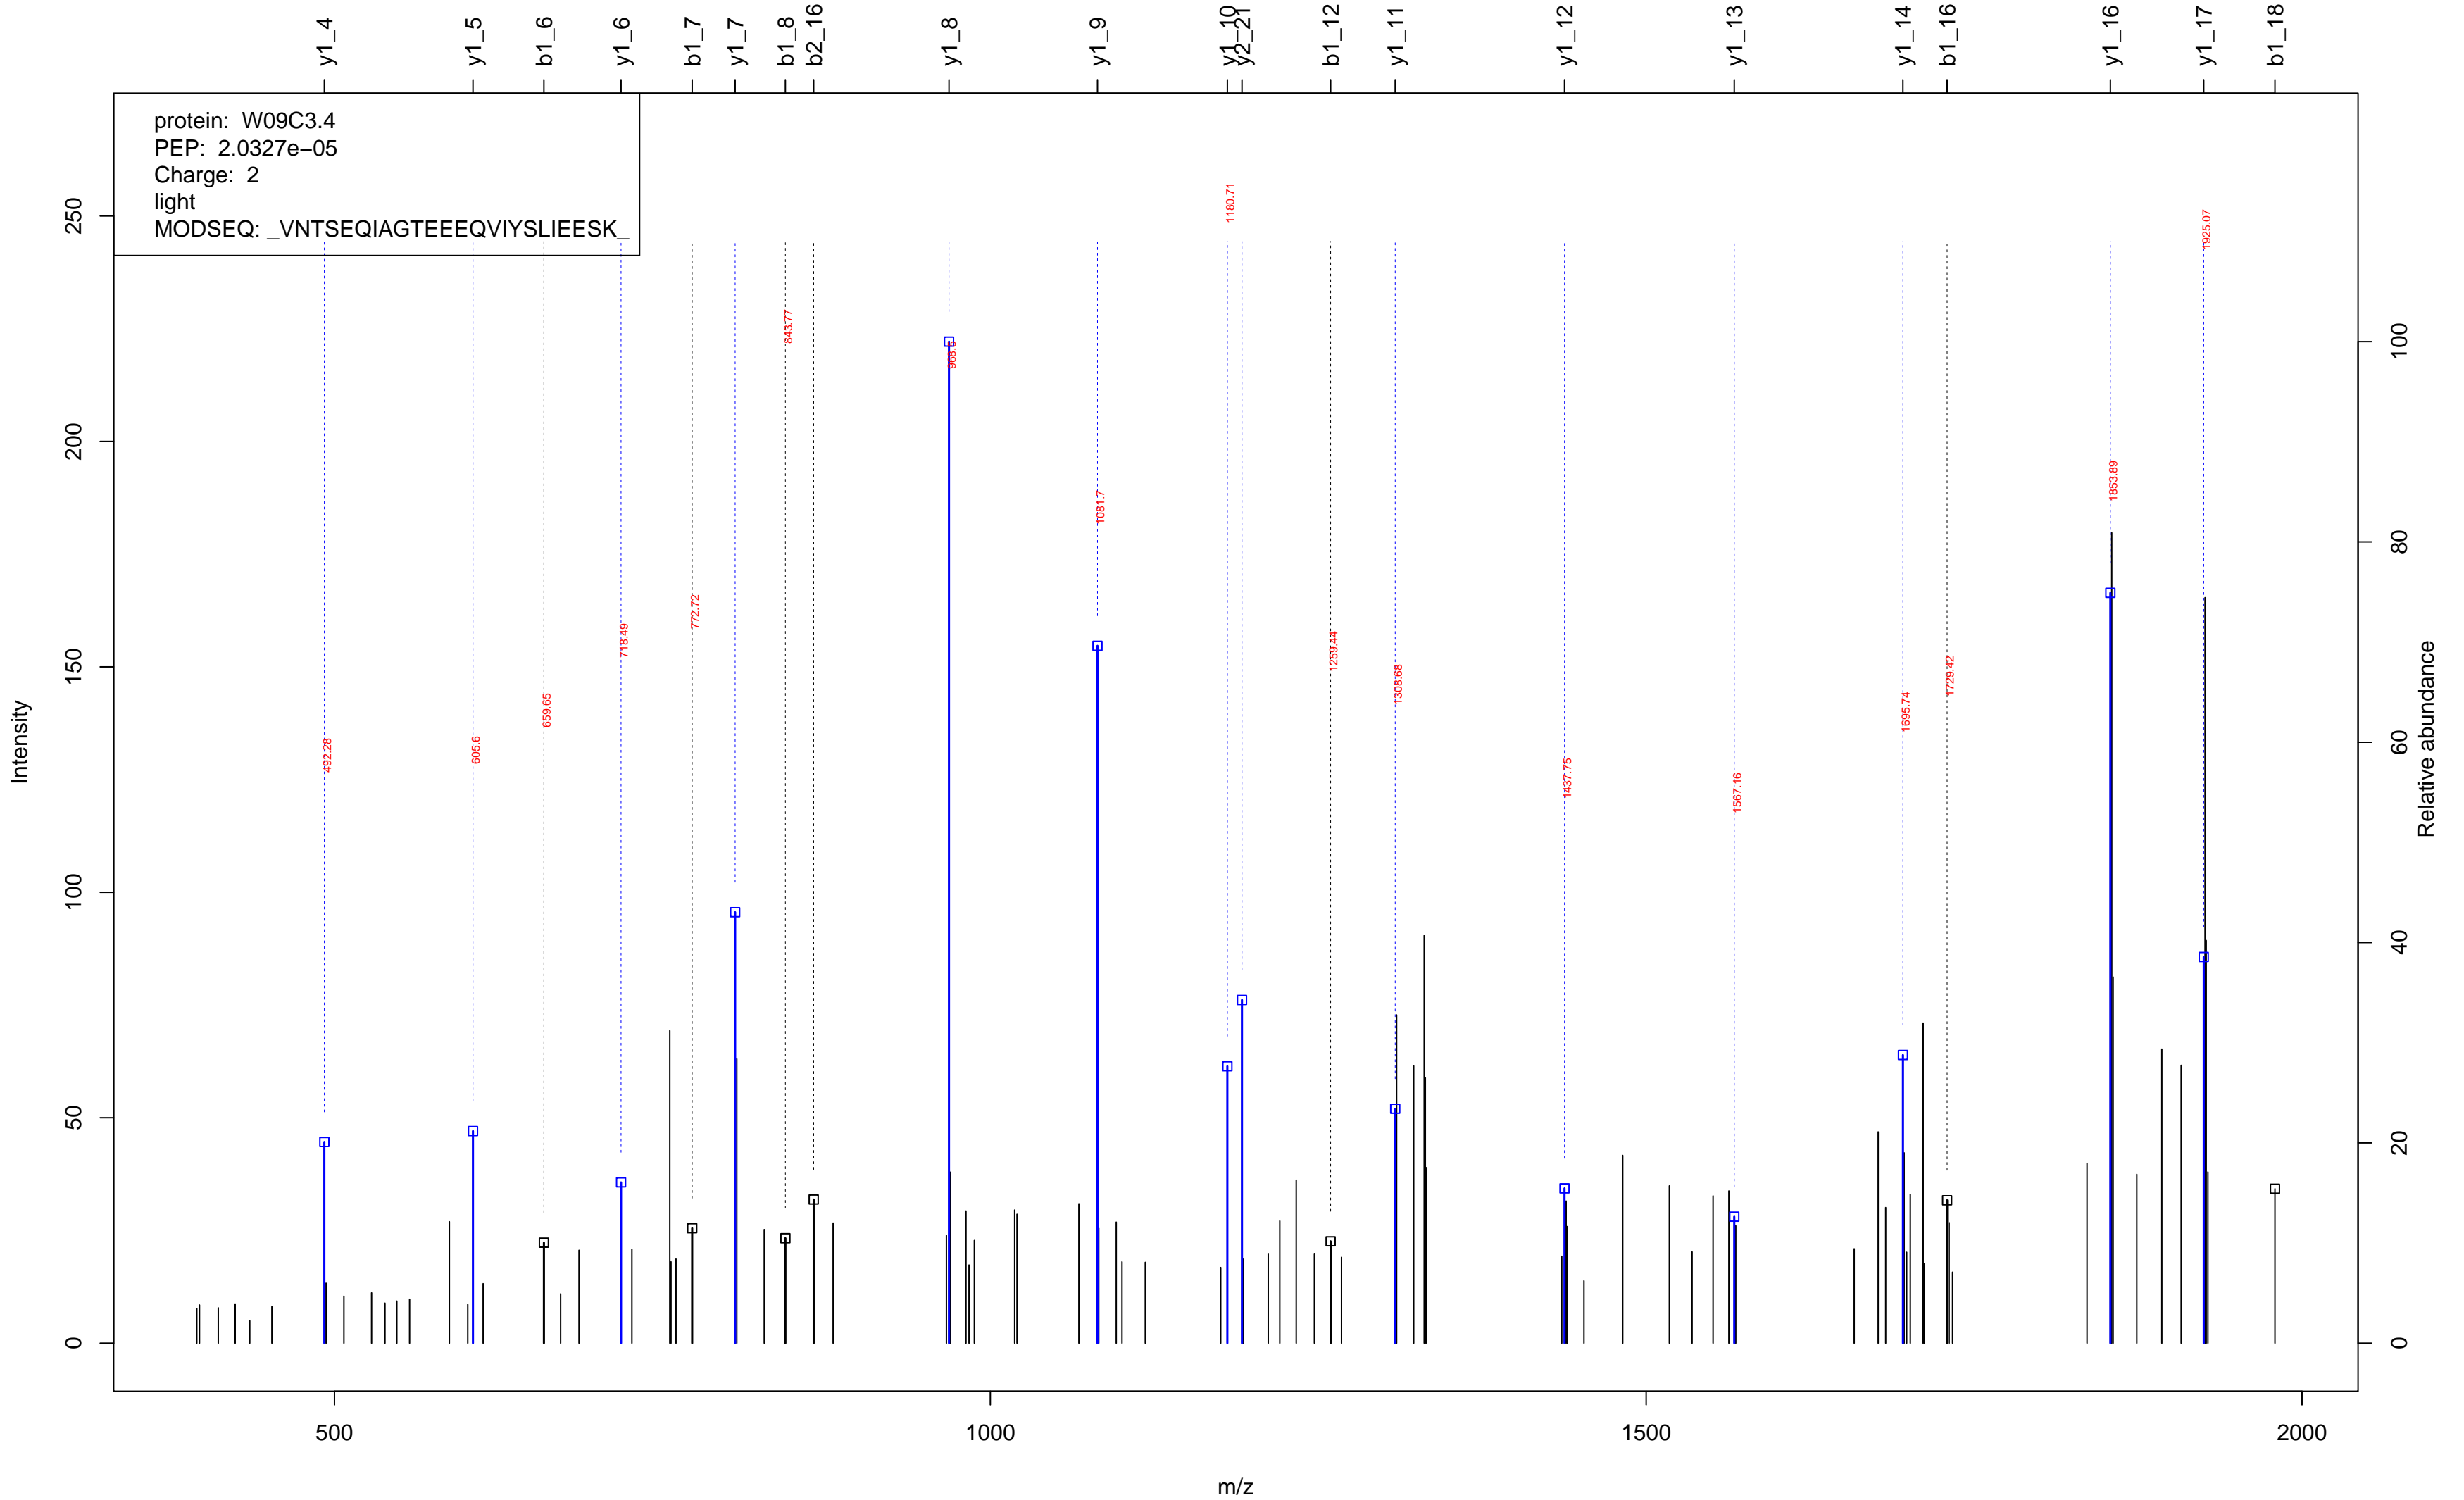

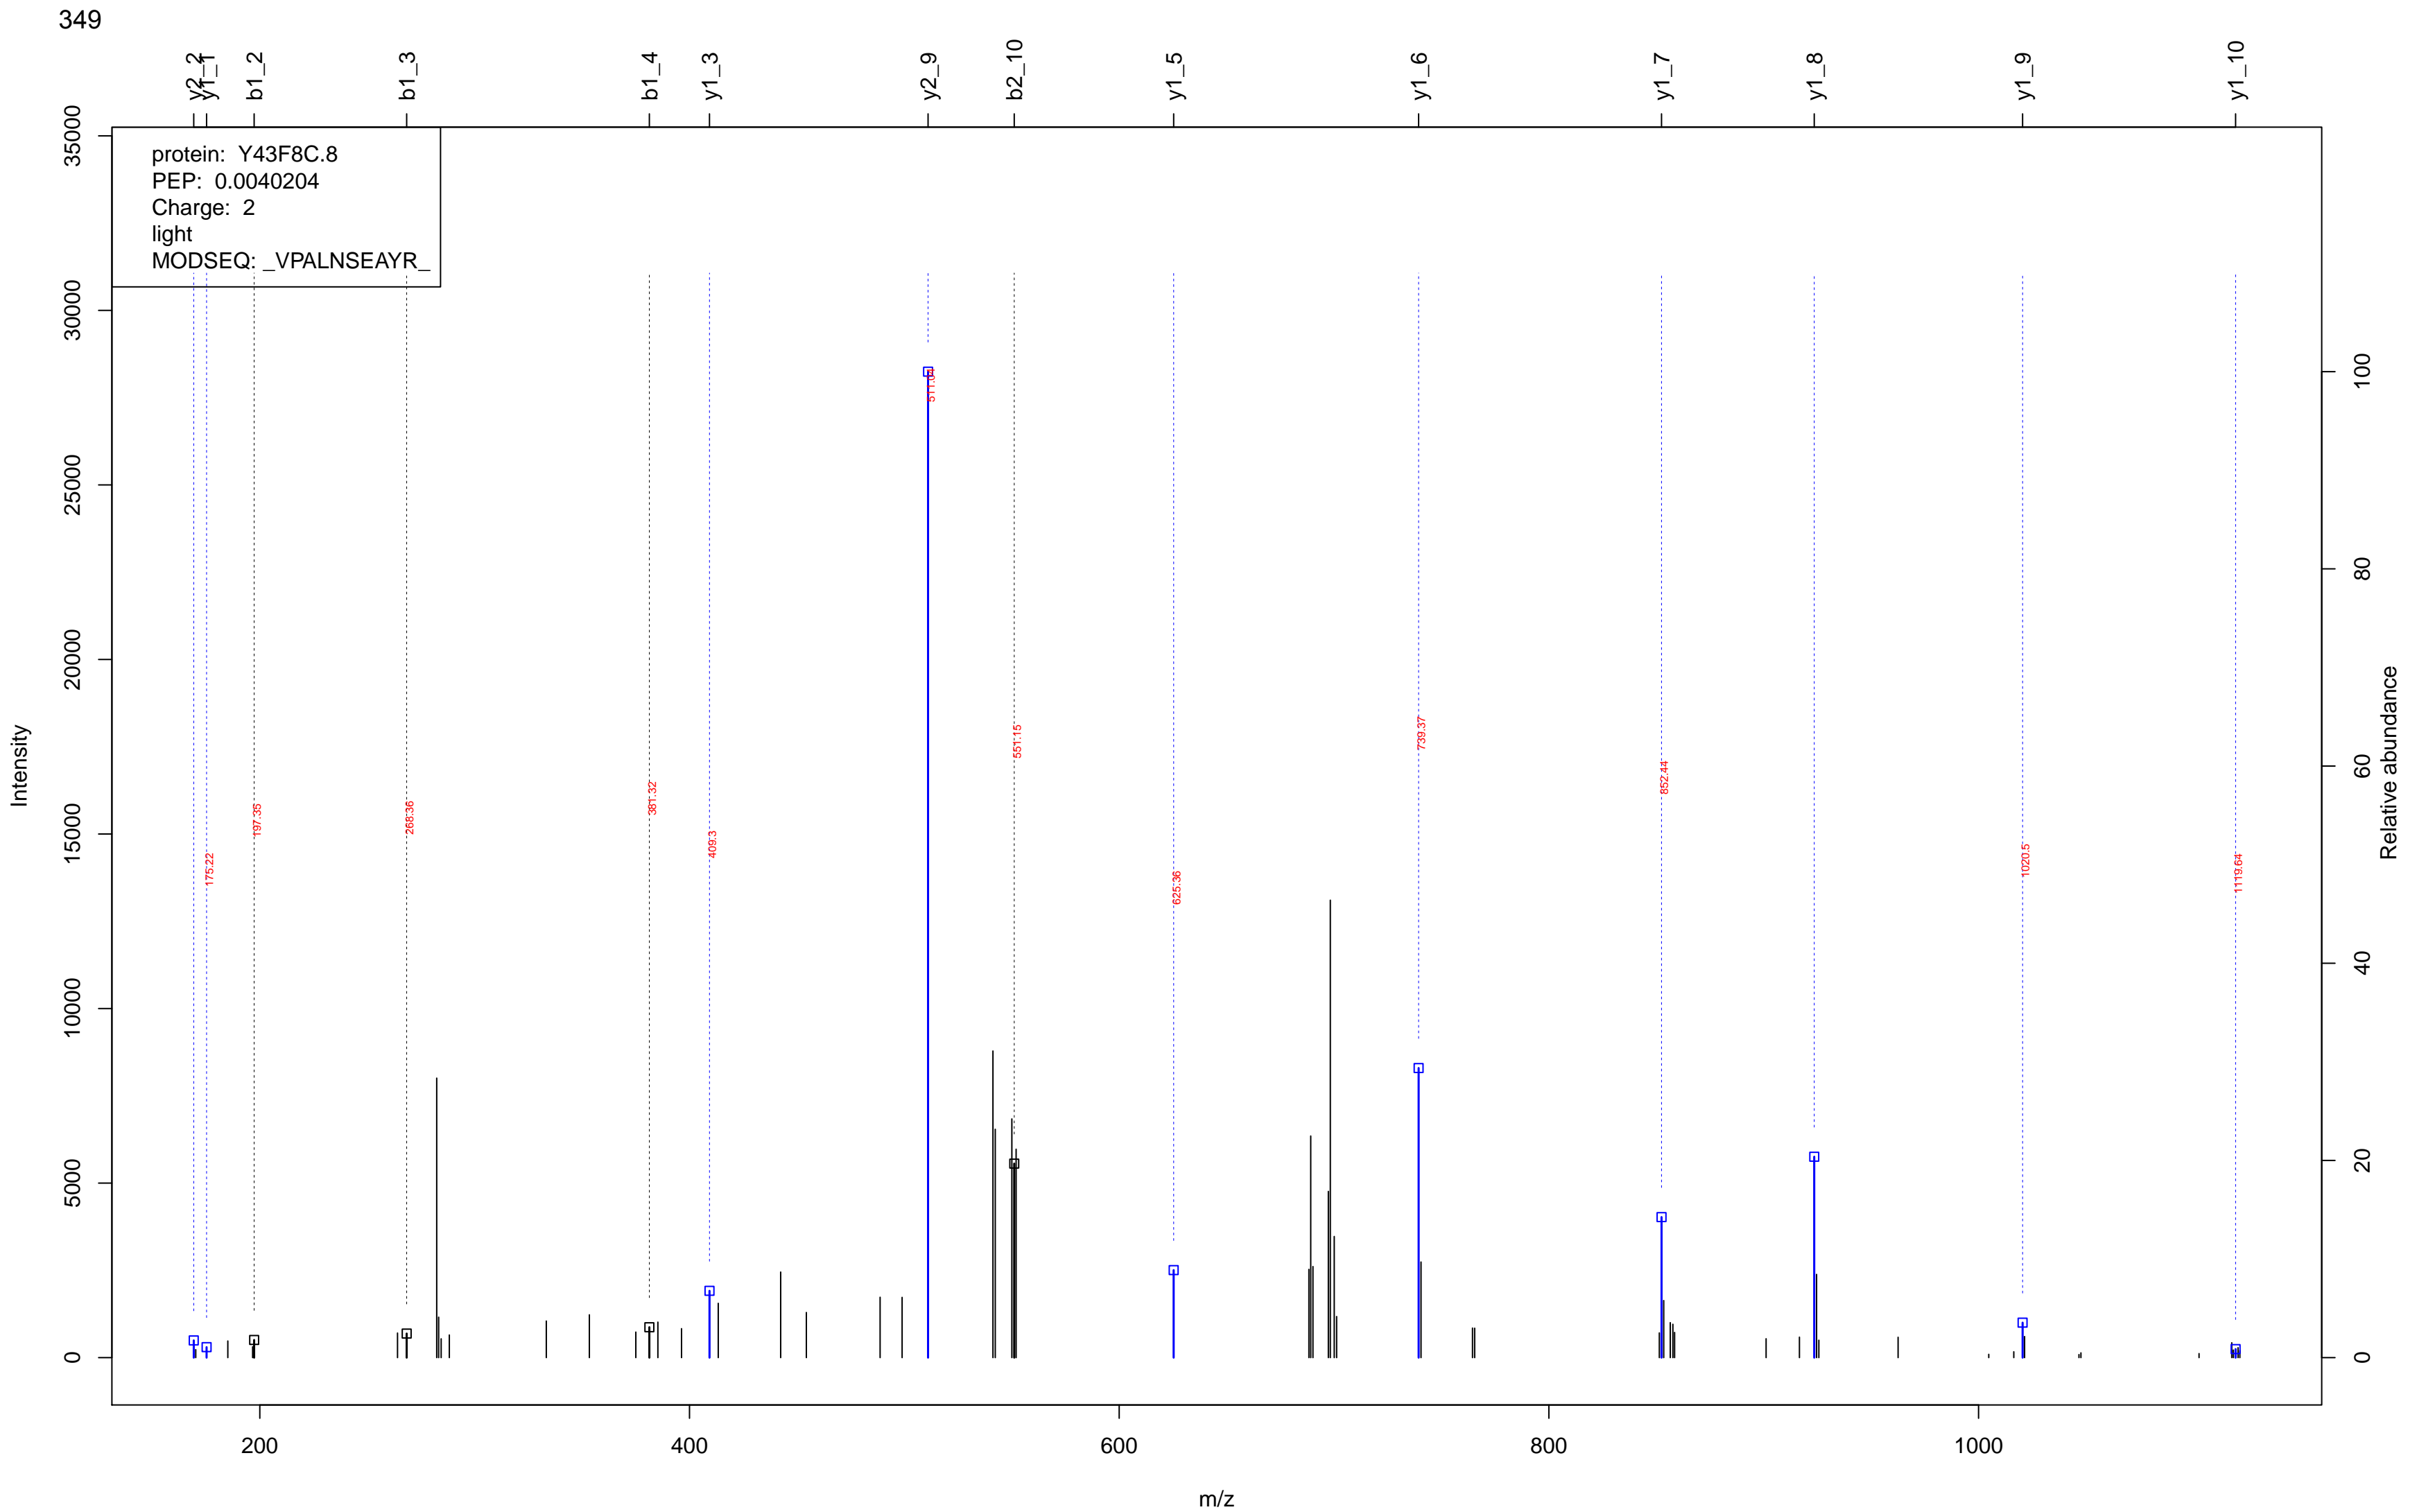

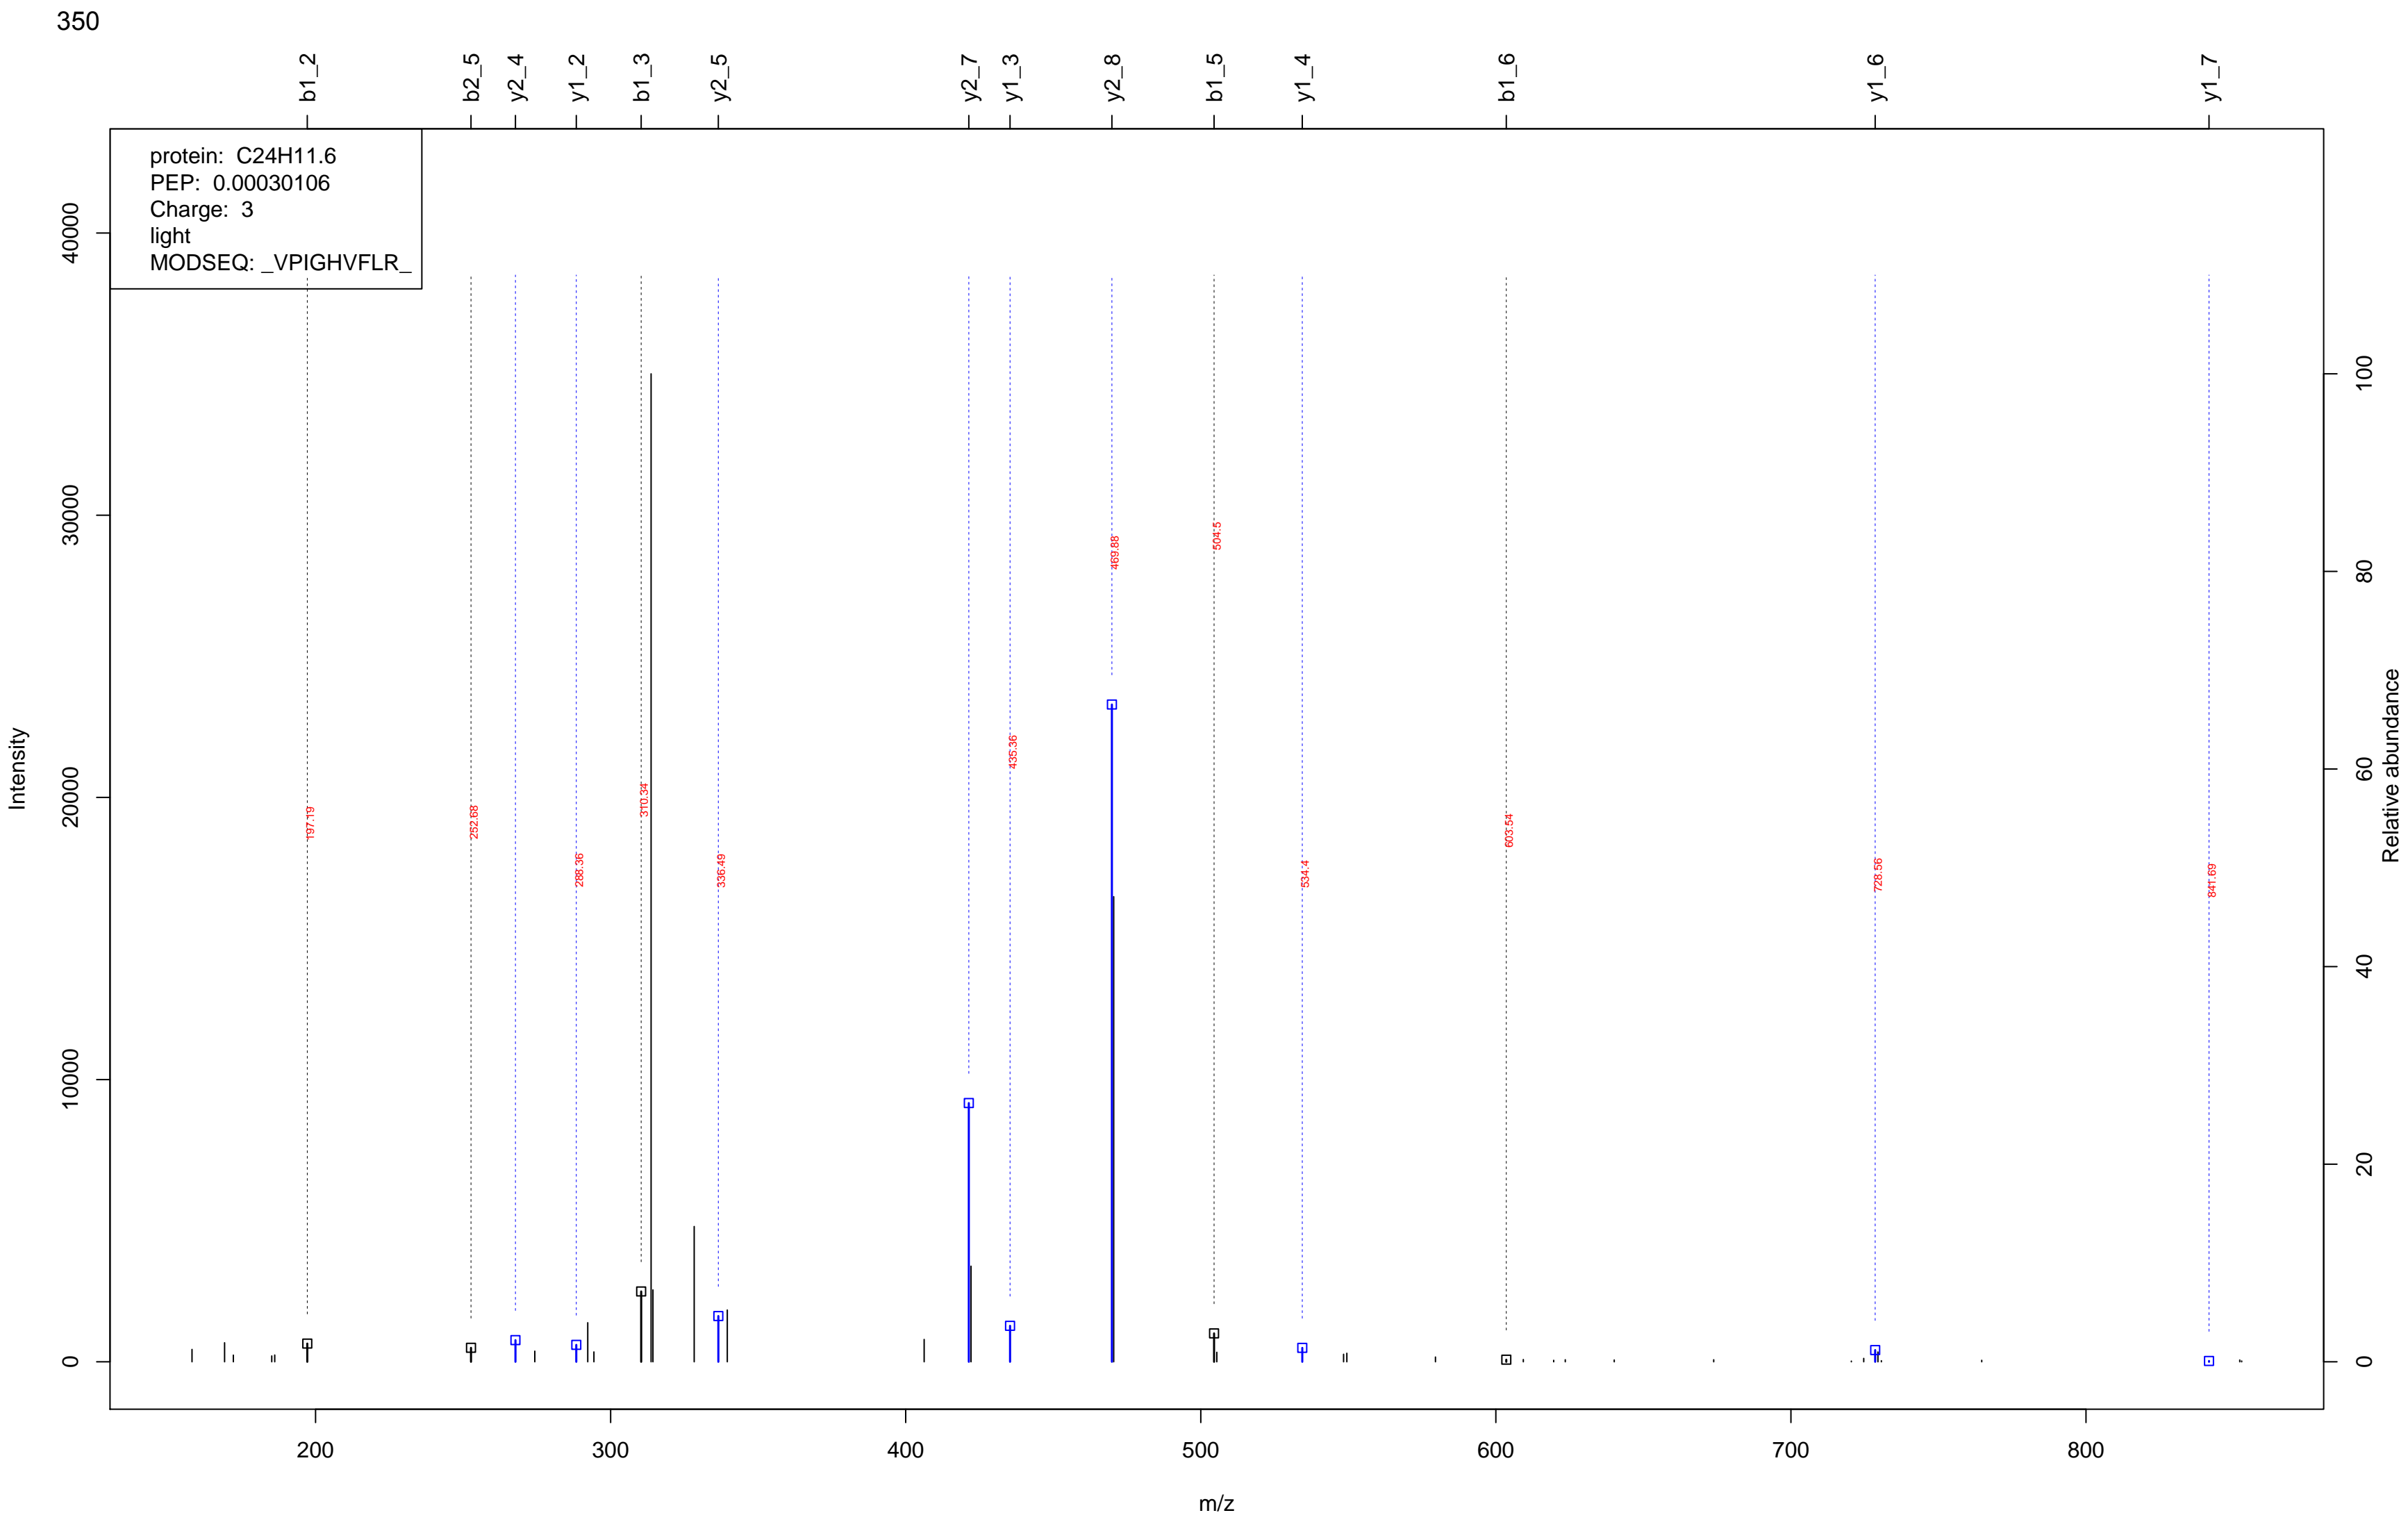

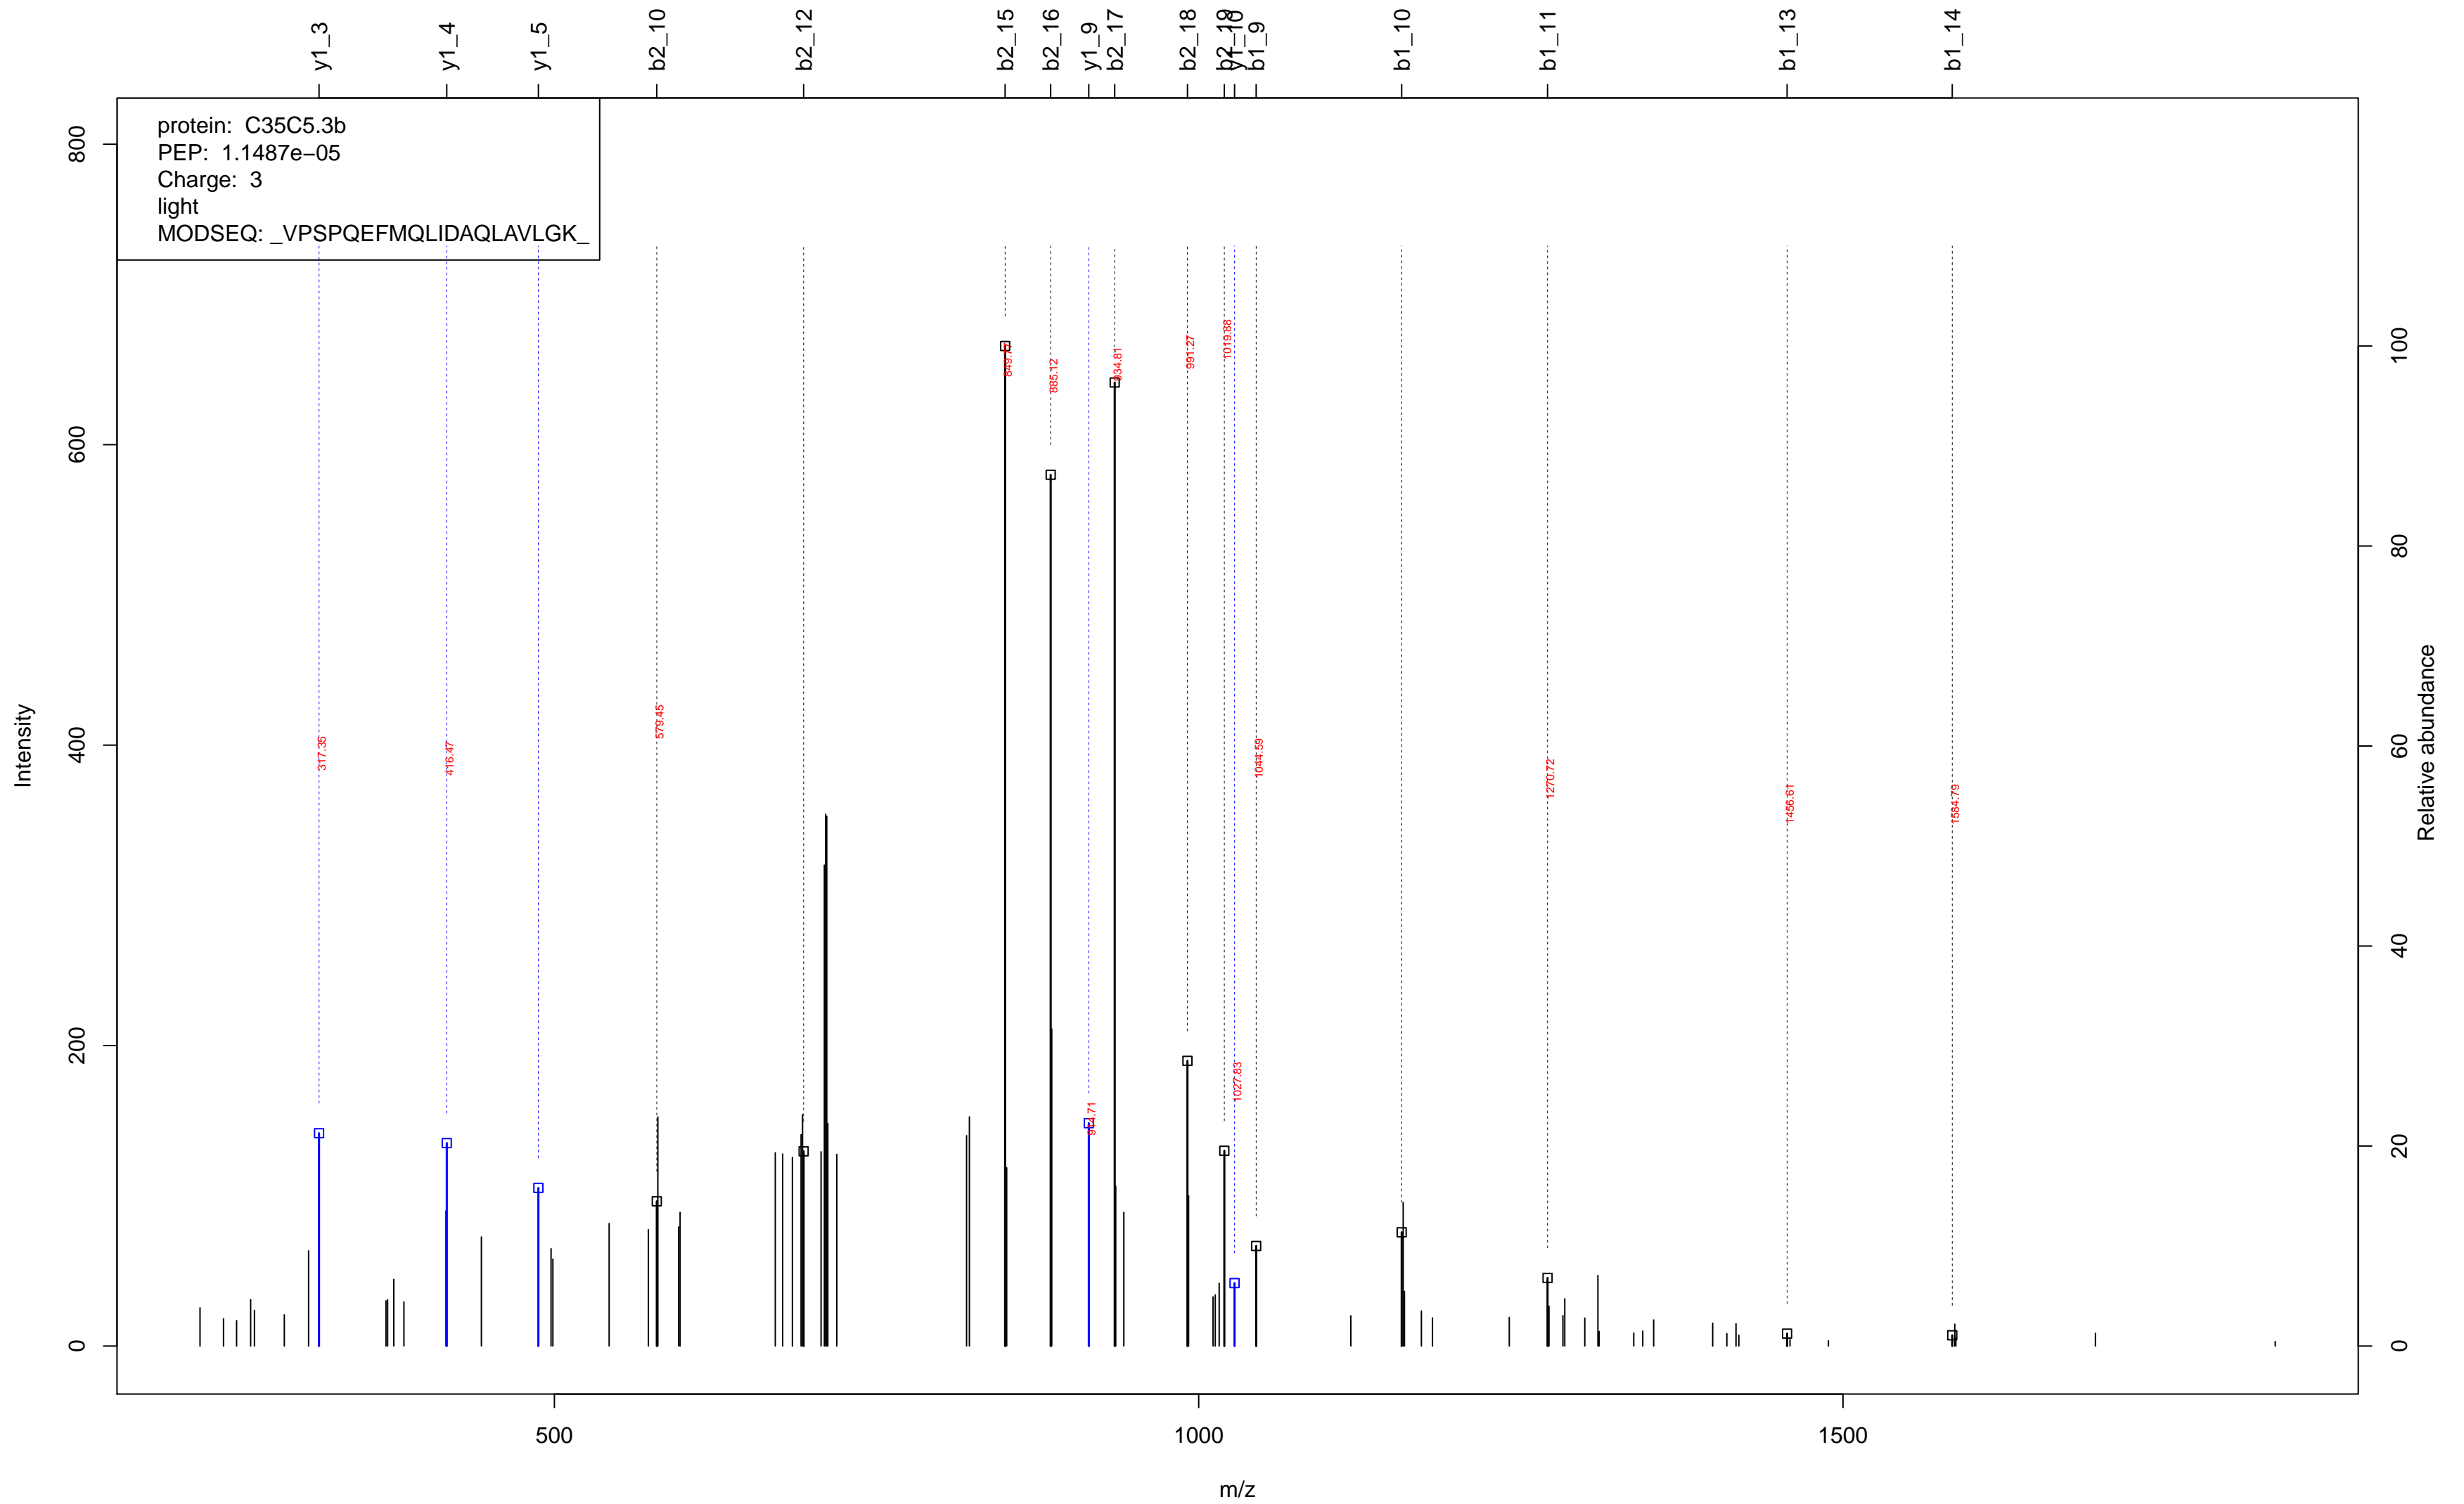

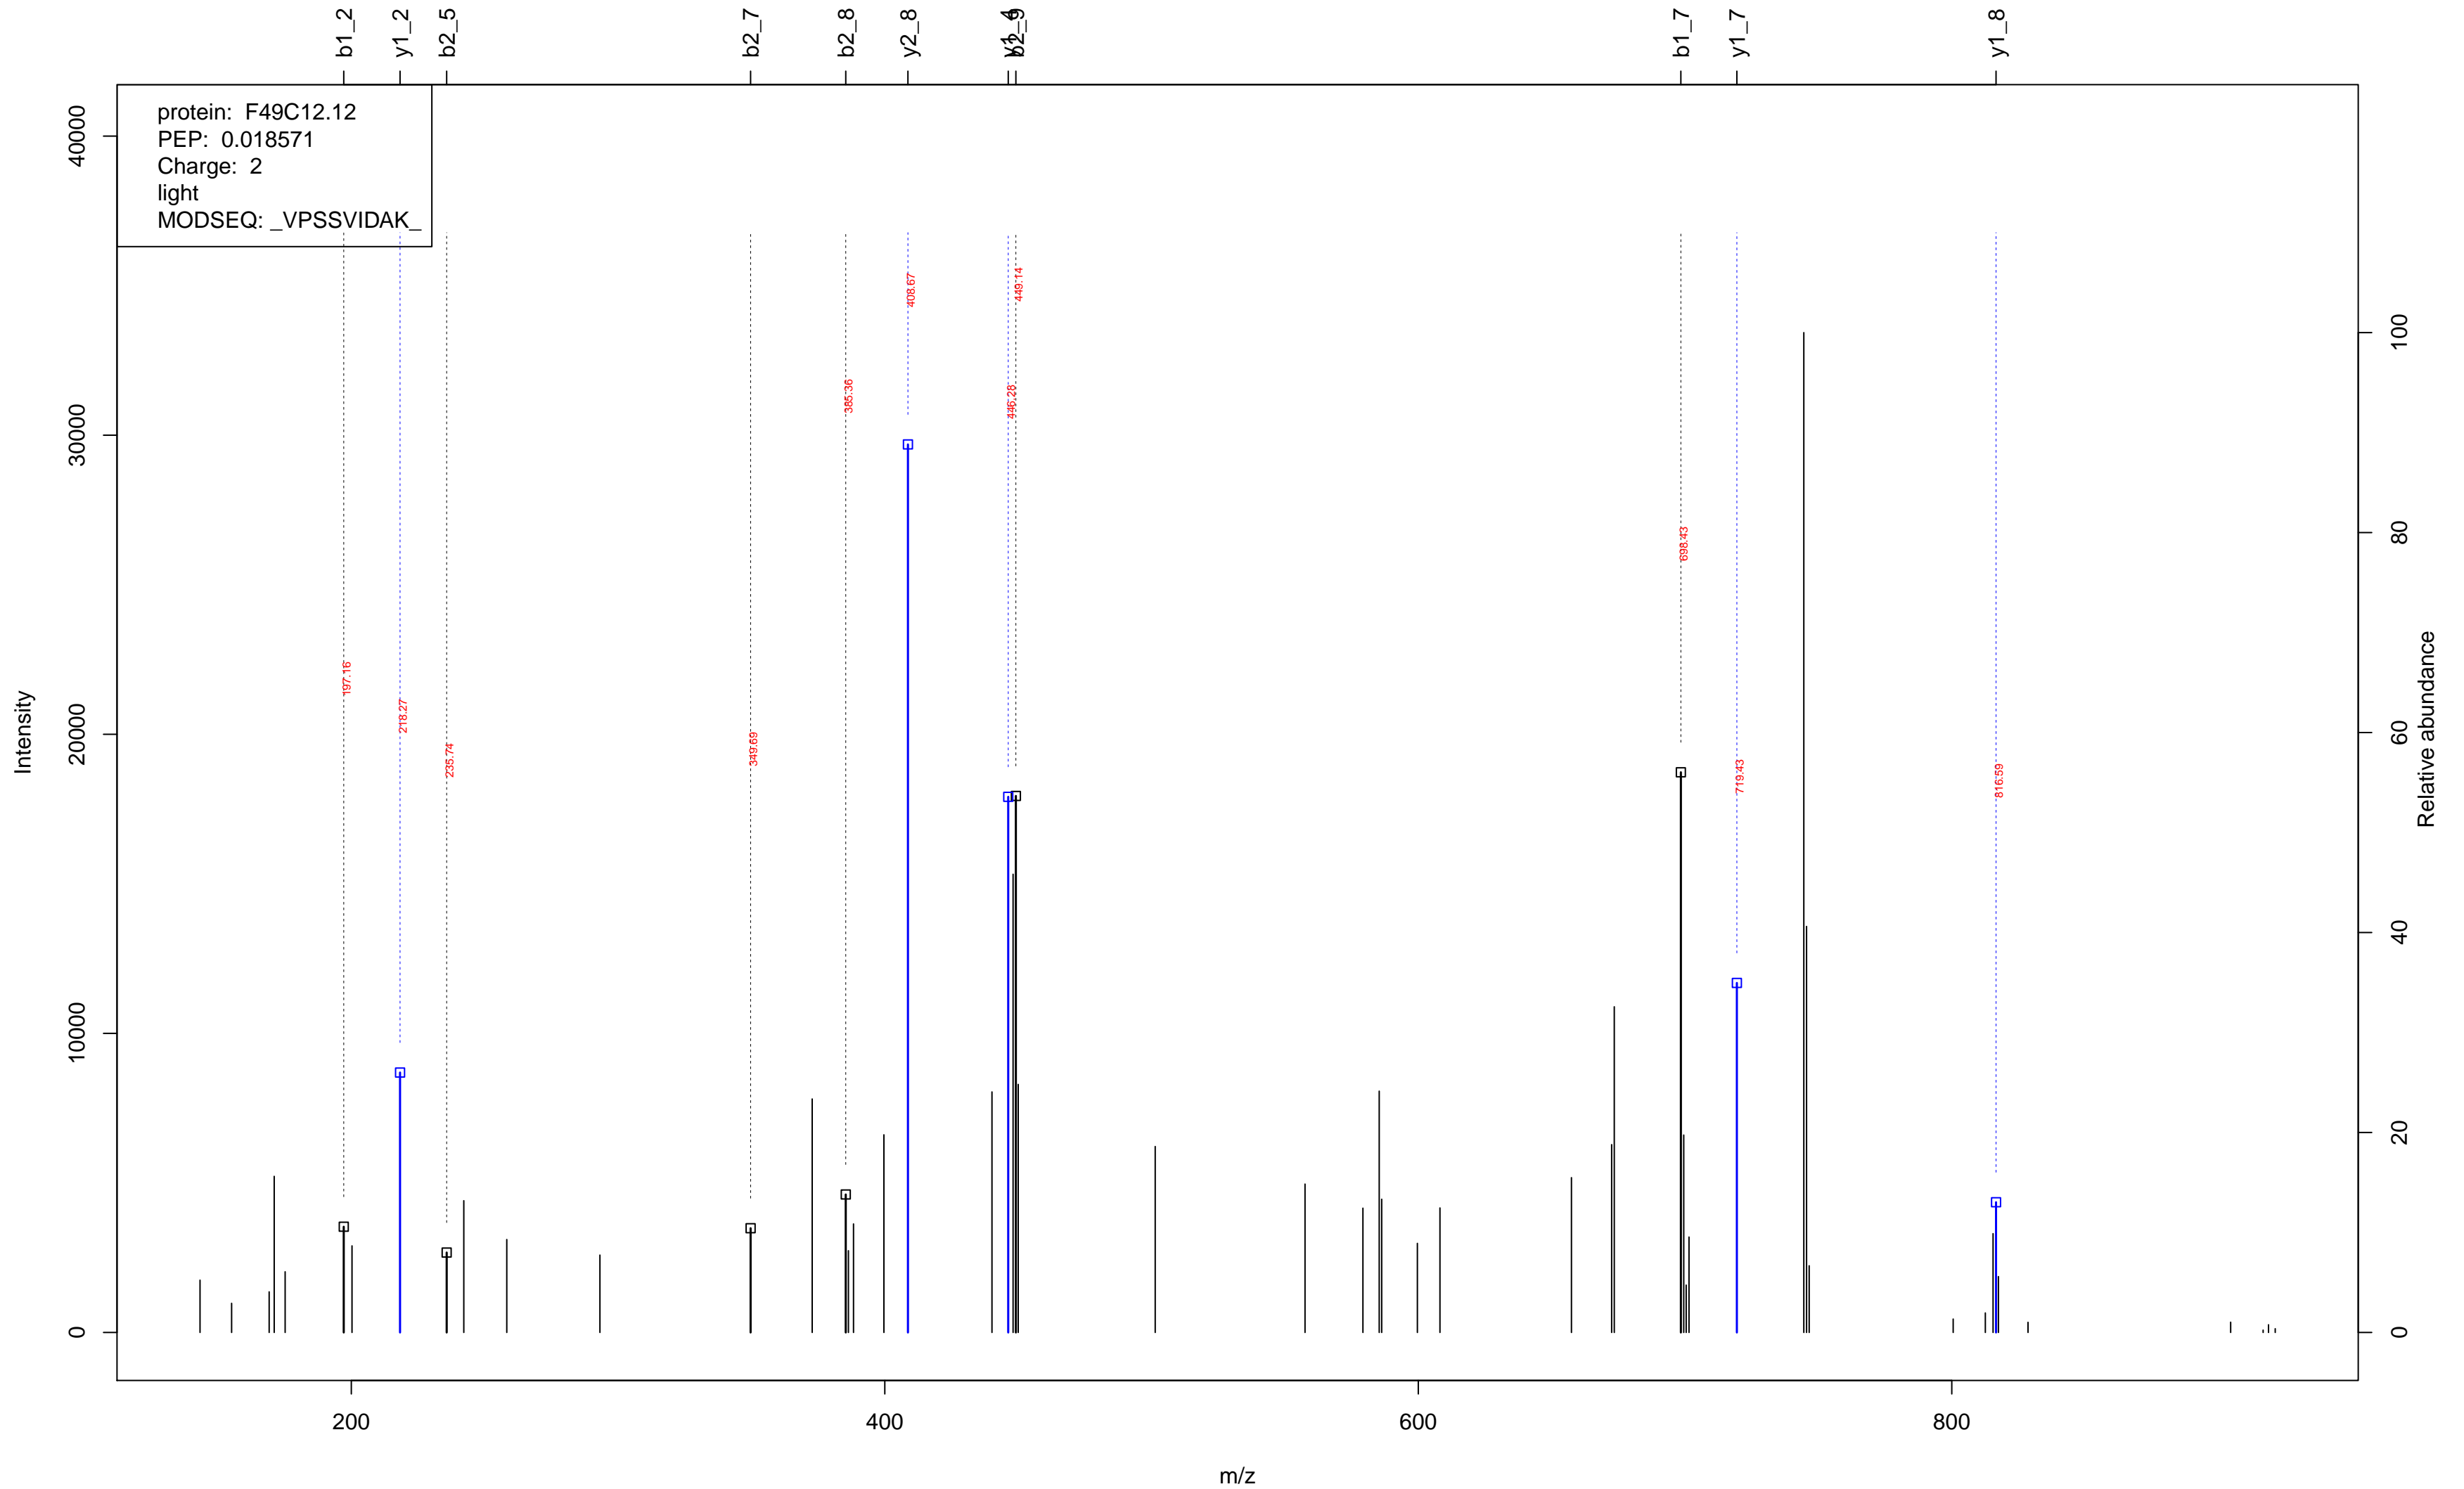



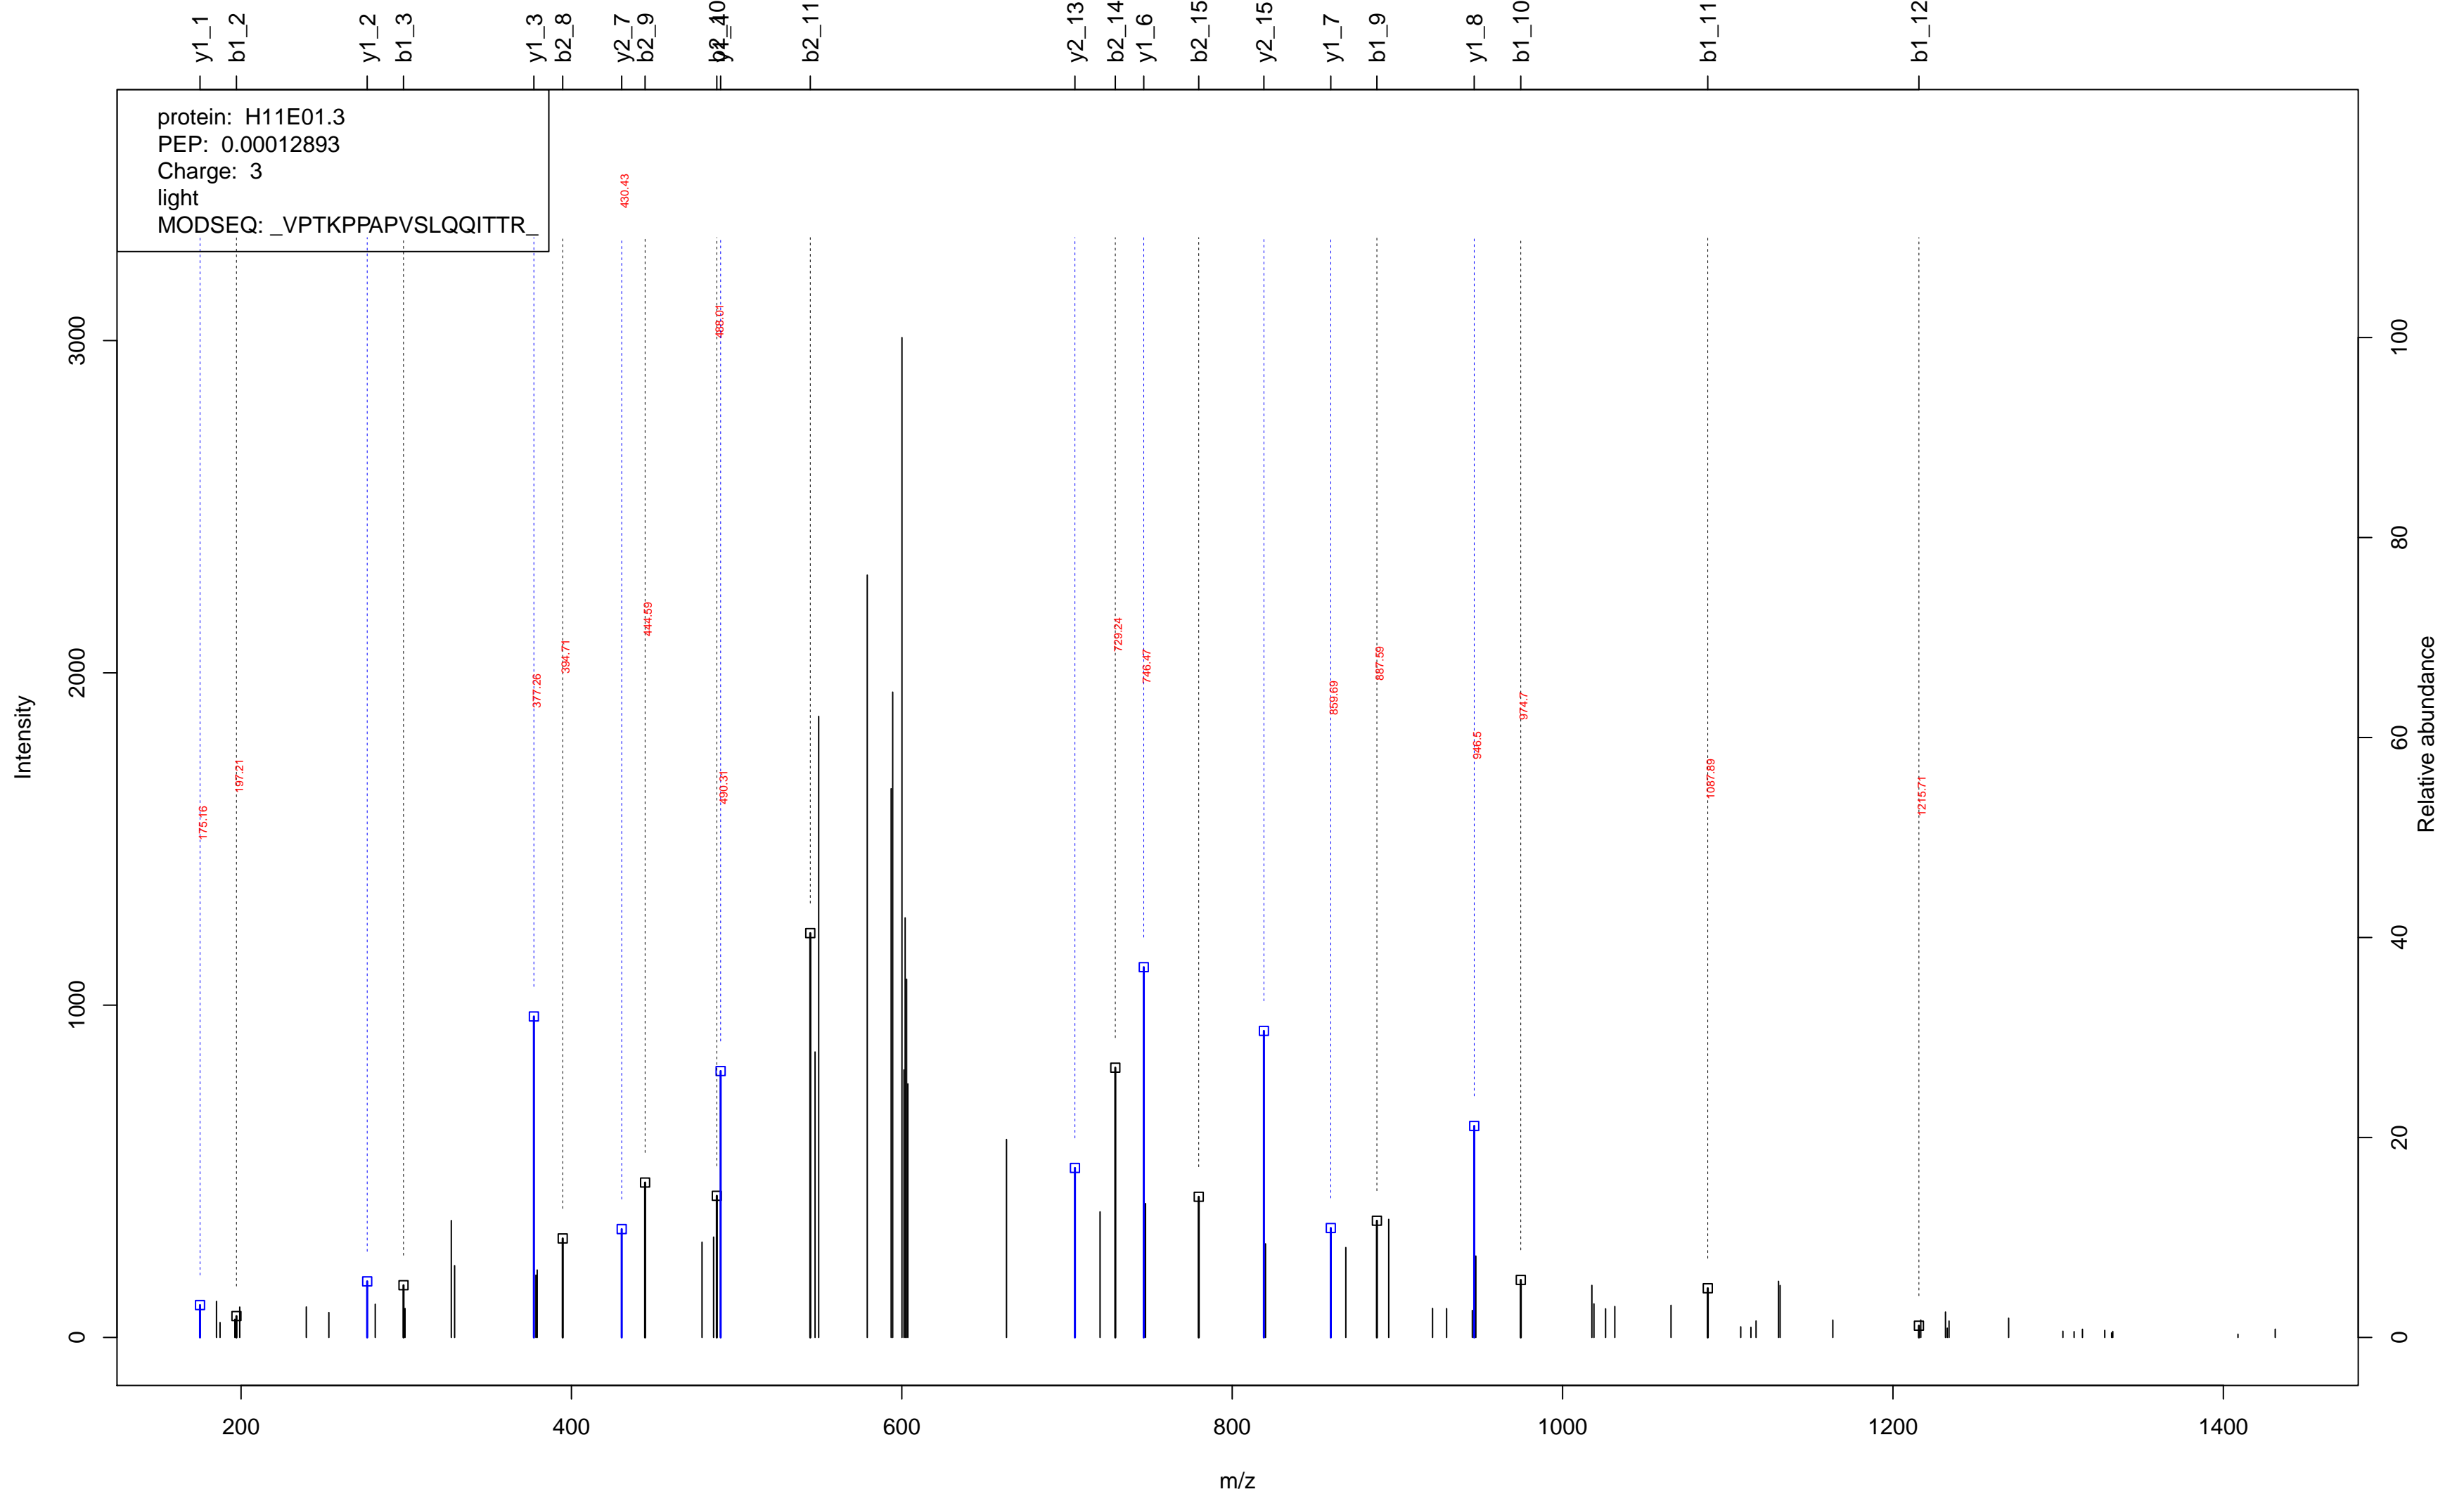

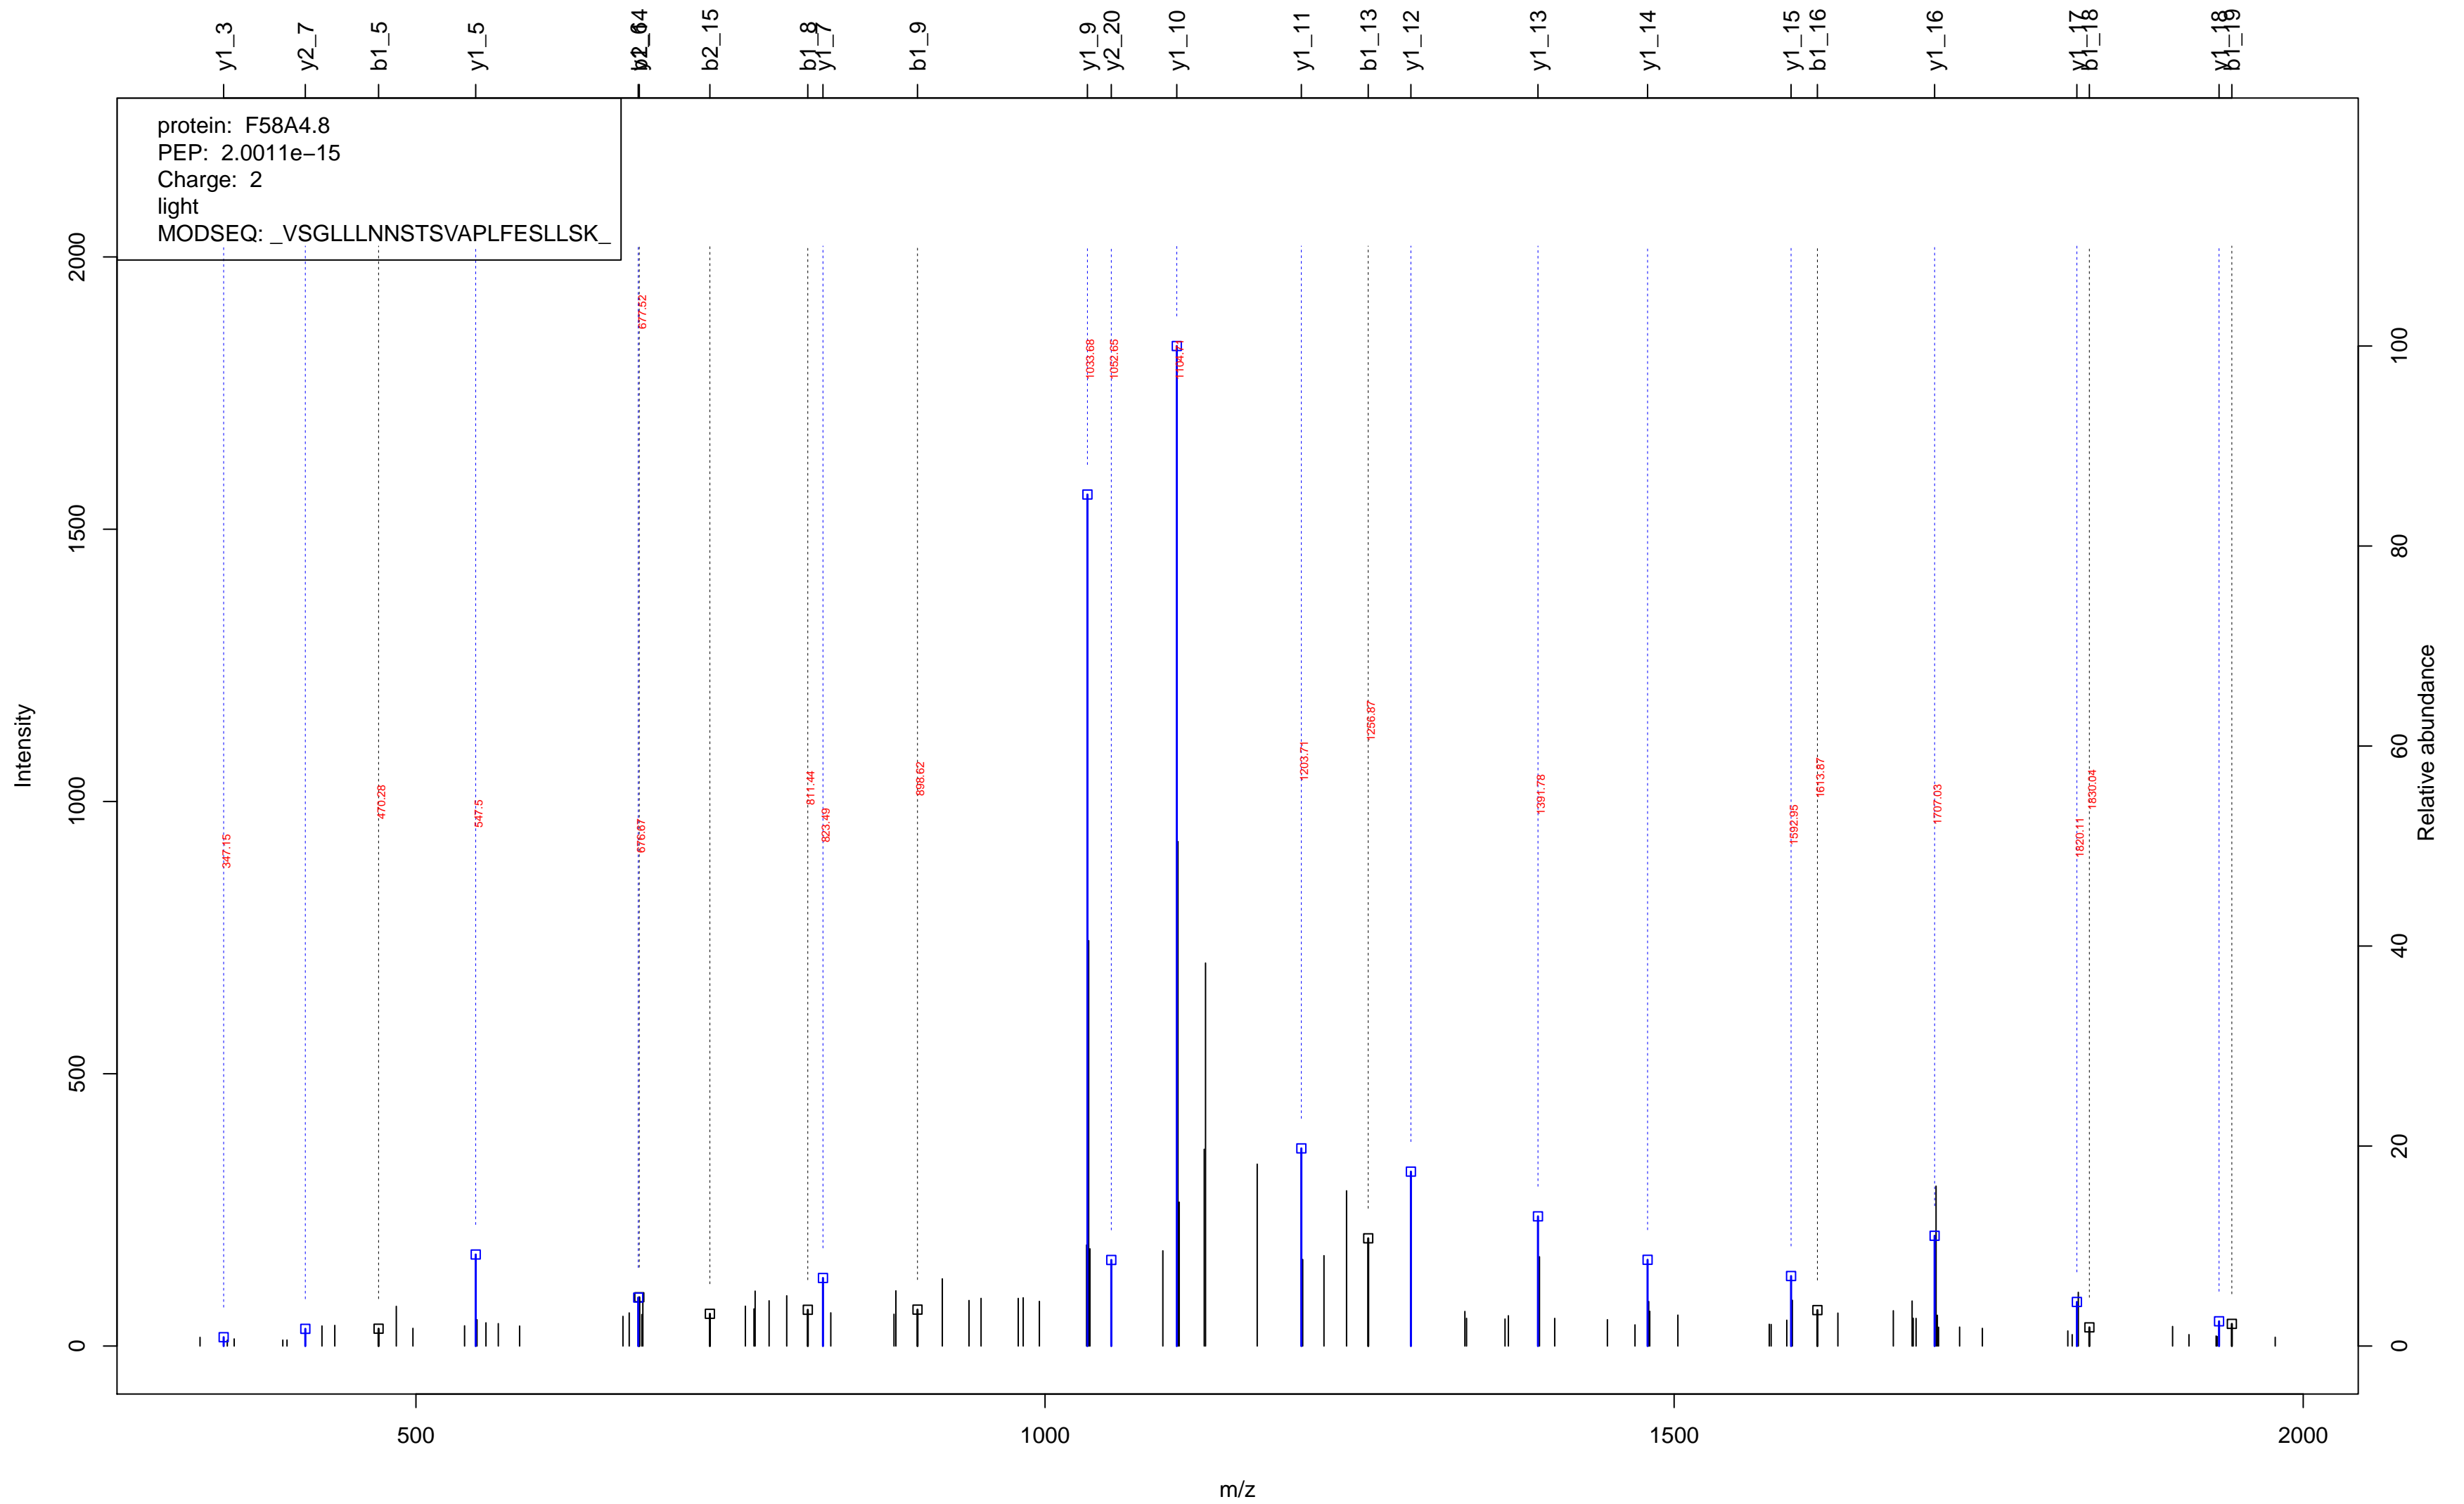

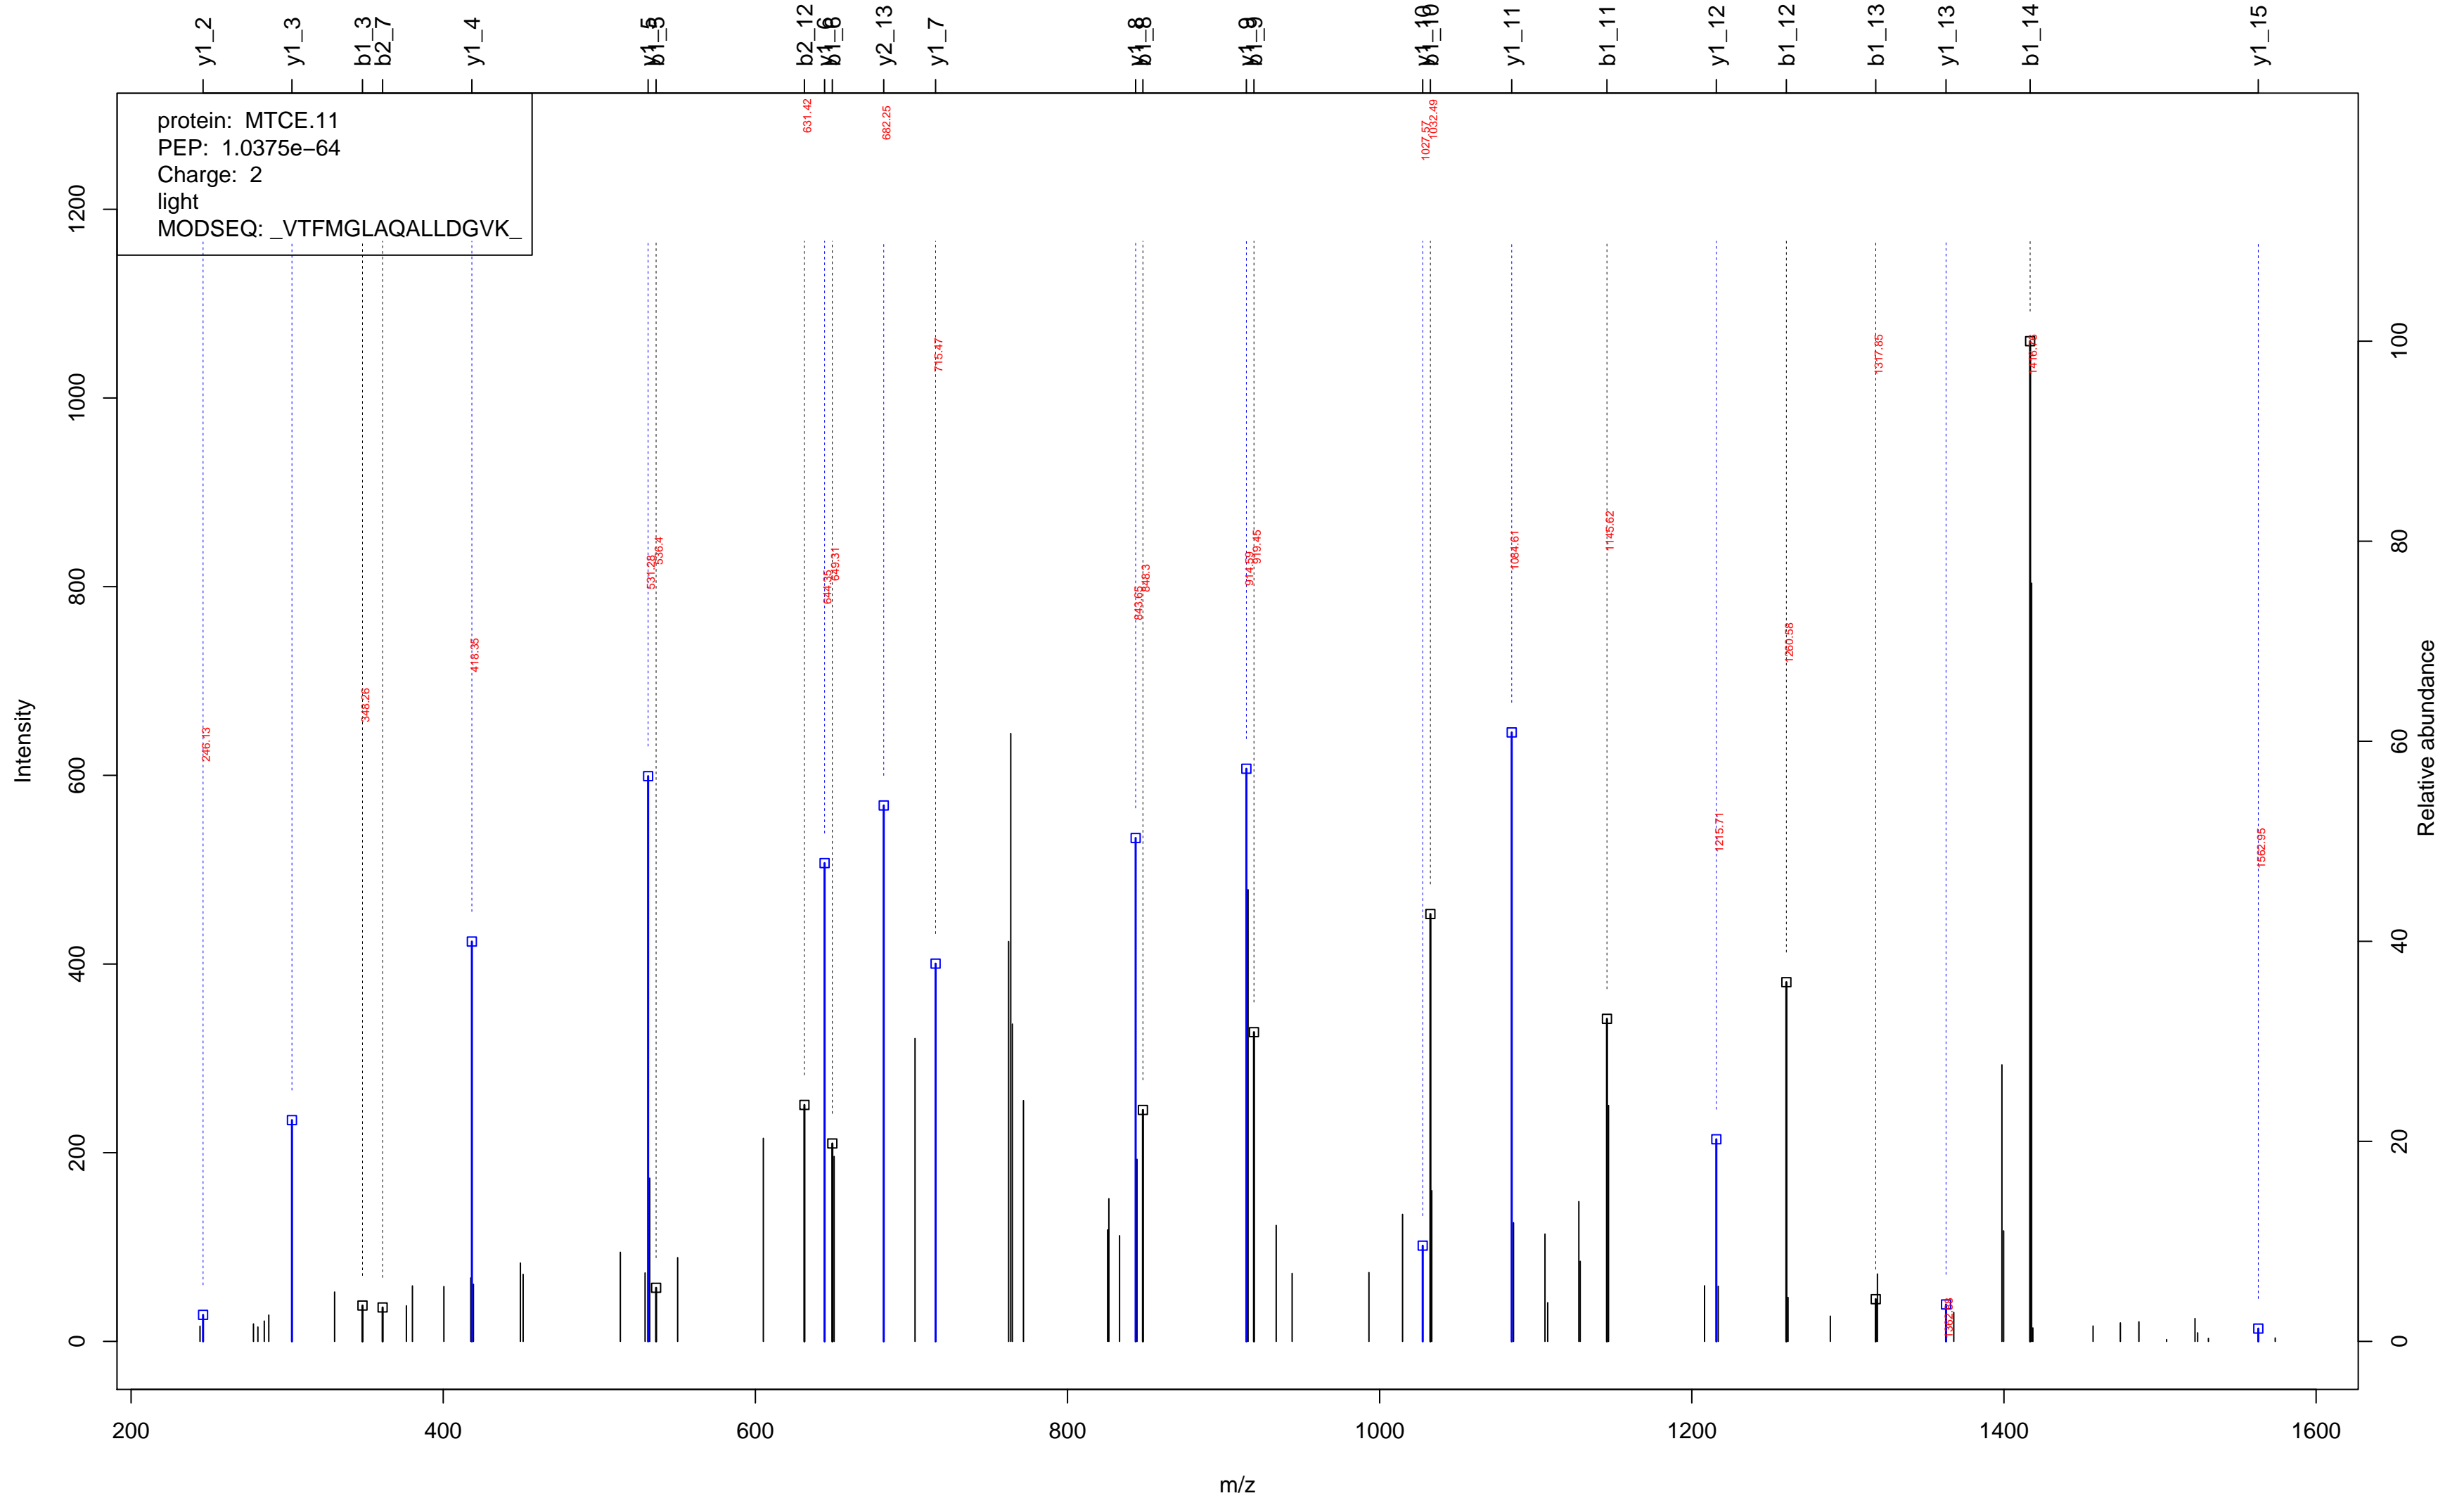

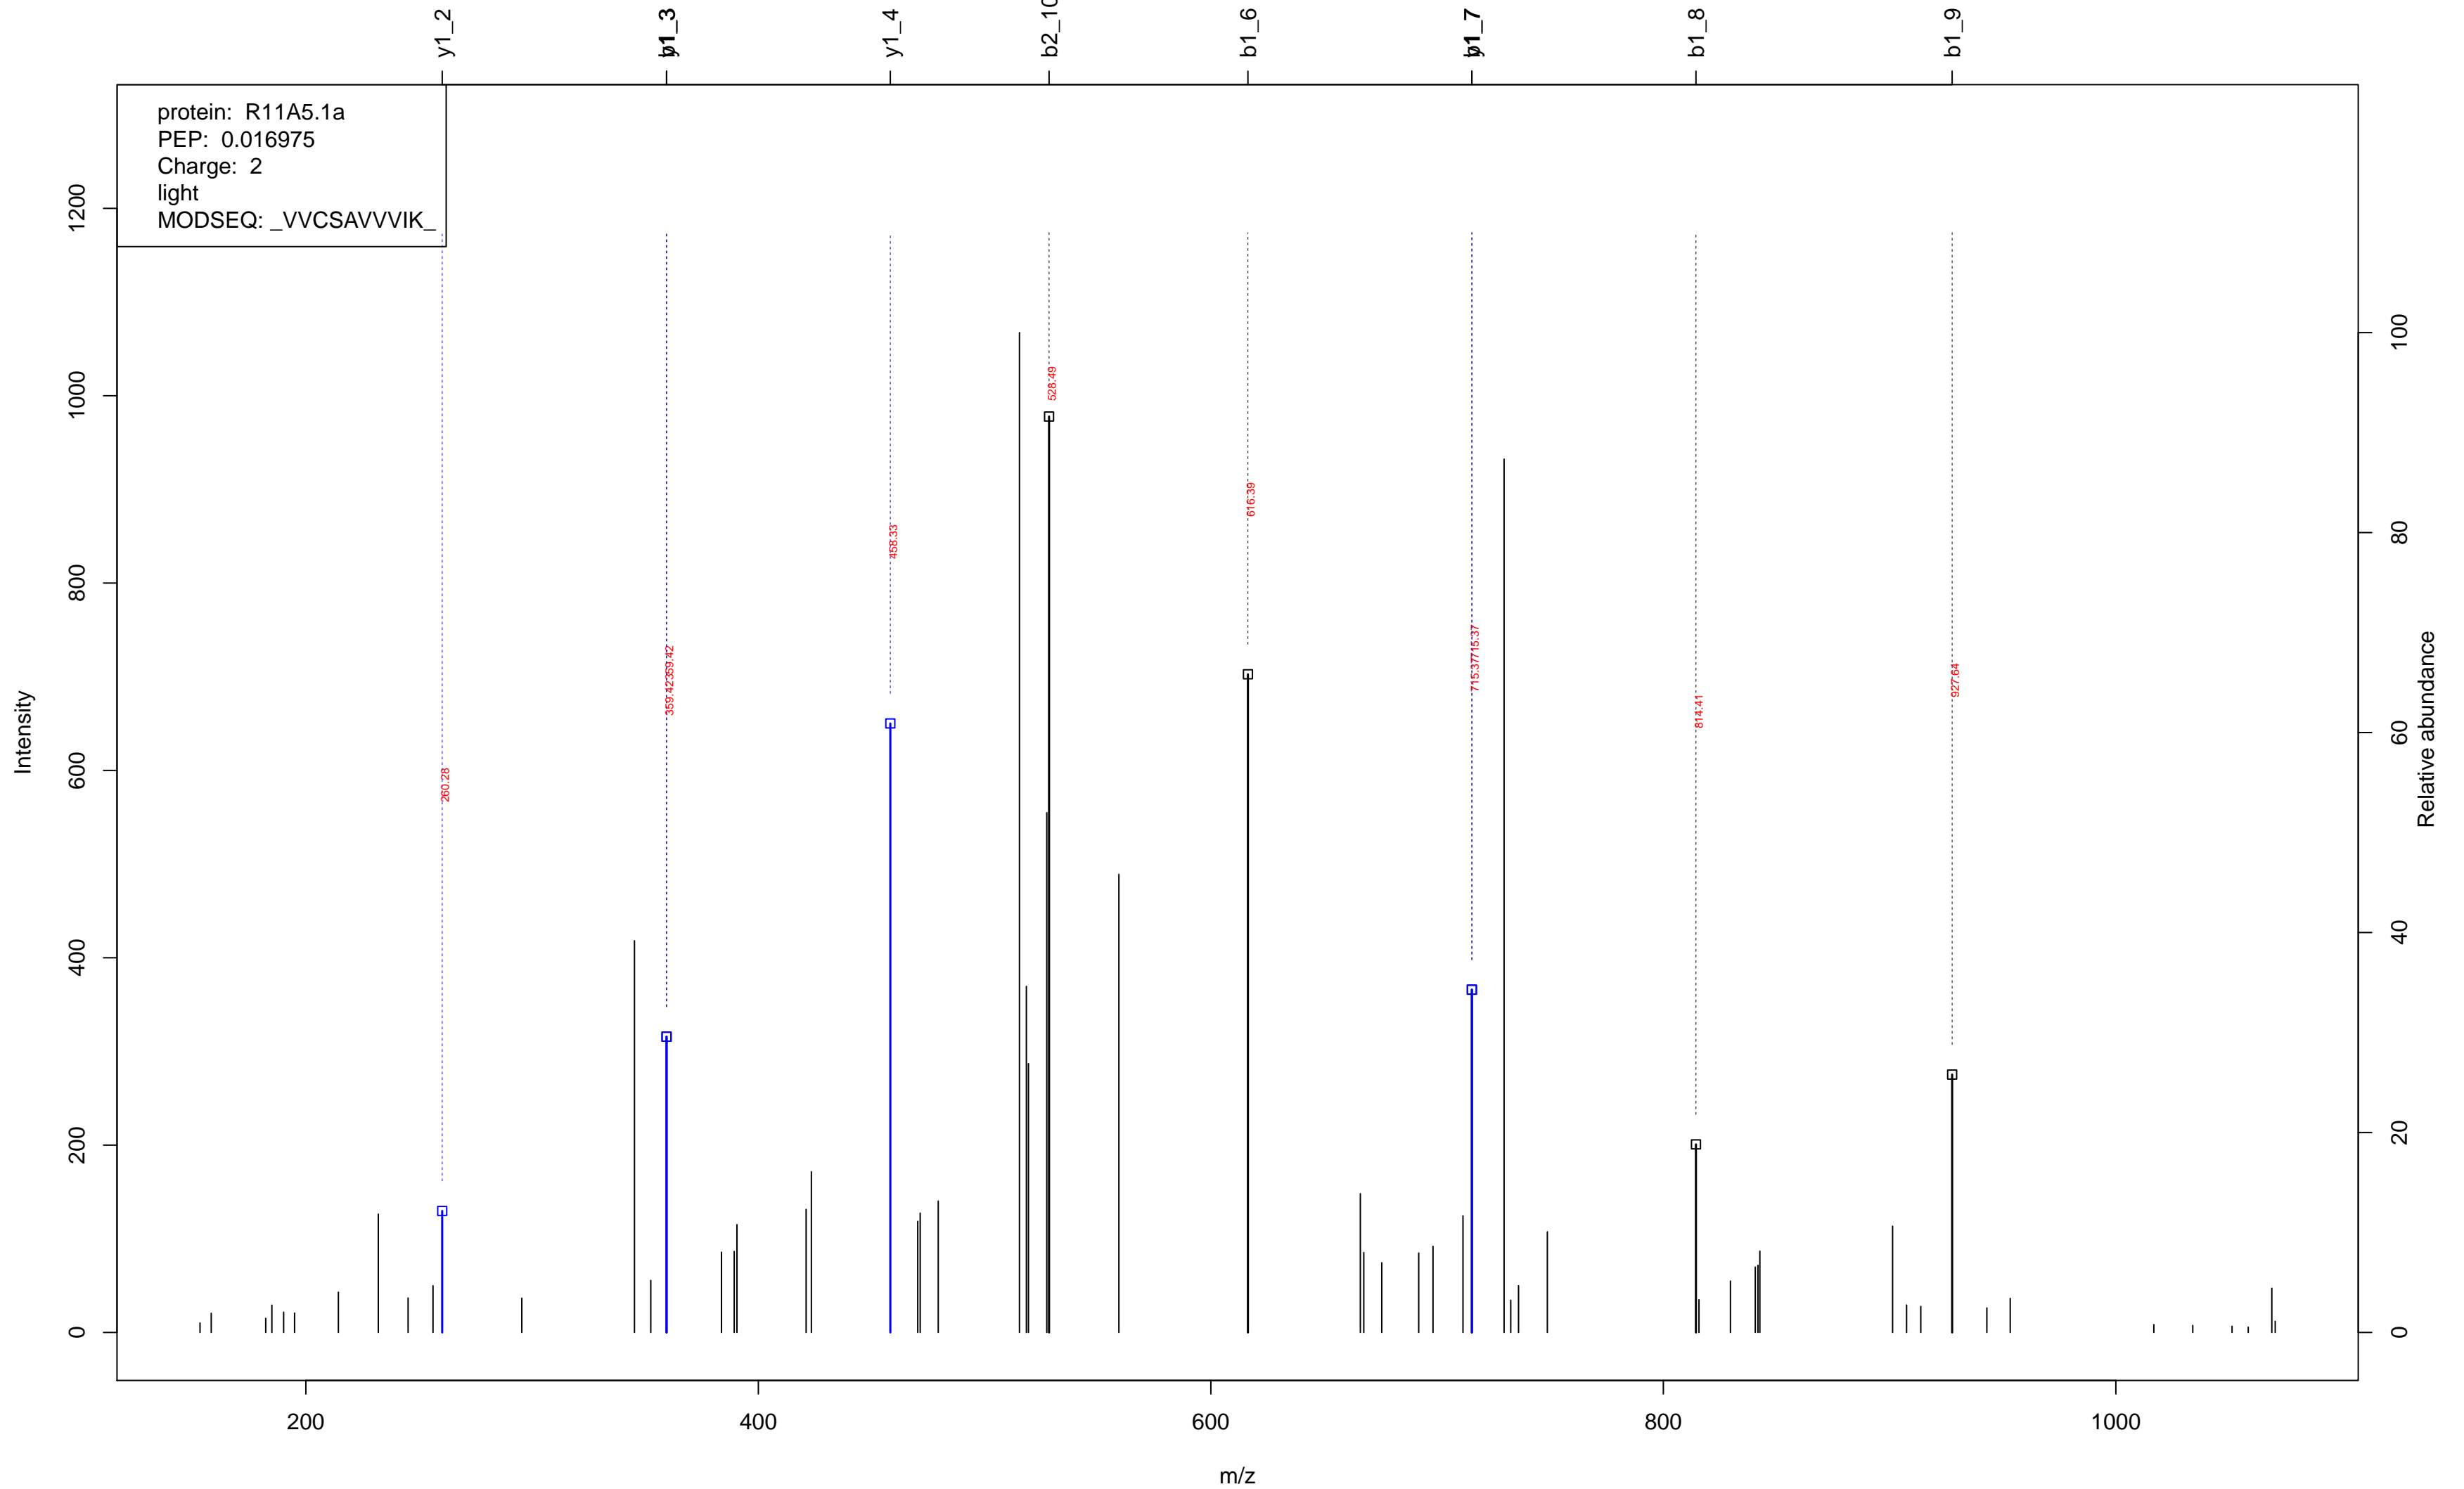

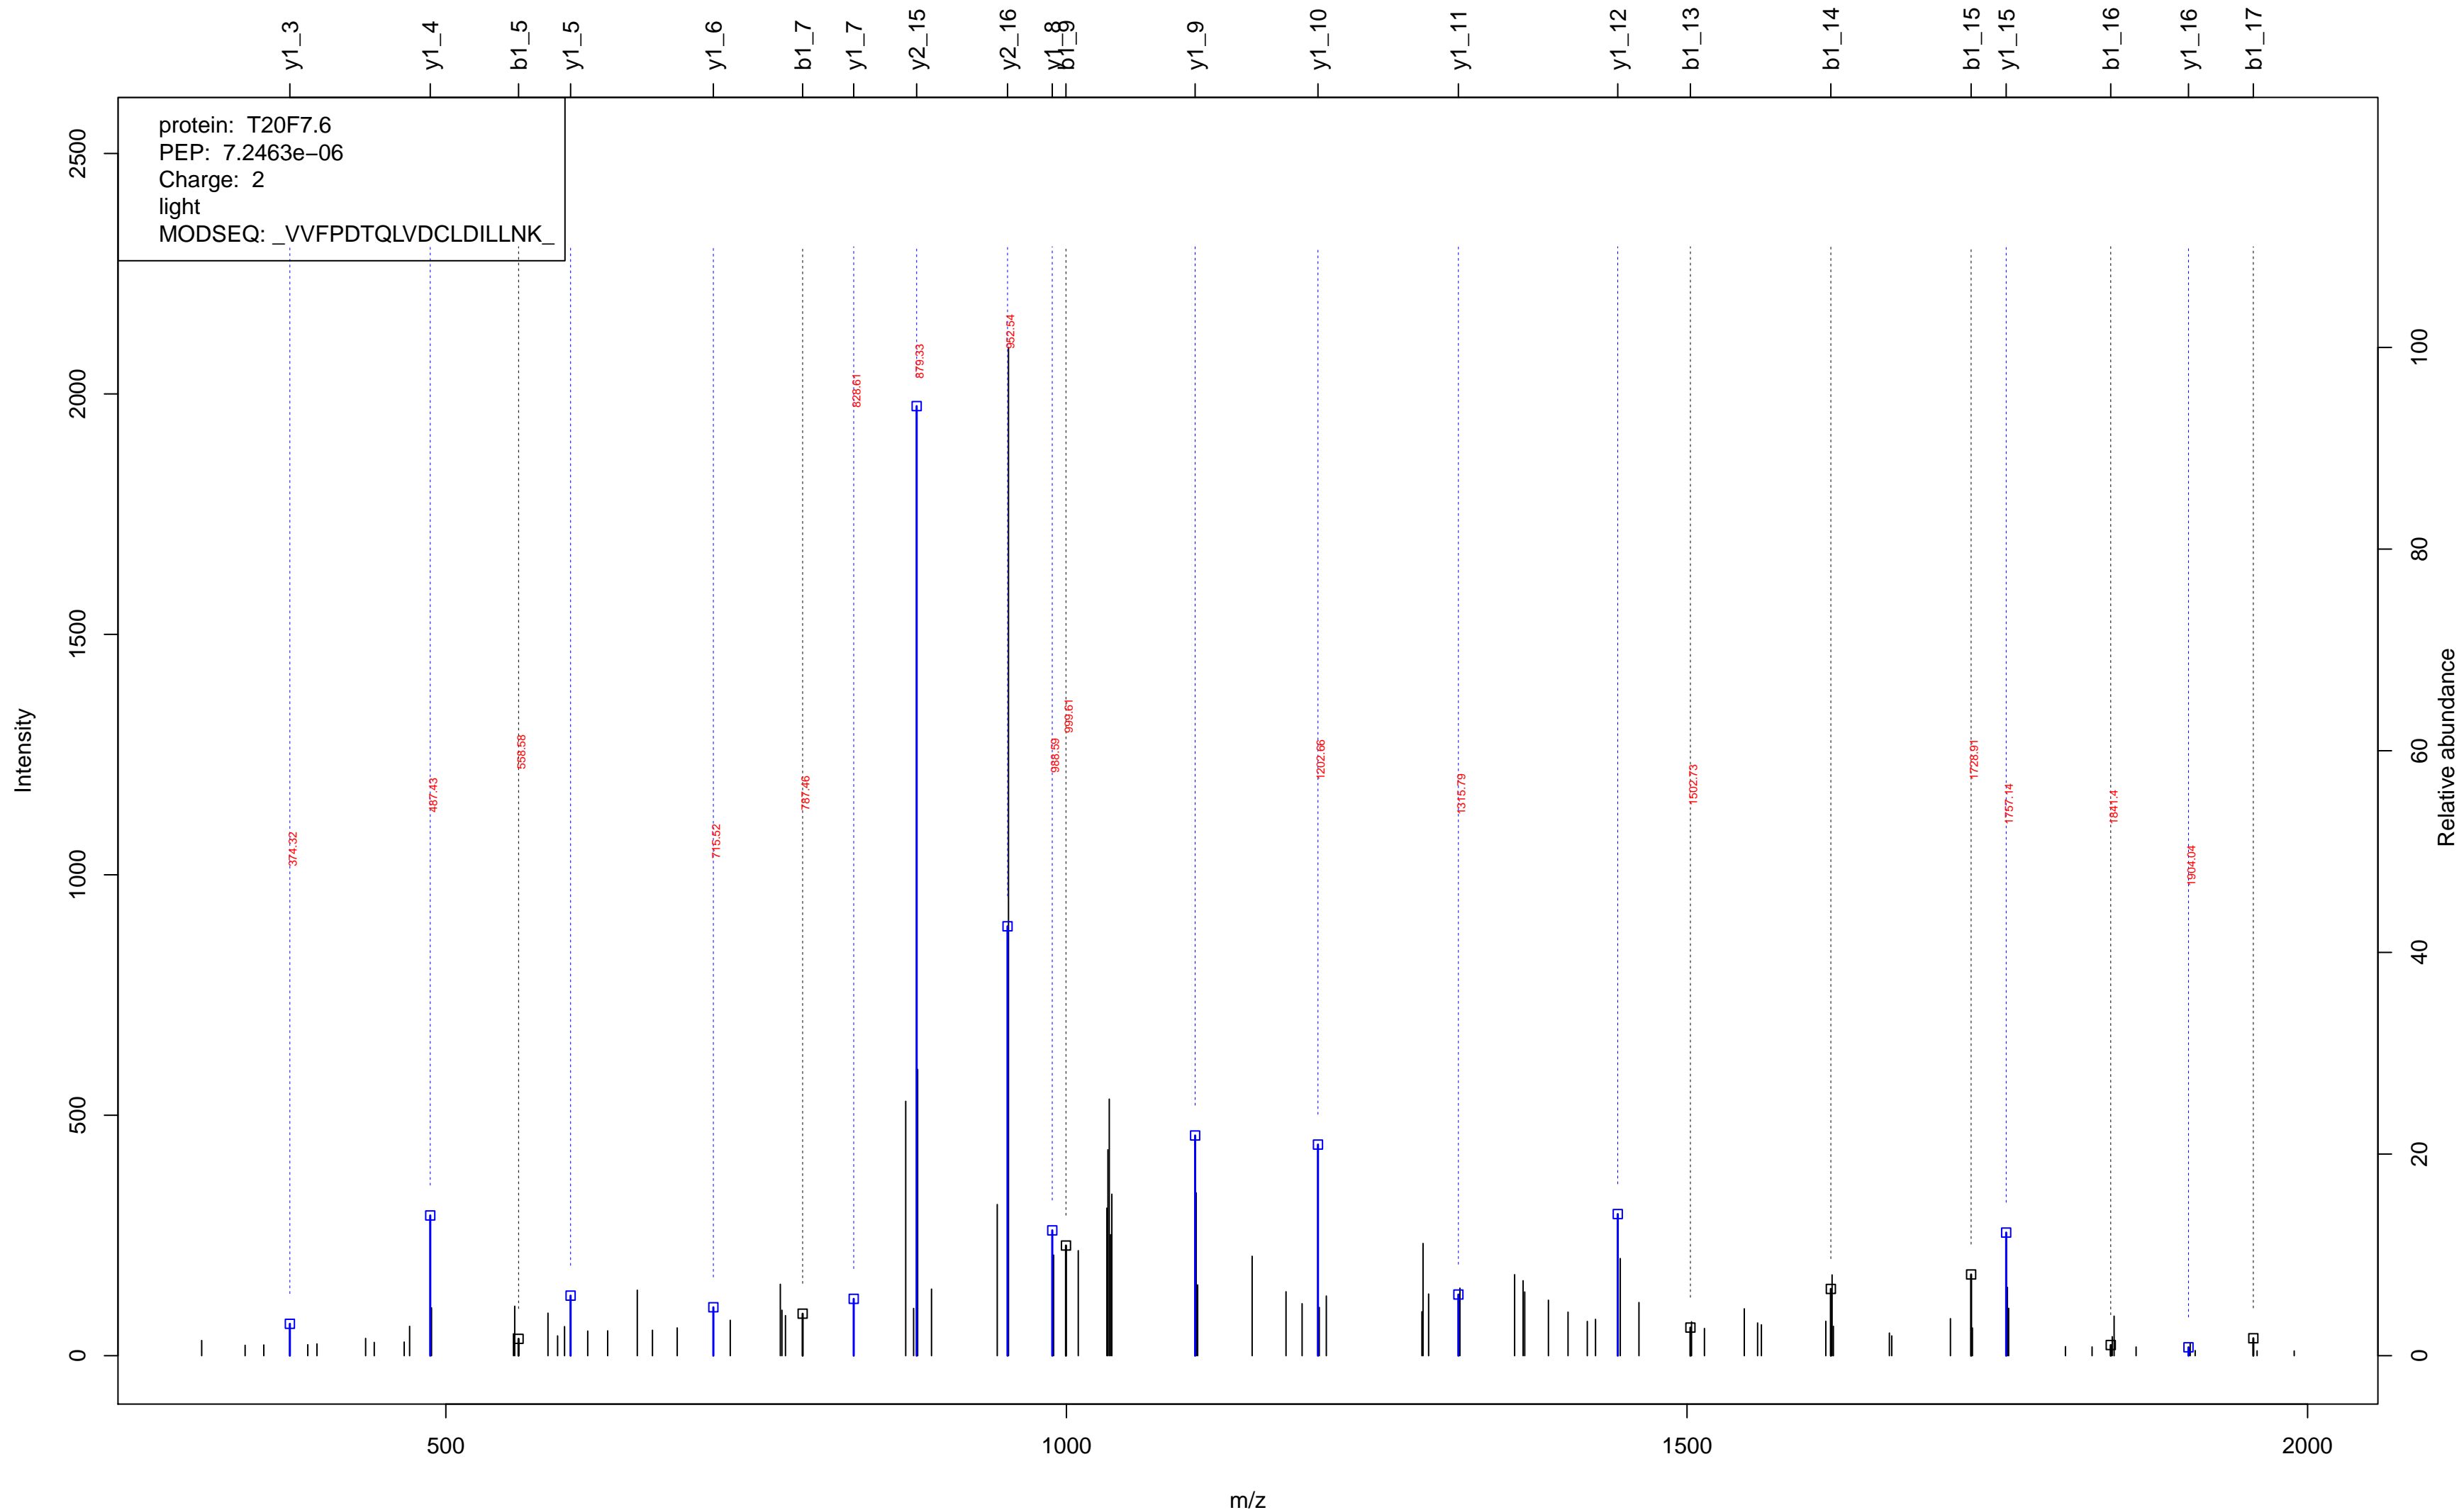

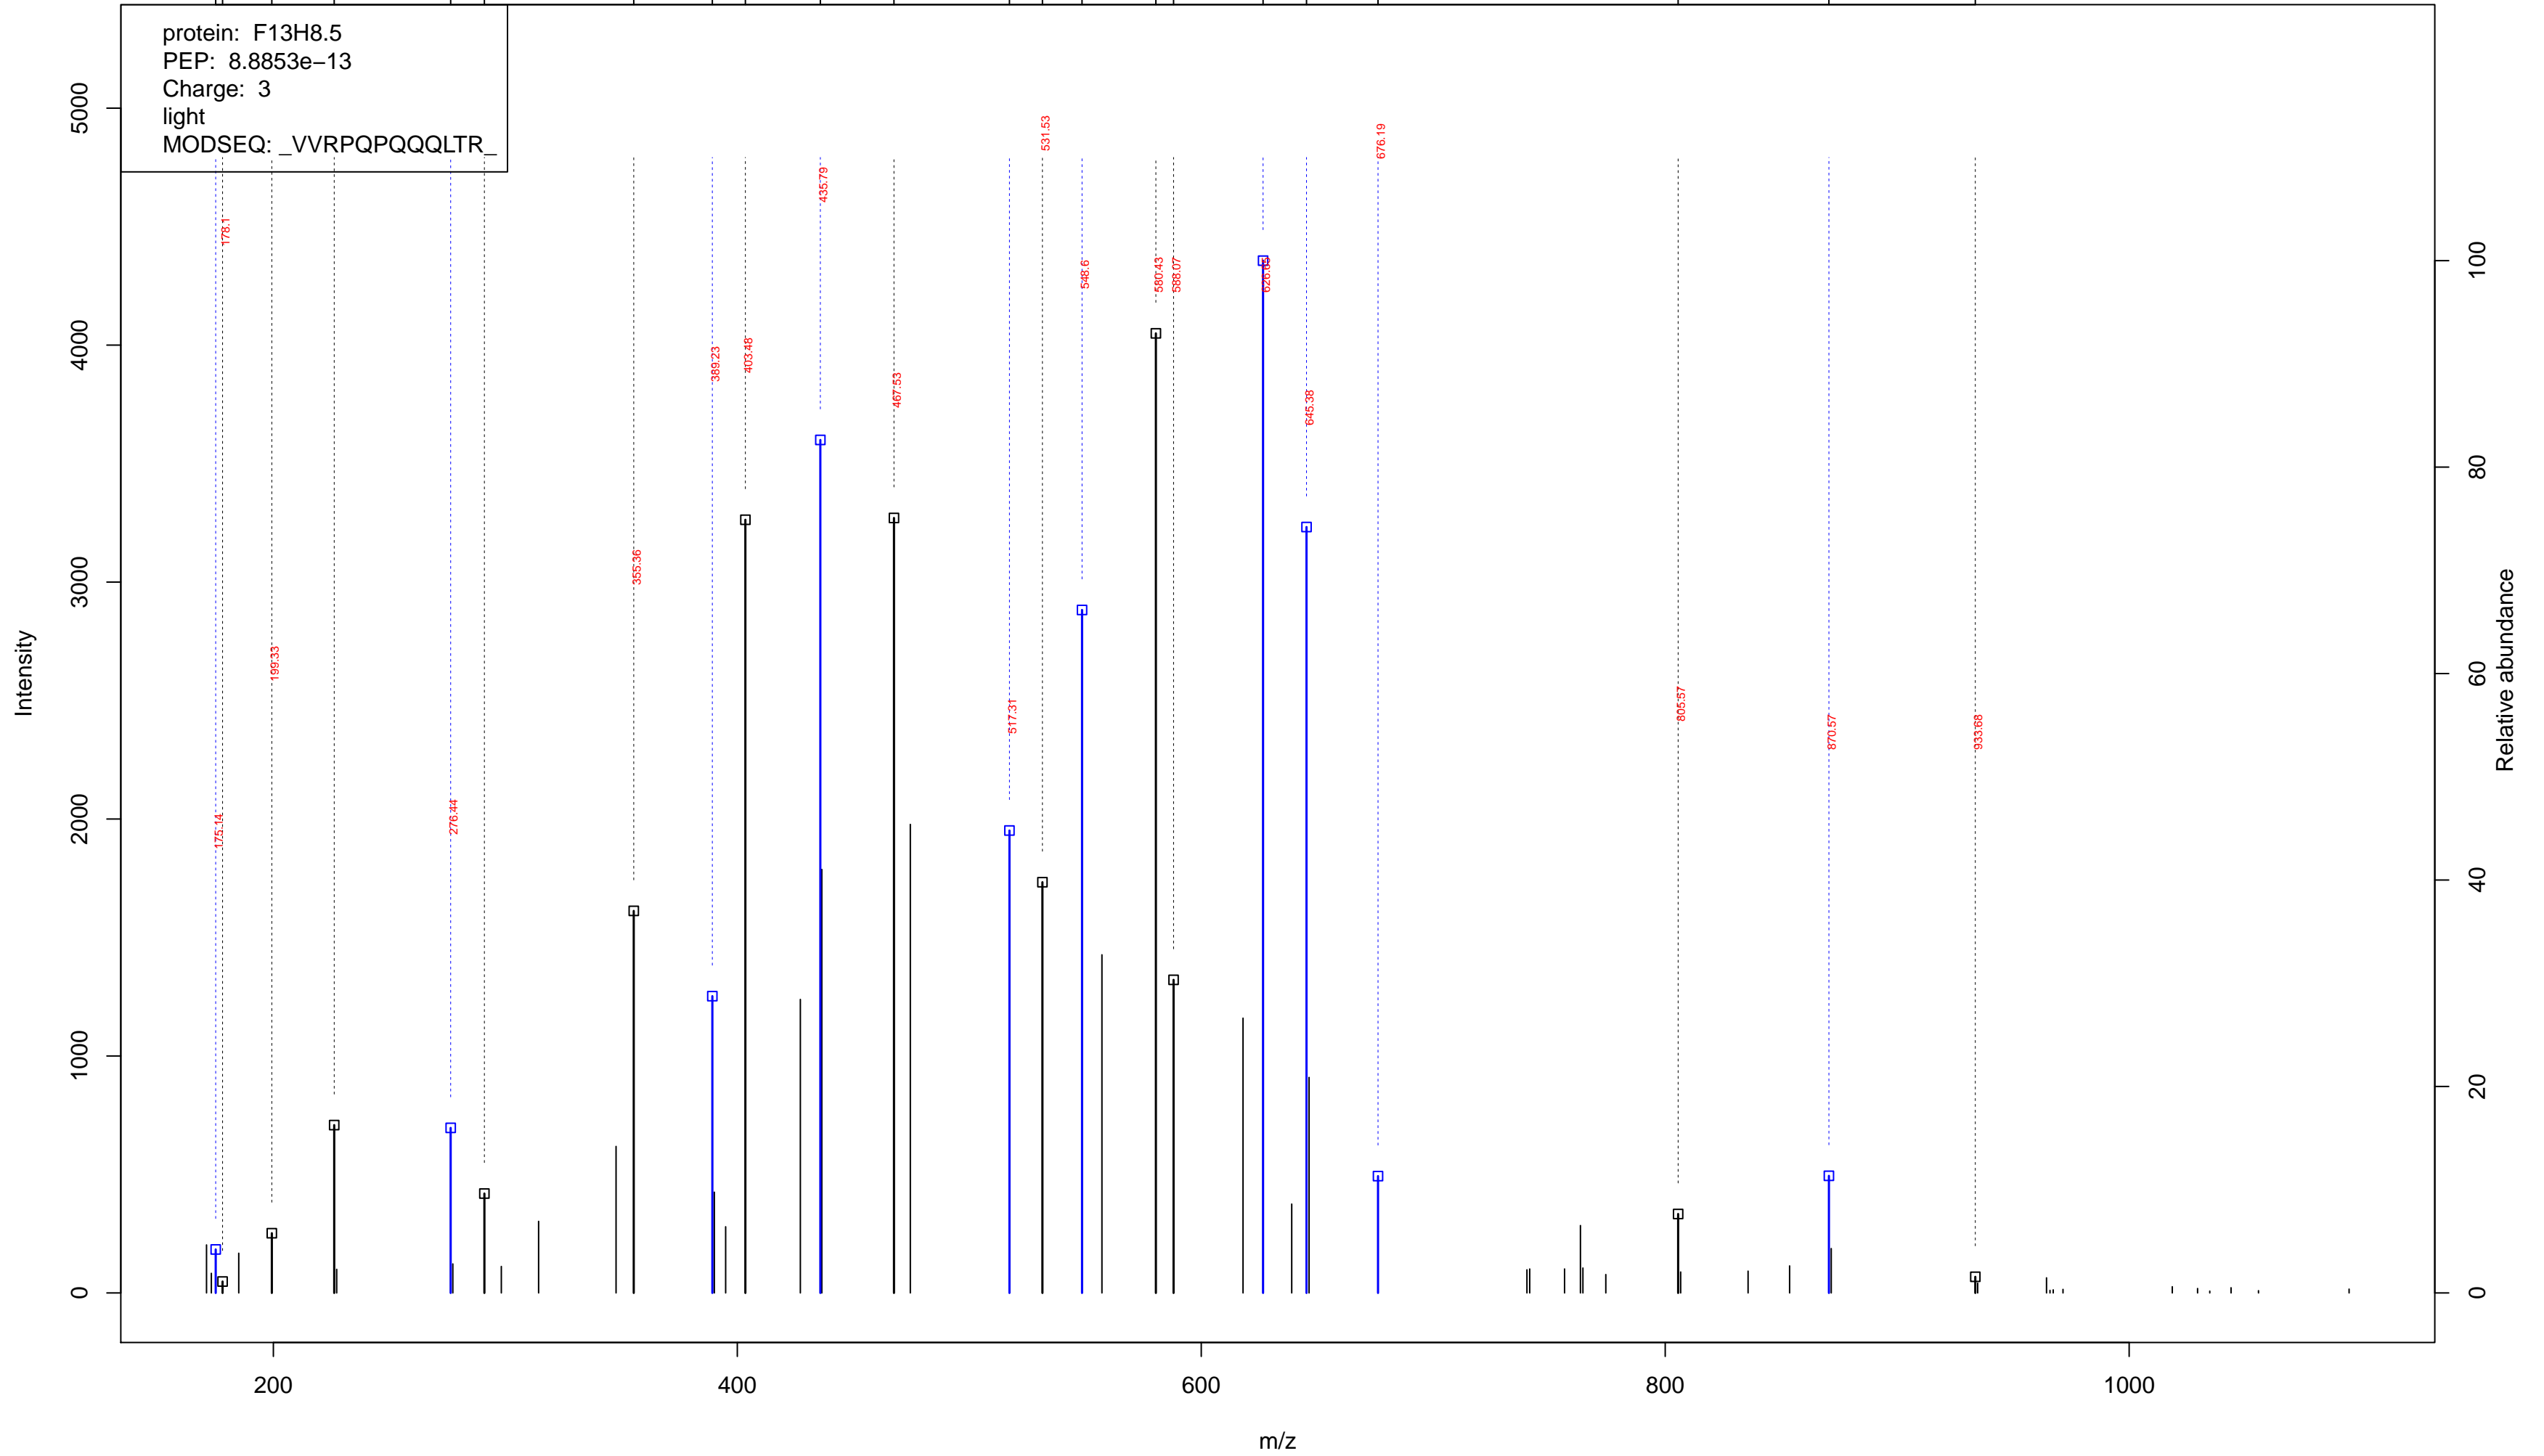

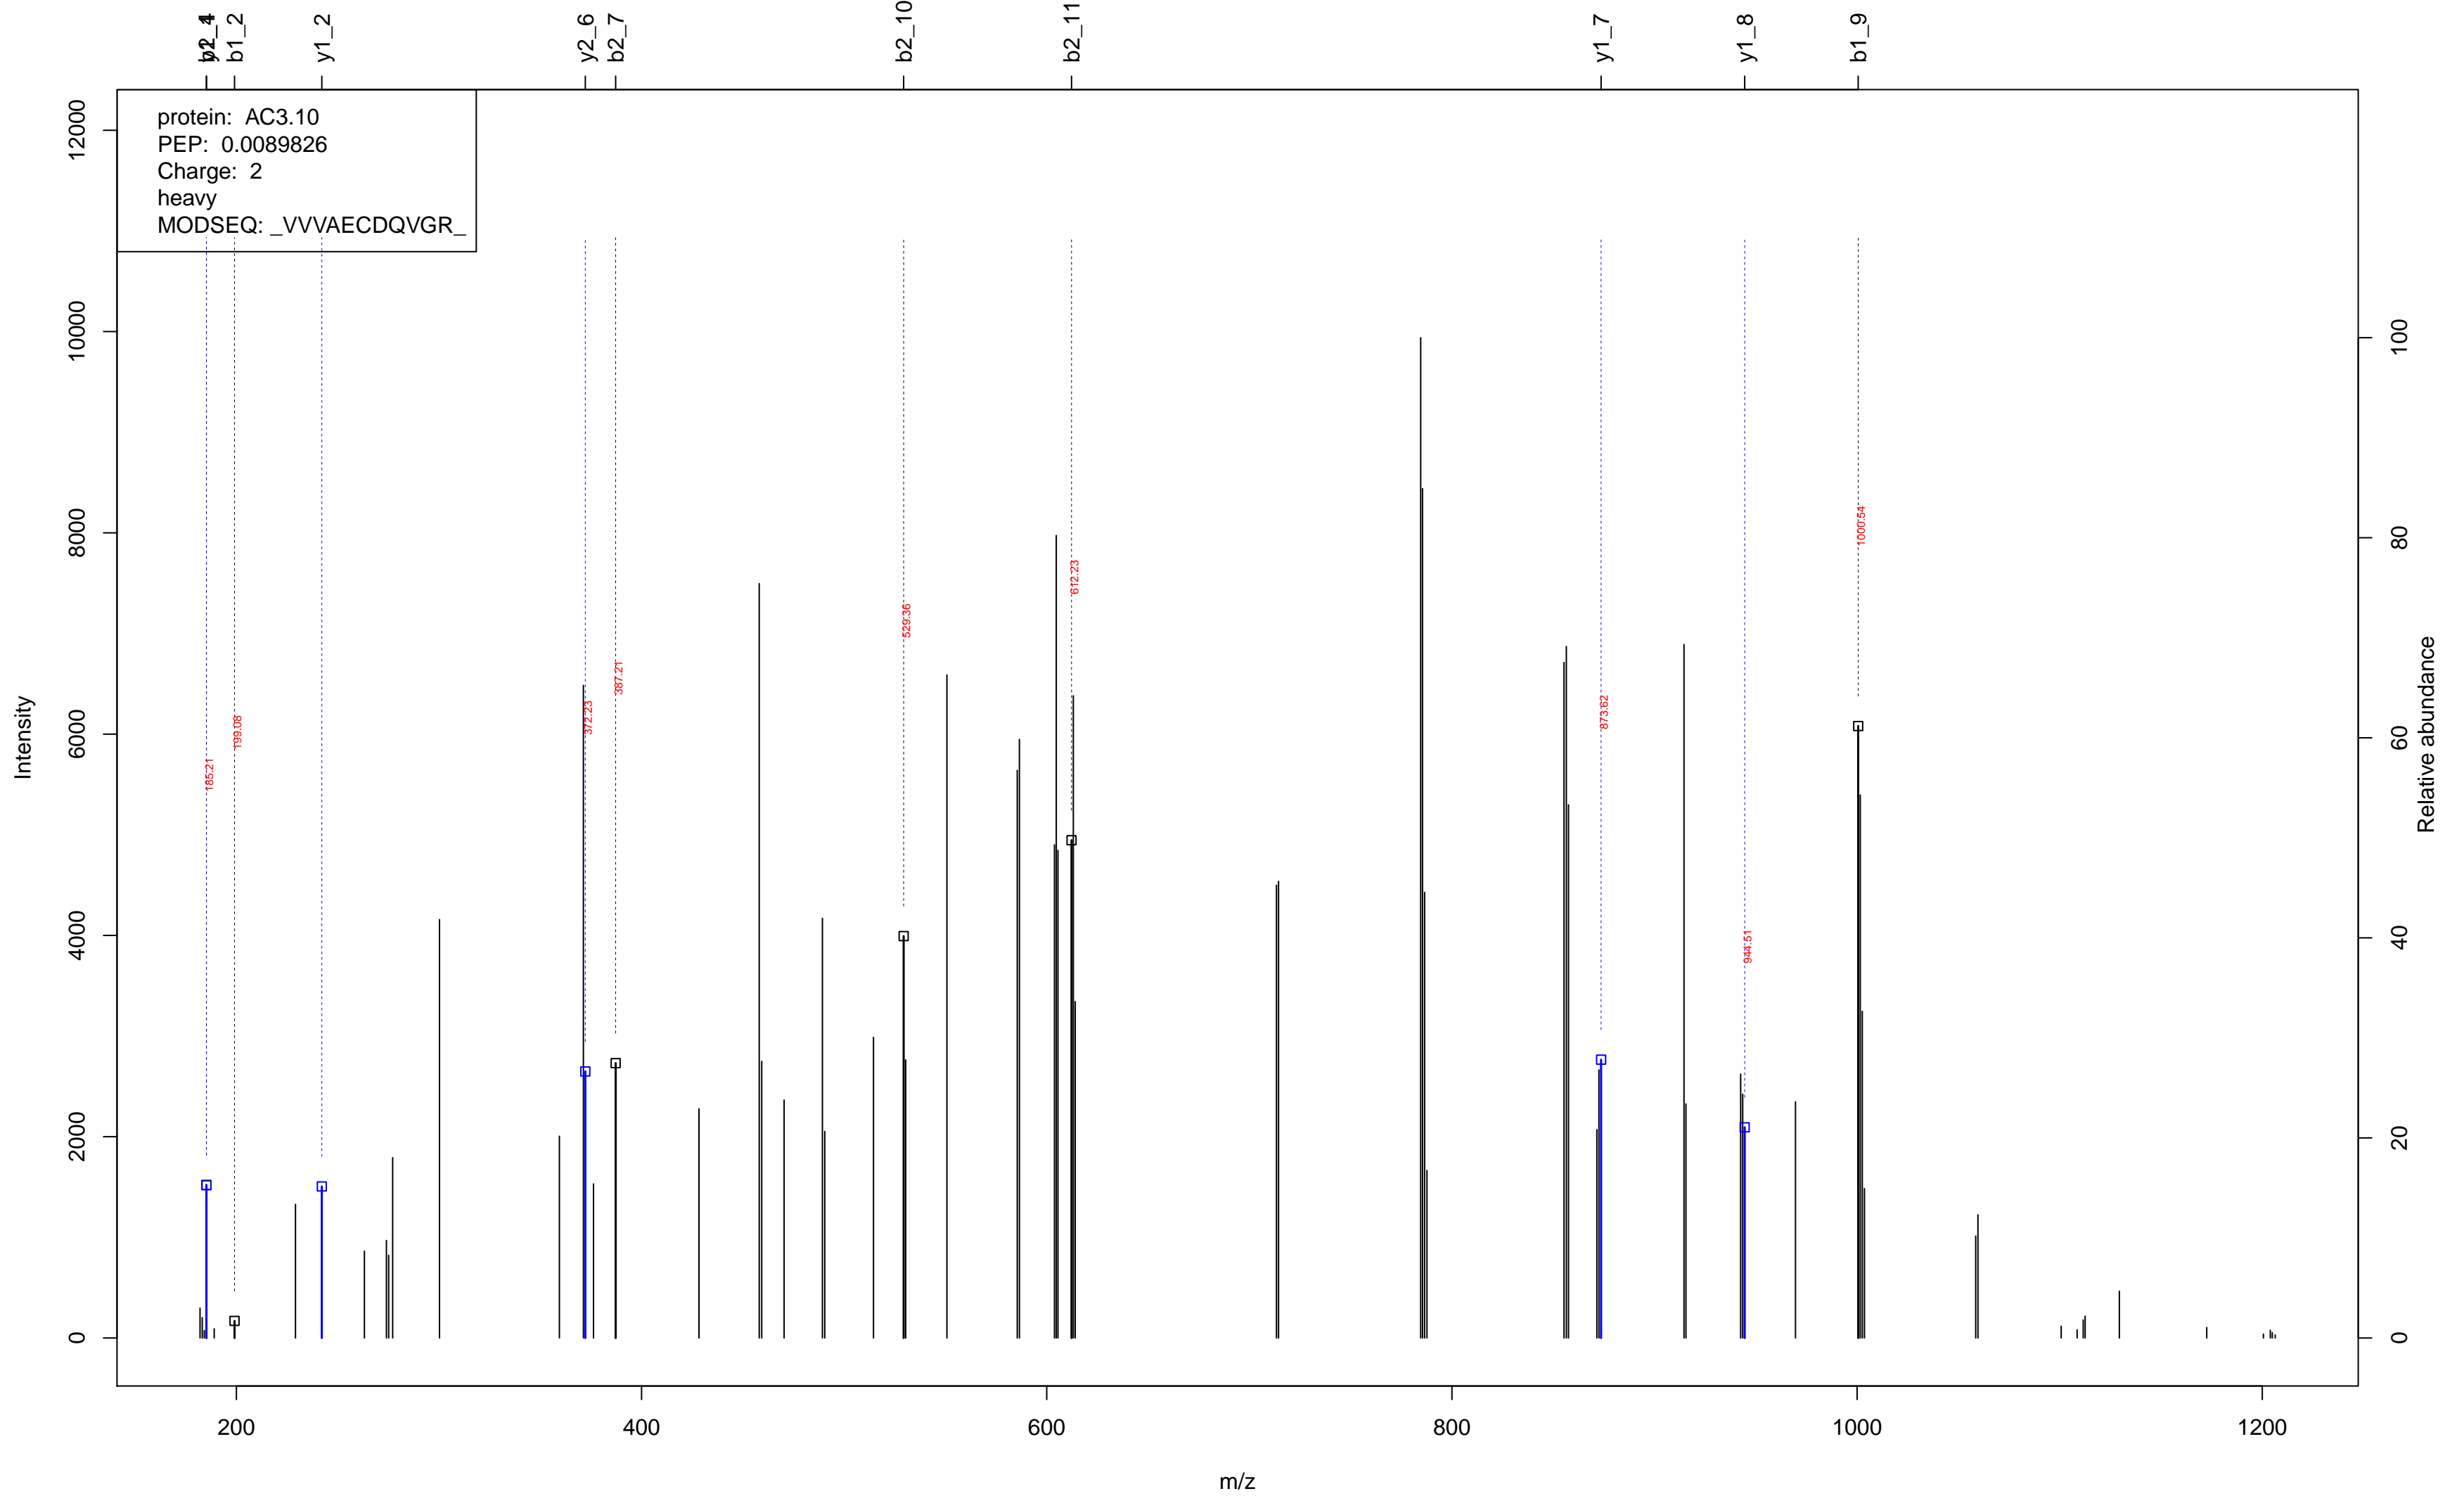

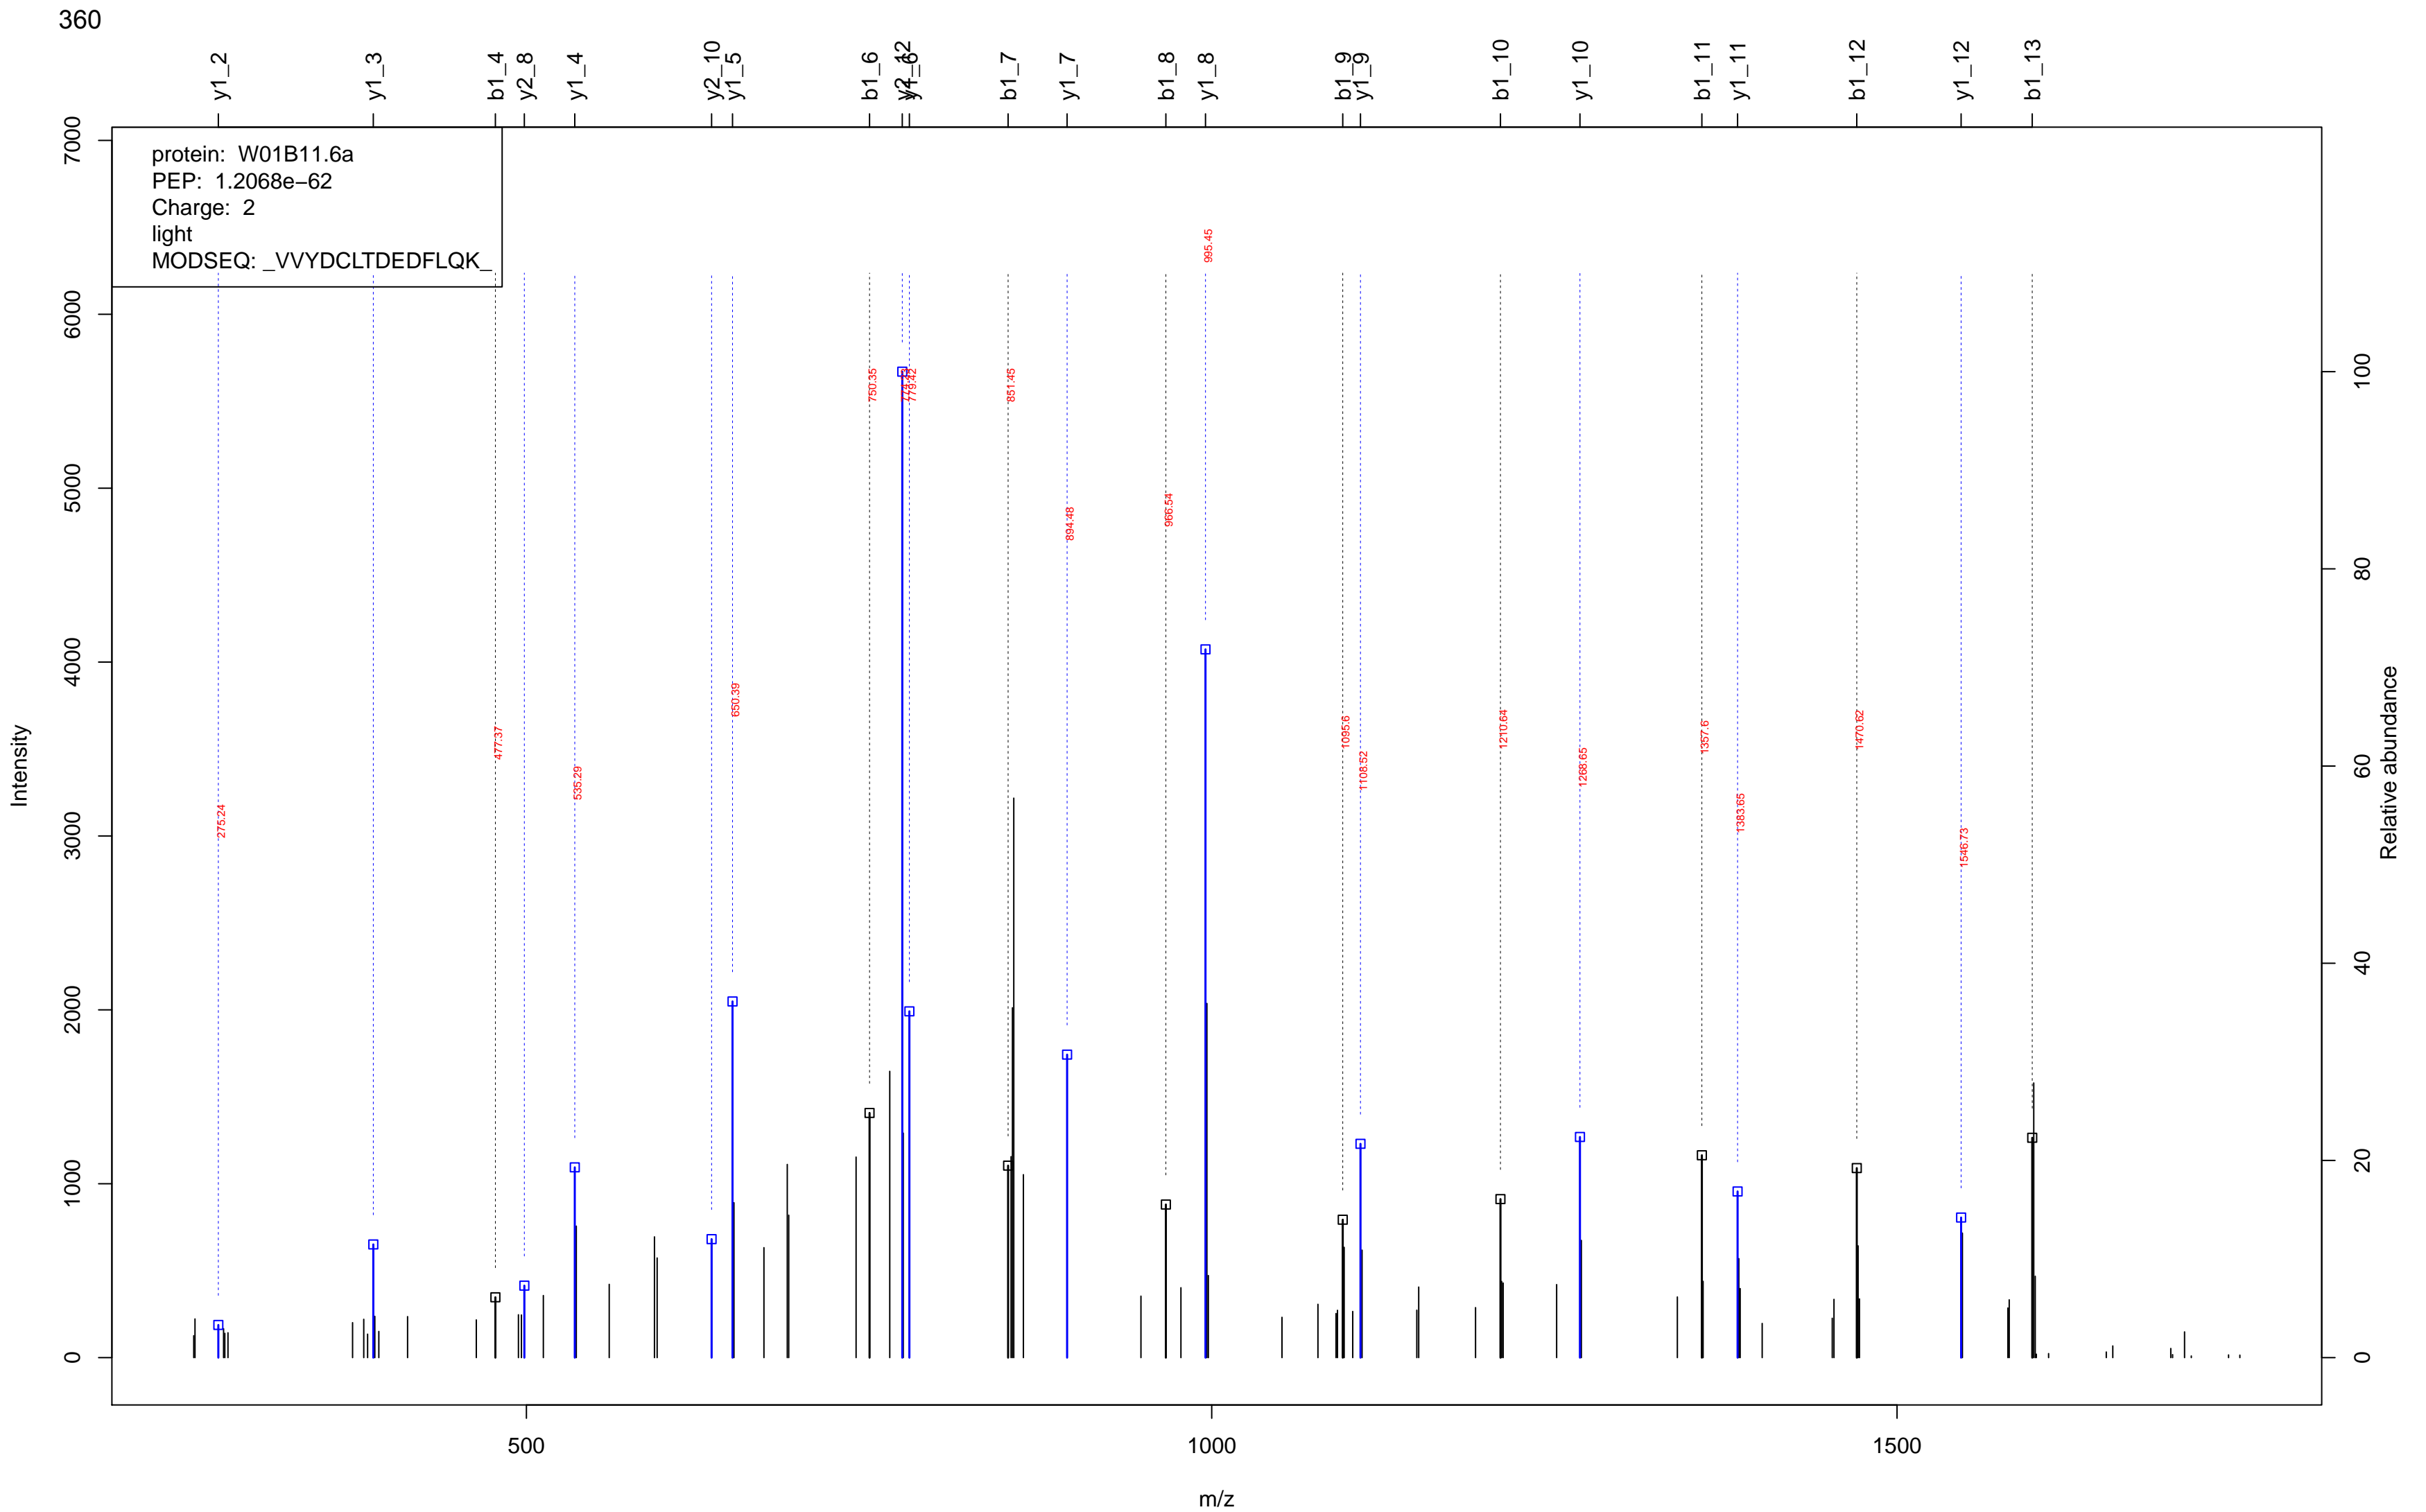



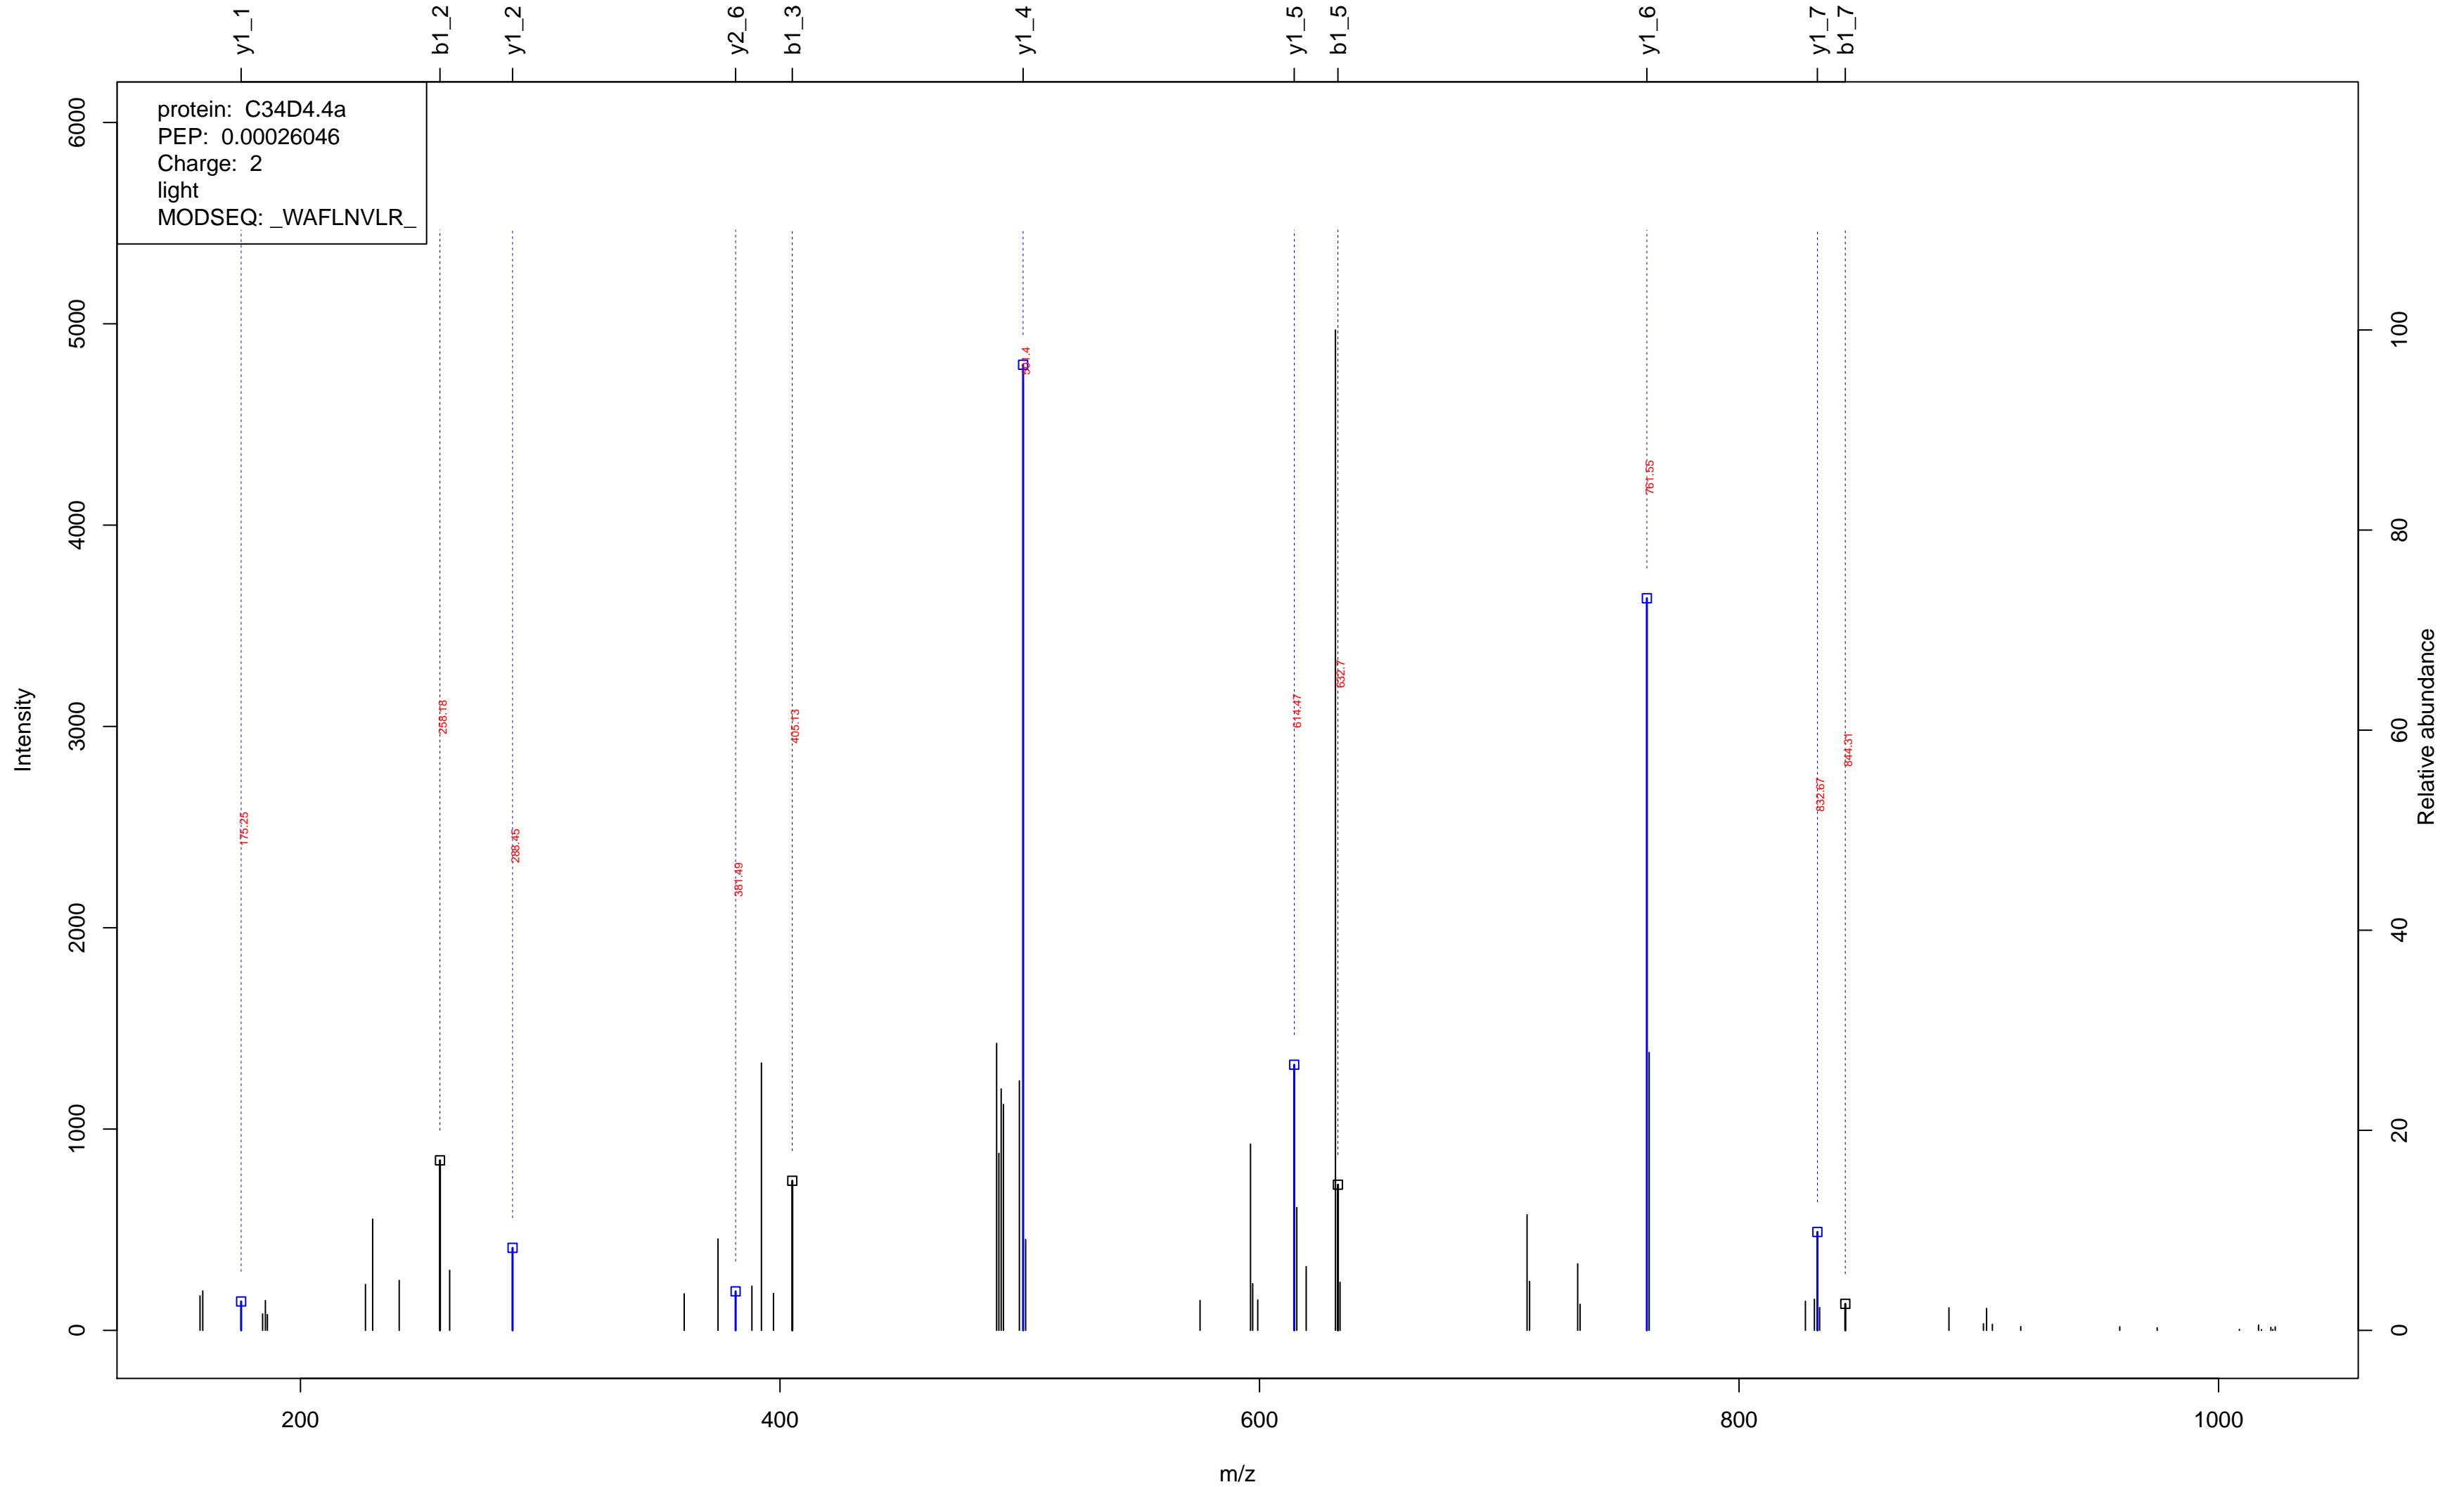

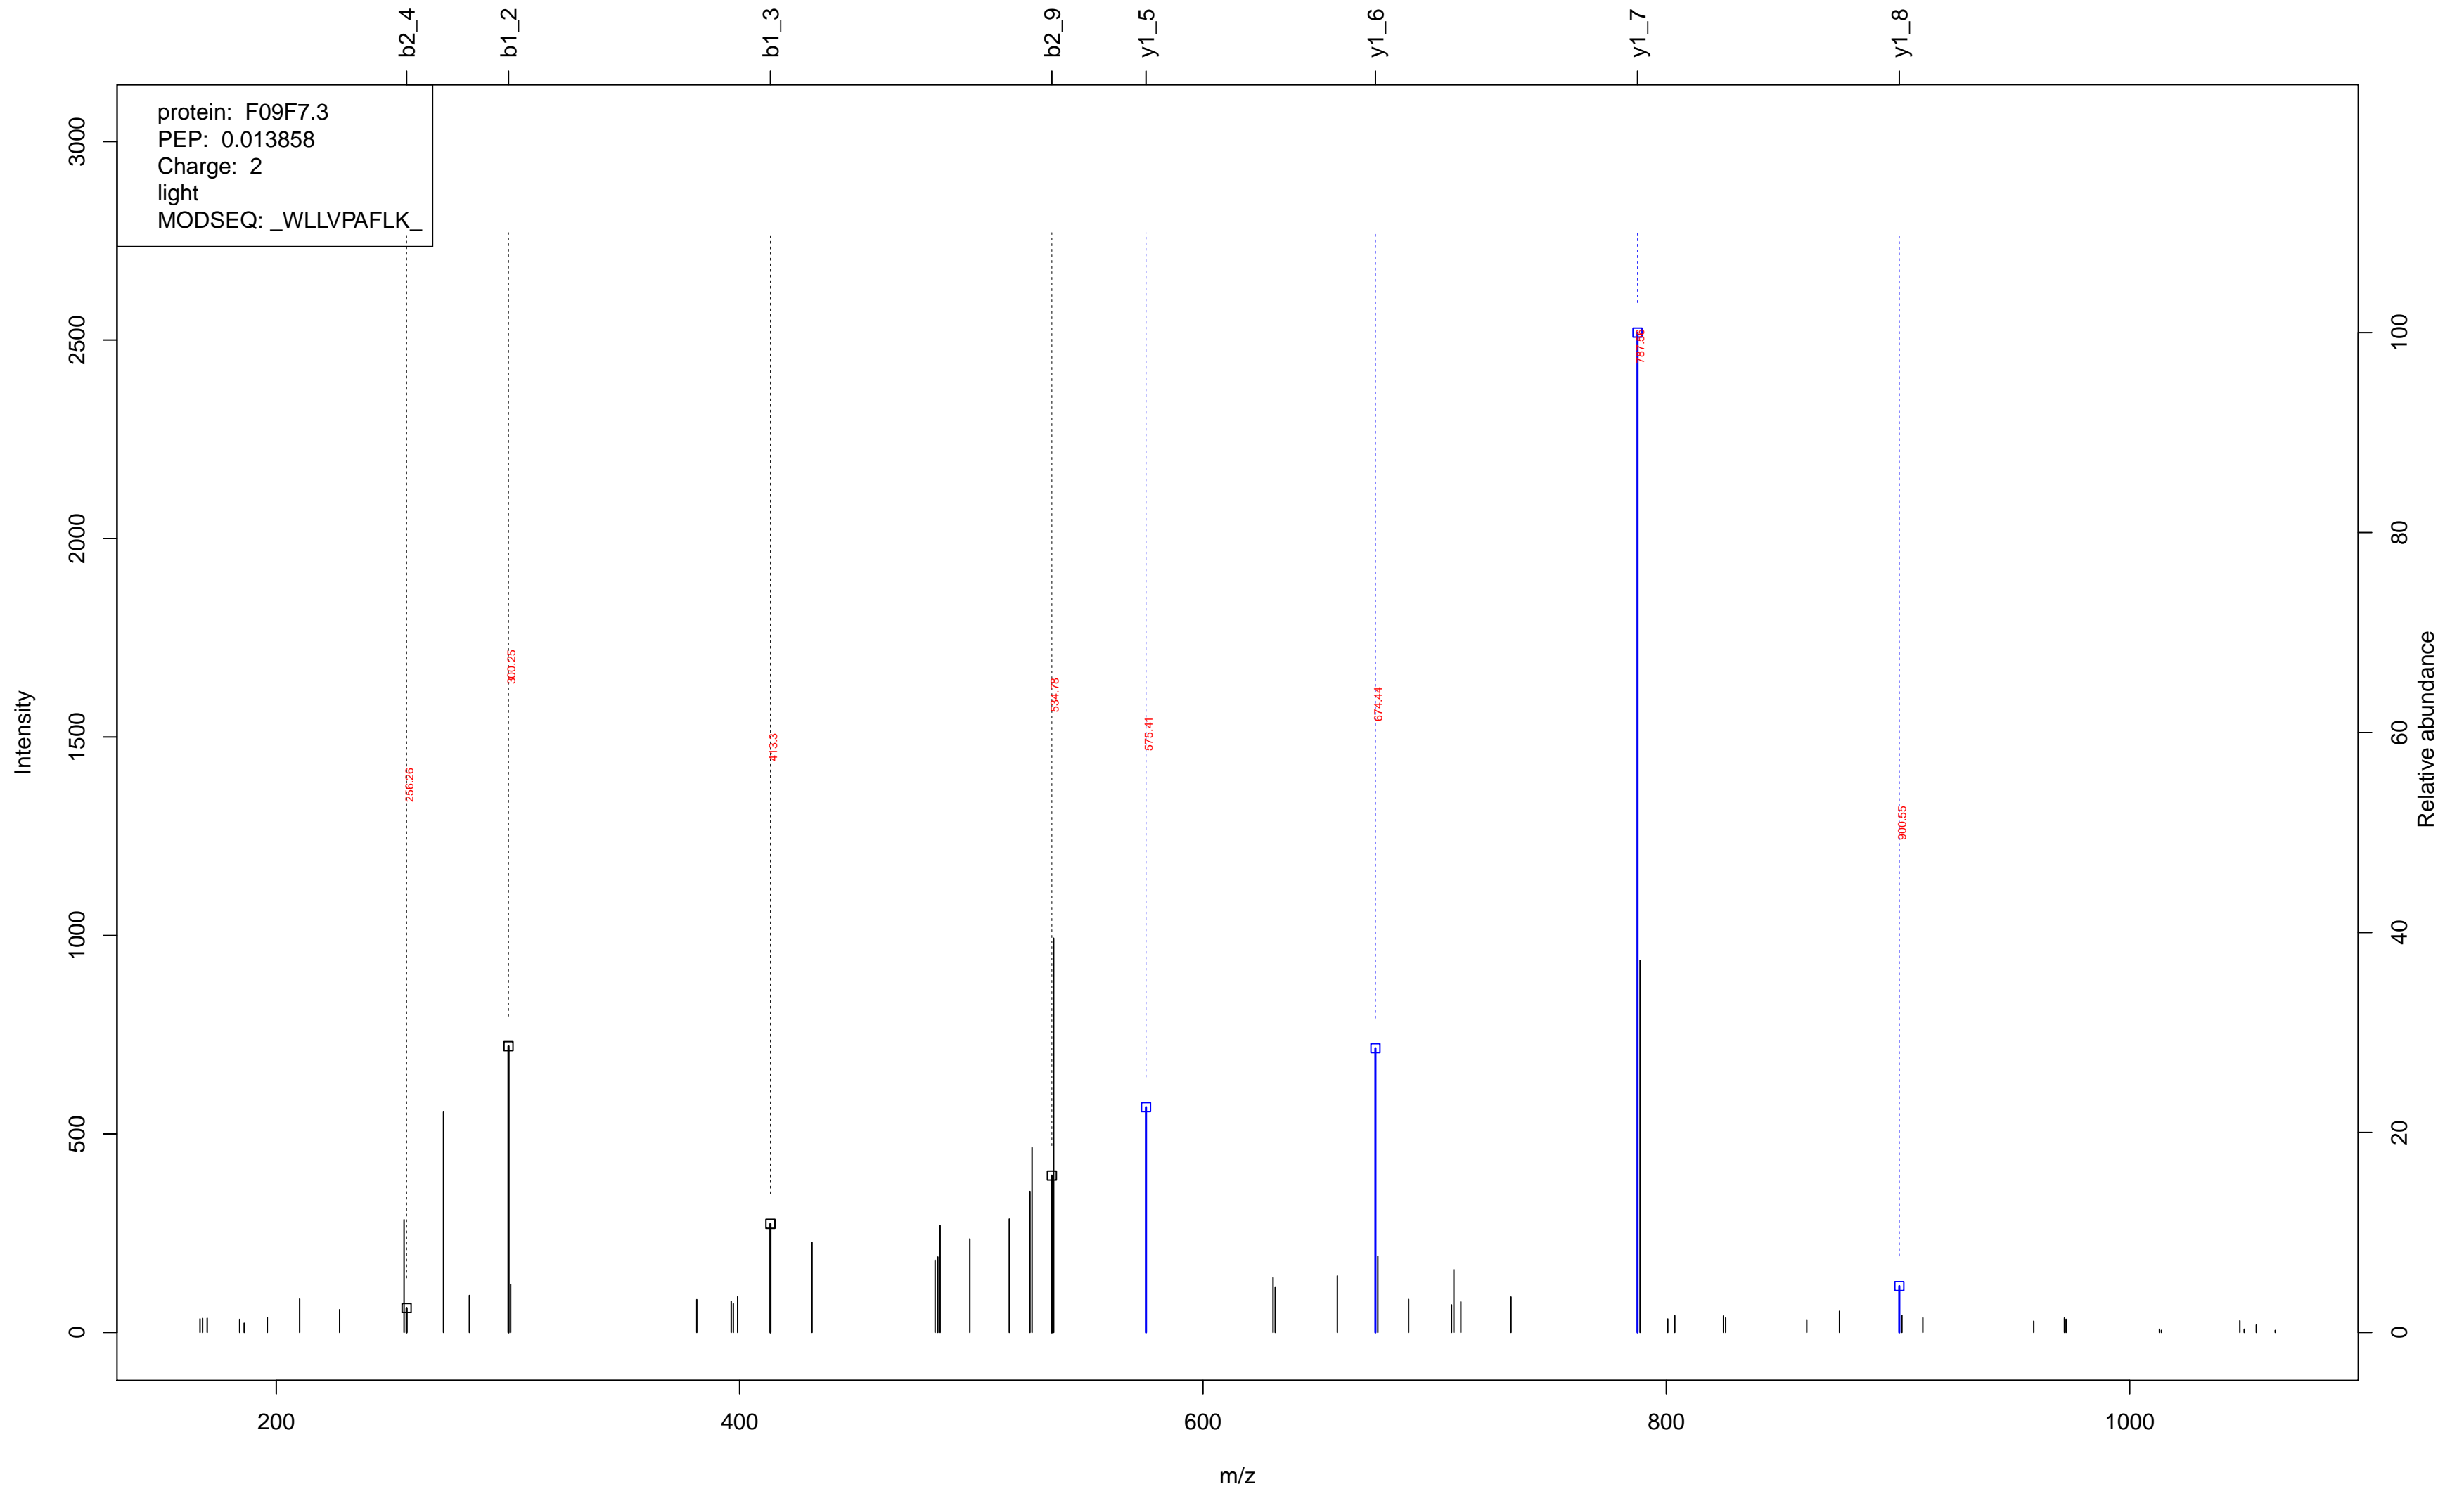

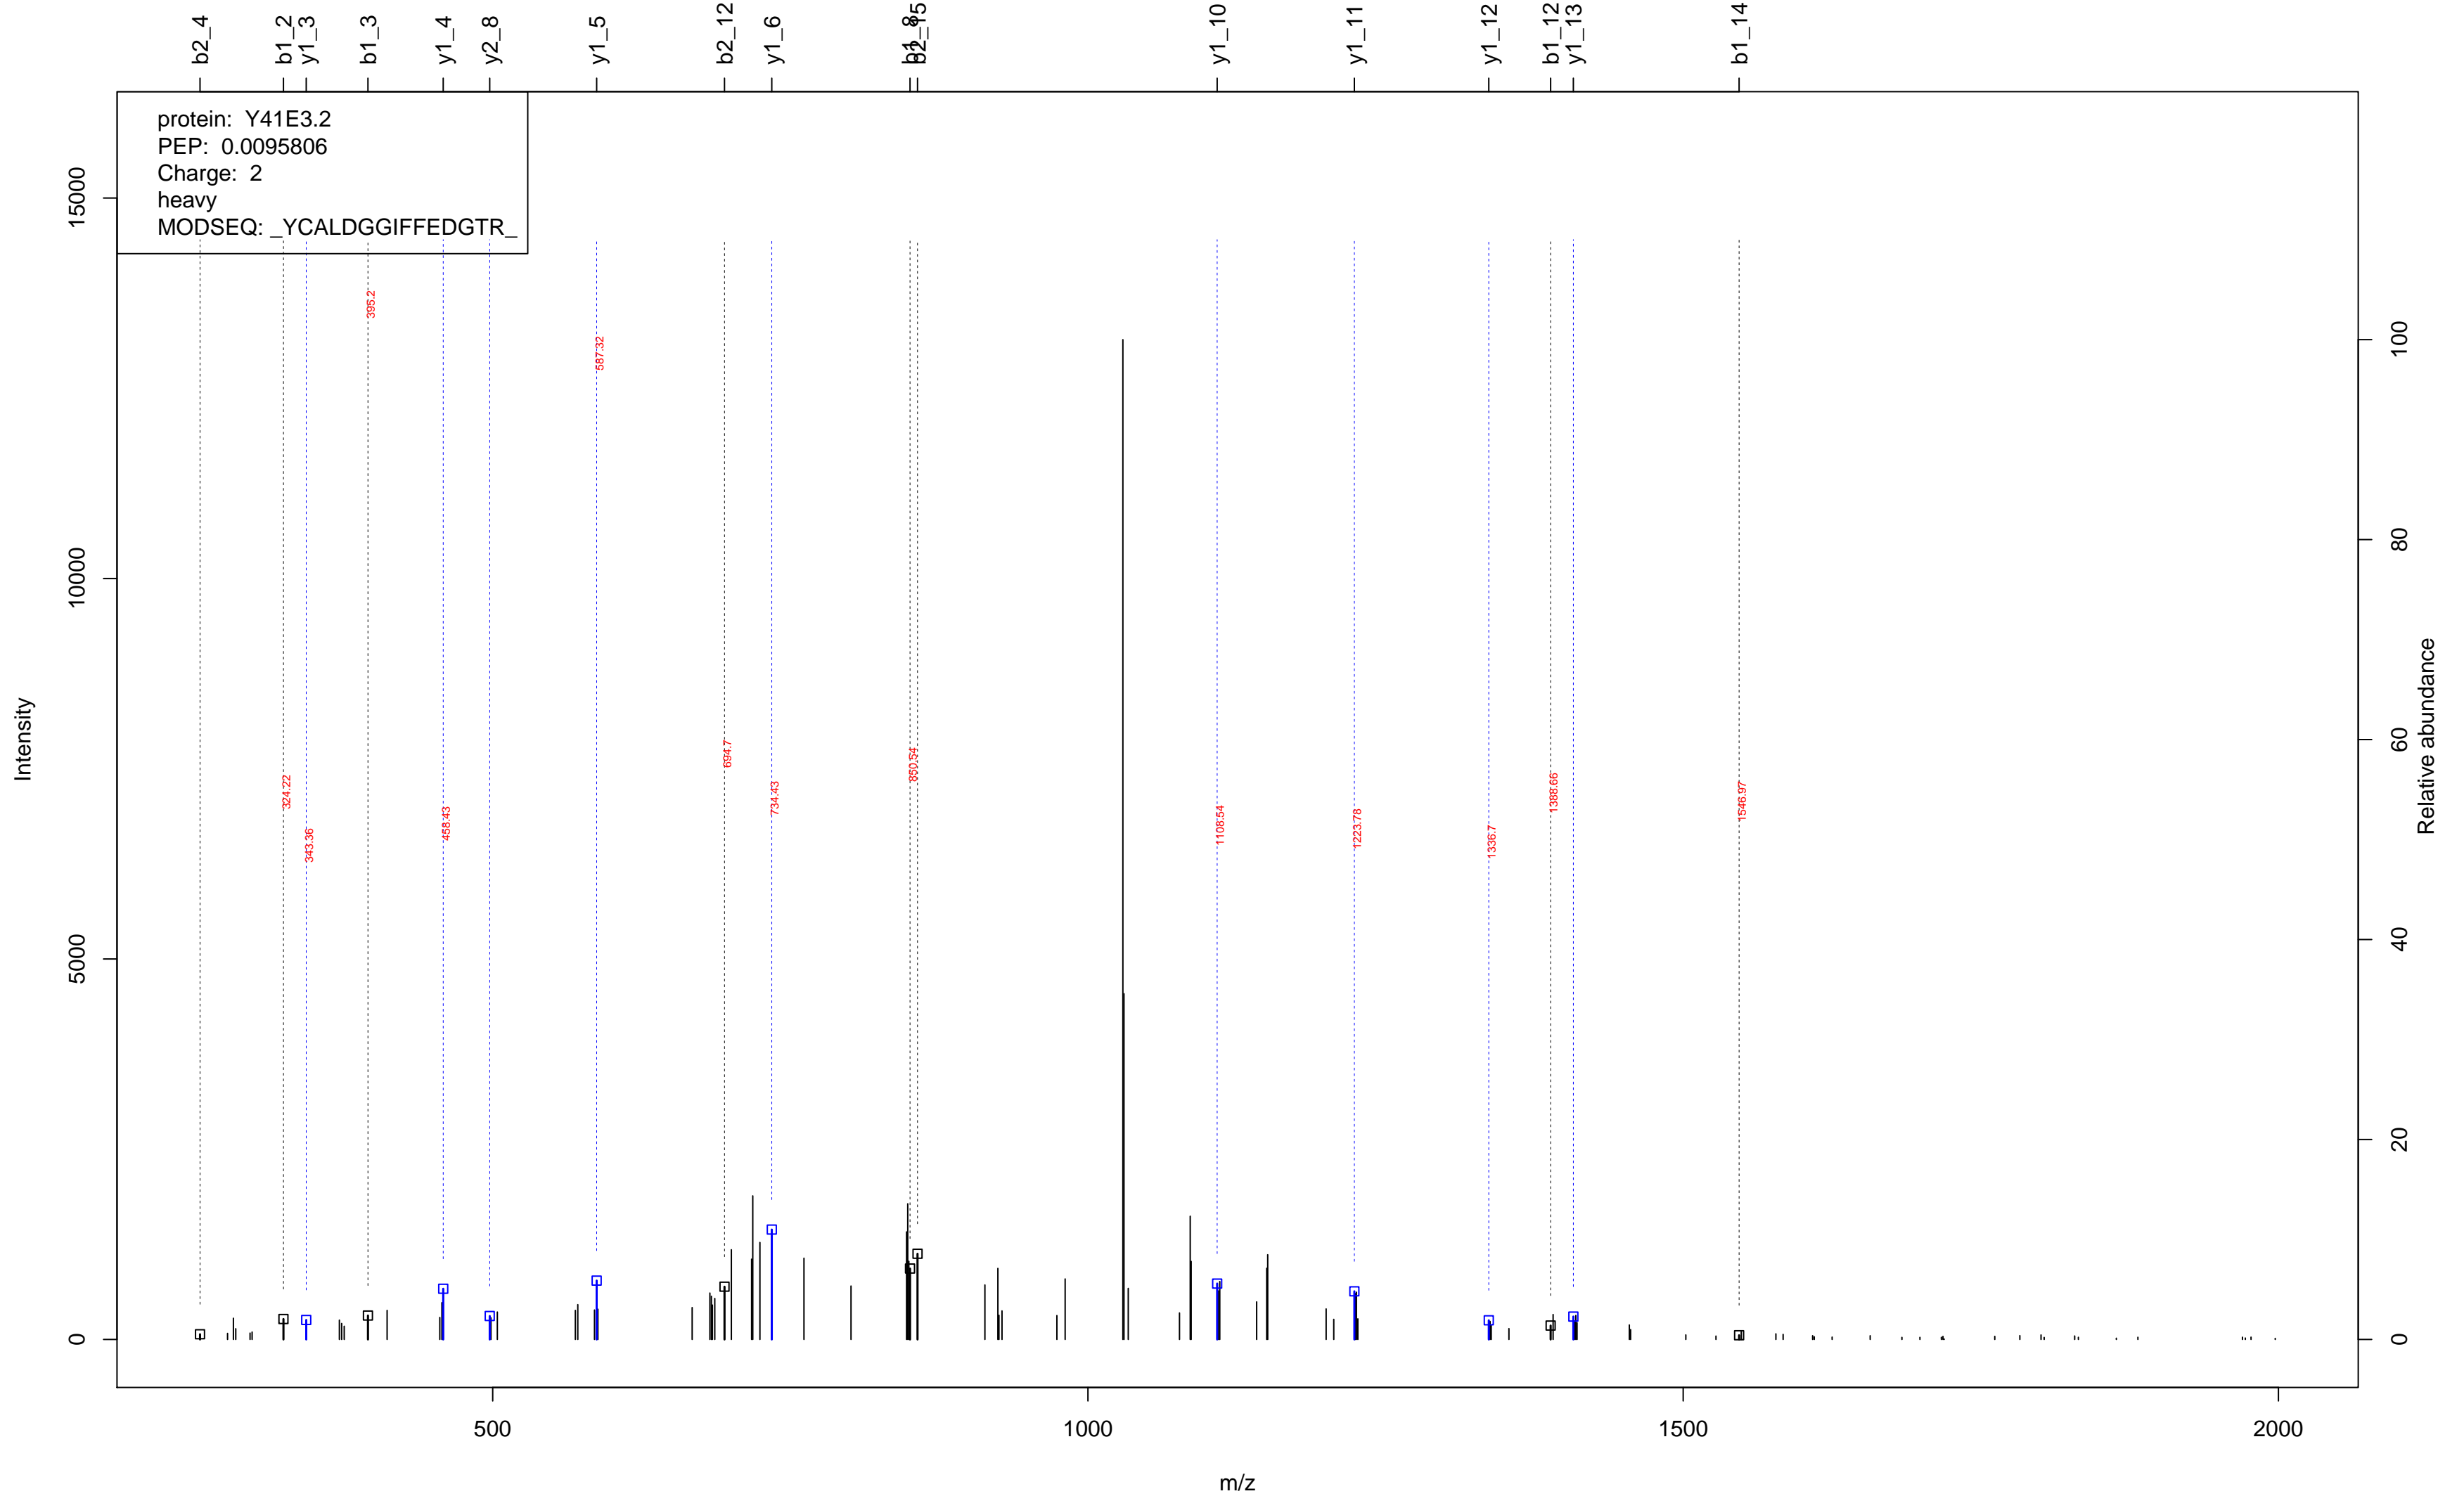

b1\_3 y1\_3 b1\_3 y1\_4 y1\_5 b1\_5 y1\_6 b1\_8 y1\_7 y1\_8 b1\_9 y1\_9 y1\_10 b1\_10 y1\_11 b1\_11 y1\_12 y1\_13 b1\_14

protein: ZC513.8  
PEP: 3.0014e-10  
Charge: 2  
light  
MODSEQ: \_YCALDGGVFFEDGTR\_

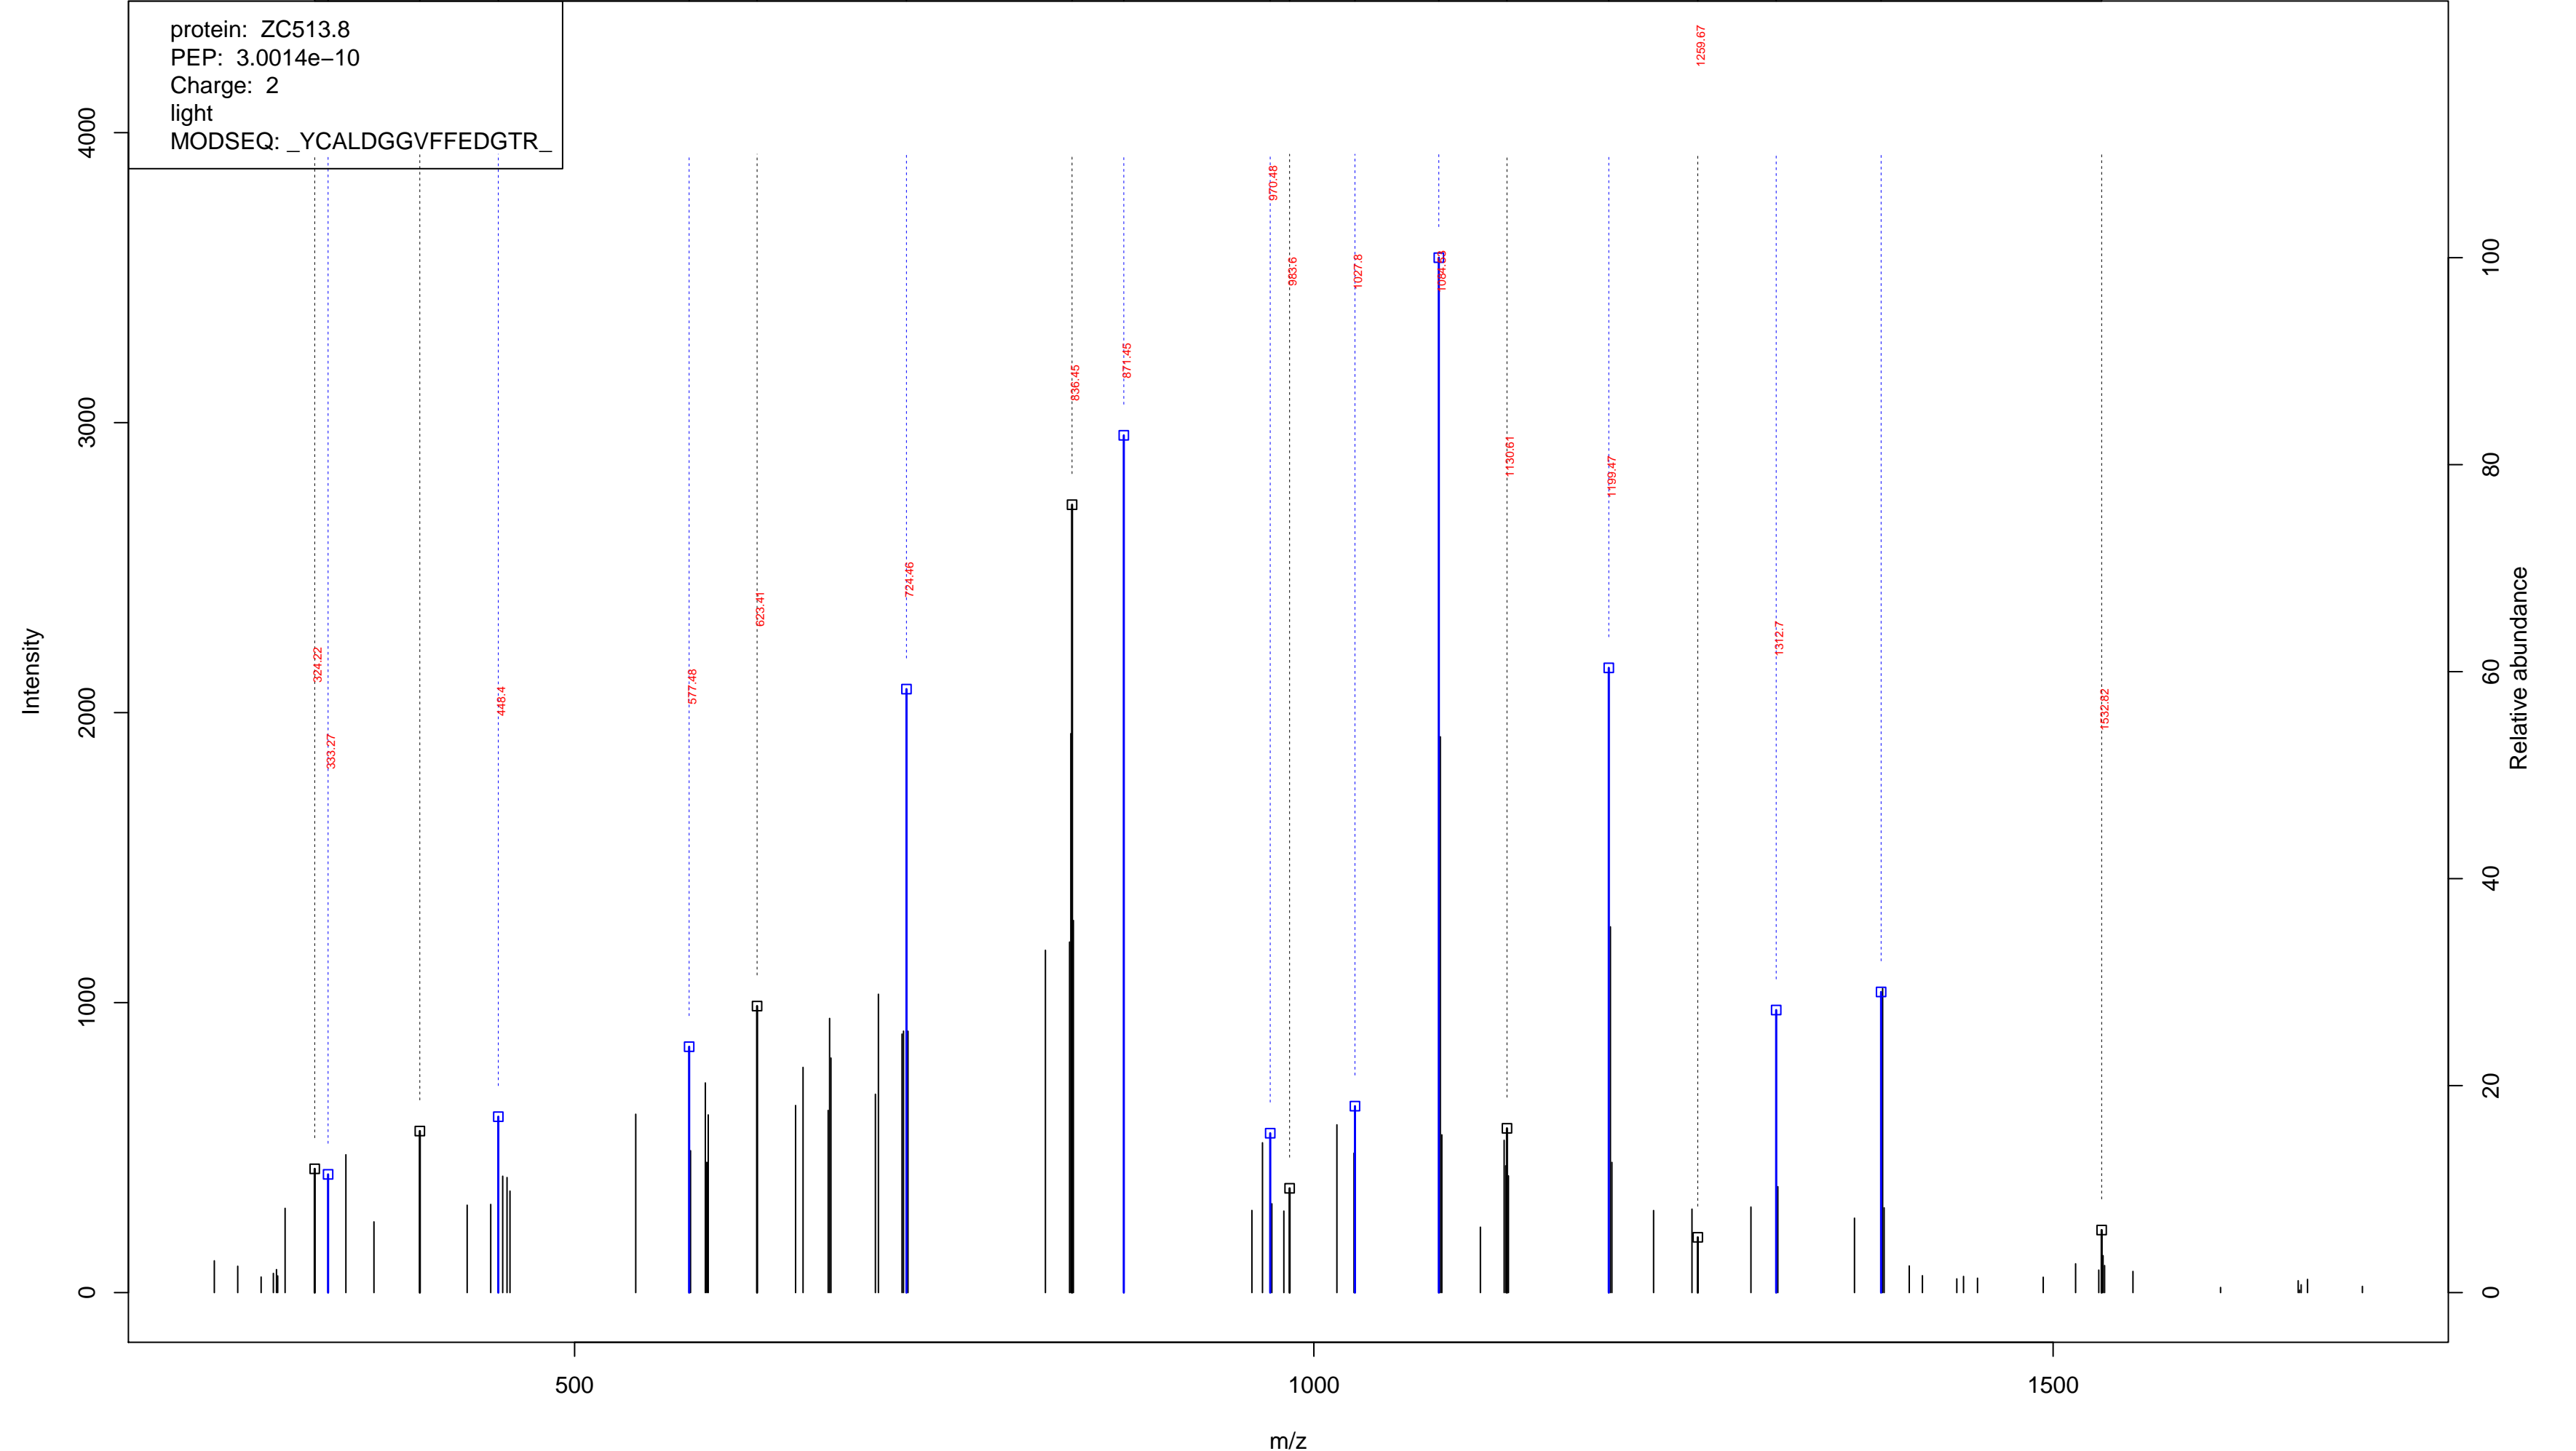

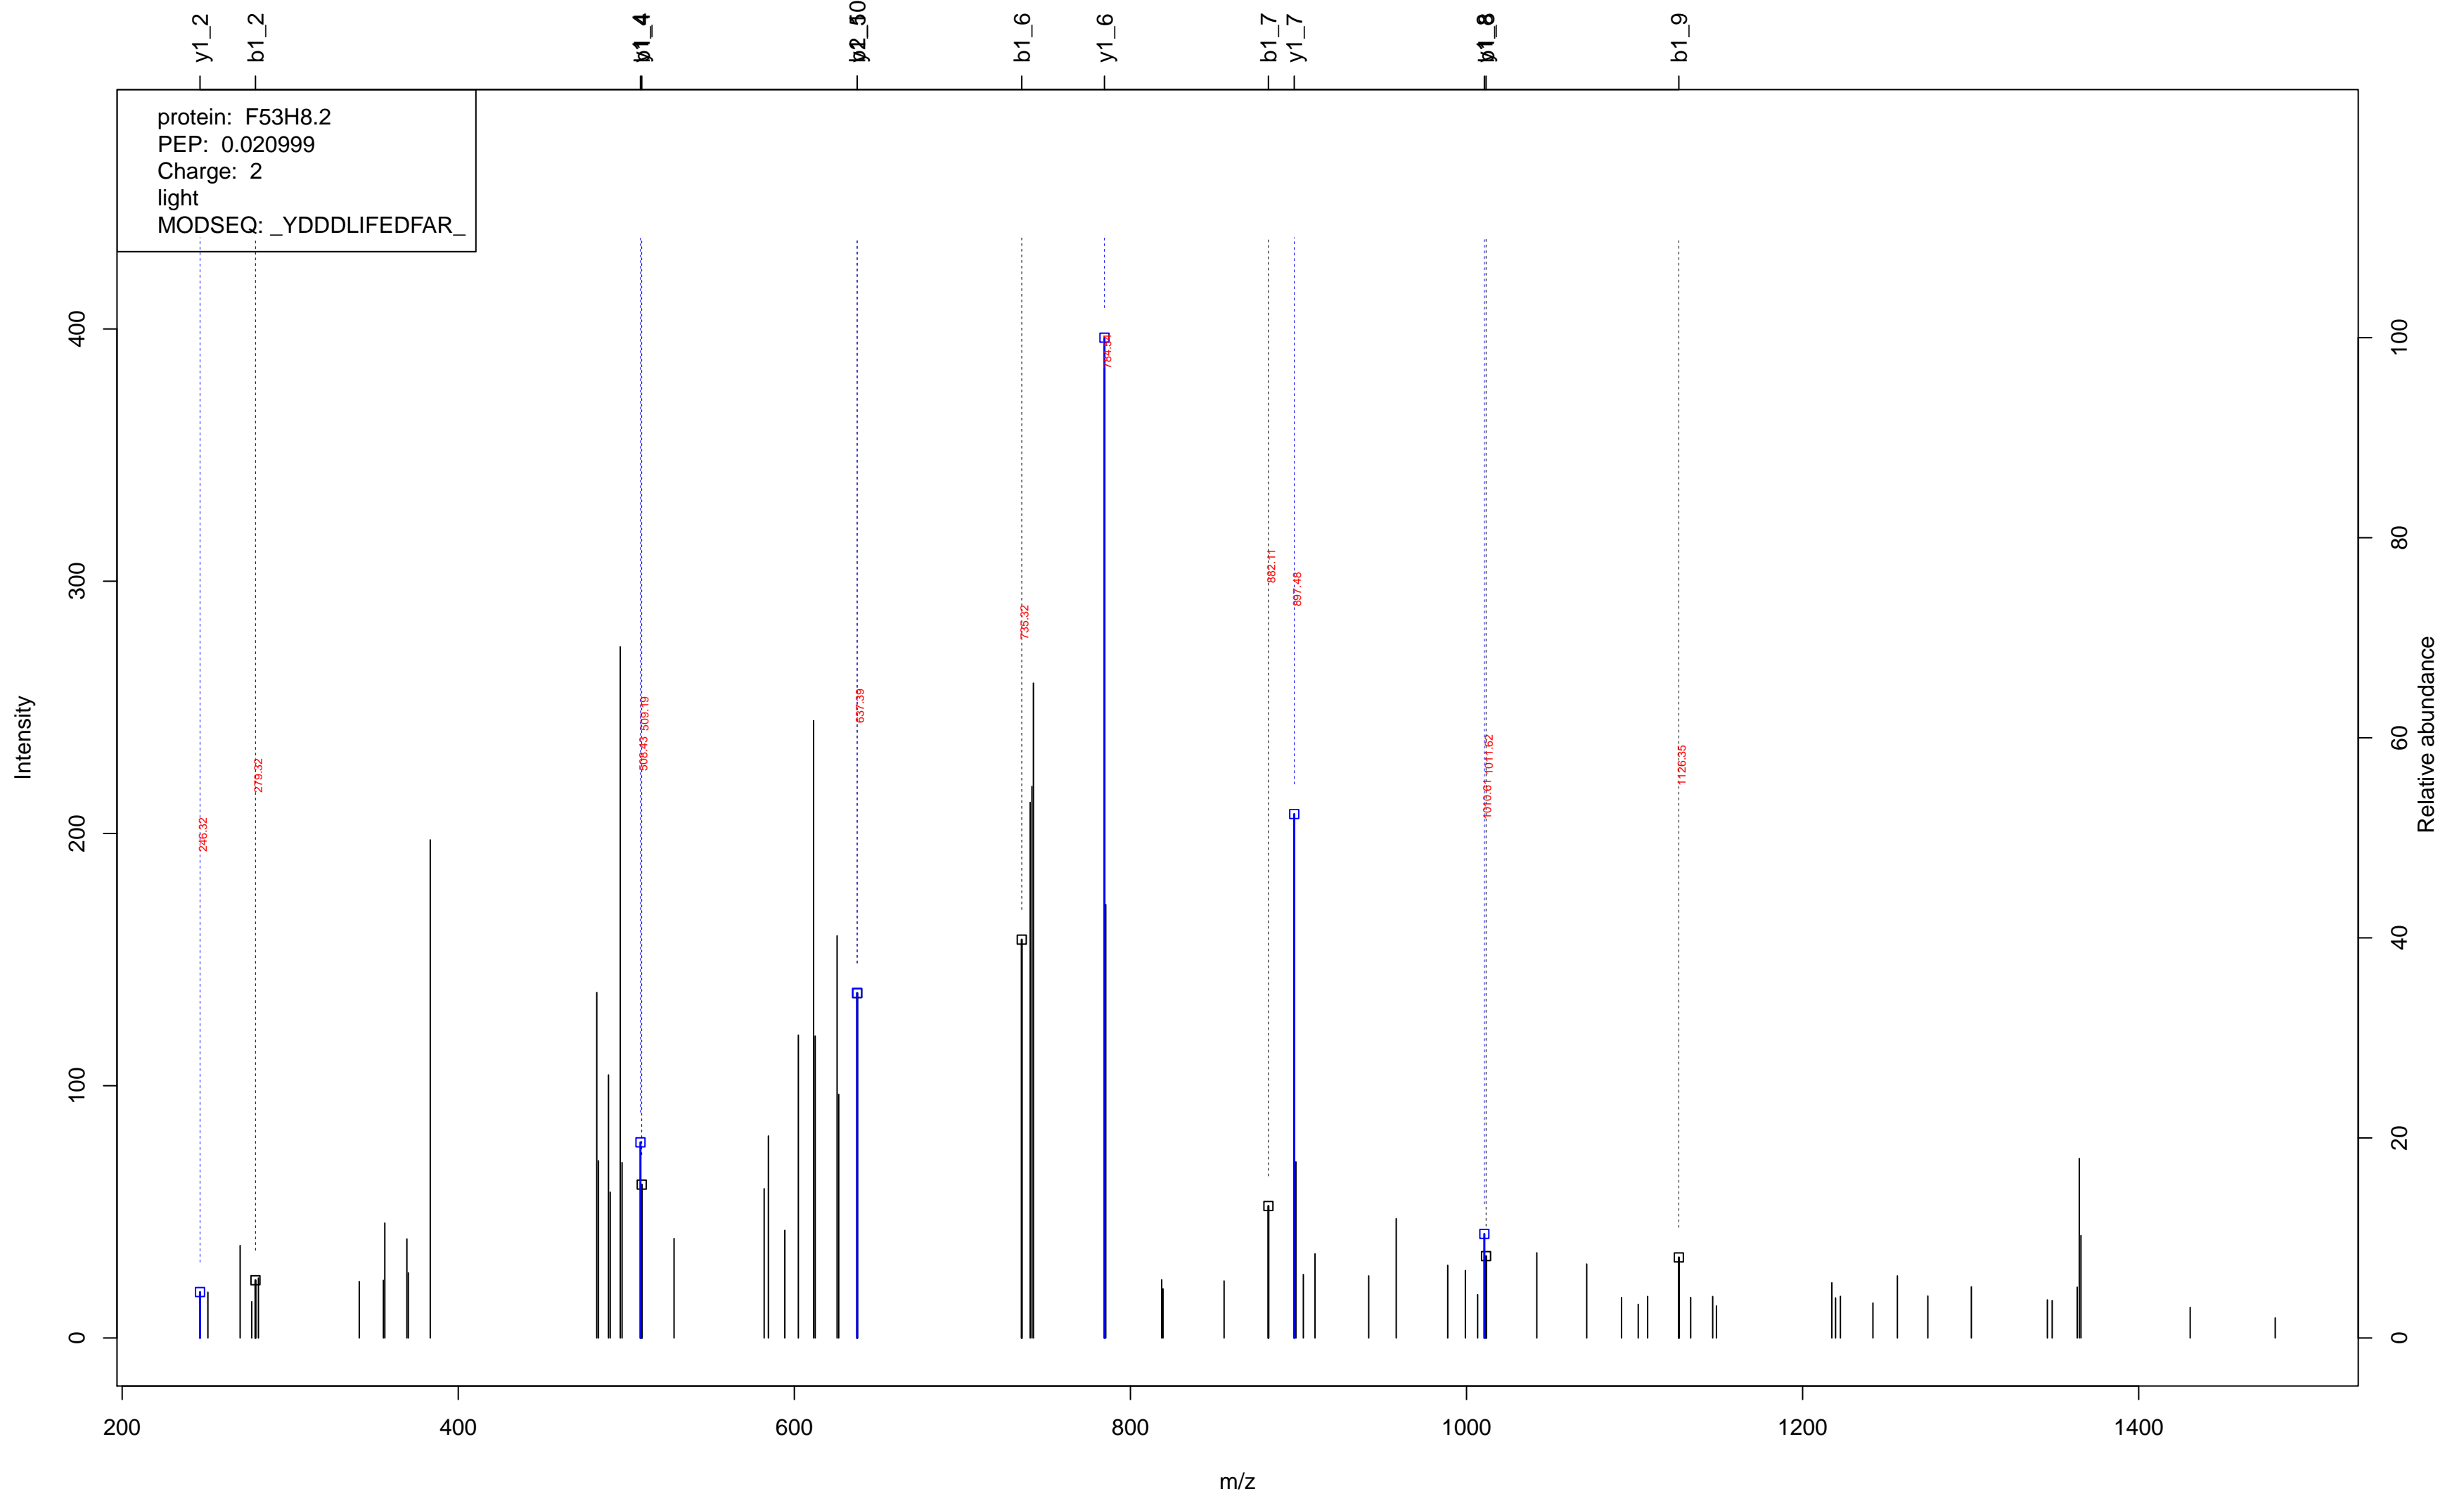

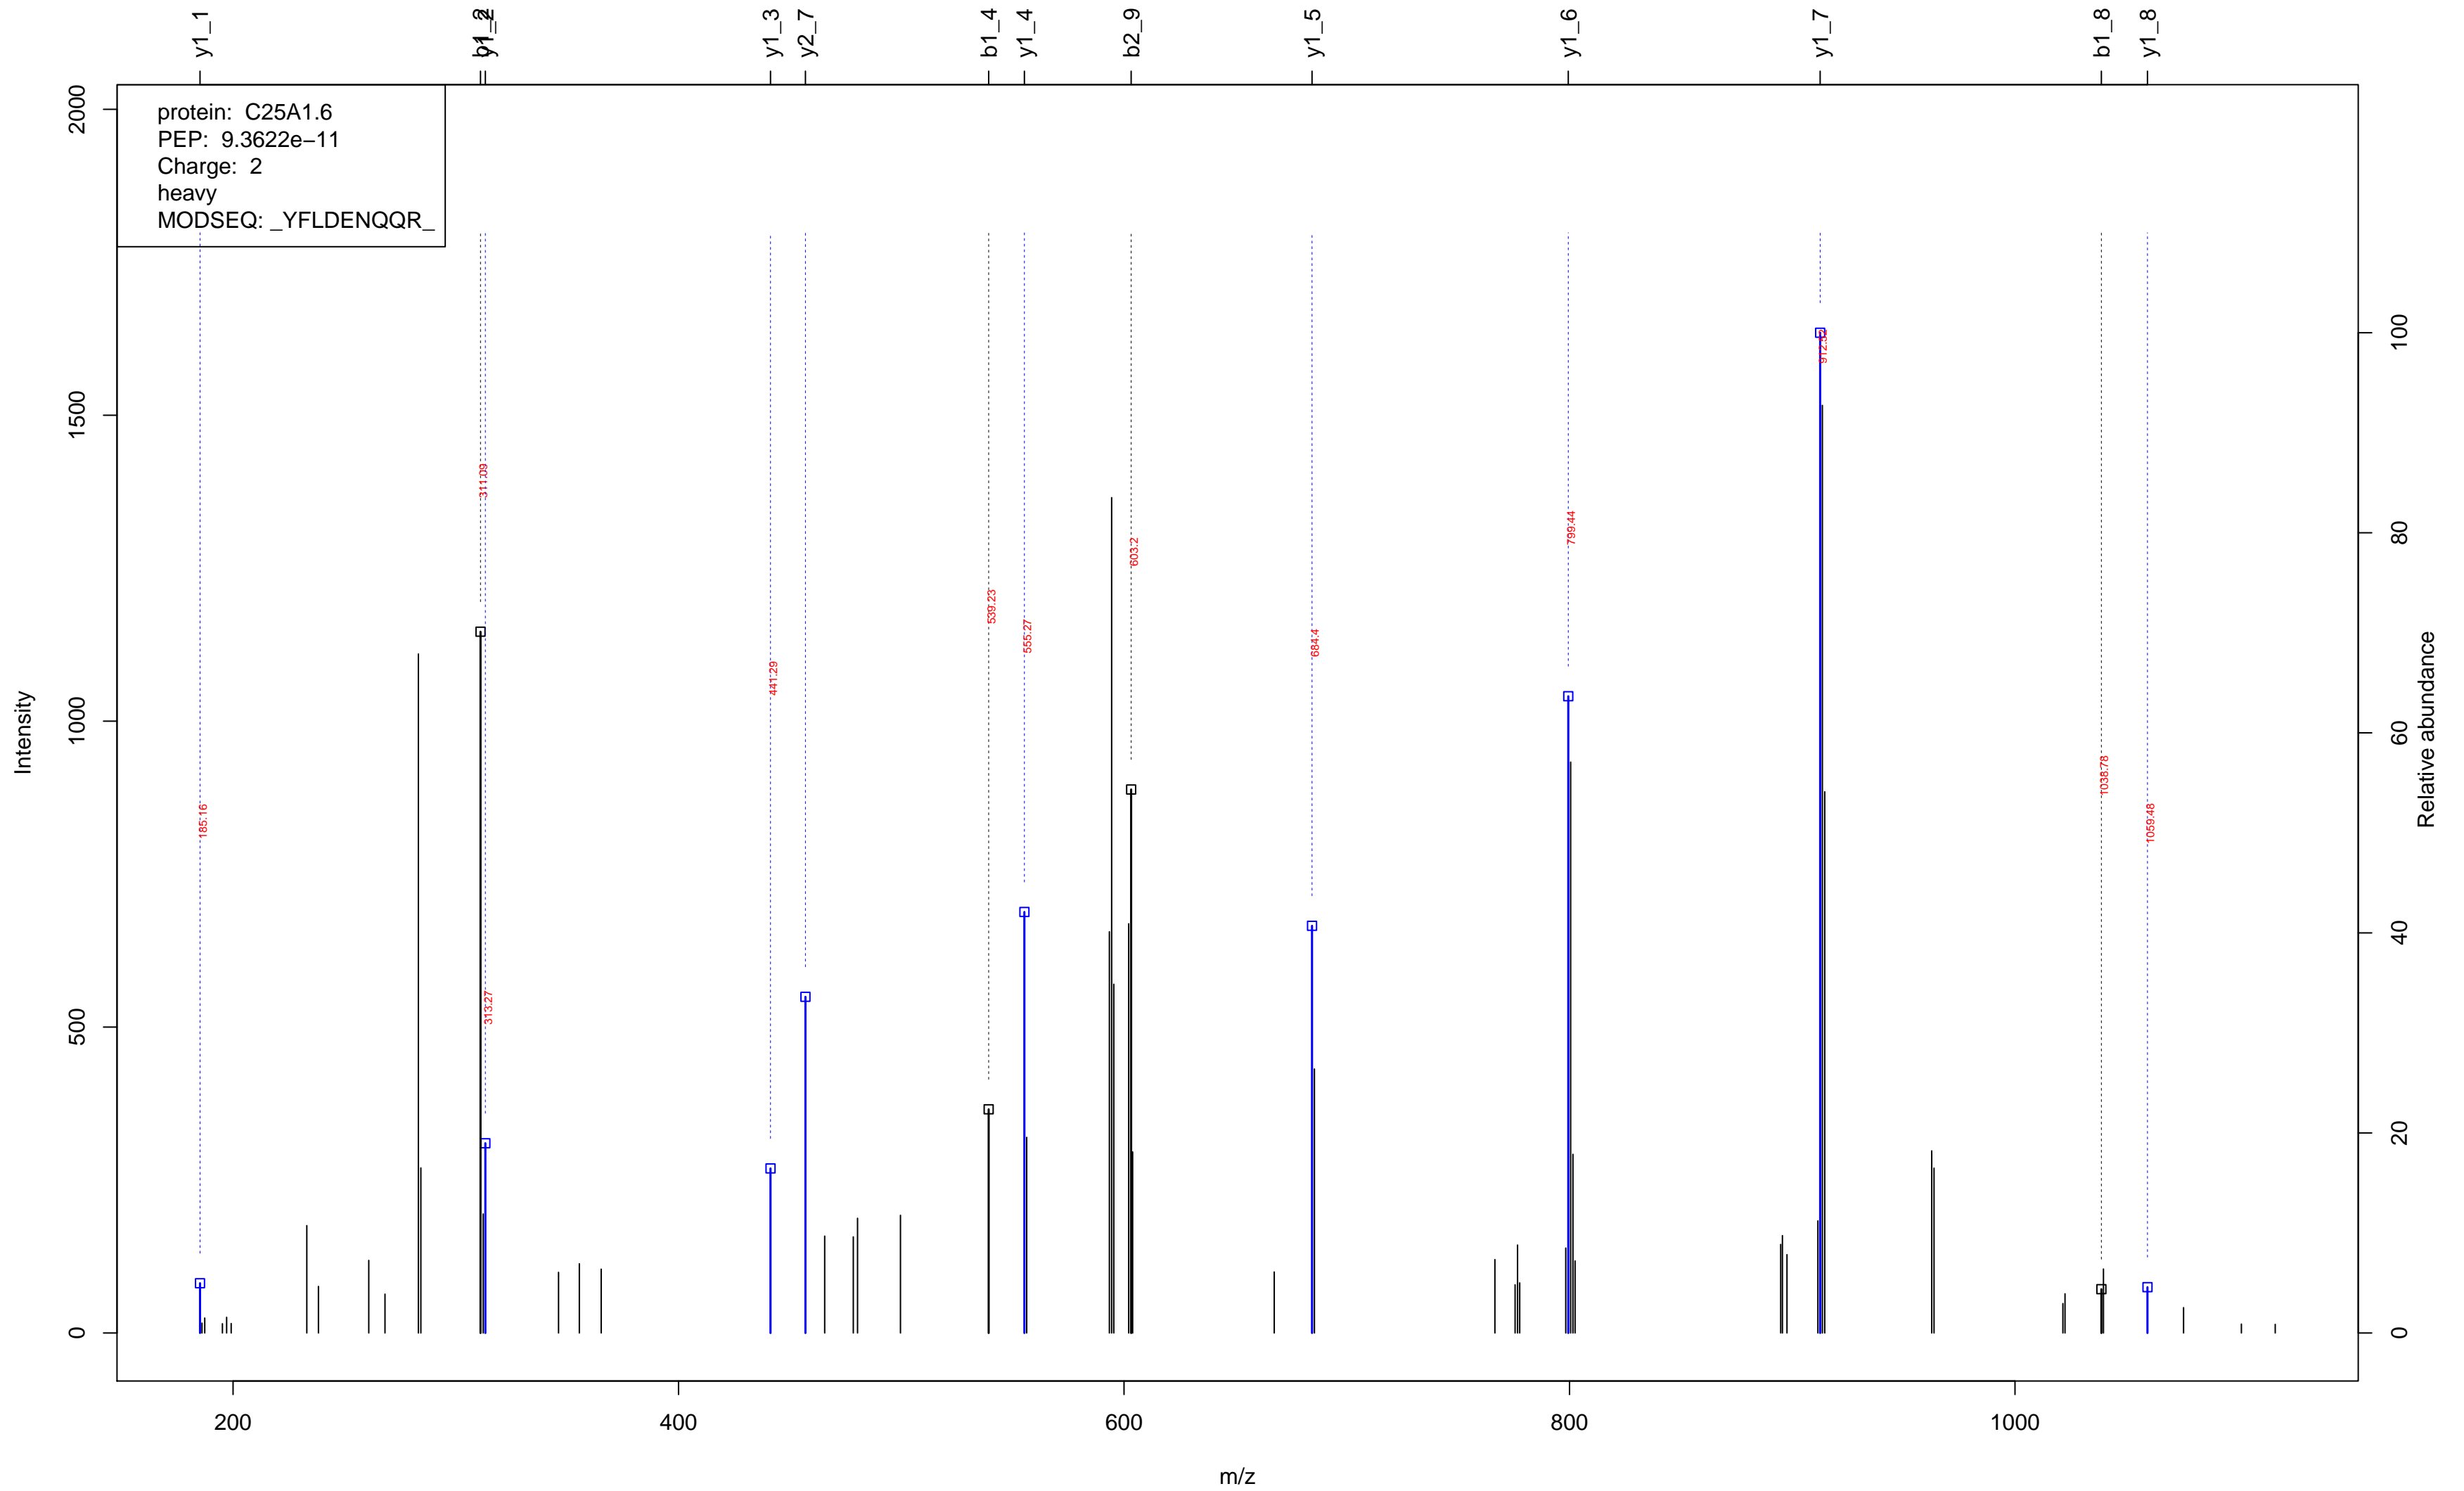

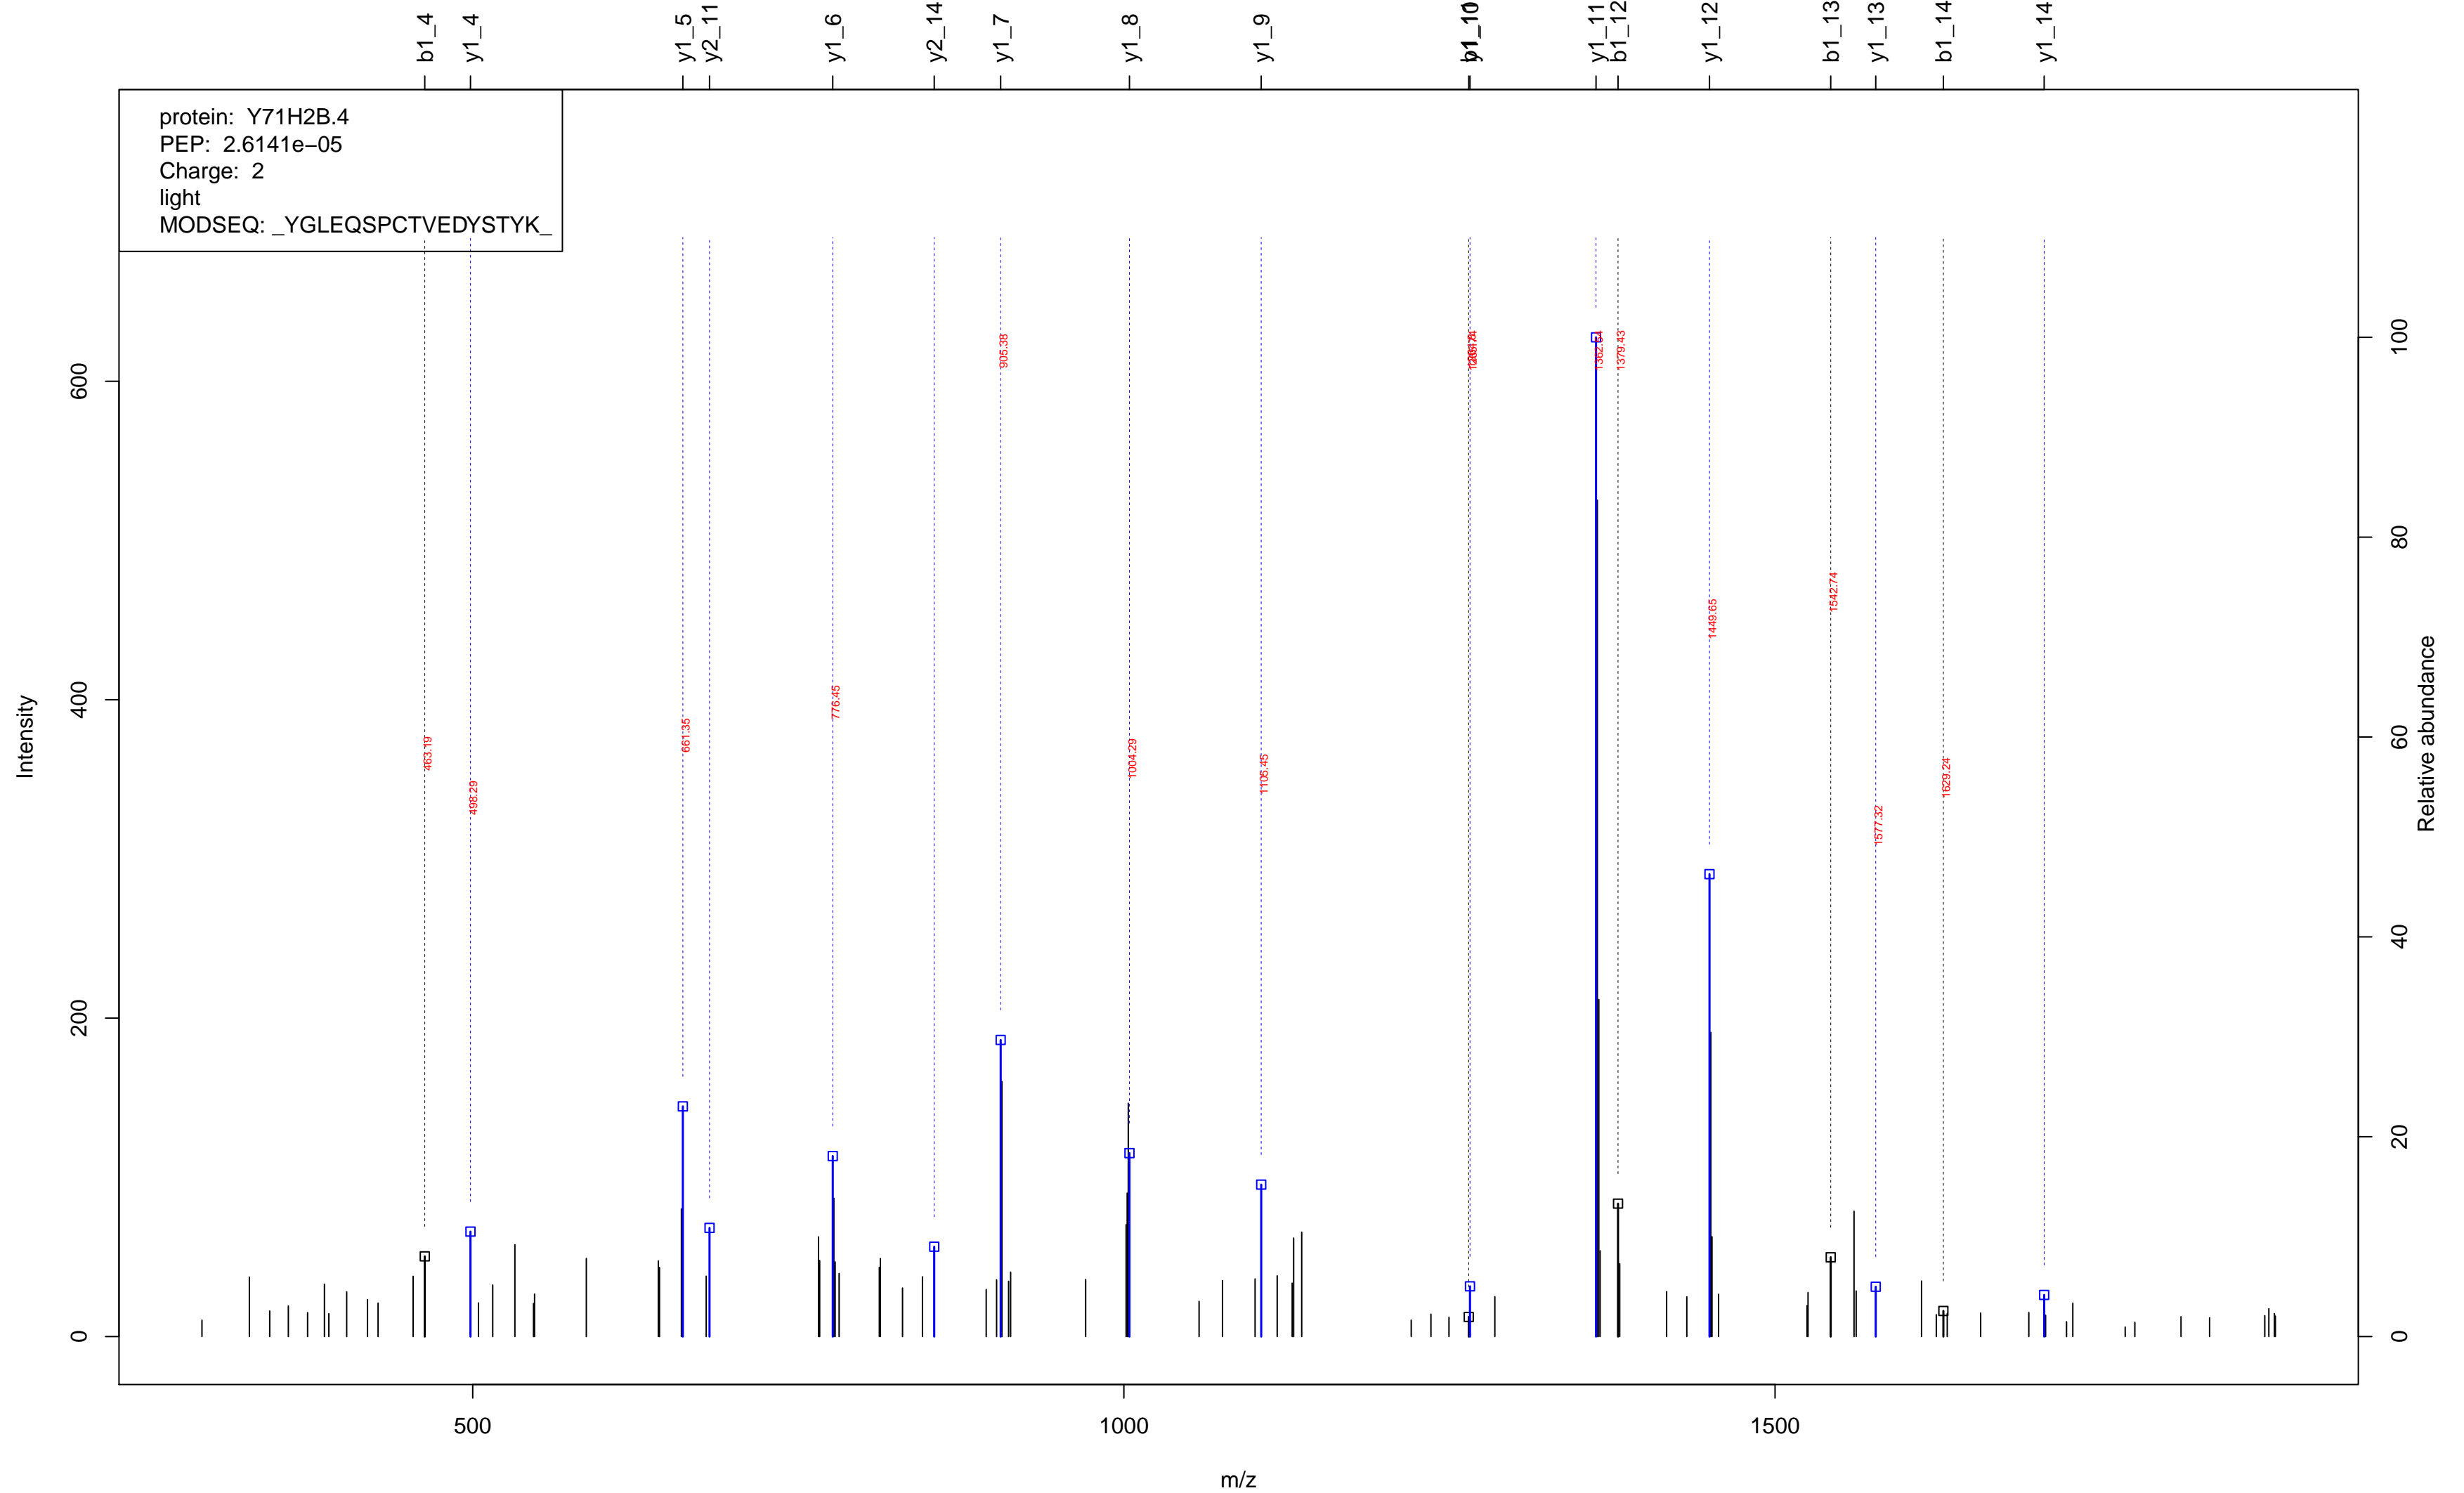

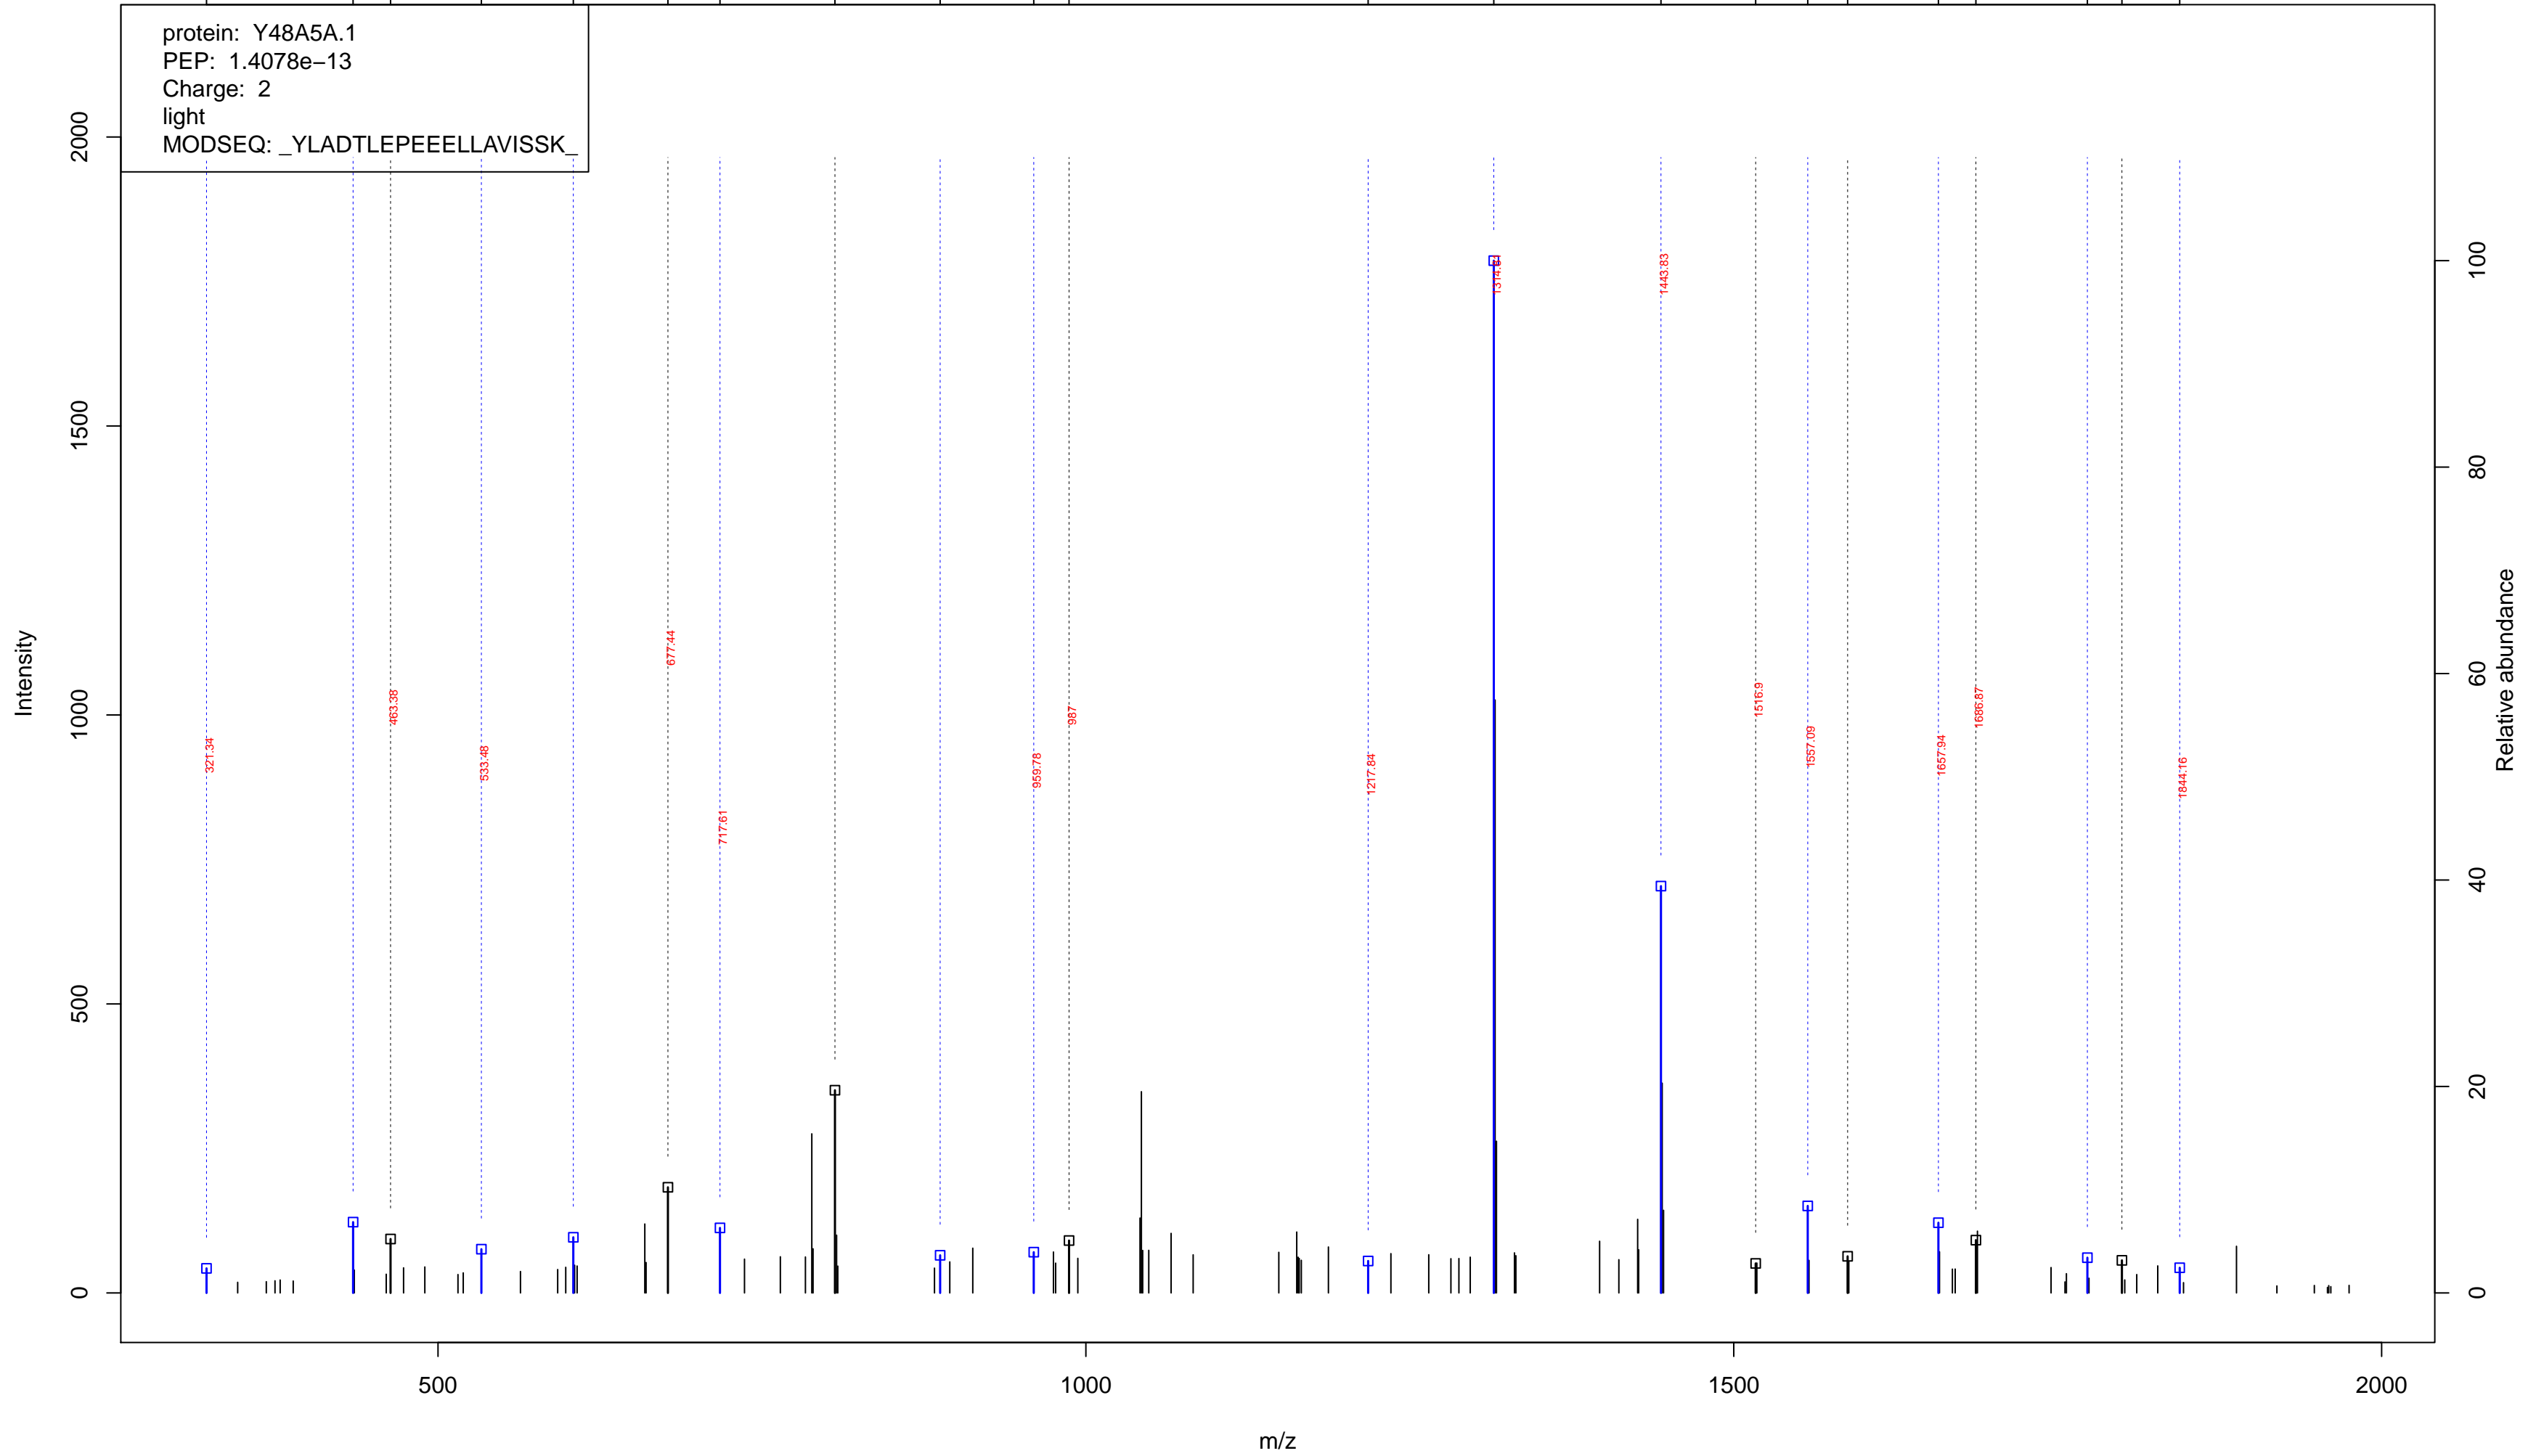



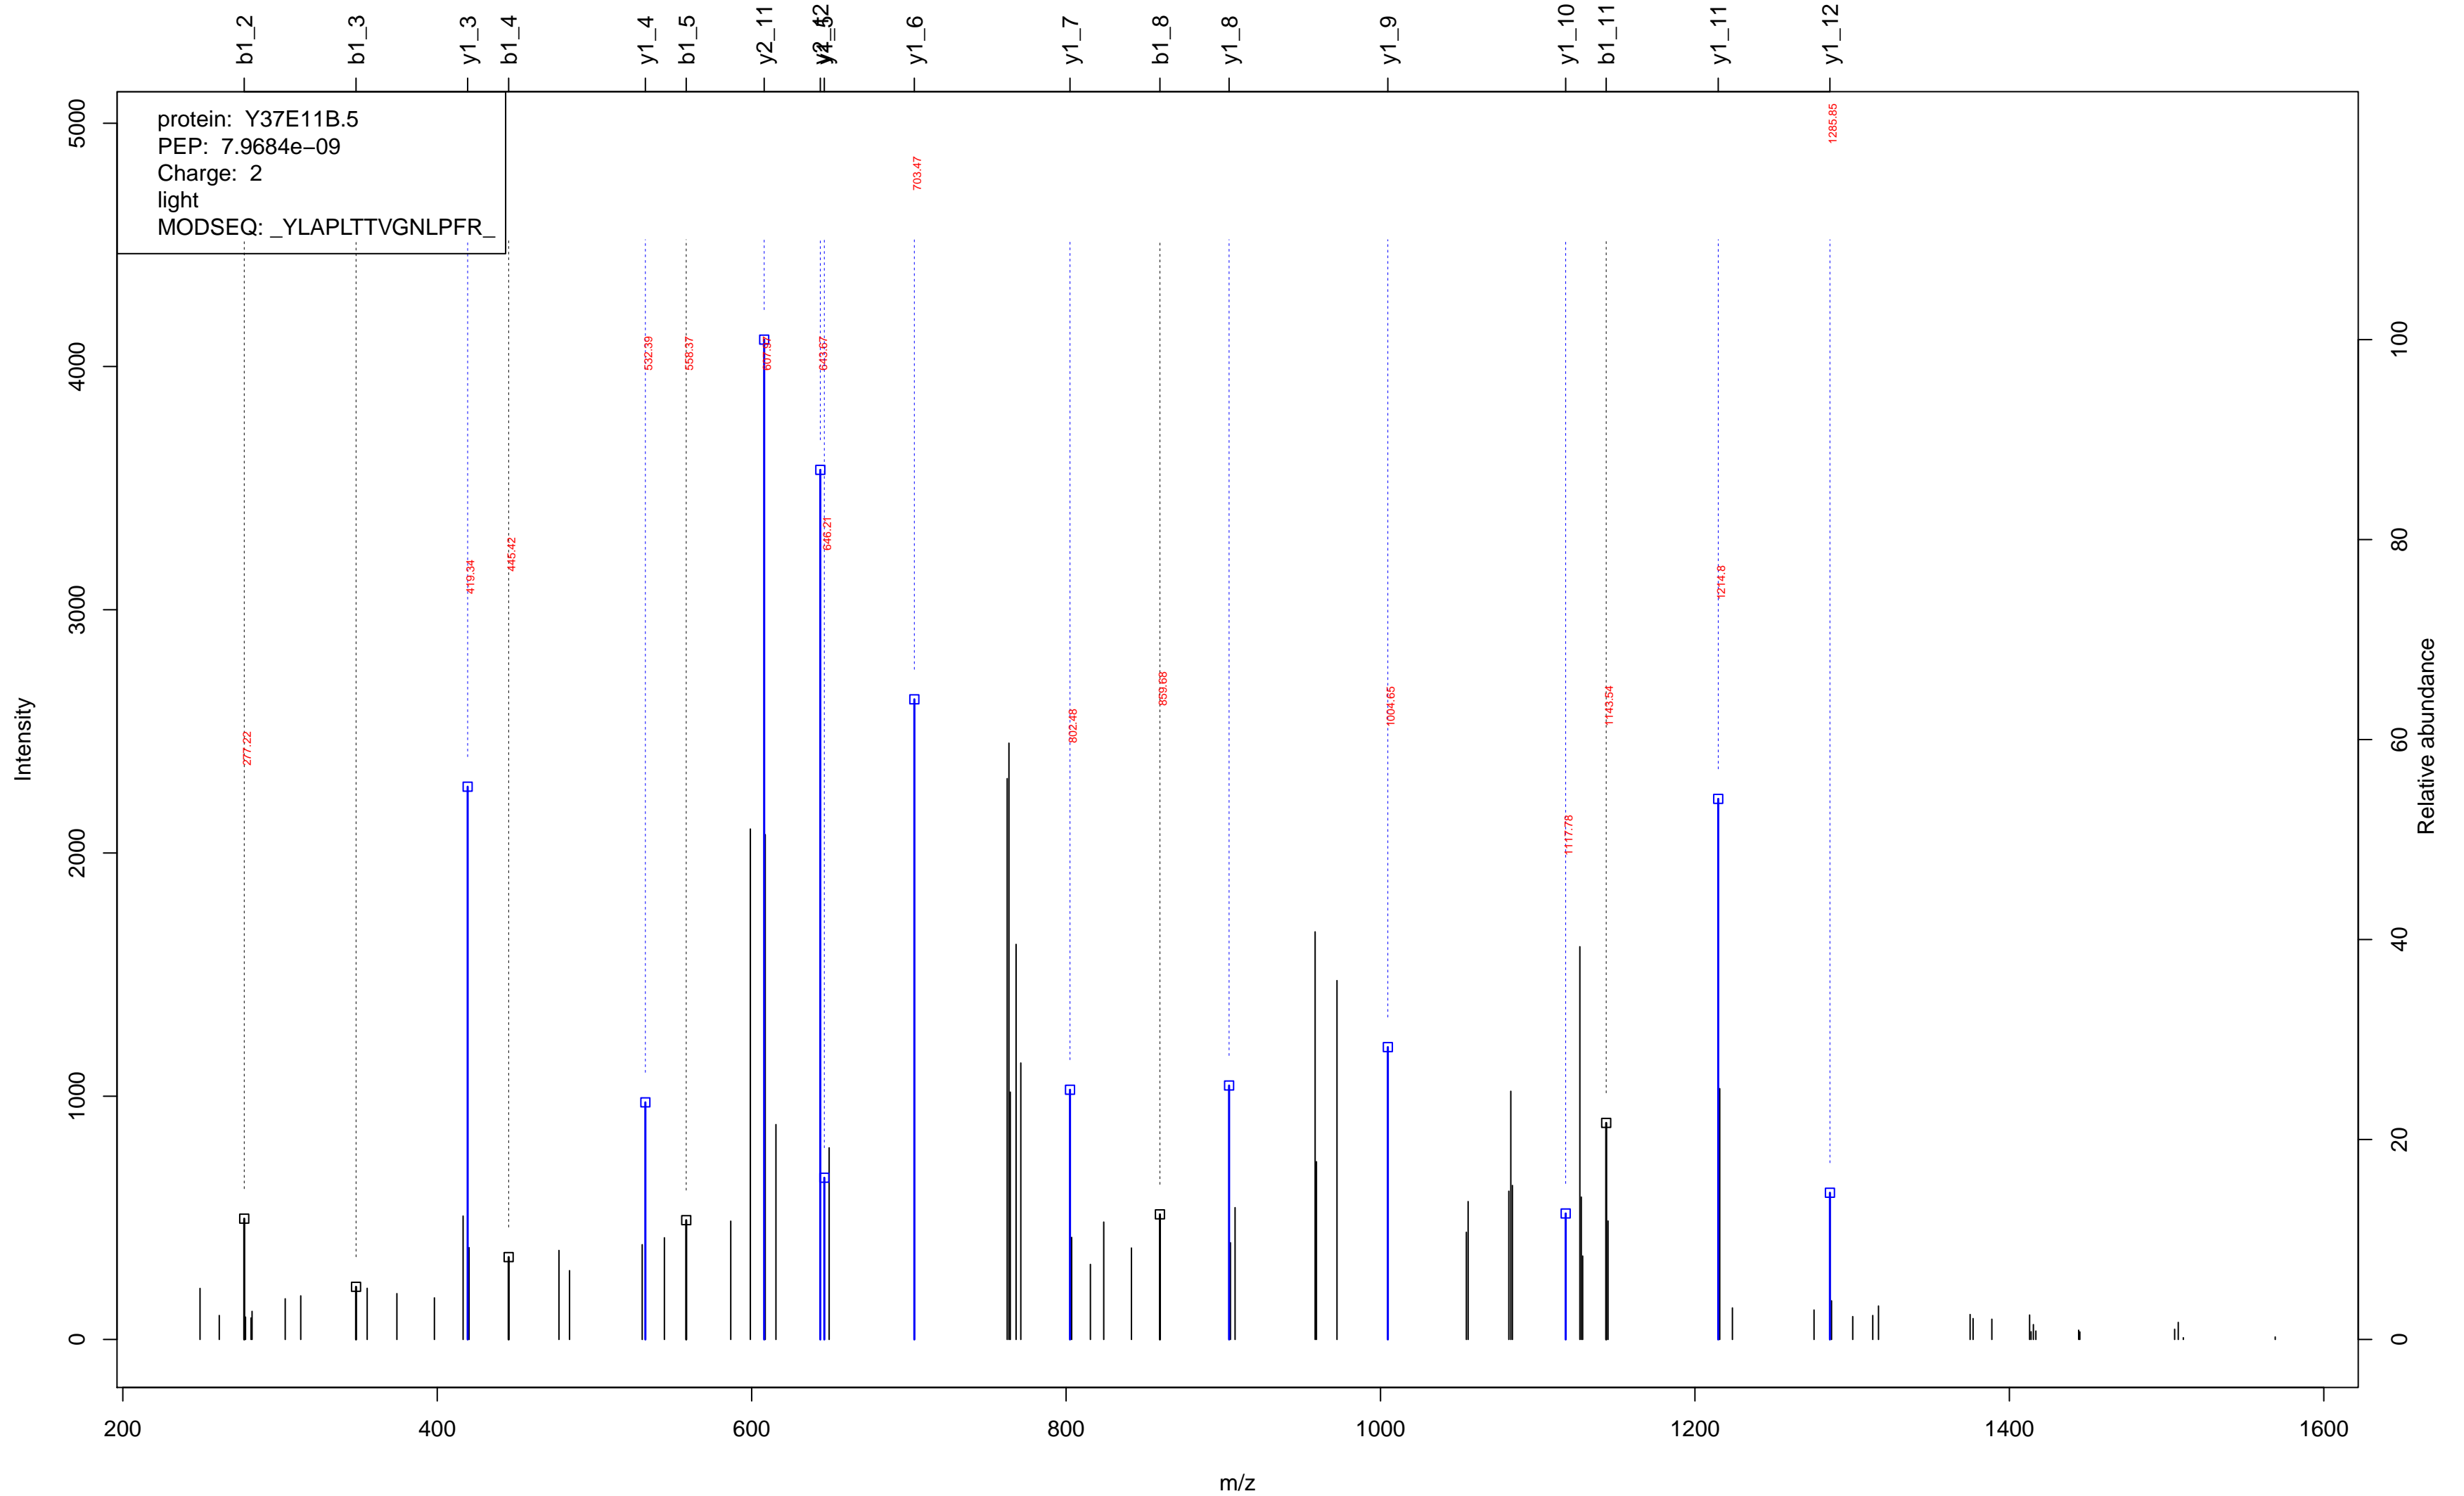

y2\_4 y1\_3 b1\_2 y2\_7 y2\_9 y2\_10 y2\_11 y2\_12 y2\_13 y2\_14 y2\_15 y1\_8 y1\_9 y1\_10 b1\_9 y1\_11 y1\_12 b1\_13

protein: Y82E9BR.14b  
PEP: 1.8499e-07  
Charge: 3  
light  
MODSEQ: \_YLQQLIDADLAEHGK\_

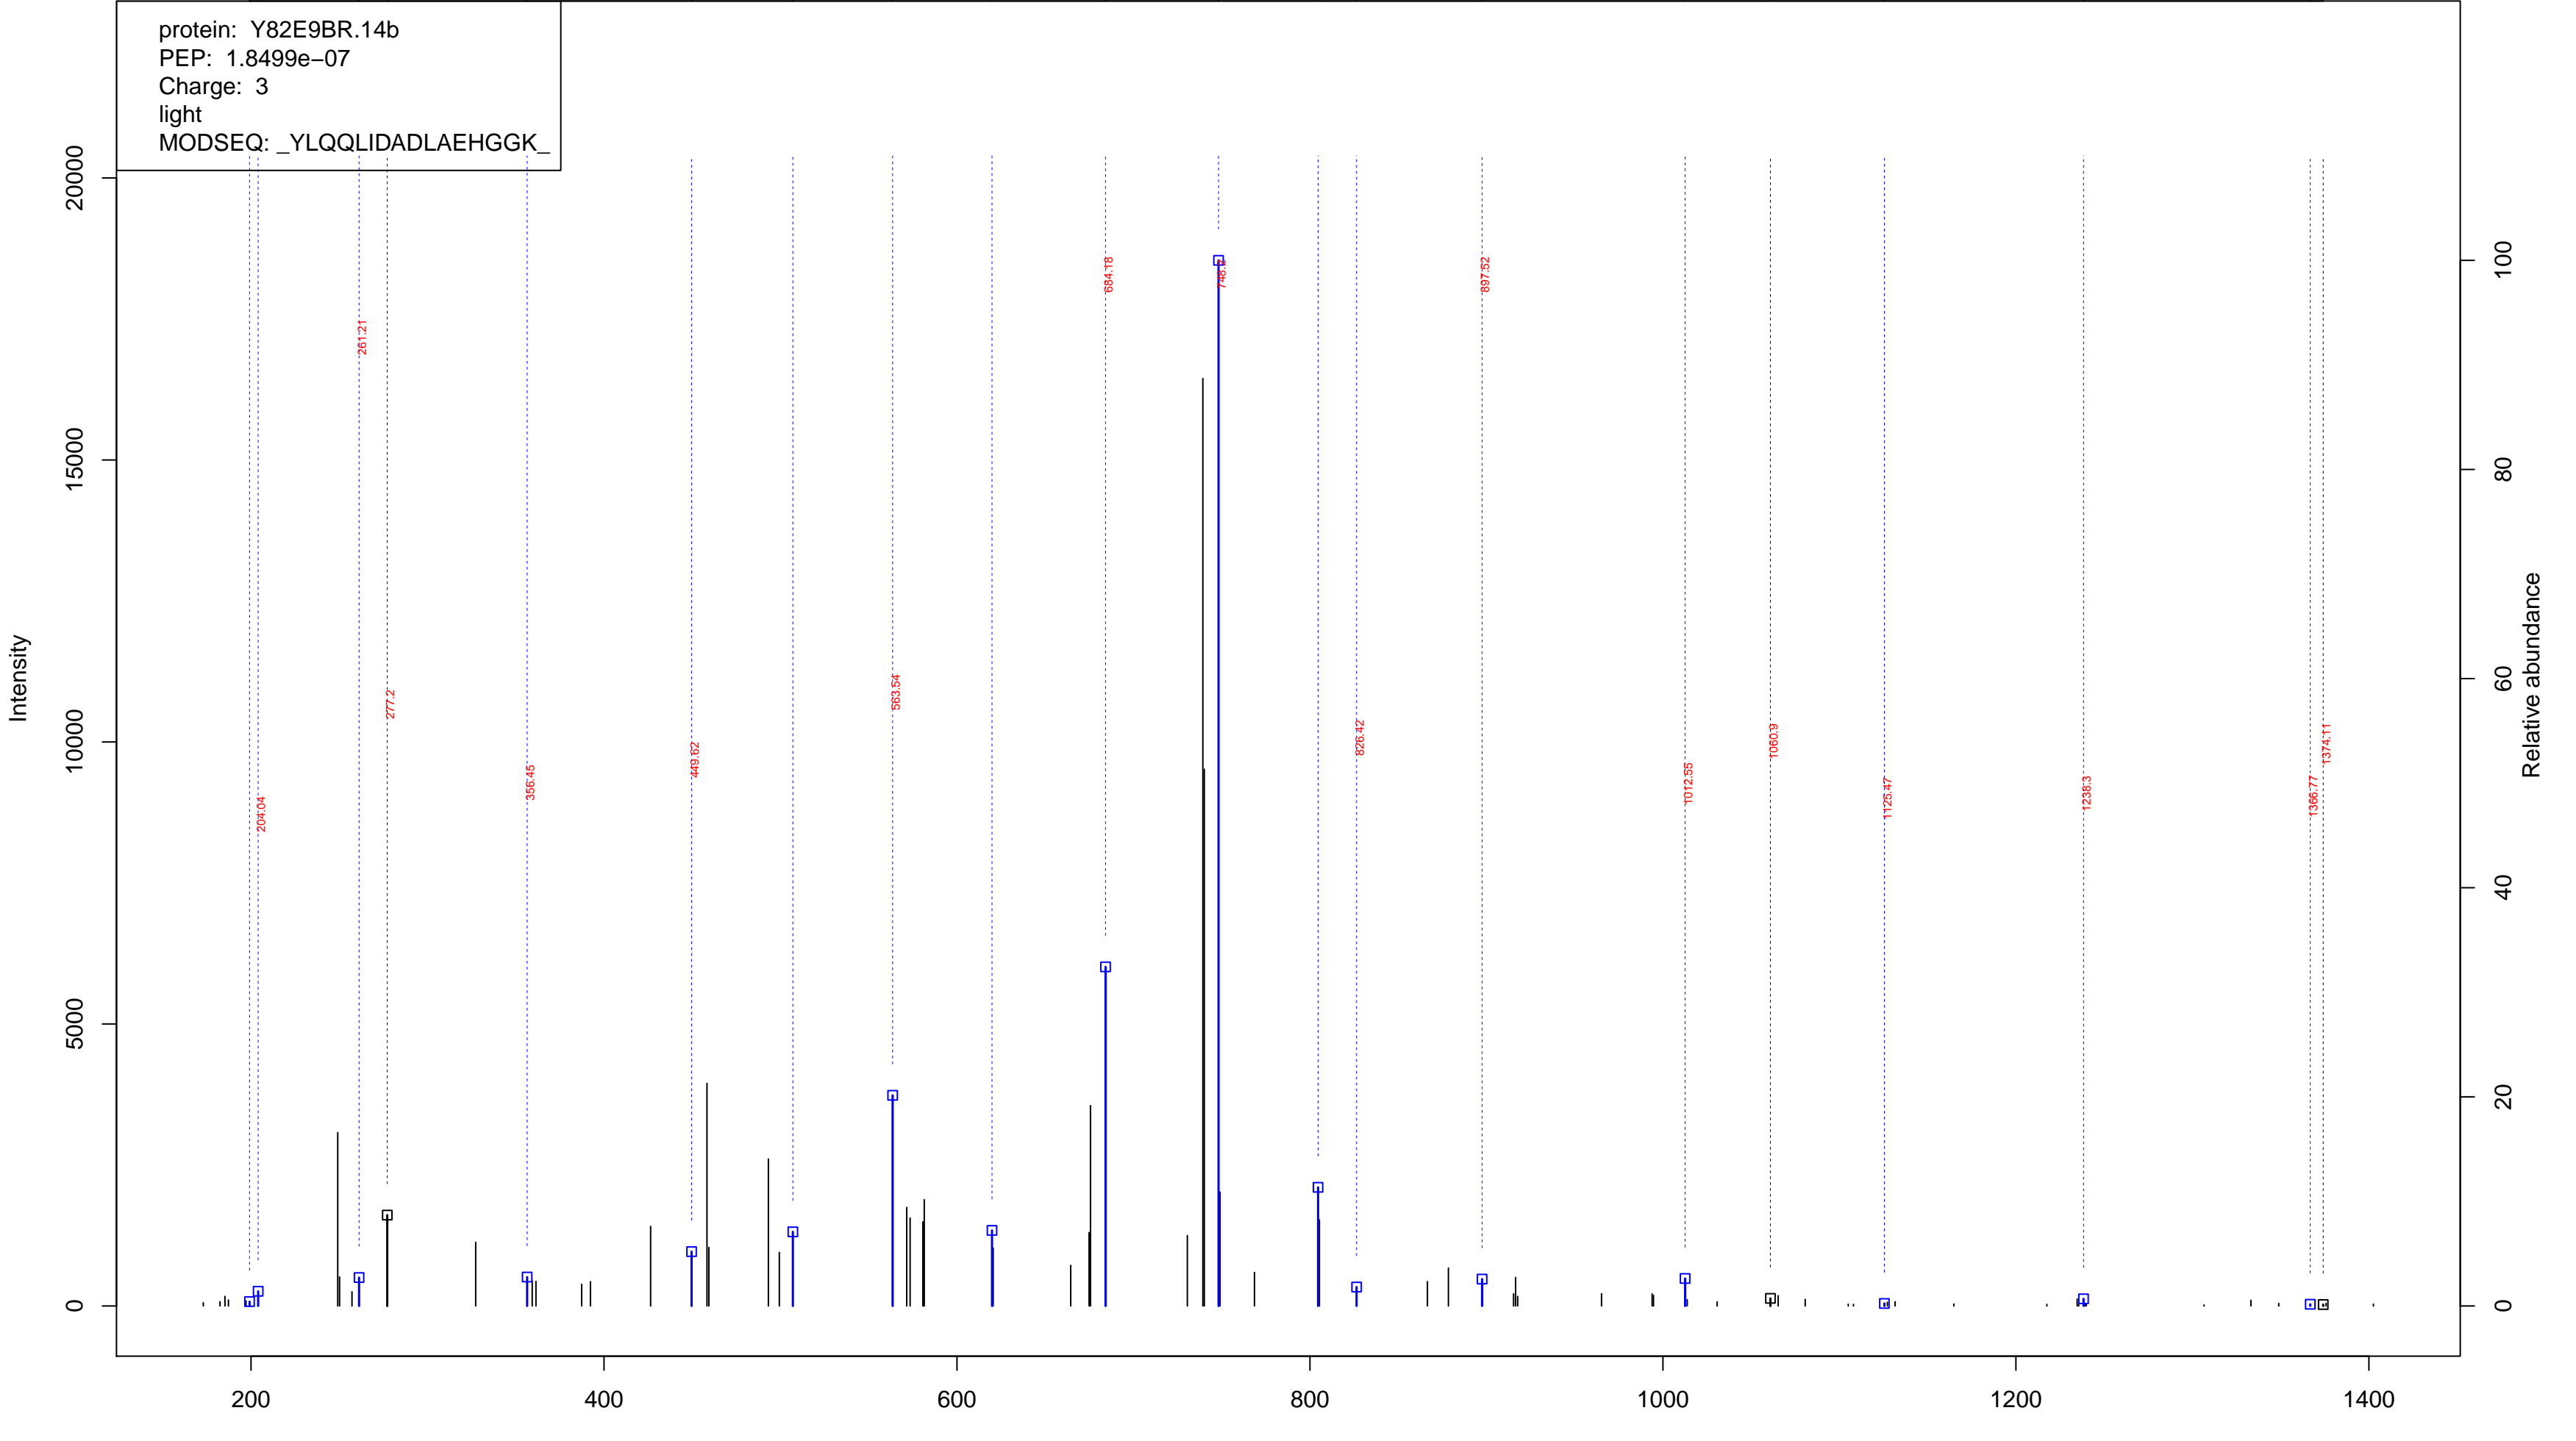

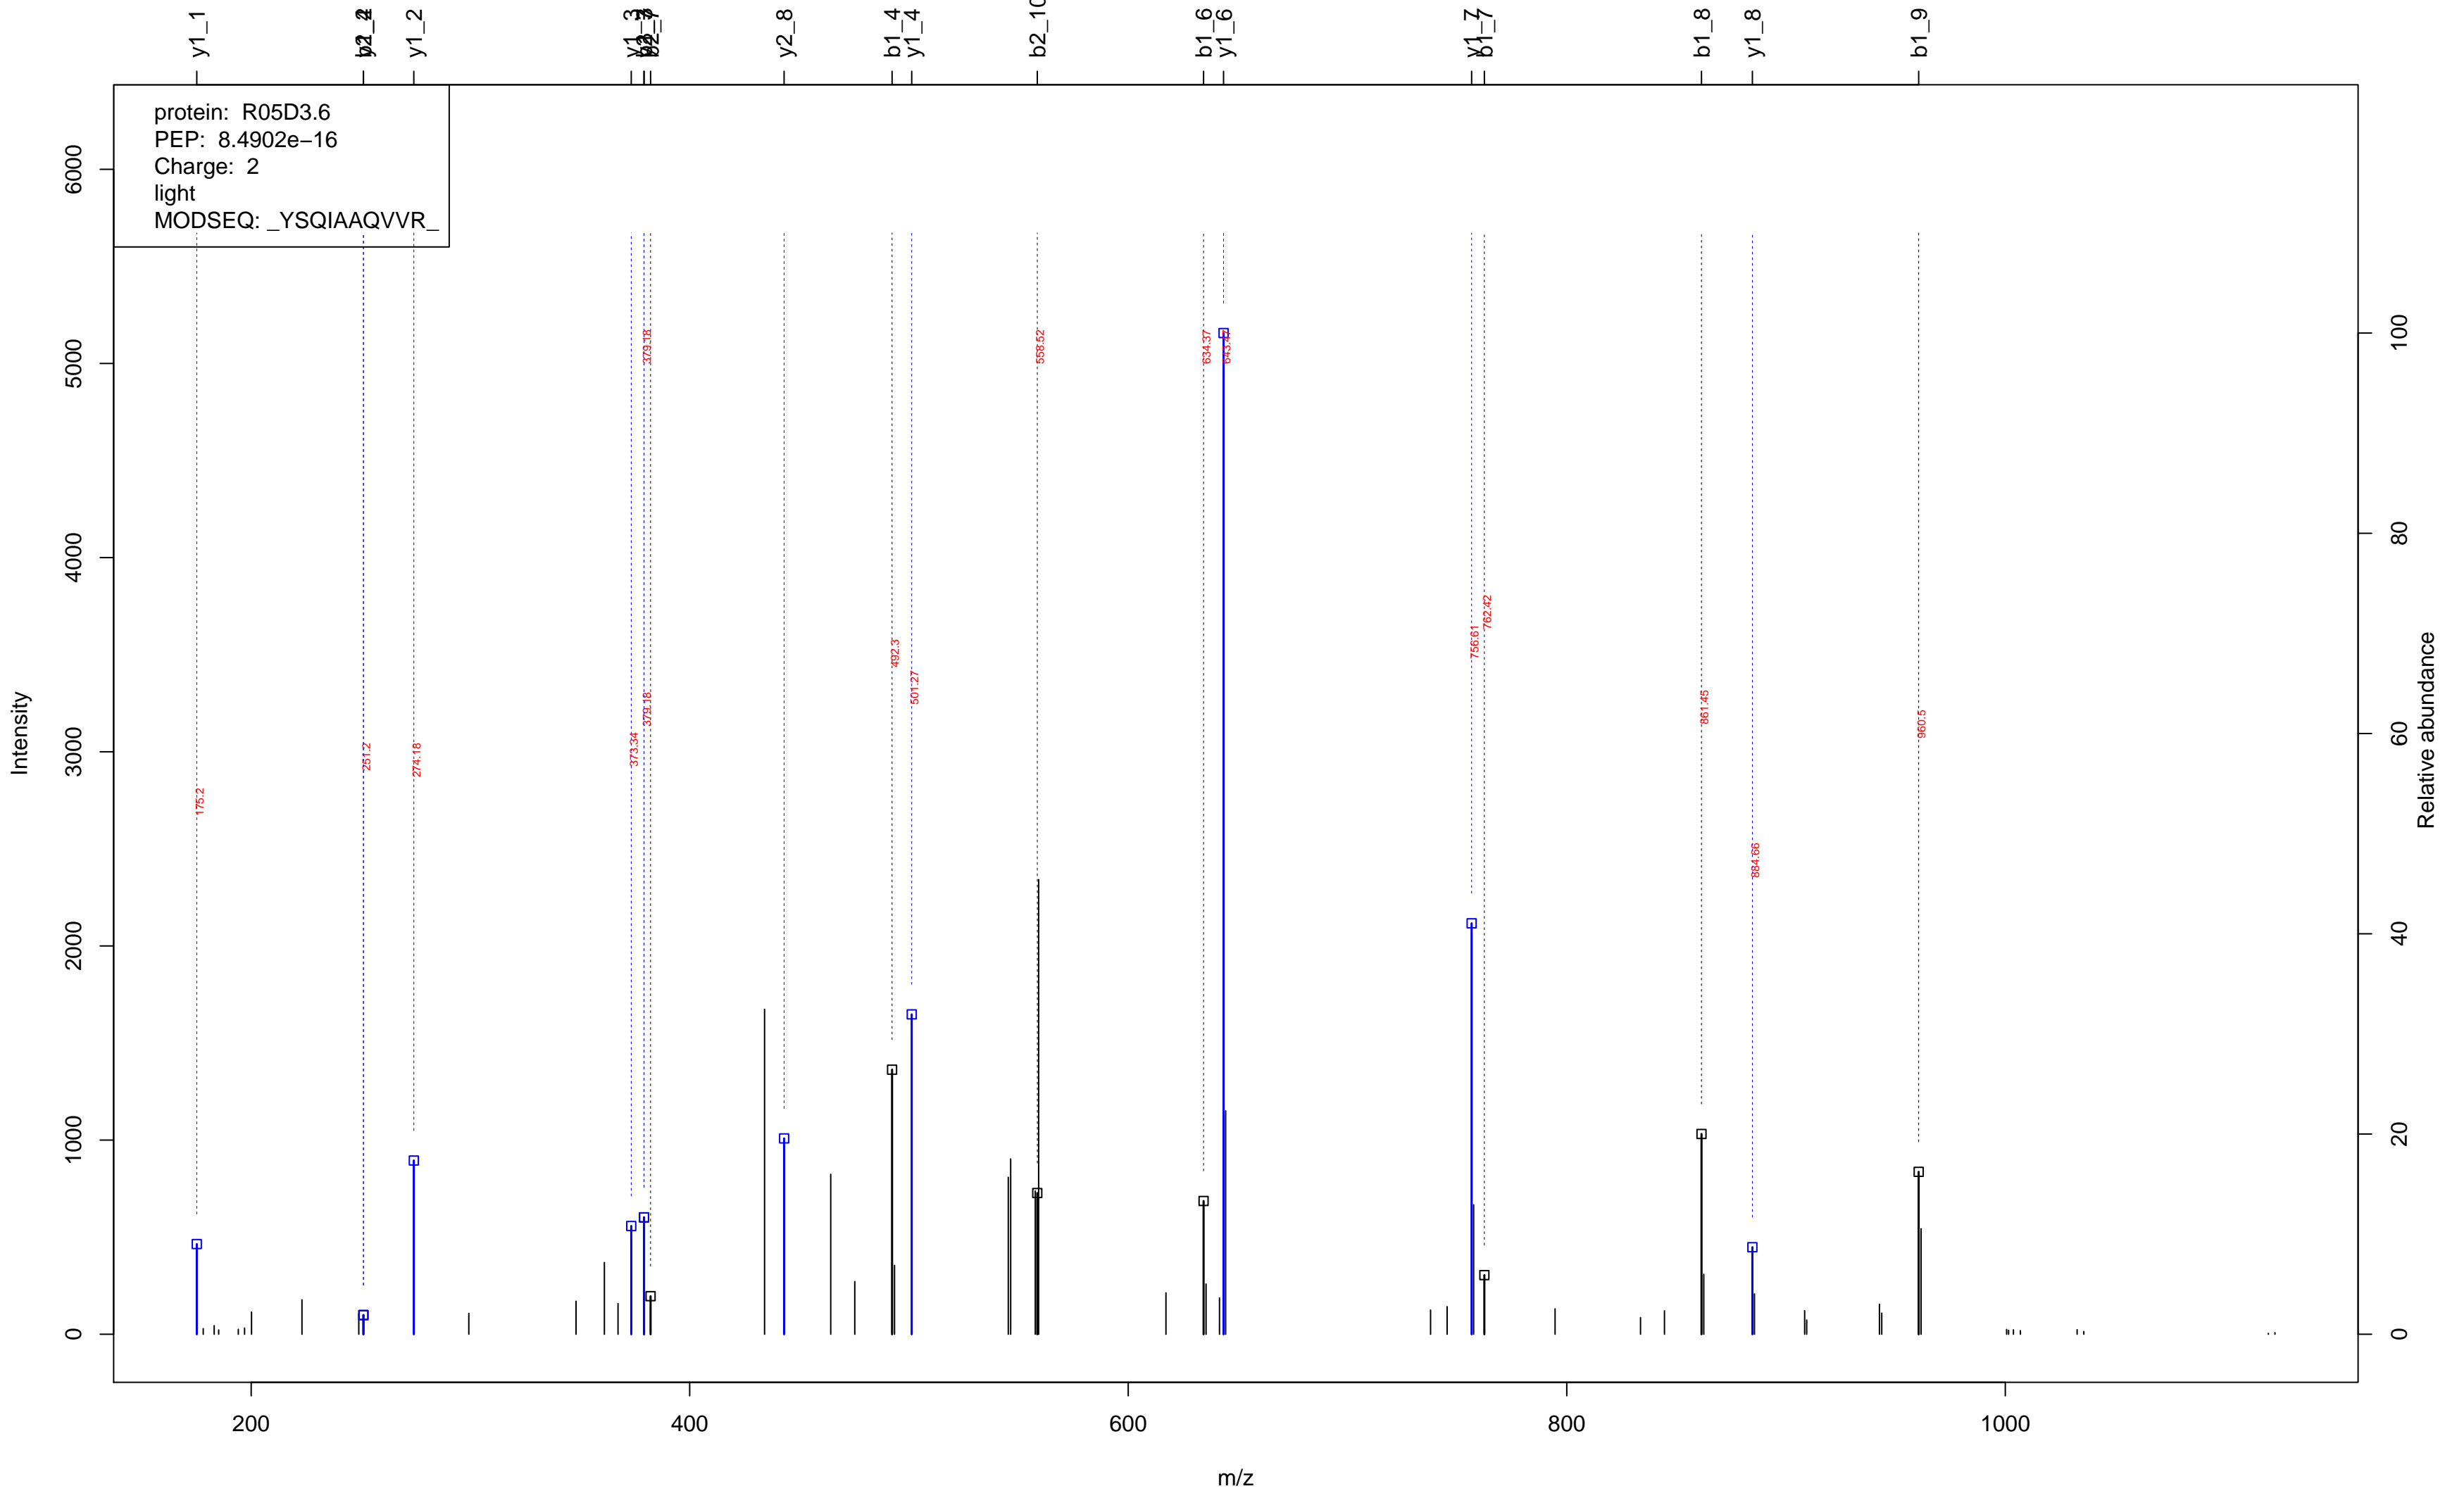

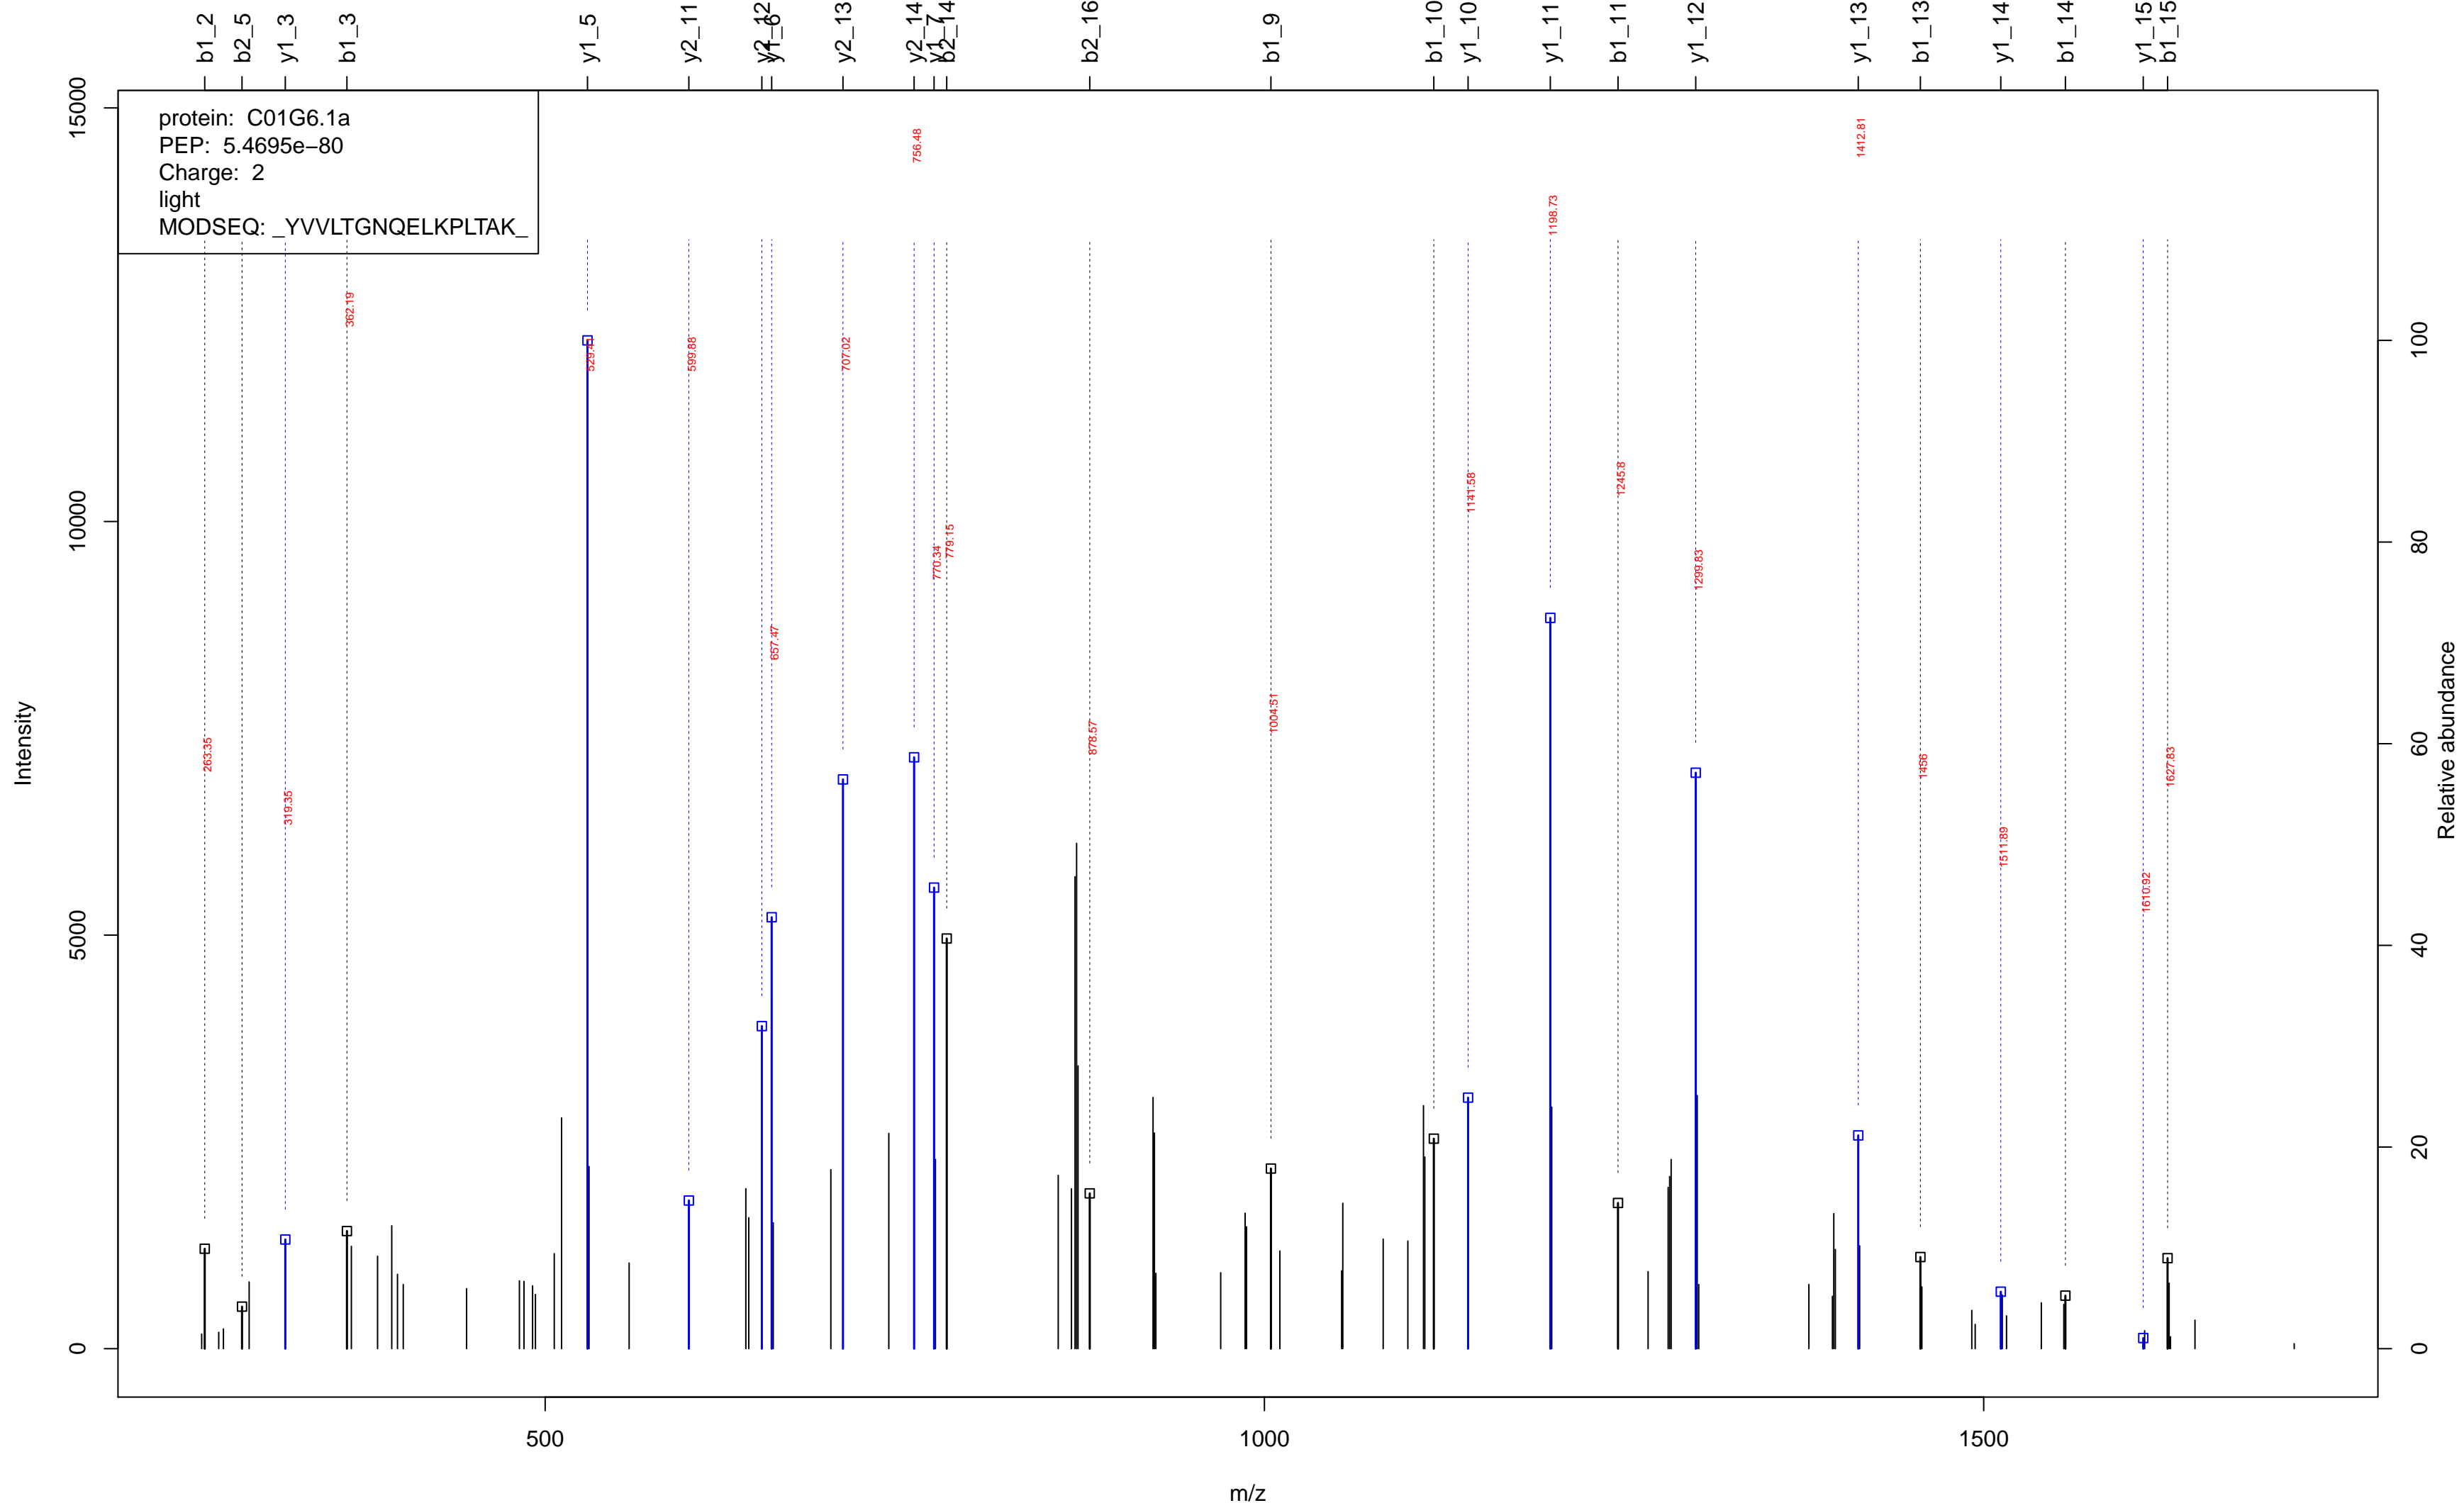

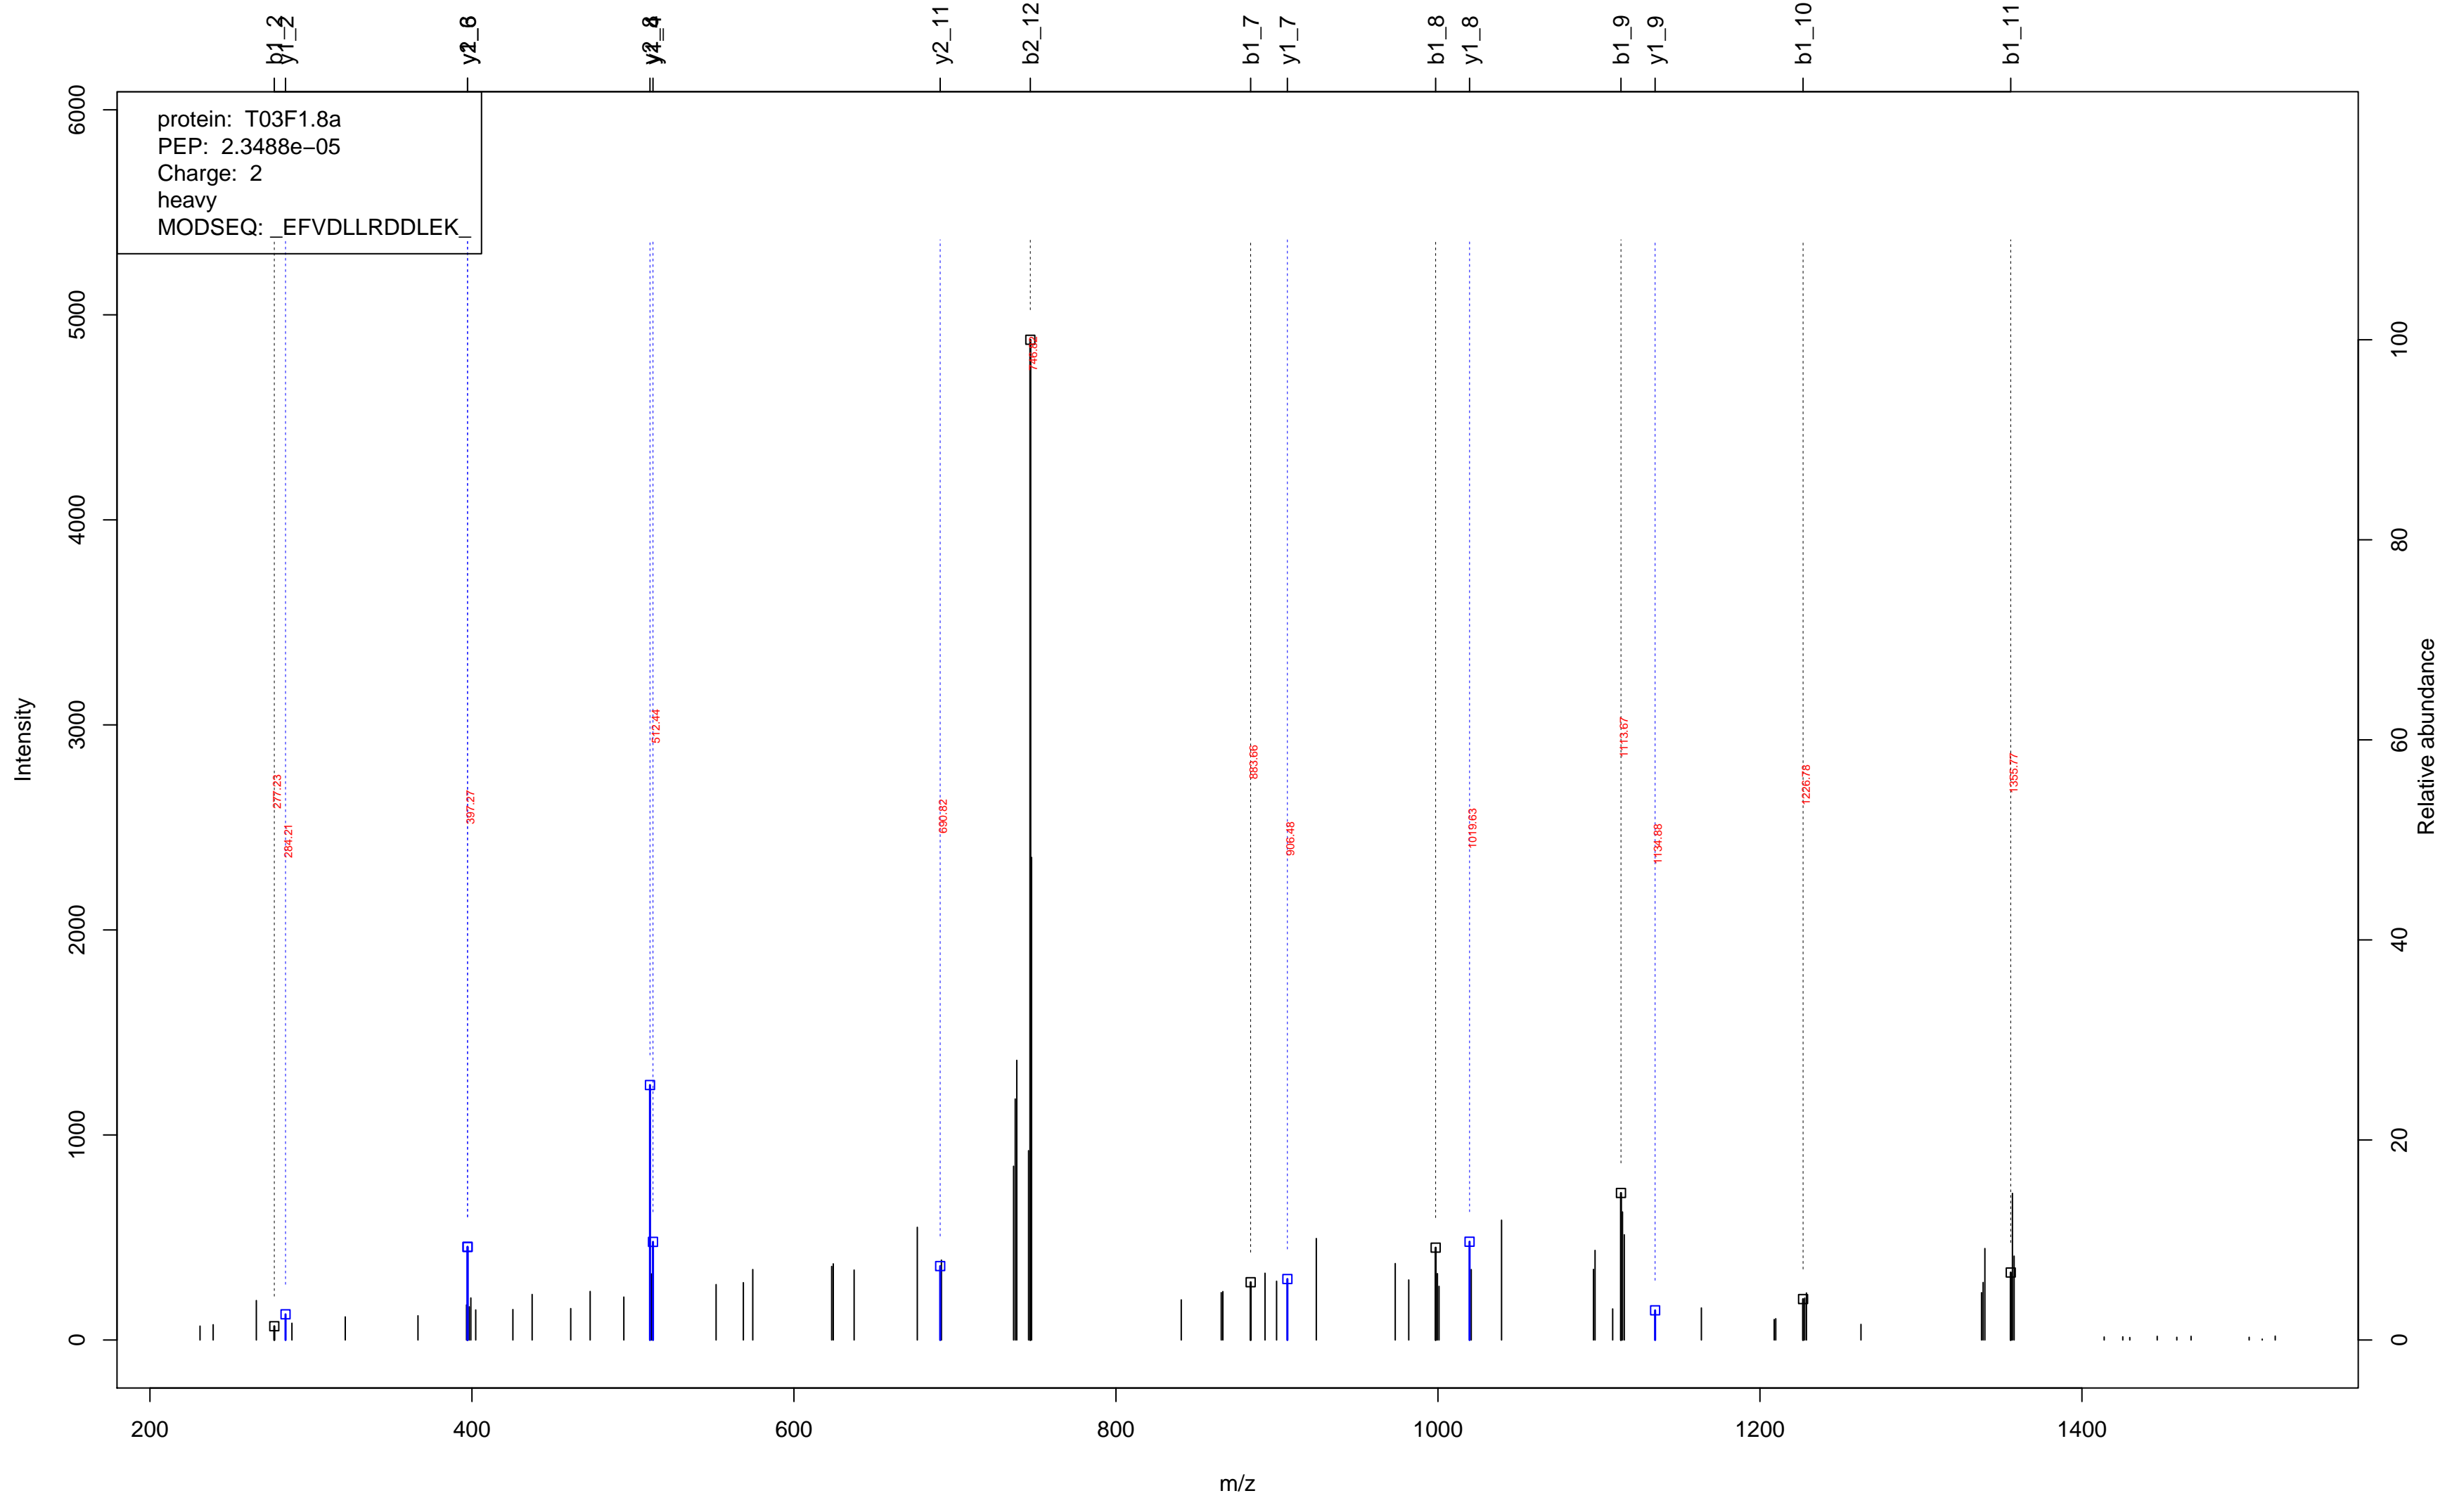

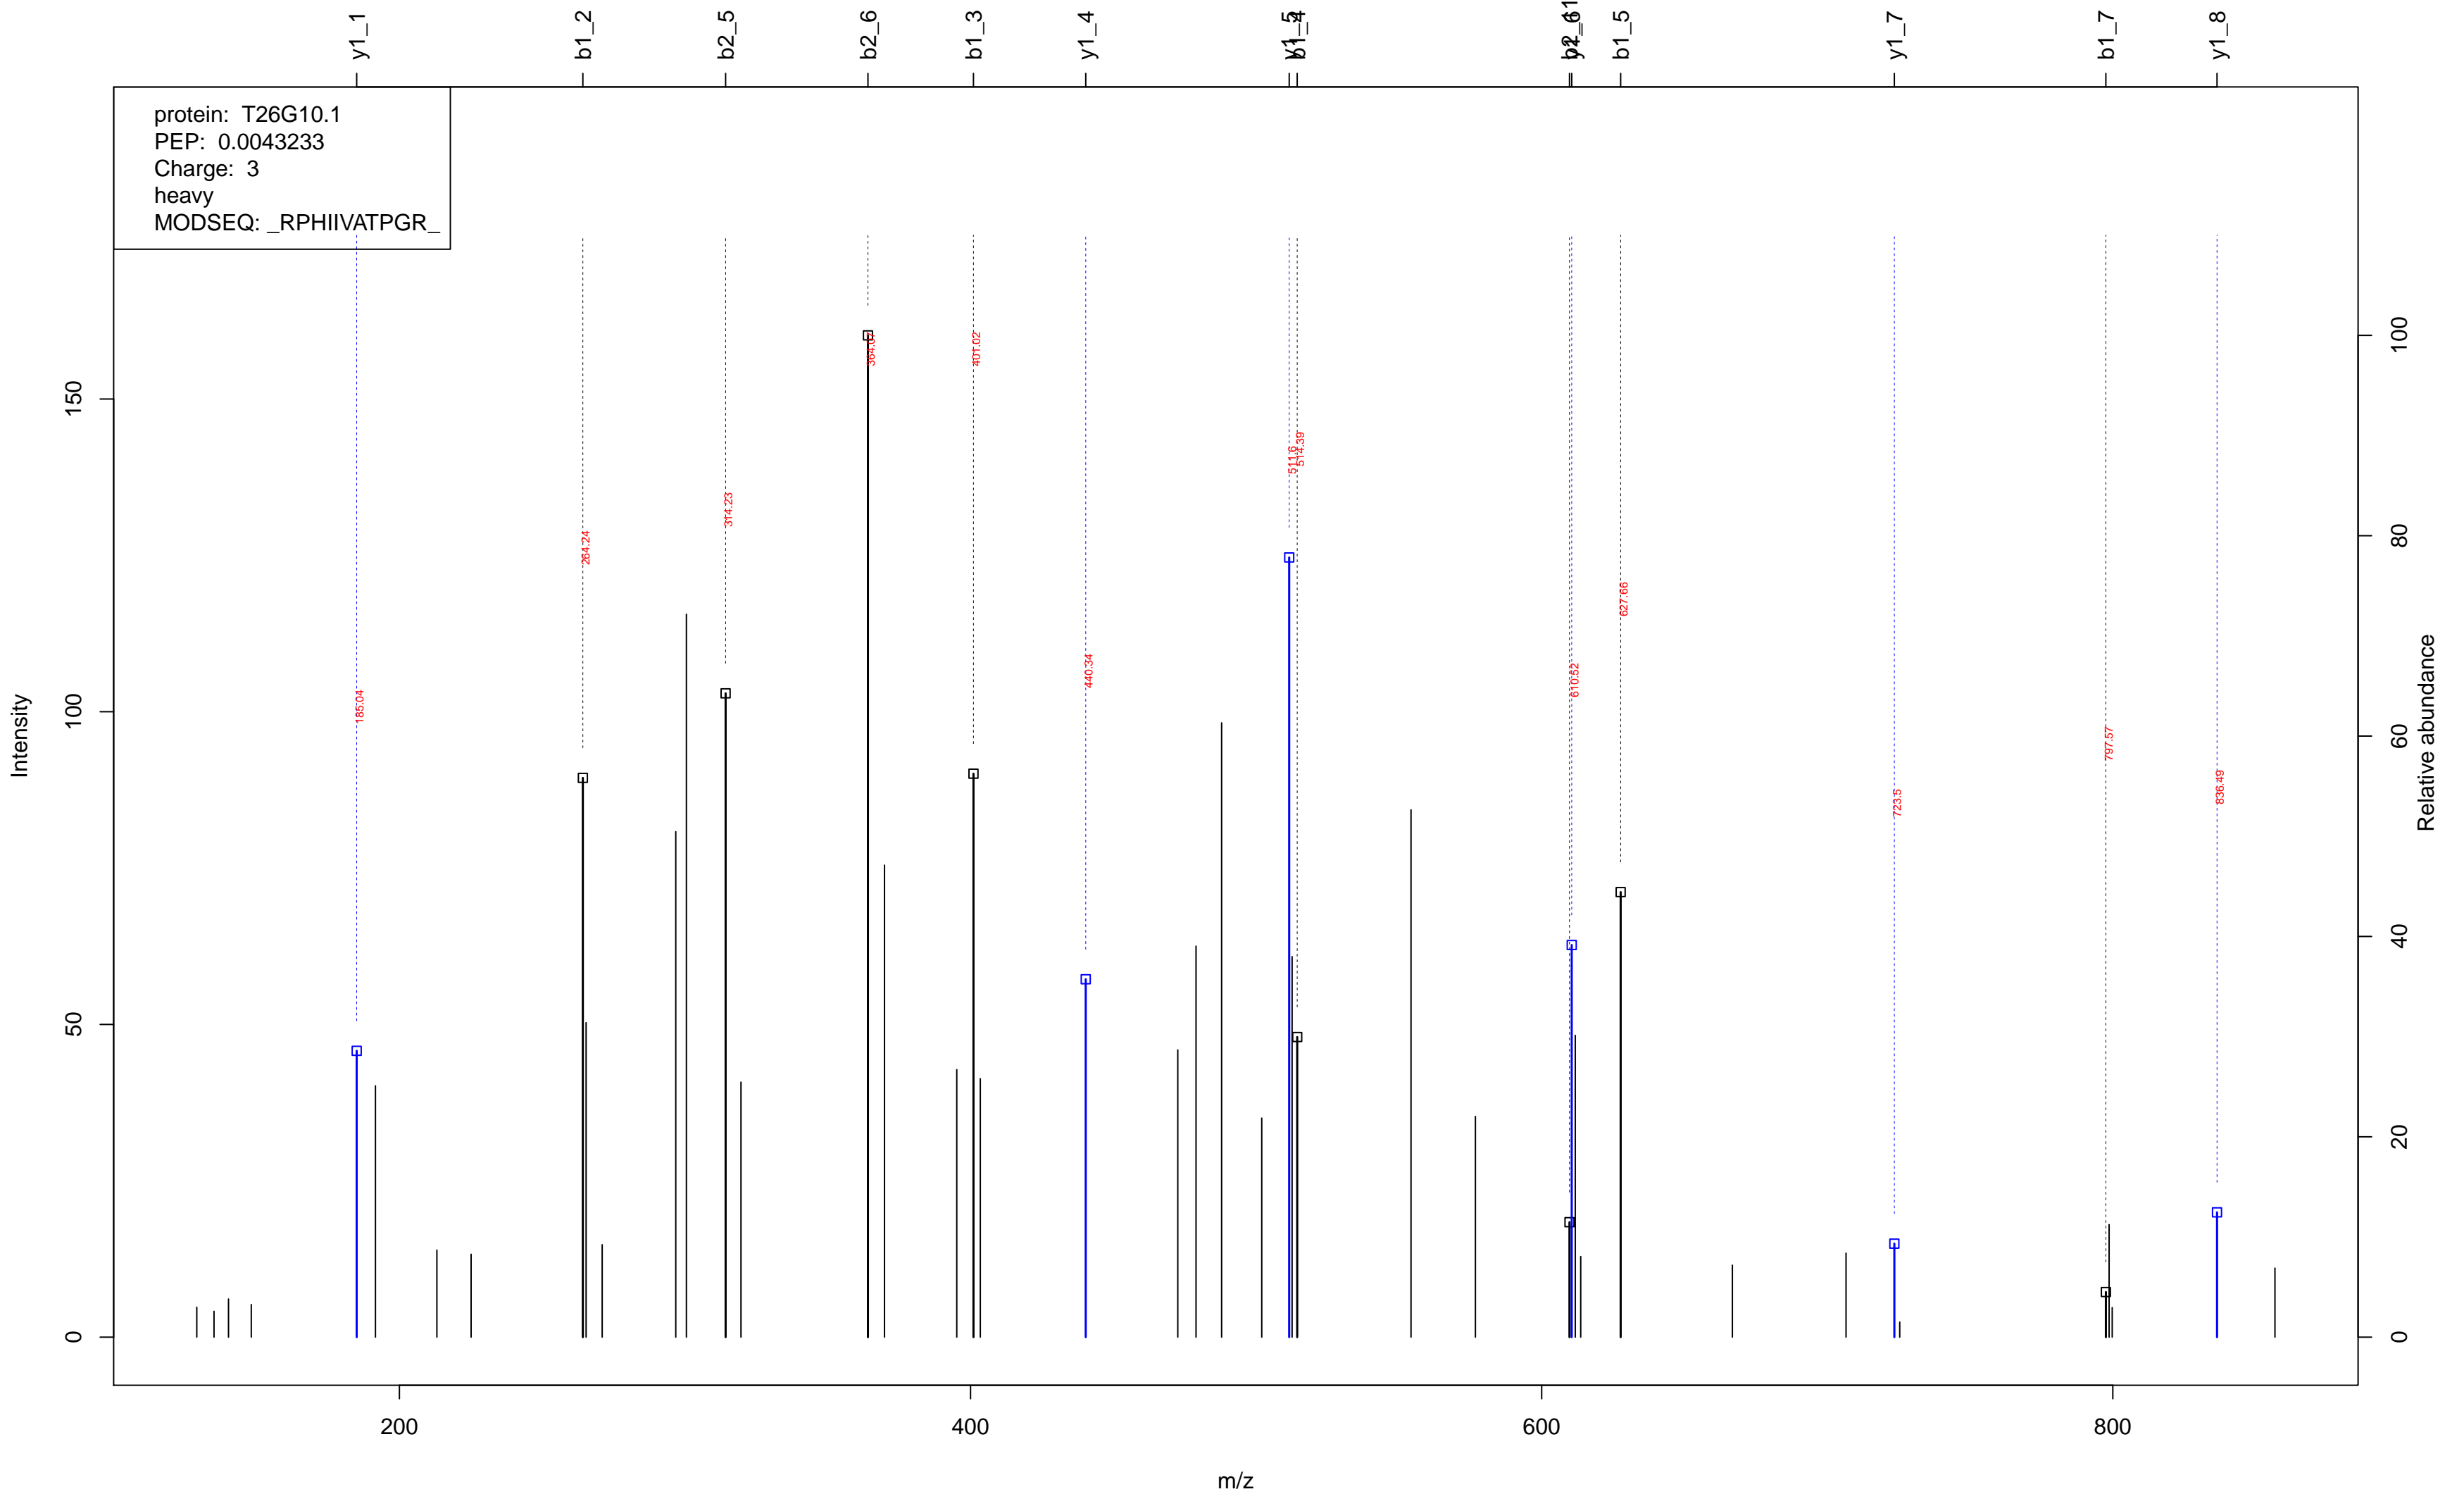

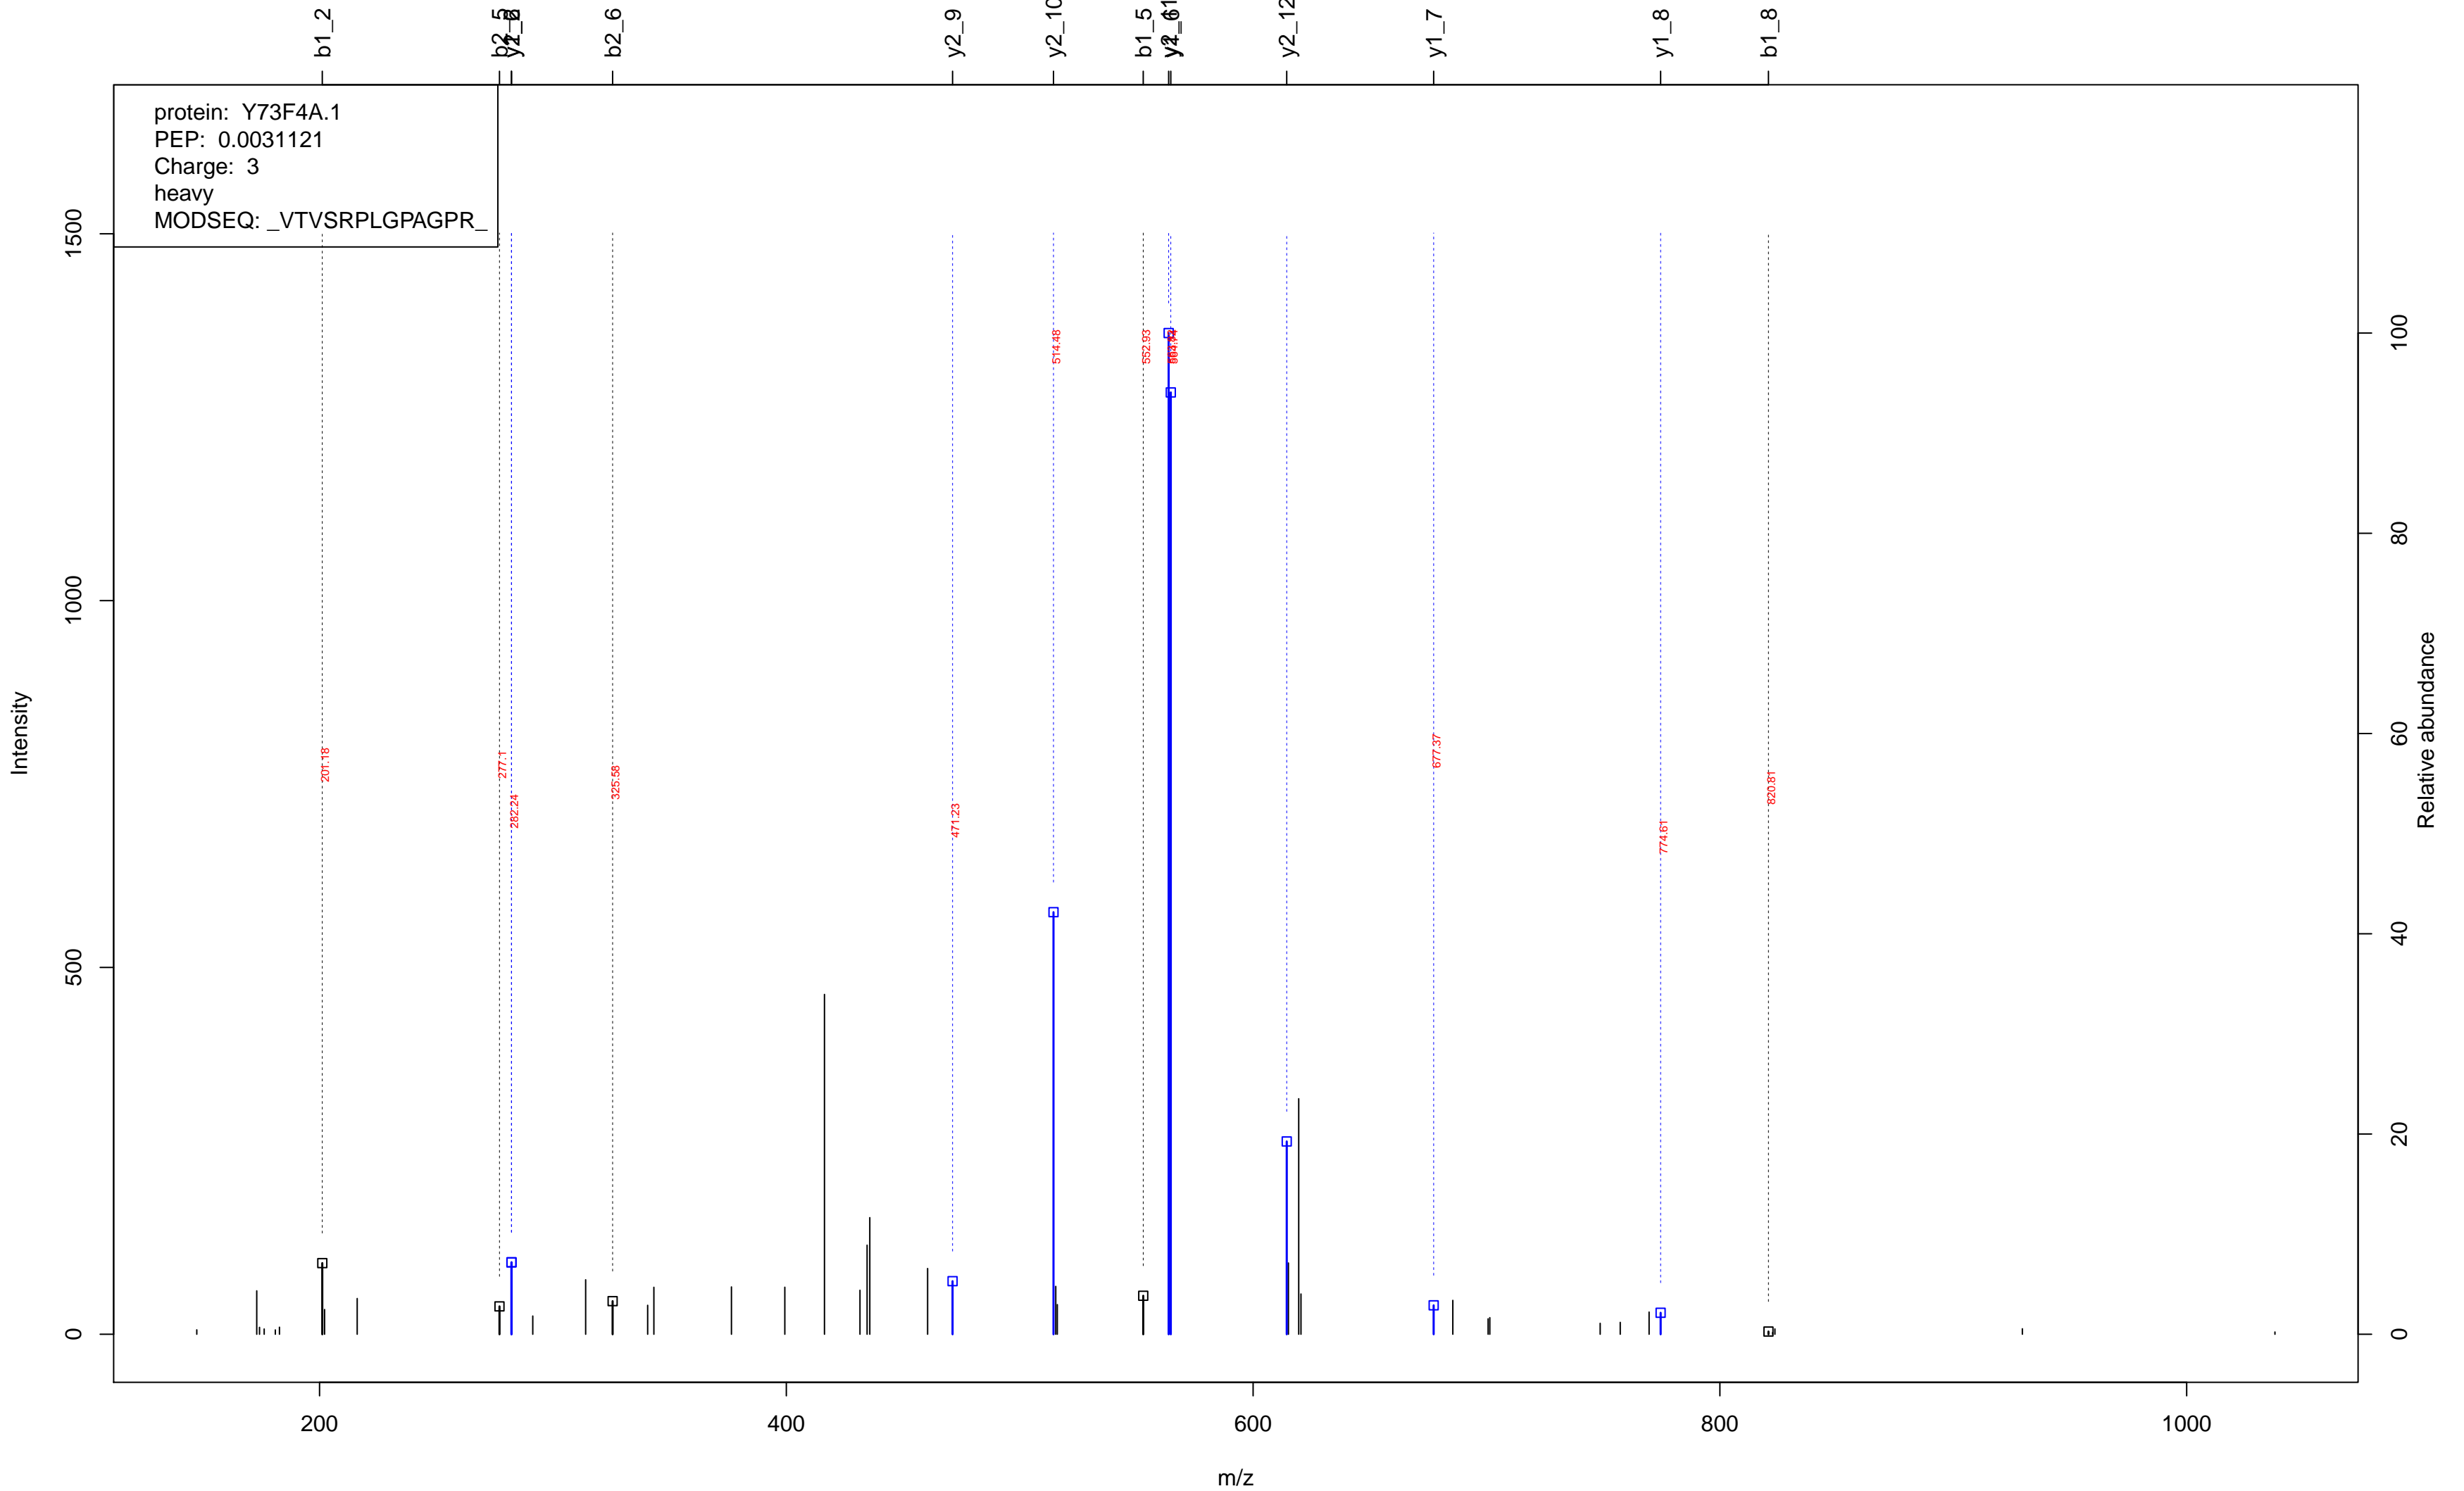

y1\_1 b2\_4 y1\_3 y2\_8 b2\_9 y2\_9 y2\_10 b2\_11 y2\_11 y1\_7 b1\_8 b1\_9

protein: T10C6.5  
PEP: 0.00055861  
Charge: 3  
heavy  
MODSEQ: \_(ac)TTAHRPTFHPAR\_

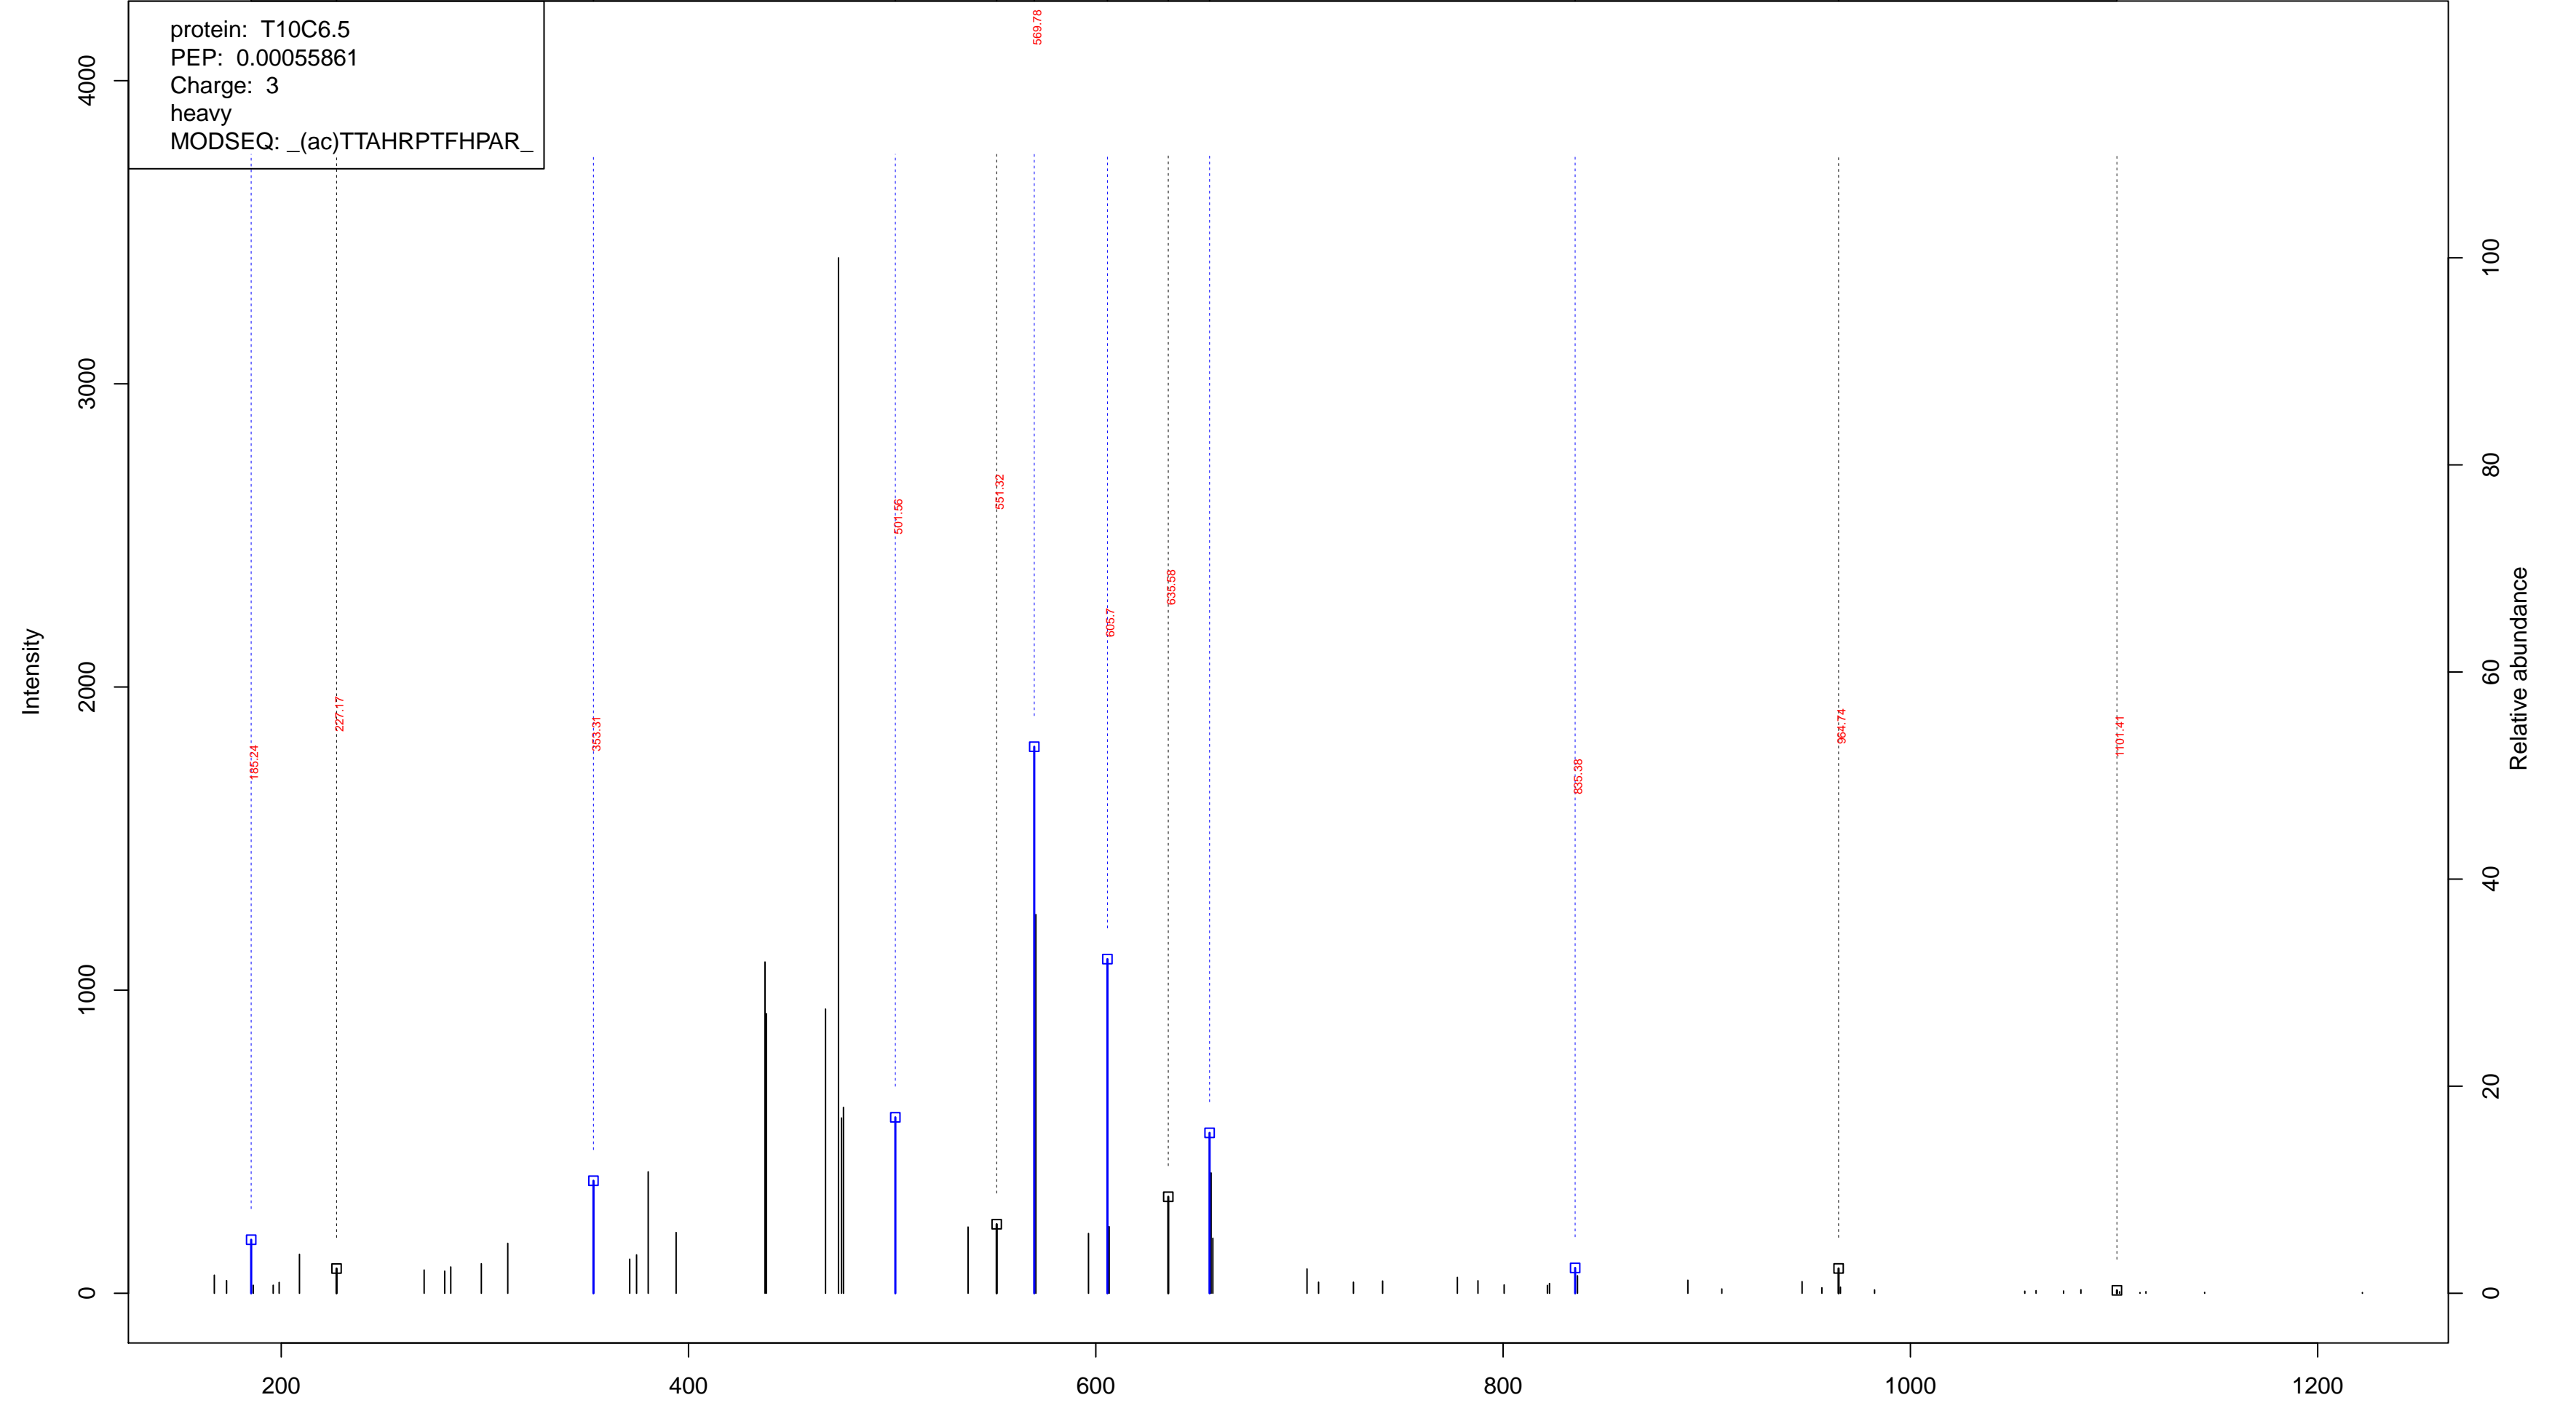



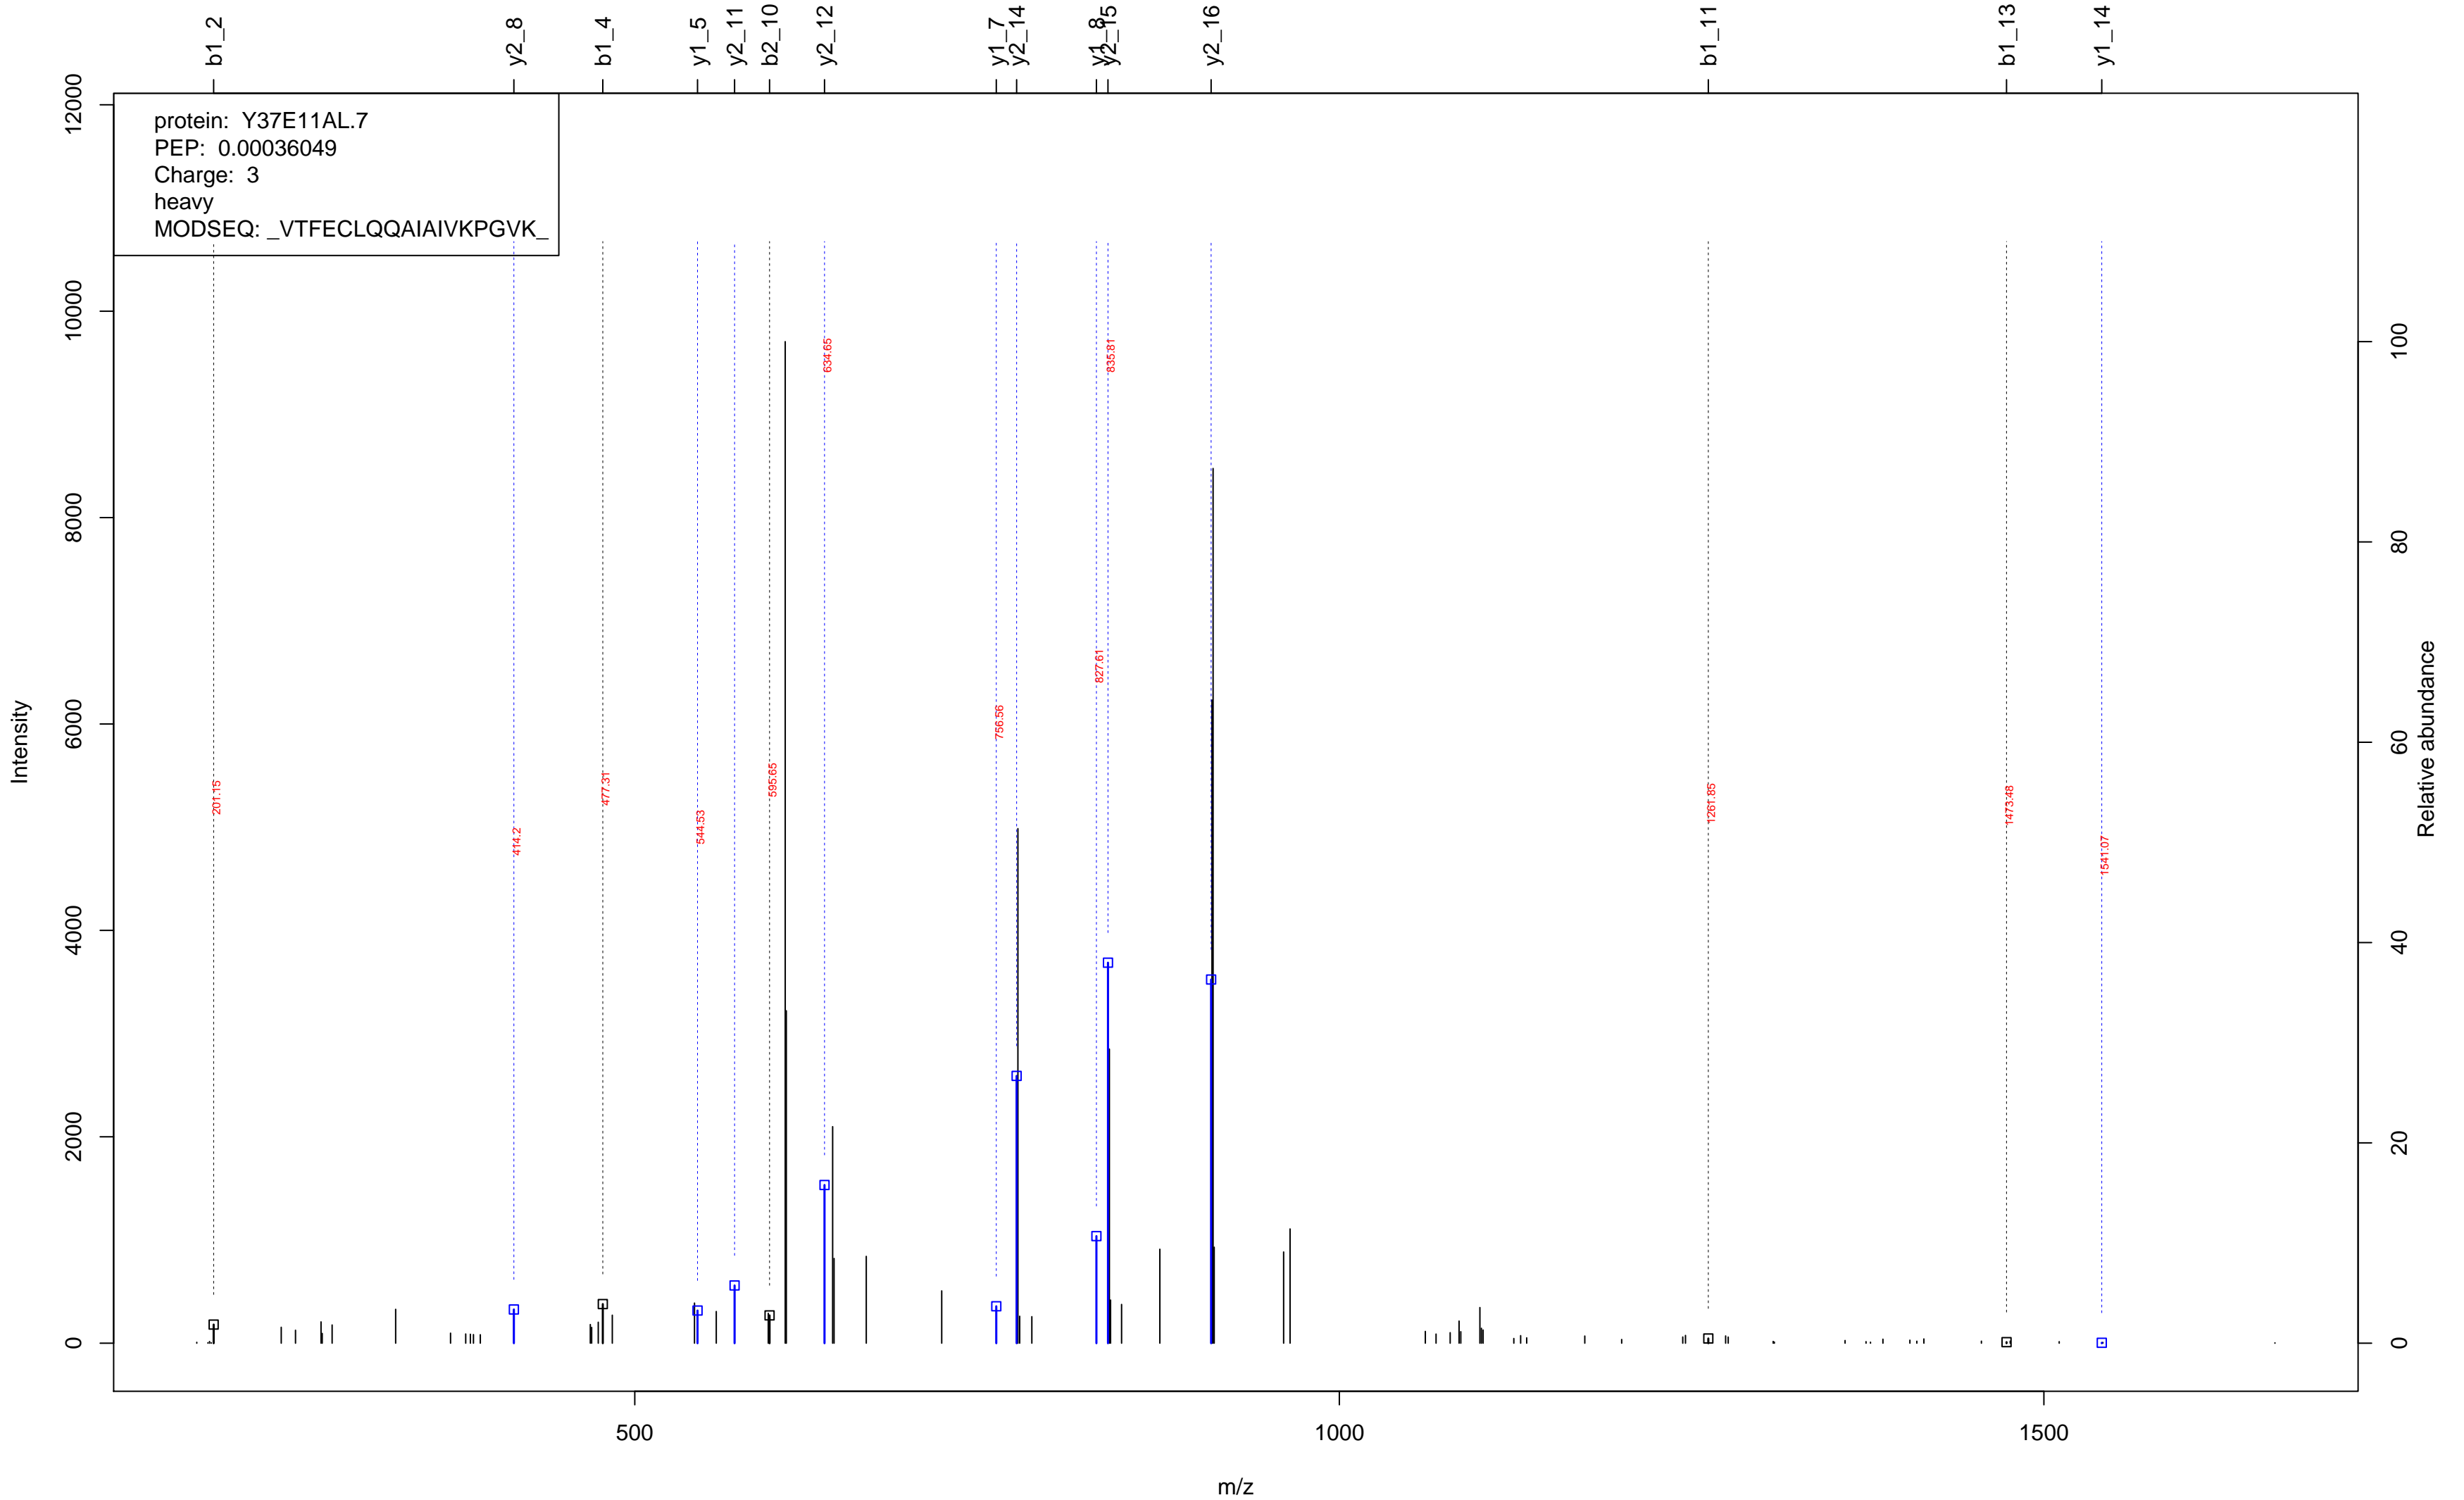

Supplement: 10.1074_M115.052548_mcp.M115.052548-4.pdf [file 10.1074_M115.052548_mcp.M115.052548-4.pdf]
