# Supplementary material
Source: PubMed Central journal article supplement (PMC4858947)

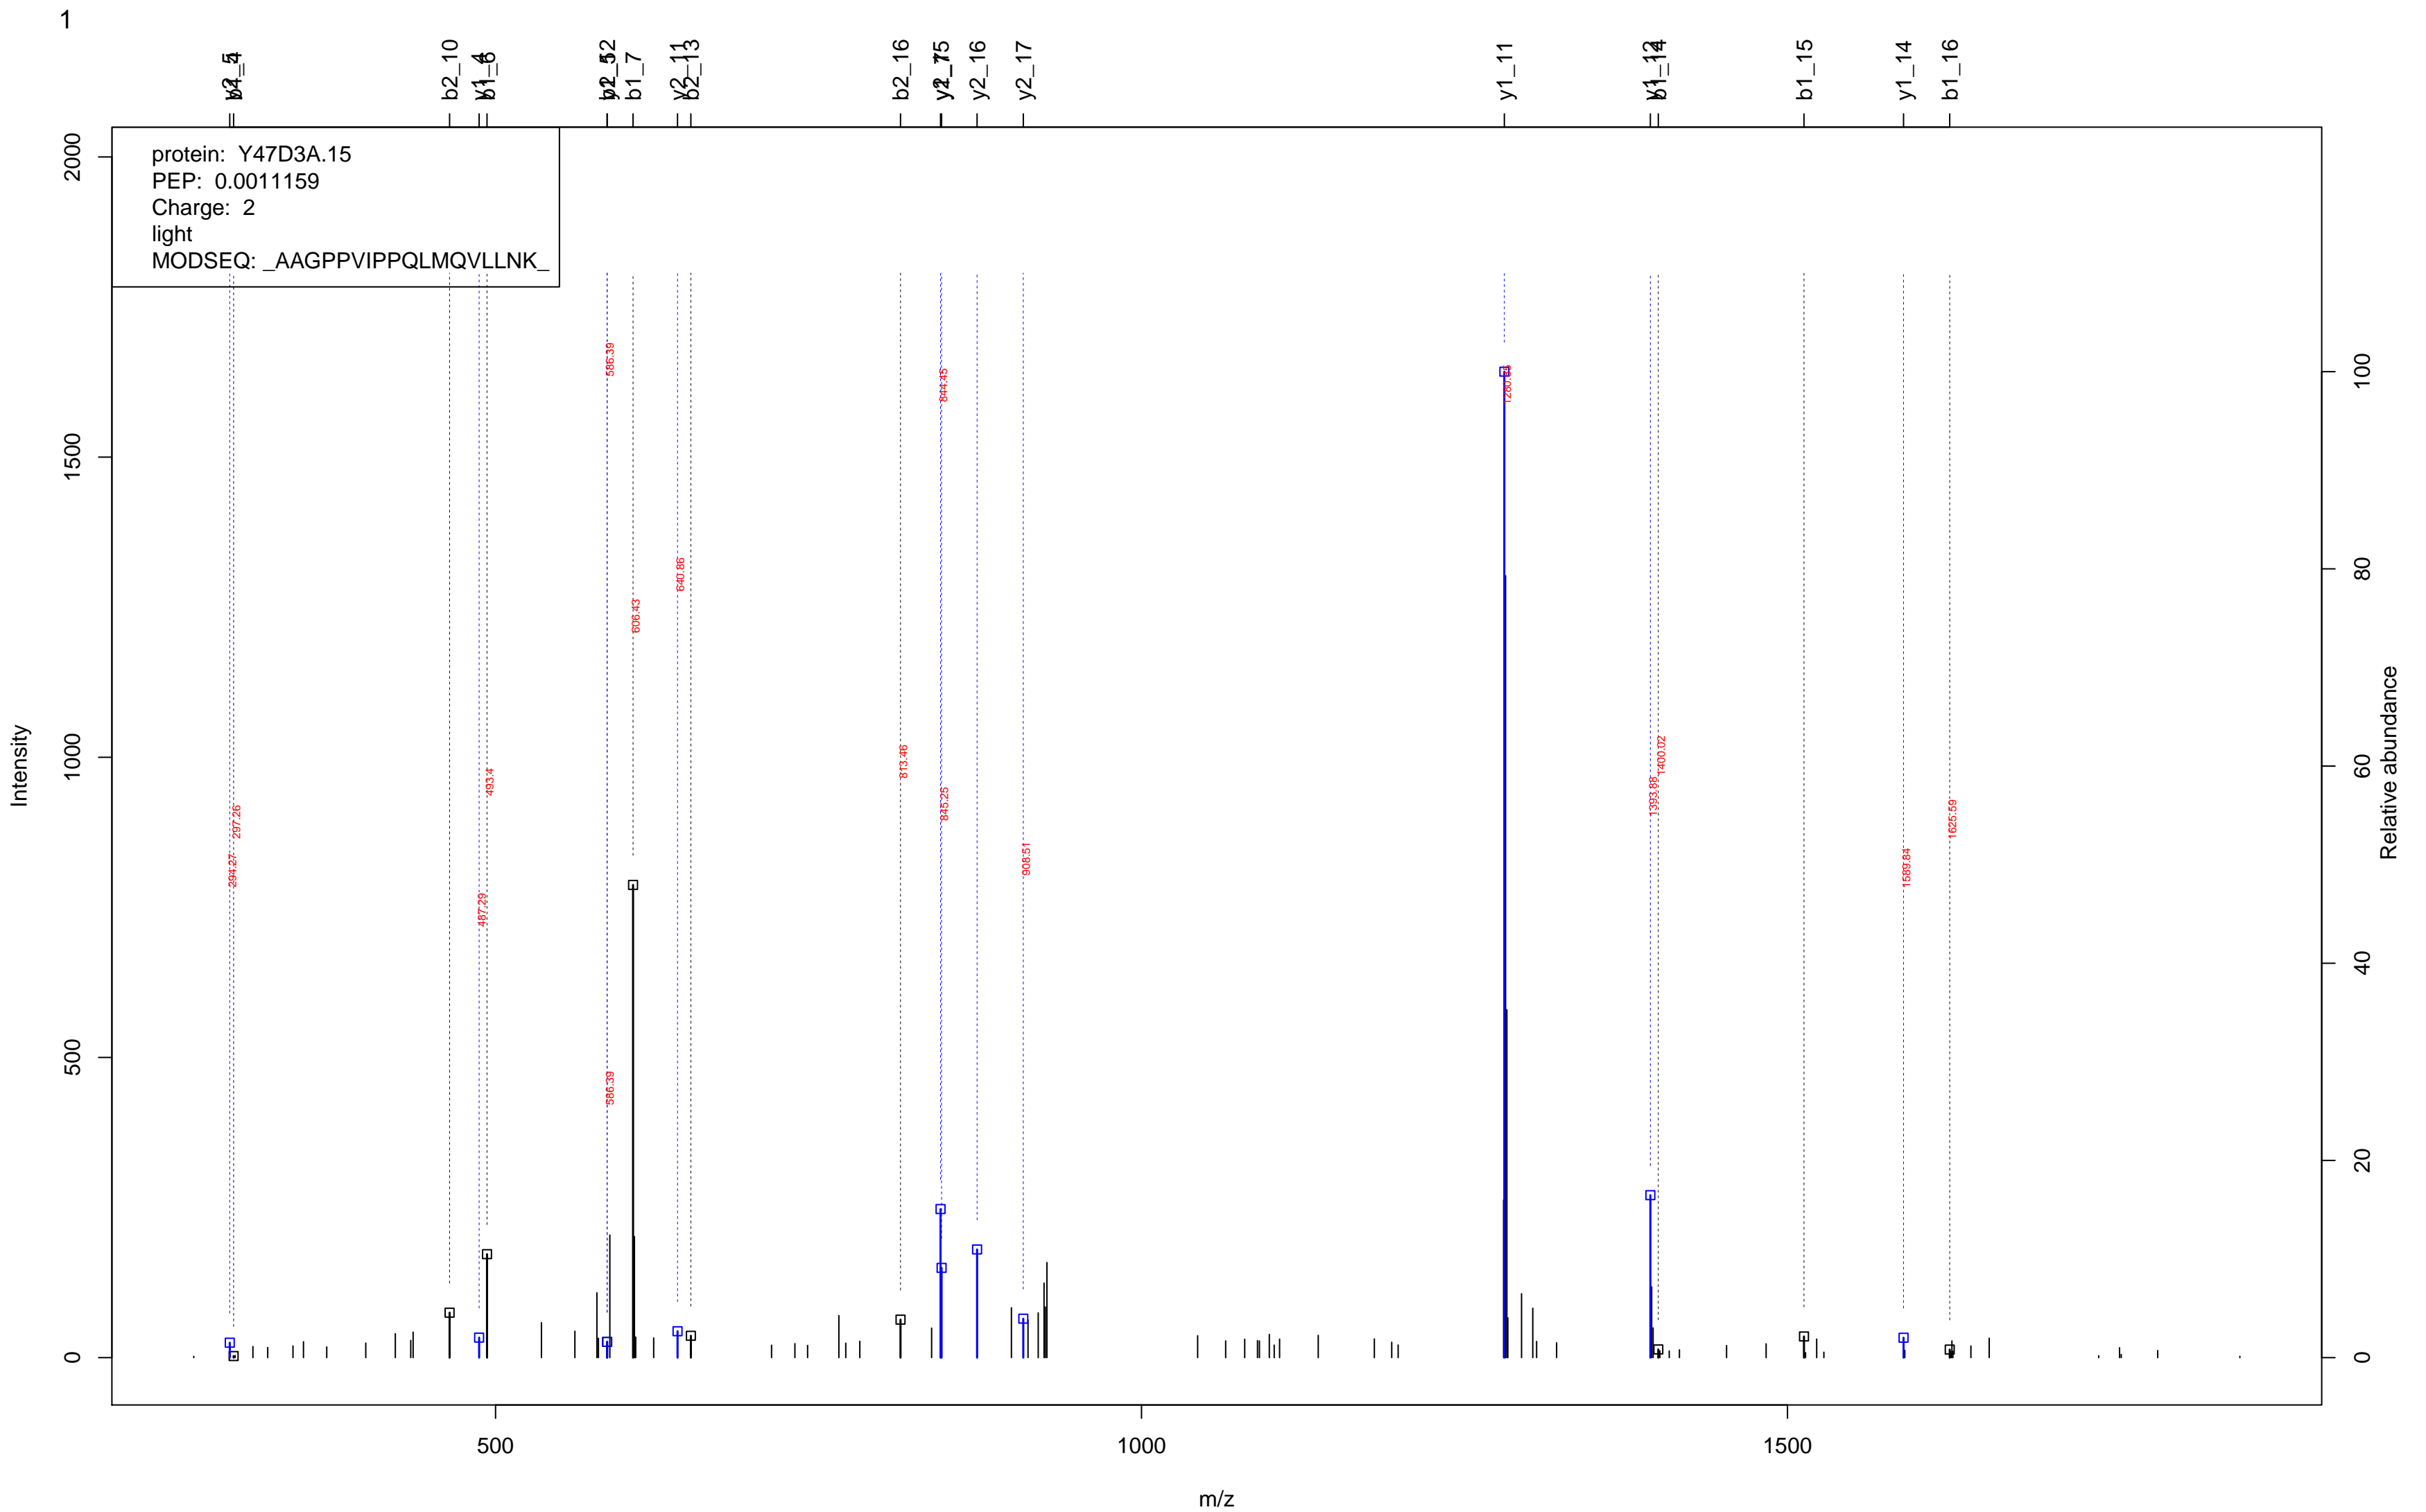

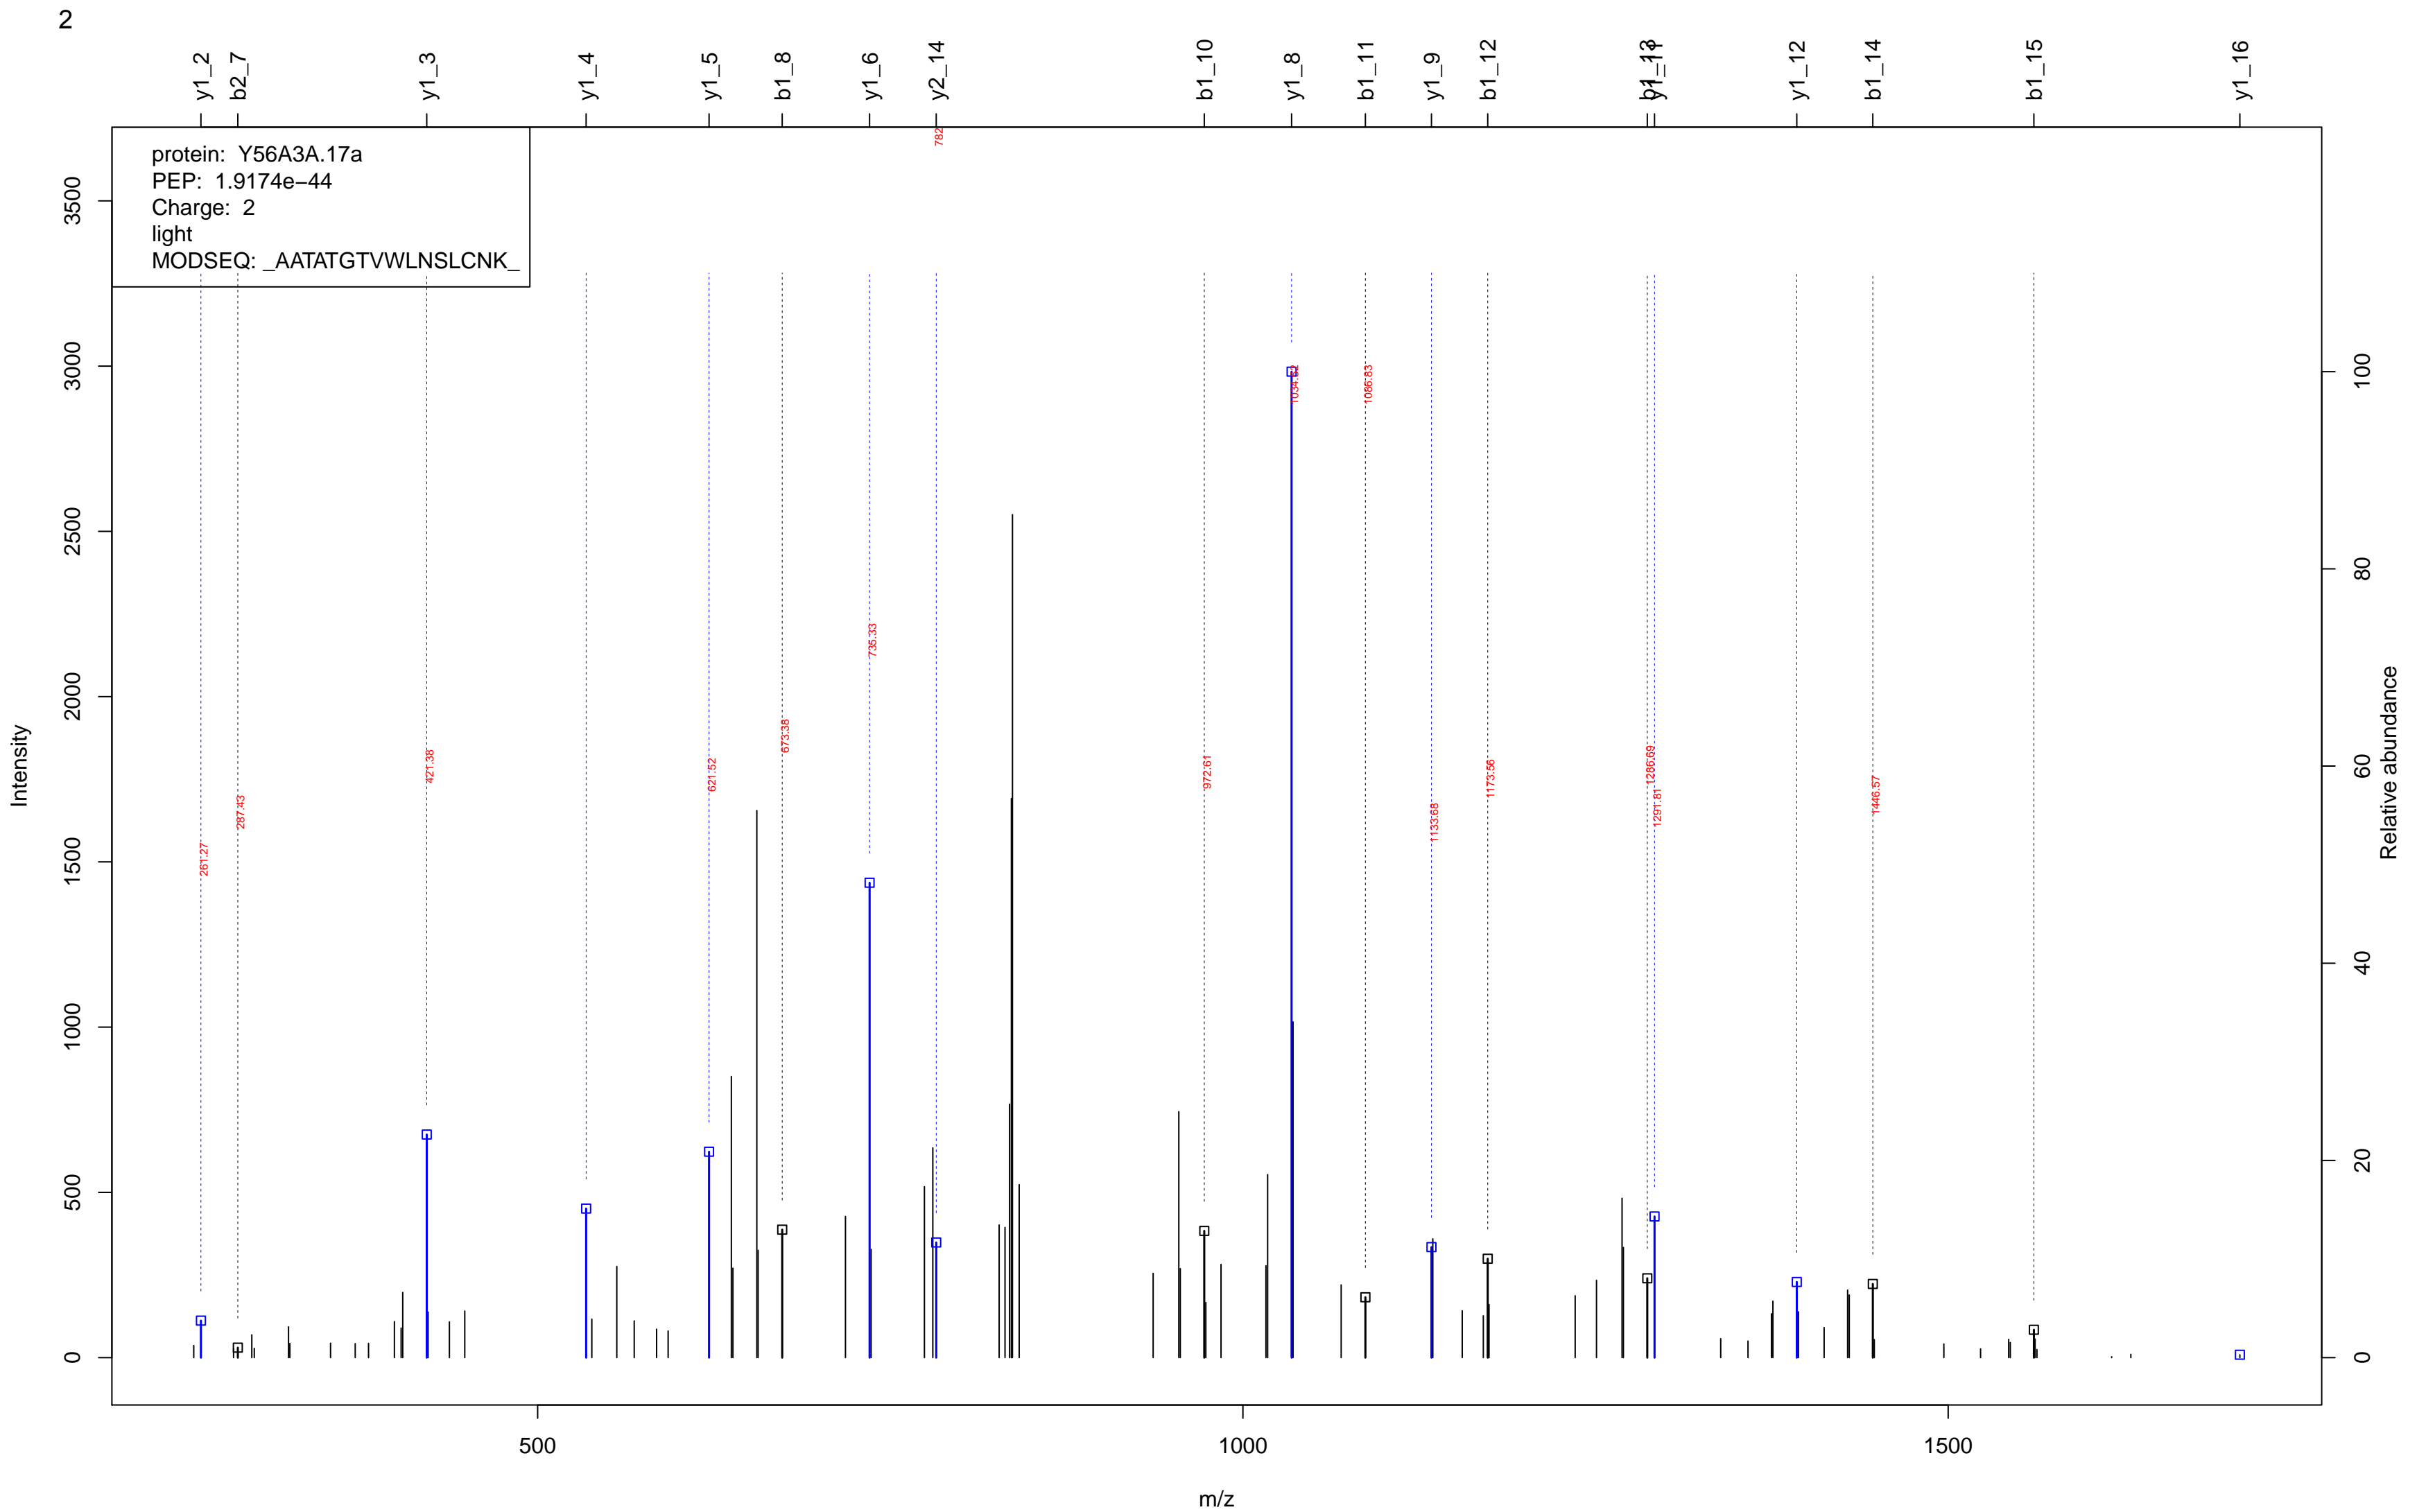

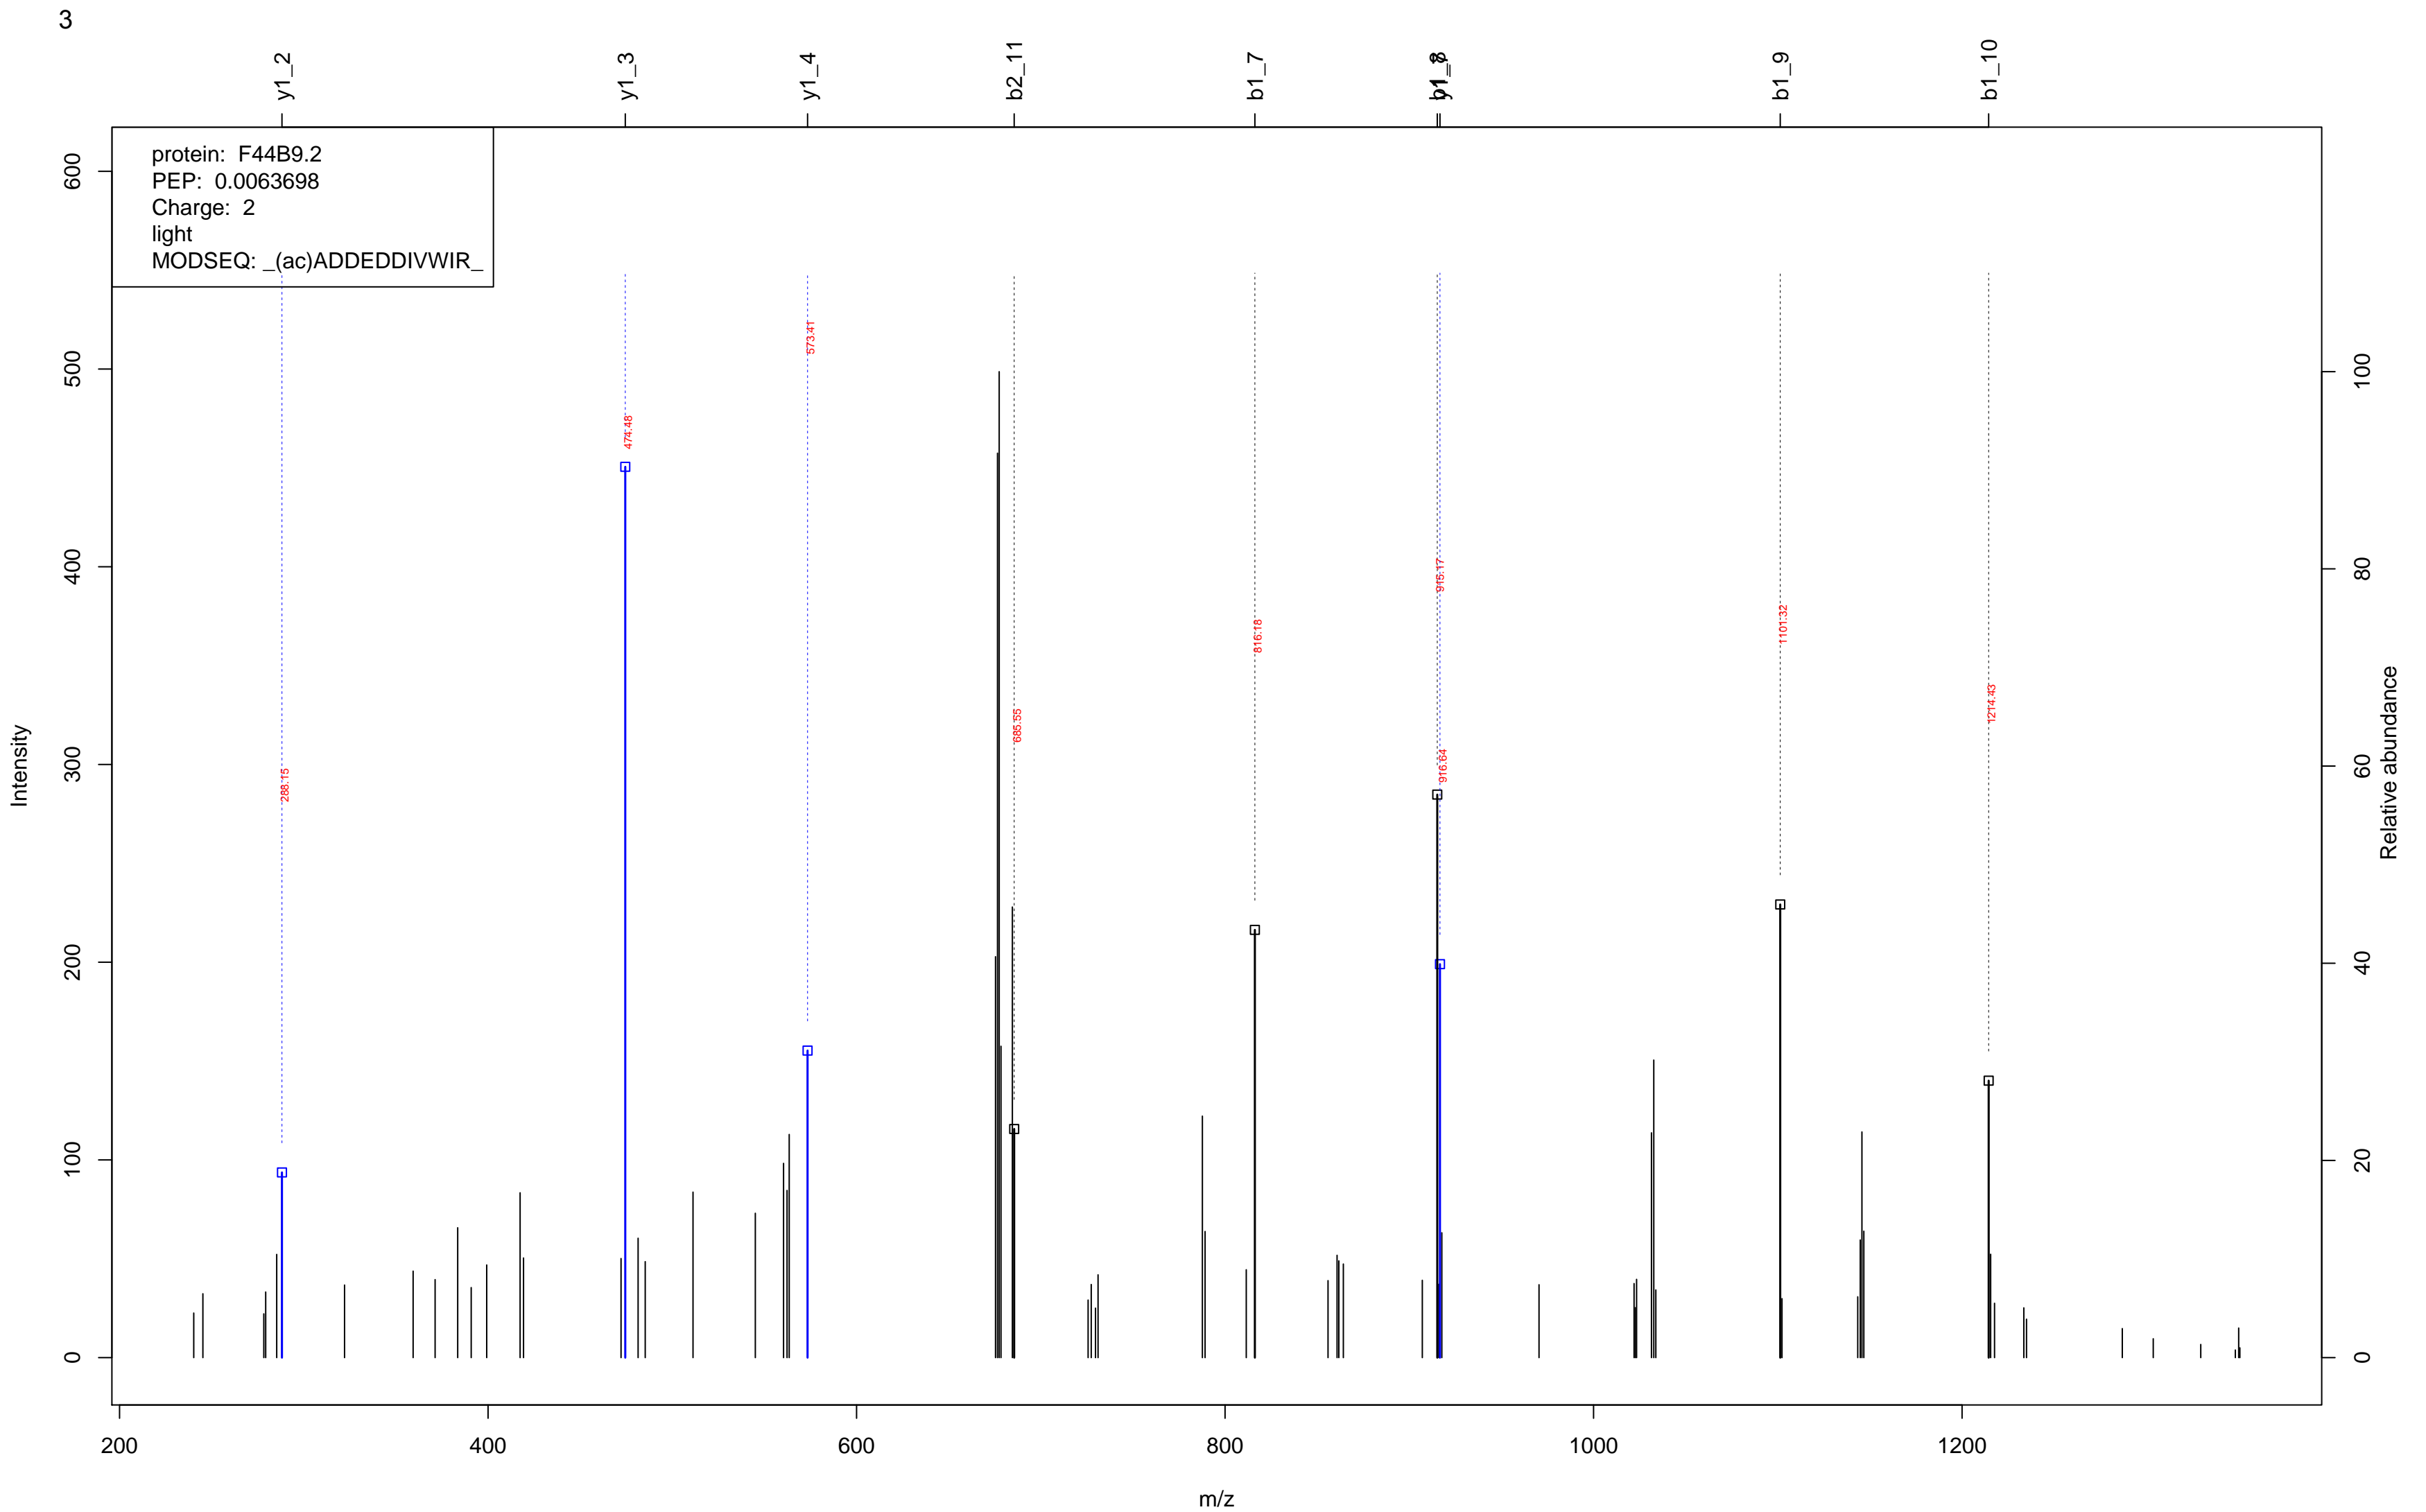

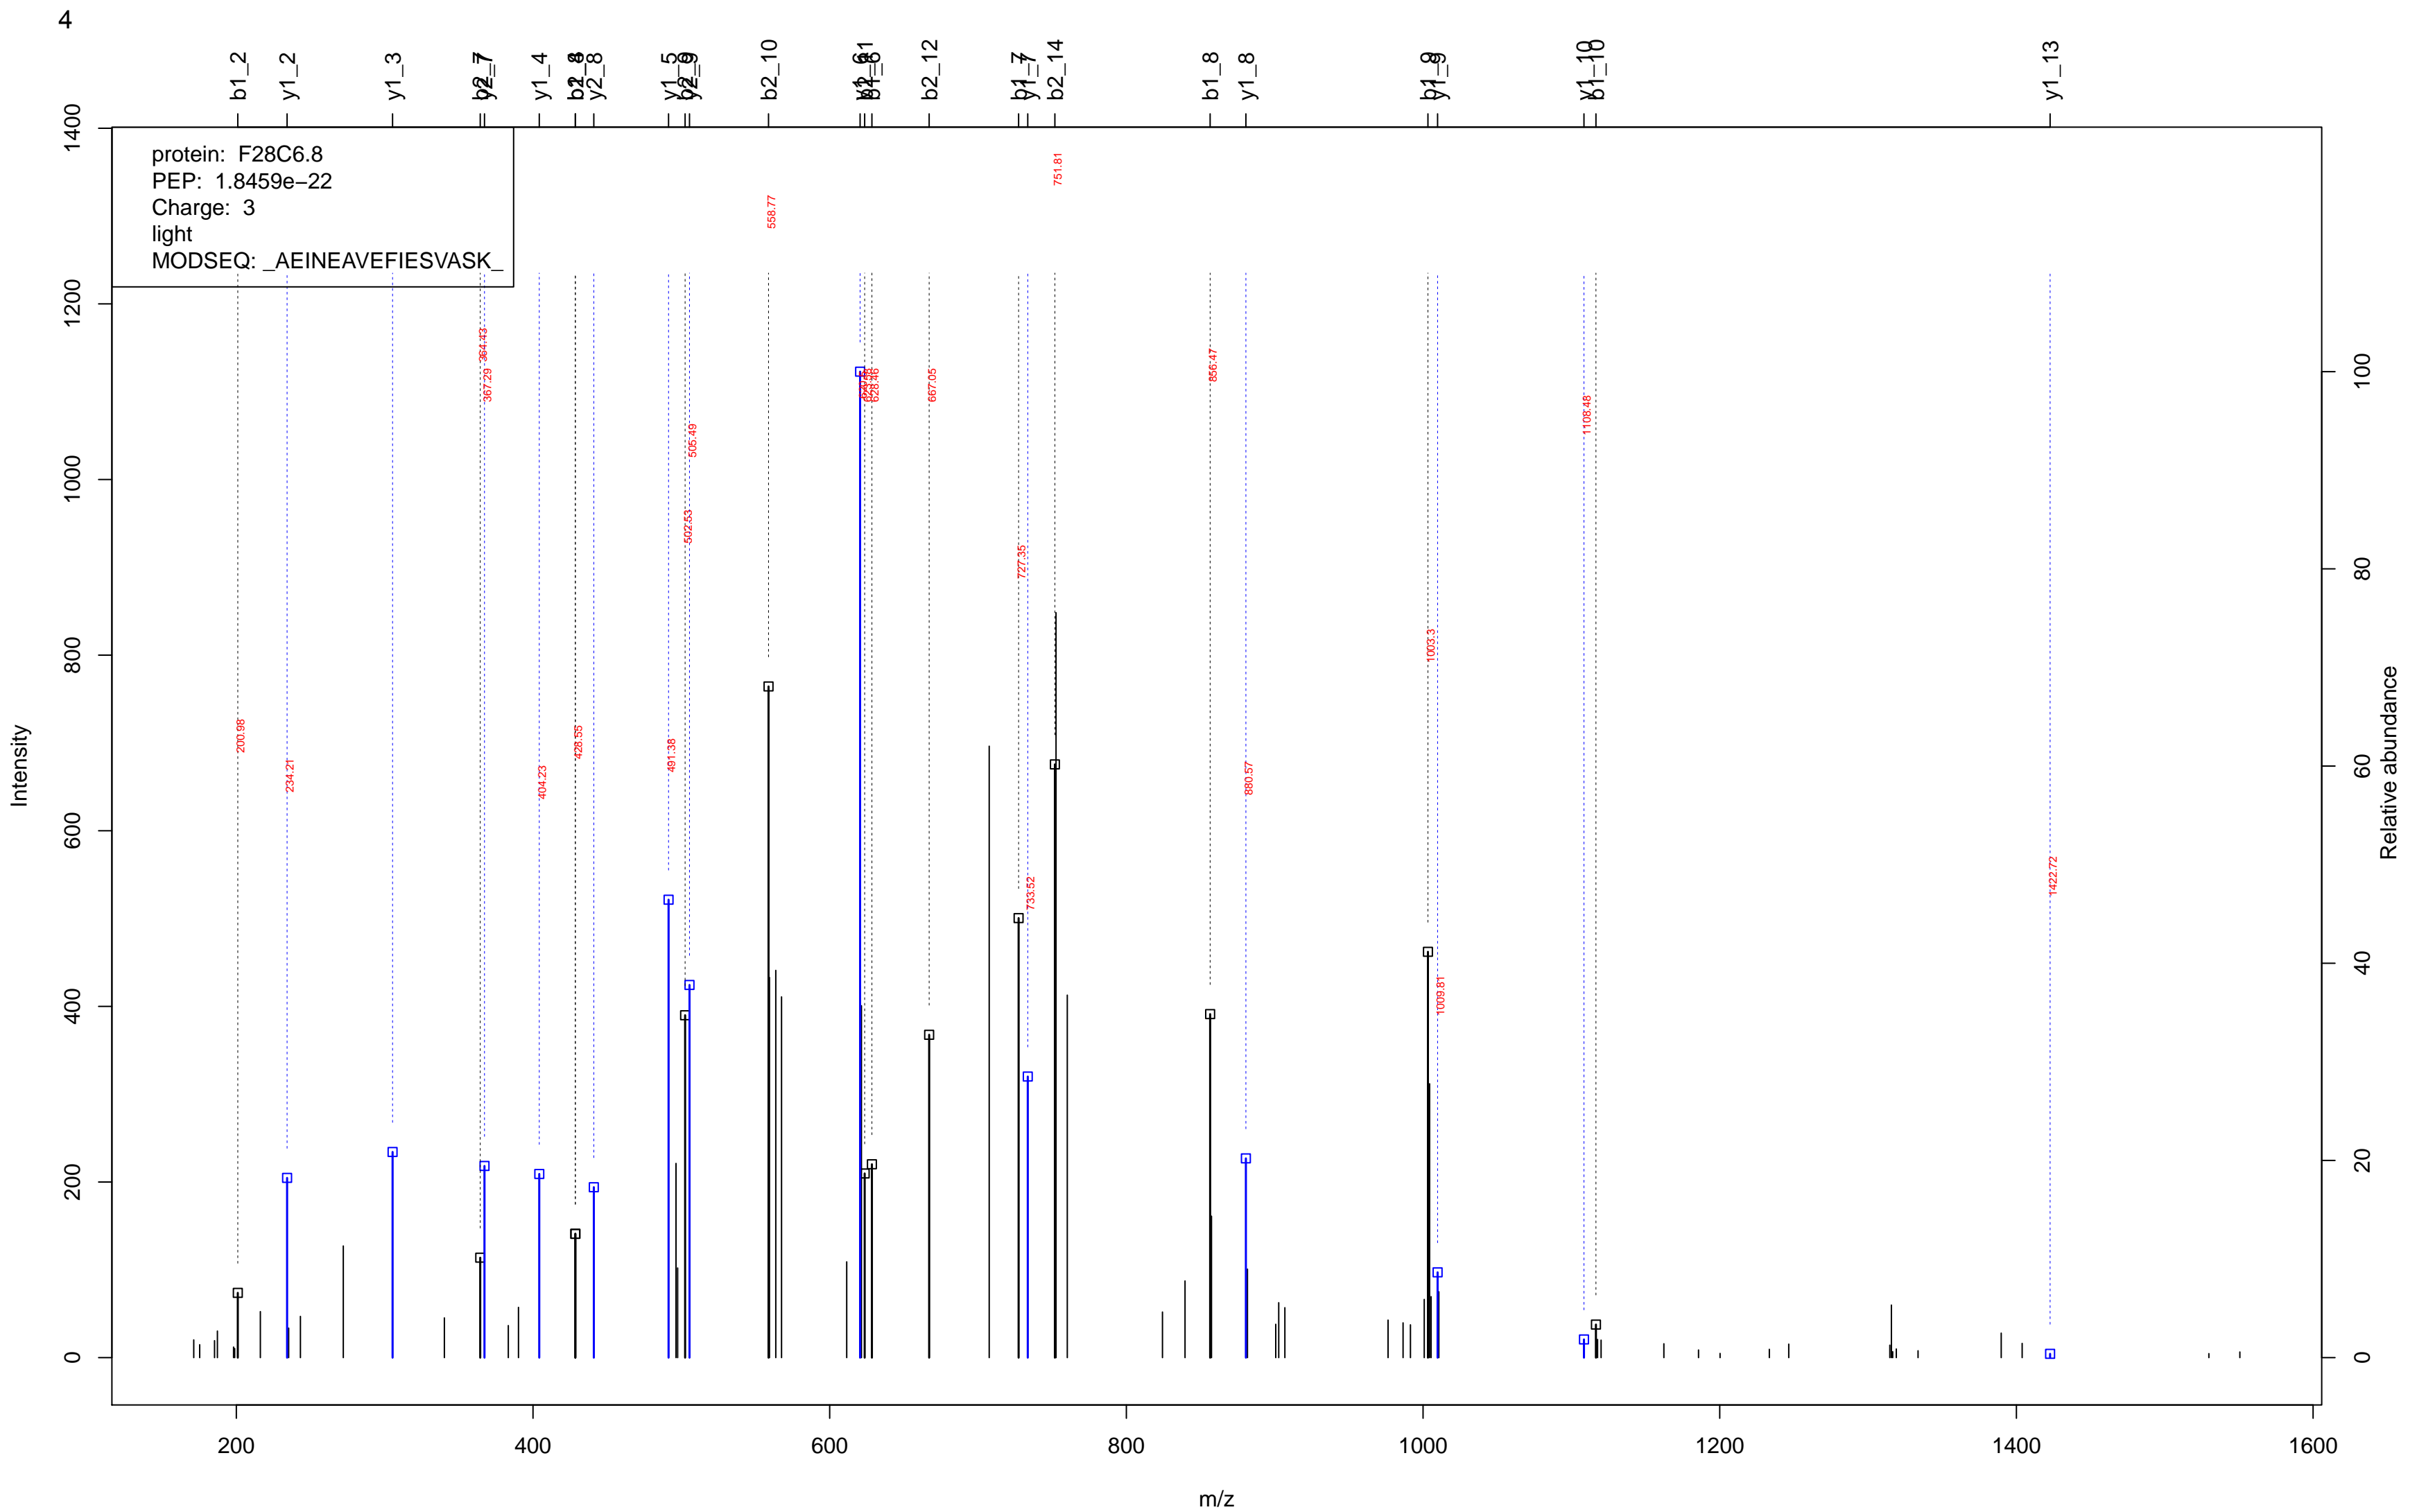

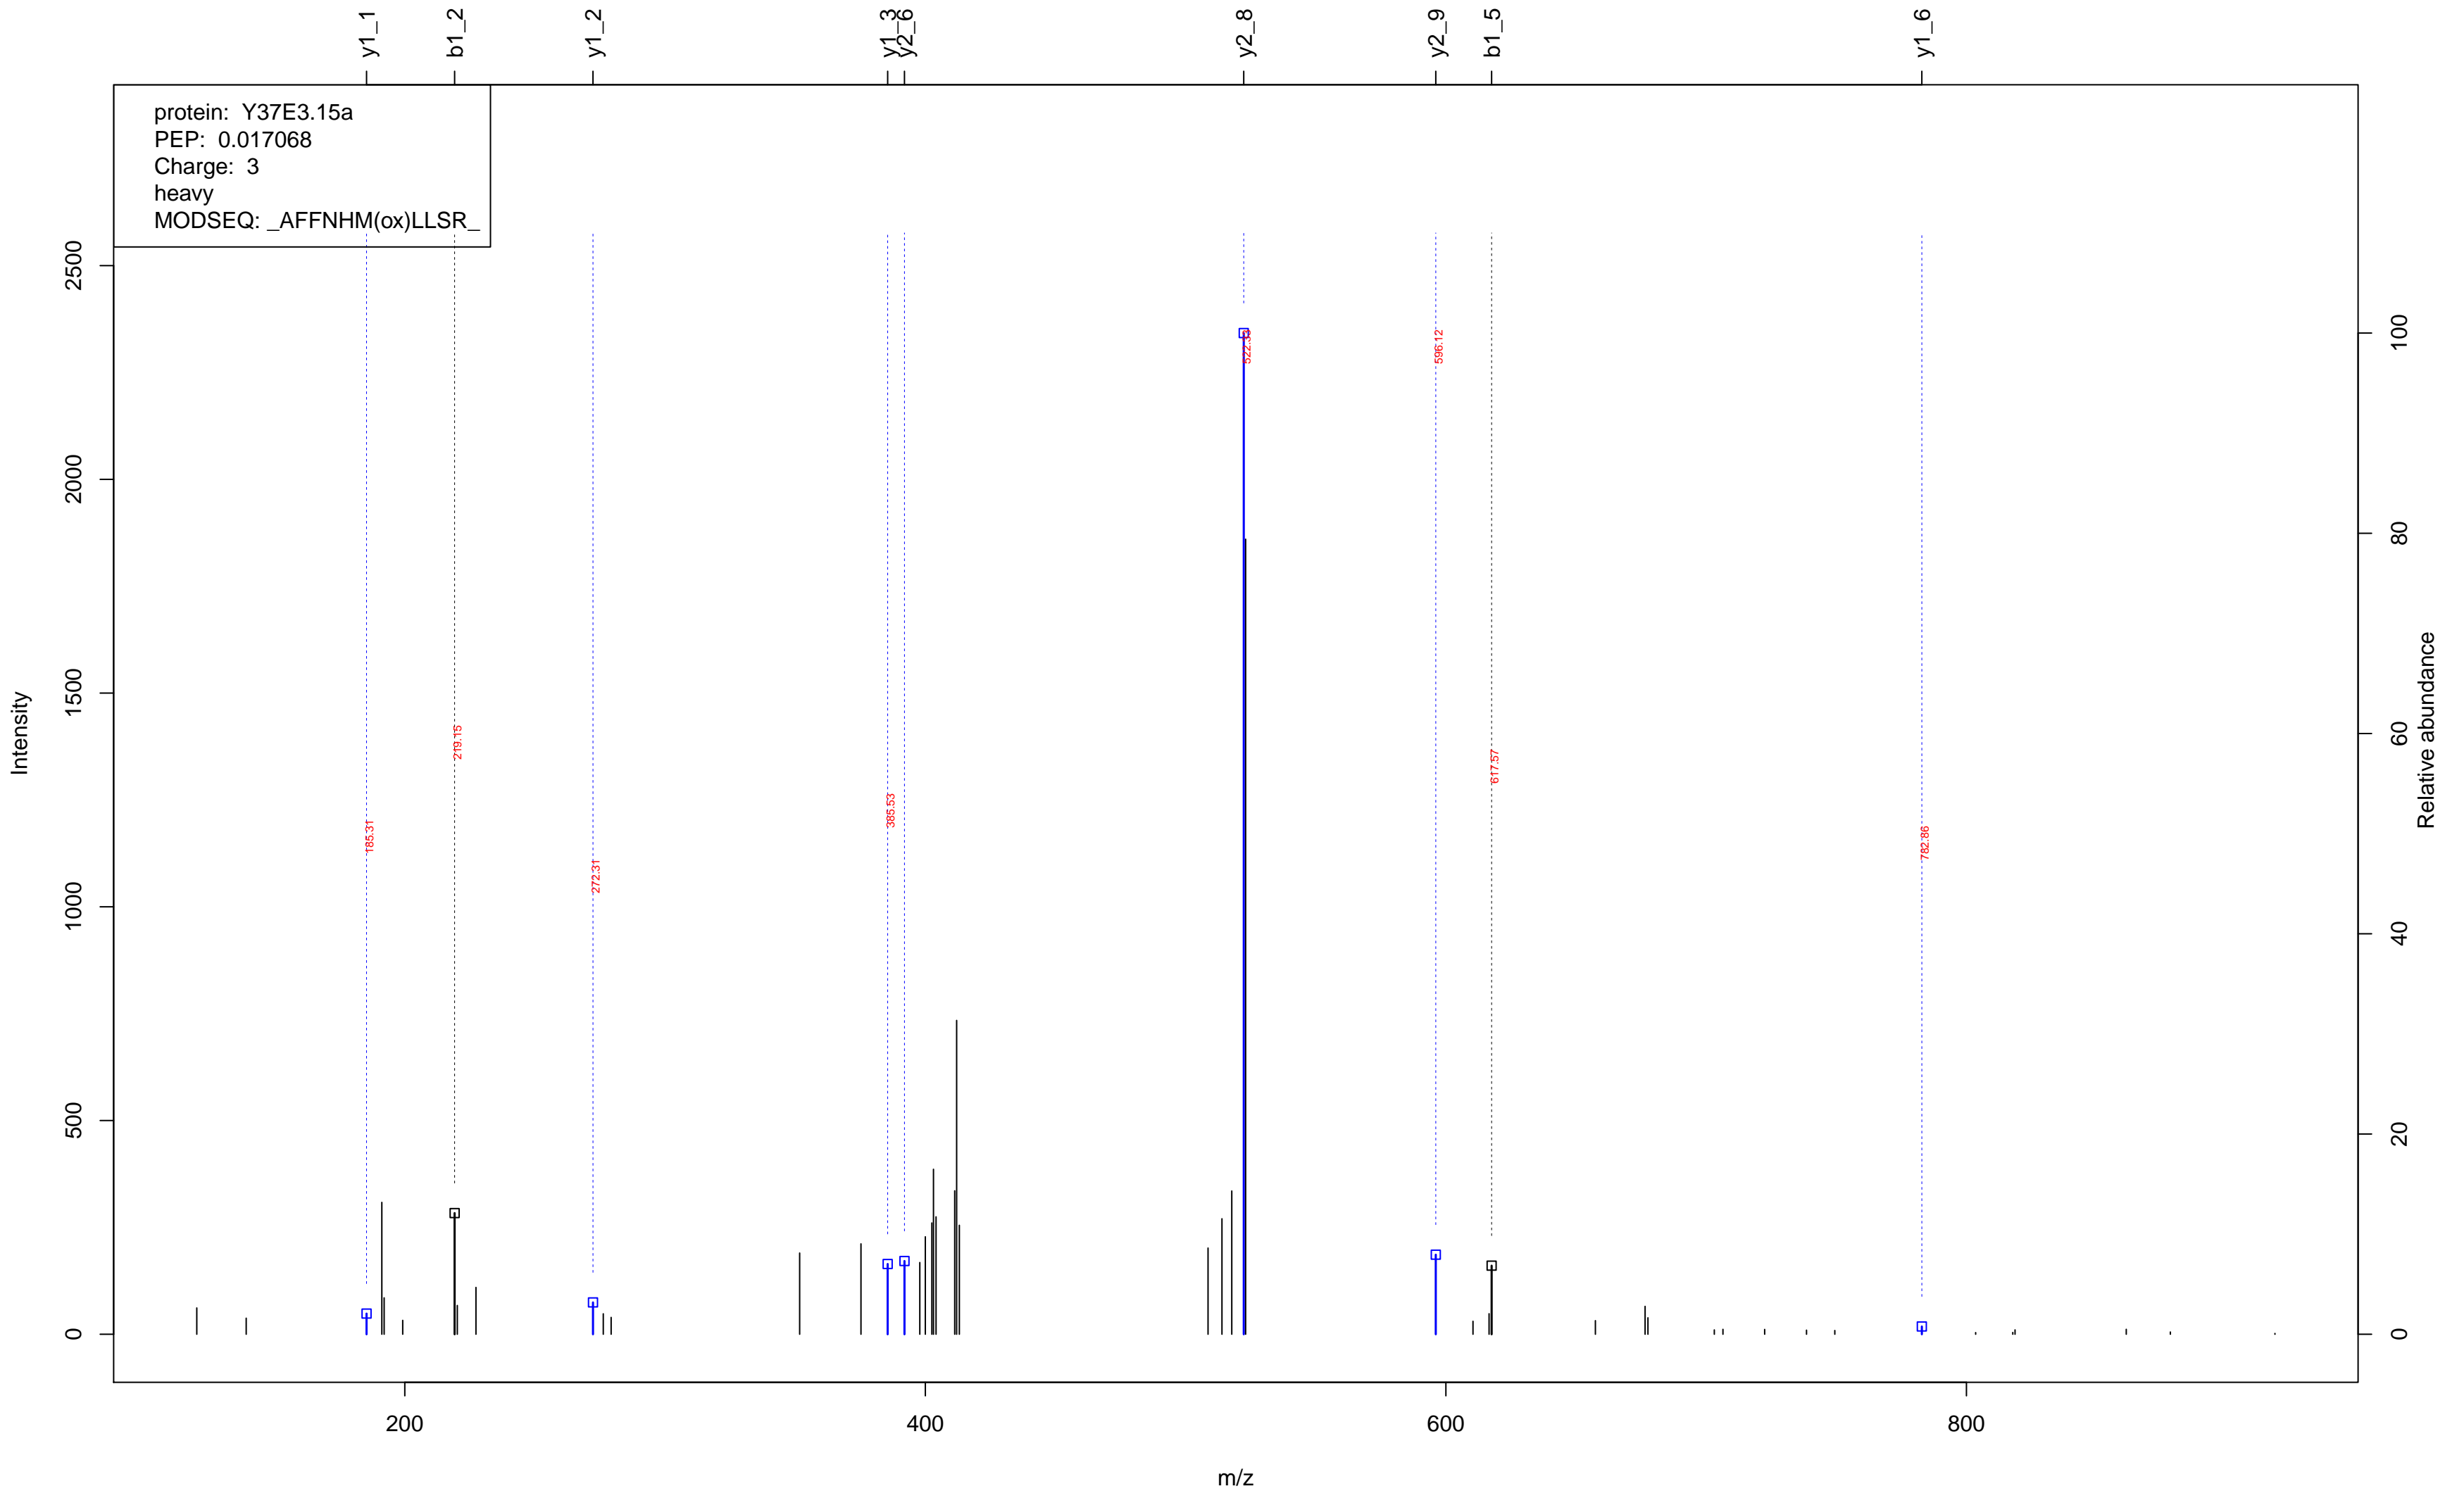

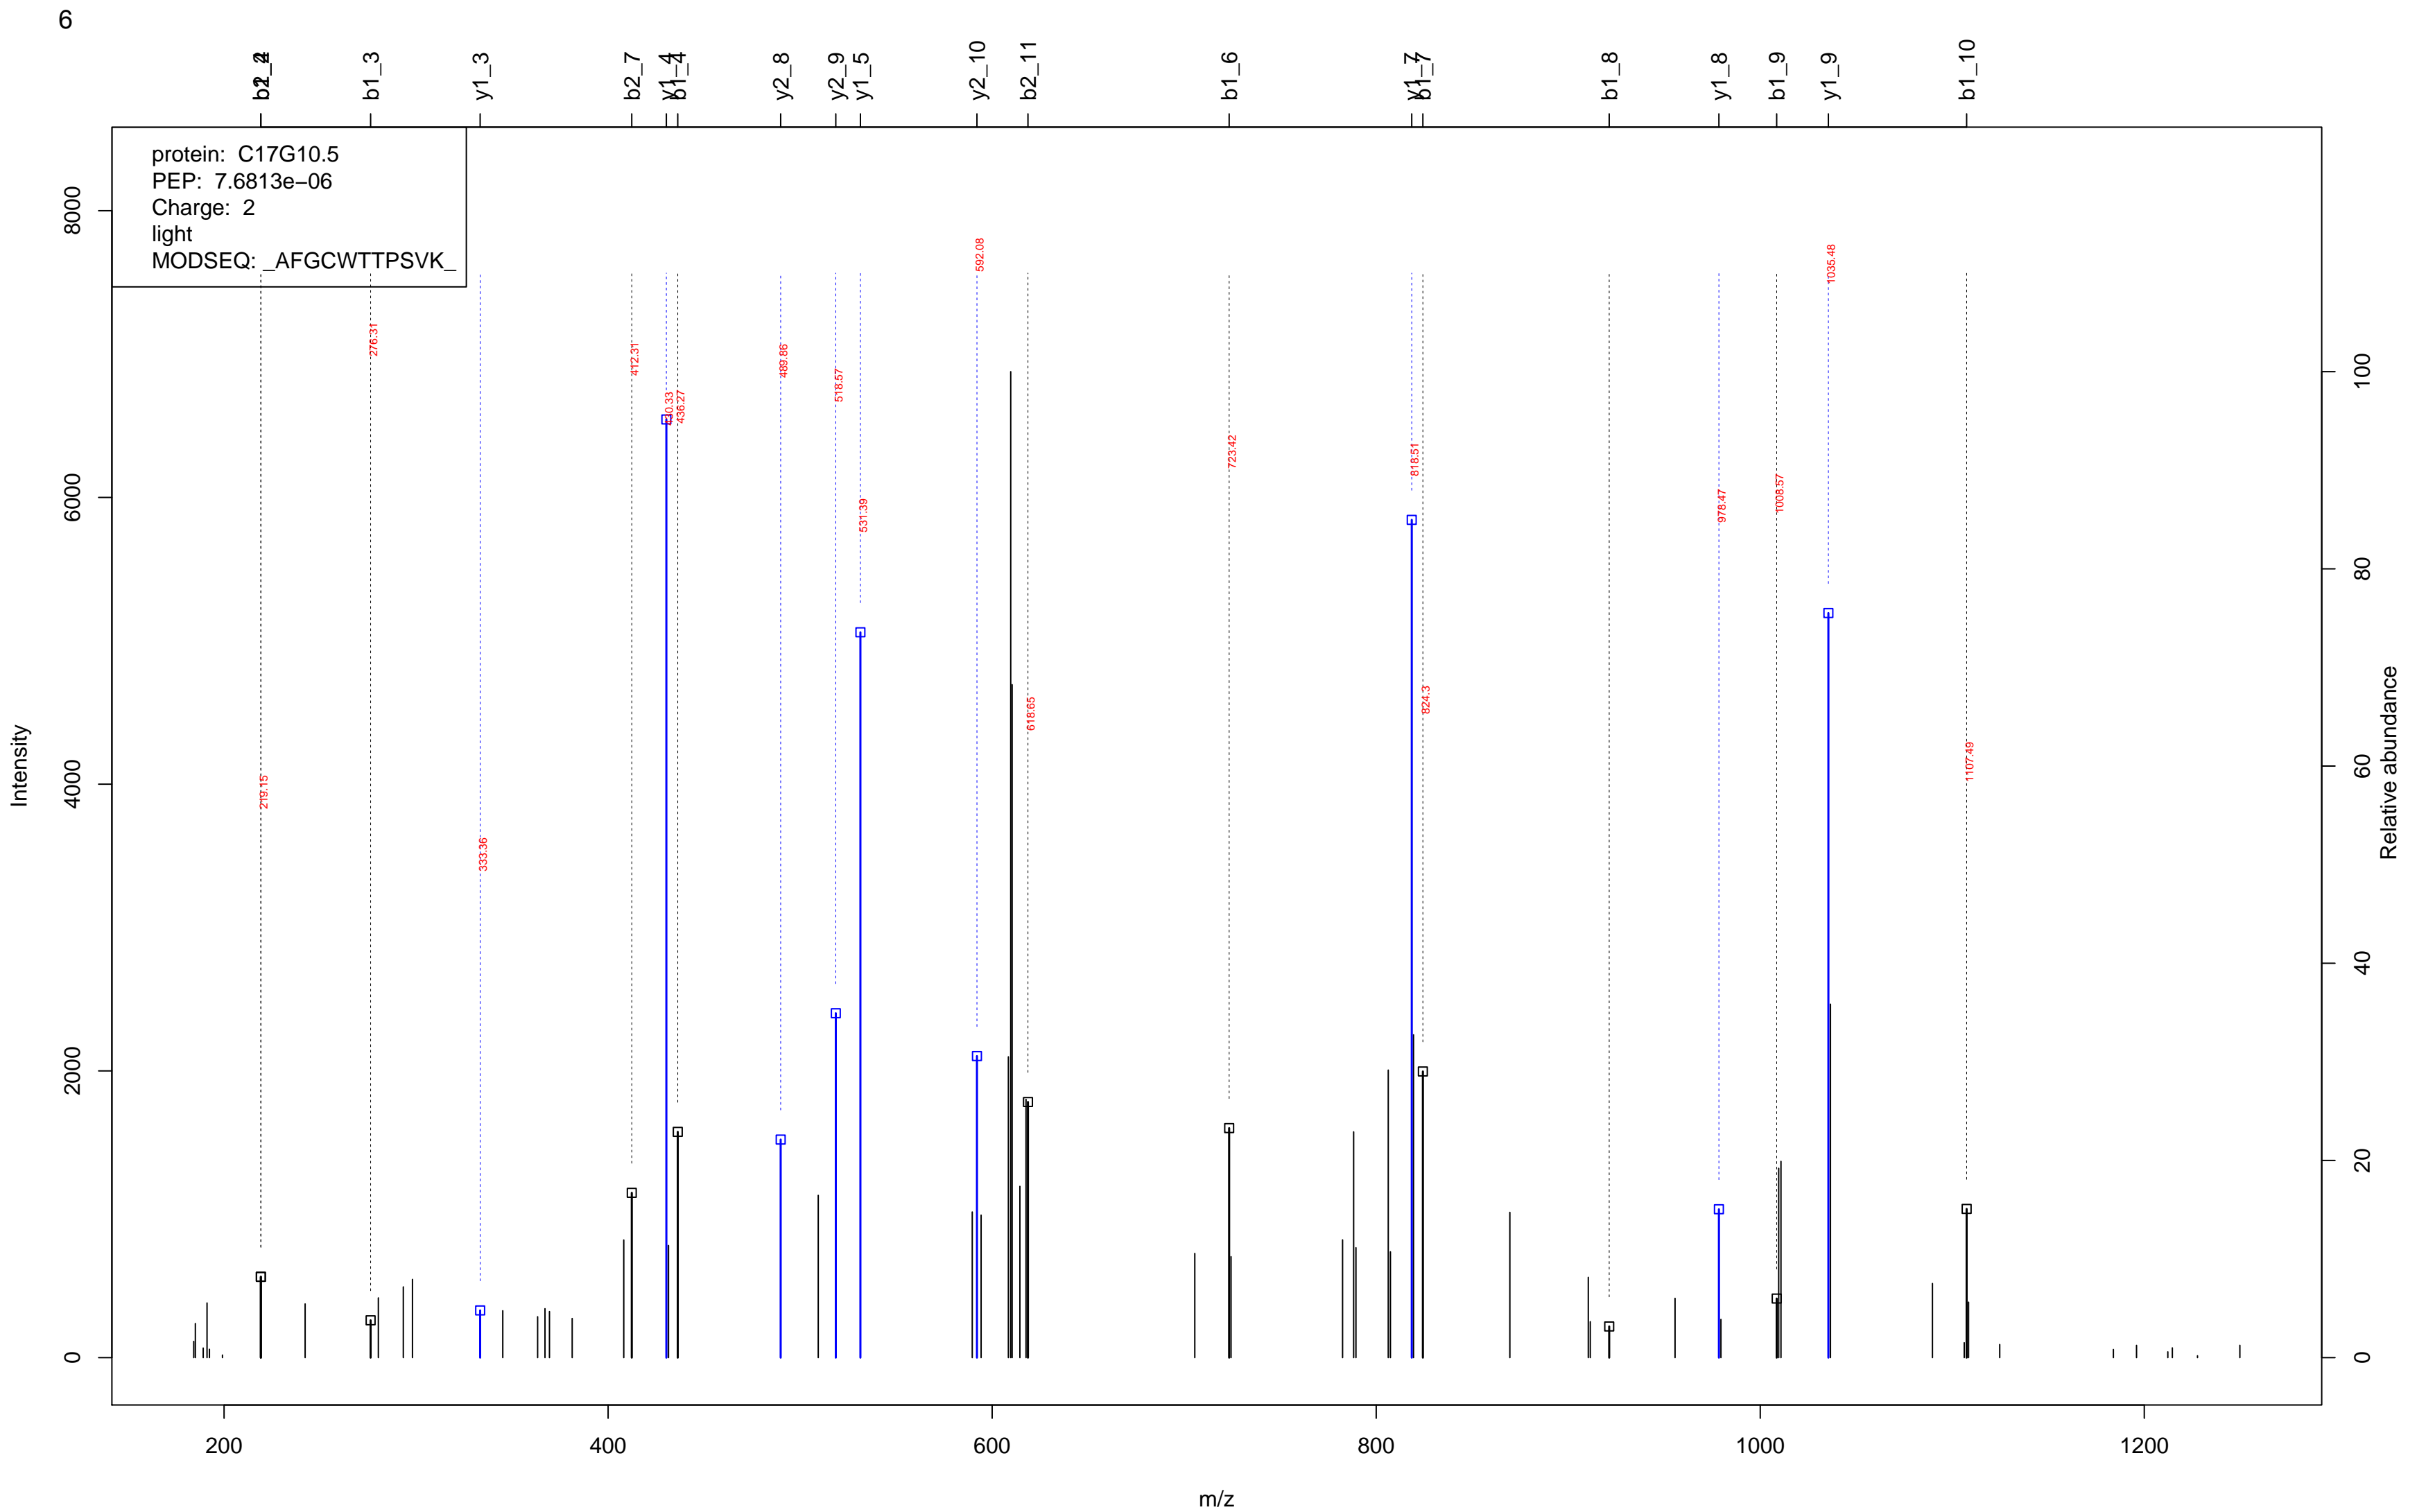

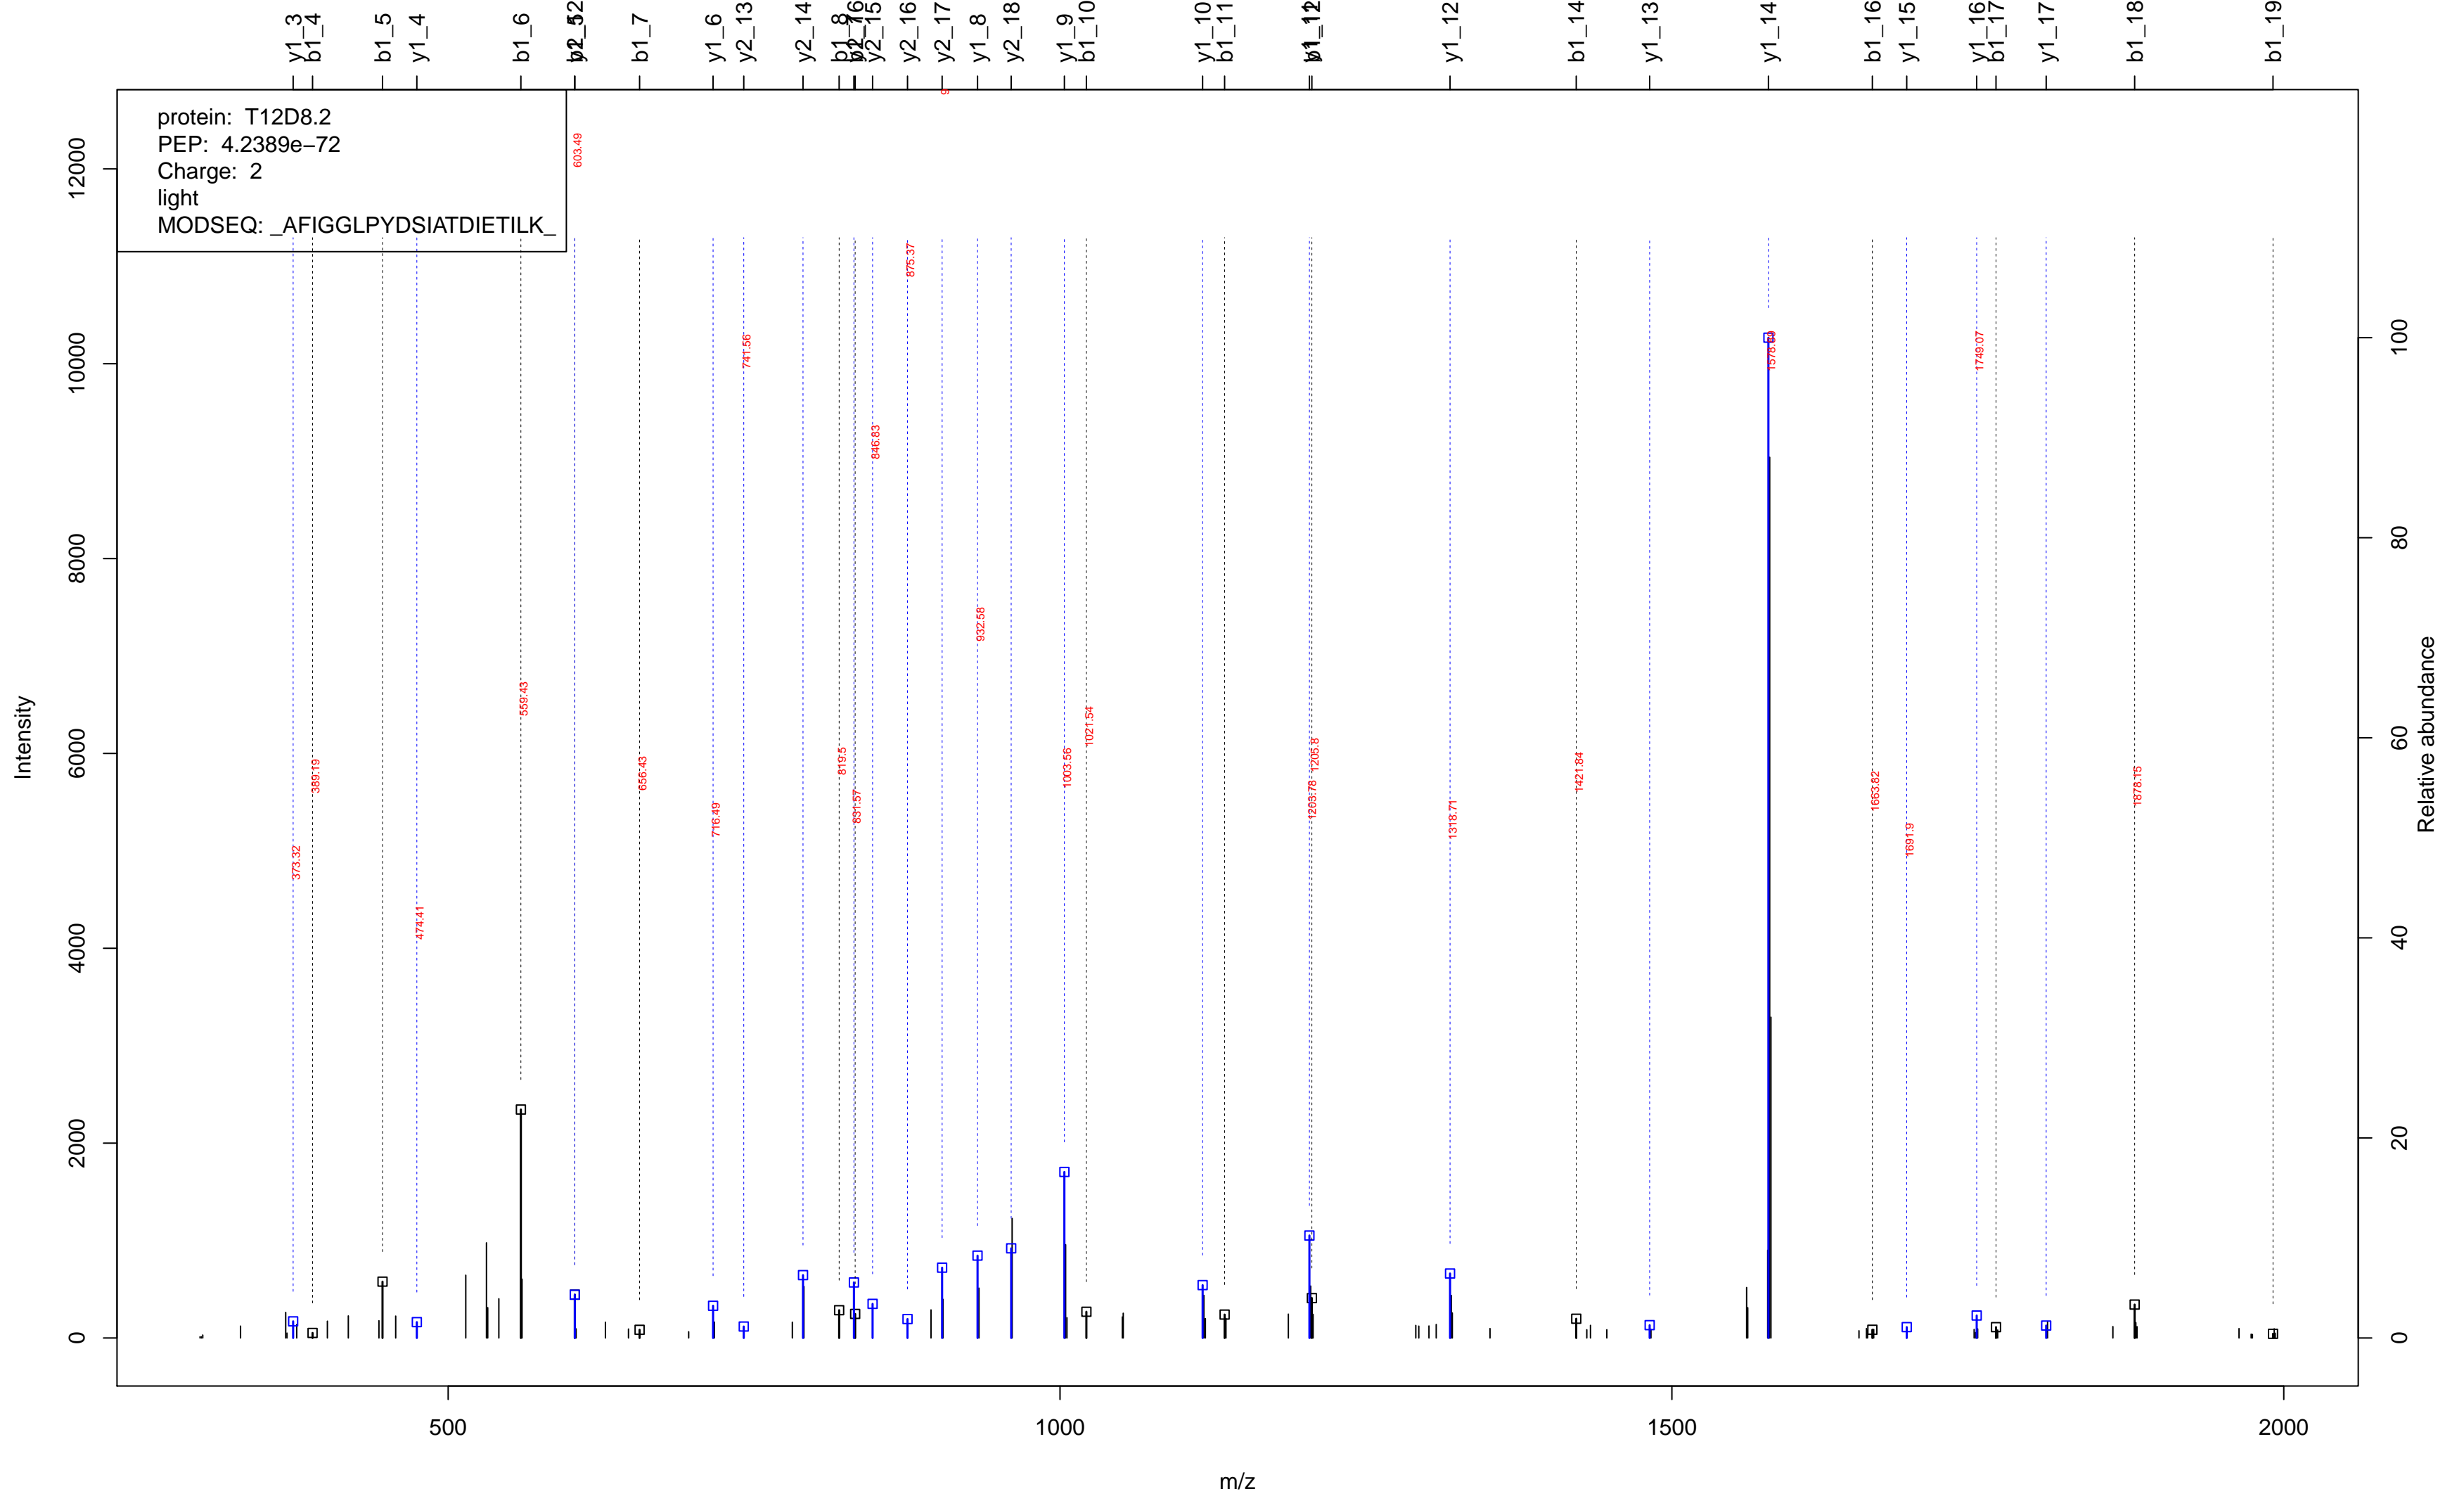

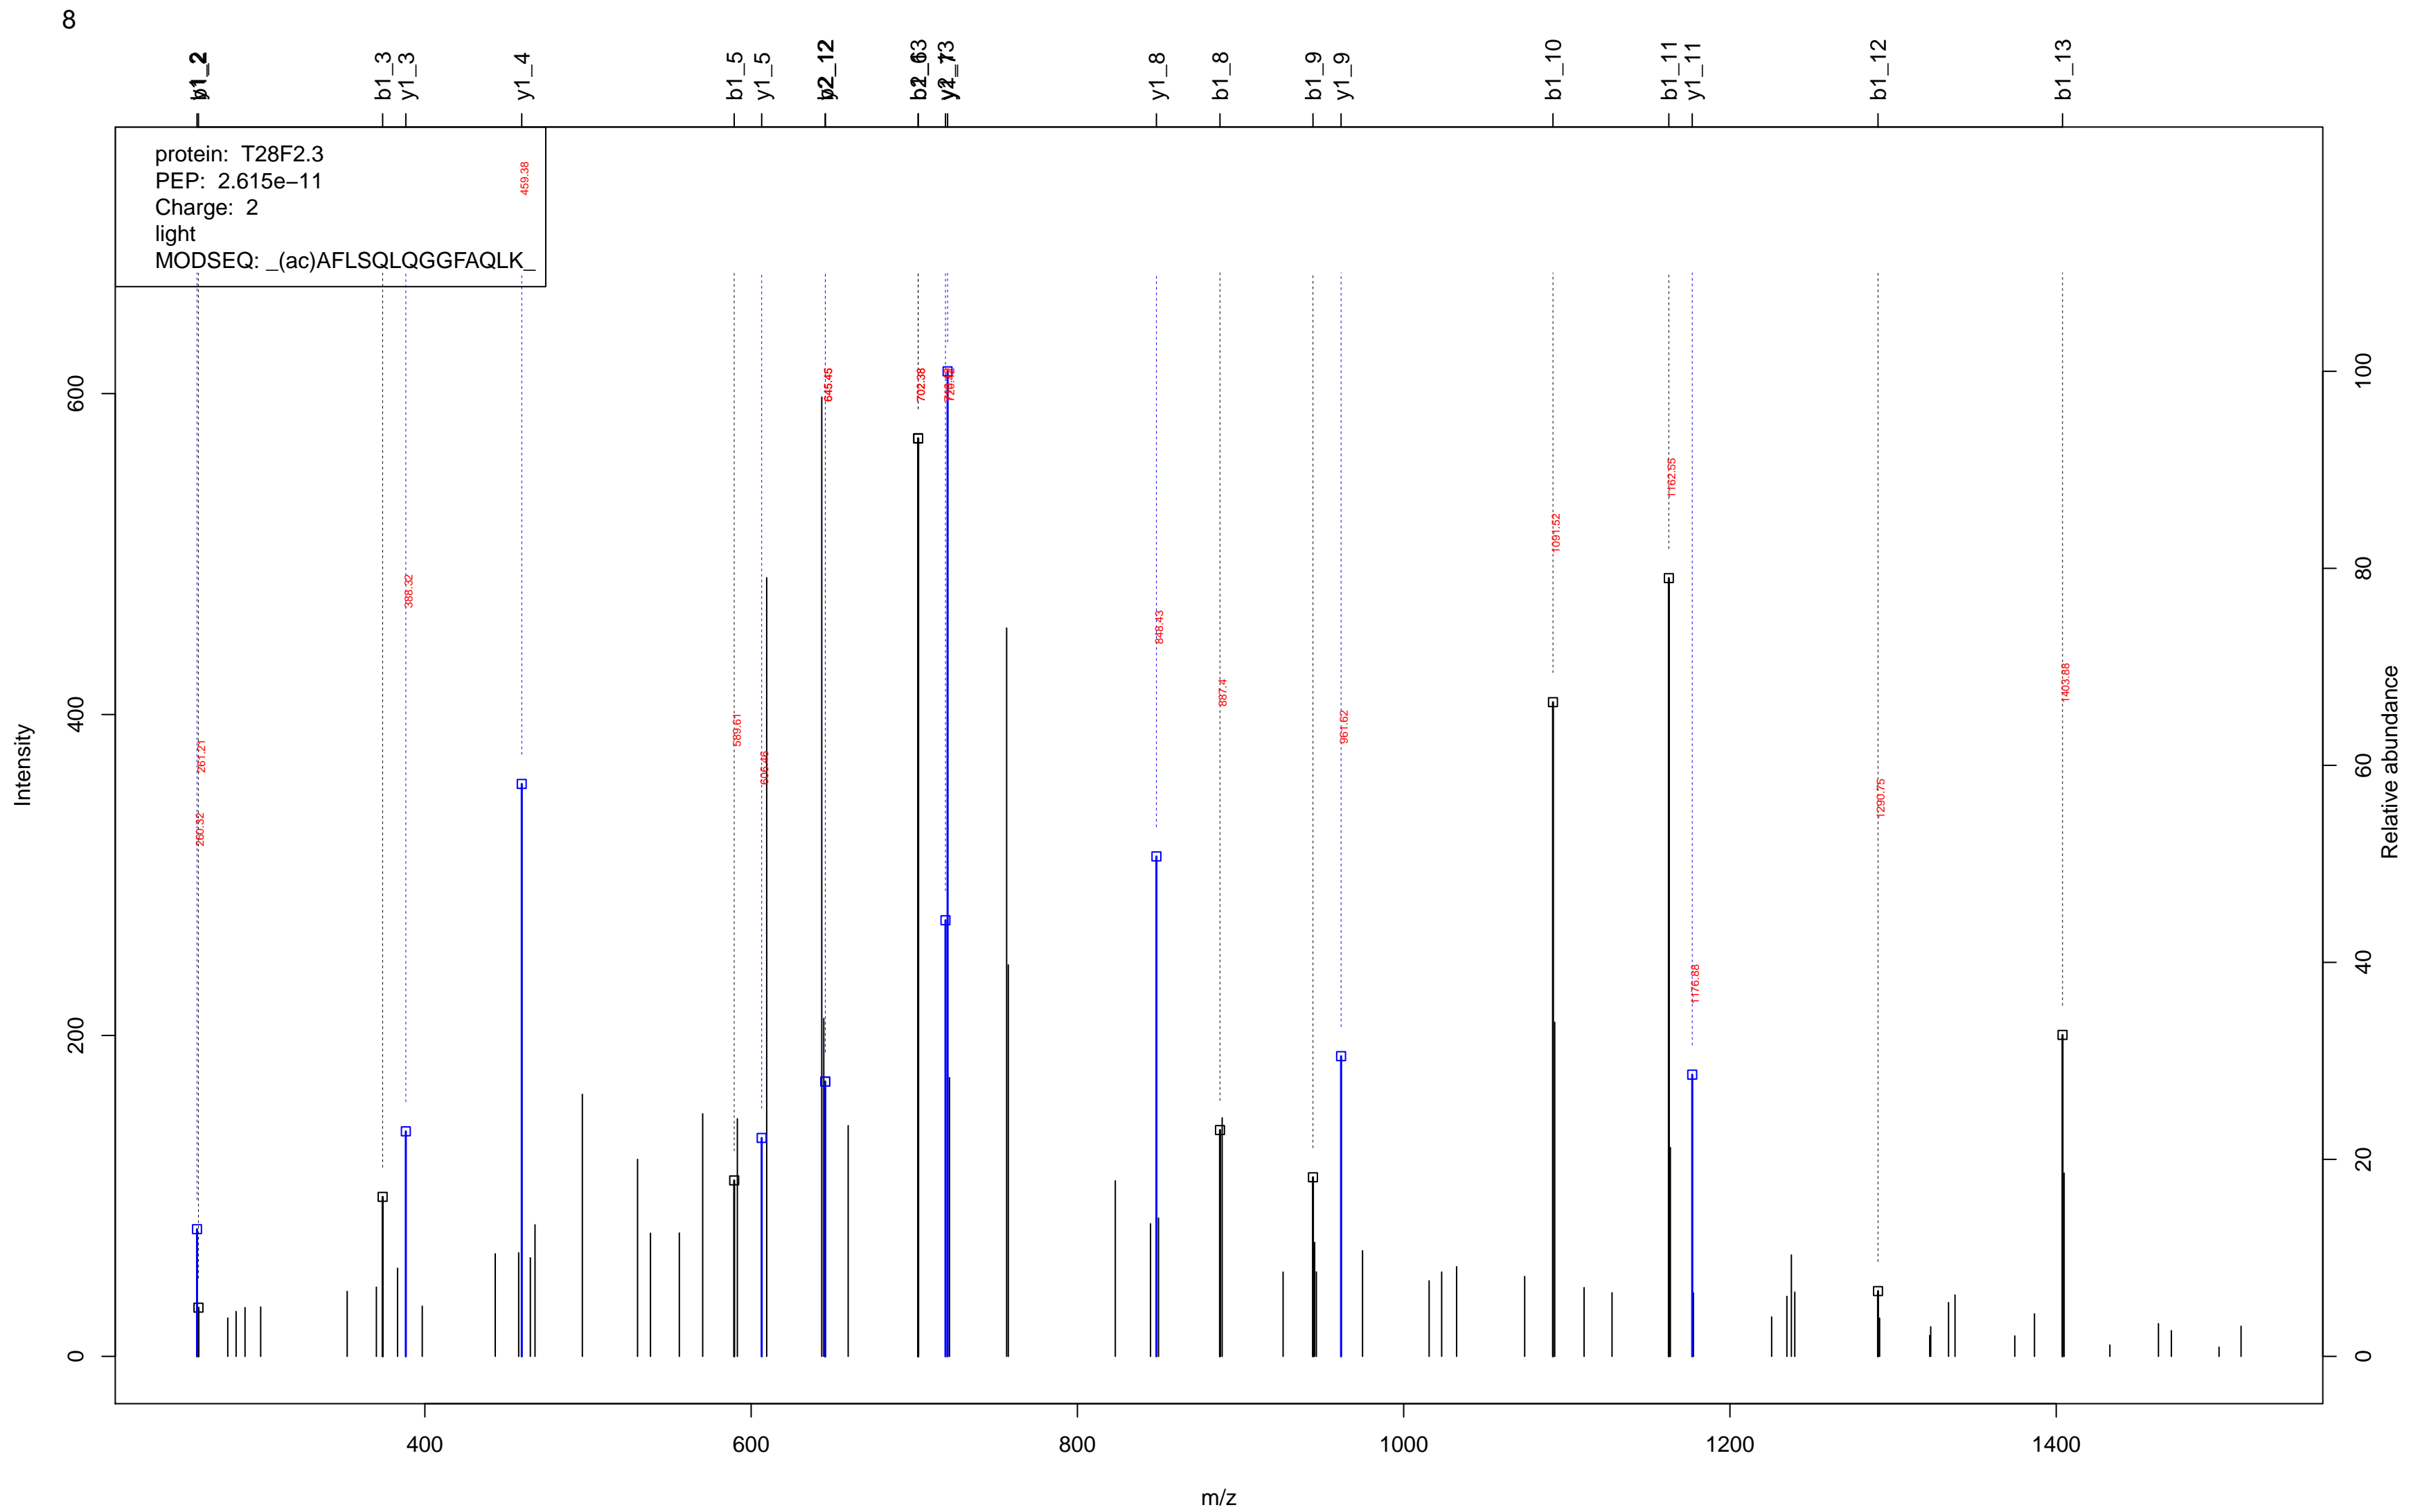



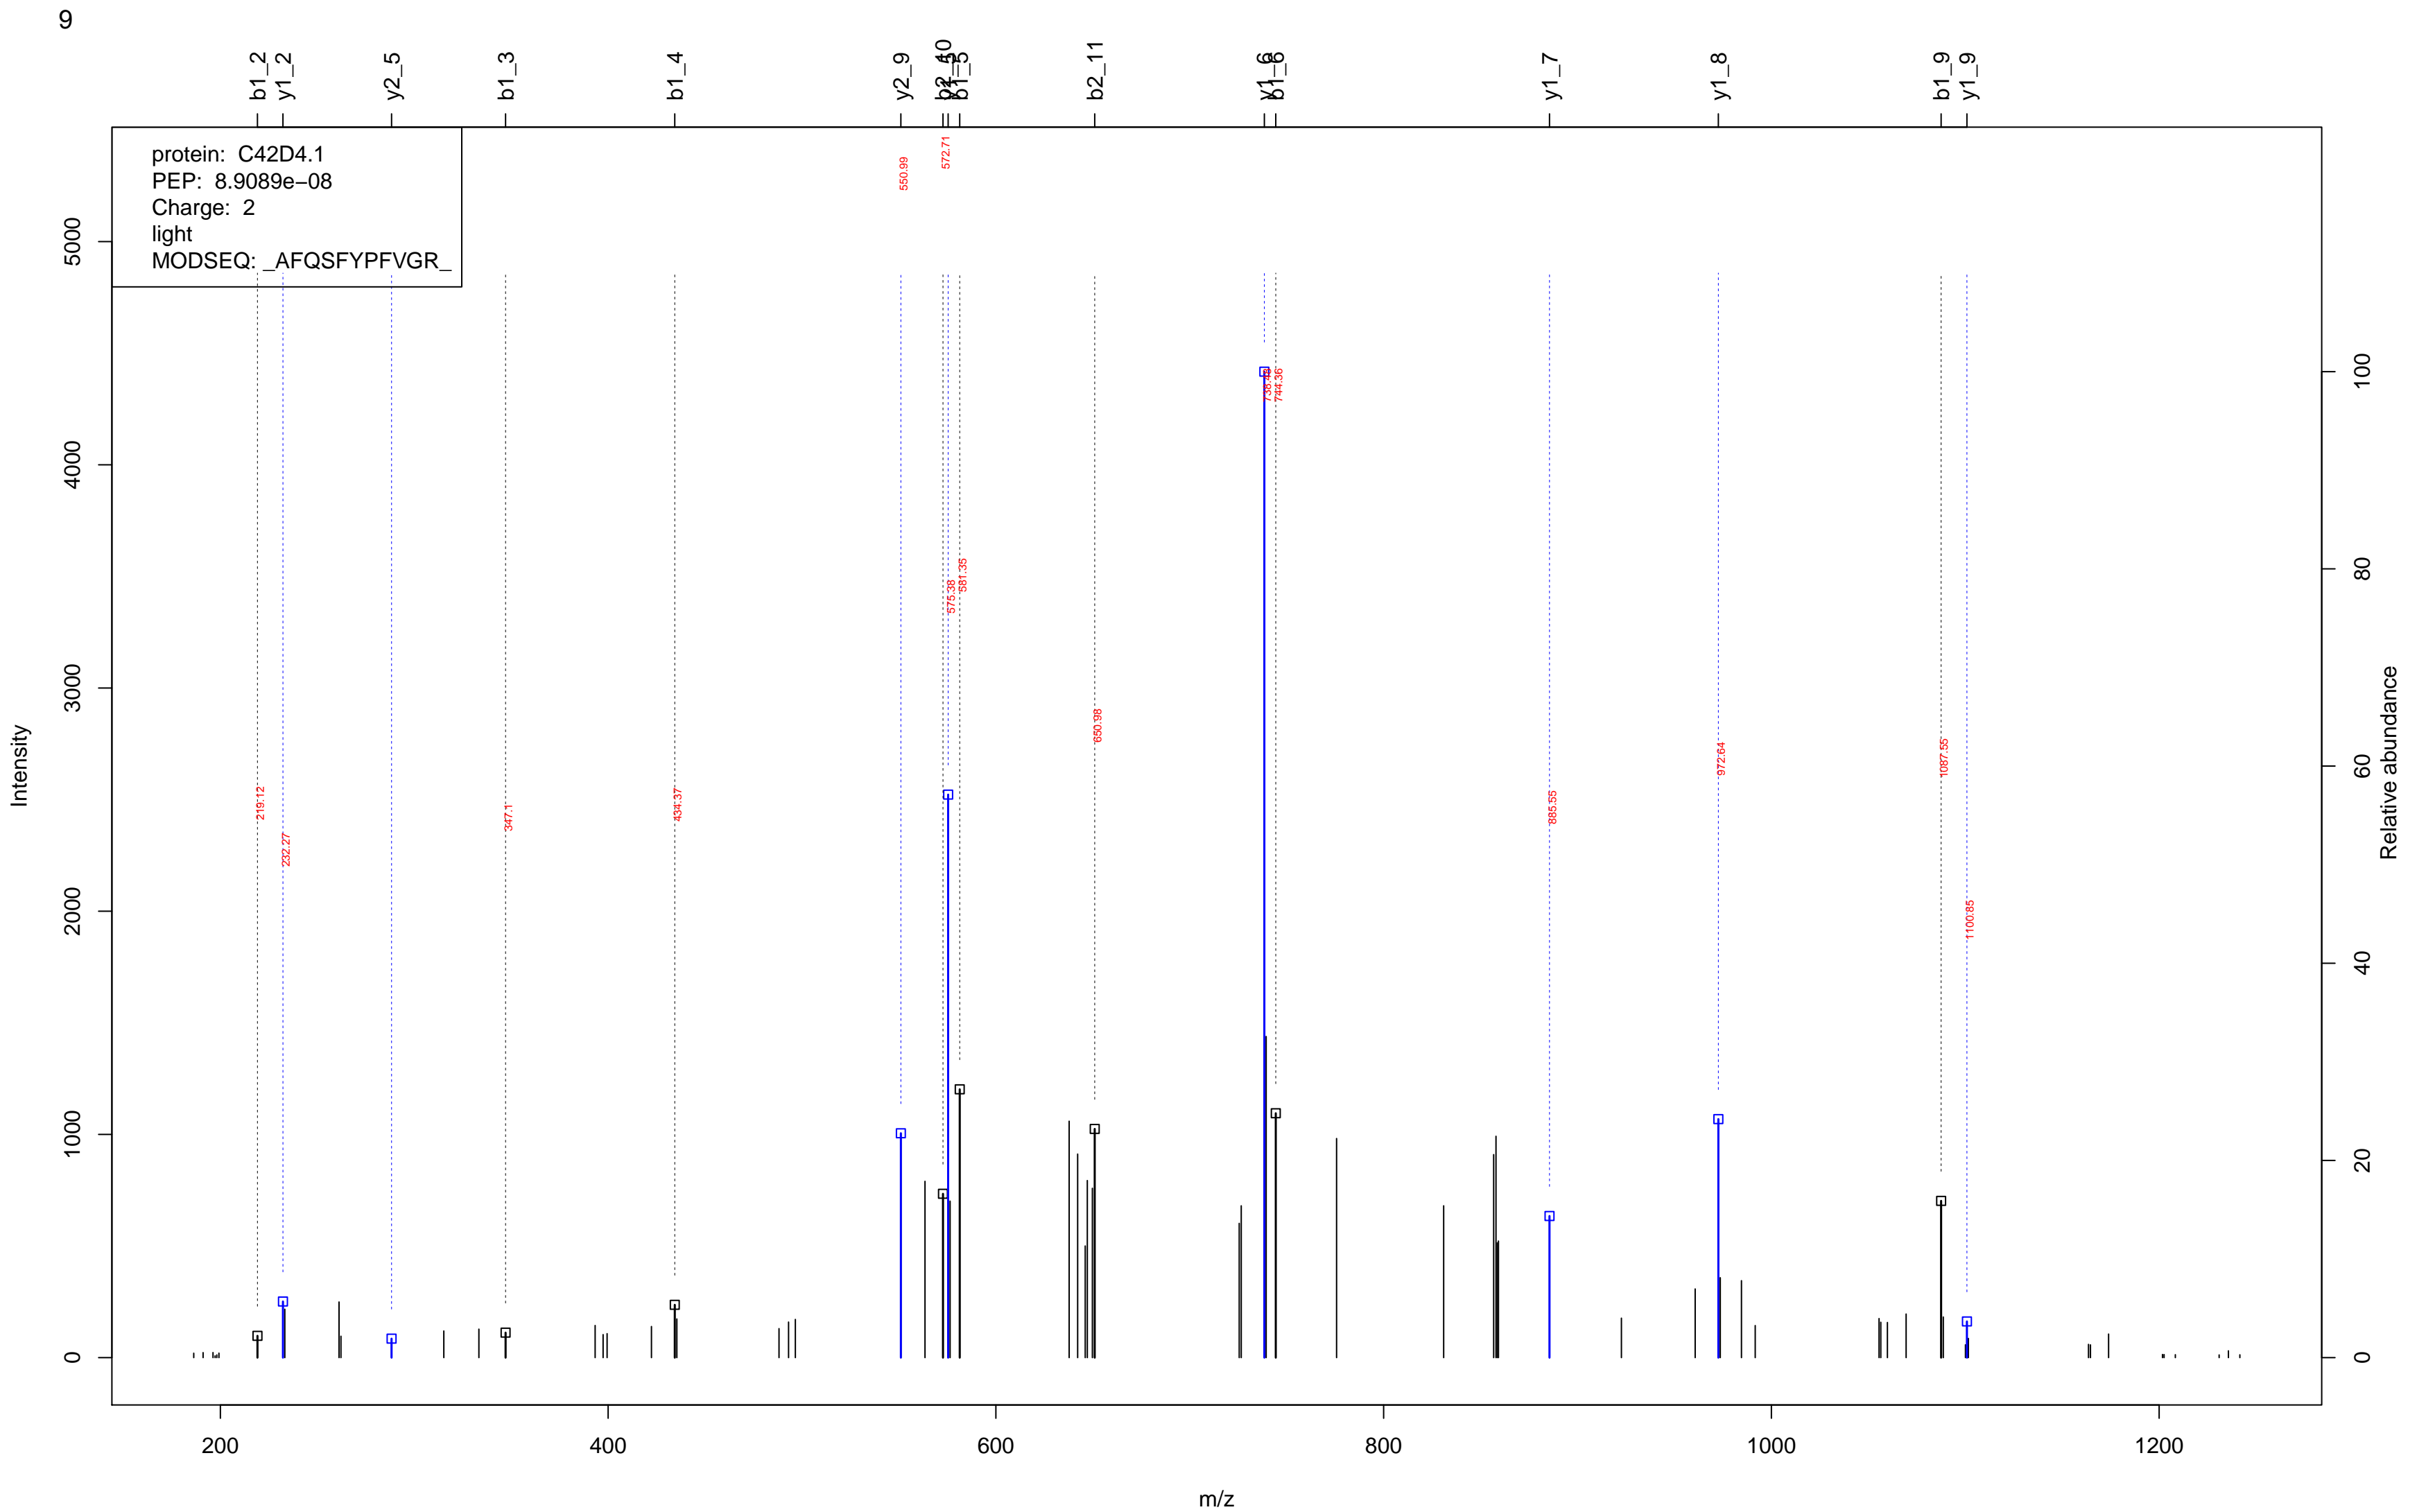

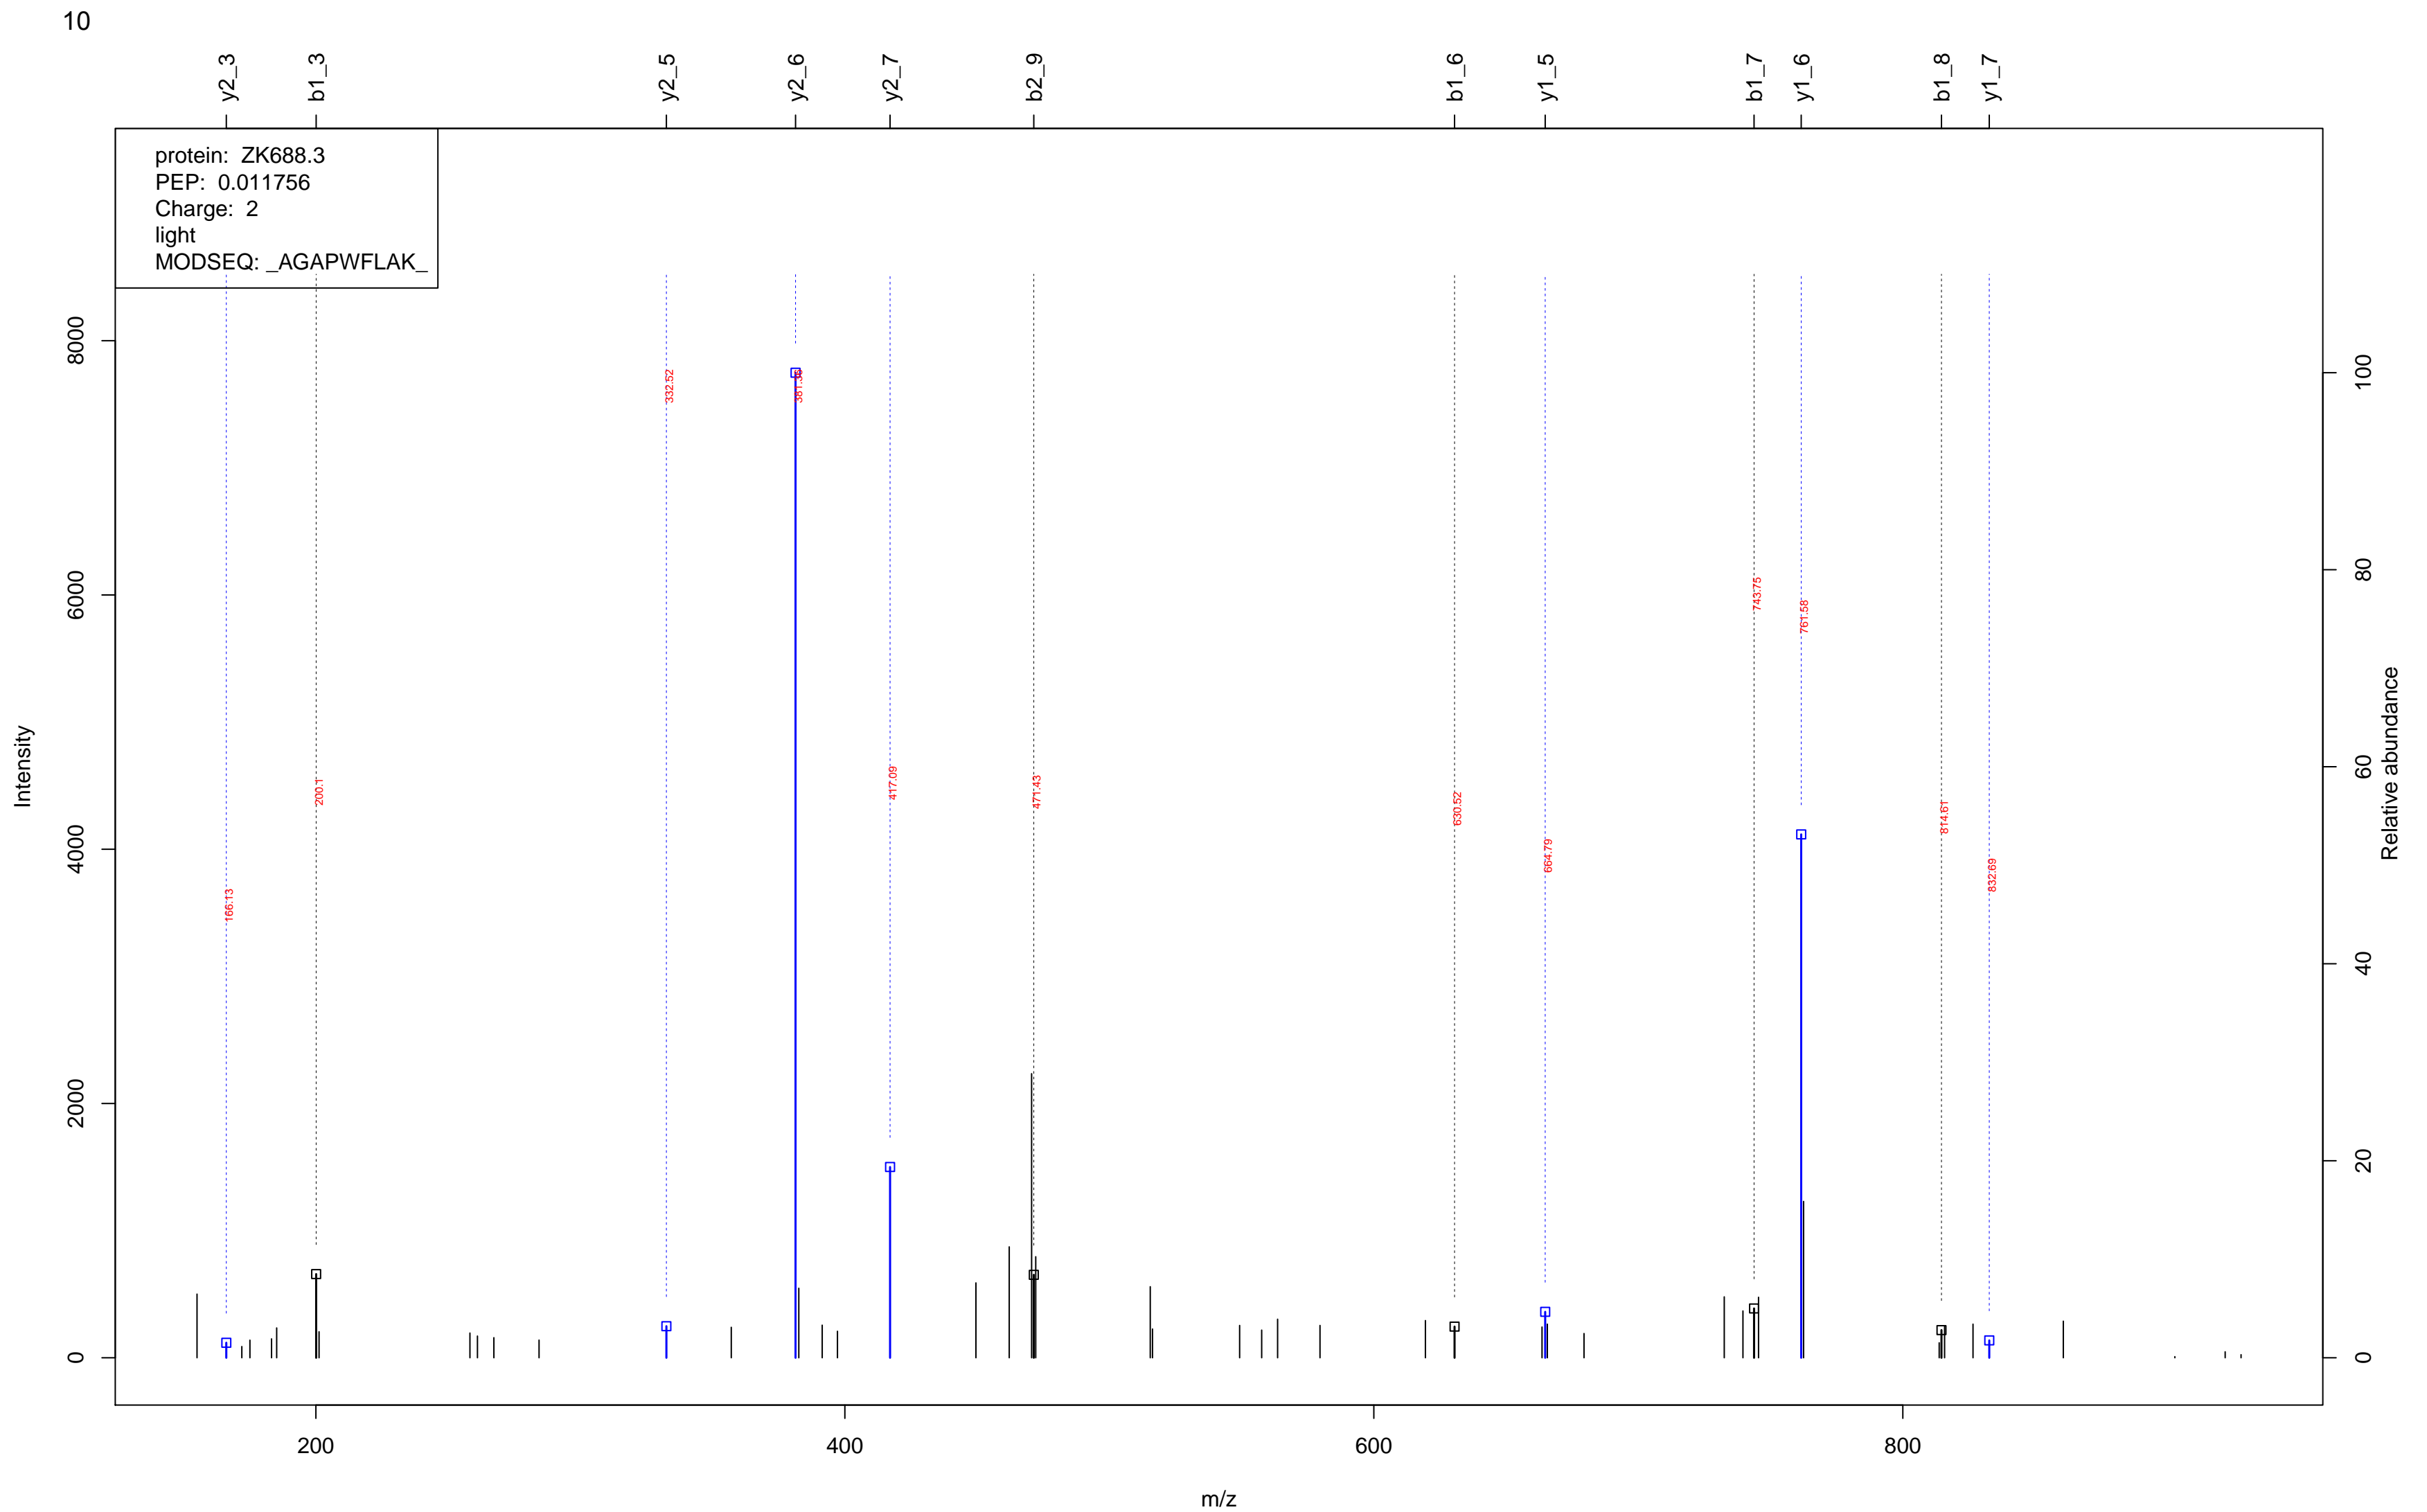

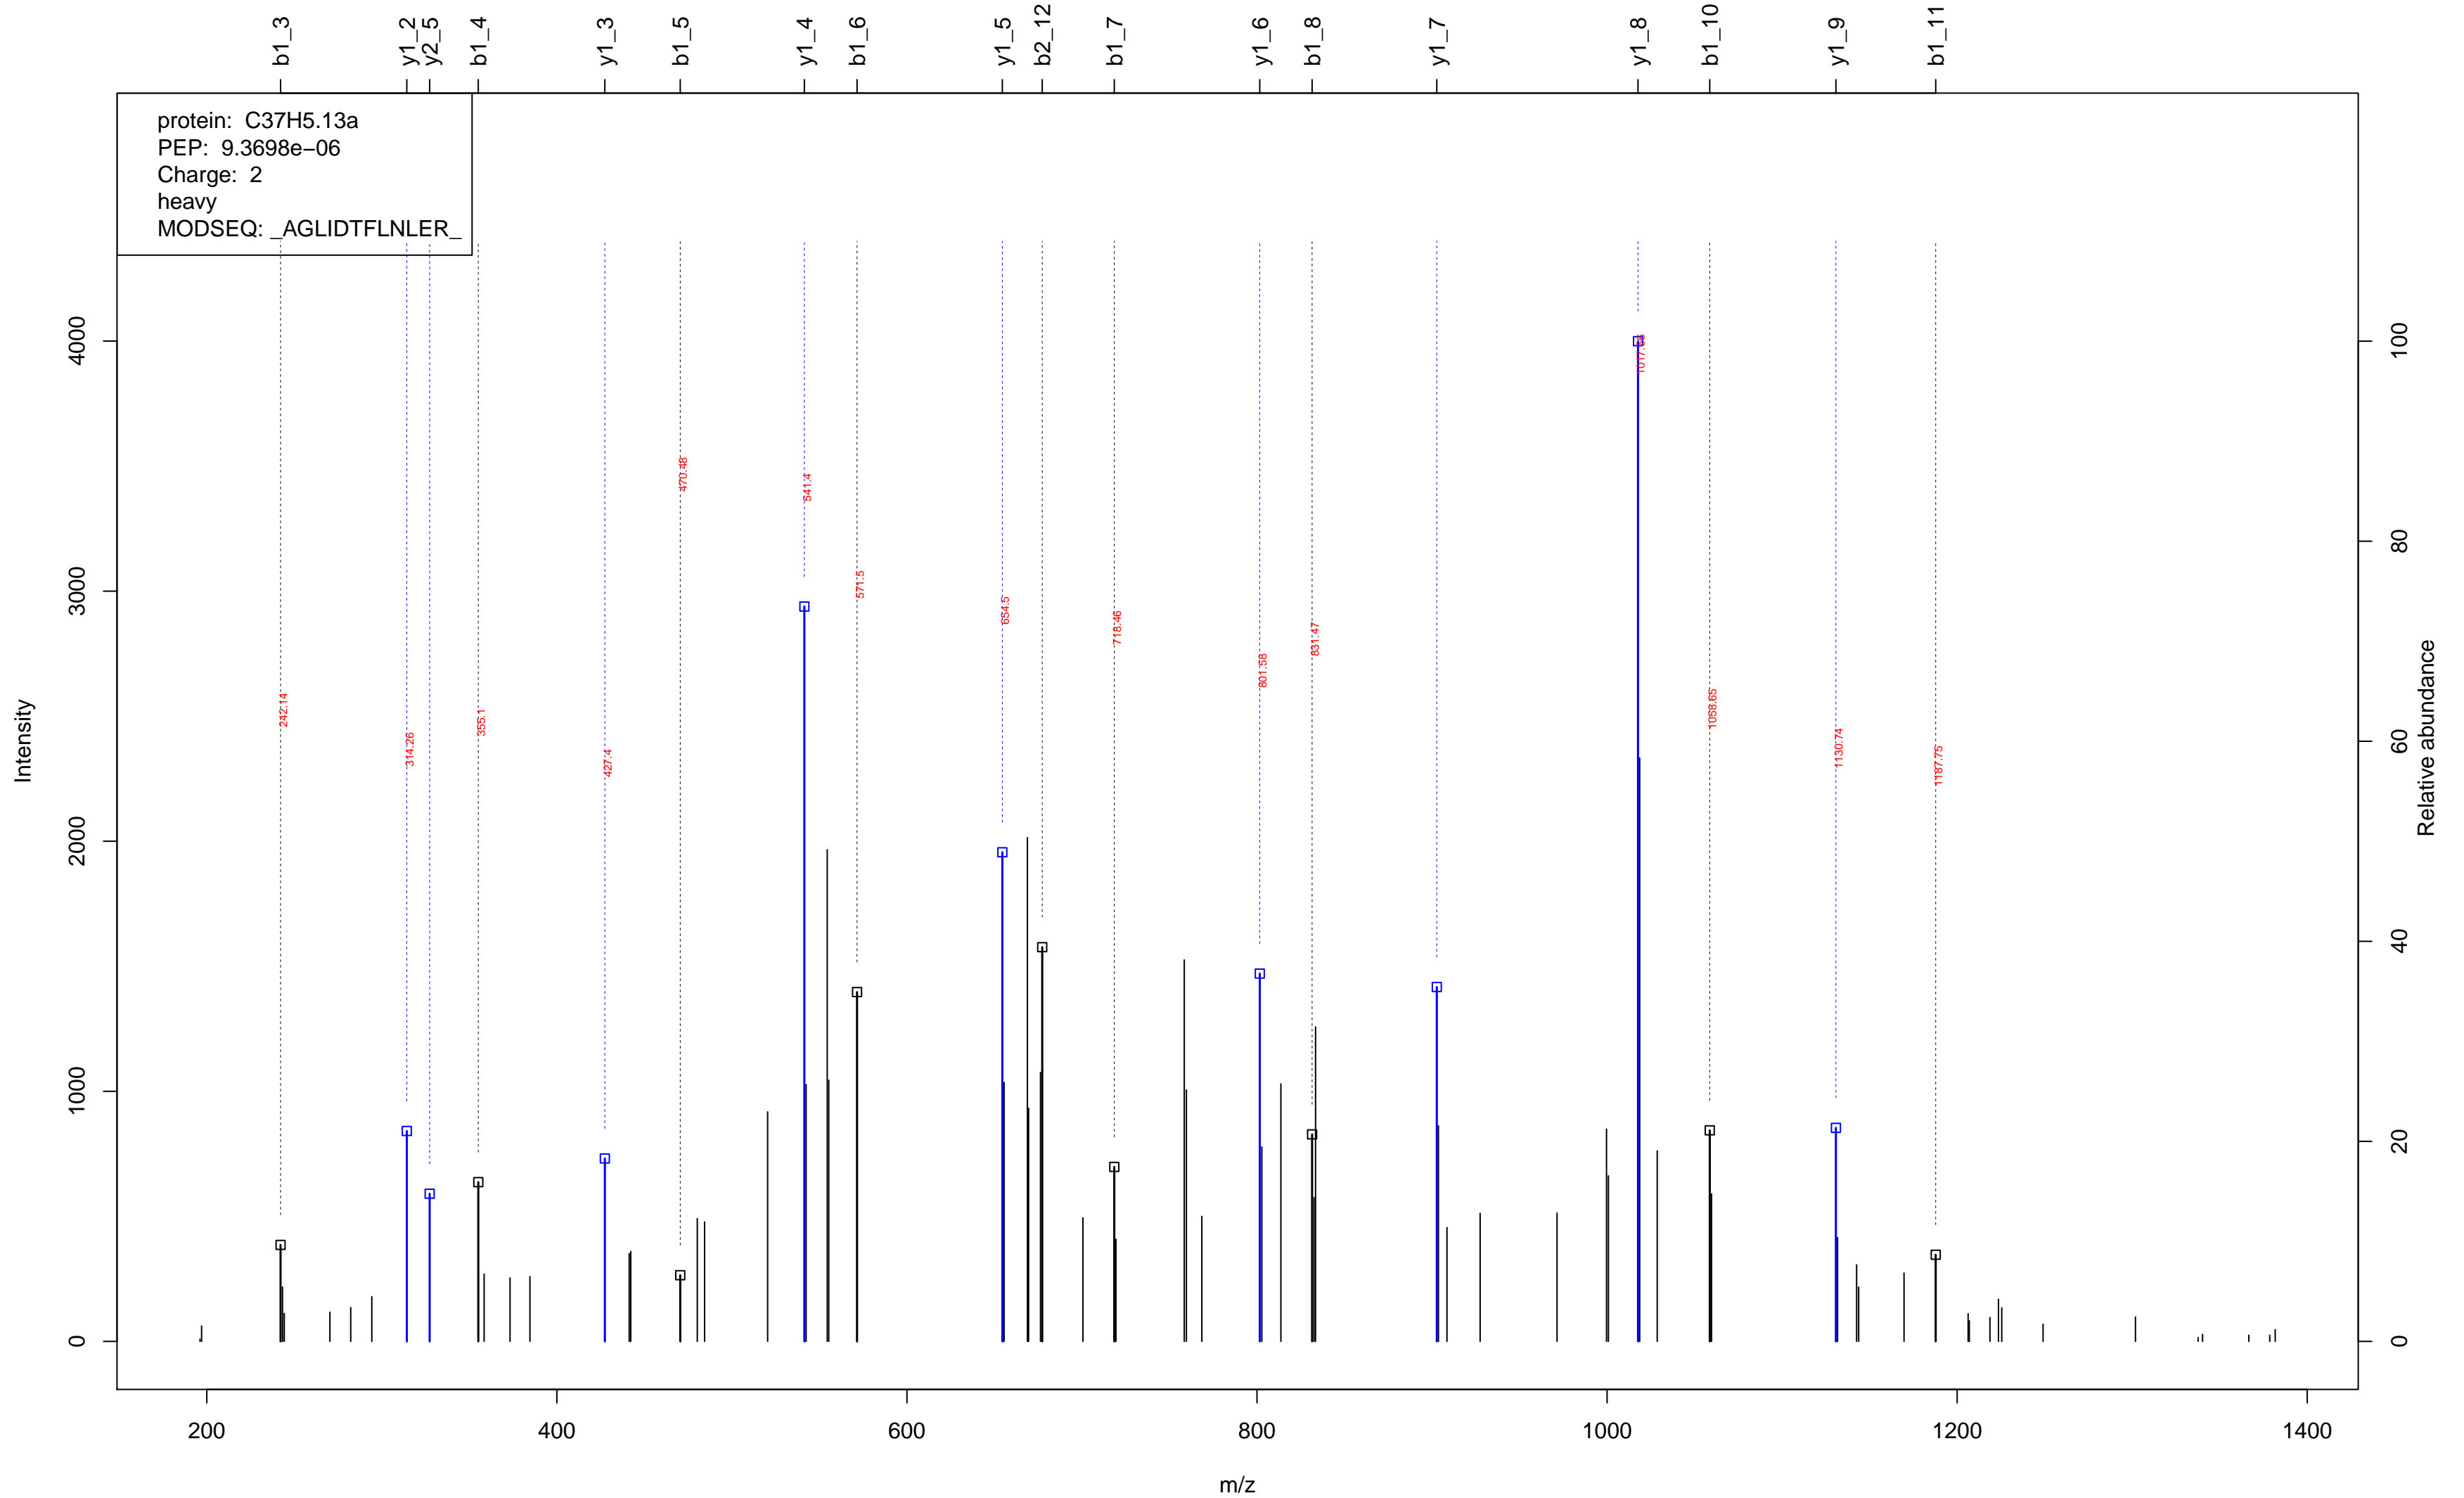

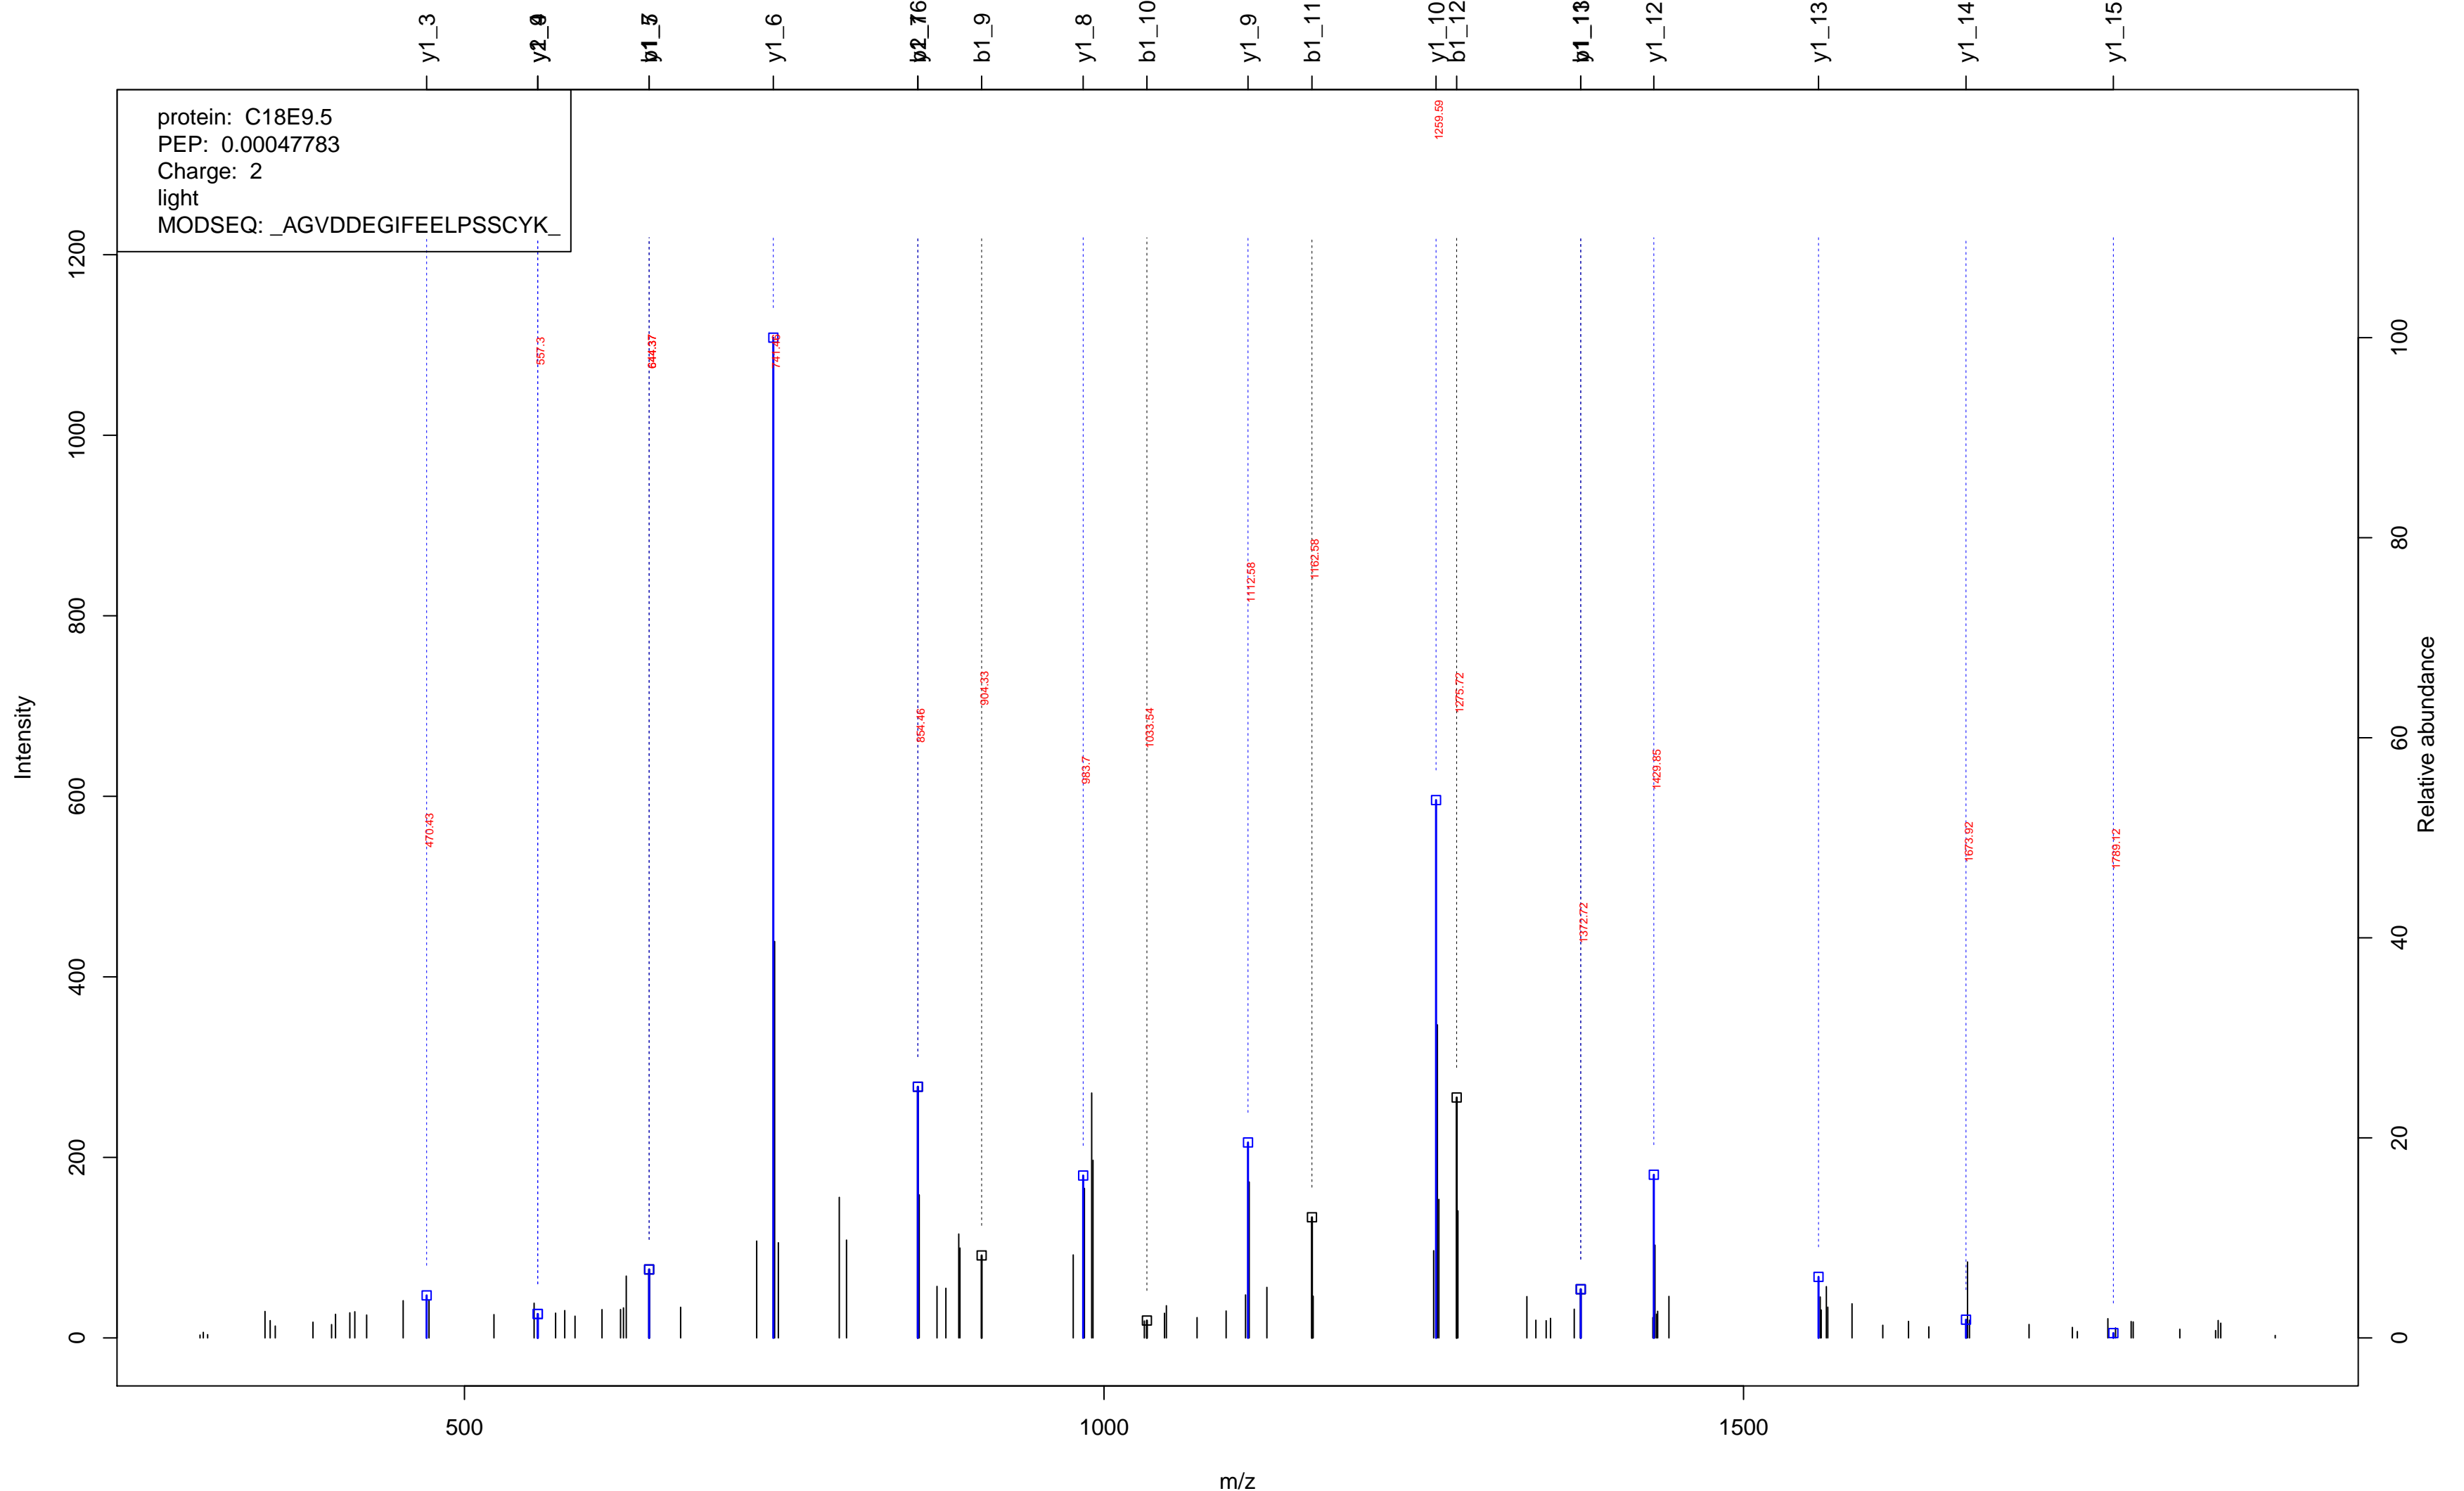

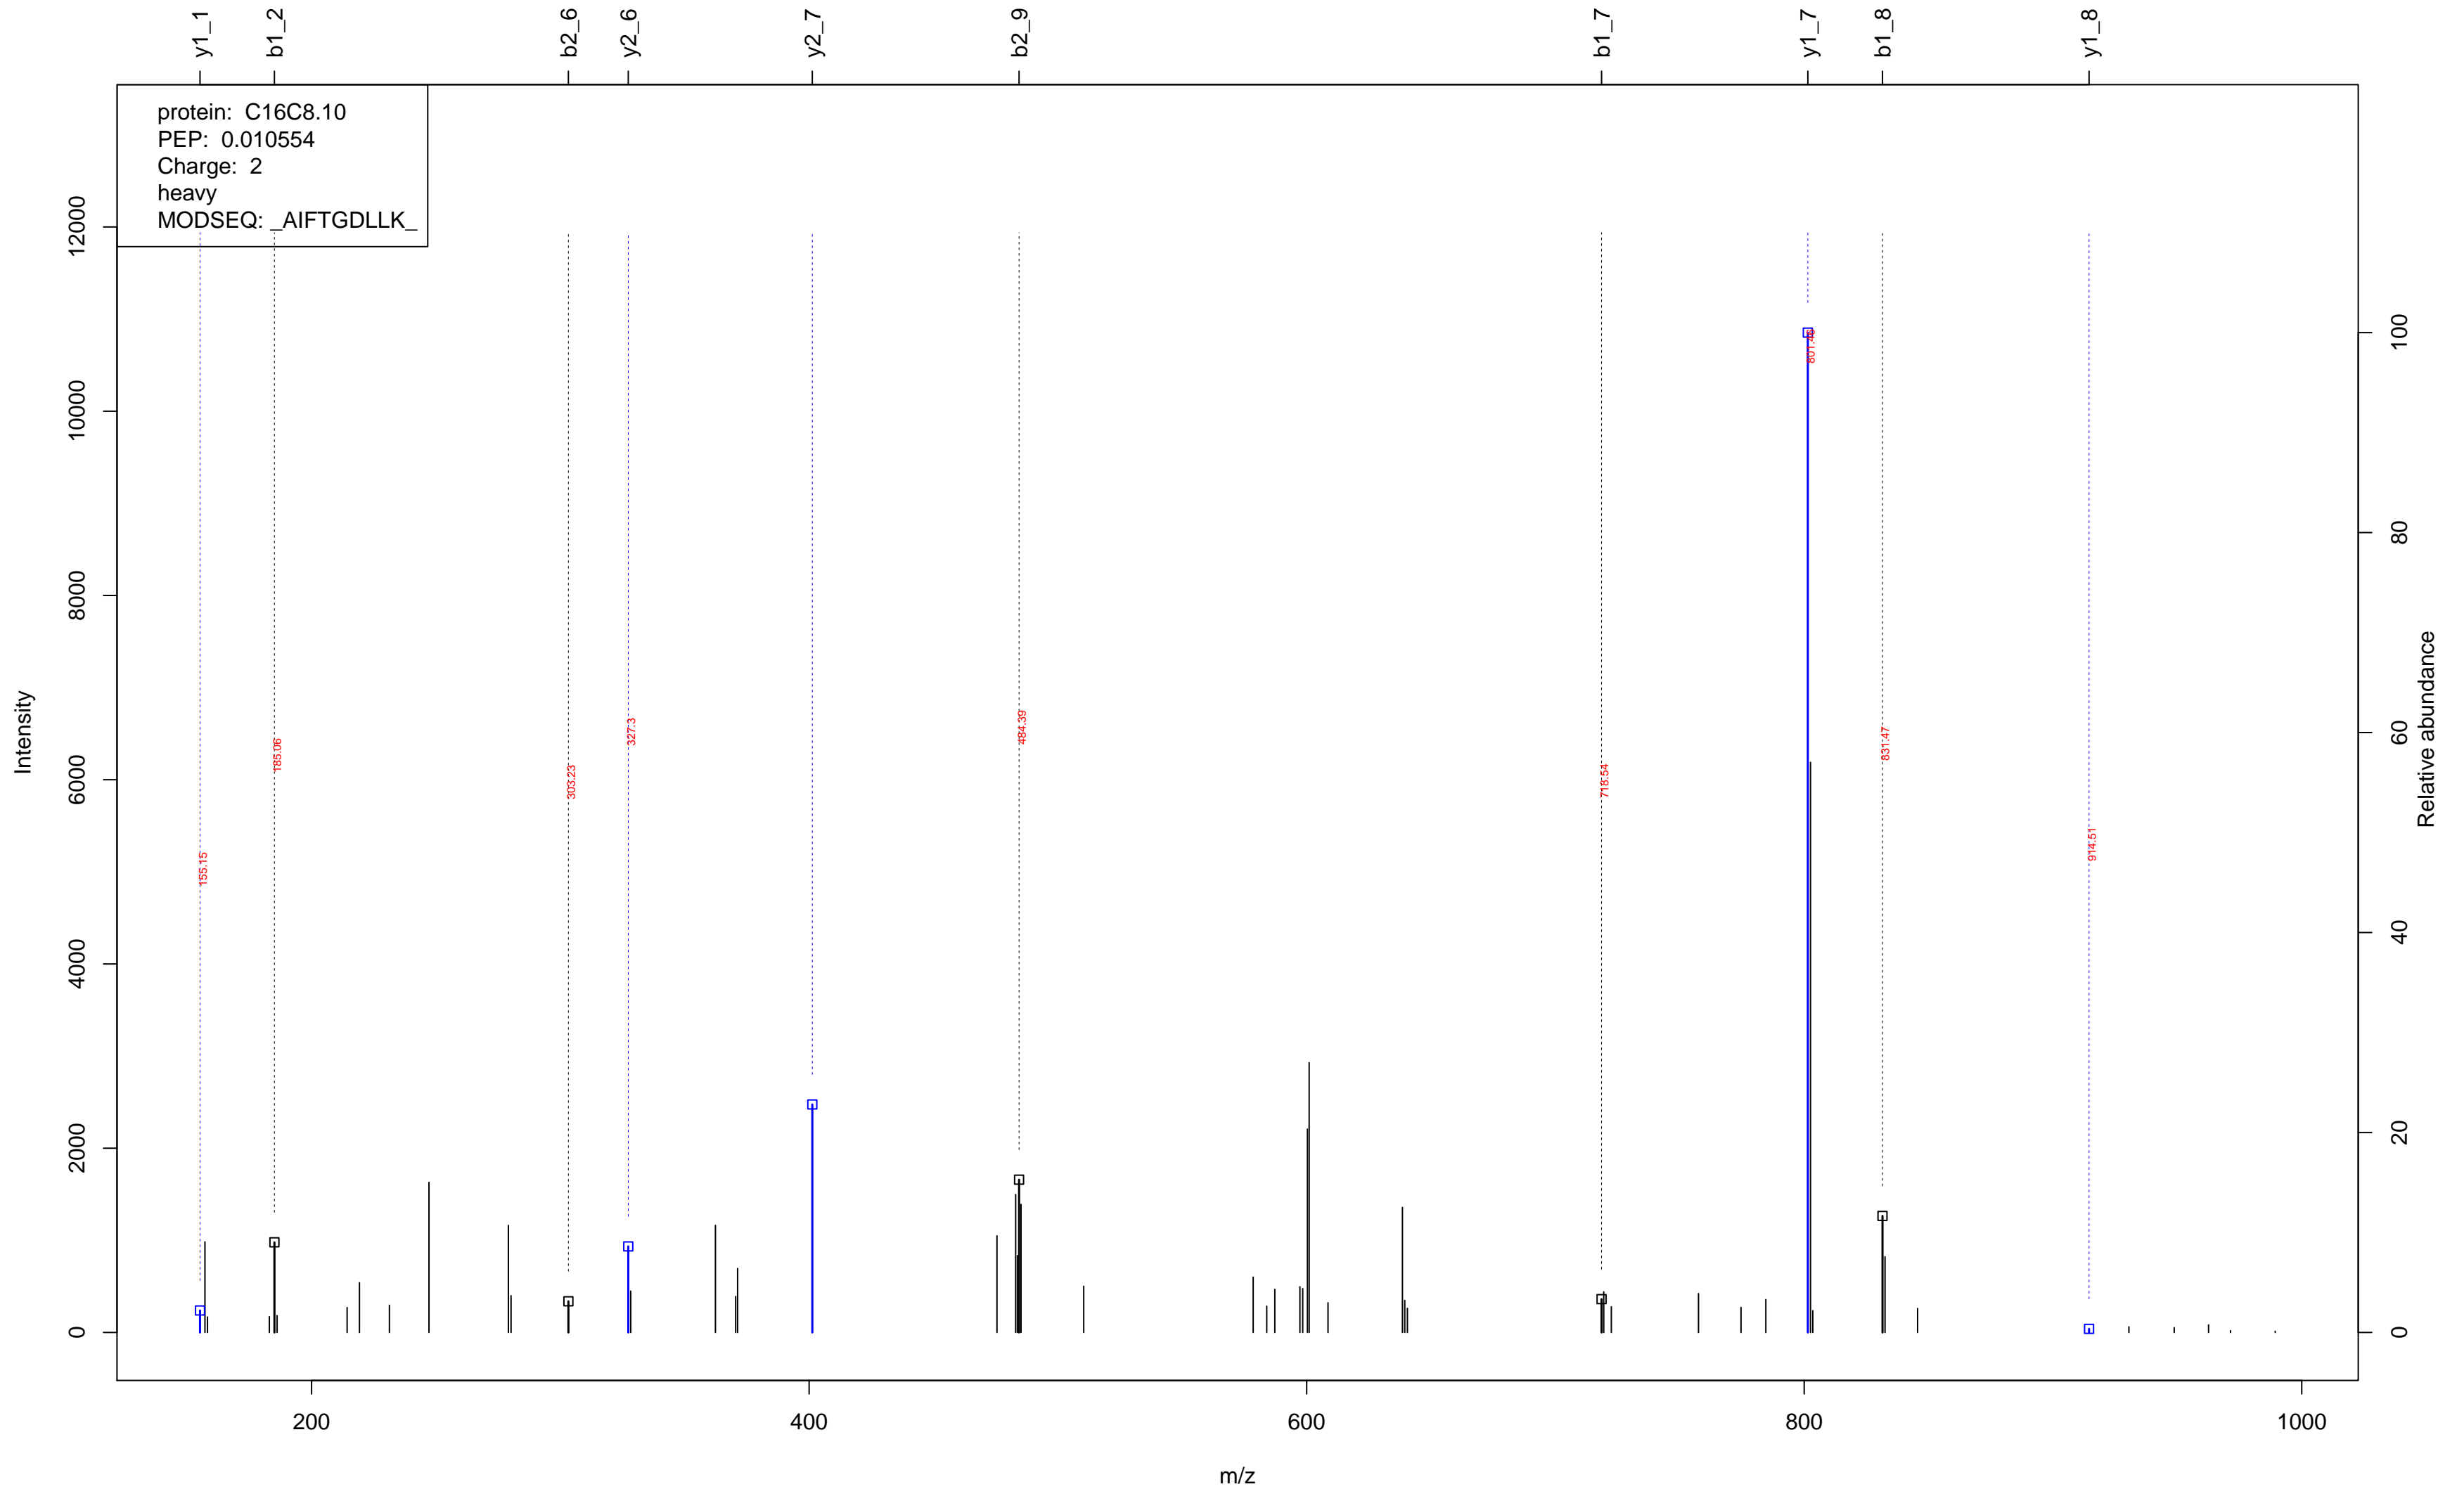

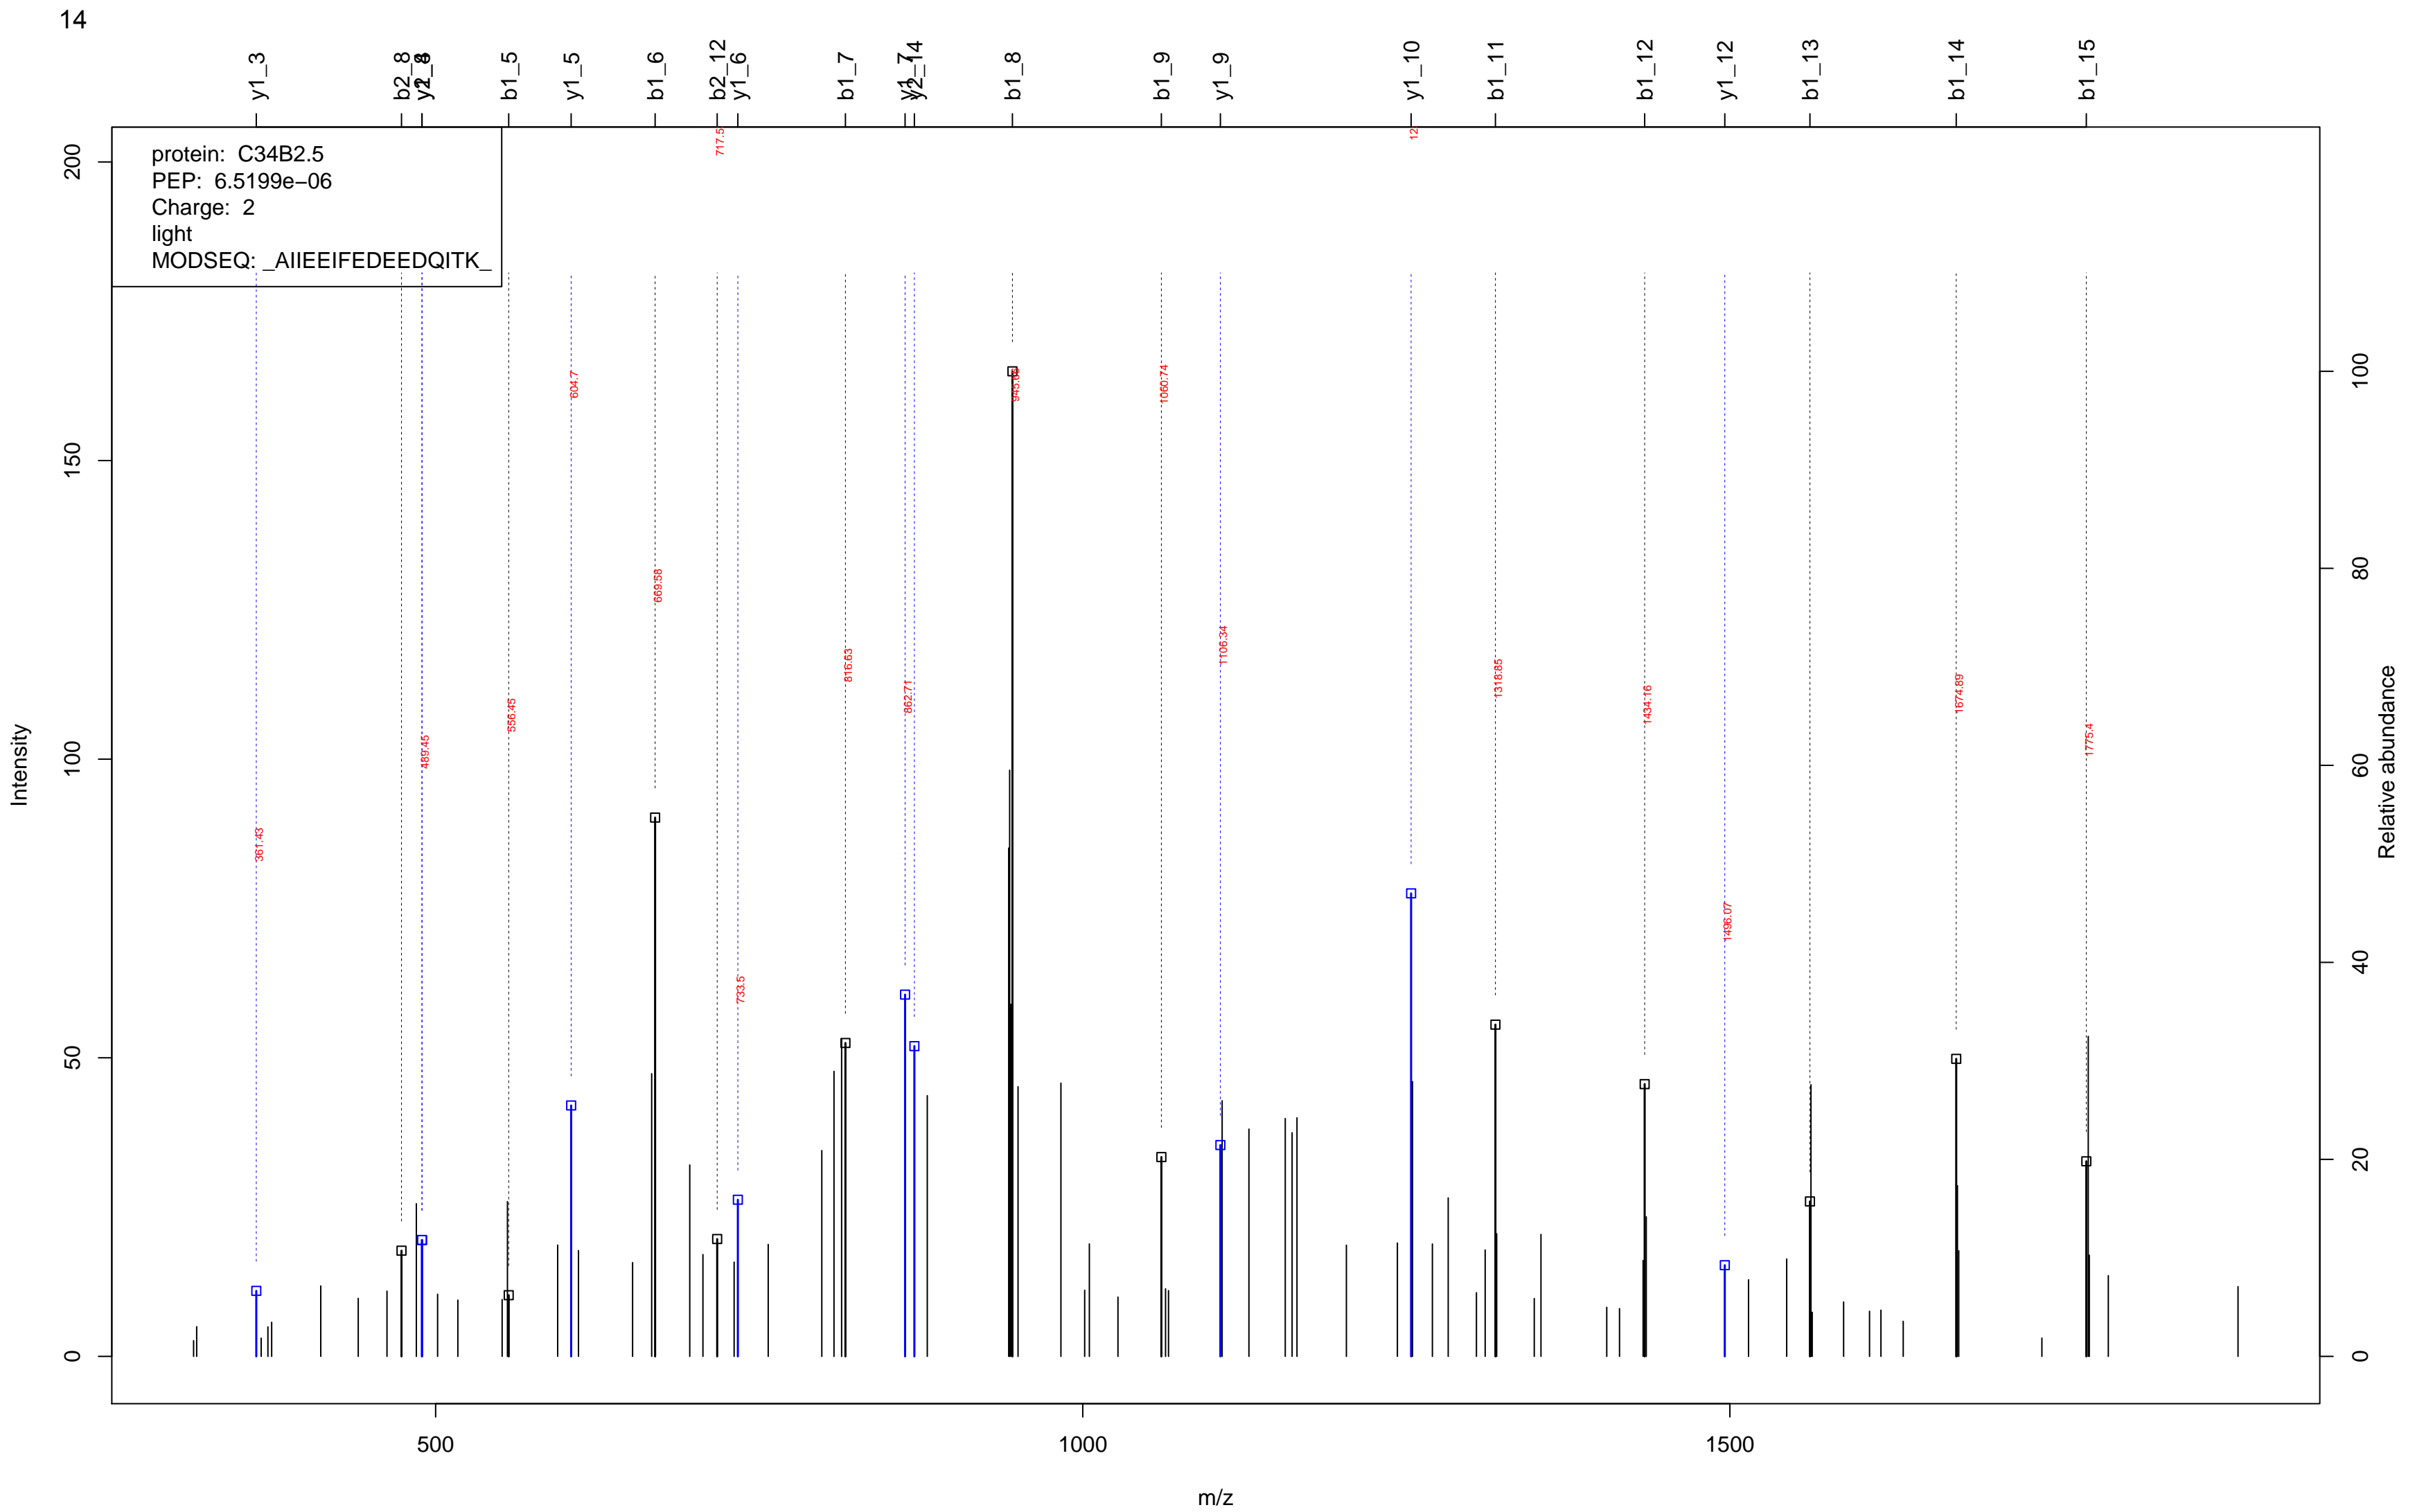

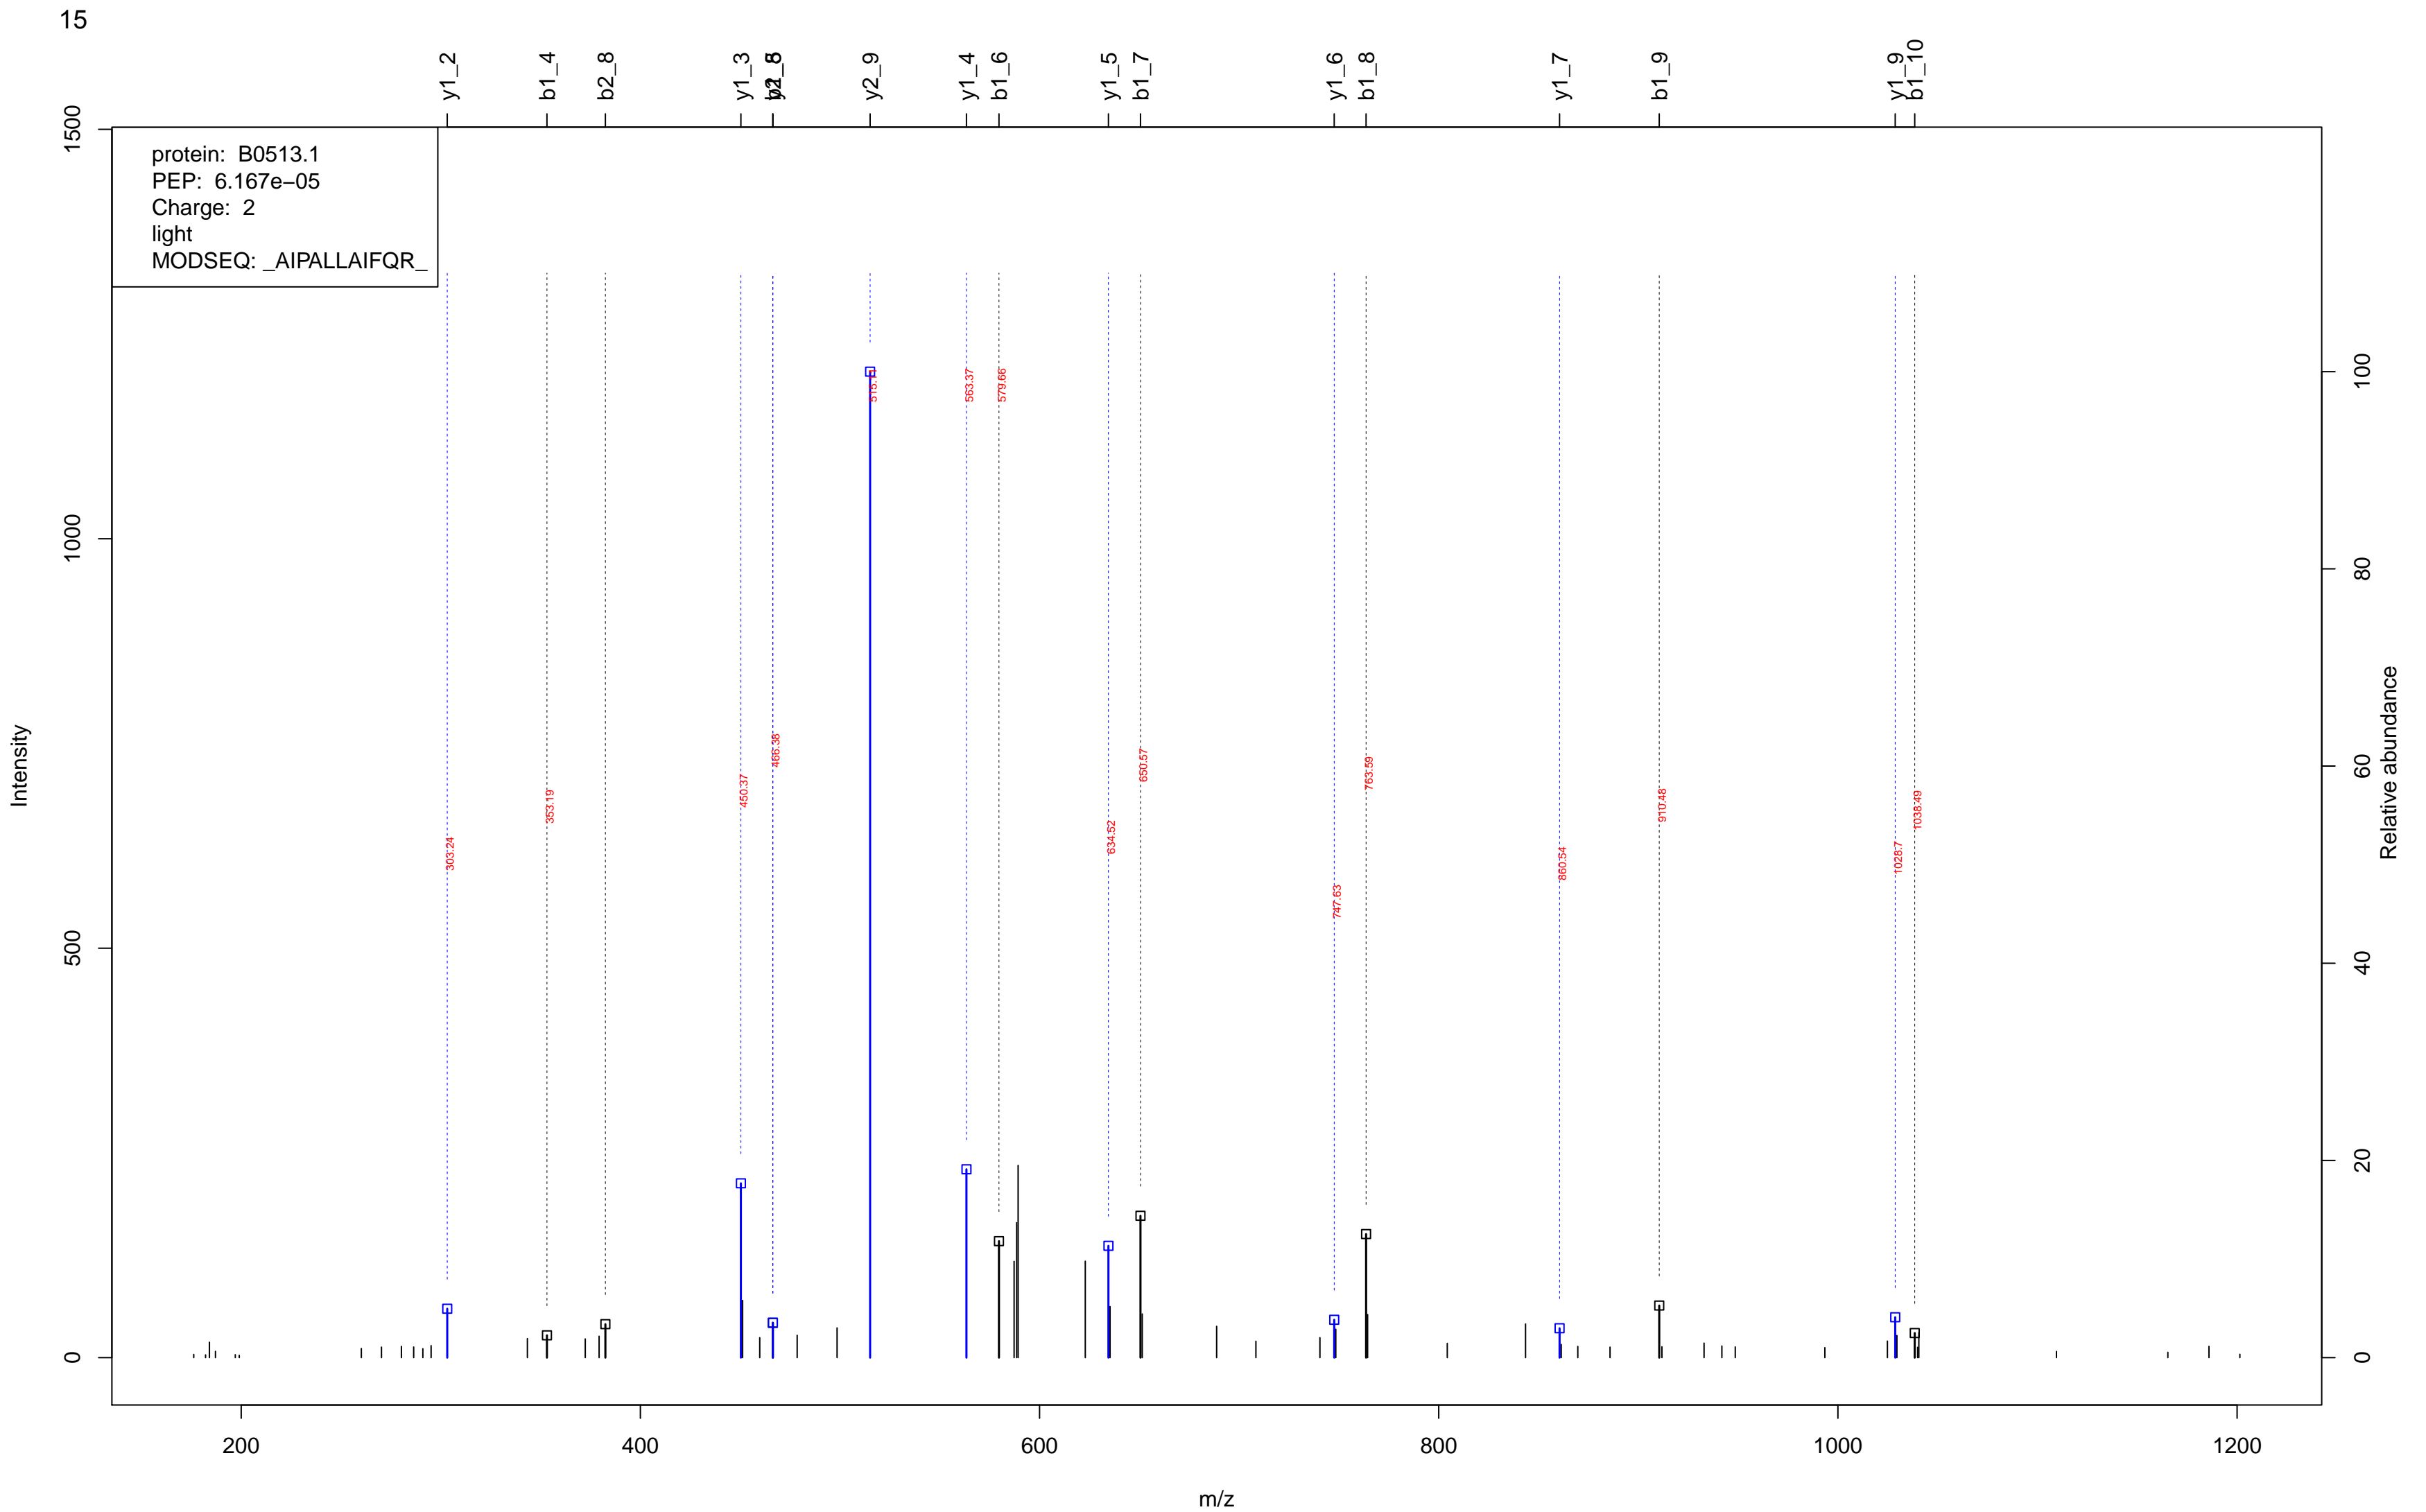

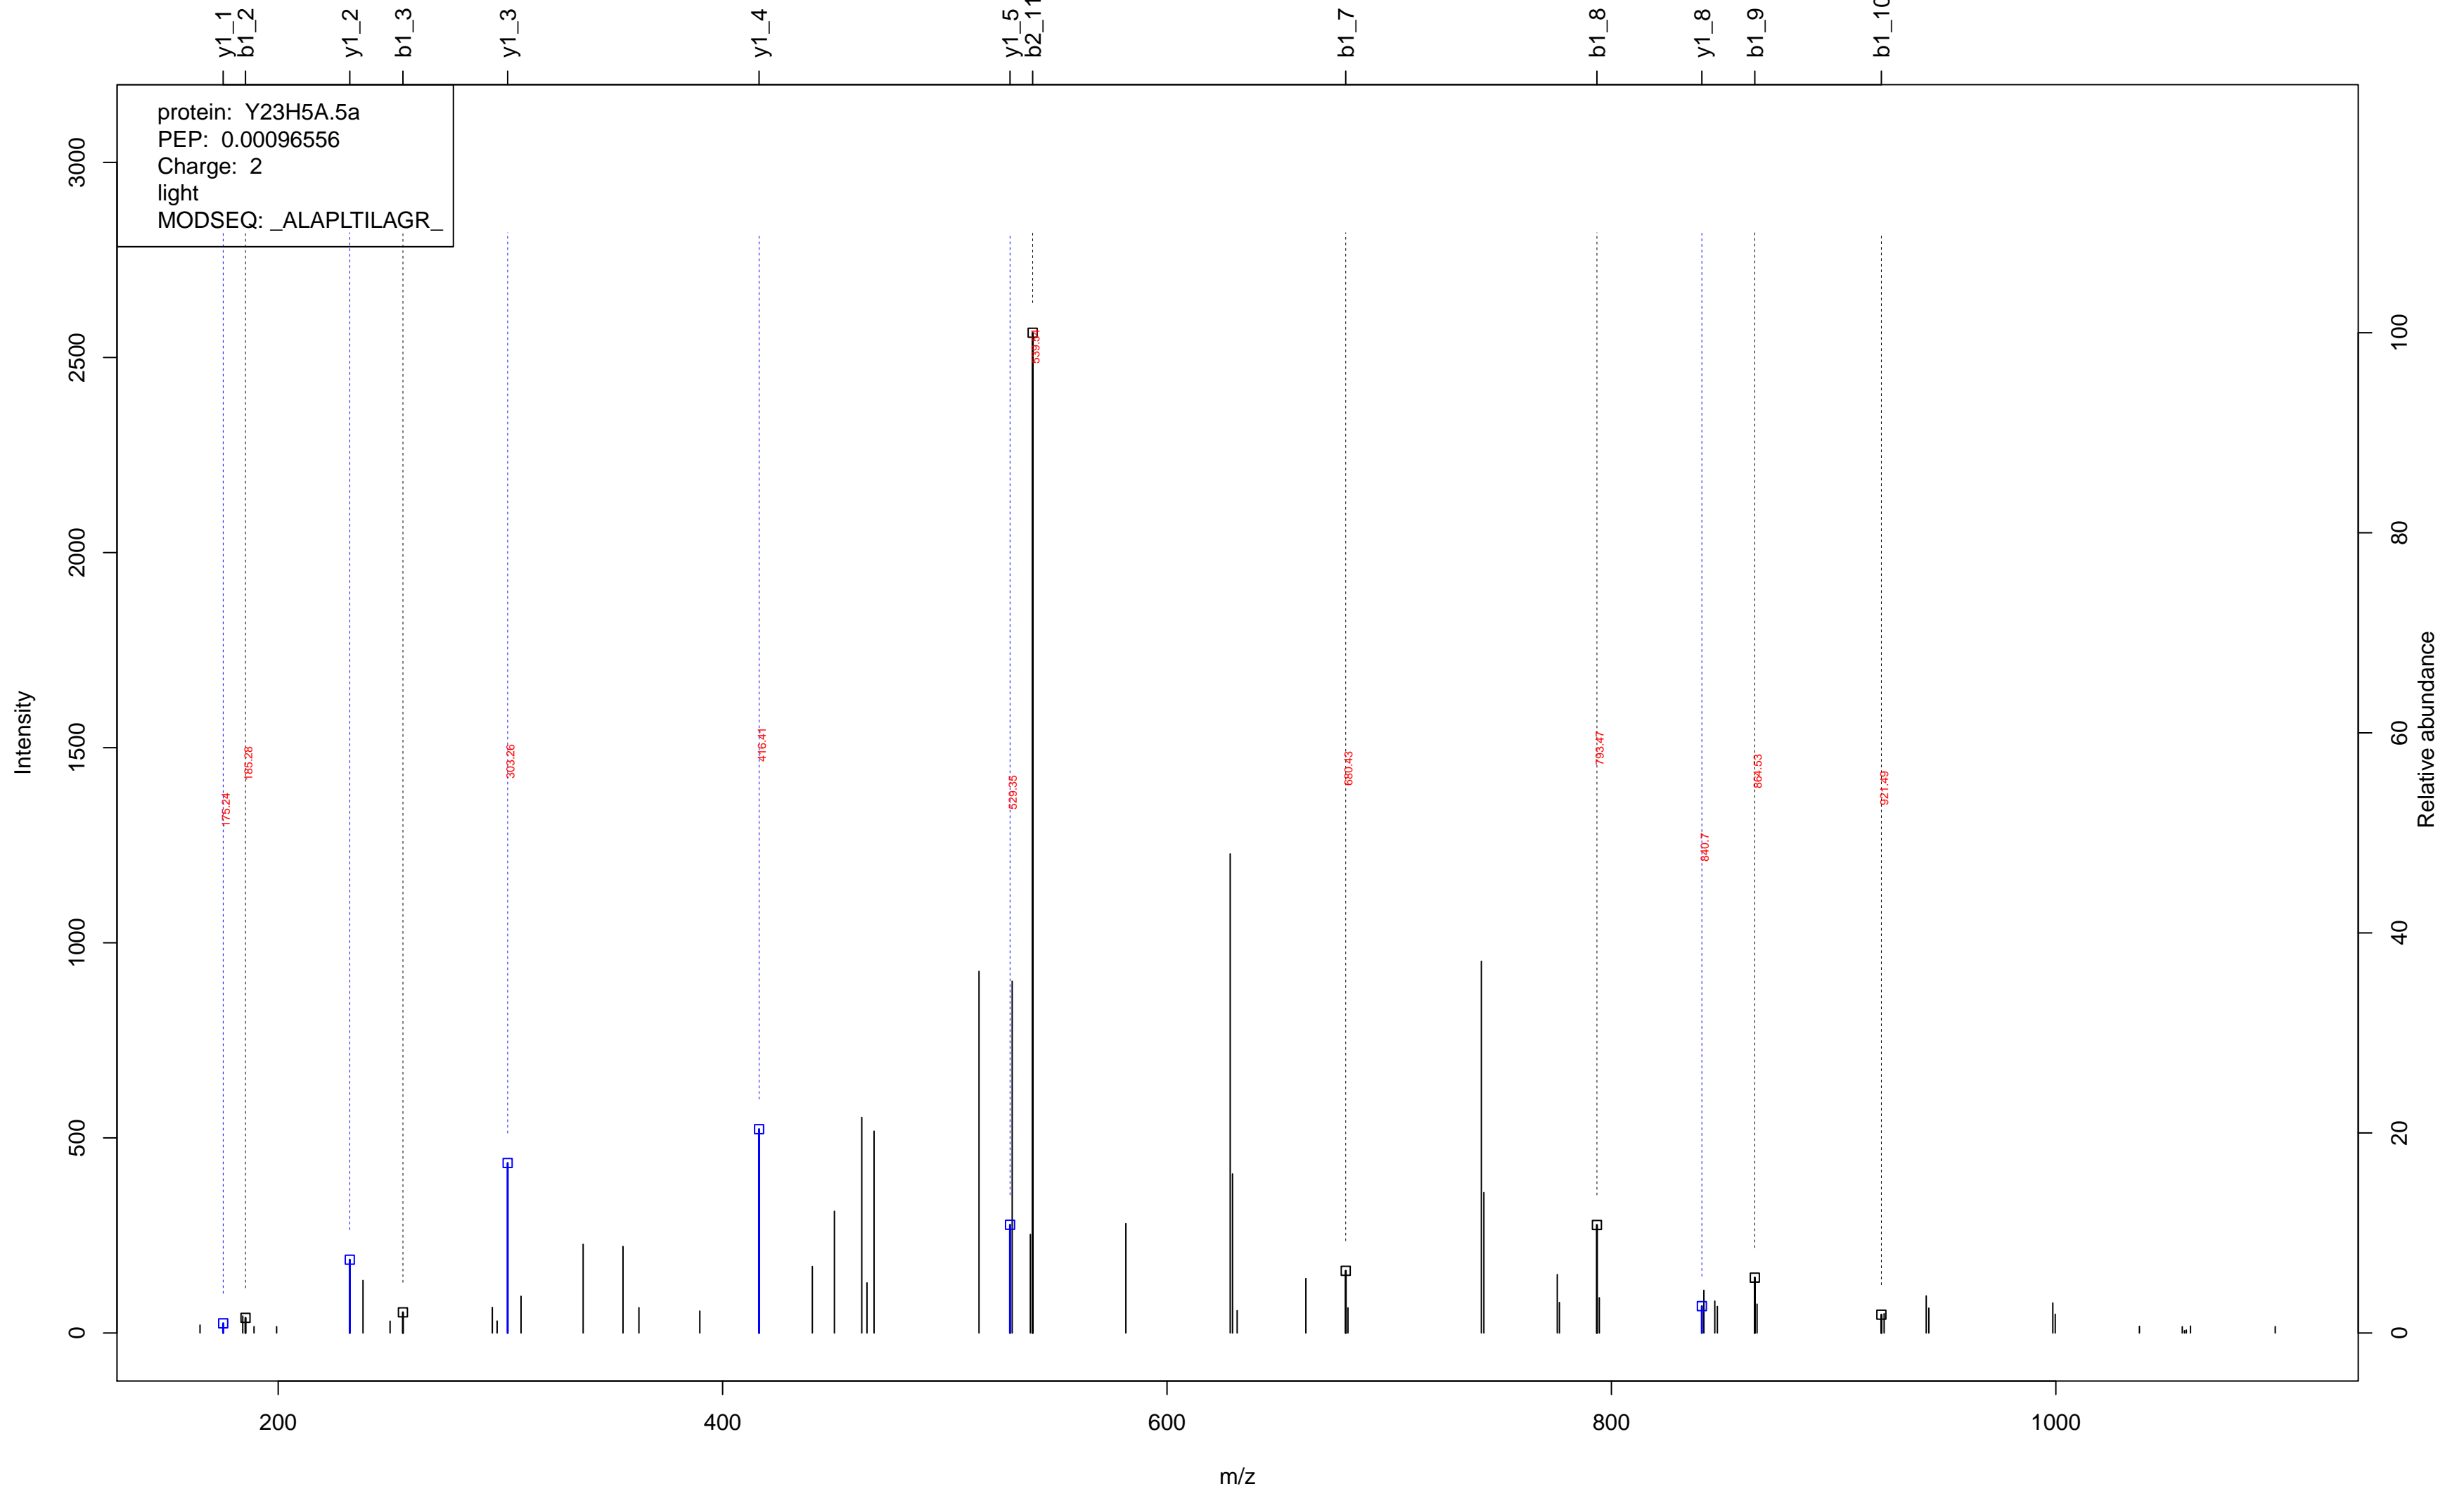

protein: Y23H5A.5a  
PEP: 0.00096556  
Charge: 2  
light  
MODSEQ: \_ALAPLTILAGR\_



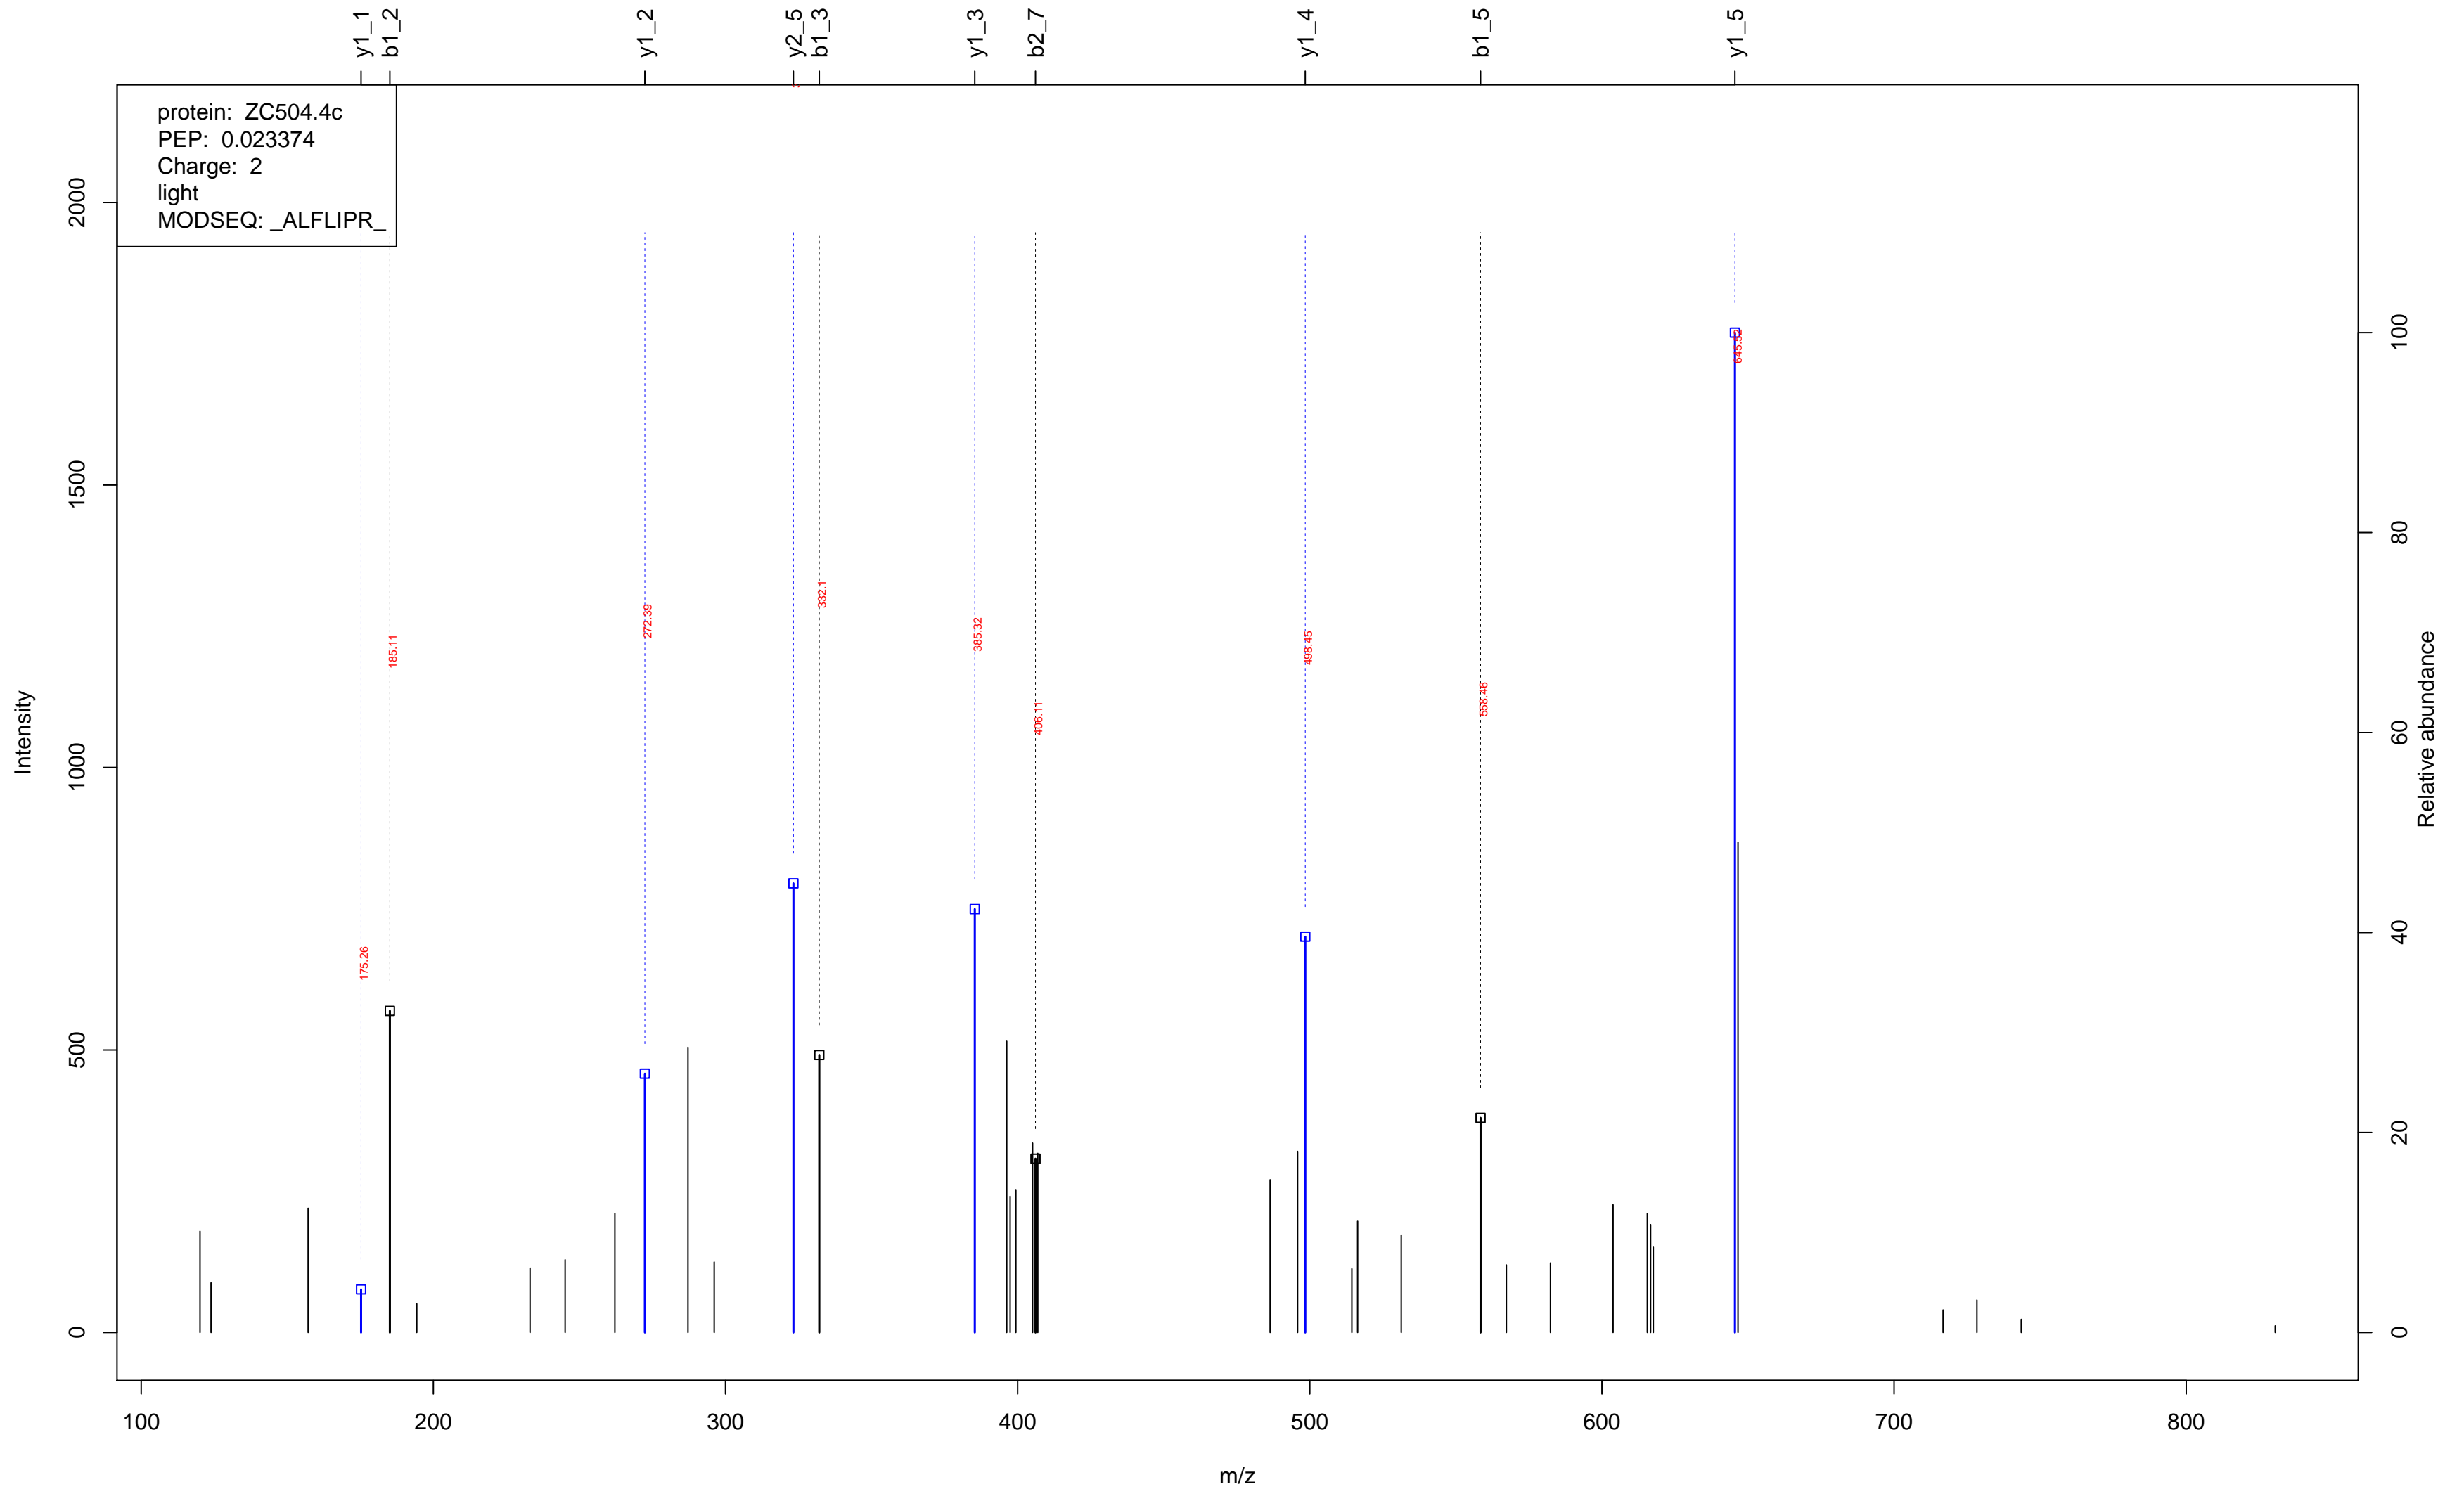

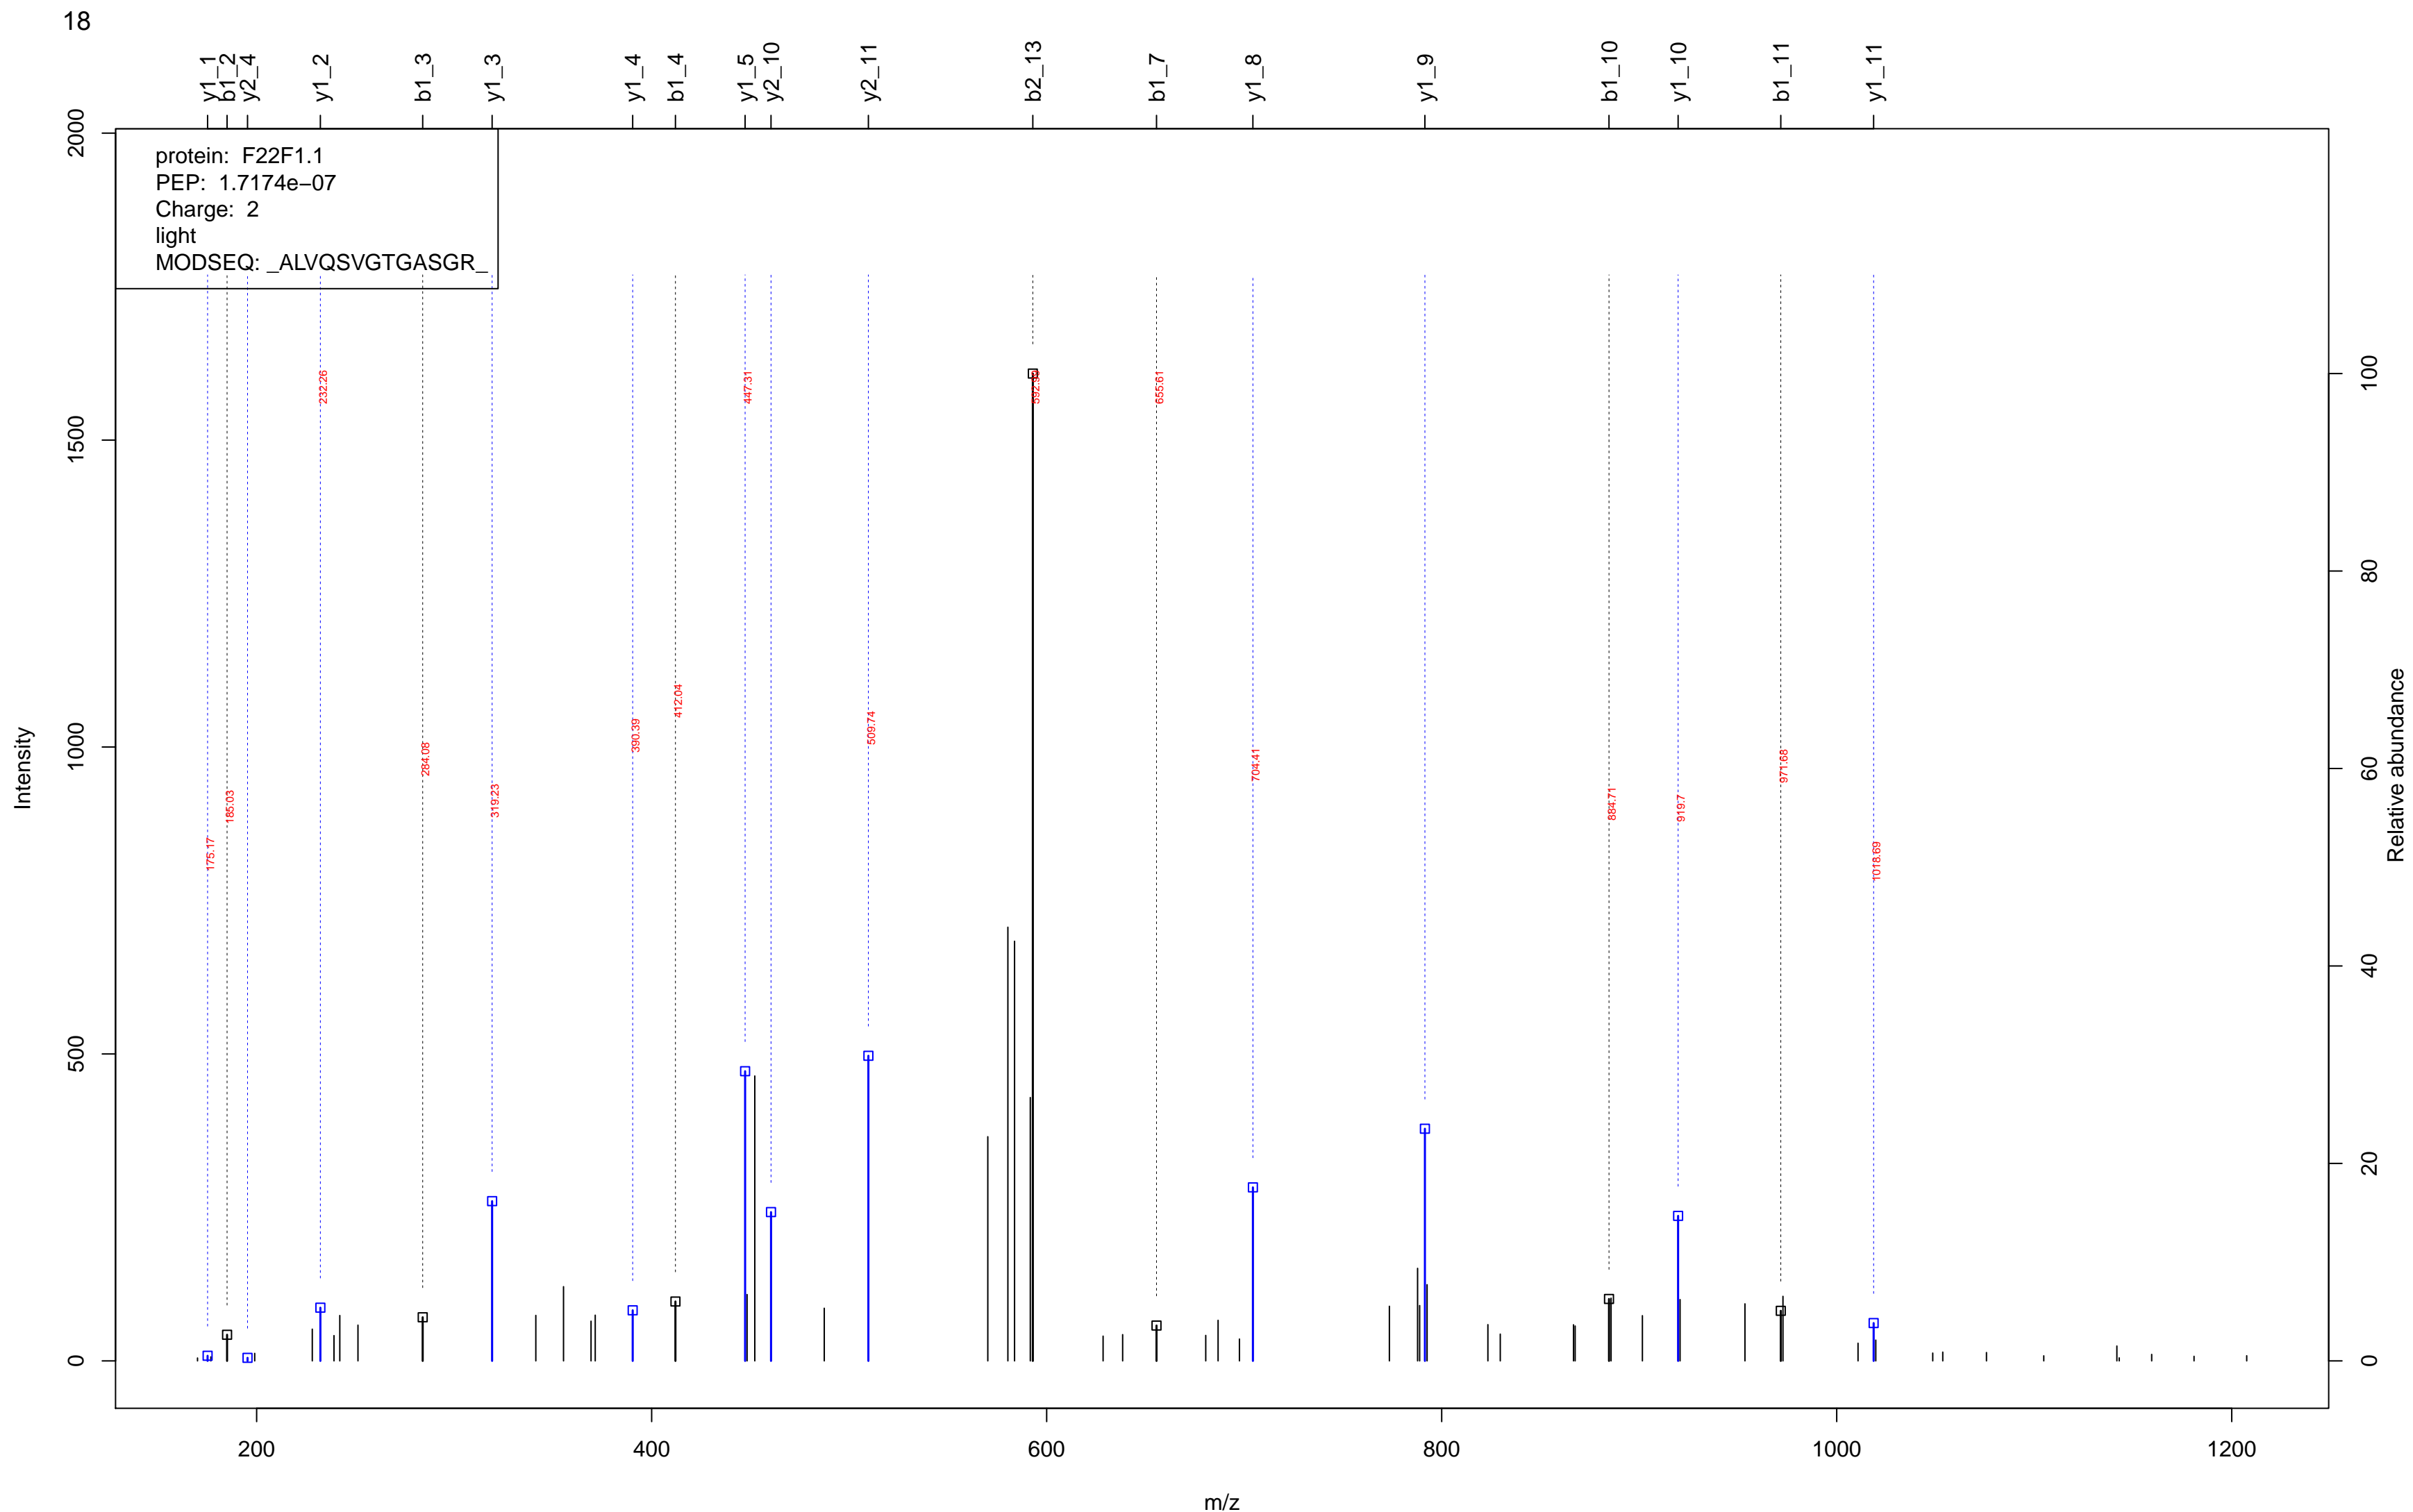

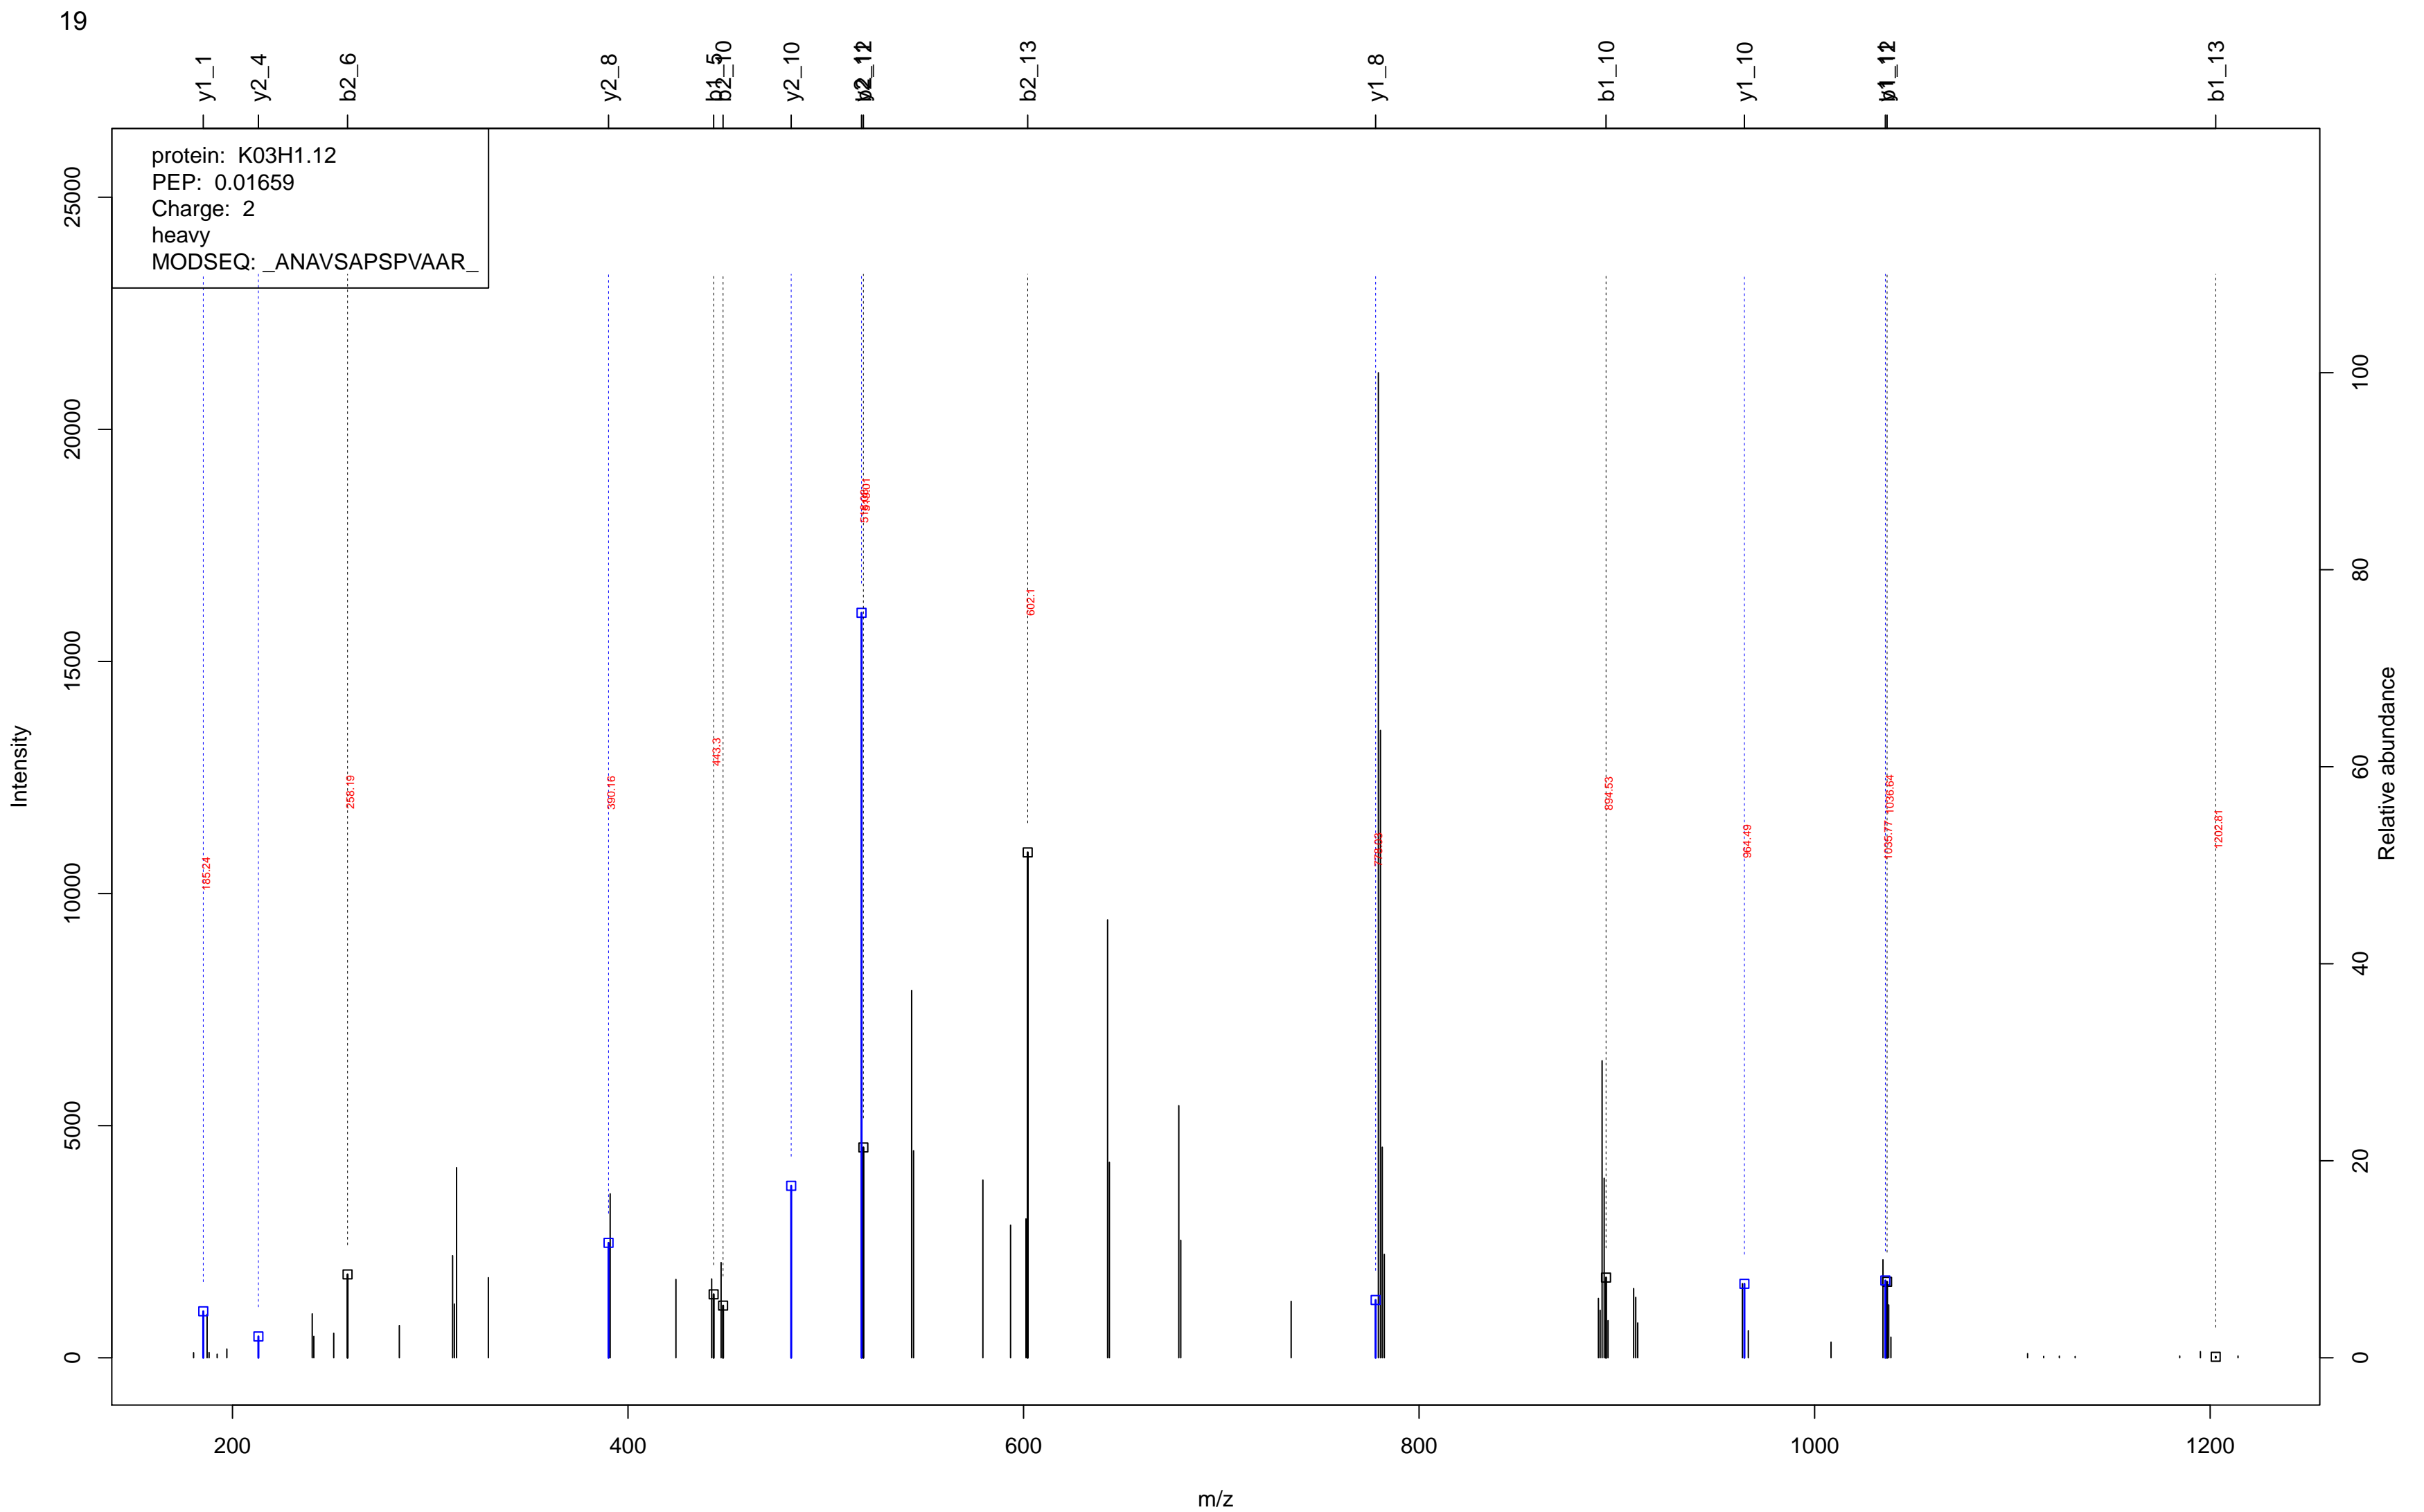

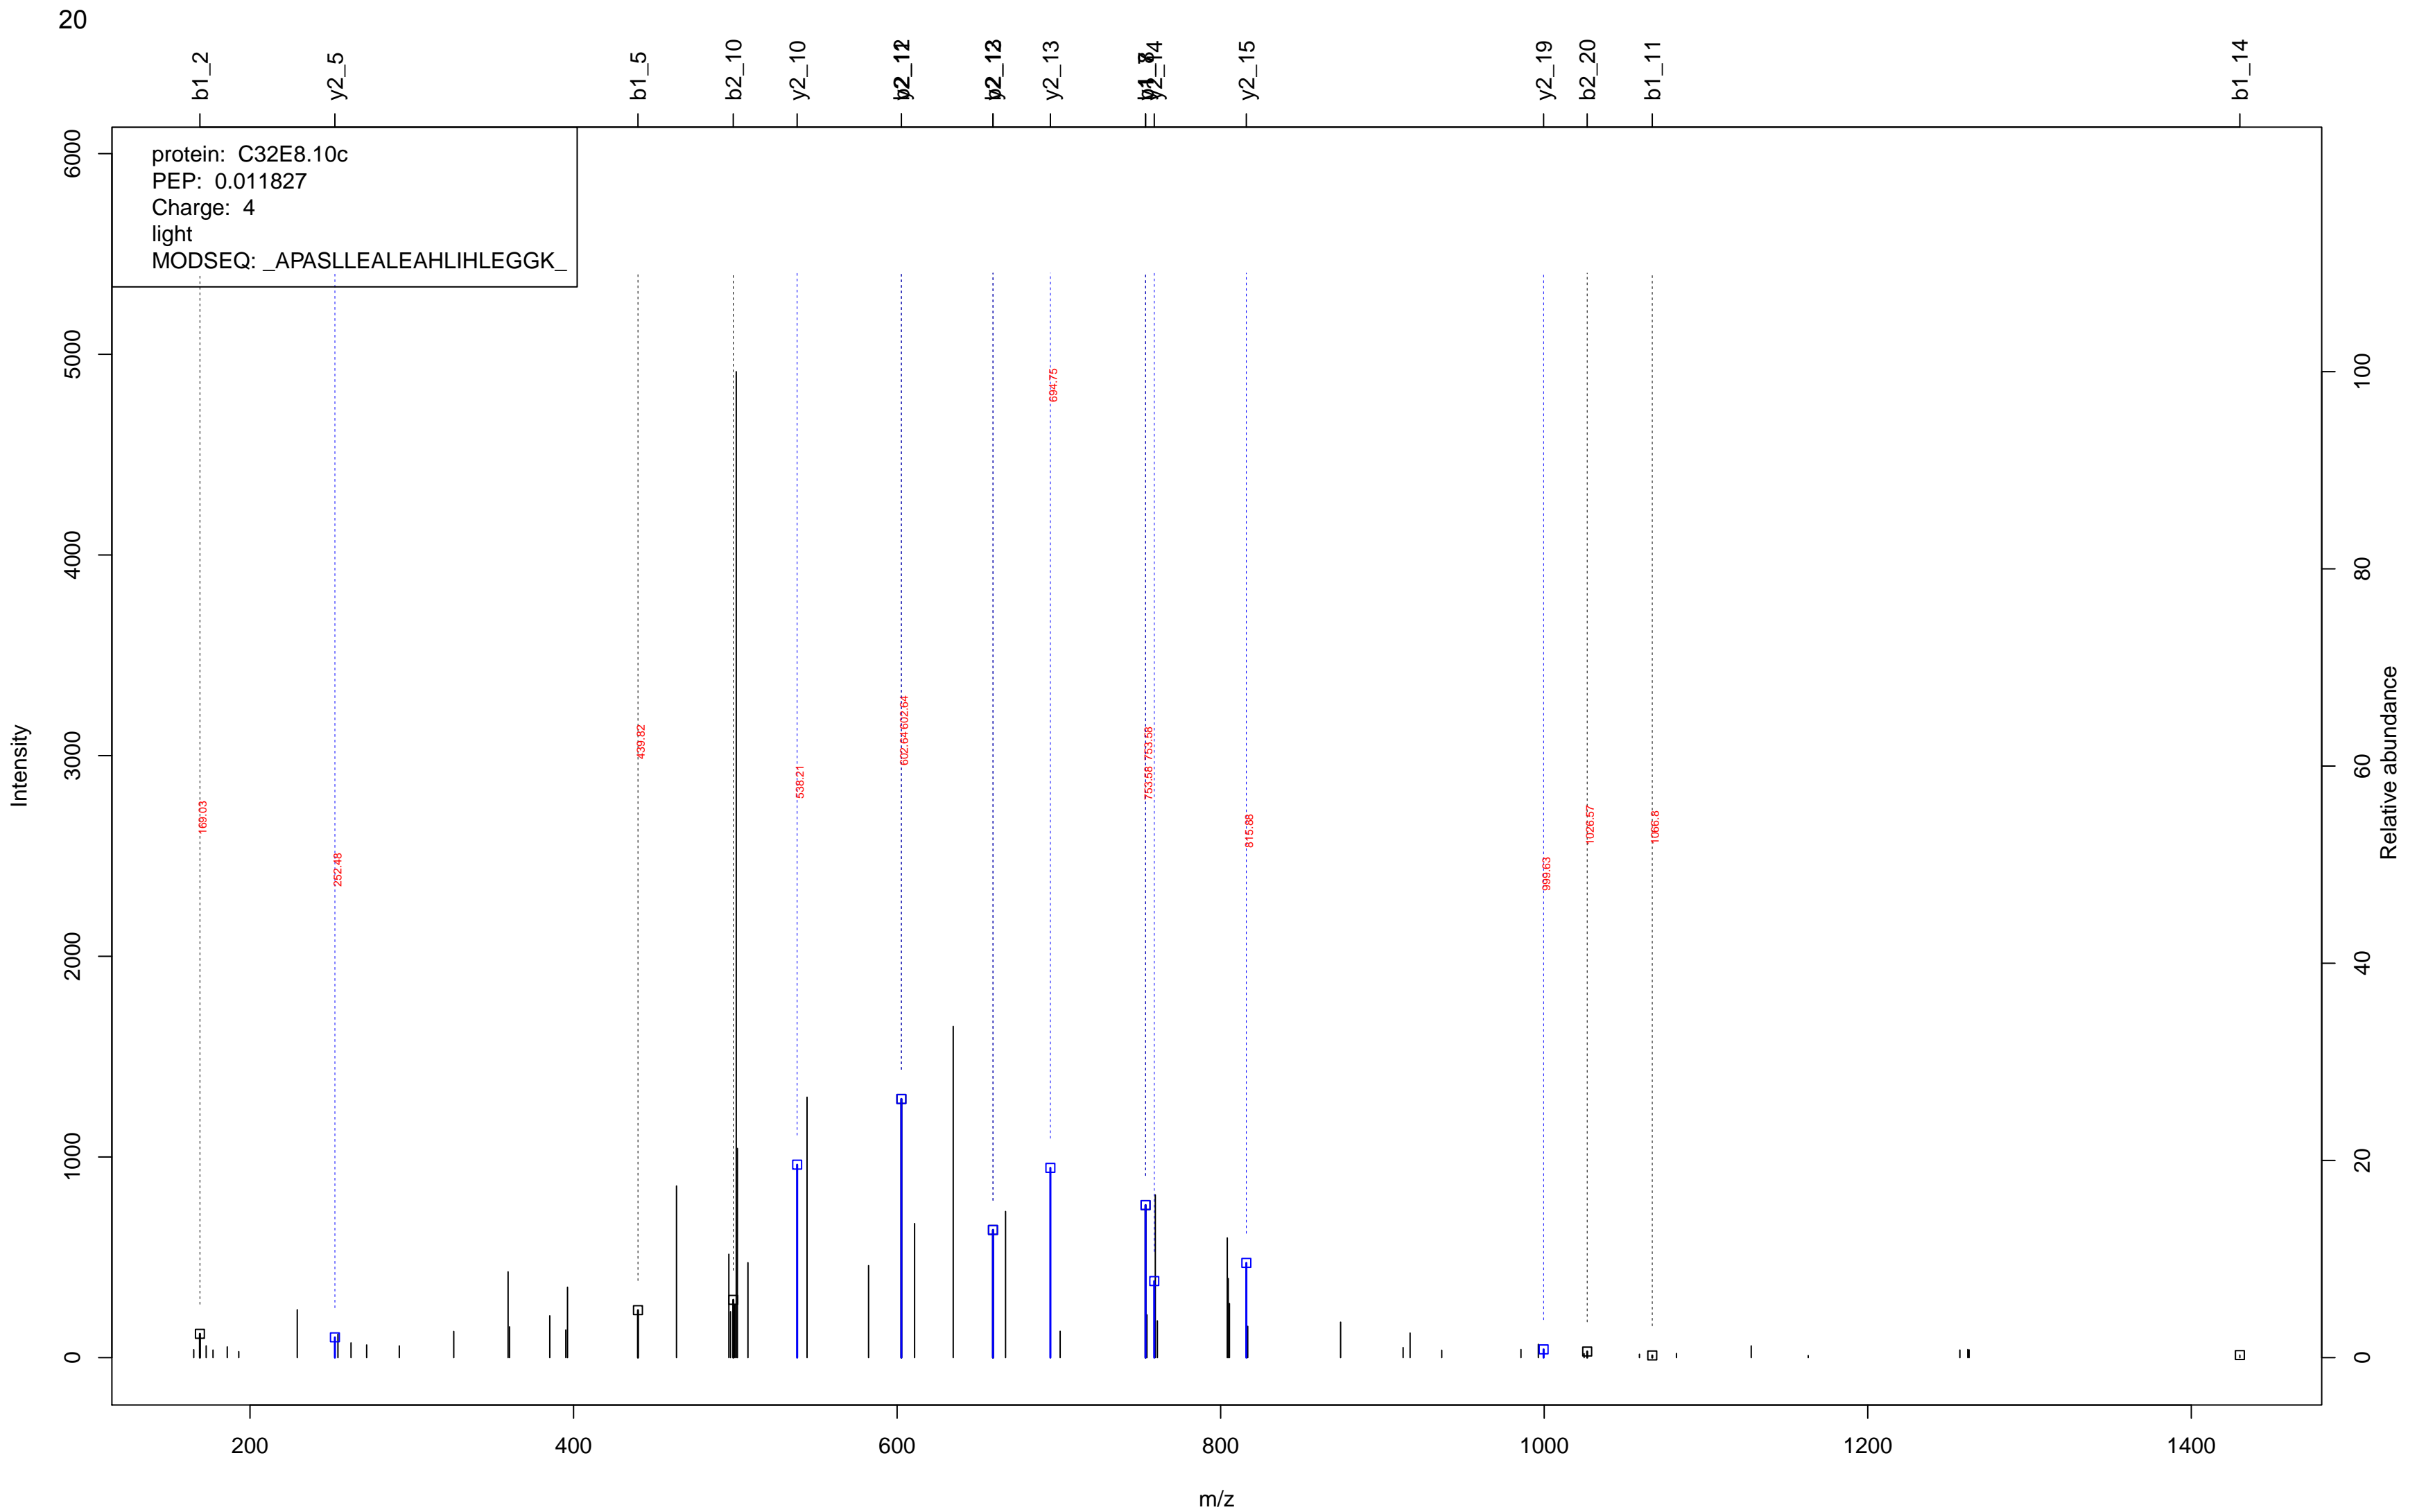

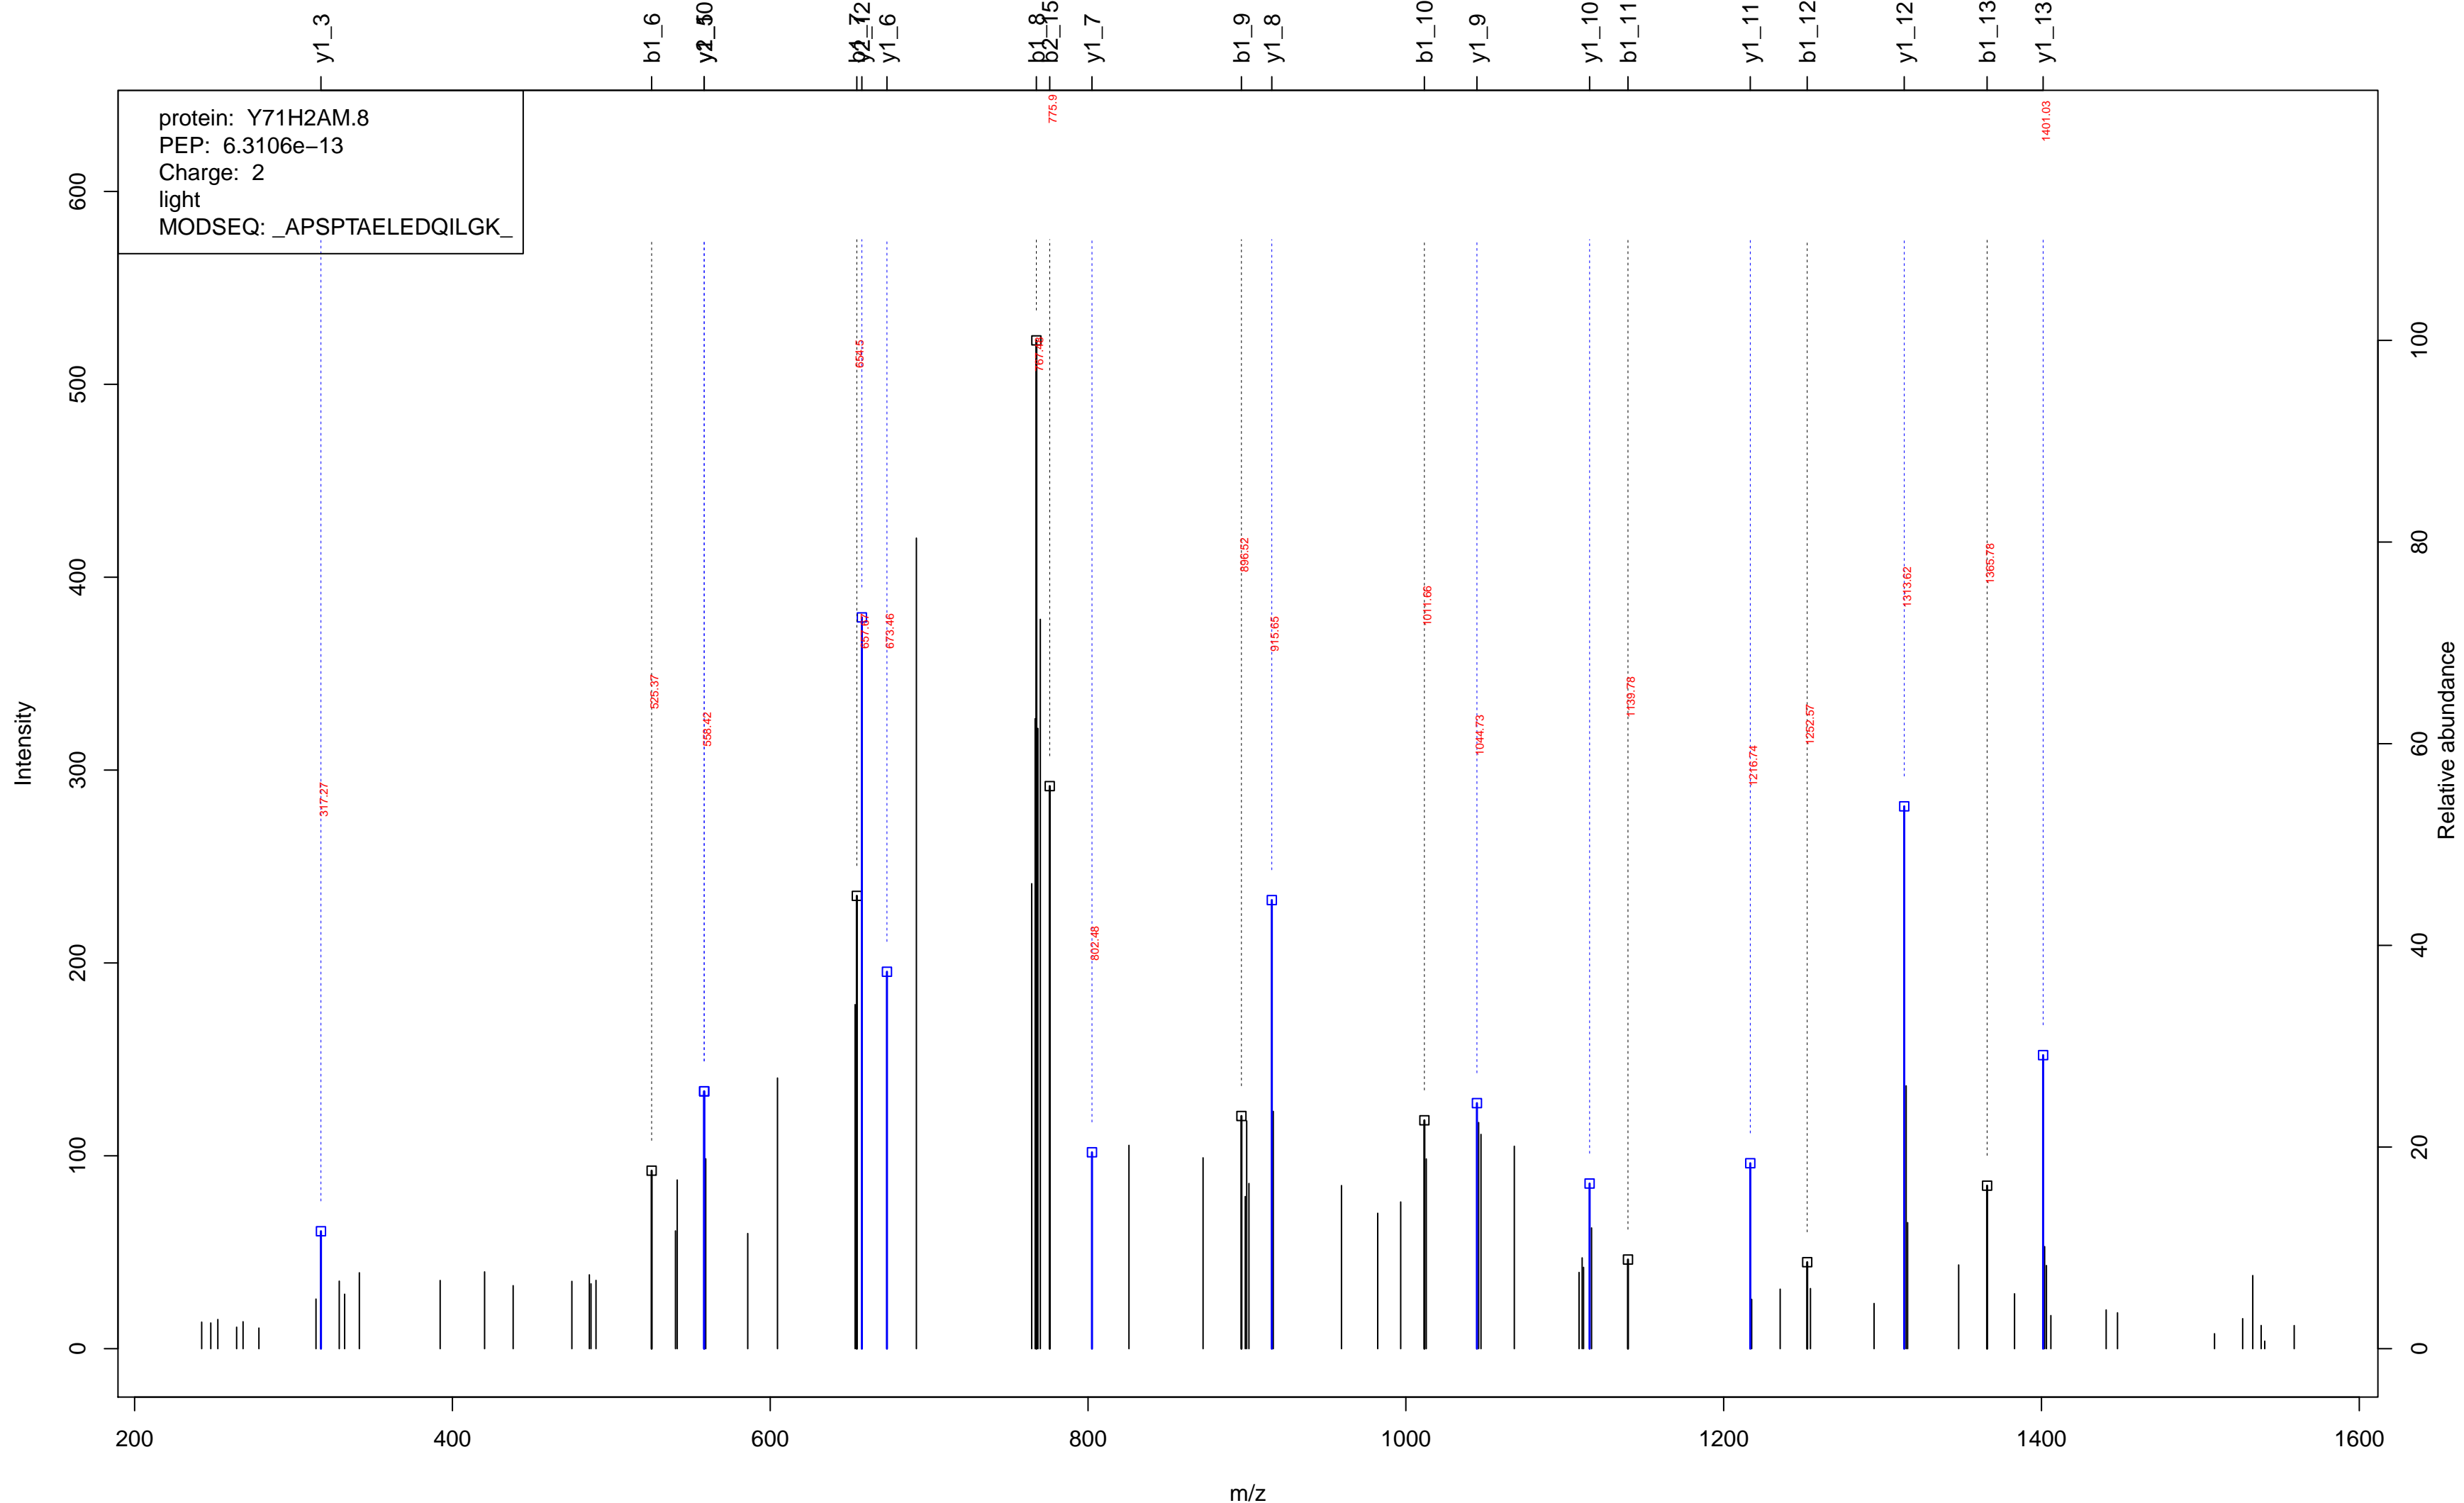

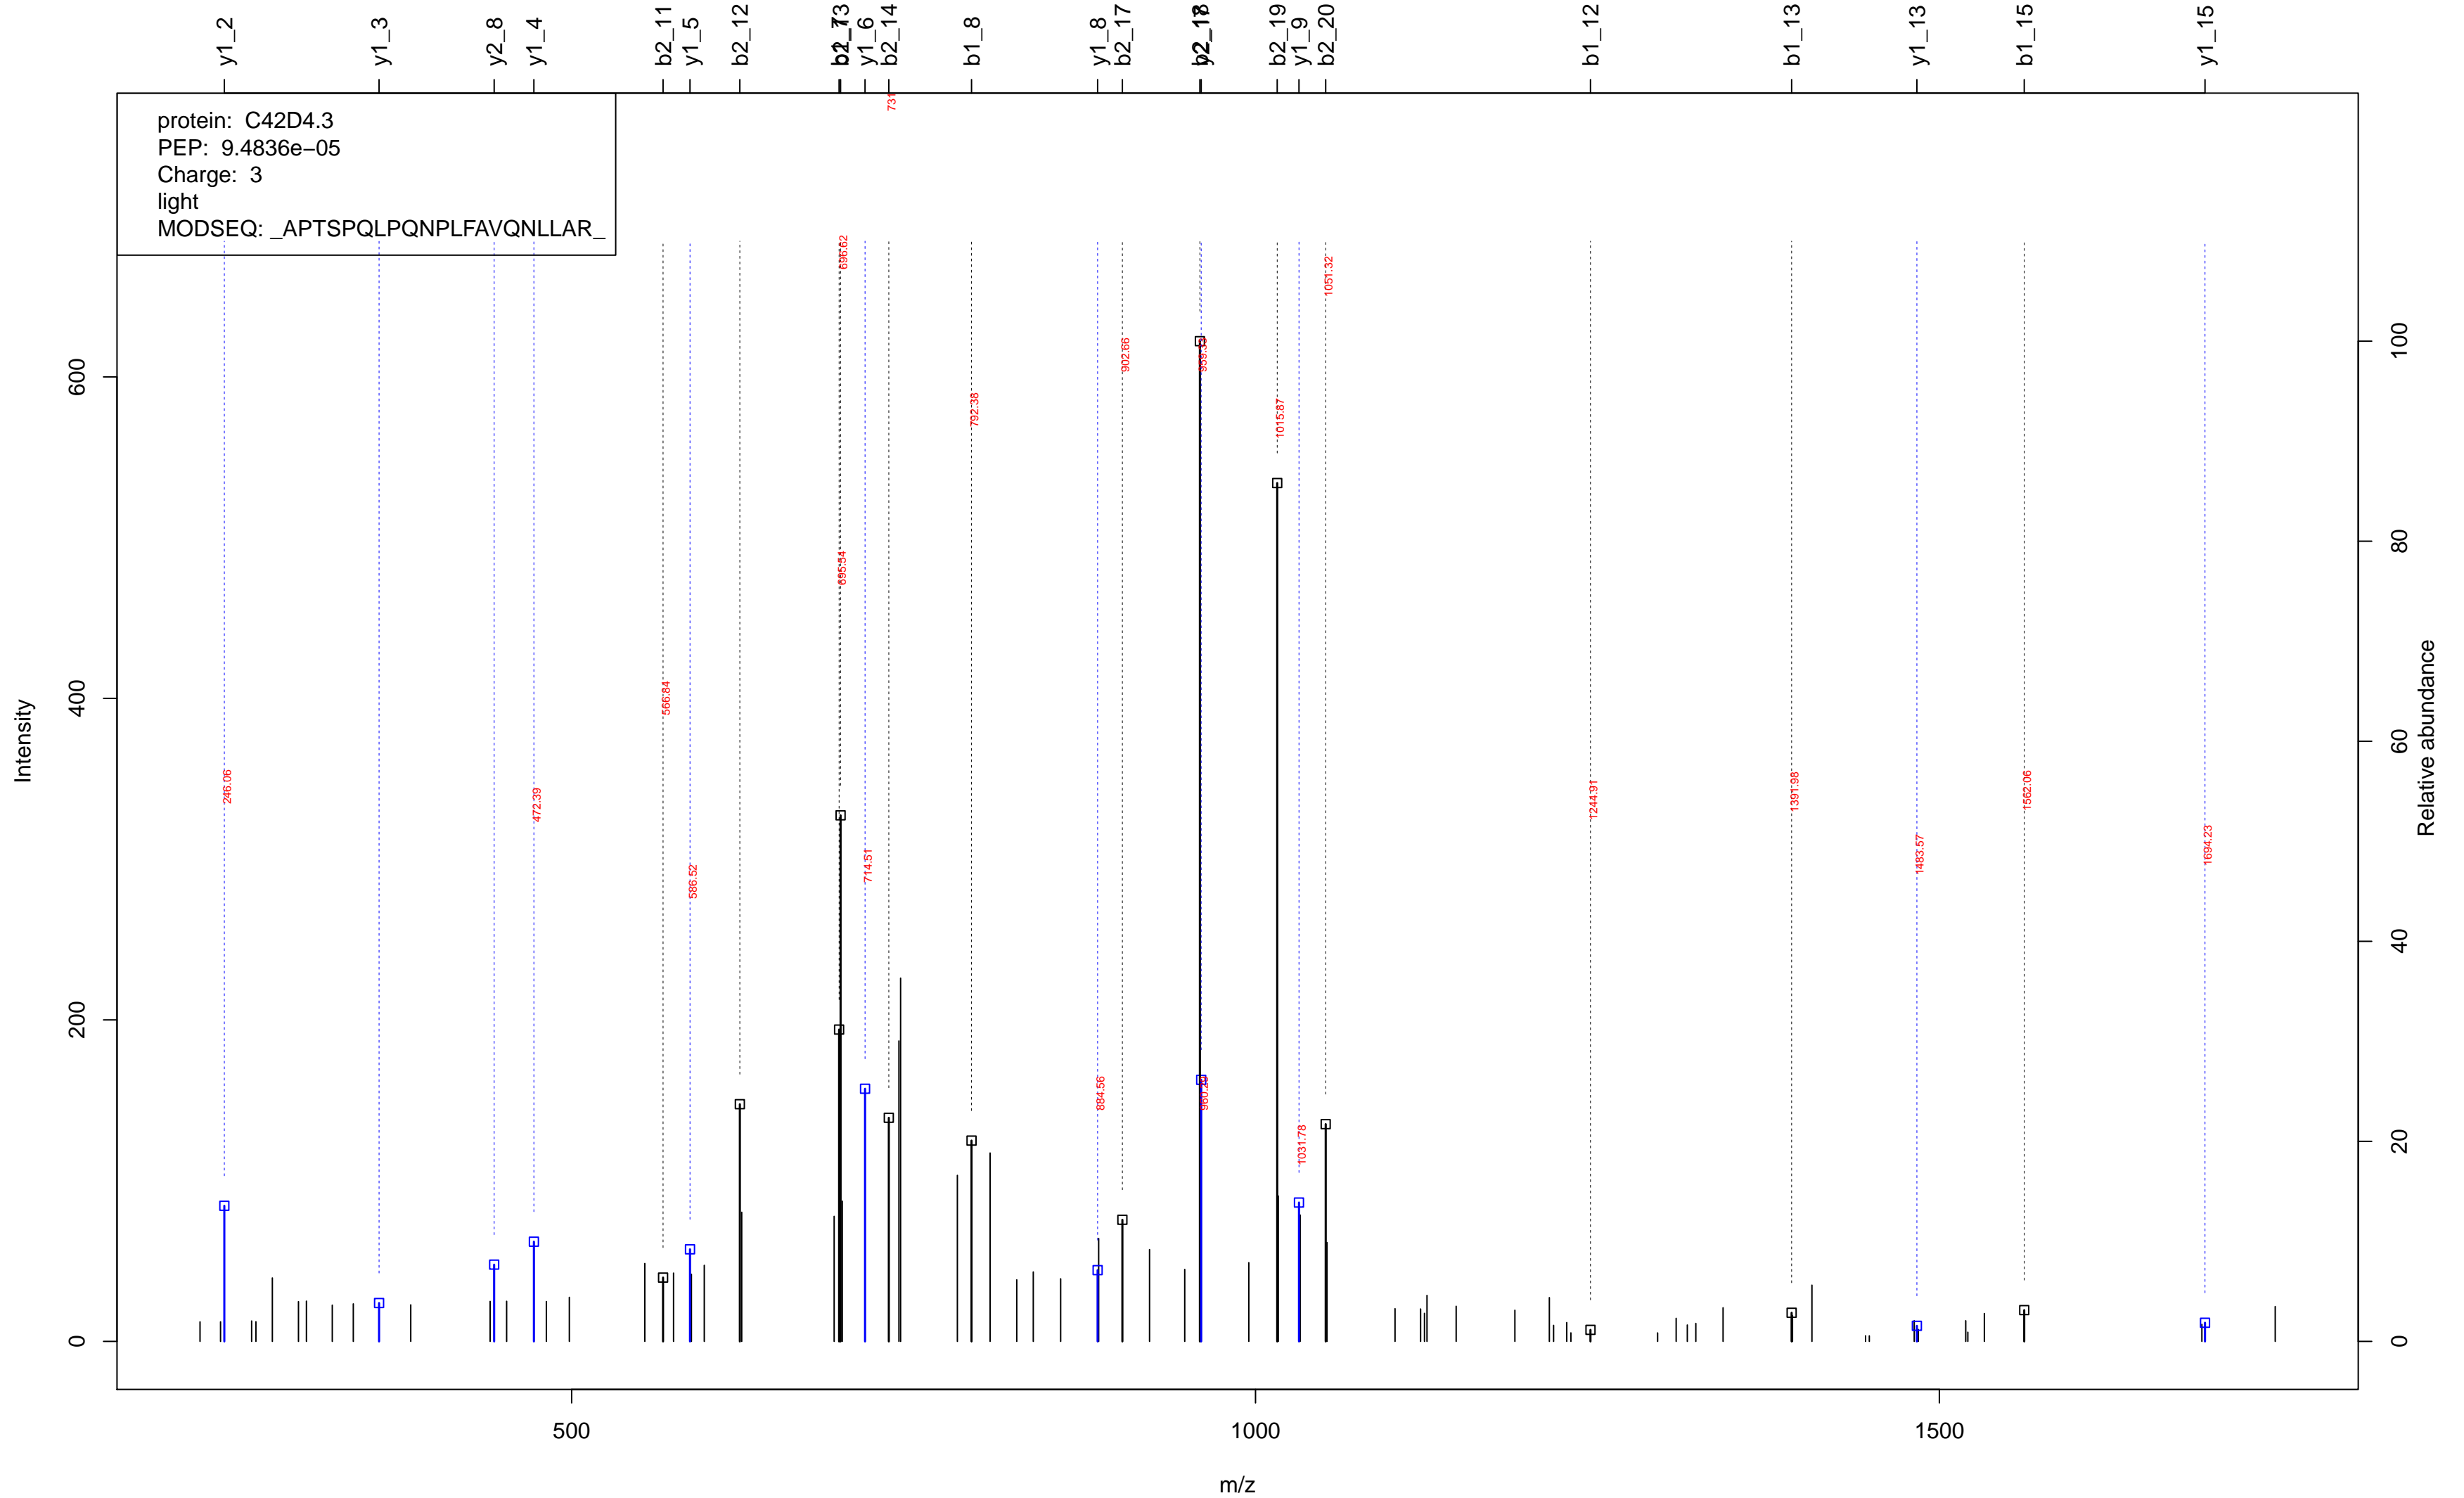

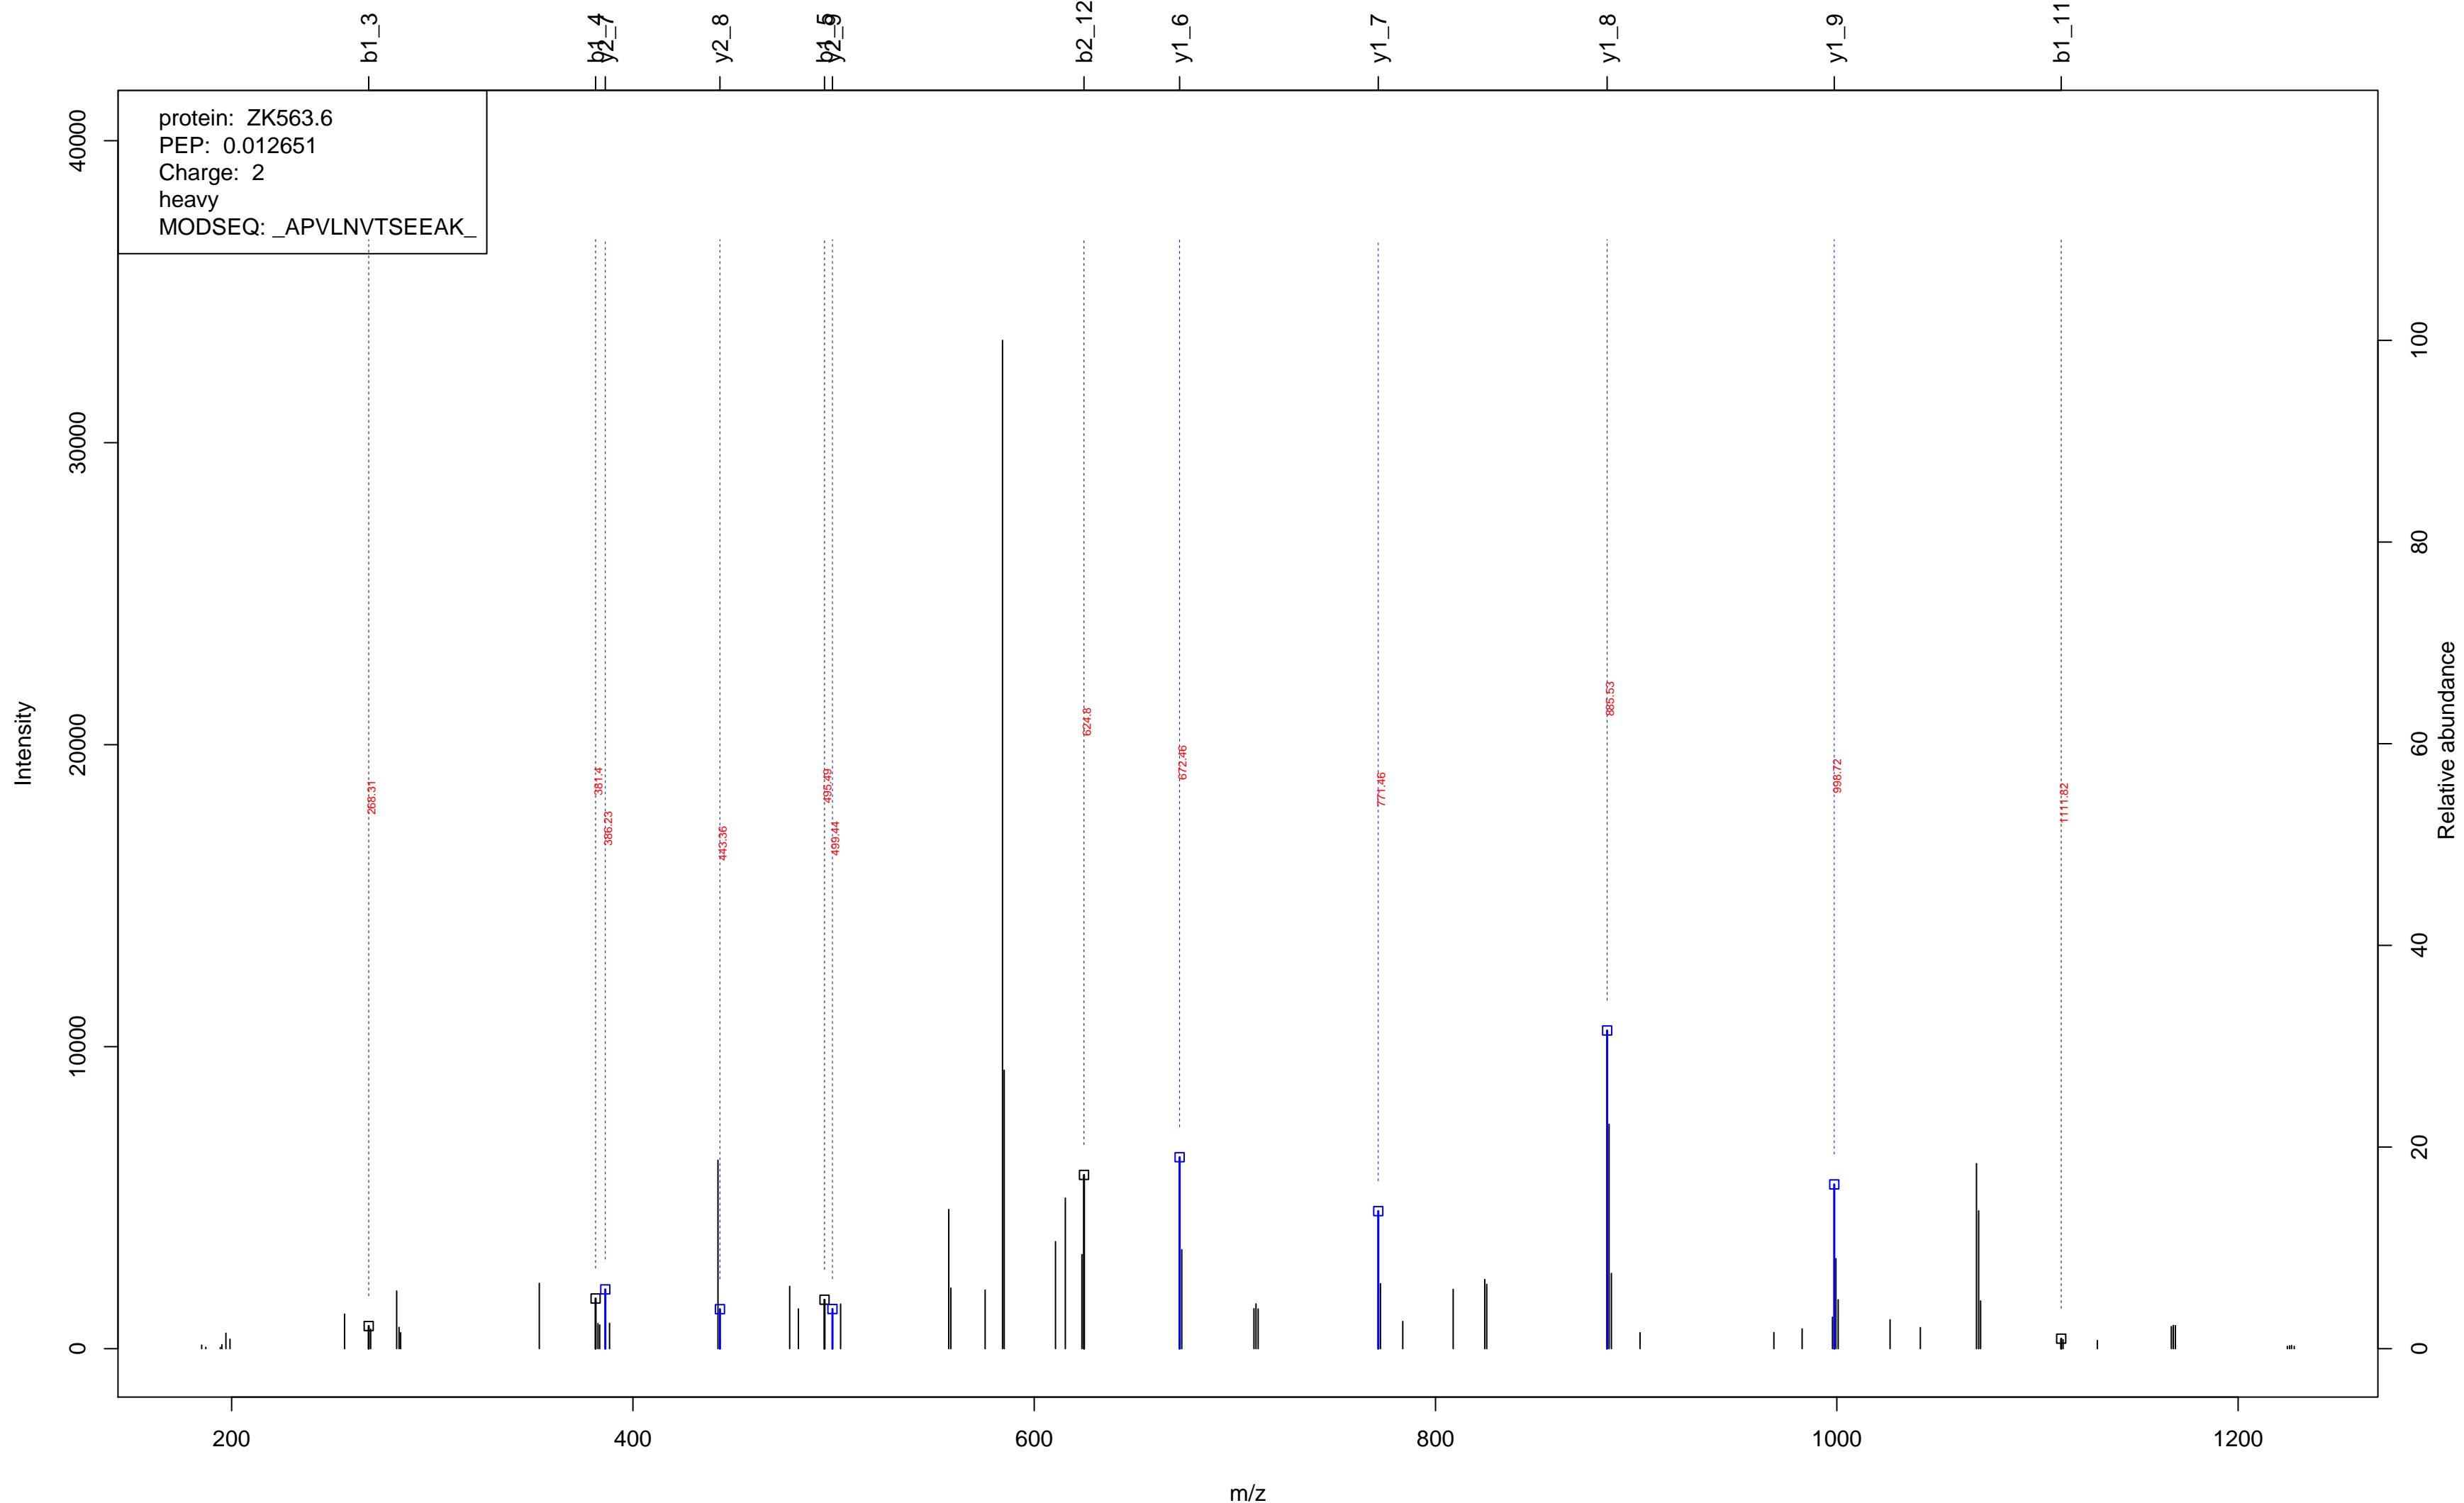

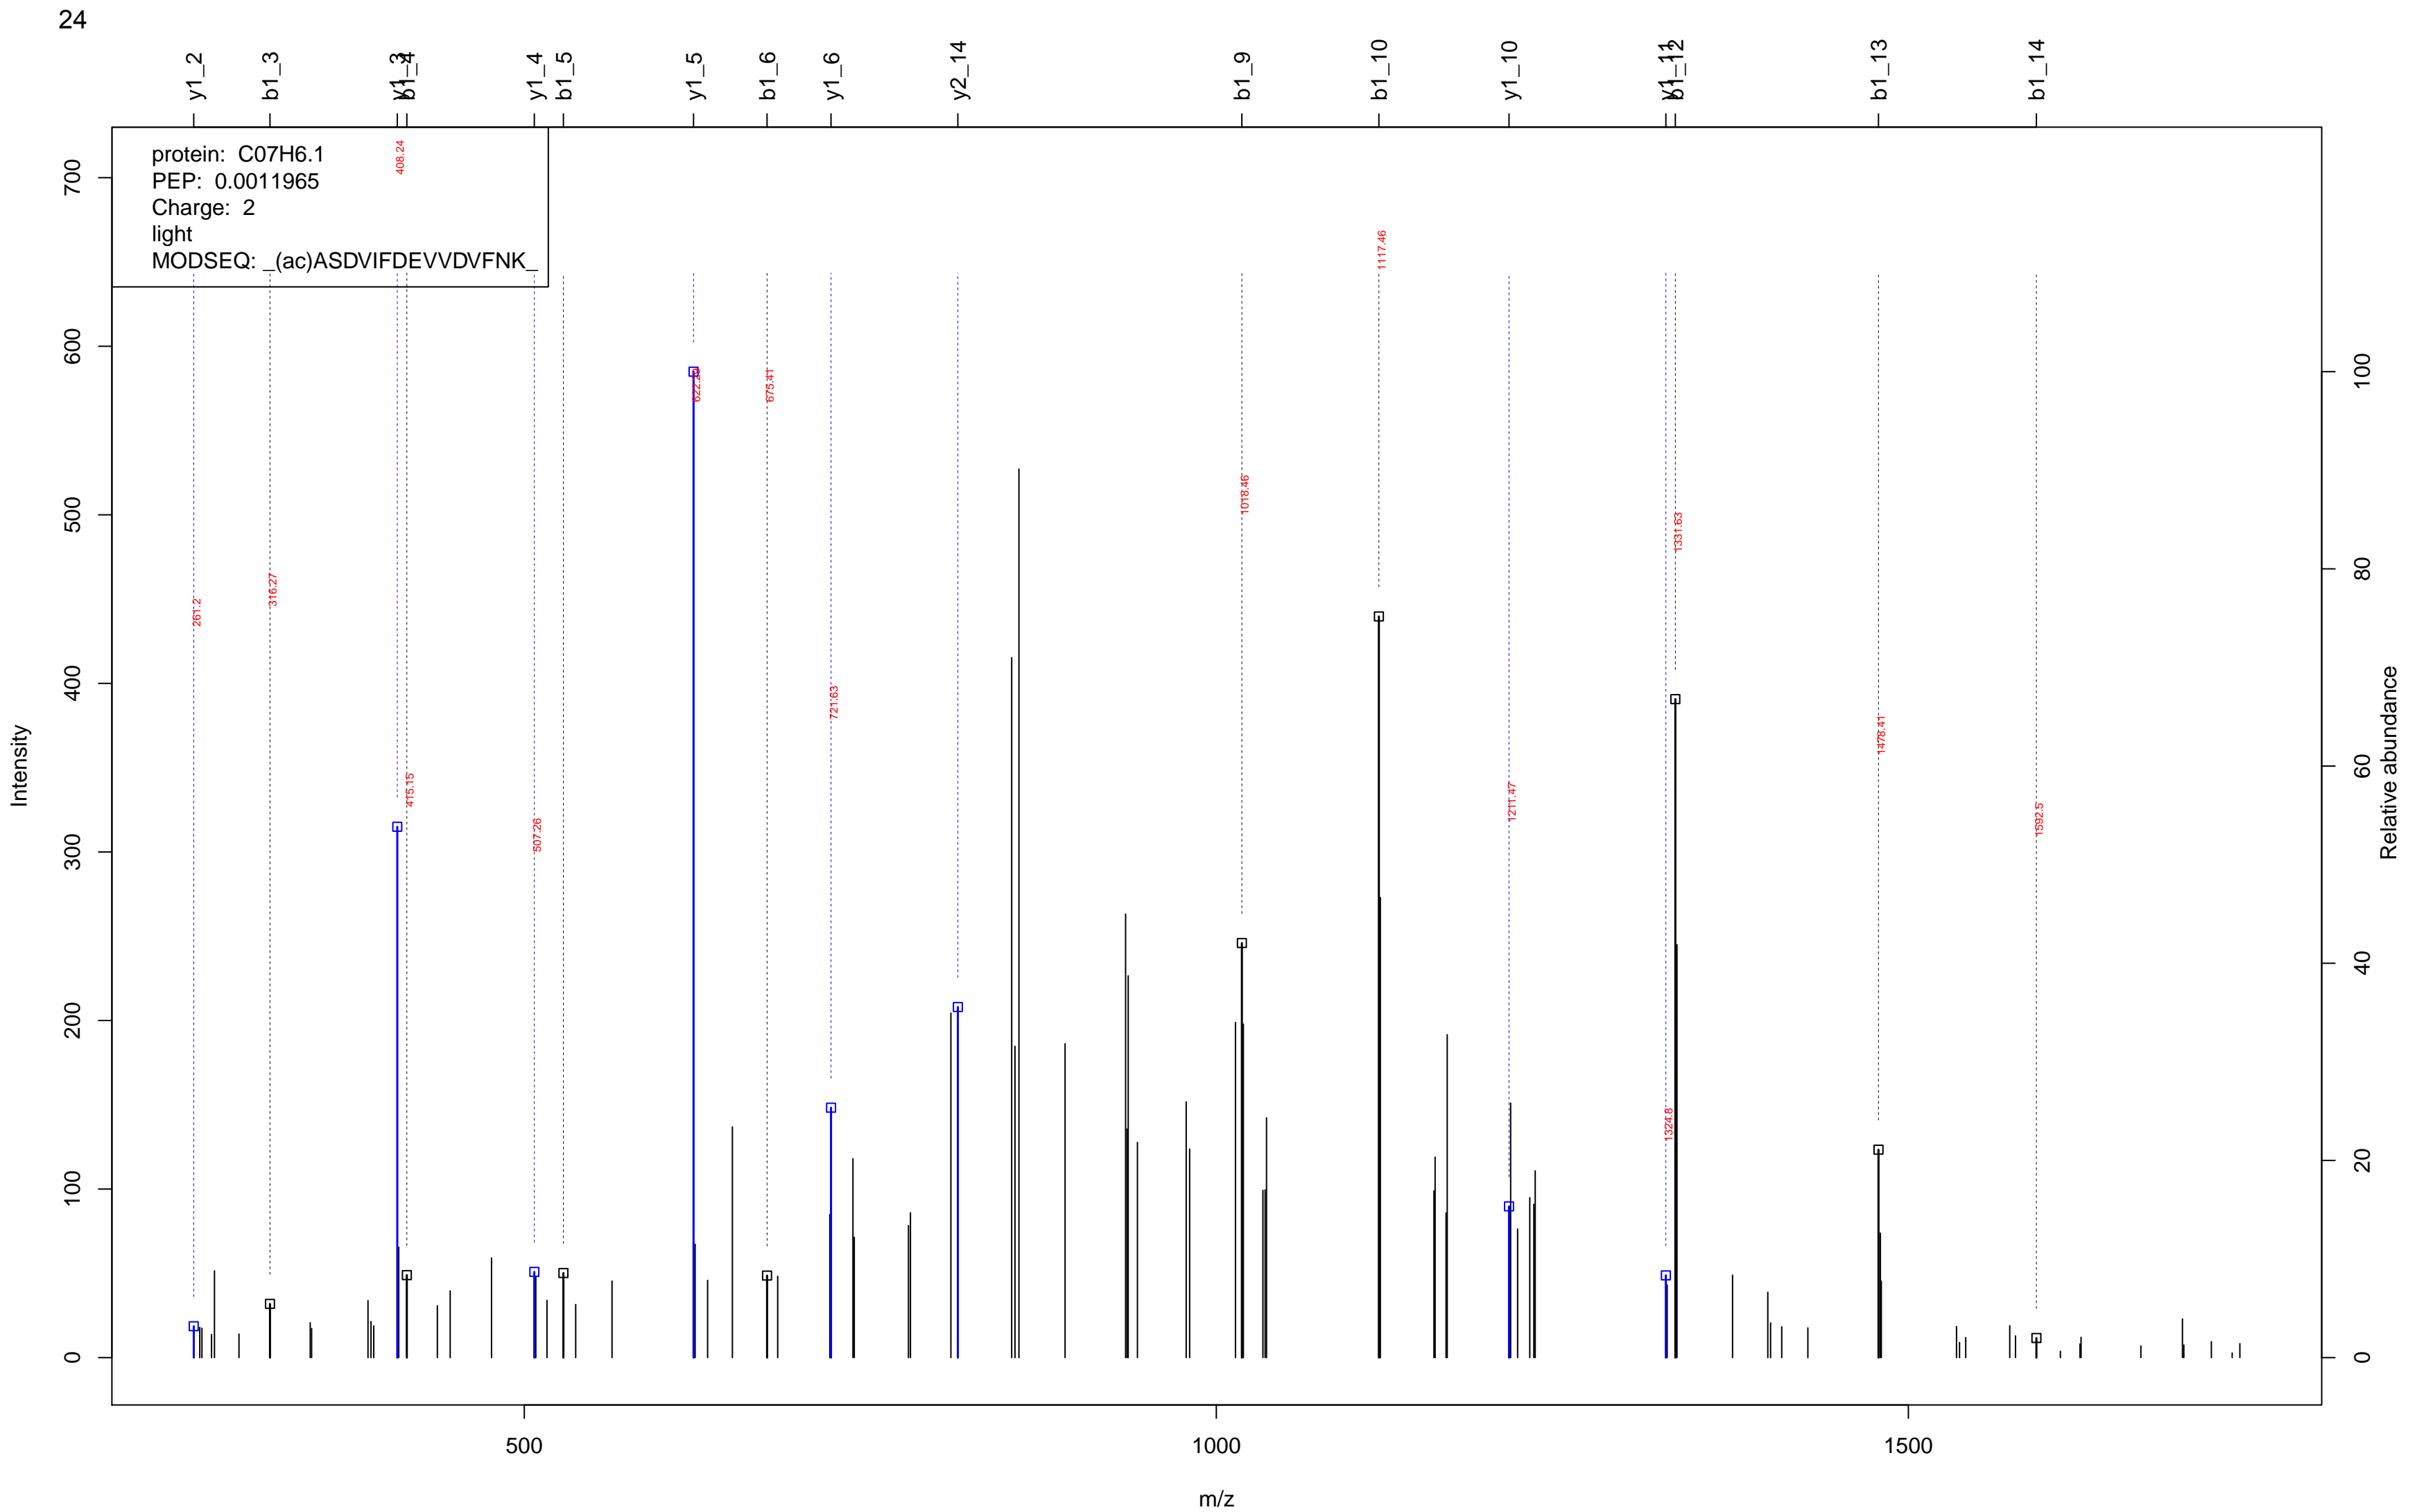



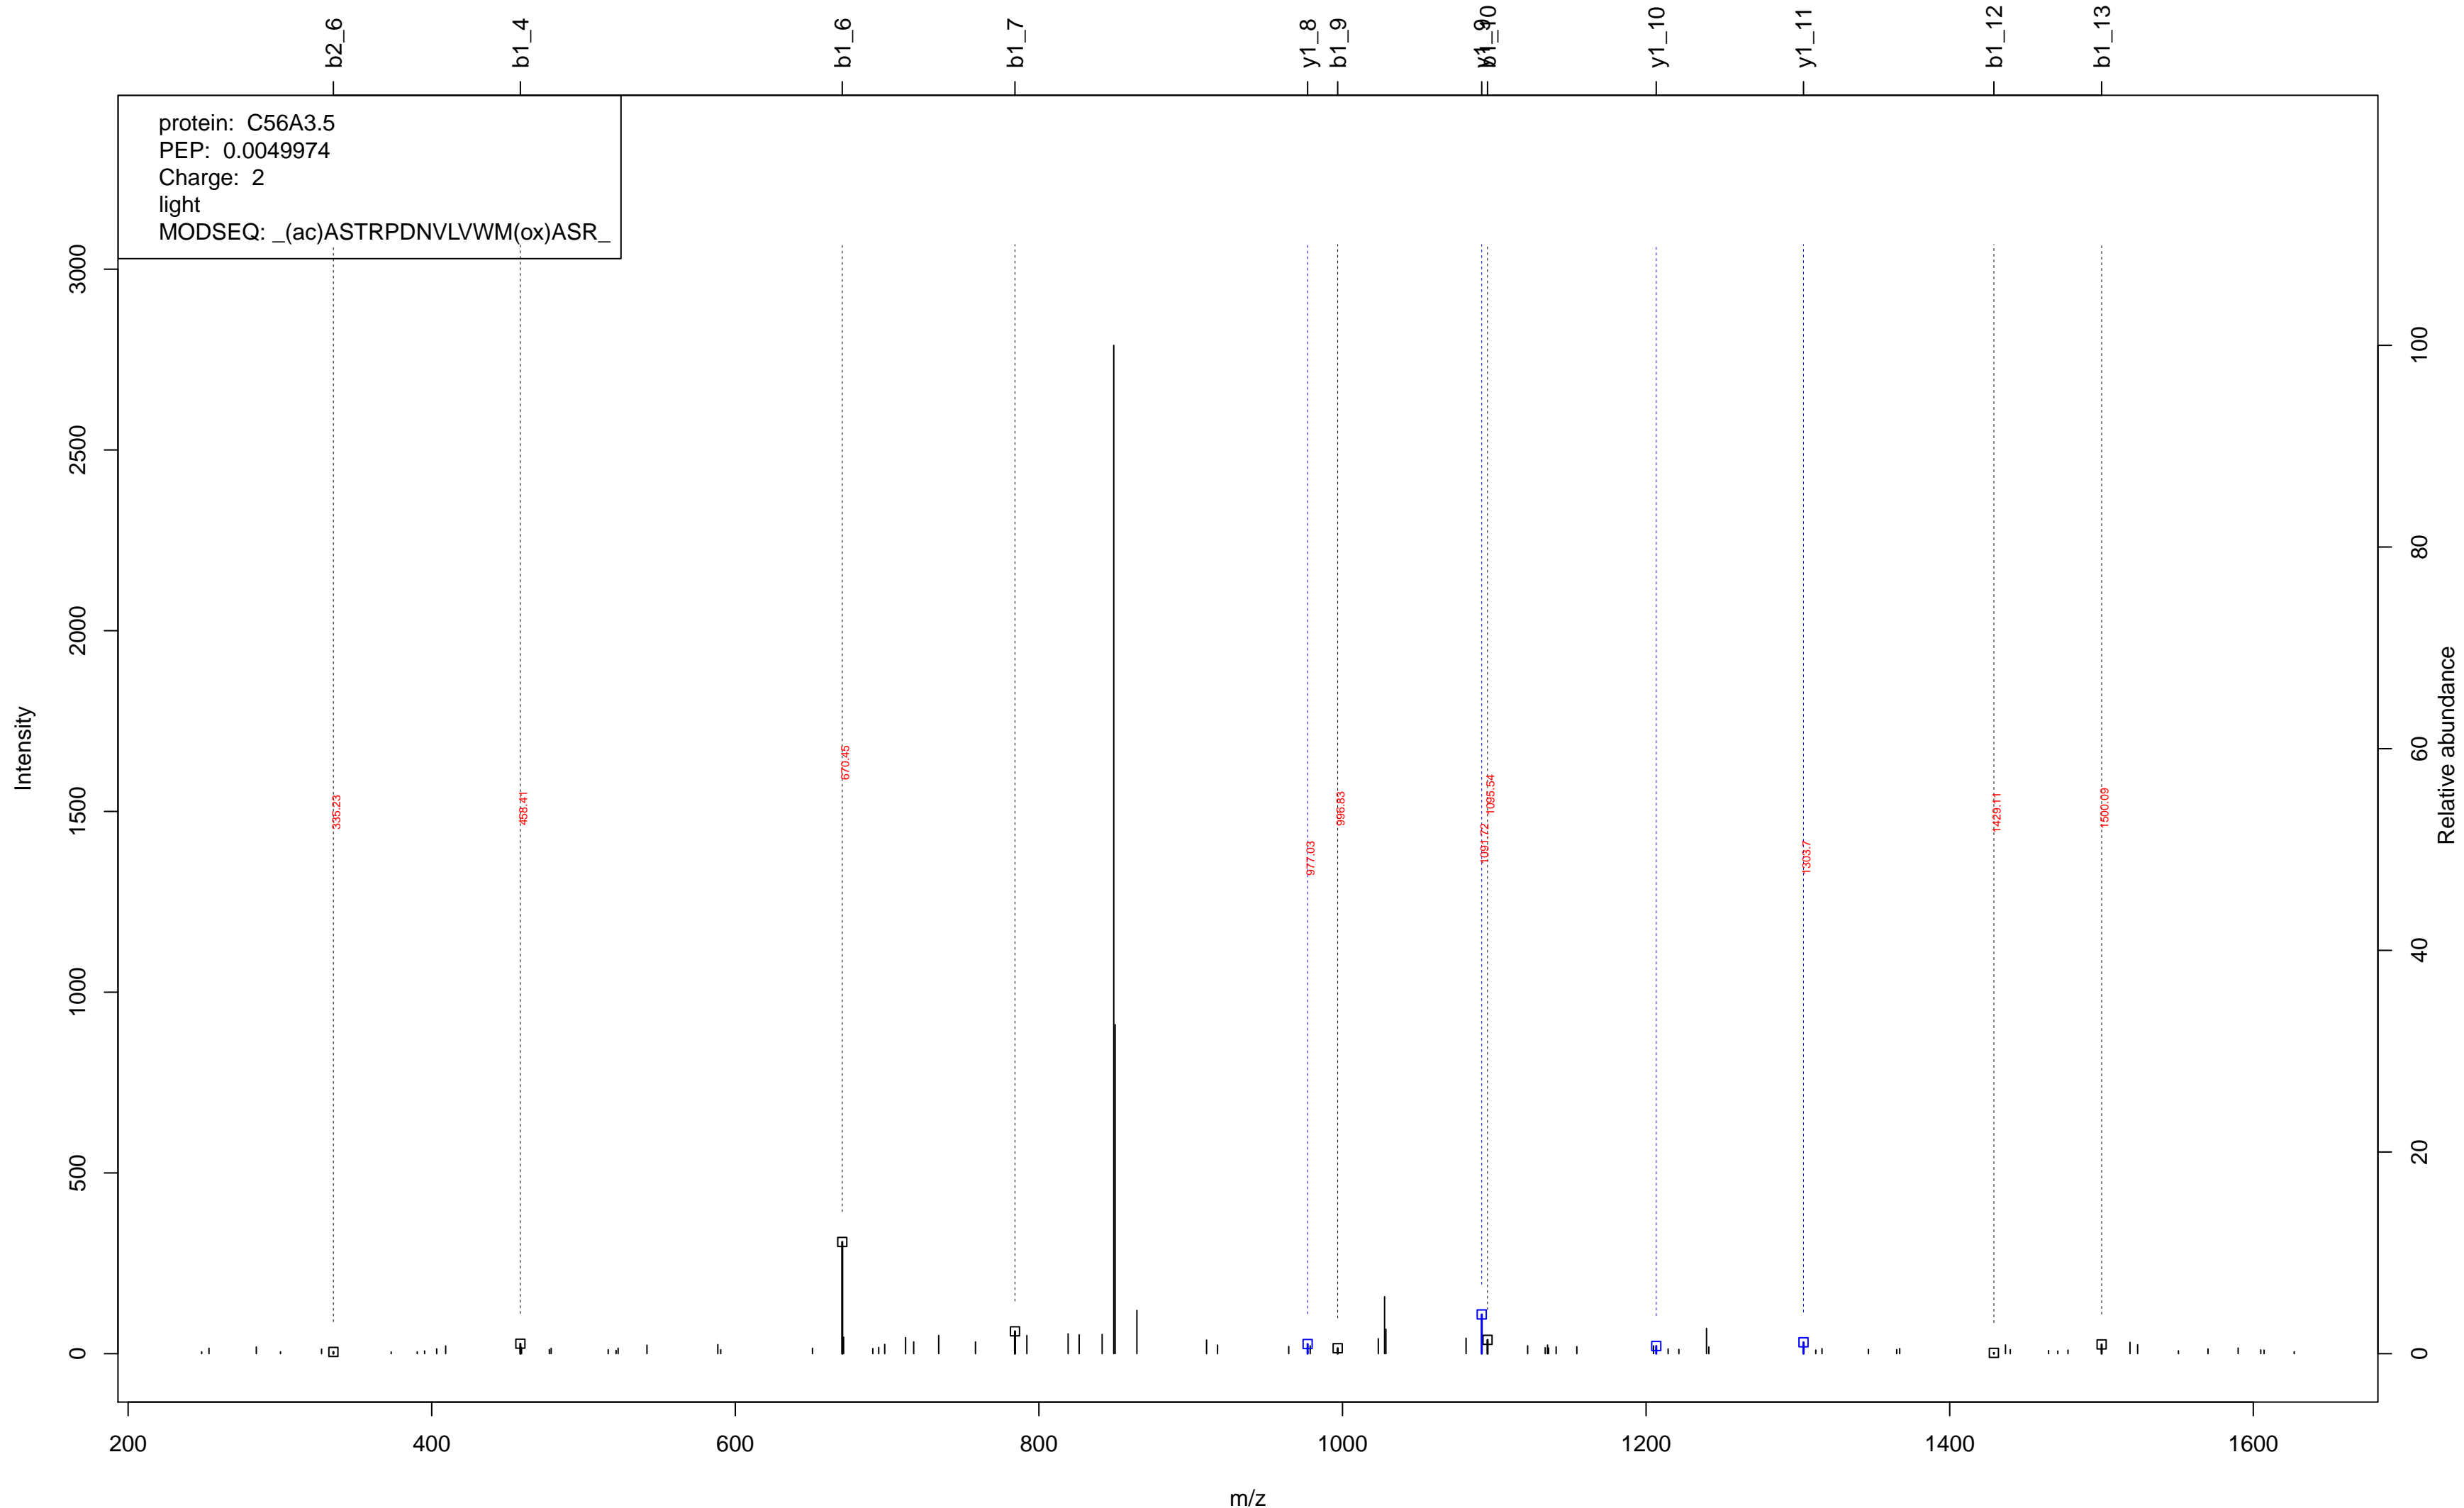

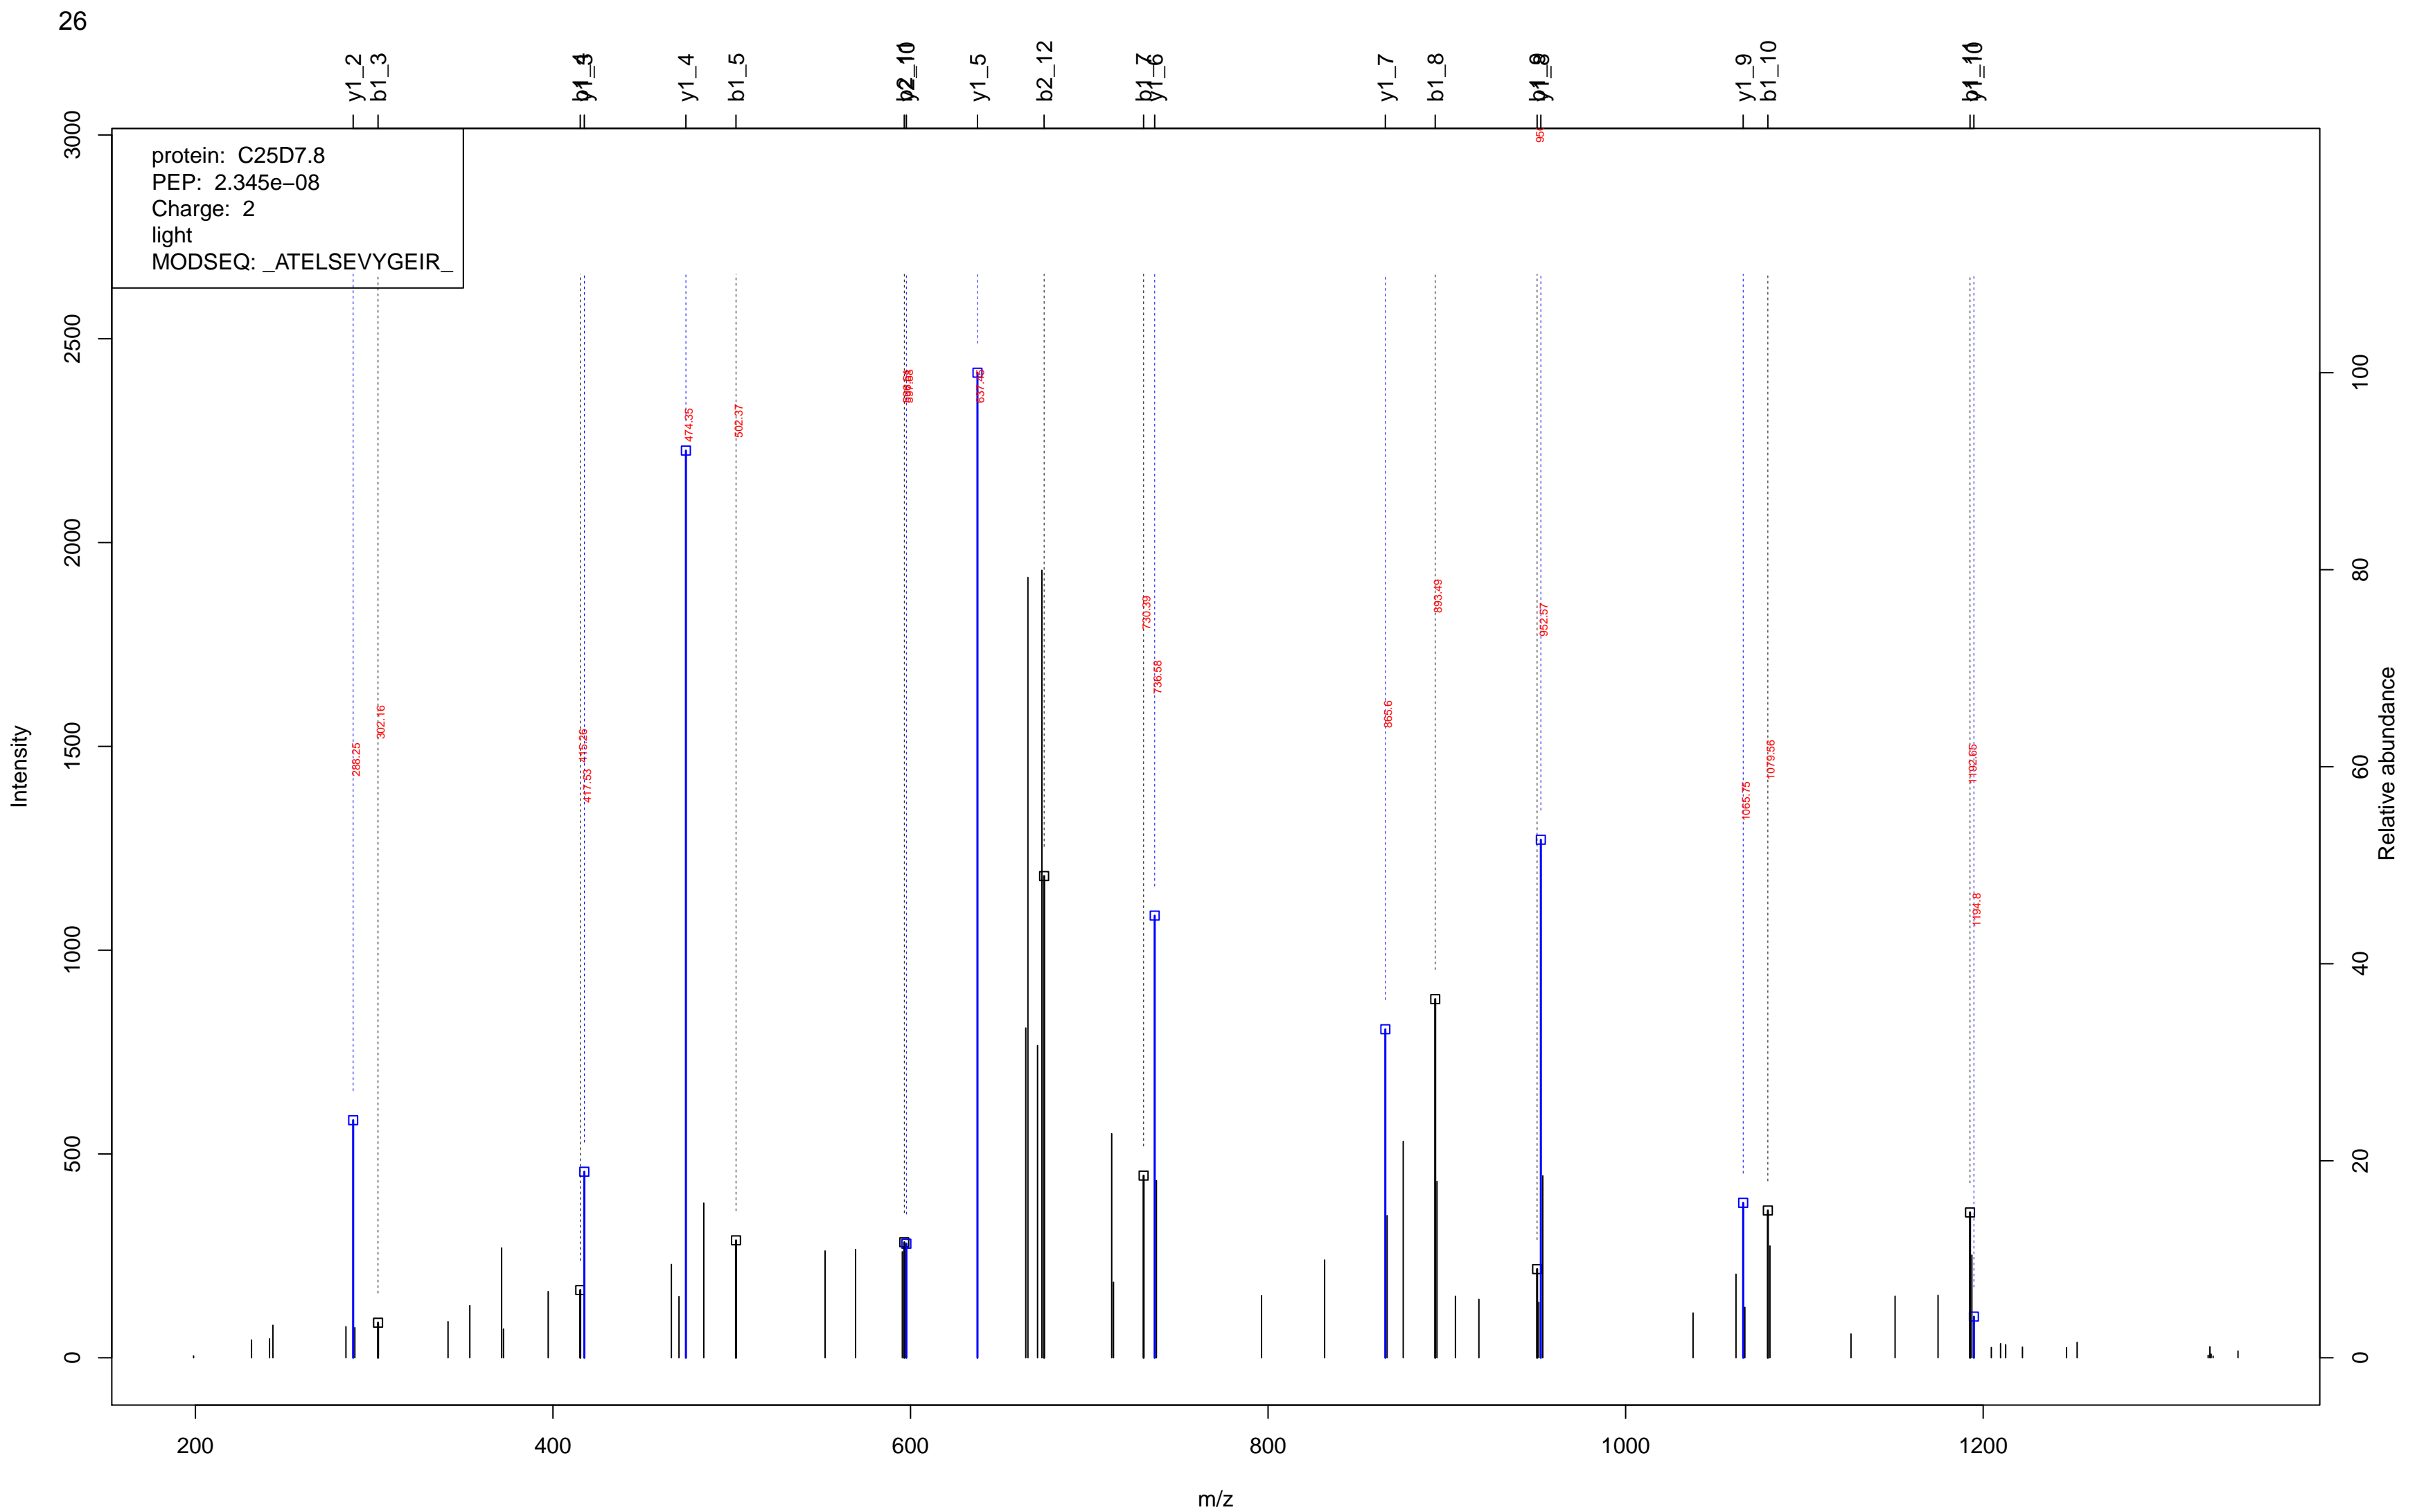

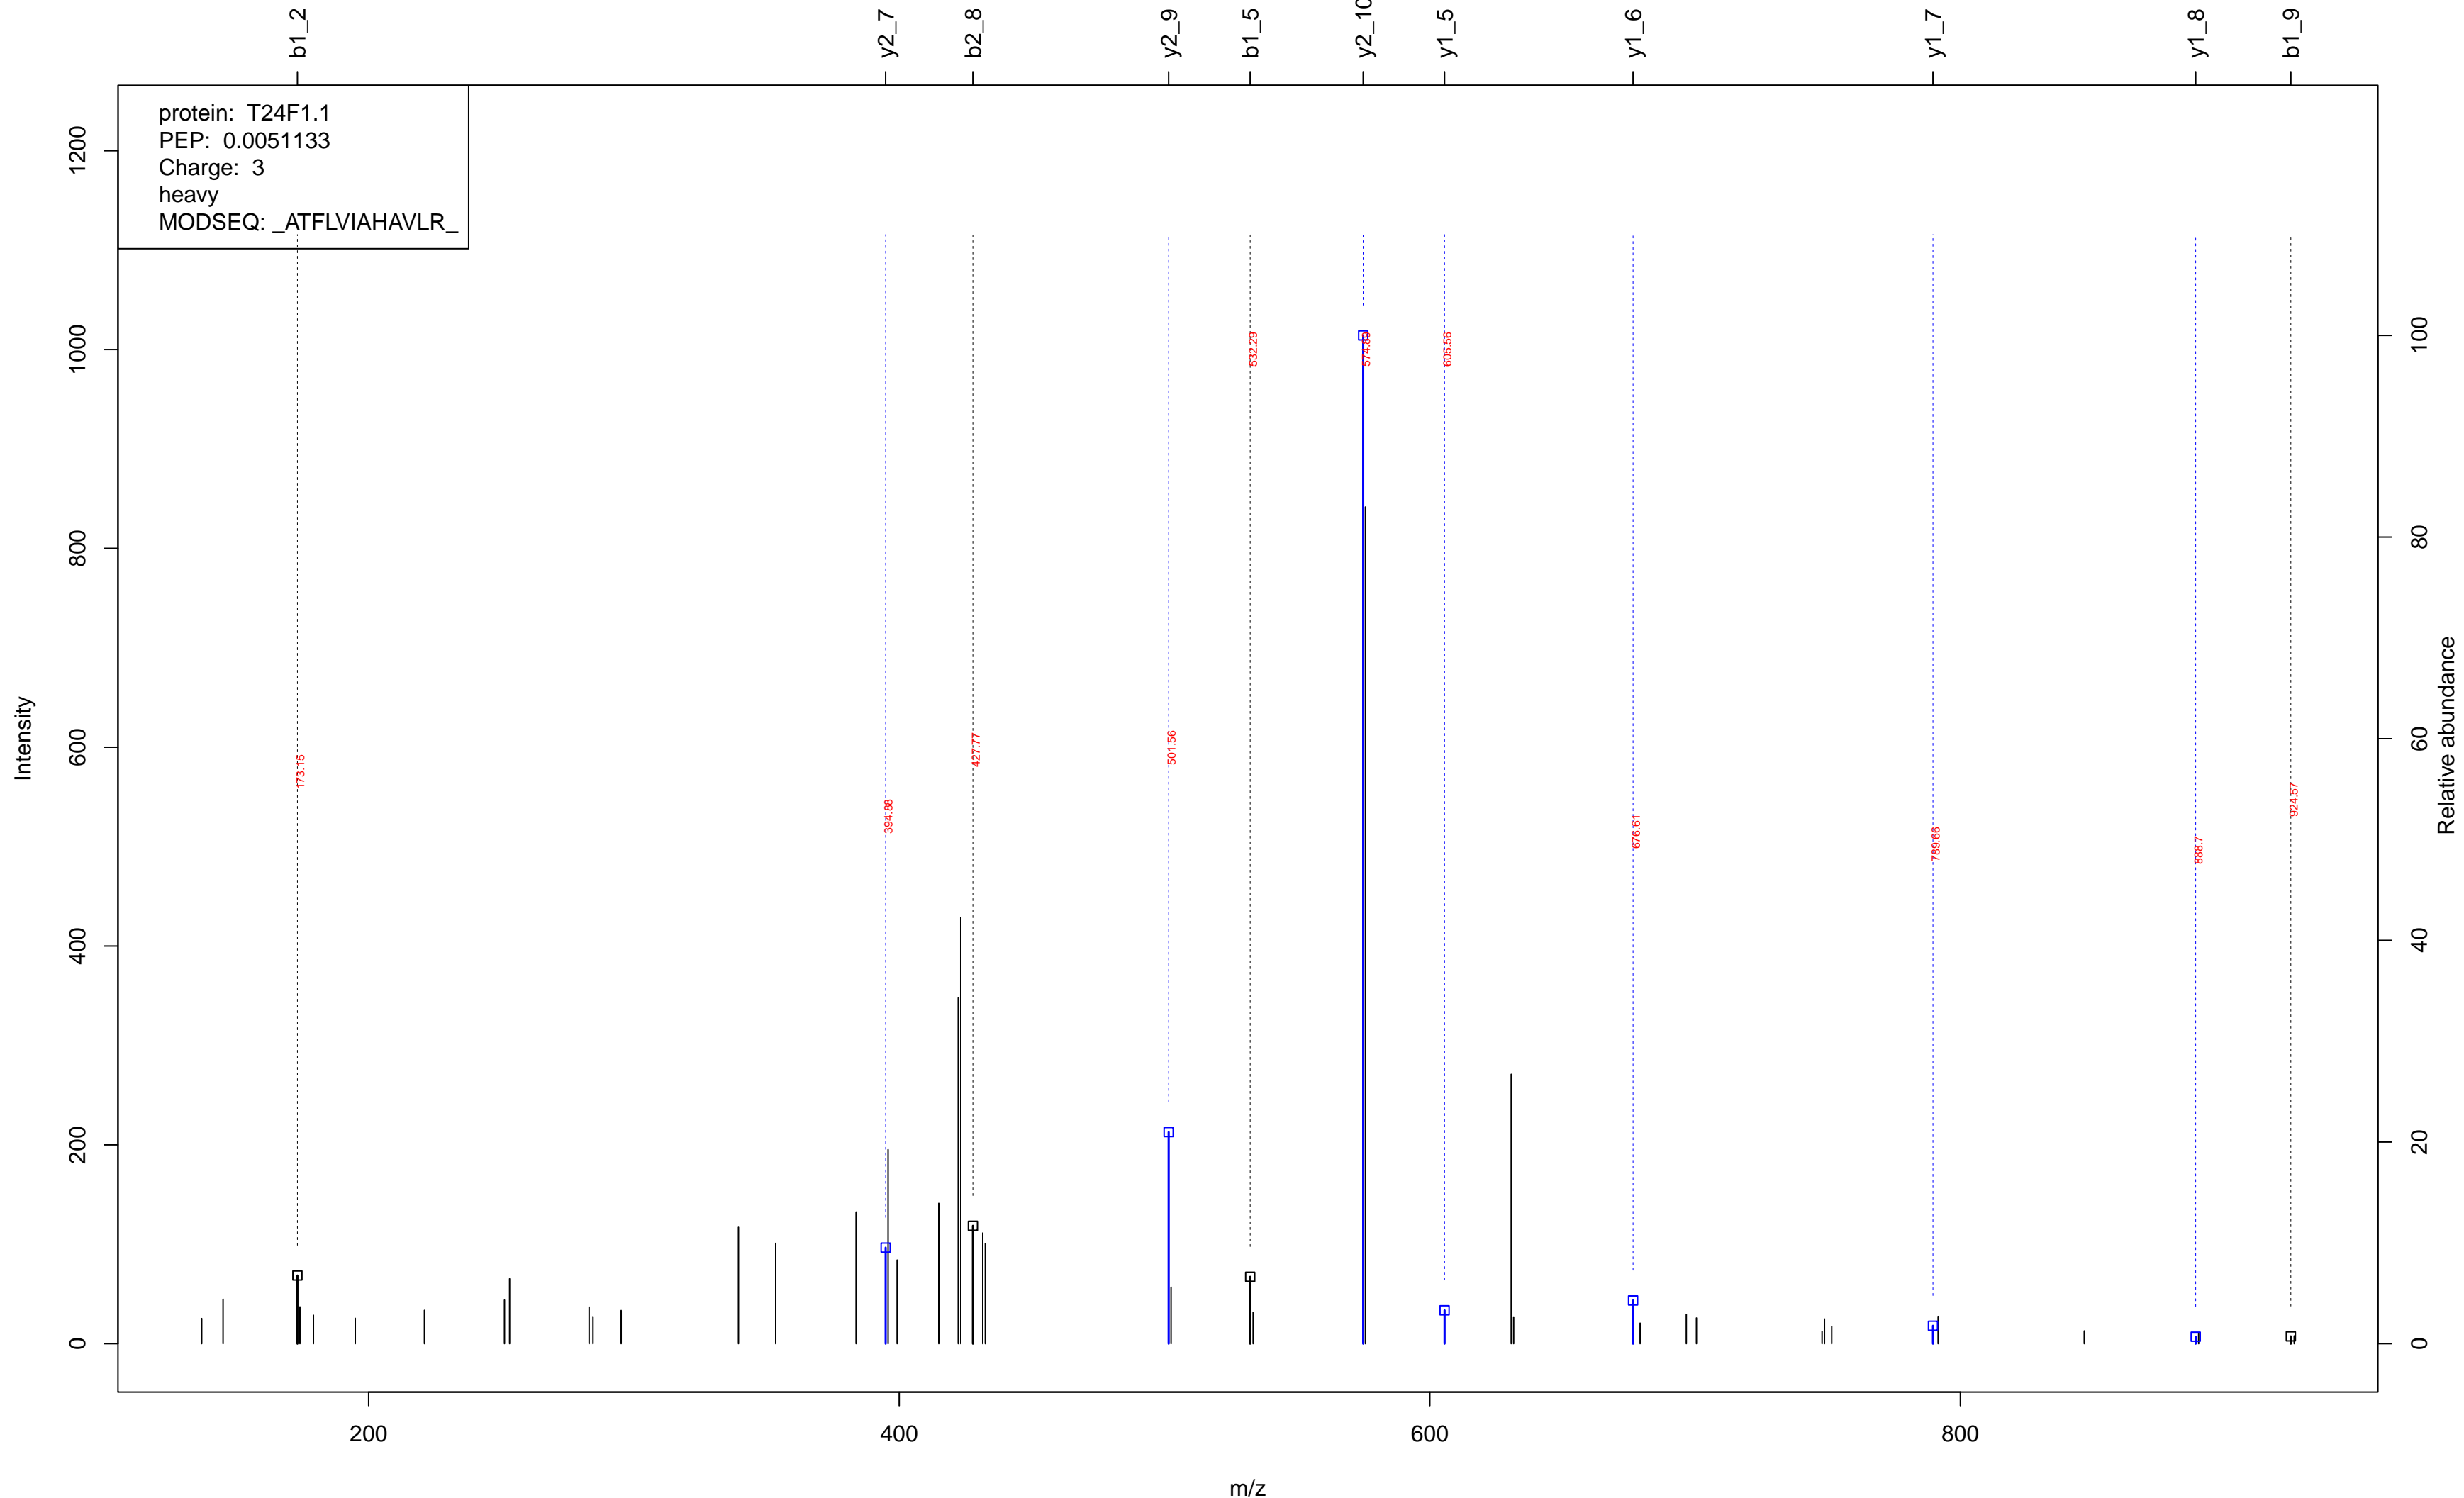

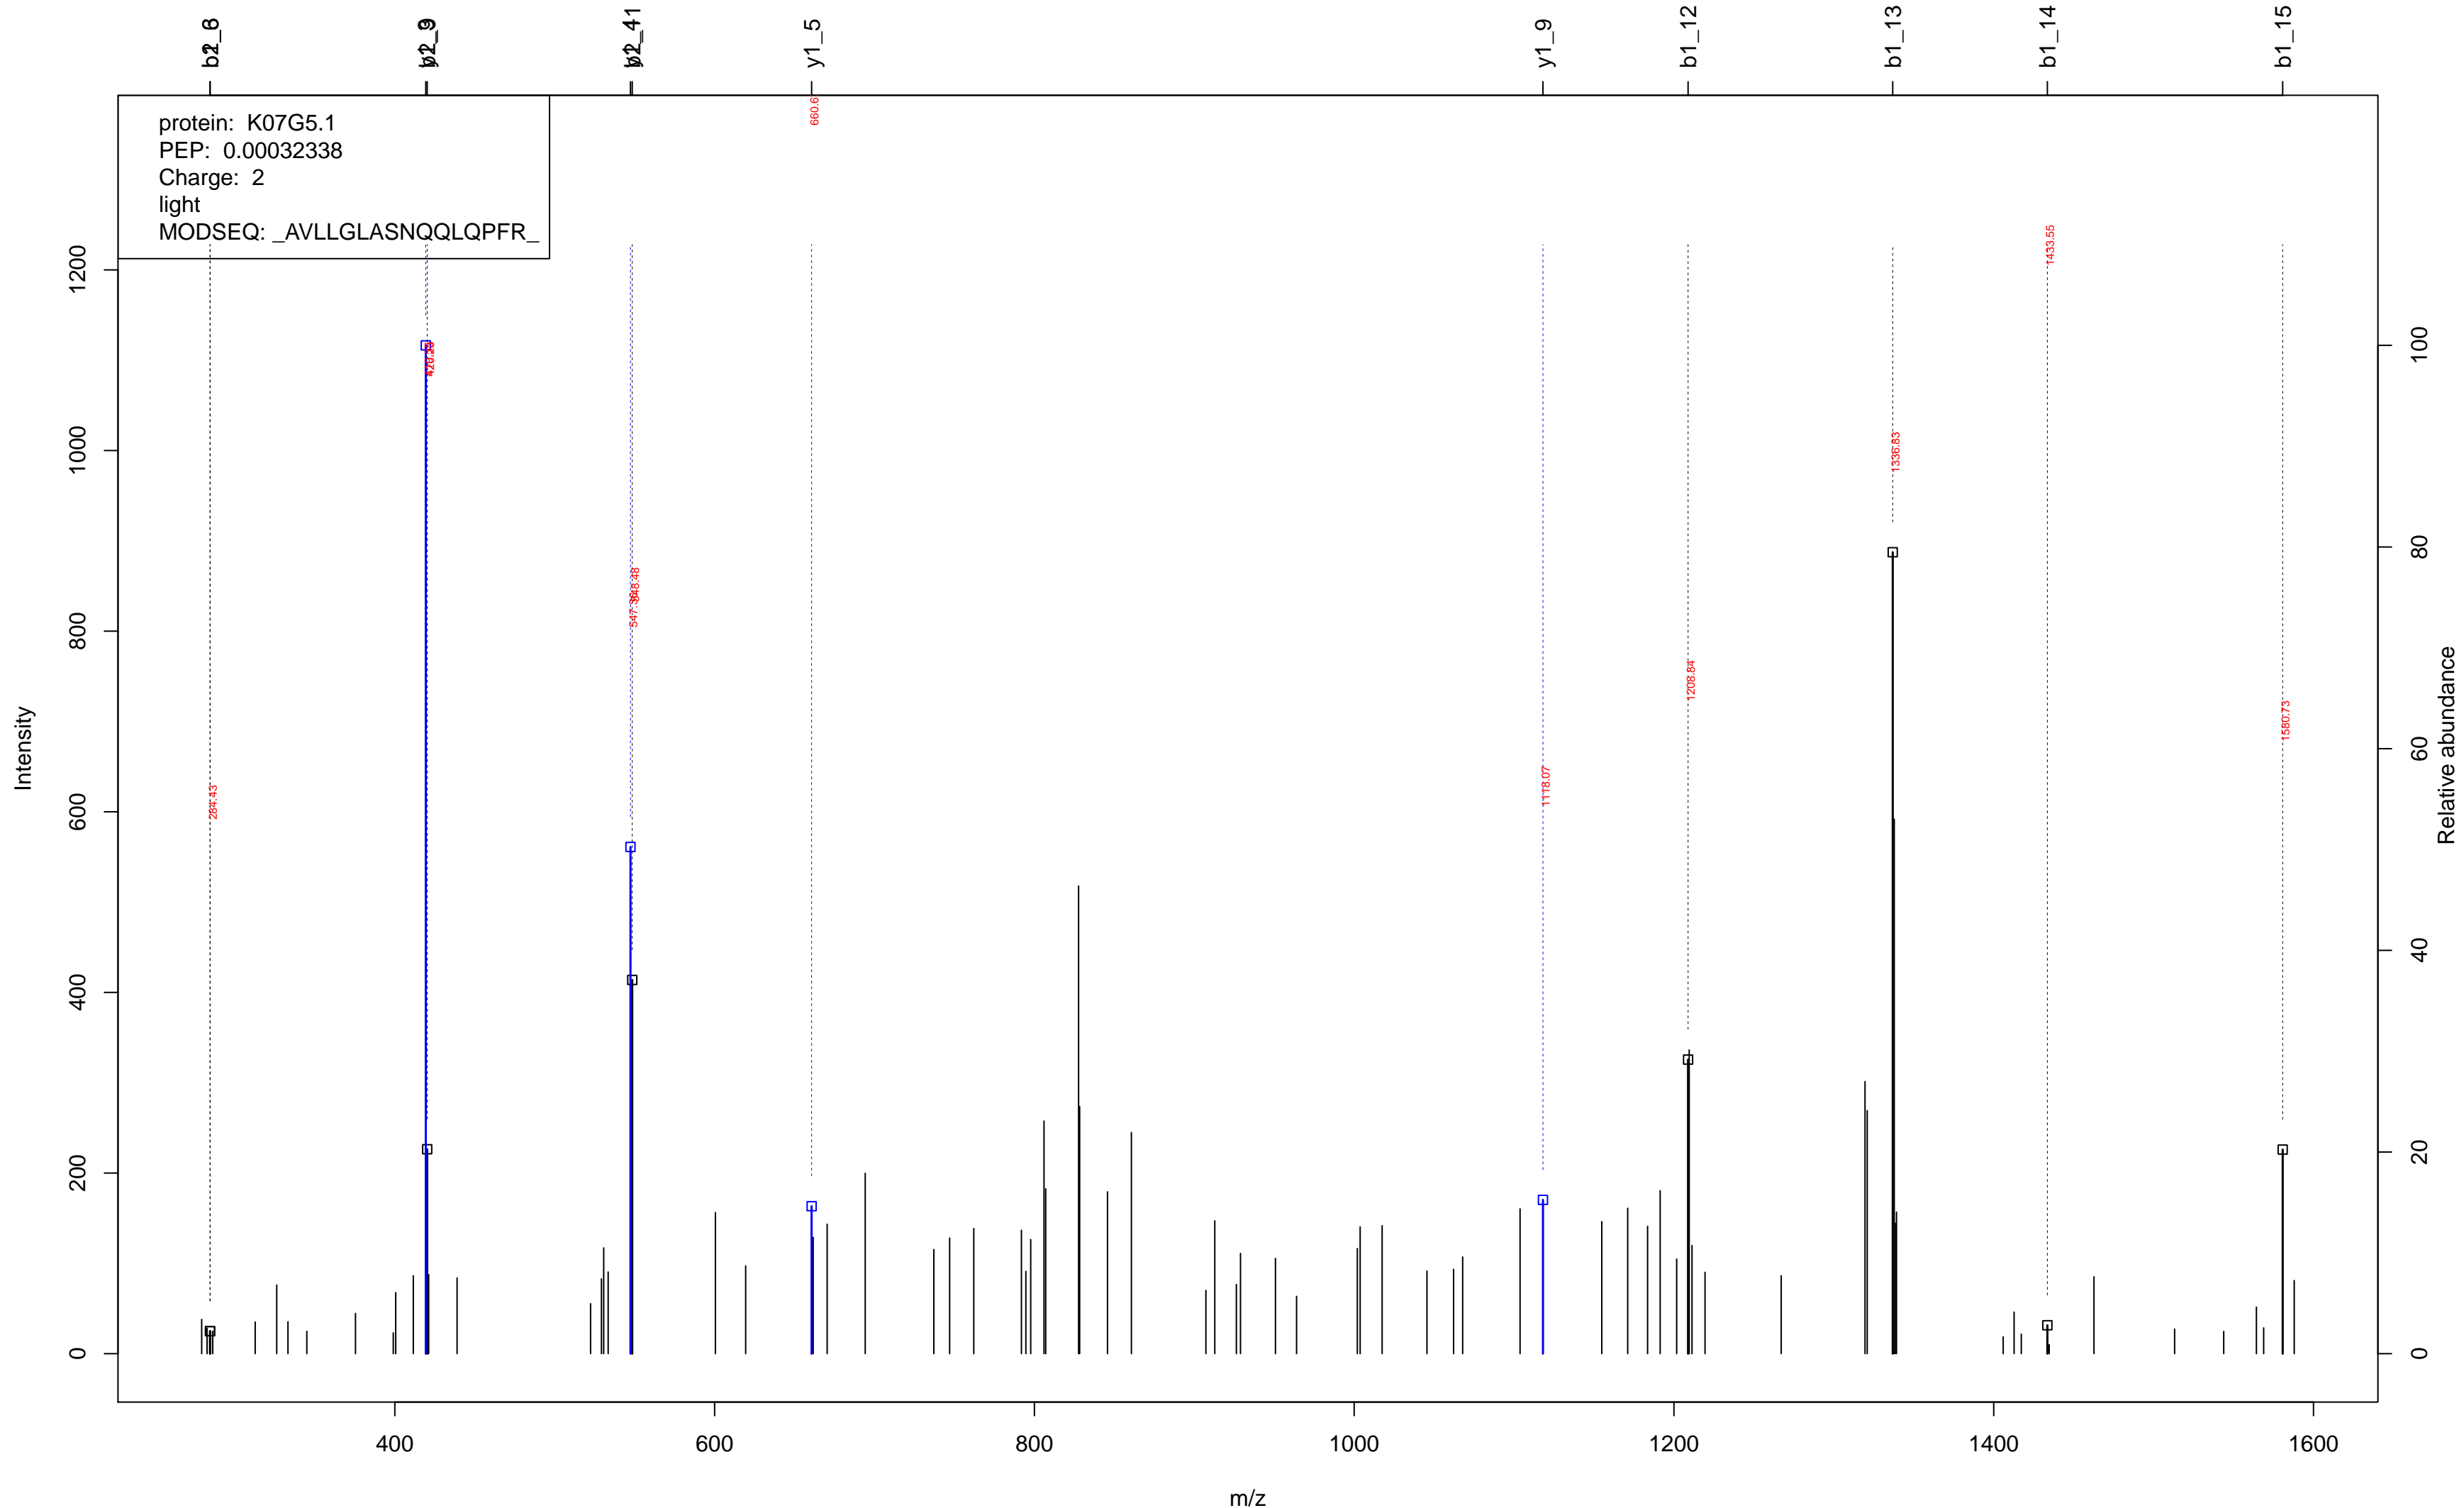

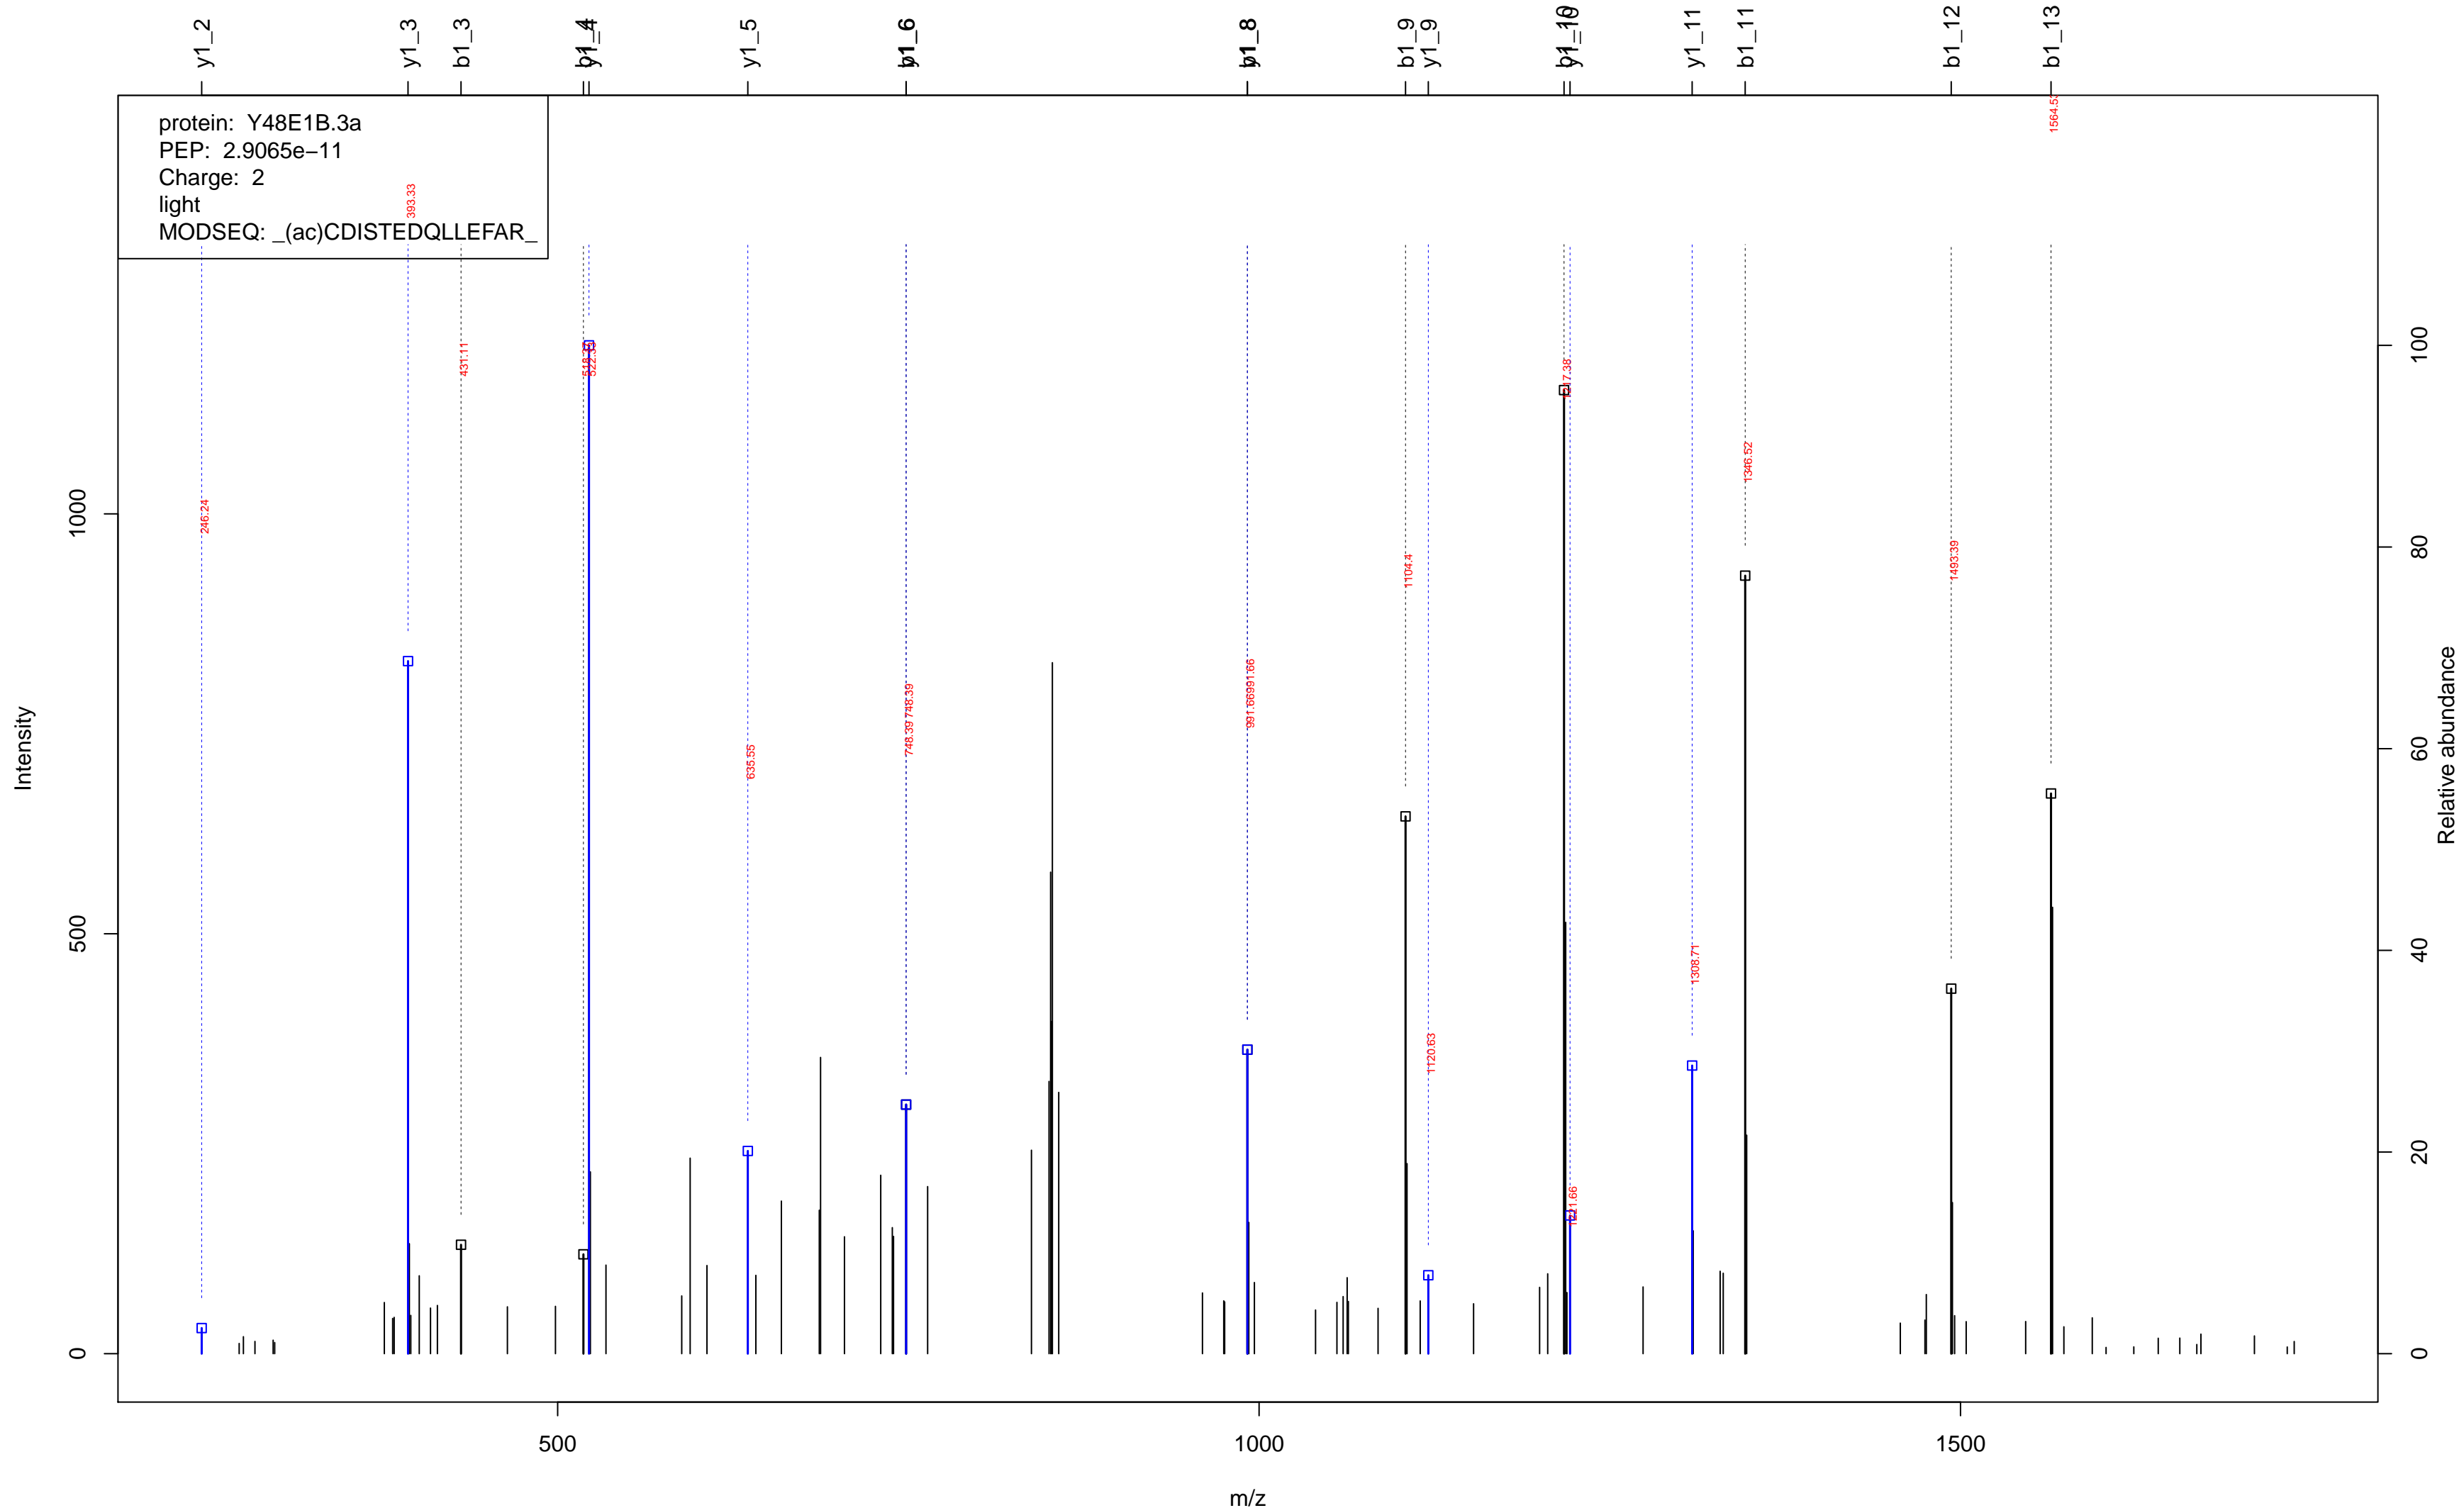

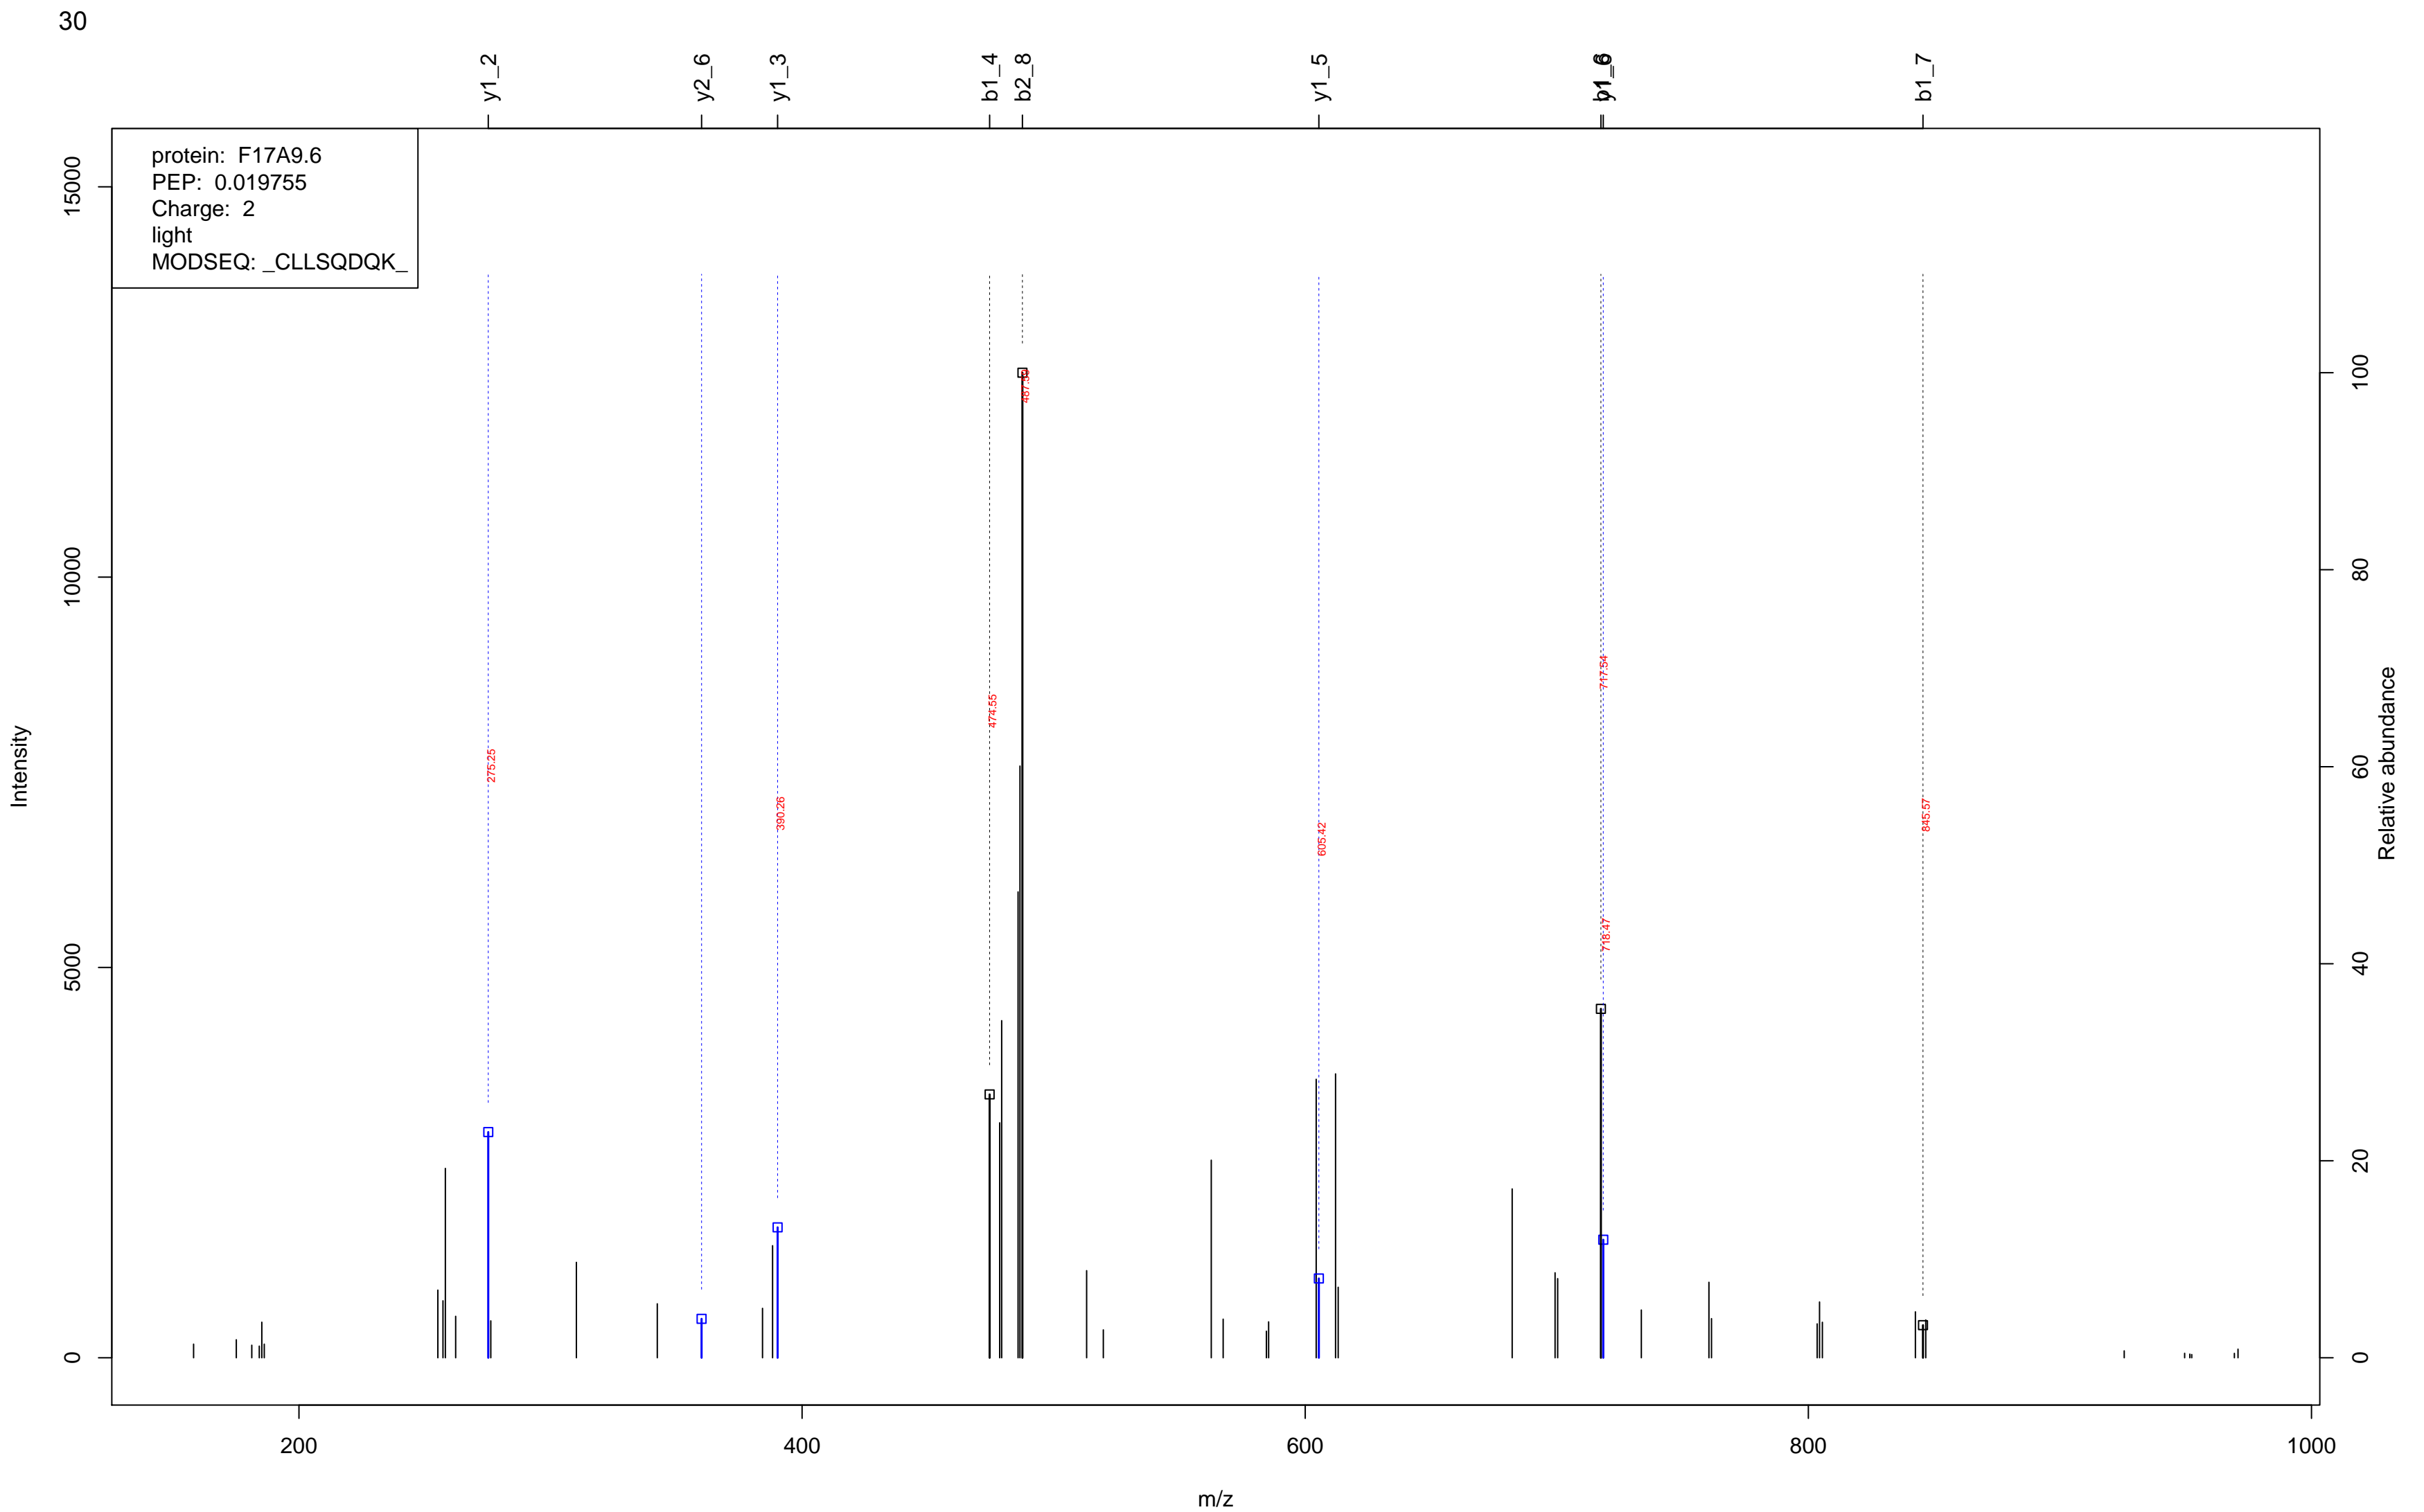

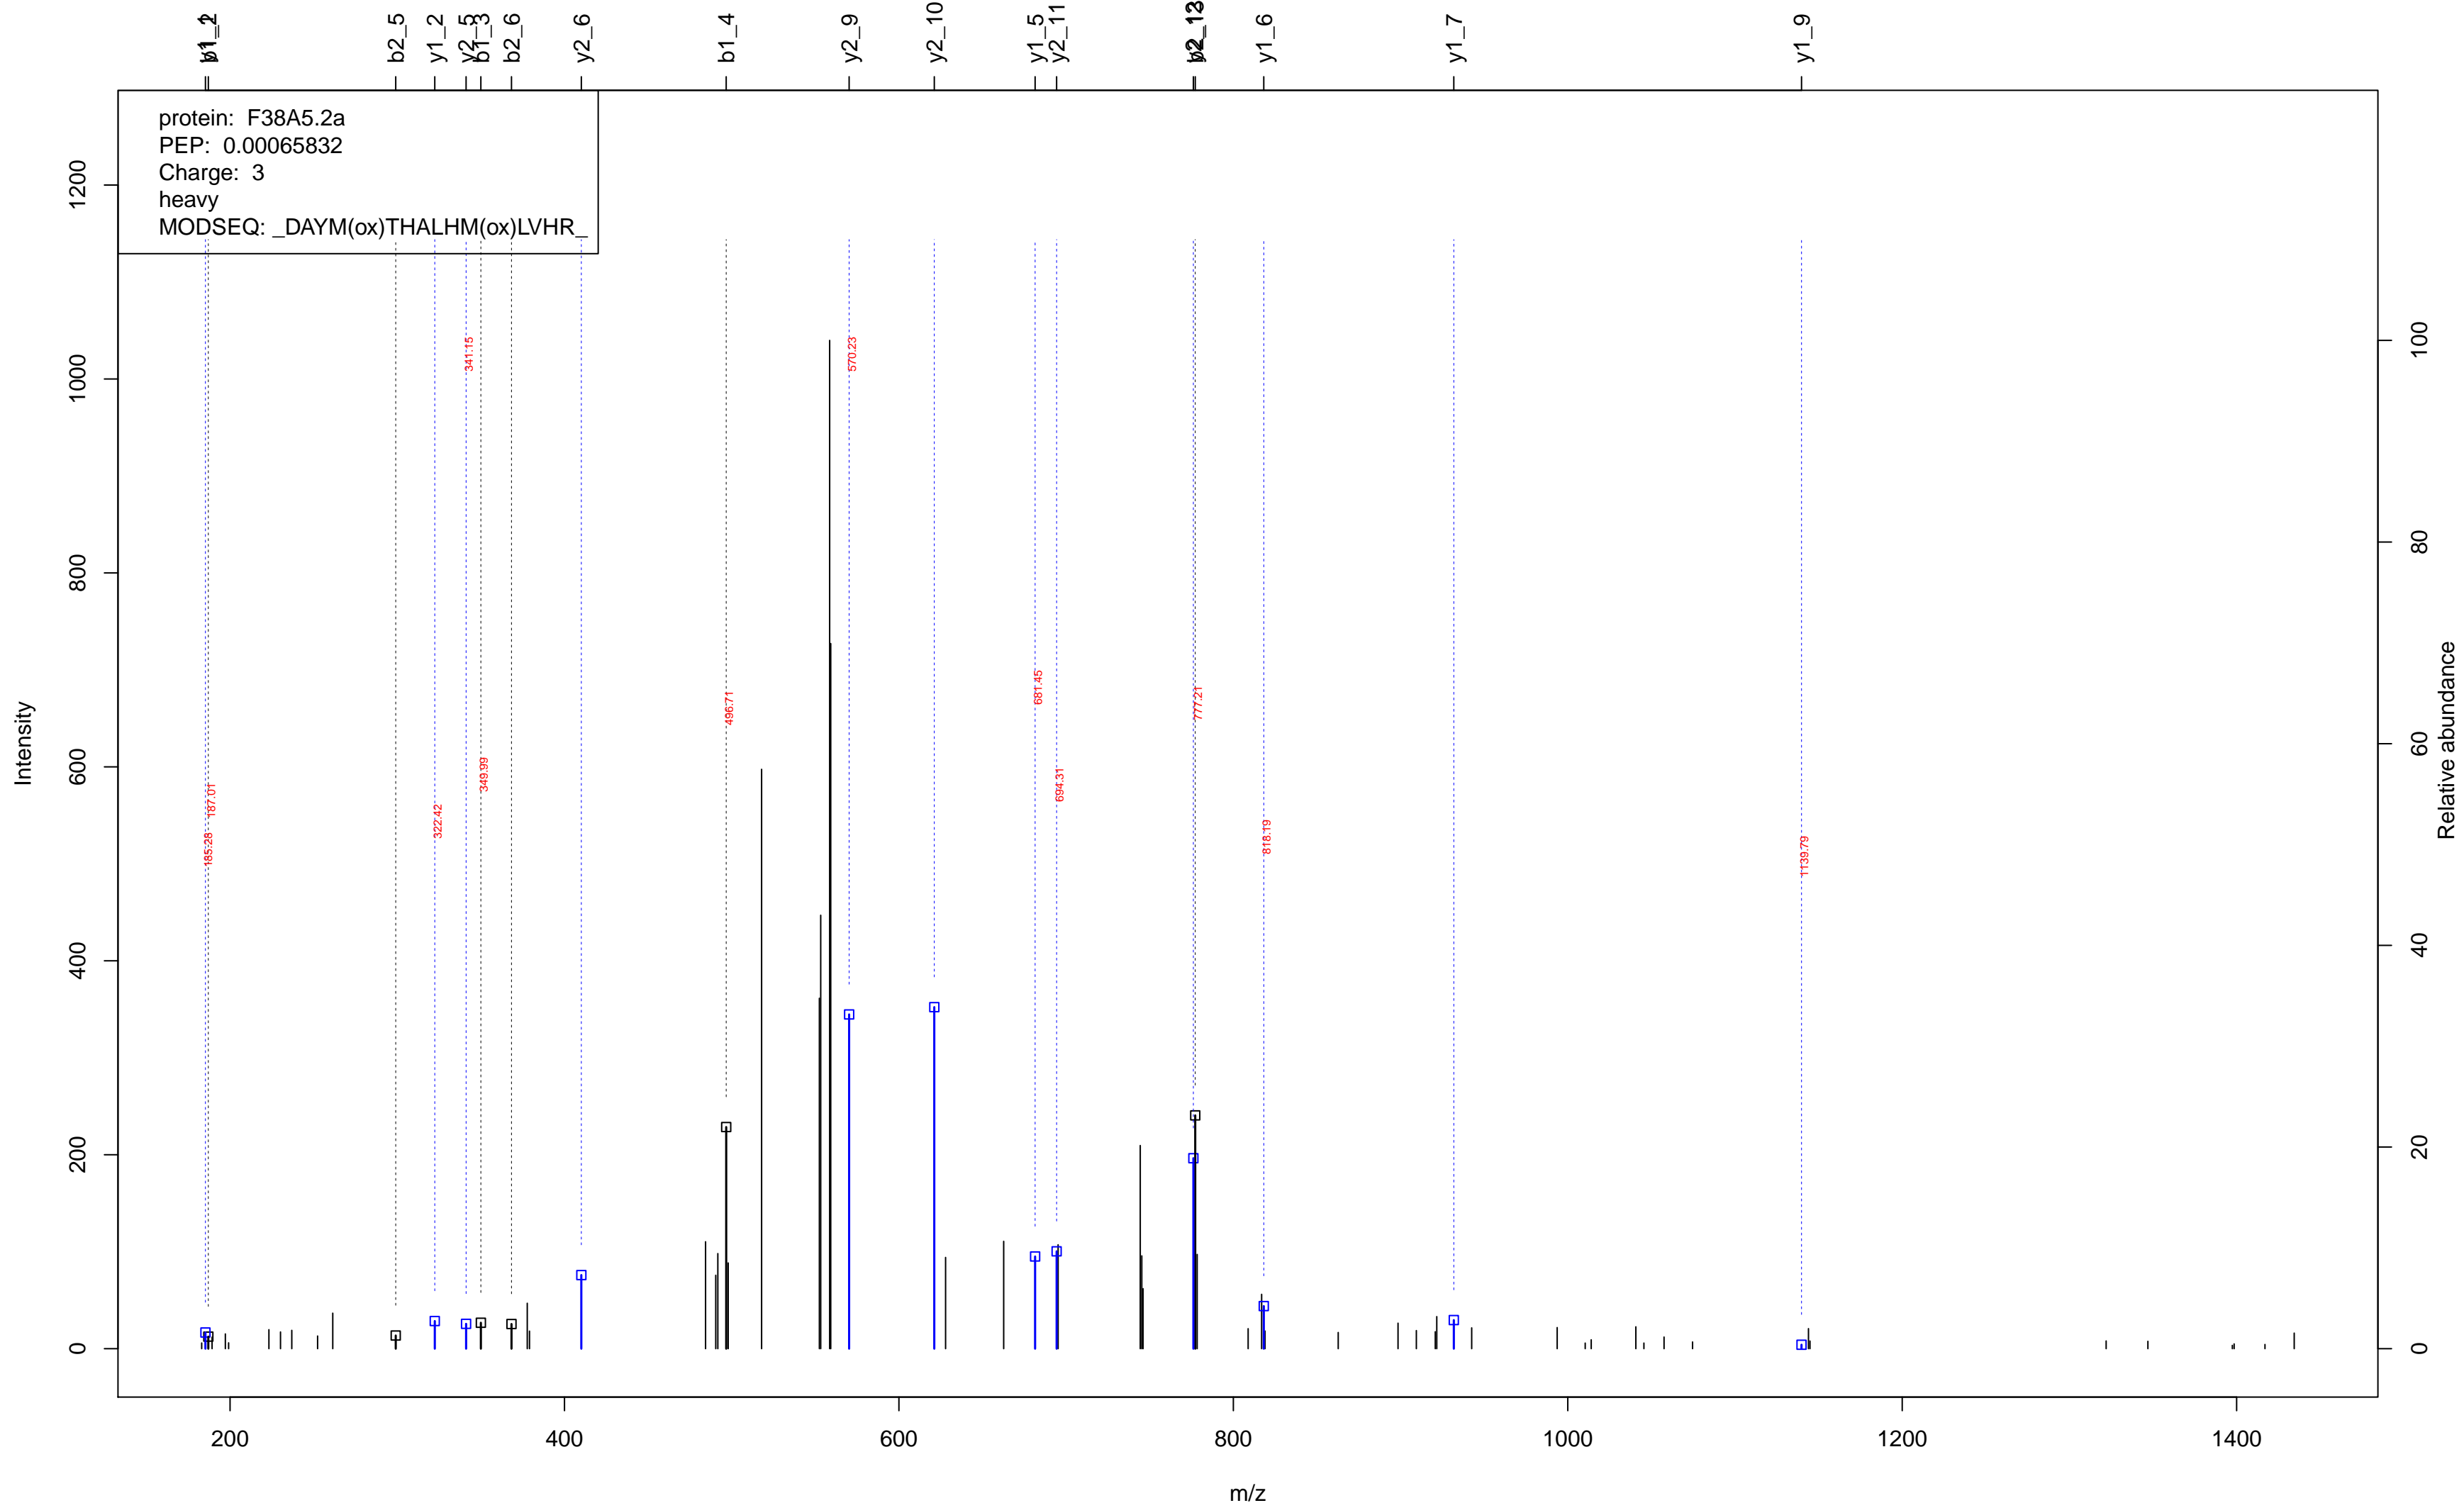

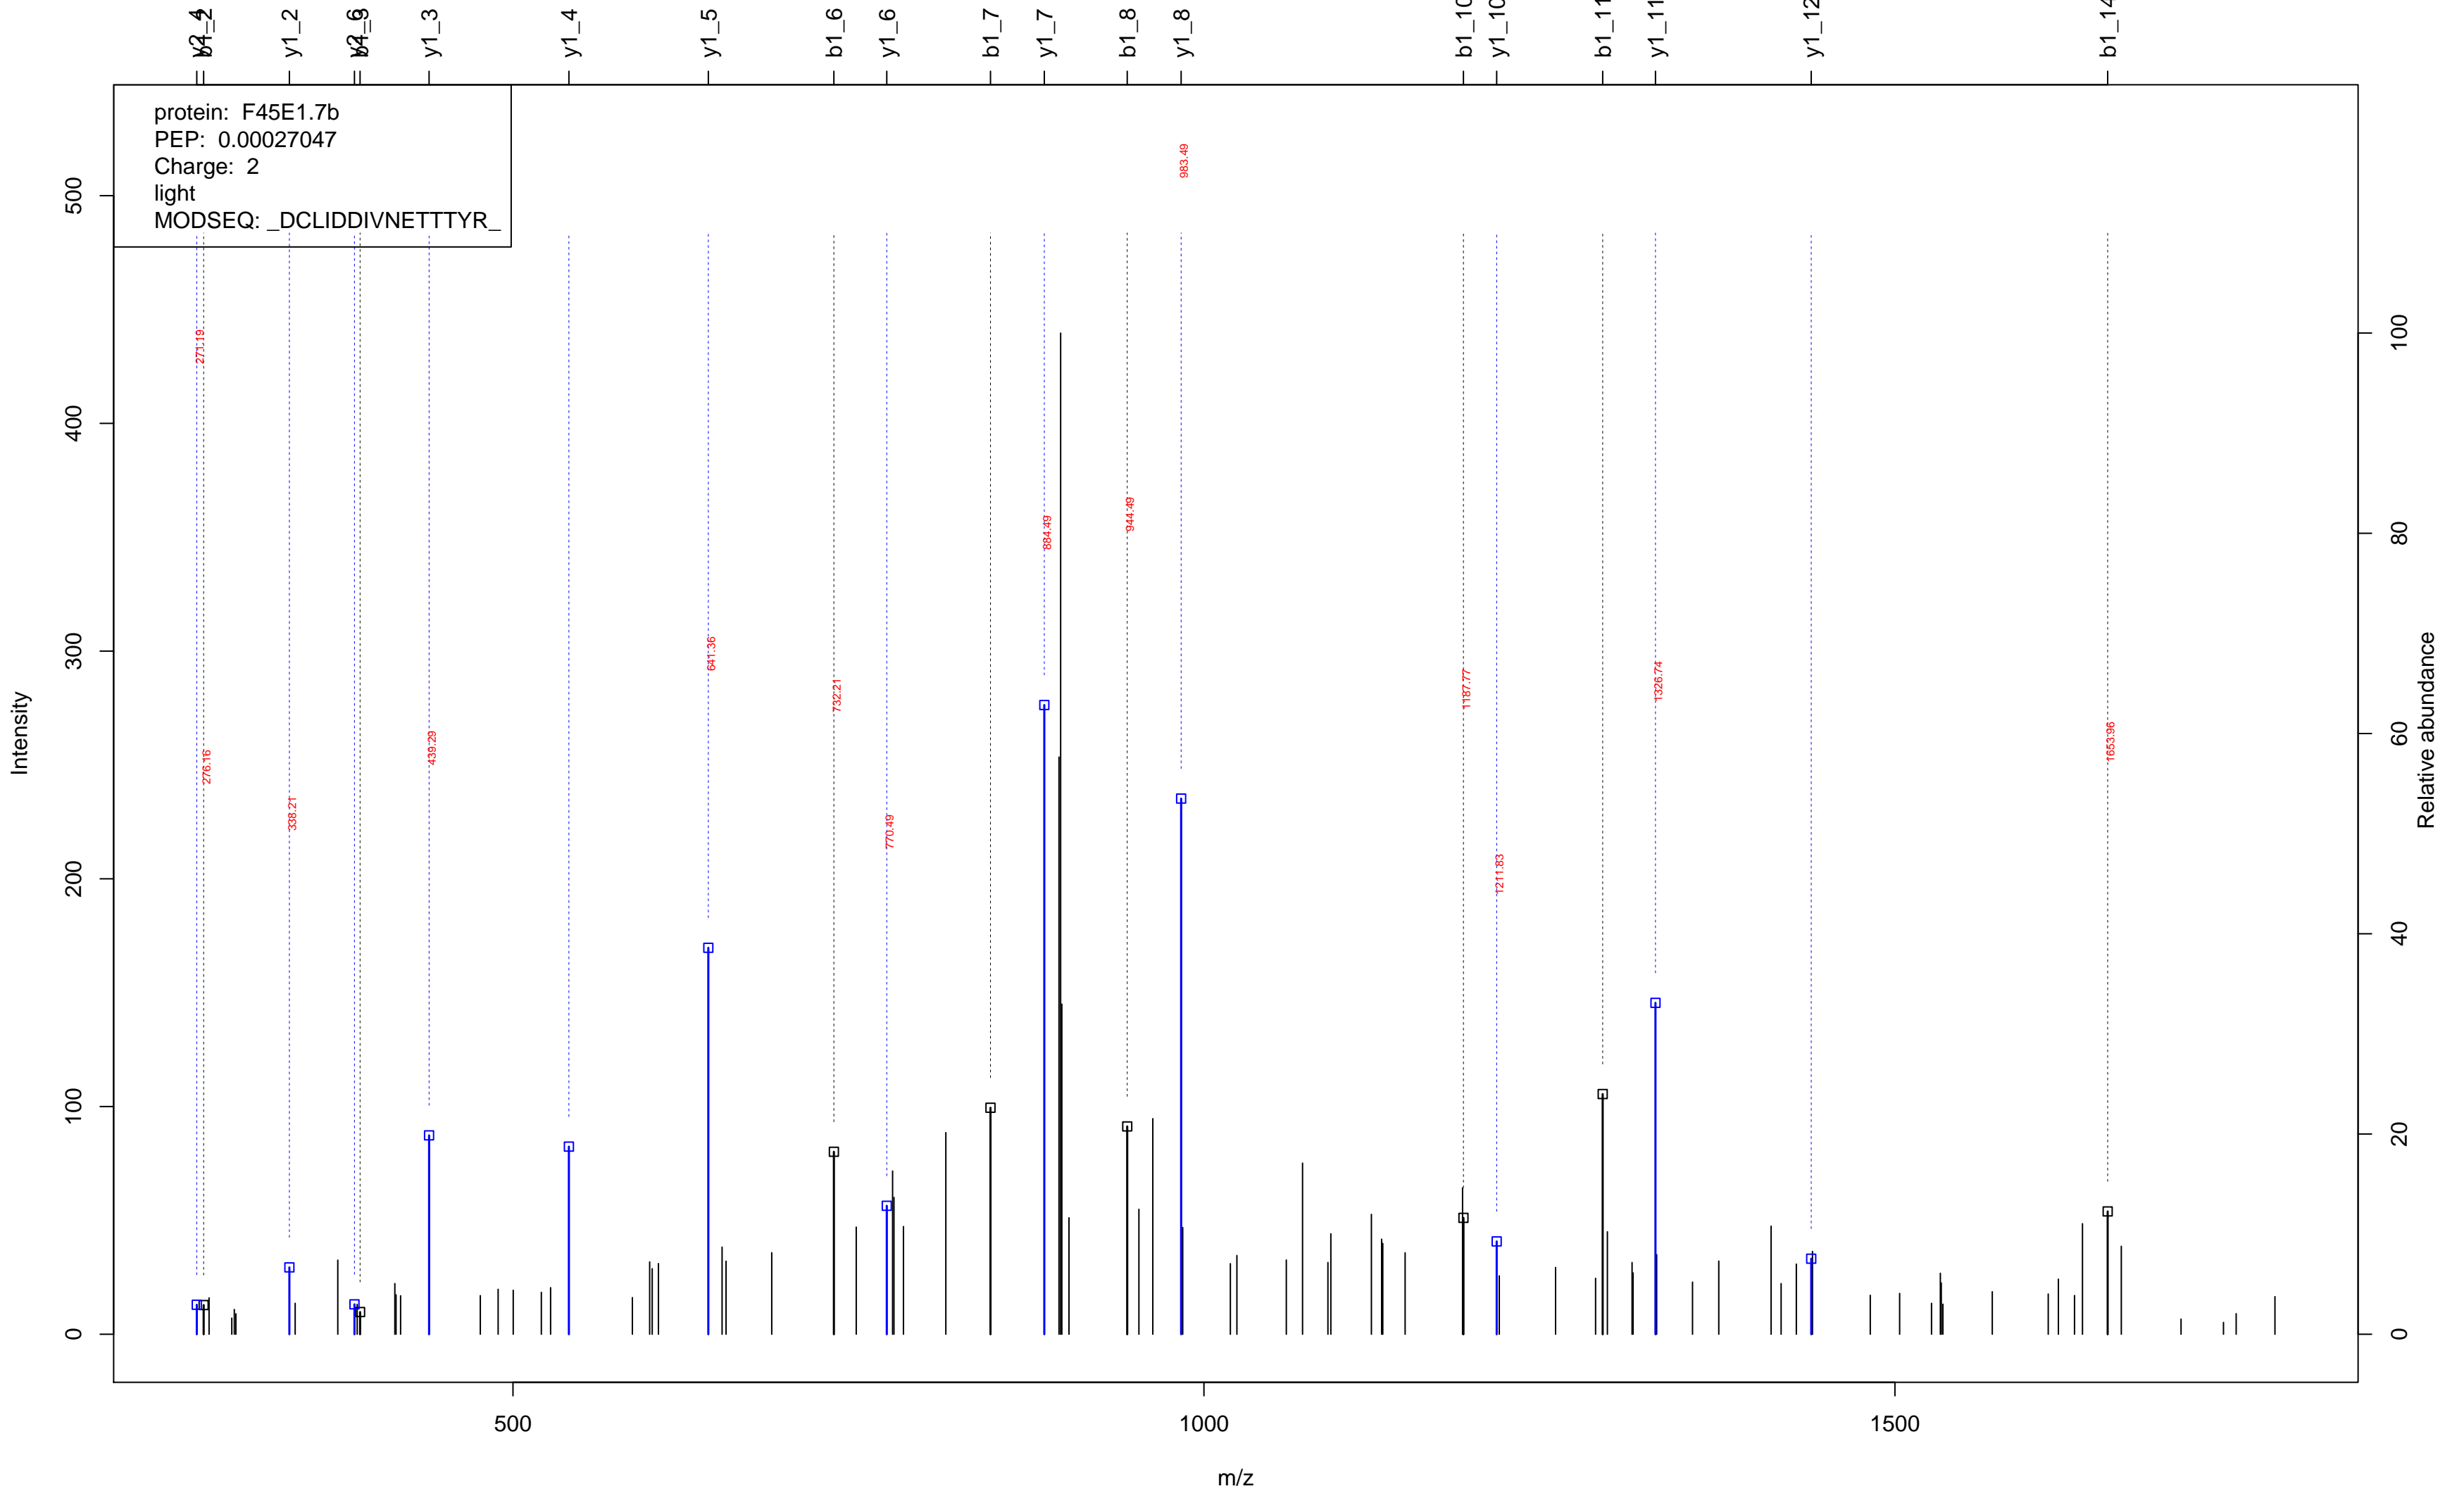



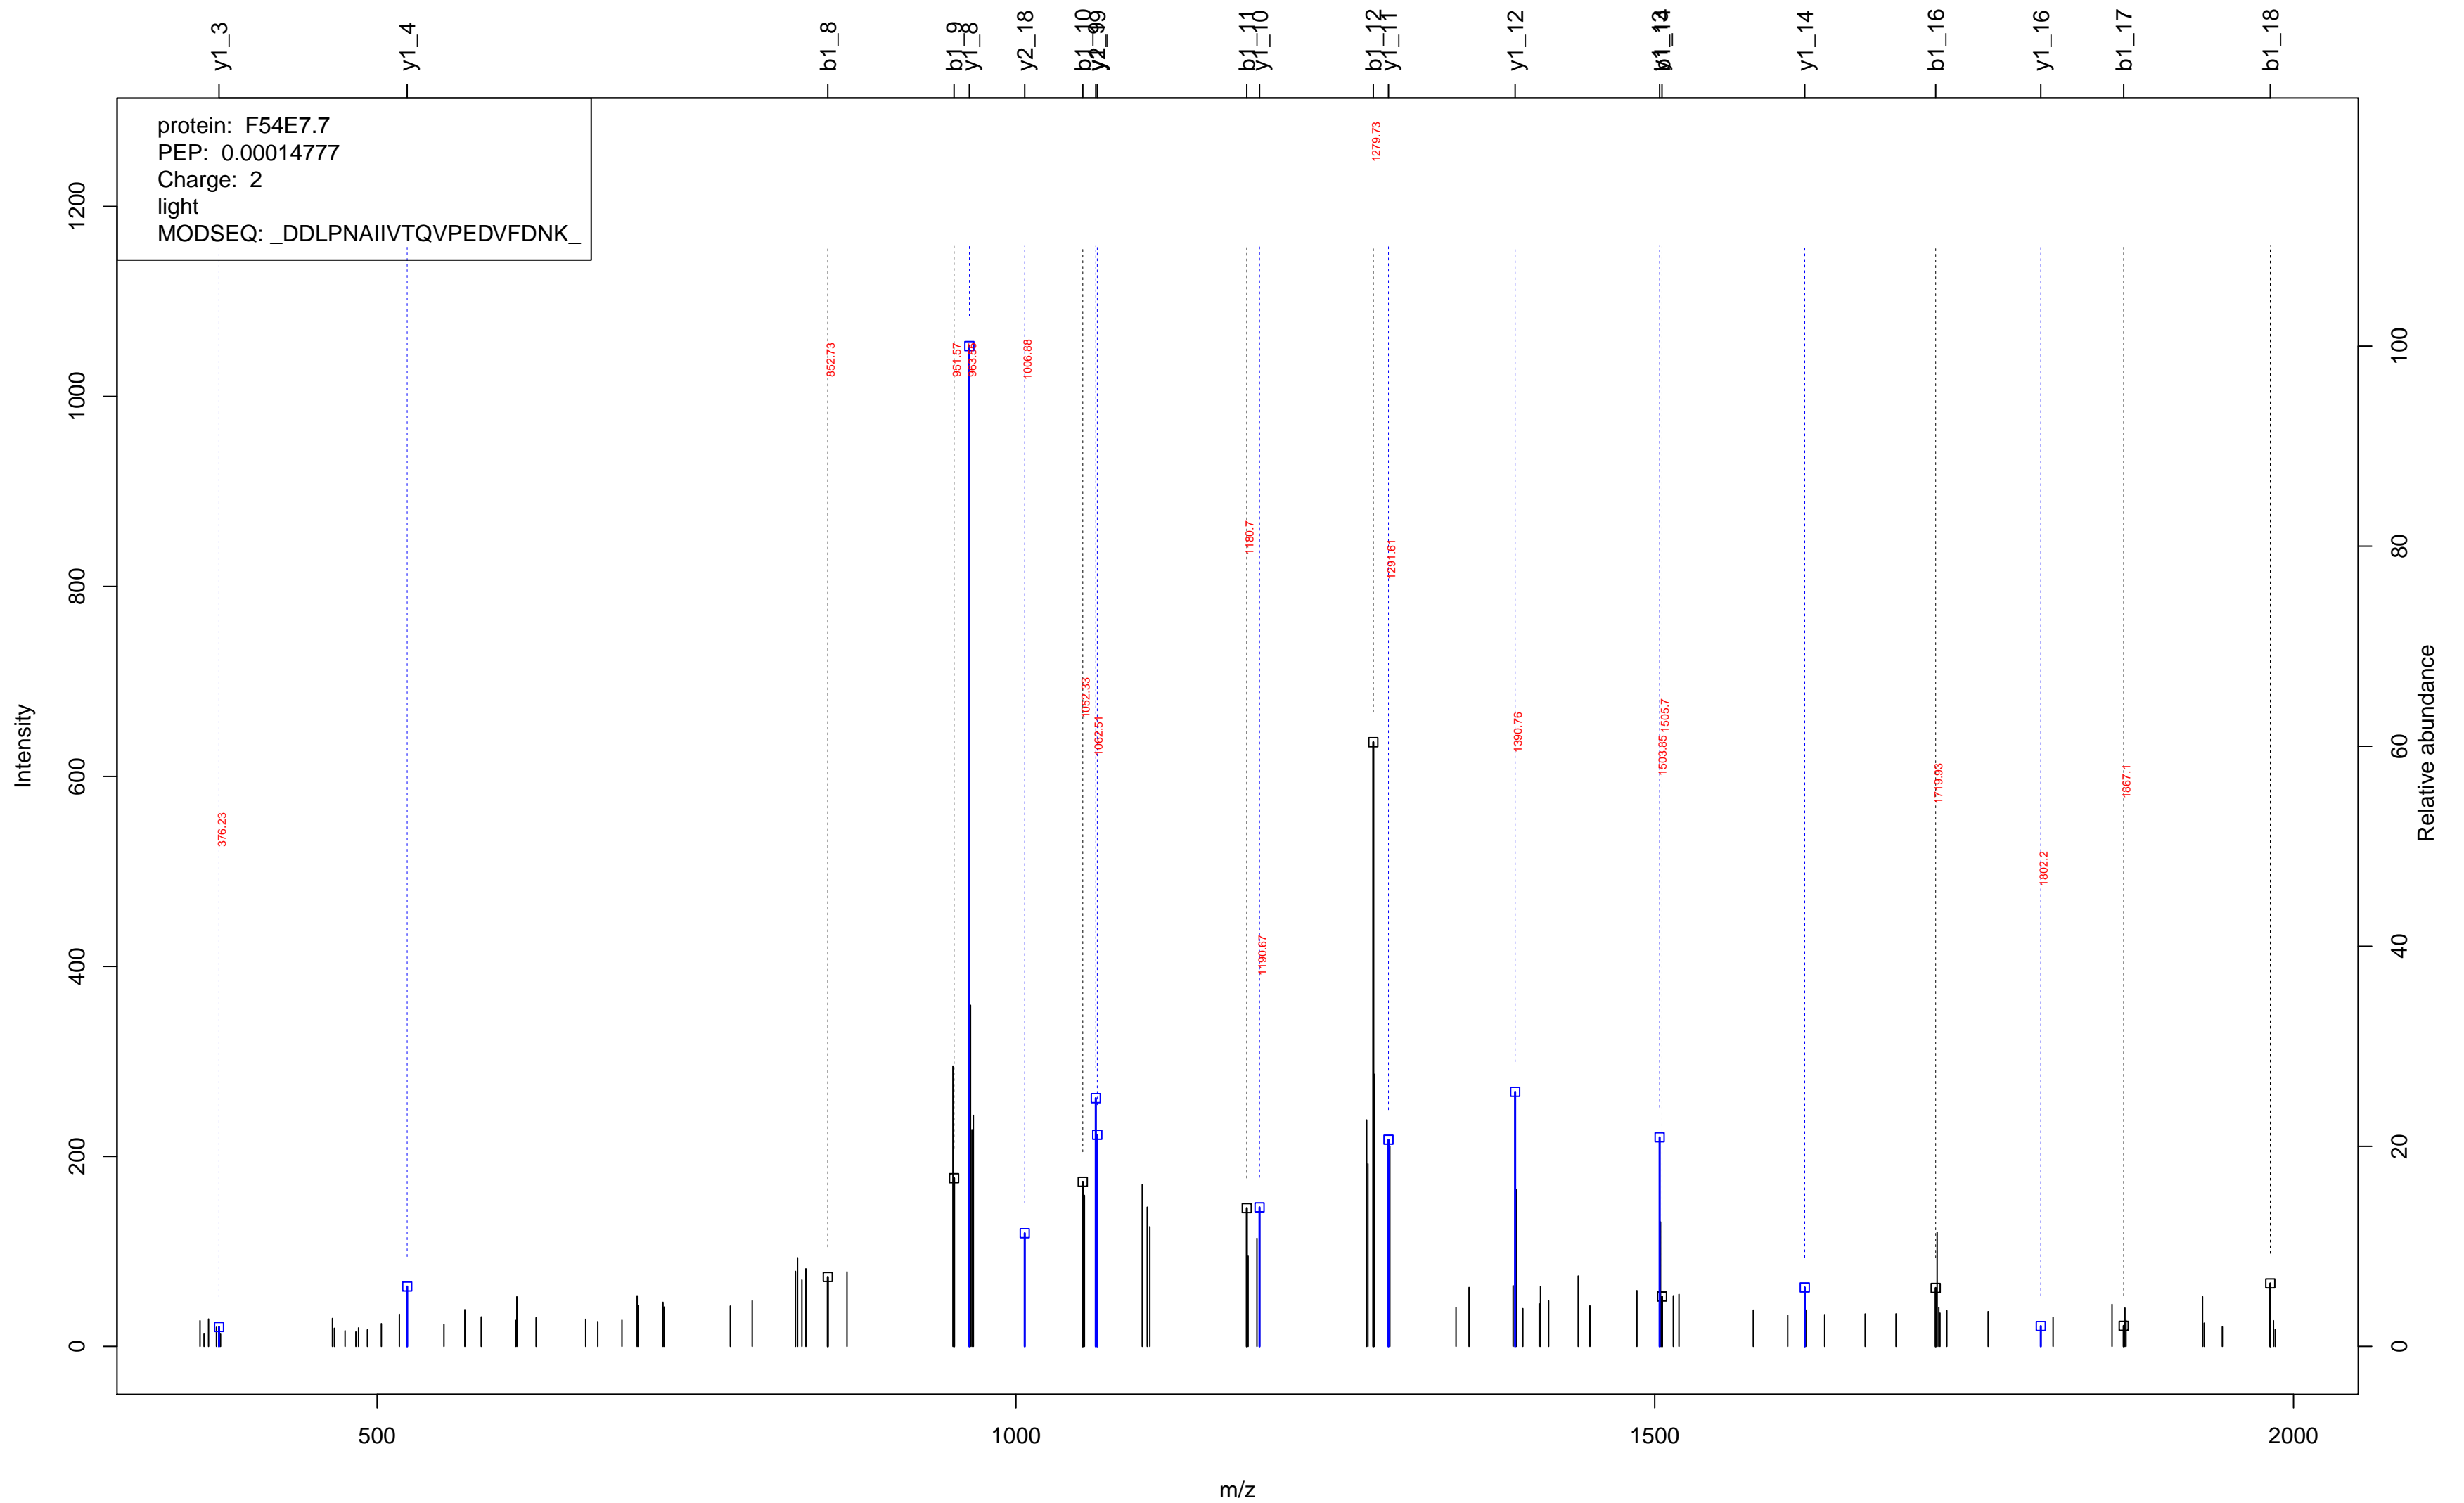

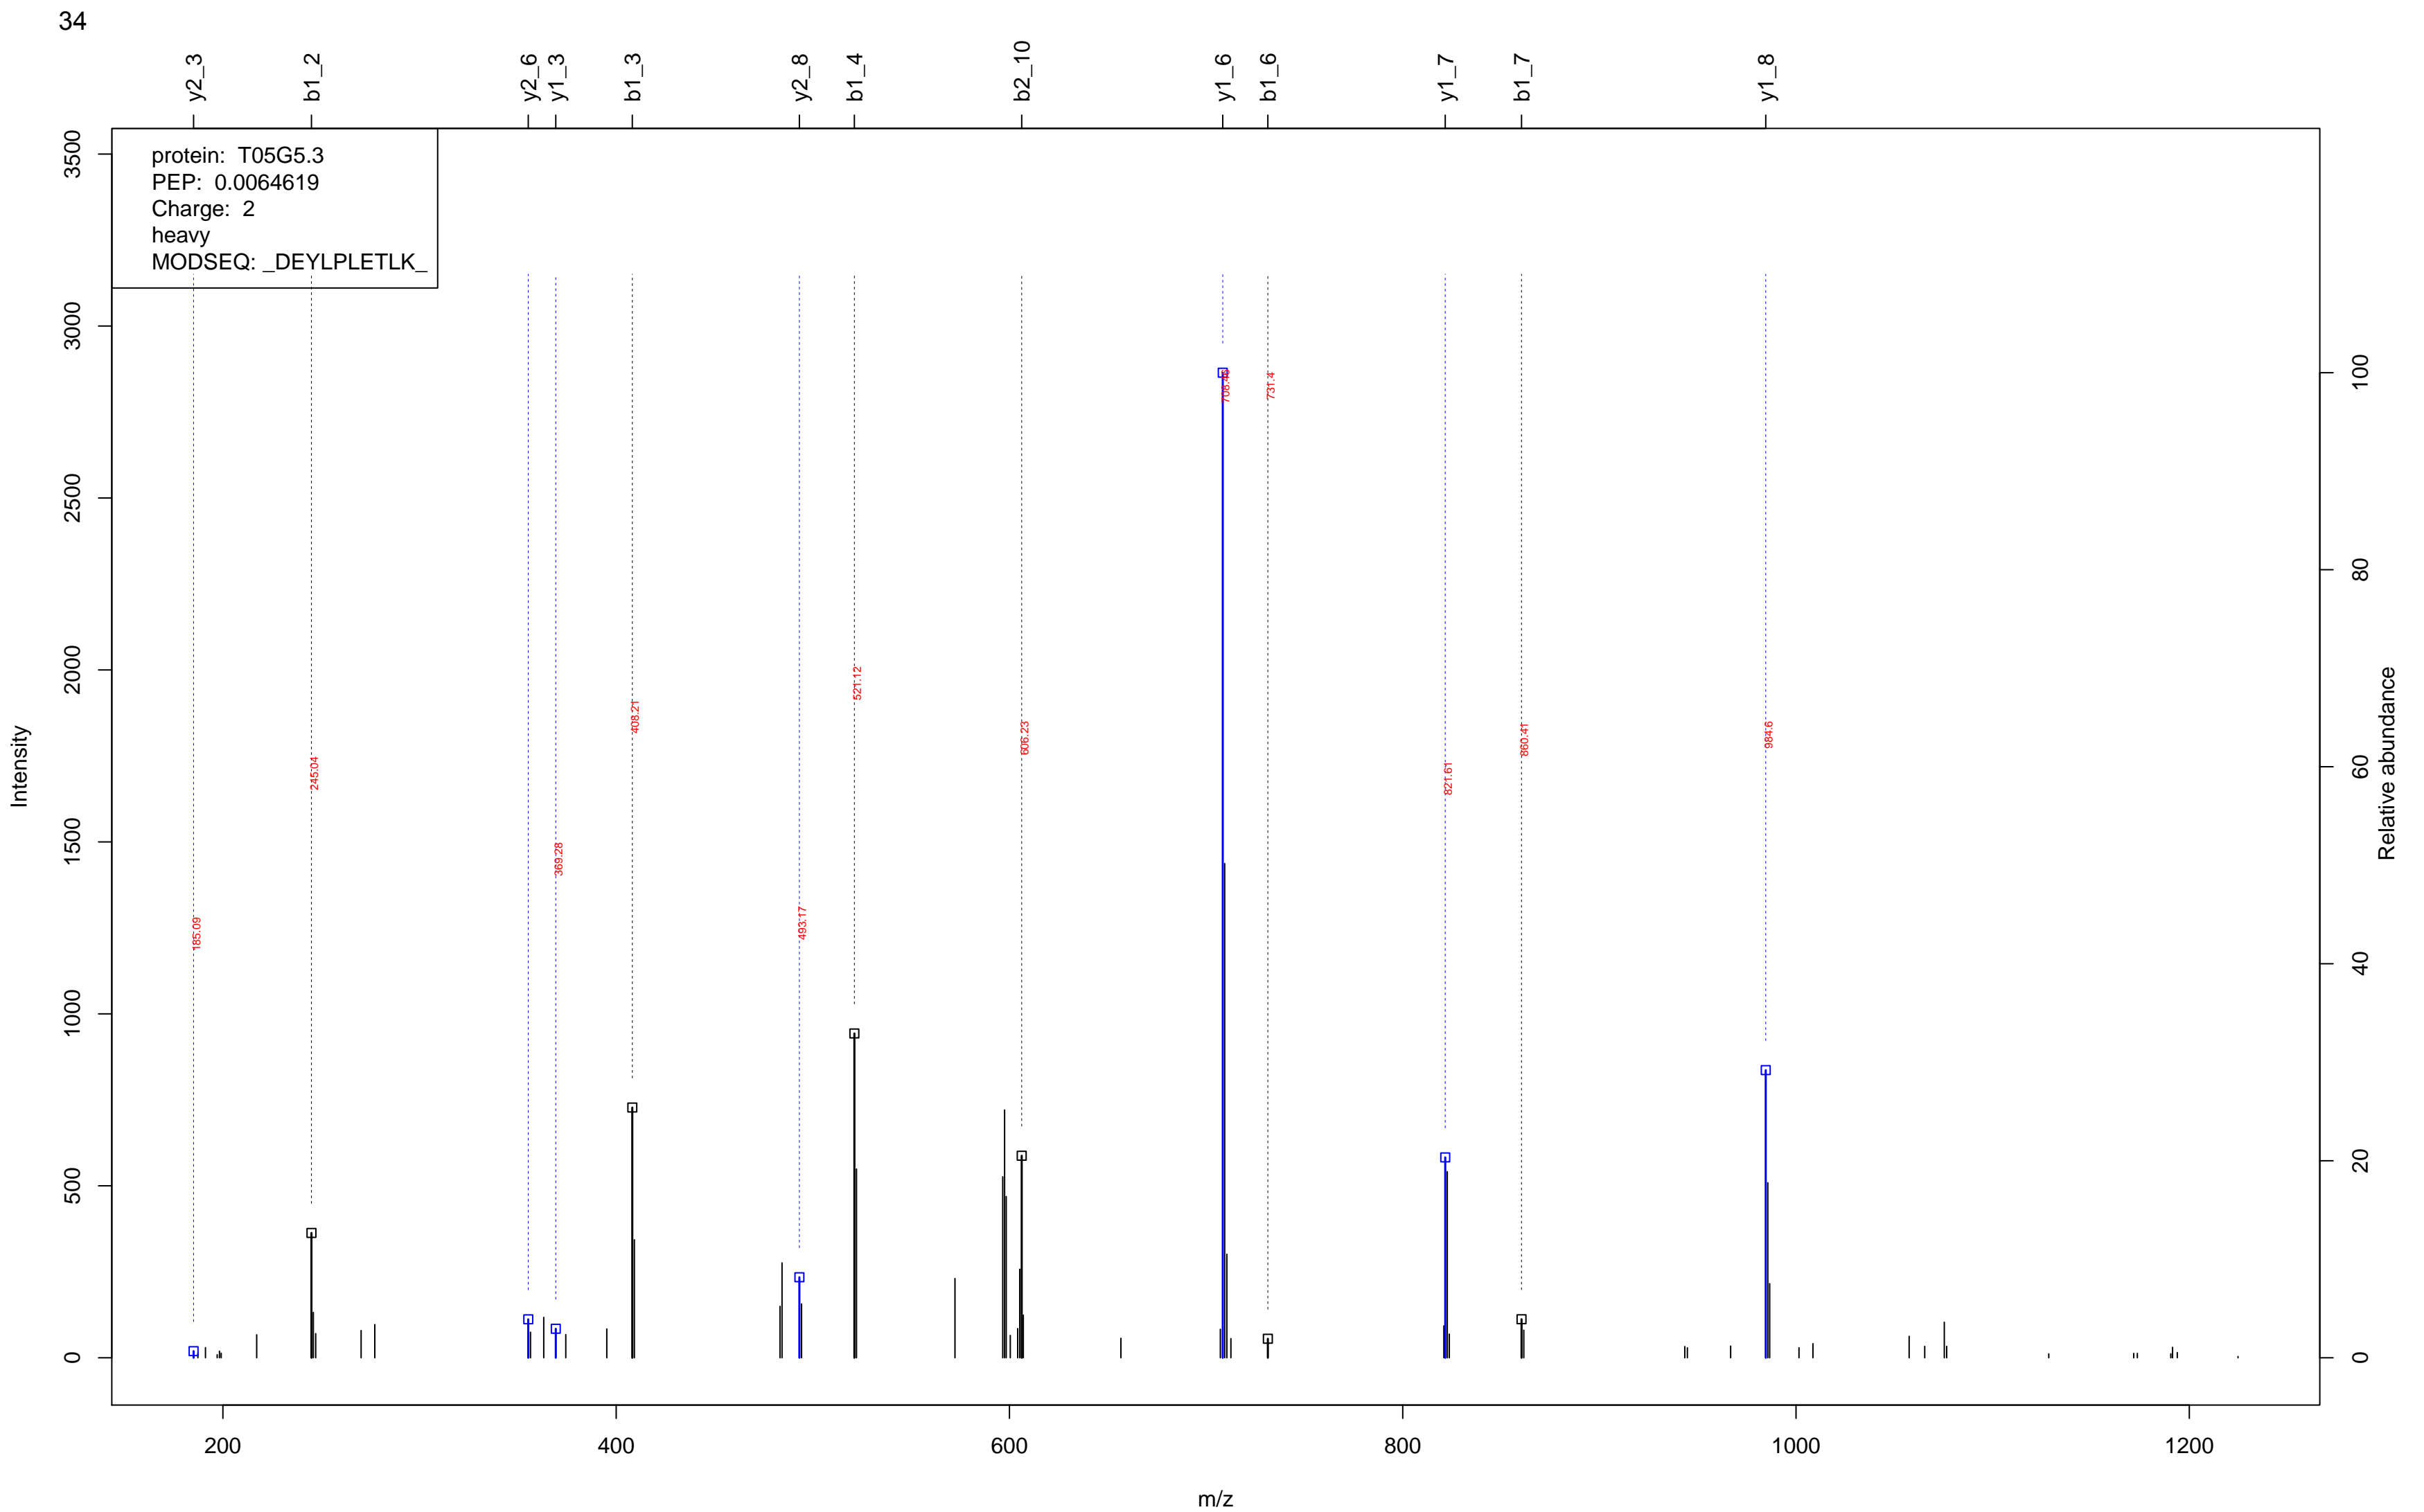

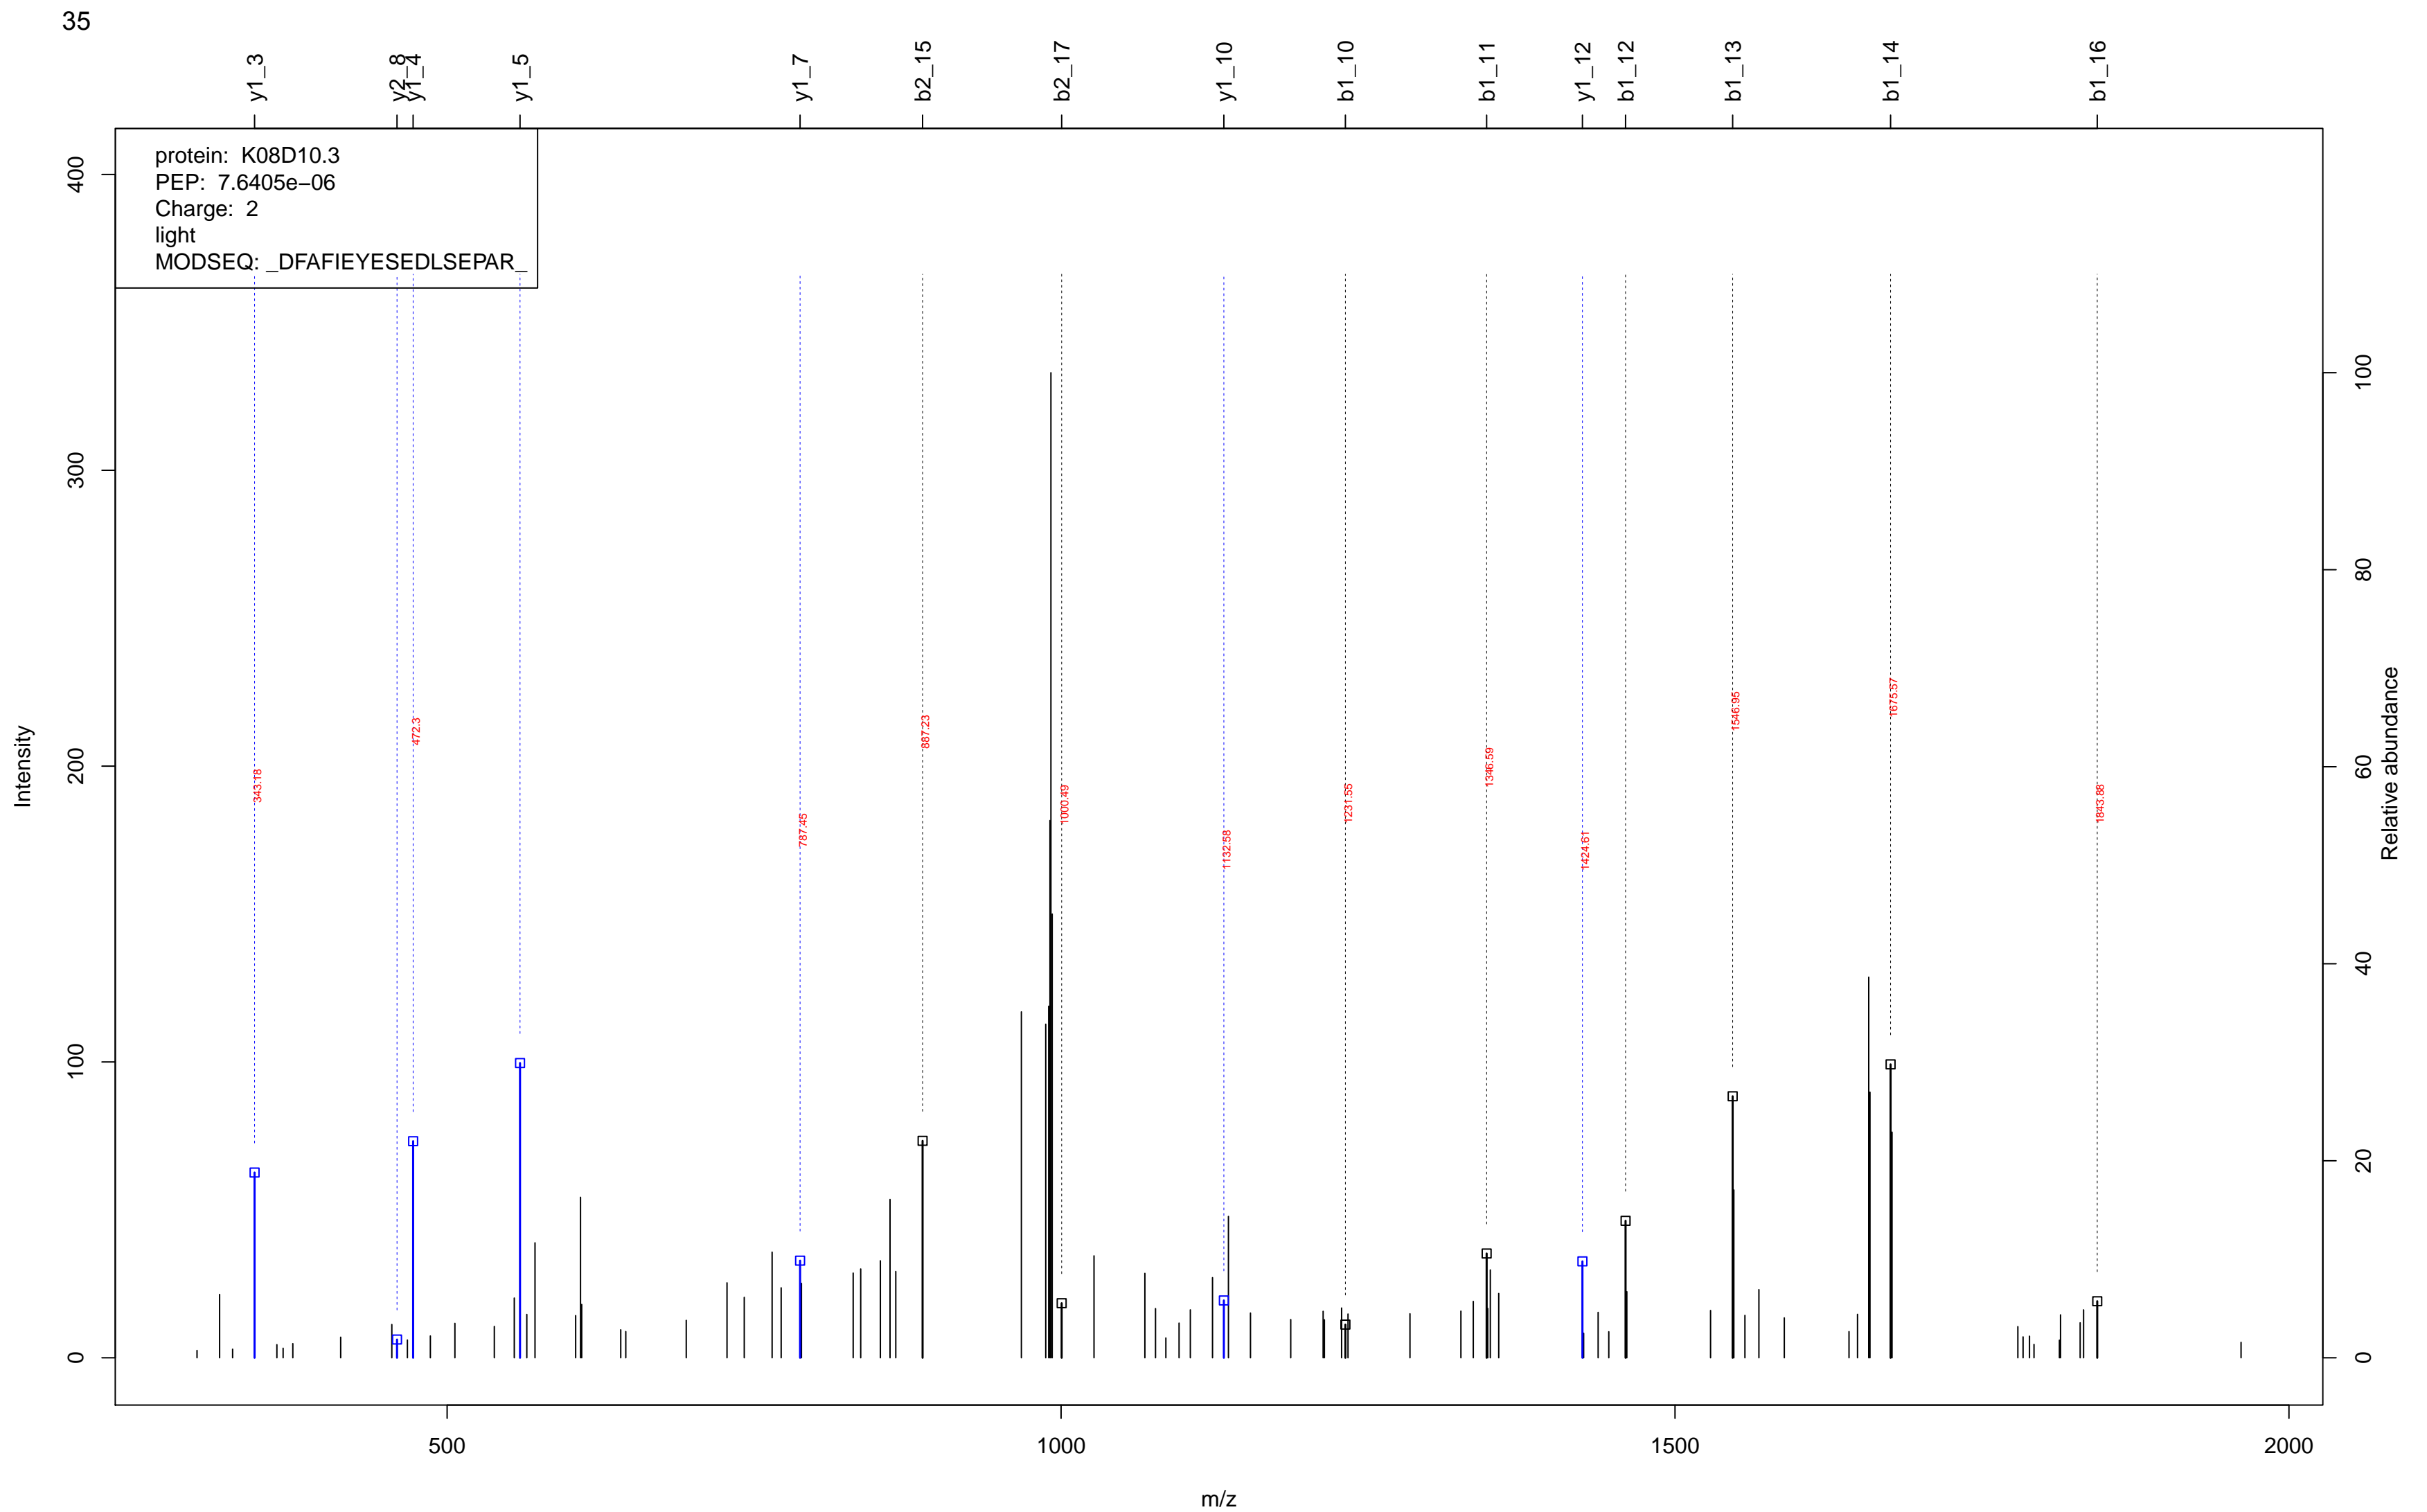

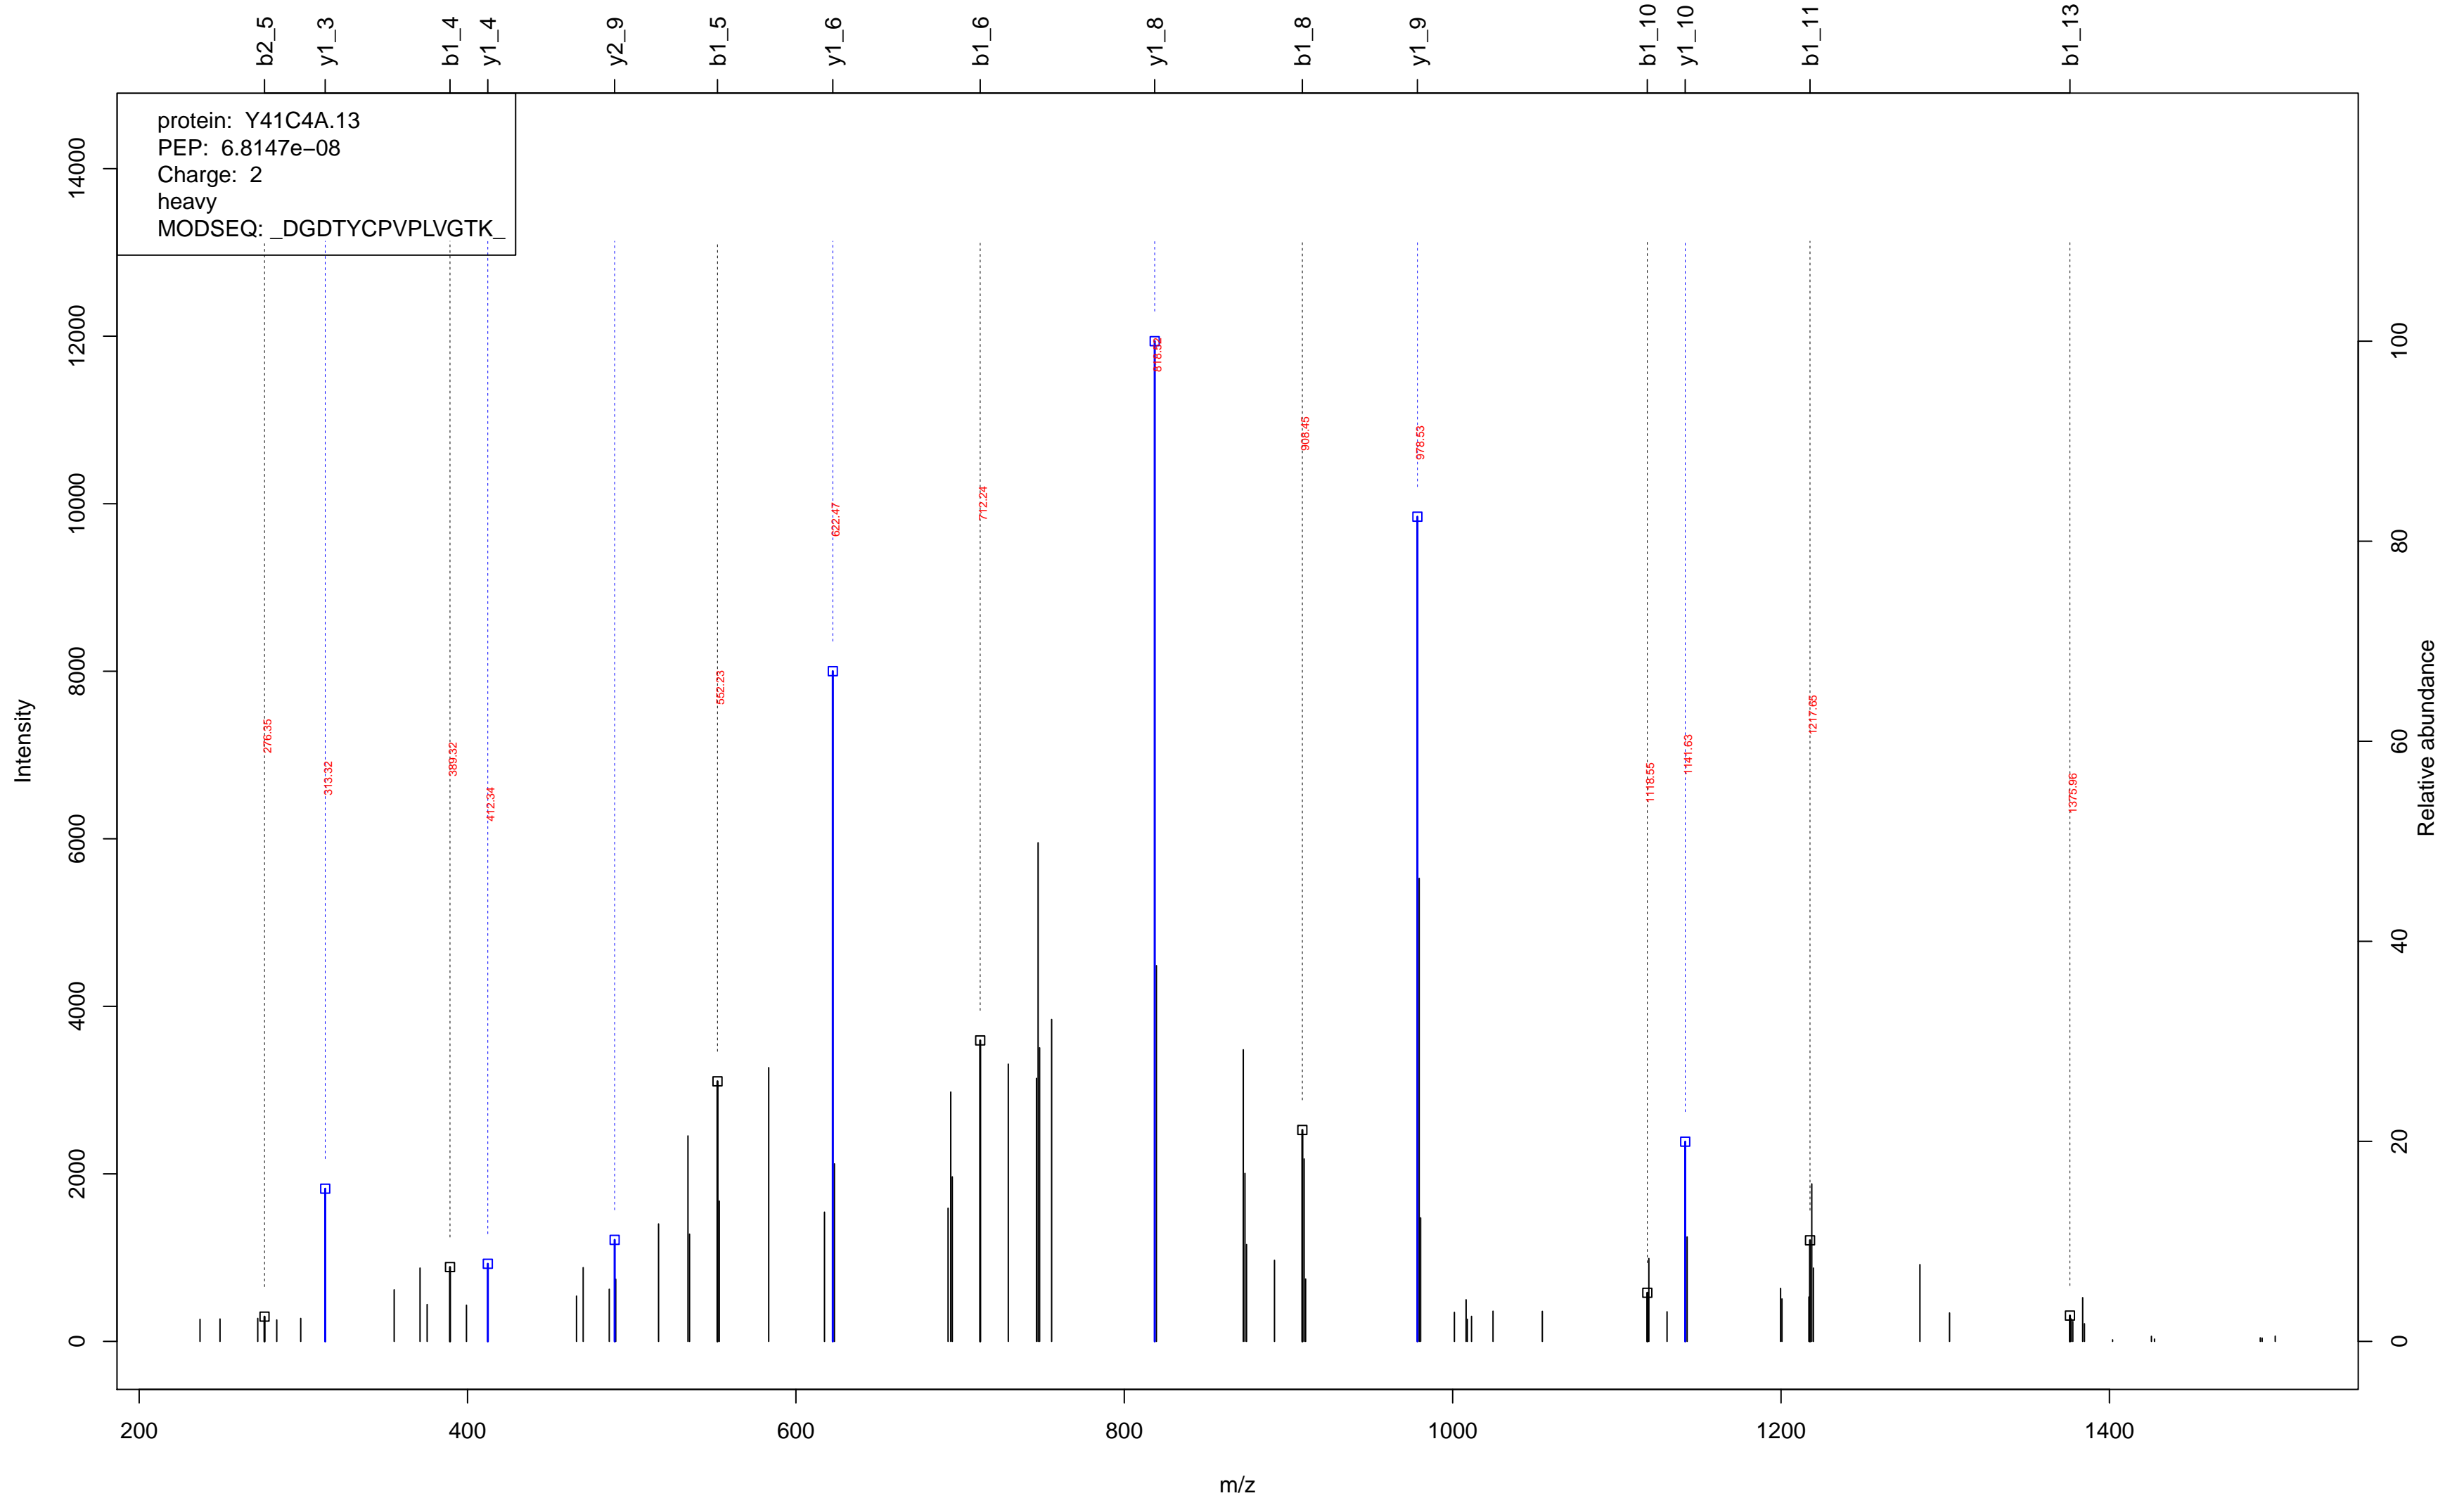

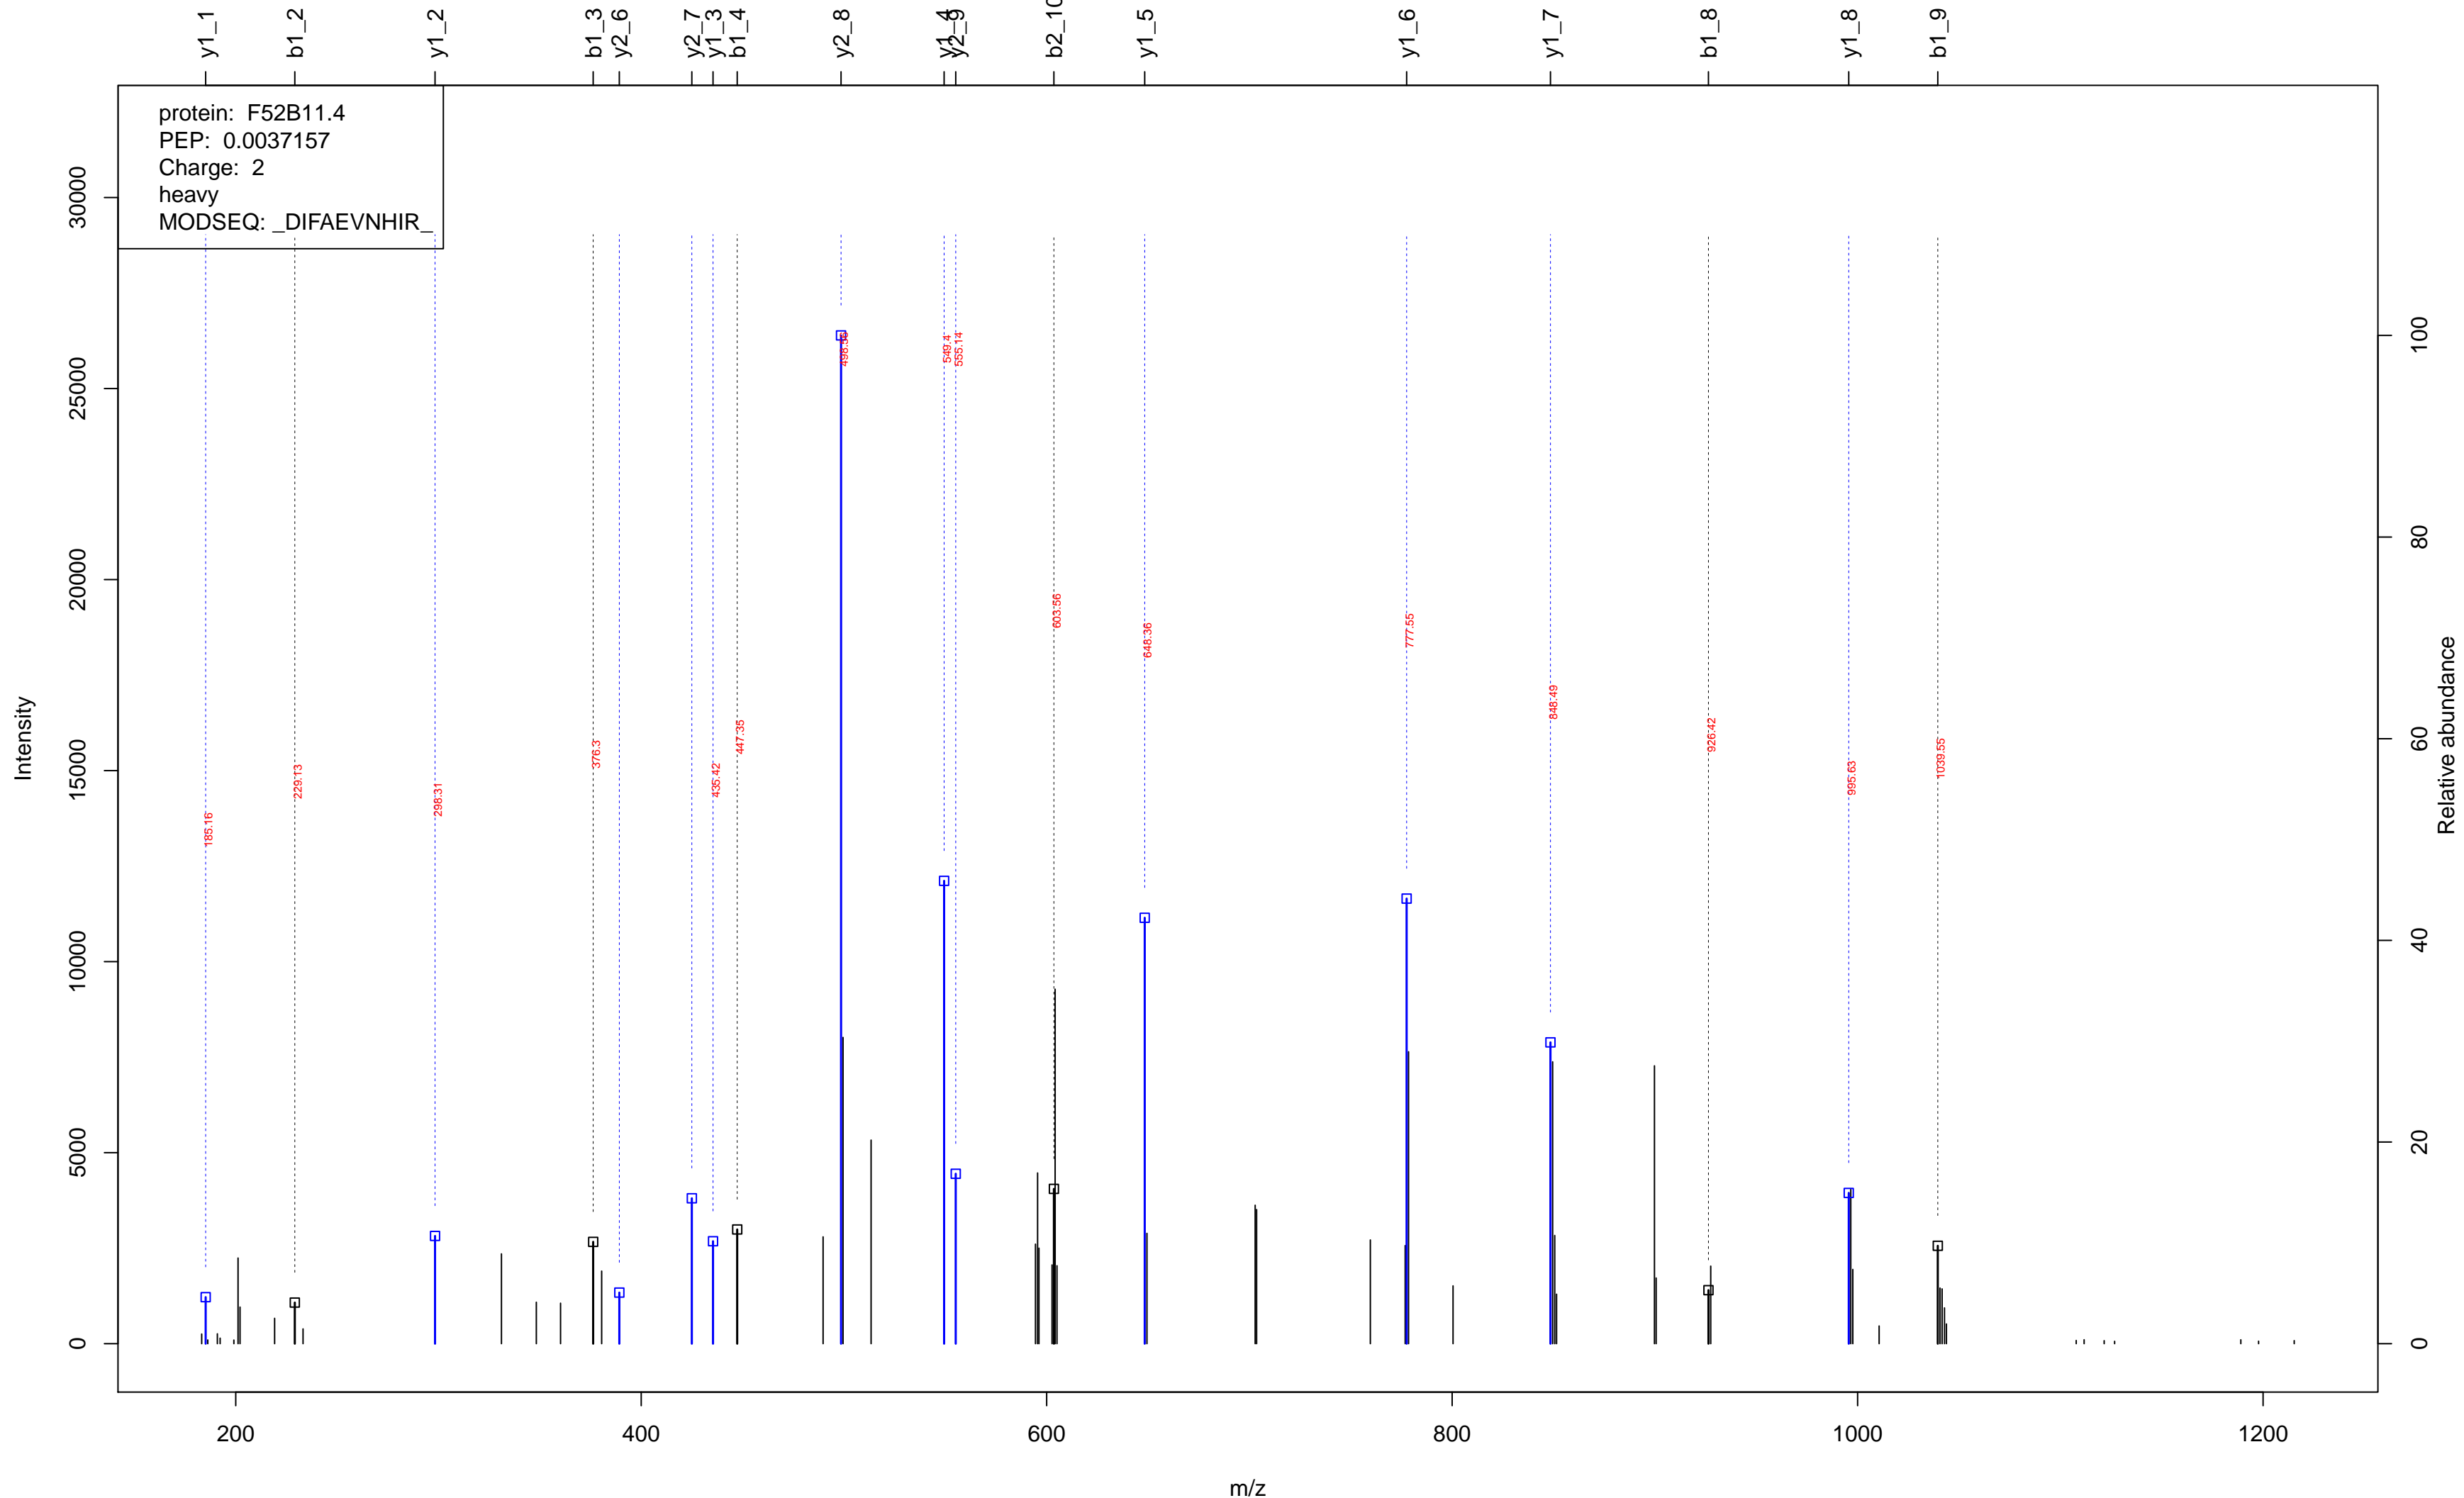

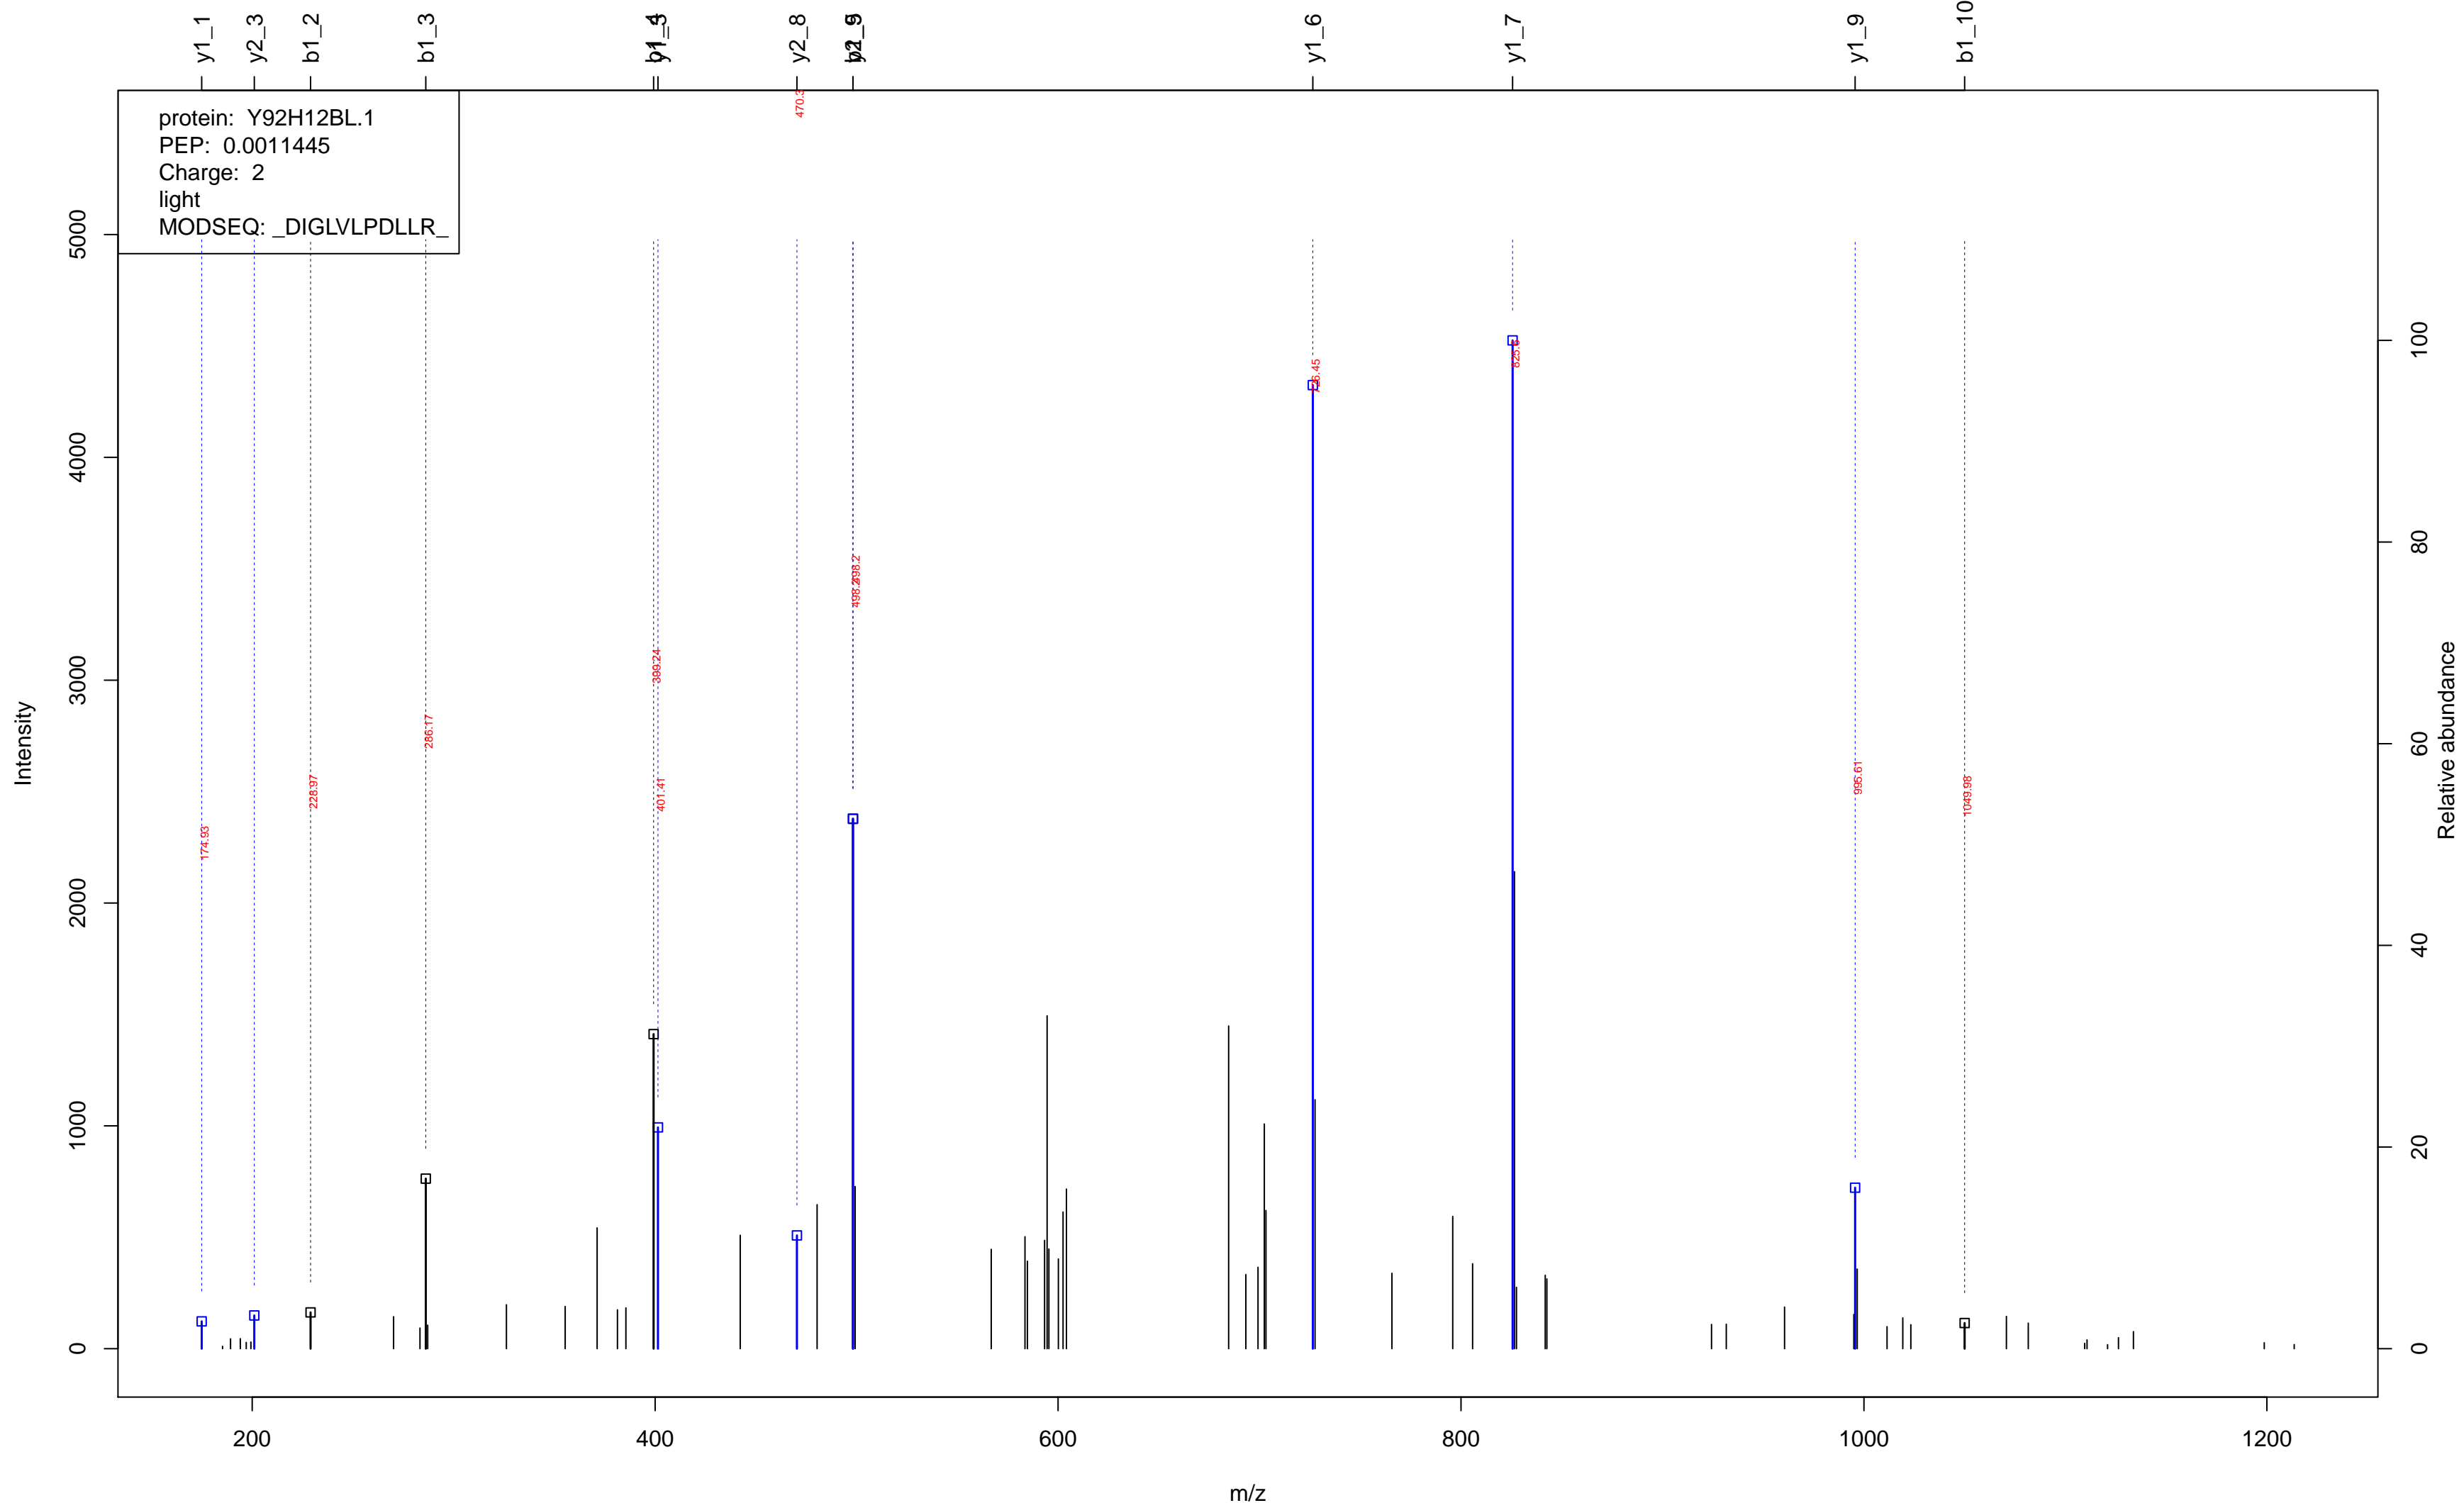

protein: Y92H12BL.1  
PEP: 0.0011445  
Charge: 2  
light  
MODSEQ: \_DIGLVLPDLLR\_

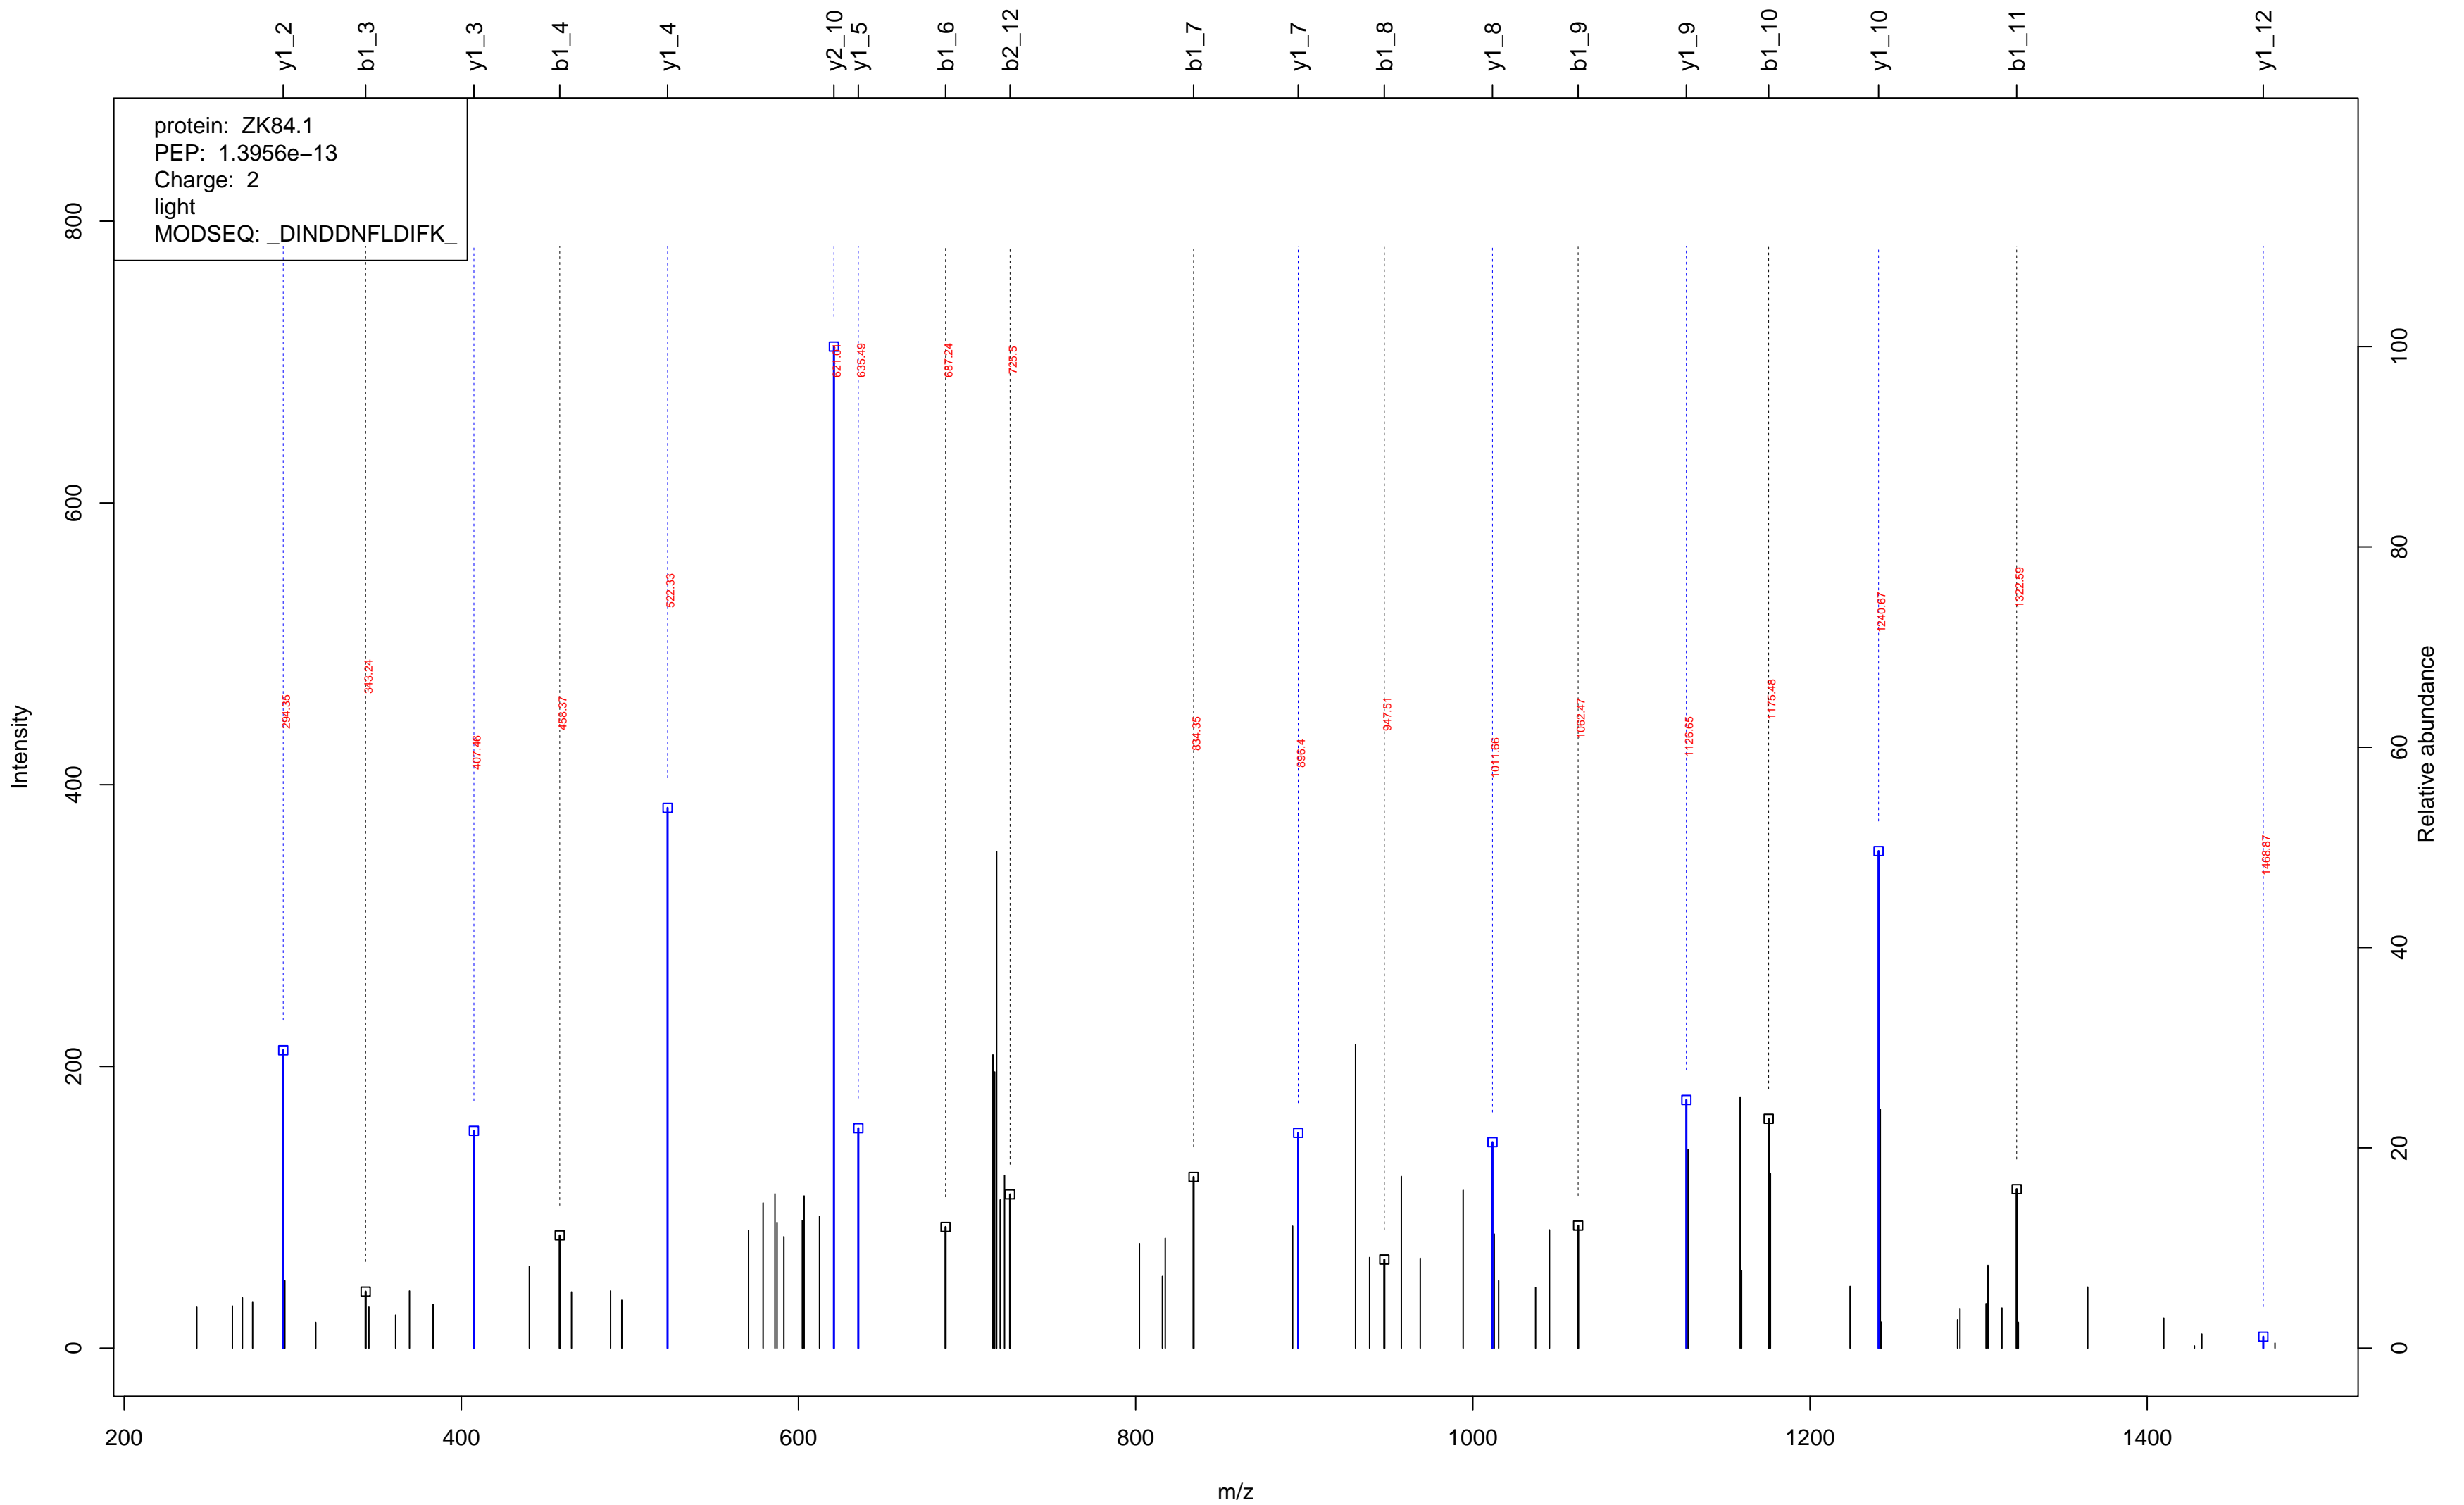

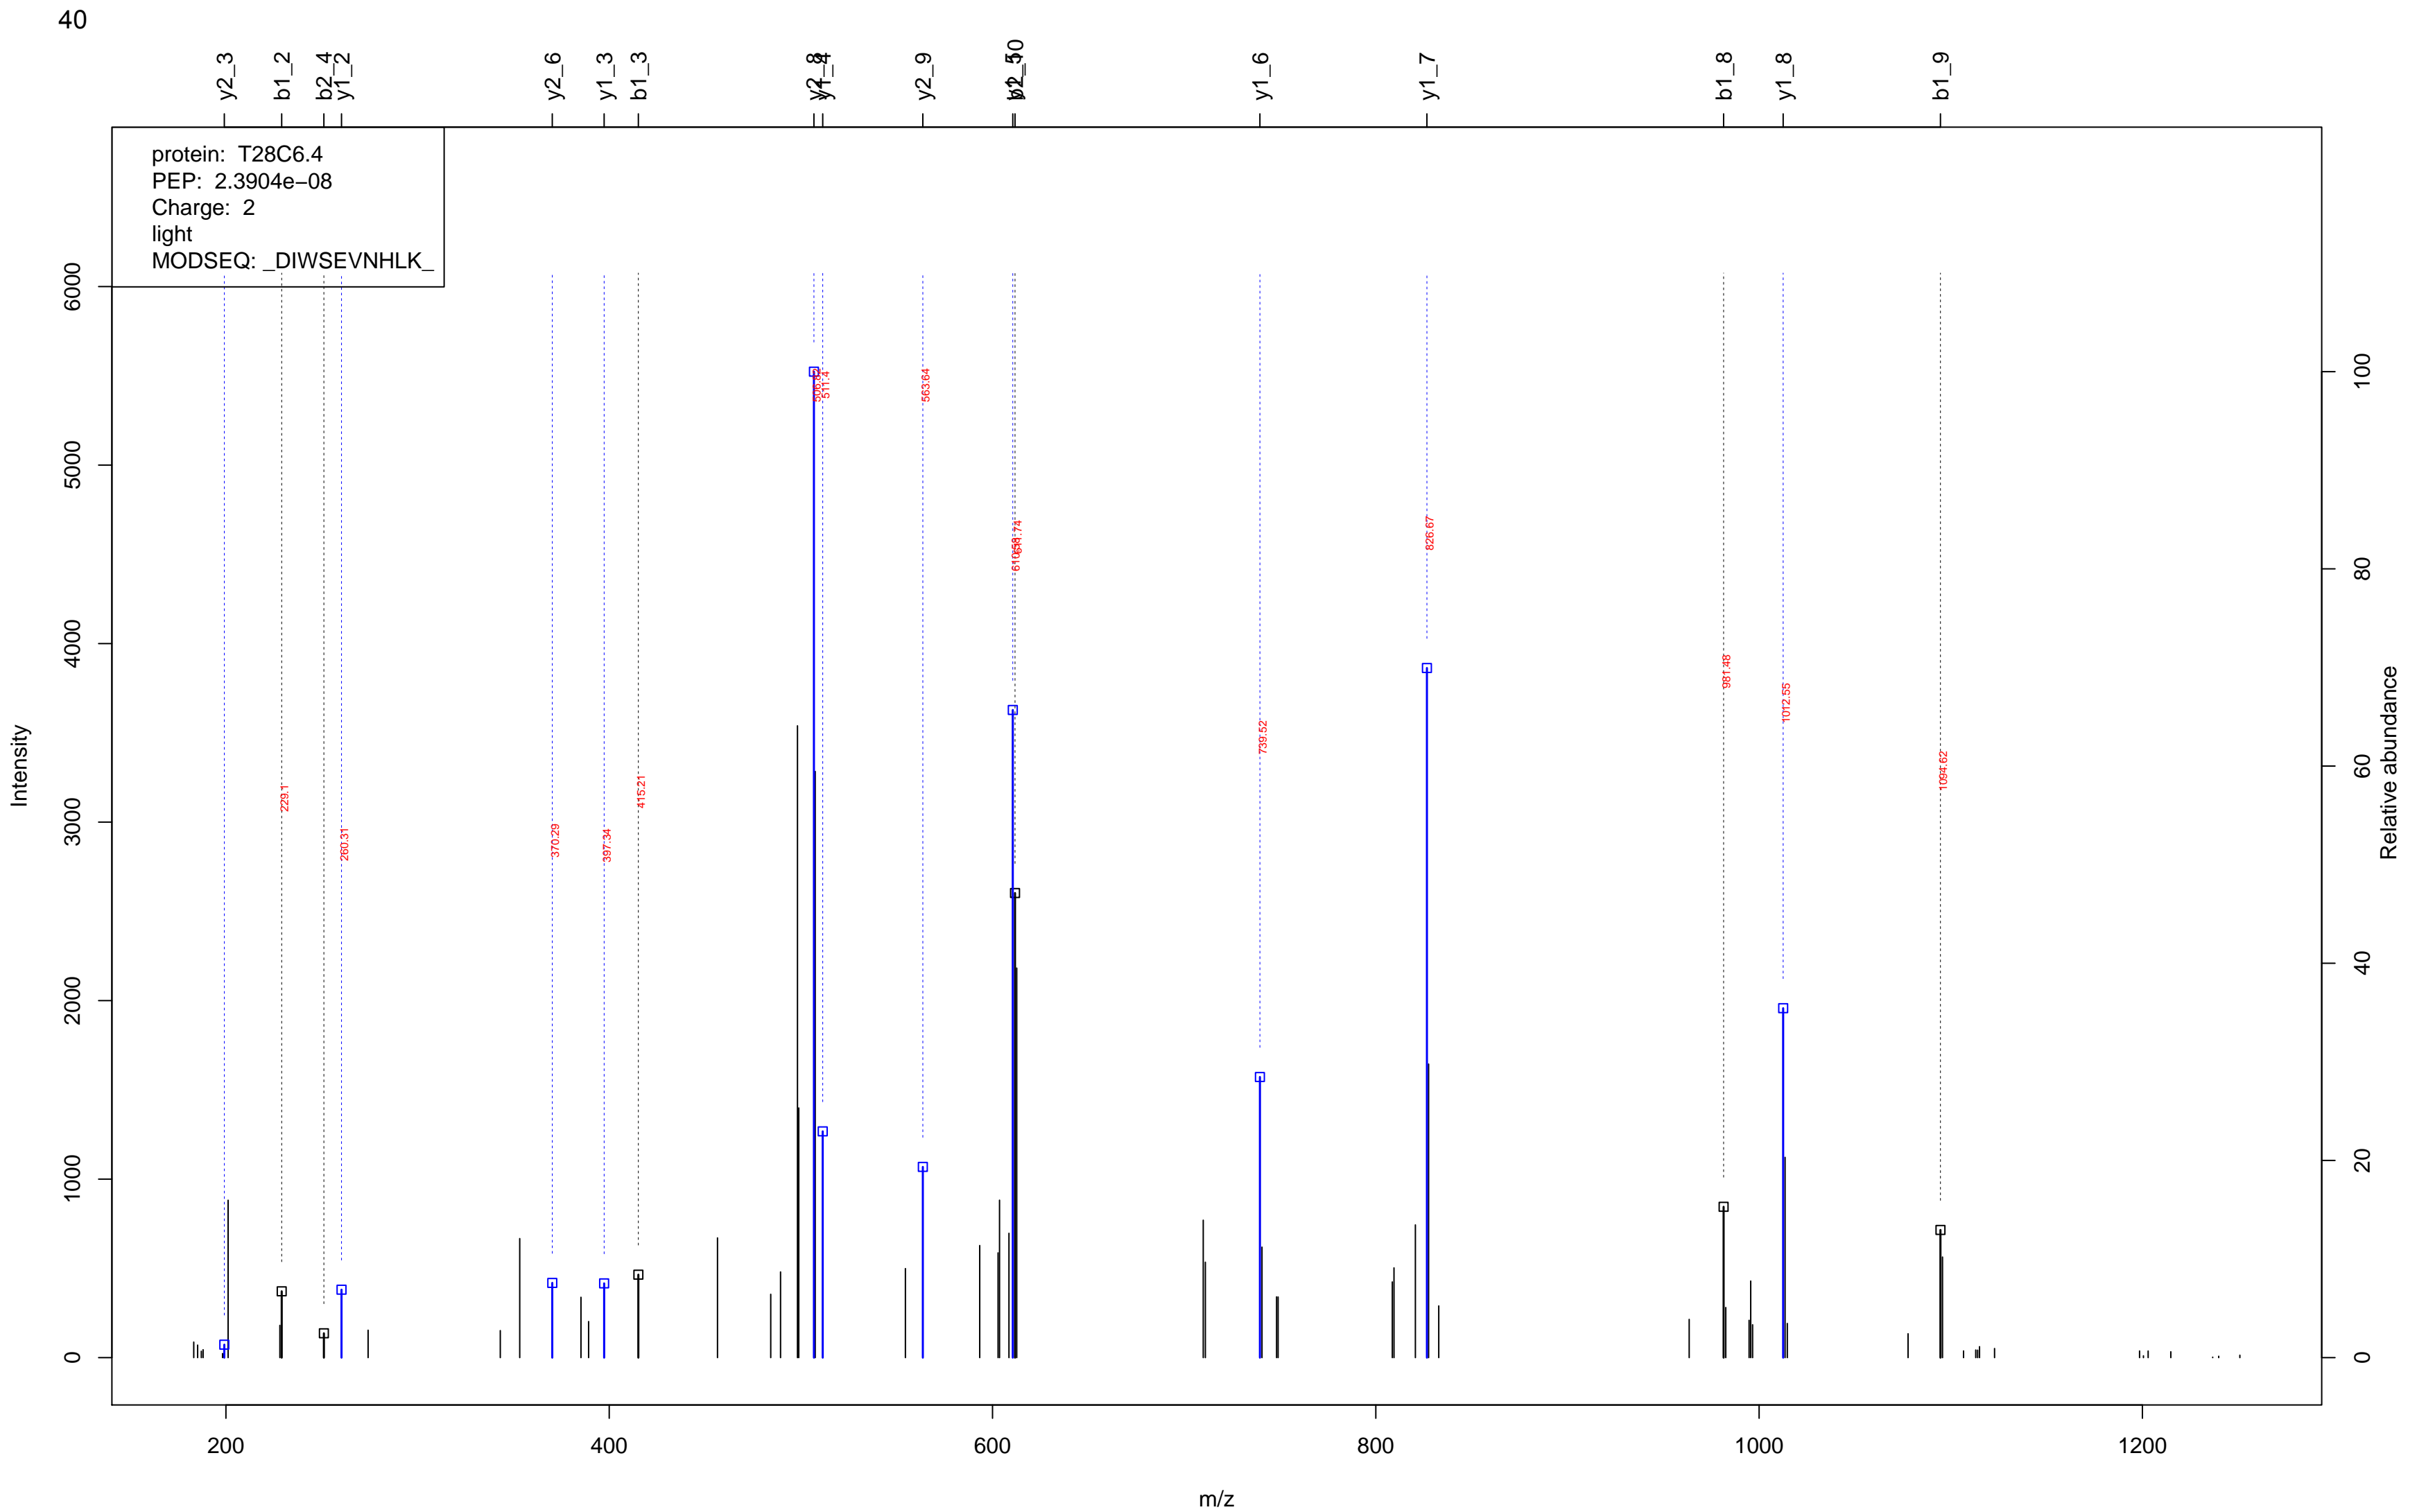



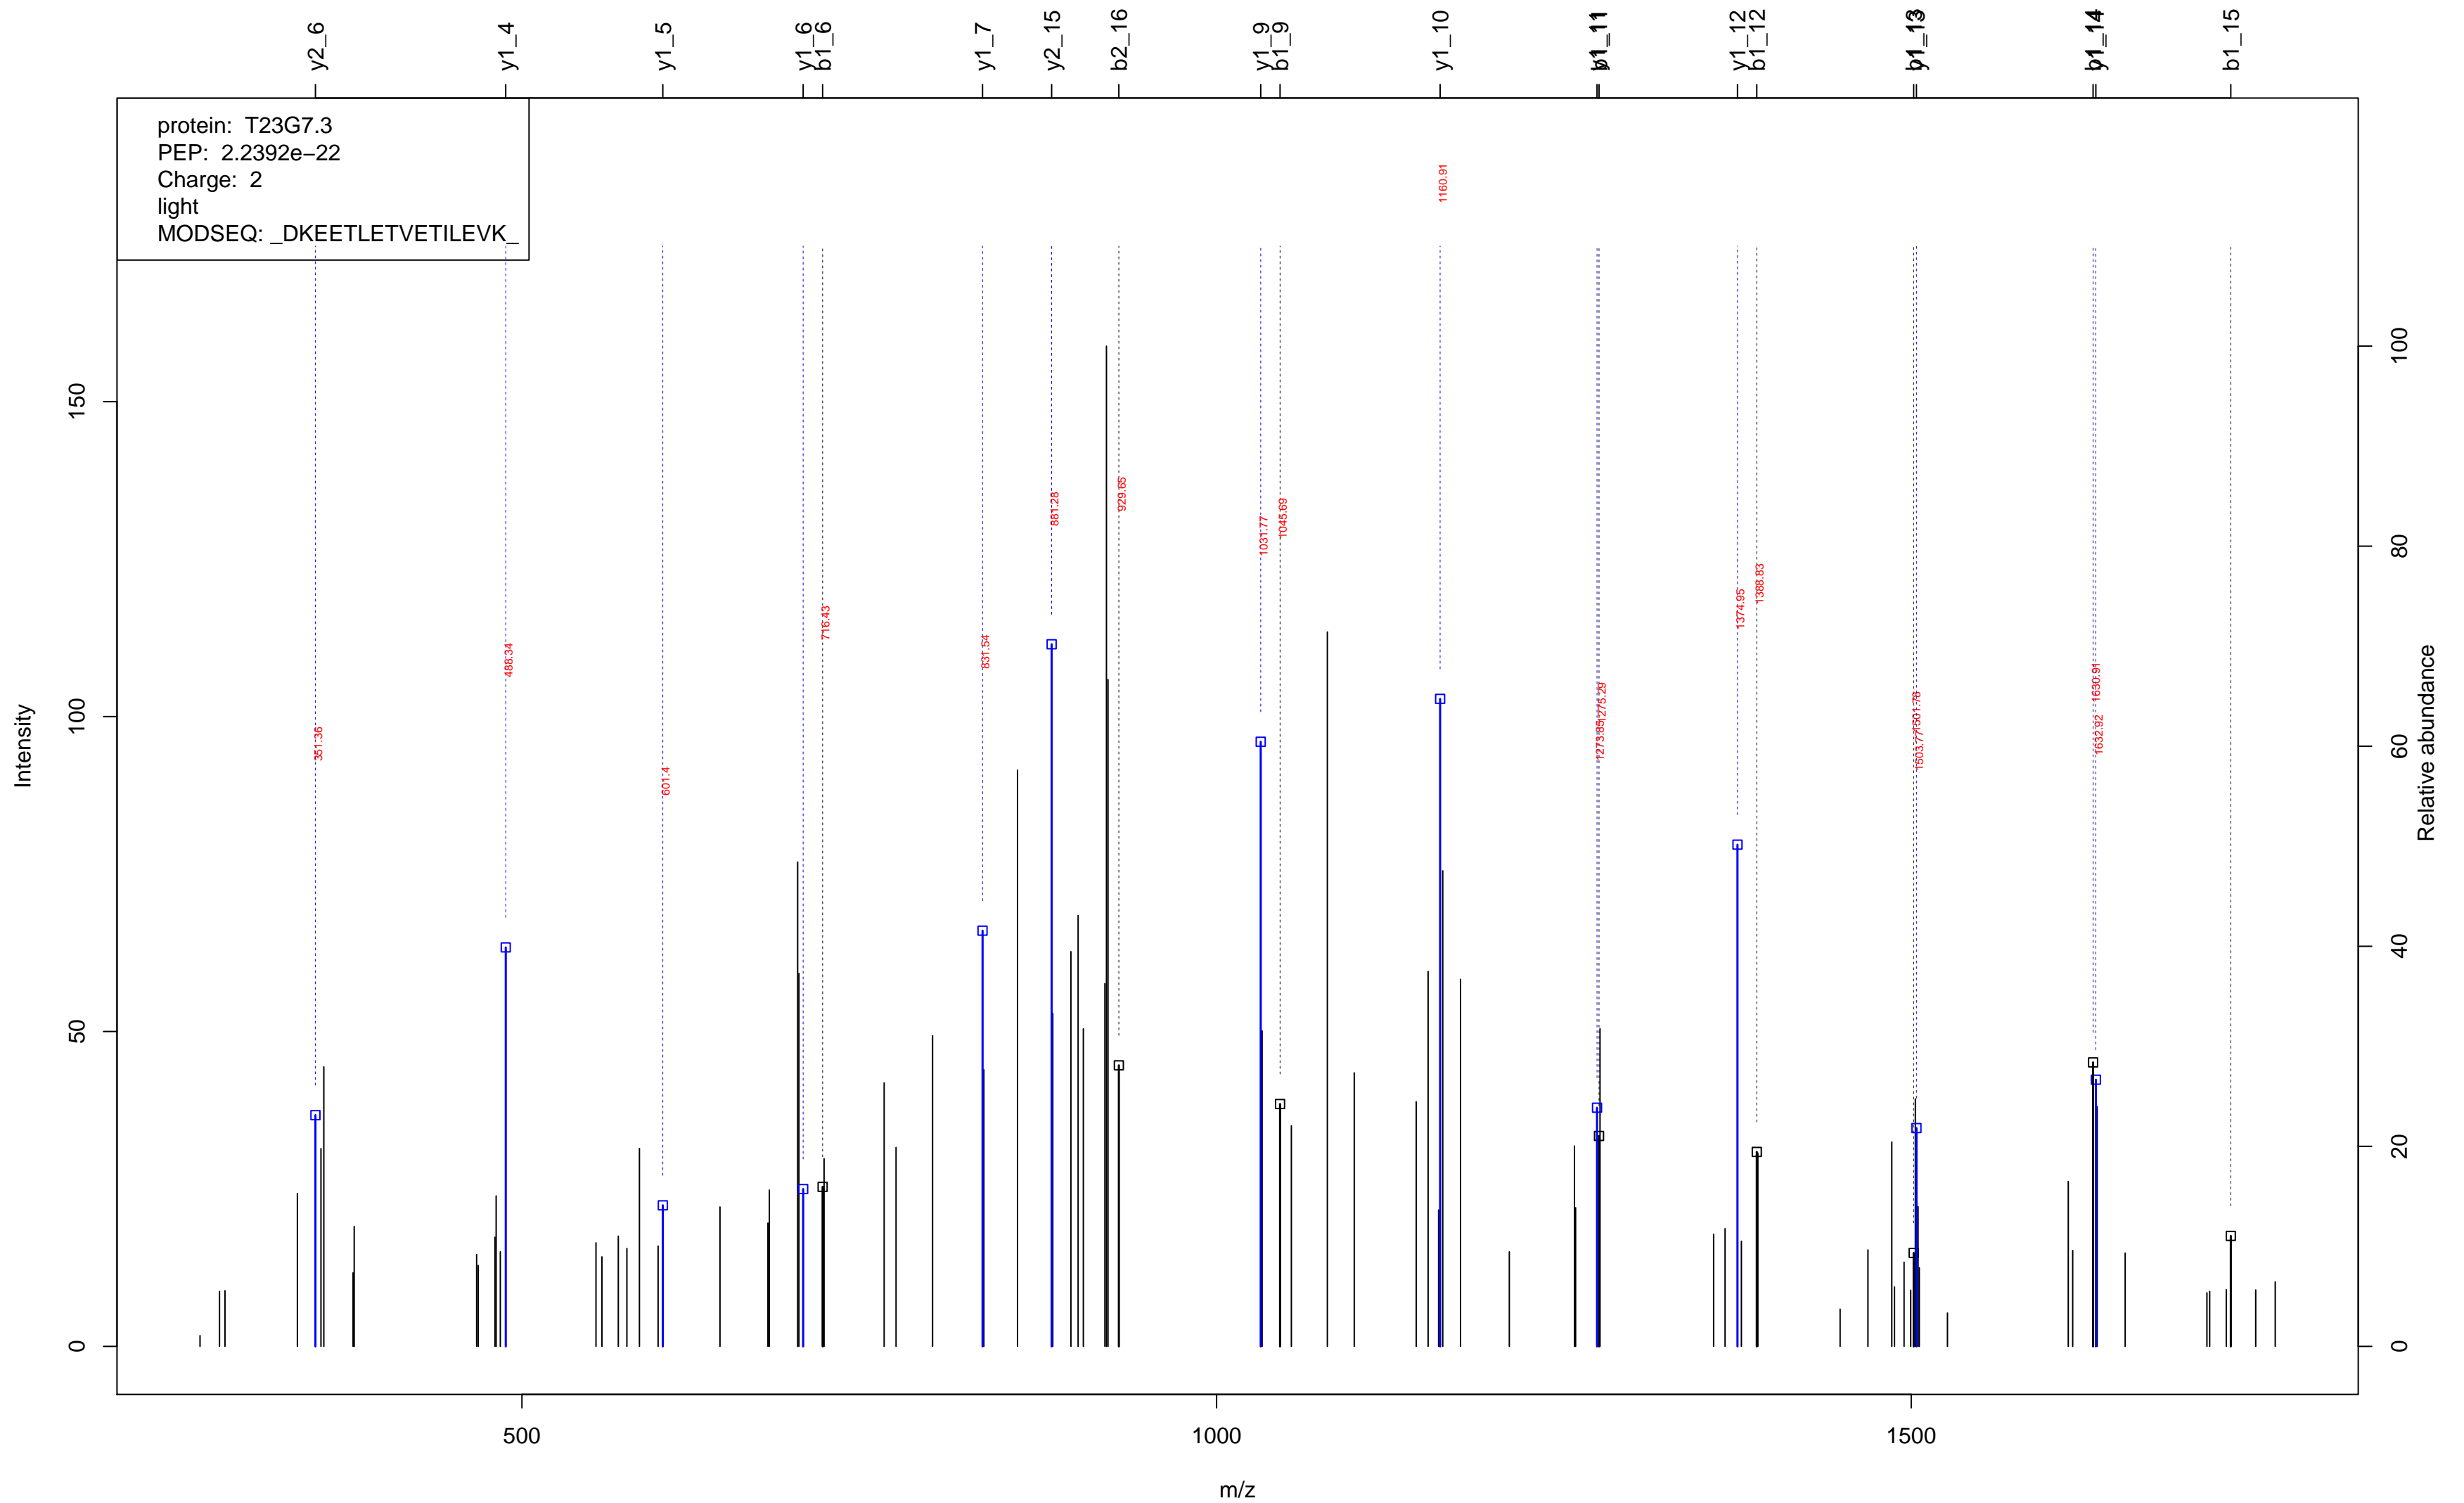

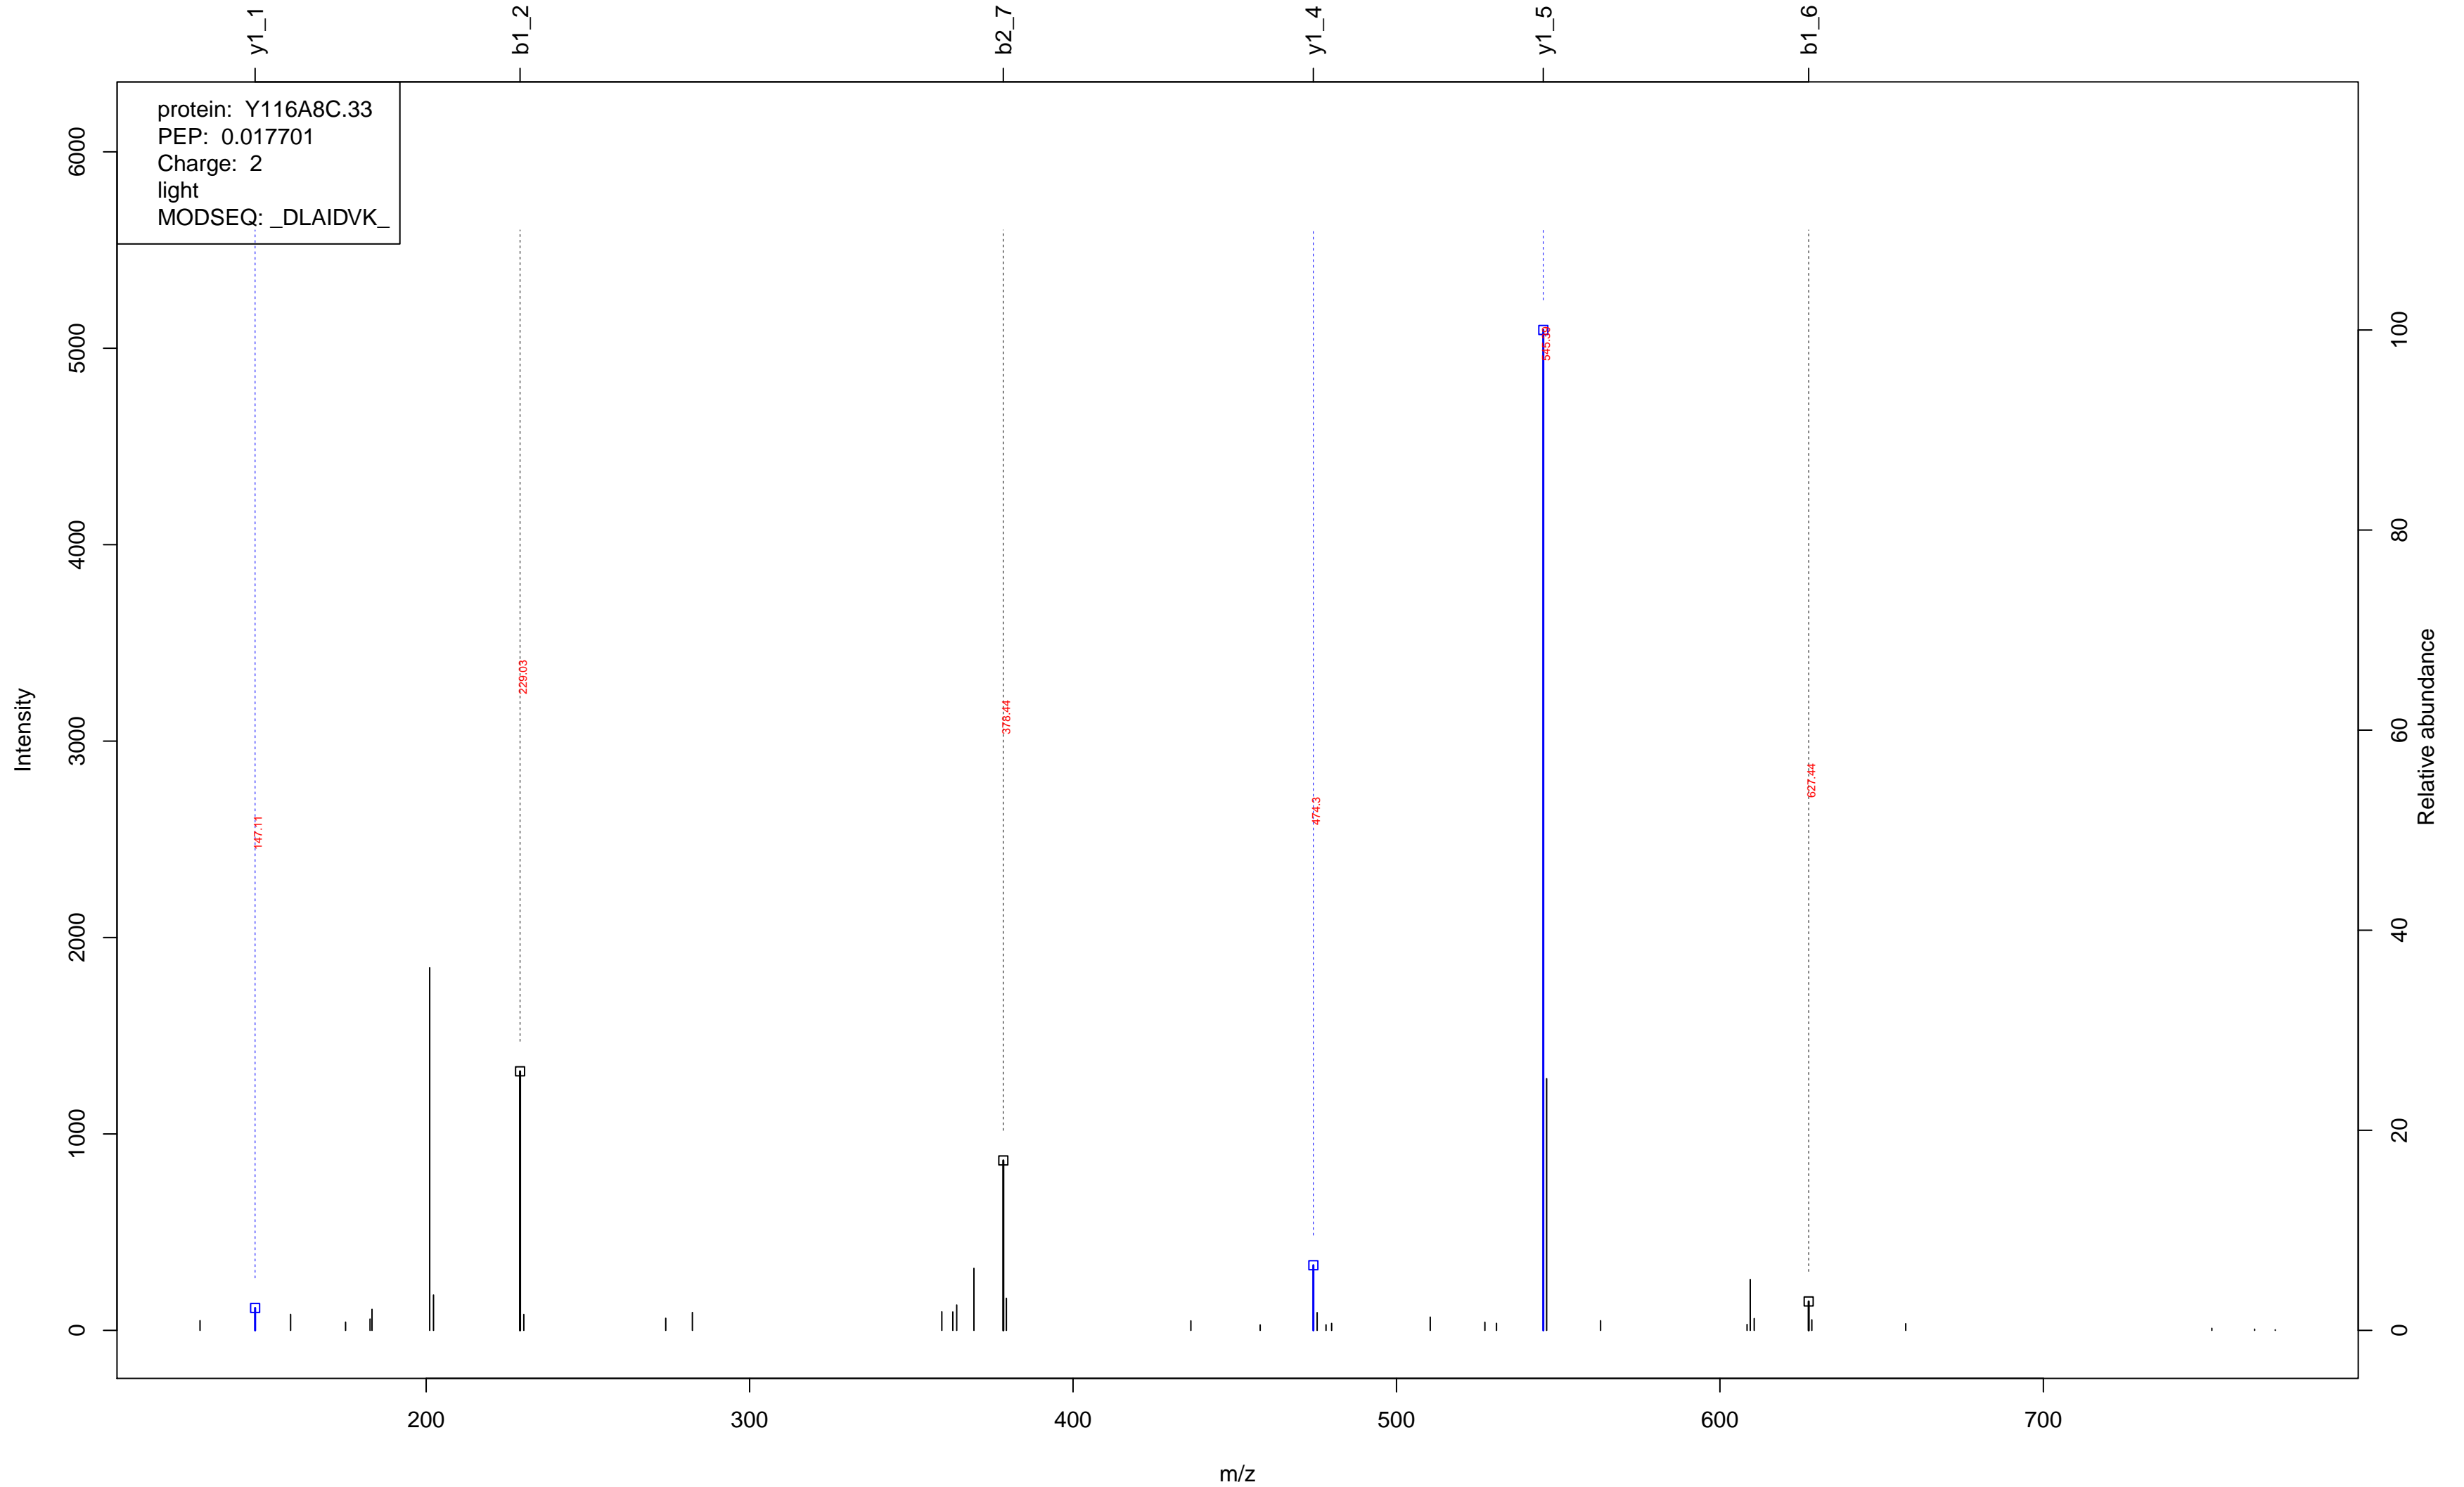

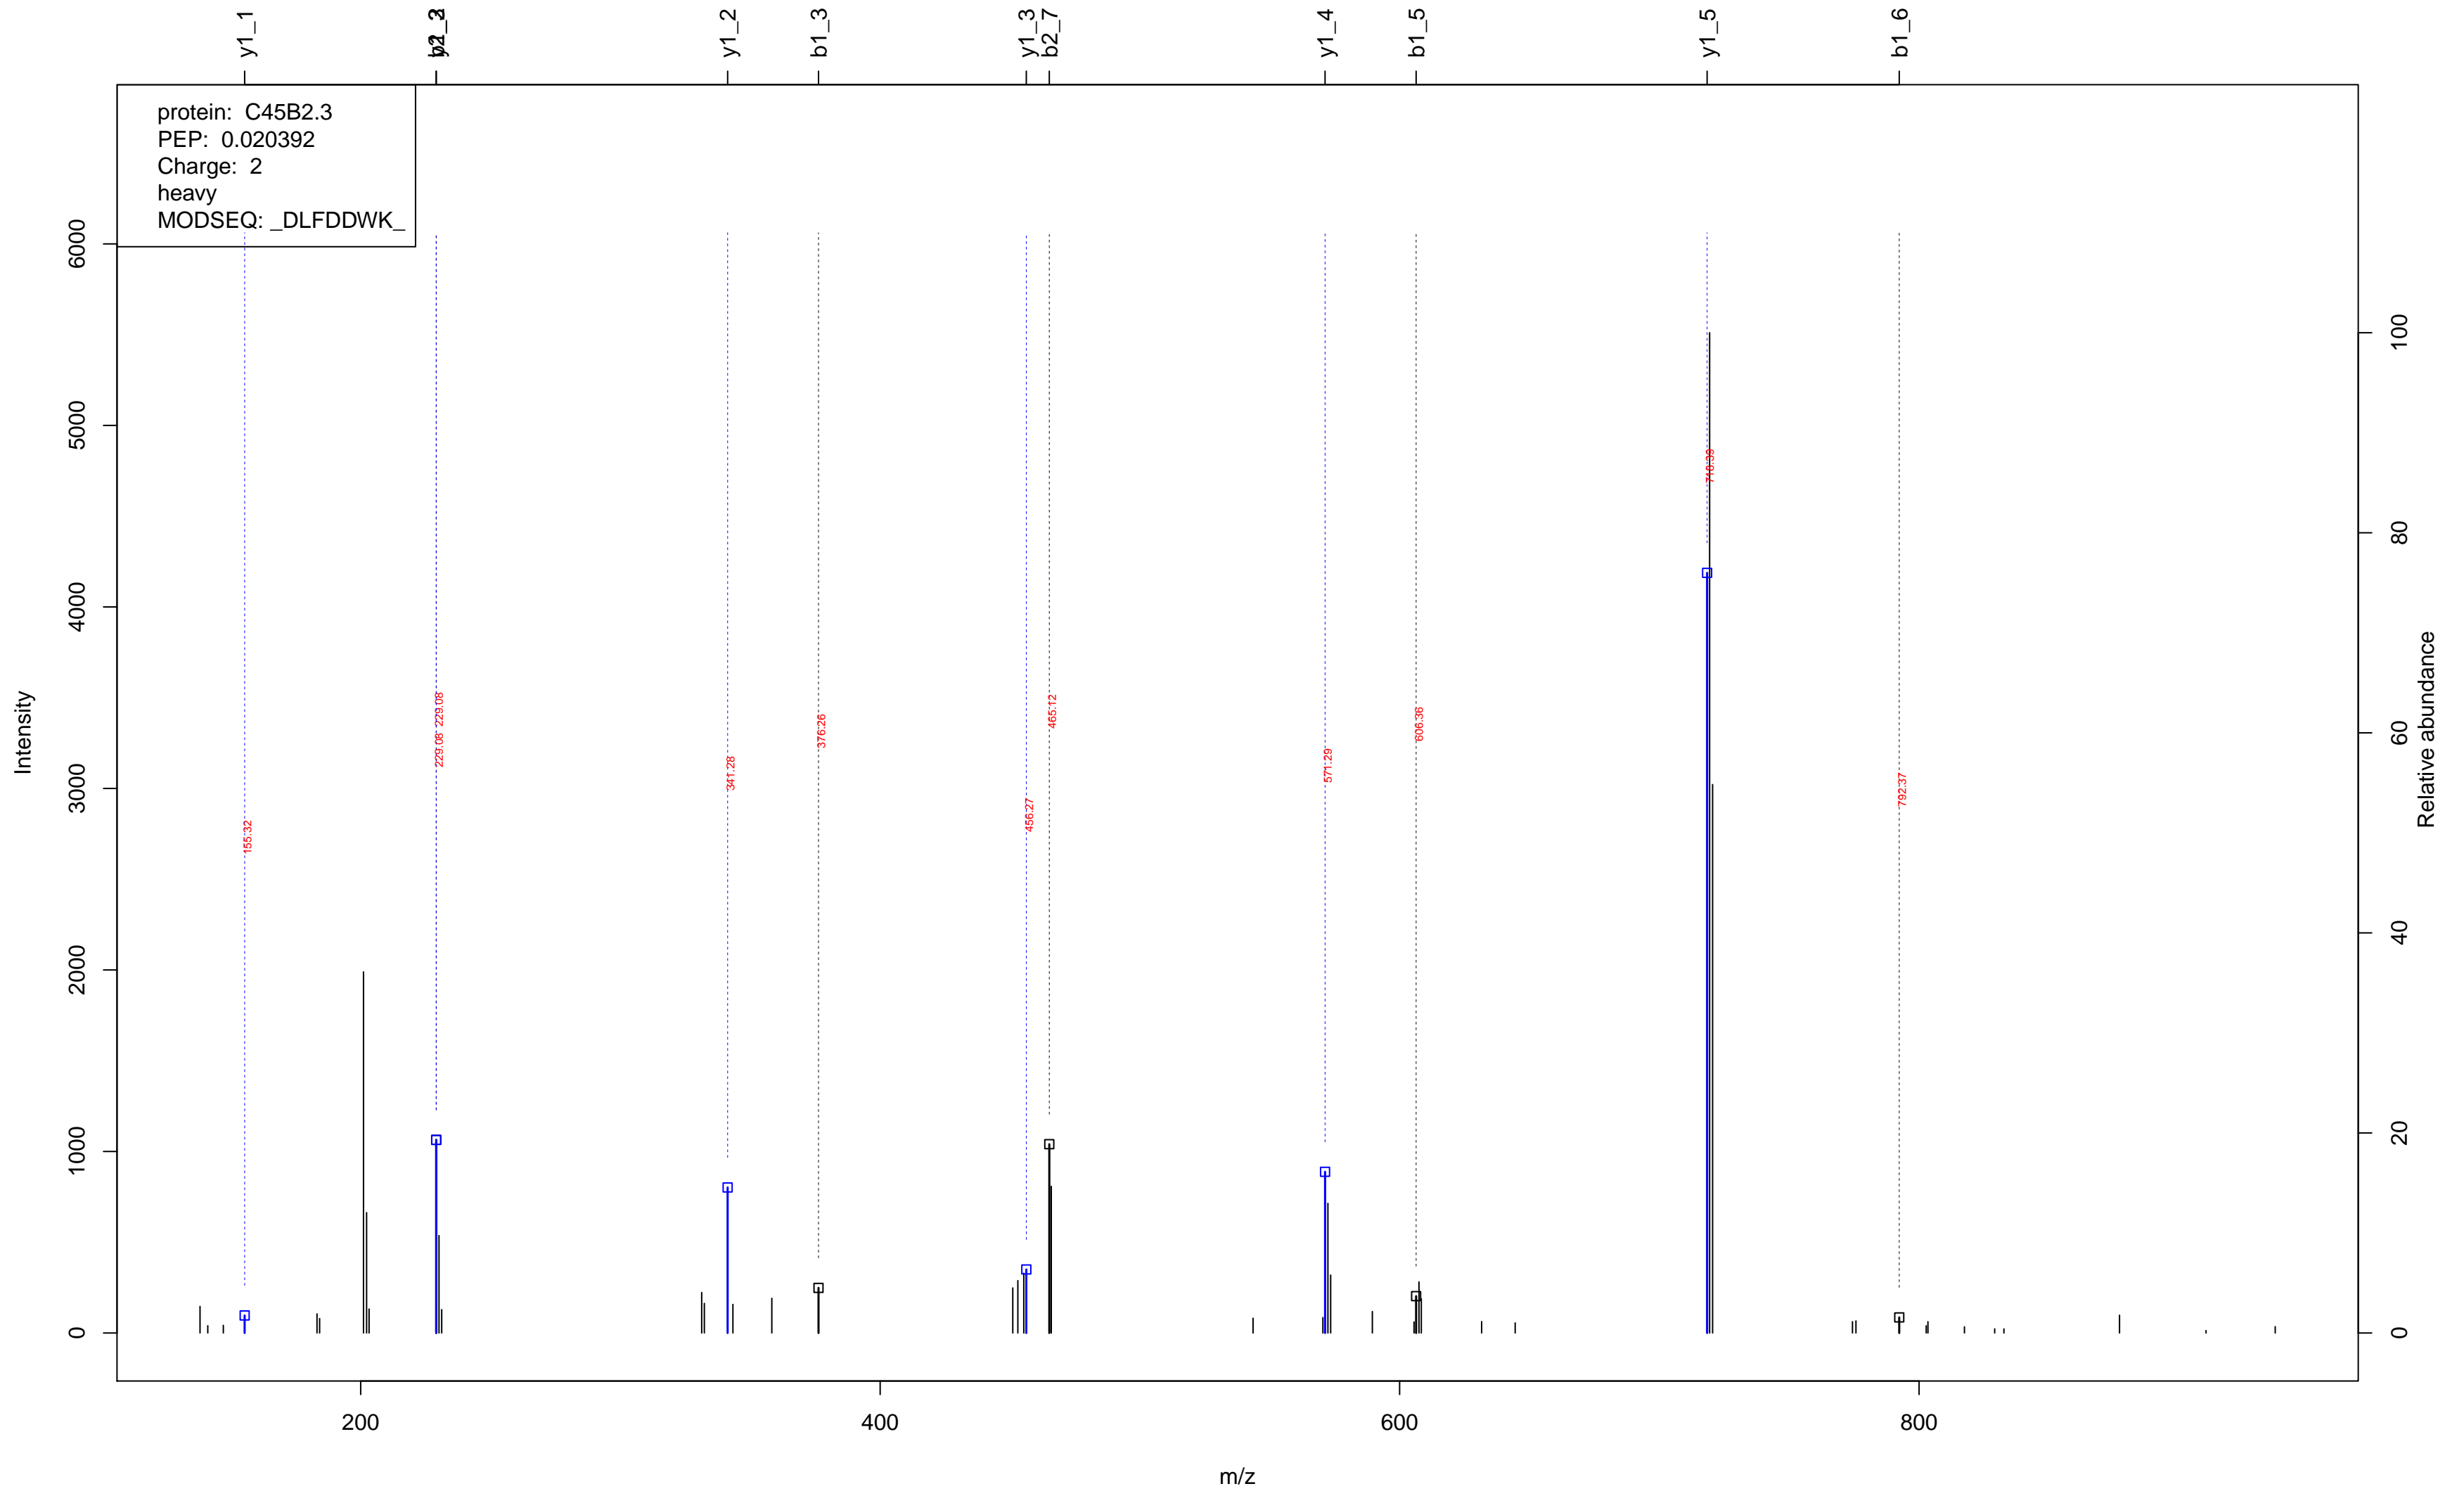

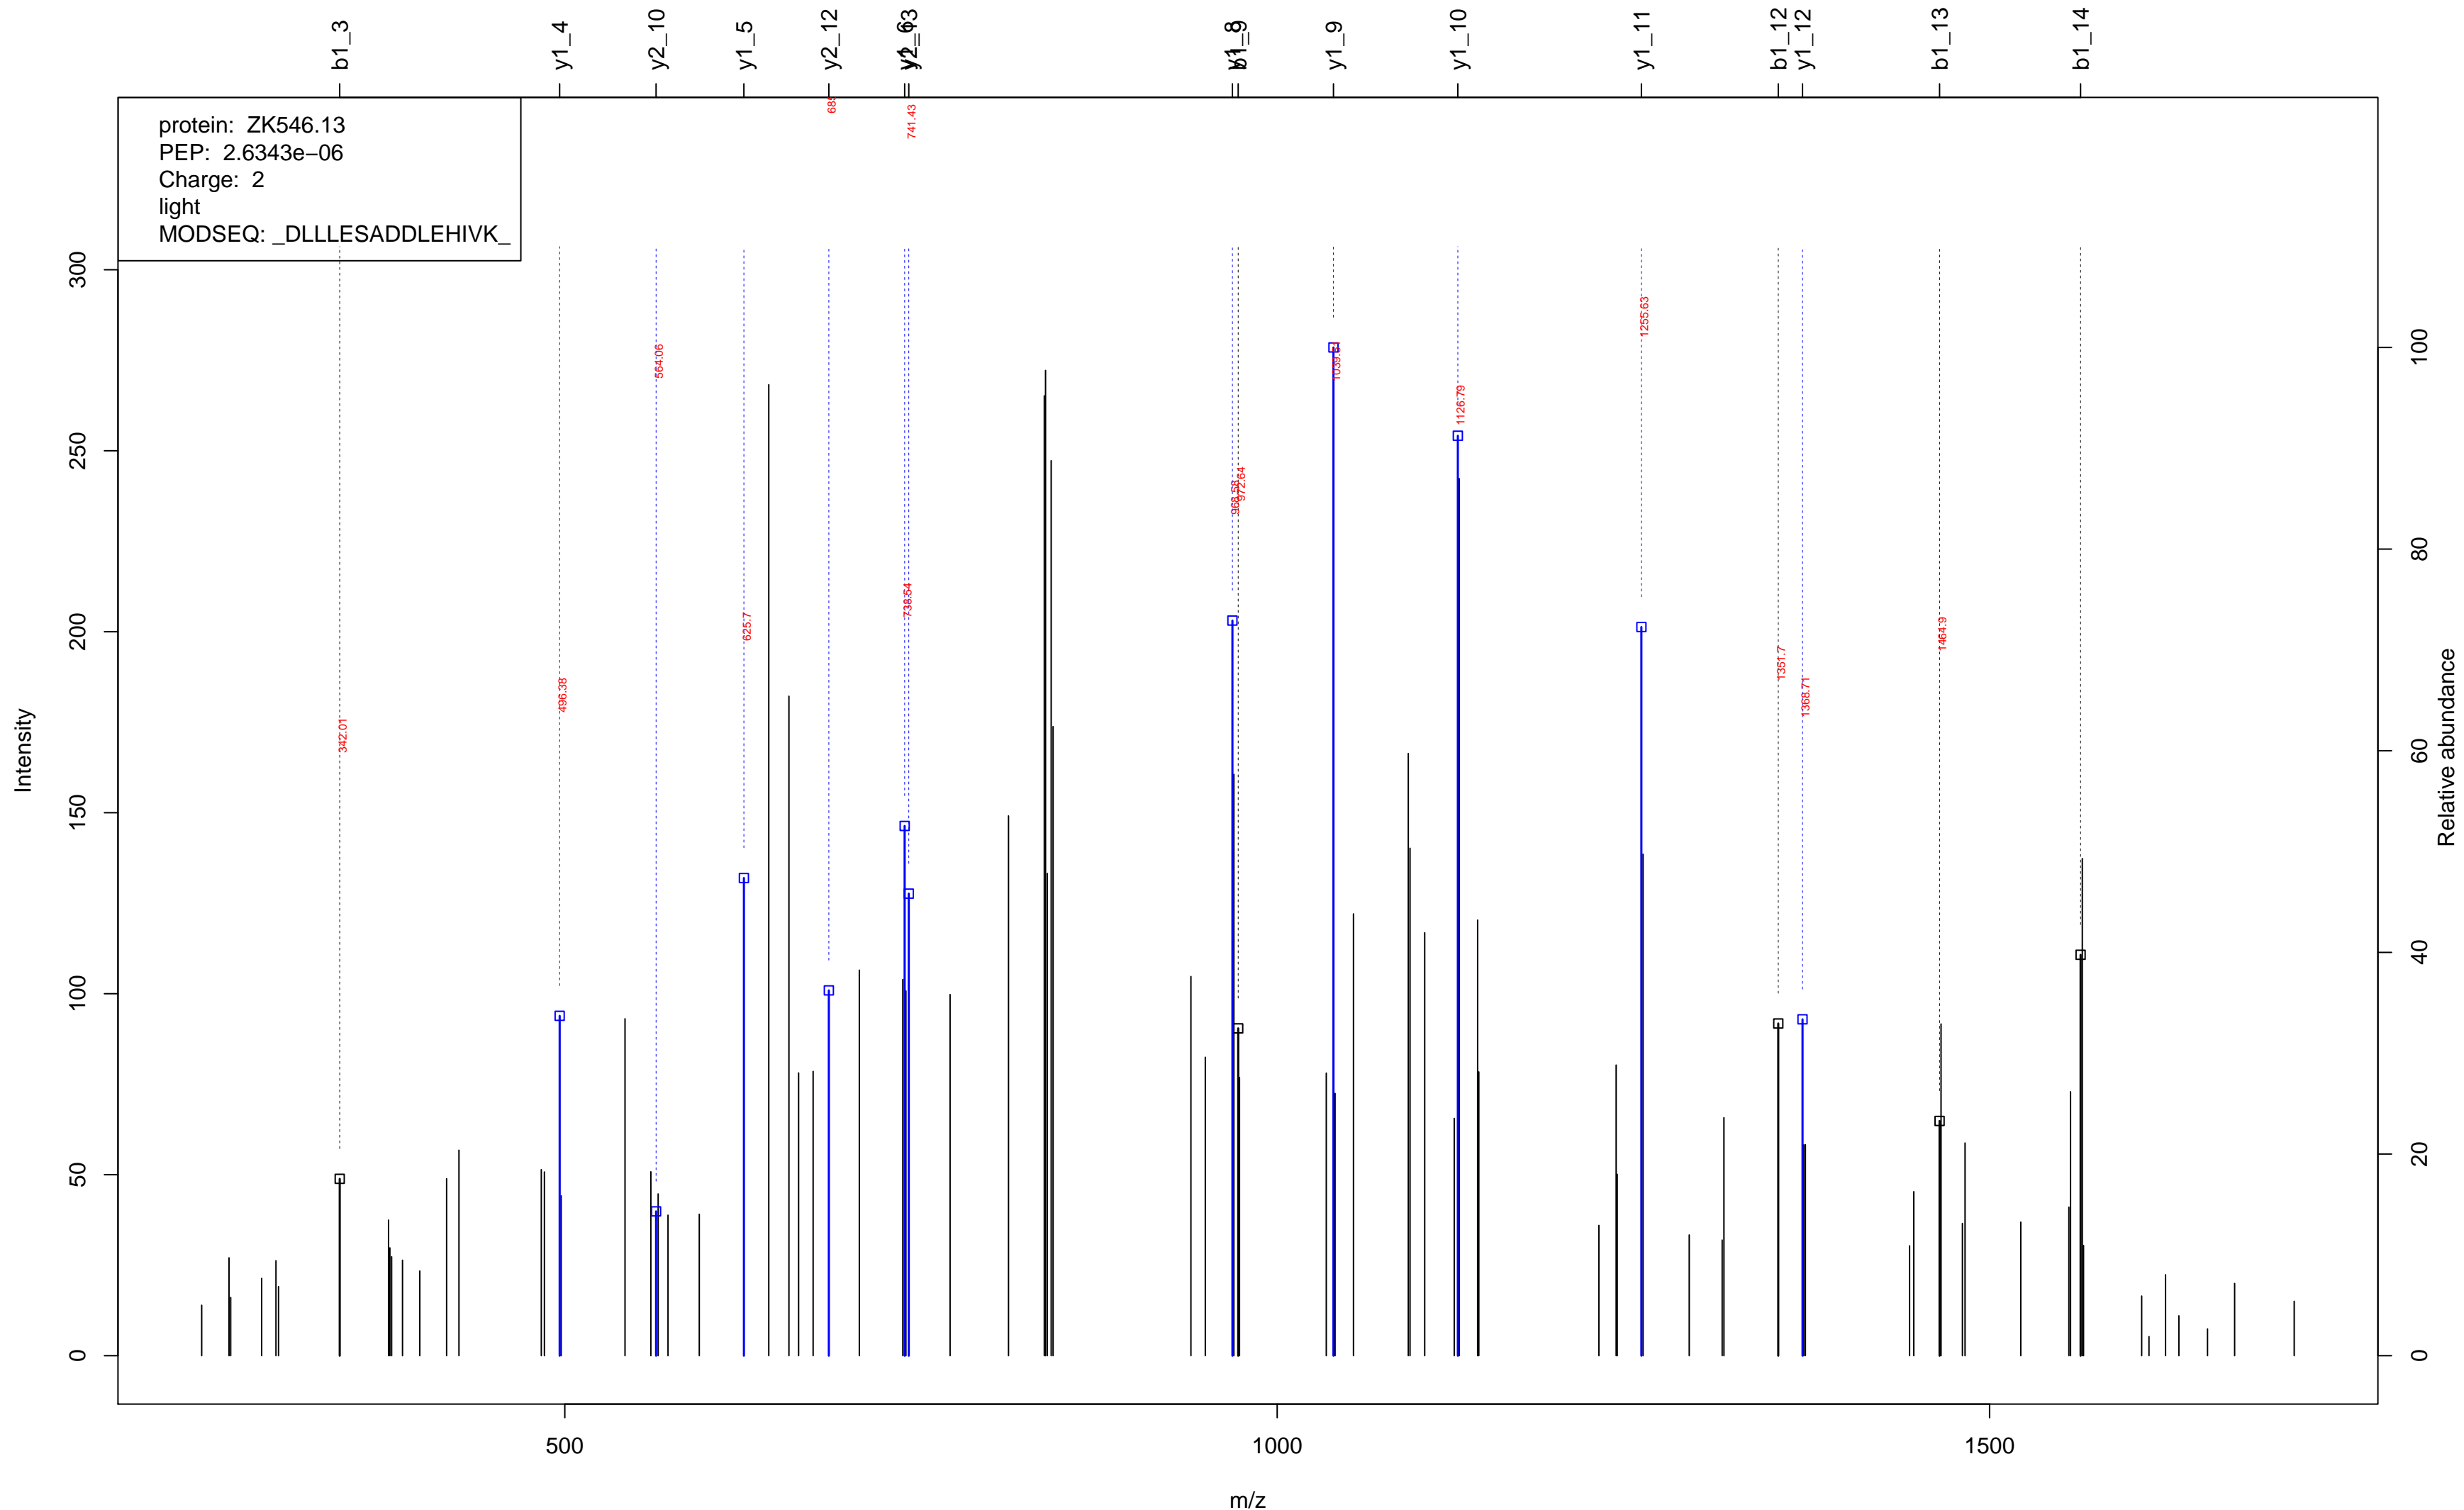

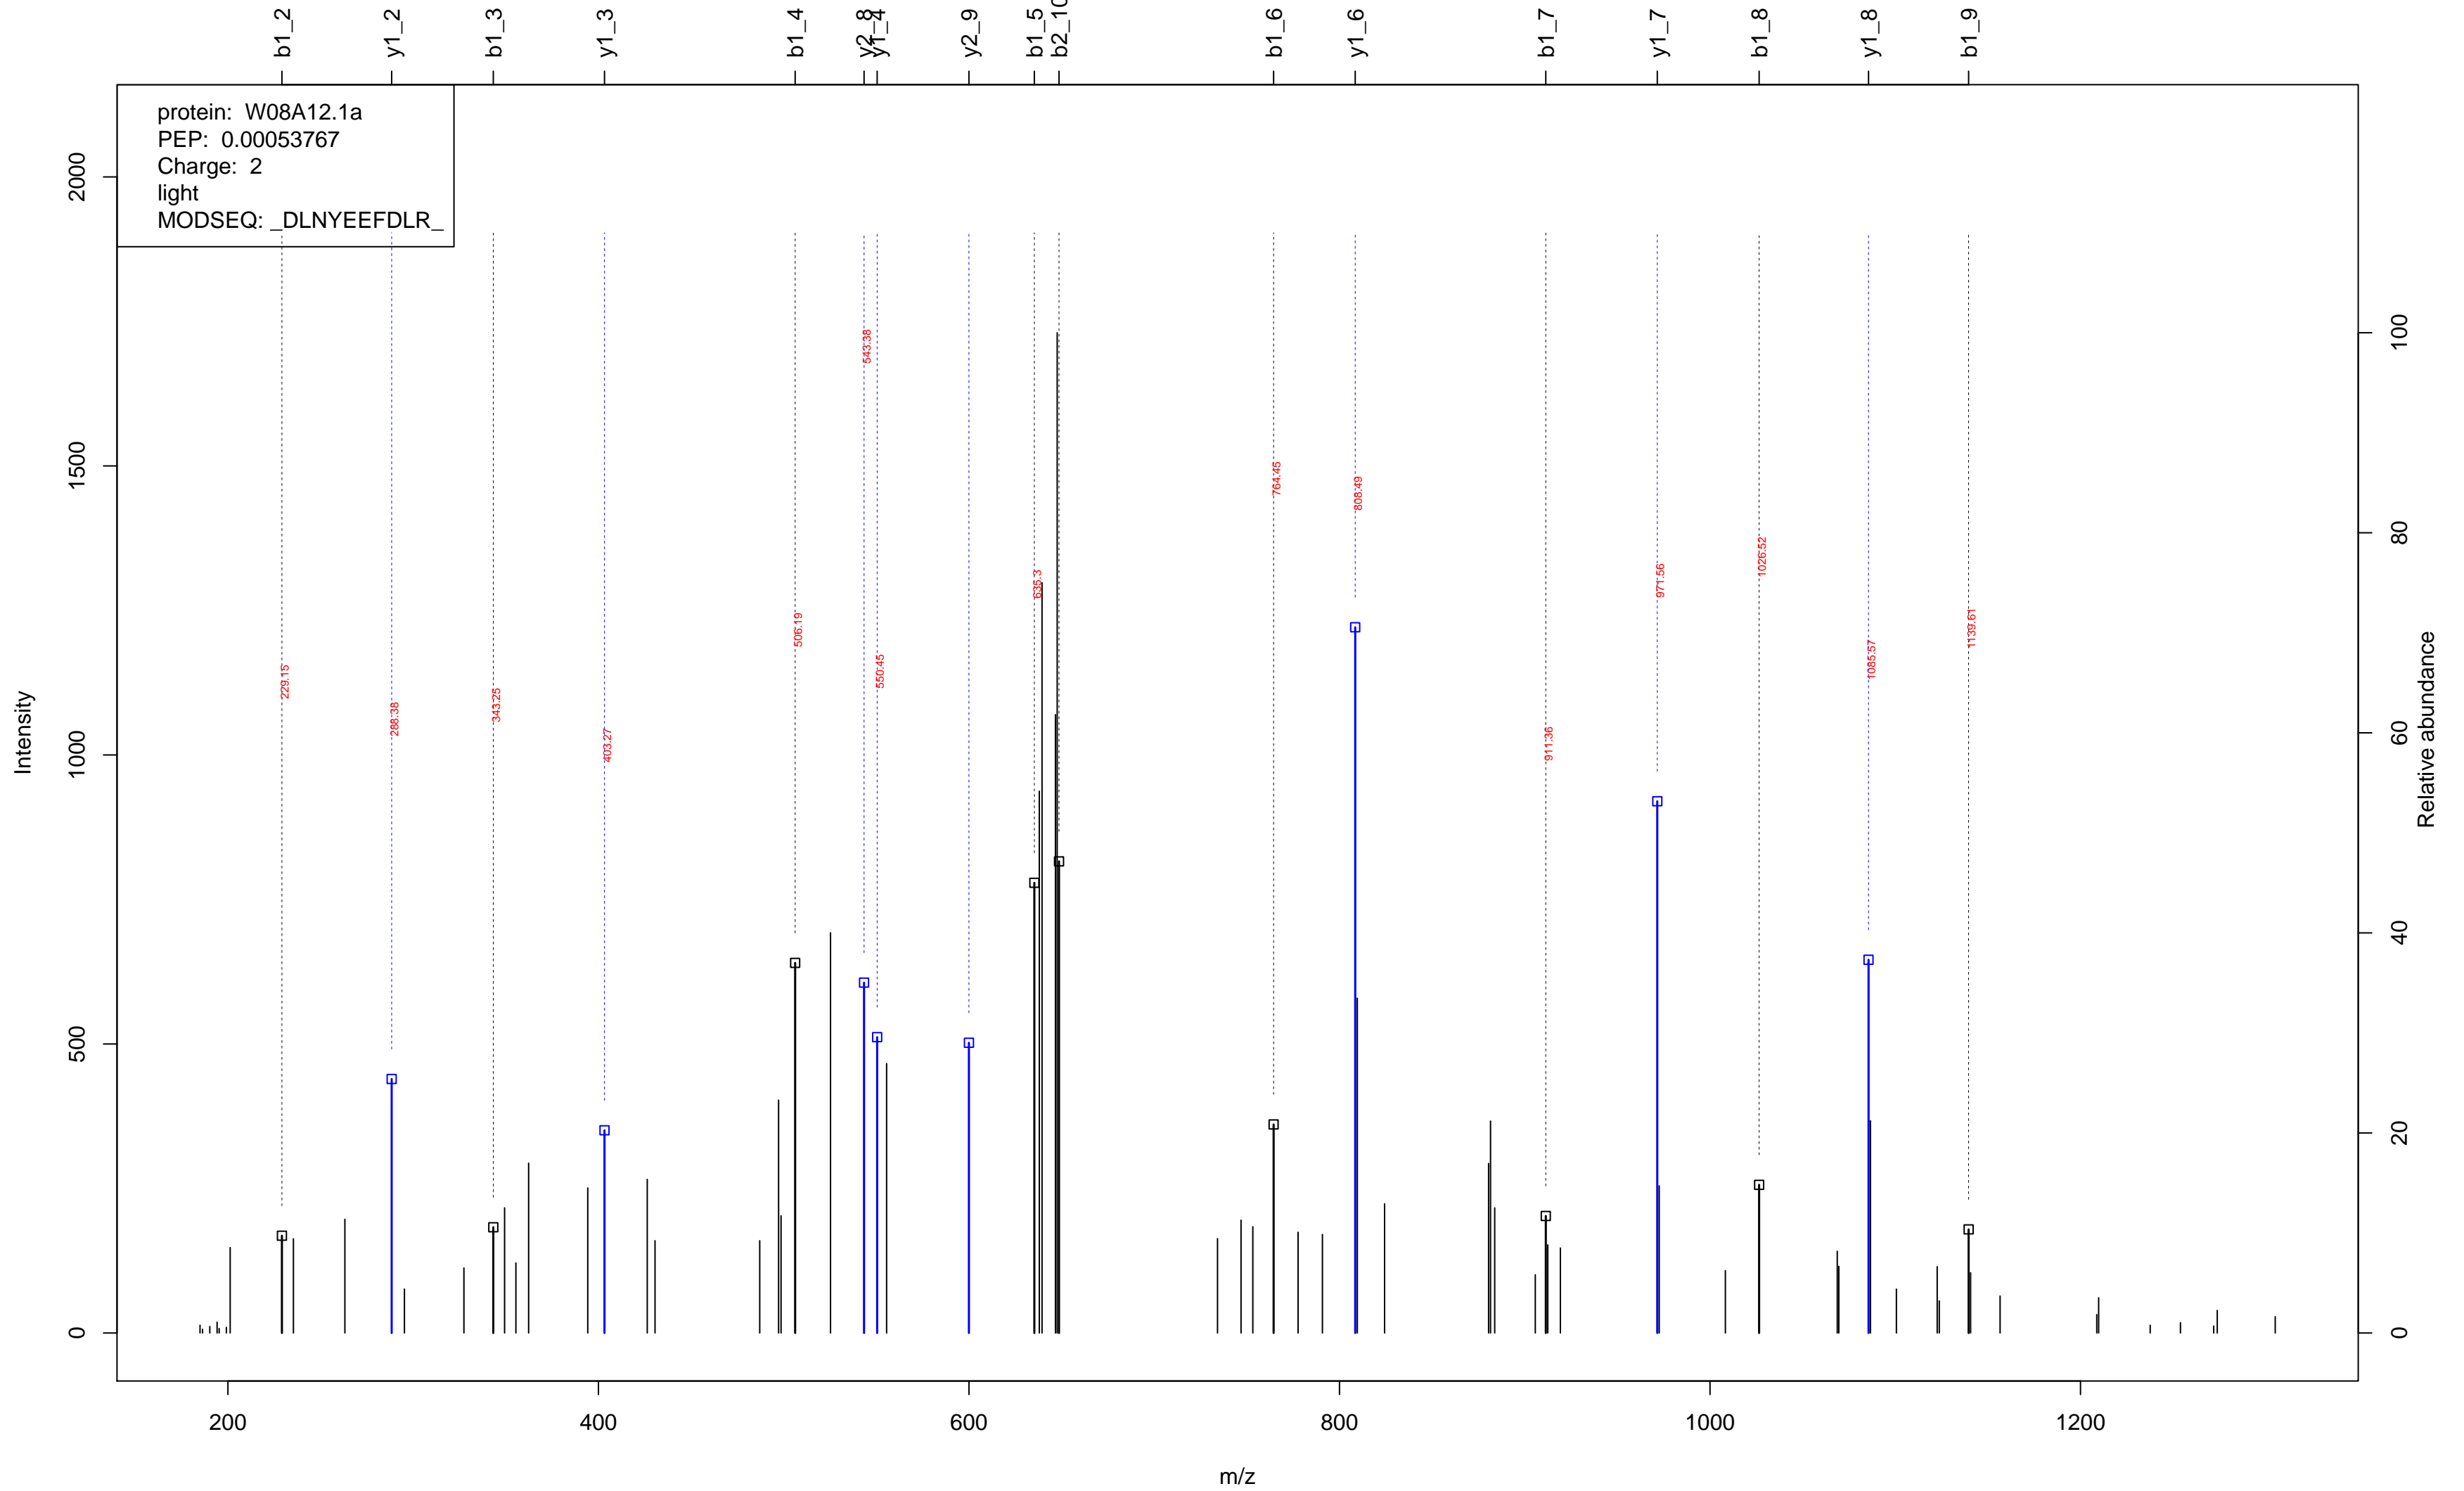

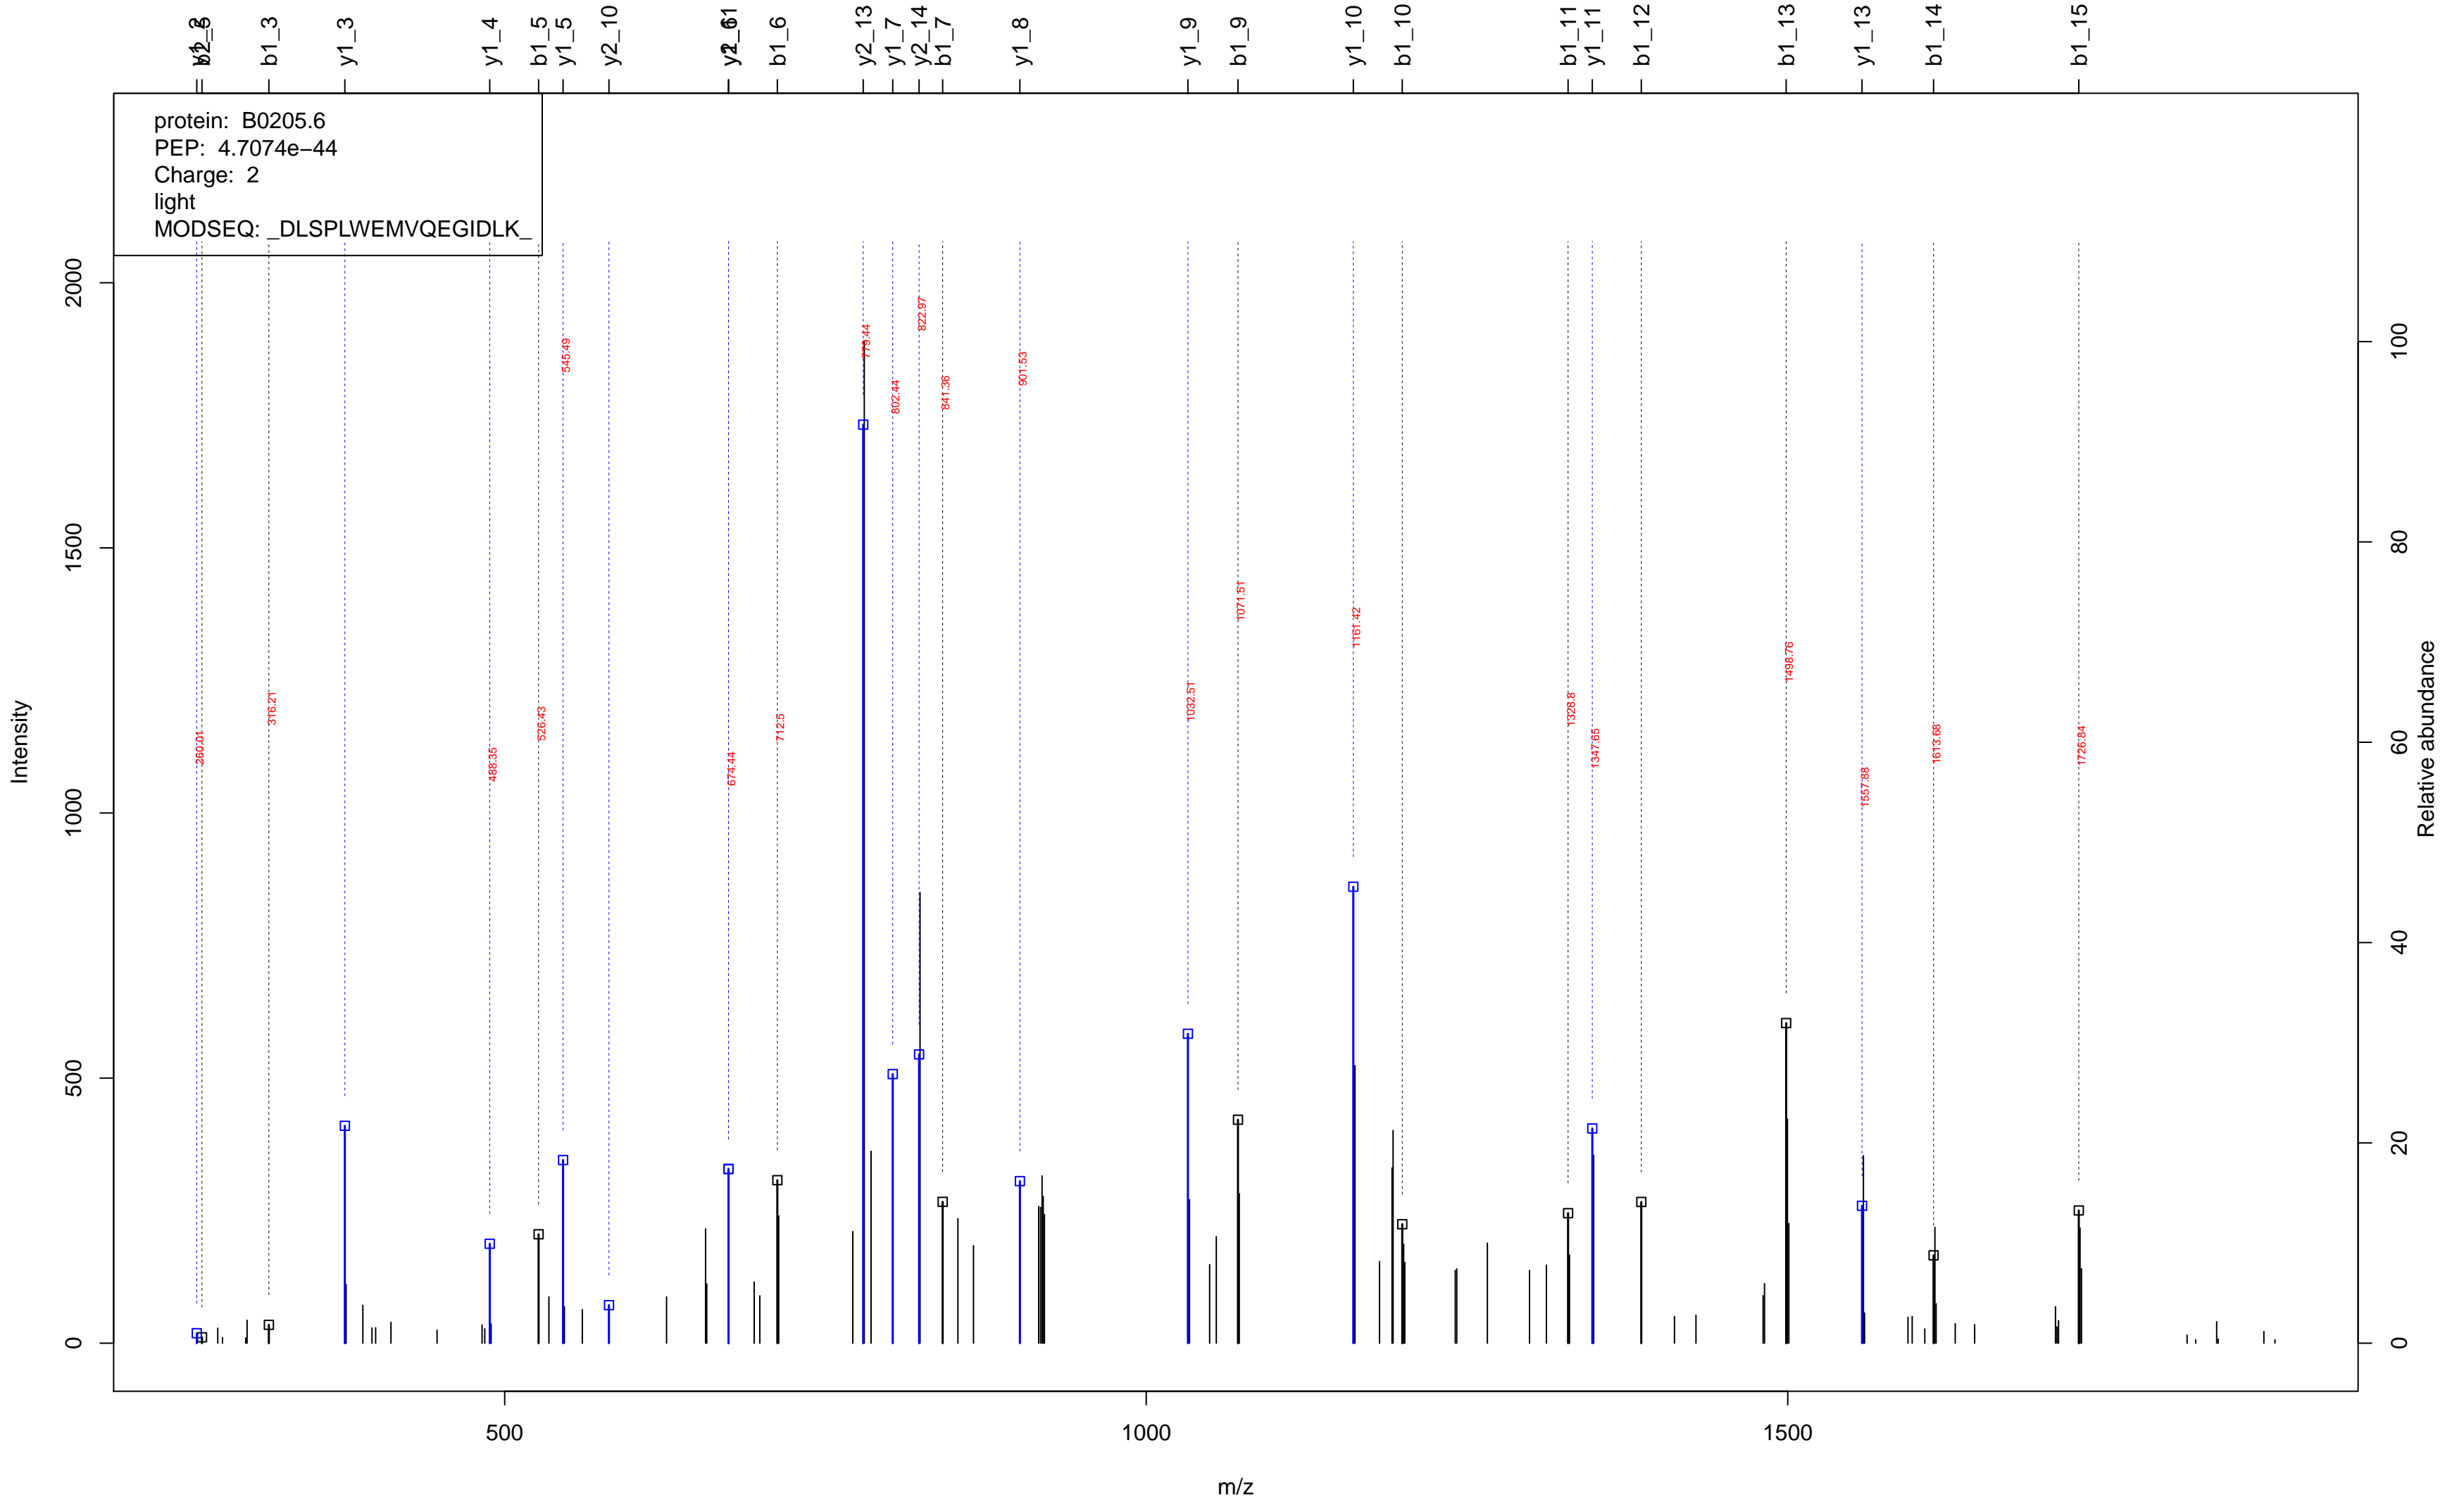

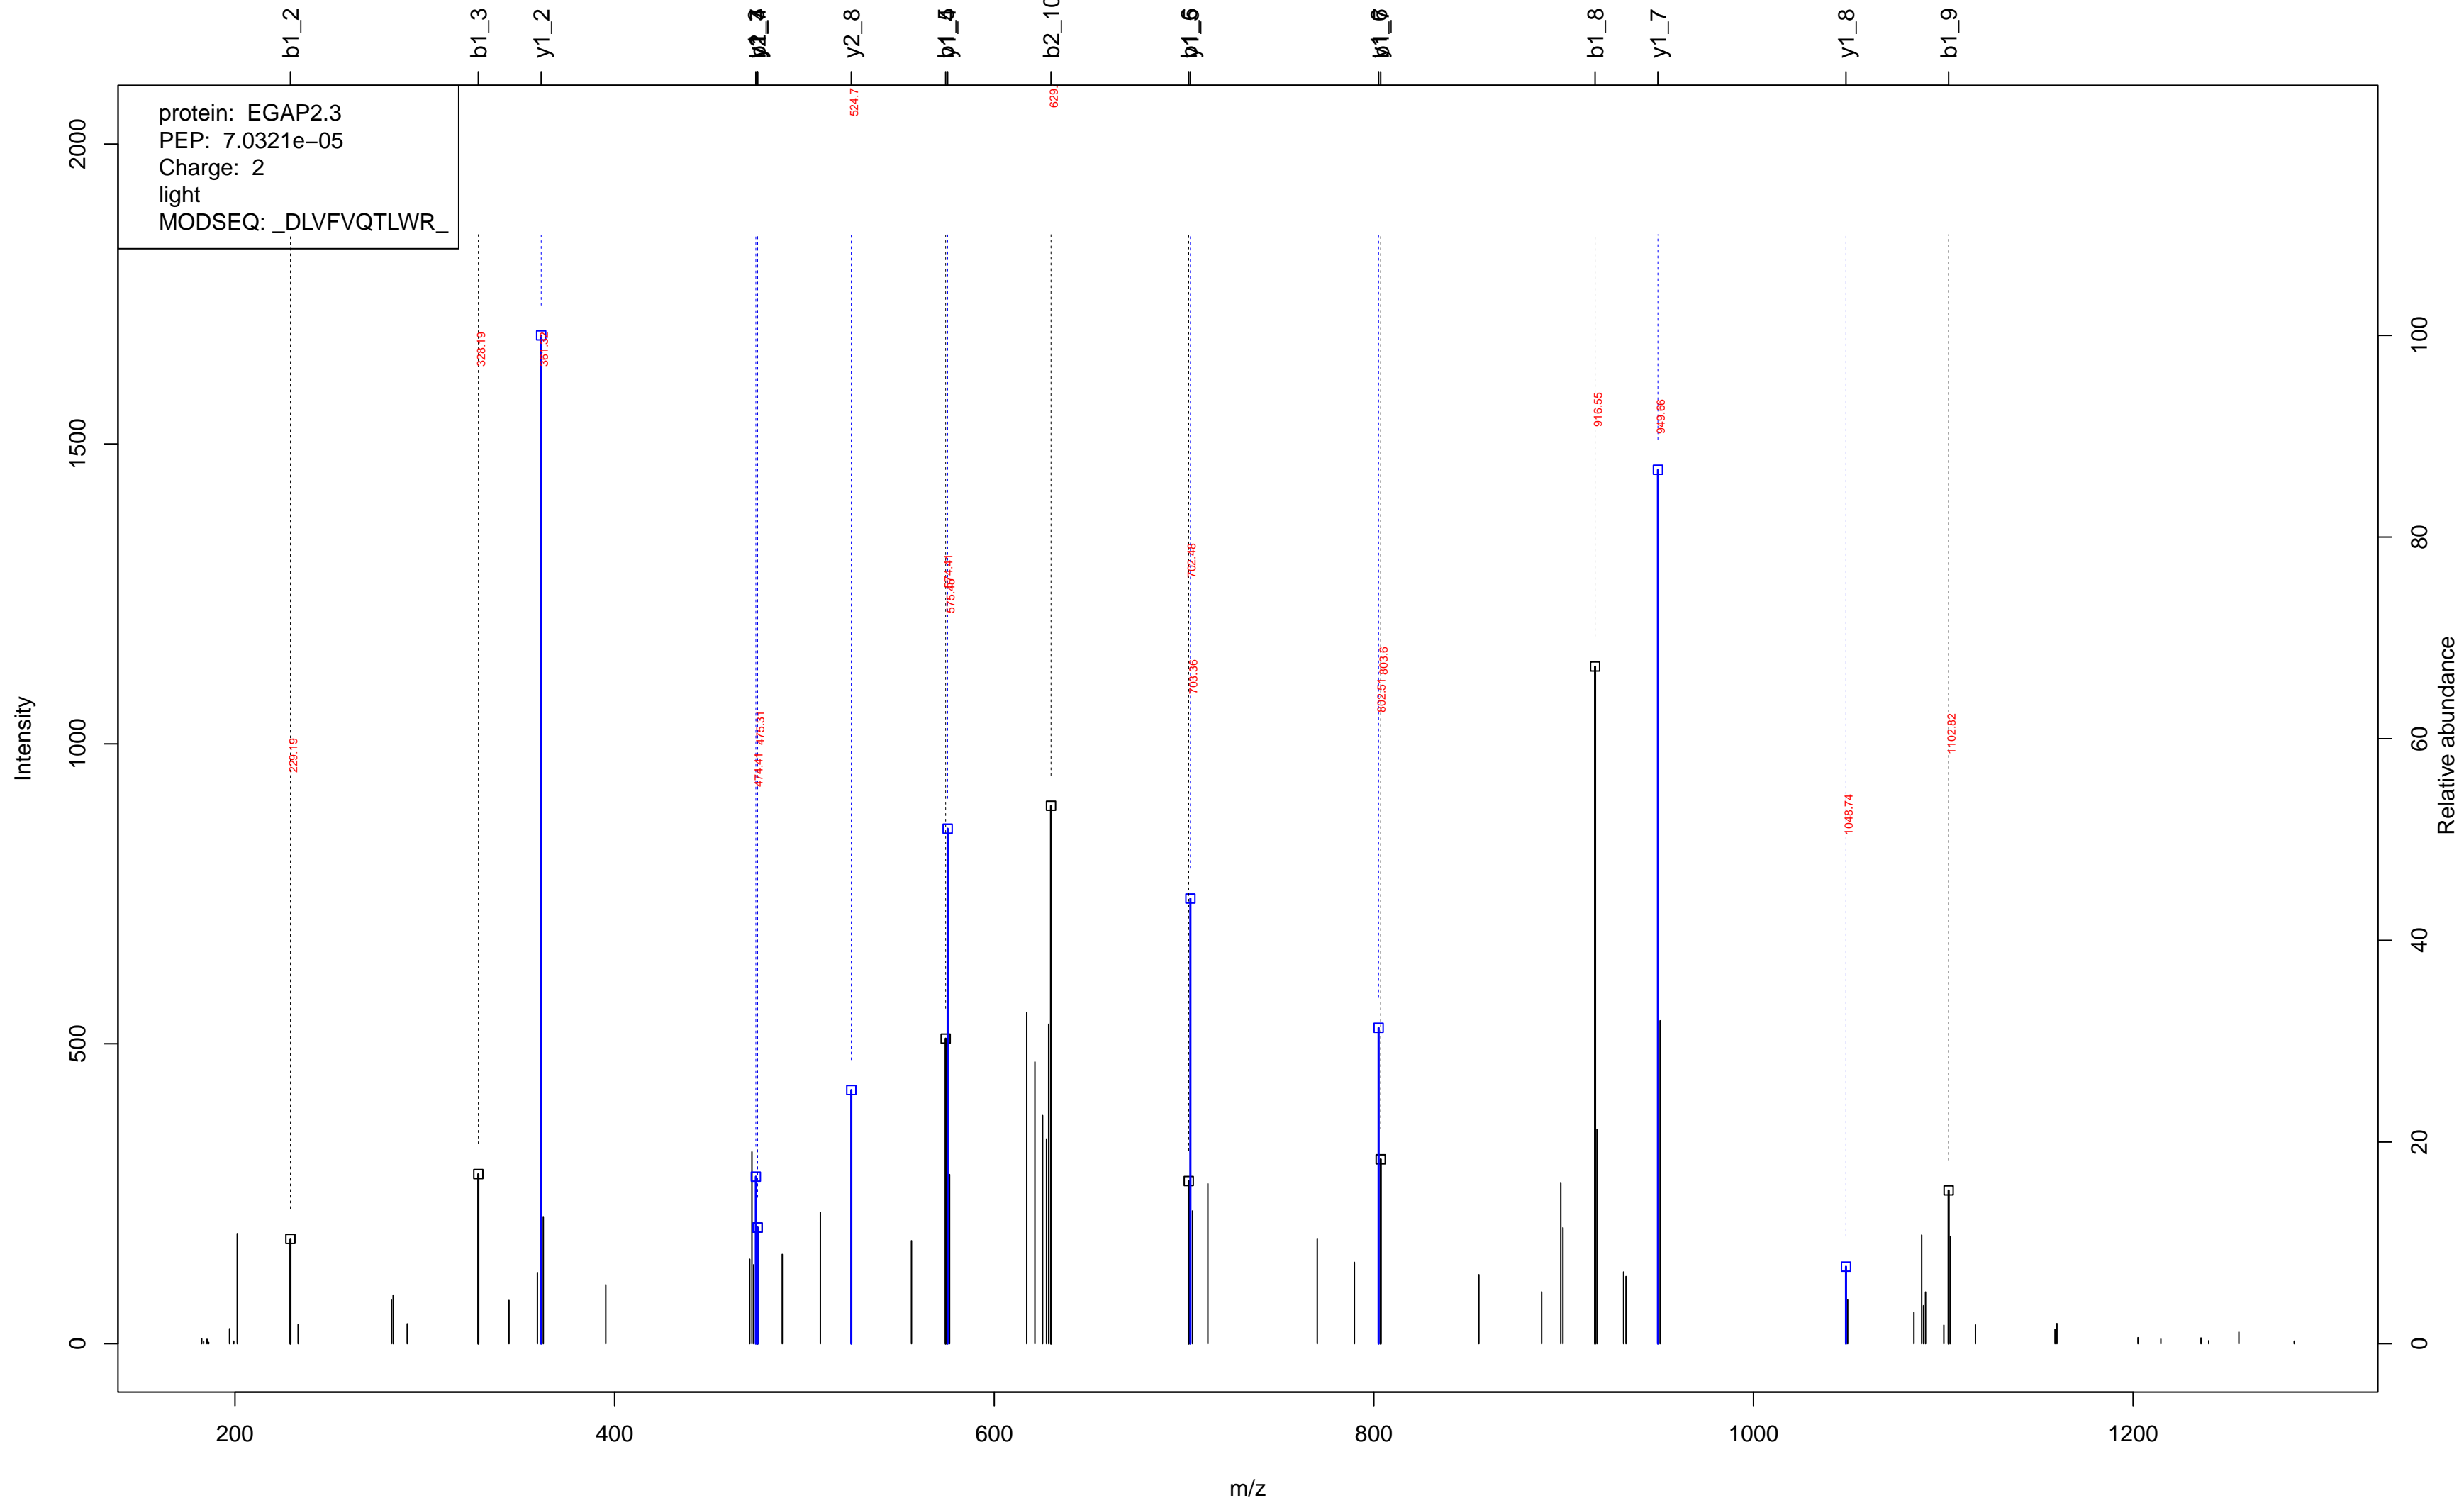

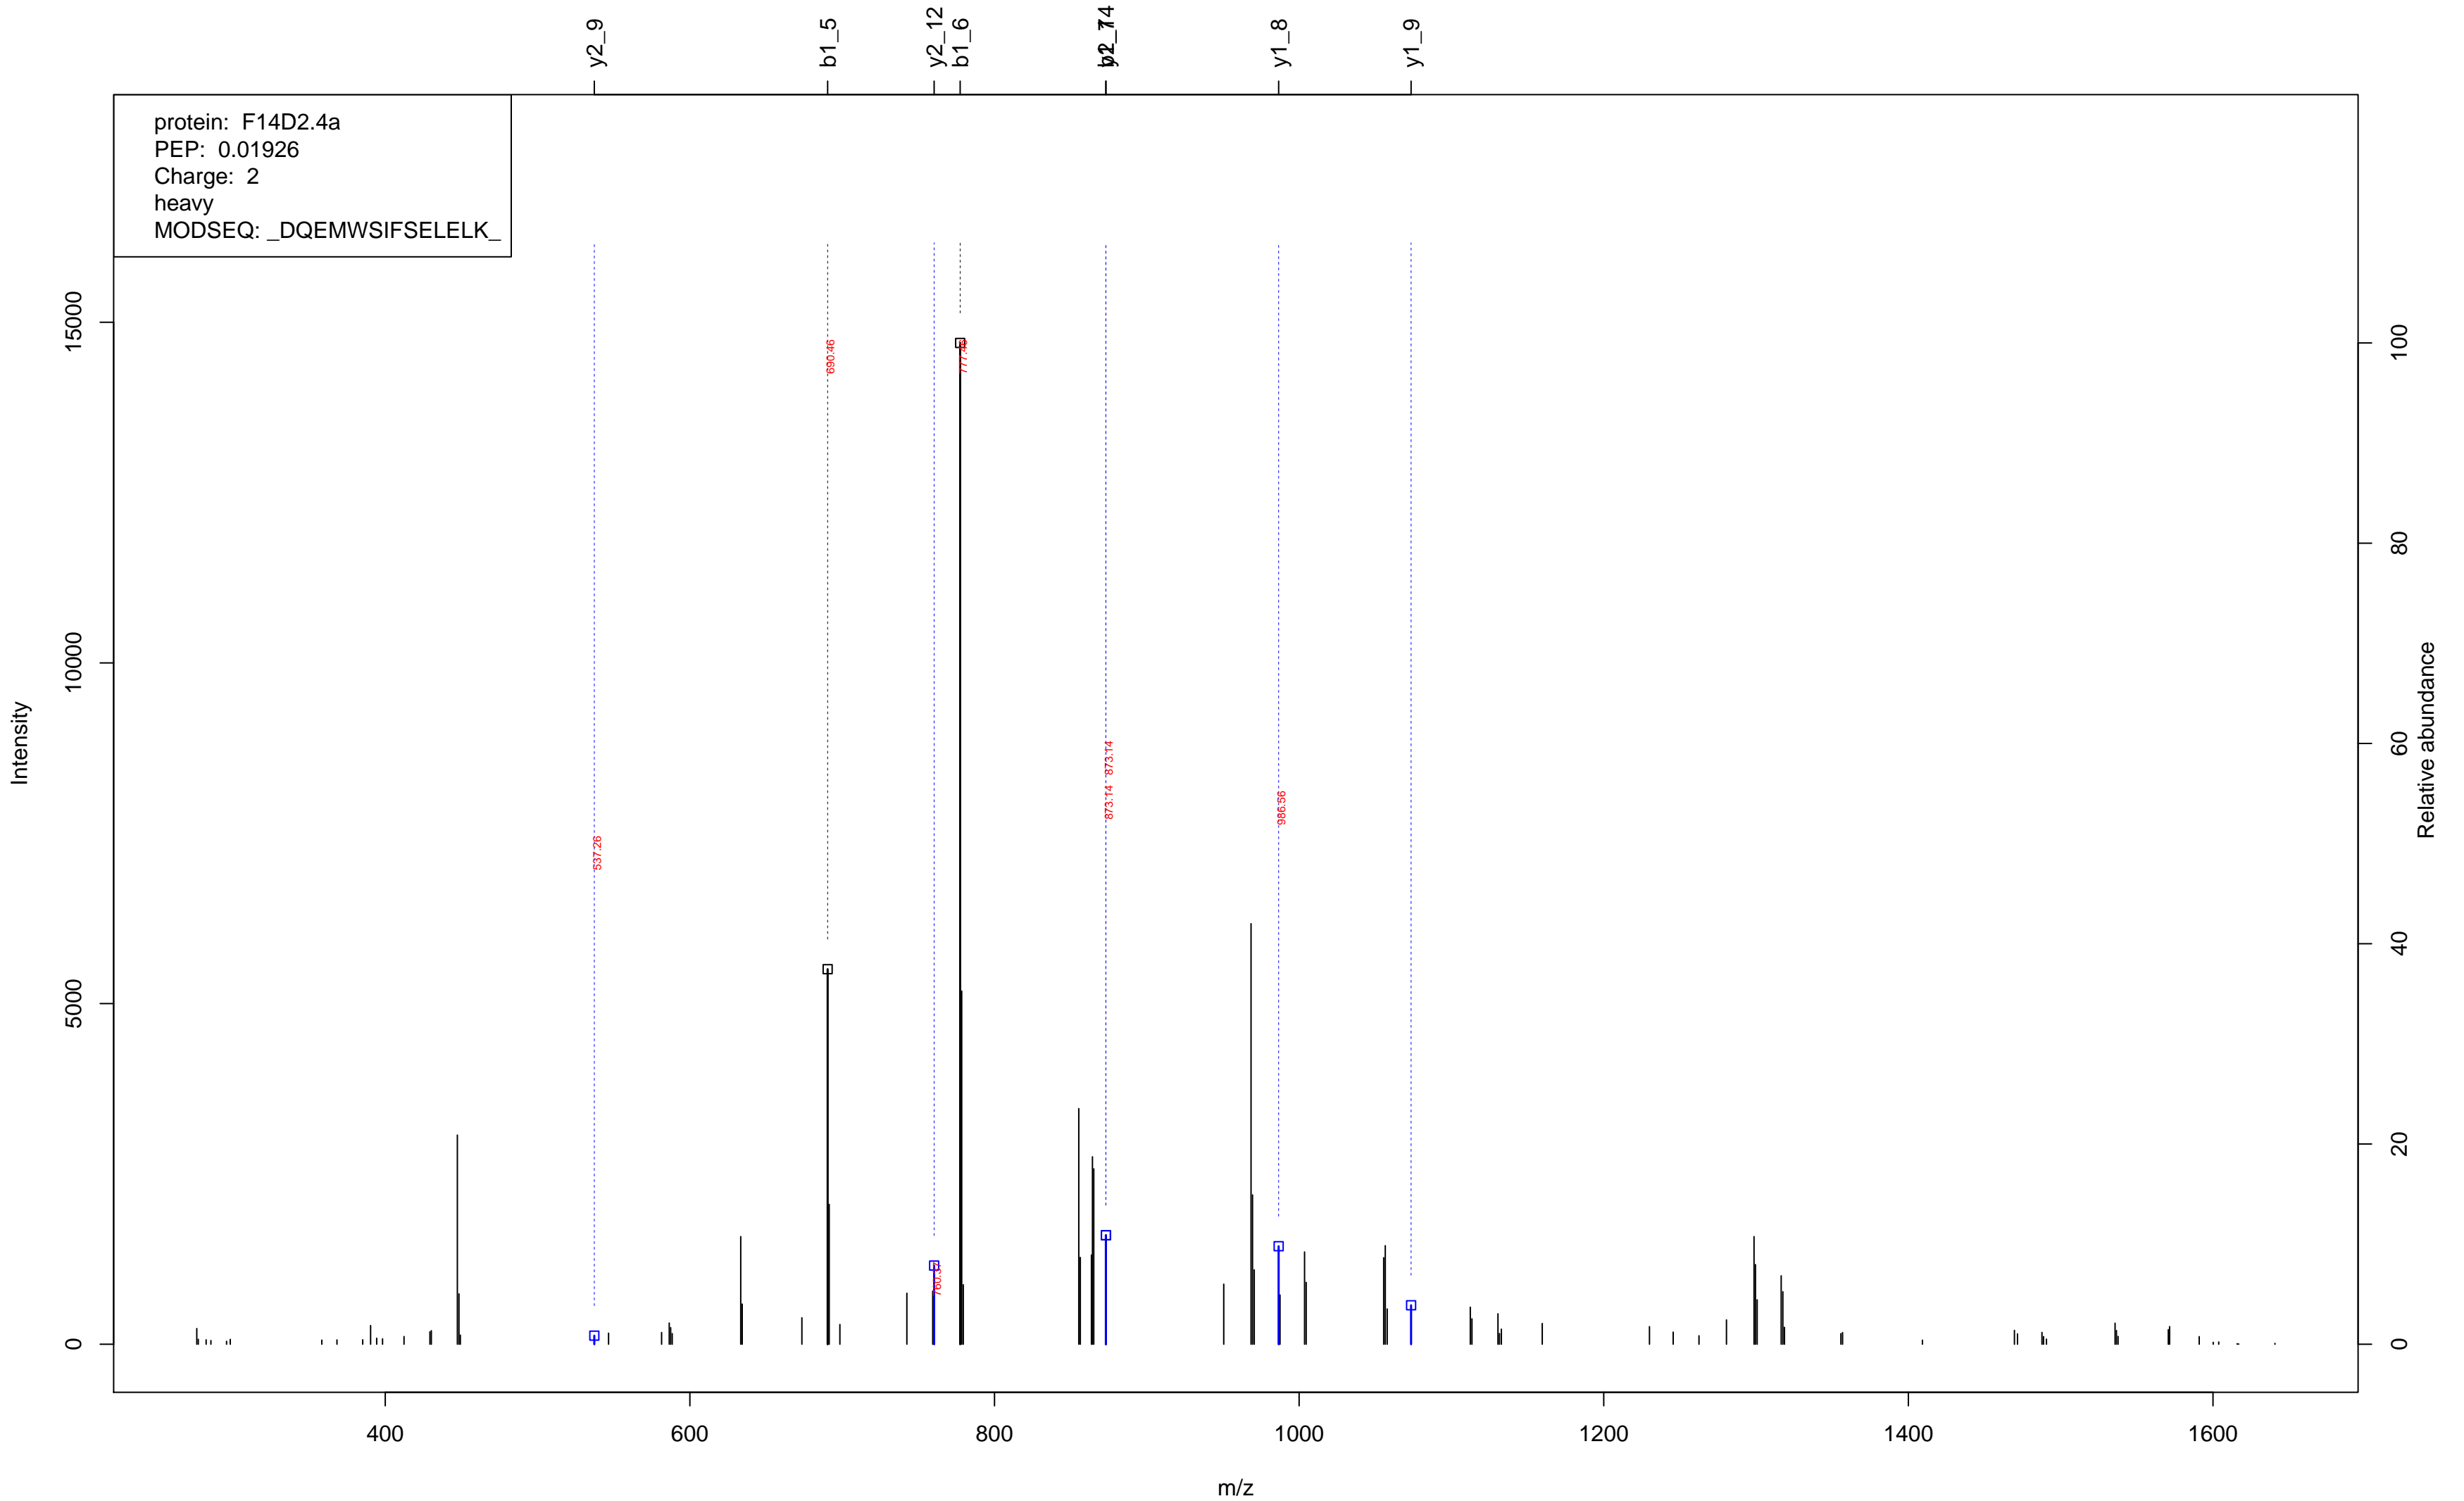



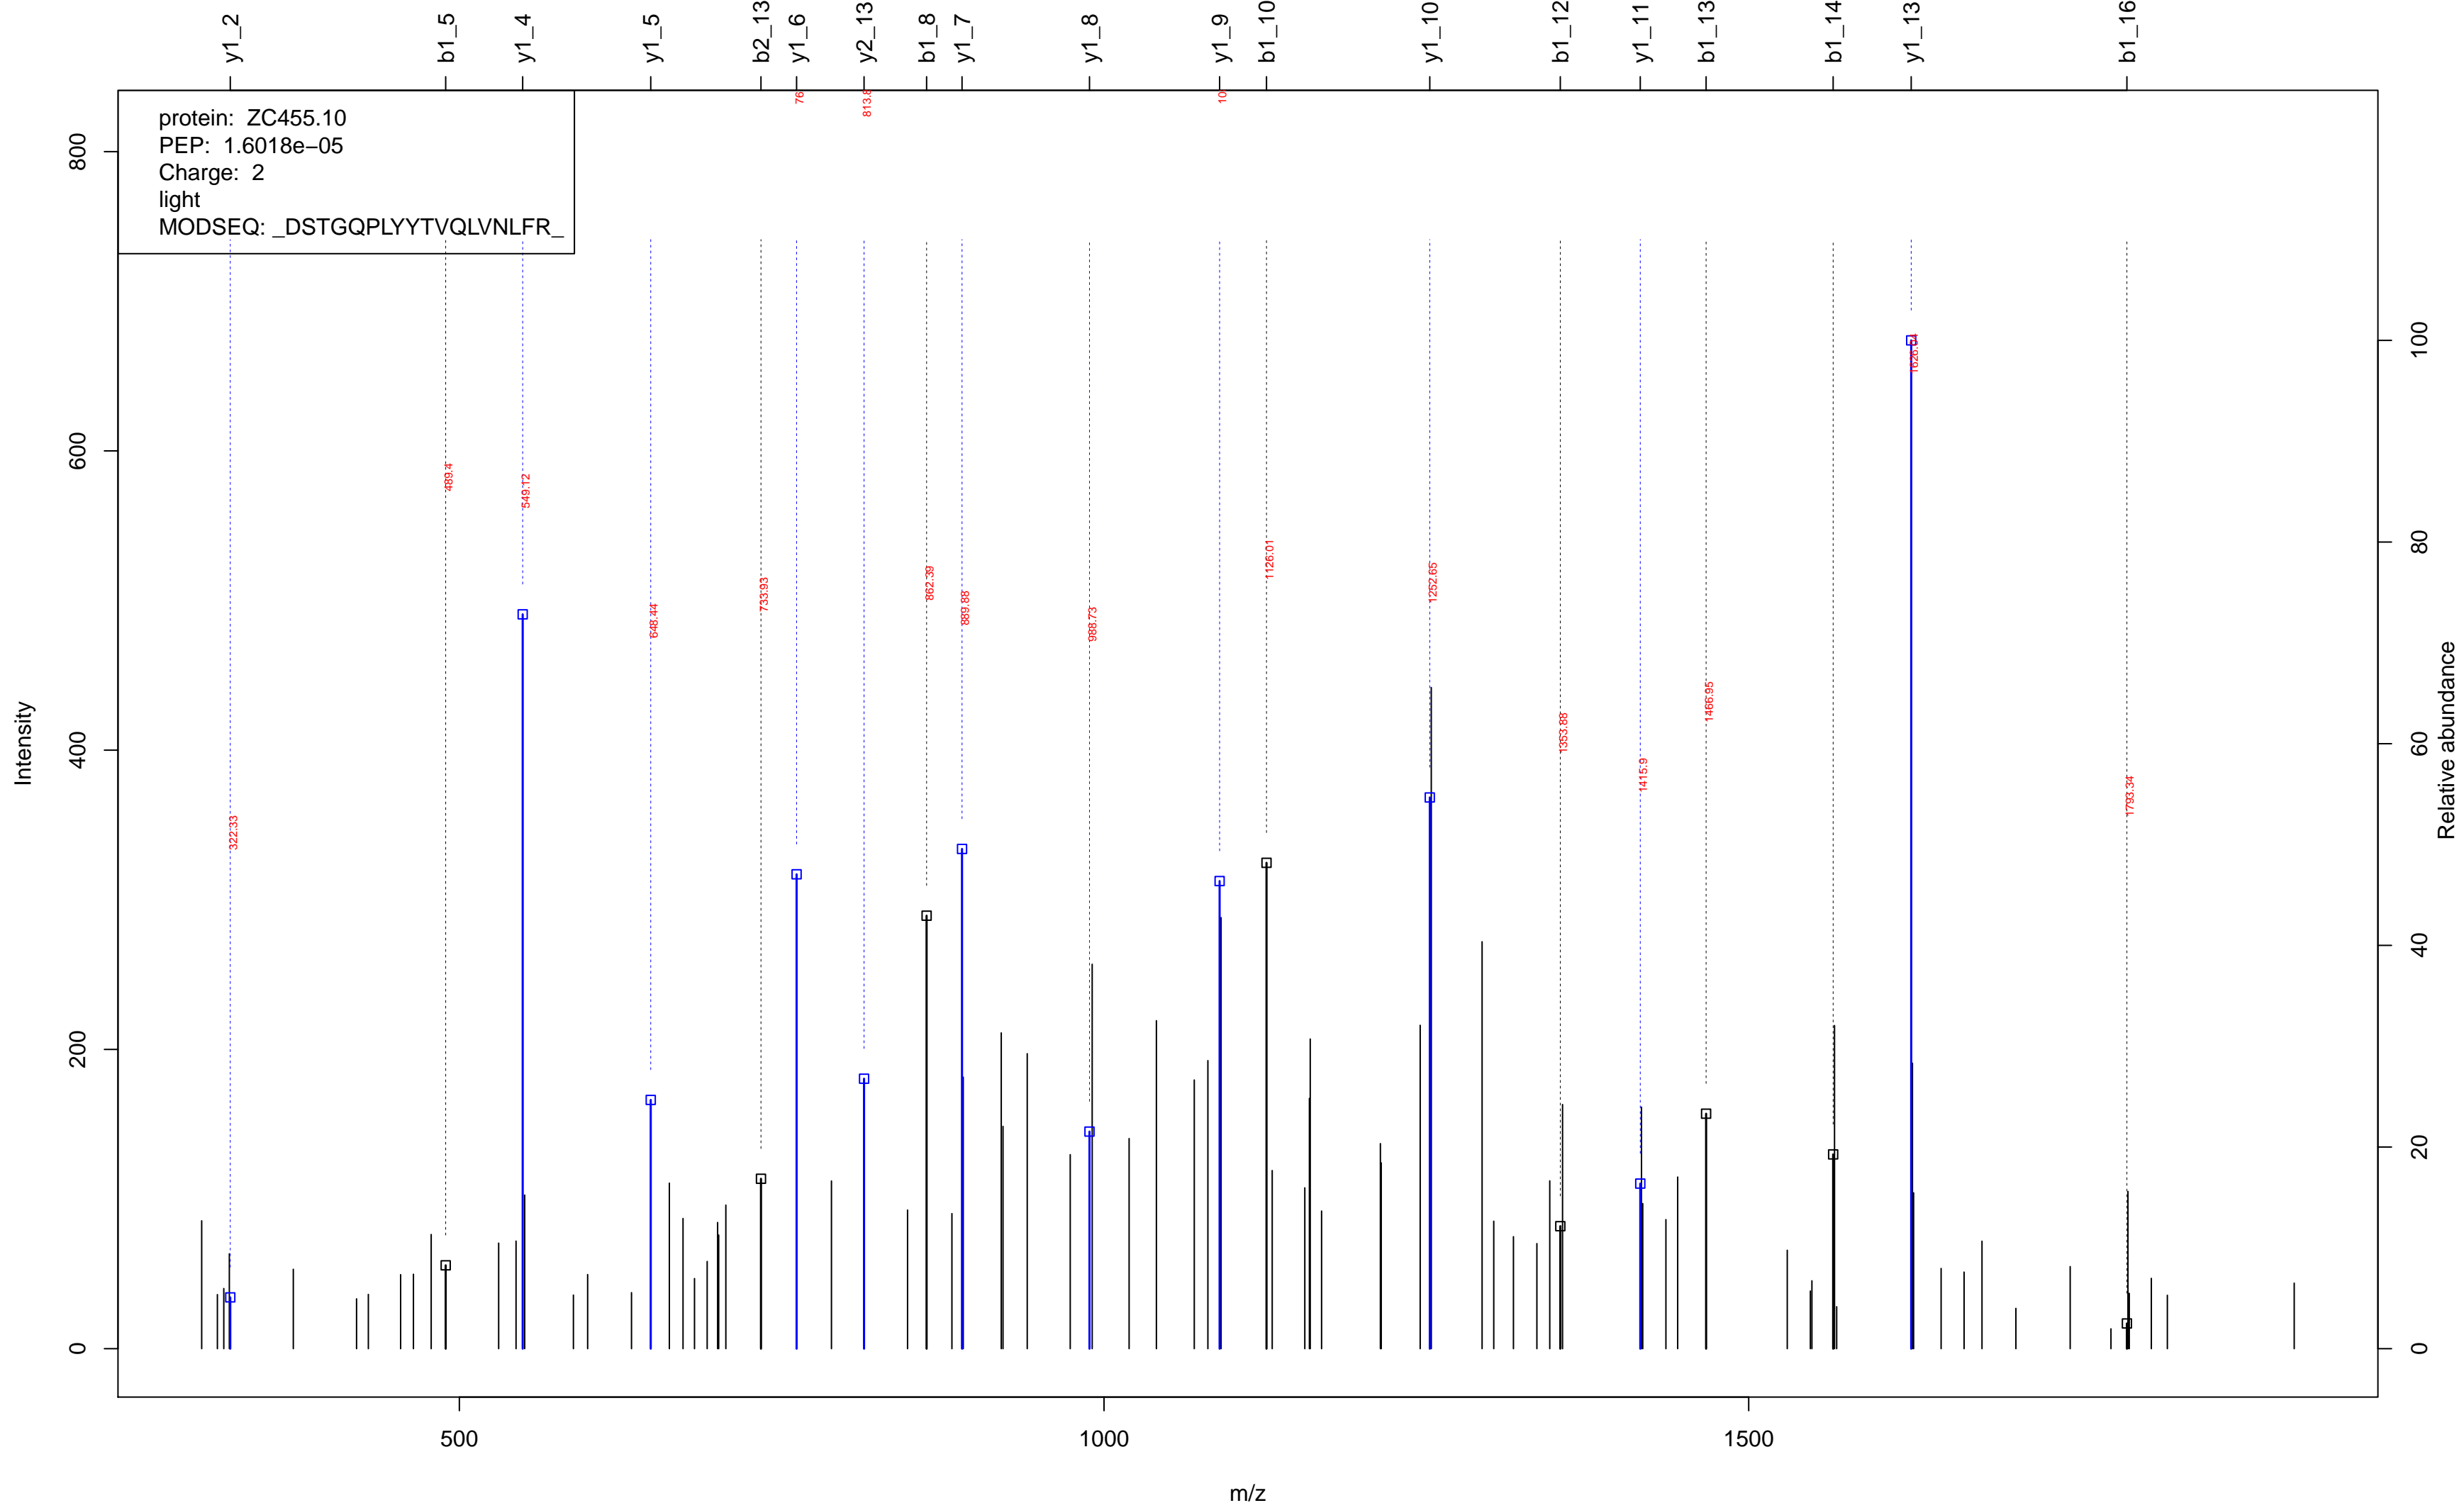

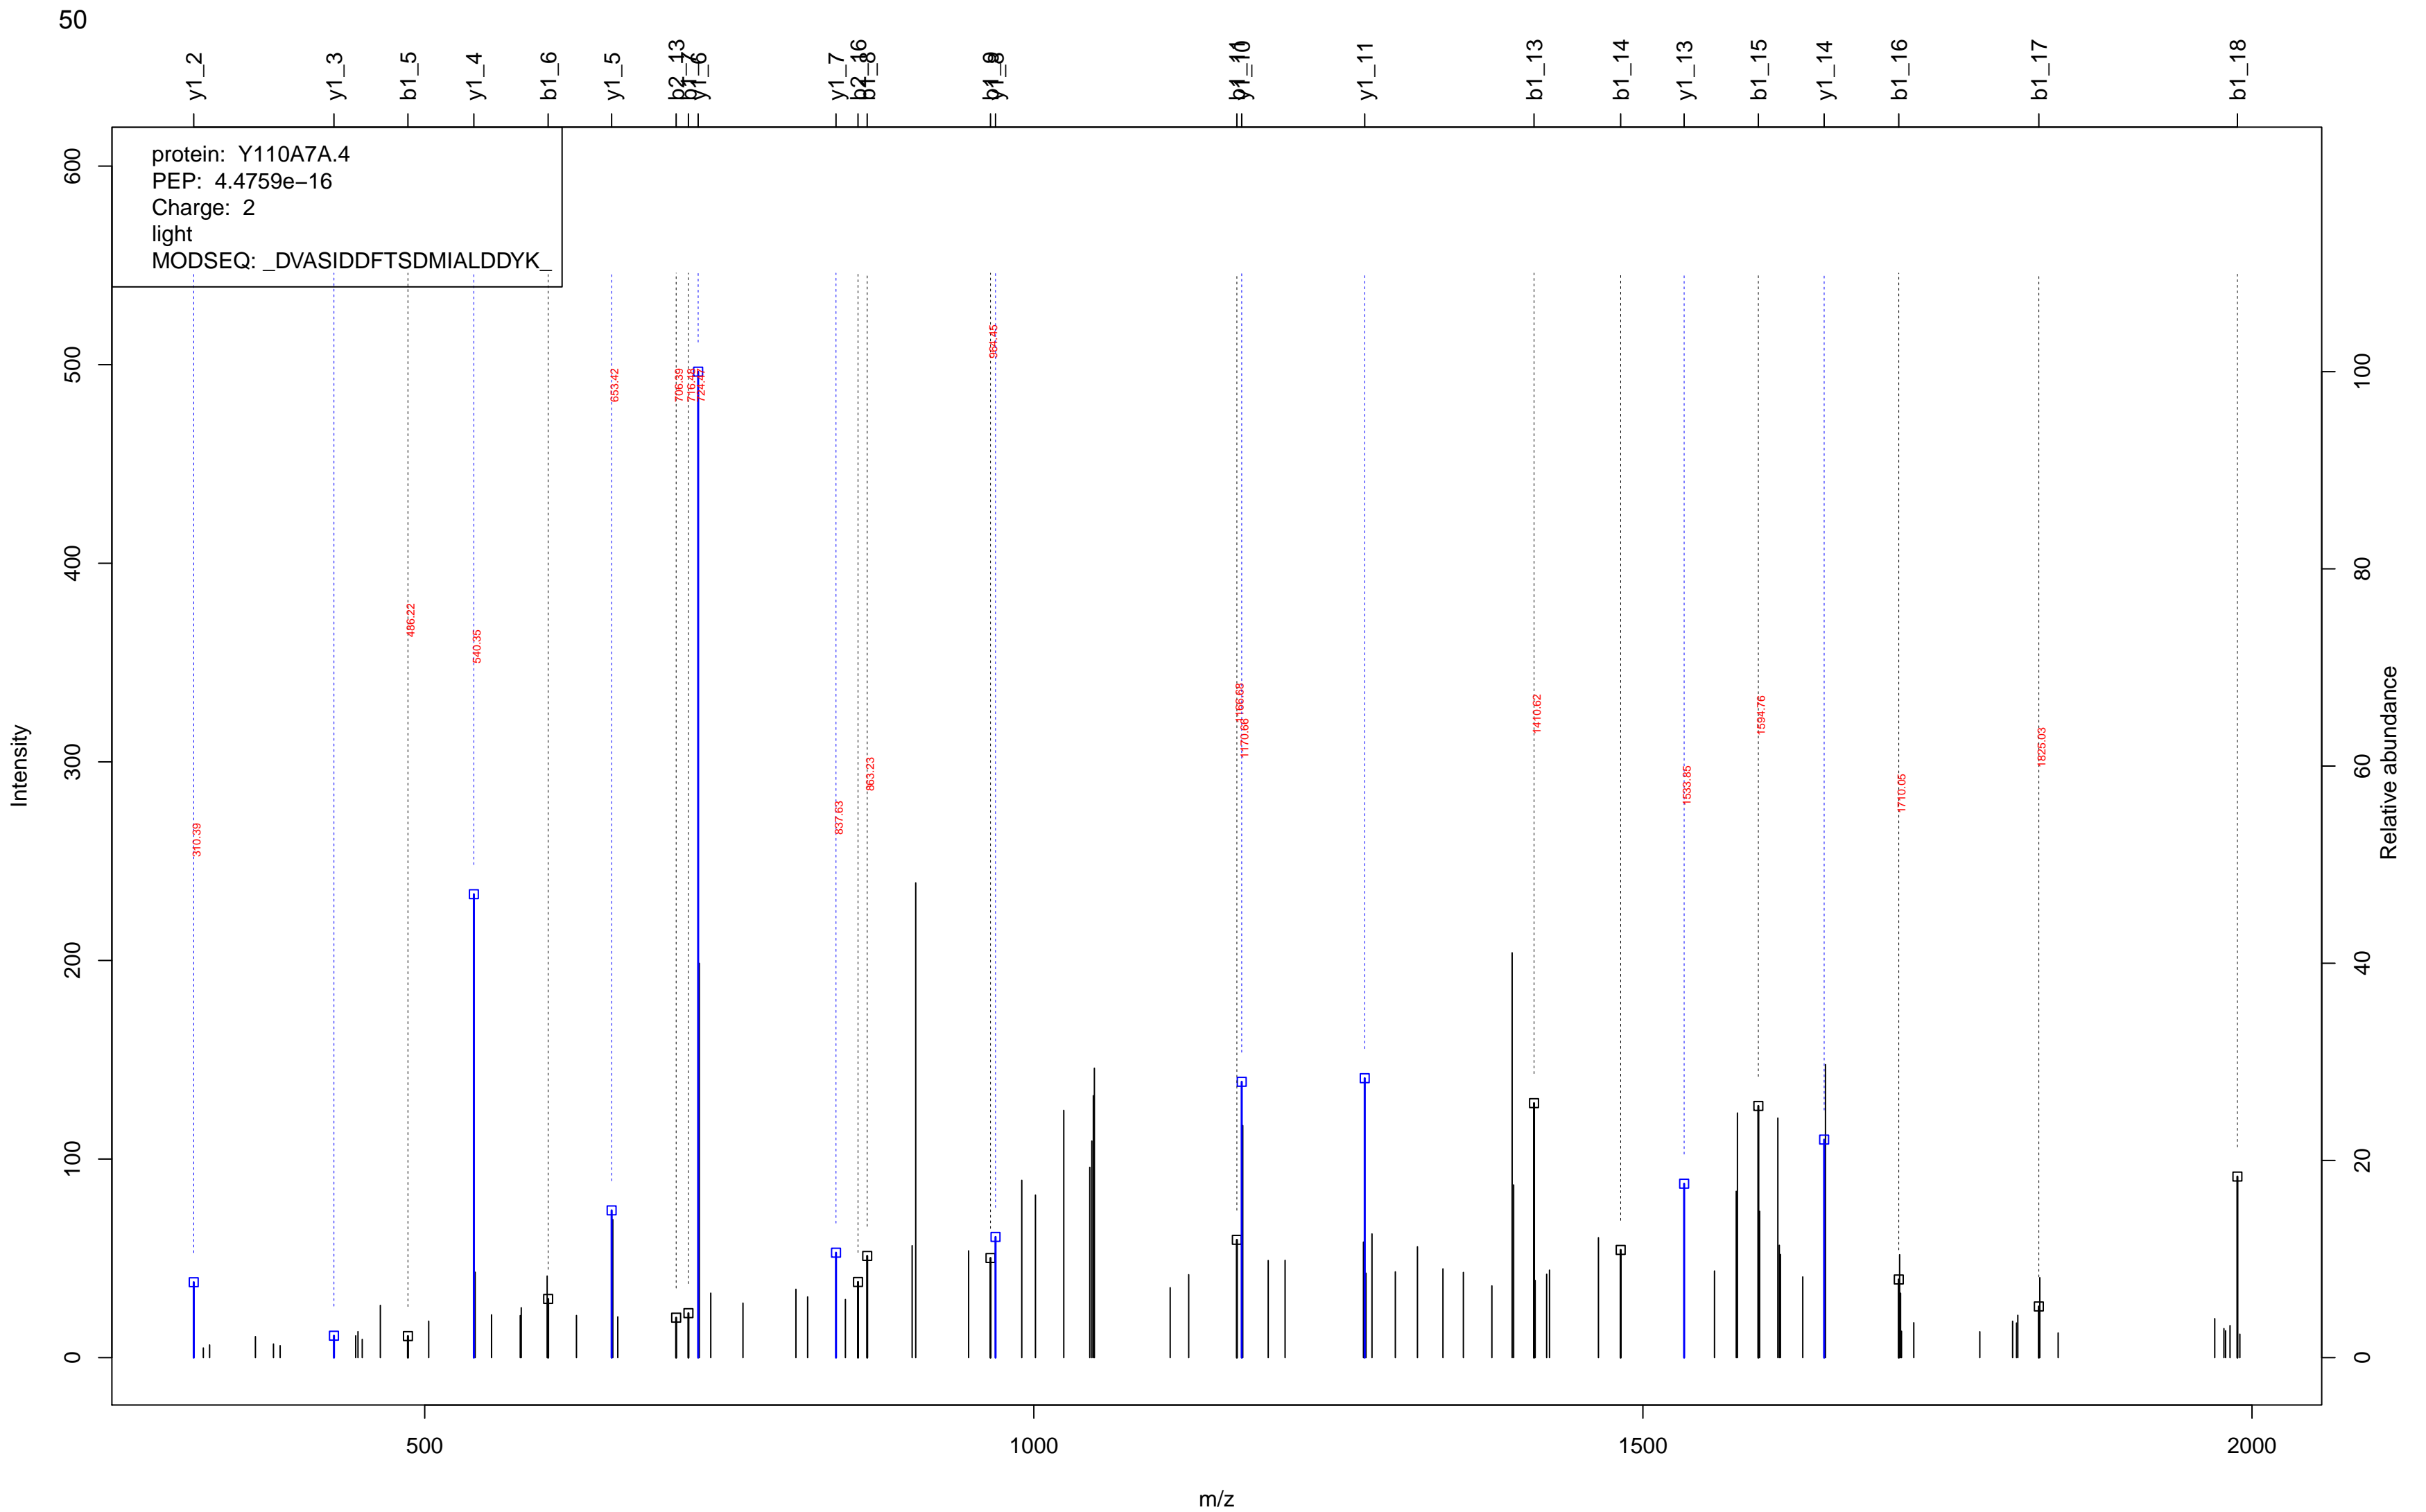

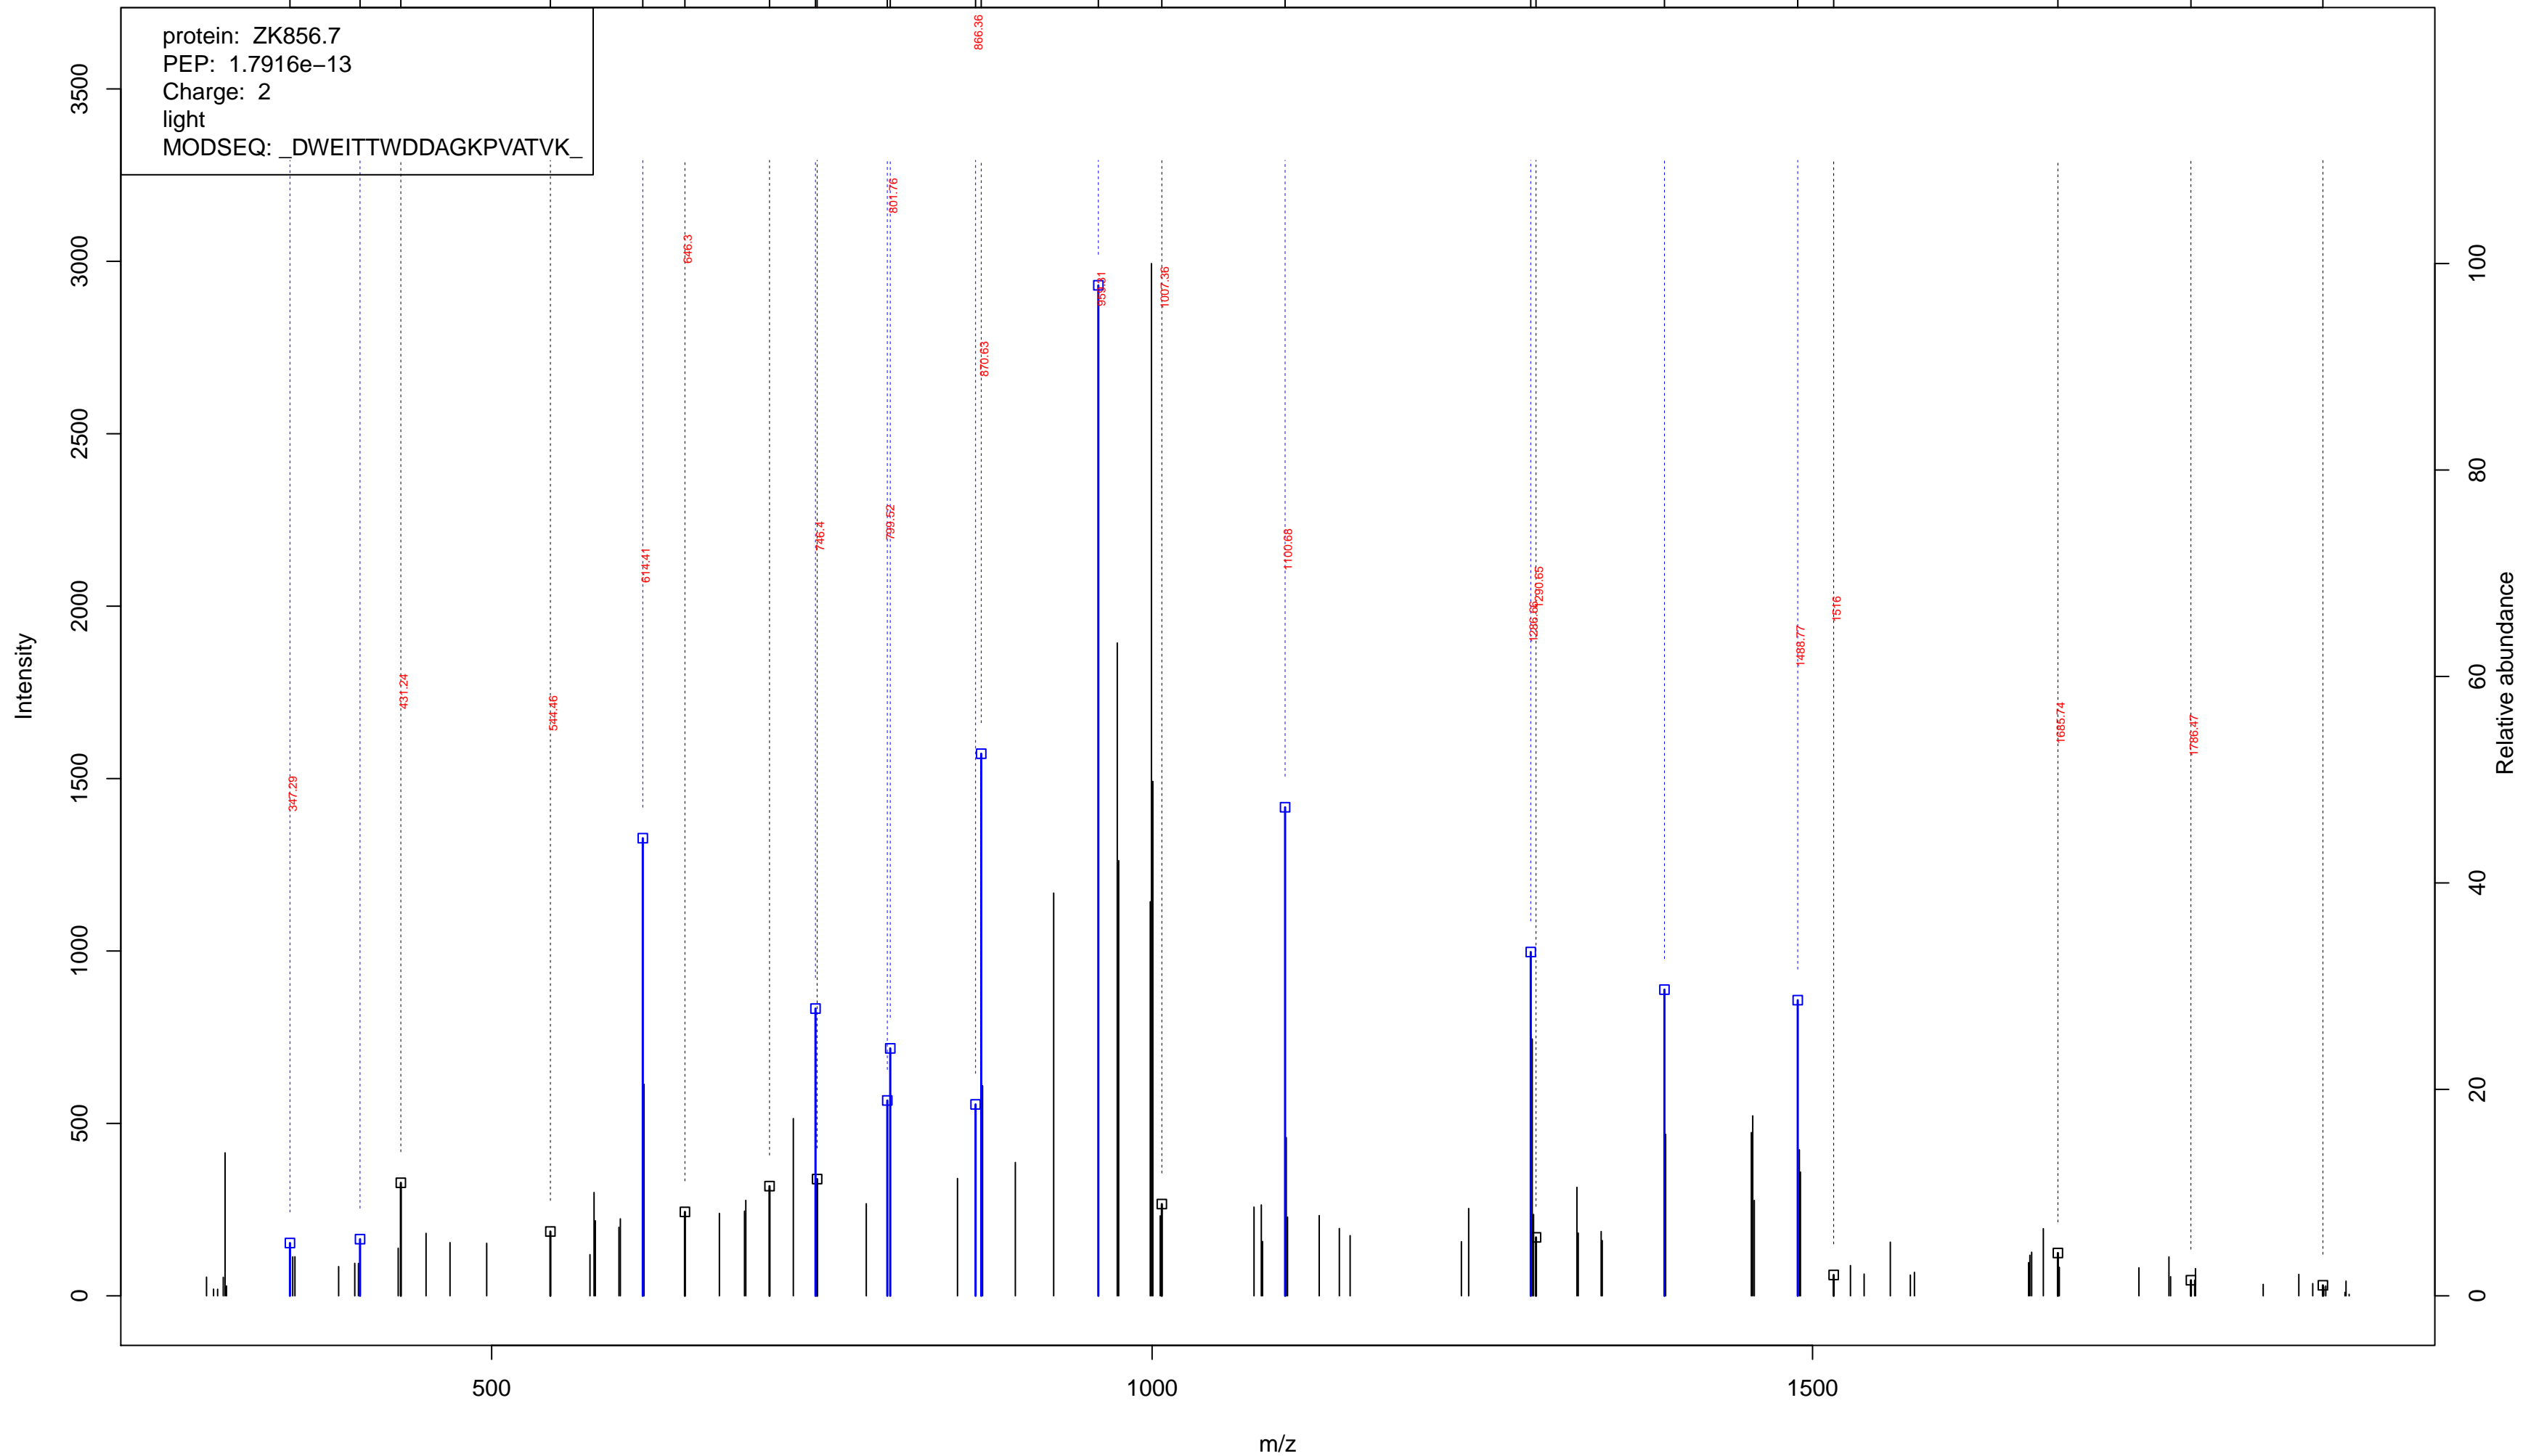

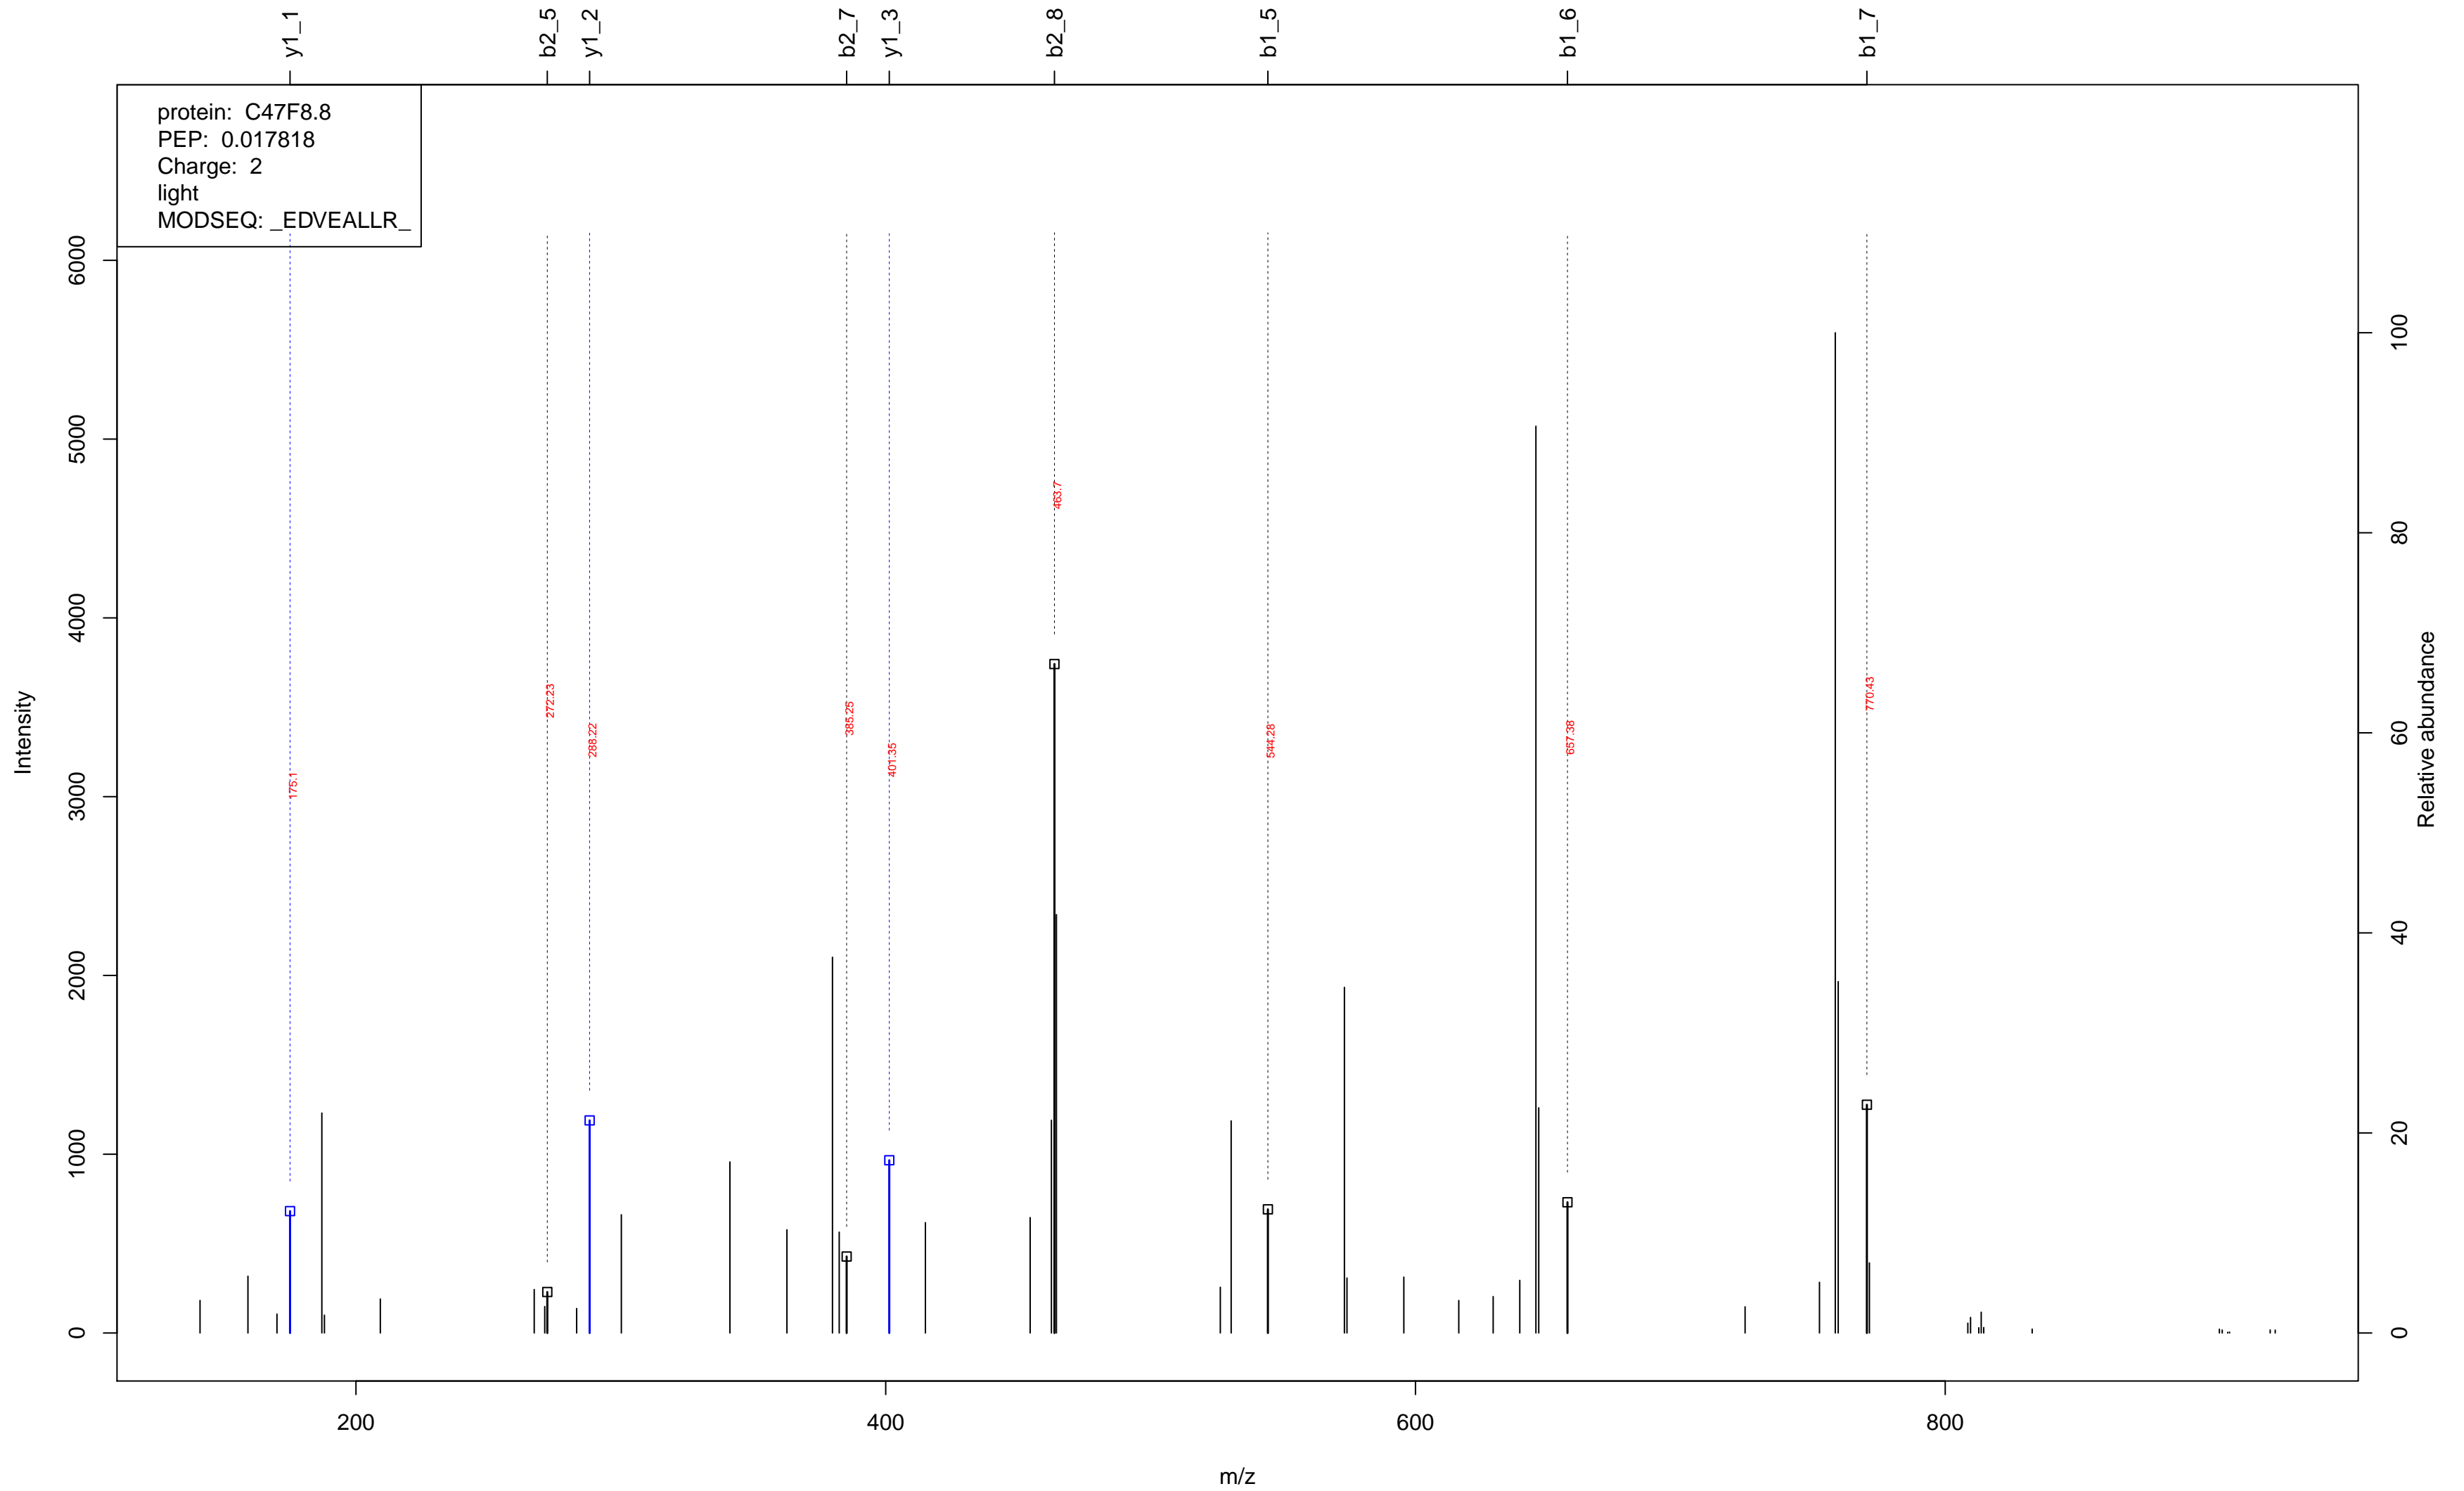

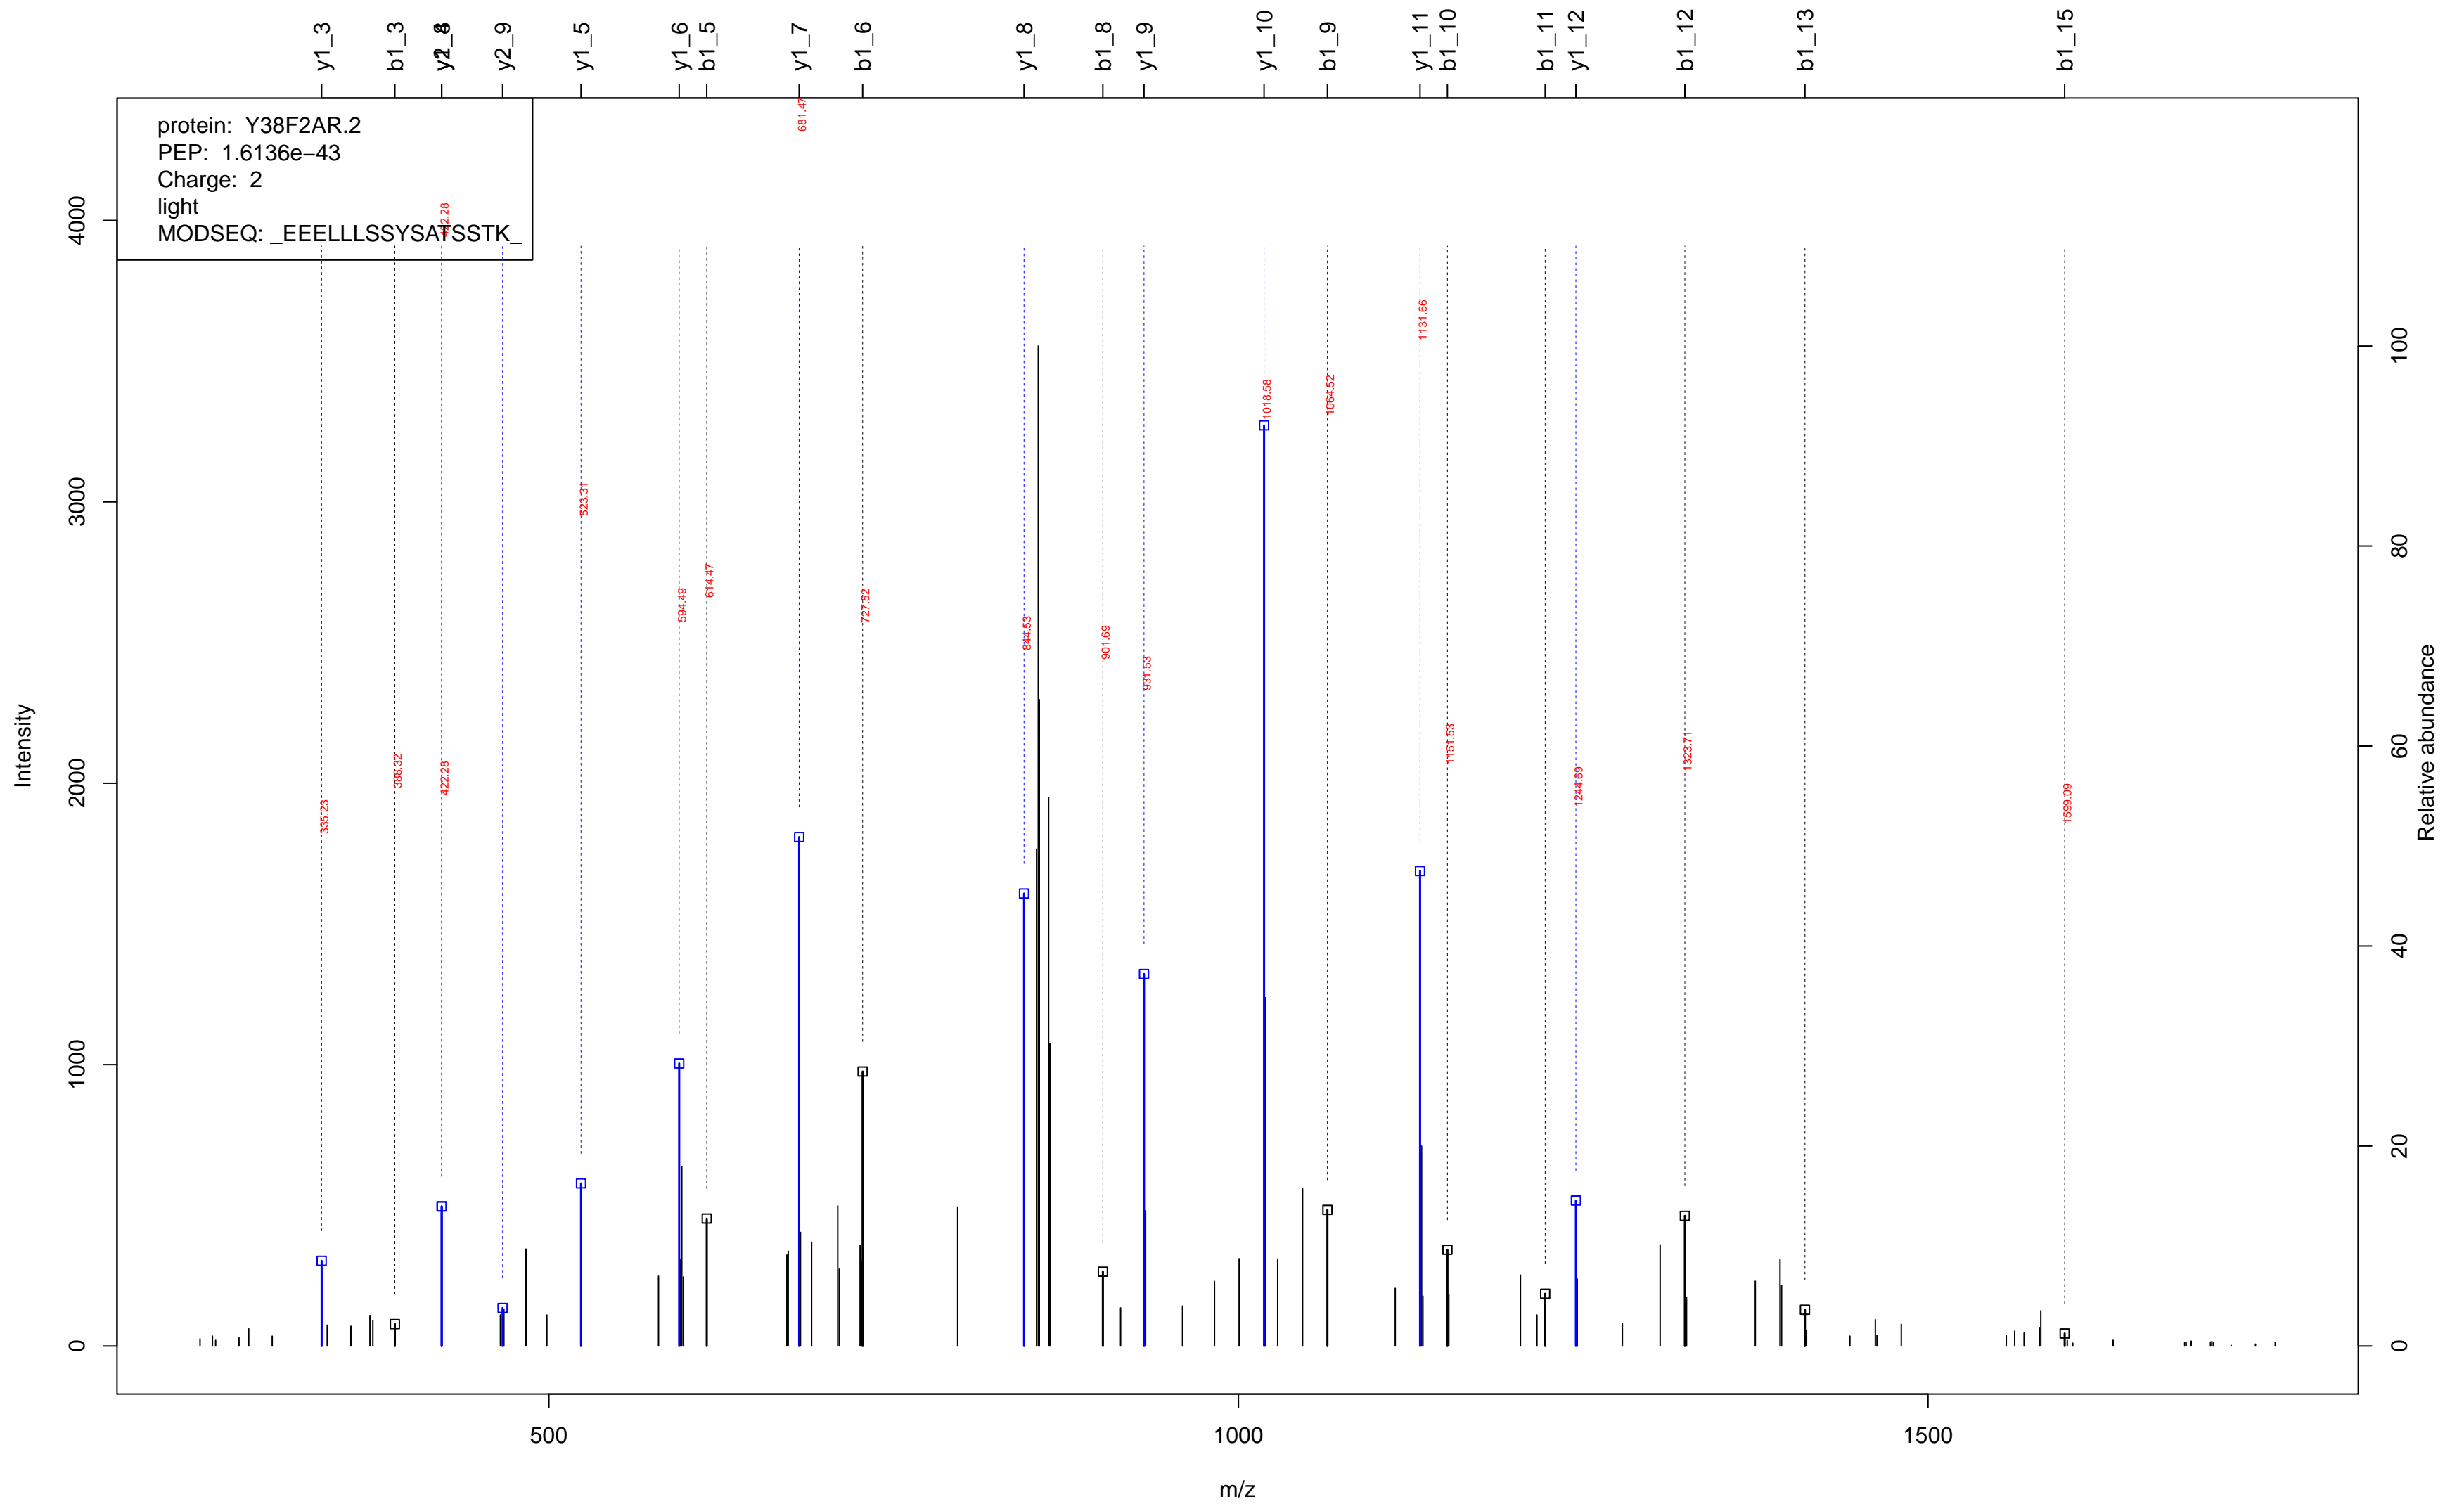

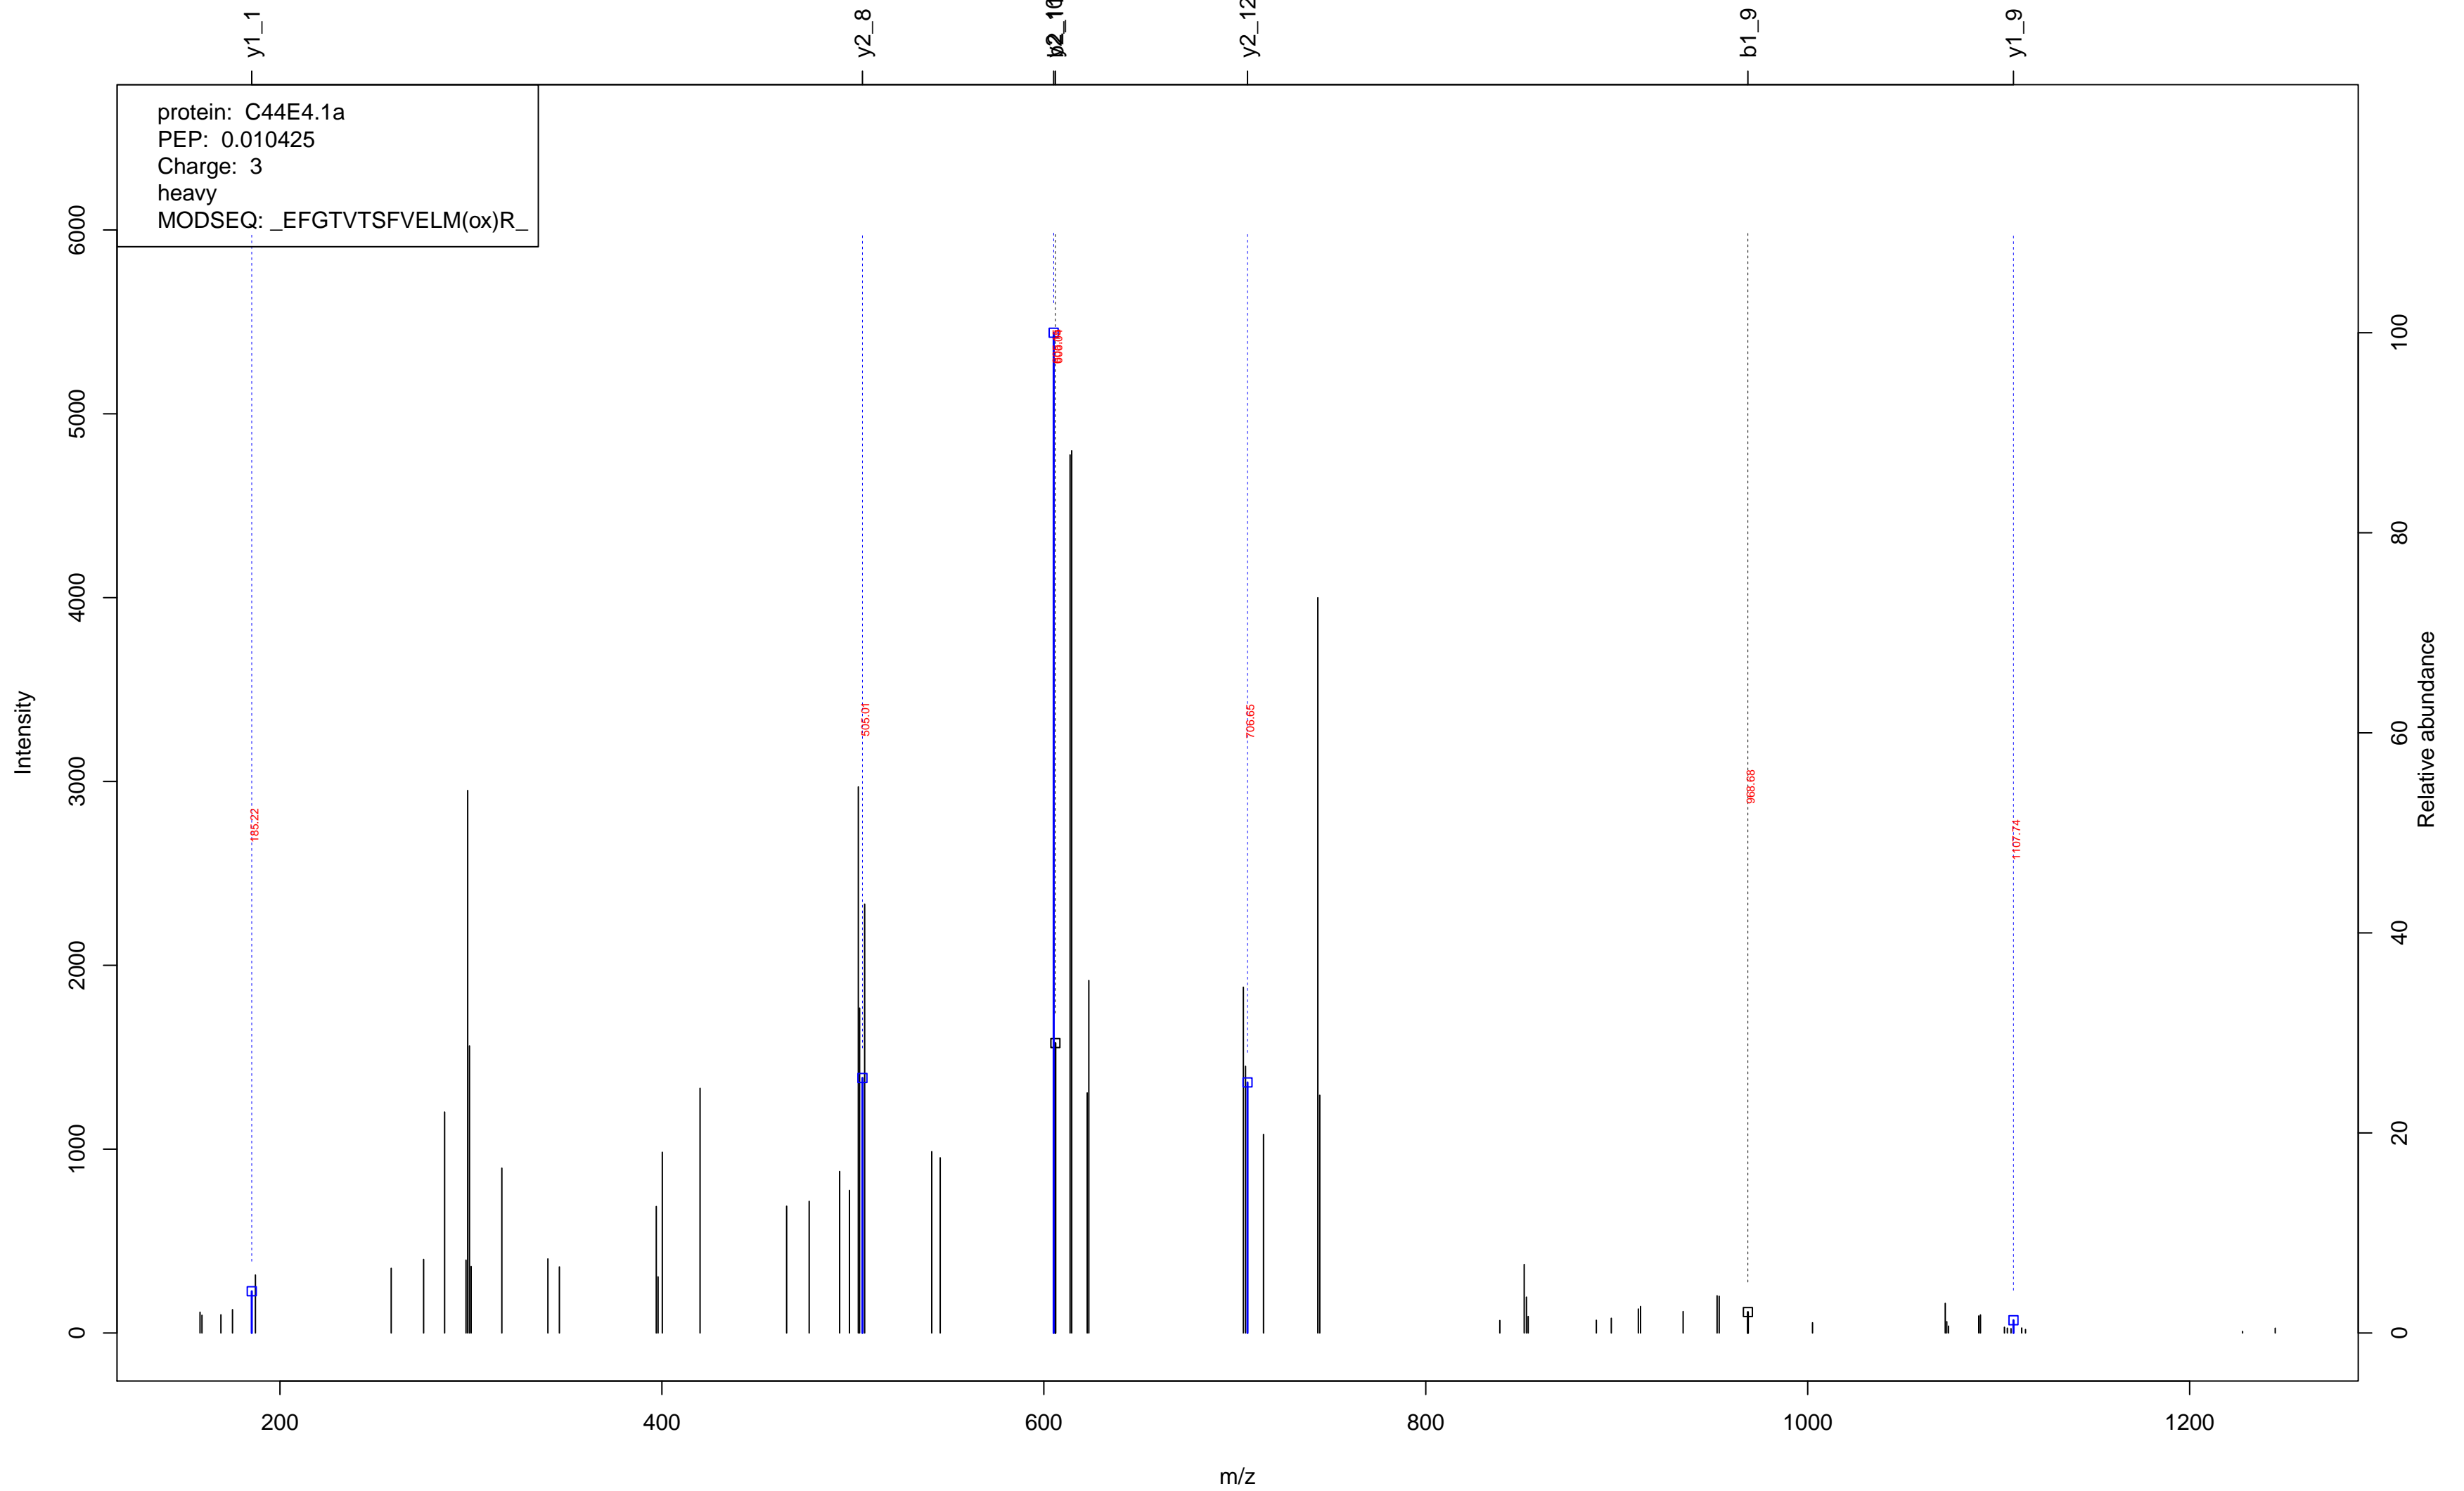

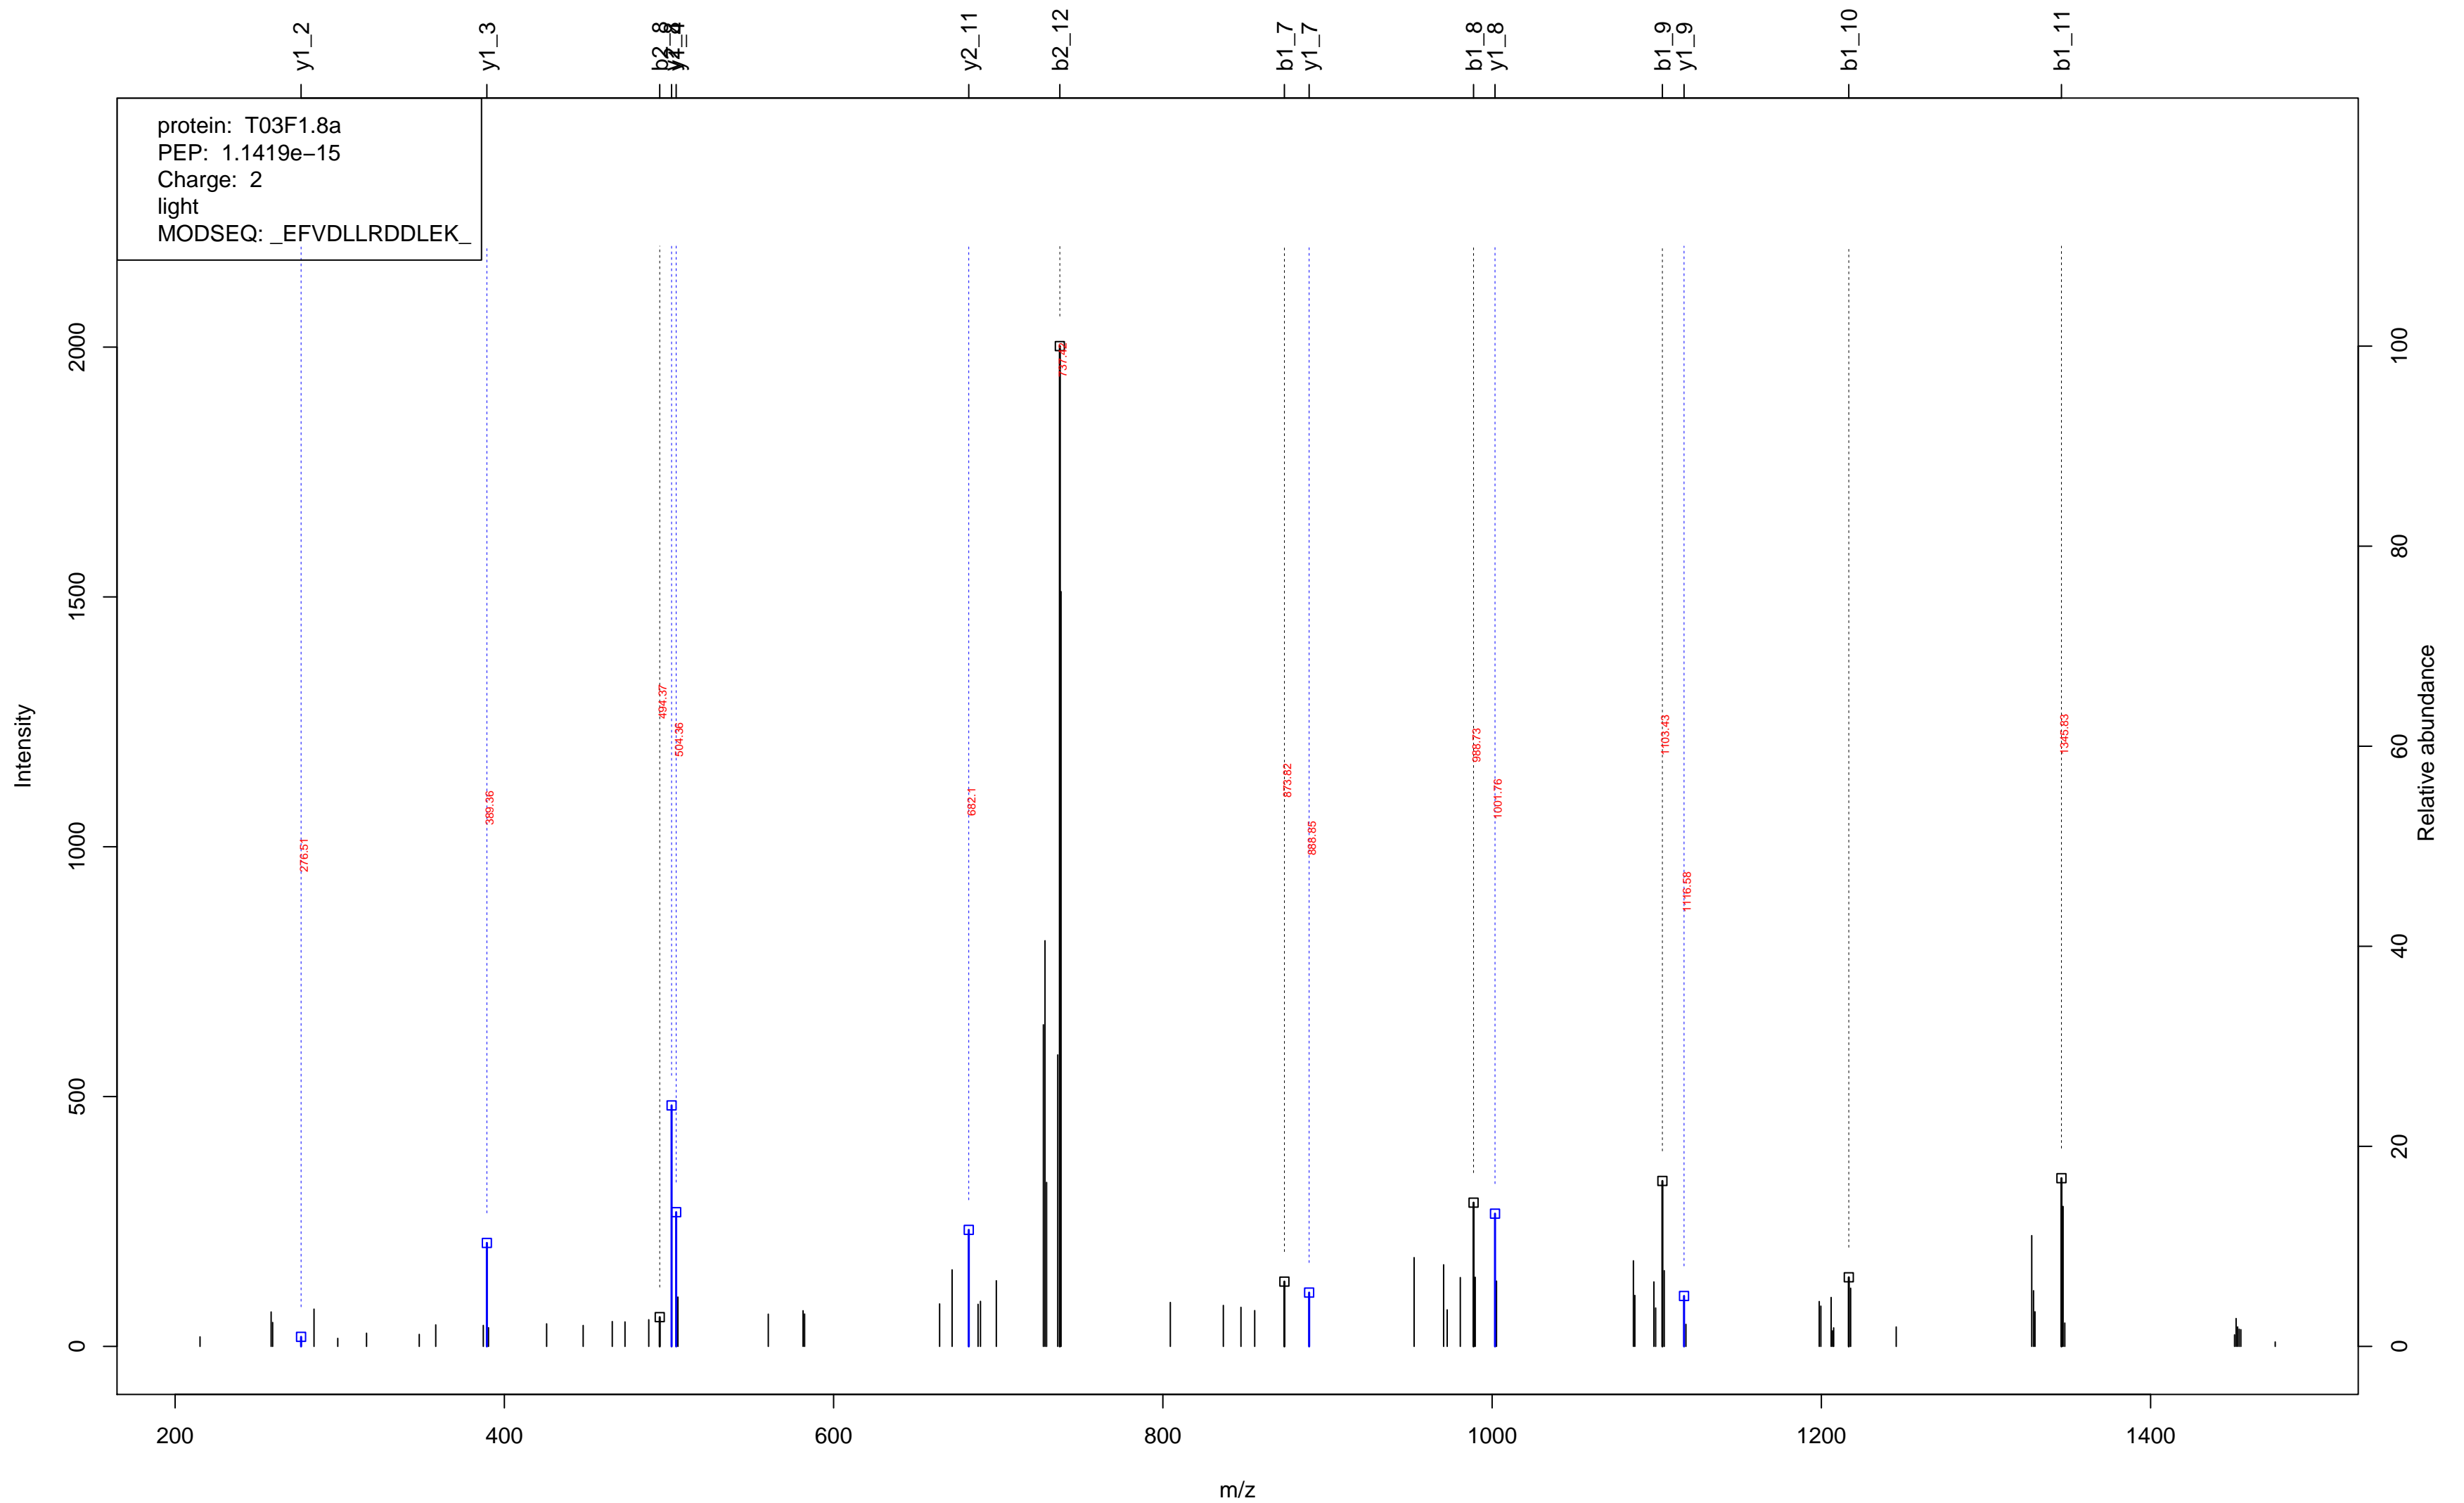

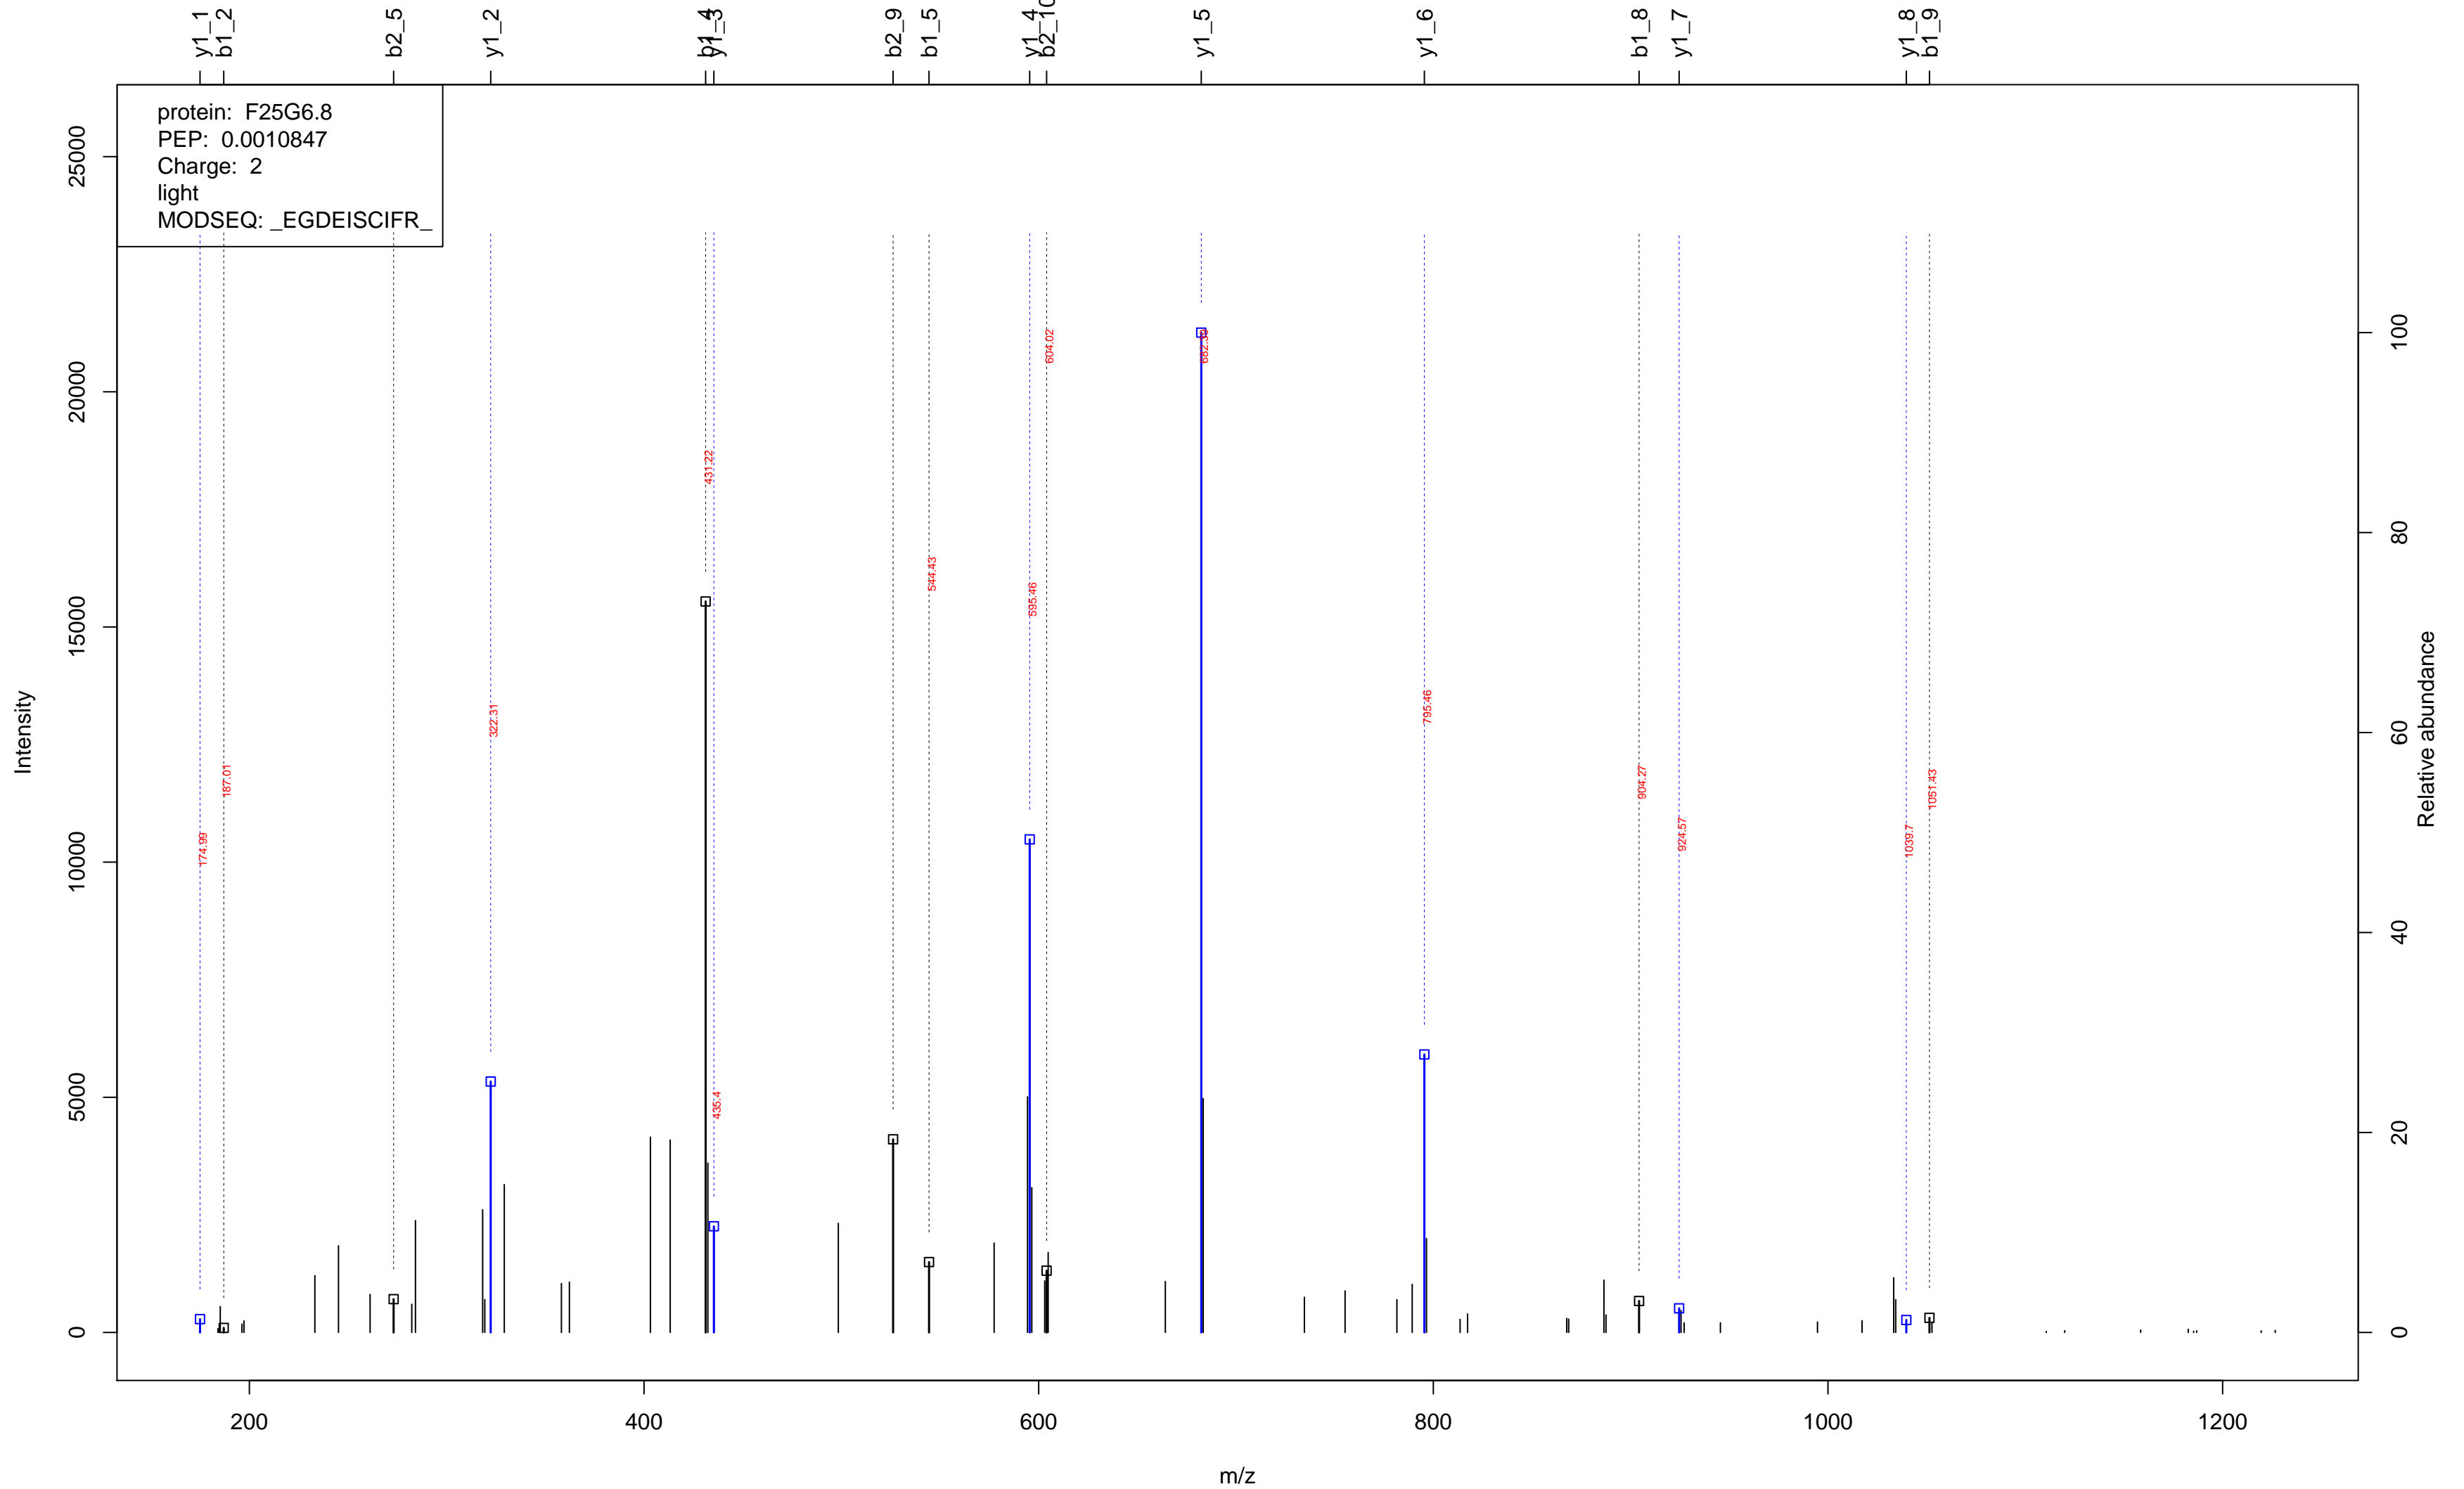



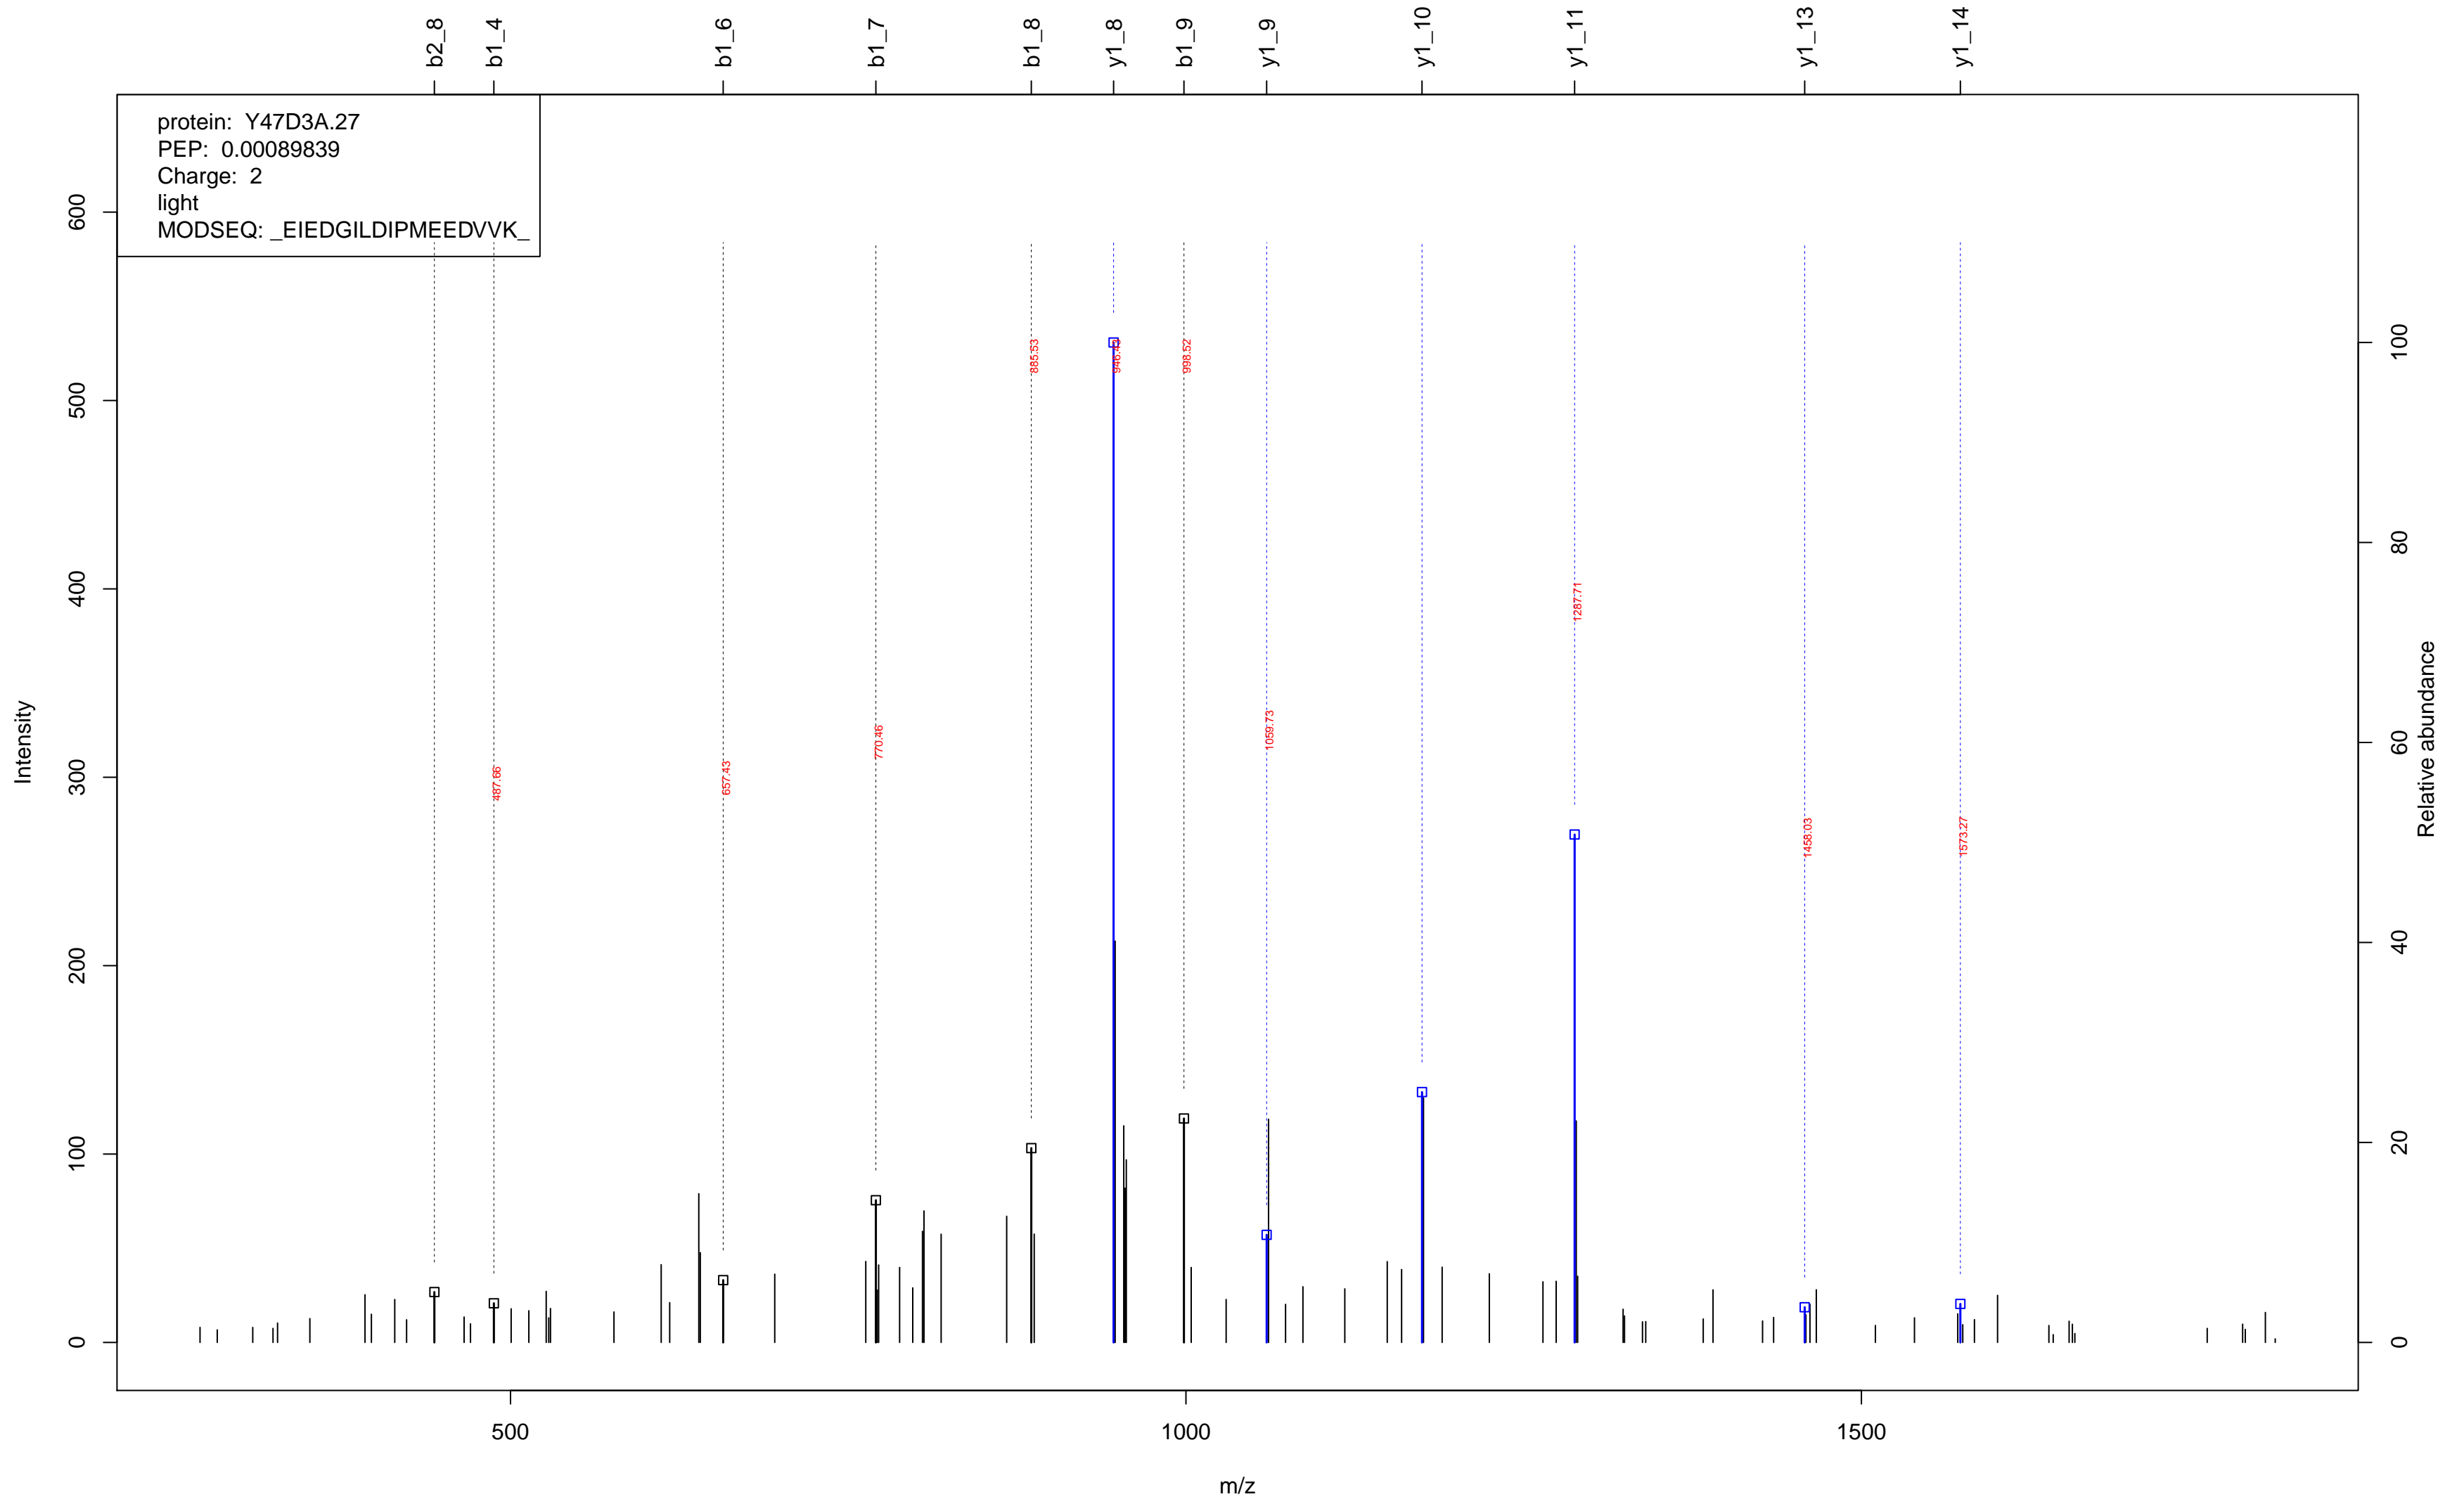

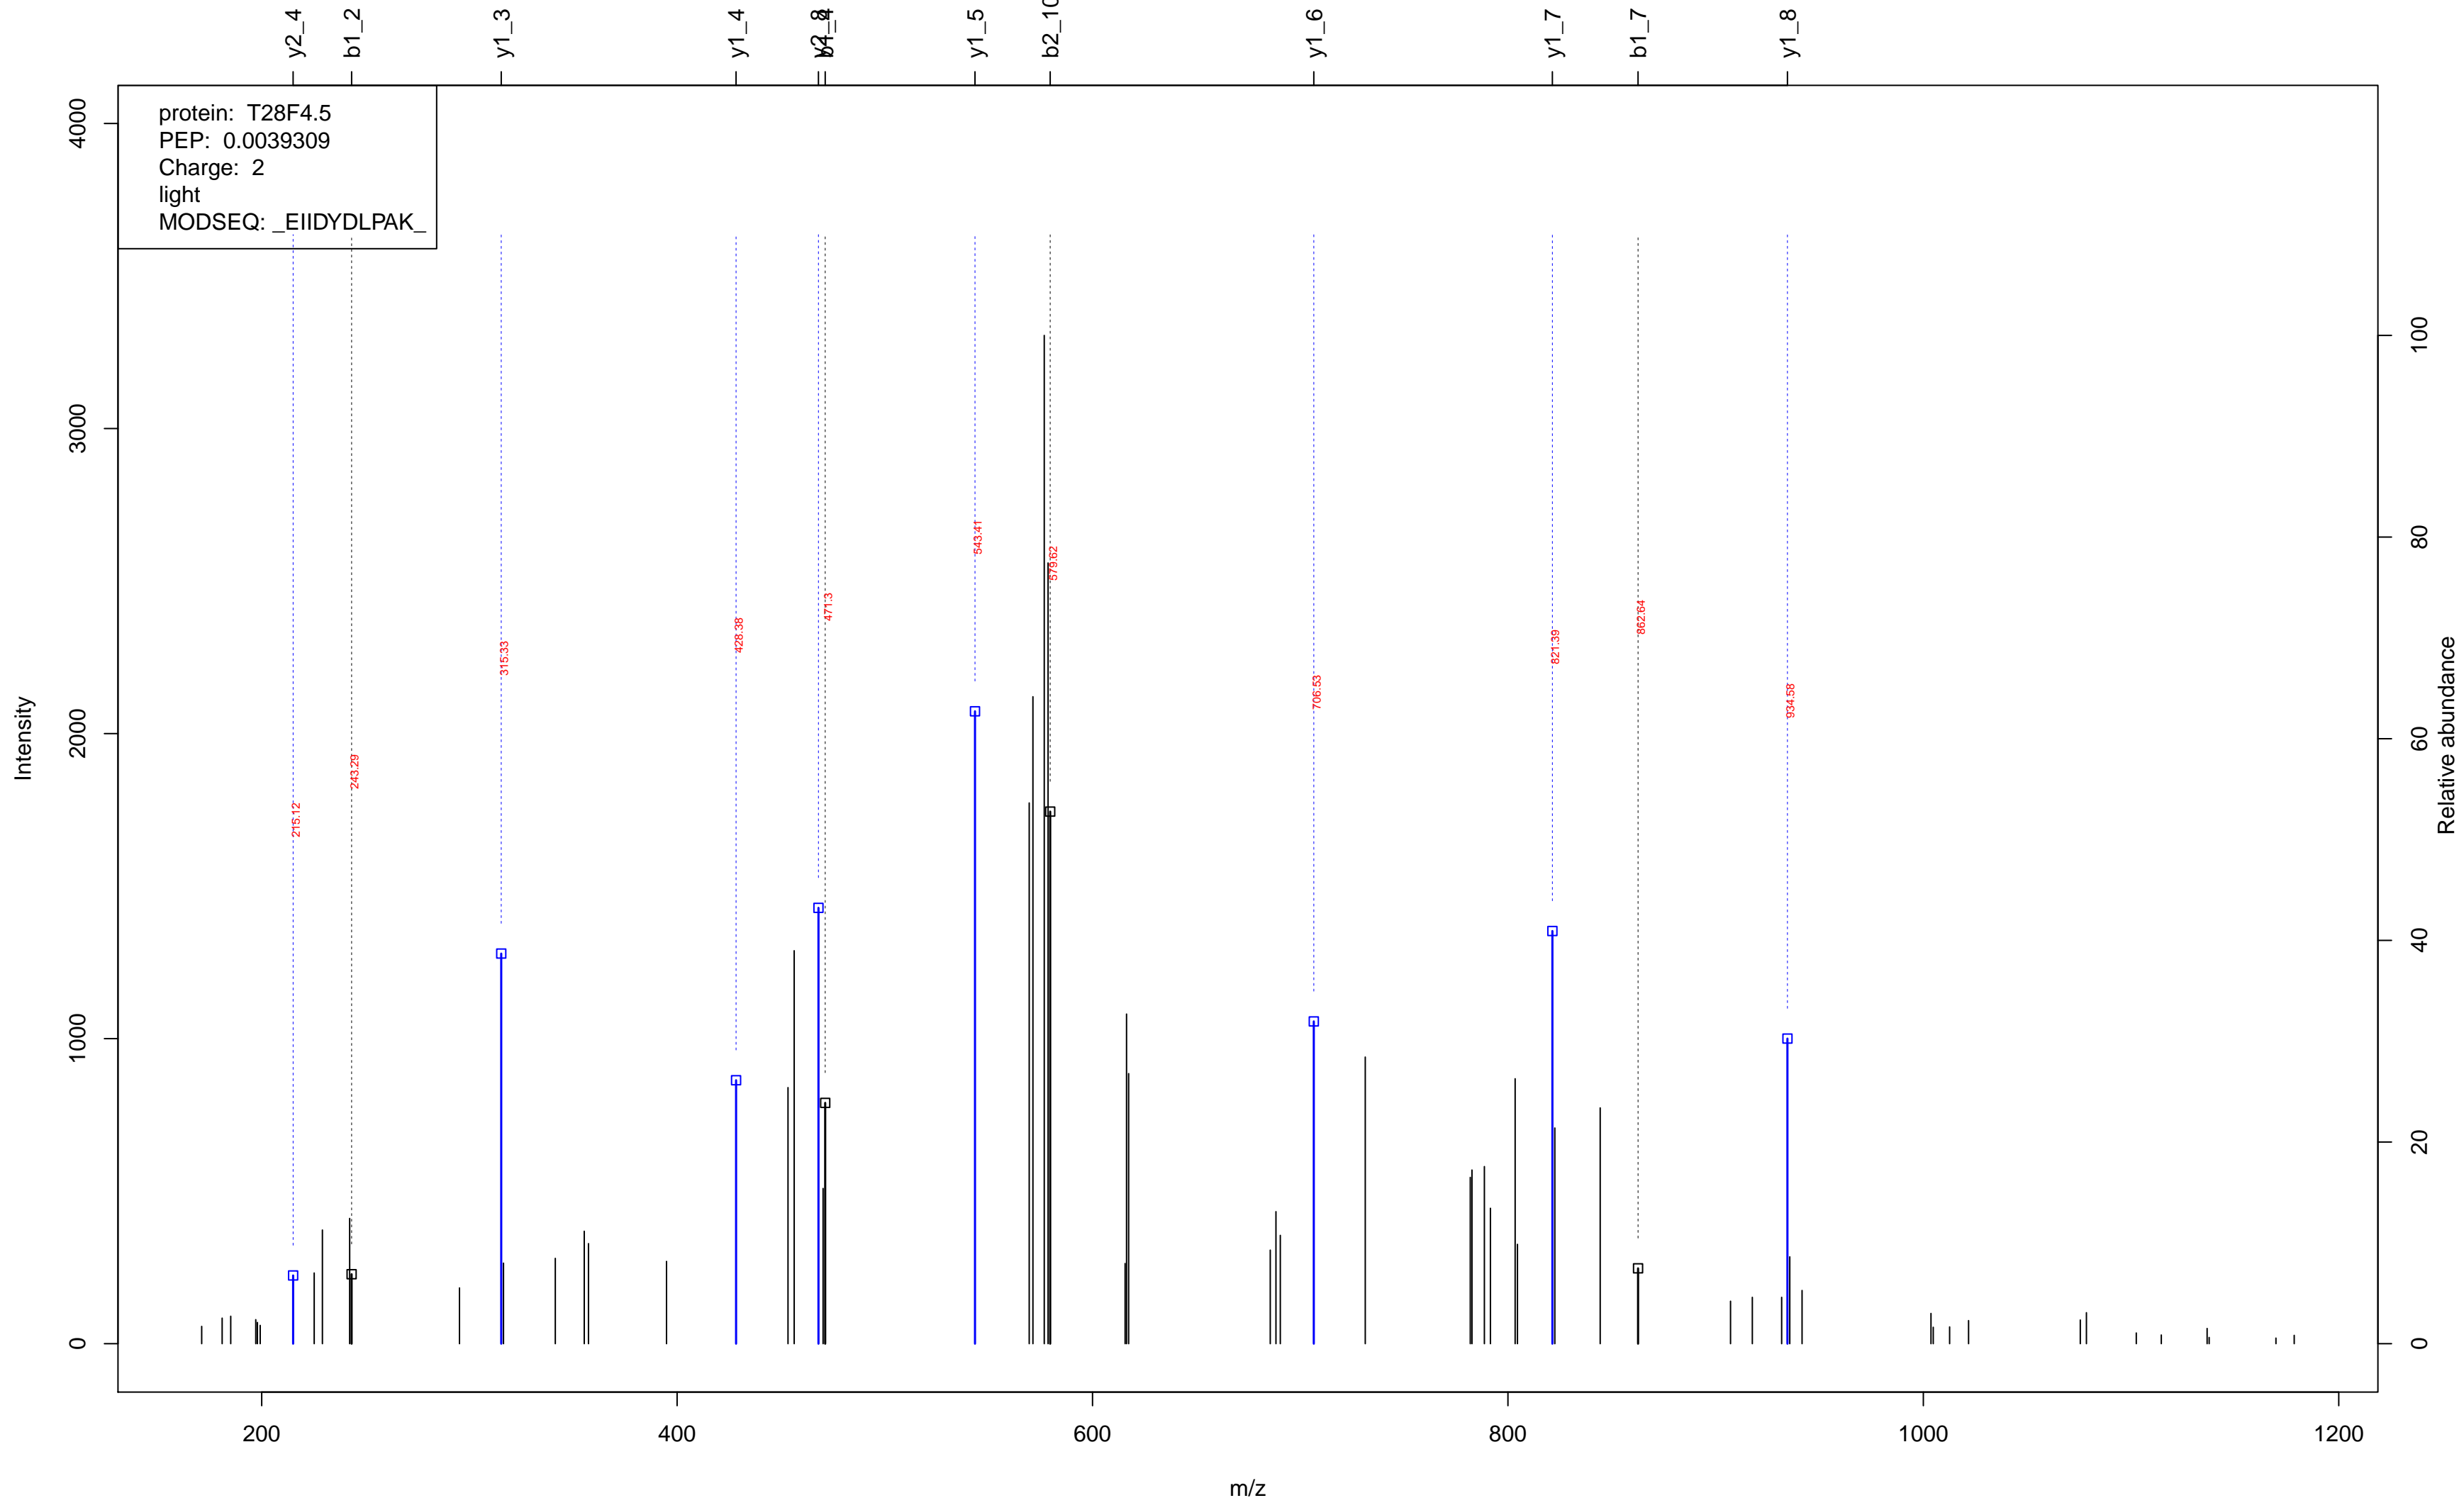

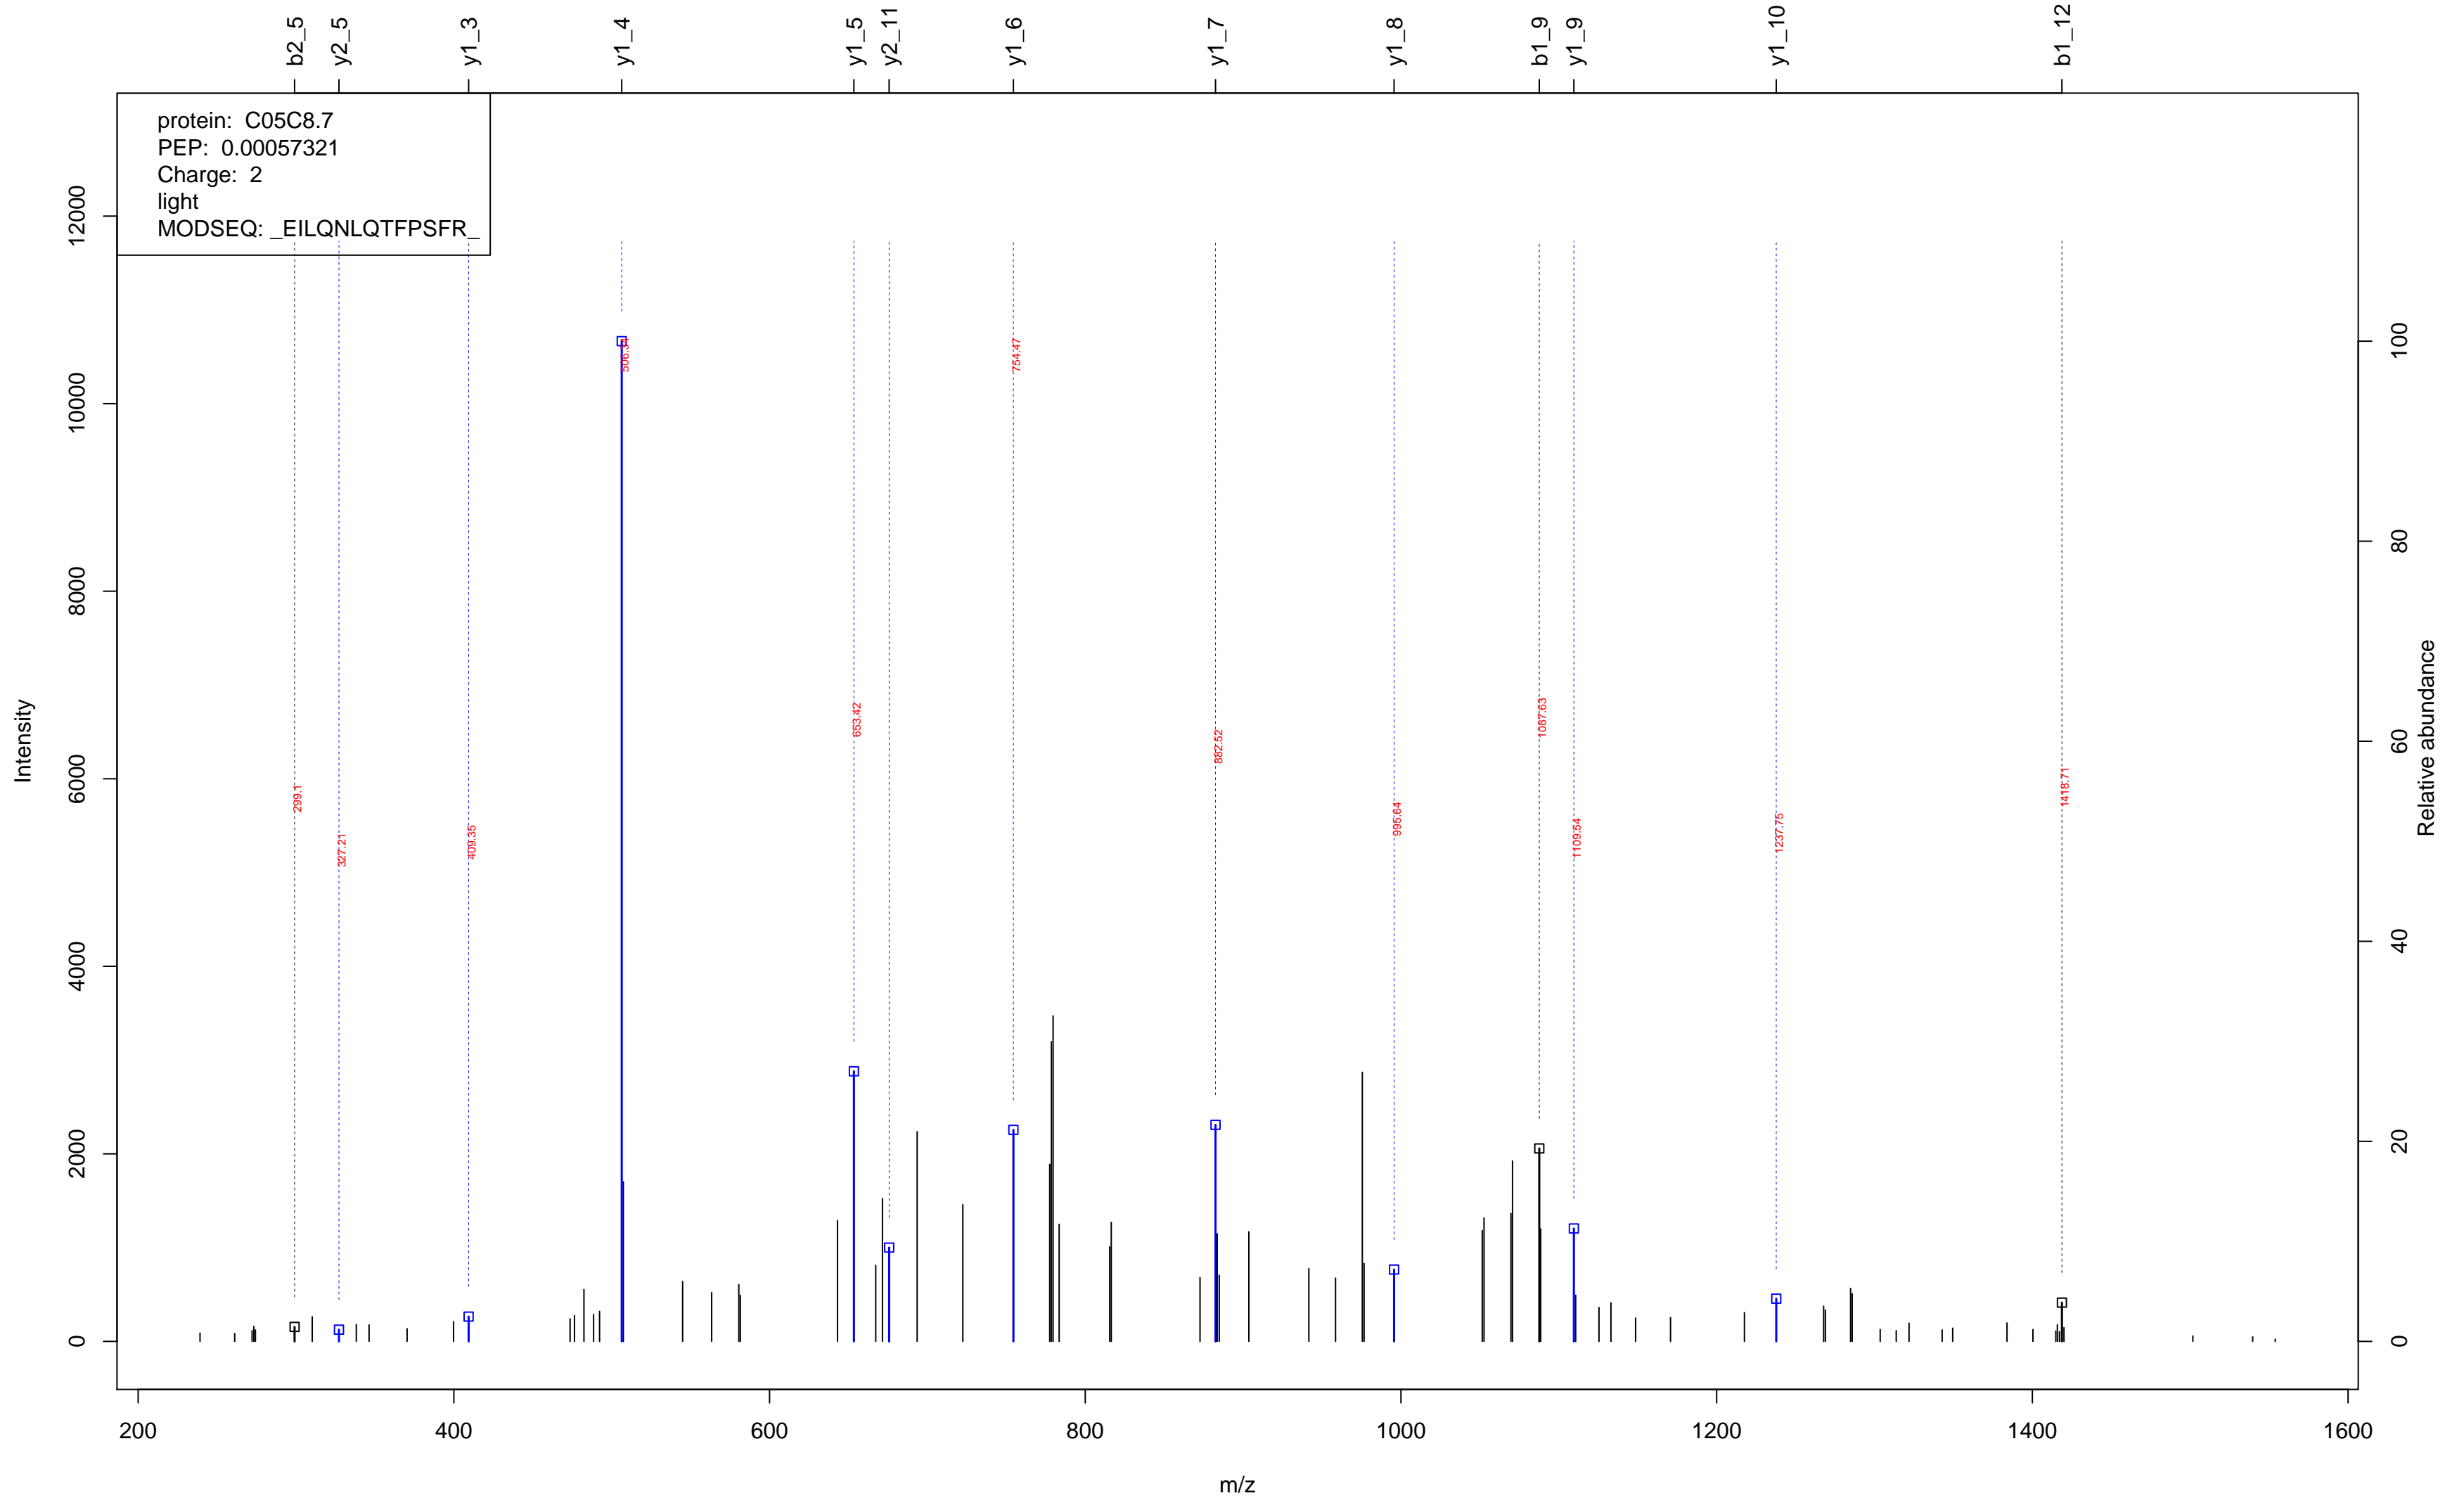

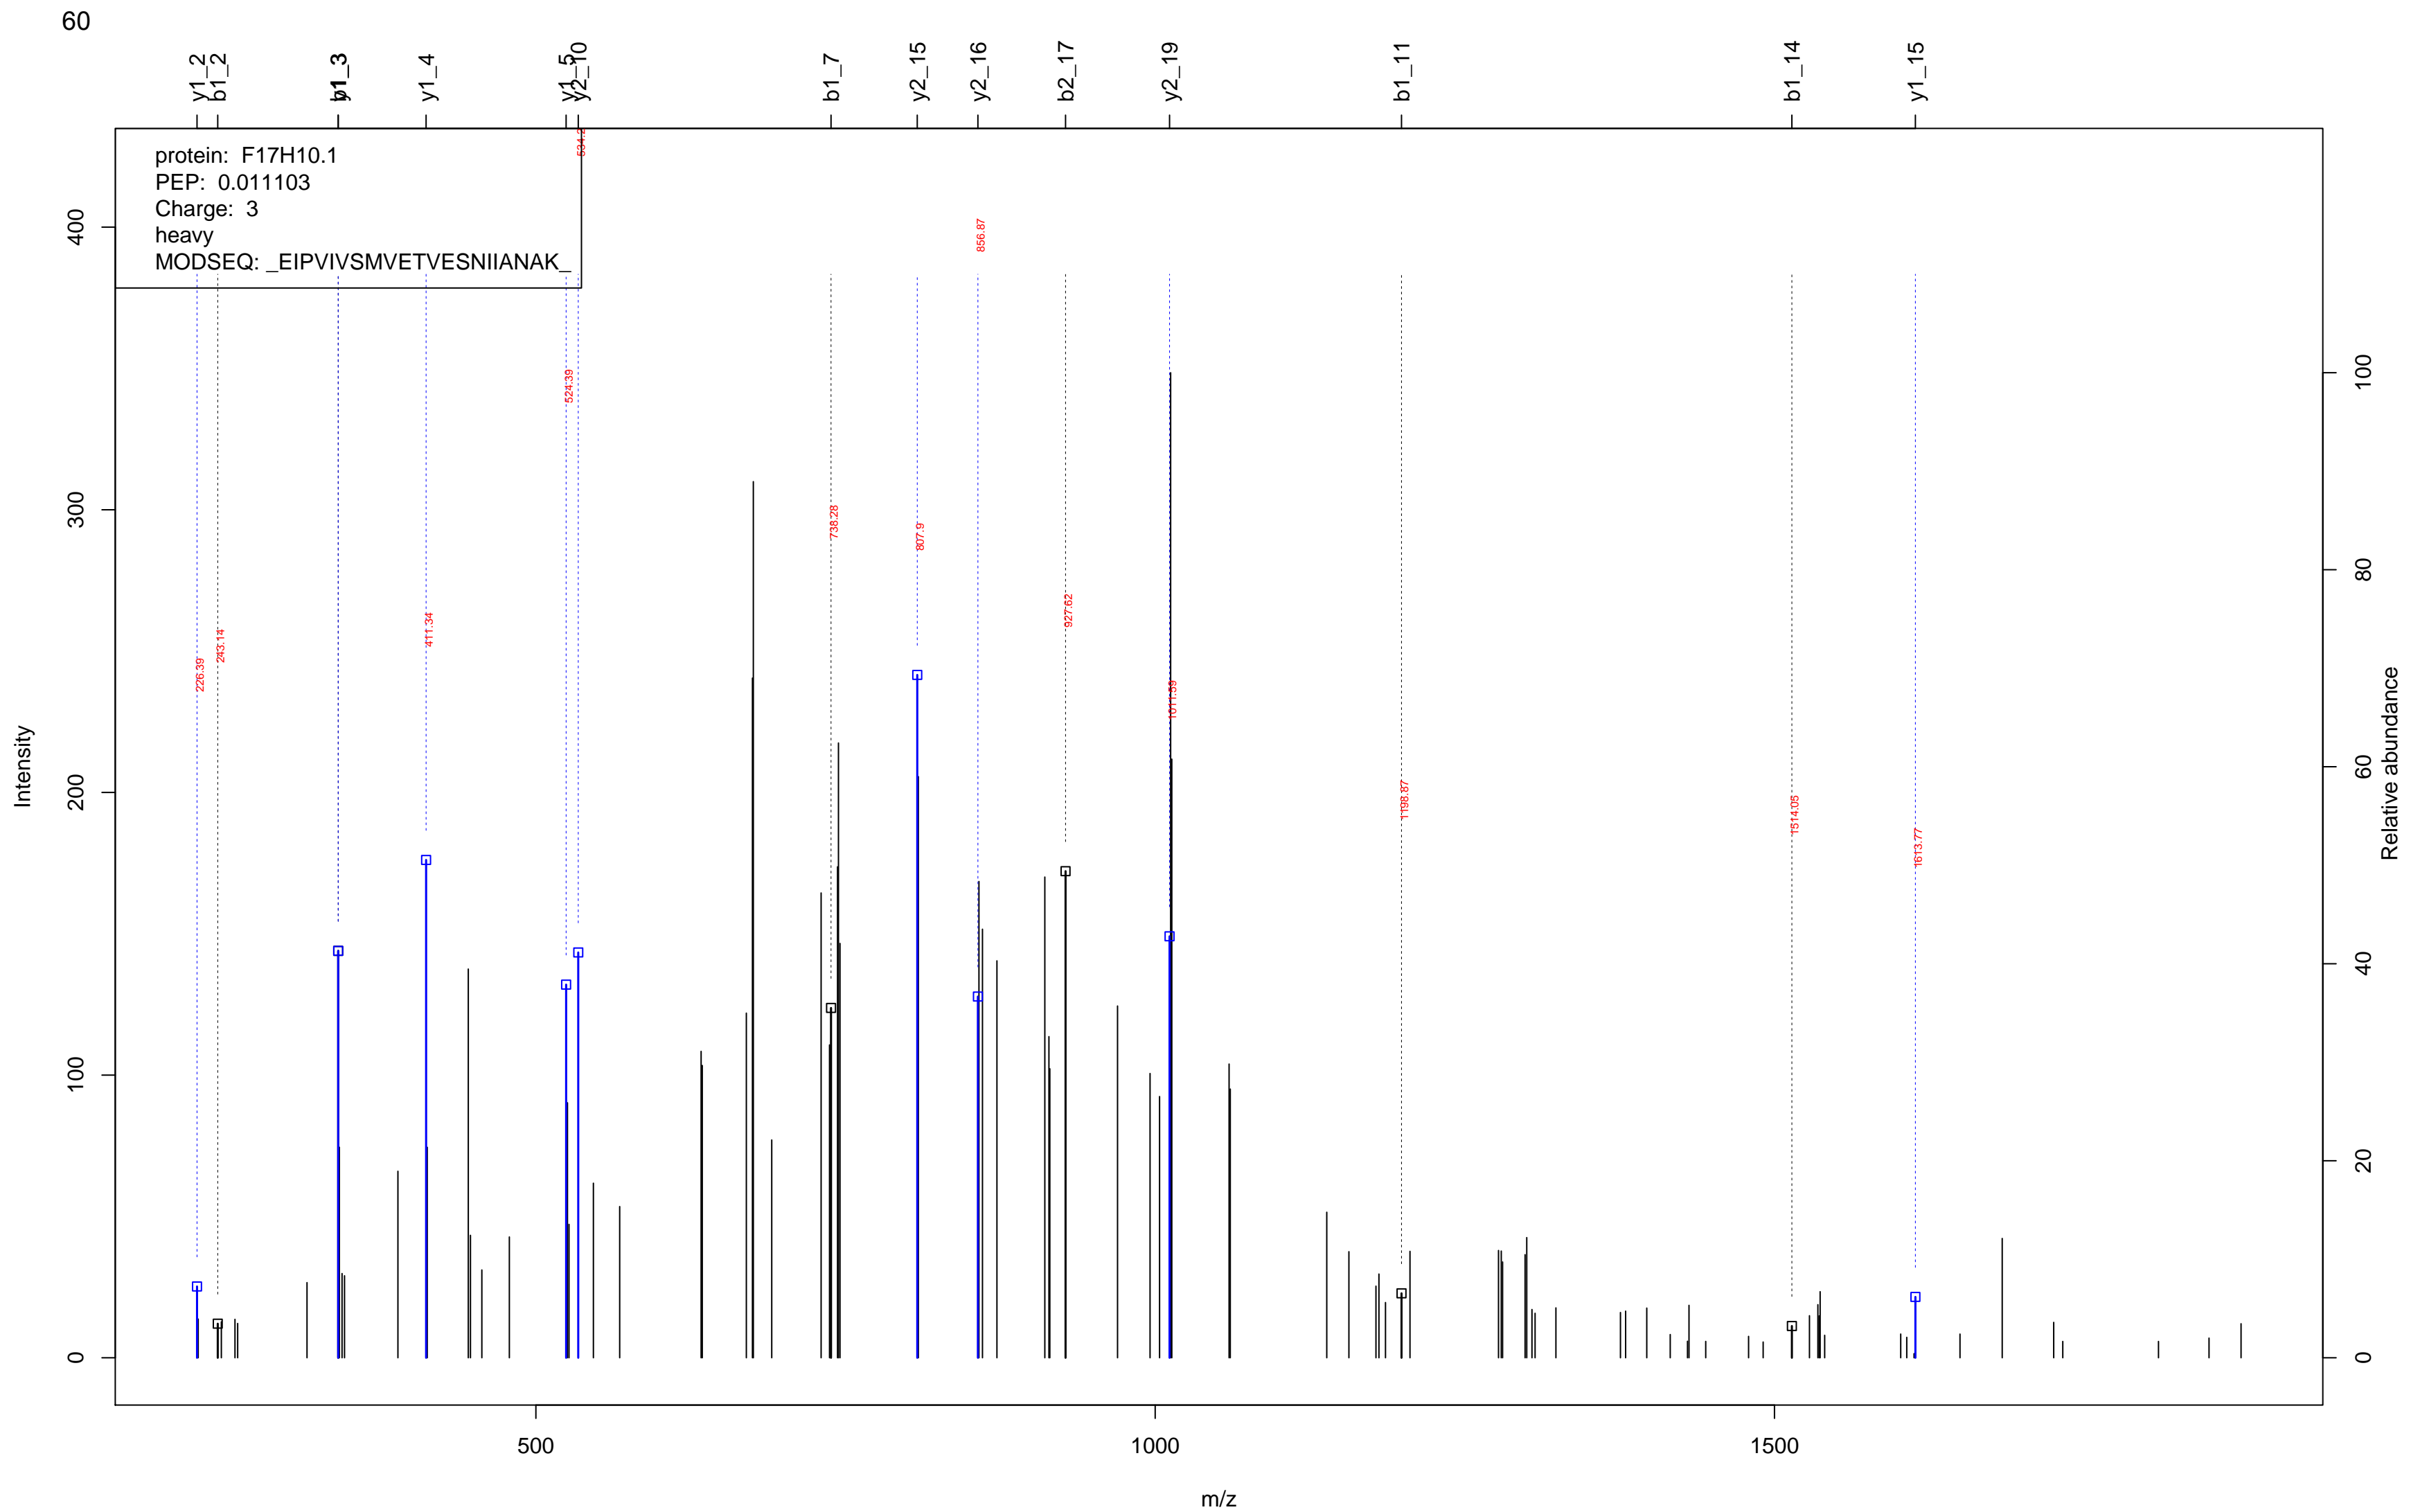

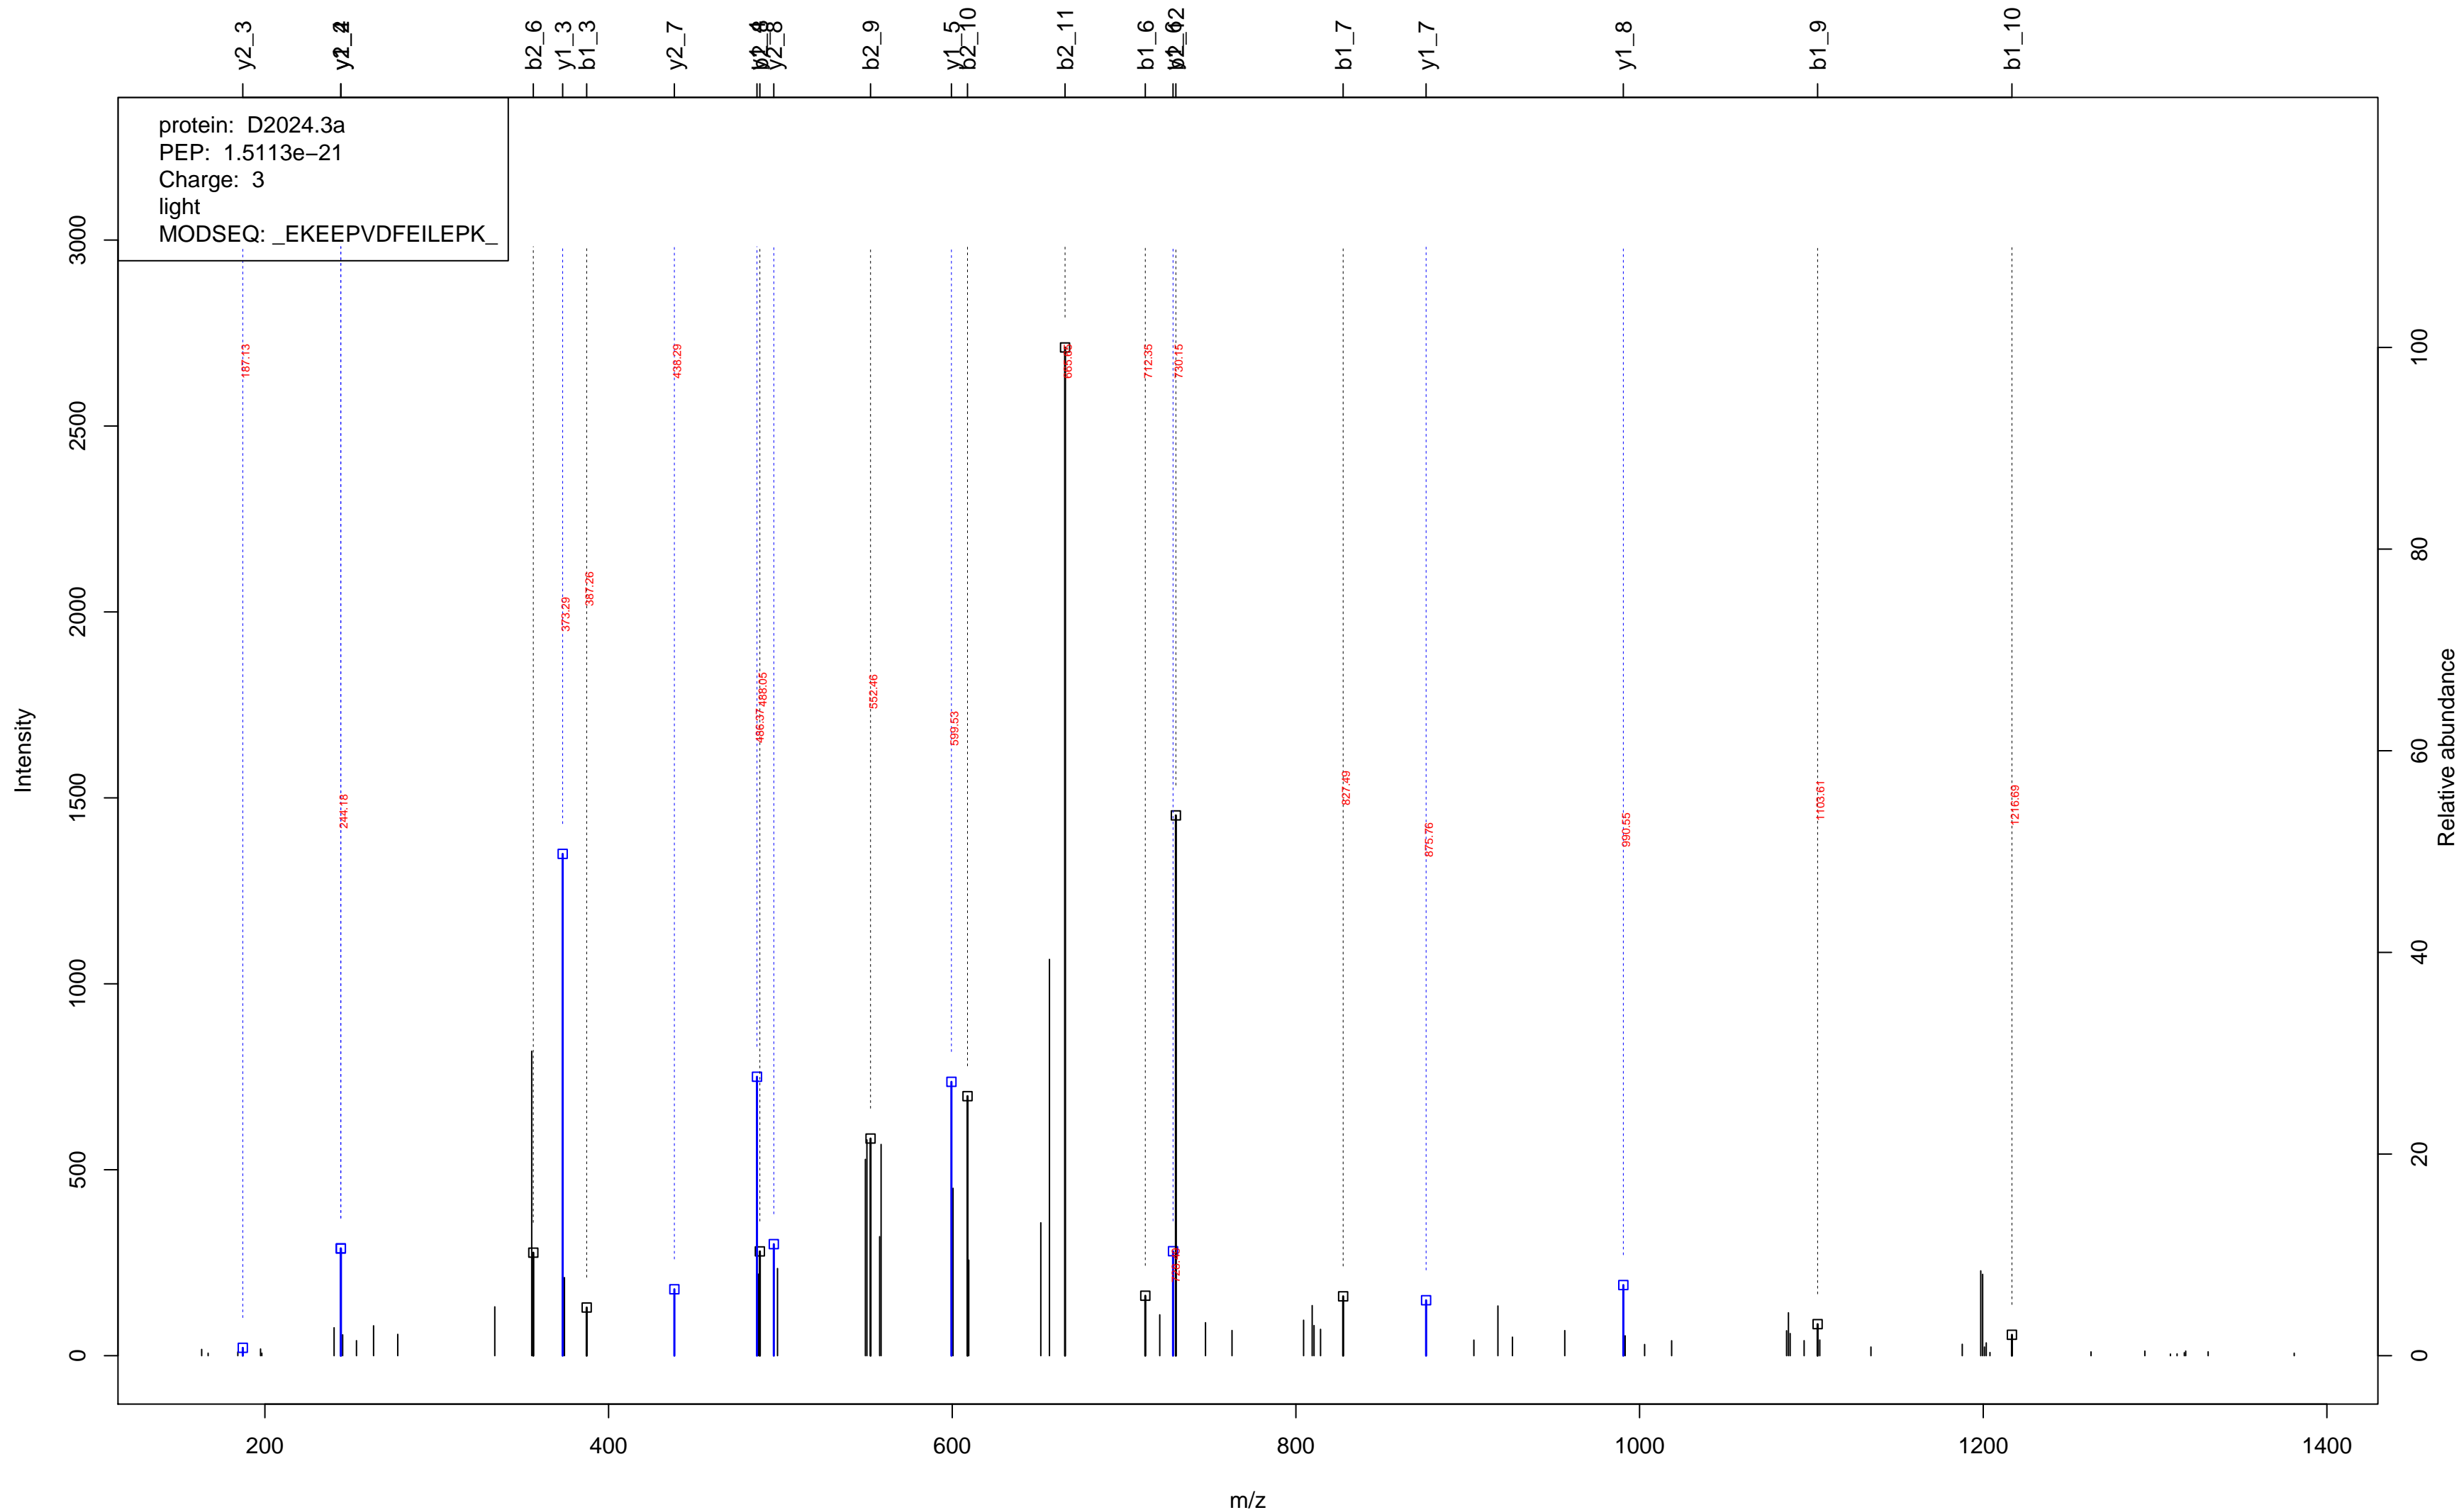

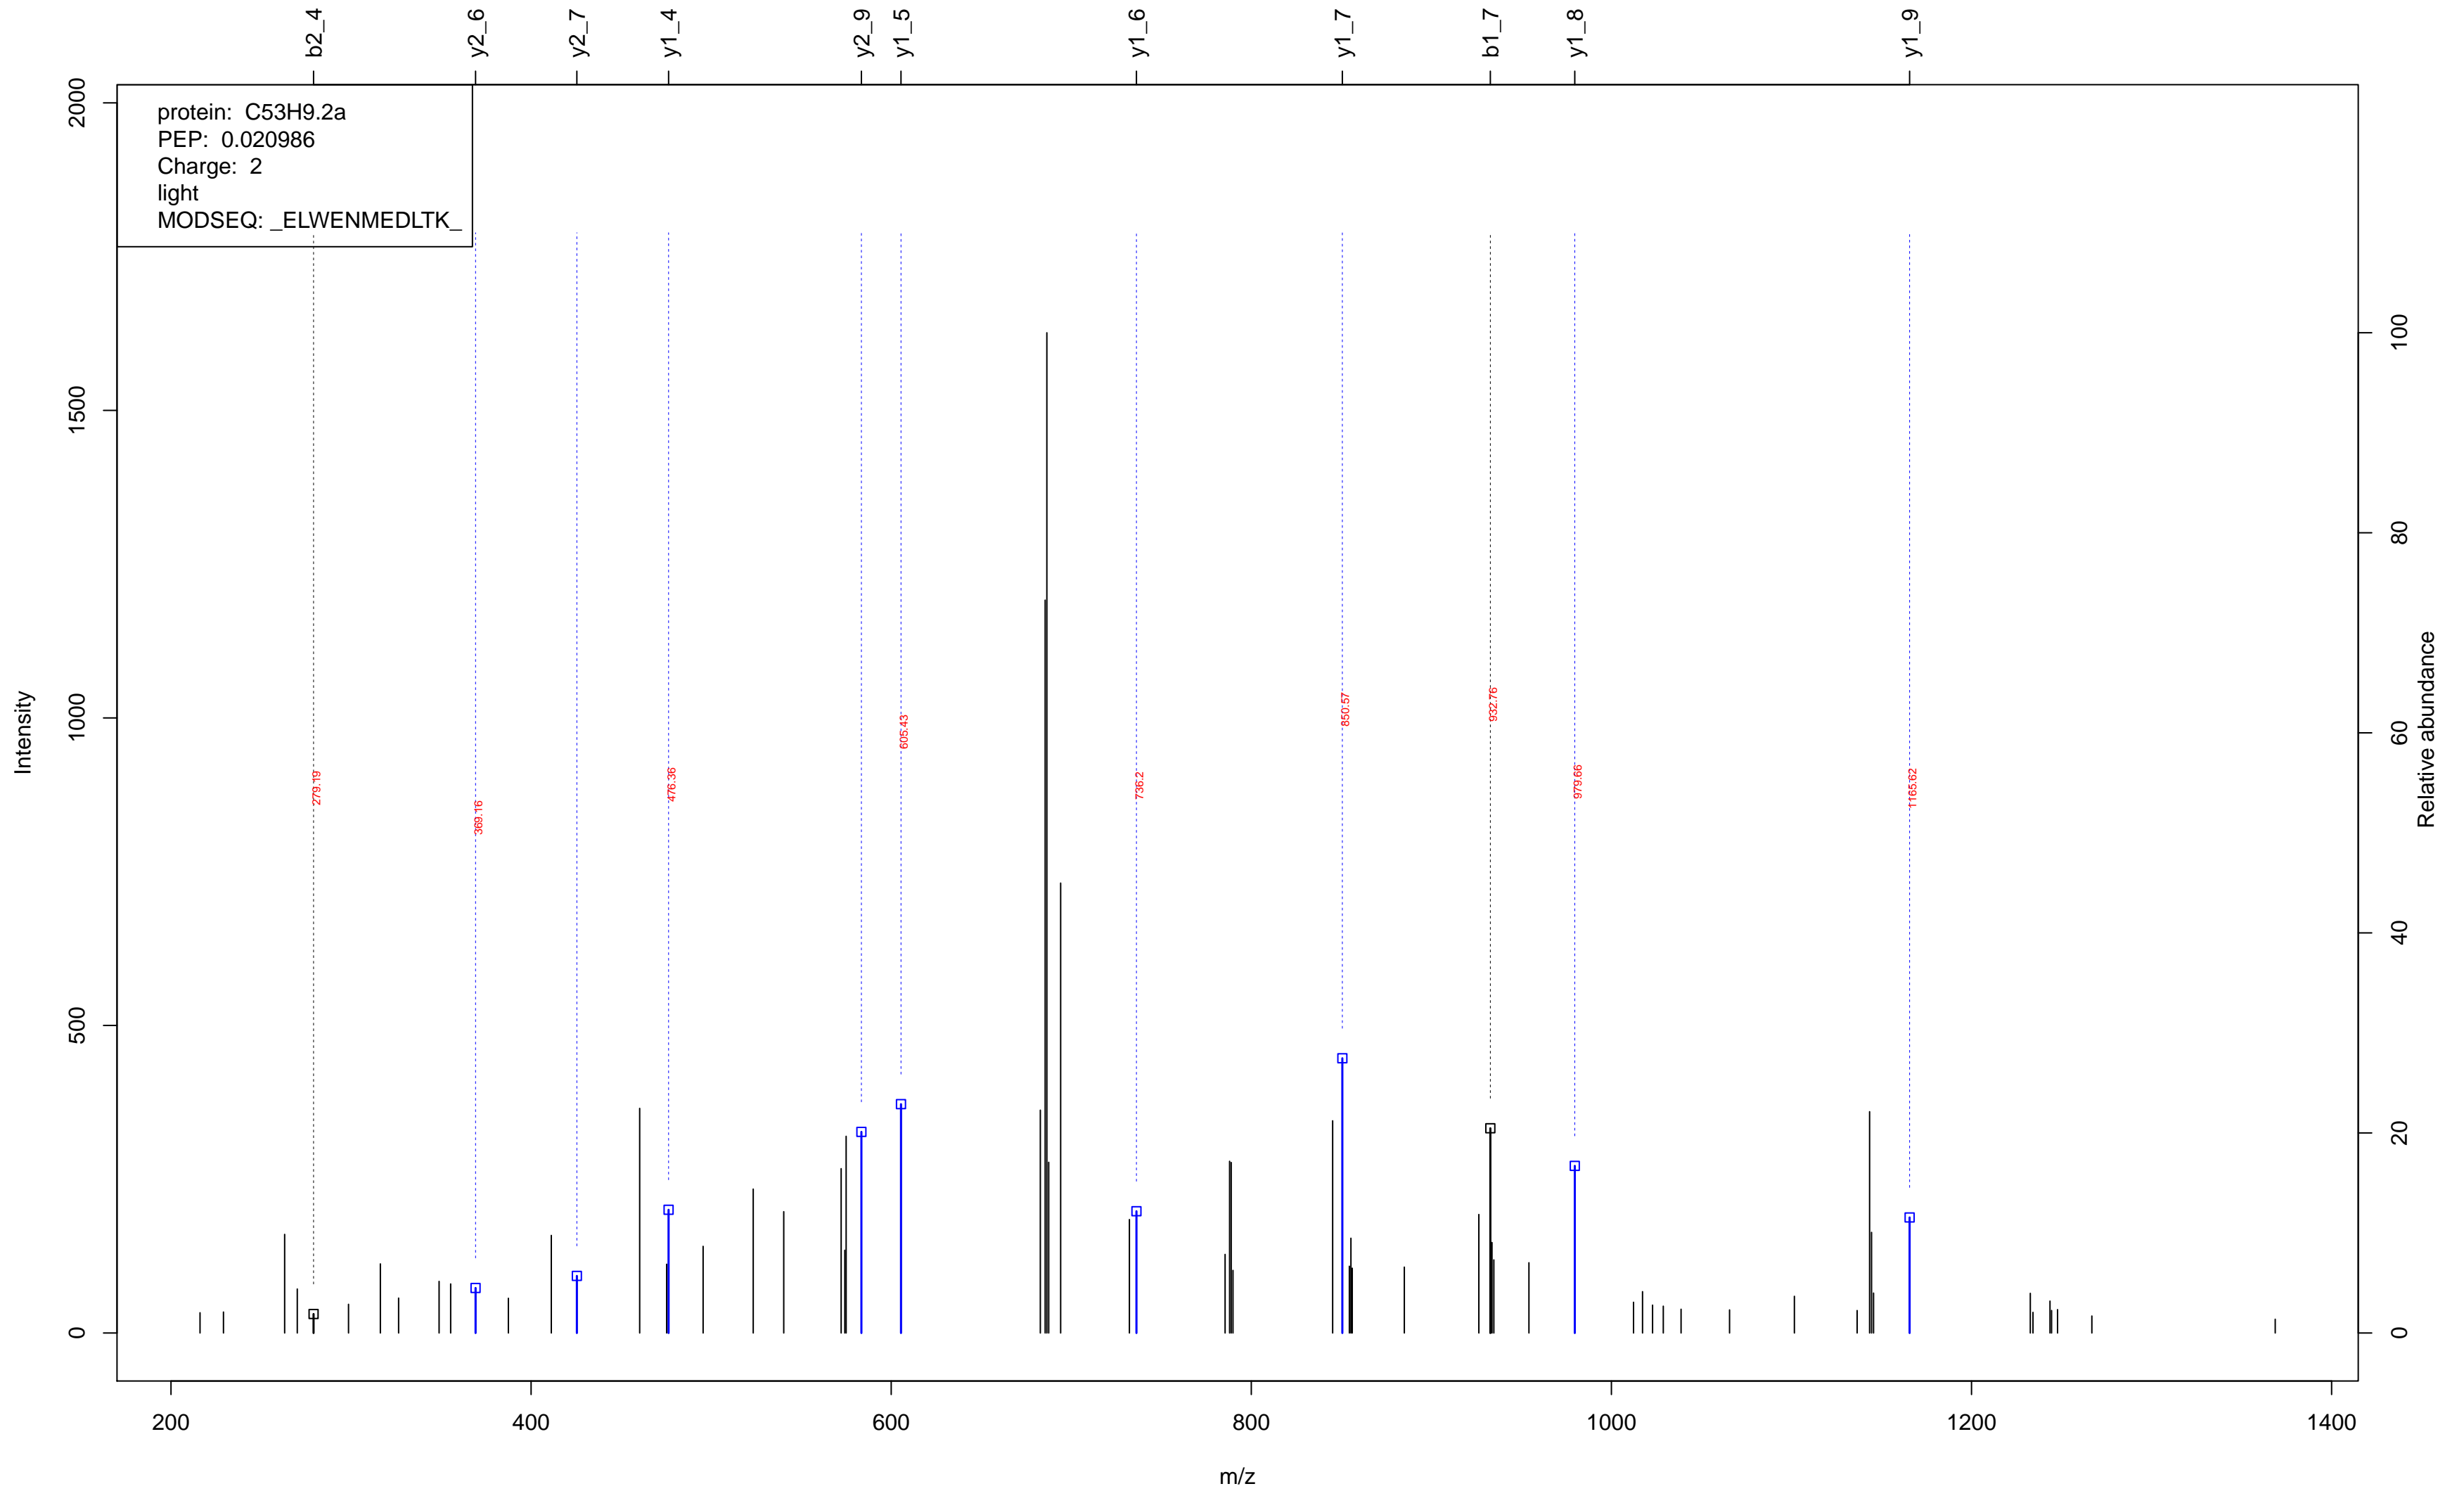

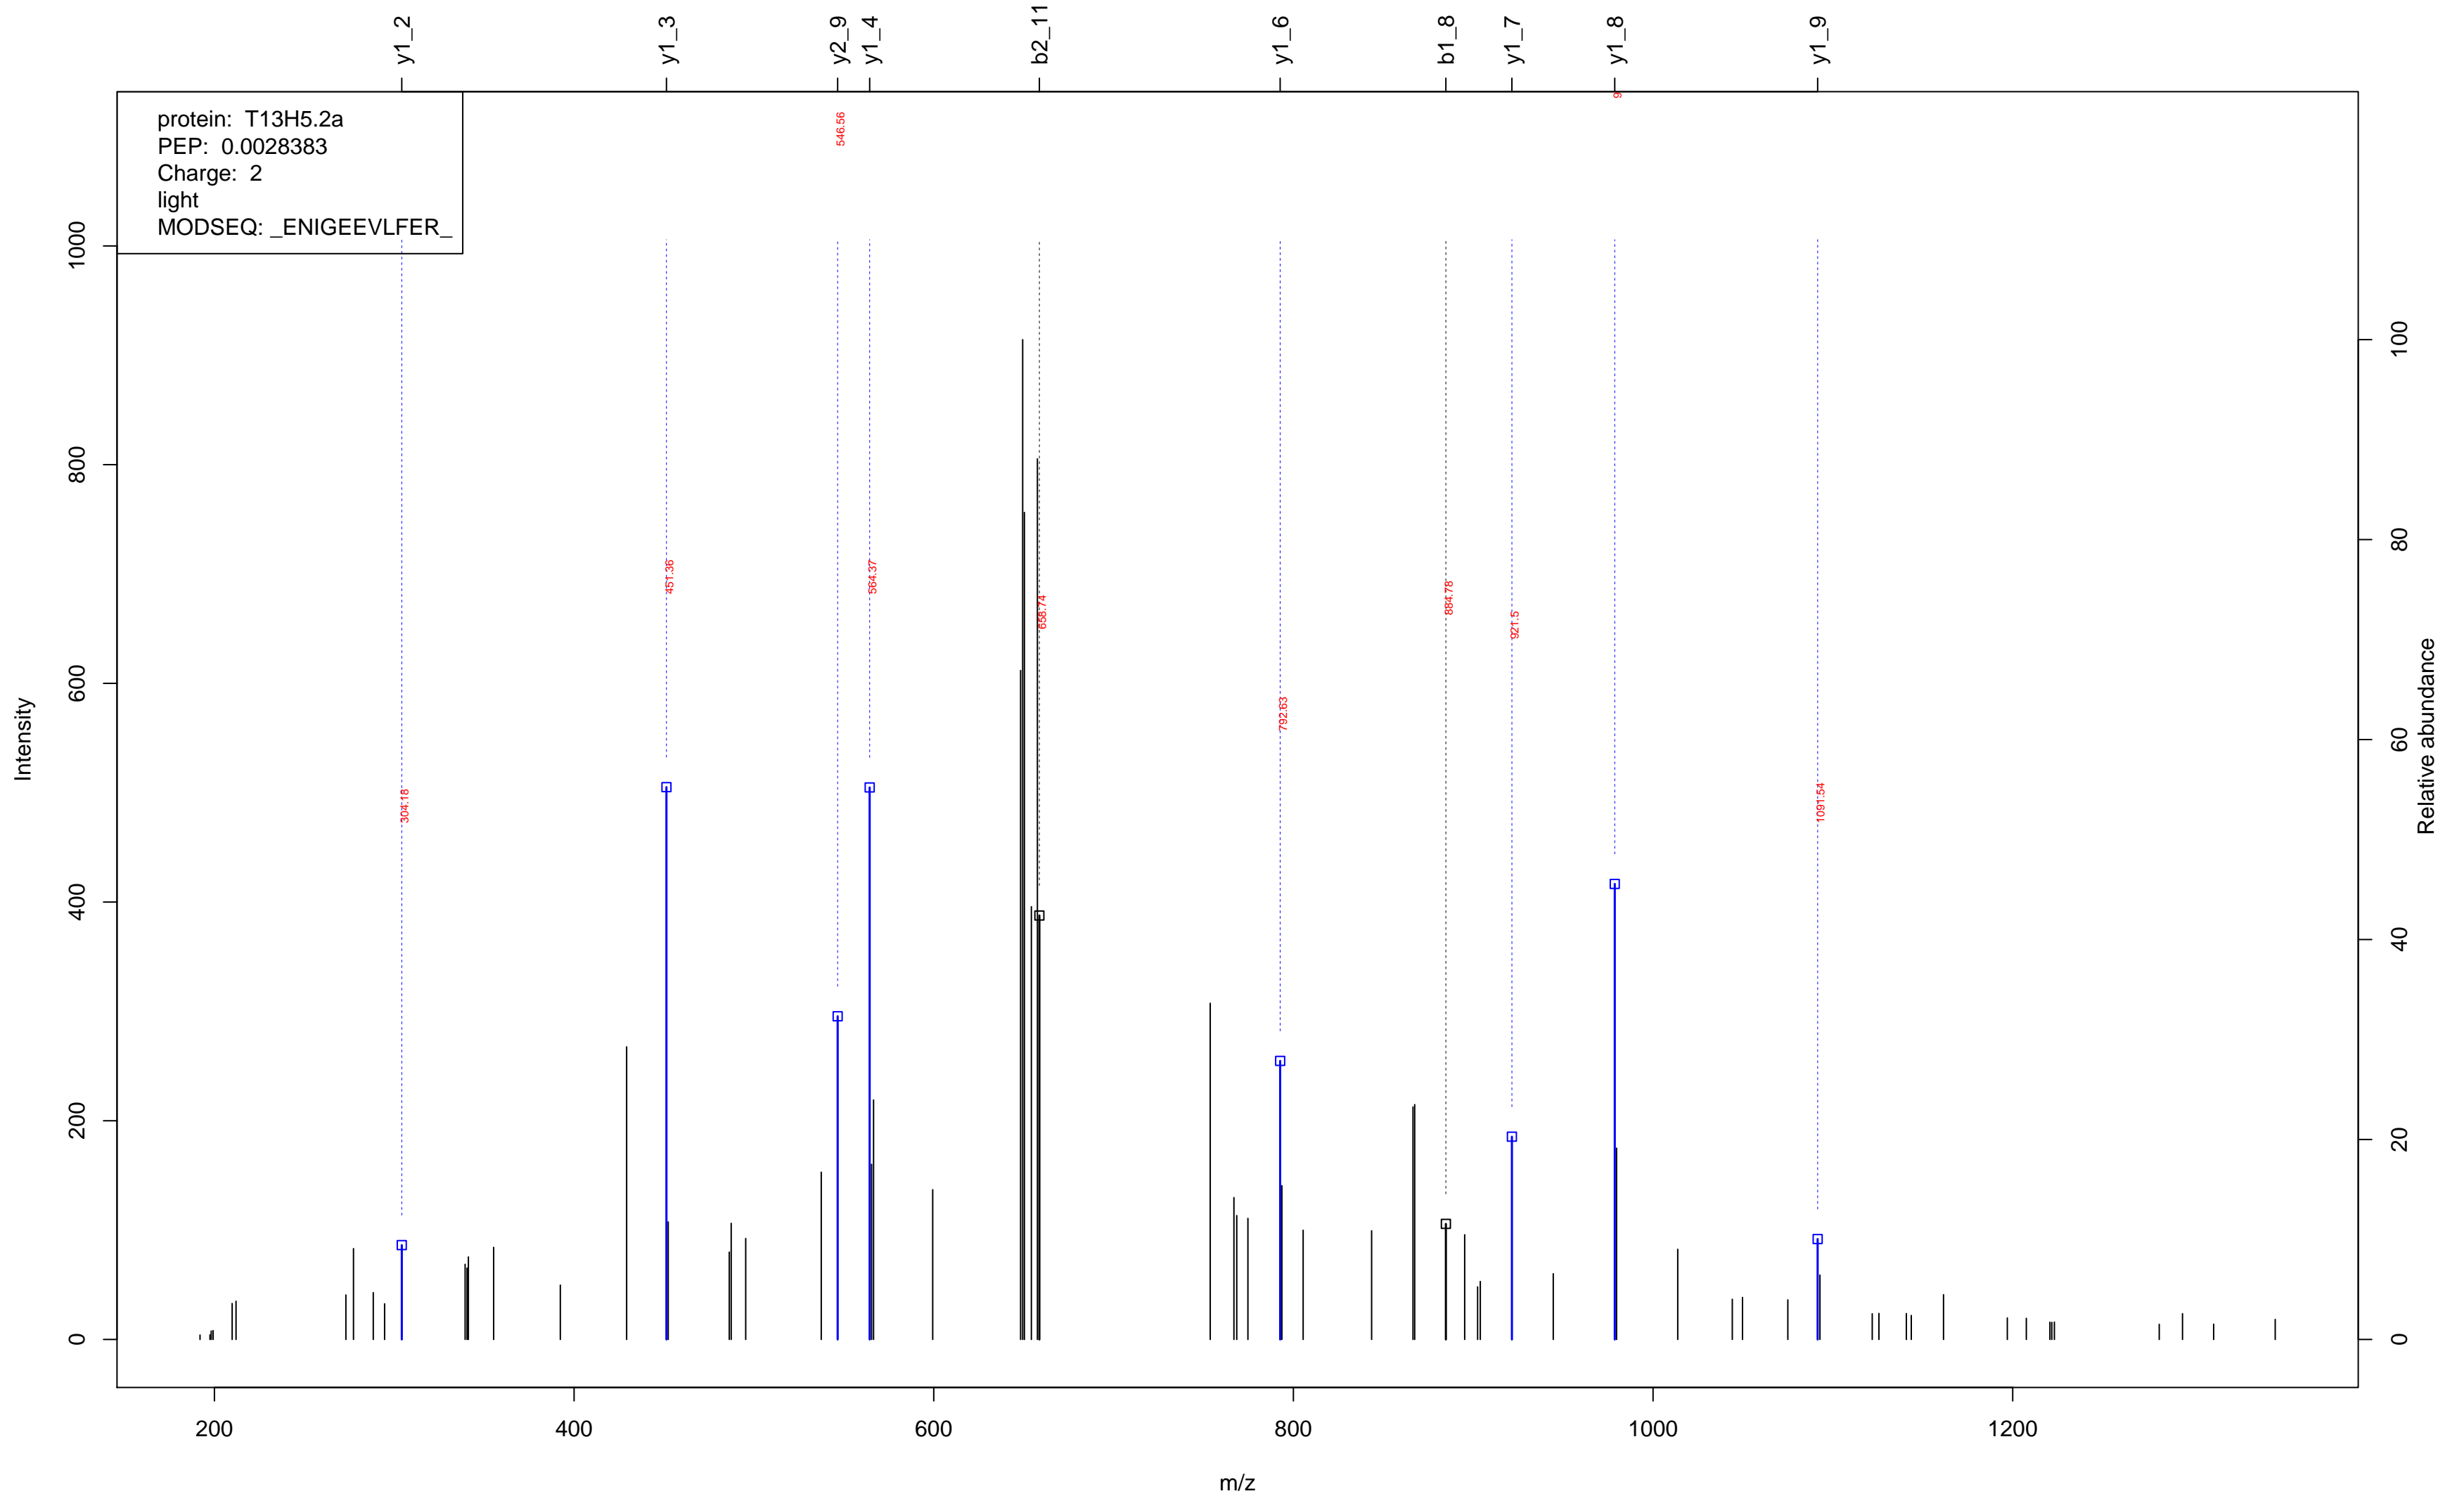

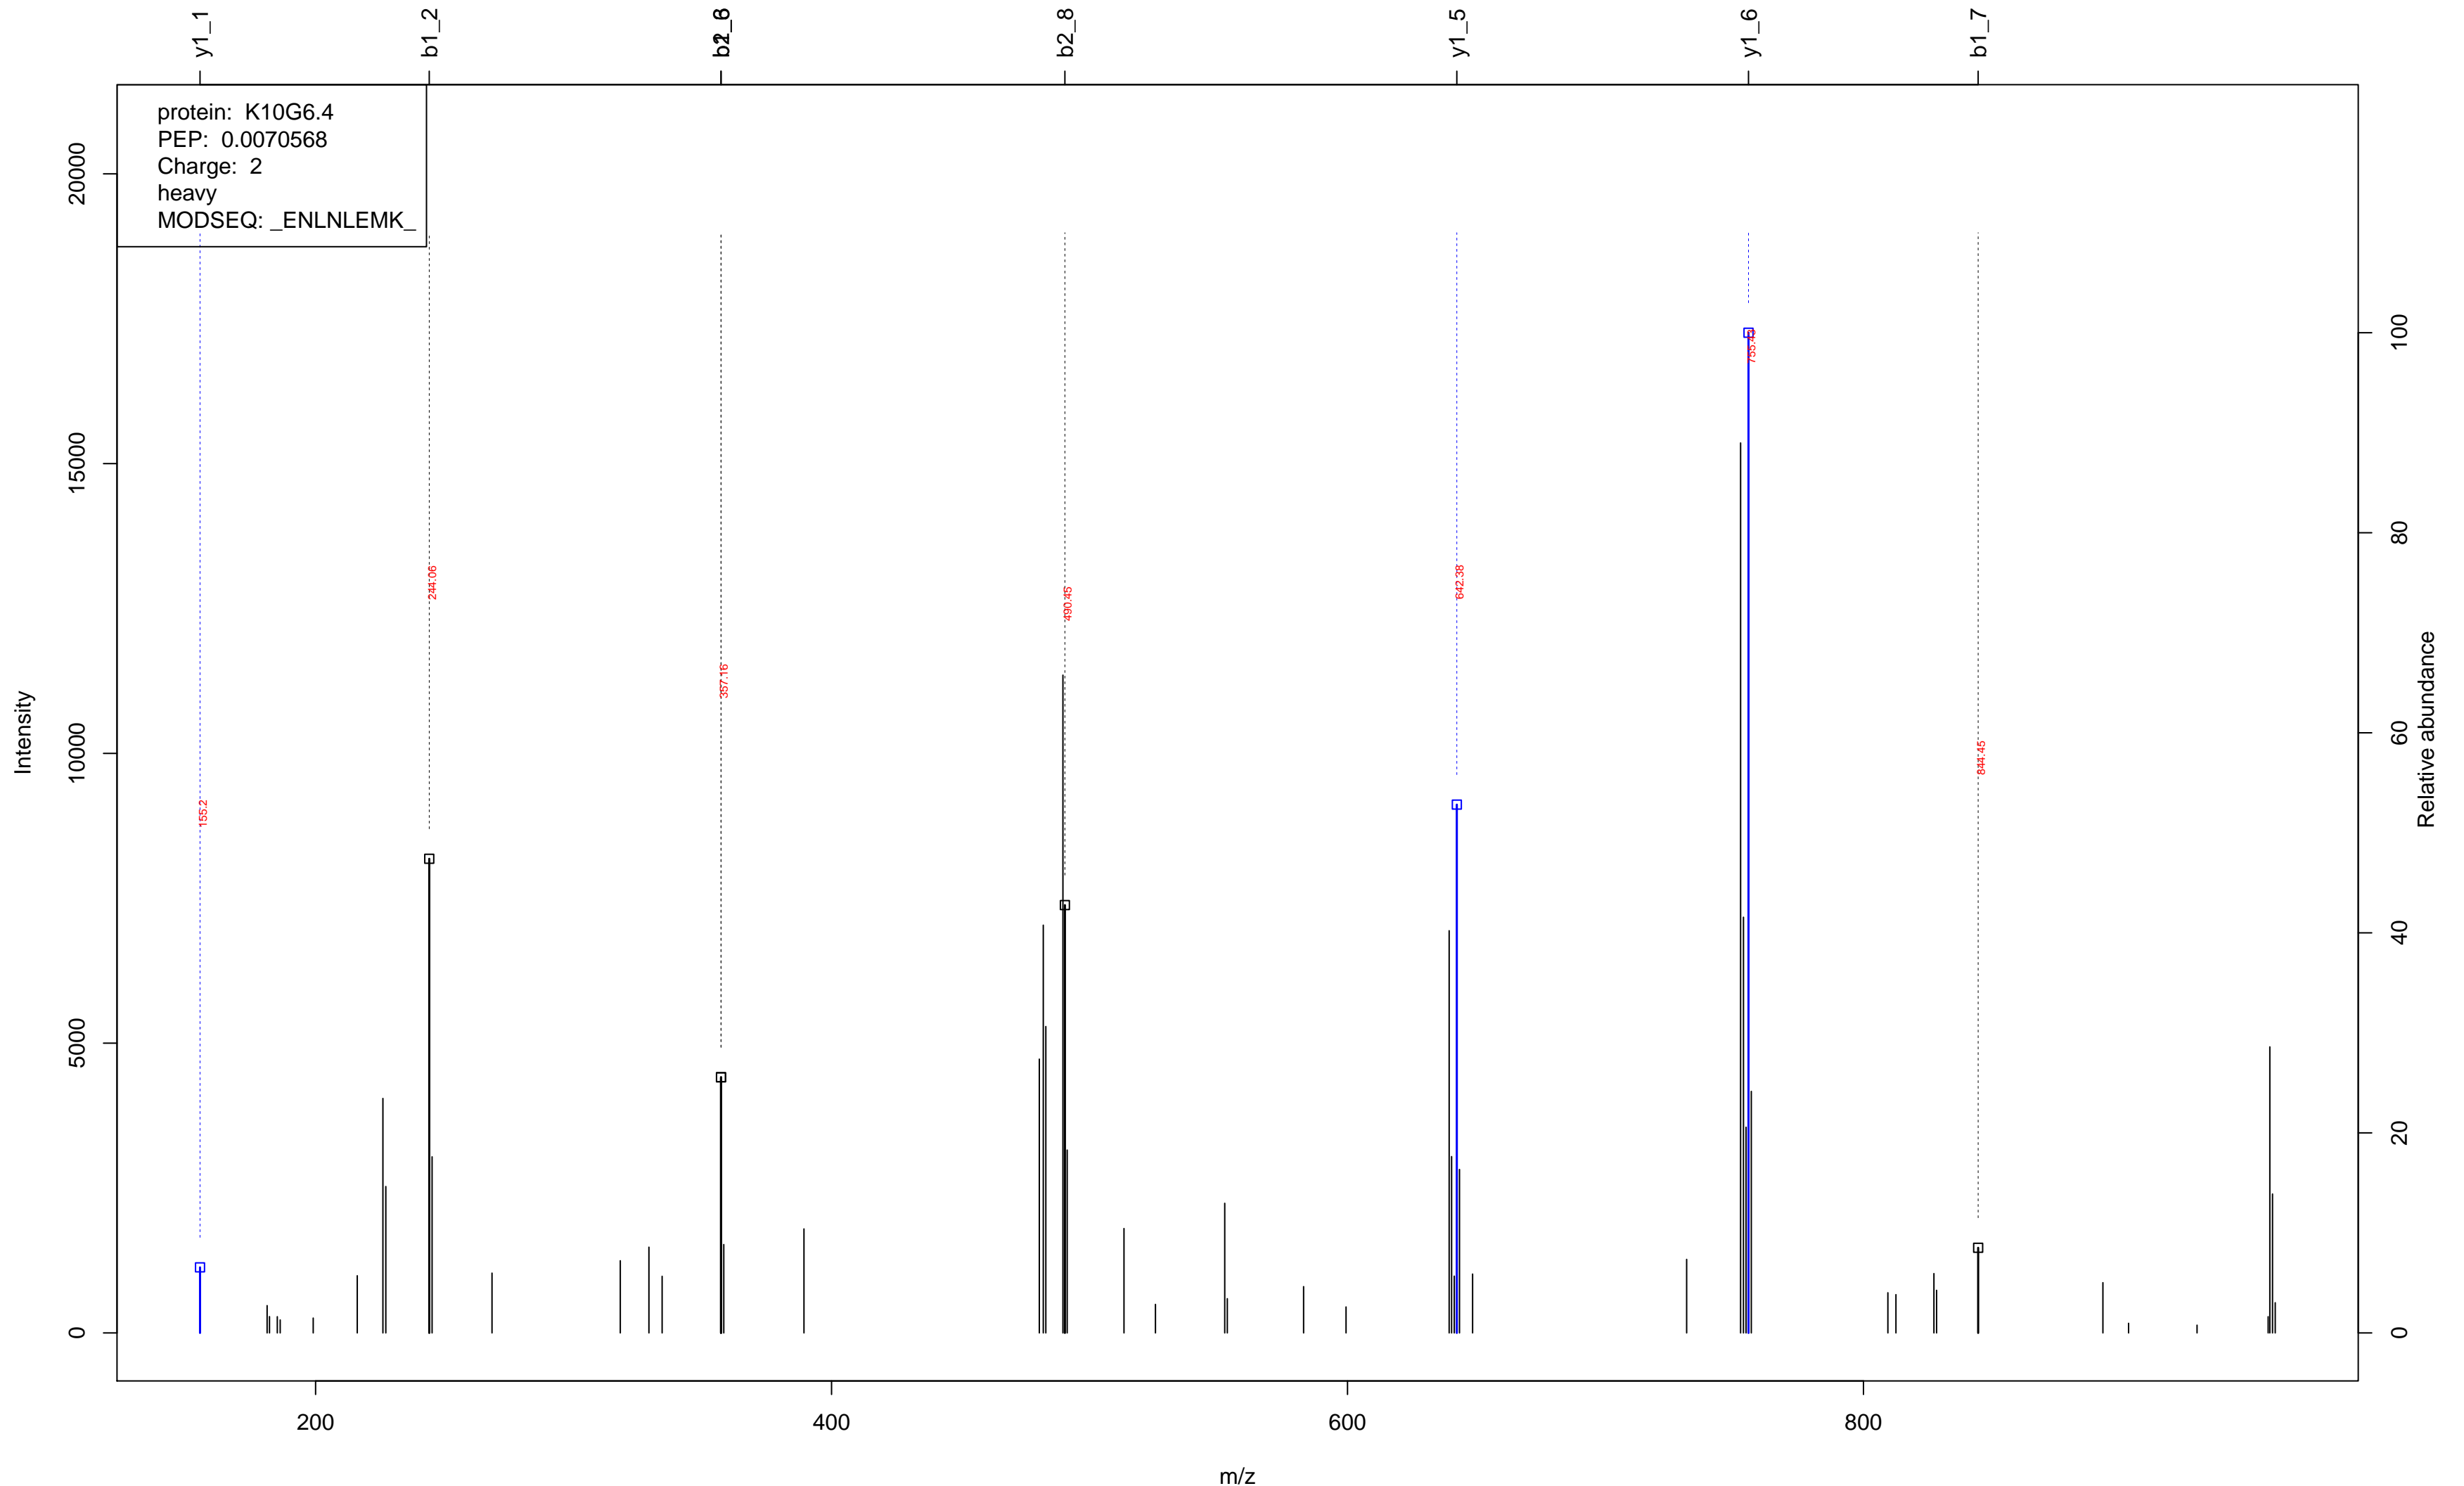



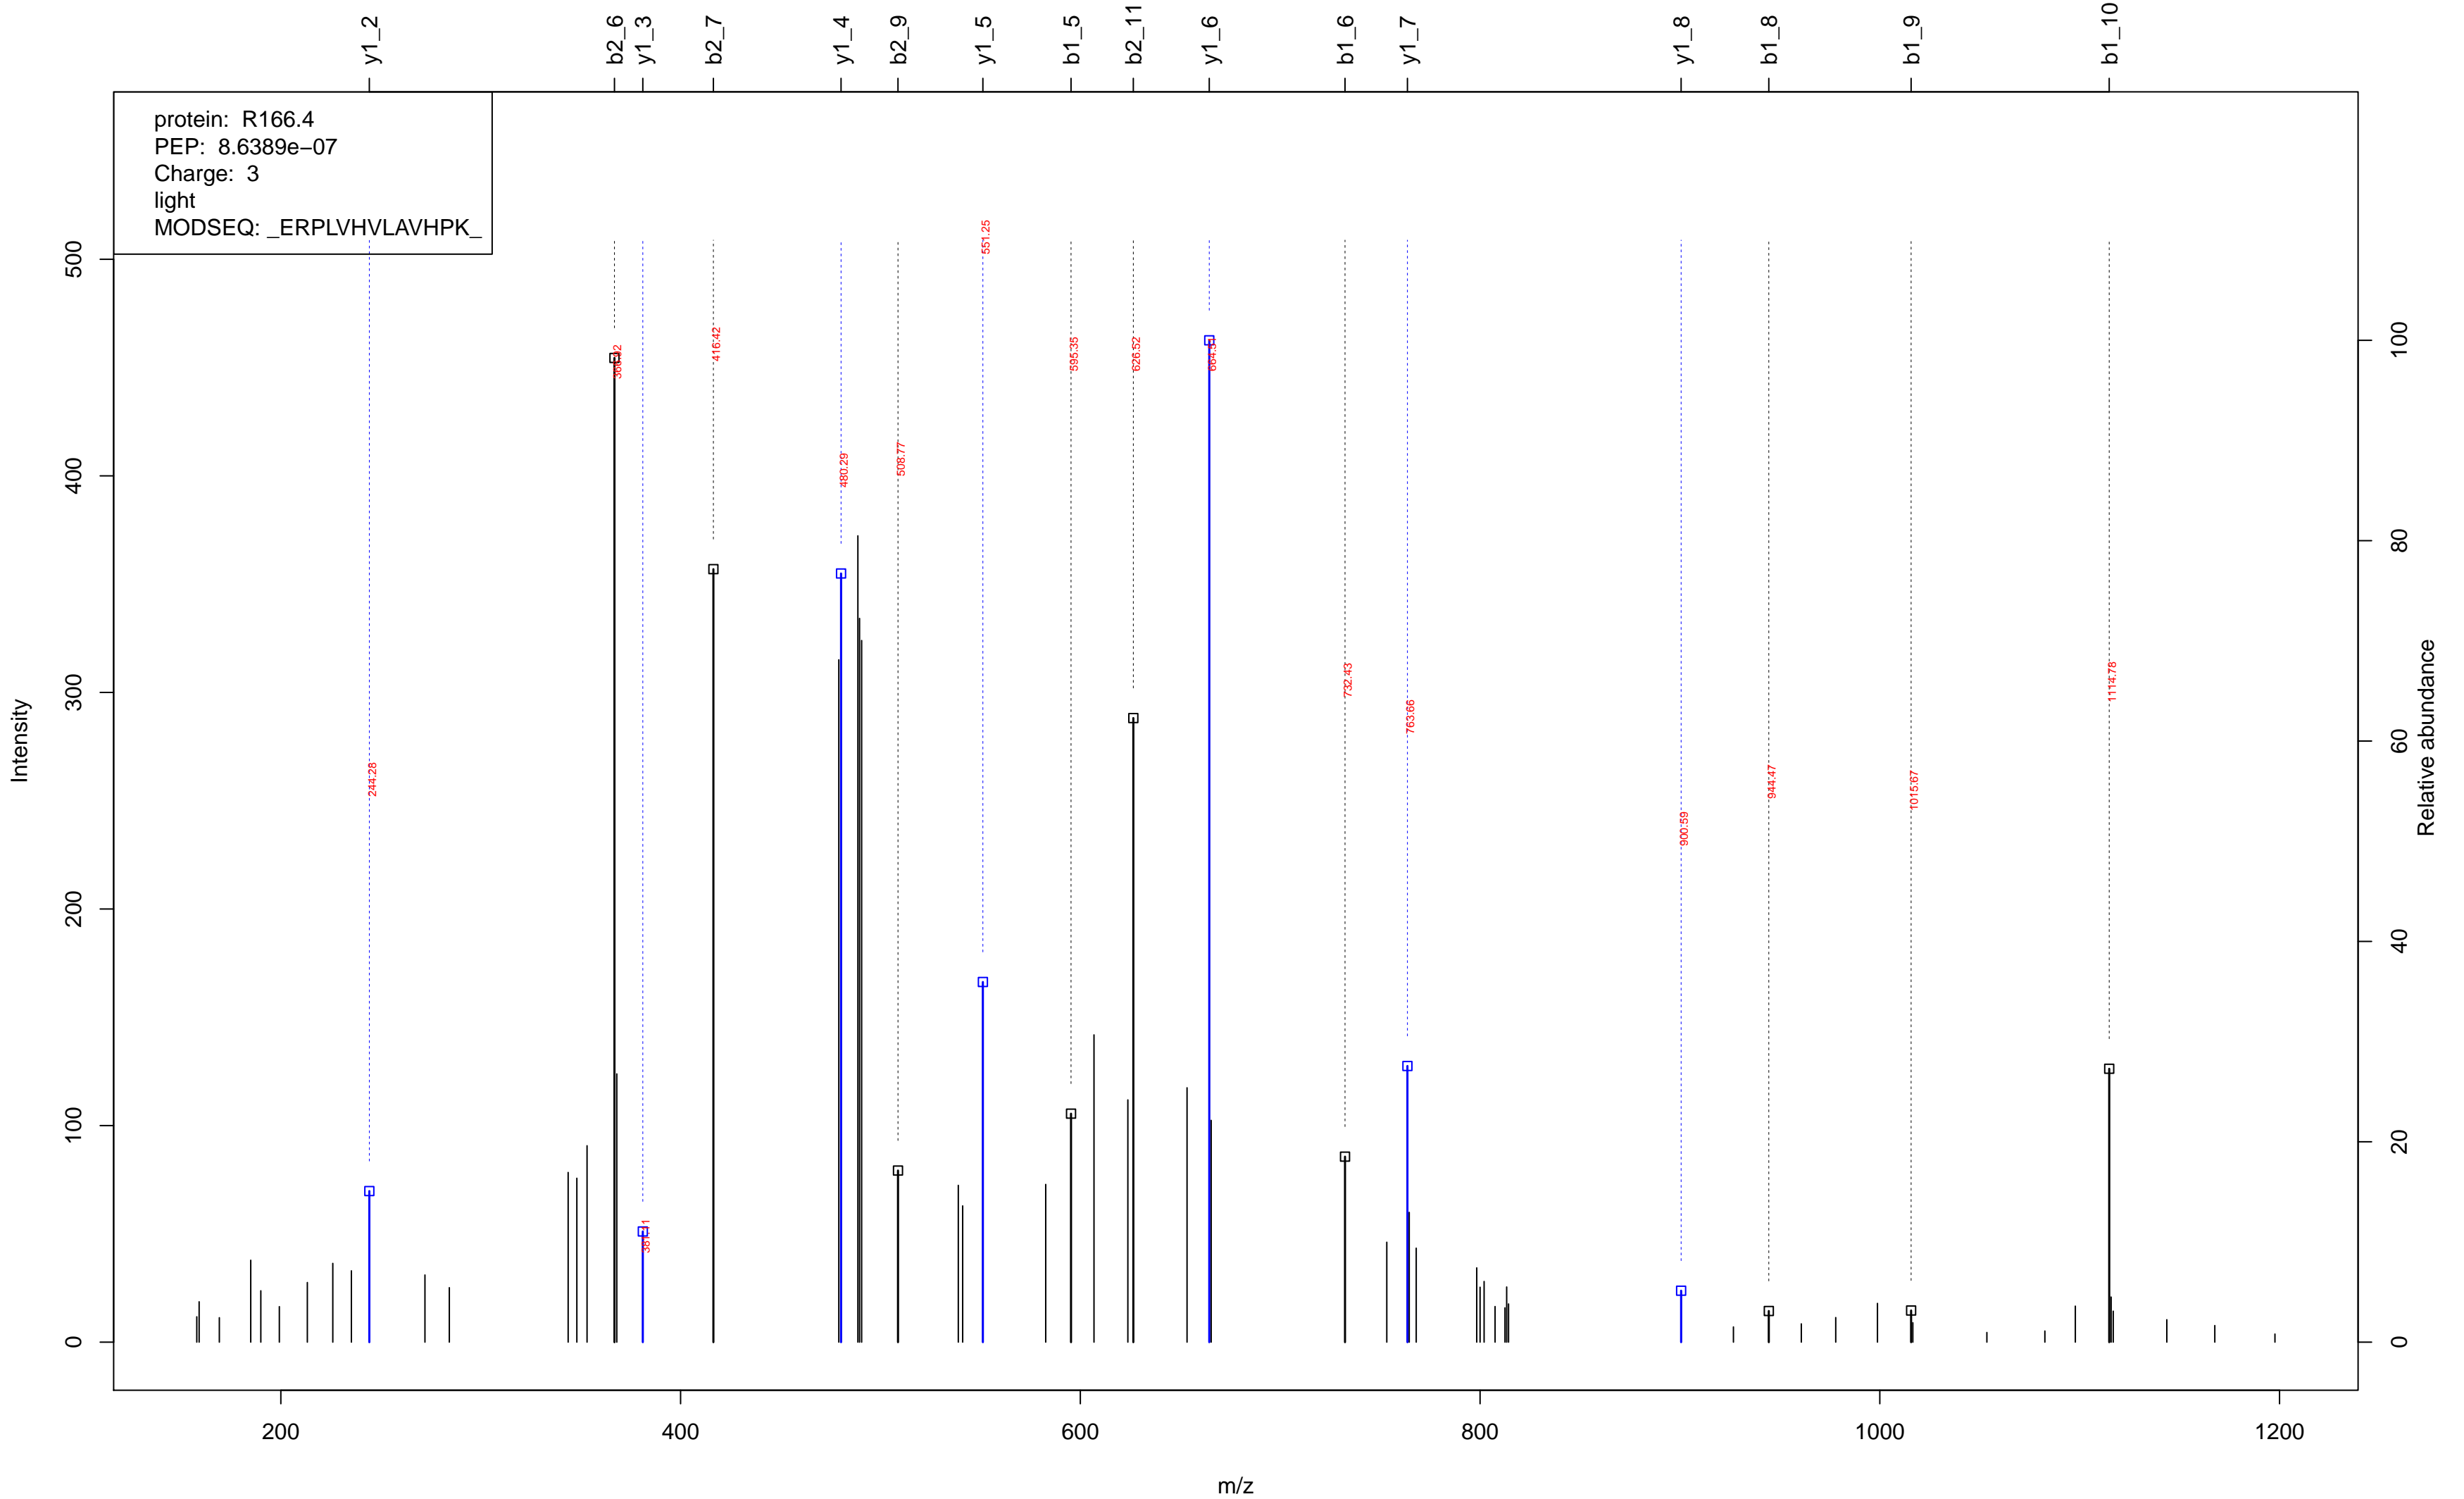

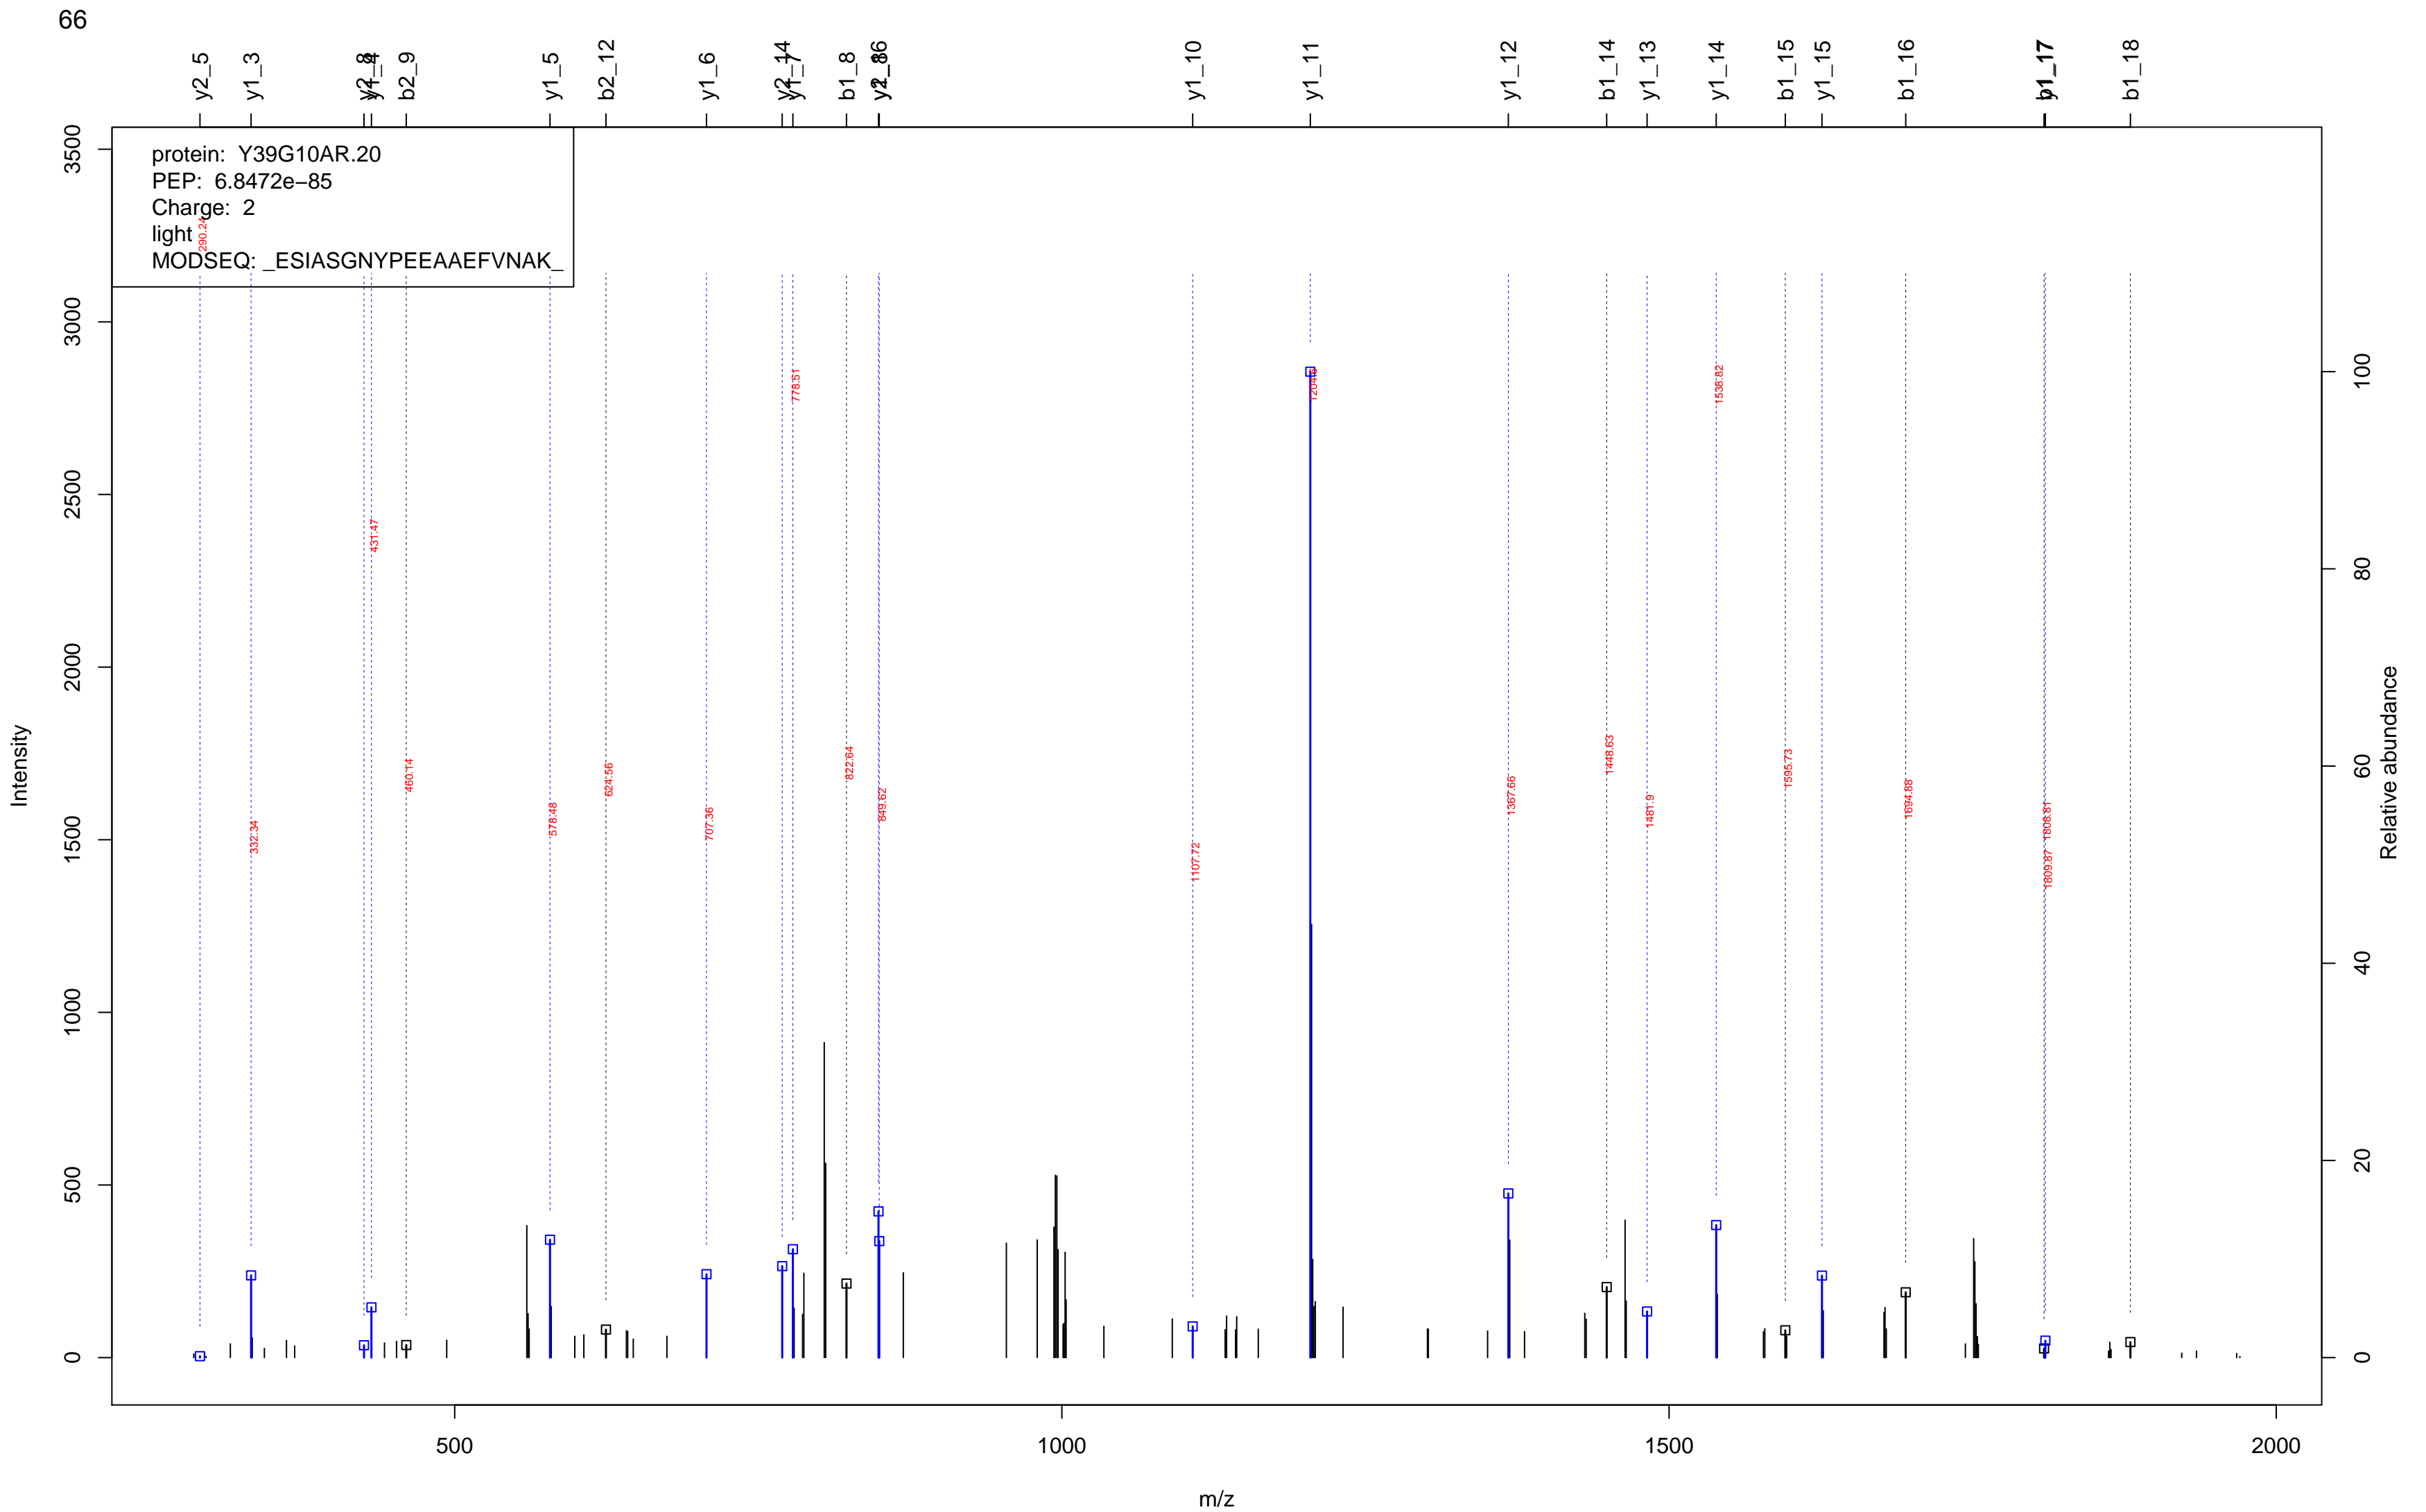

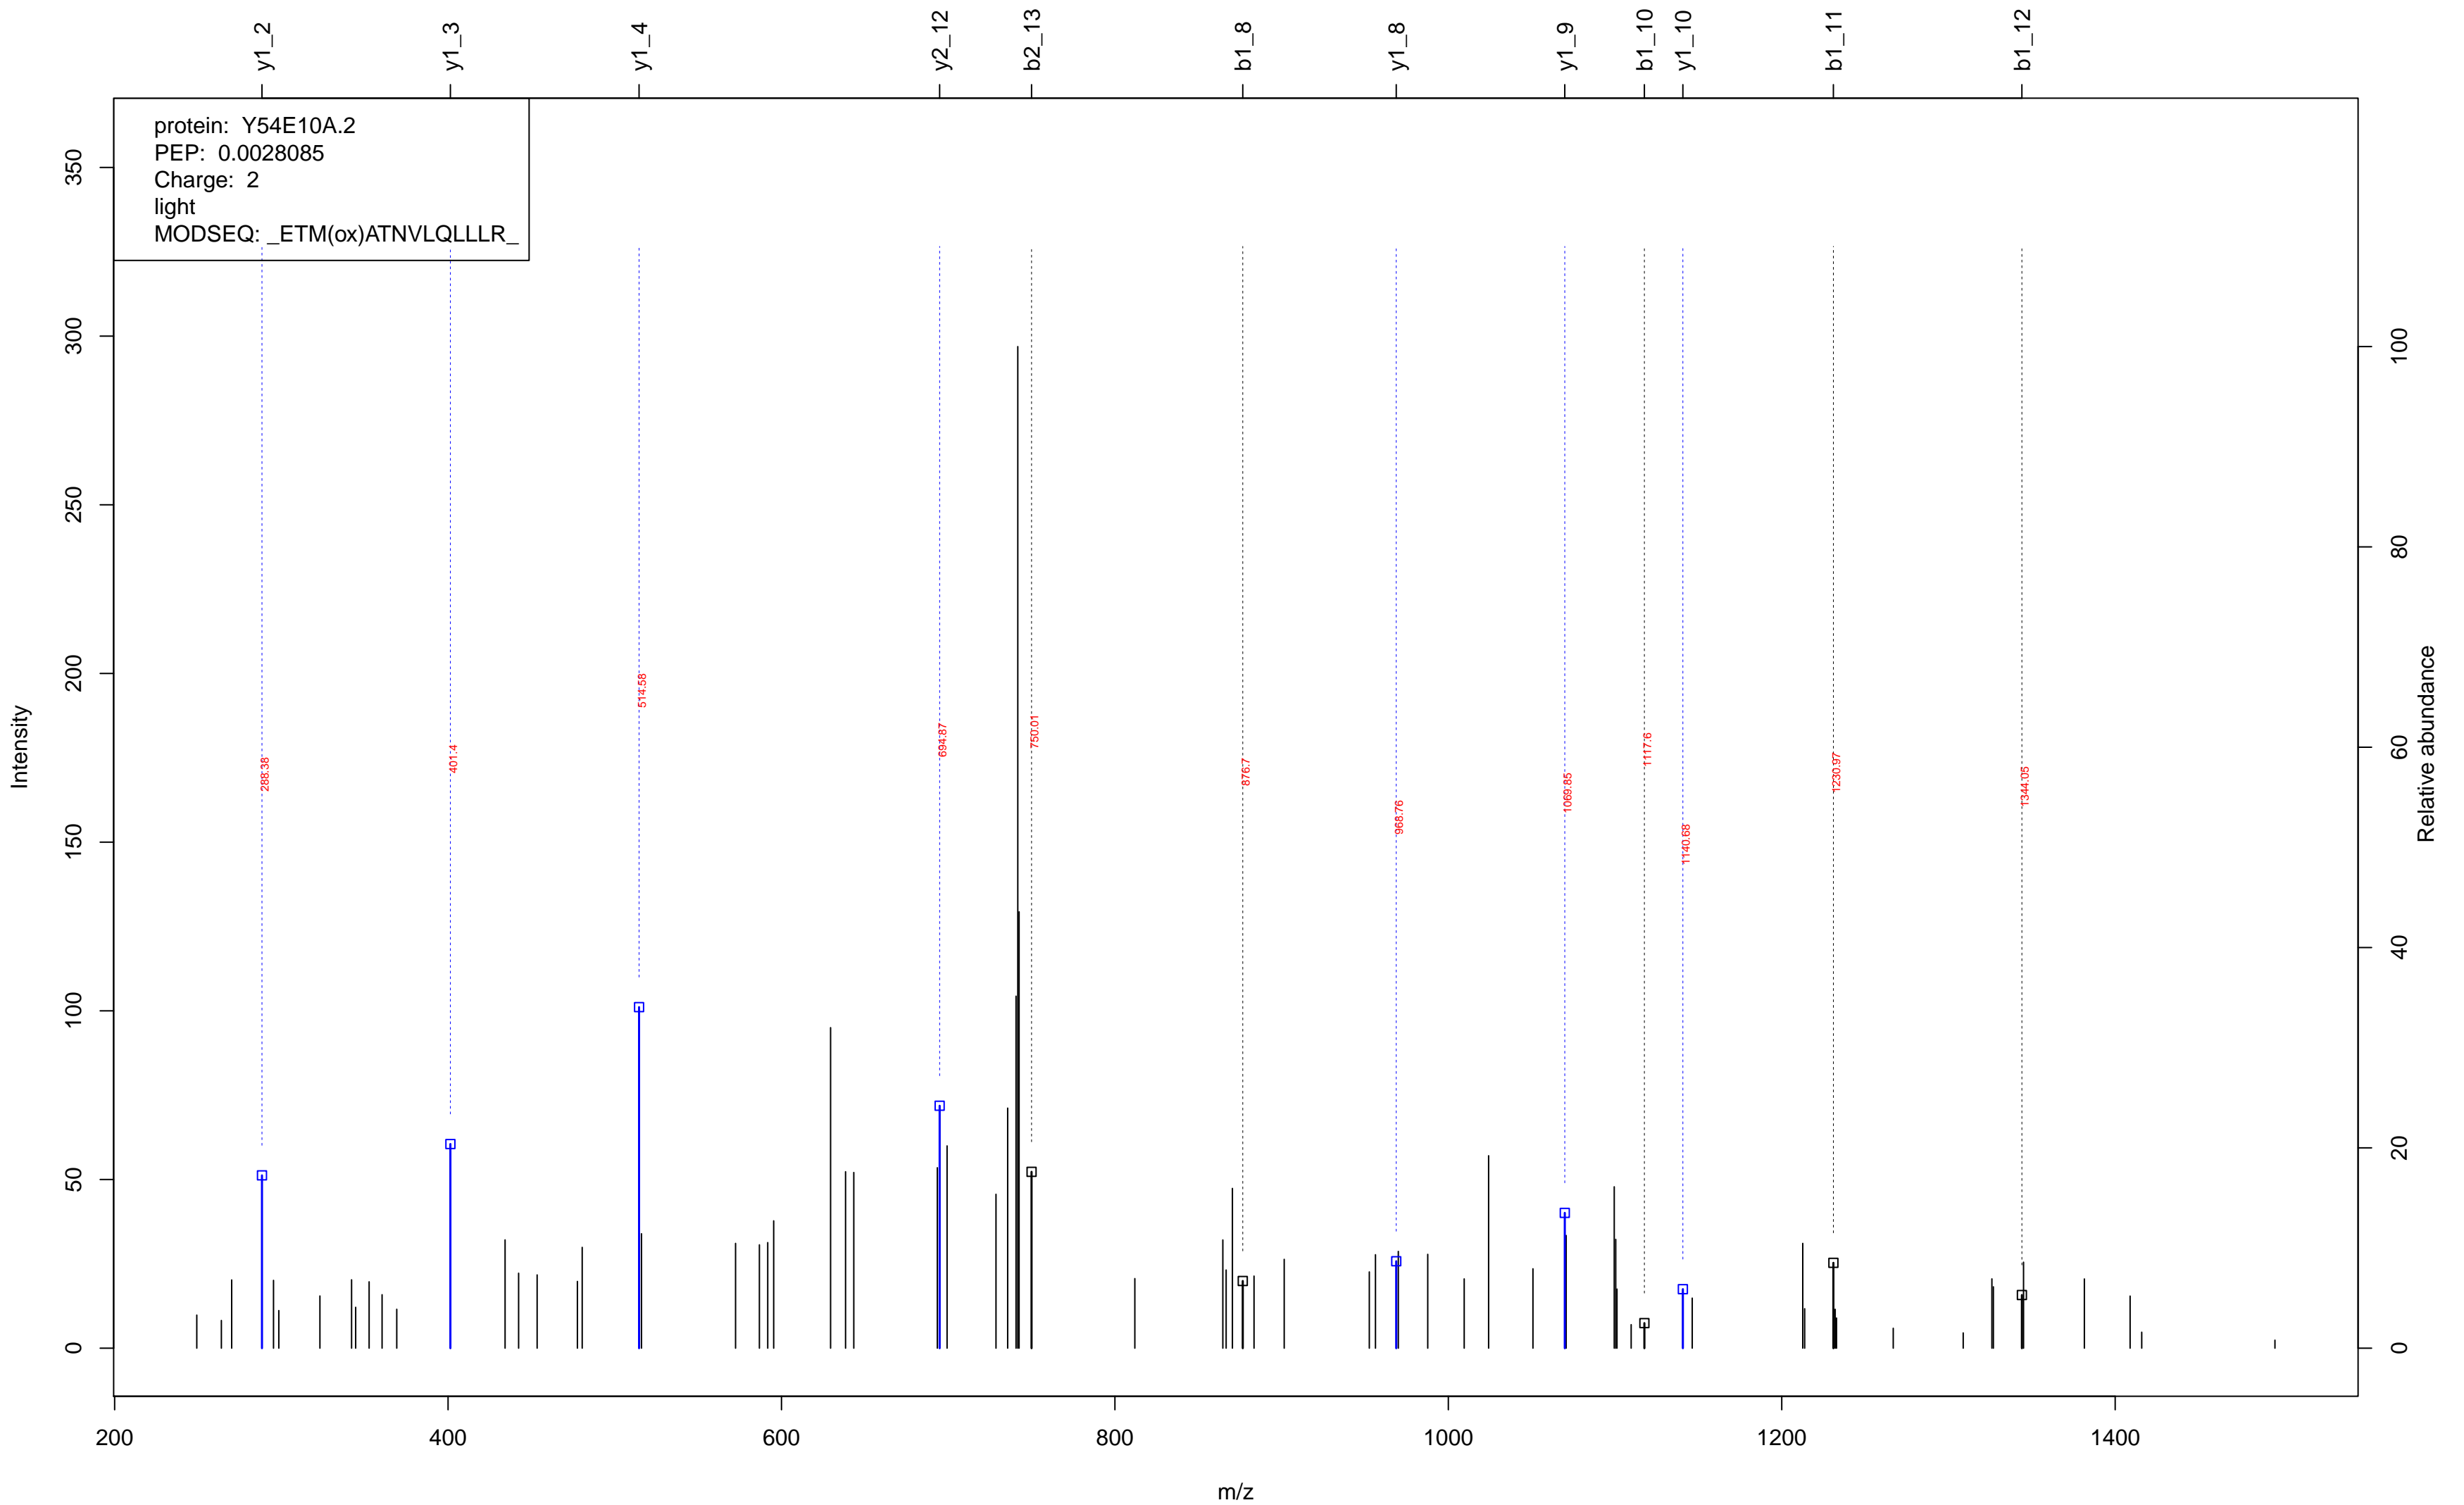

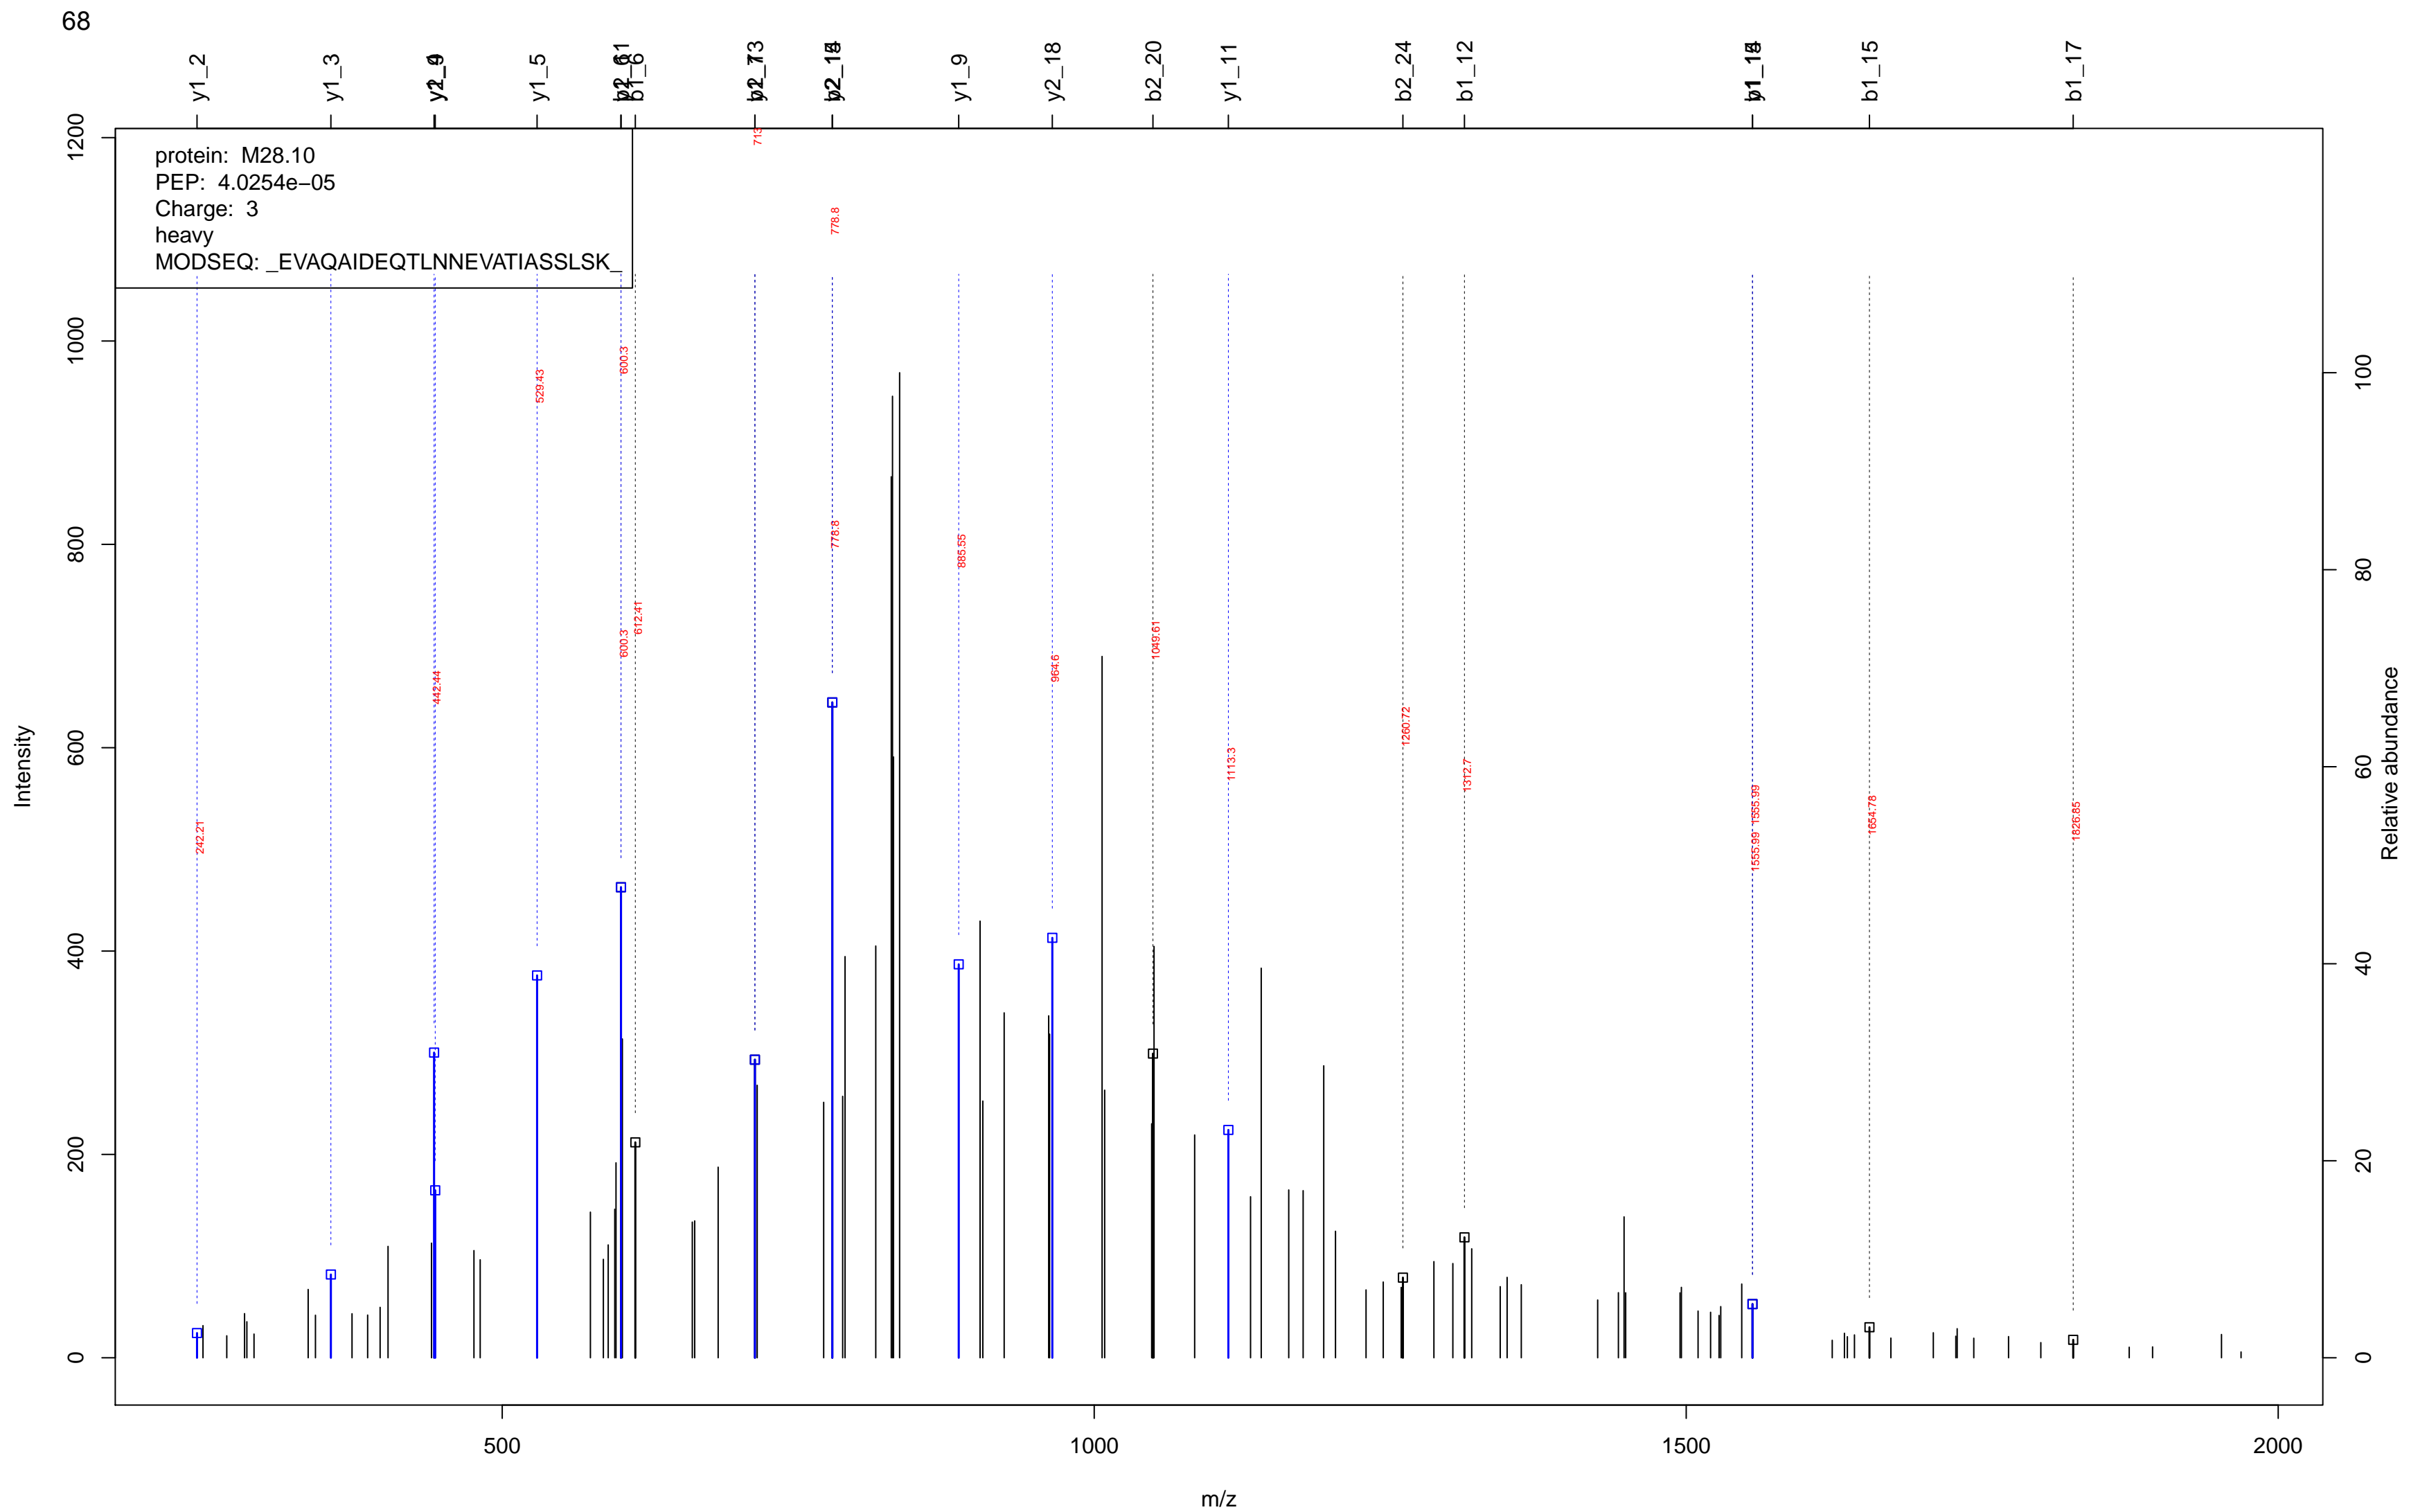

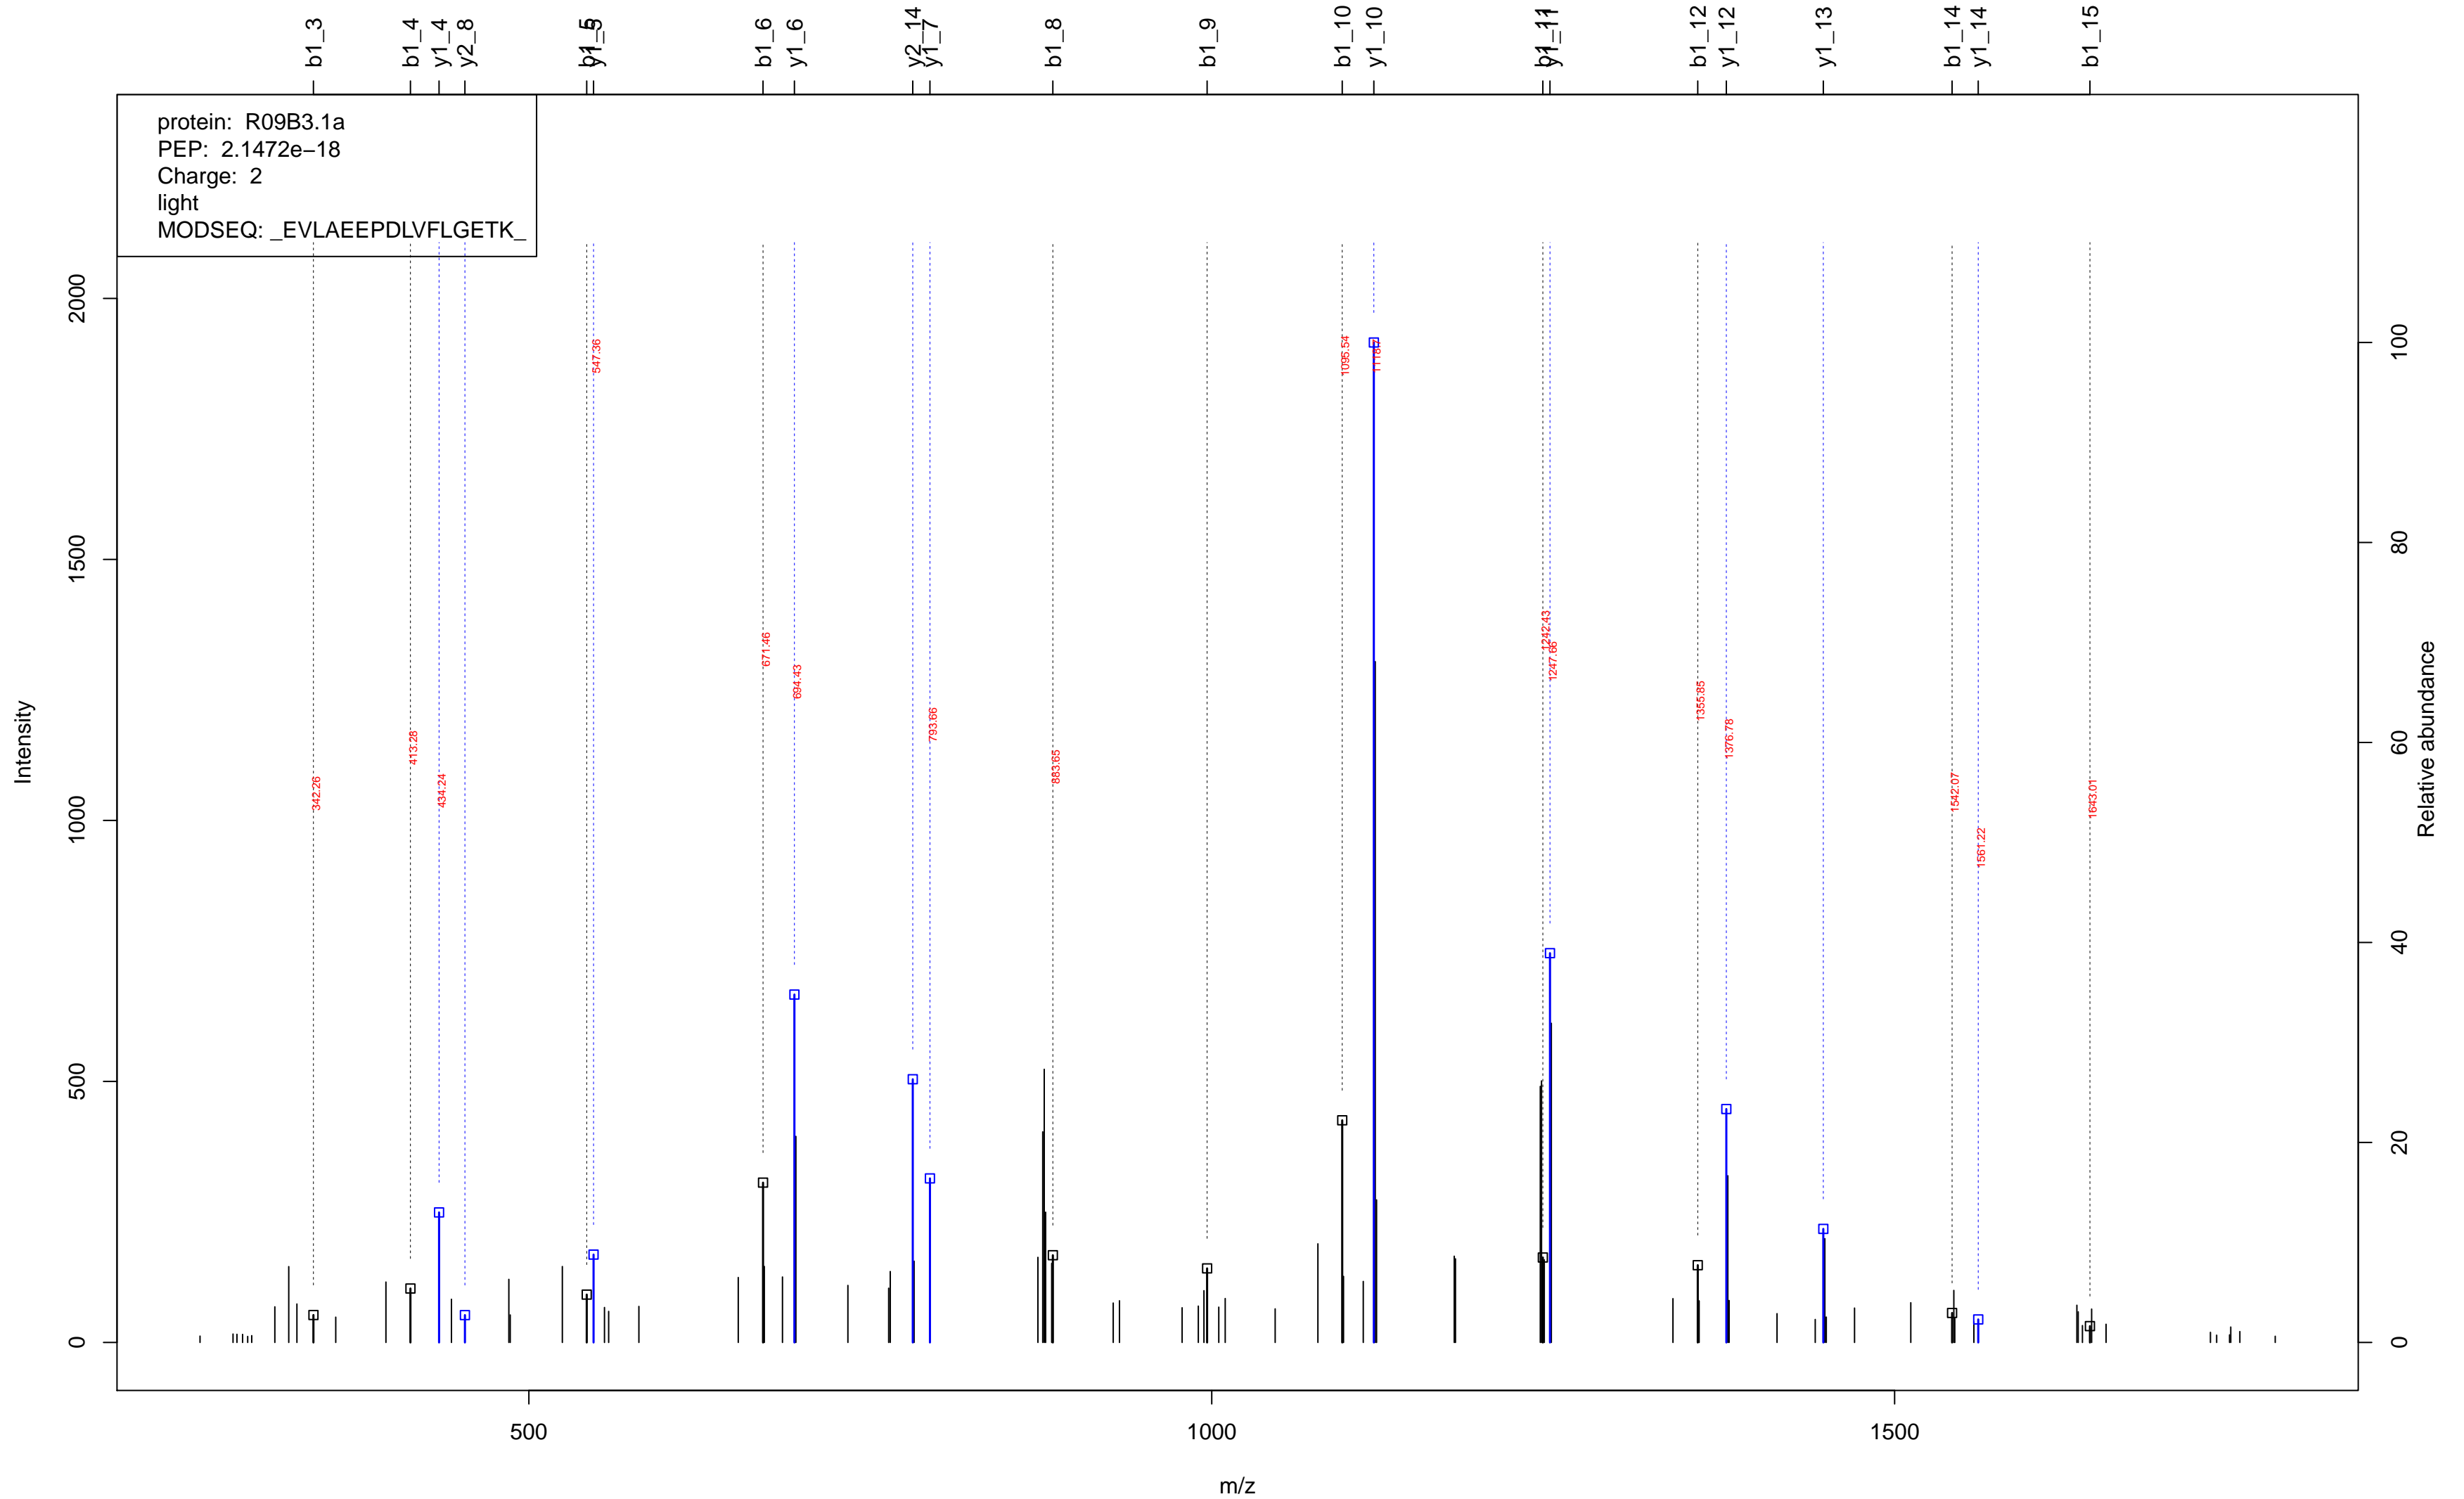

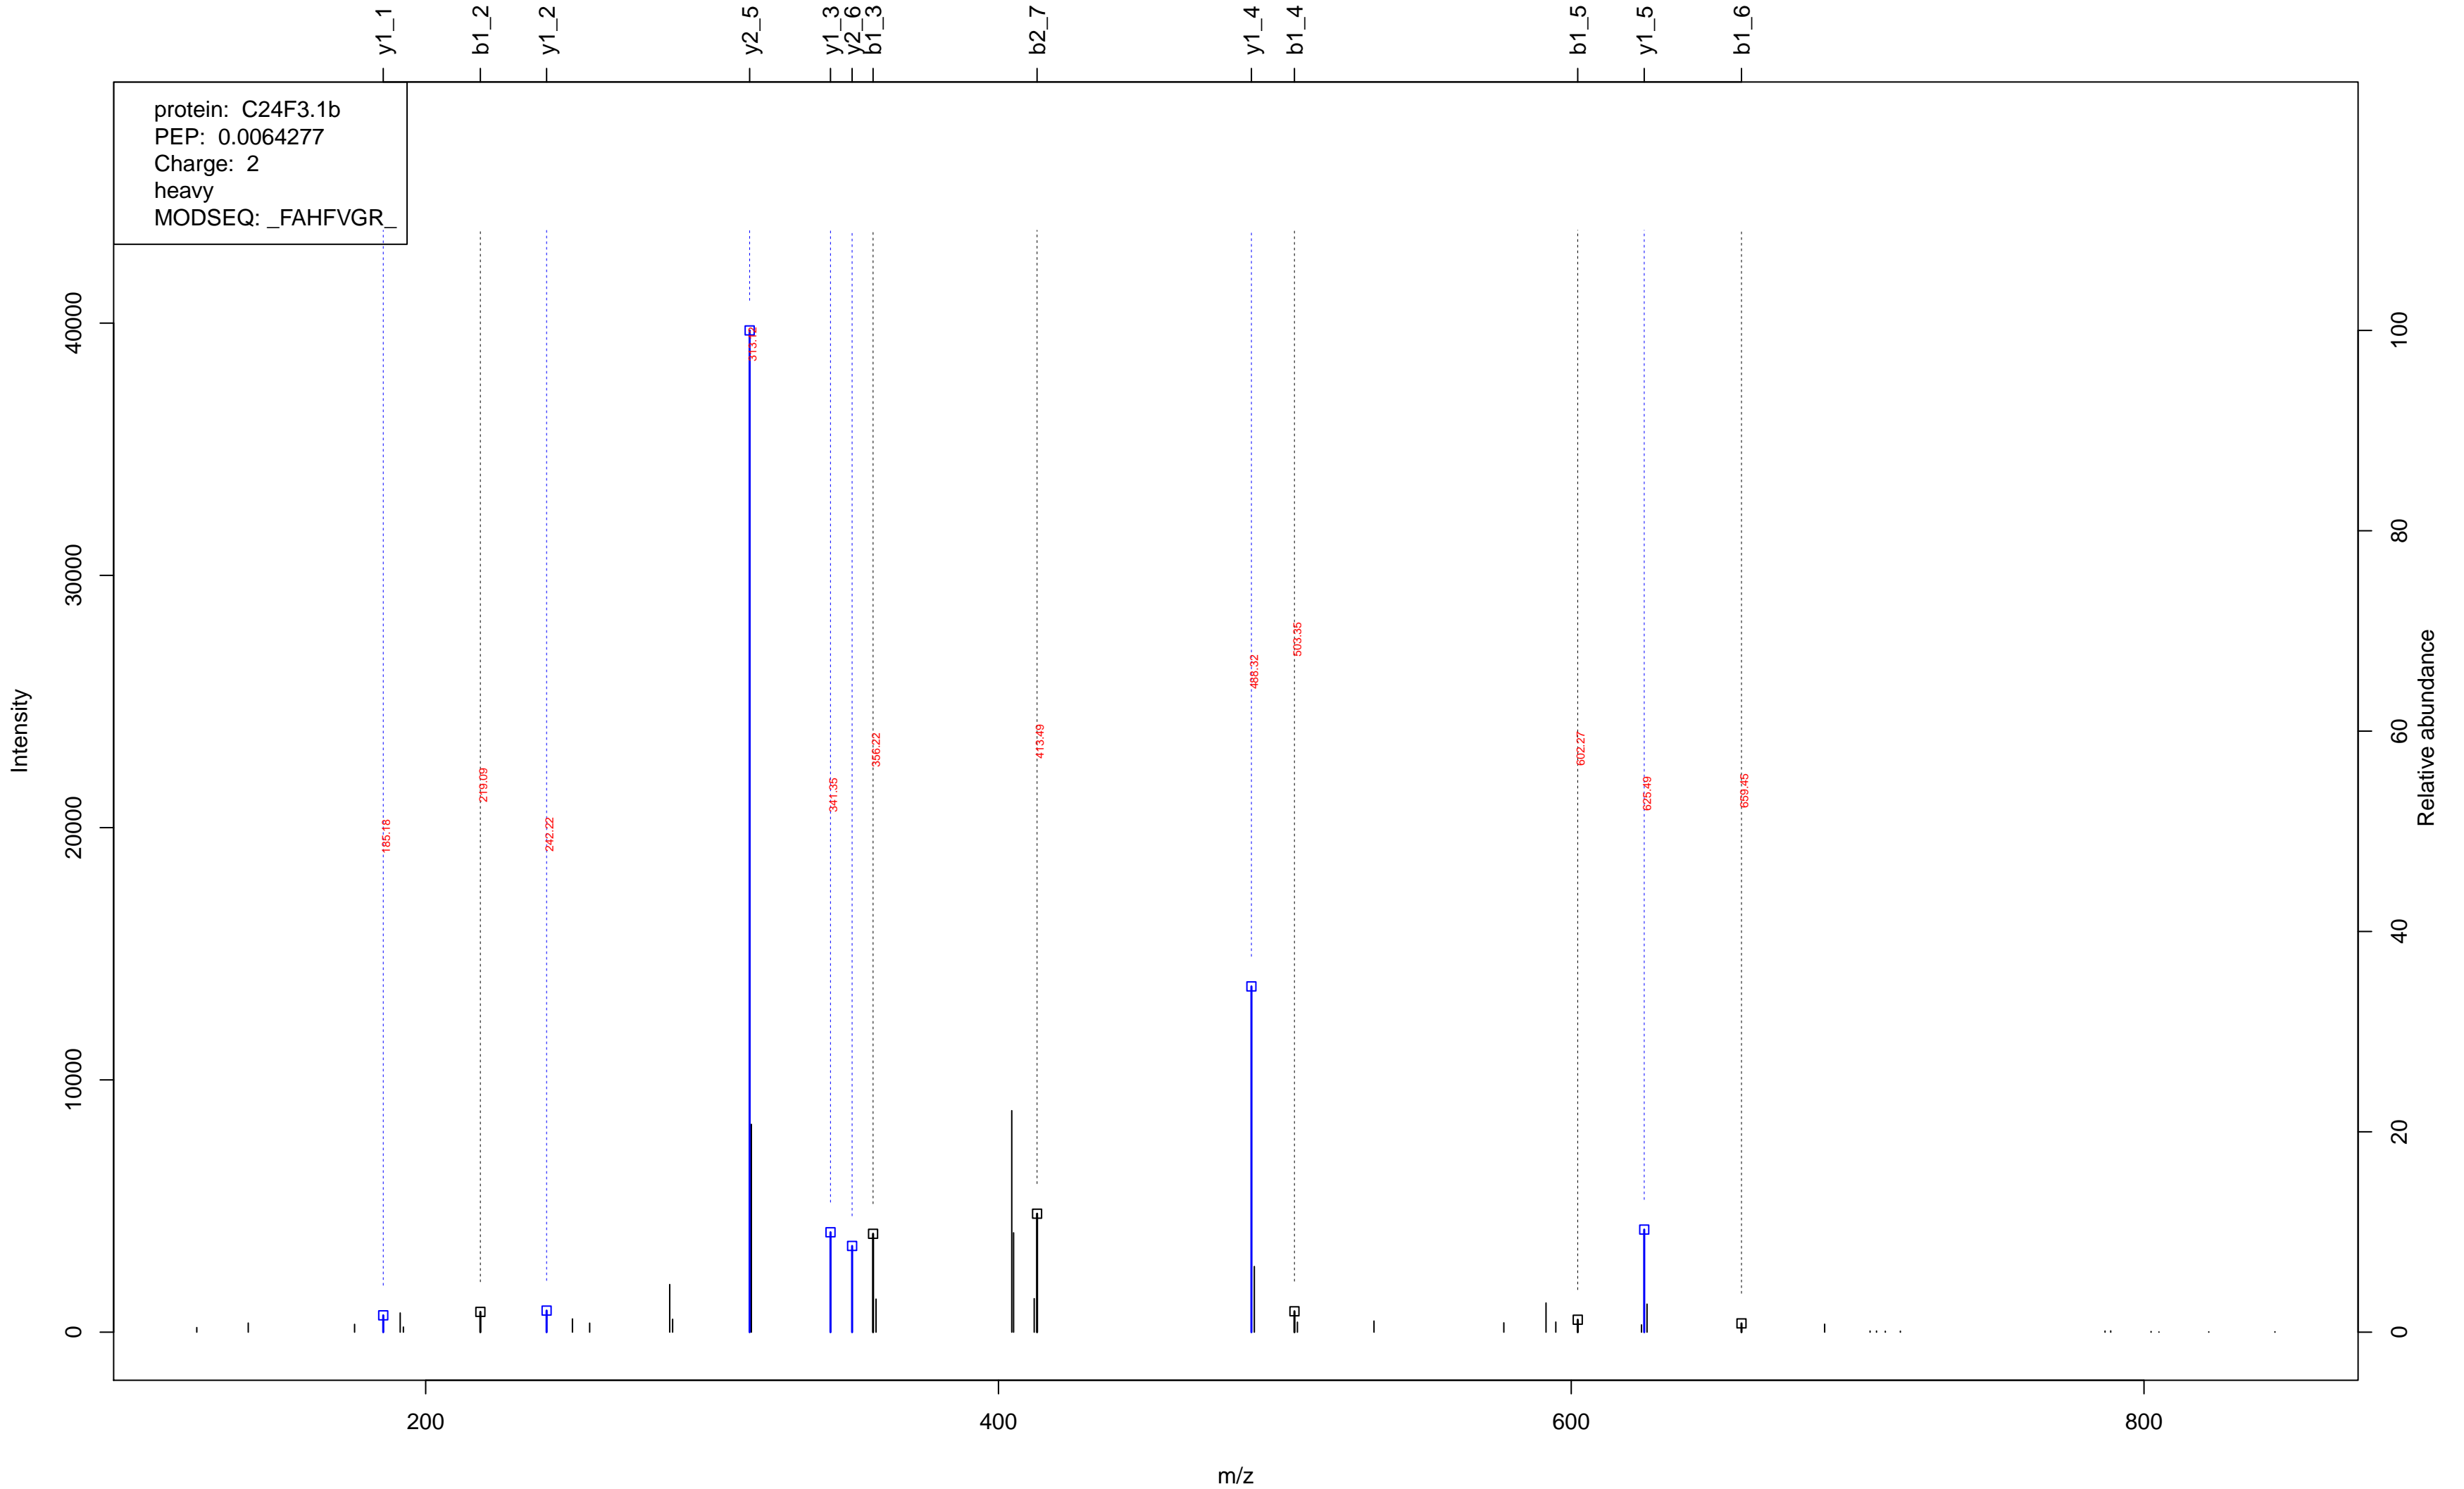

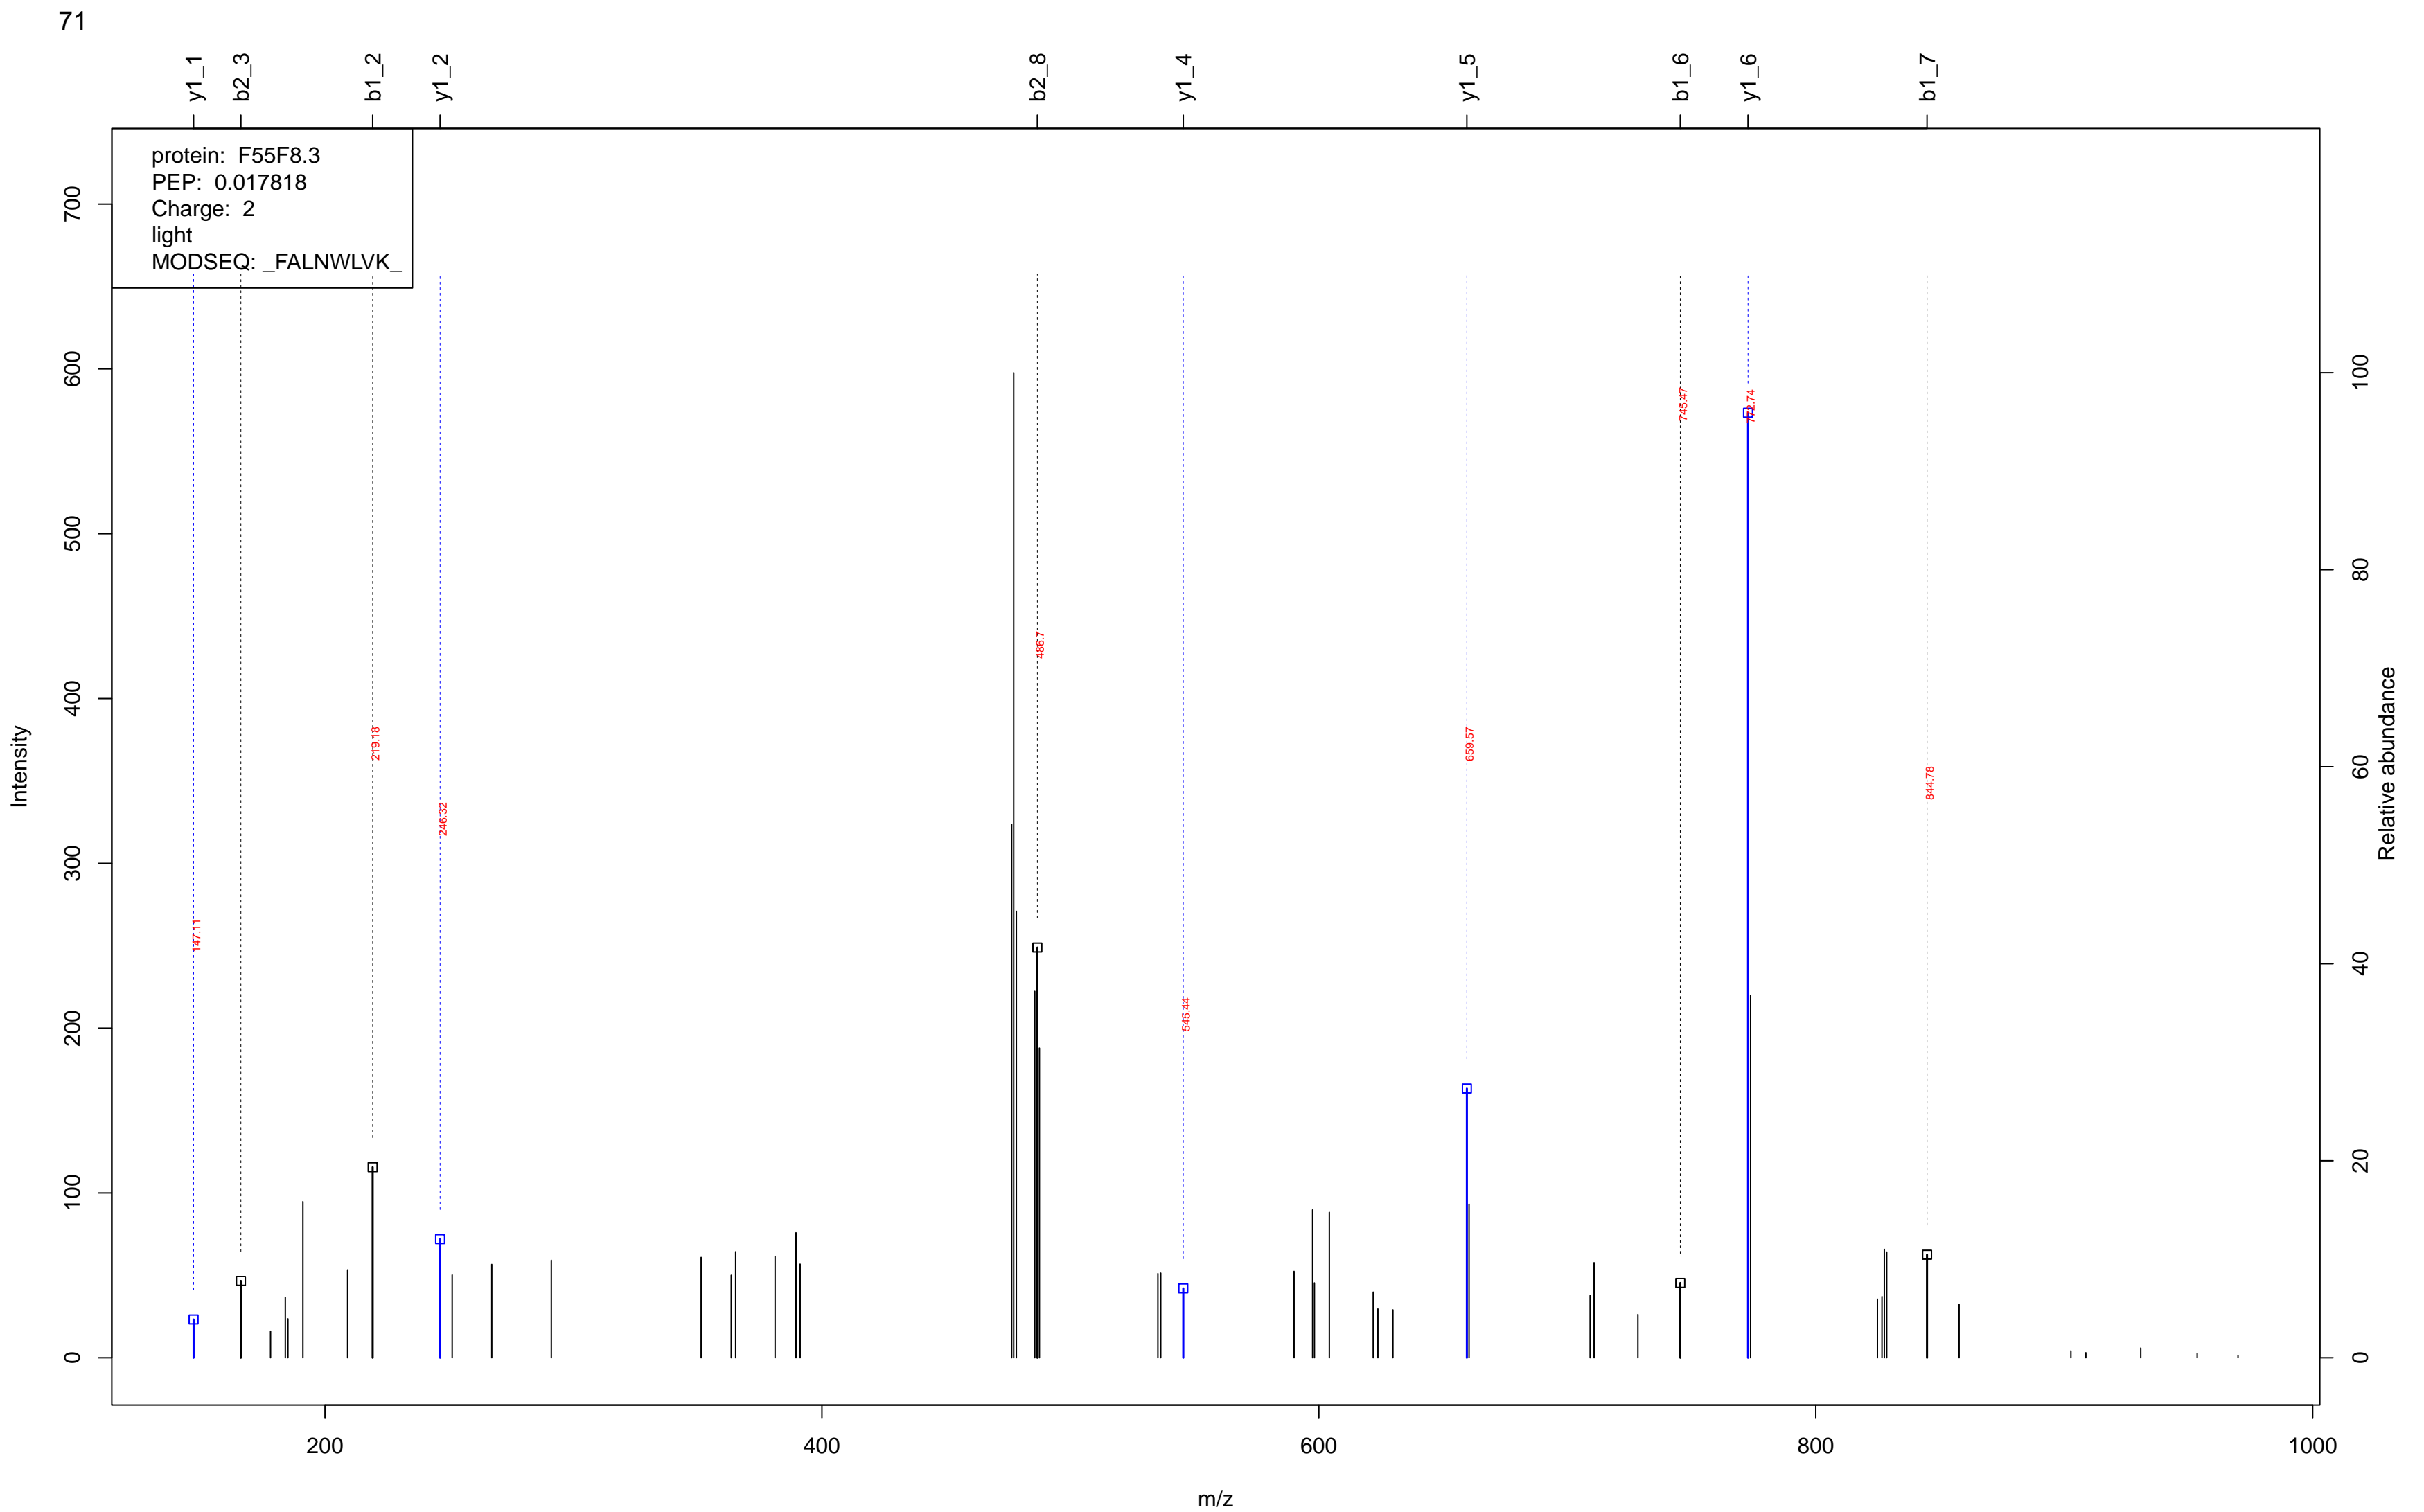

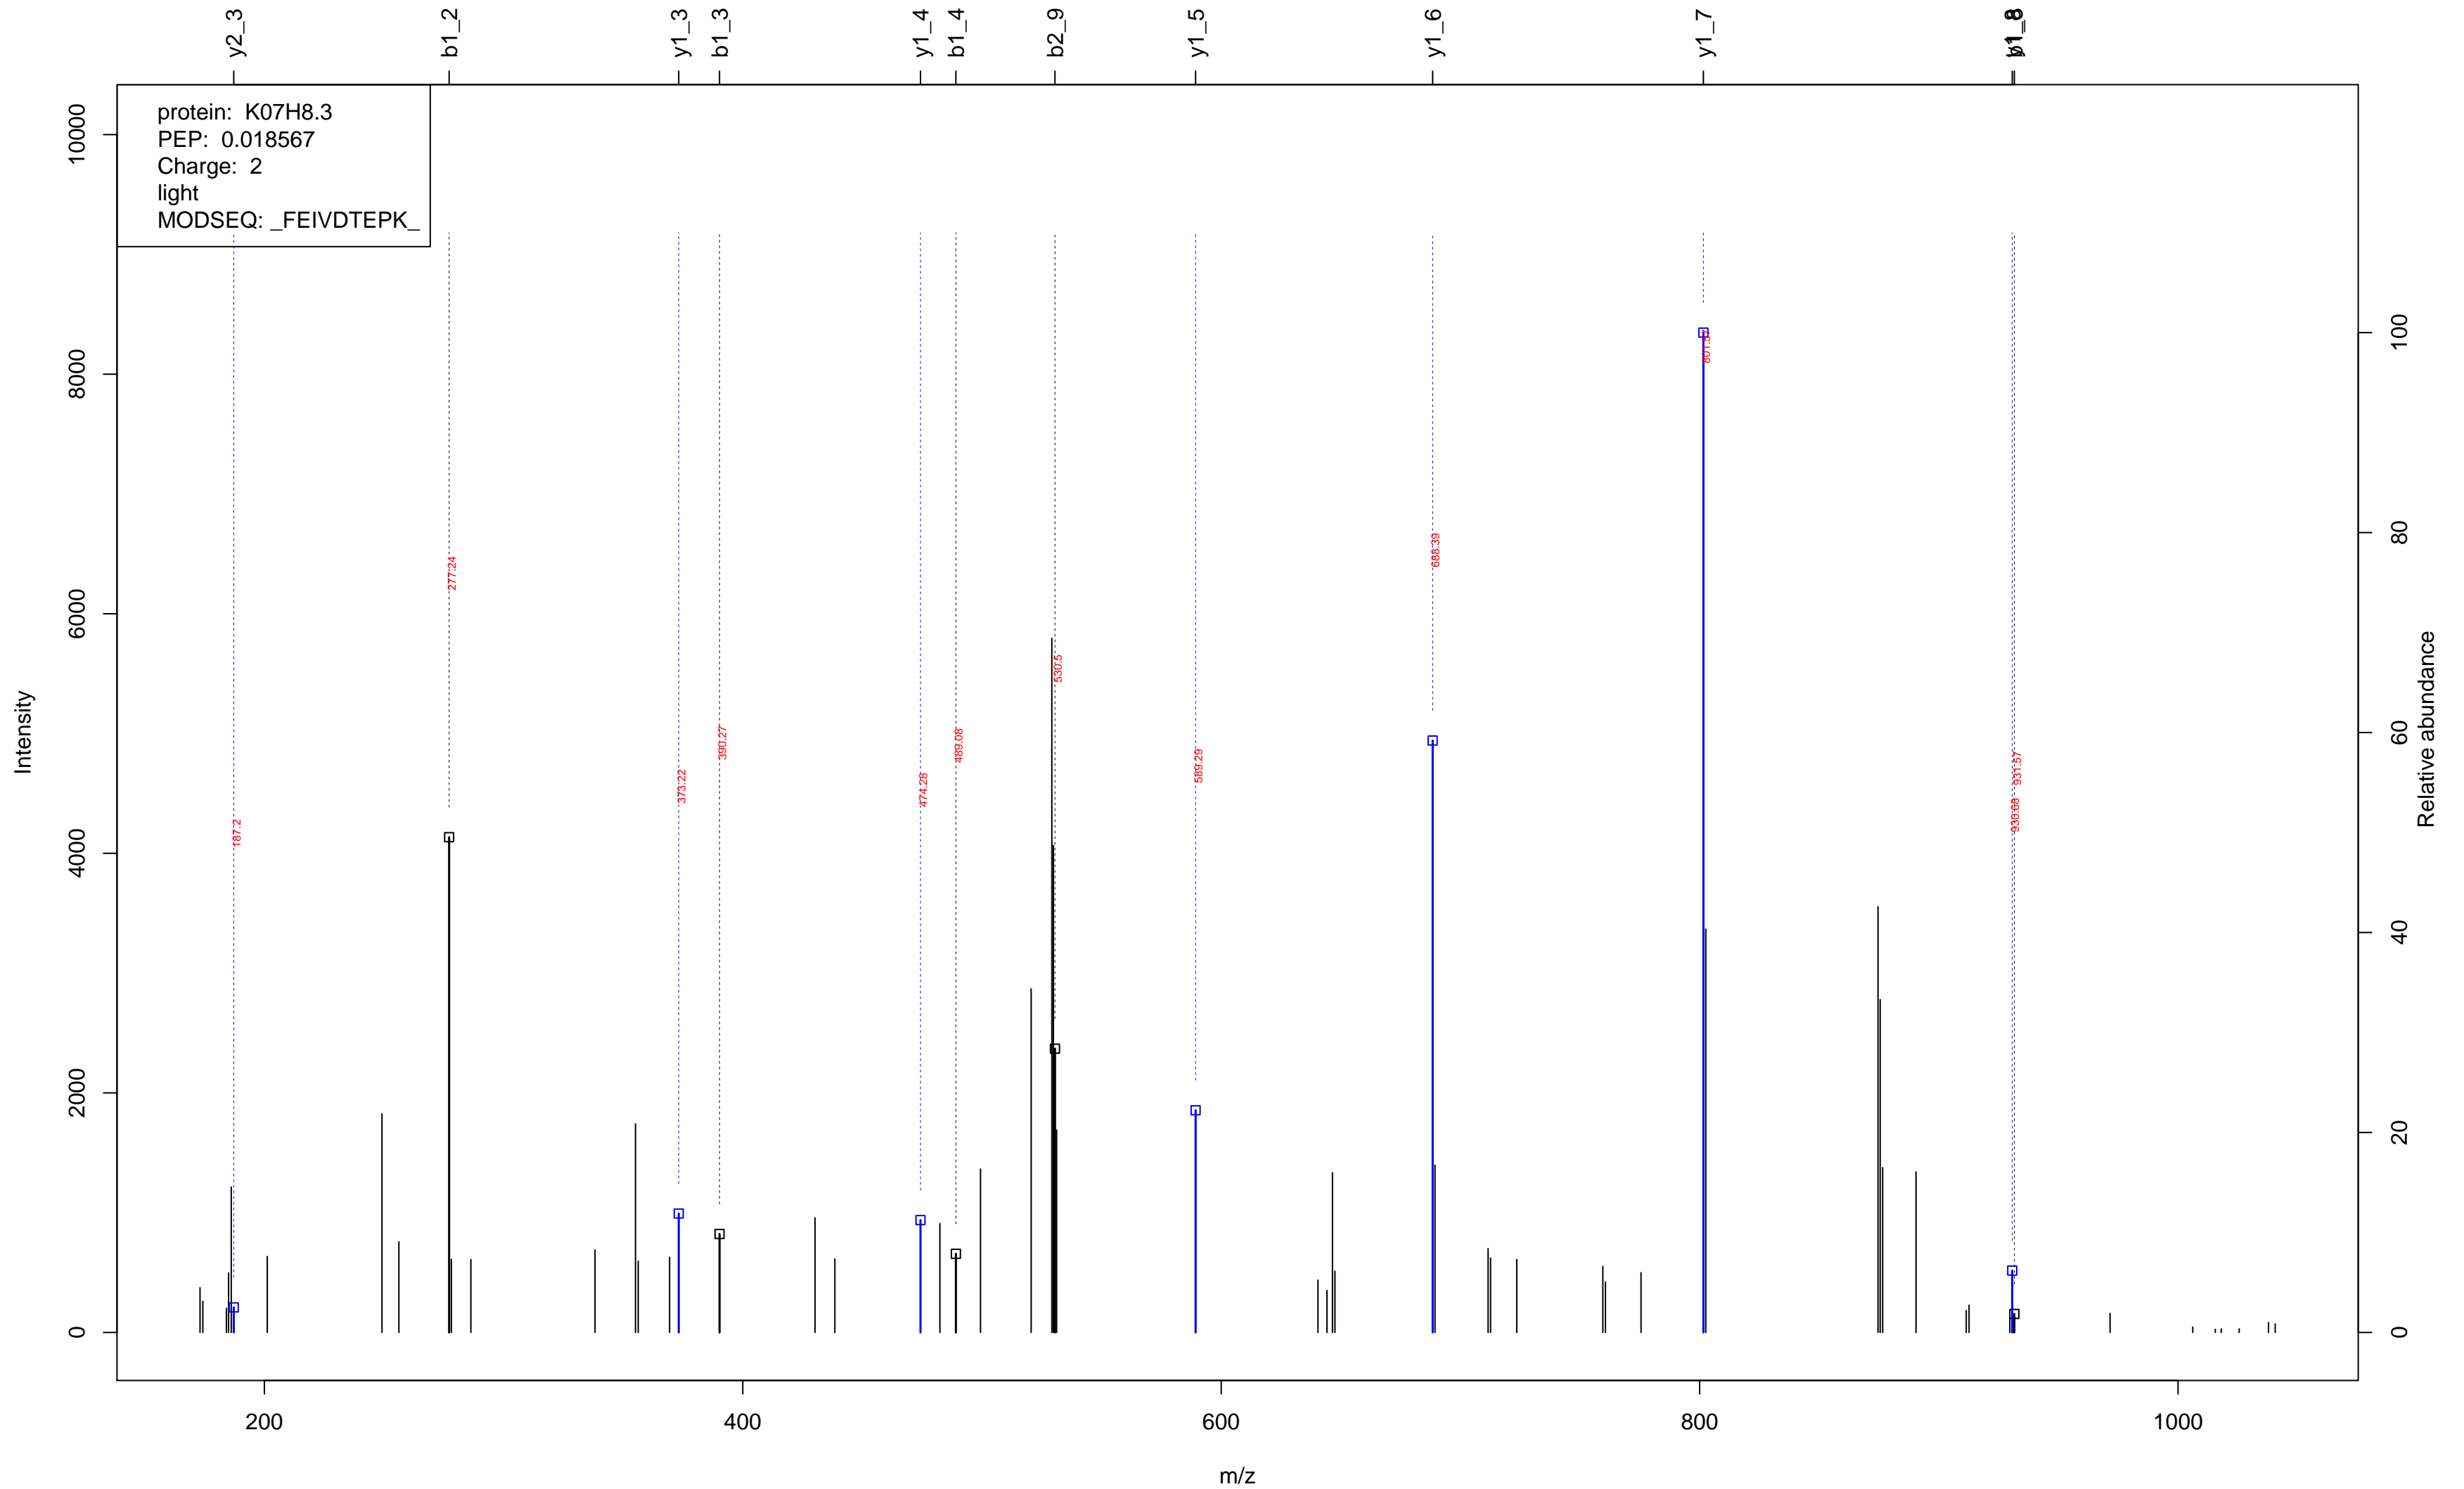



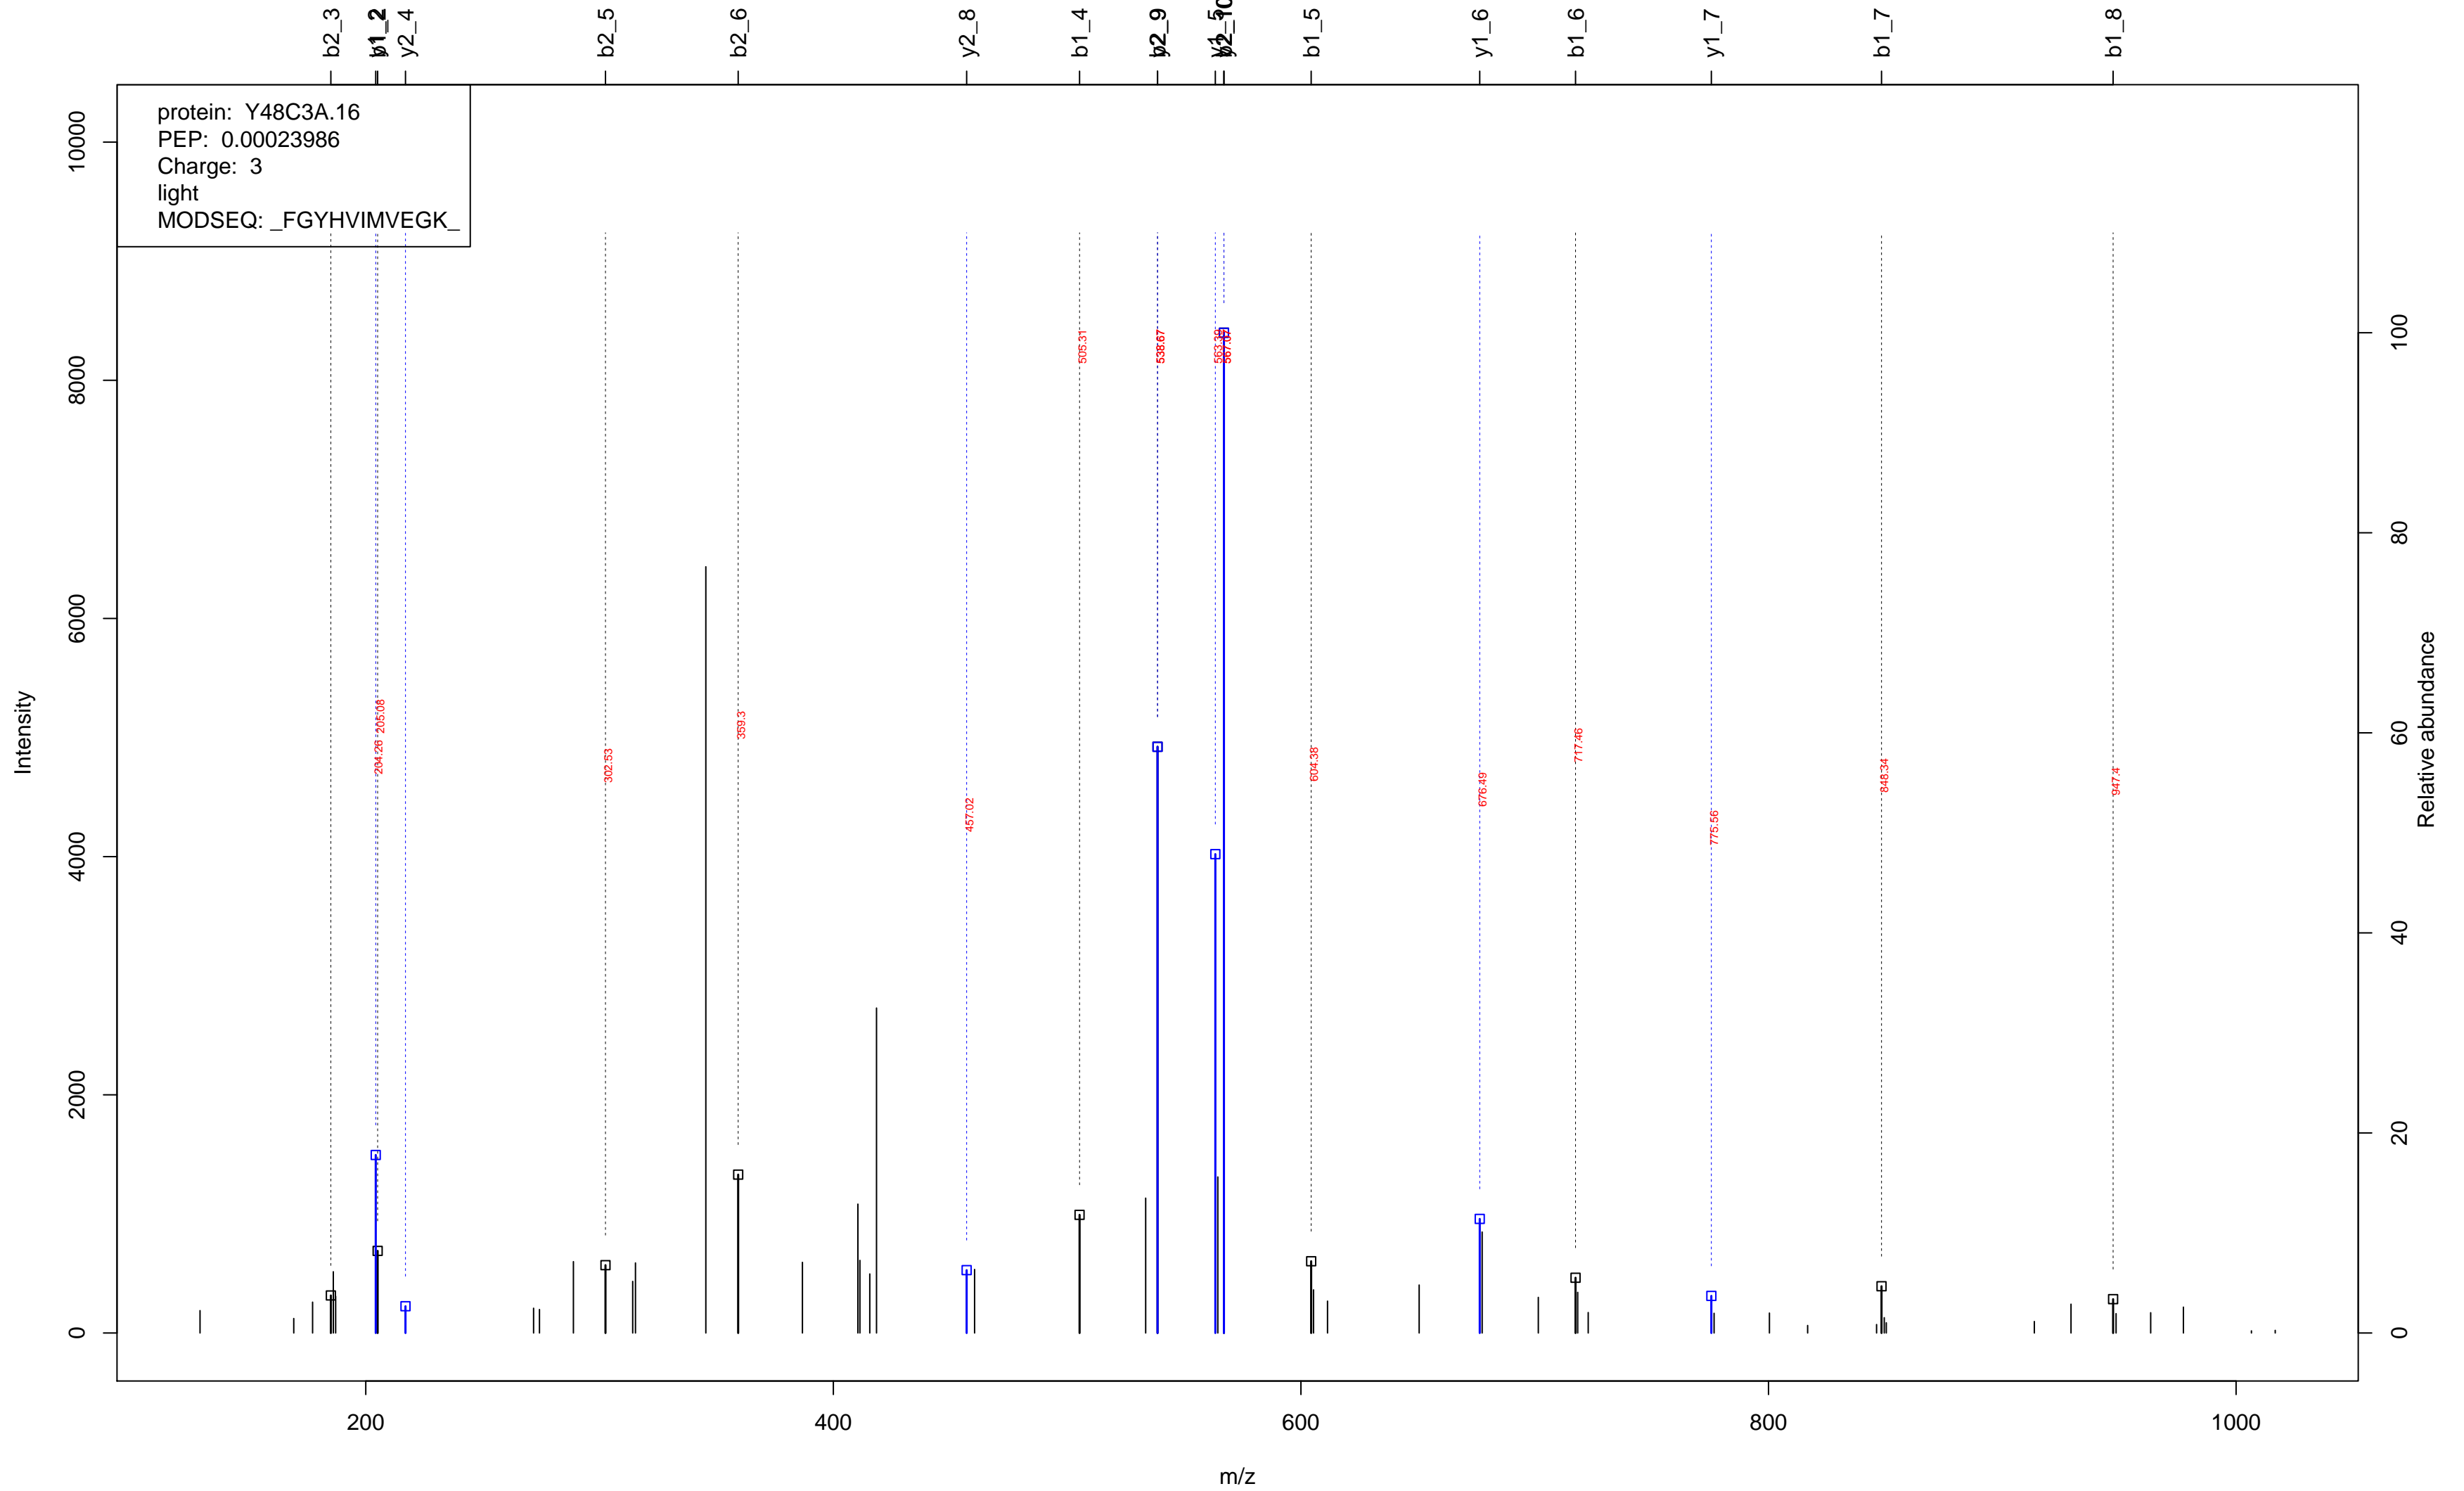

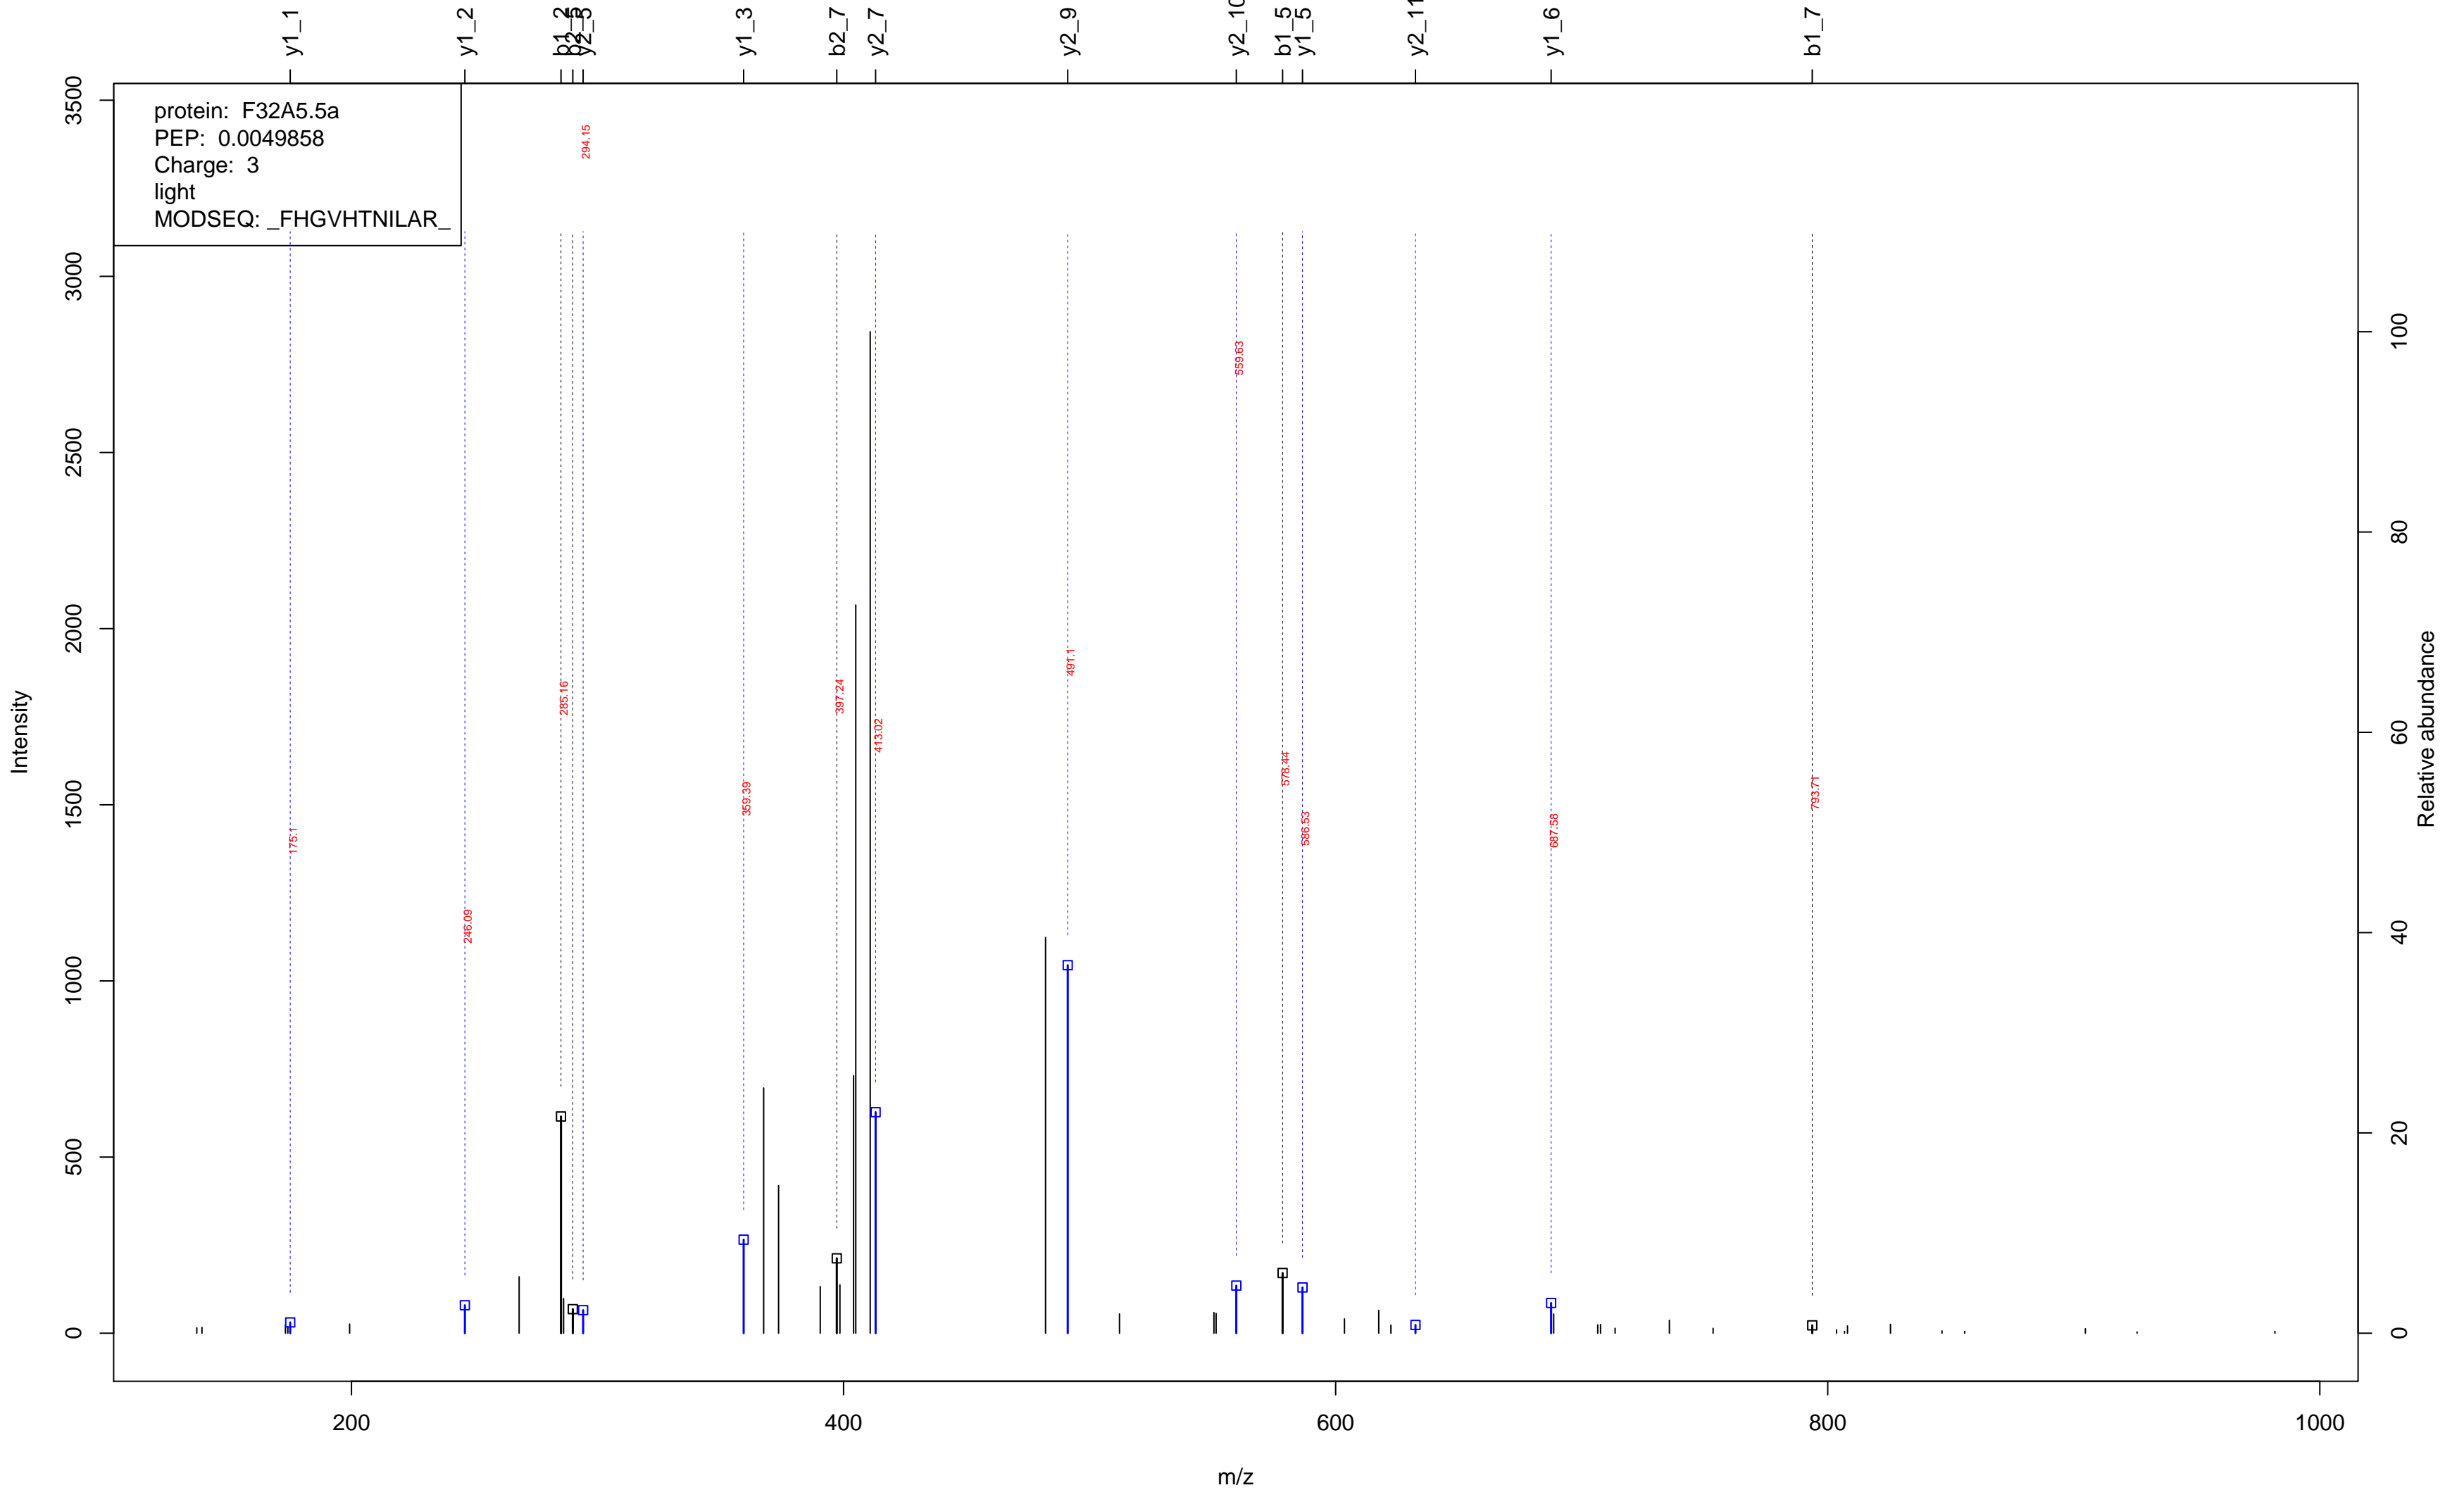

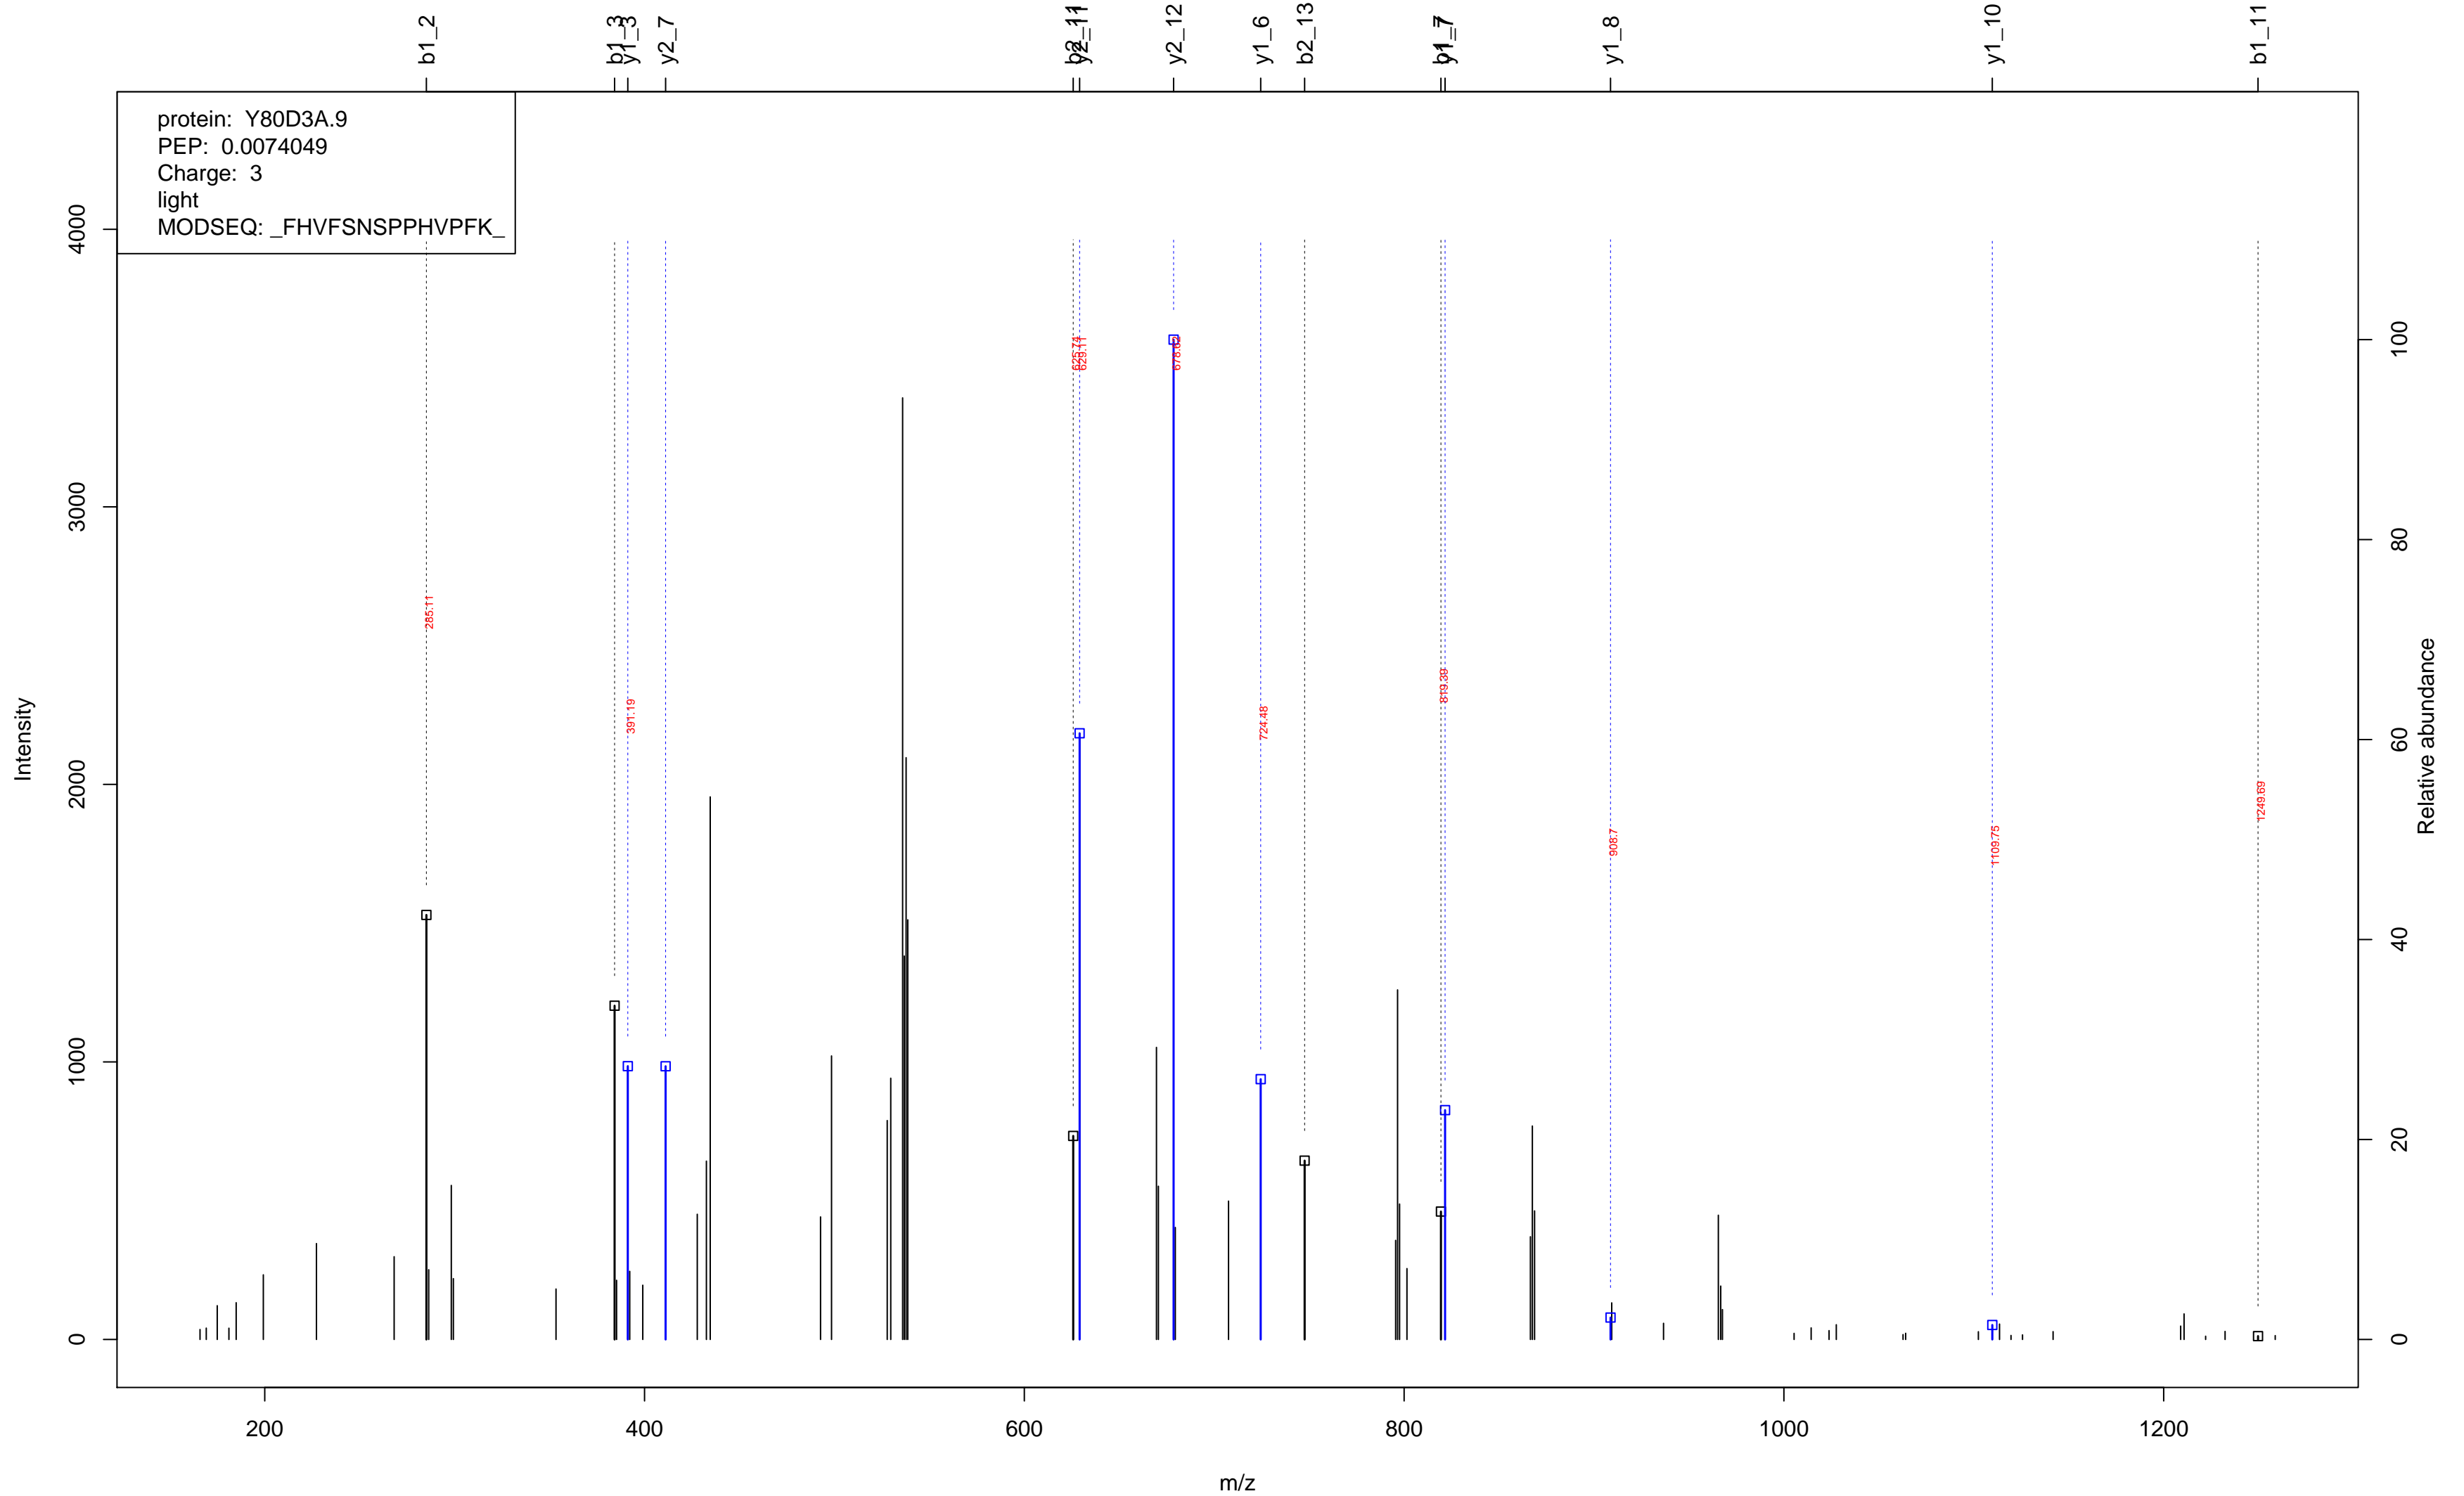

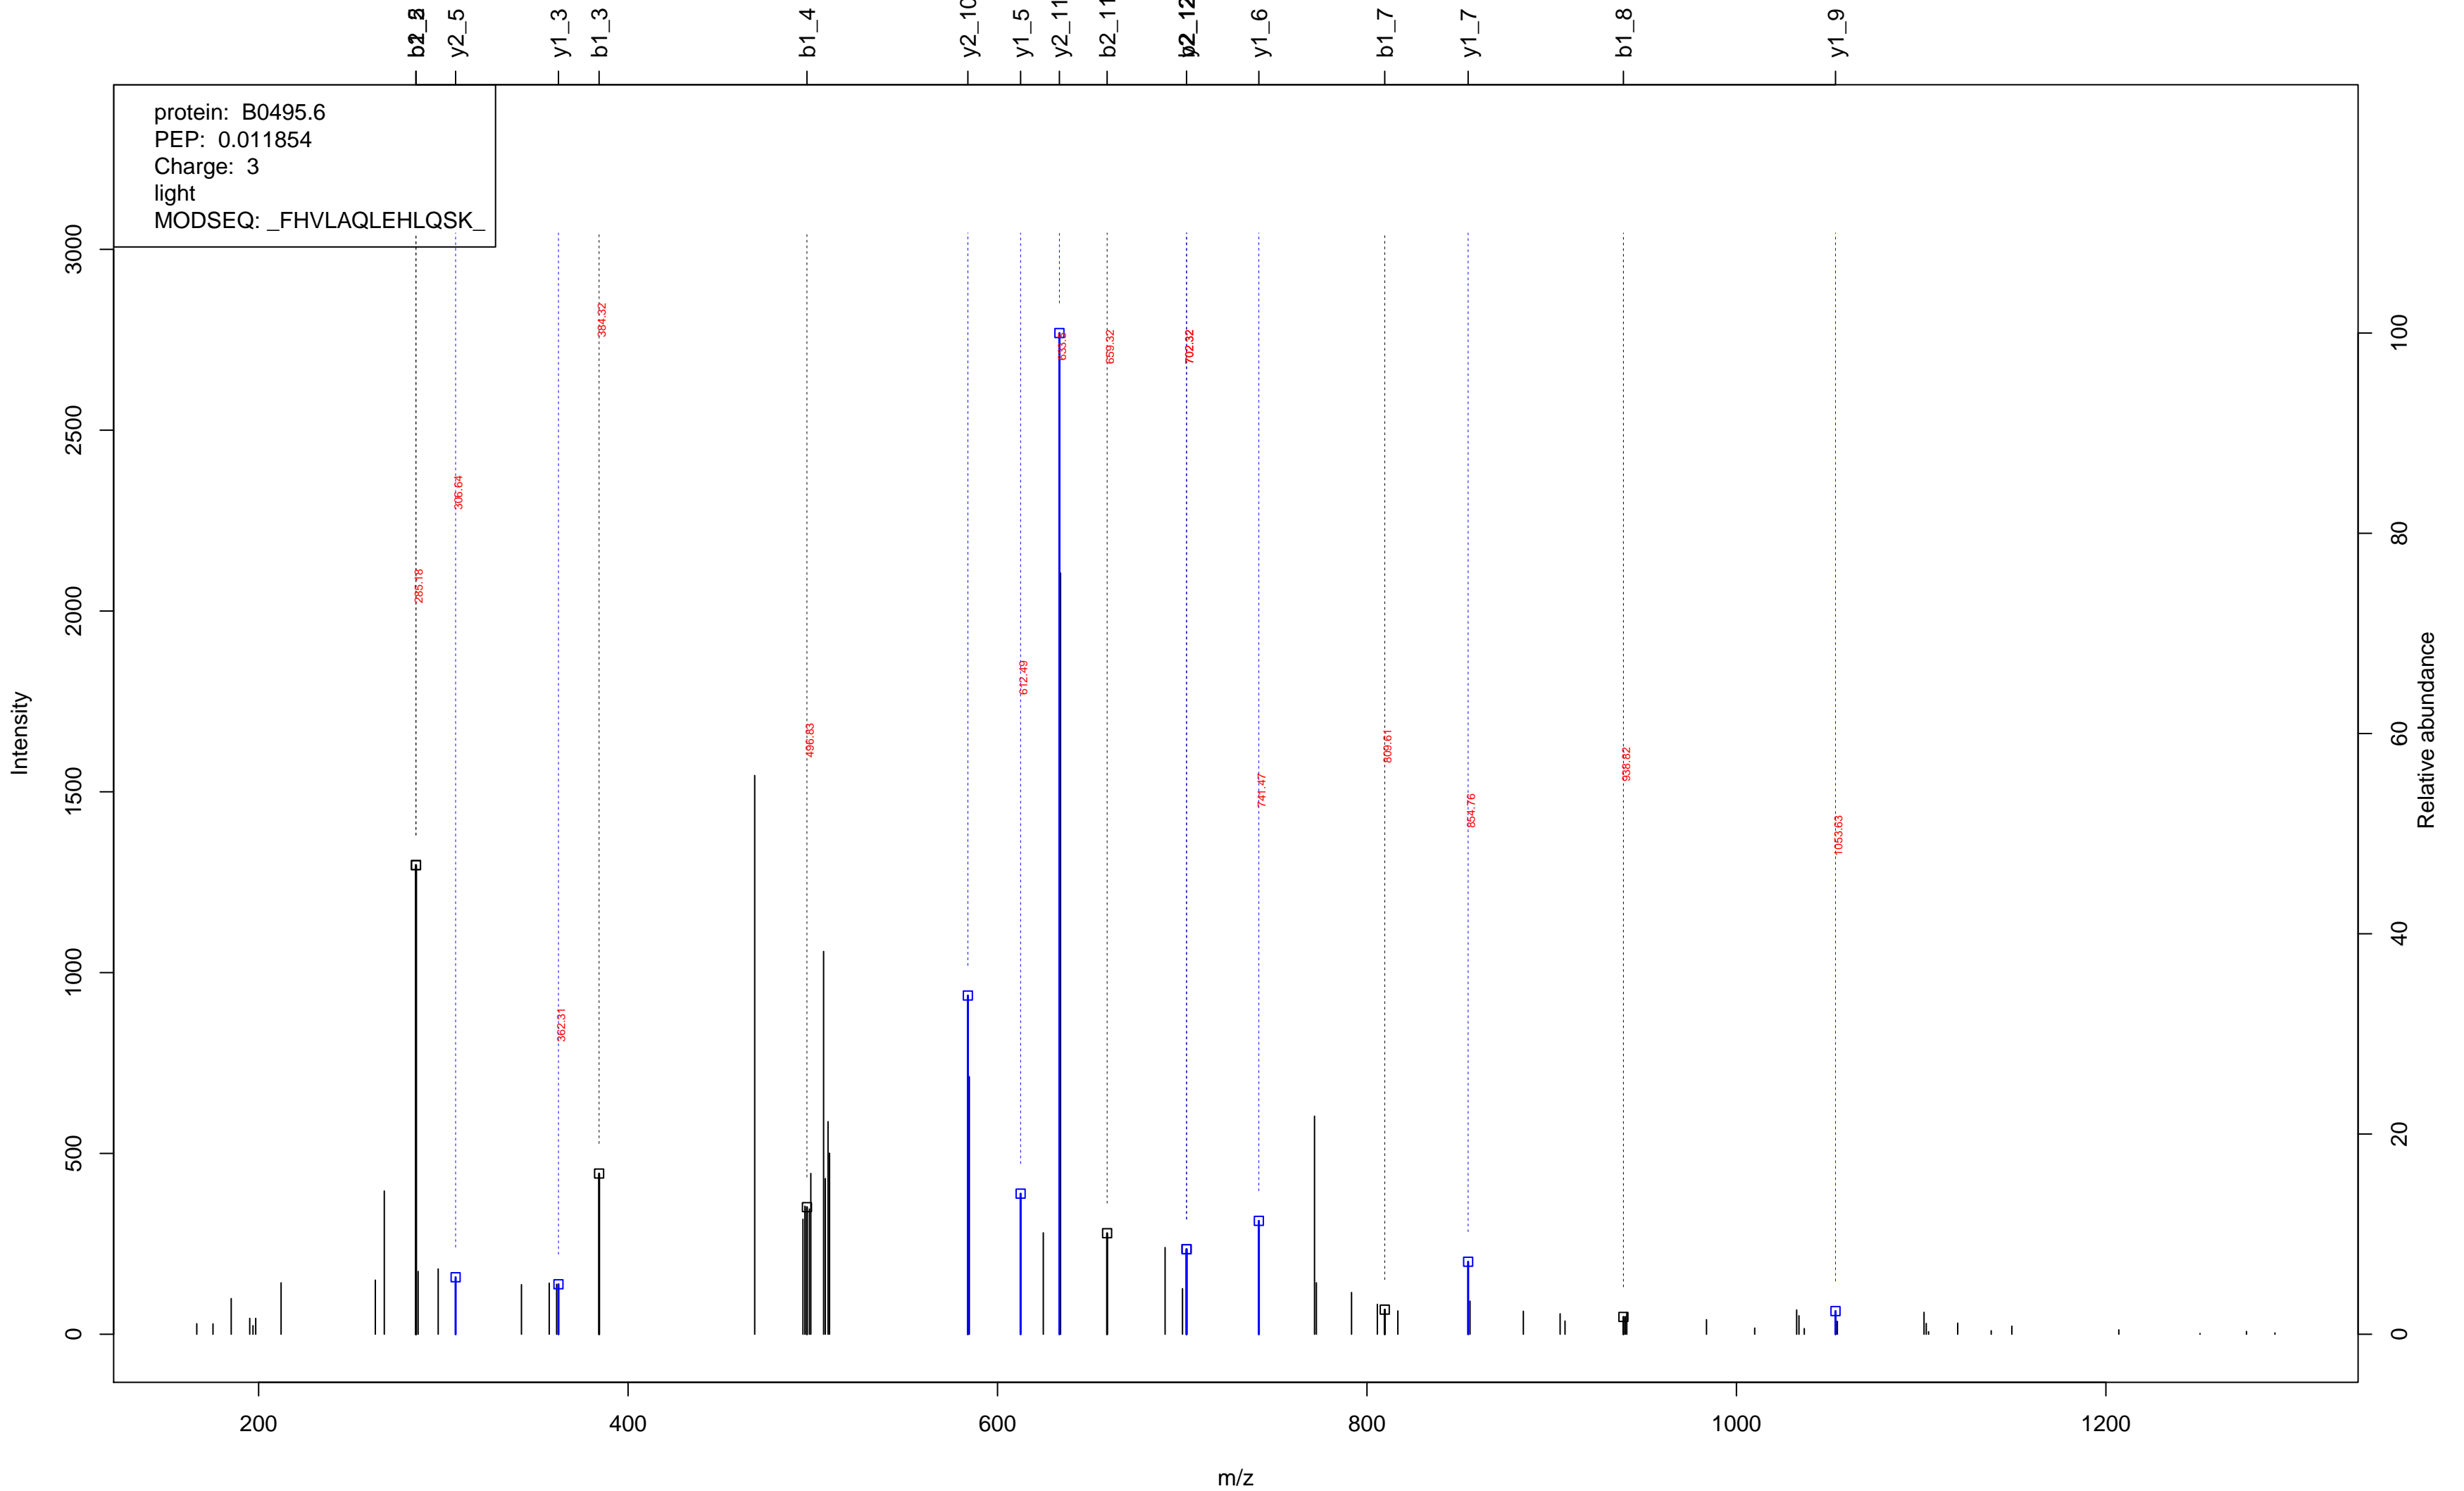

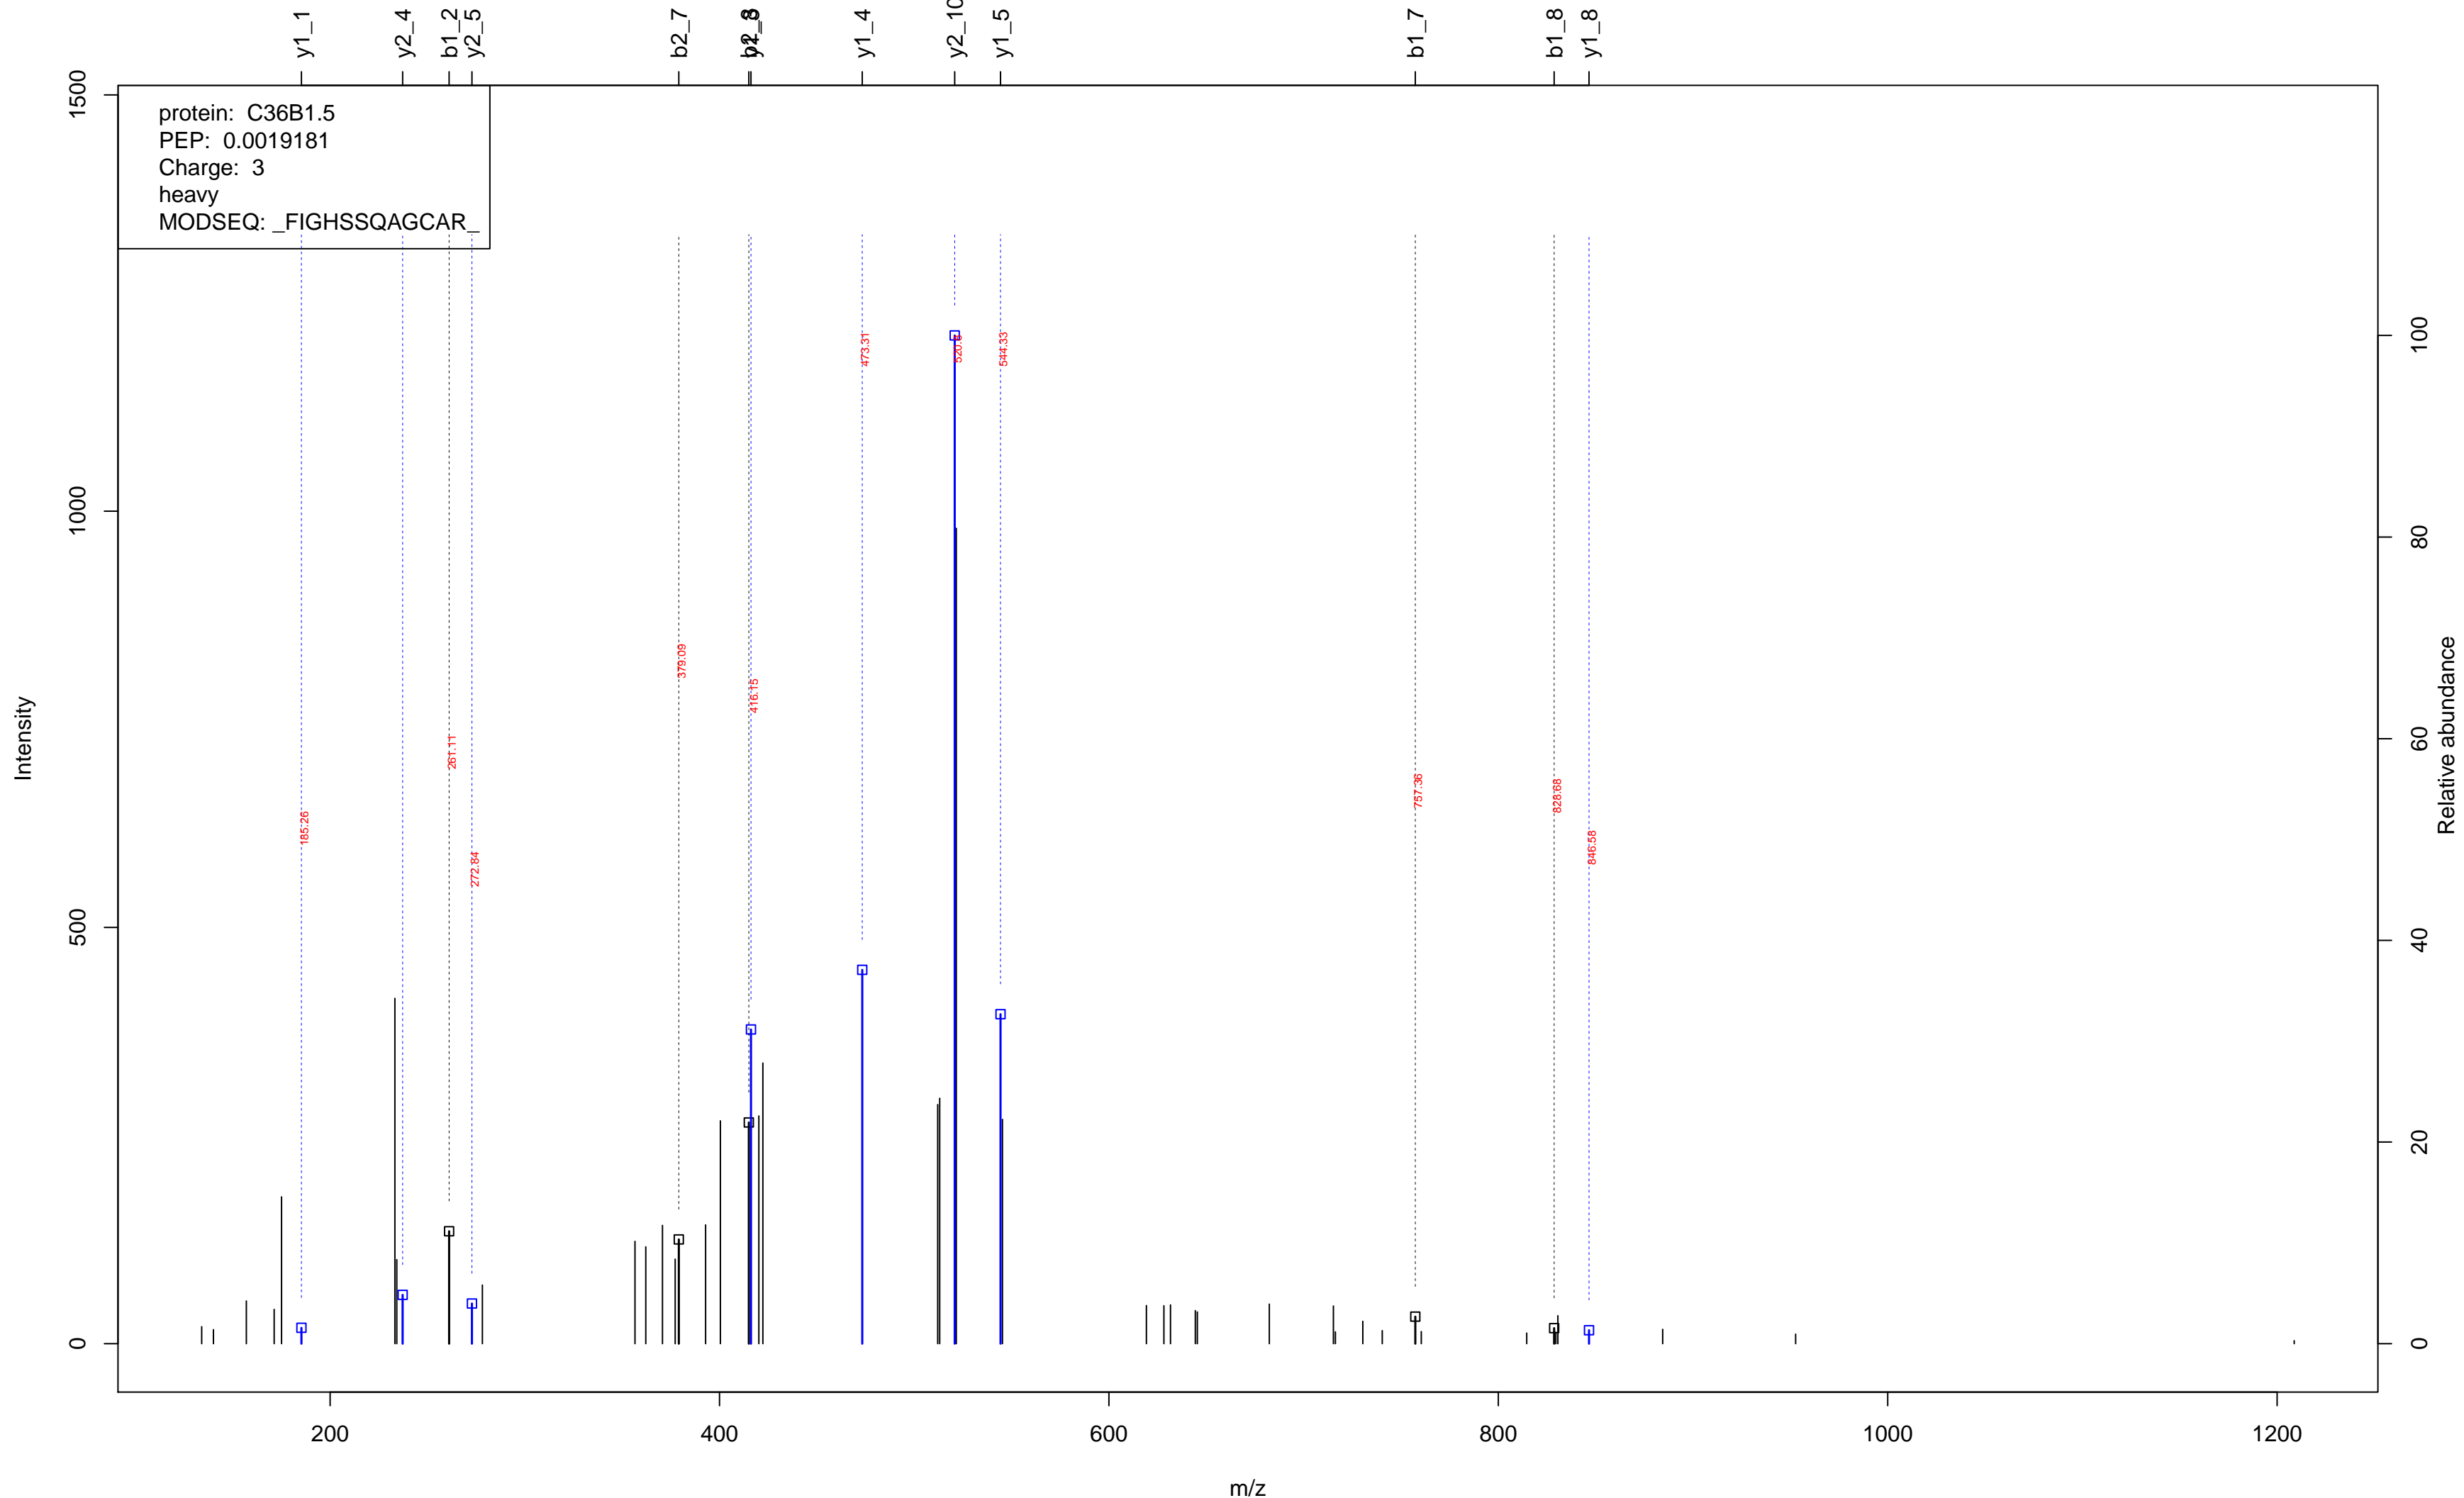

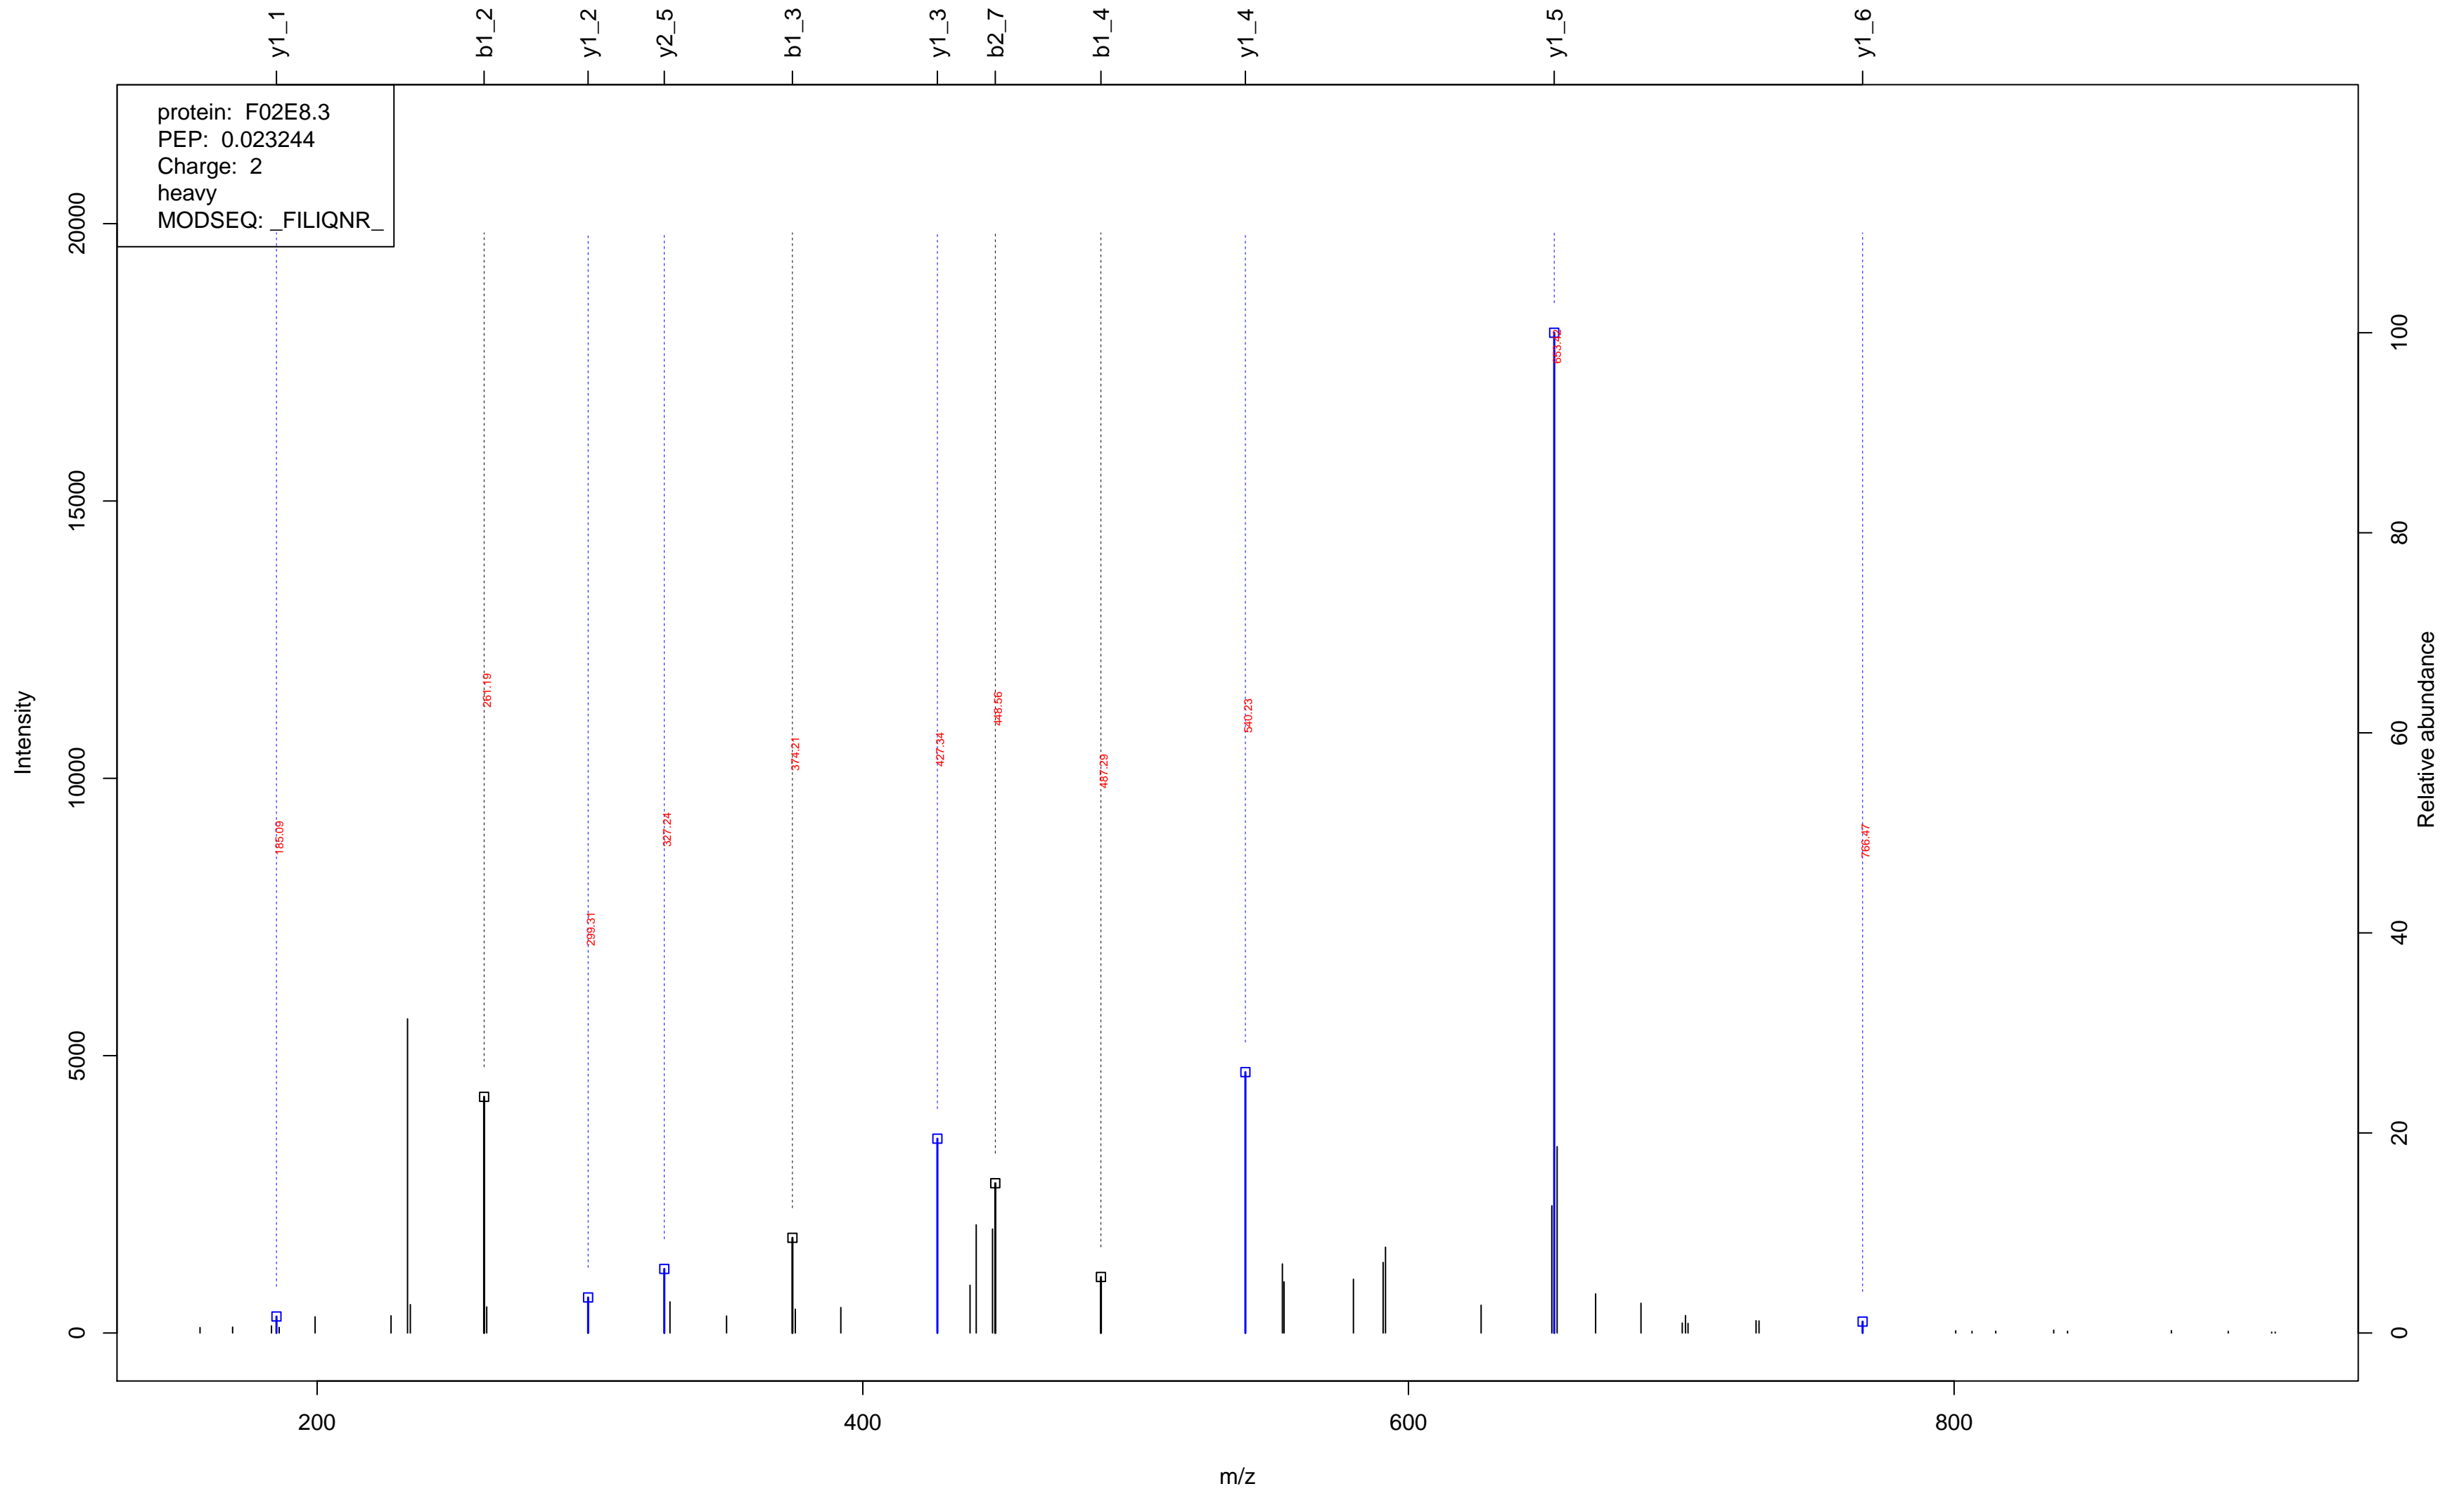

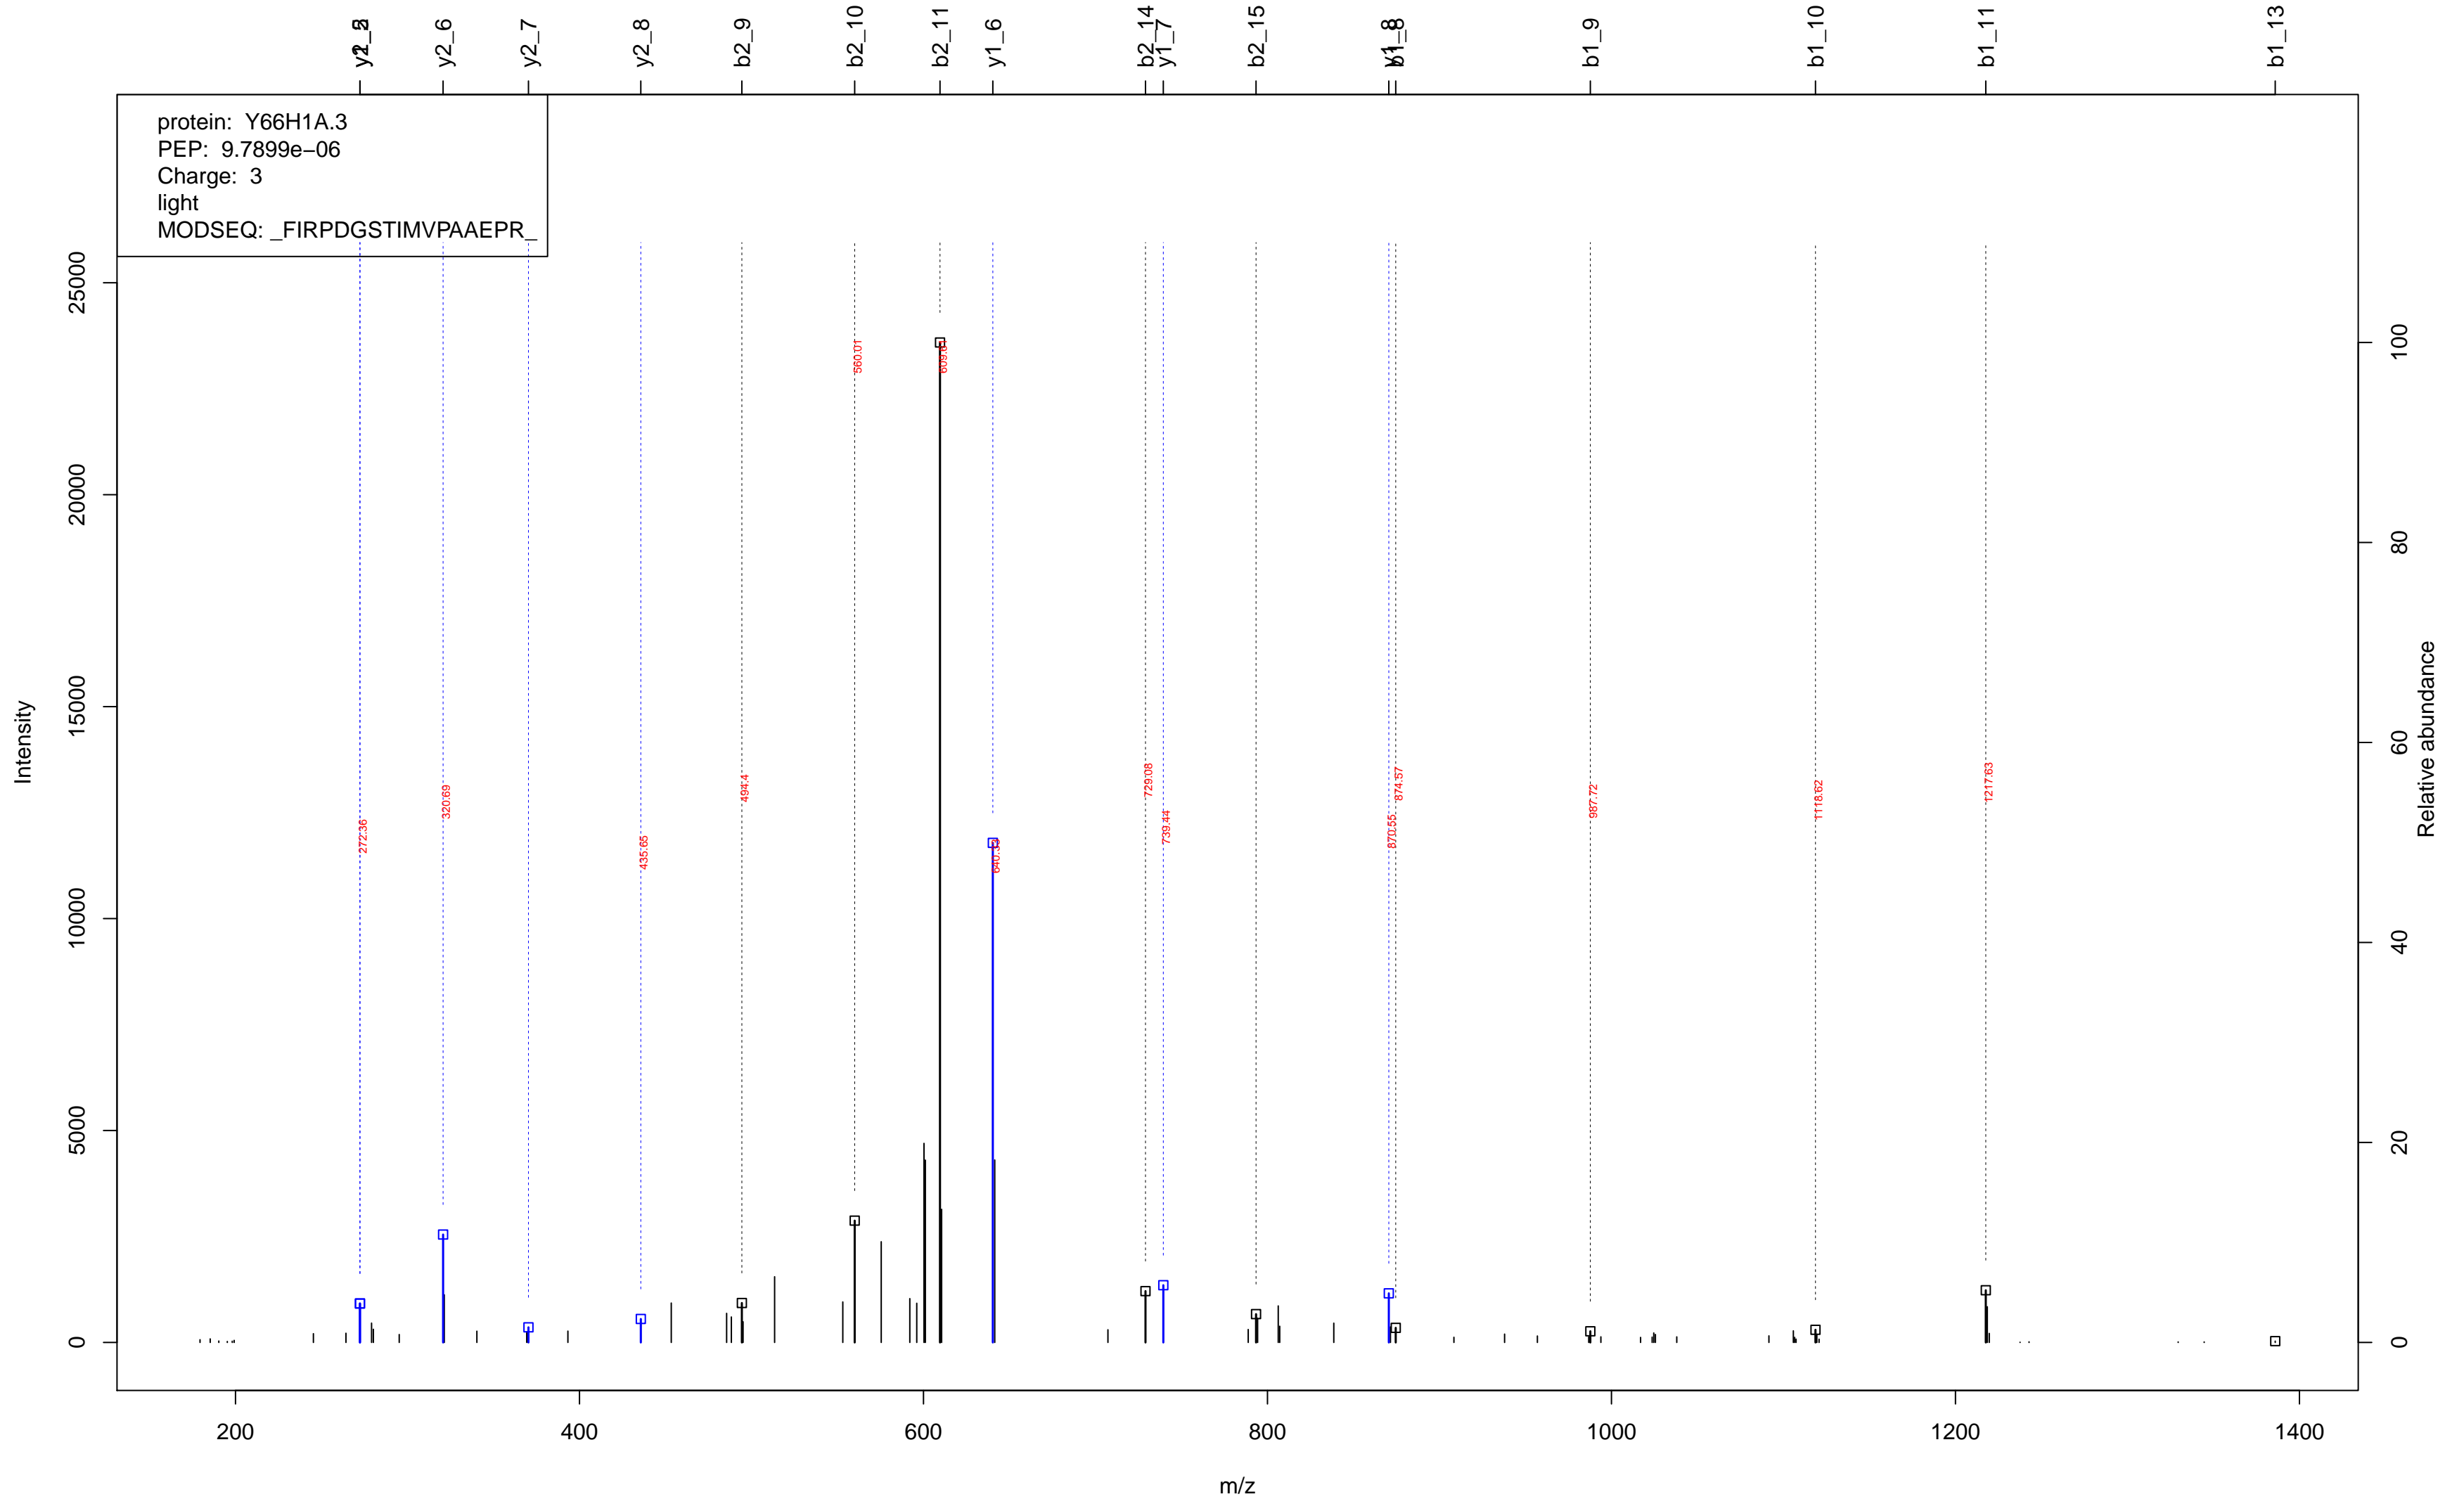

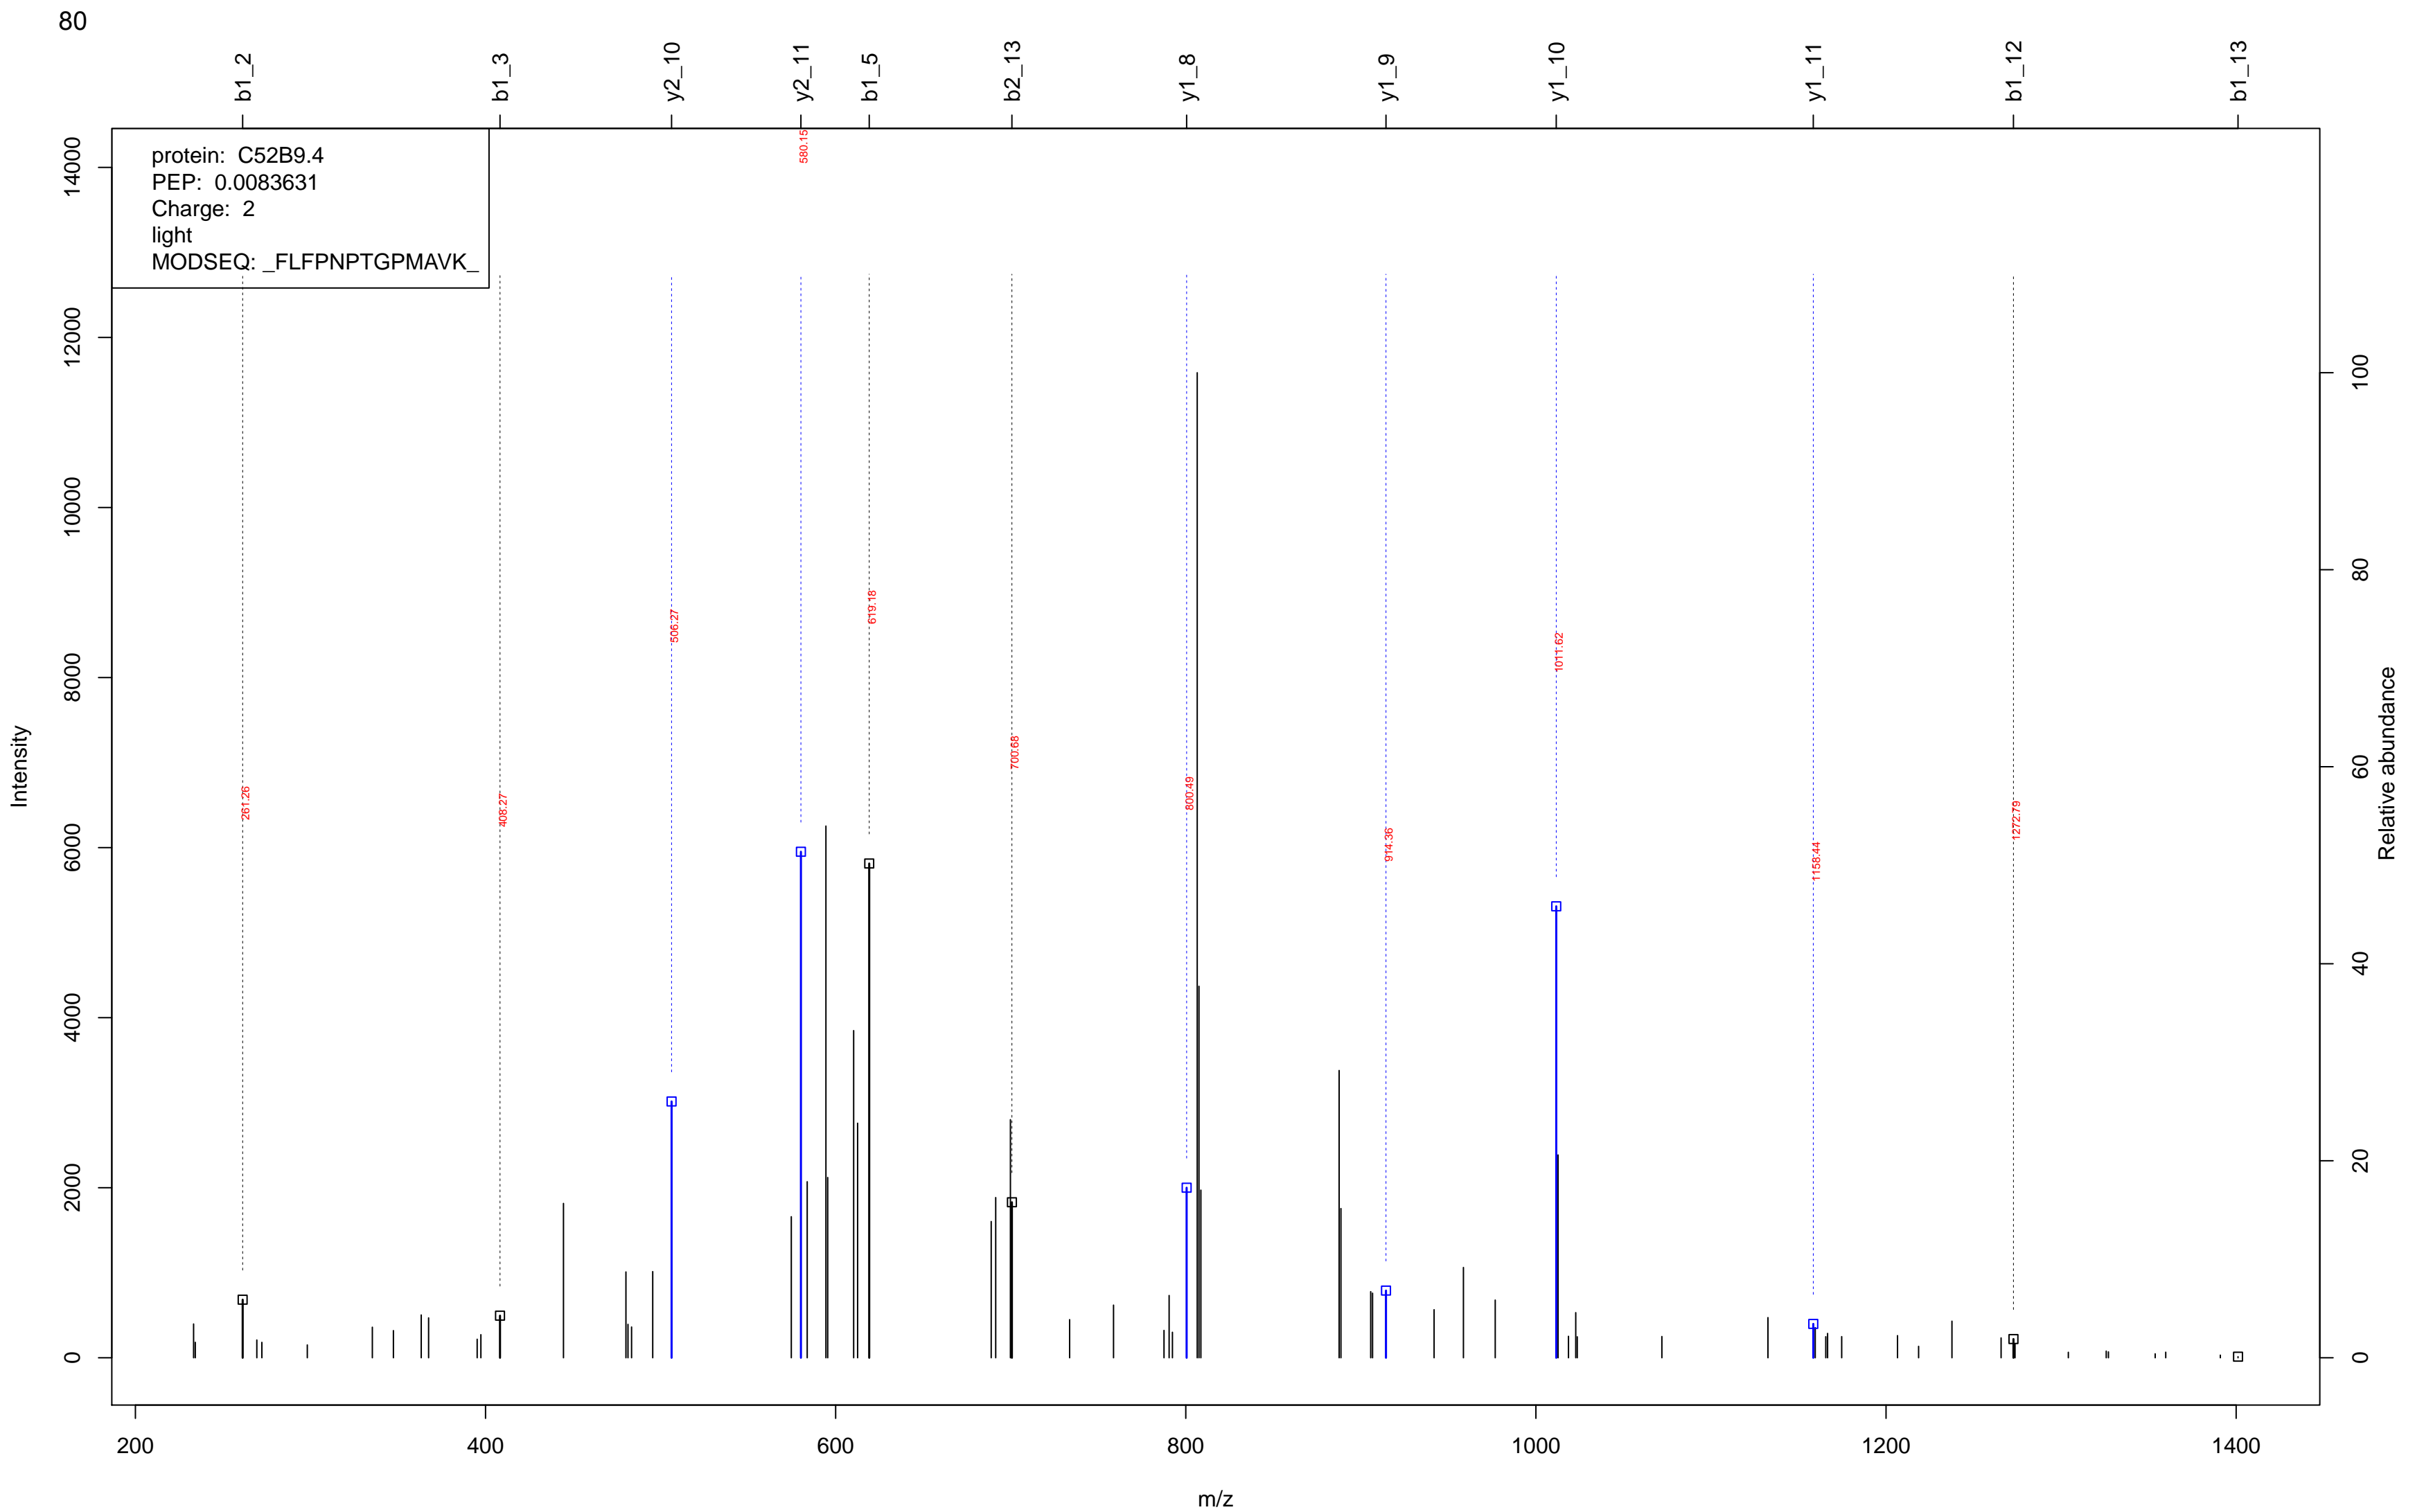



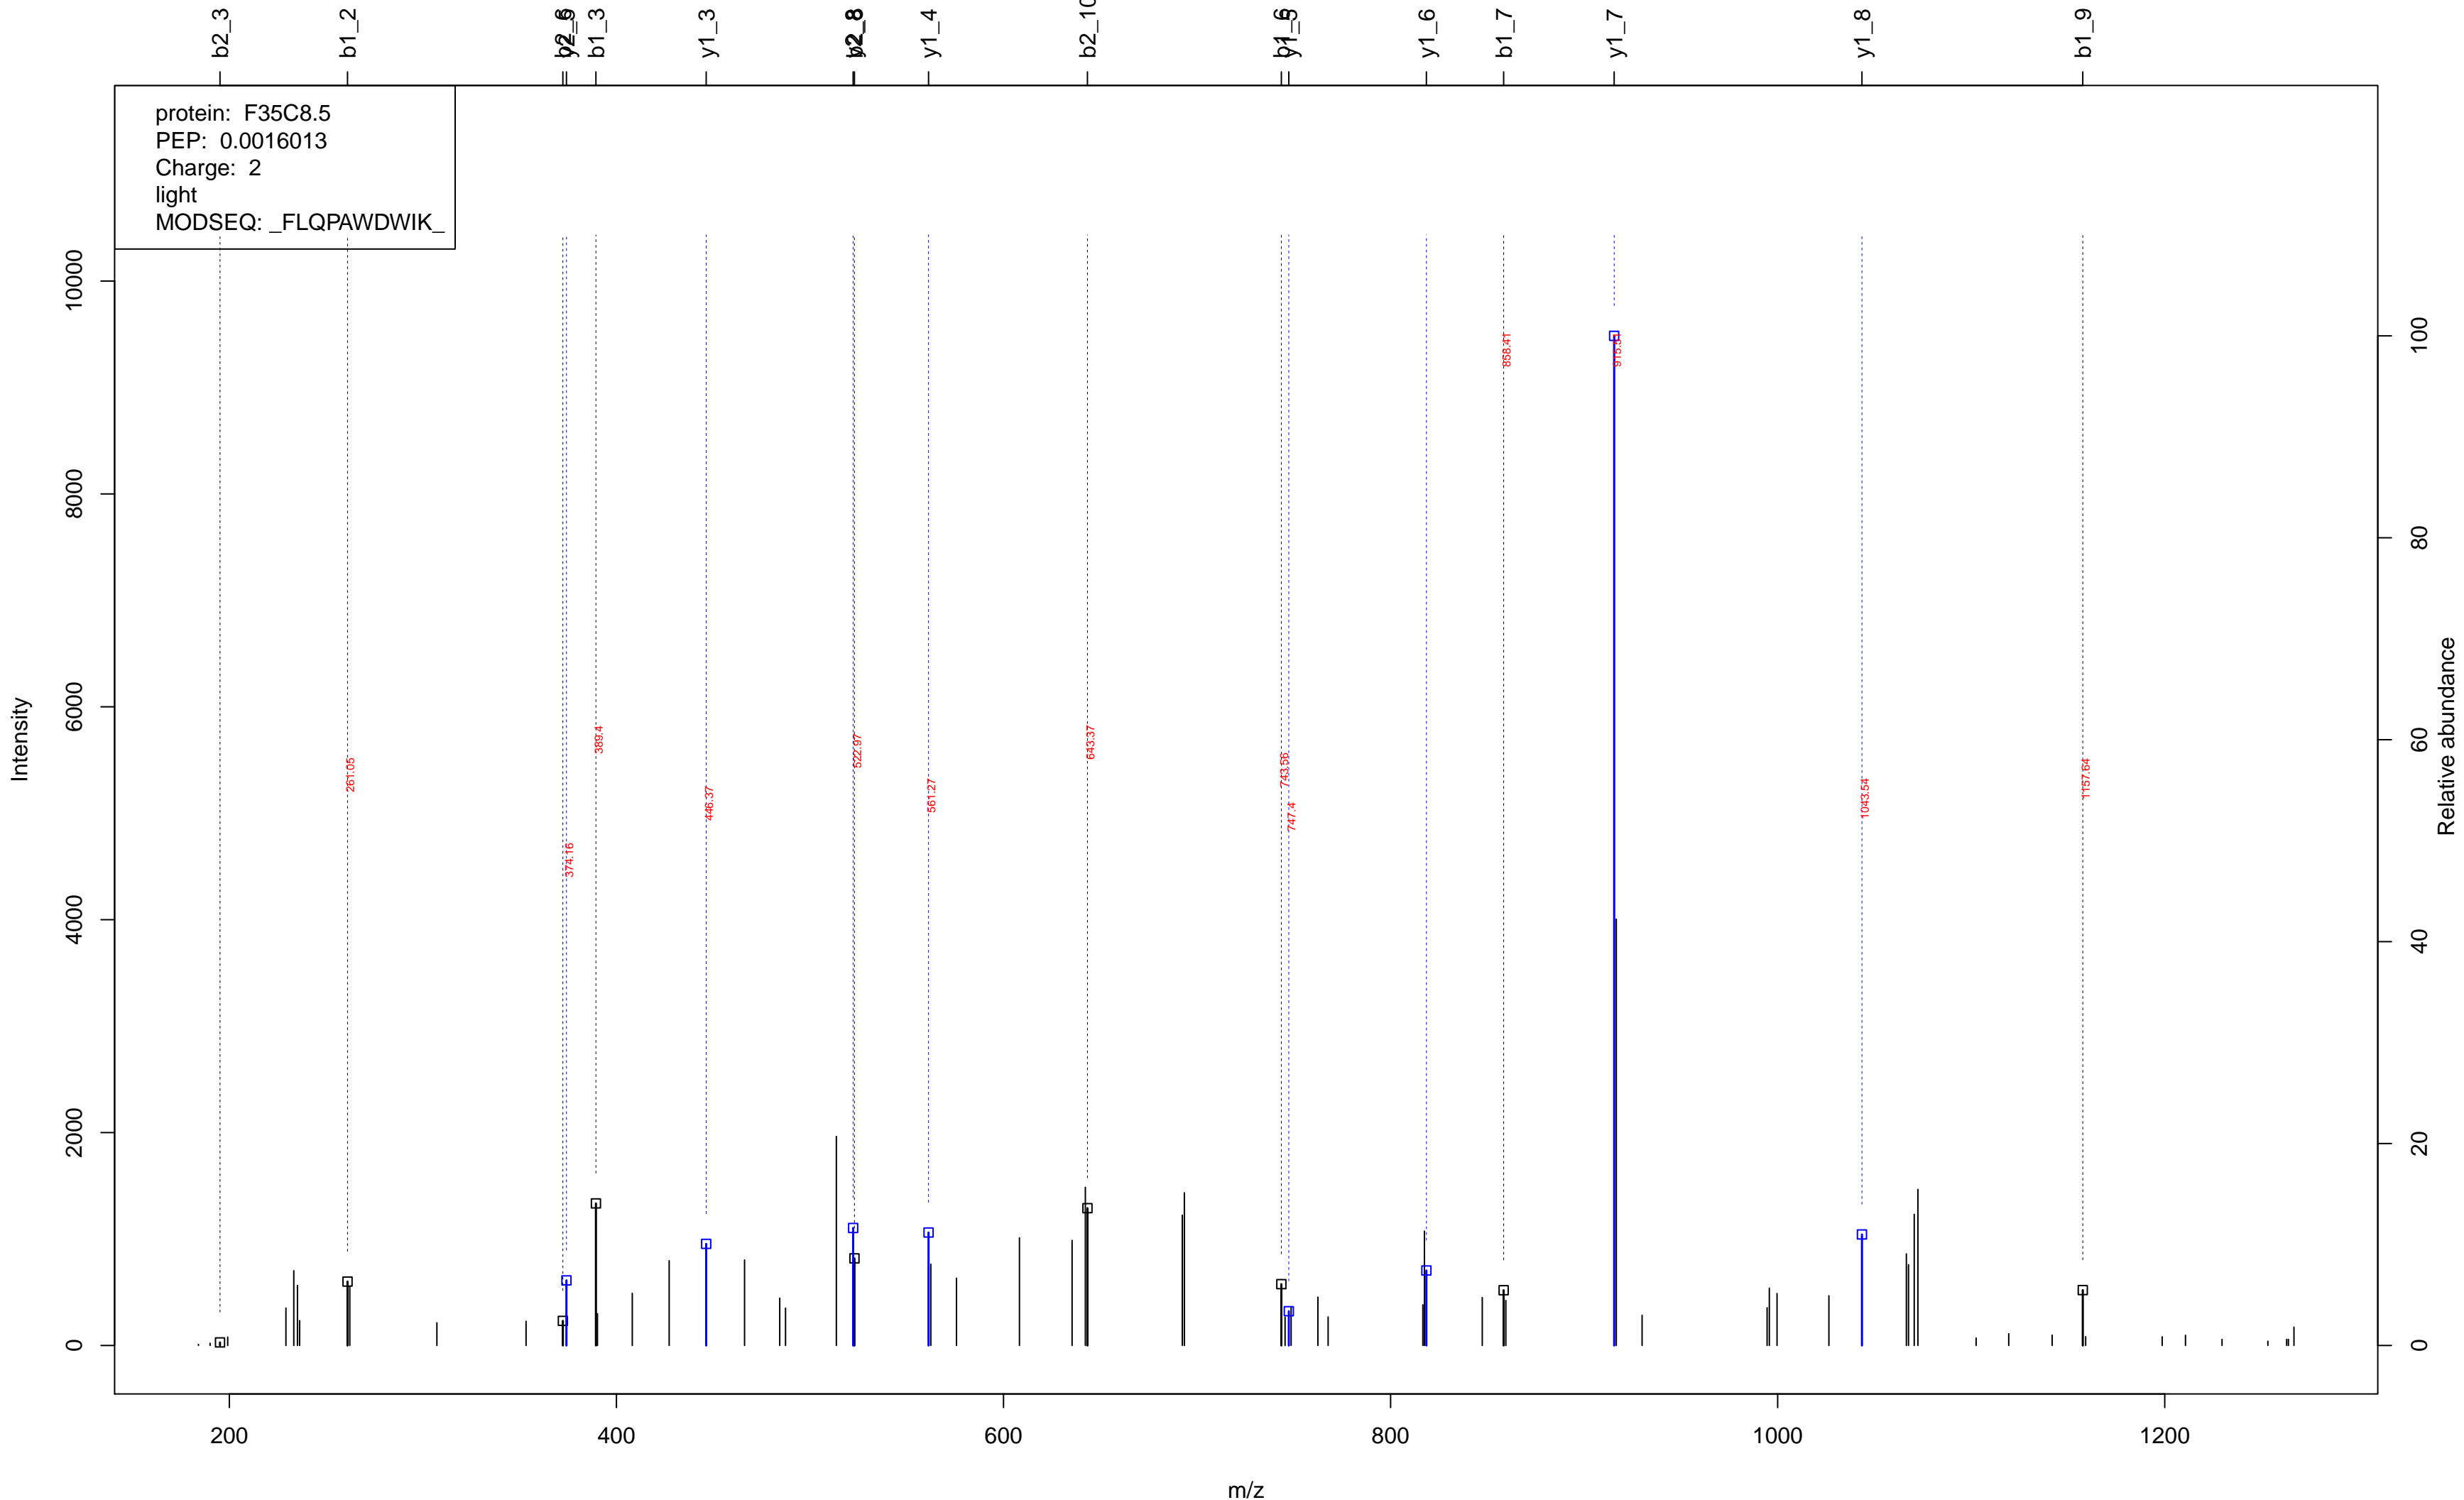

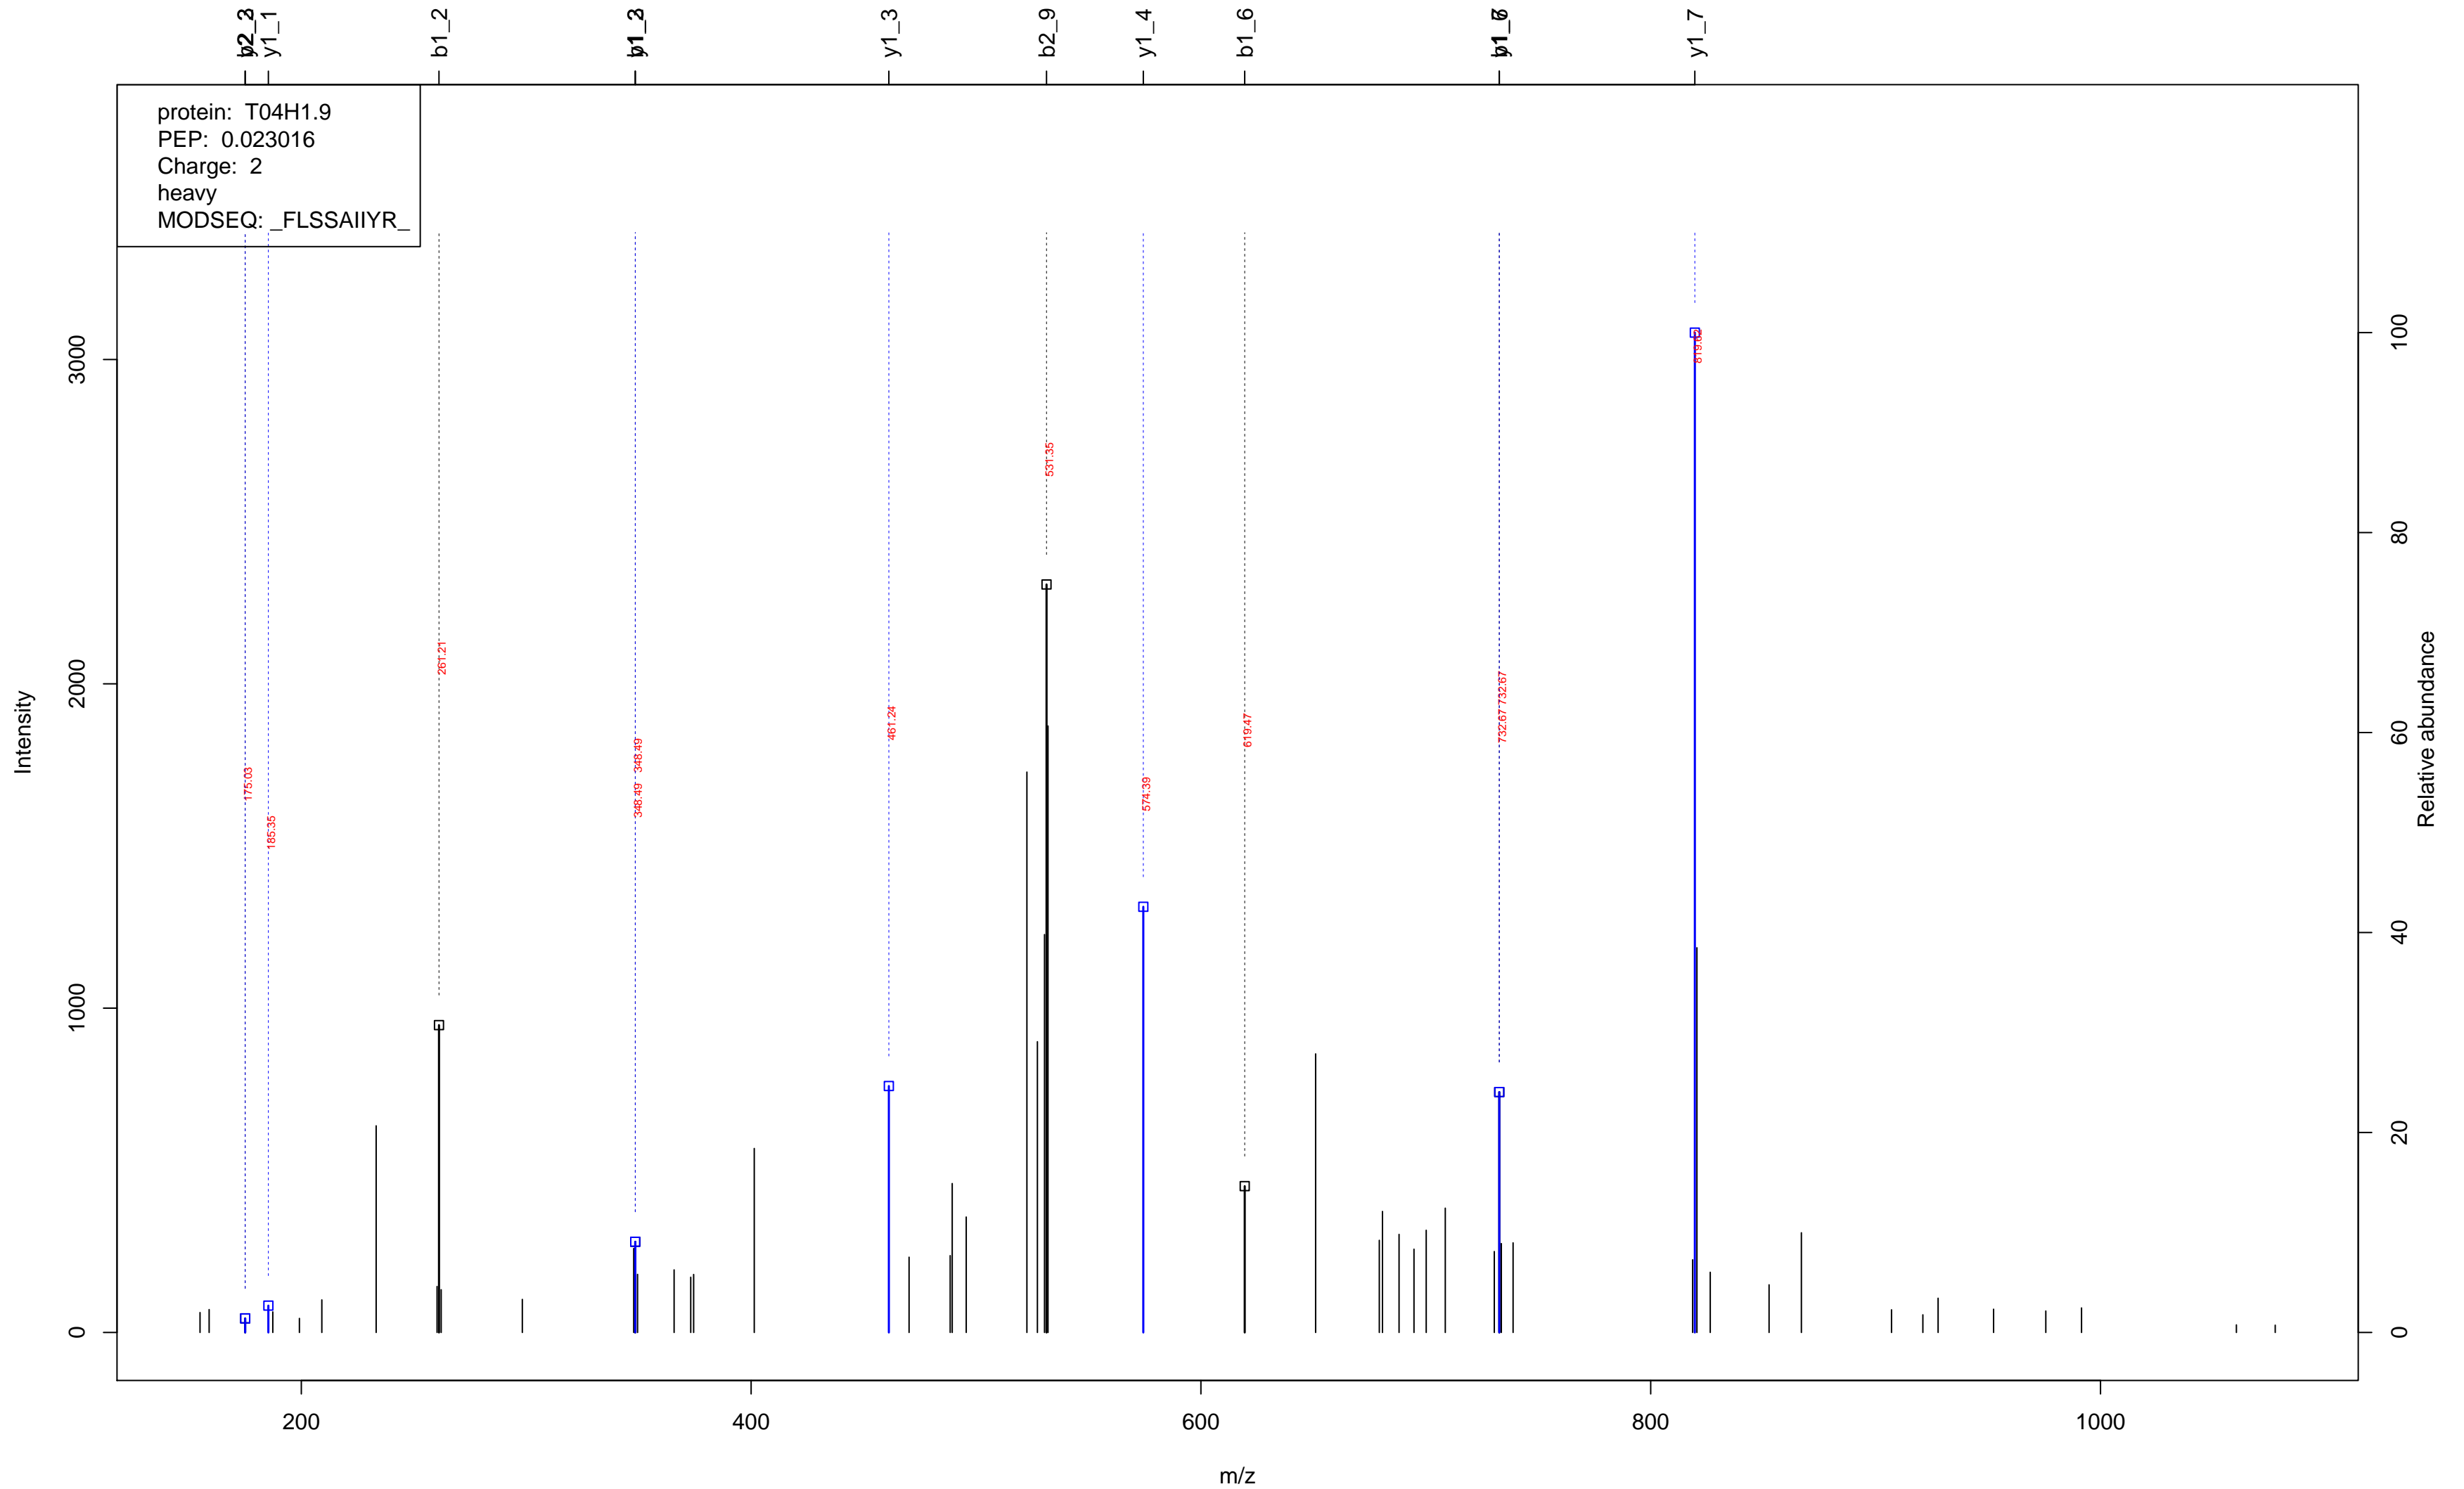

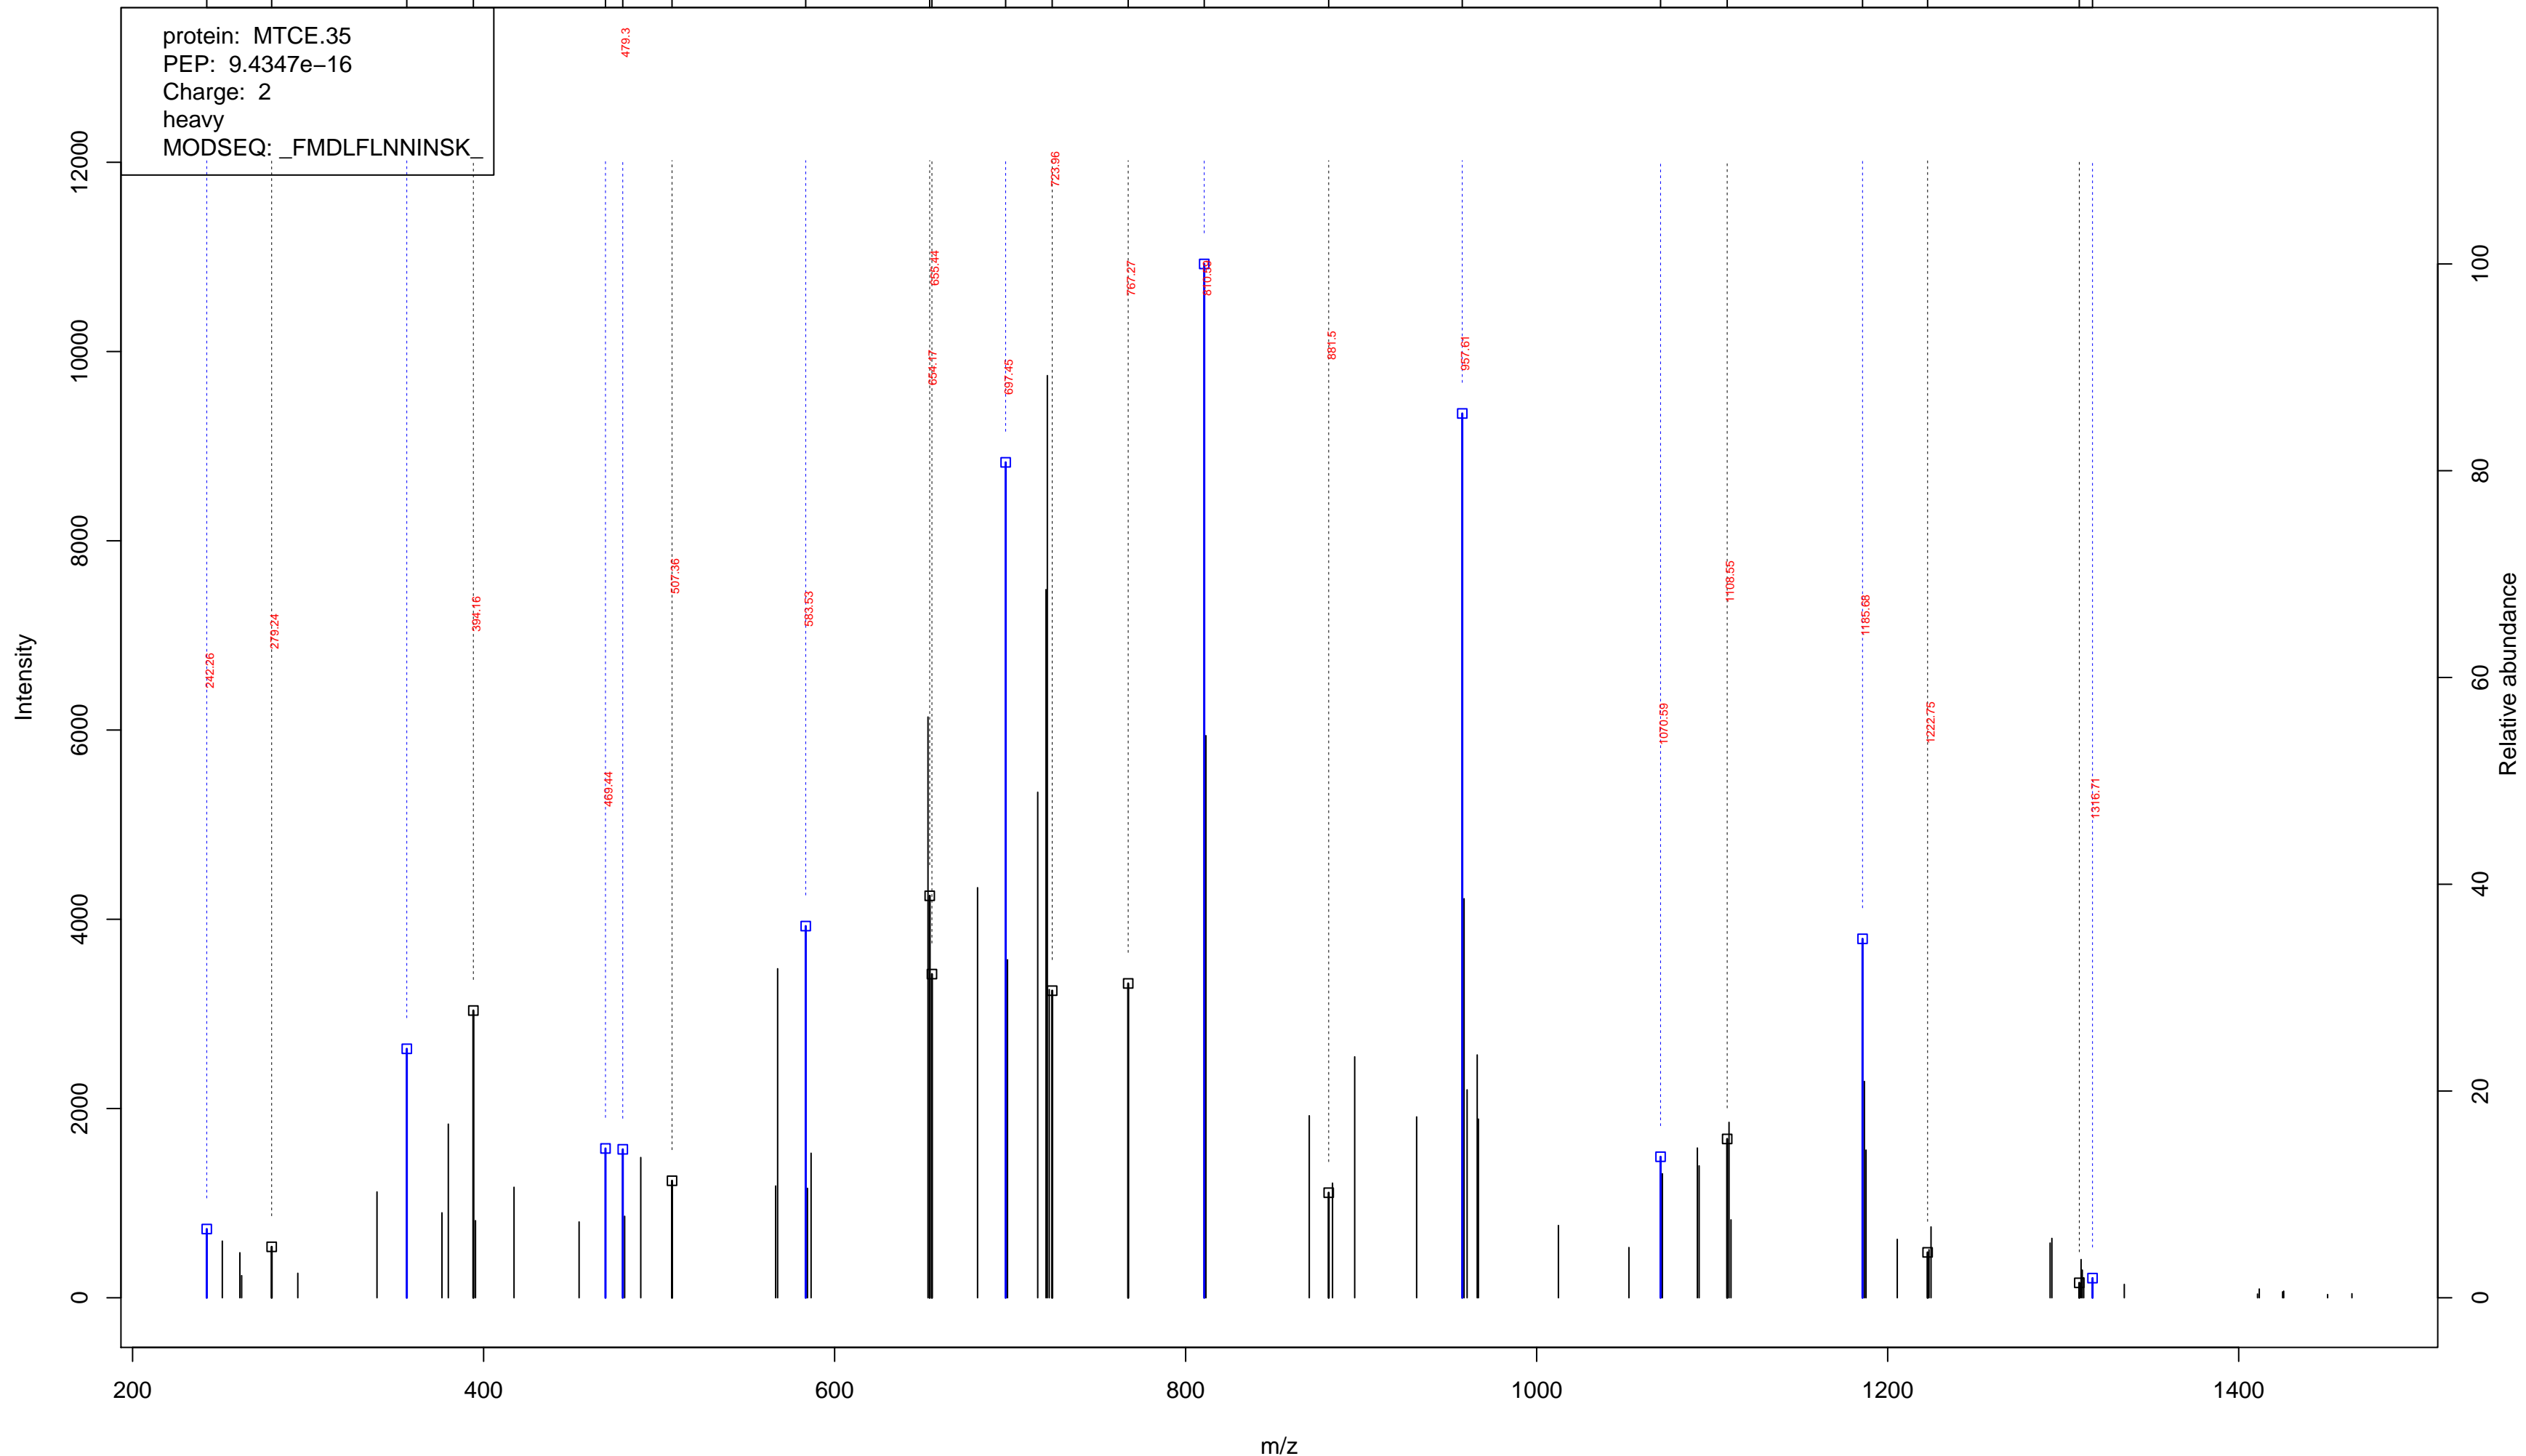

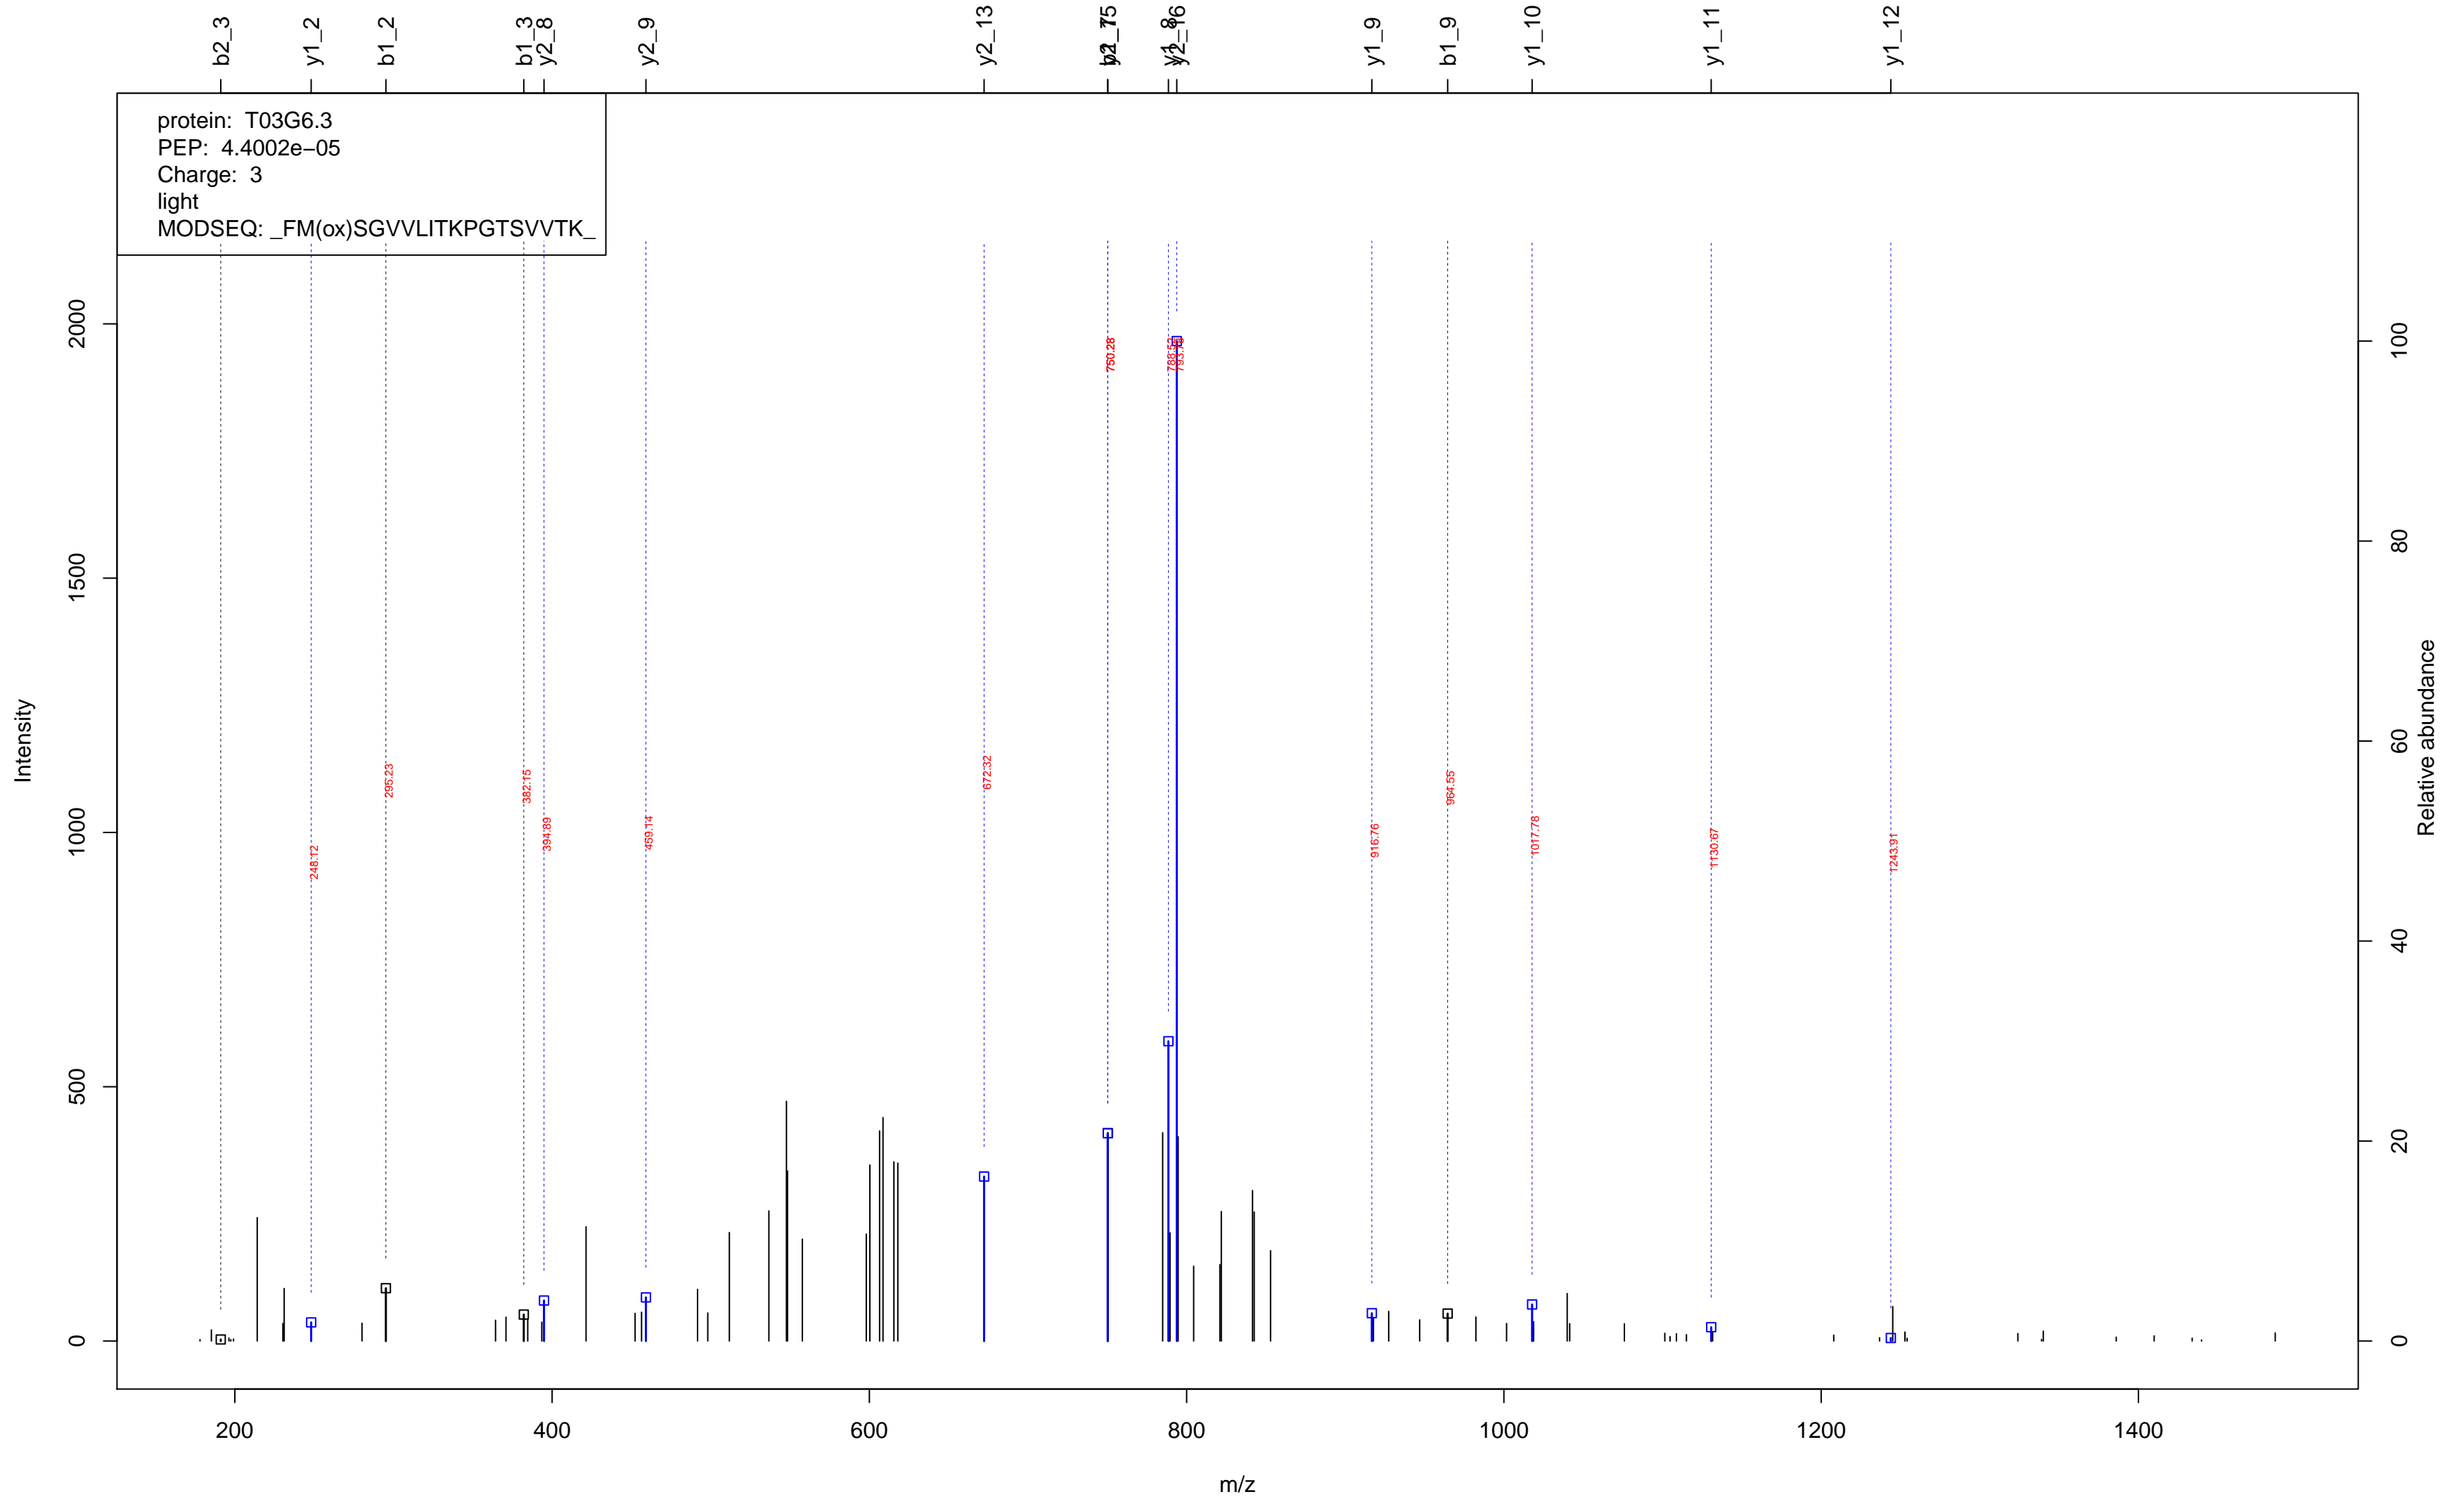

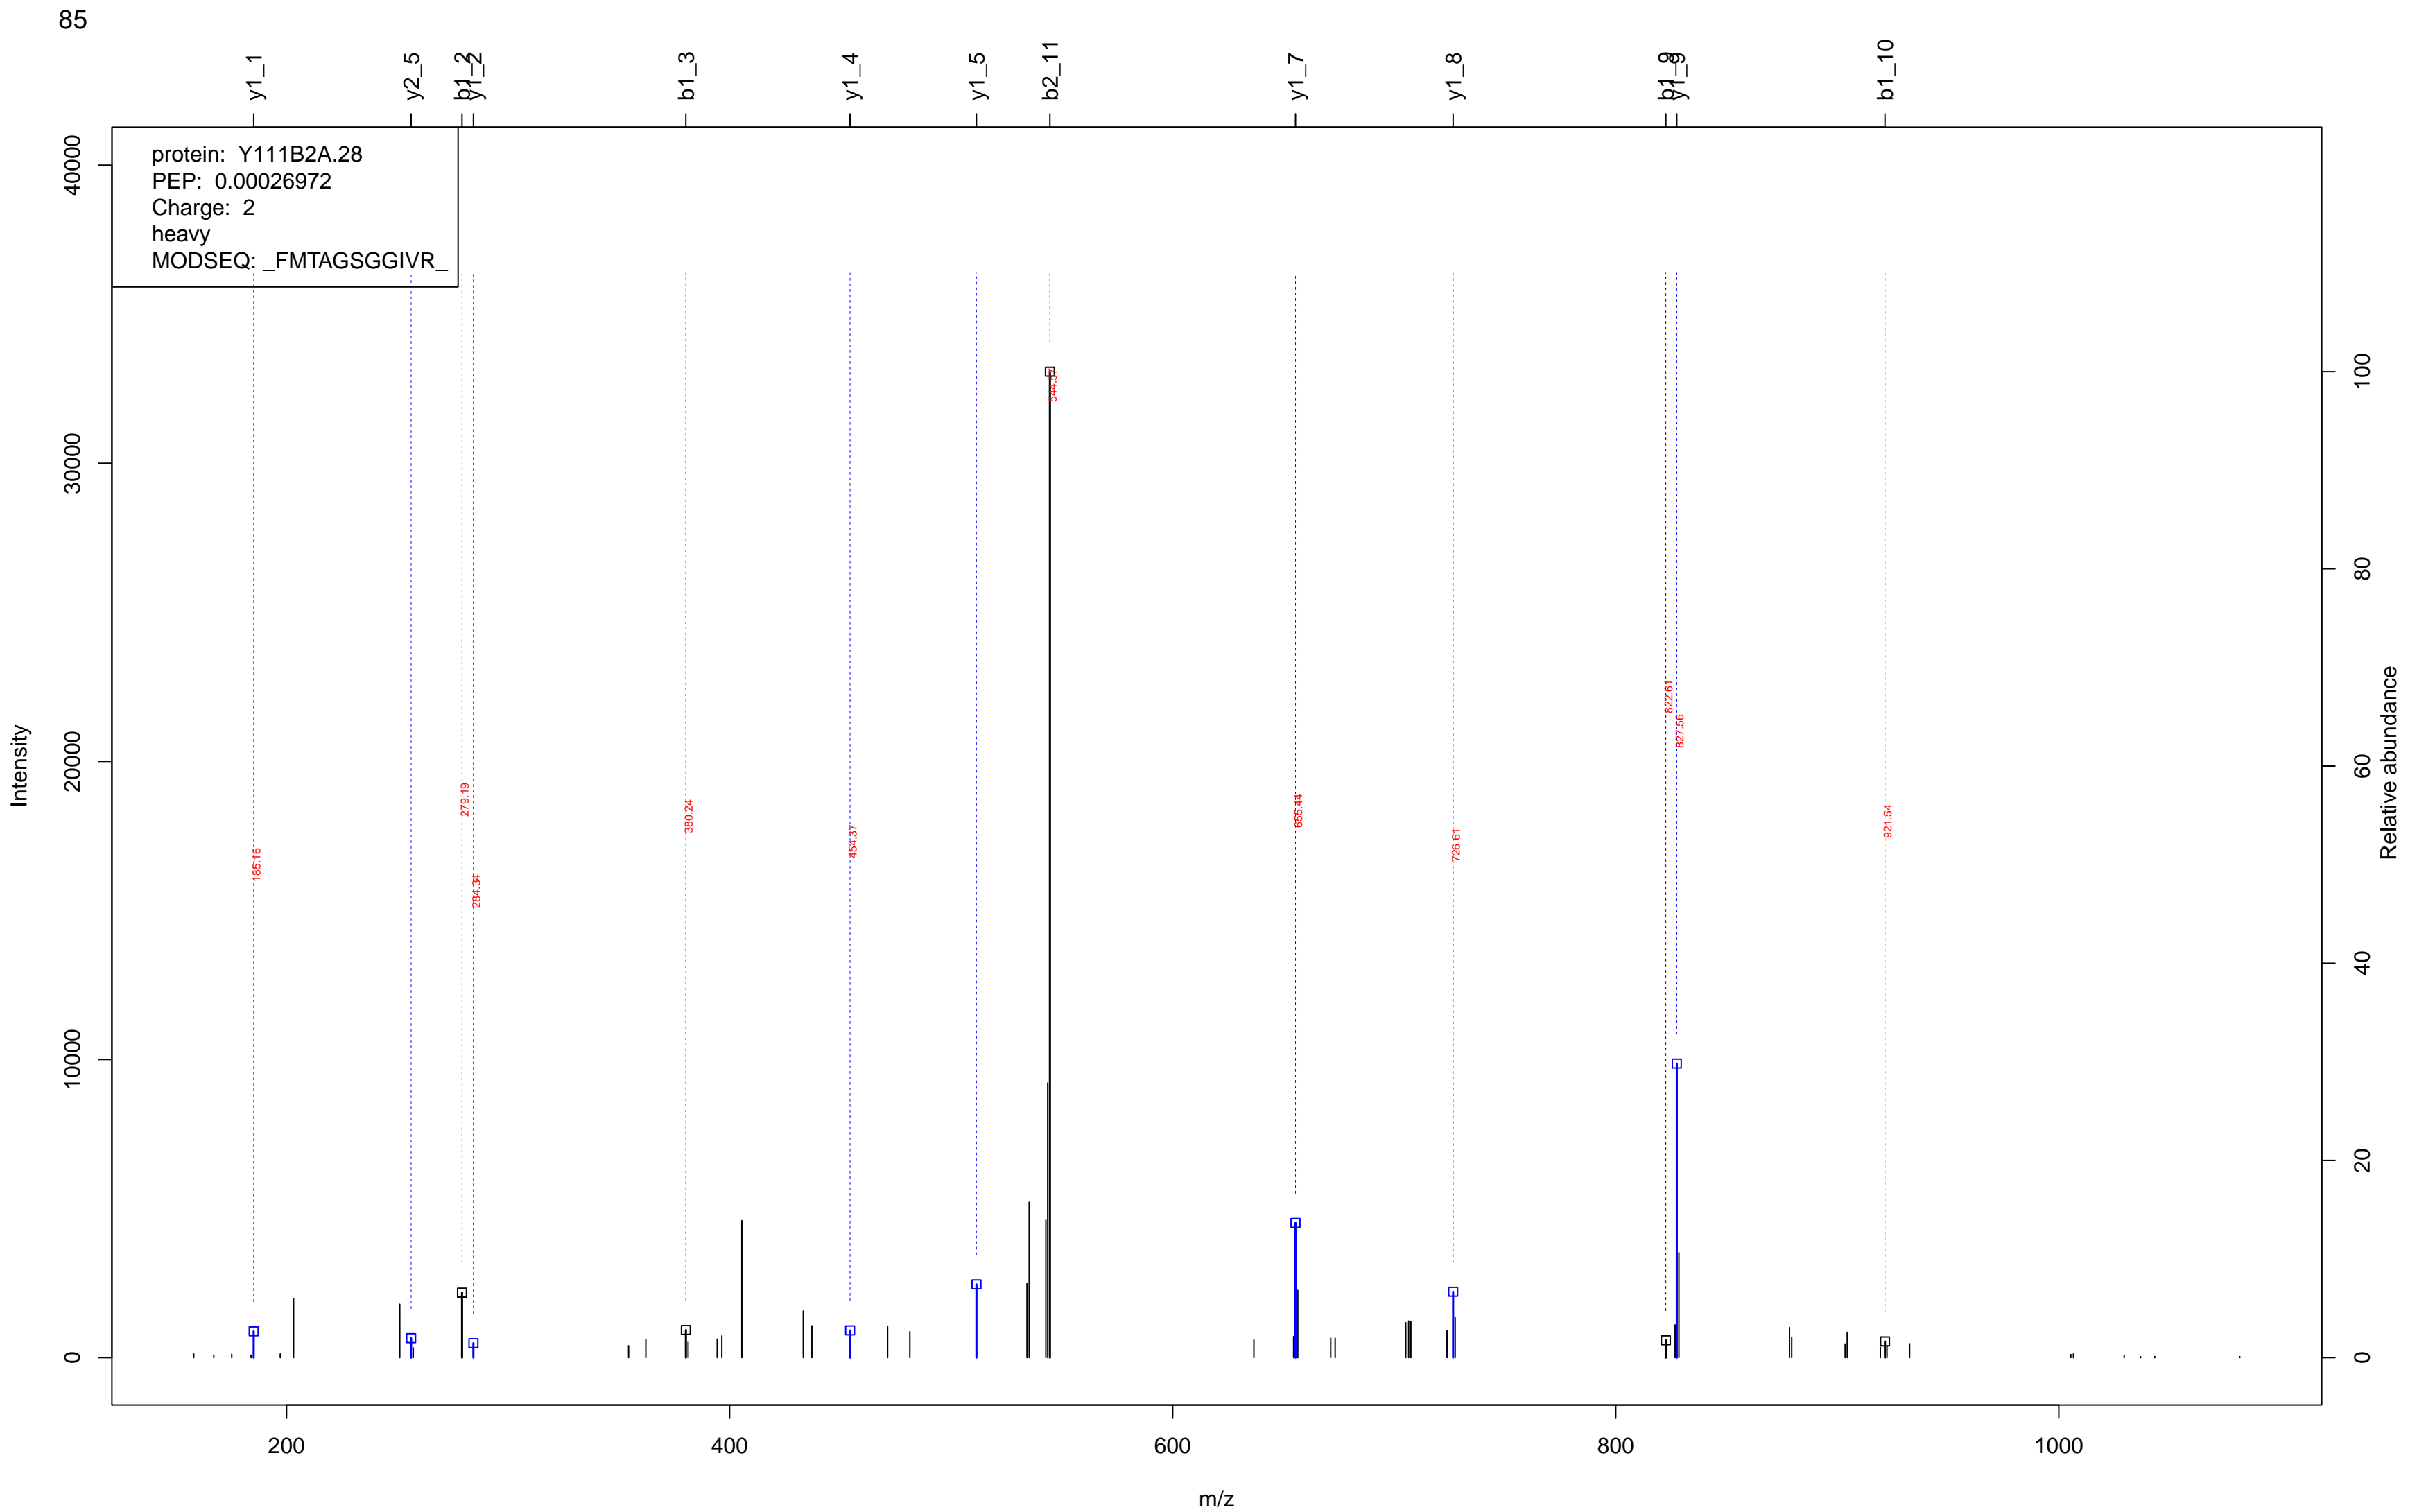

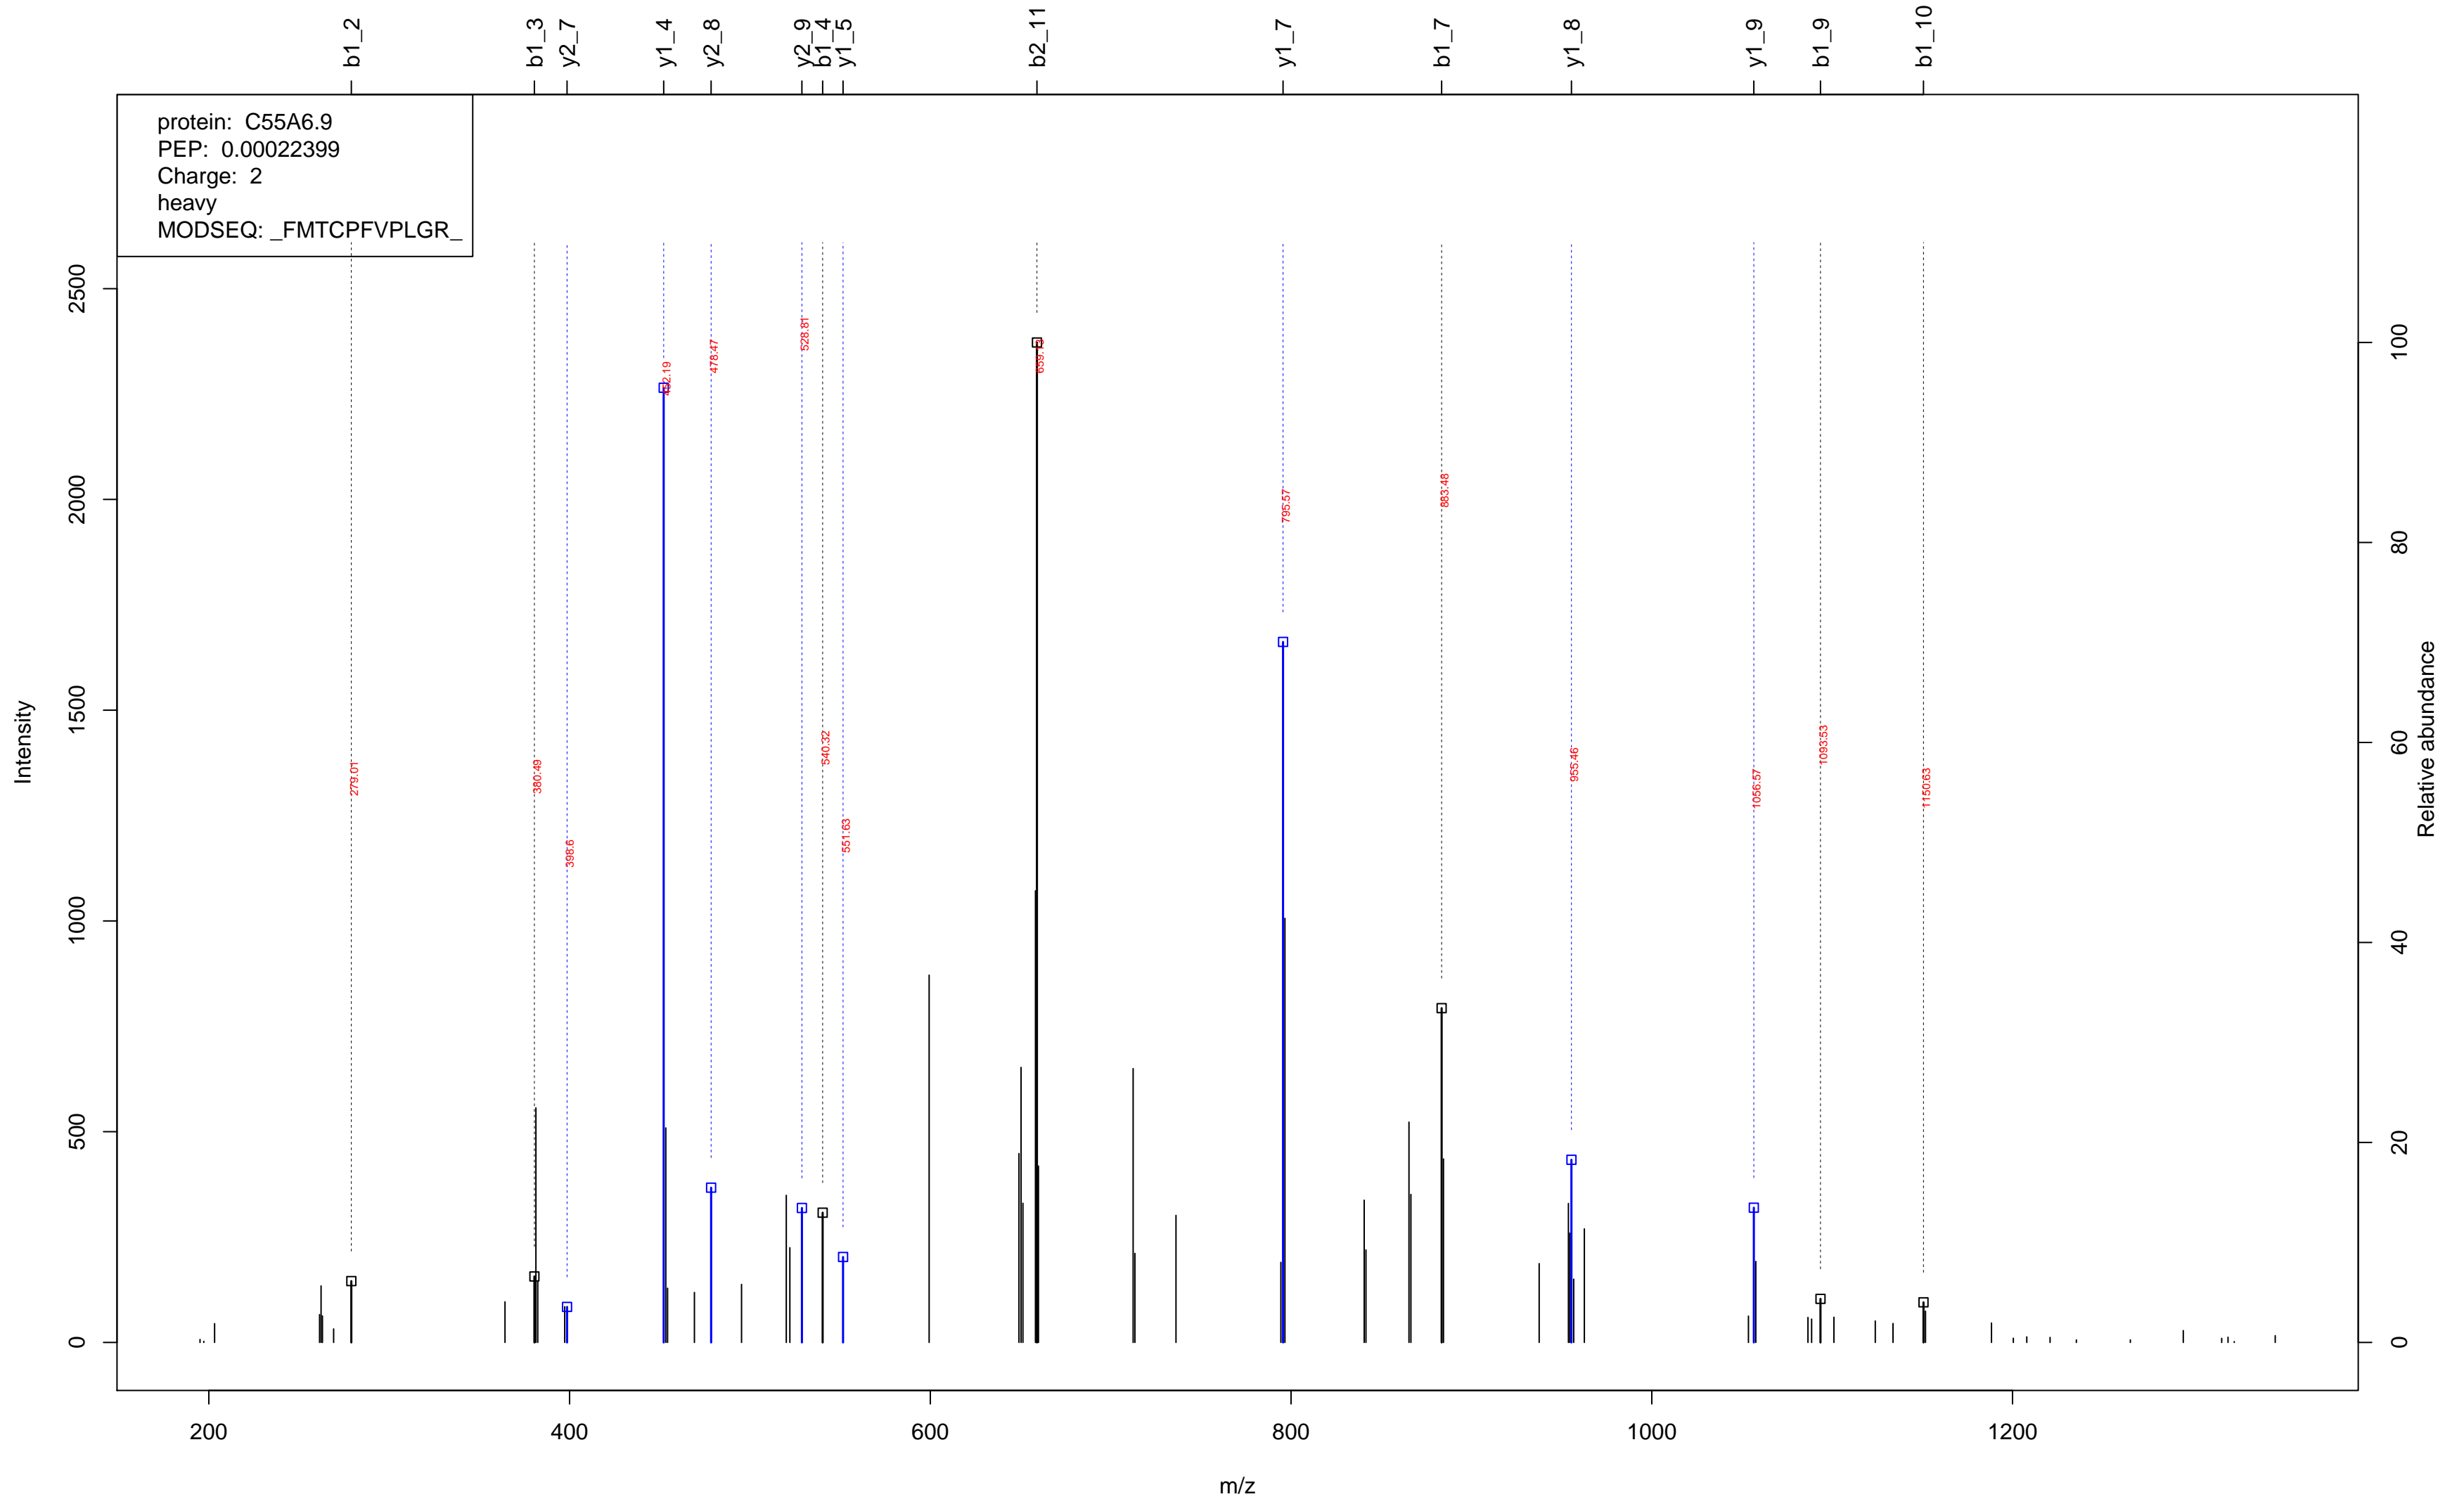

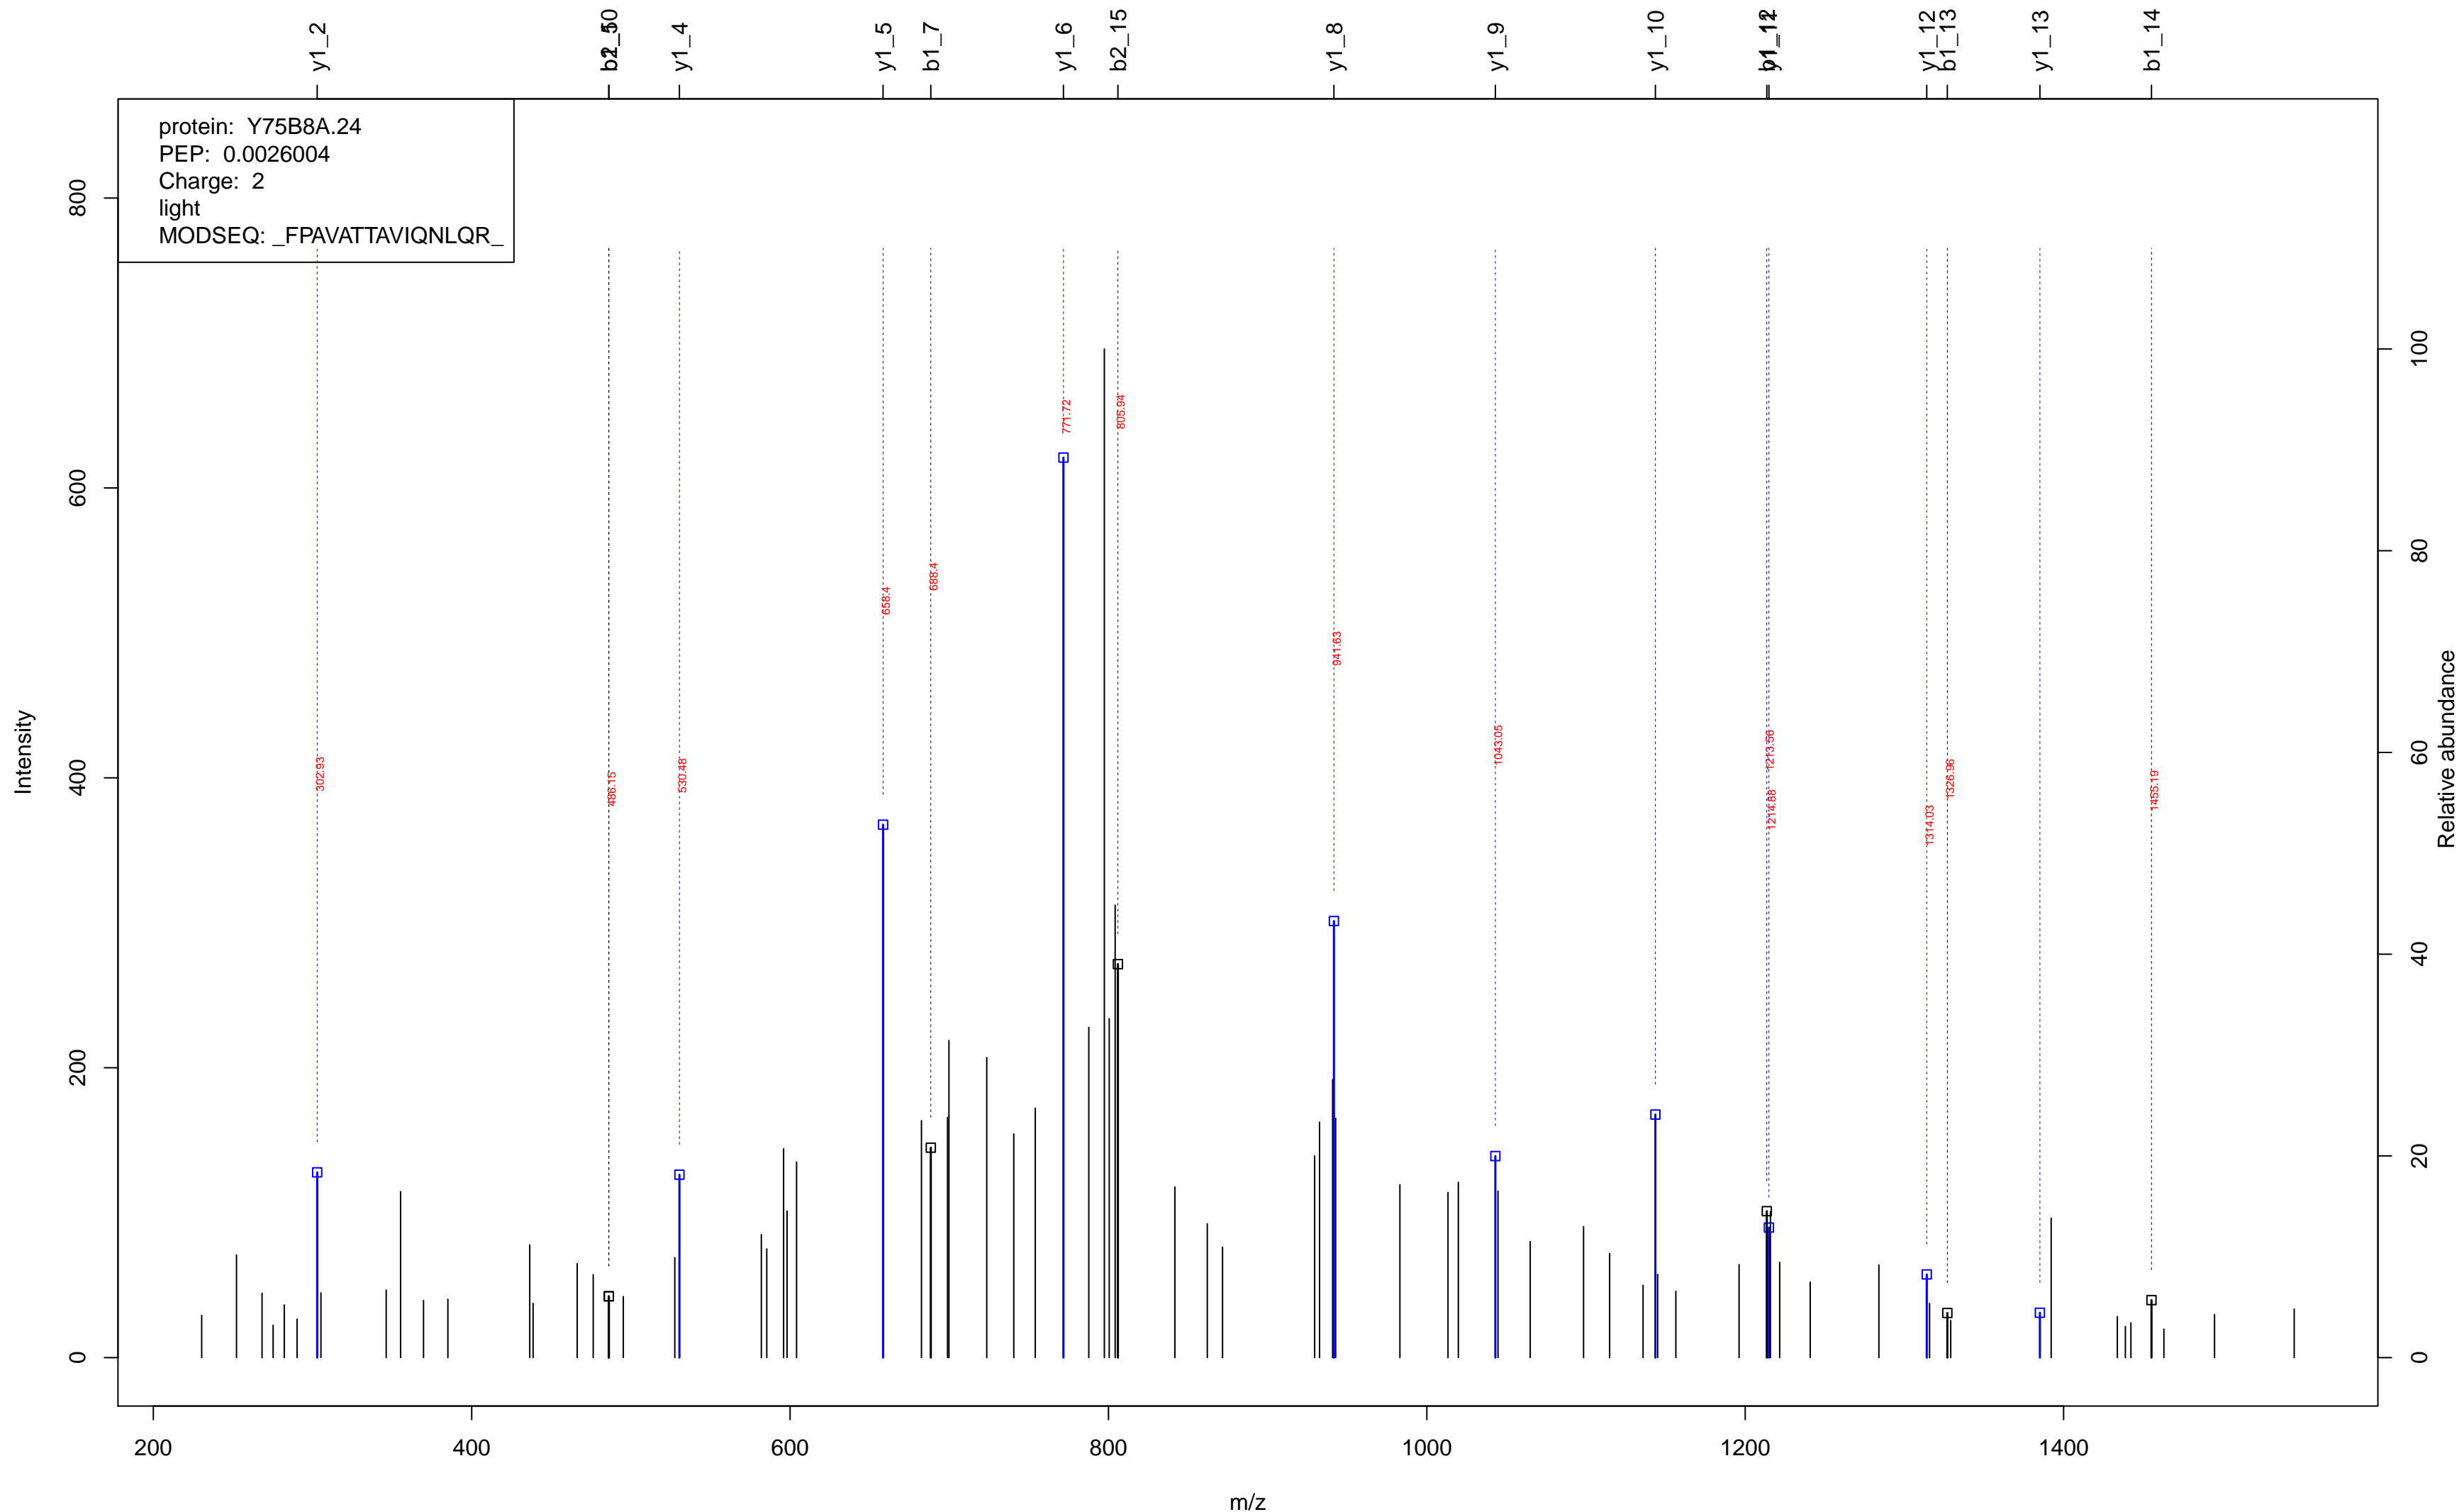

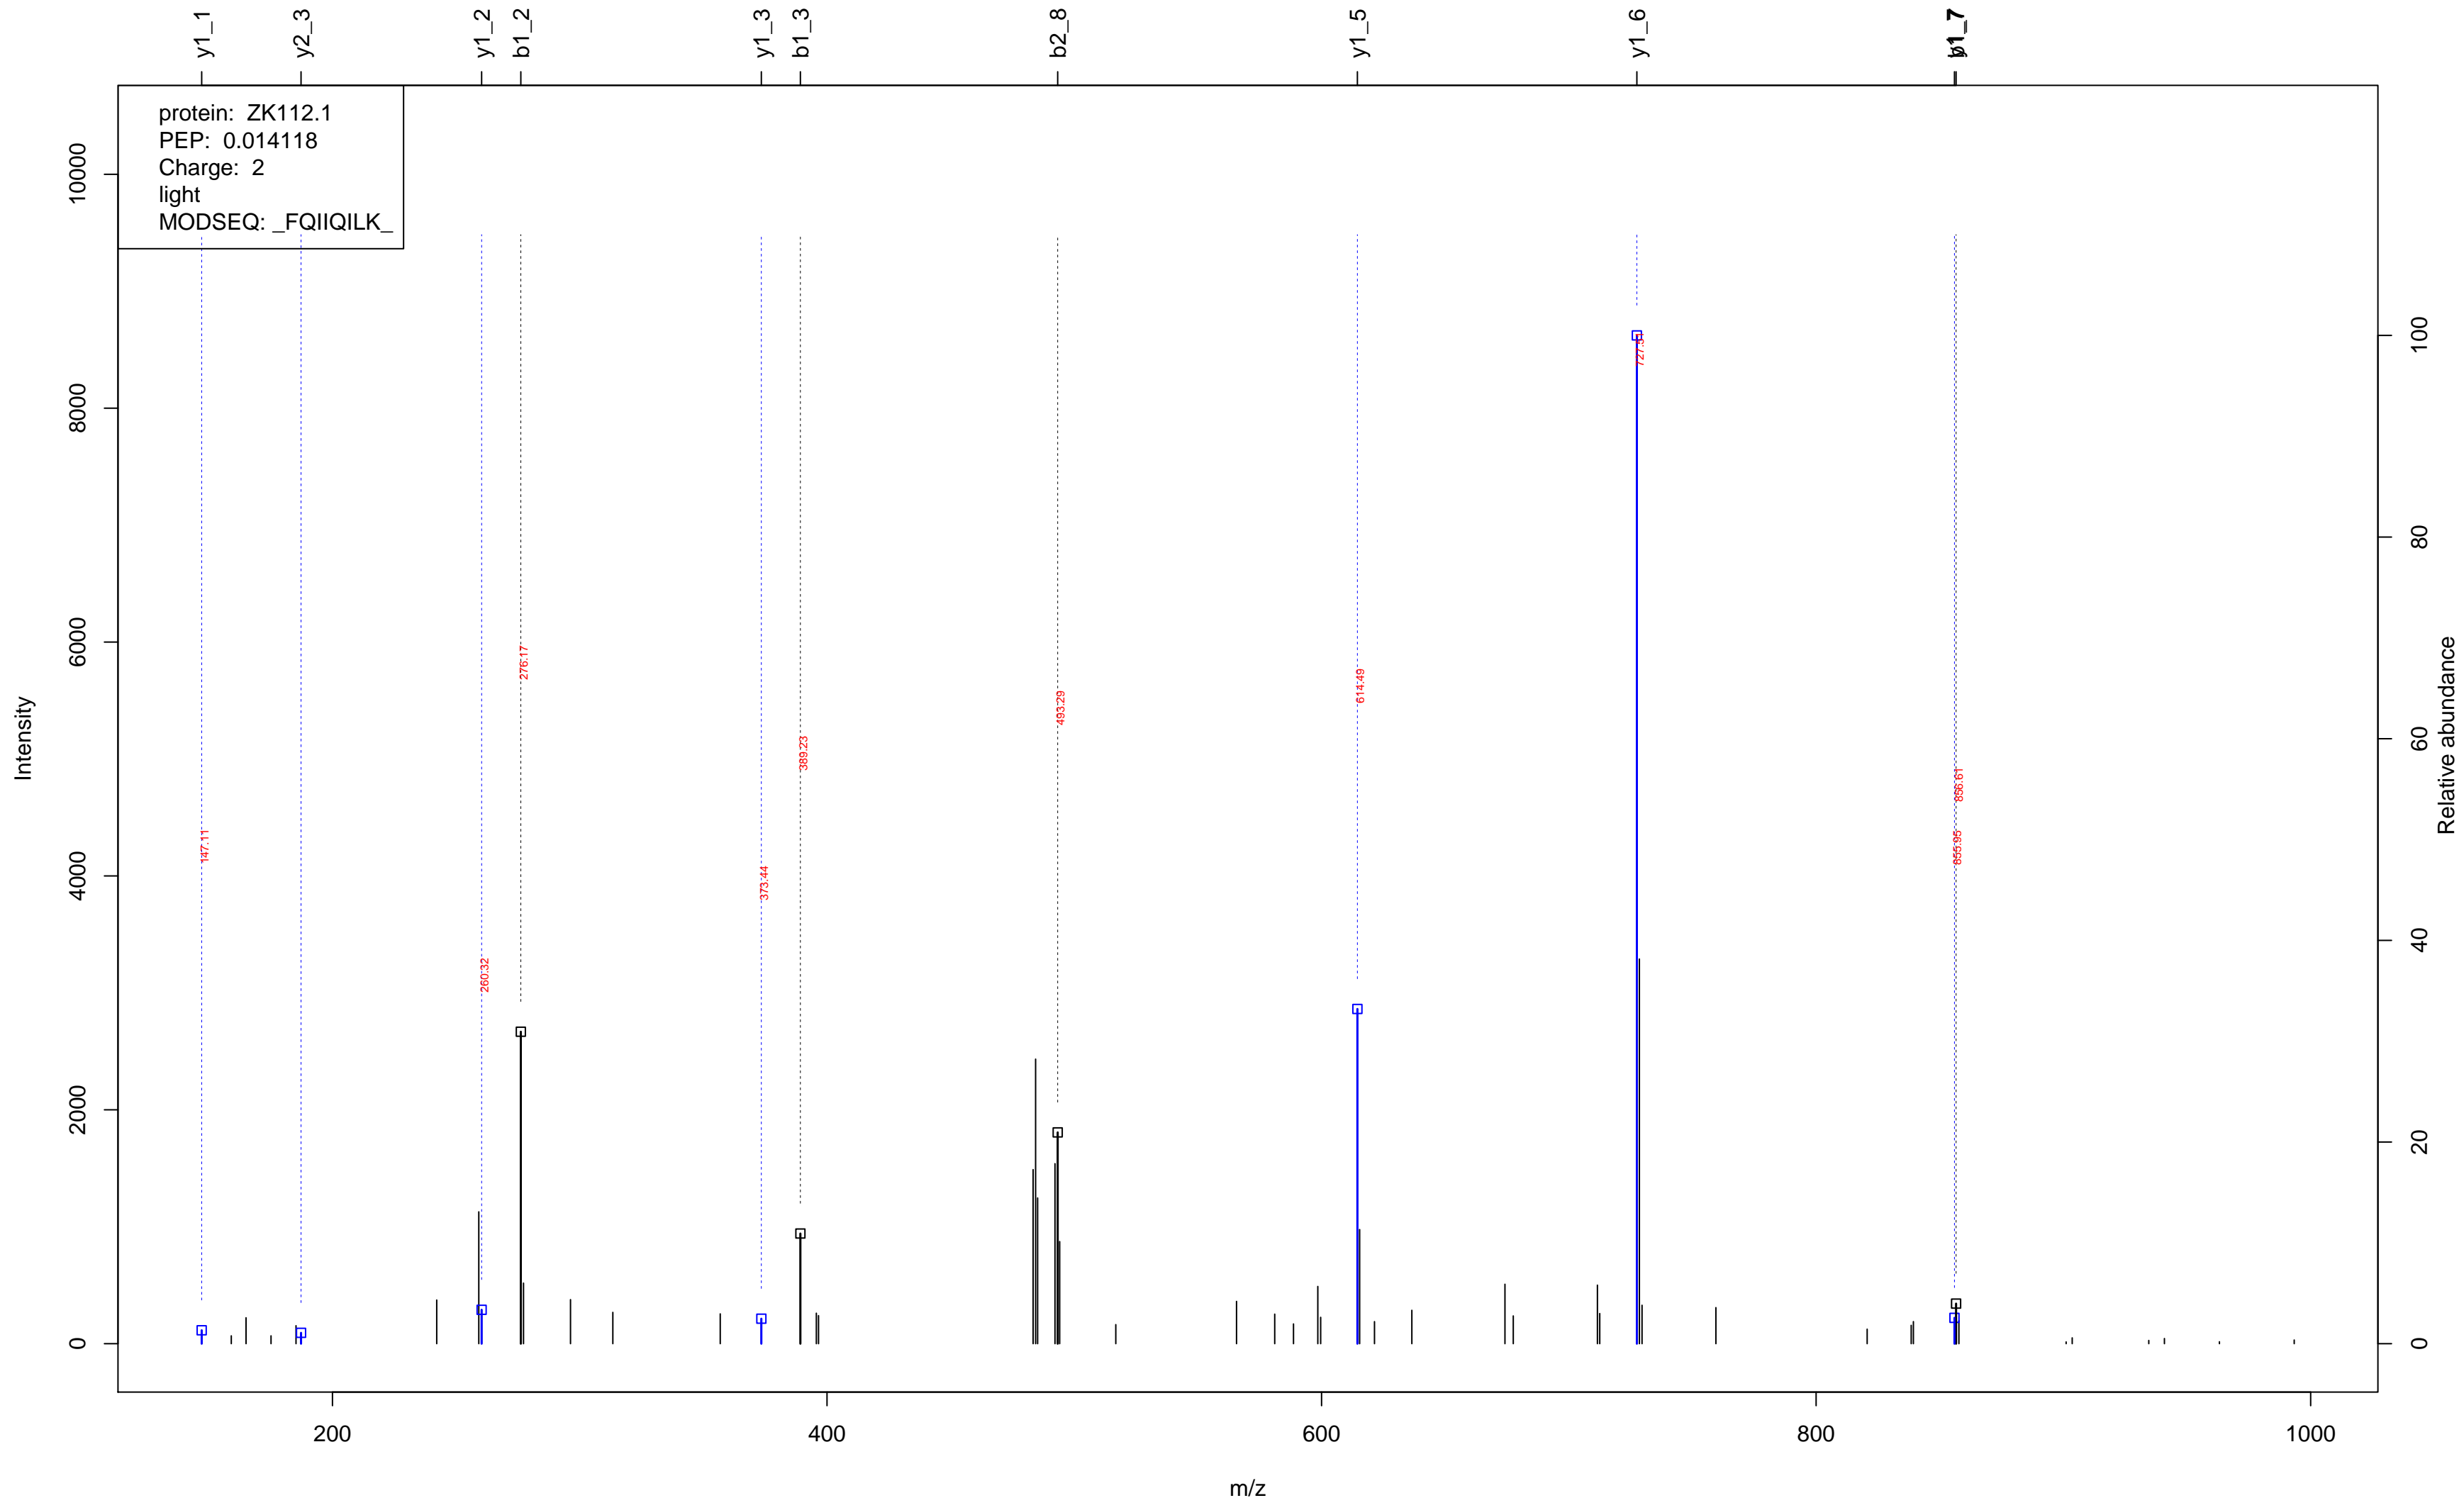



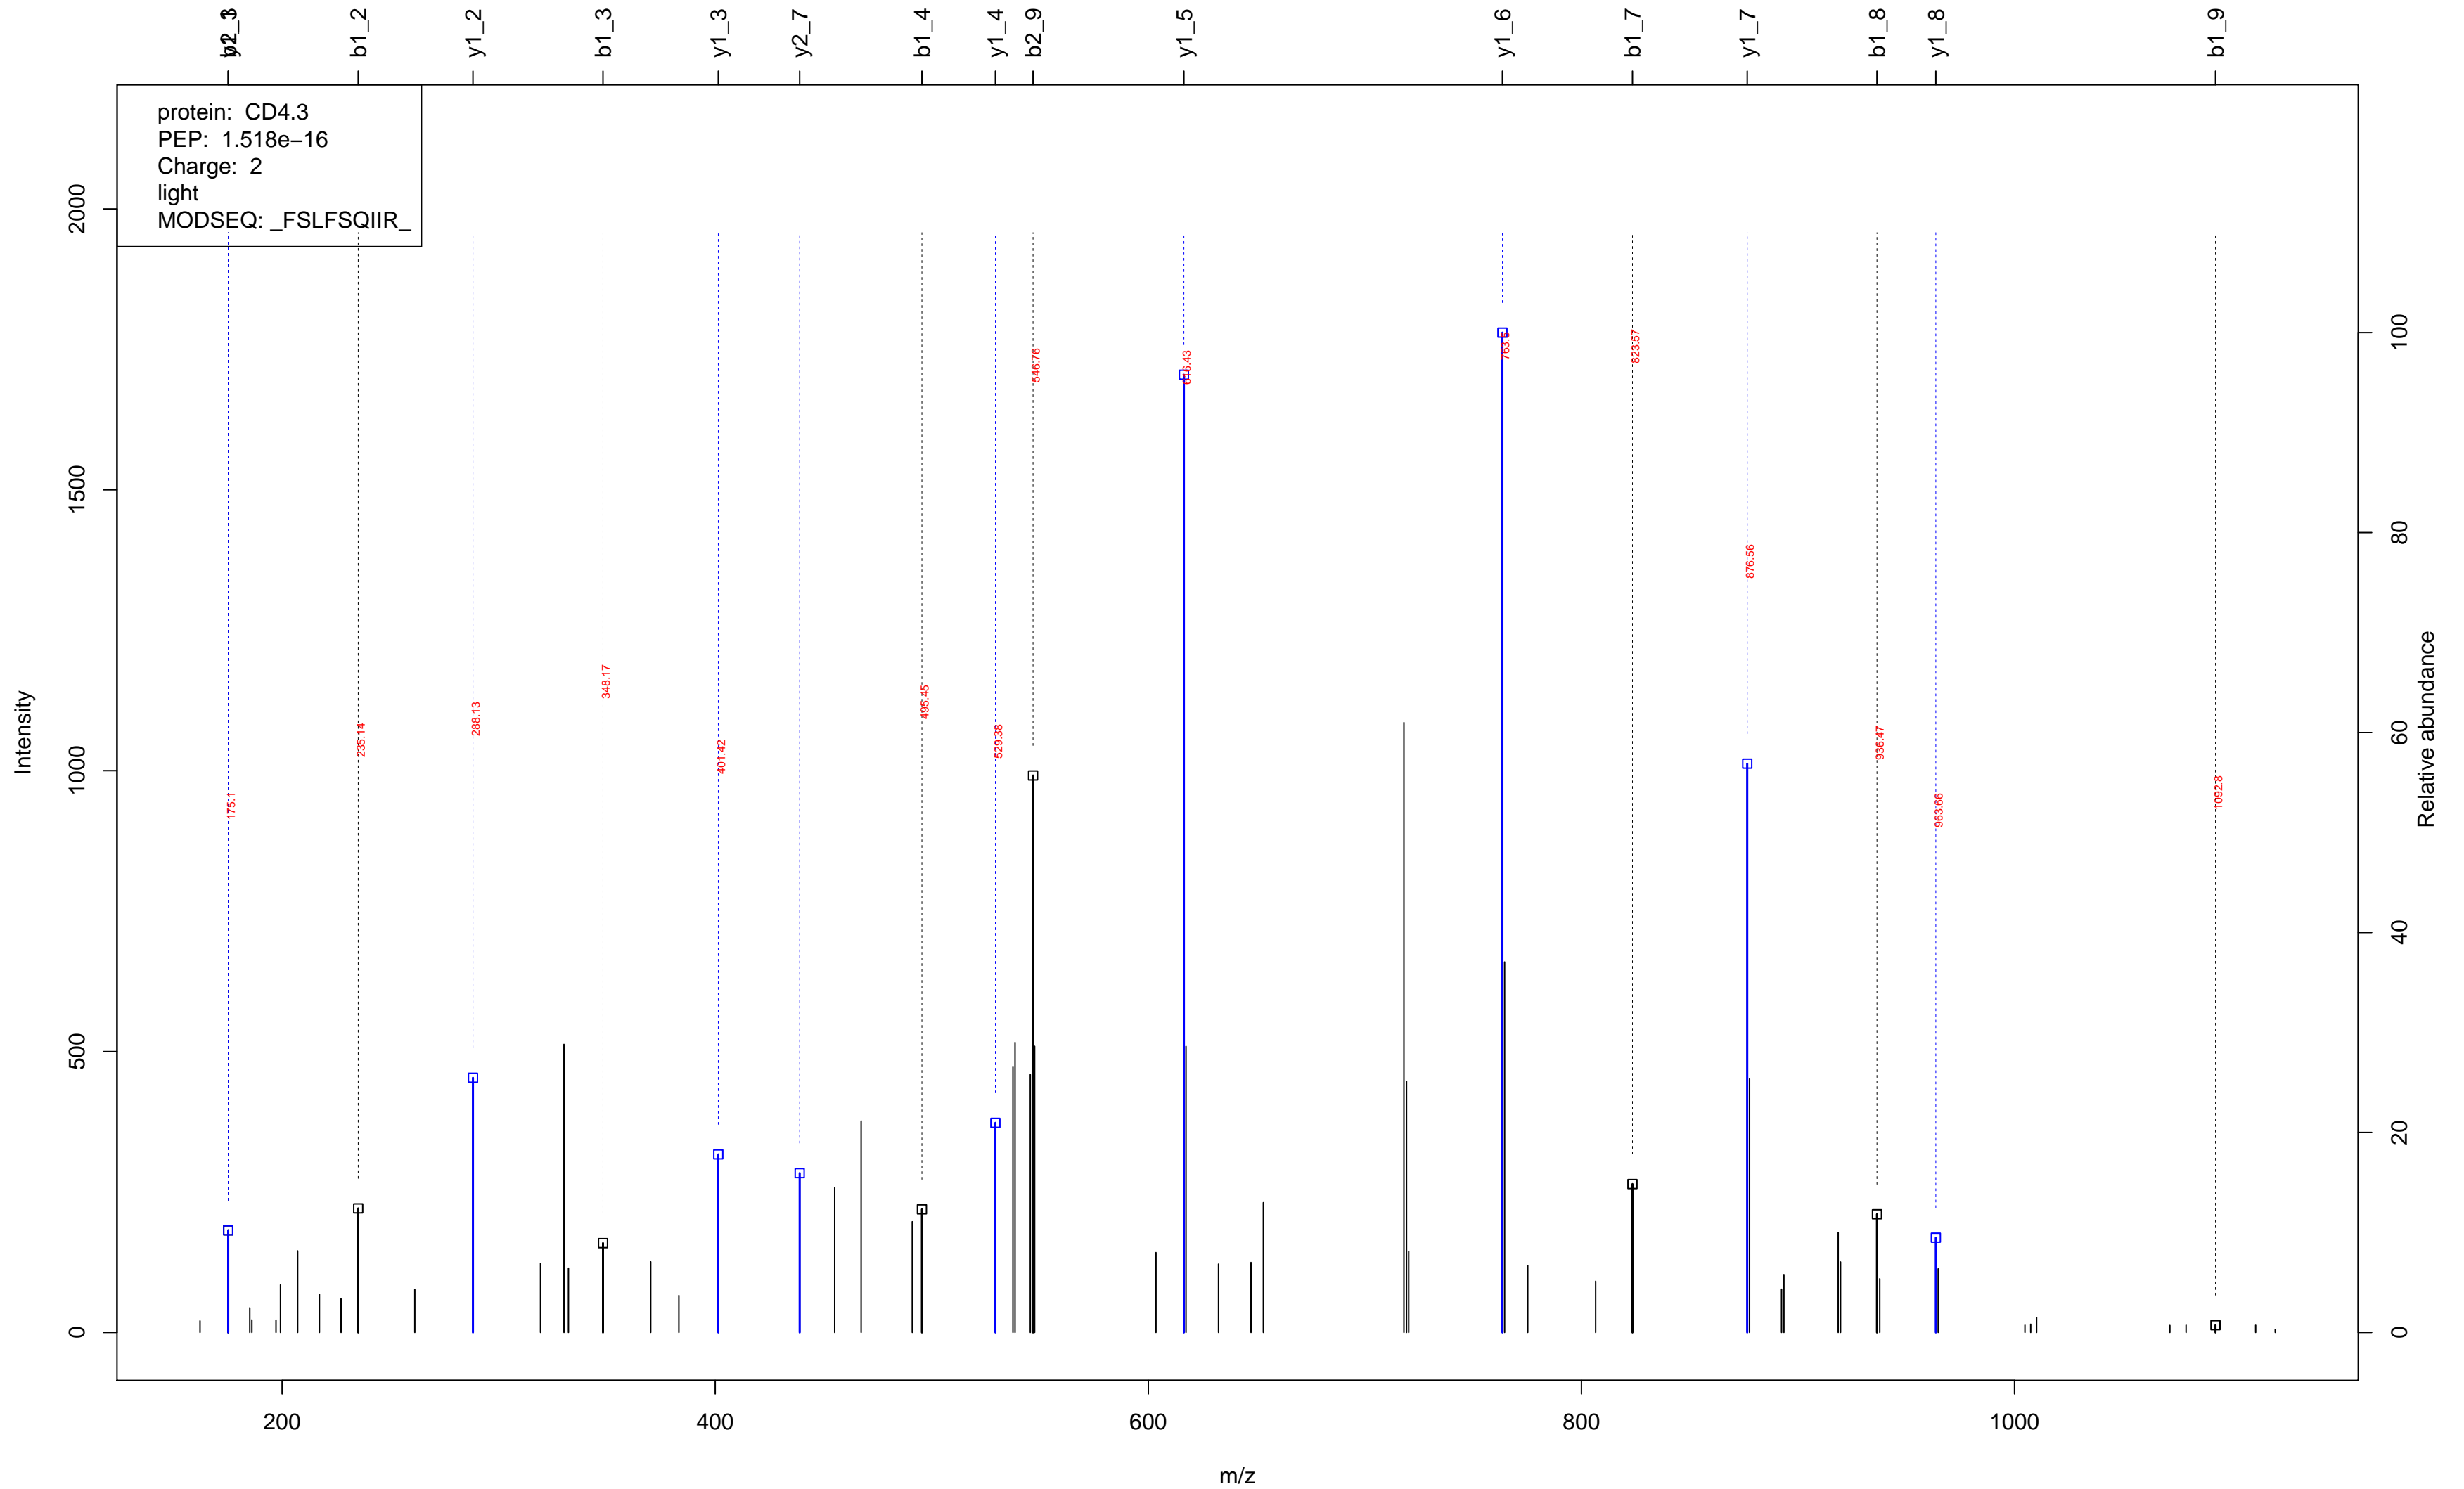

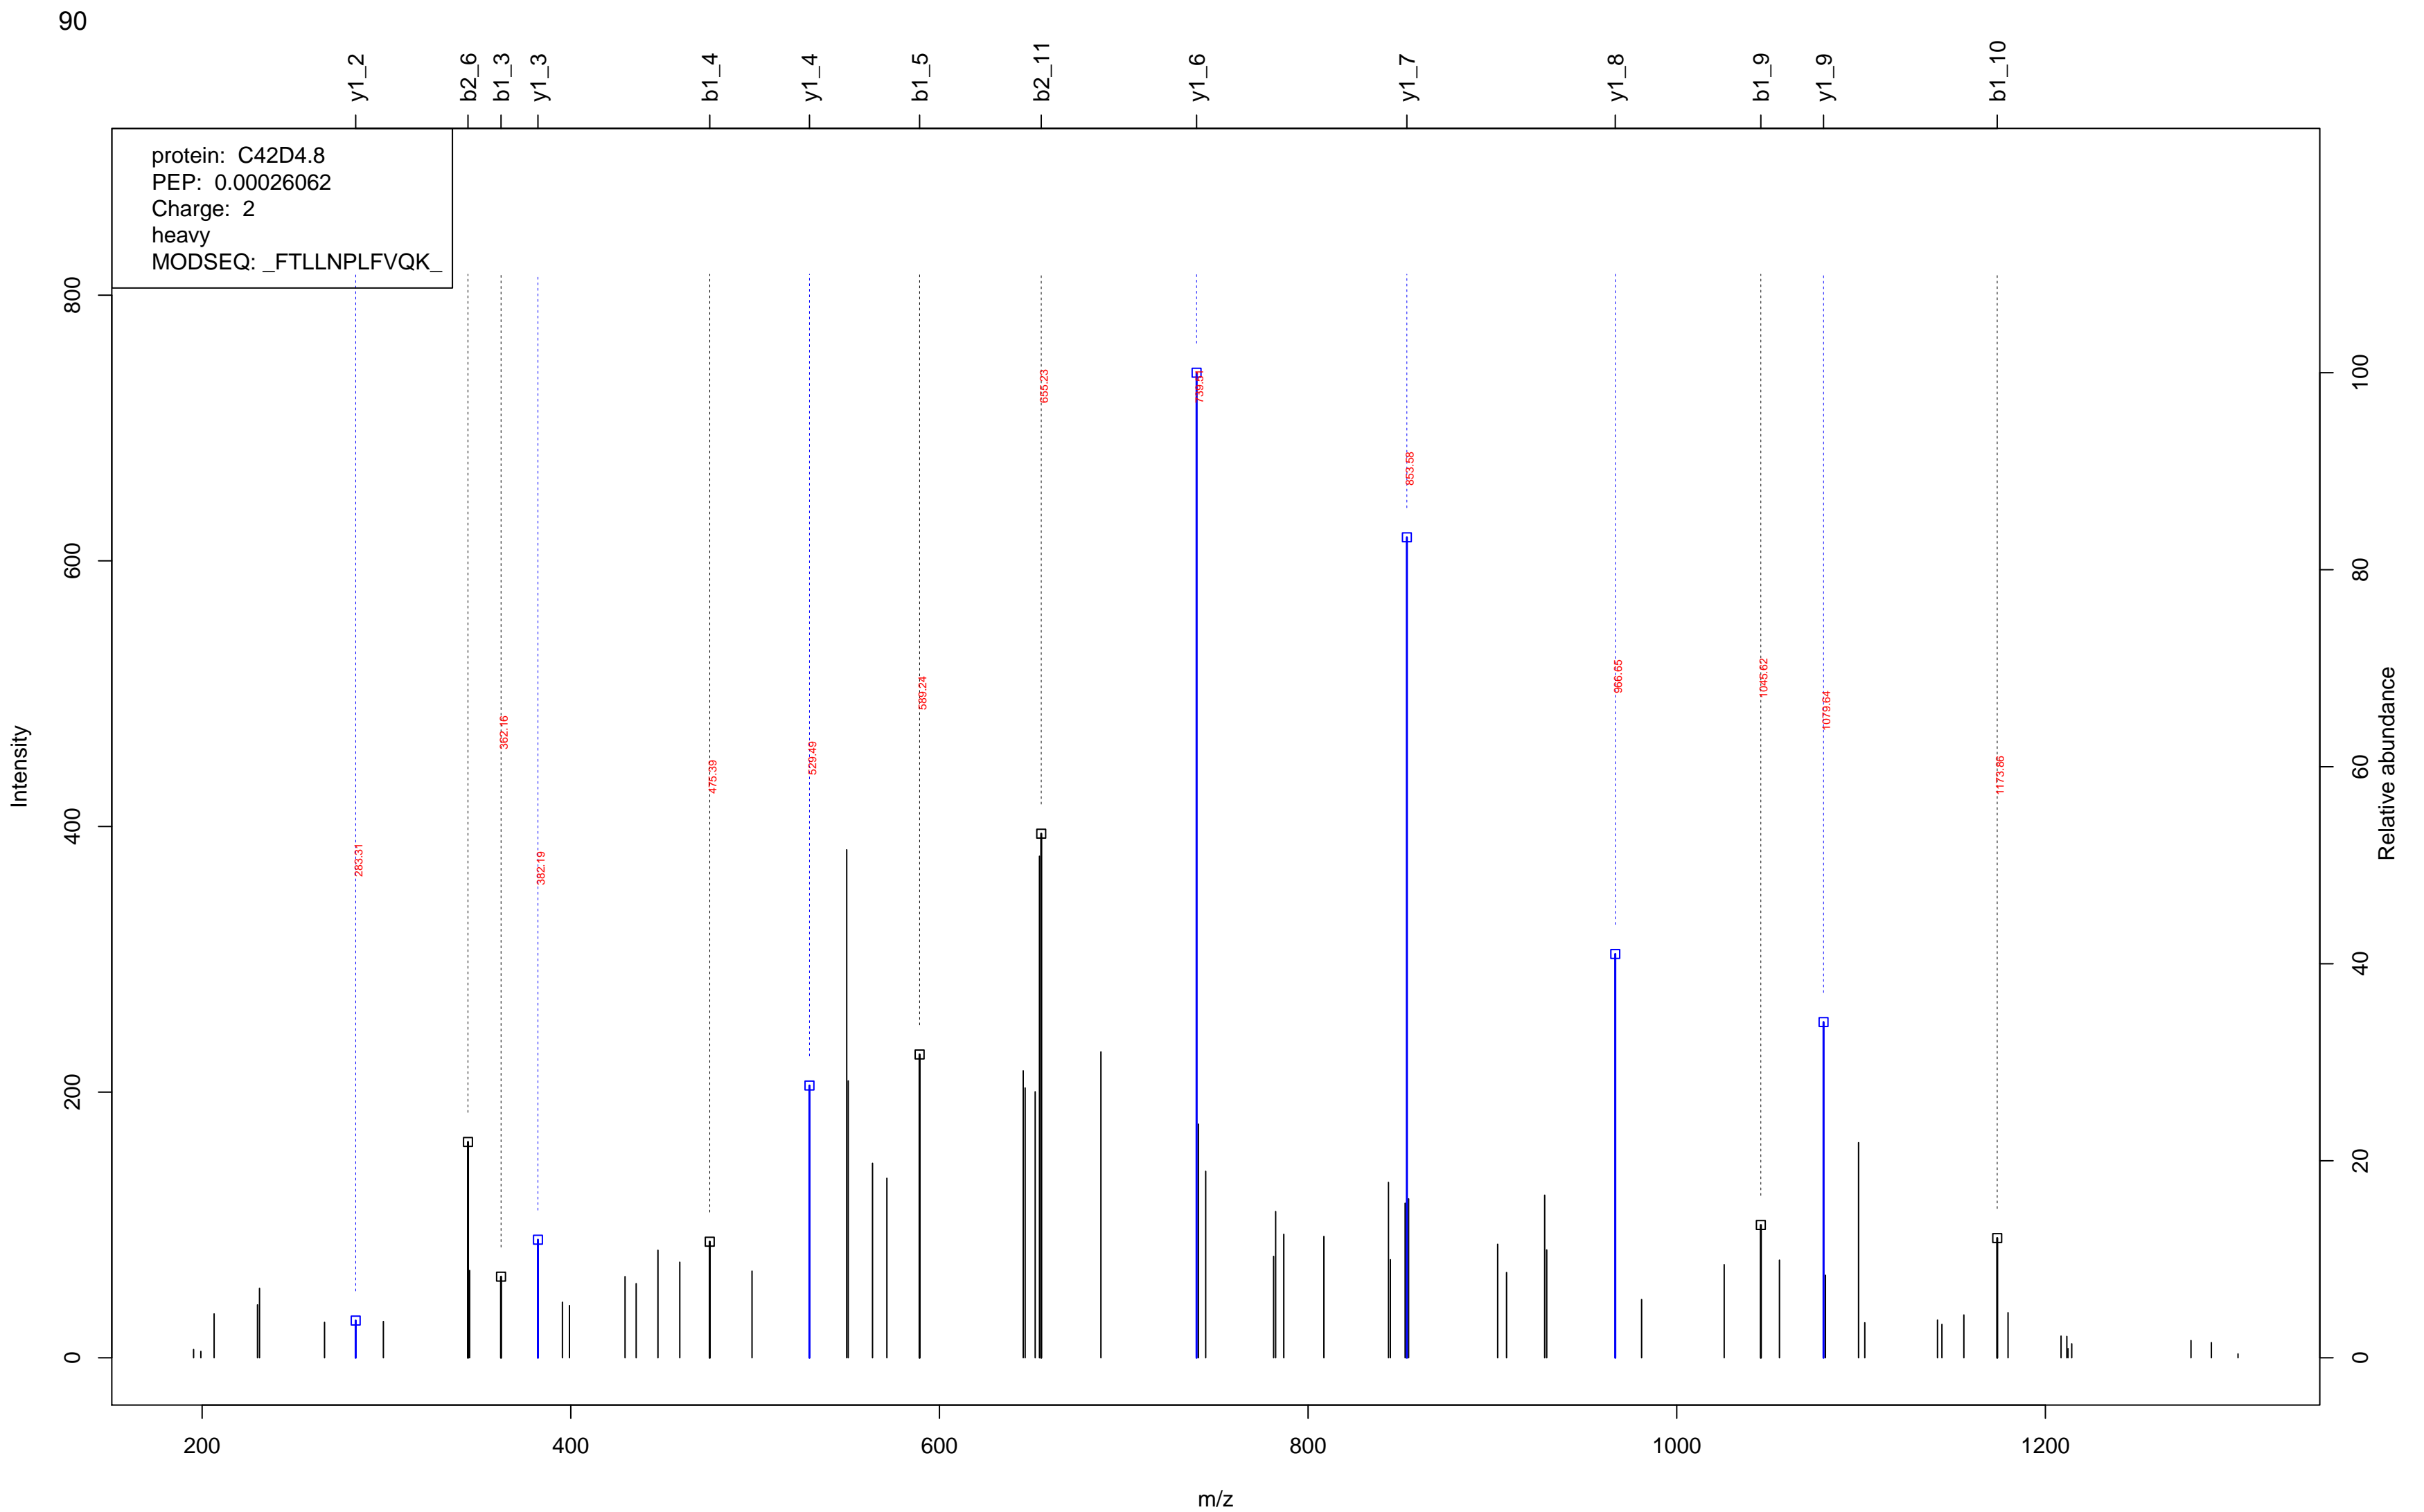

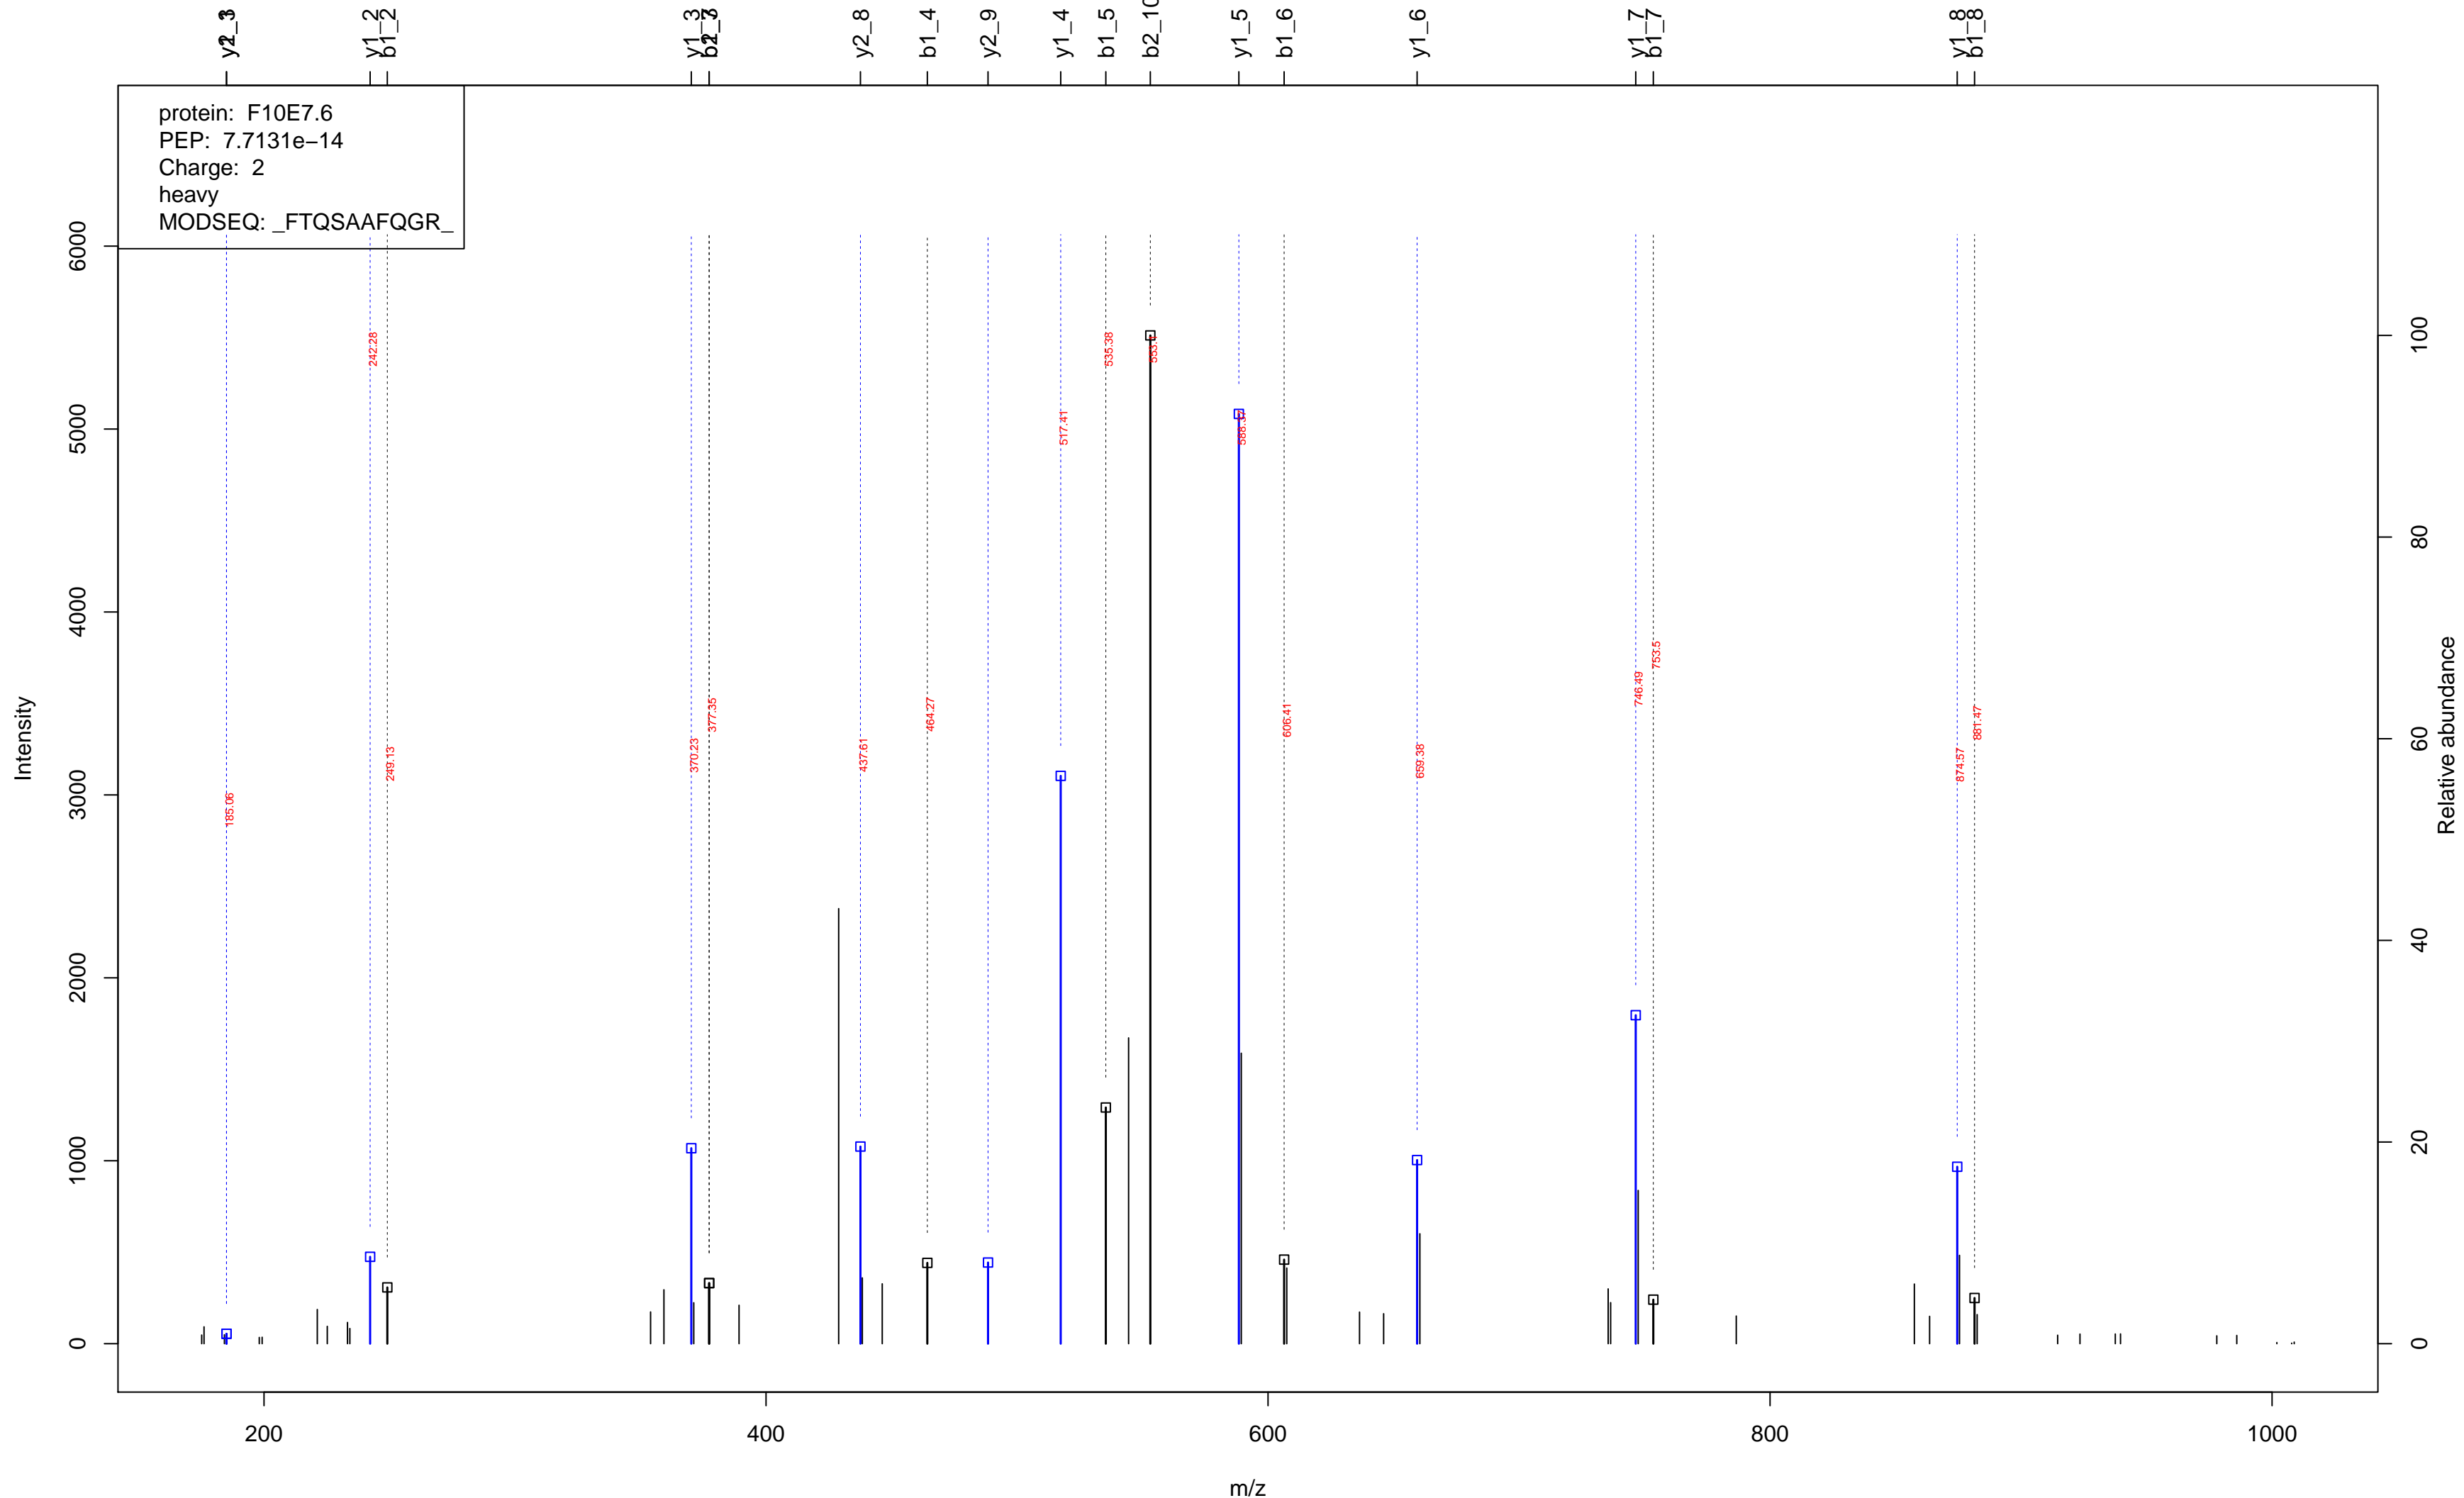

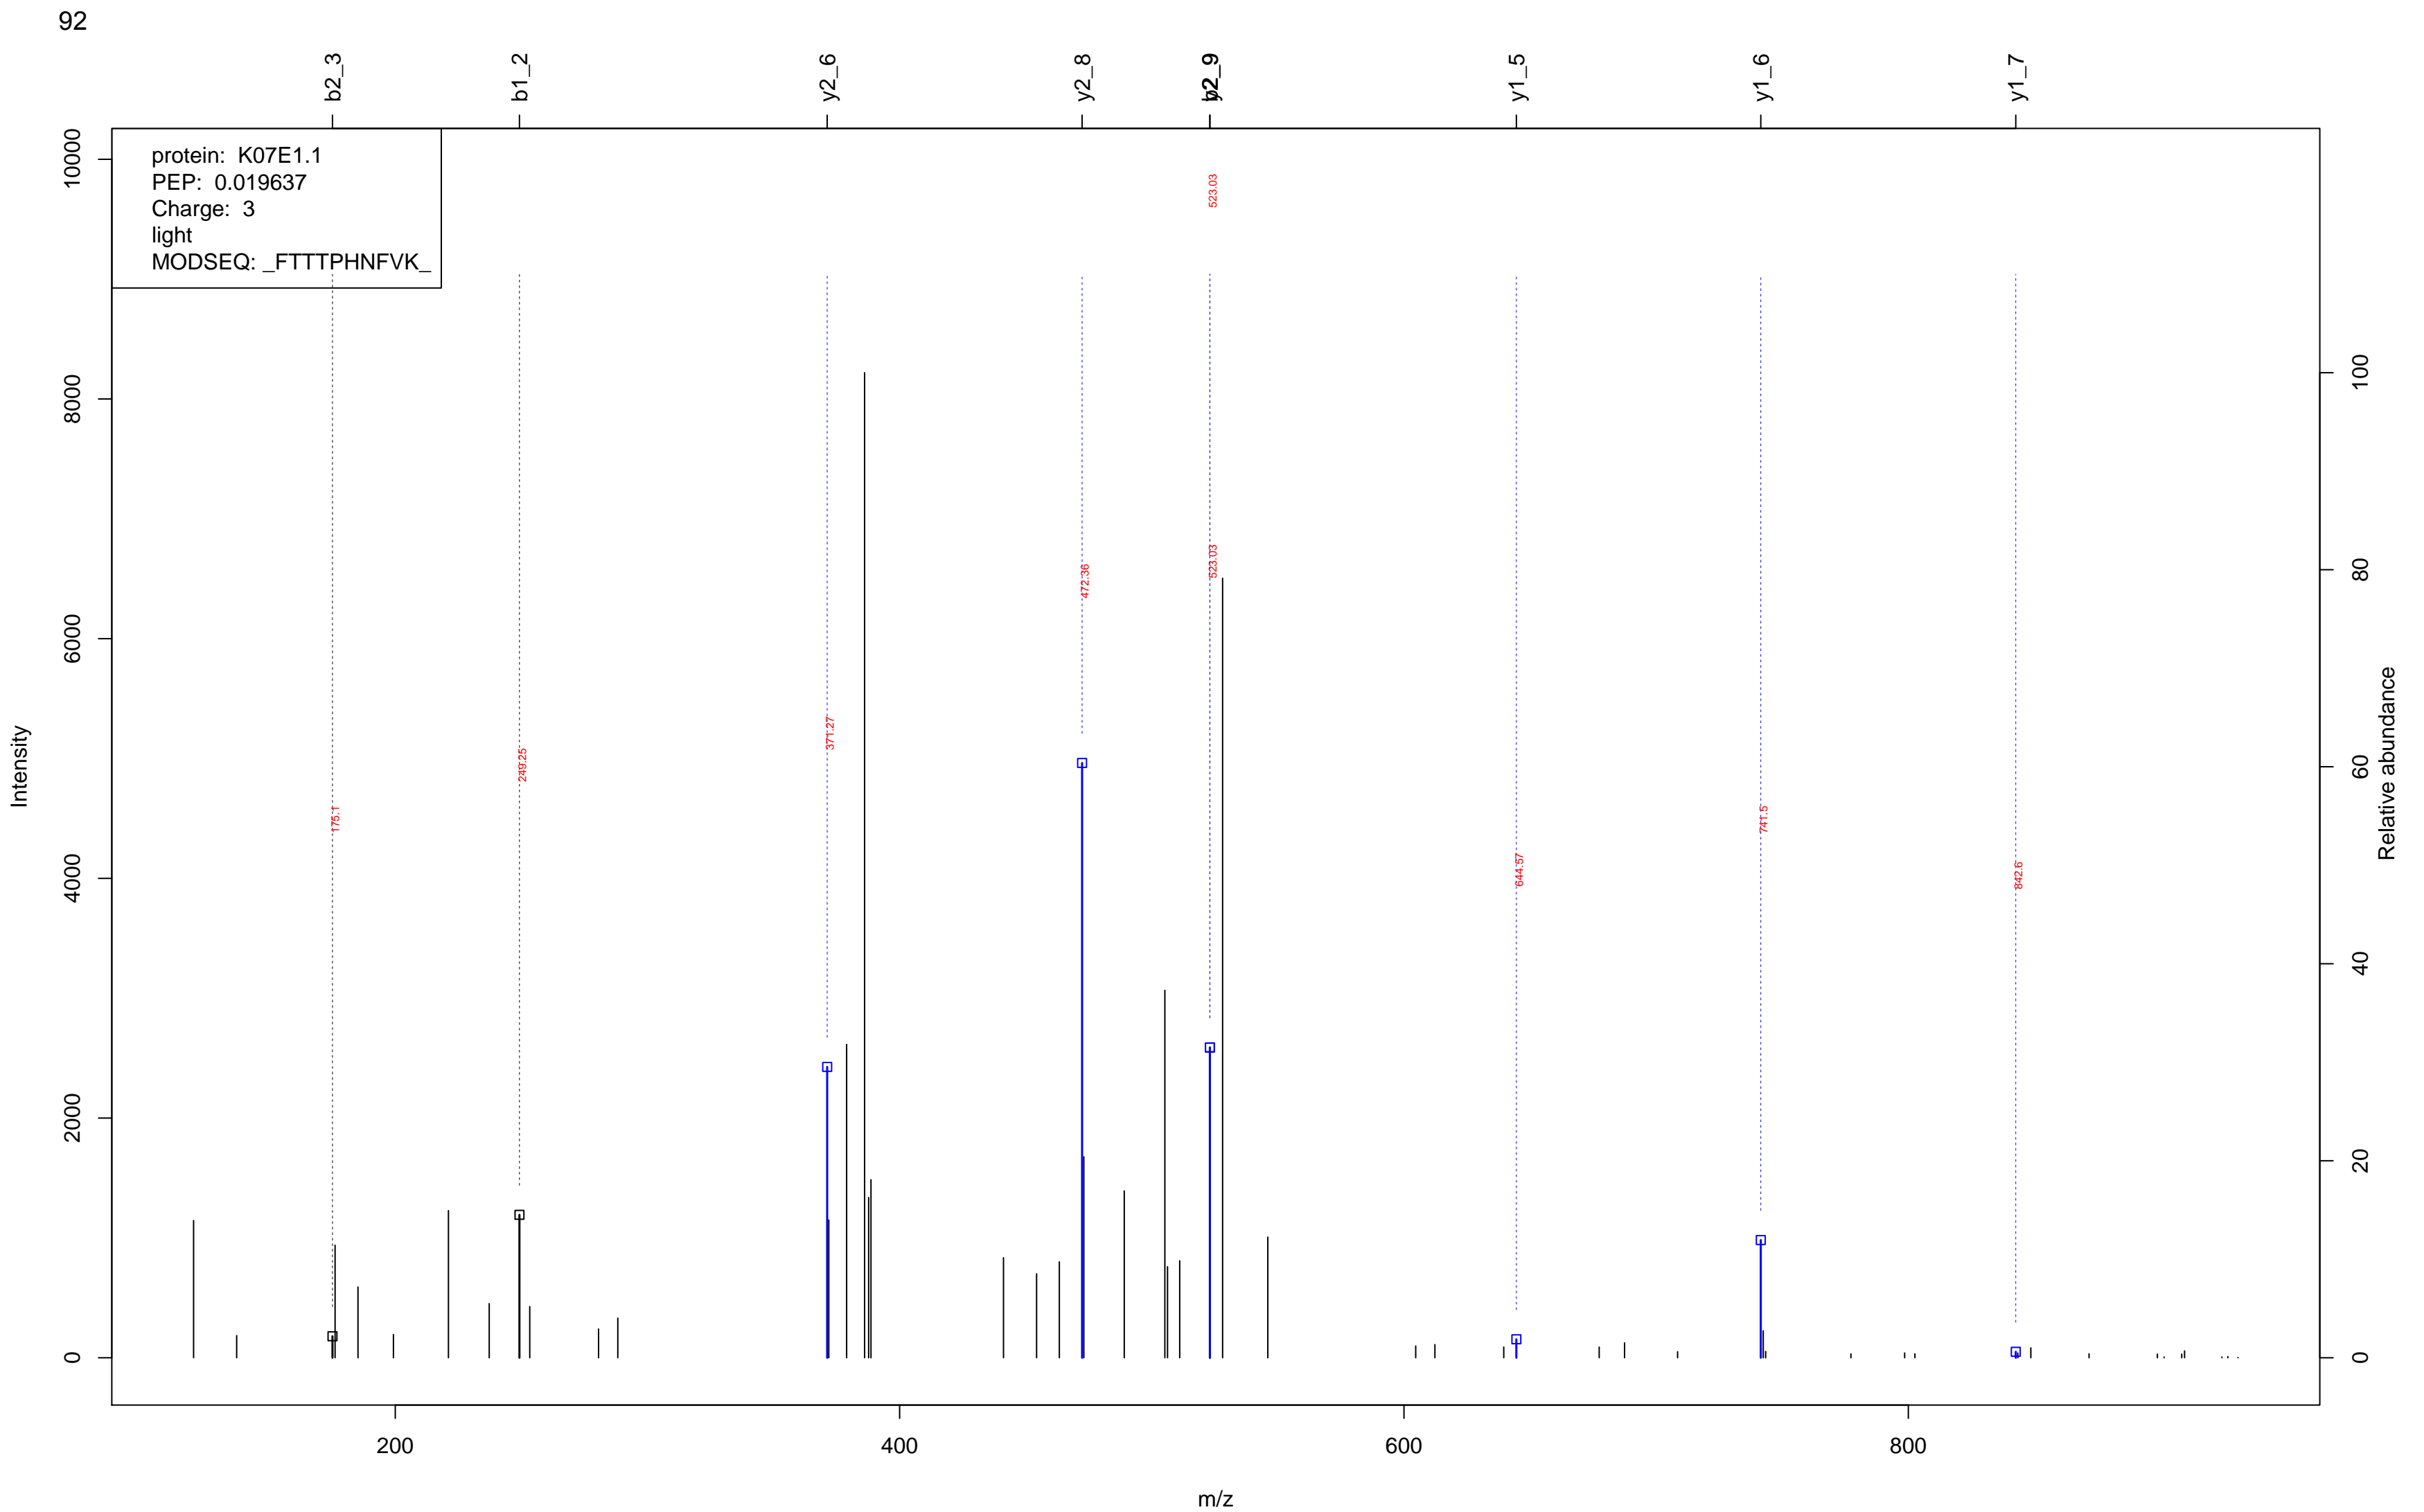

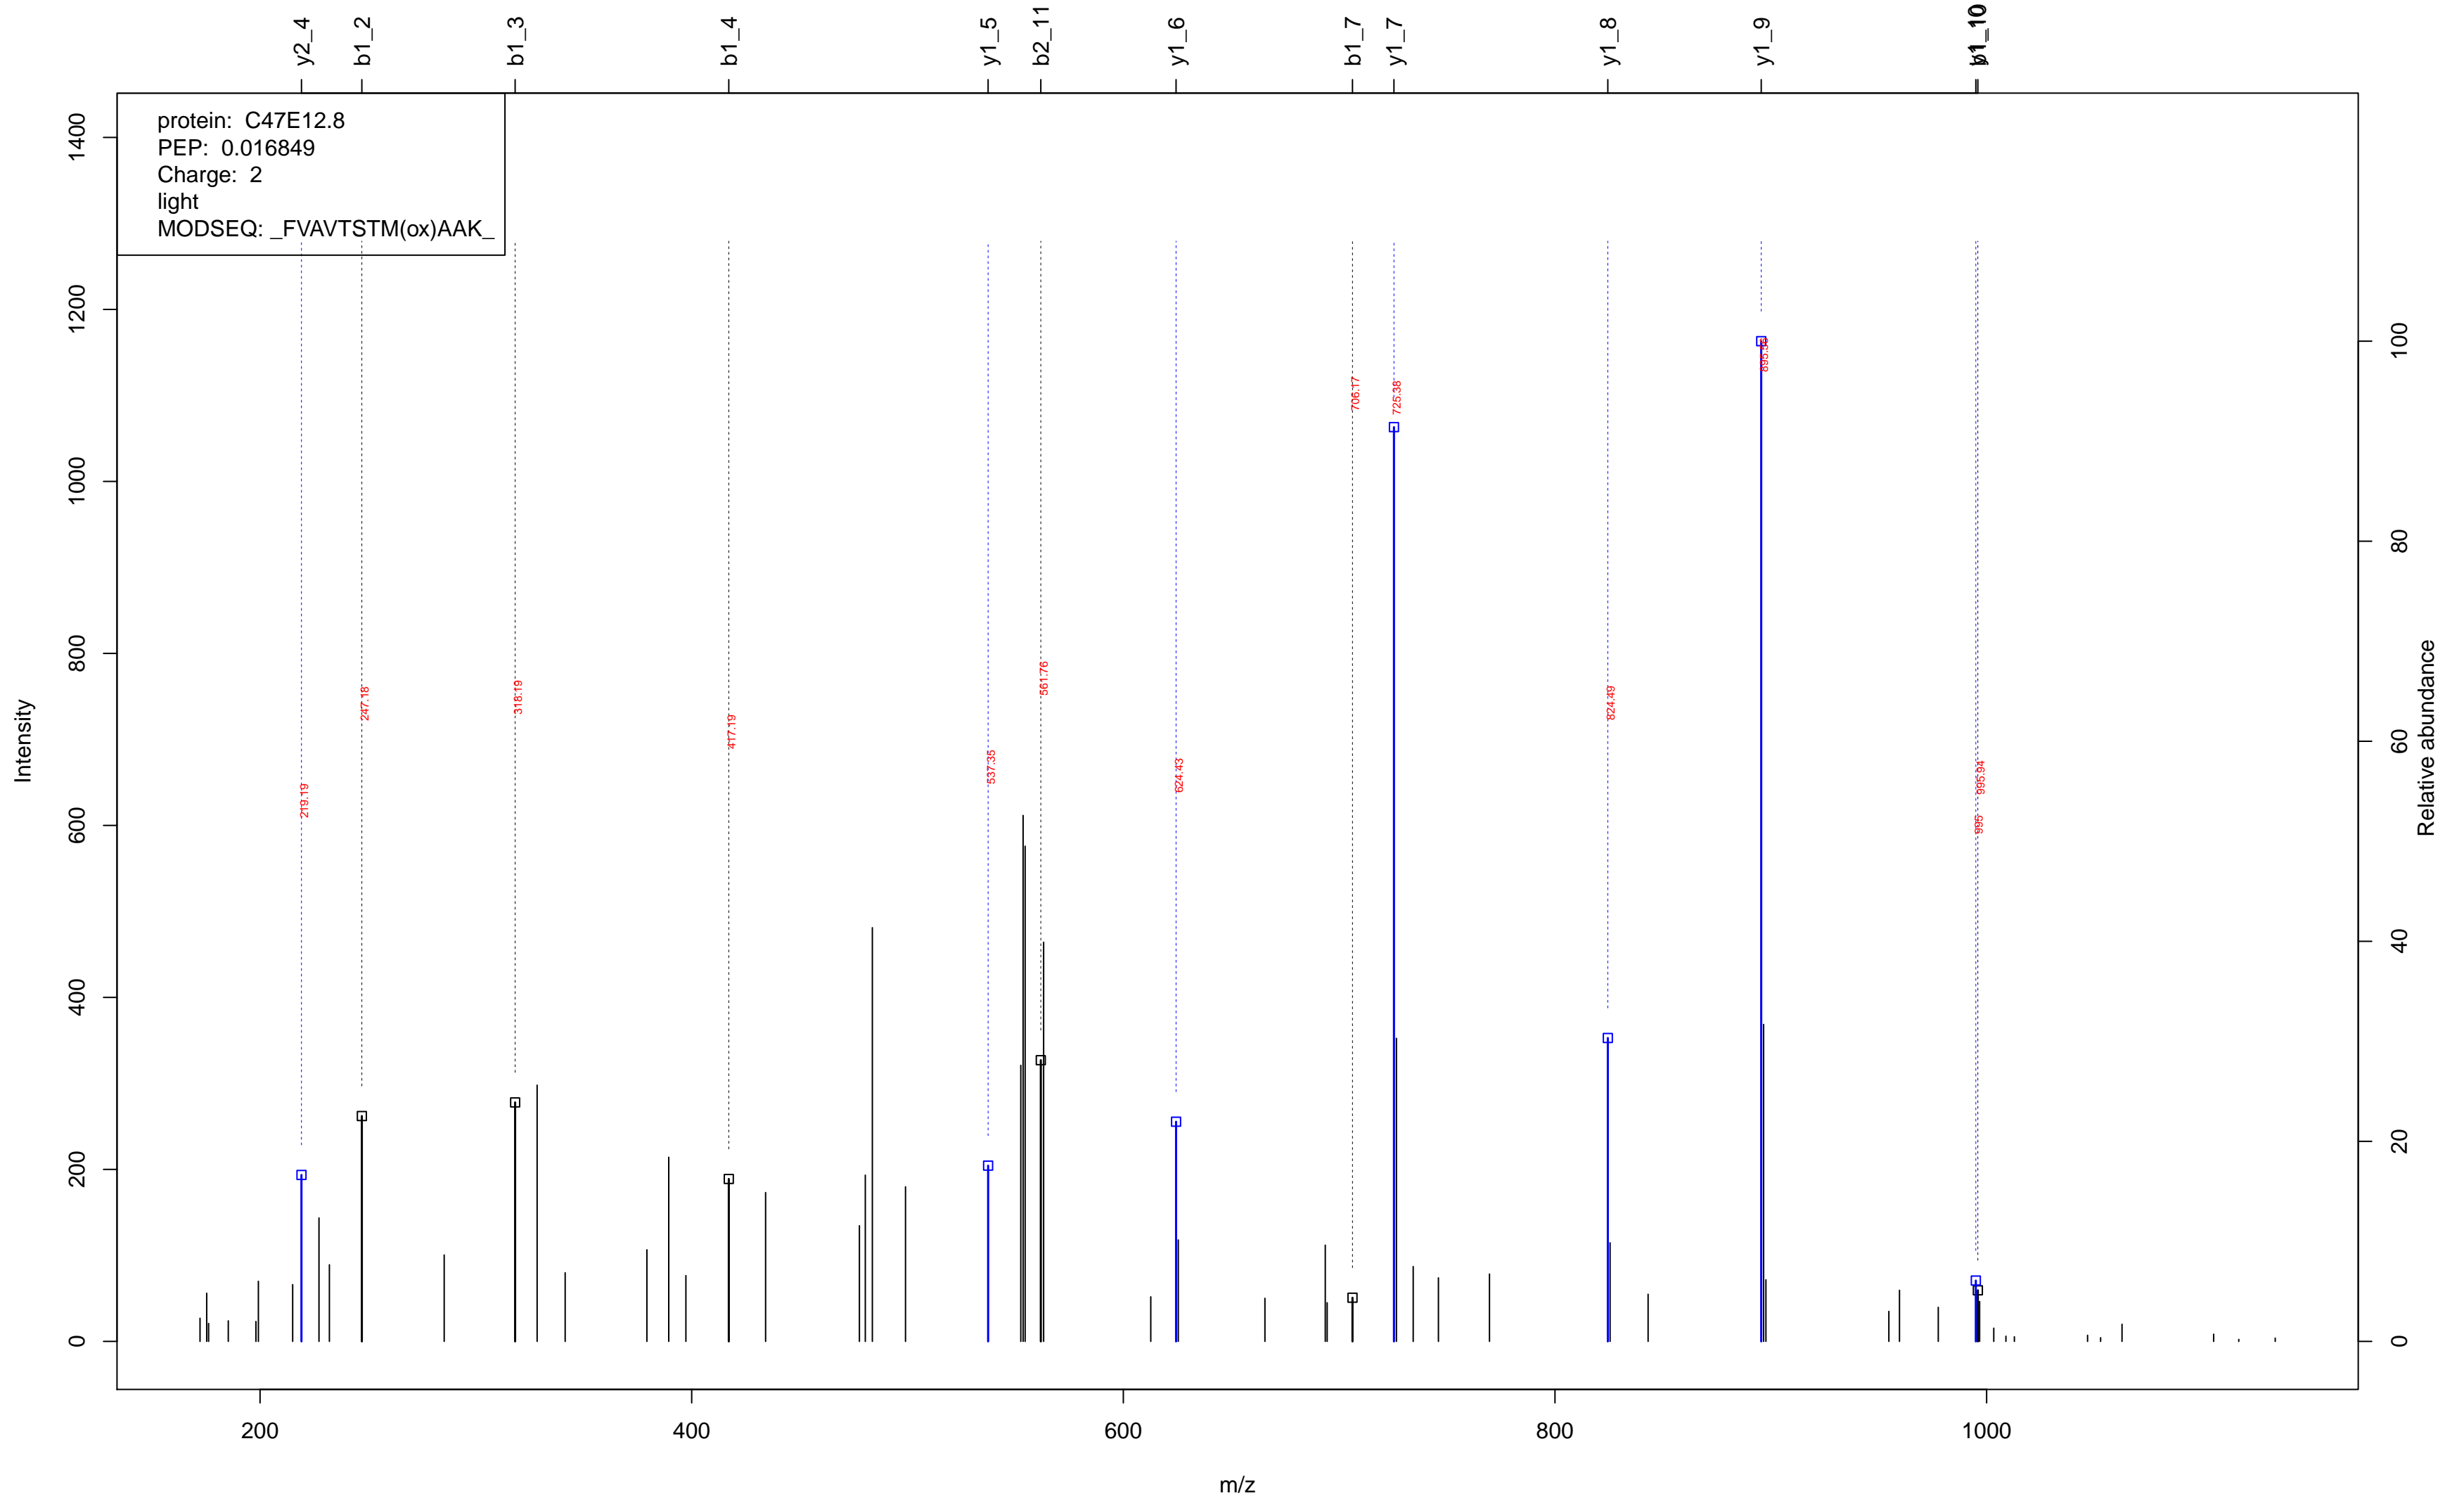

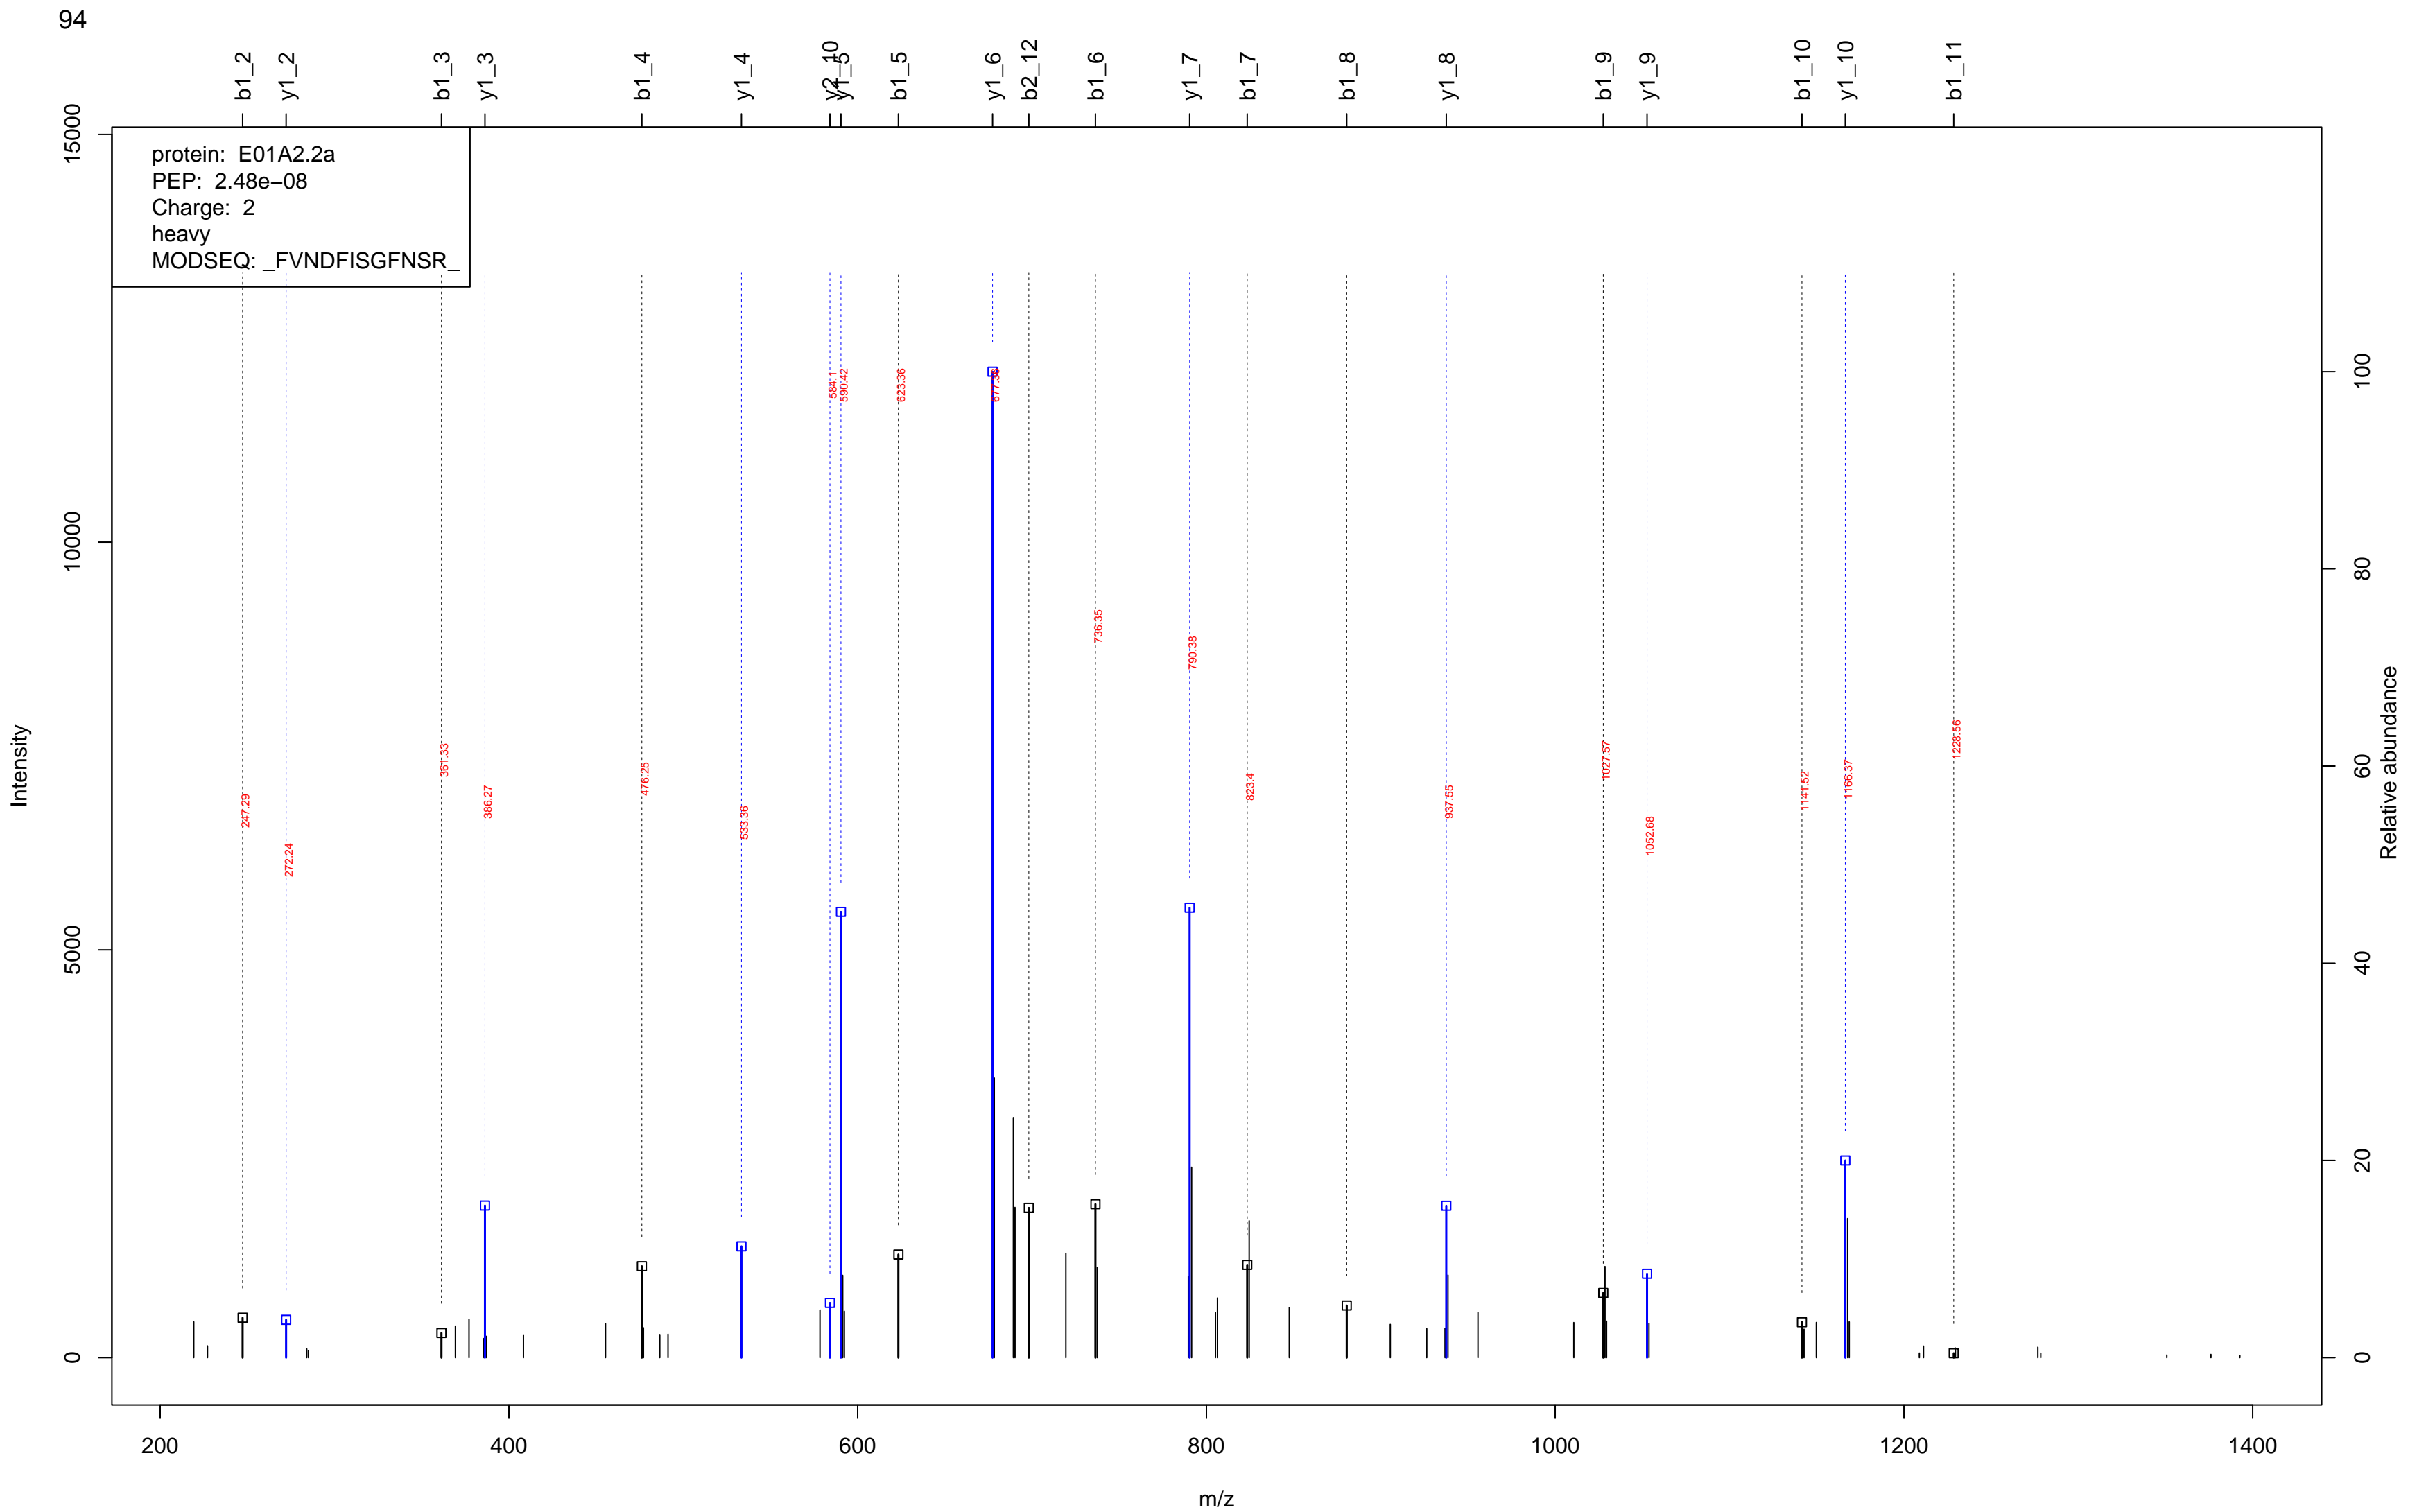

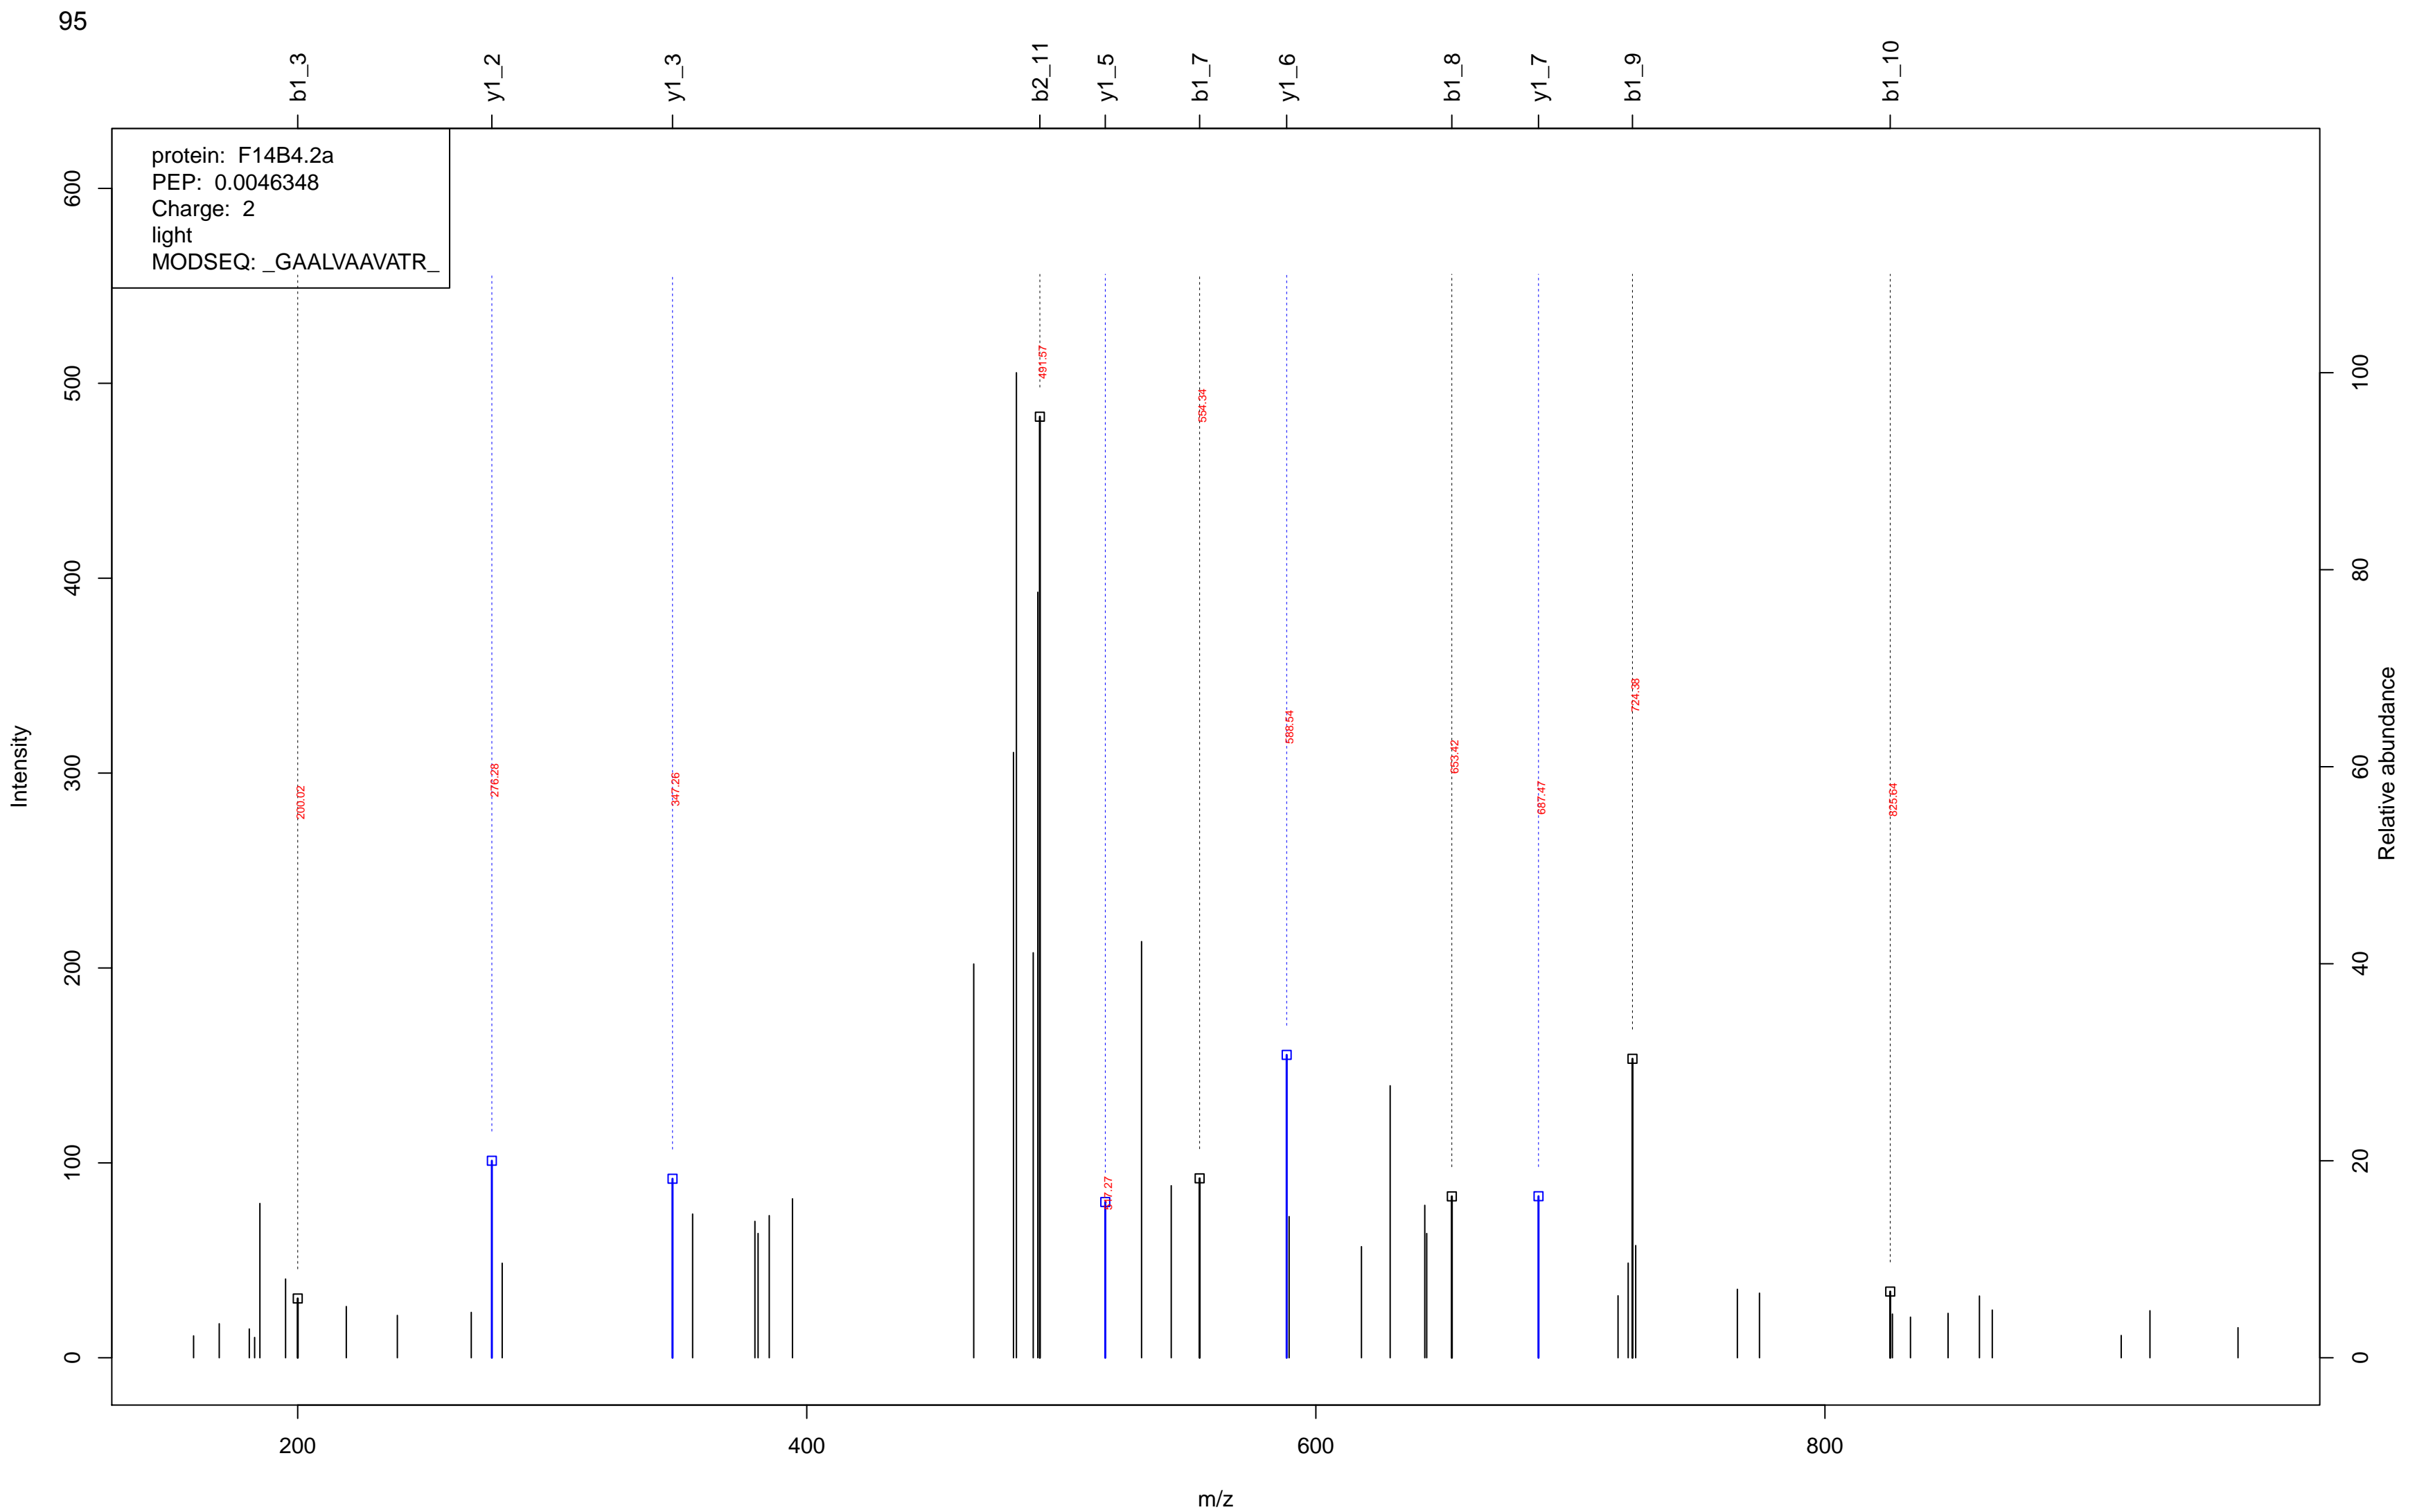

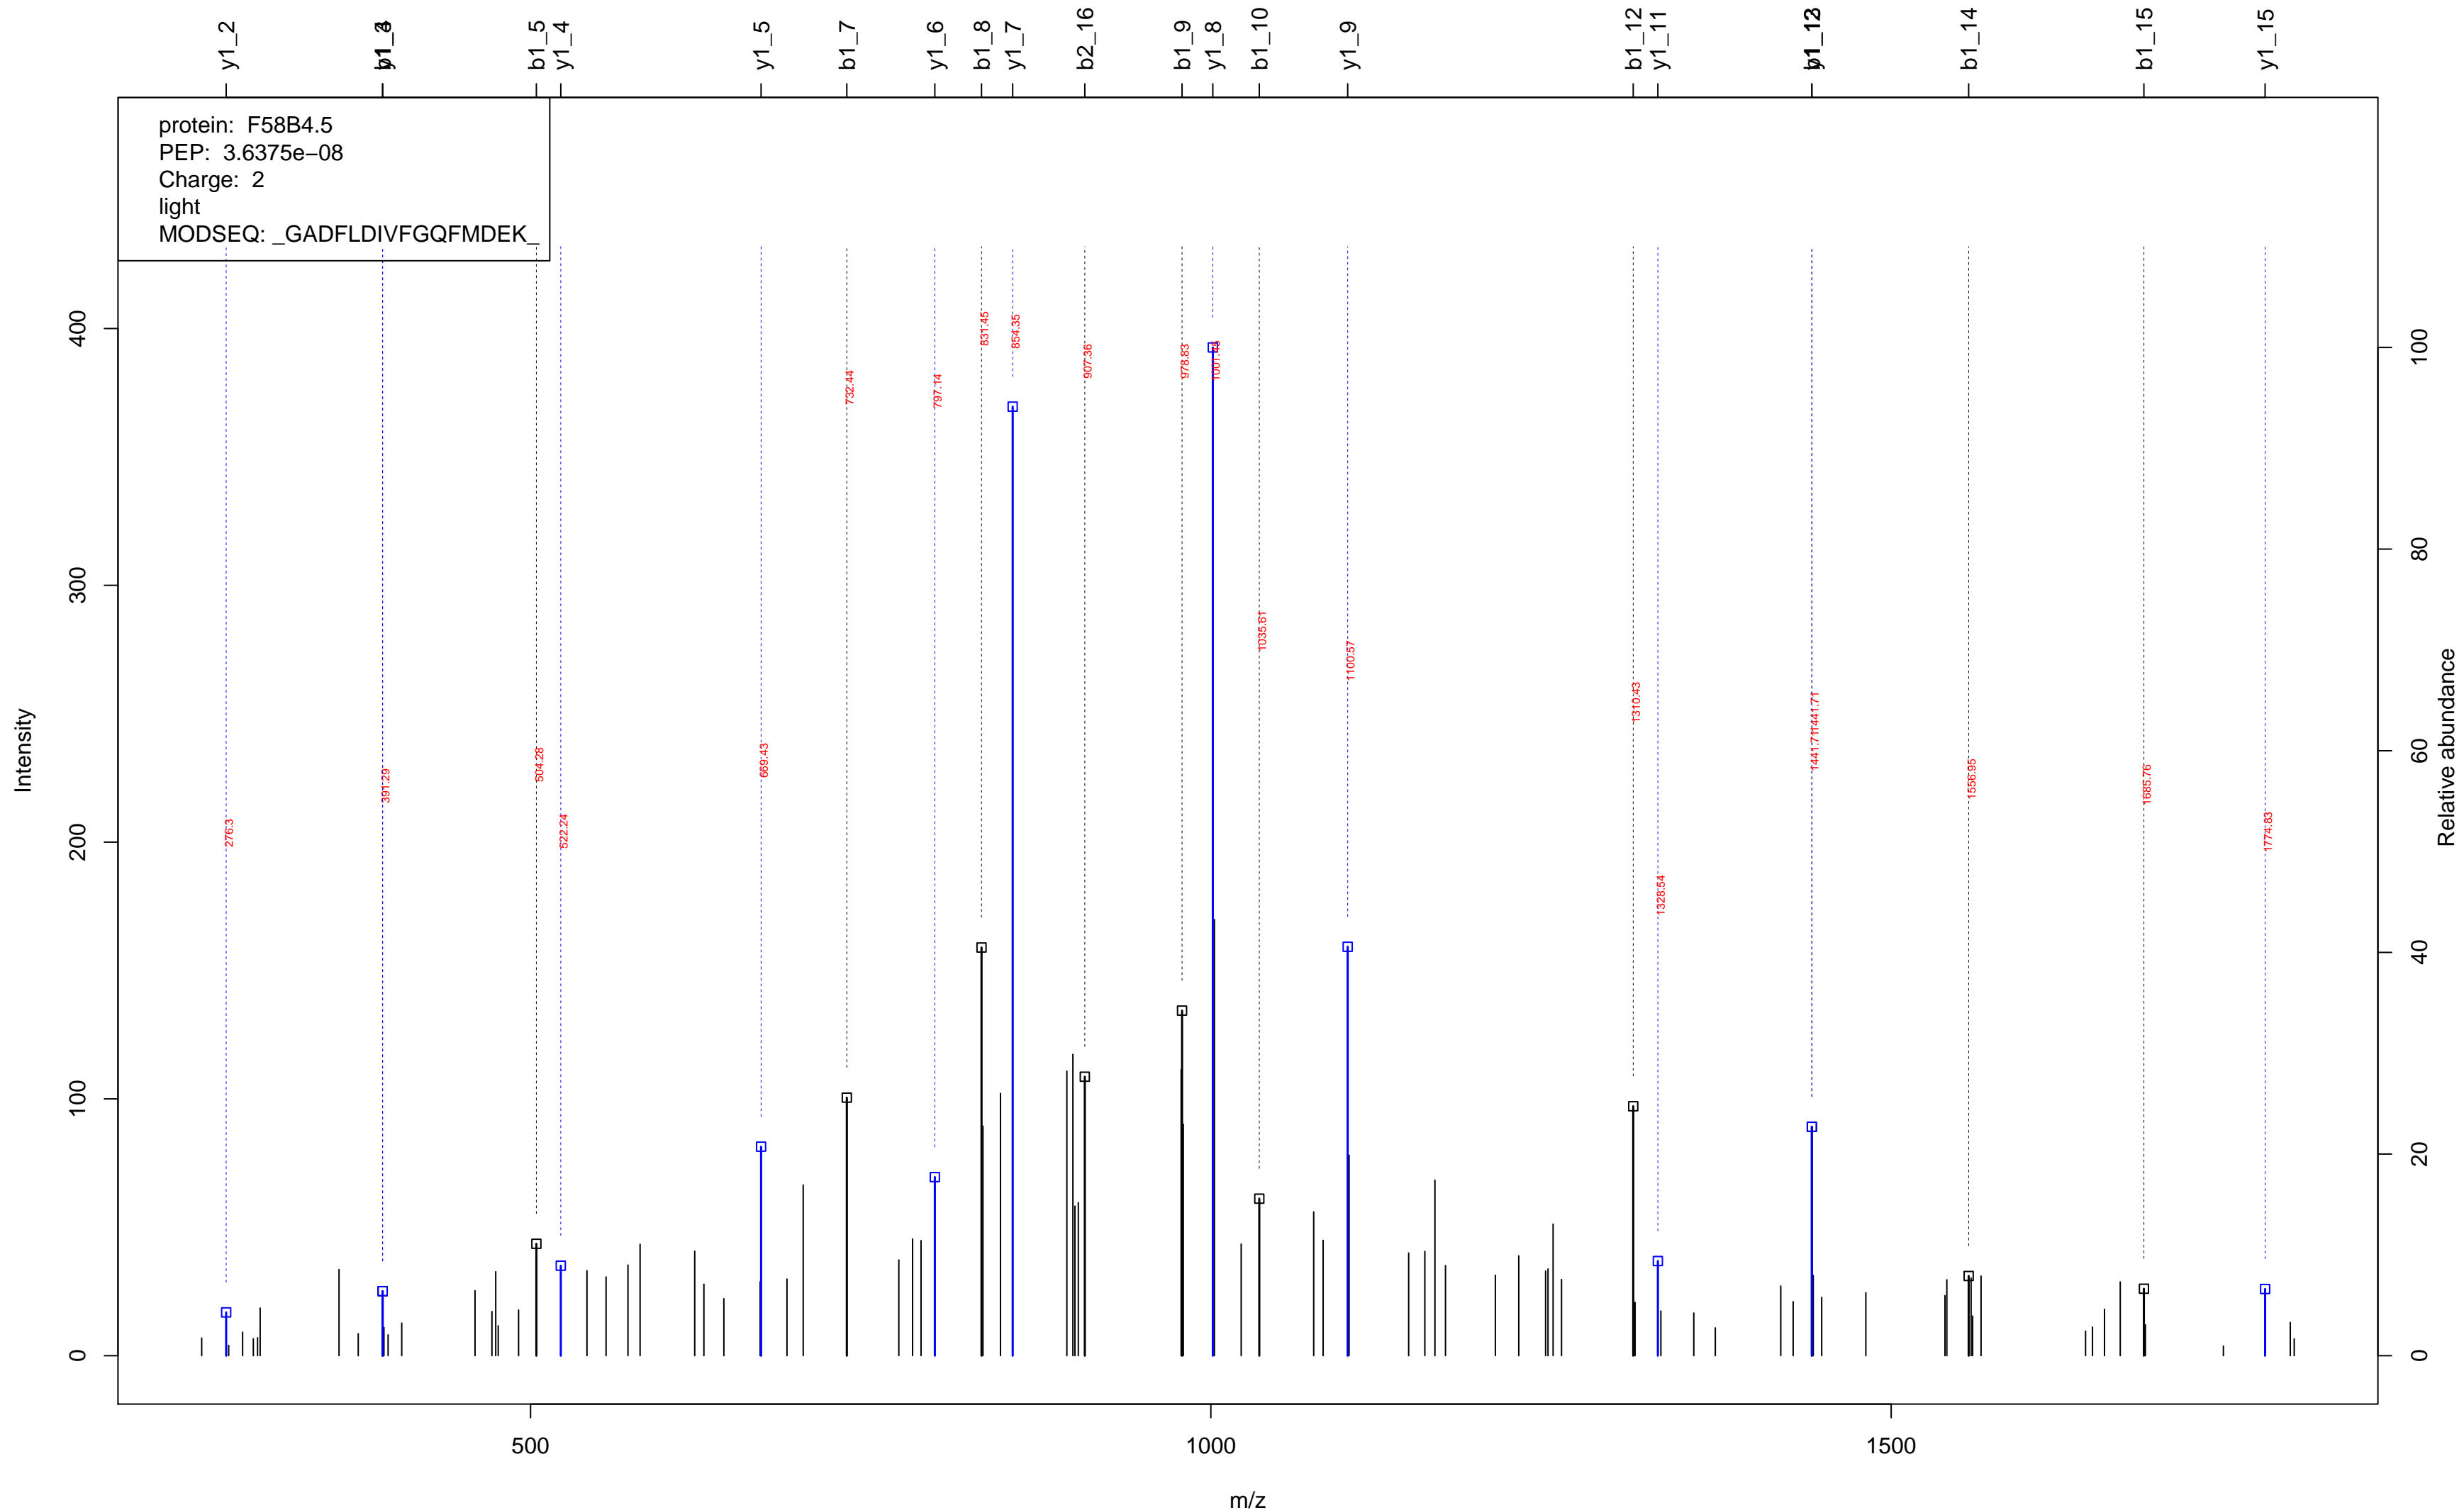



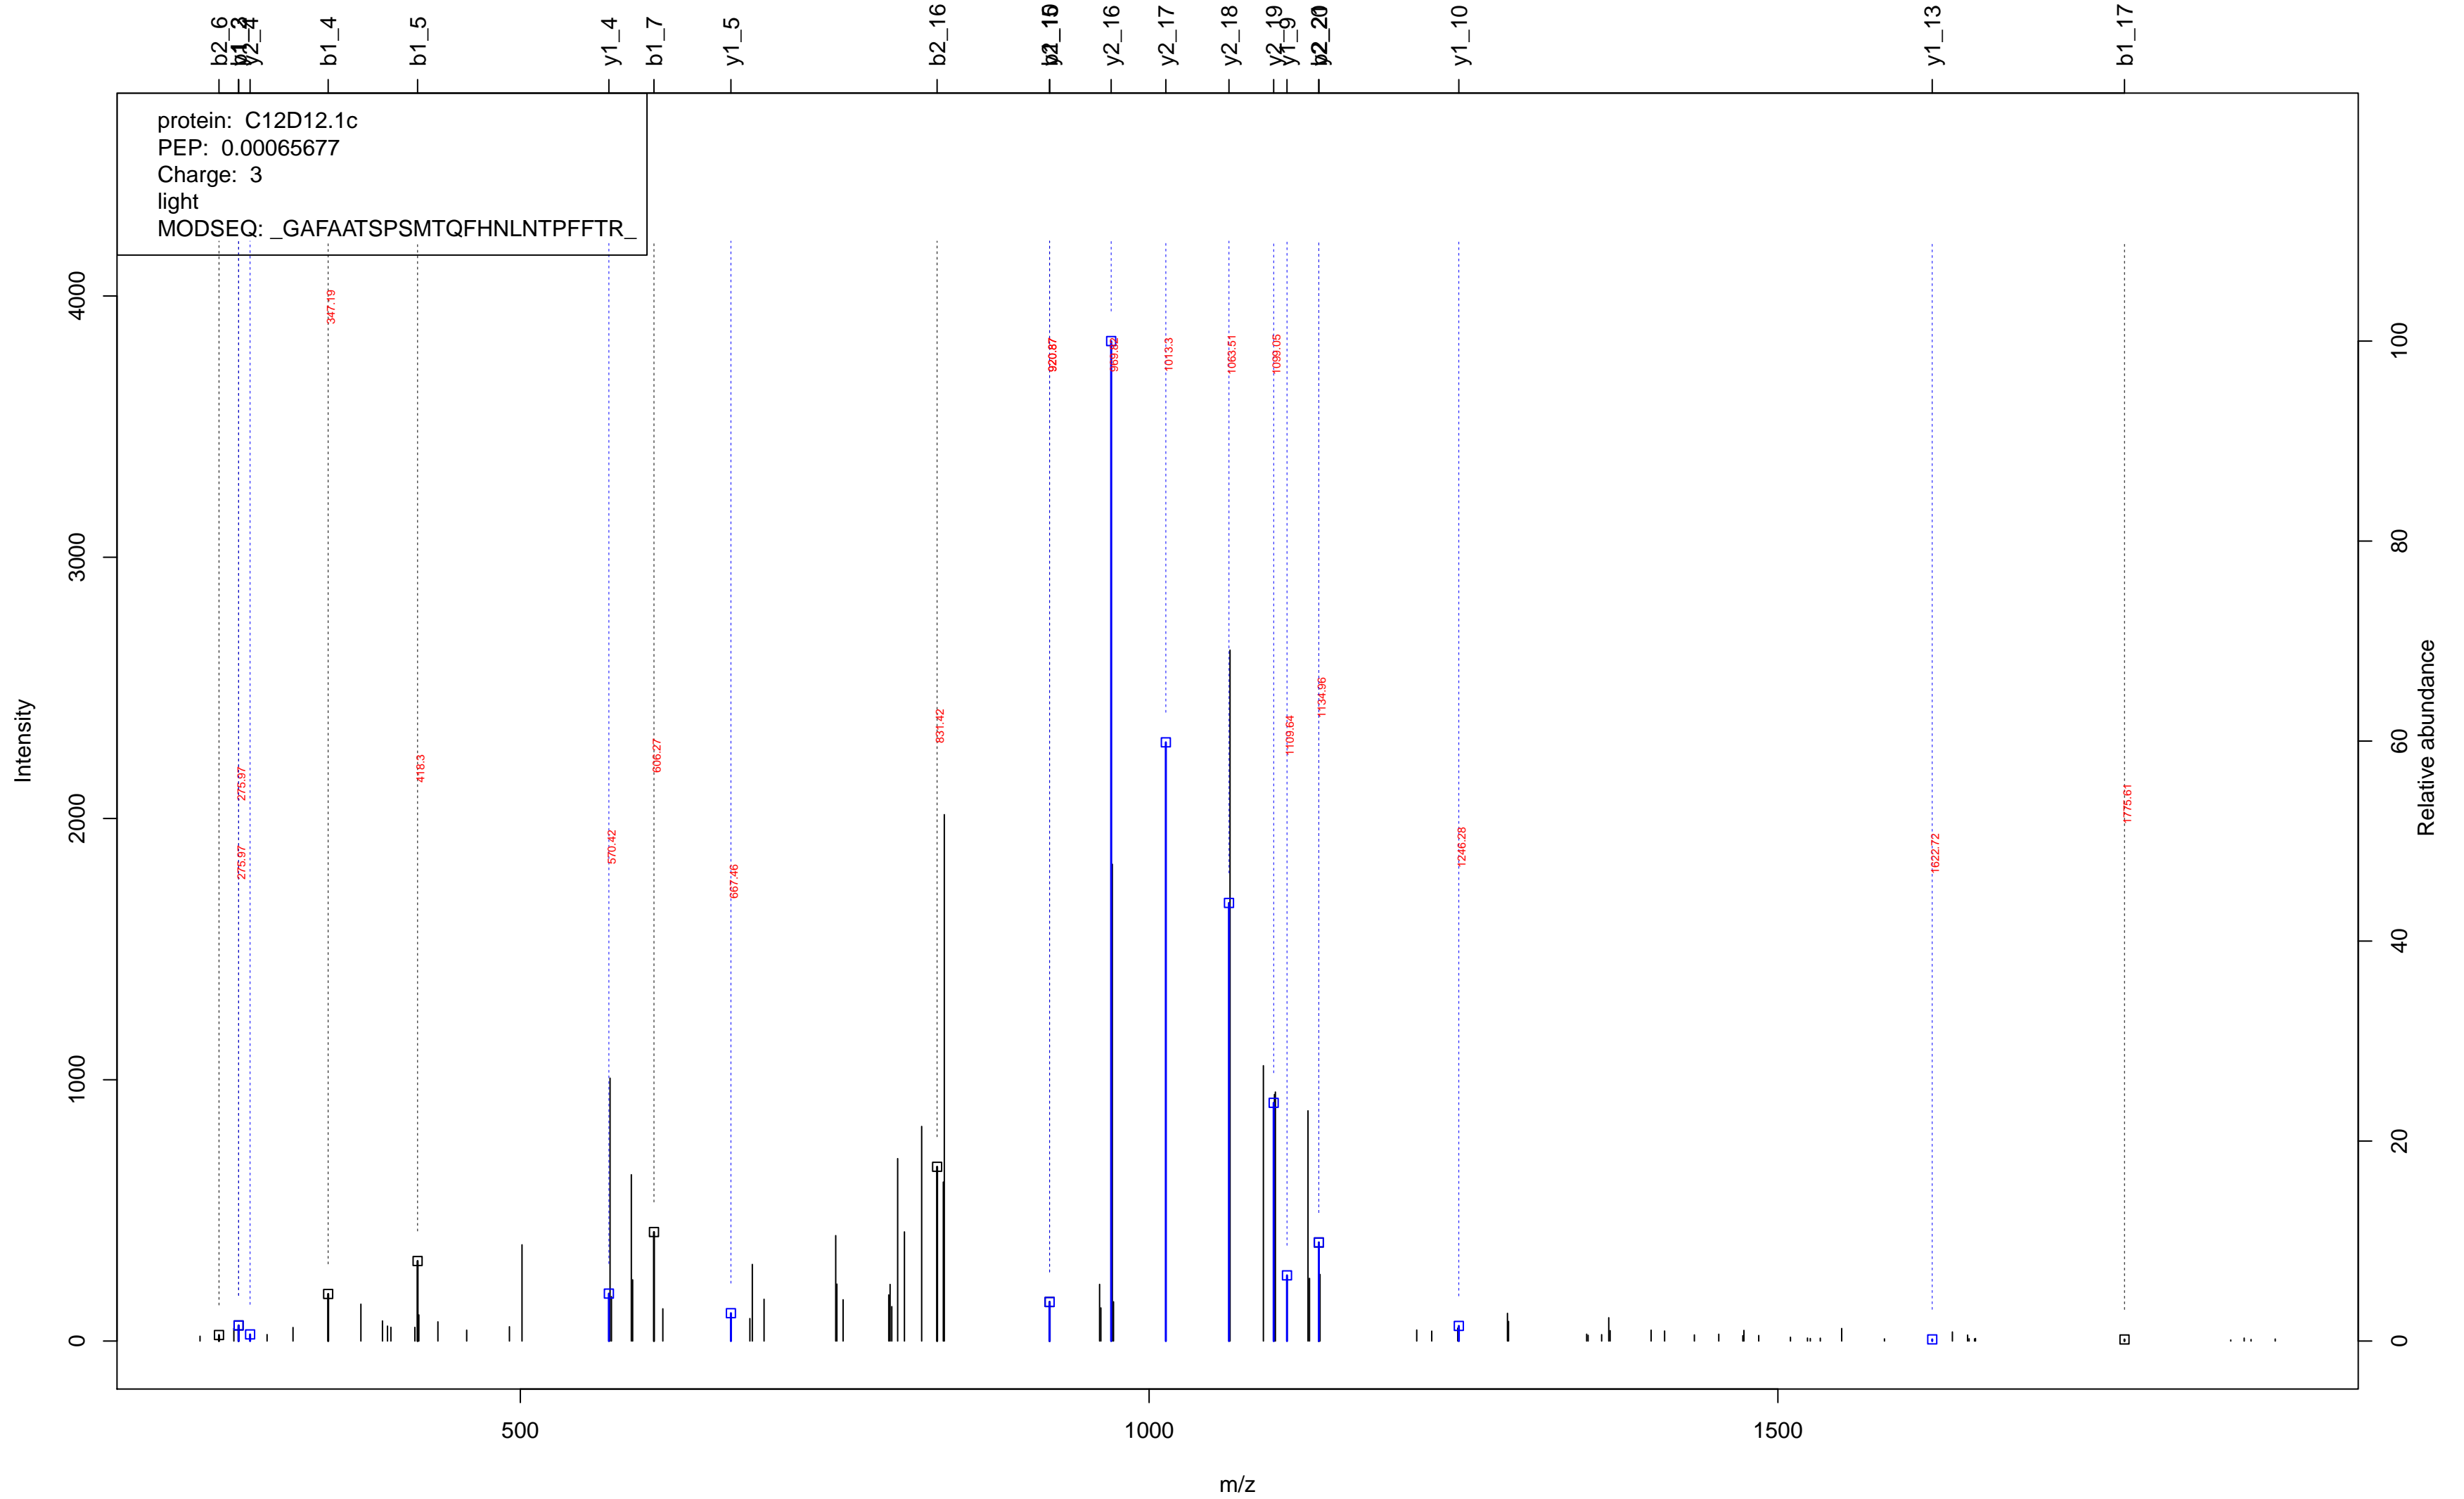

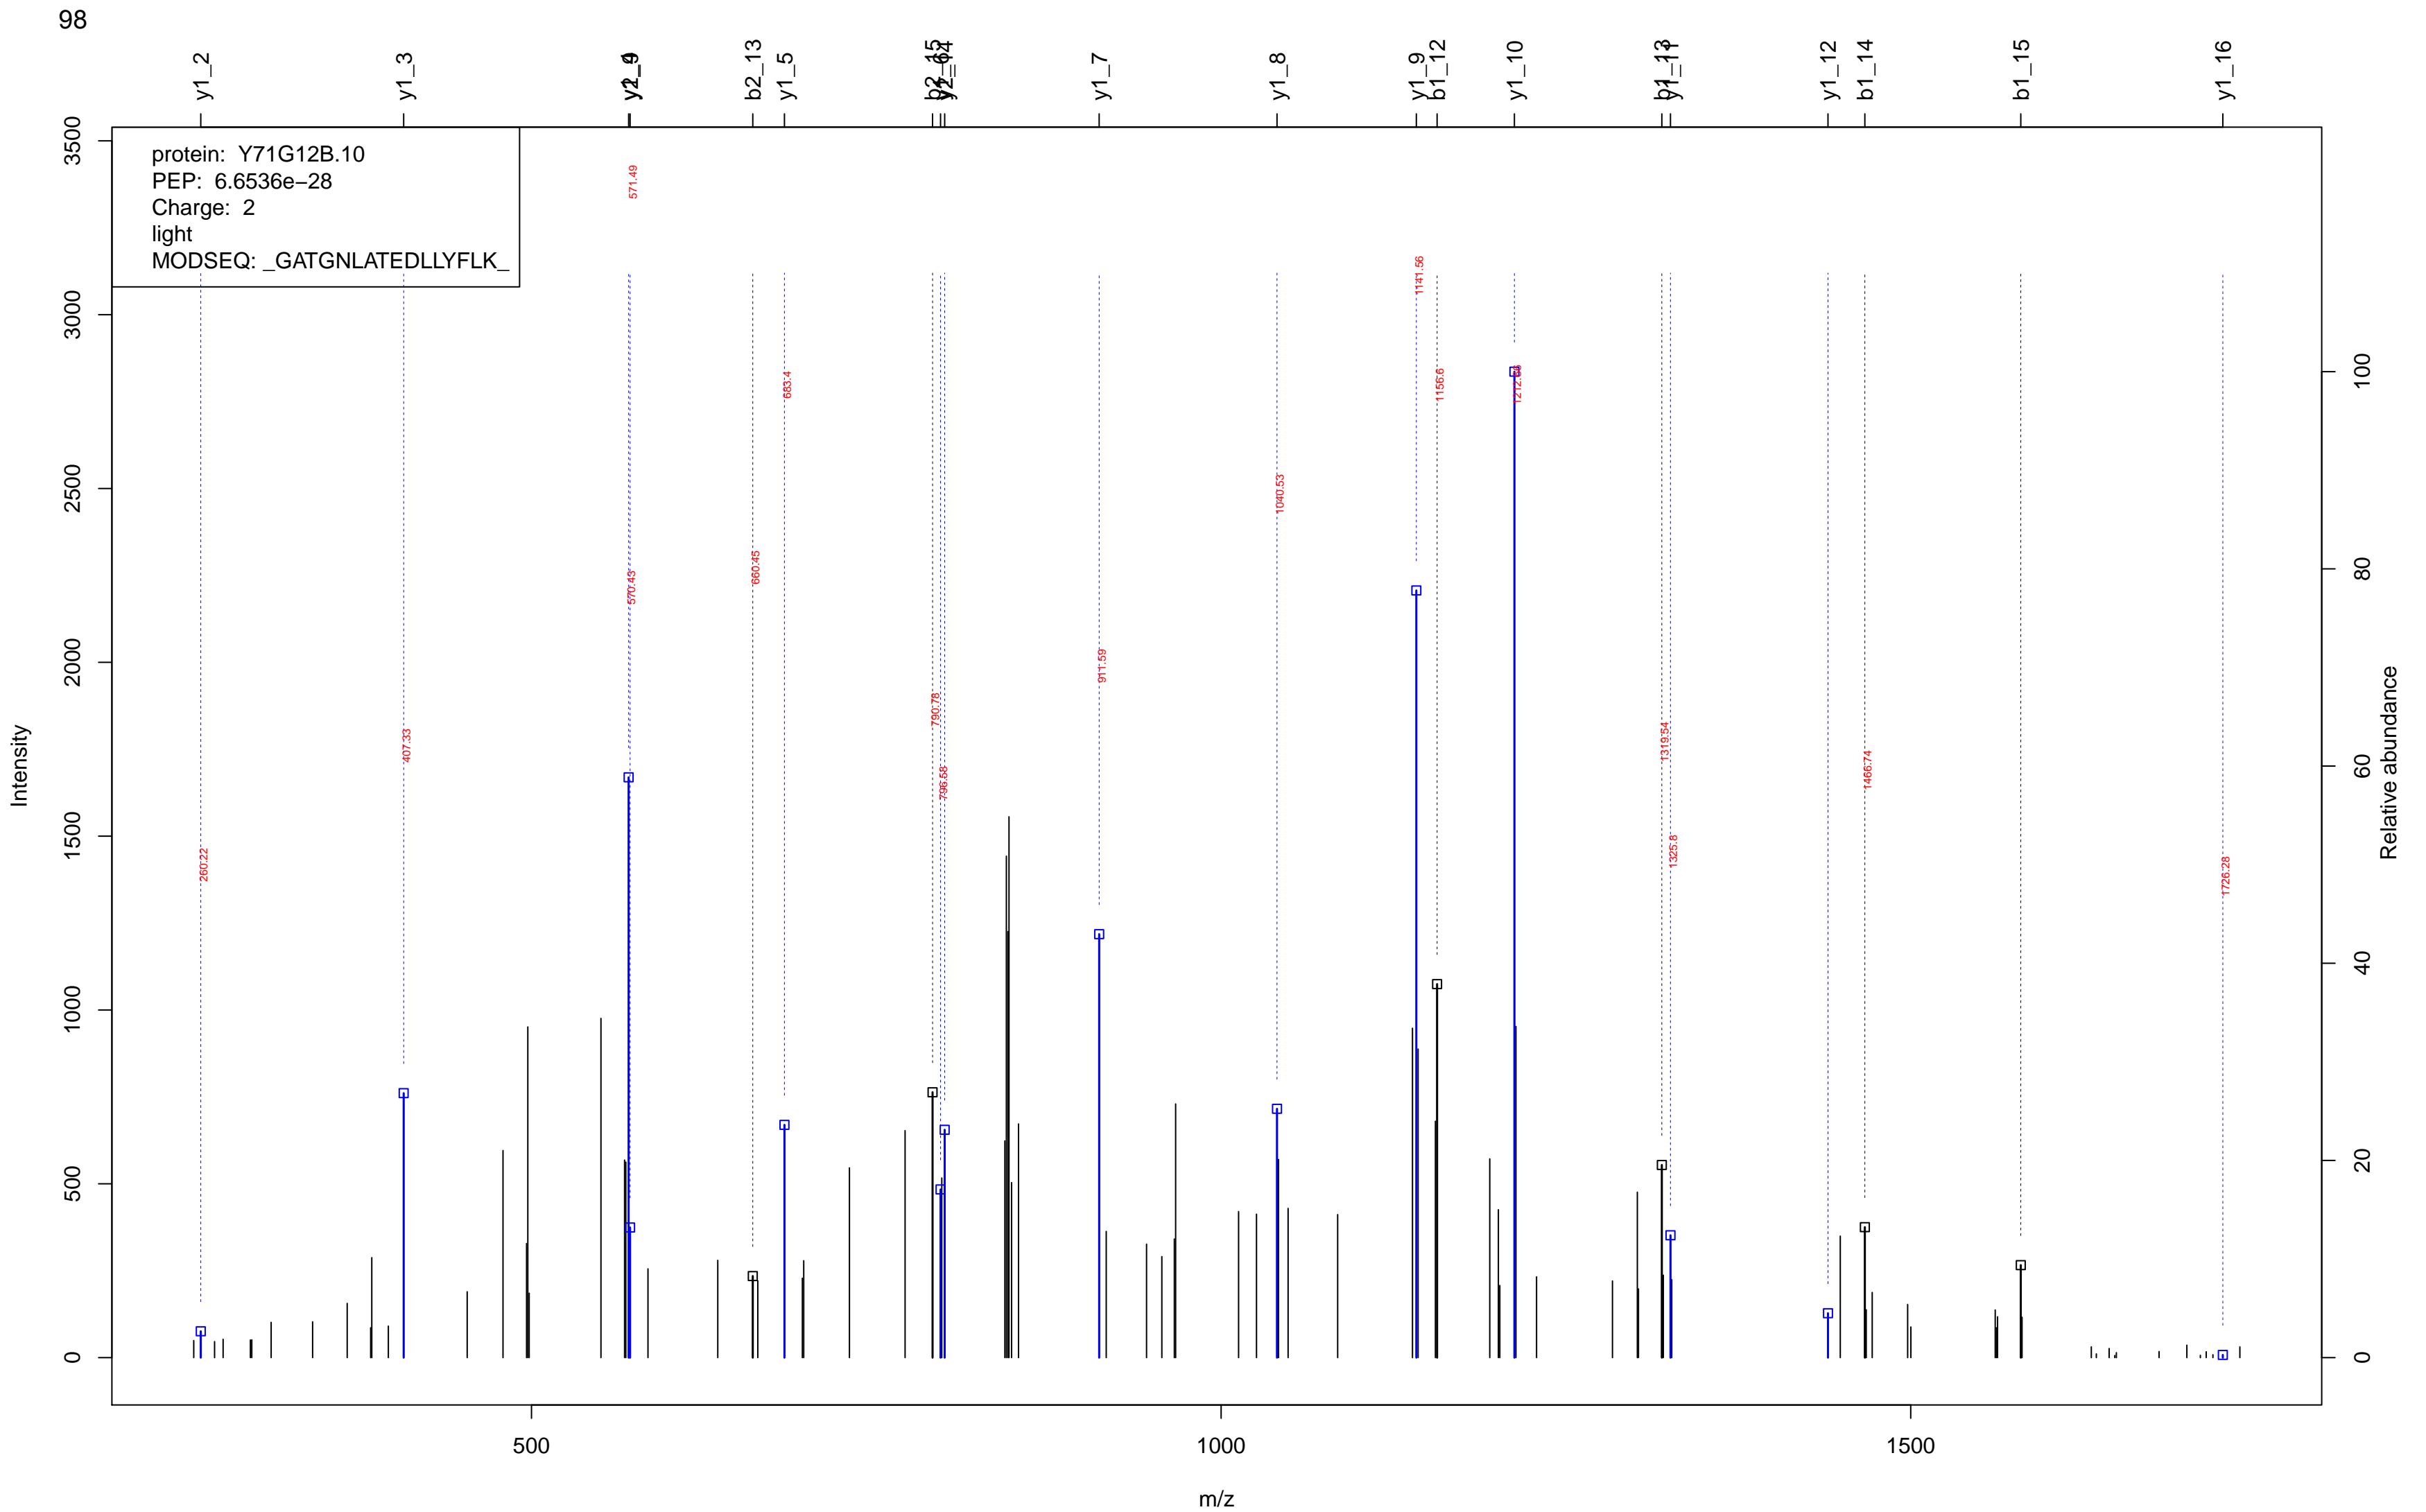

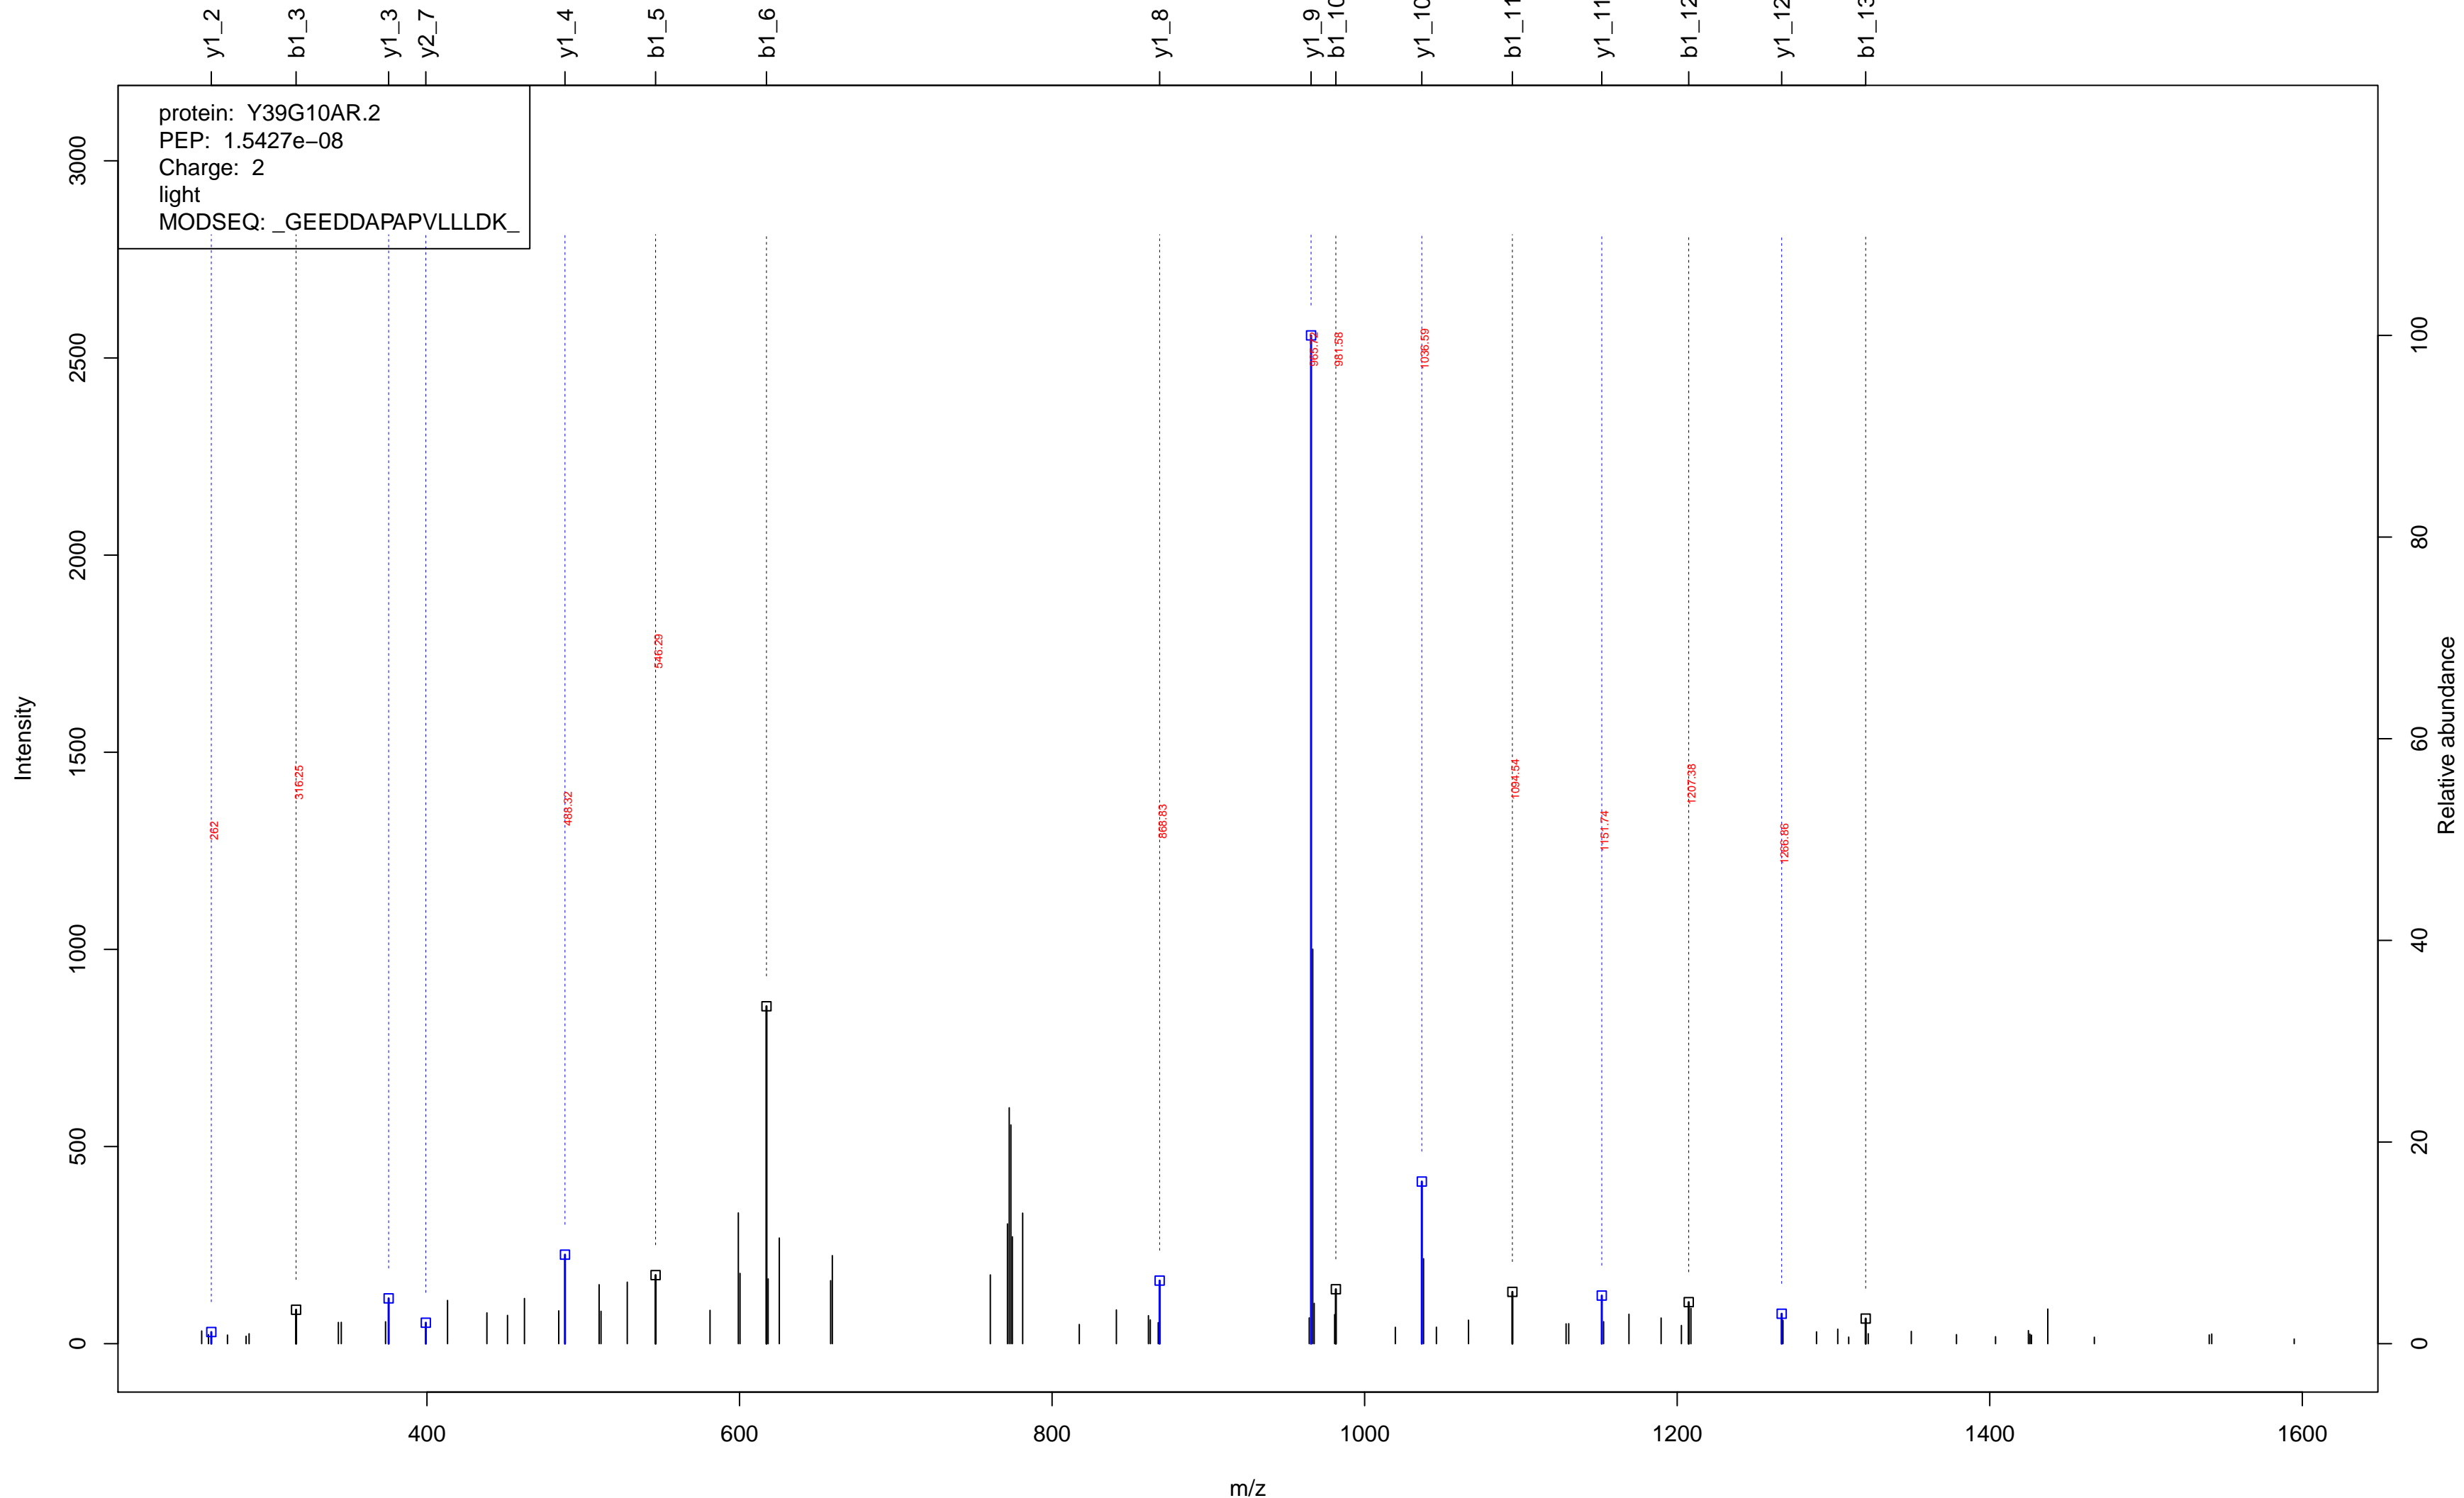

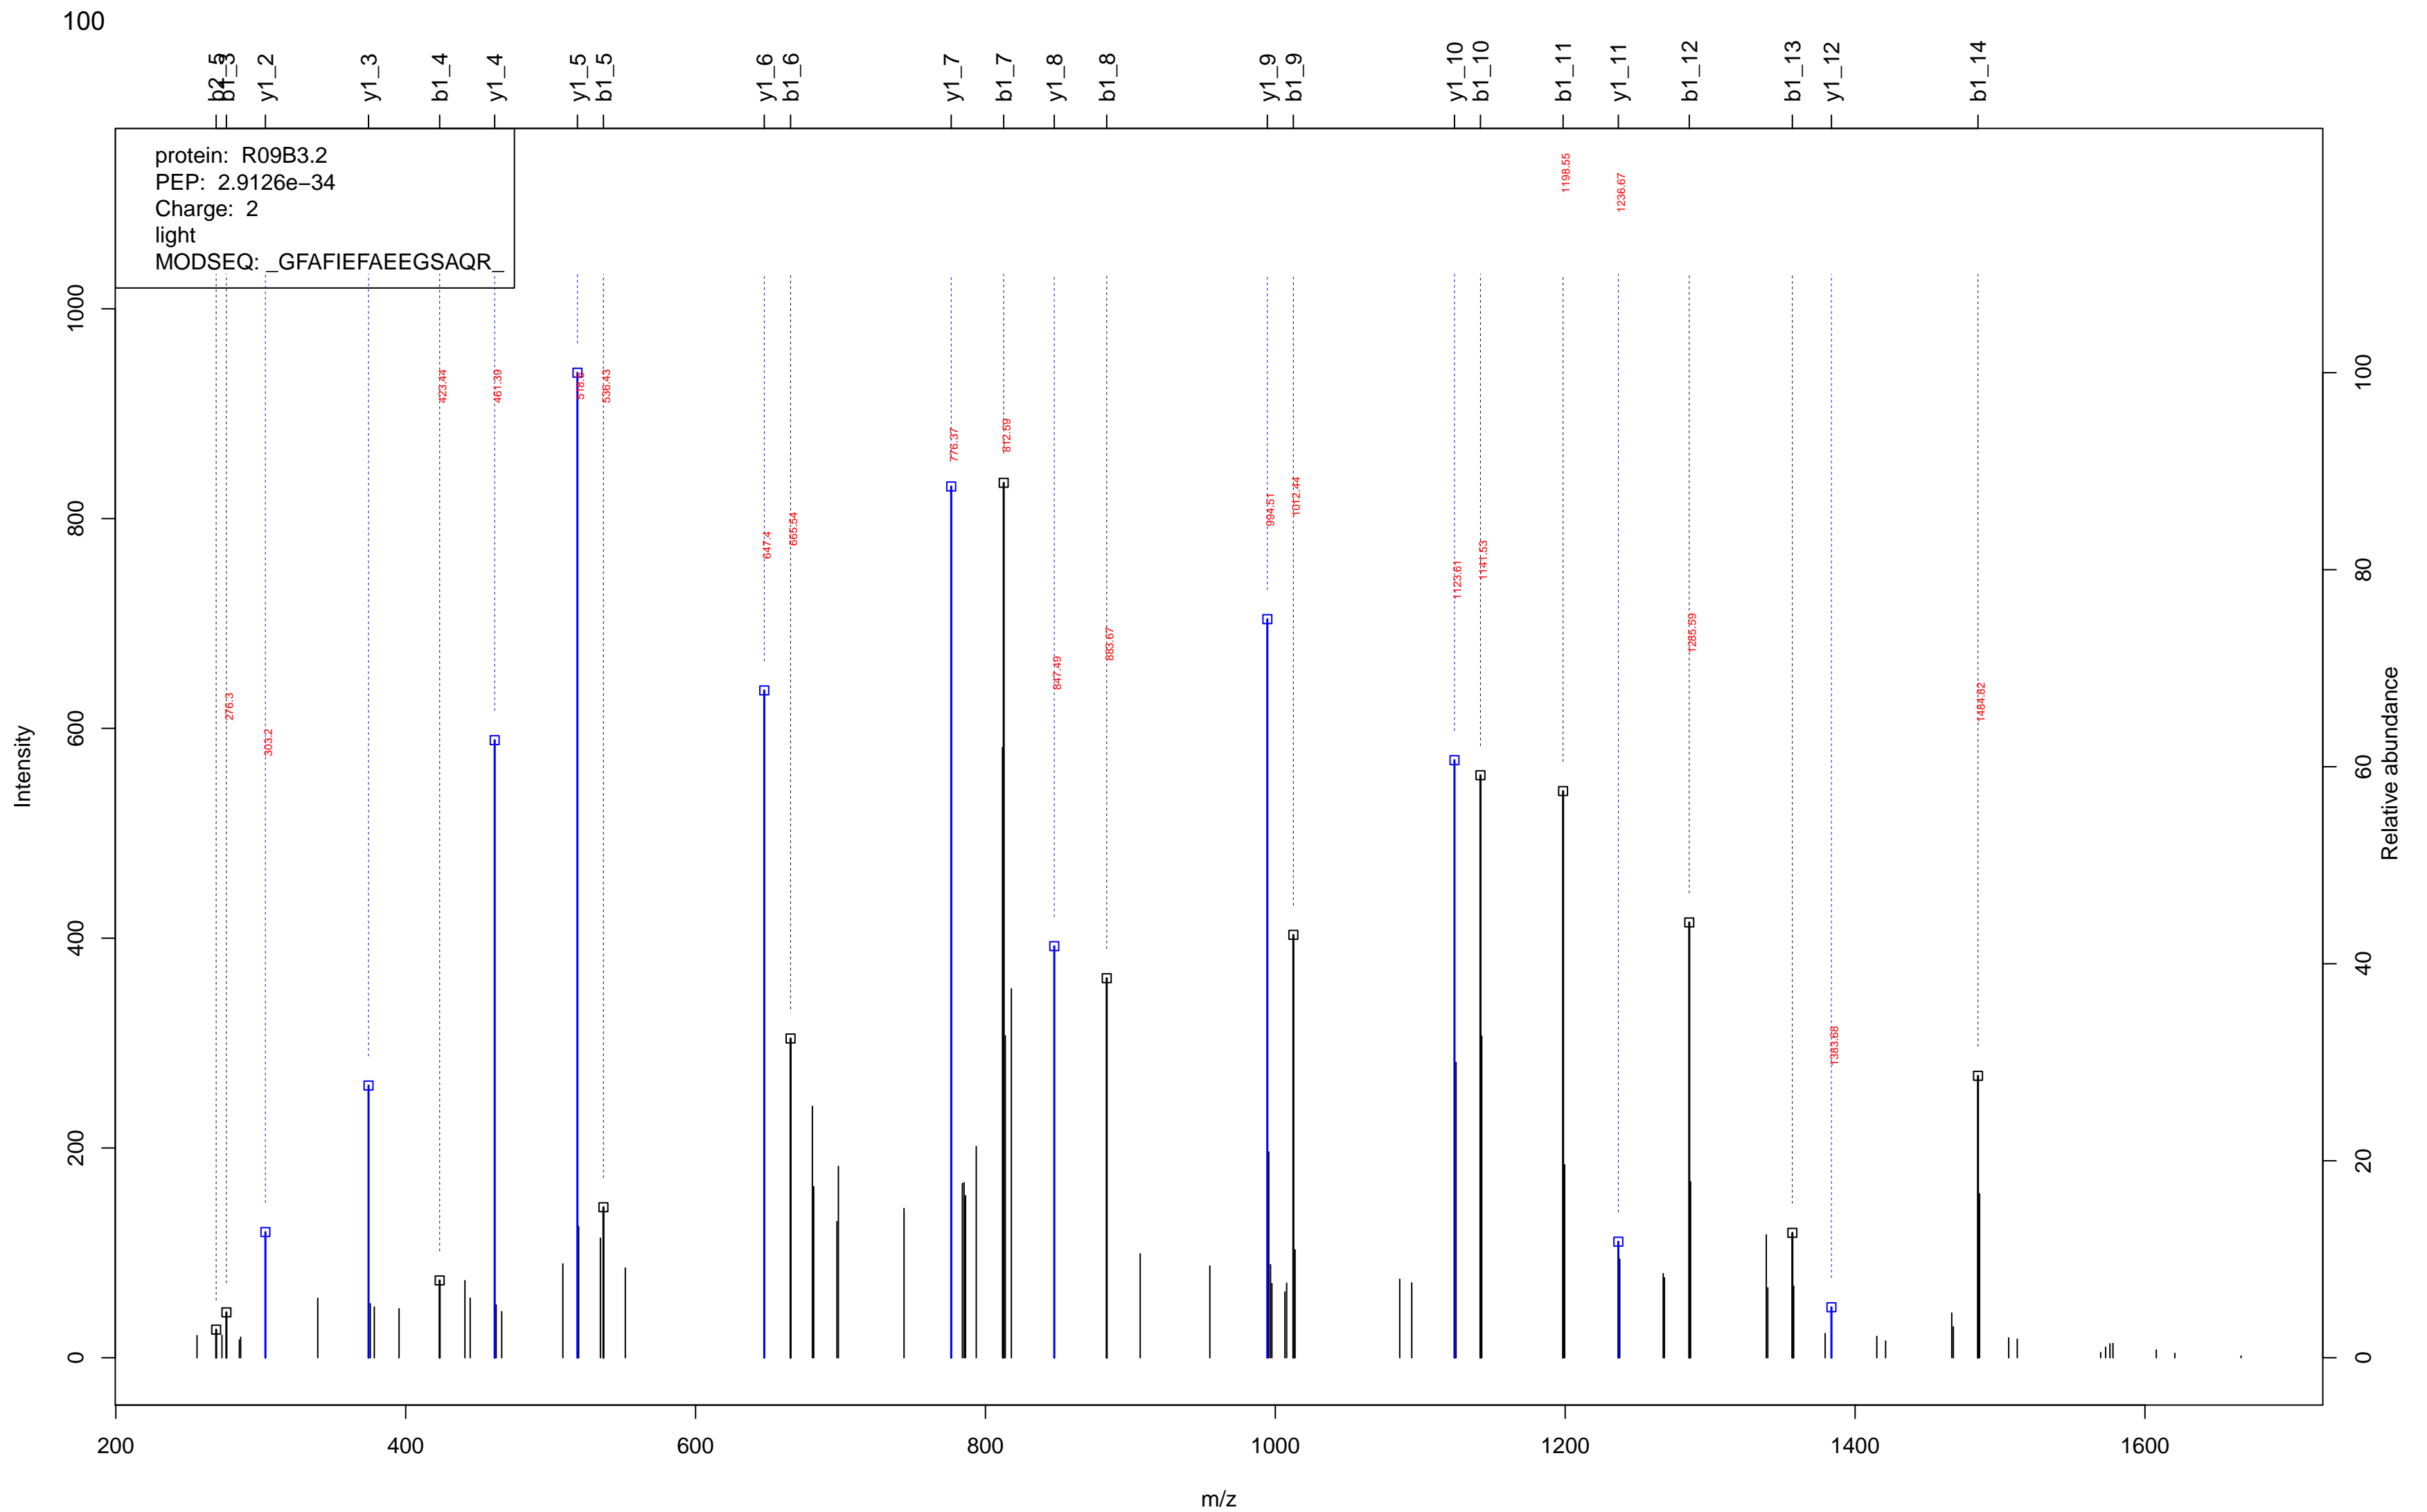

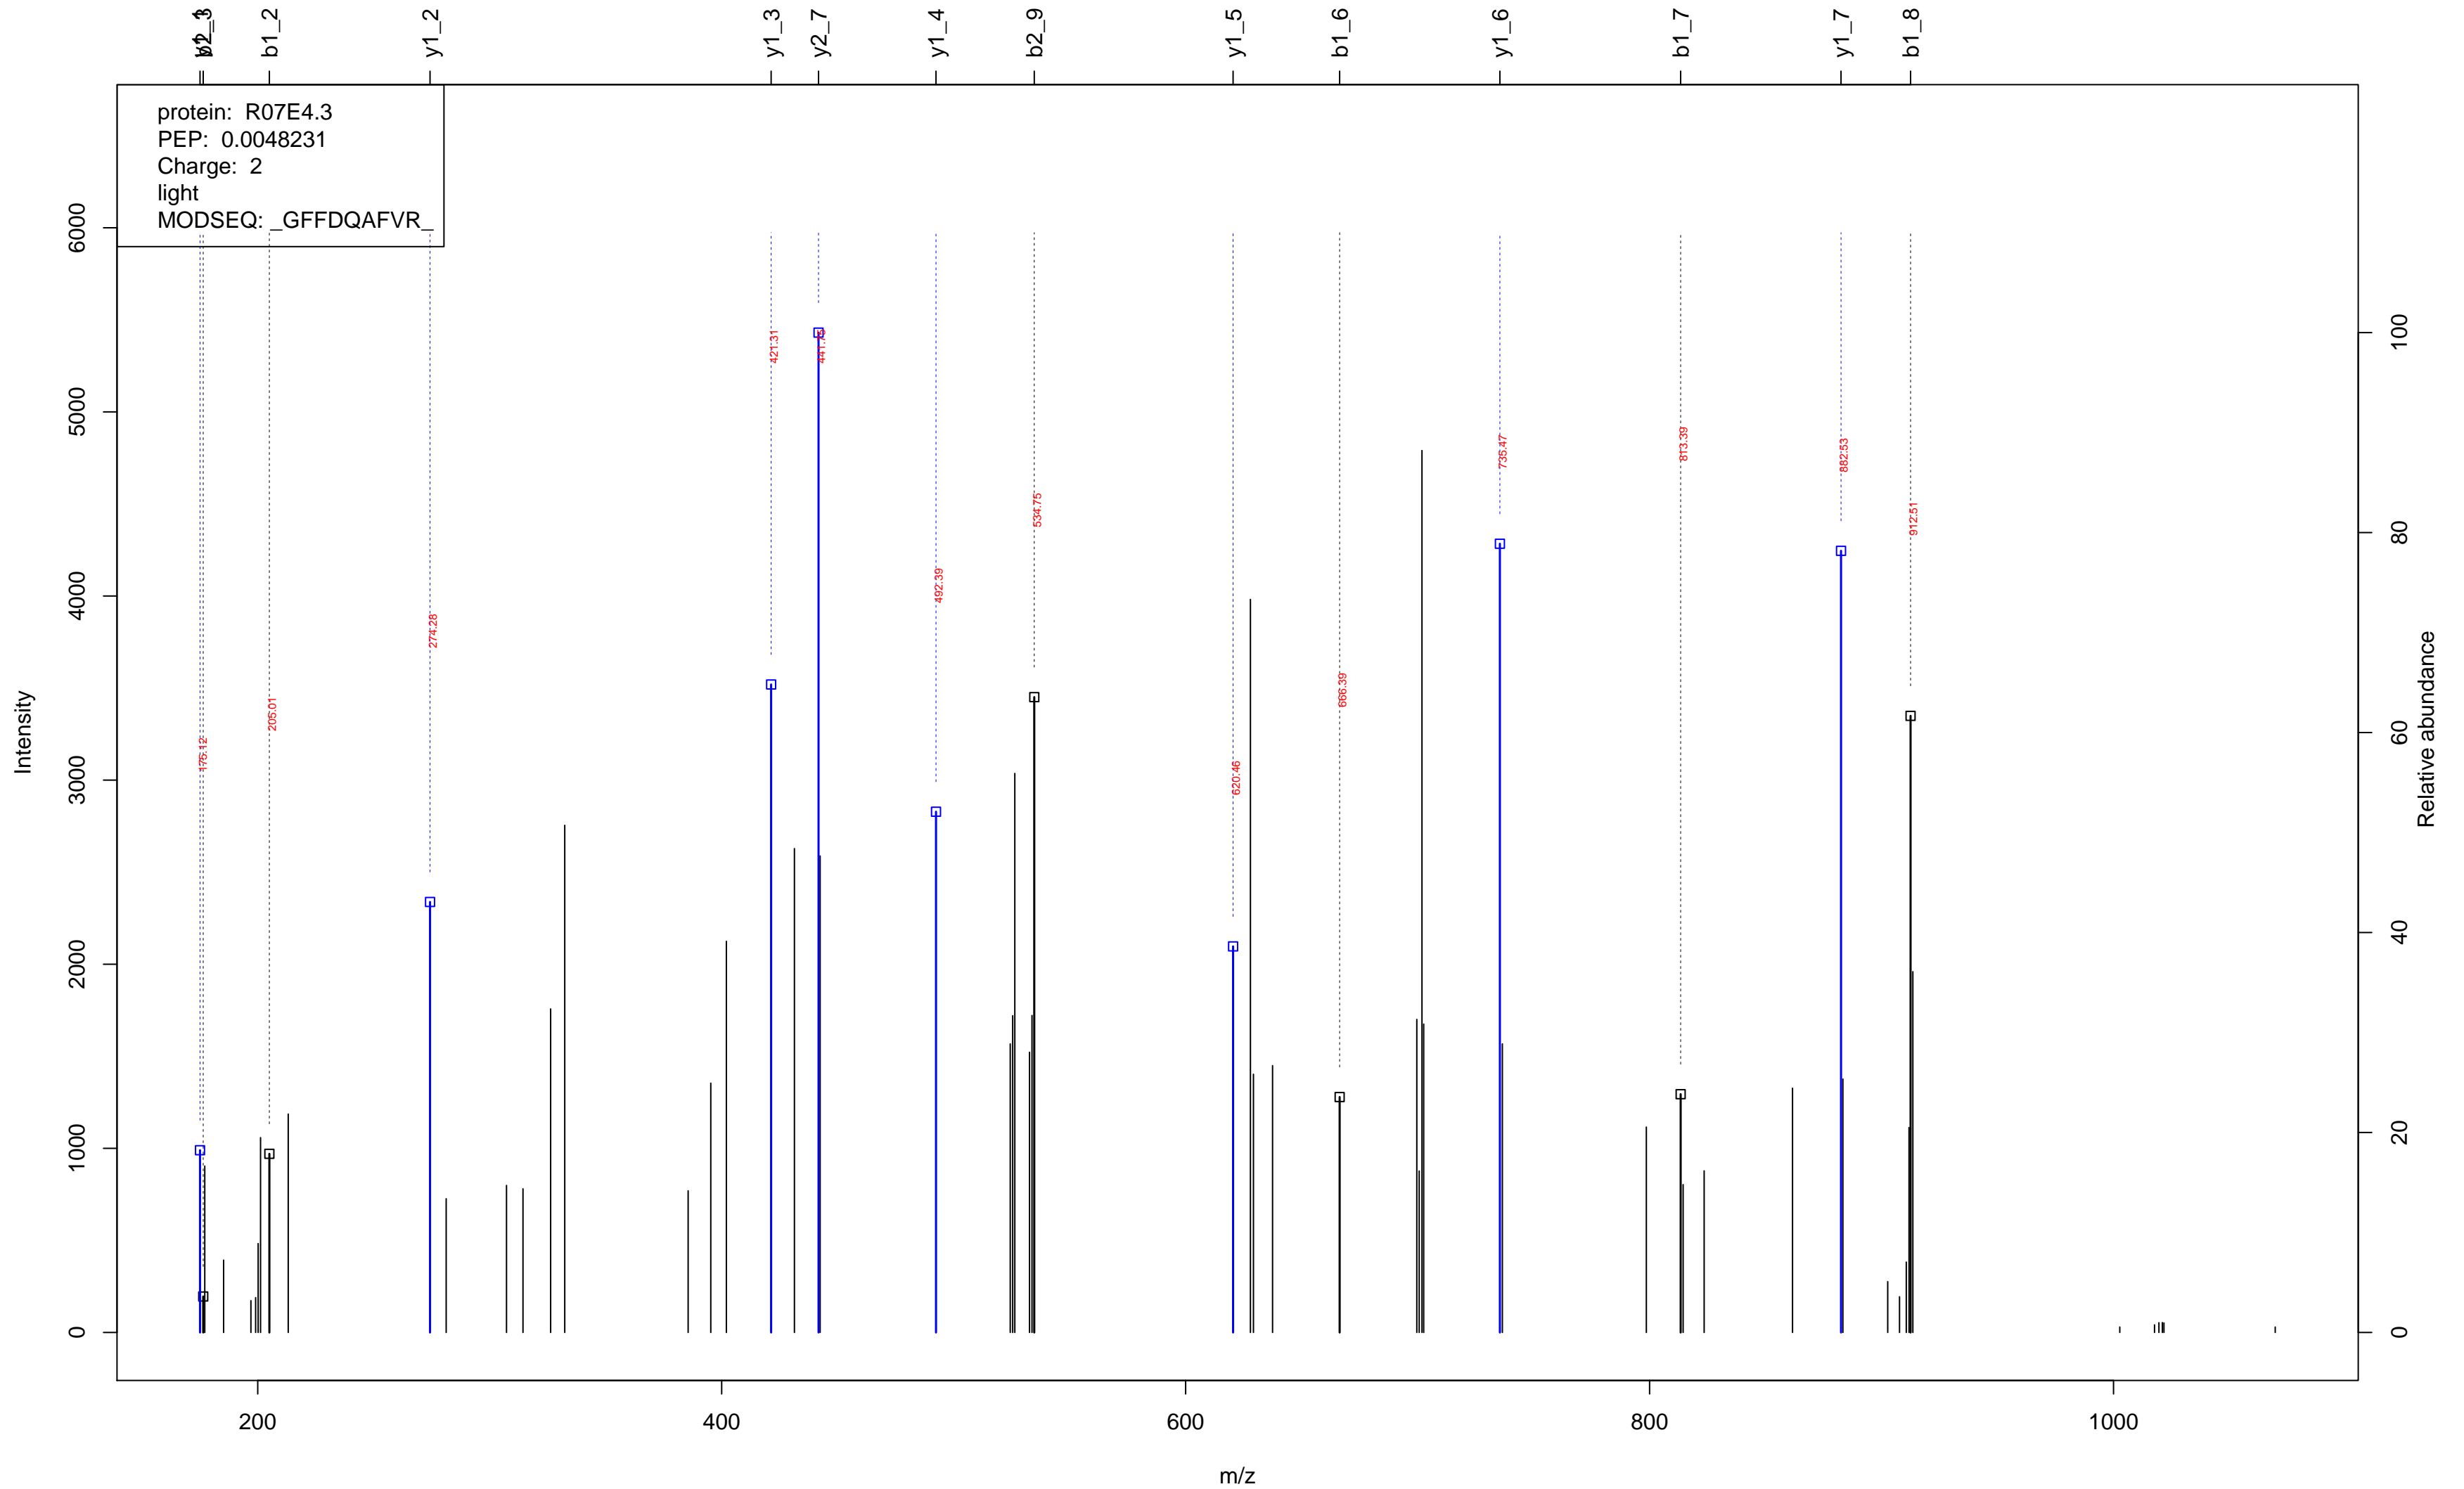

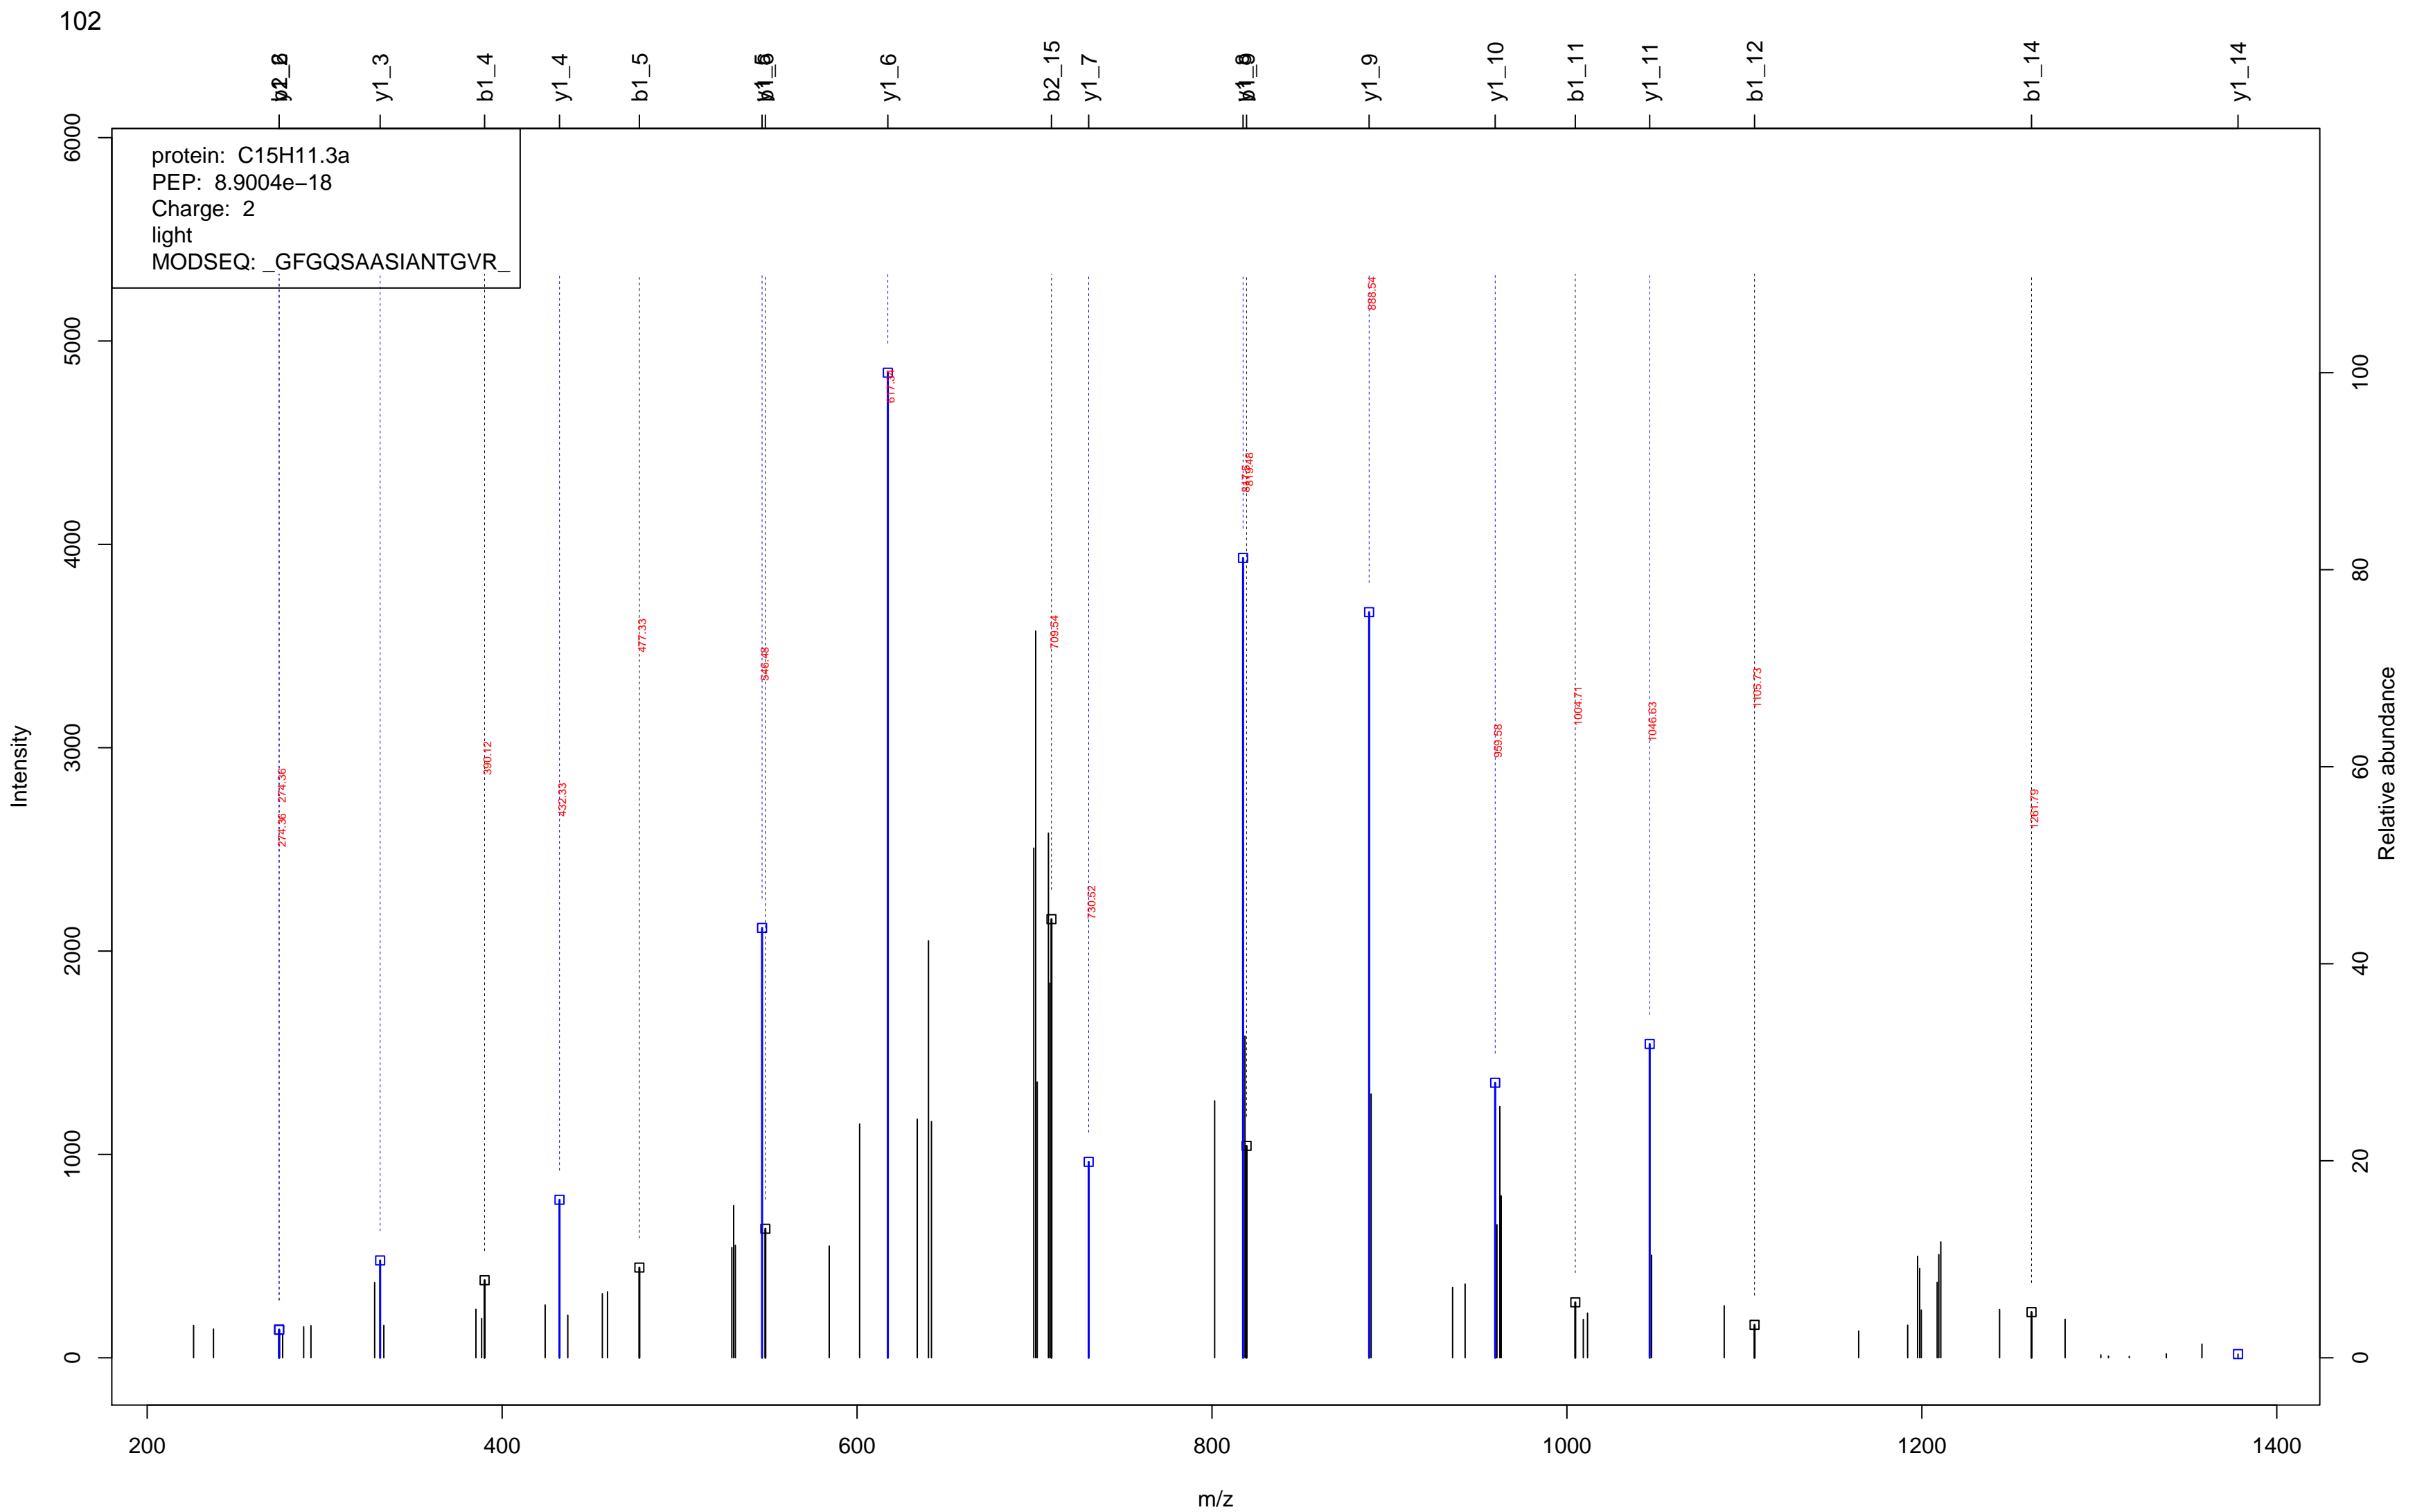

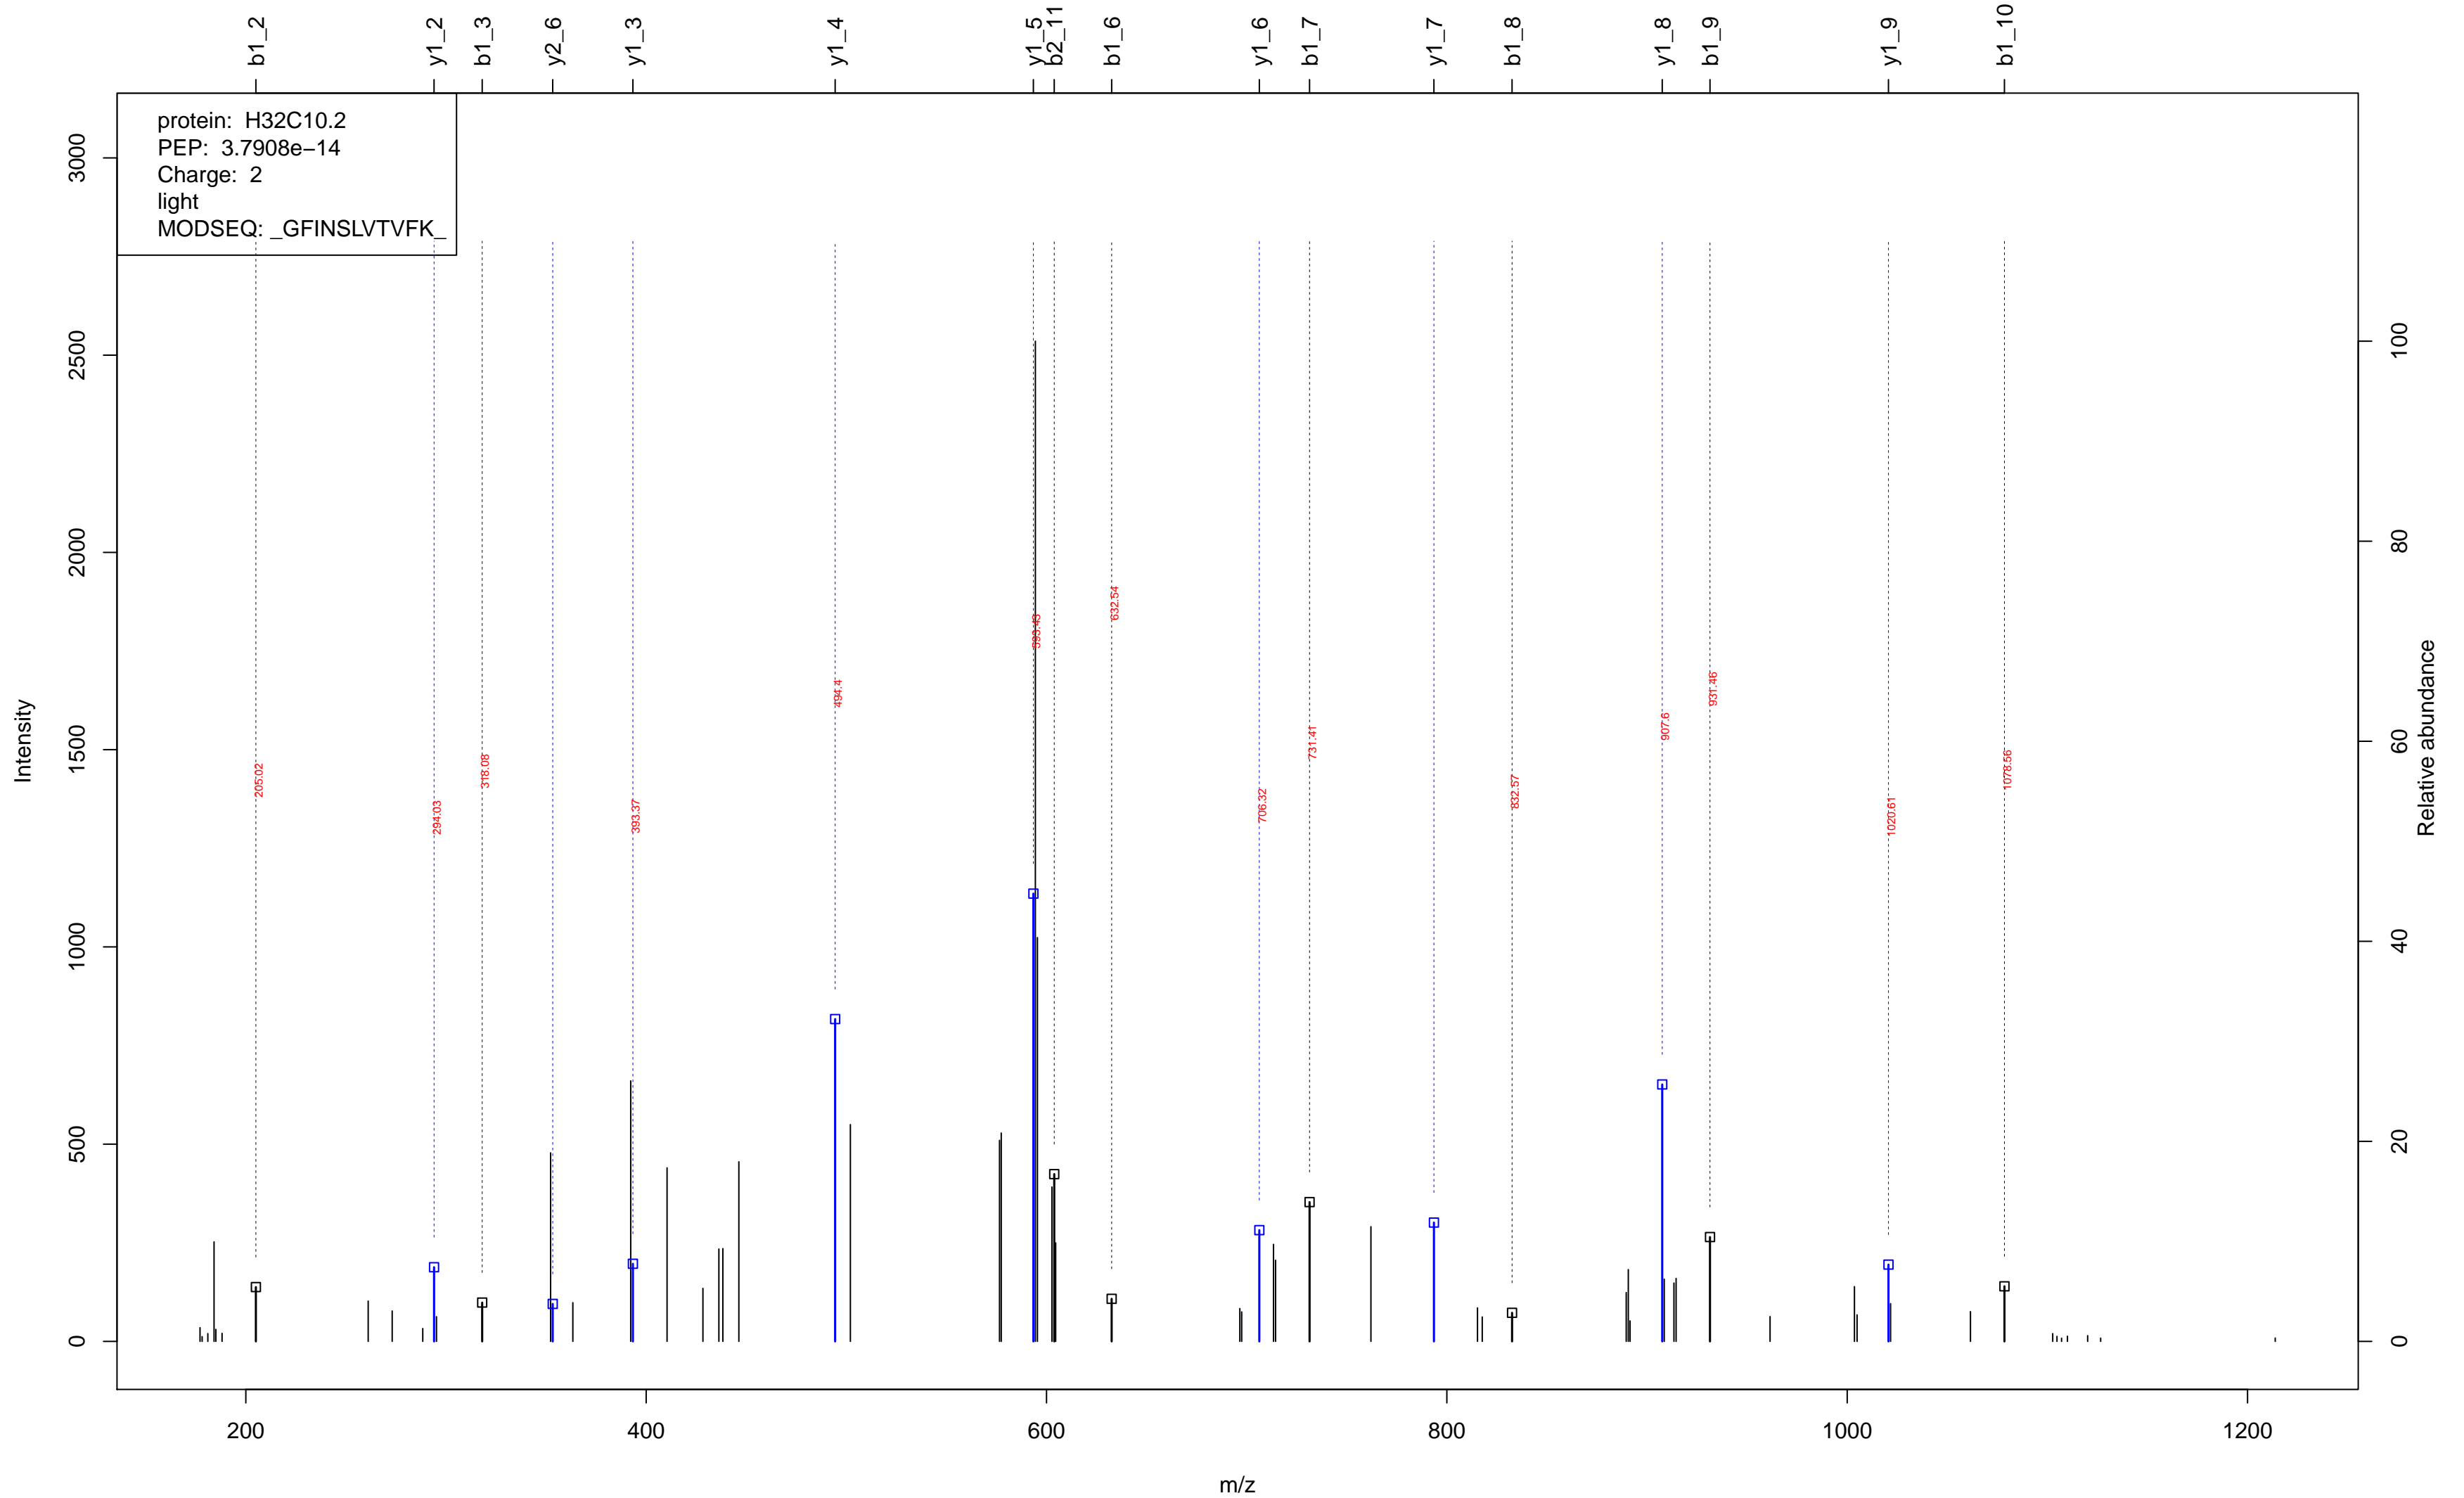

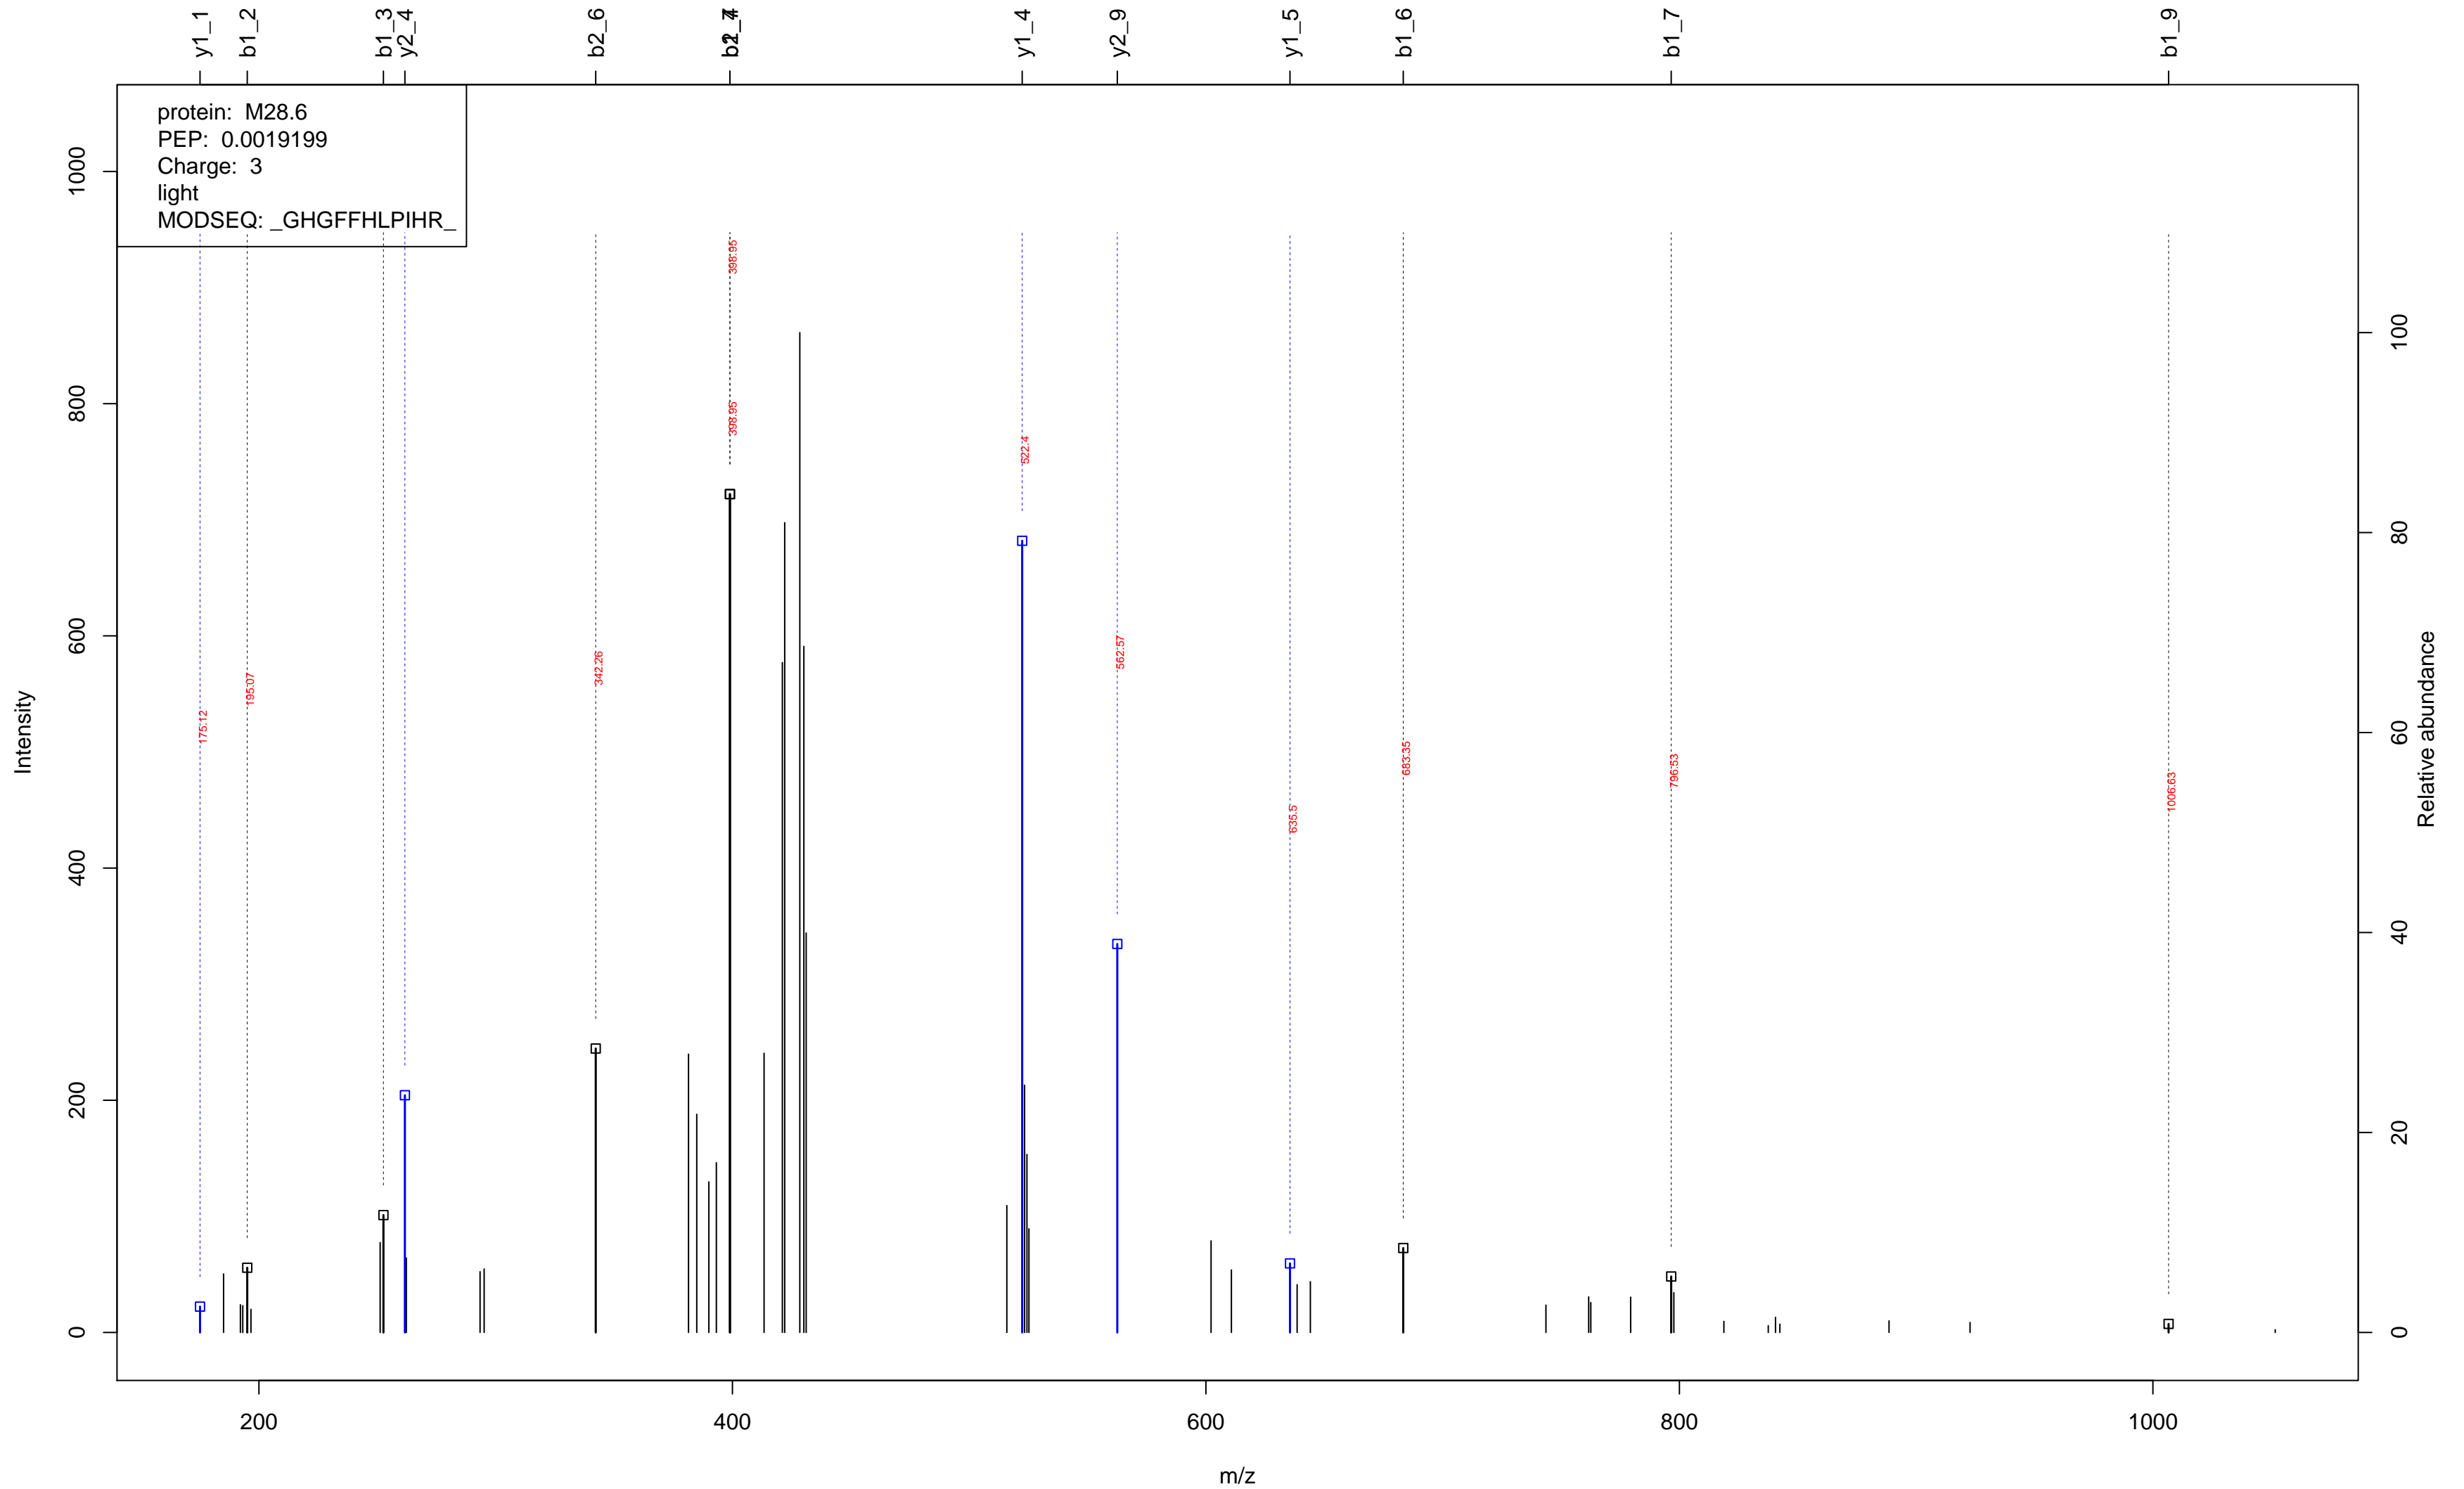



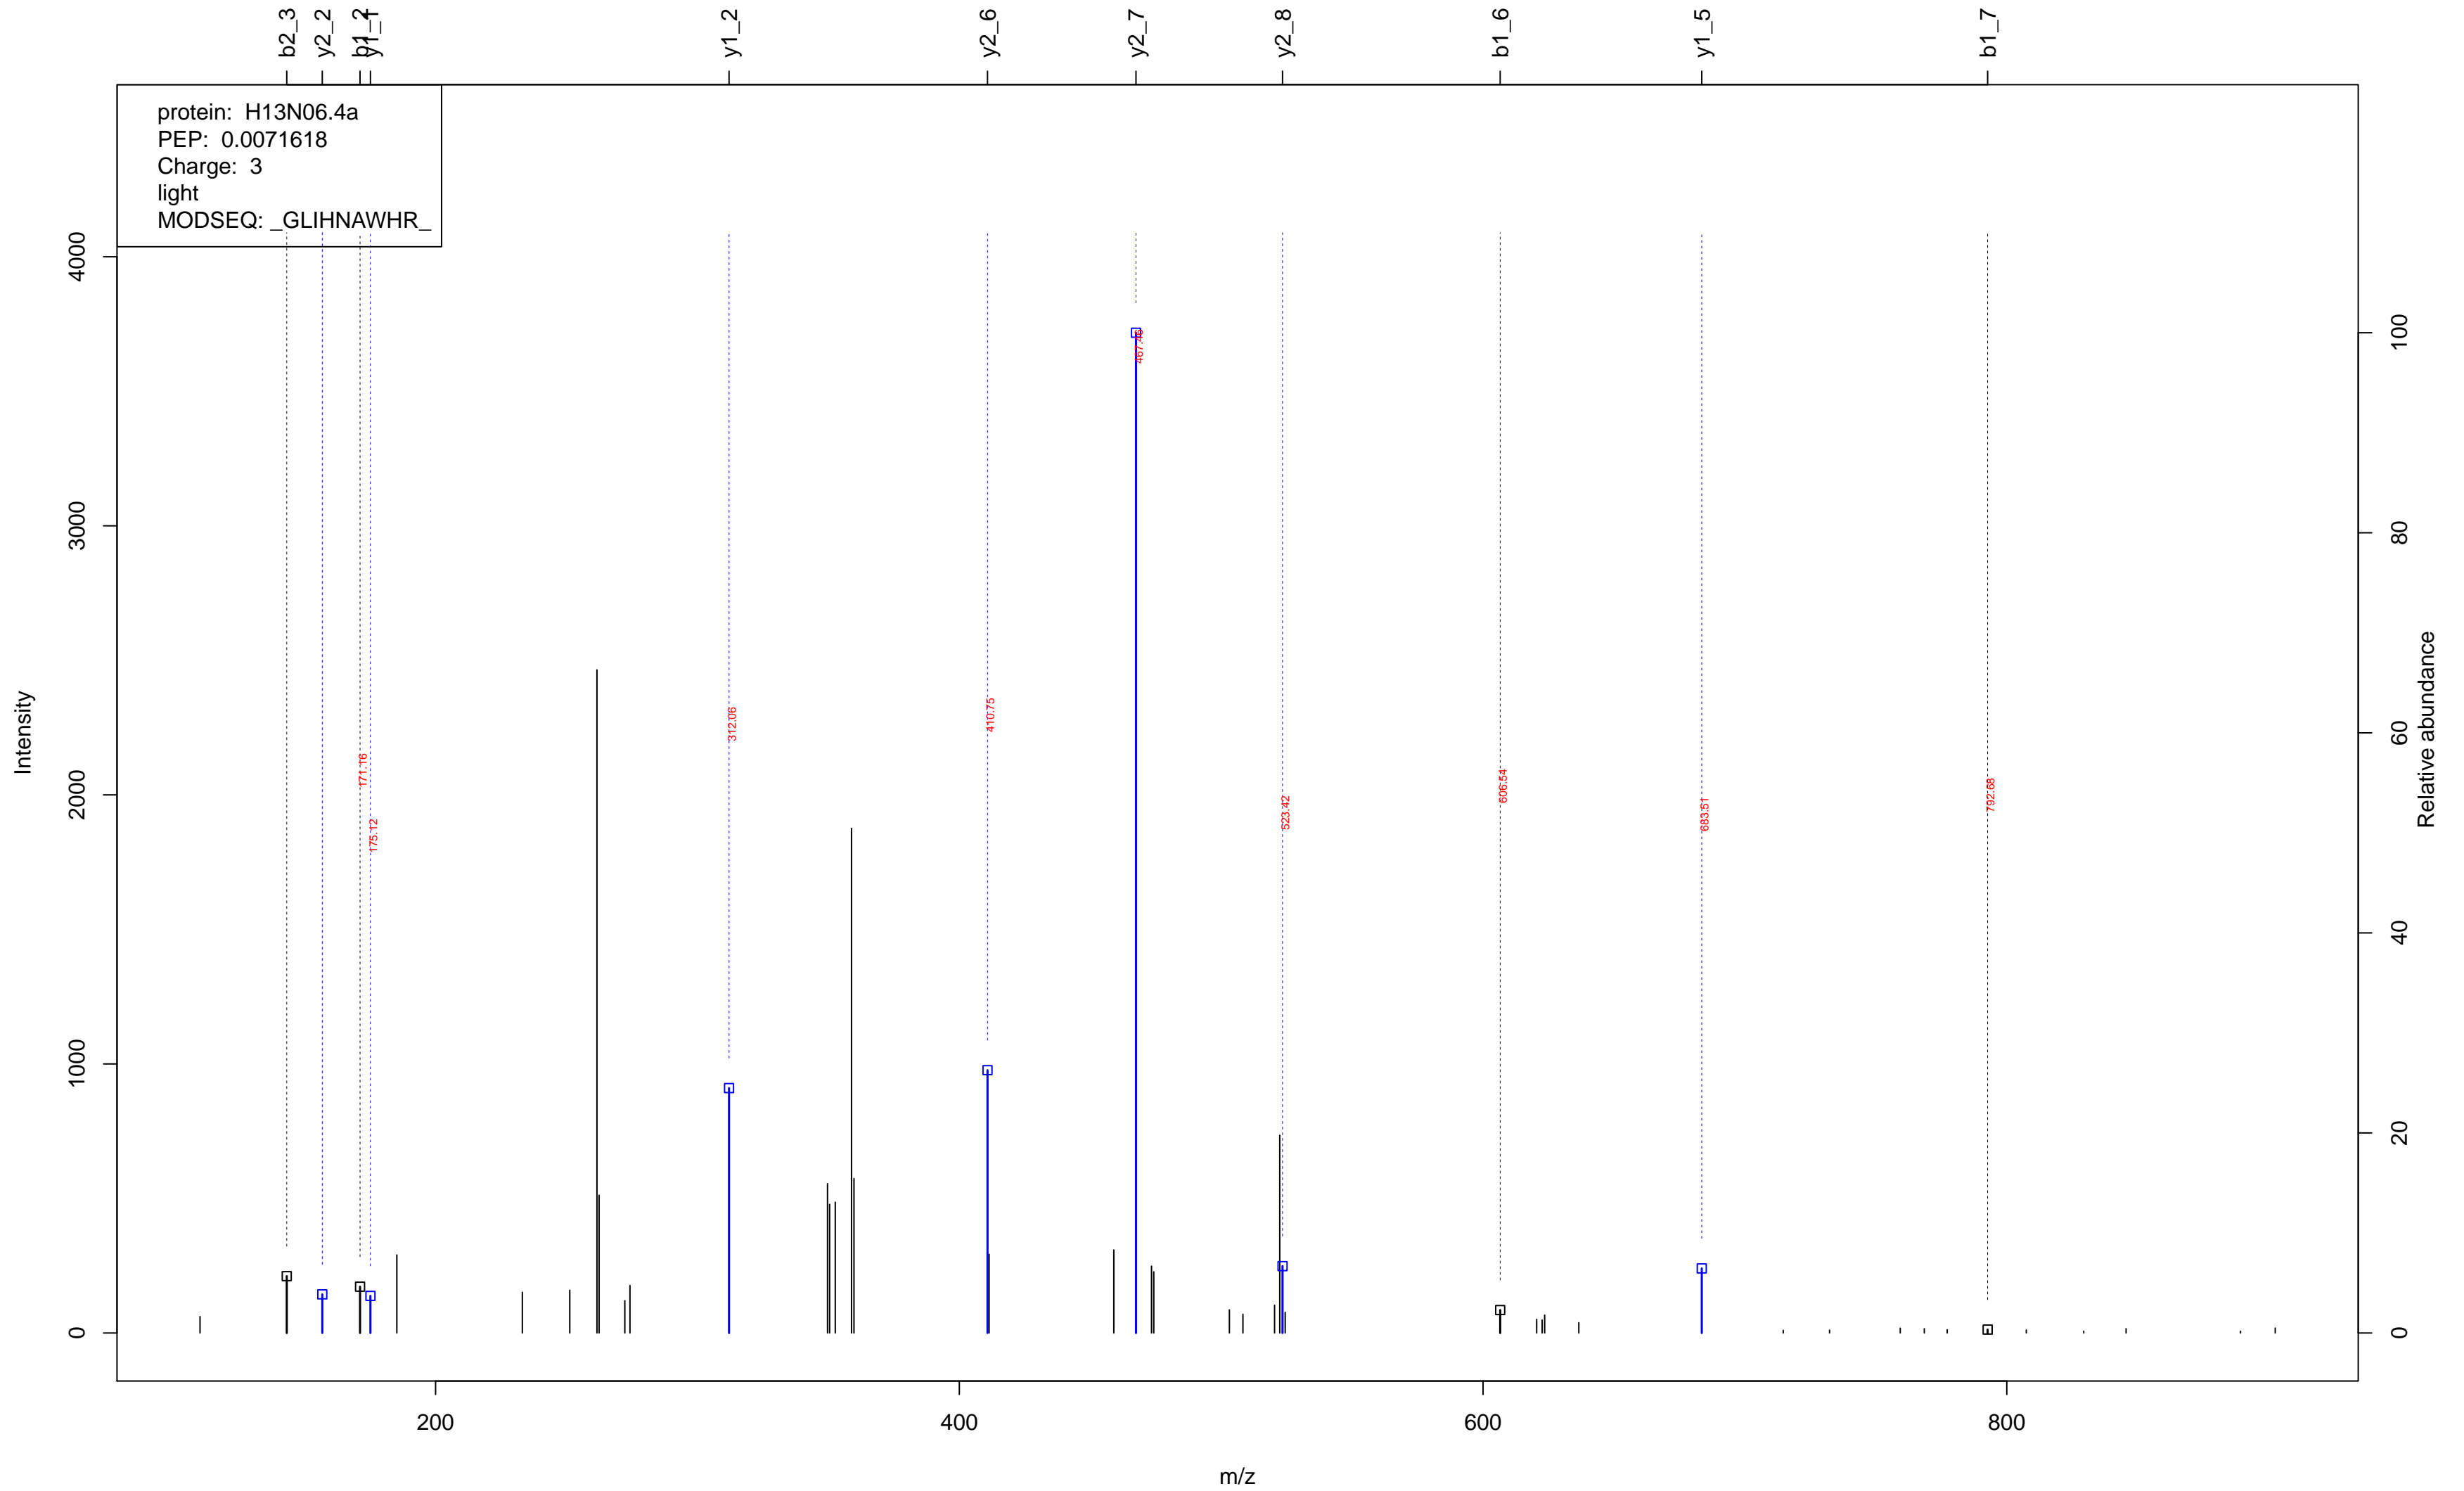

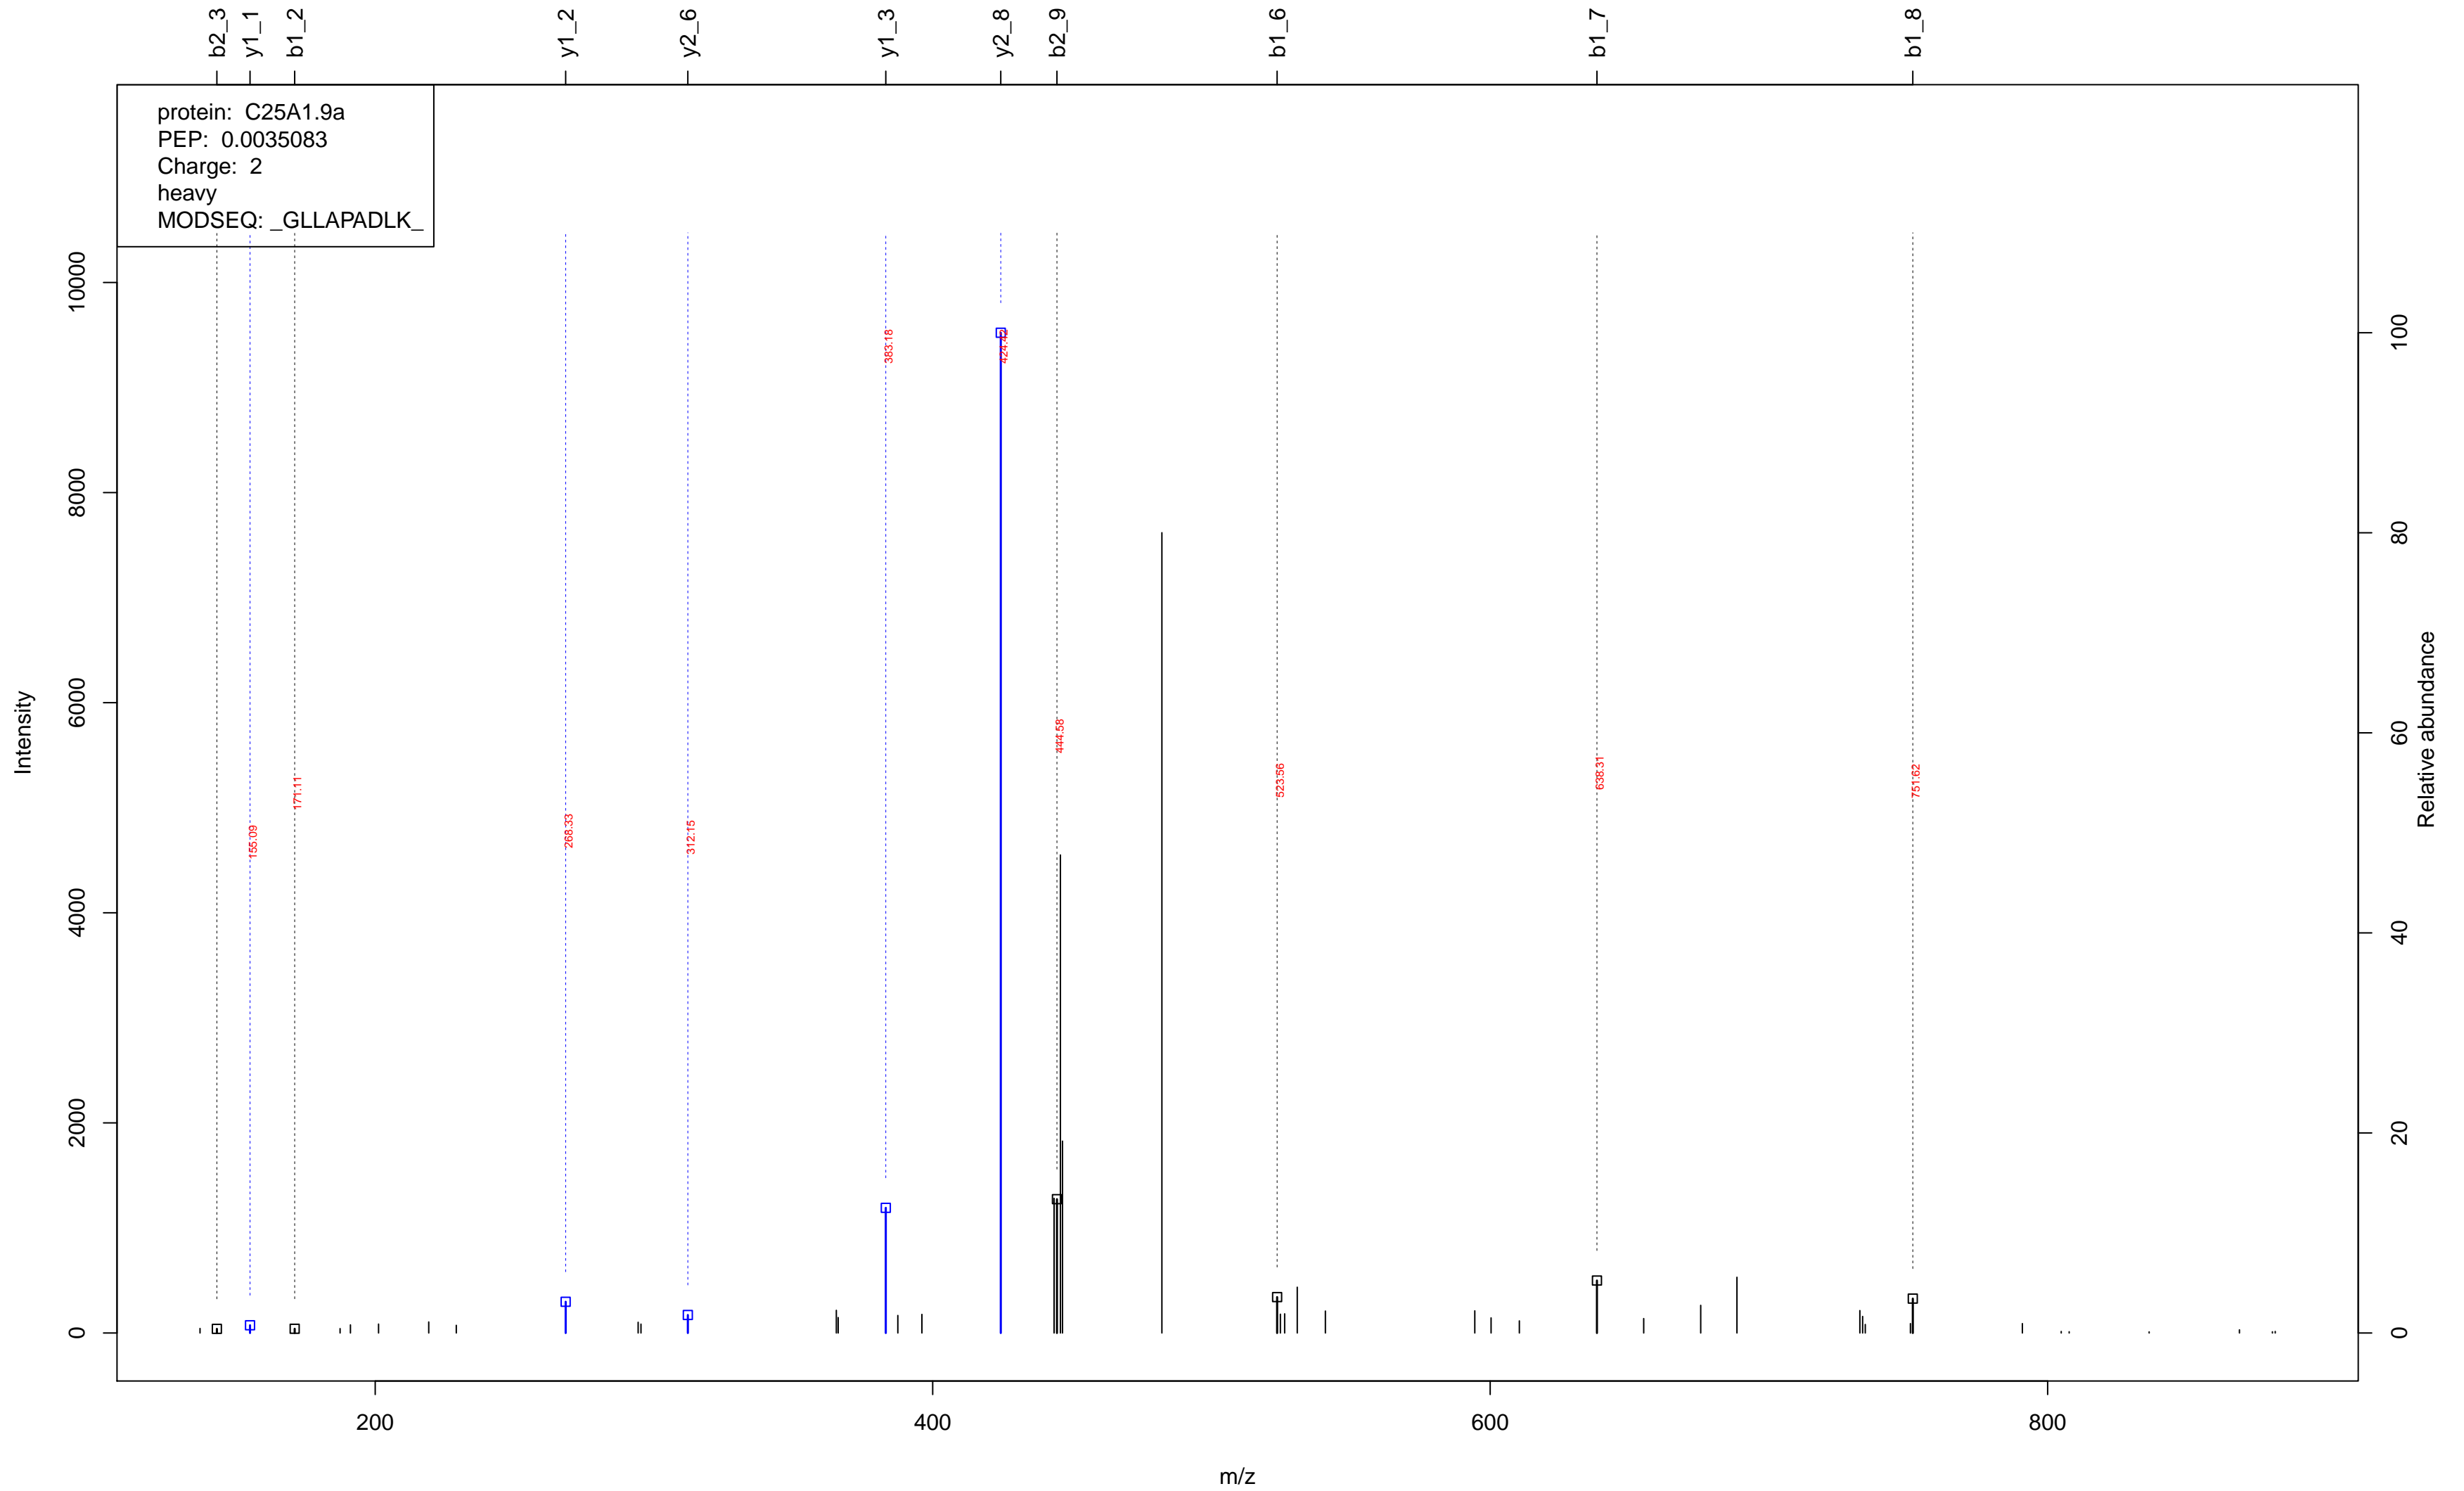

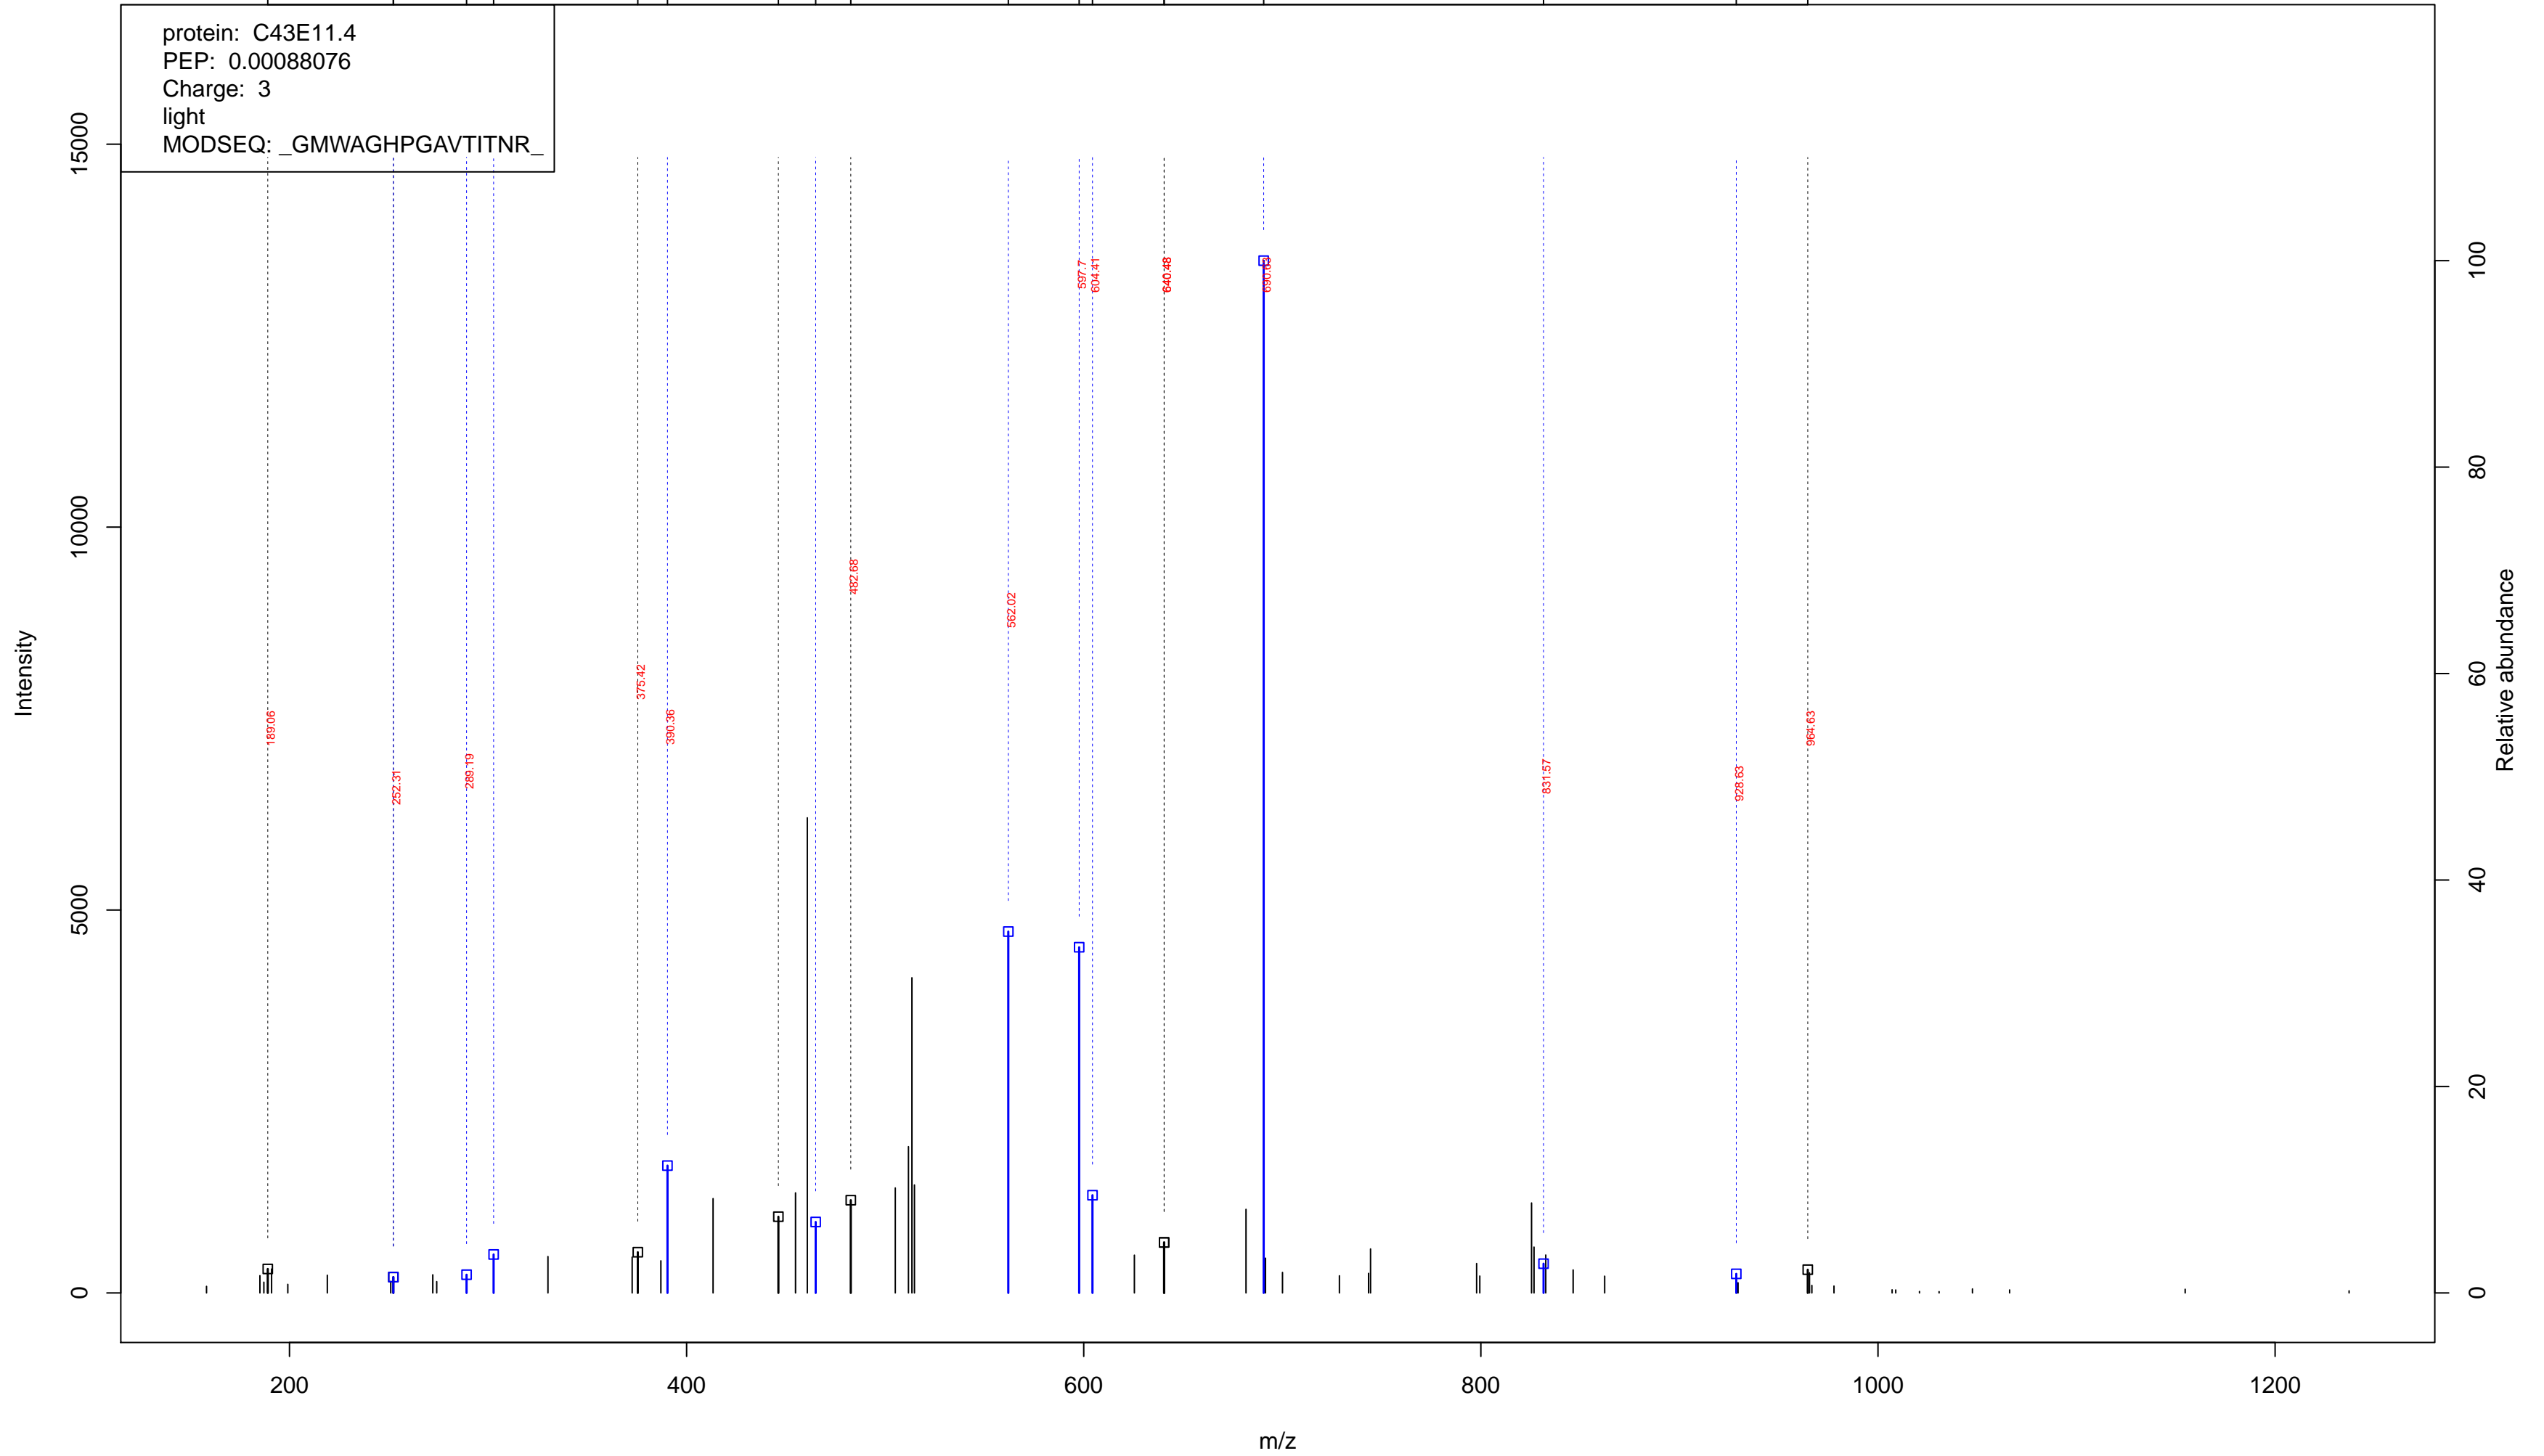

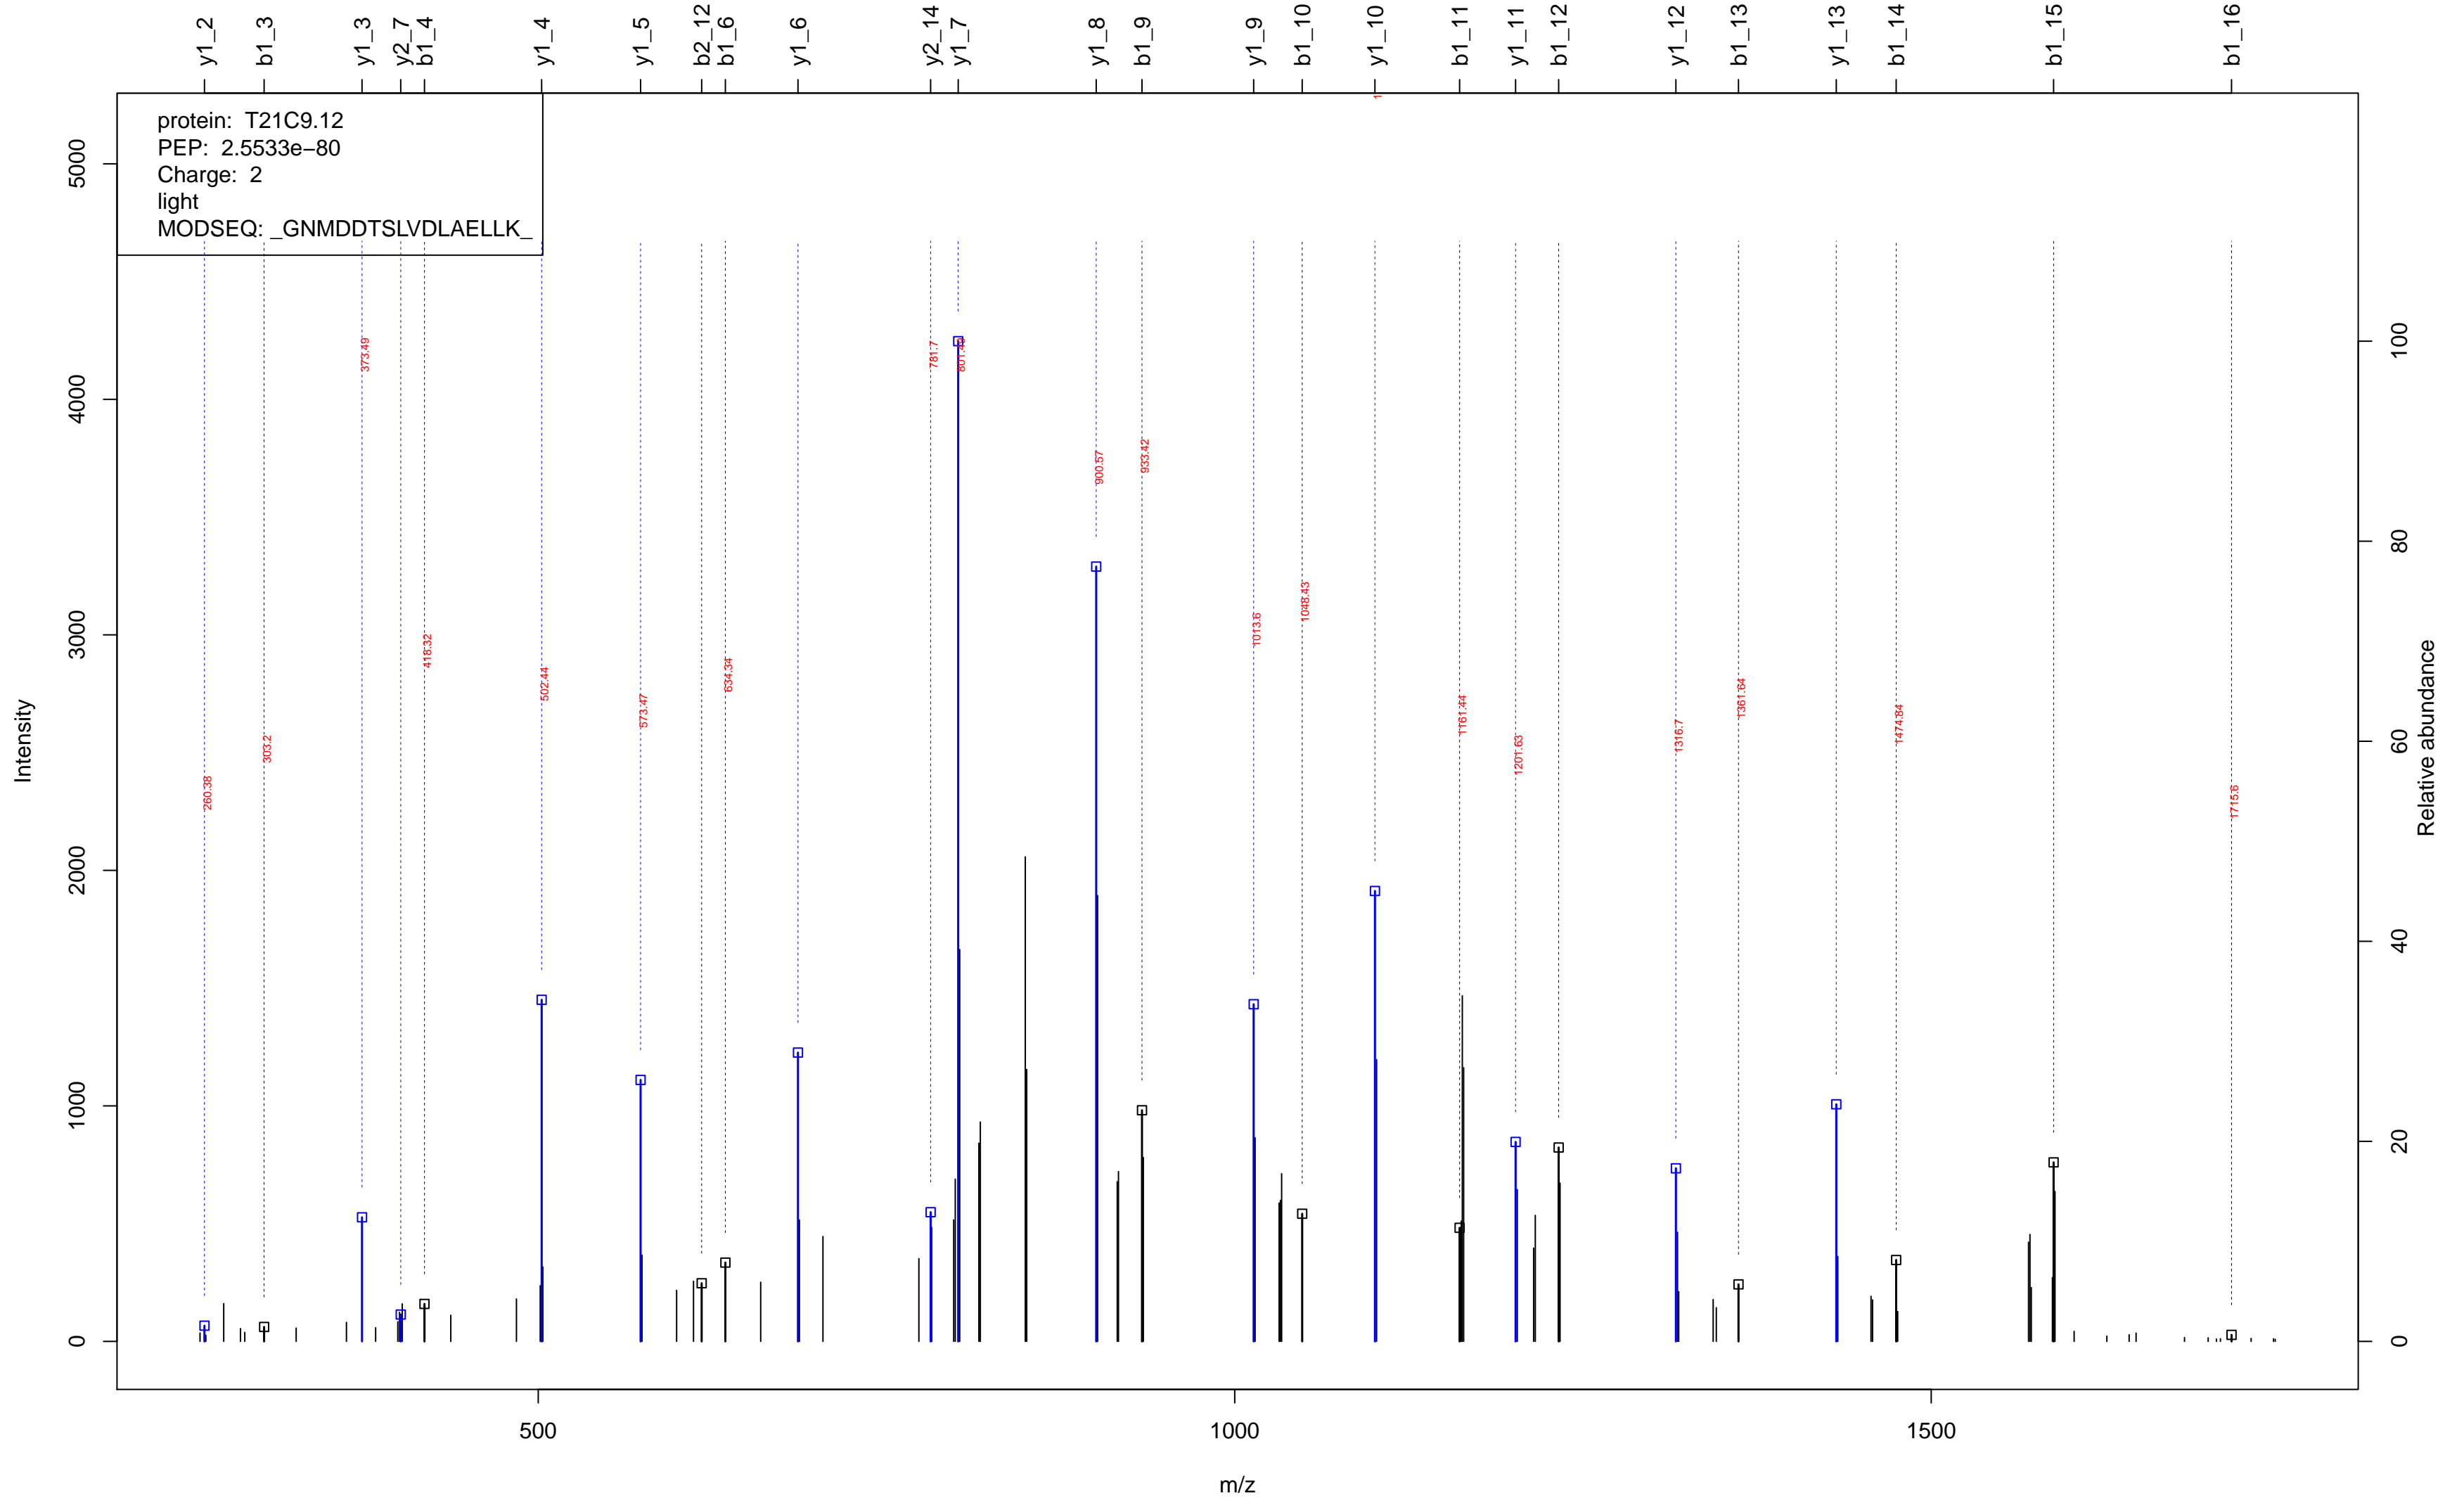

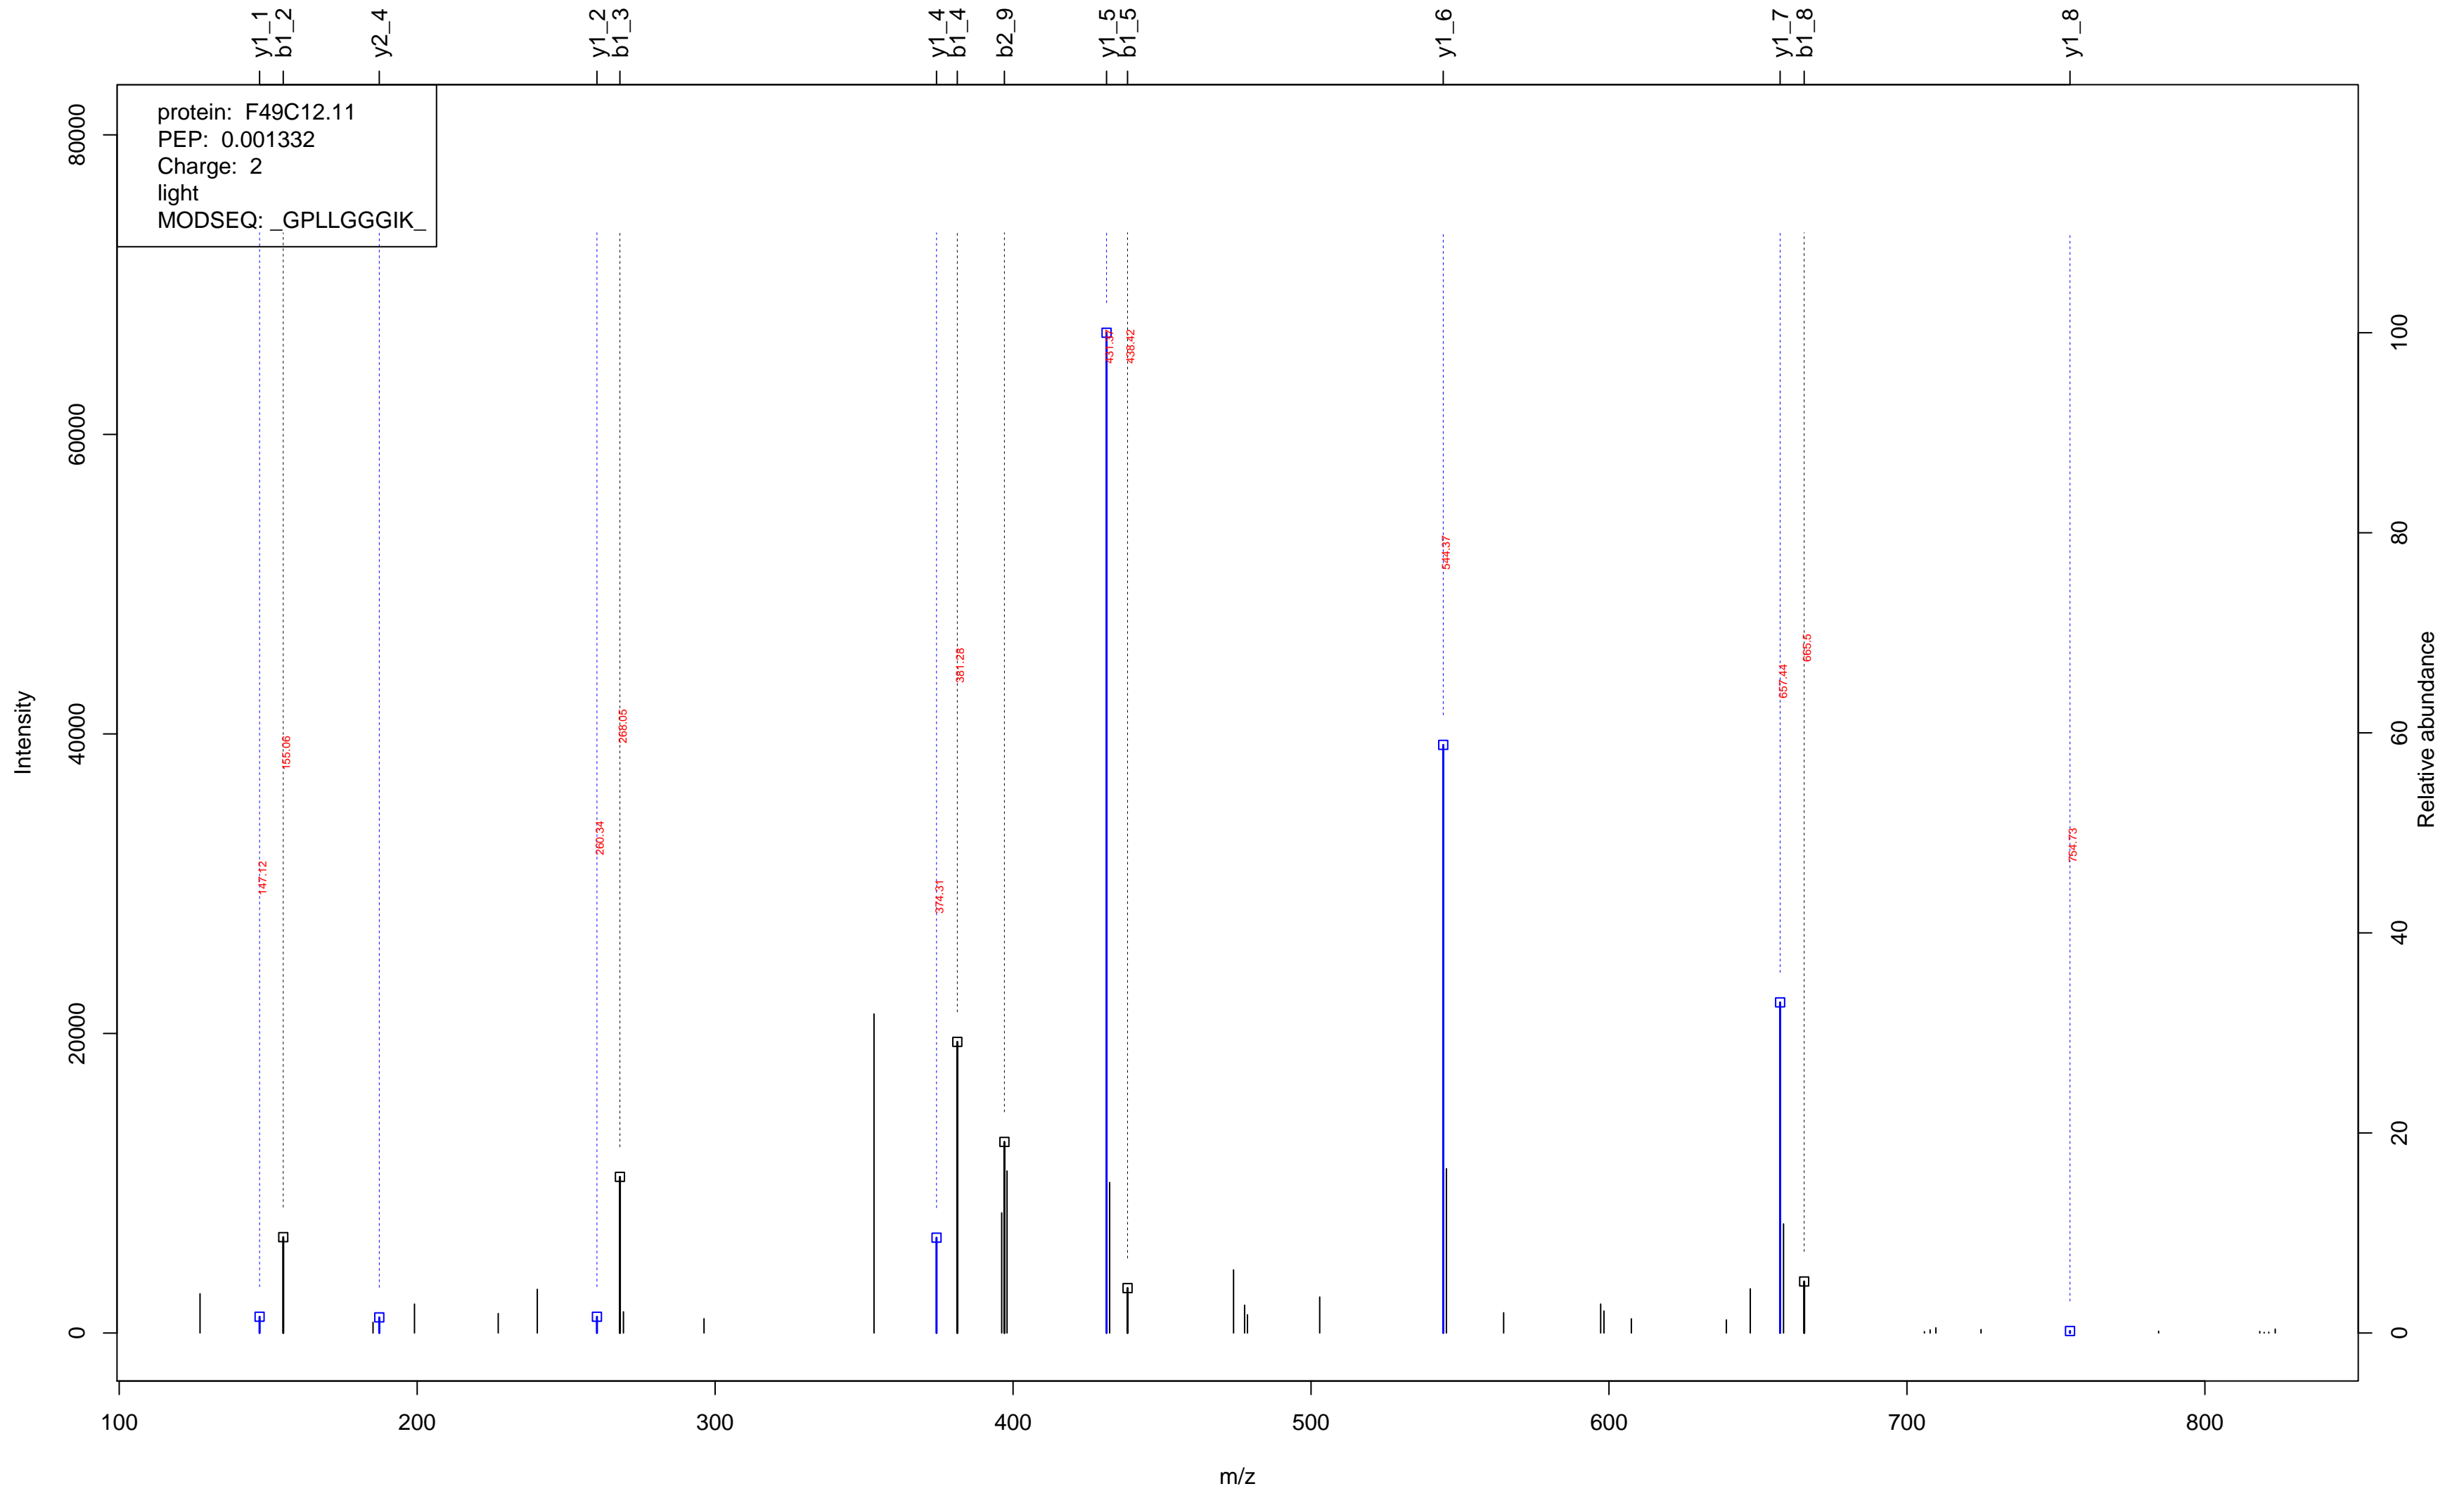

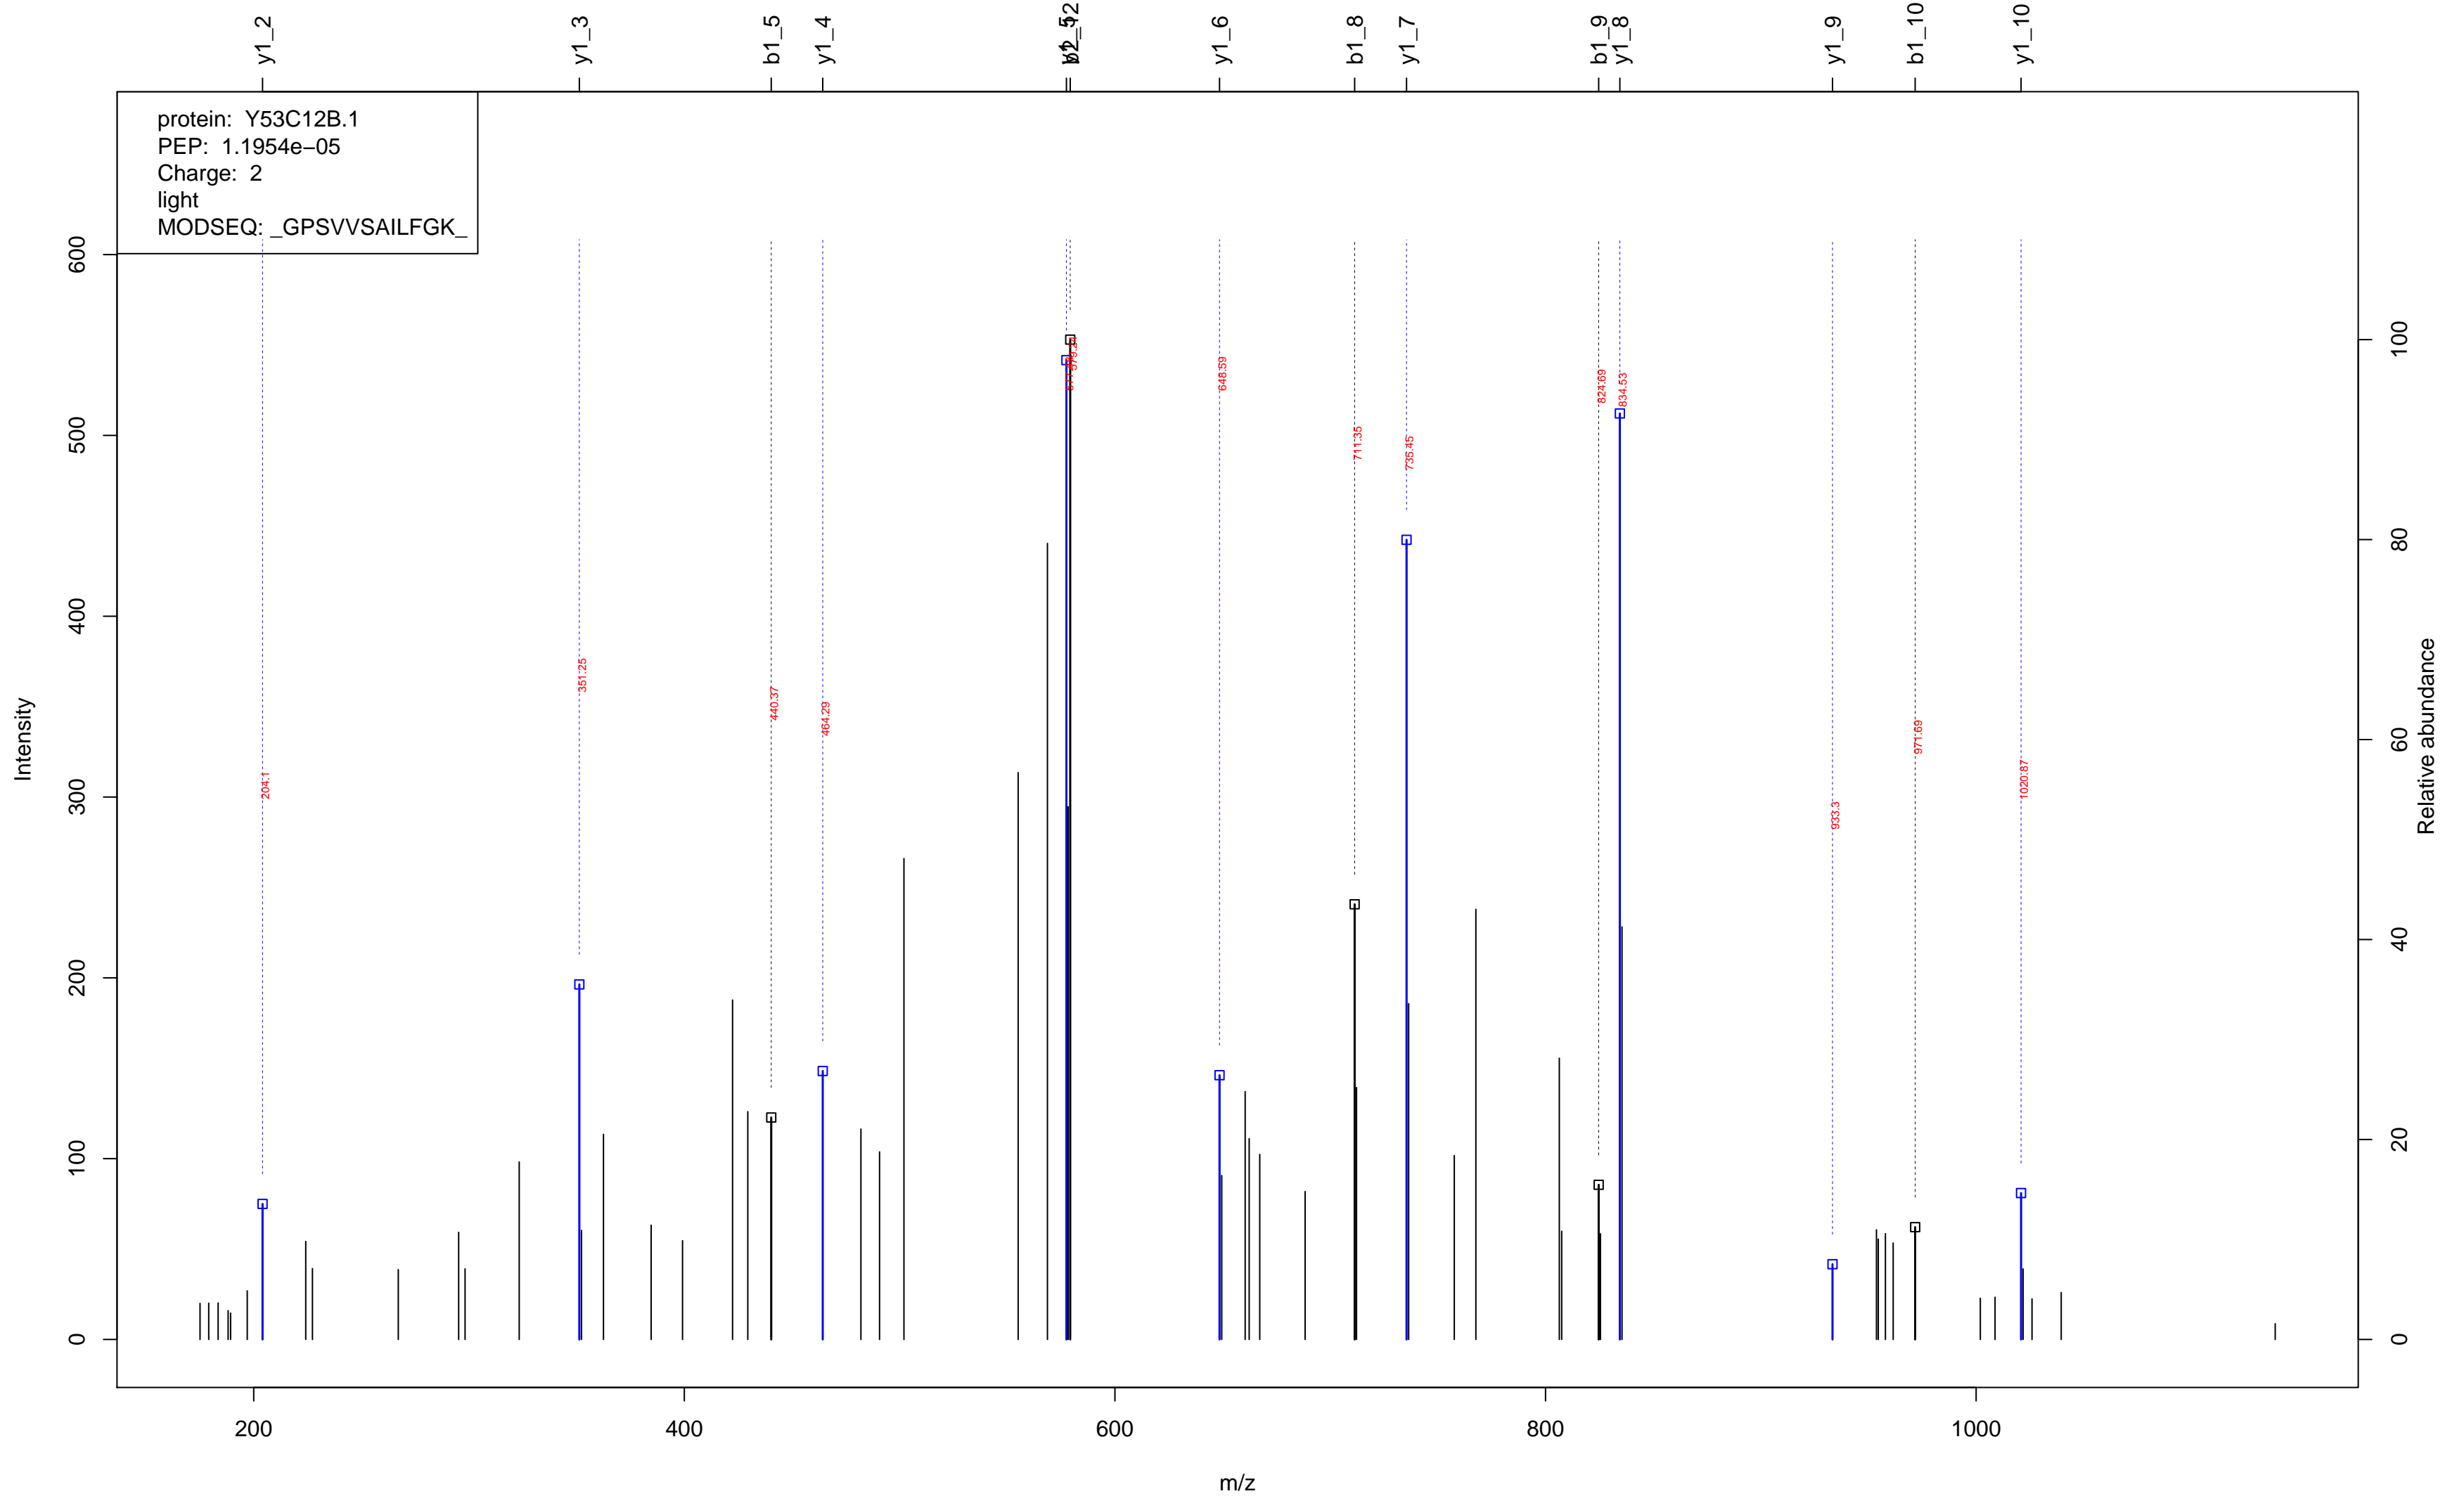

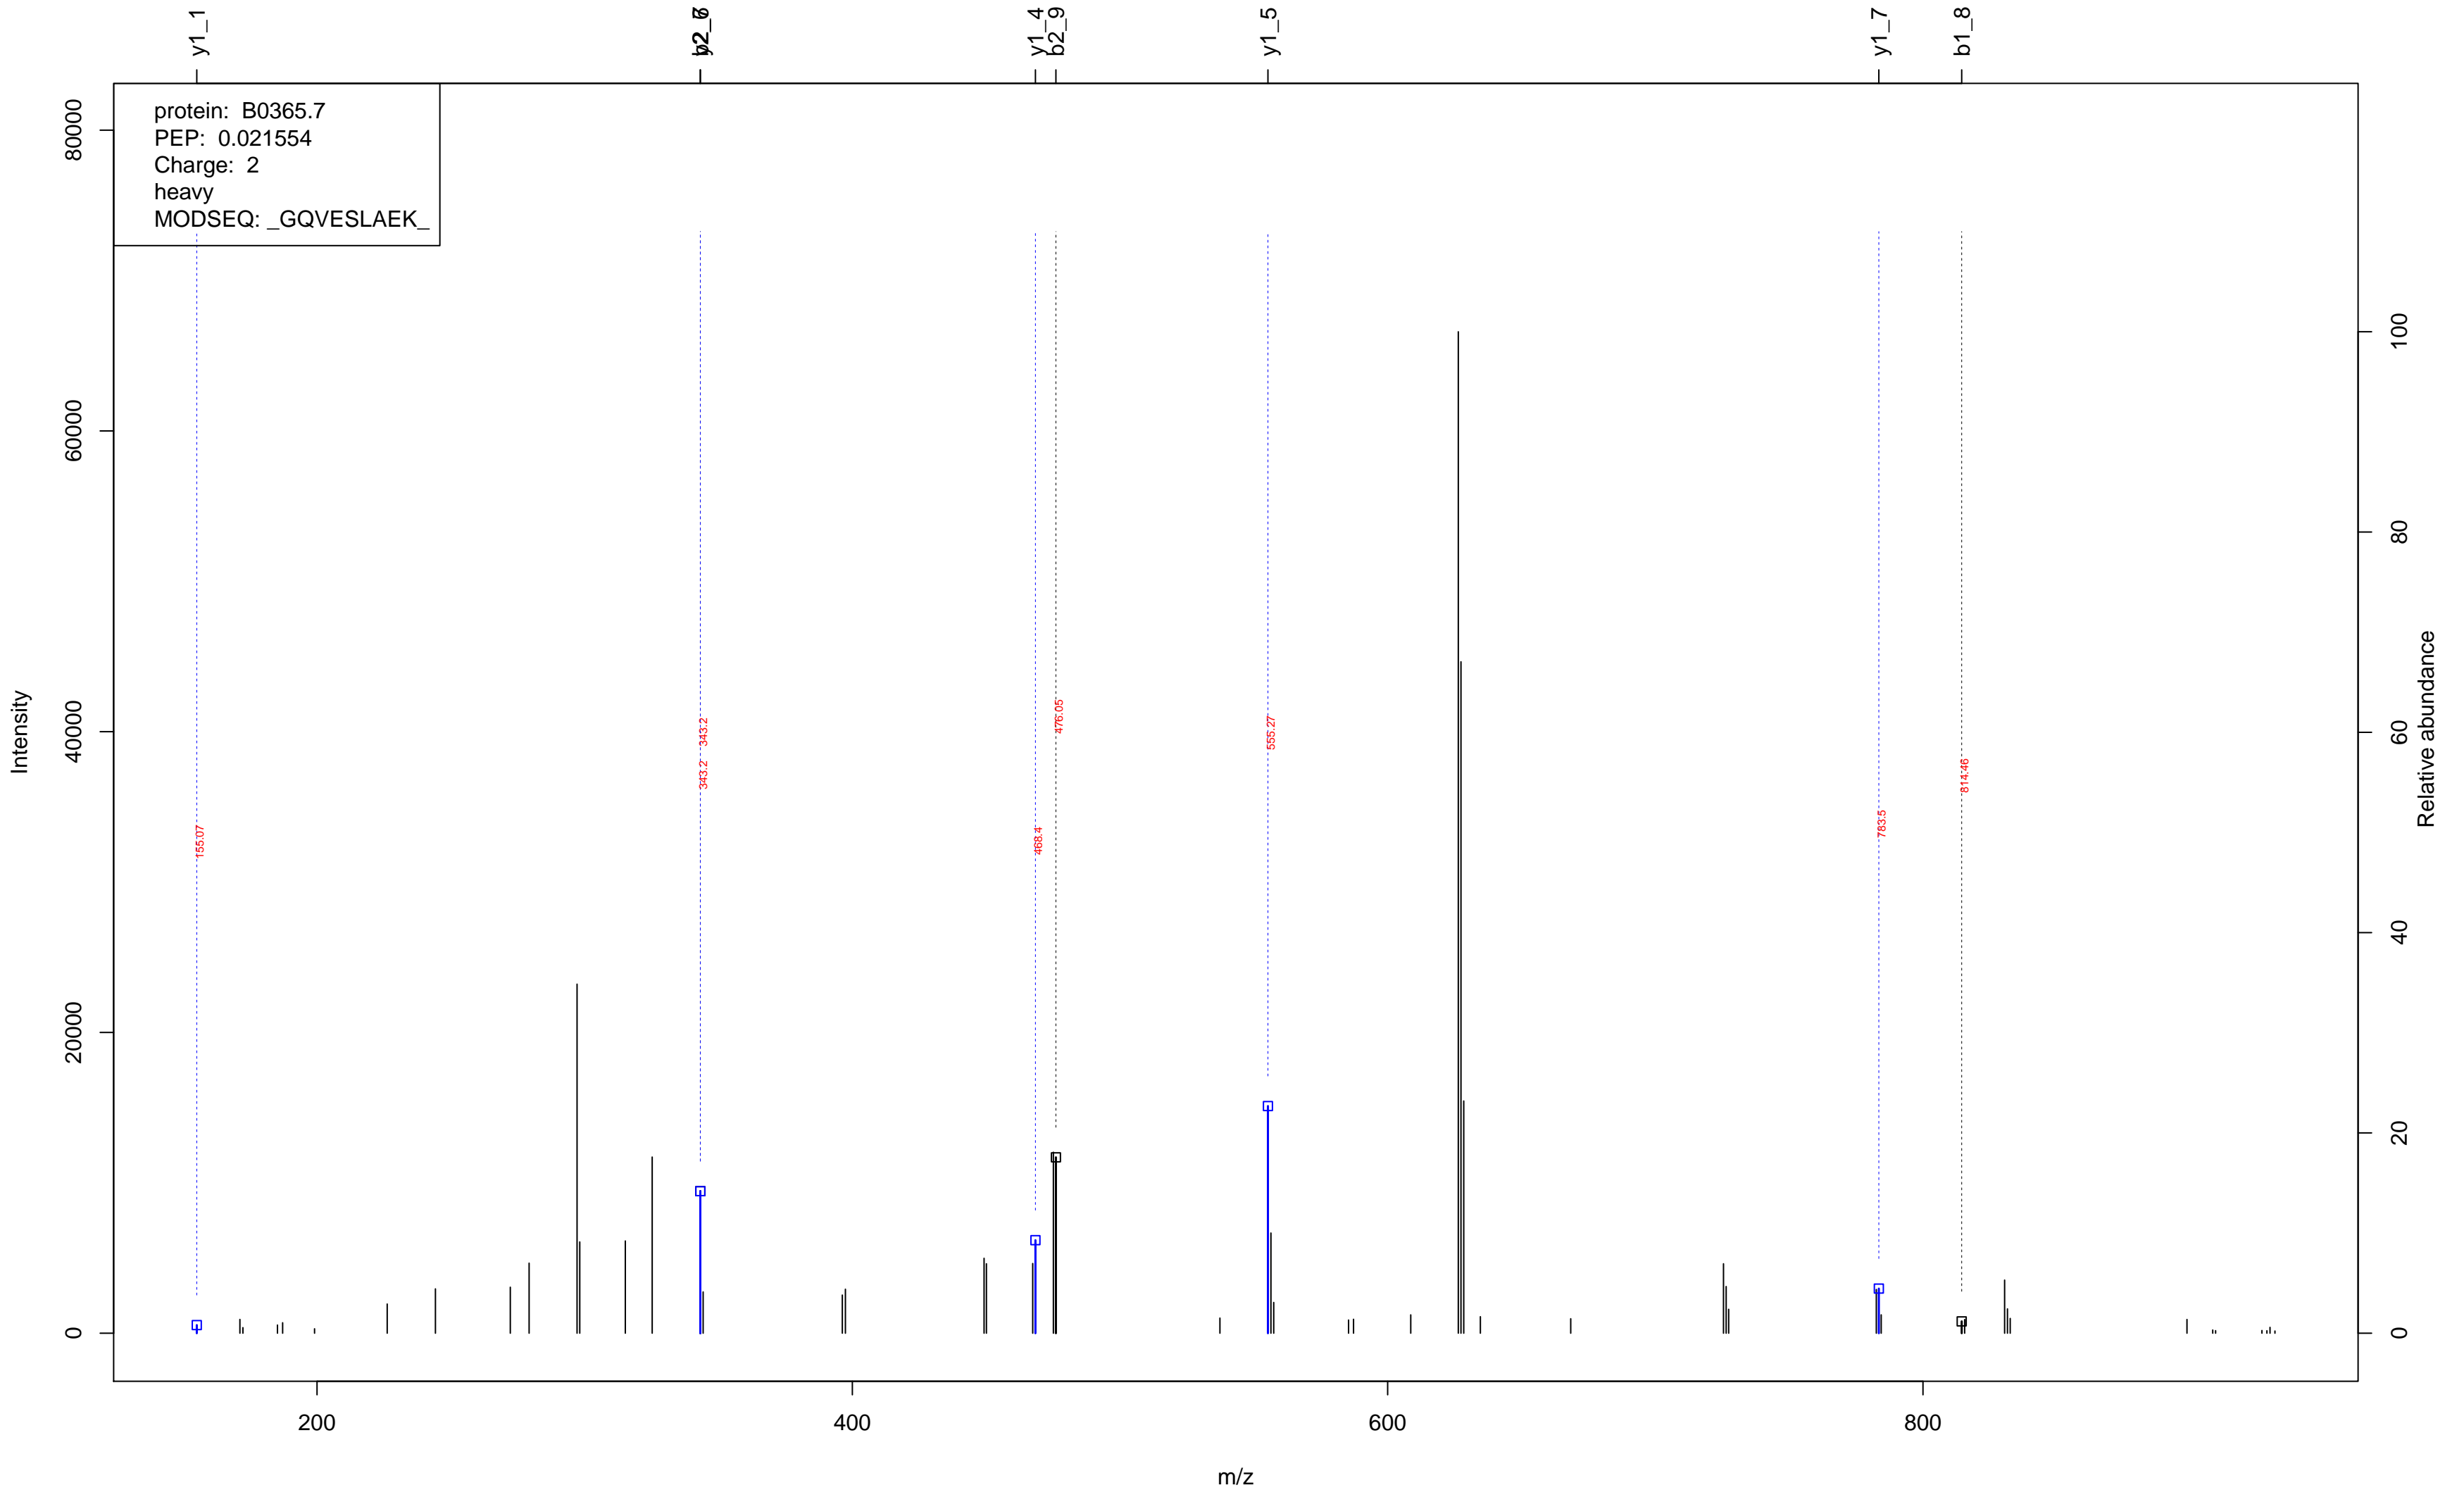

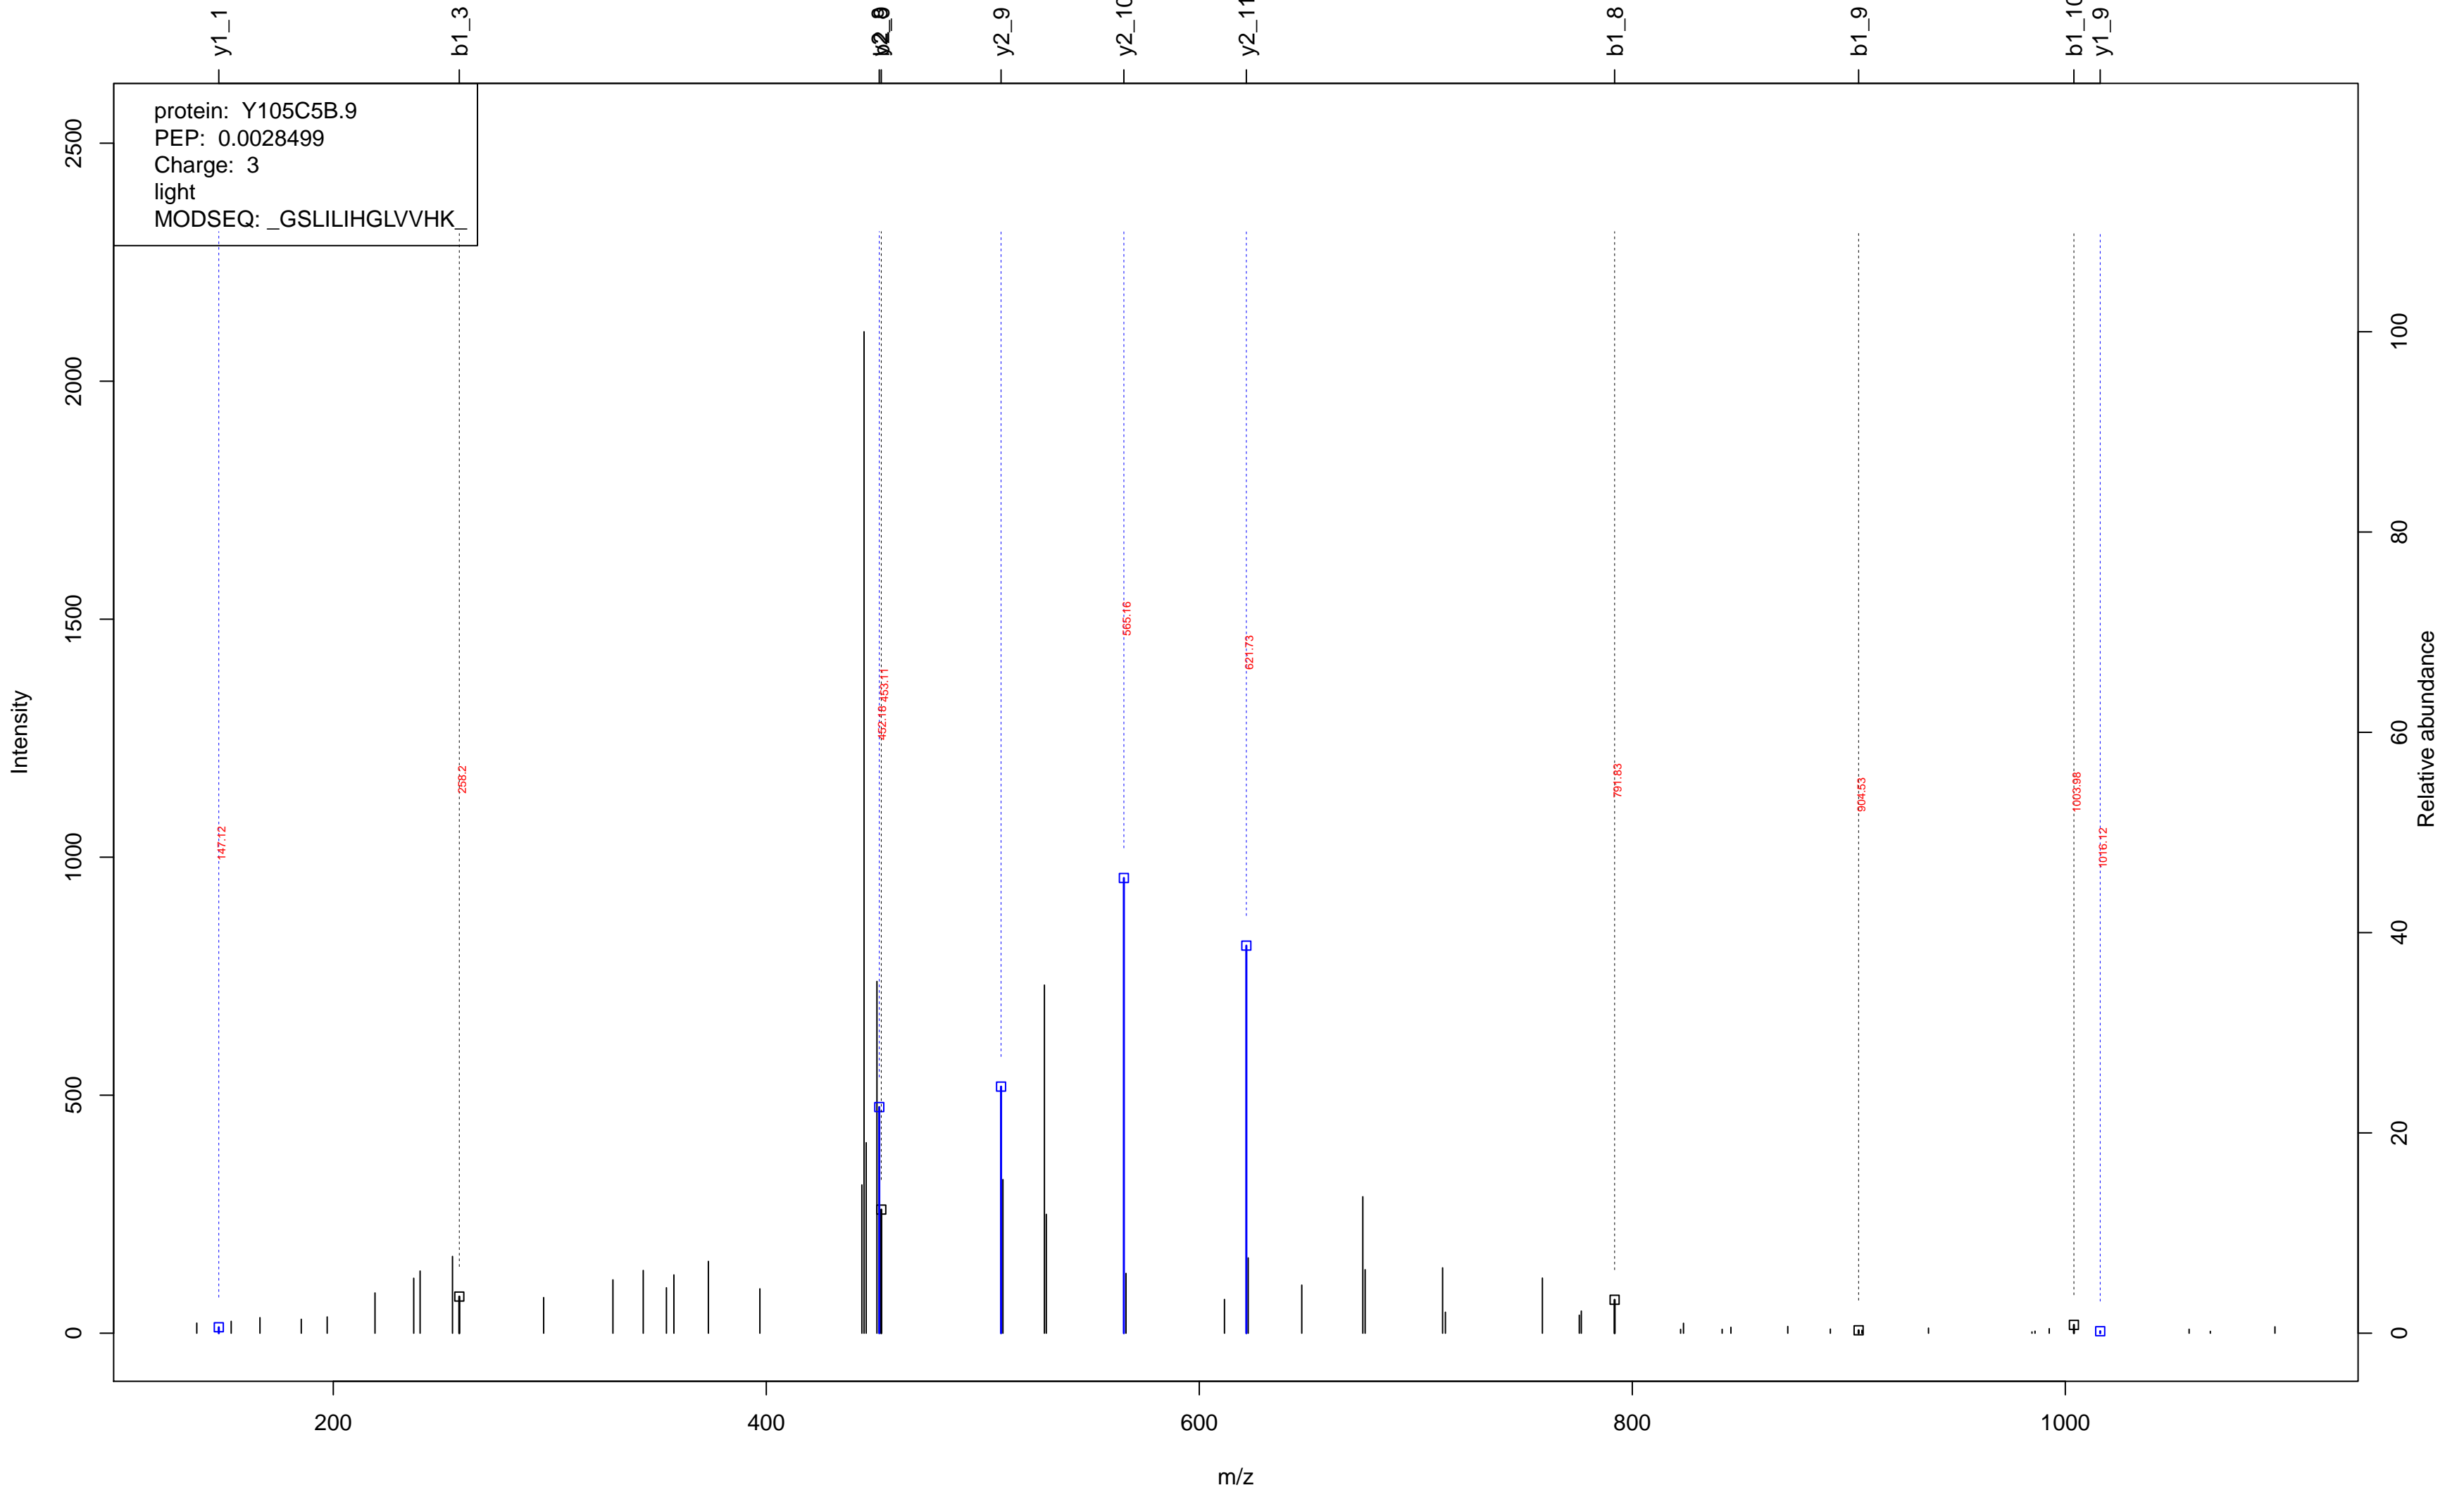



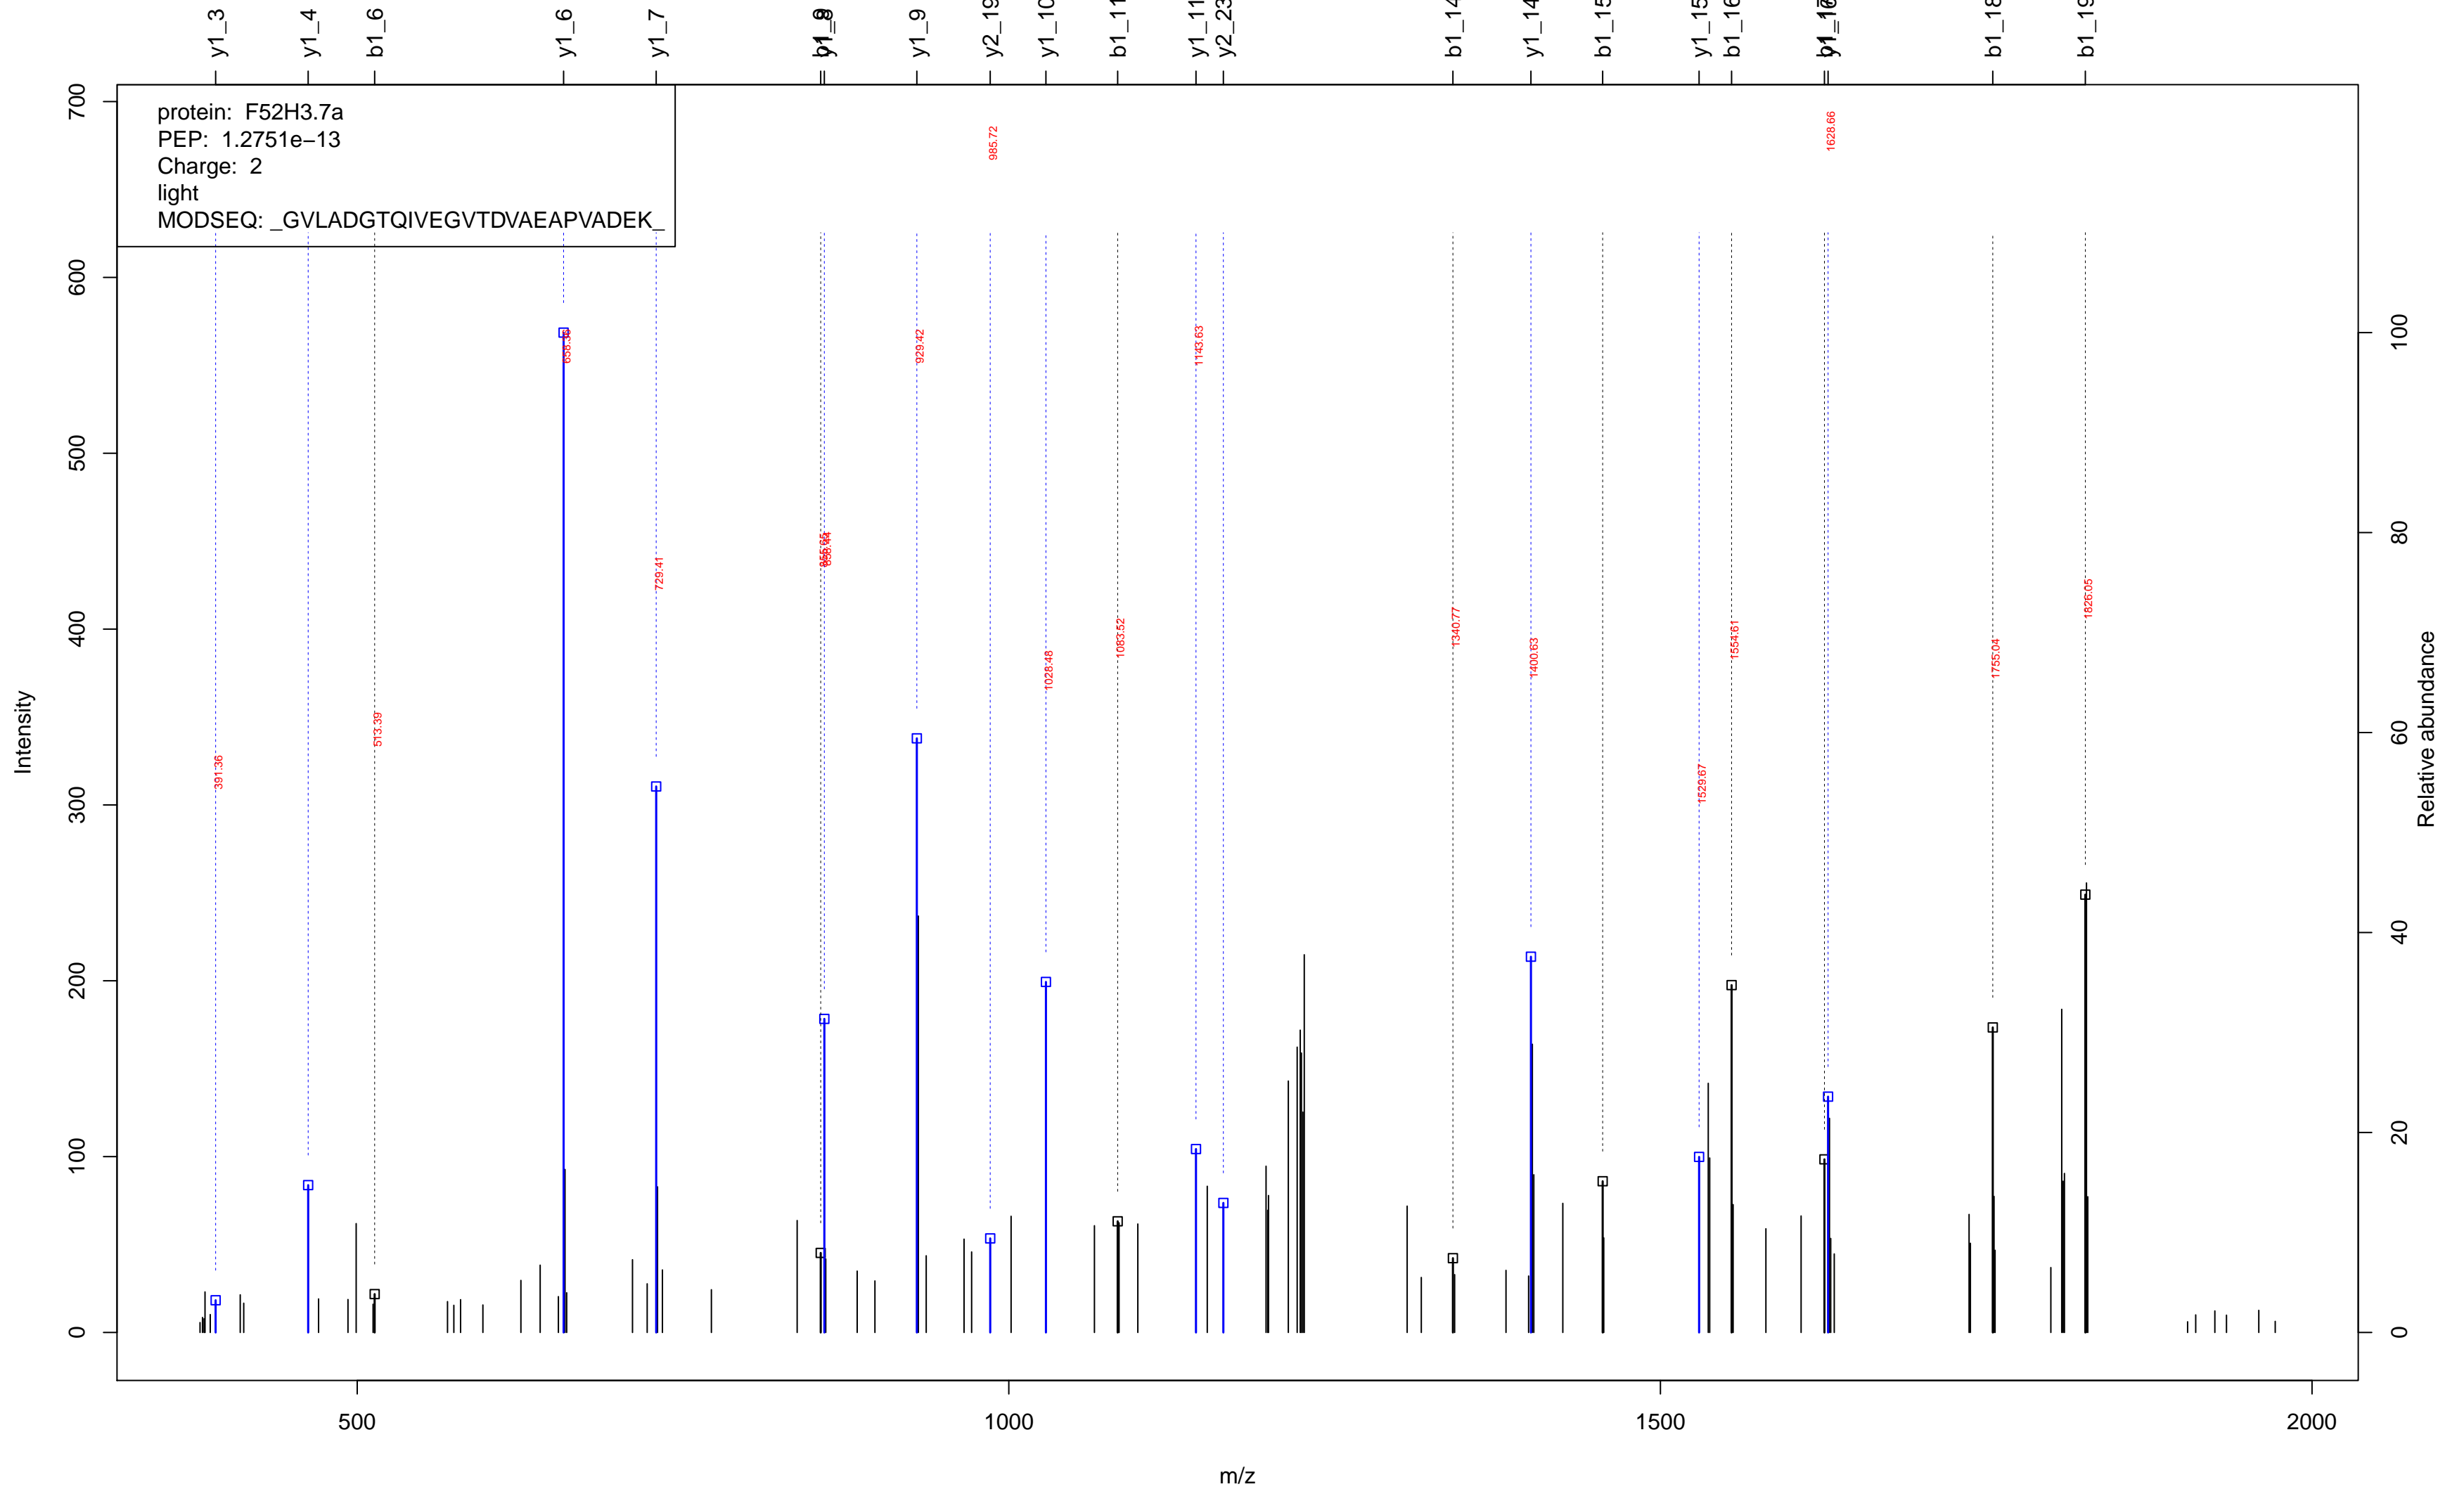

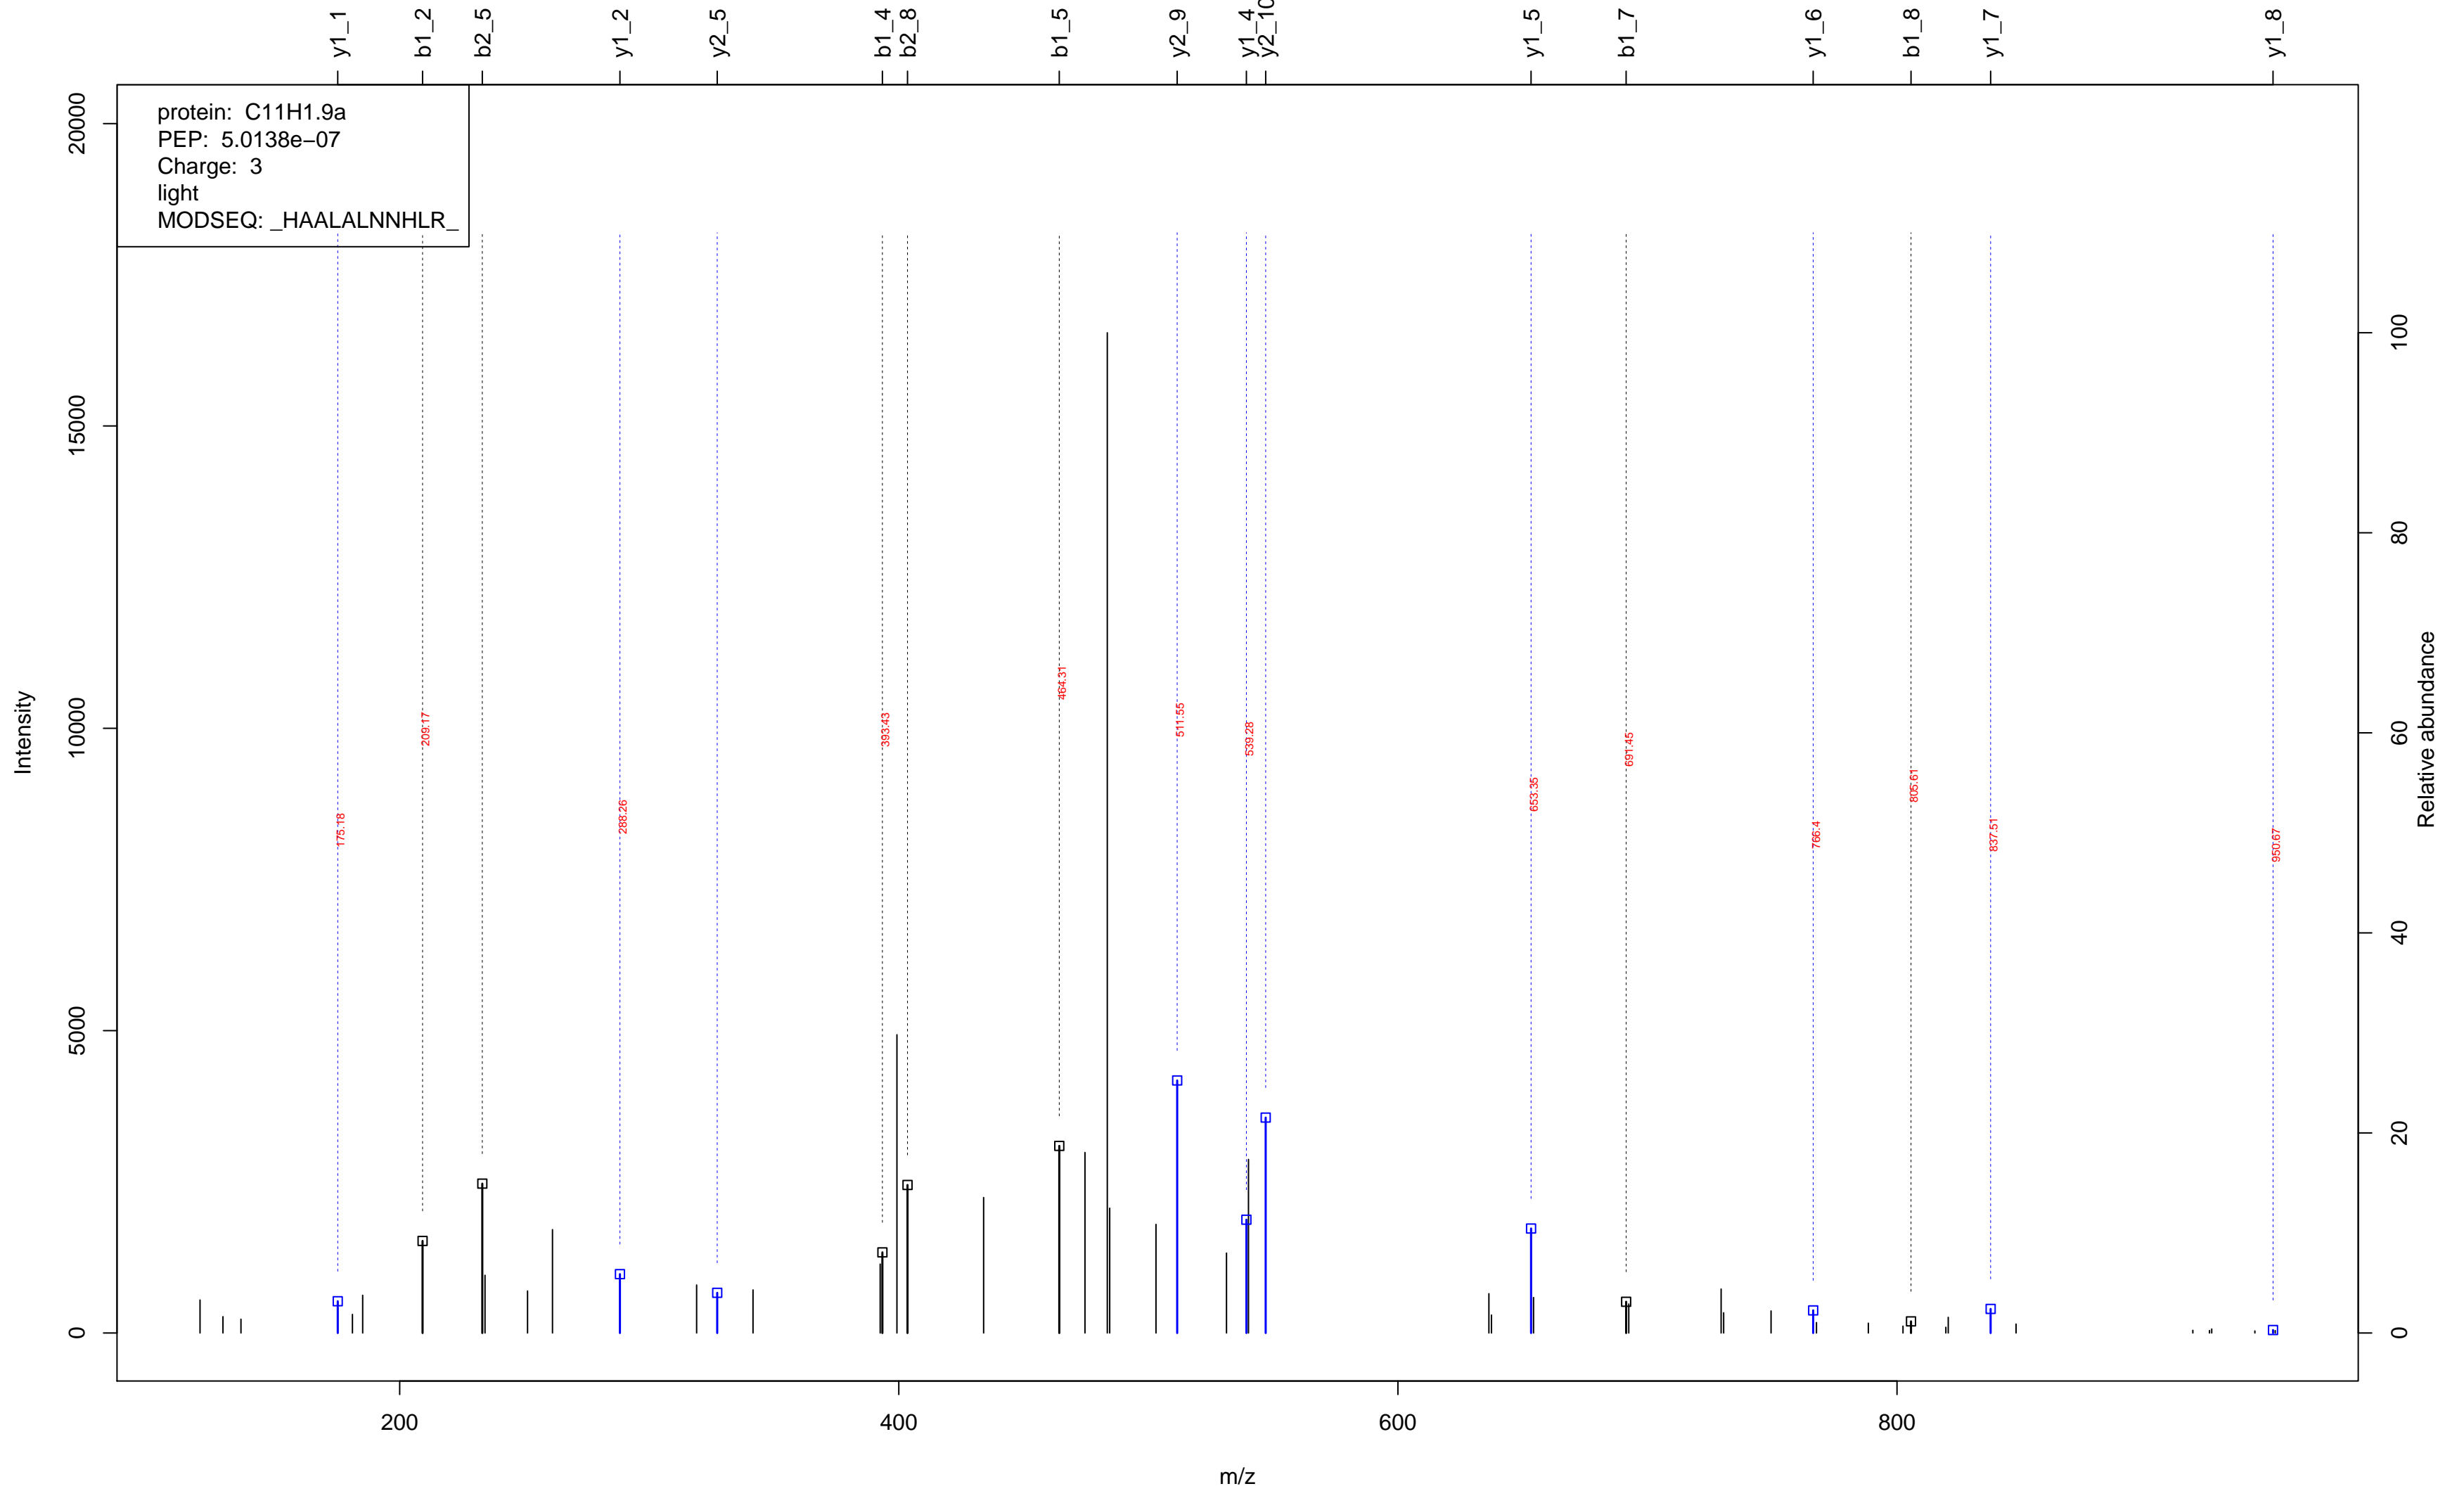

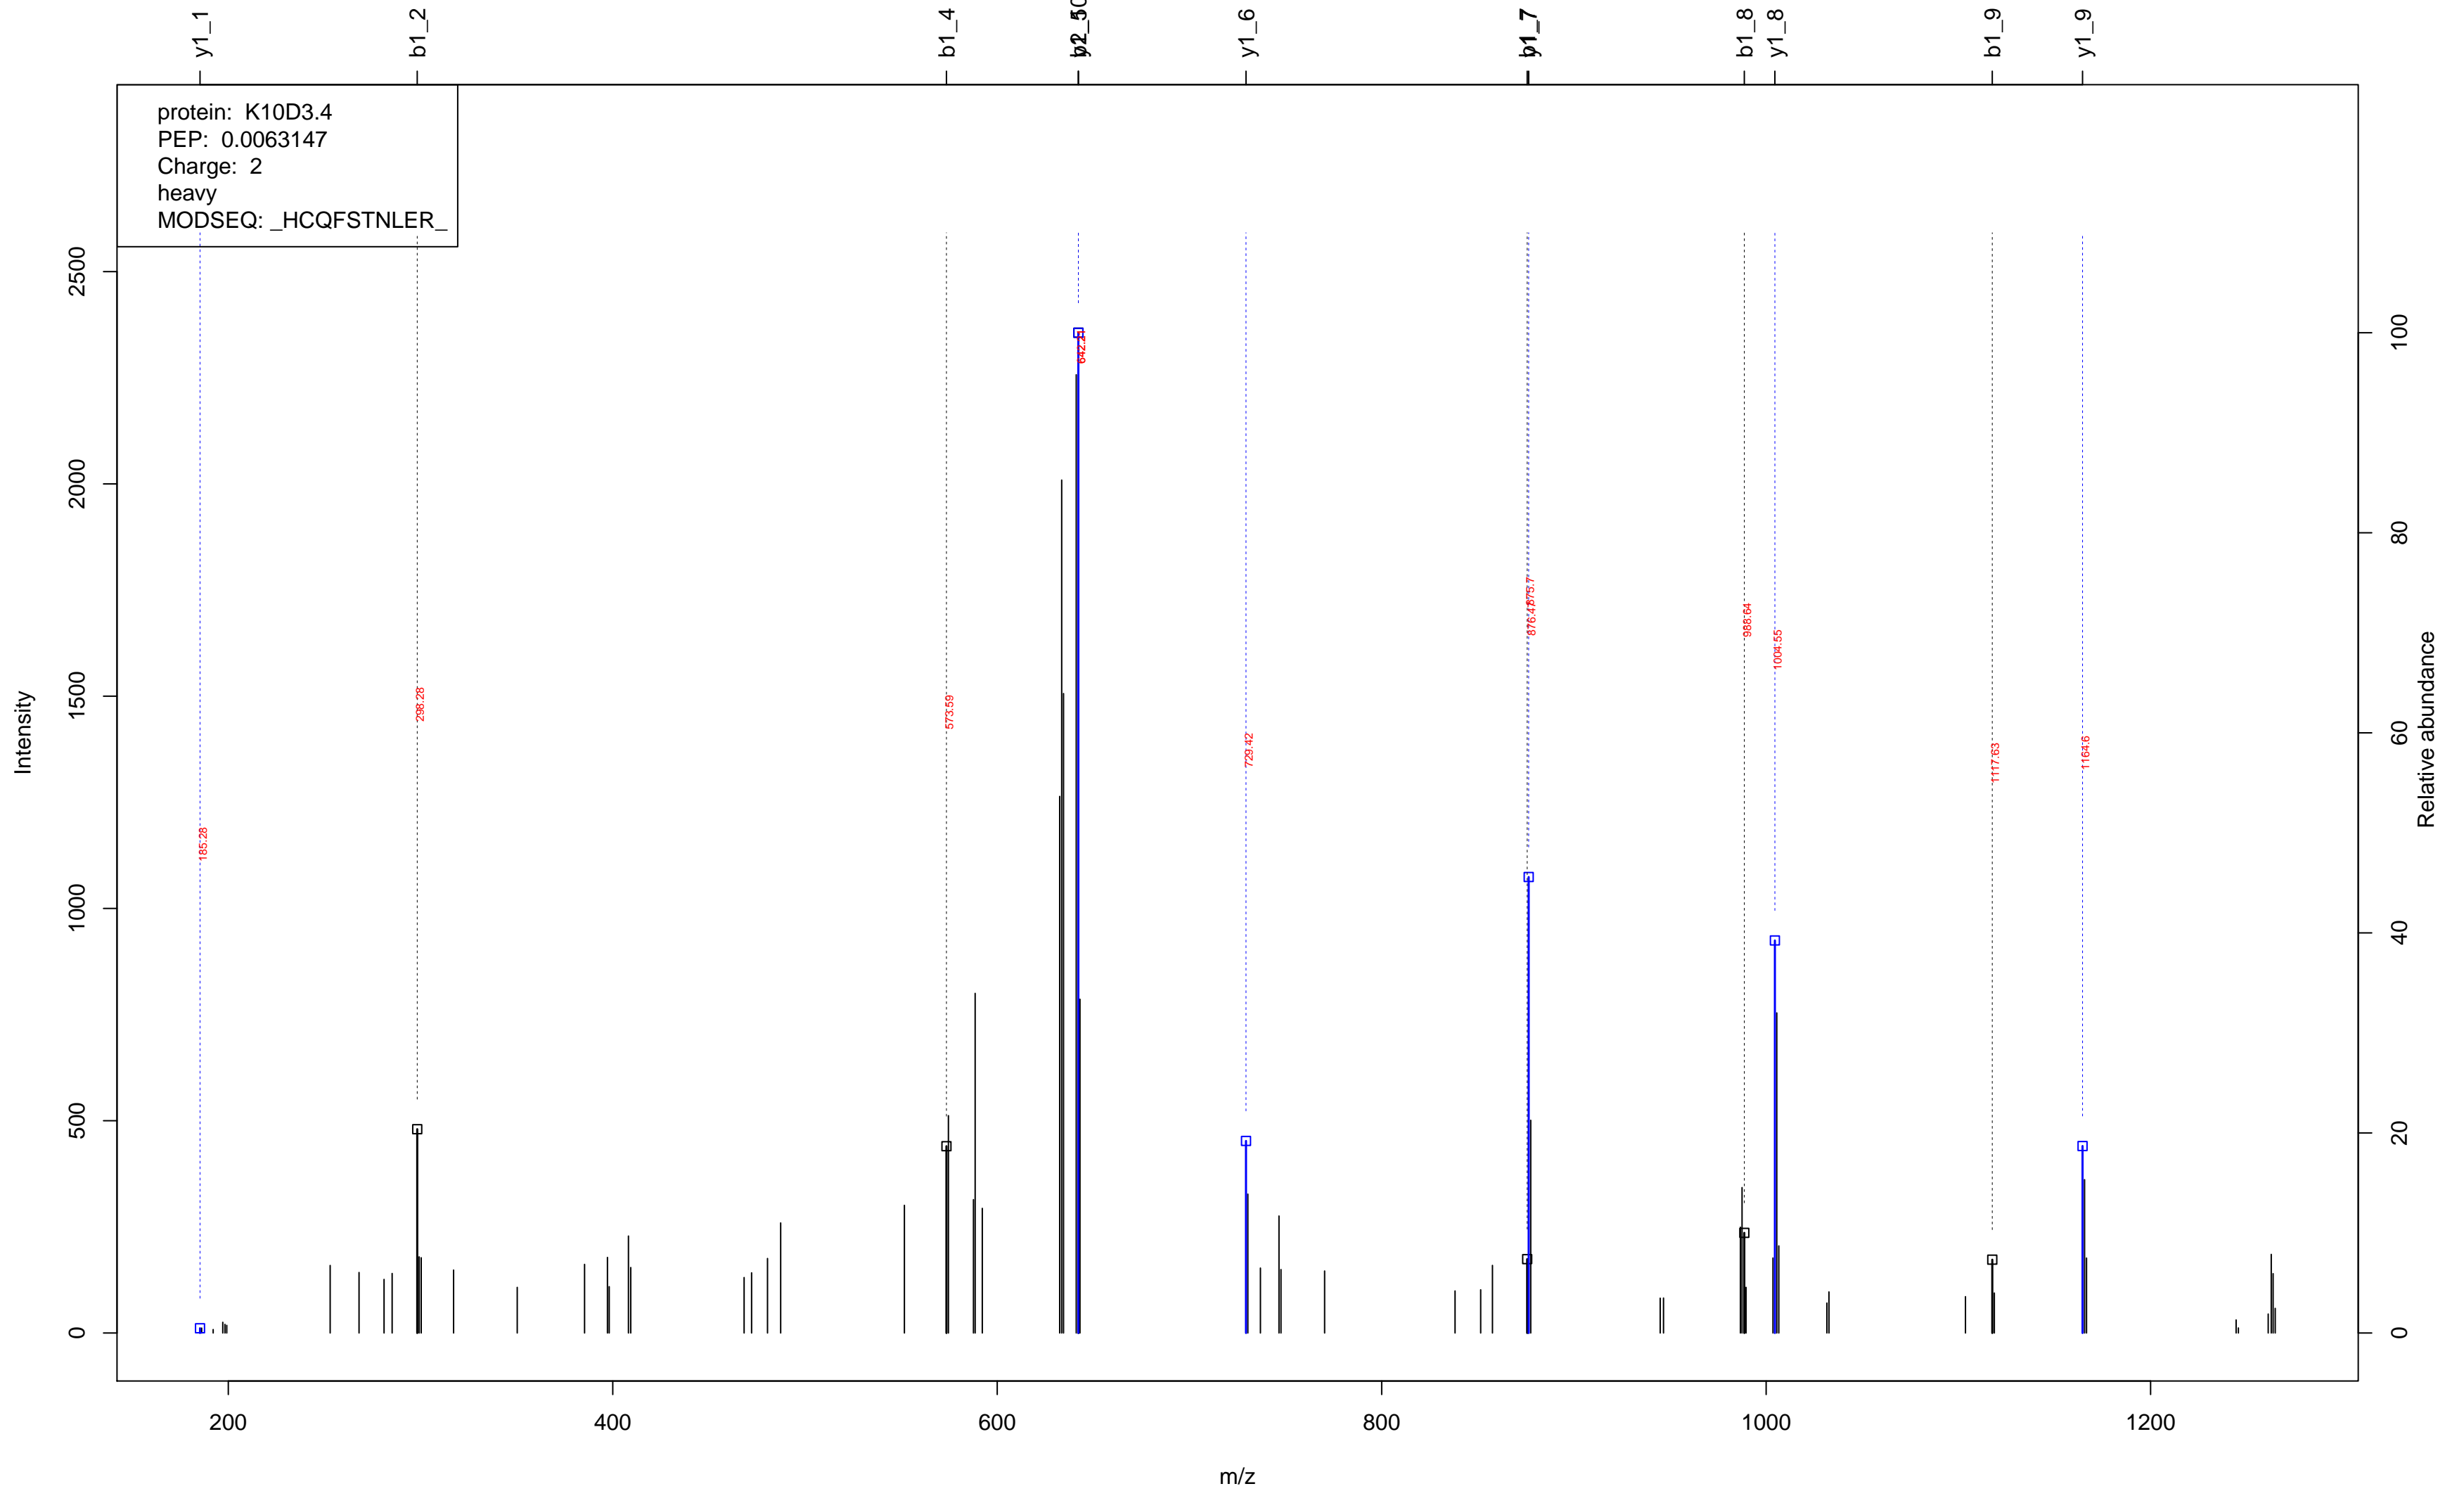

y1\_1  
b1\_2

b1\_3  
y1\_2

b2\_8

y1\_4

y1\_5

y1\_6  
b1\_7

y1\_7

protein: T04B8.5a  
PEP: 0.020242  
Charge: 2  
heavy  
MODSEQ: \_HGIQQLMR\_

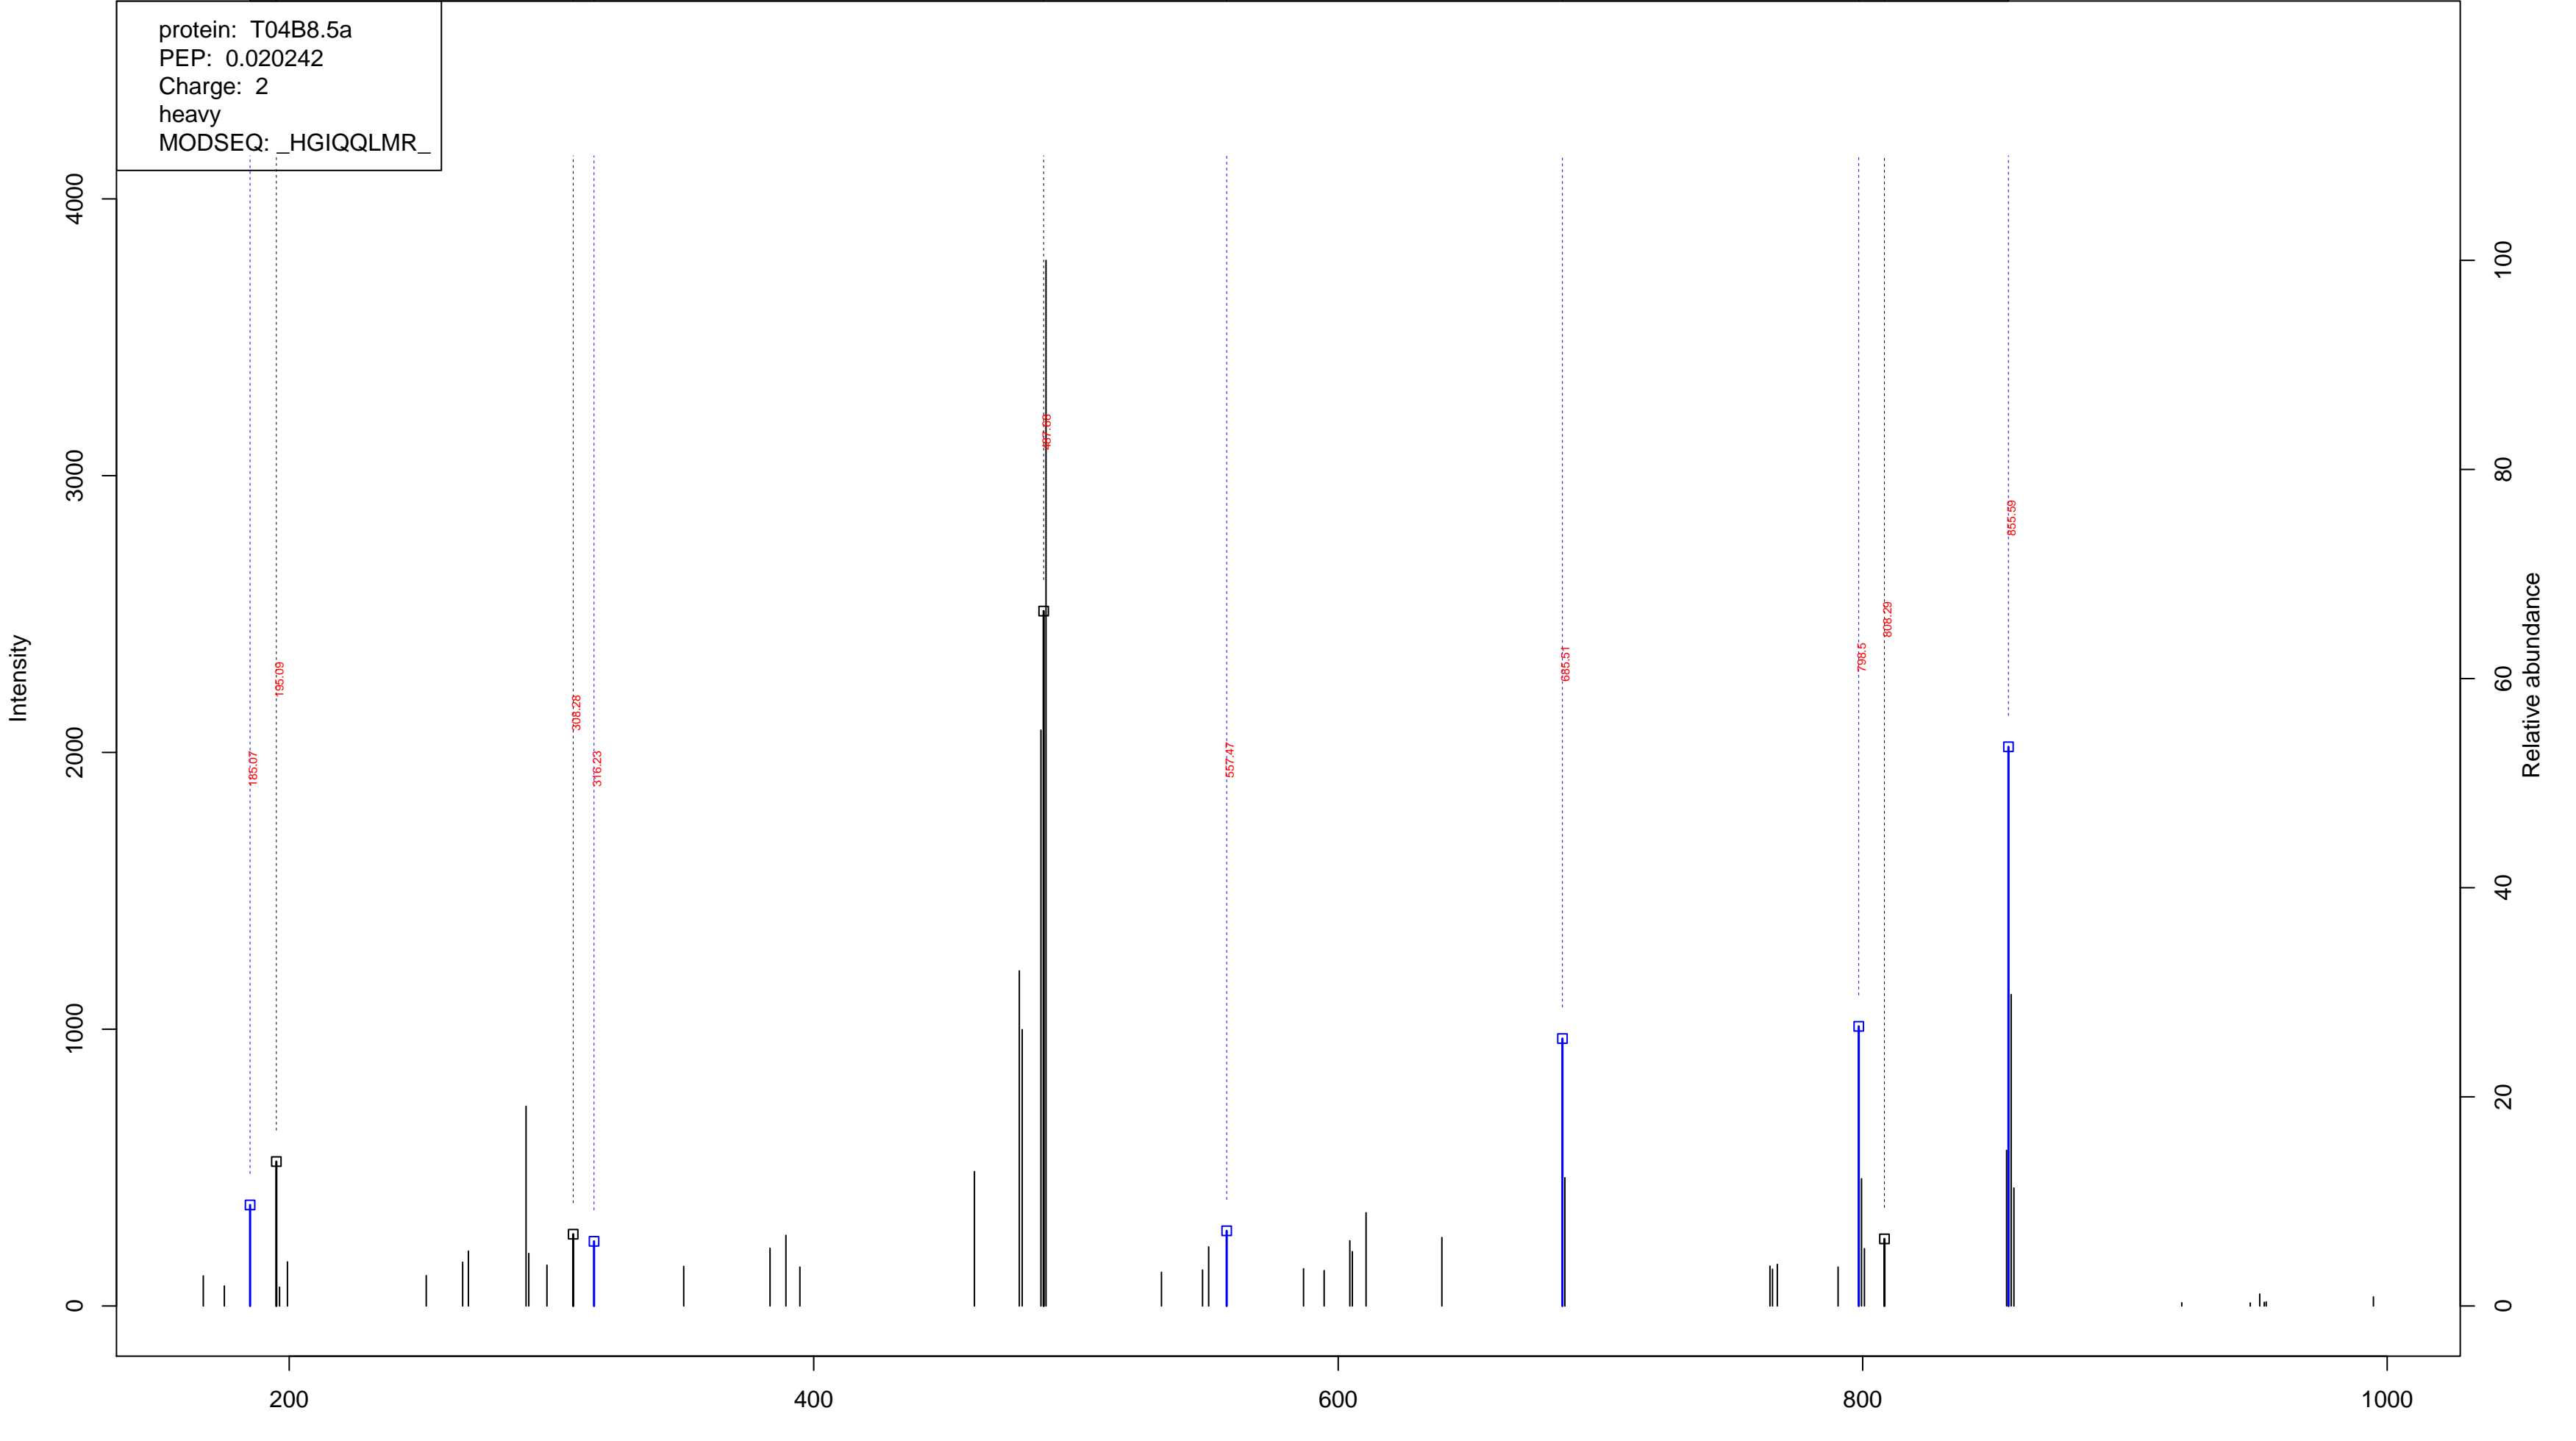

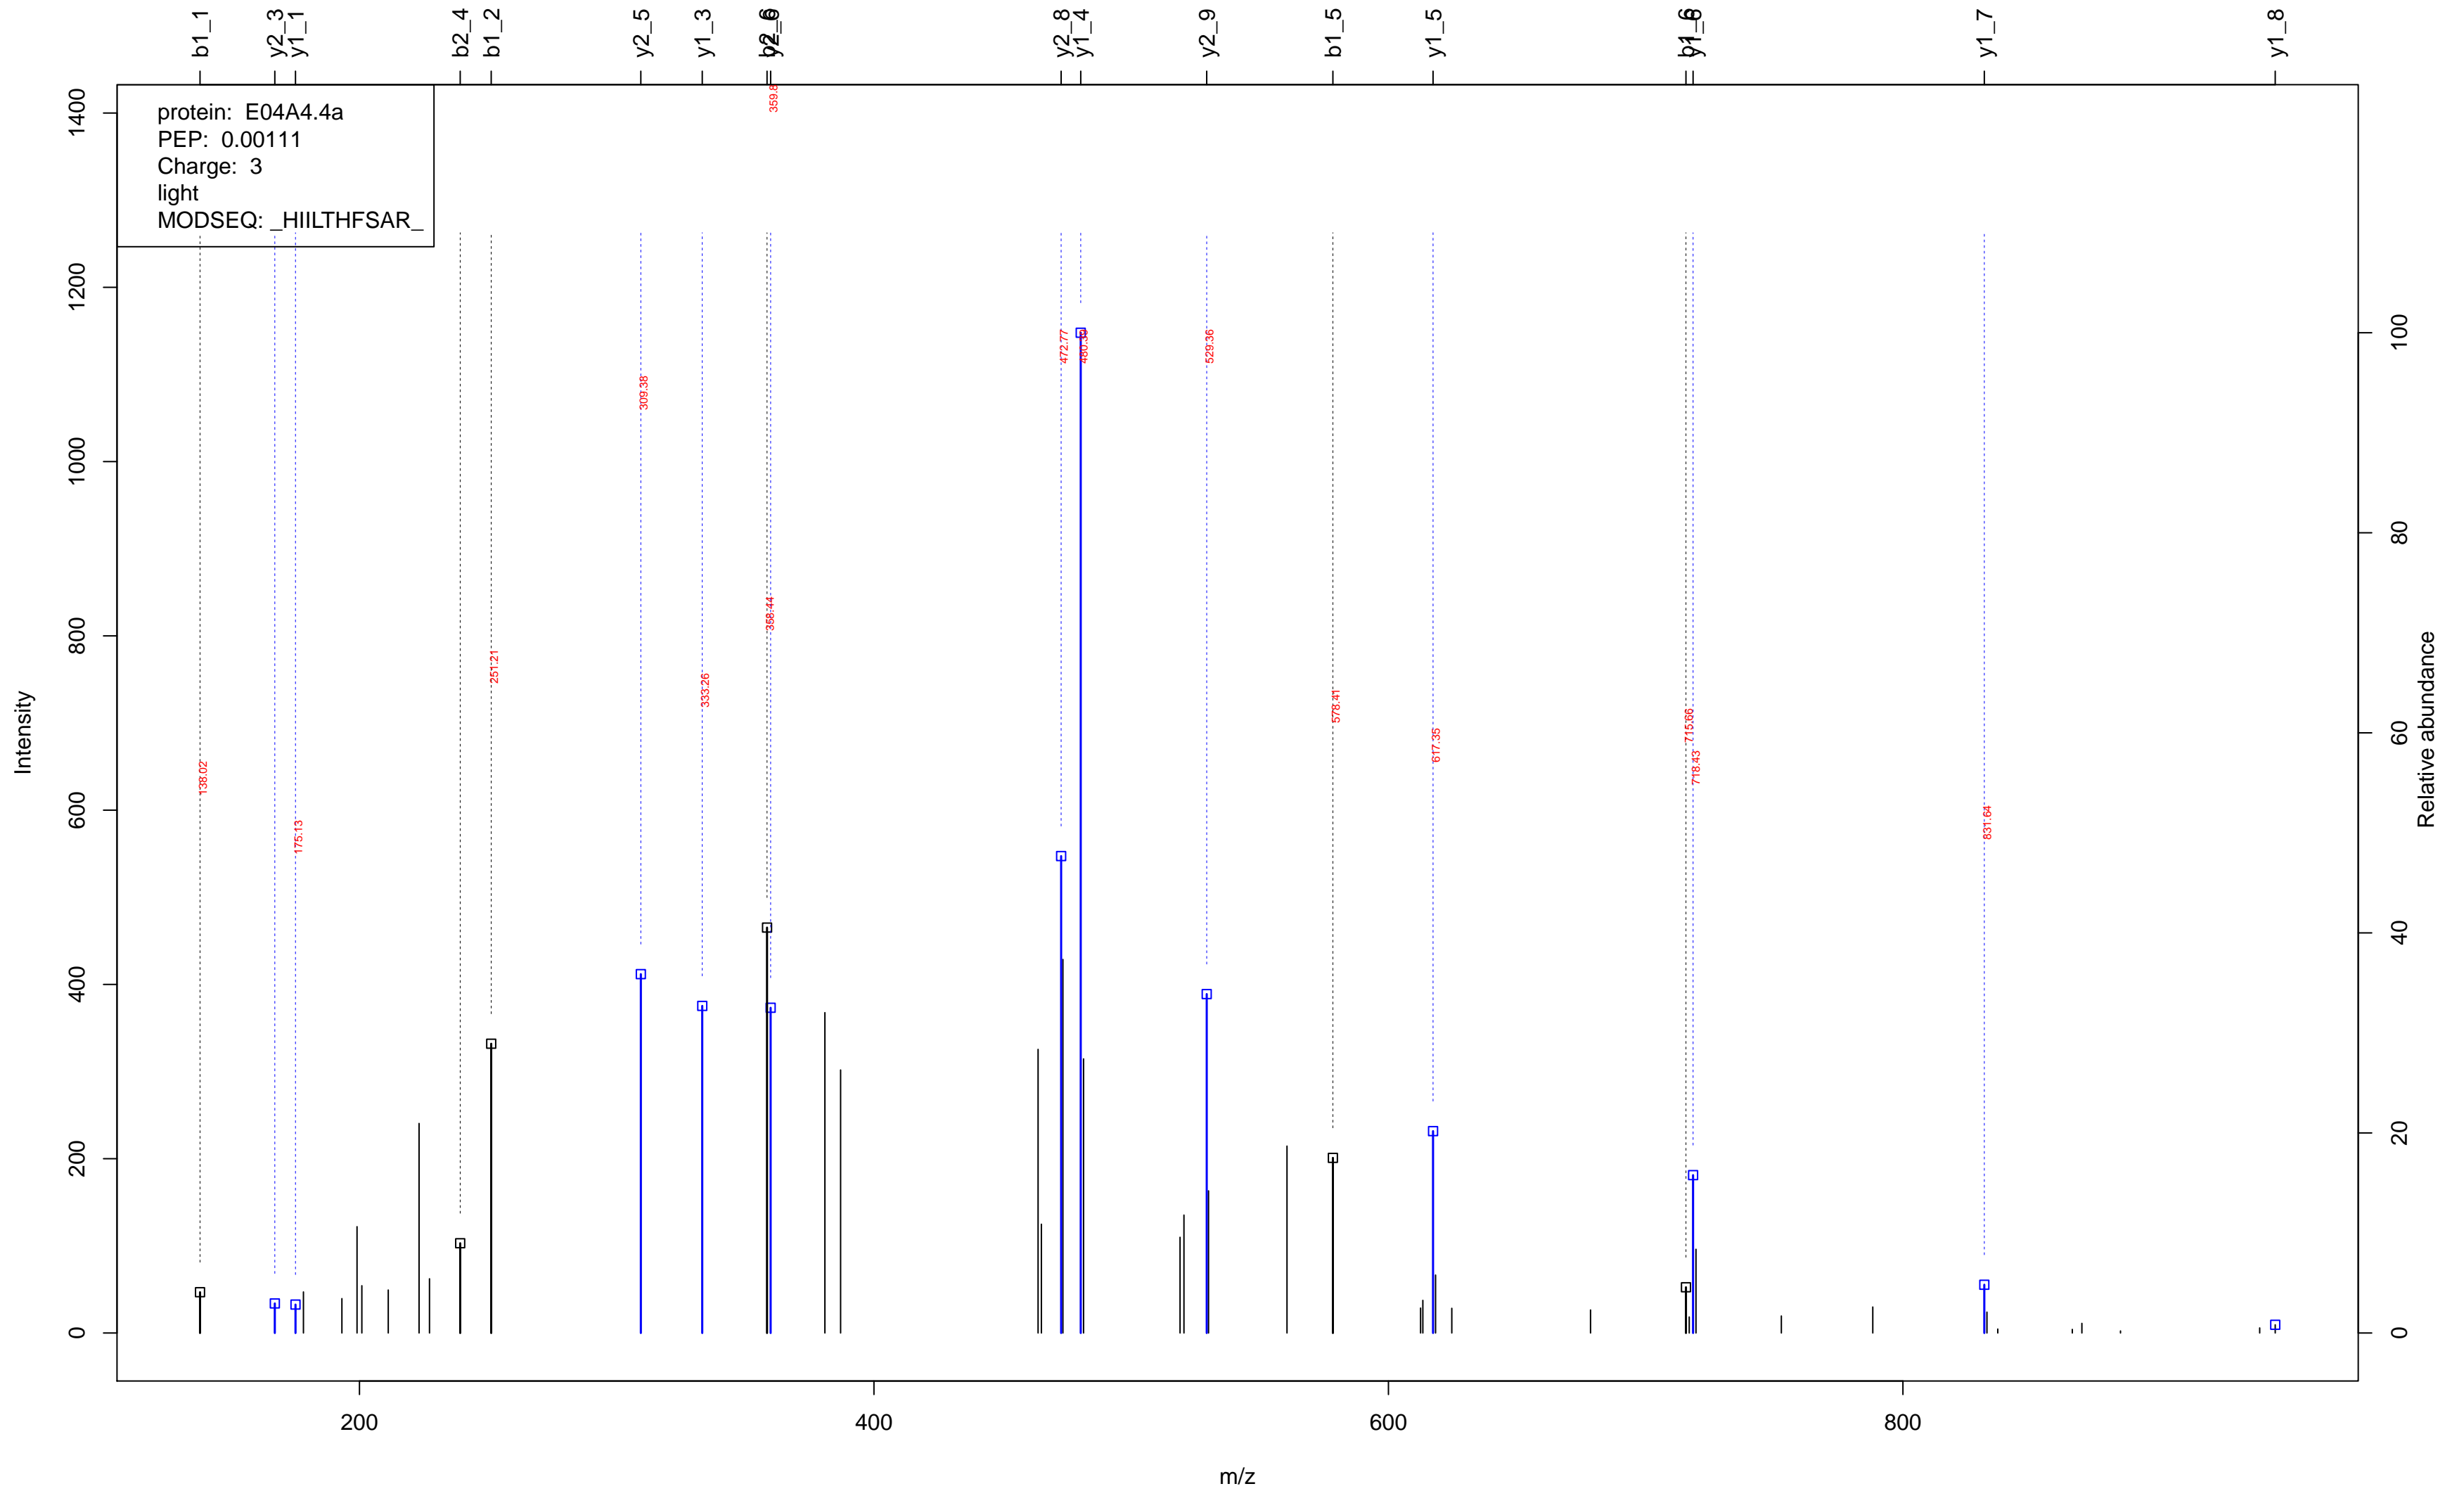

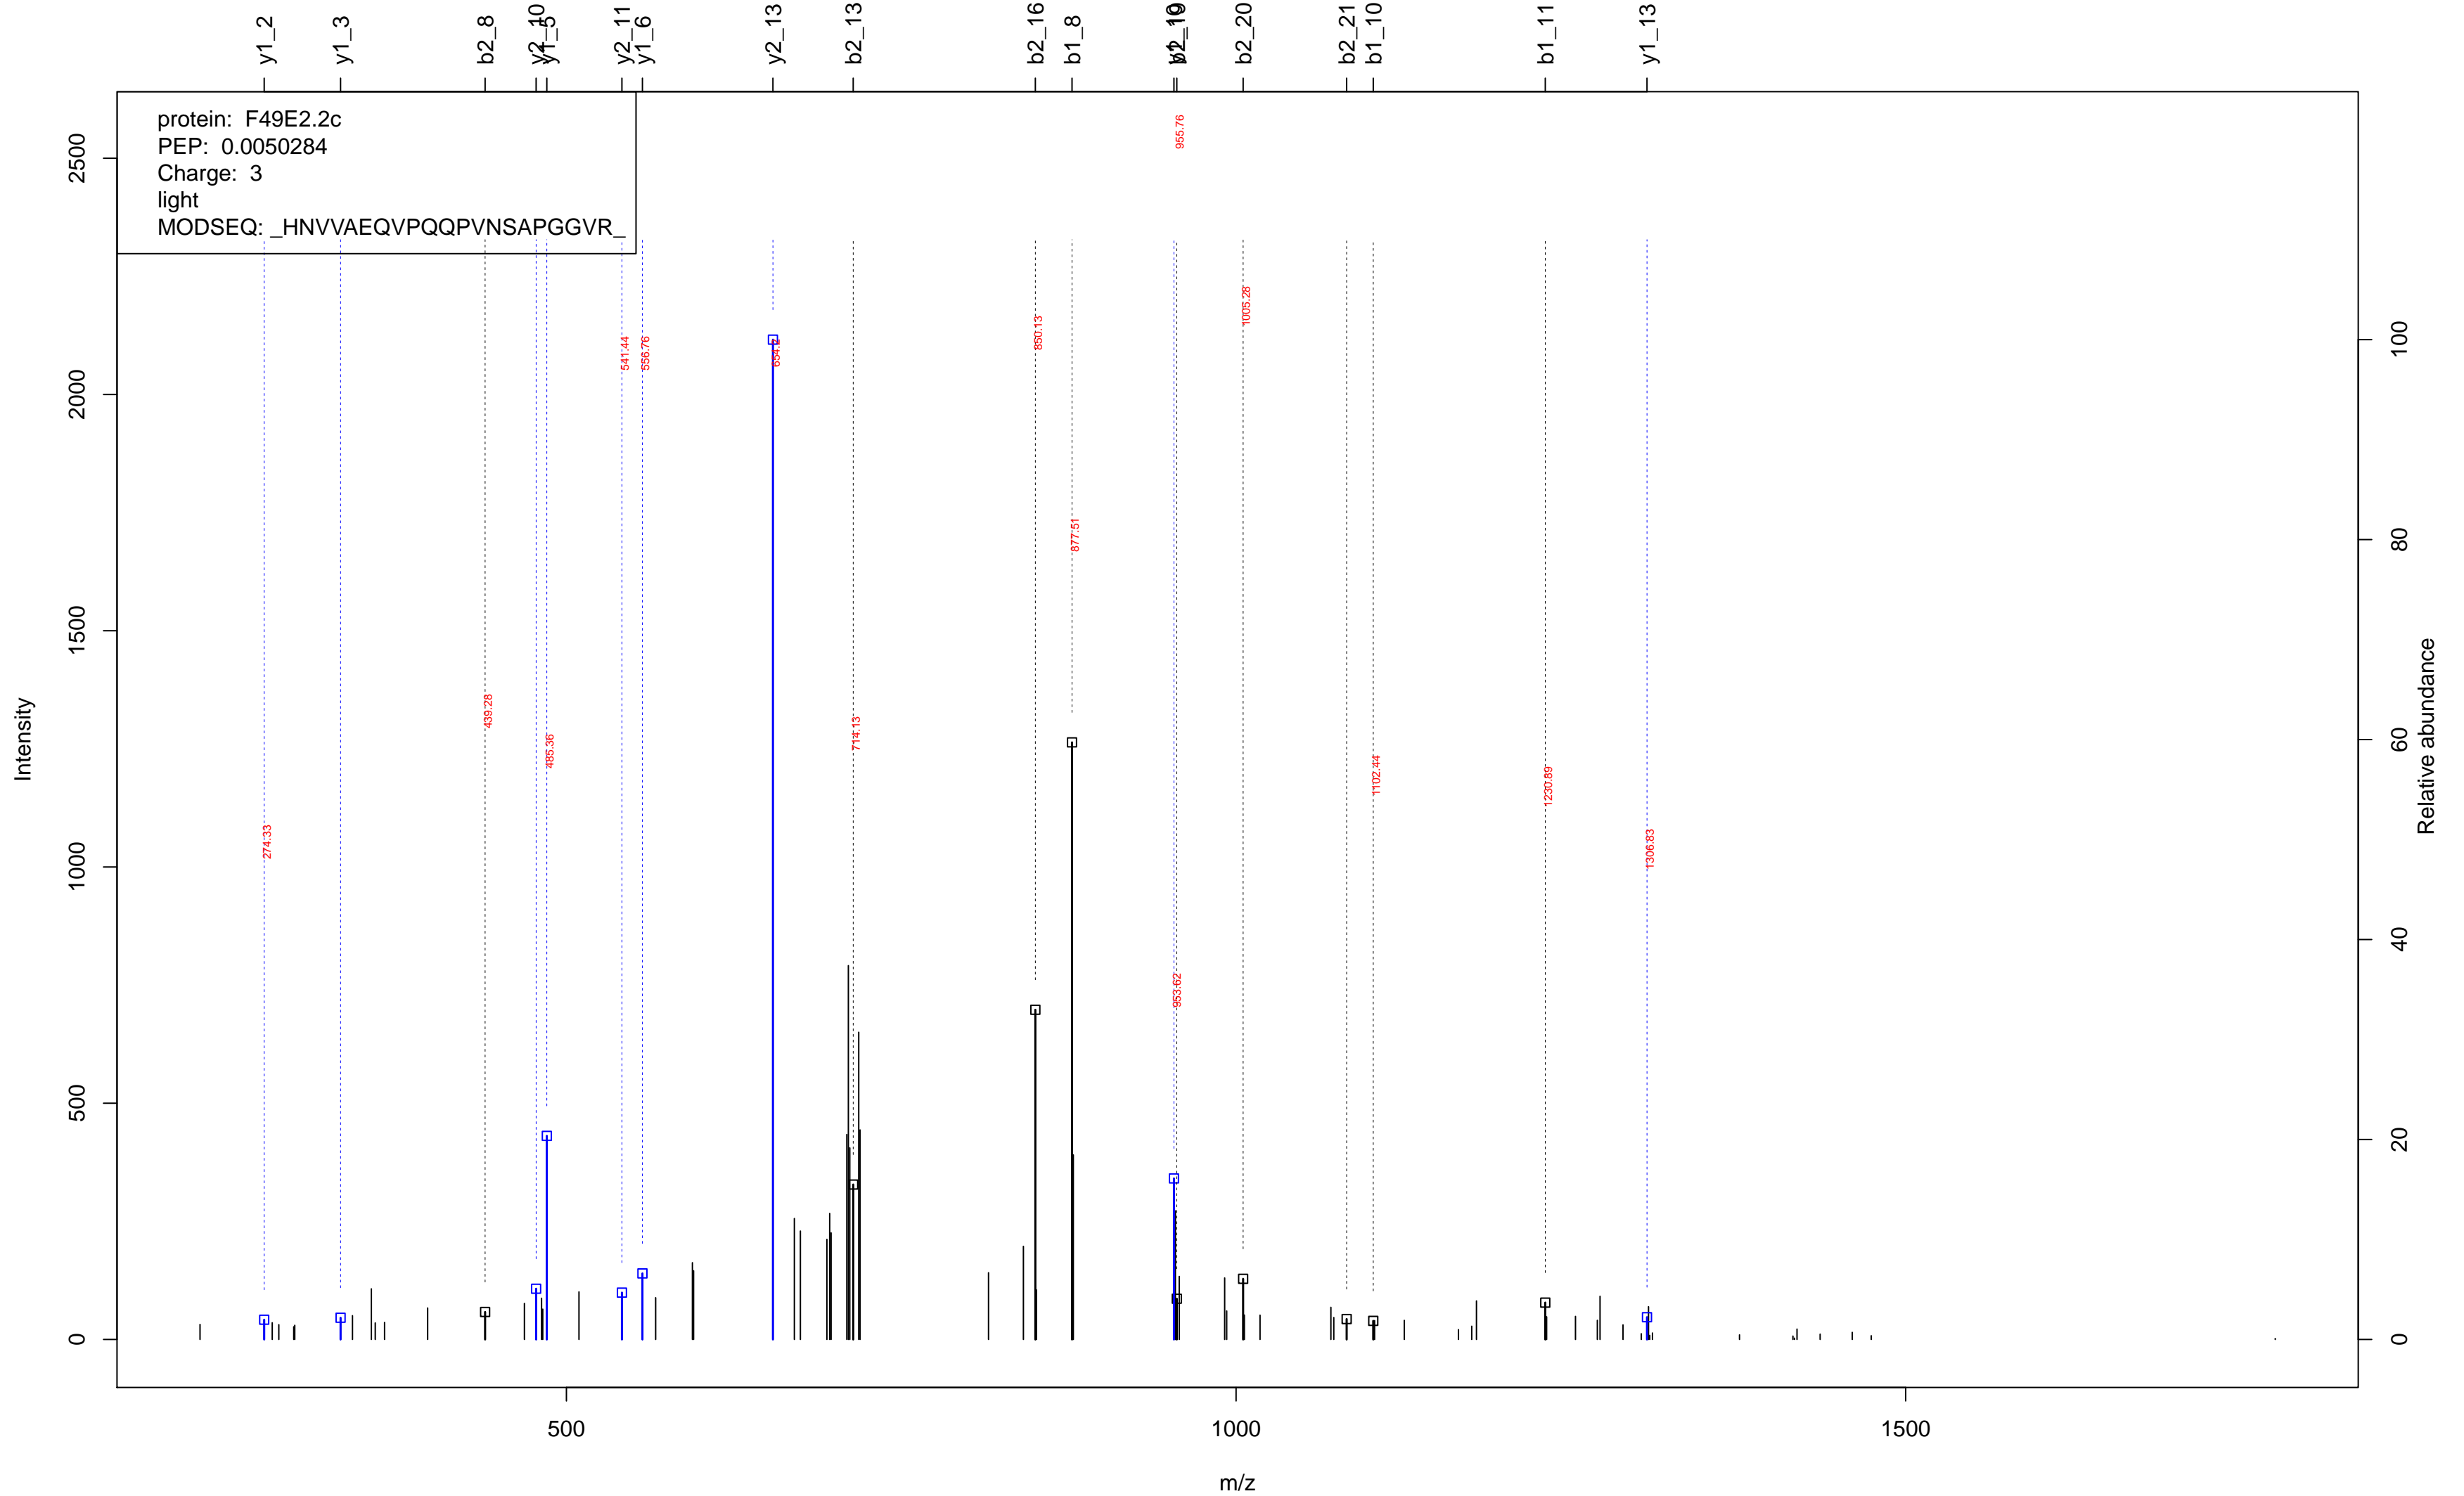

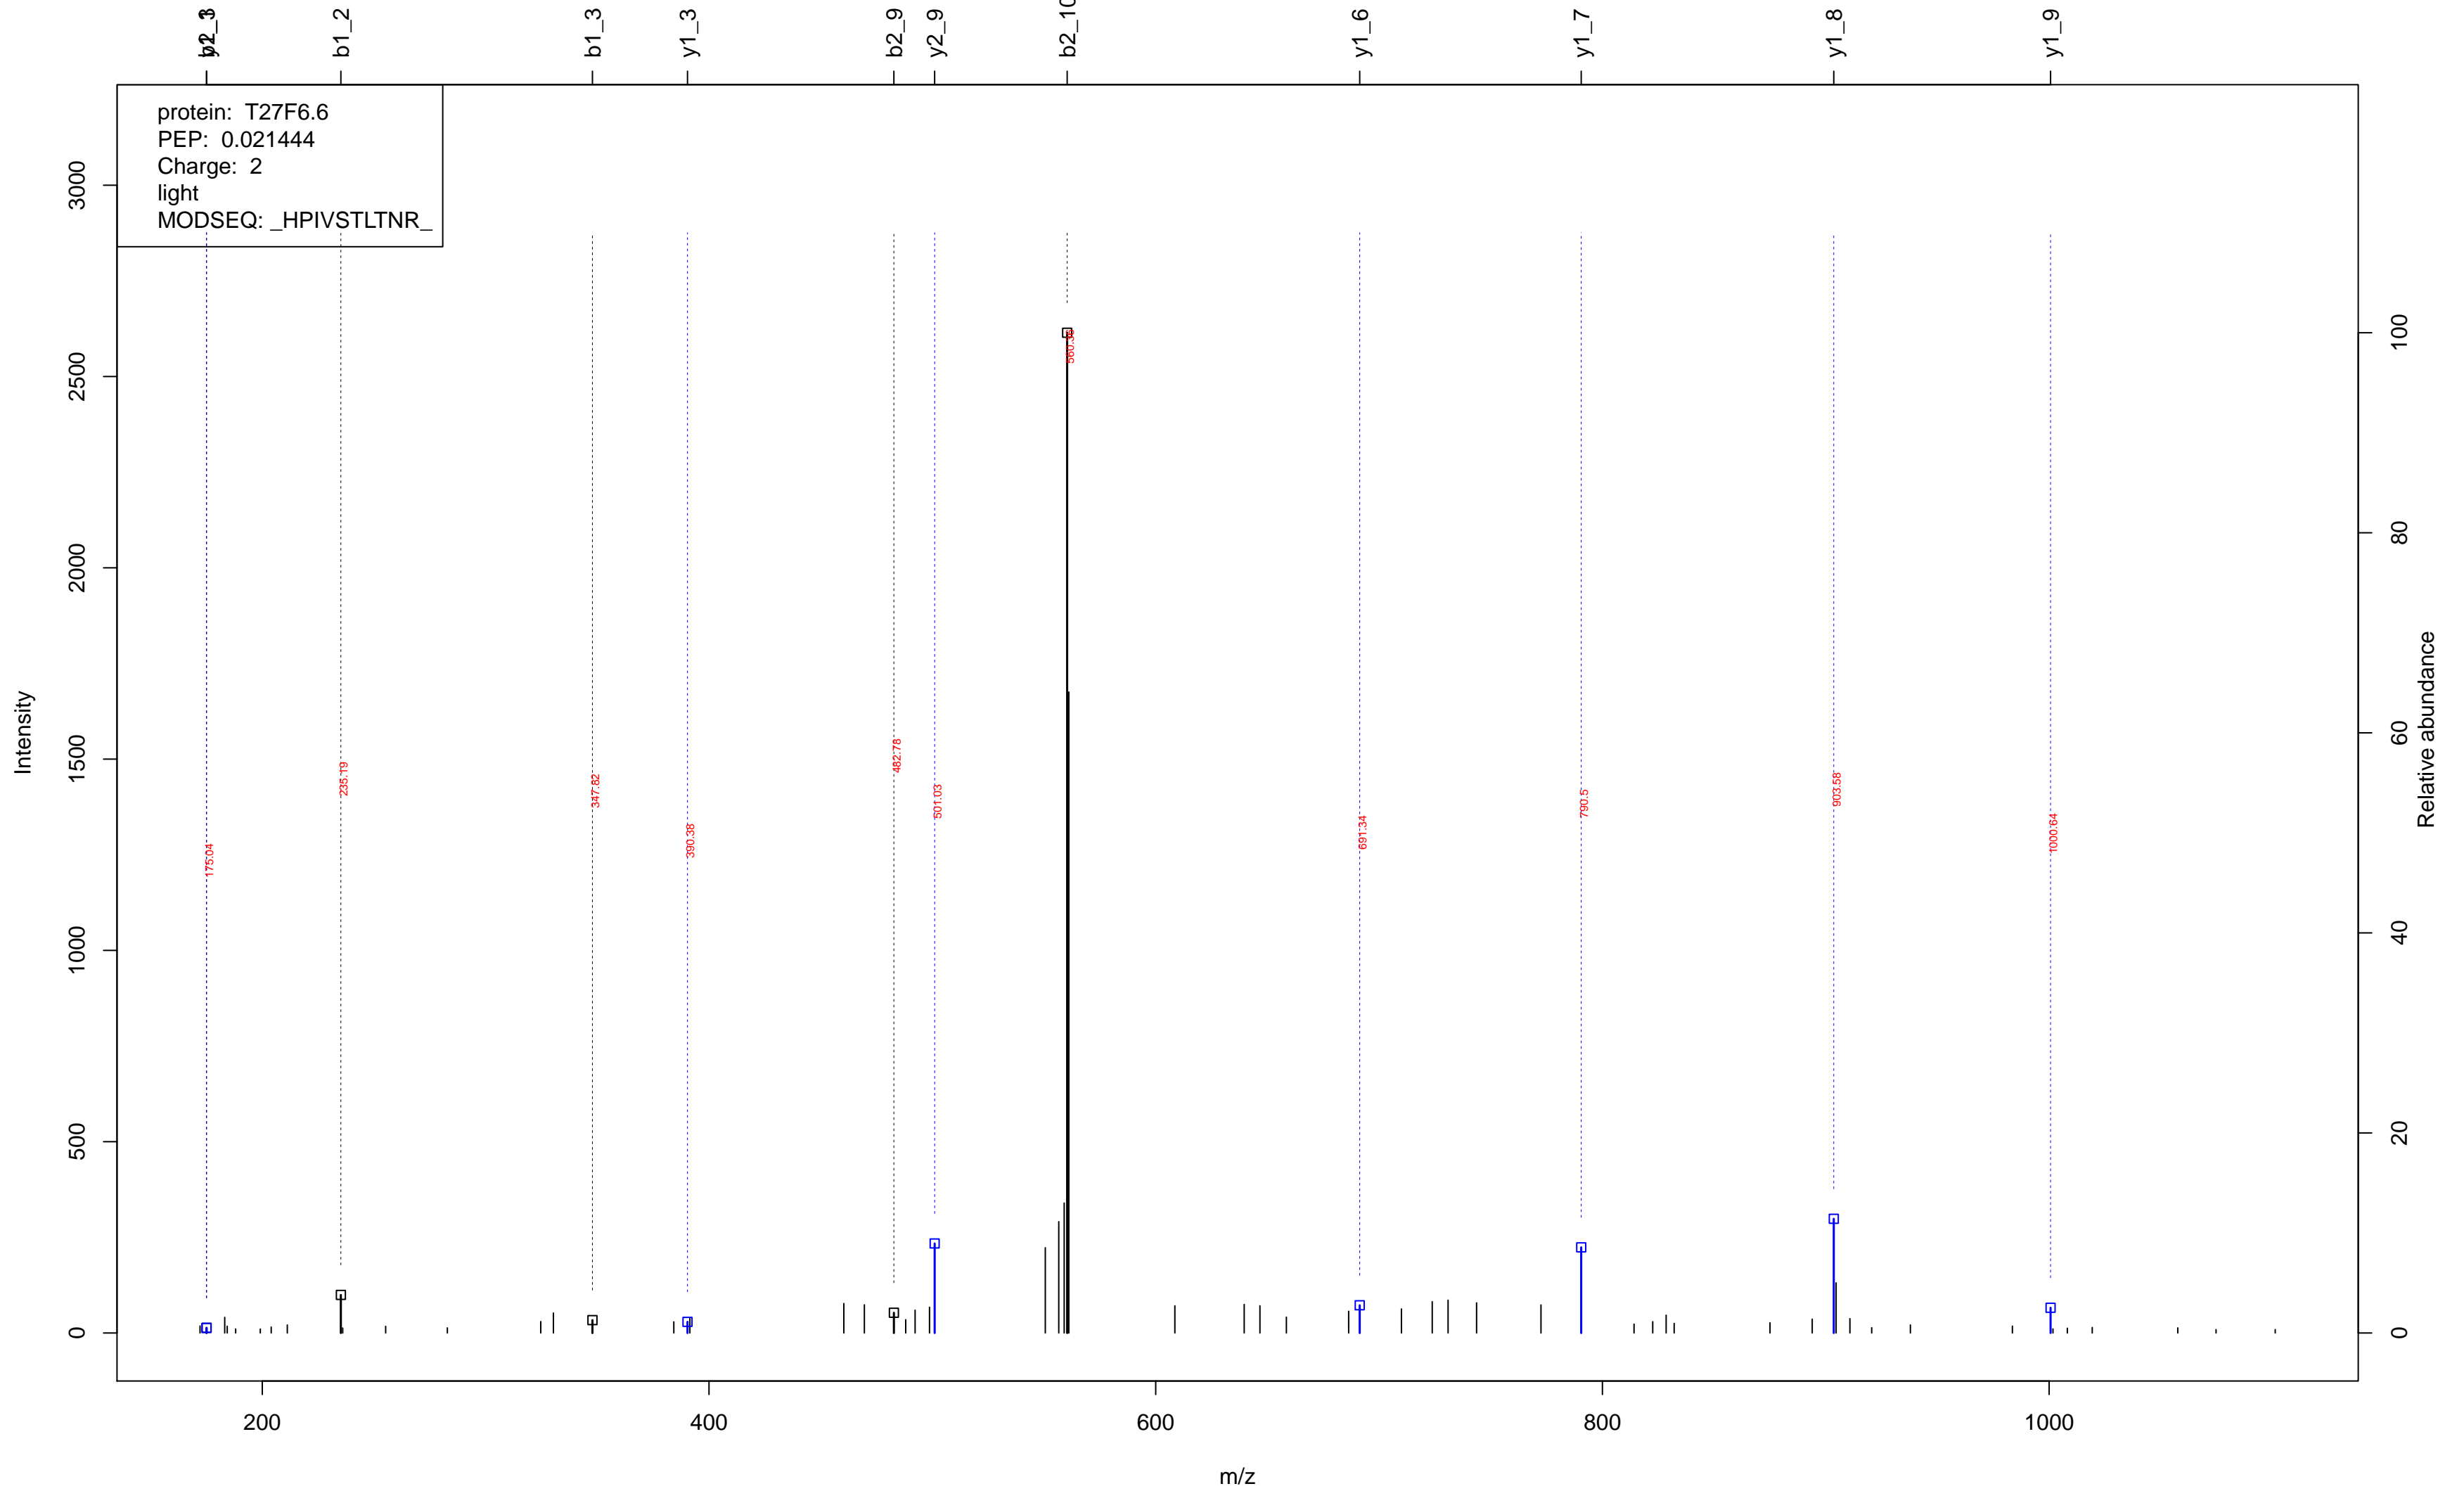

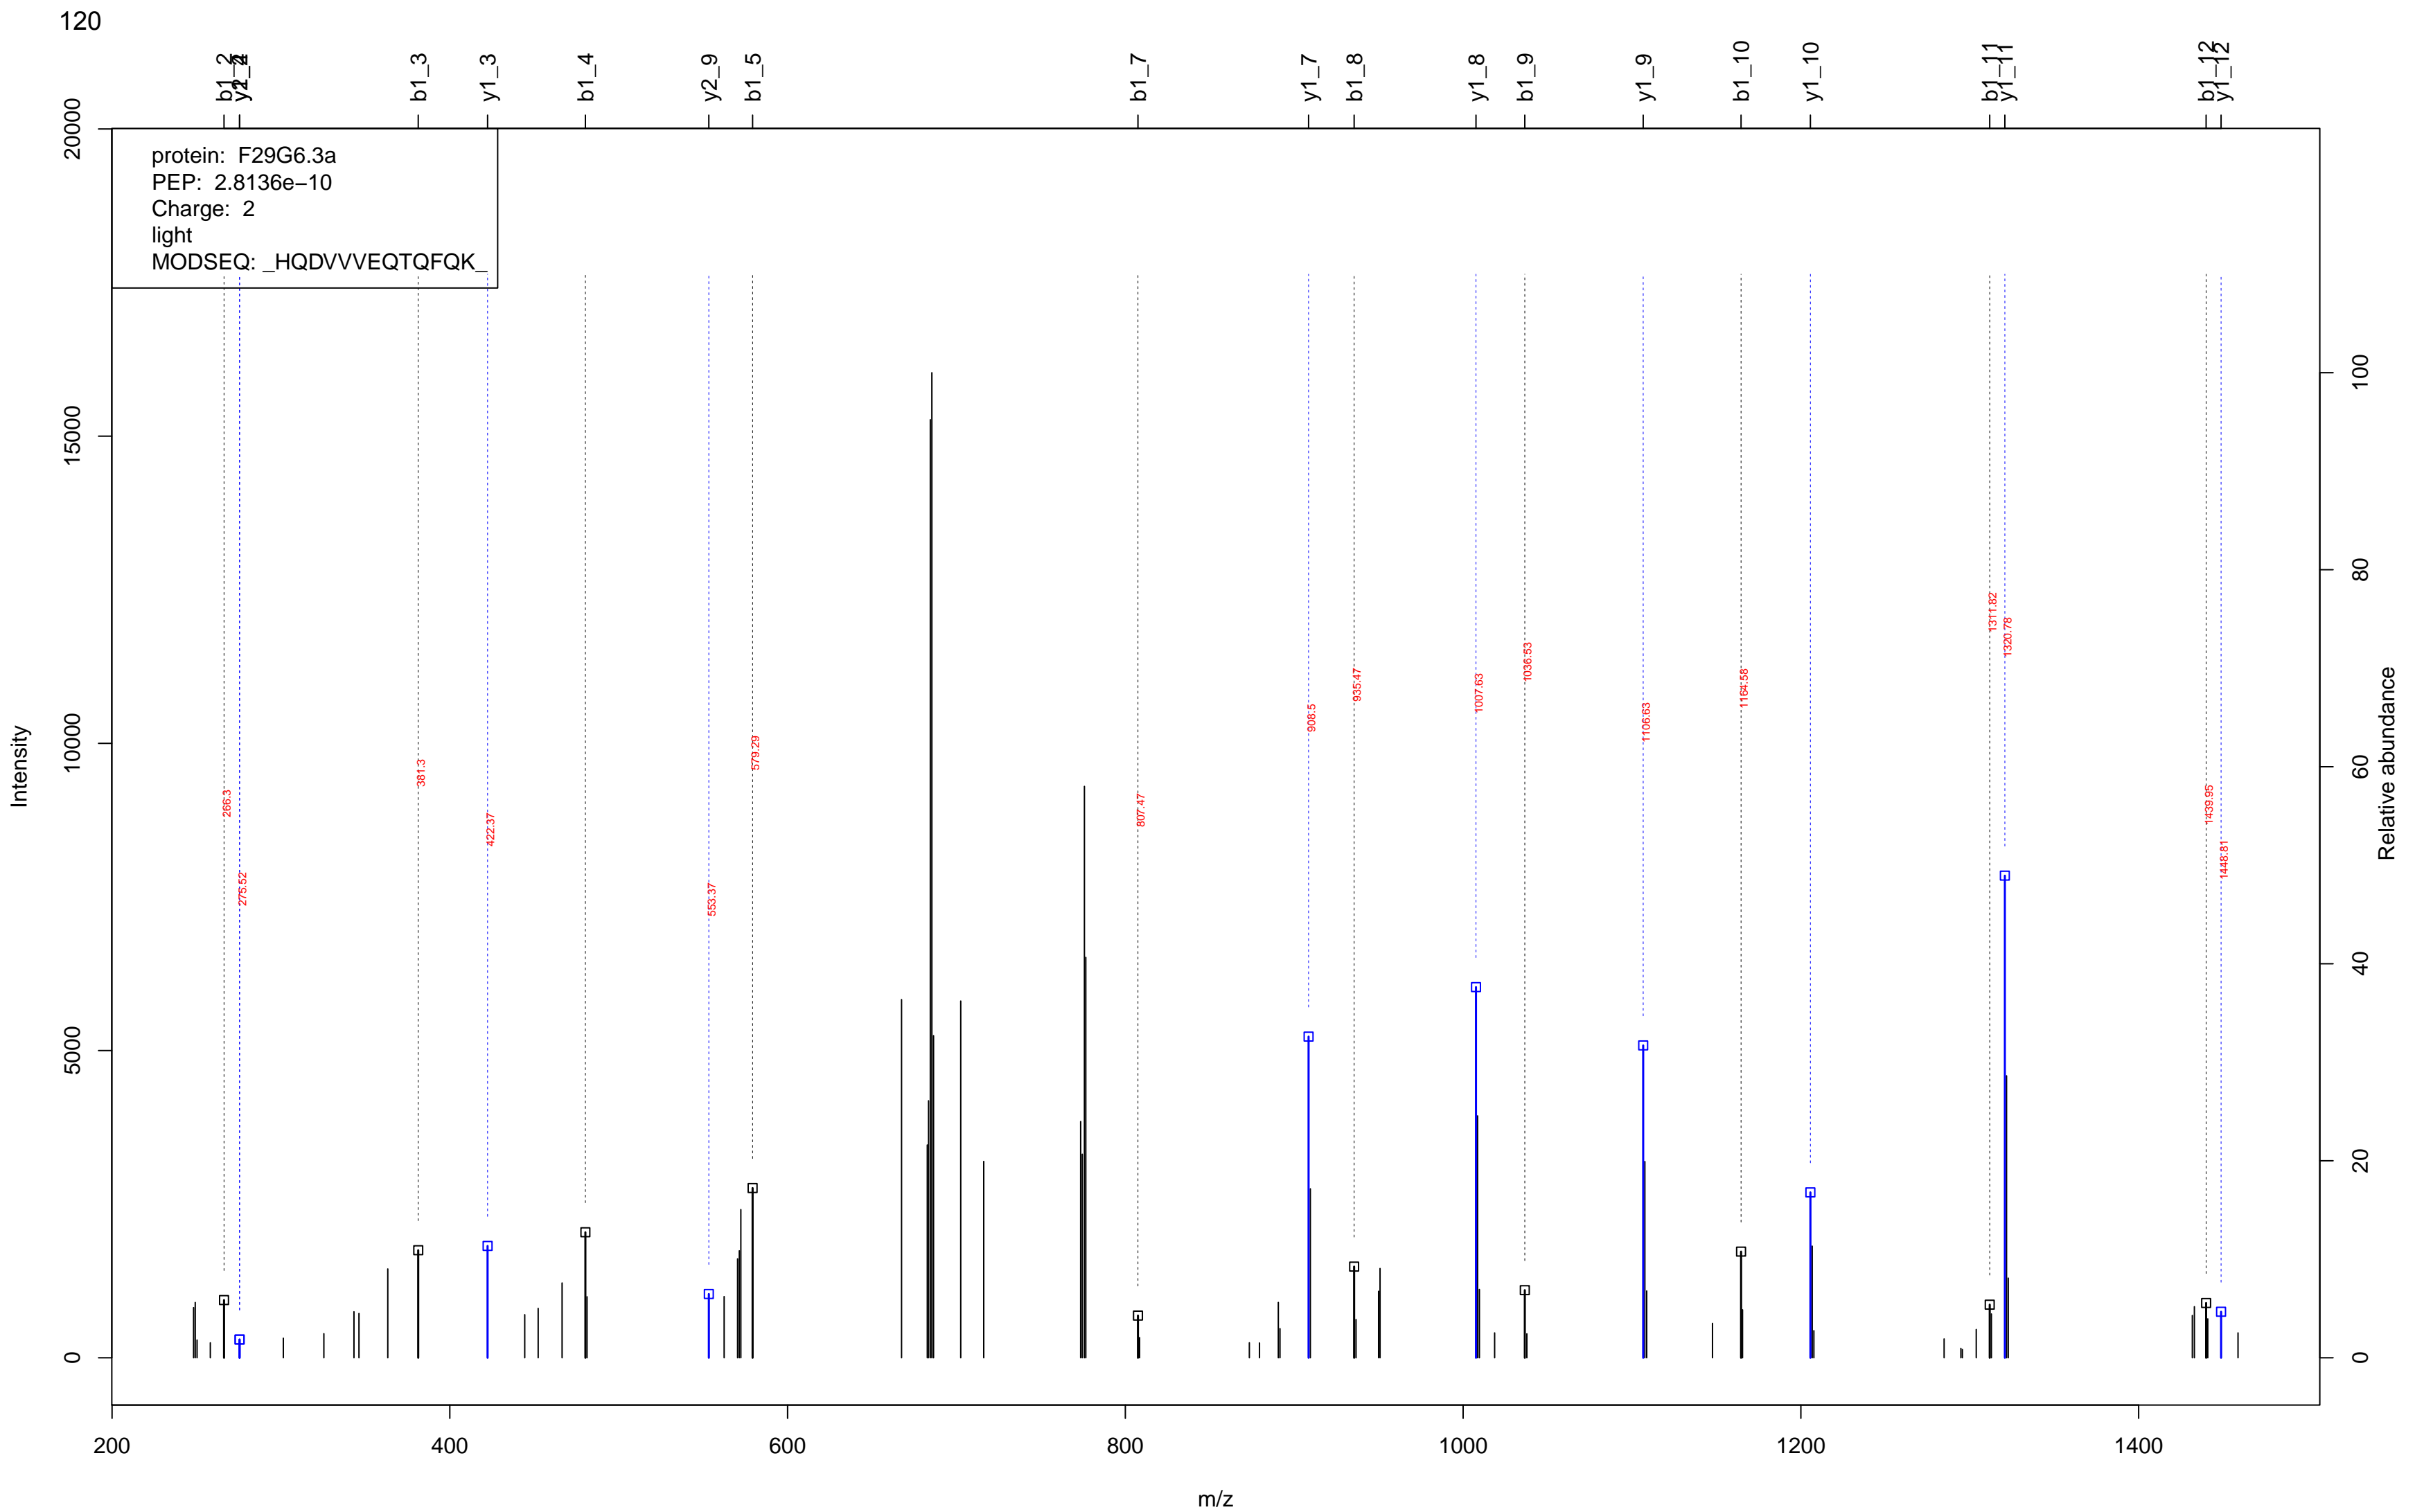



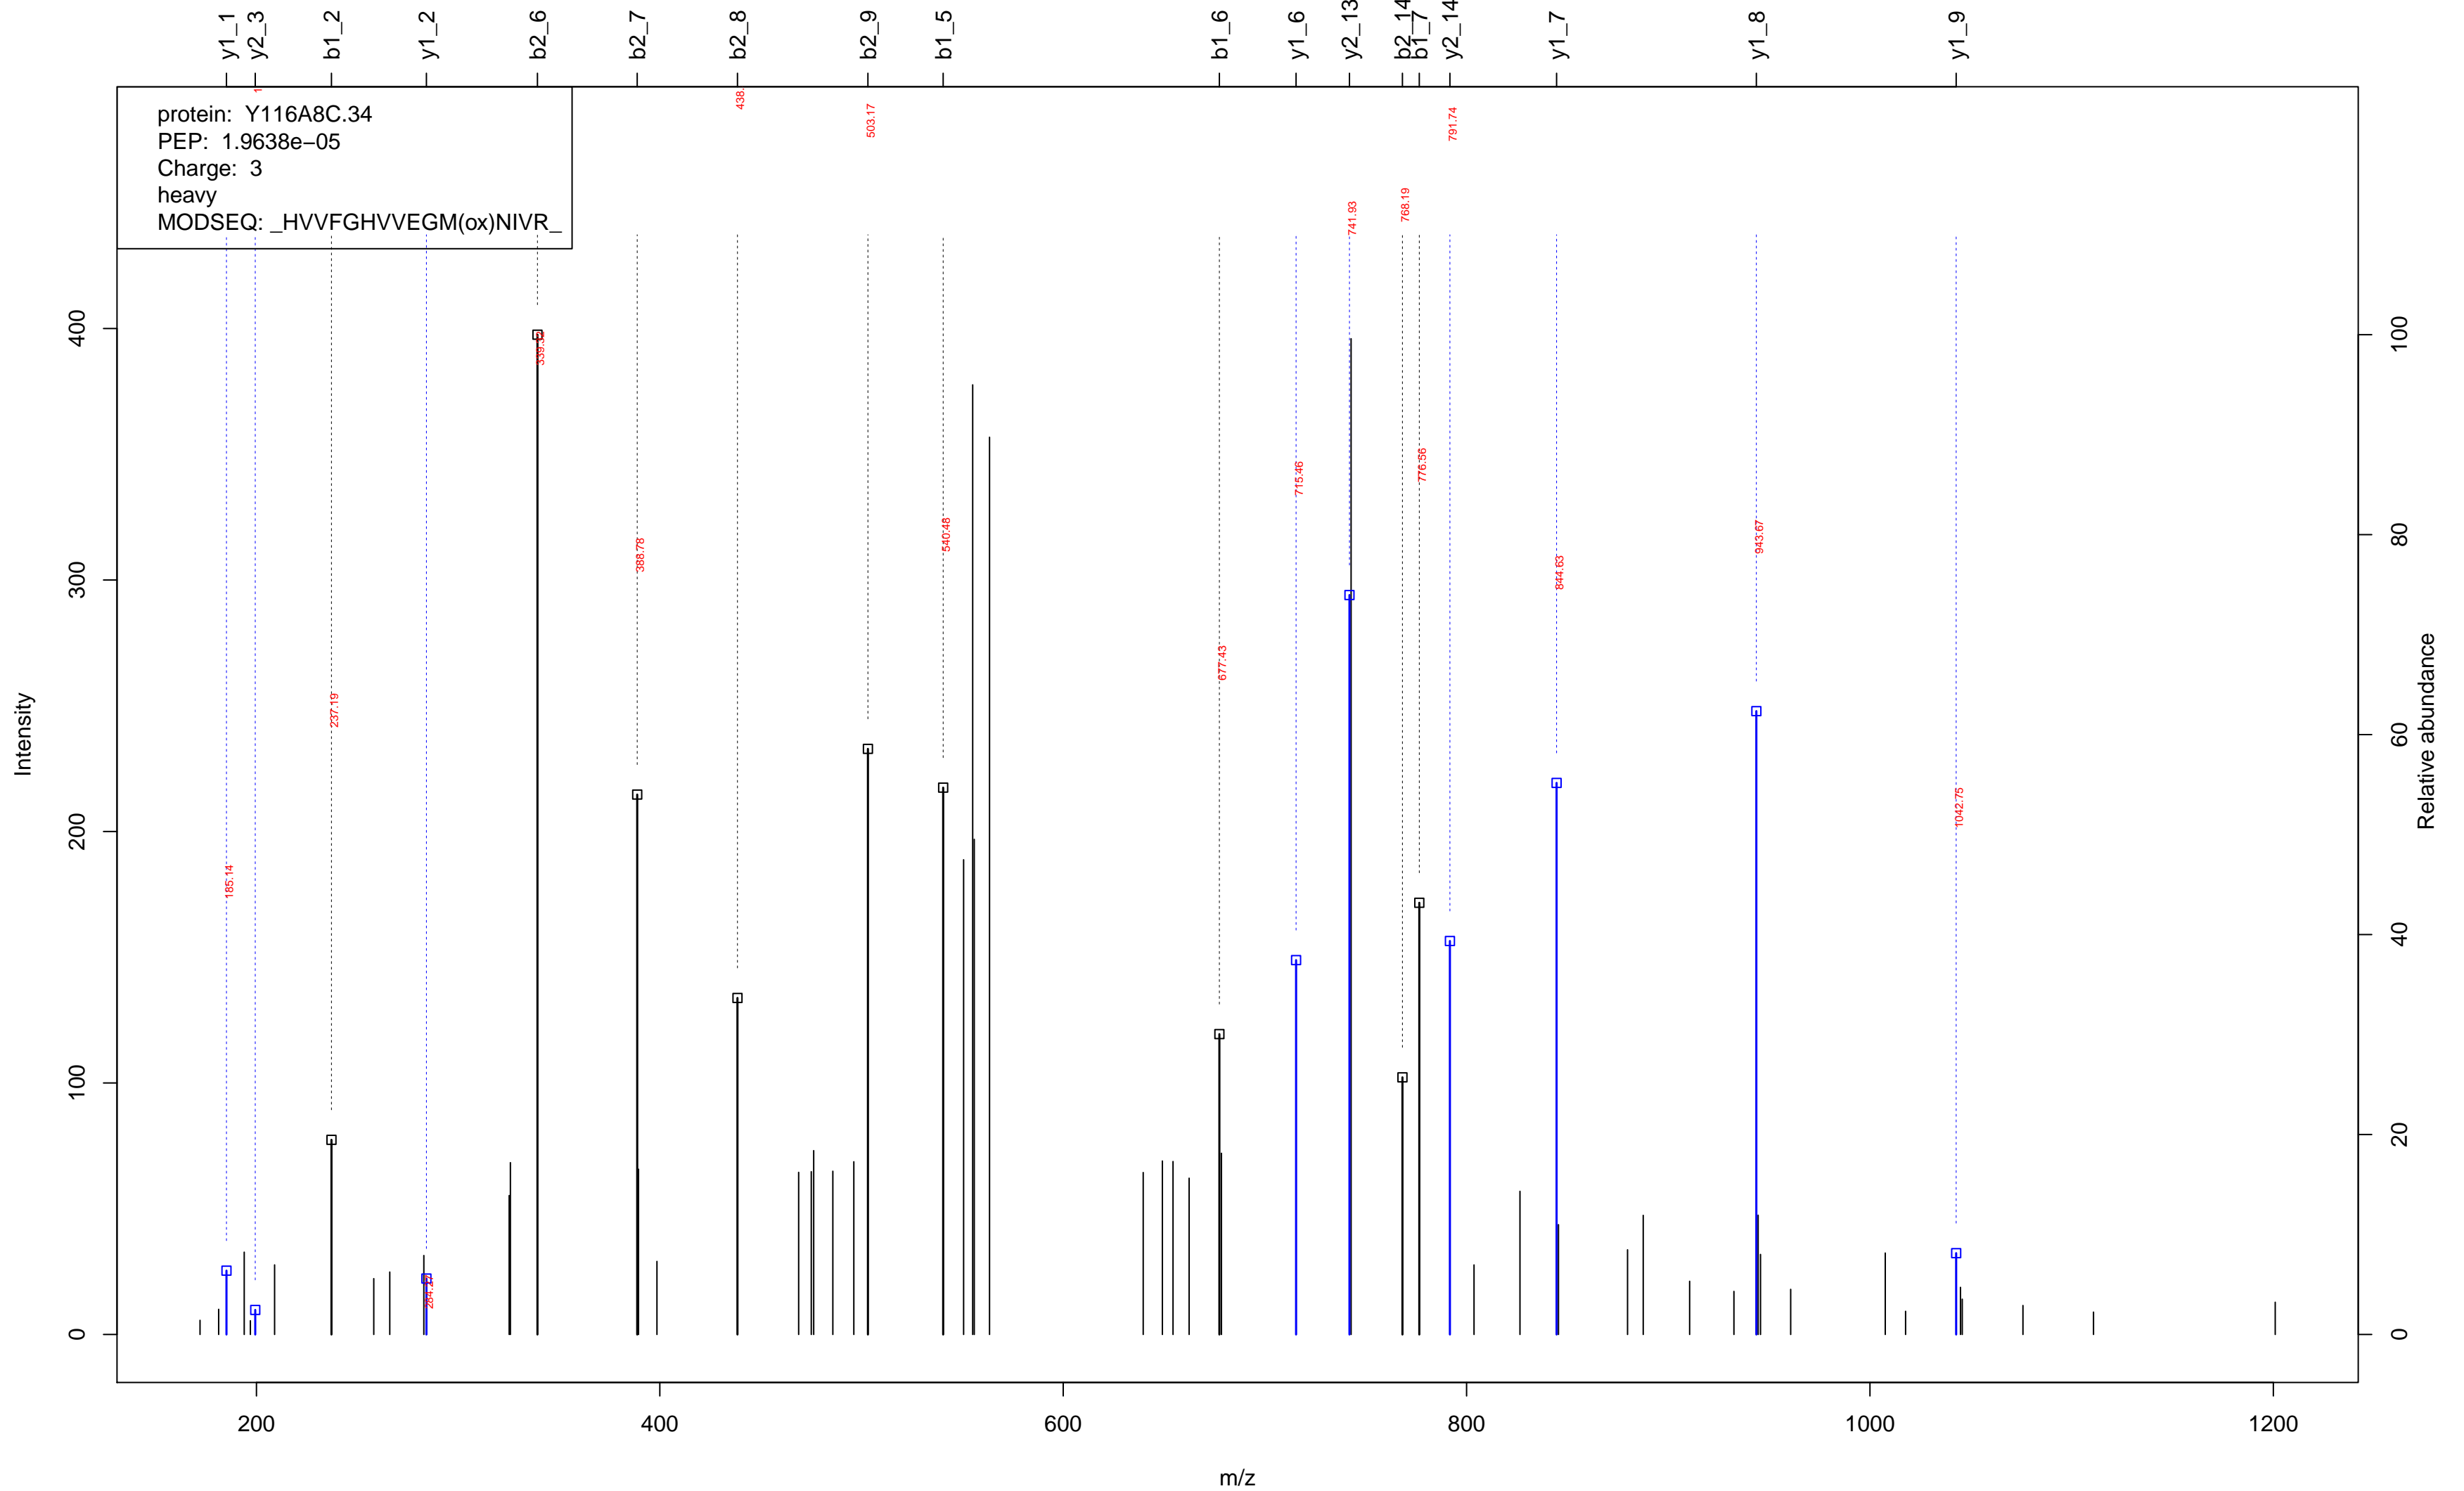

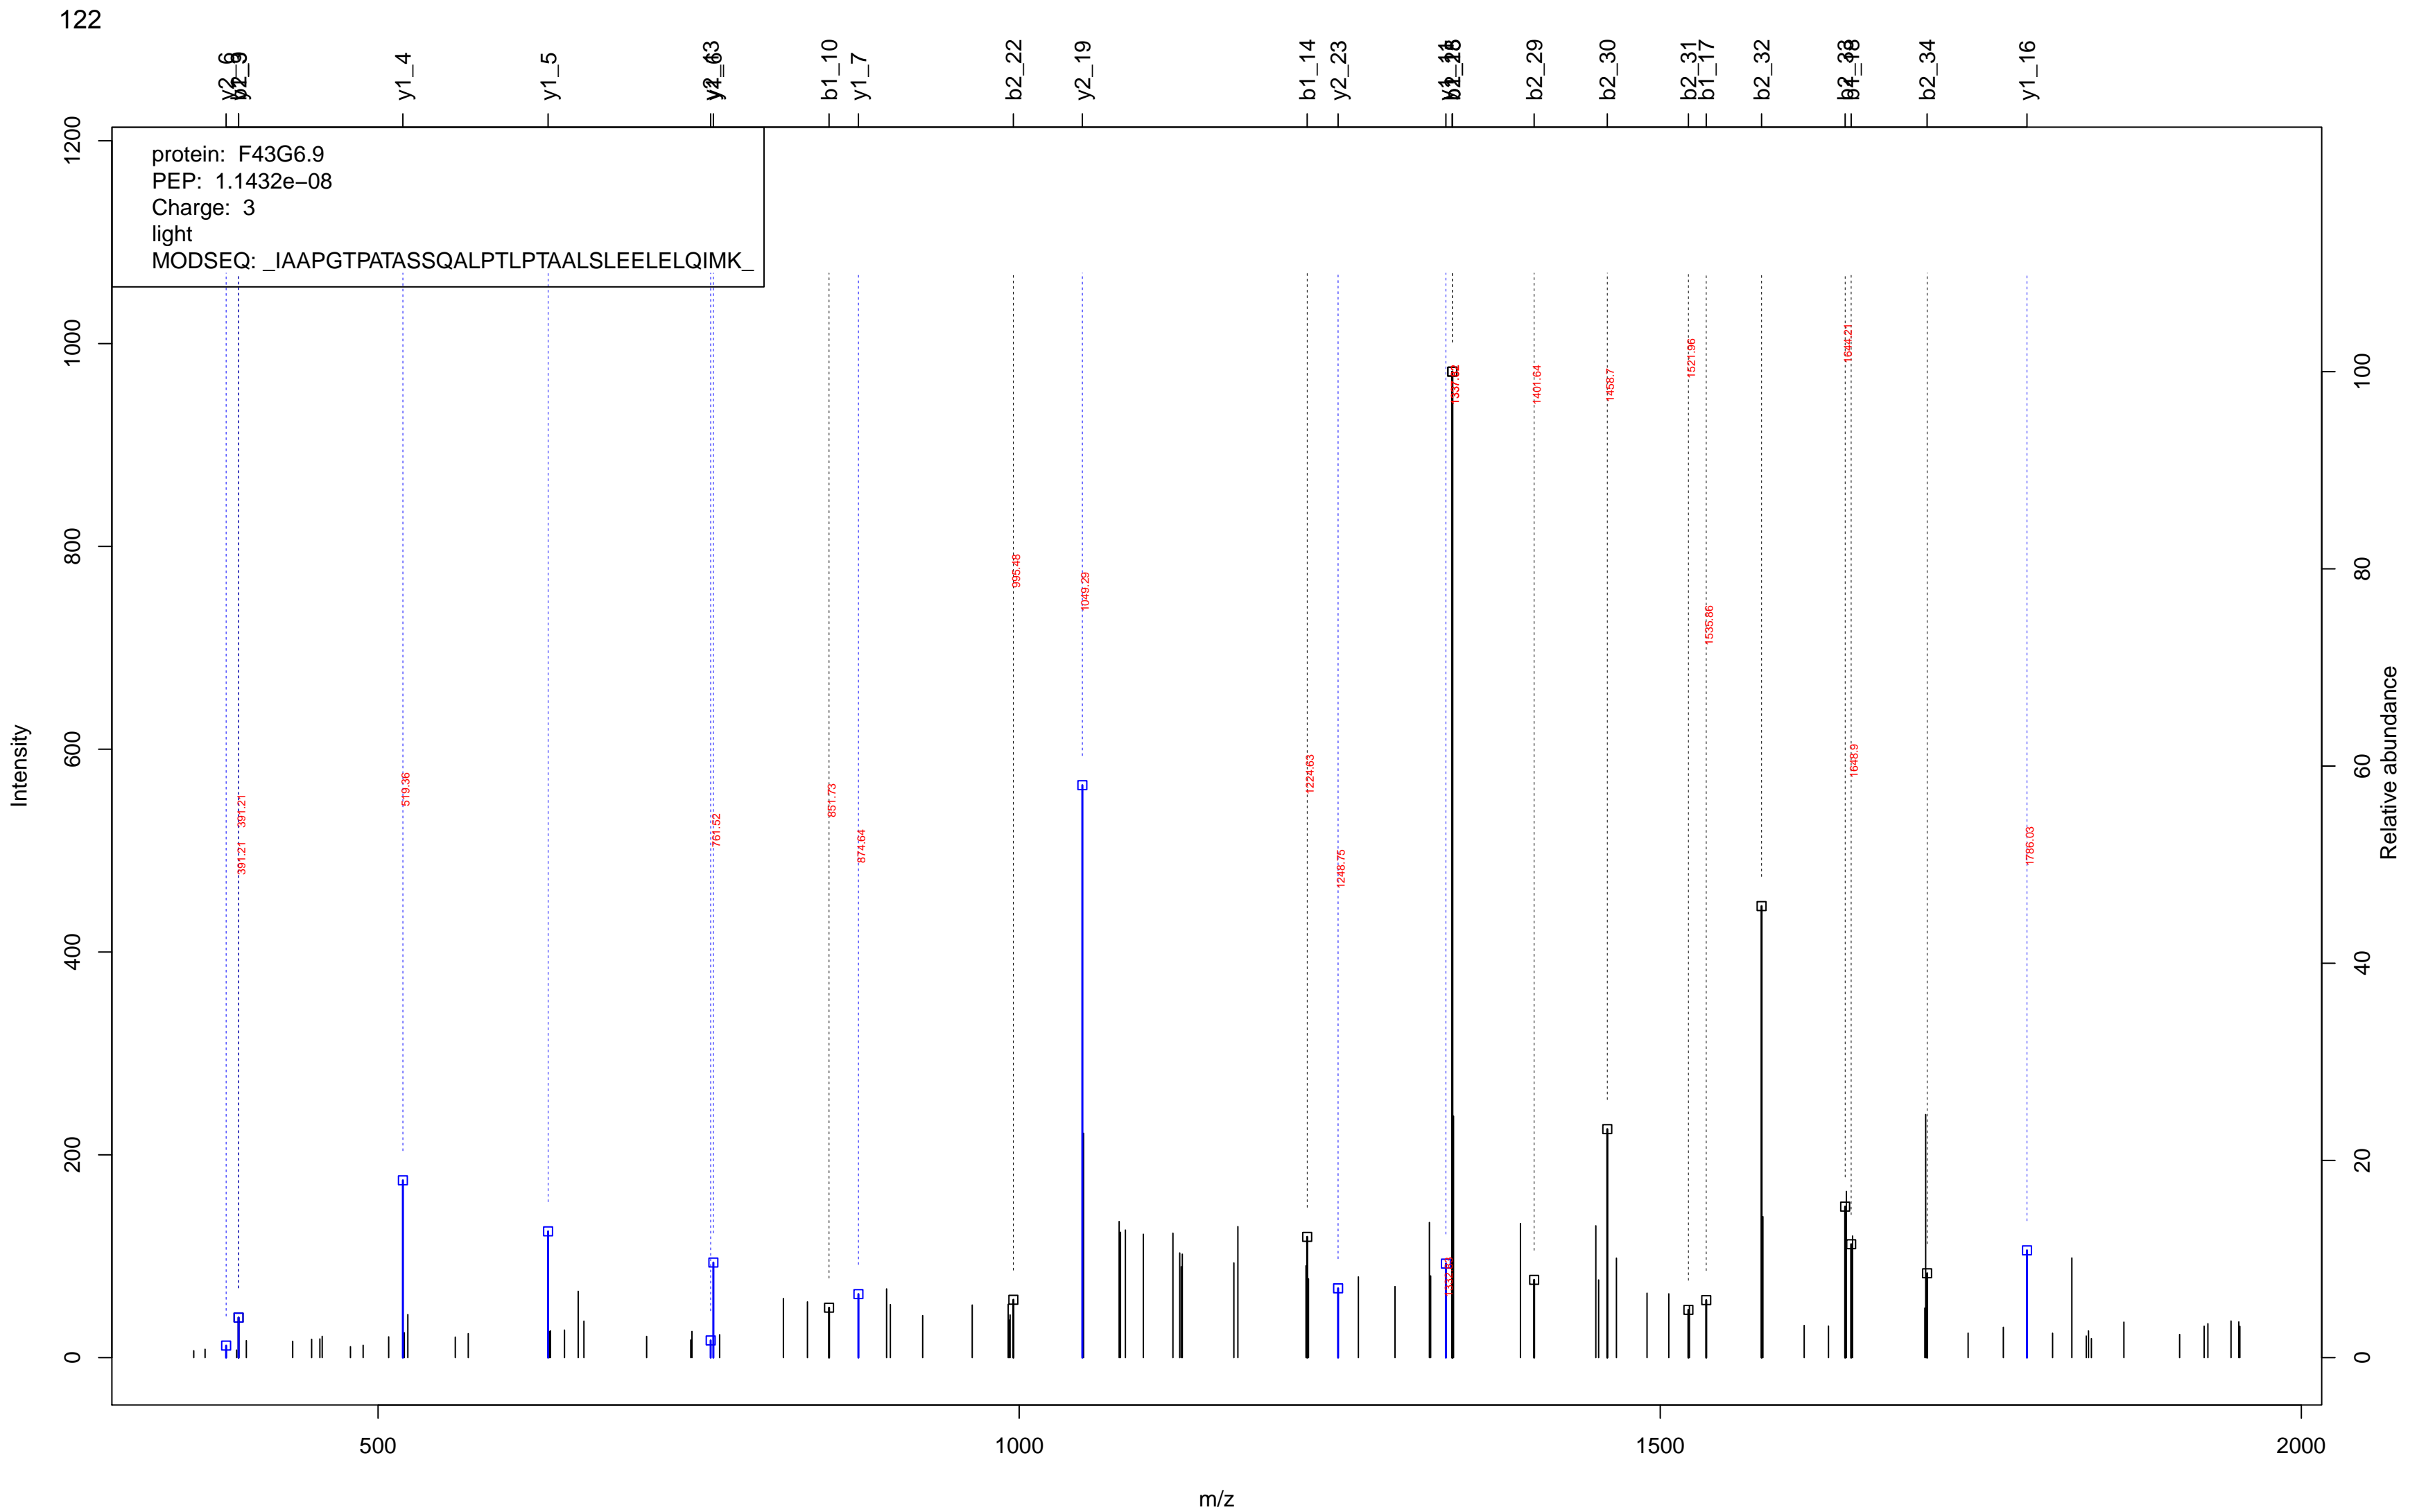

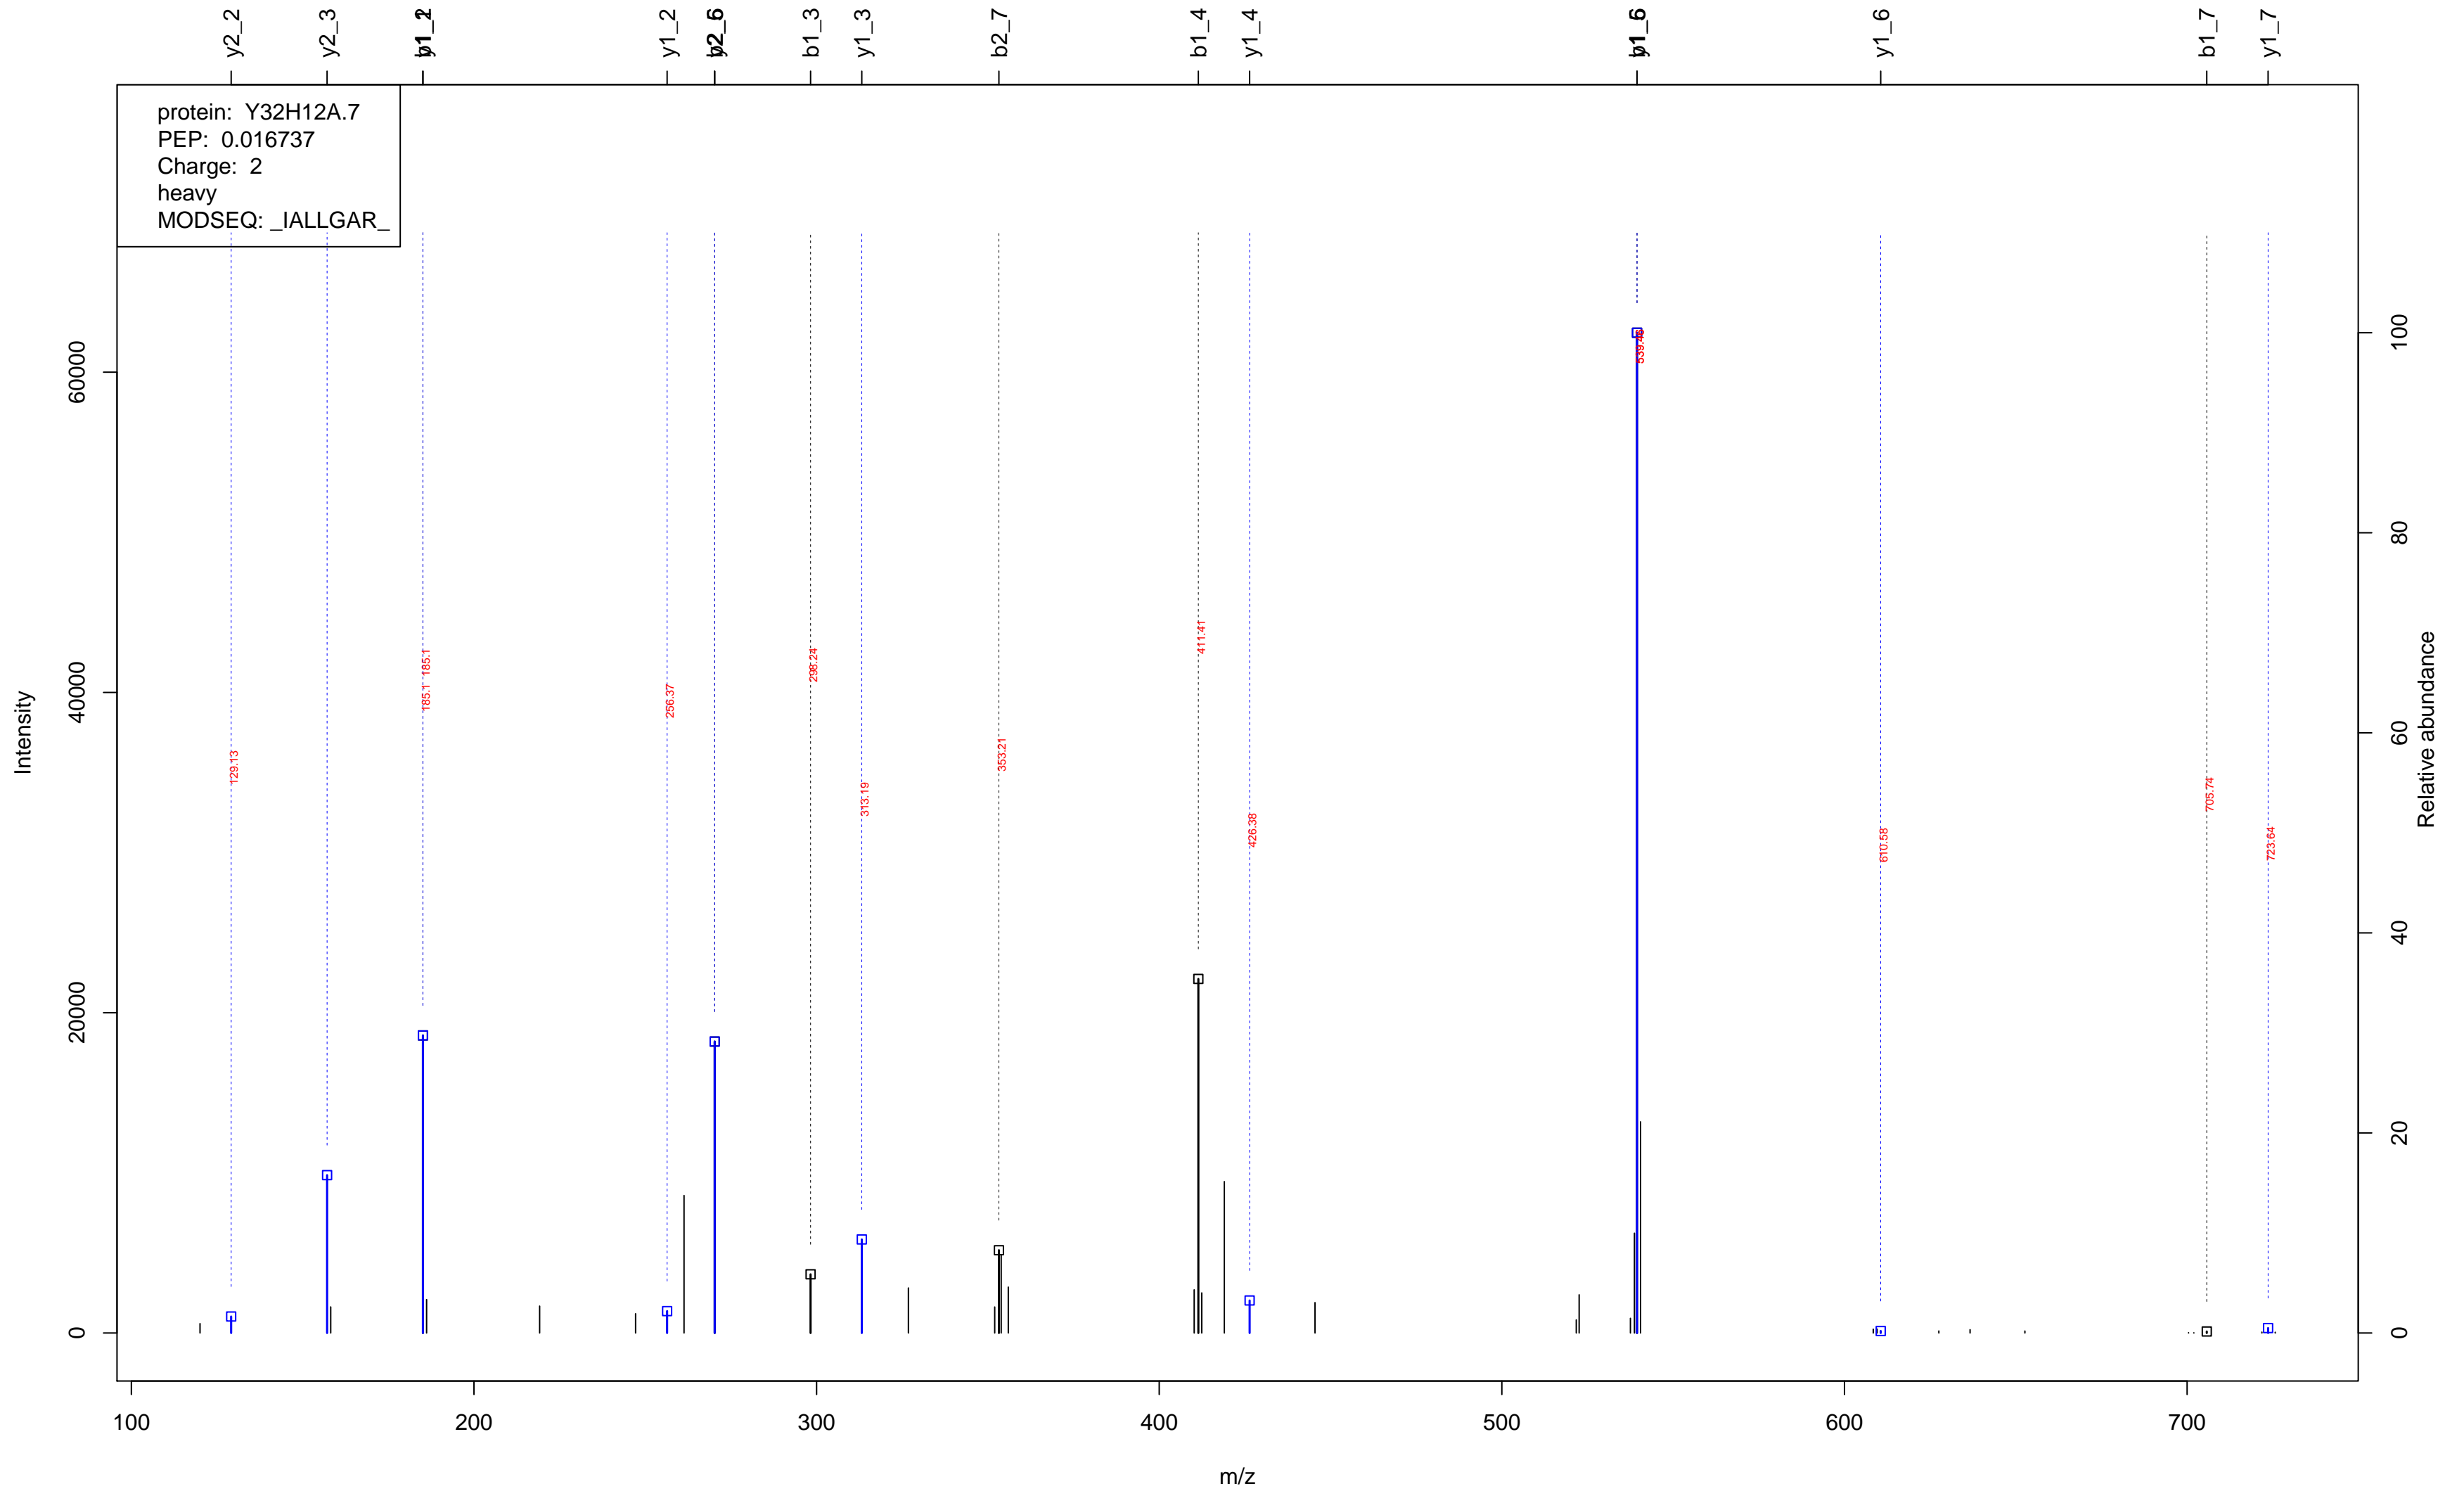

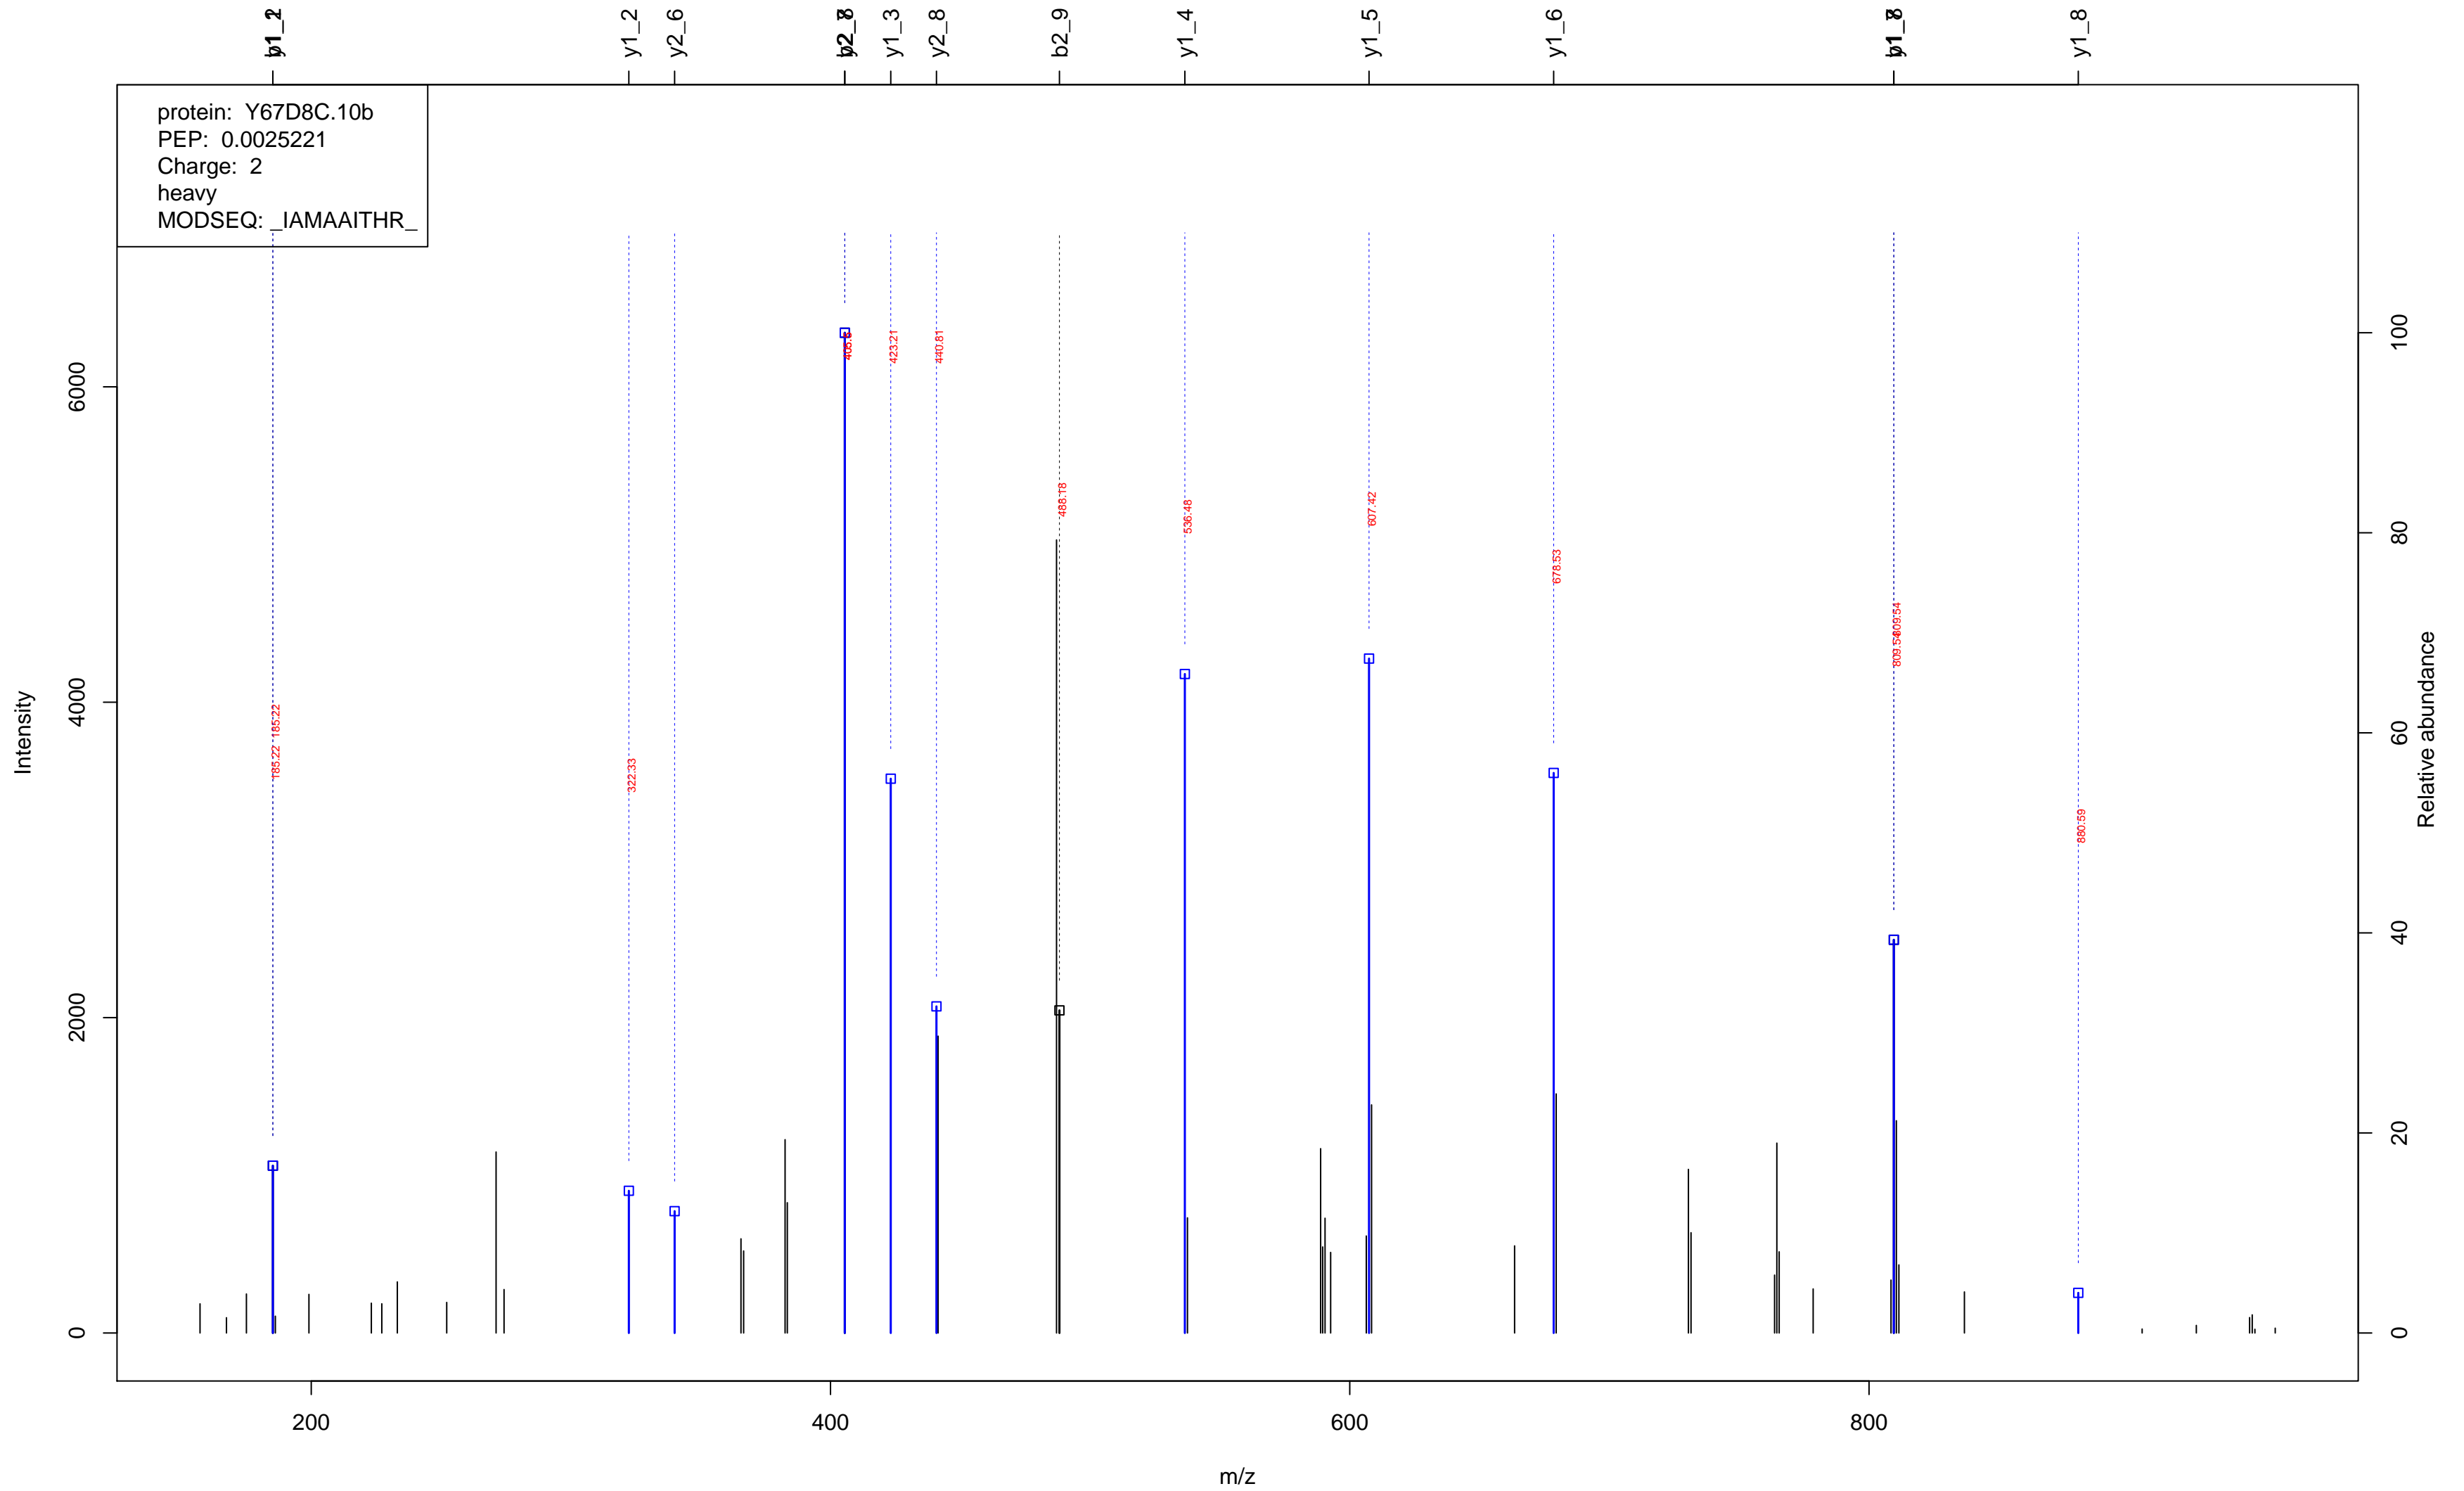

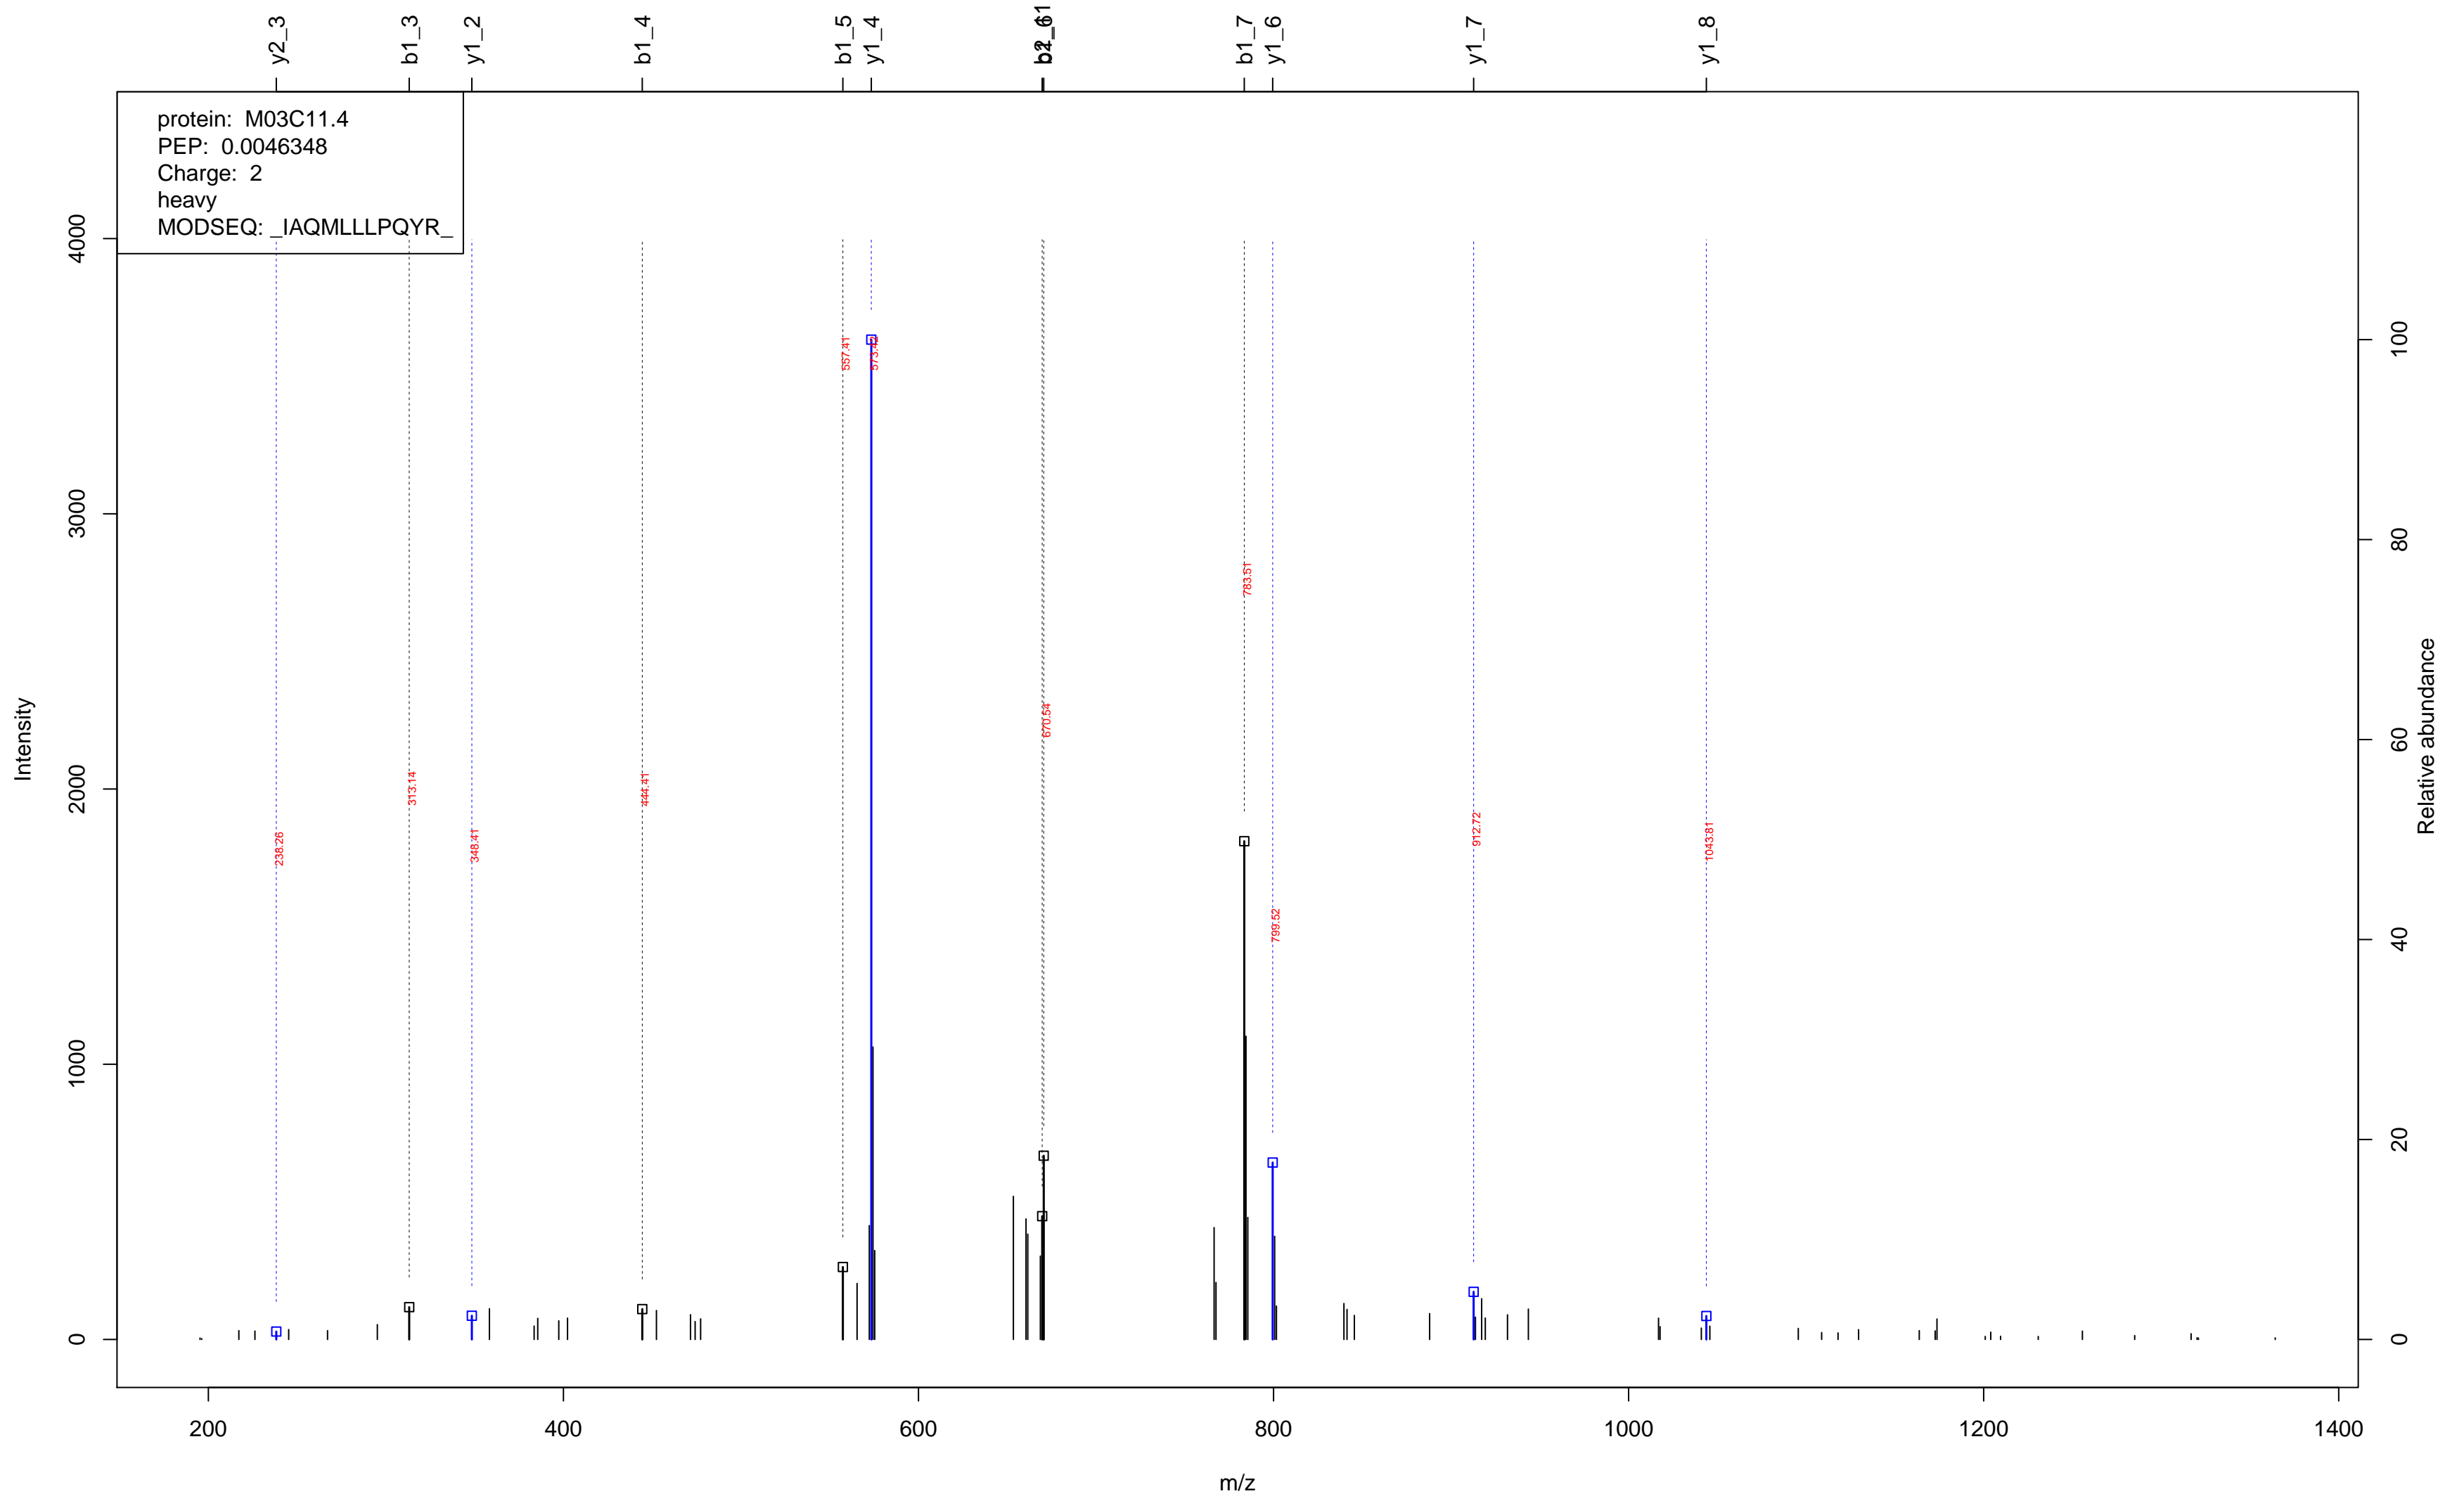

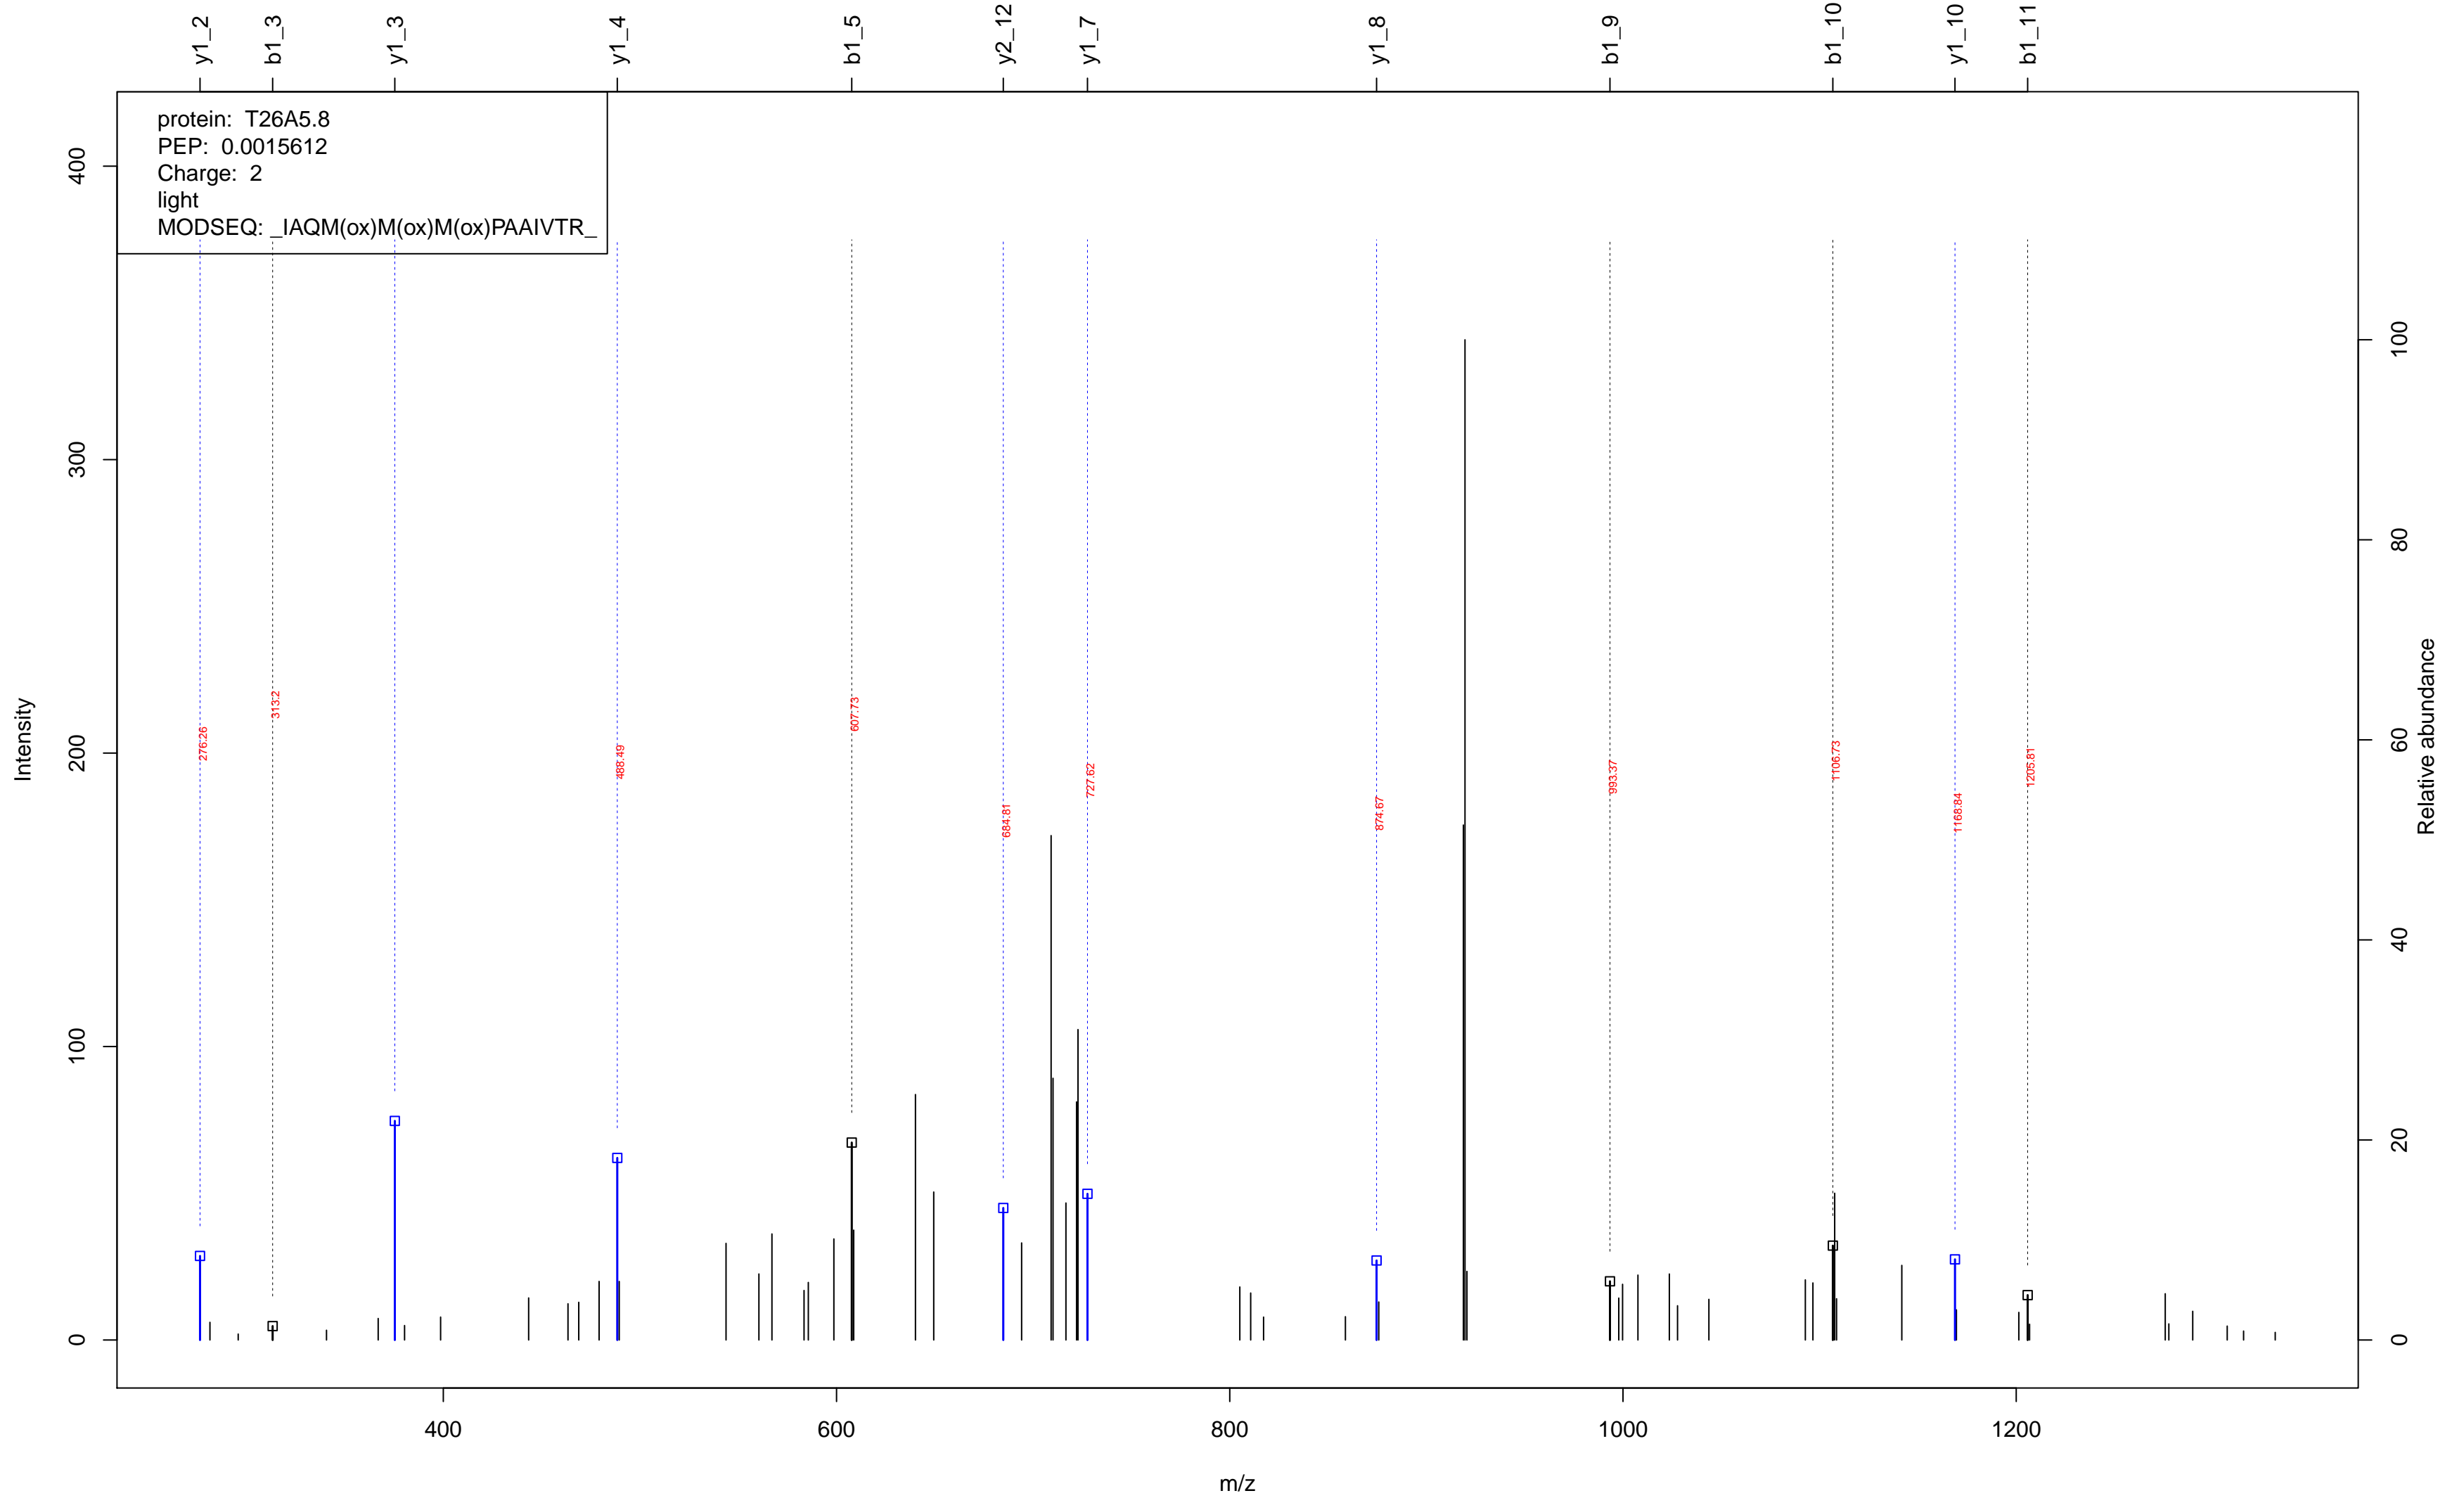

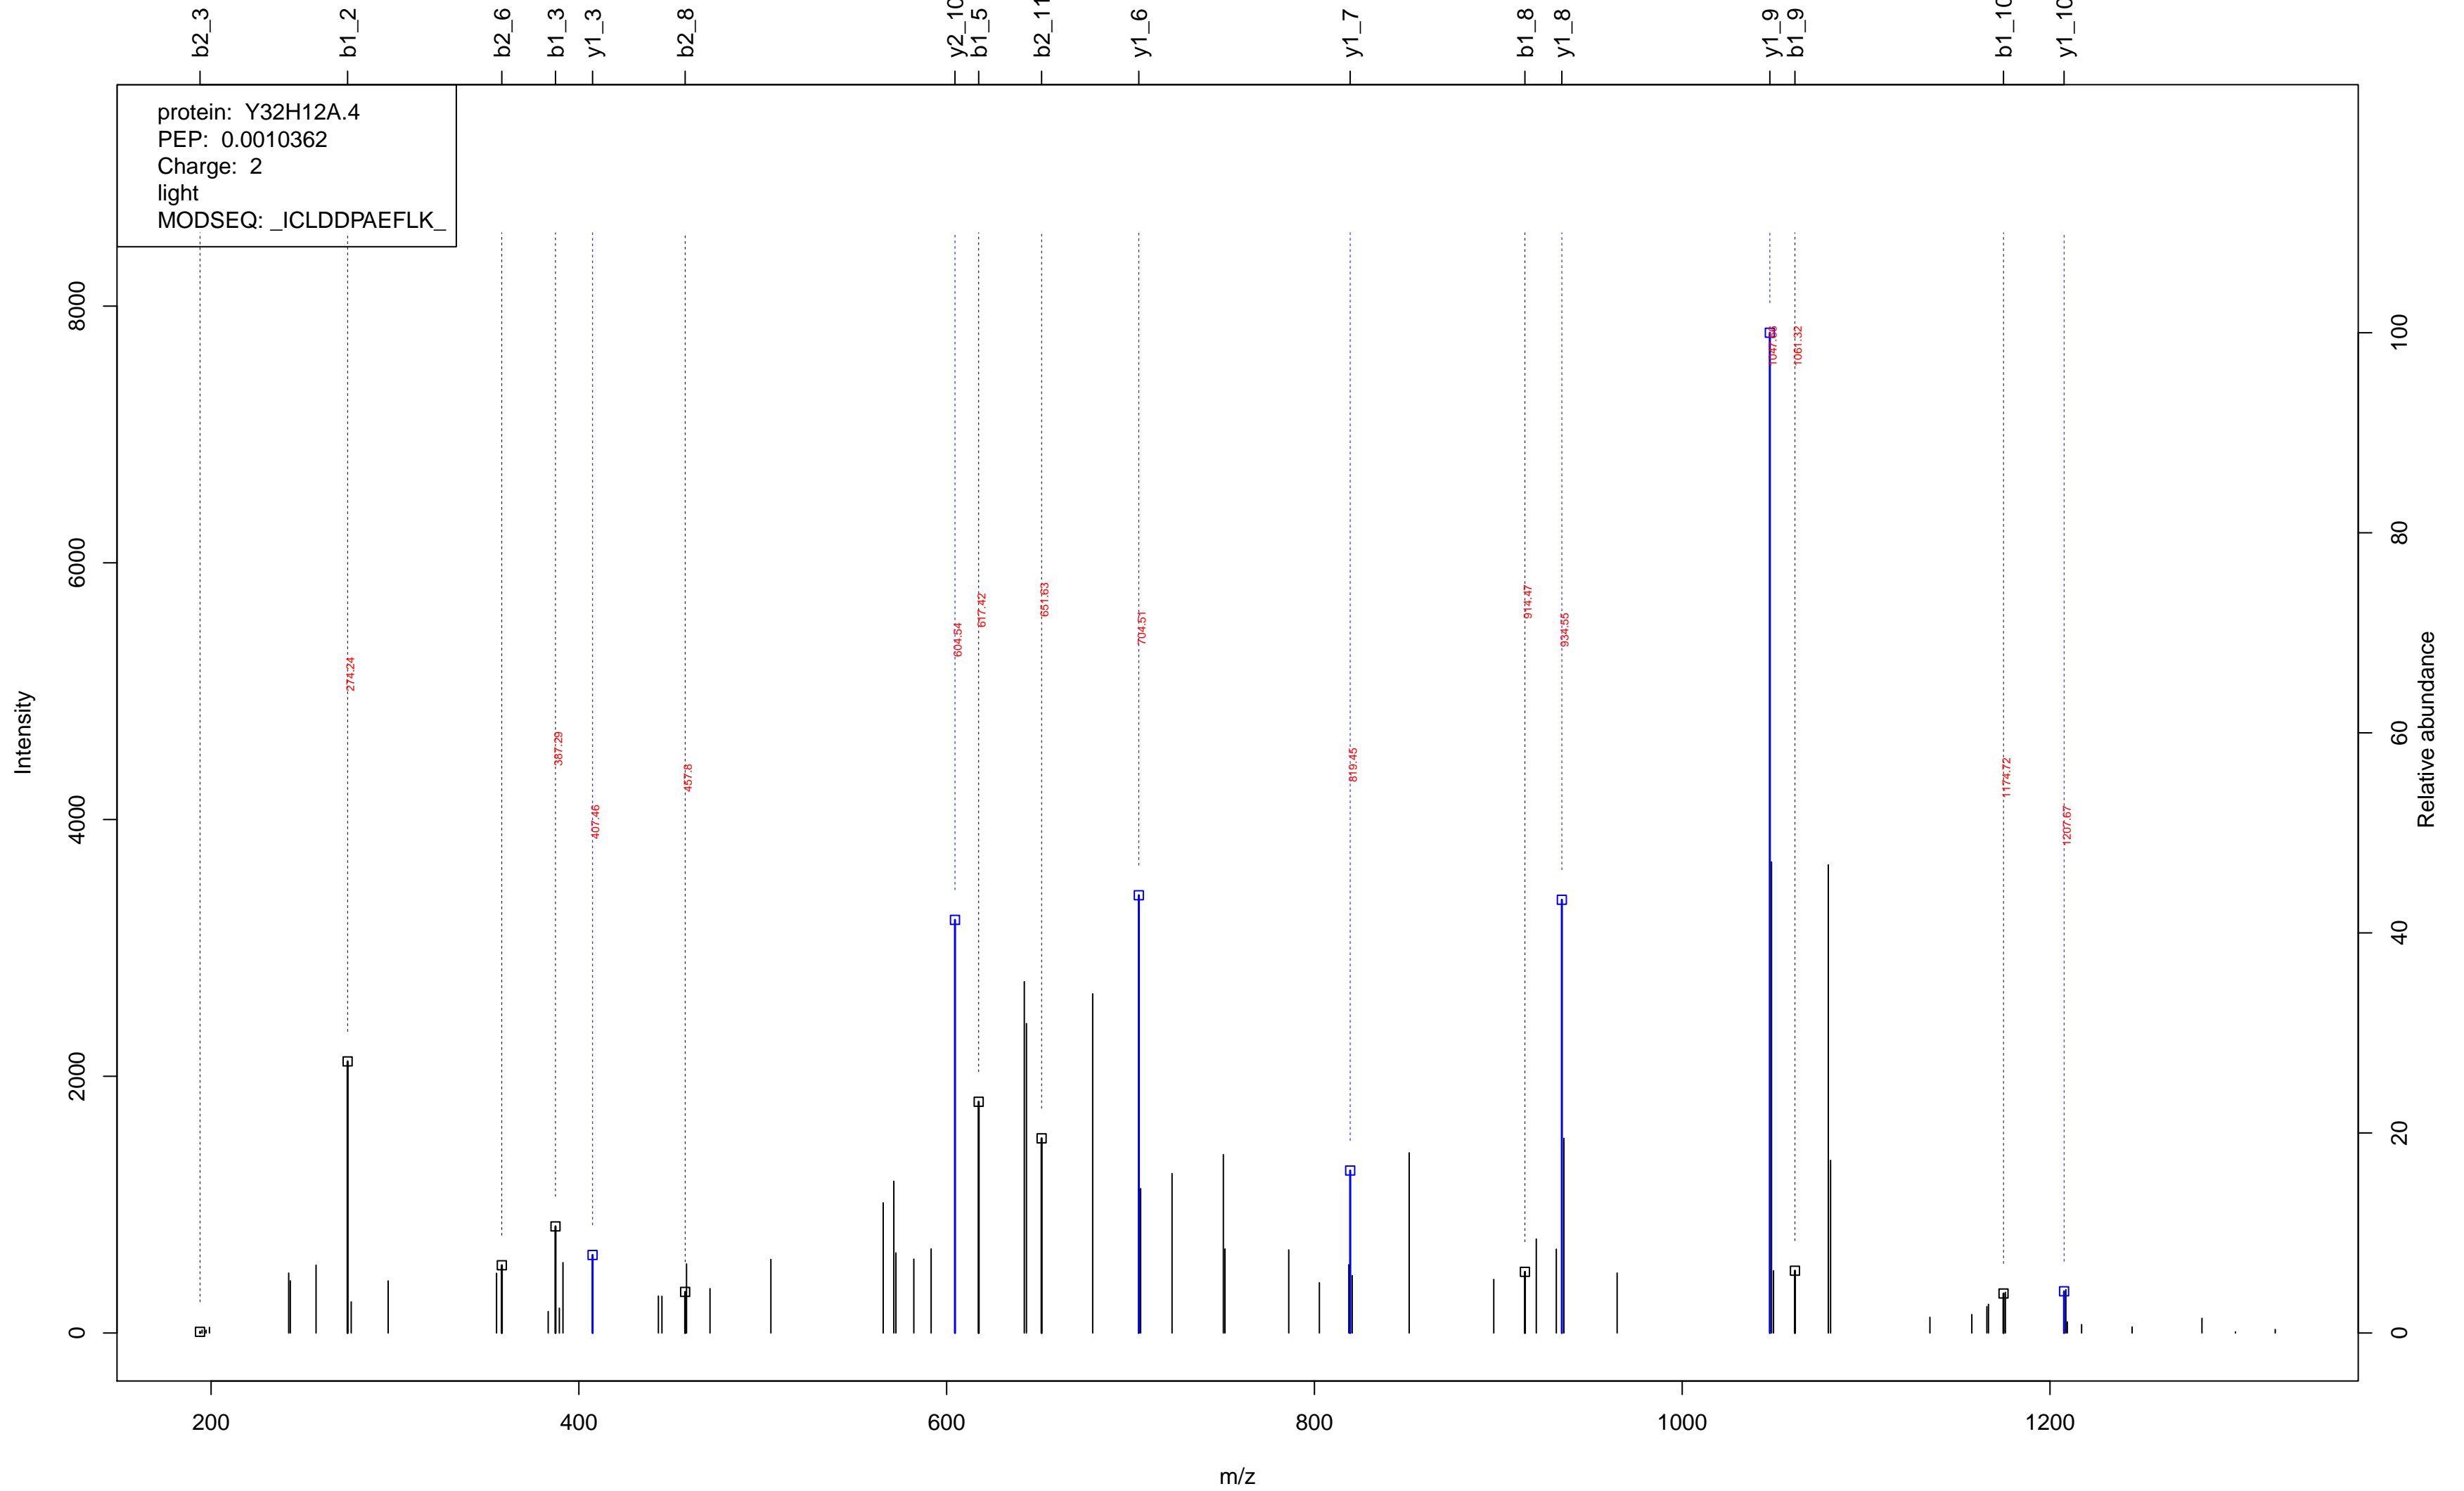

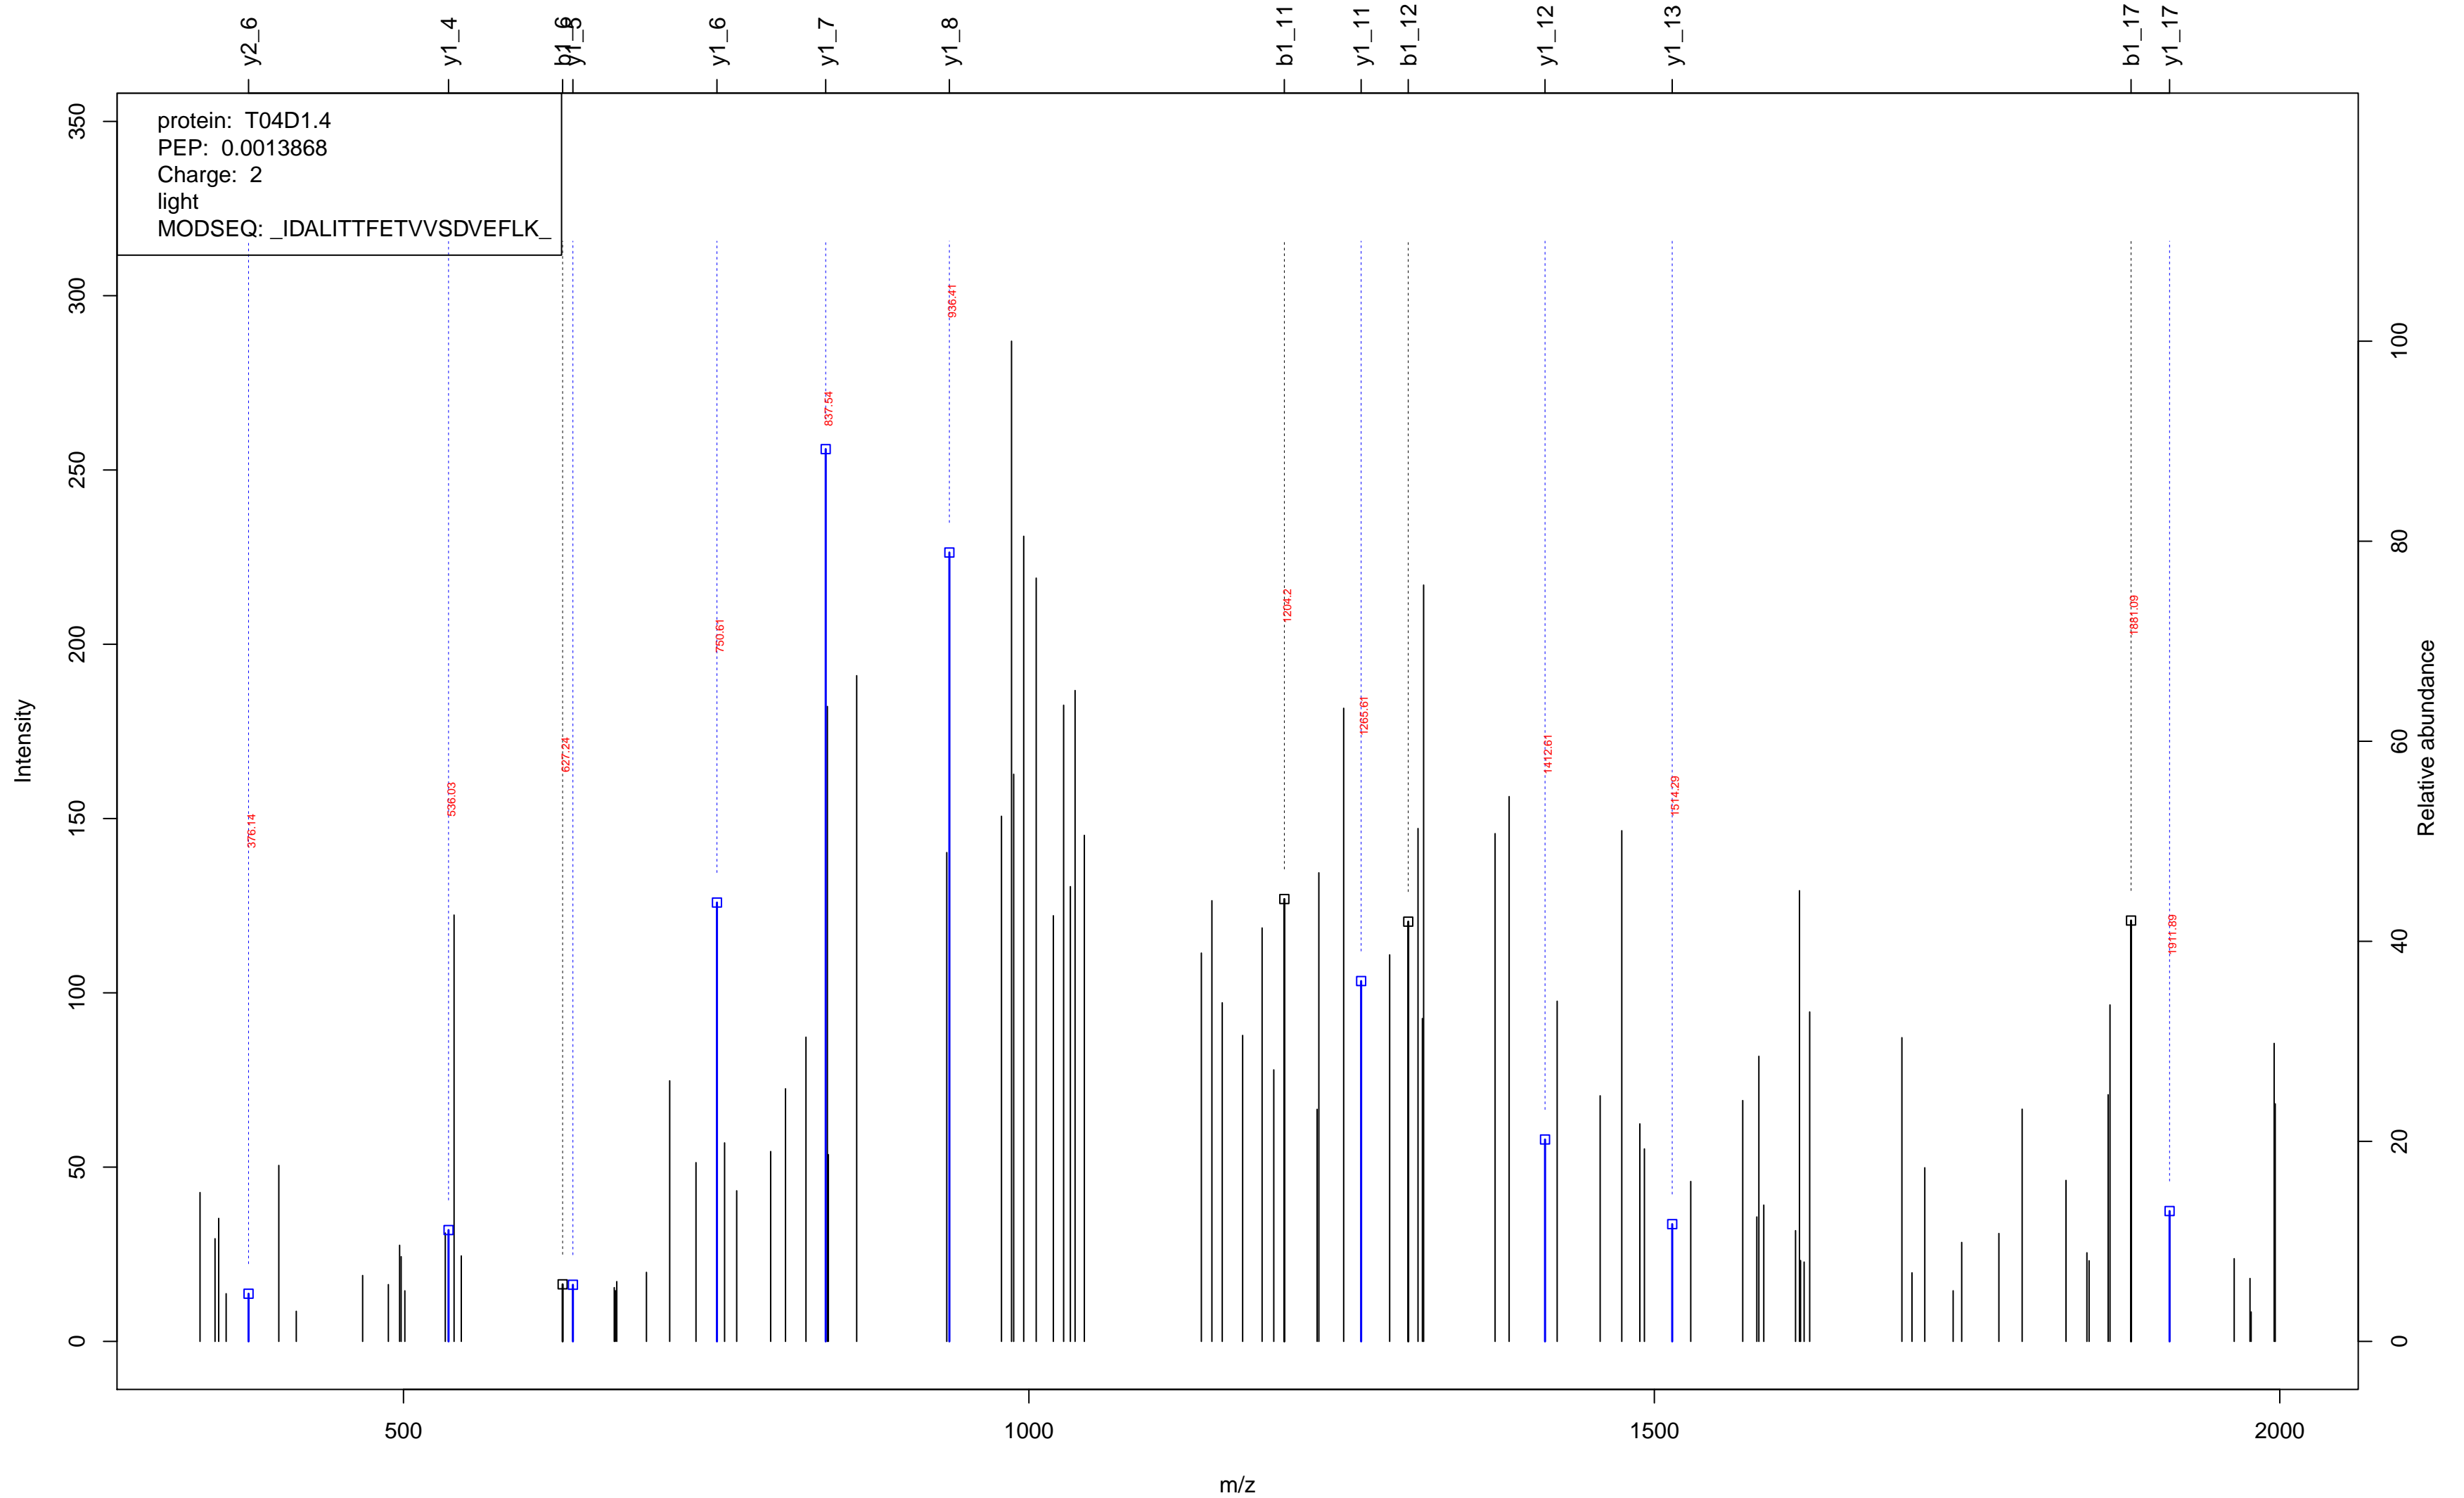



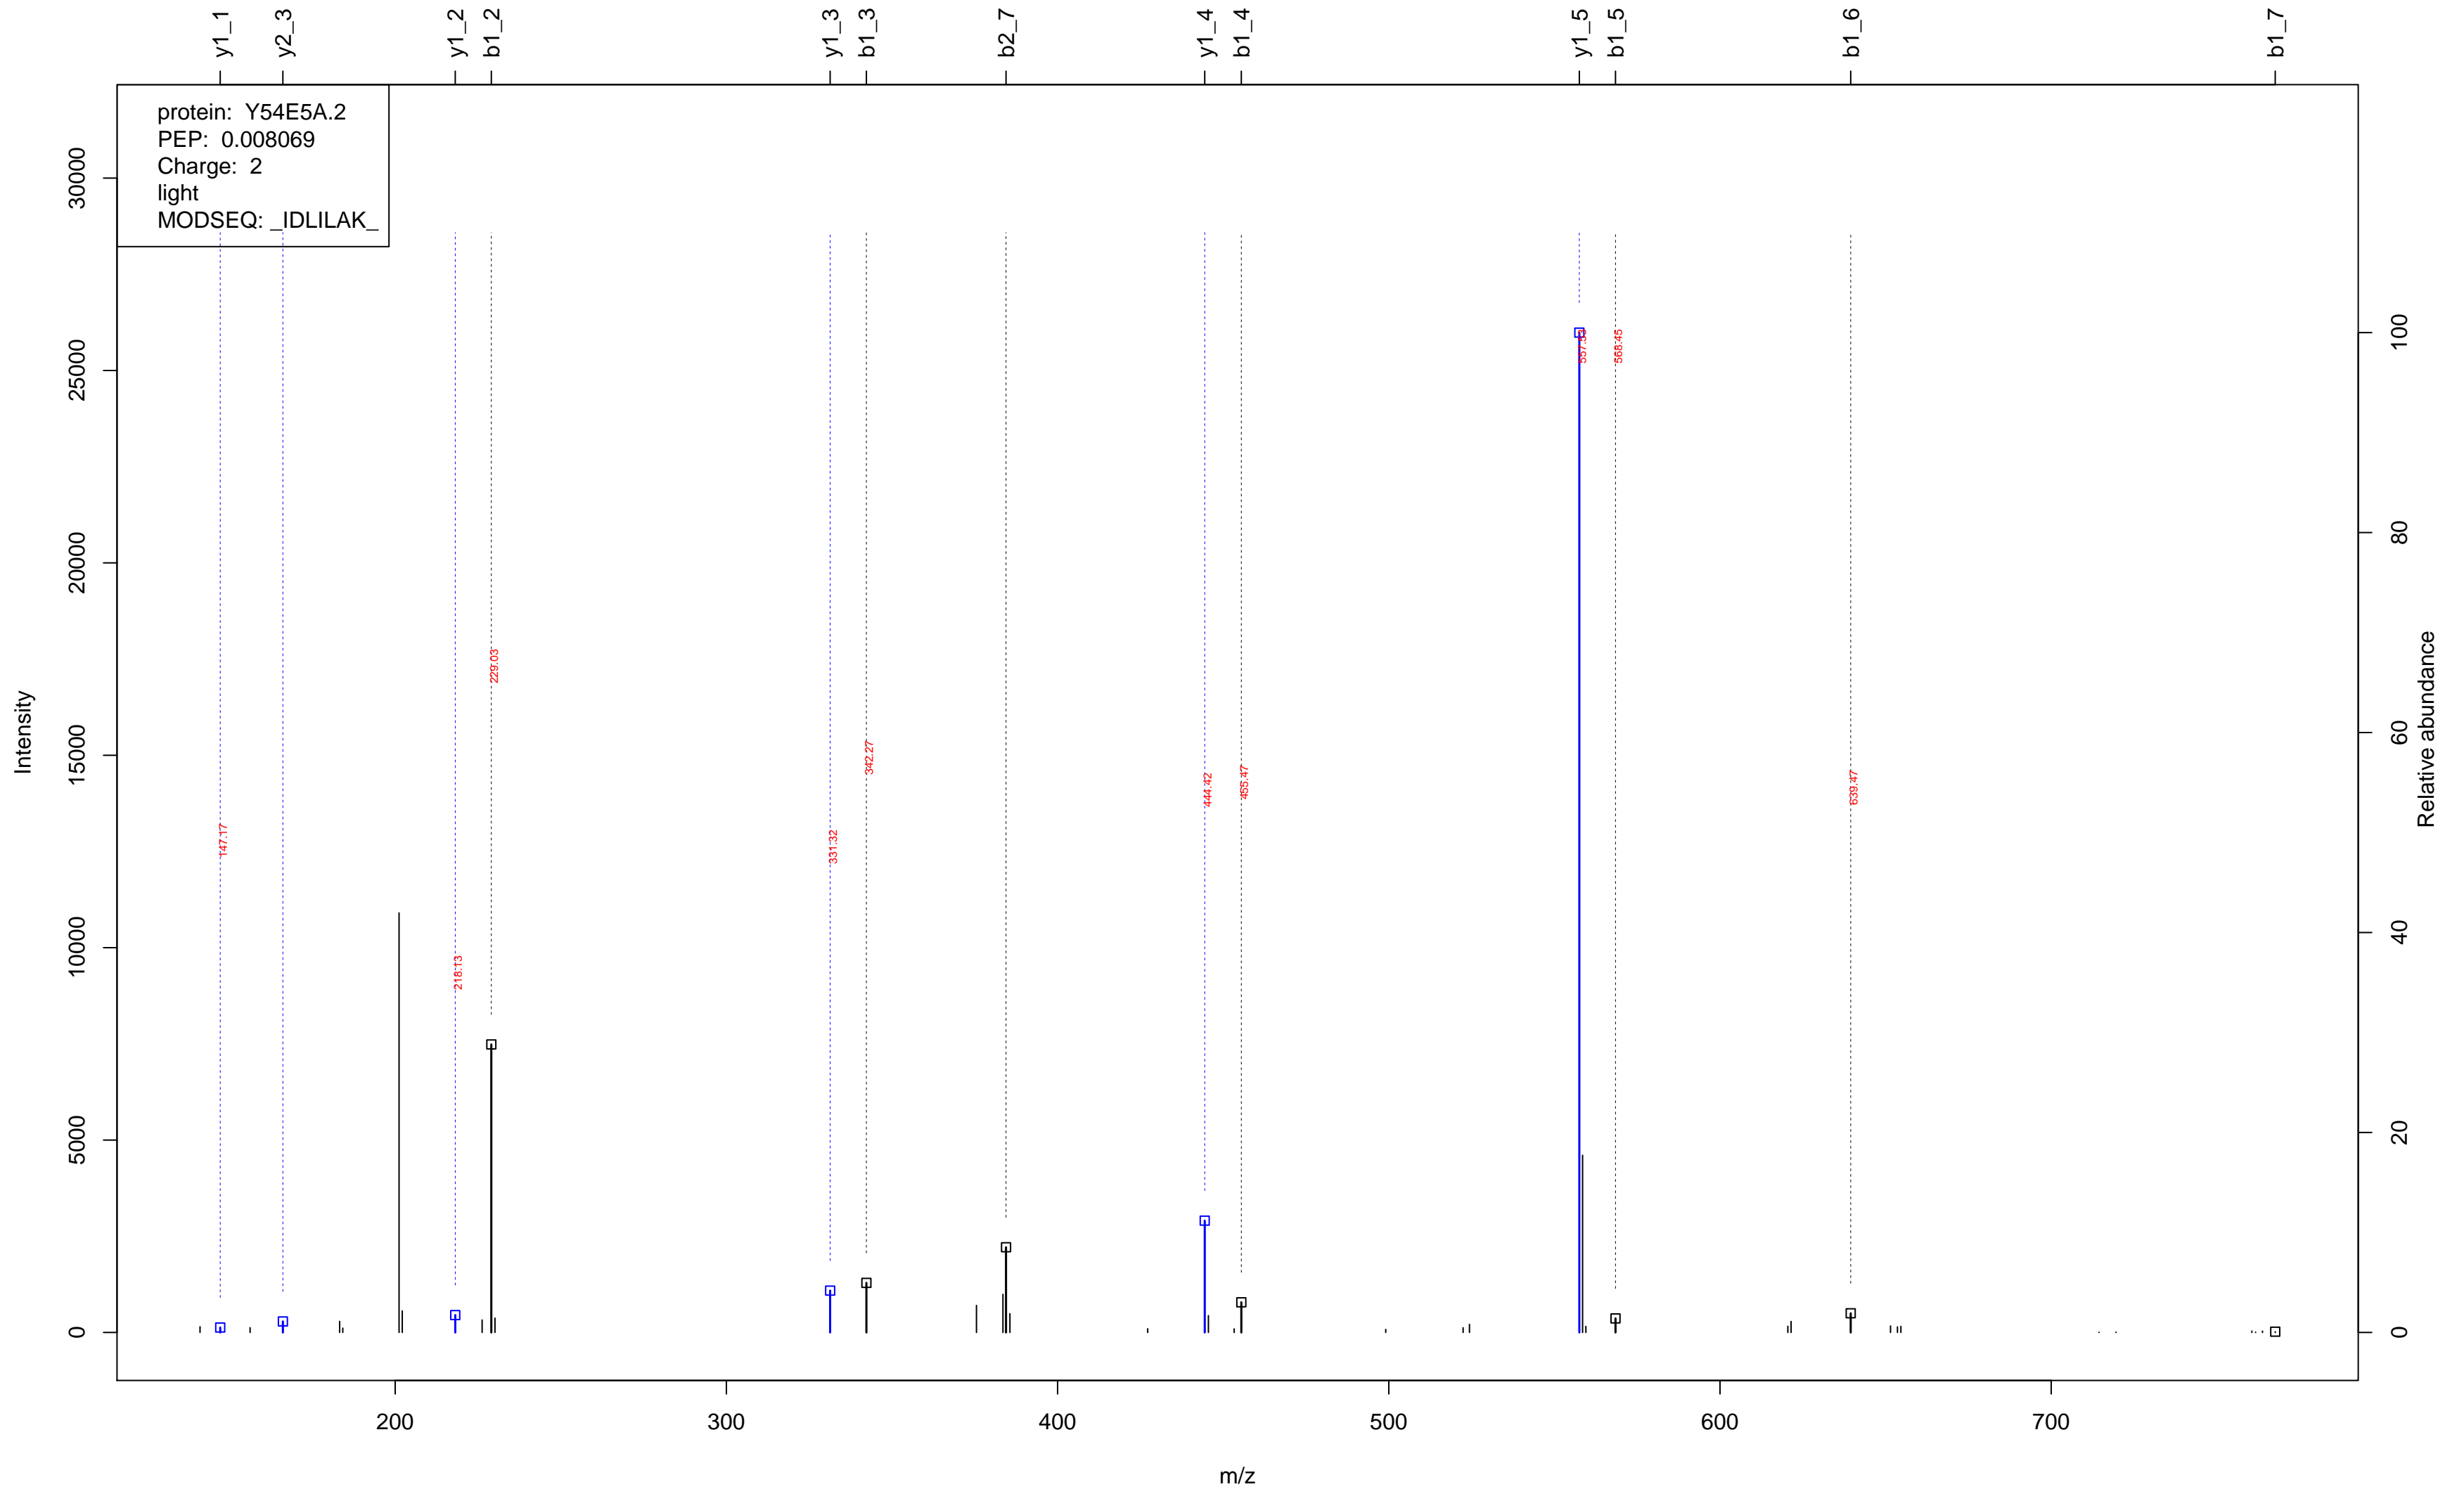

130

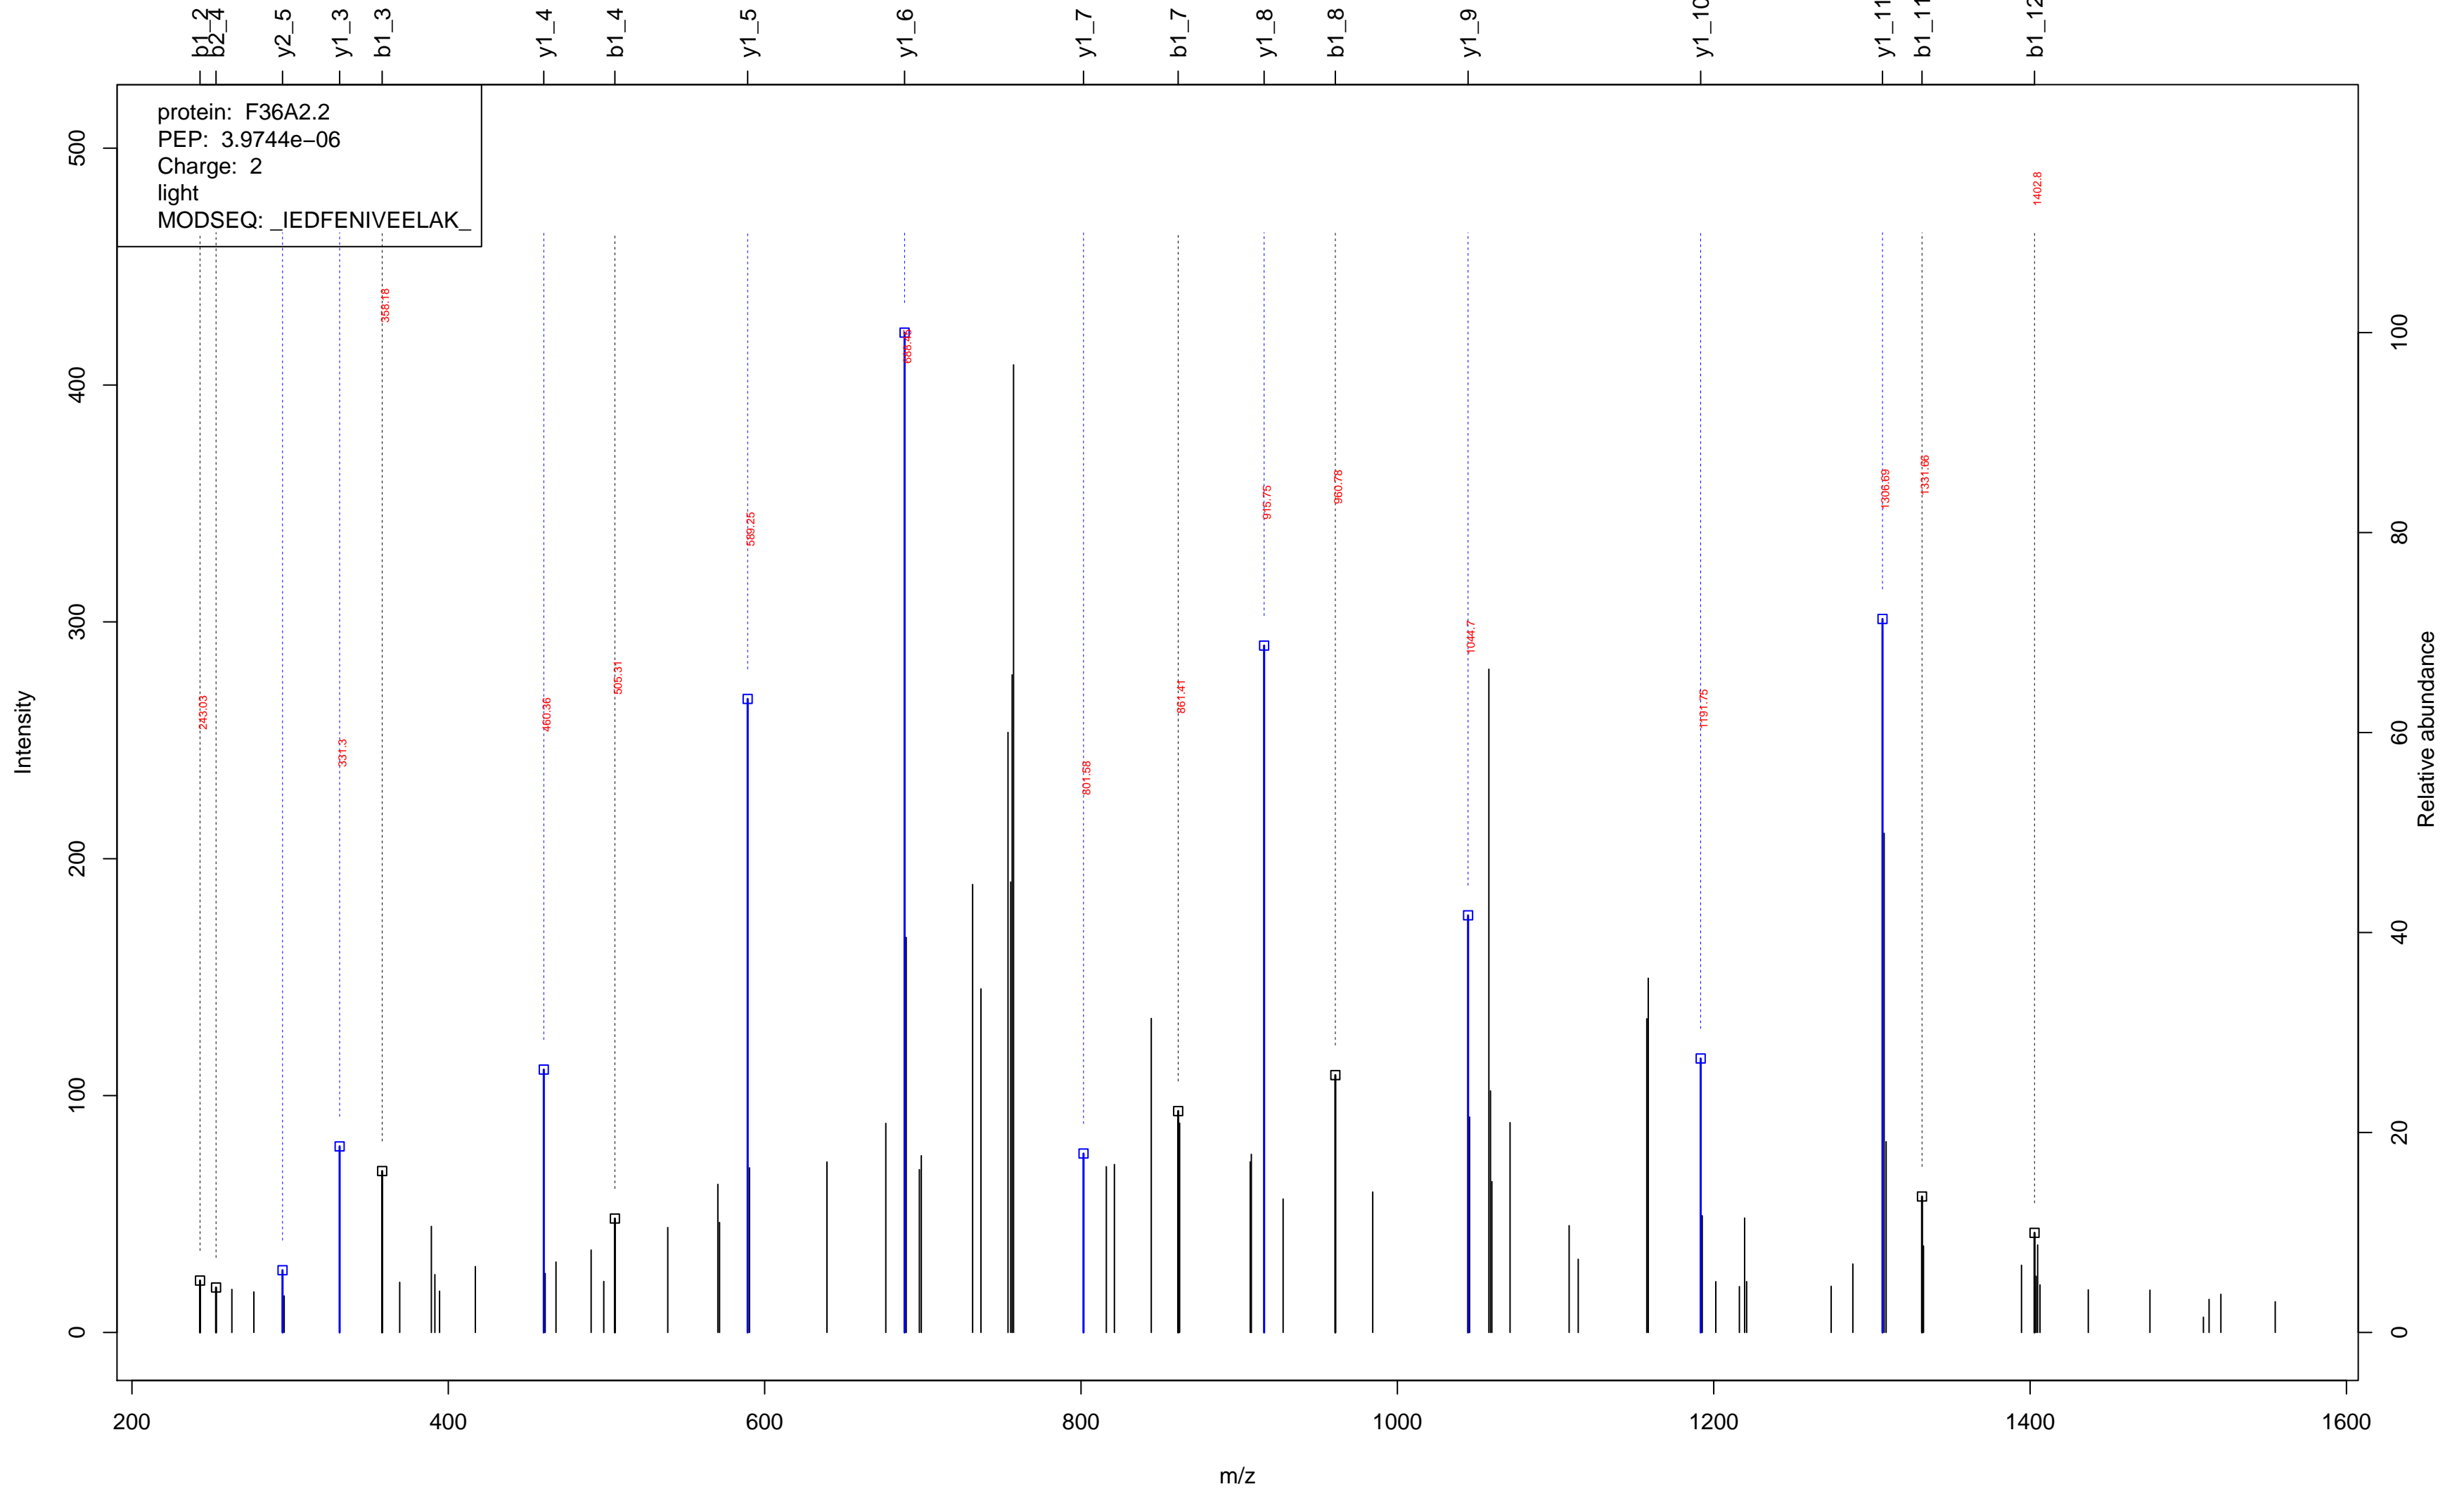

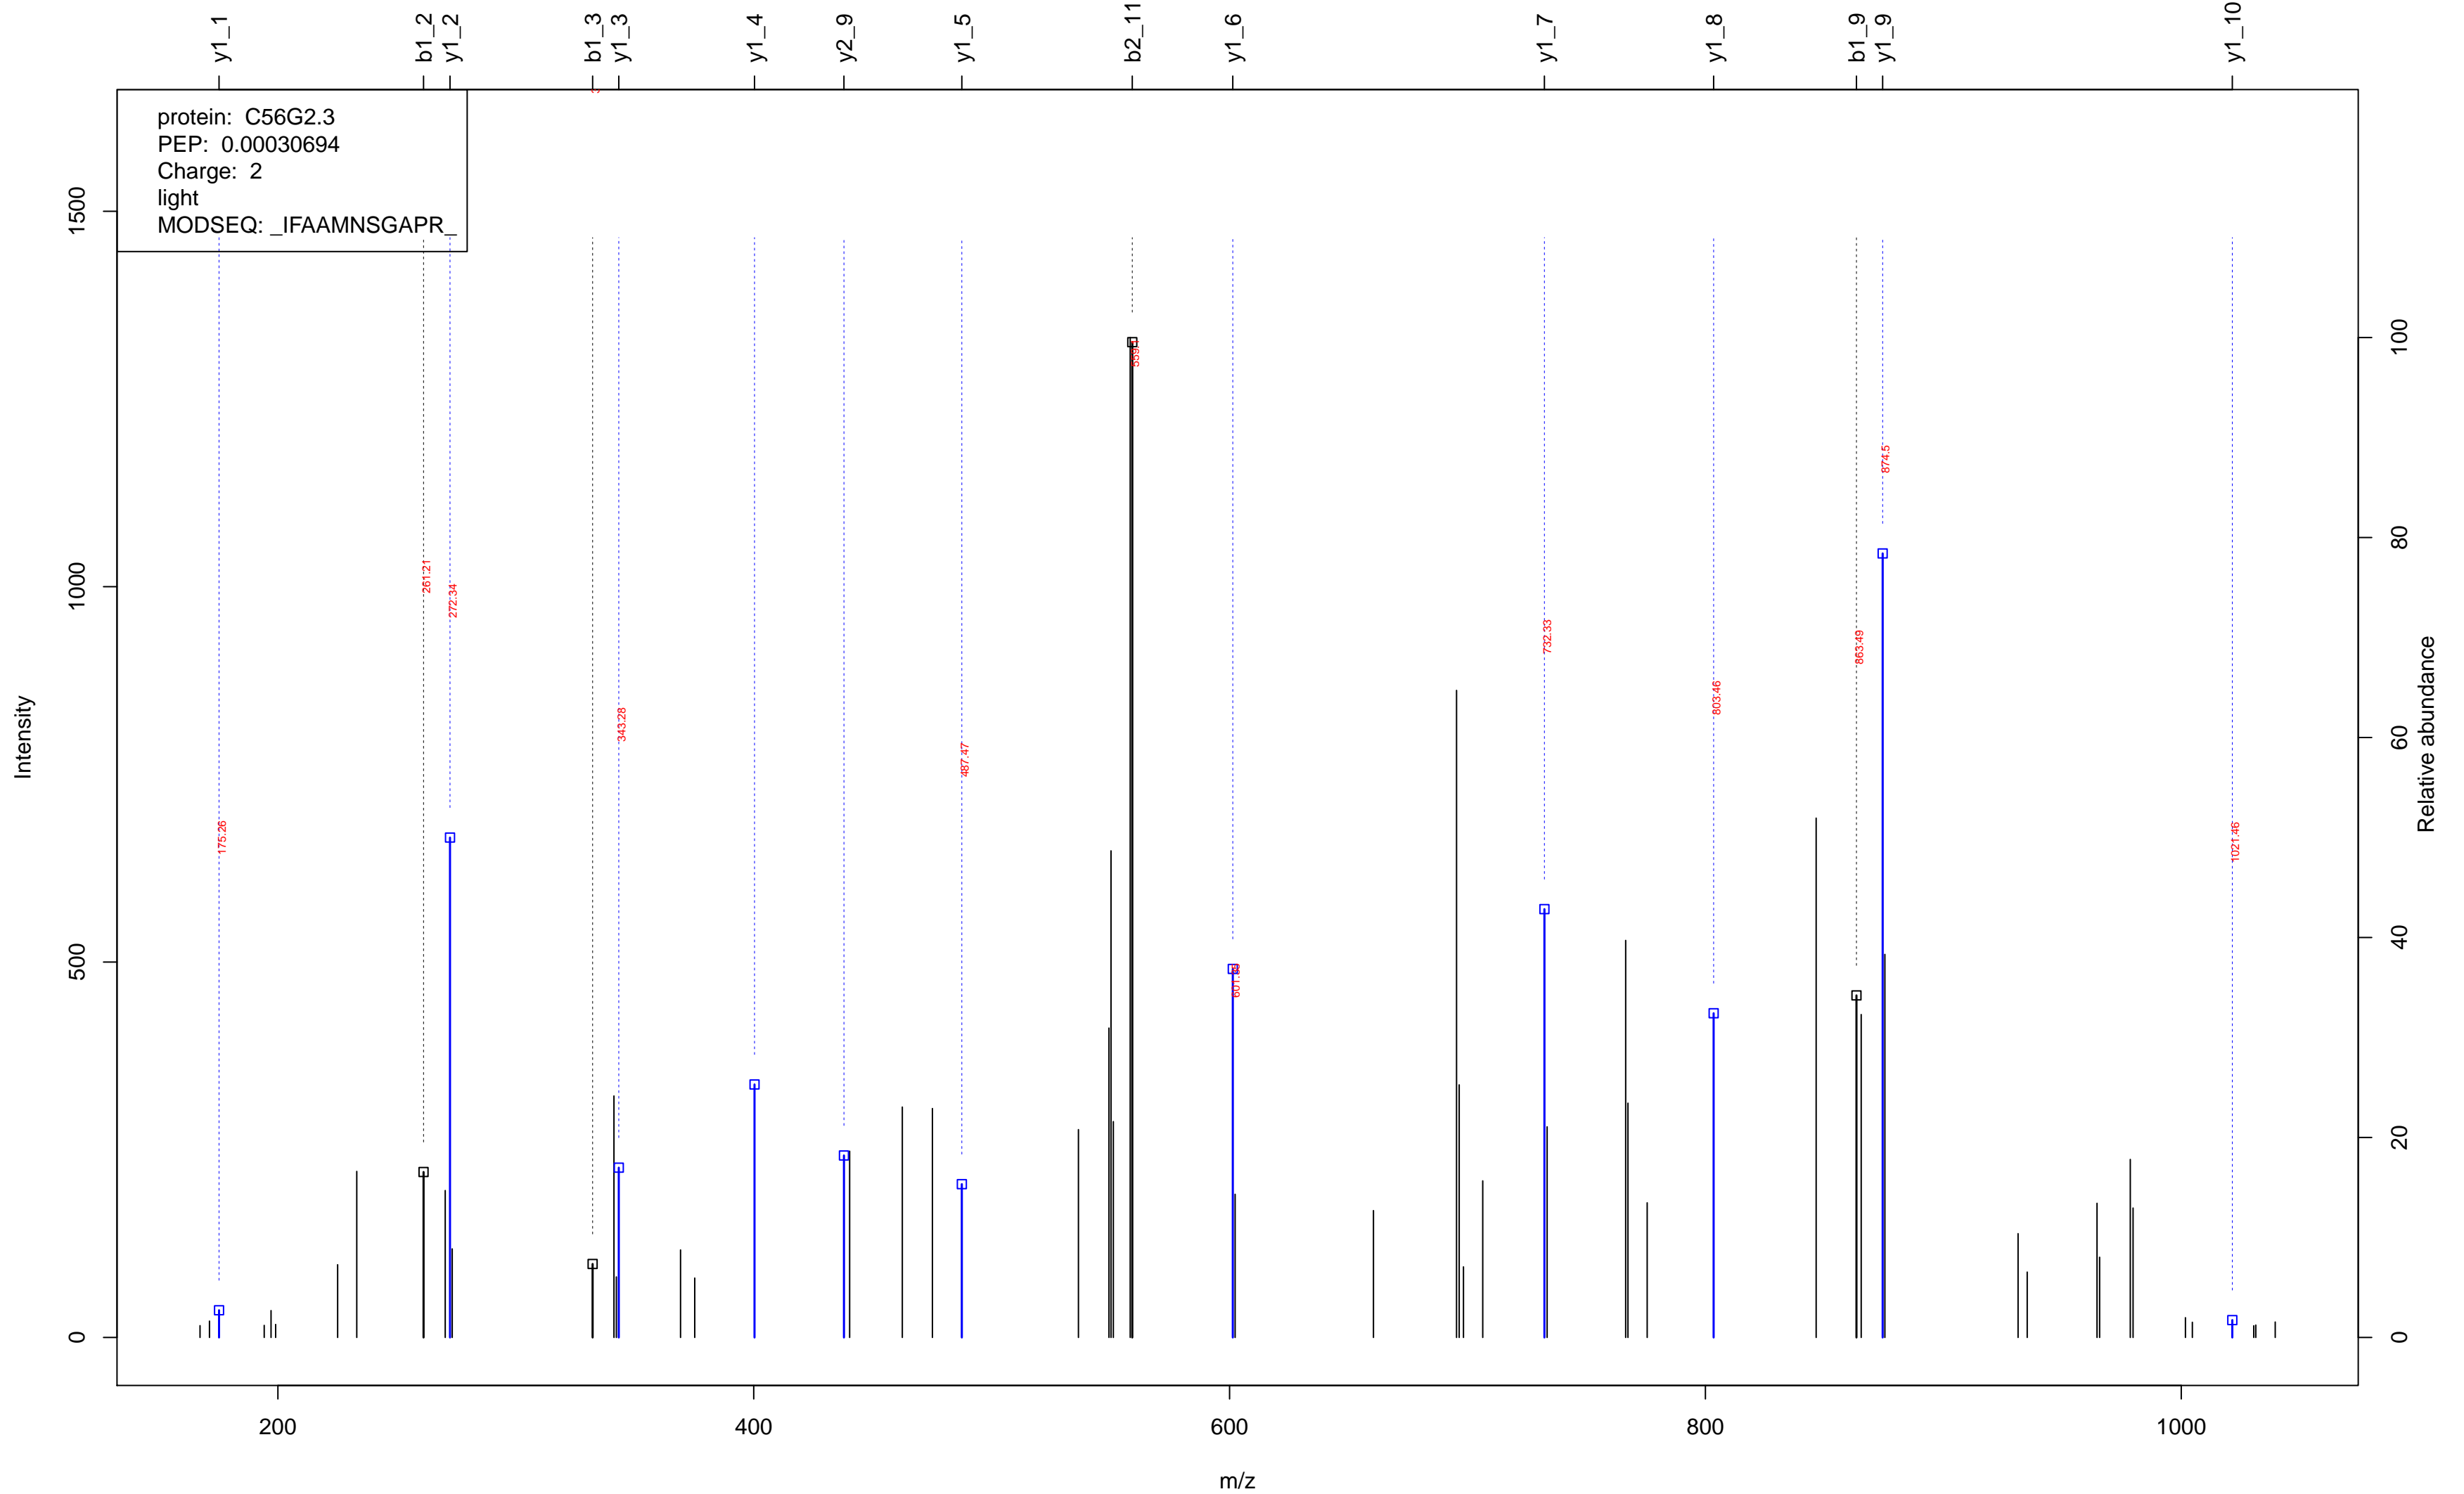

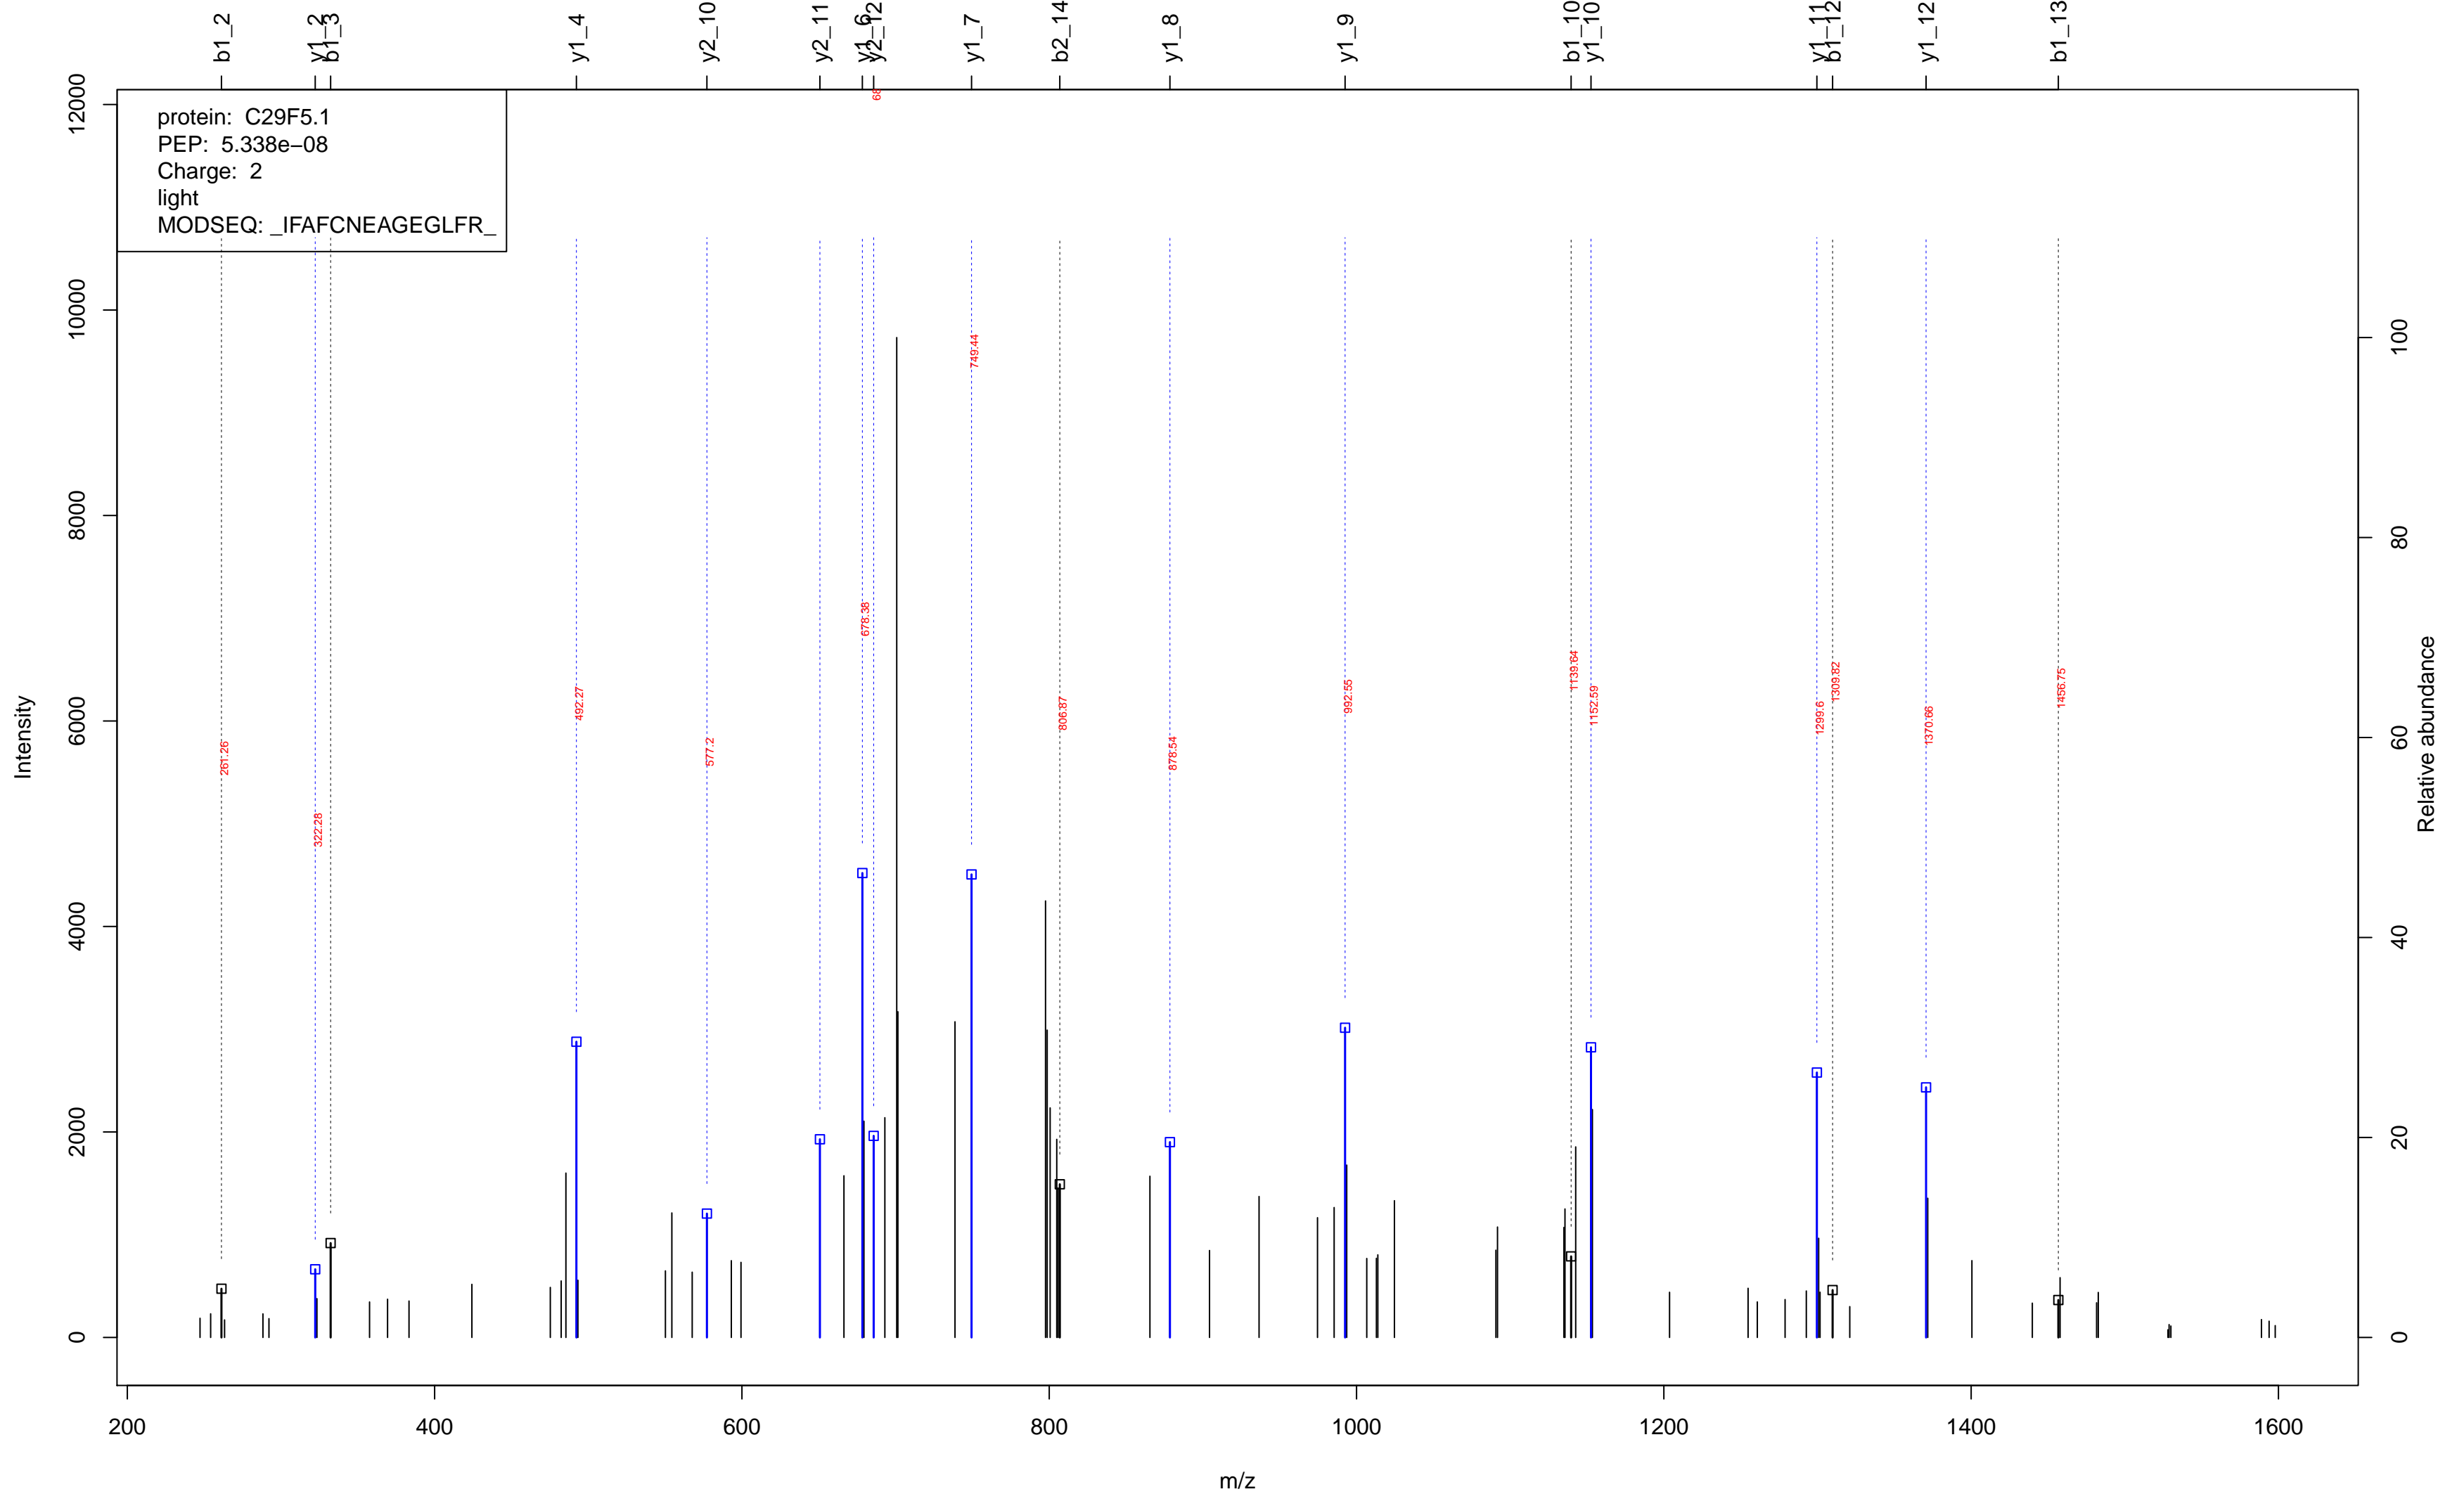

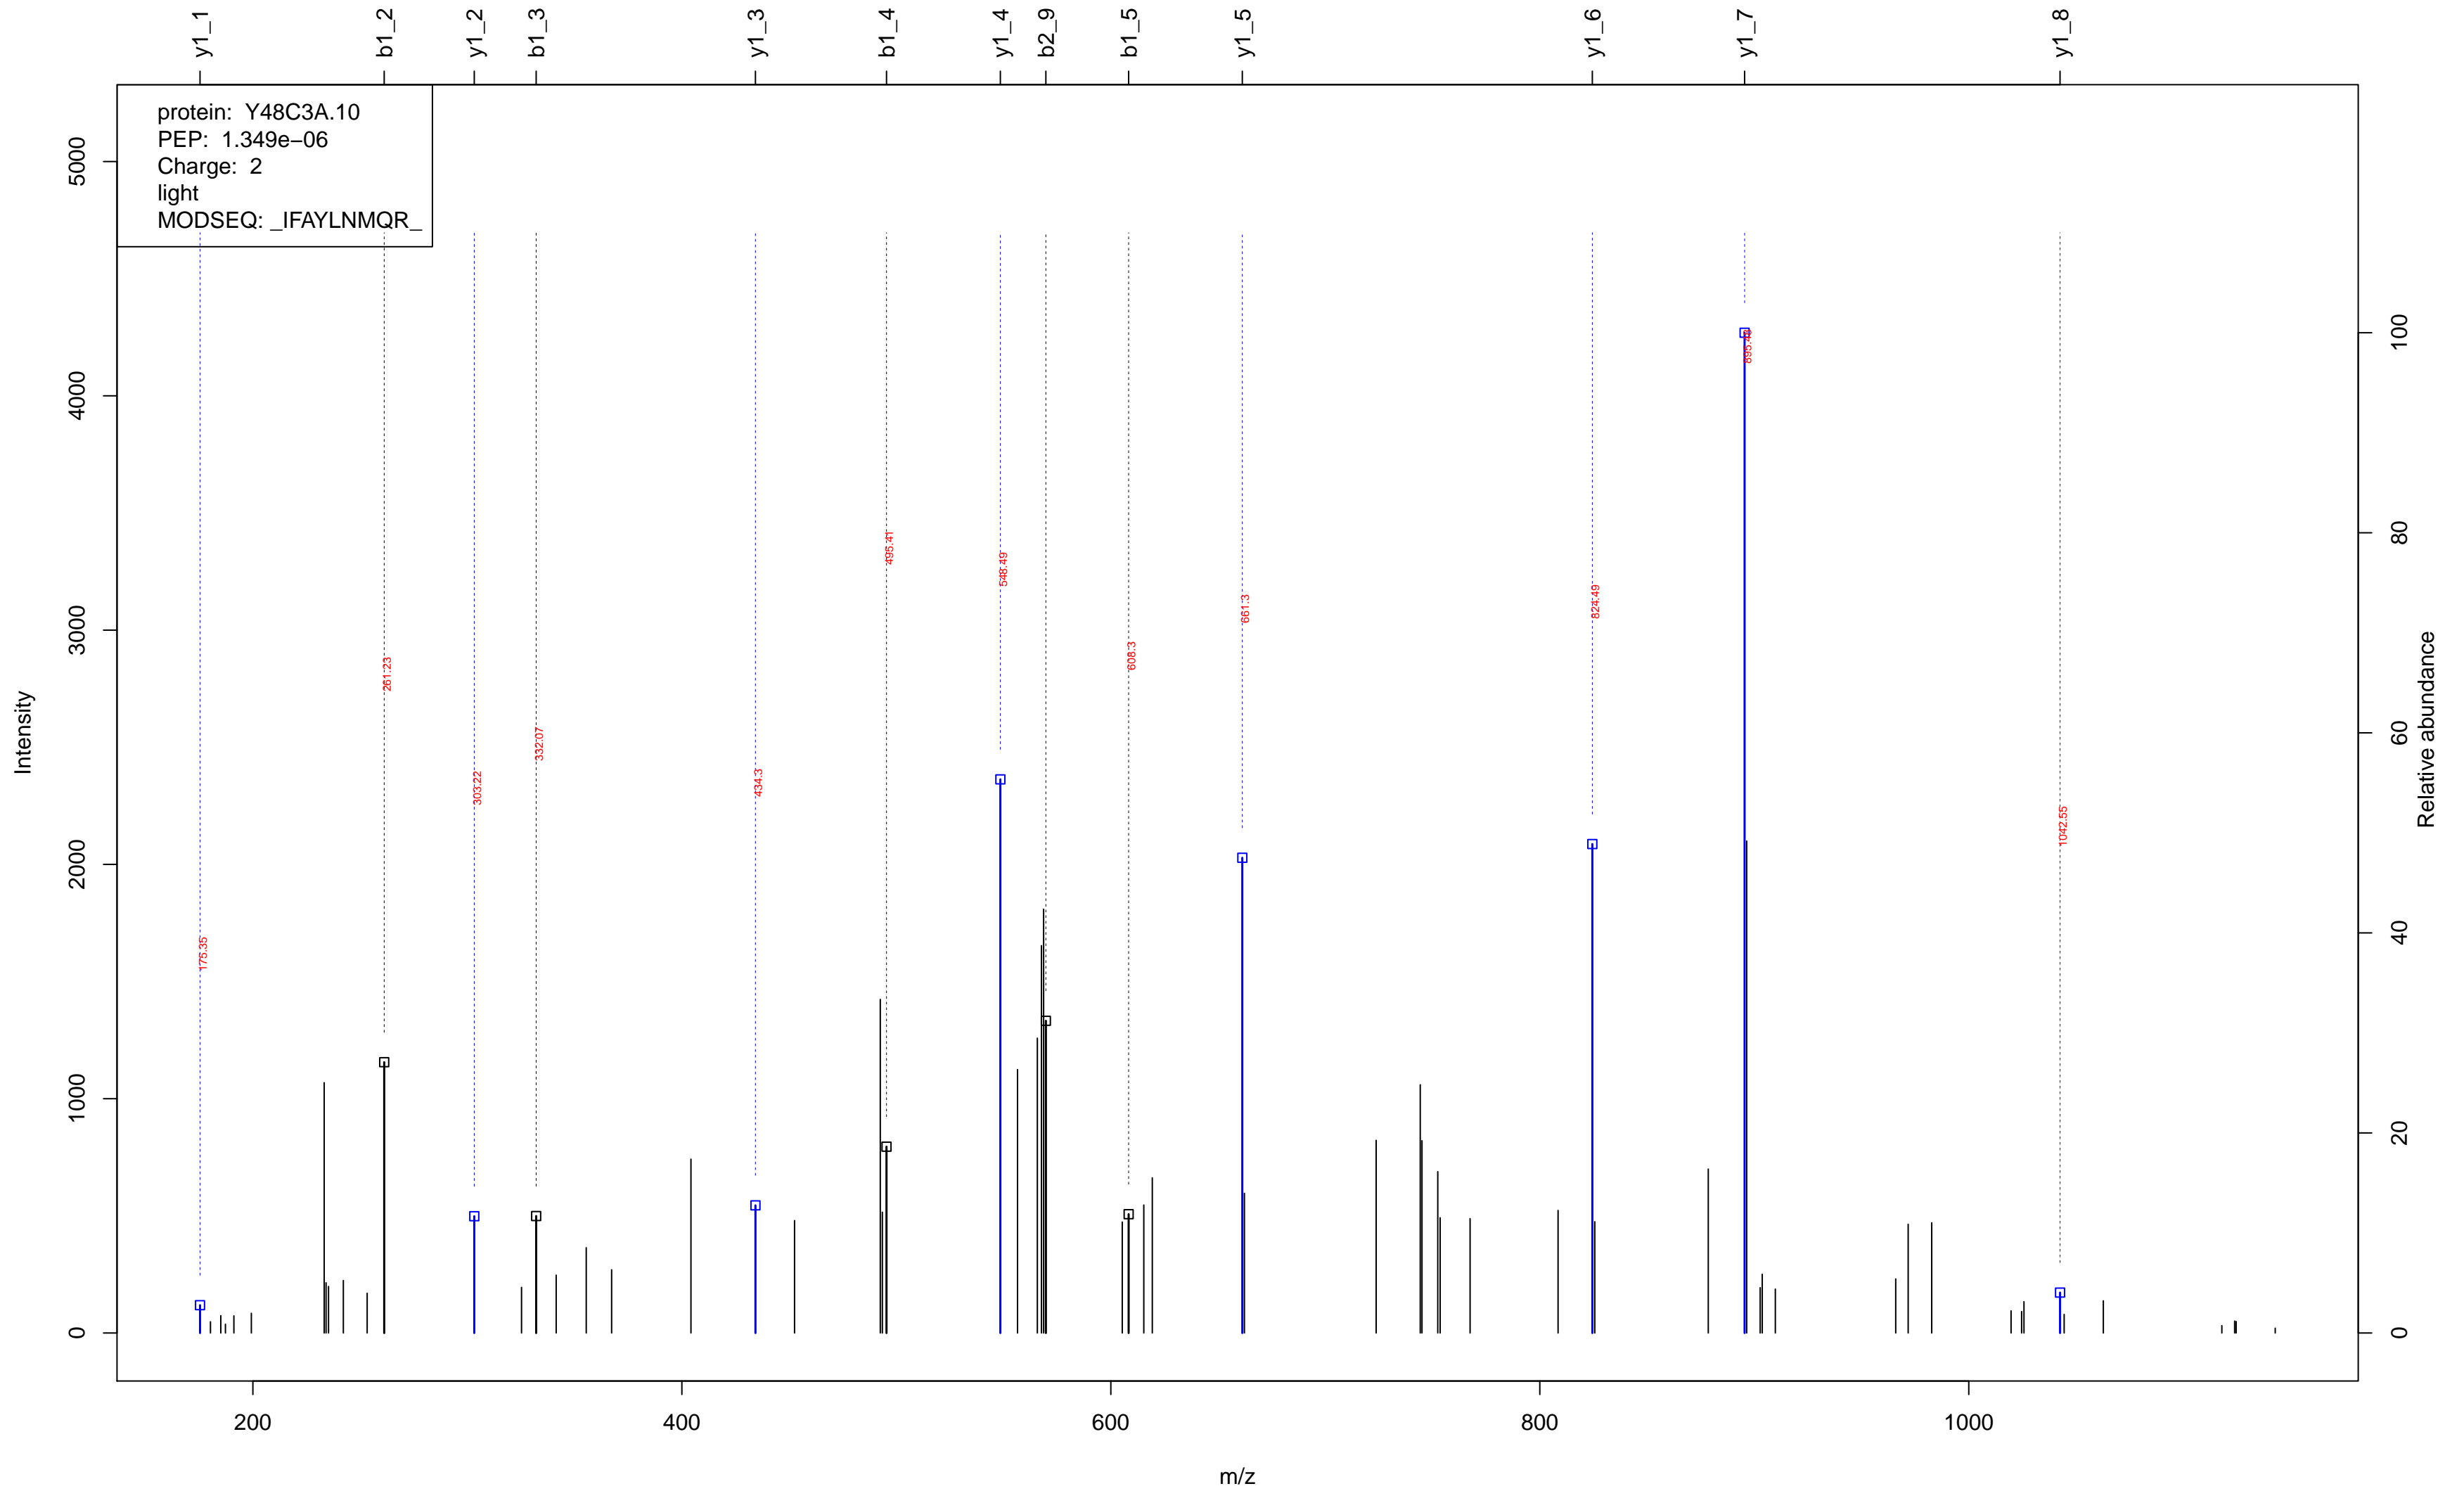

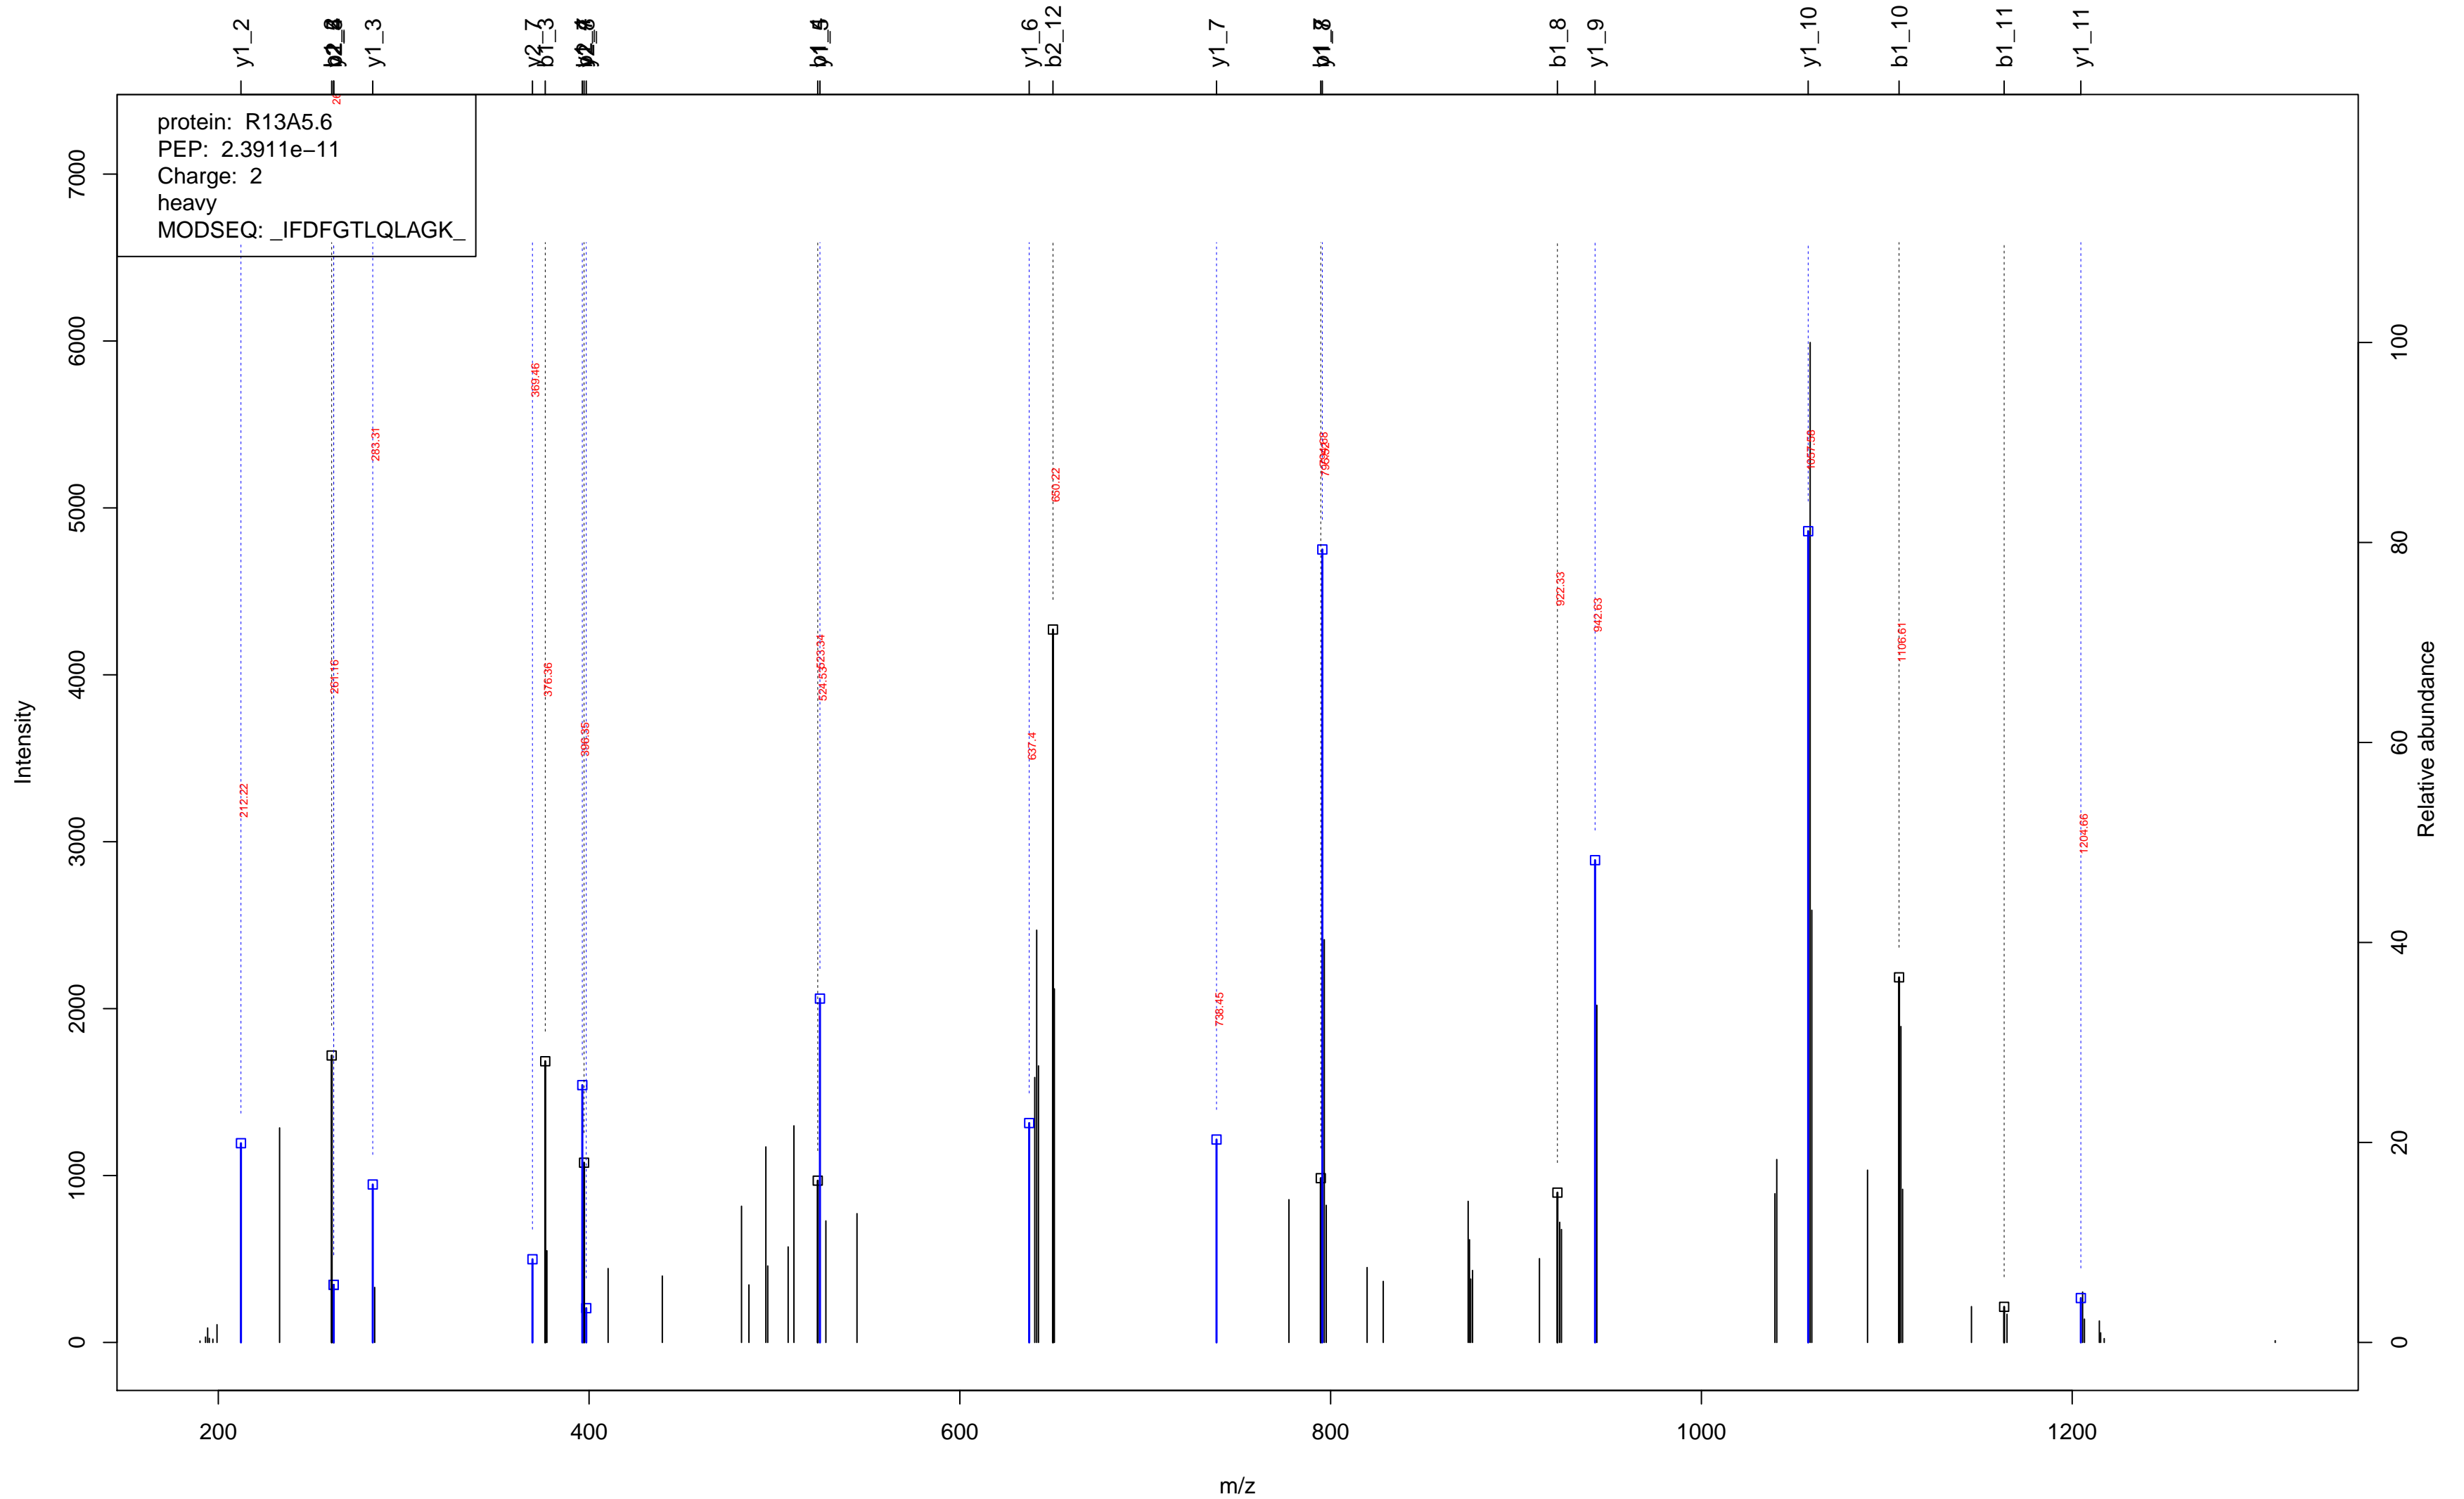

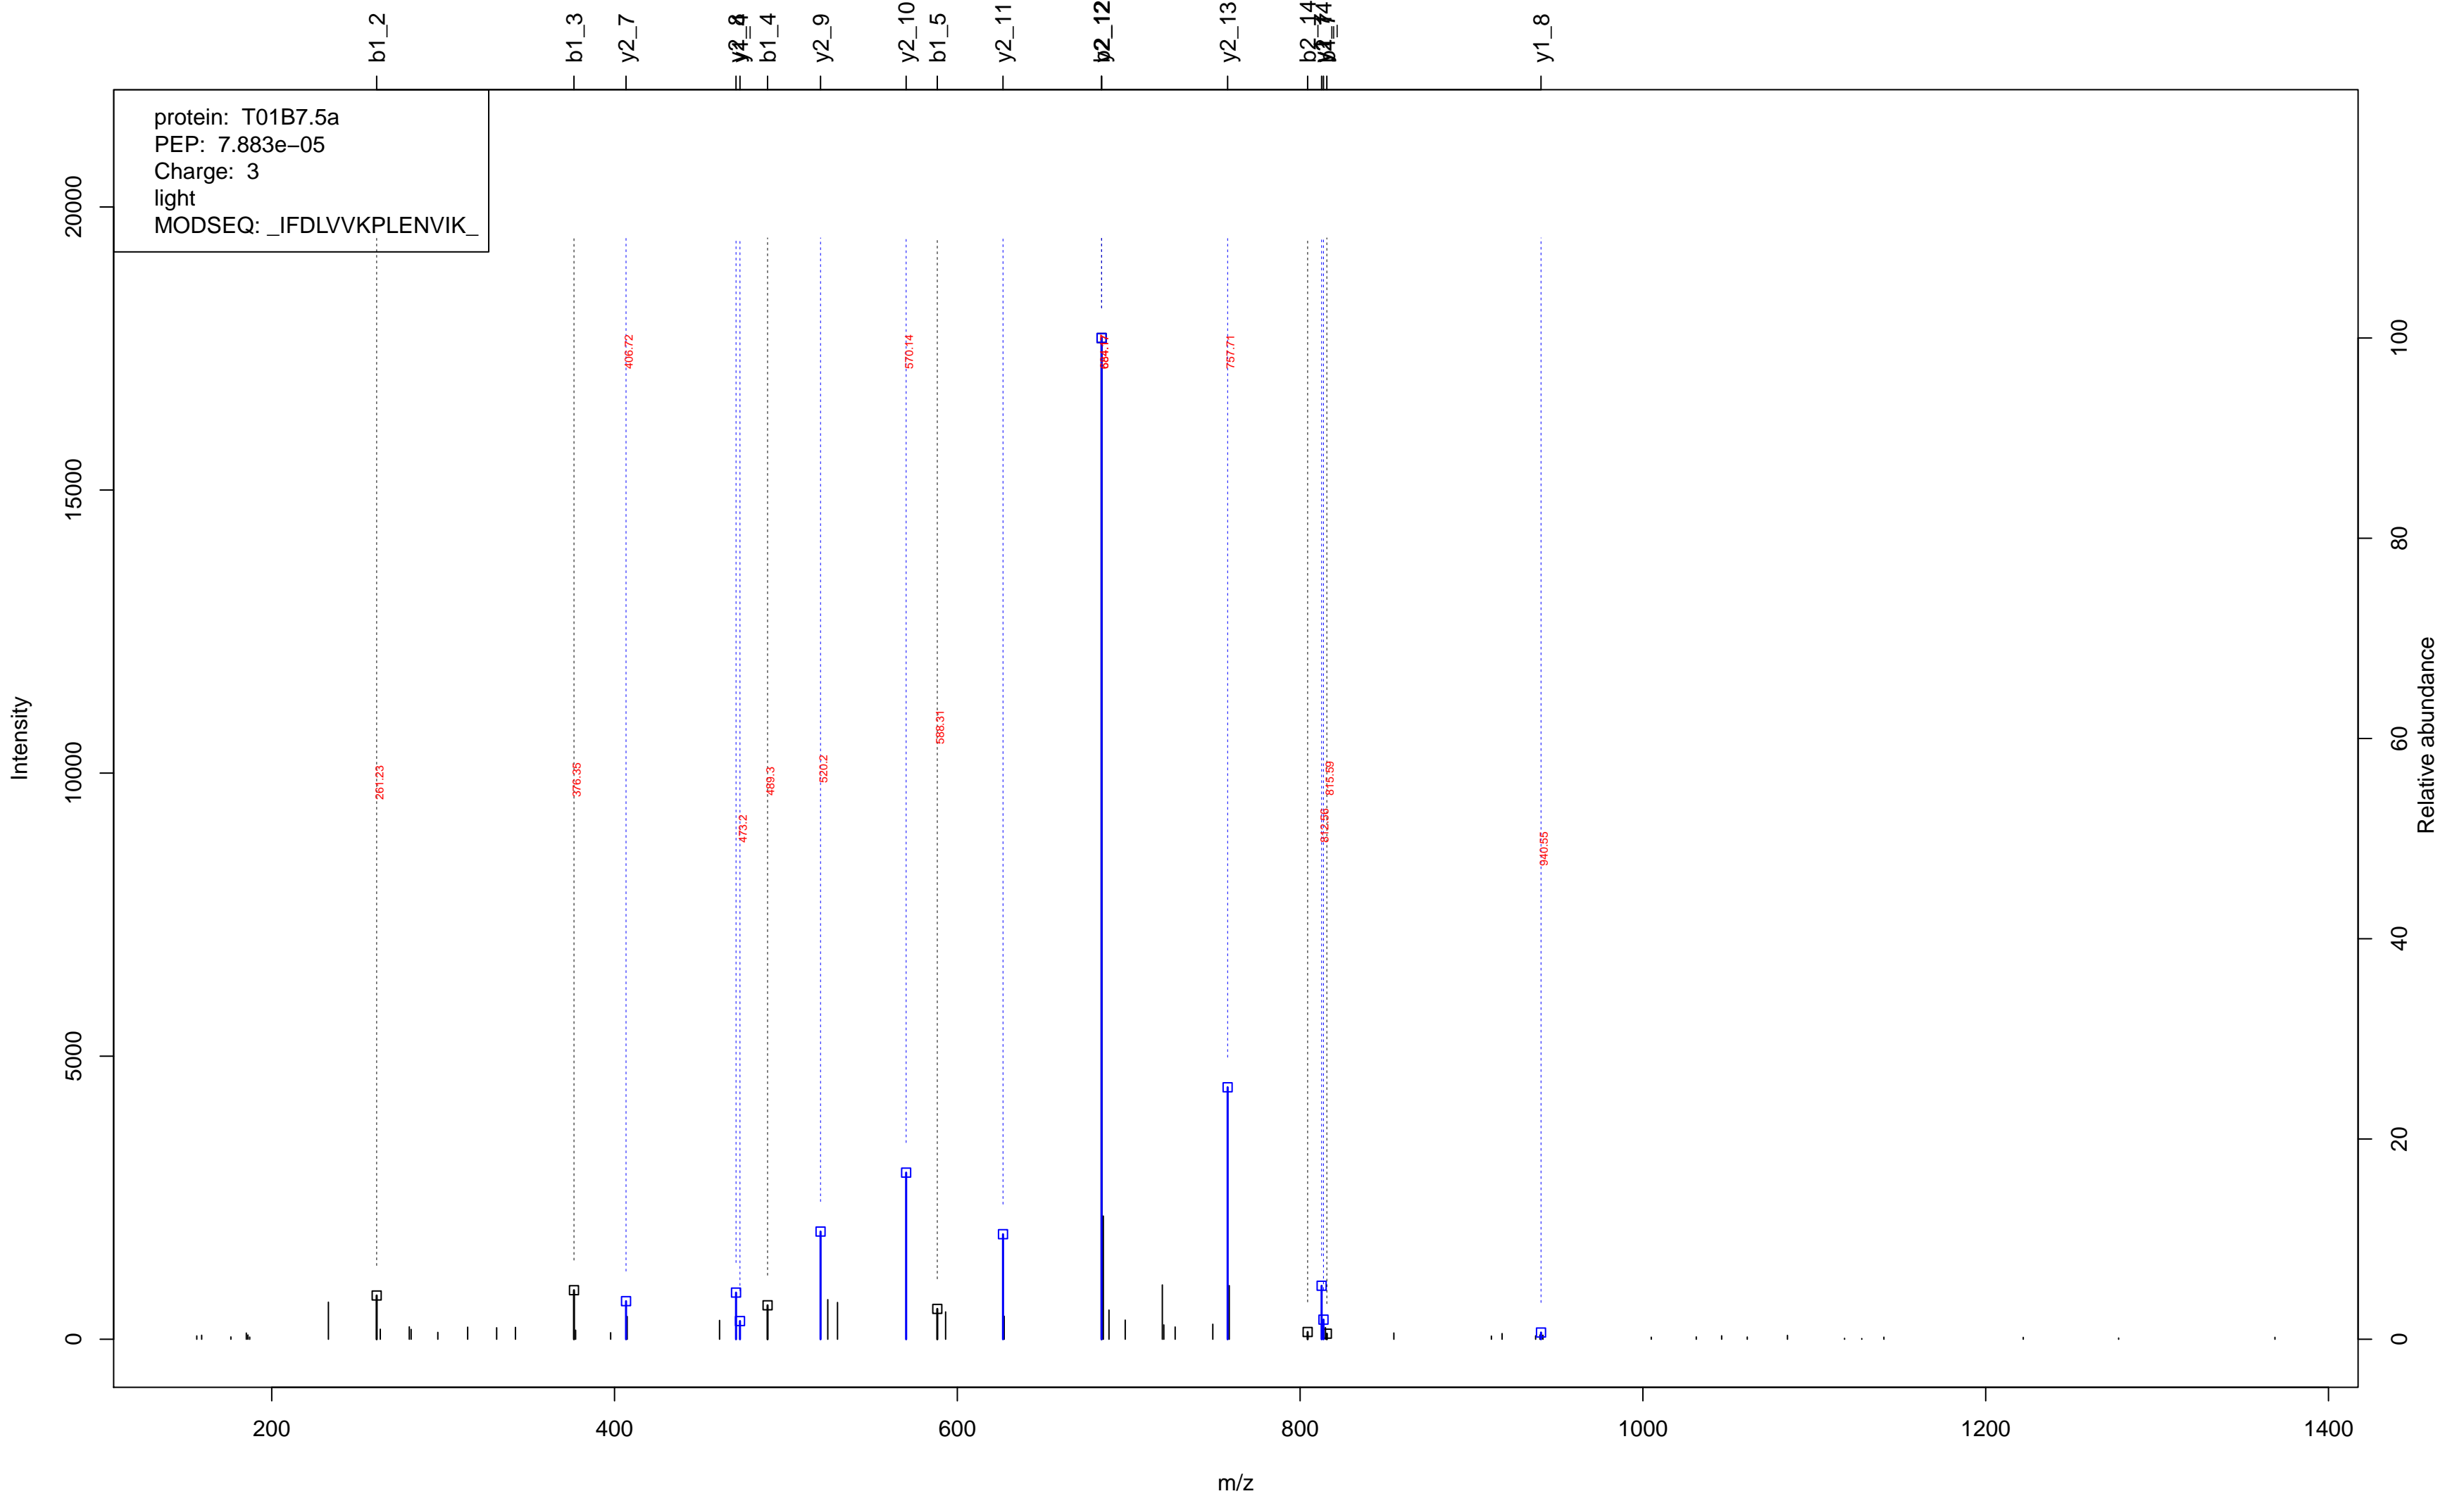

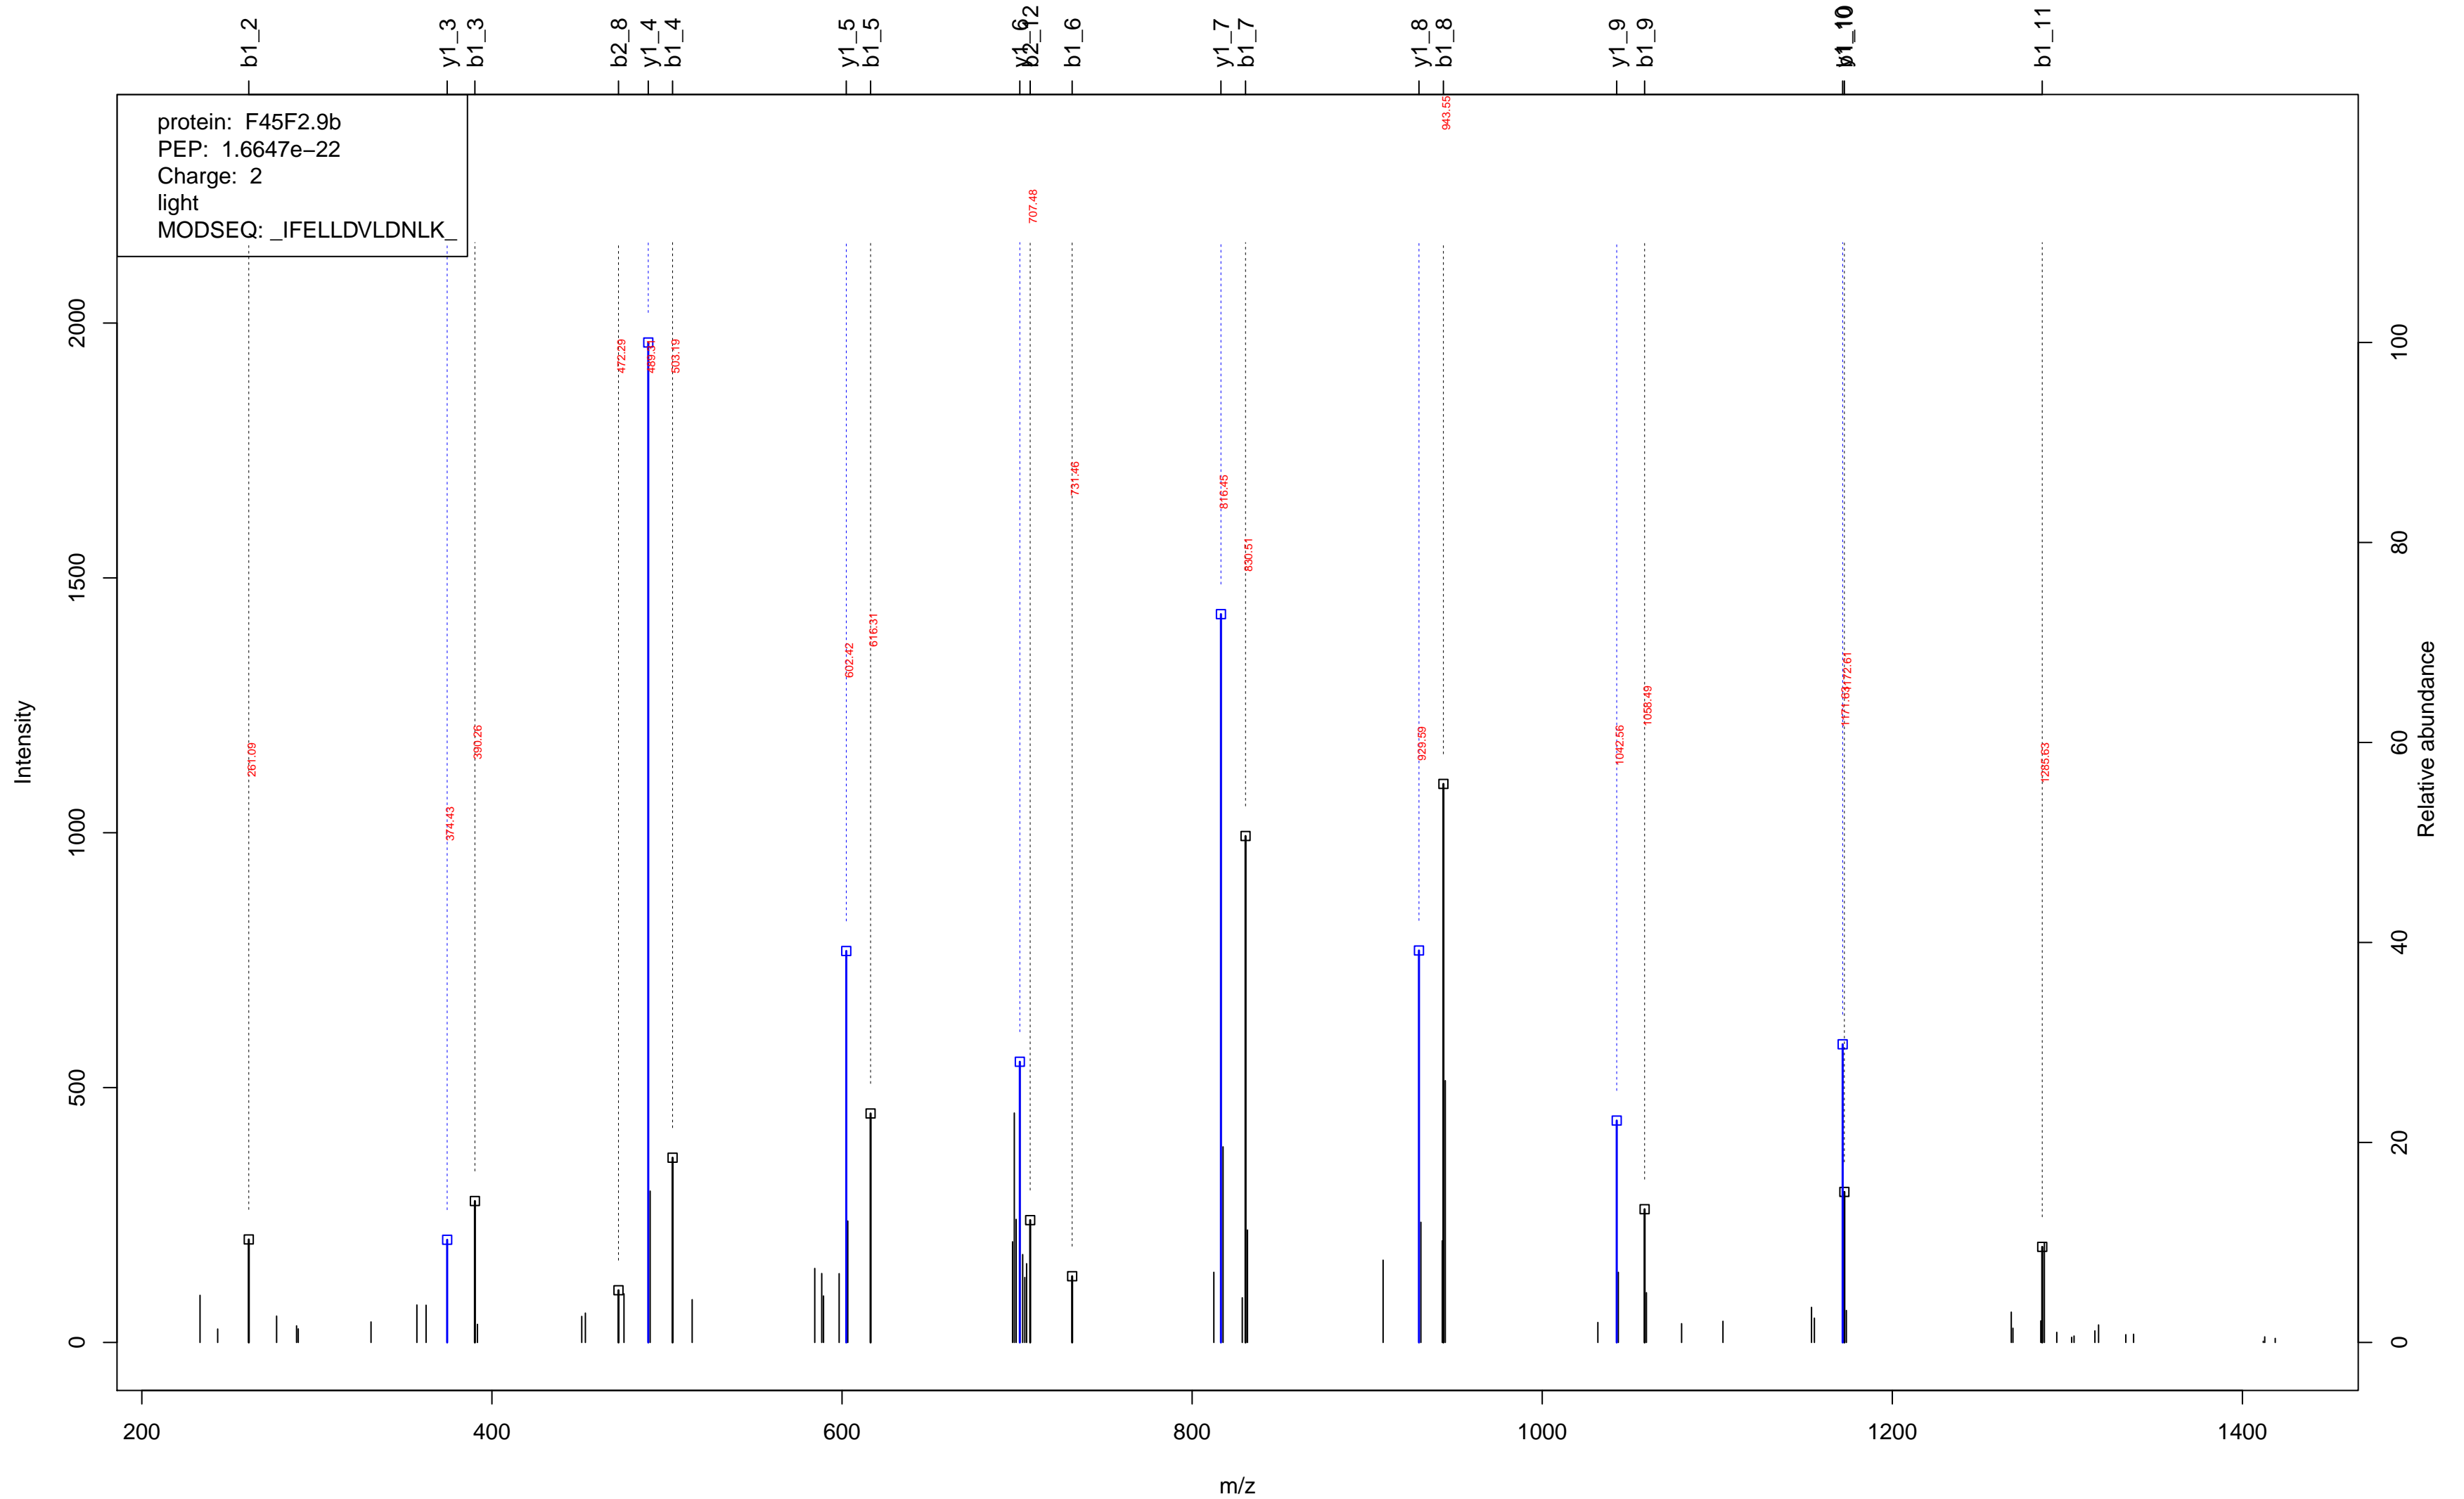



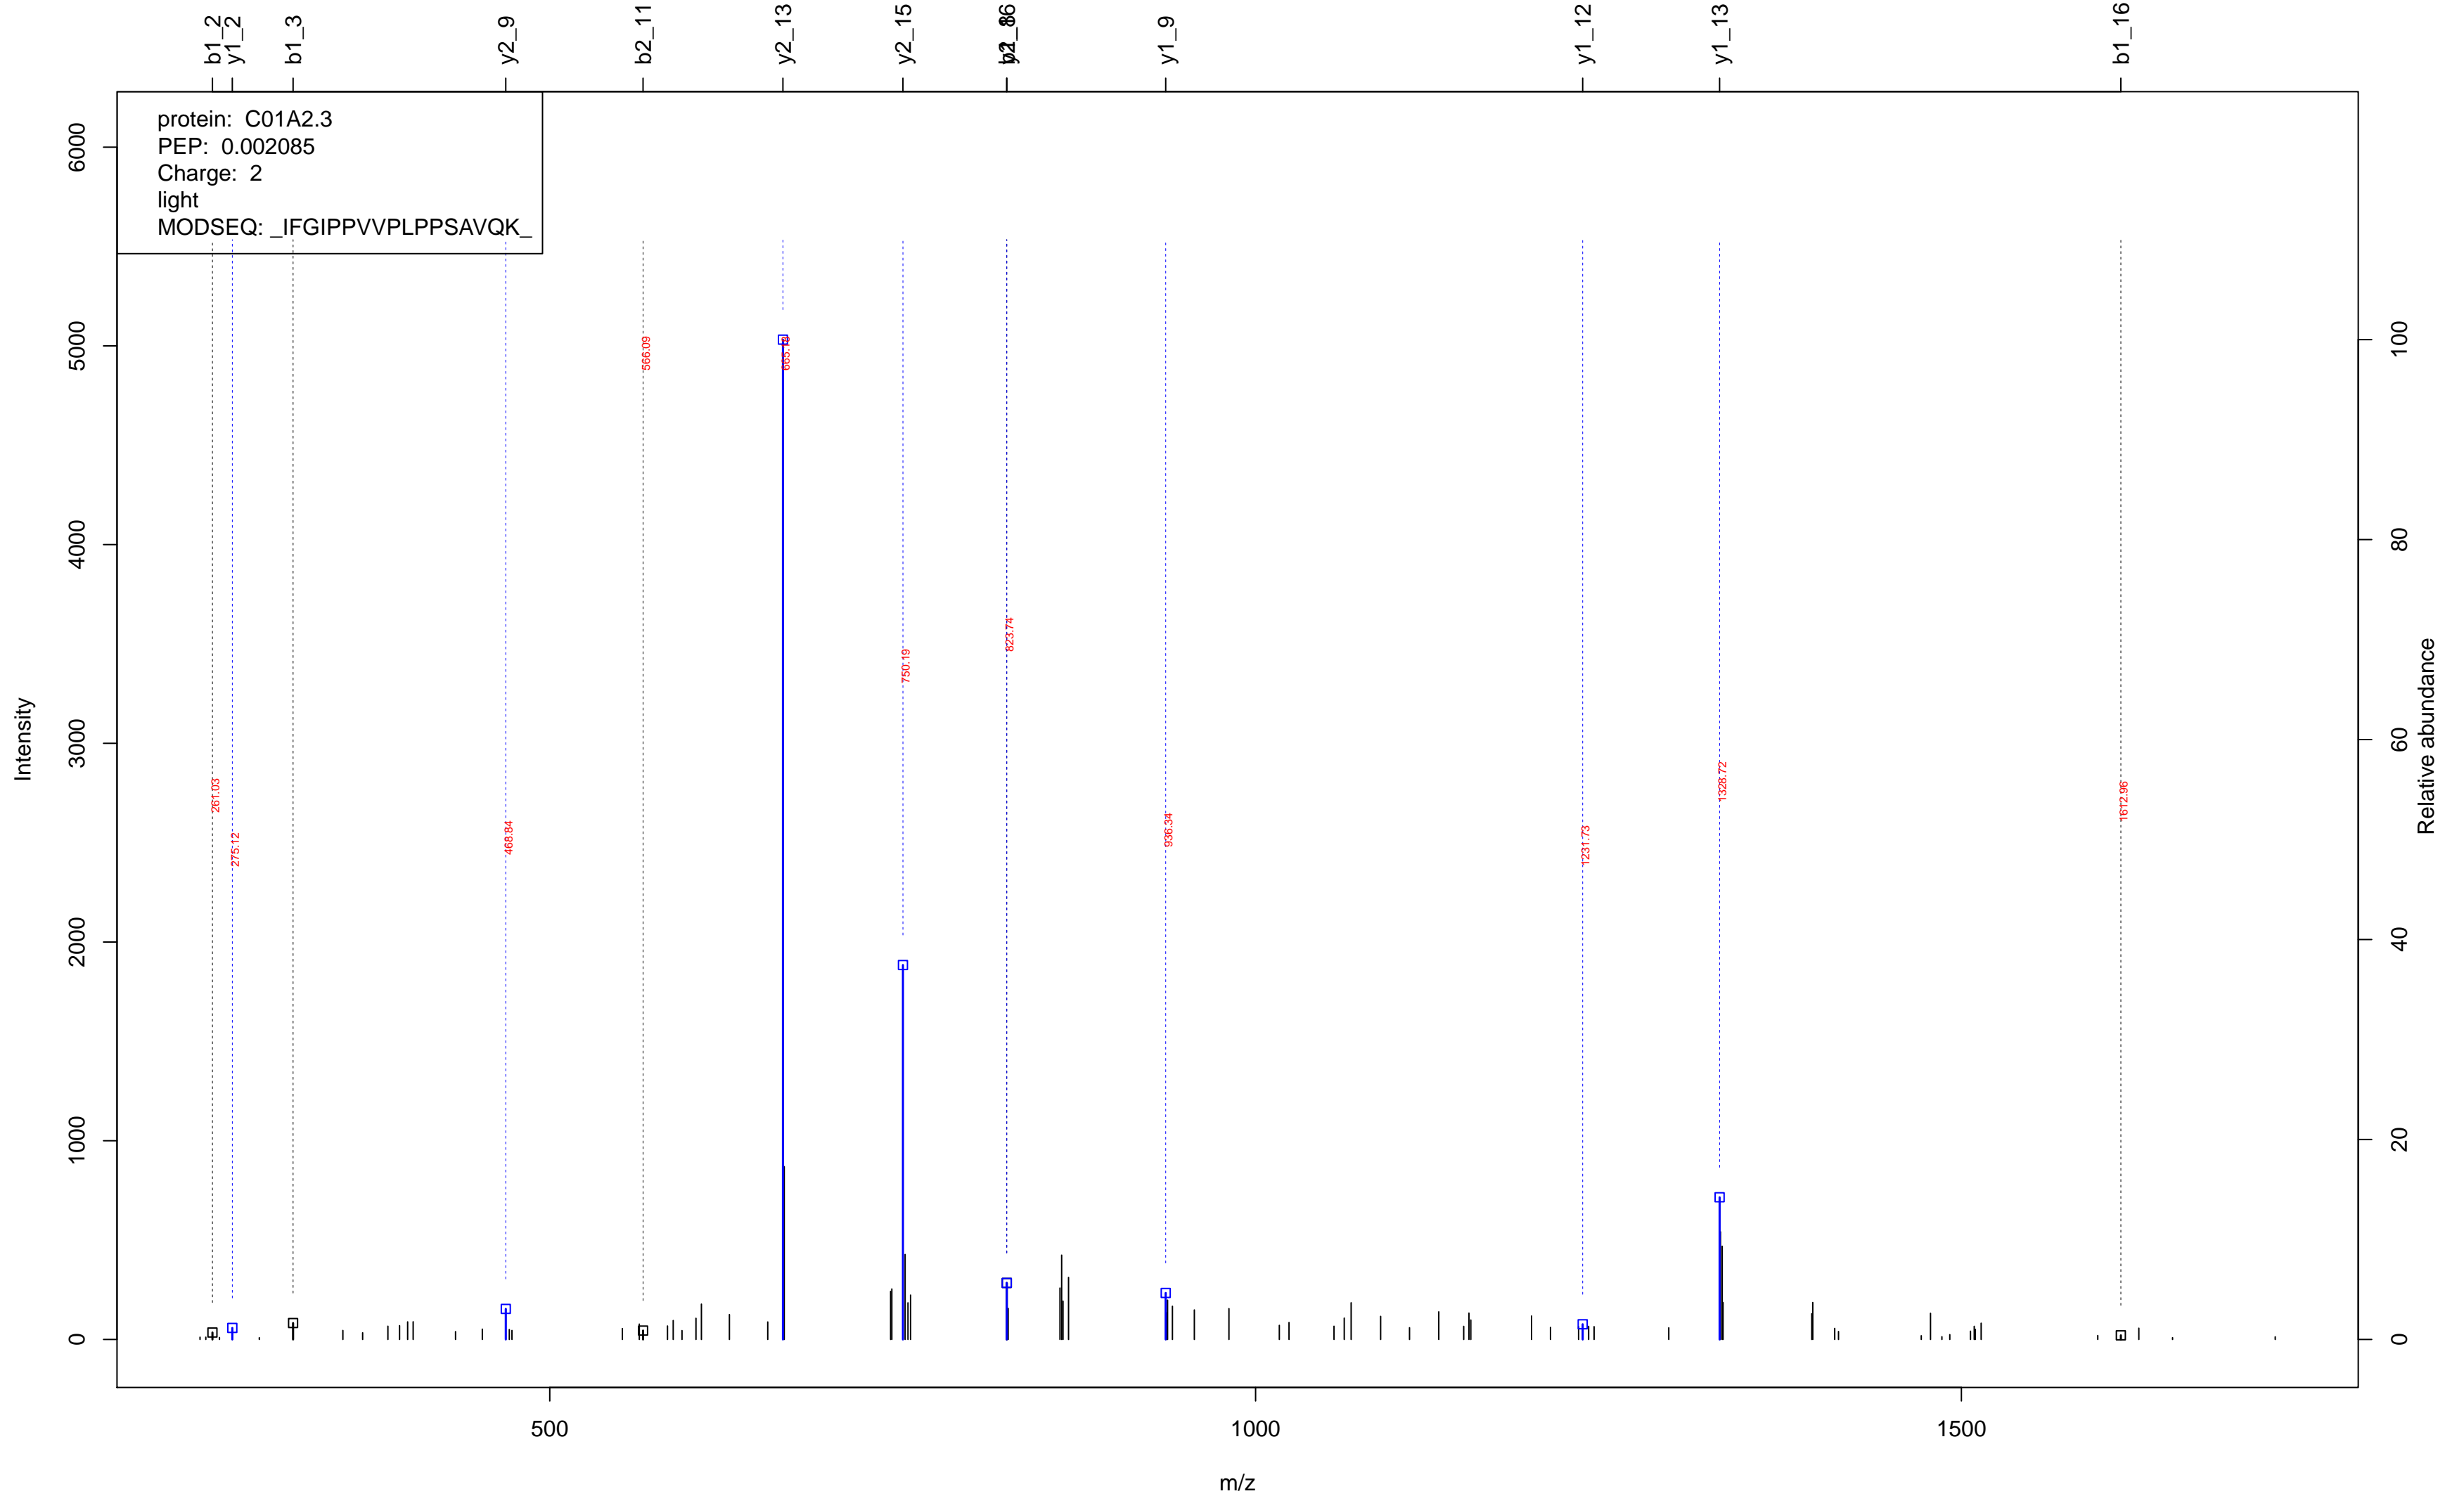

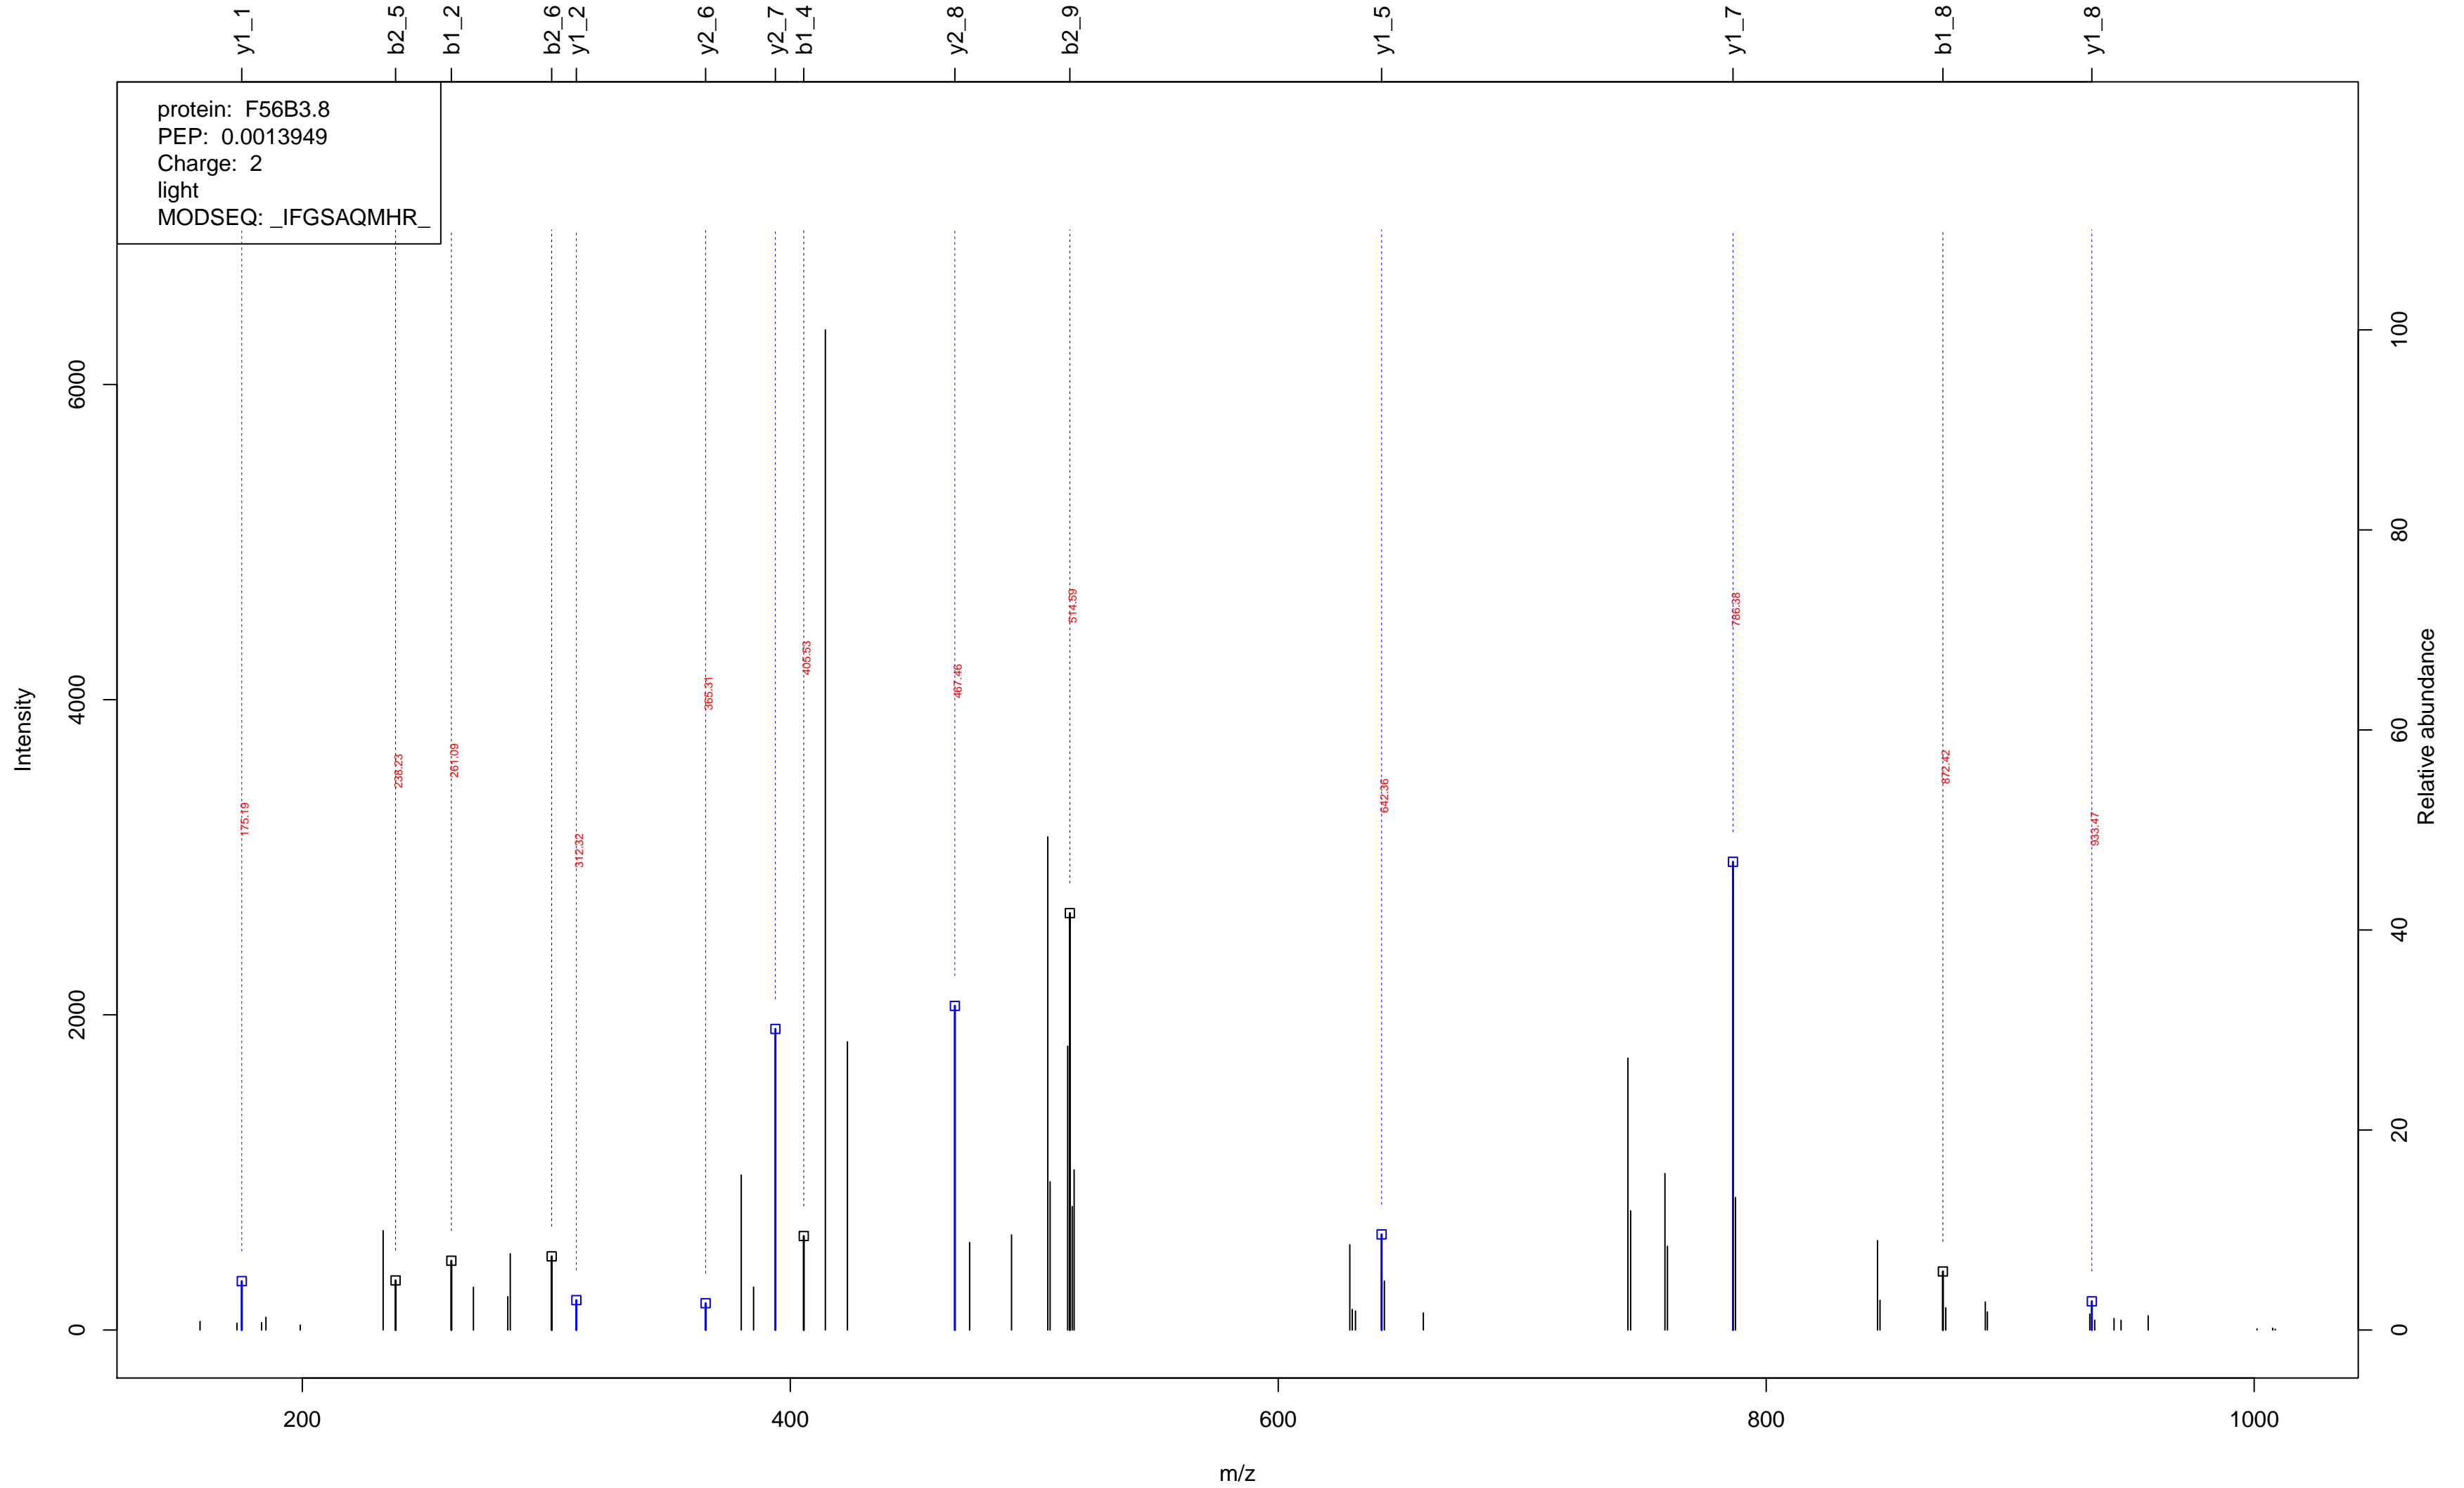

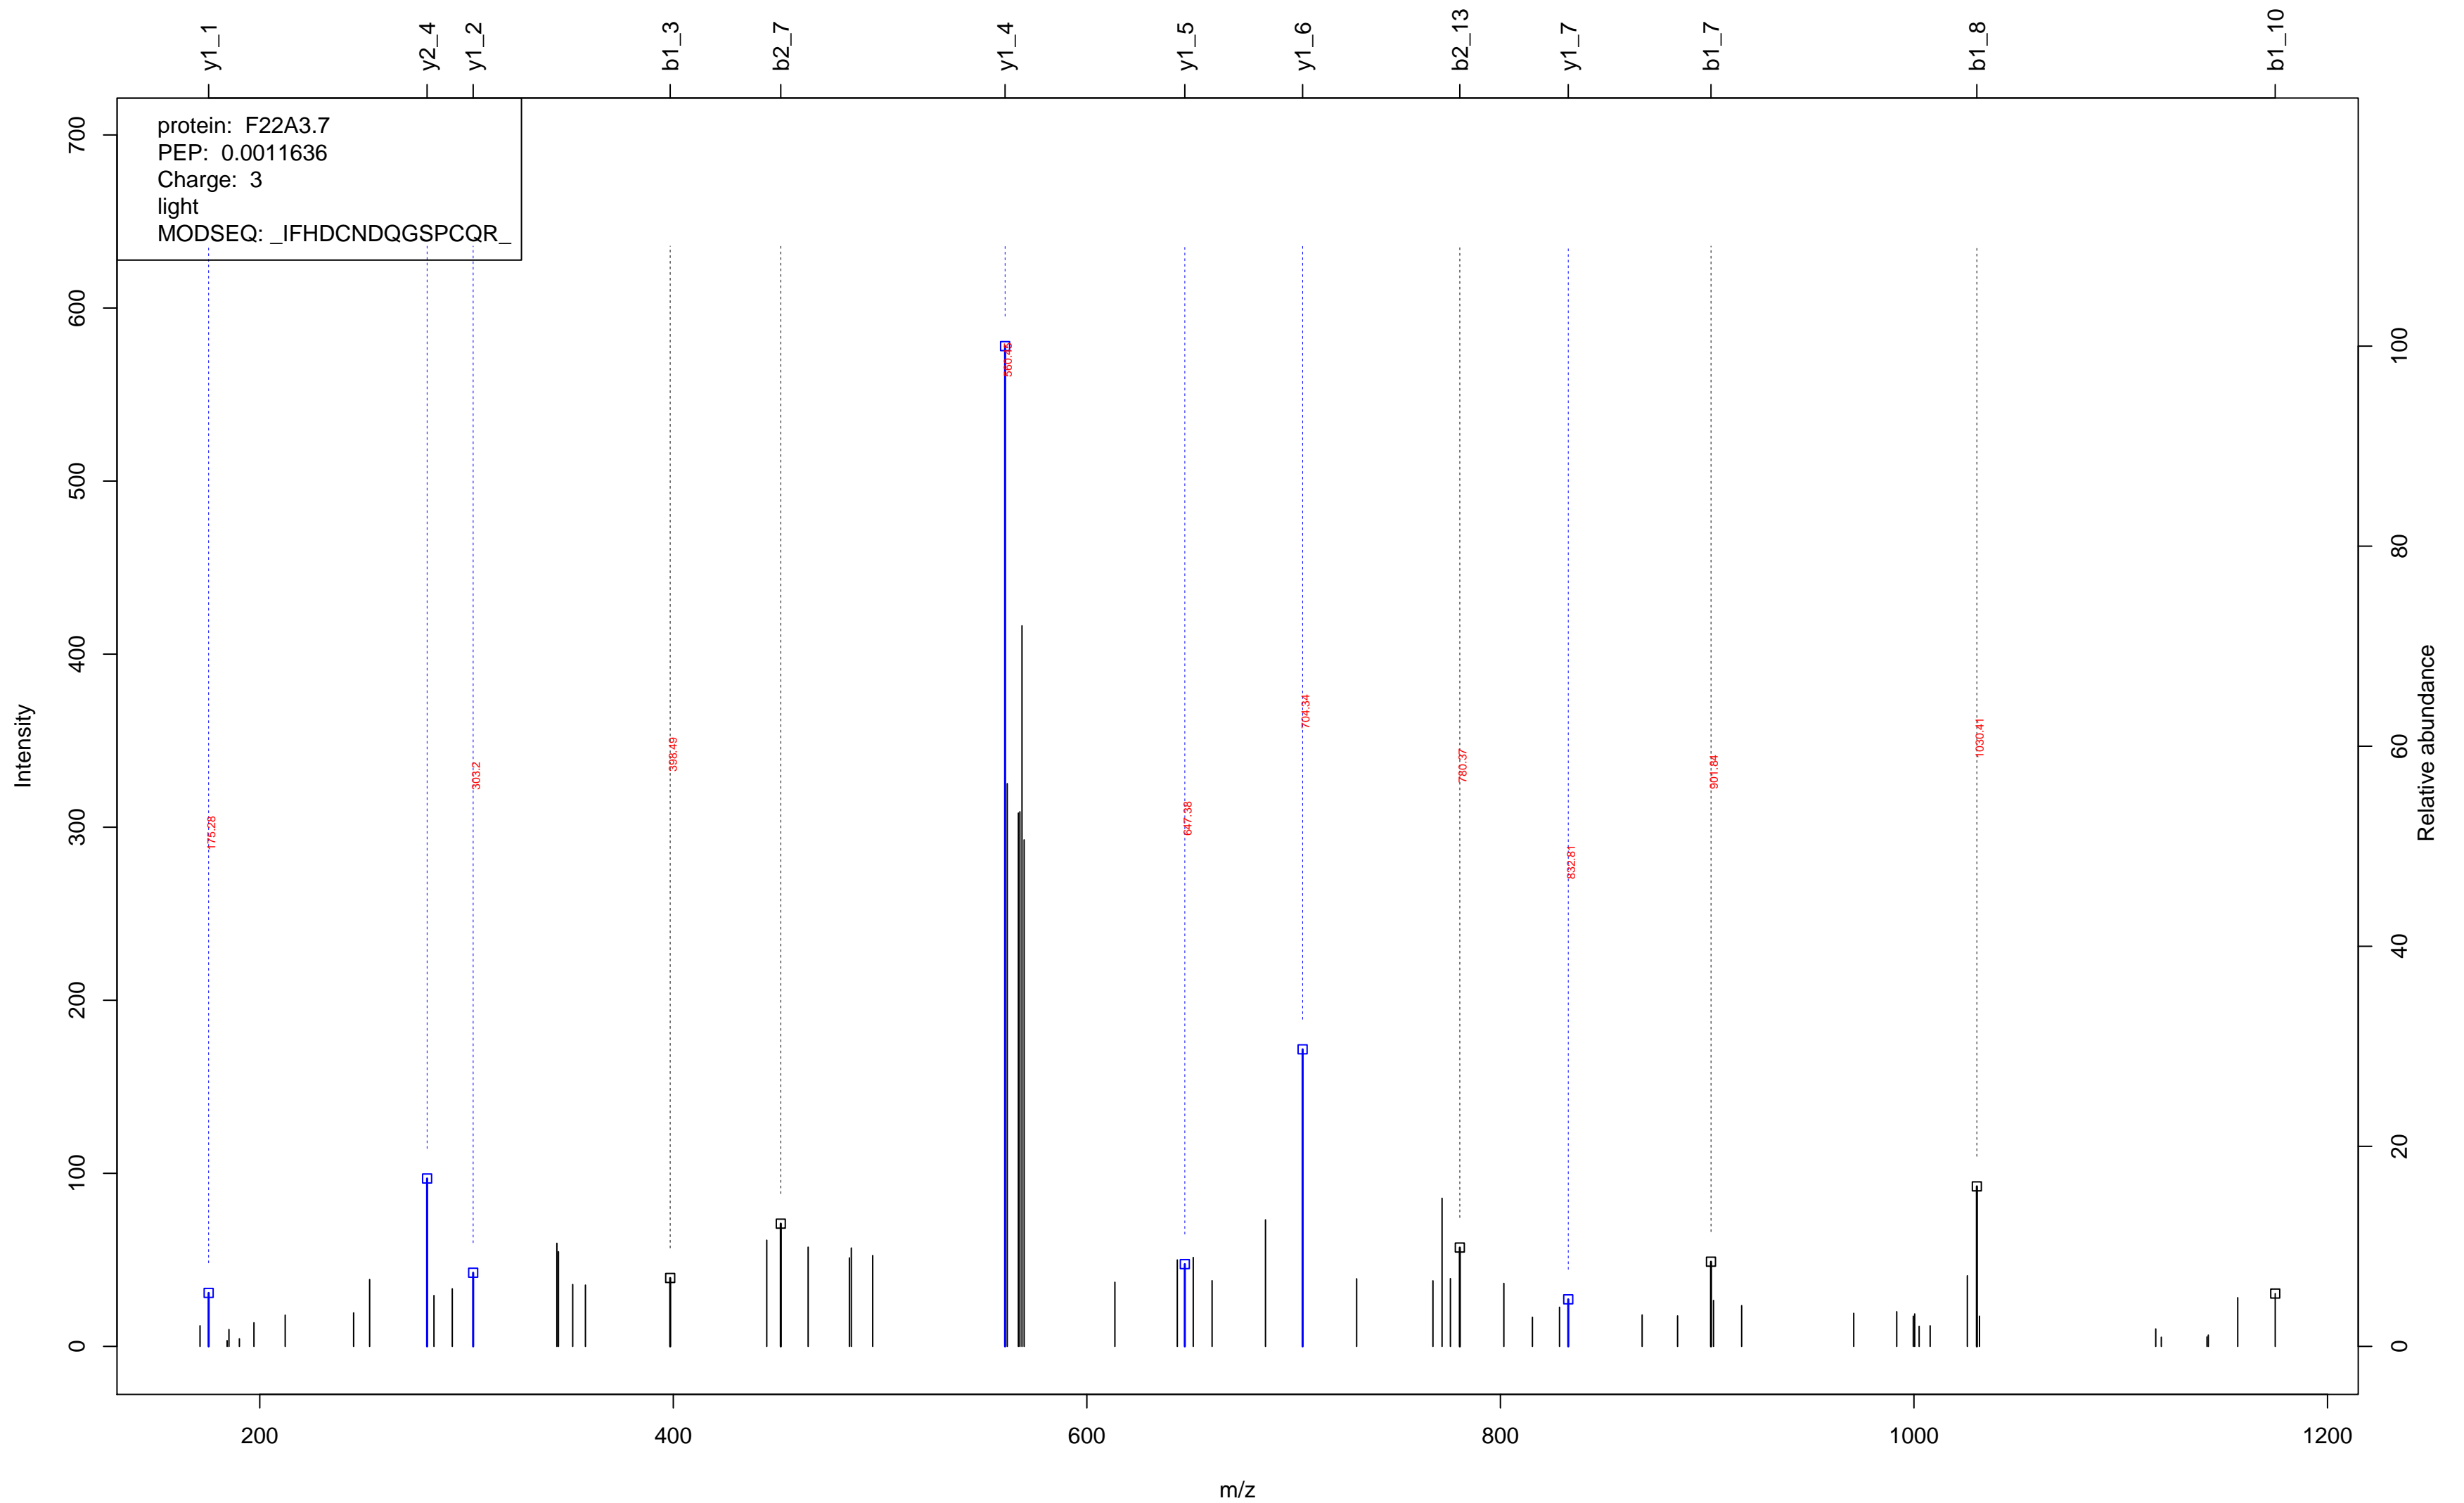

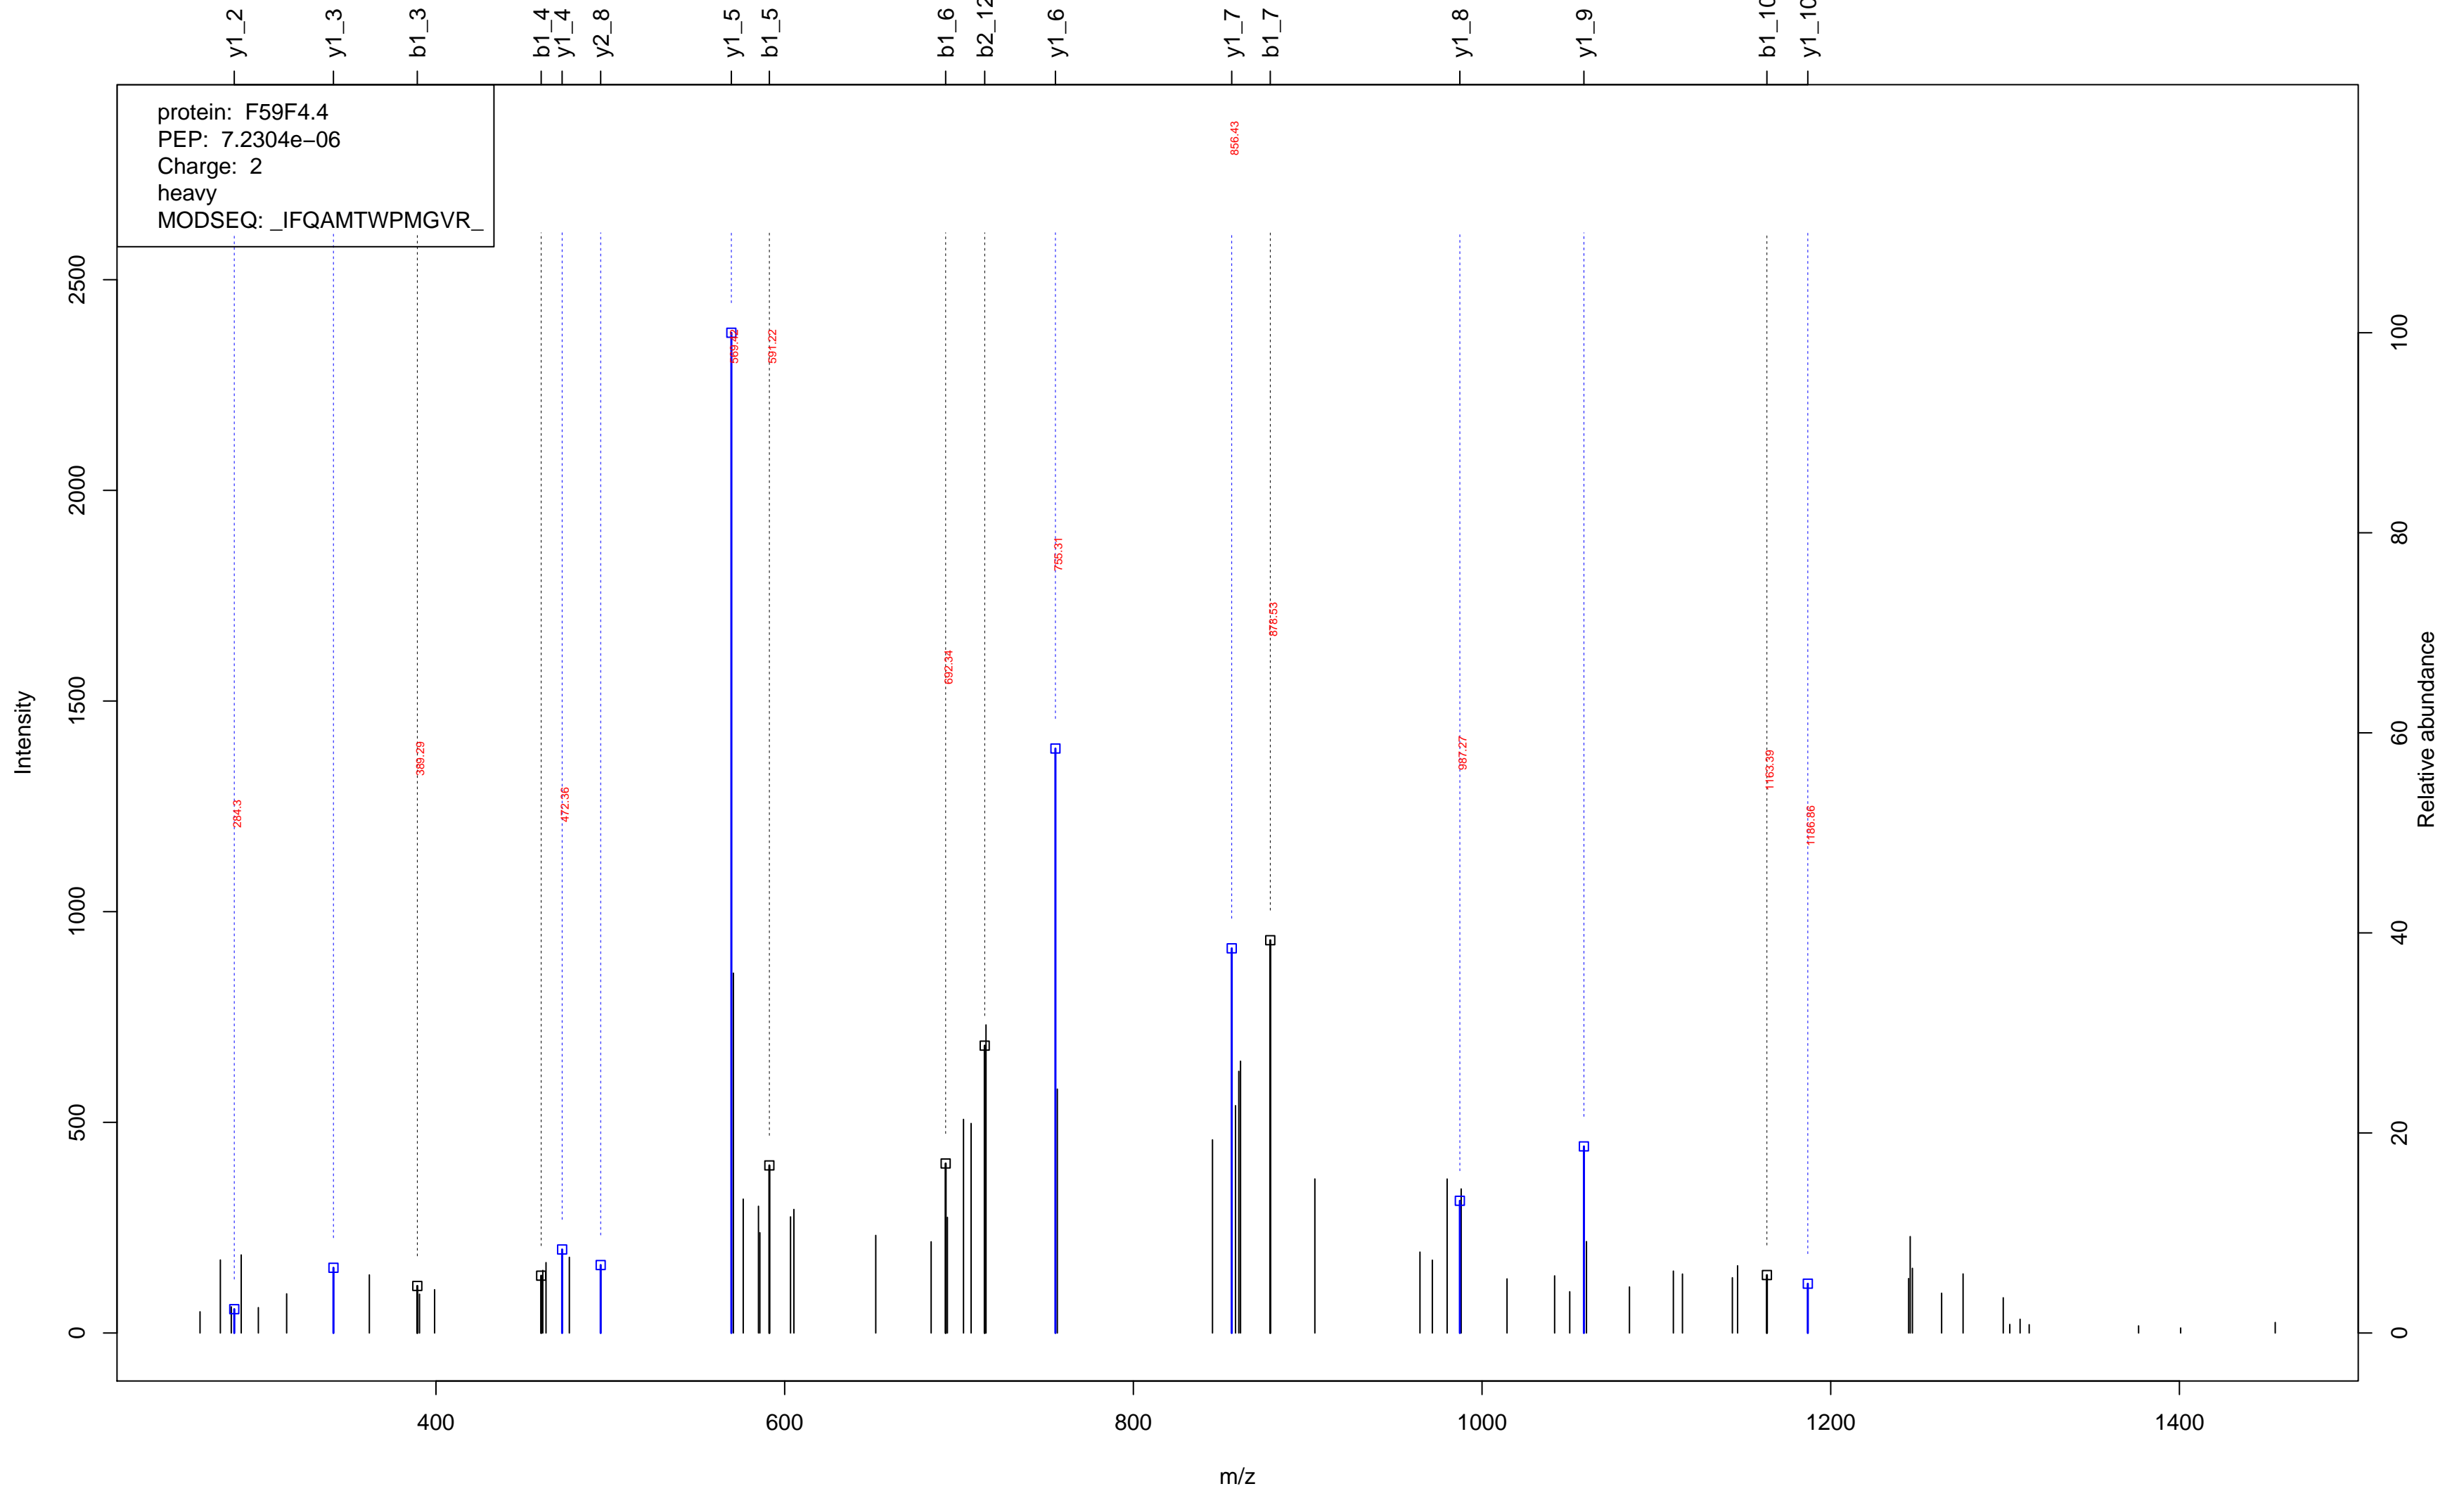

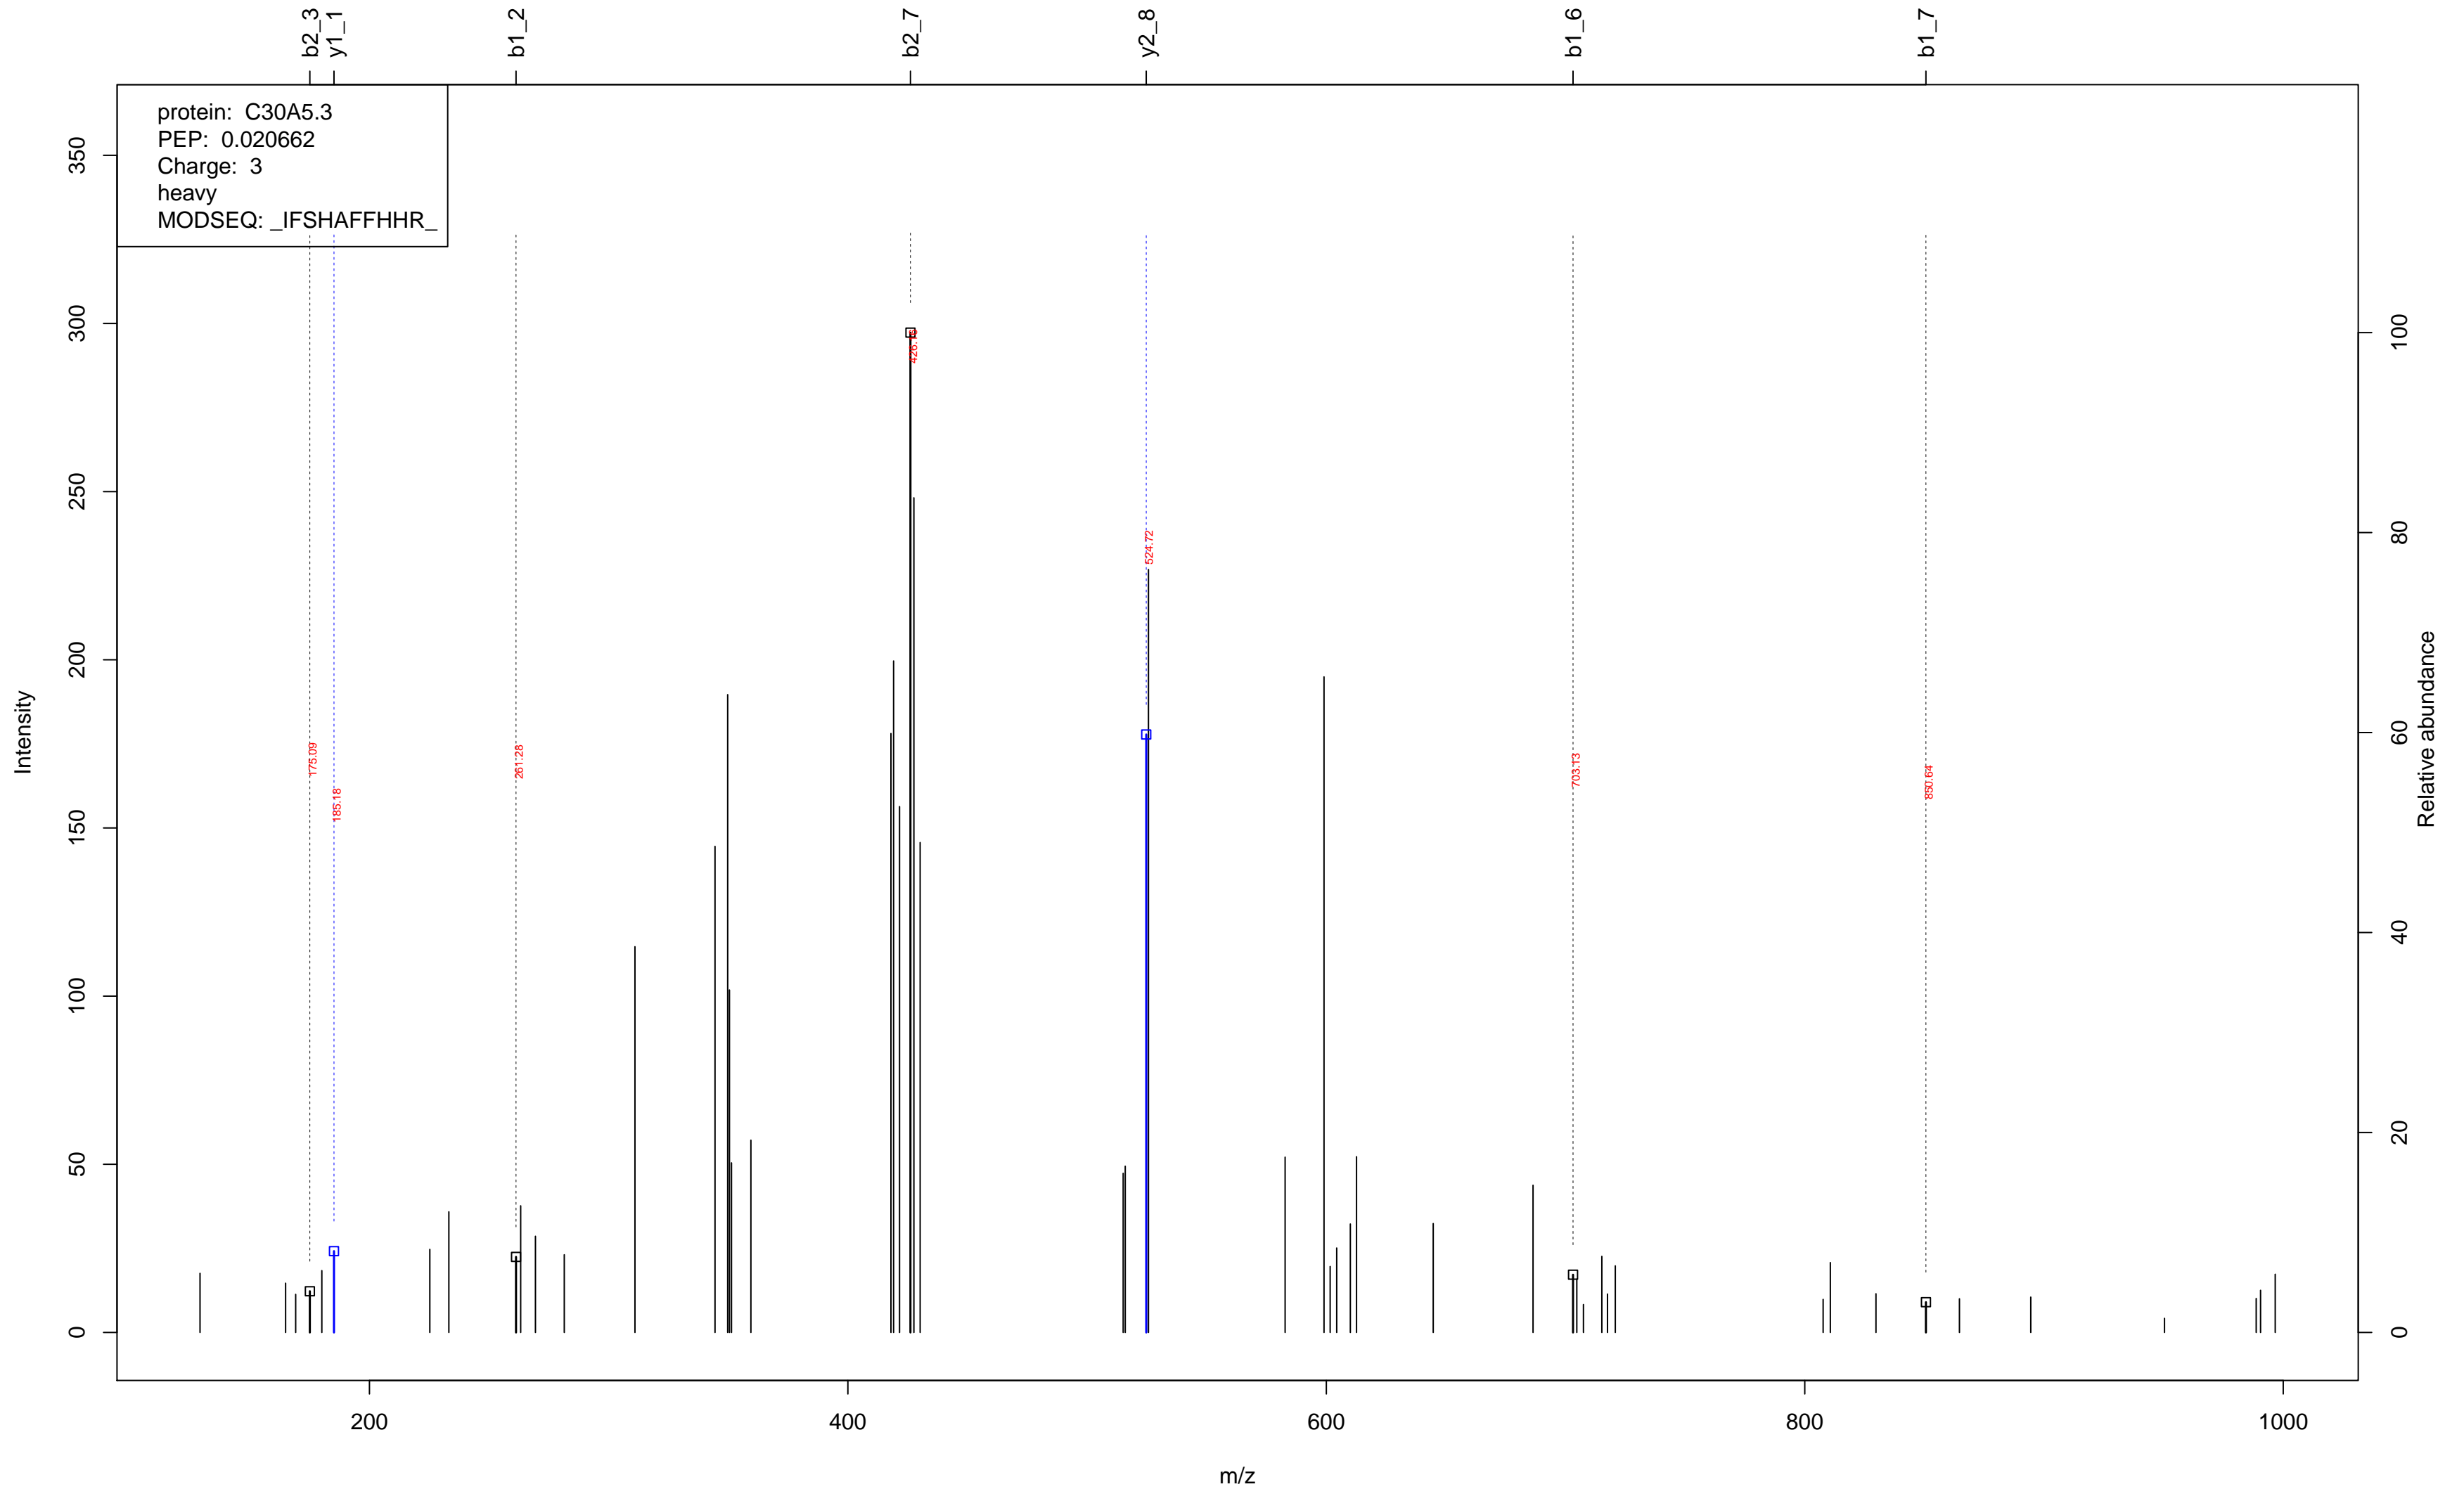

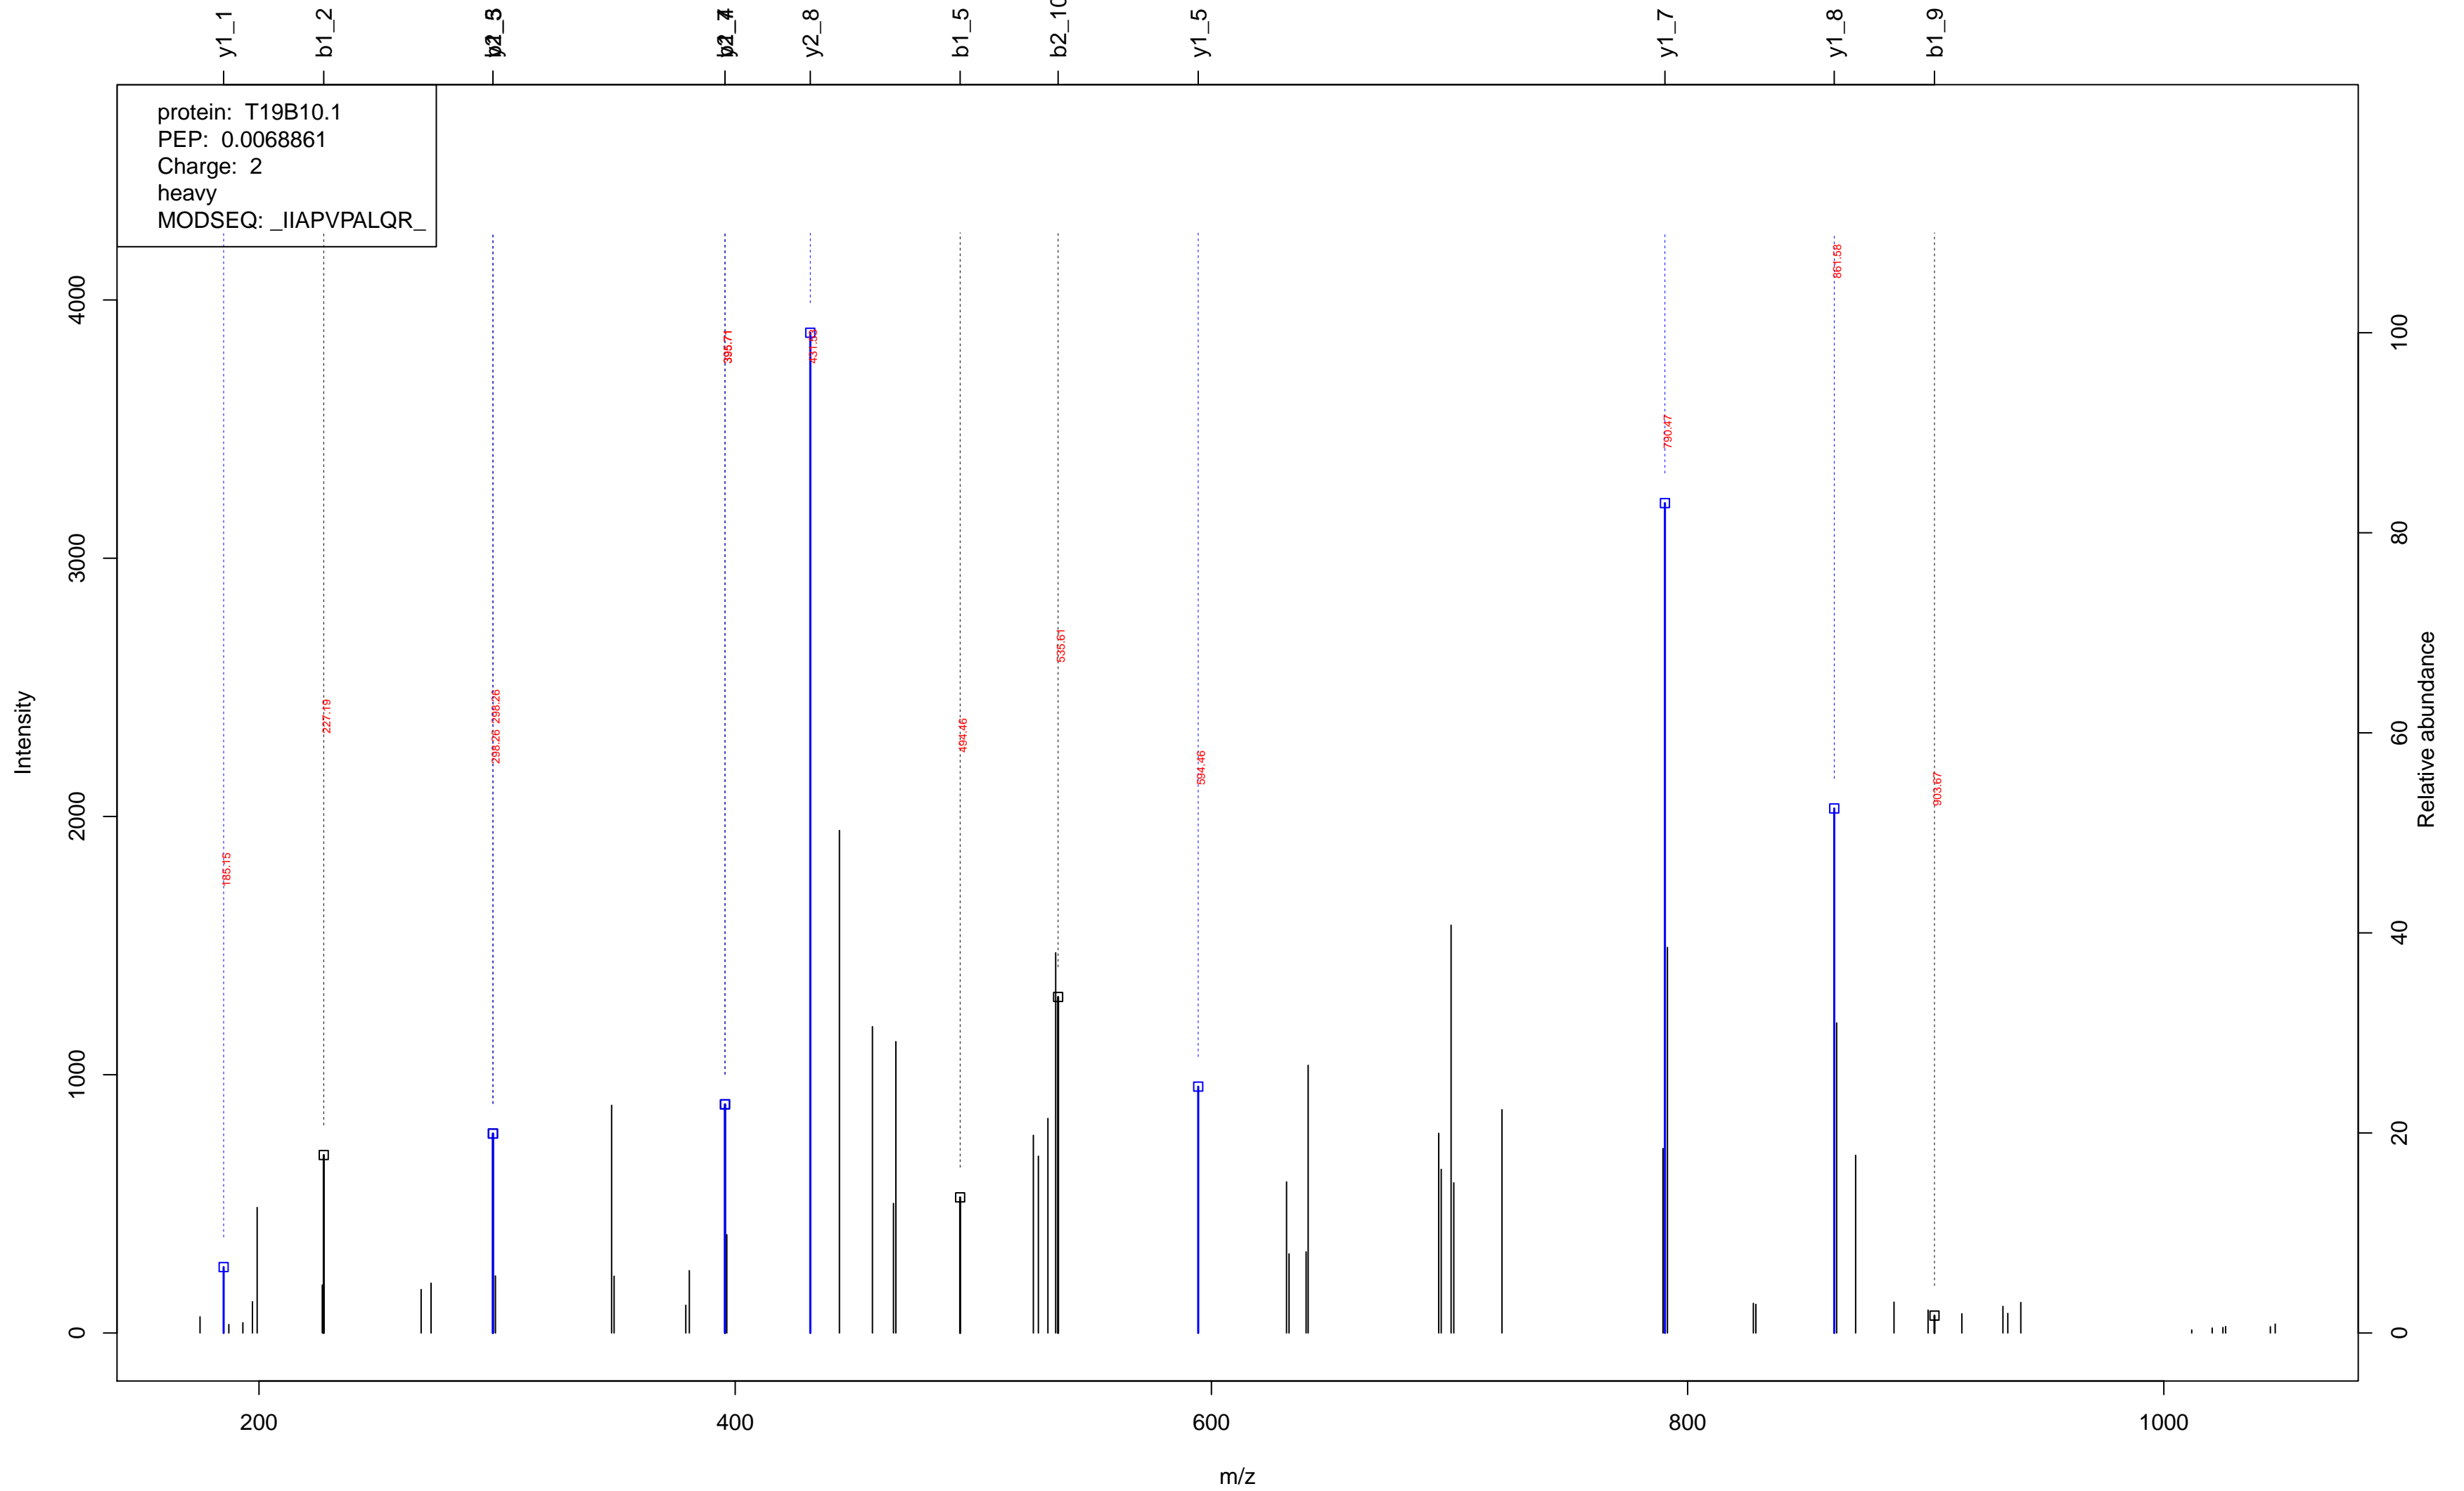

protein: T19B10.1  
PEP: 0.0068861  
Charge: 2  
heavy  
MODSEQ: \_IAPVPALQR\_

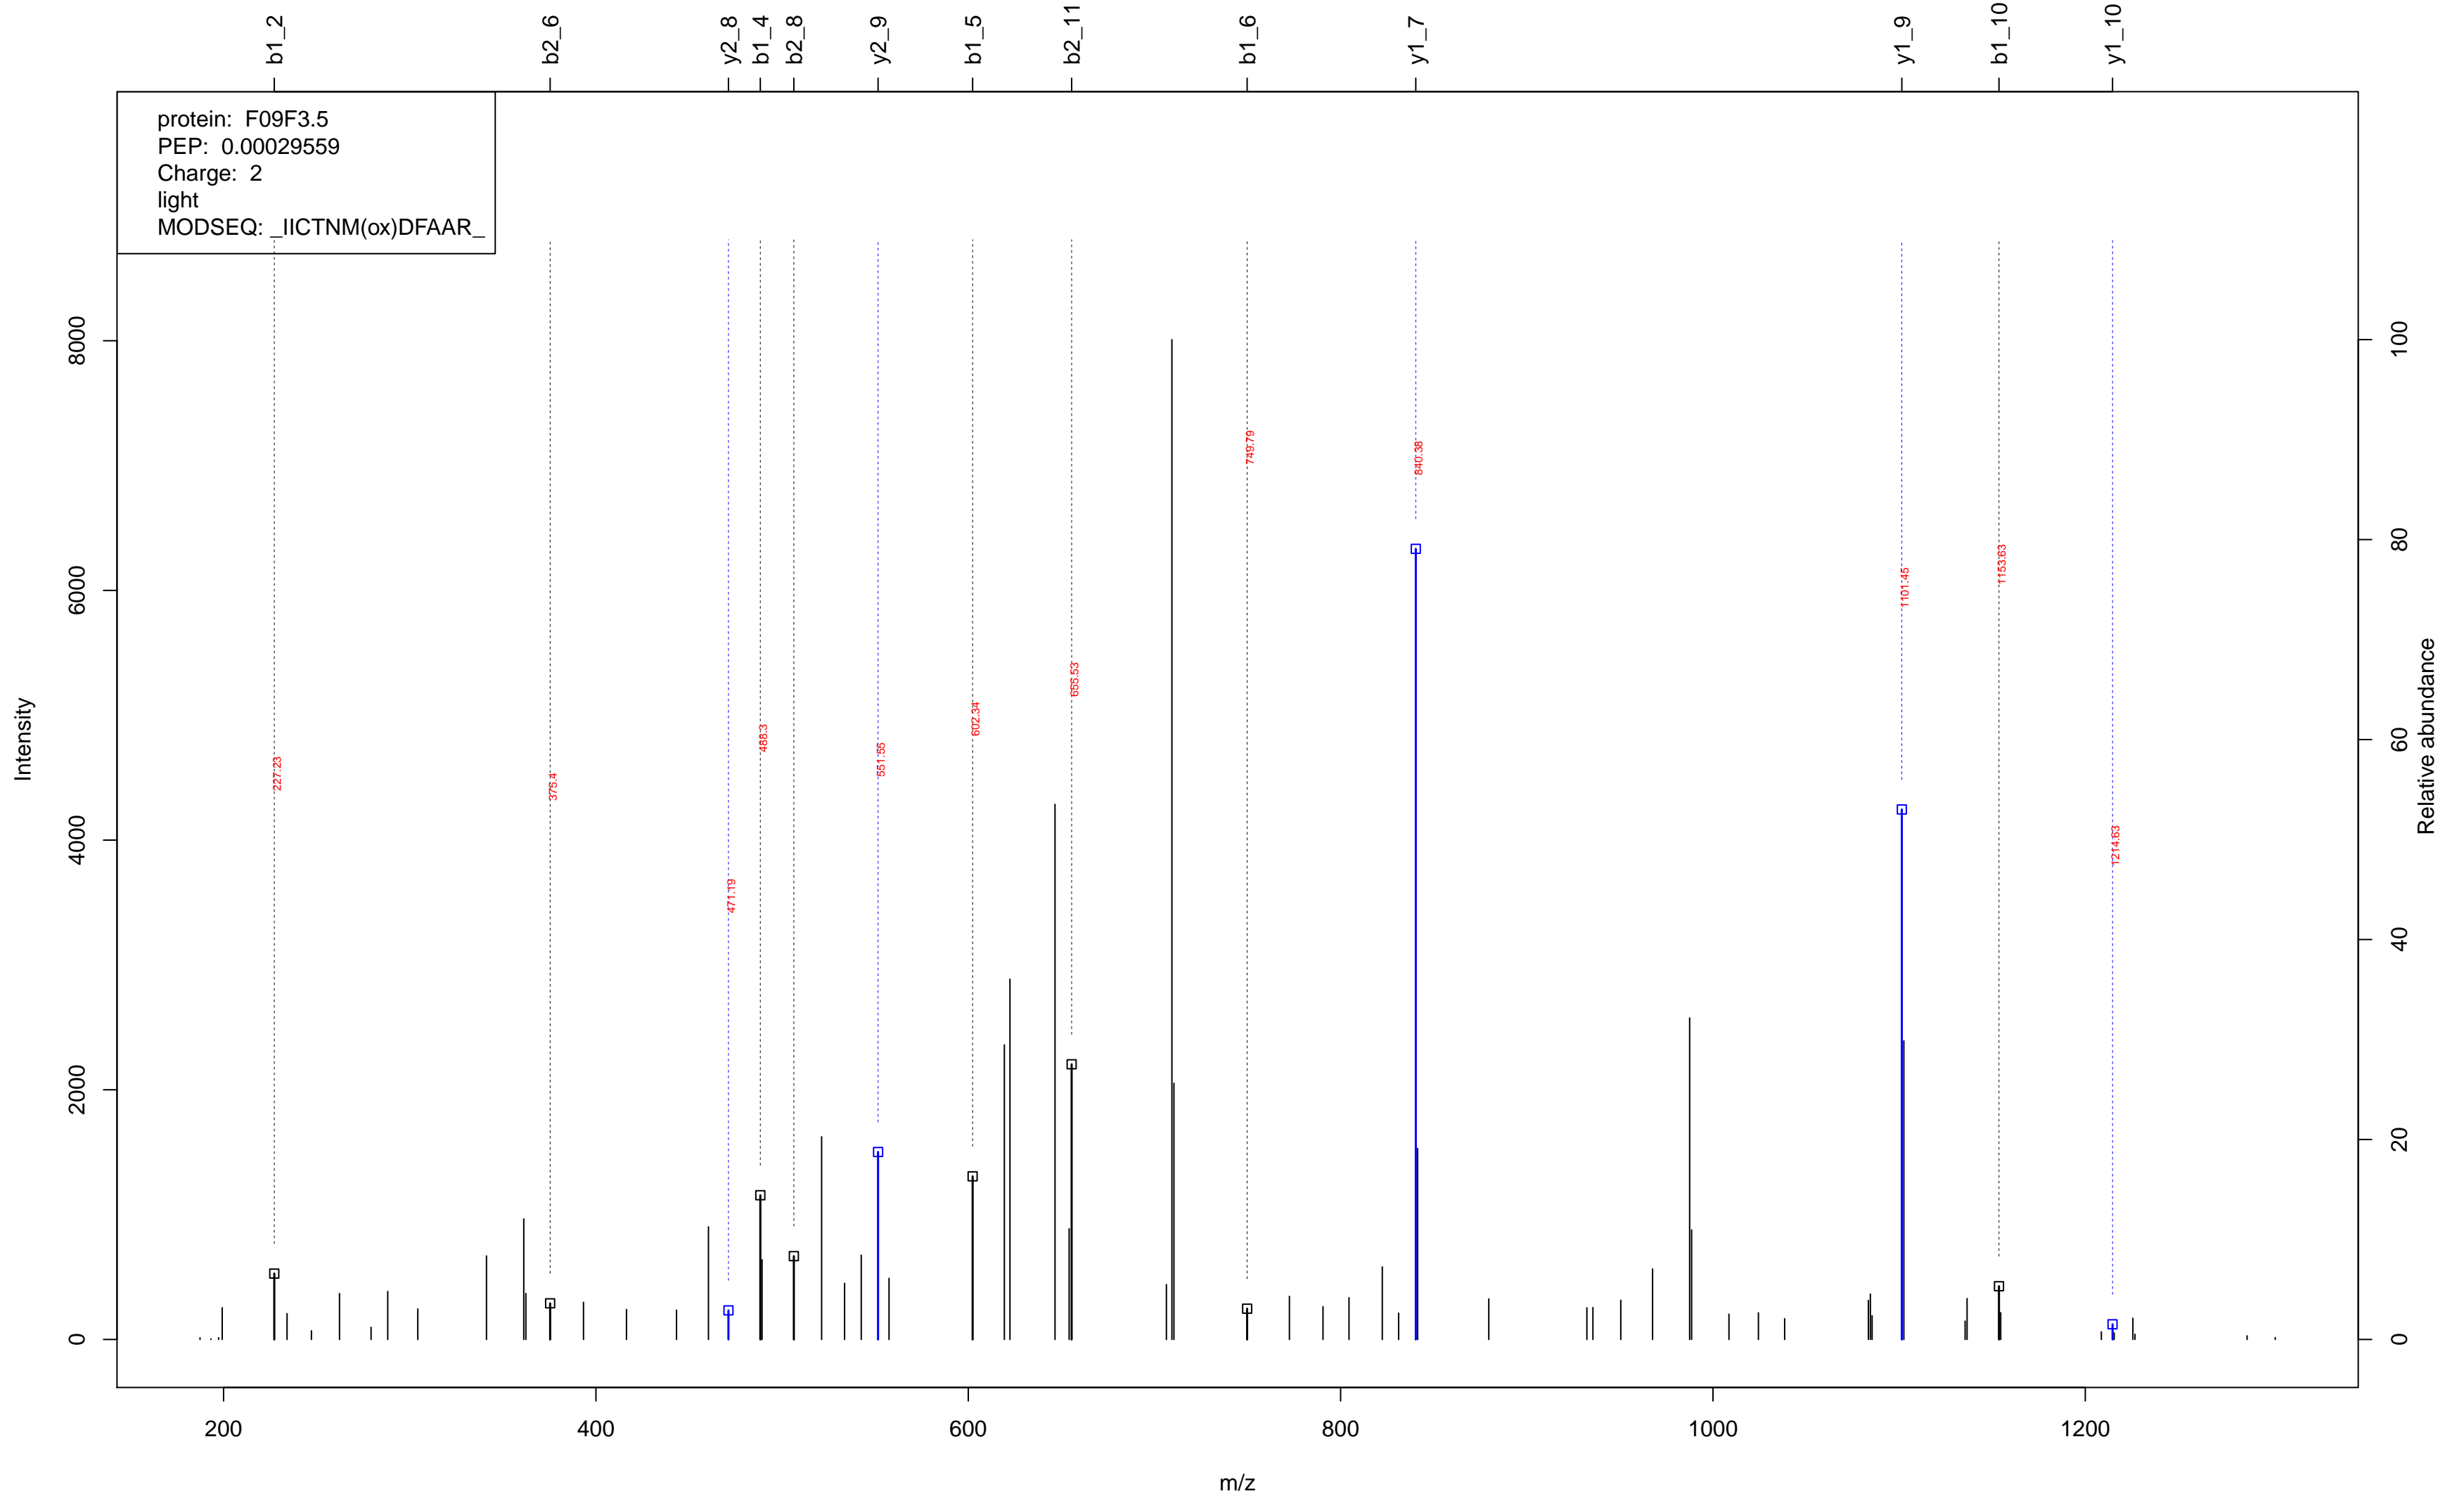

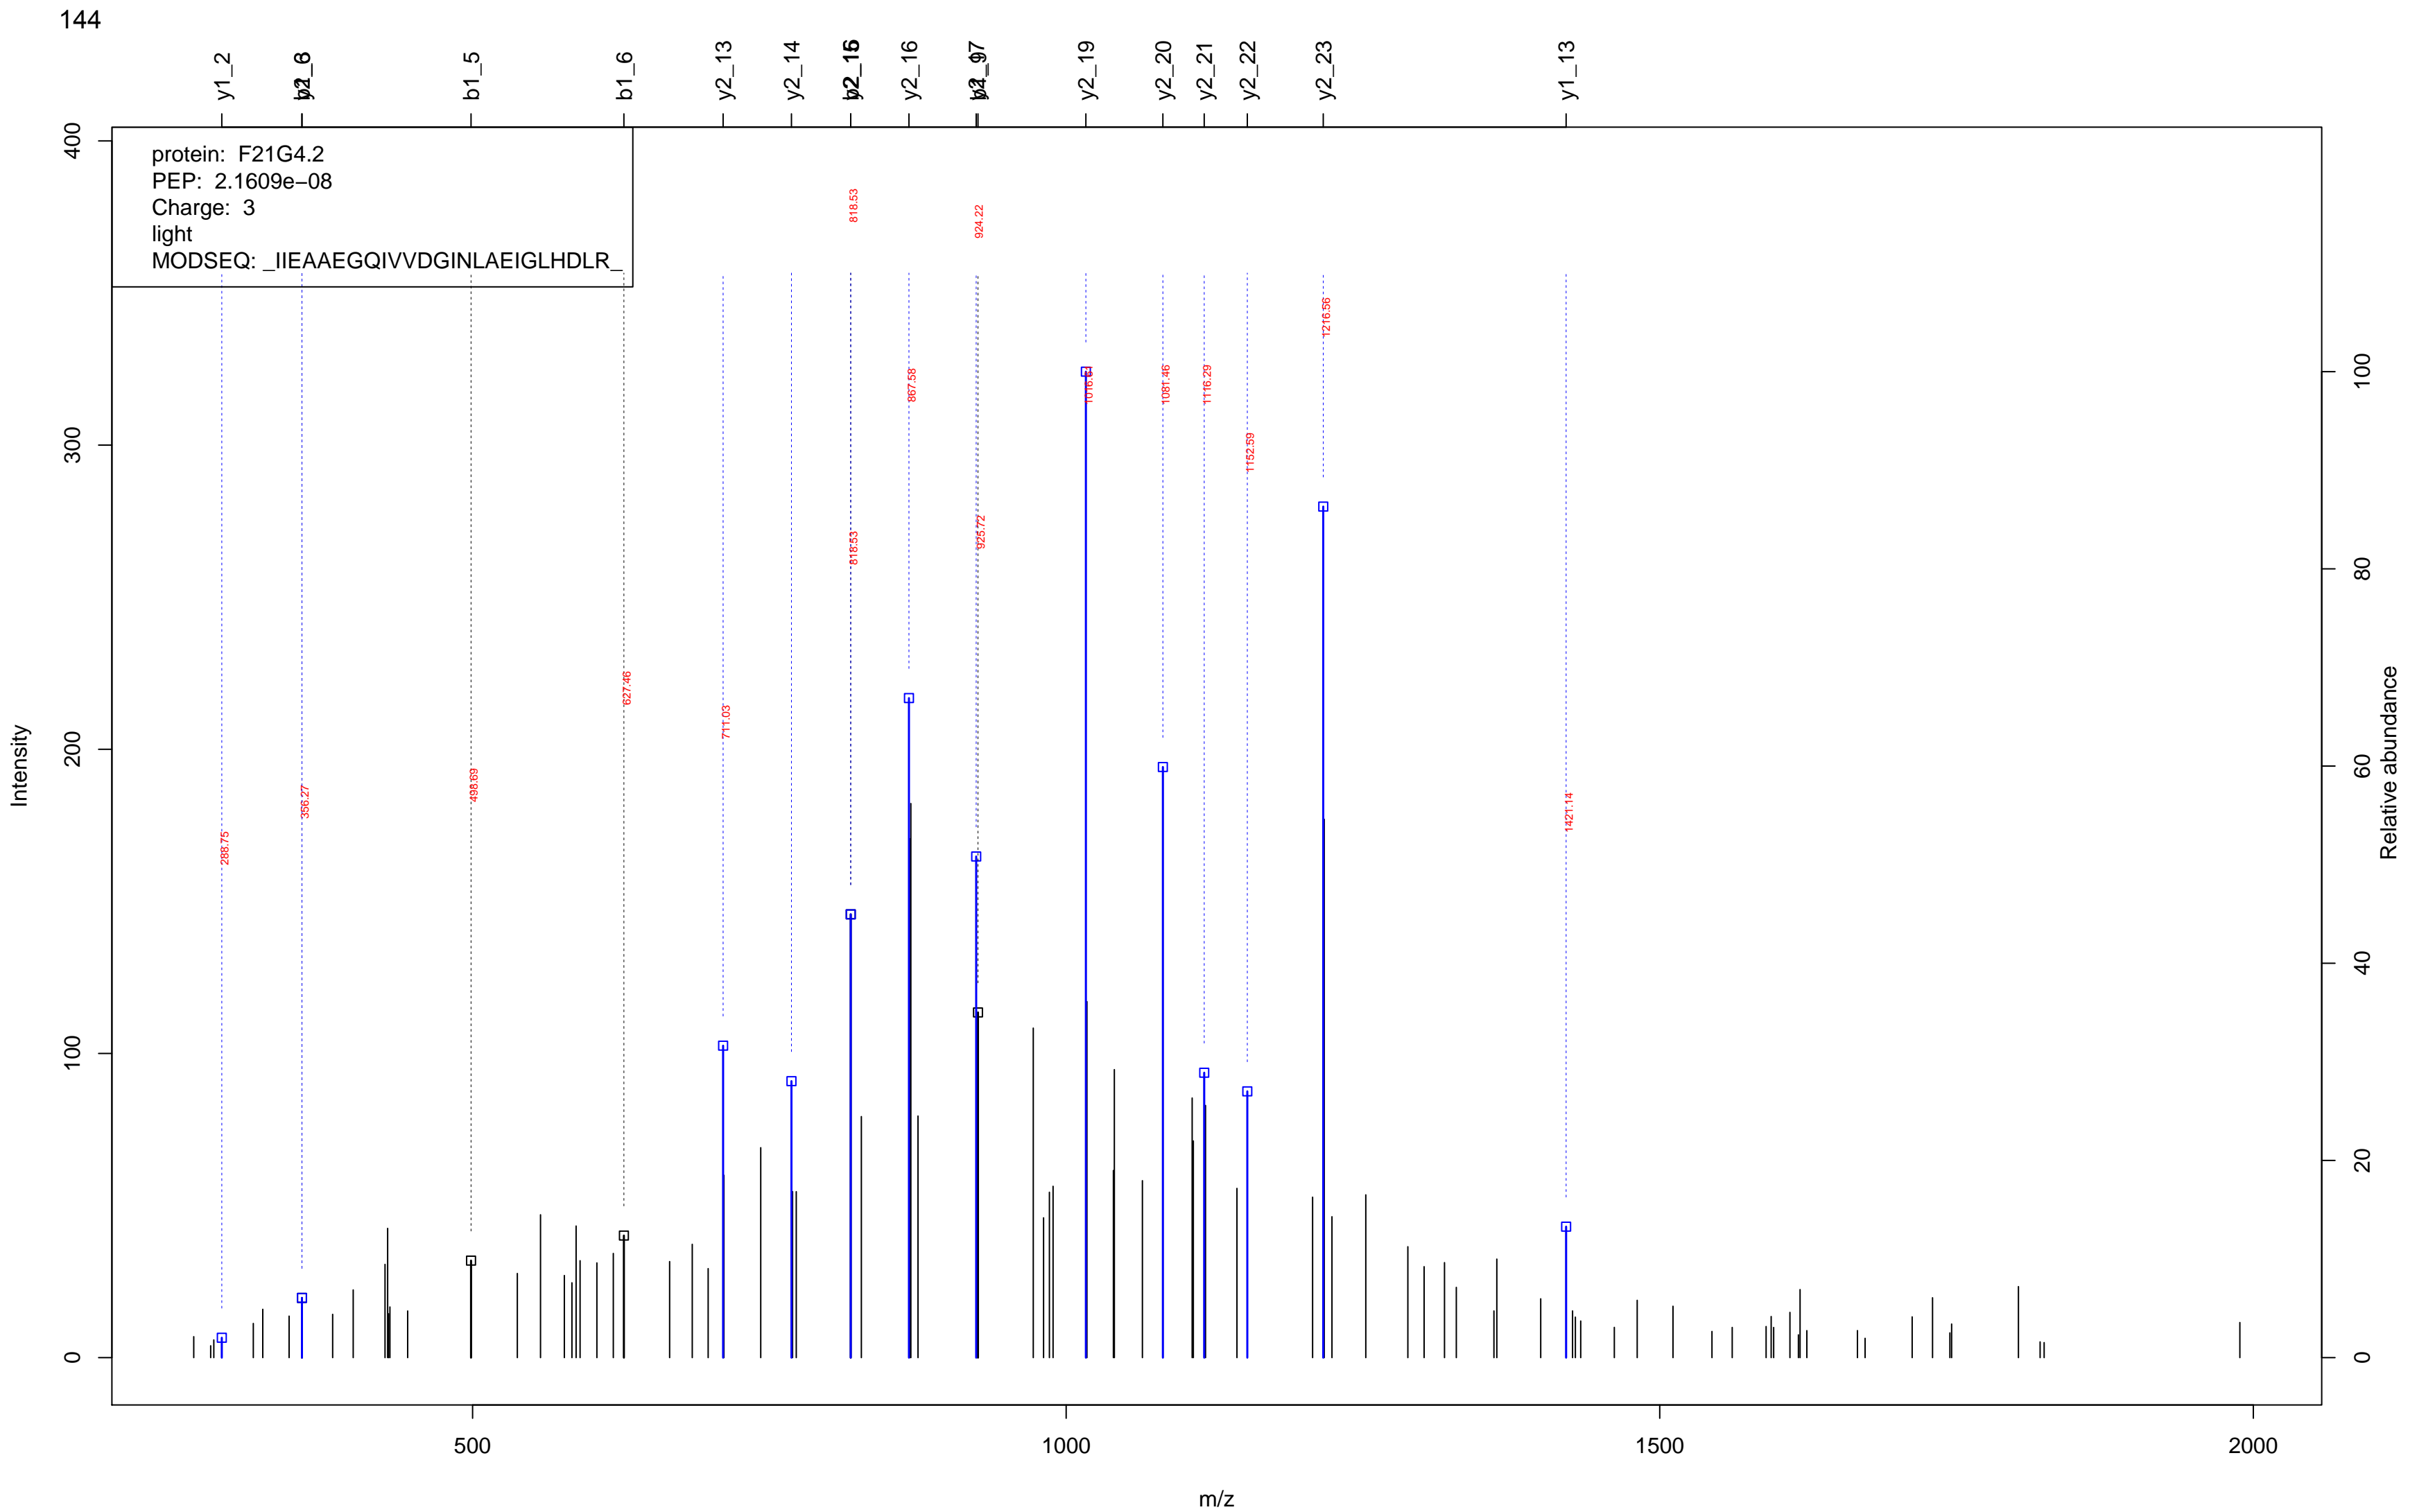



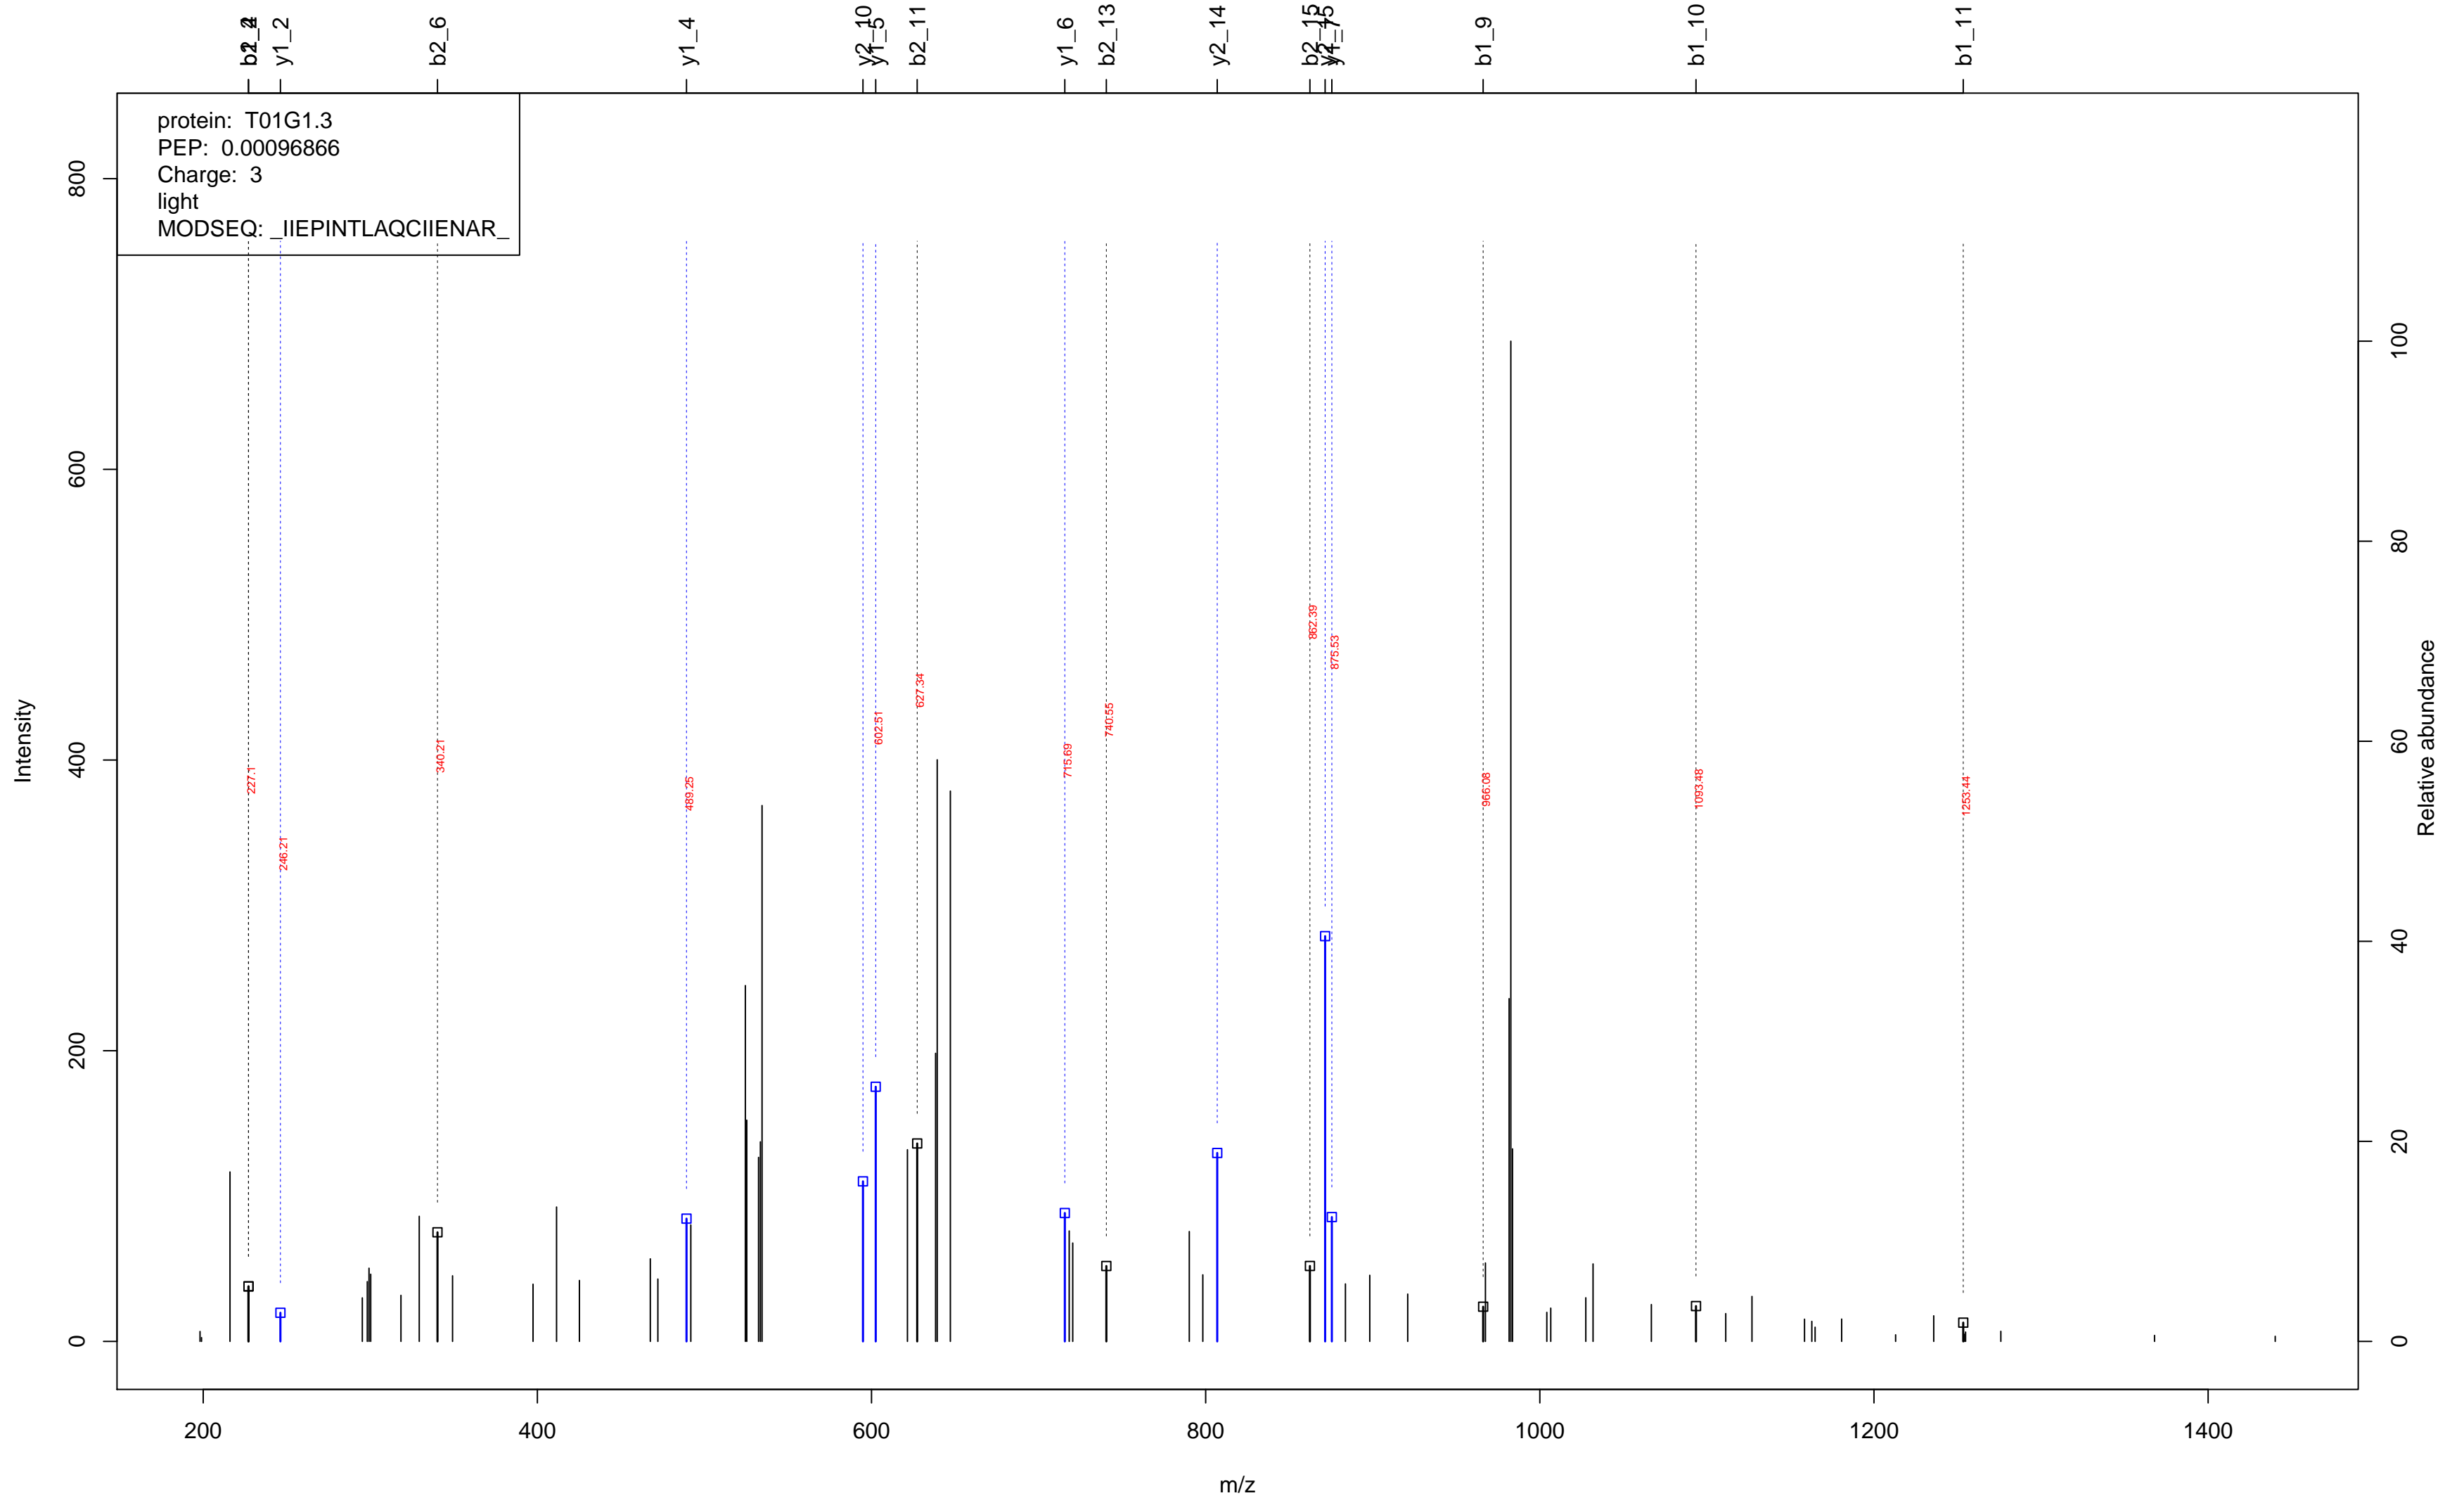

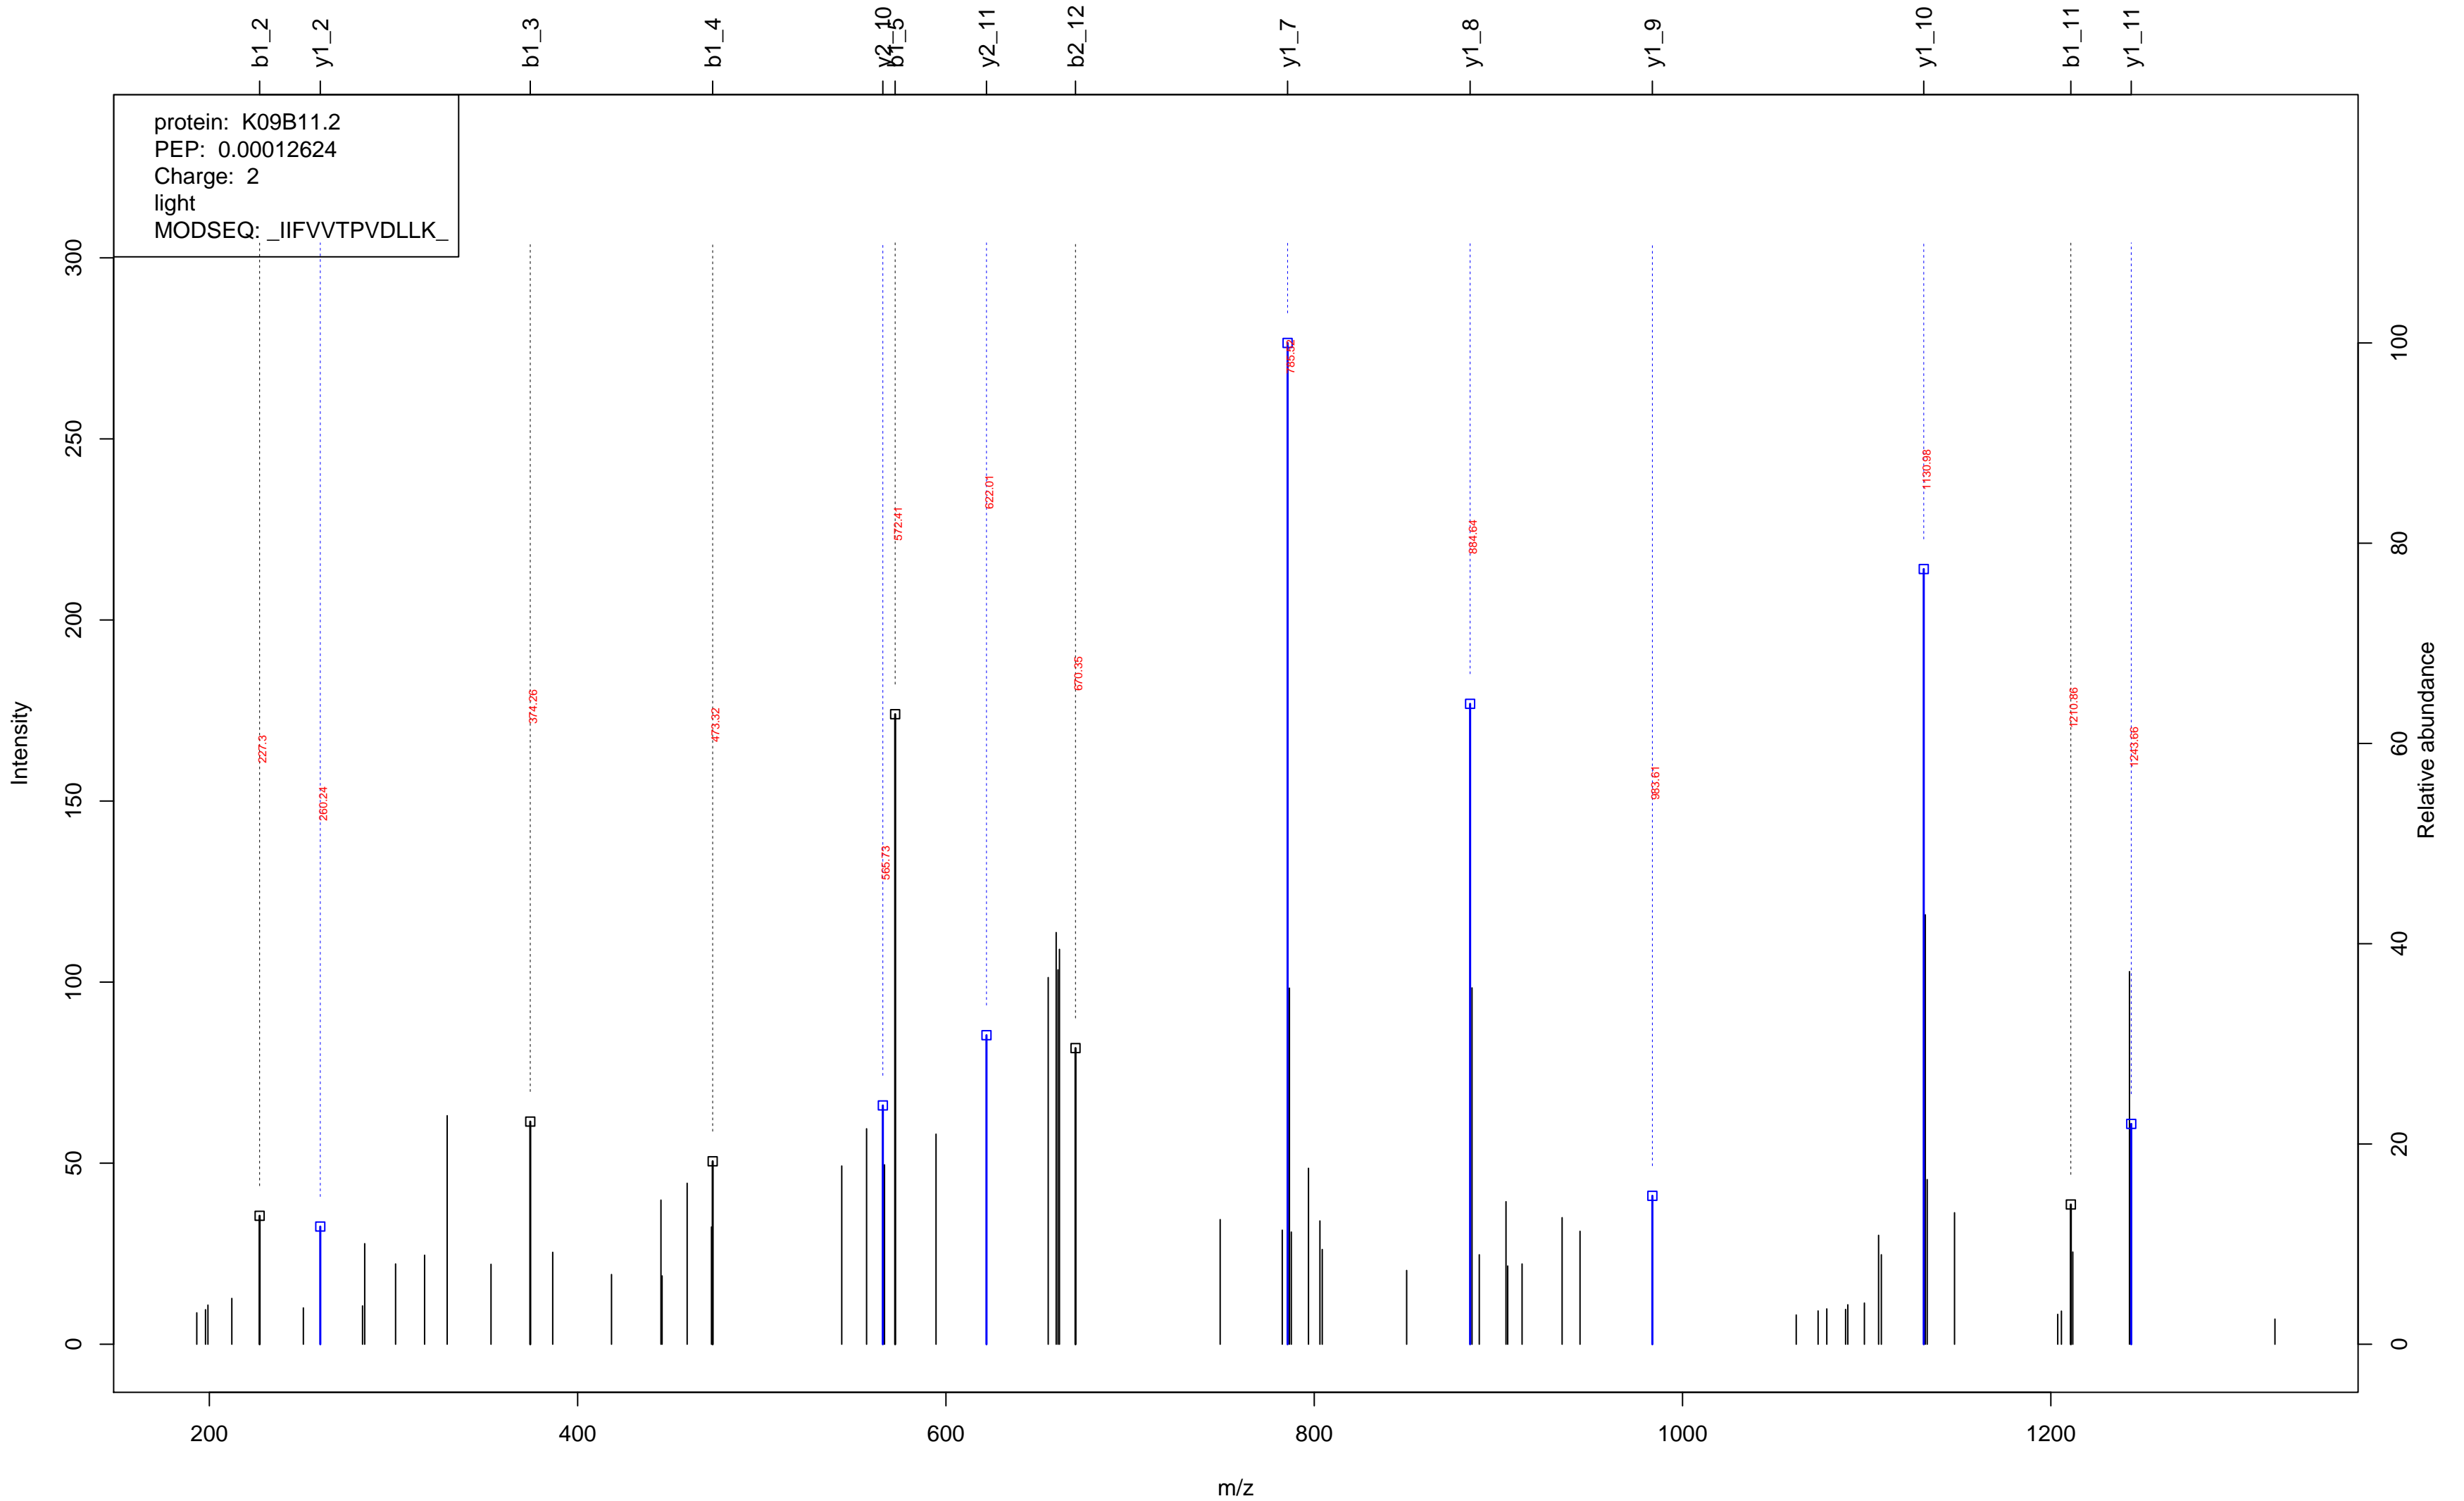

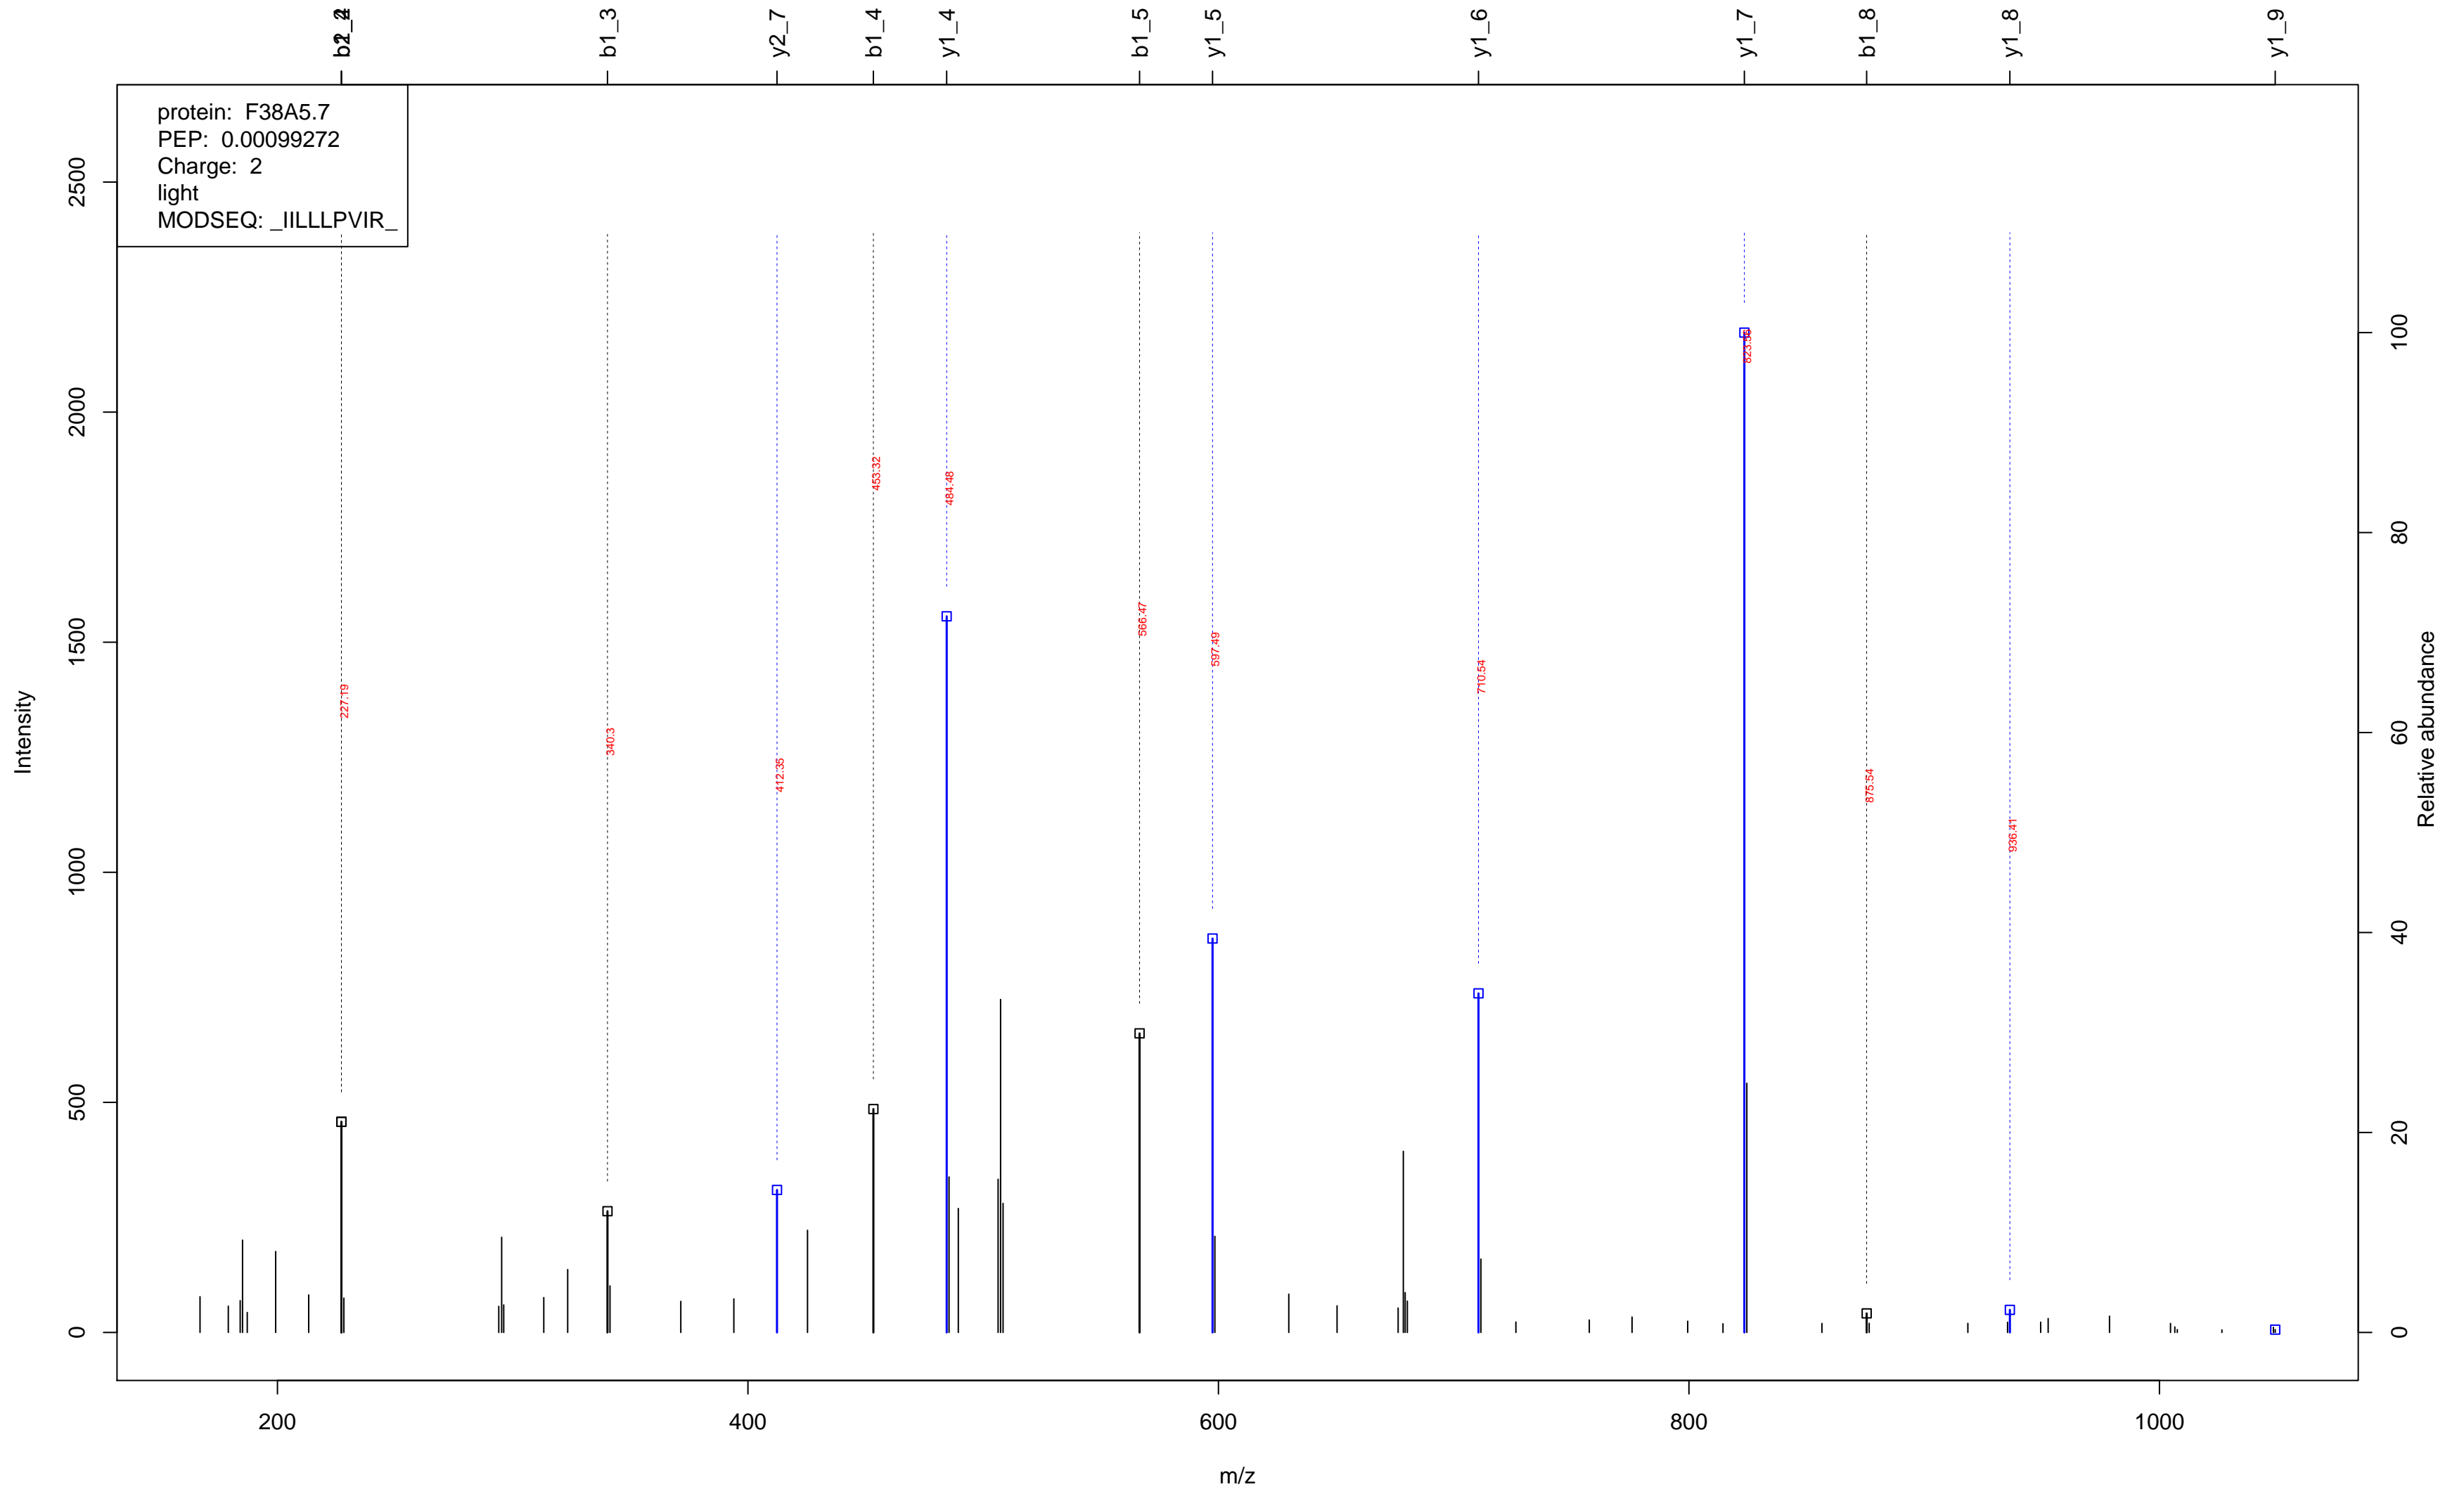

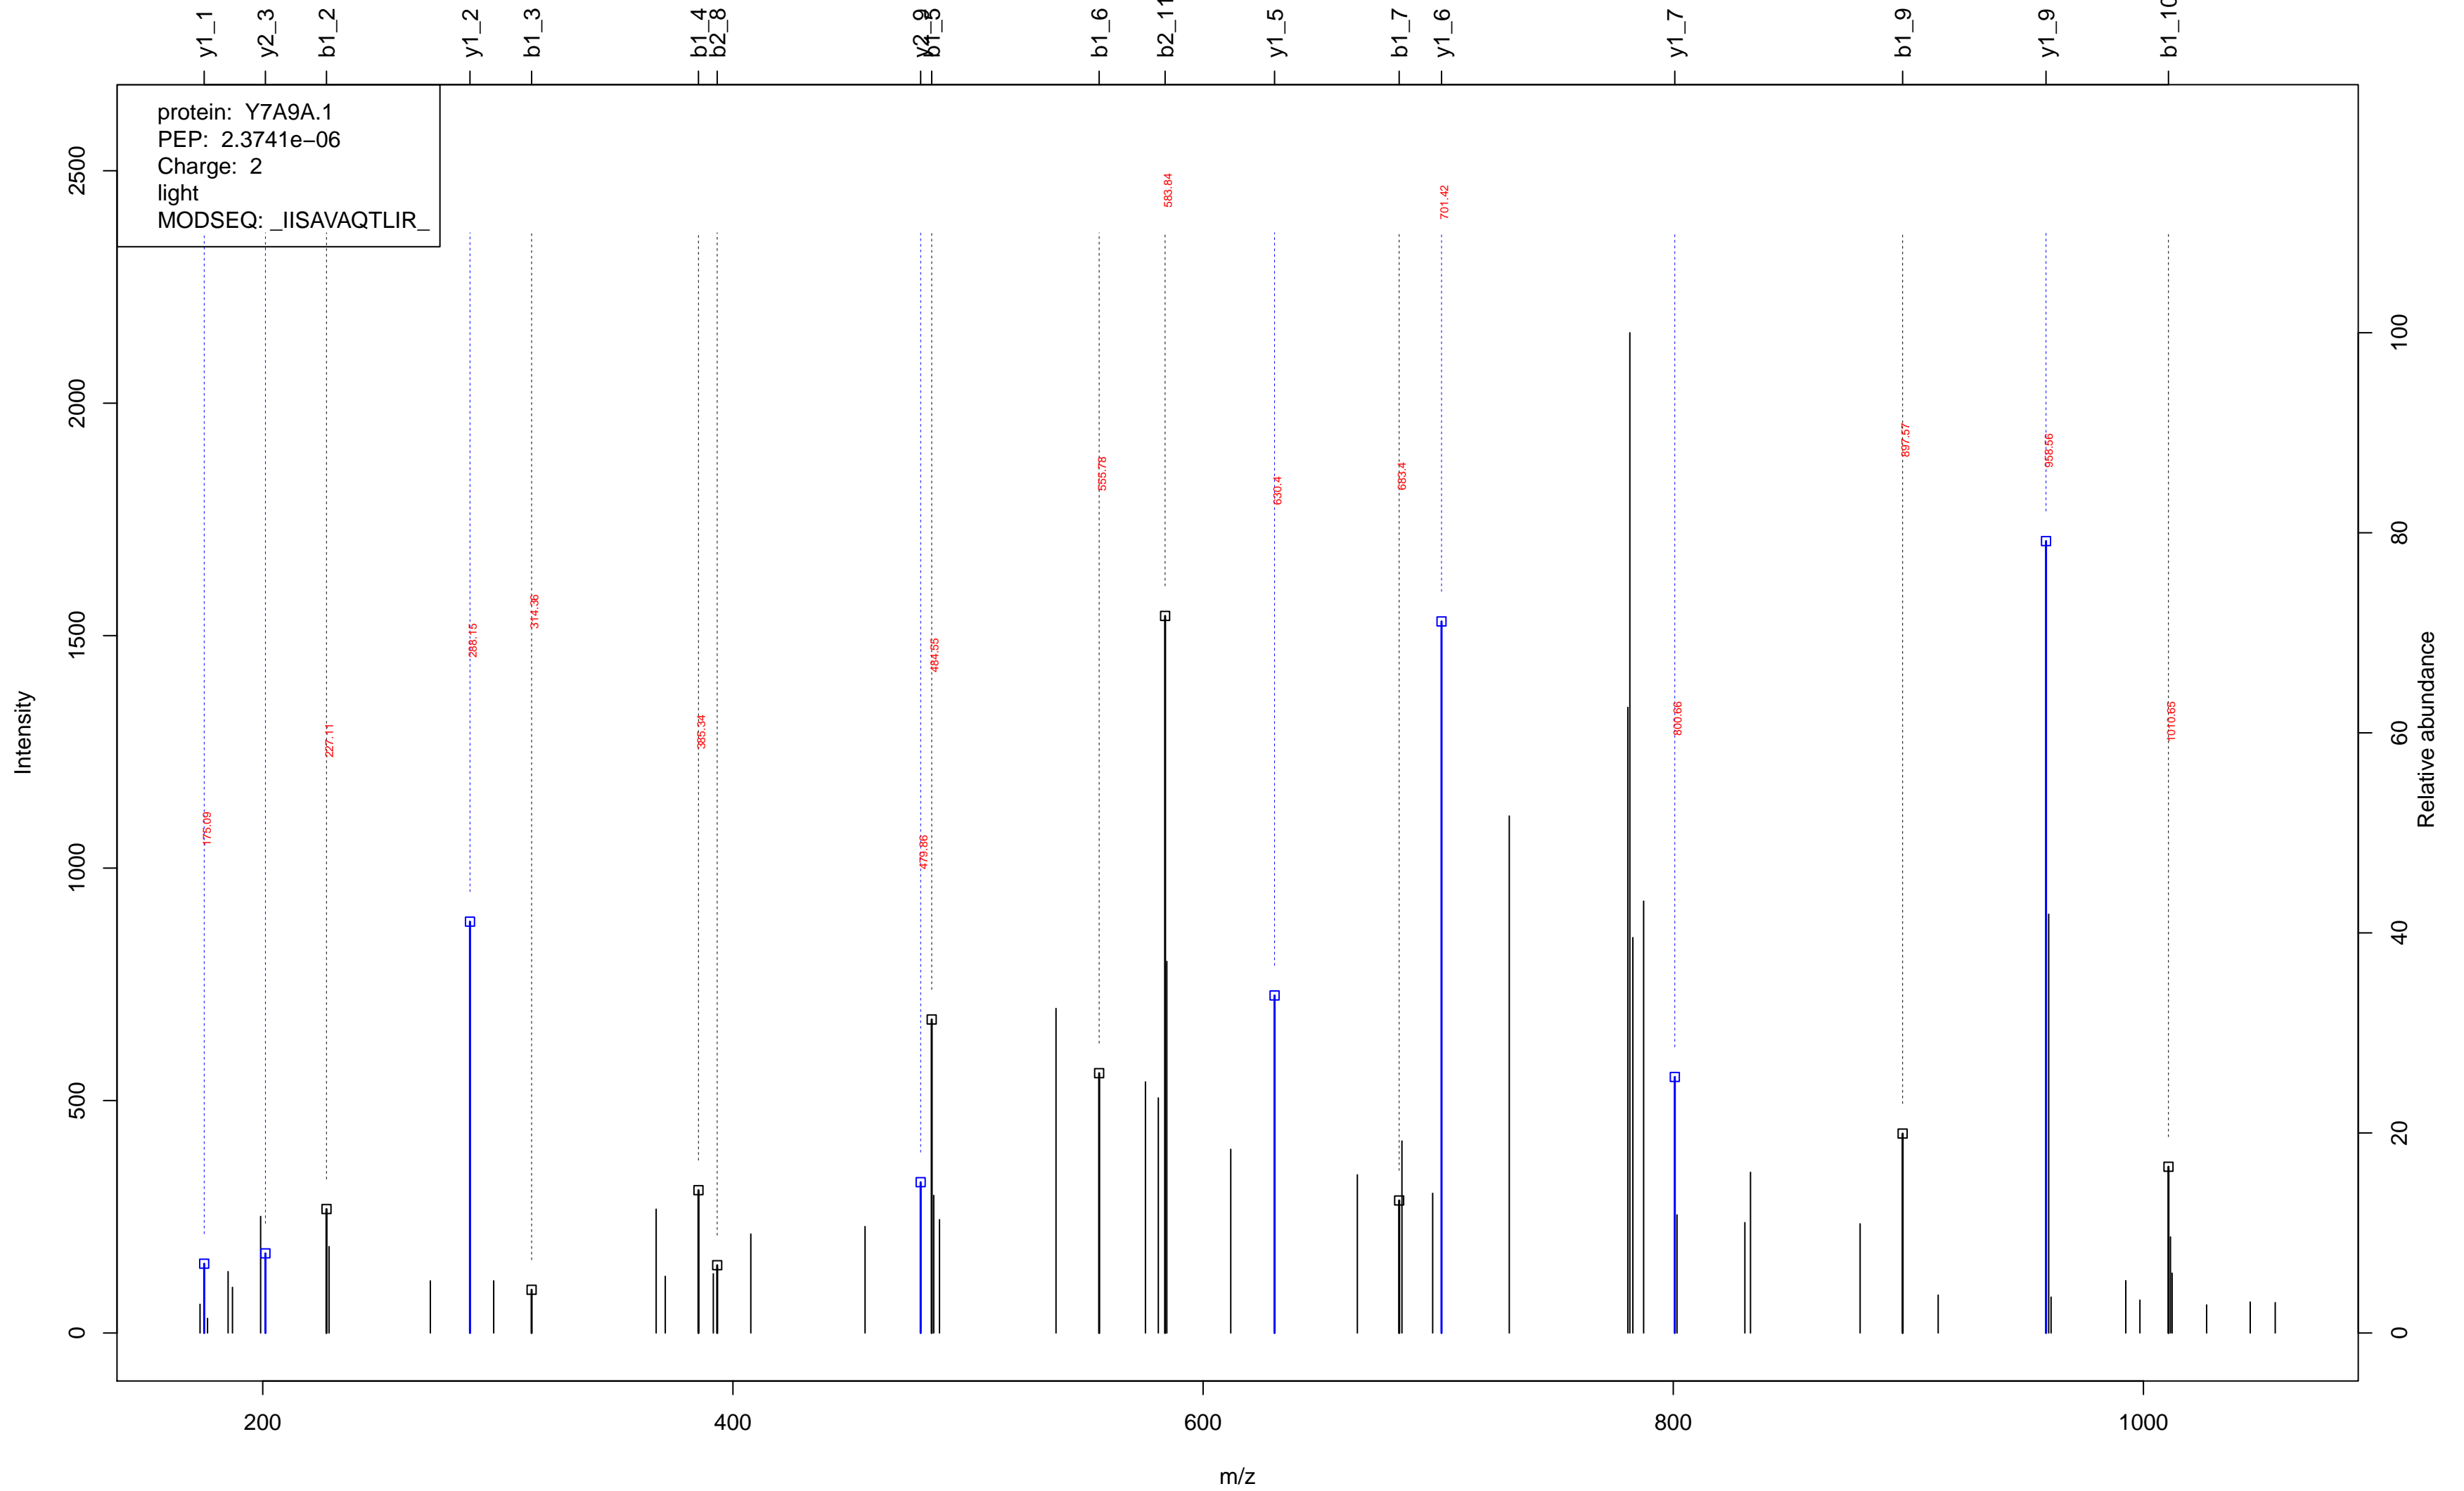

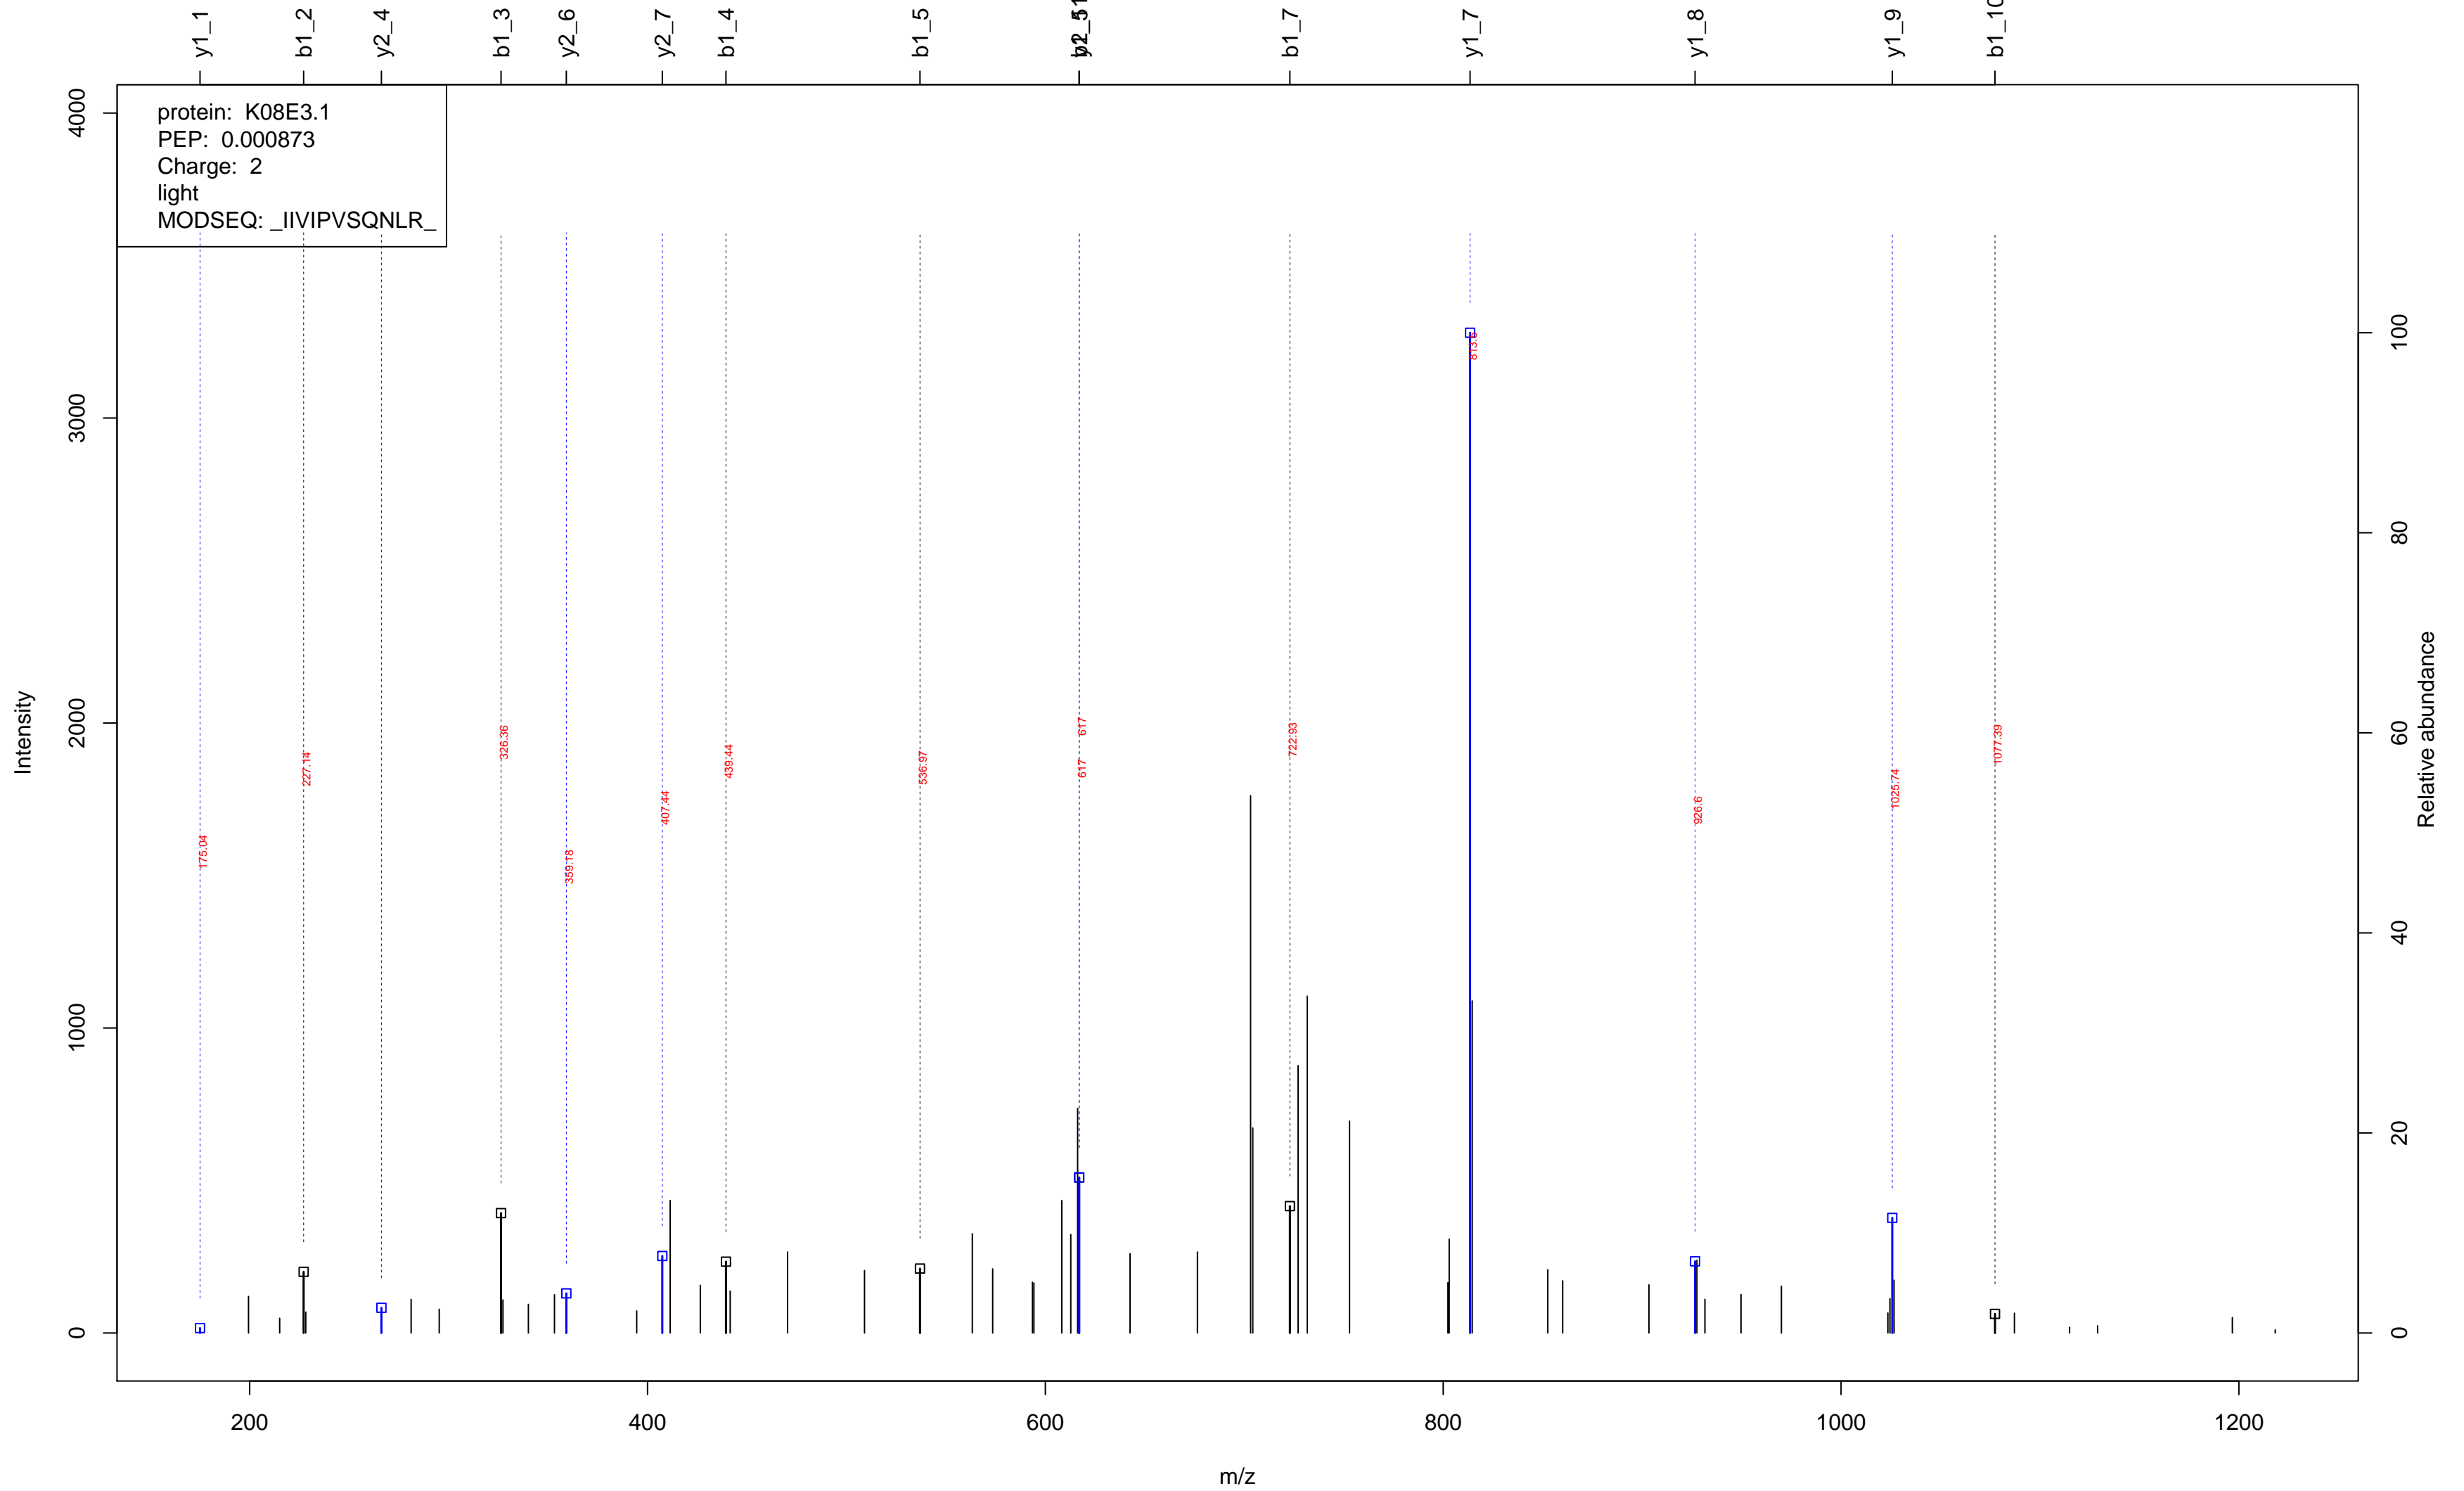

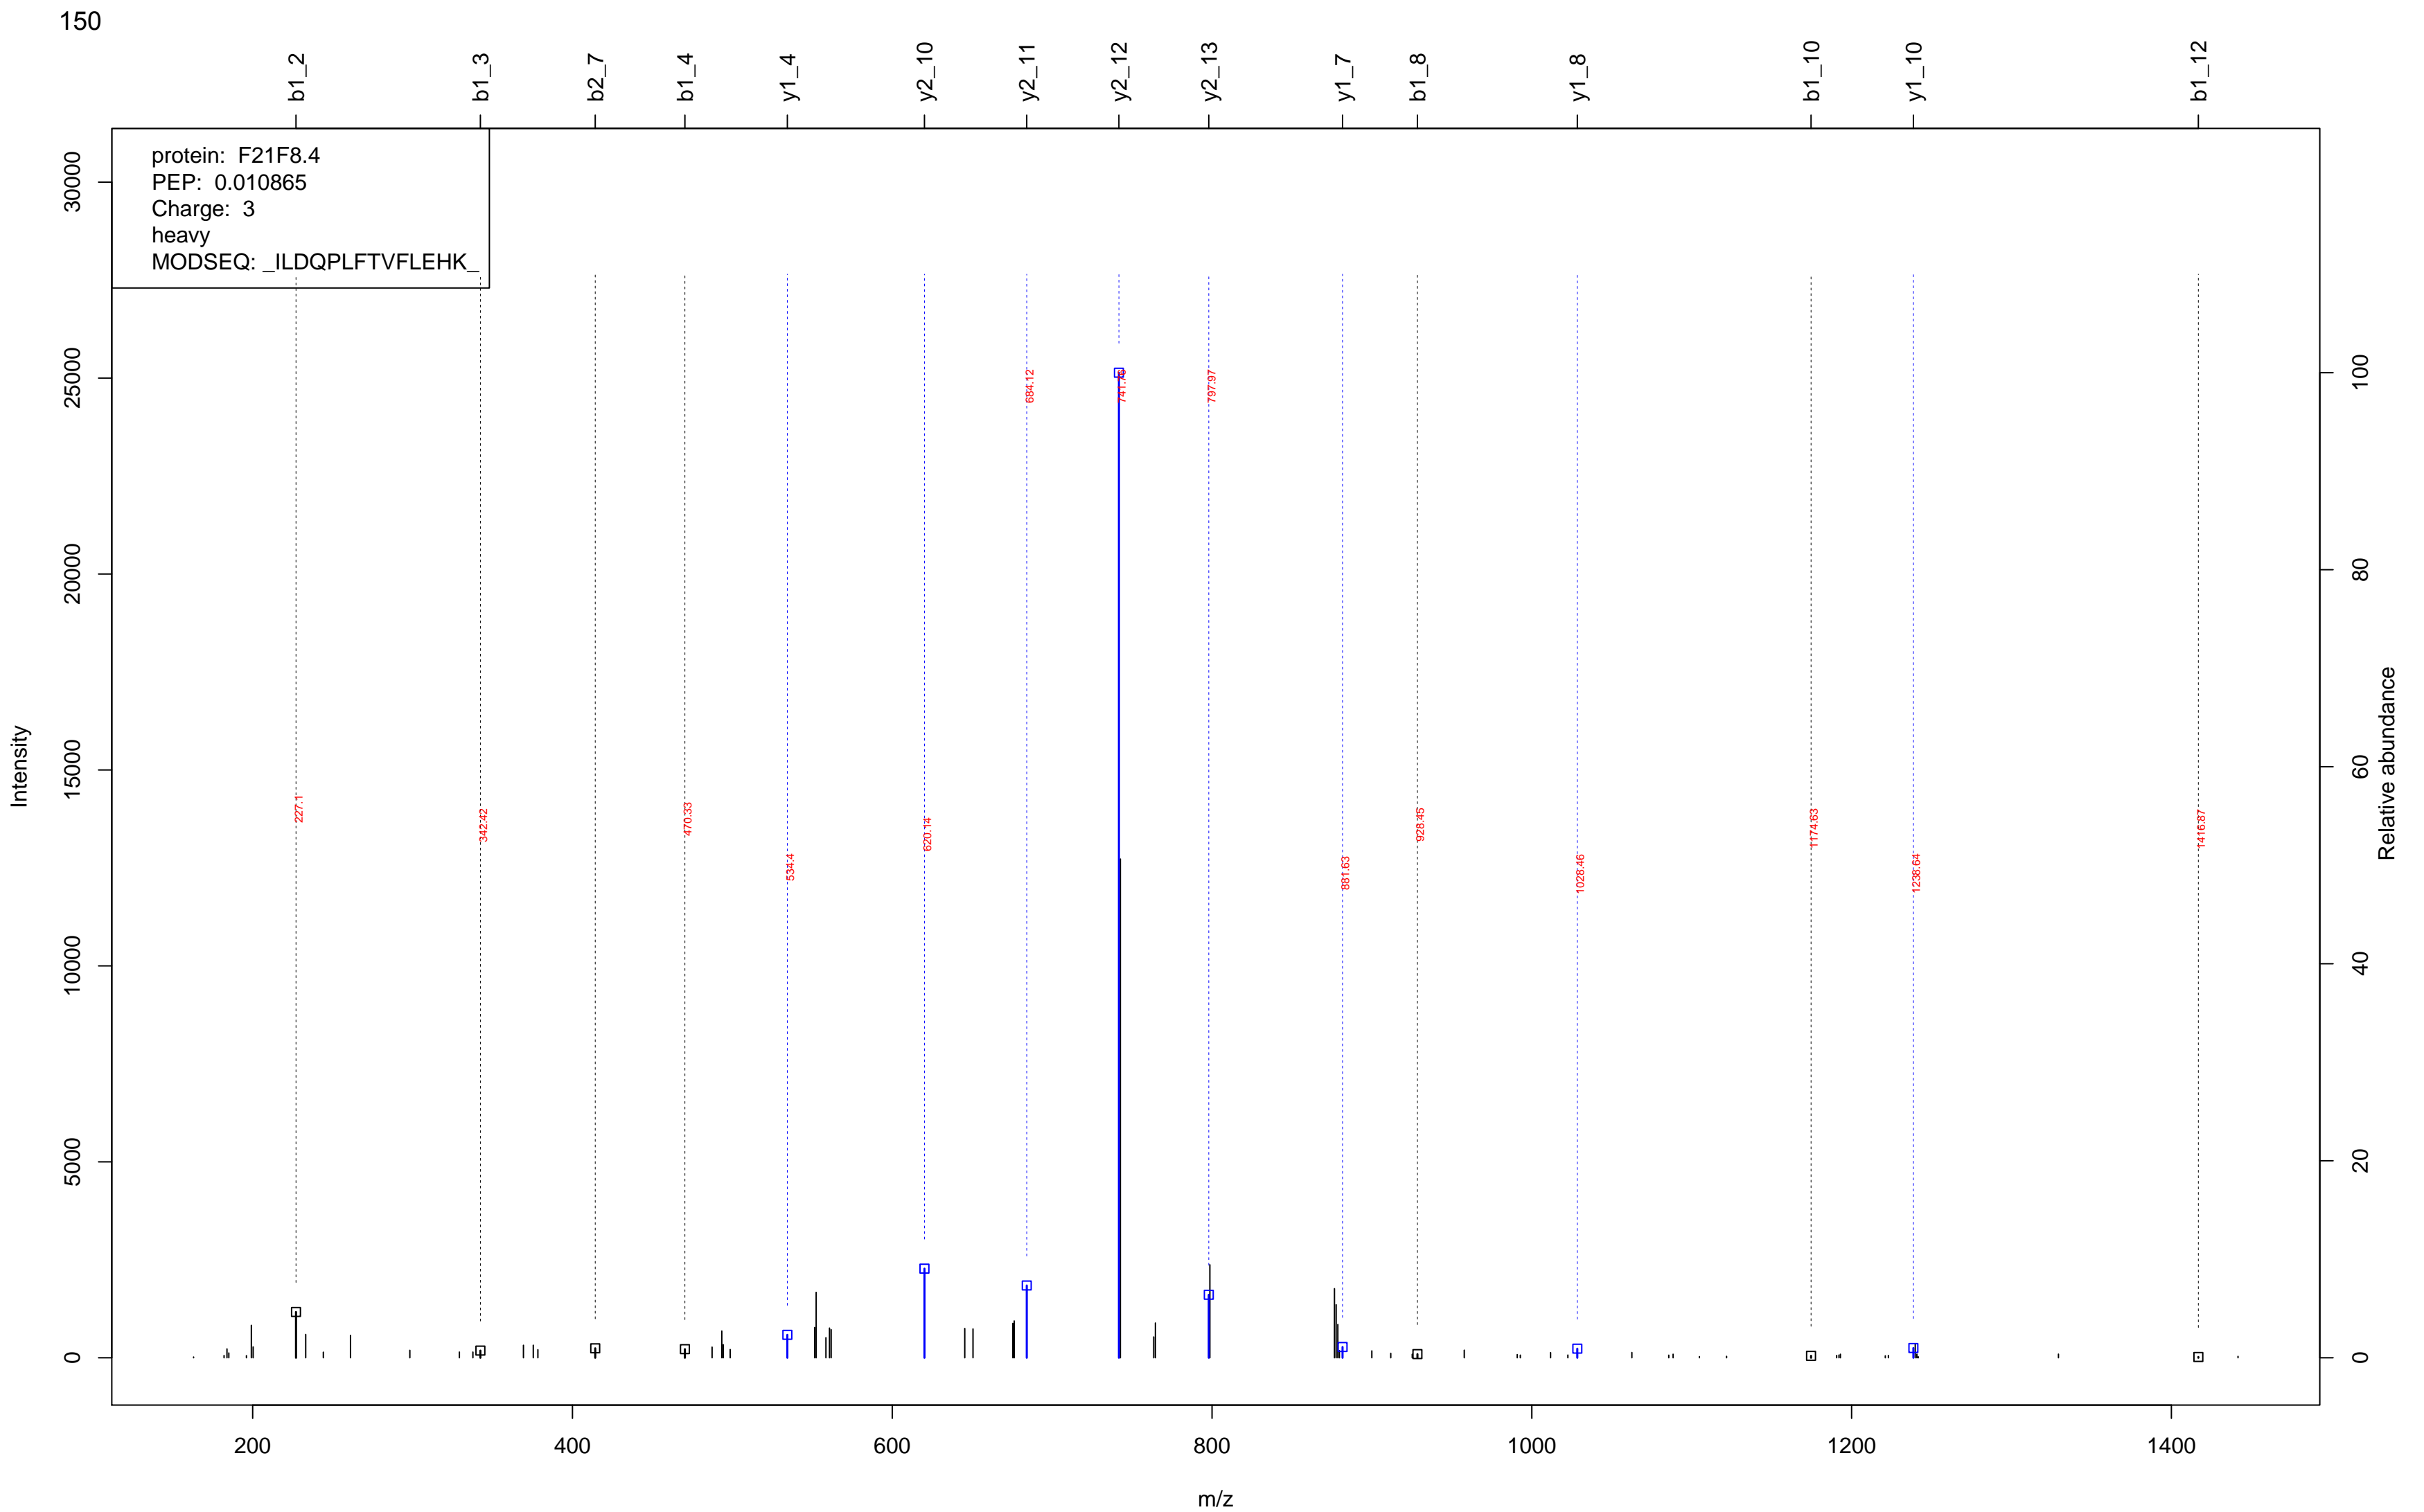

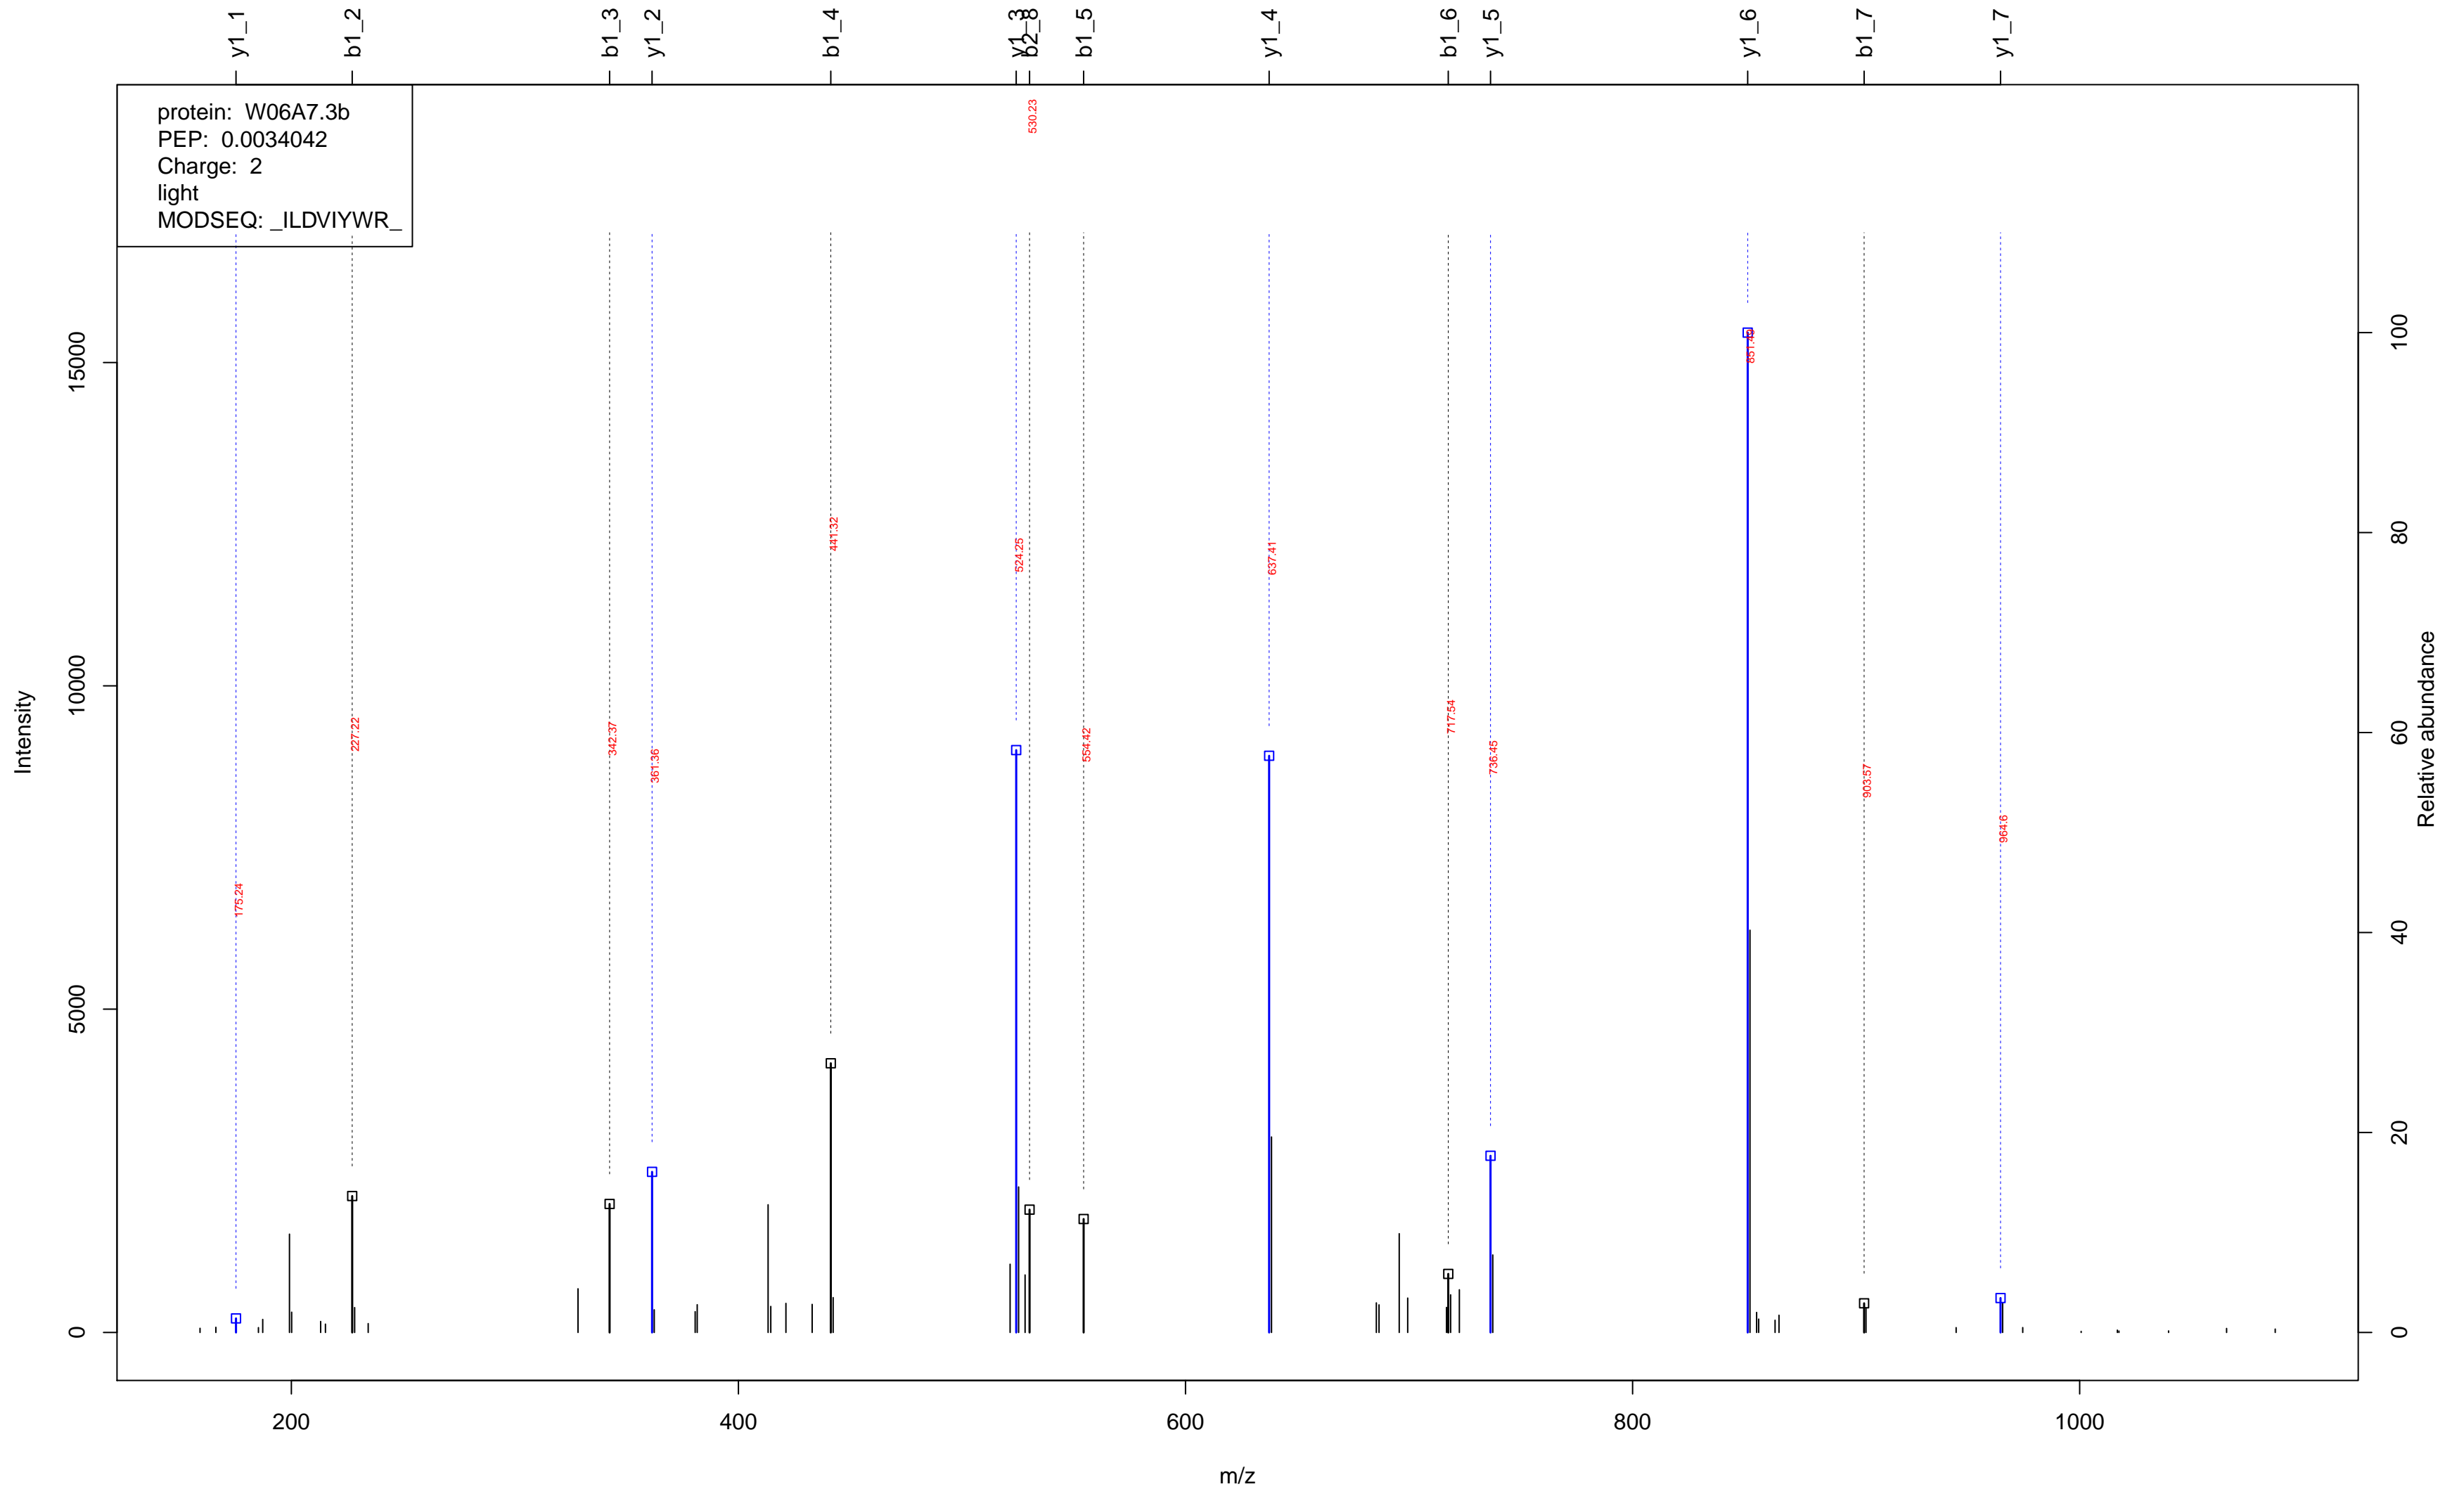

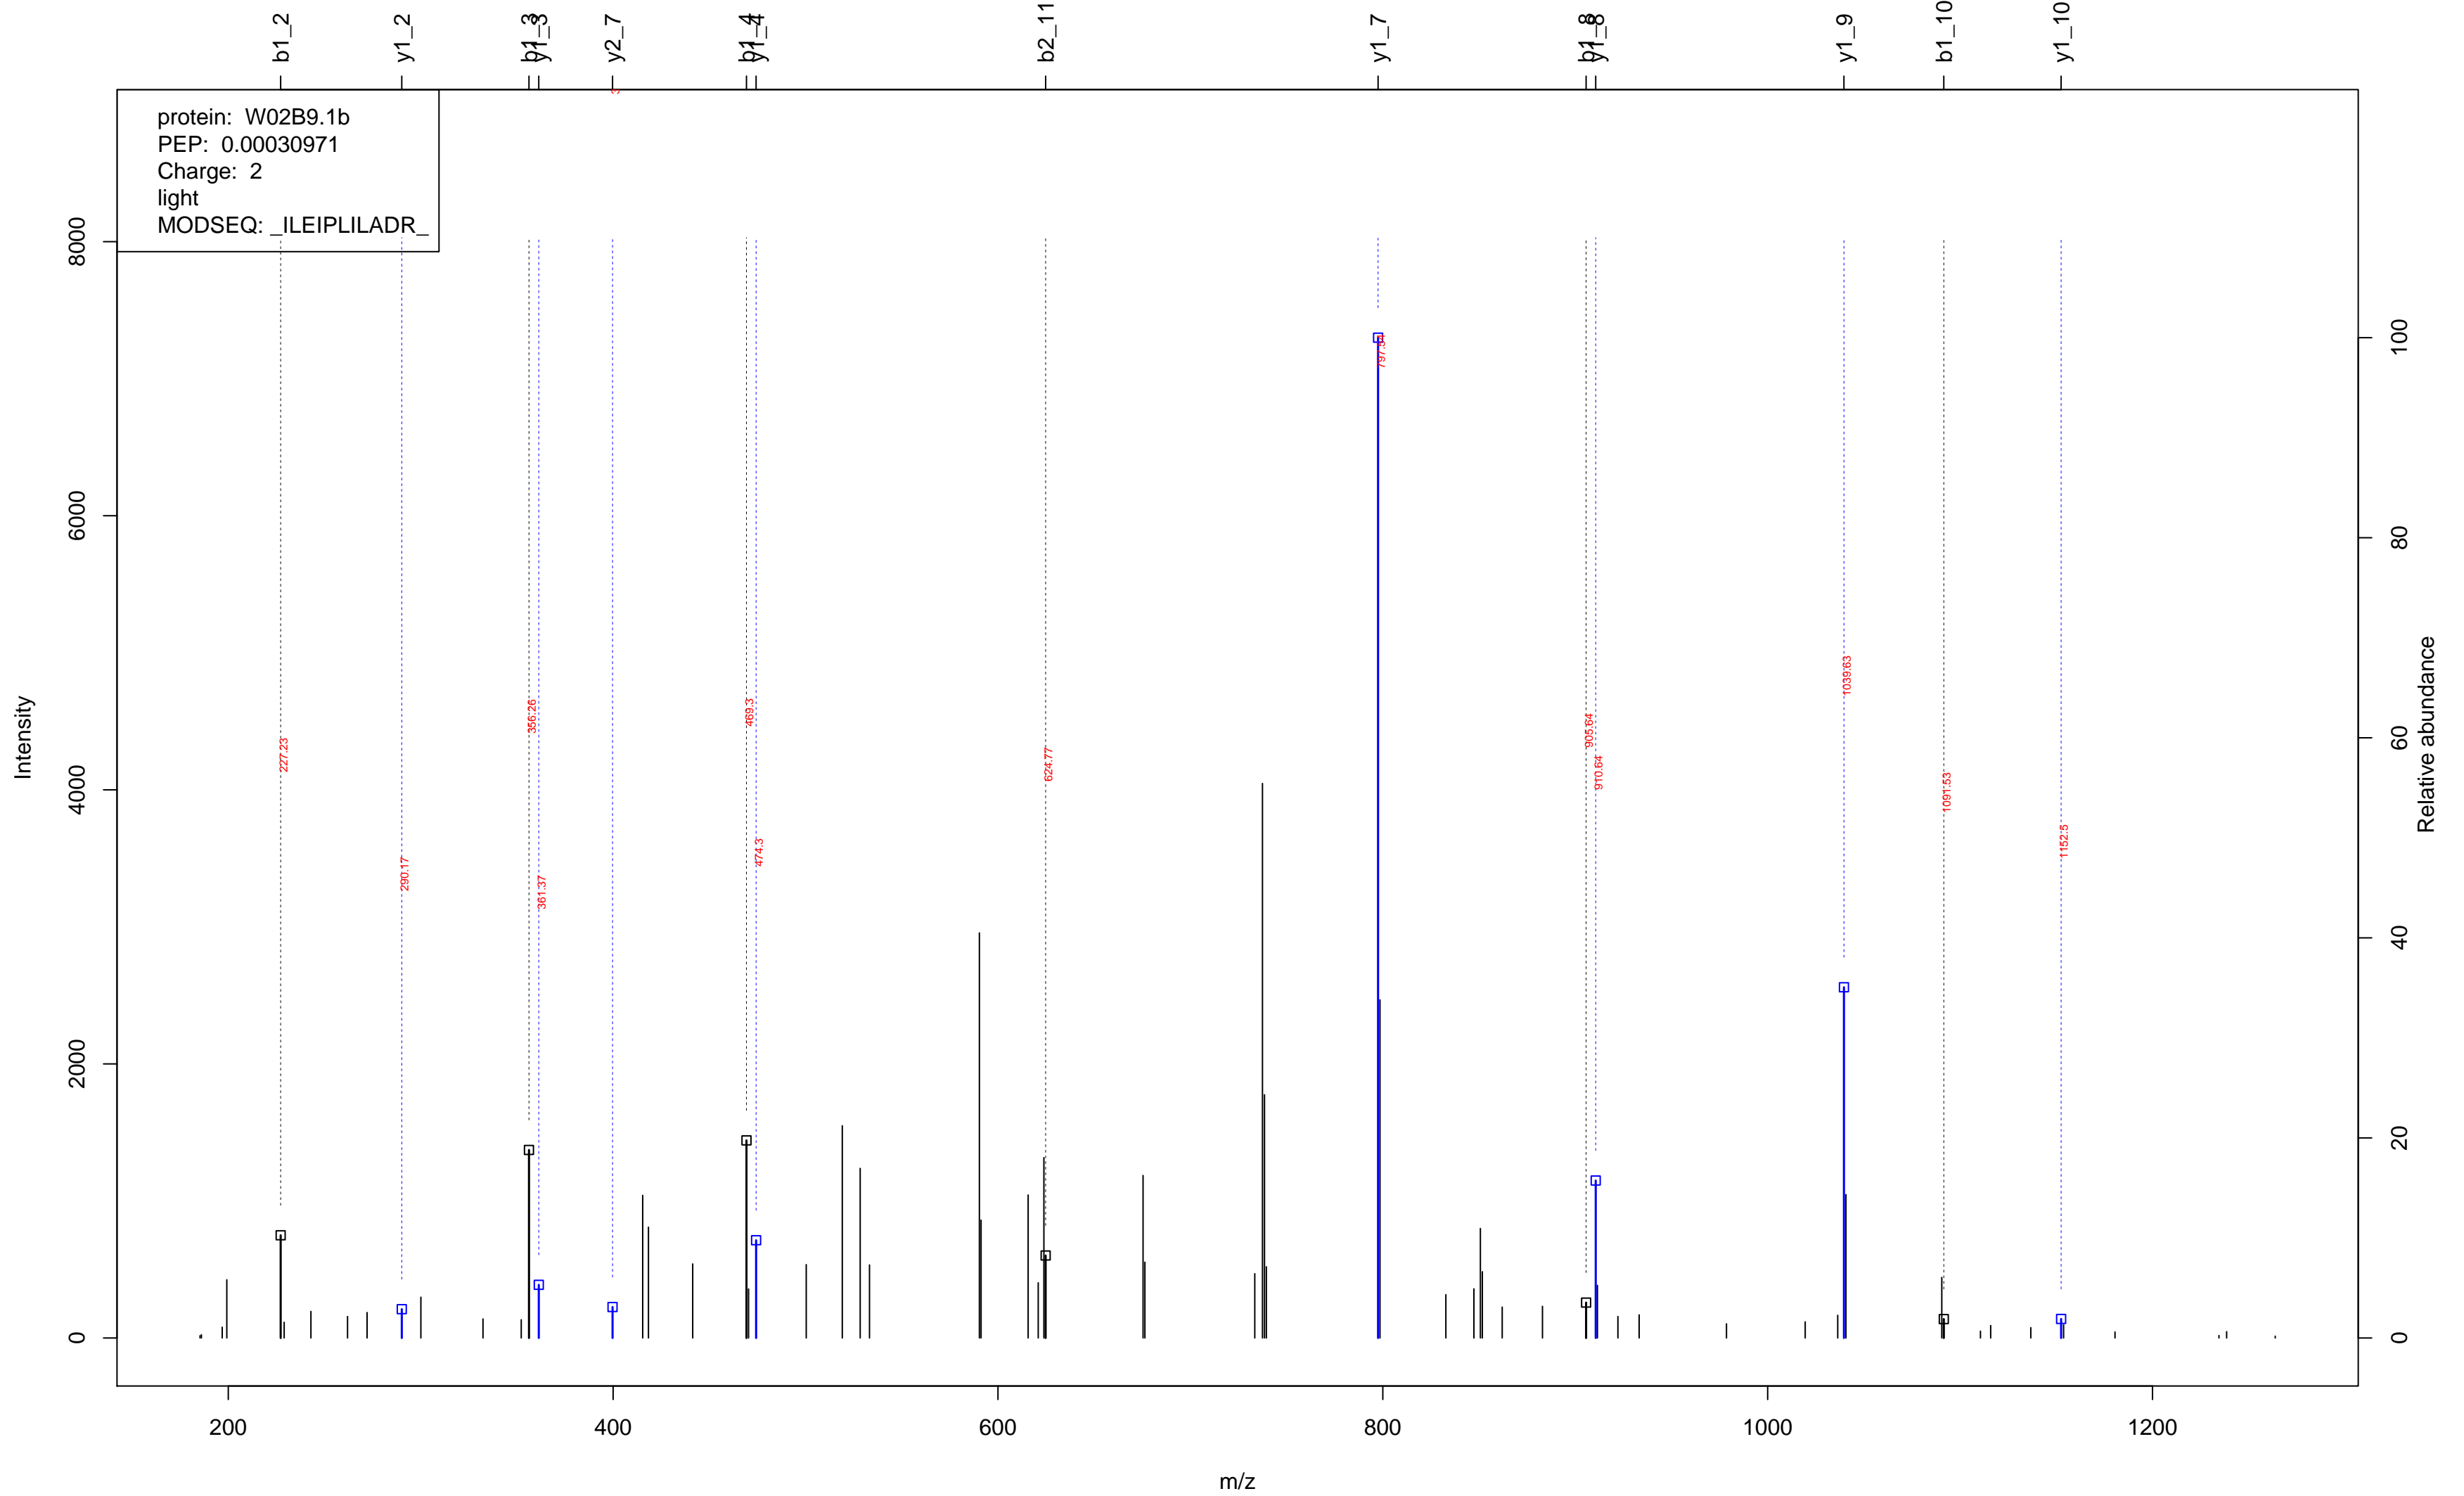



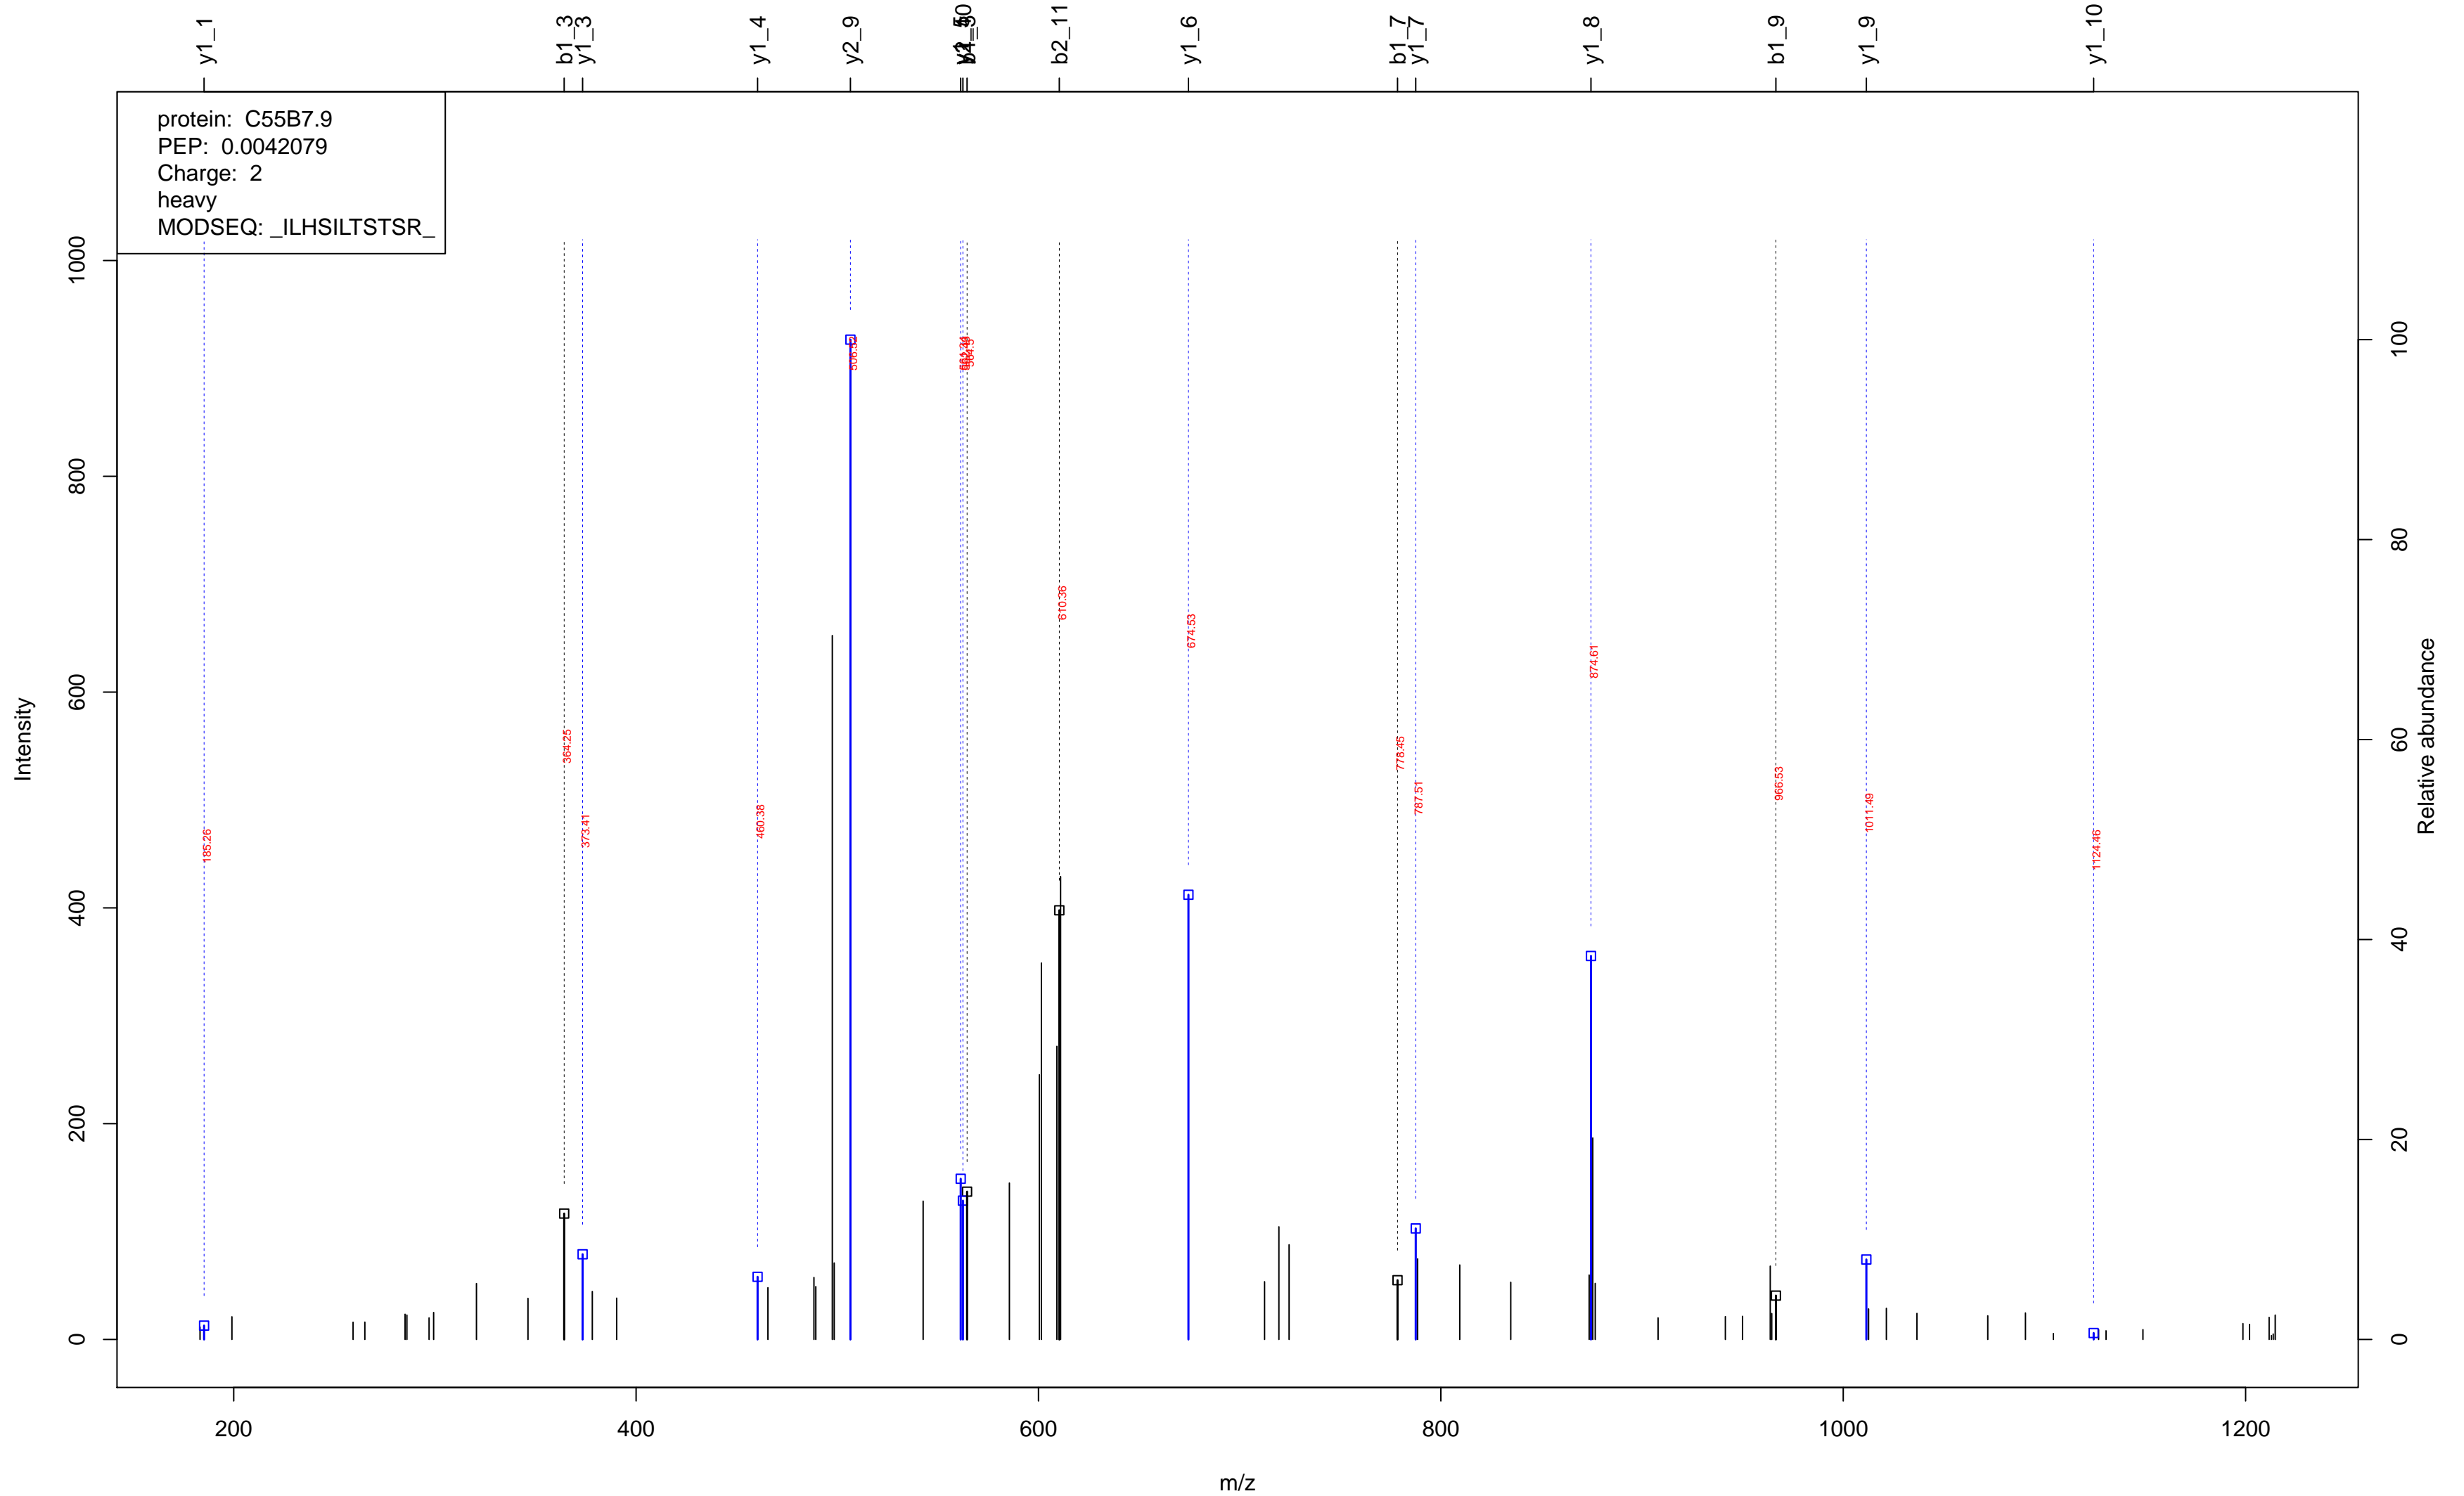

y2\_3 b1\_2 y1\_3 b2\_6 b2\_7 y2\_7 y1\_4 b1\_4 b2\_9 y1\_5 b1\_5 b1\_6 y1\_6 y1\_7

protein: C27F2.10  
PEP: 0.0015817  
Charge: 2  
heavy  
MODSEQ: \_ILIYLIPVK\_

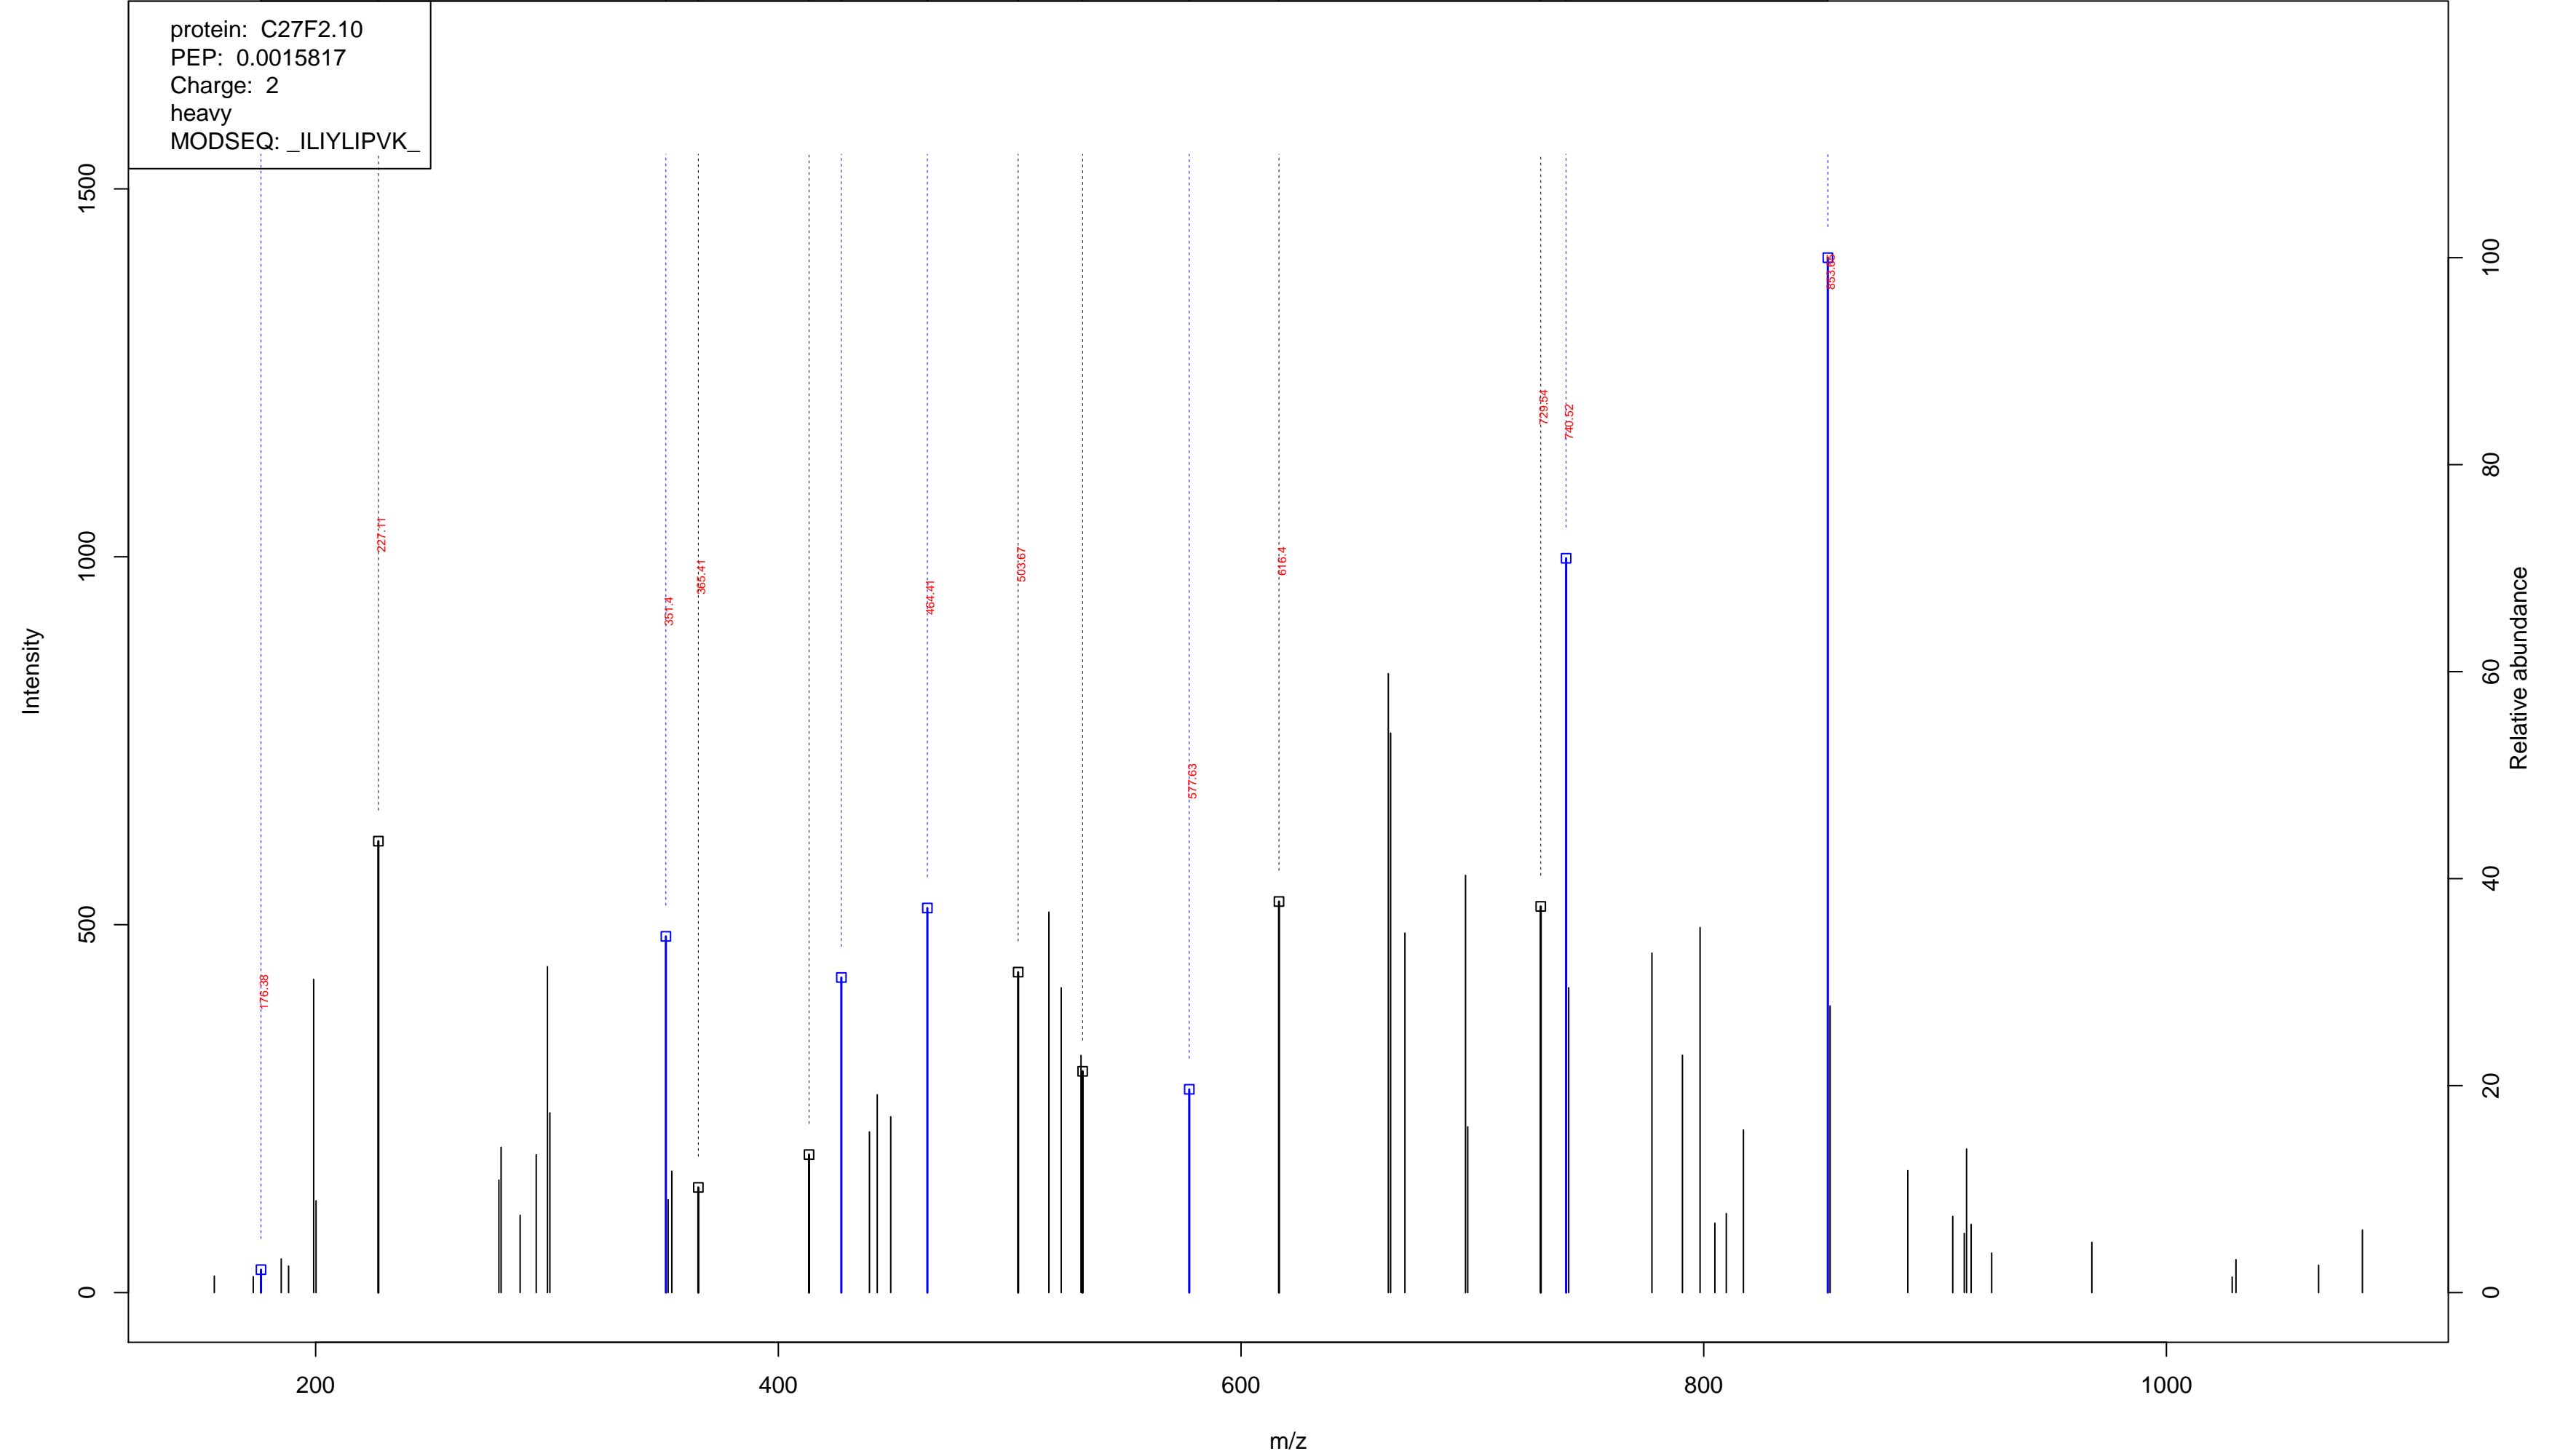

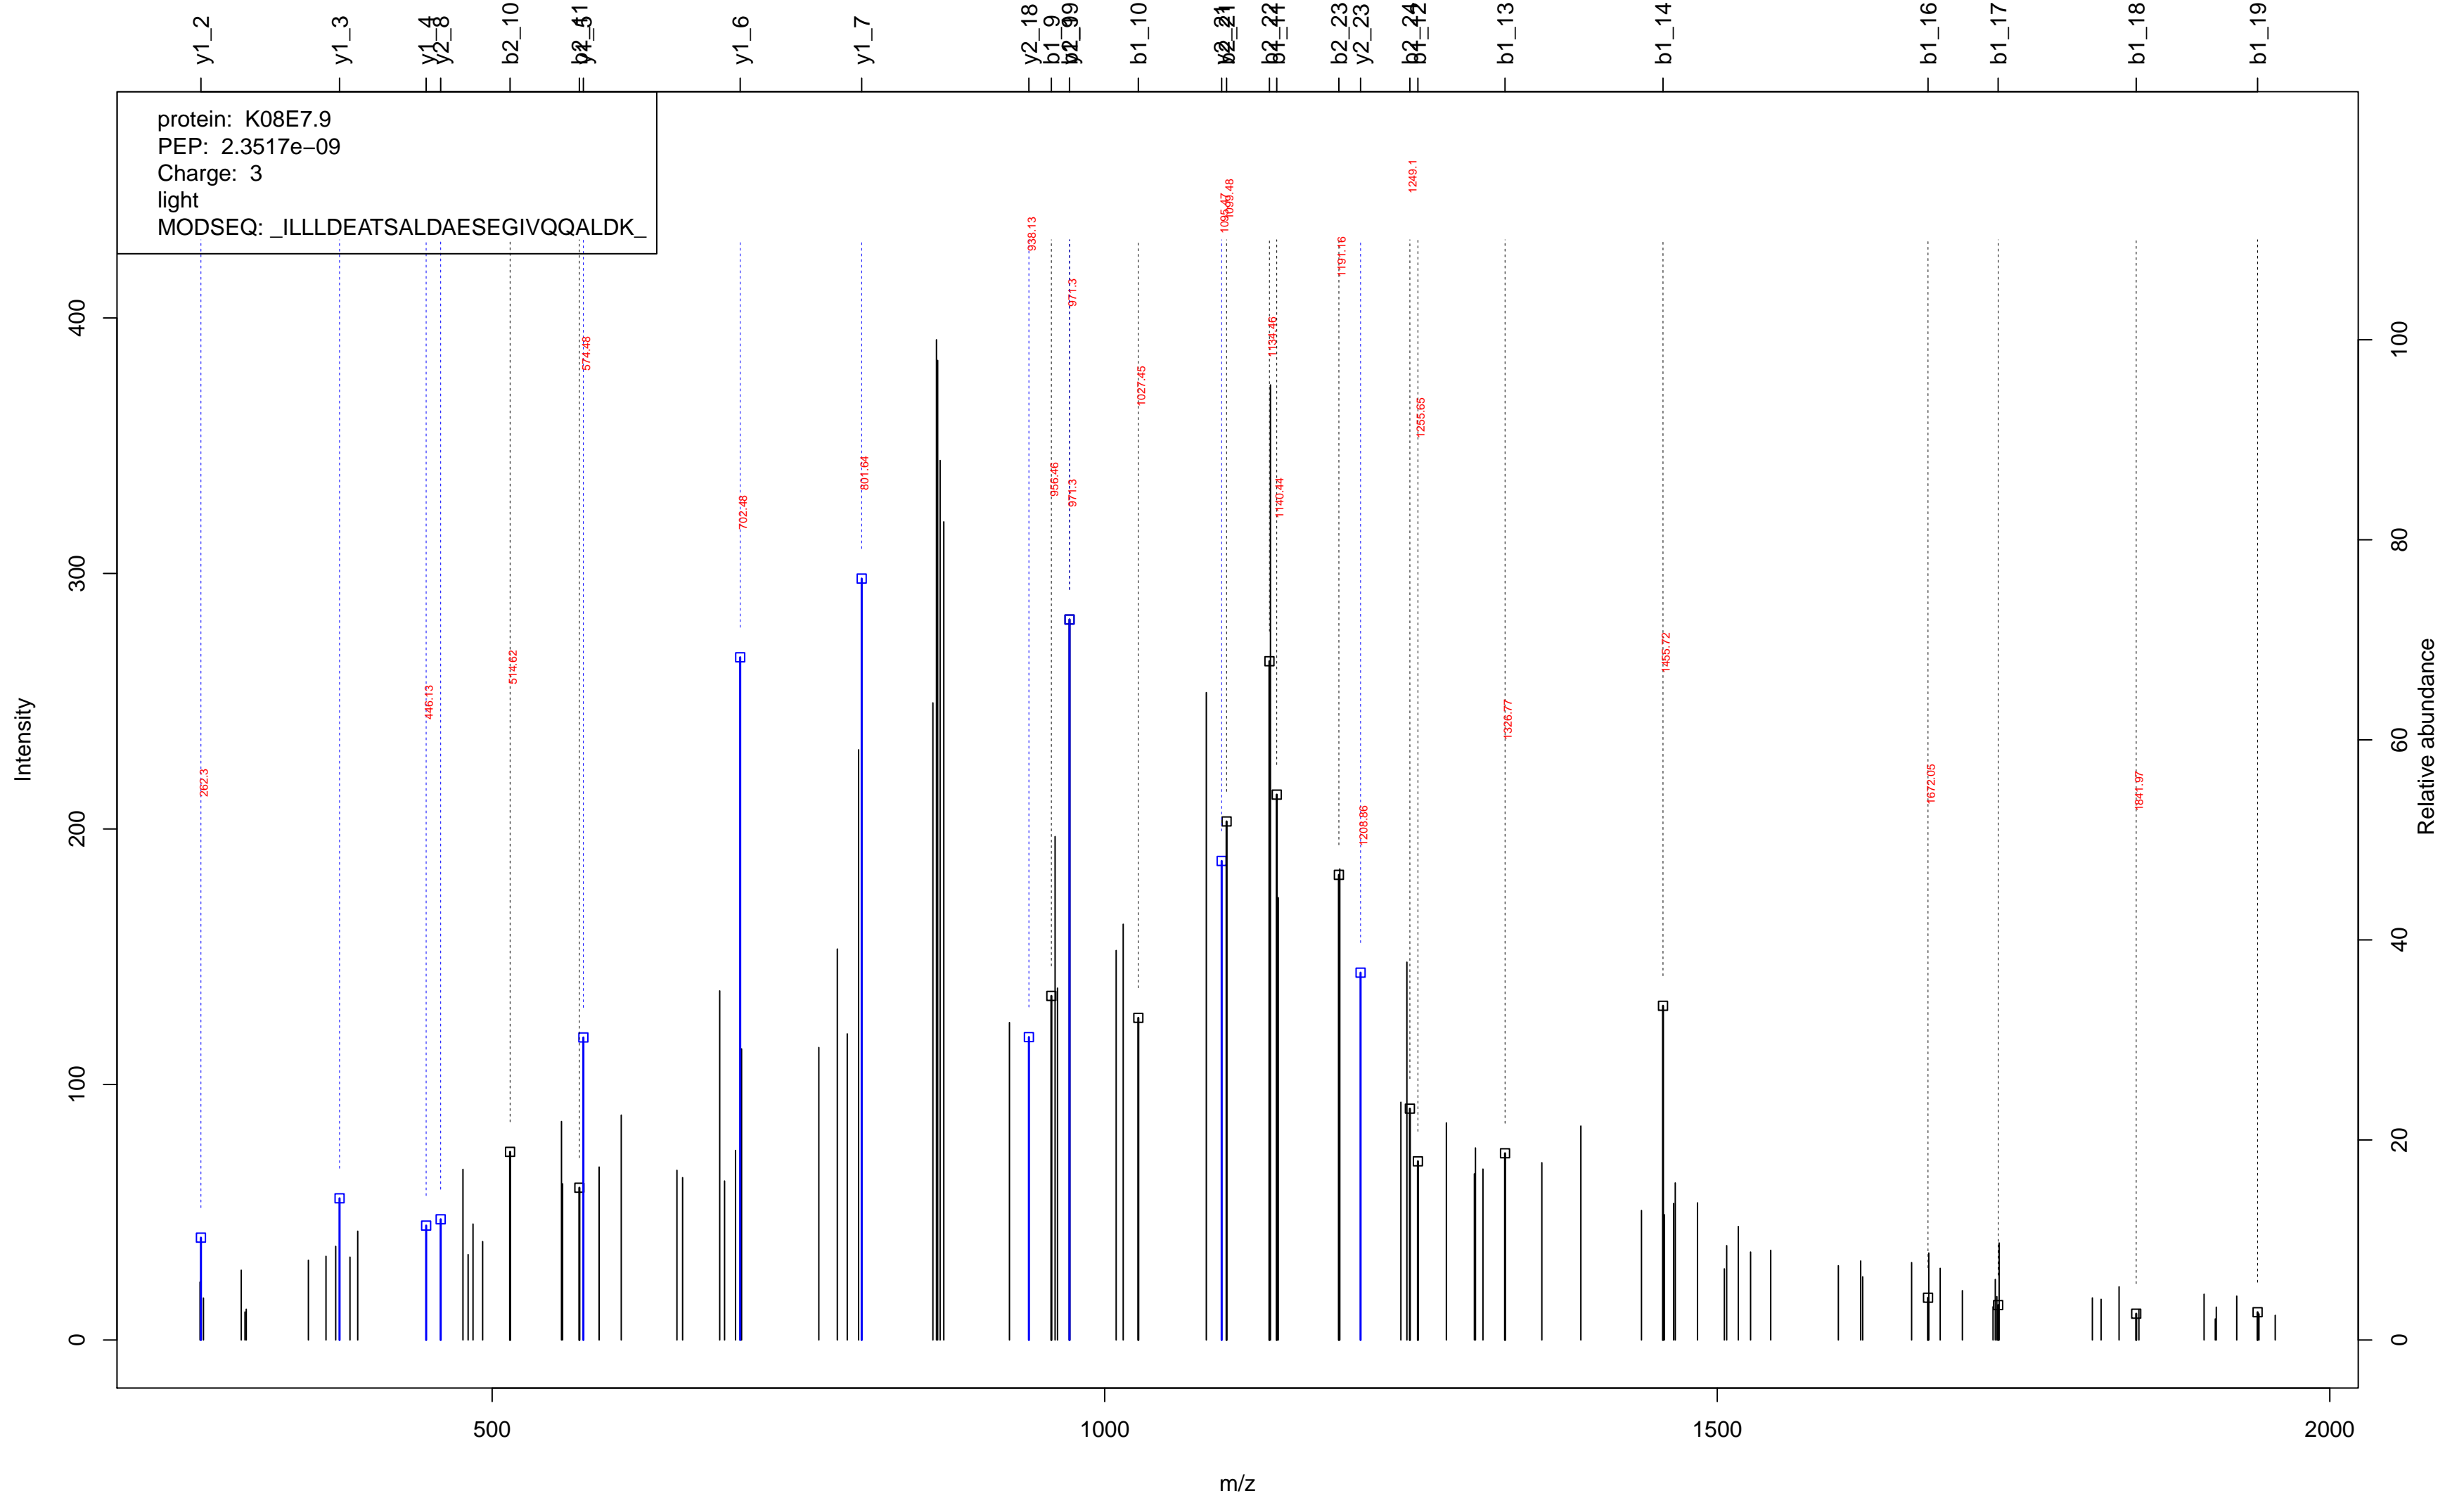

protein: K08E7.9  
PEP: 2.3517e-09  
Charge: 3  
light  
MODSEQ: \_ILLLDEATSALDAESEGIVQQALDK\_

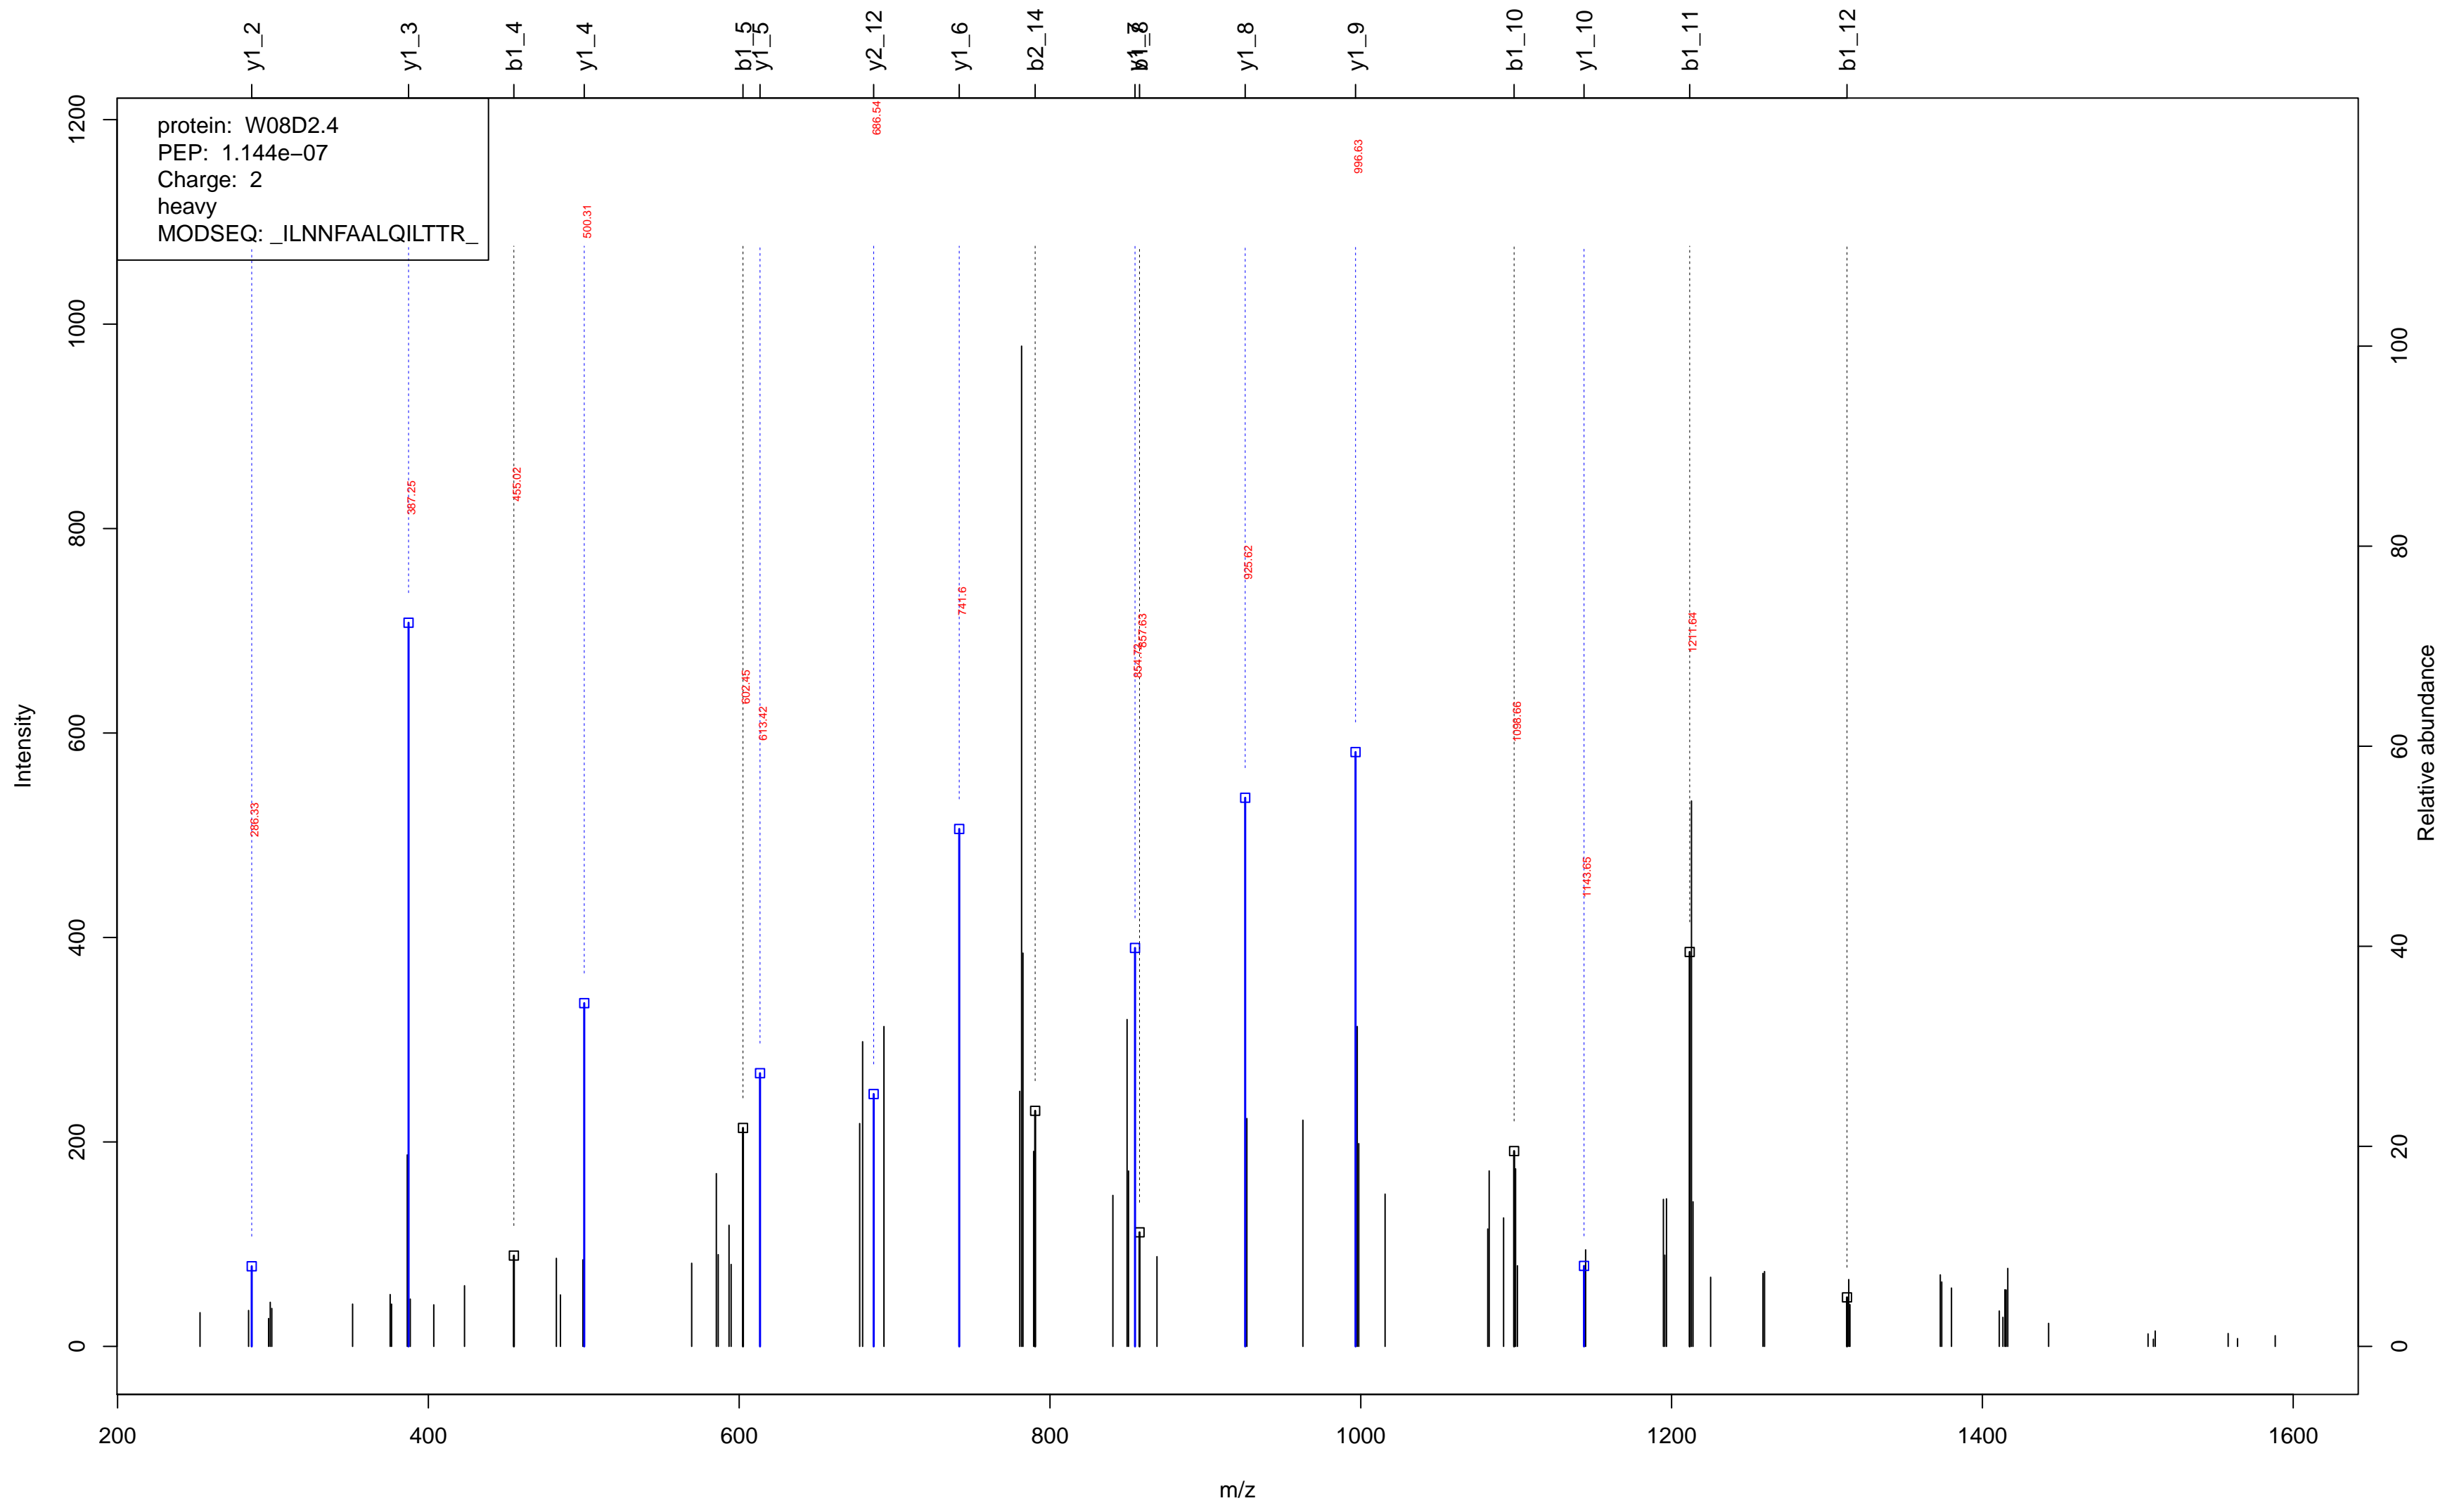

b1\_2    b2\_5    b1\_4    y2\_7    y2\_9    b1\_5    y2\_10    ~~p2\_51~~    y1\_6    y1\_7    b1\_9    y1\_9

protein: F54E2.1  
PEP: 0.019908  
Charge: 2  
heavy  
MODSEQ: \_ILPAHSSLFTK\_

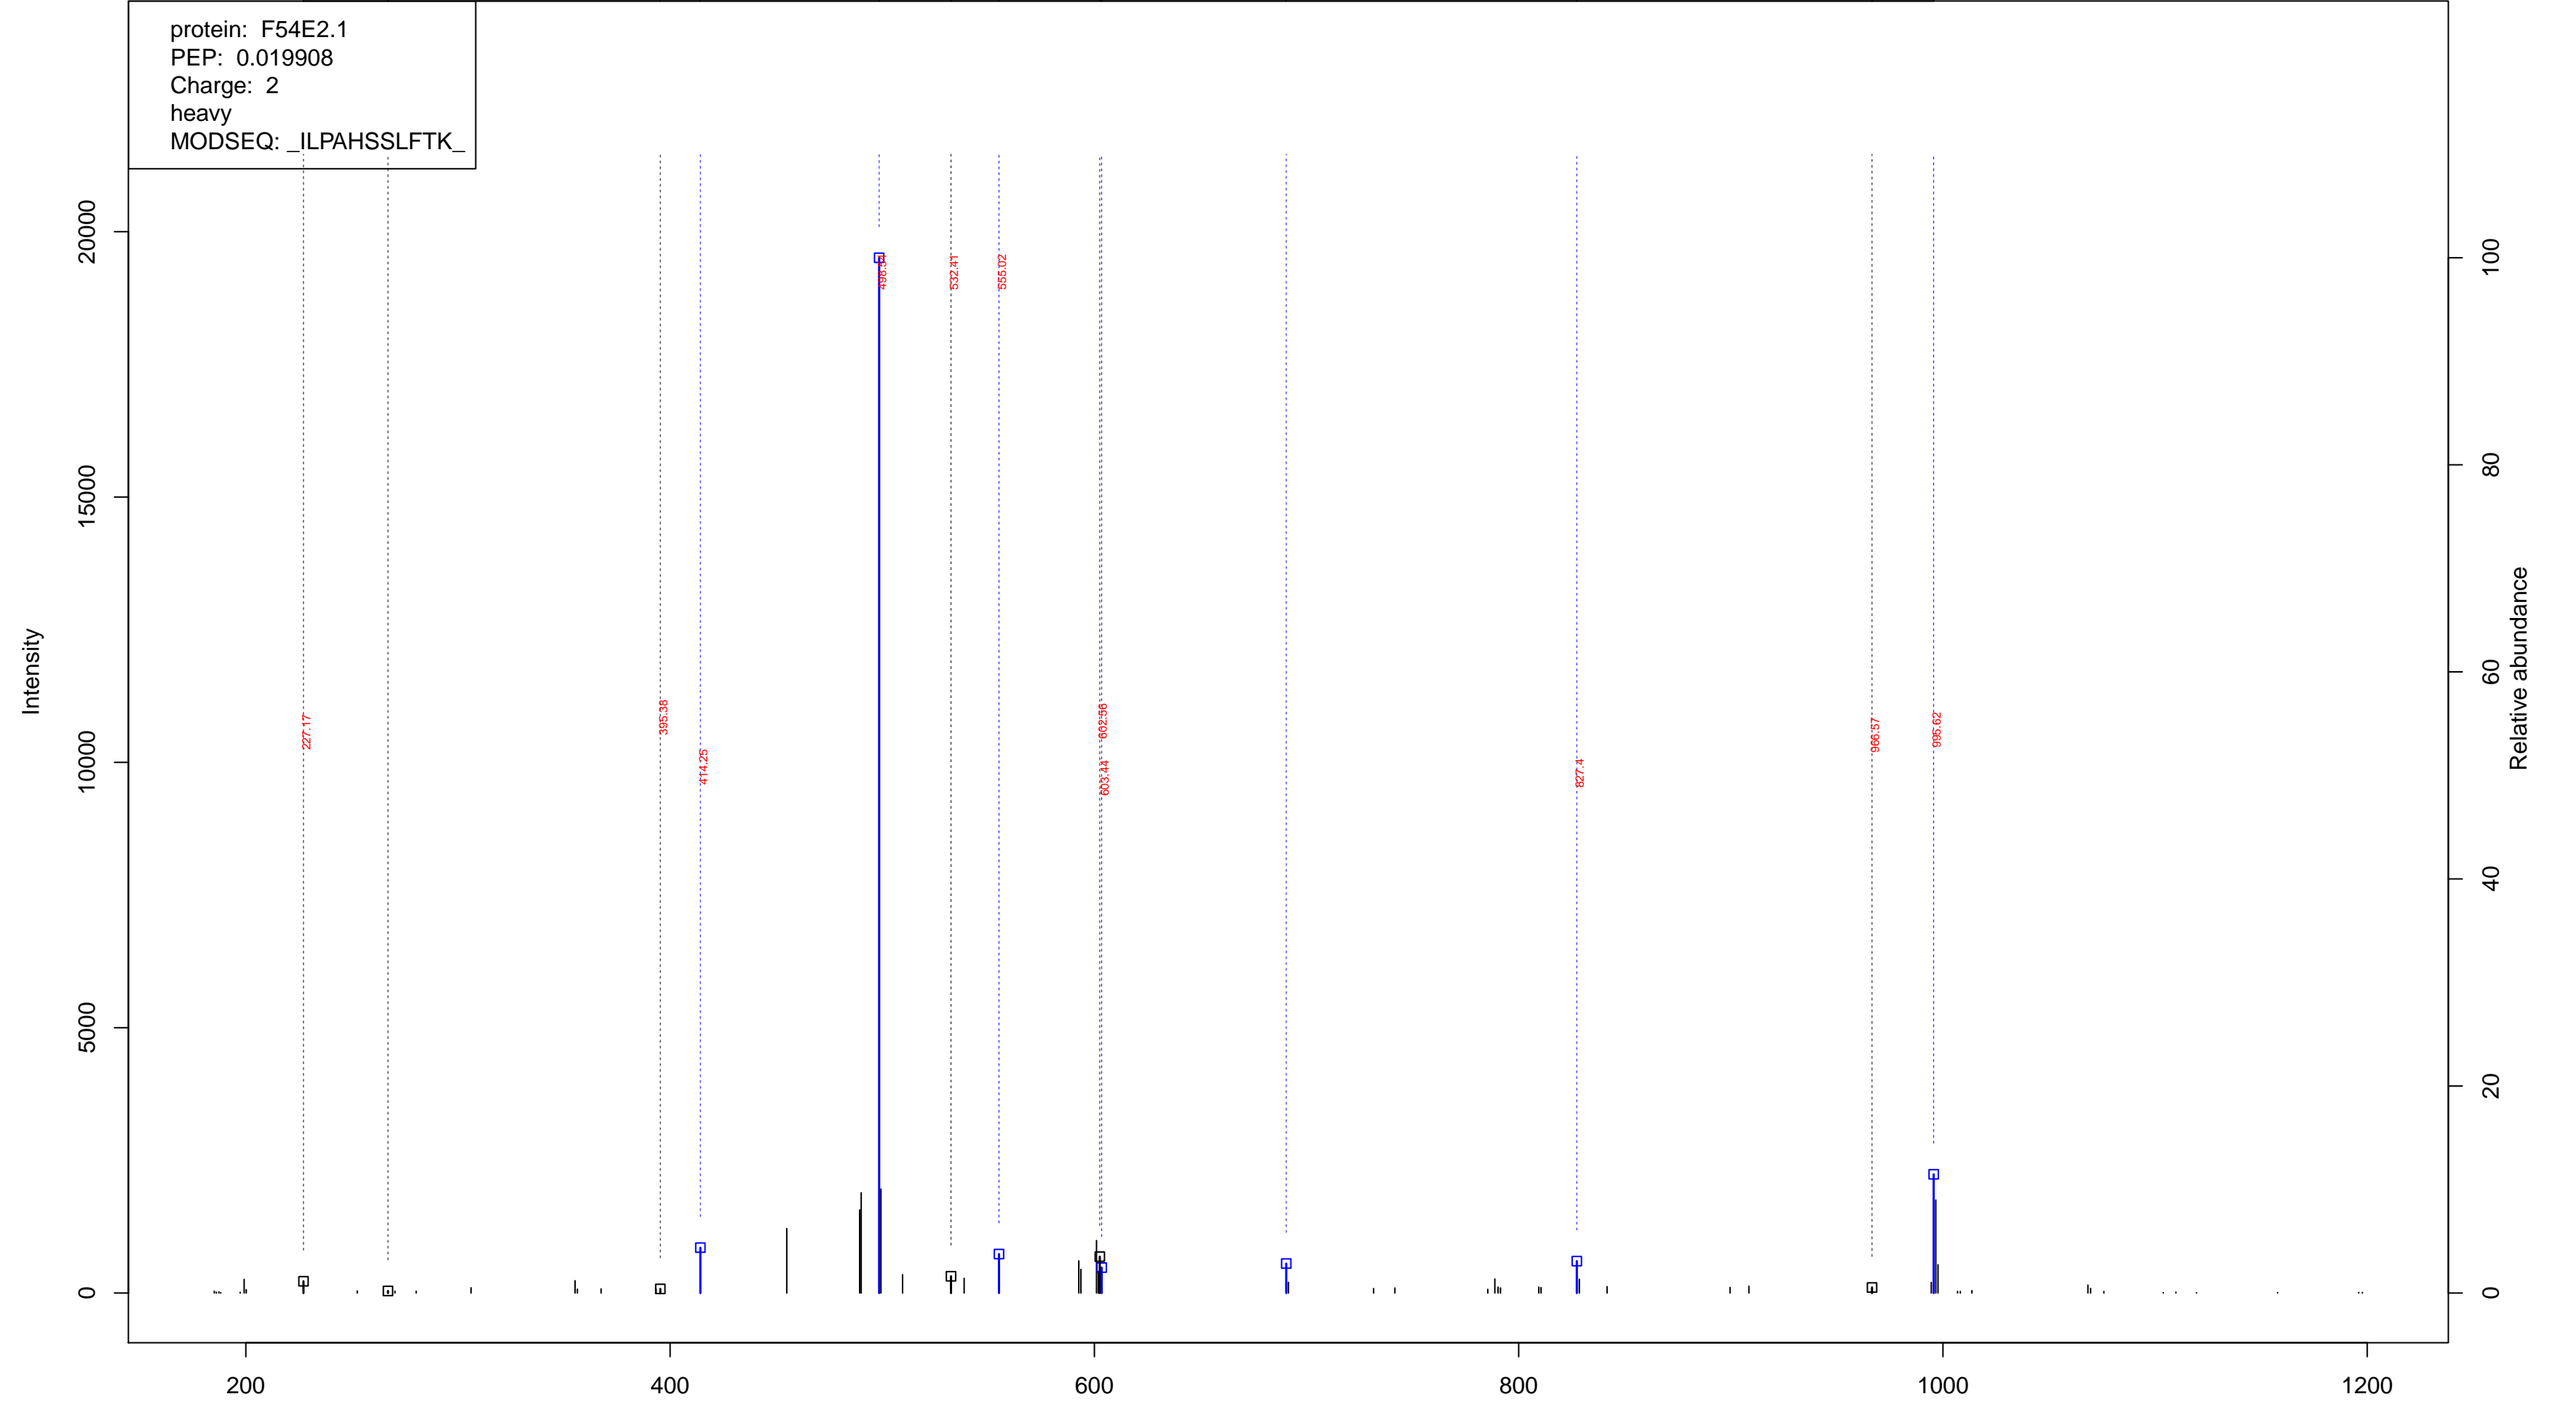

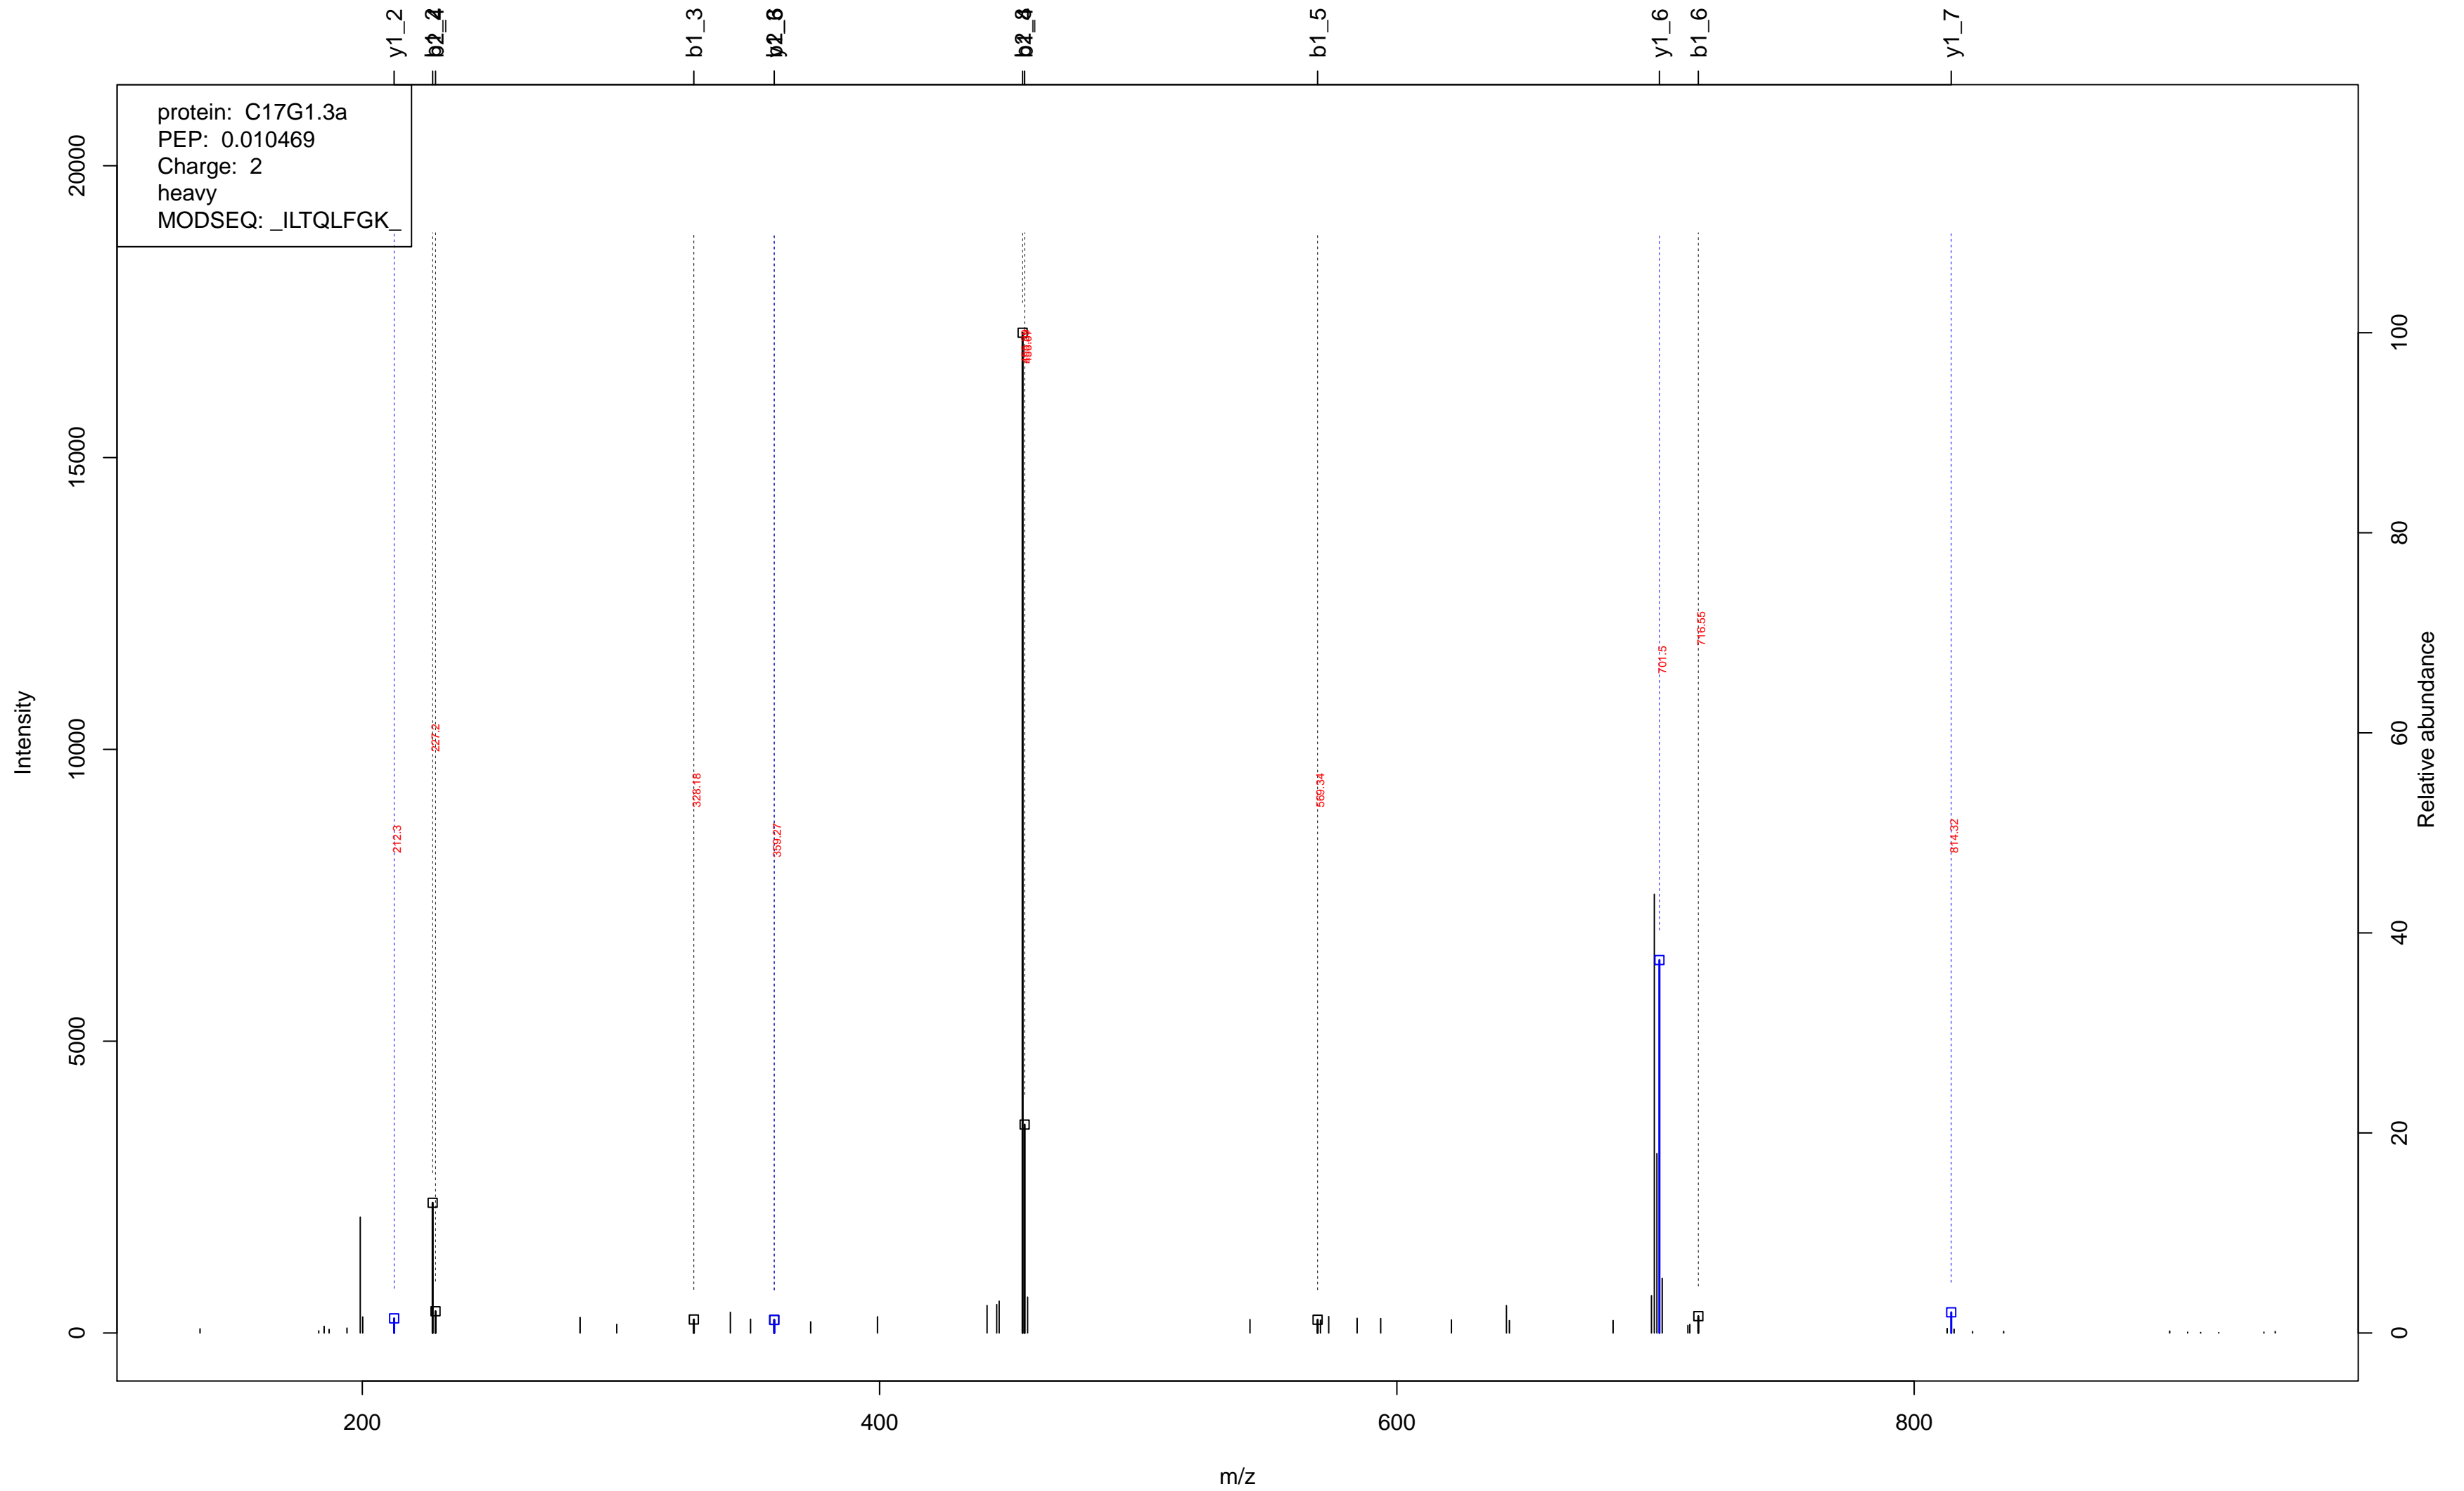

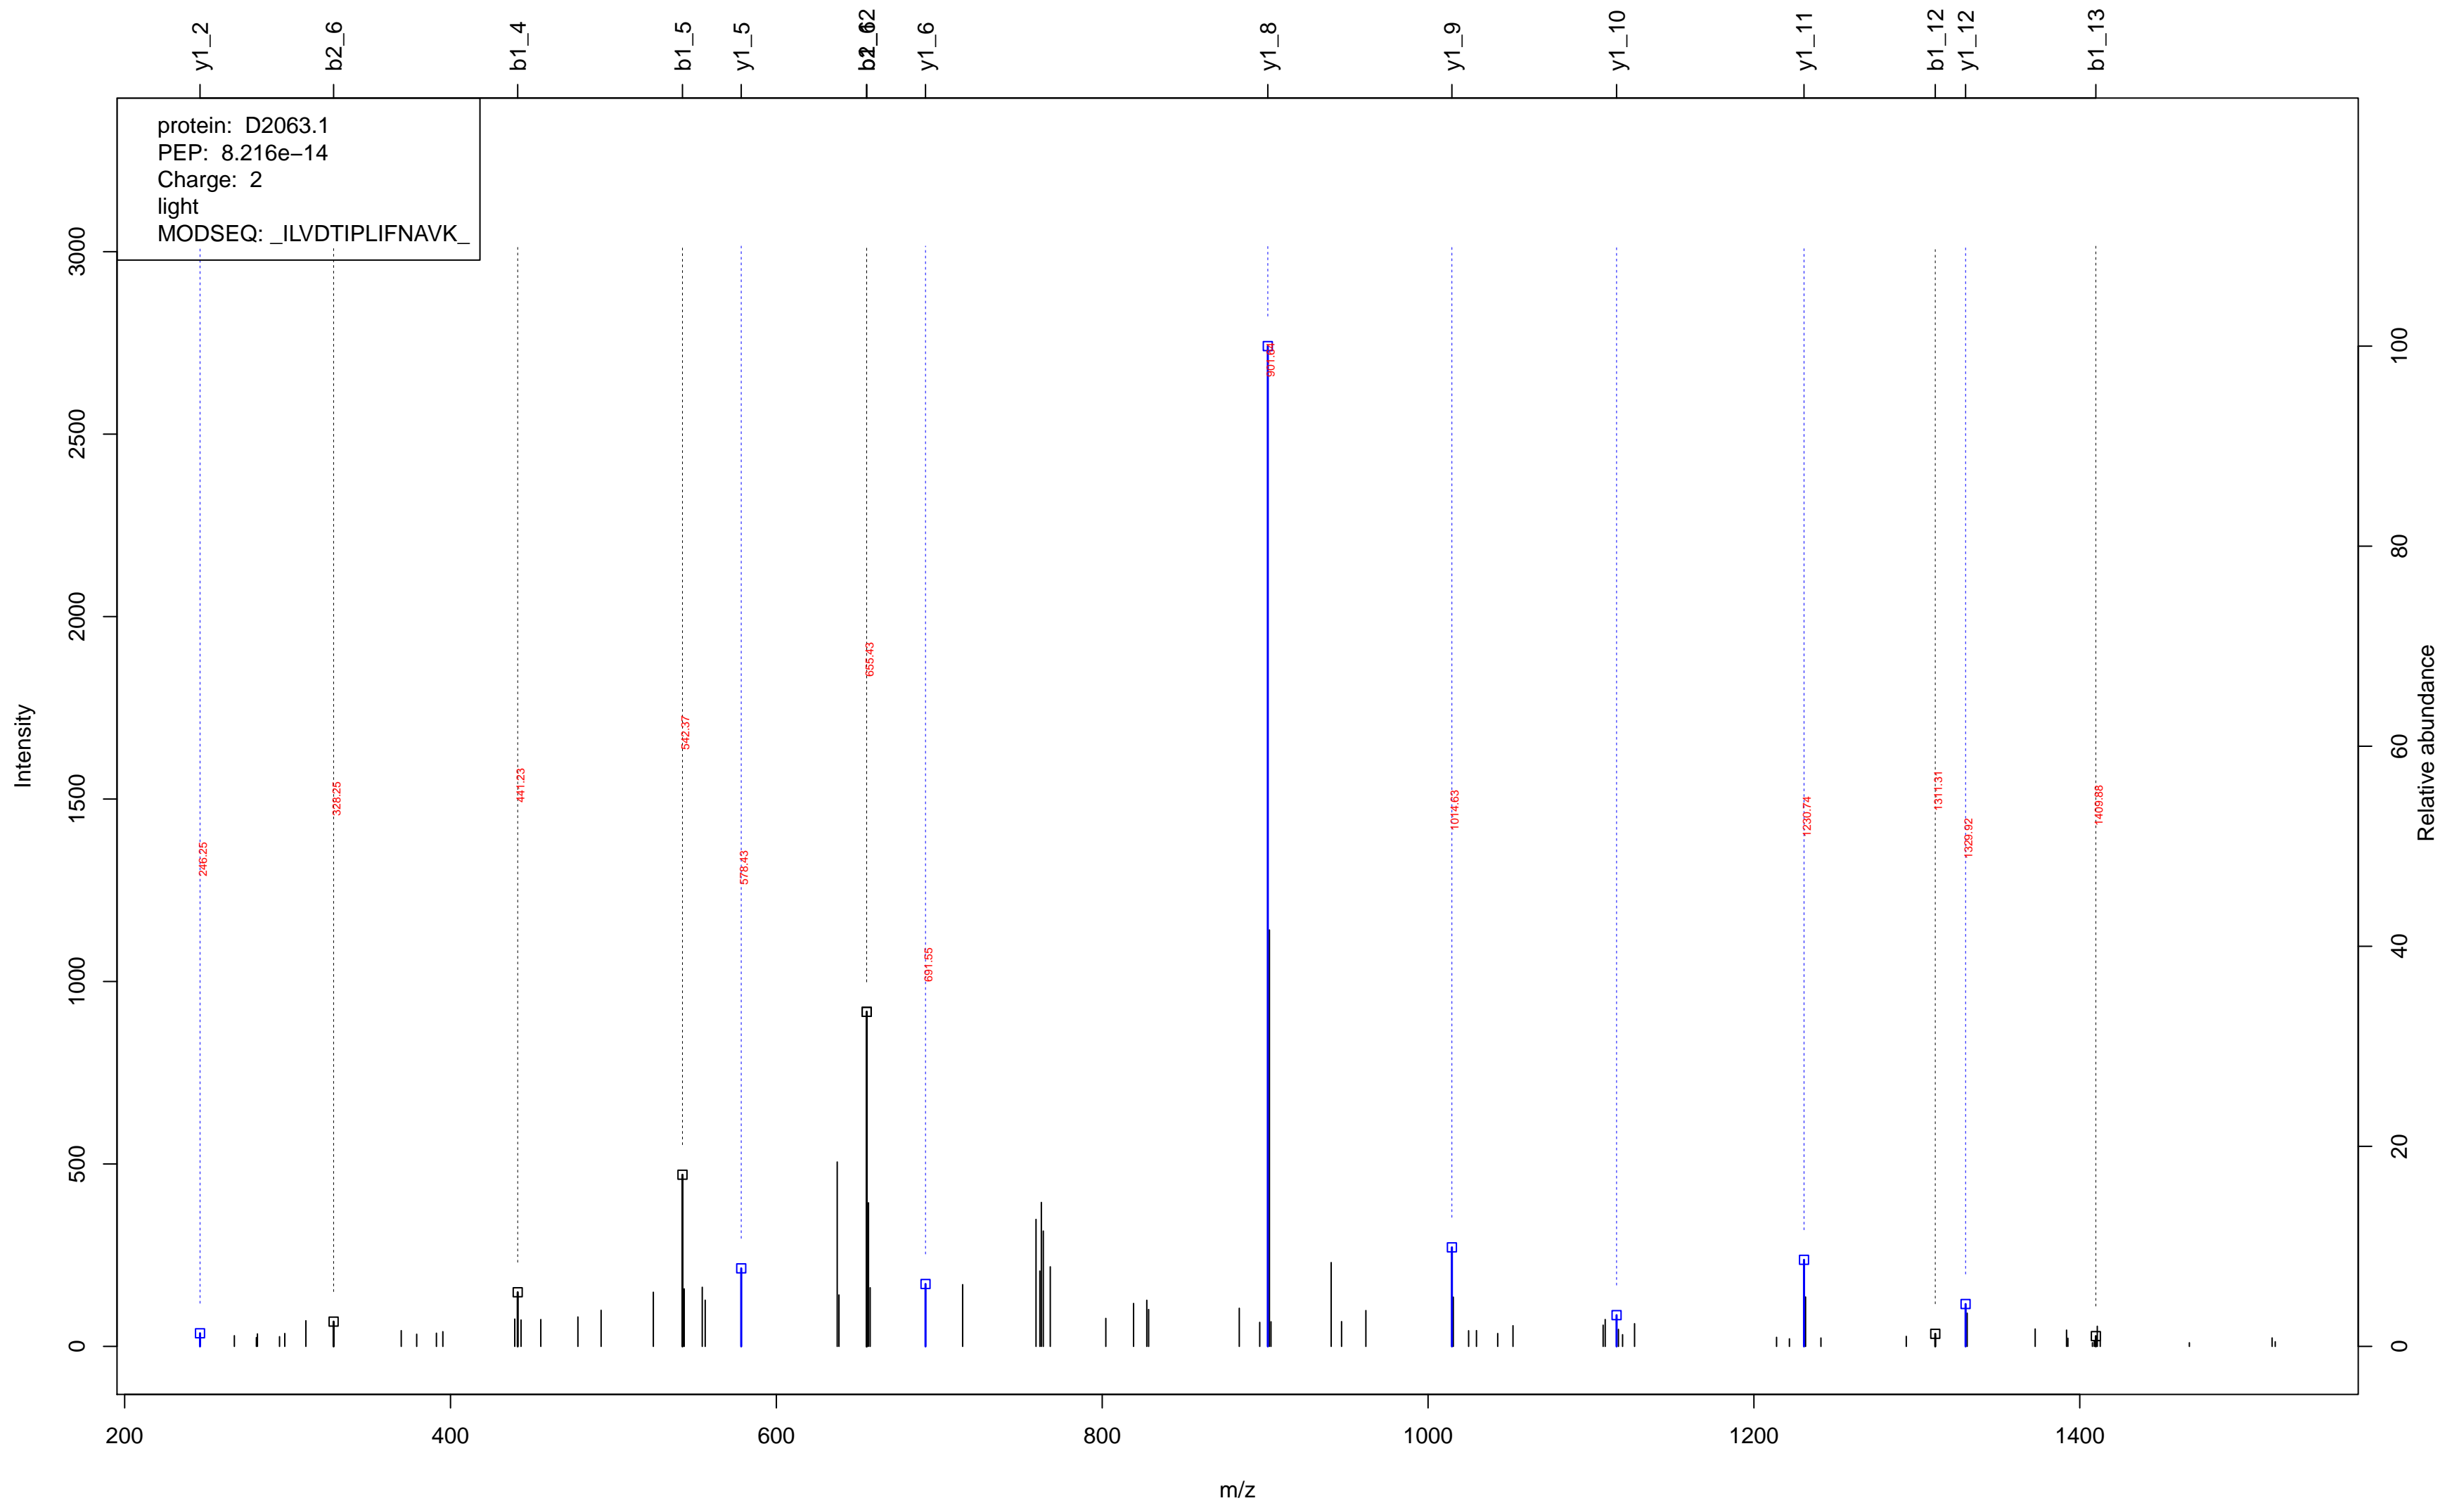

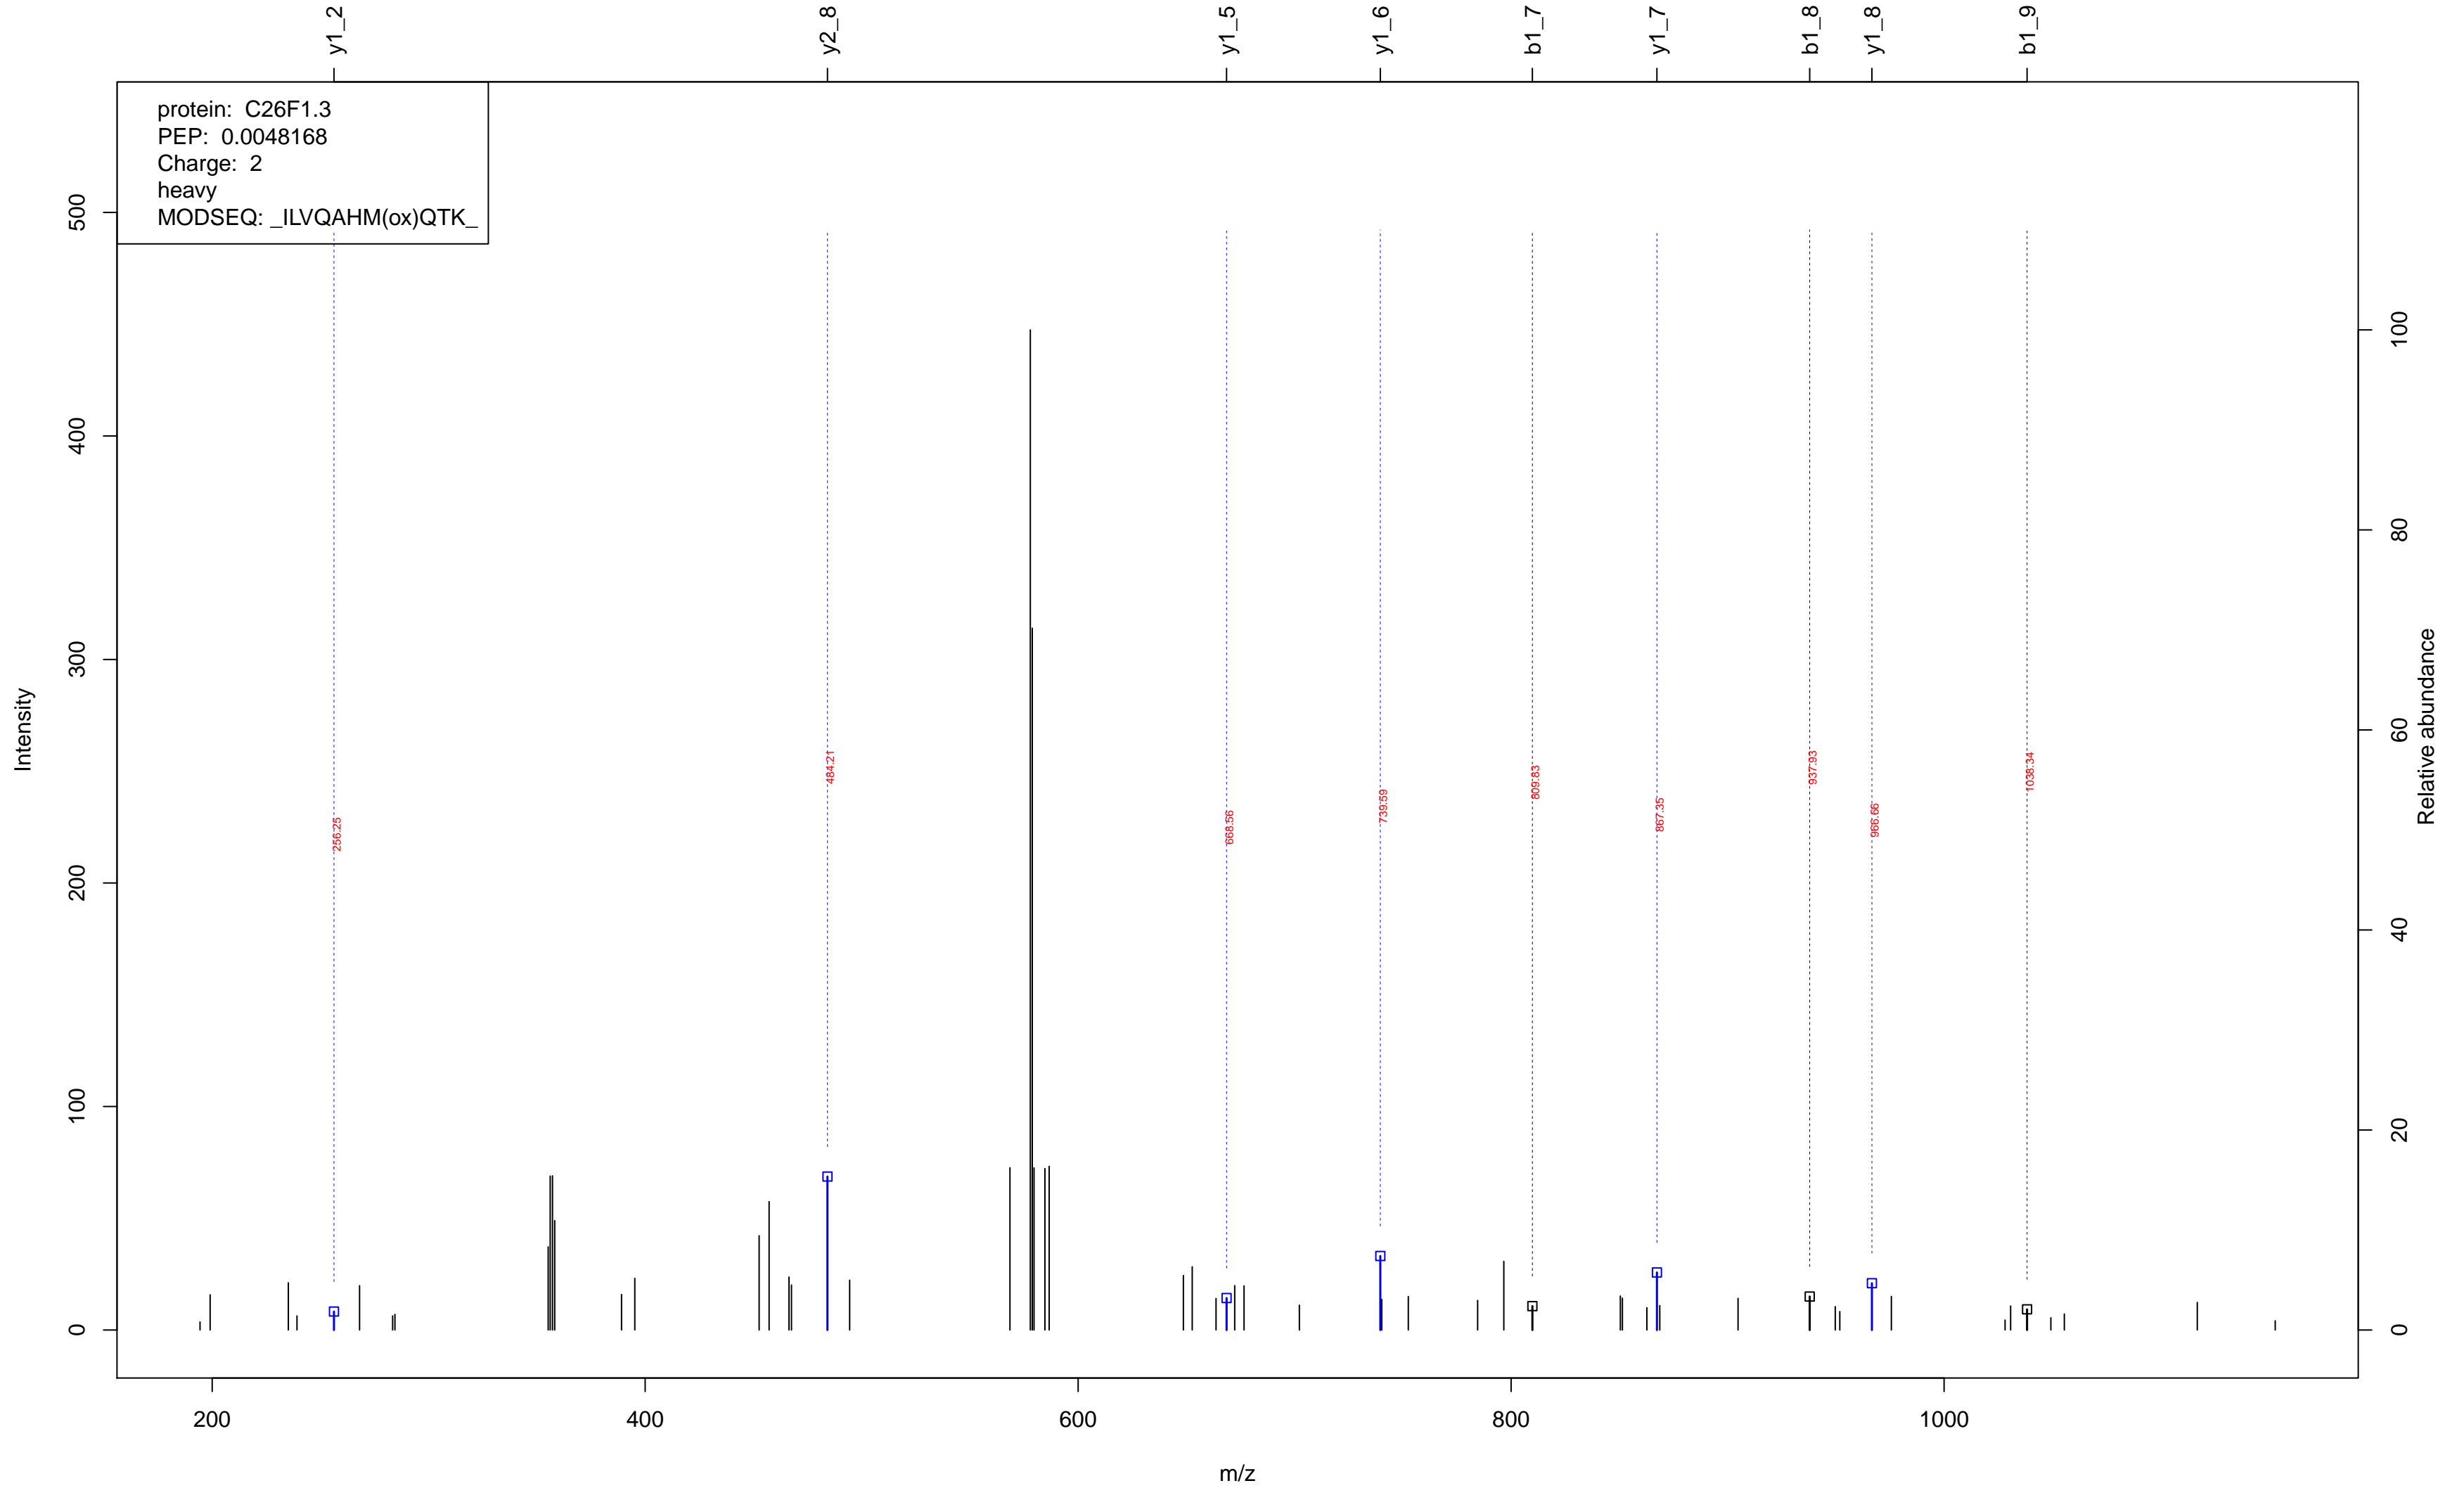



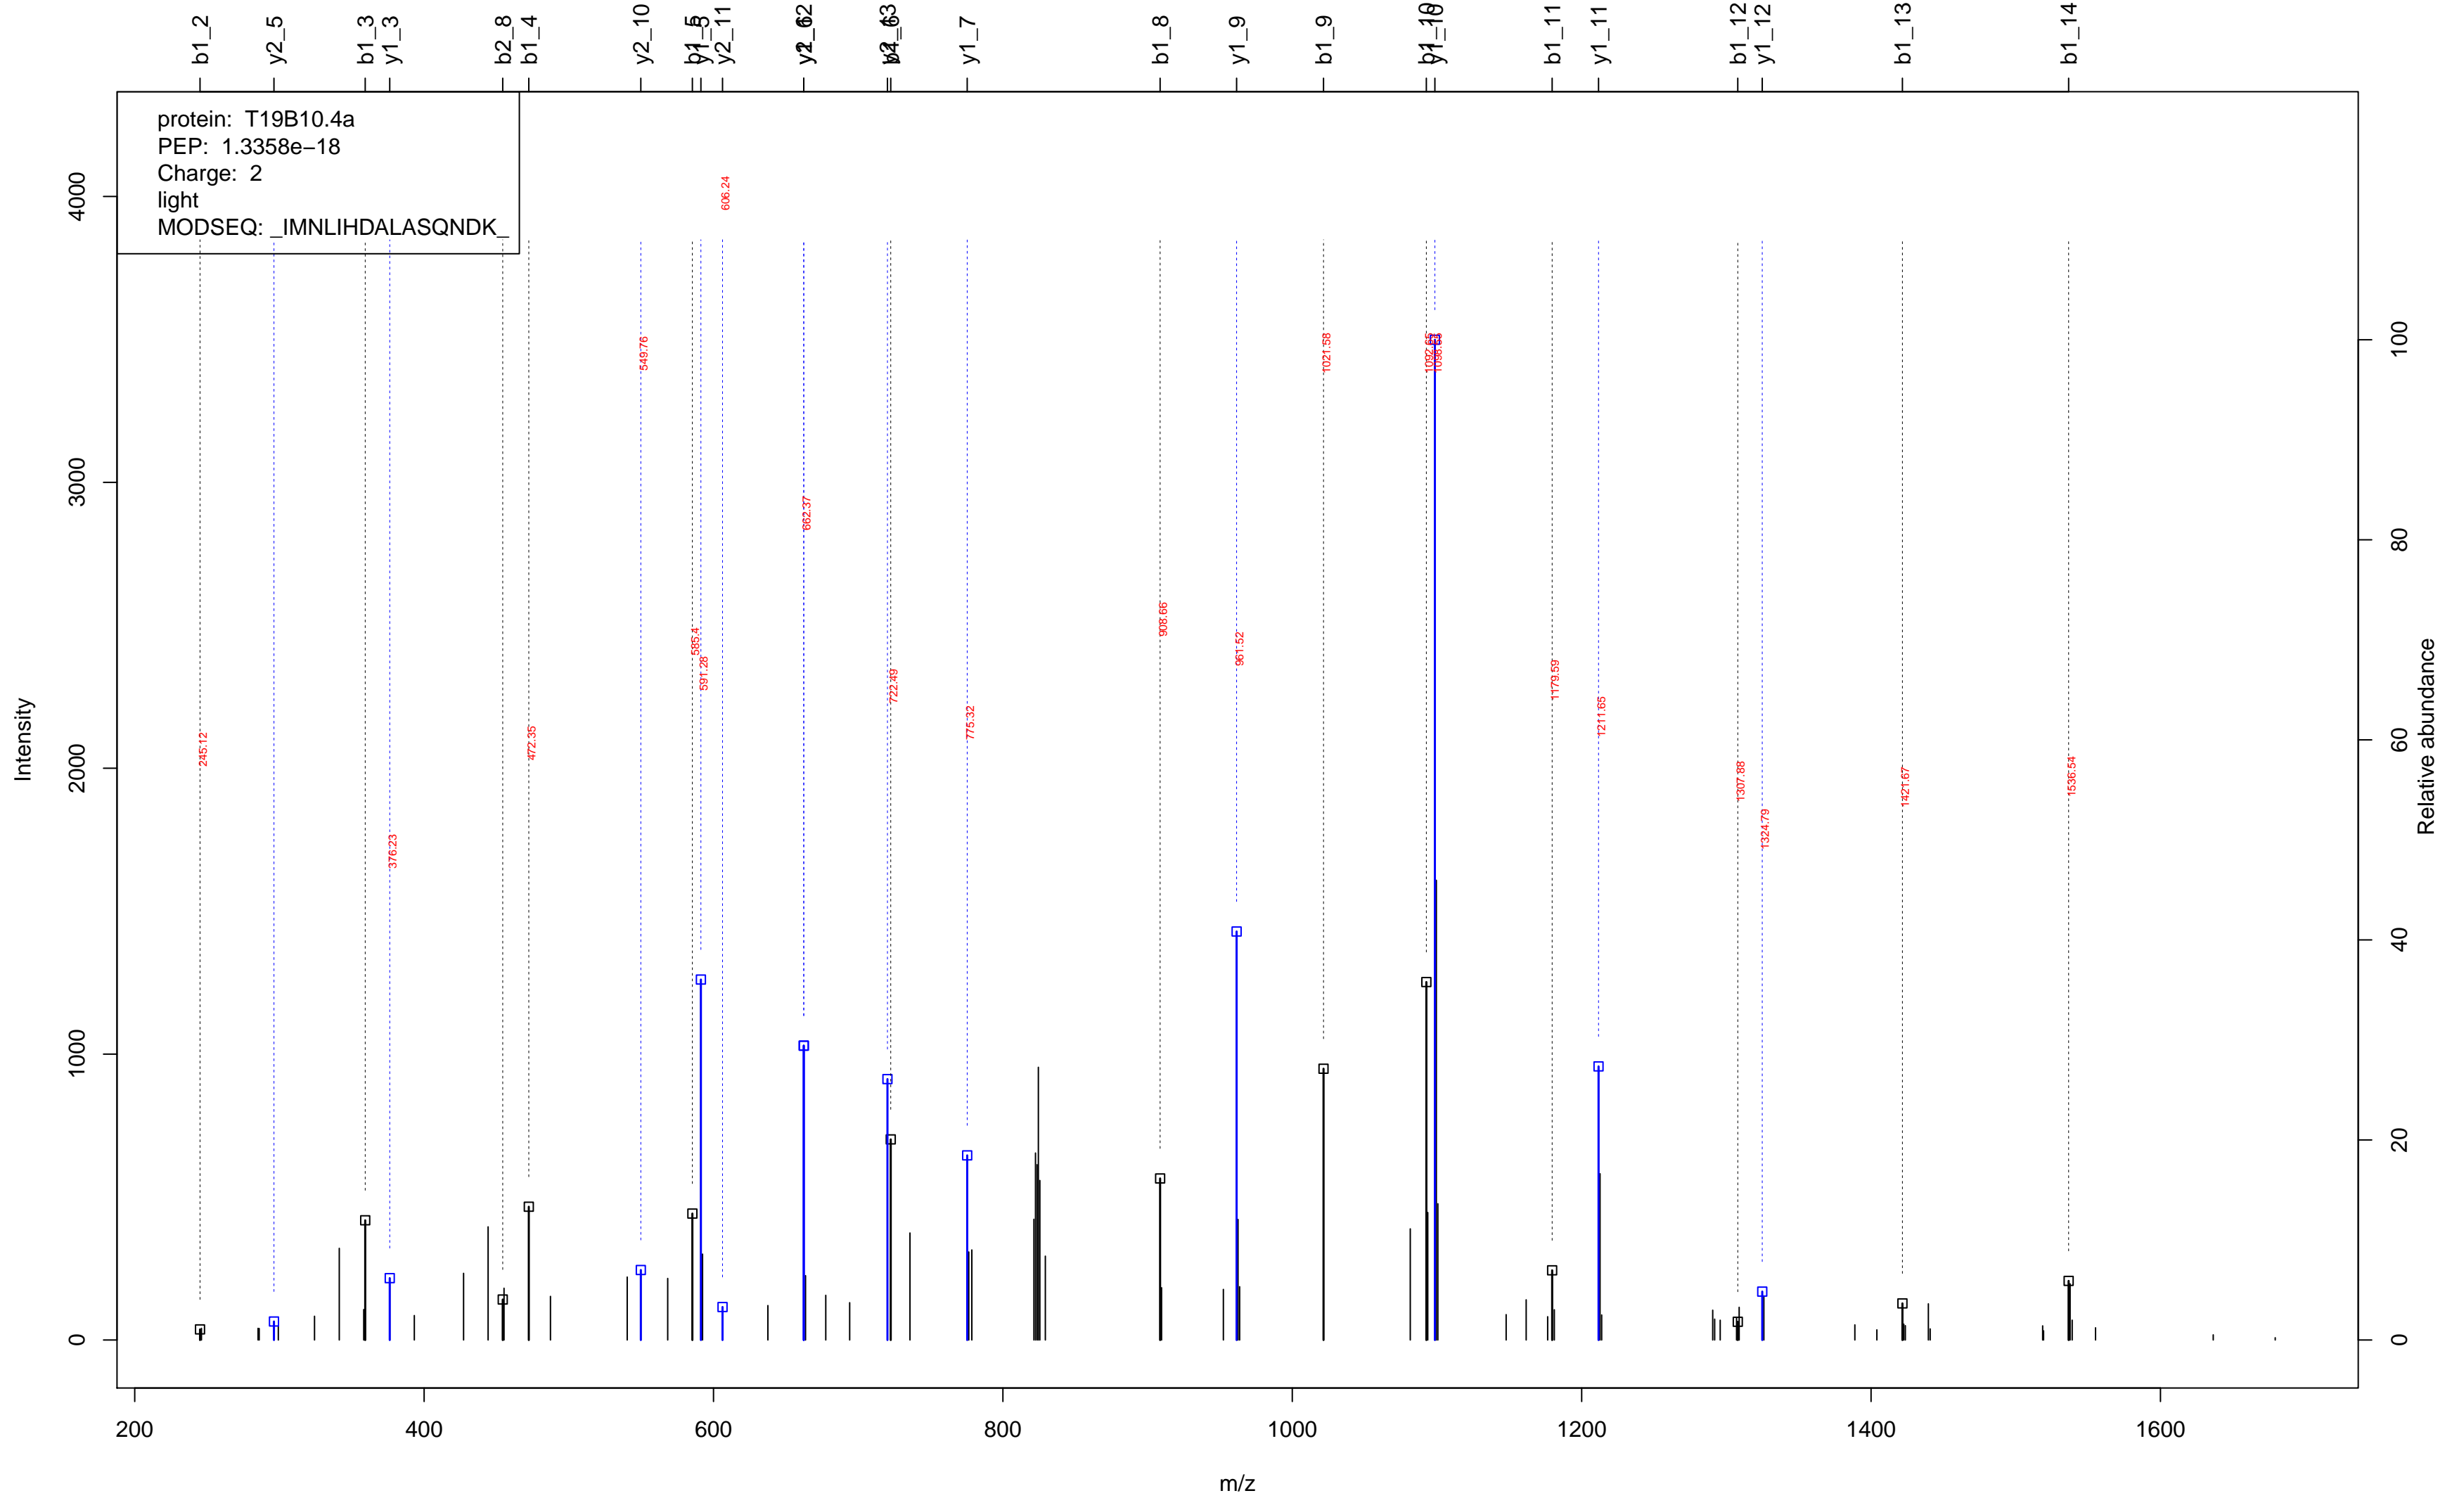

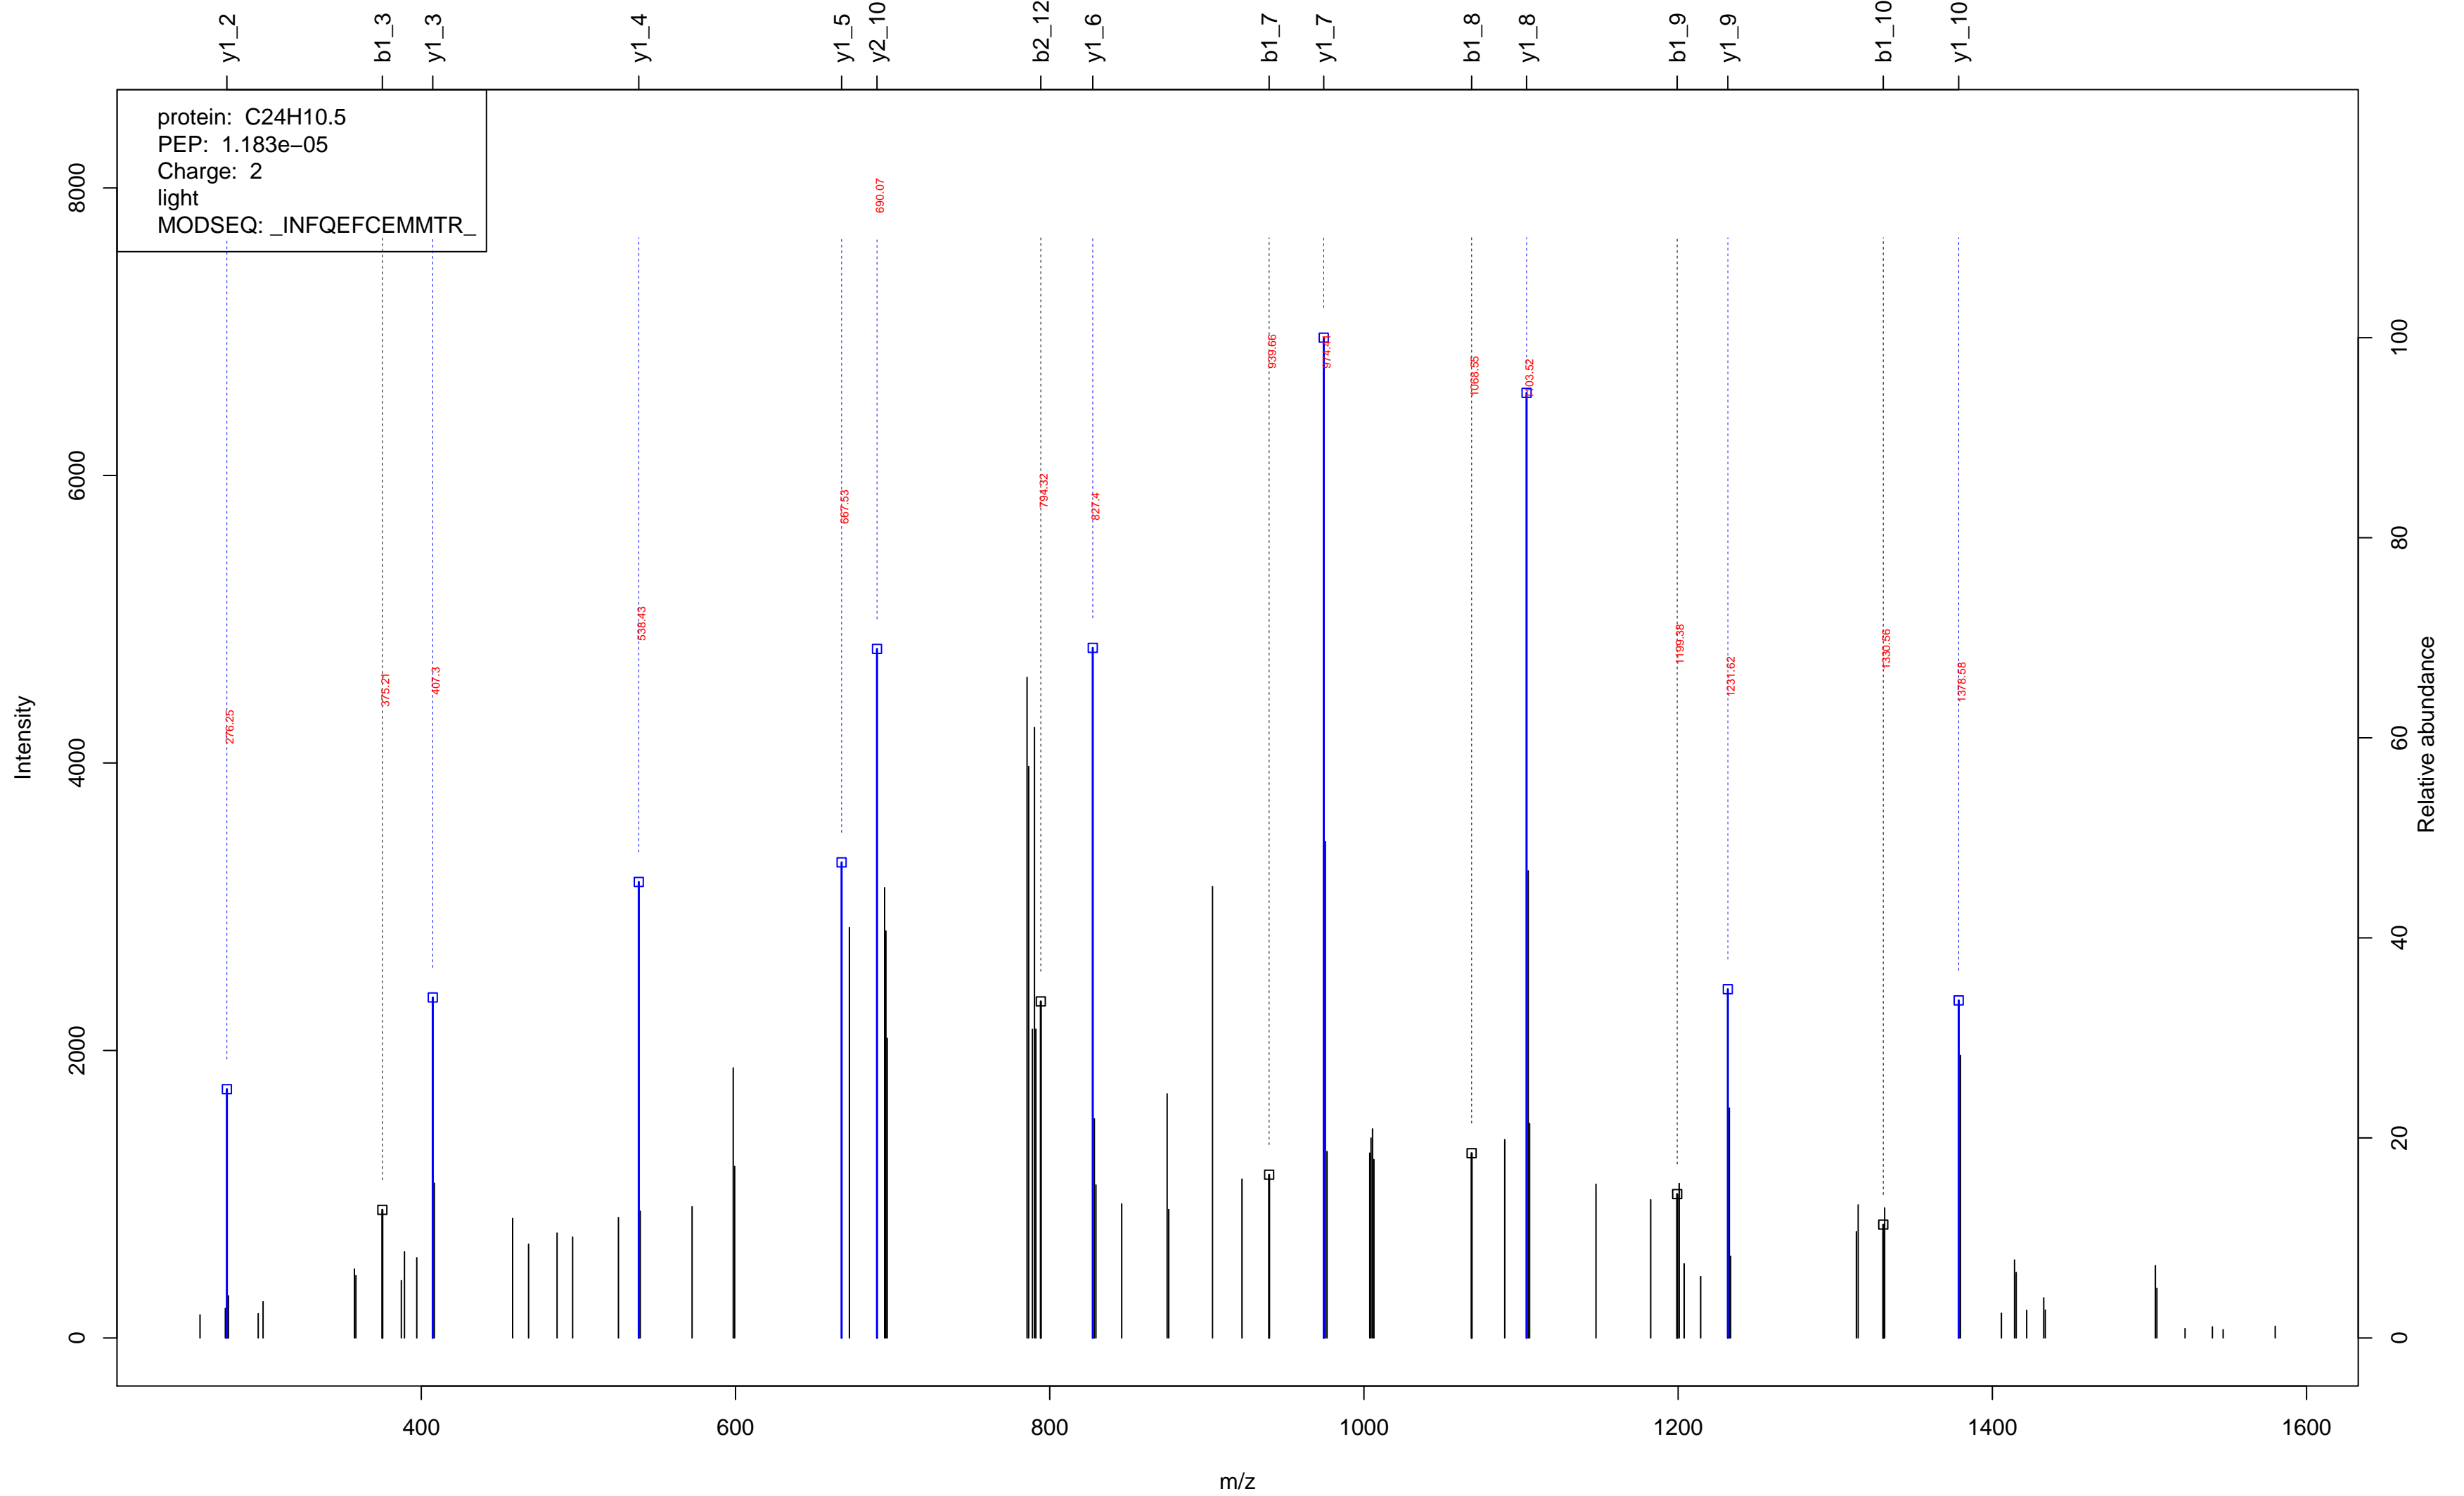

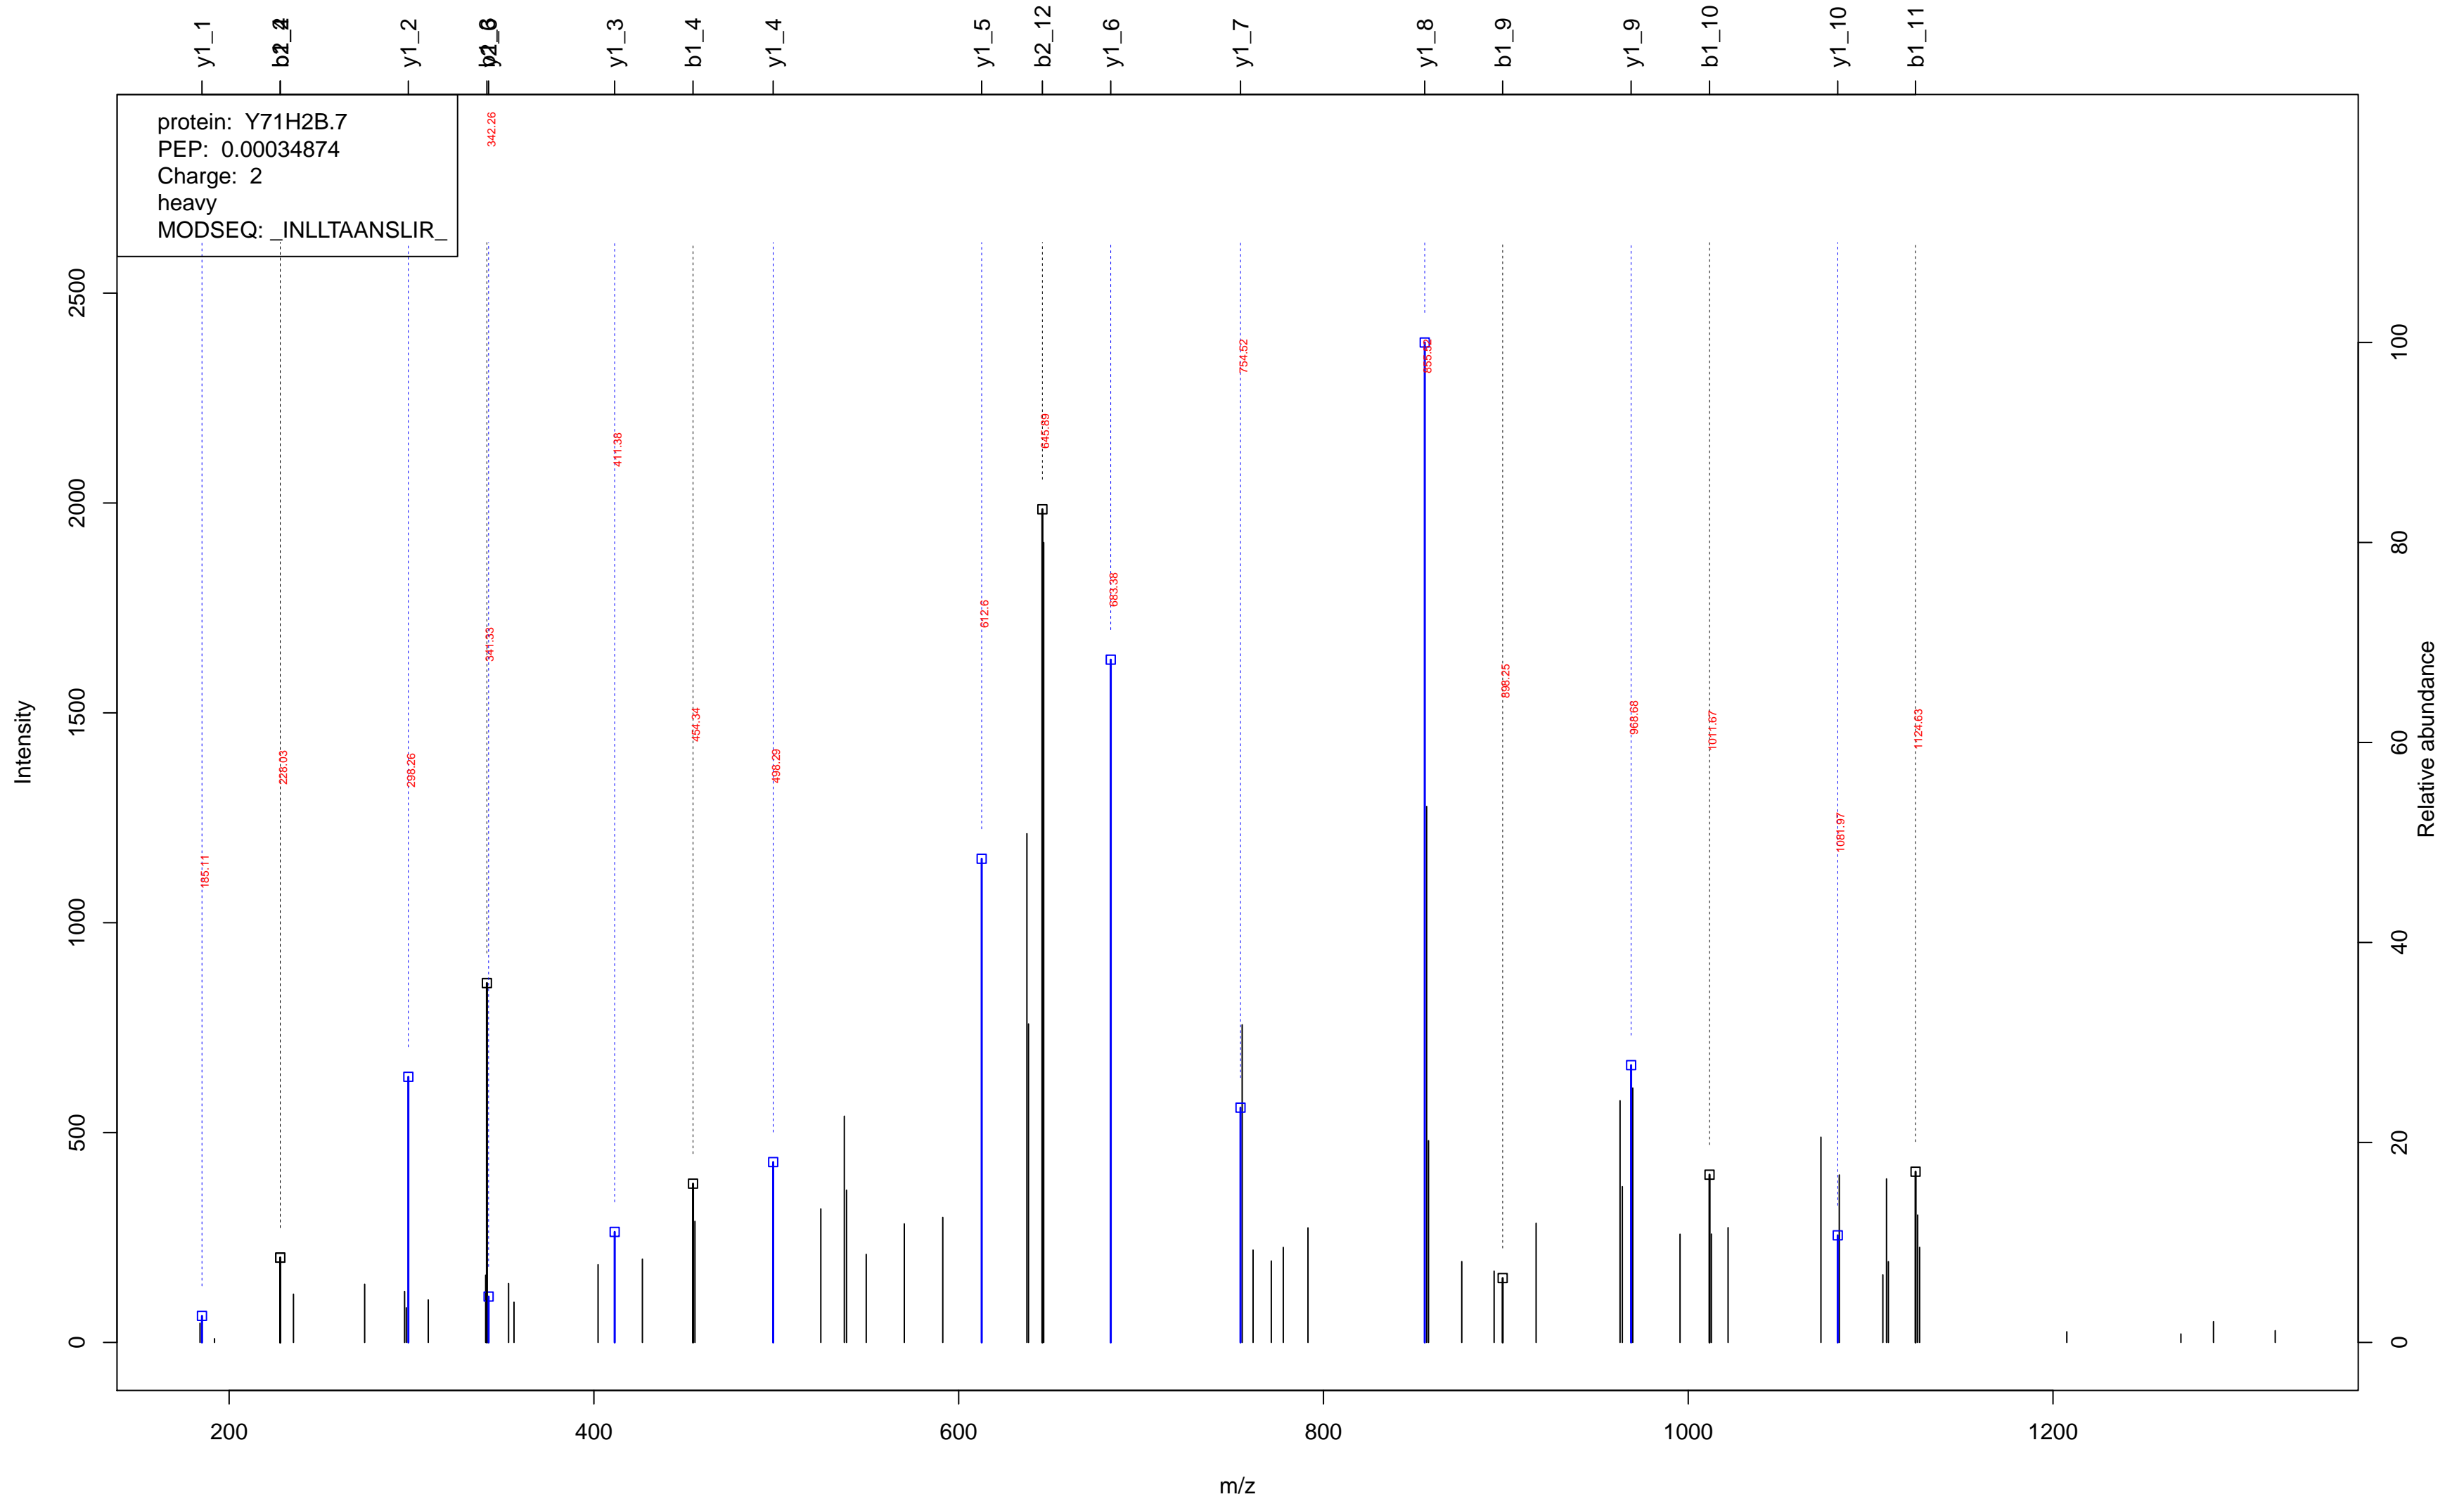

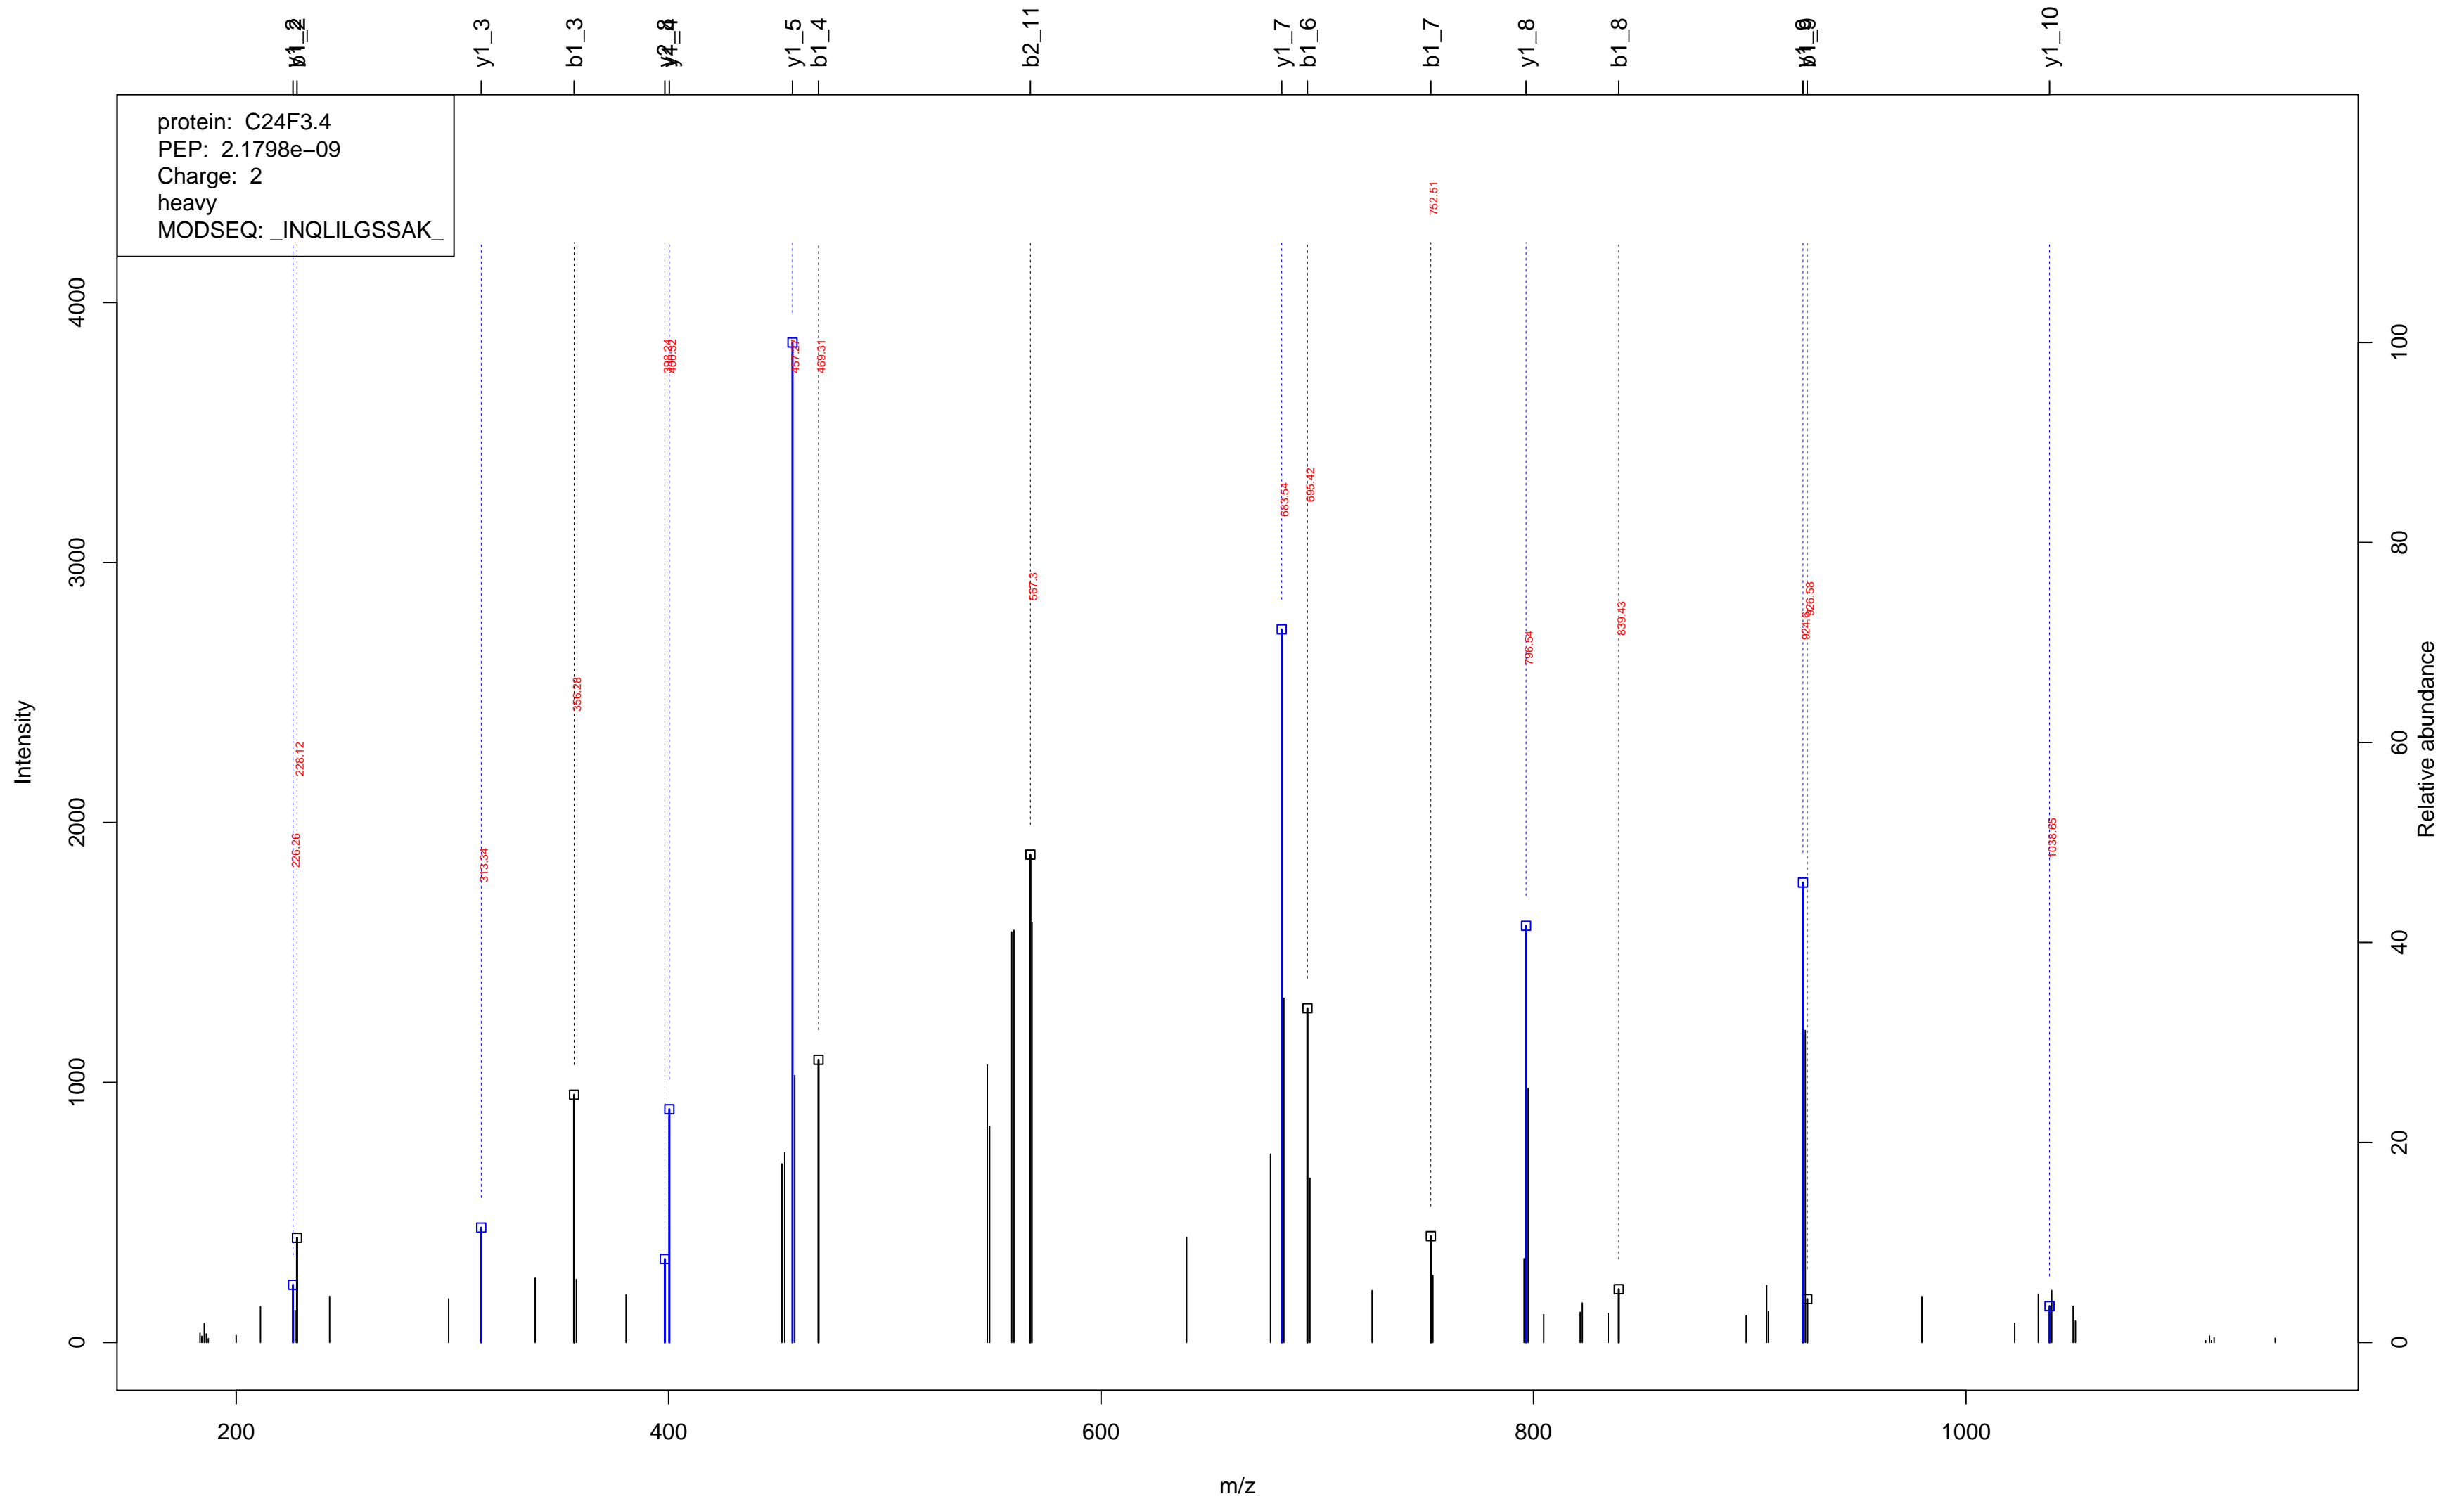

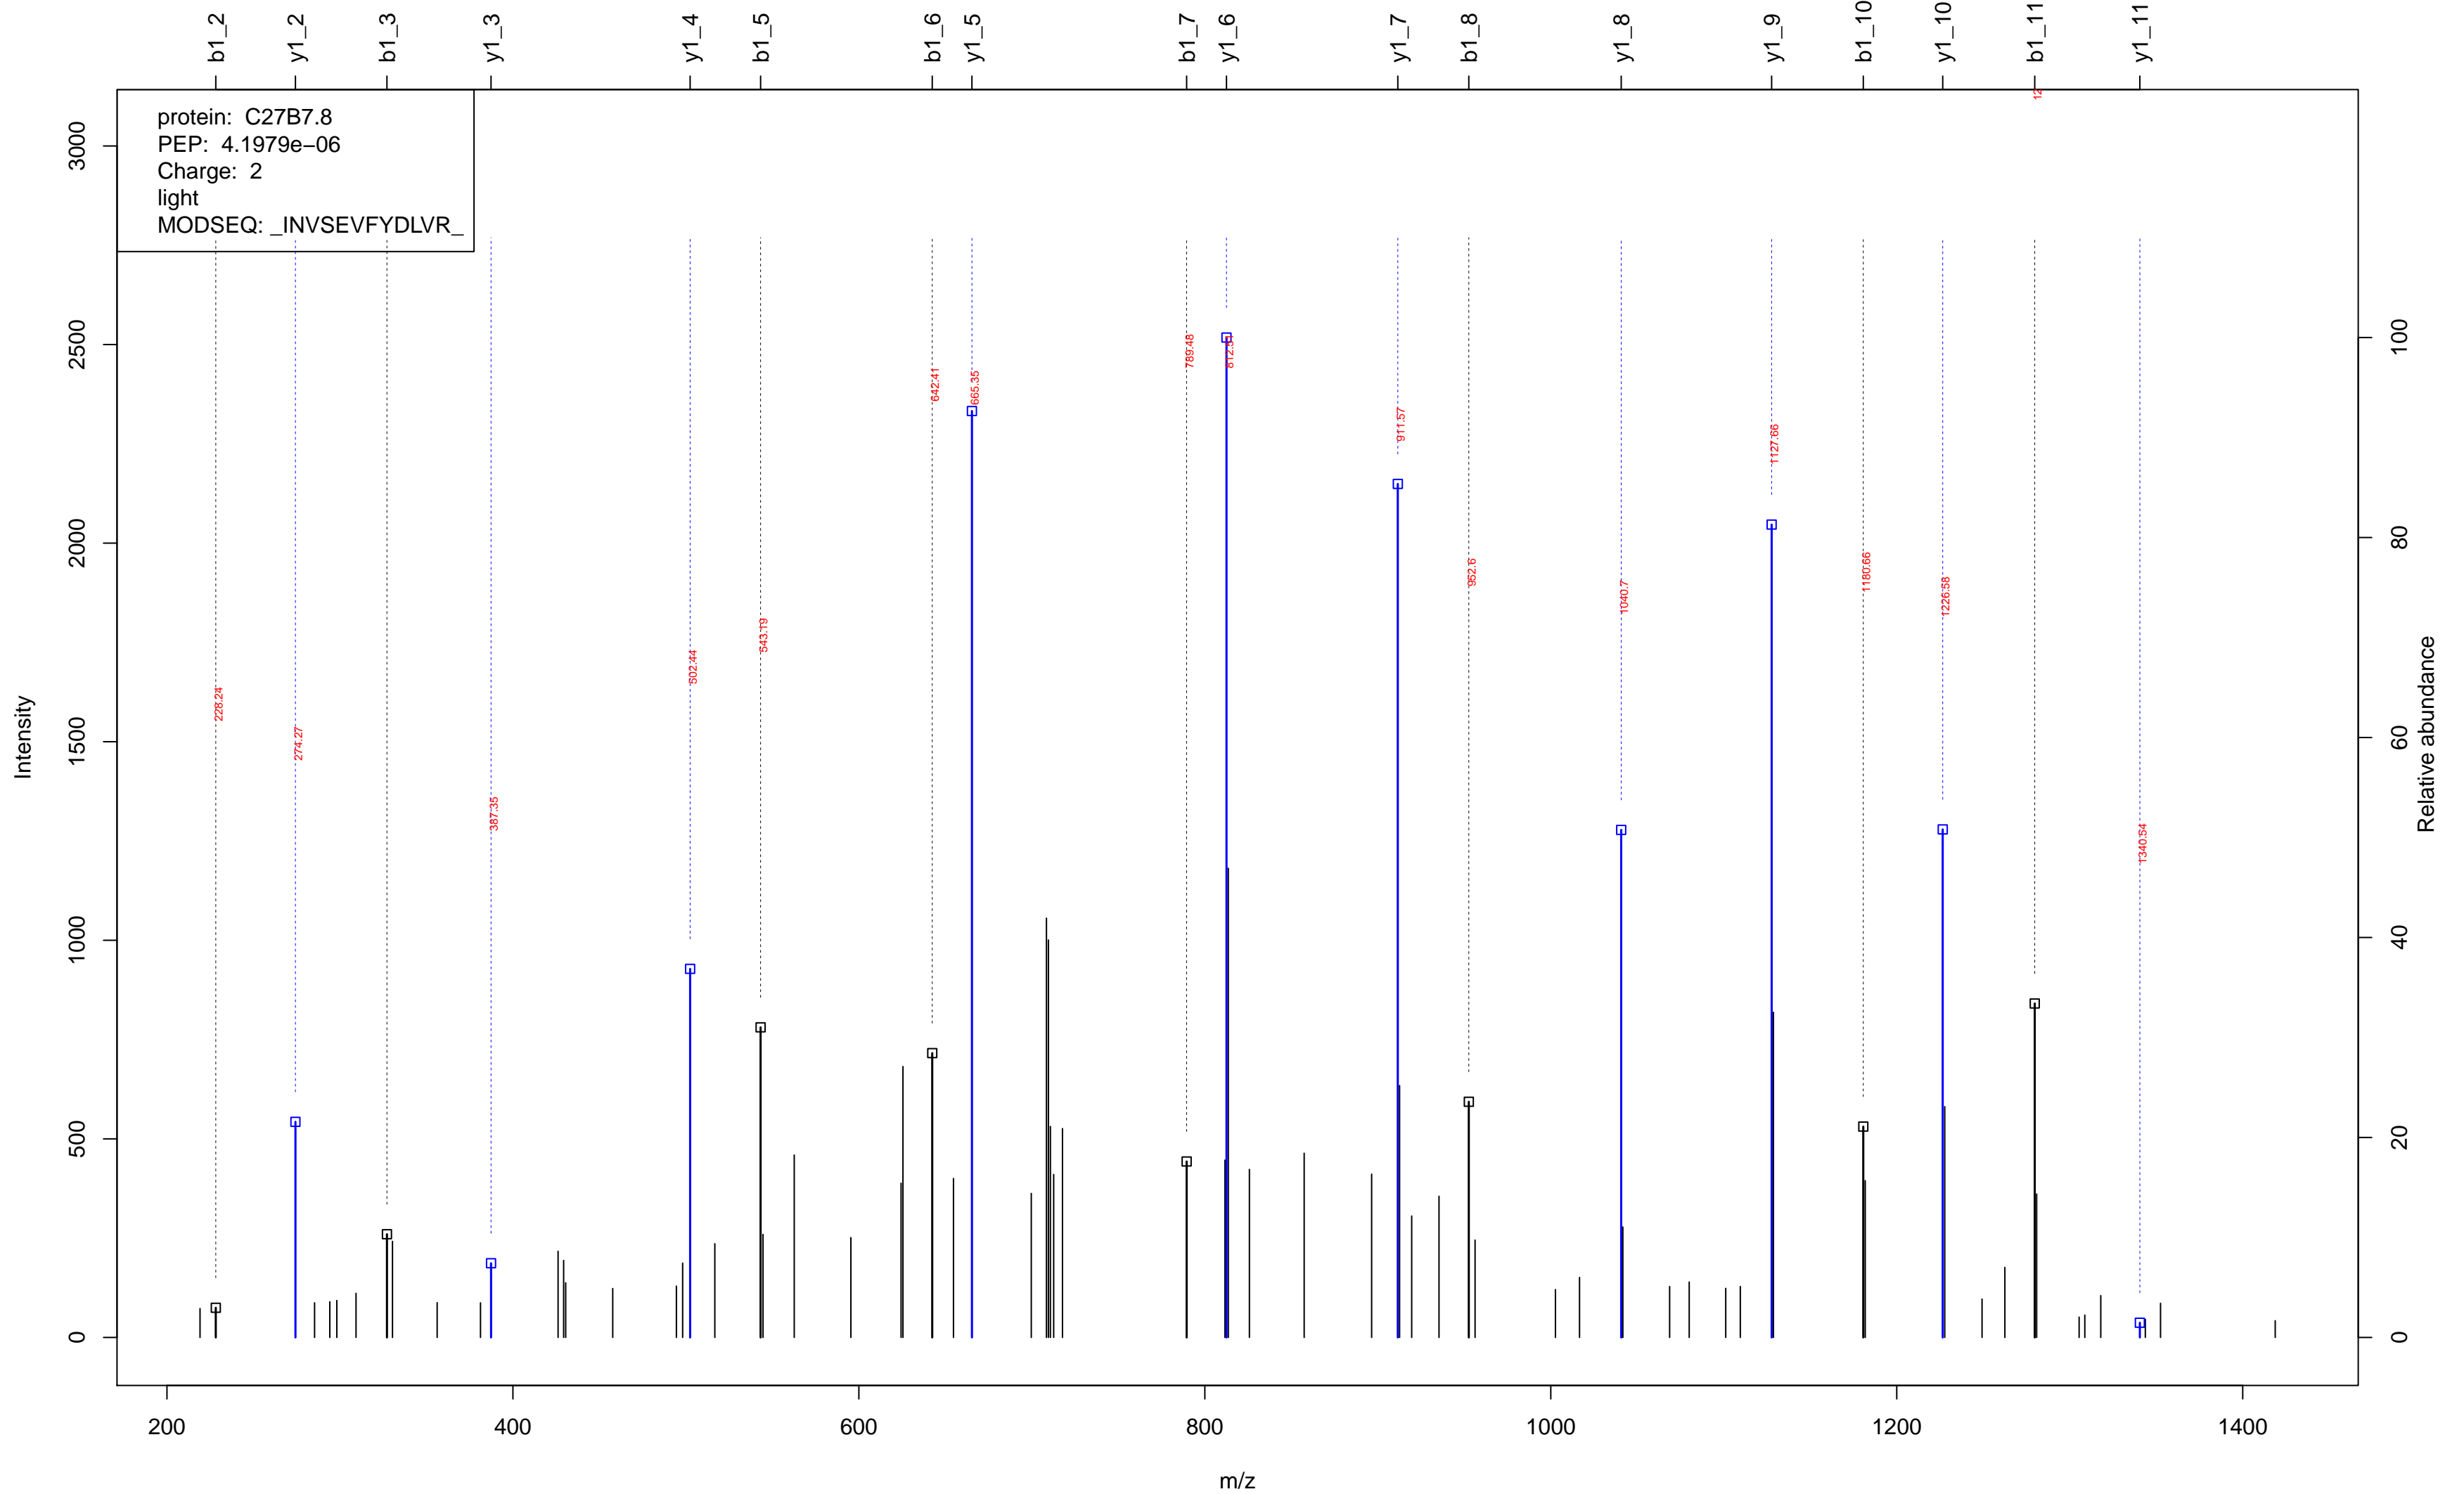

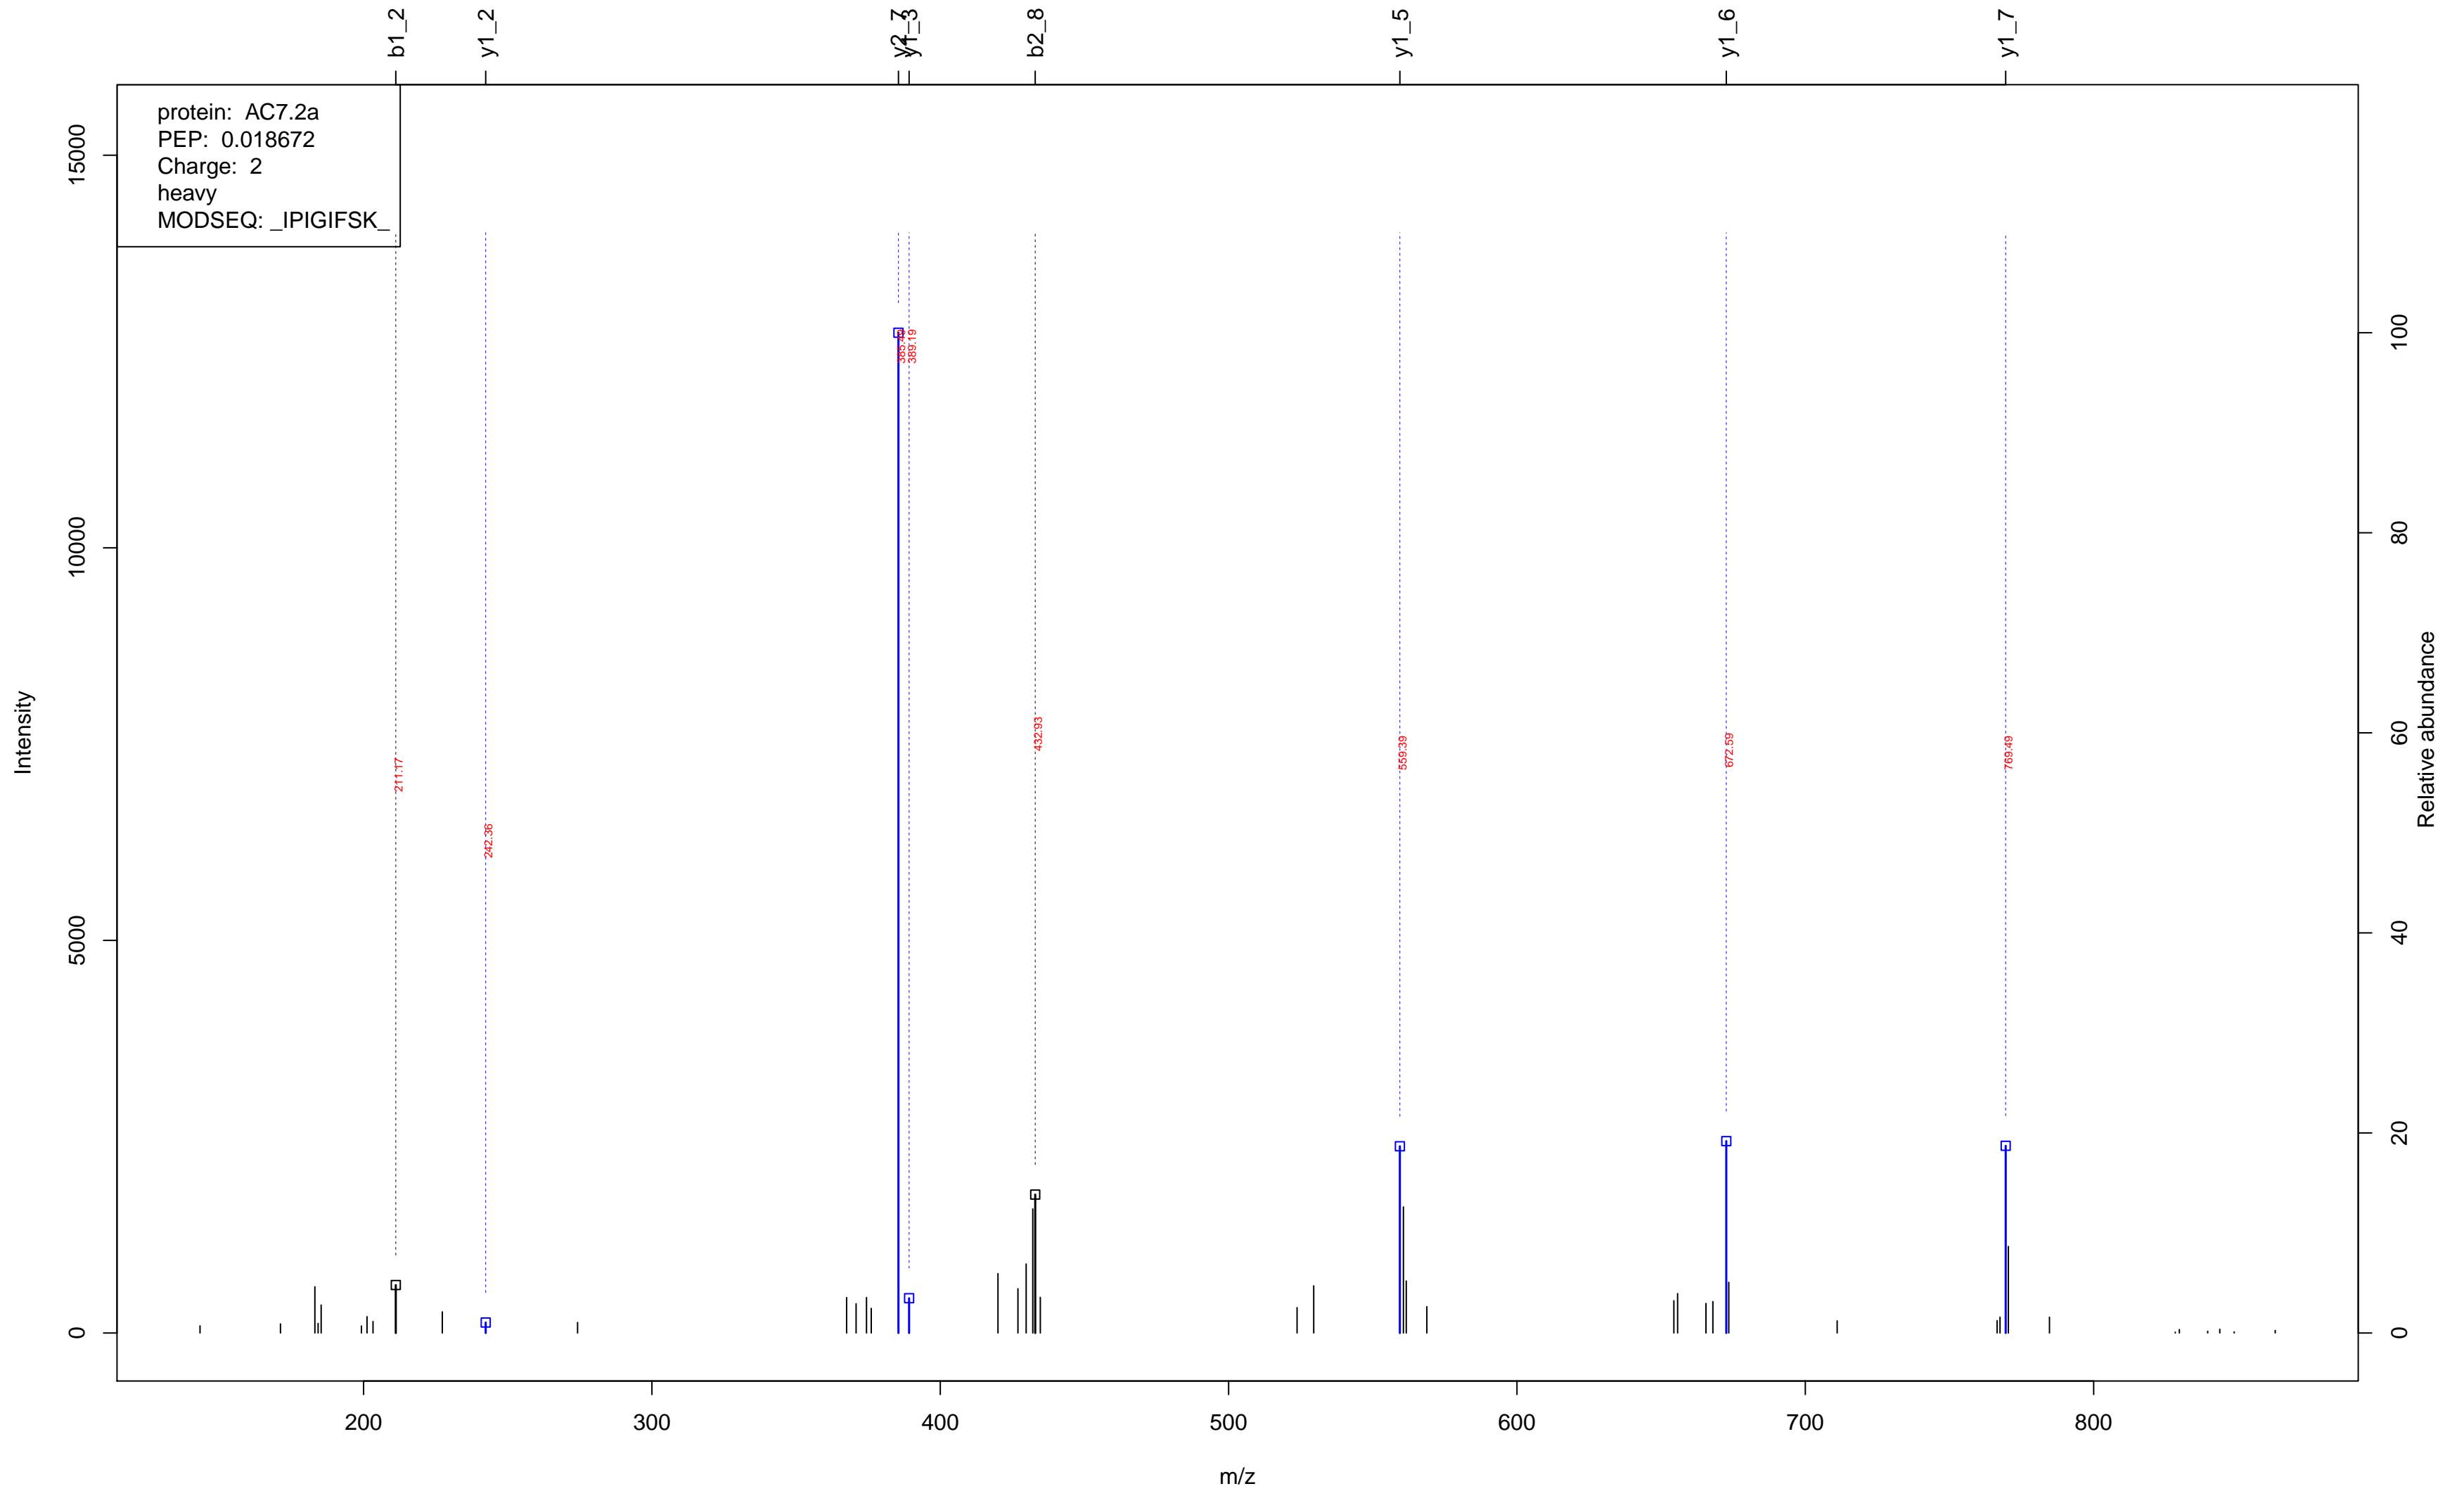

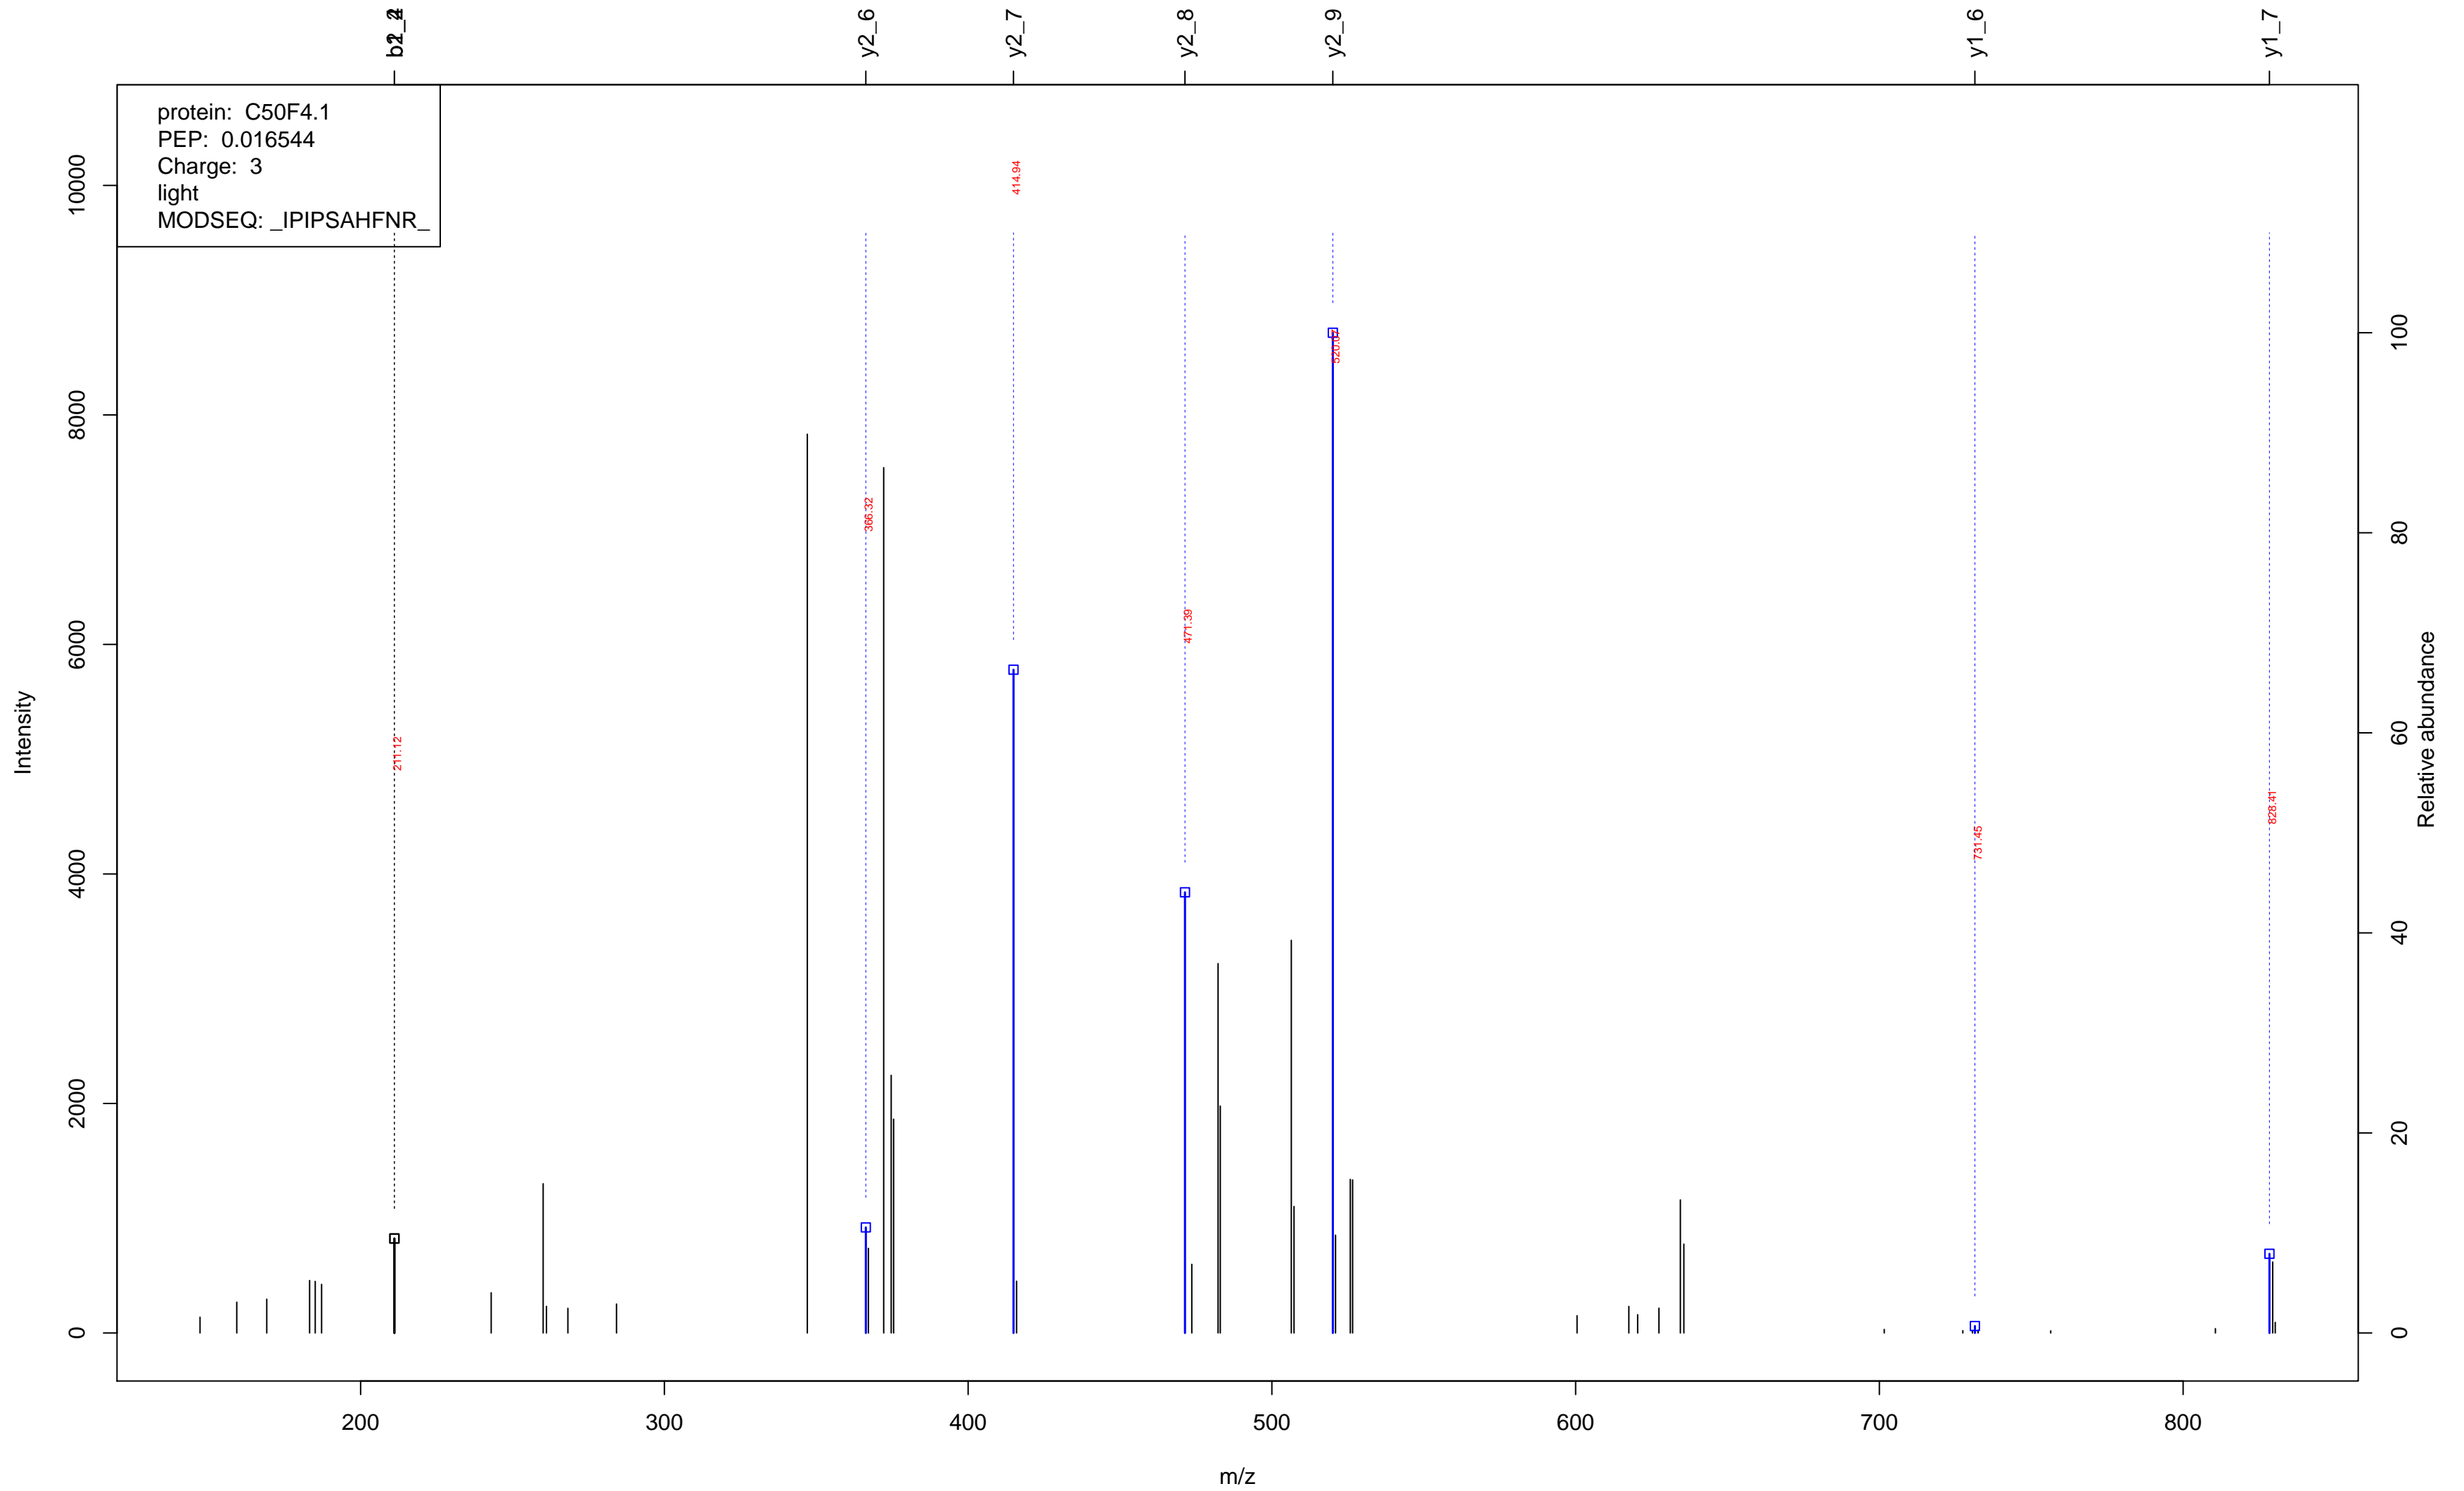

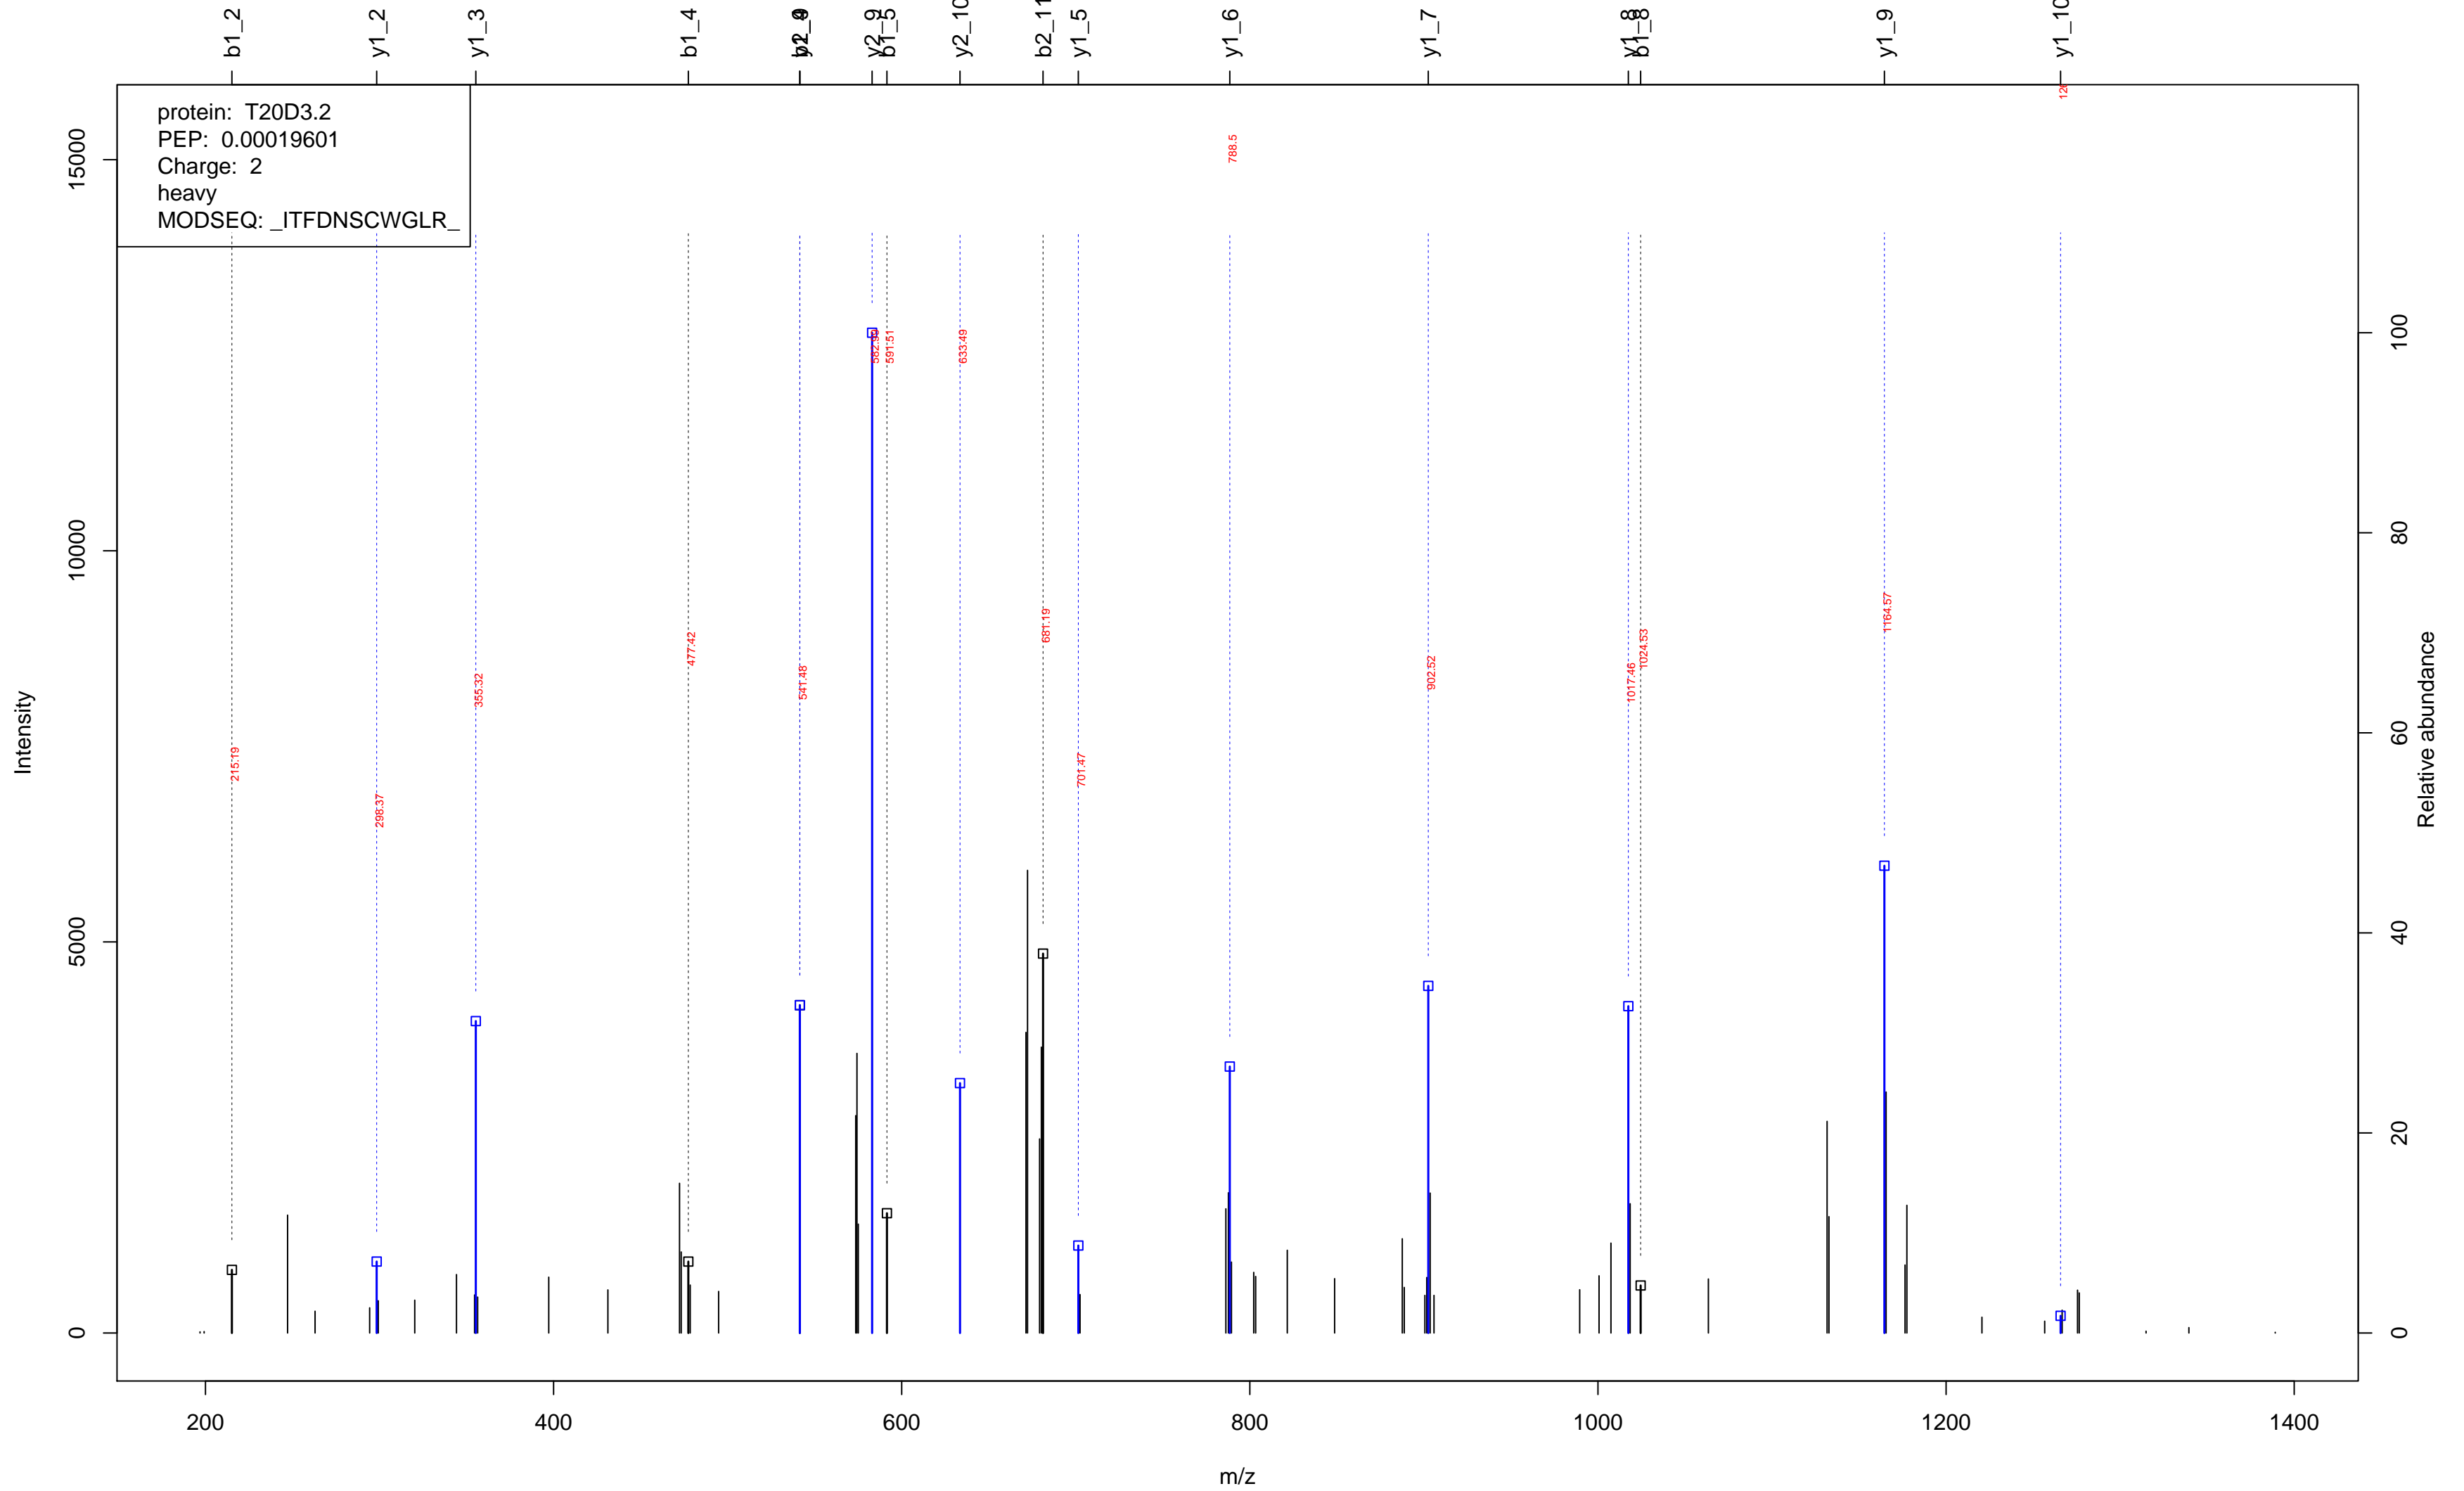



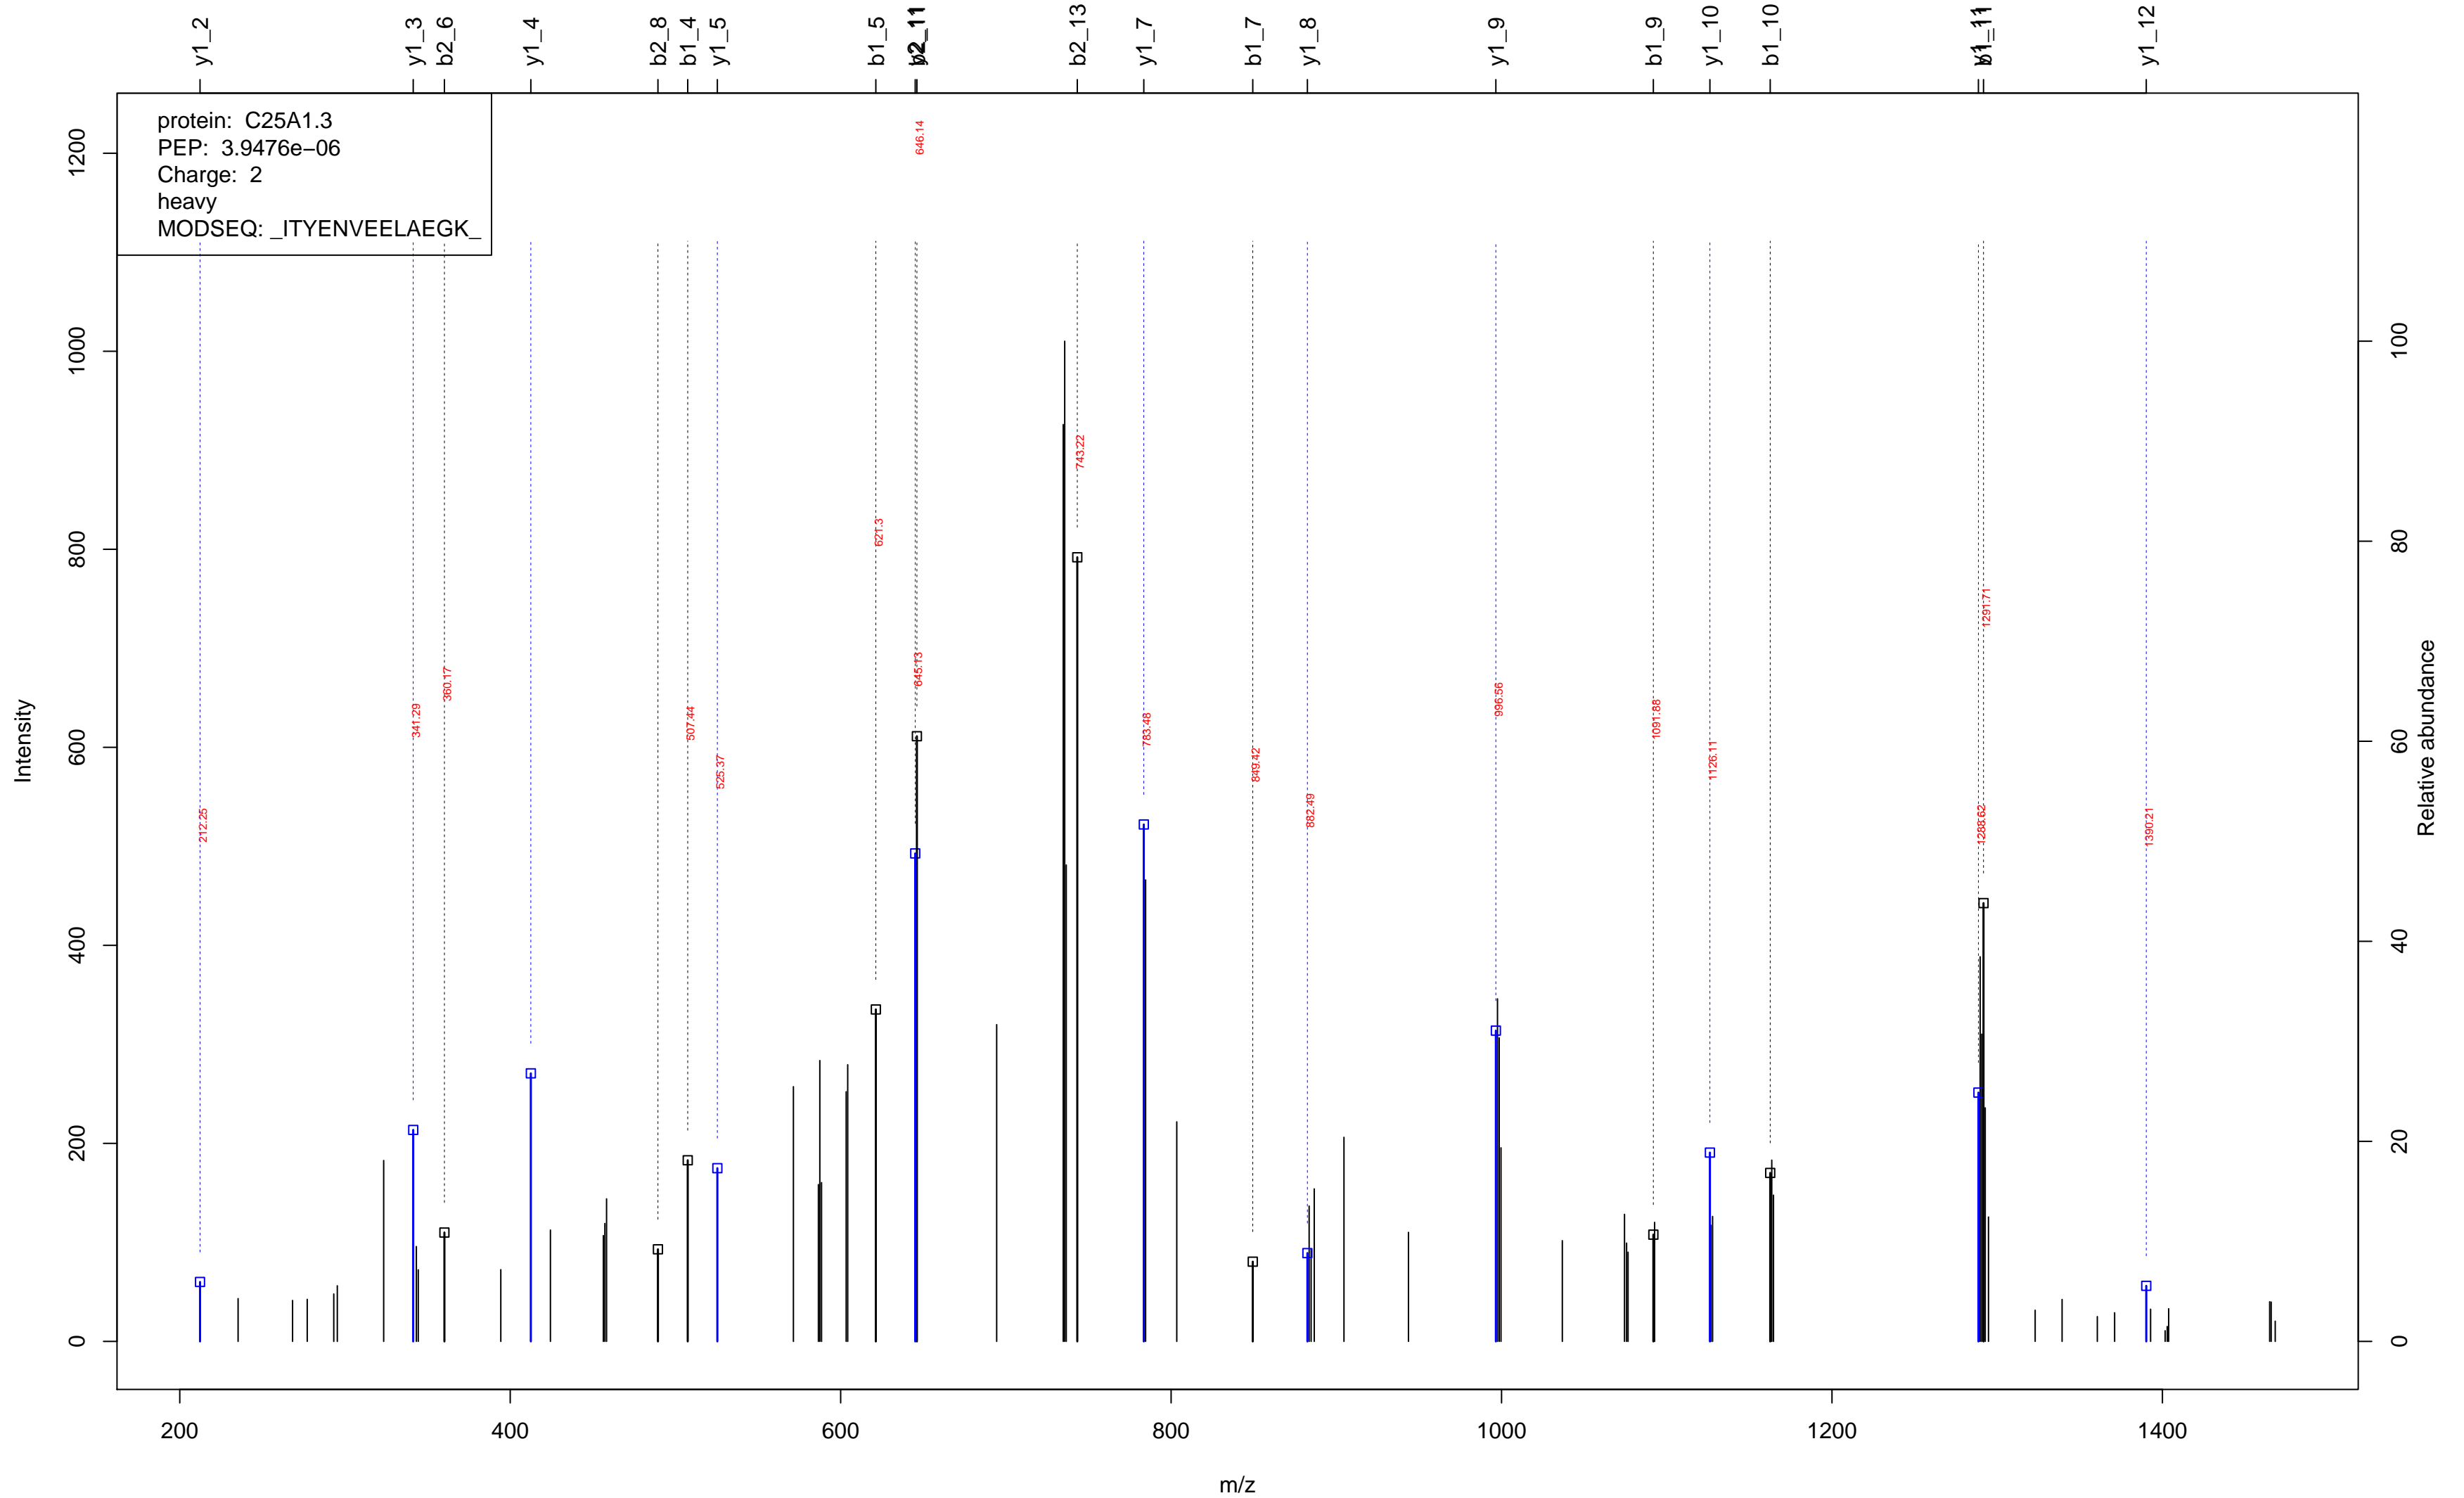

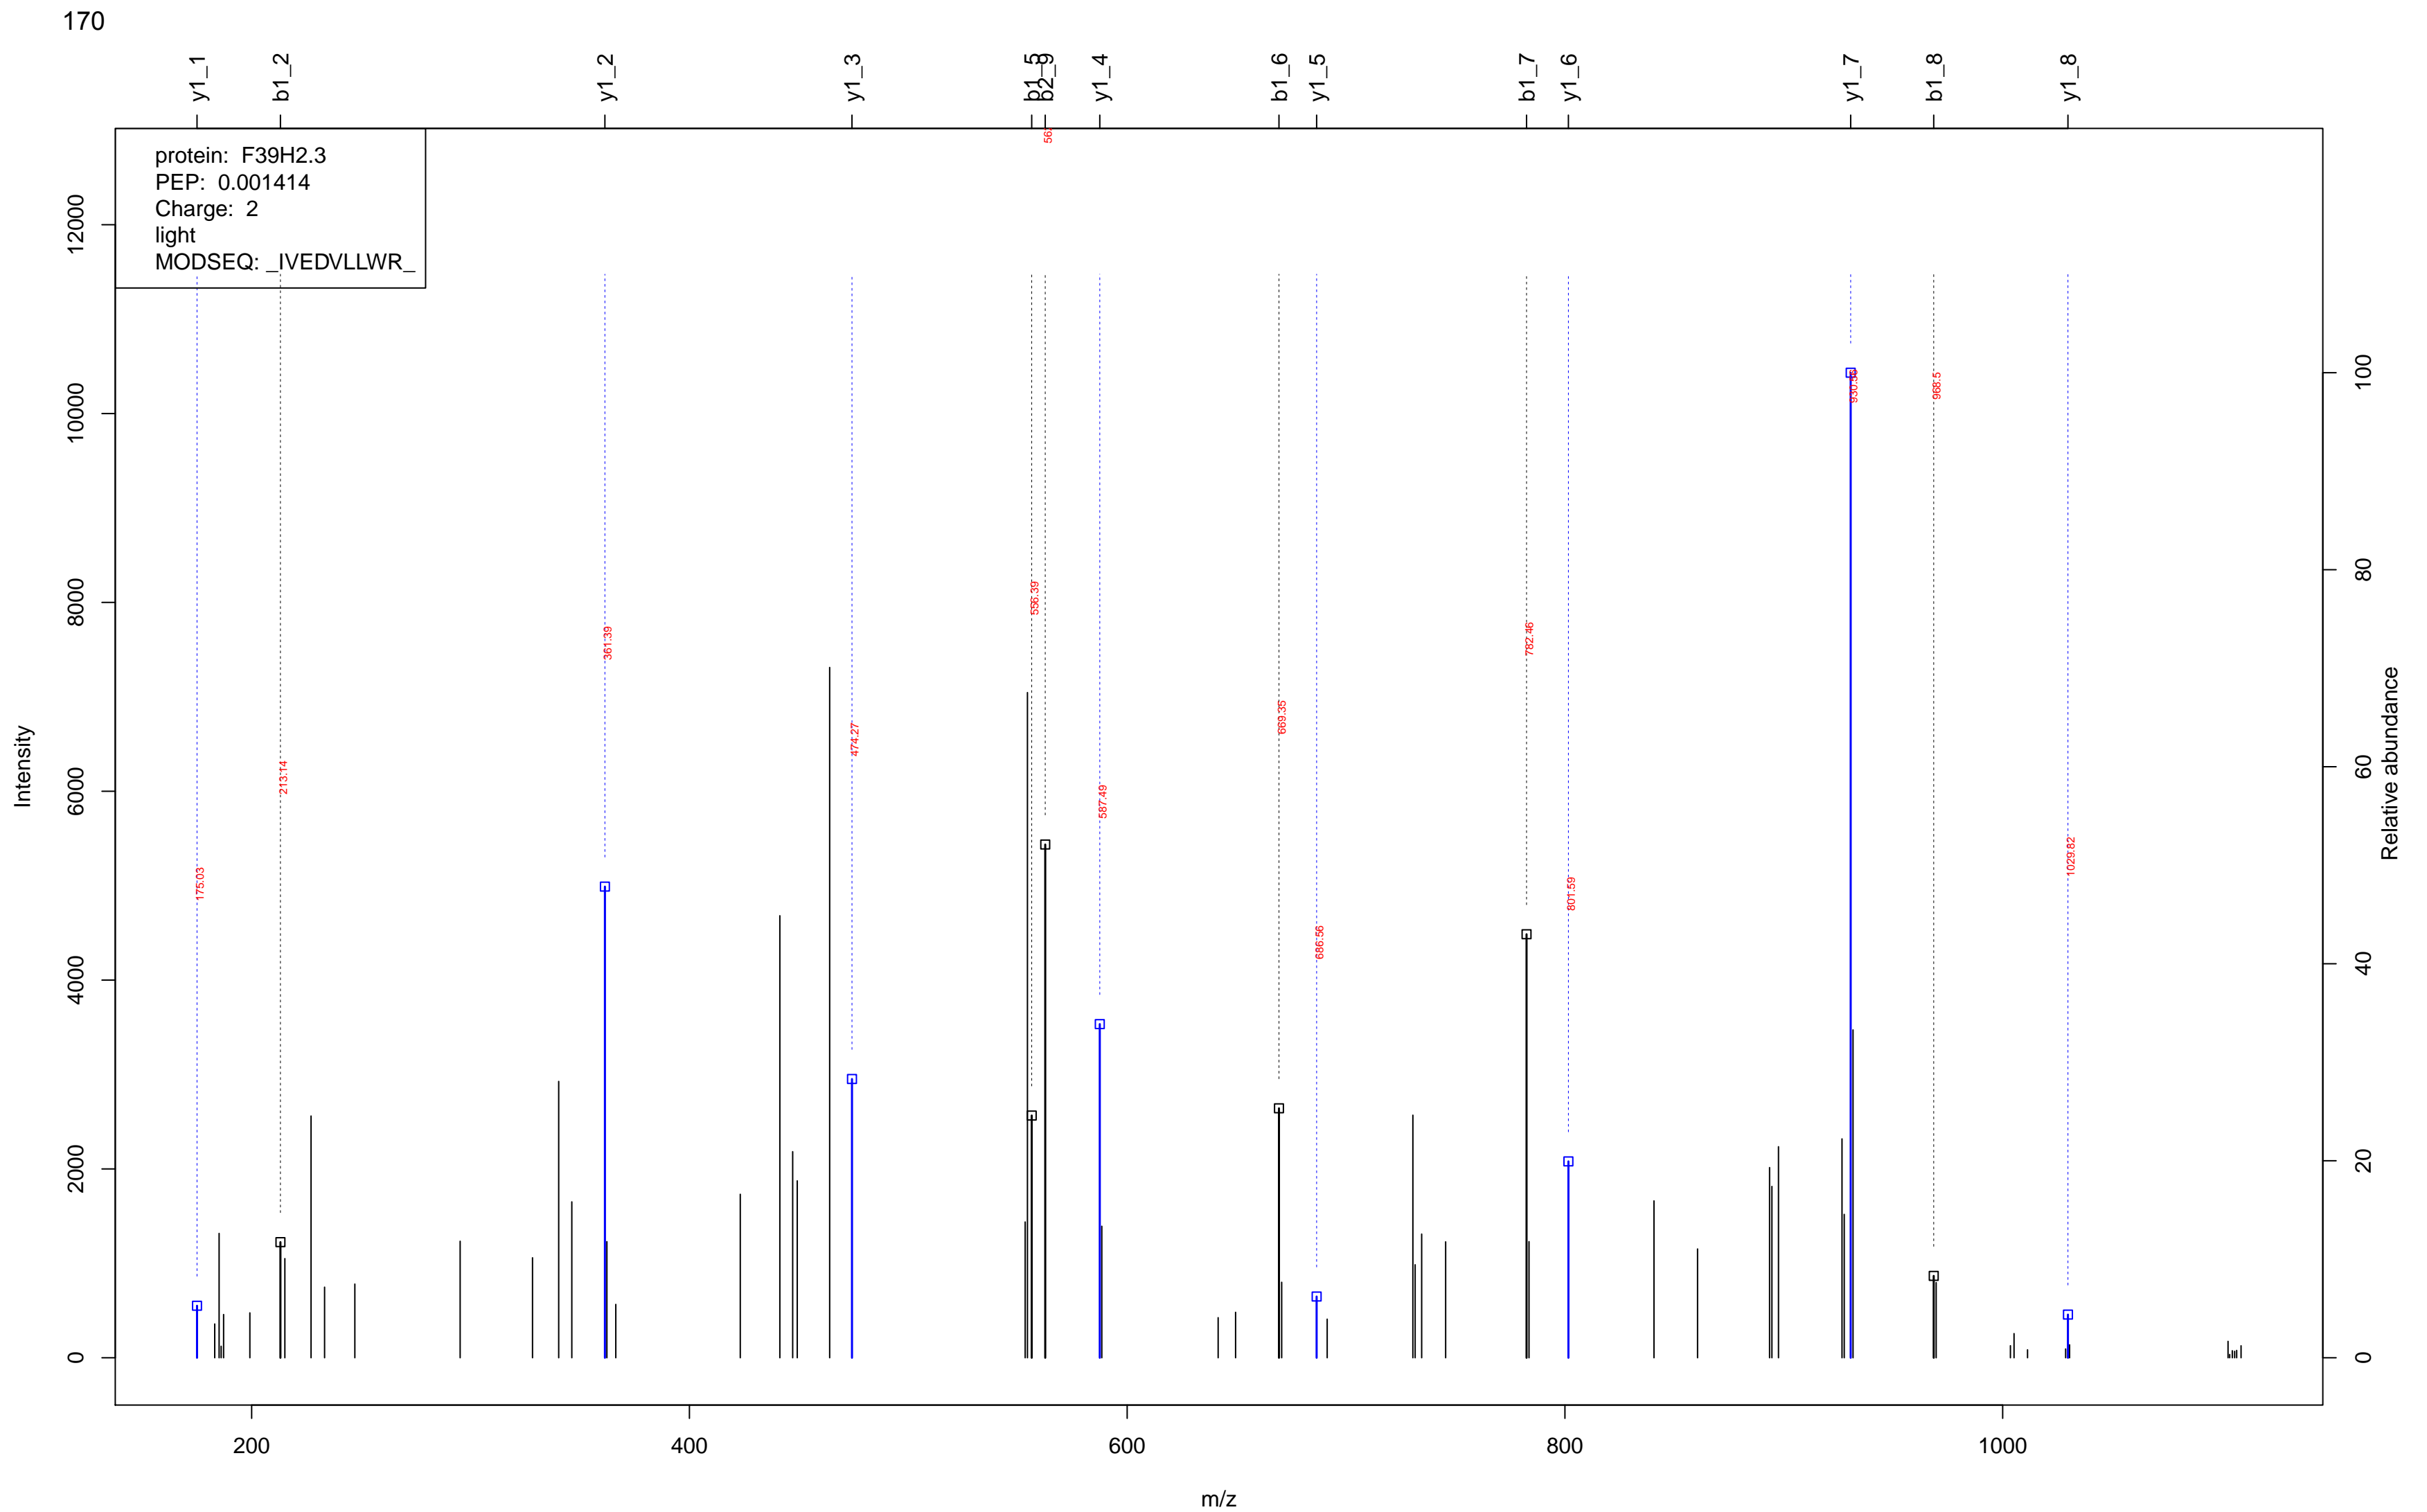

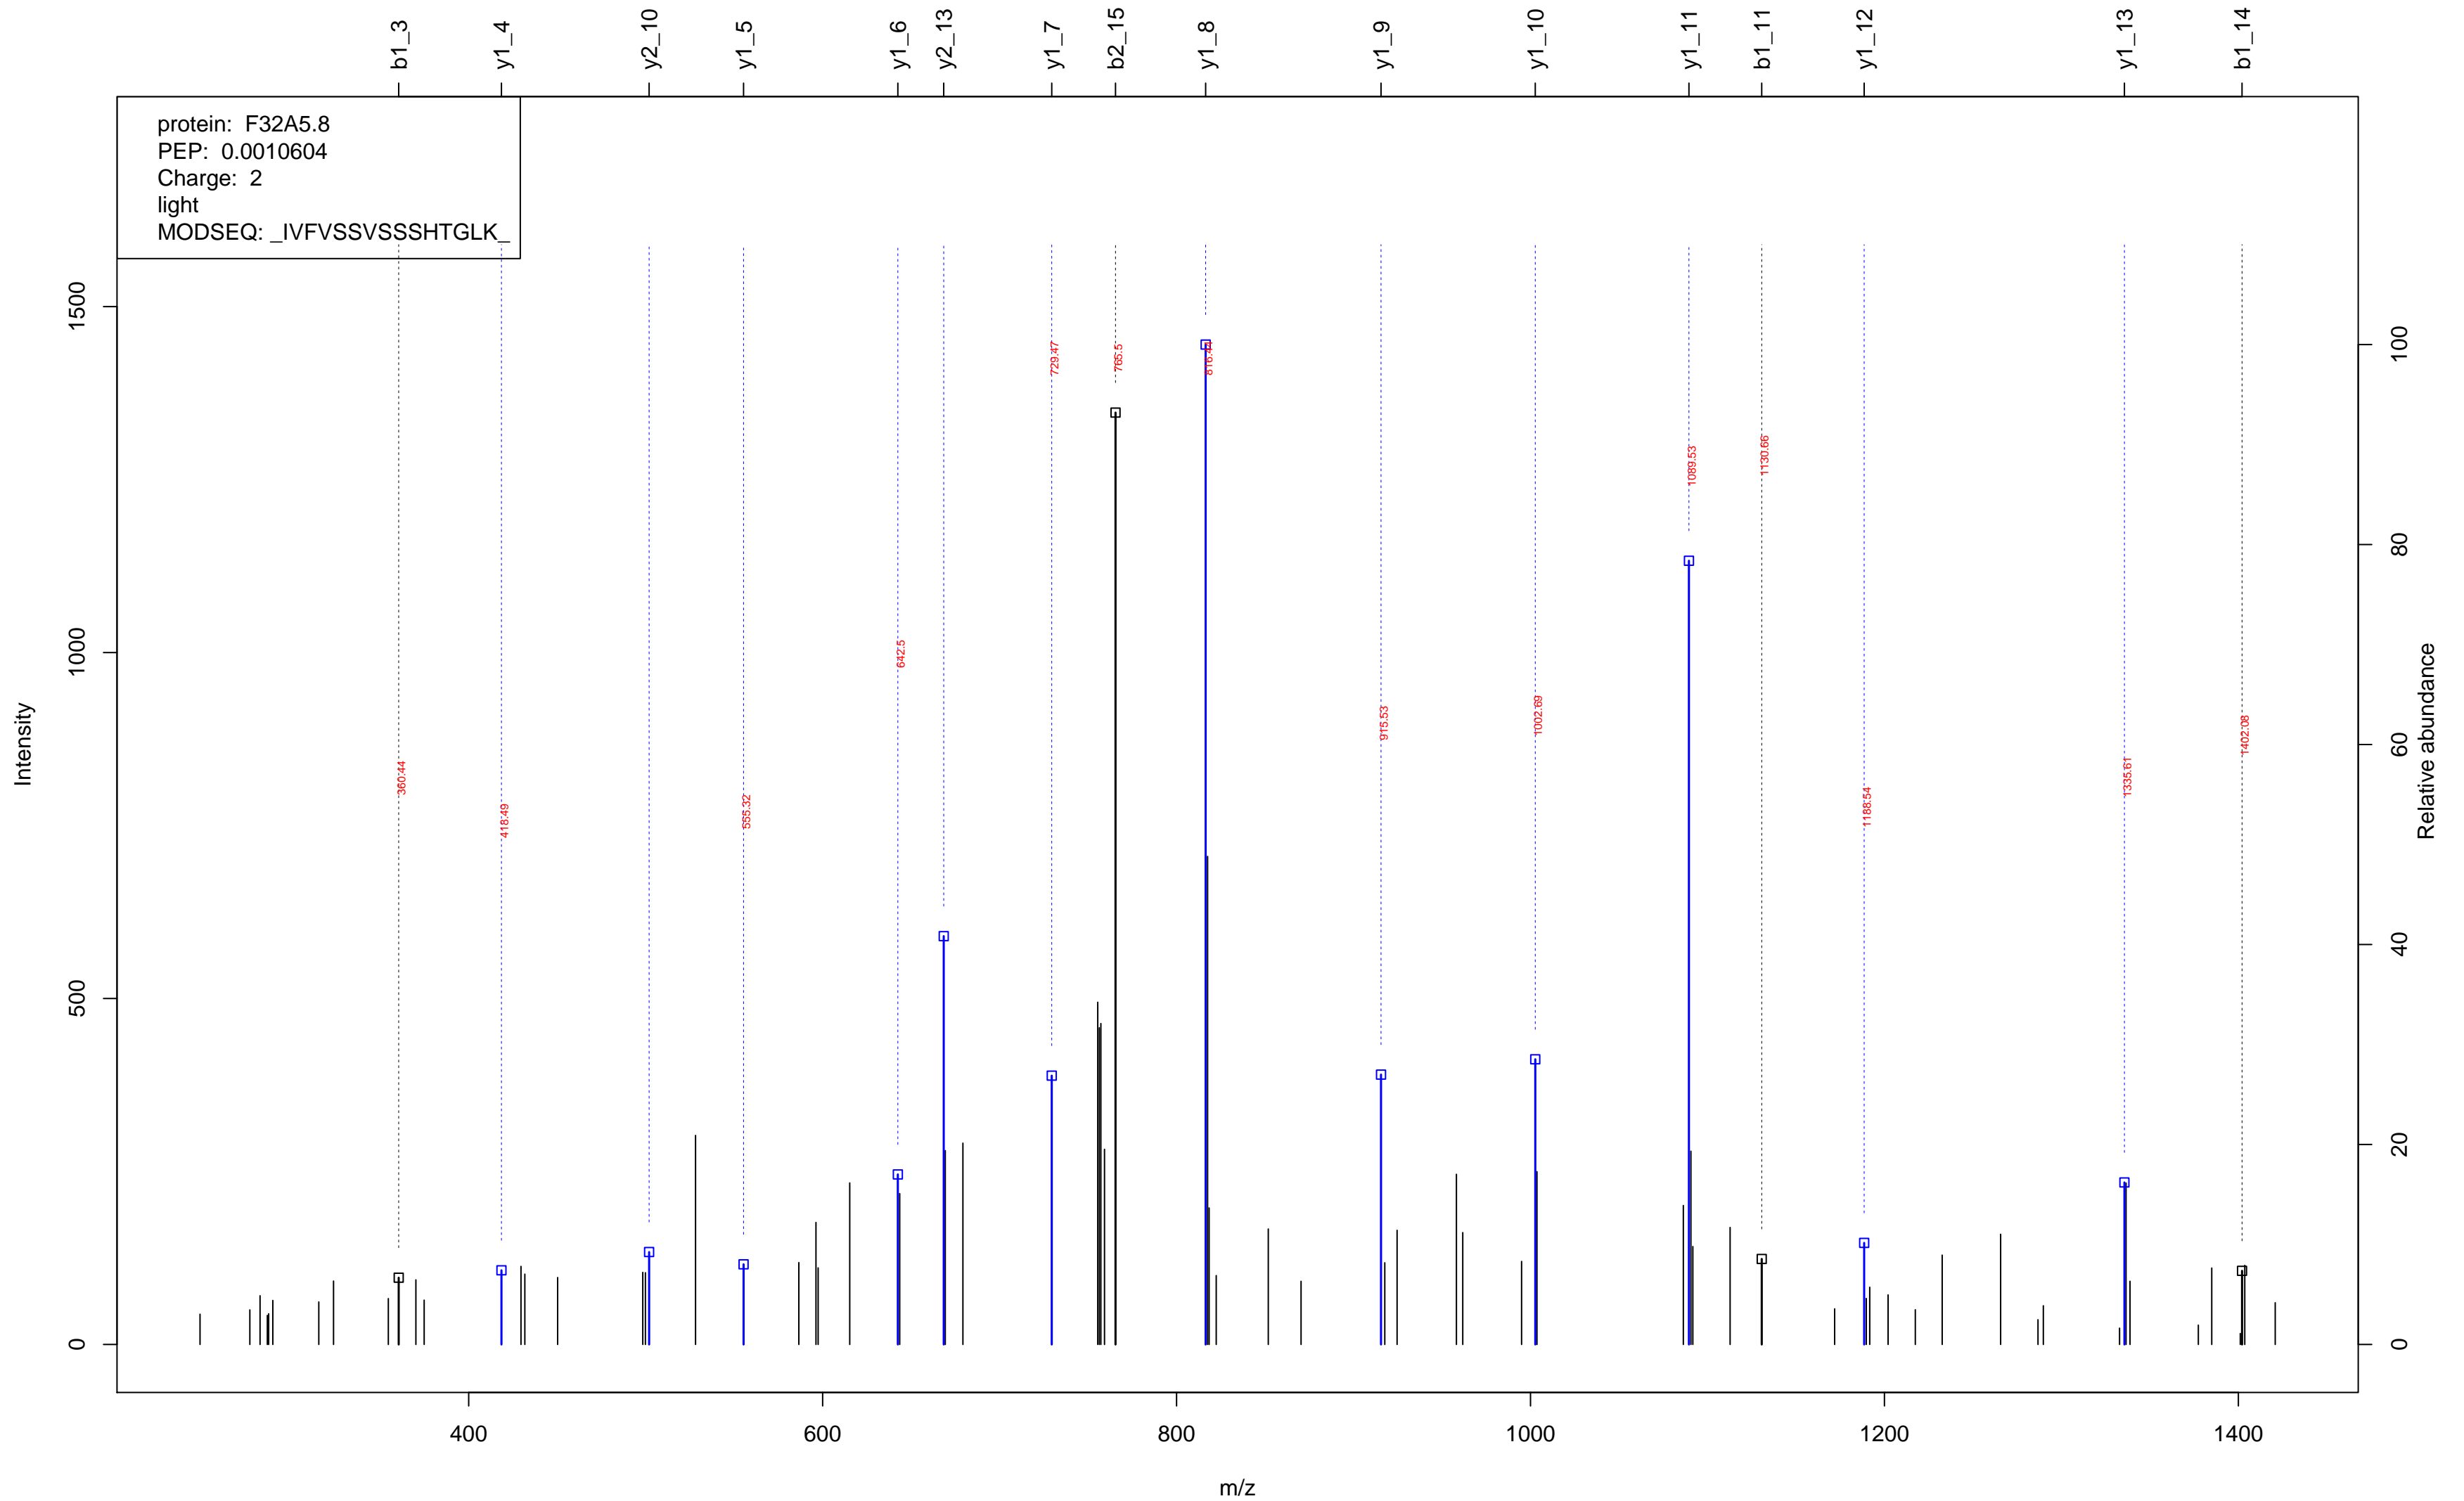

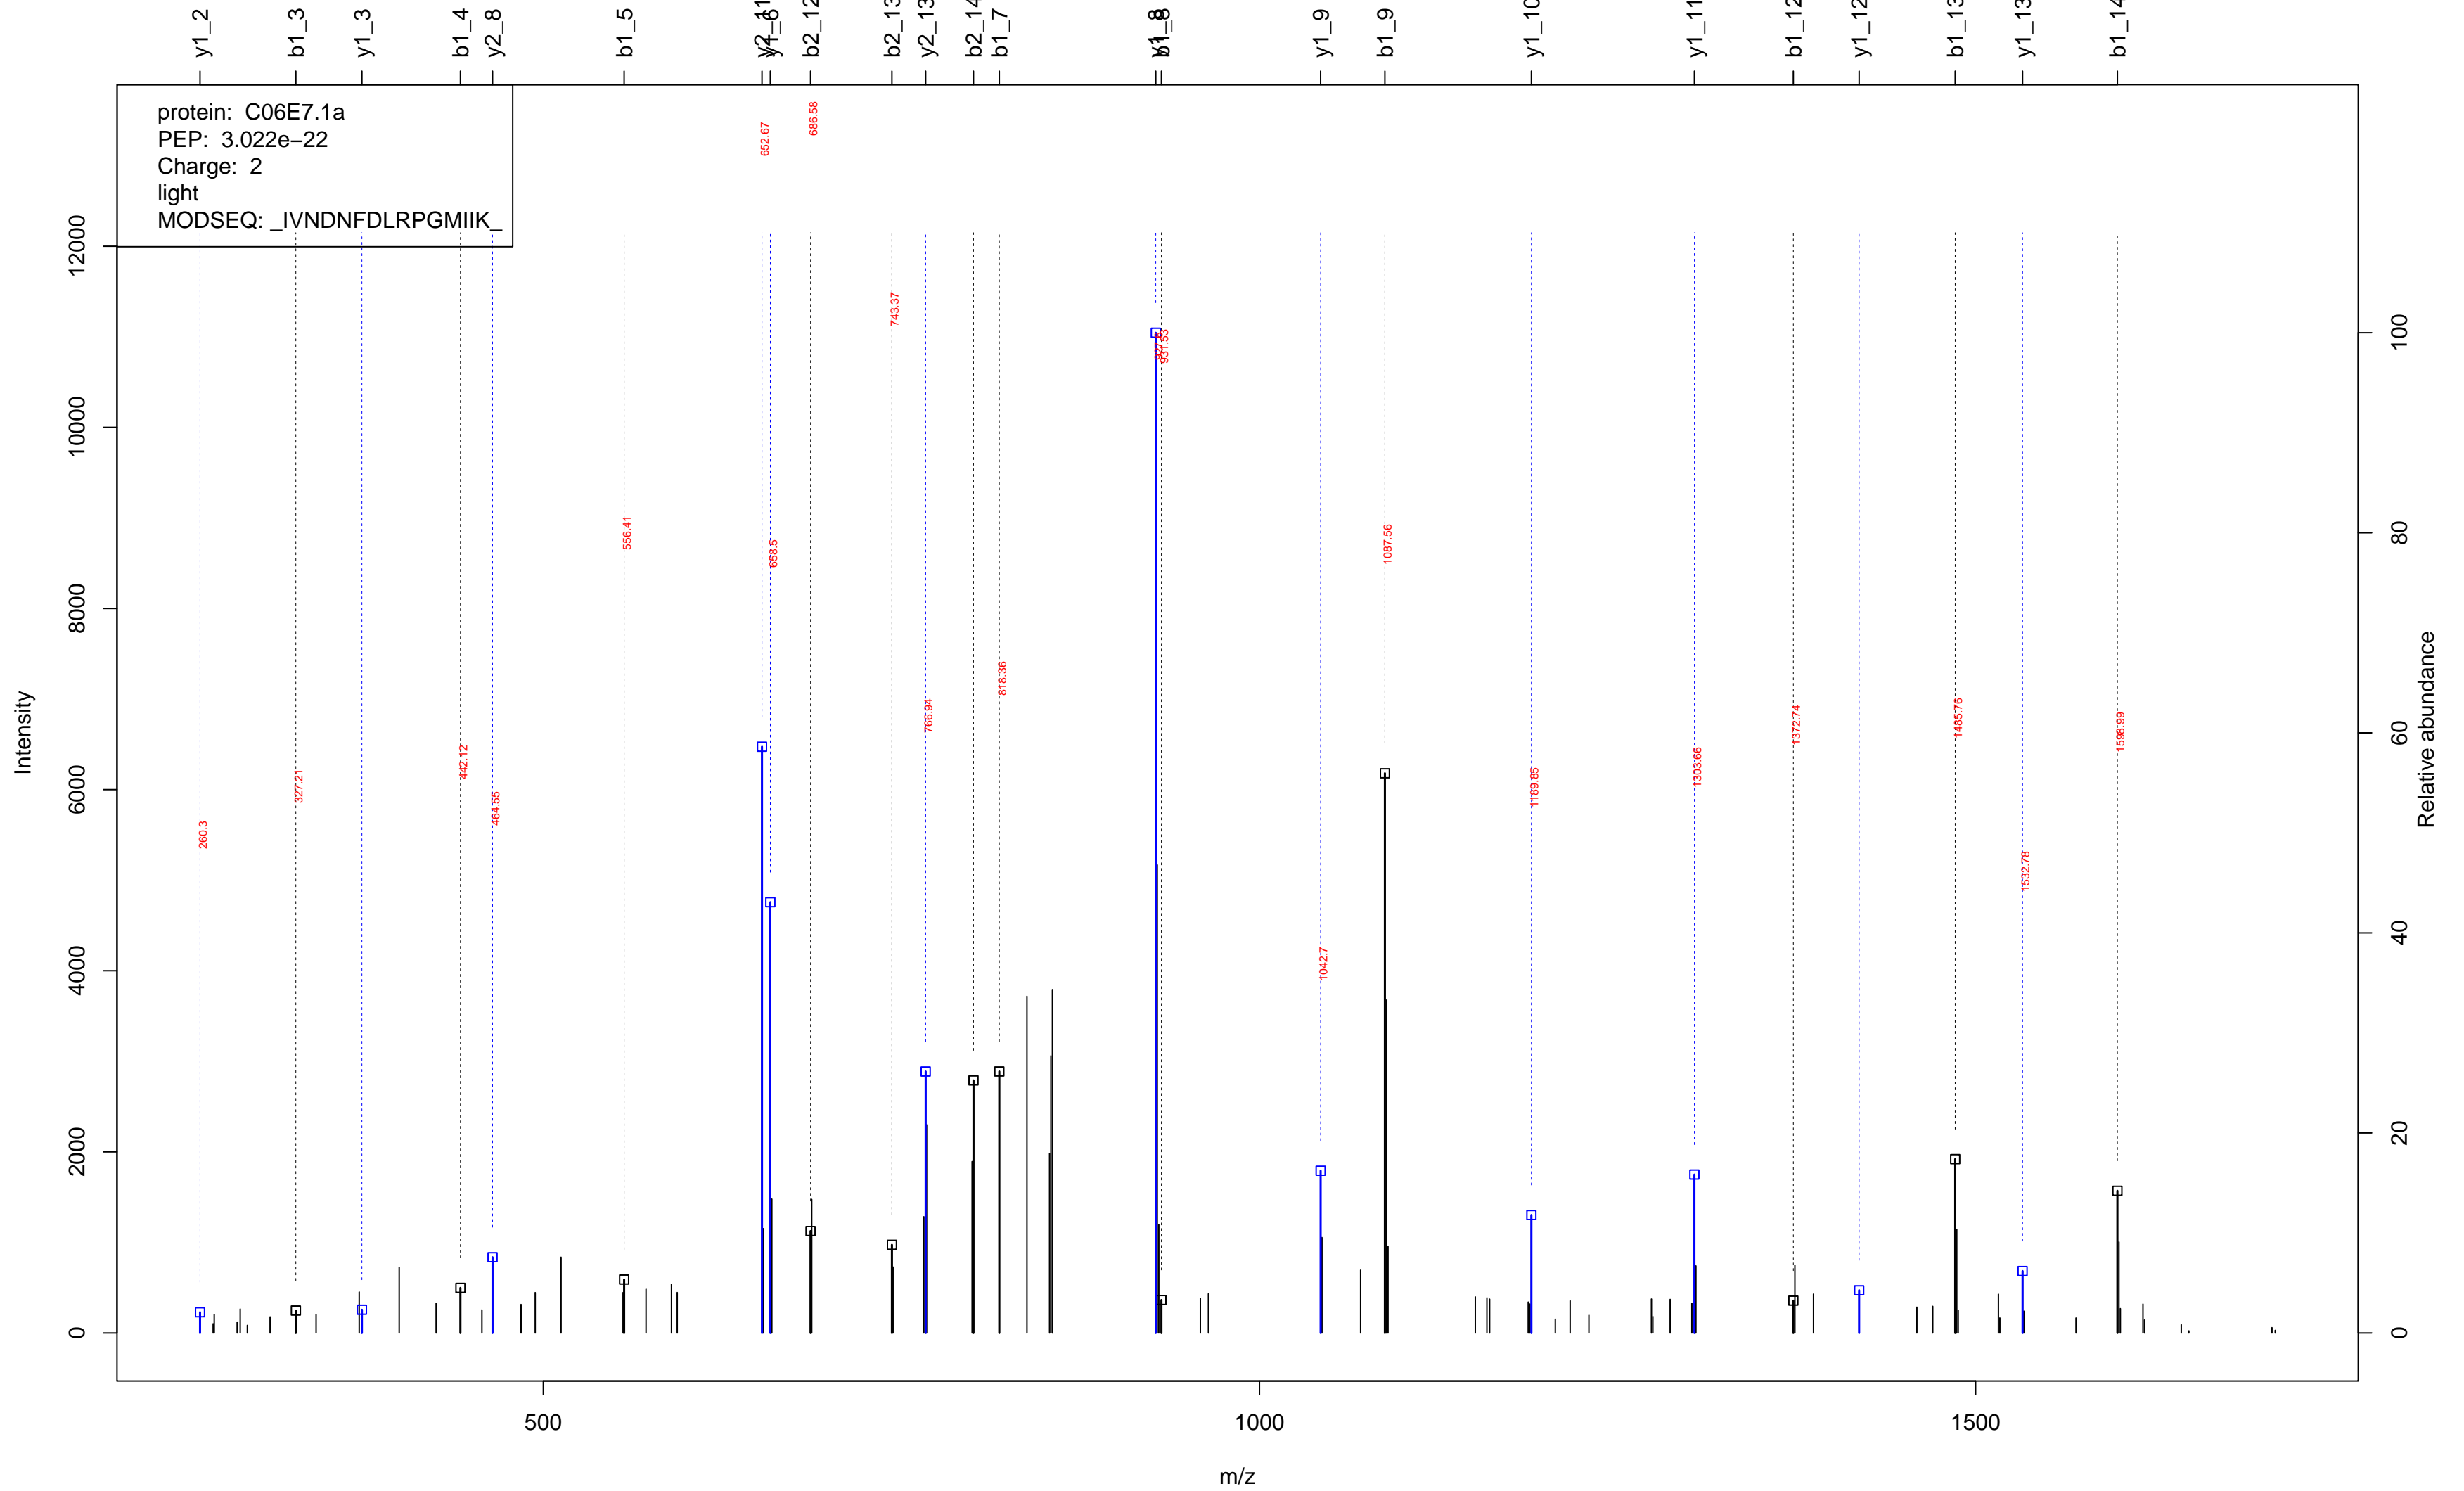

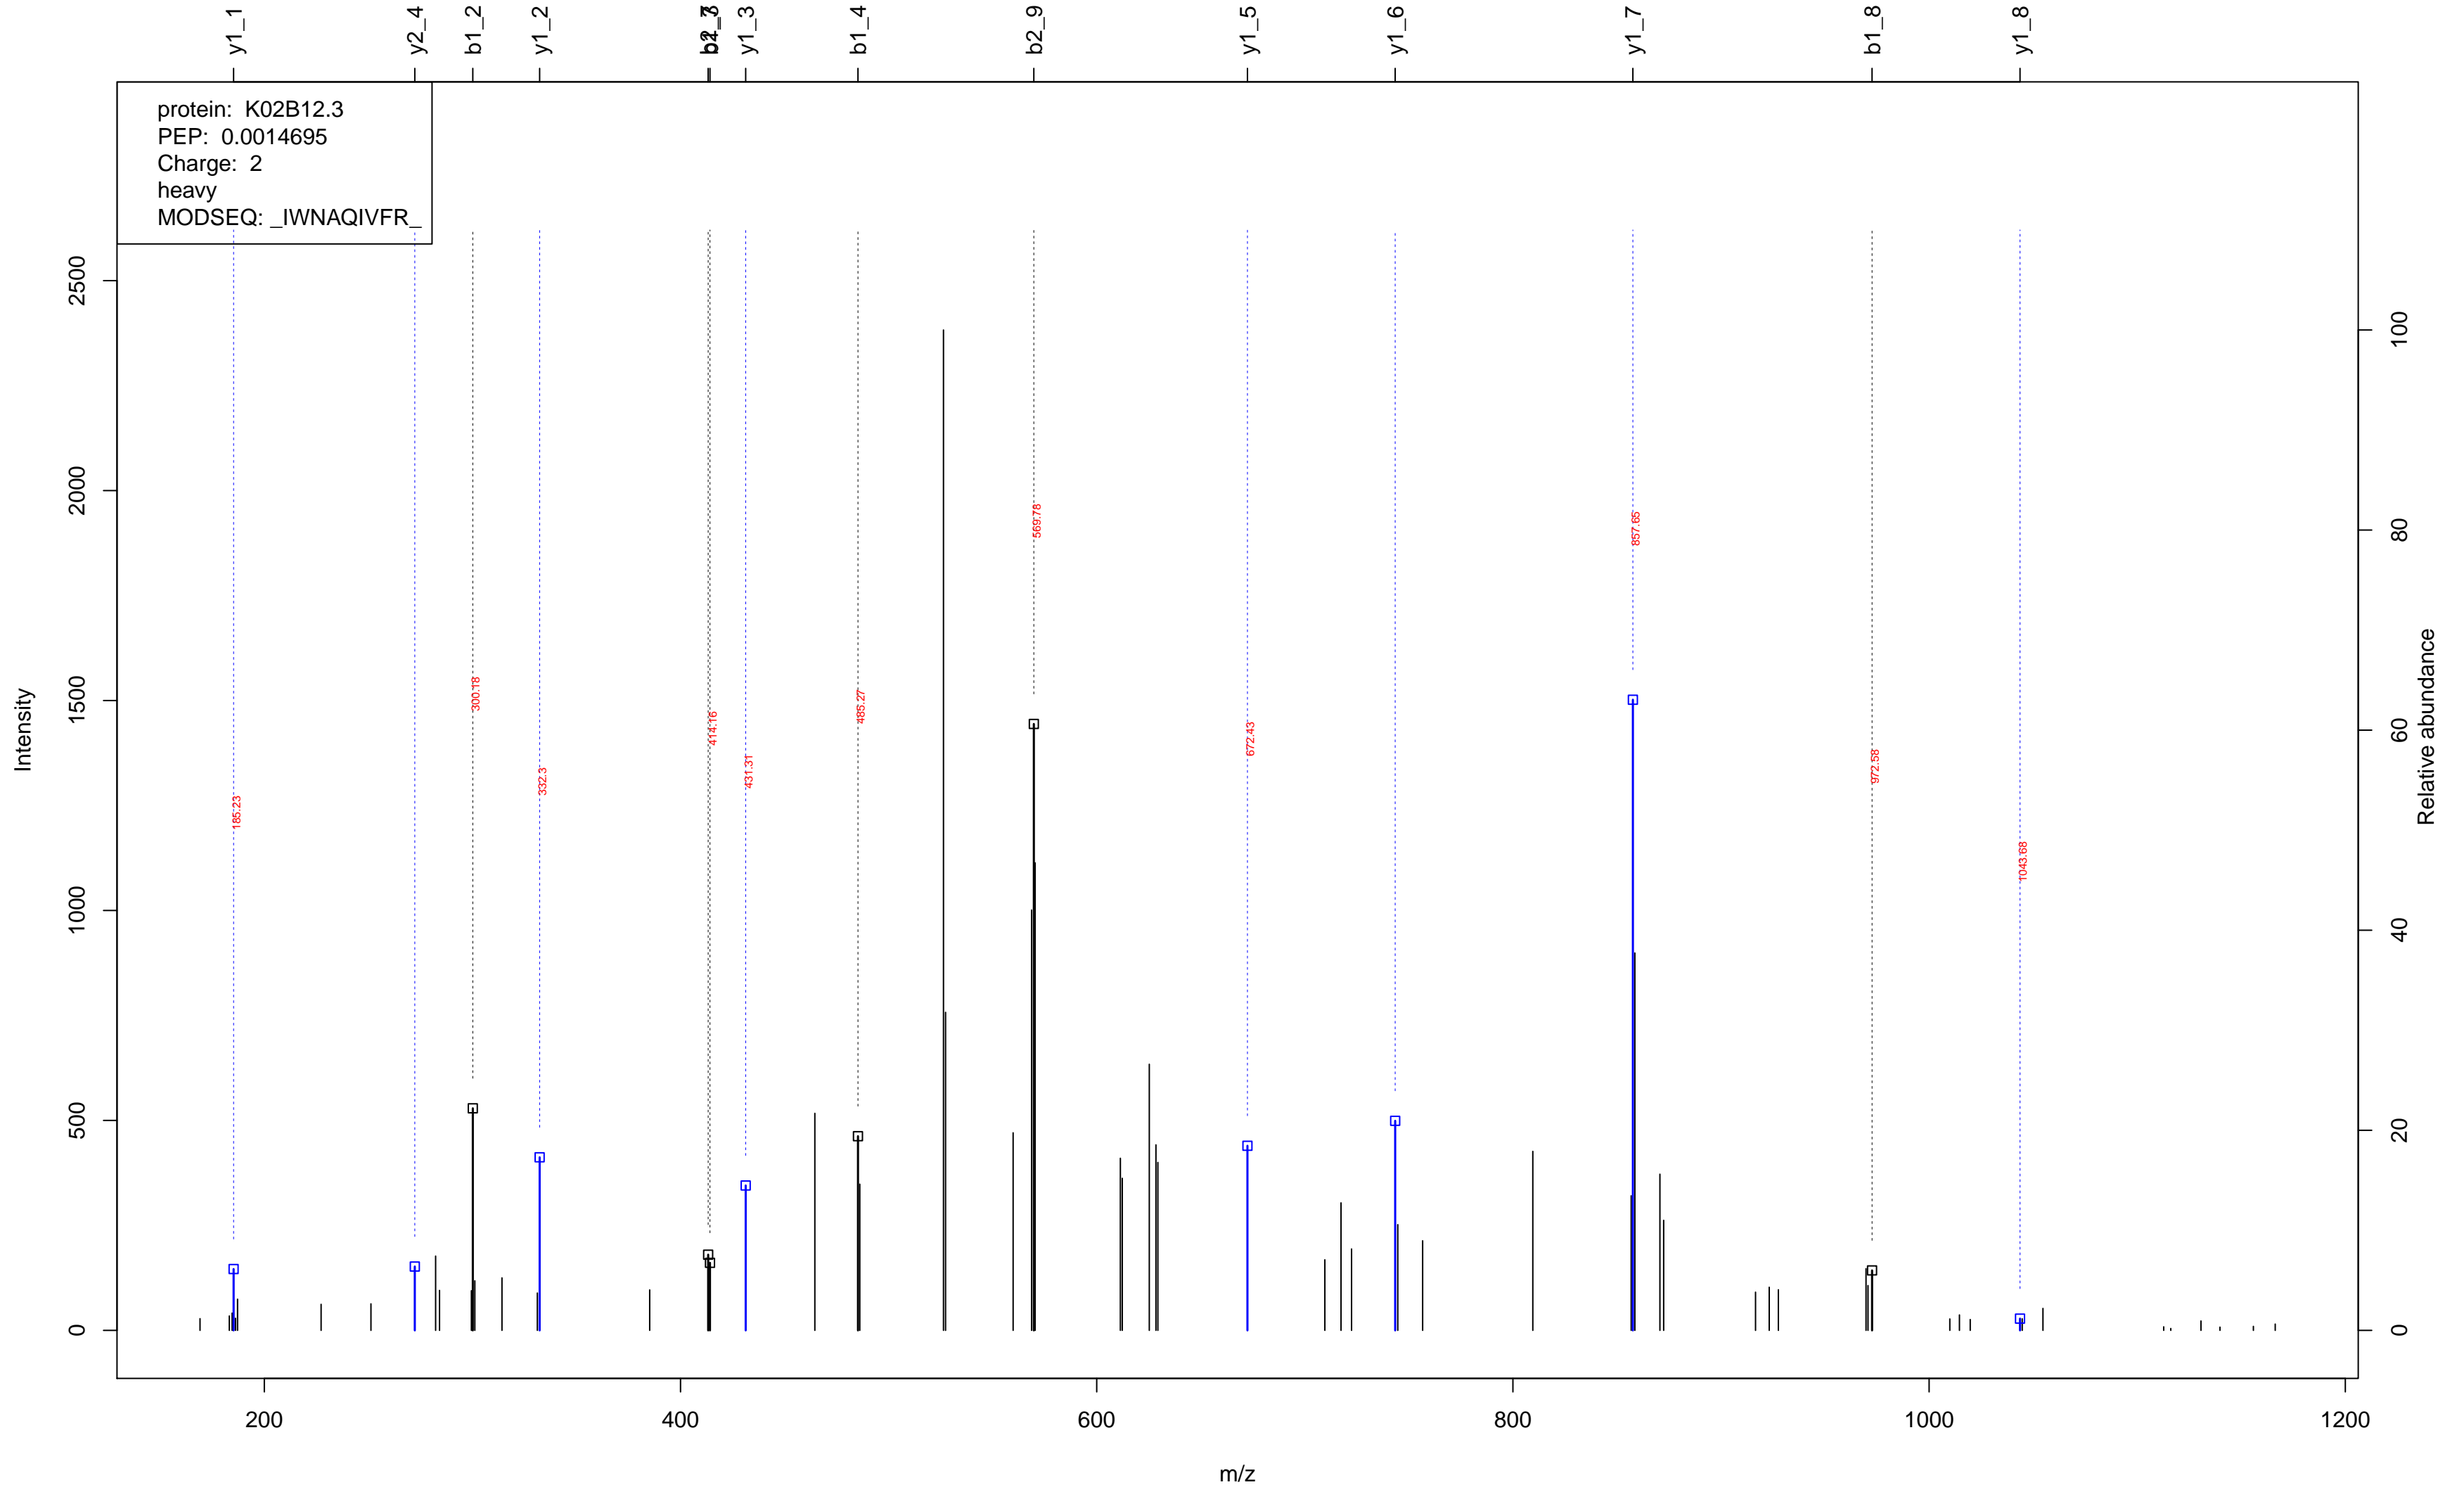

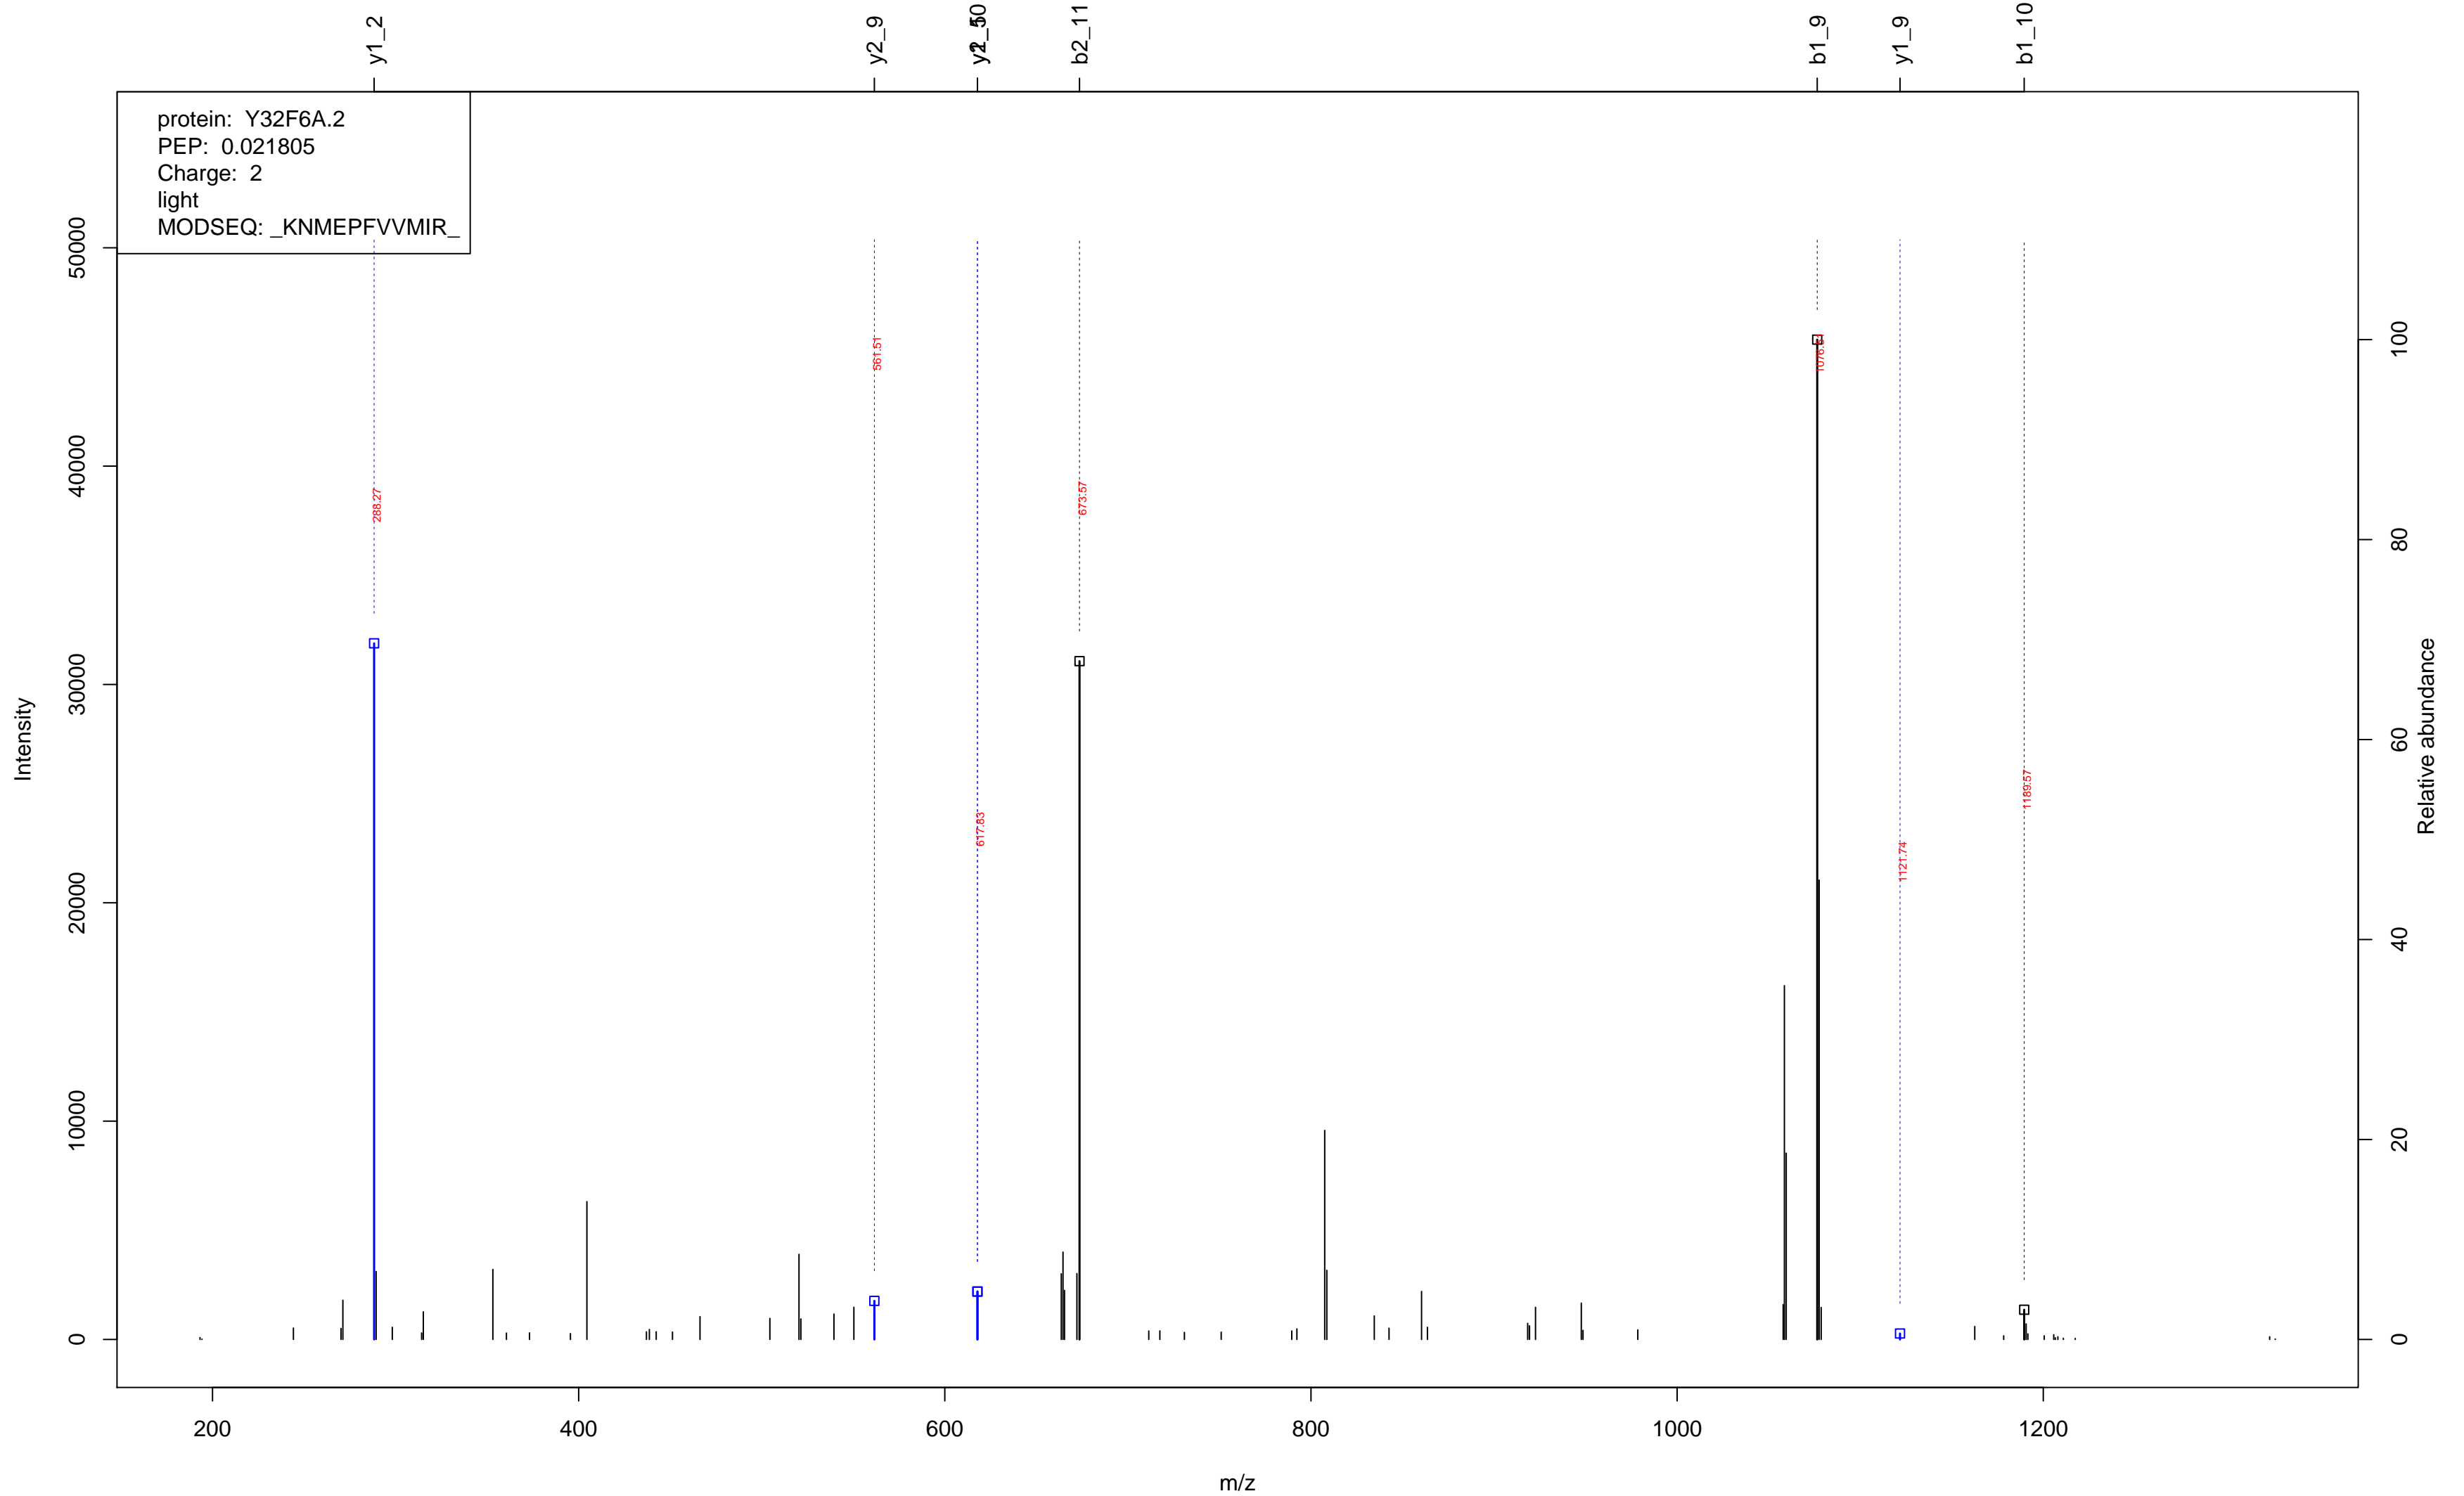

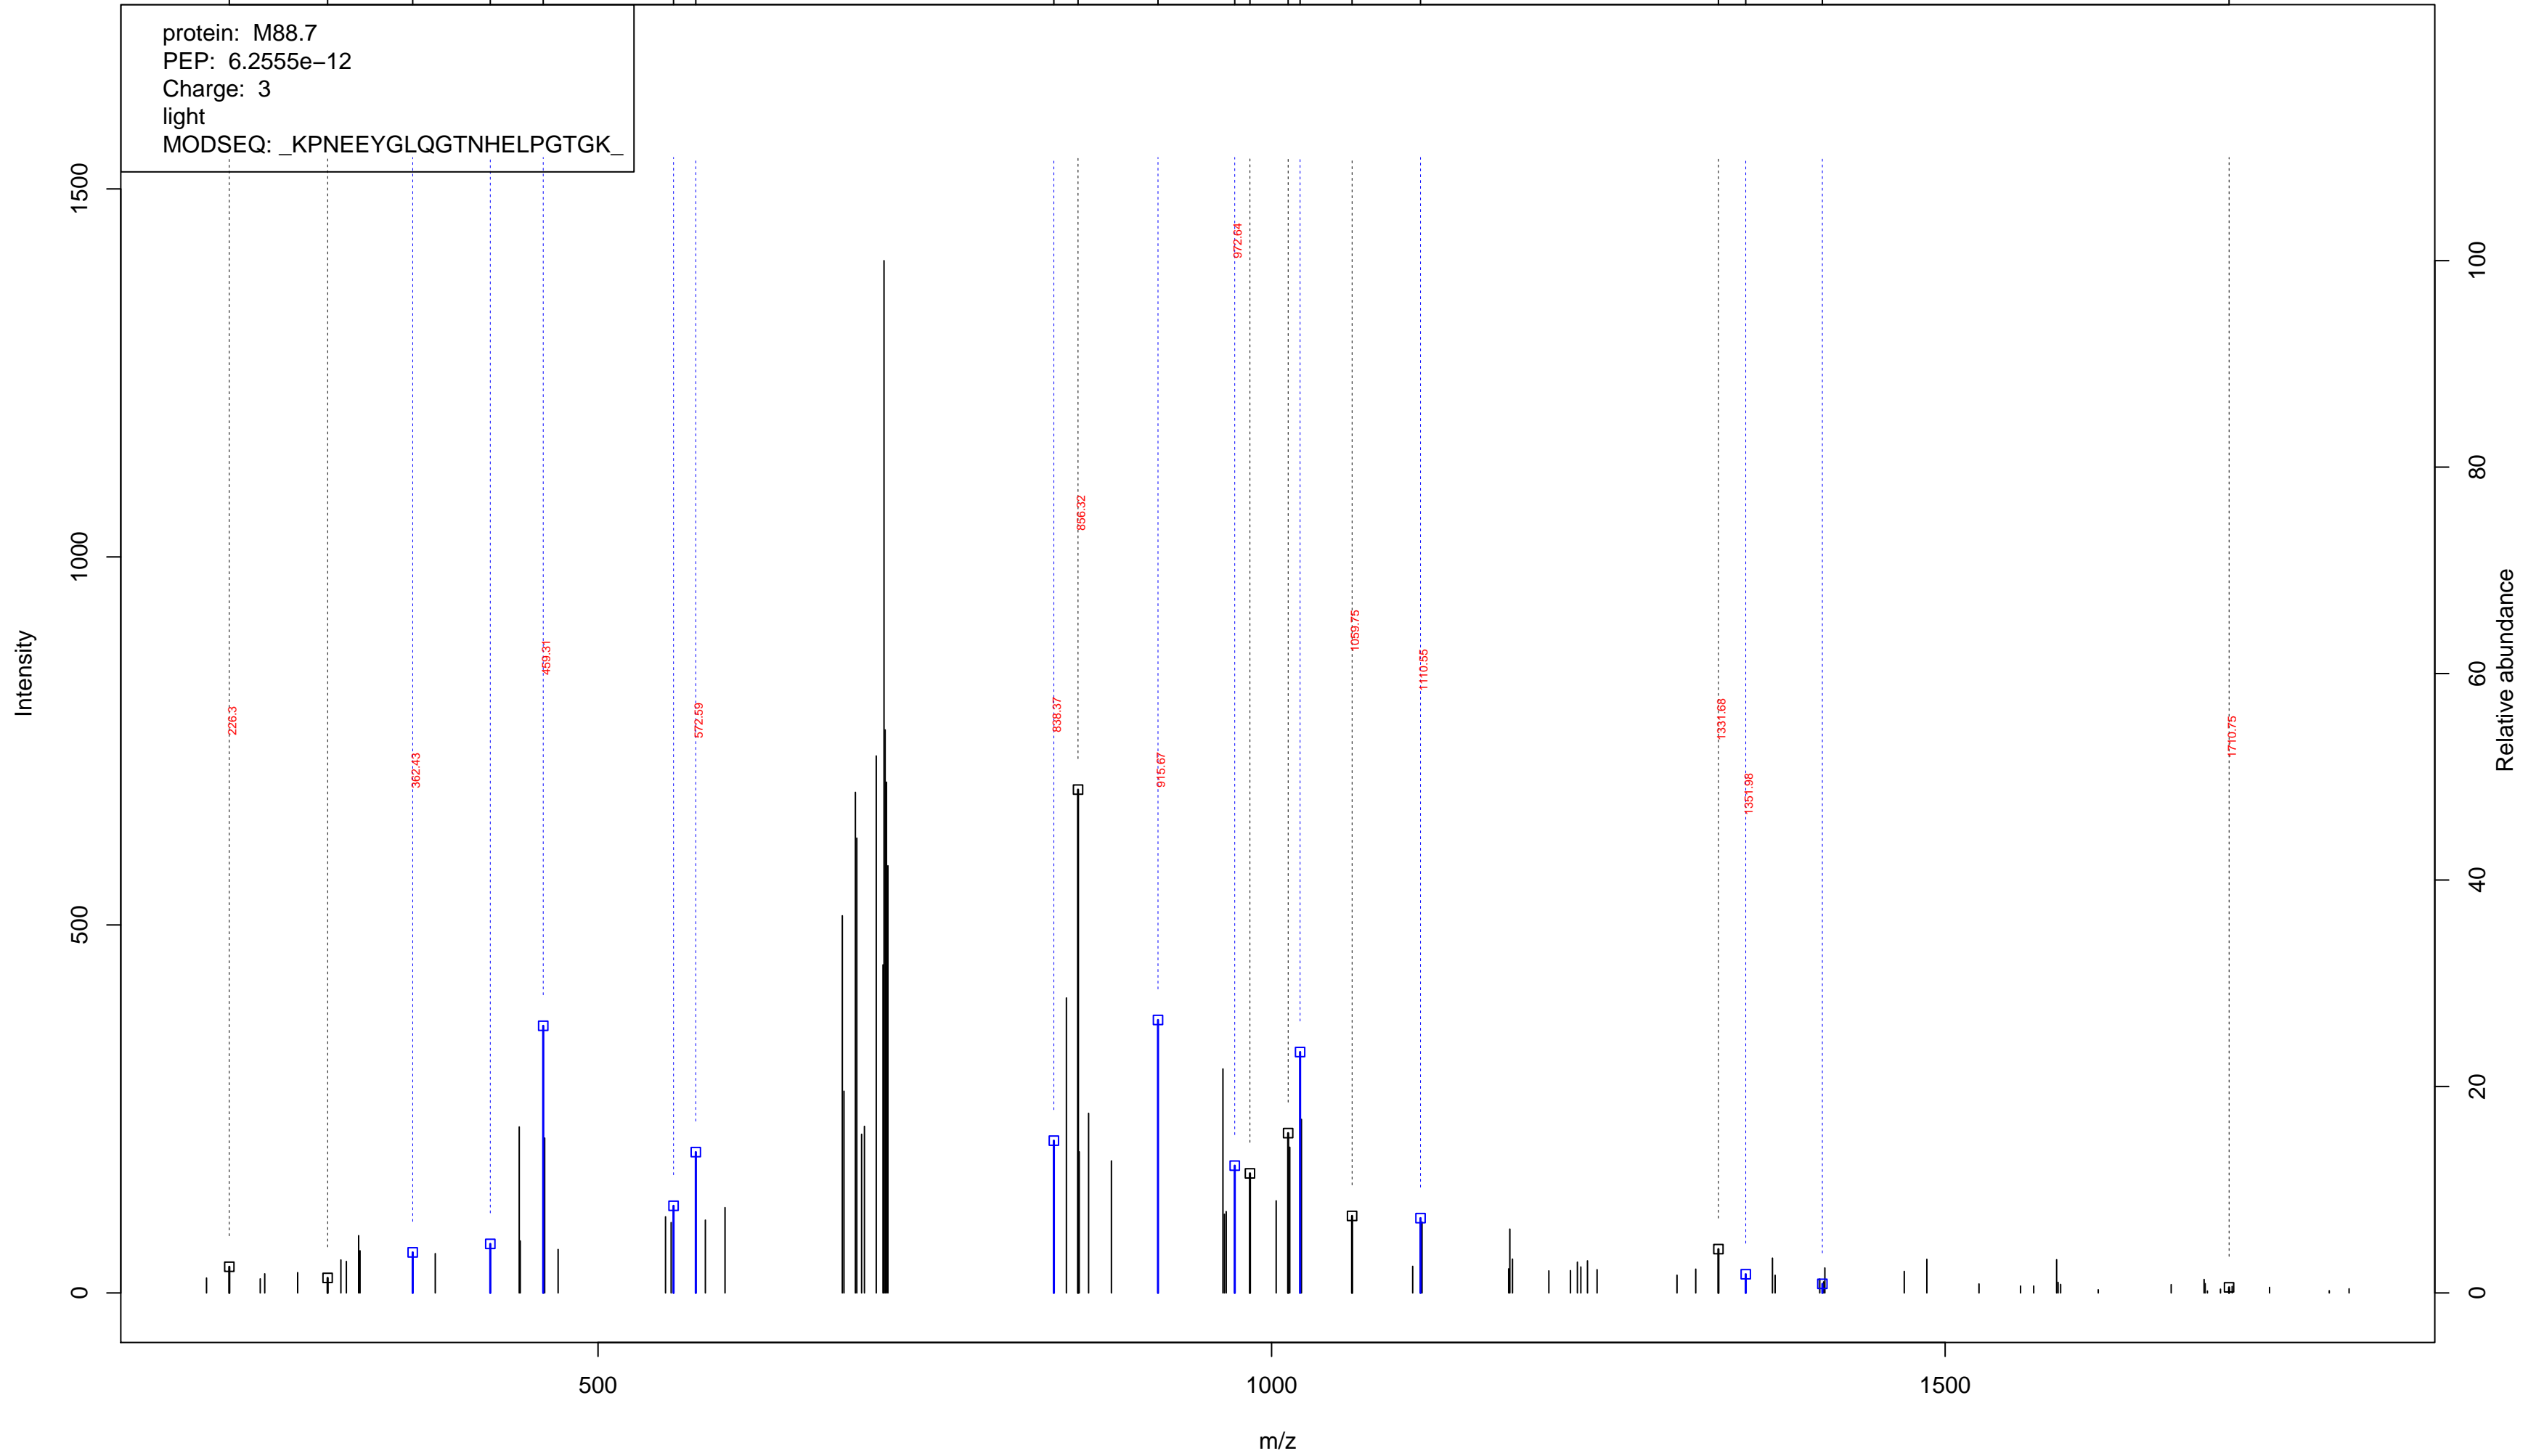

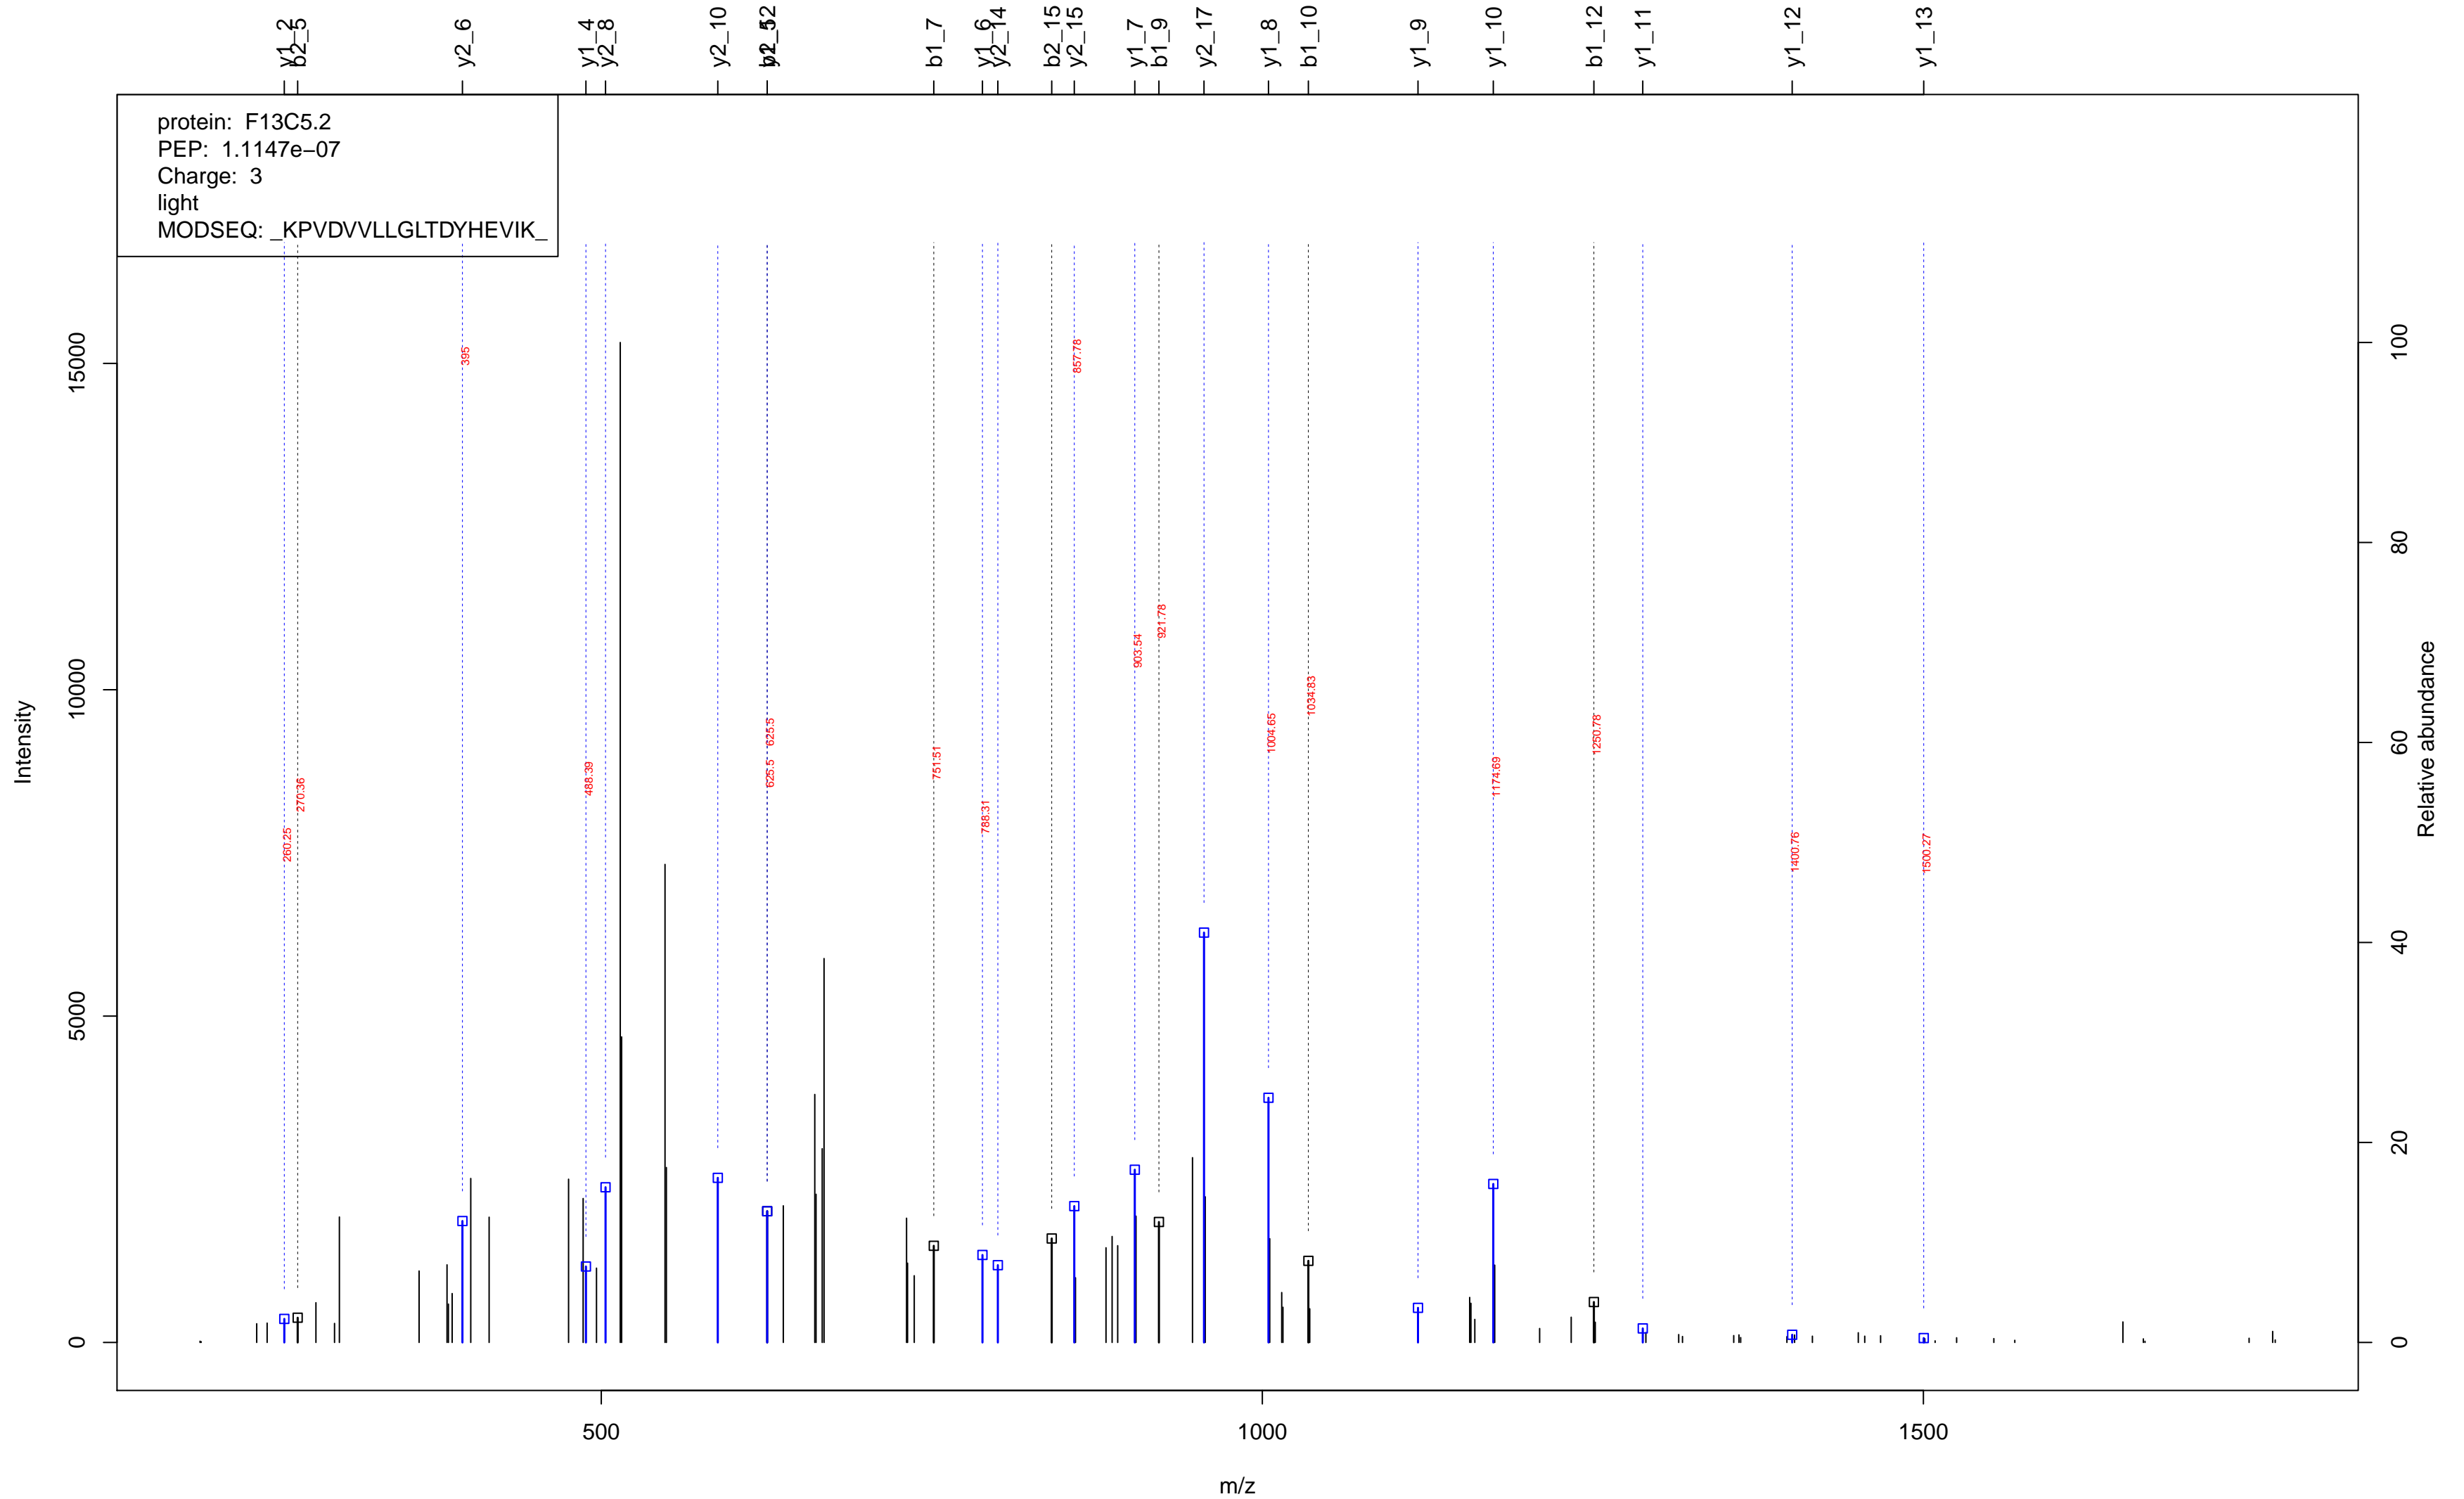



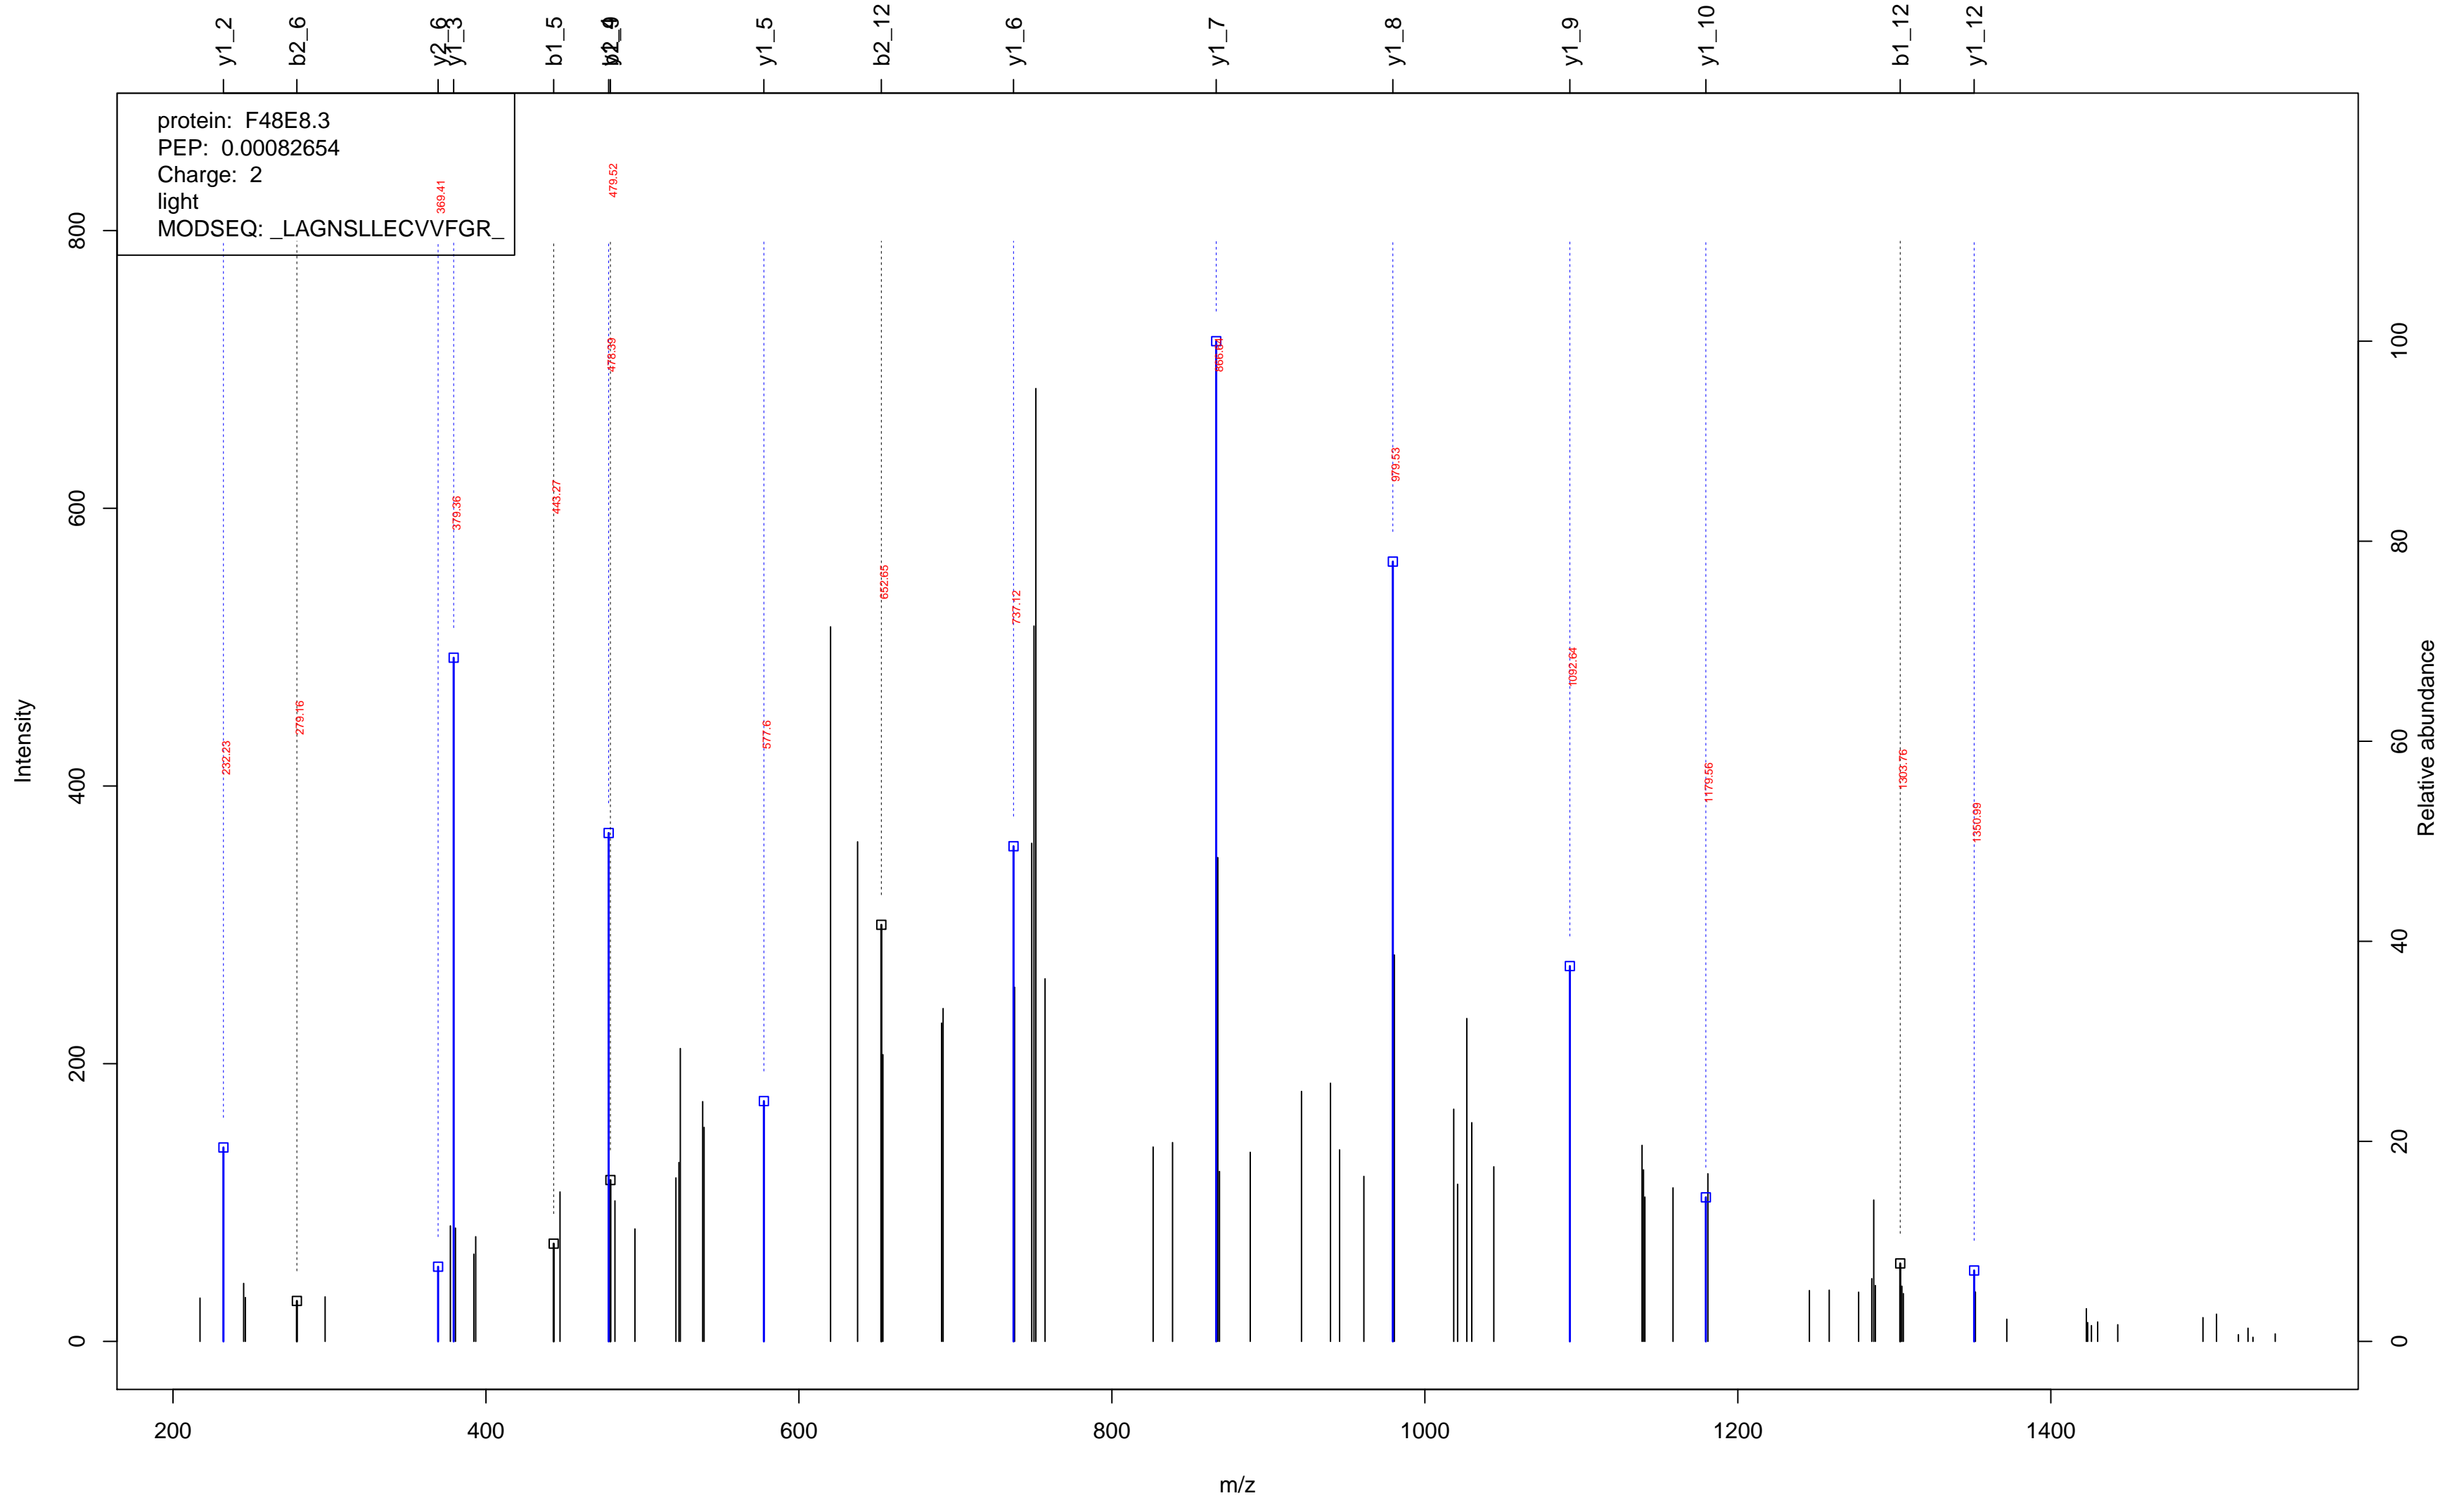

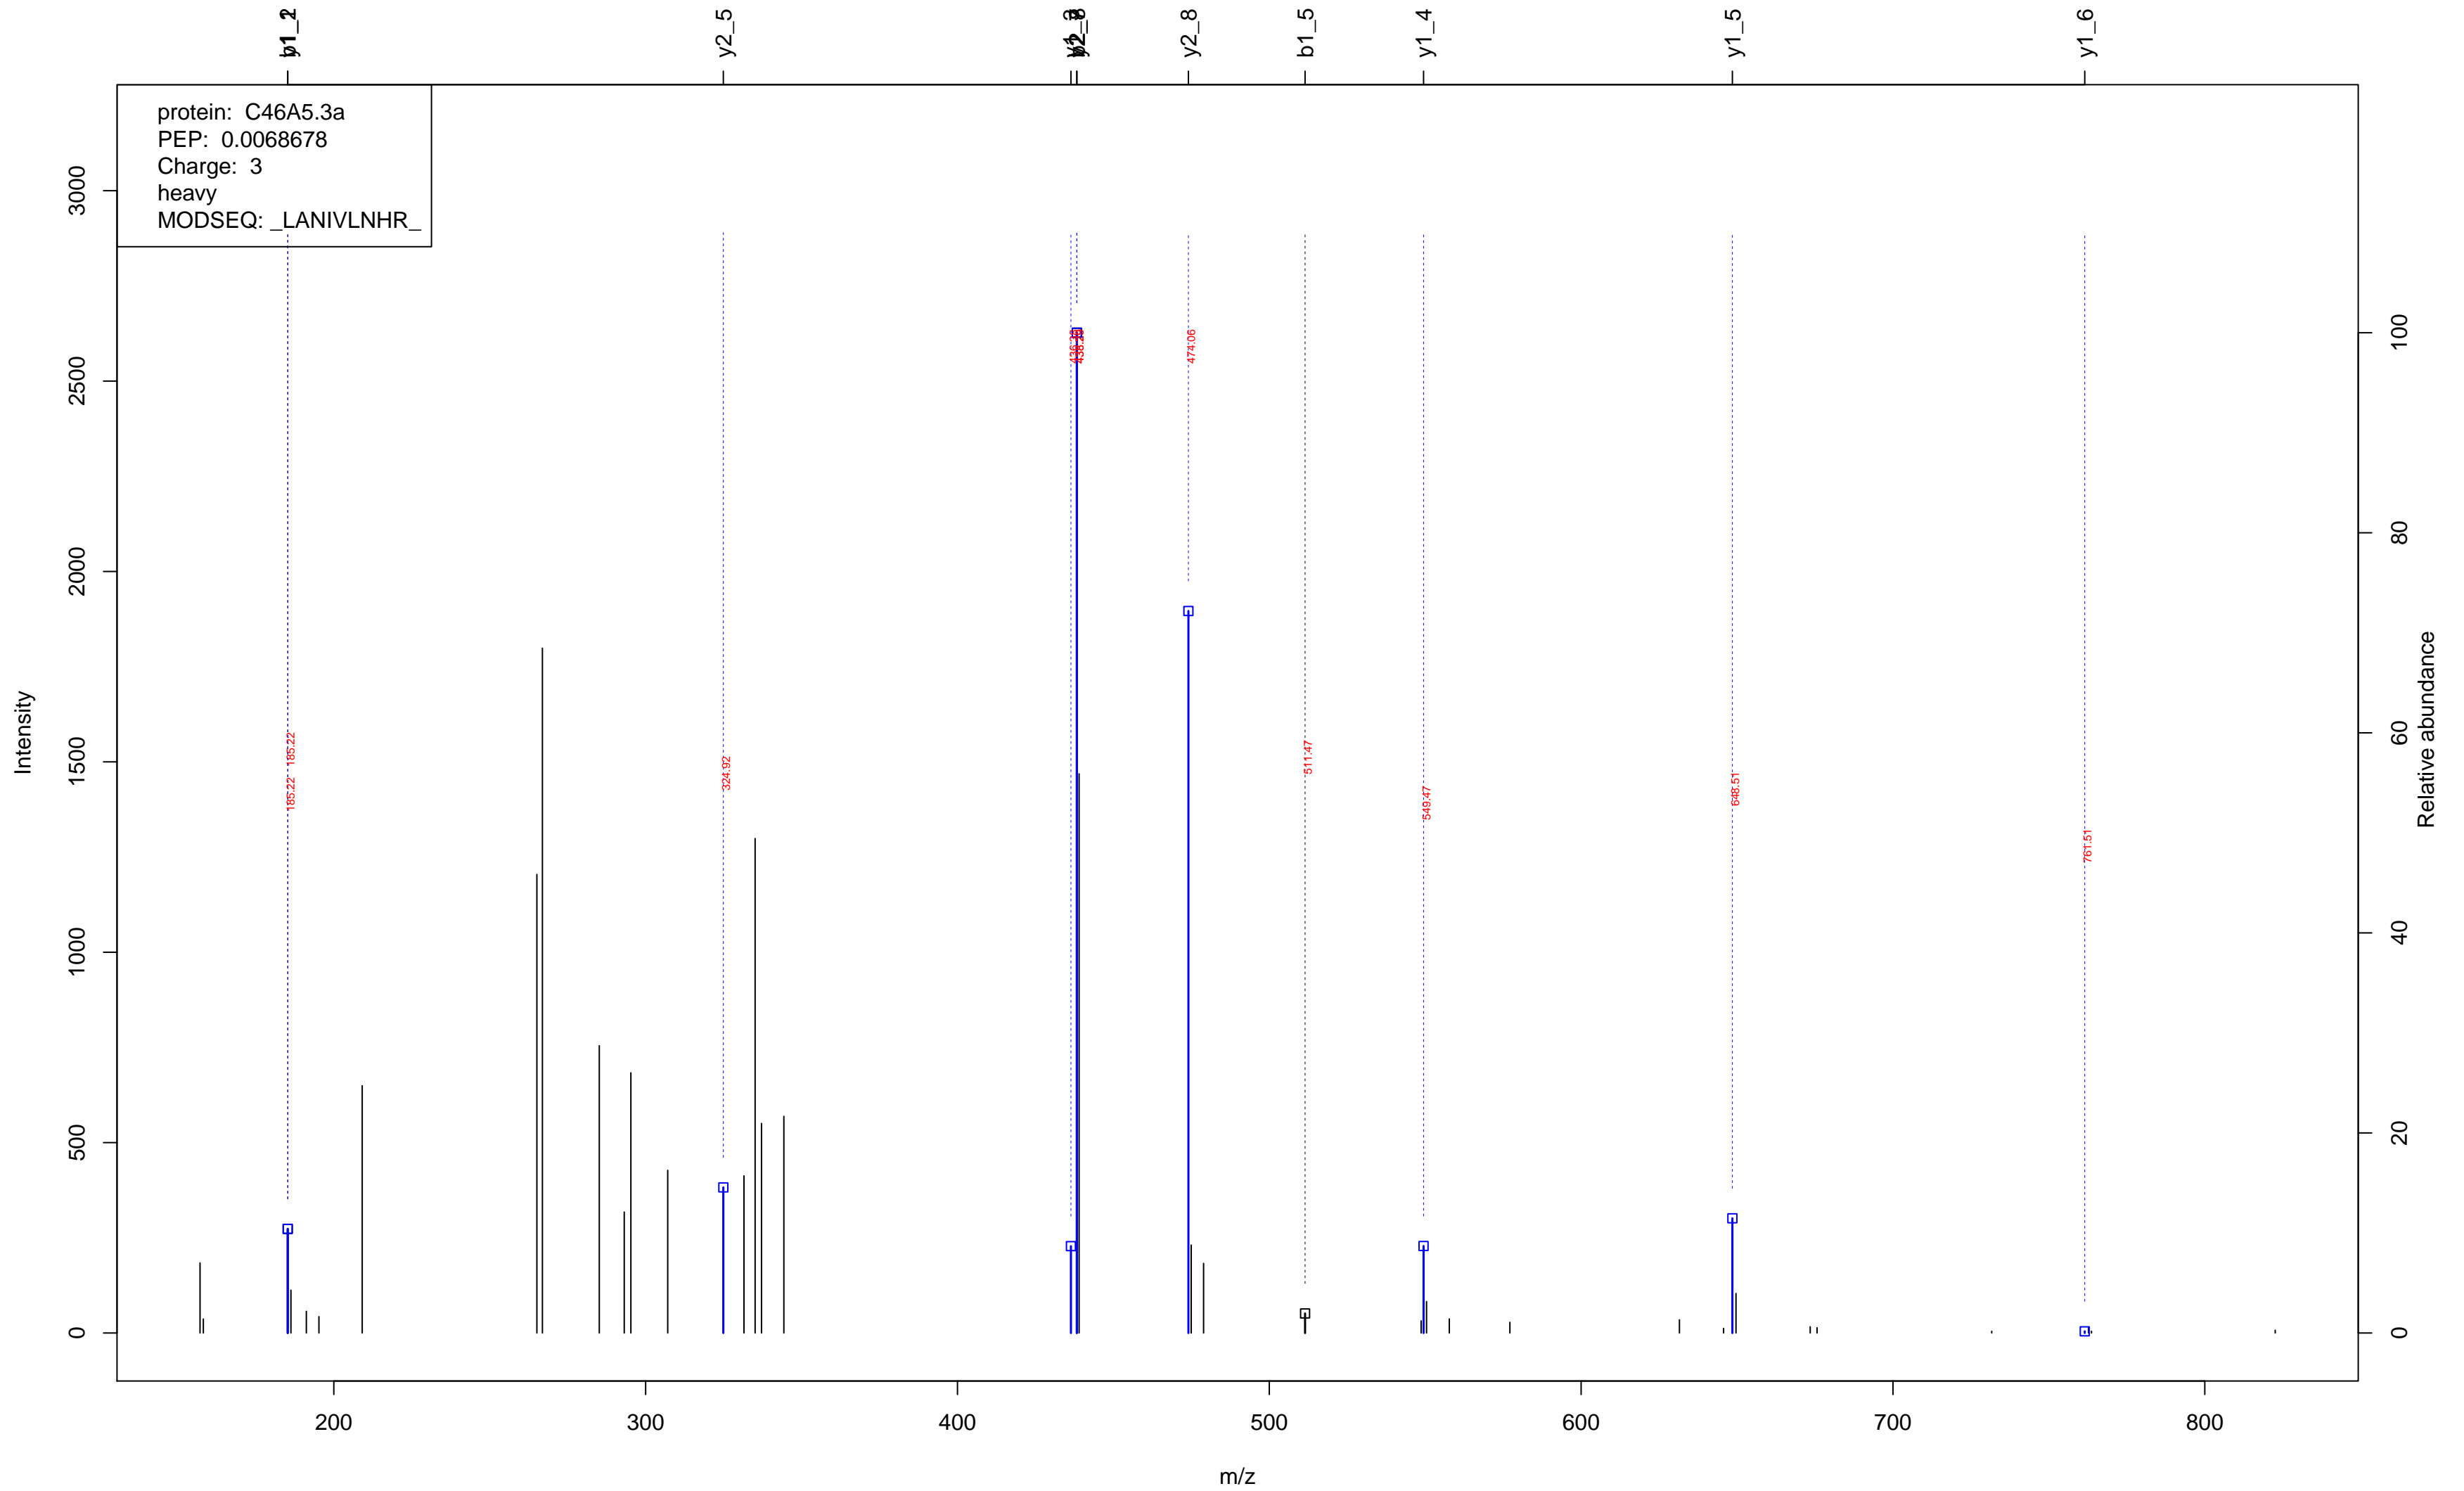

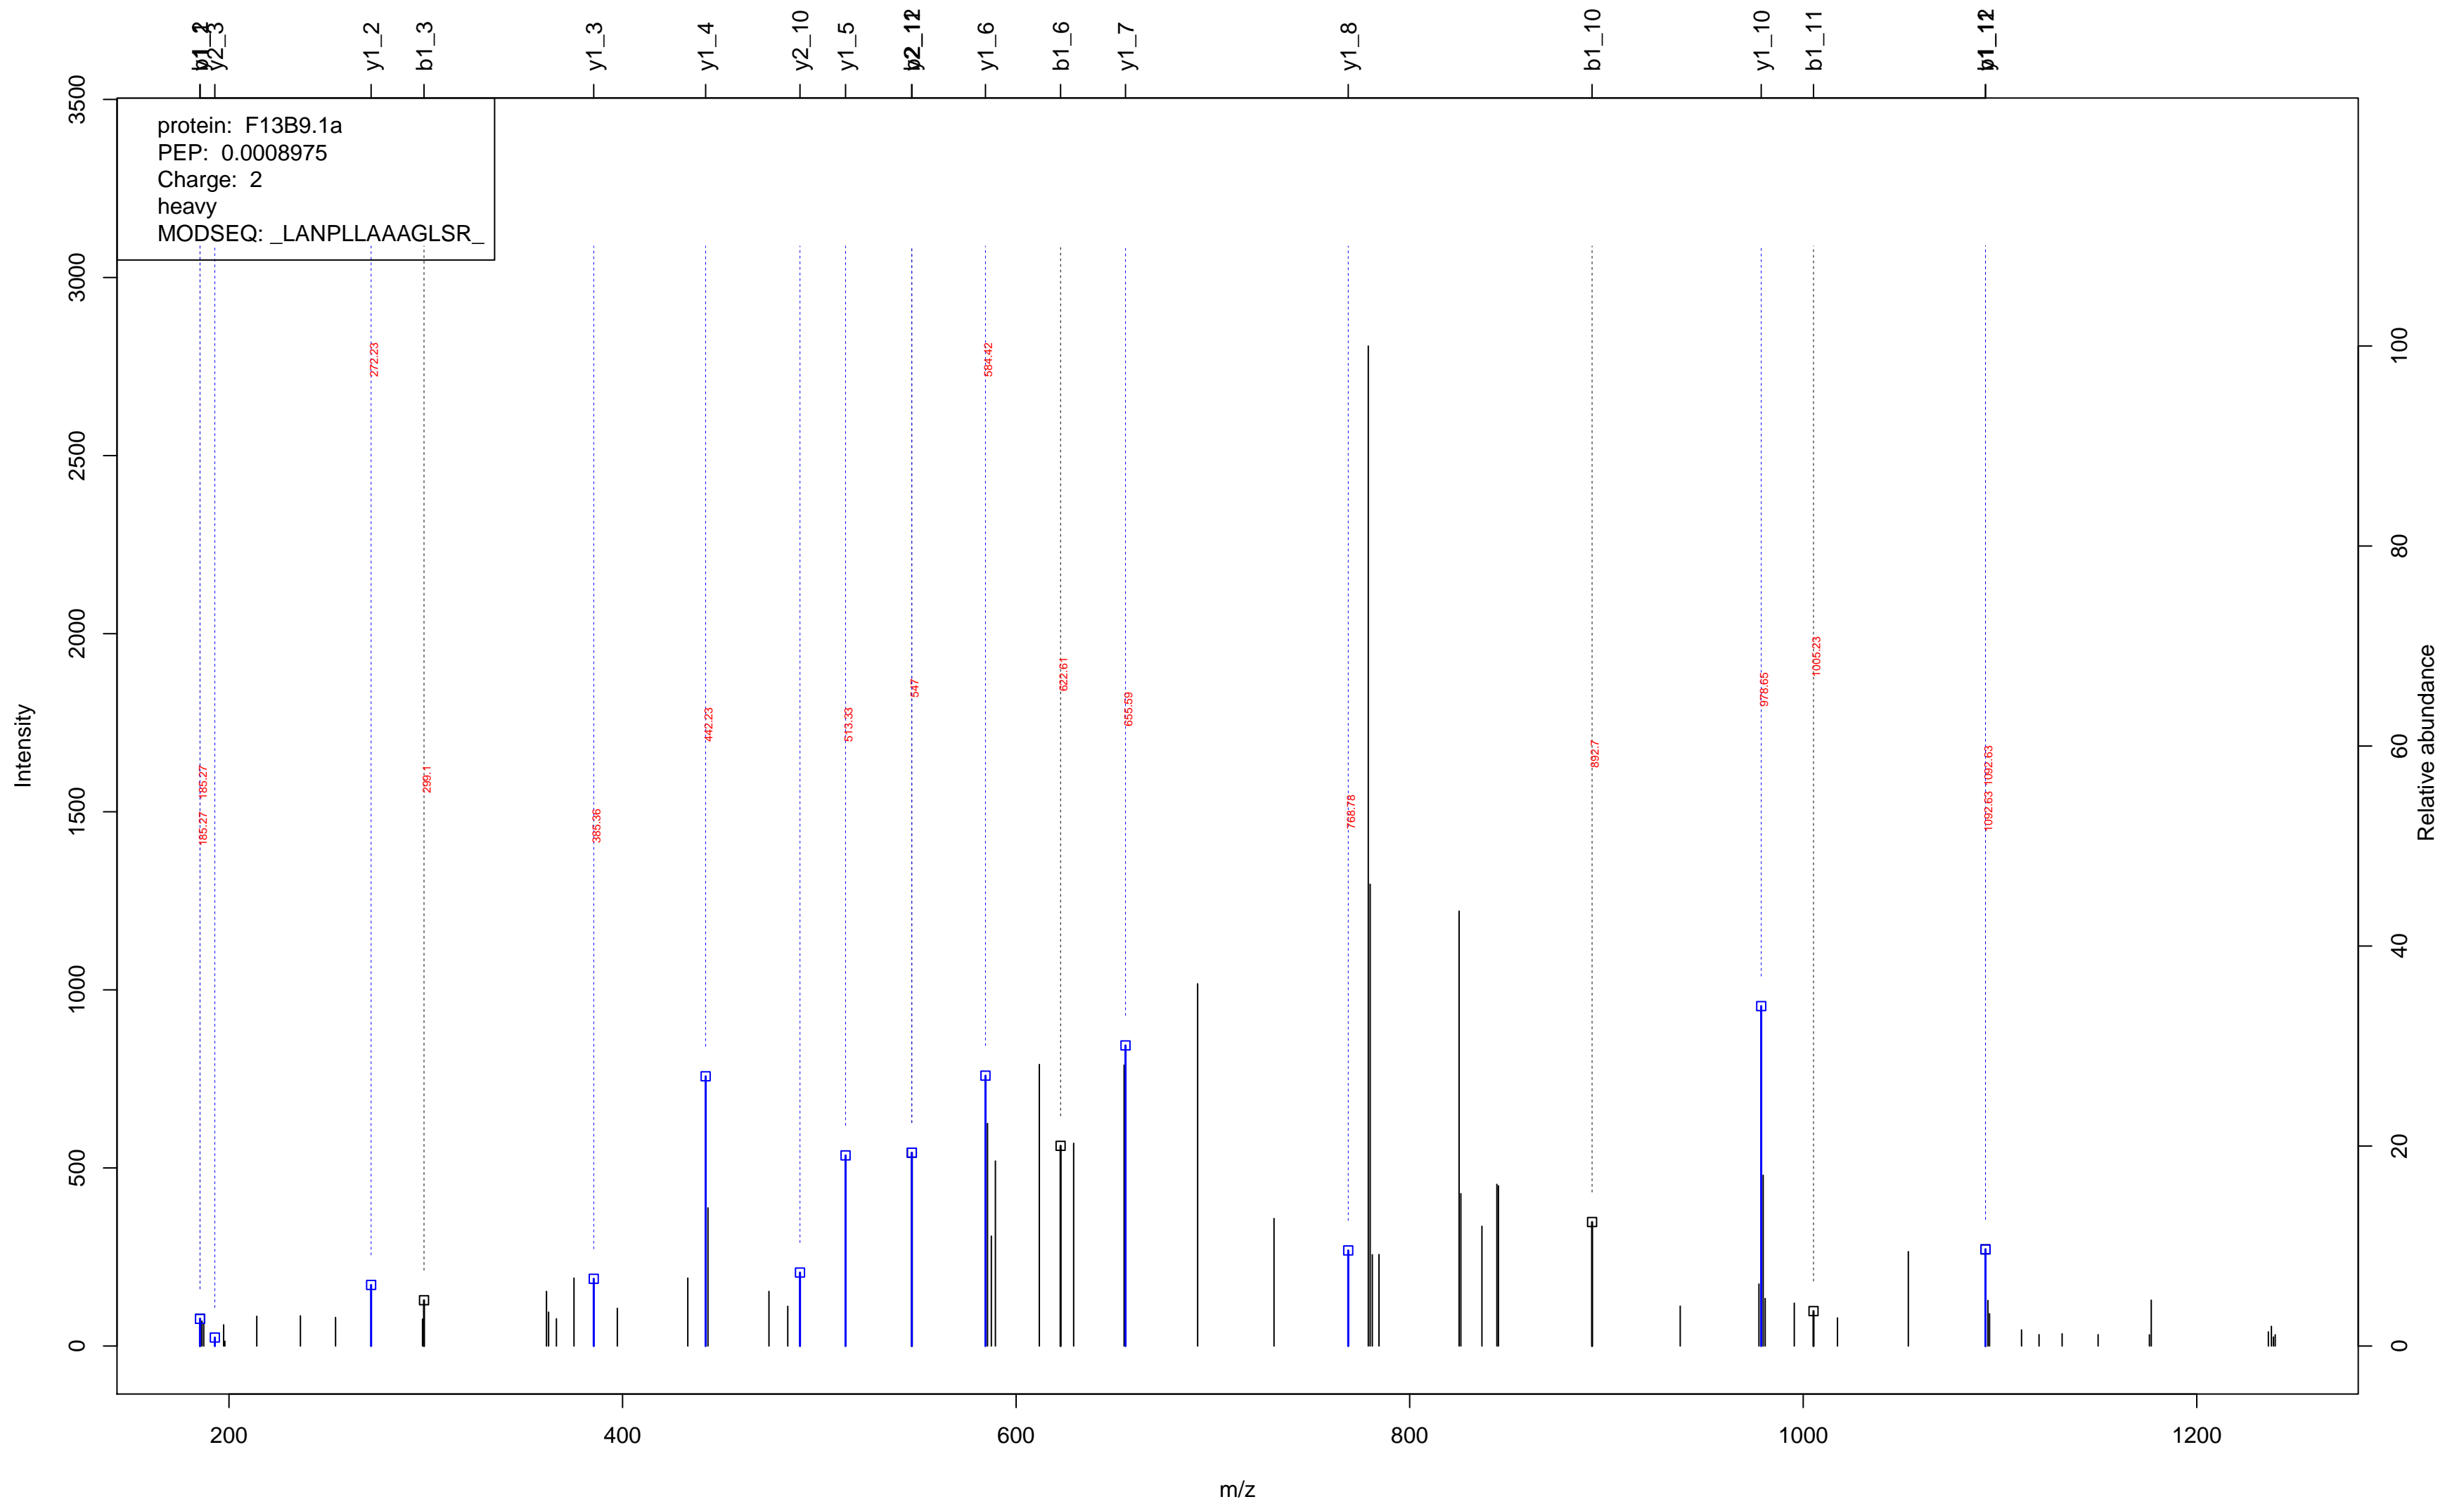

b1\_3  
y2\_3  
y1\_2  
b1\_3  
y1\_3  
y1\_4  
y2\_10  
y1\_5  
b2\_12  
y1\_6  
b1\_6  
y1\_7  
y1\_8  
b1\_10  
y1\_10  
b1\_11  
b1\_12

185.27  
186.27  
272.23  
299.1  
385.36  
442.23  
513.33  
547  
584.42  
622.61  
655.59  
766.78  
892.7  
978.65  
1005.23  
1092.63  
1092.63

180

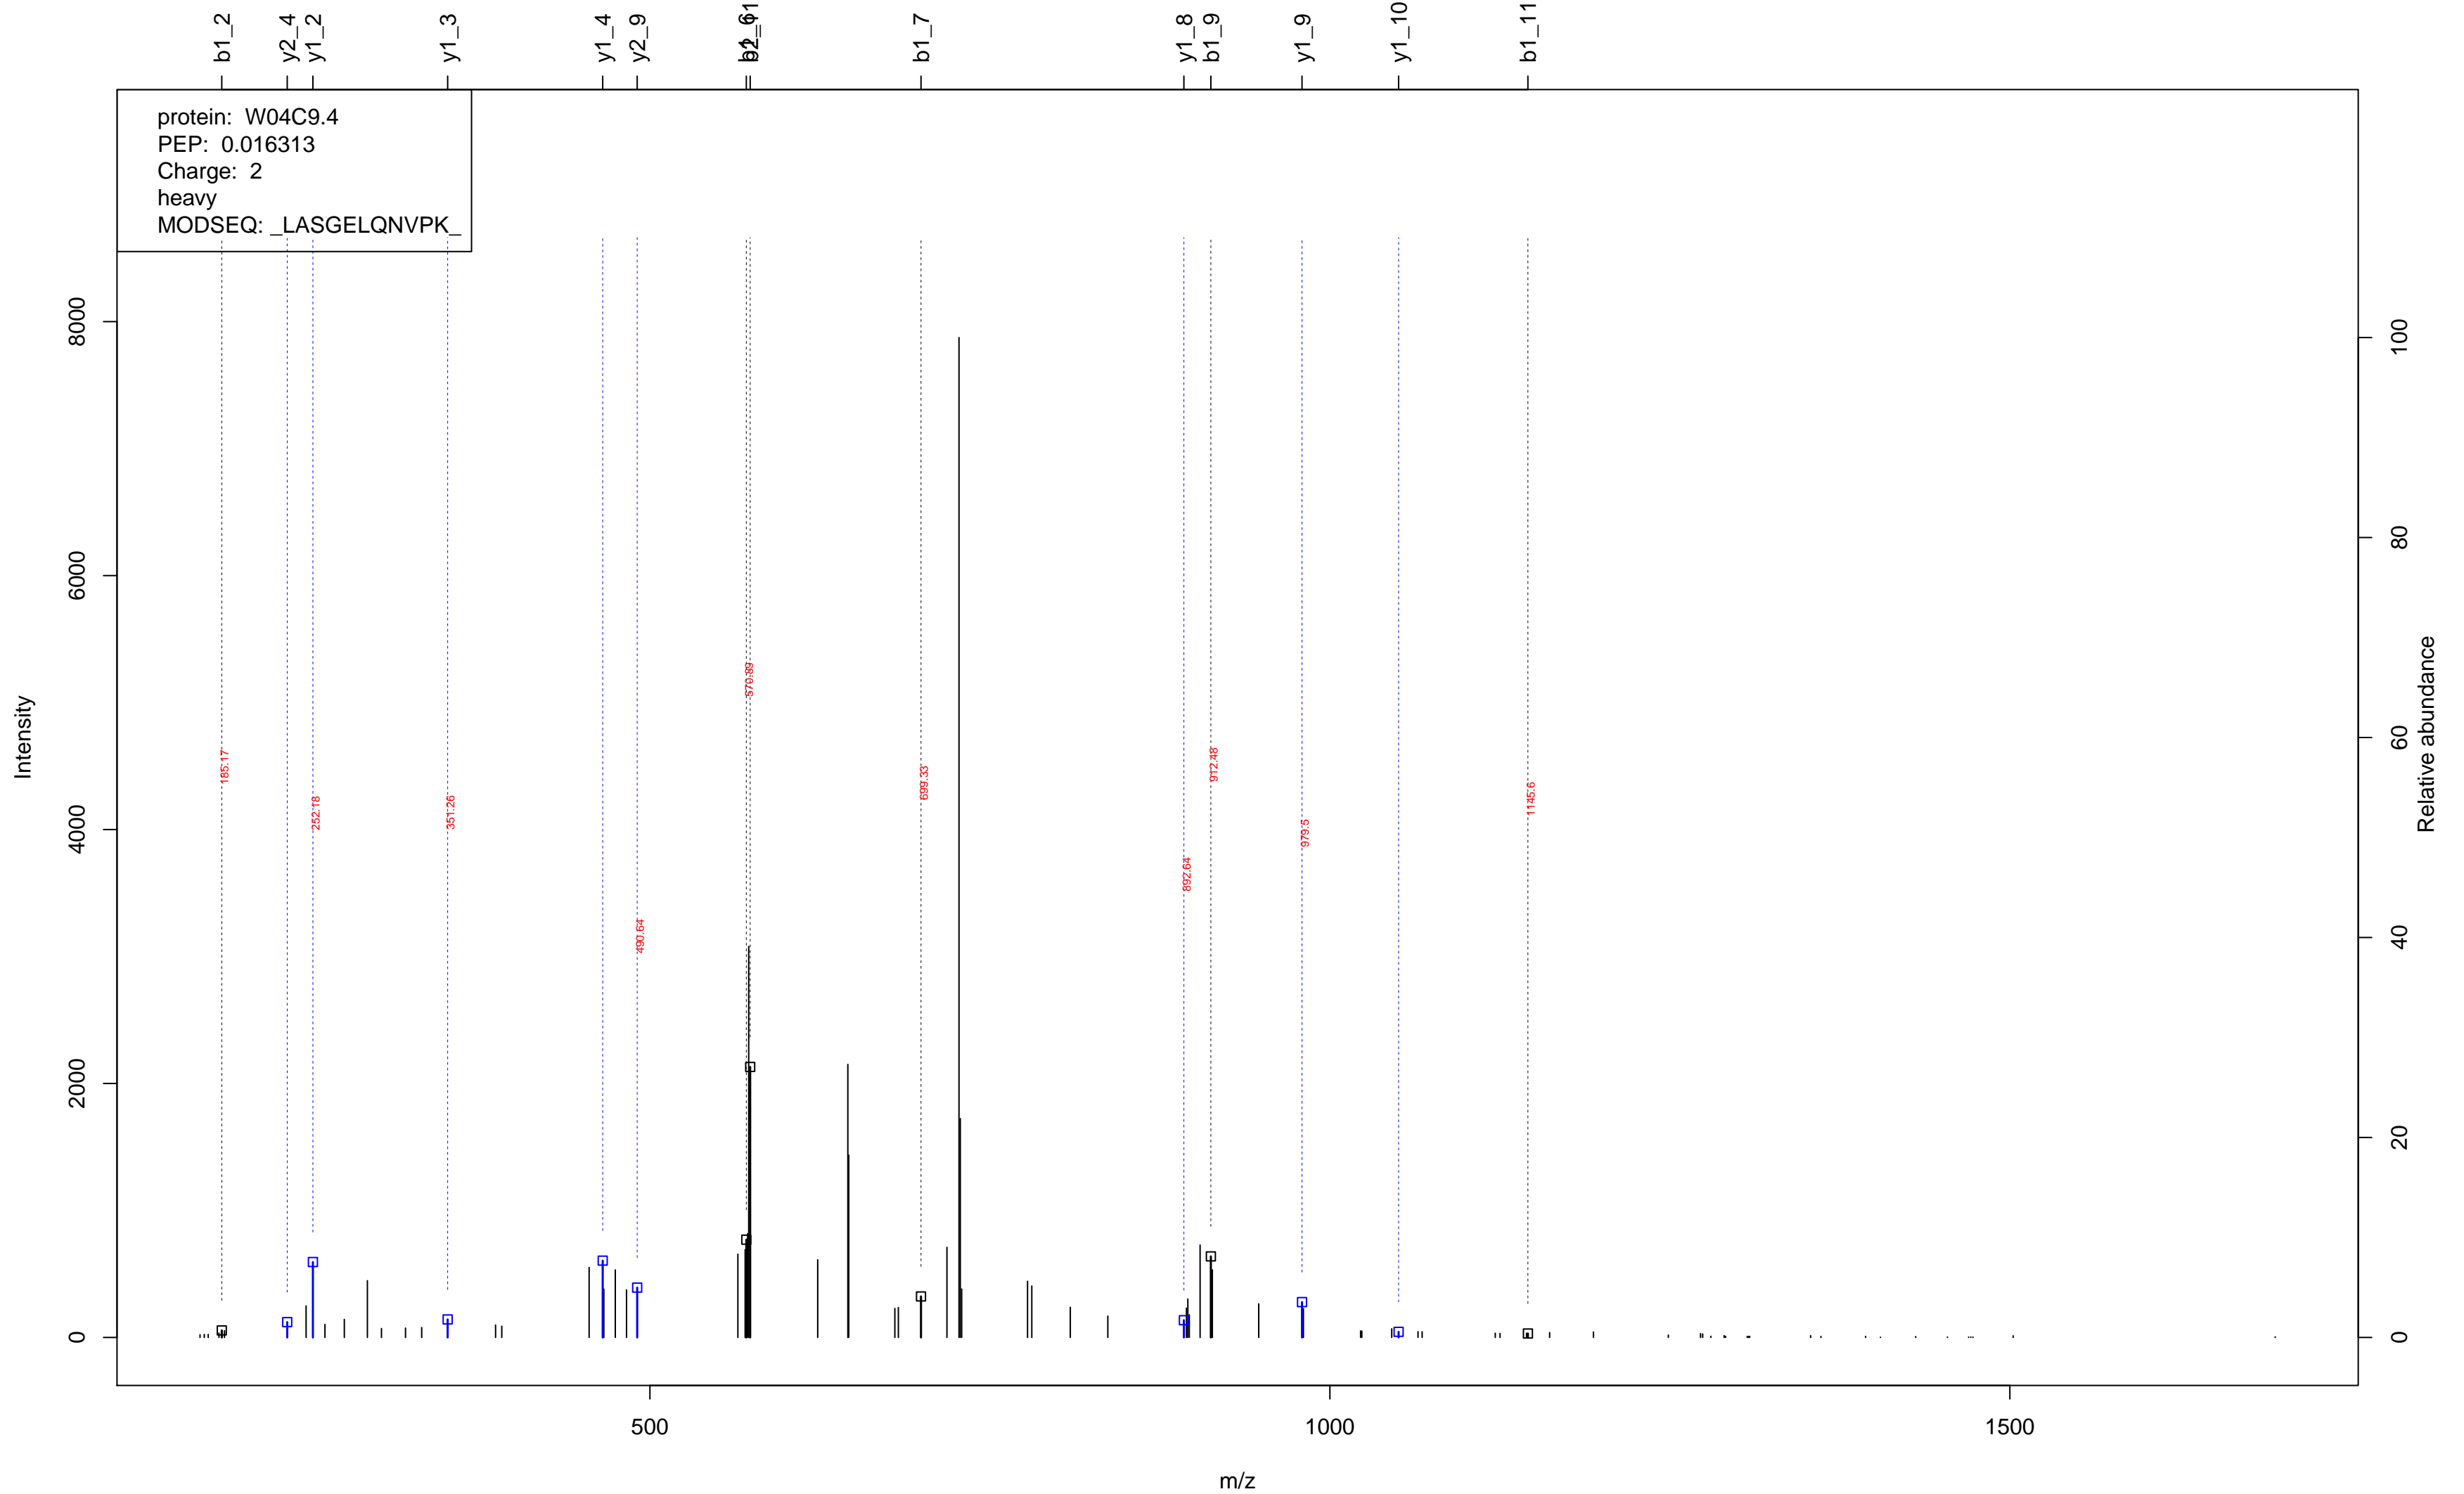

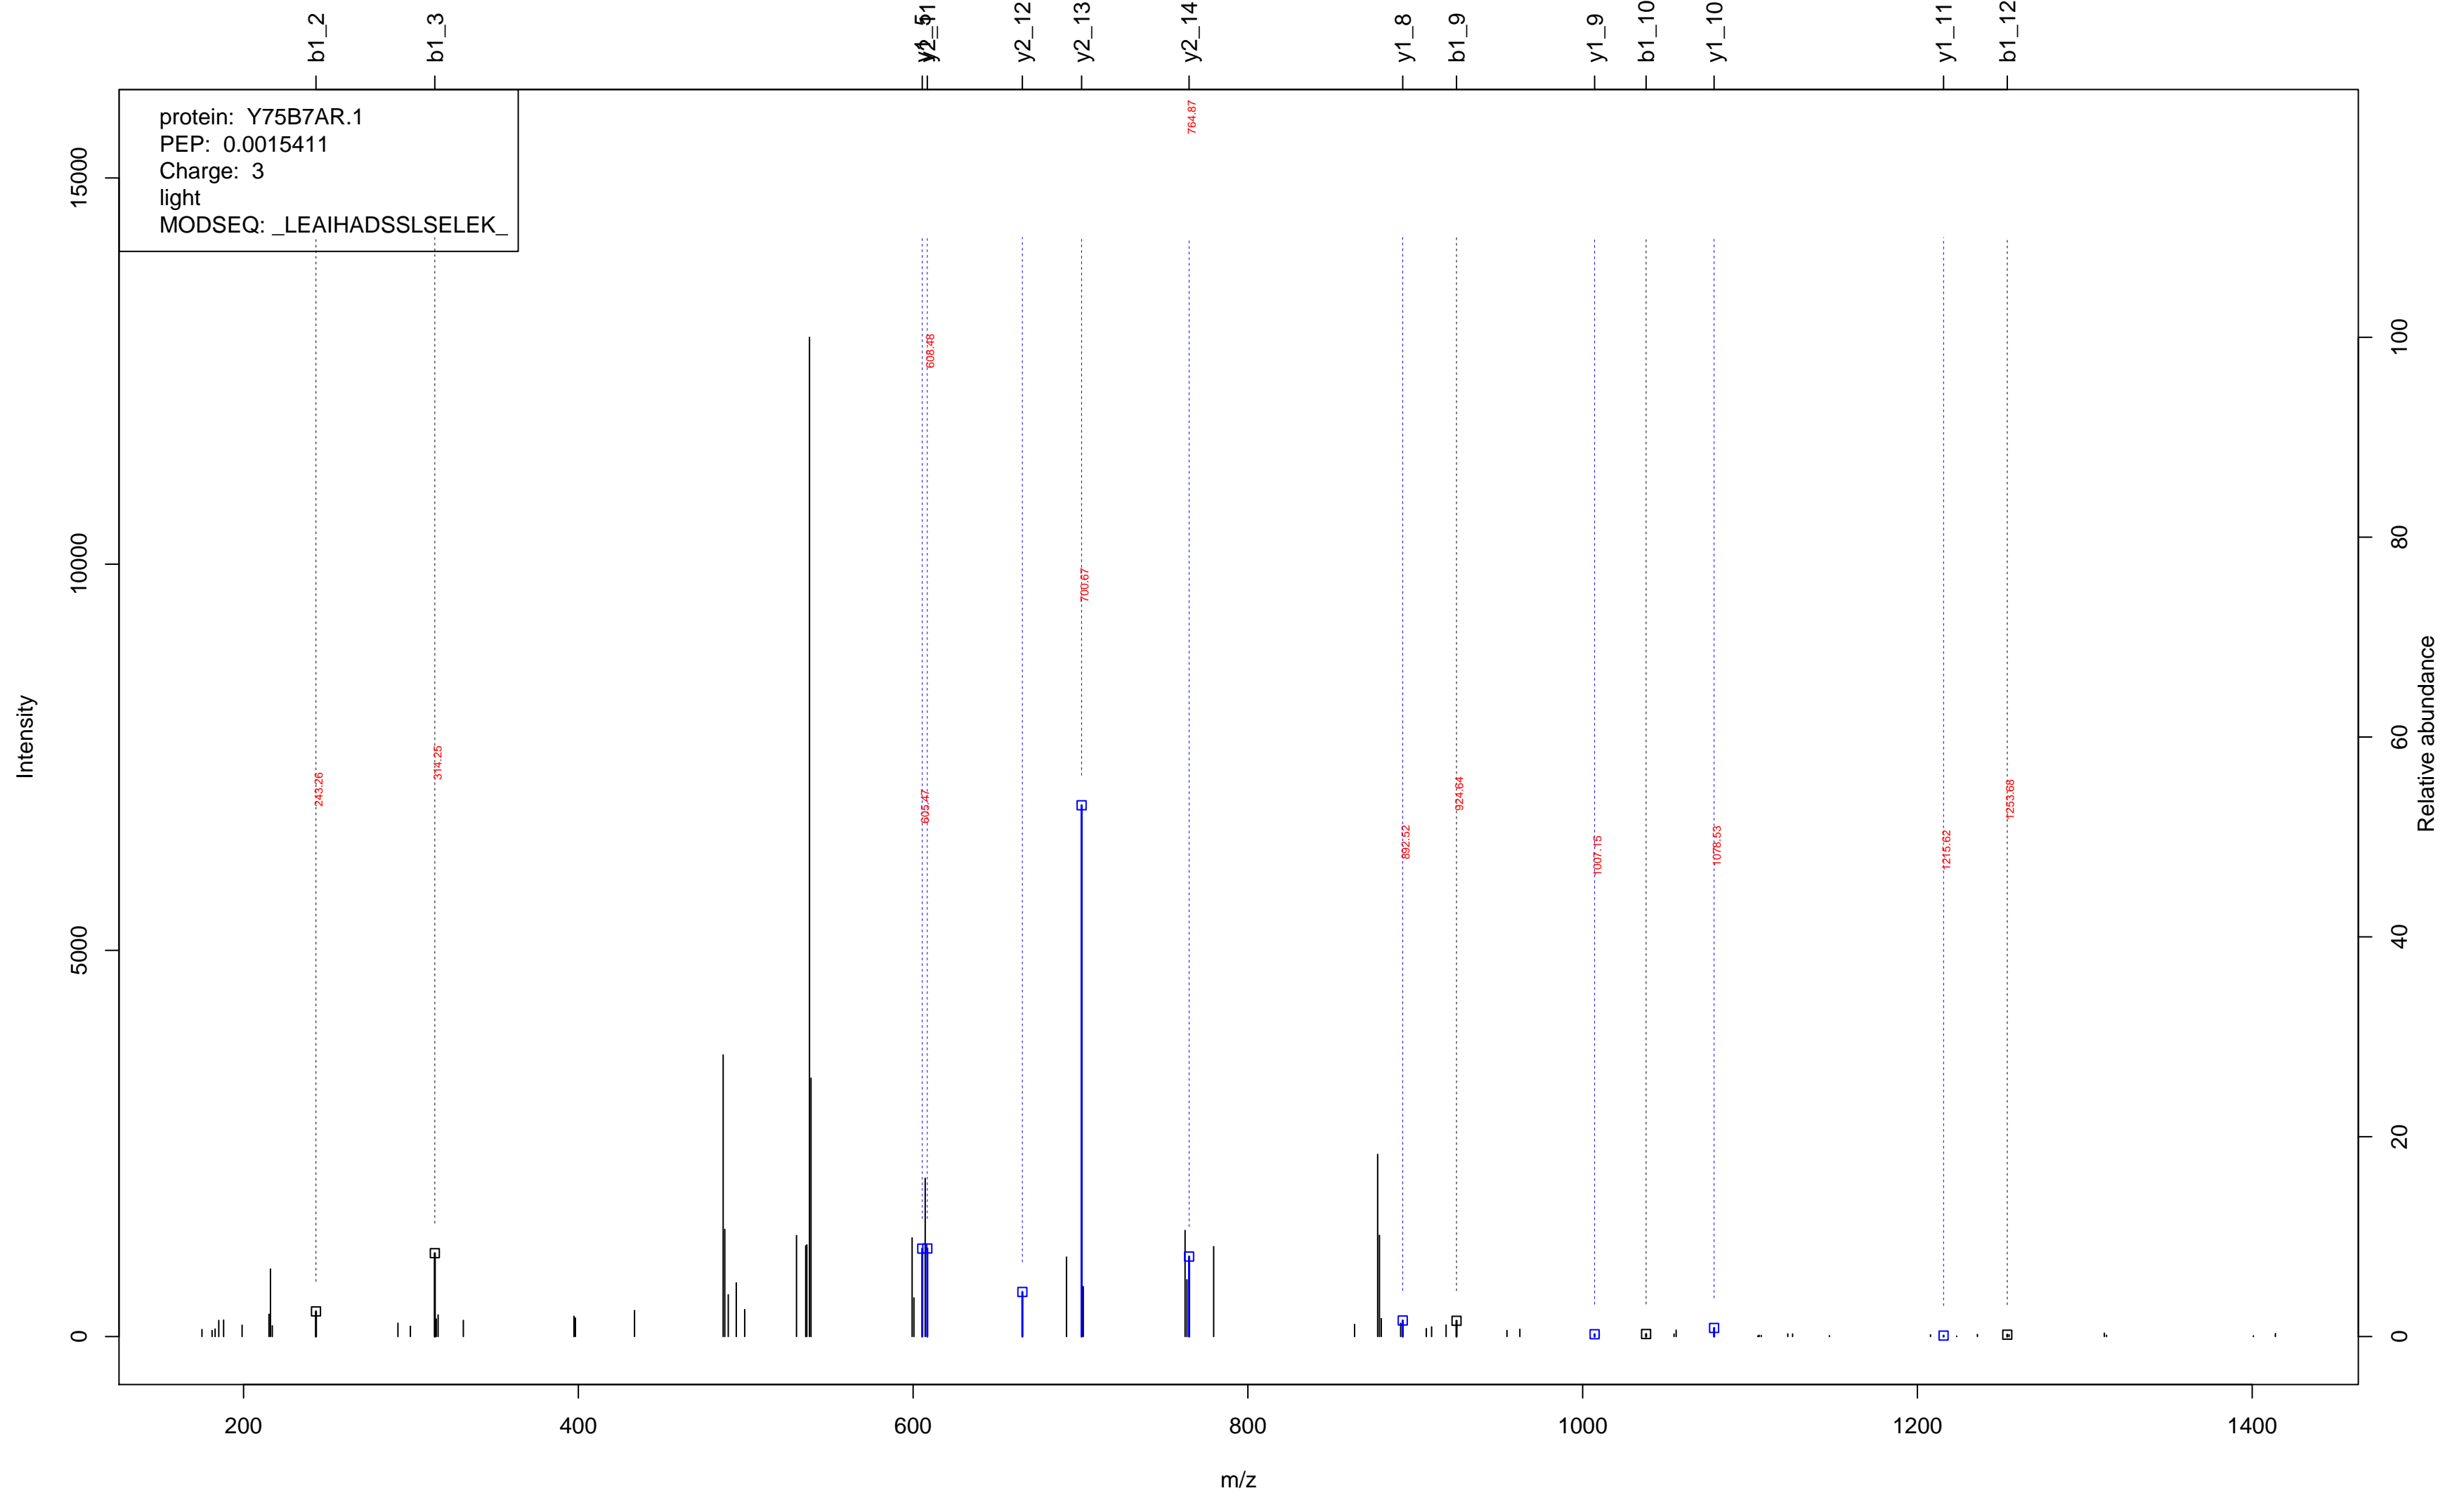

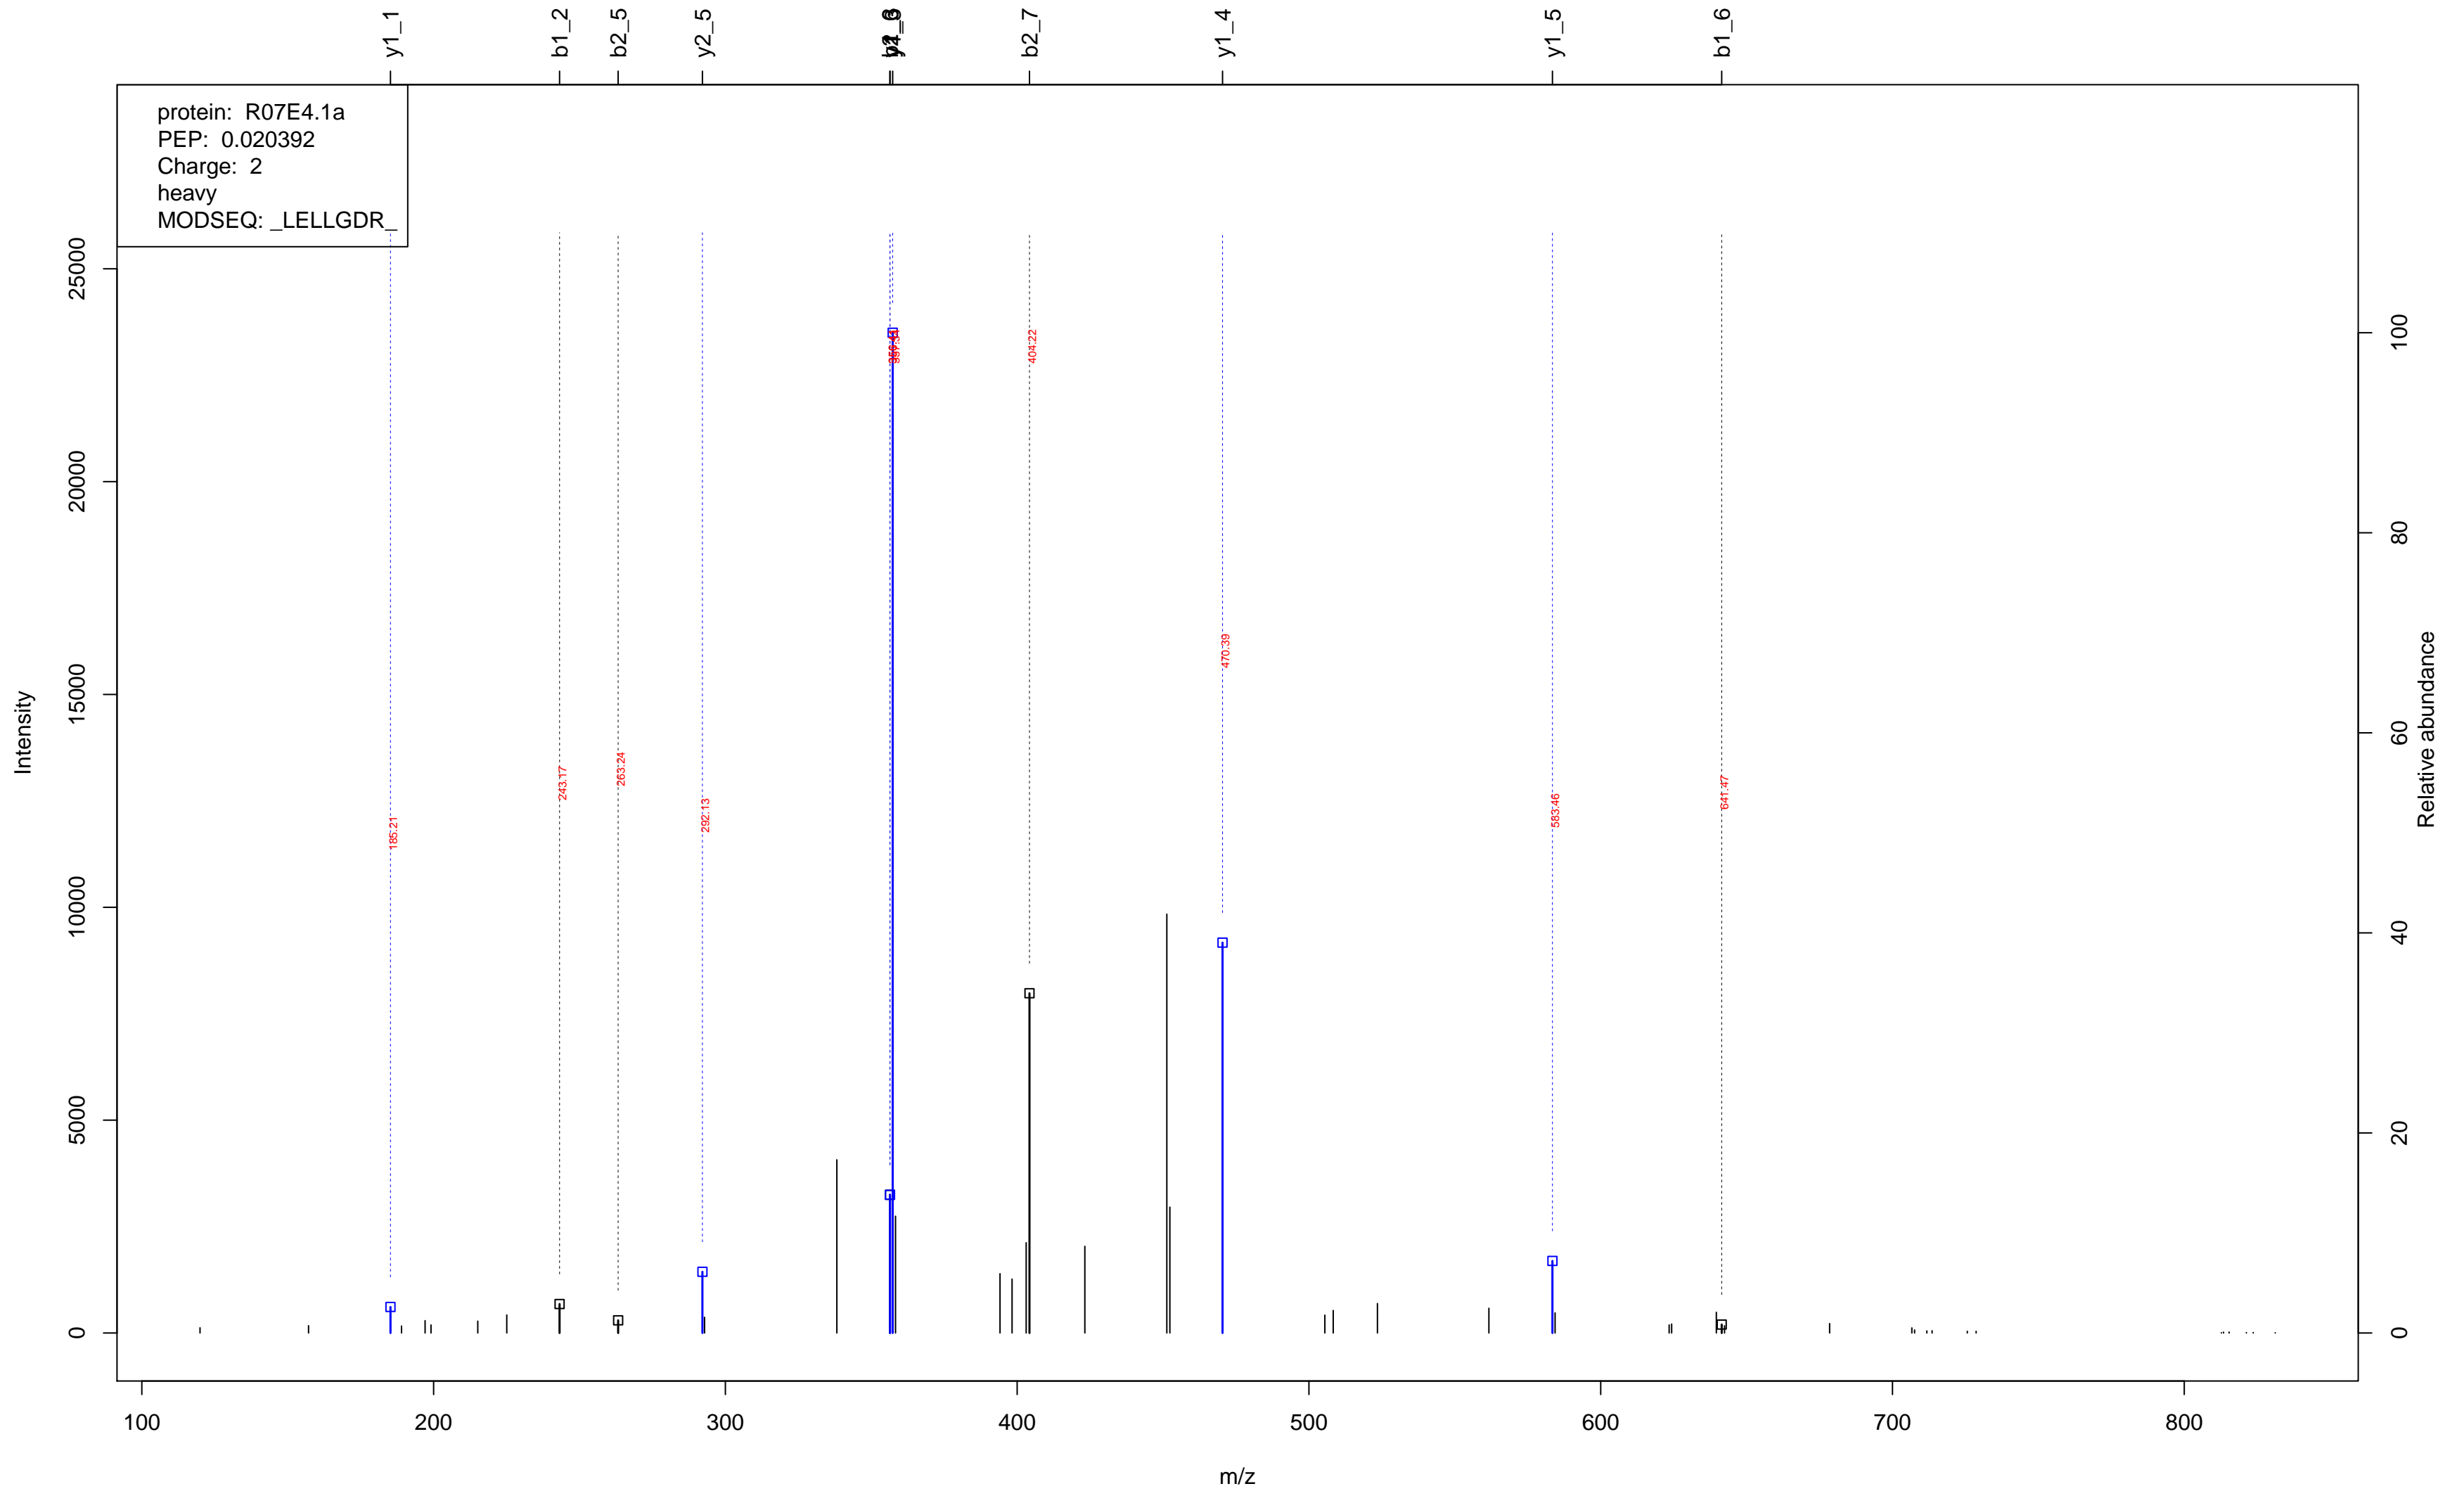

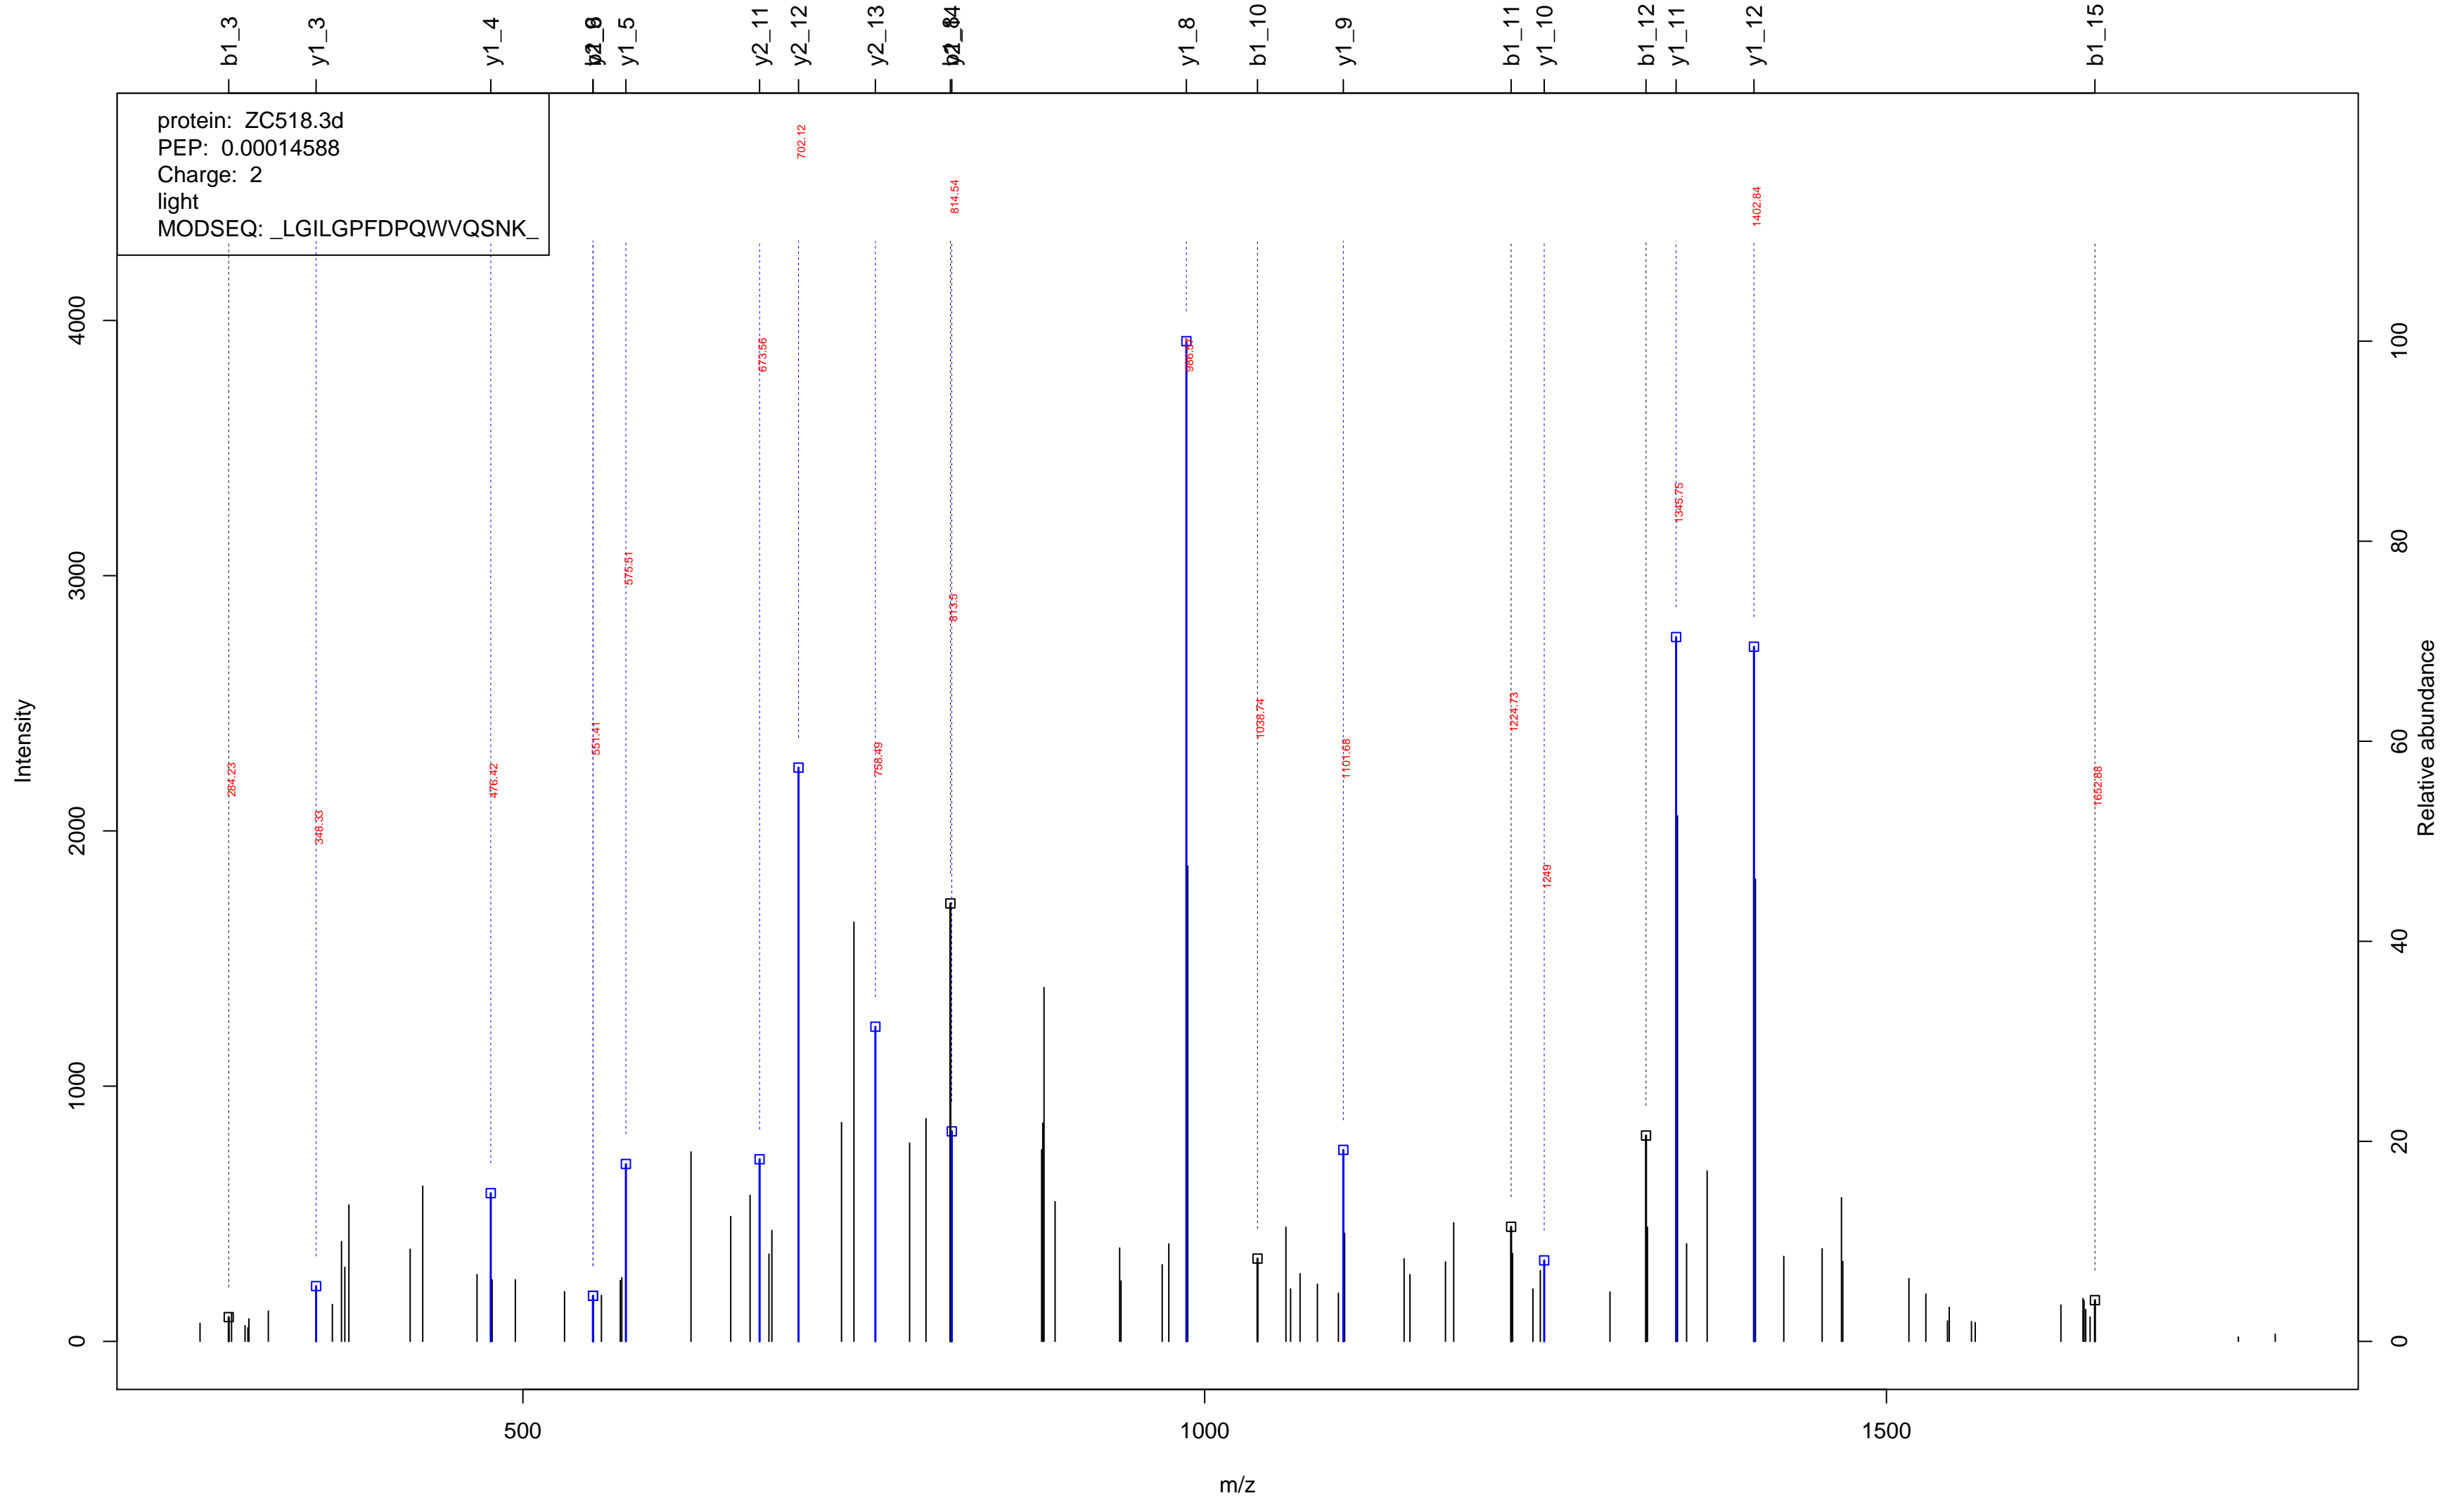

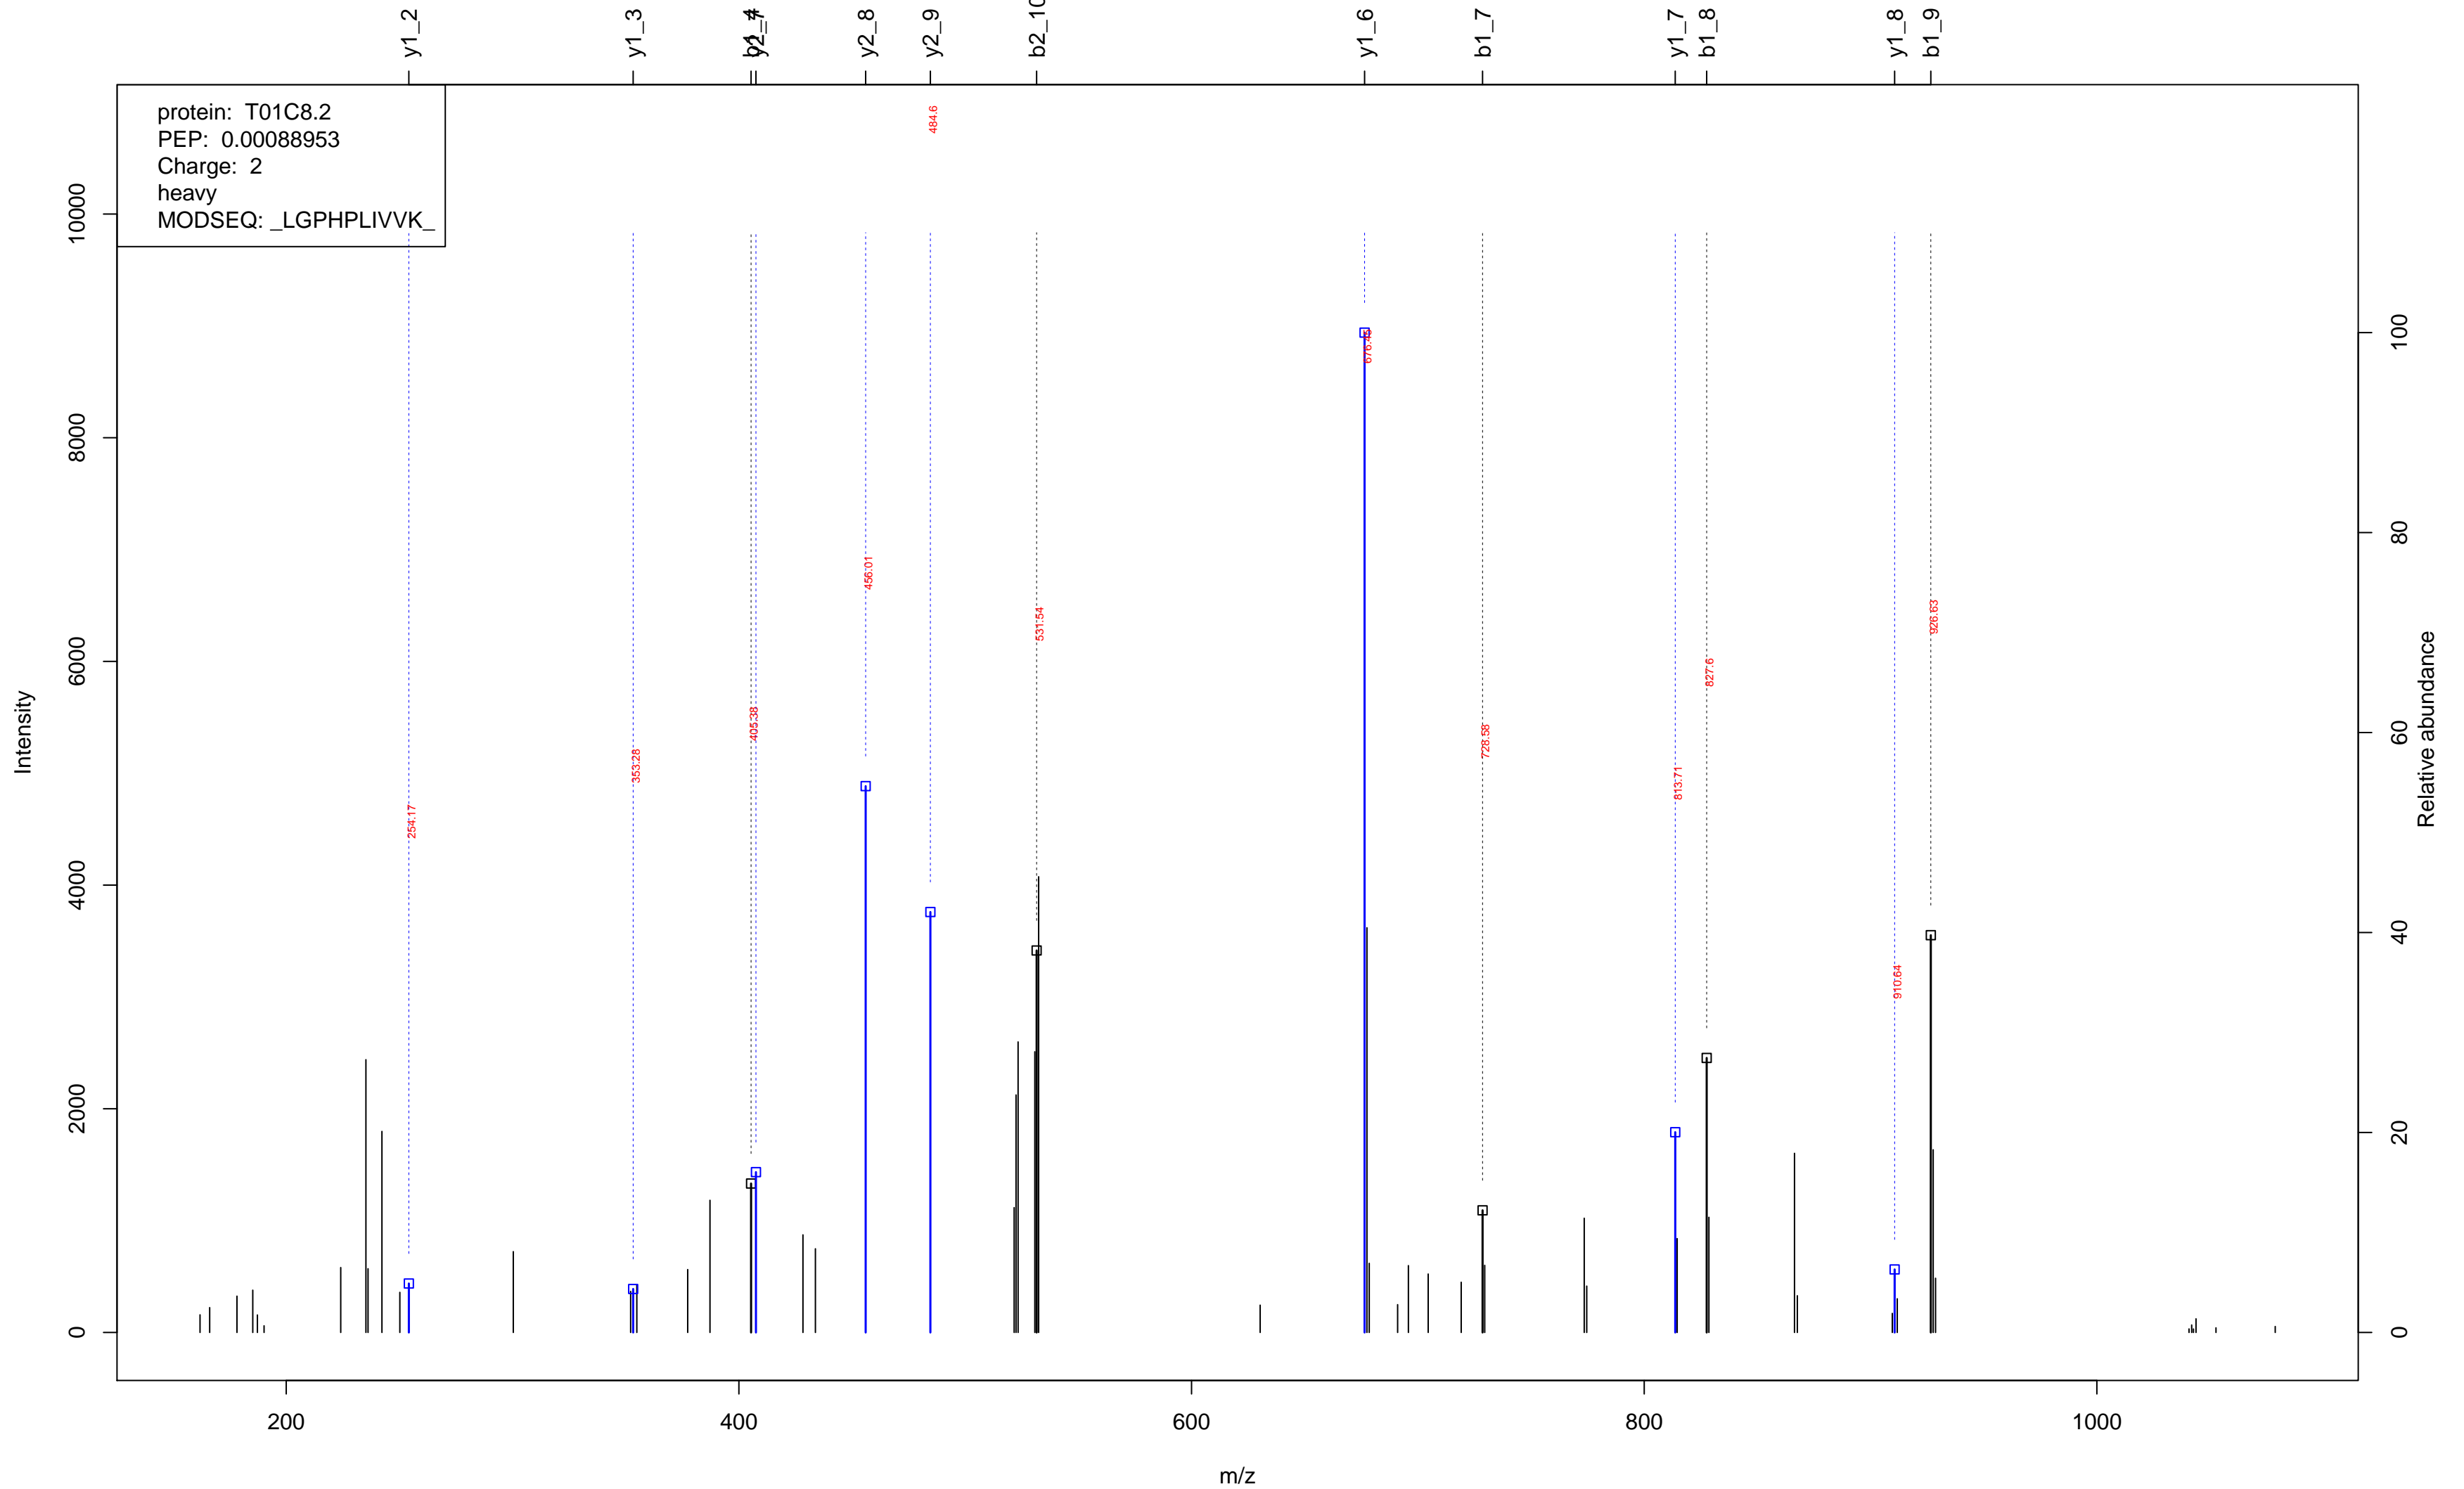



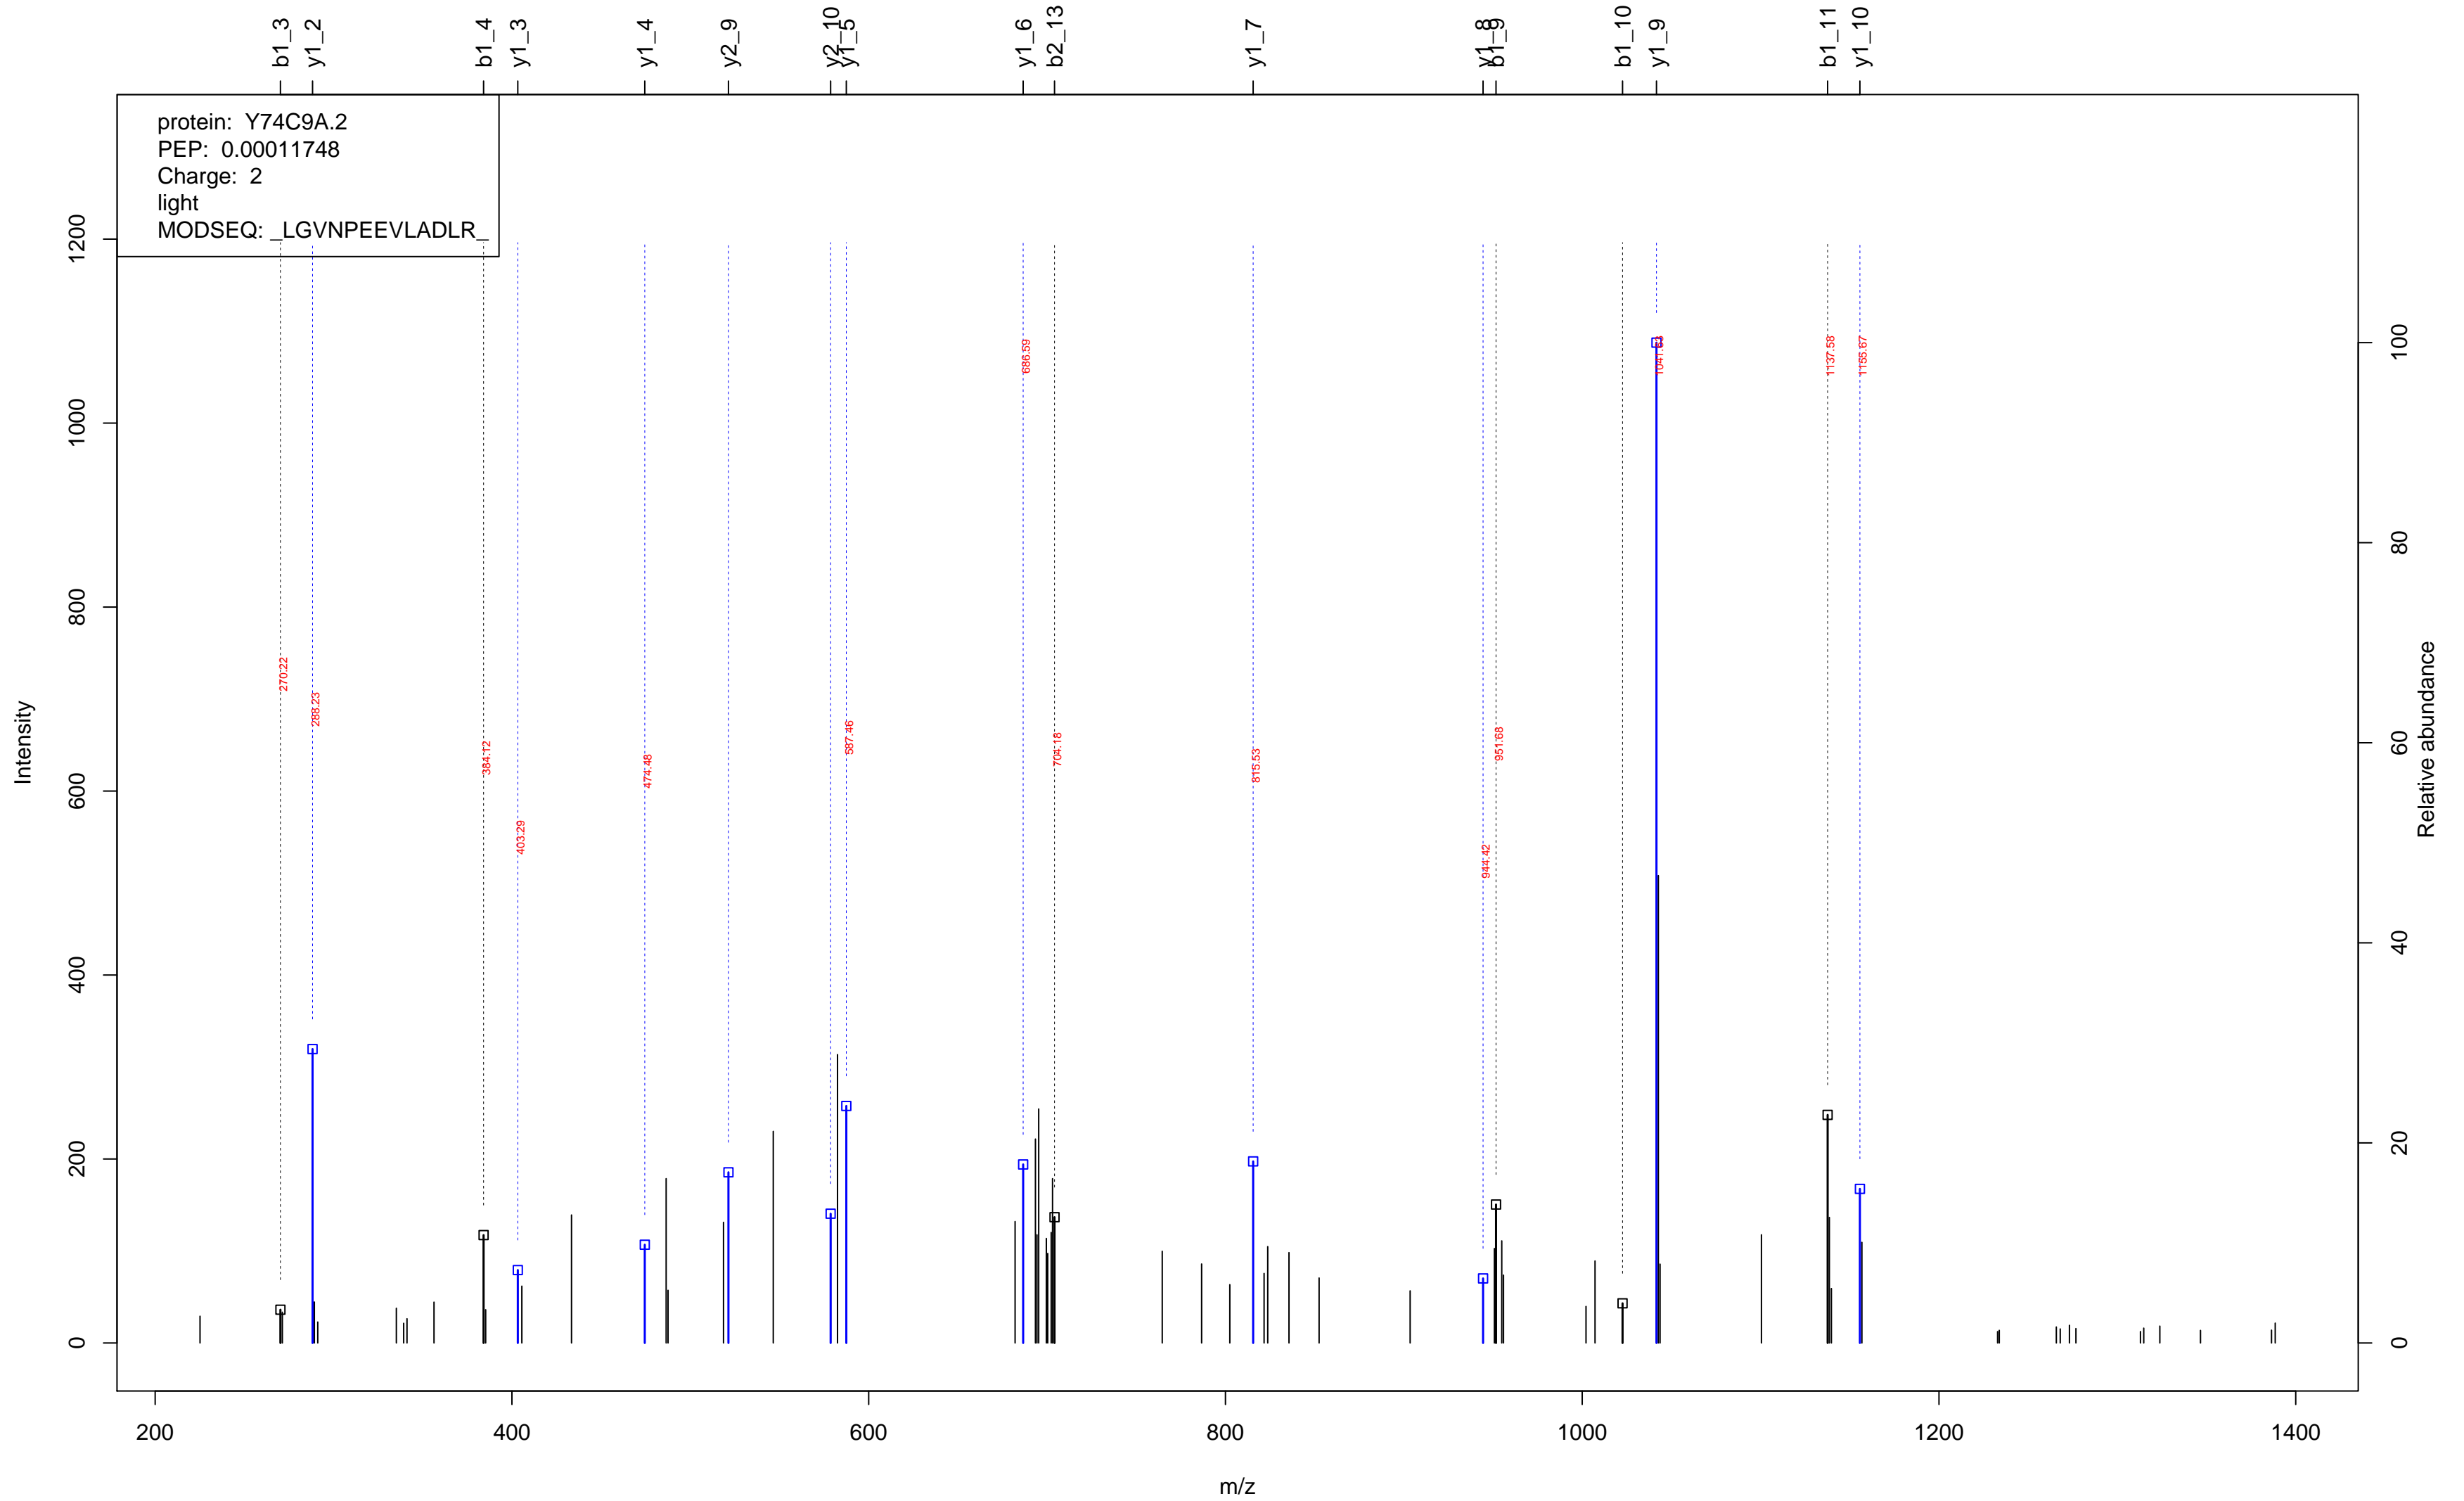

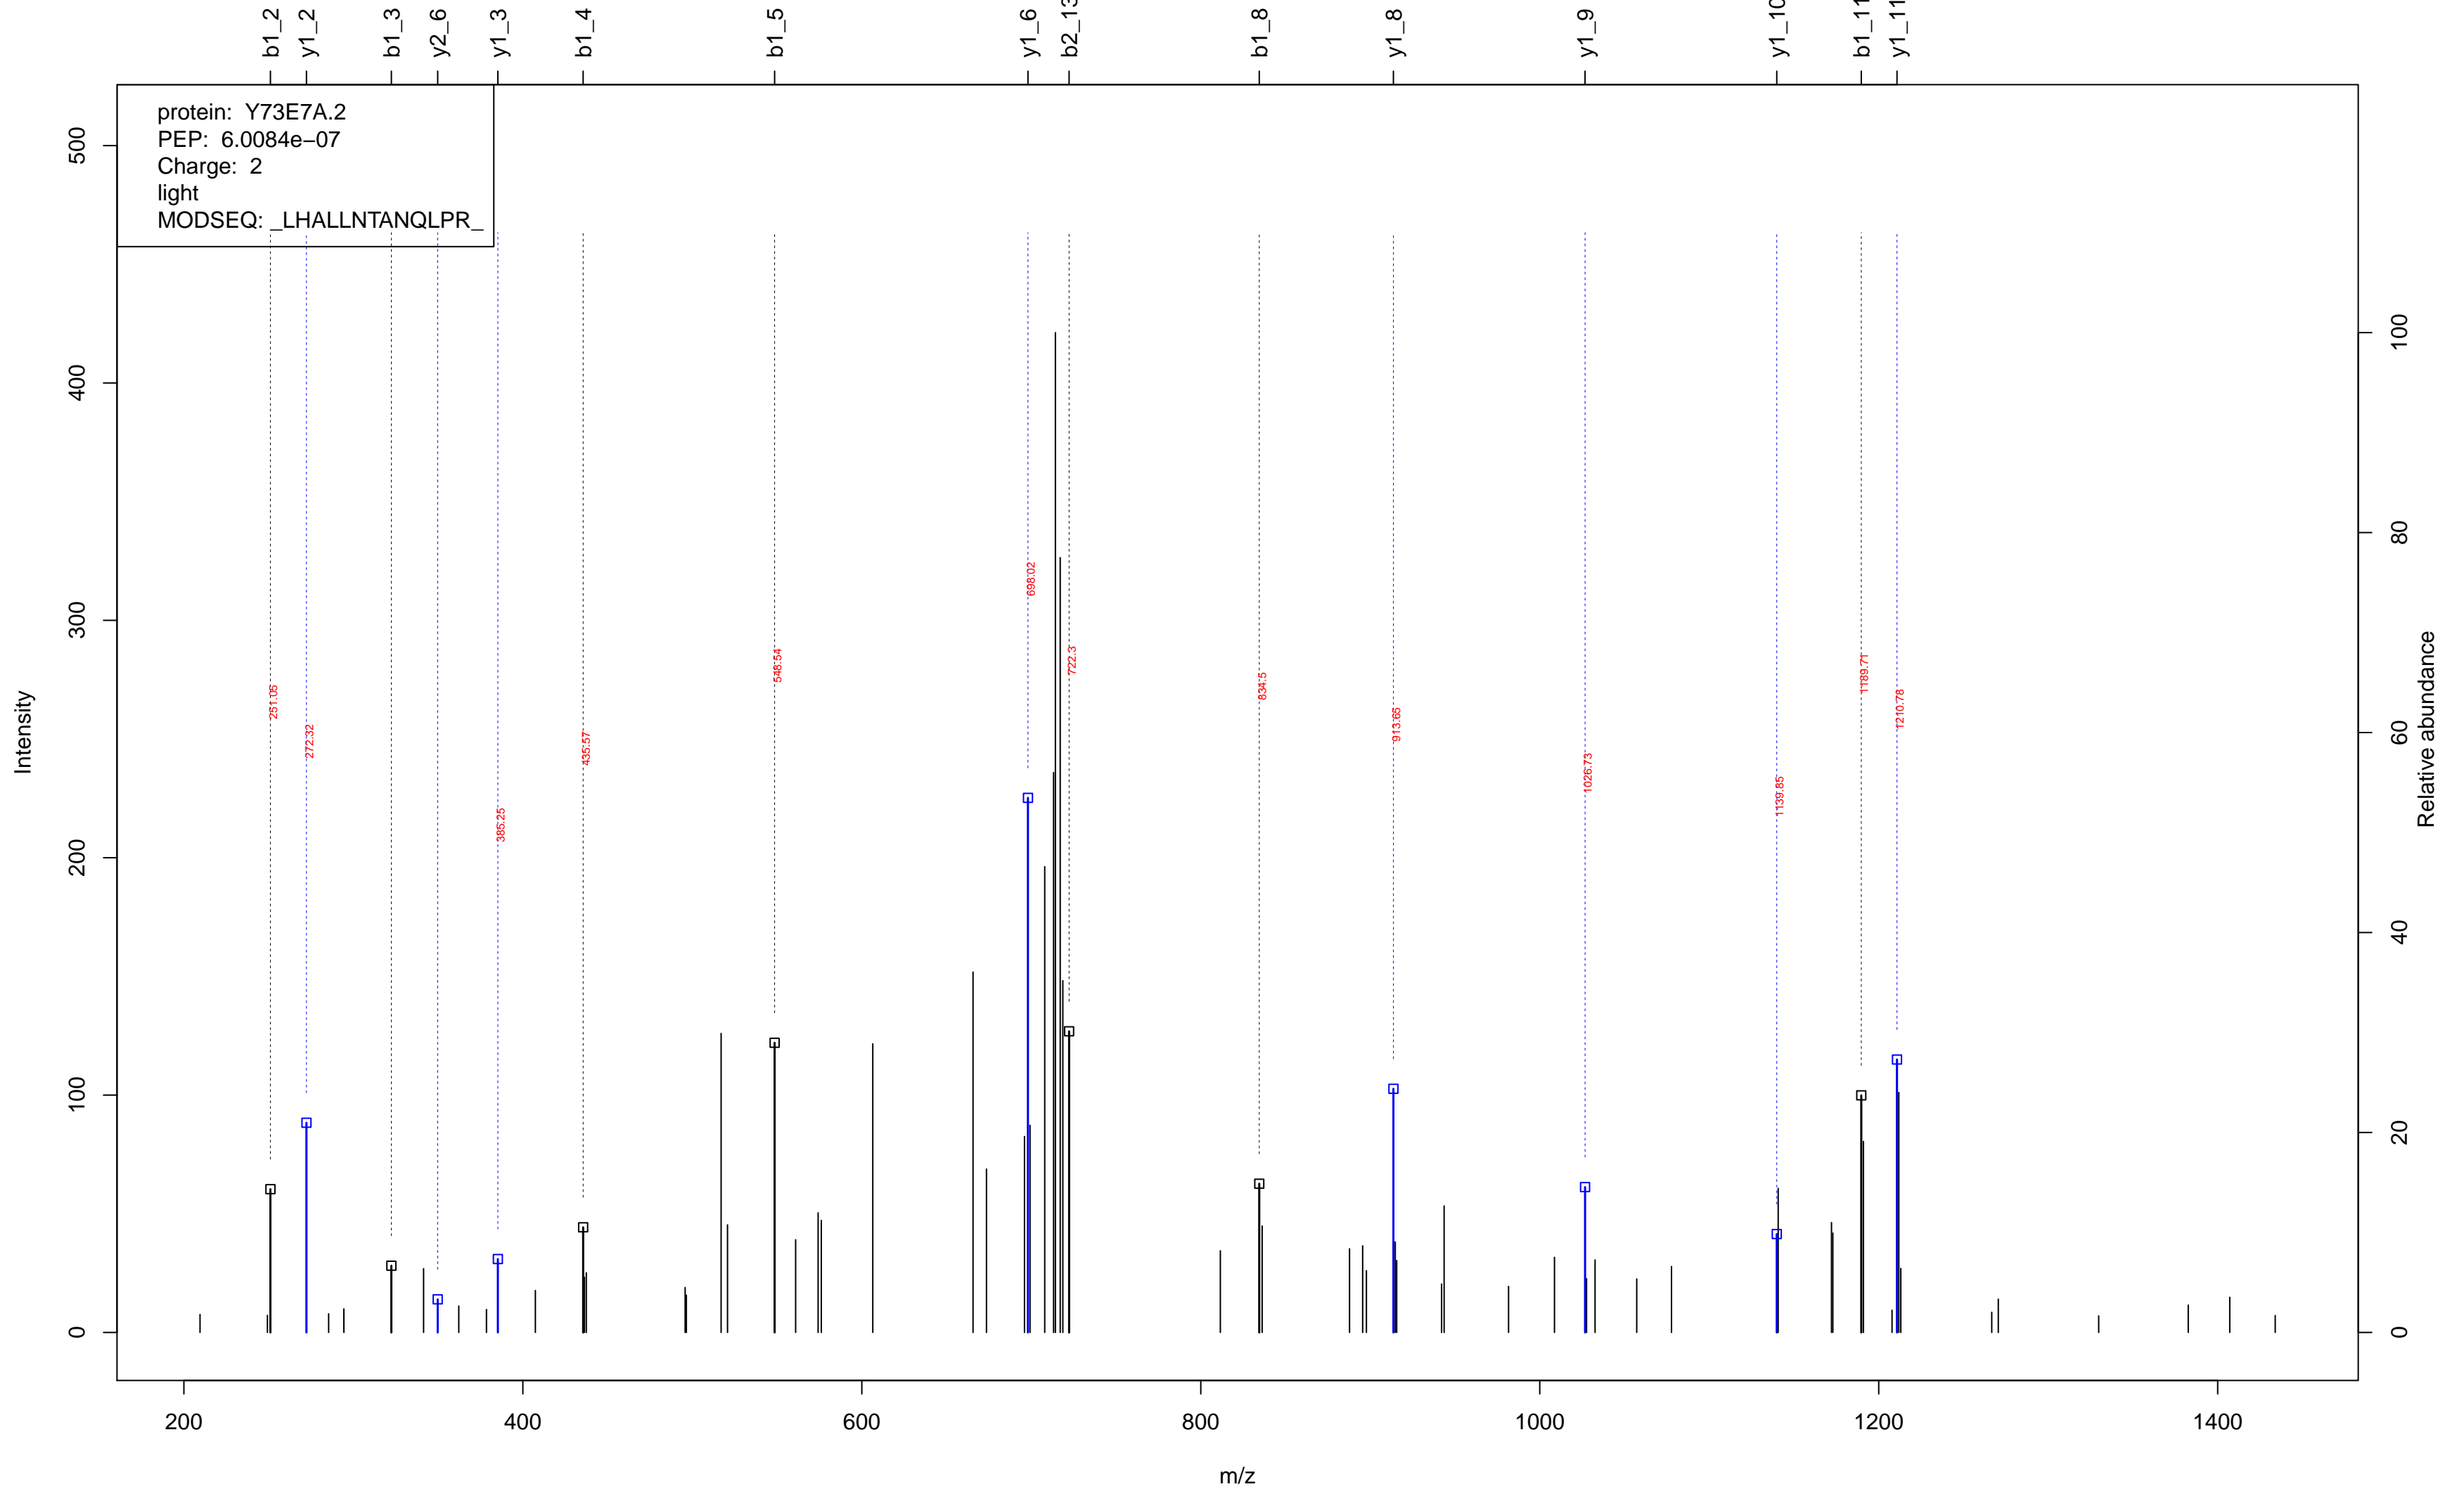

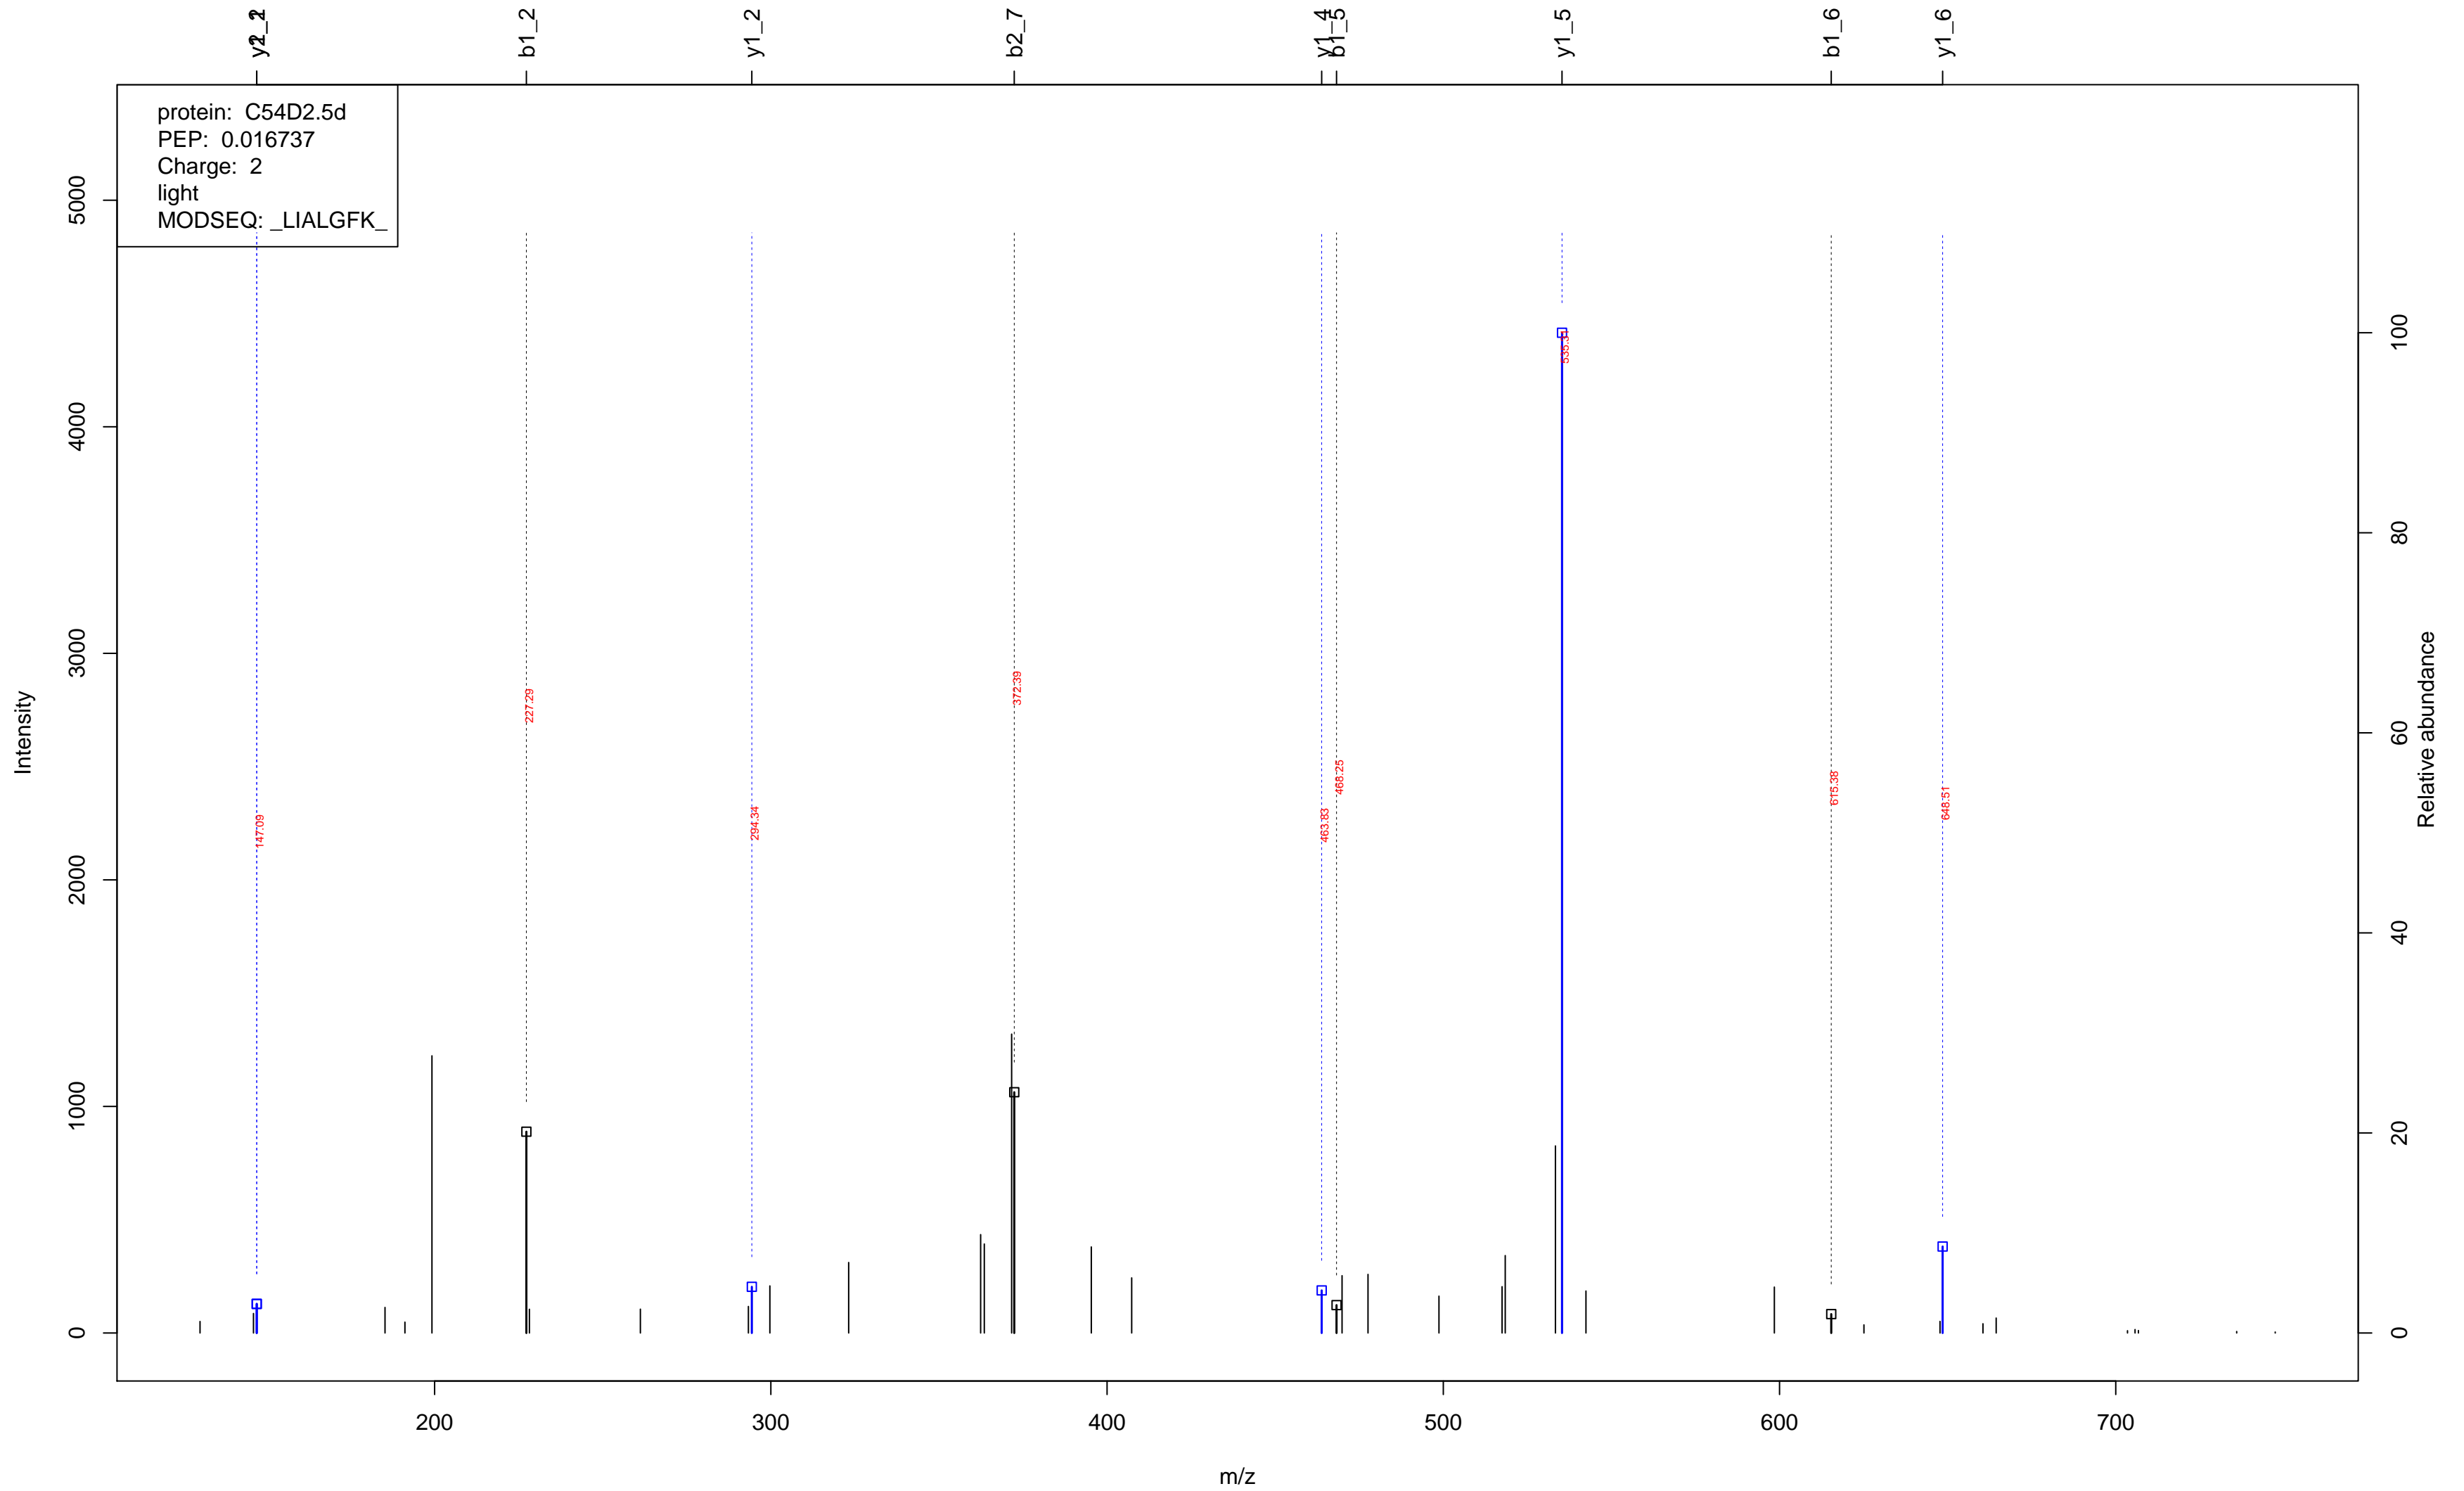

y1\_1 b1\_2 y1\_2 b1\_3 y2\_8 b1\_4 y1\_4 y2\_8 y1\_6 y1\_7 y1\_8 b1\_9

protein: F20D6.11  
PEP: 0.00092628  
Charge: 2  
light  
MODSEQ: \_LIATGGNVR\_

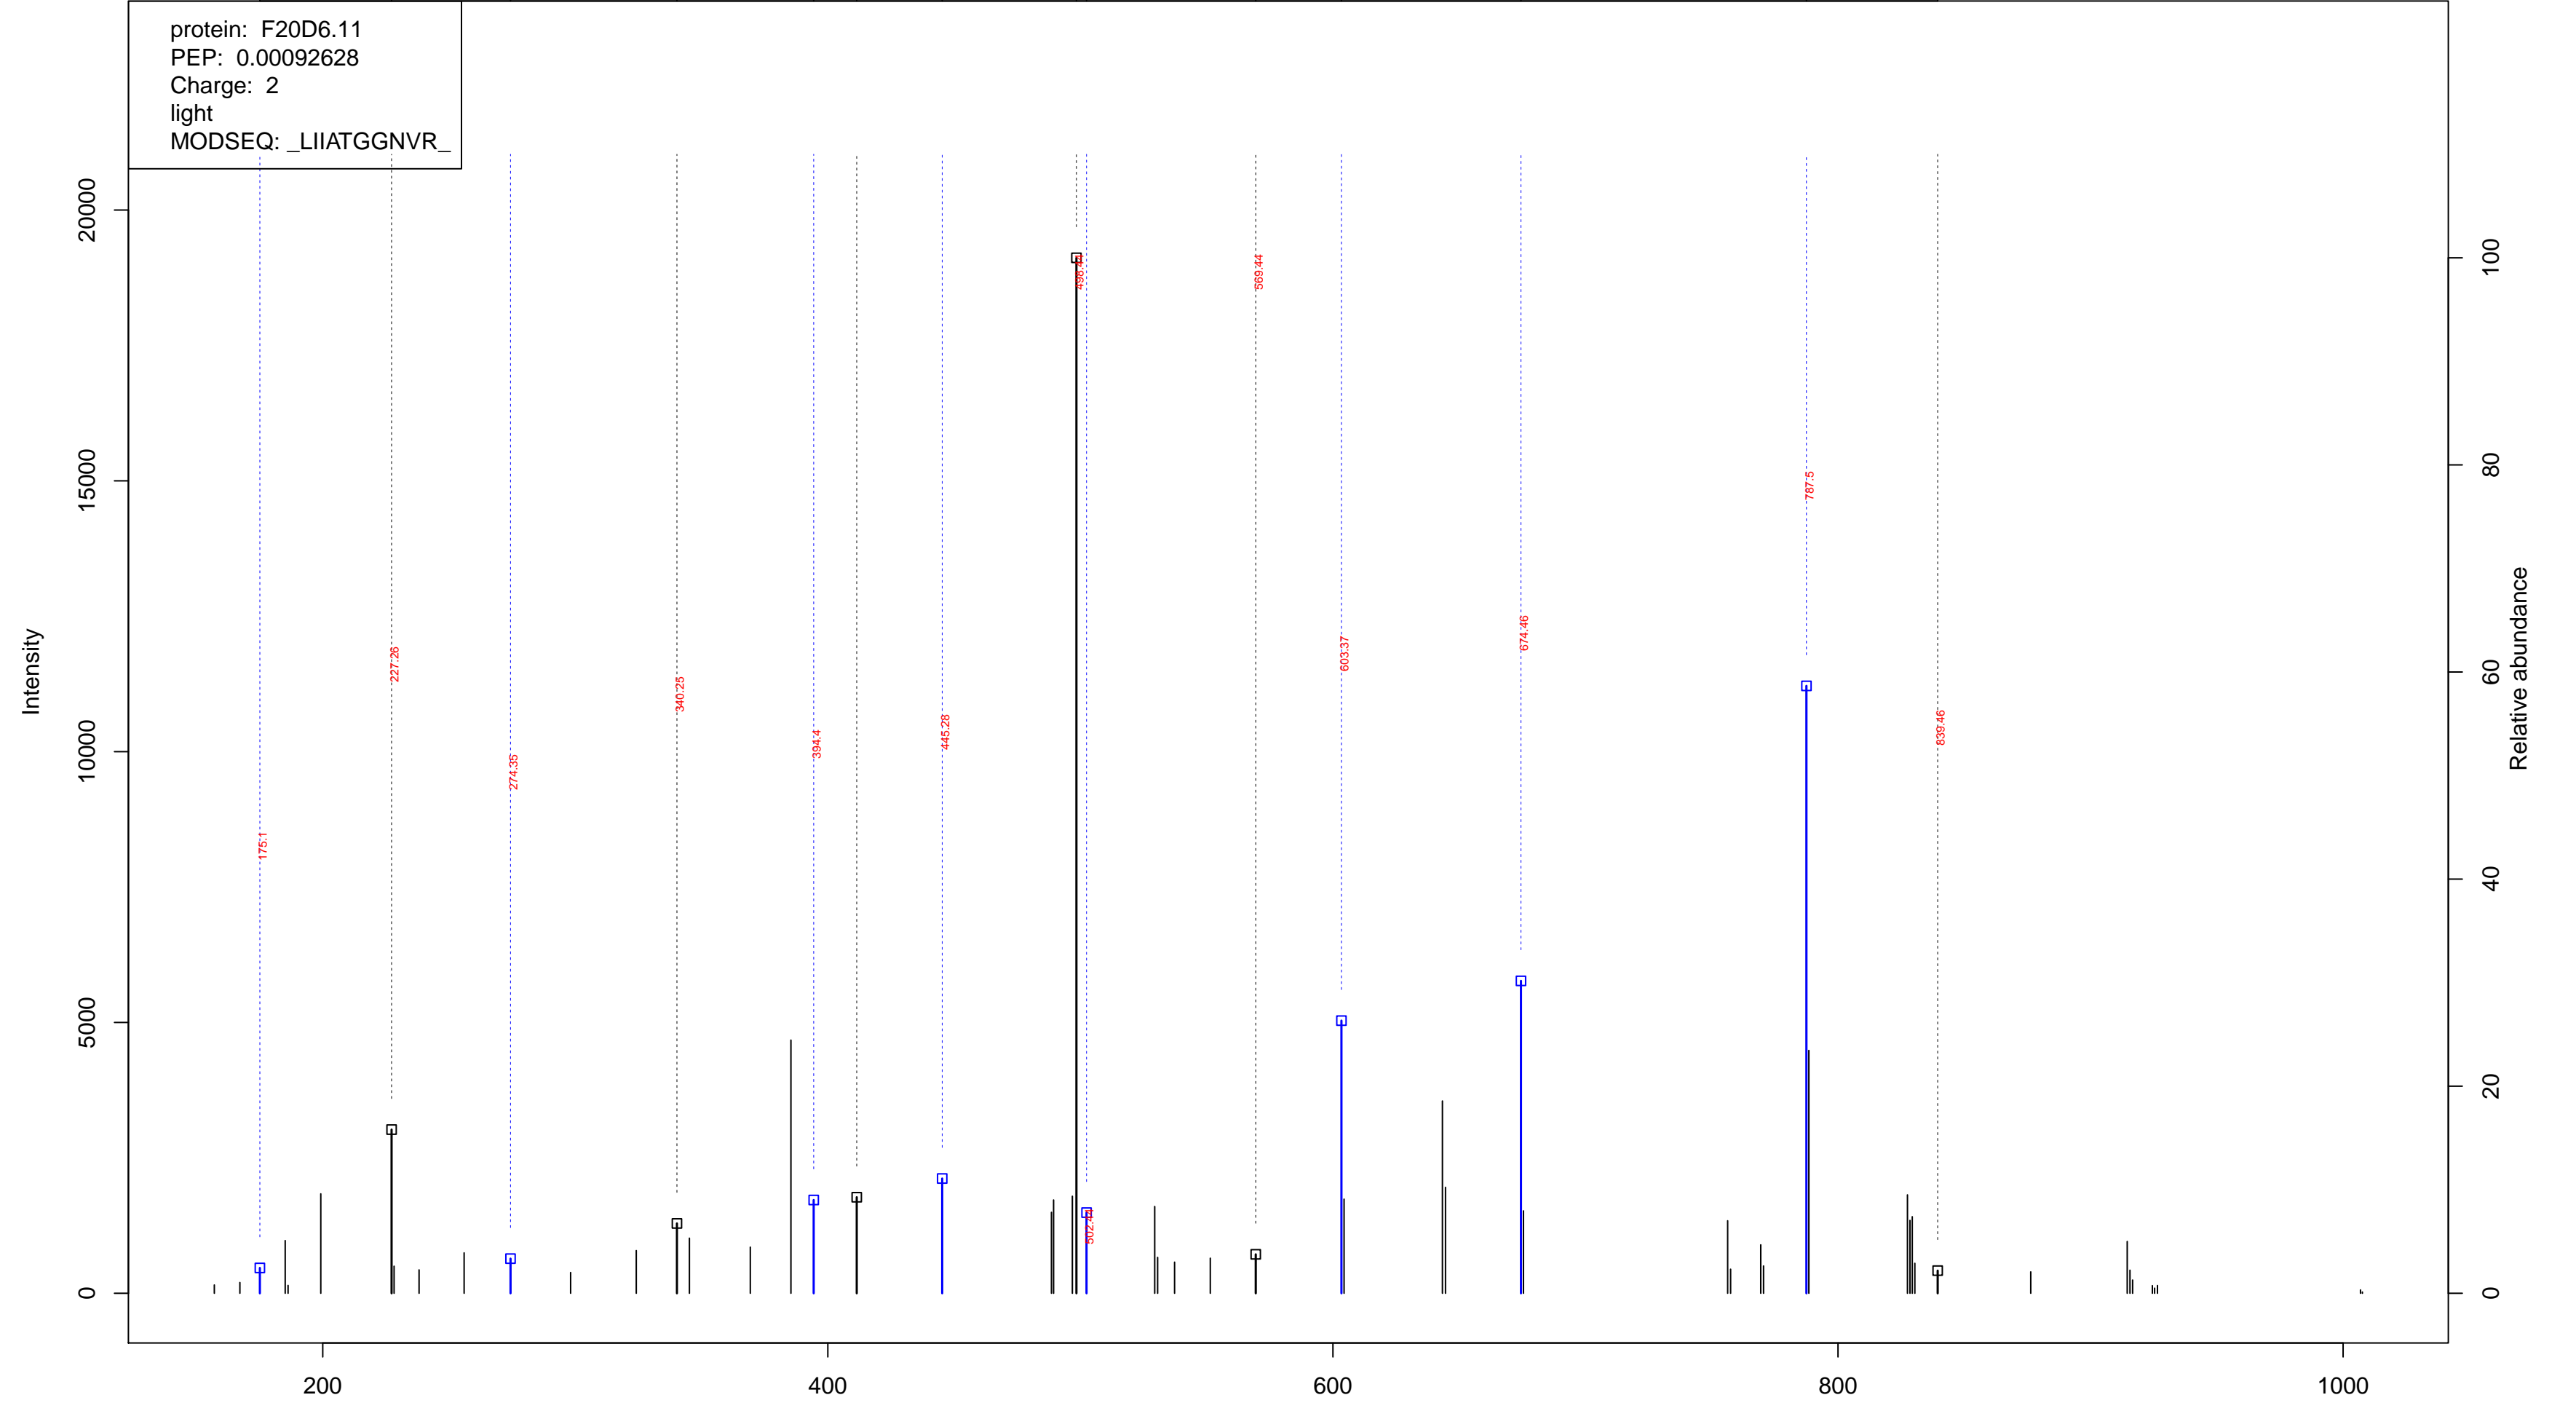

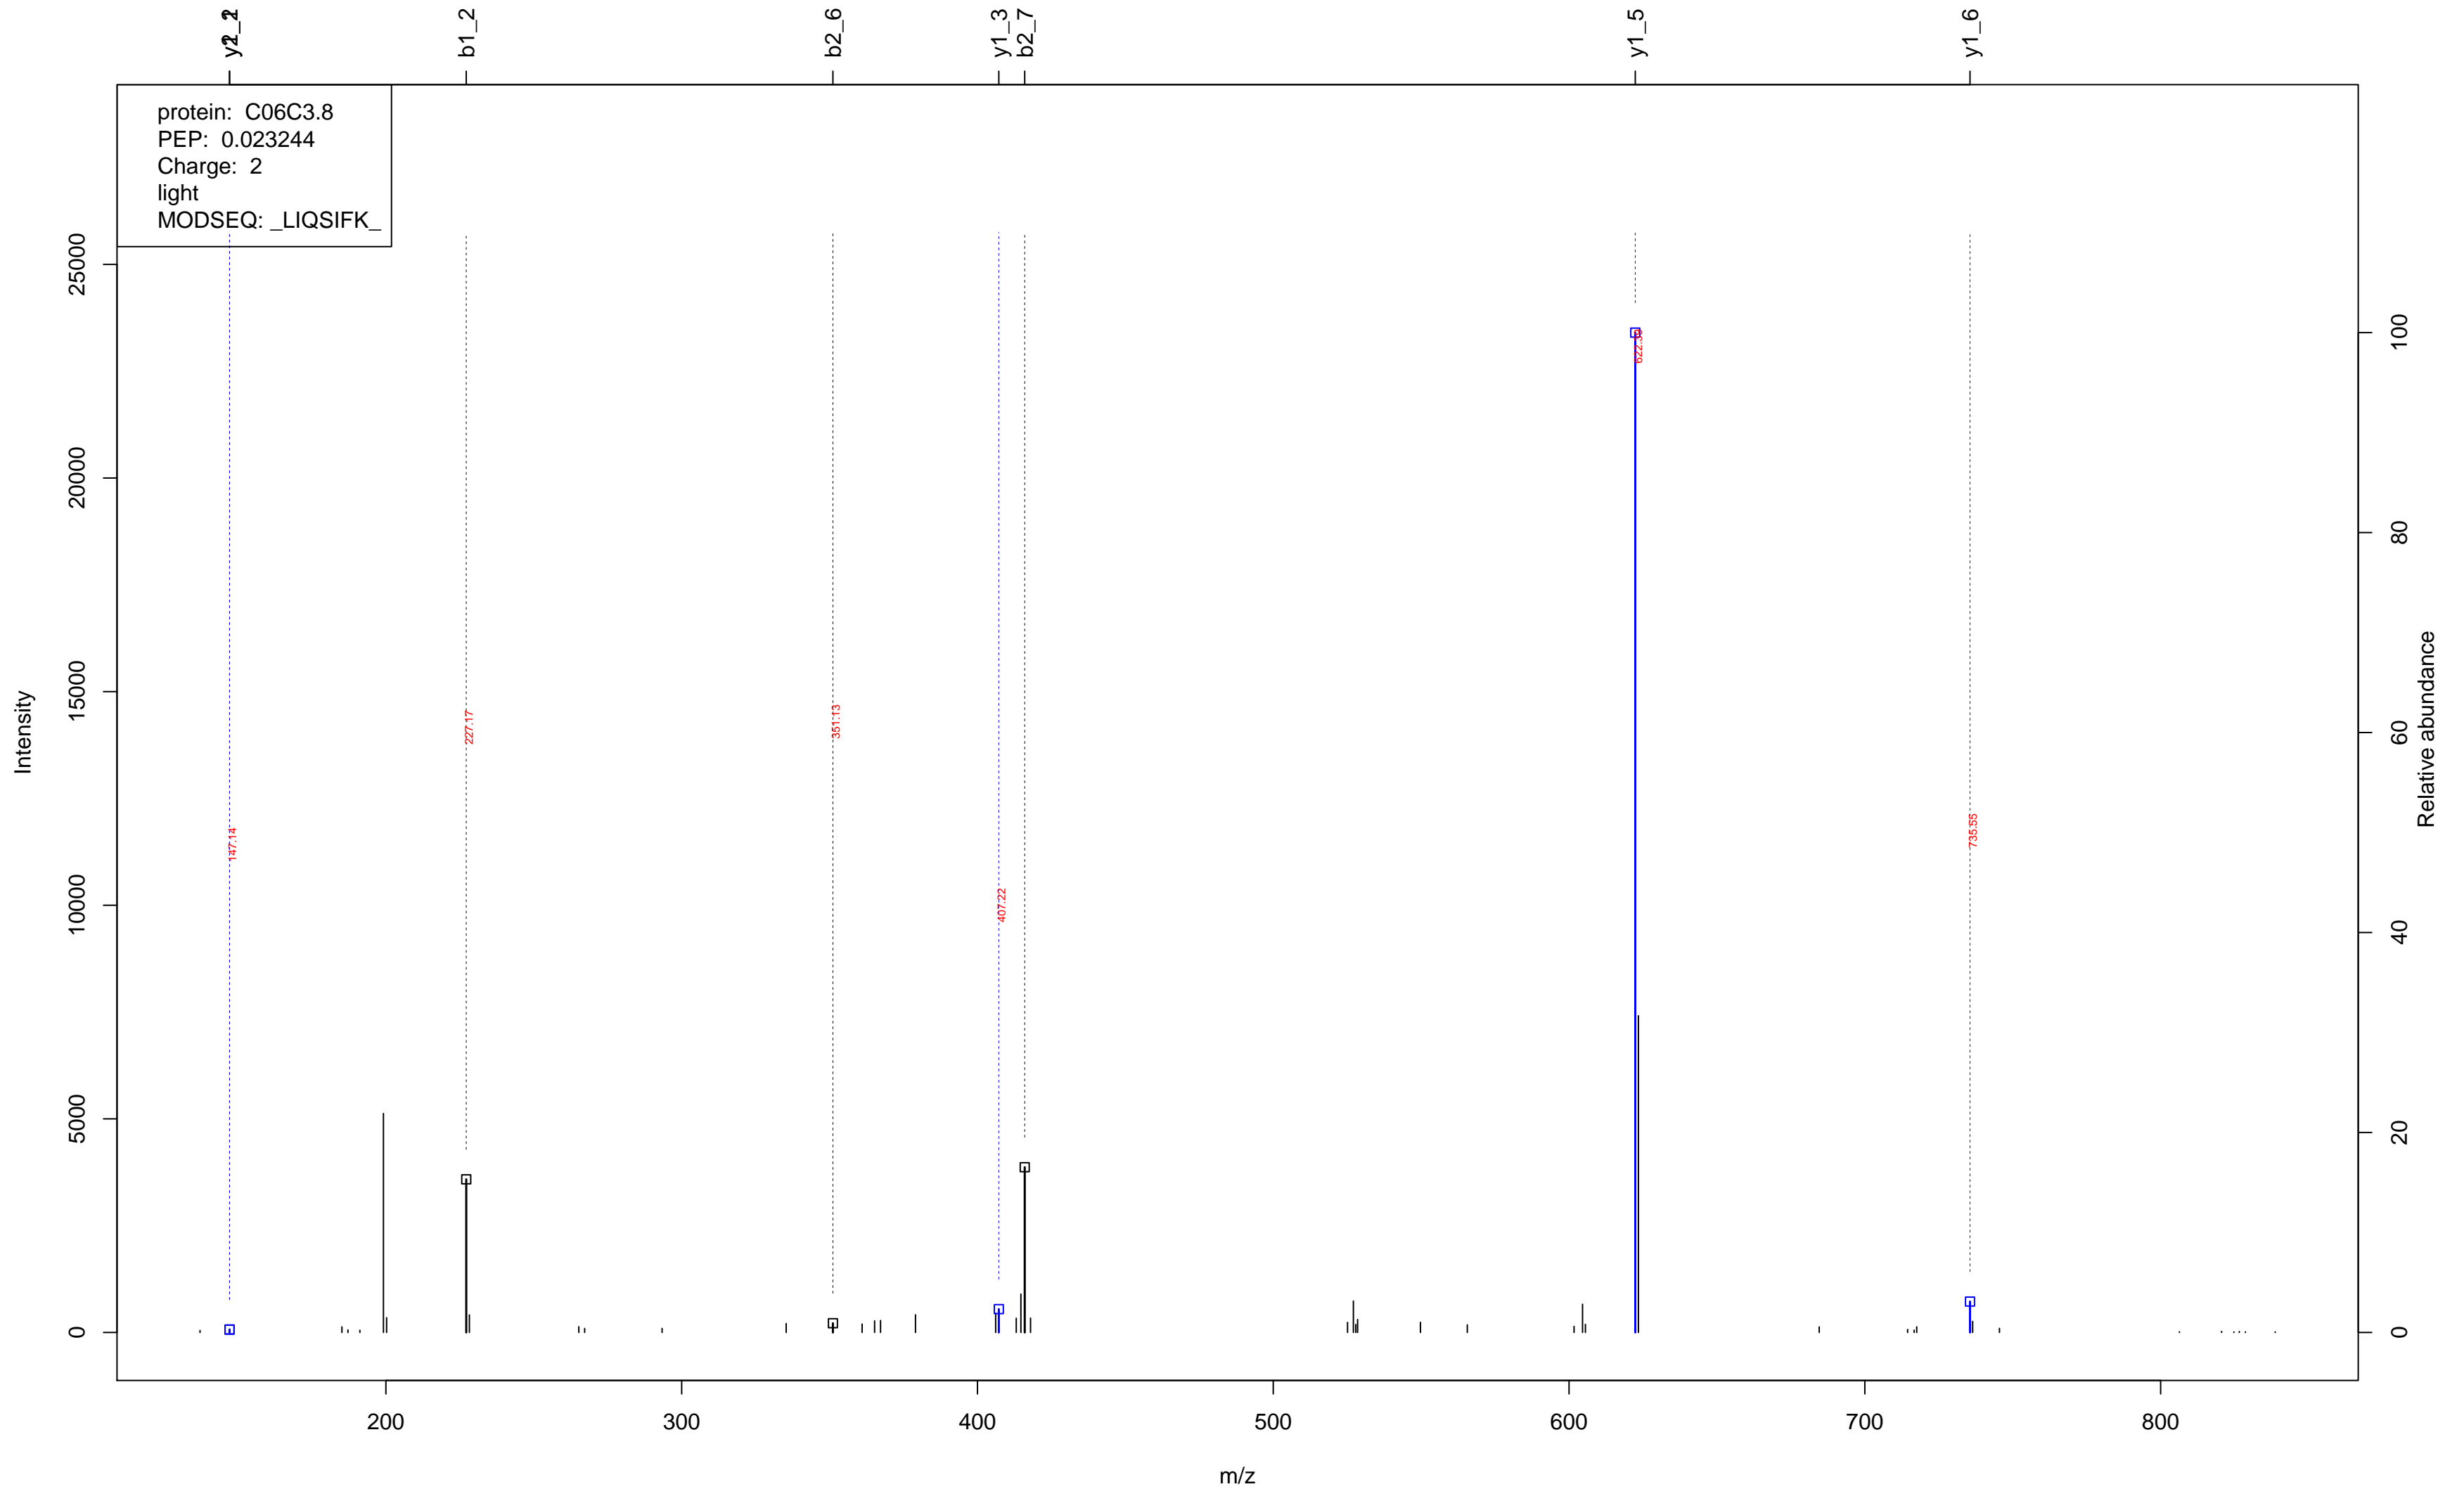

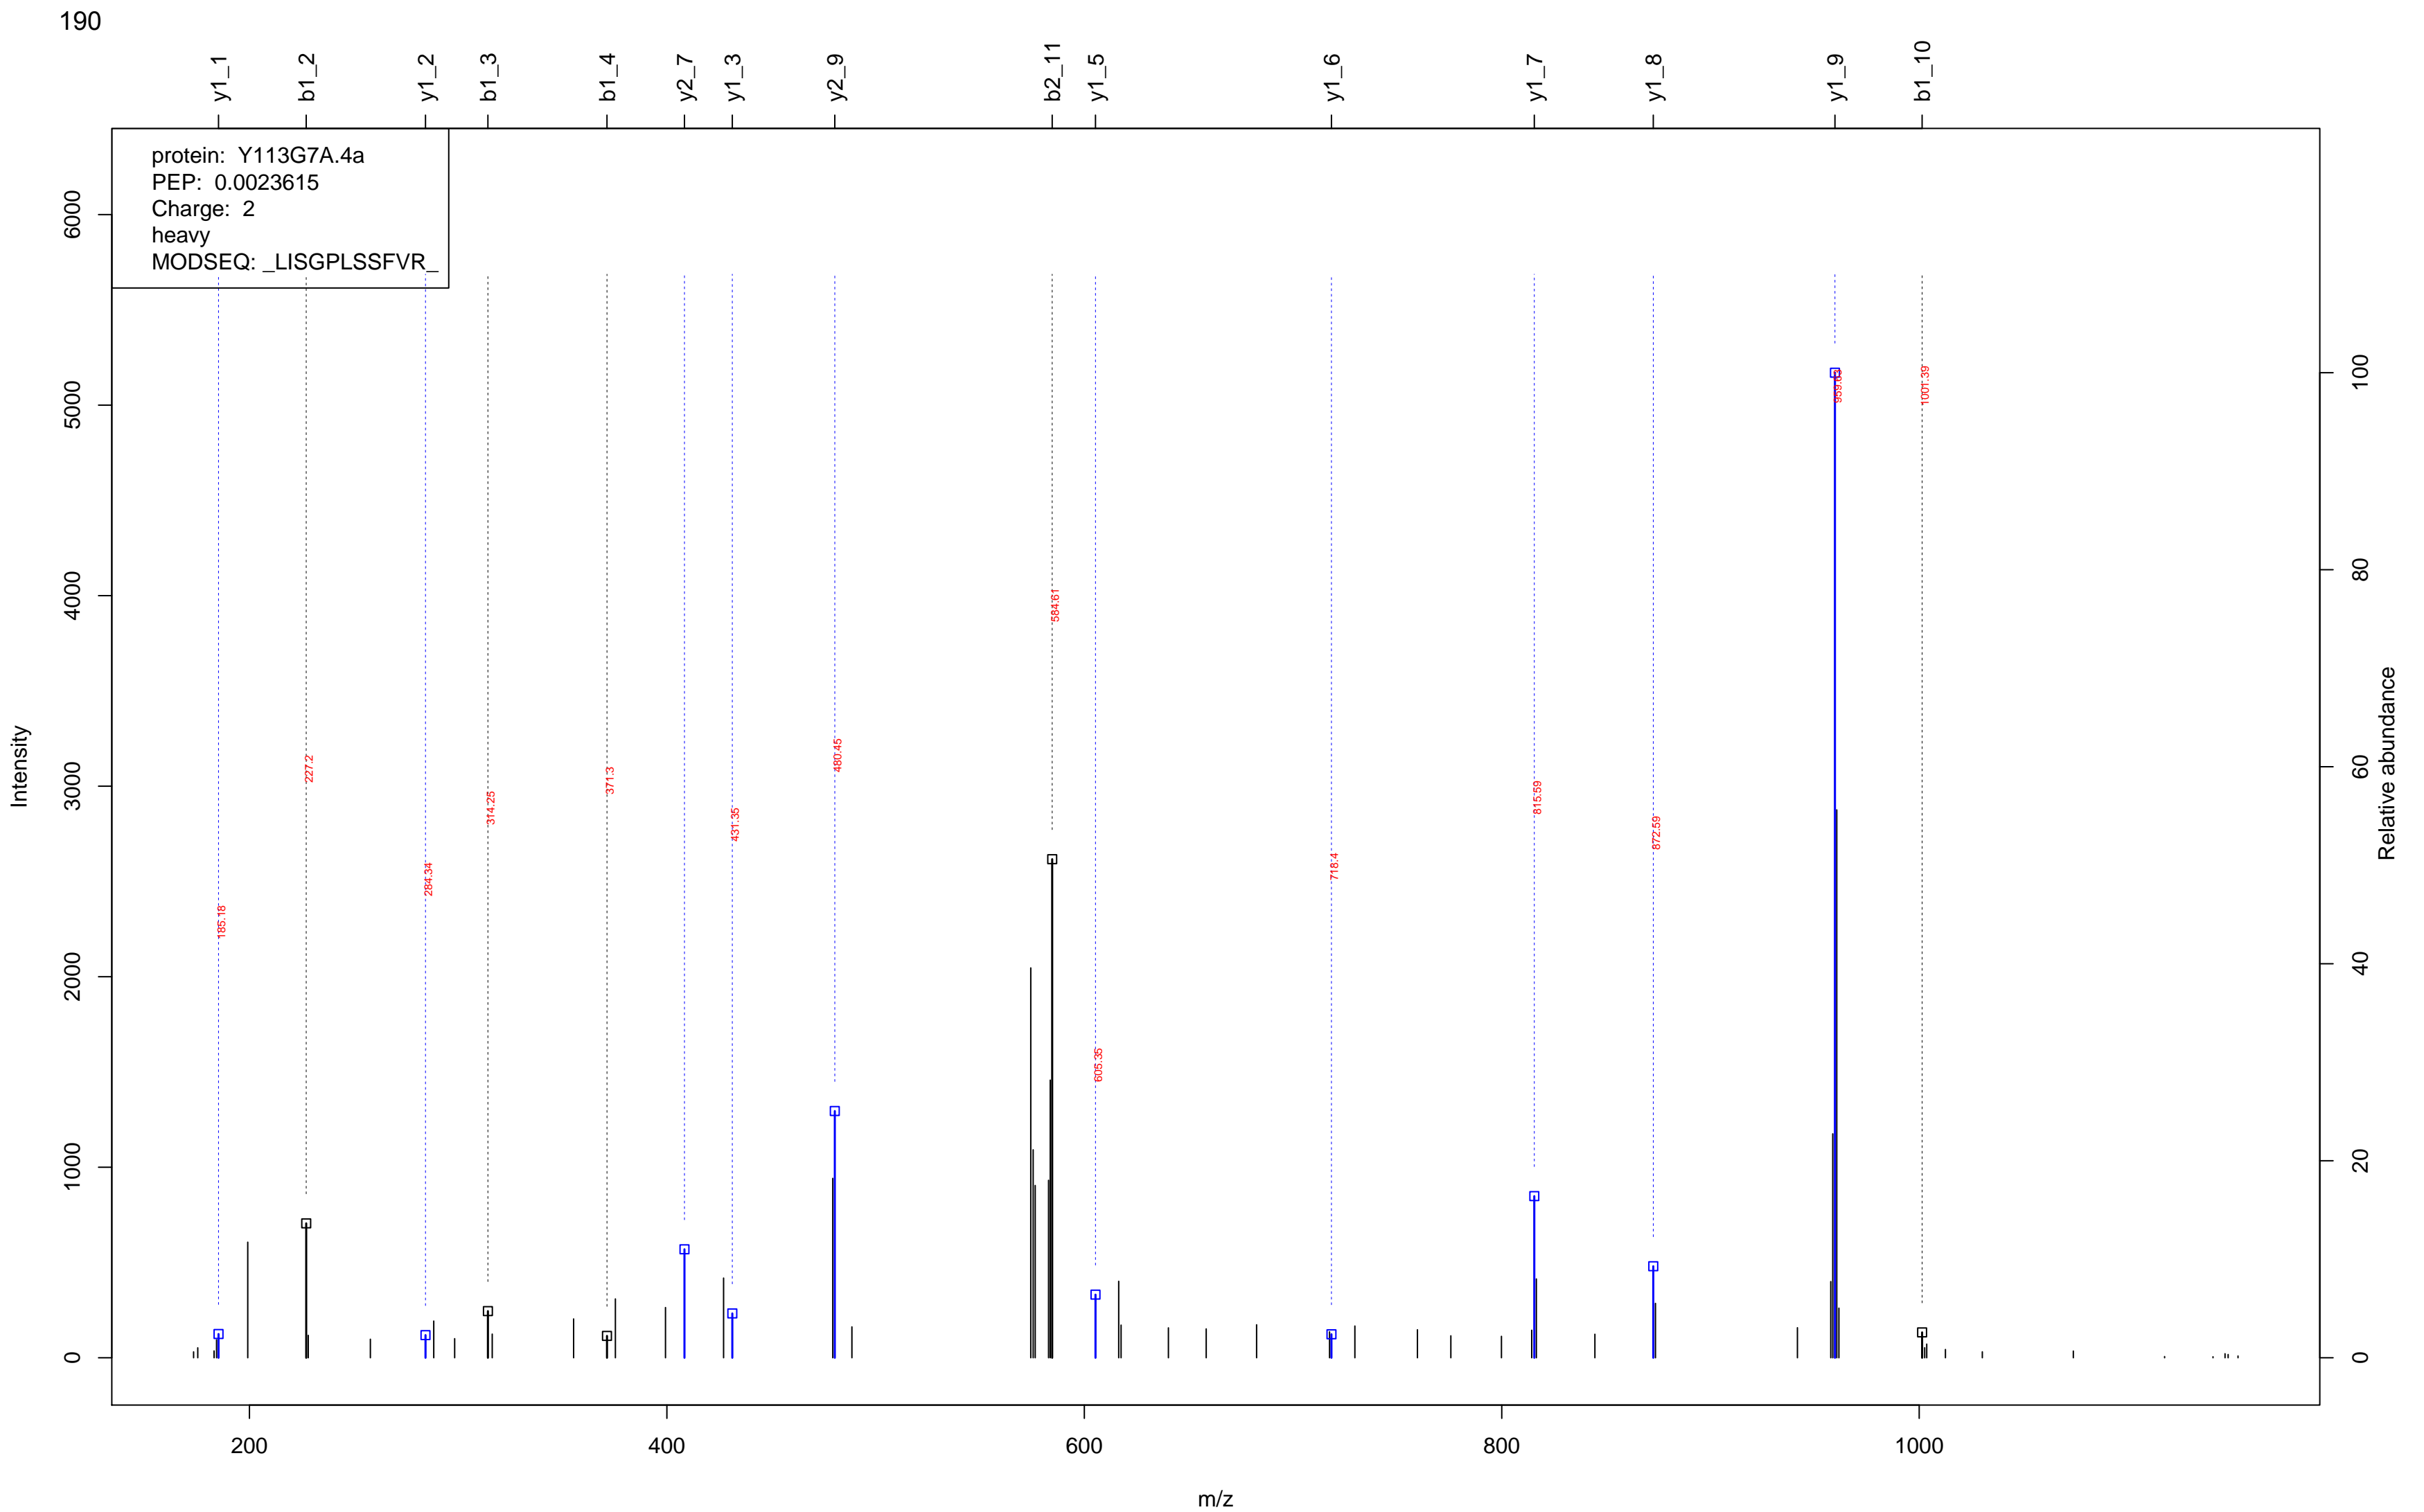

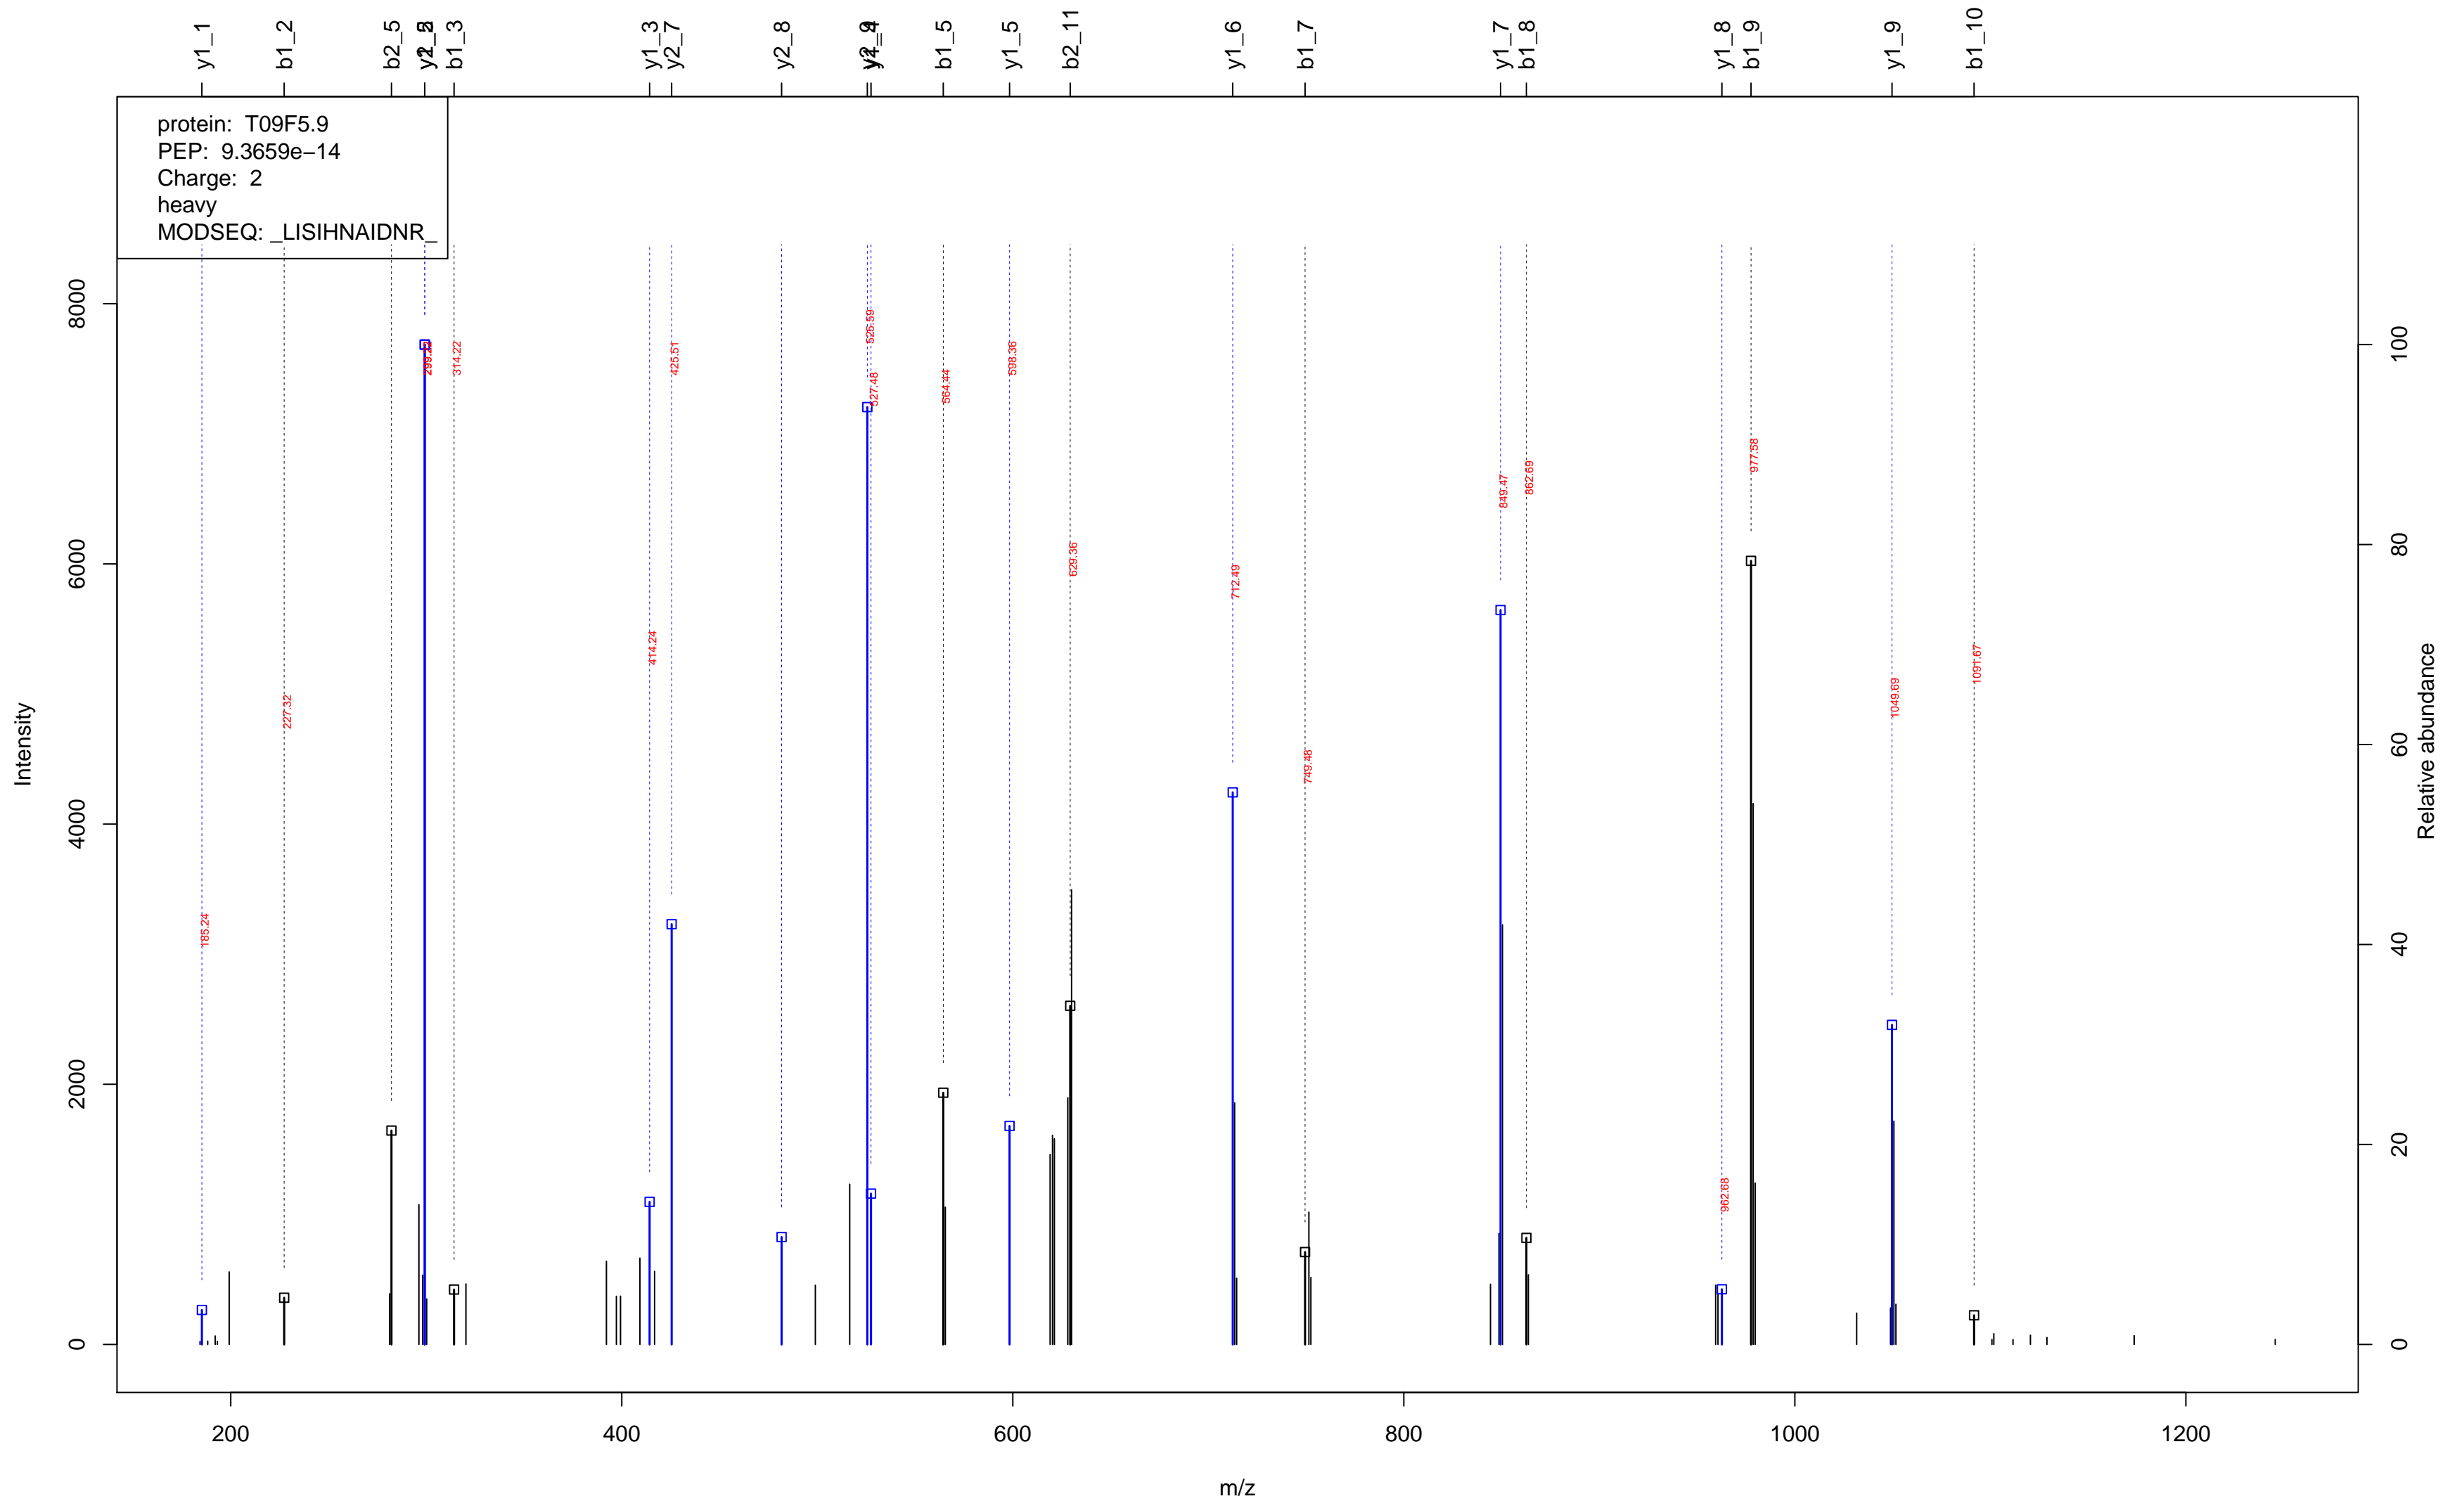

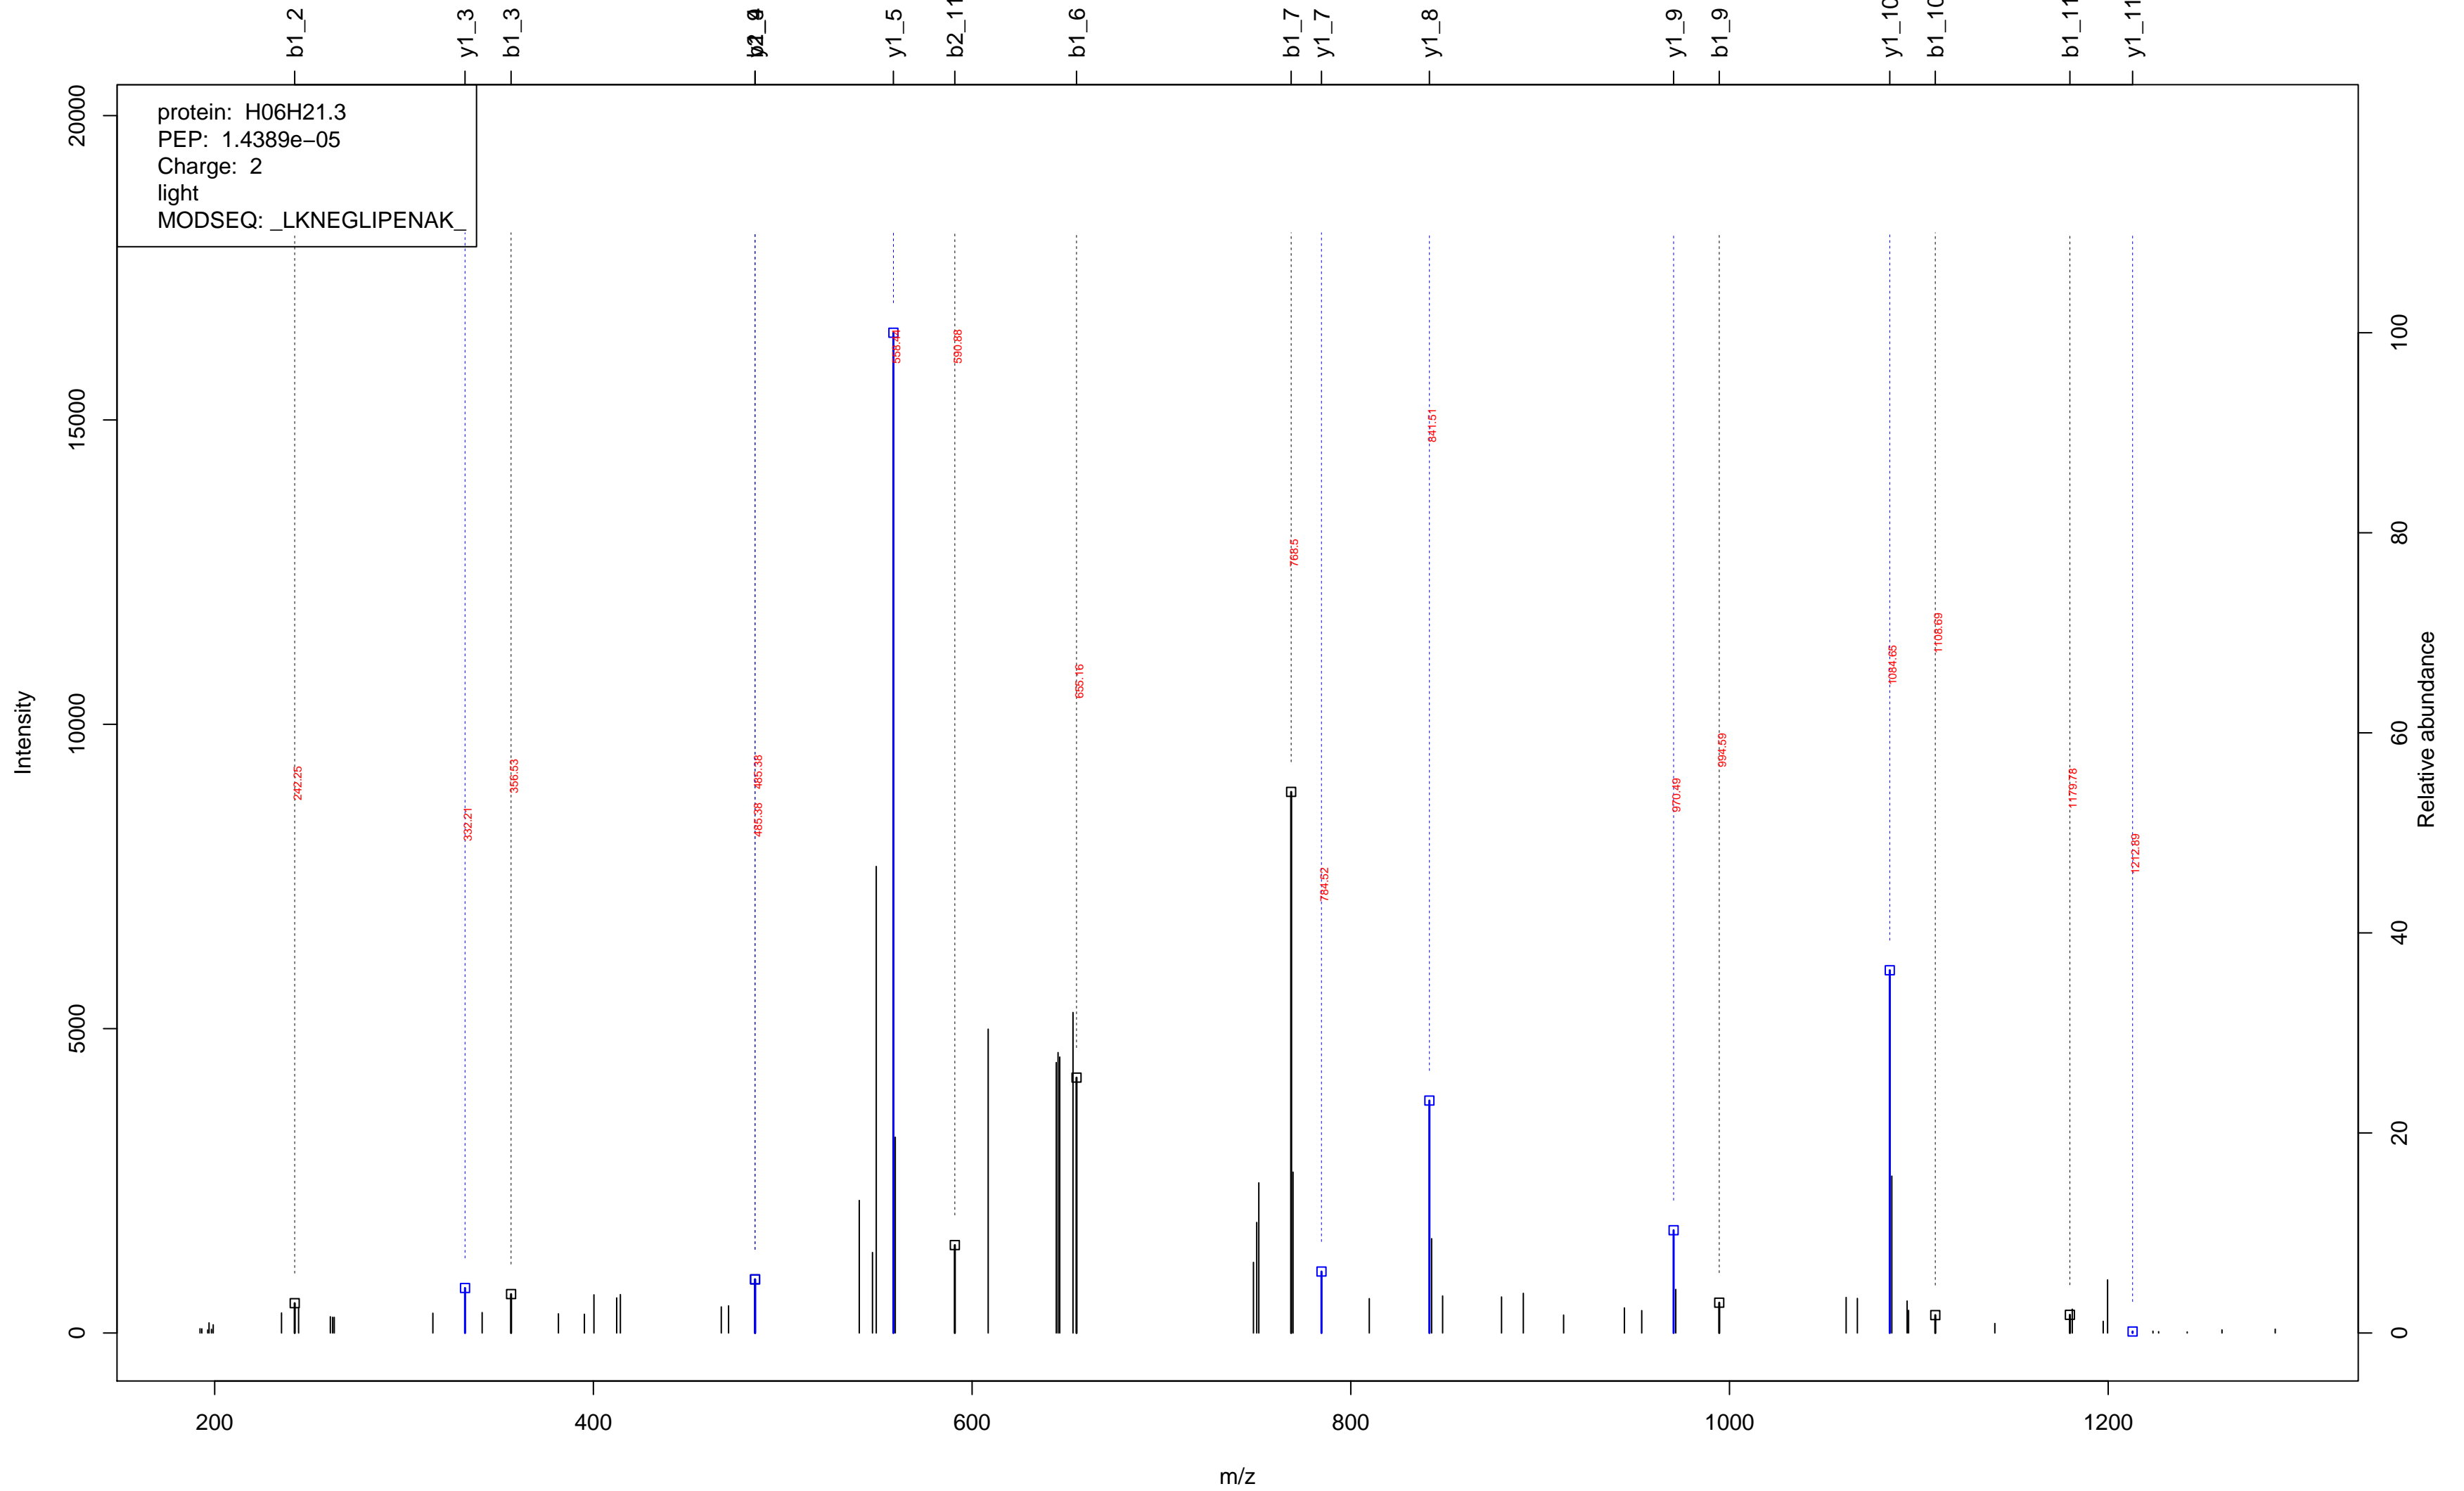



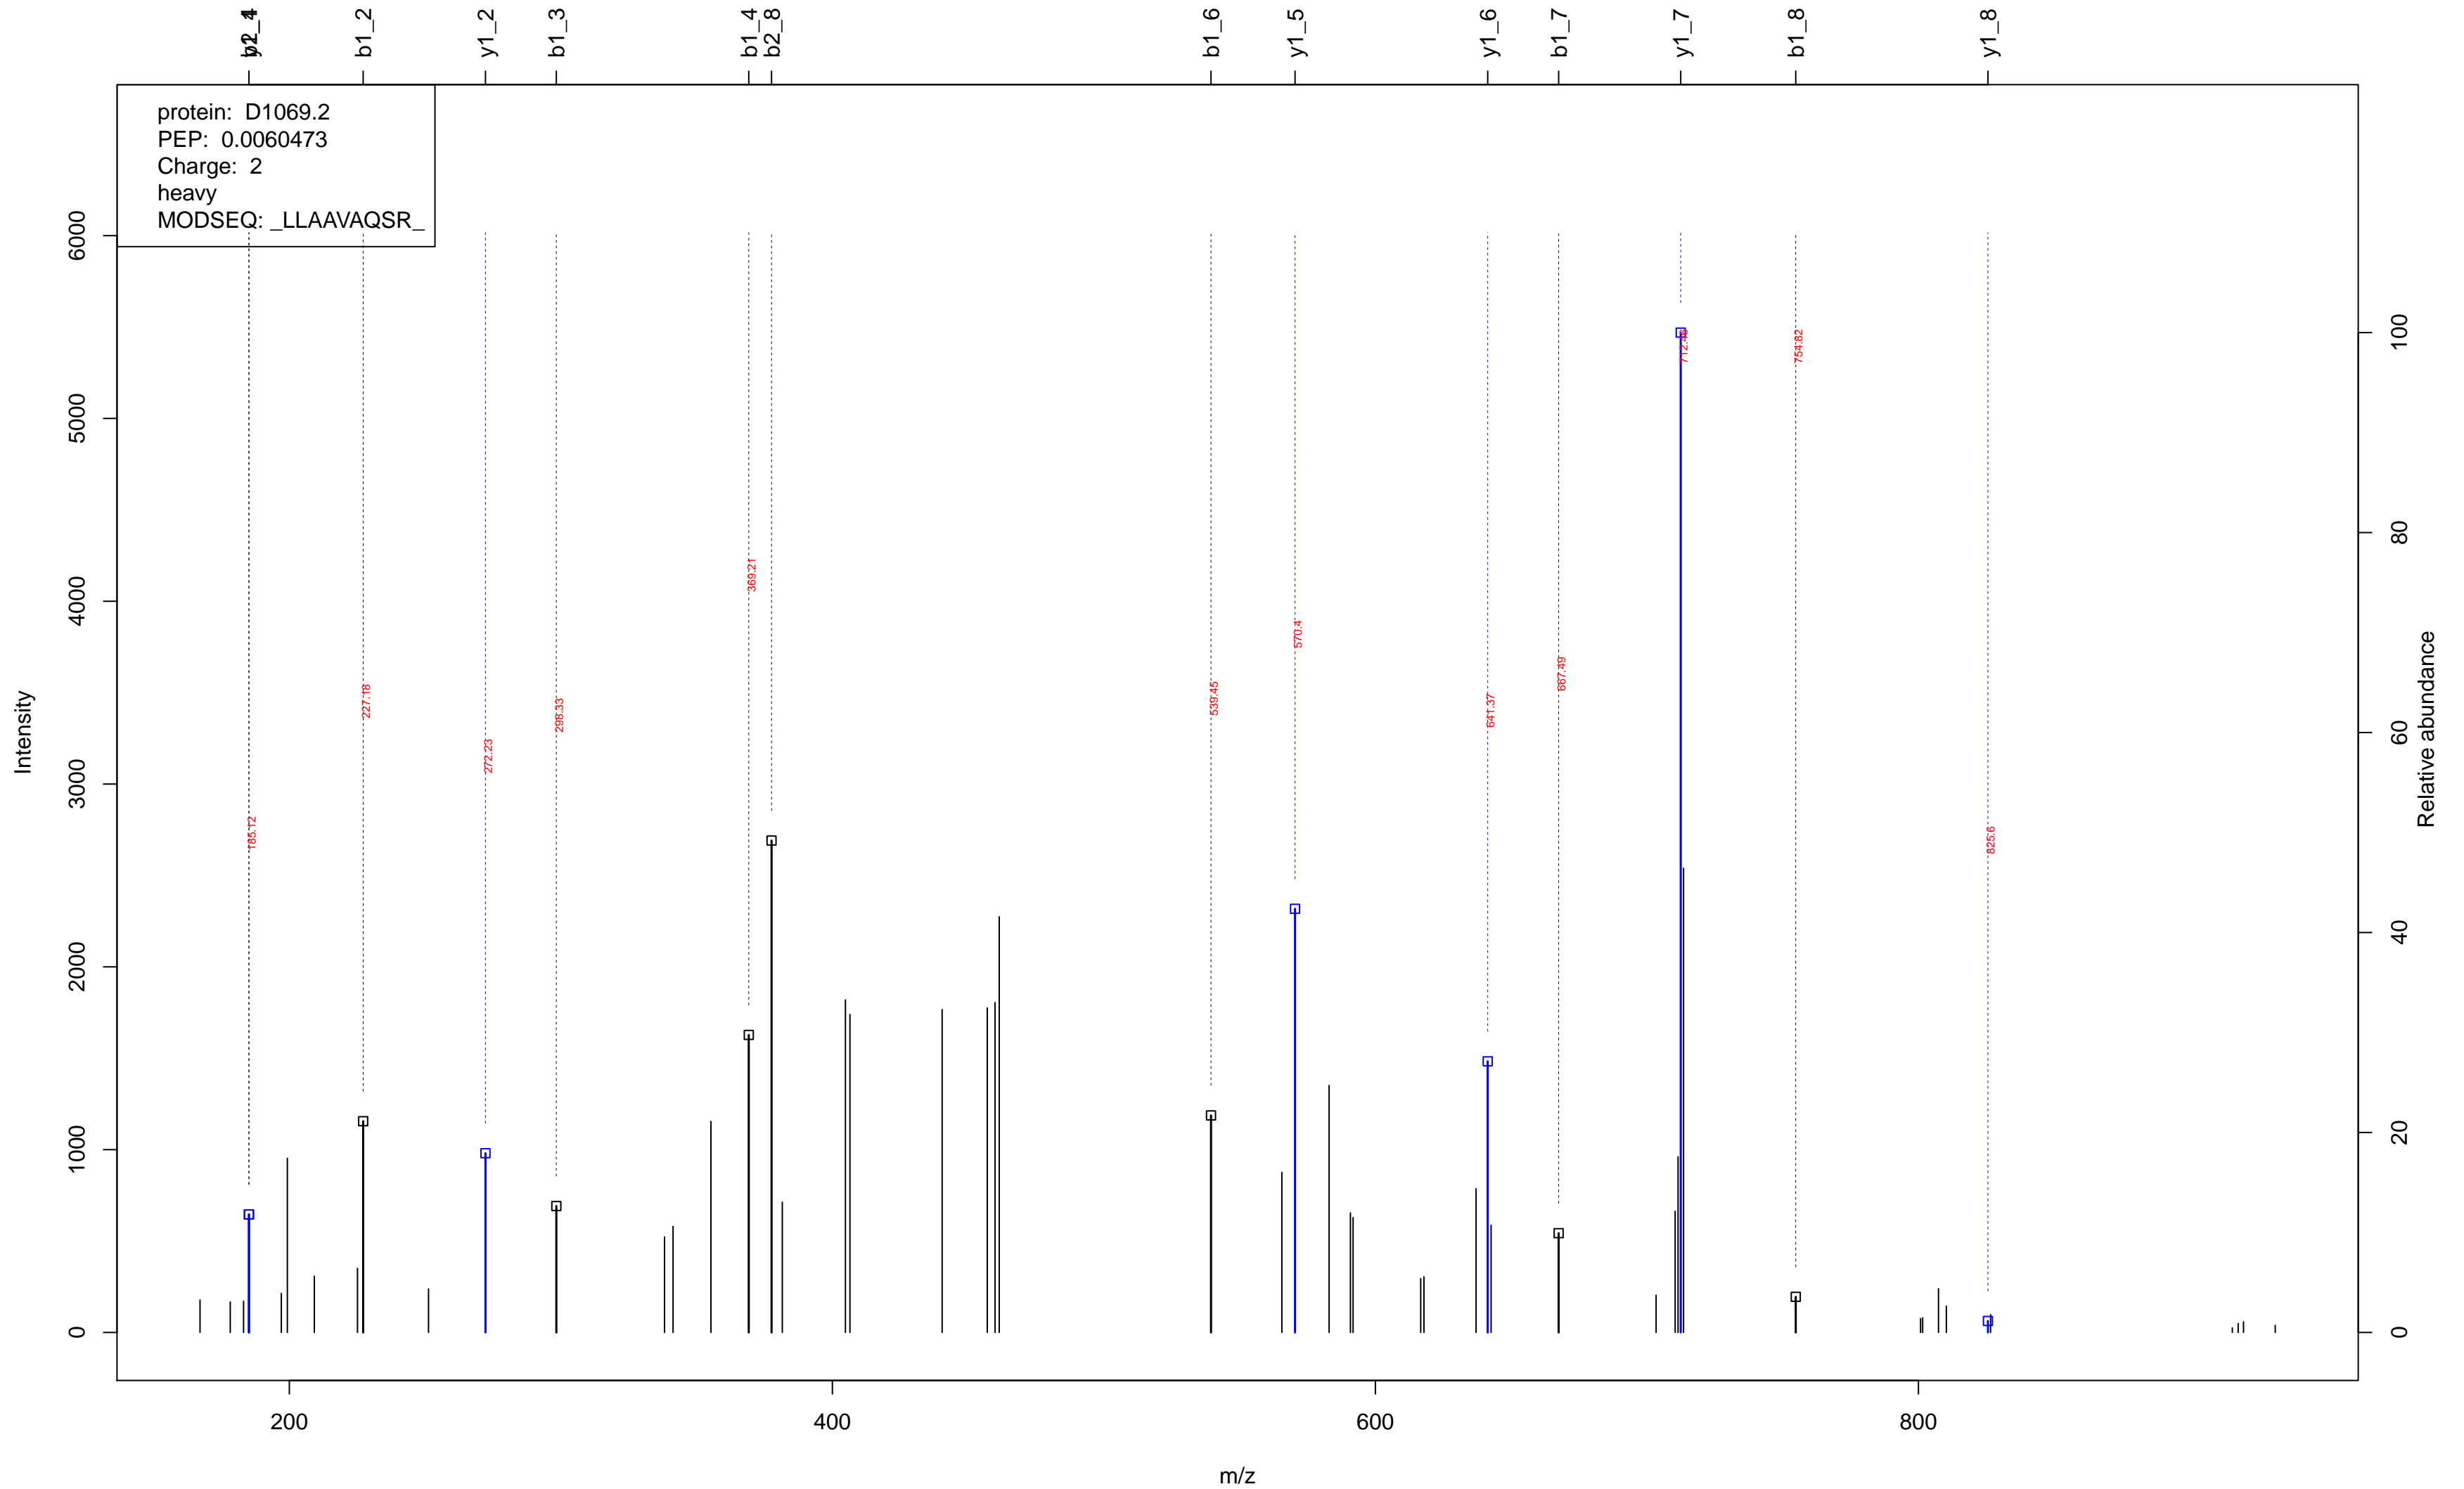

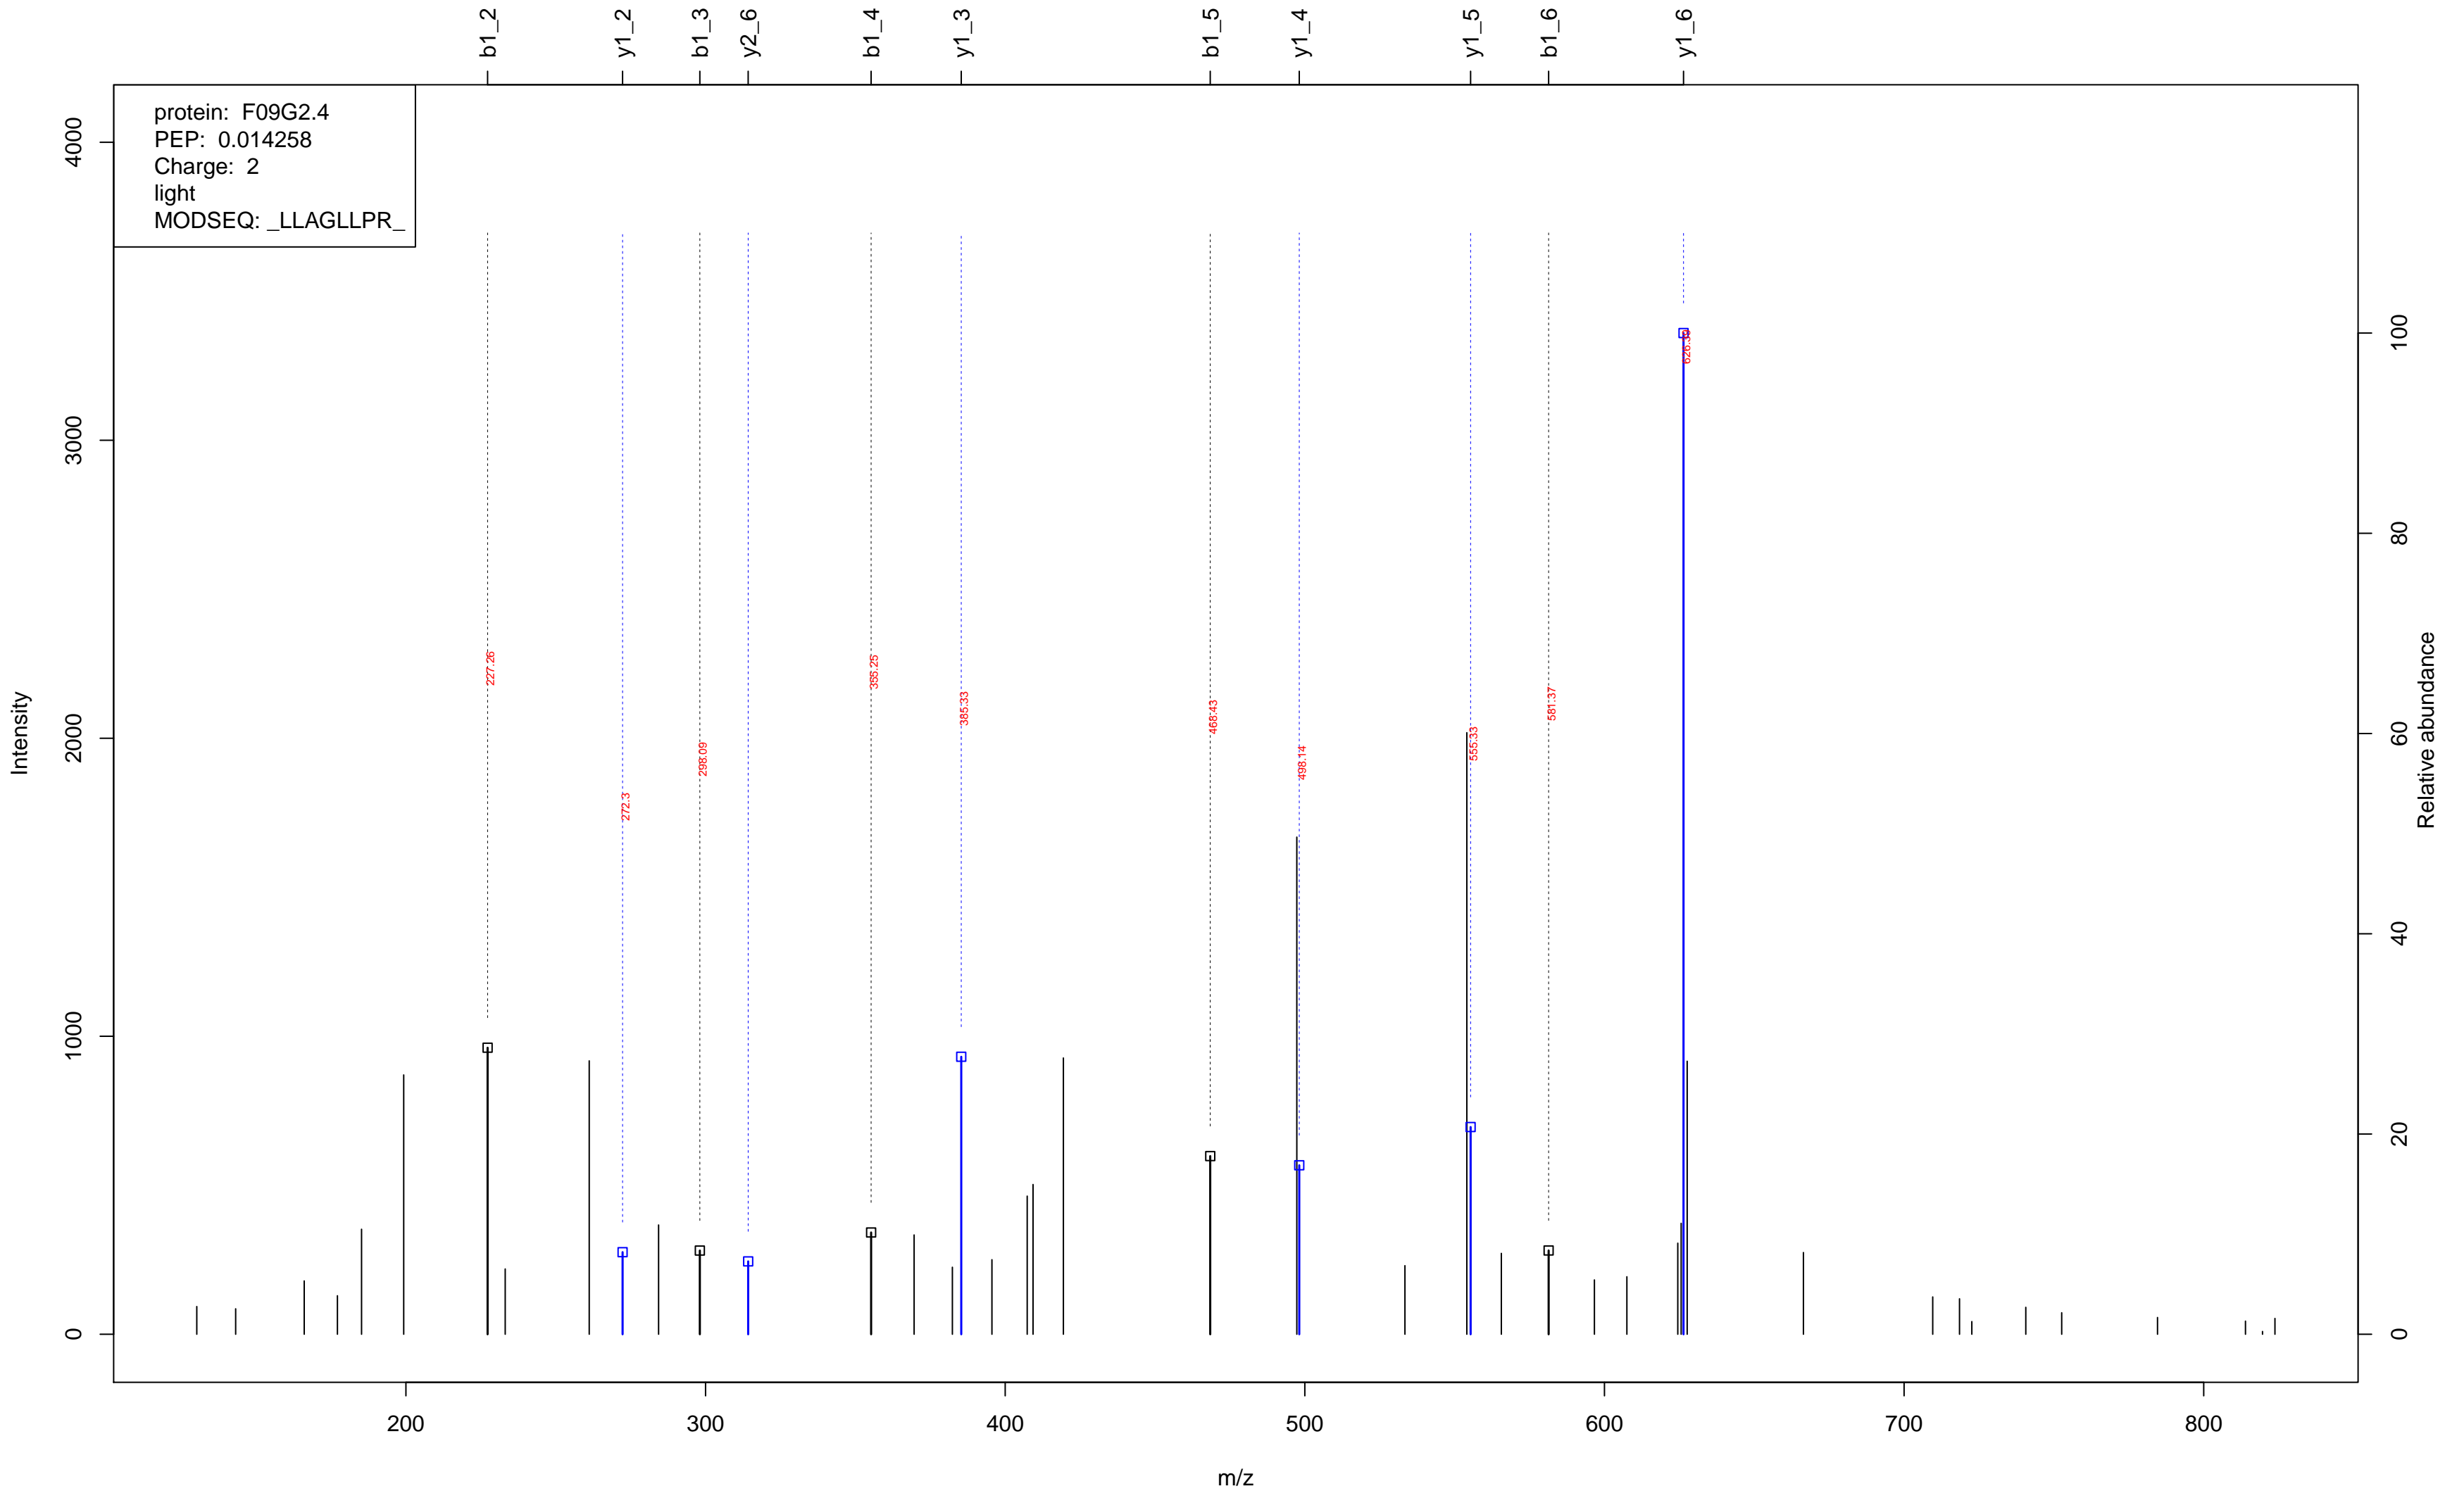

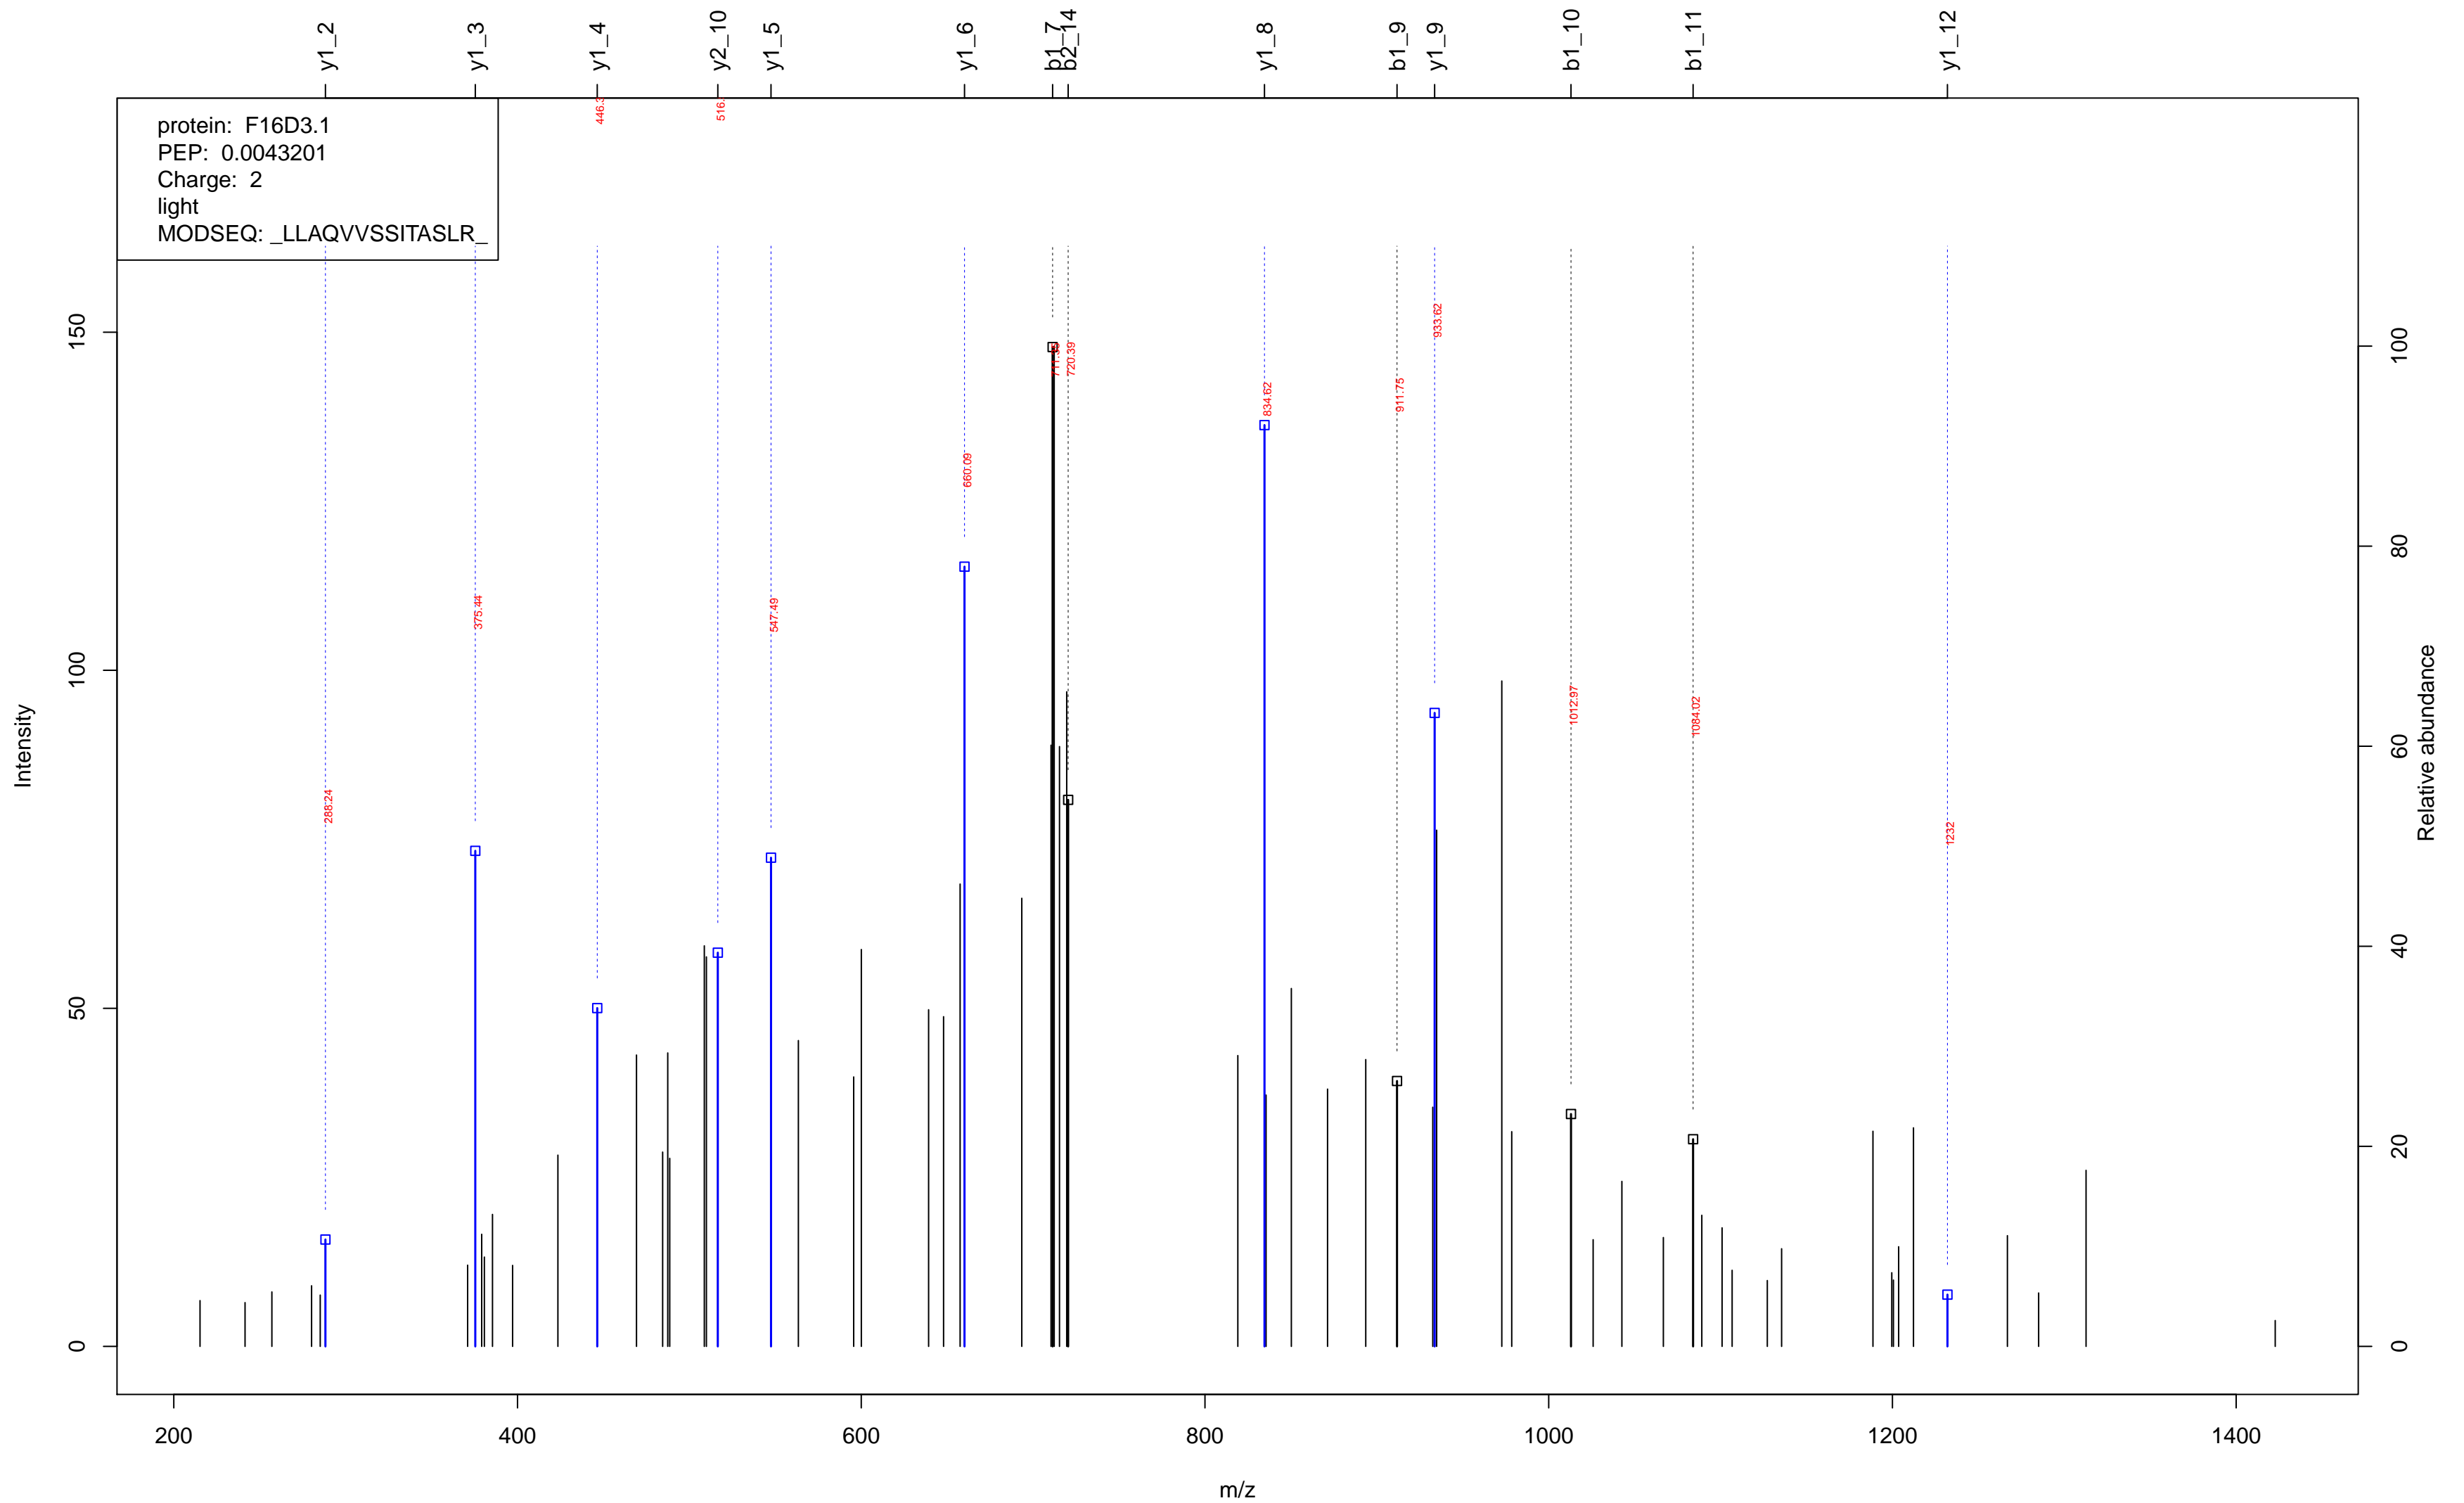

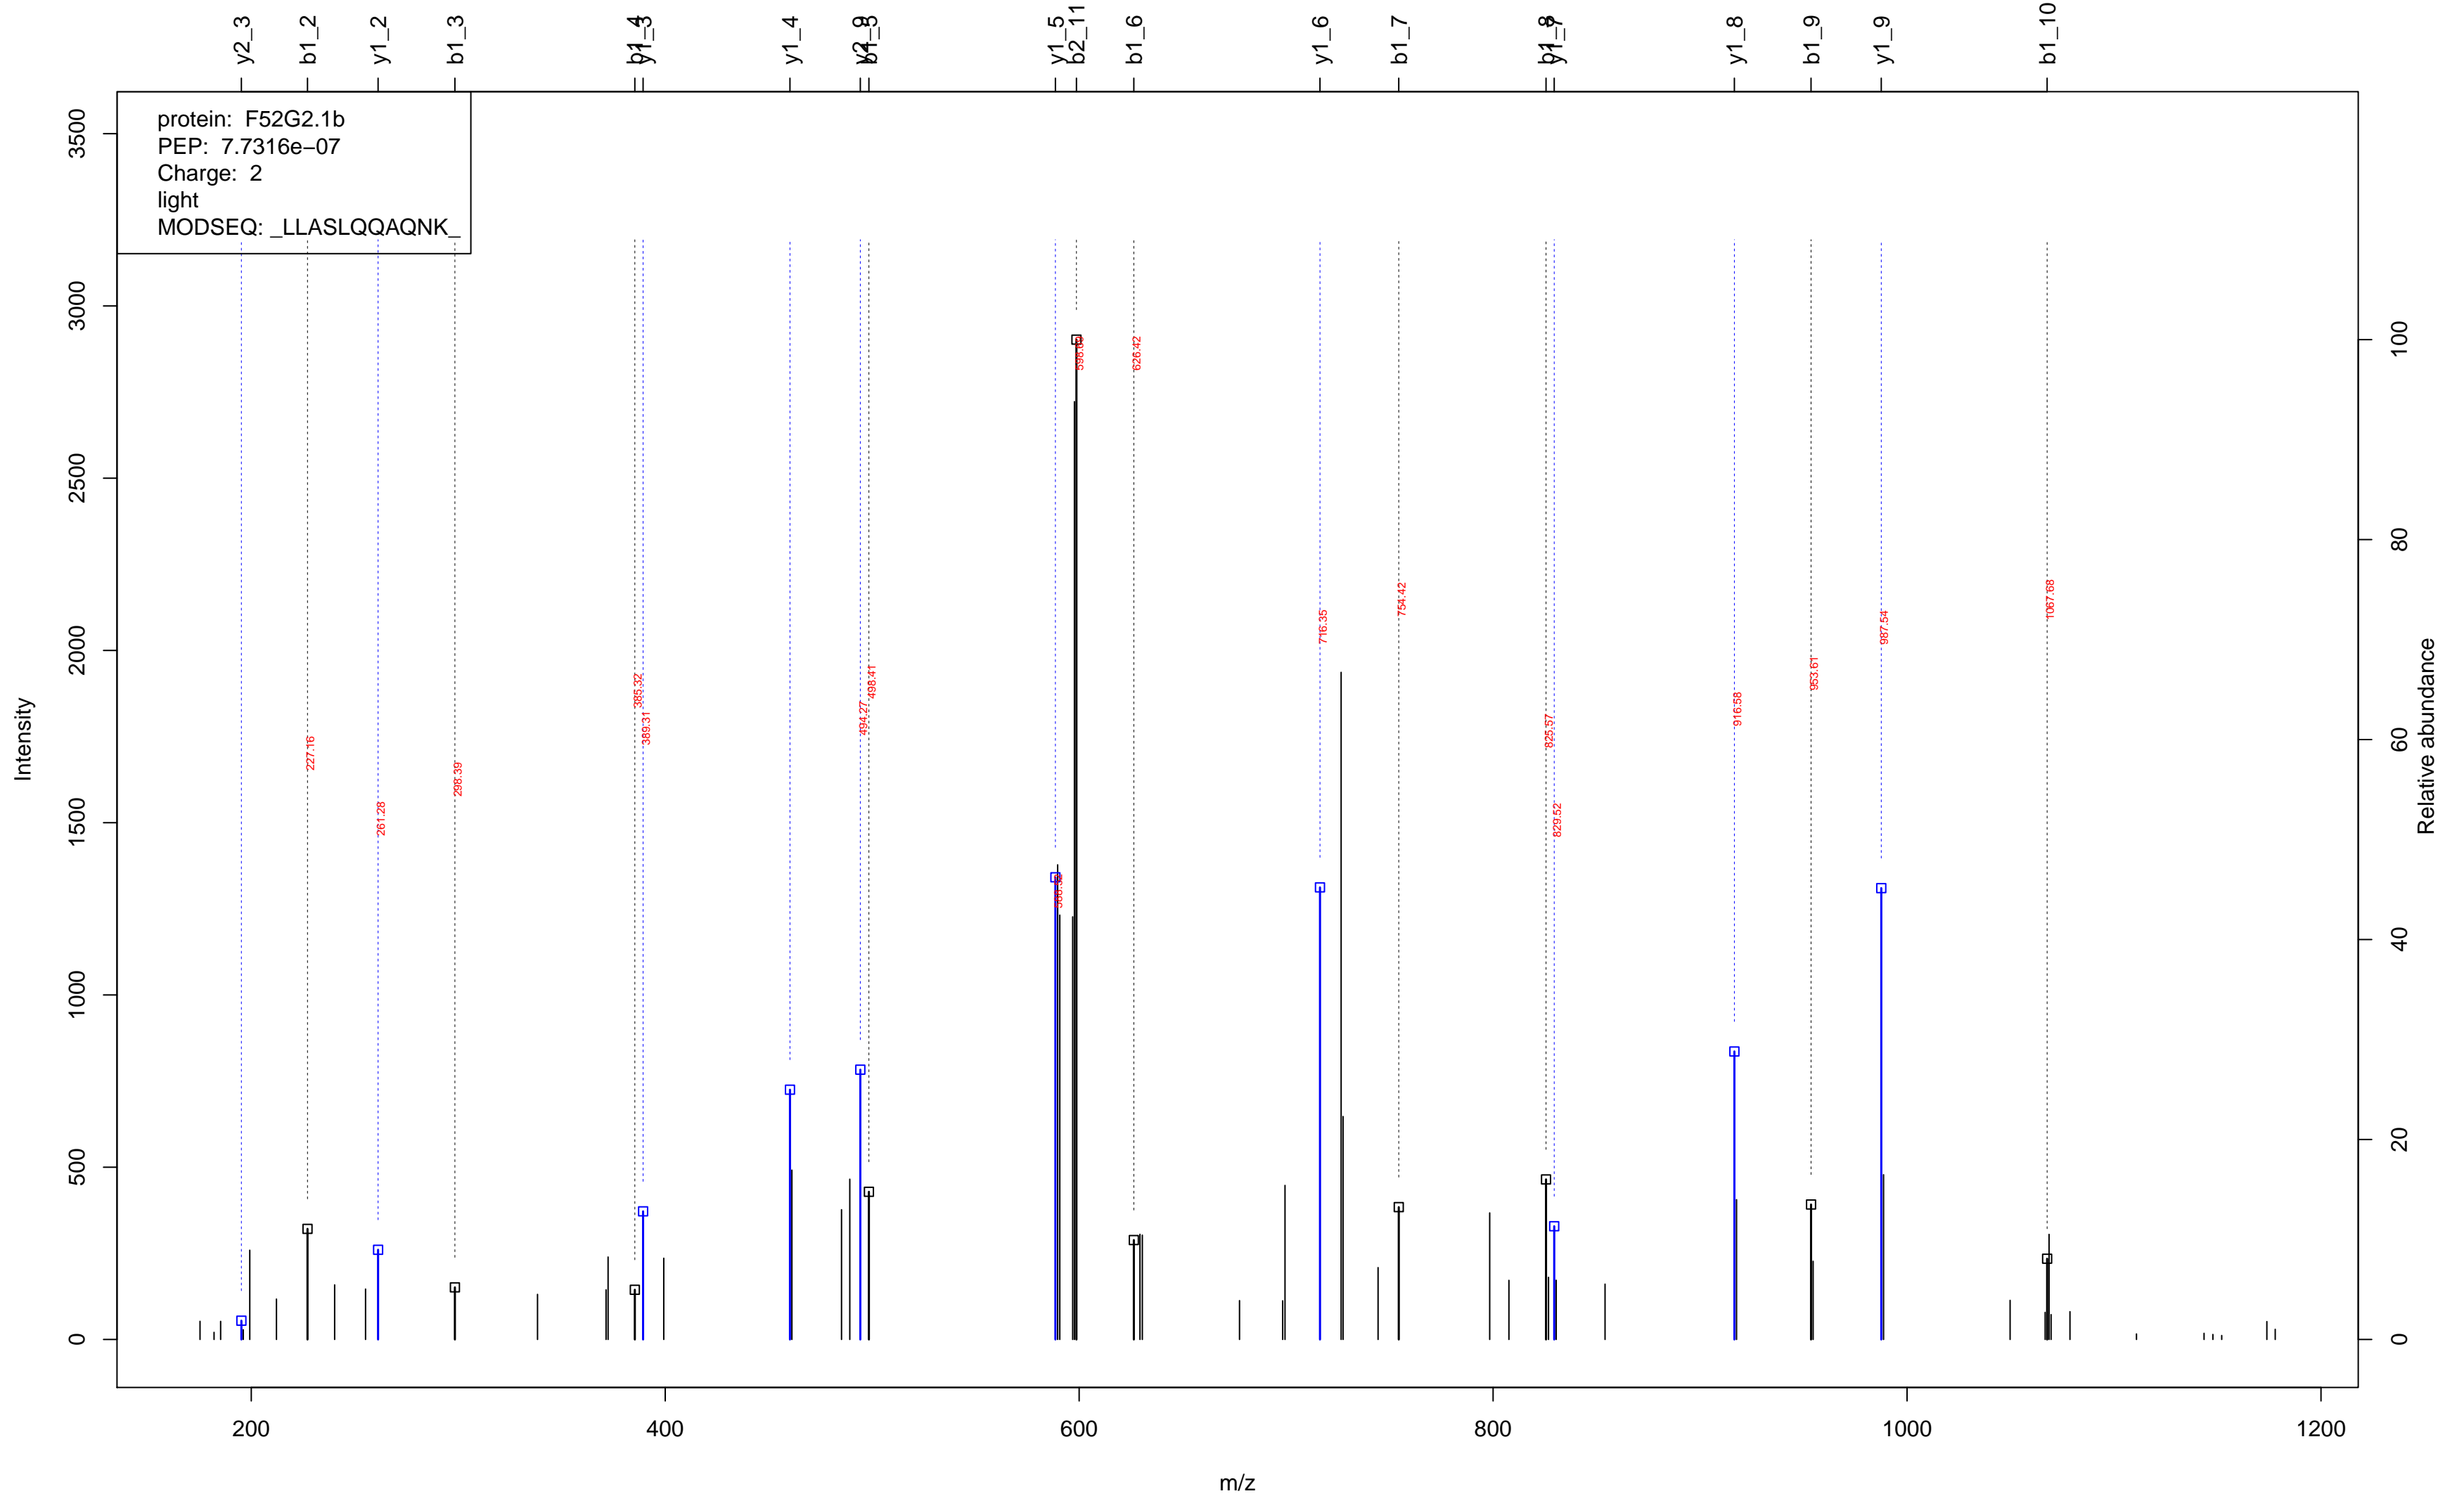

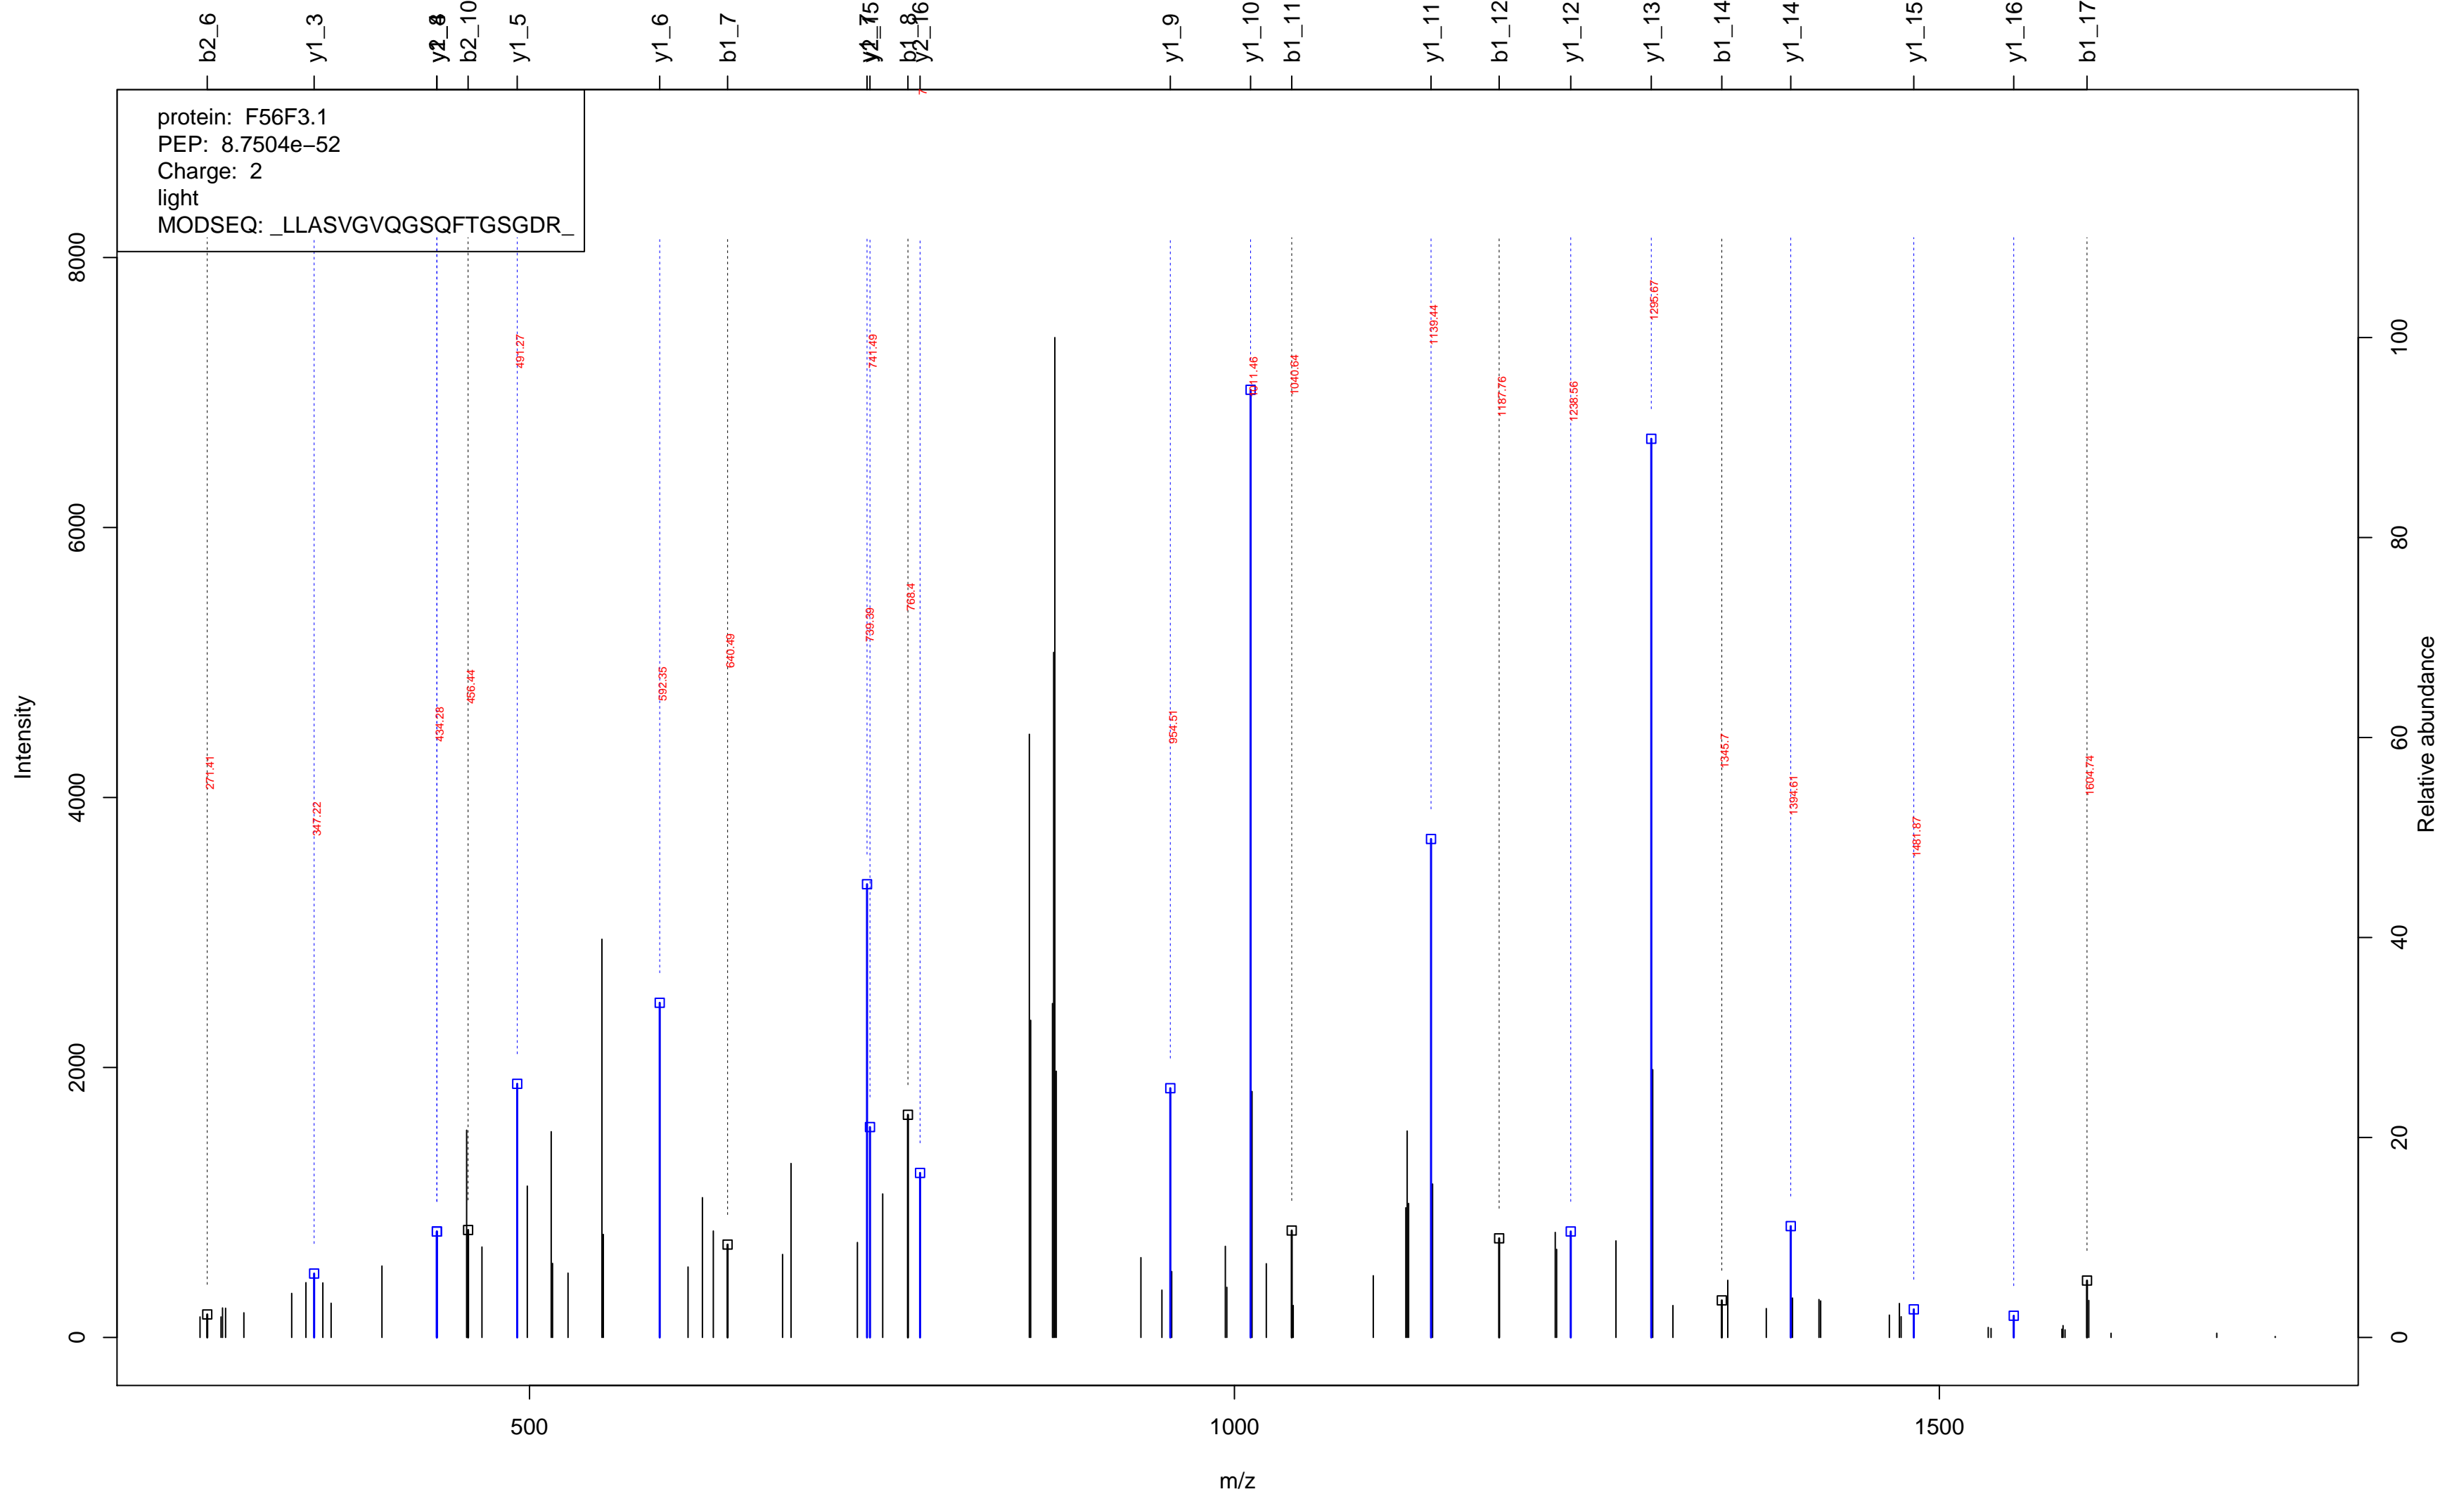

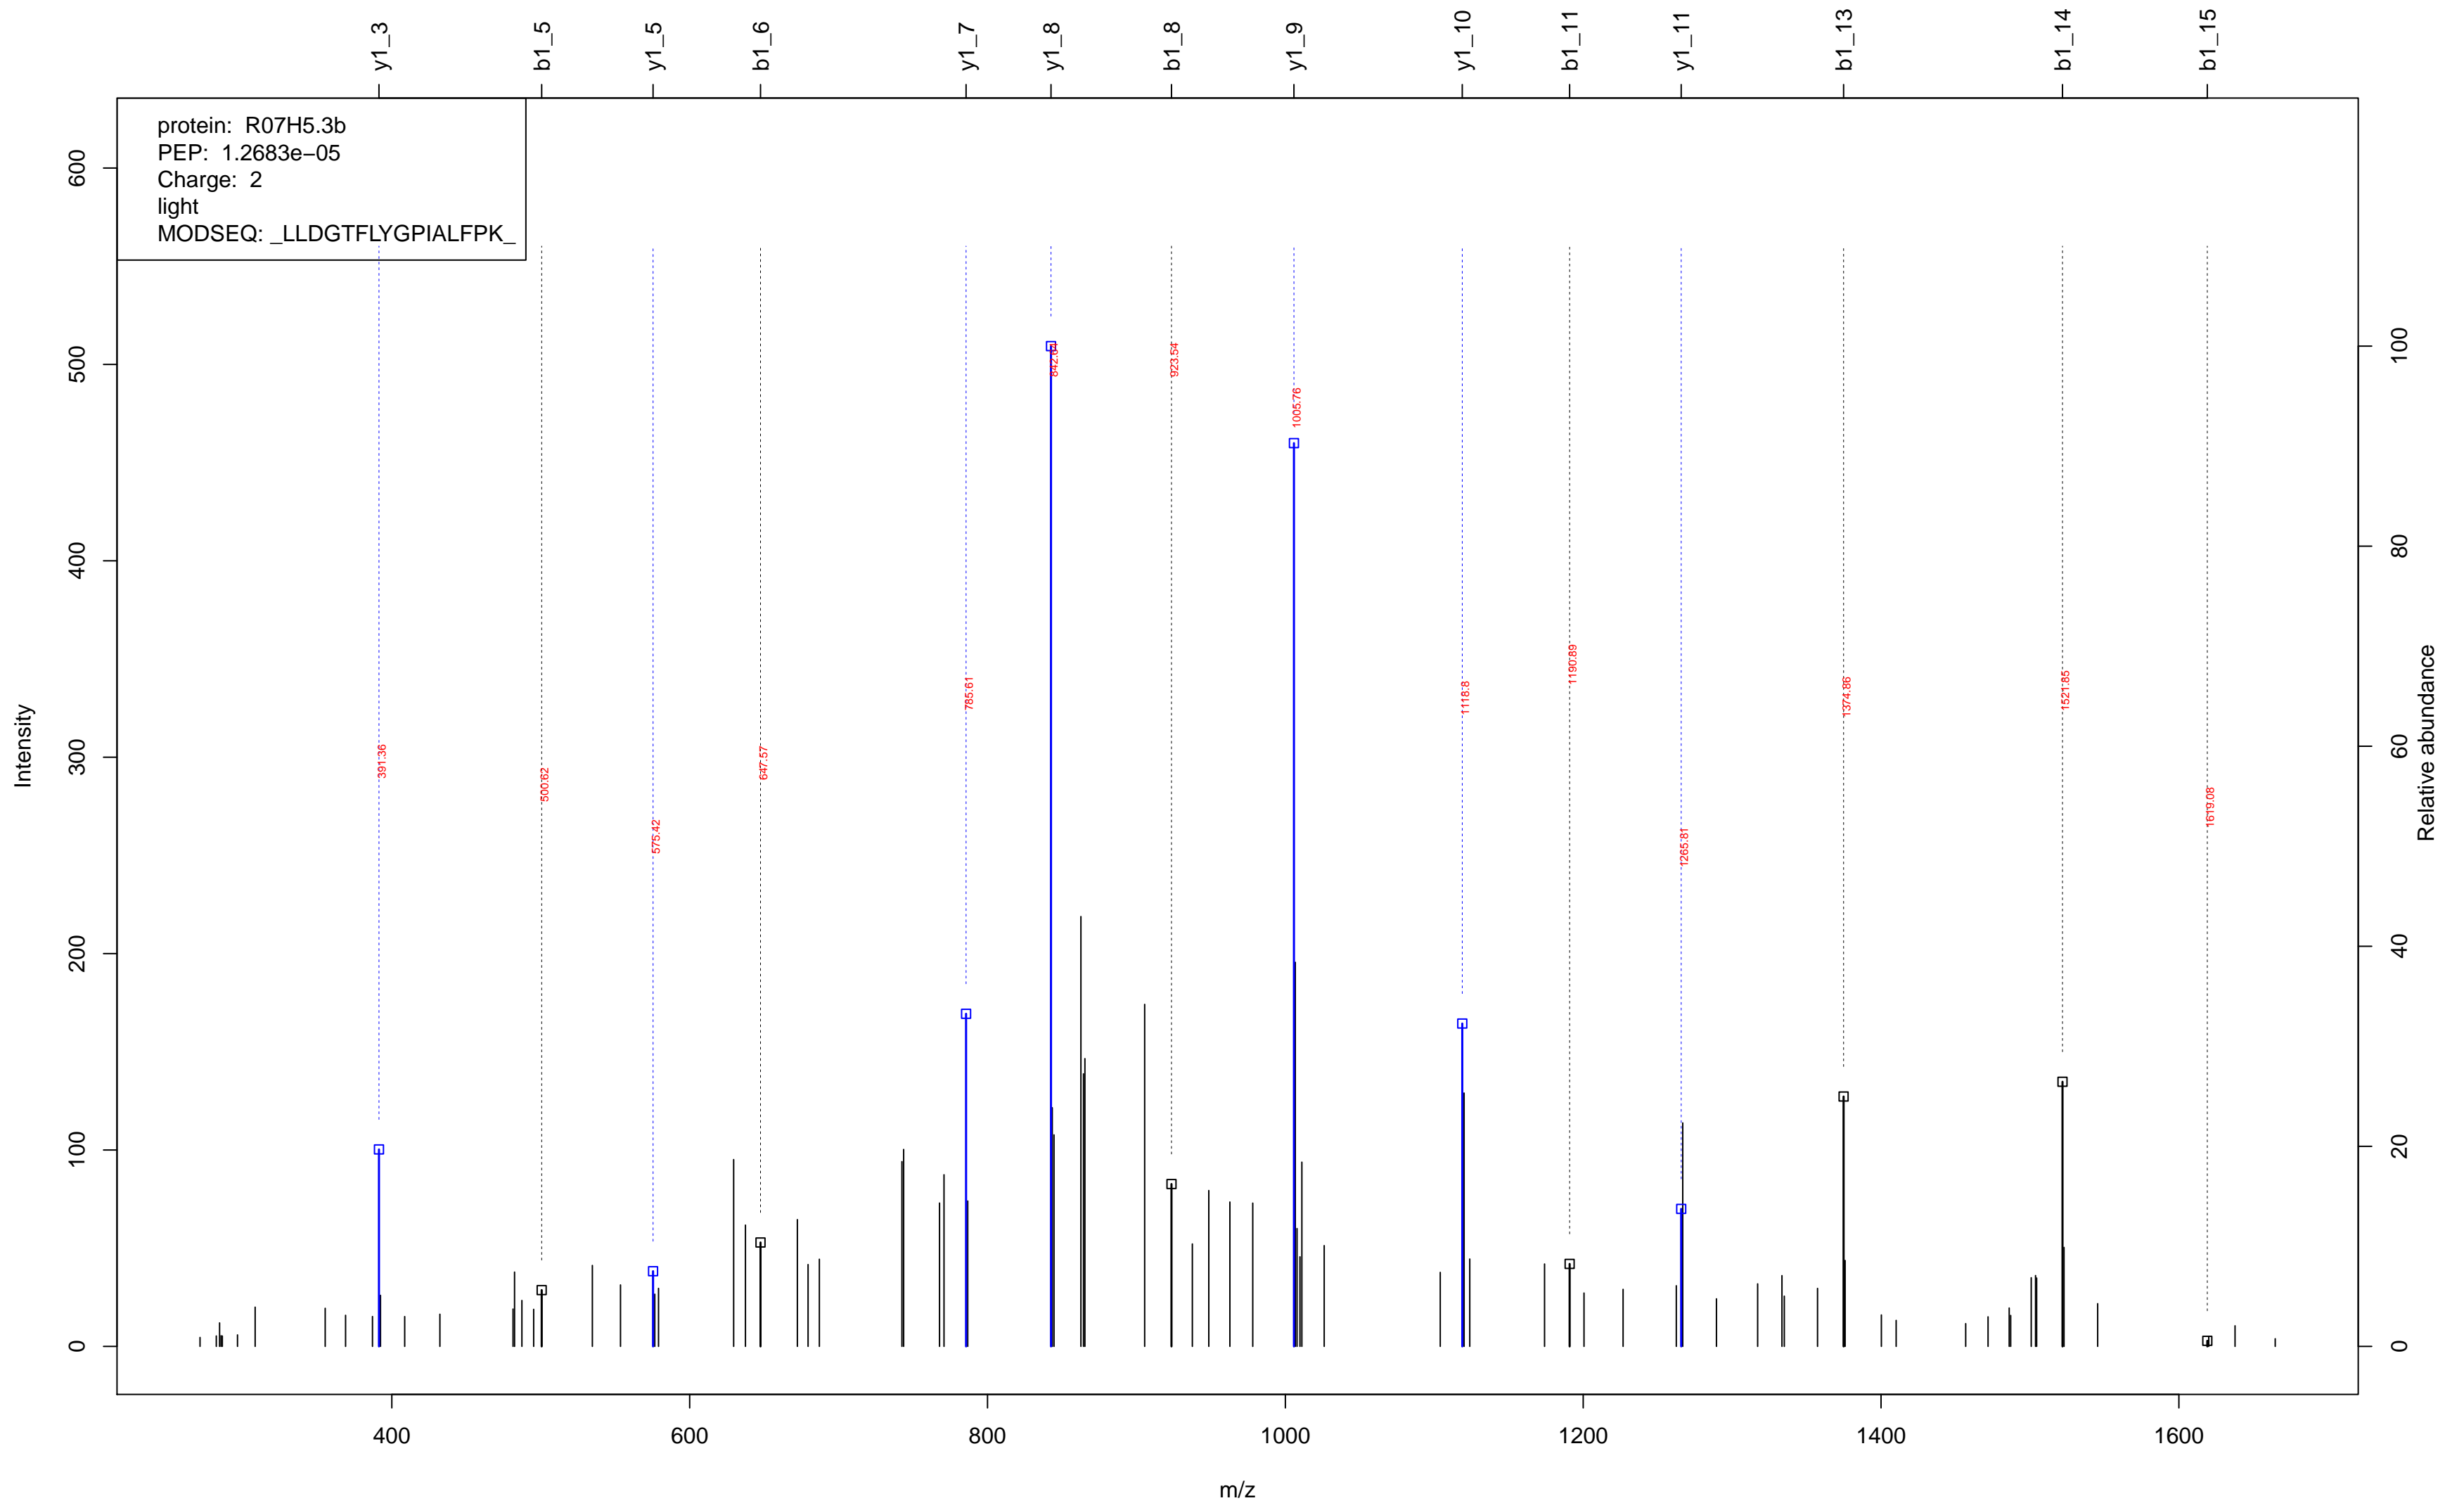

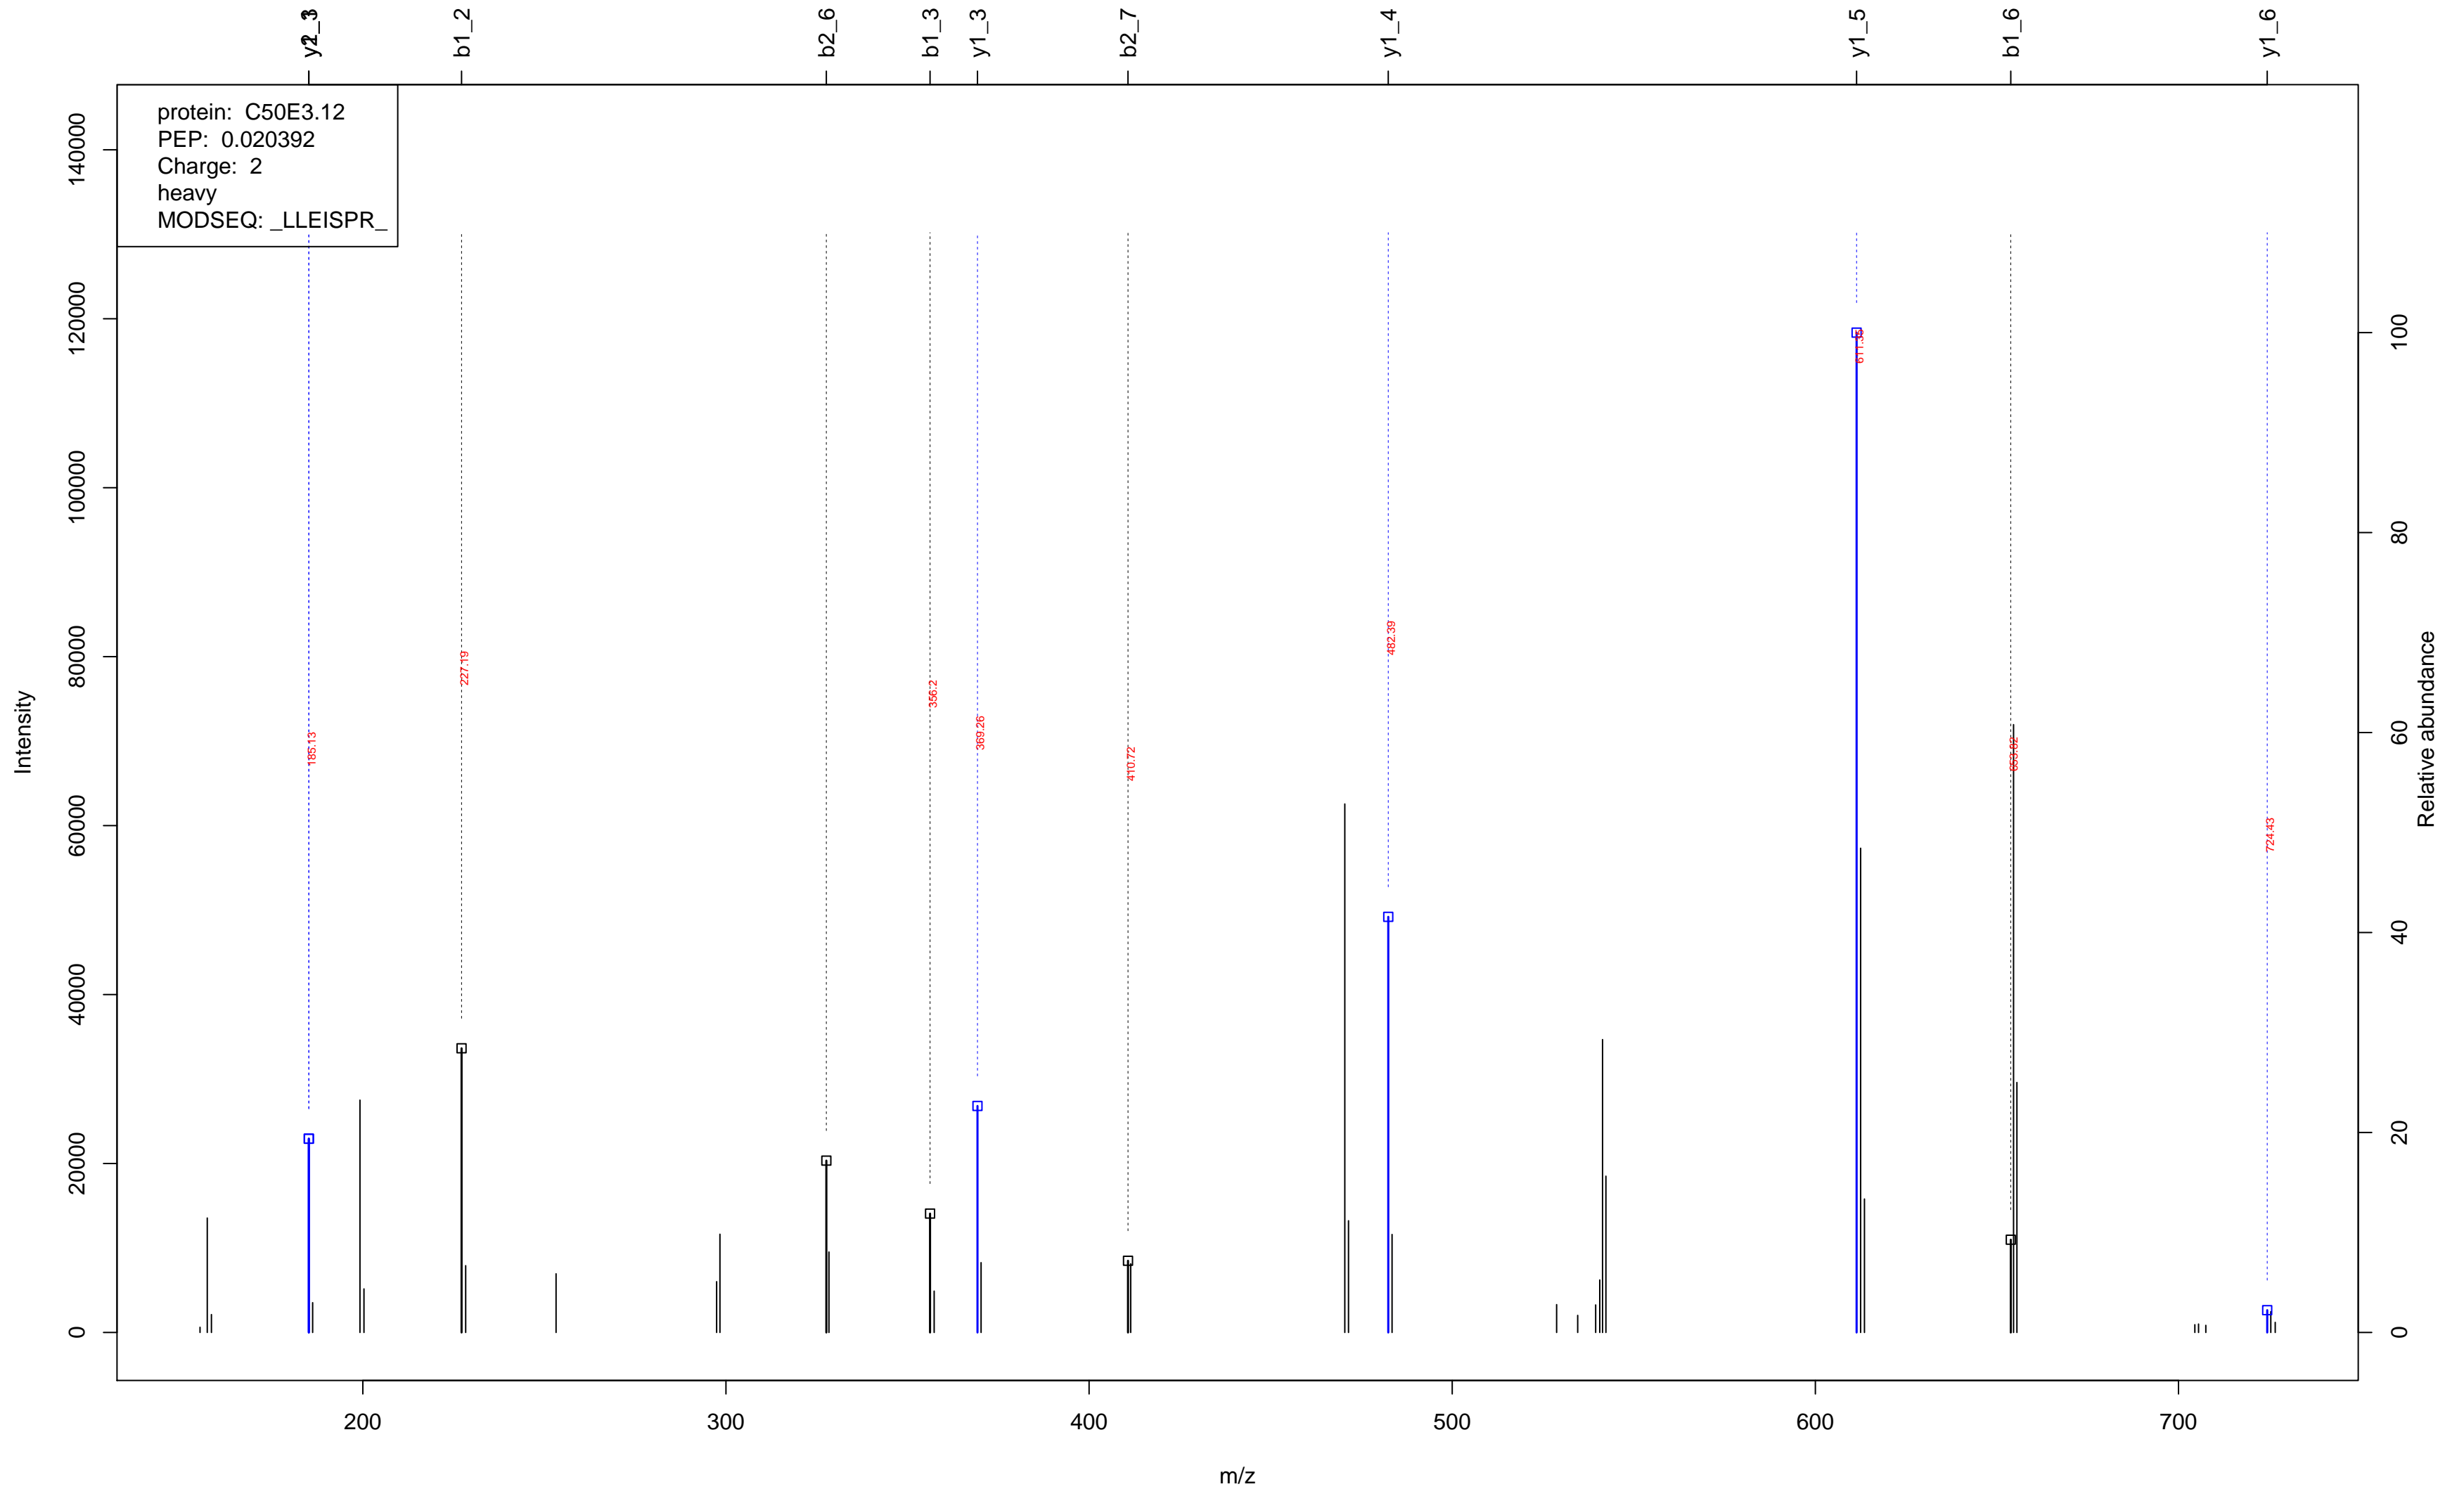

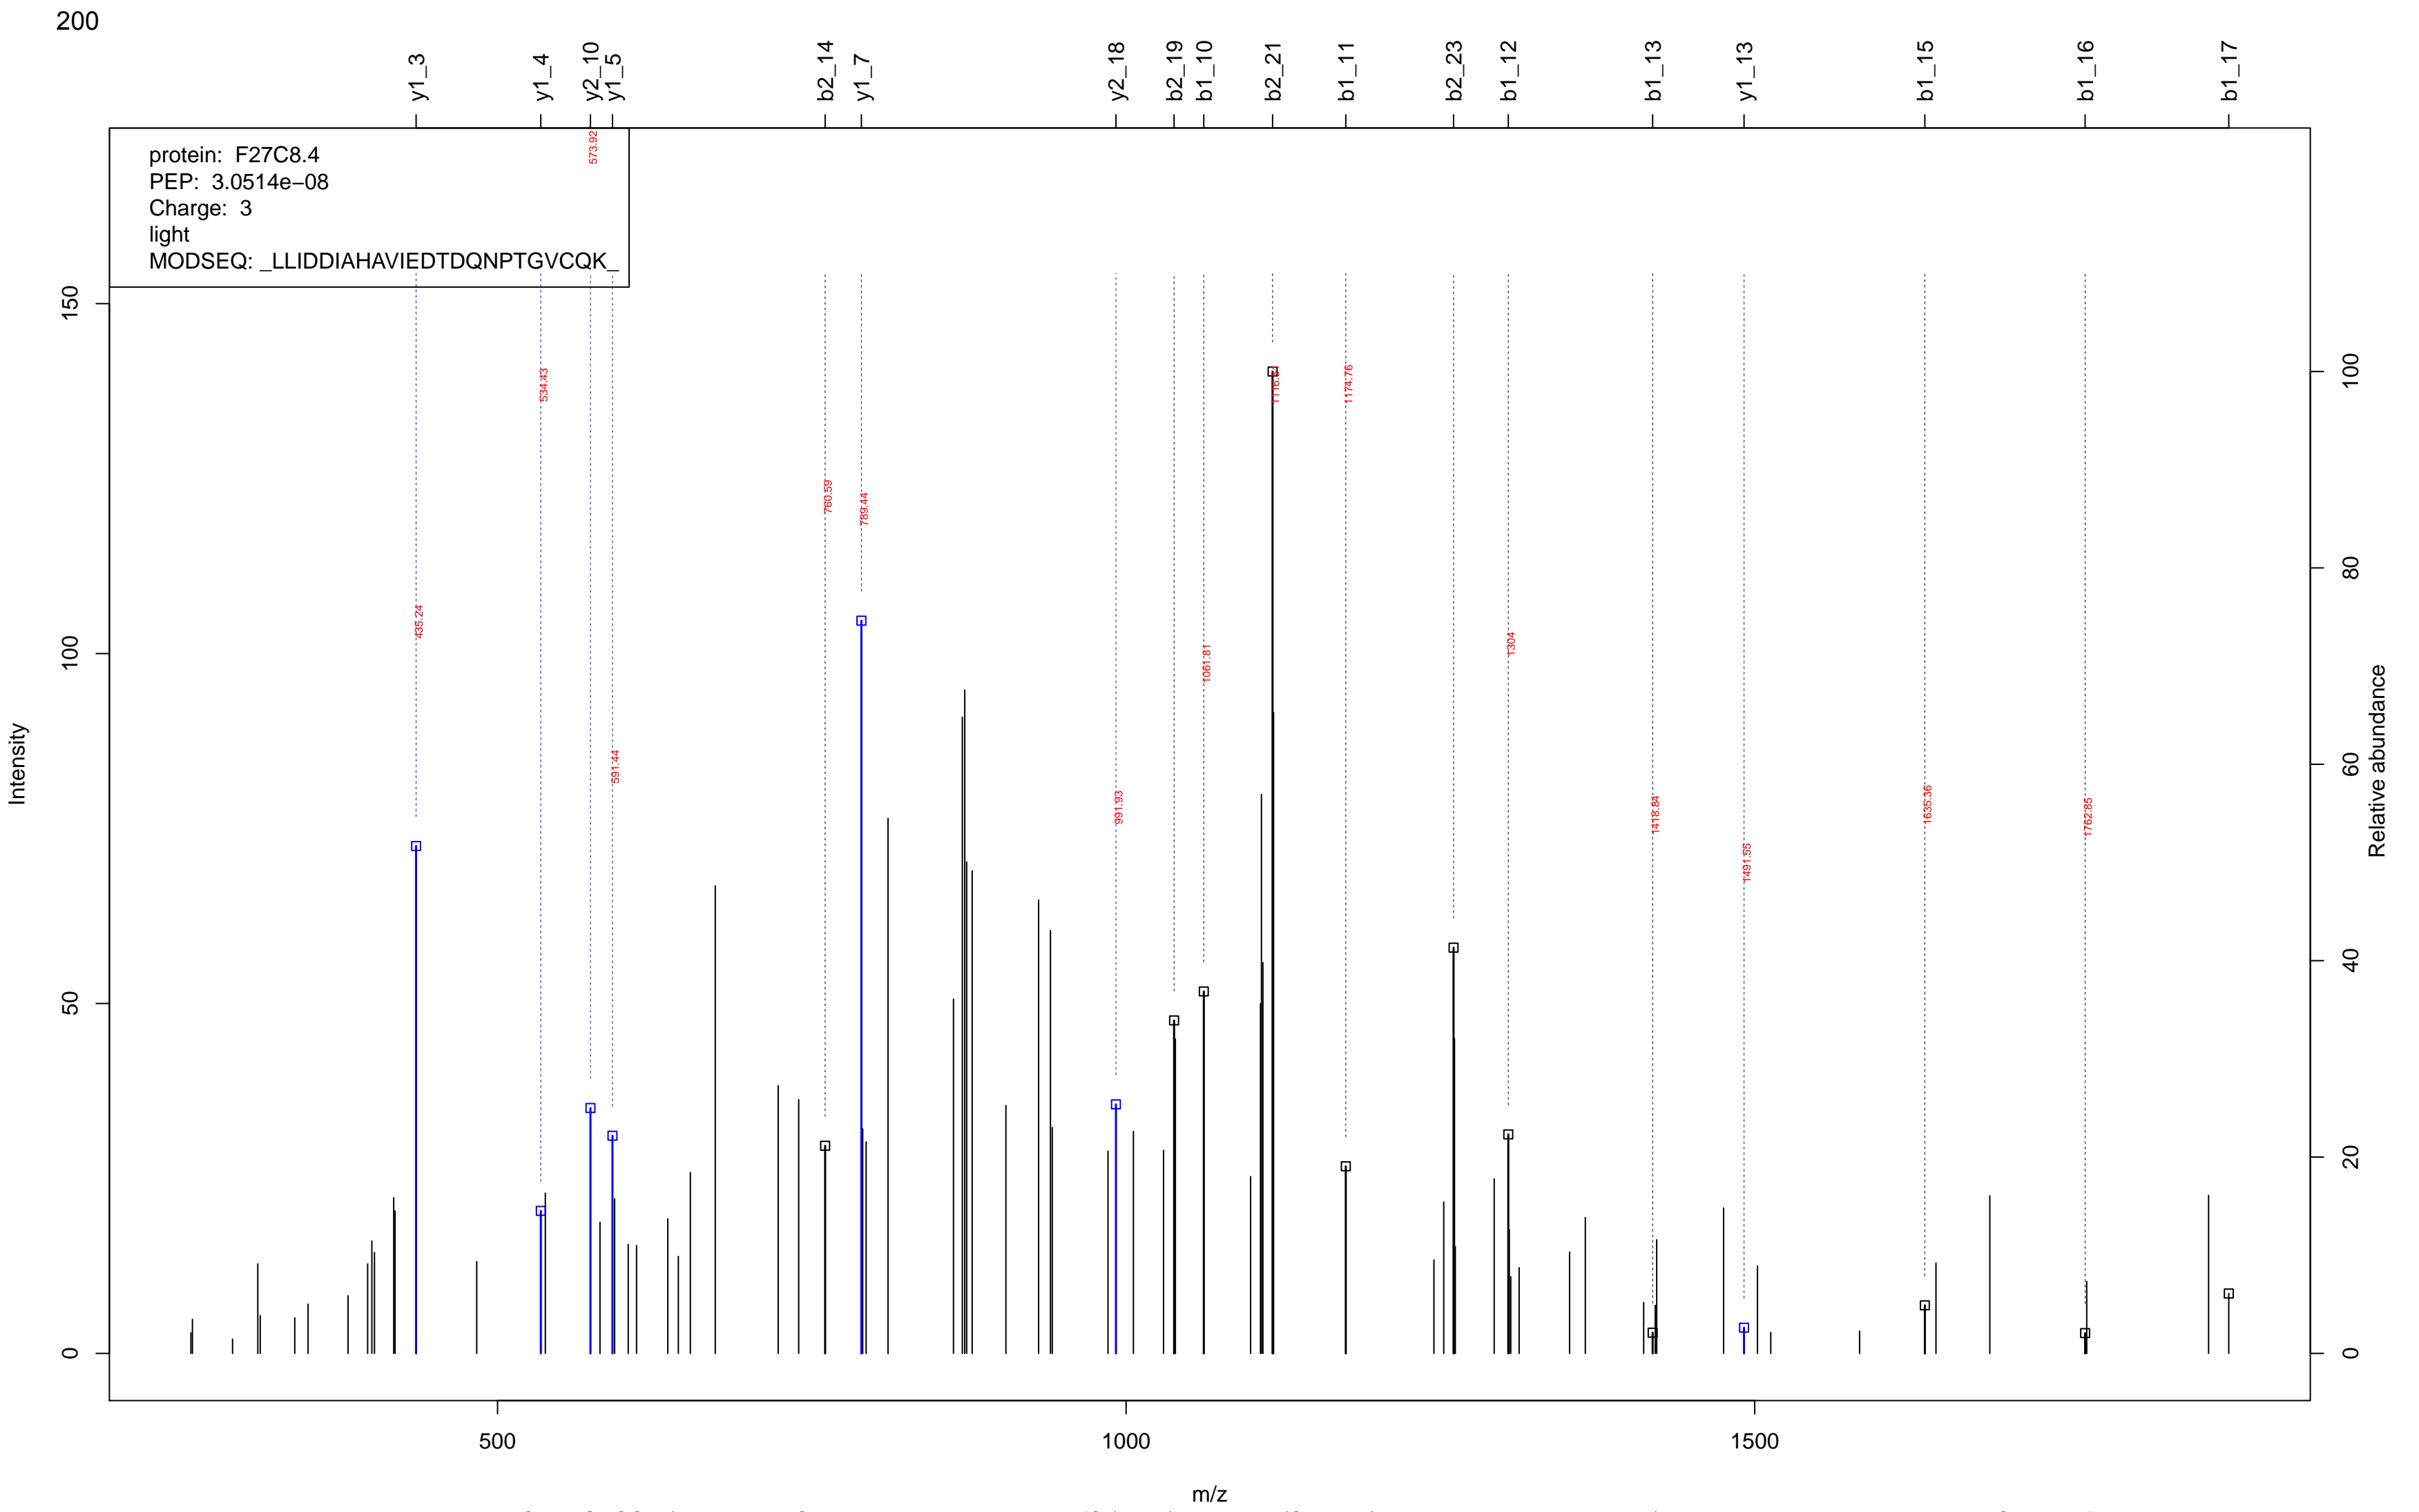



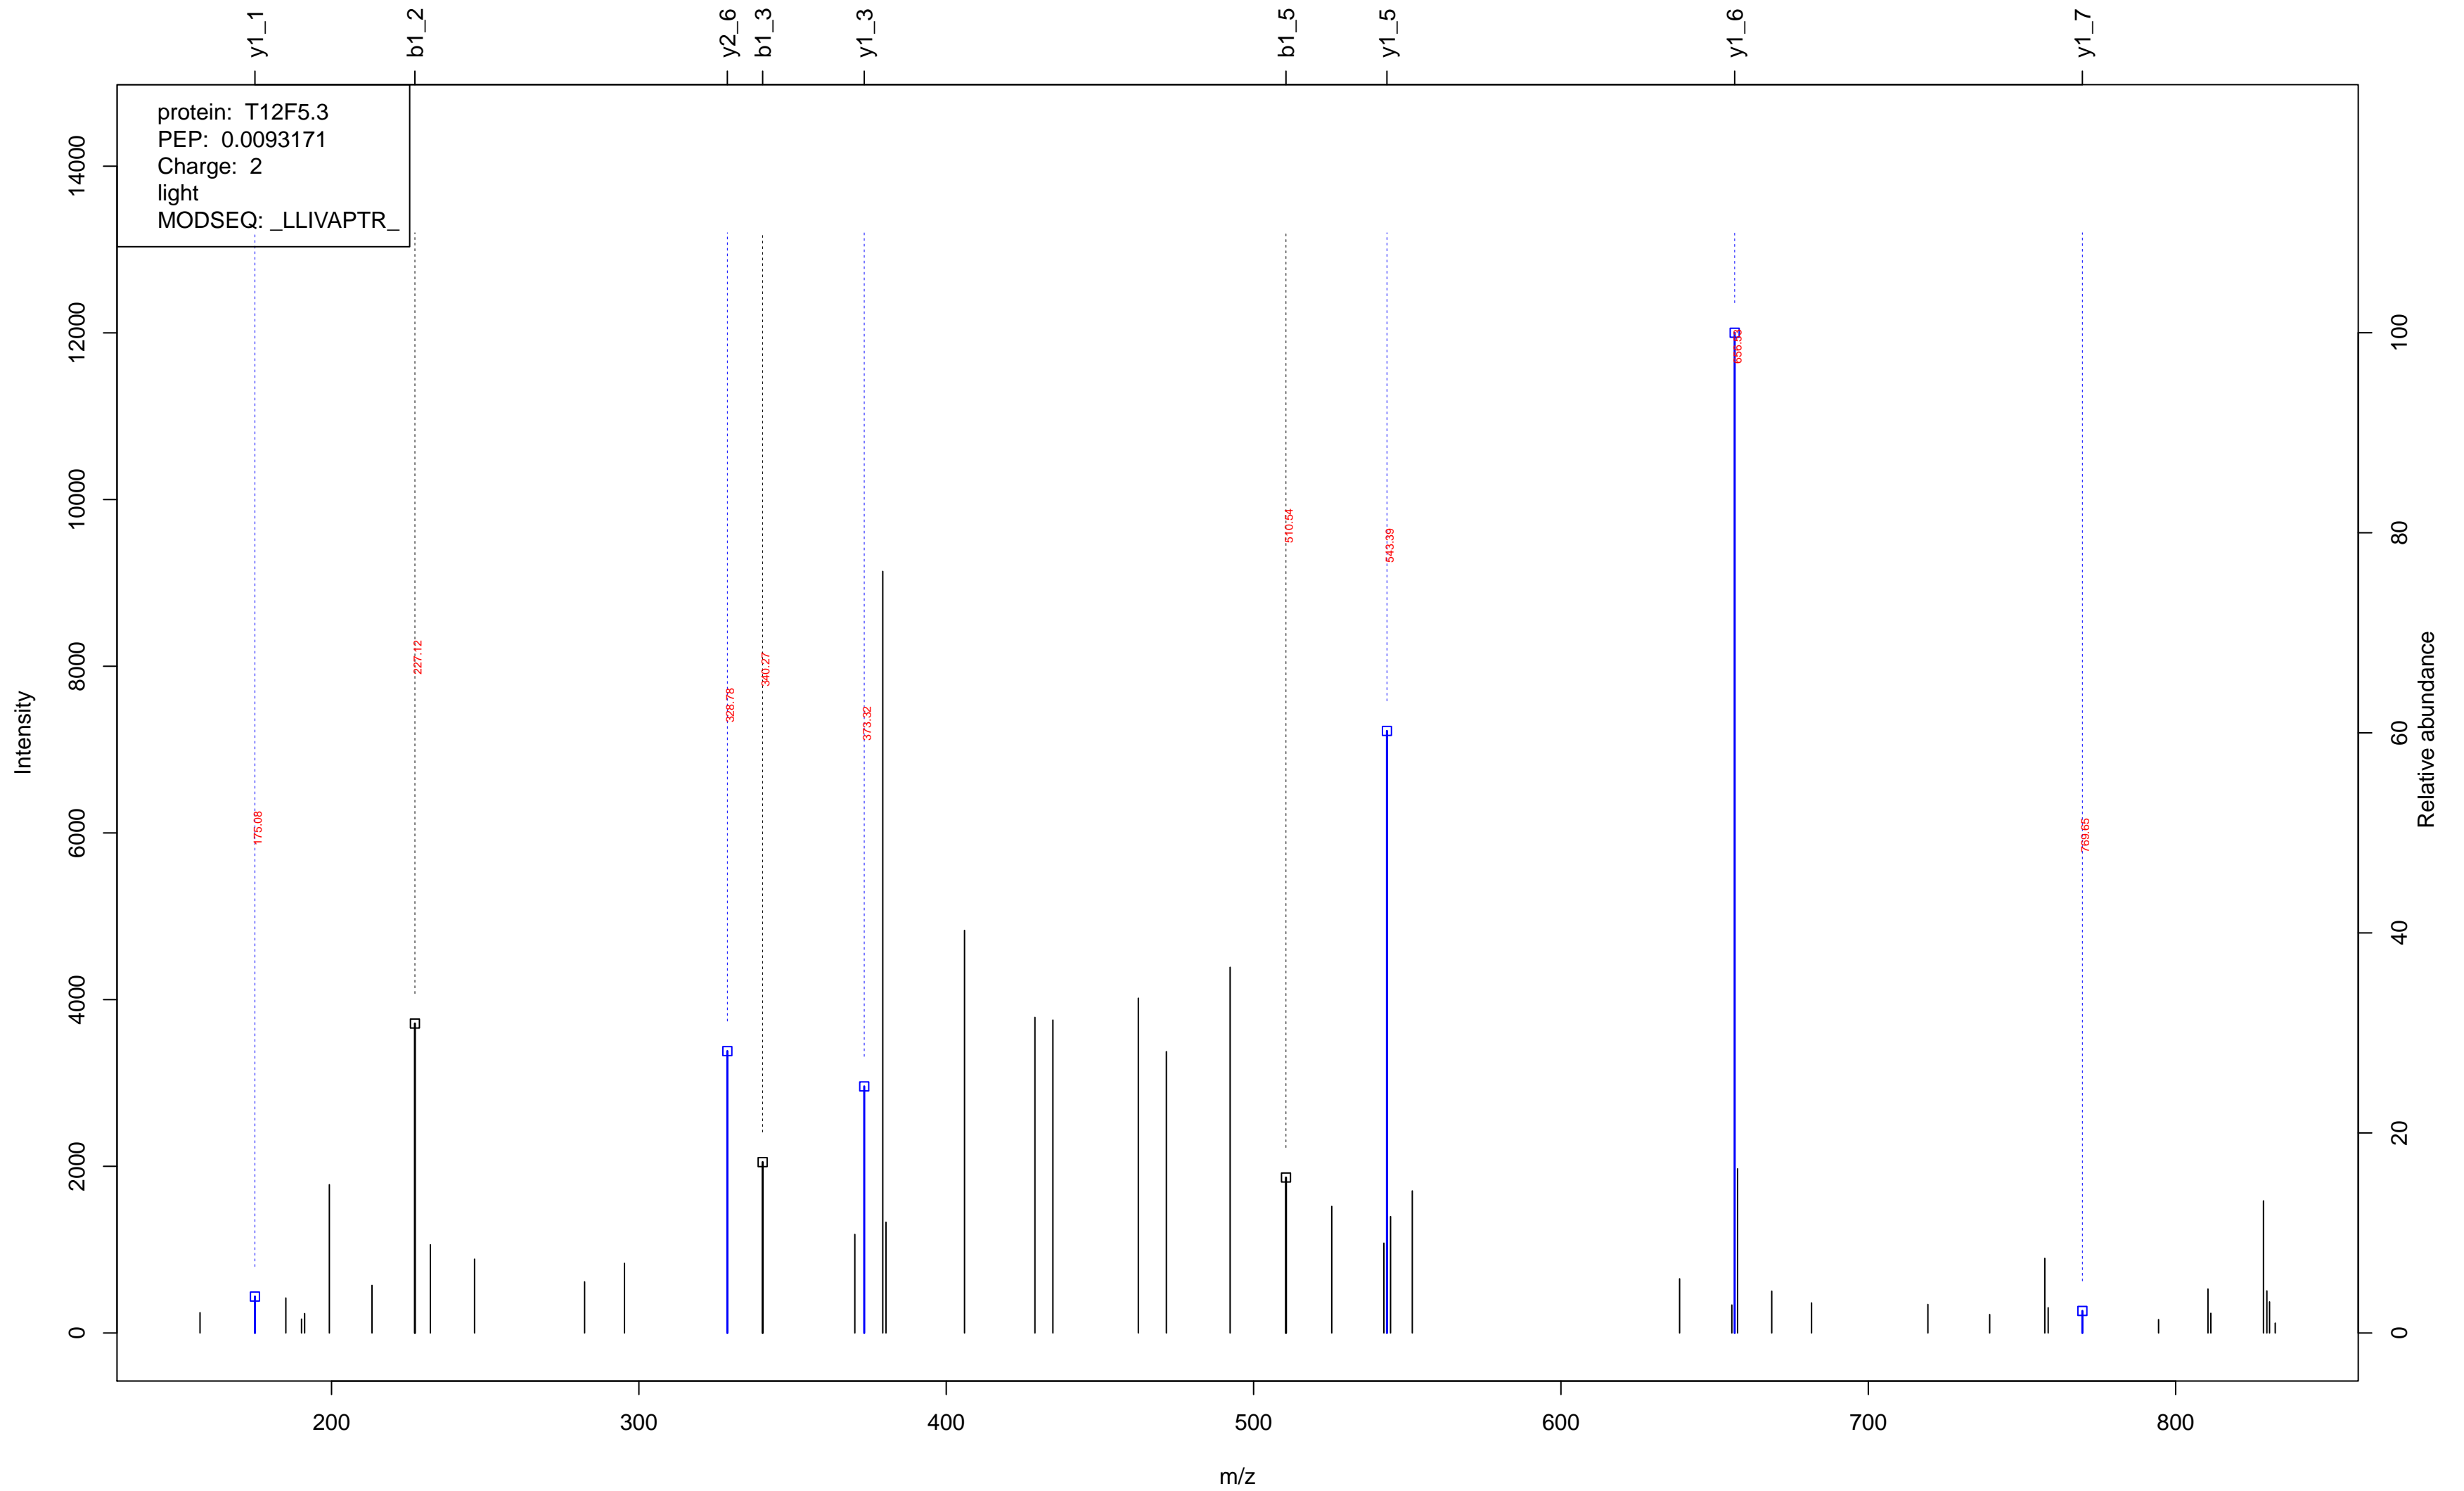

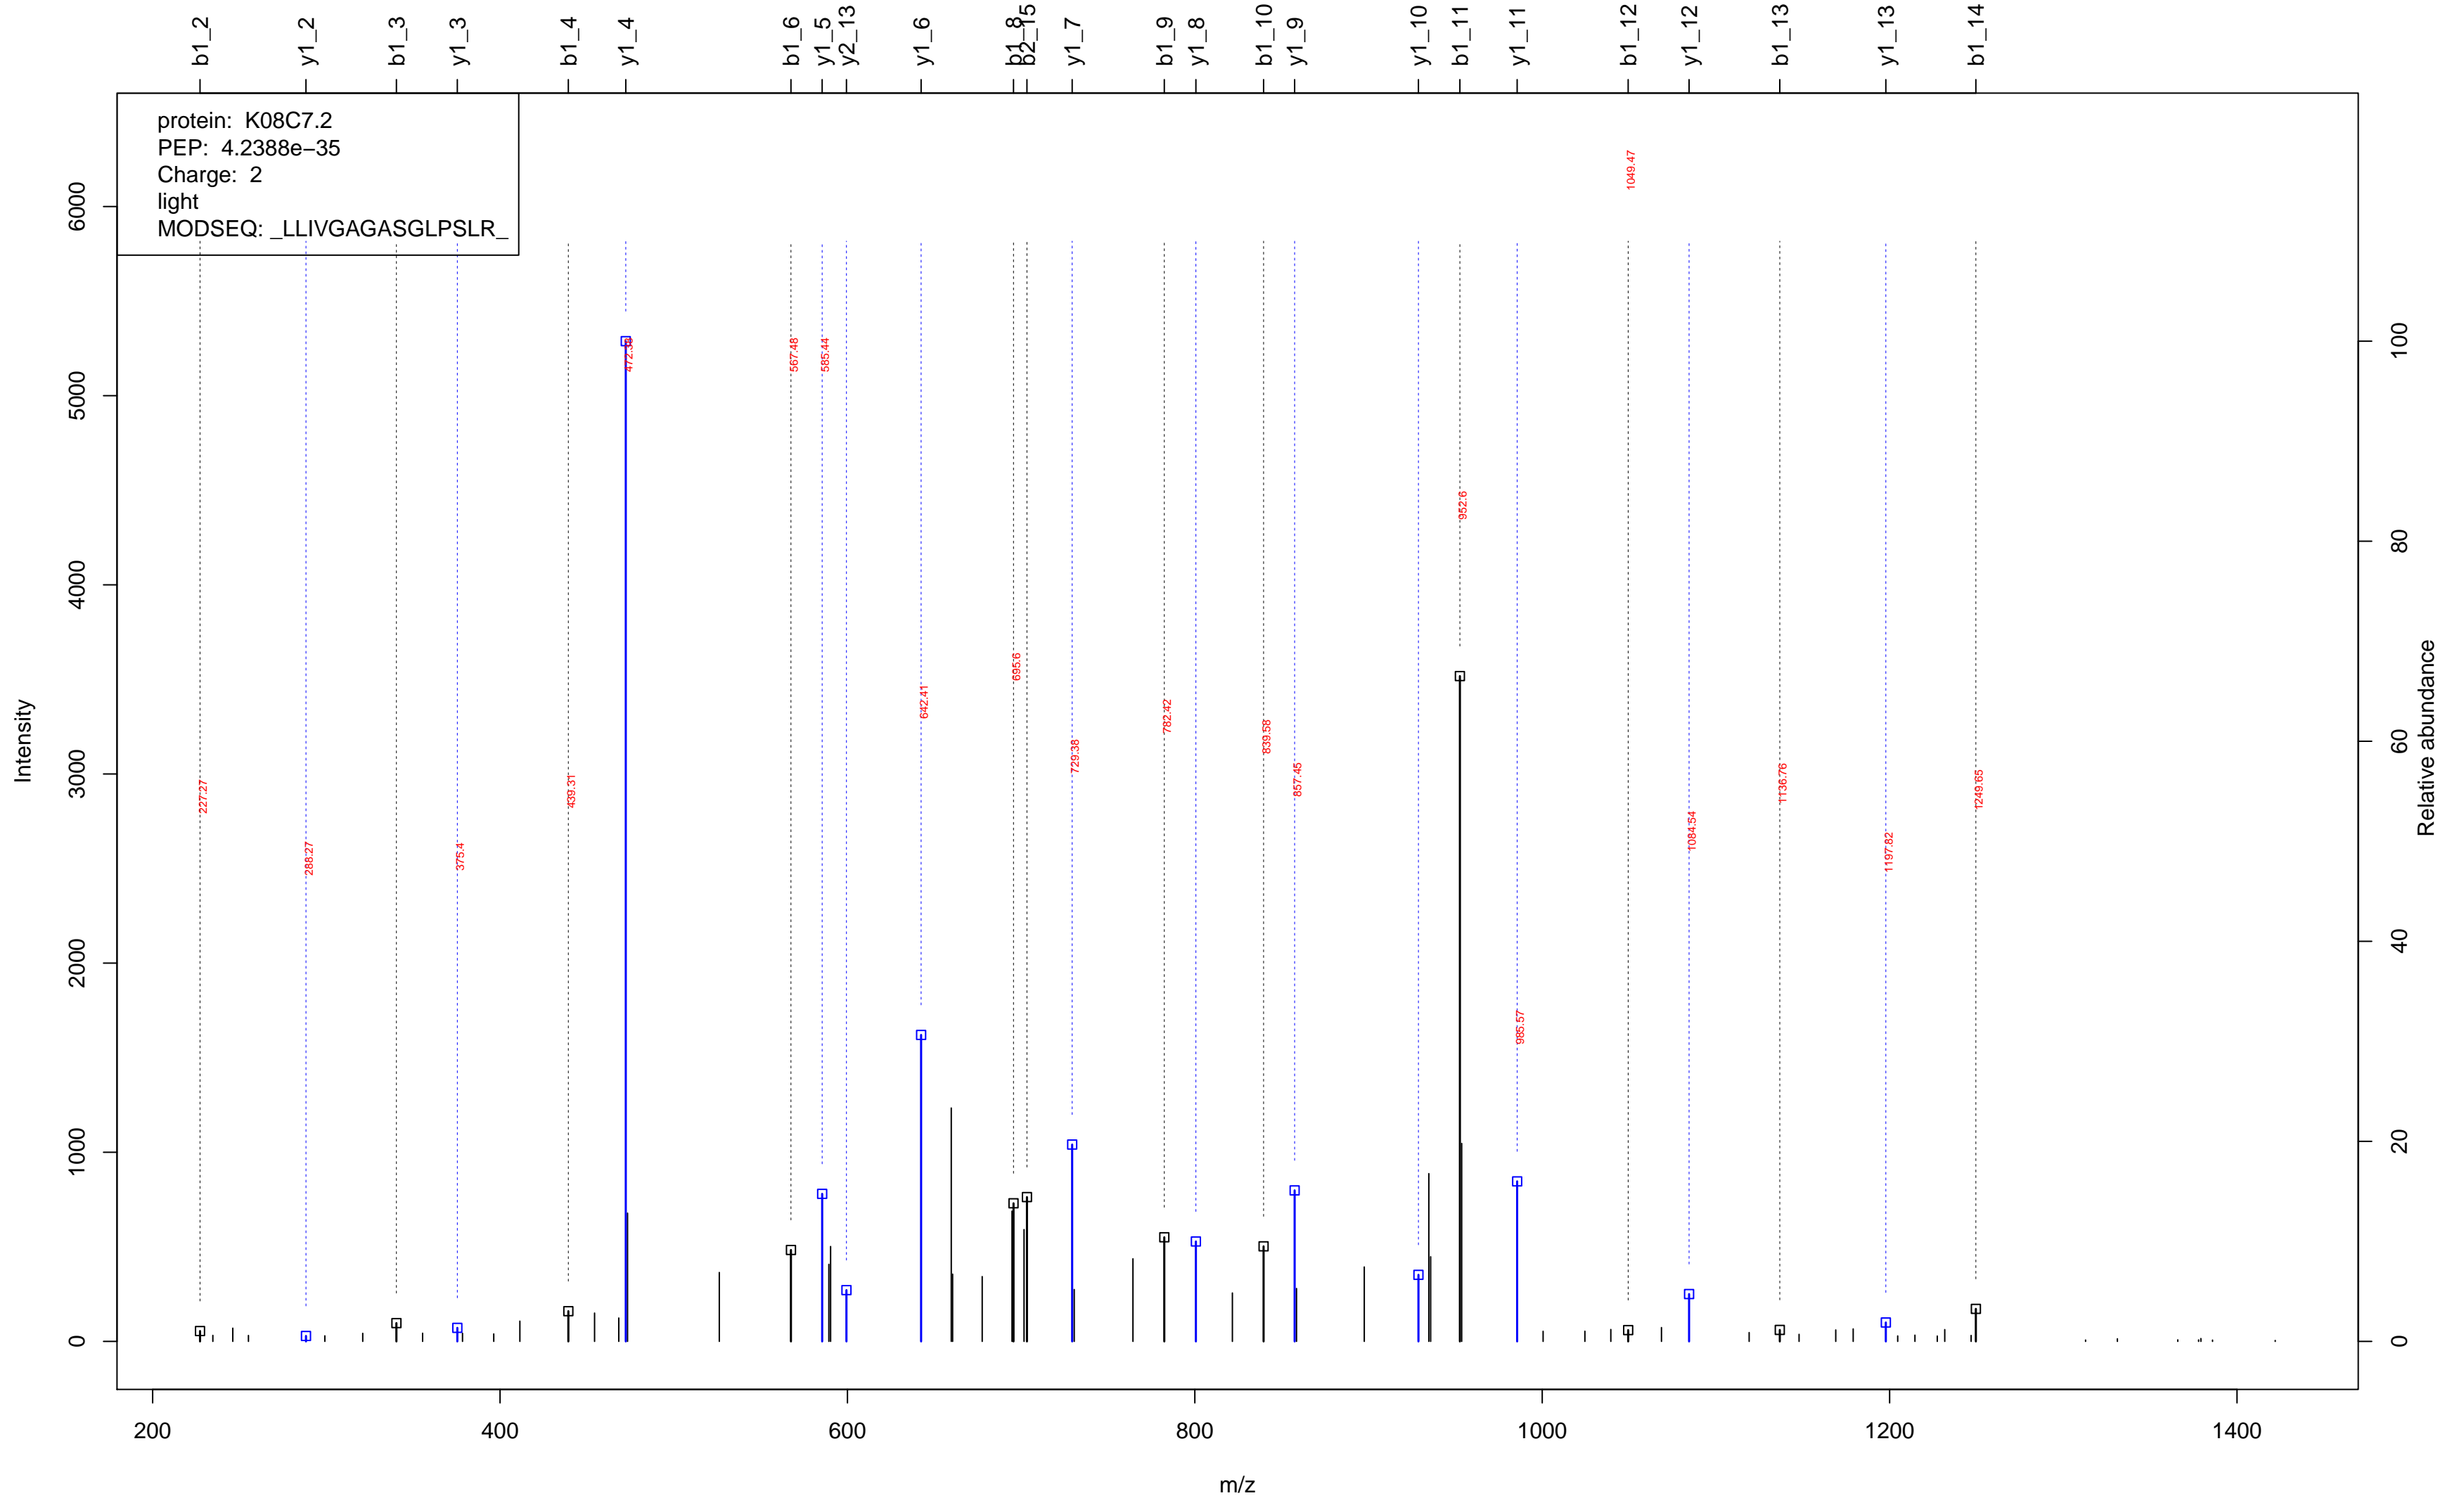

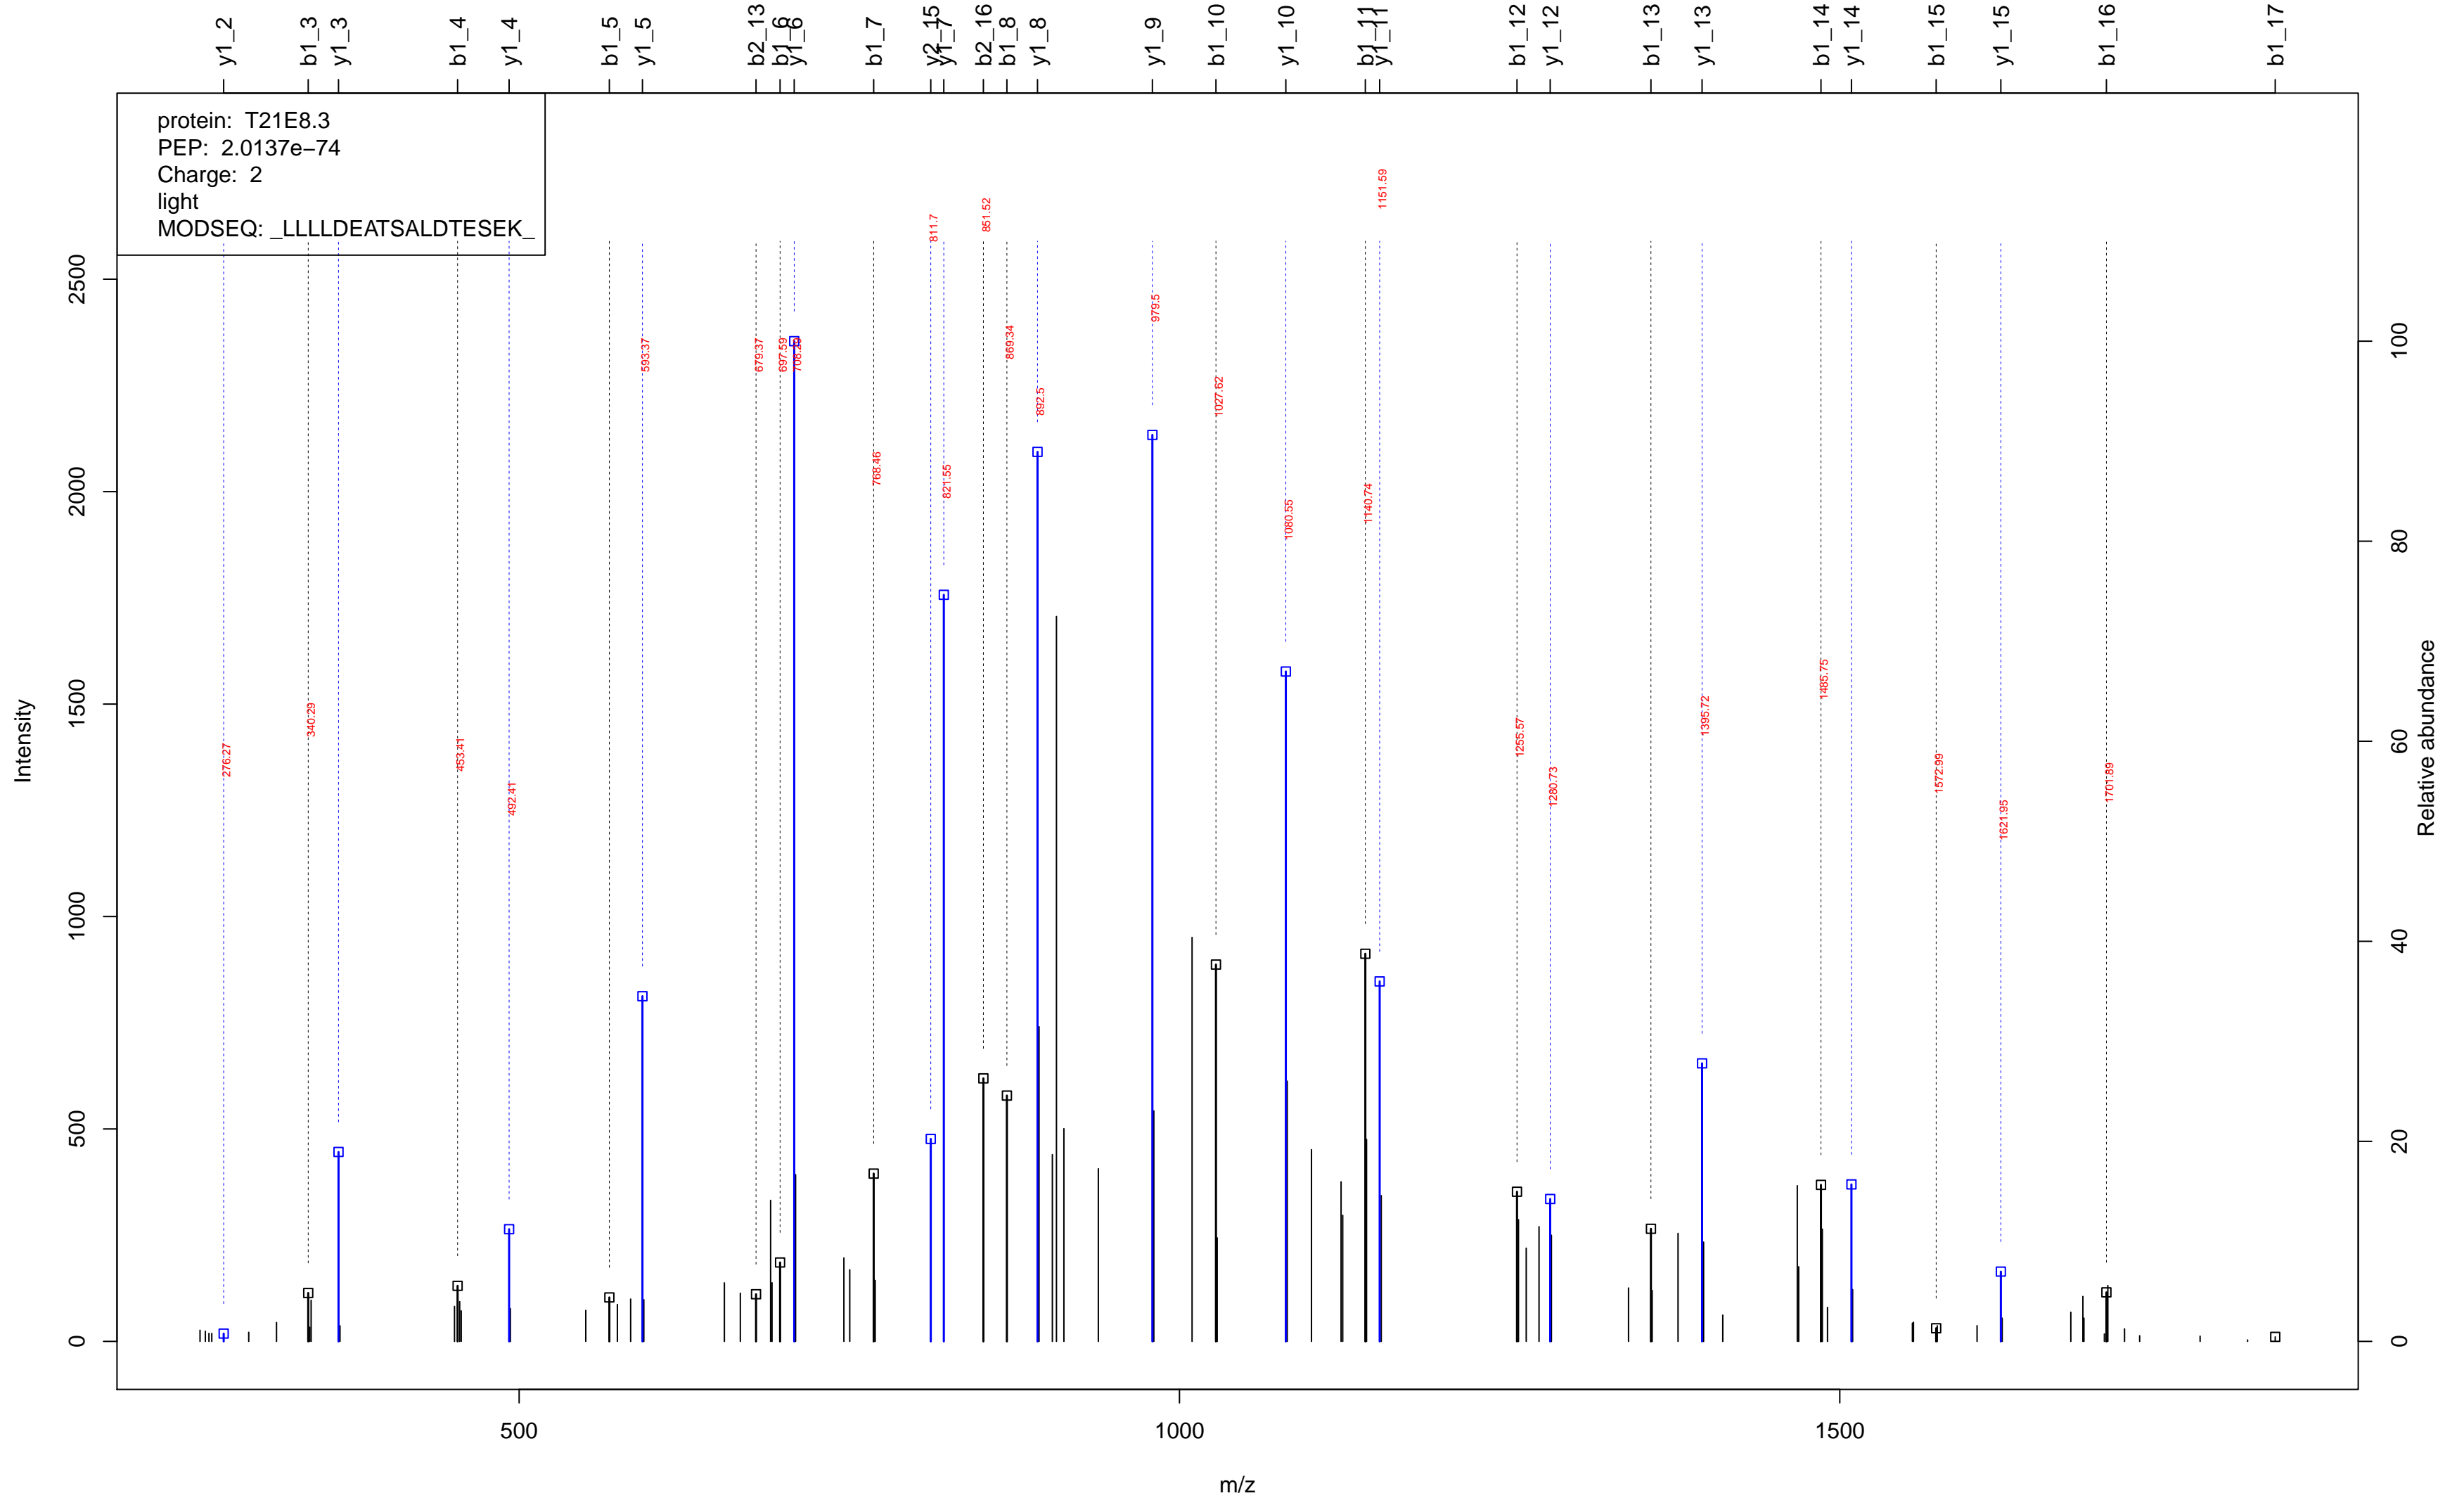

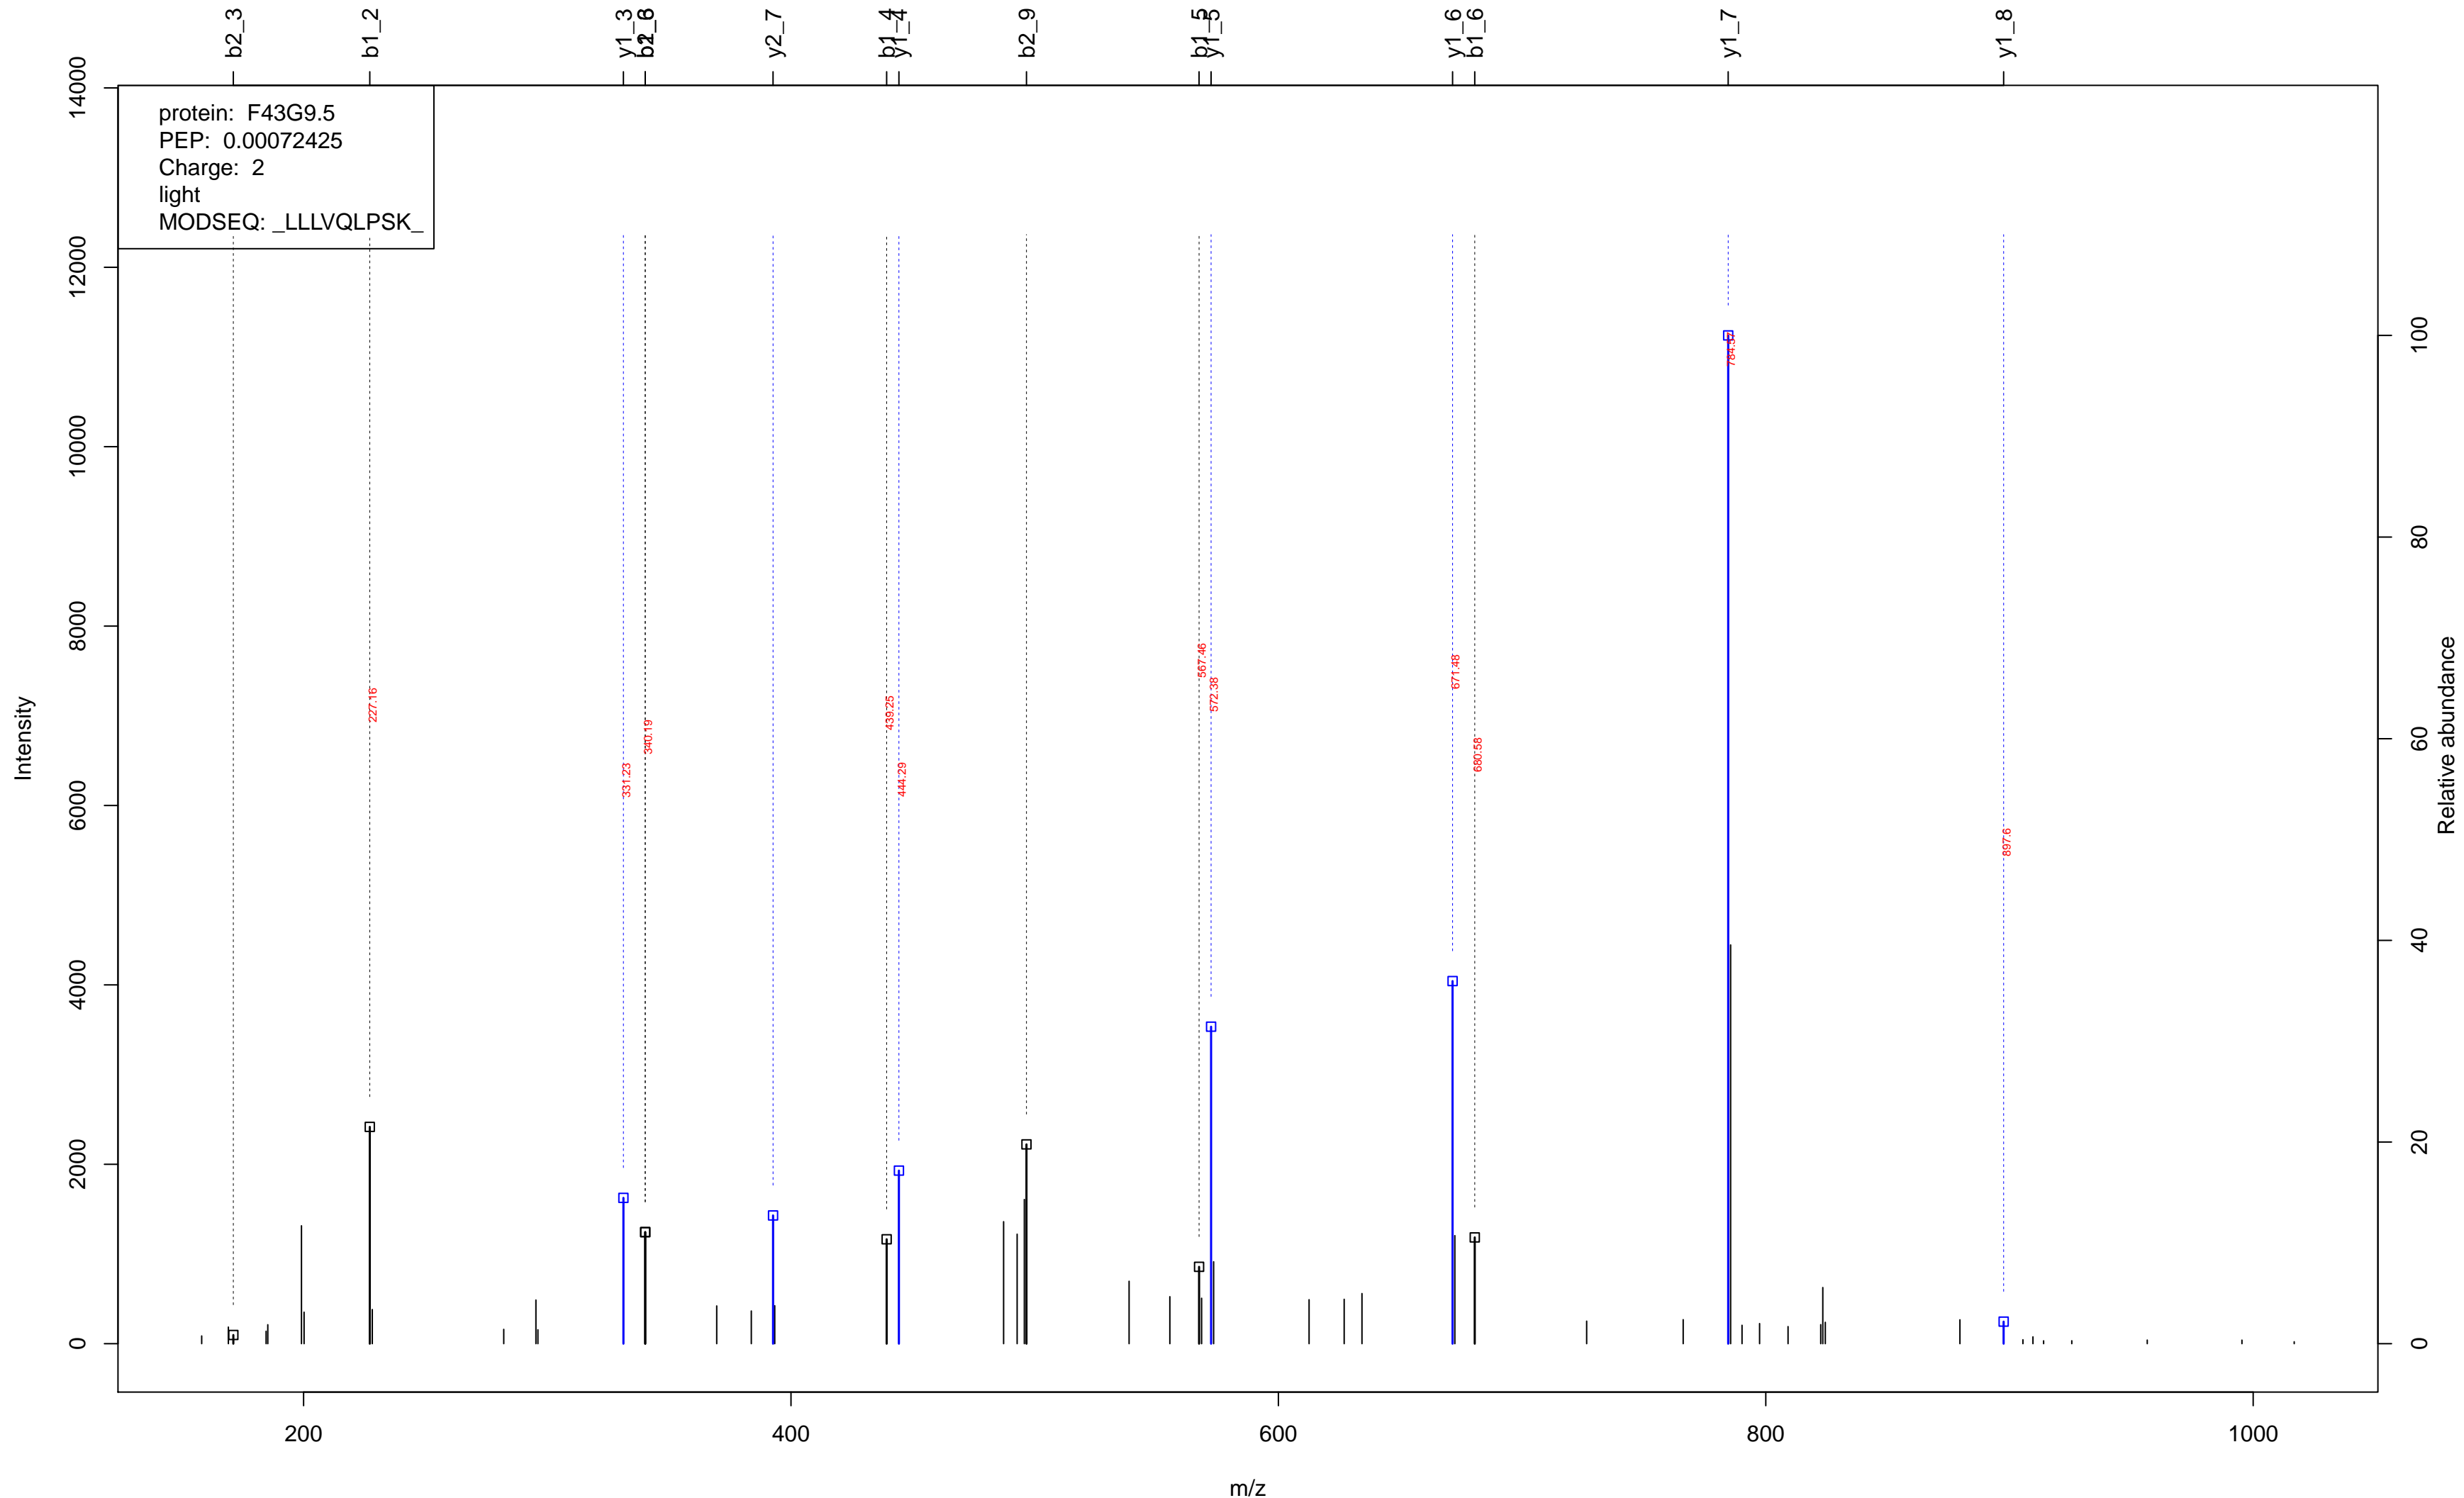

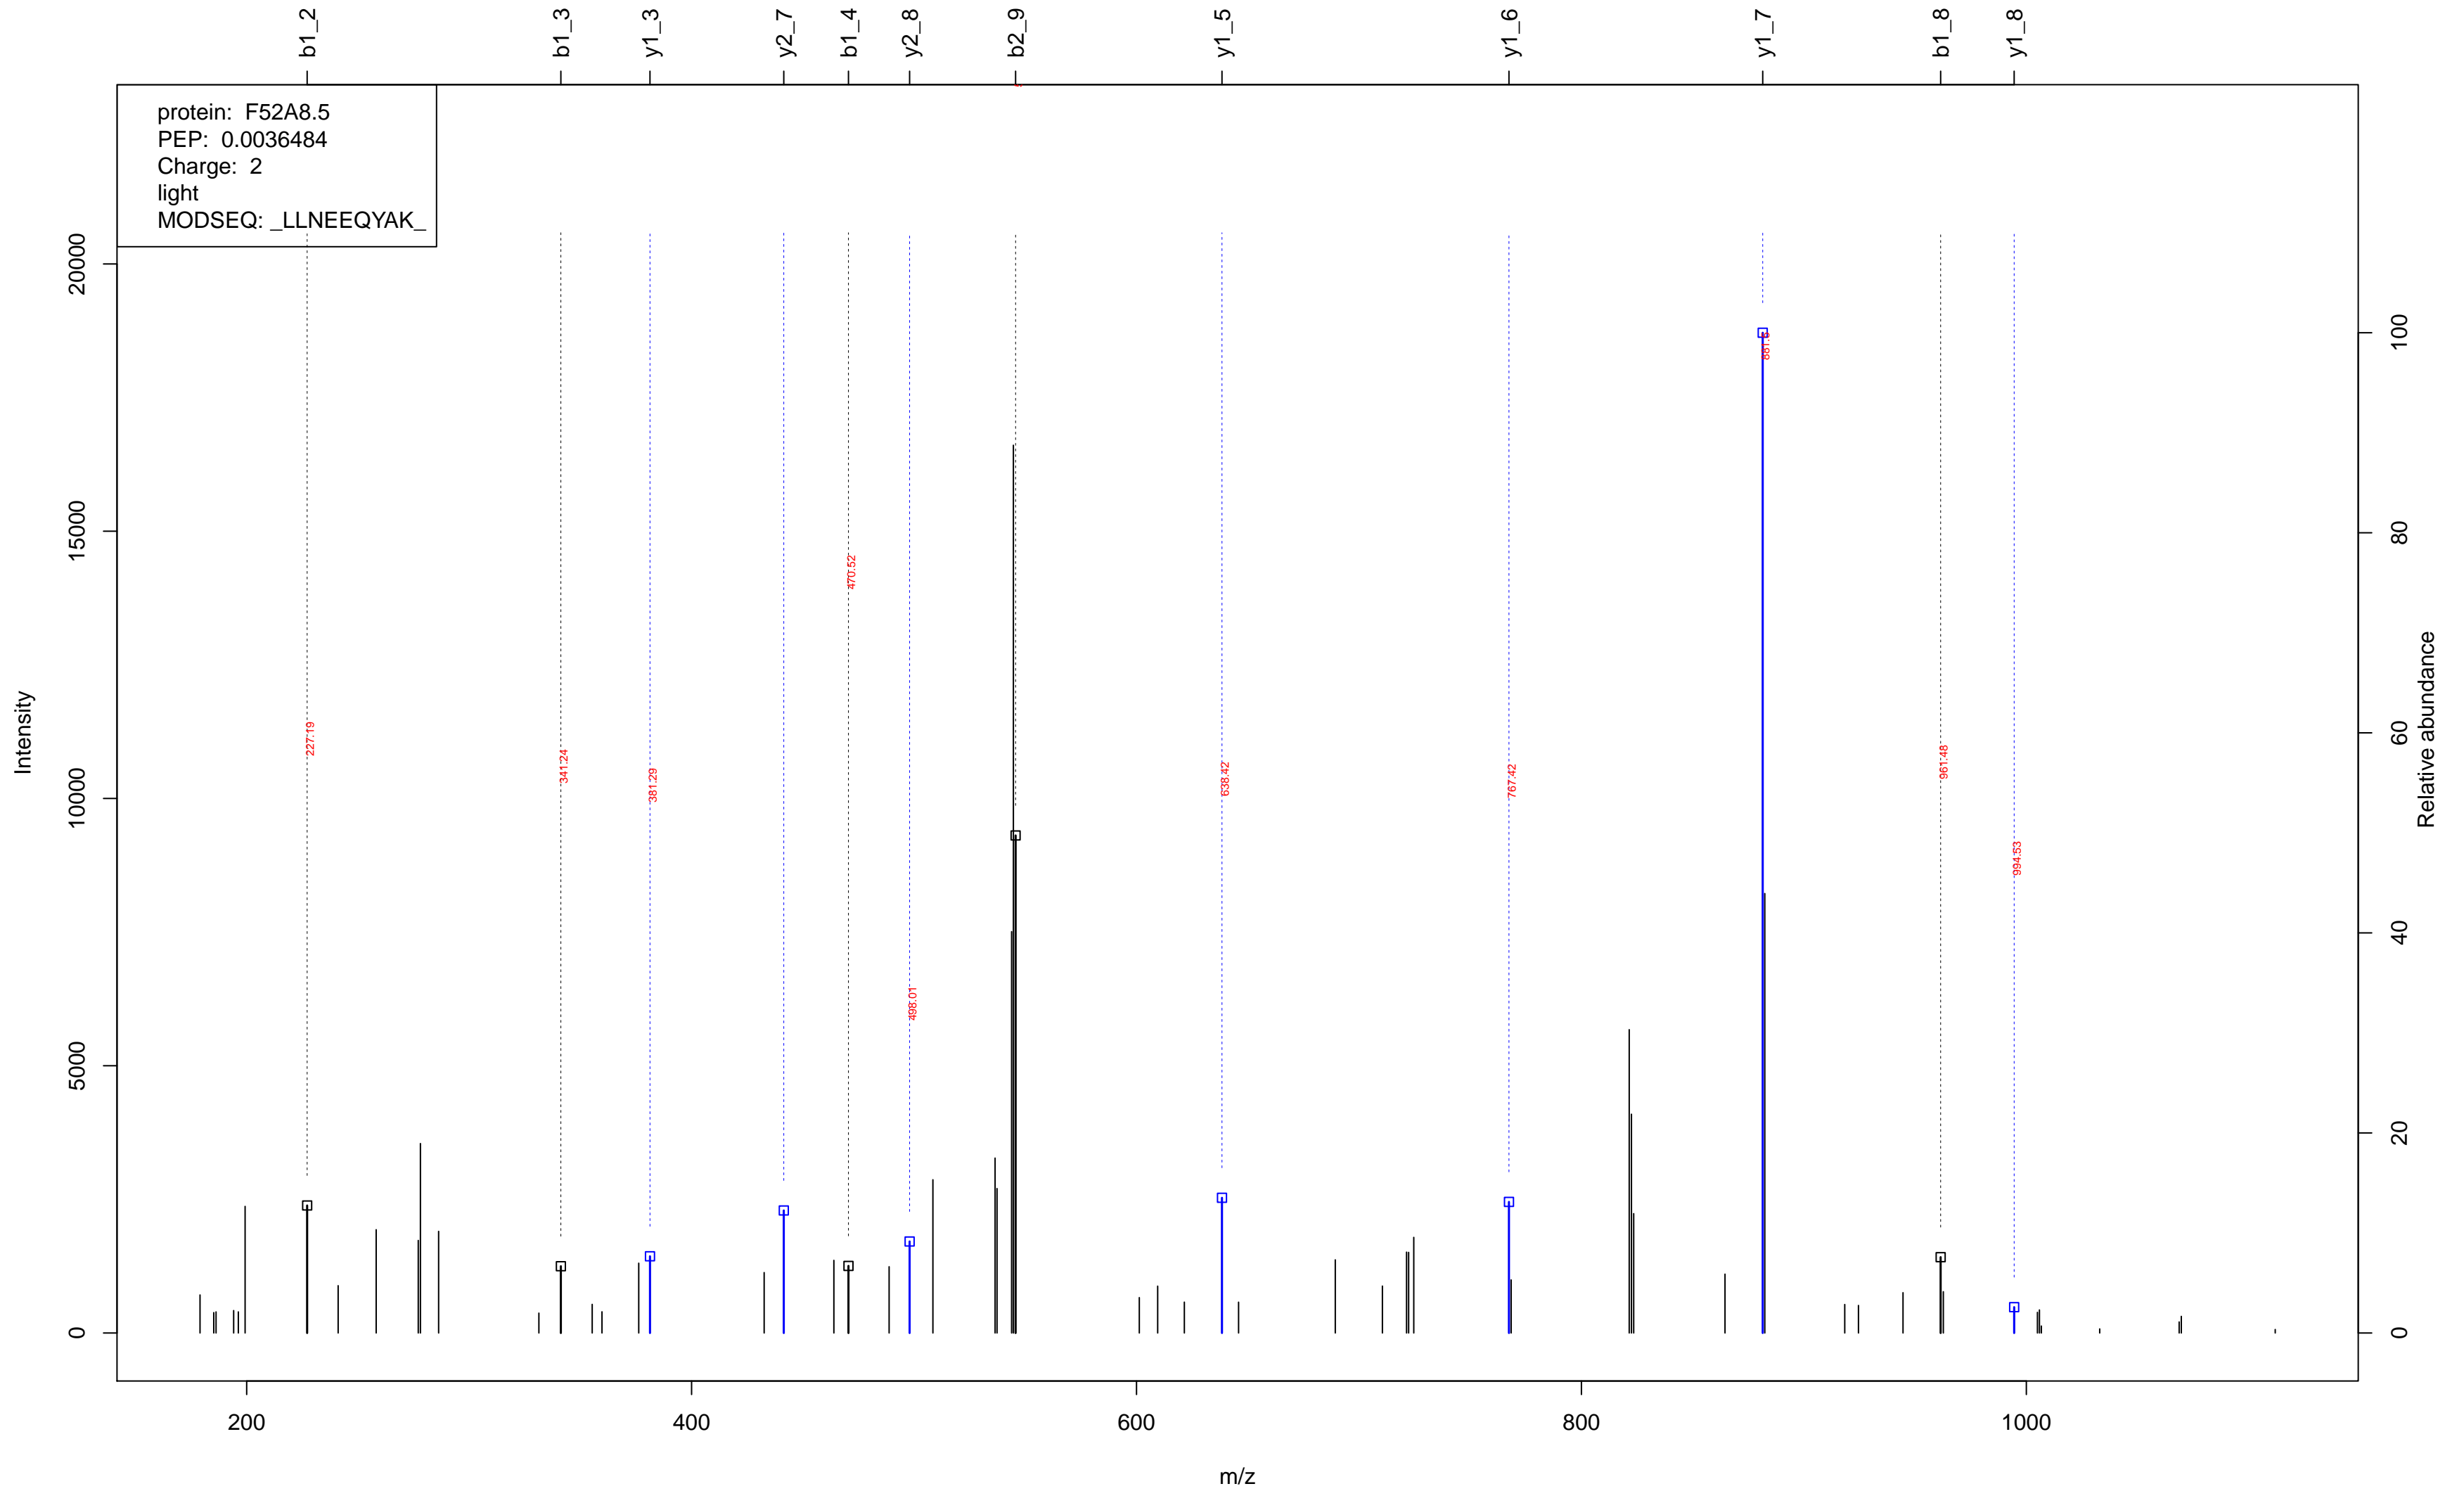

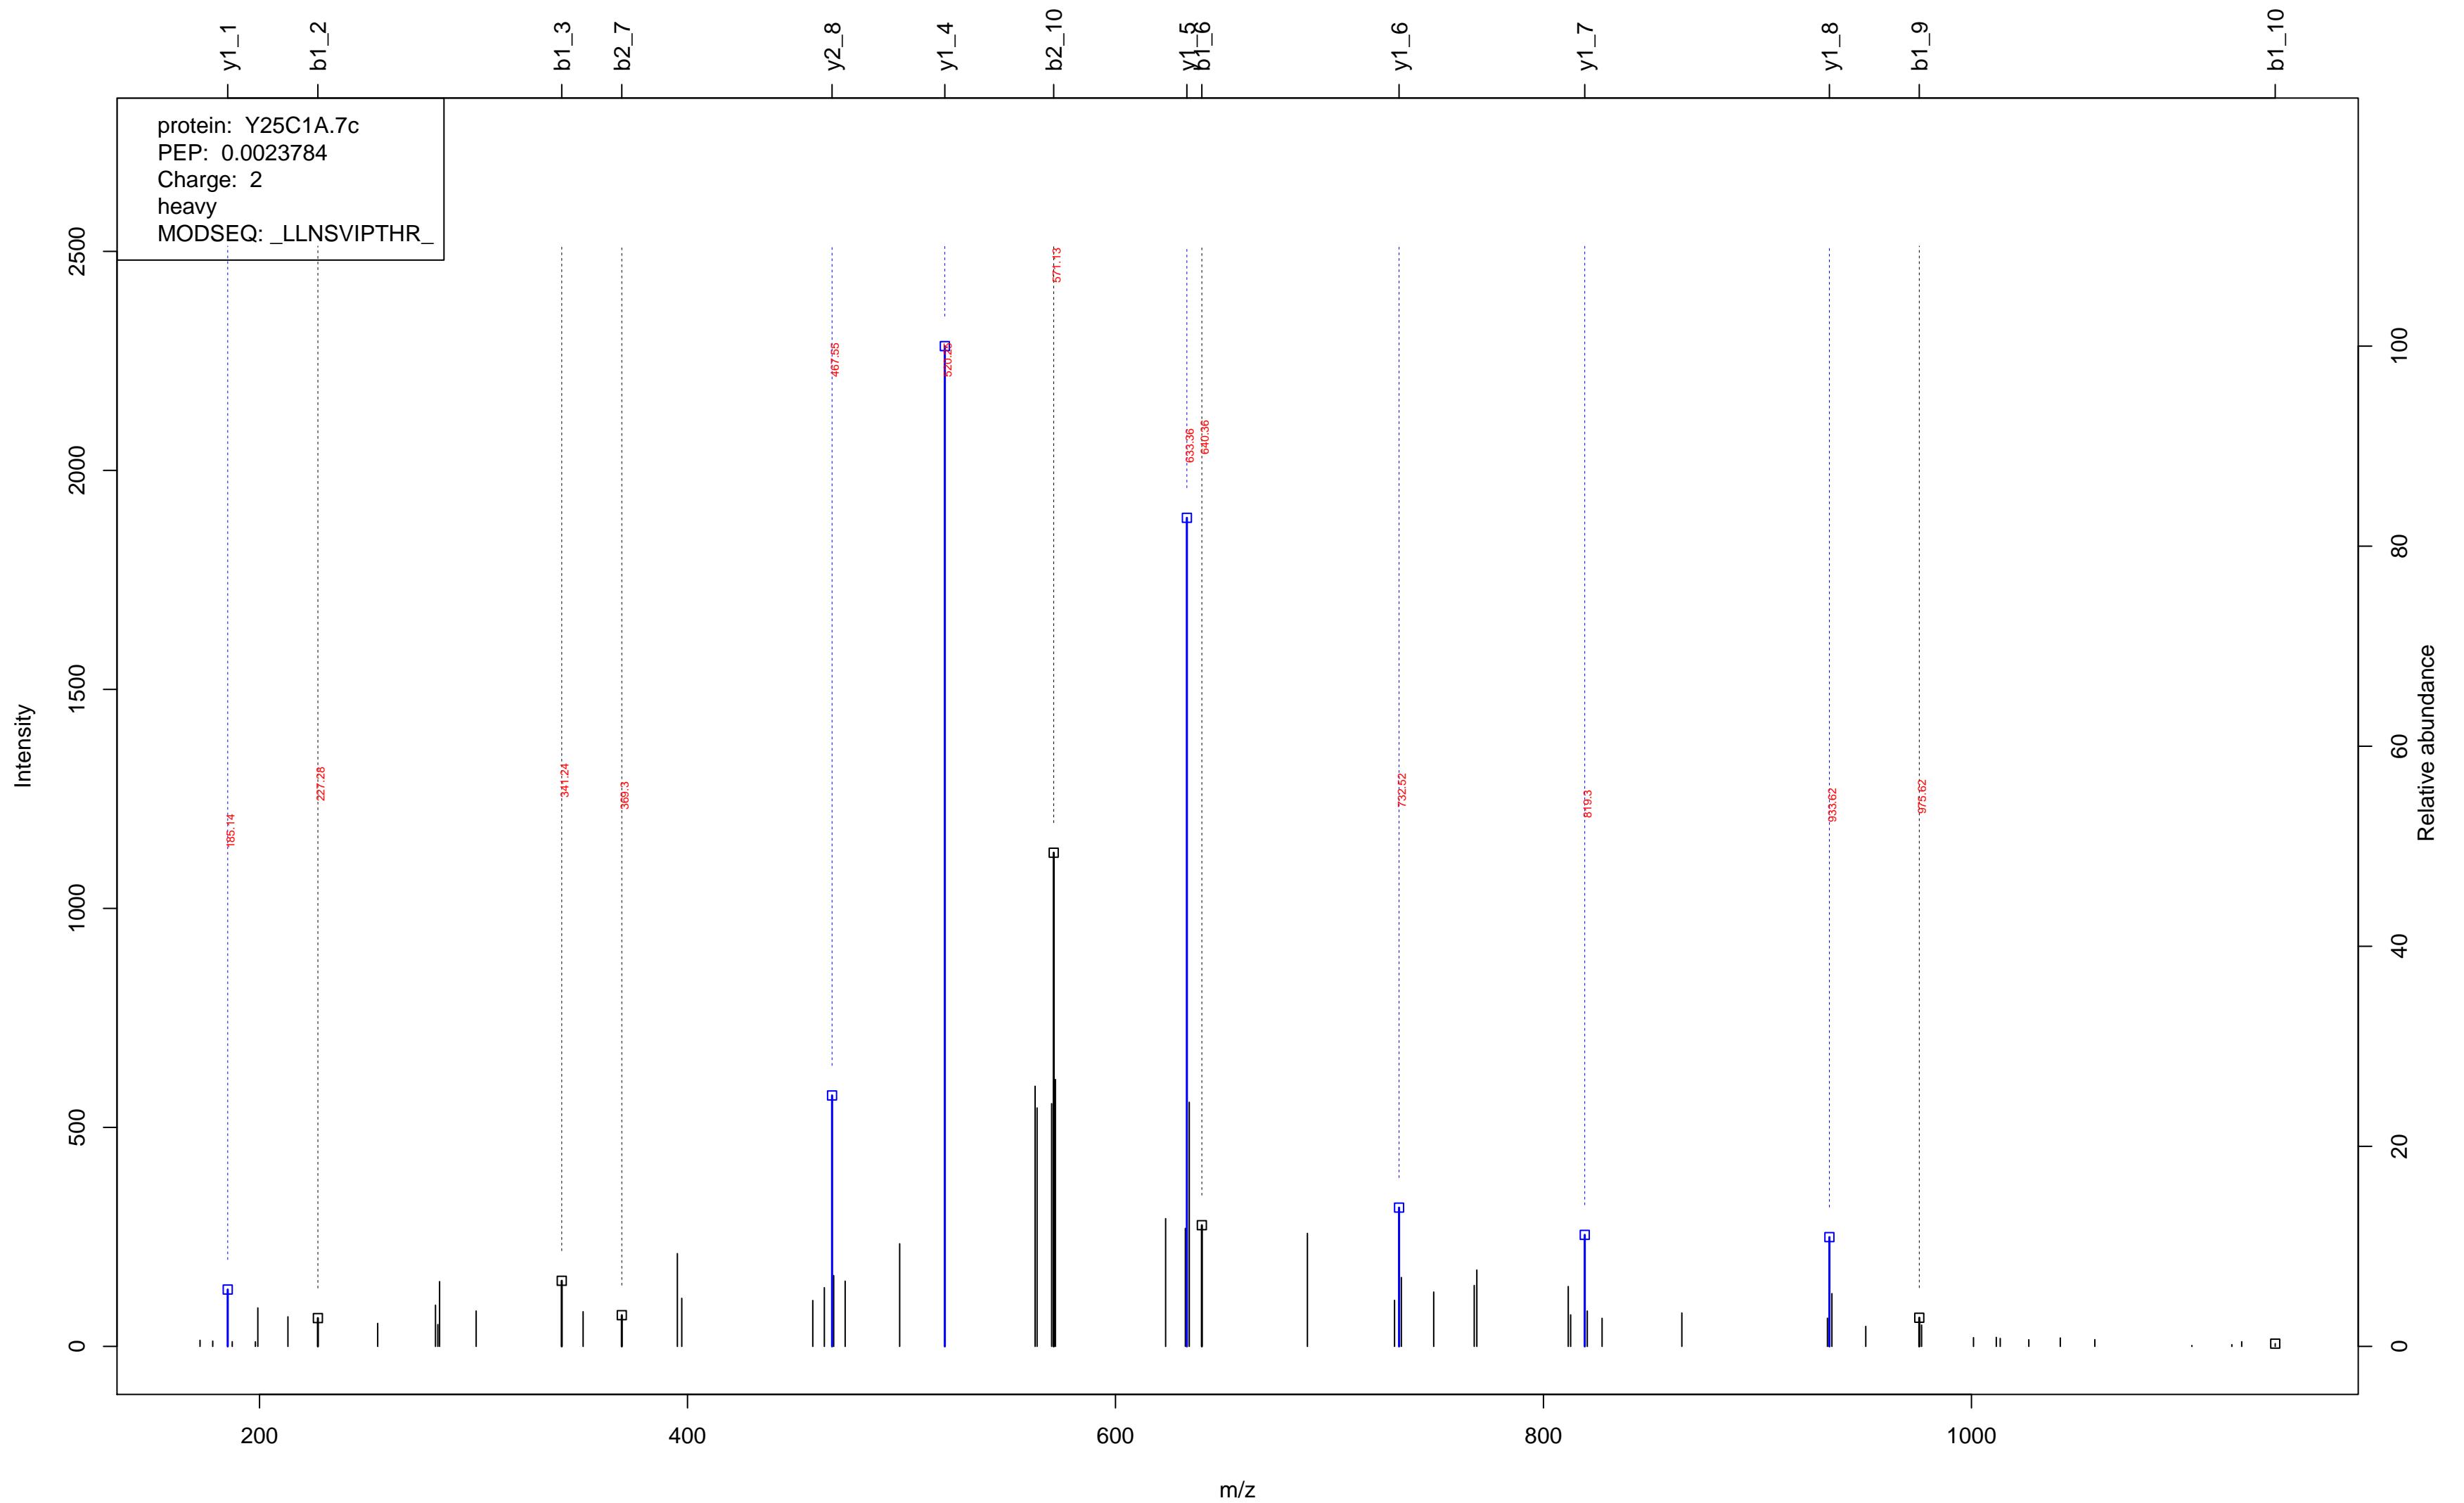

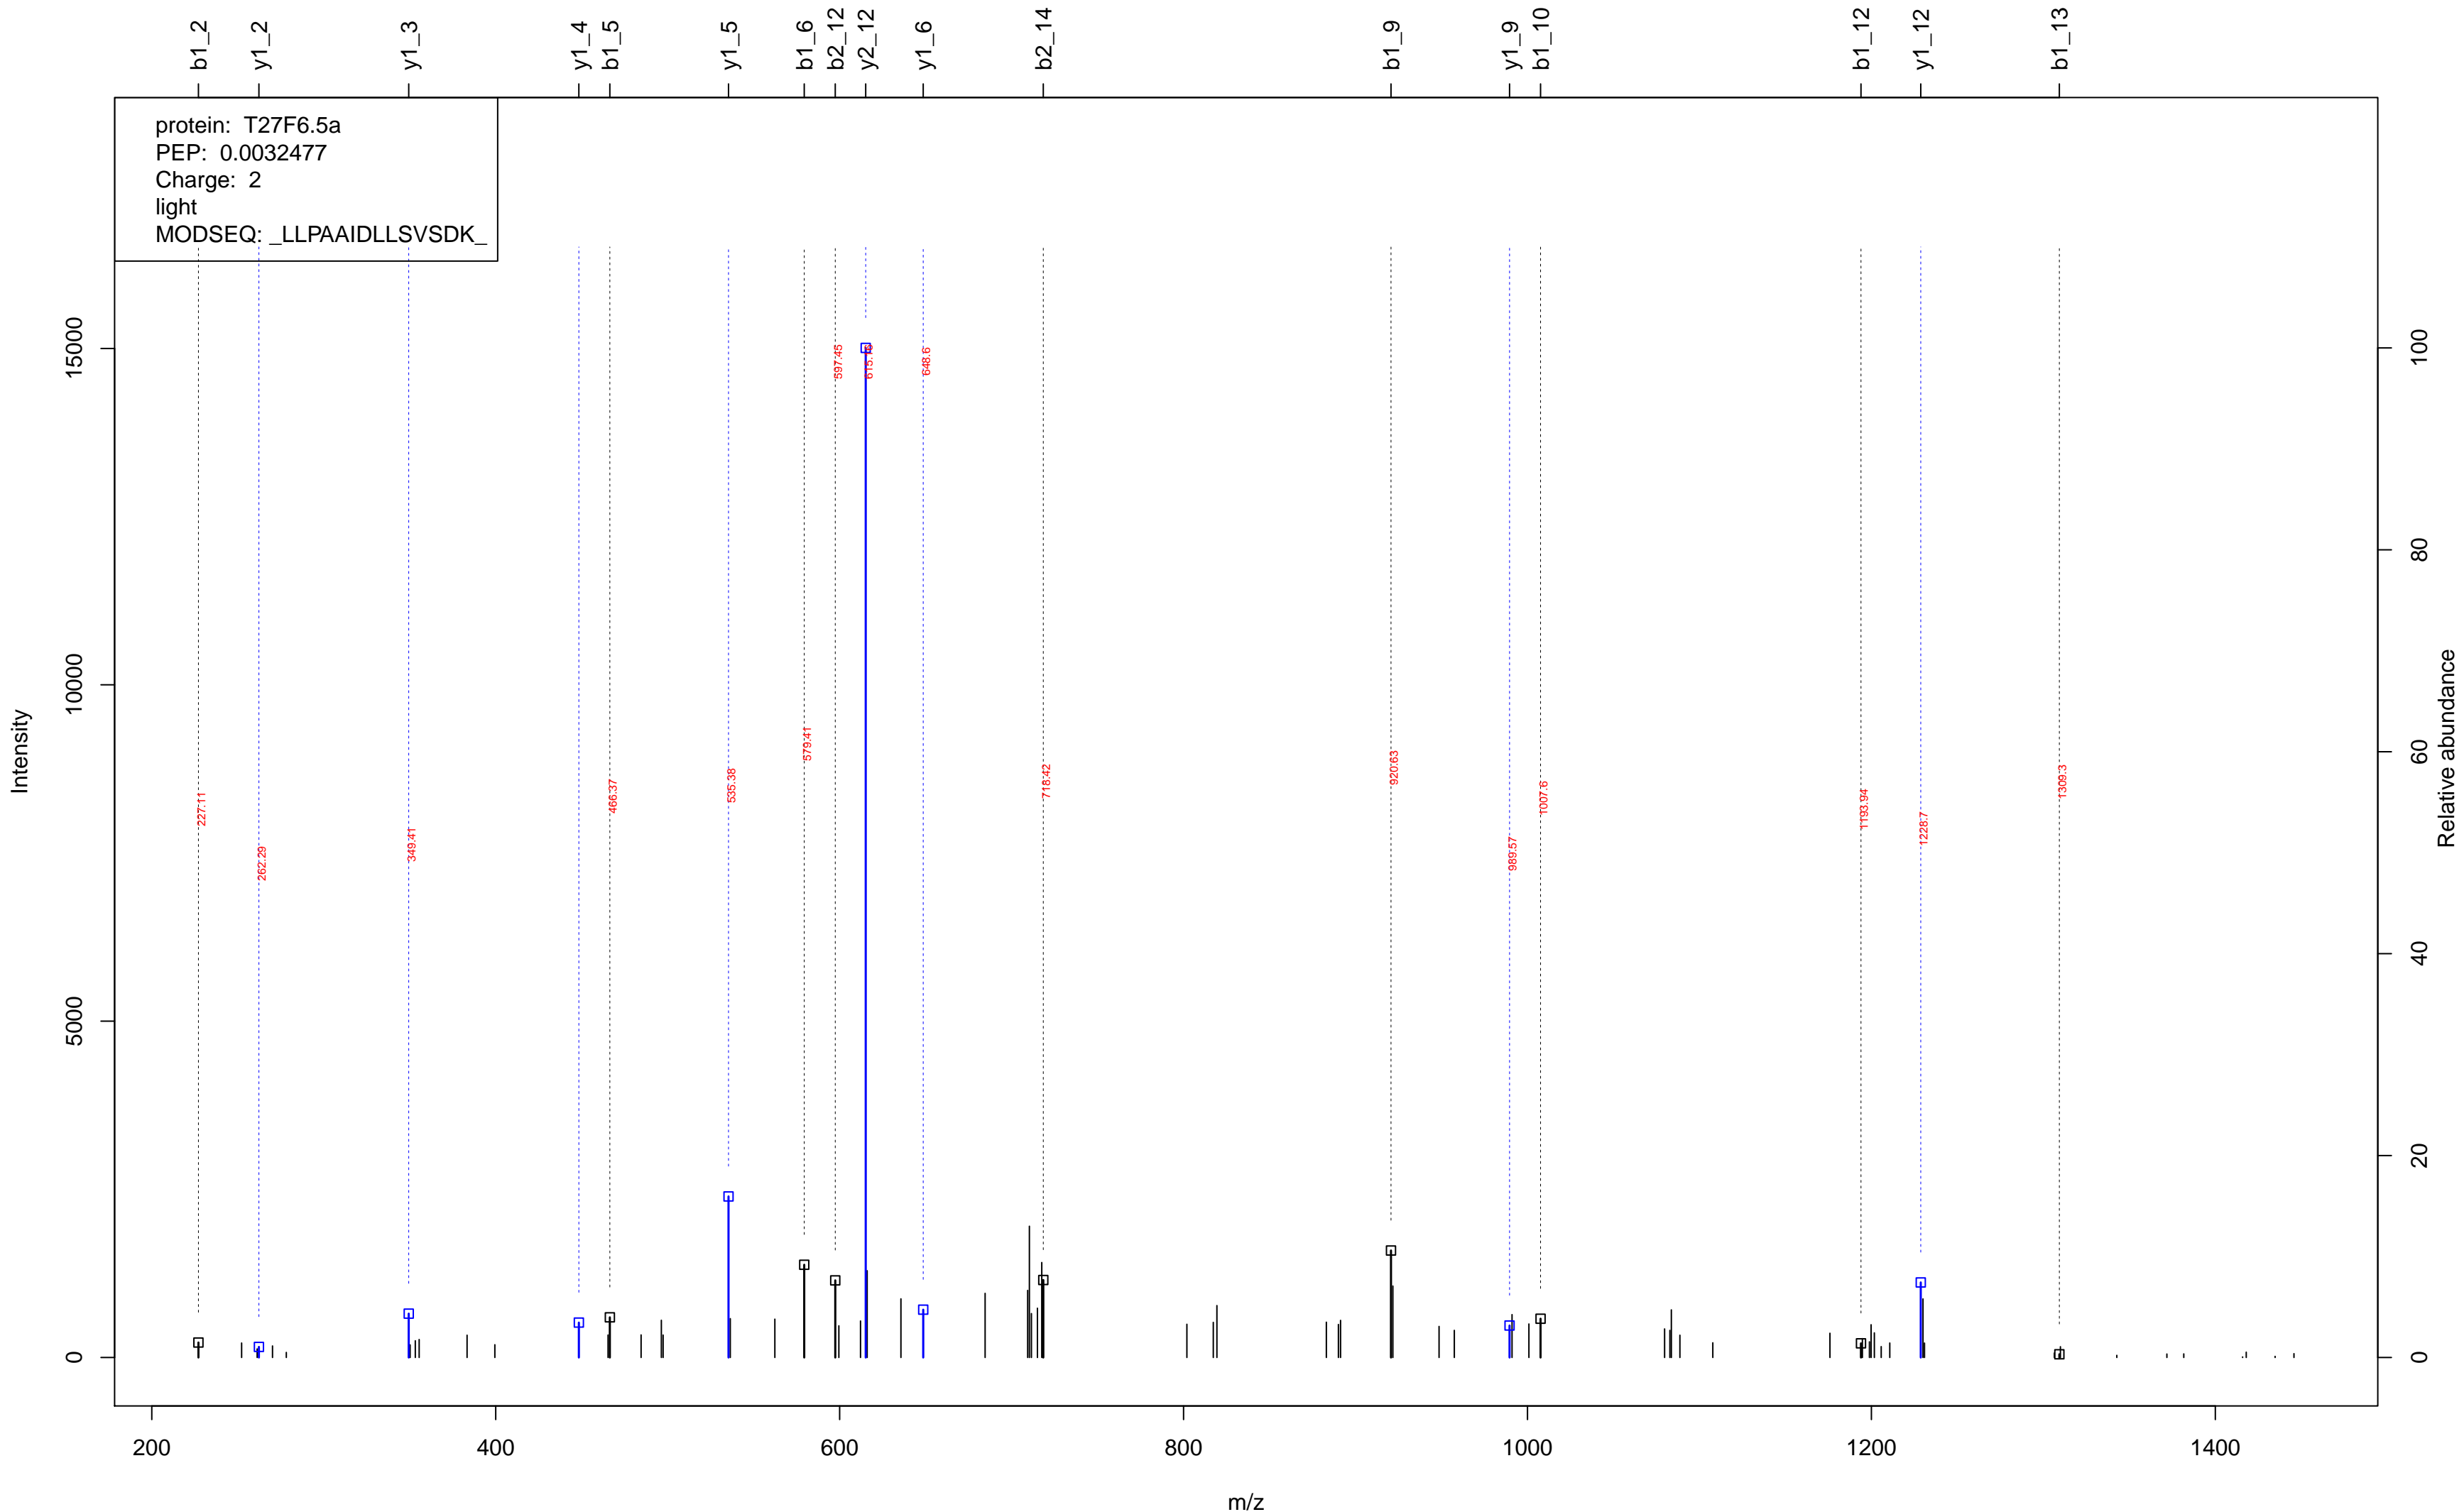

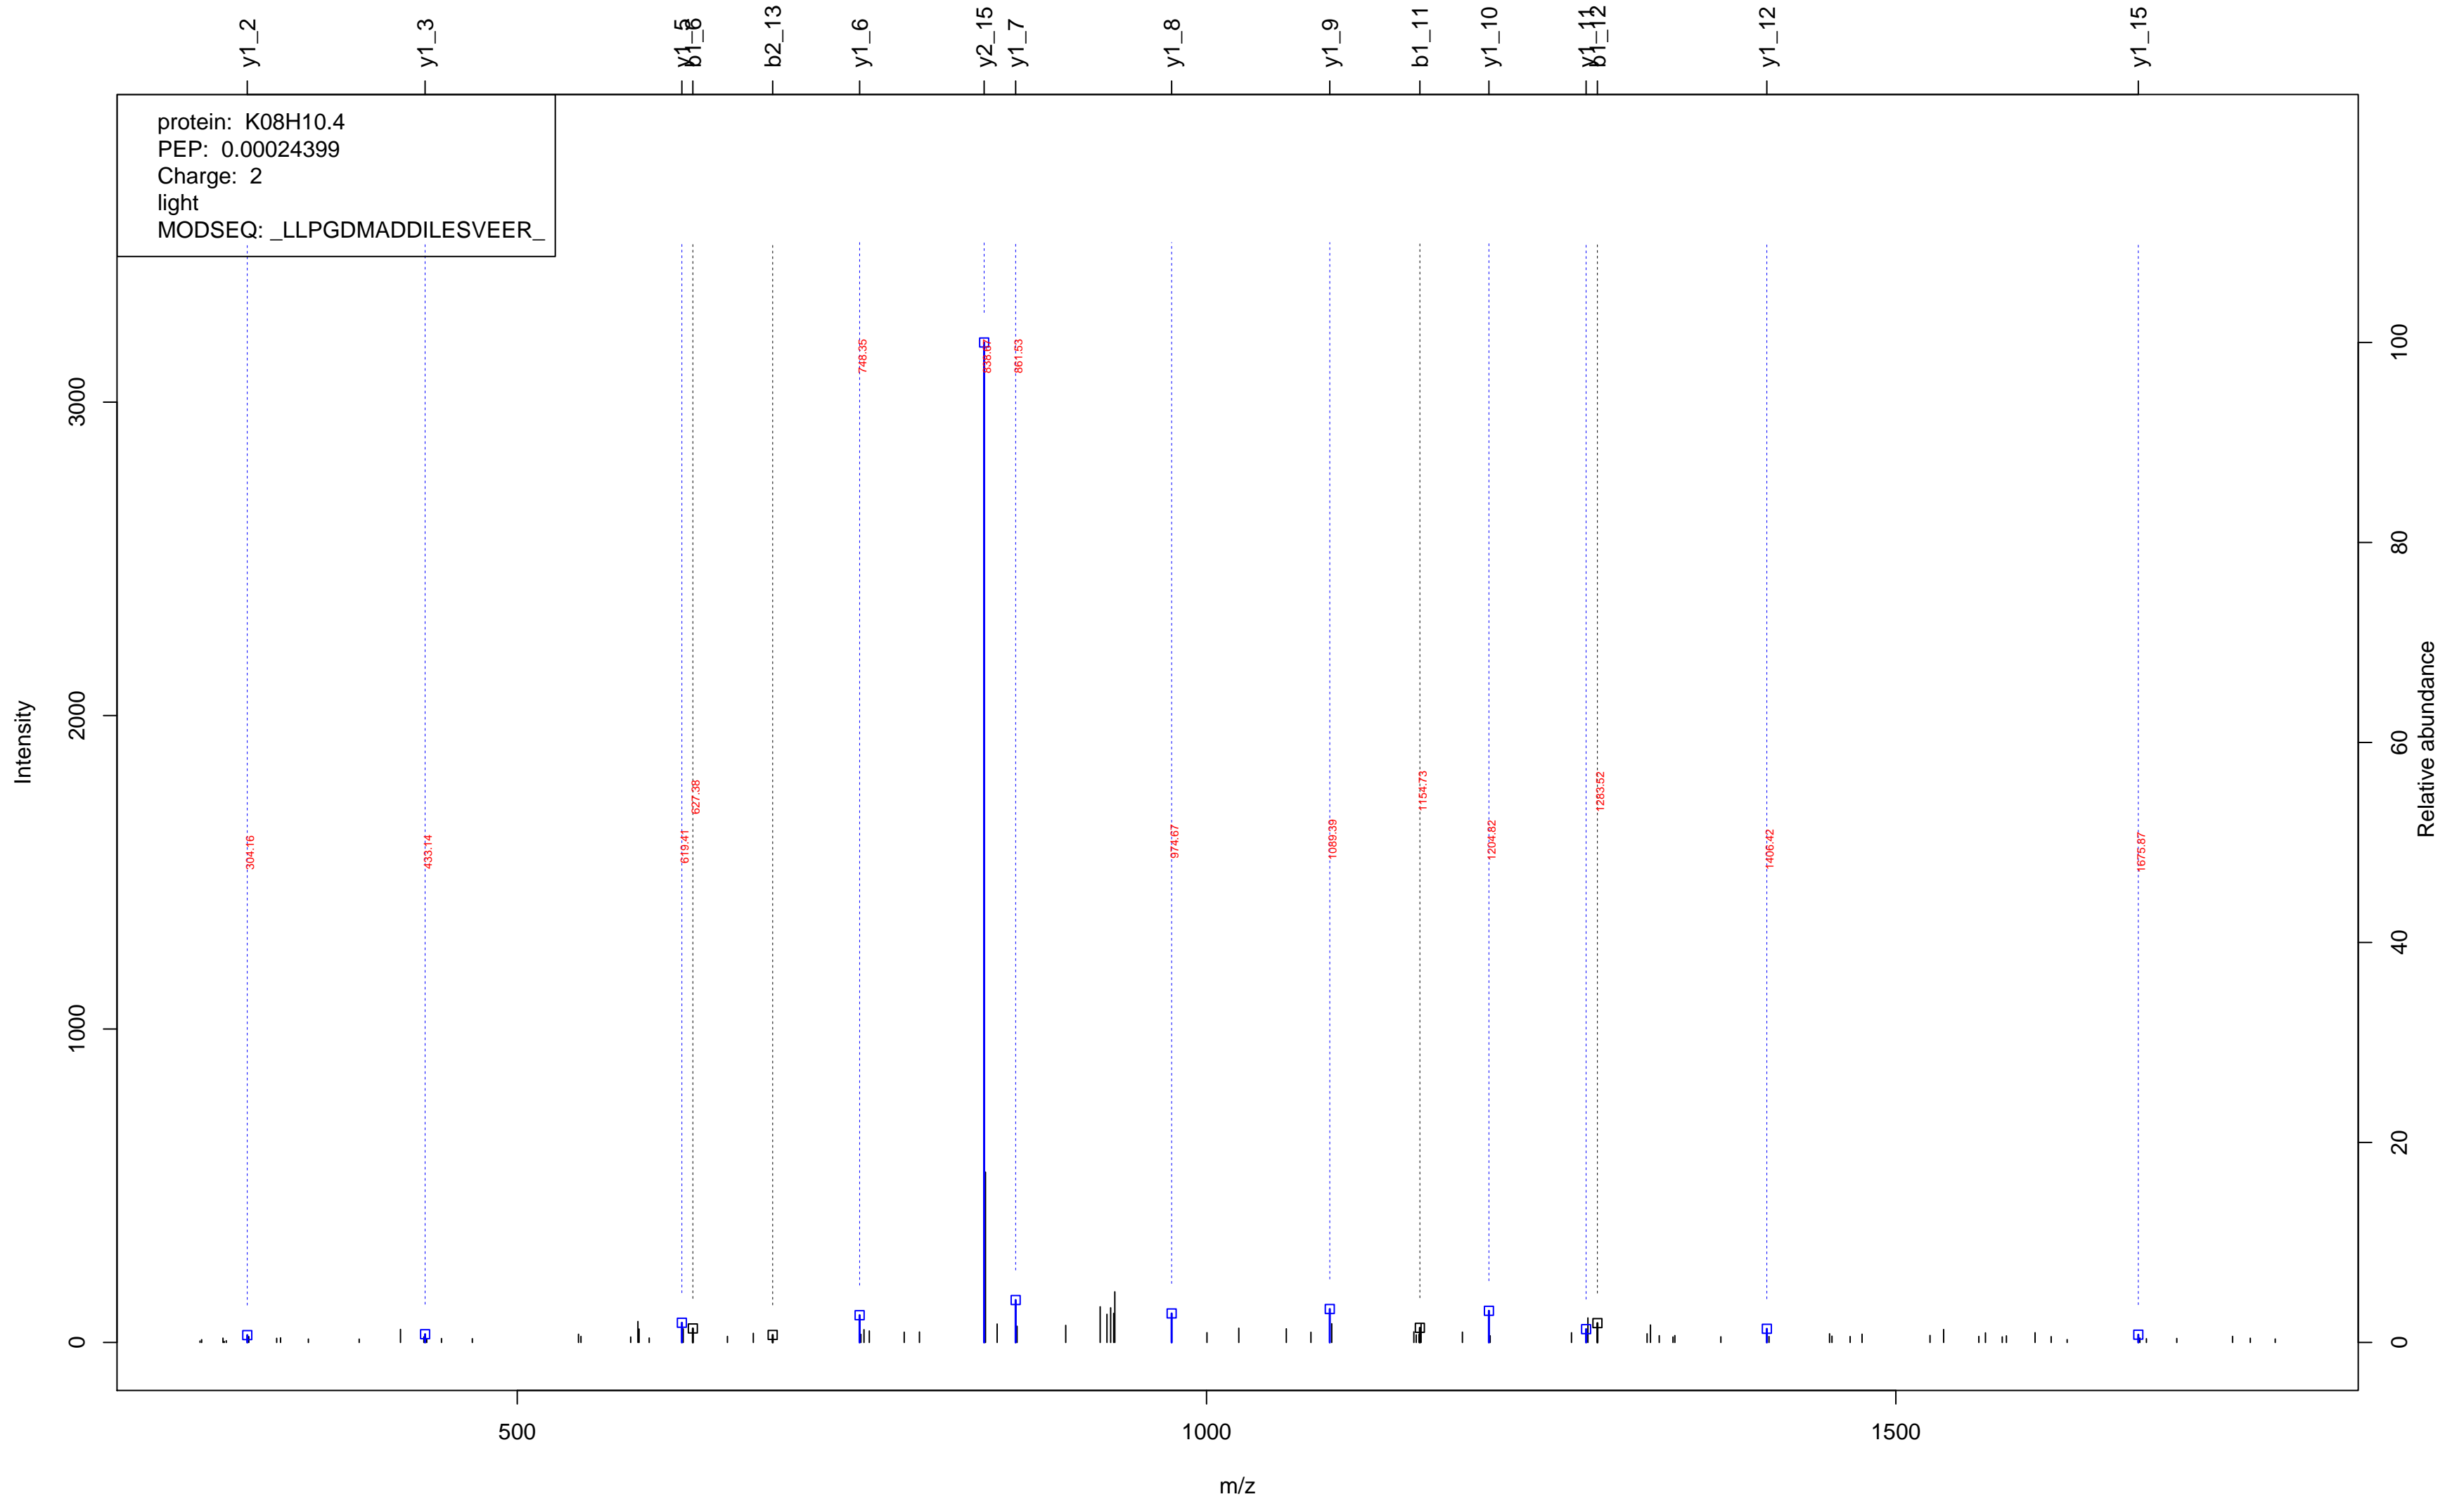



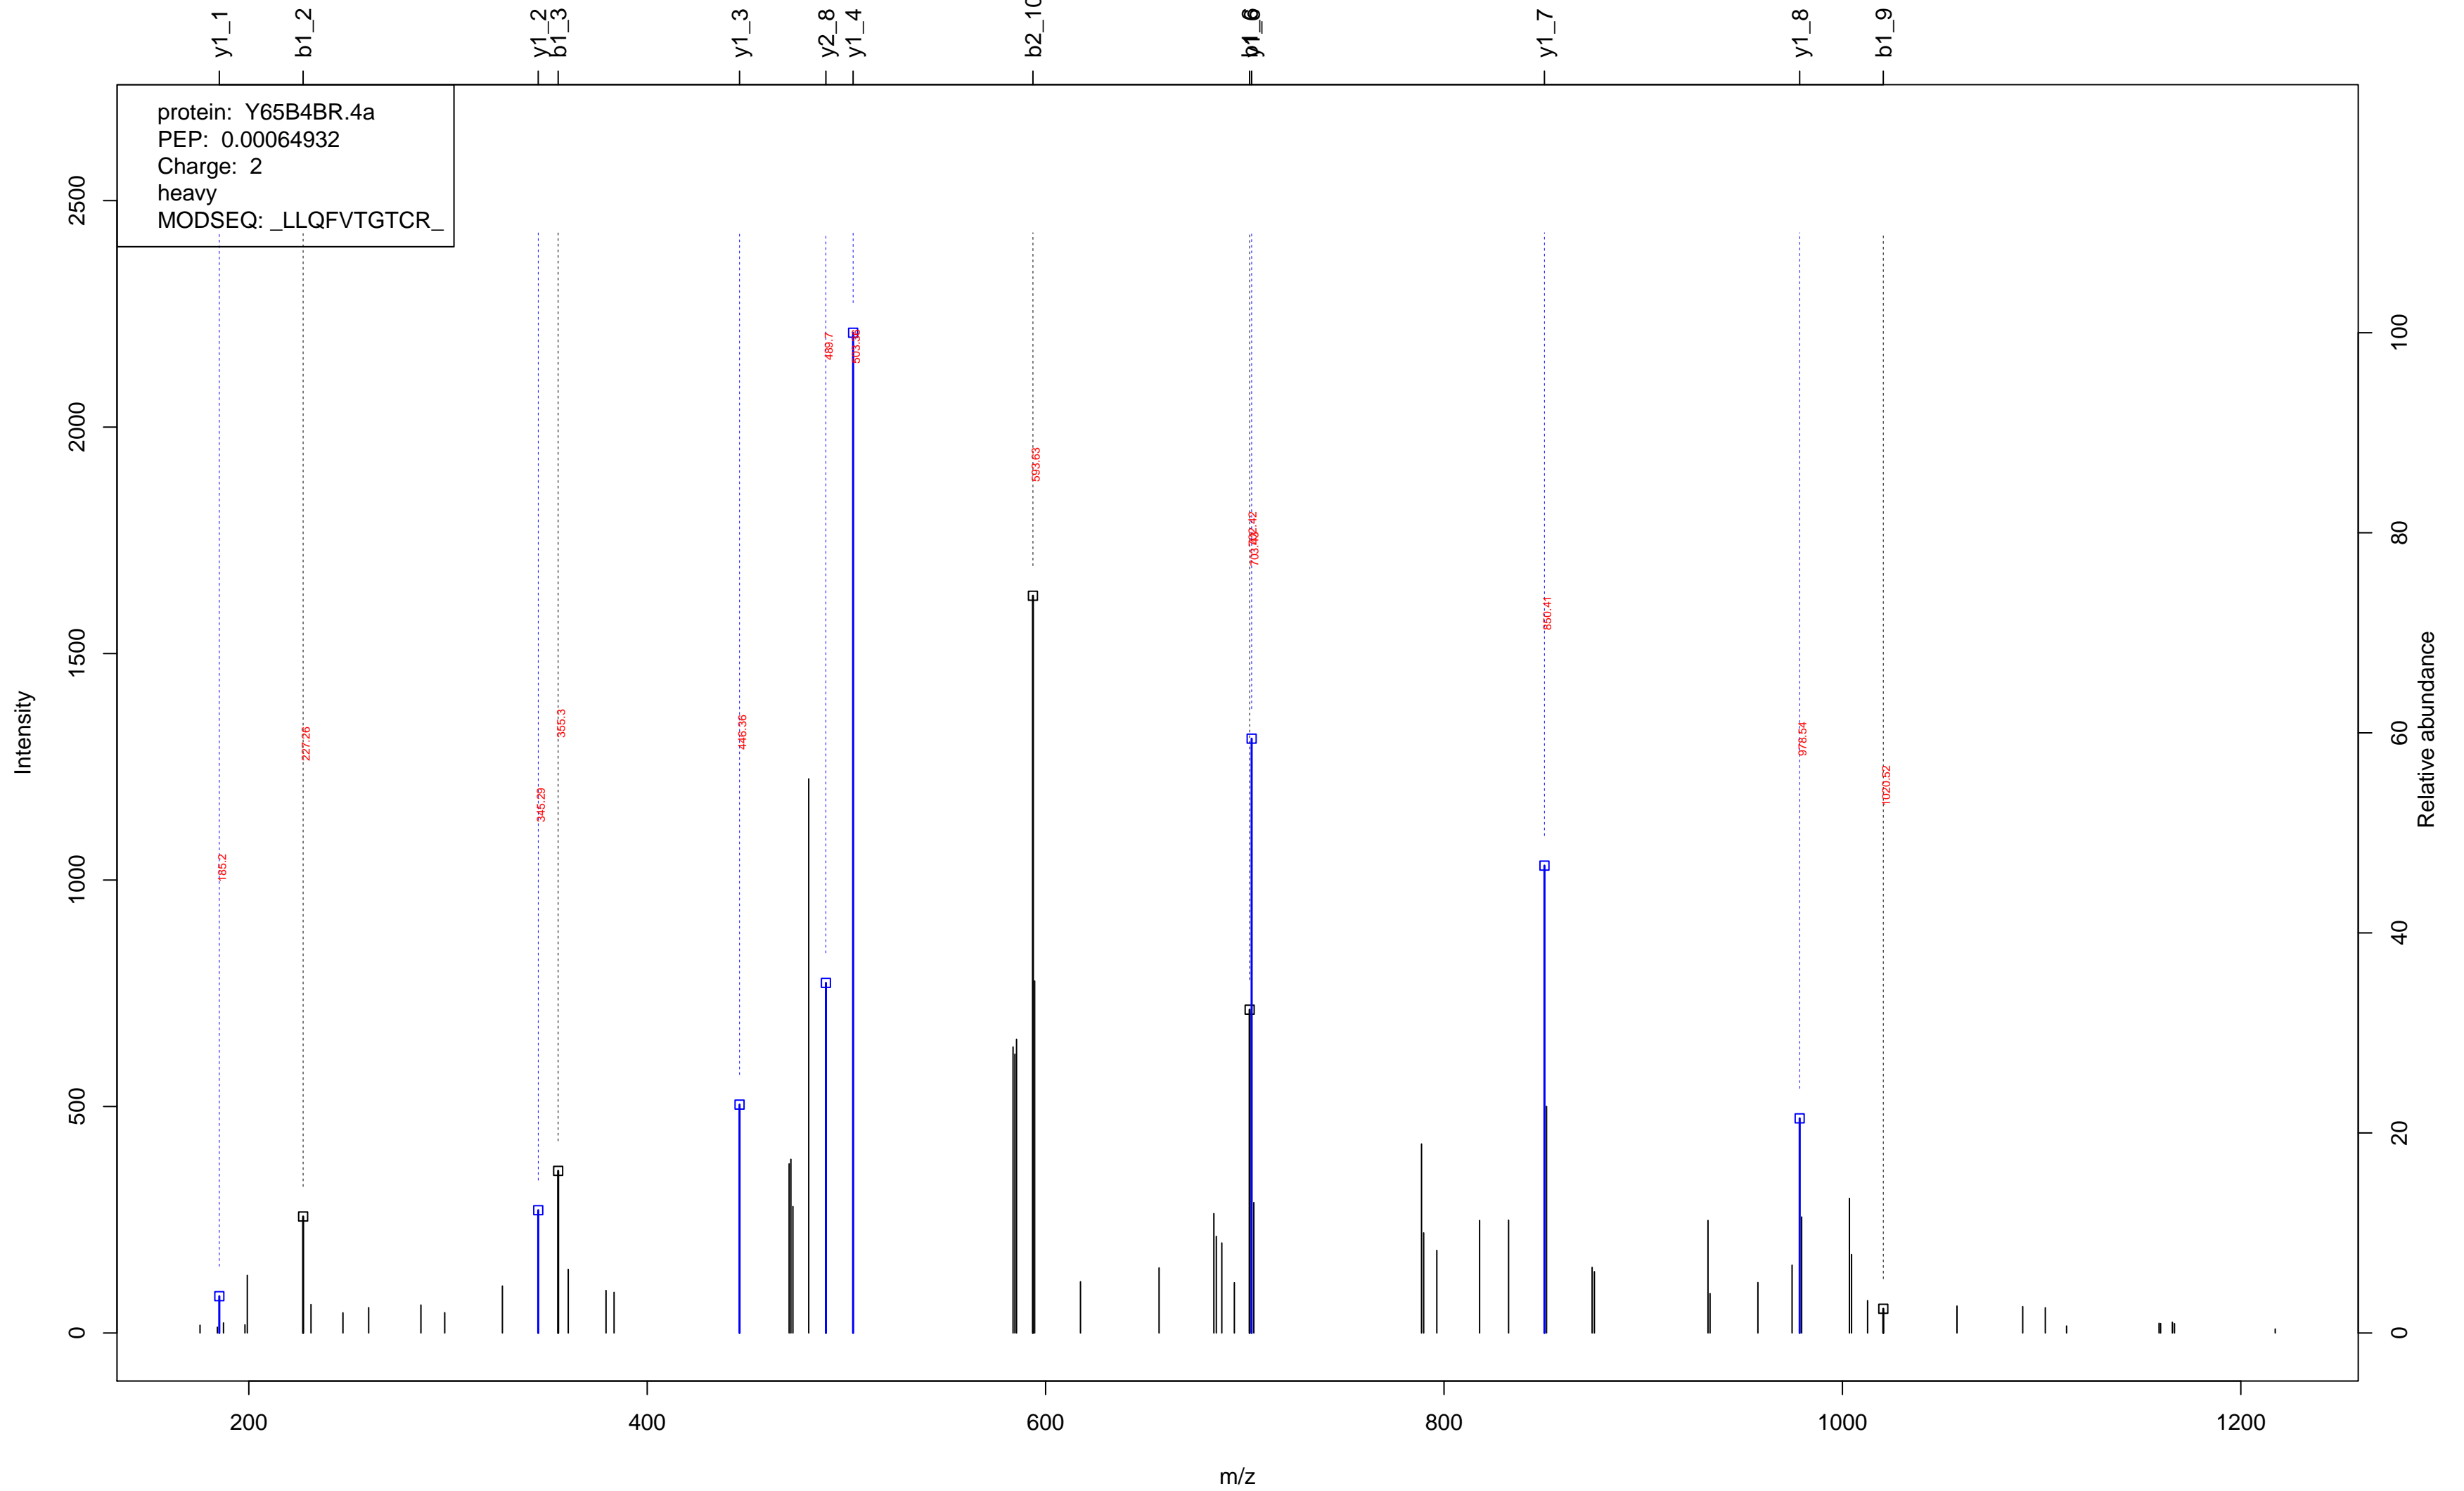

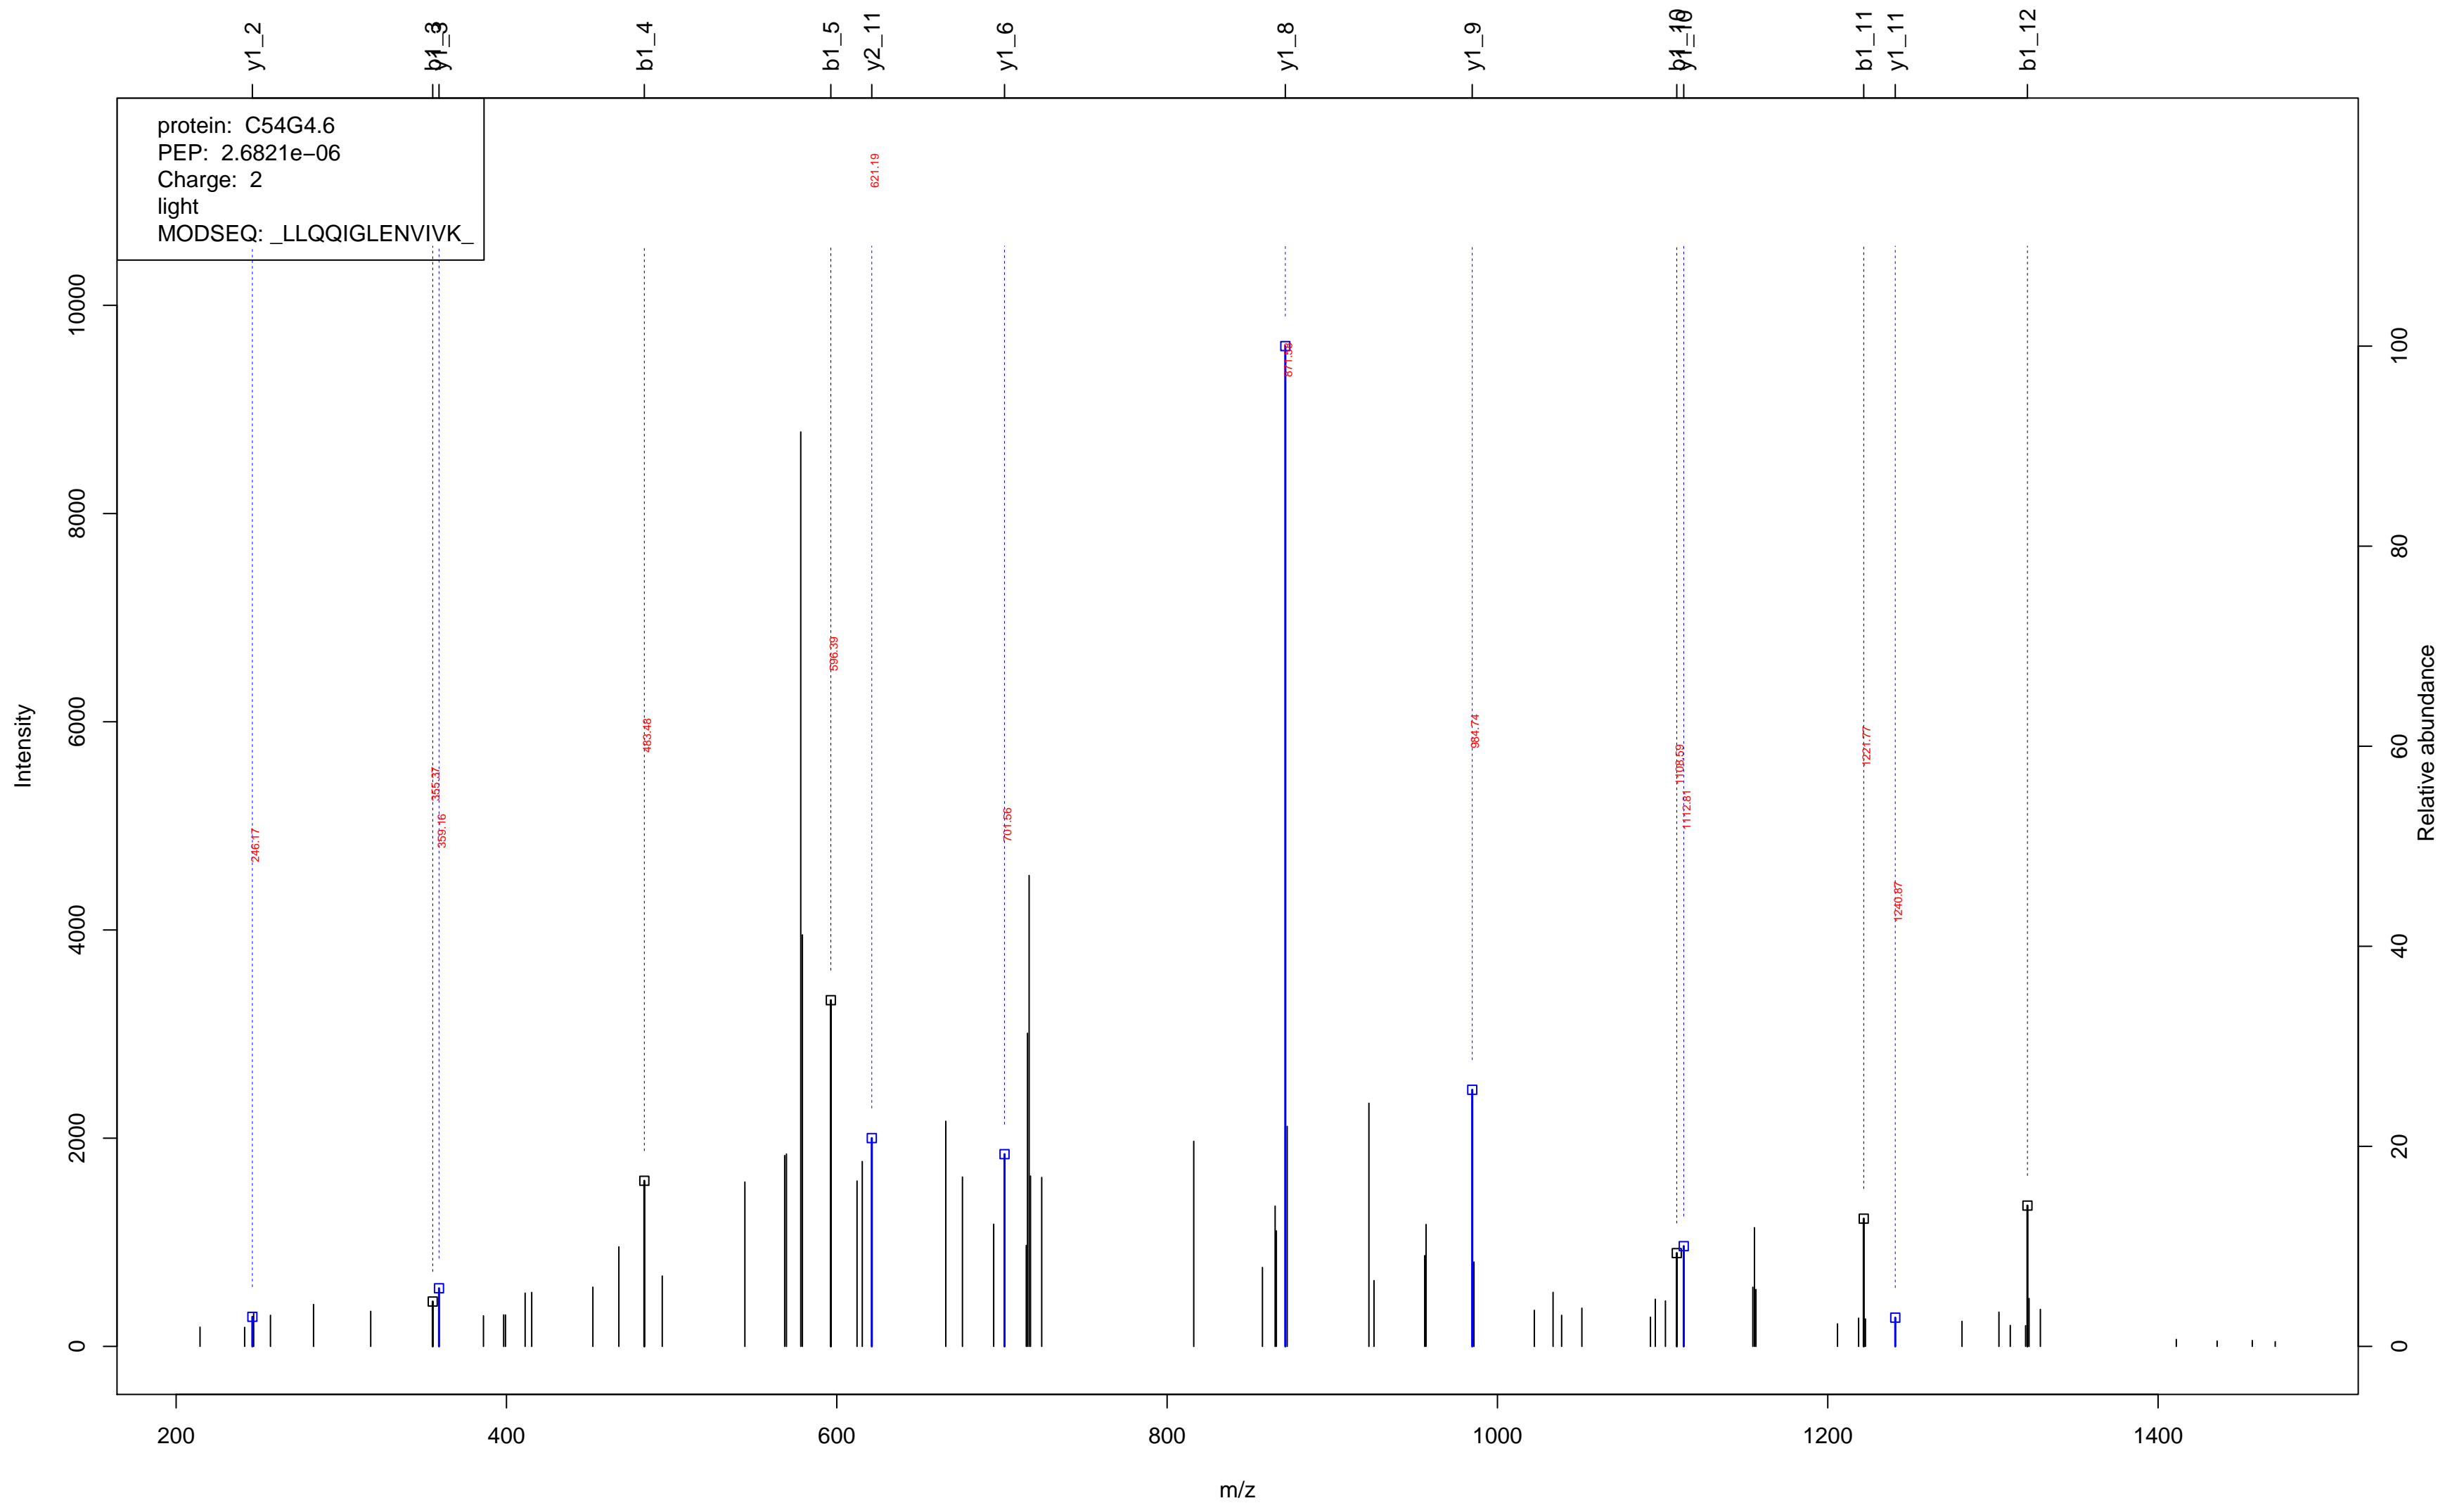

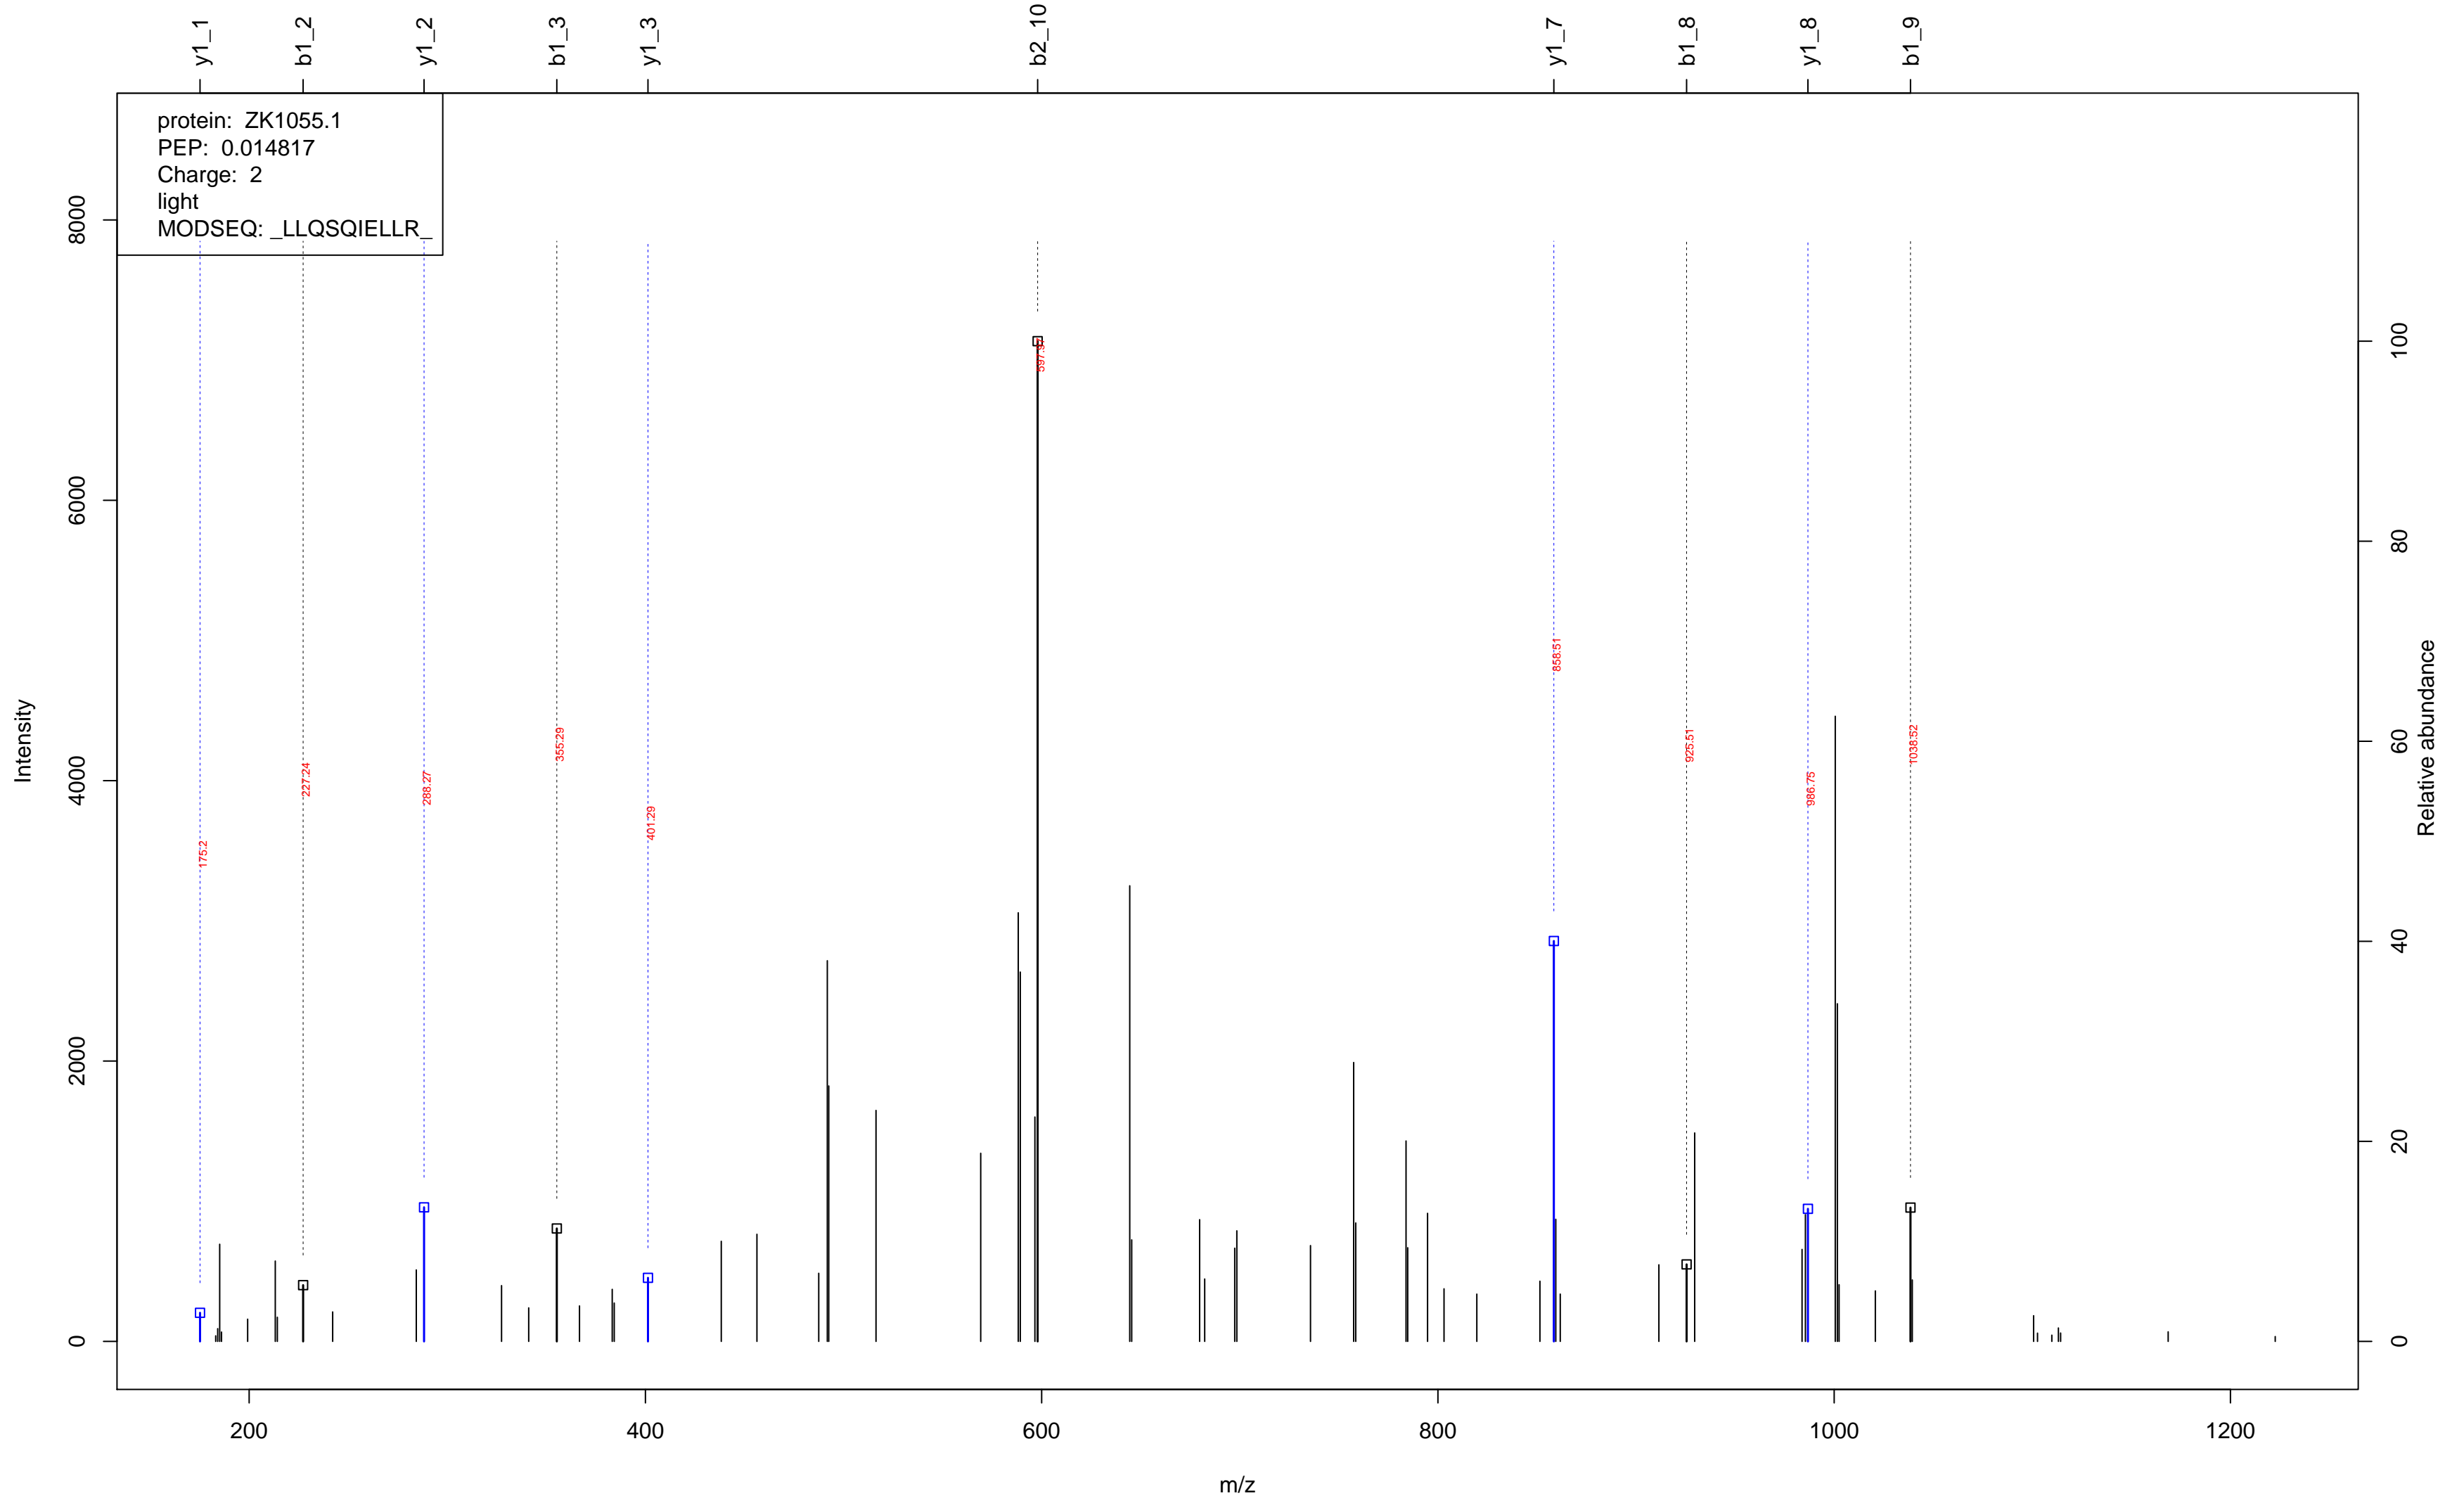

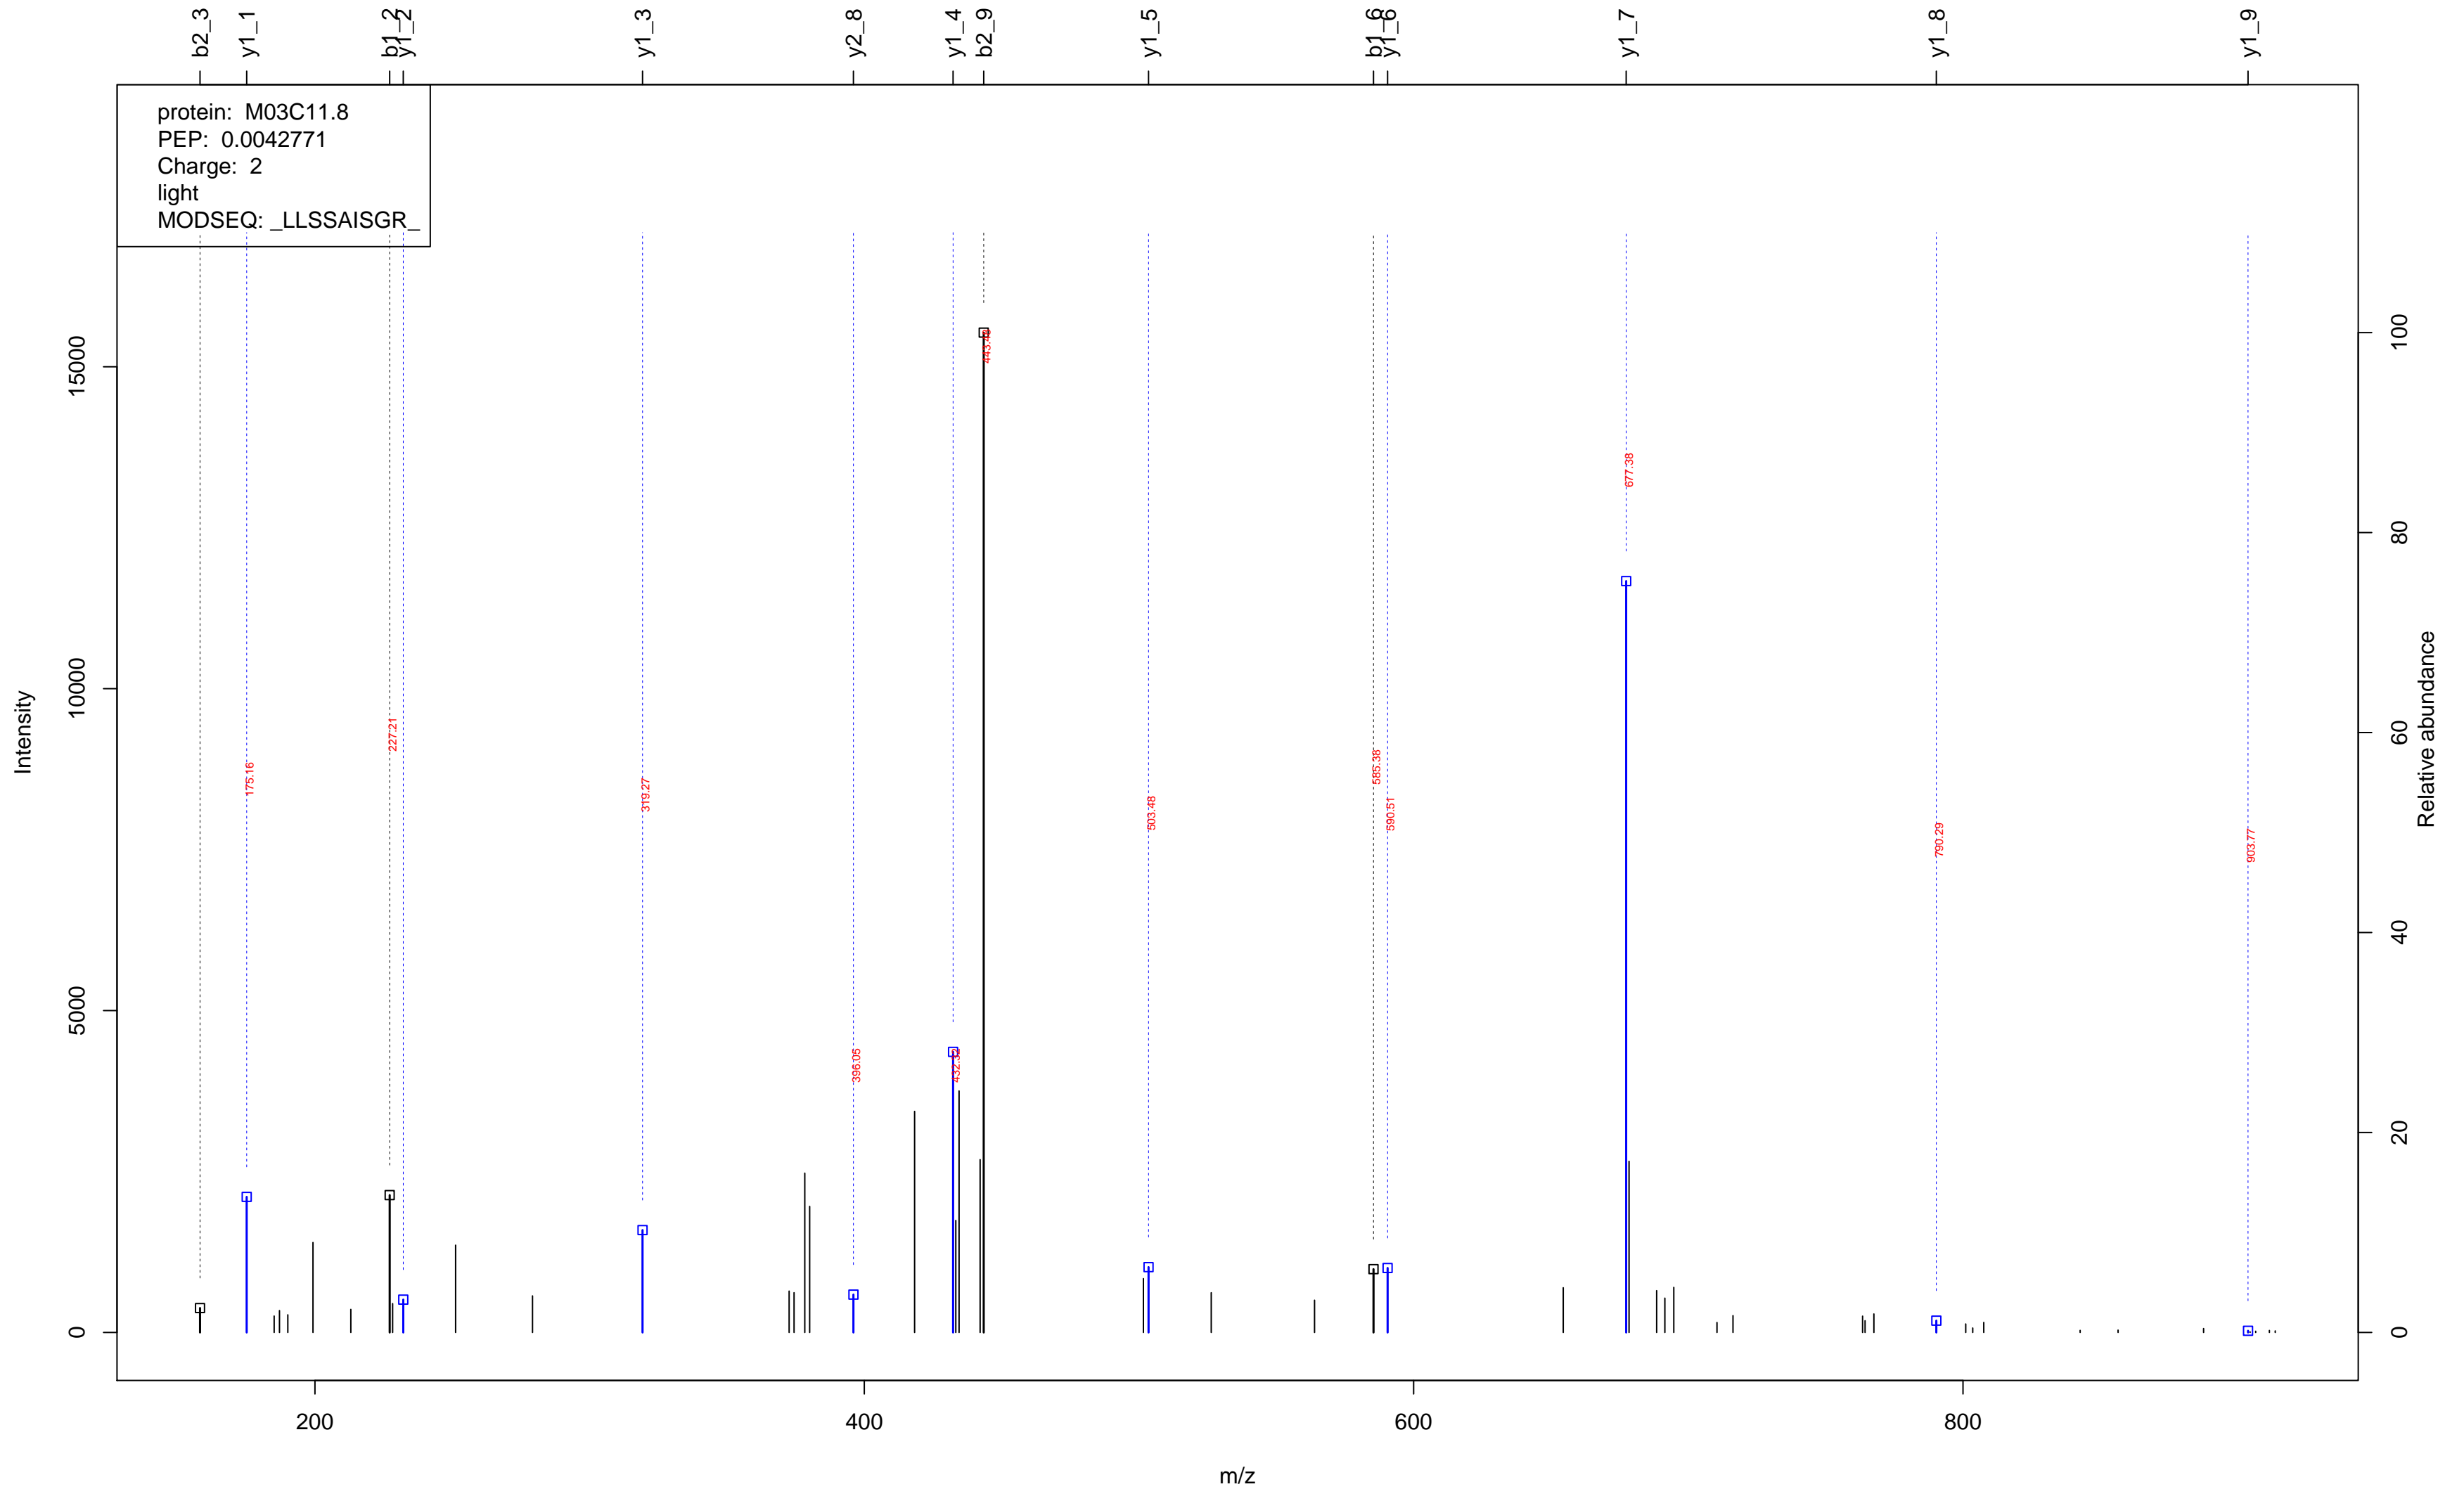

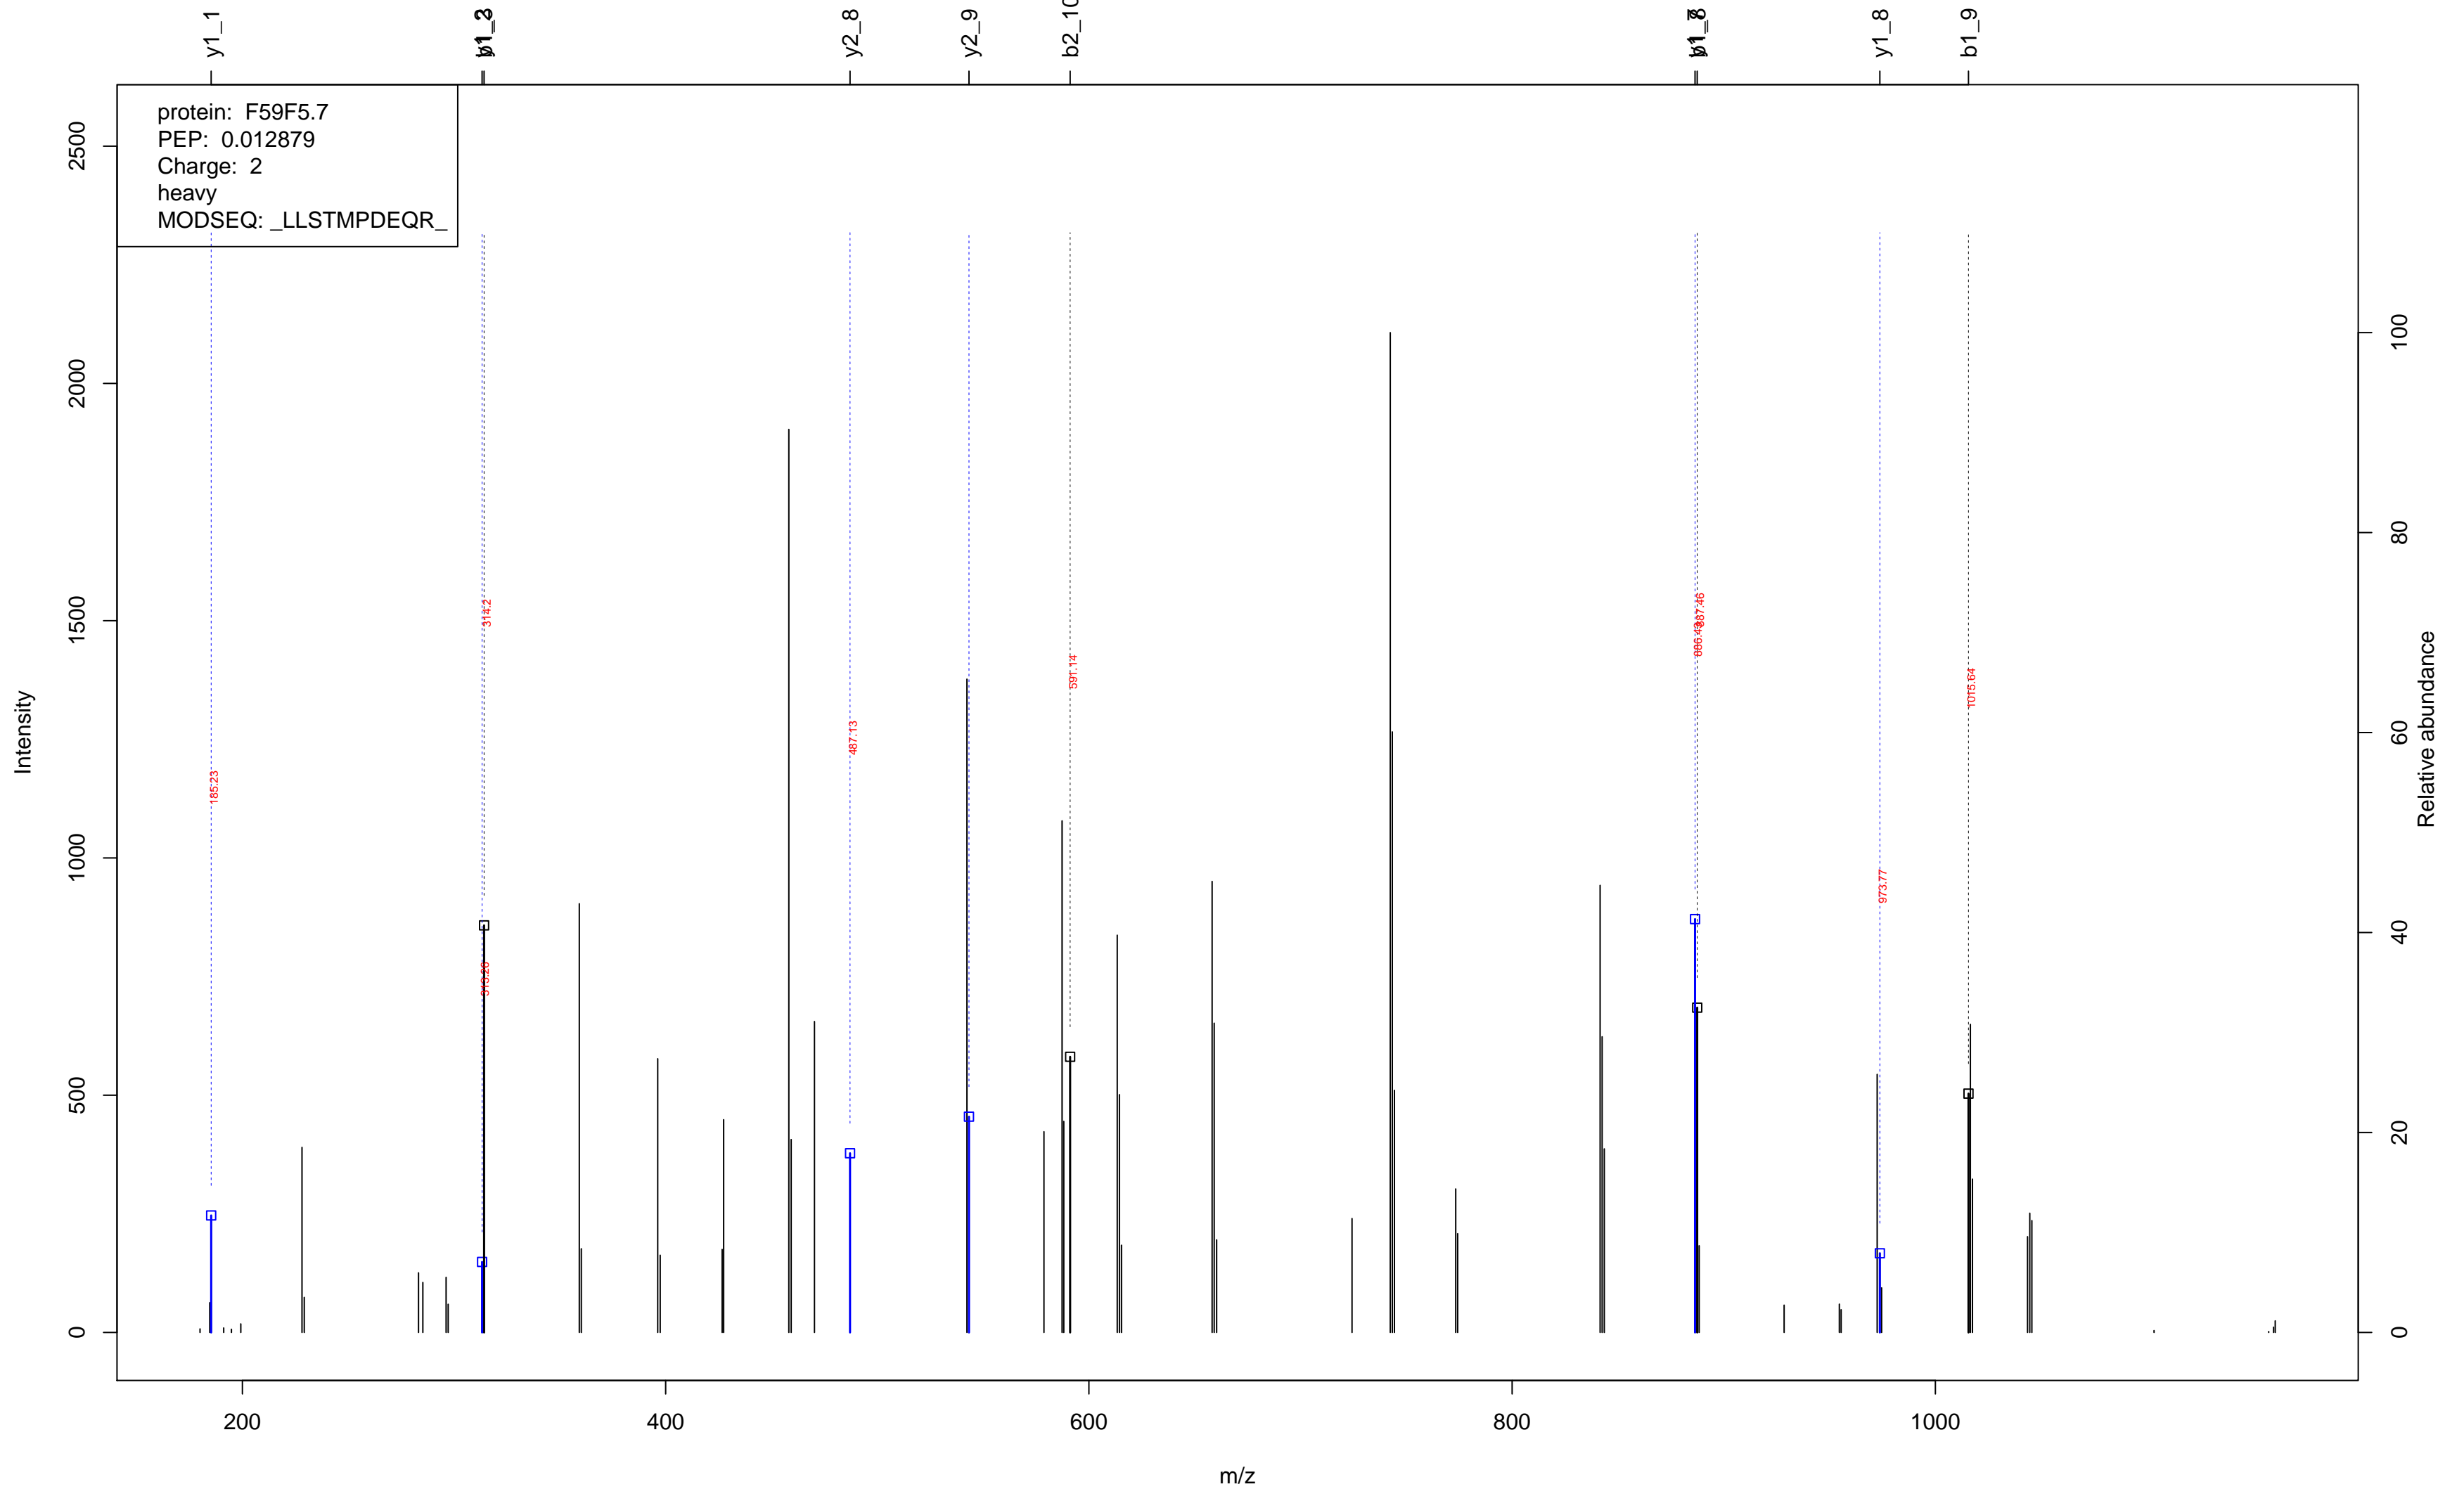

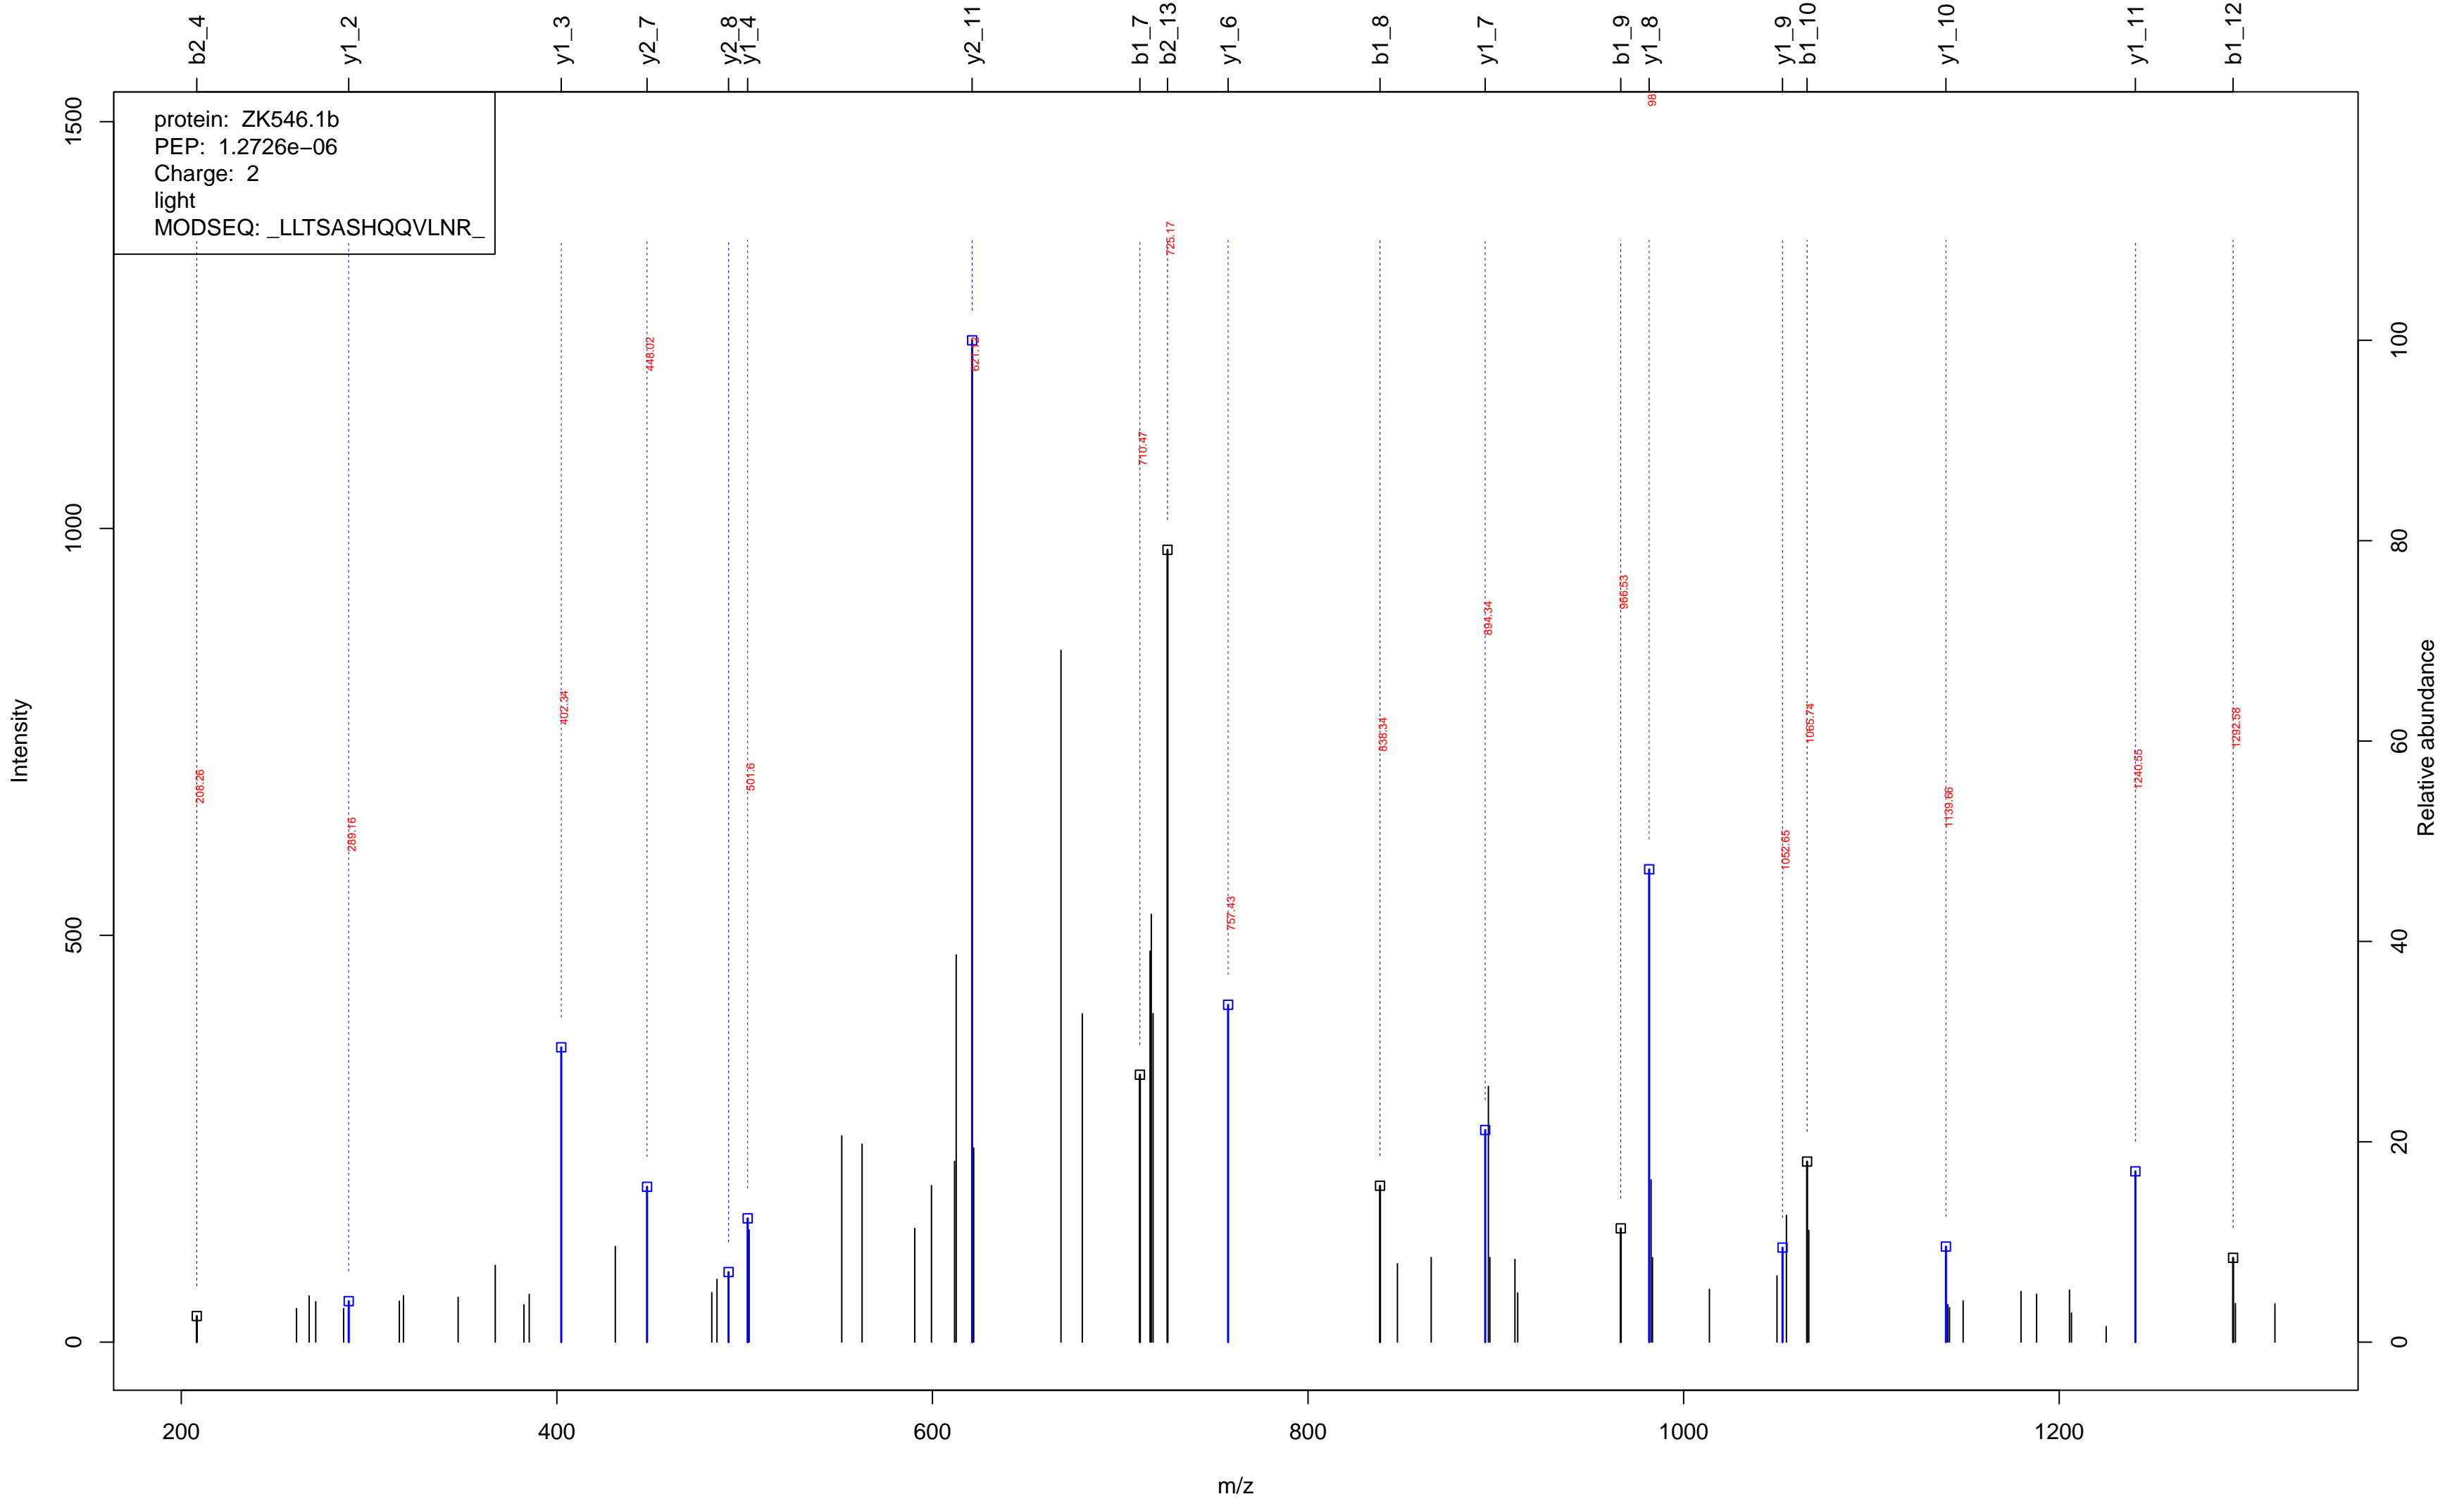

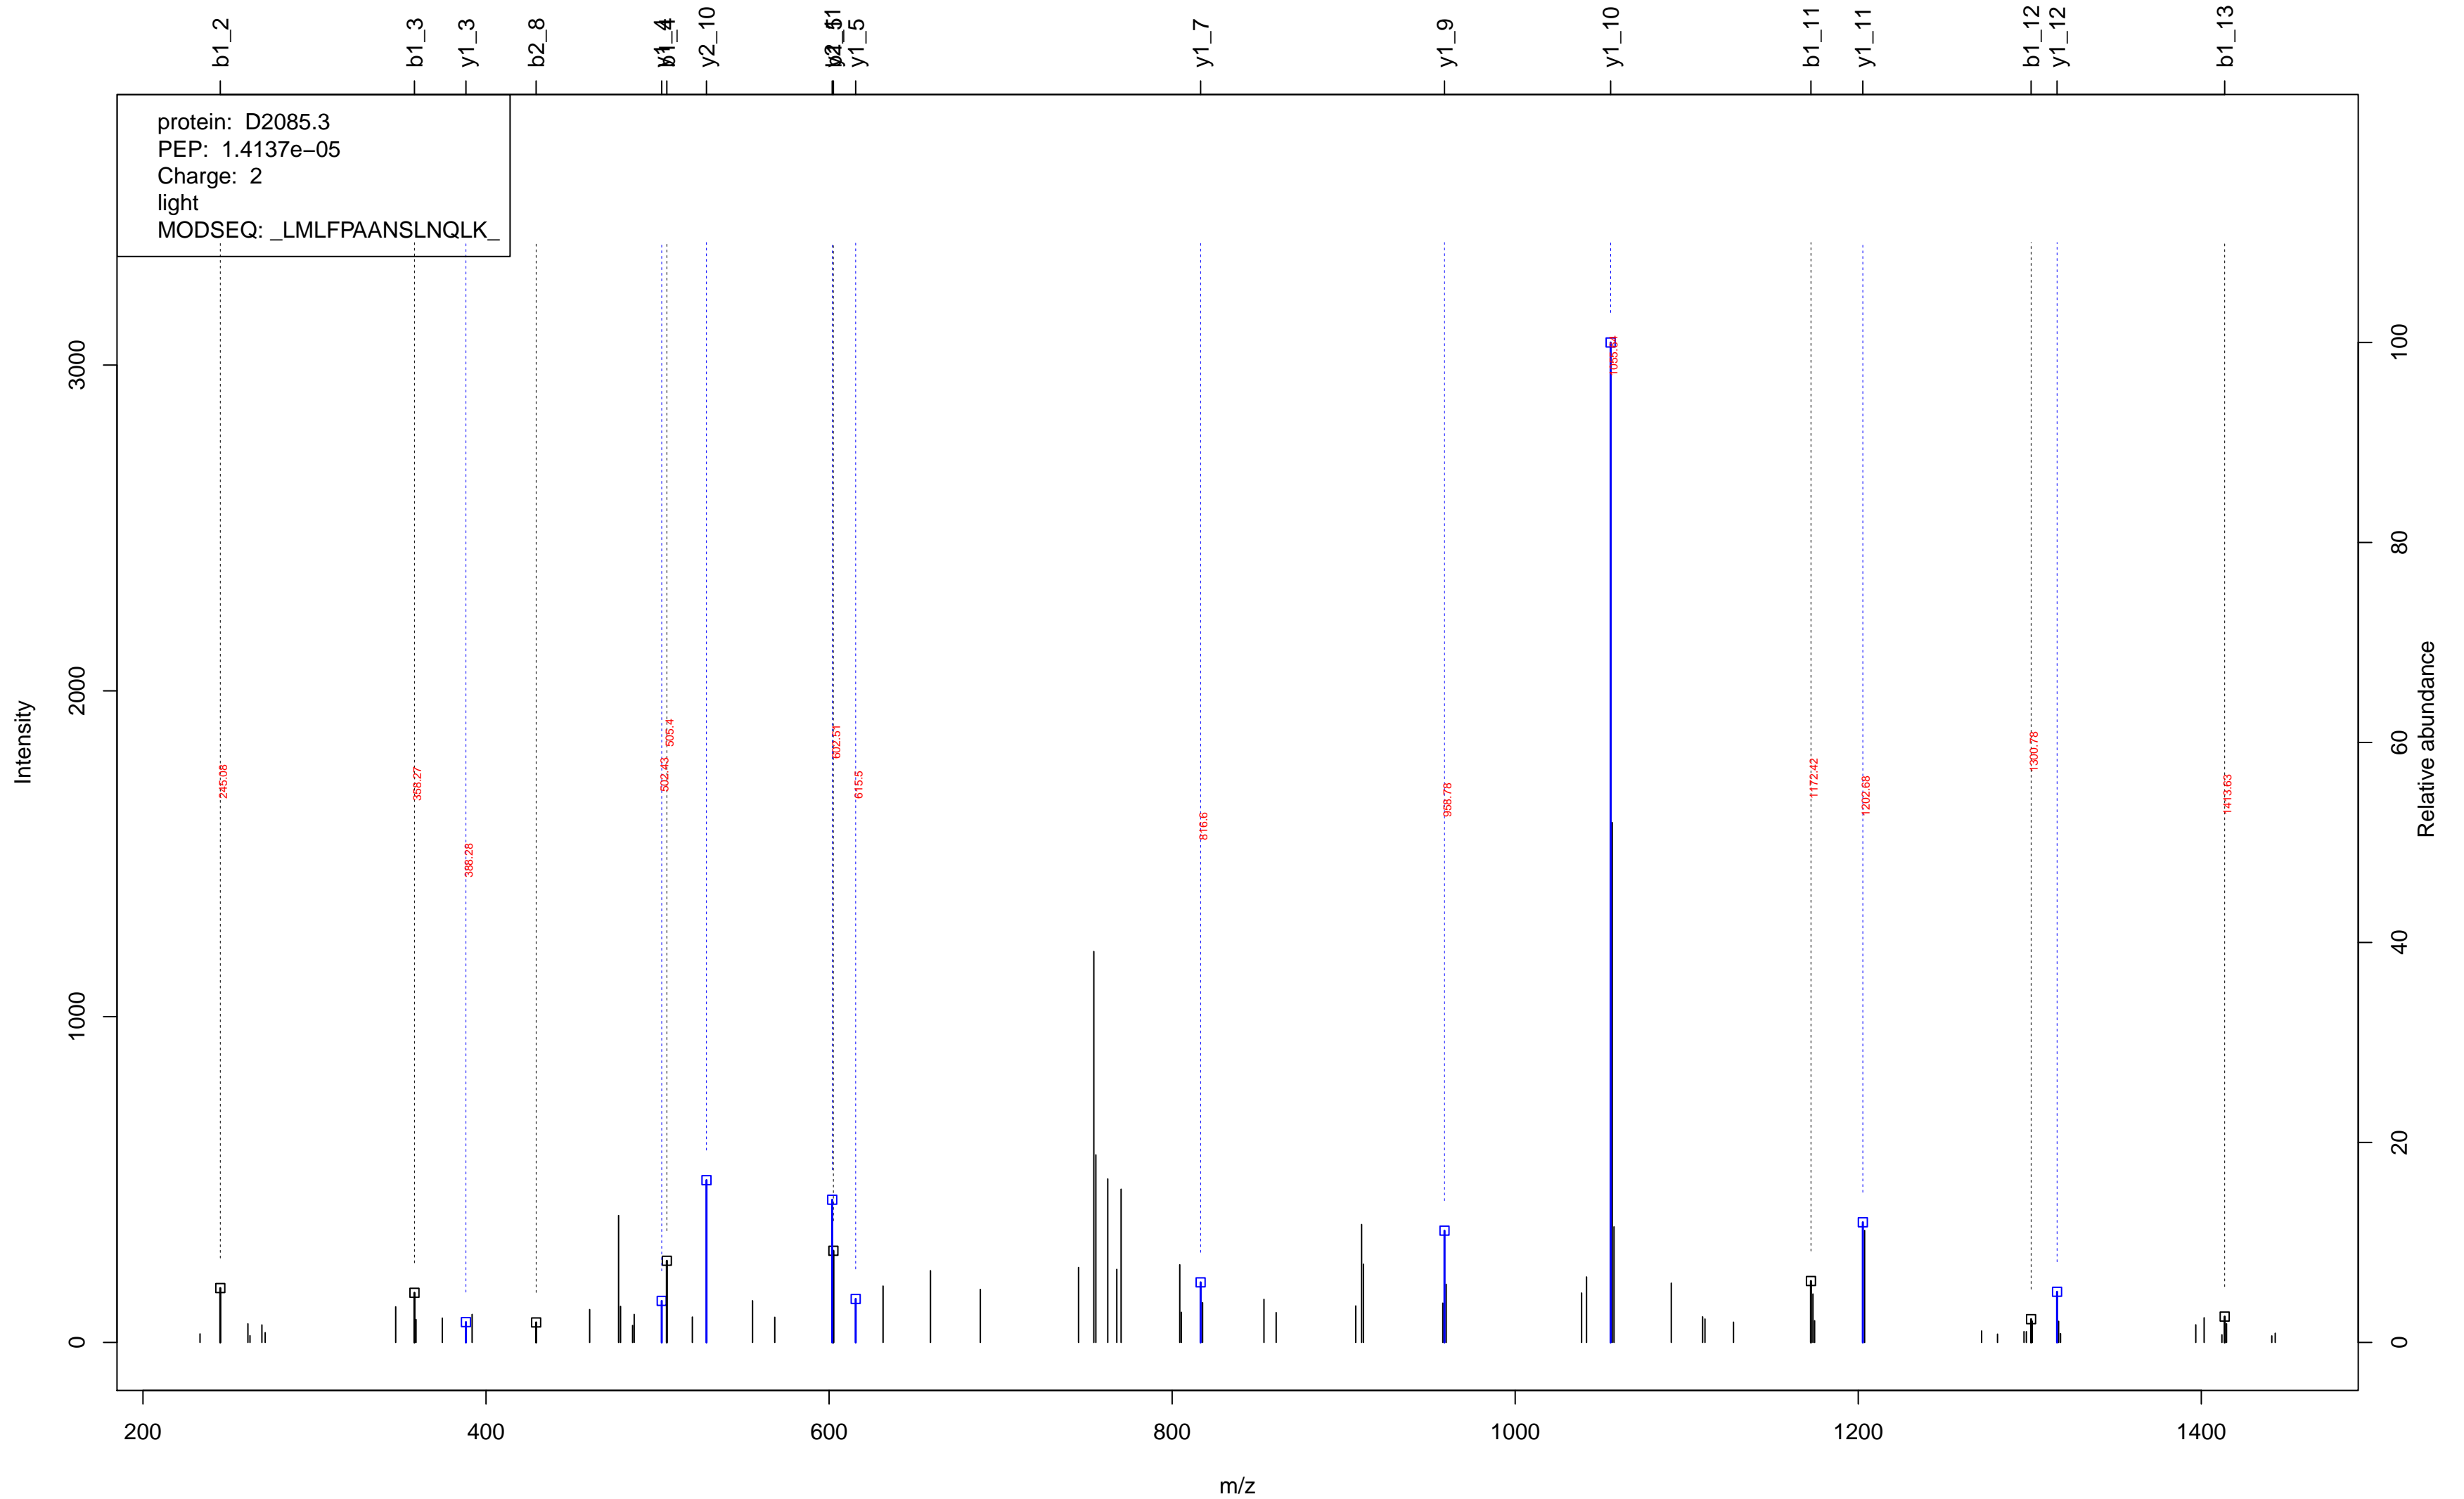

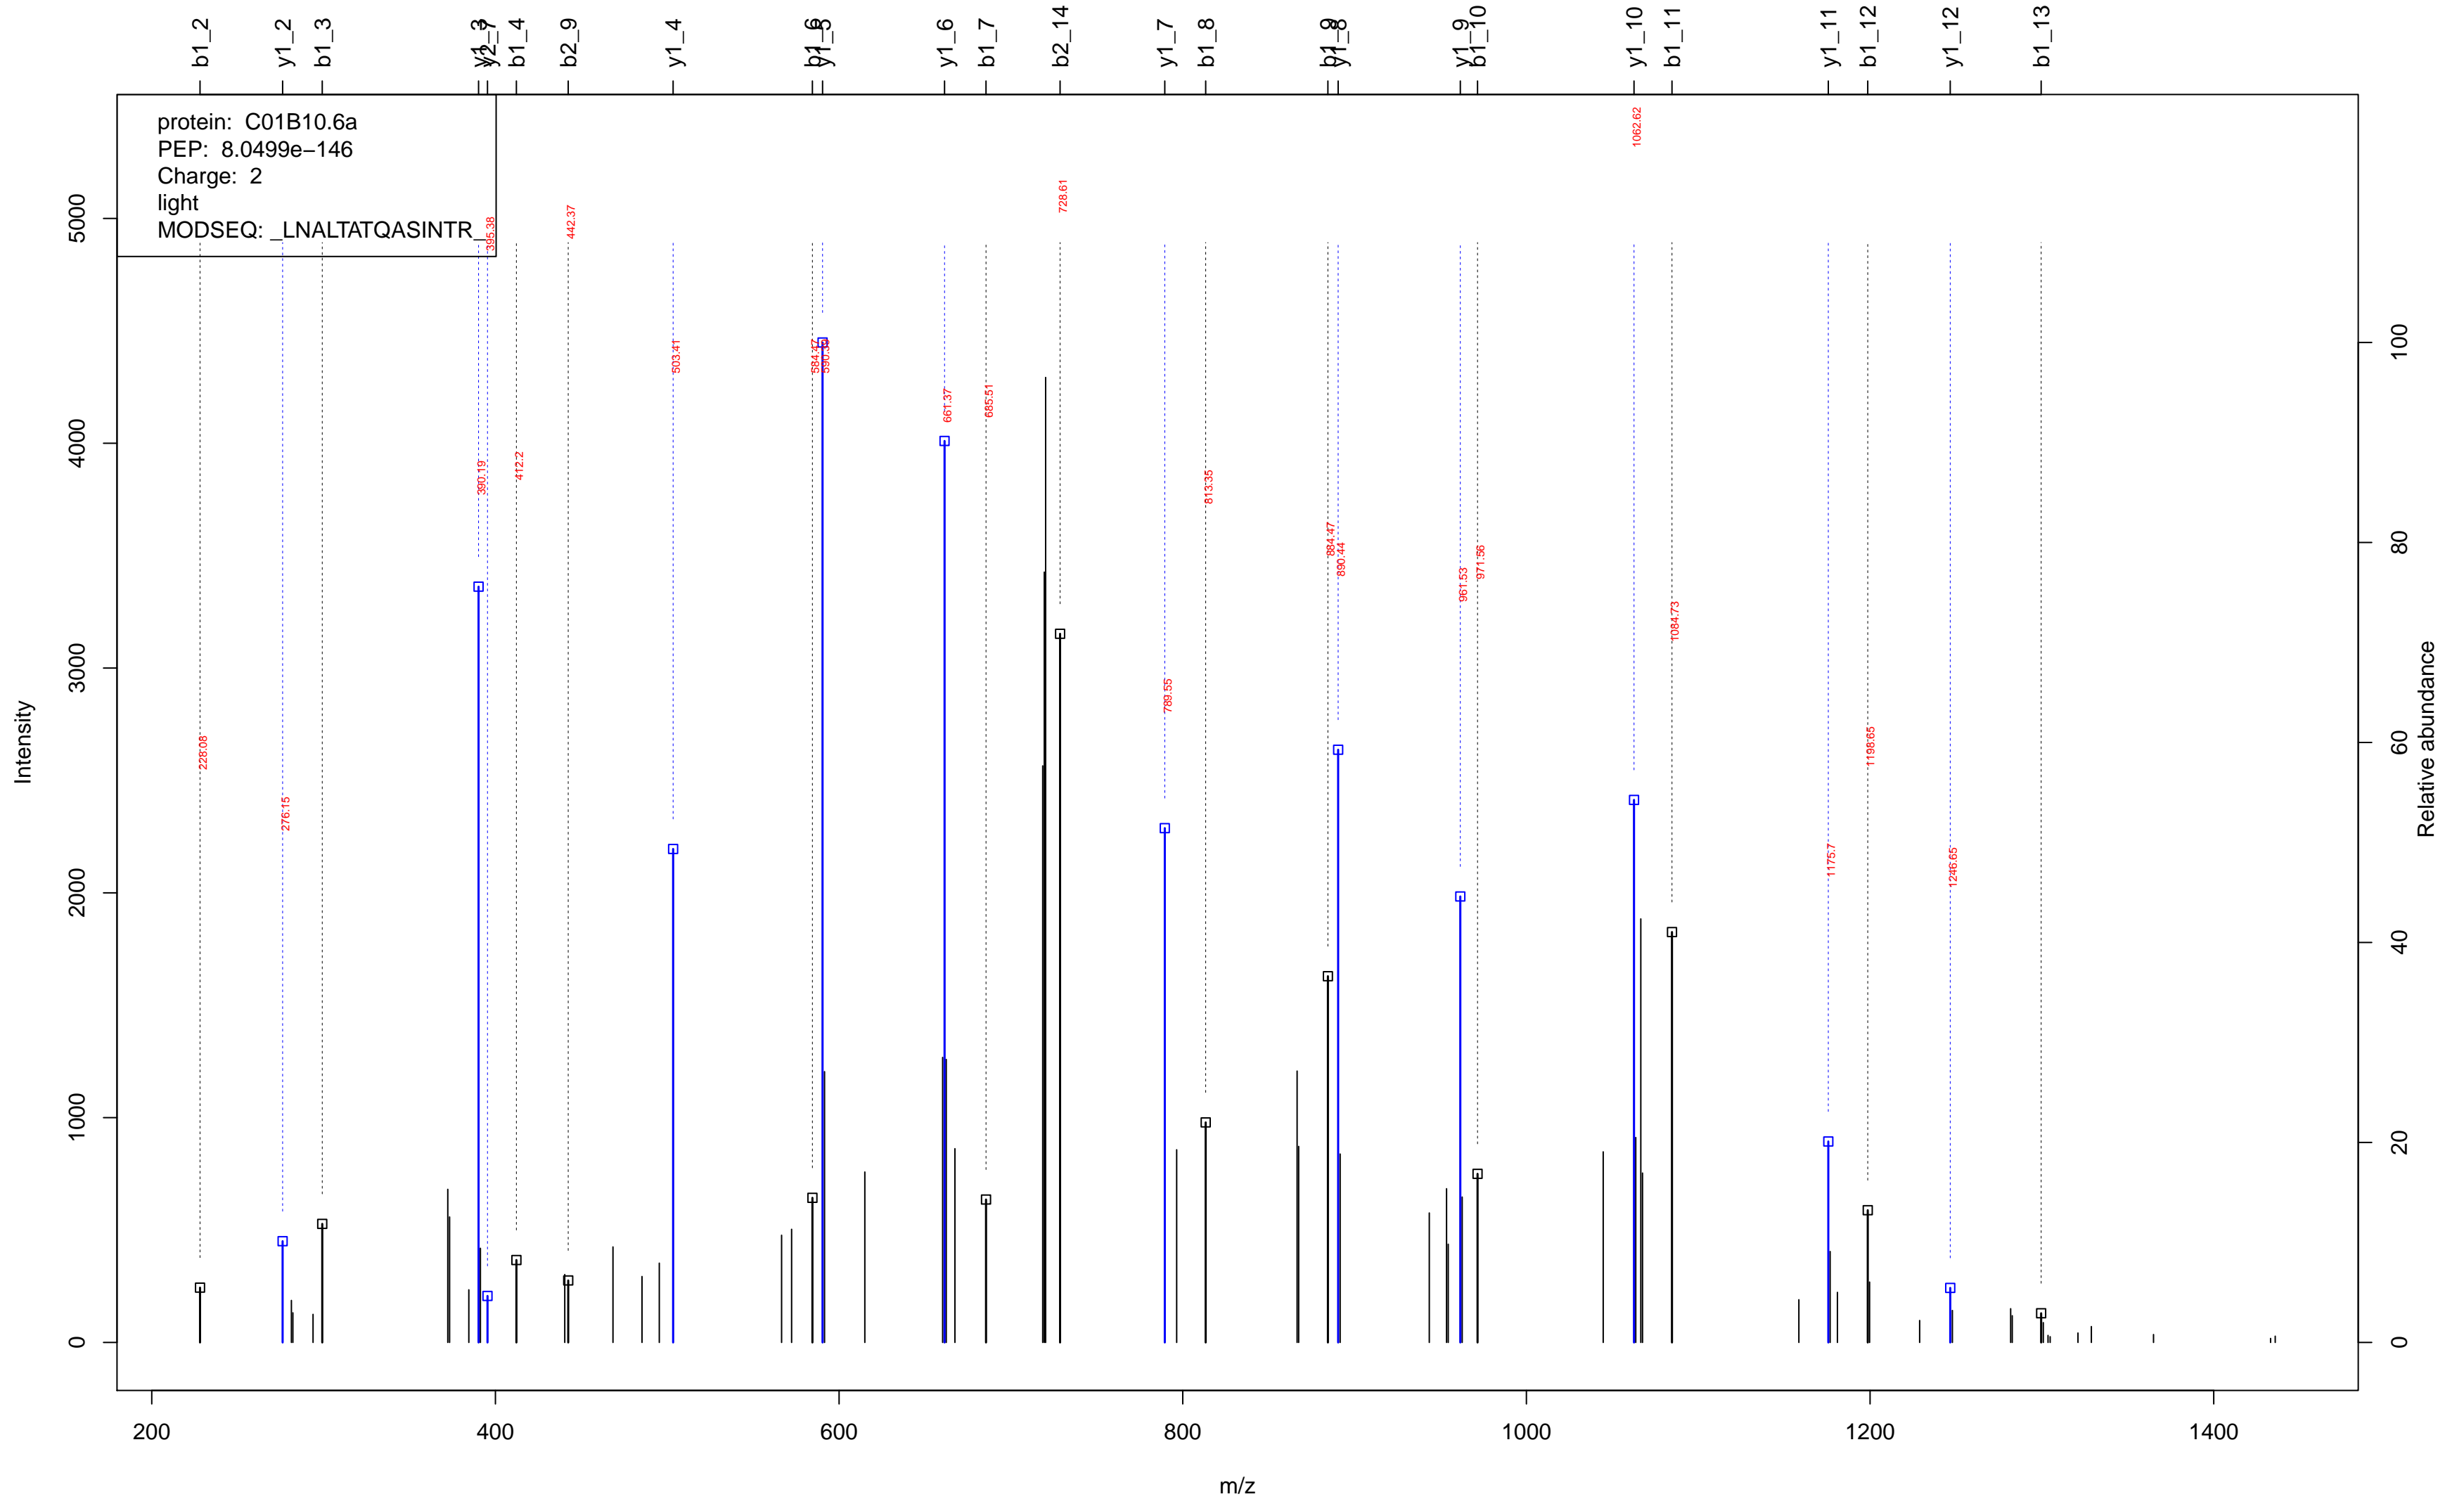



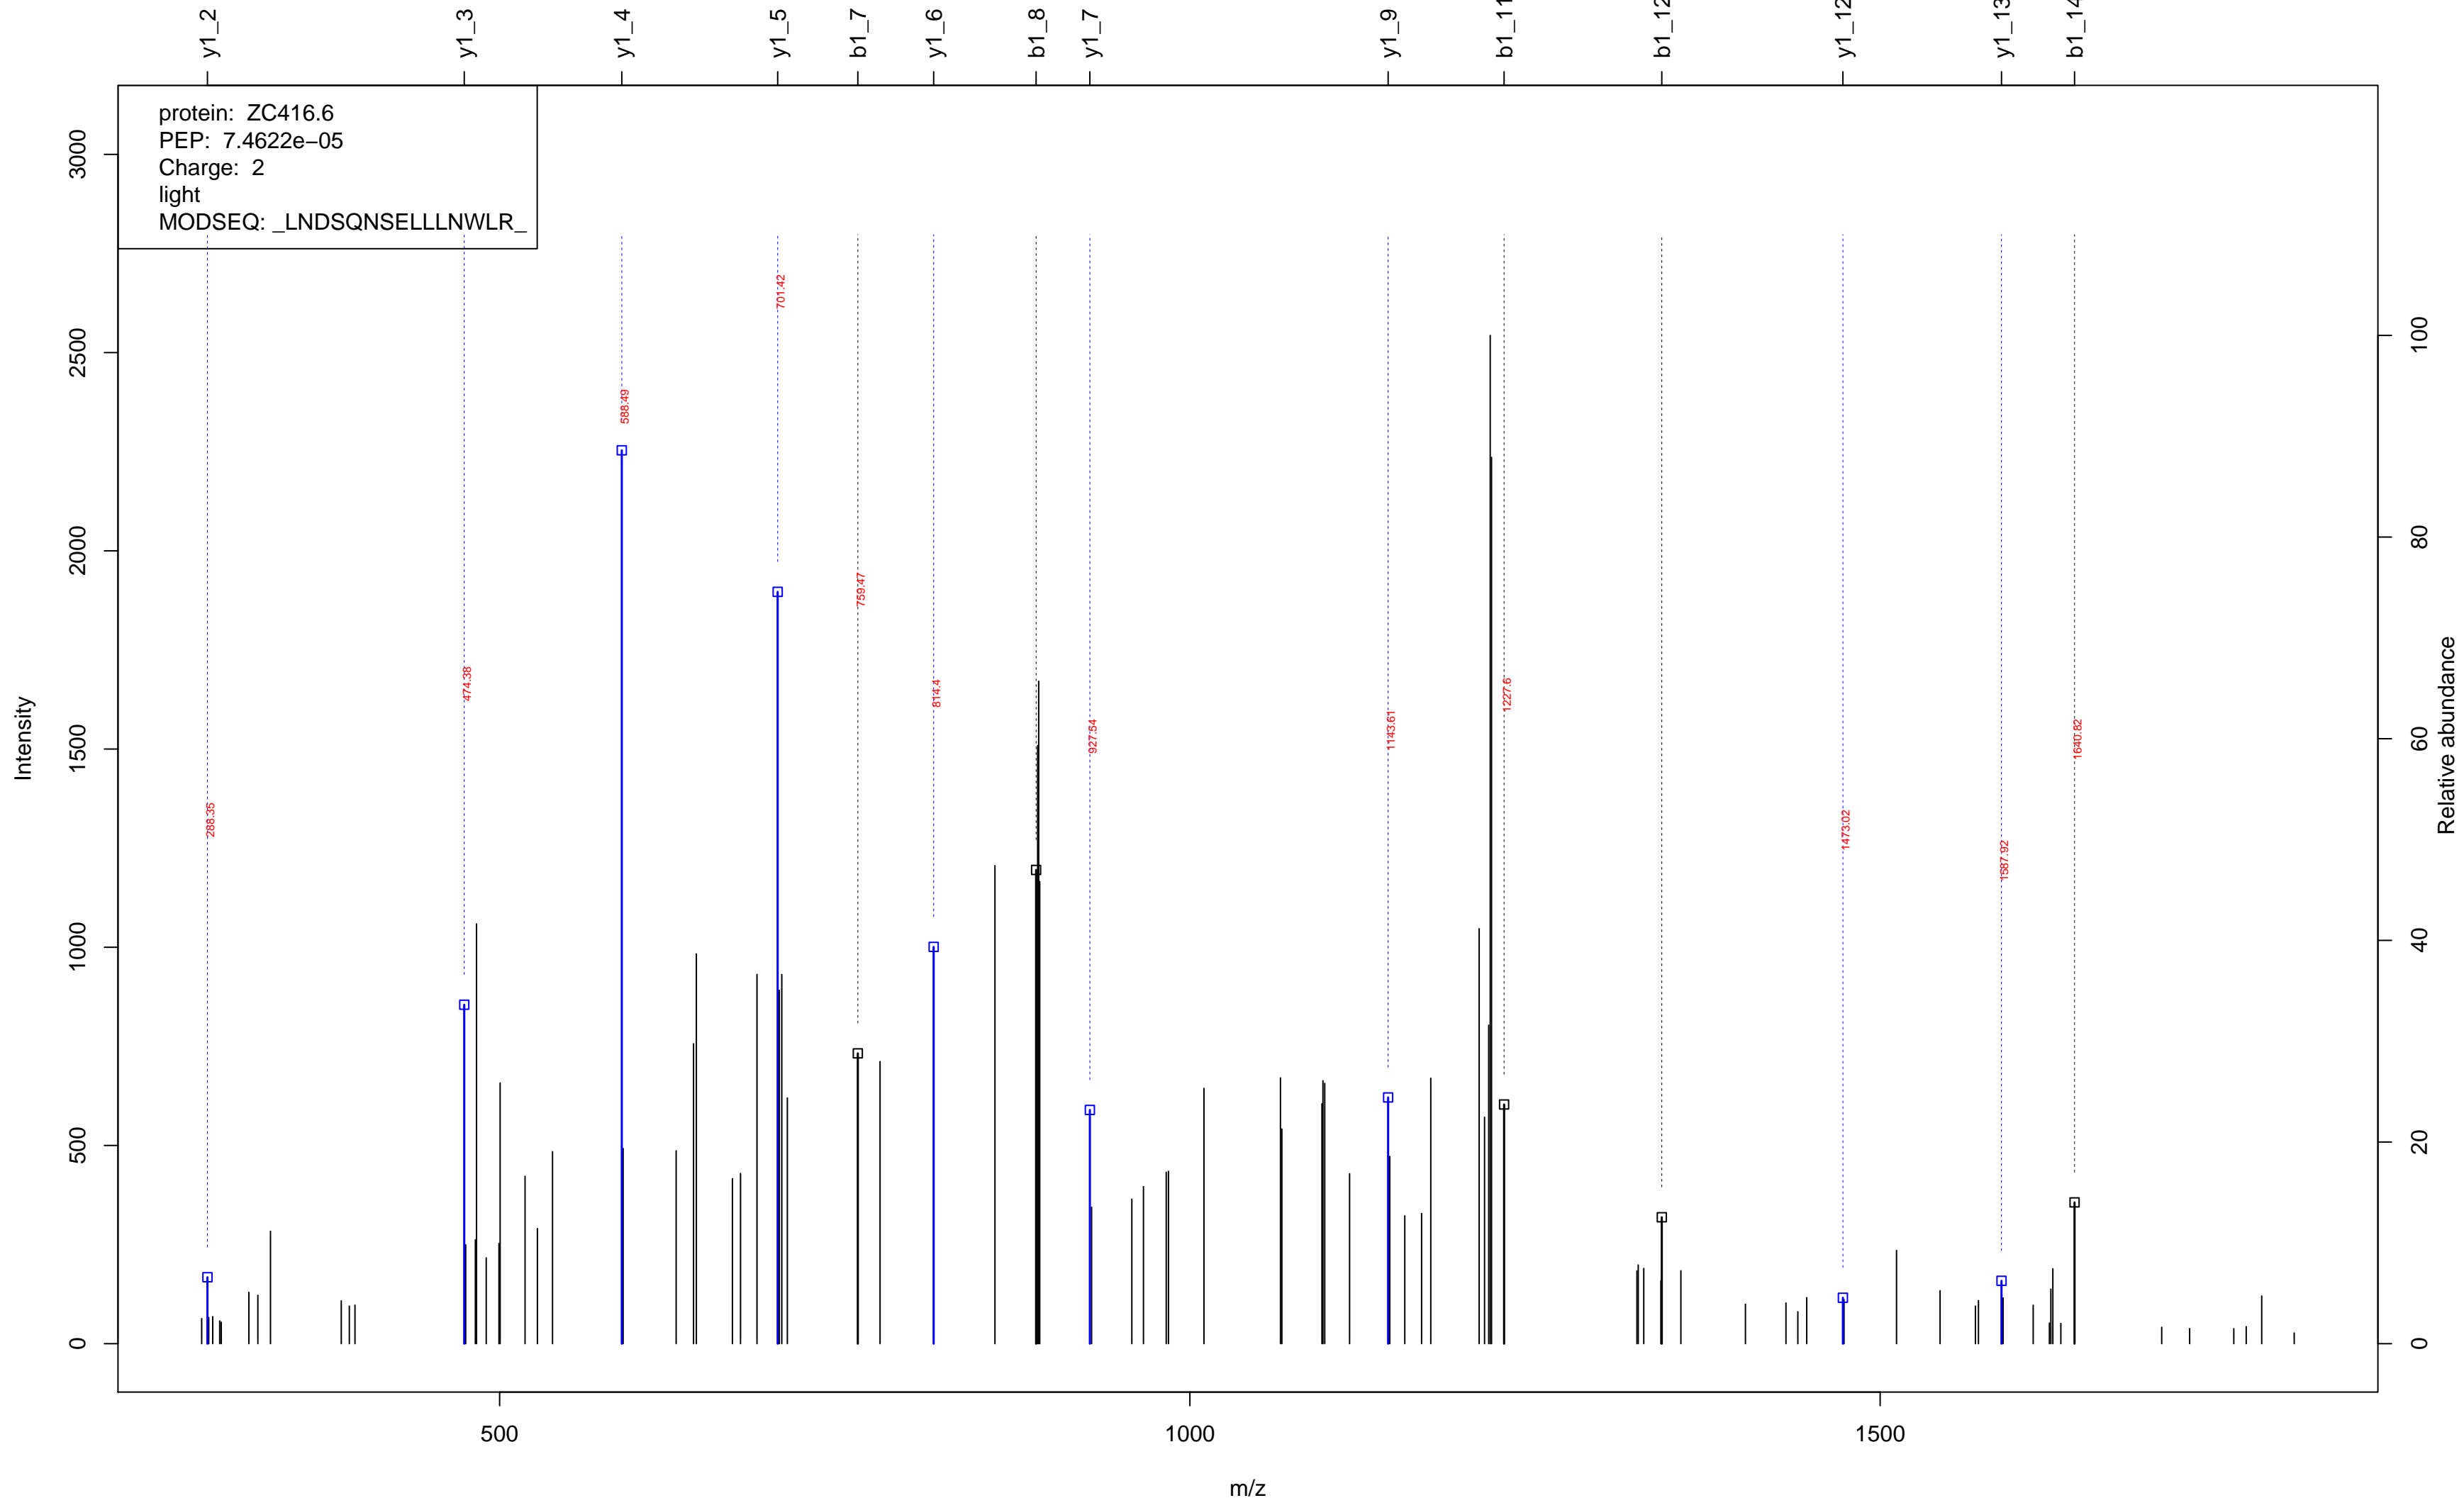

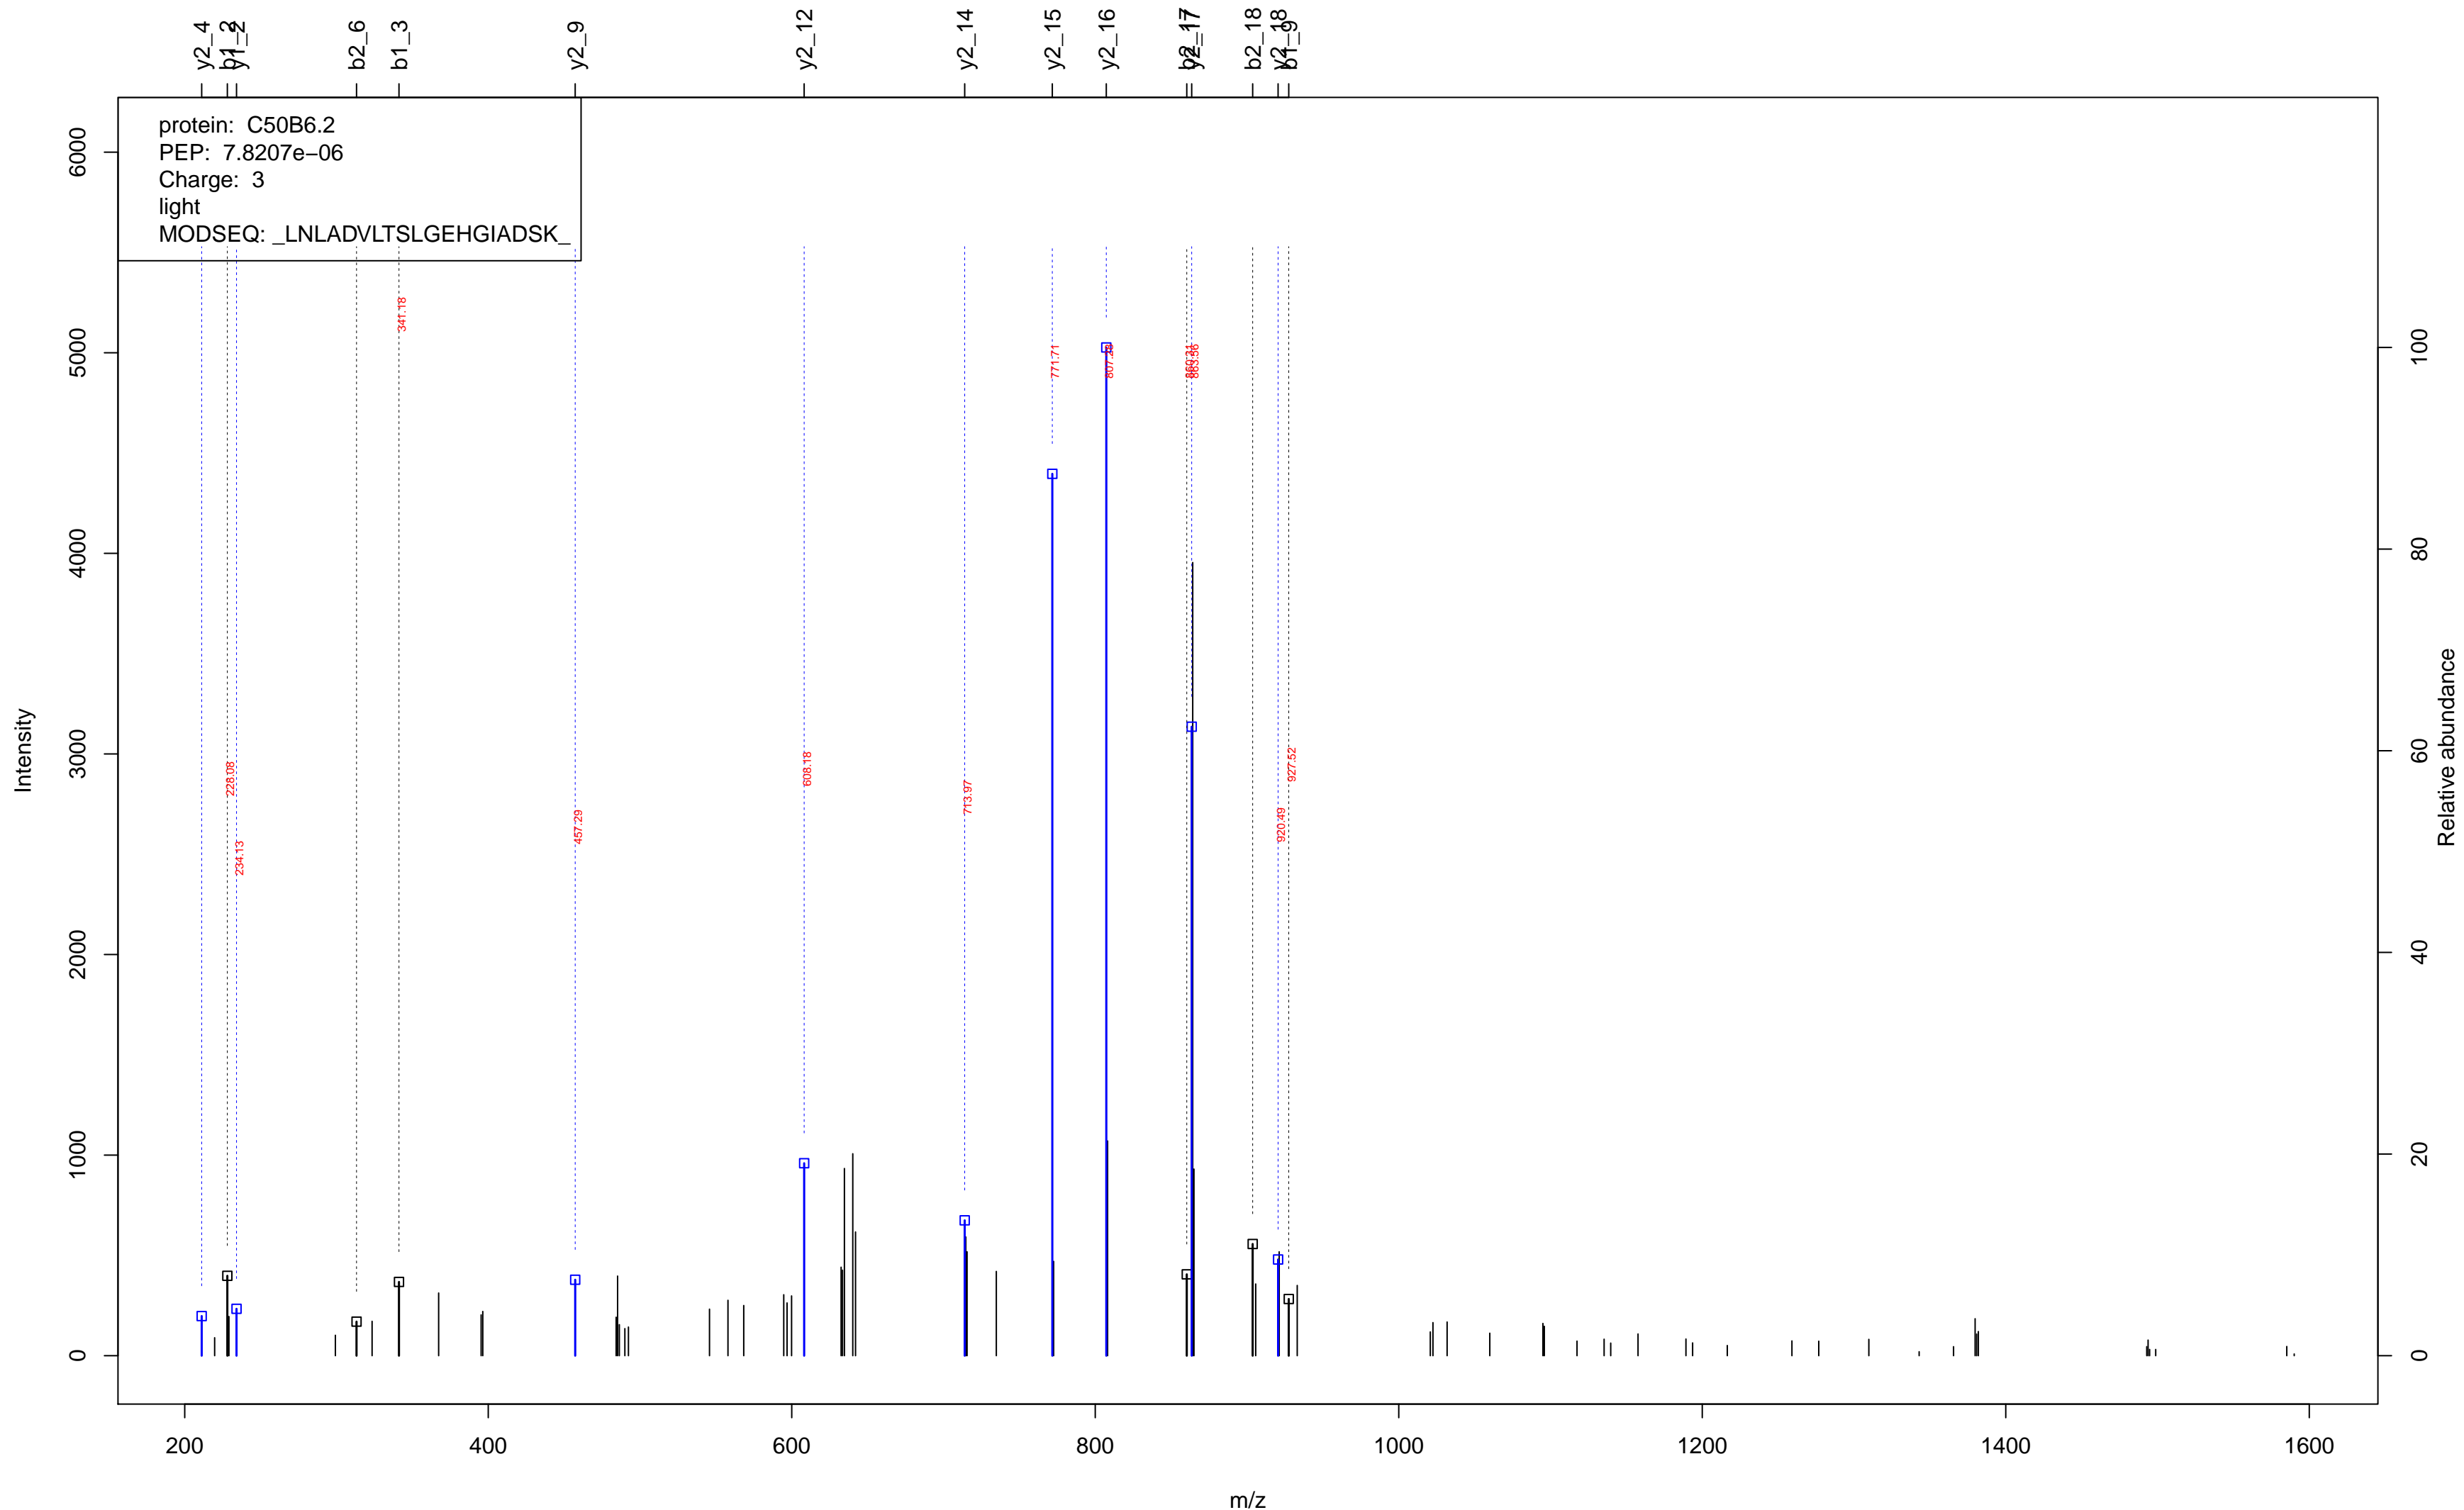

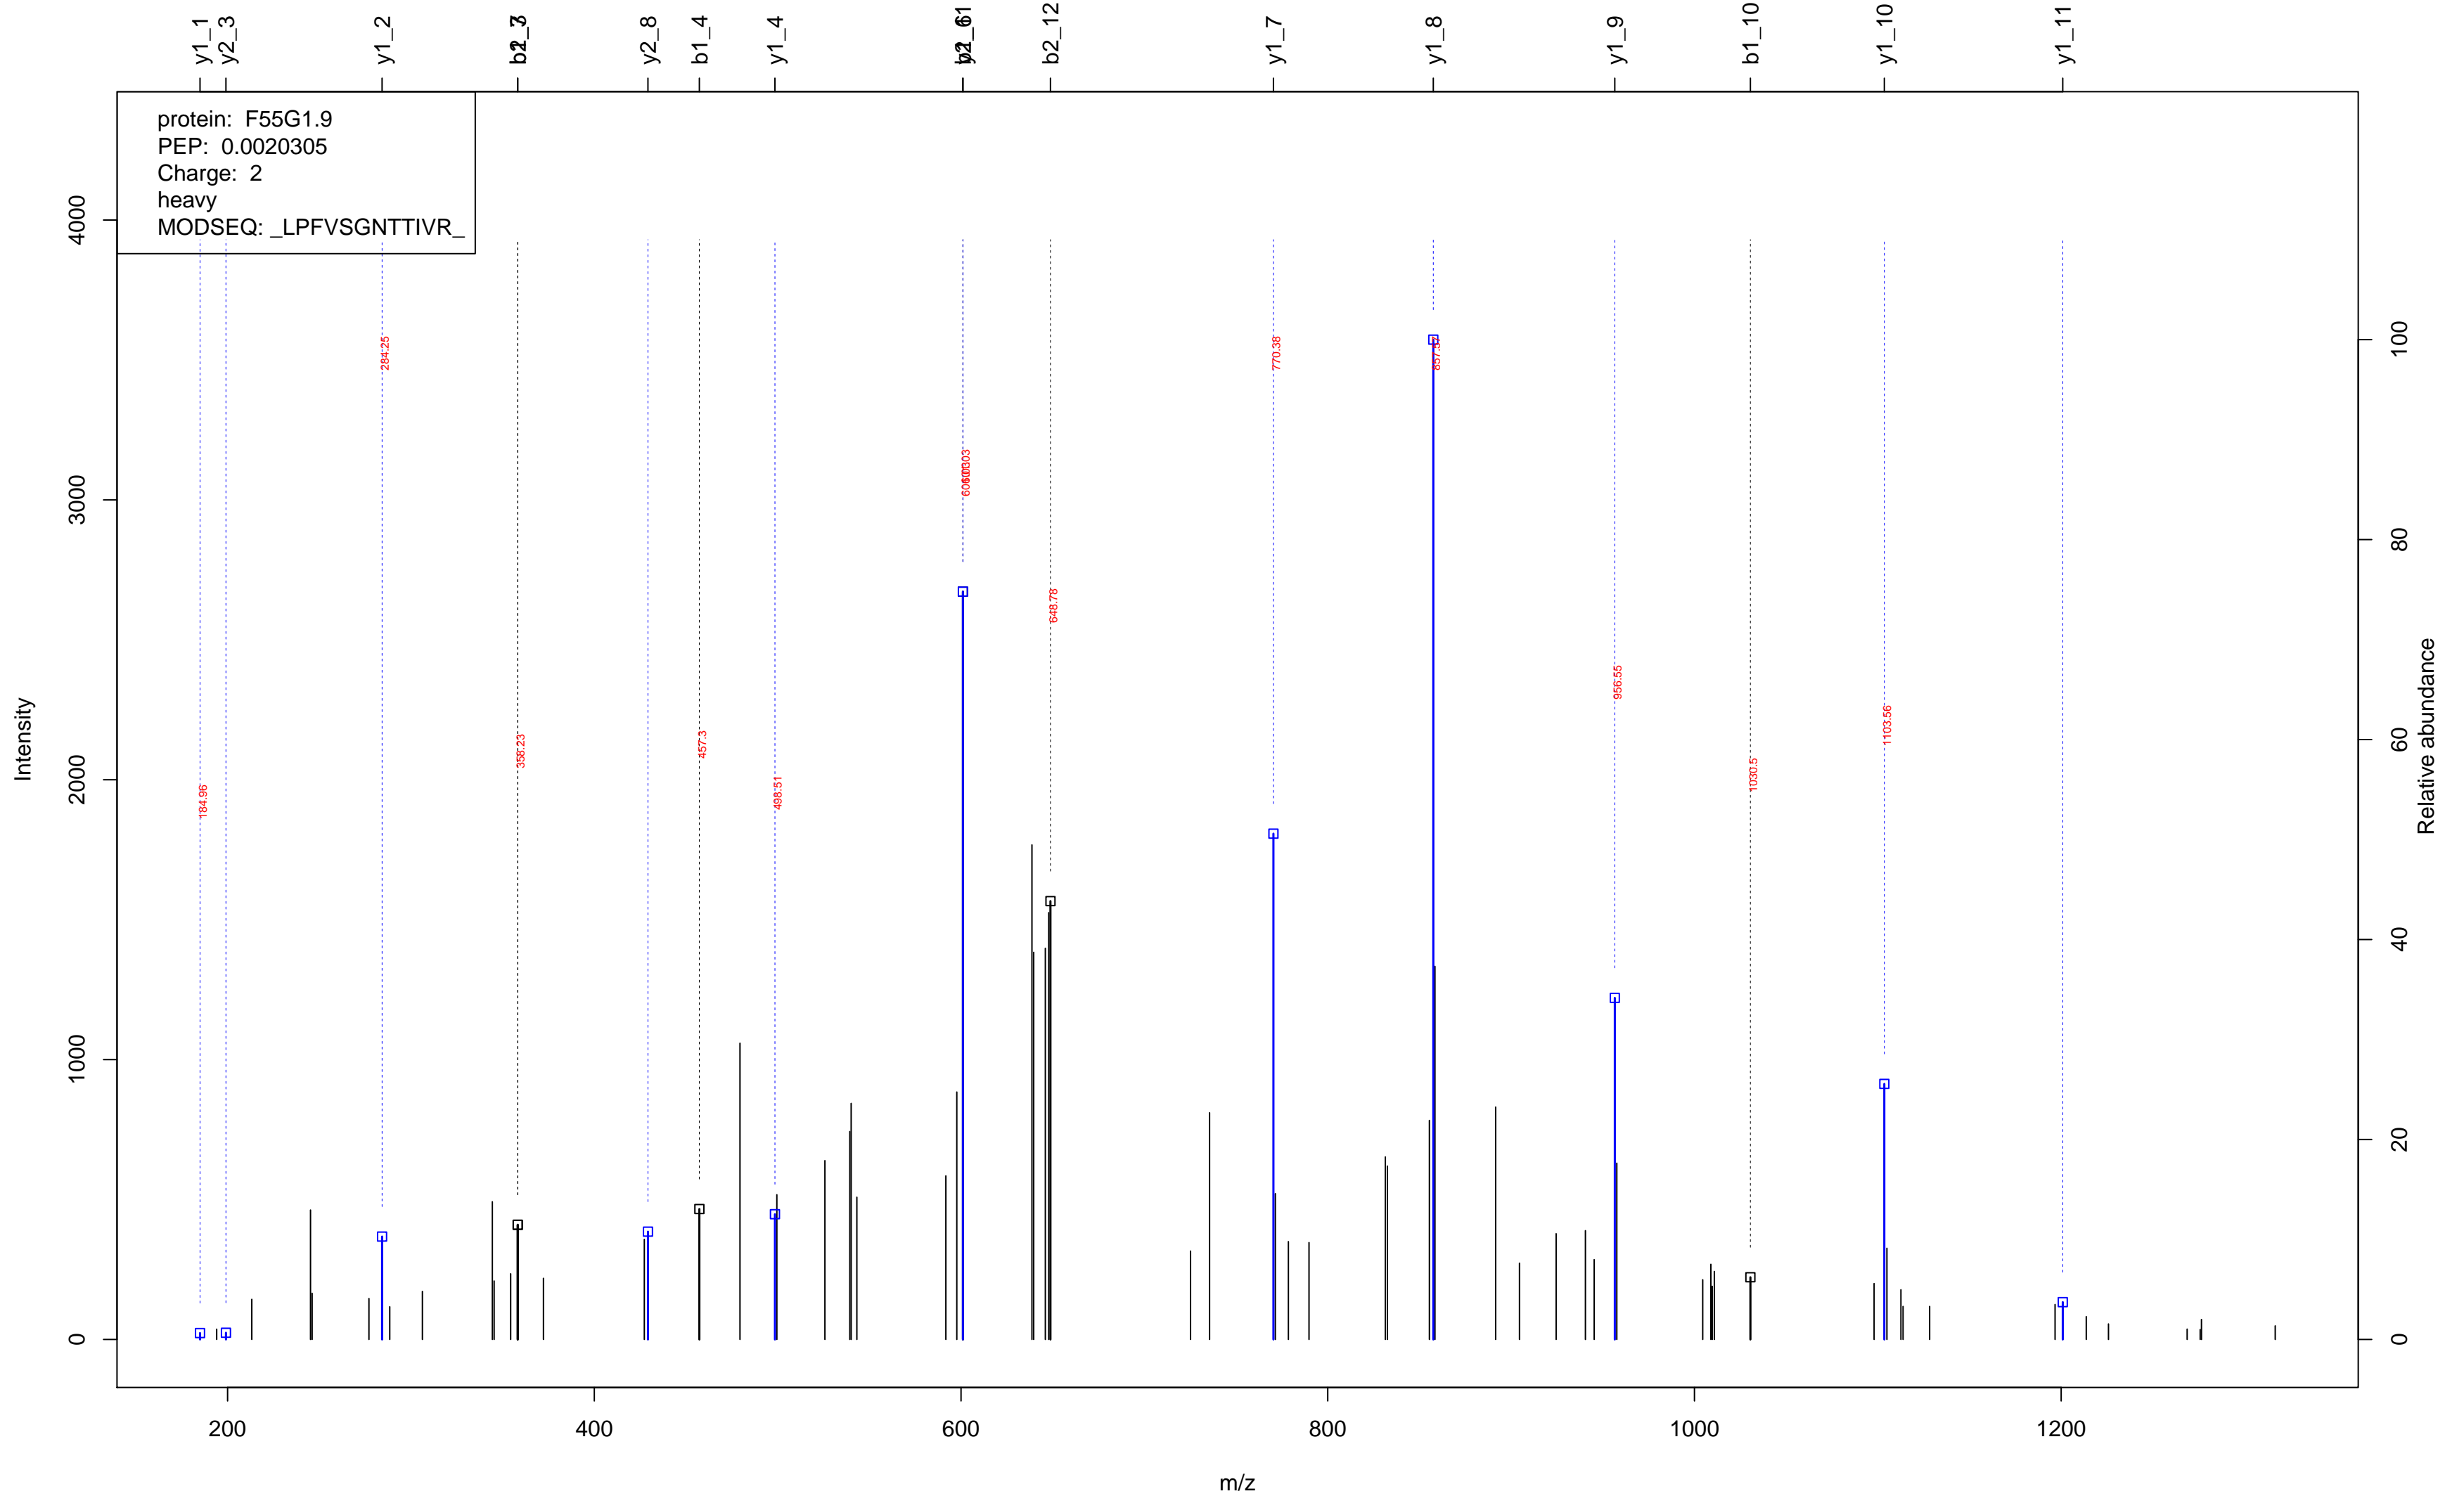

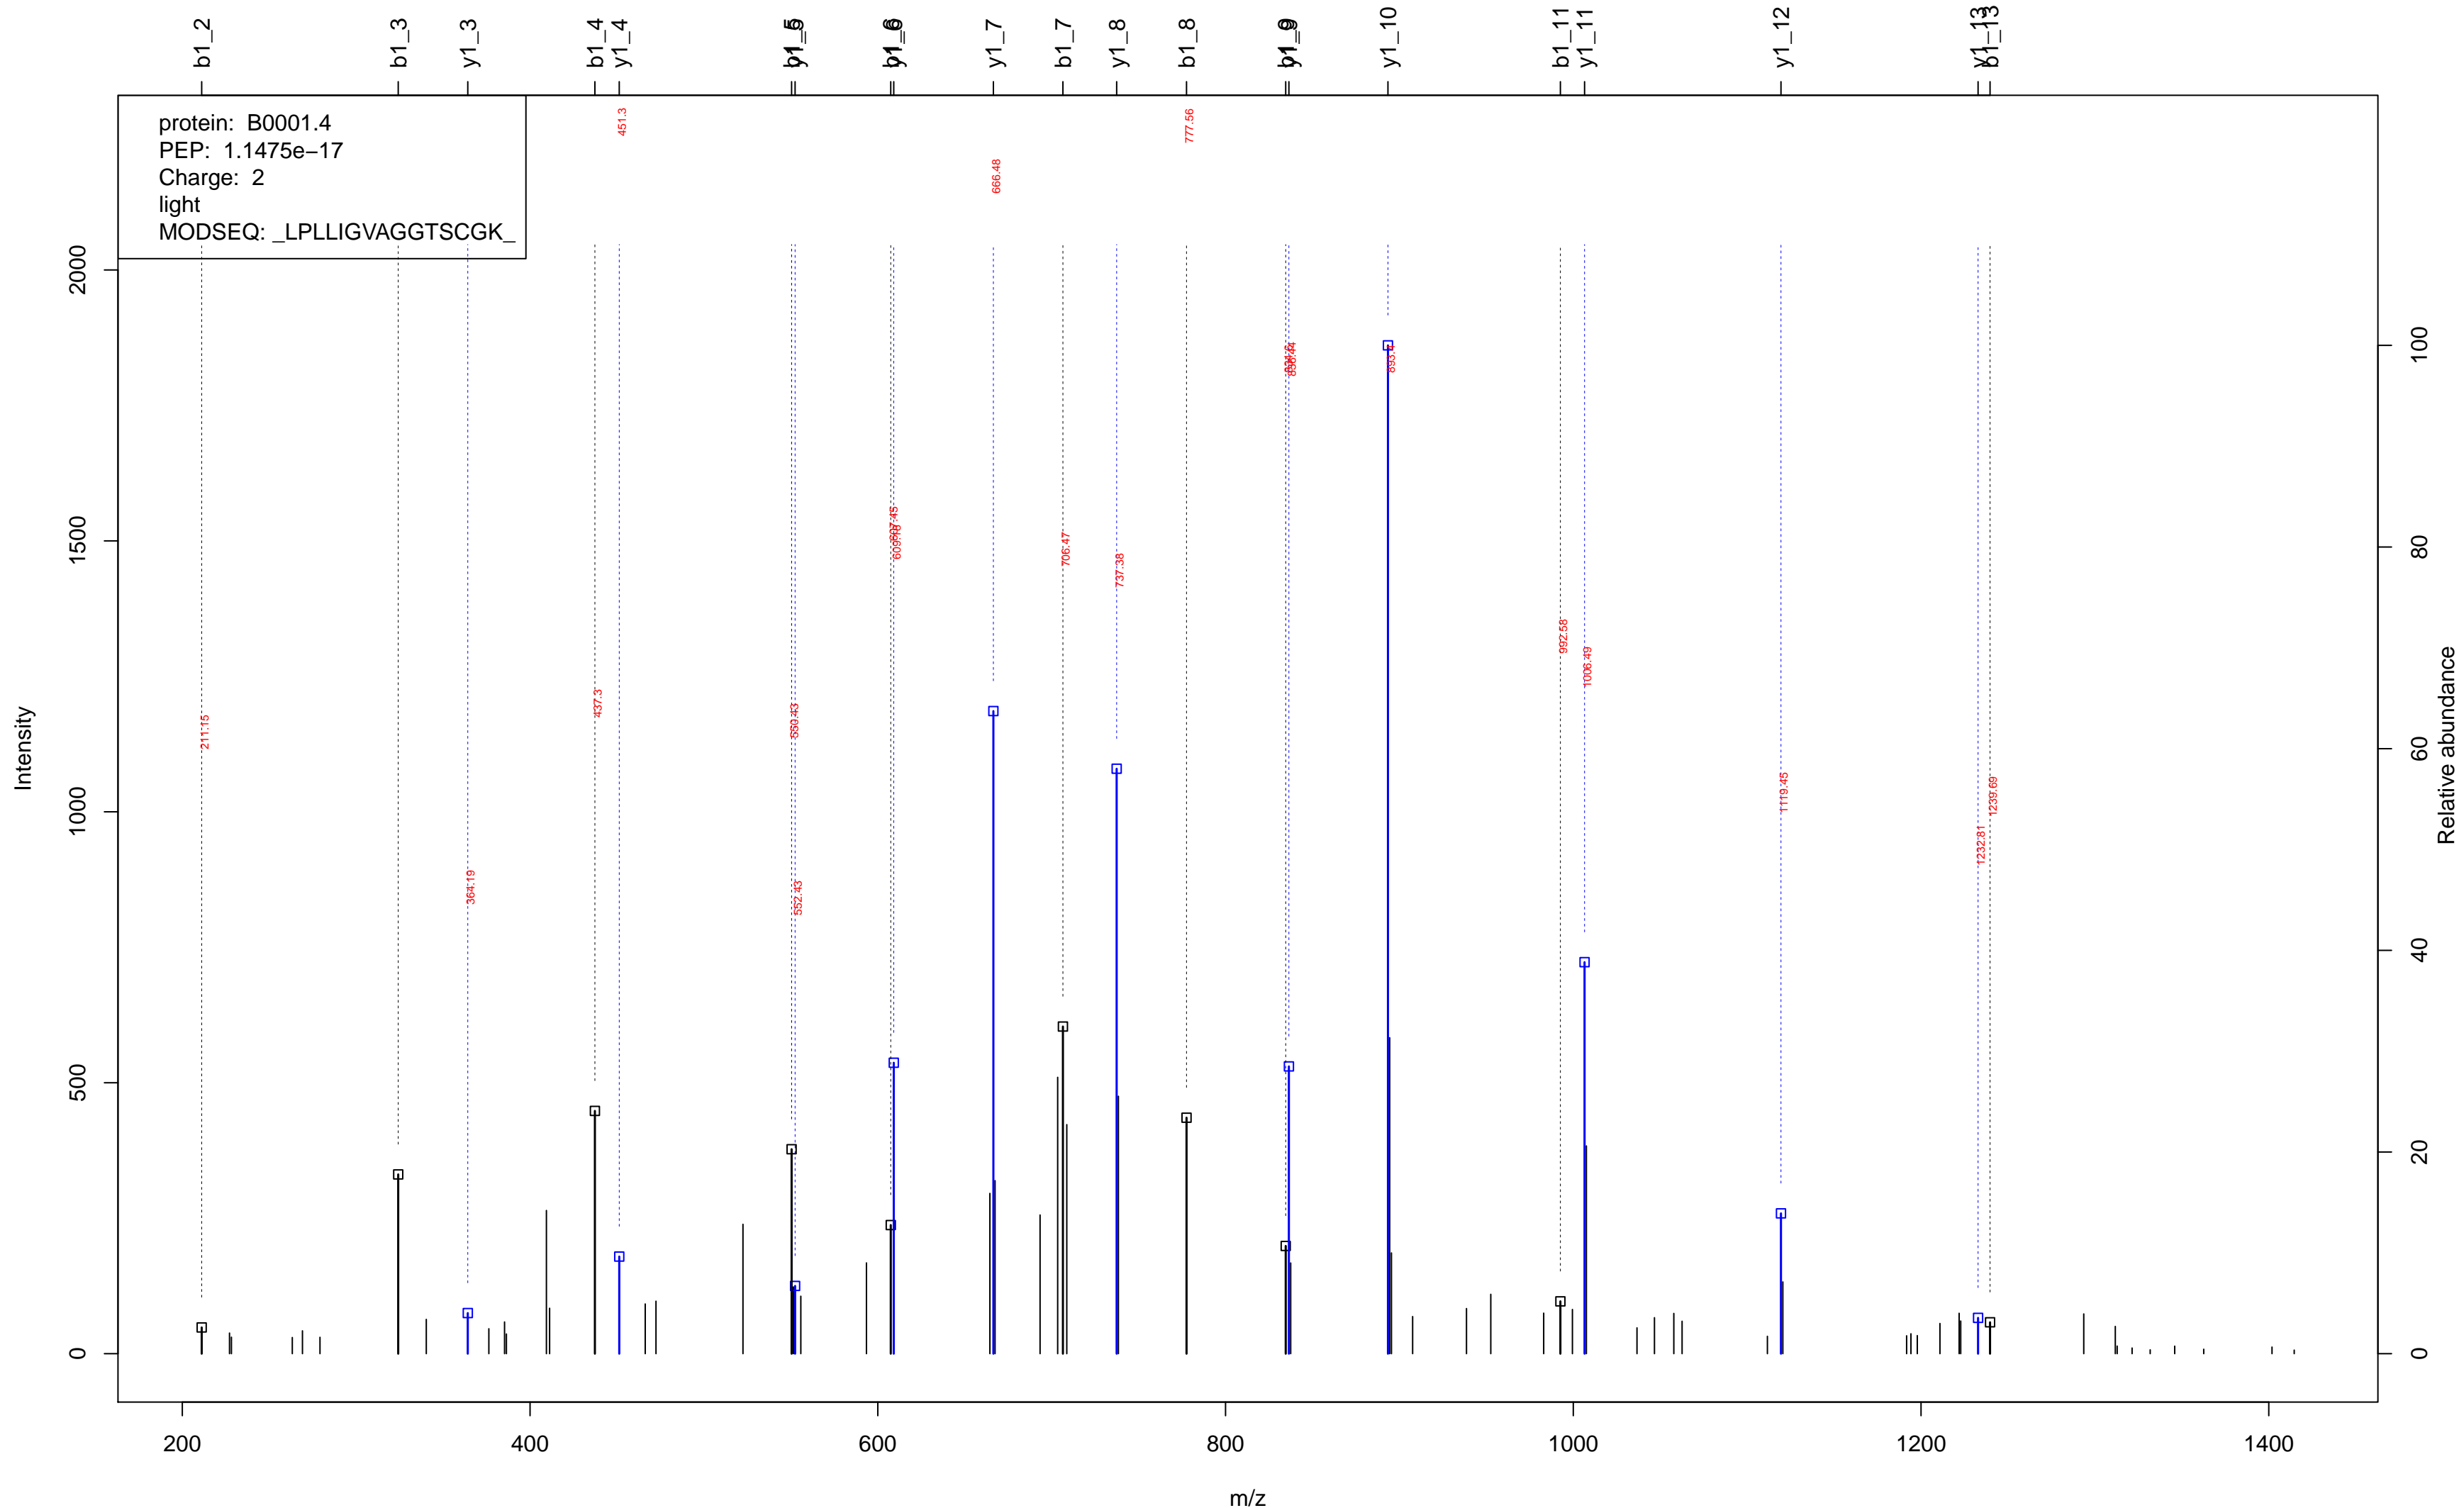

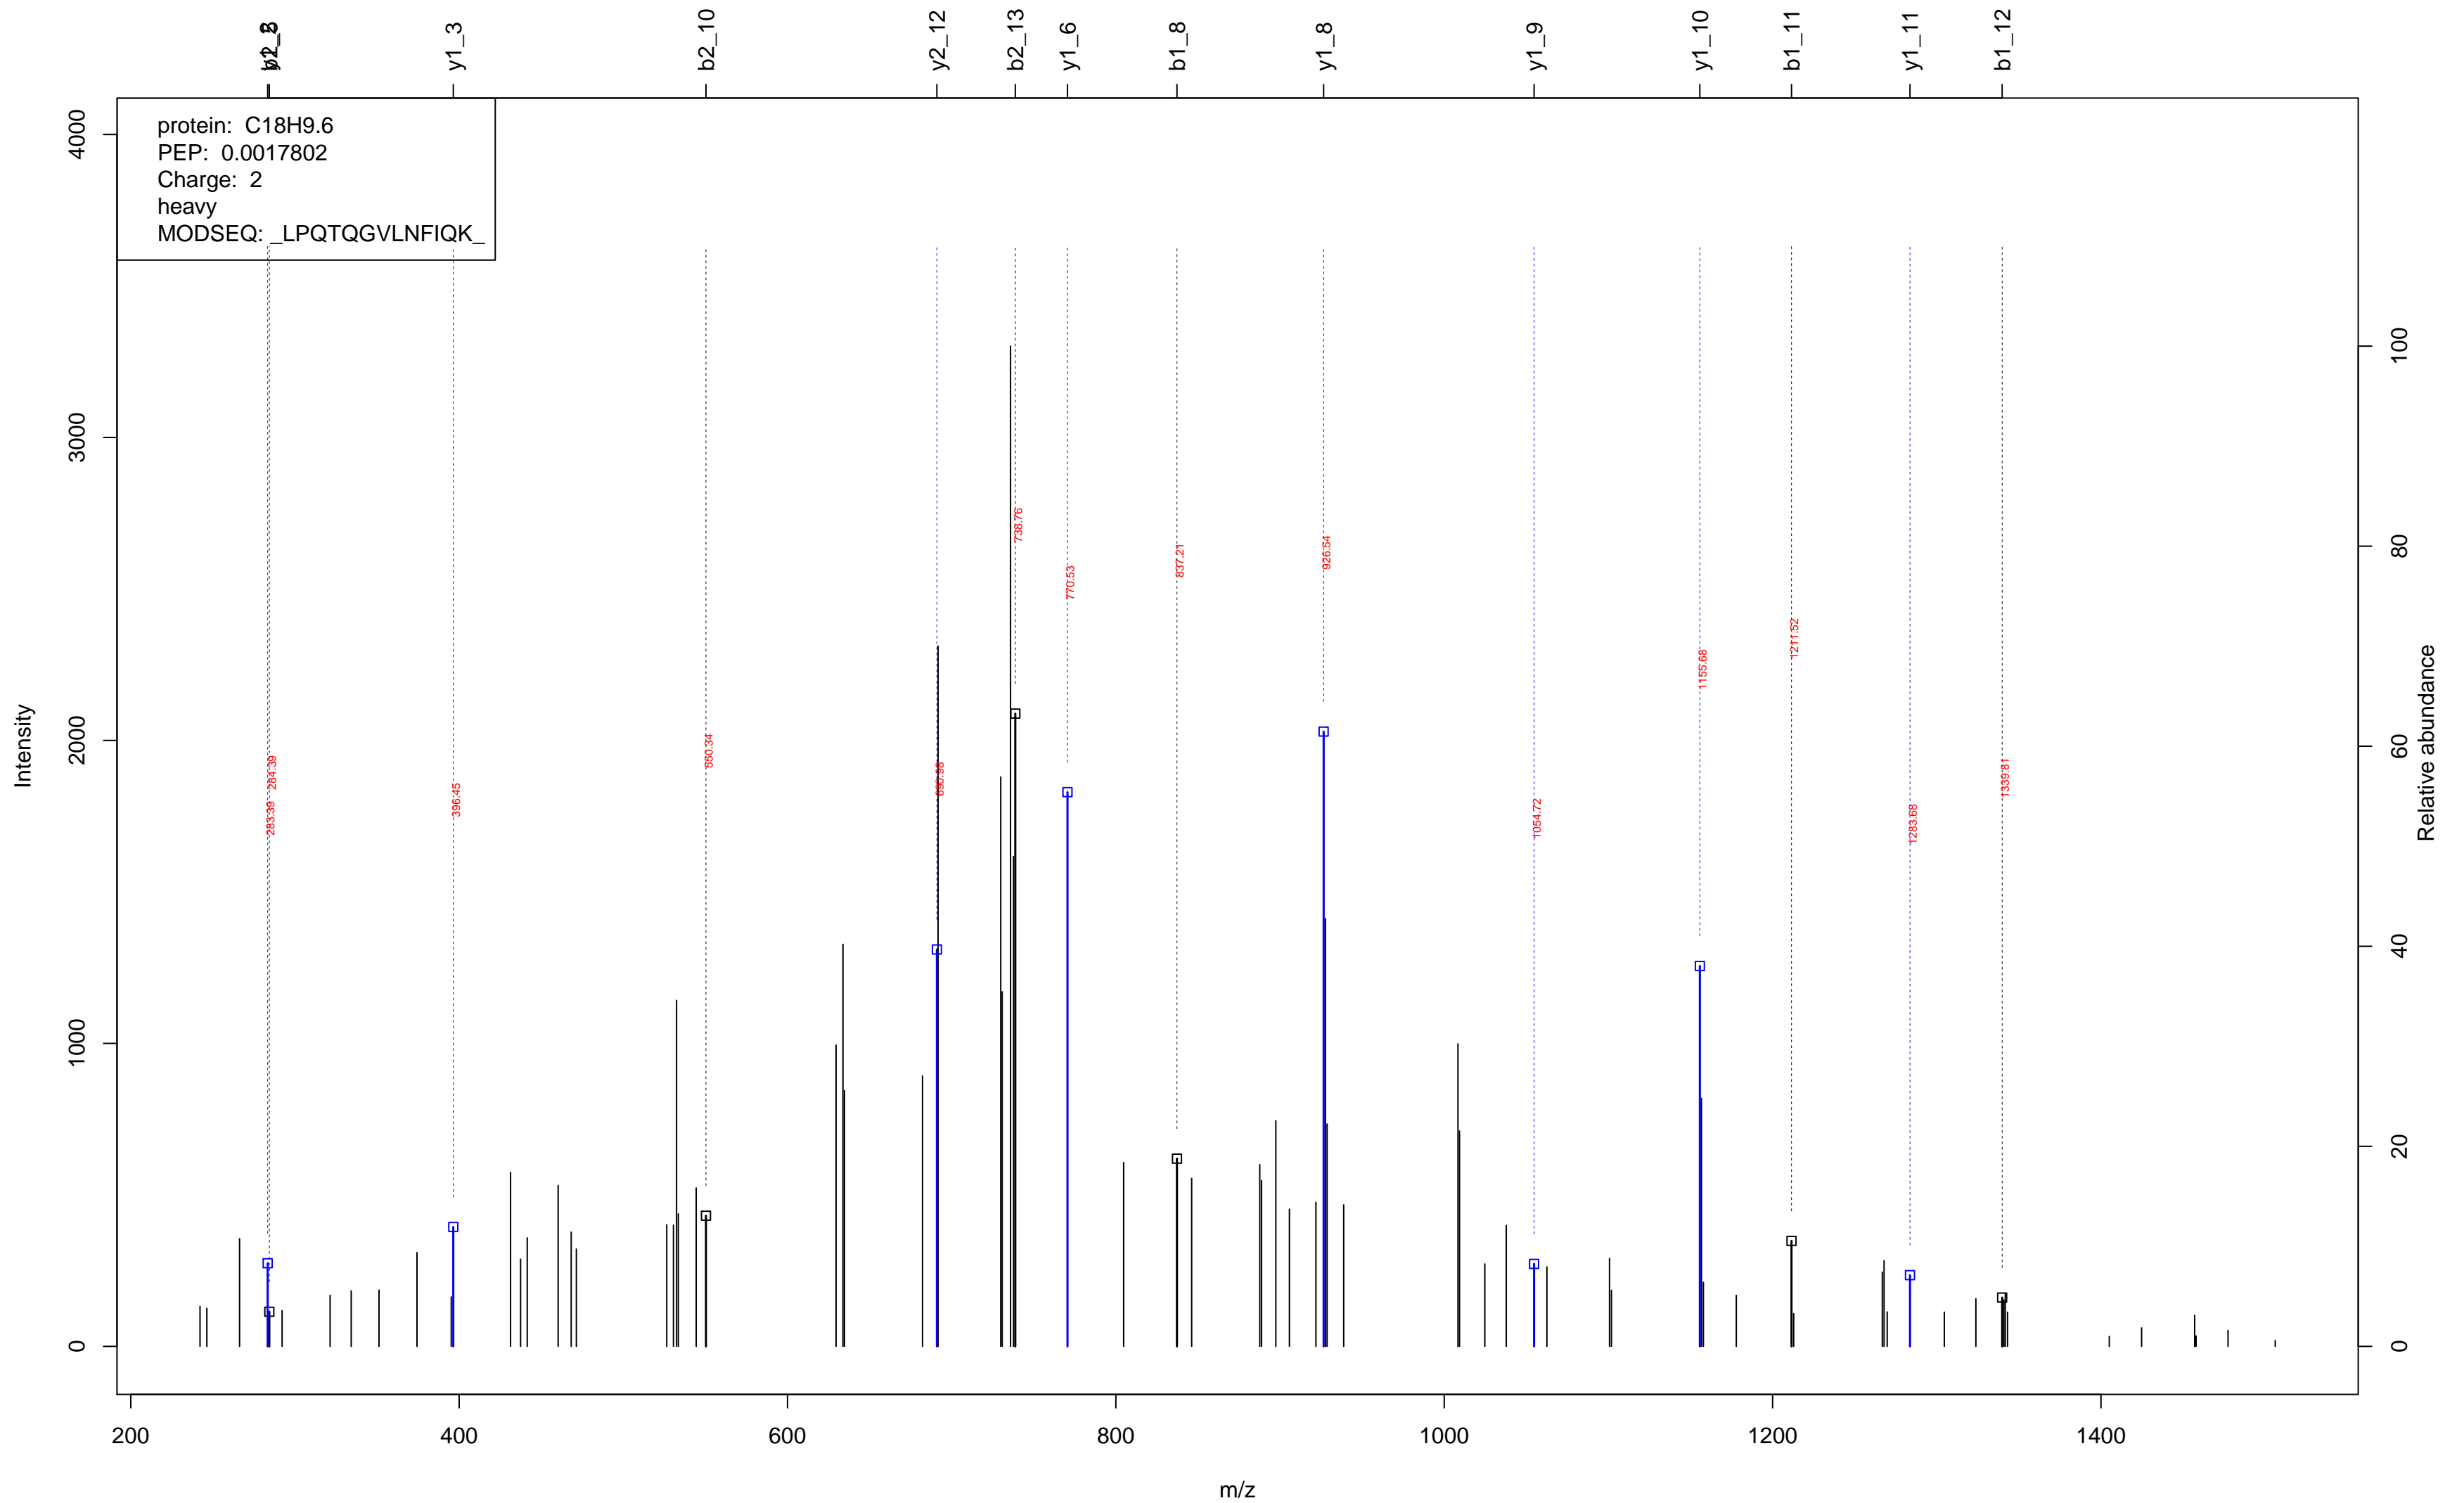

b1\_3  
y1\_3  
b1\_3  
b1\_8  
y2\_9  
y2\_10  
b2\_12  
y1\_9

protein: F47G6.4  
PEP: 0.0097144  
Charge: 3  
heavy  
MODSEQ: \_LQLENDELAEVER\_

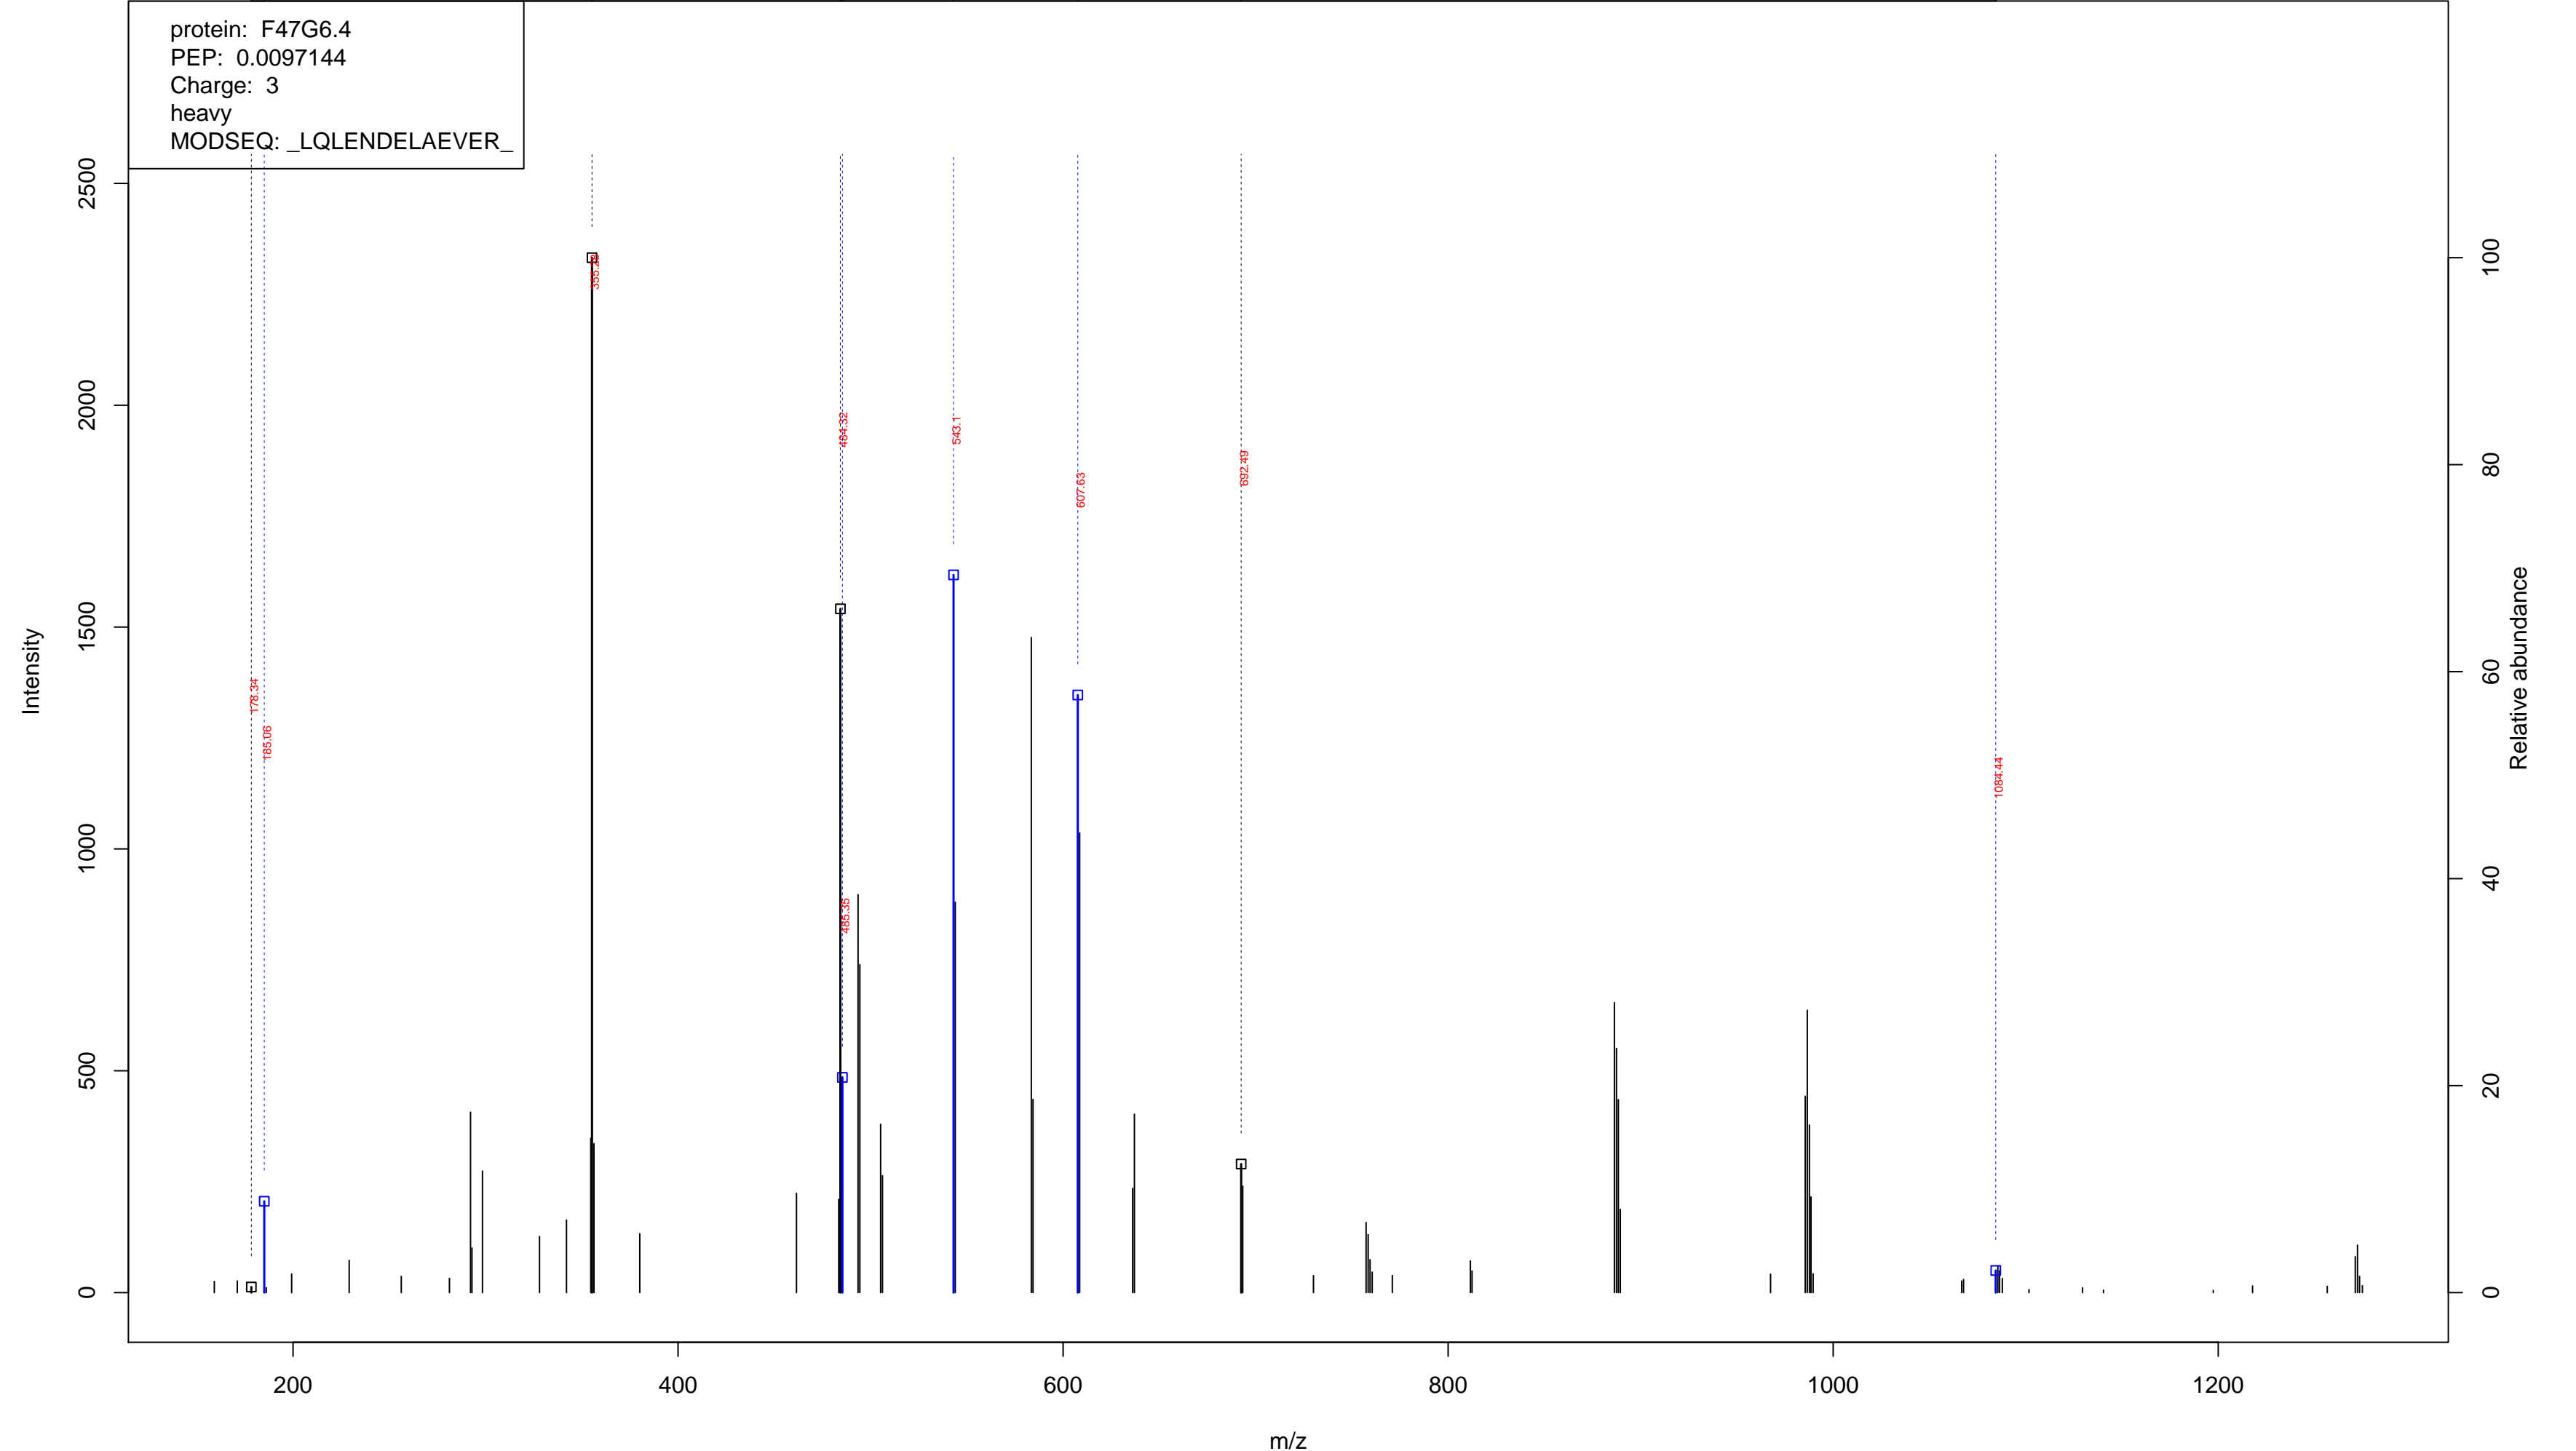

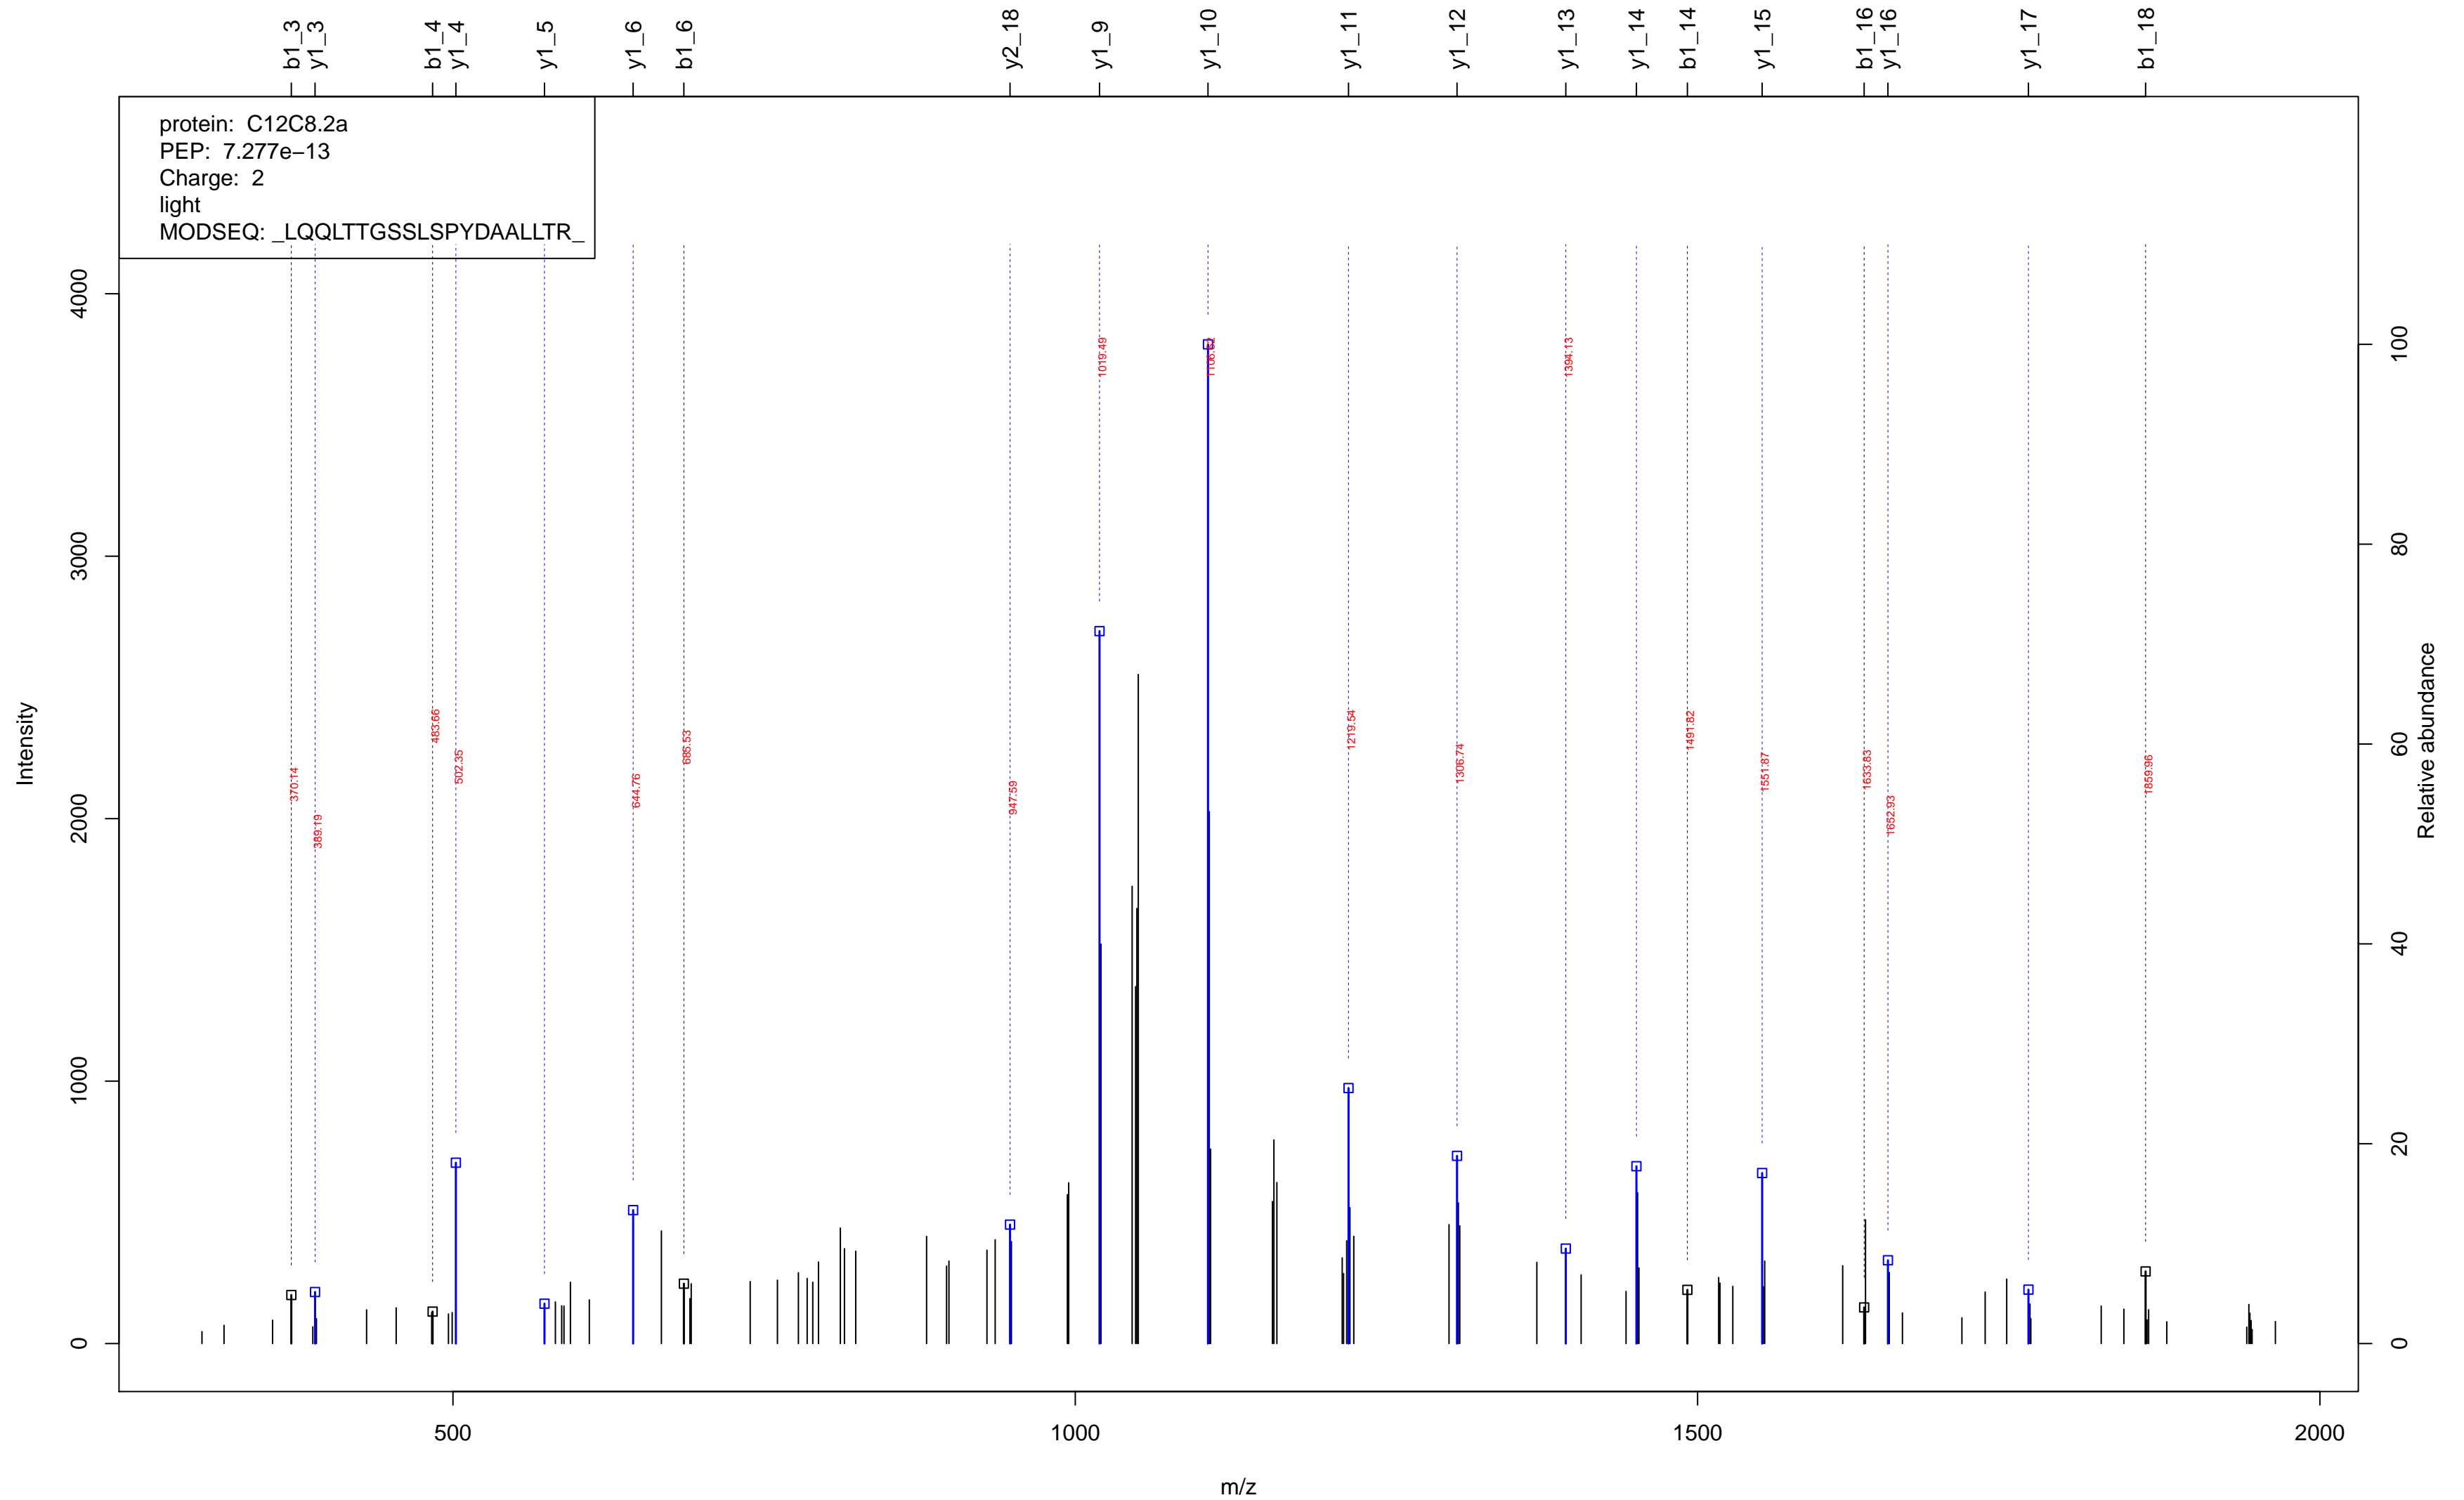

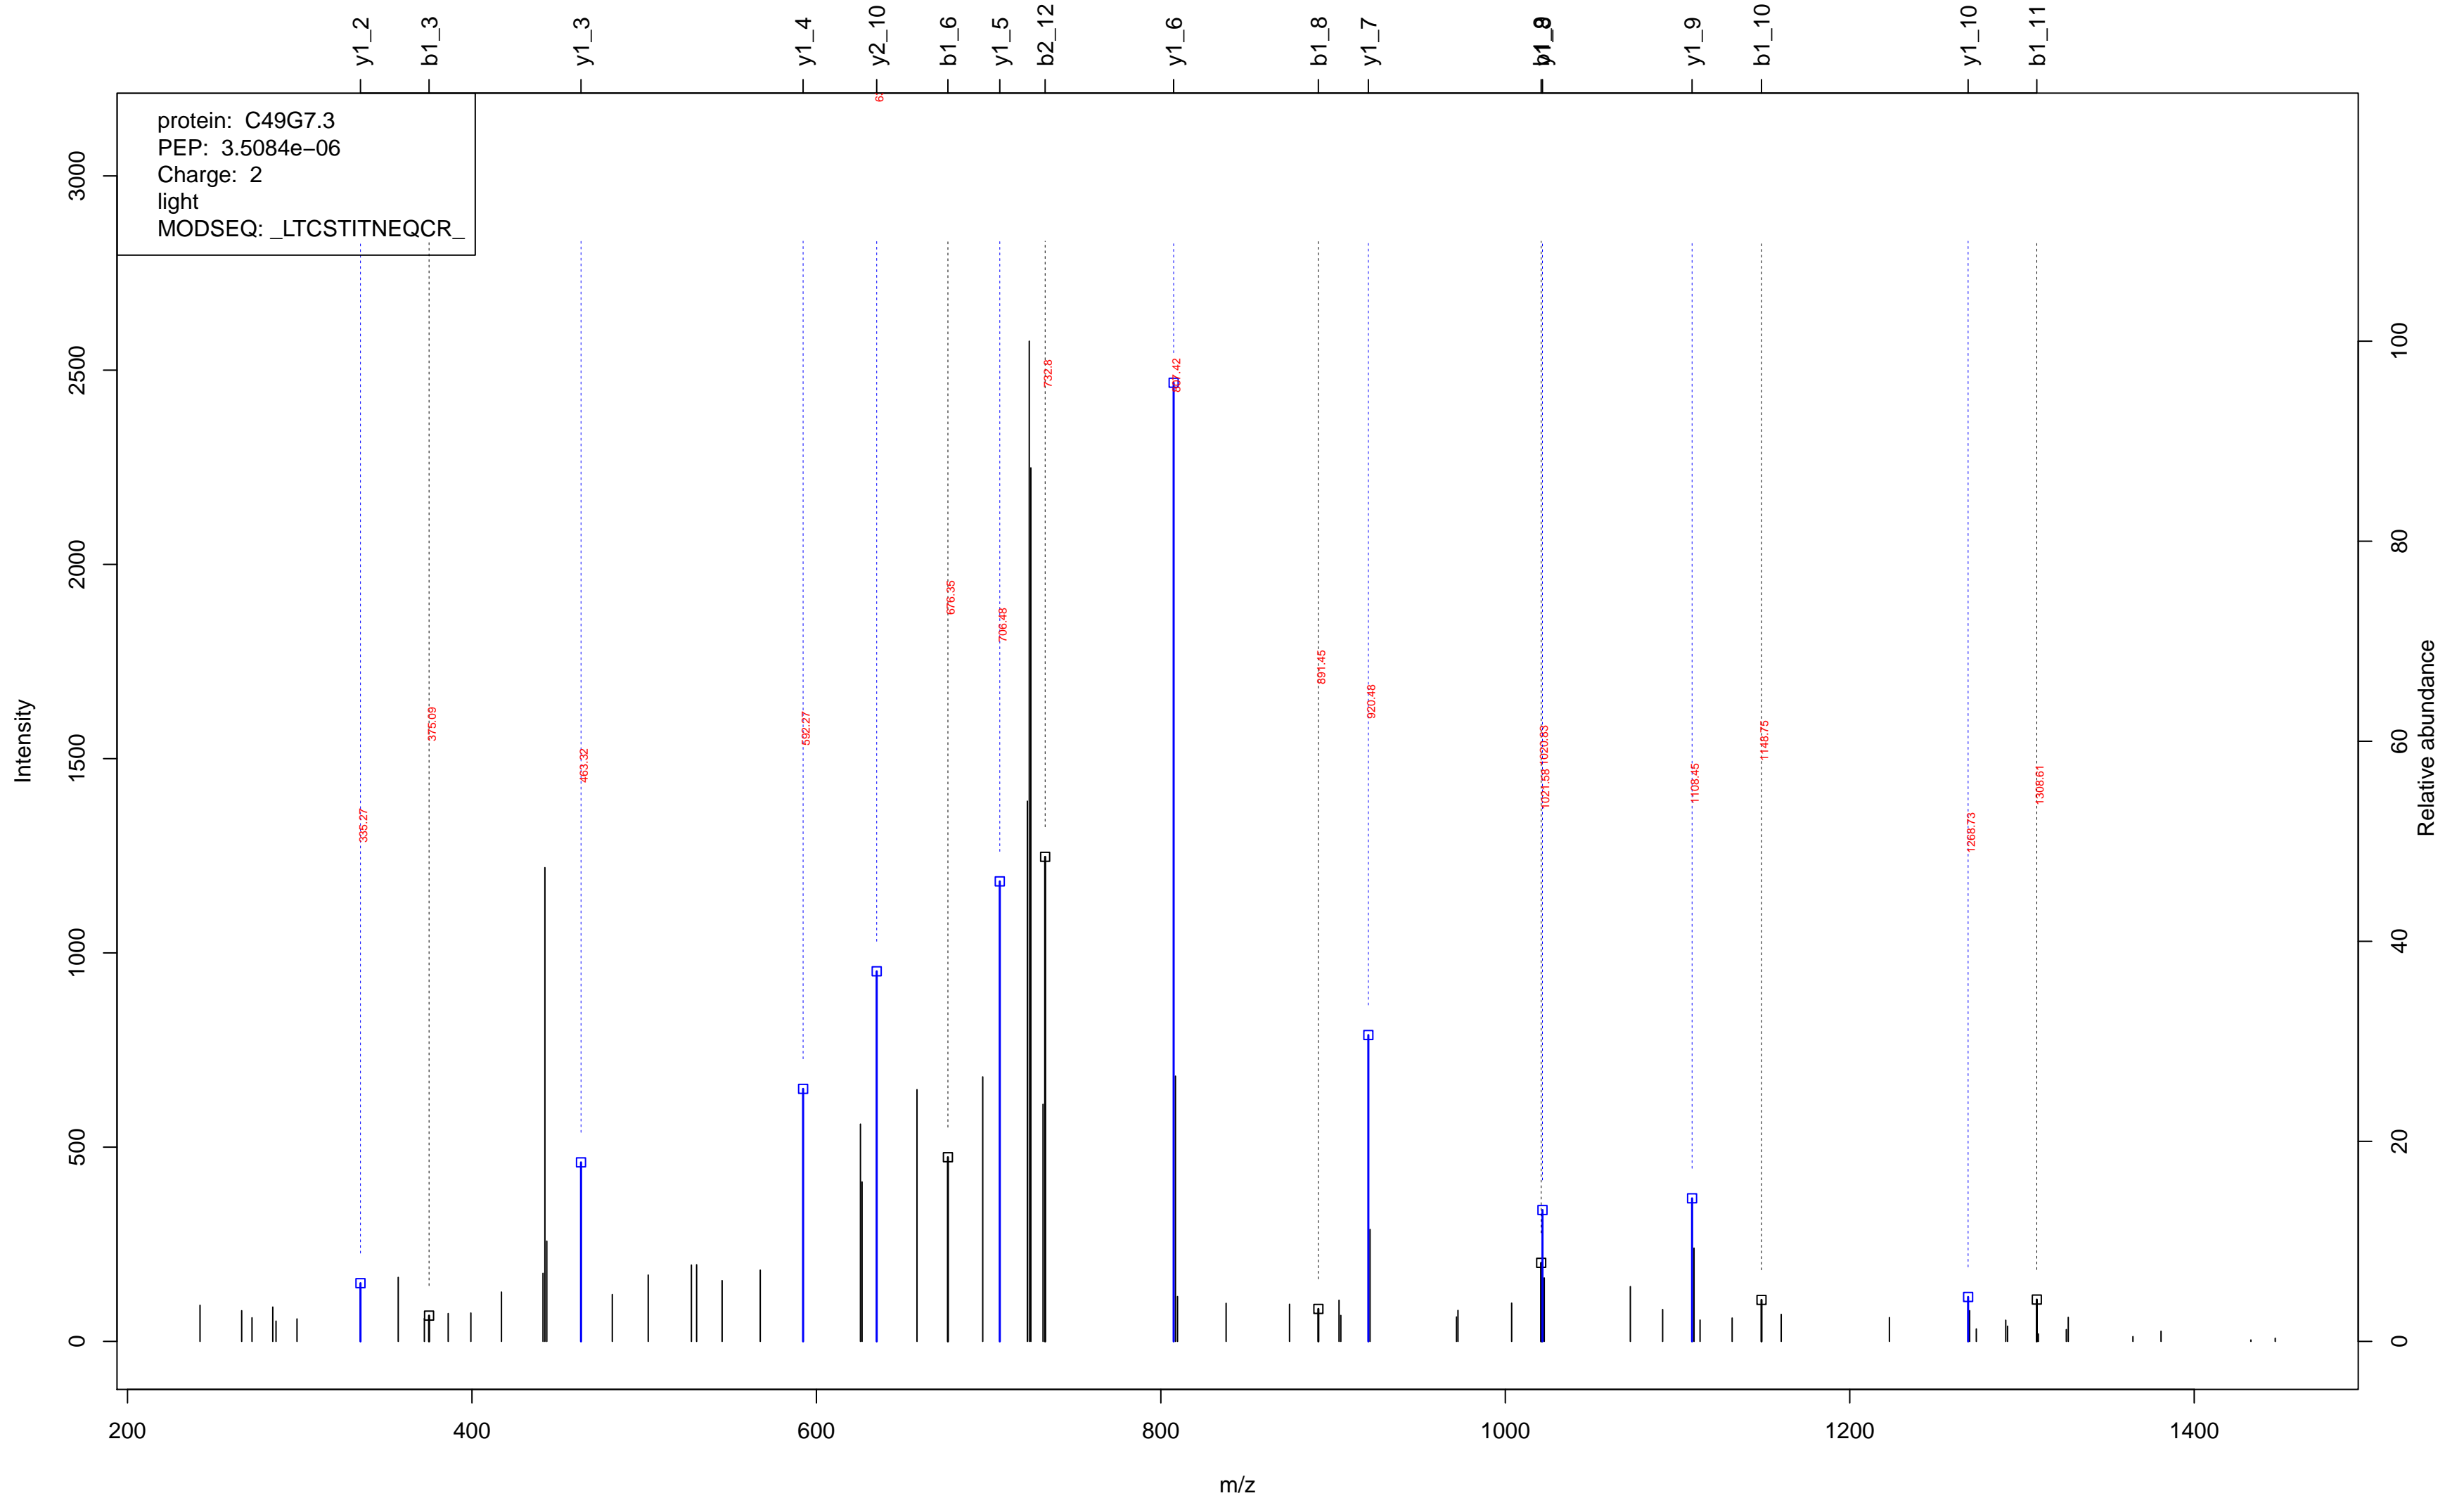



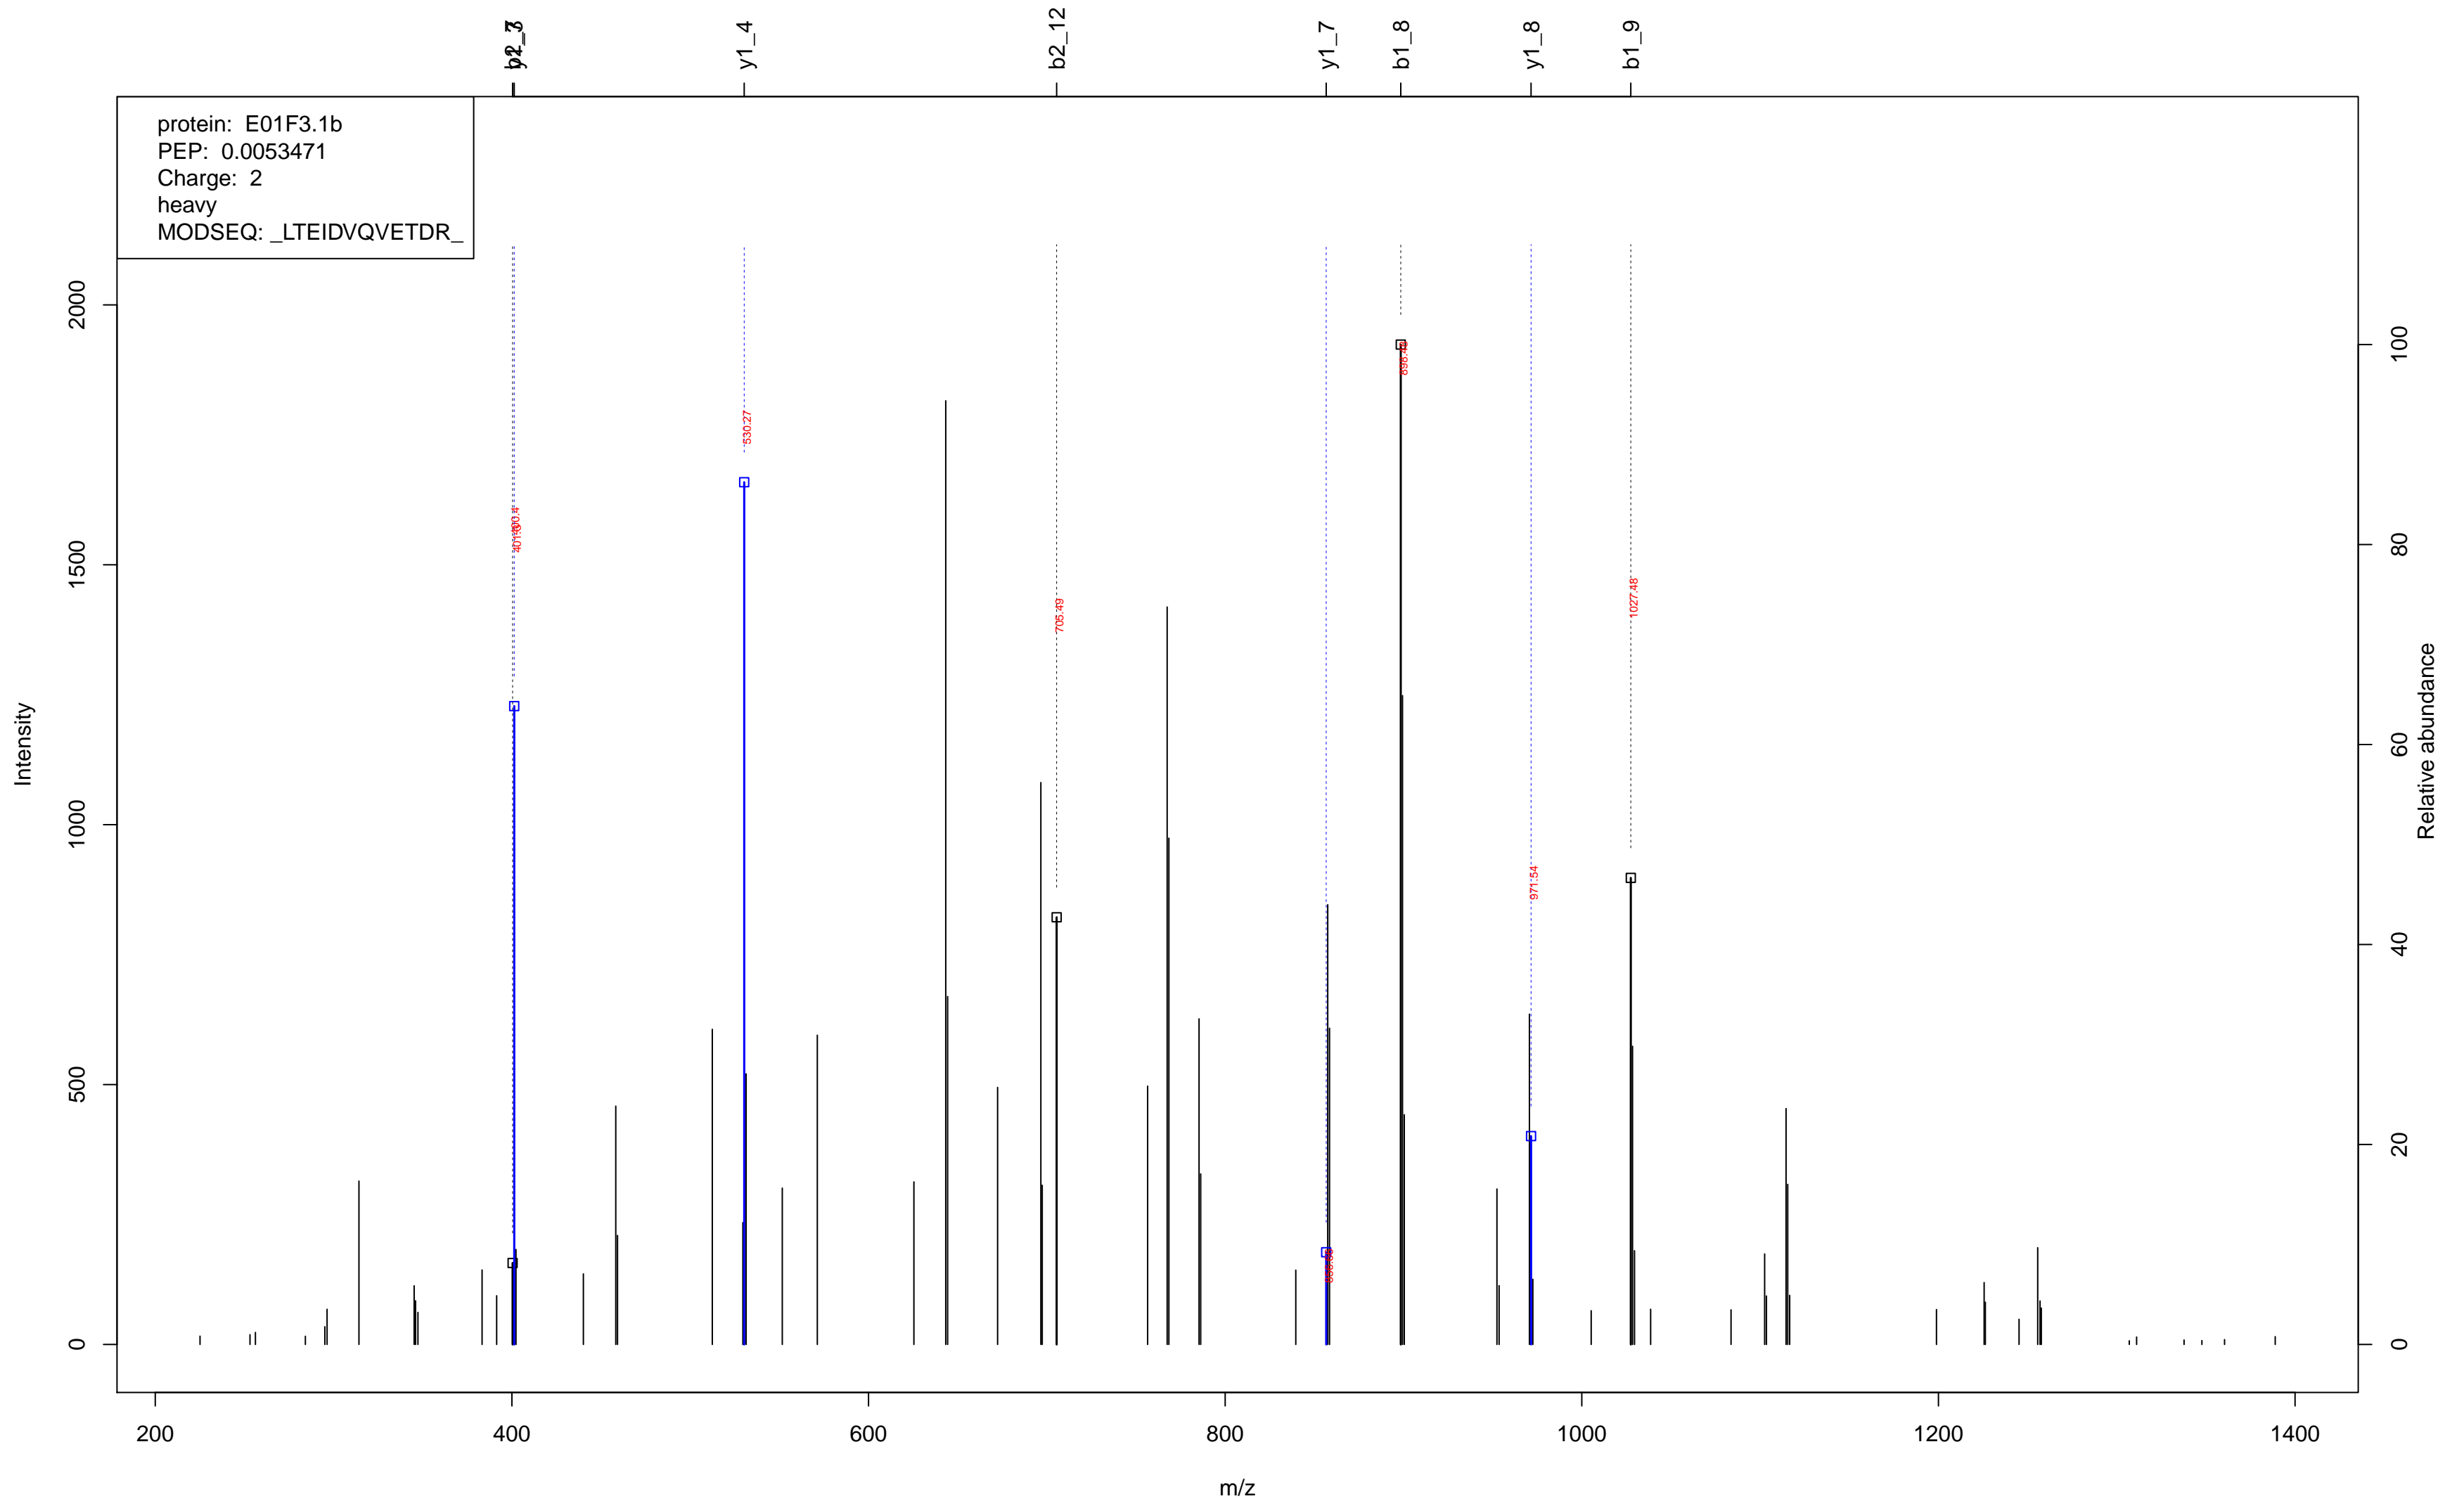

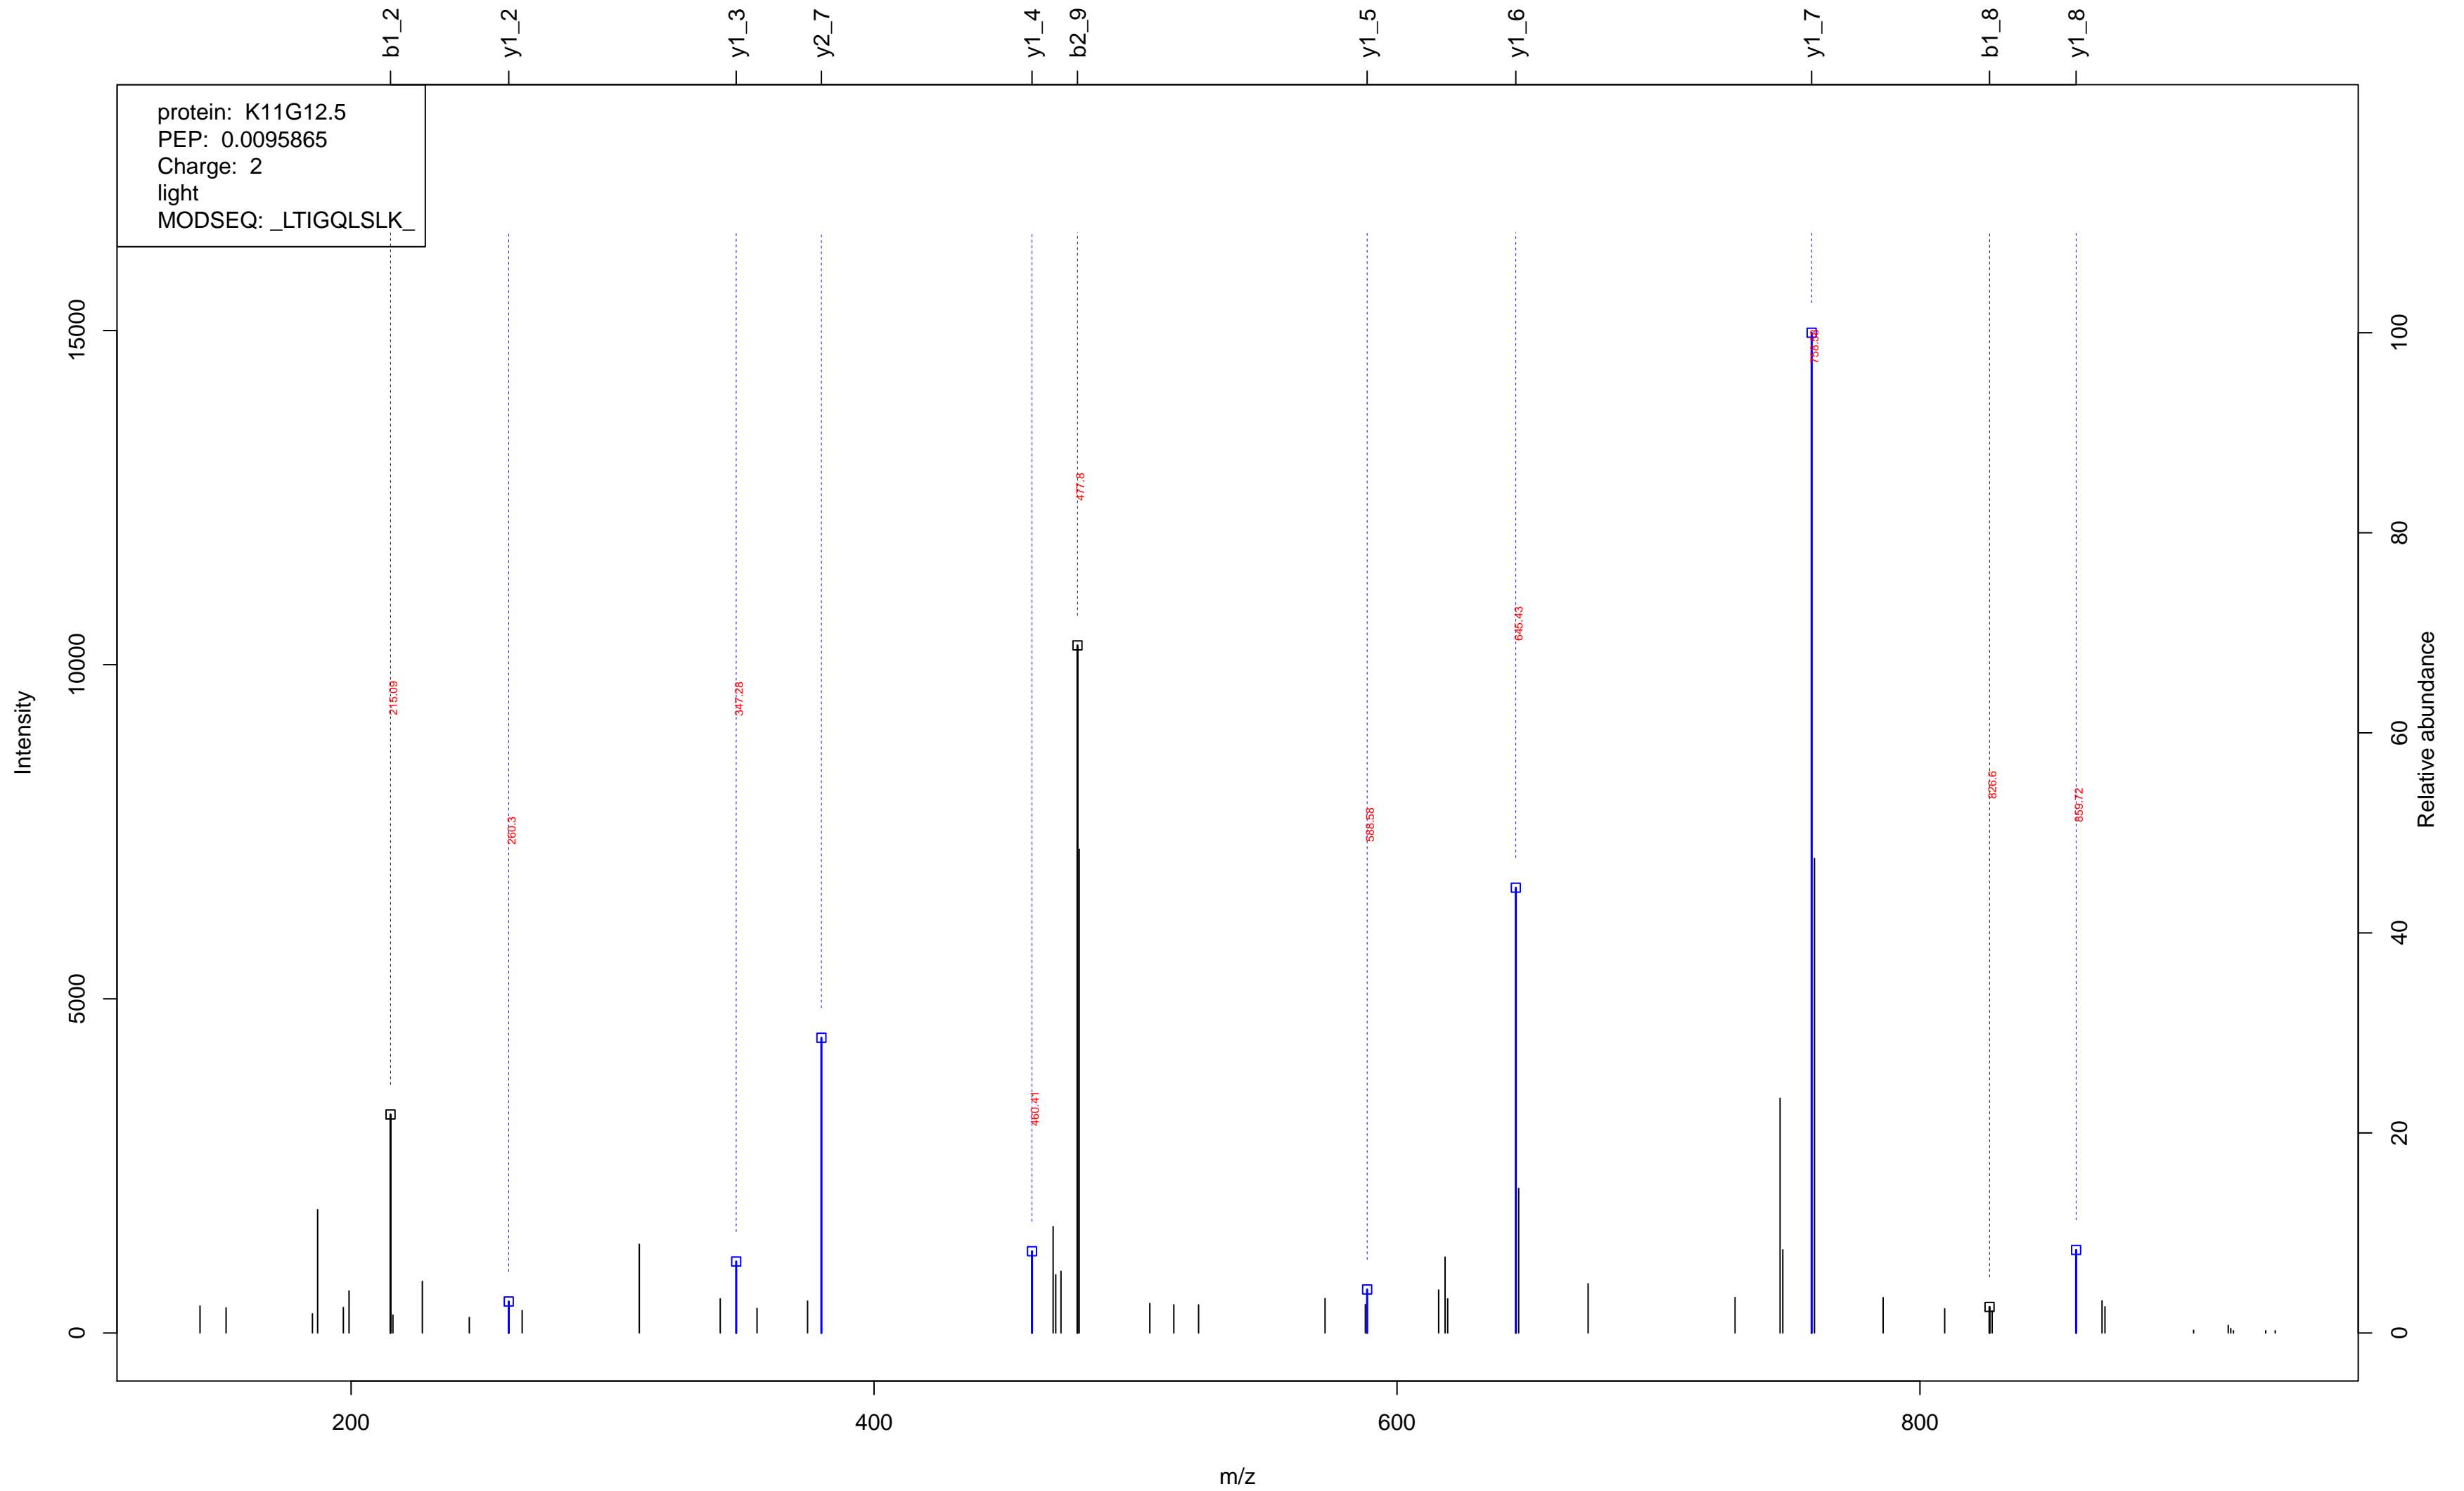

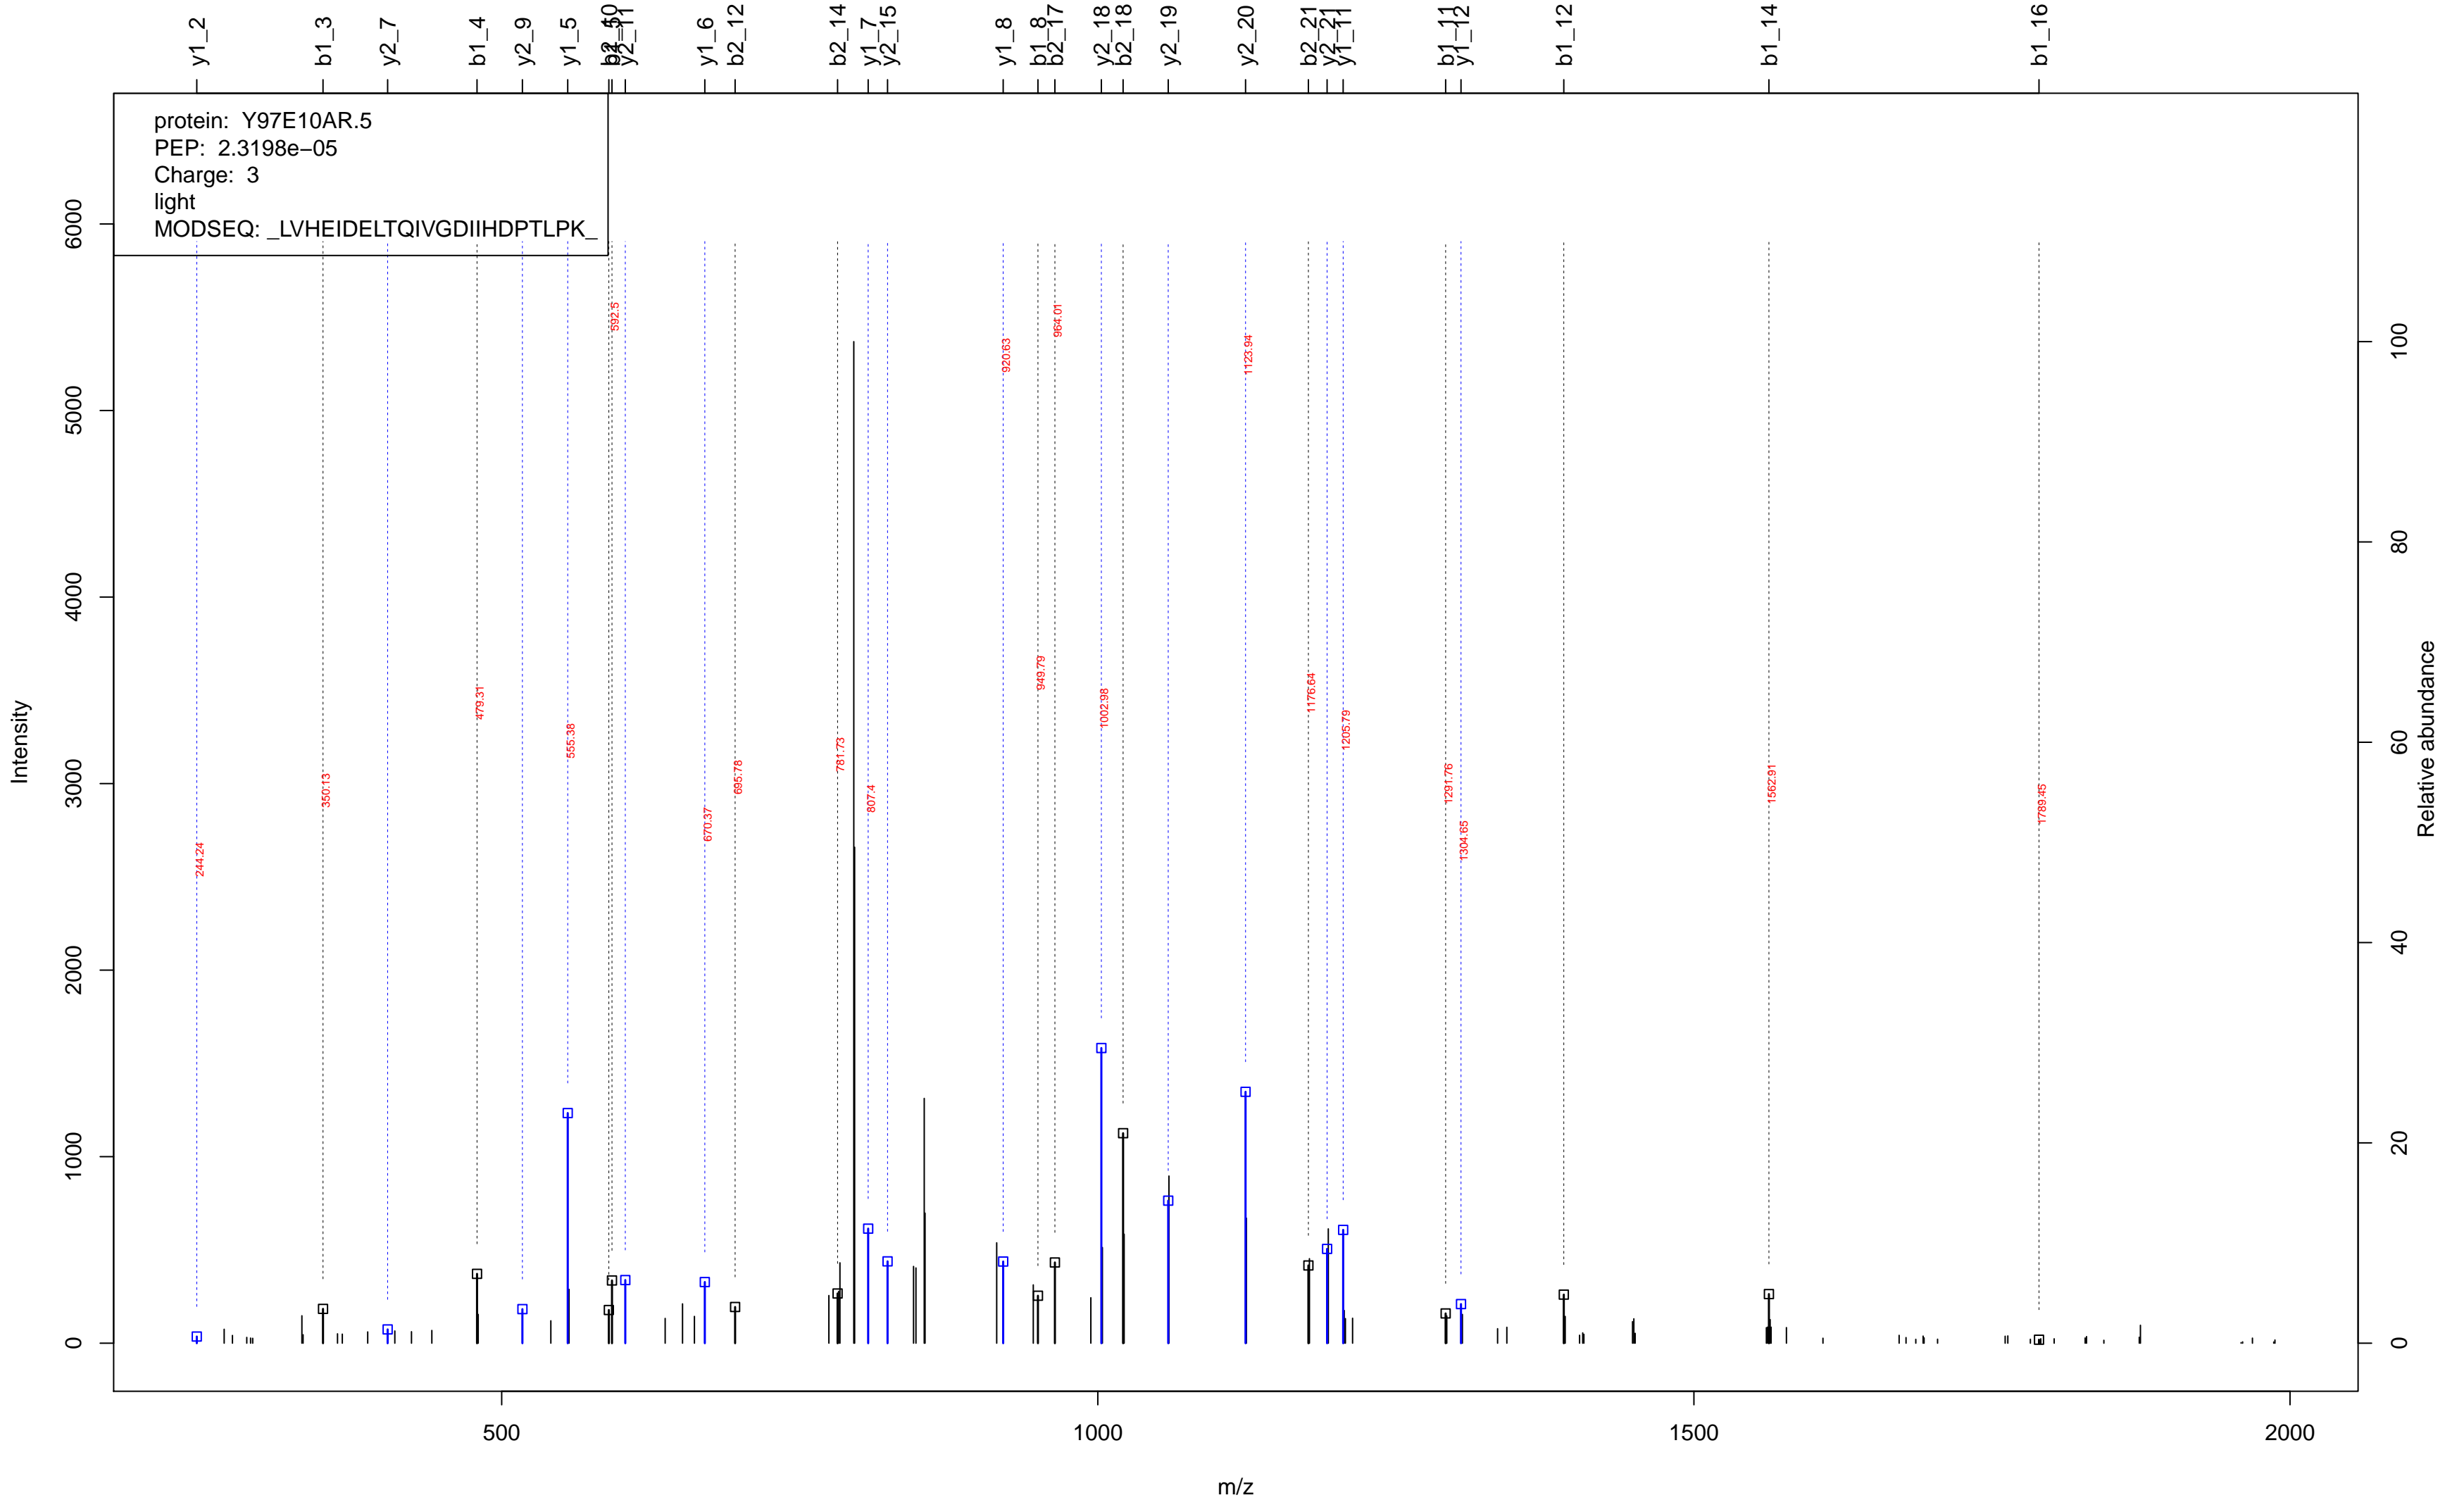

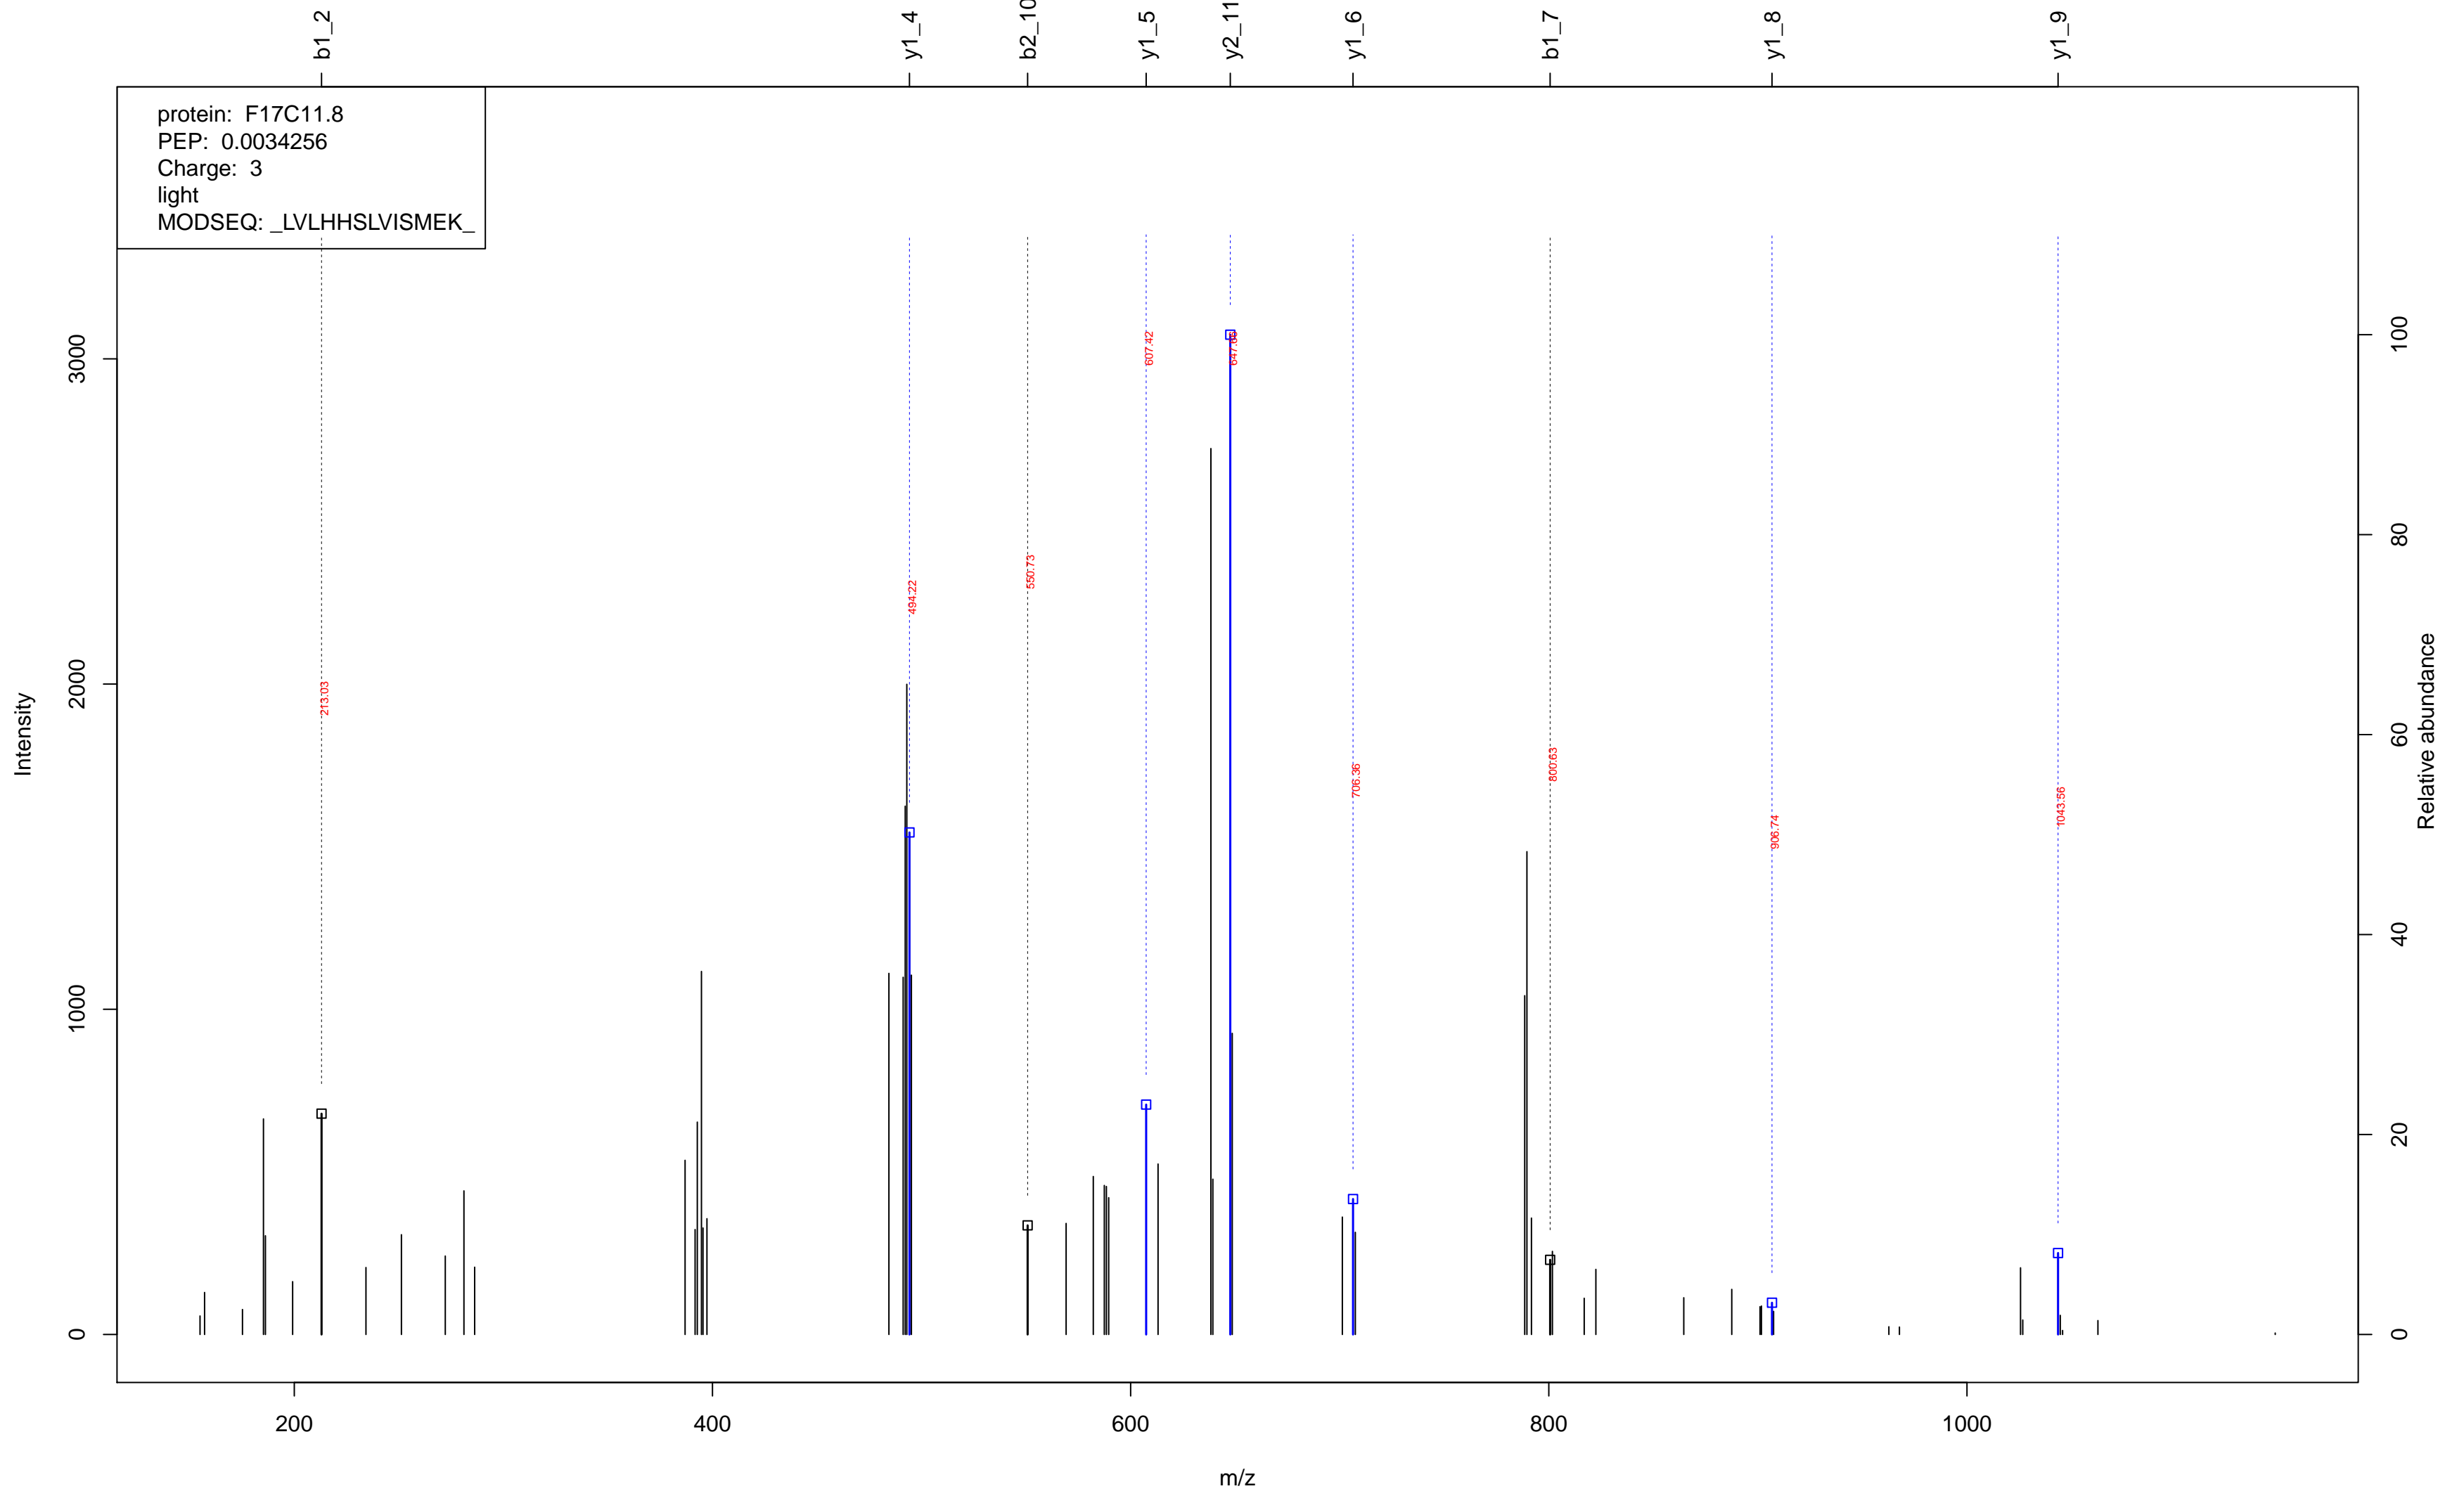

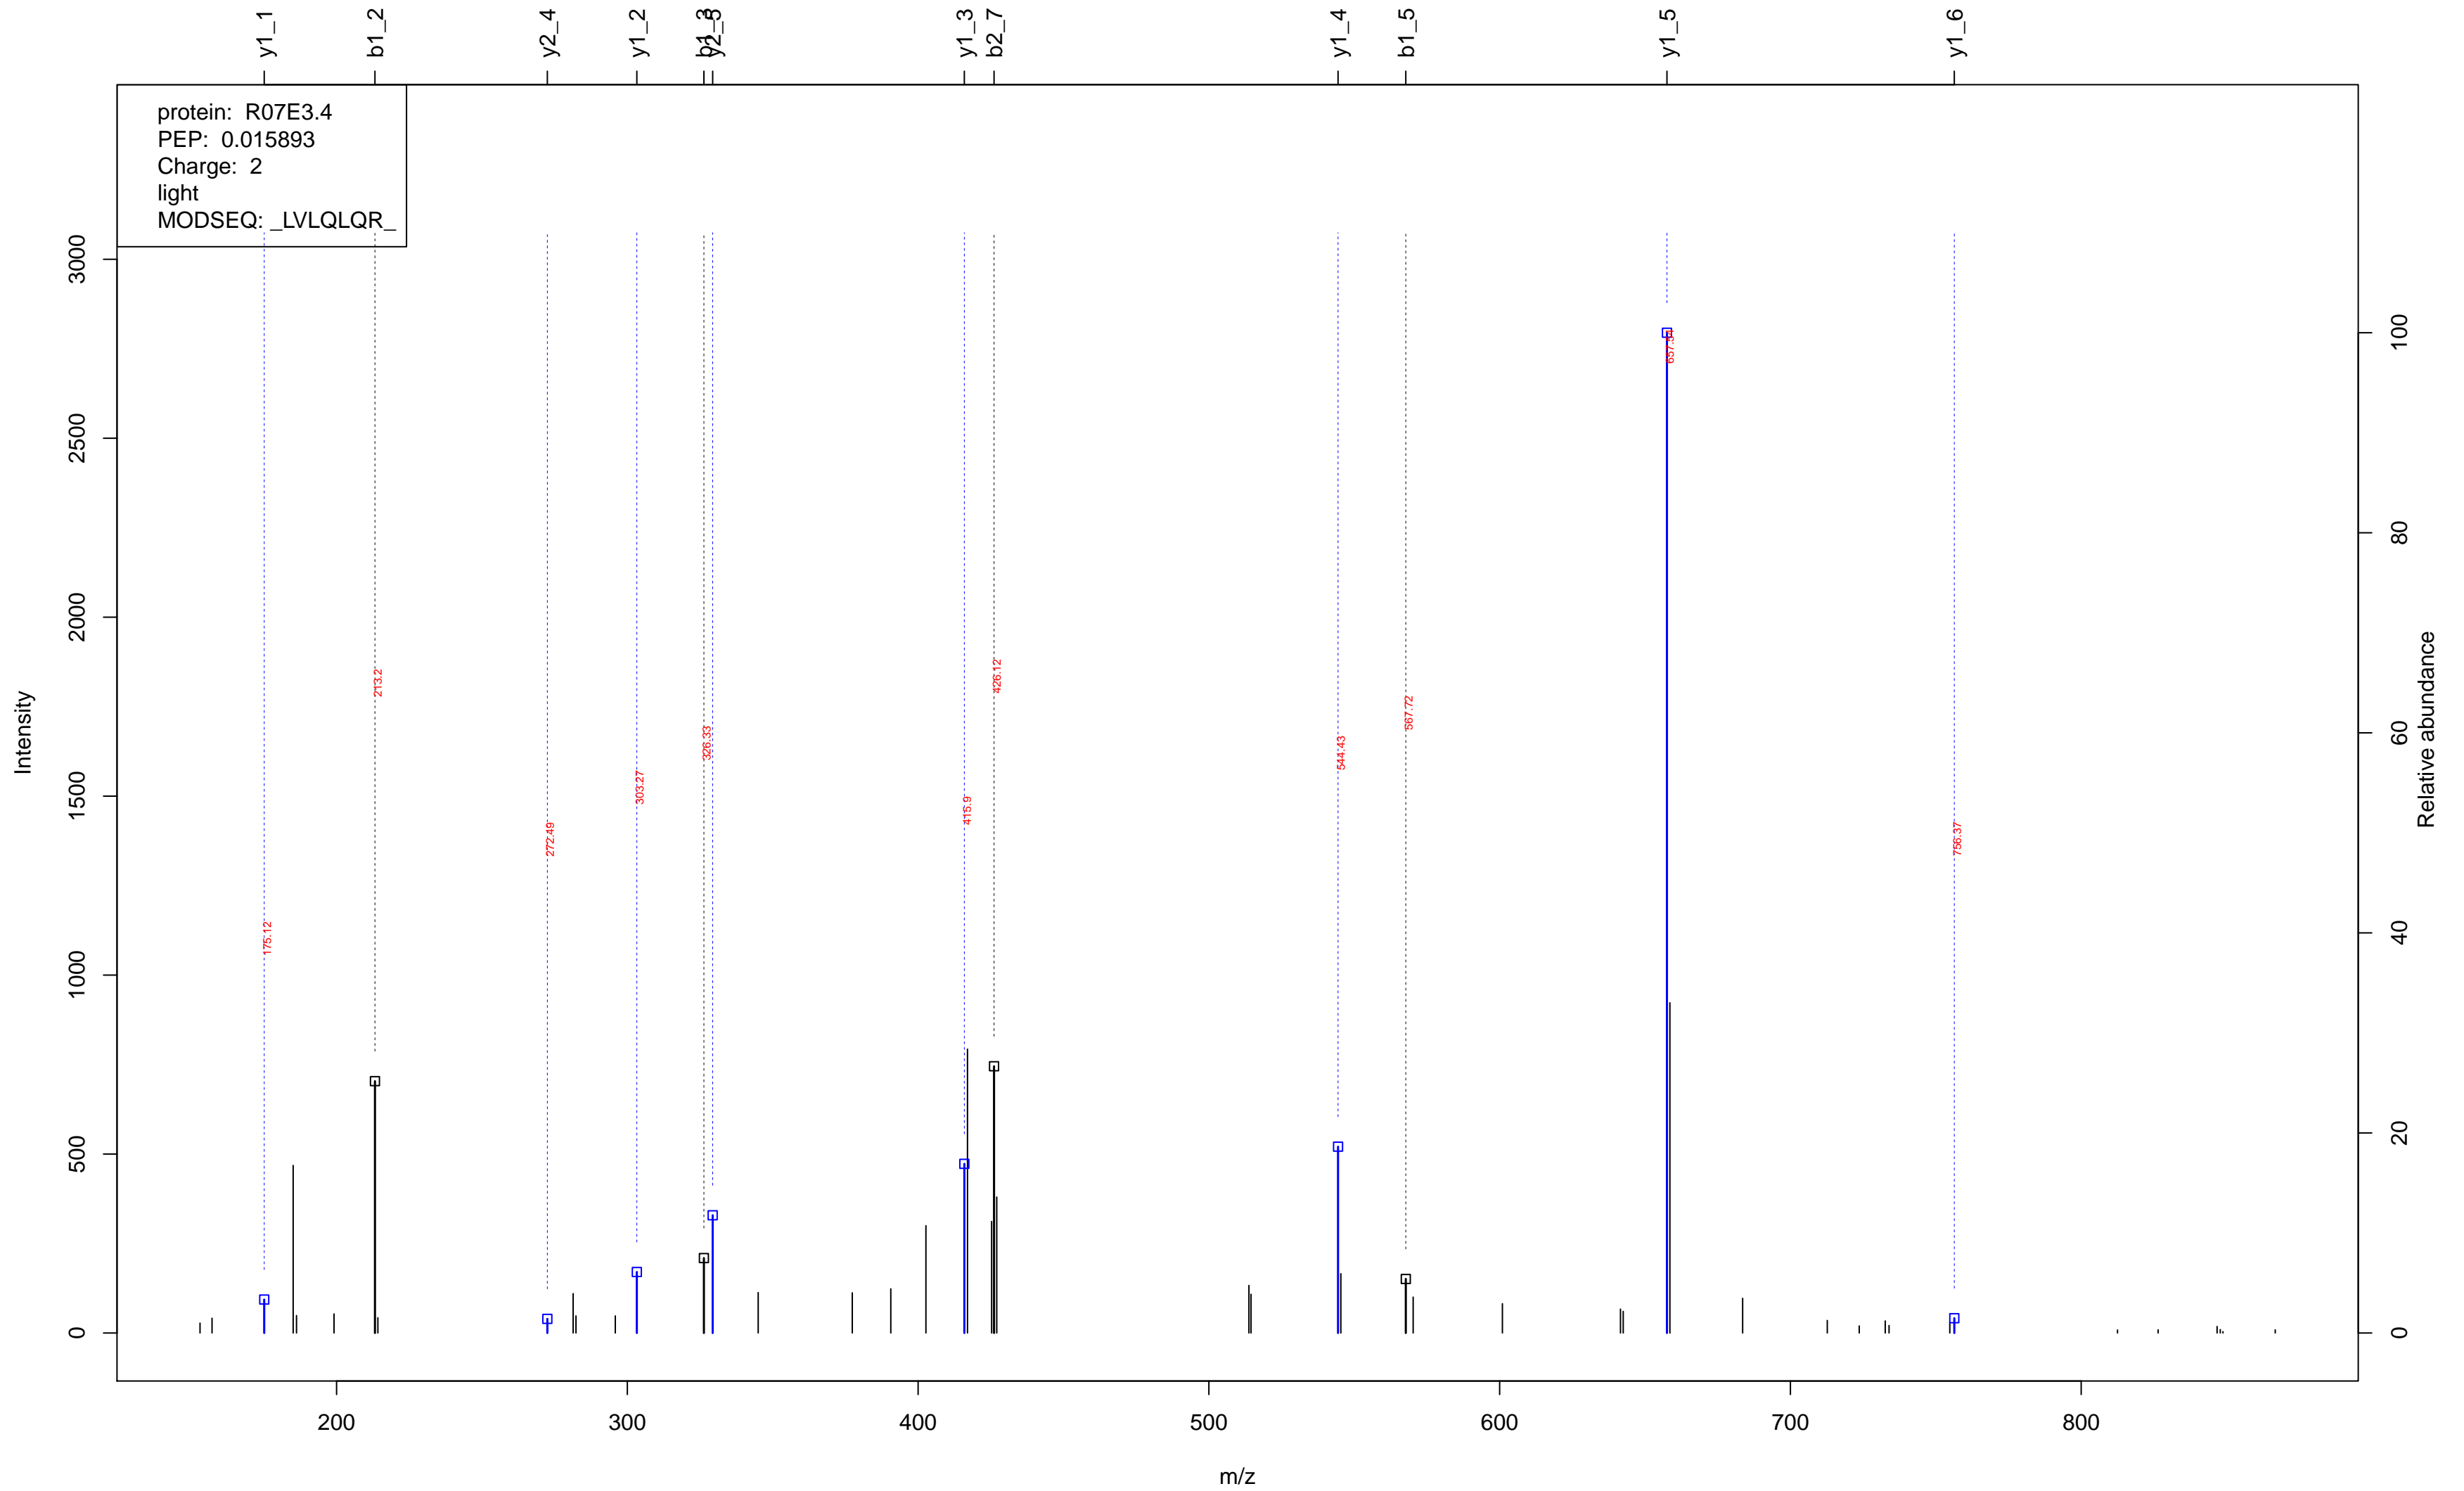

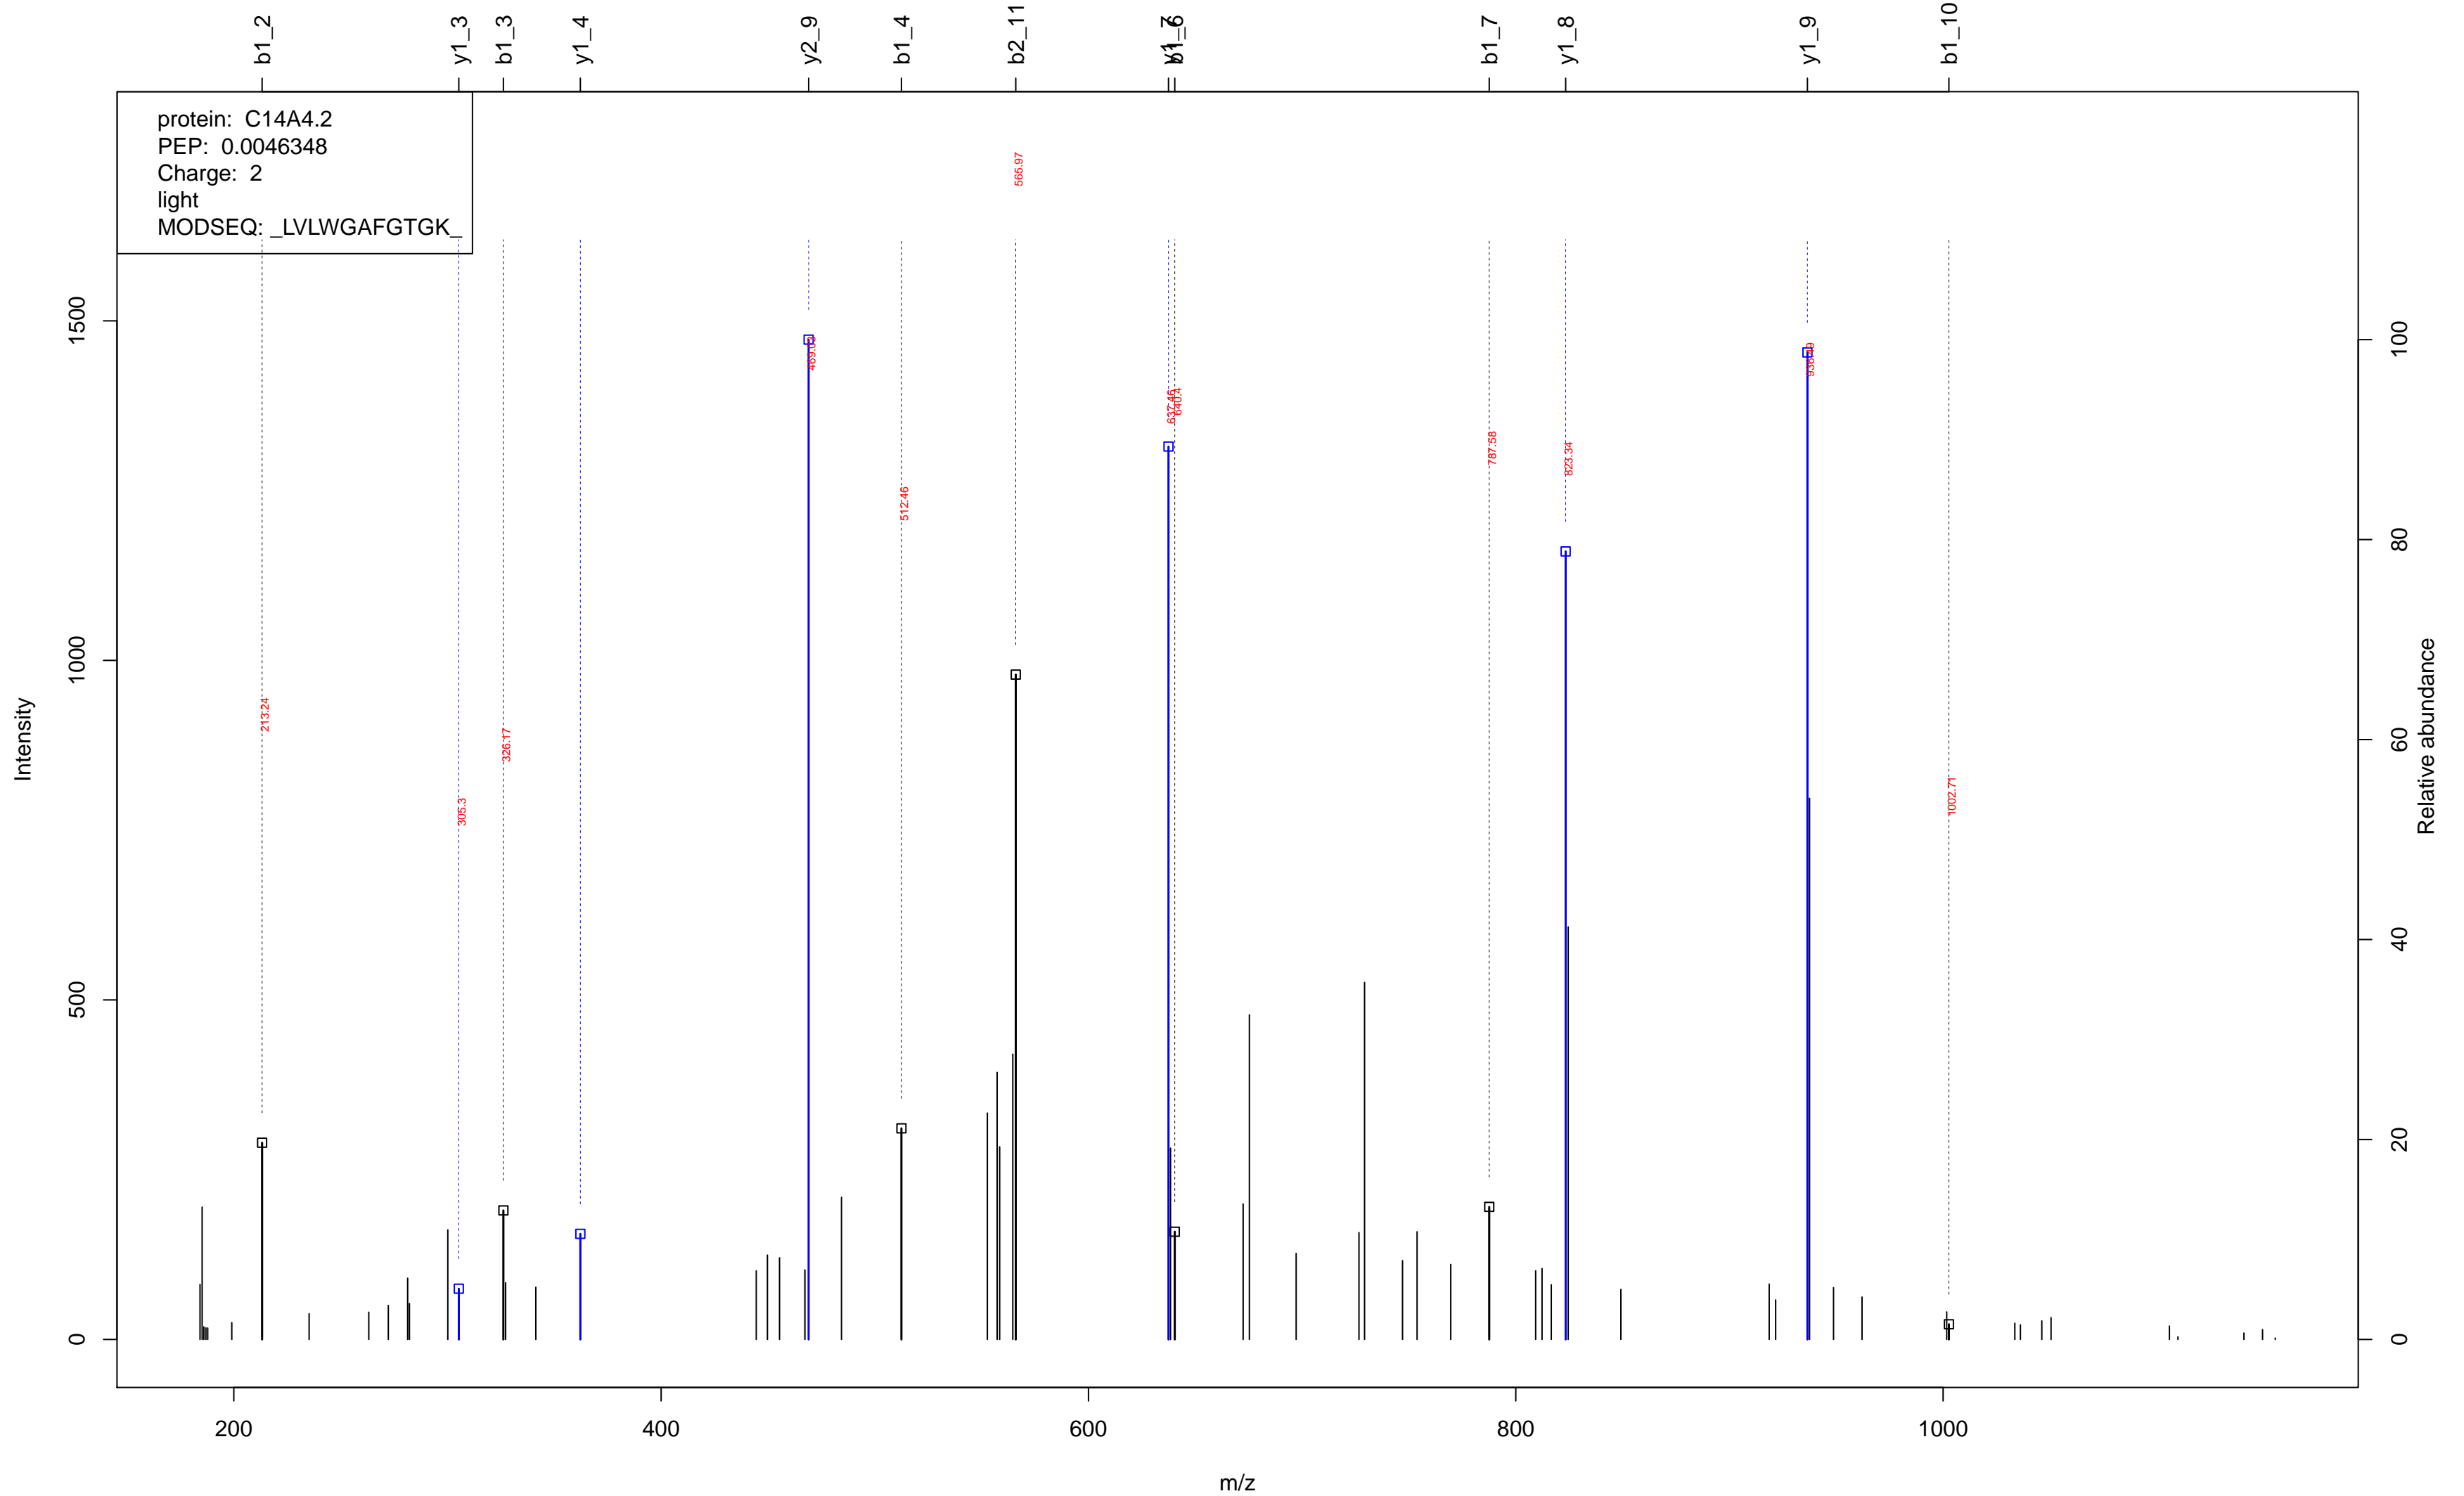

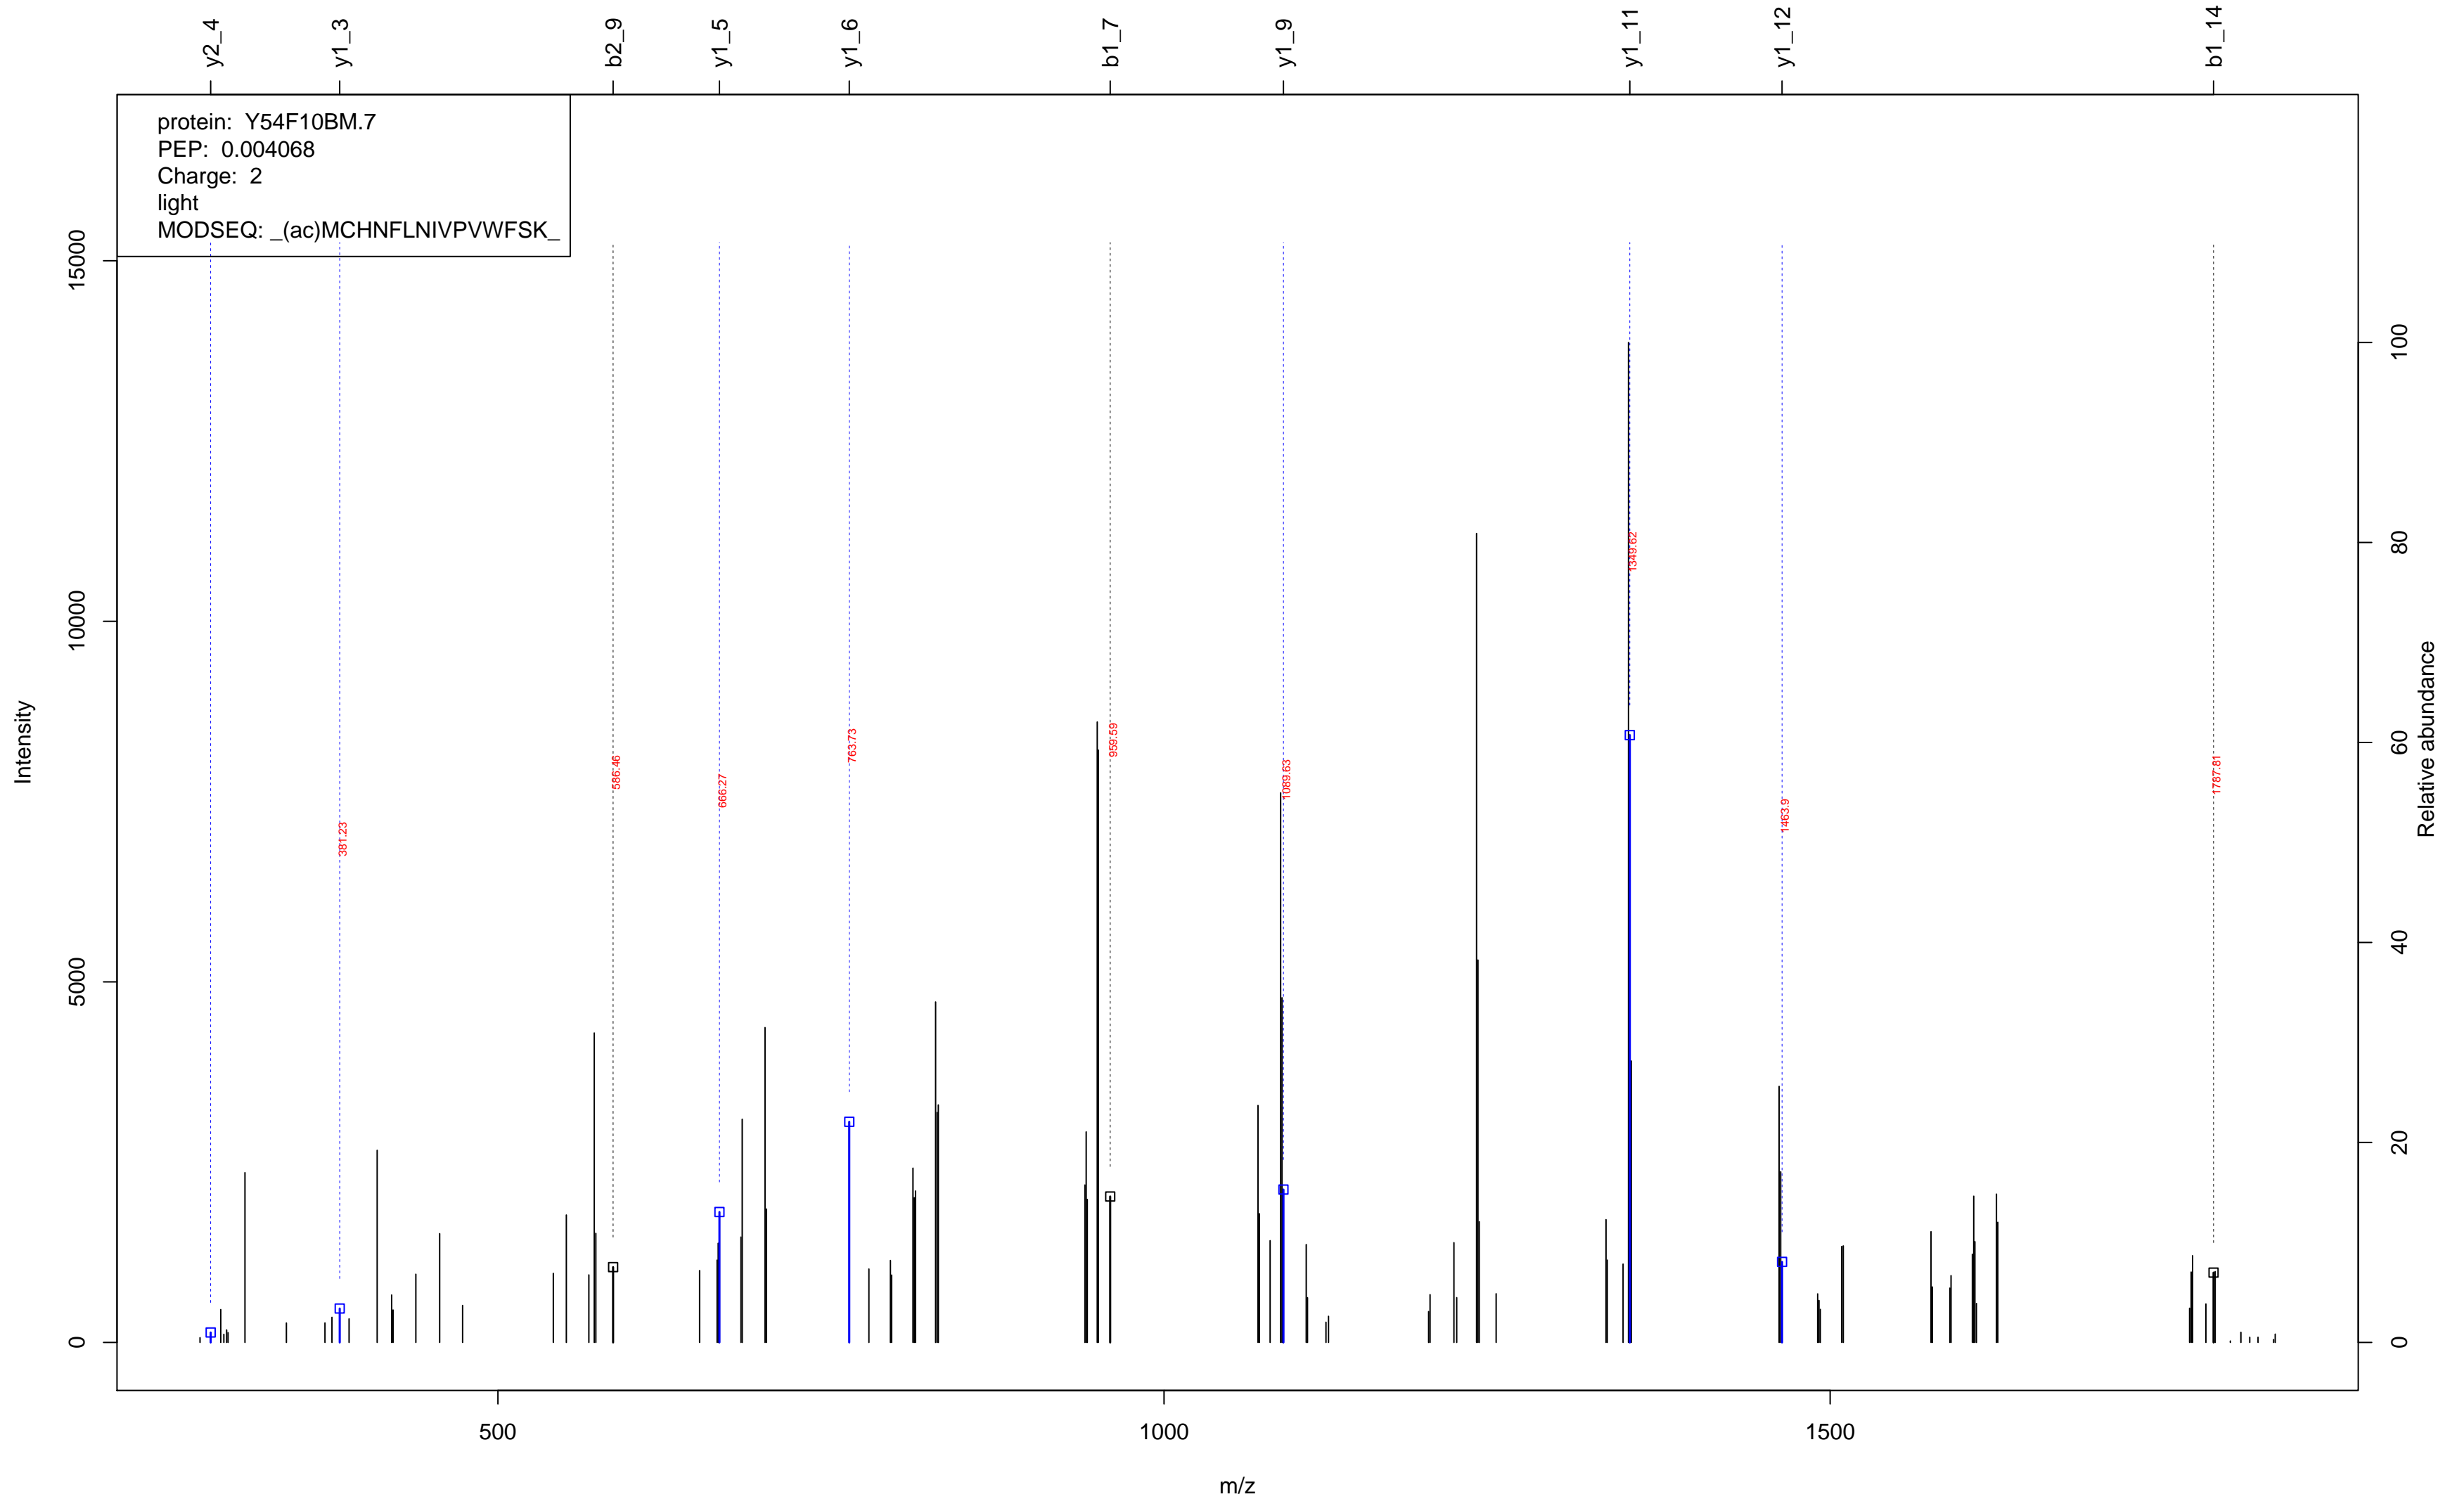

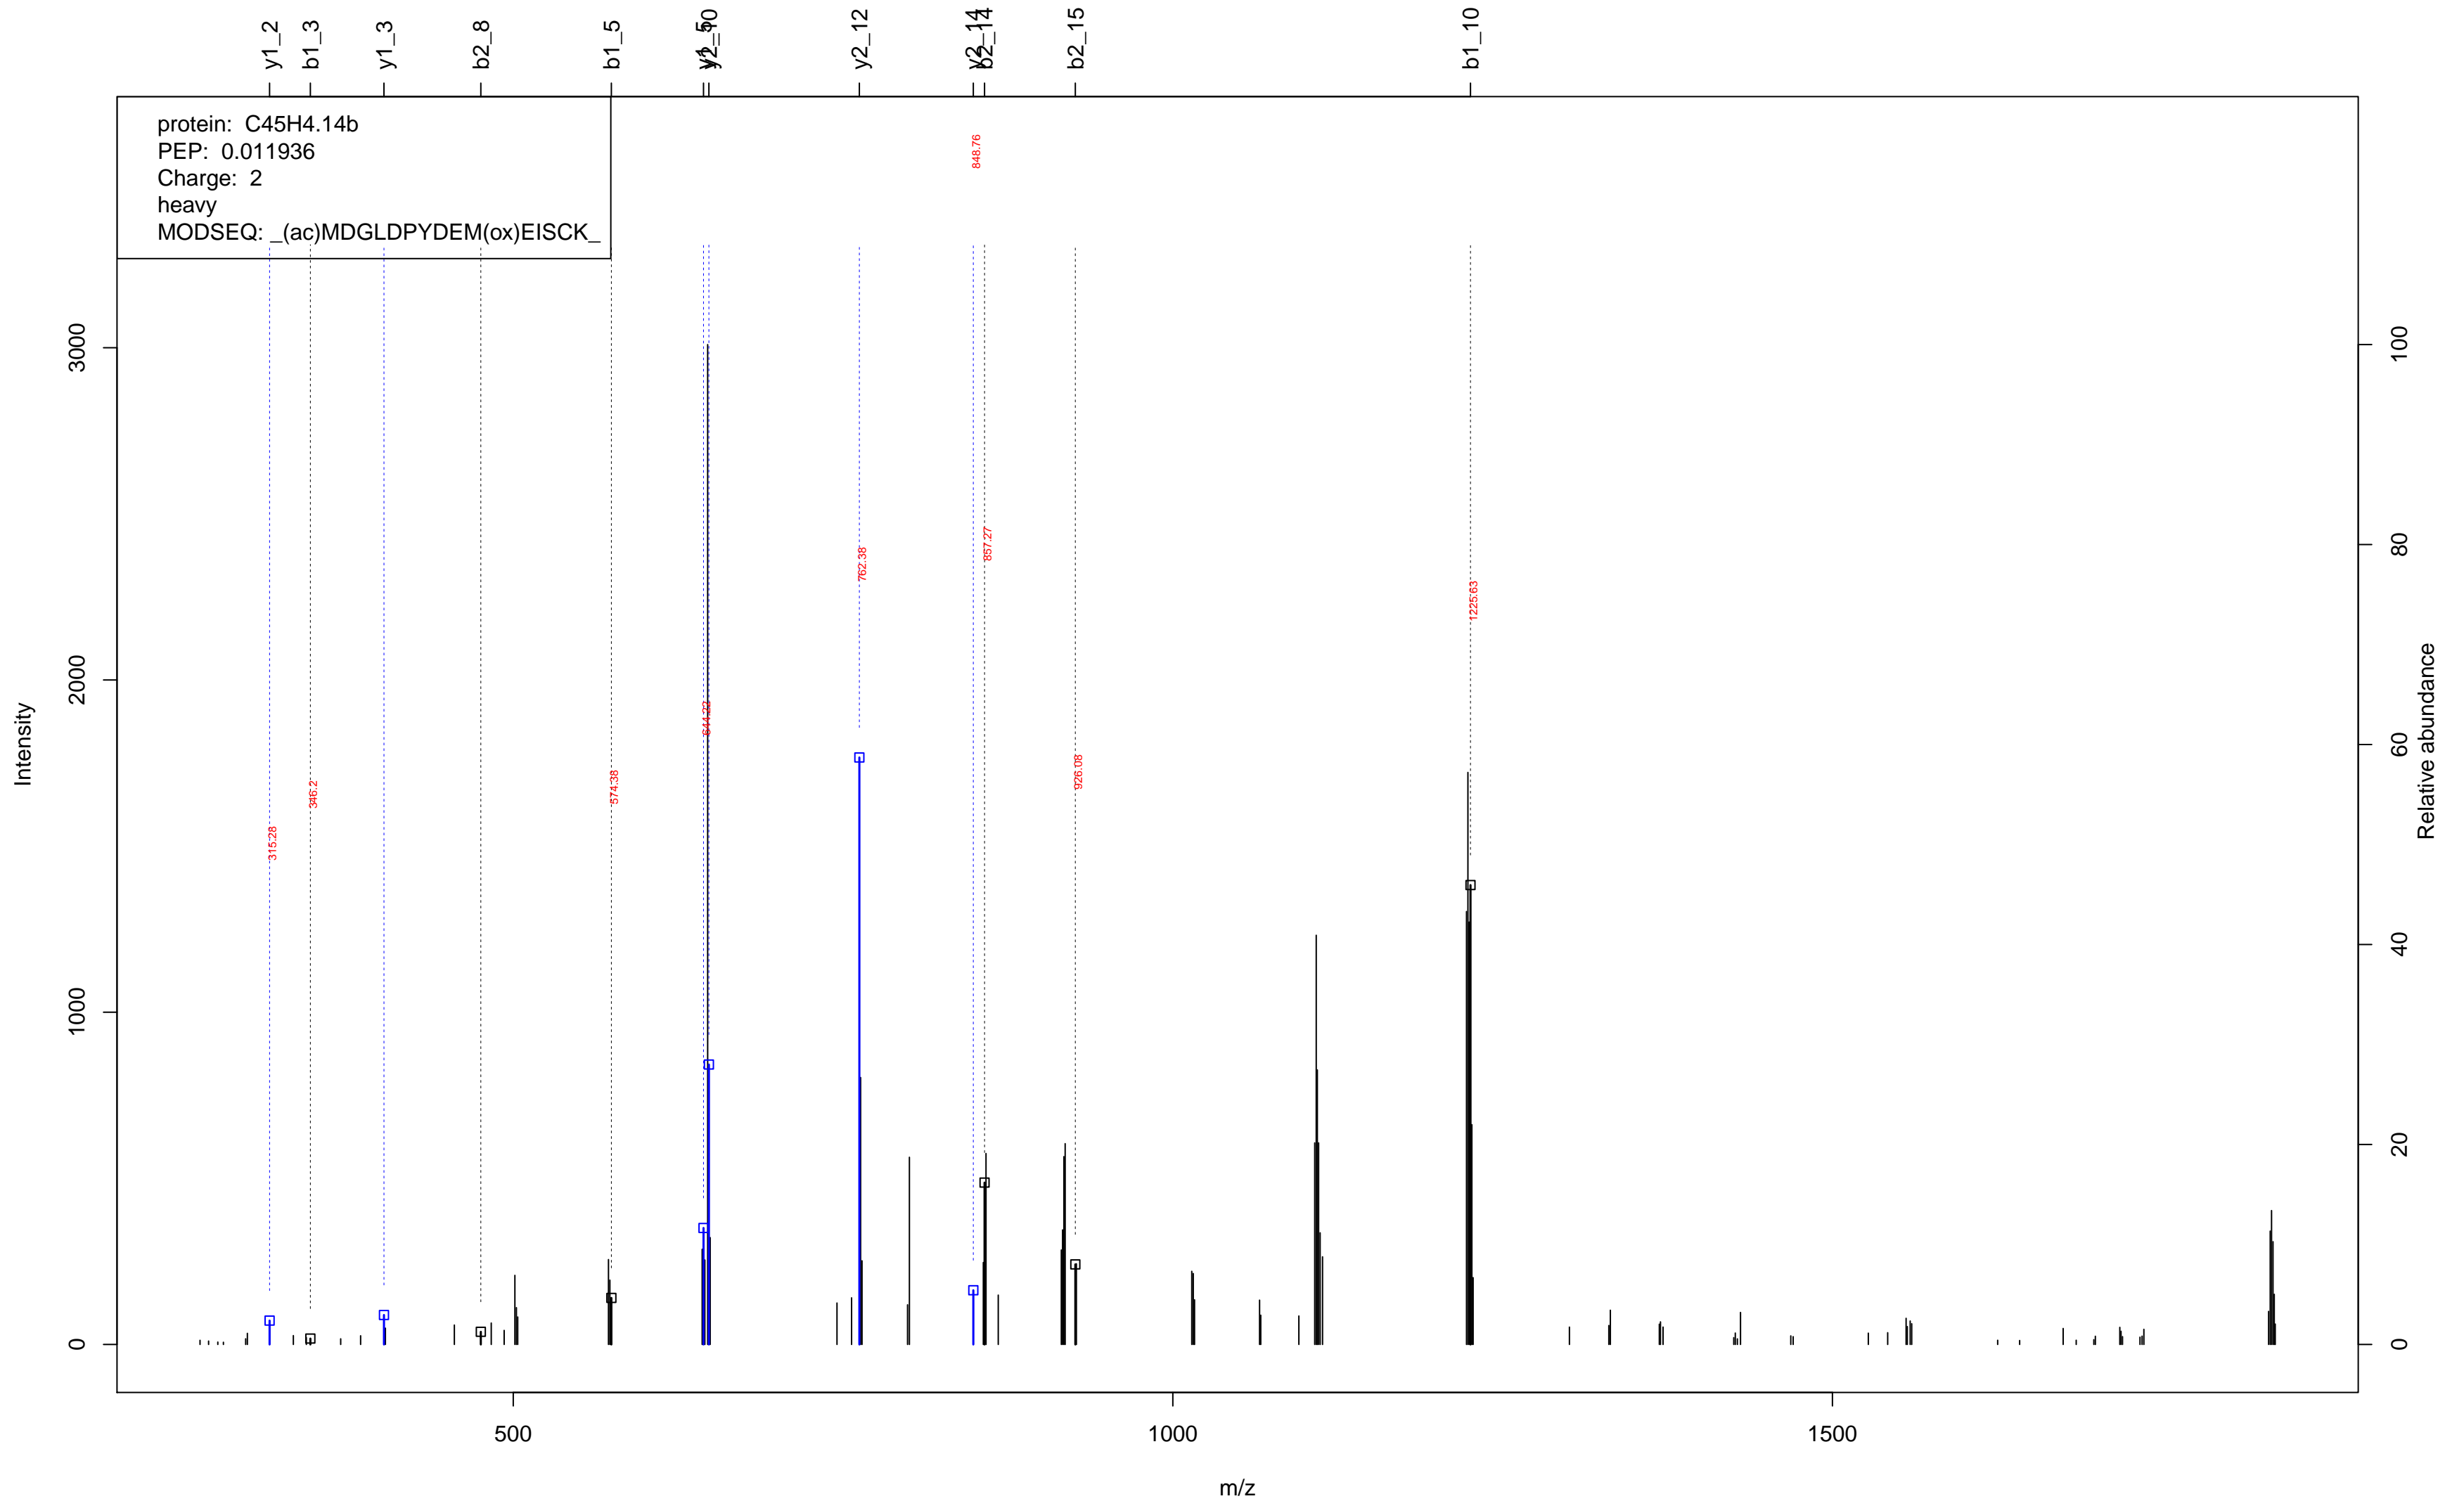



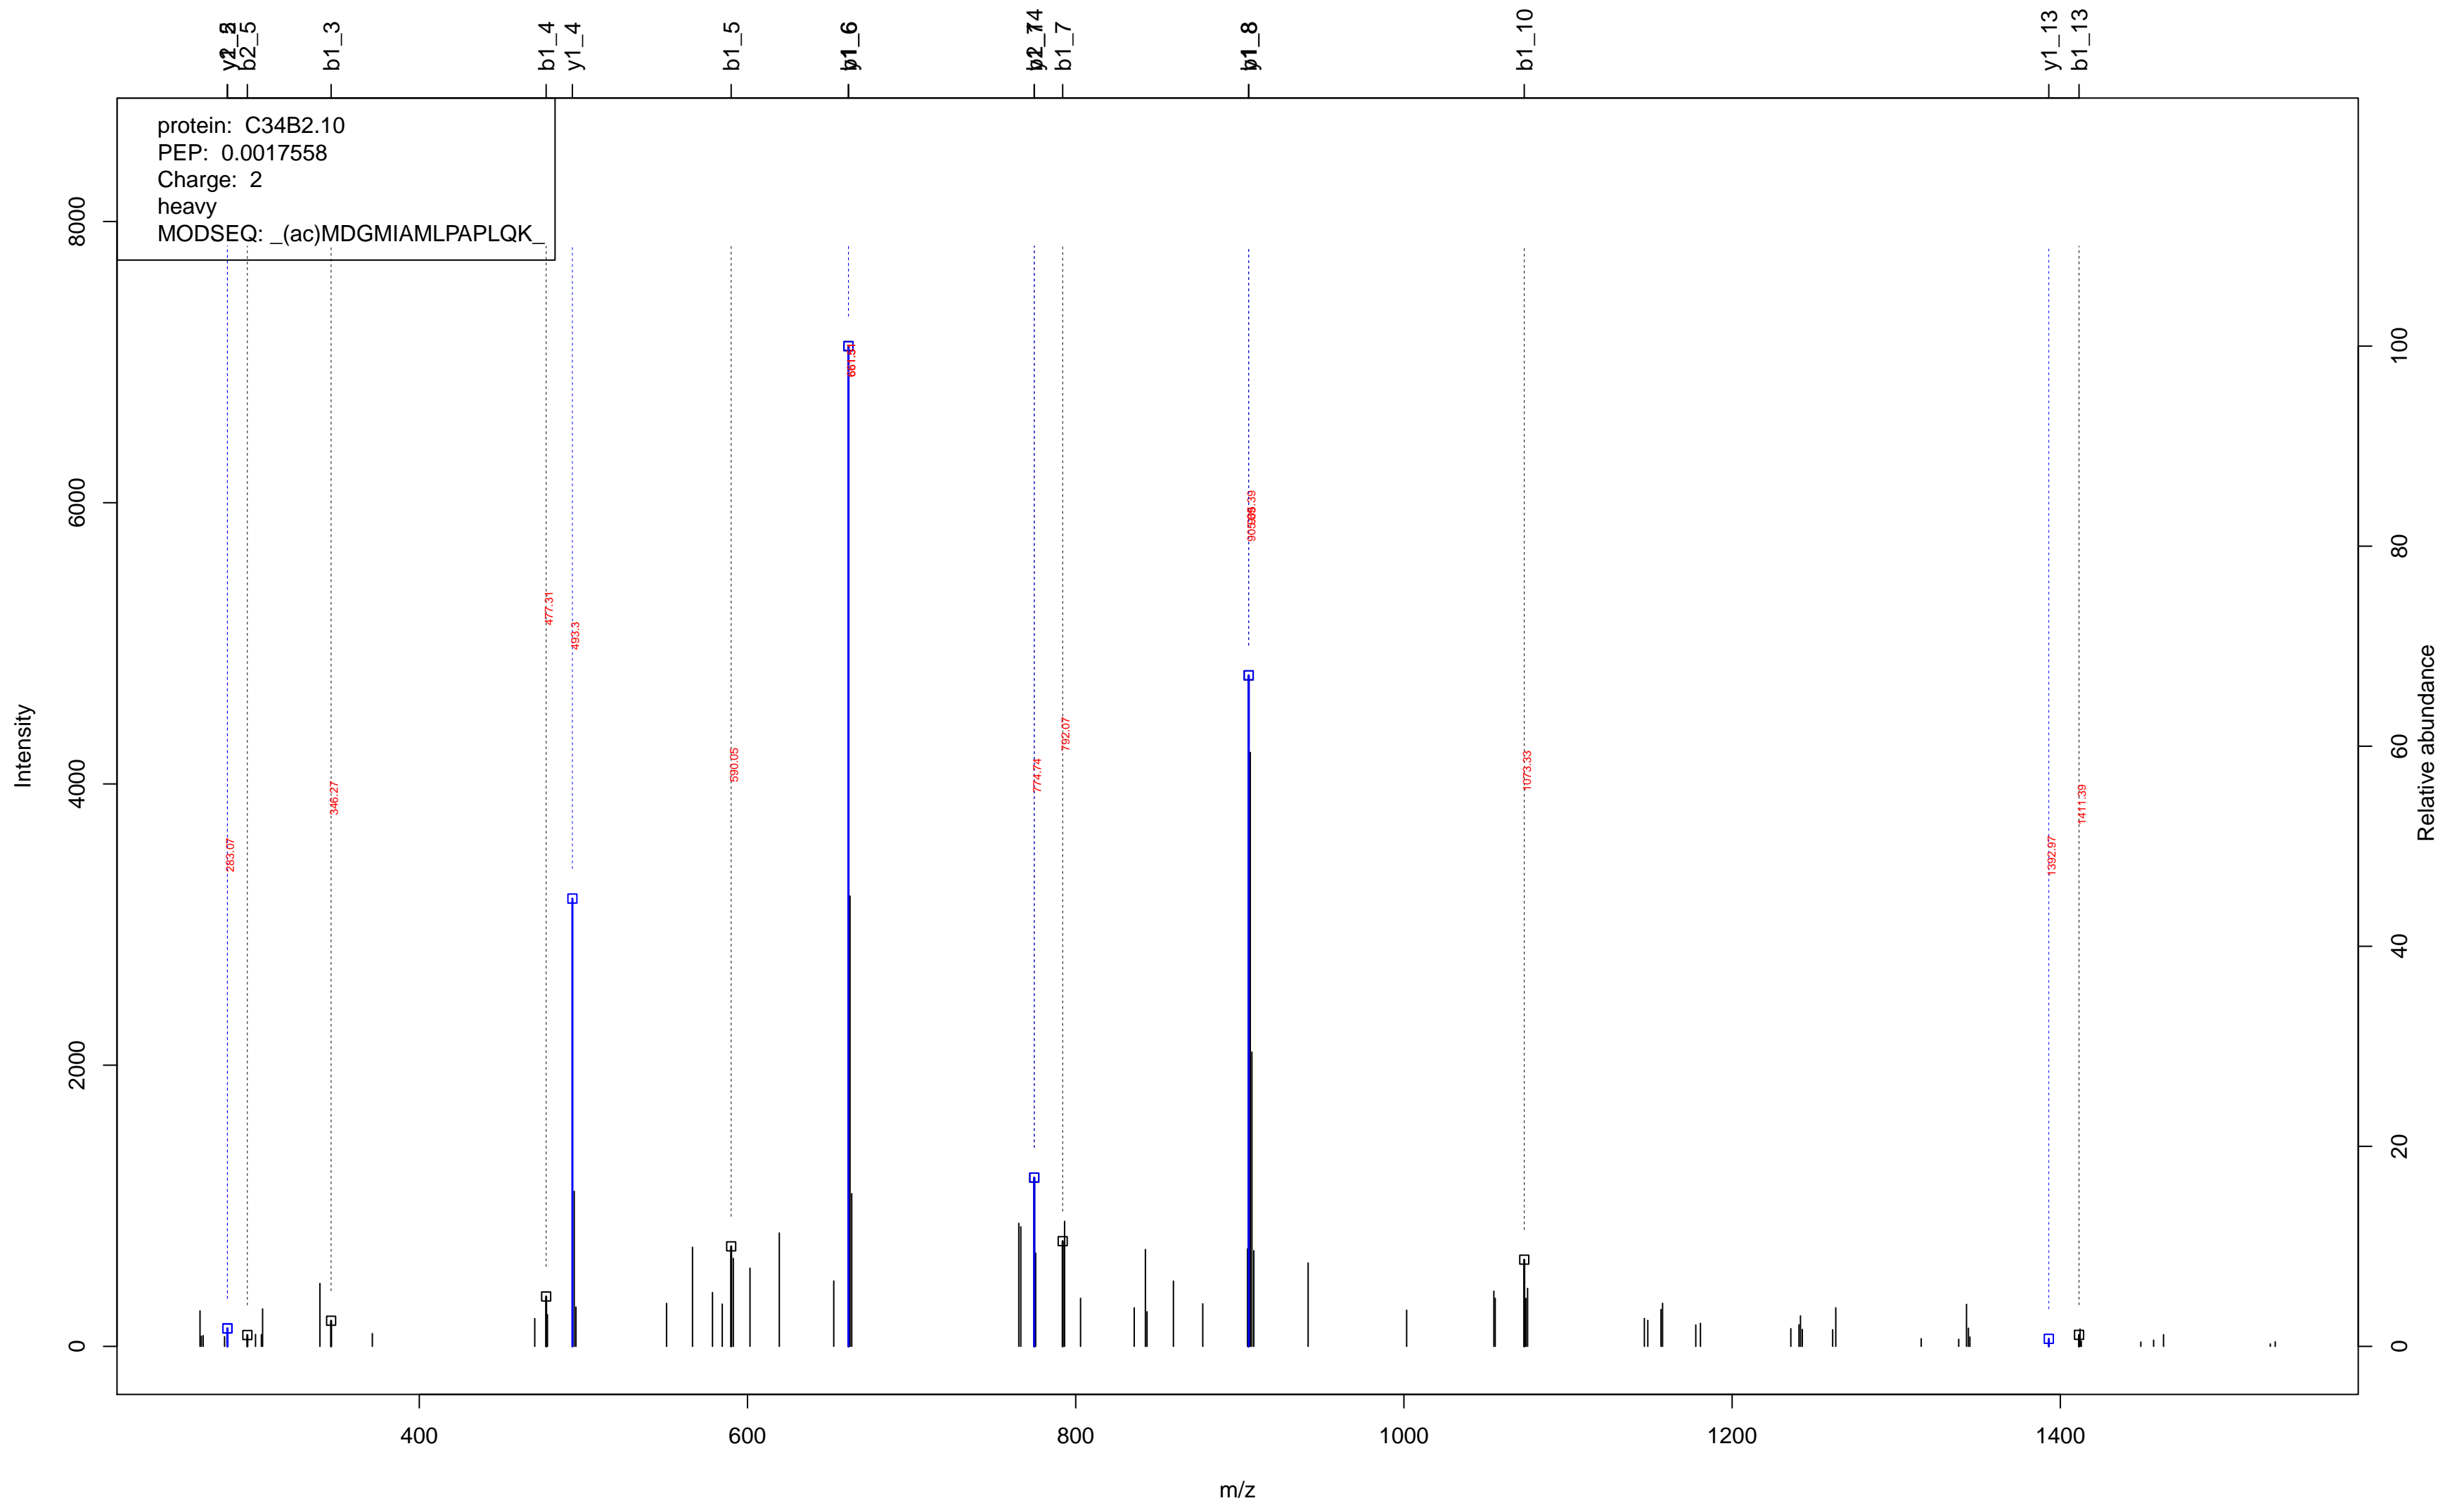

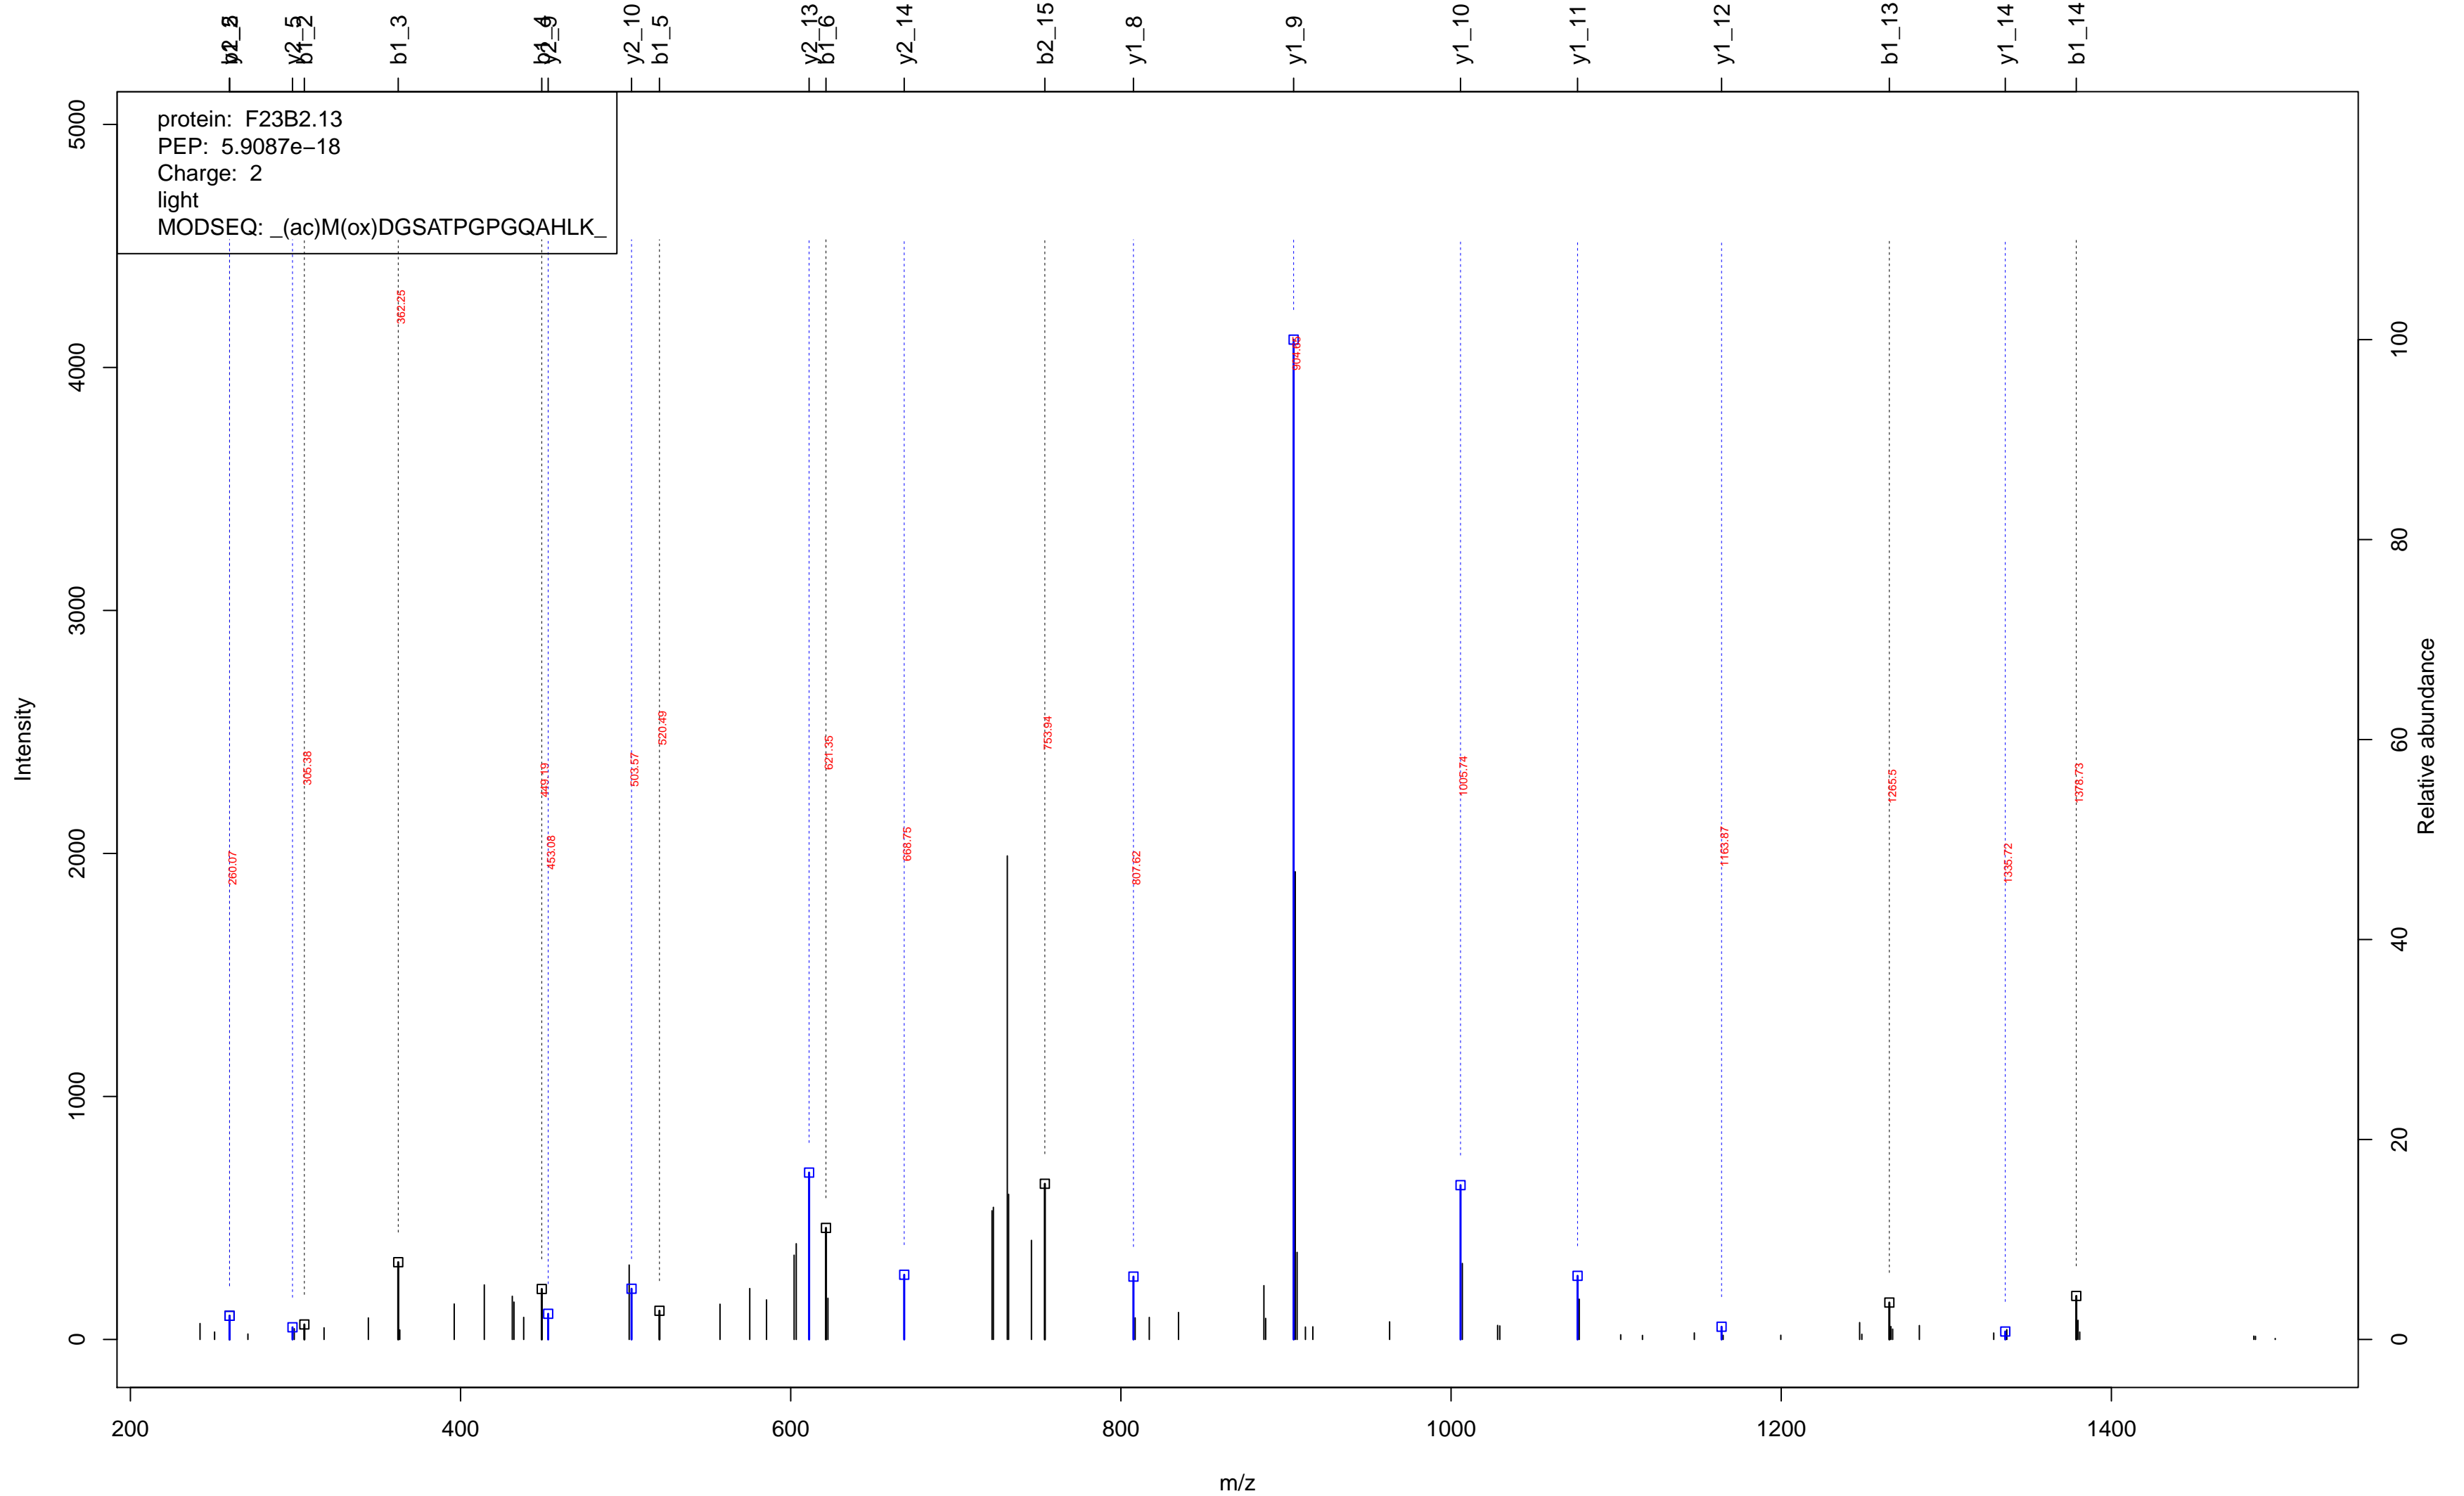

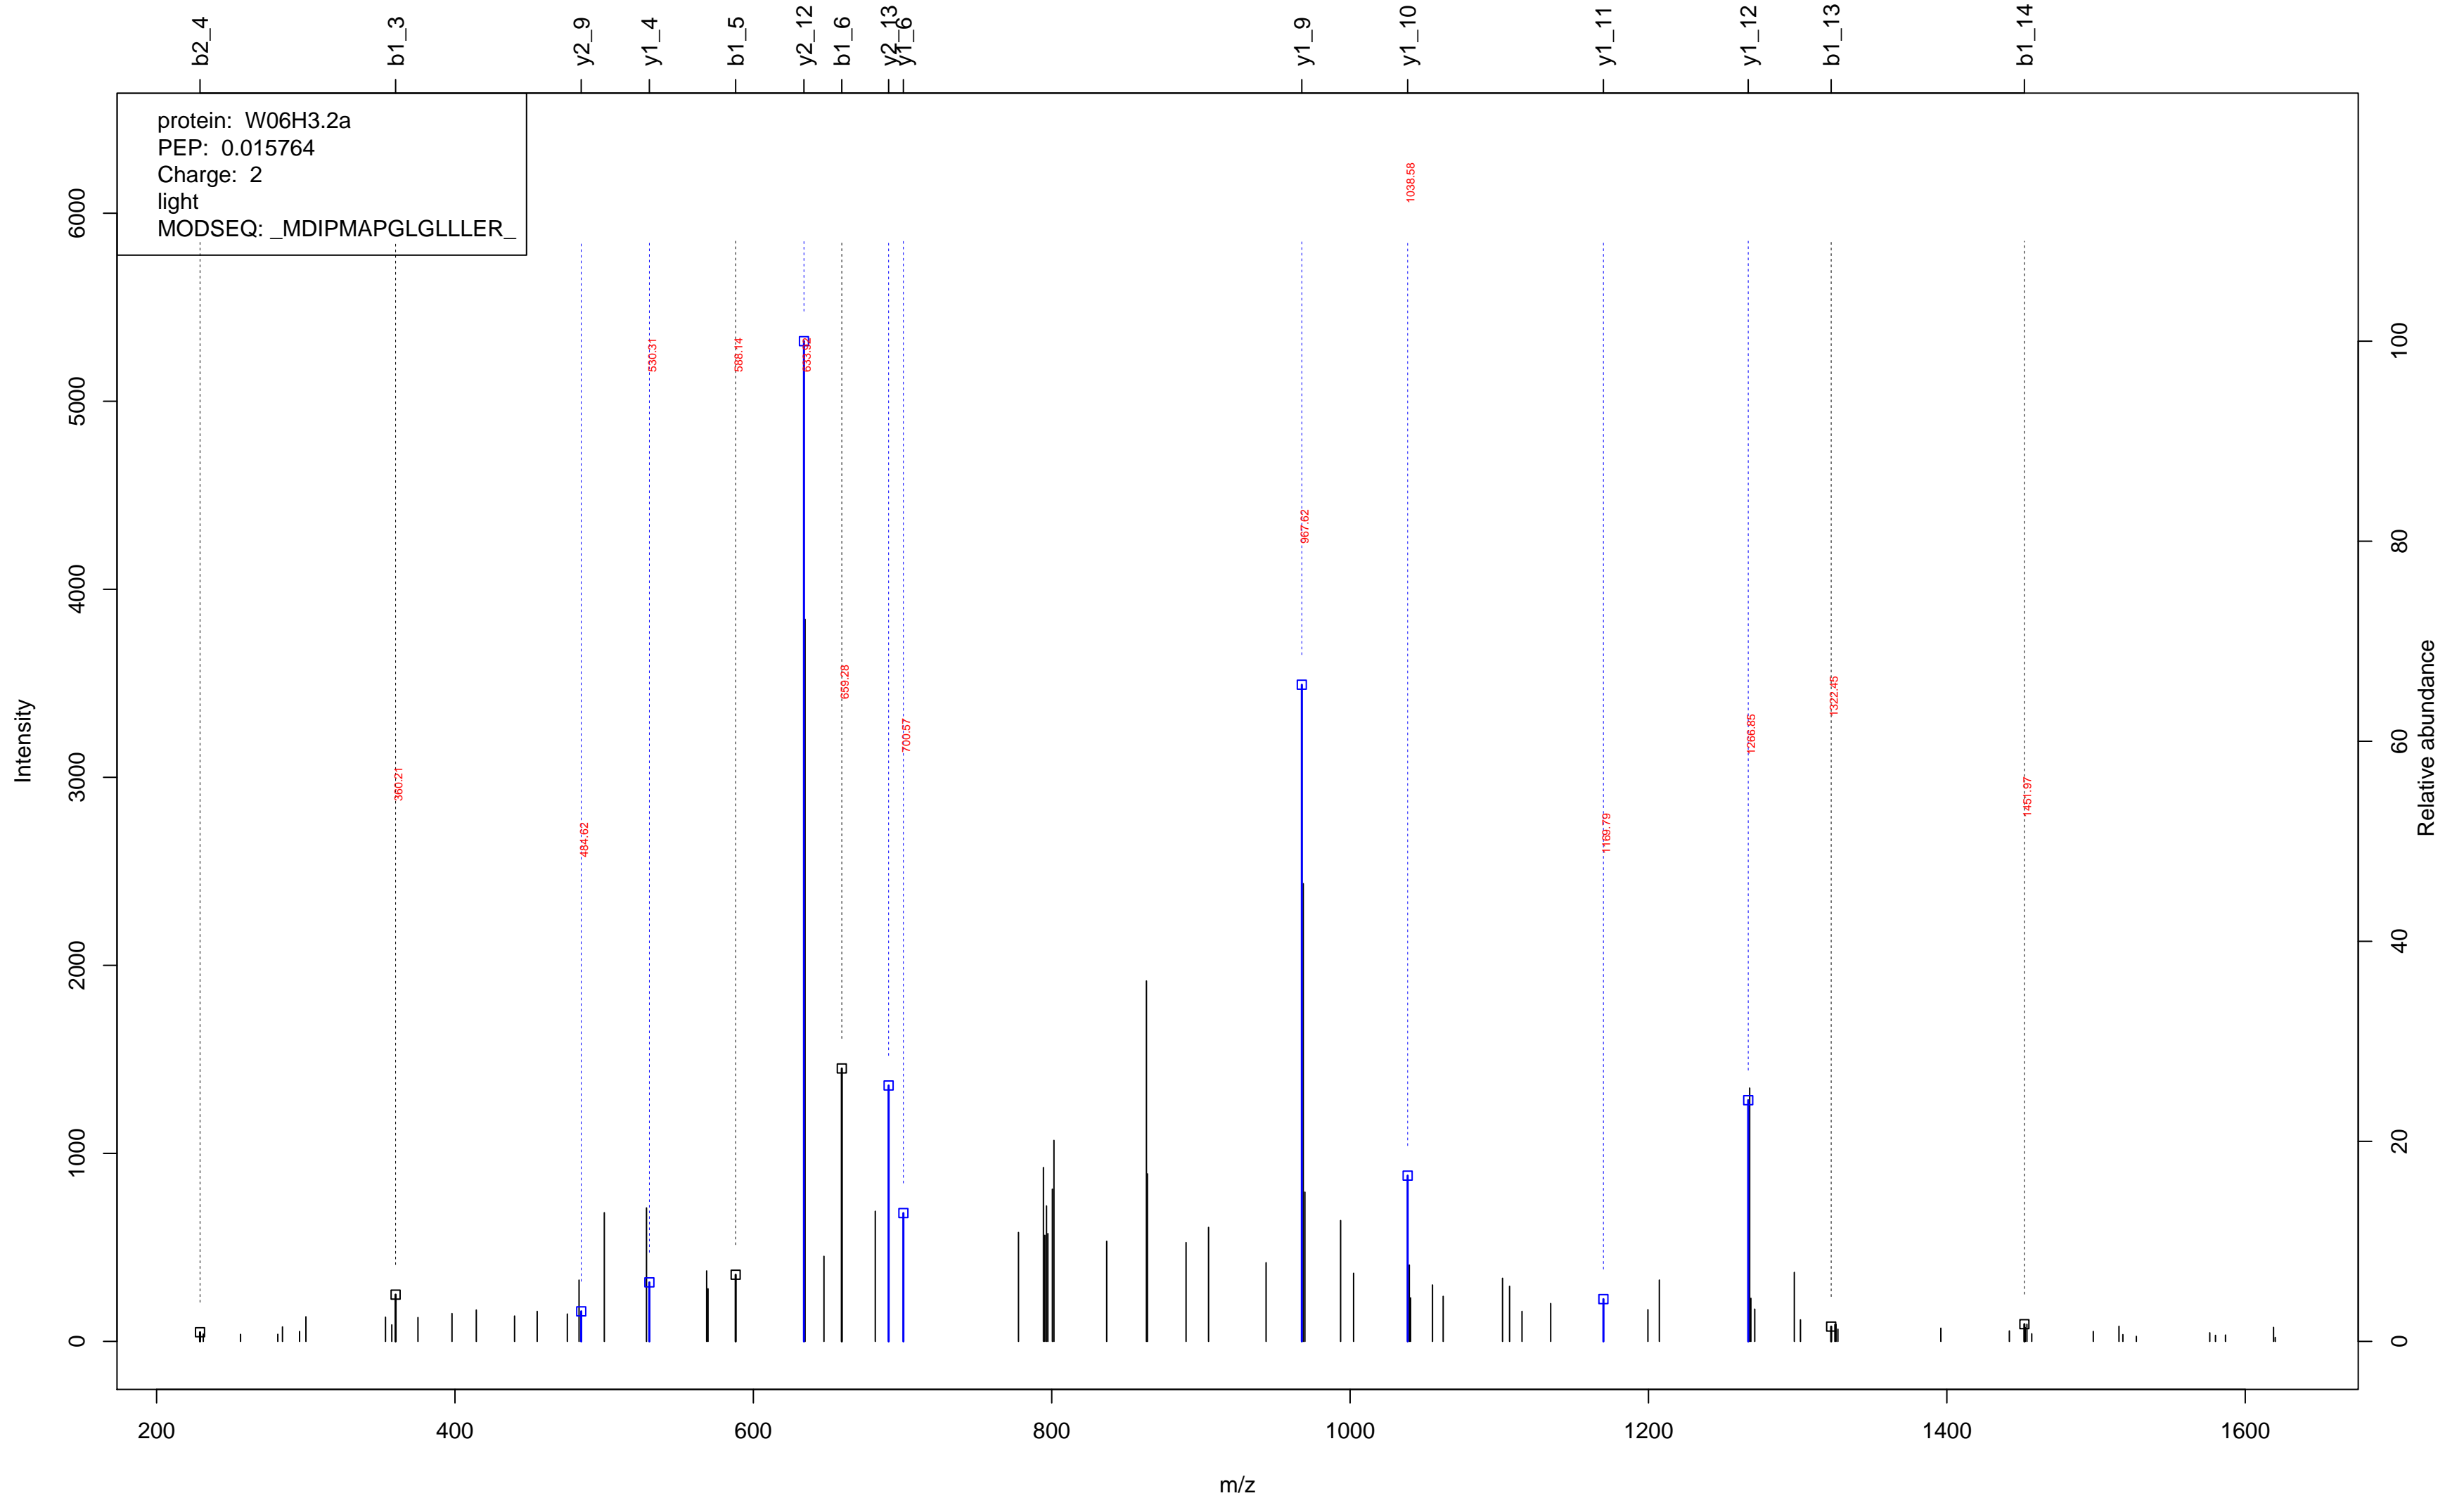

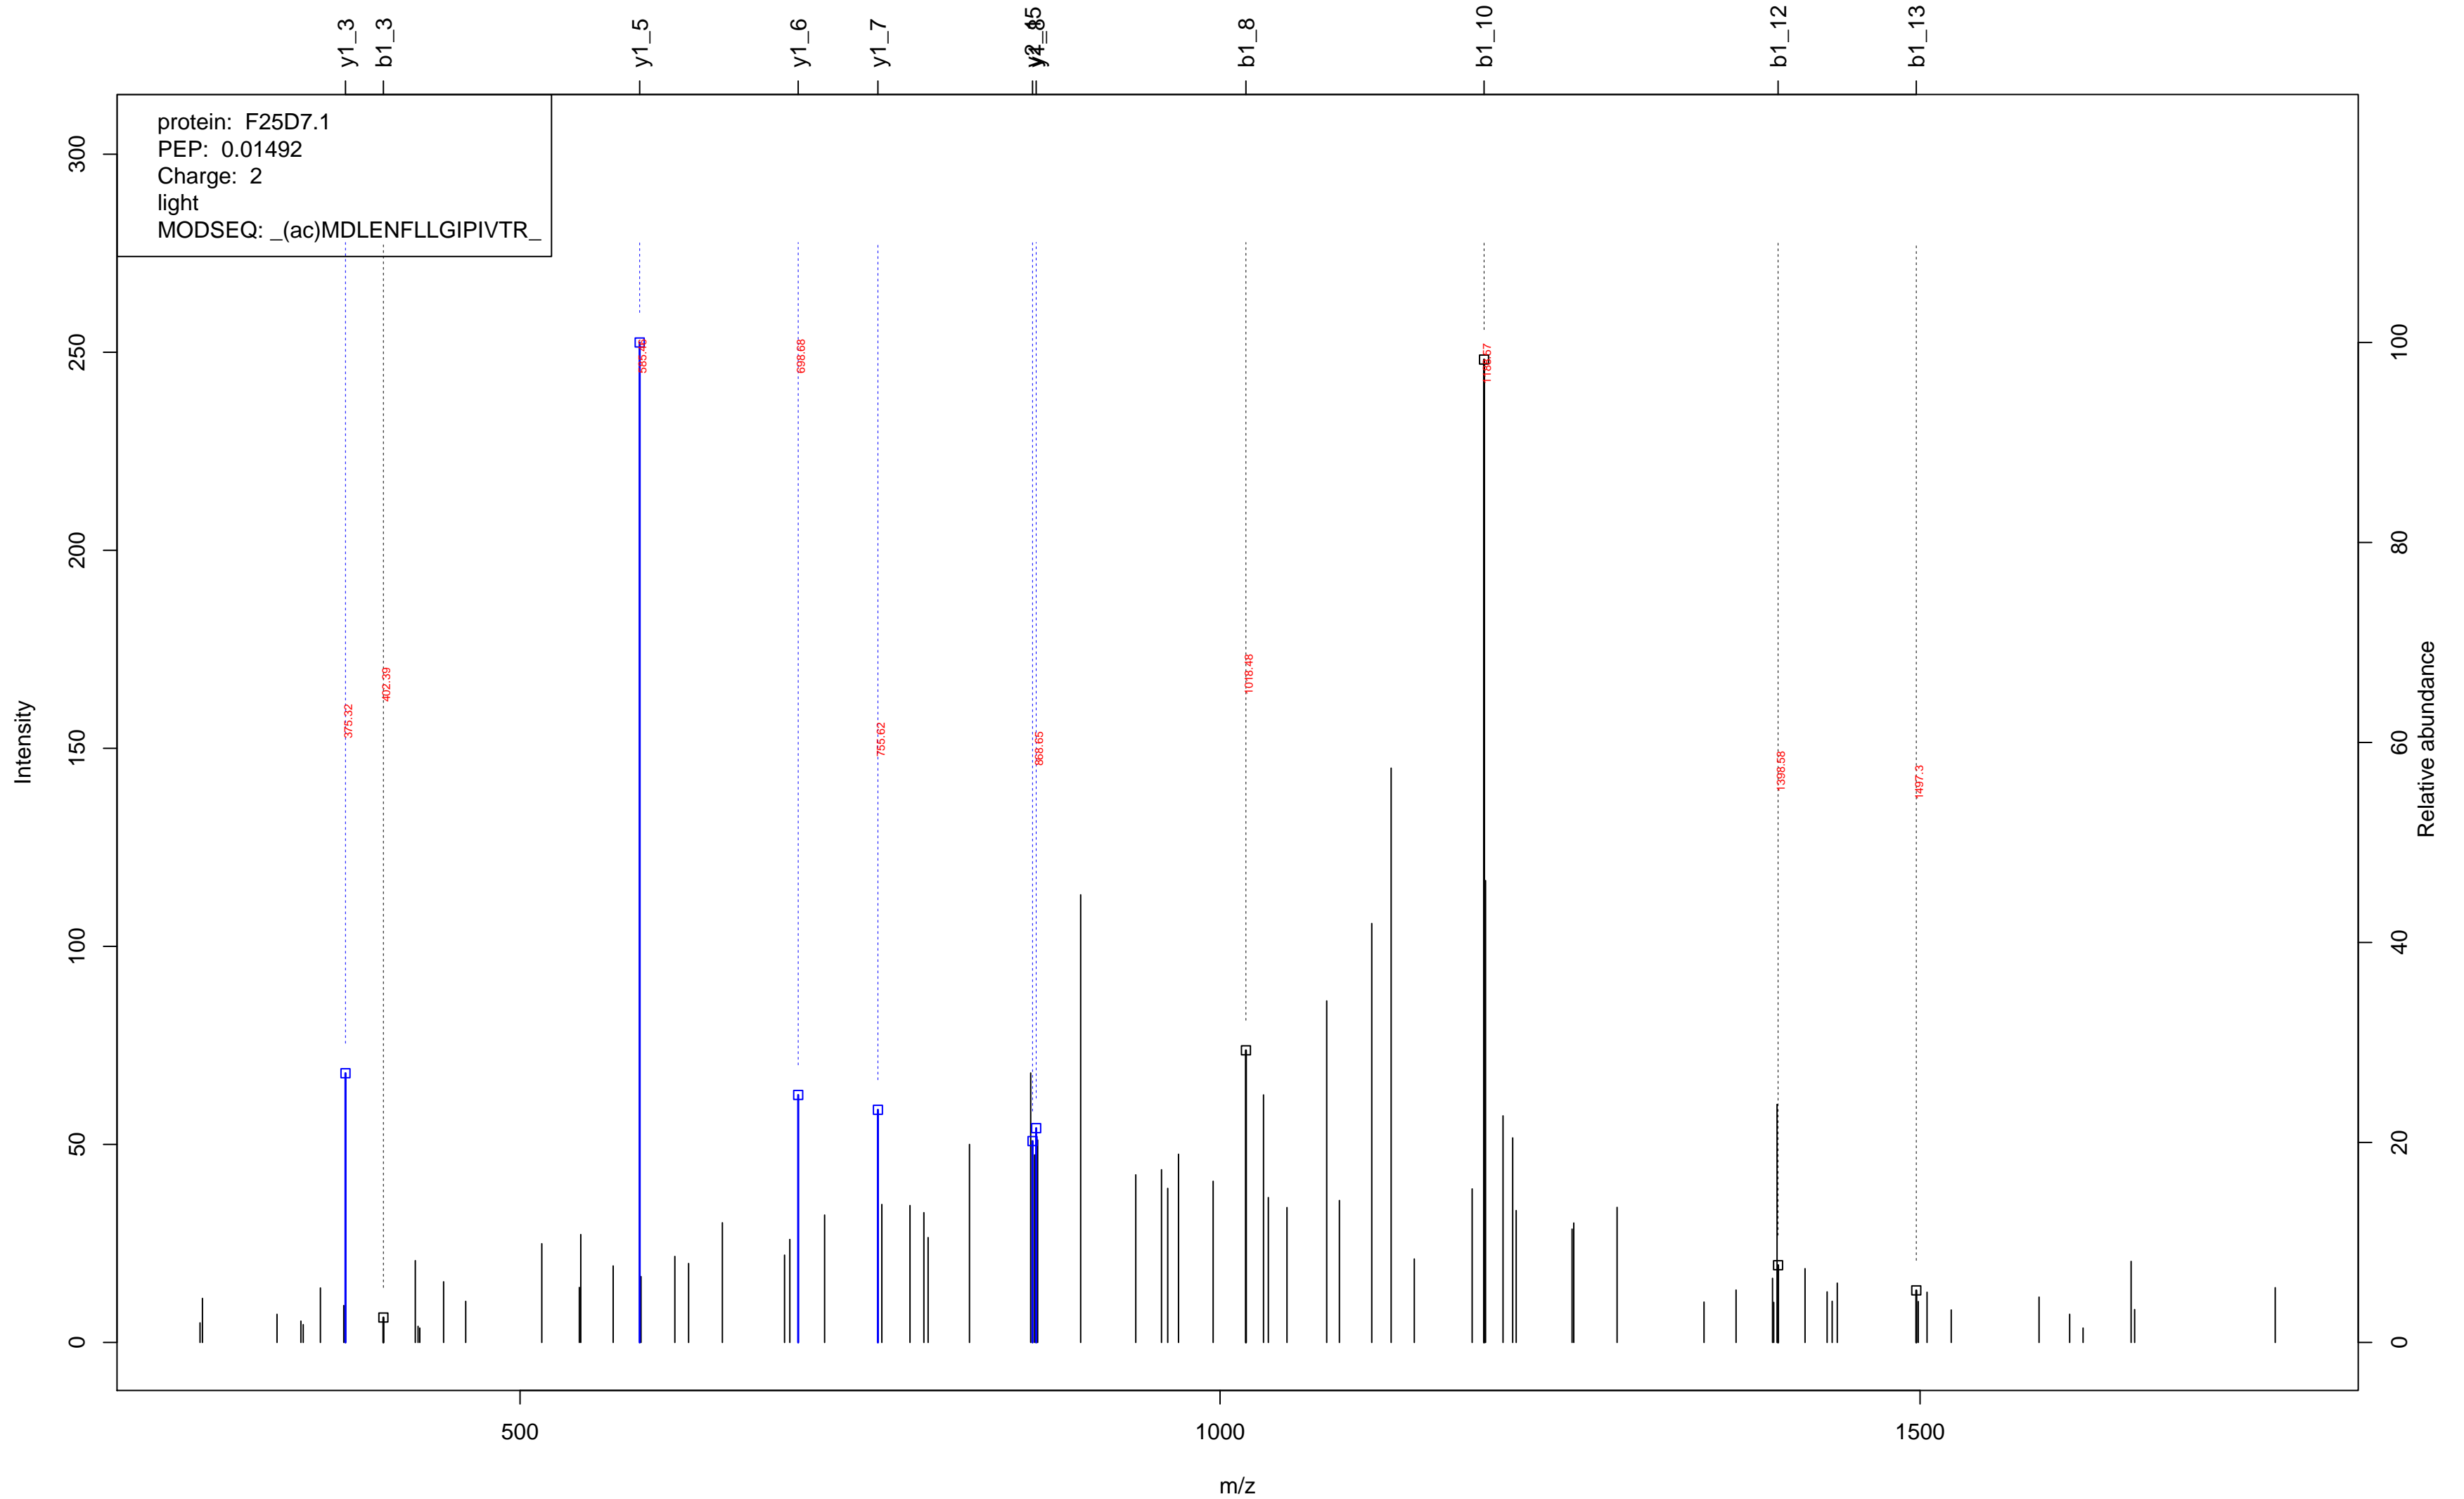

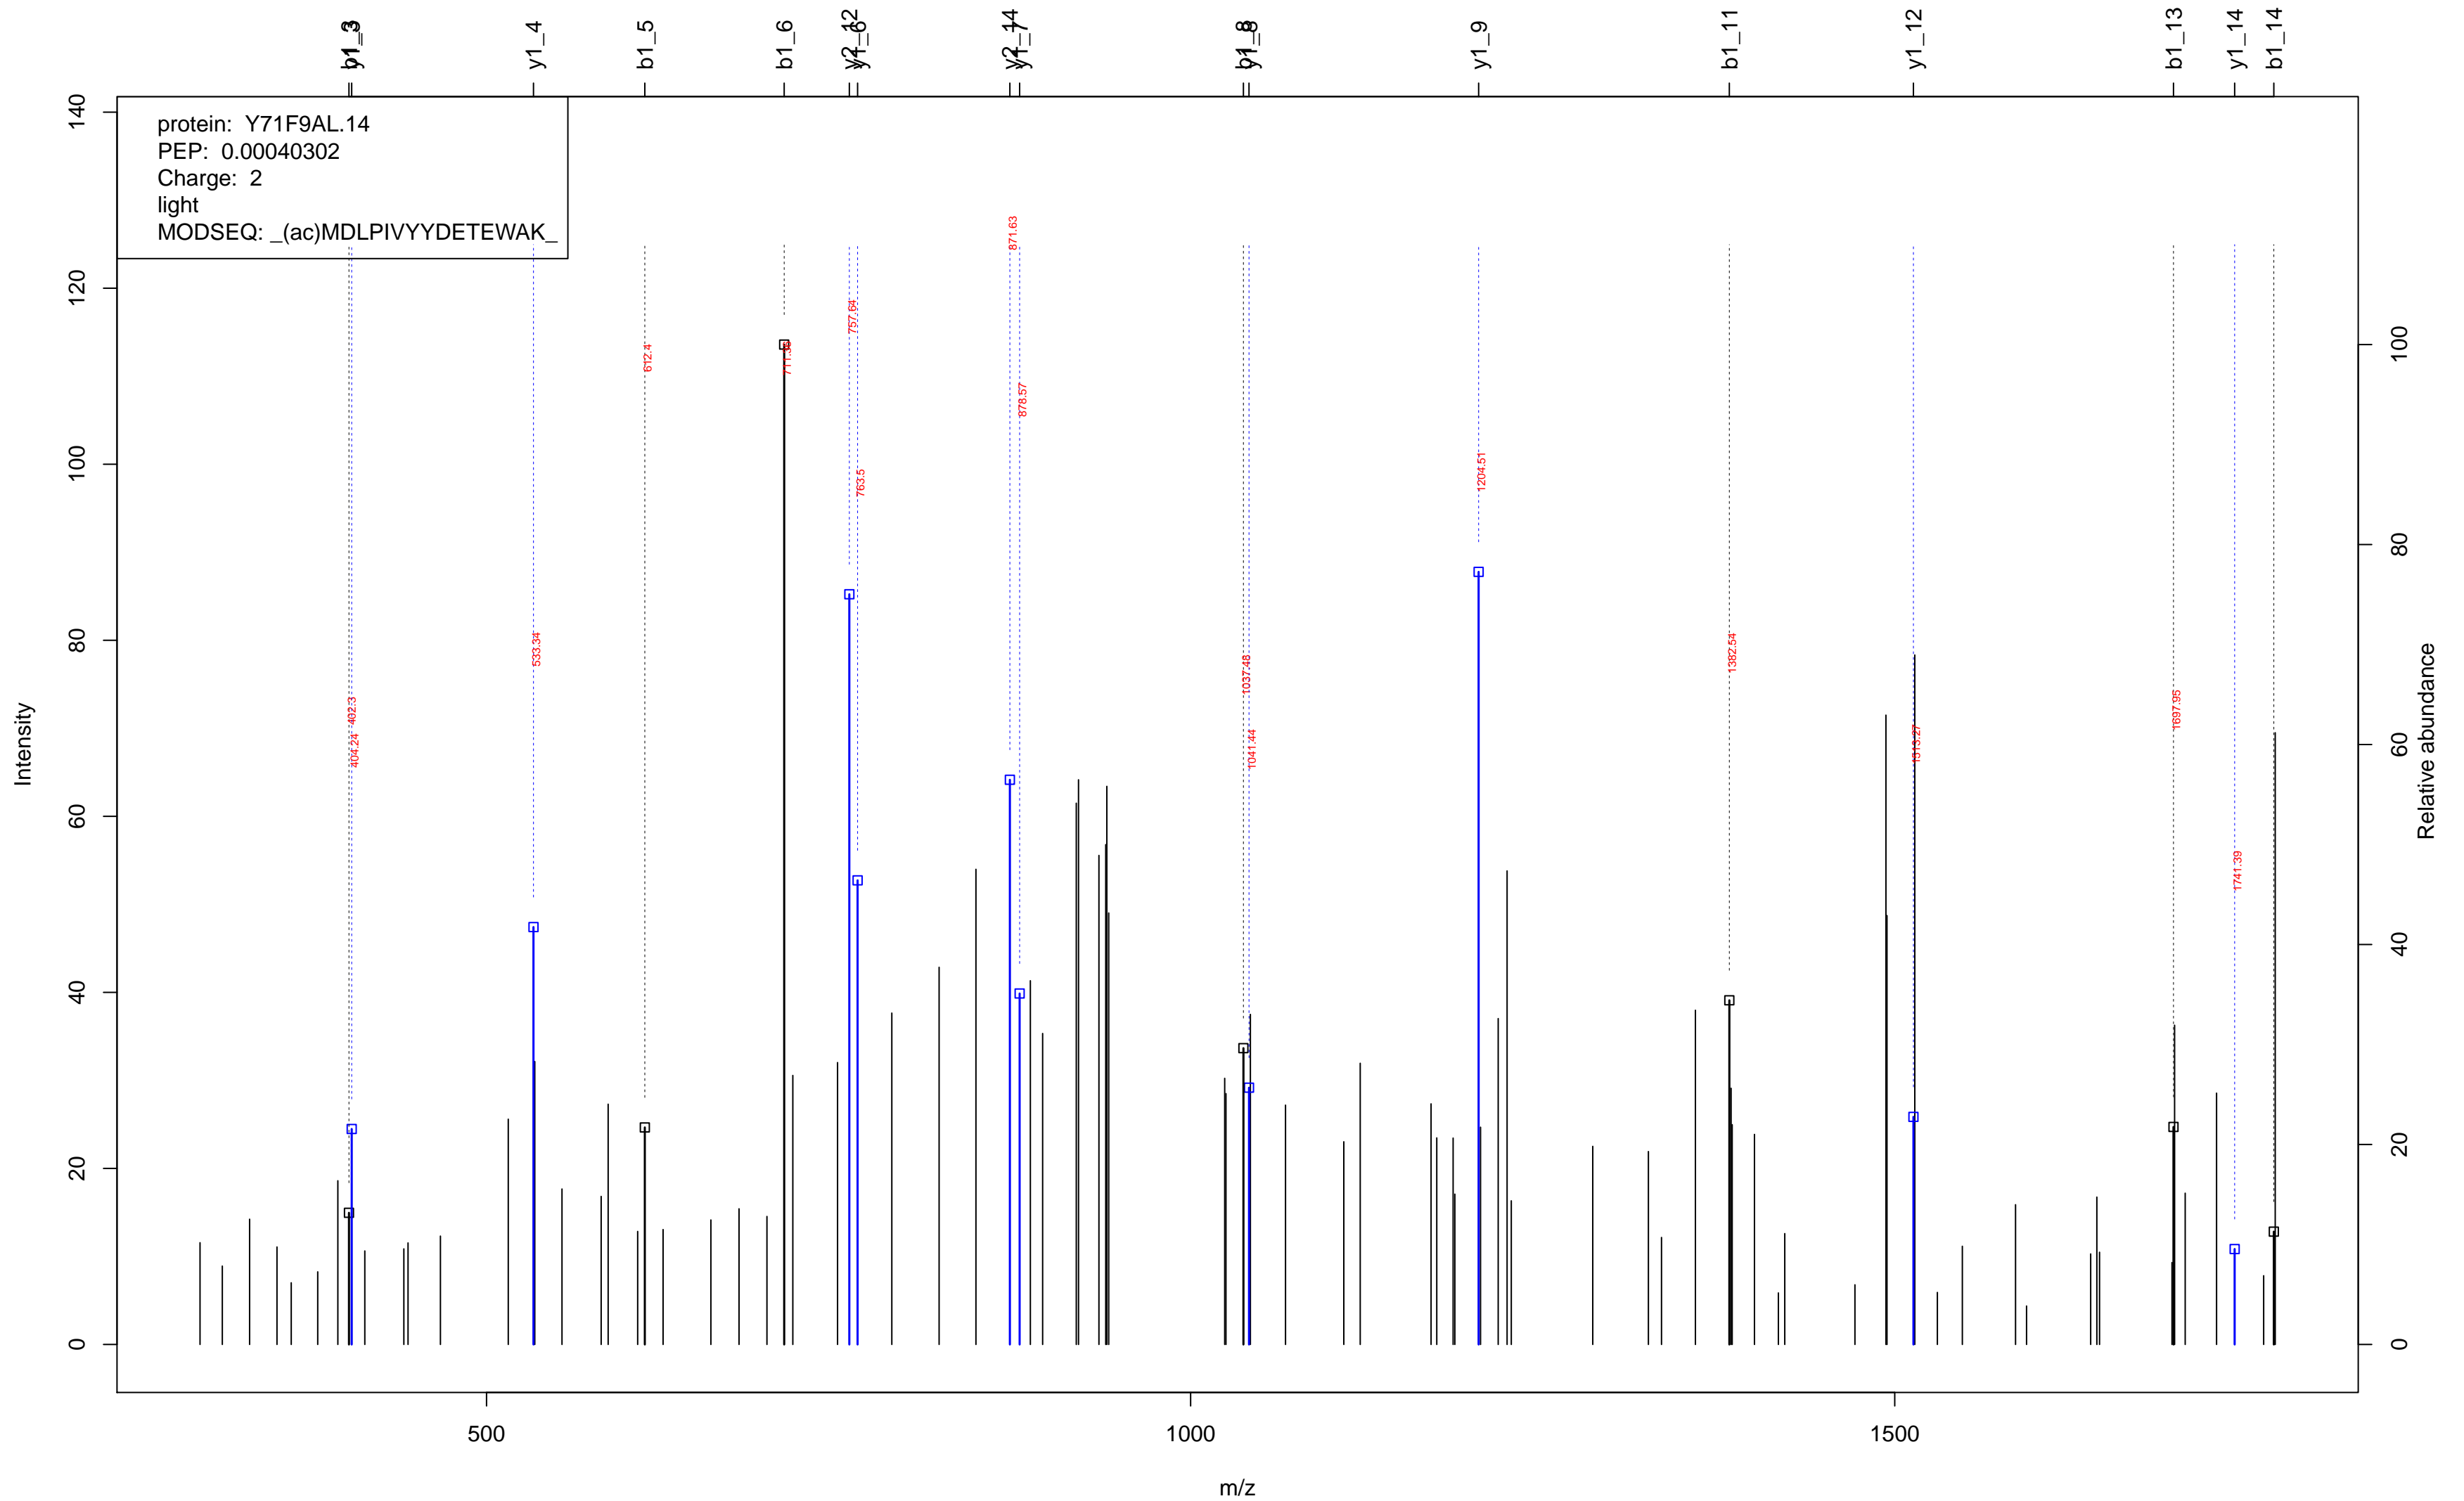

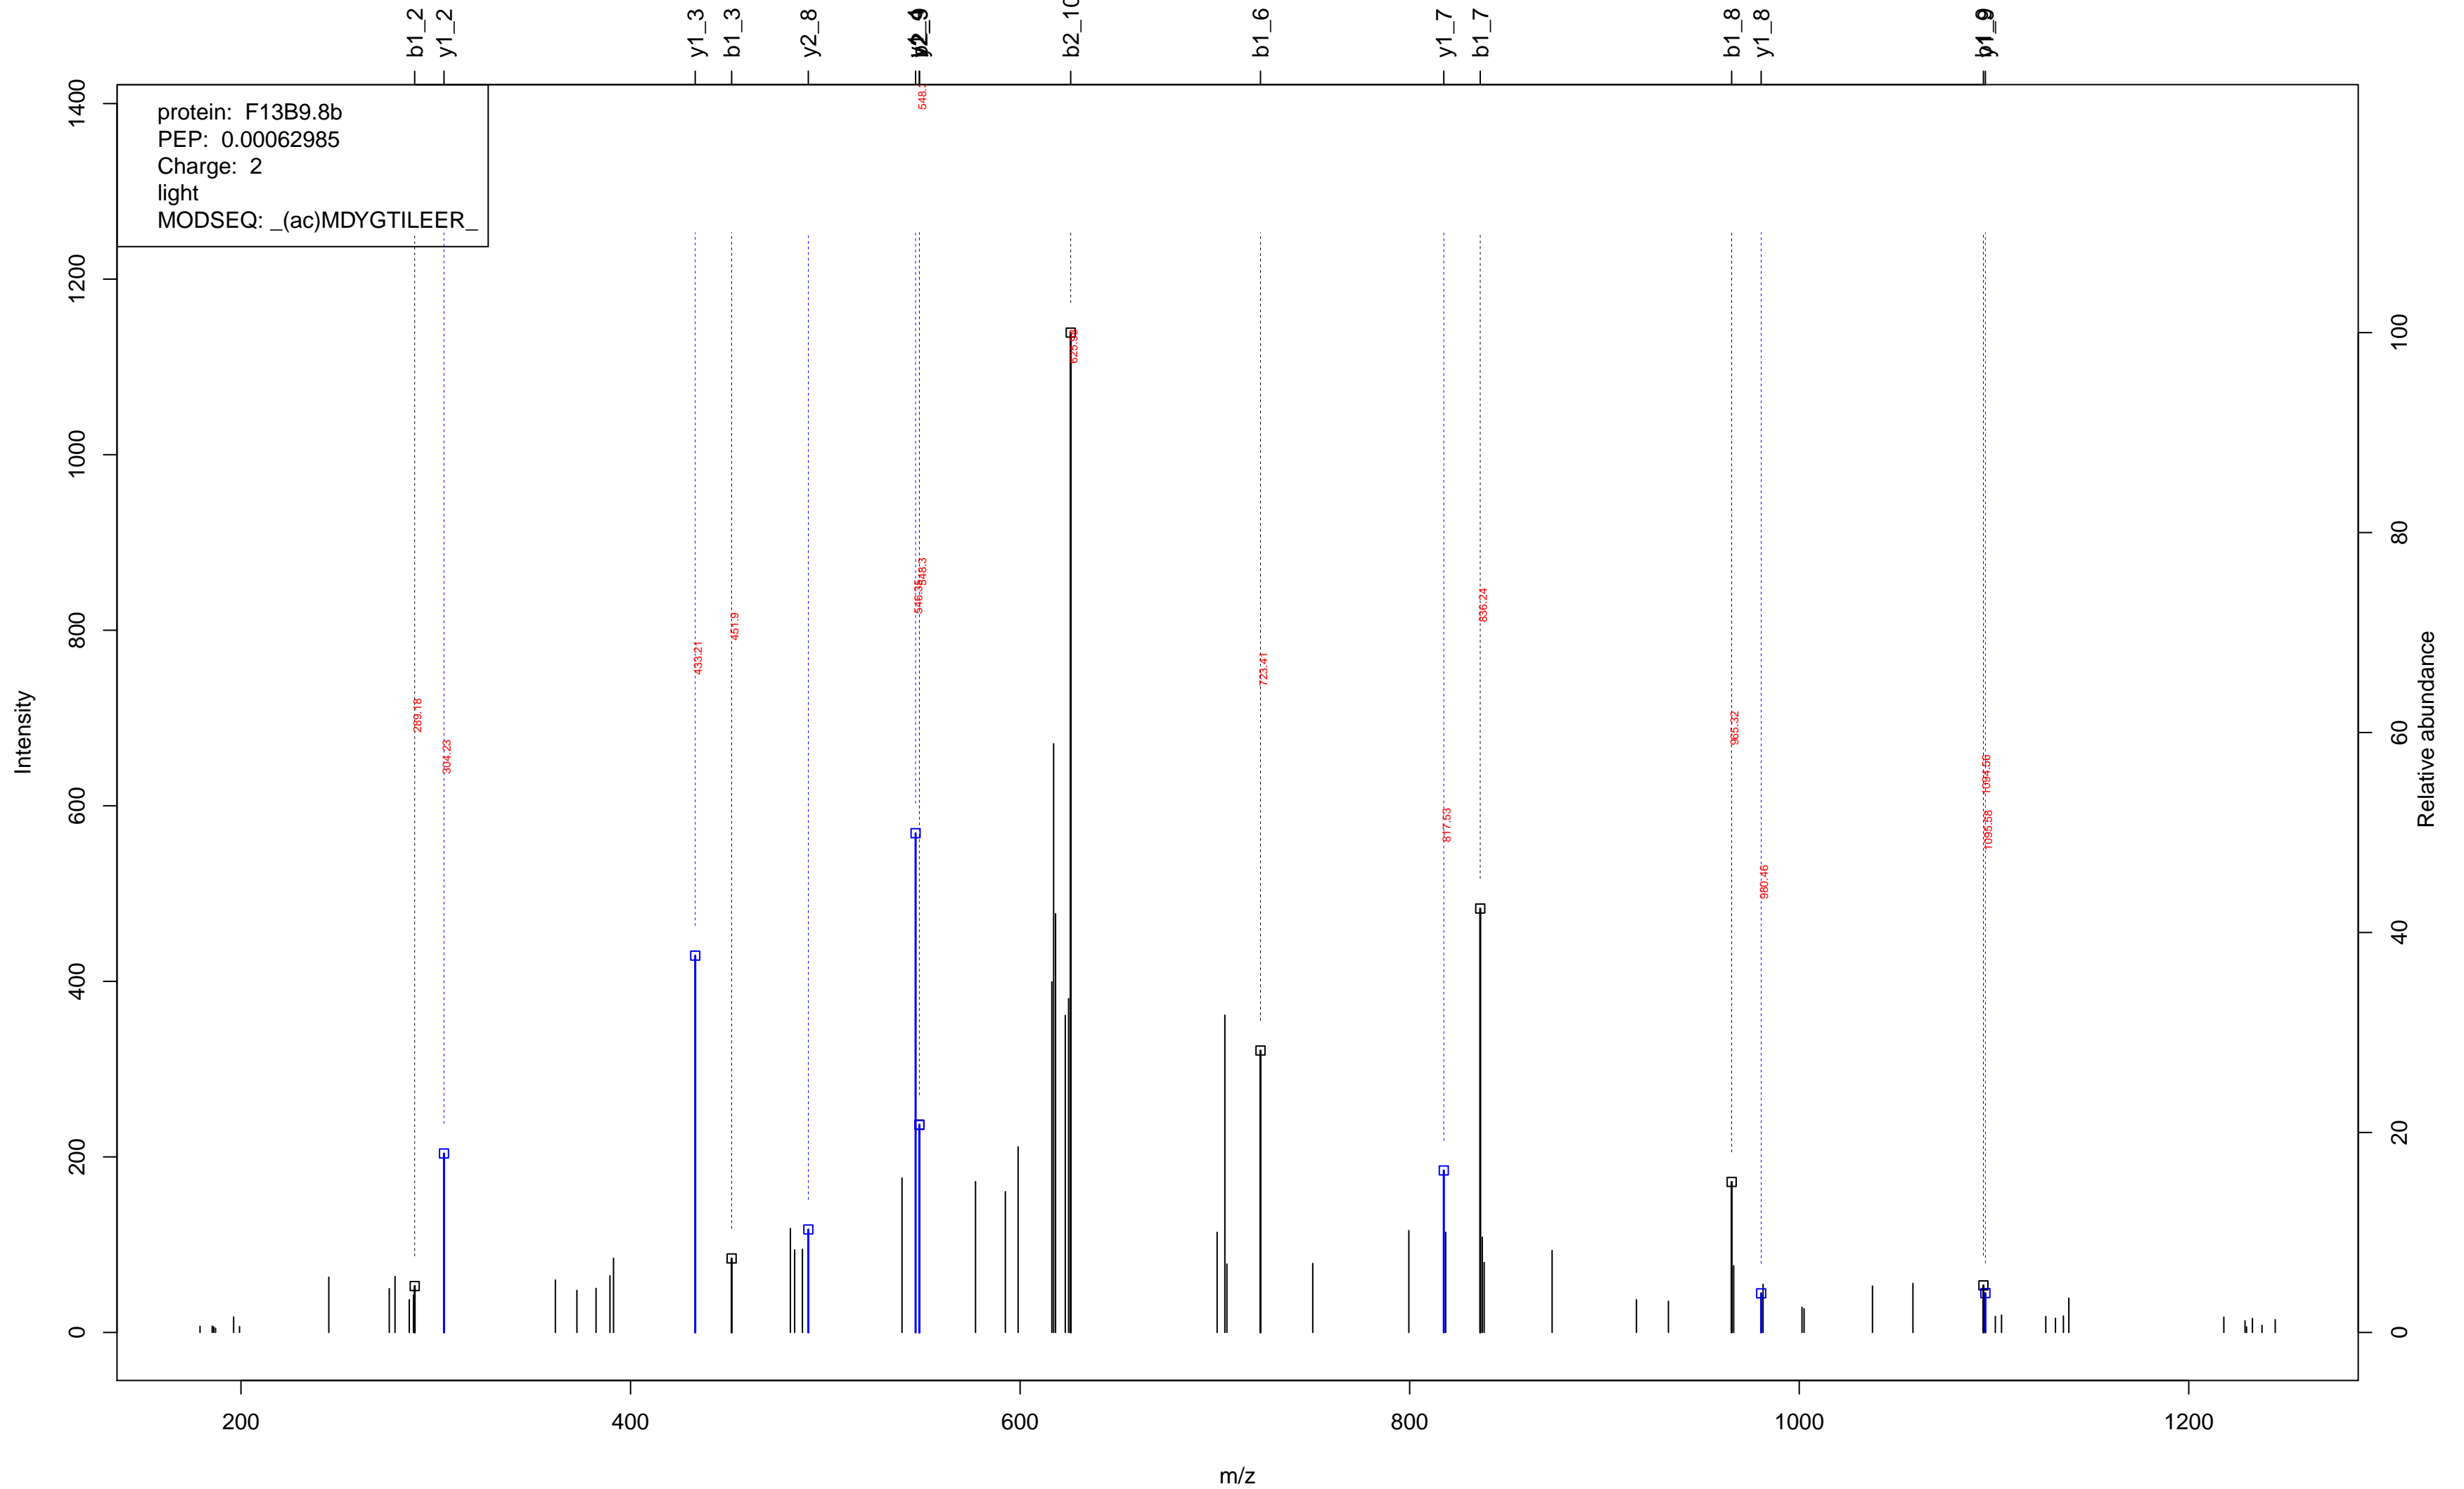

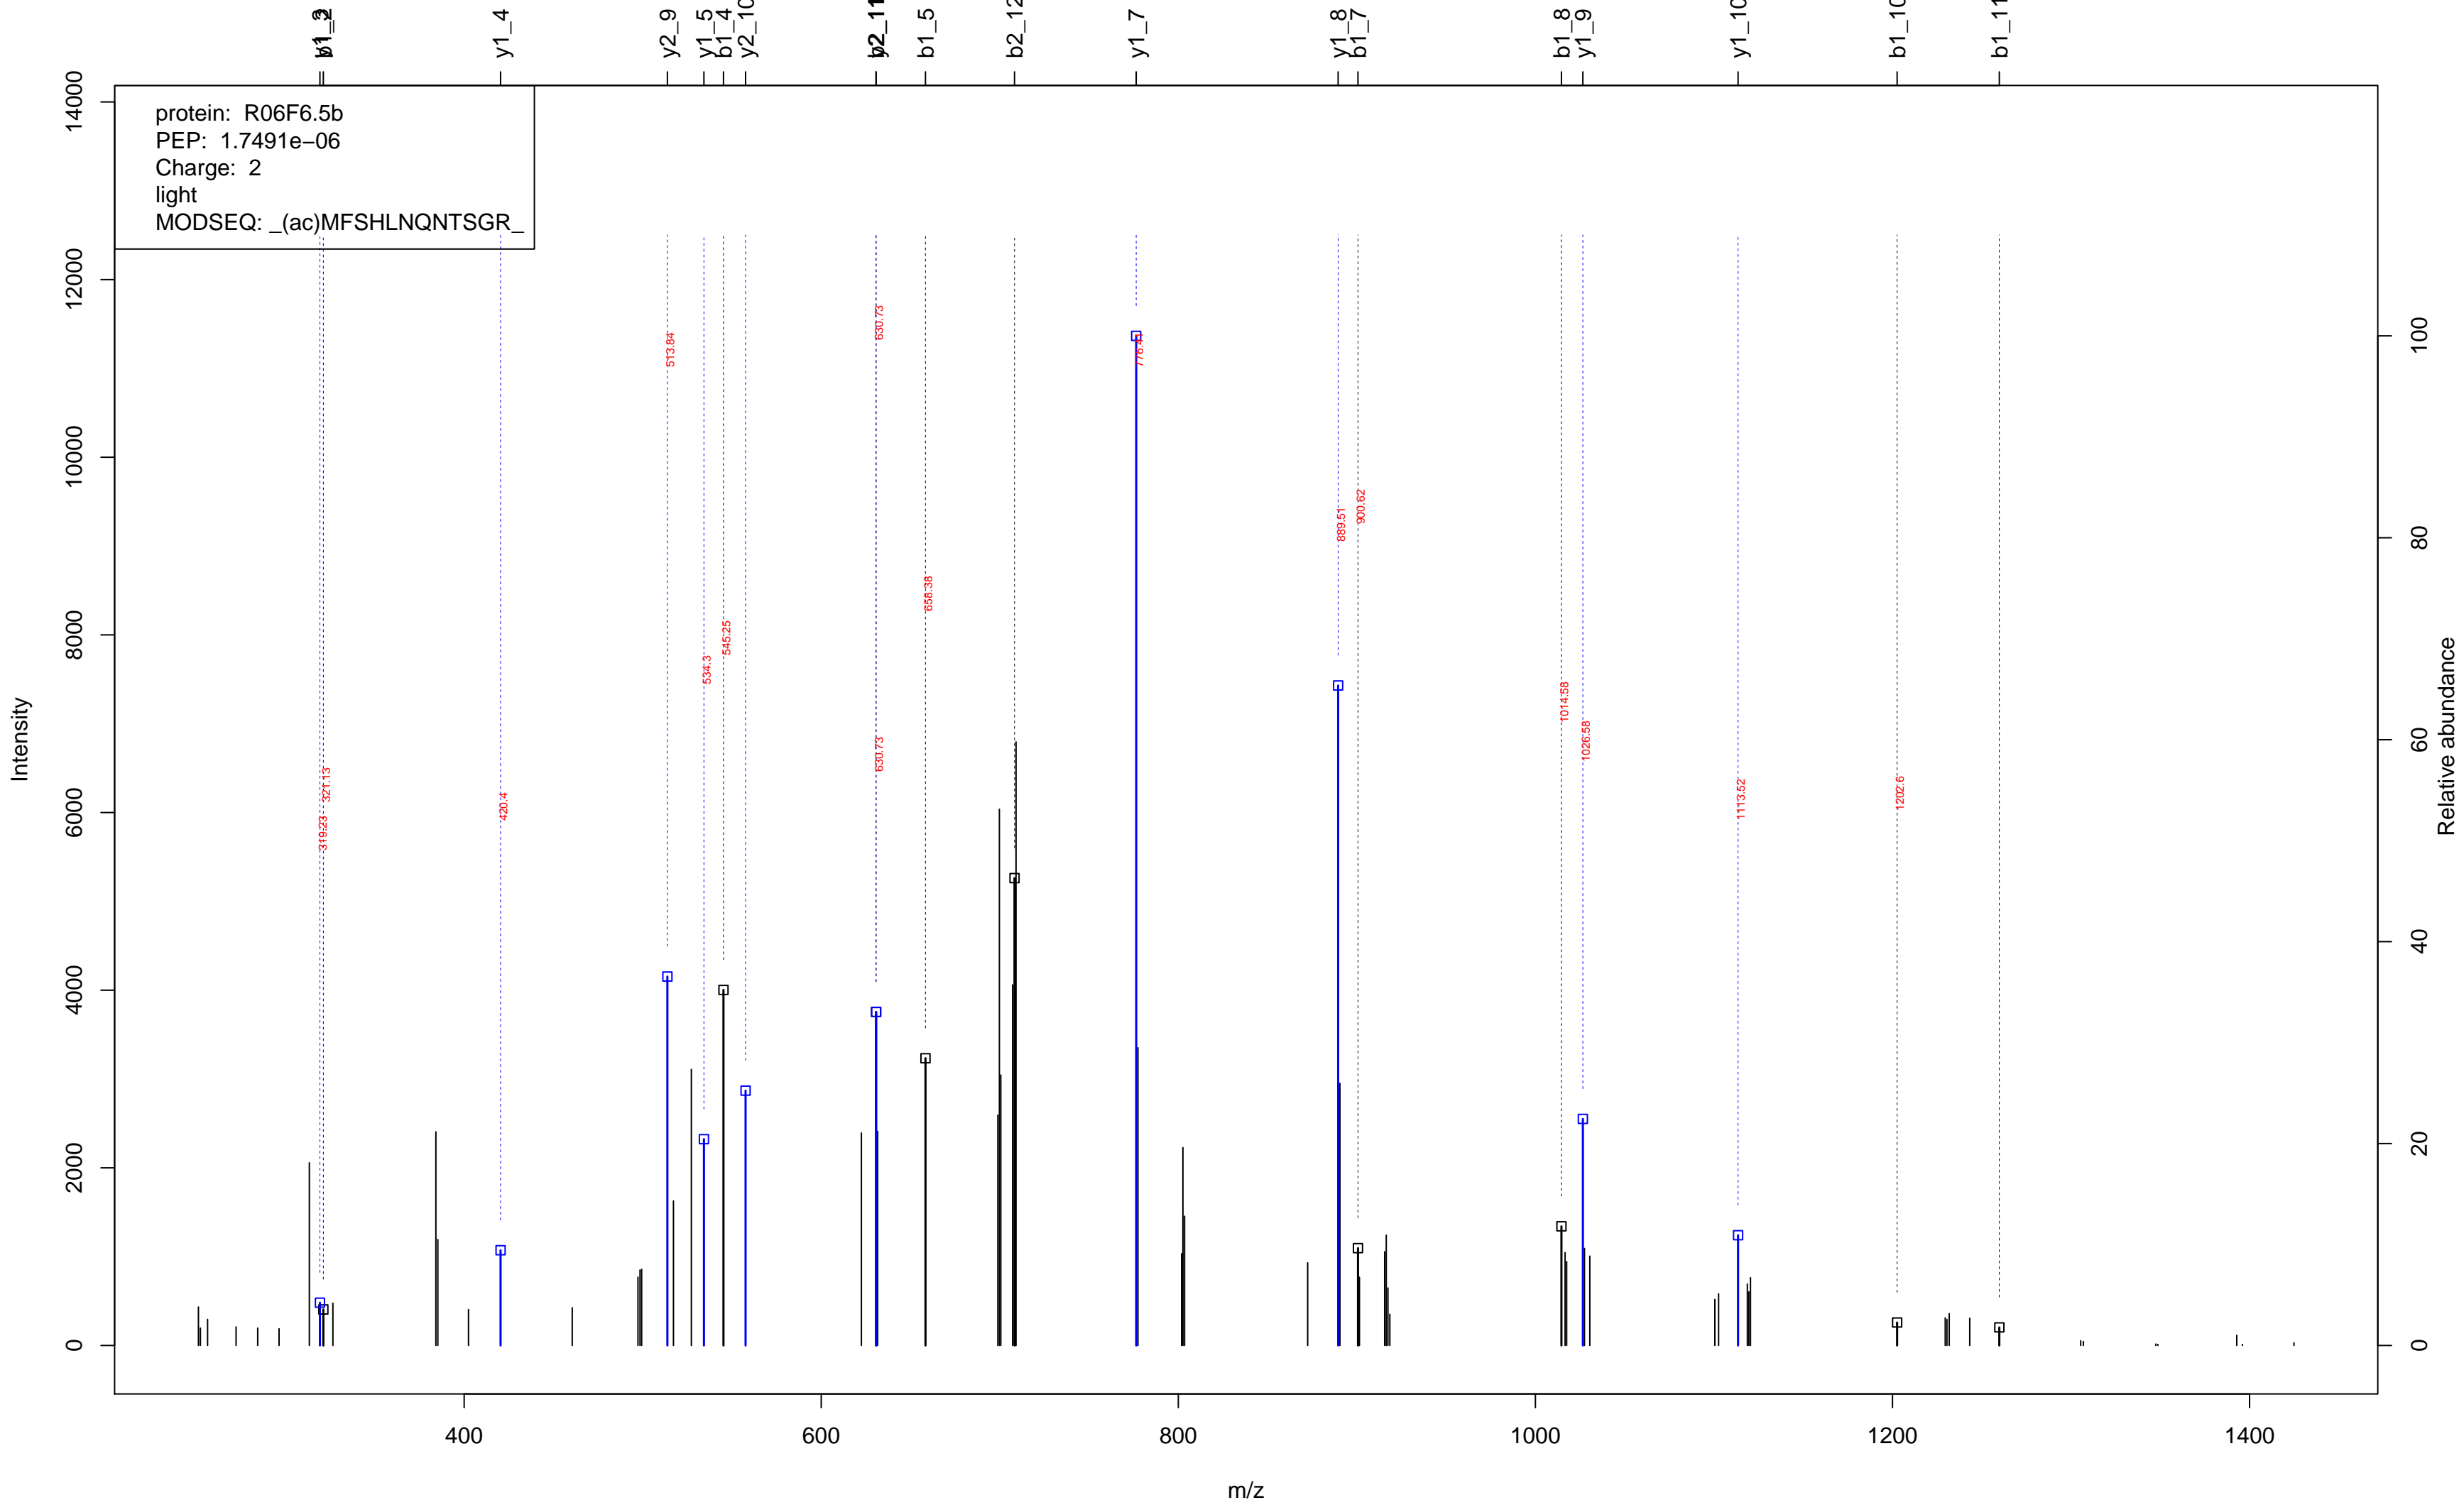

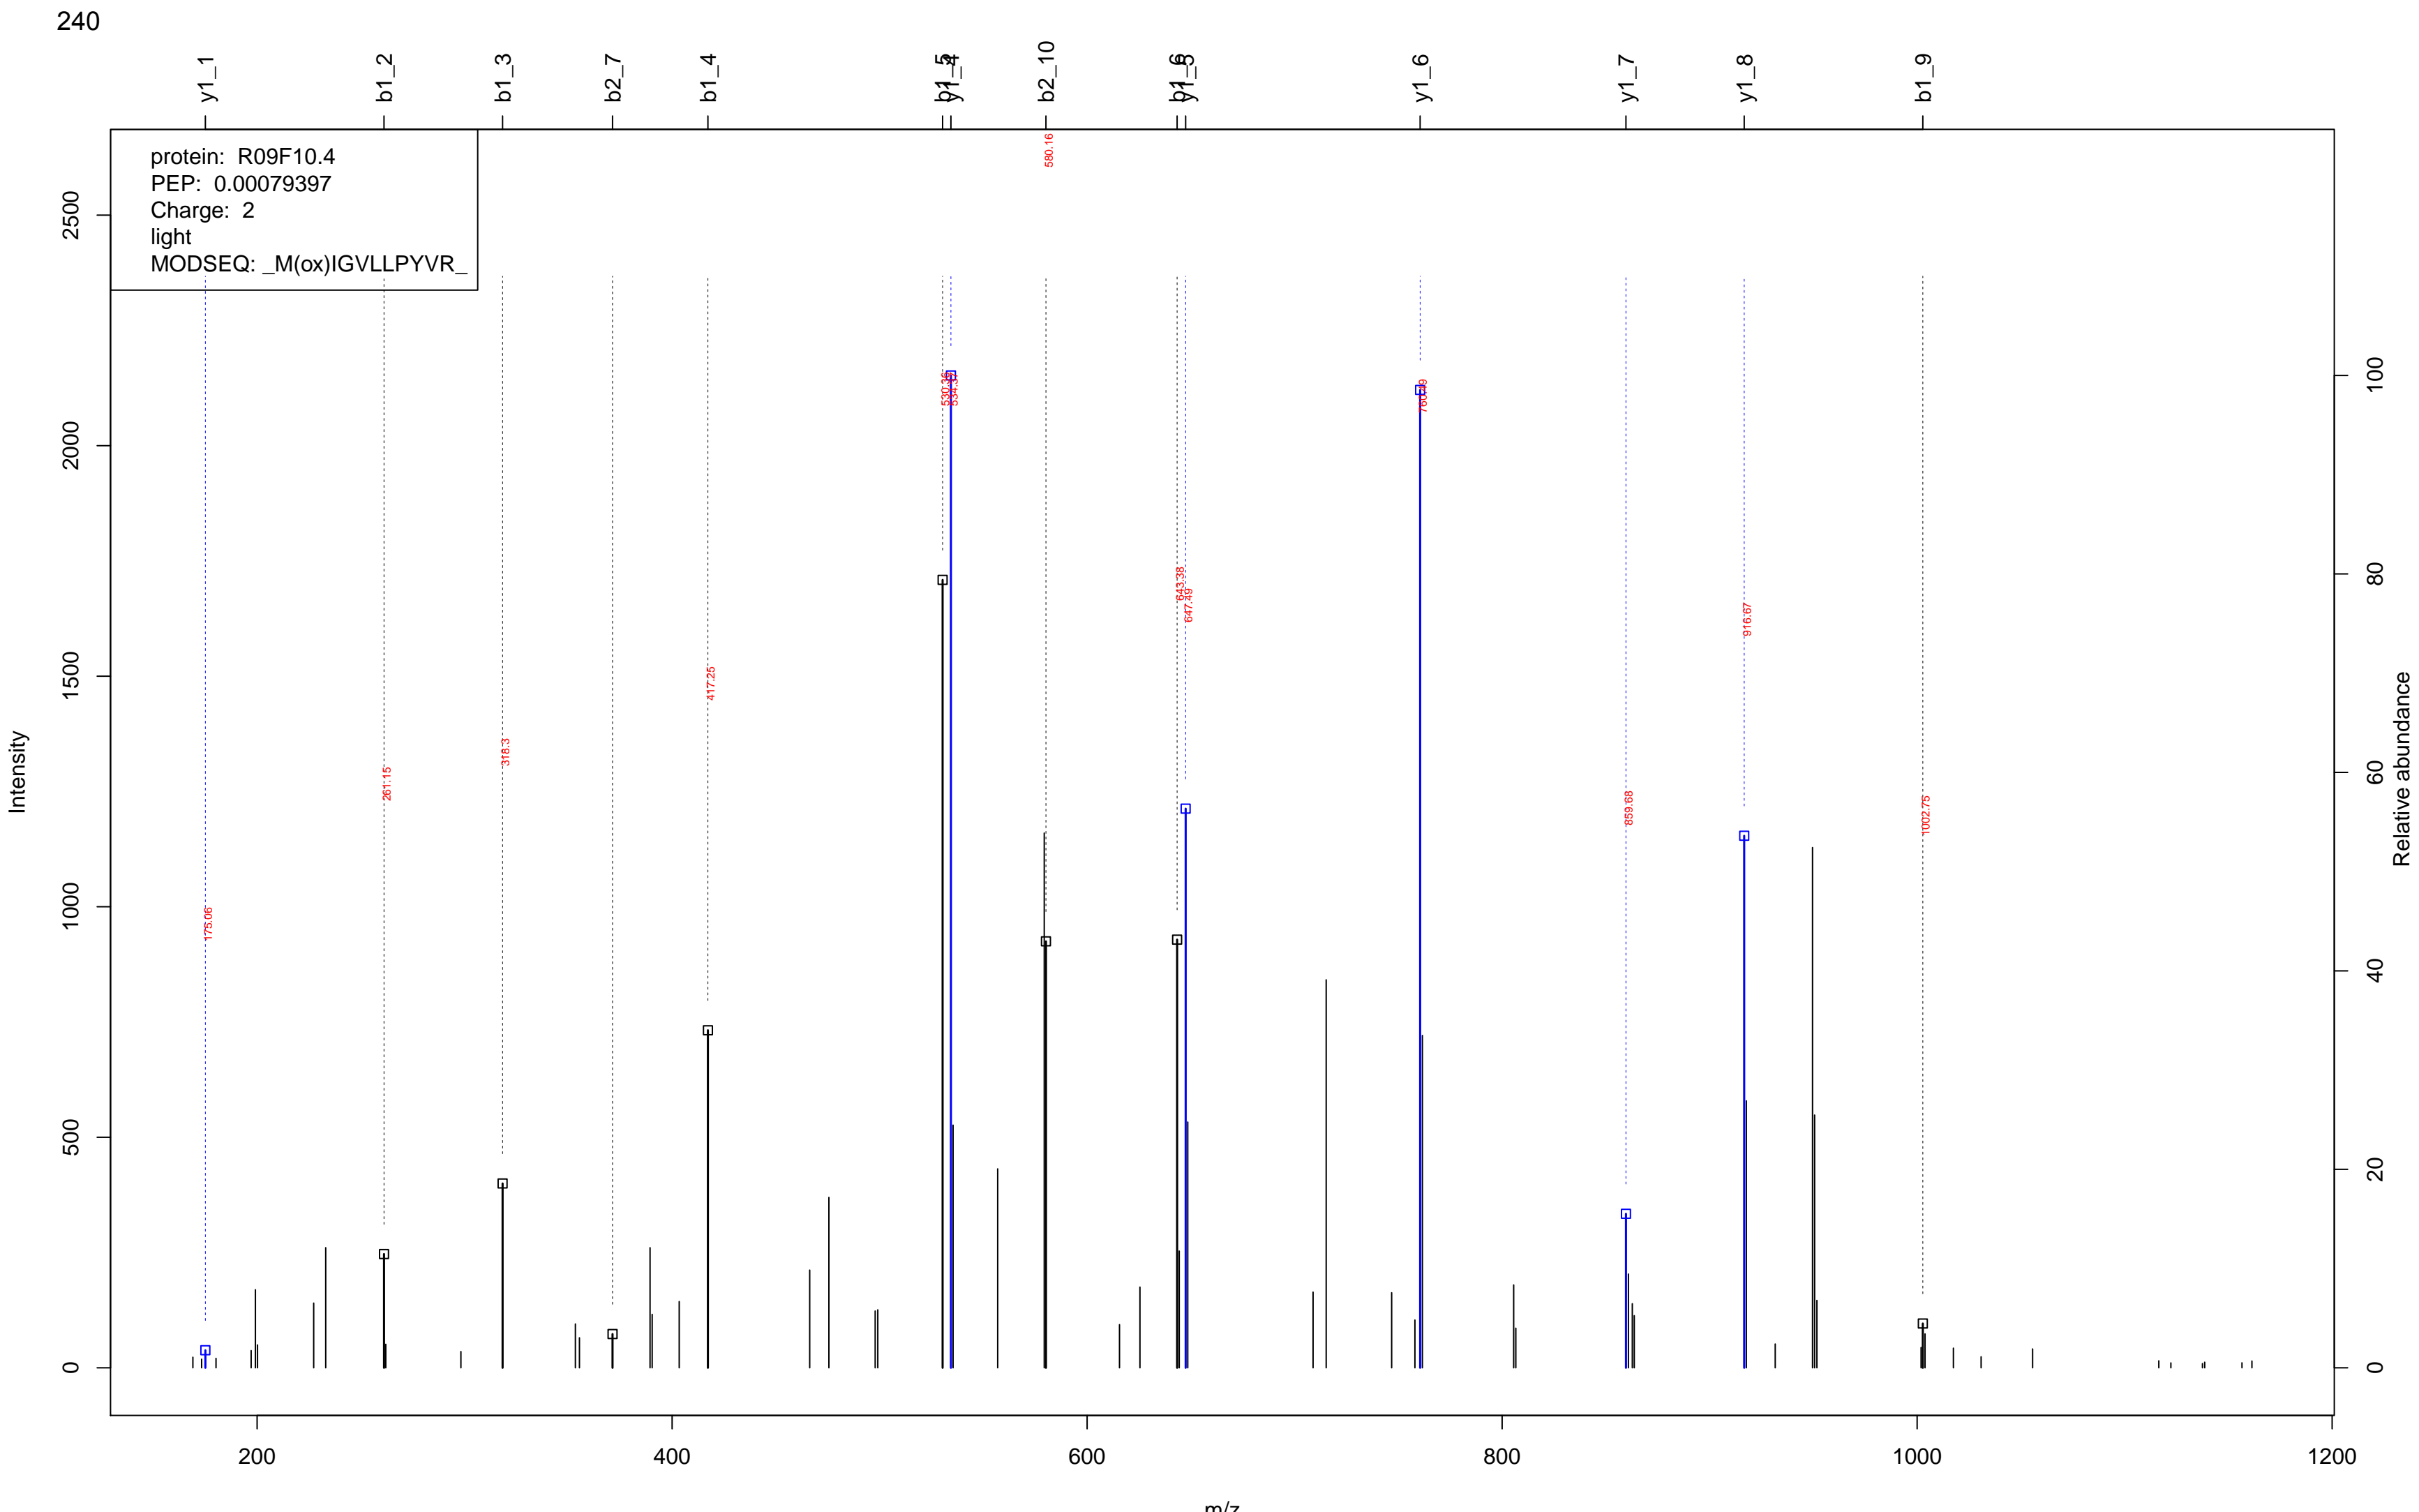

MIGVLLPYVR / File181476 Spectrum7287 scans: 4760 [S:/p743/Proteomics/ORBI\_2/cpanse\_20160211\_peakplot/20121012\_12\_38to40ExclList\_N2hCBI.RAW]



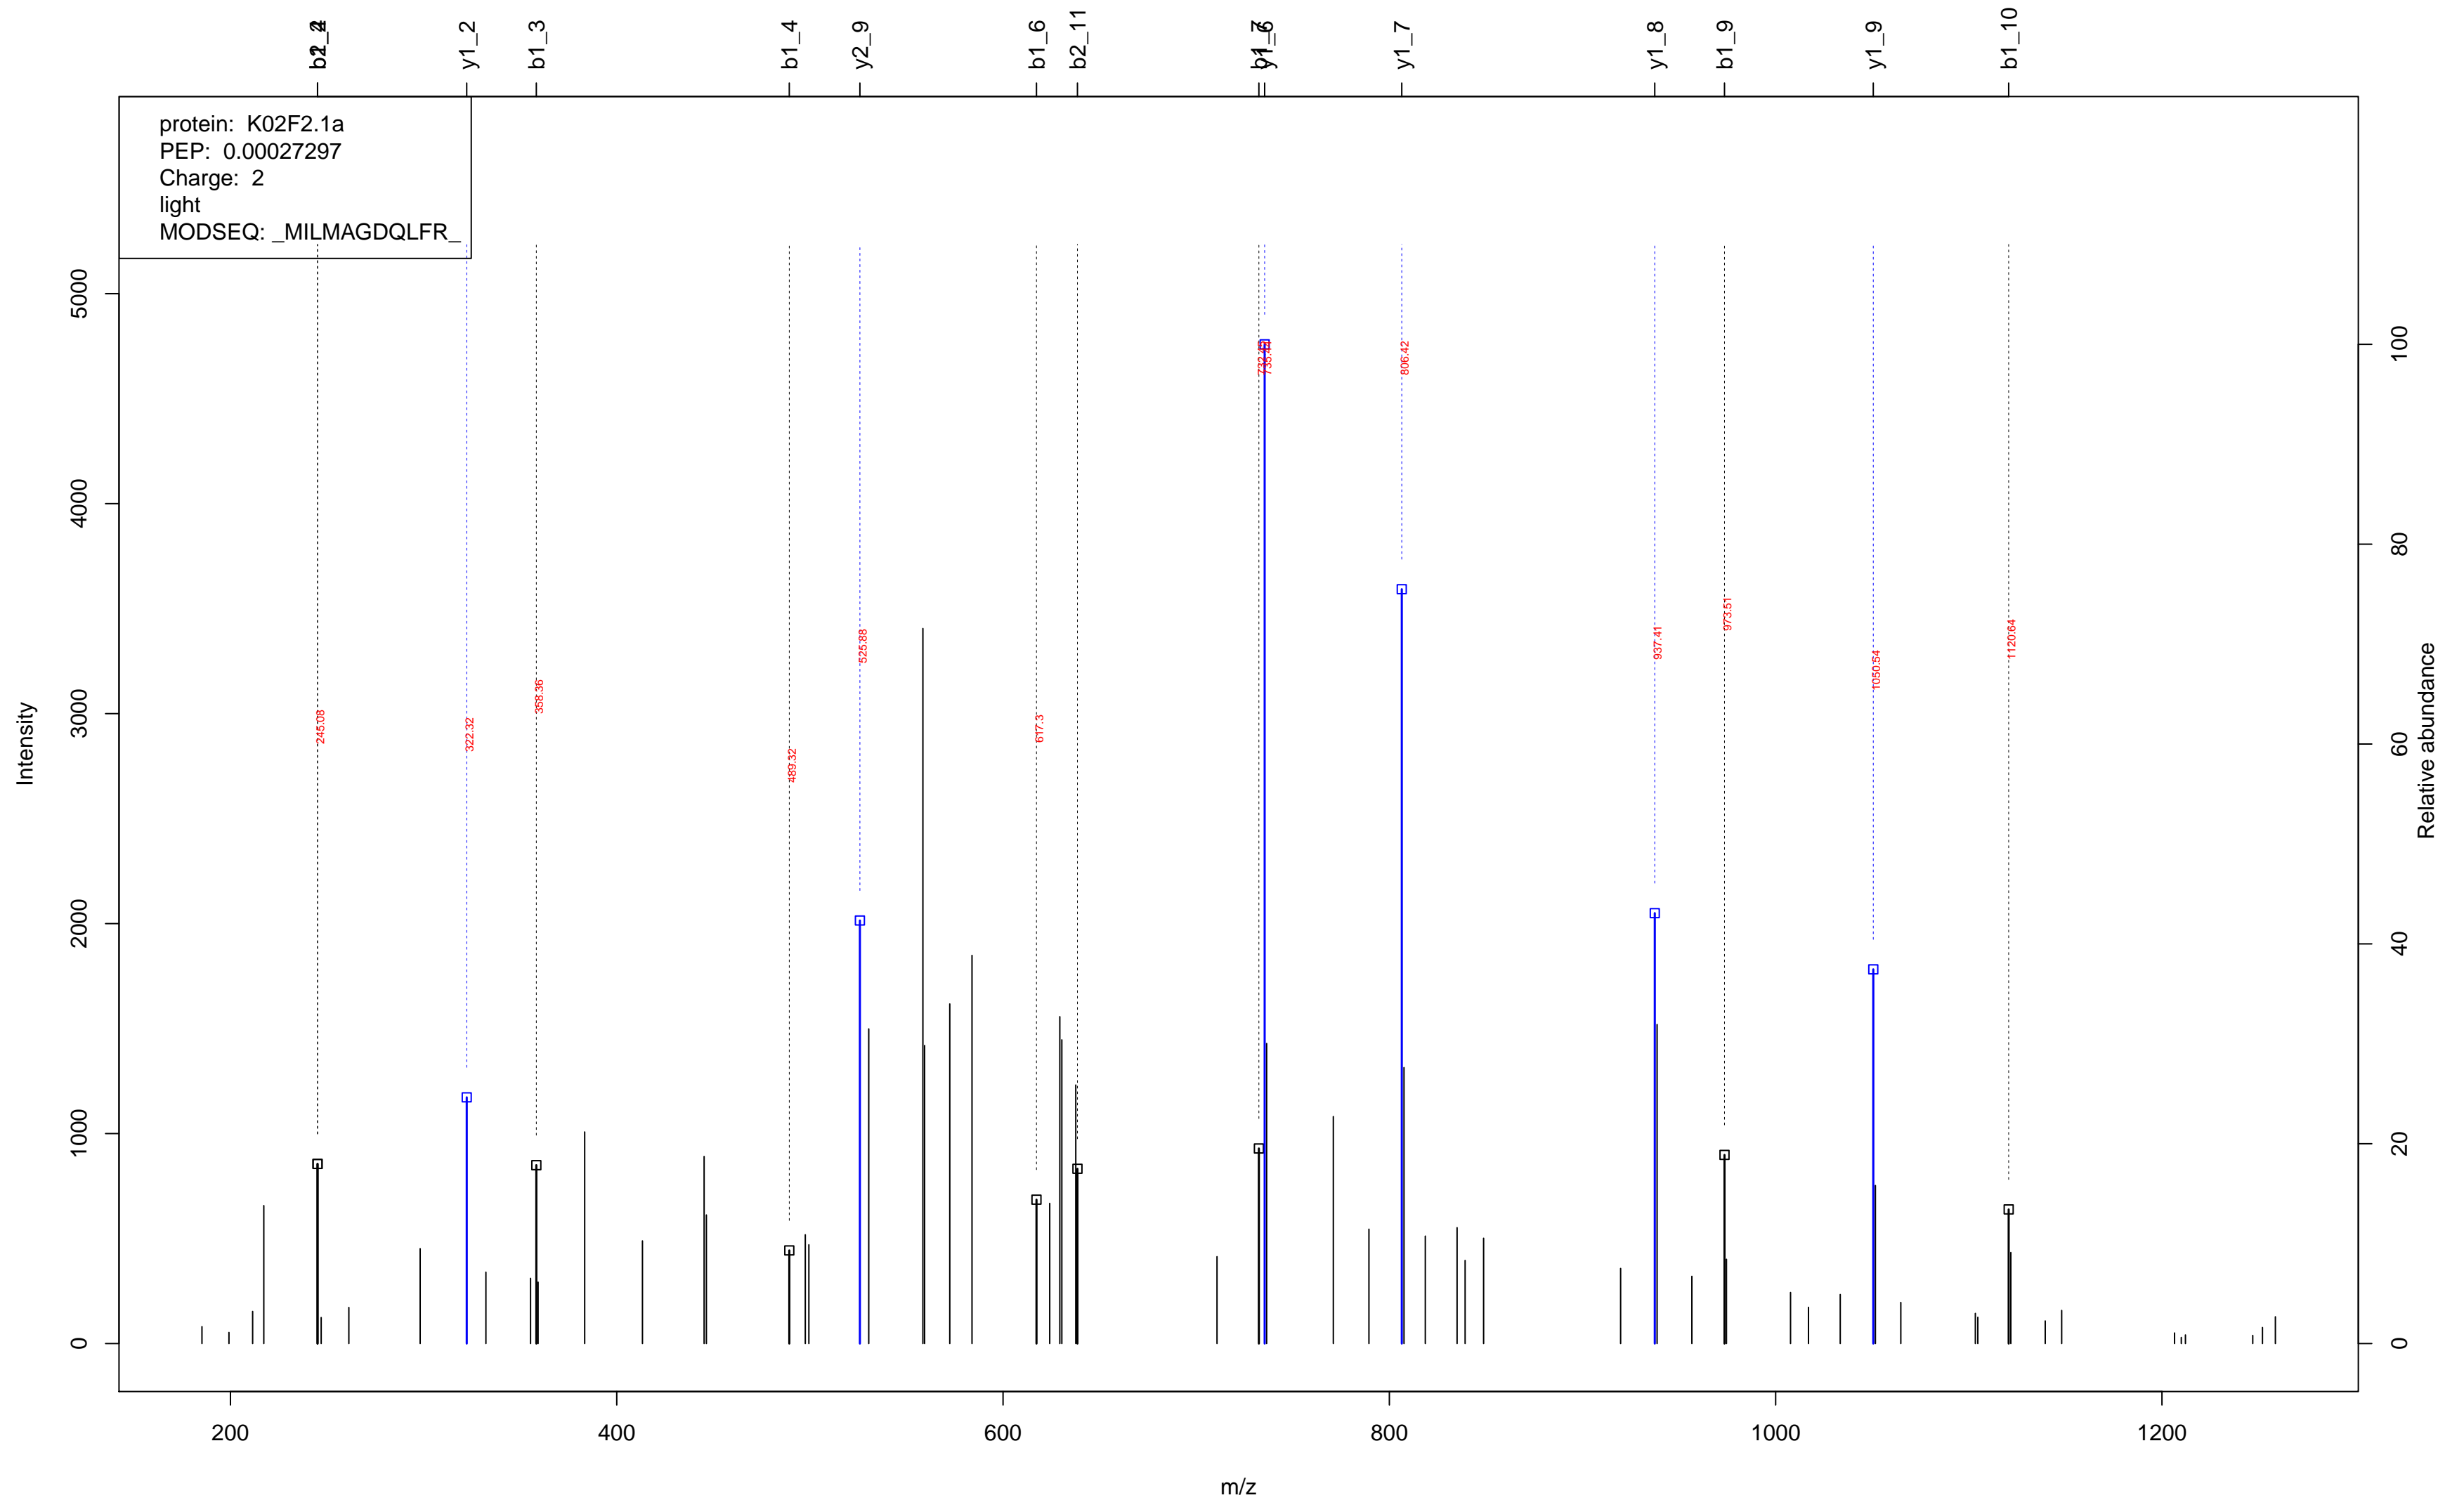

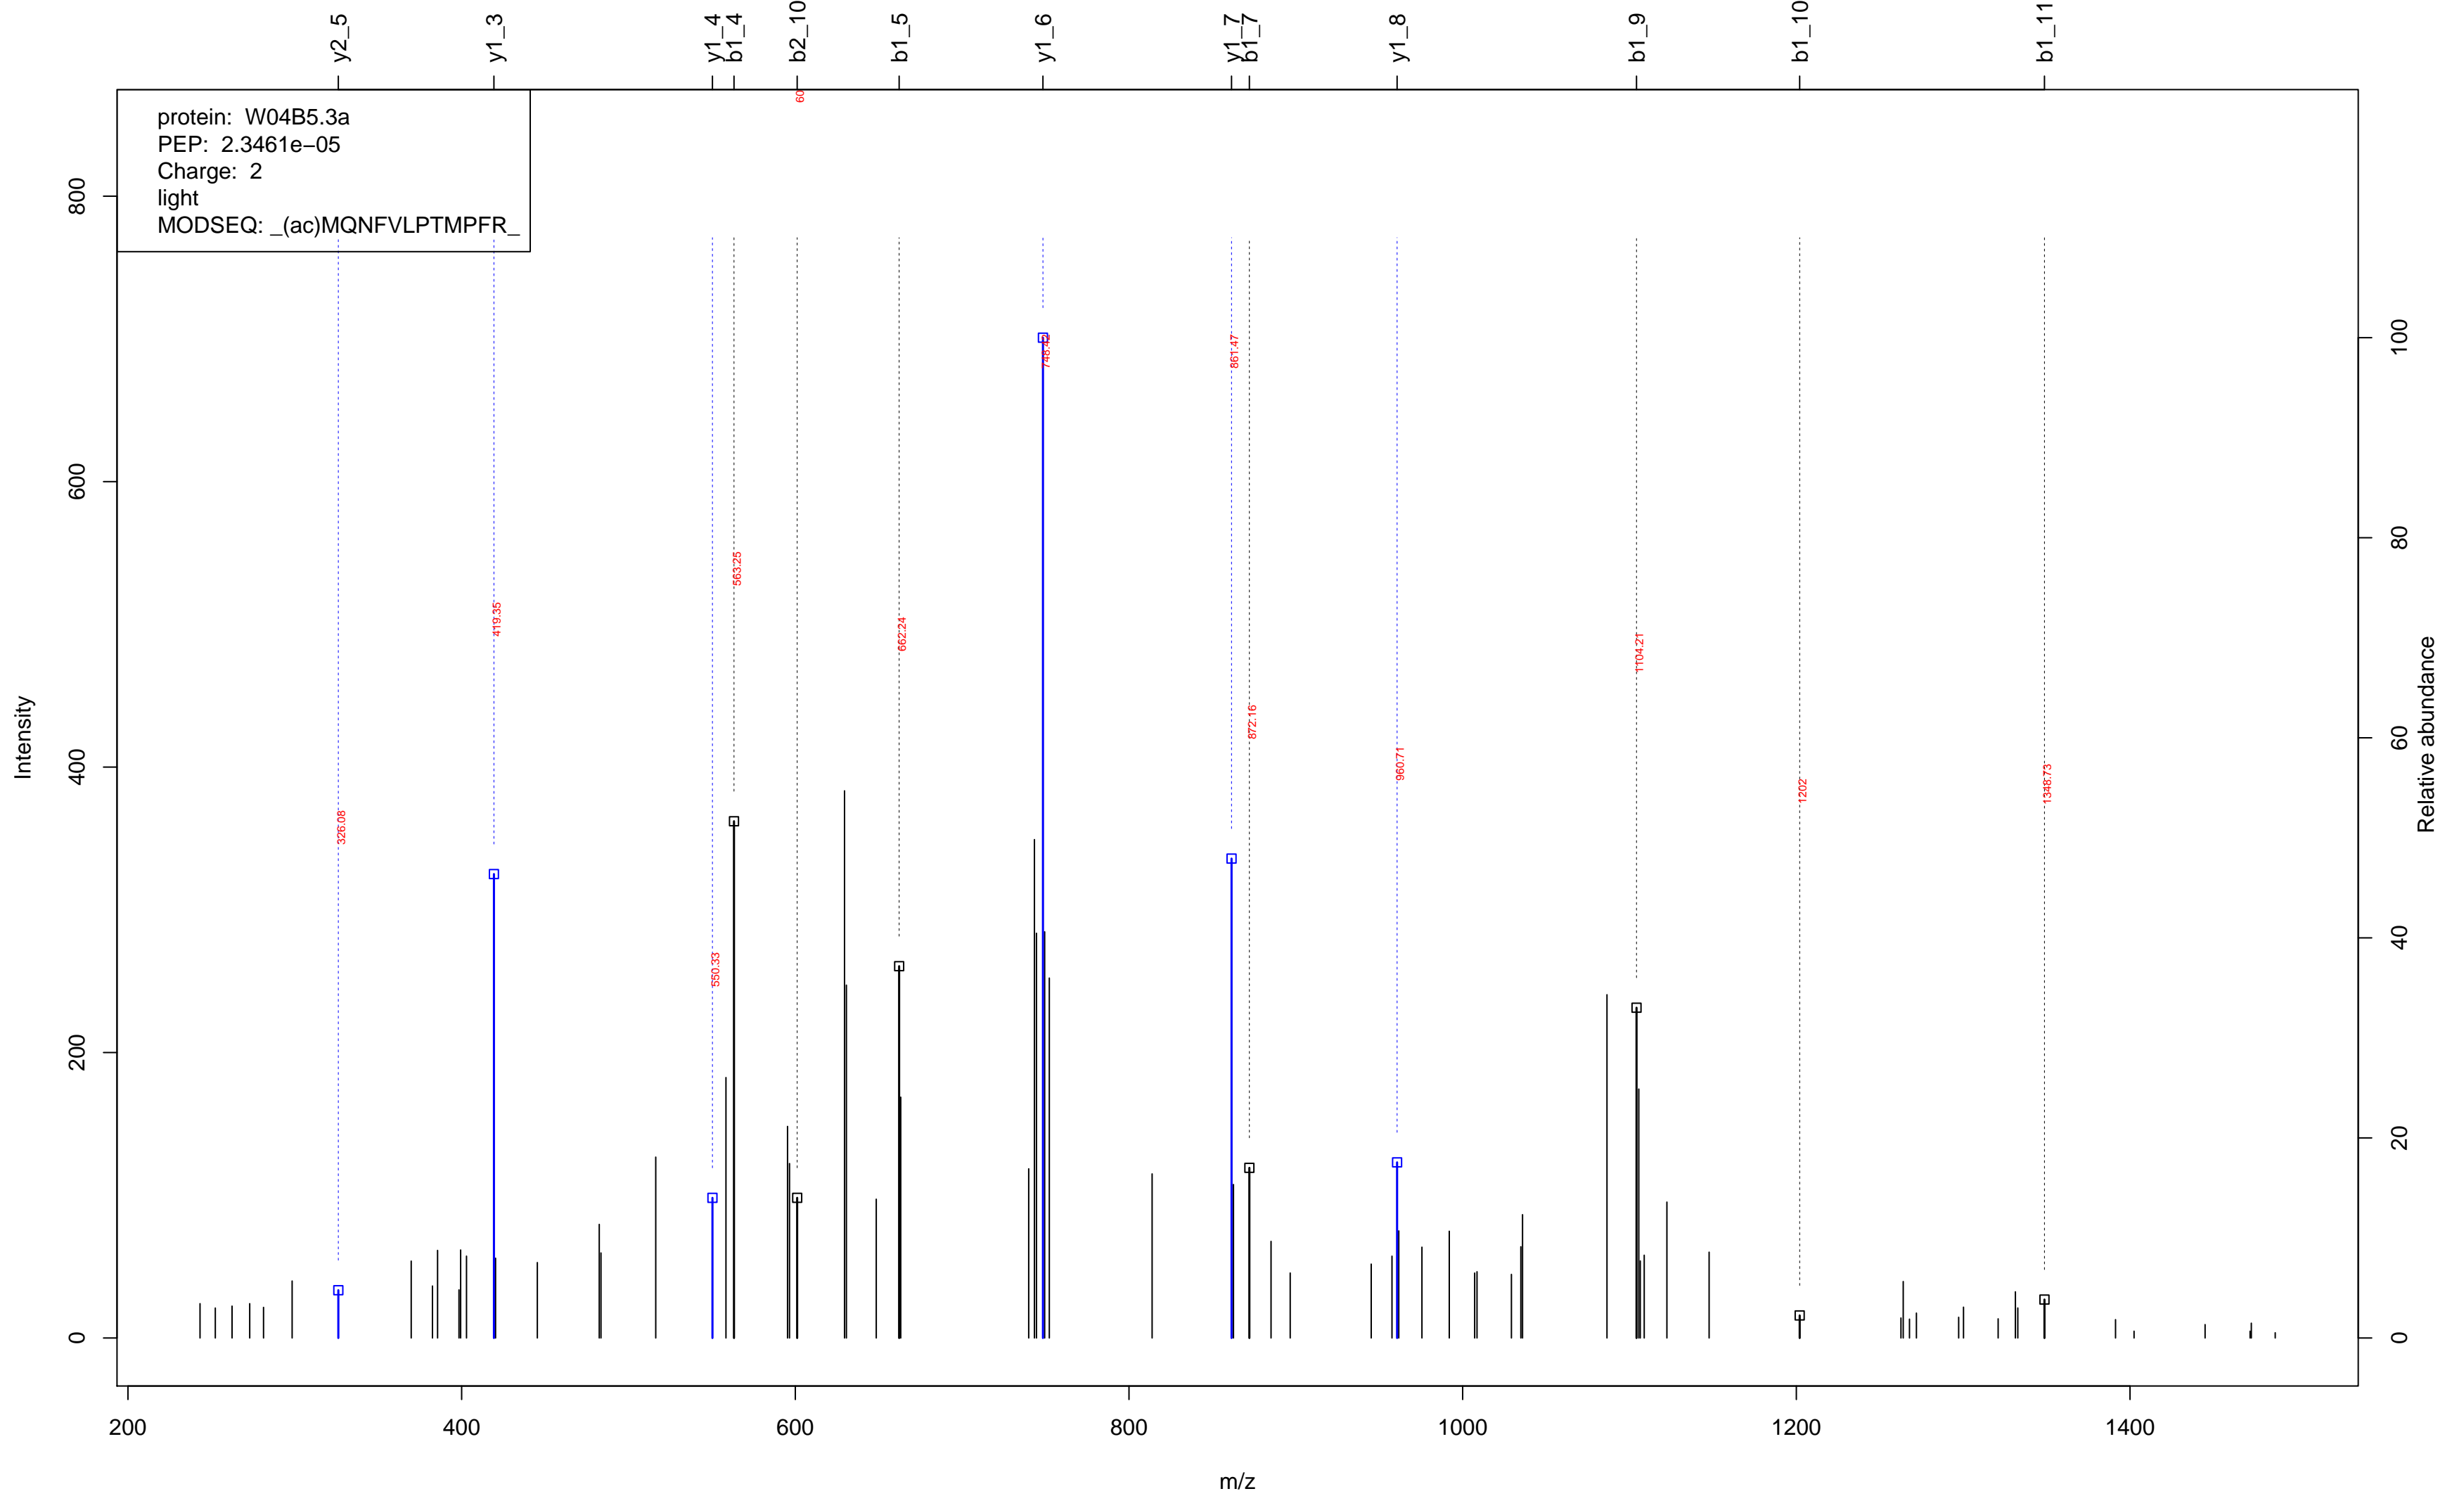

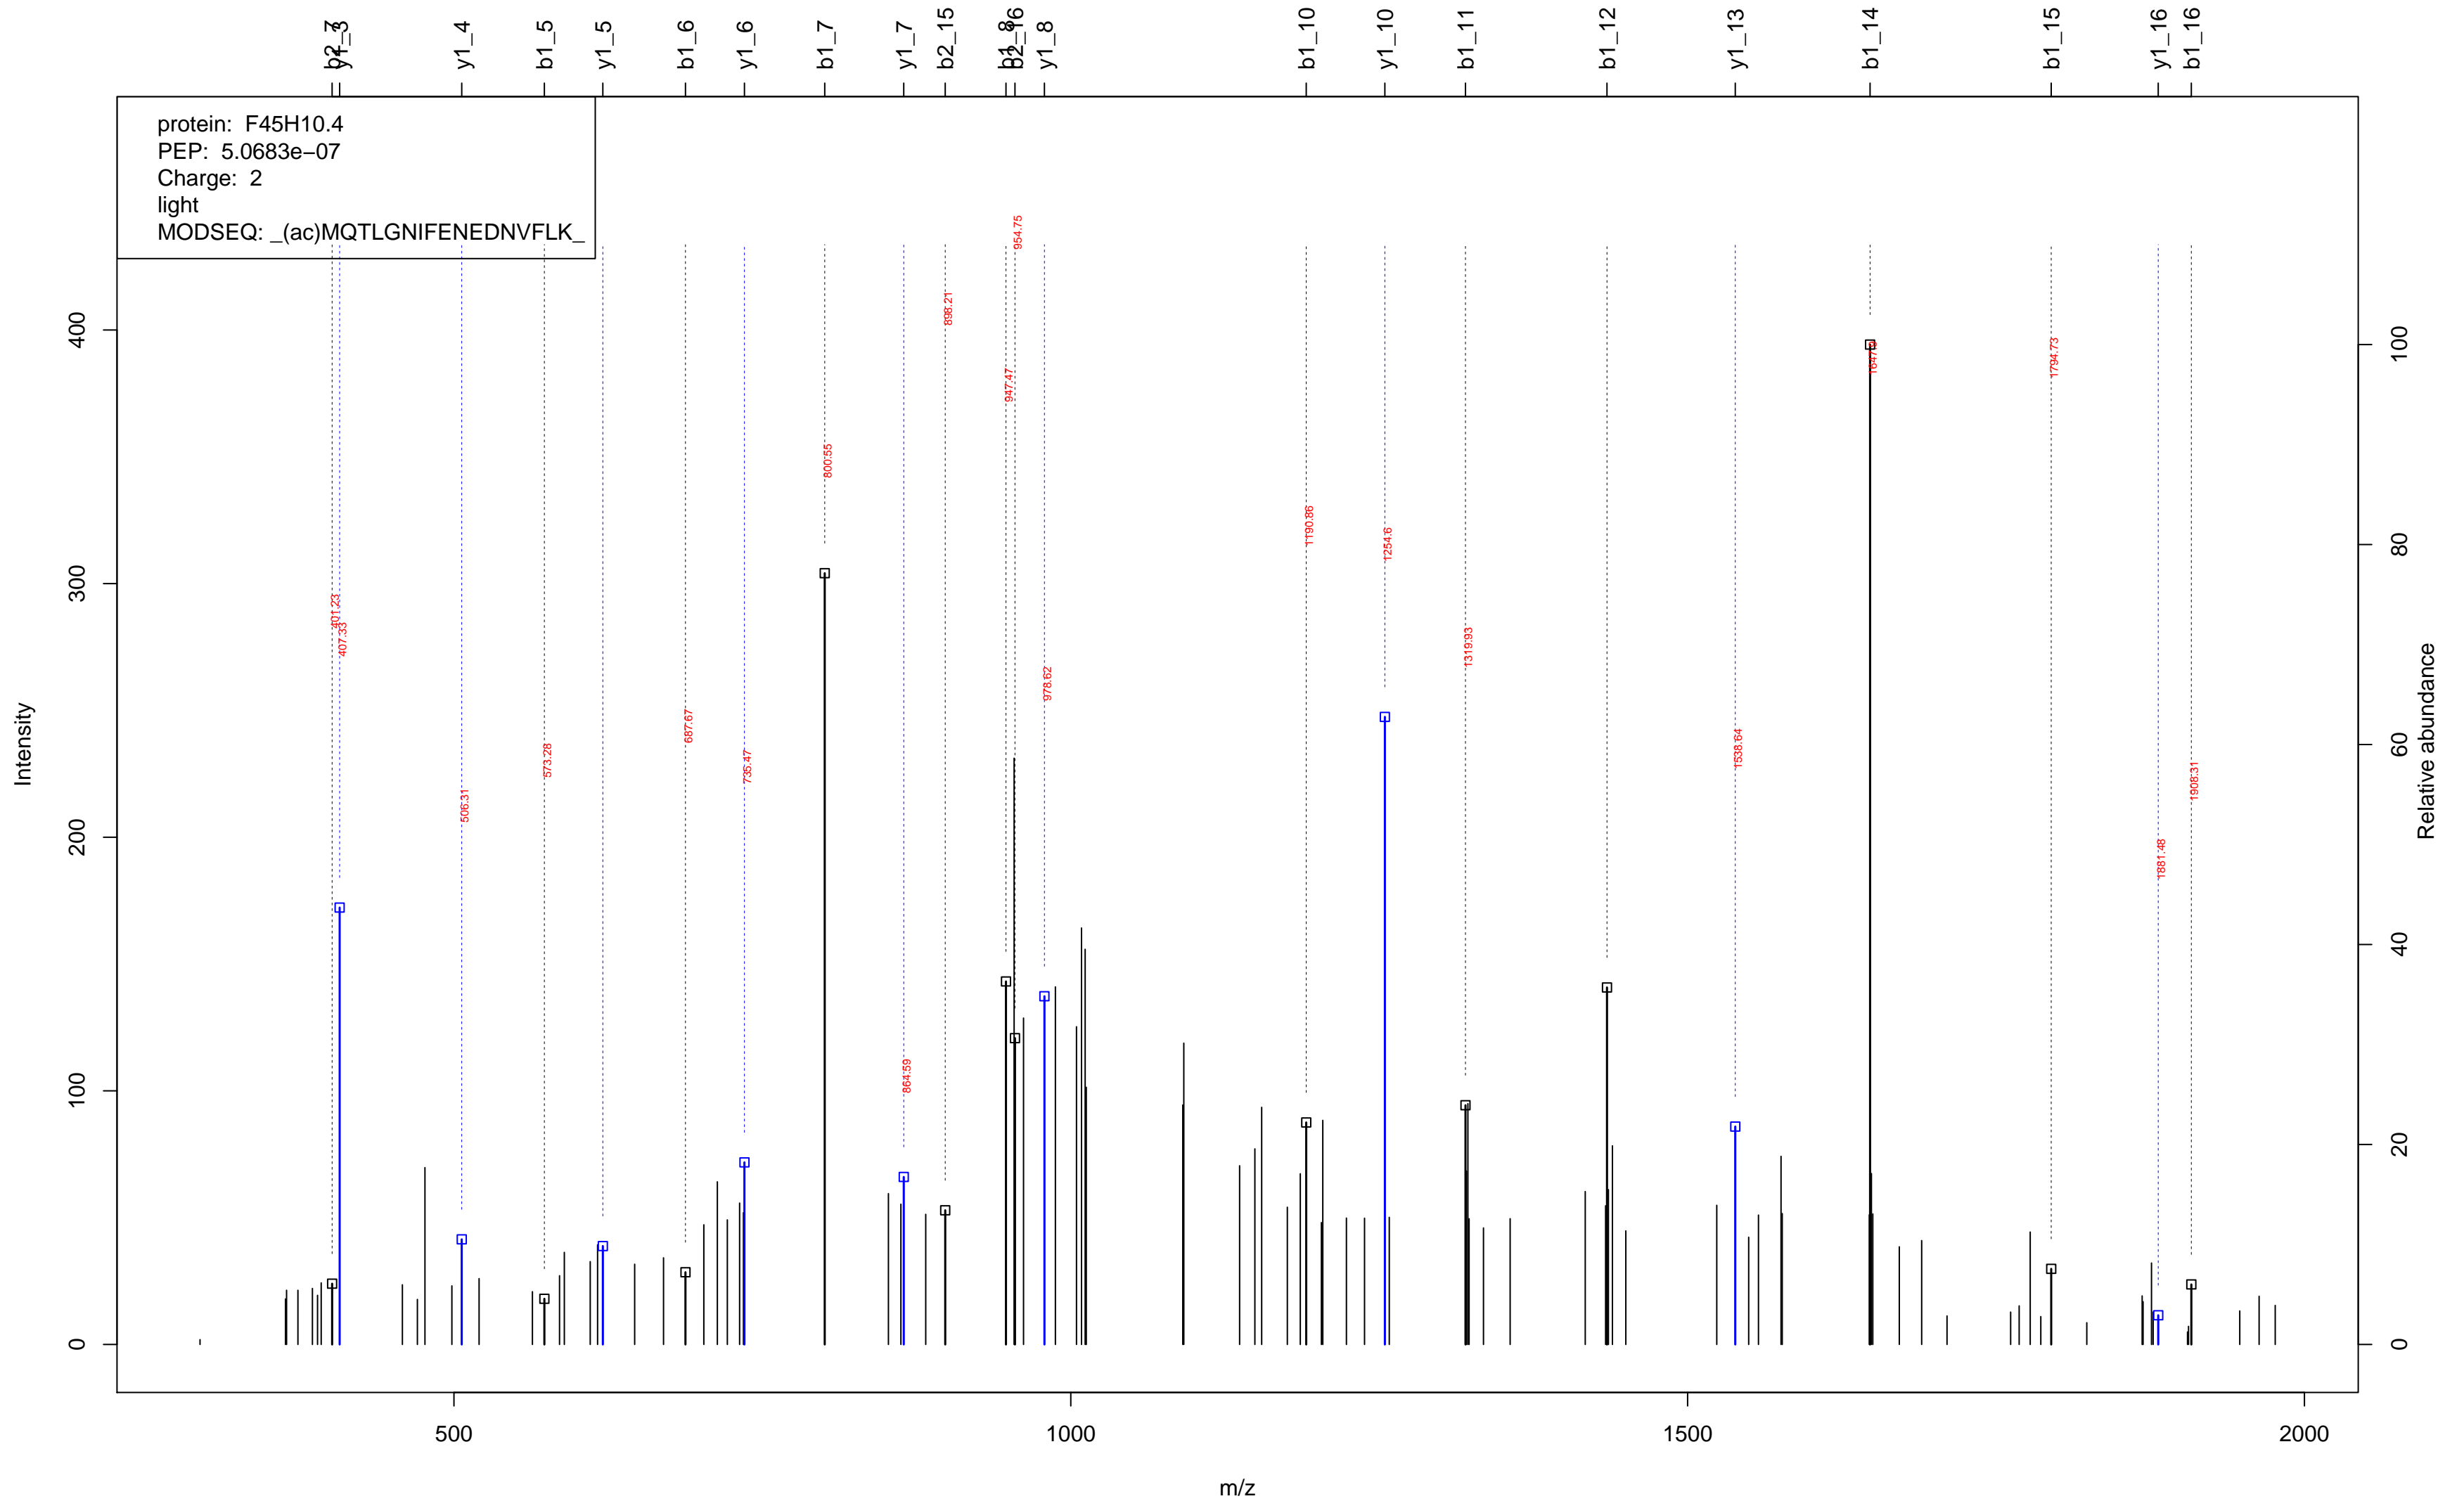

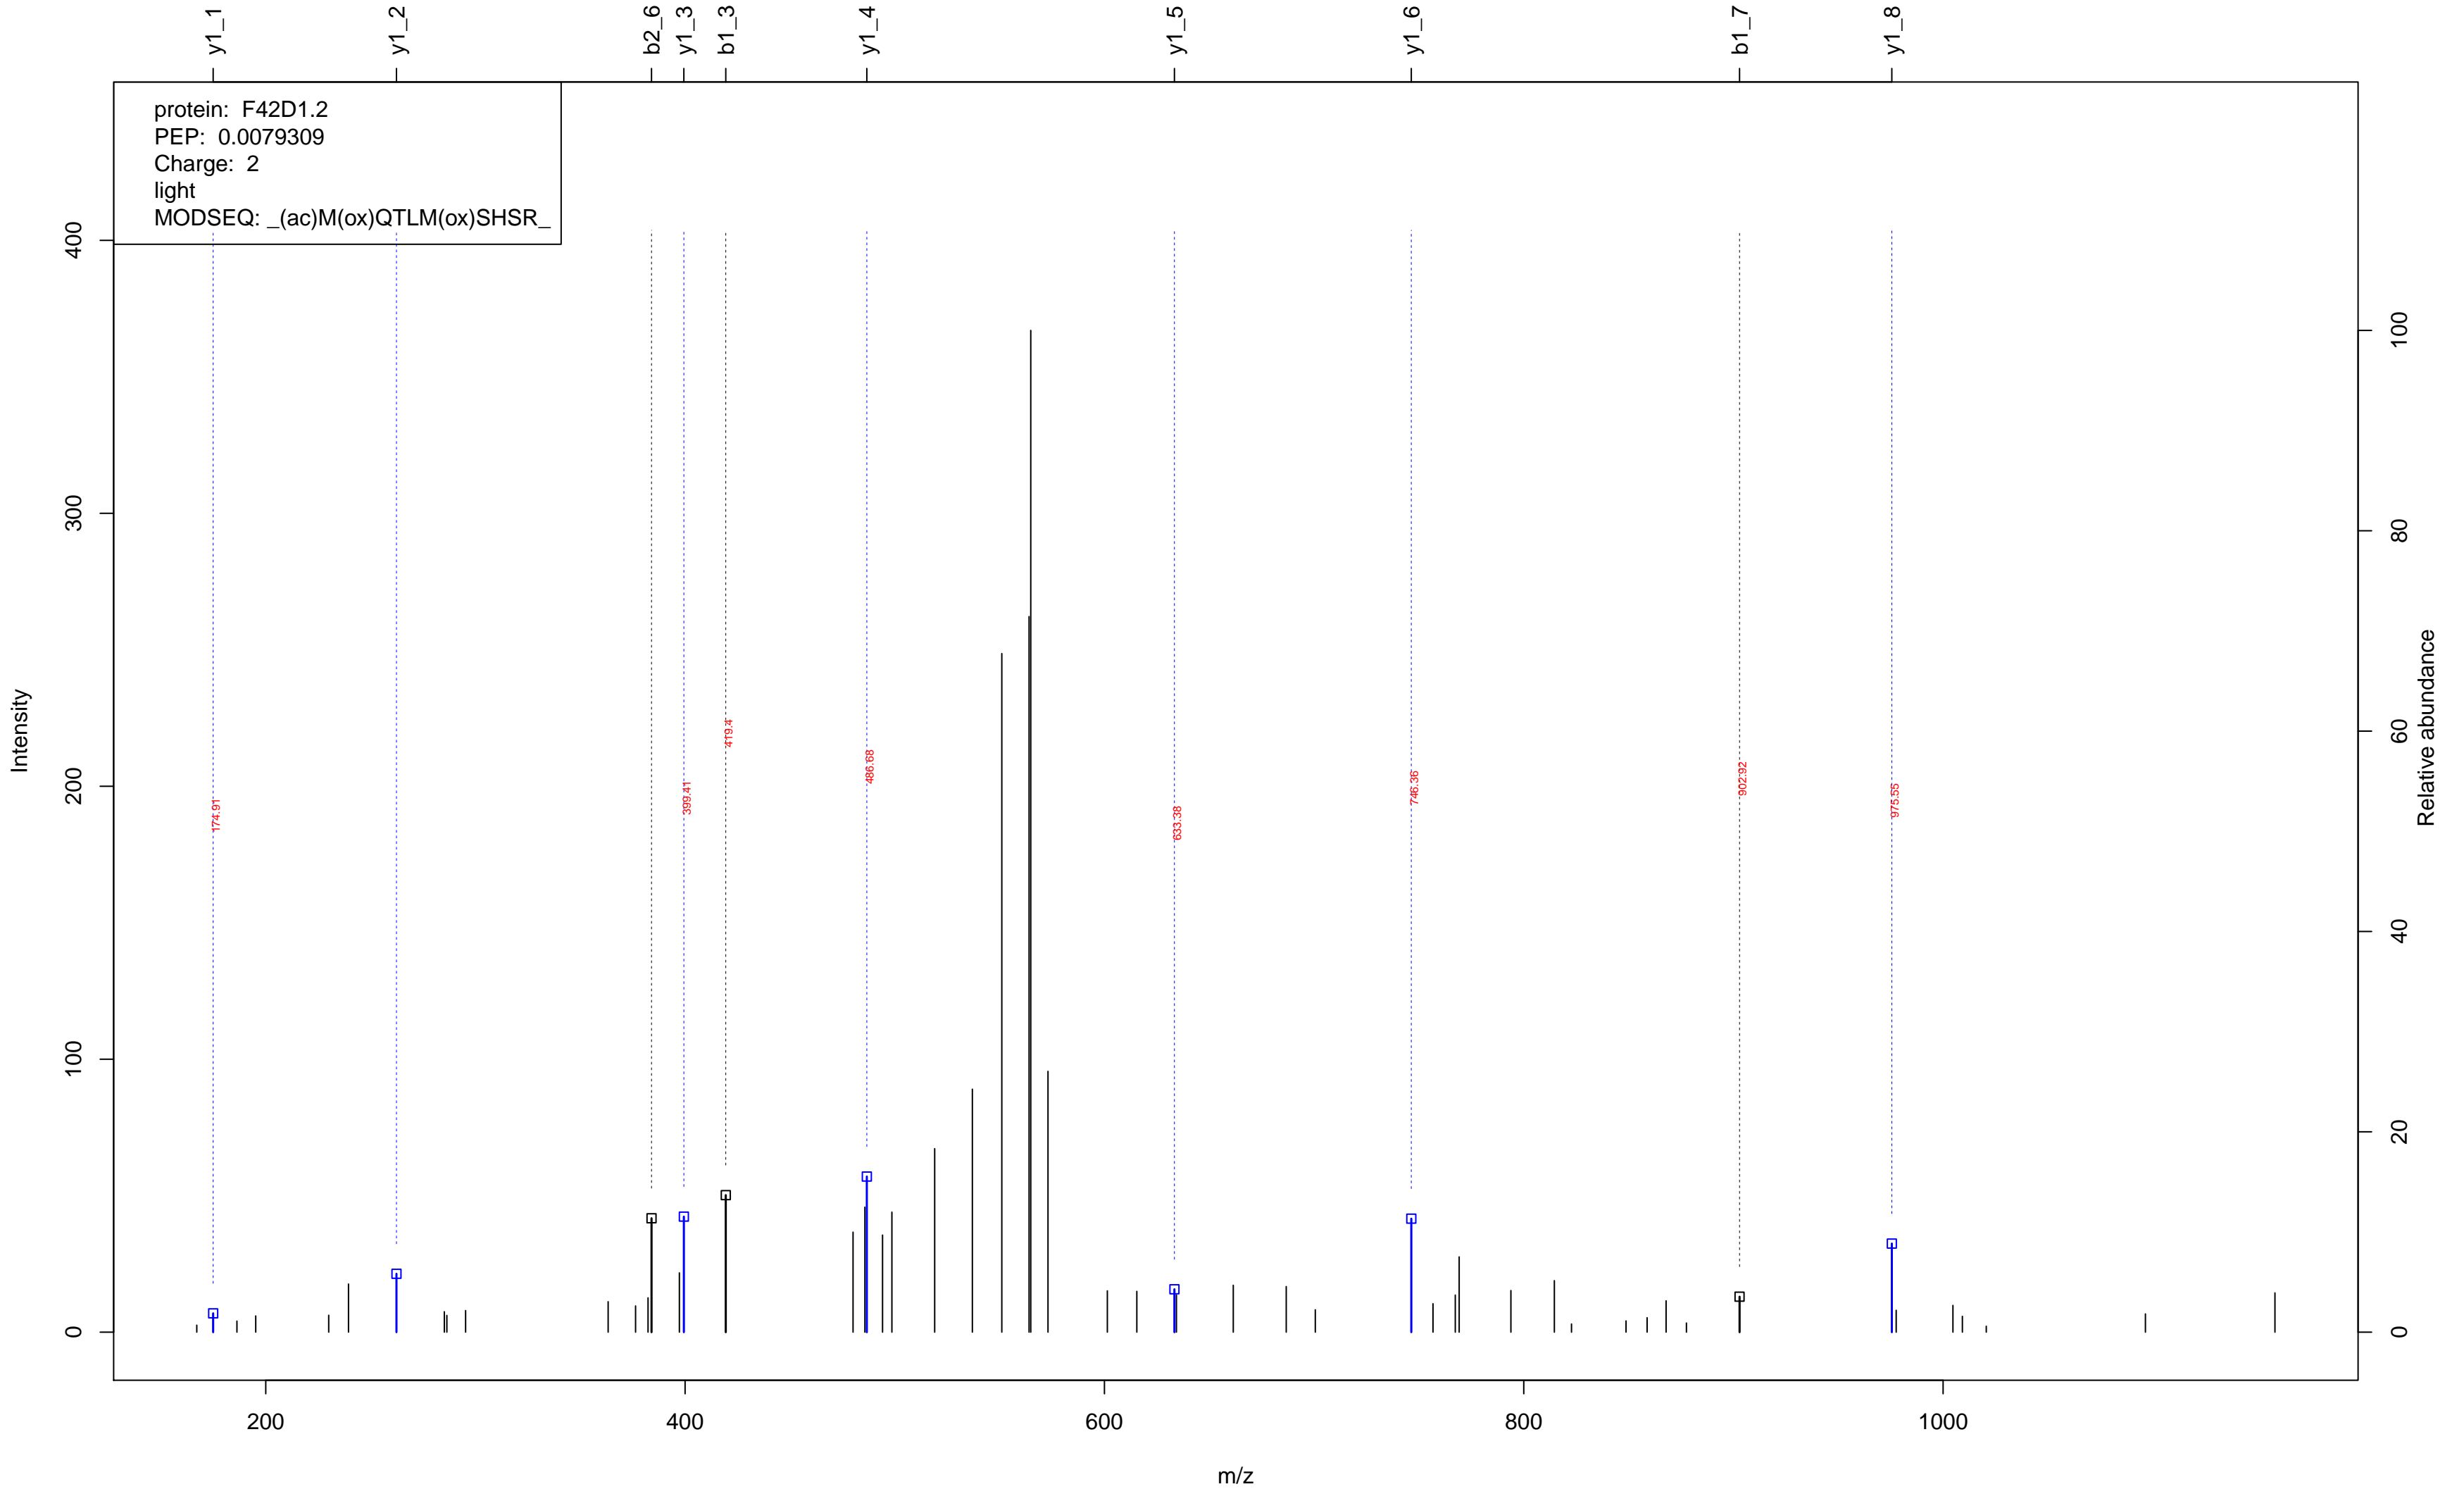

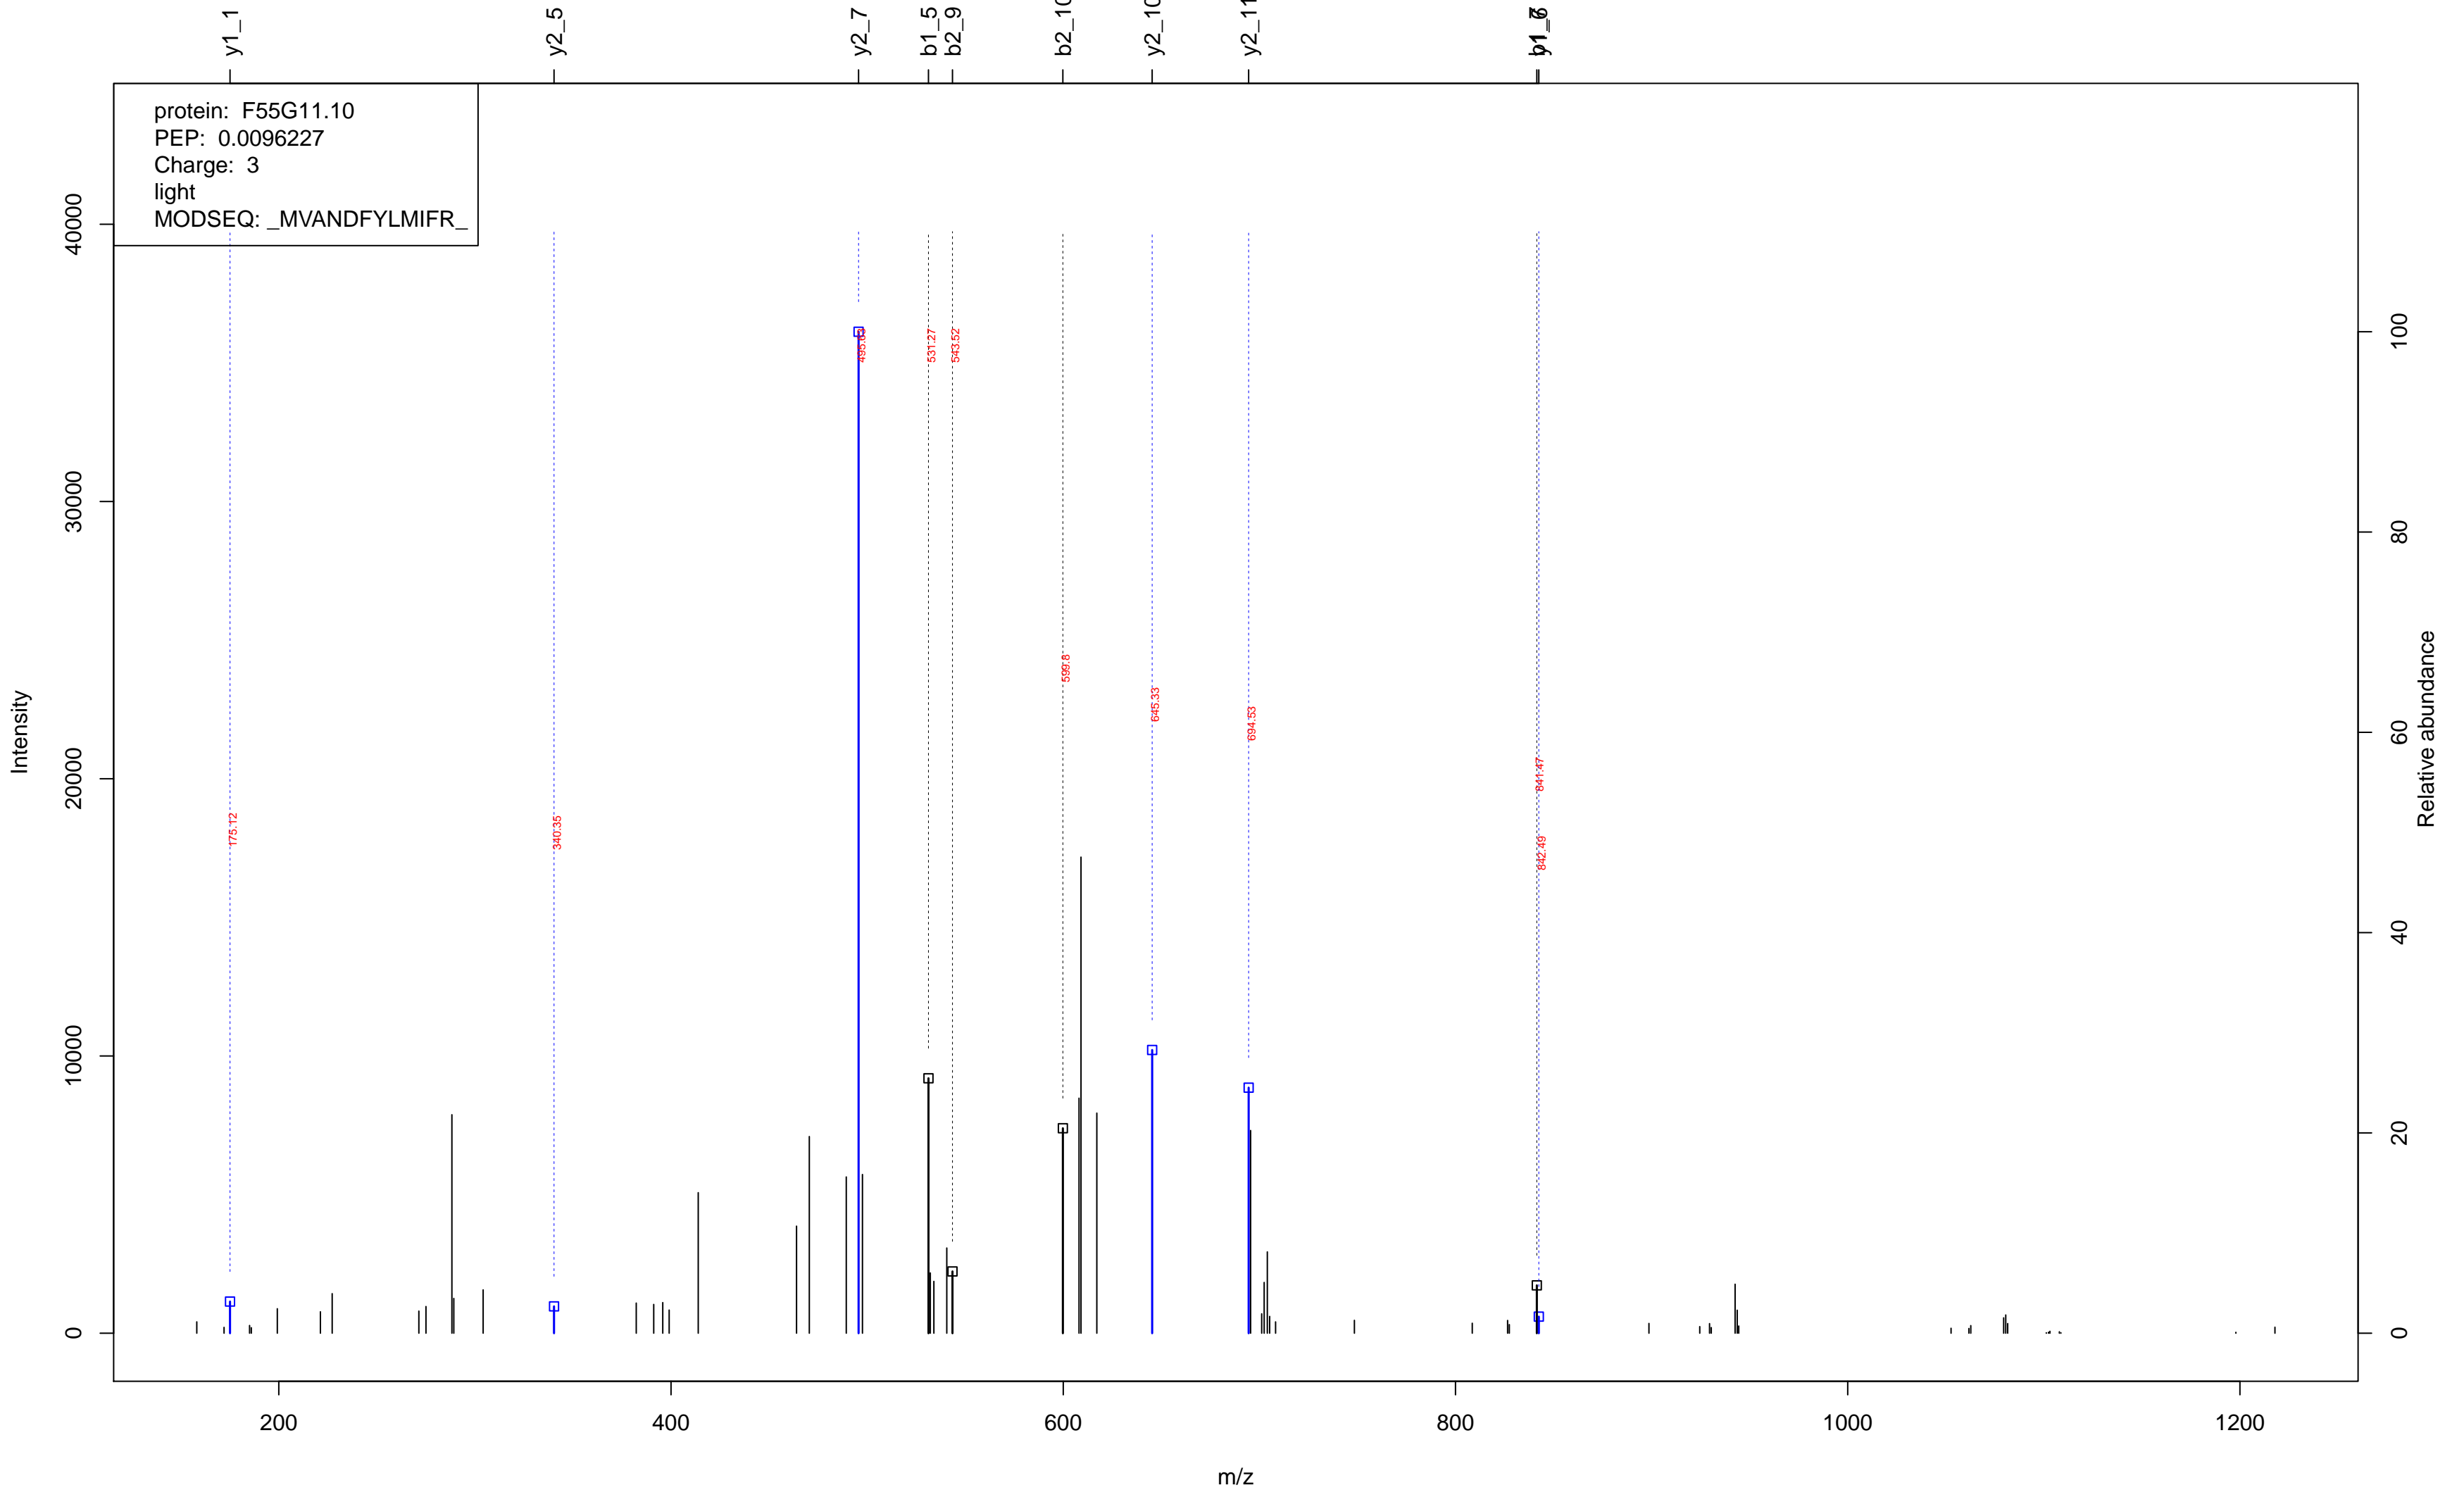

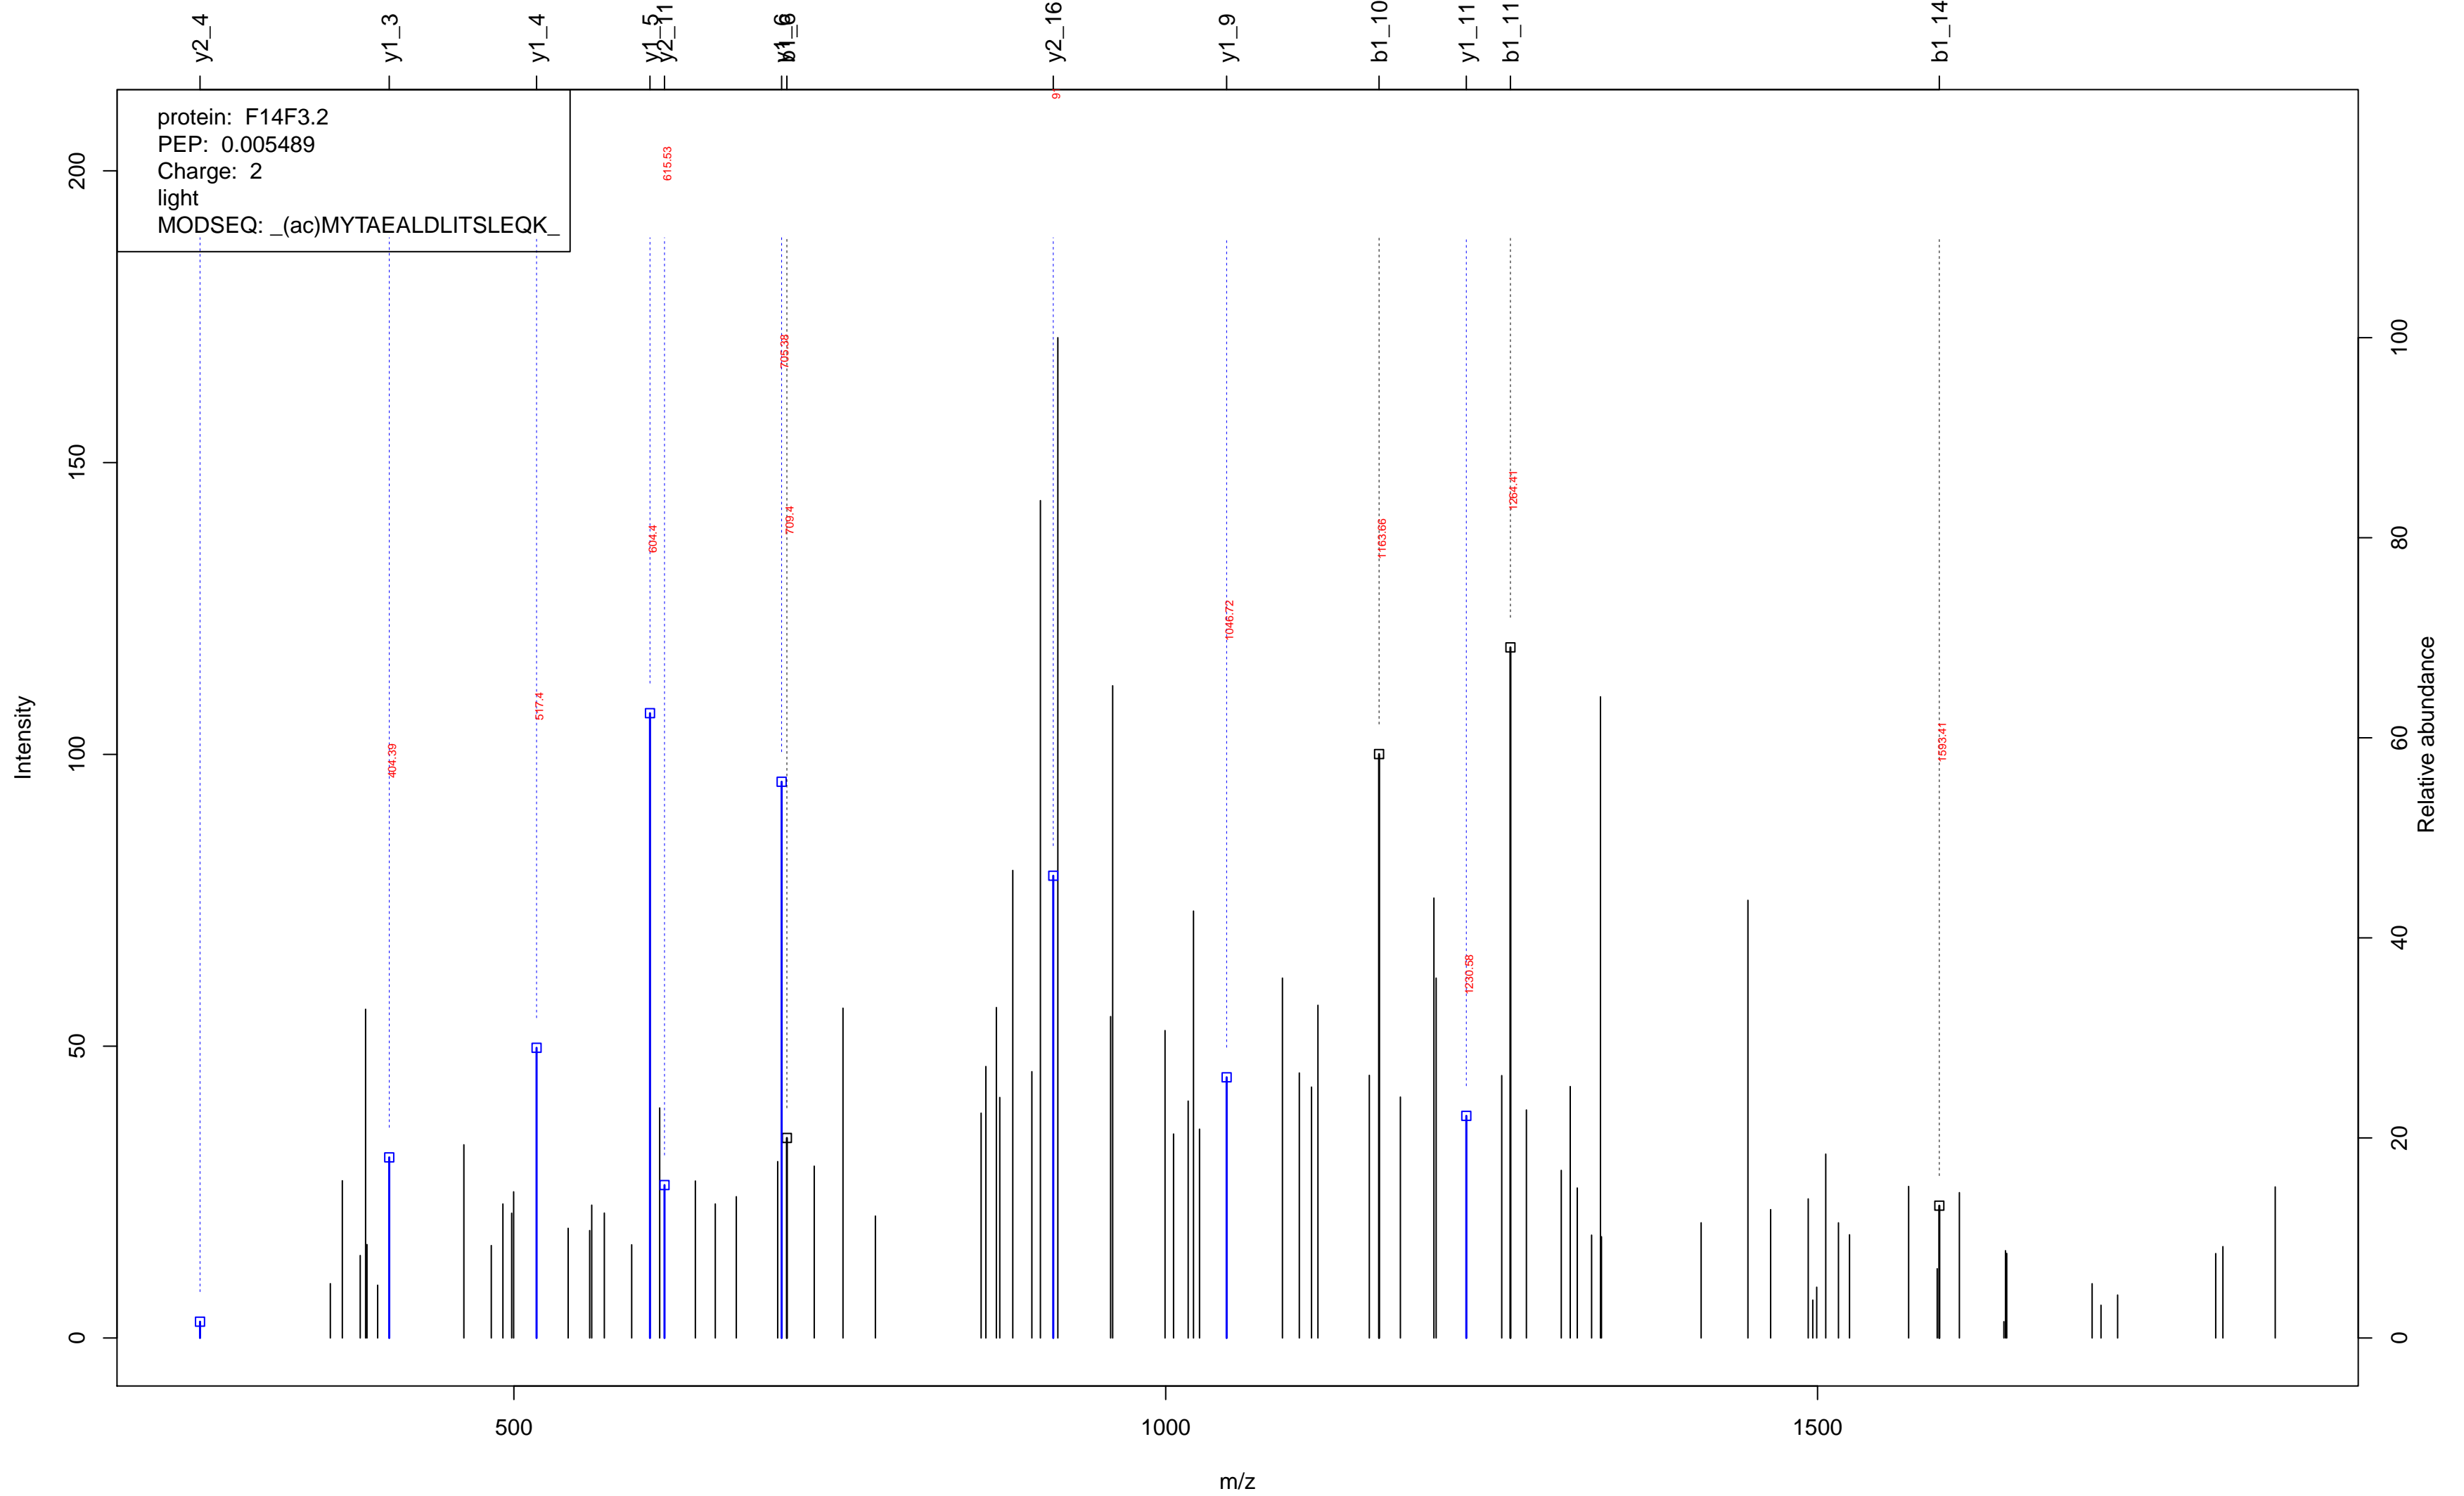

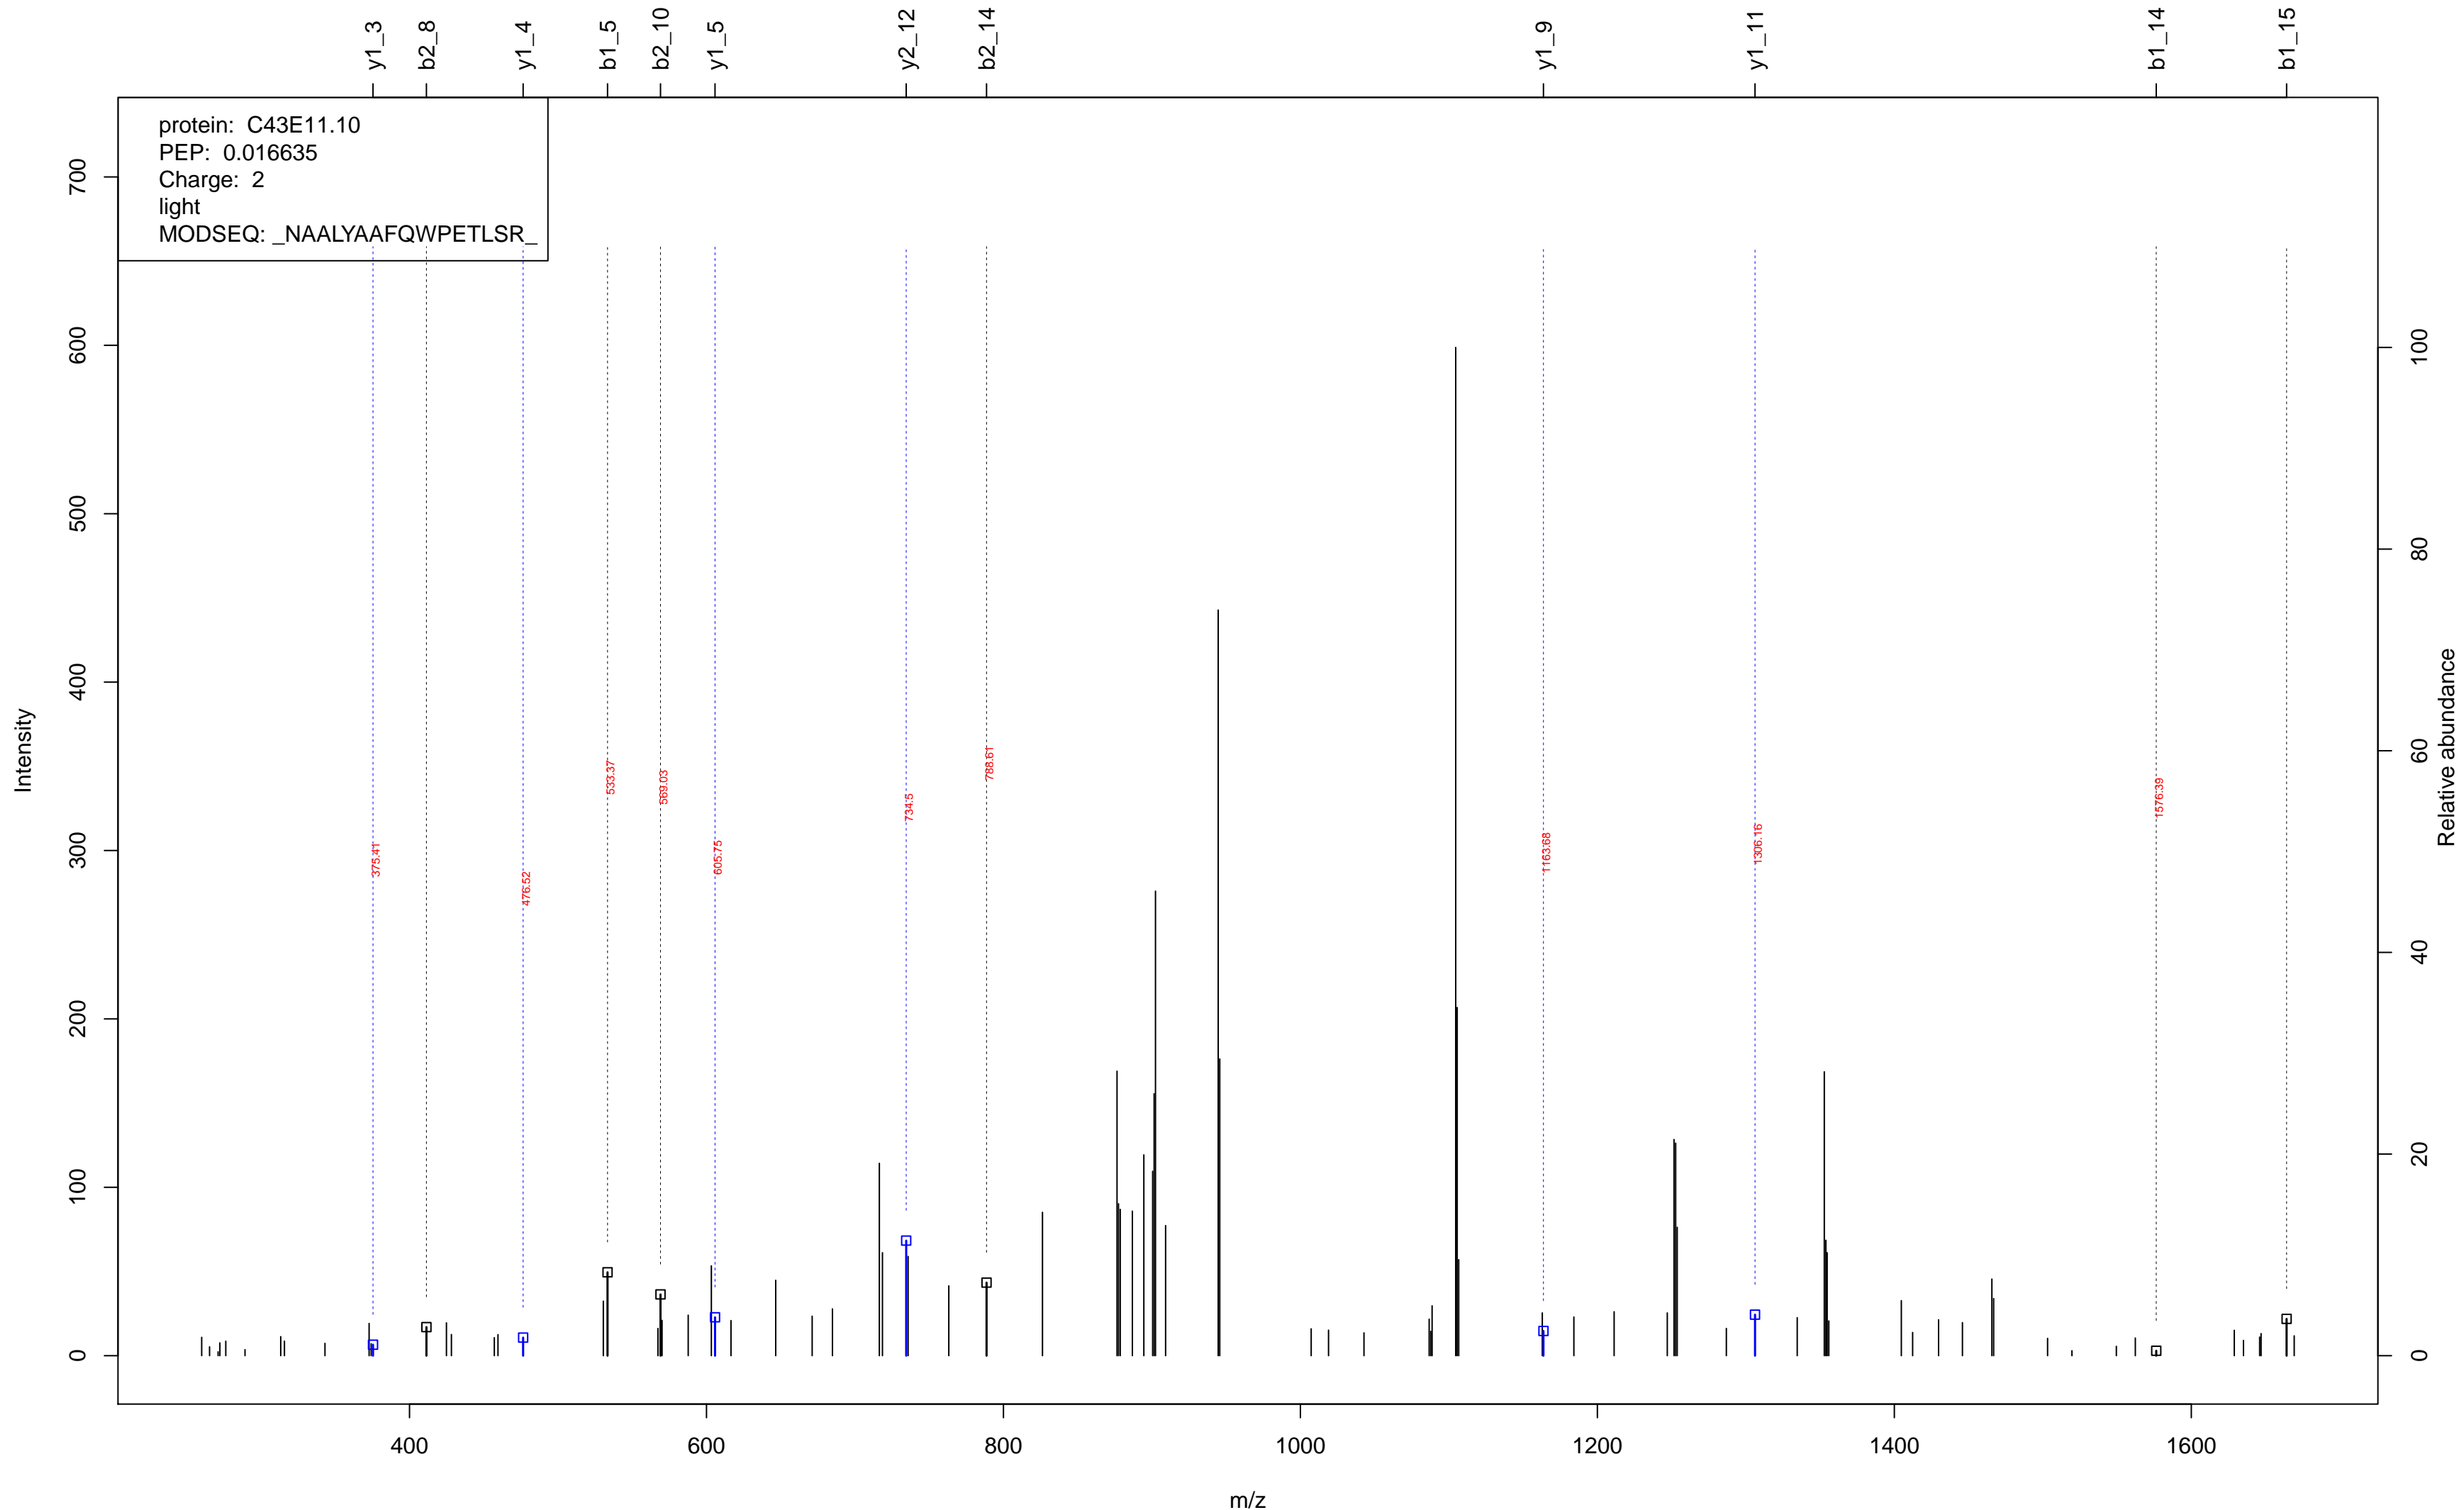

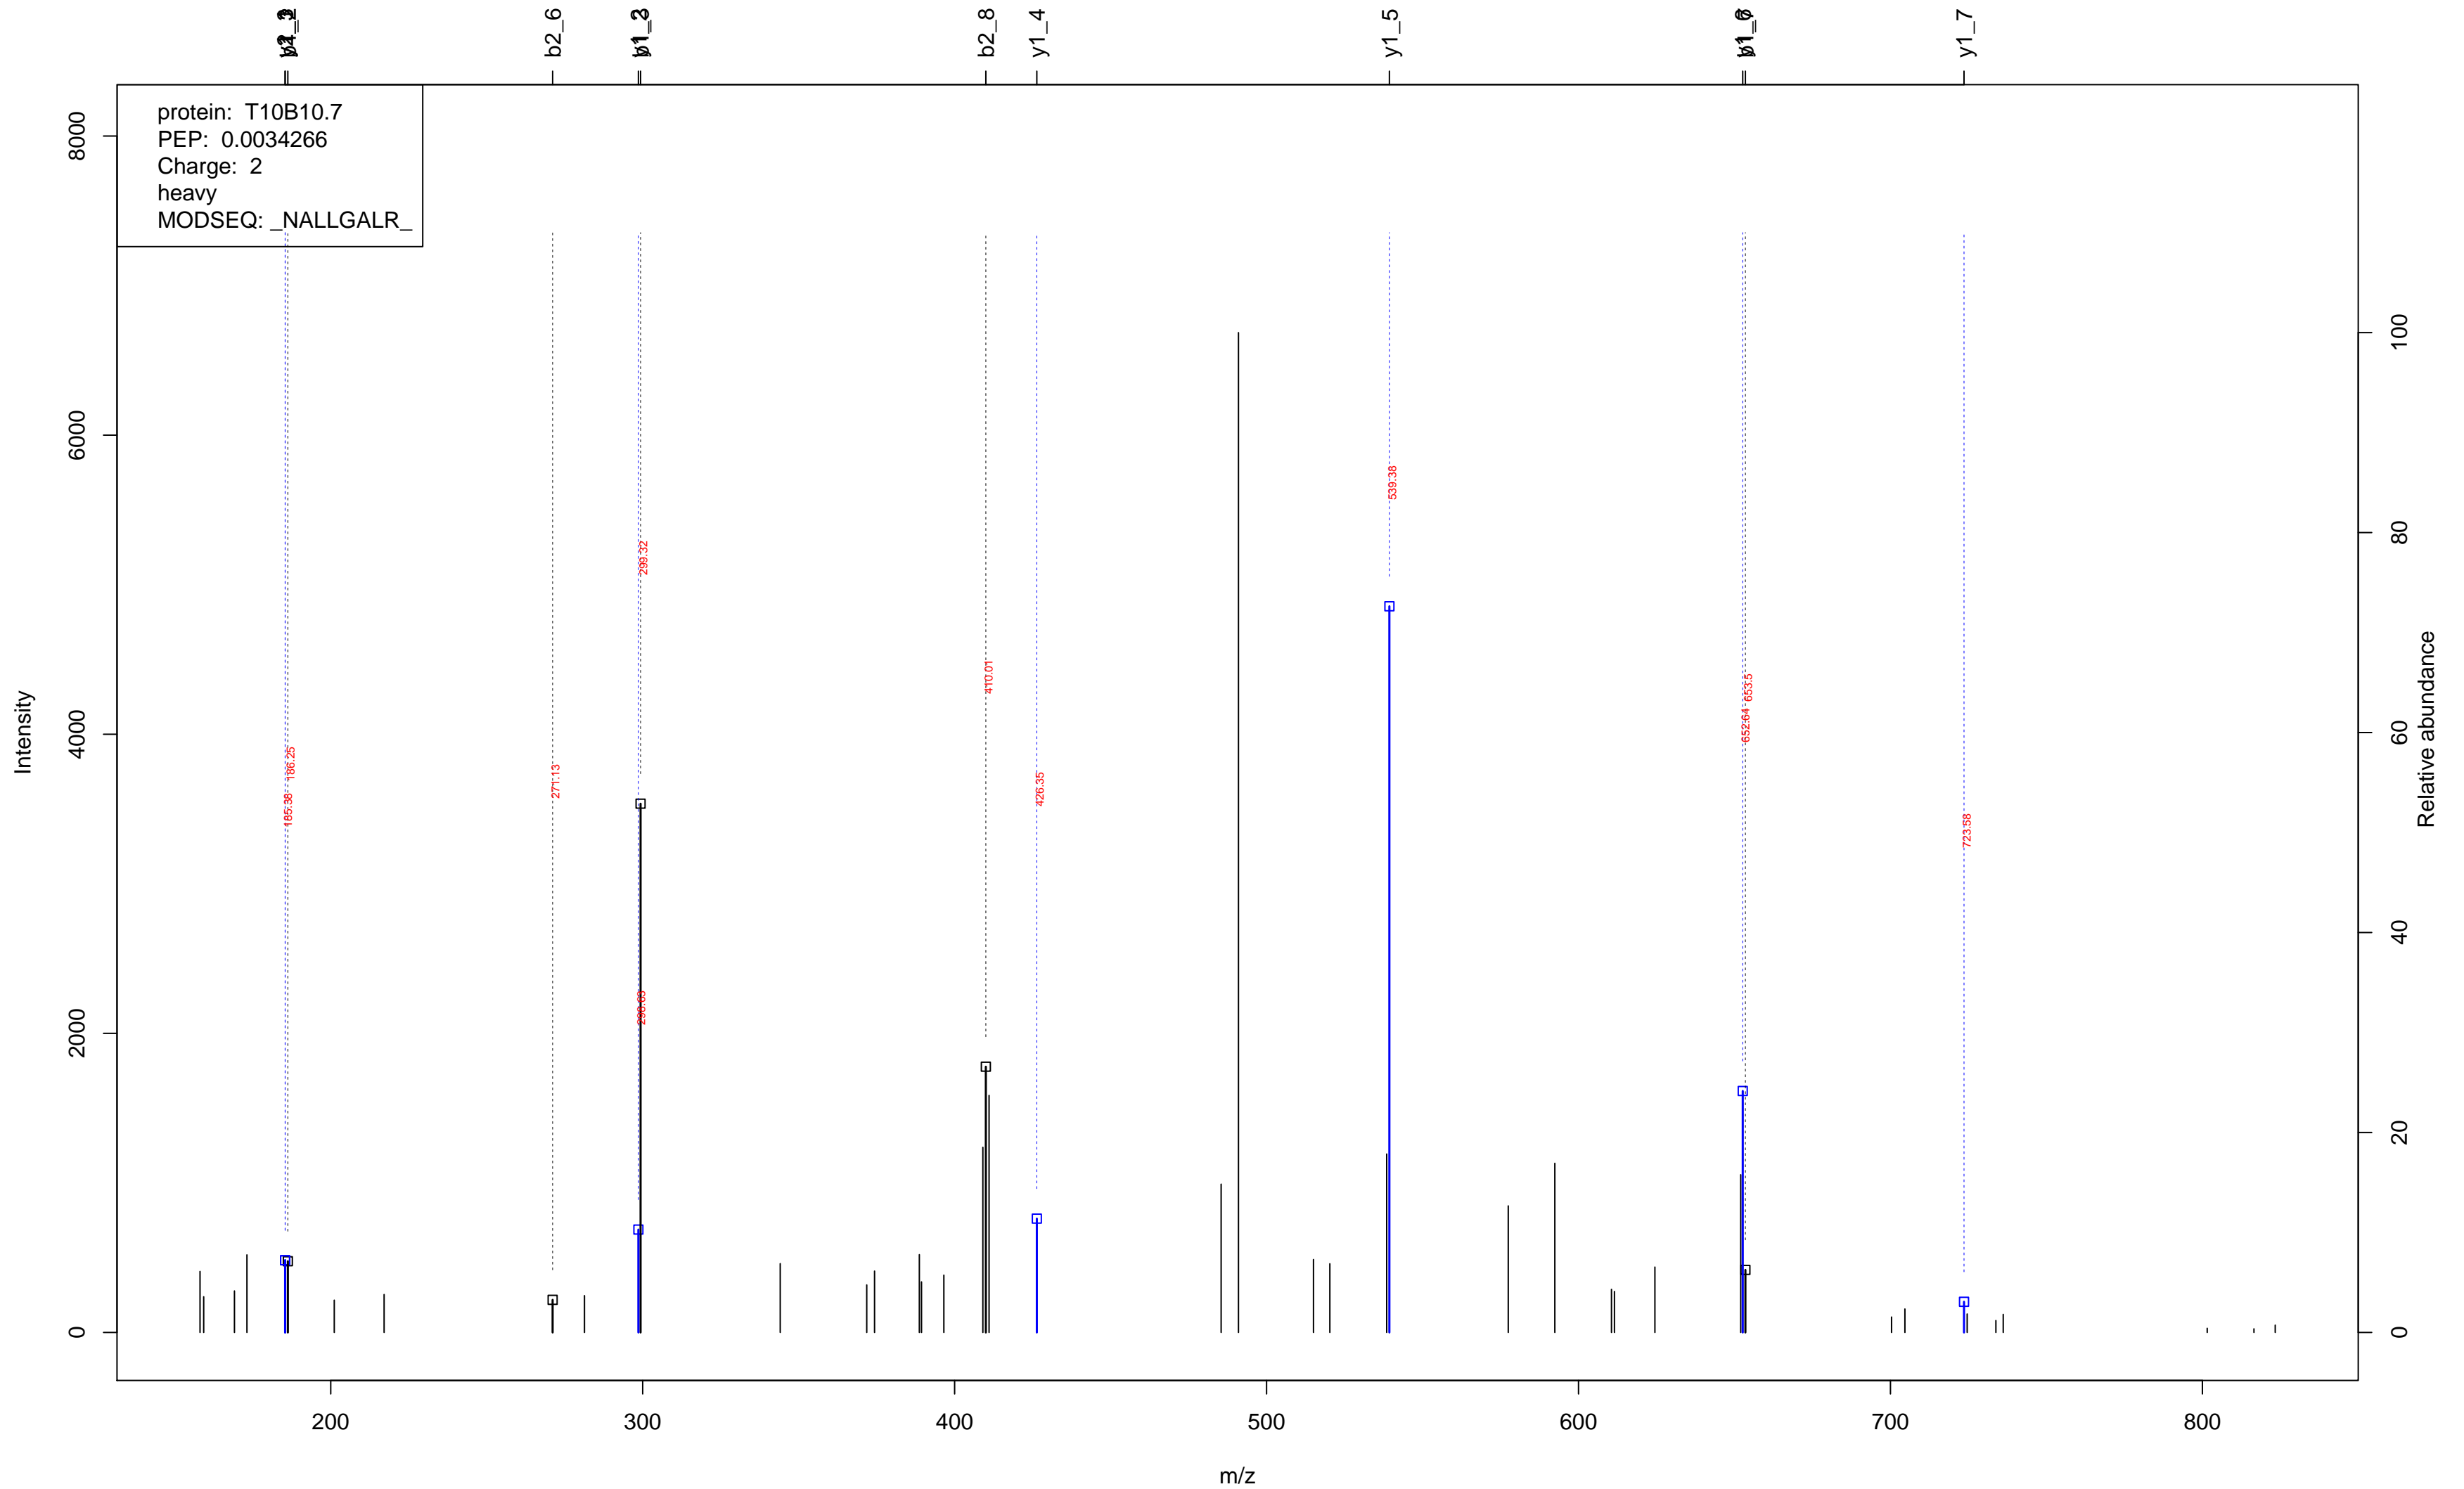



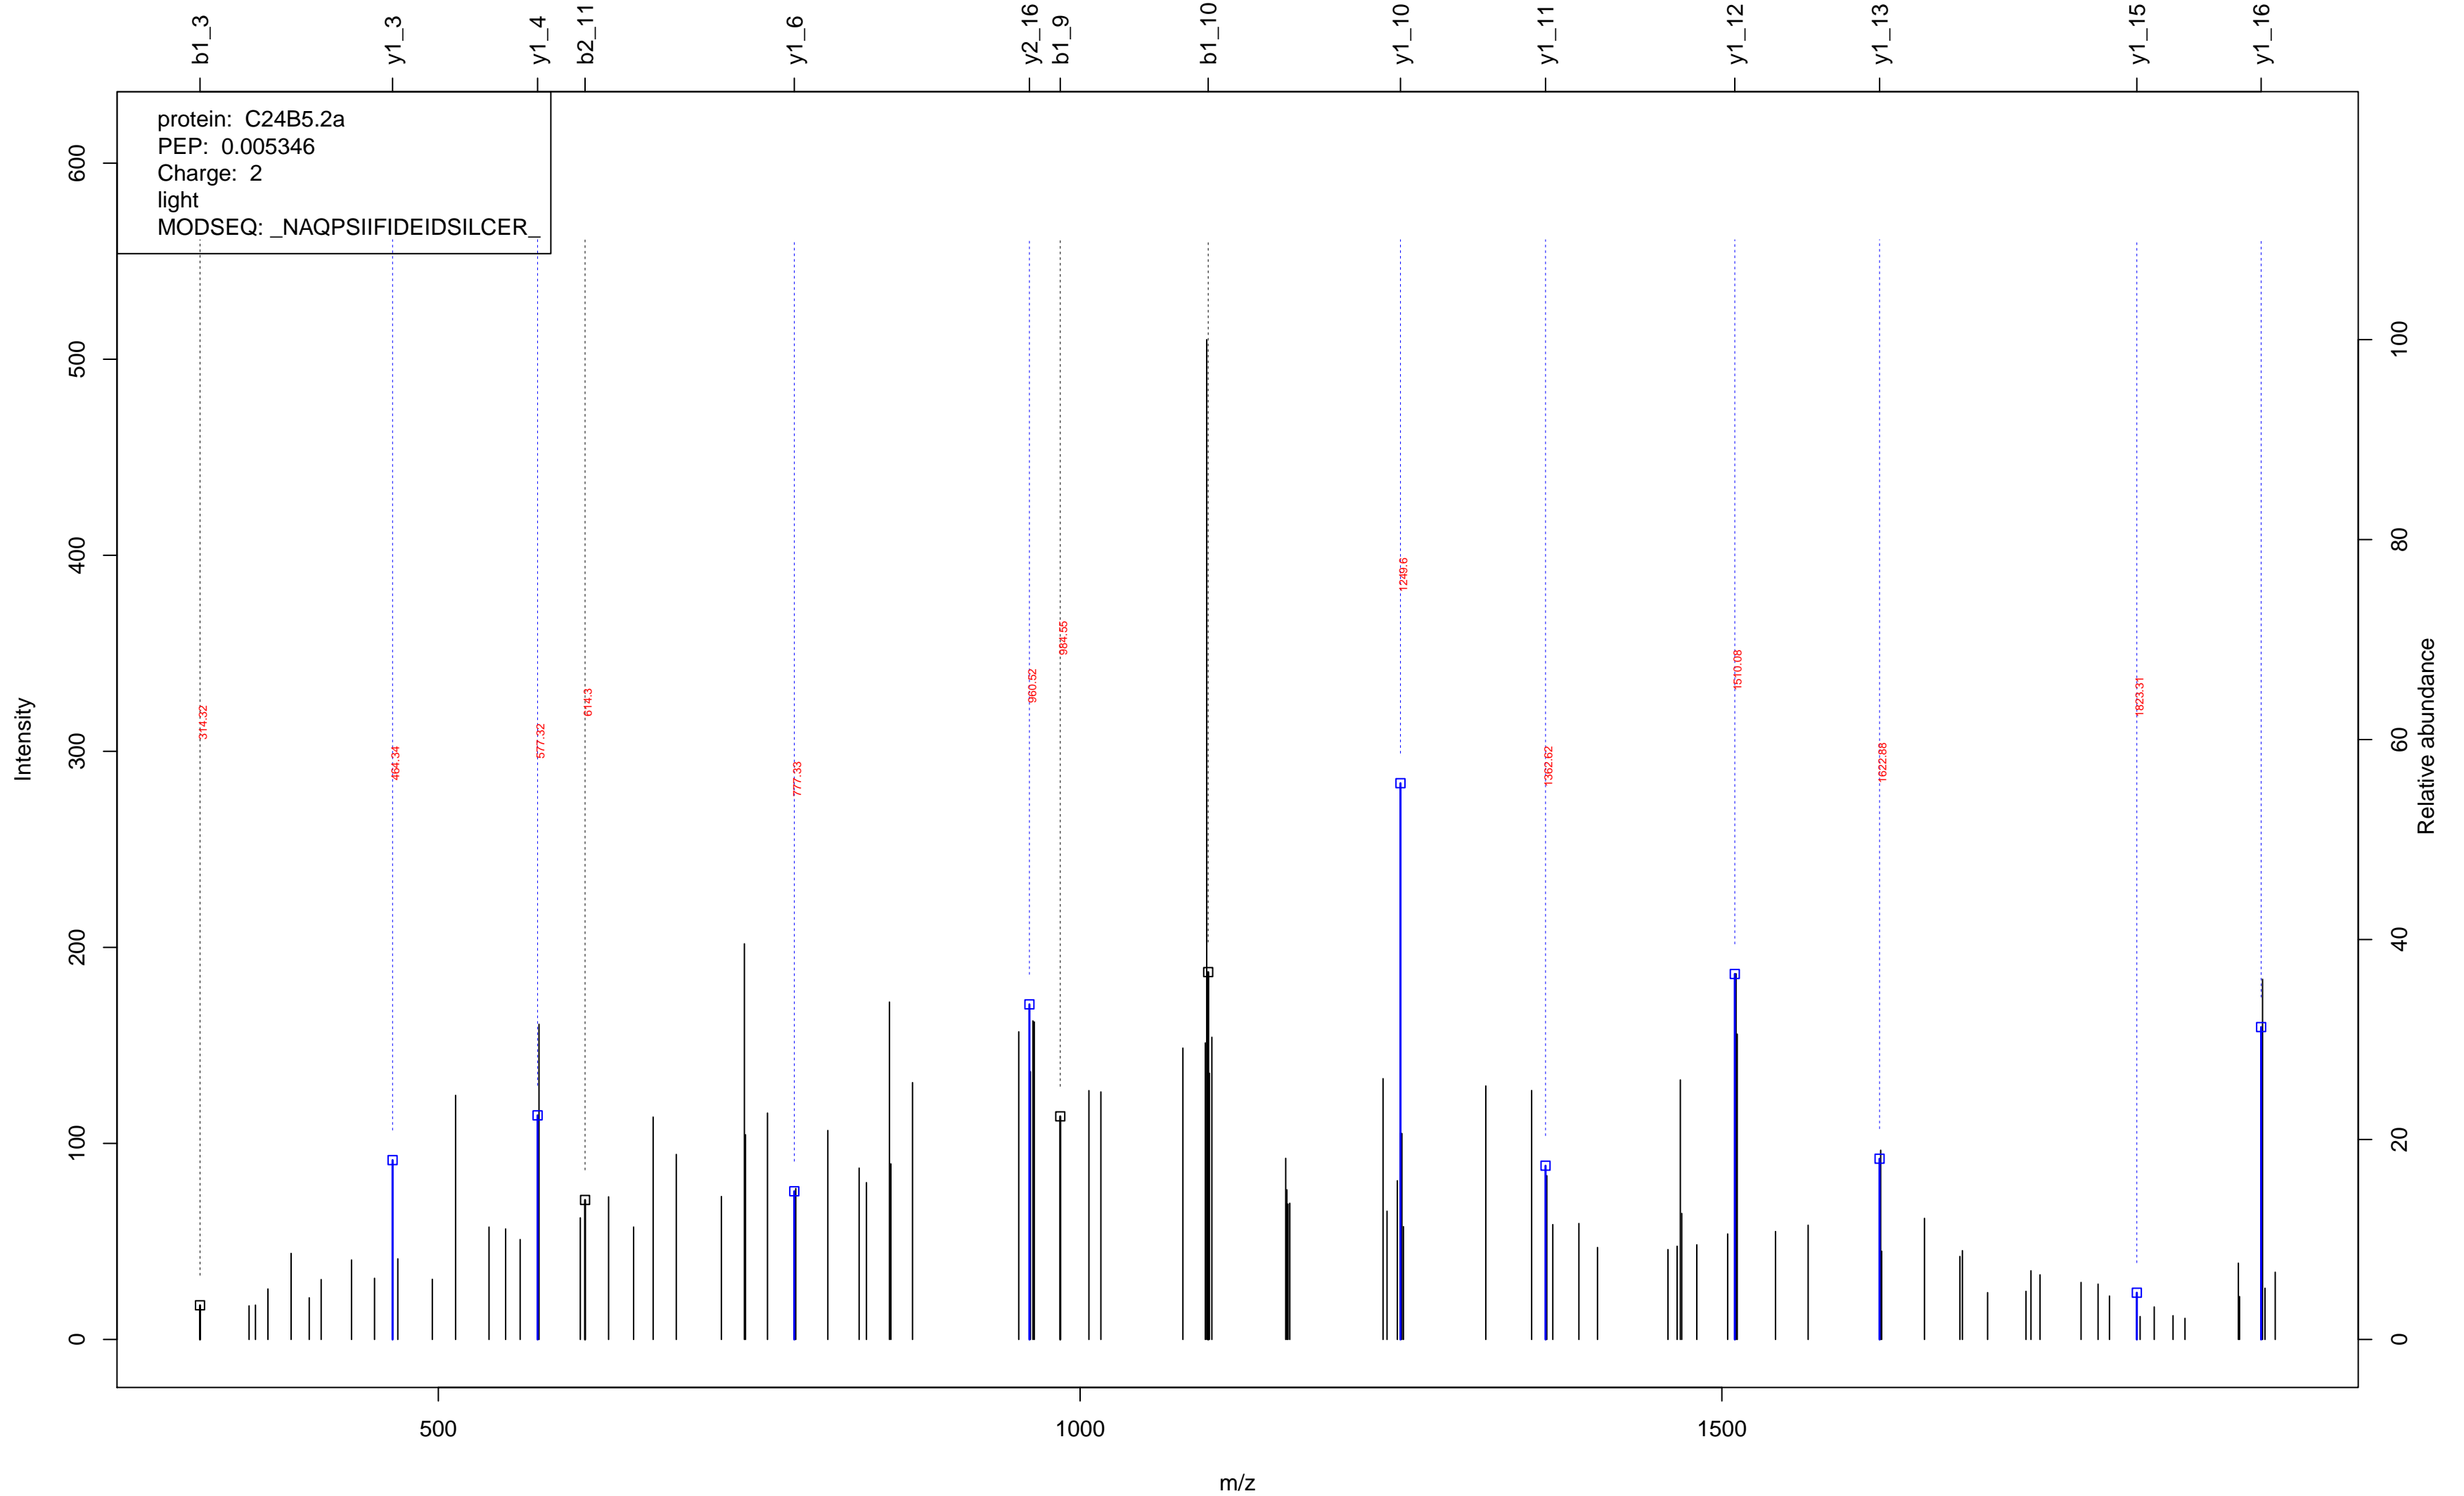

250

y1\_1

y2\_2

y1\_3

b1\_4

b2\_9

y1\_5

b1\_7

b1\_8

y1\_8

protein: R151.8  
PEP: 0.016488  
Charge: 2  
light  
MODSEQ: \_NDAFLSSLR\_

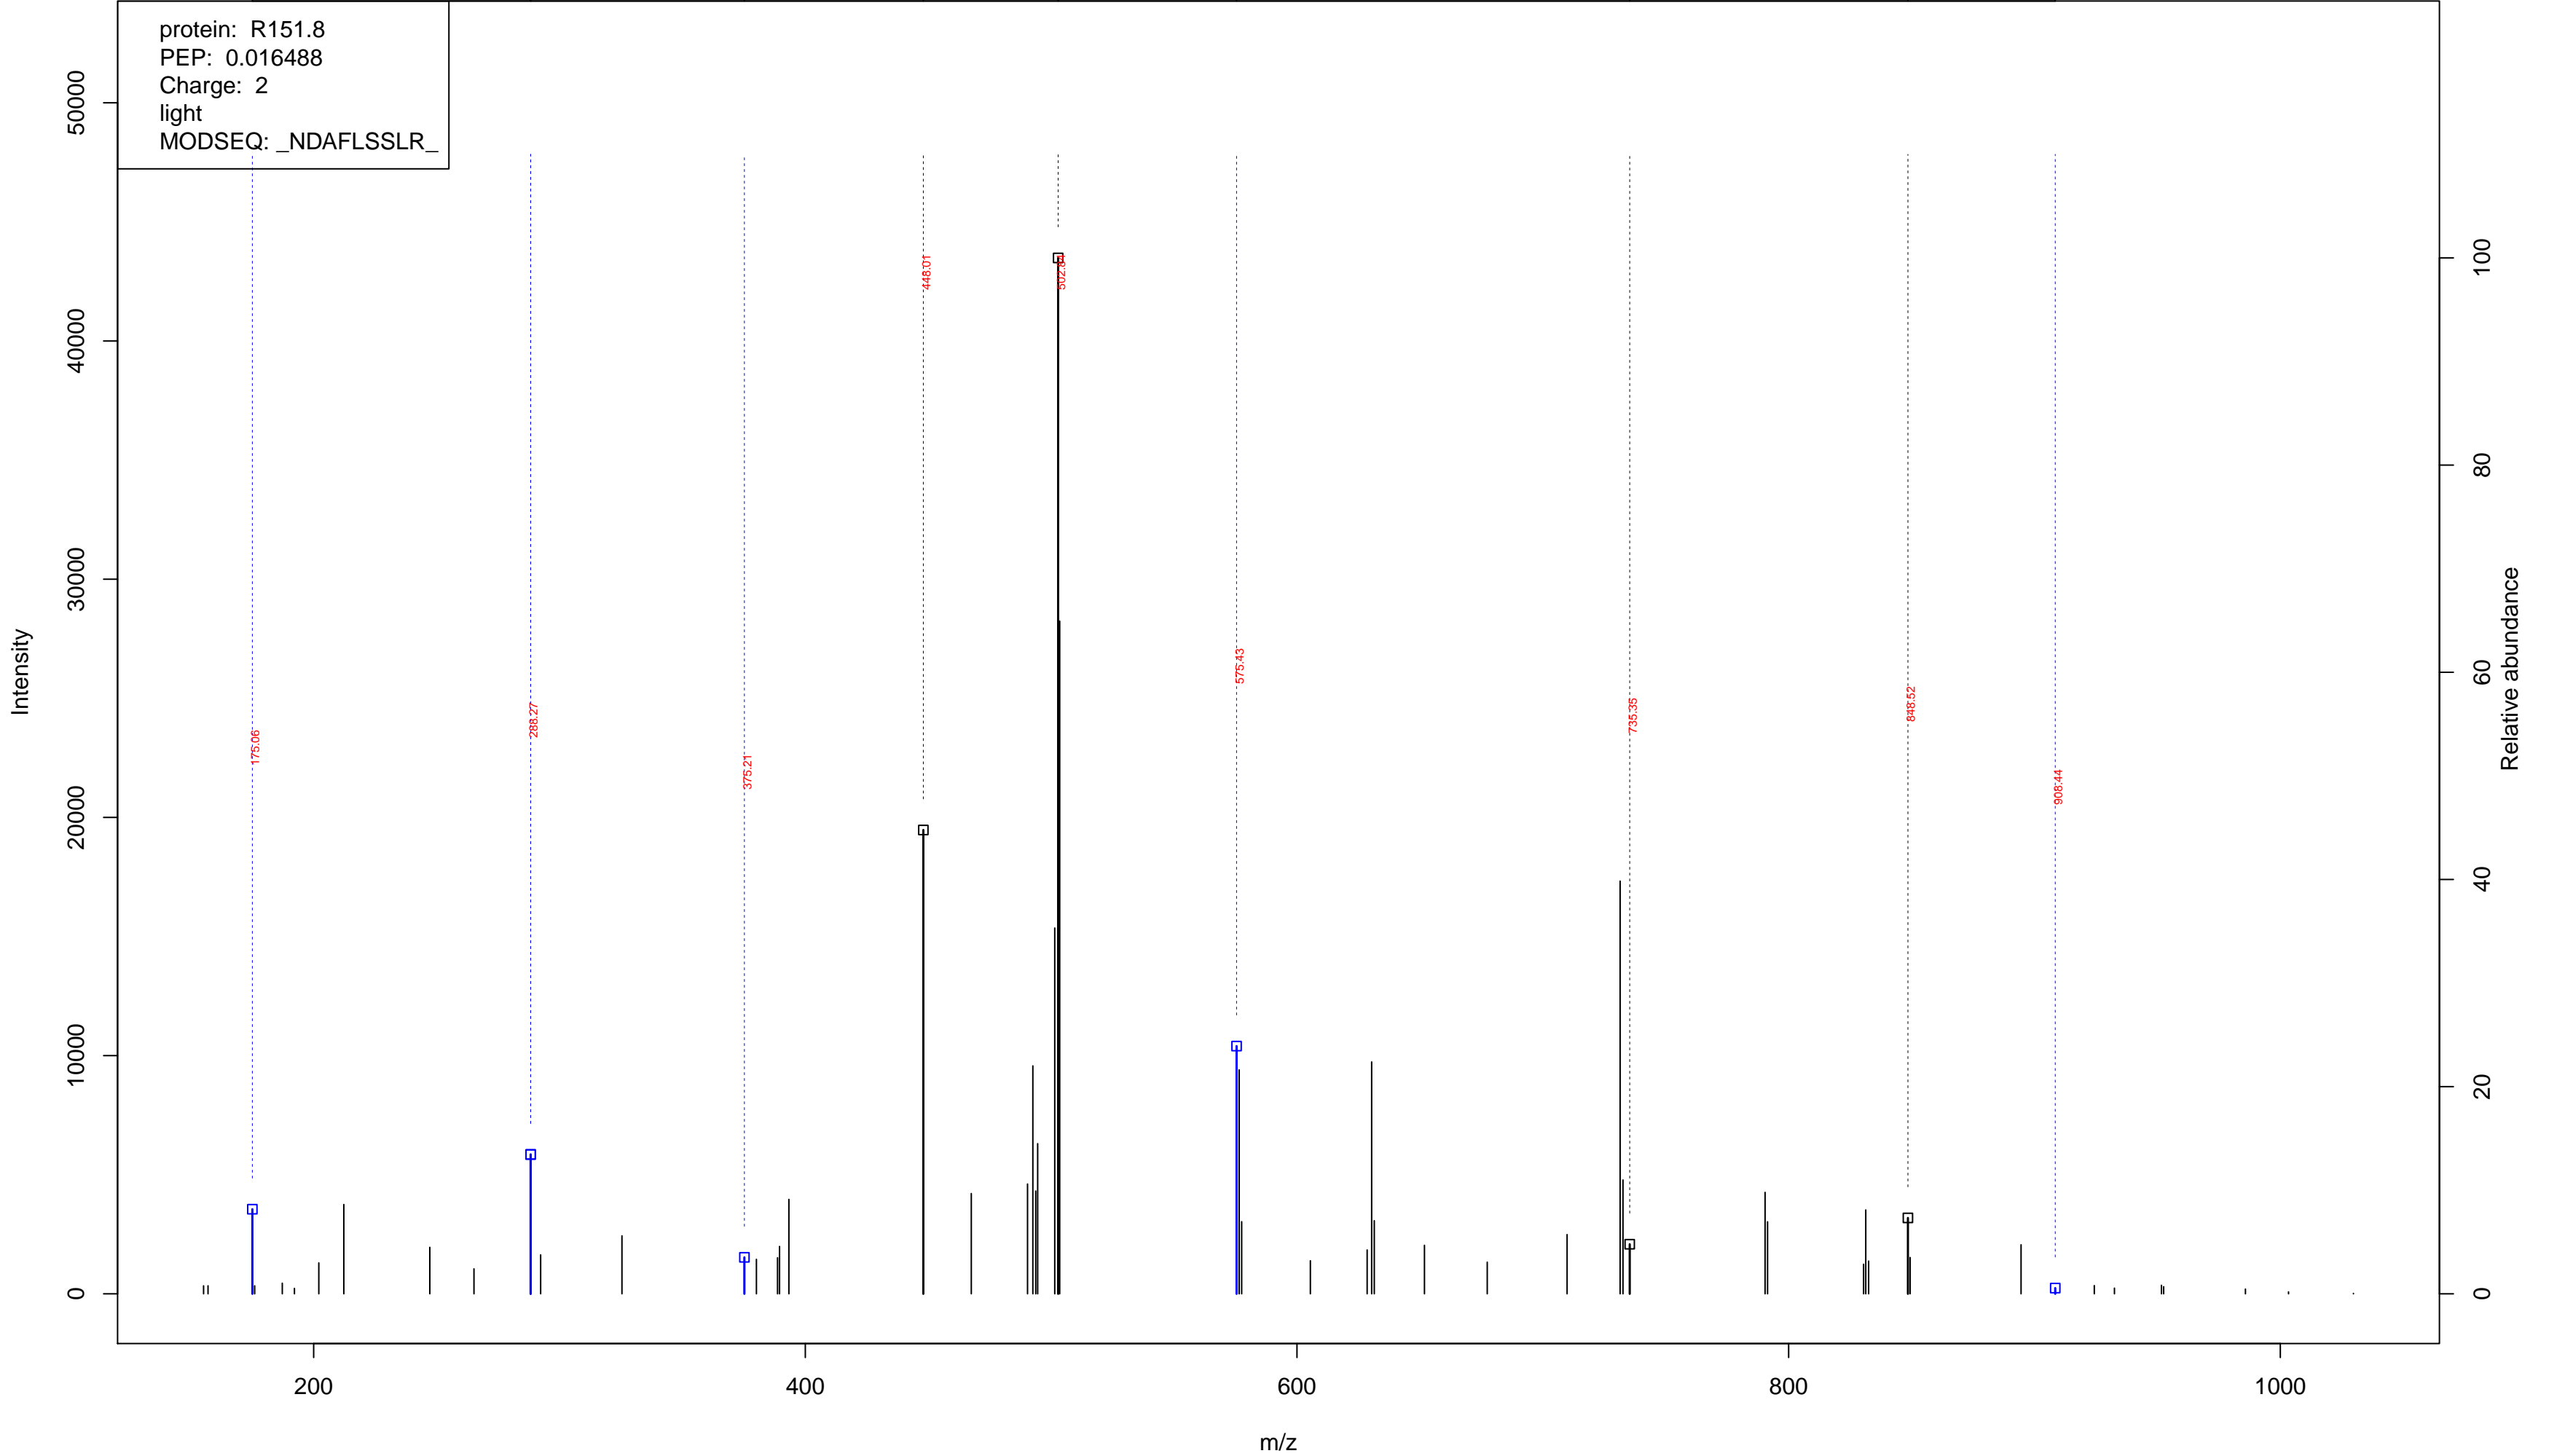

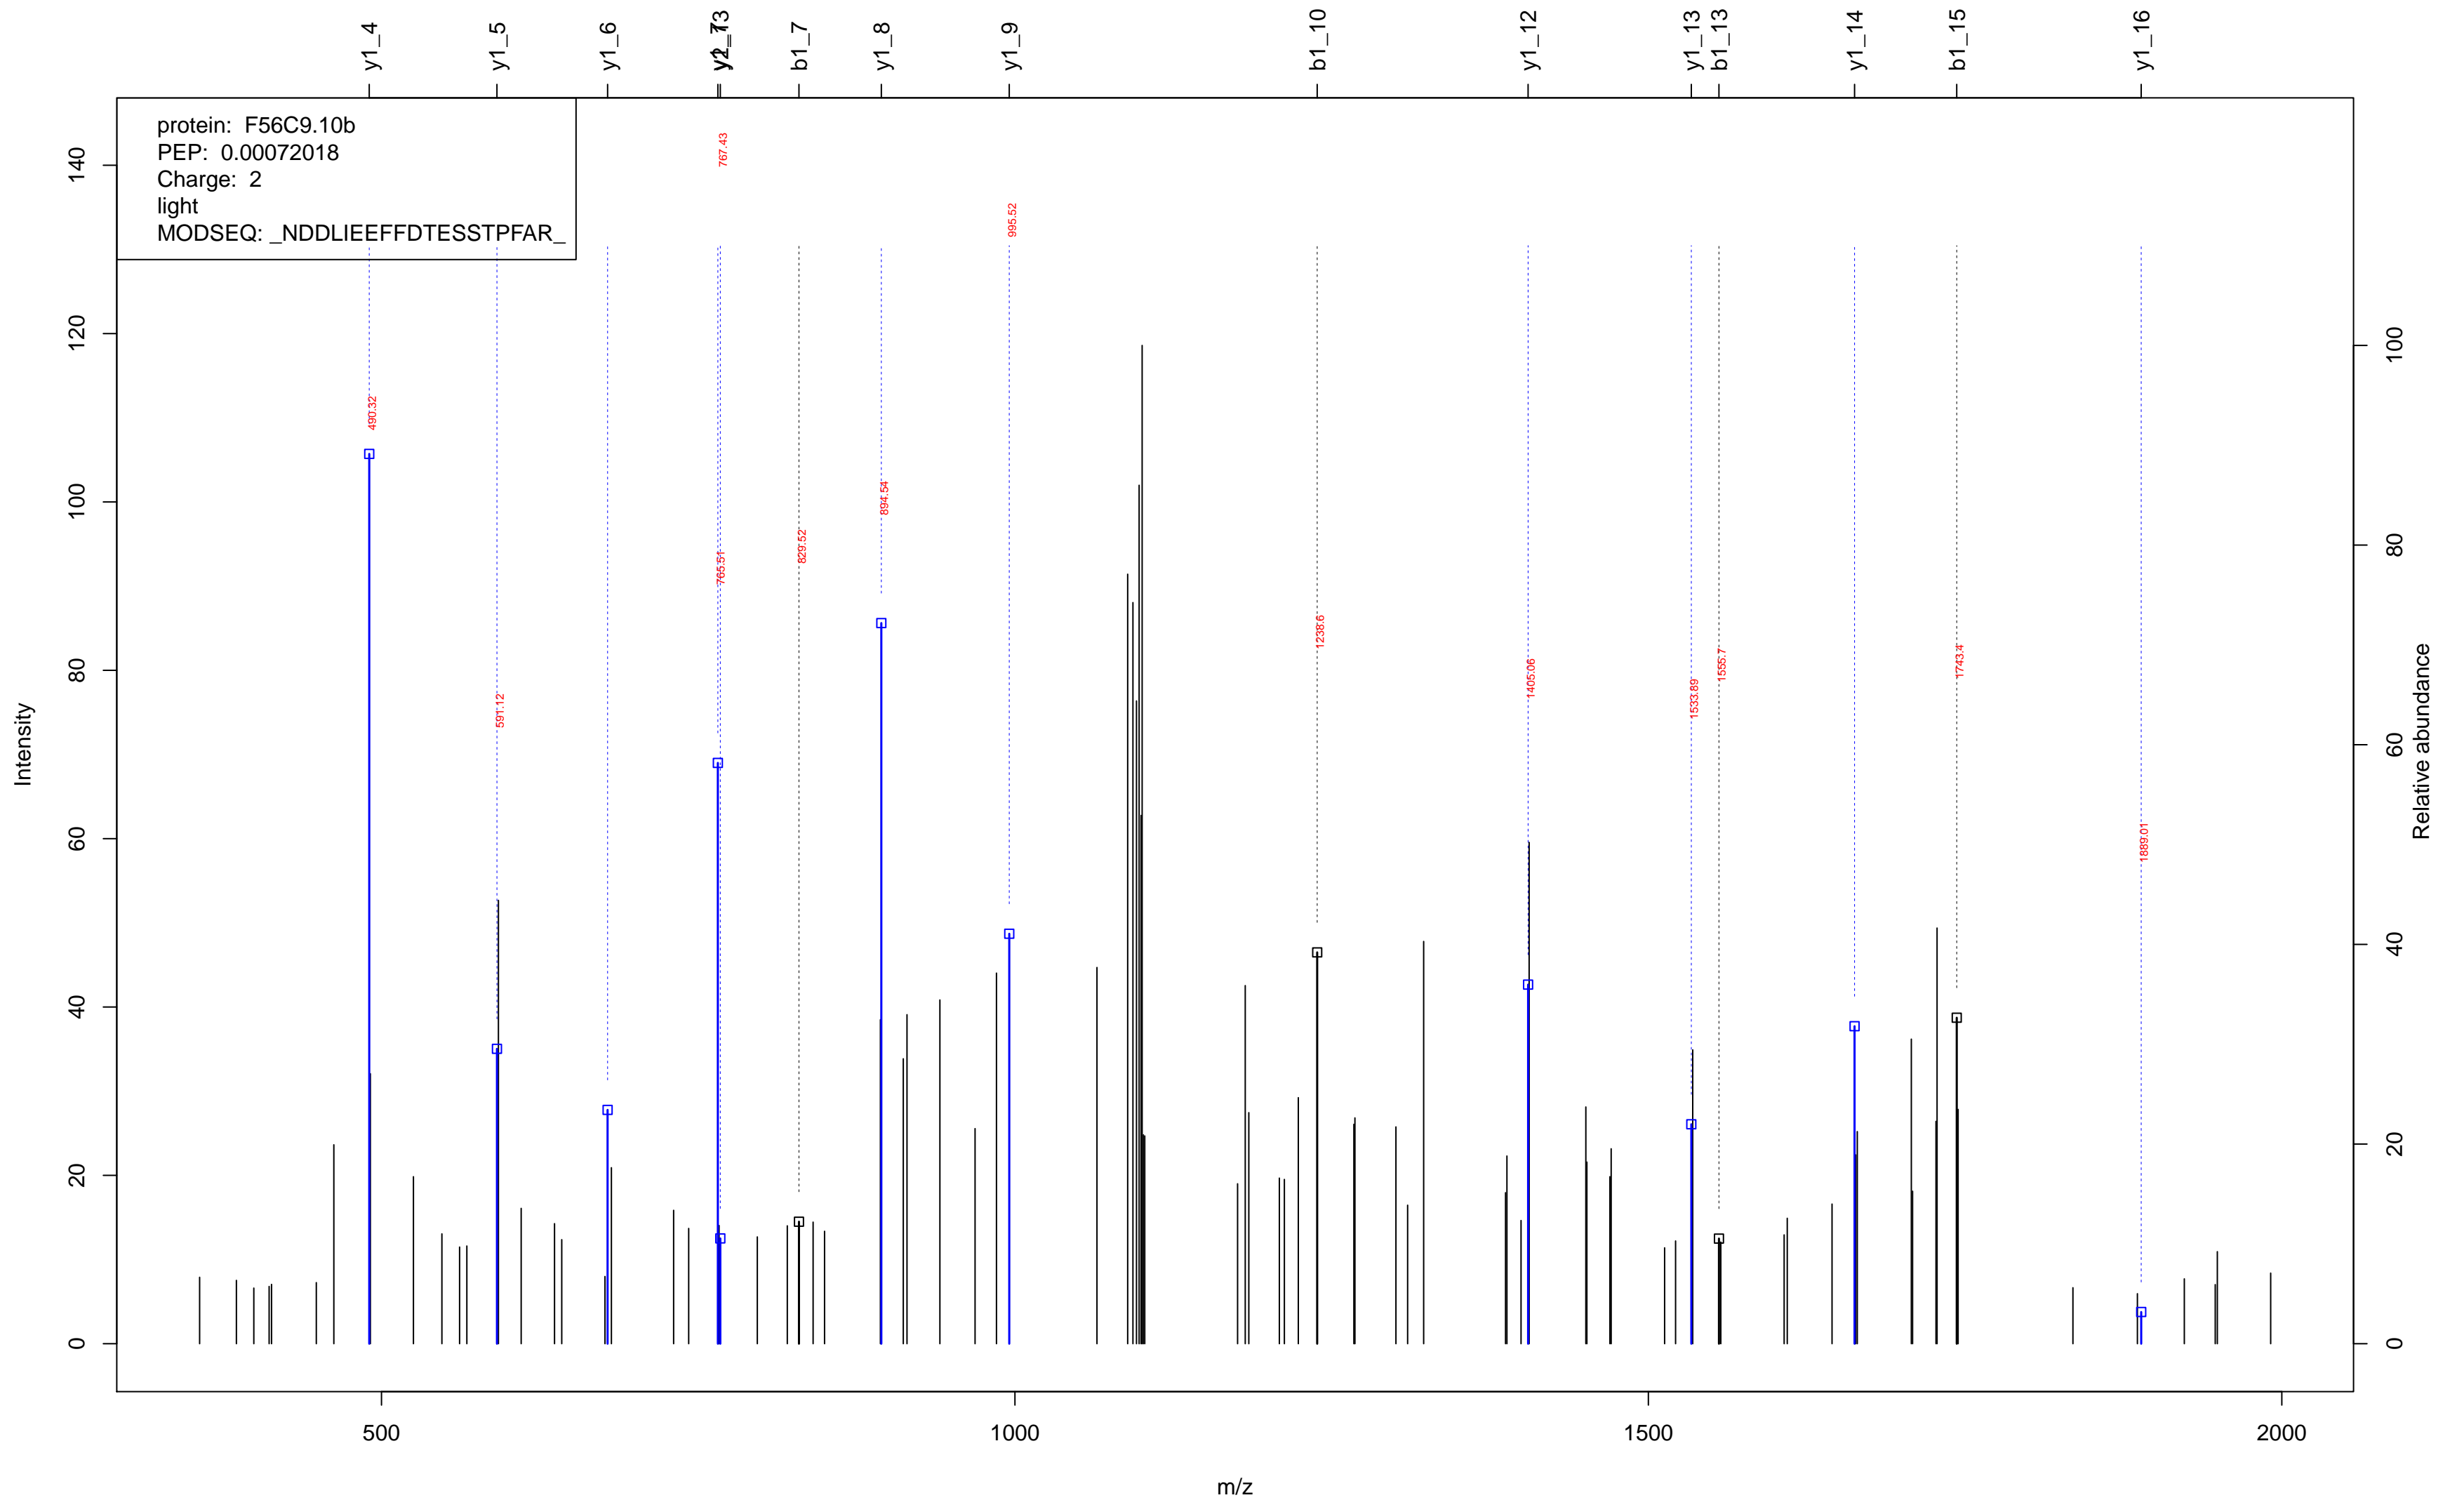

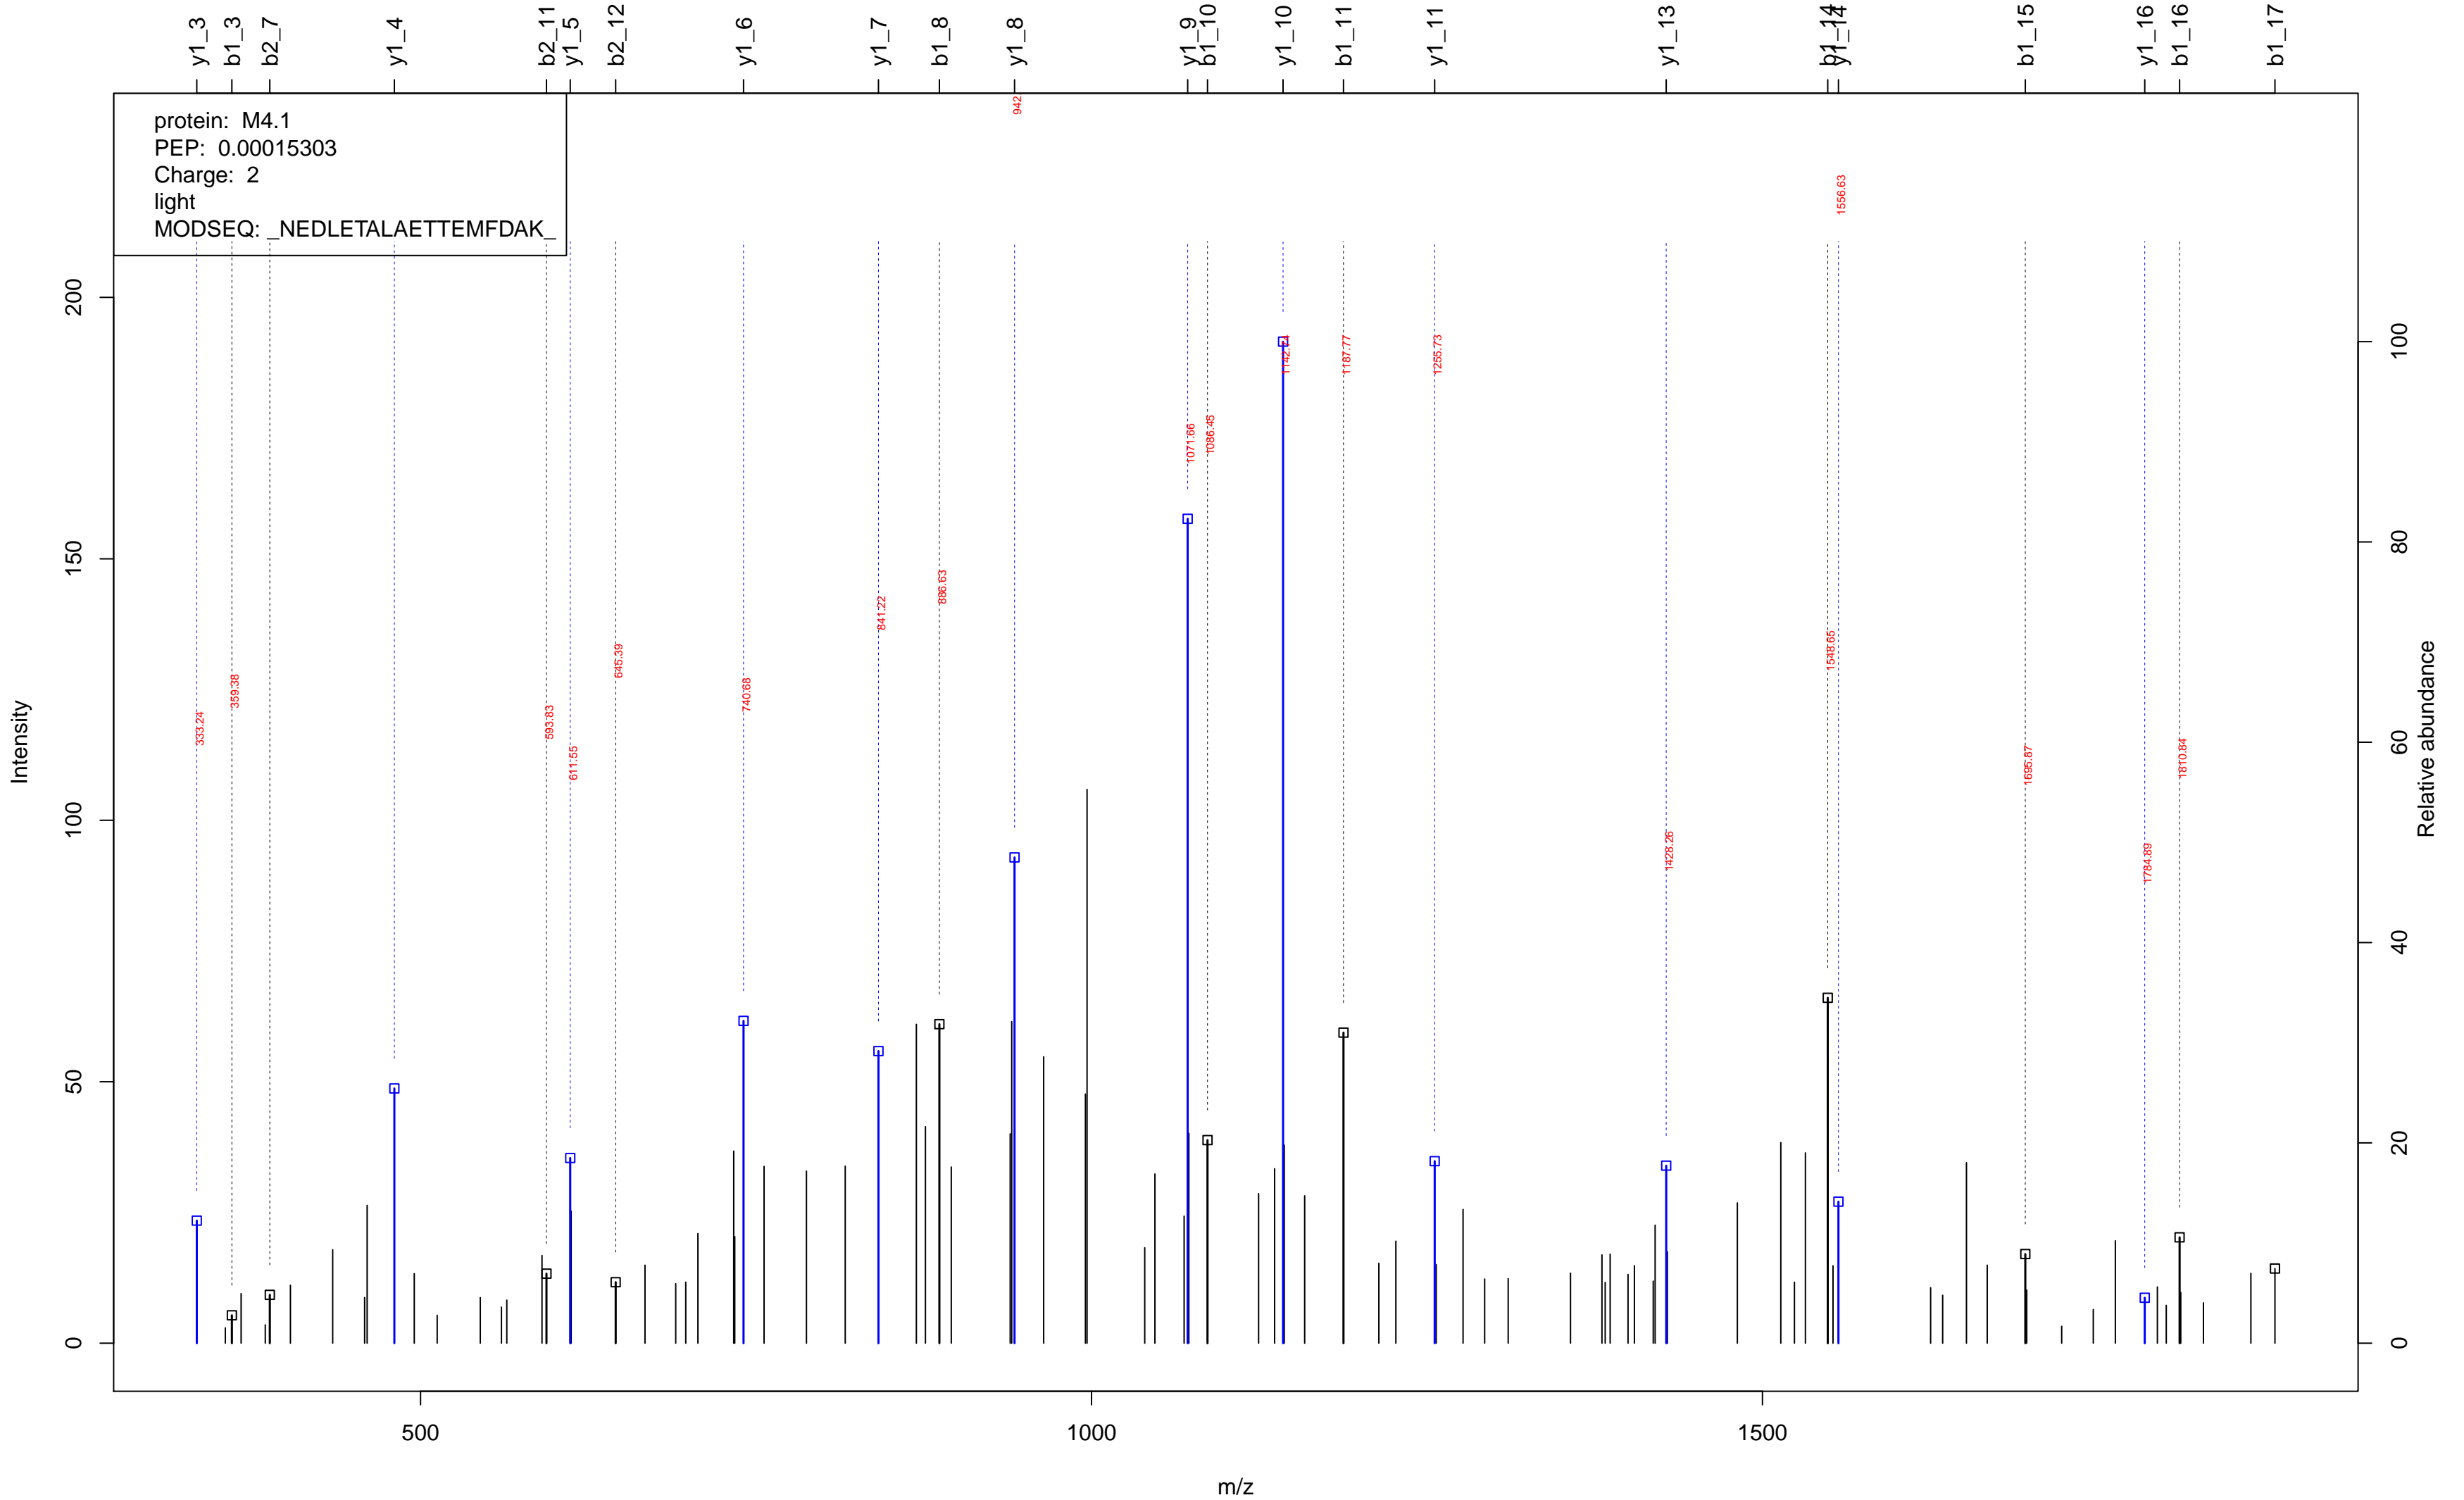

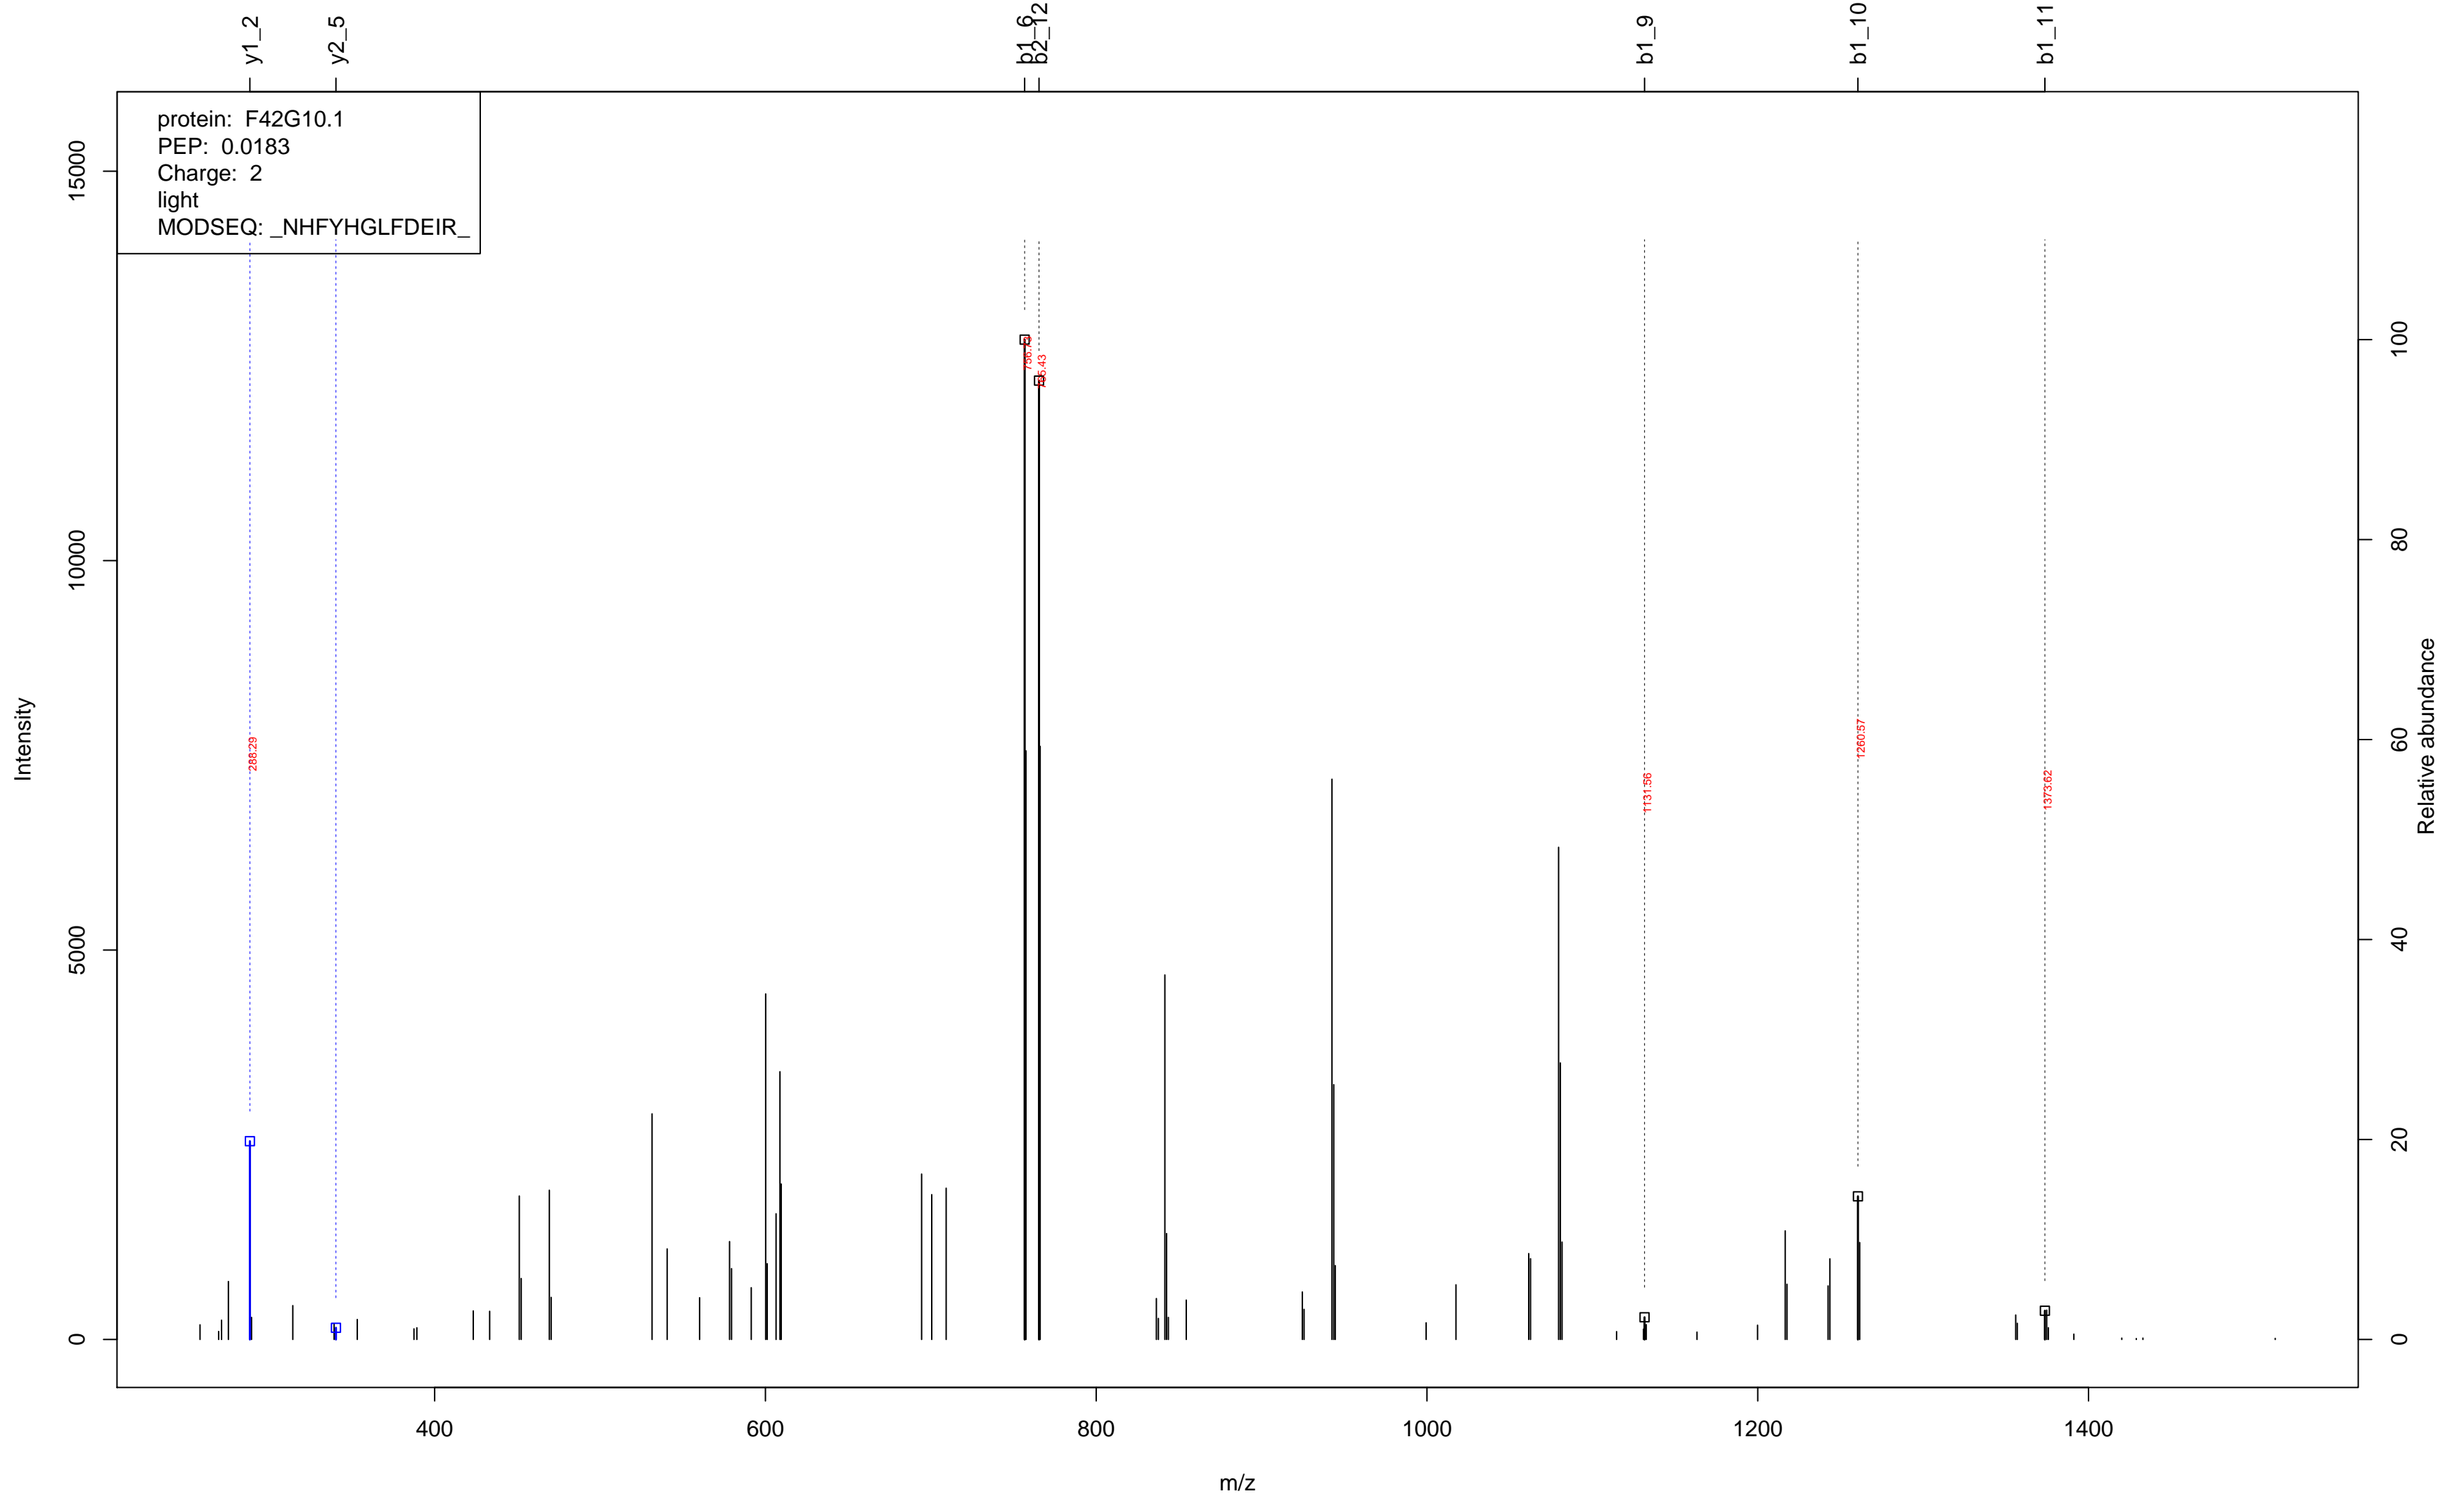

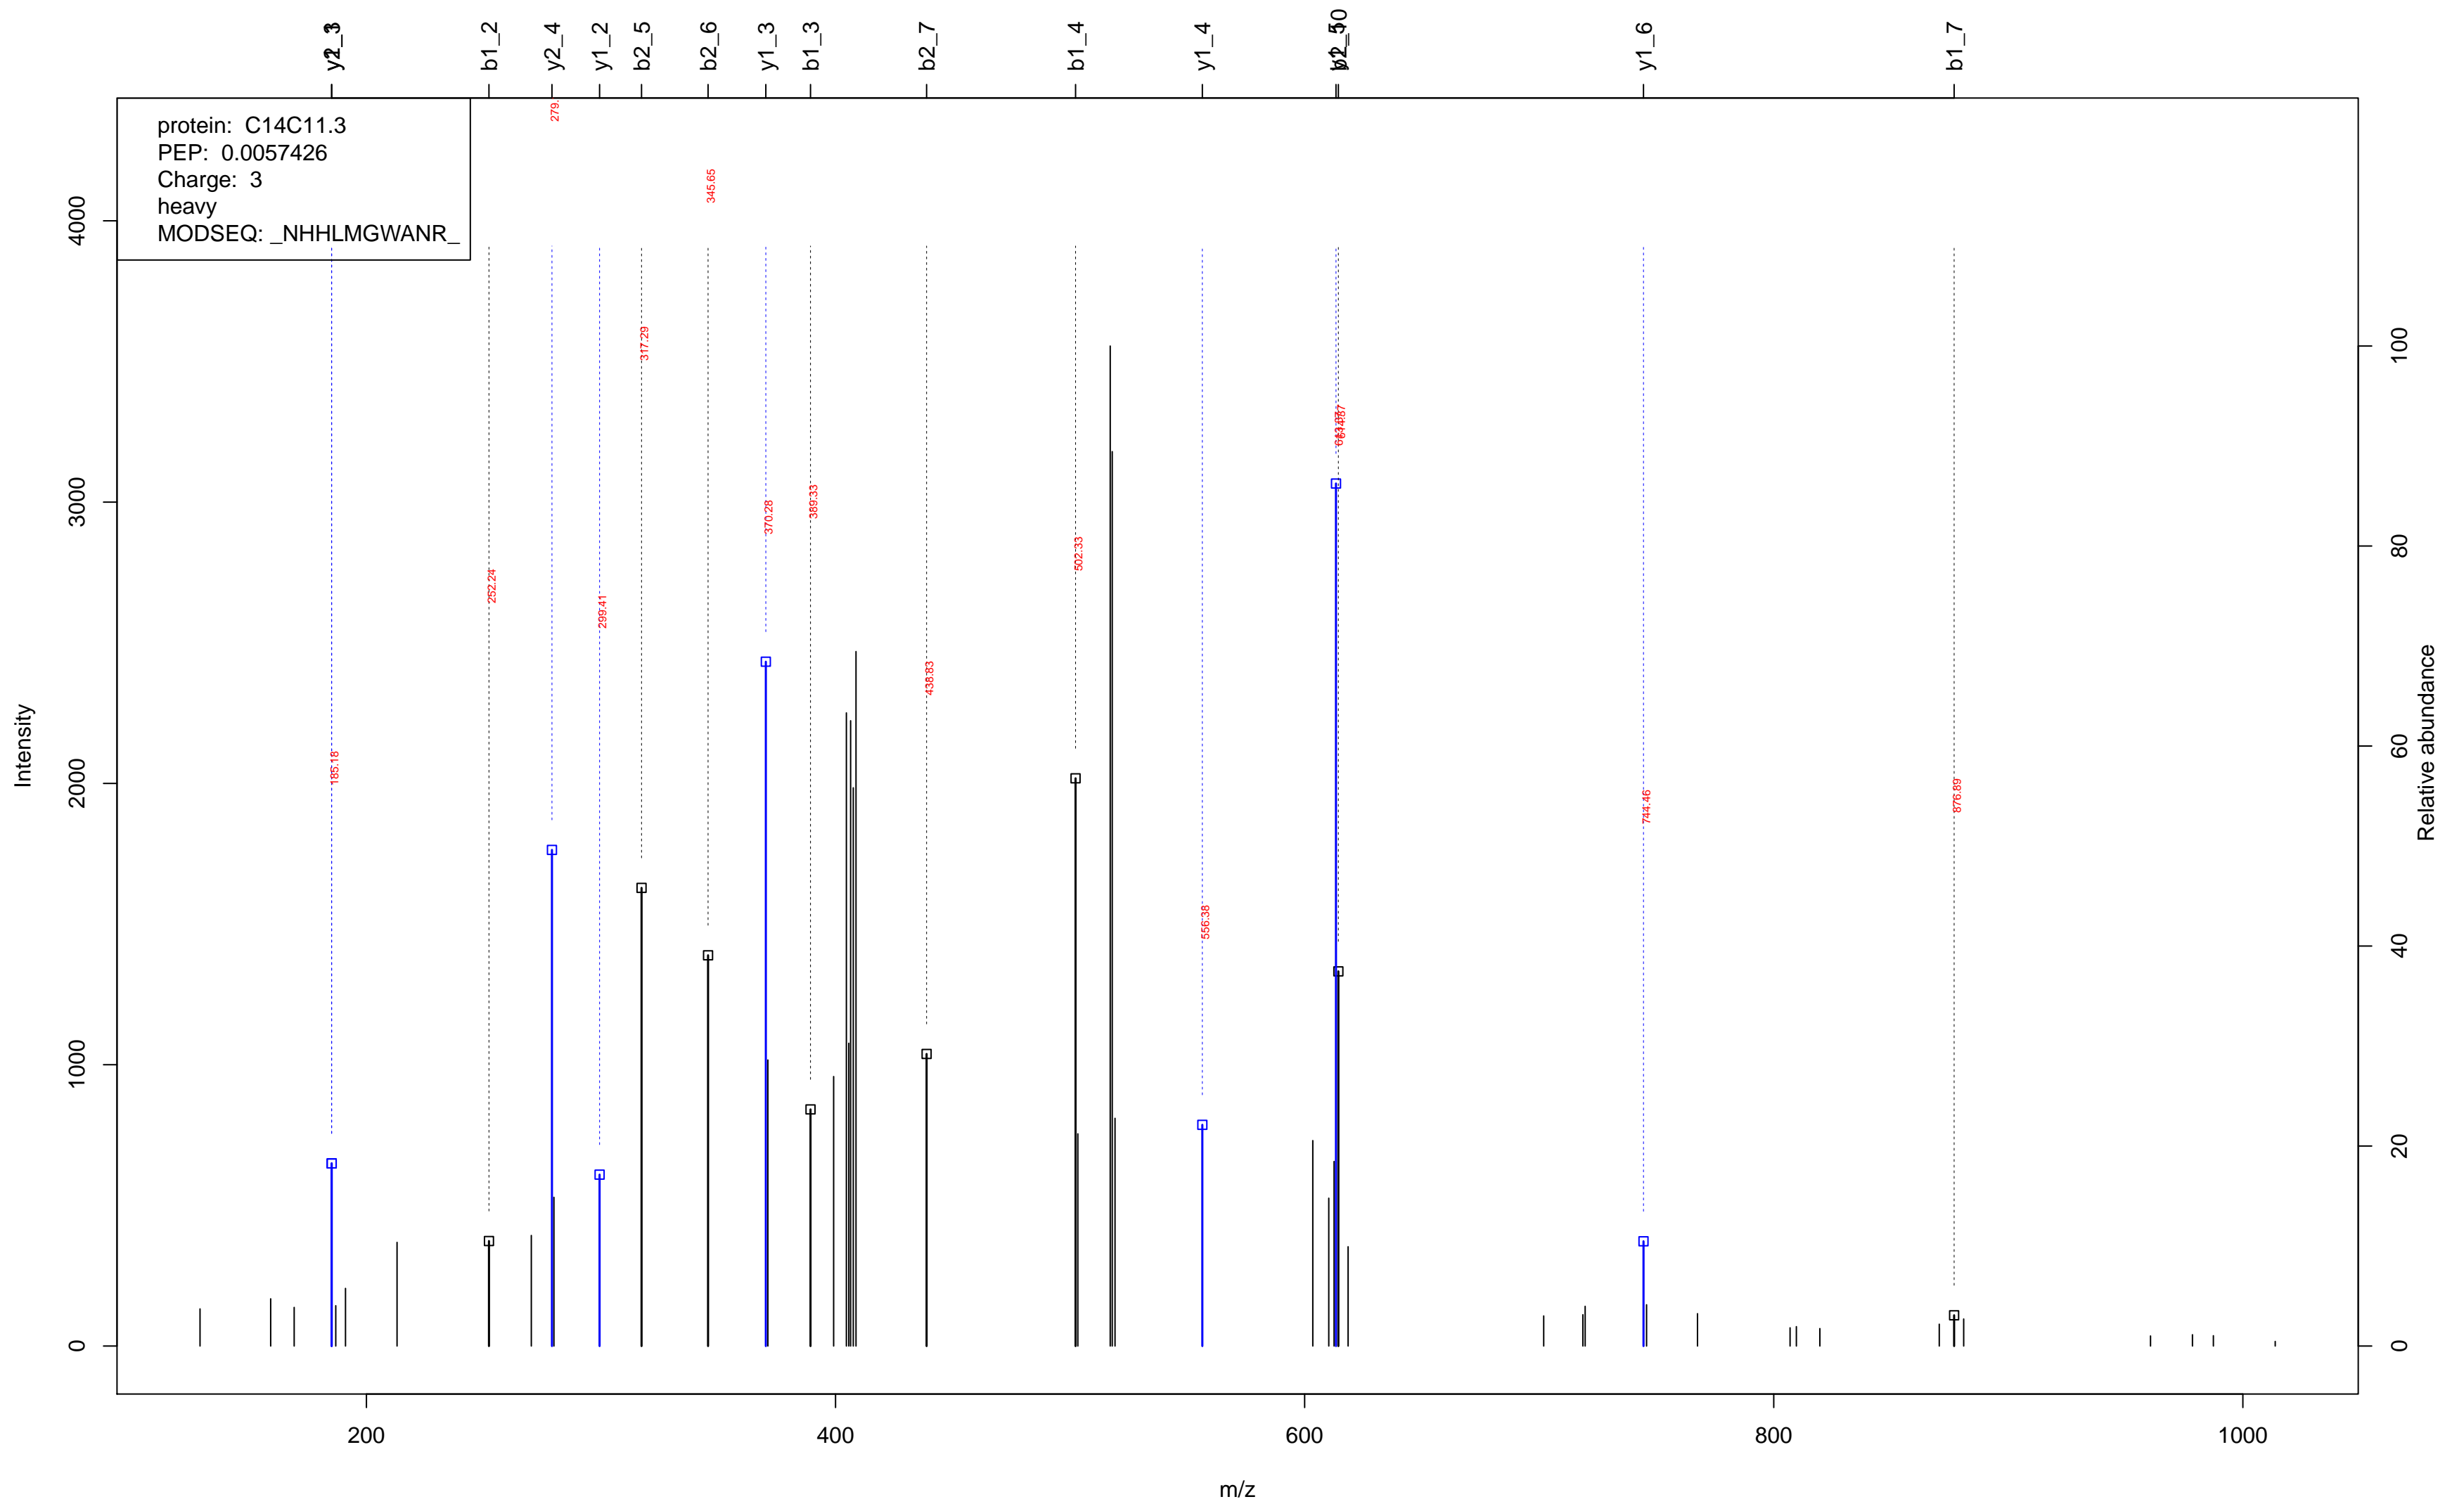

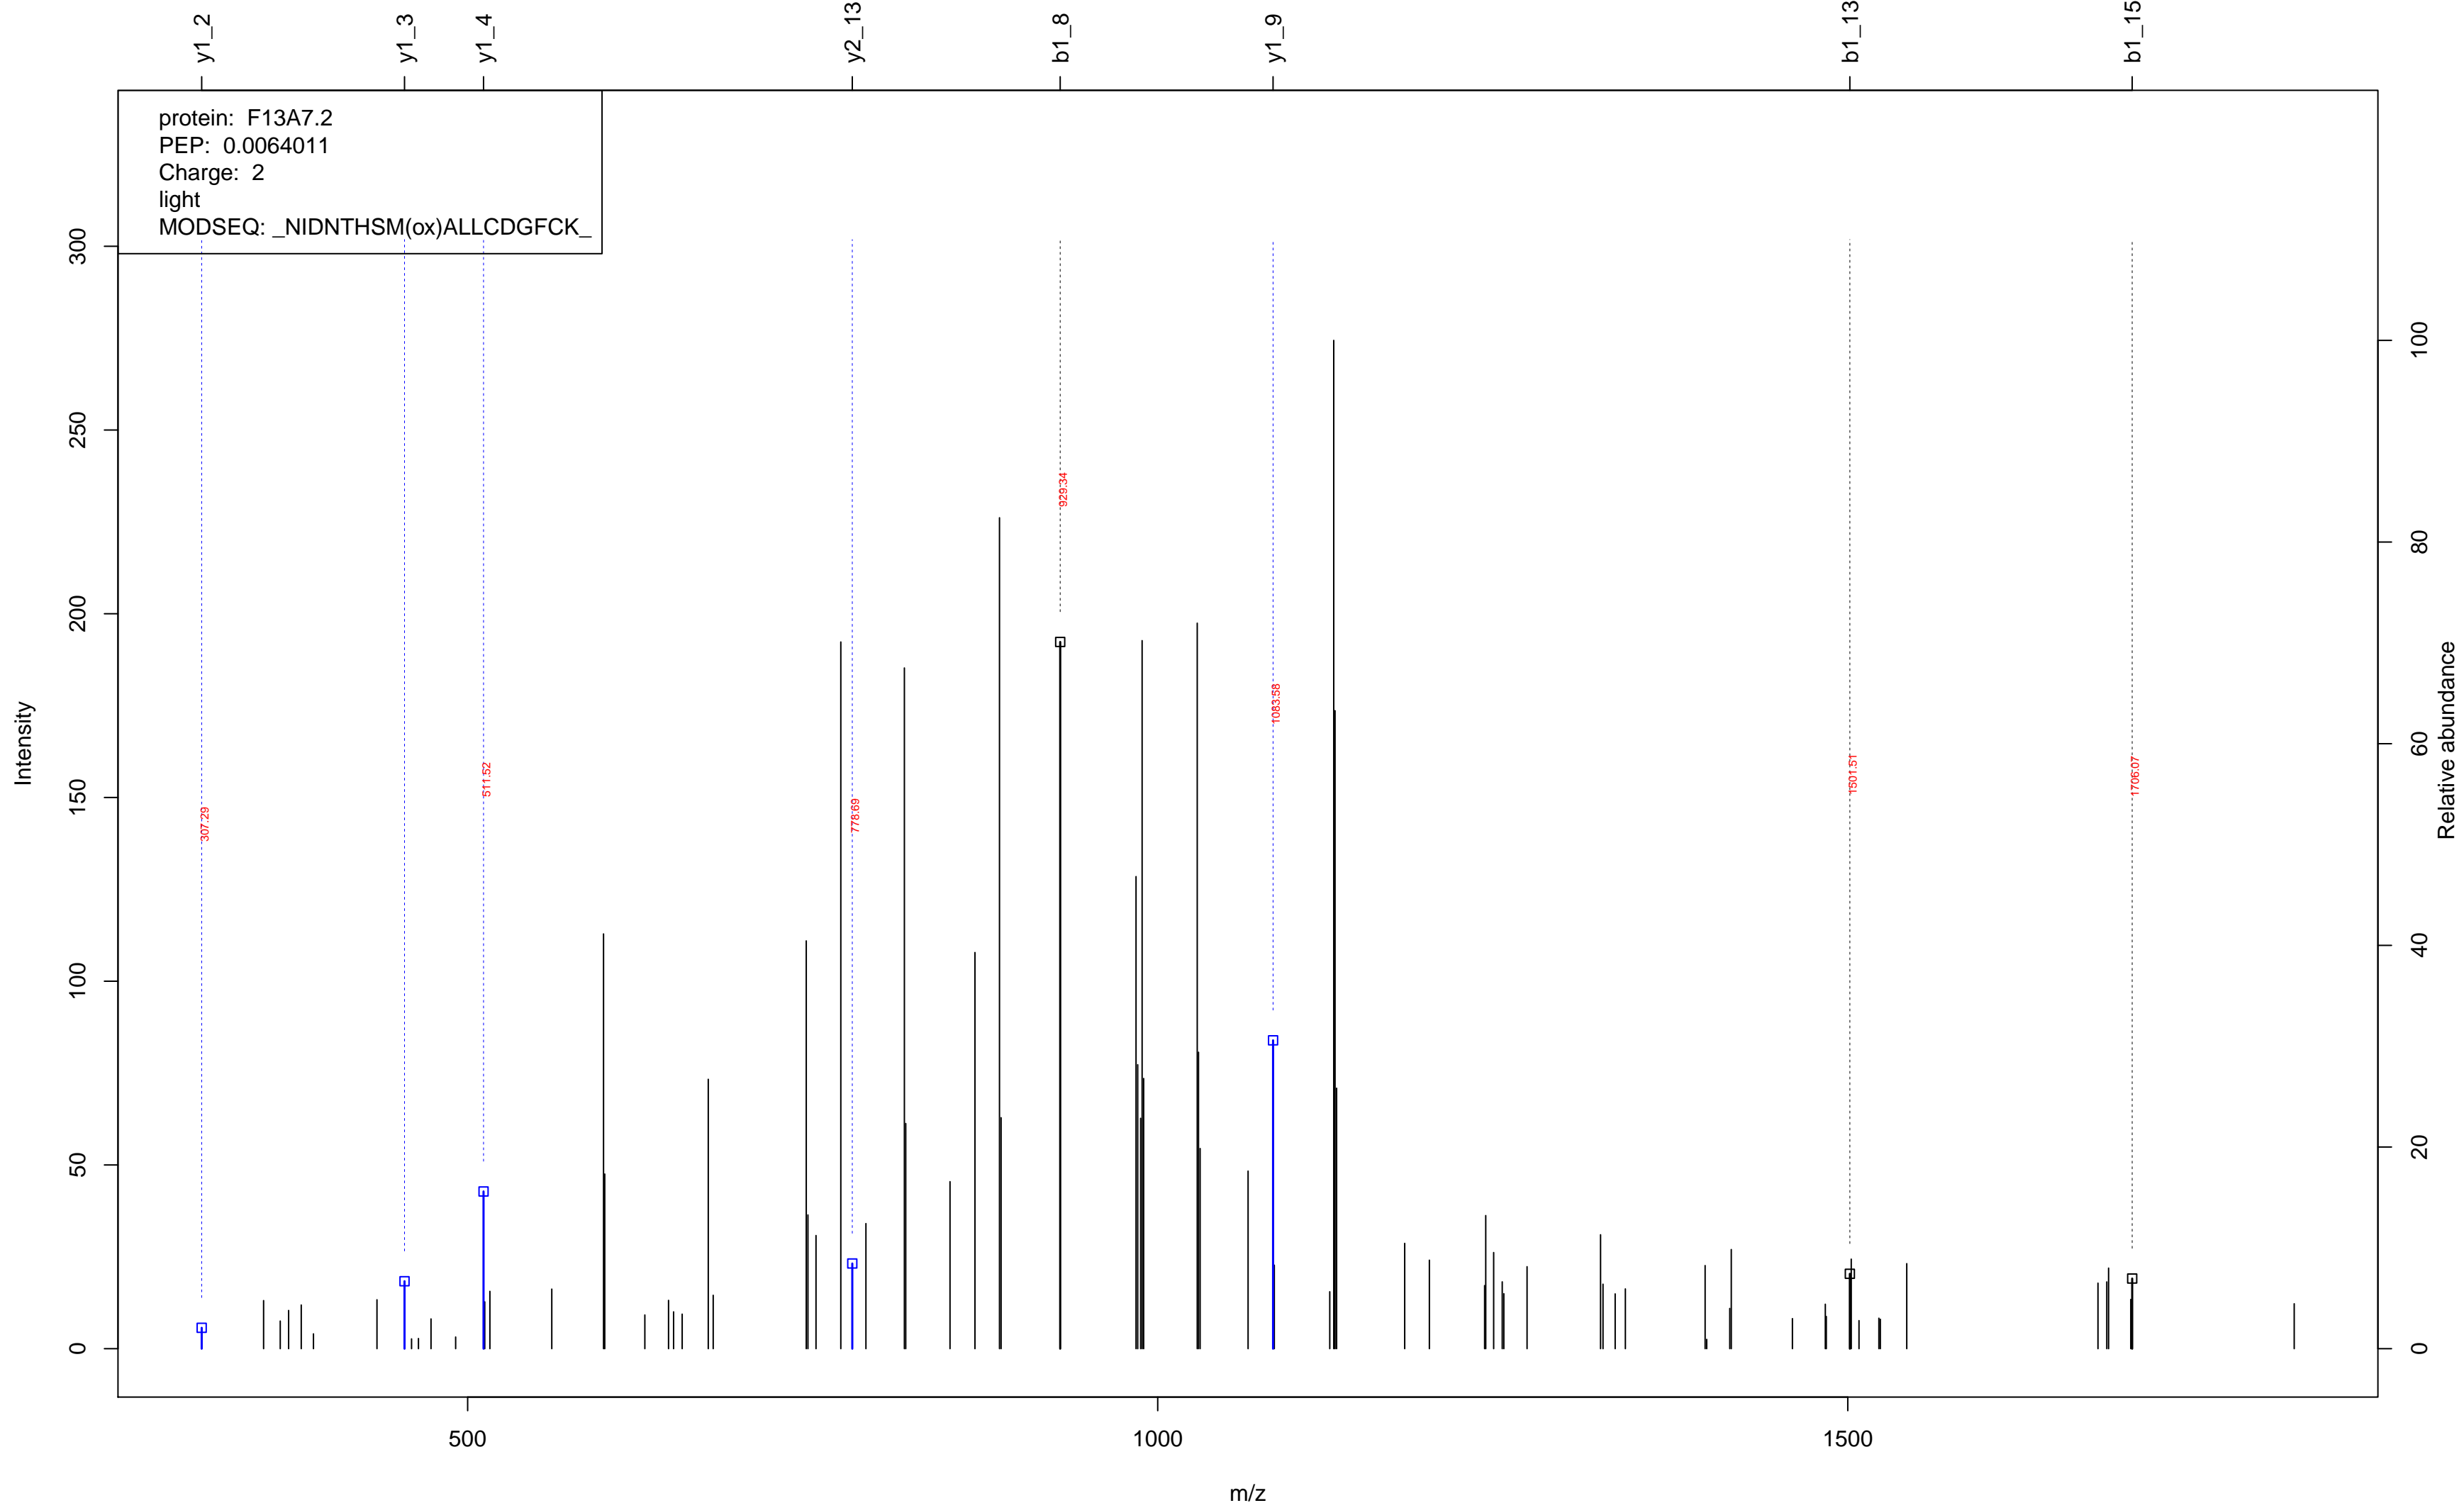

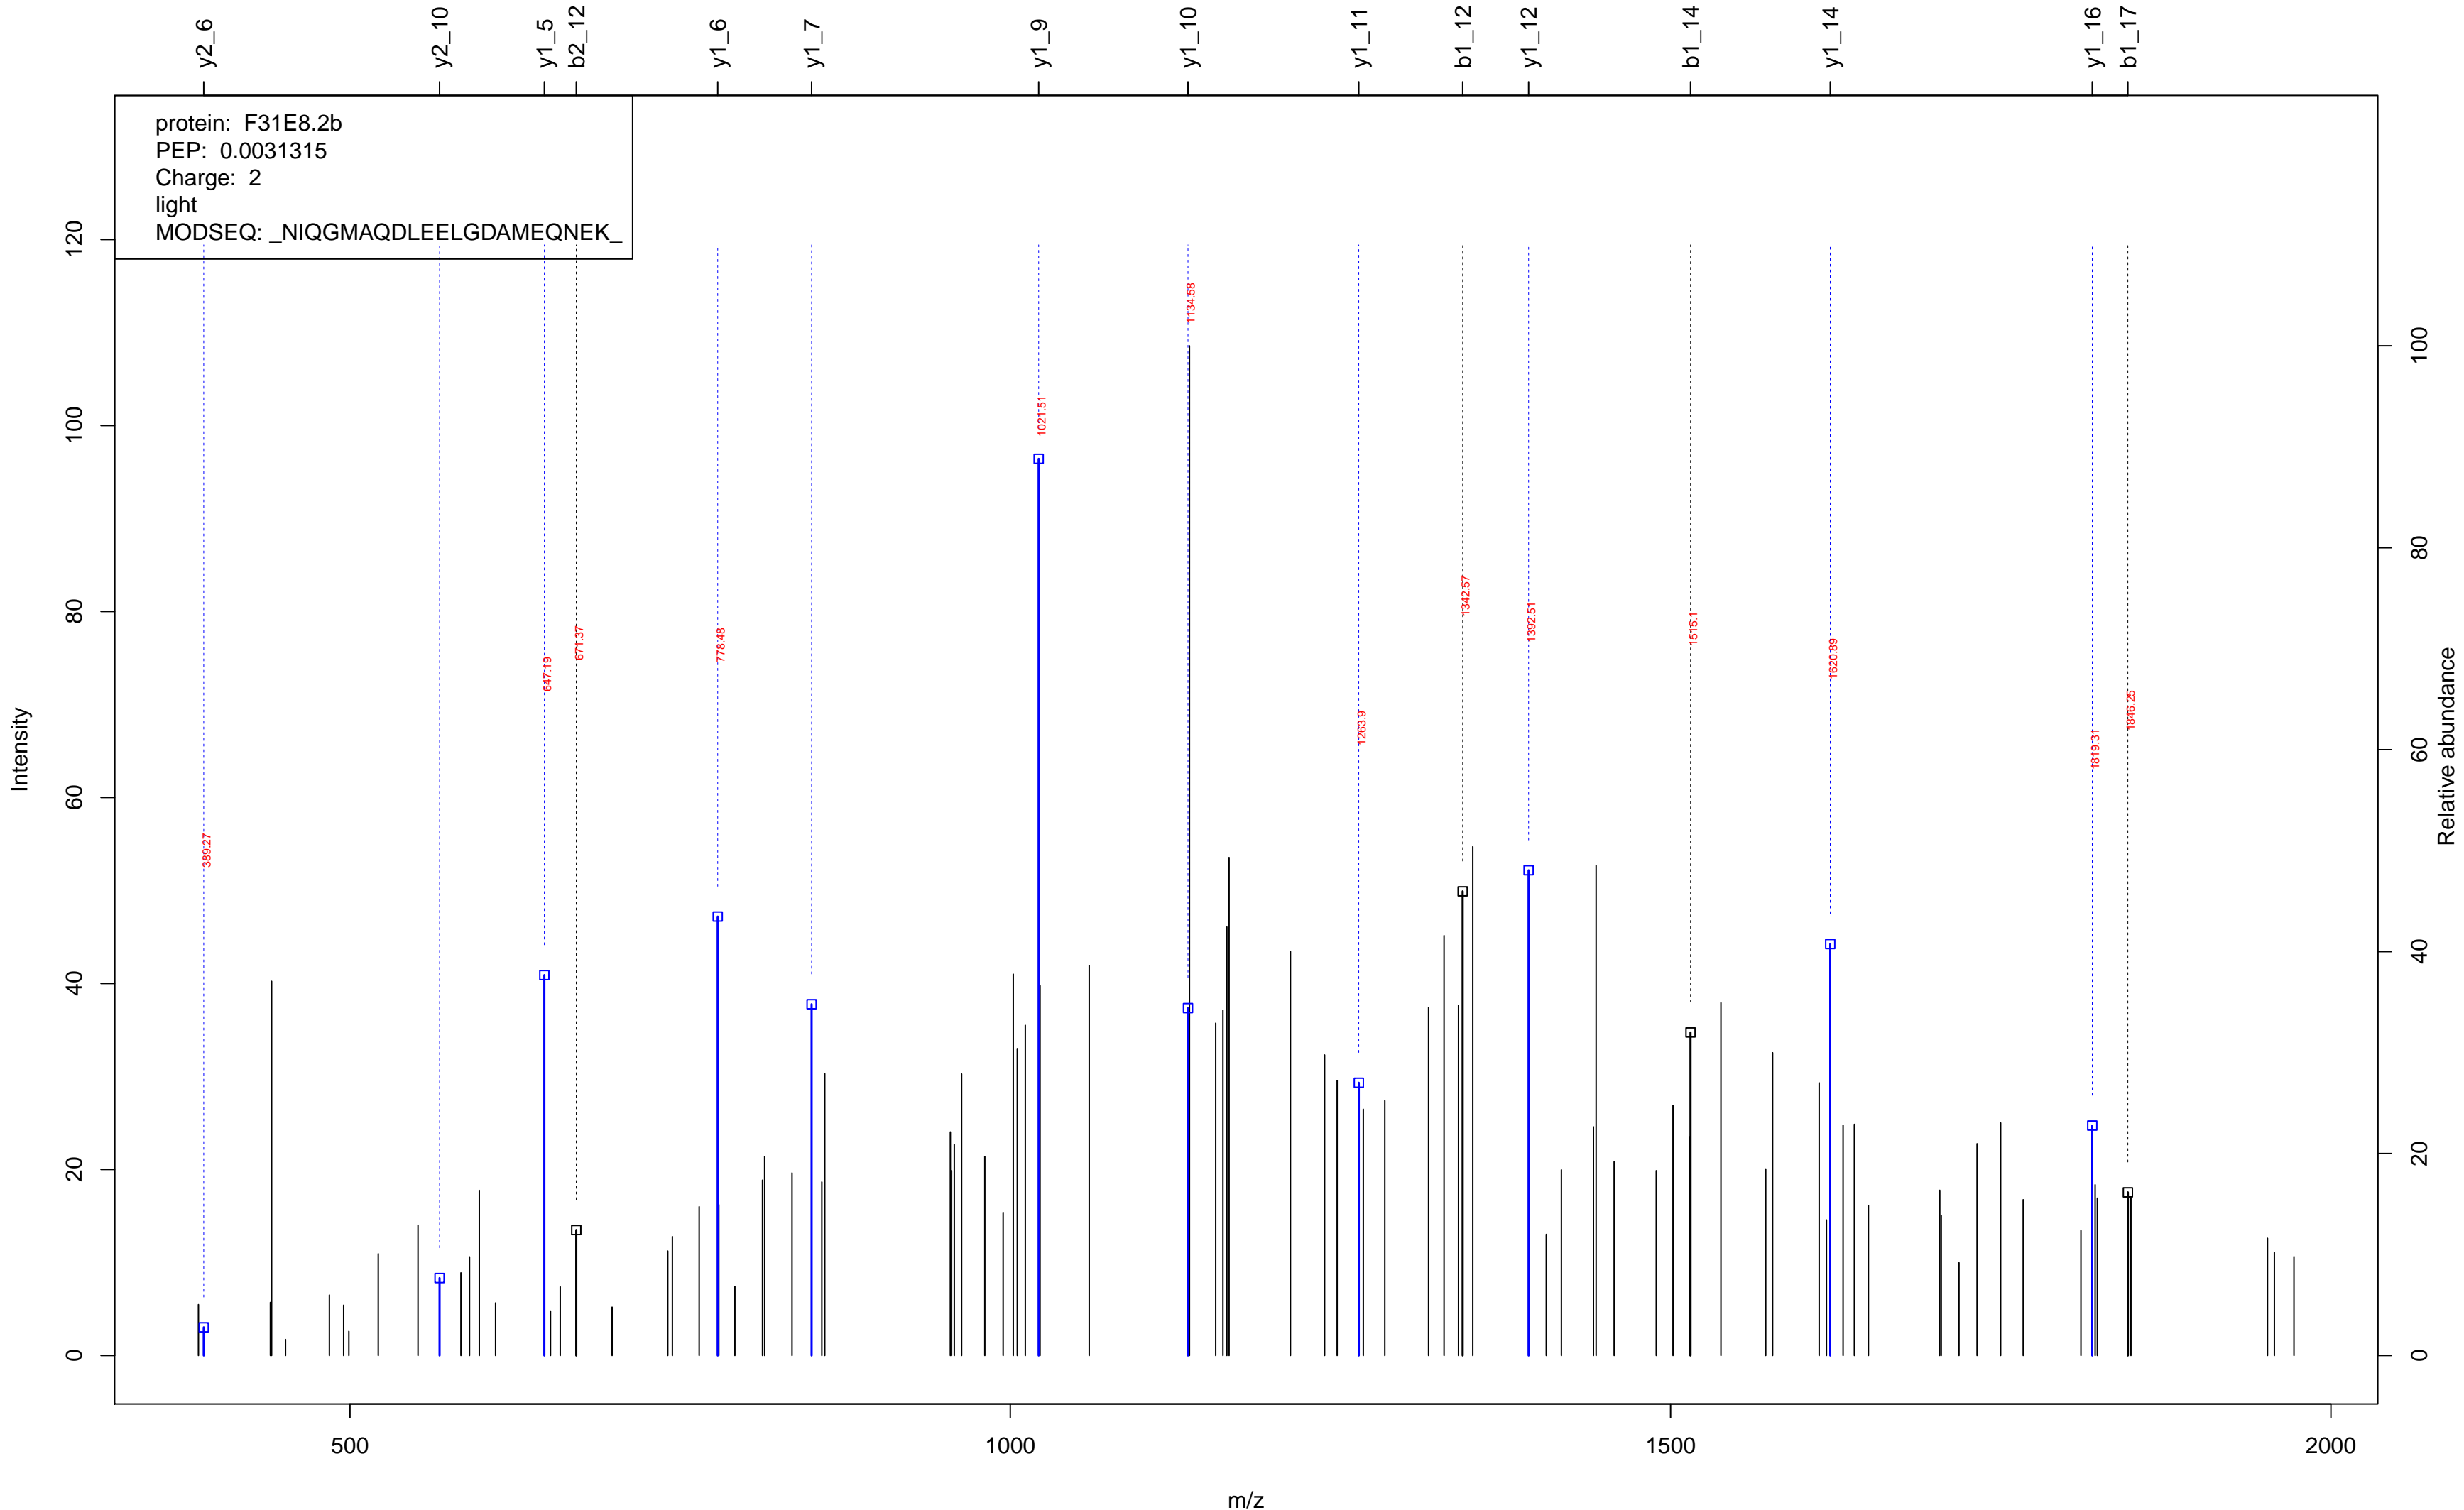



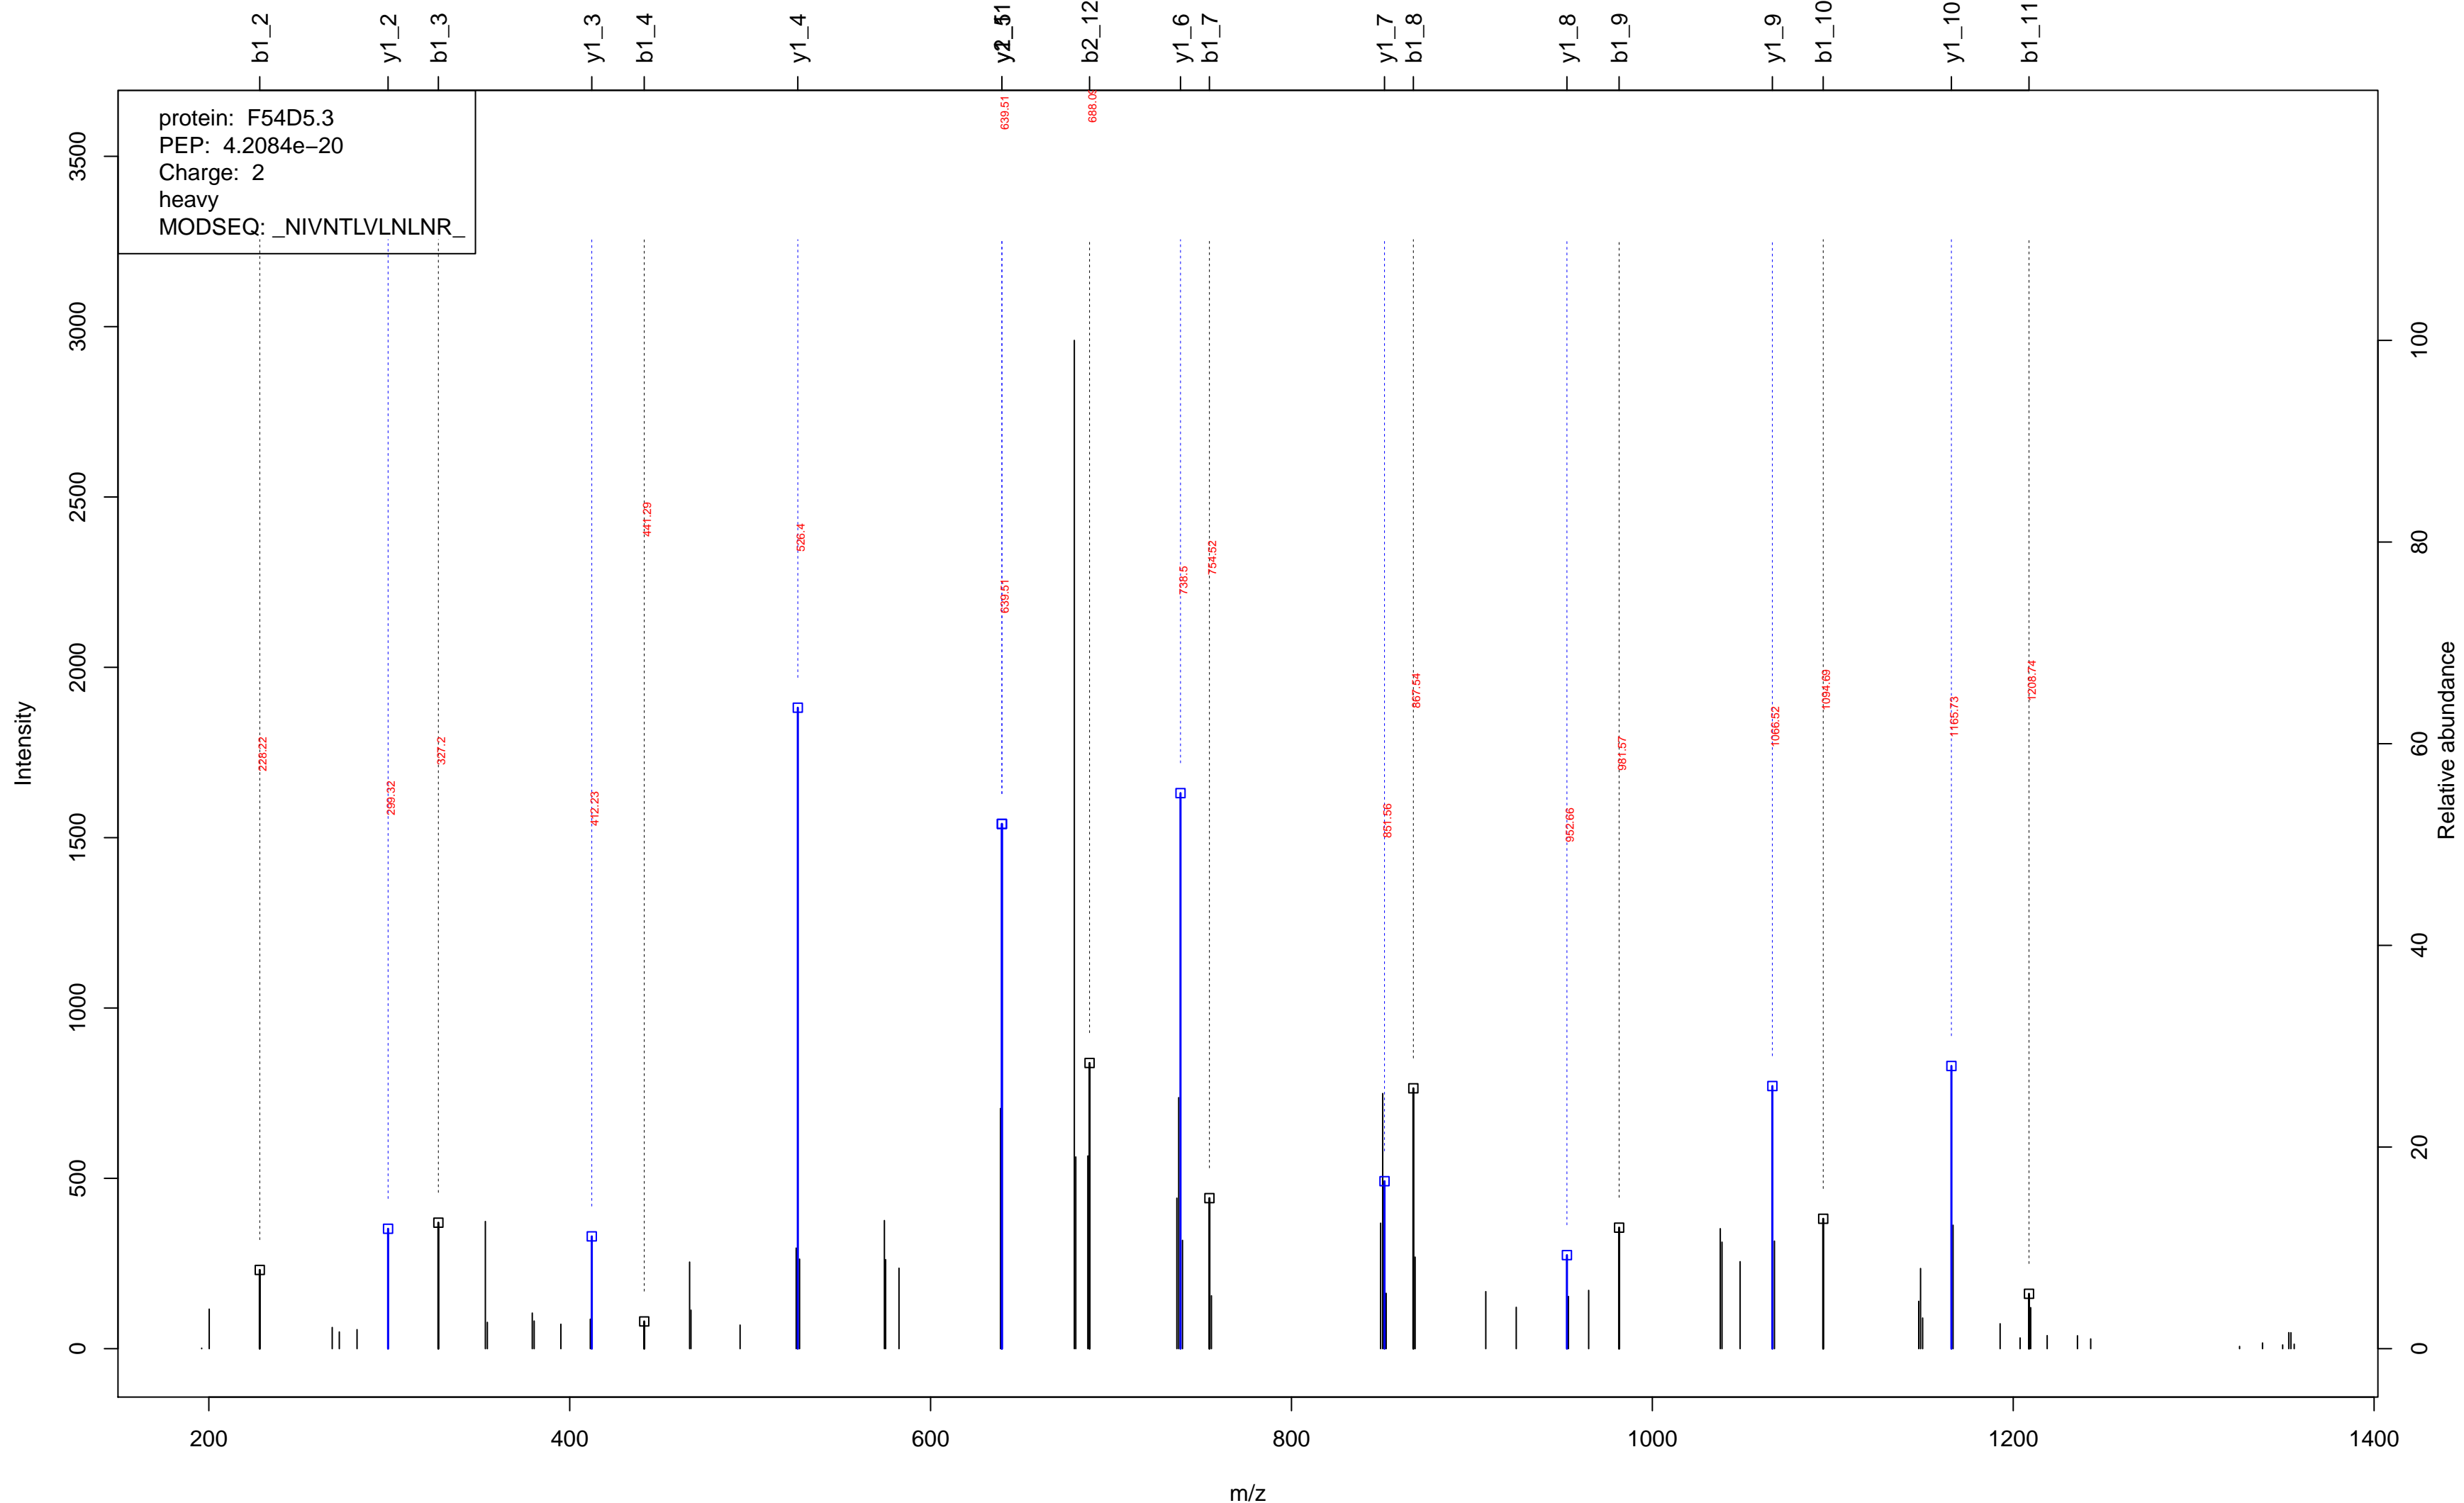

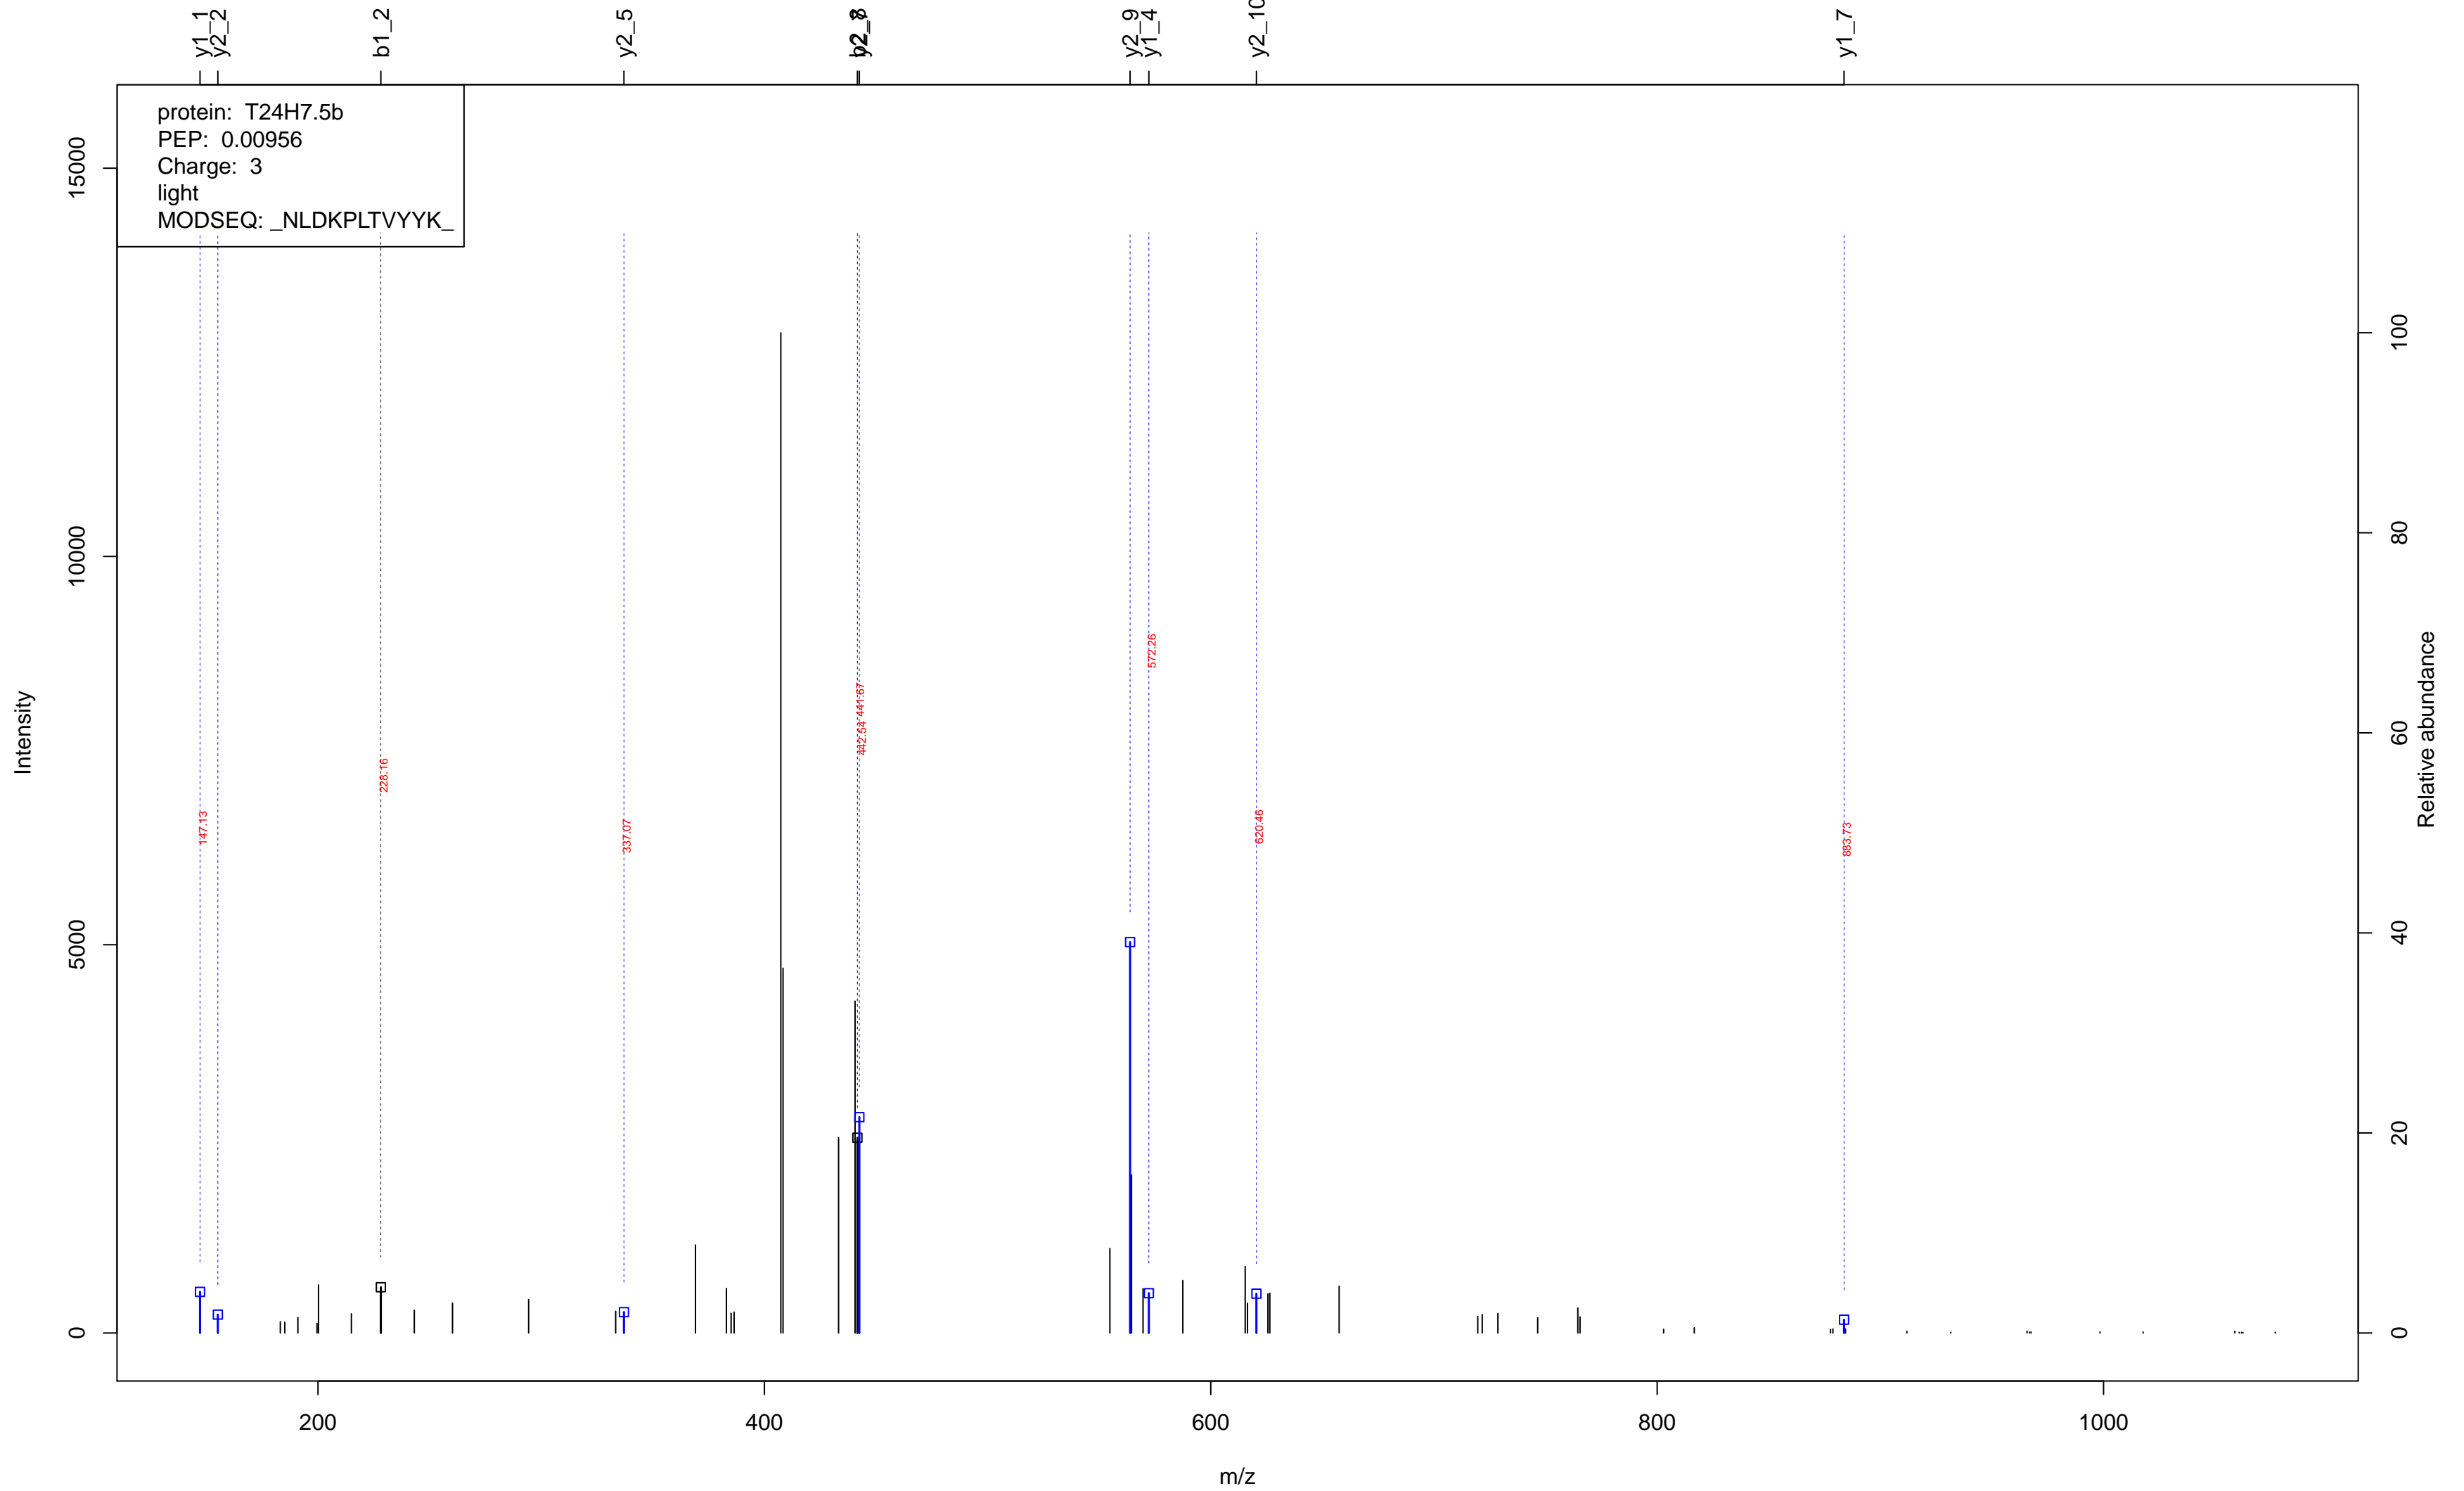

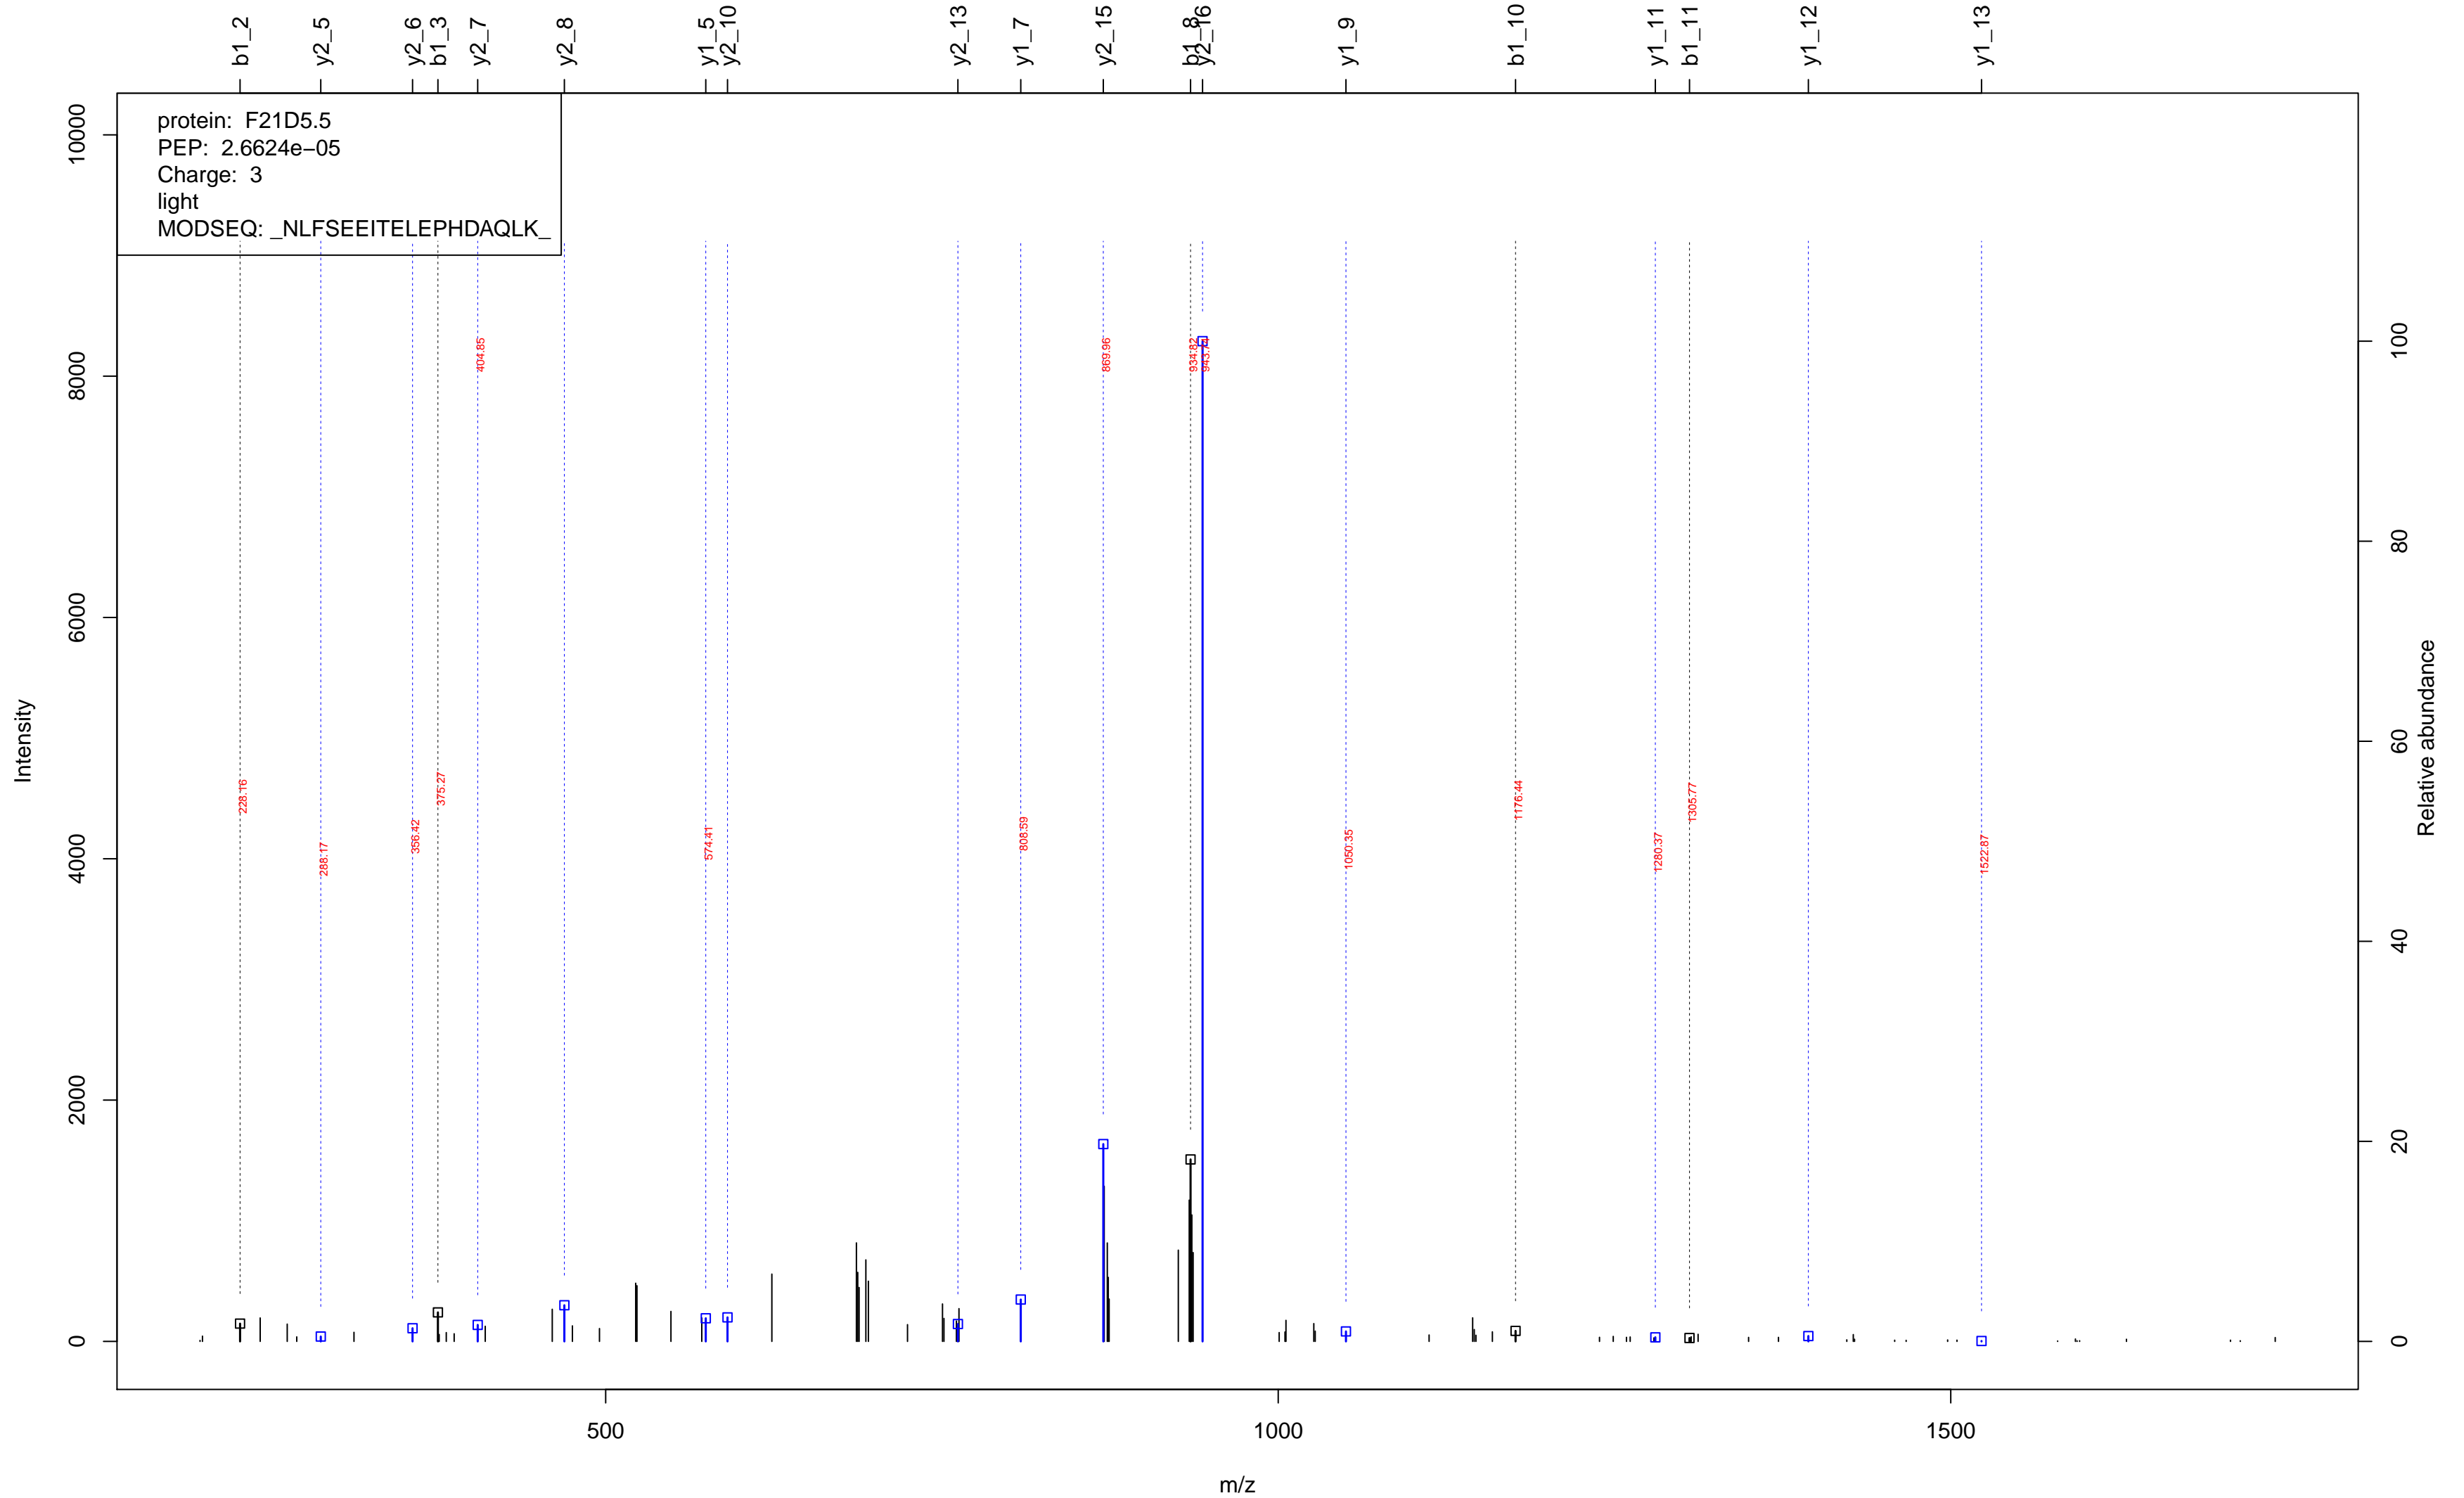

b1\_3 y1\_2 b2\_6 y1\_3 b1\_4 y1\_5 y1\_6 y2\_13 b2\_14 y1\_7 b1\_8 y1\_8 b1\_90 y1\_10 y1\_11 y1\_12

protein: T12G3.5  
PEP: 1.757e-05  
Charge: 2  
heavy  
MODSEQ: \_NLGLWEEEPDYTYK\_

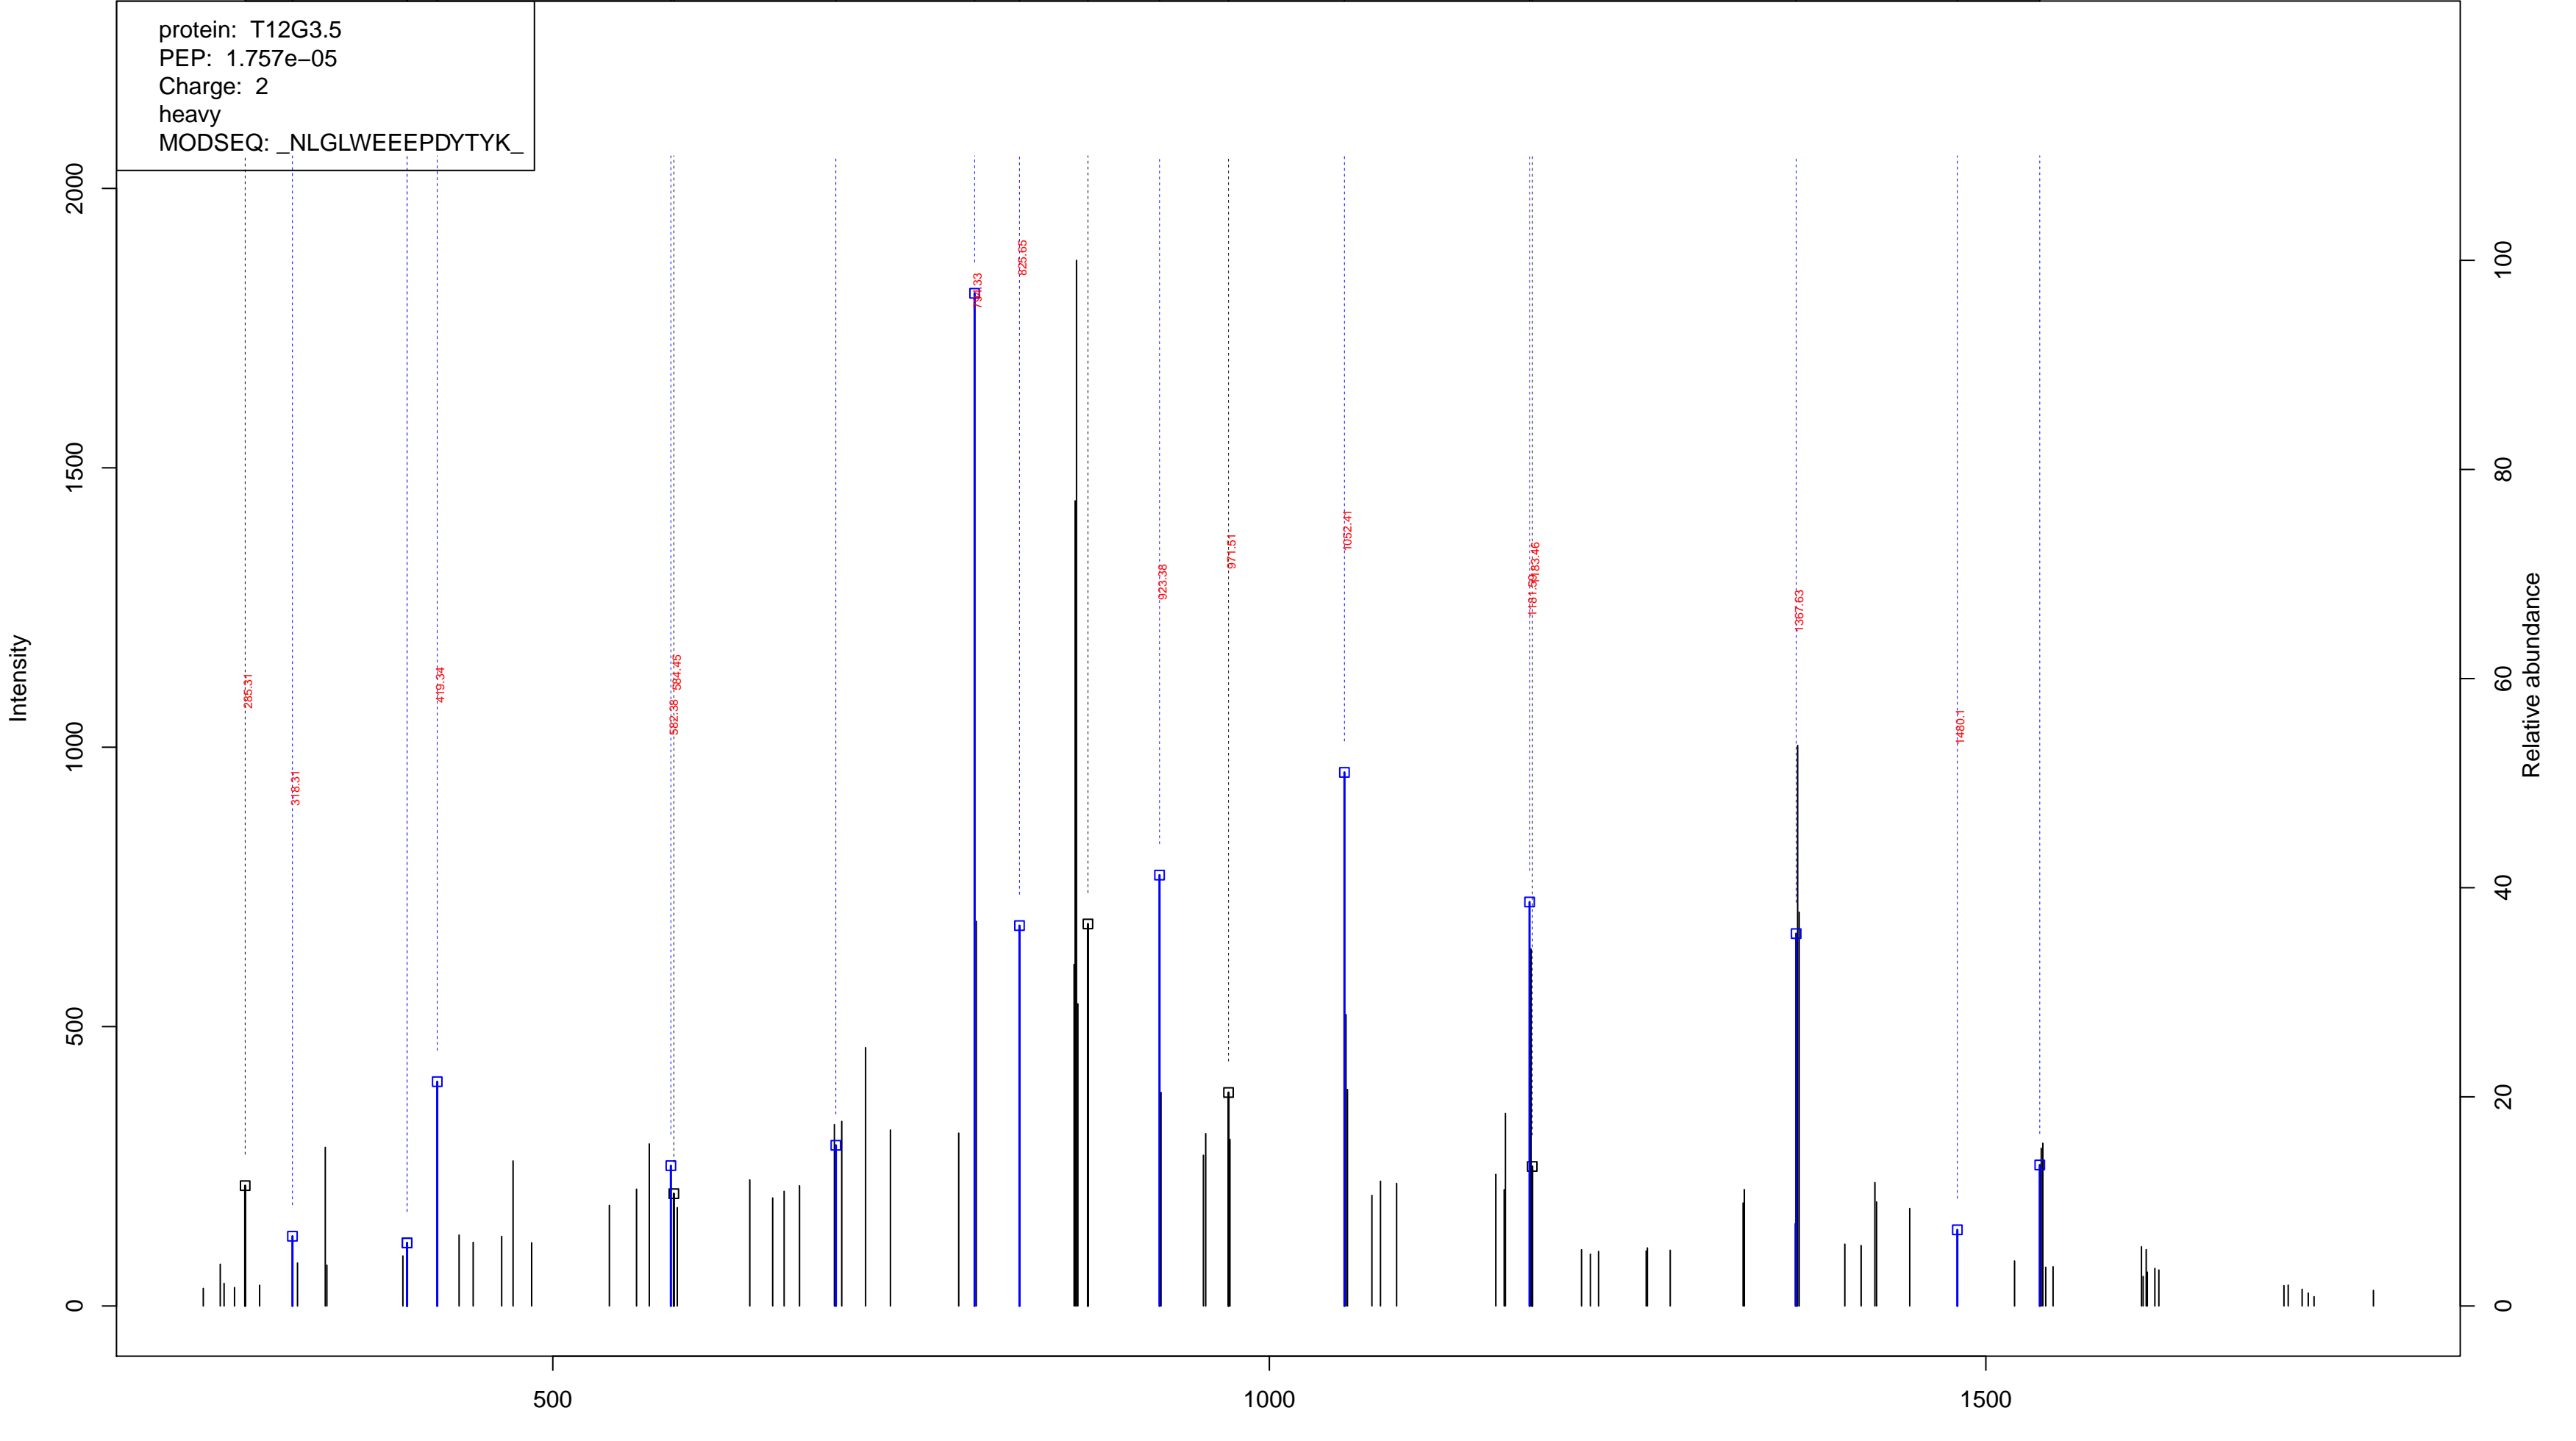

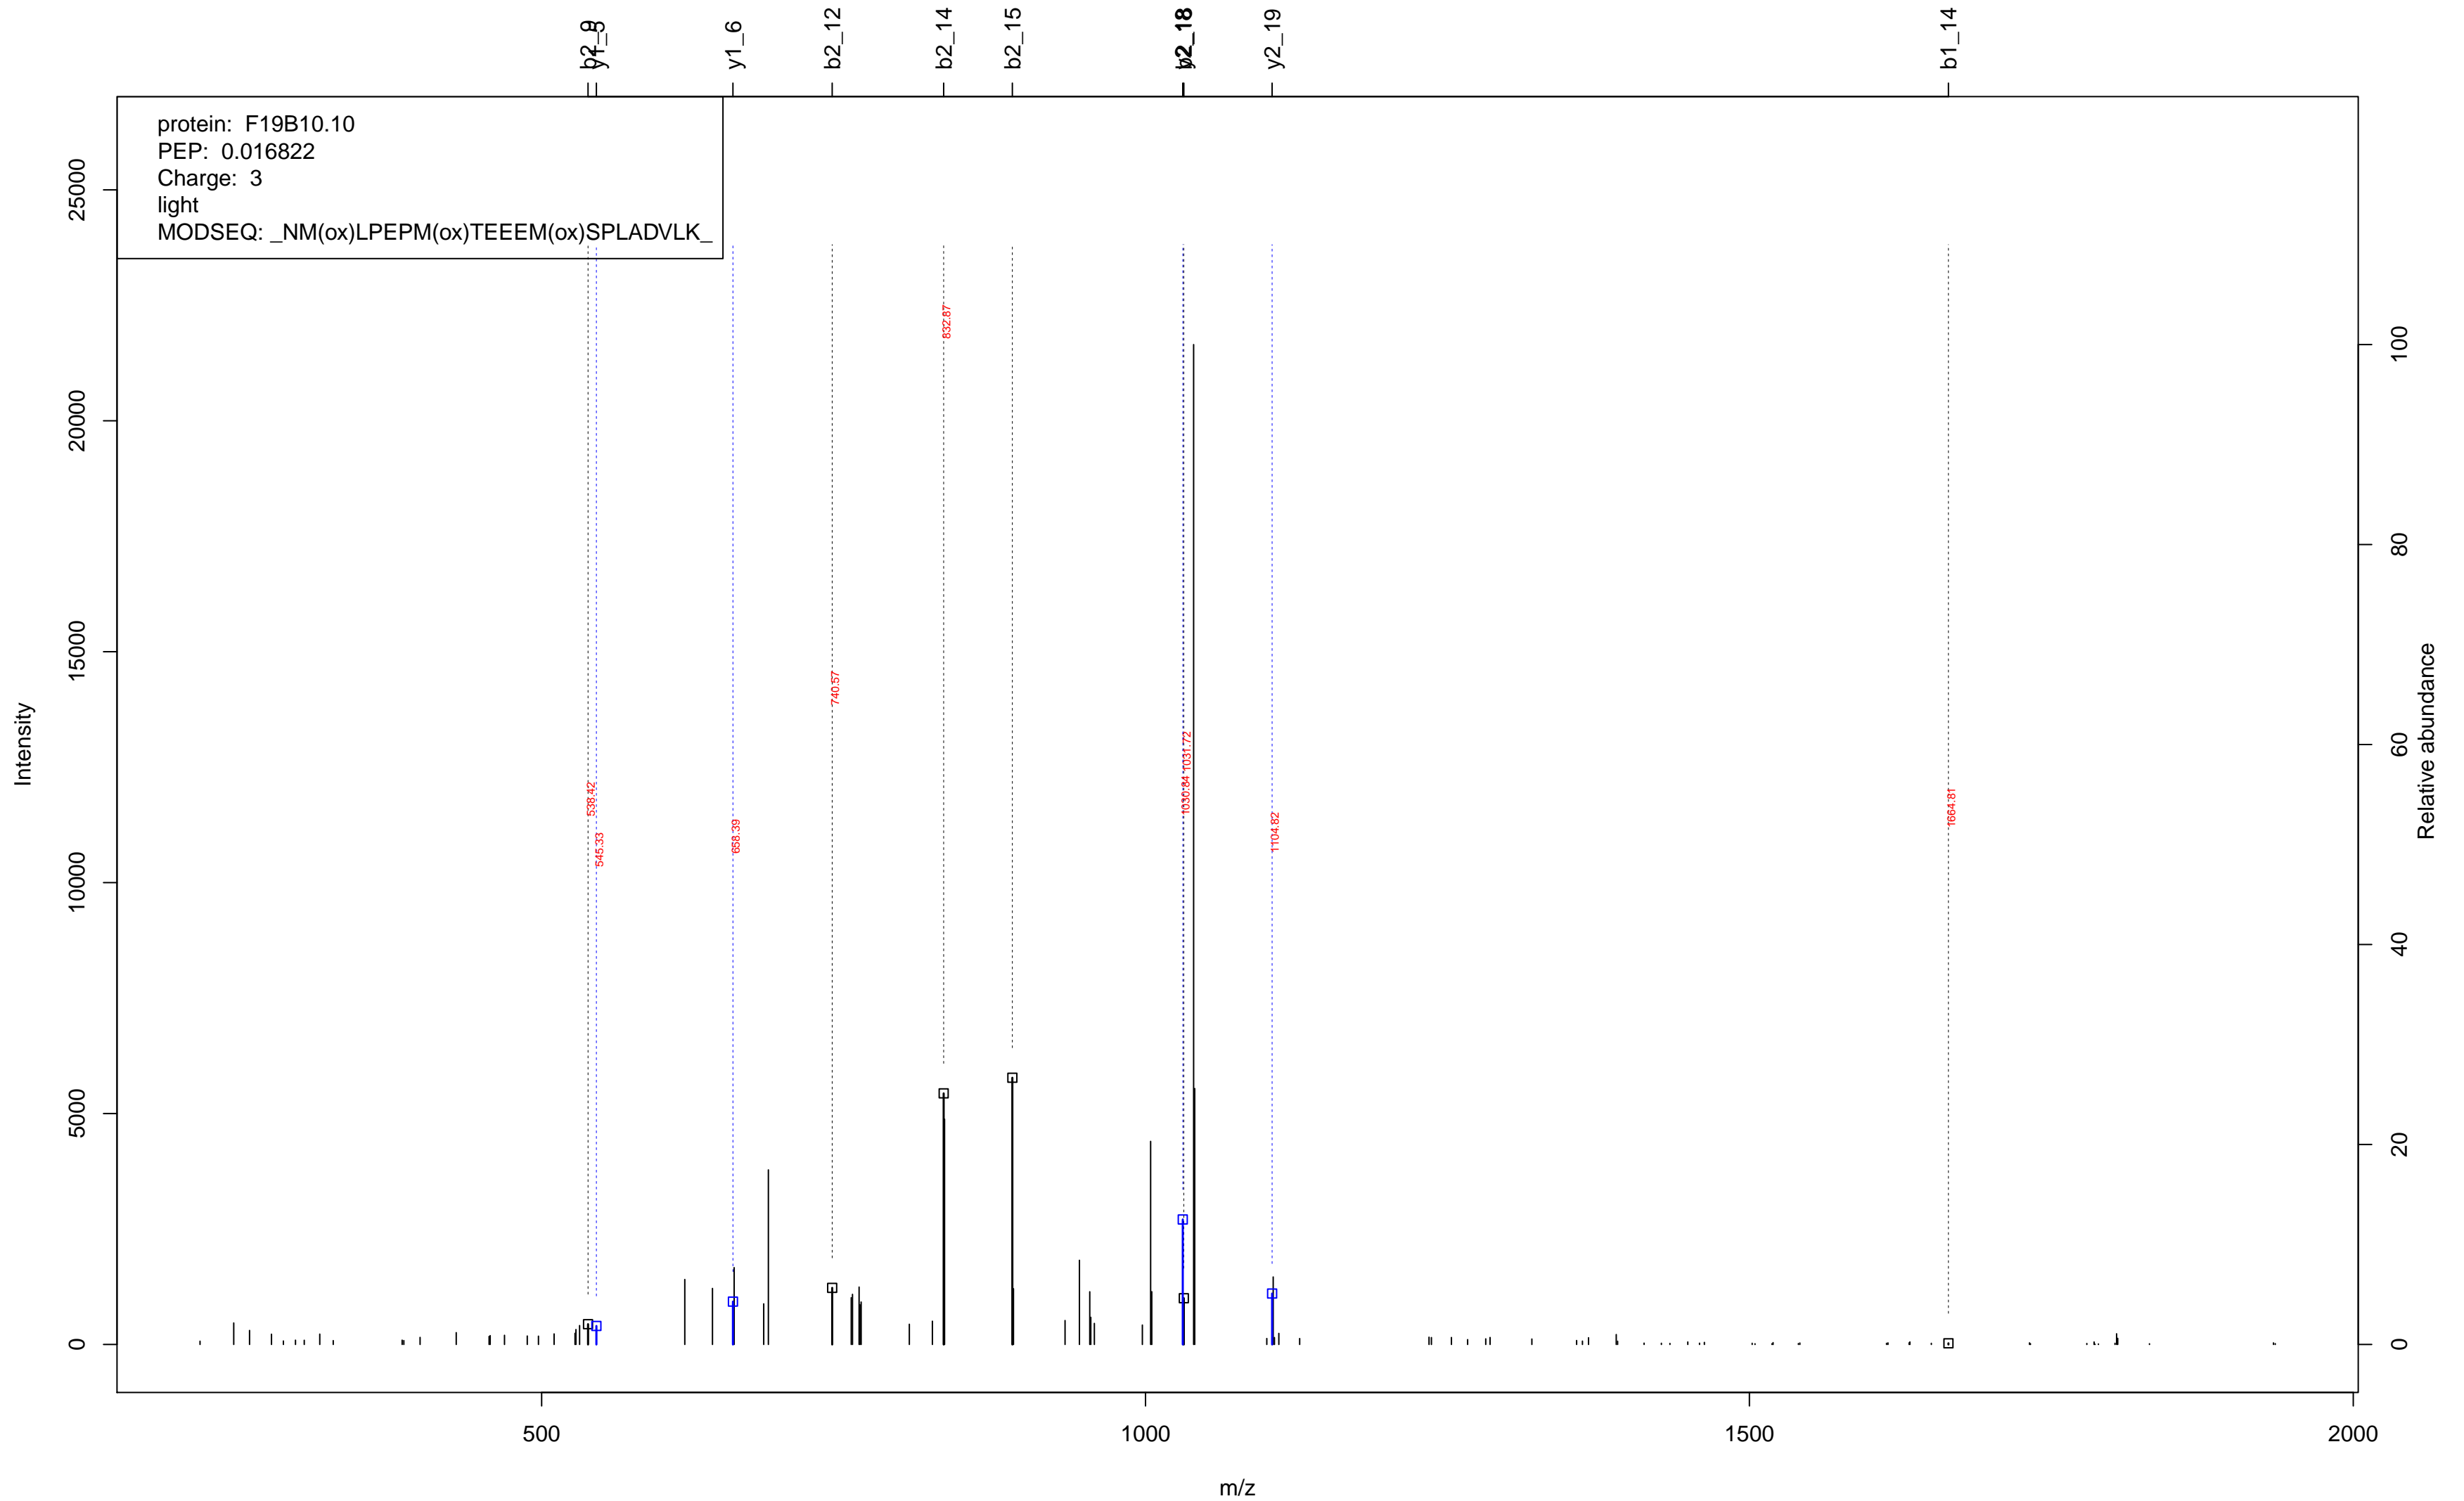

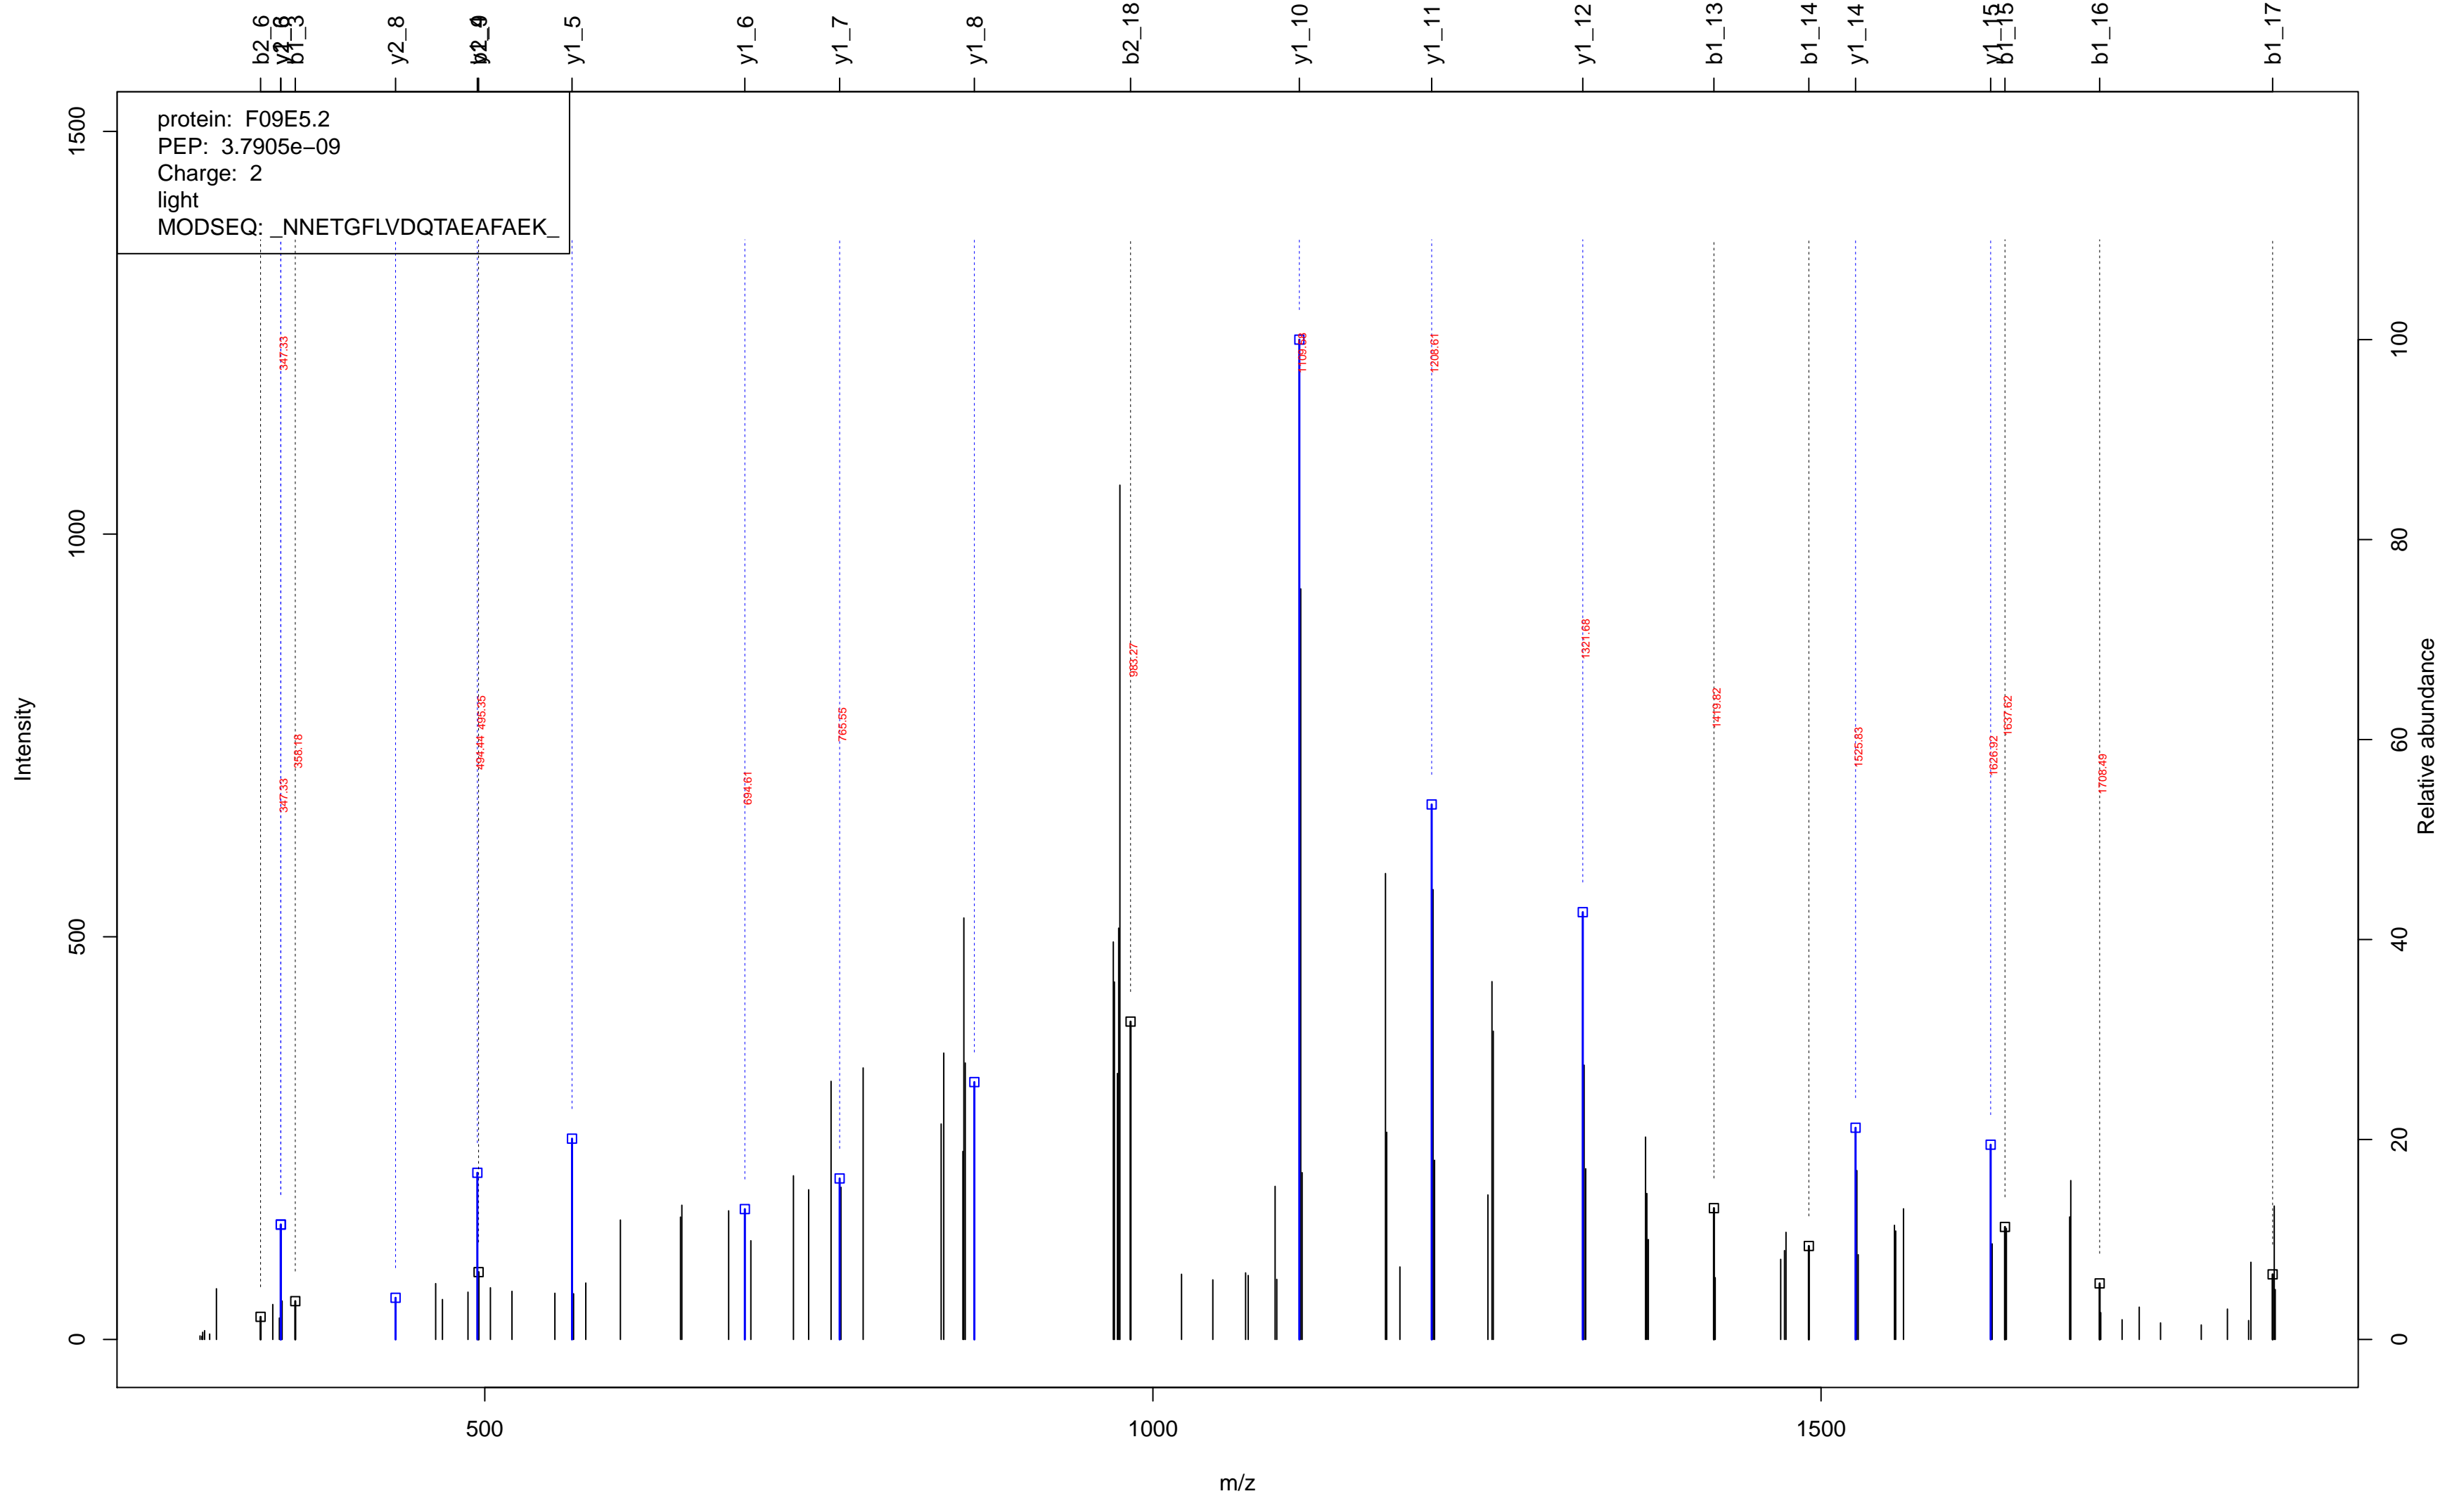

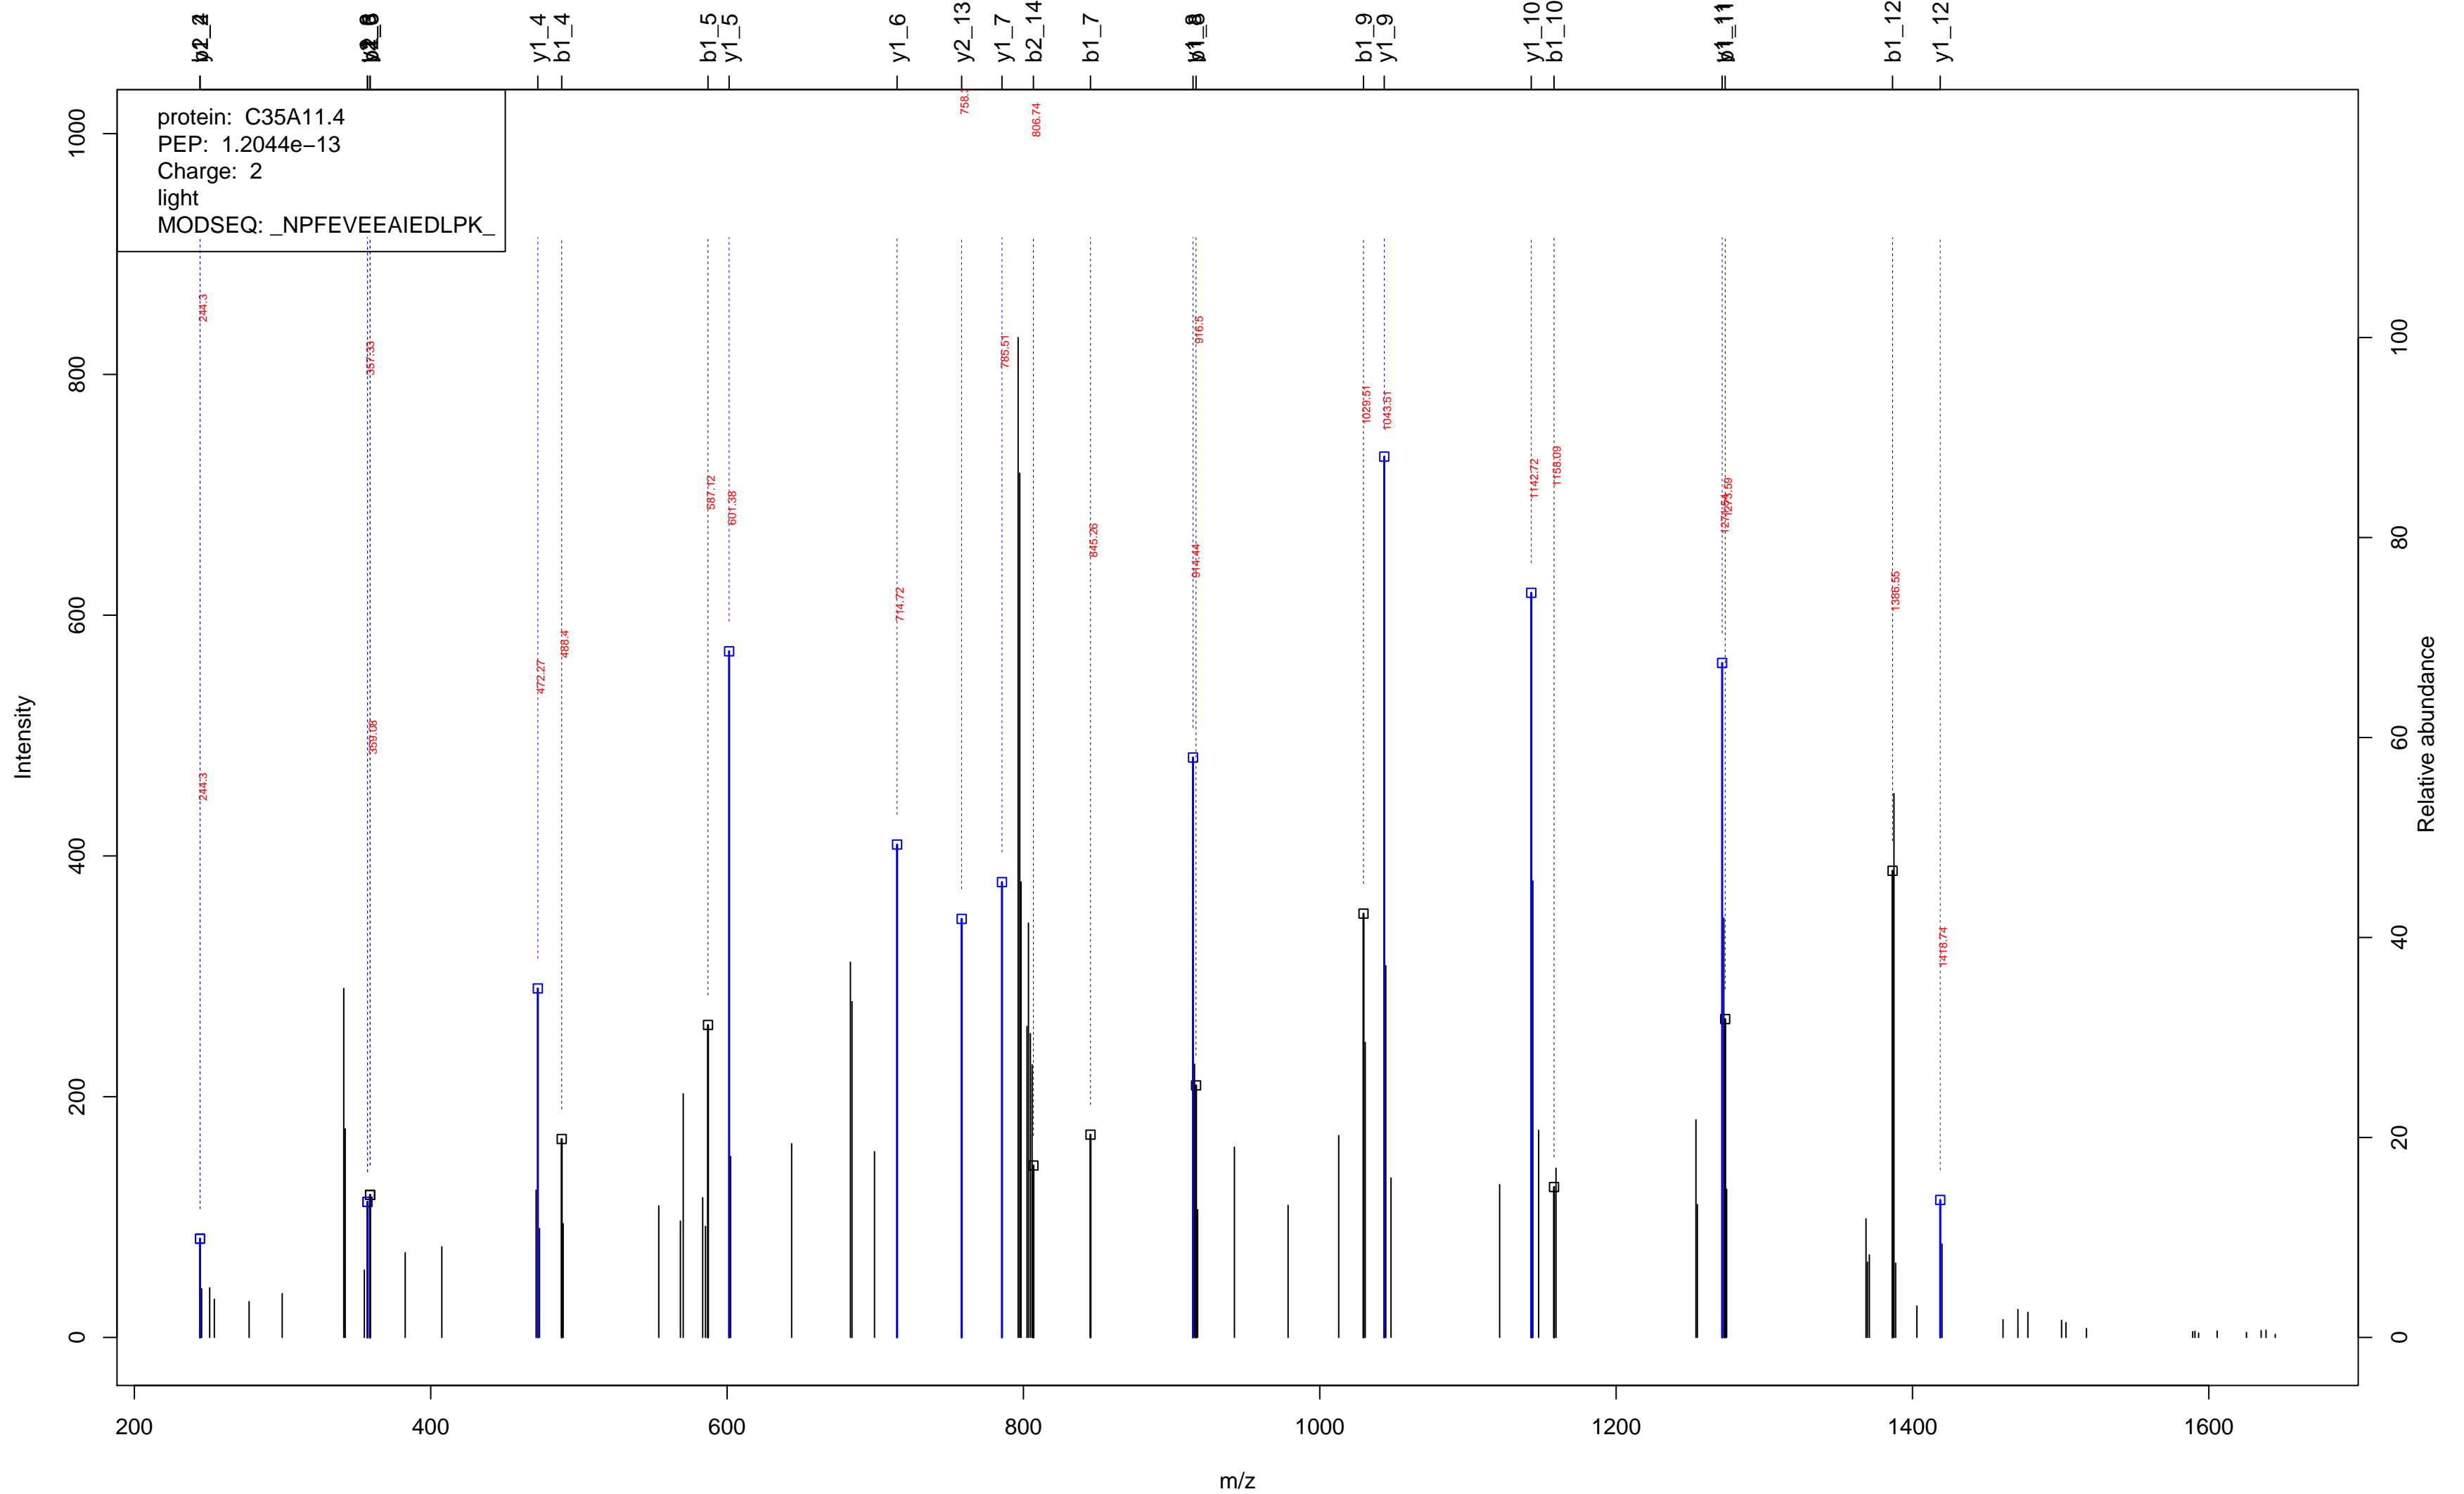

y1\_2 b1\_3 b1\_4 y1\_4 b2\_10 b1\_5 b1\_6 y1\_7 b1\_7 y1\_8 y1\_9 y1\_10 y1\_11 b1\_12 y1\_12

protein: T14G10.1  
PEP: 2.9731e-06  
Charge: 2  
light  
MODSEQ: \_NPILLHPLGGWTK\_

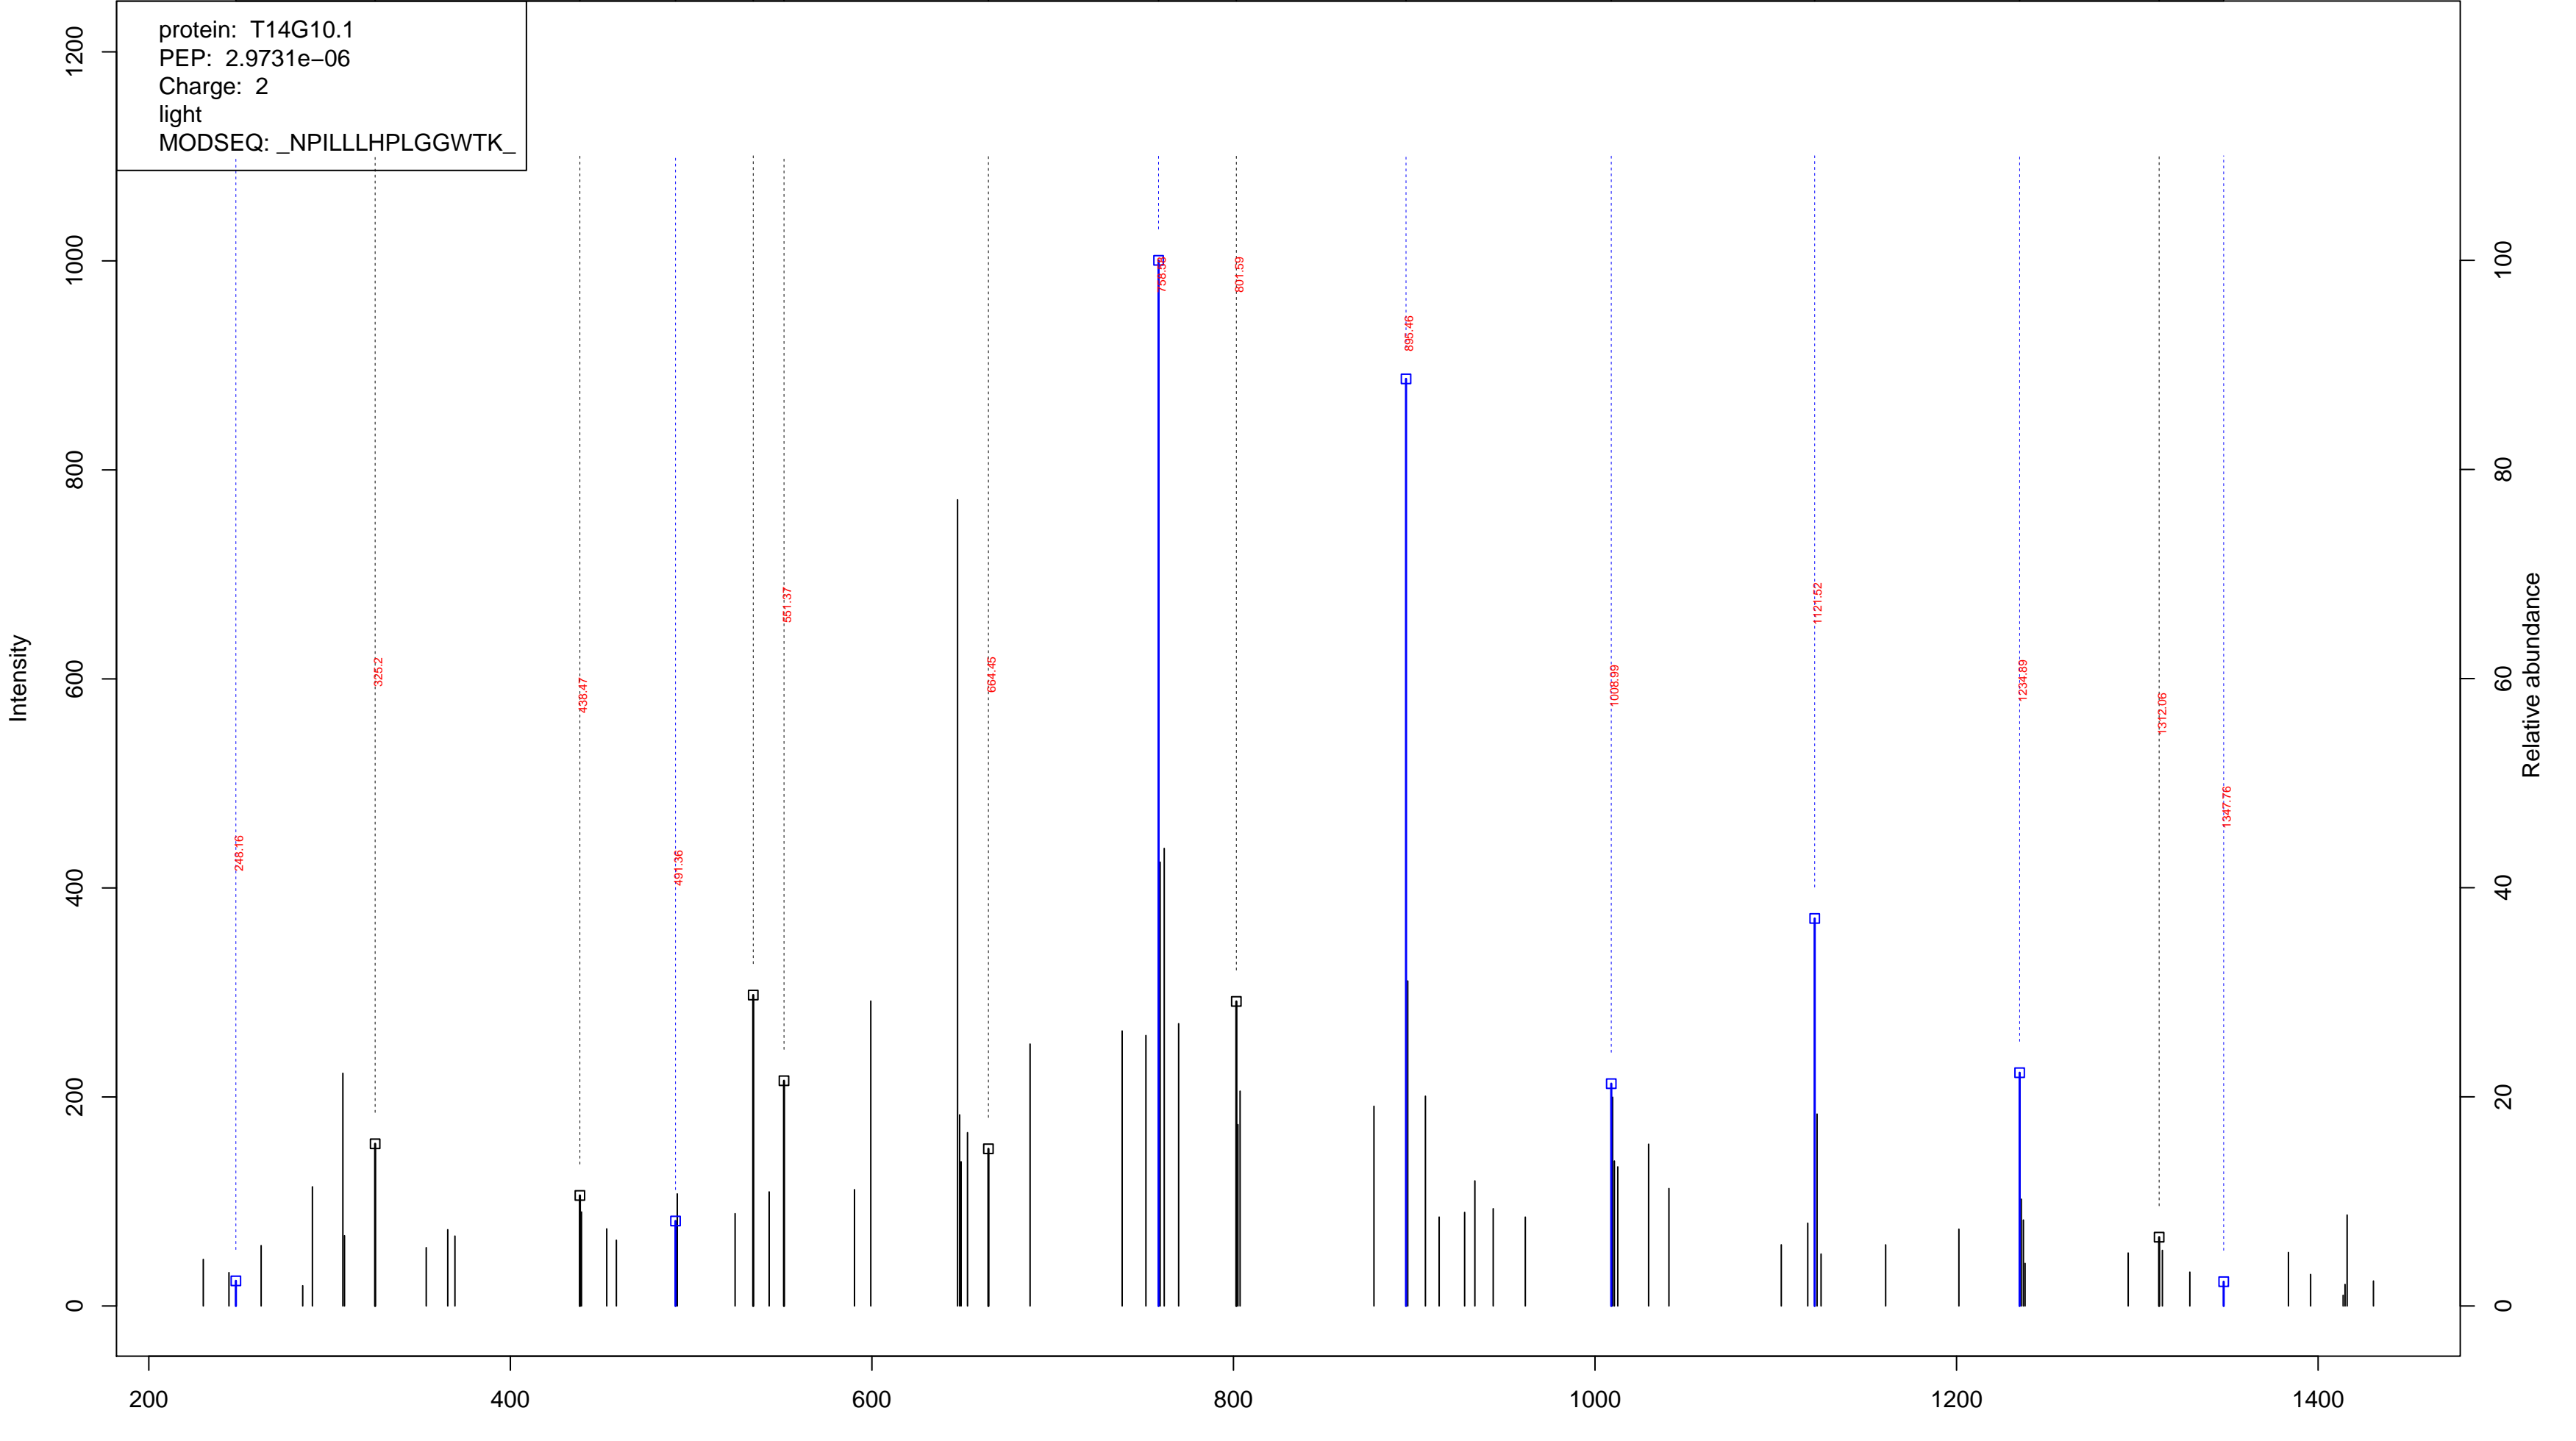



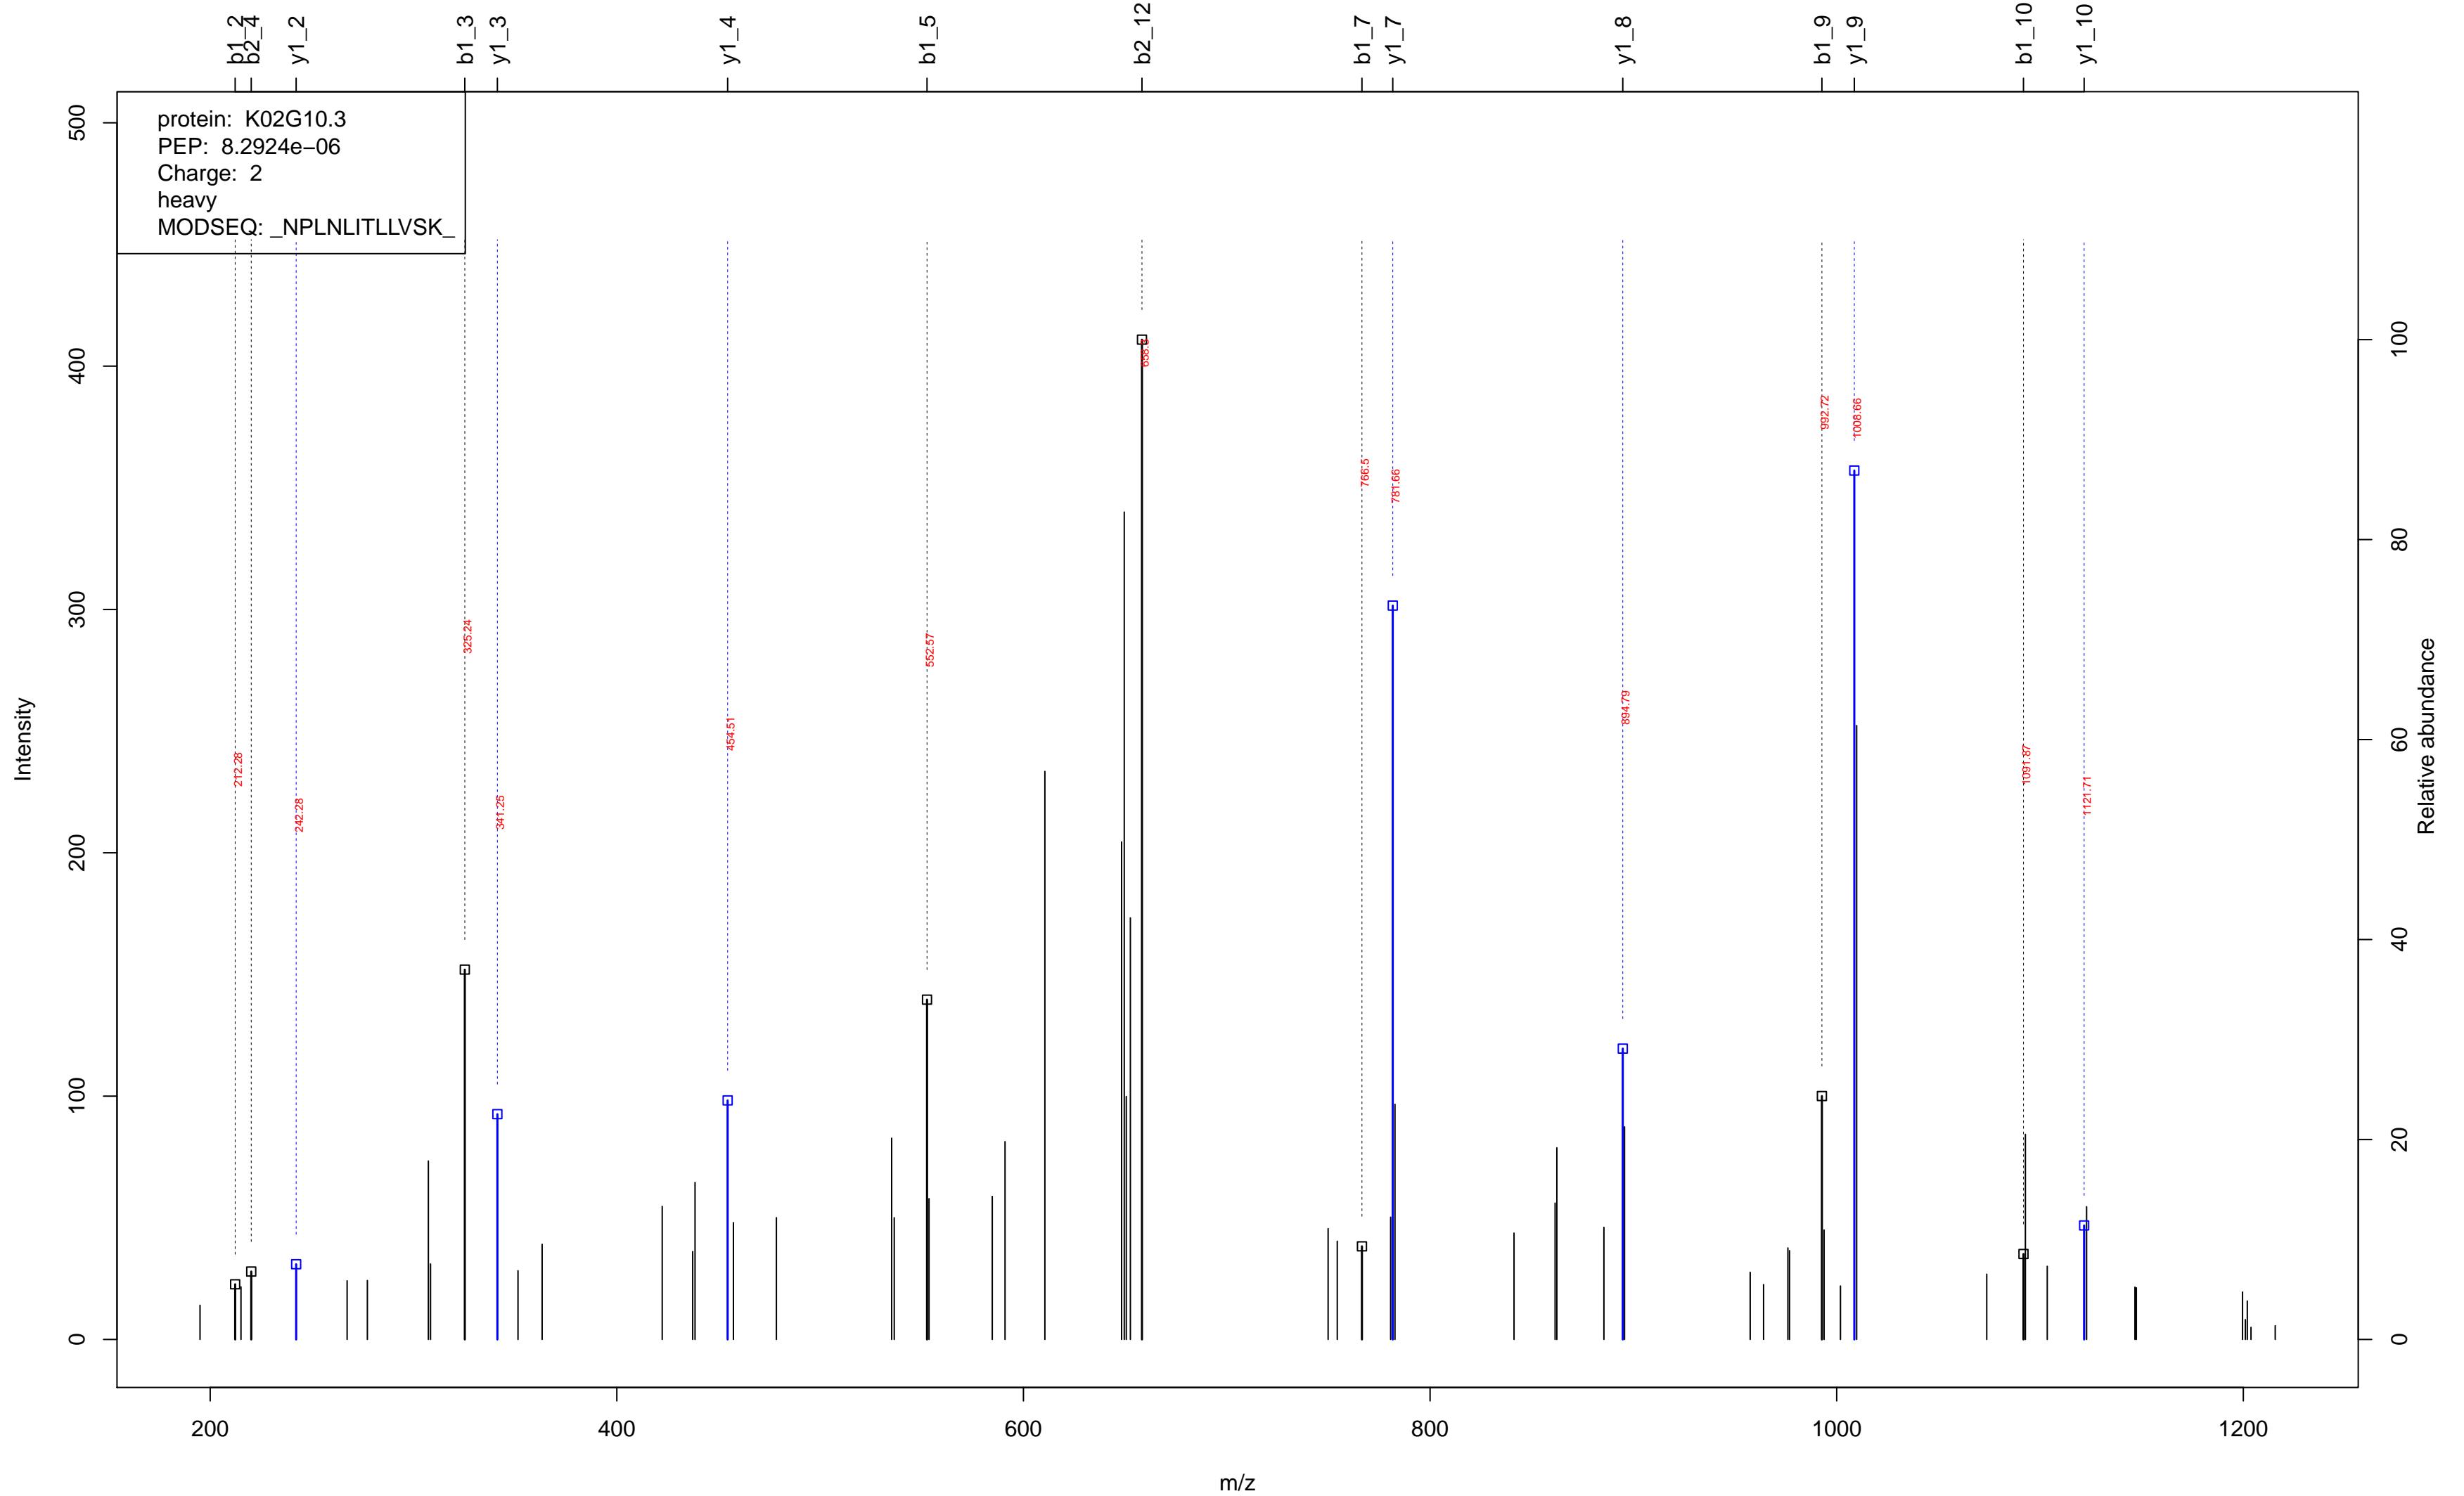

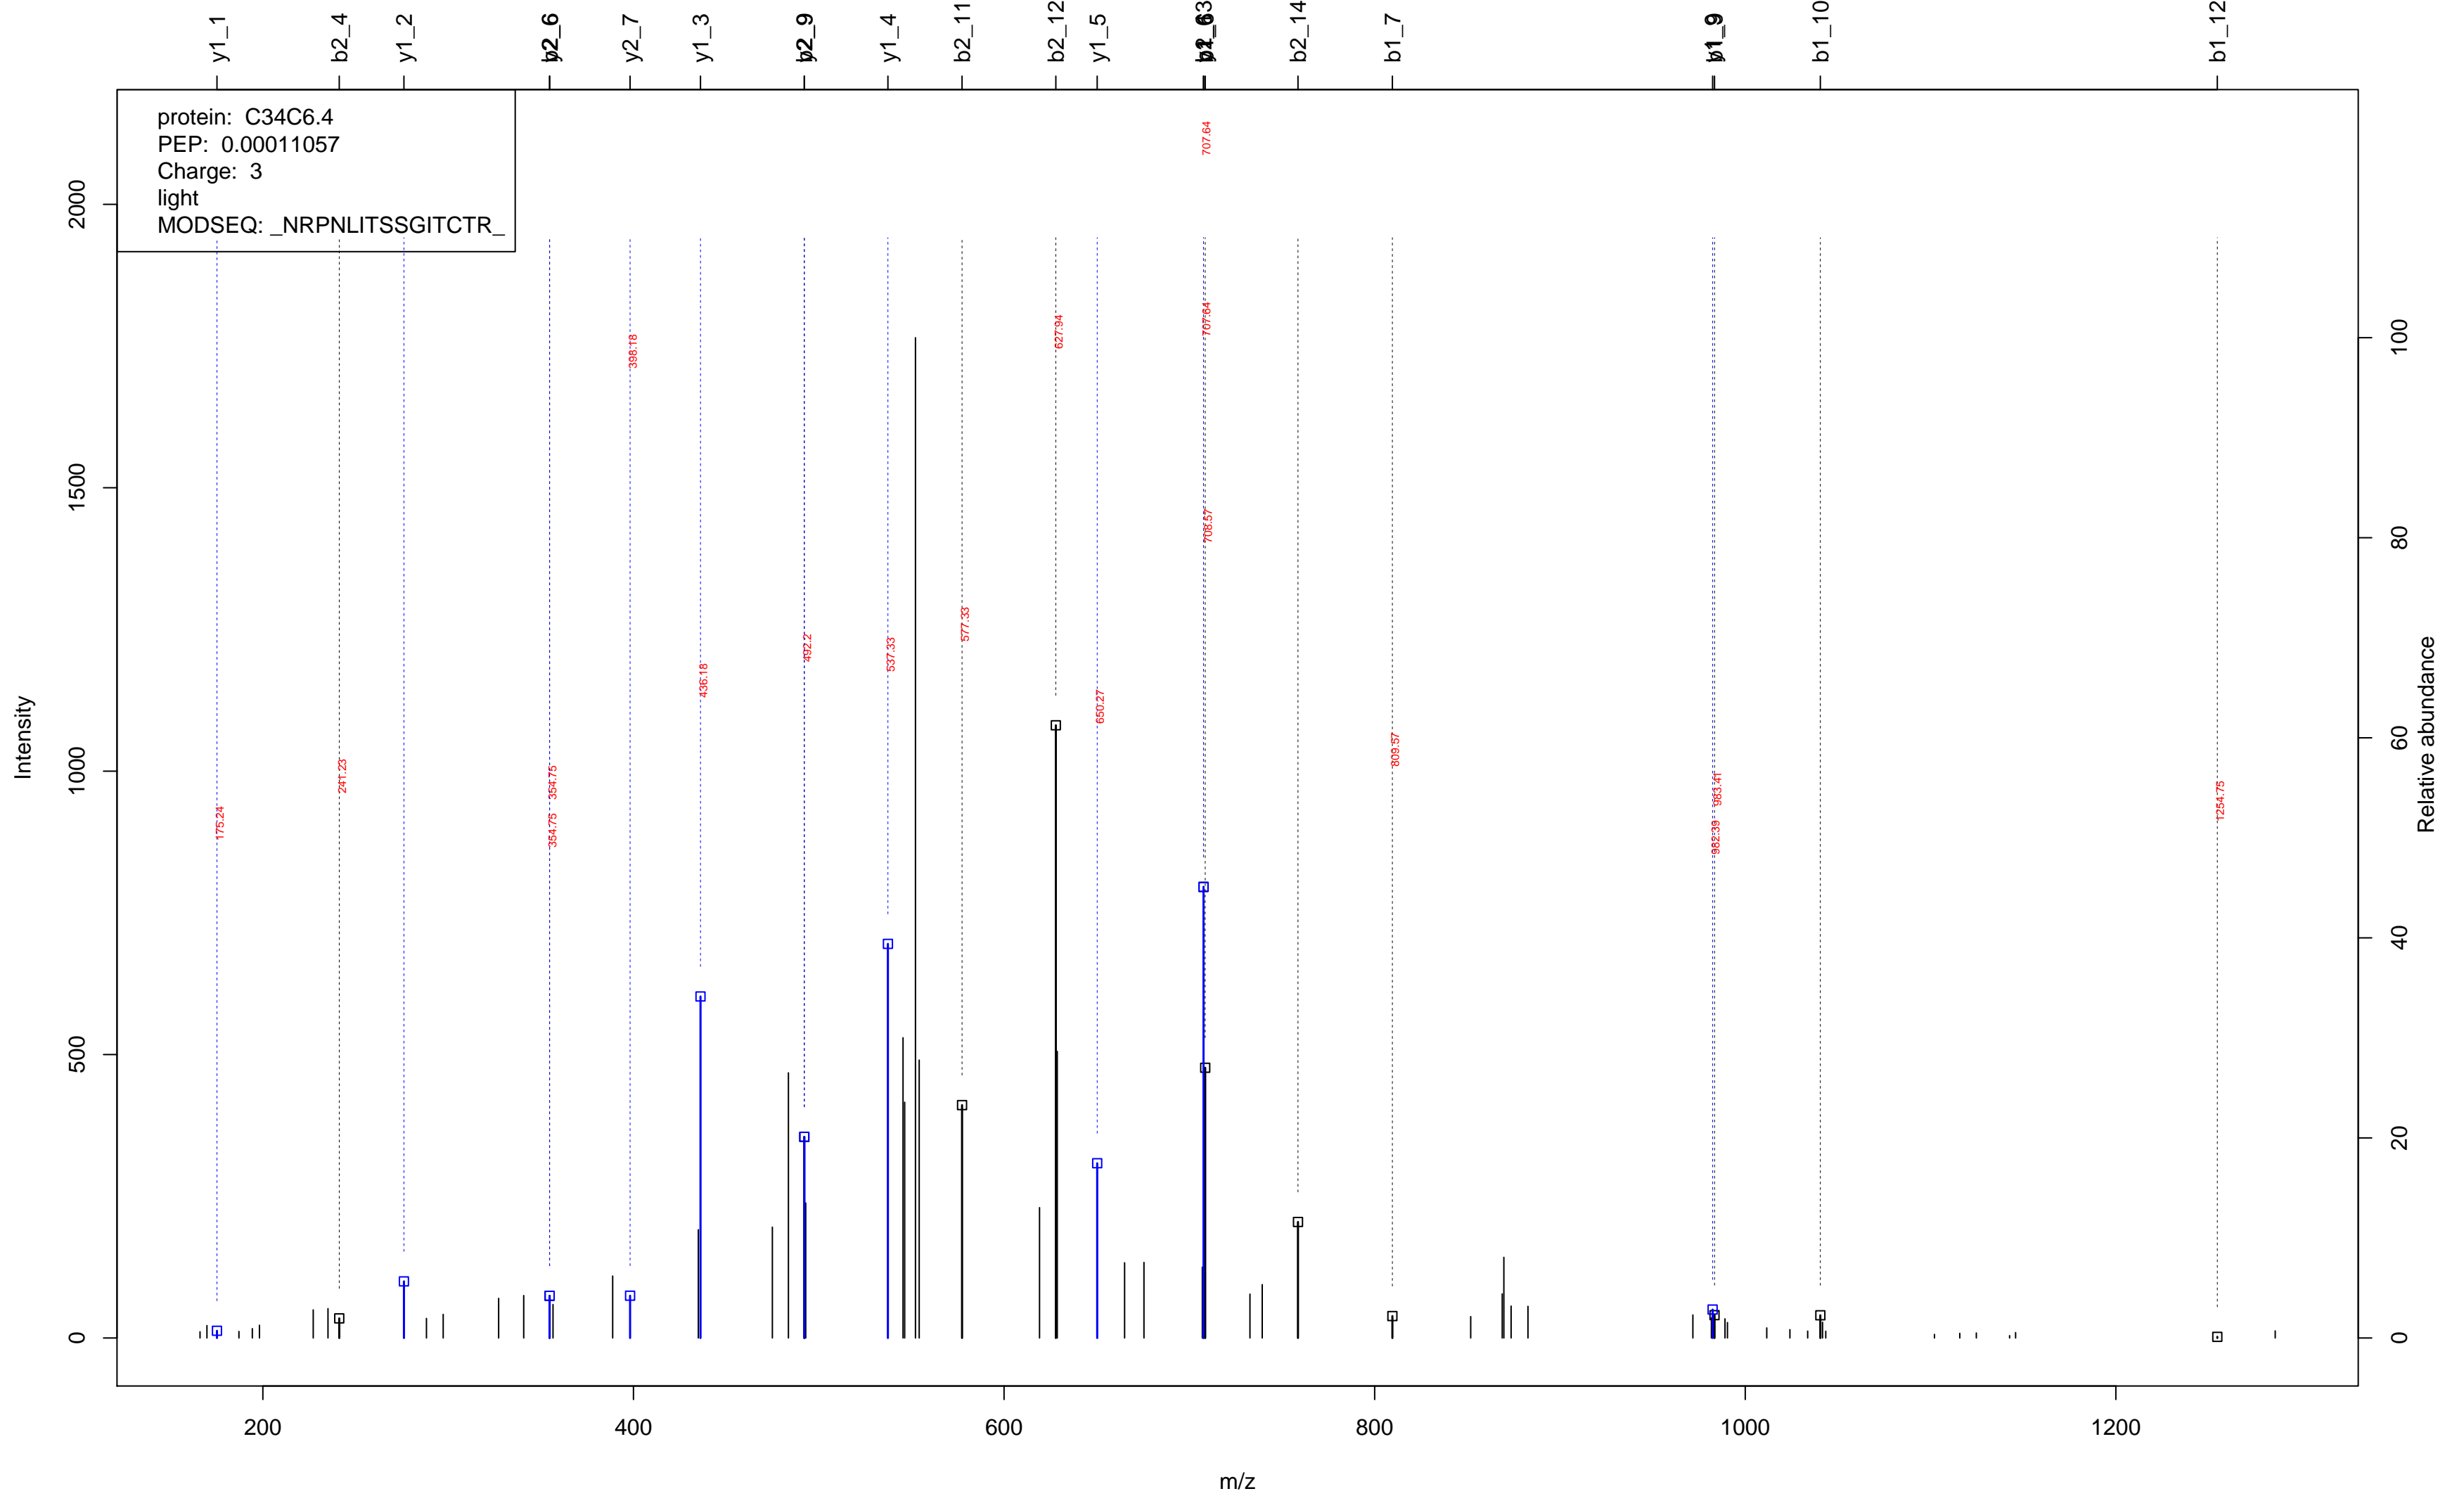

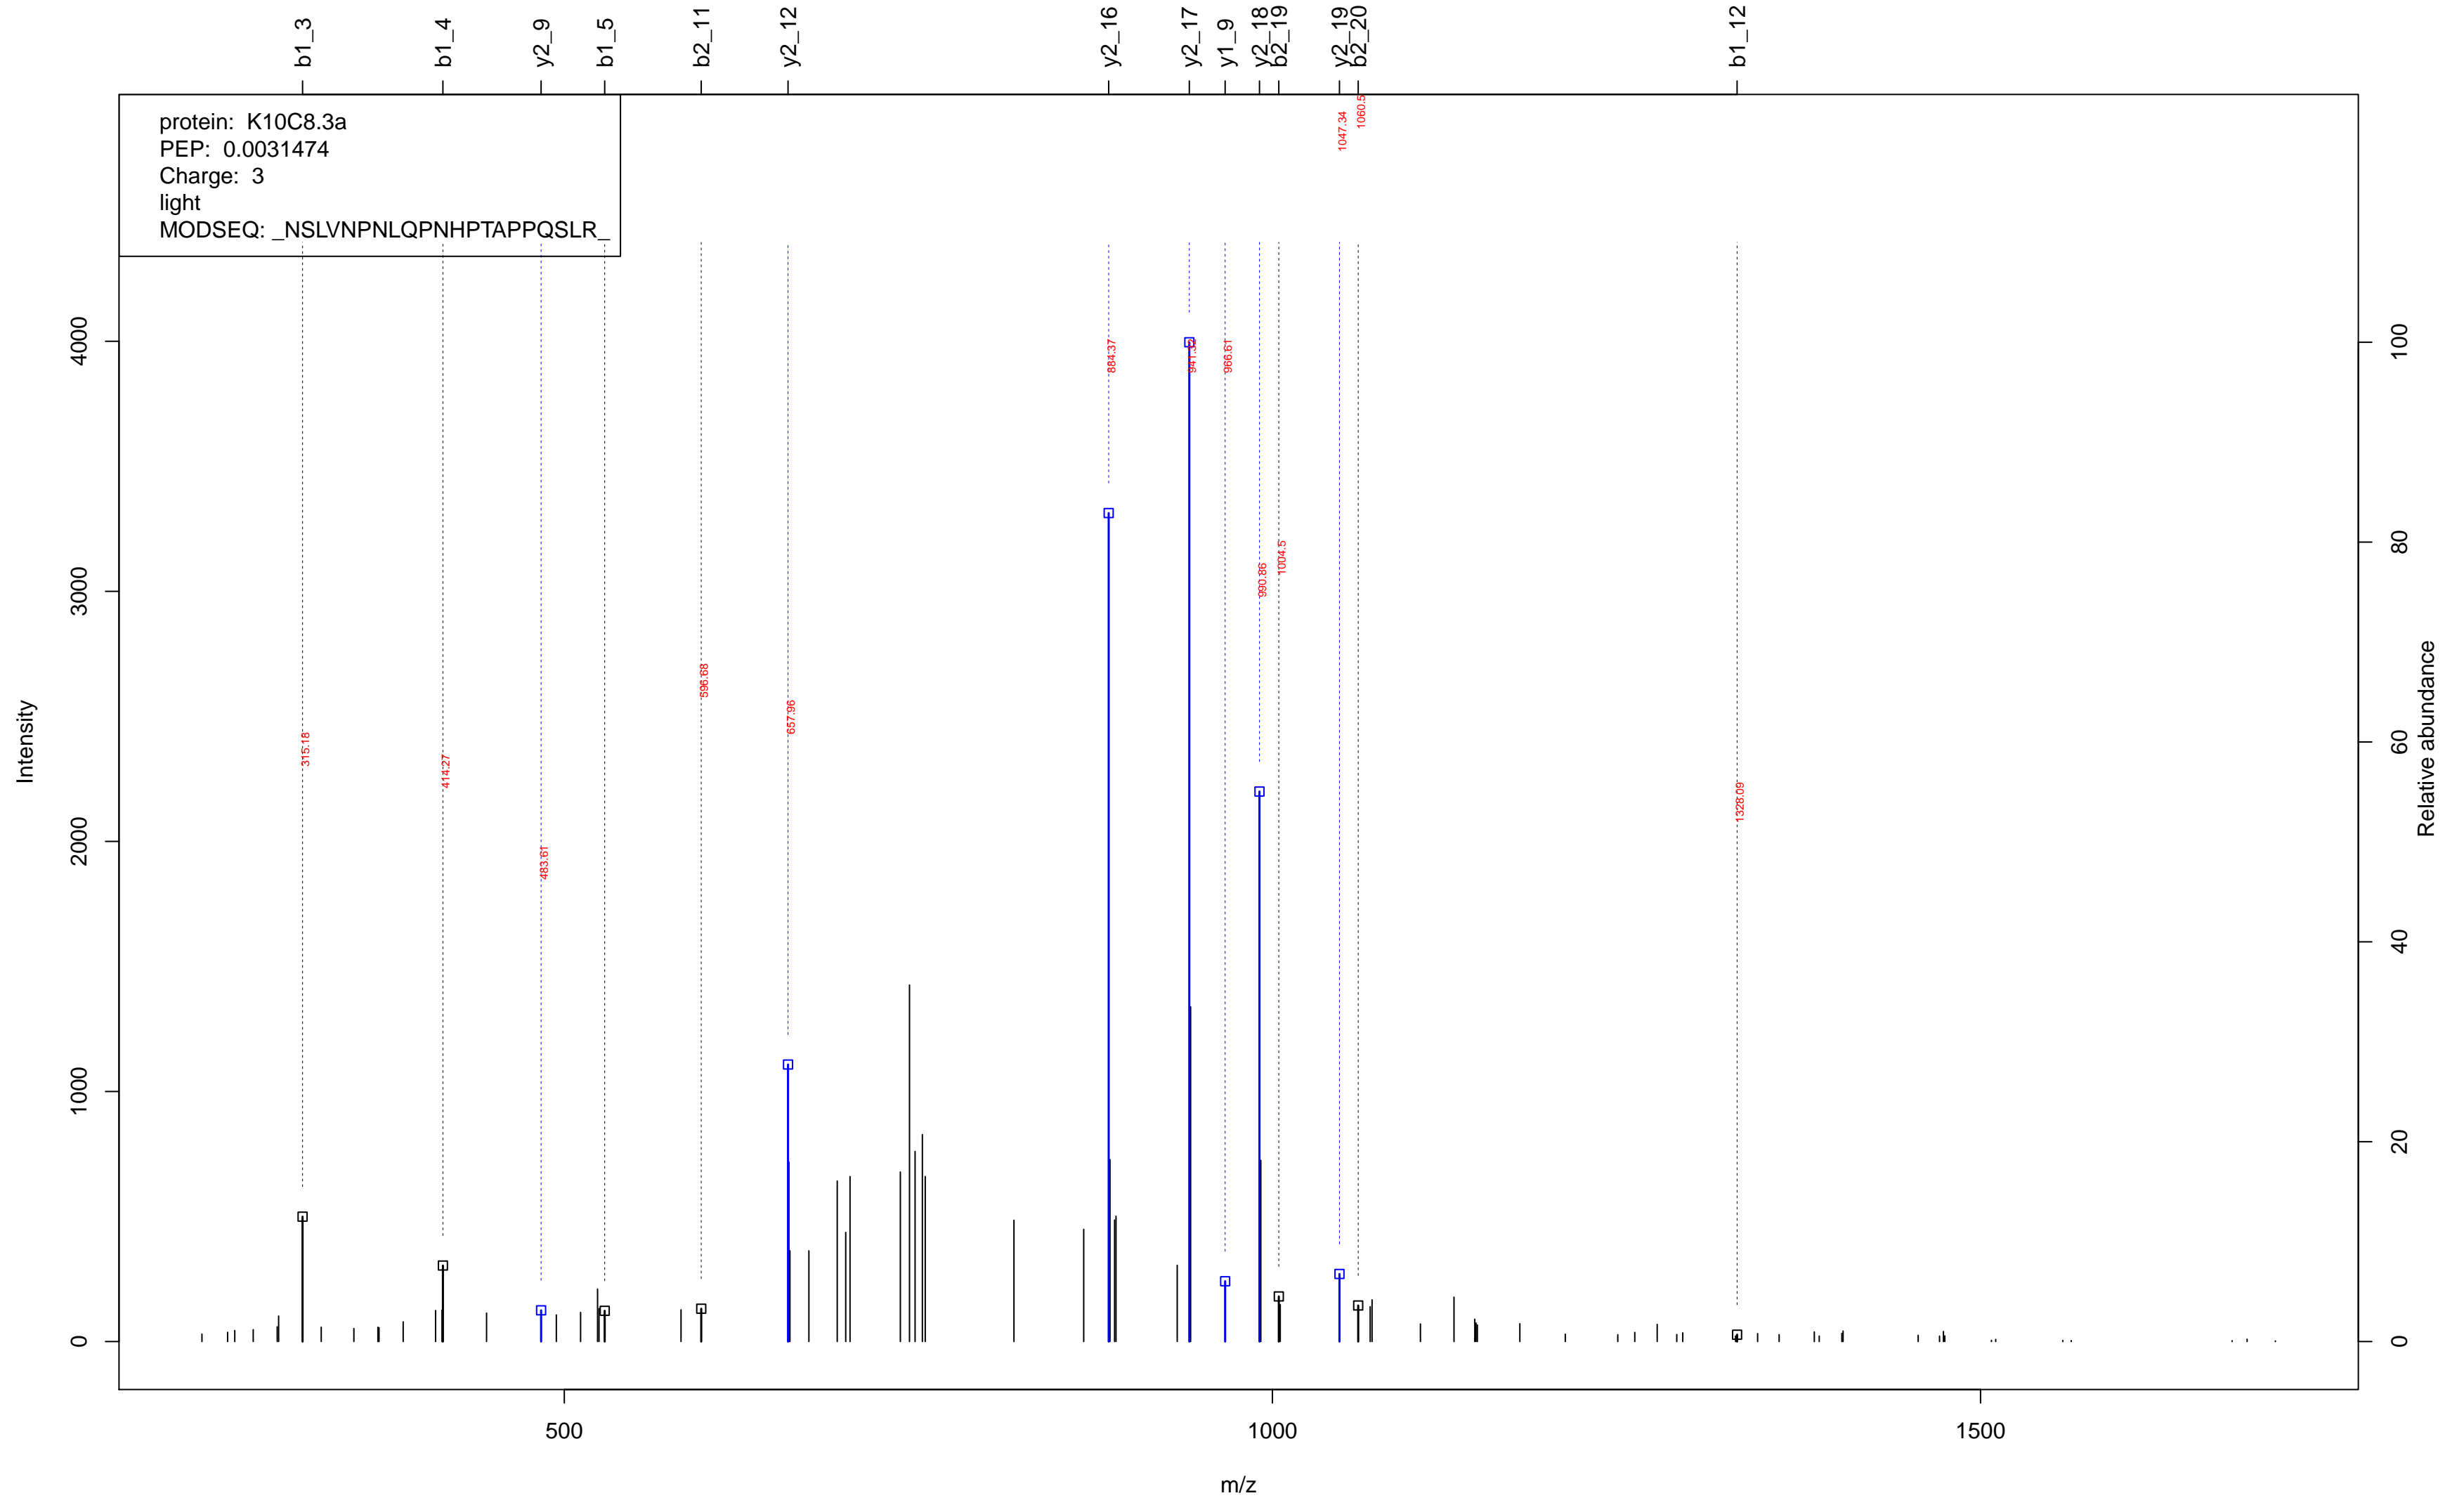

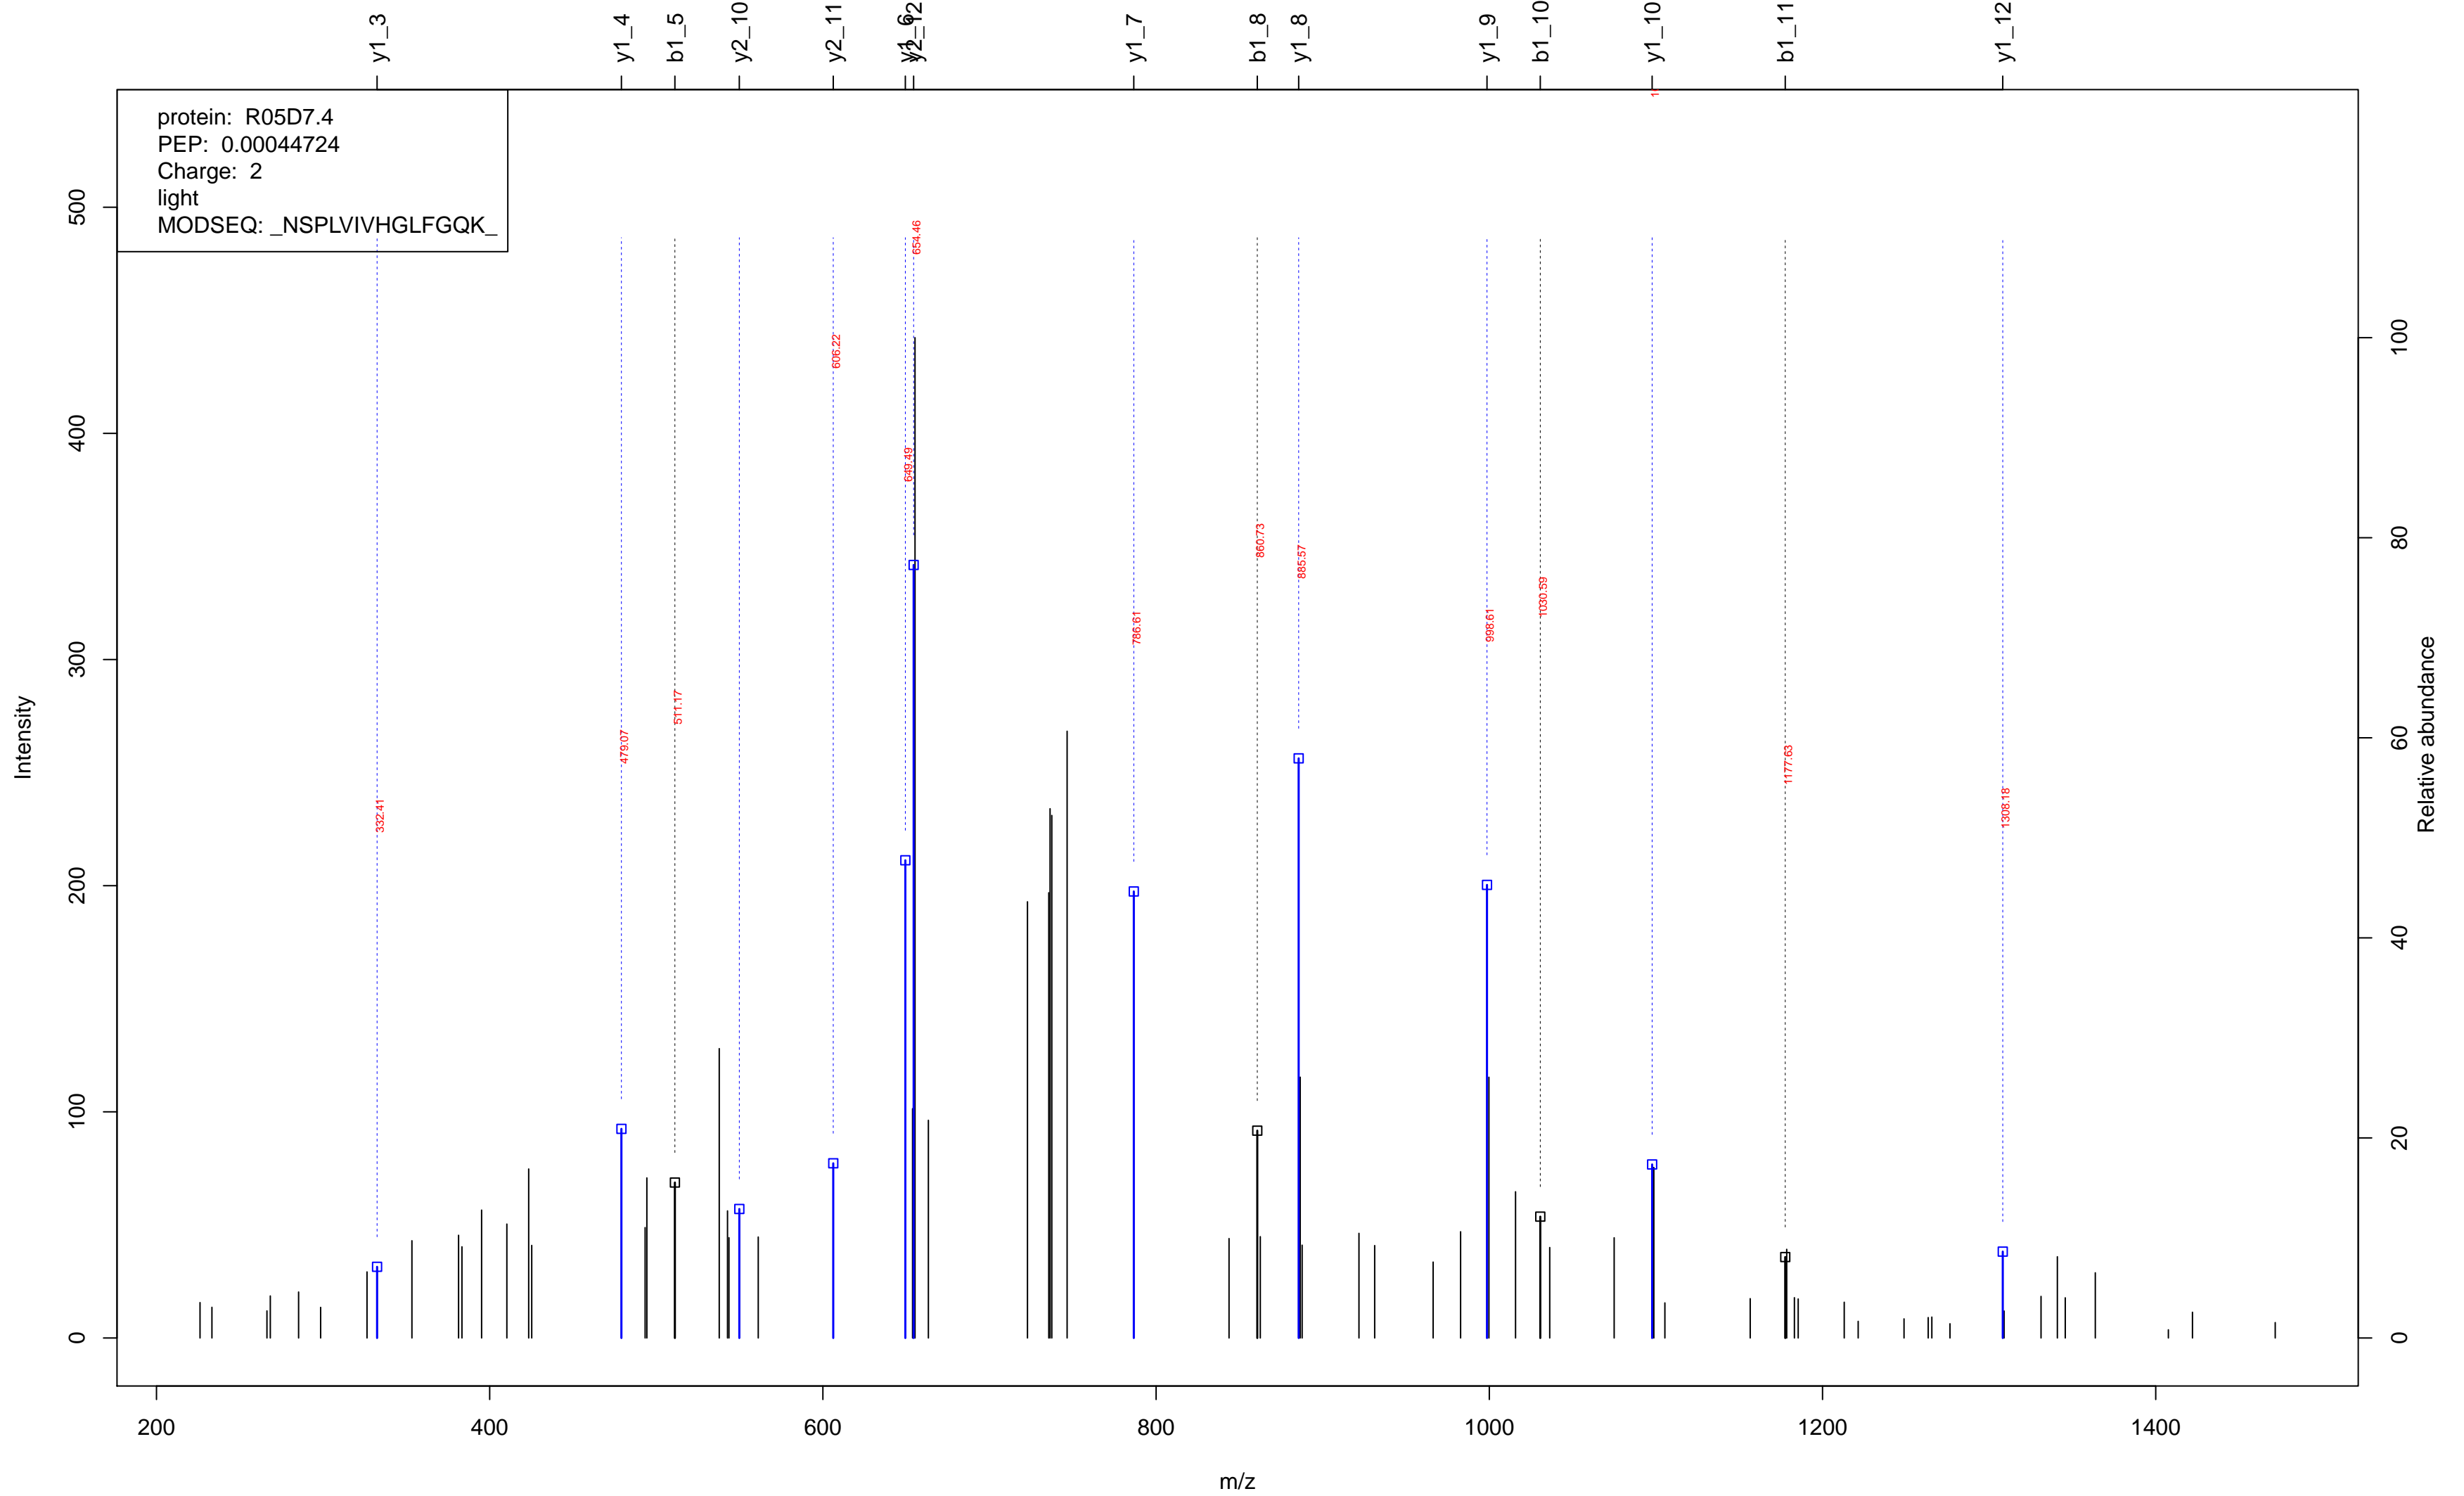

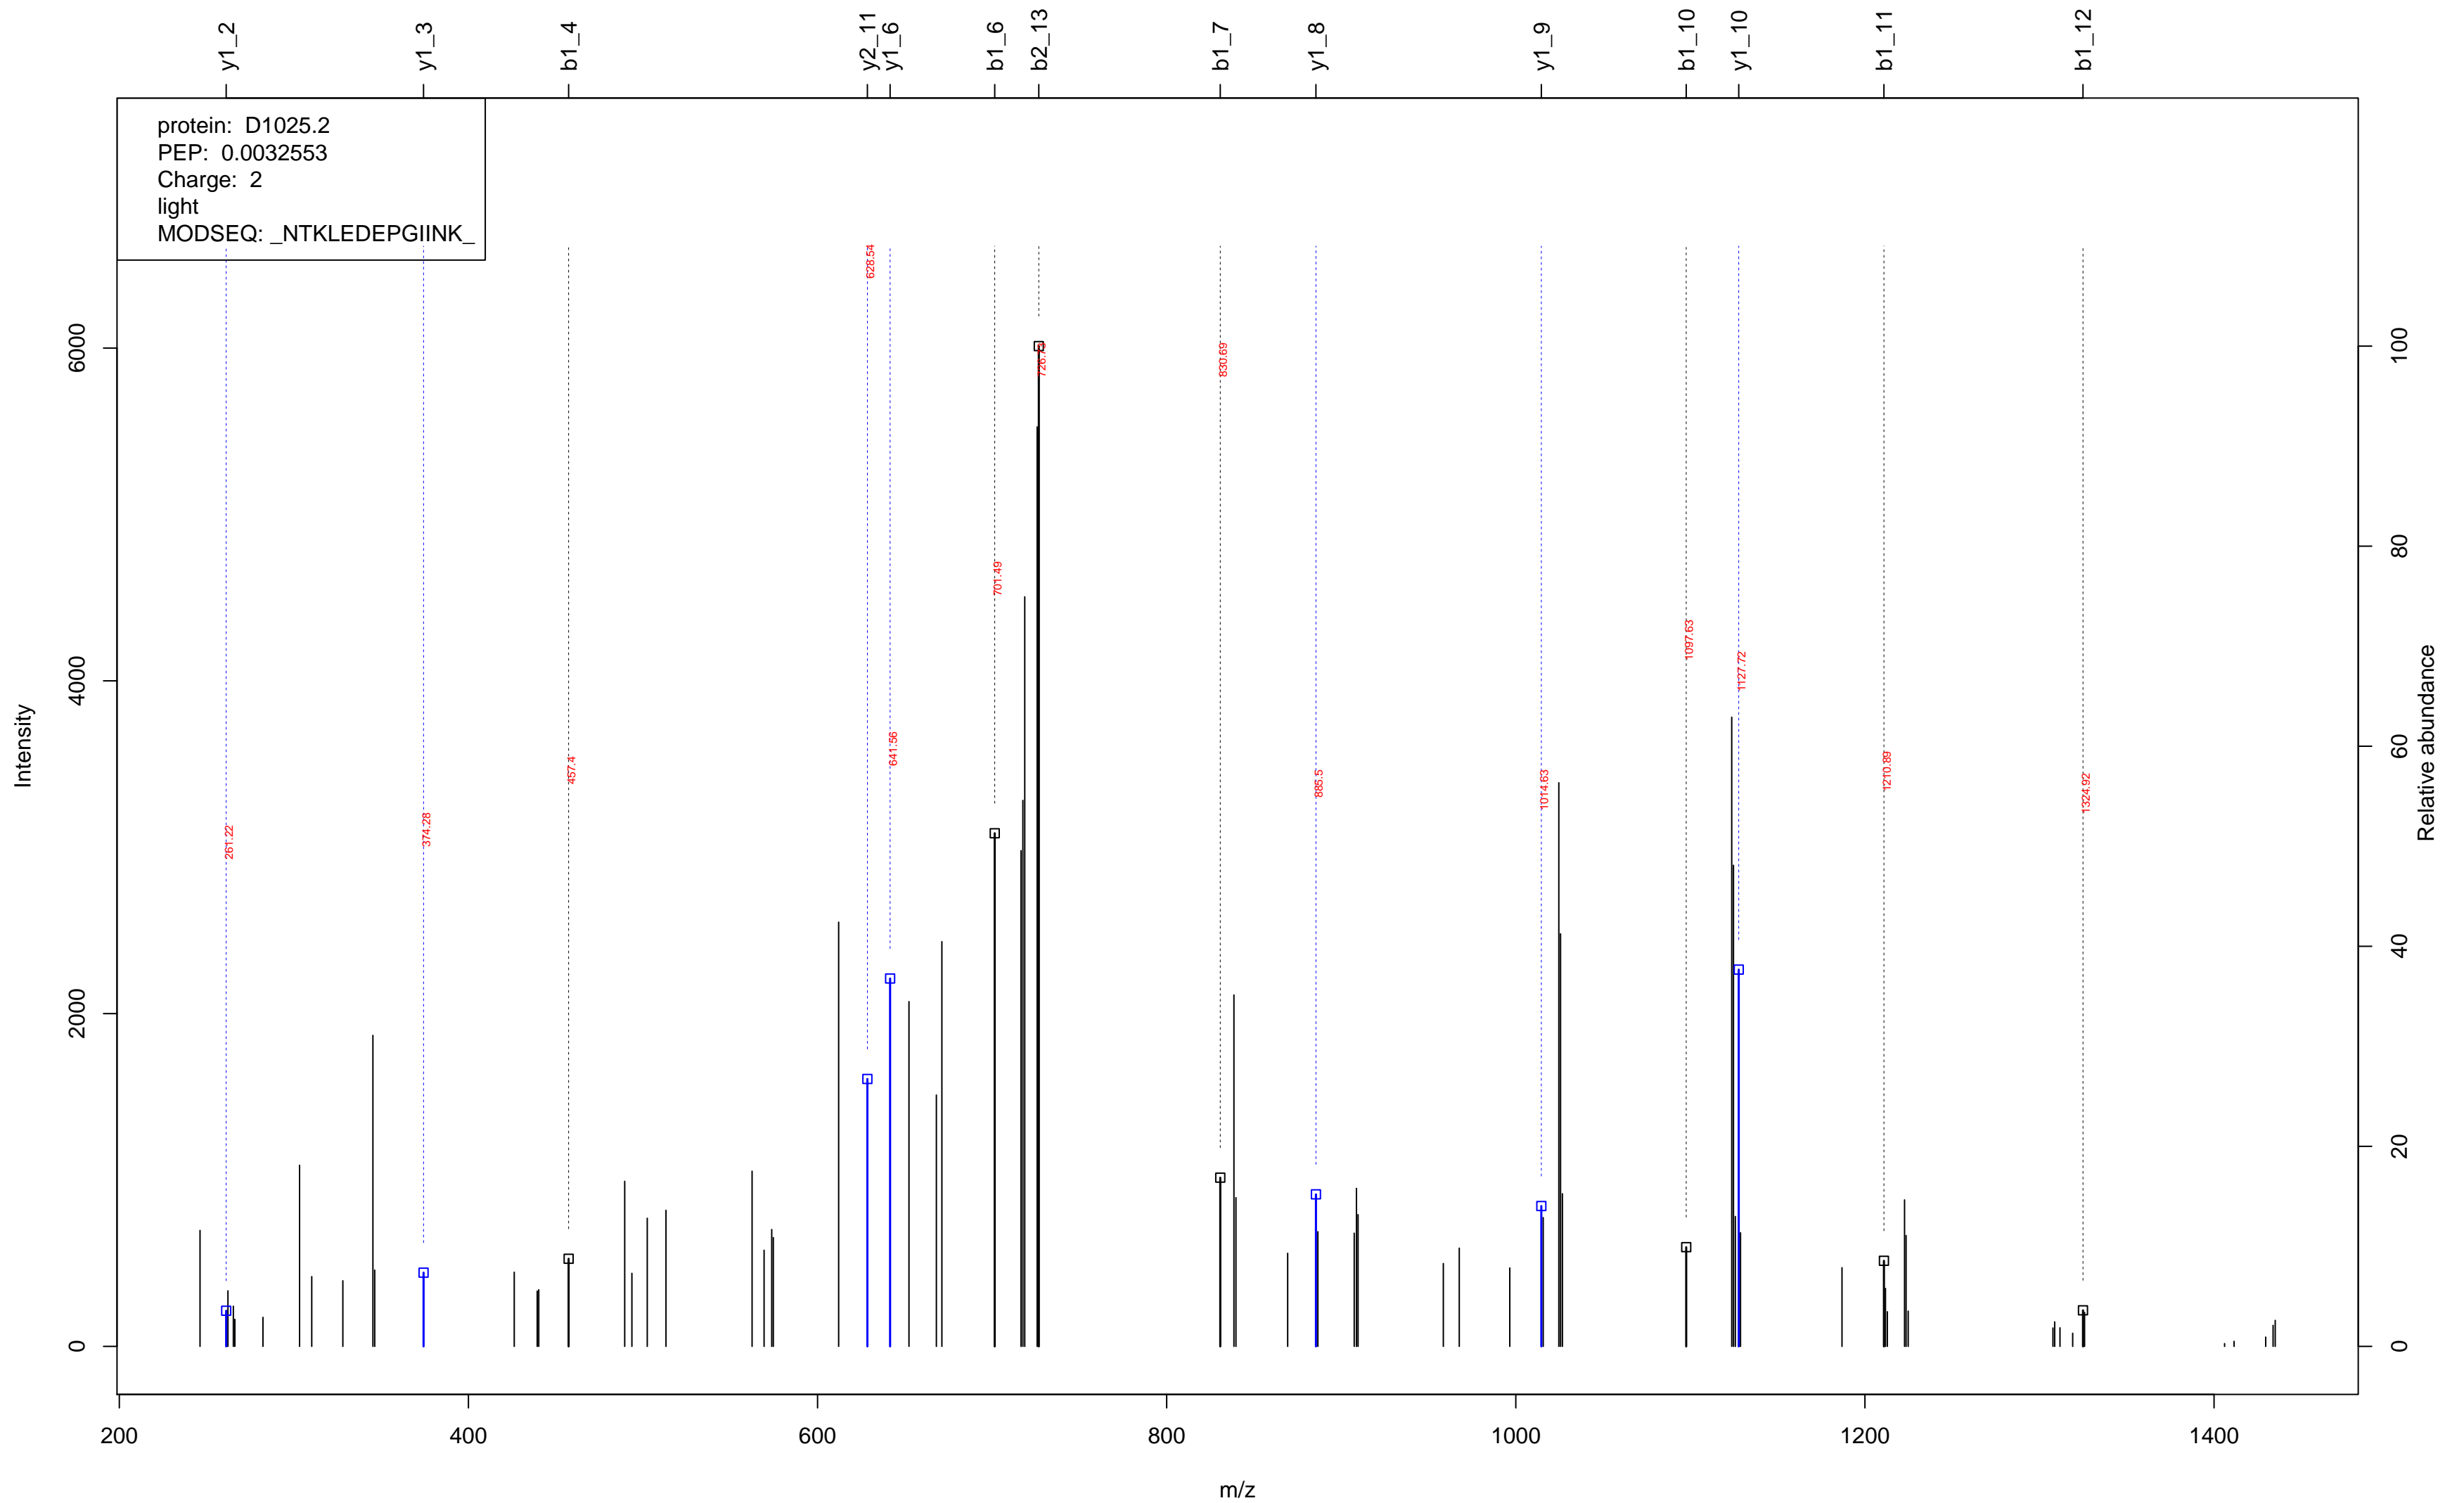

270

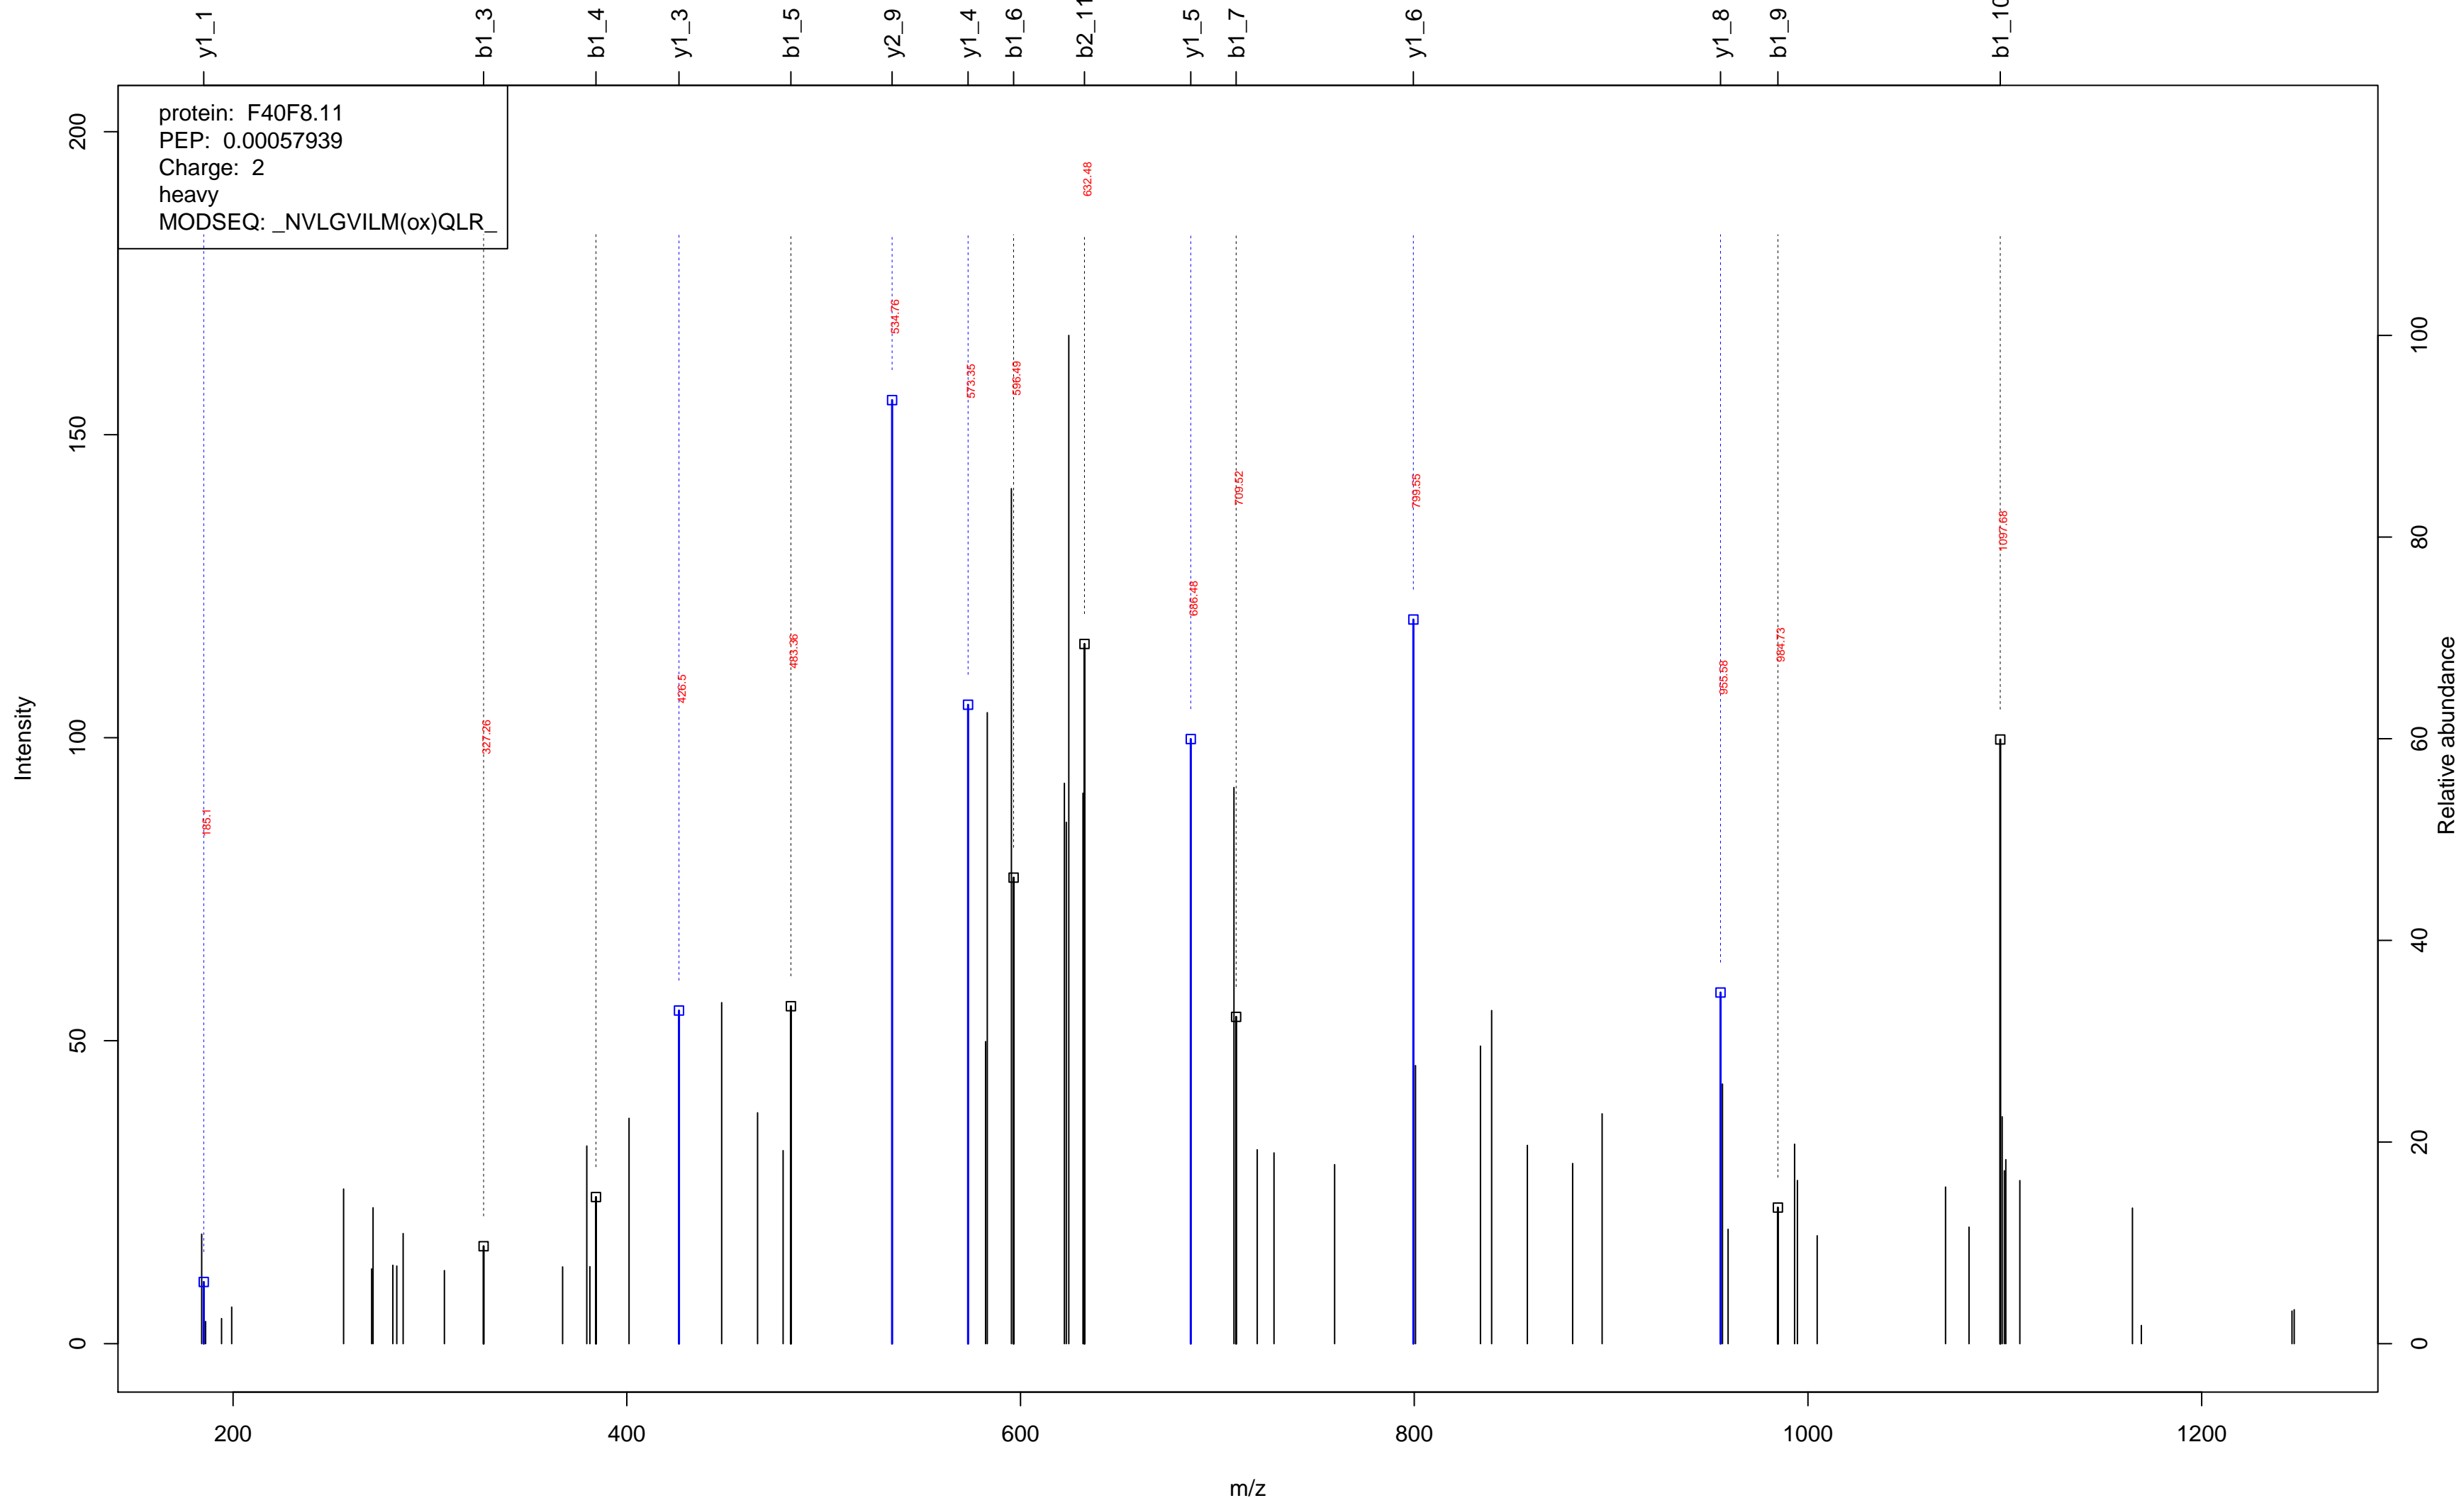

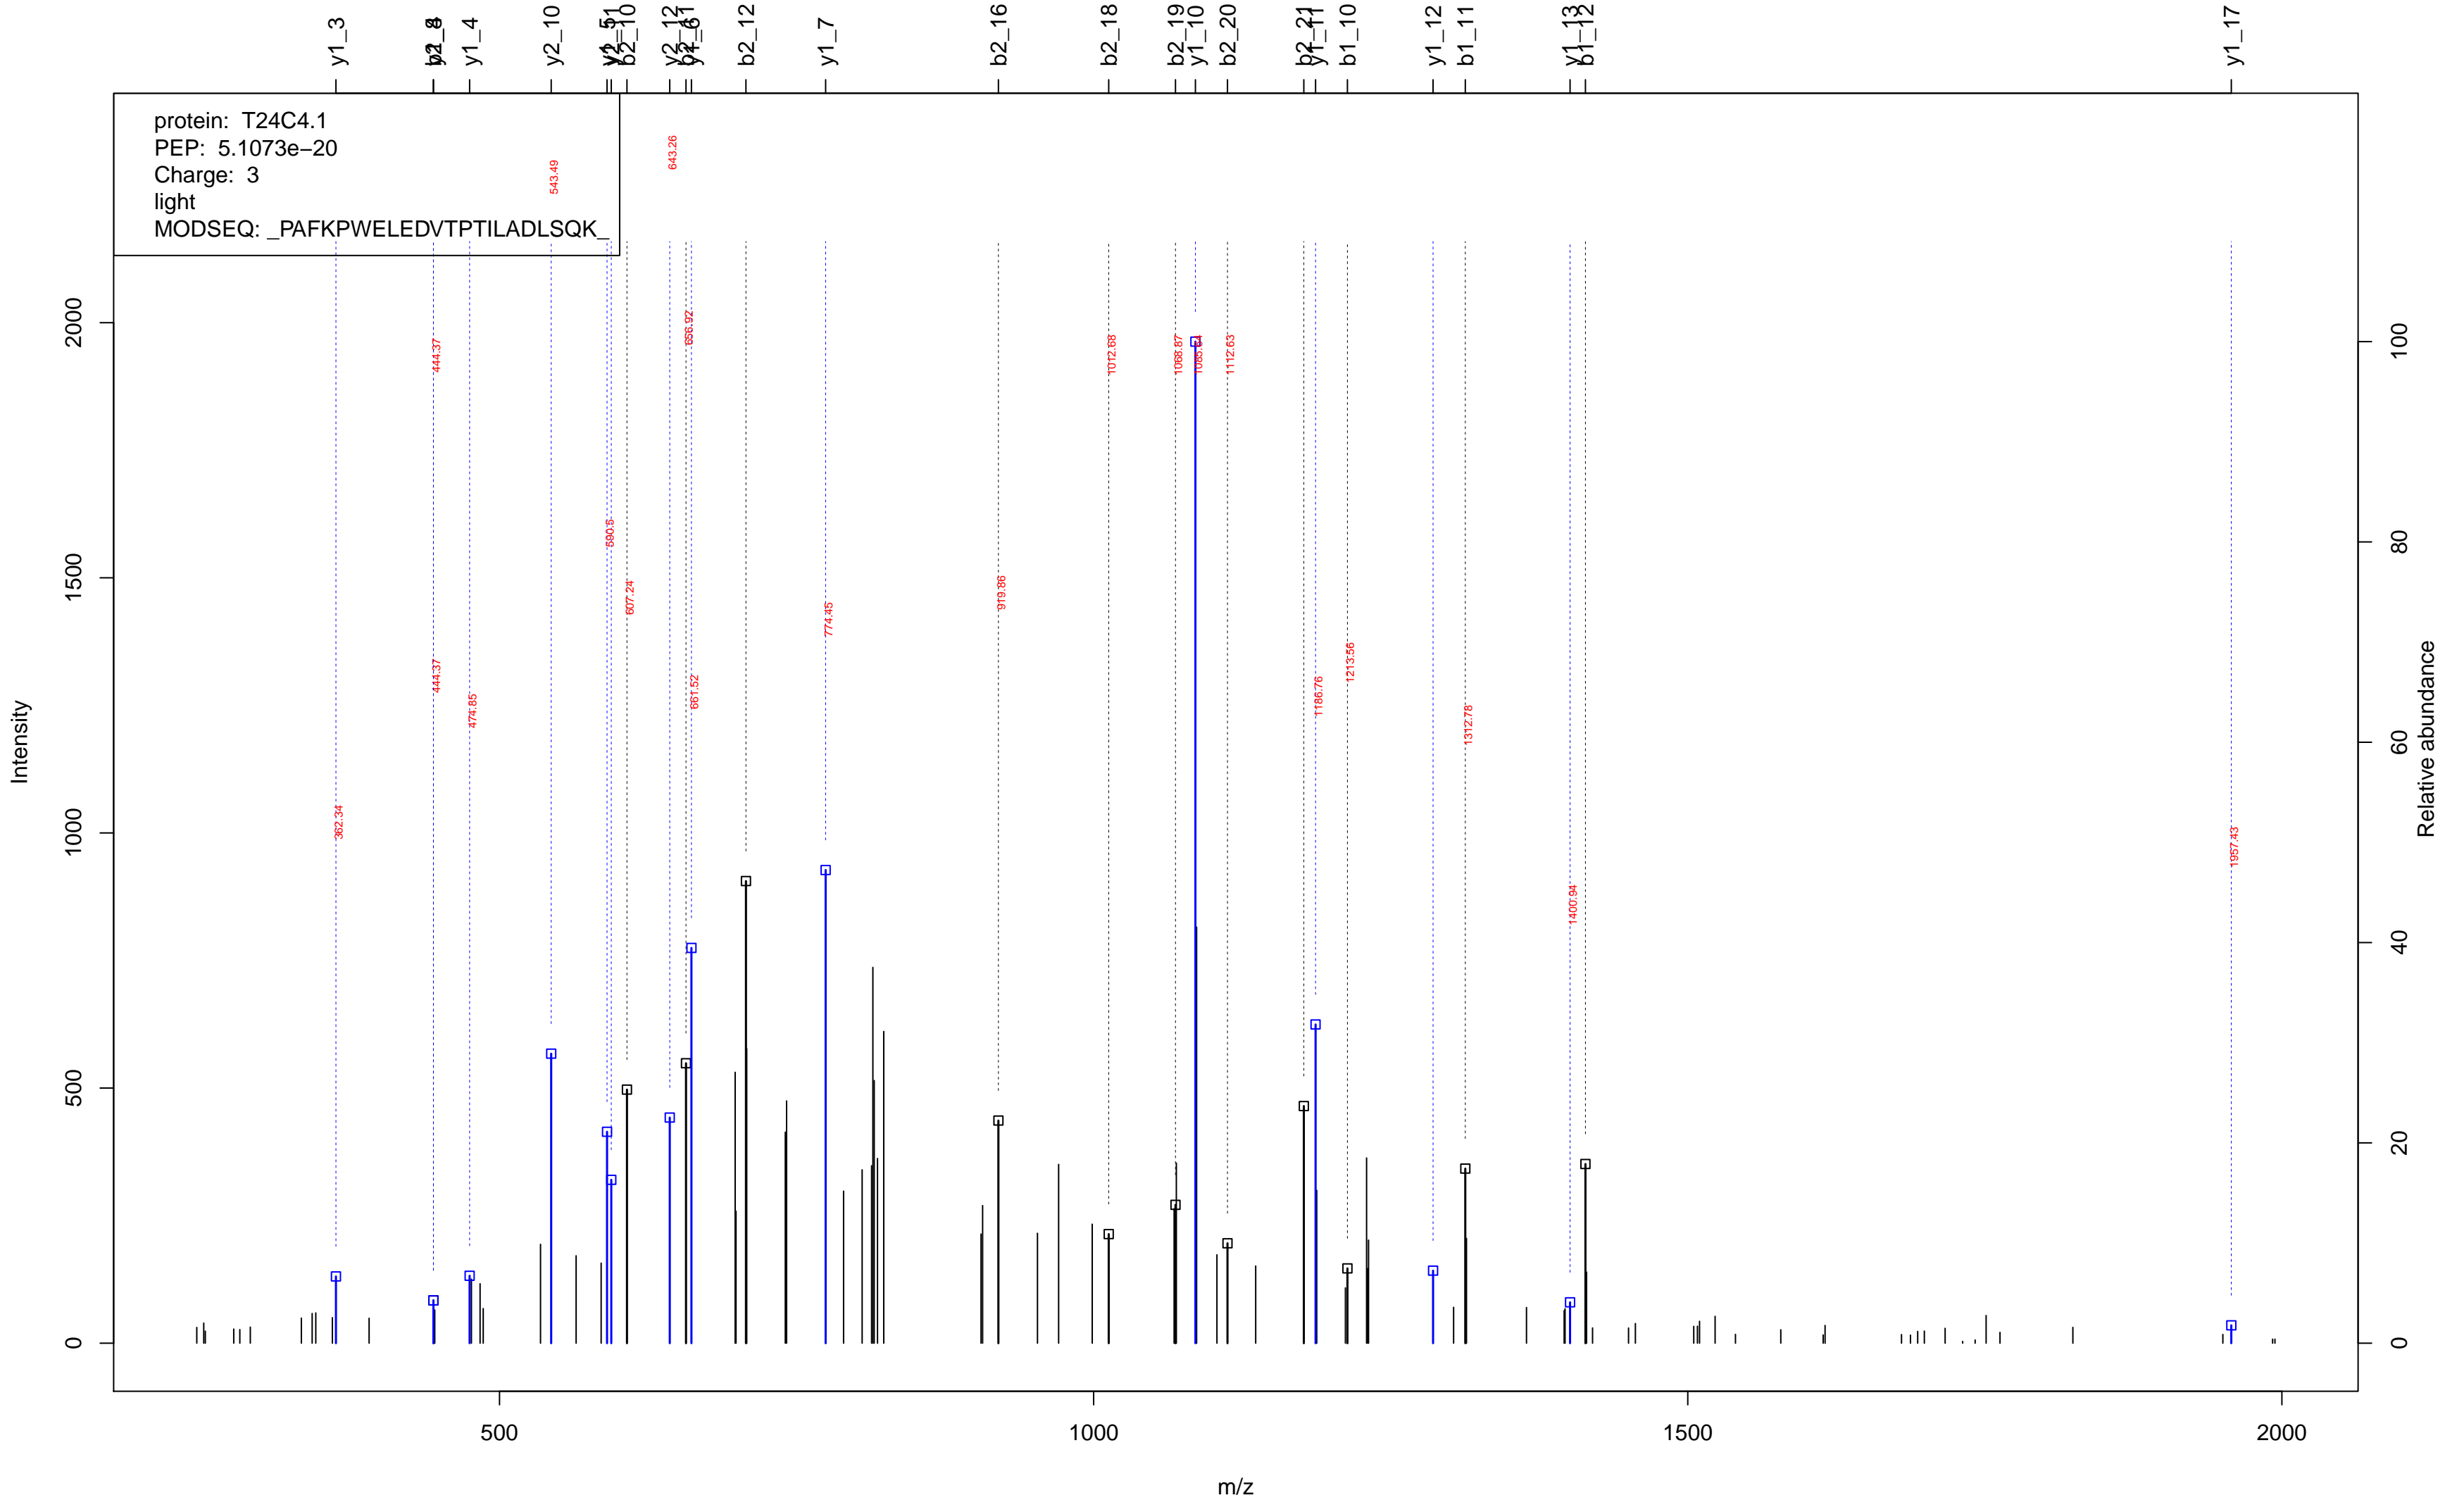

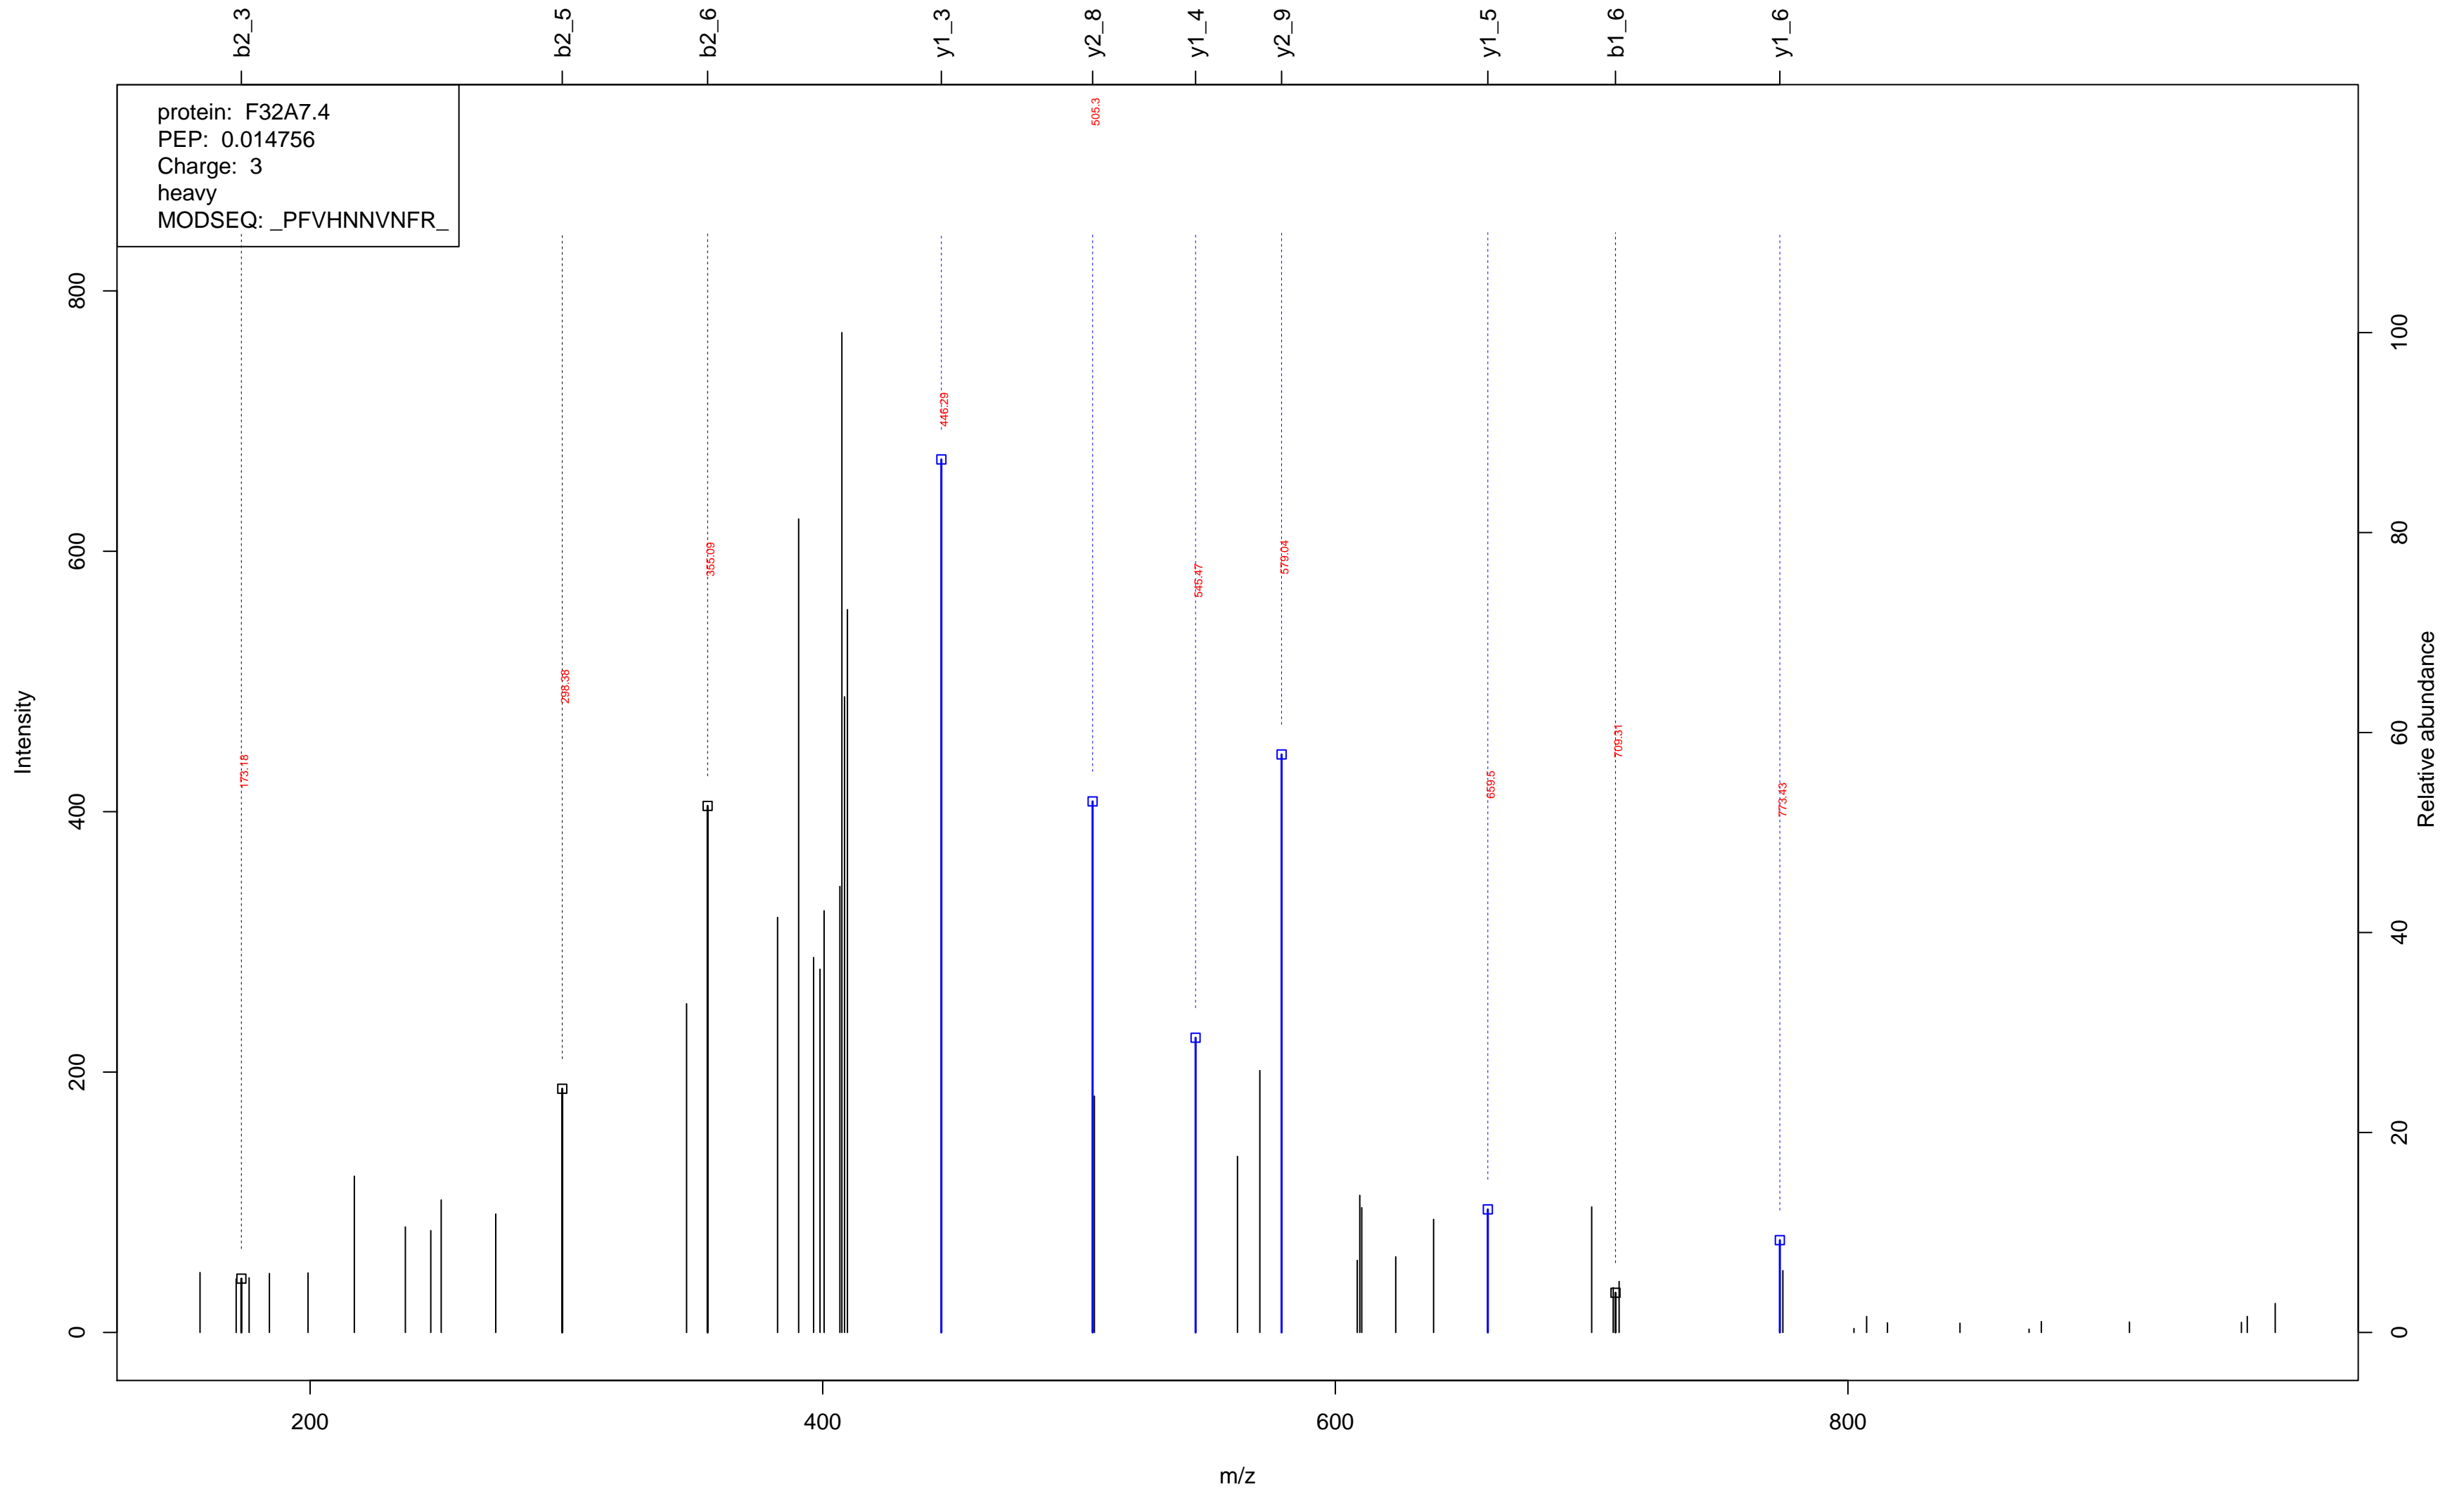



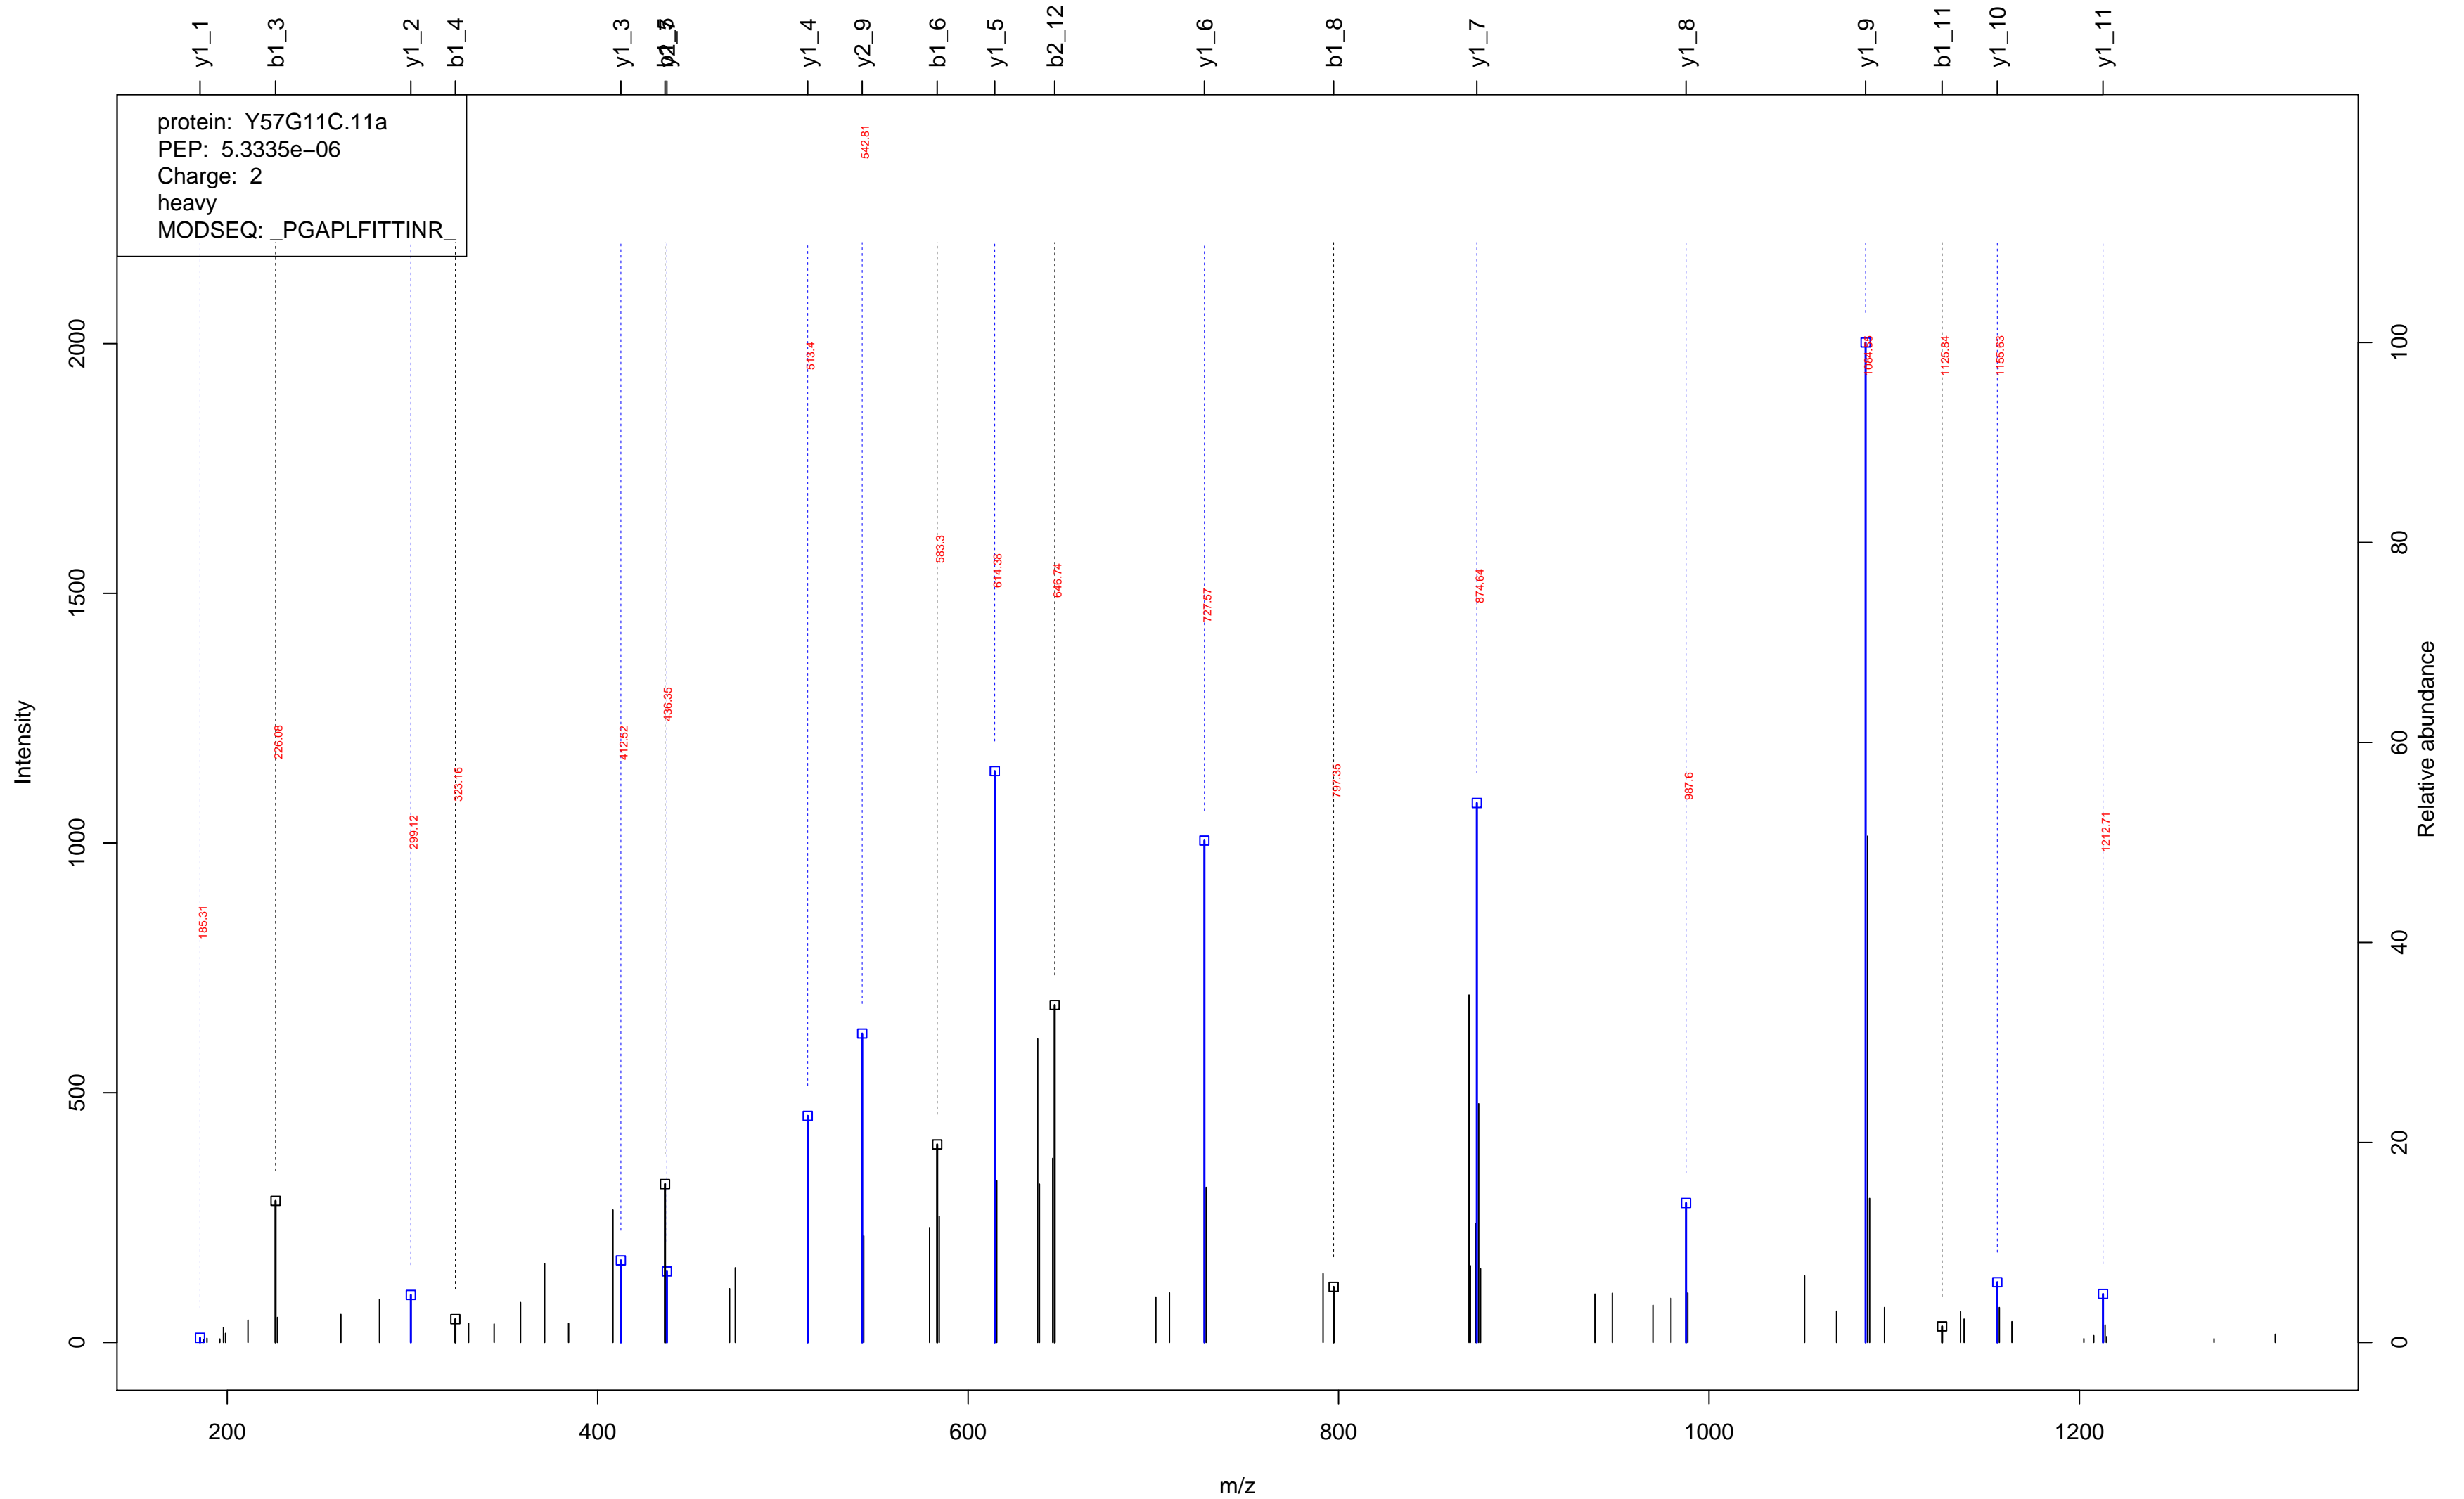

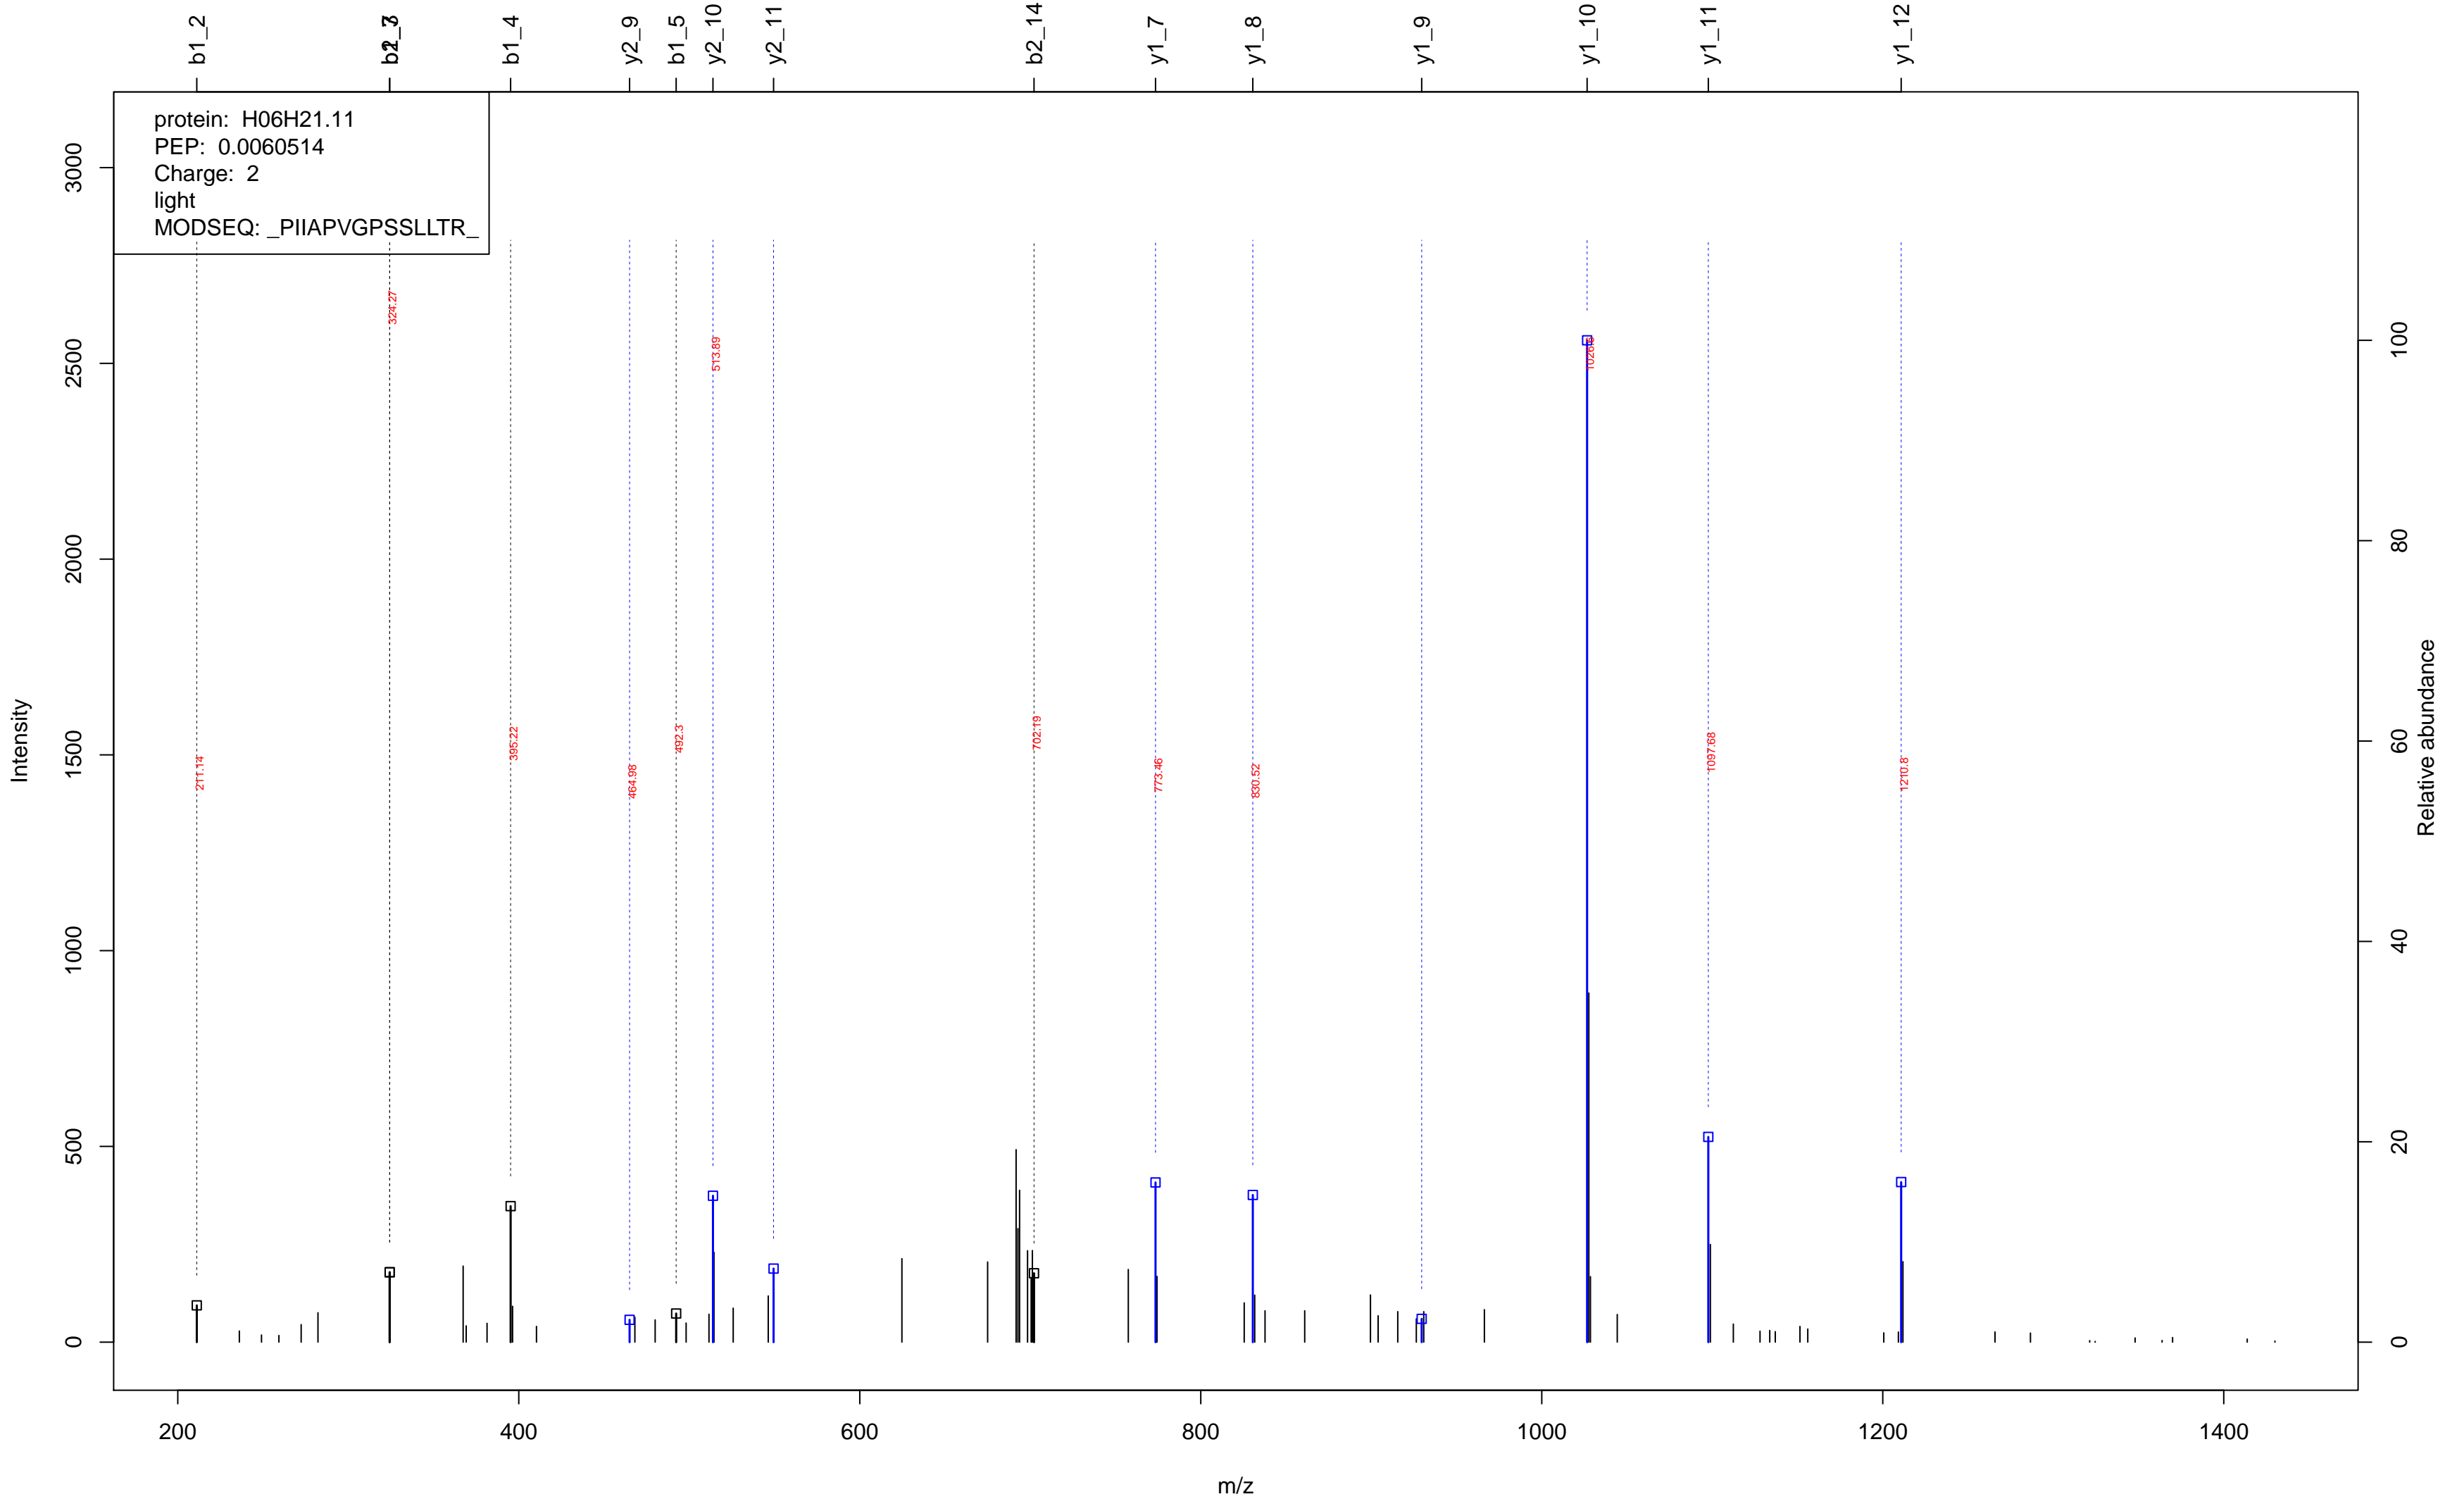

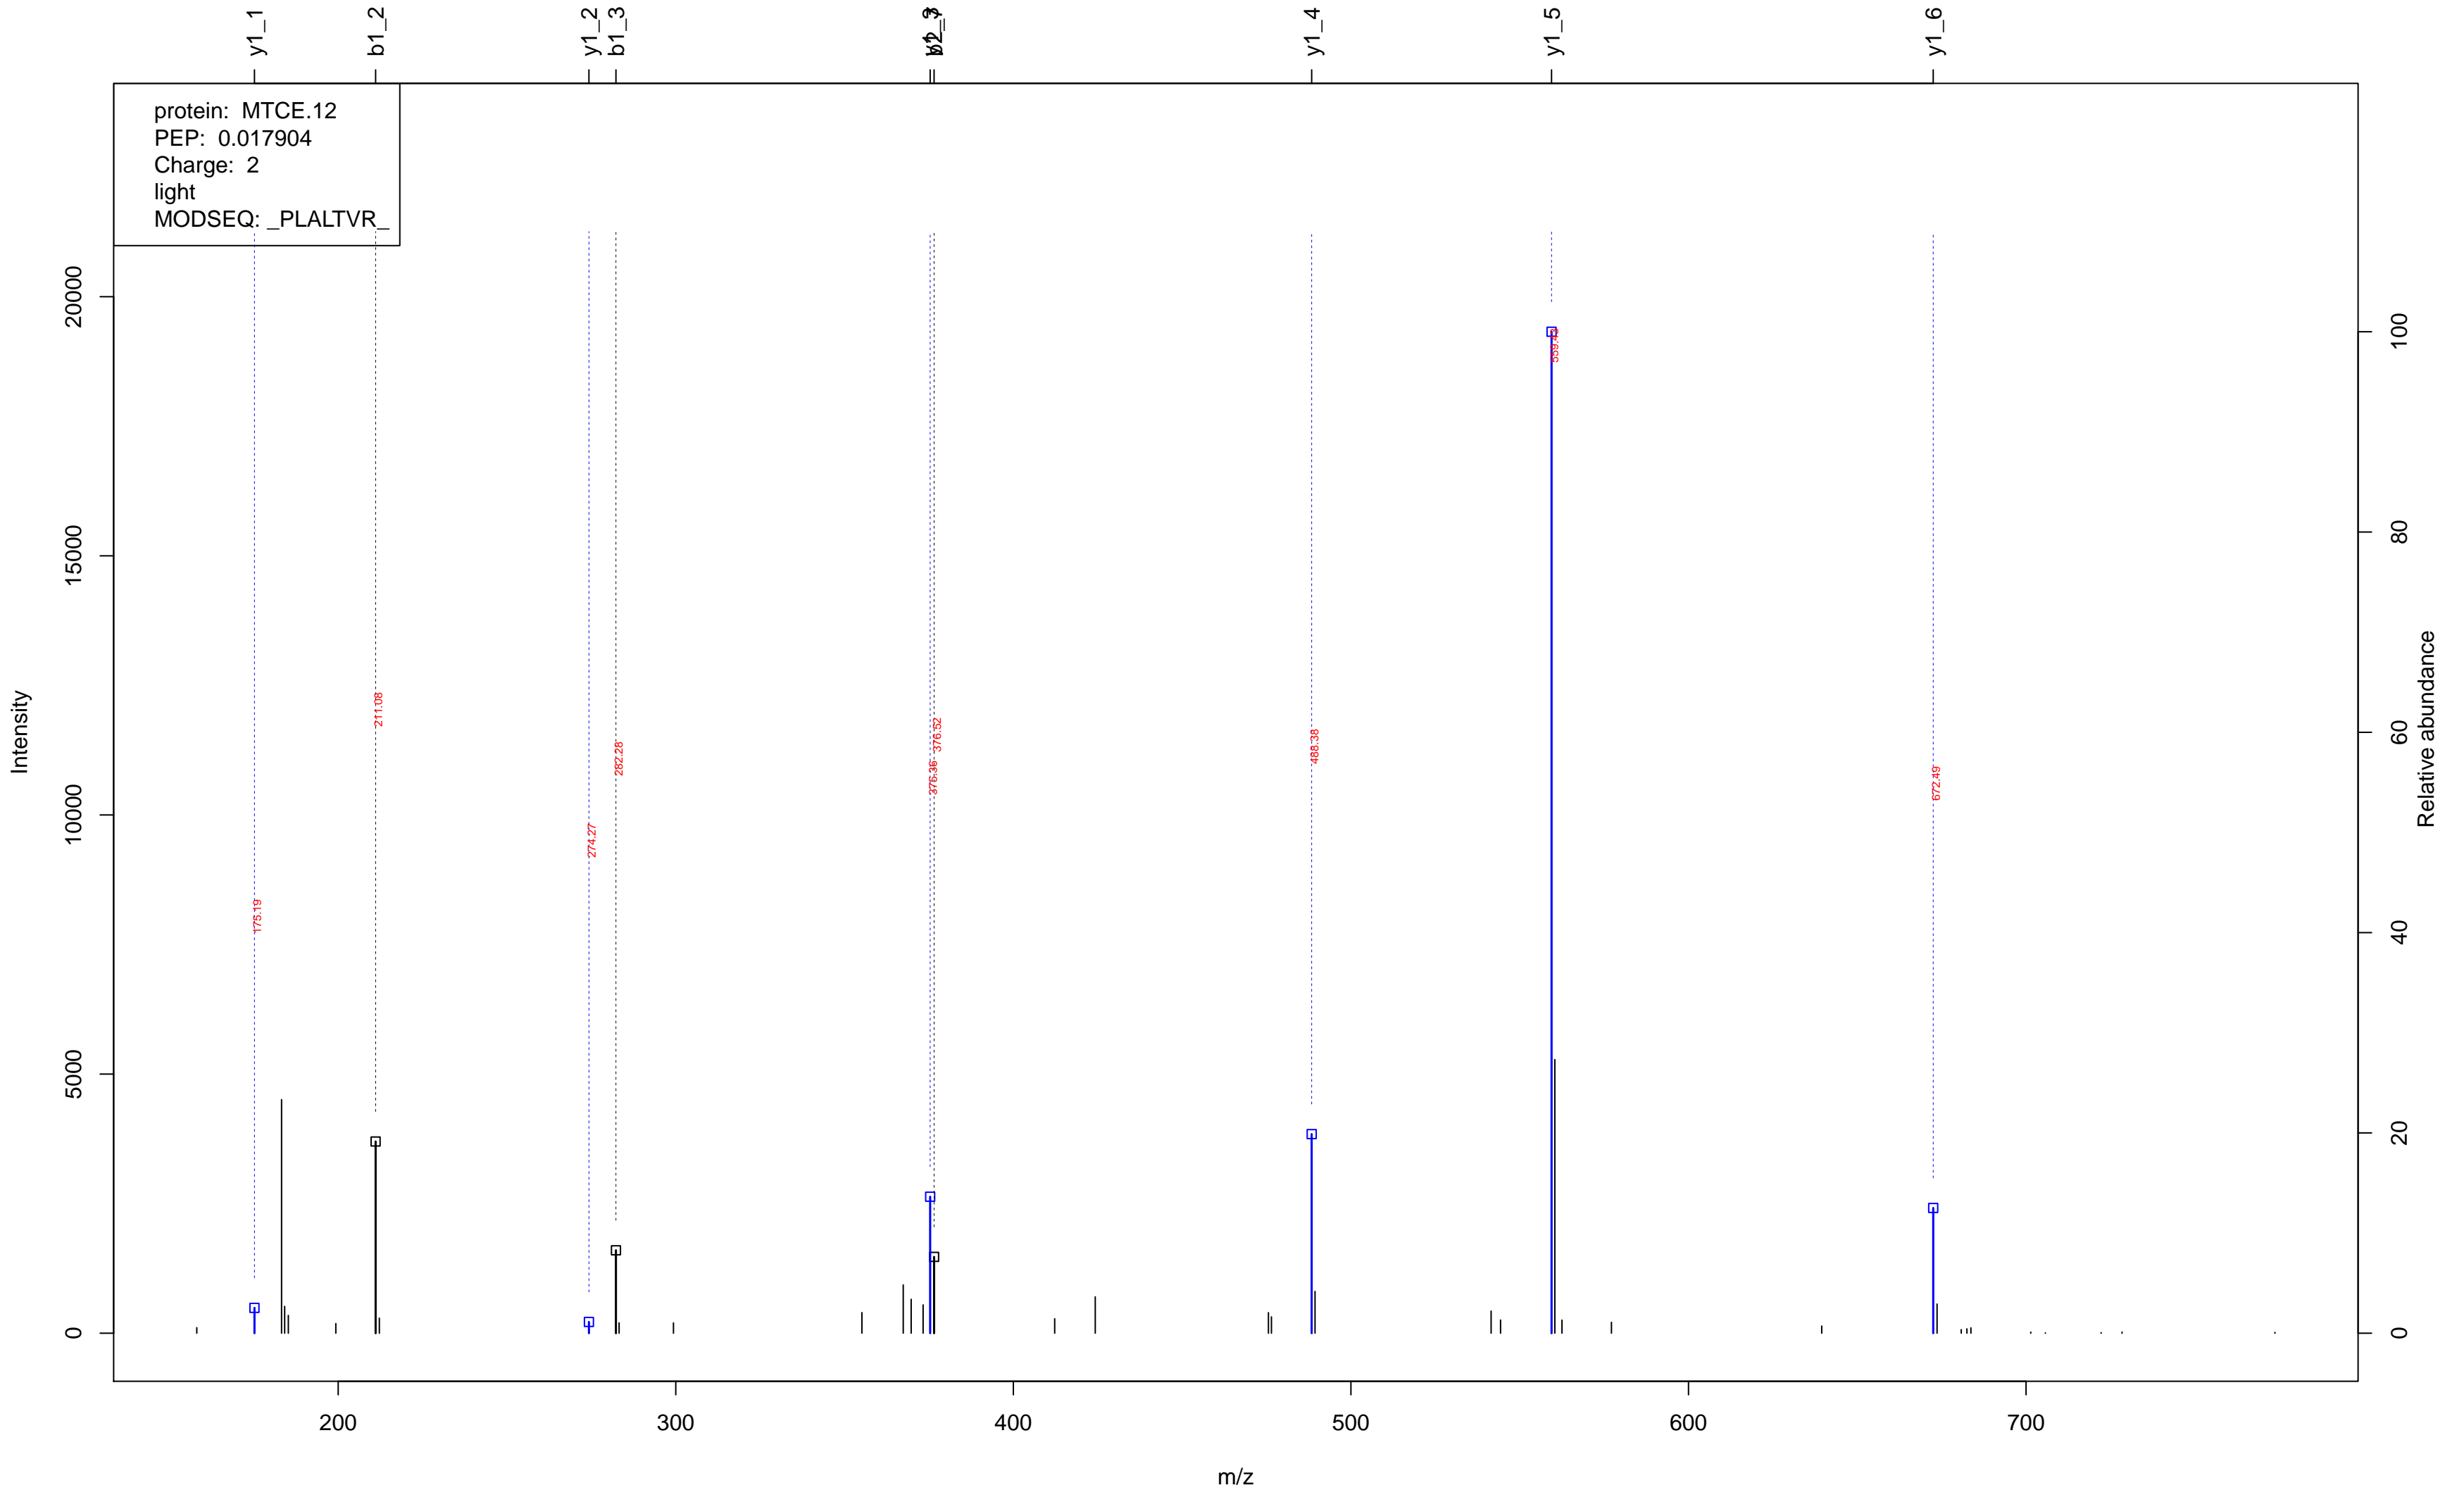

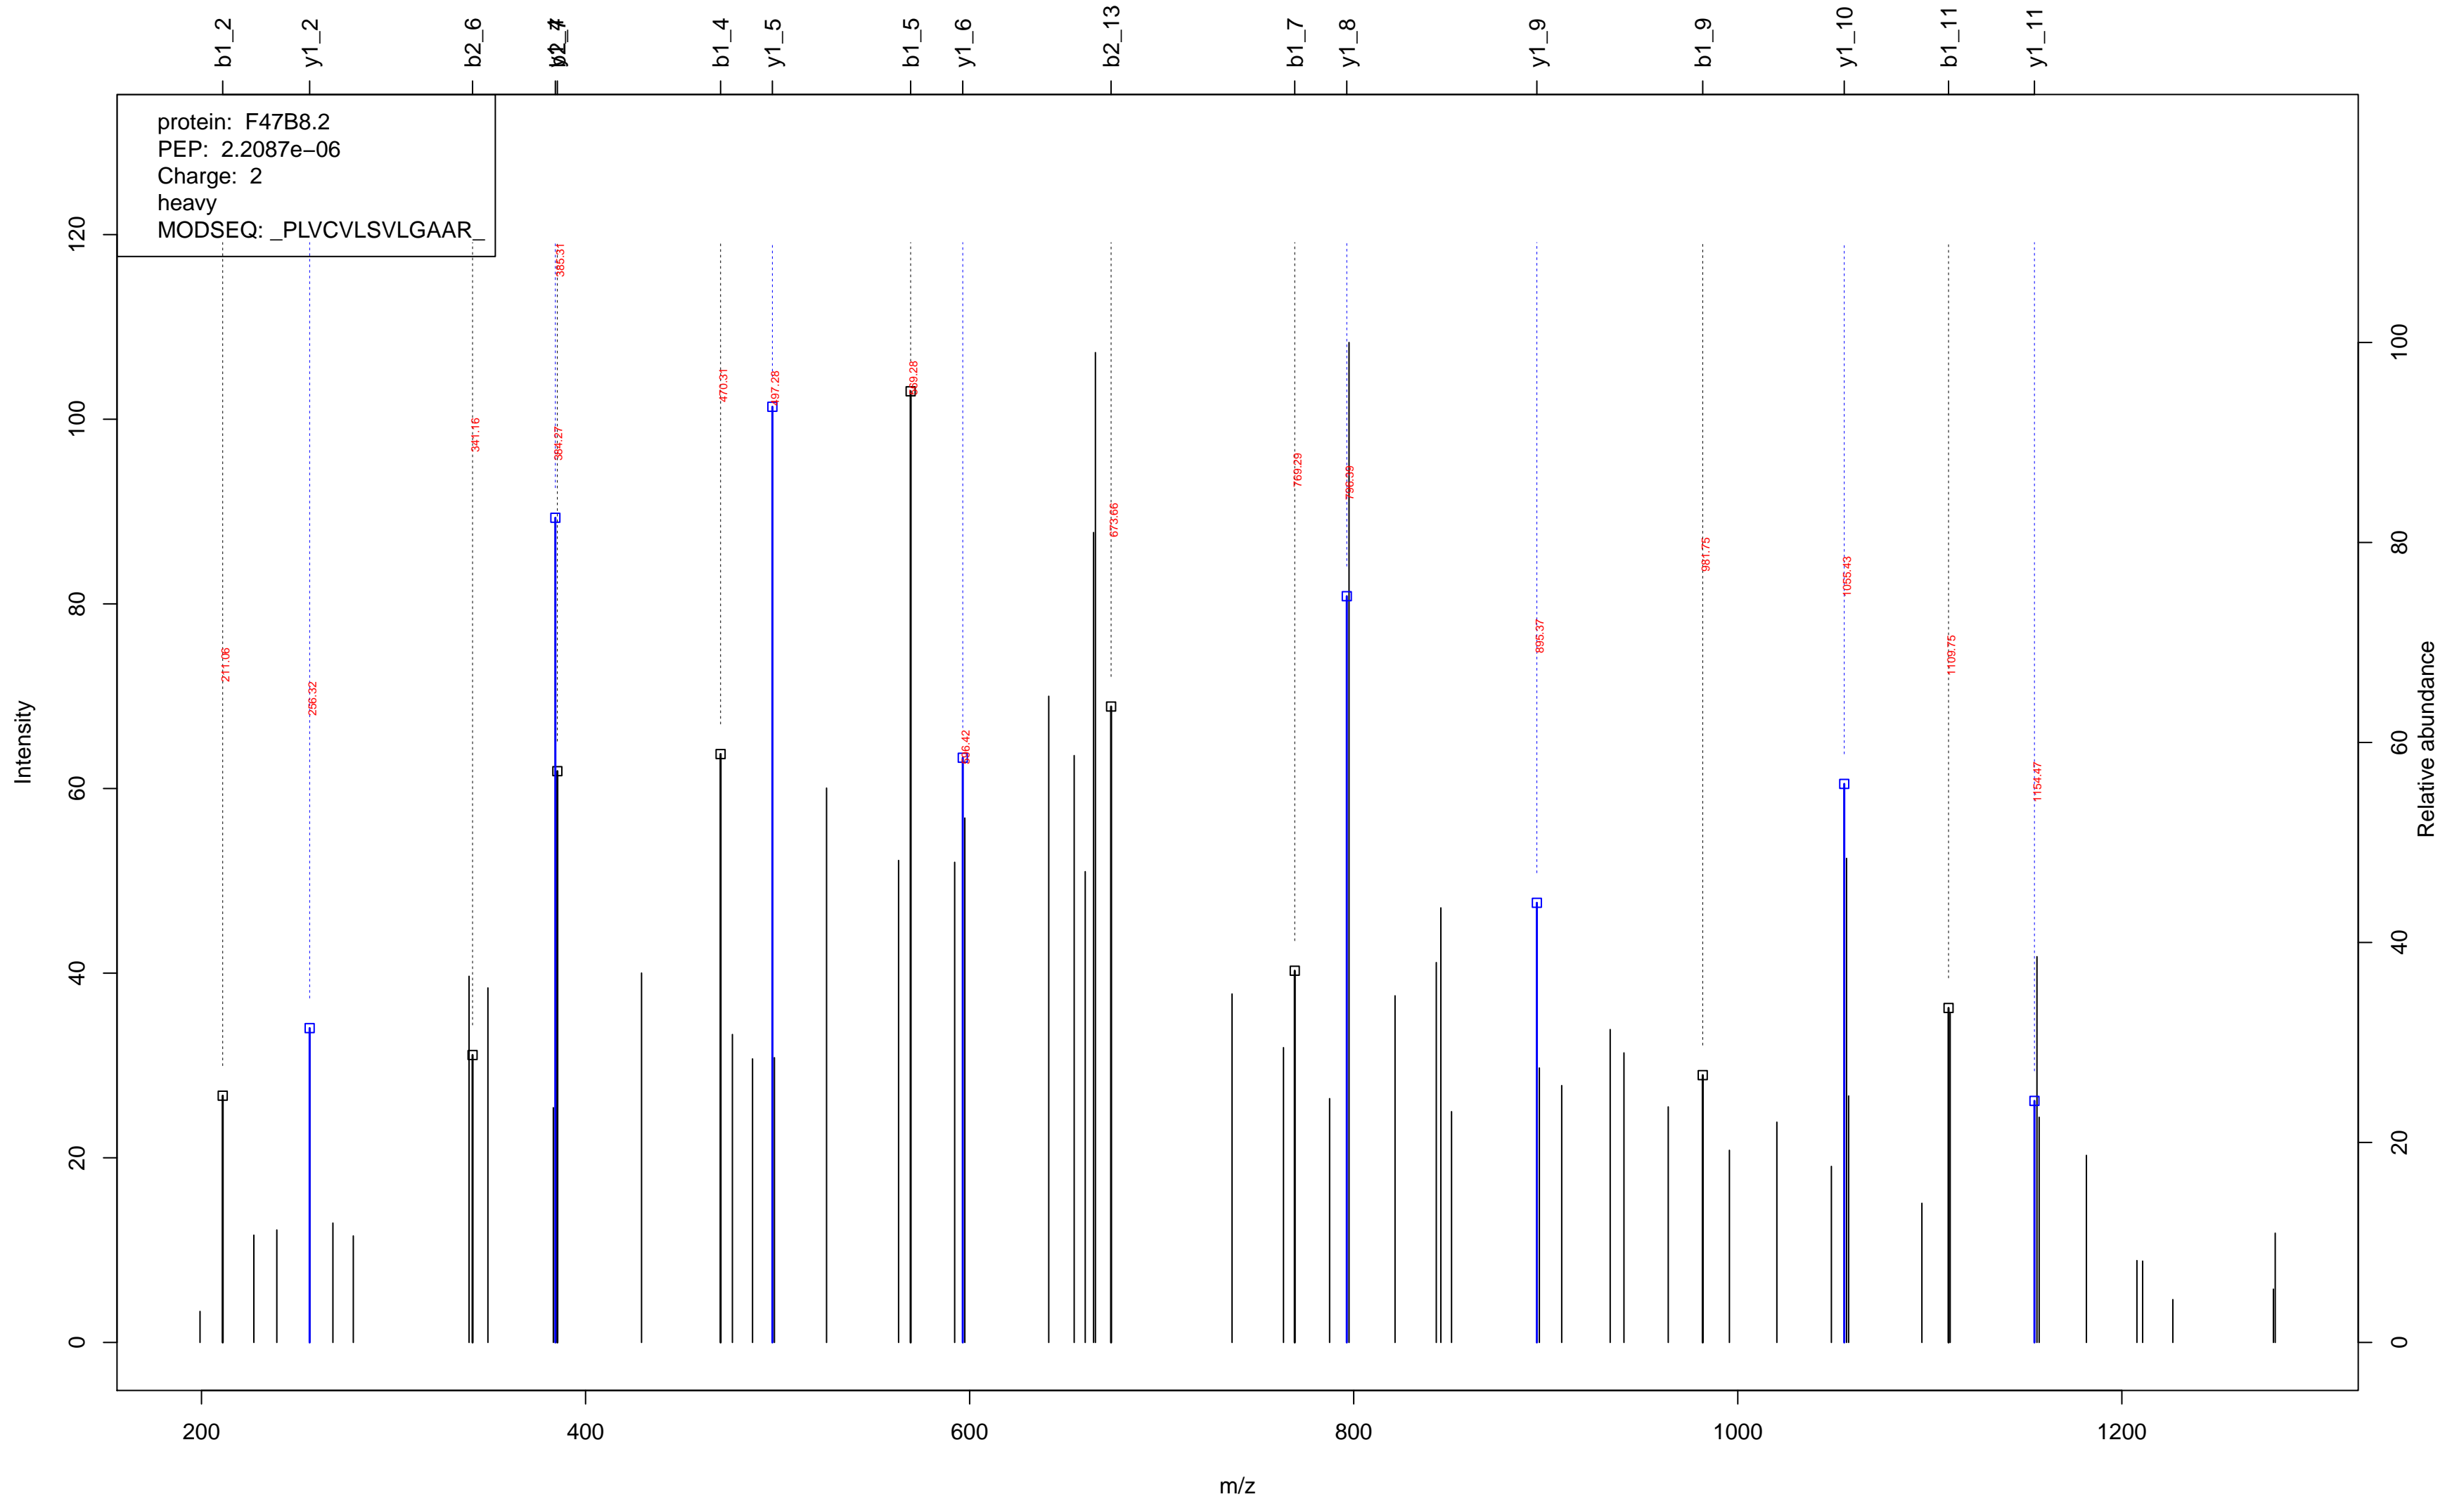

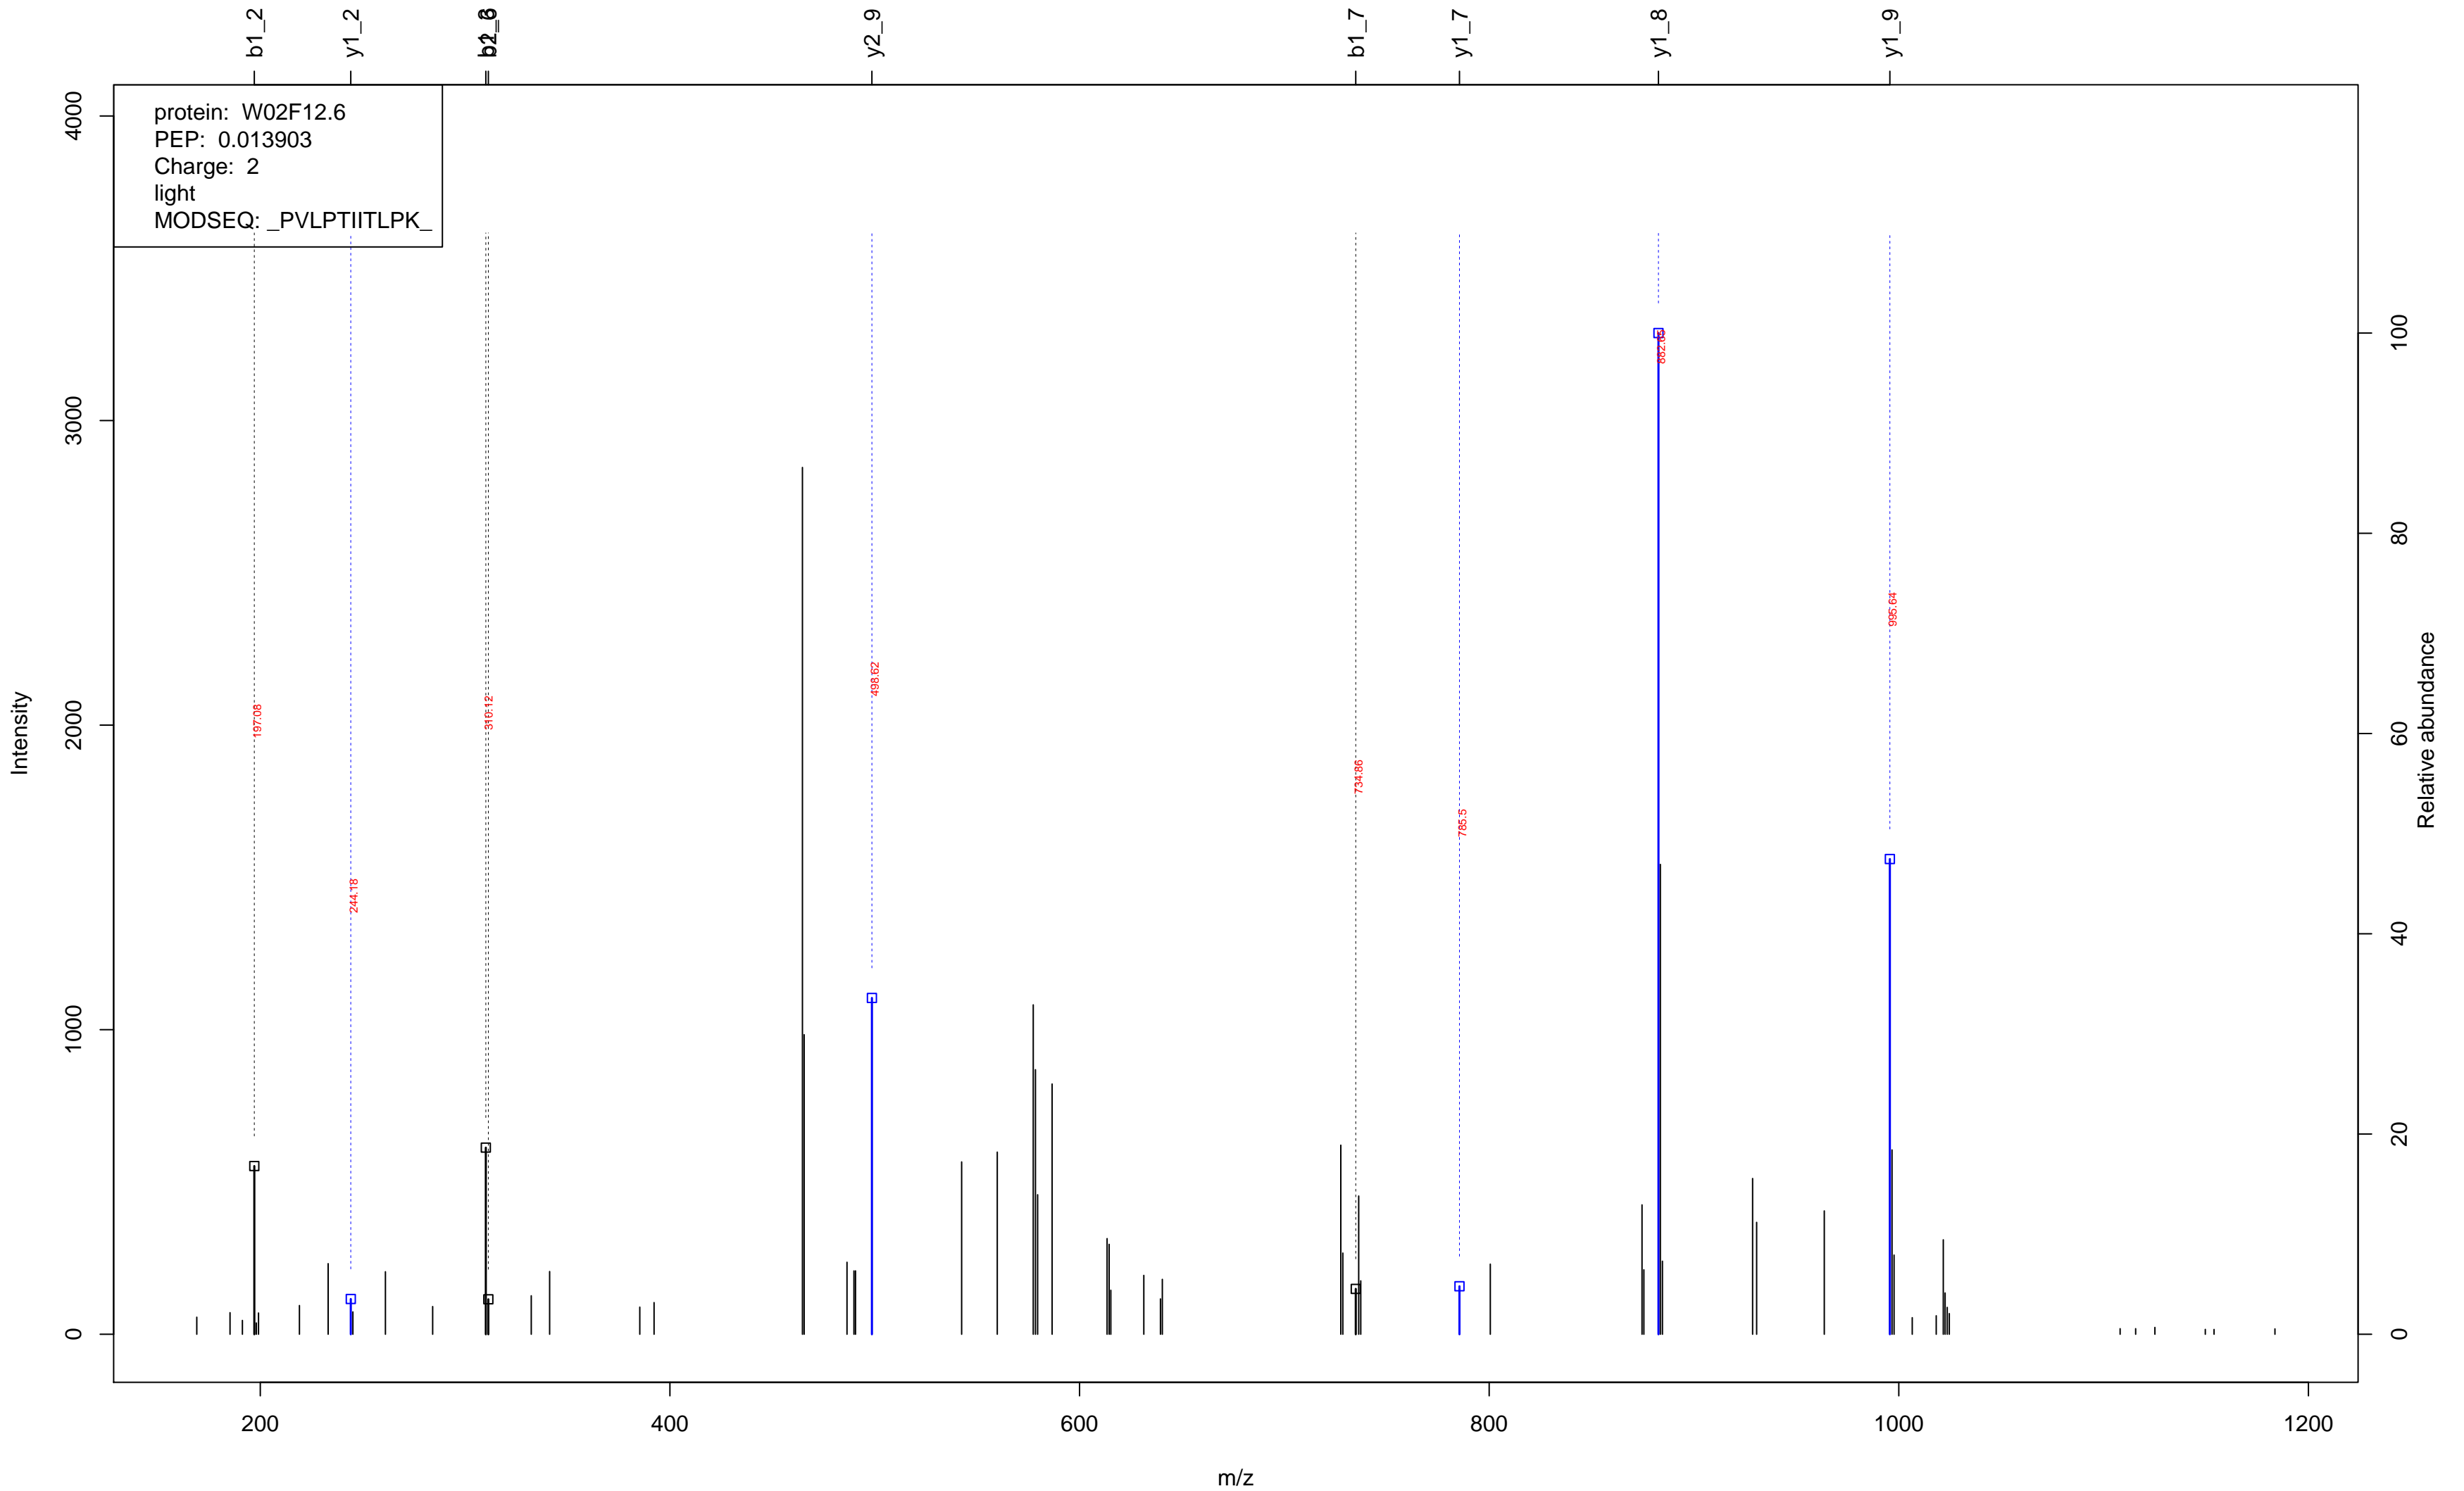

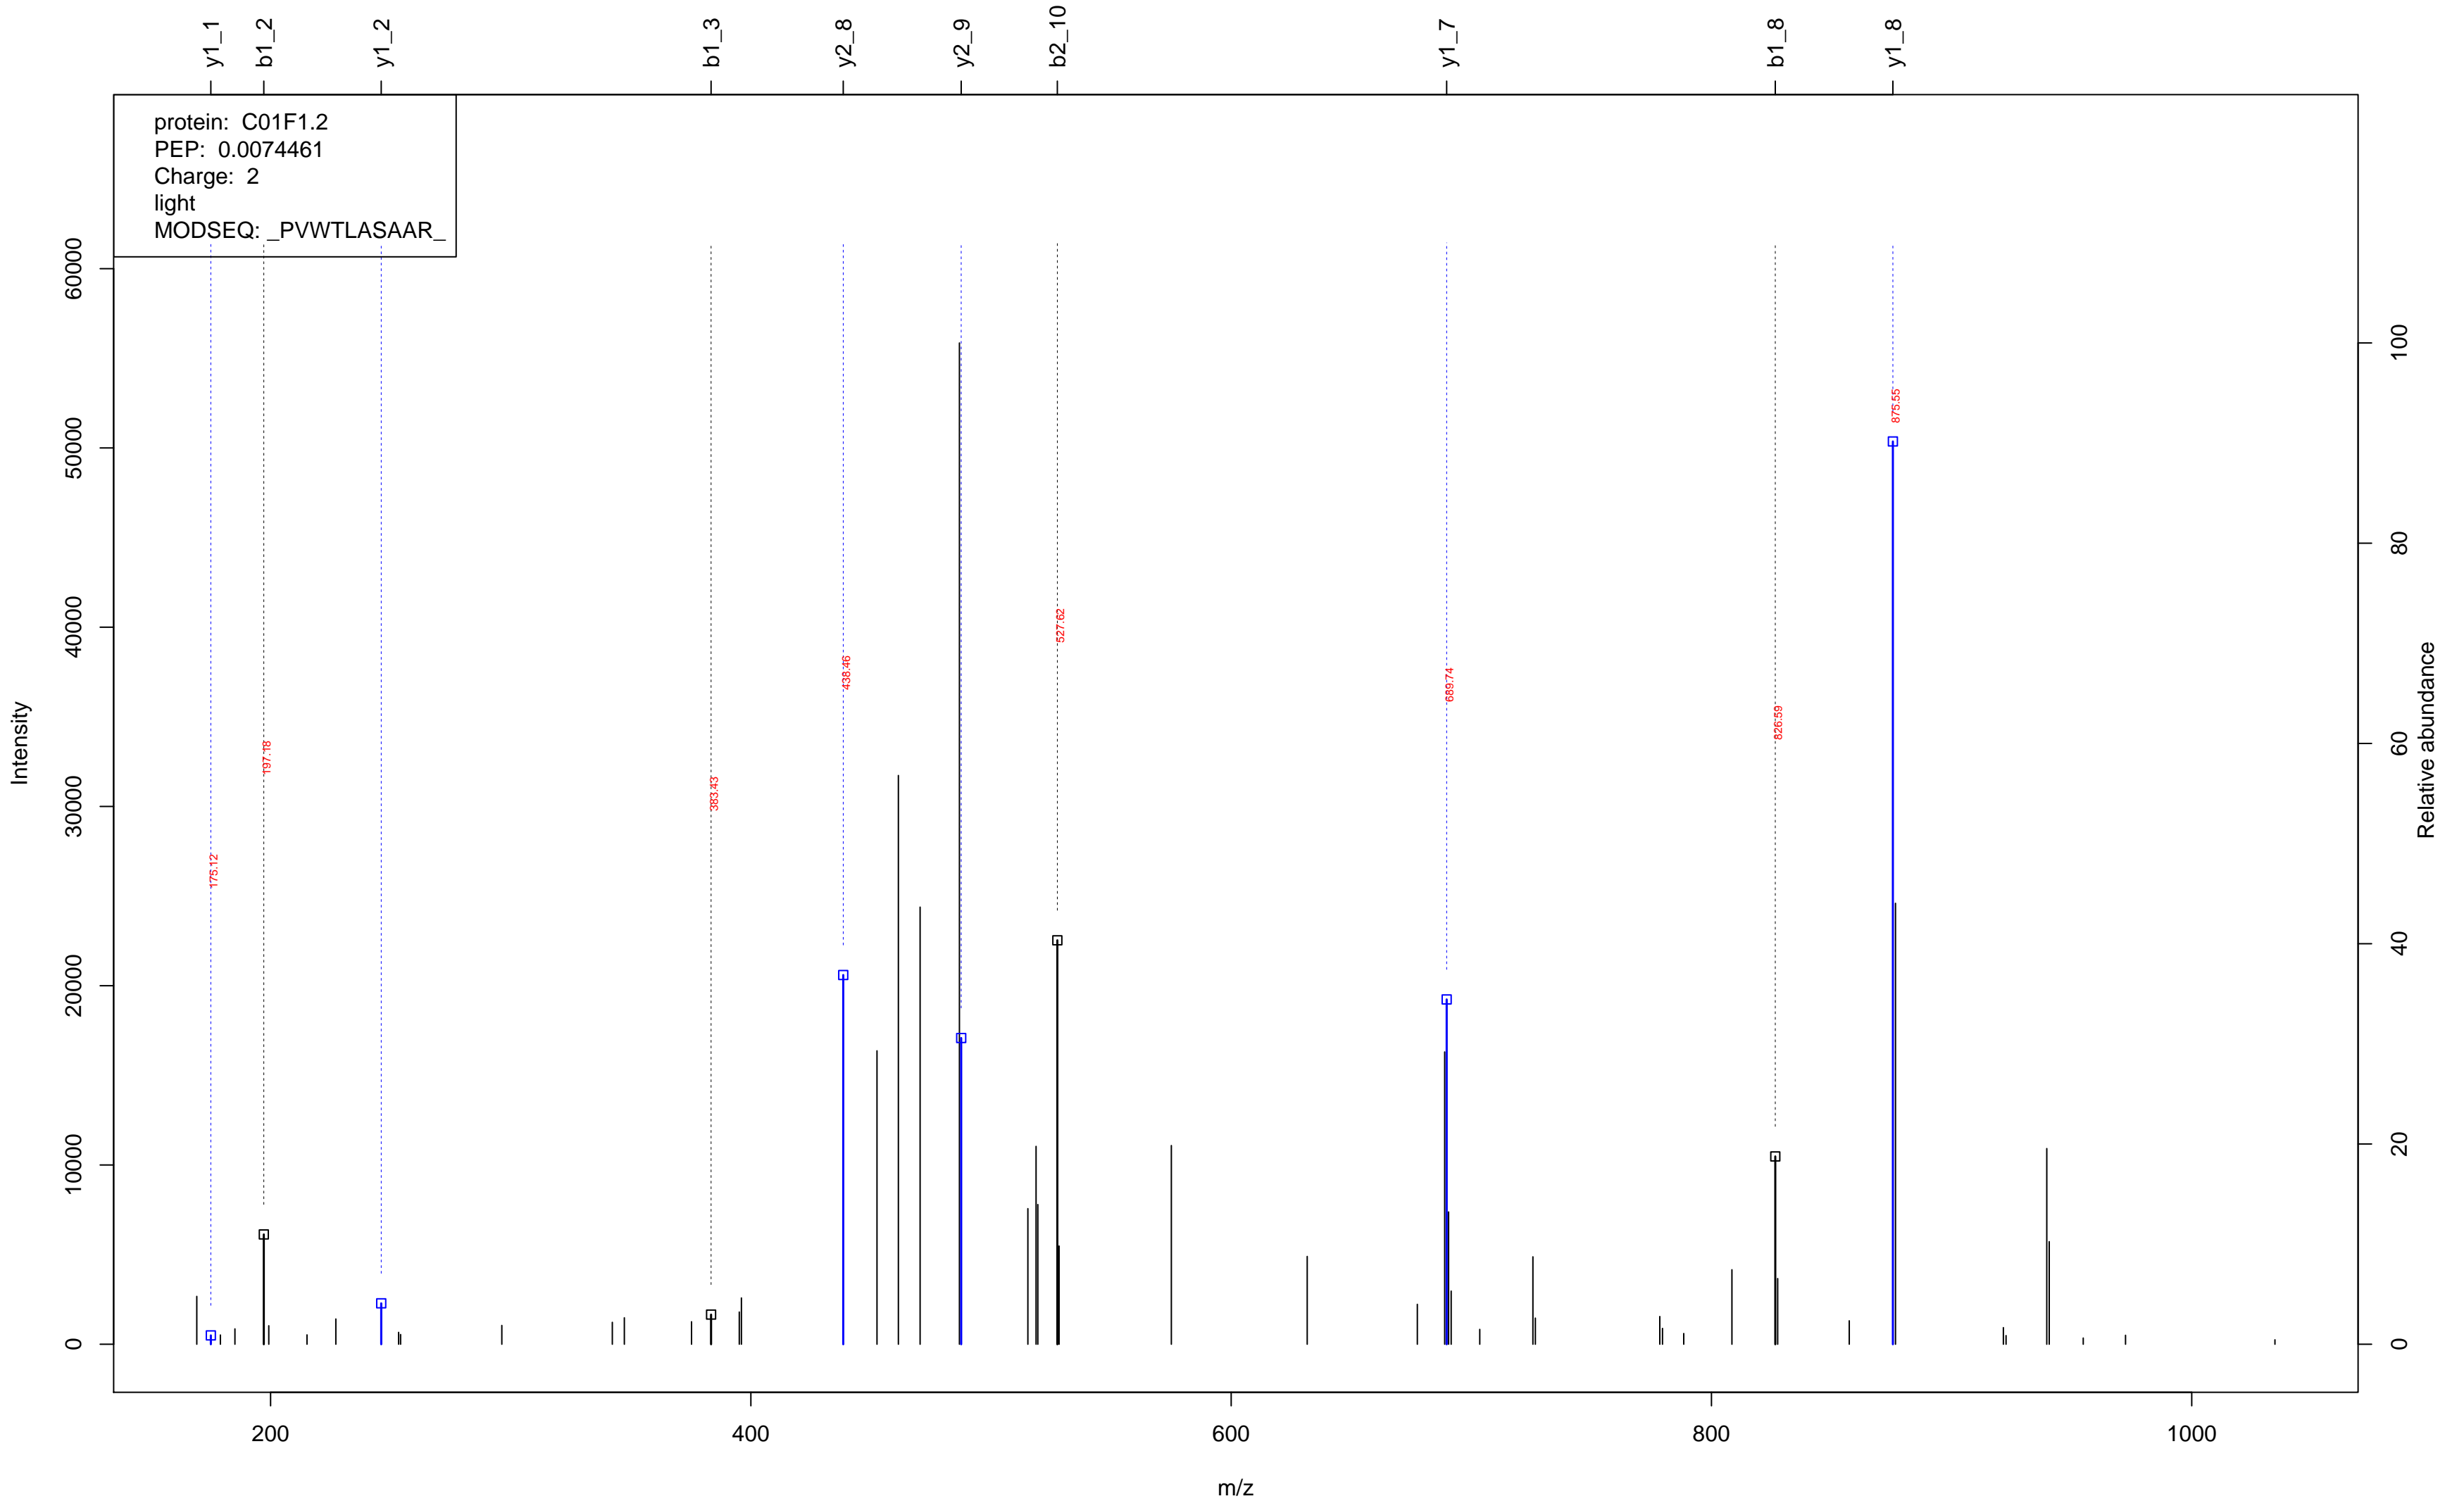

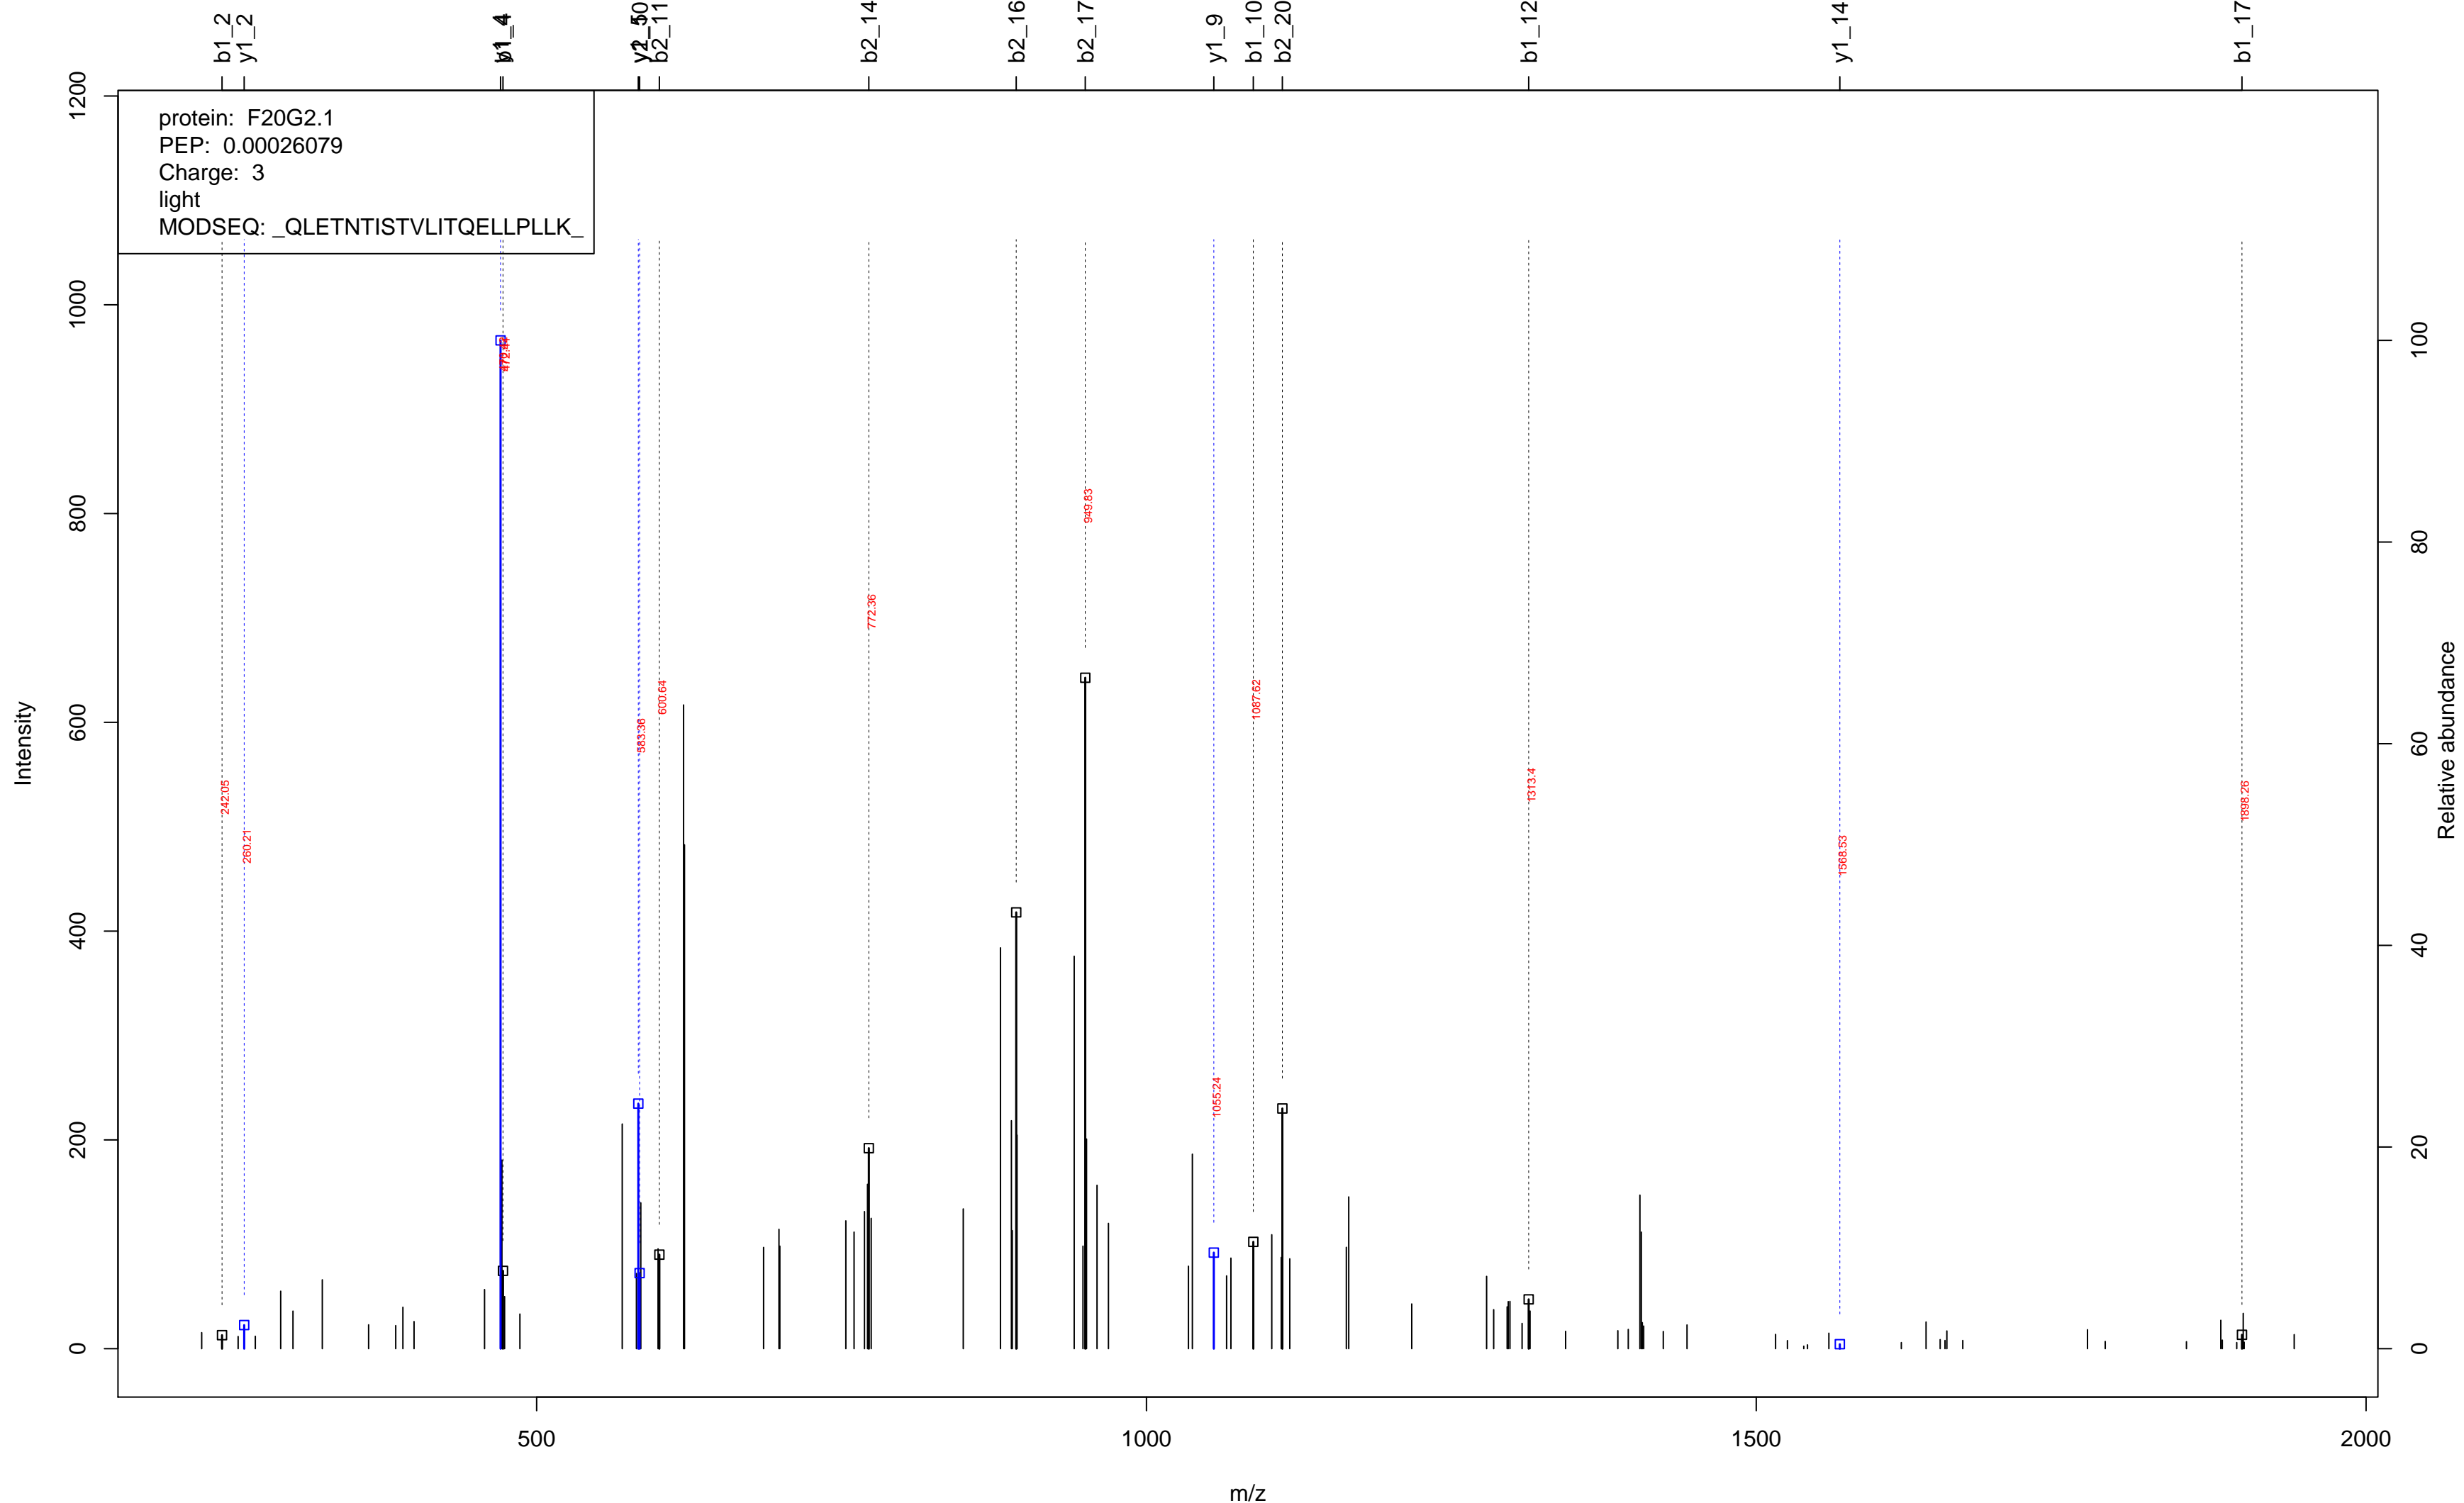

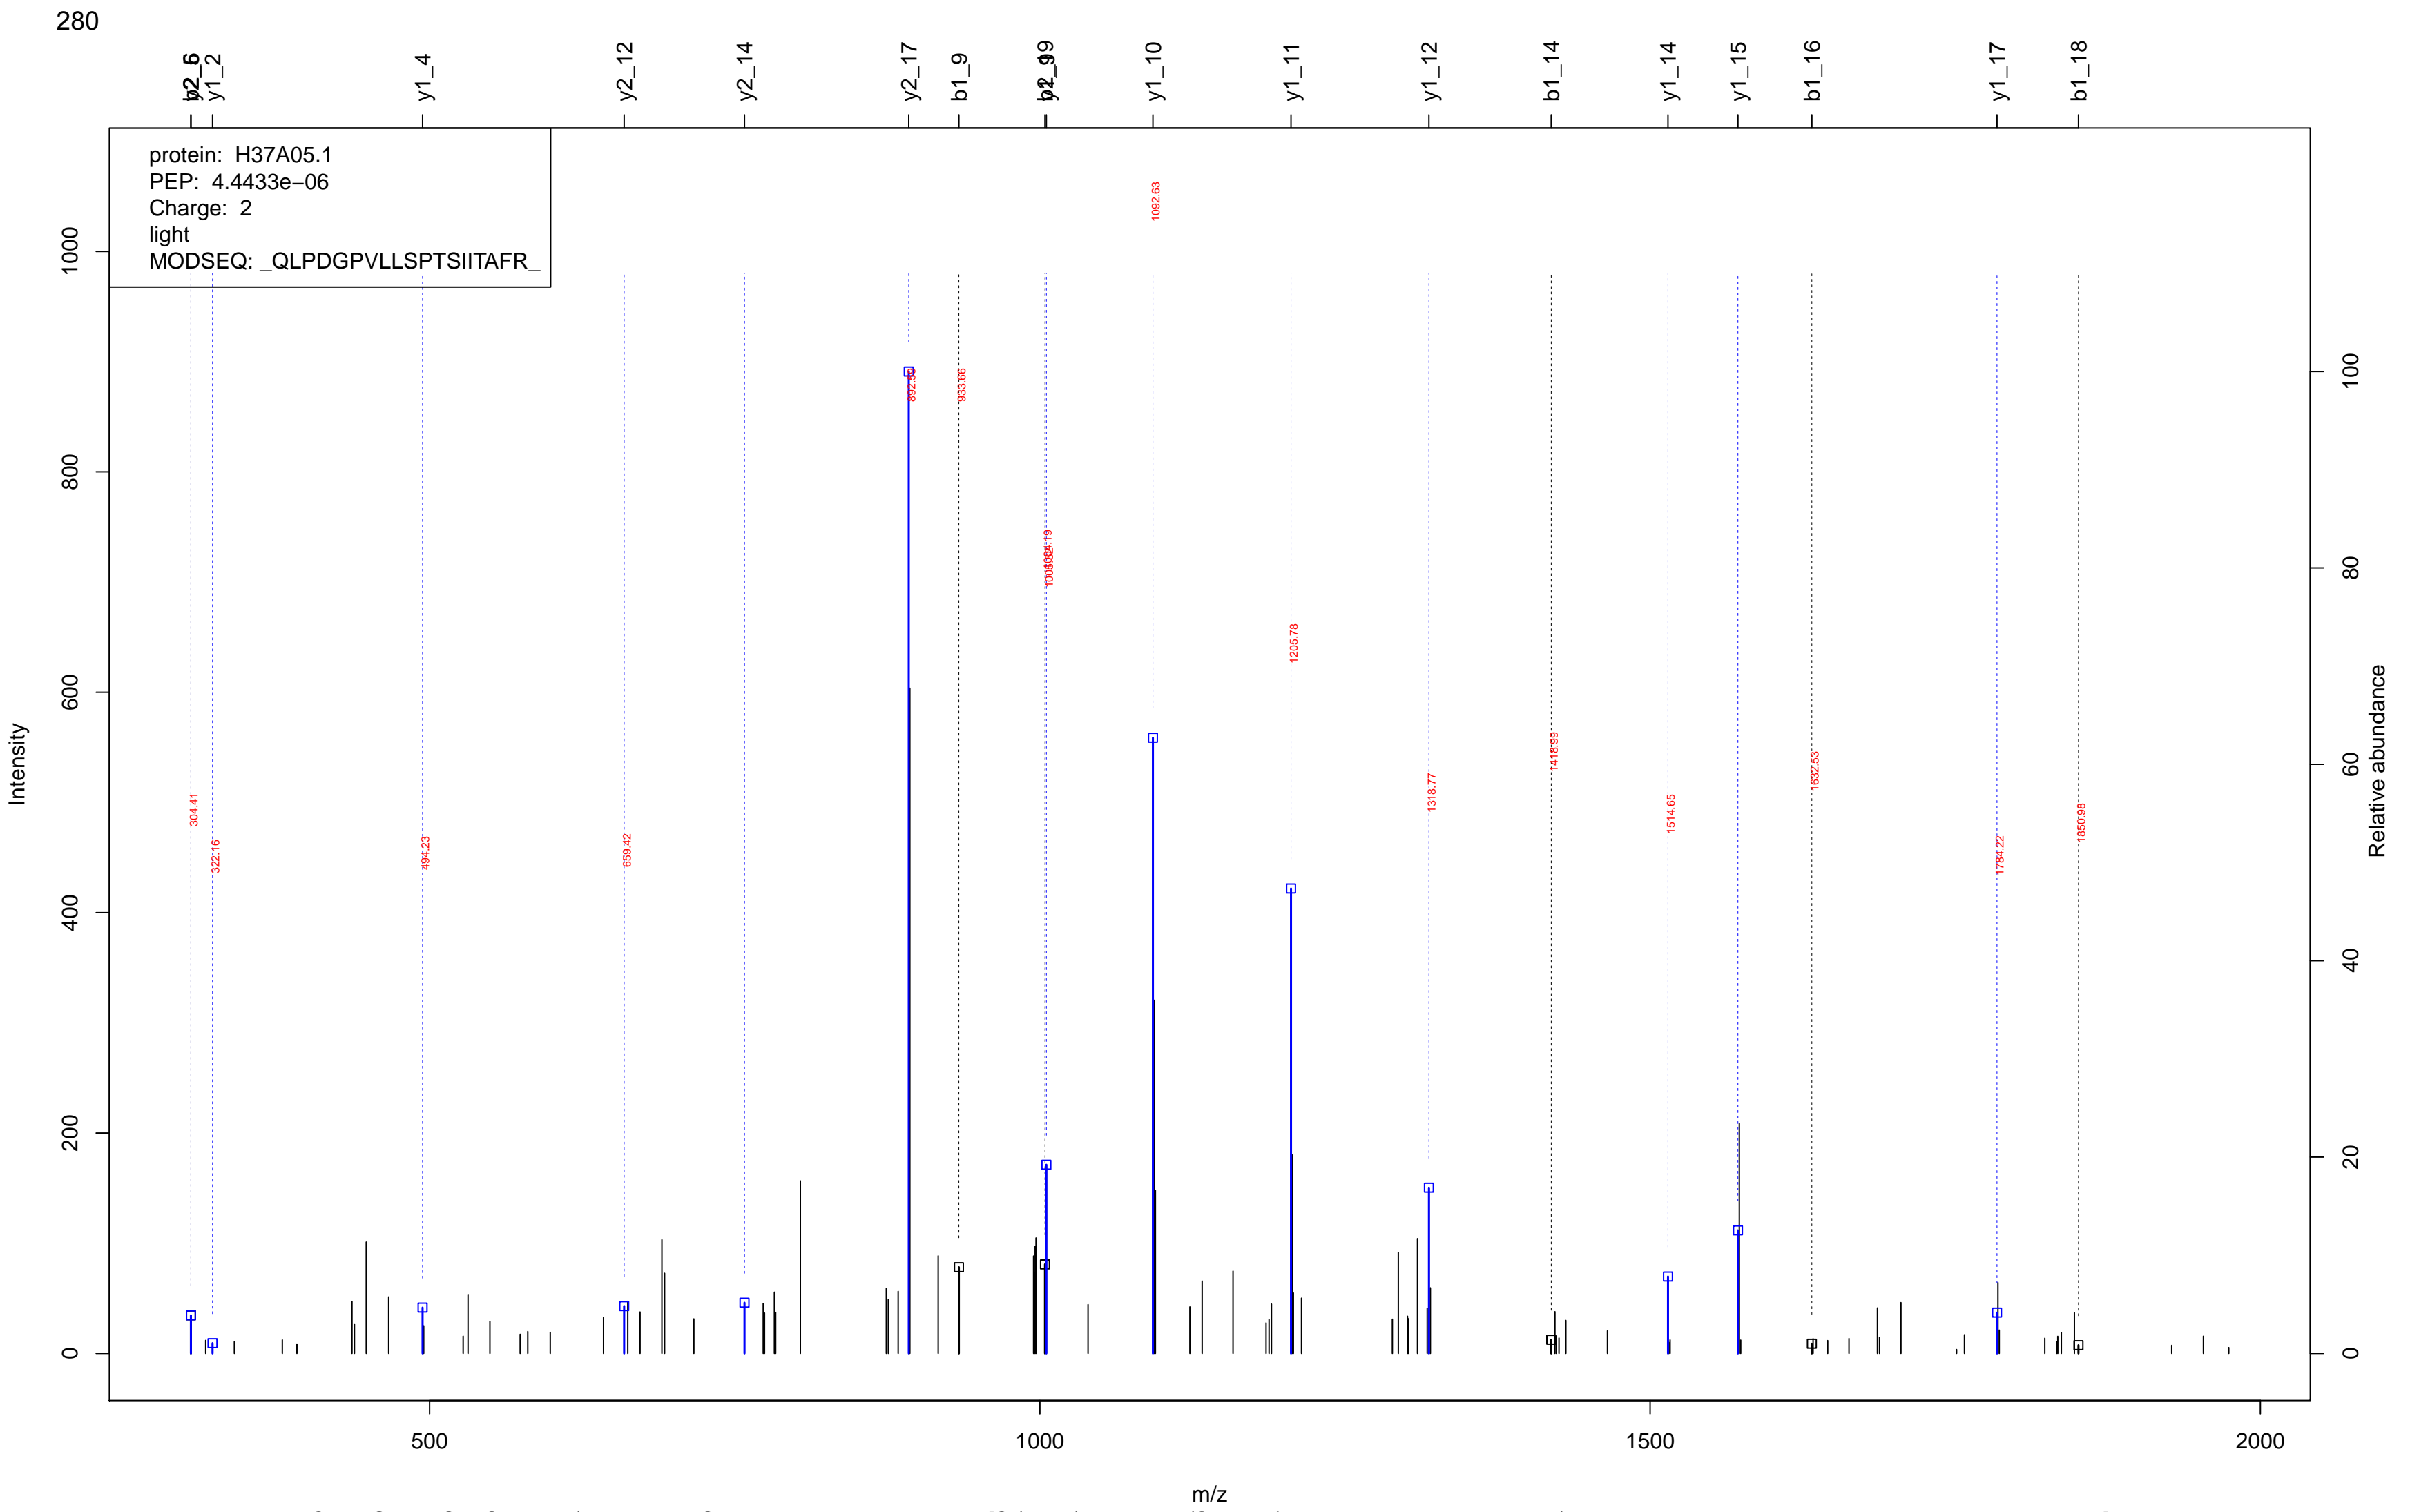



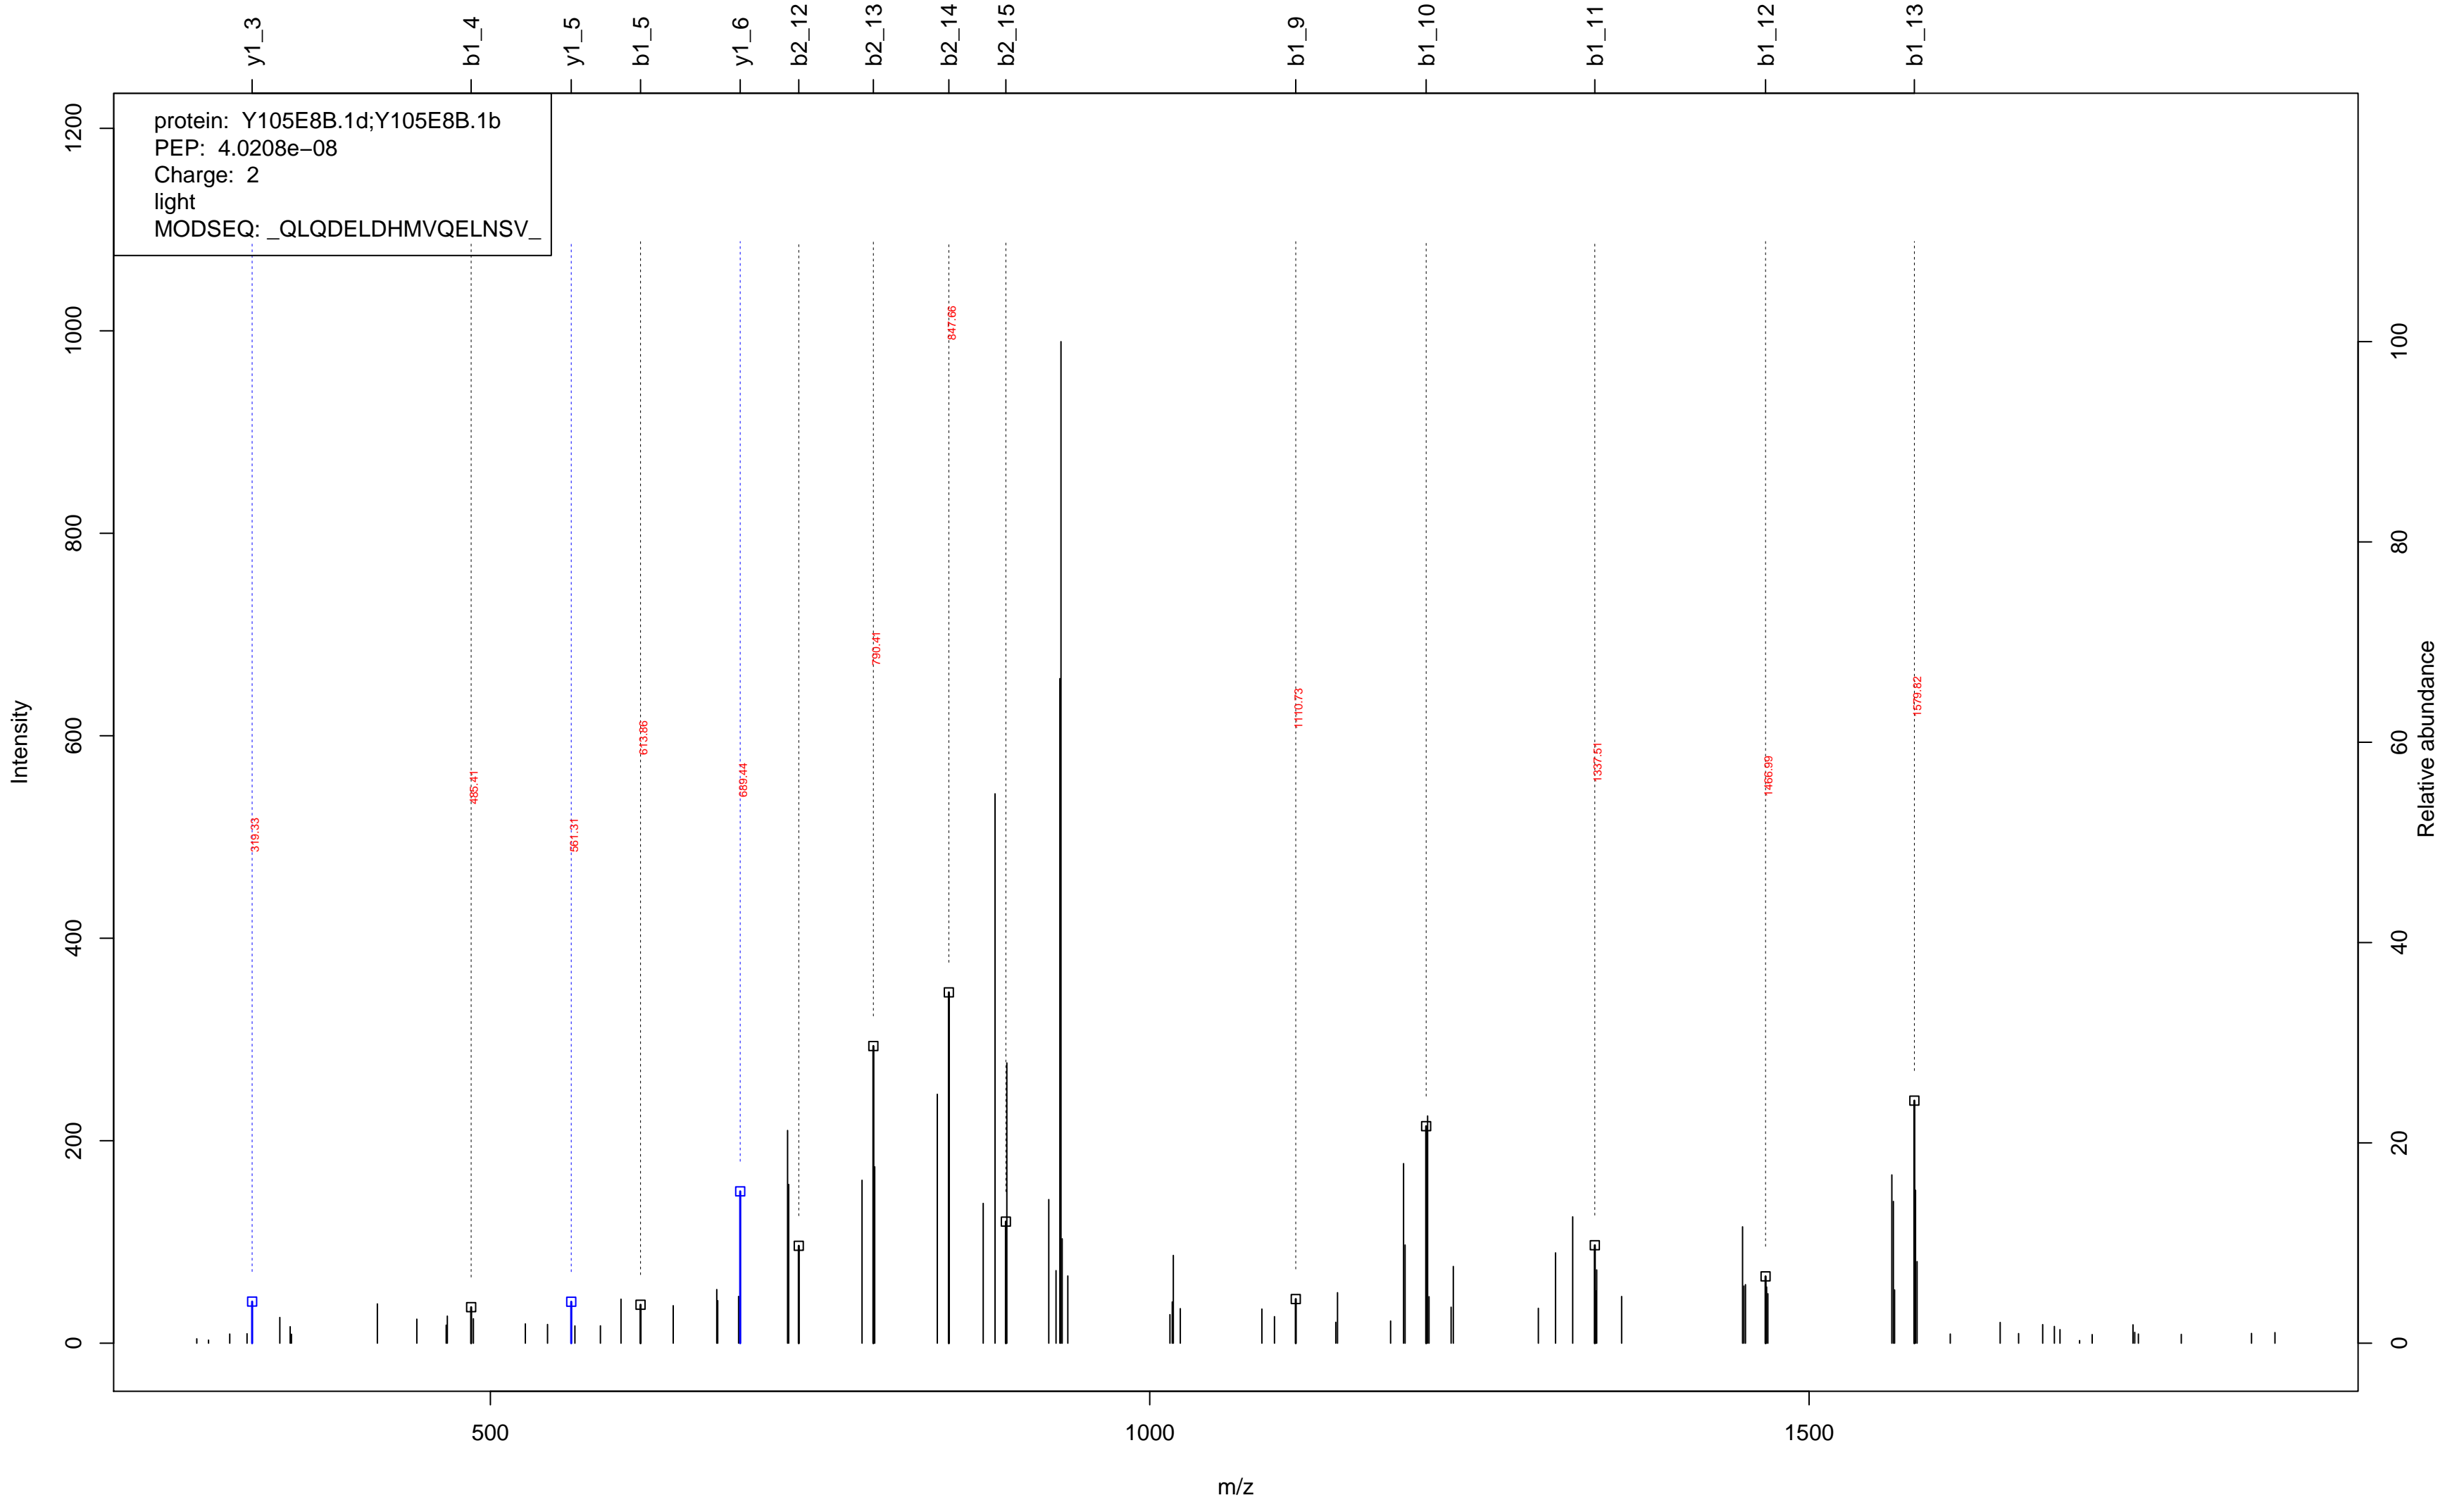

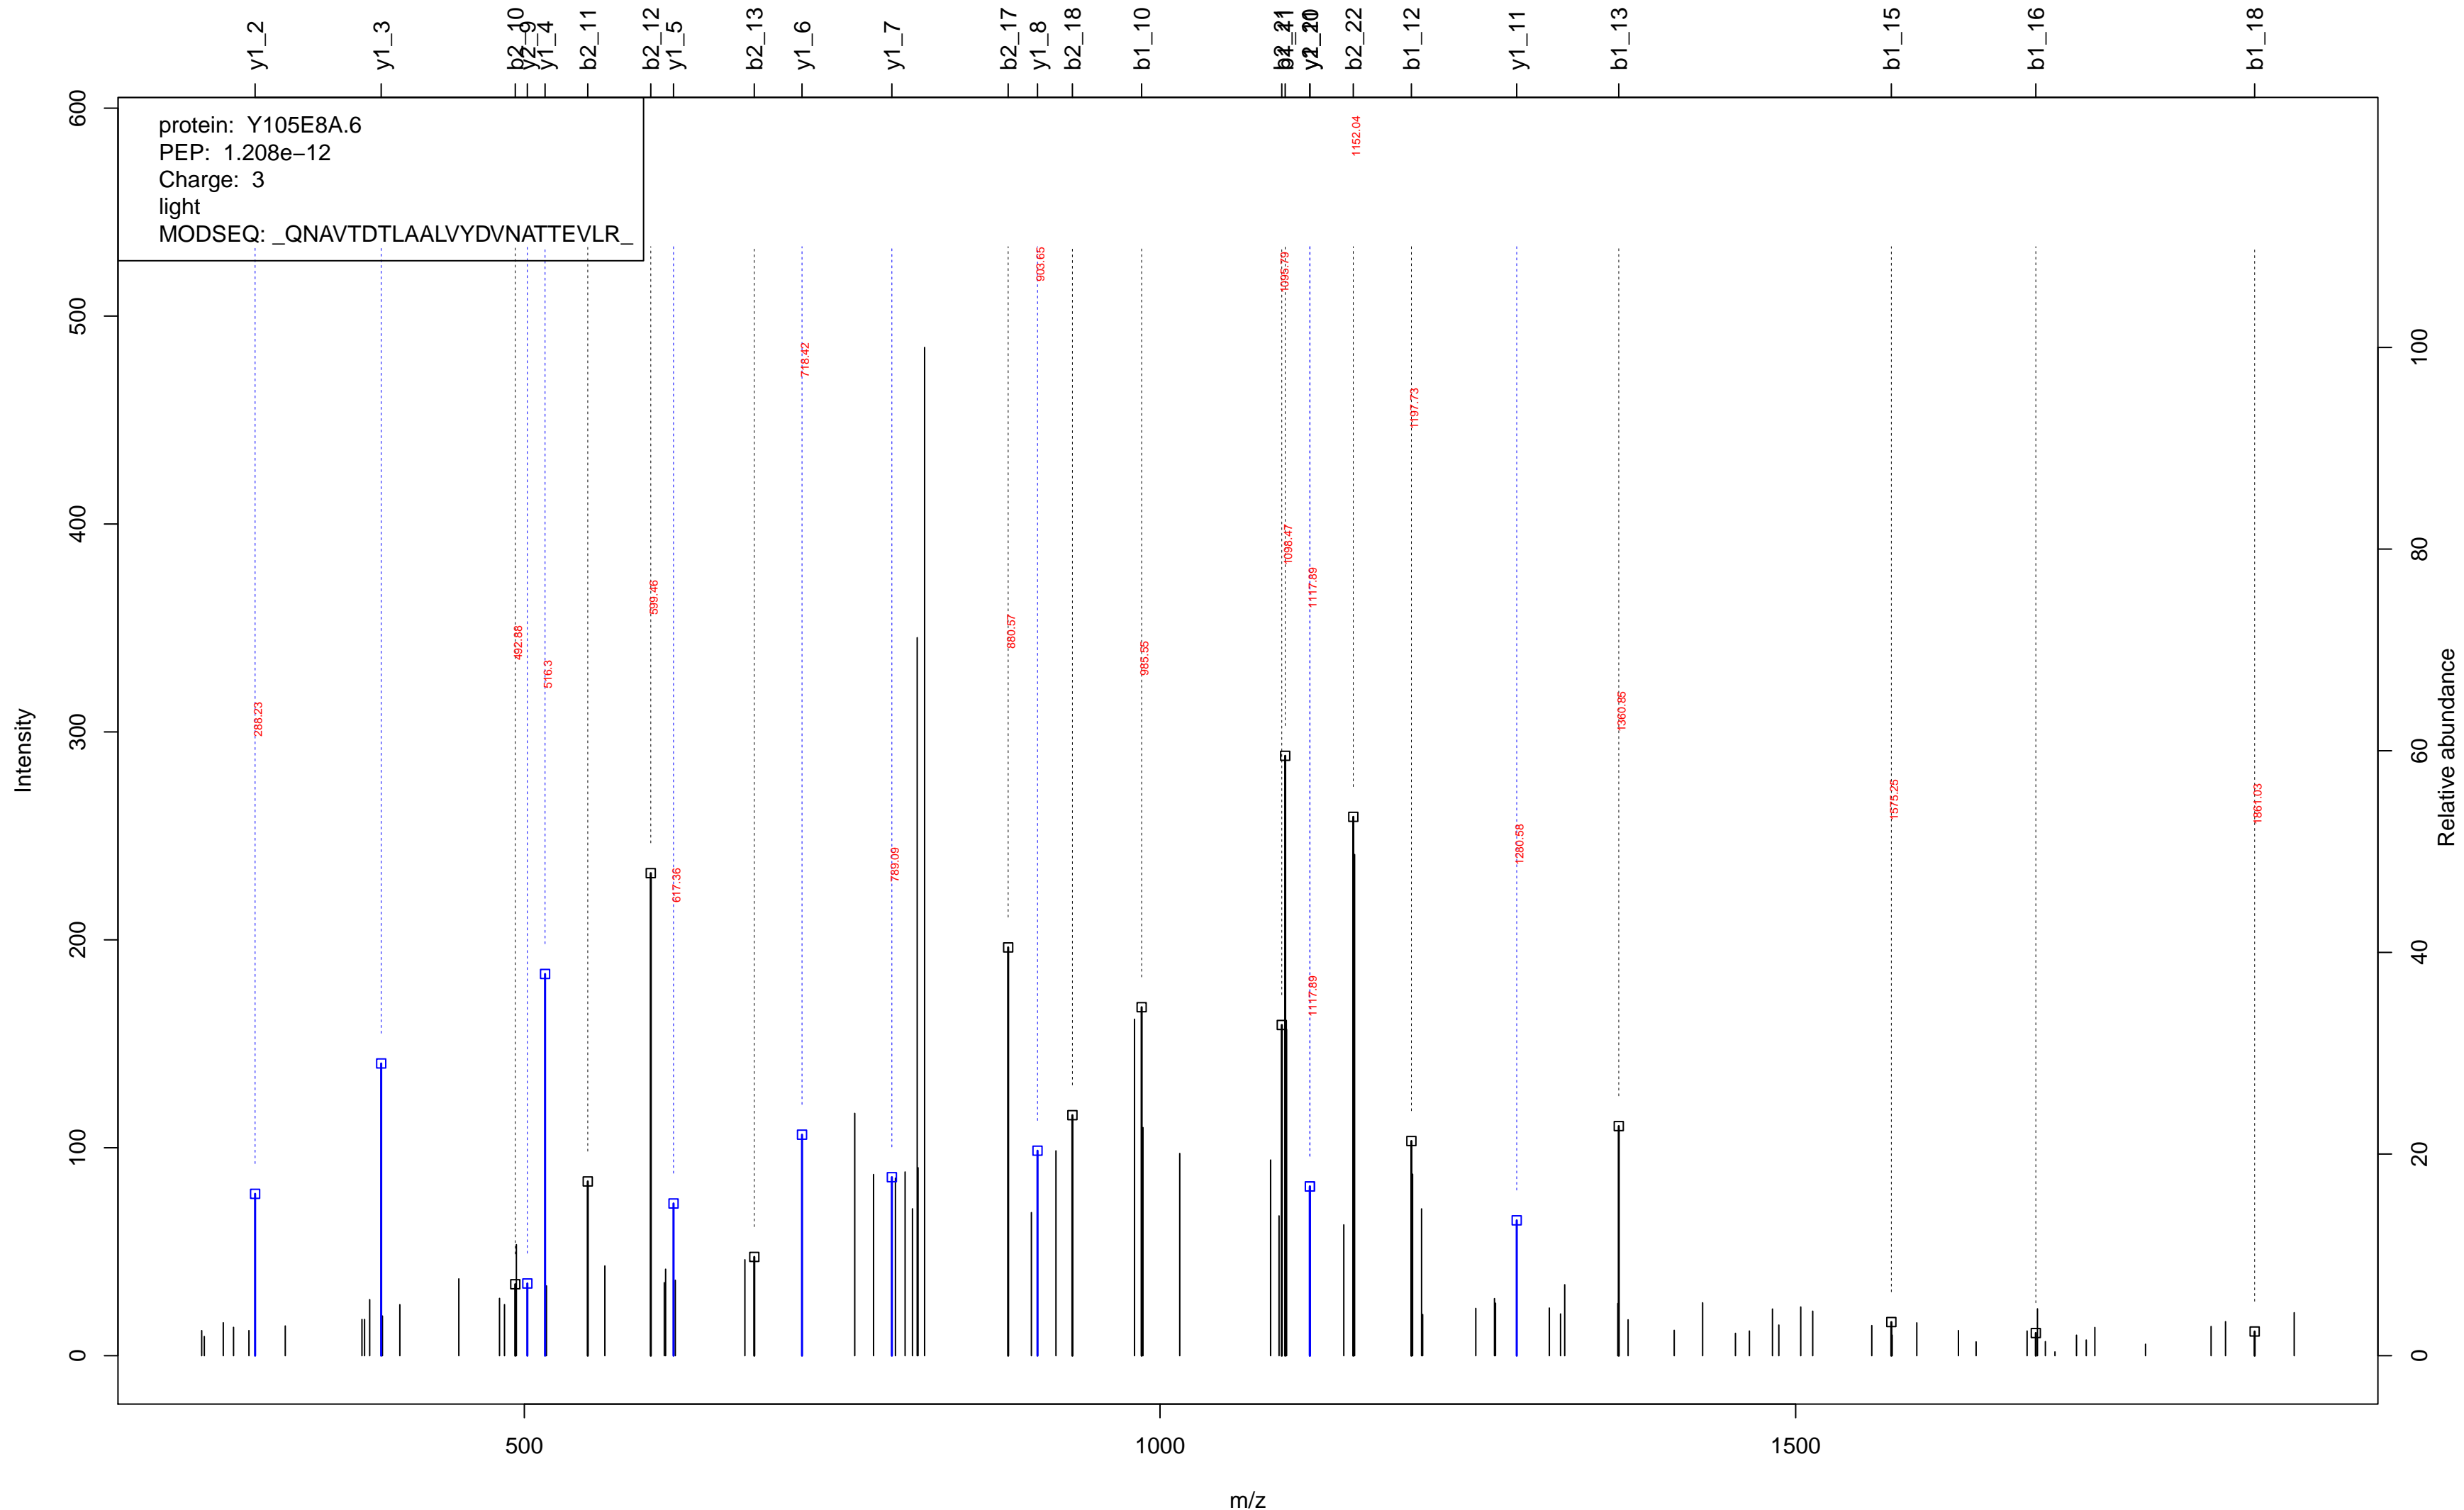

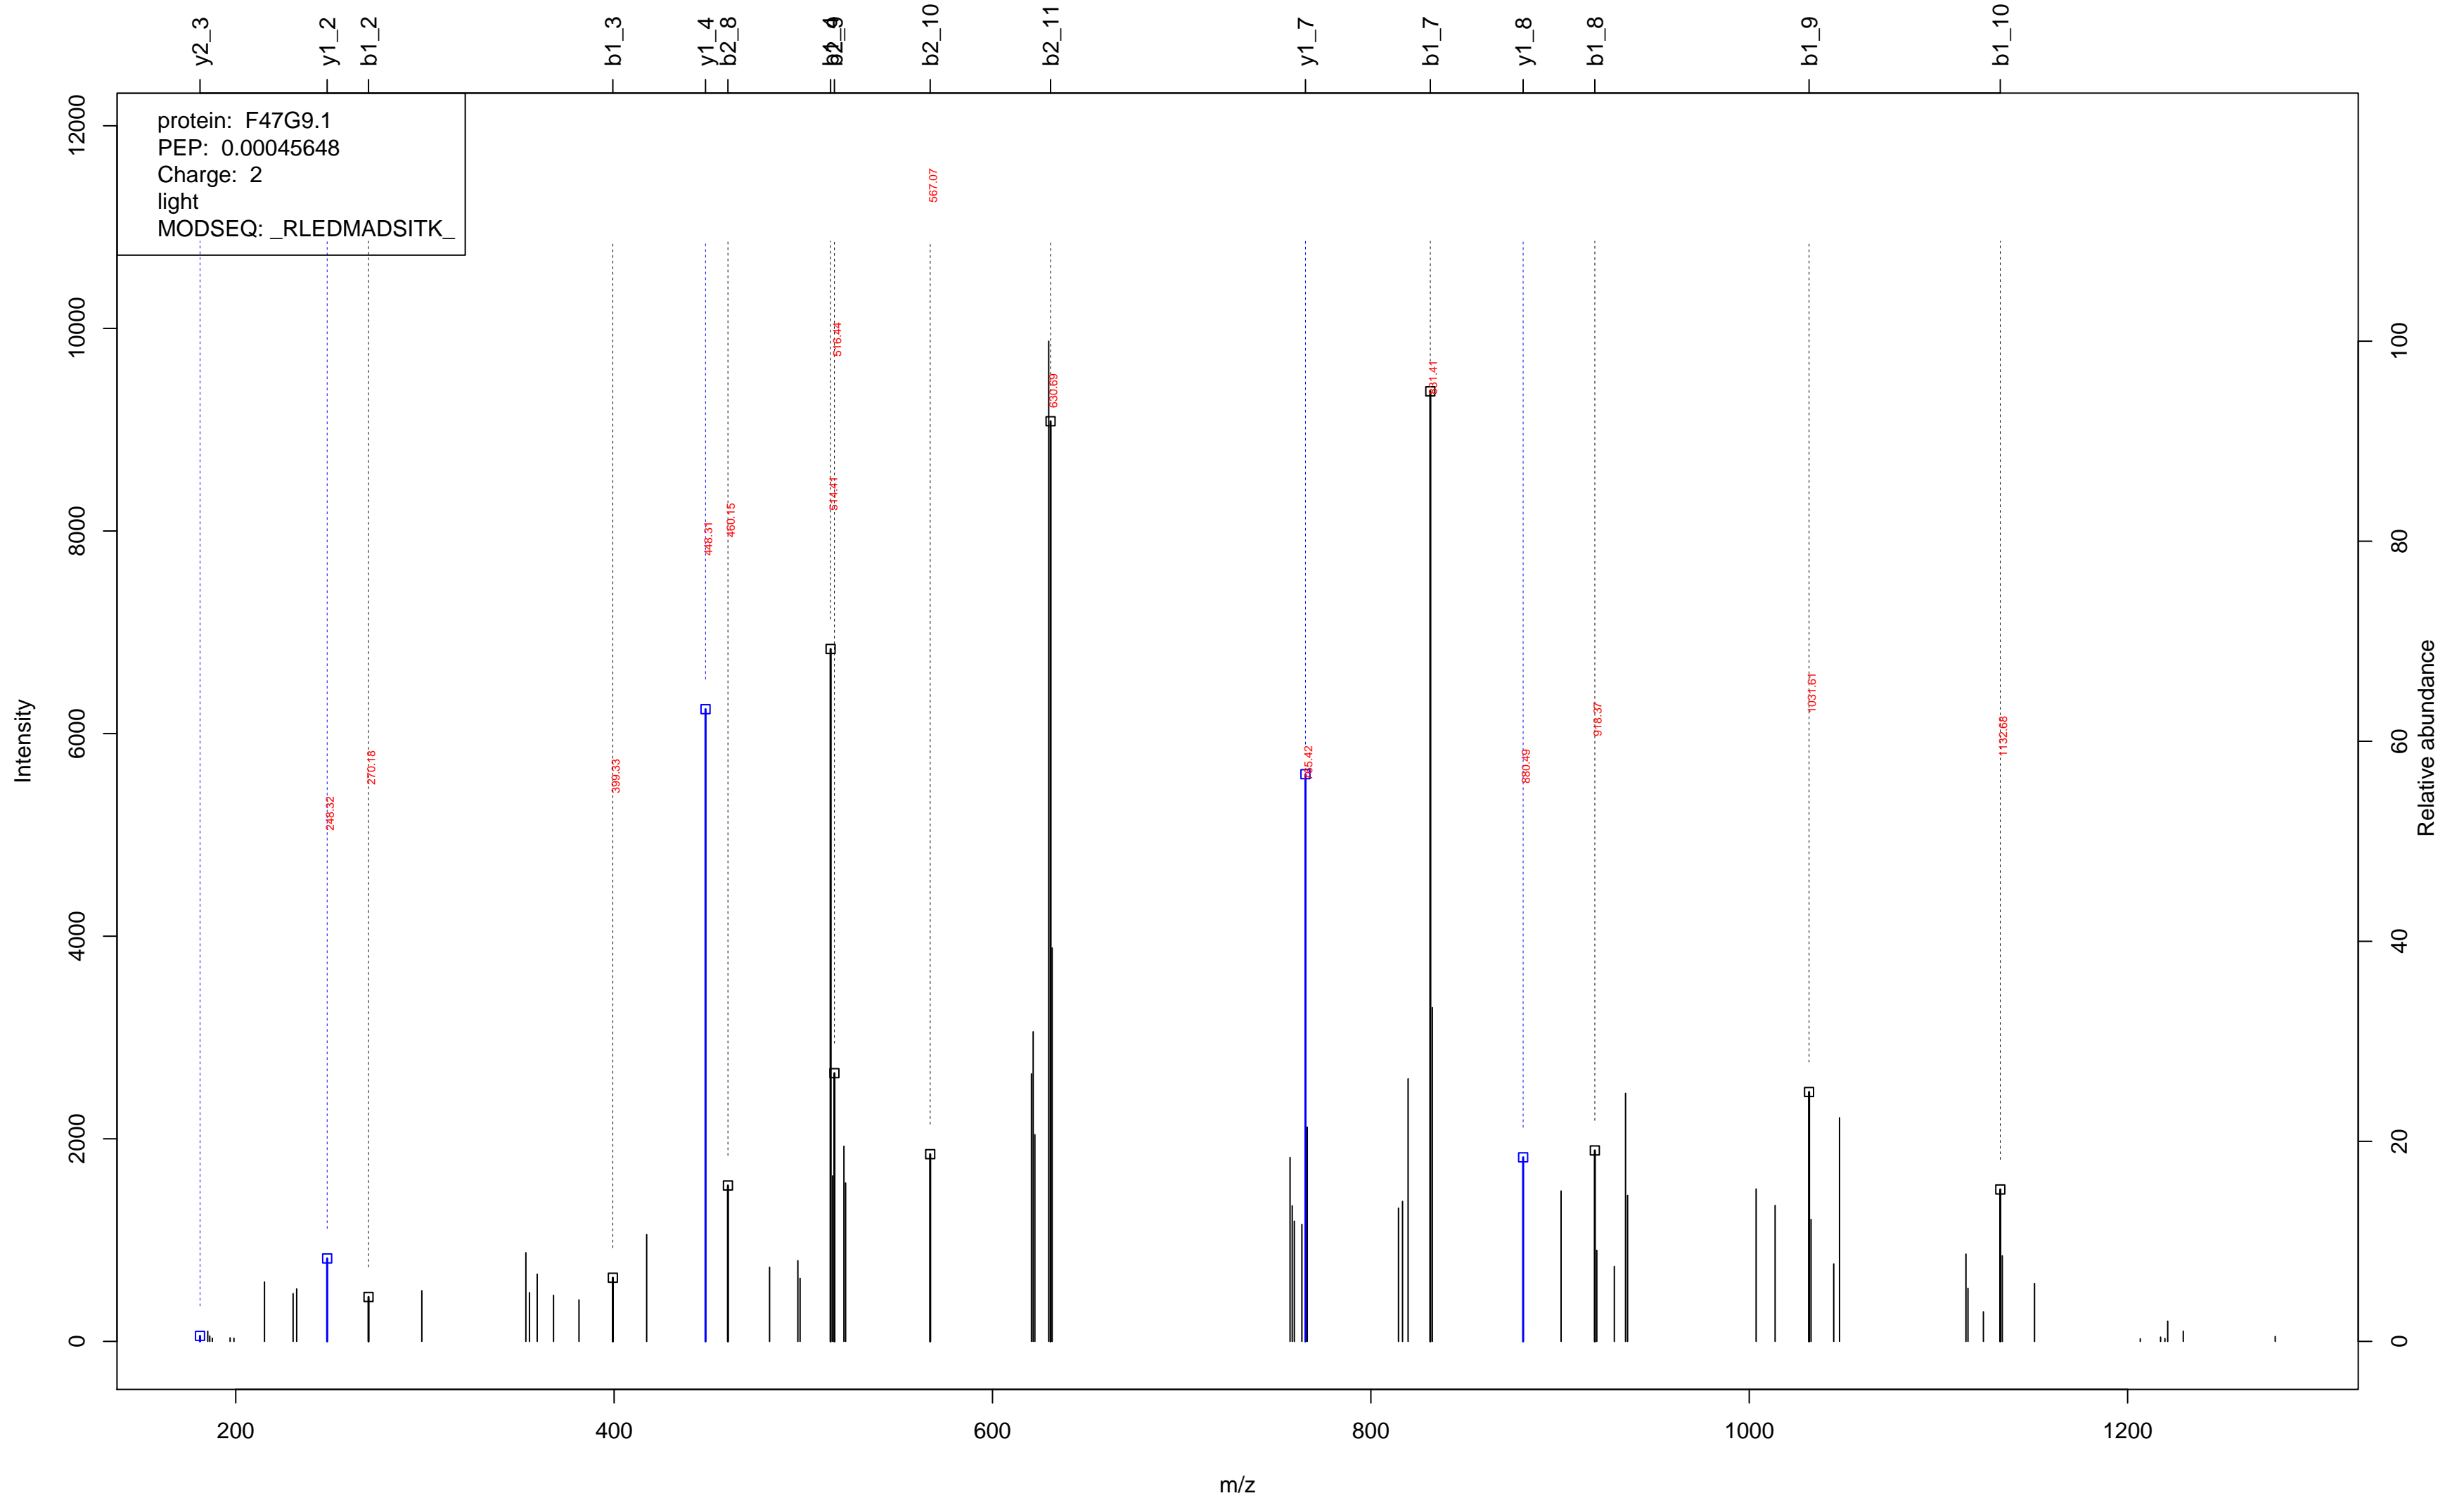

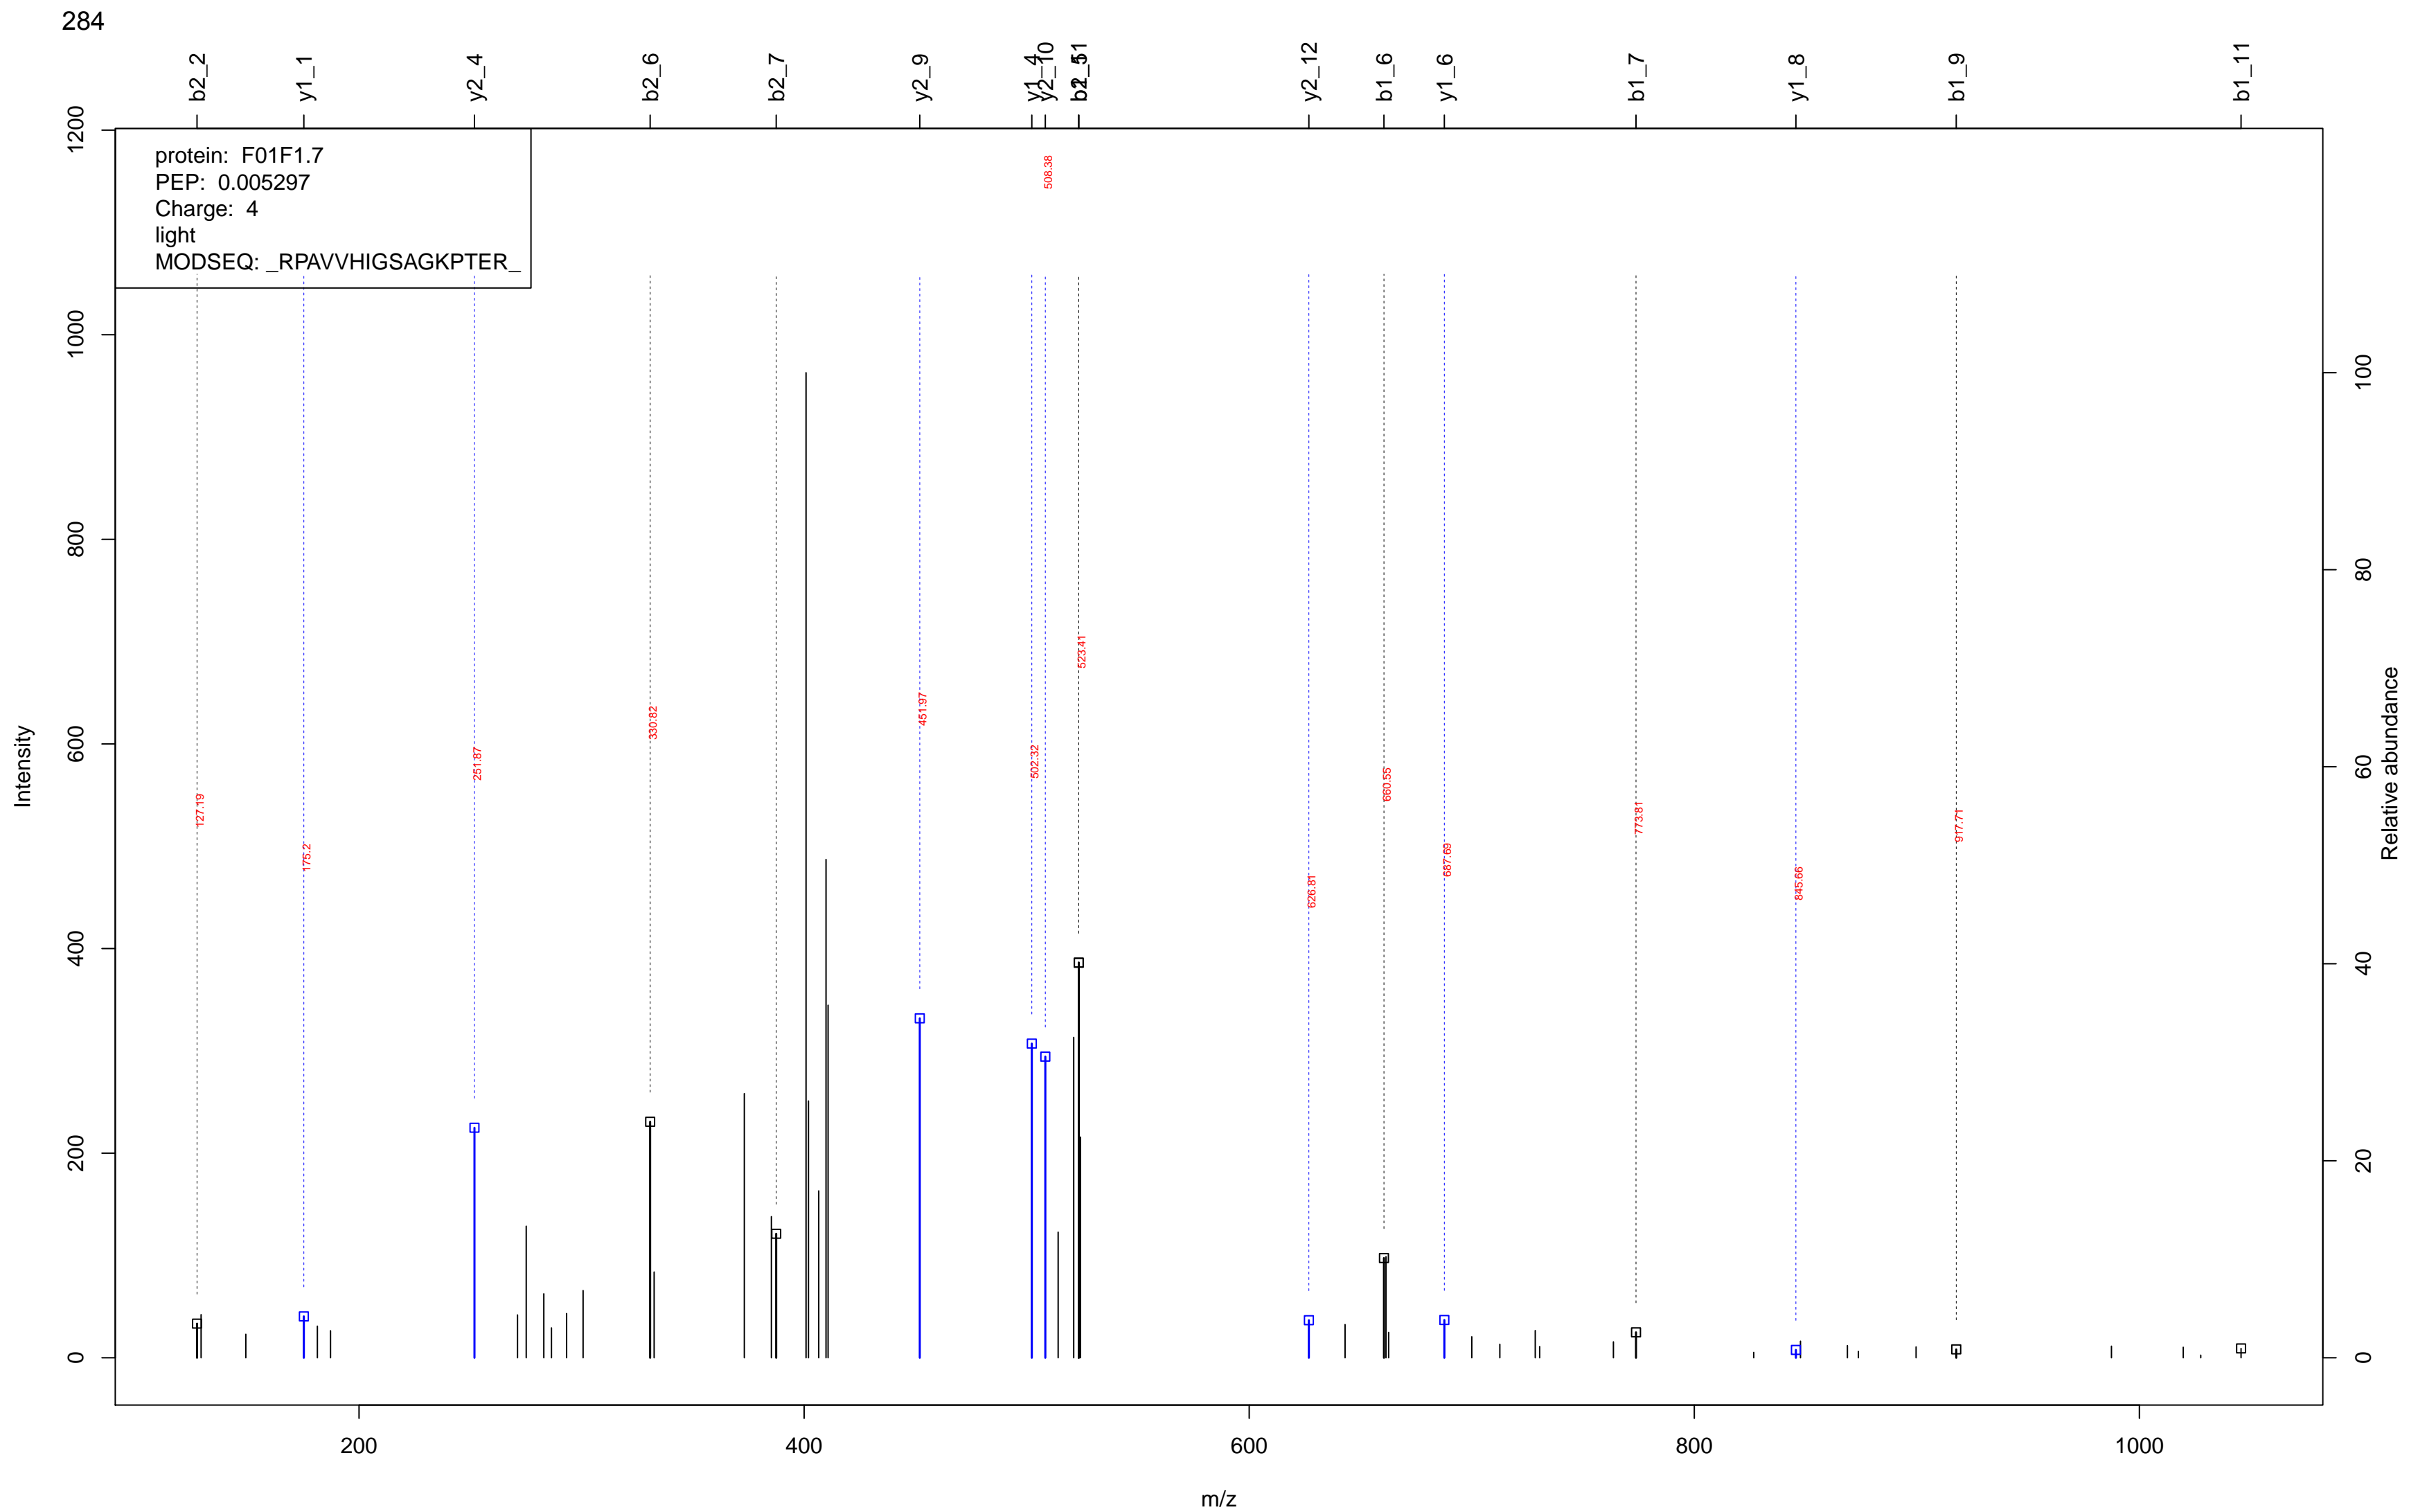

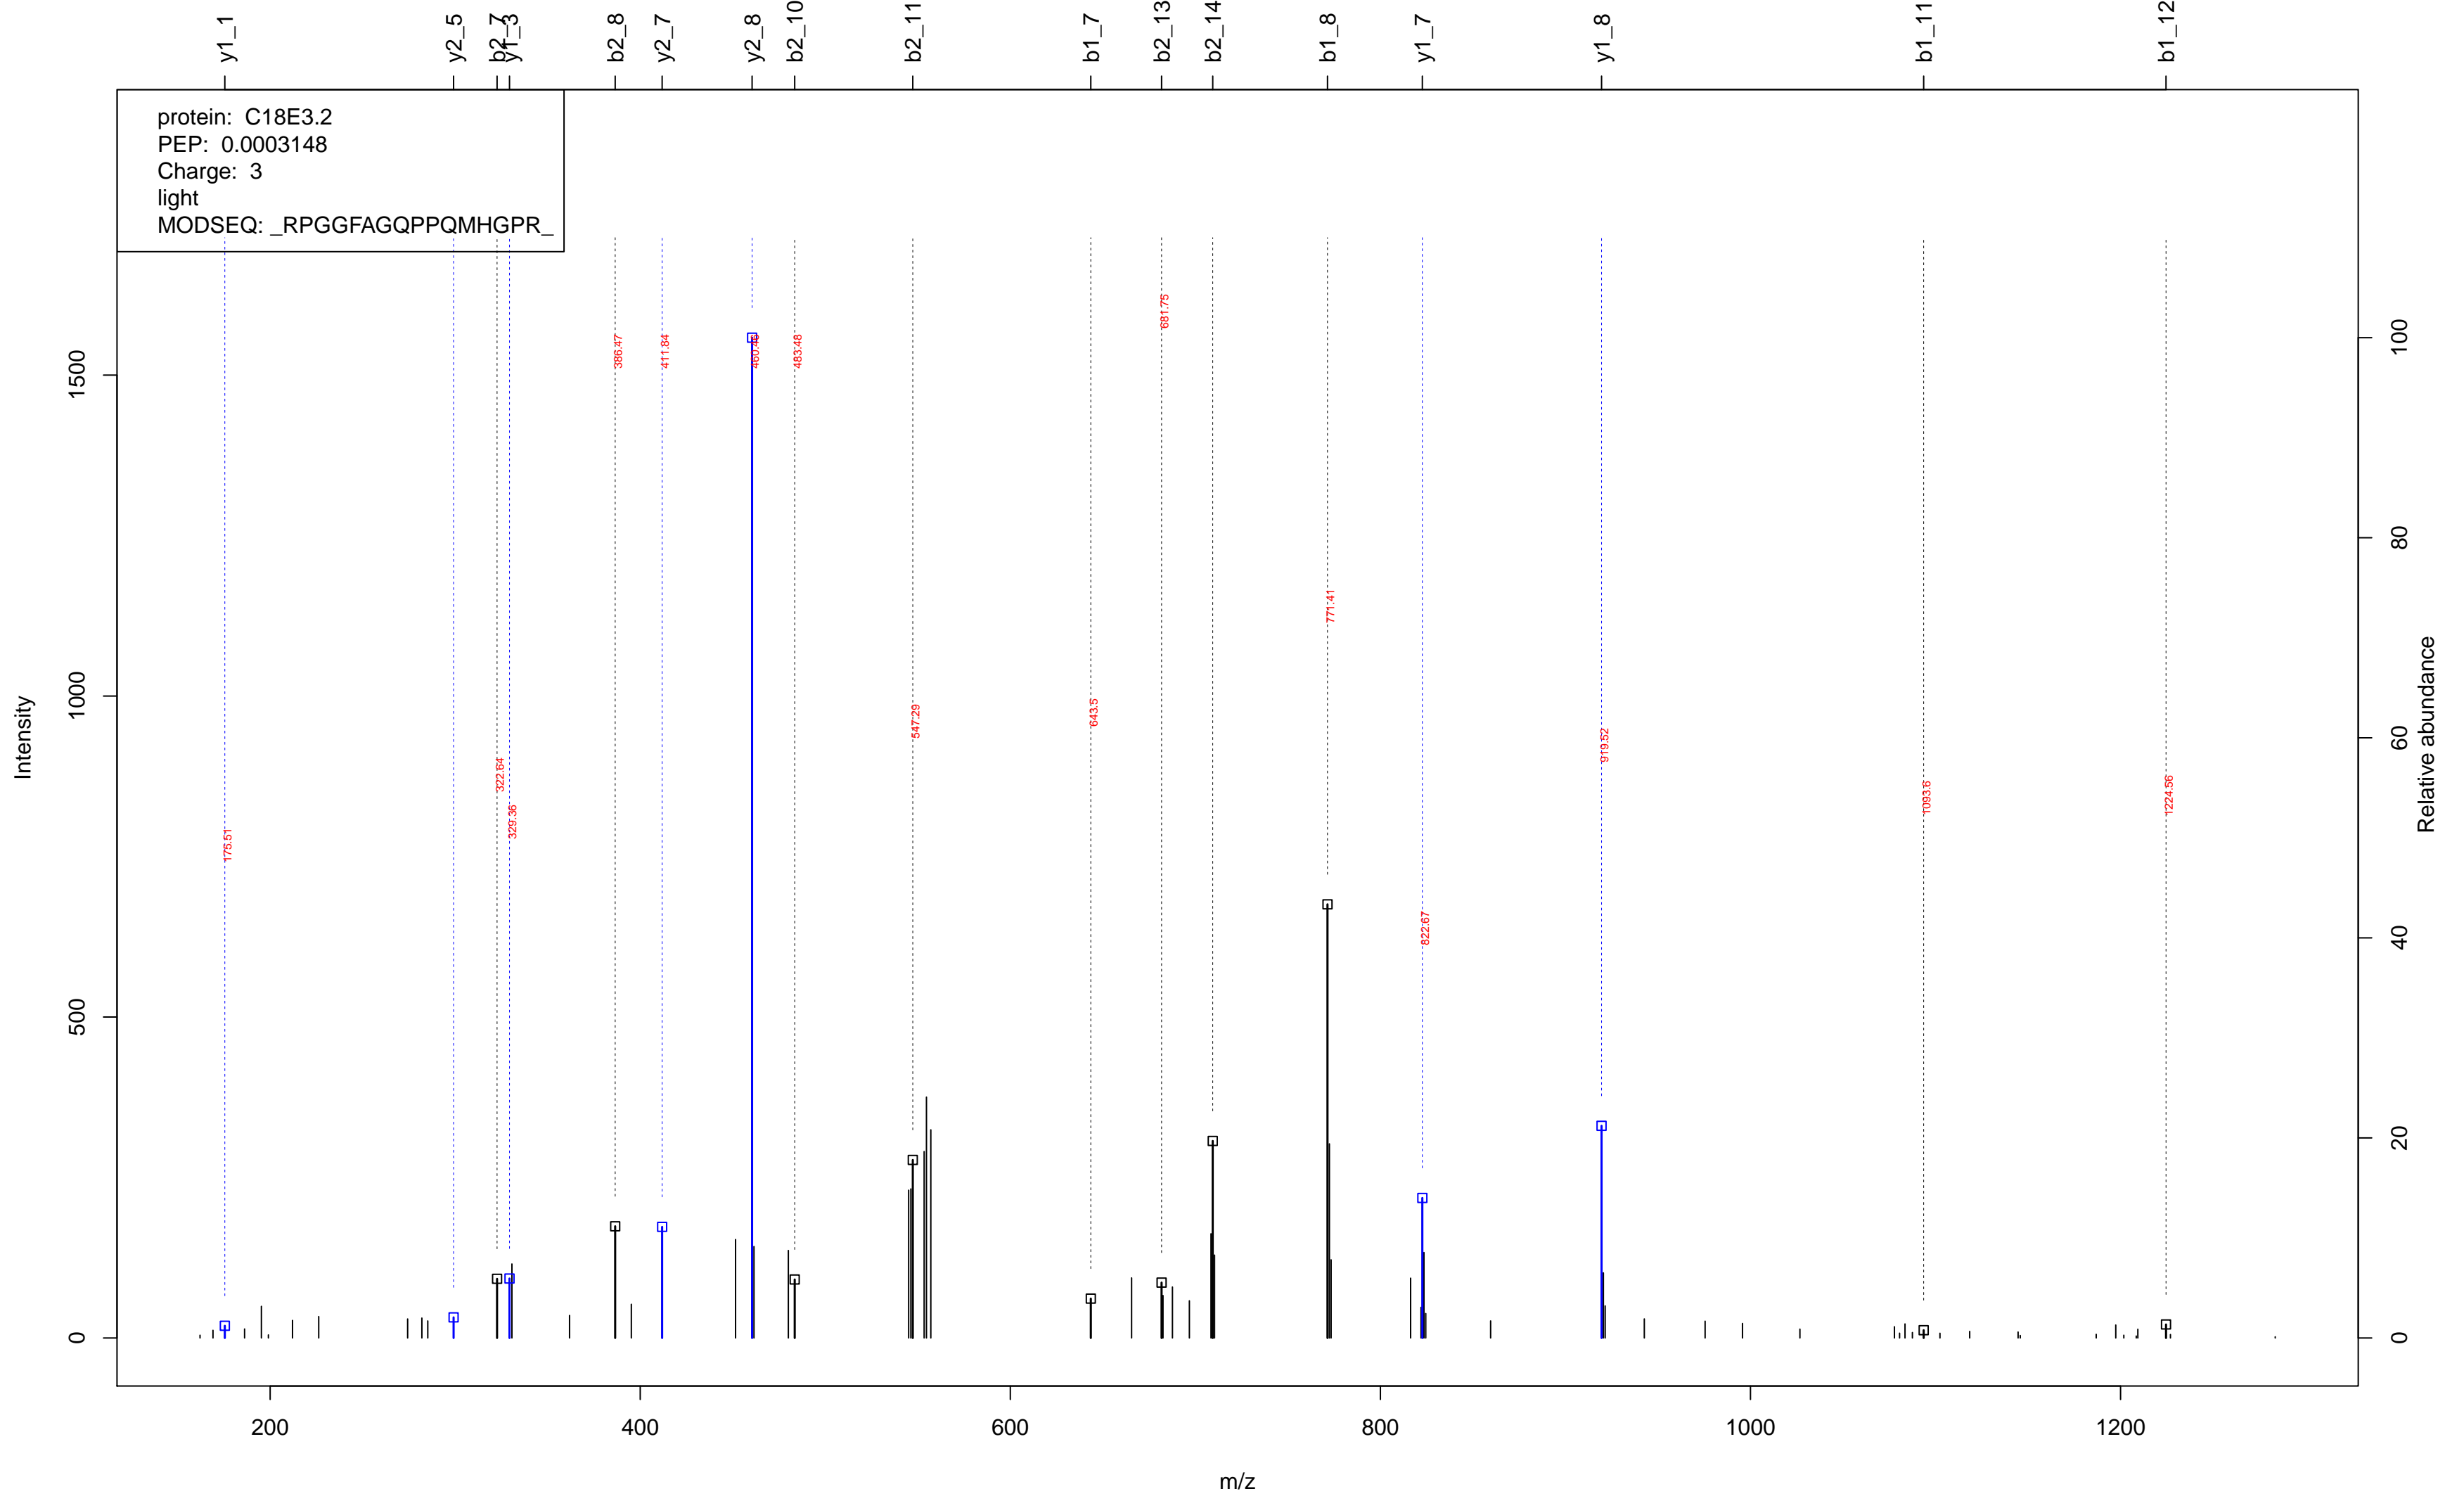

y2\_4

y1\_3

b2\_7

y1\_4

b2\_11

y4\_51

b2\_12

b2\_13

y1\_6

b2\_14

b1\_7

b2\_15

b2\_16

b2\_17

y4\_87

y1\_9

b1\_11

protein: ZK1128.5  
PEP: 4.943e-05  
Charge: 3  
light  
MODSEQ: \_RPINAPLPGQTAQIQGNR\_

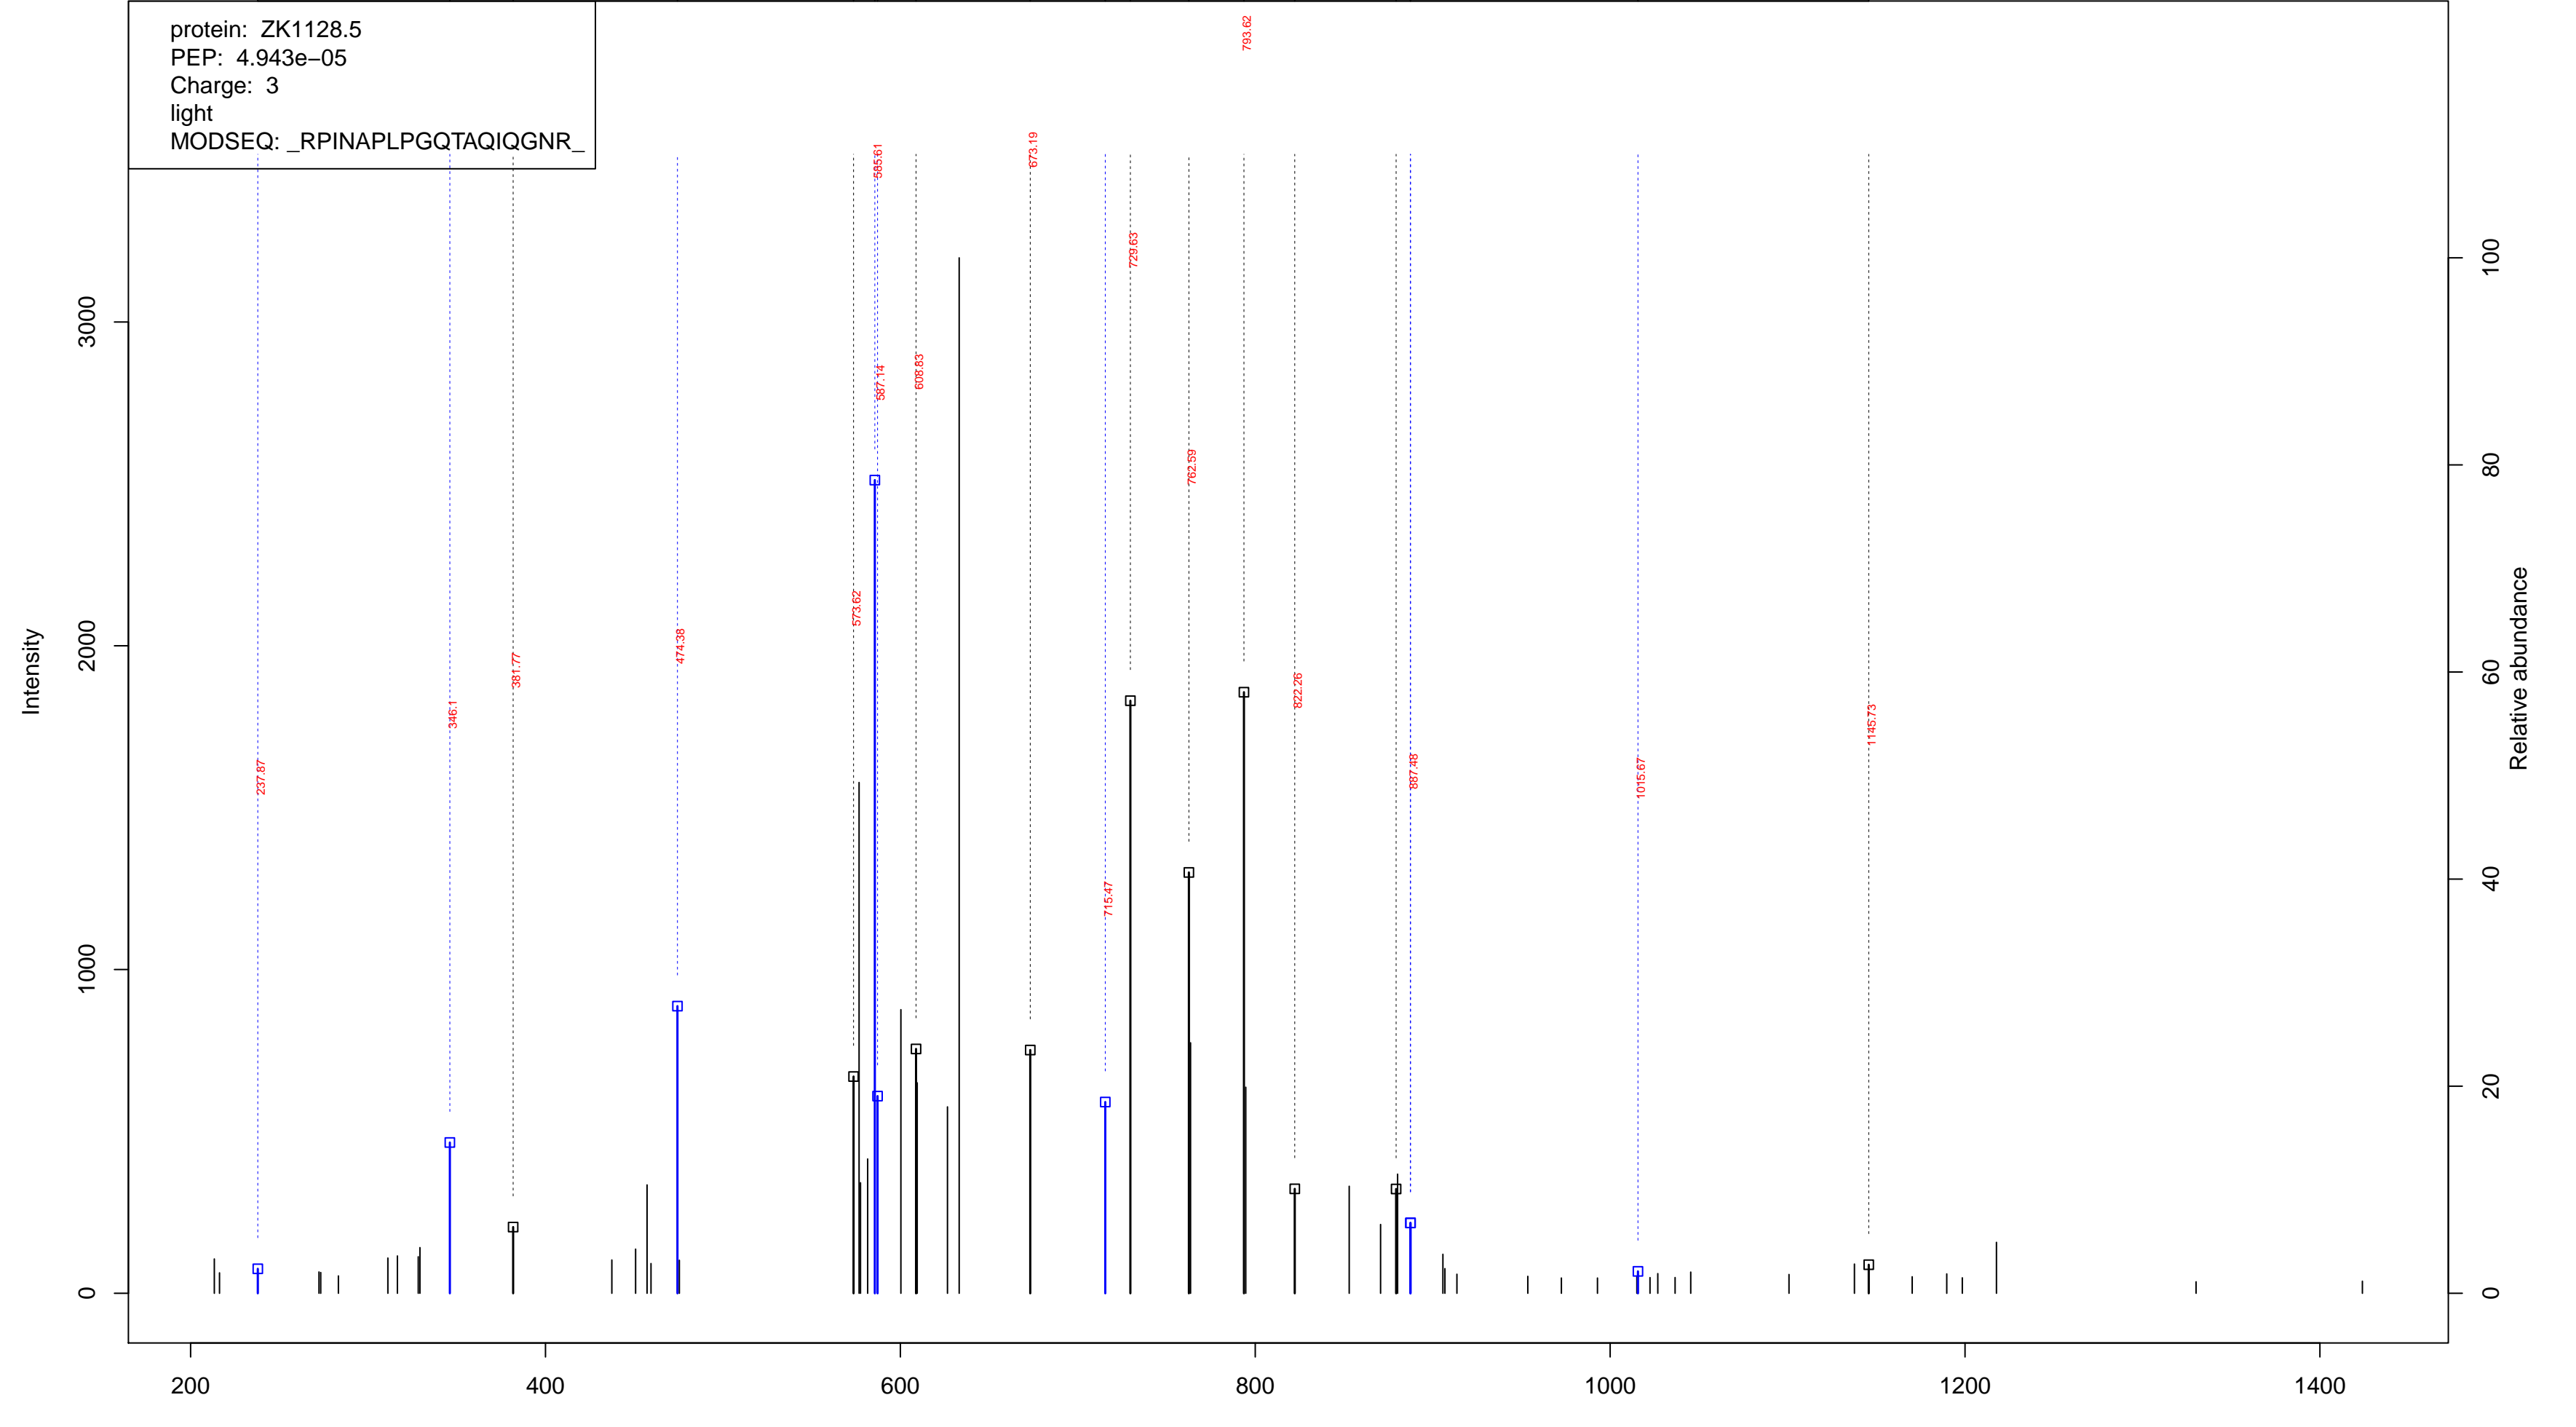

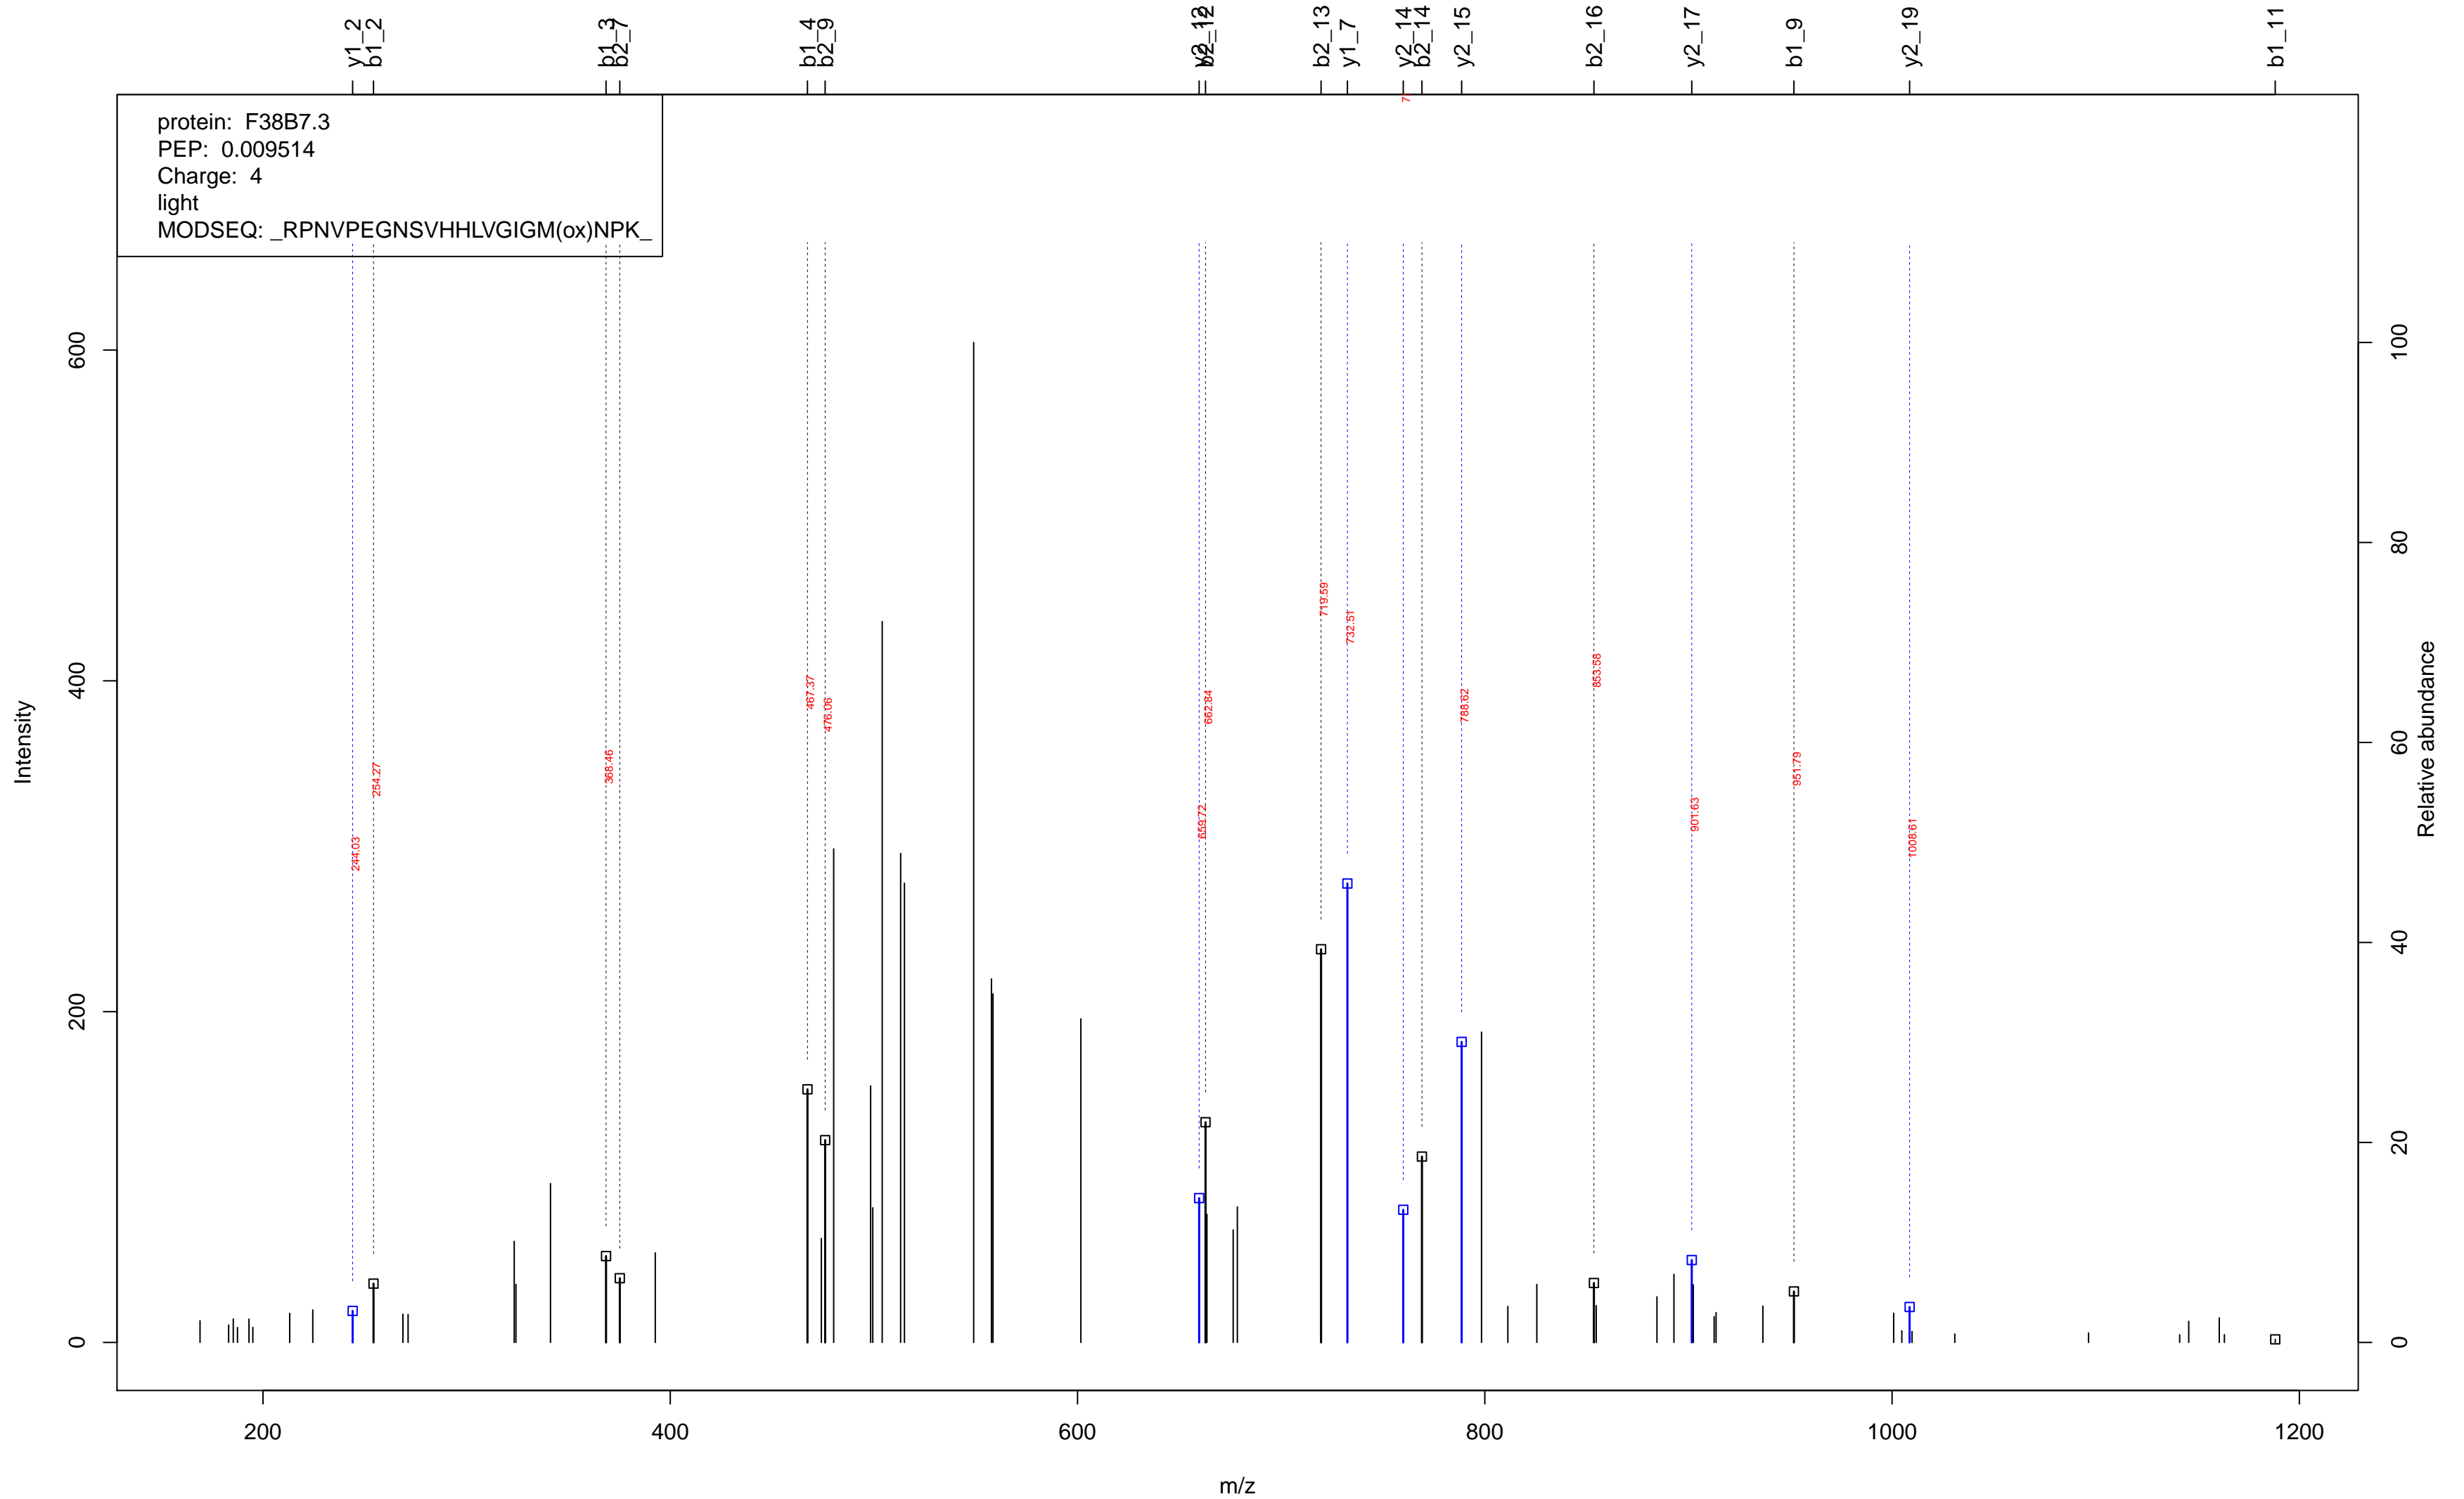

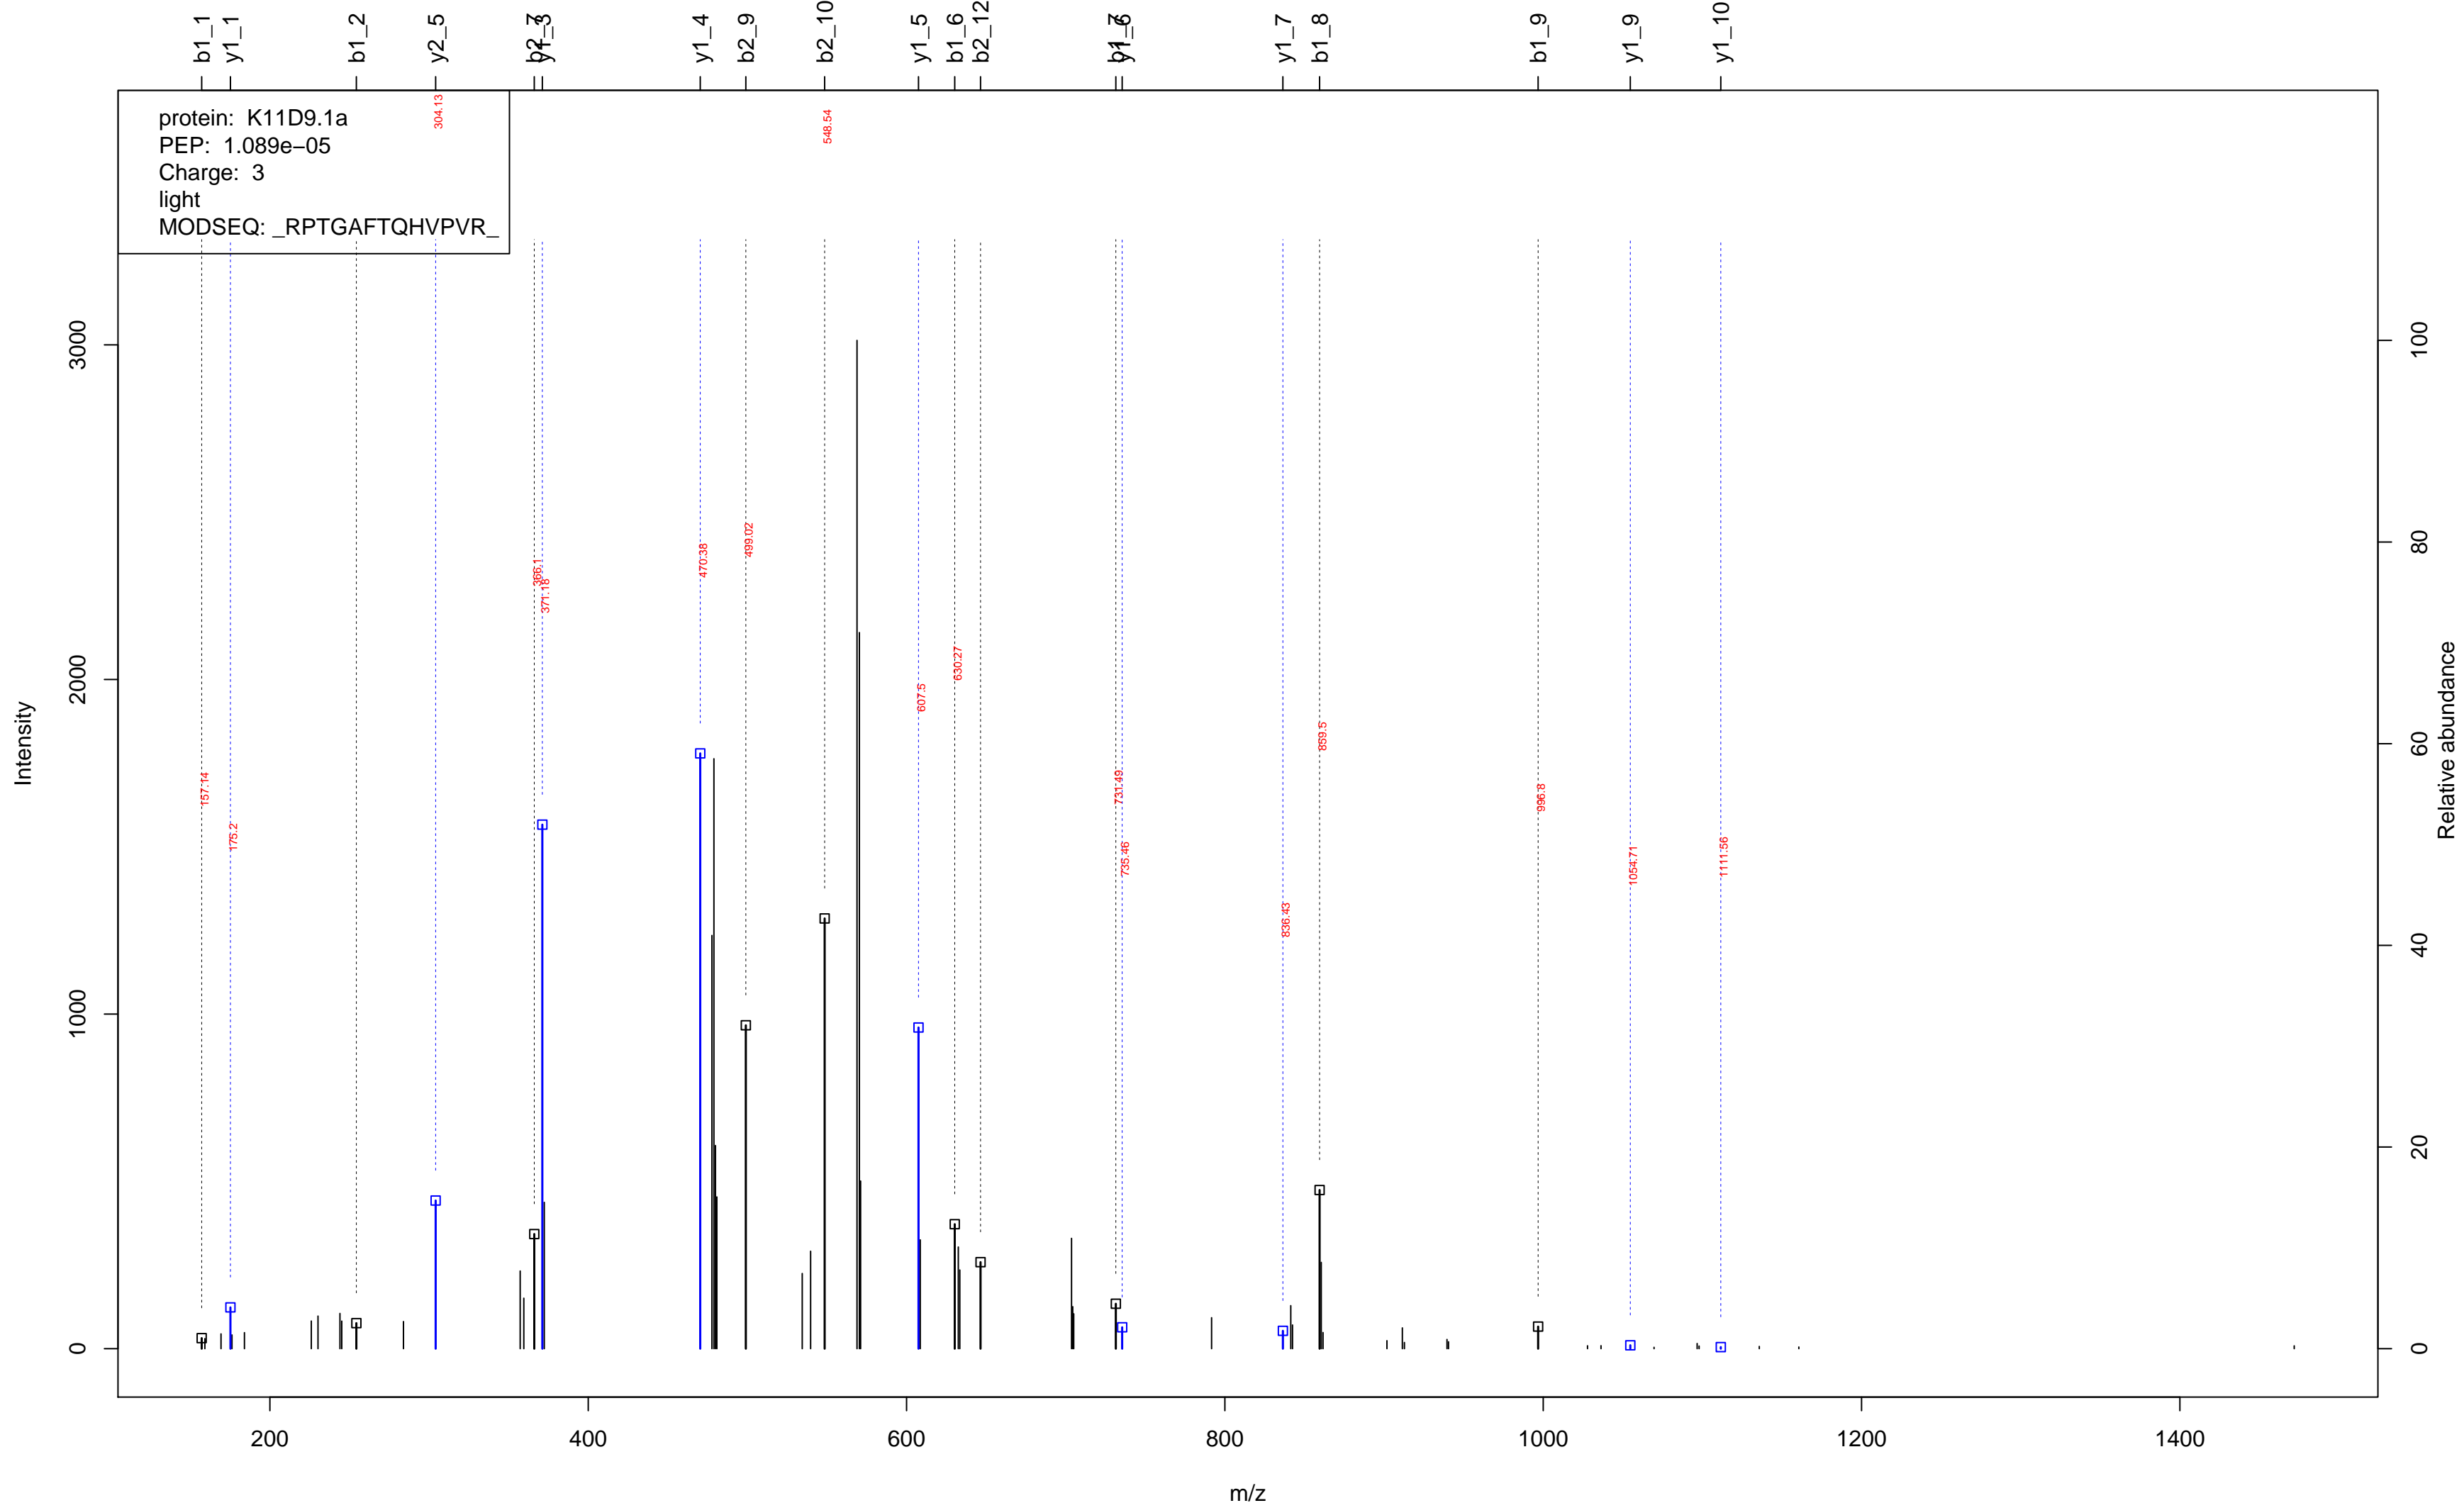



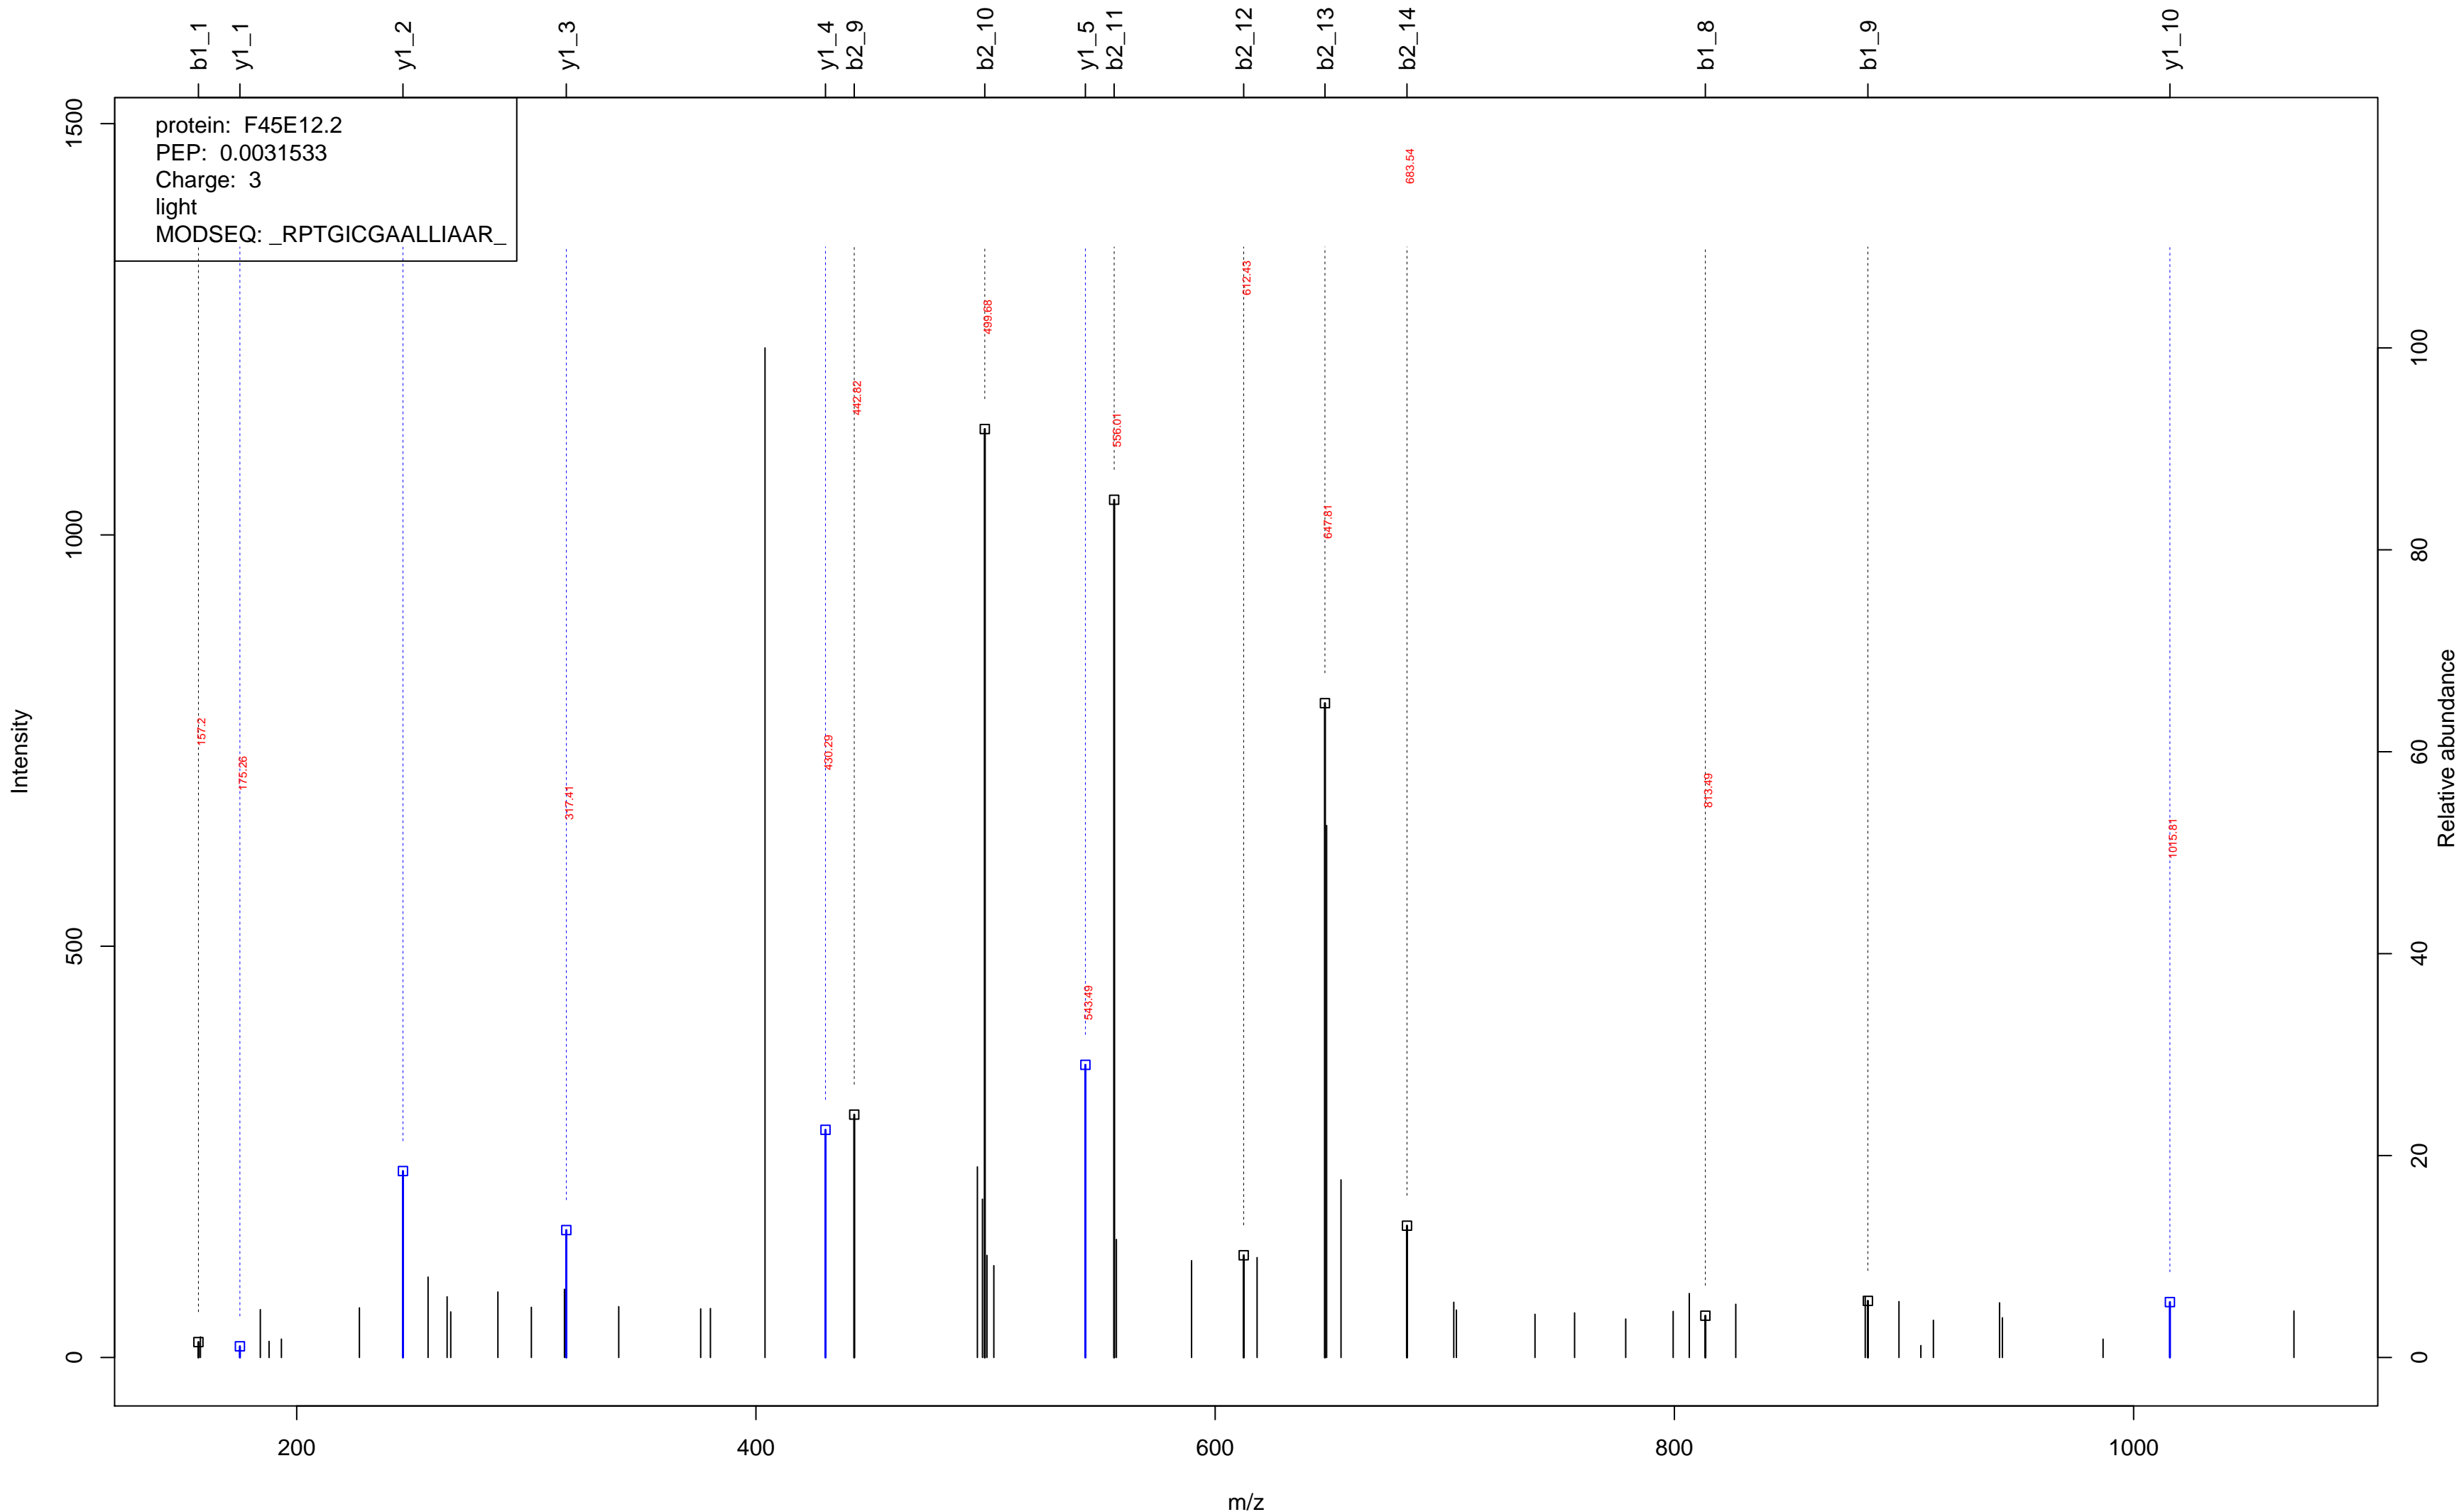

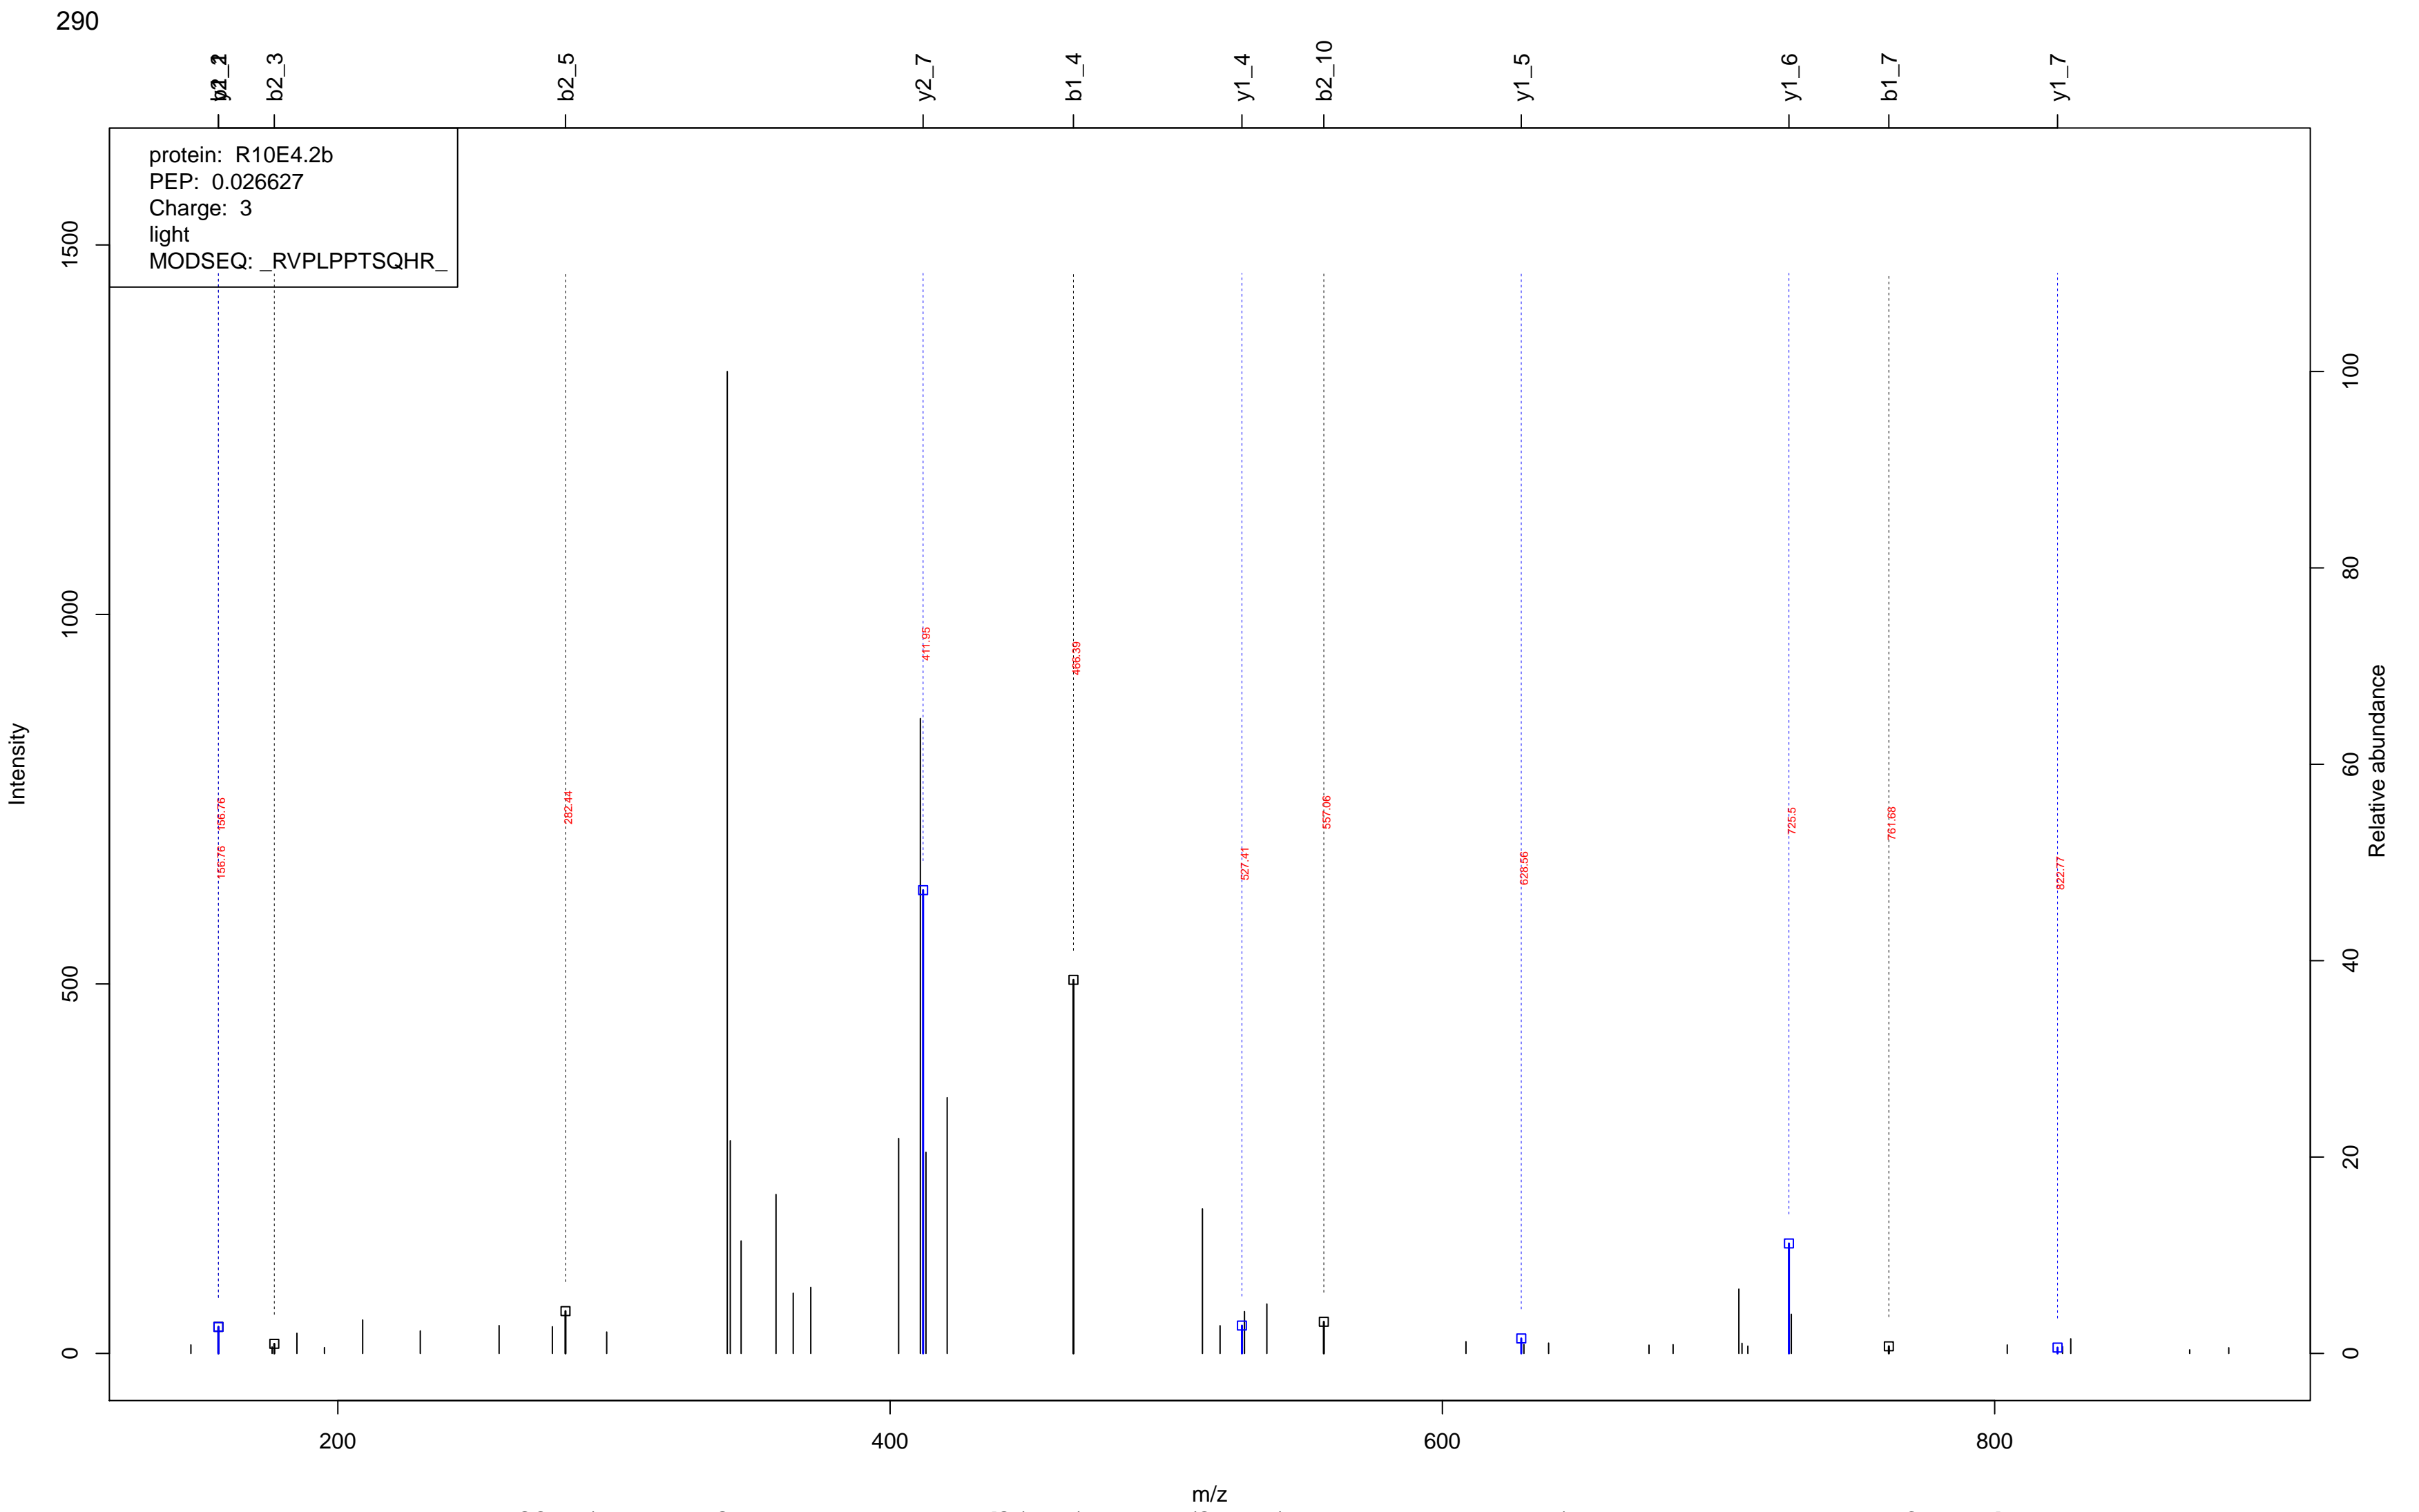

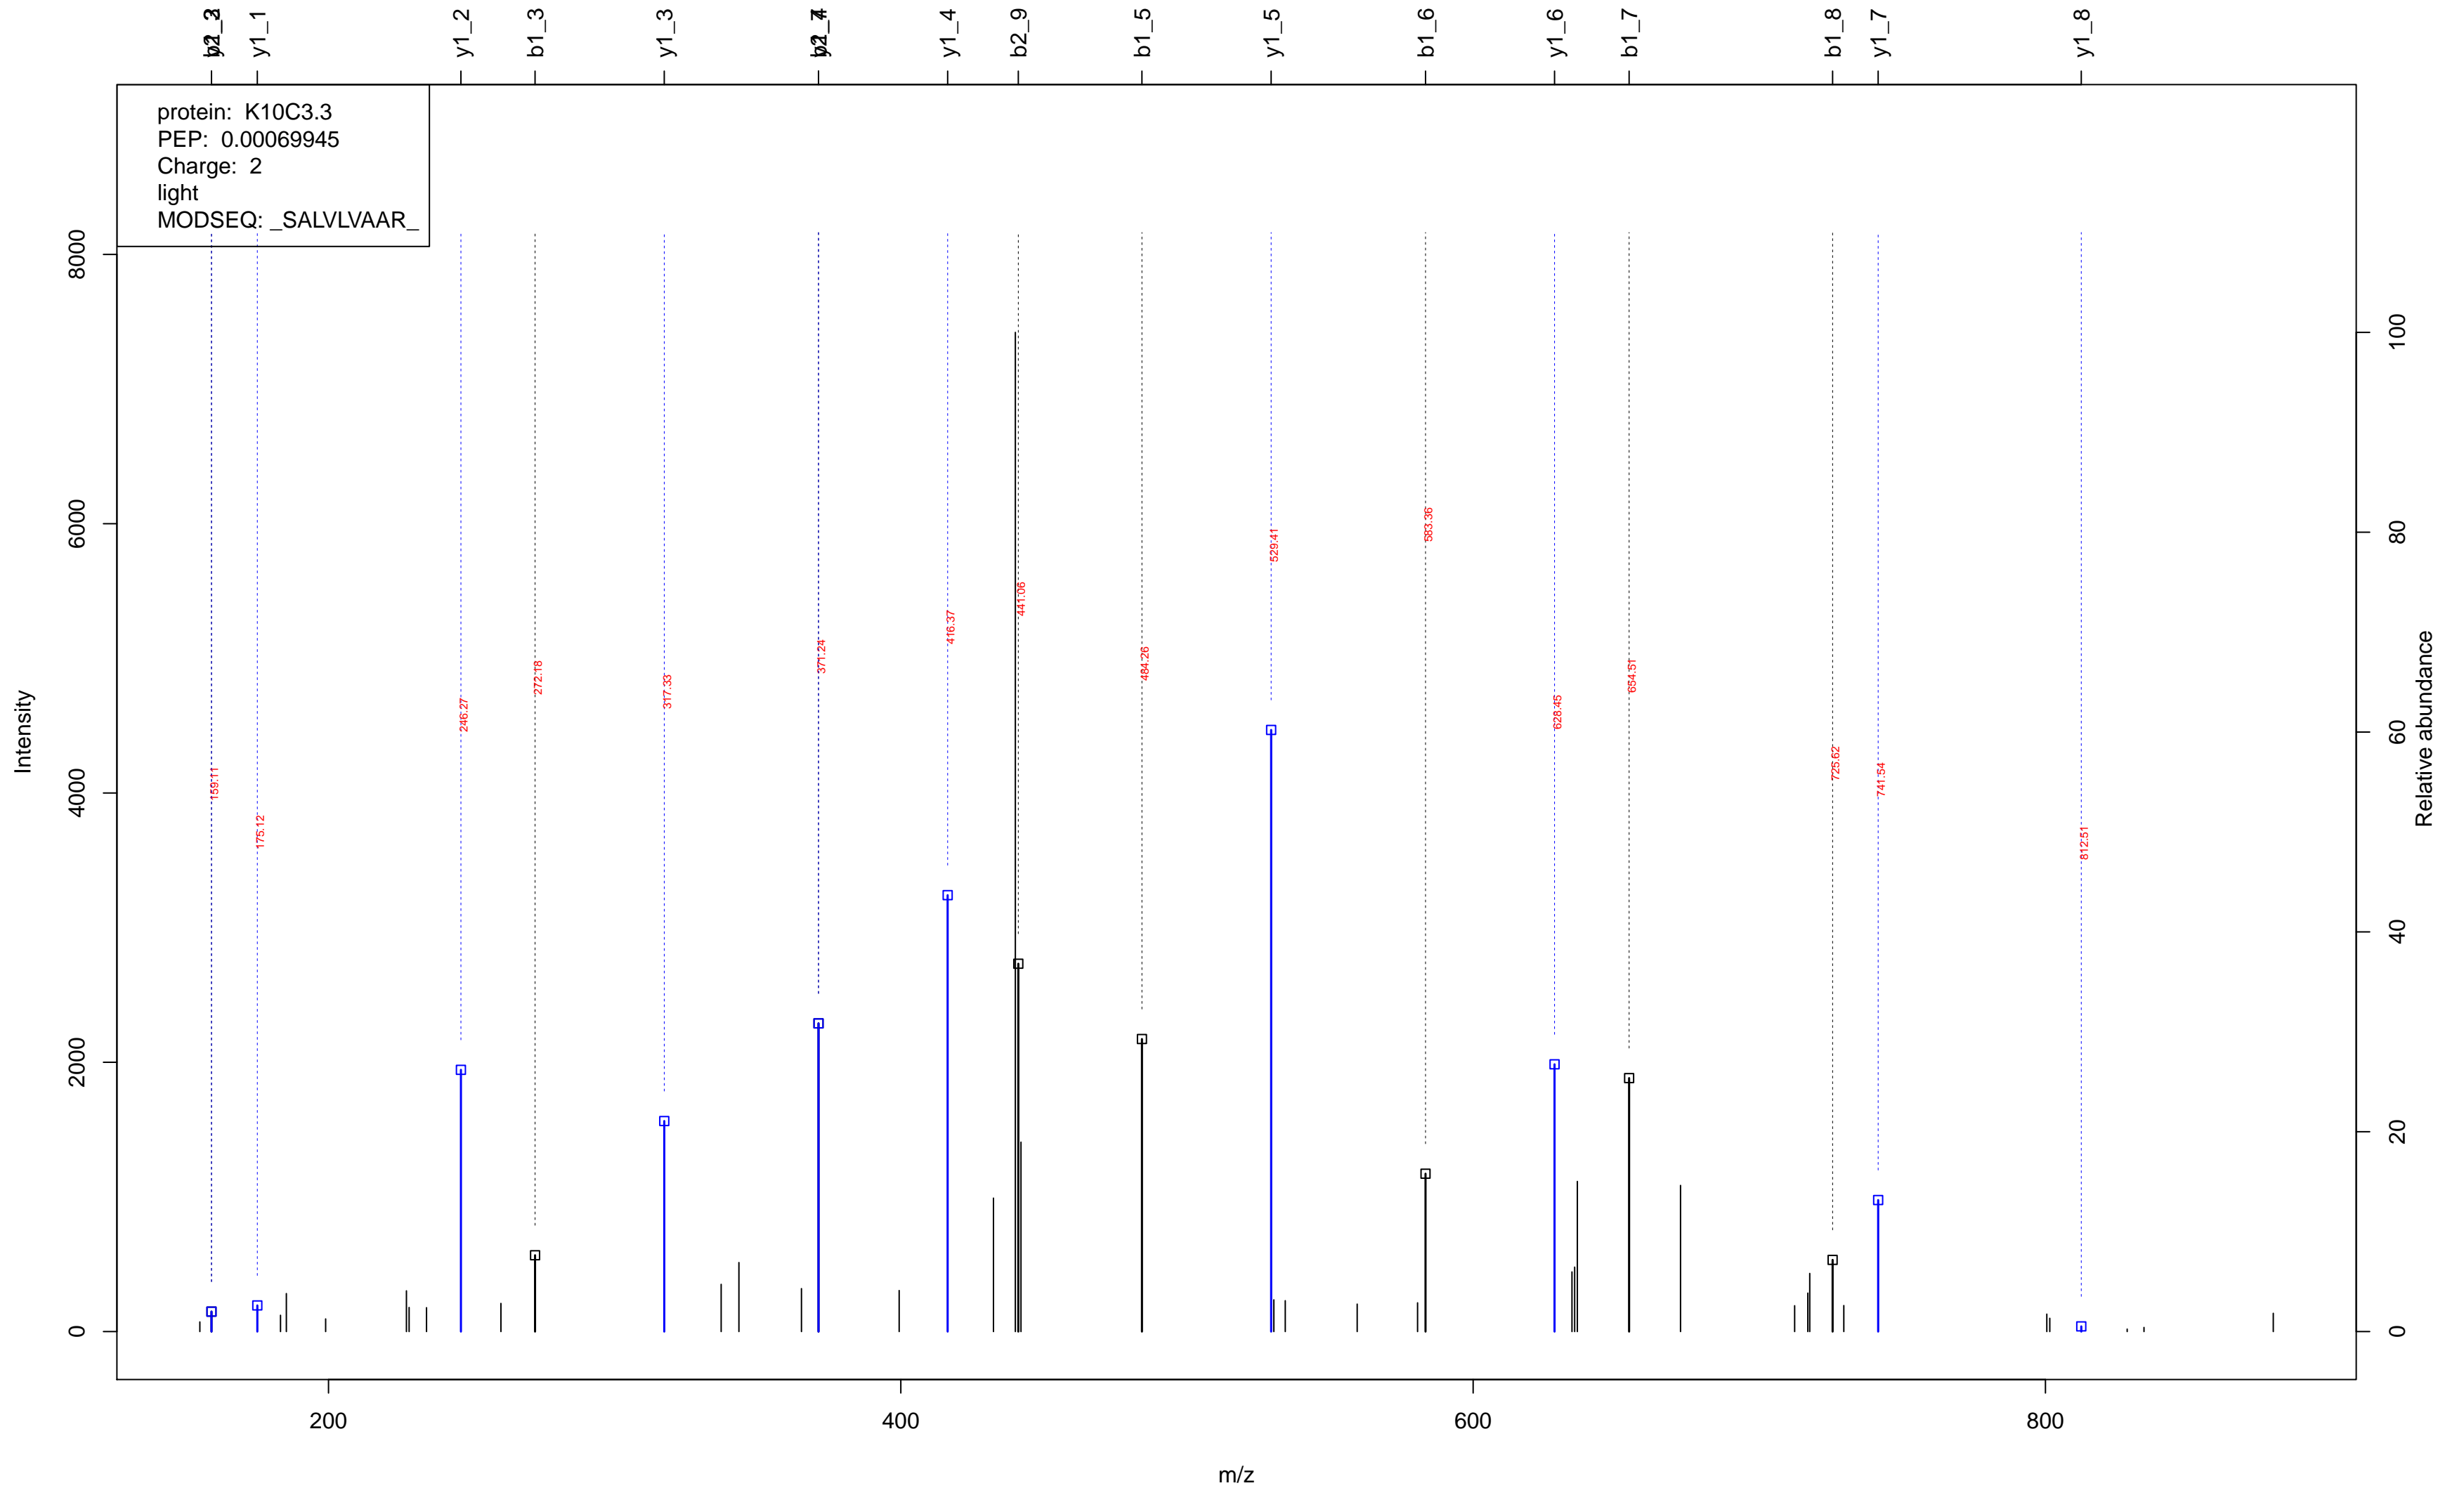

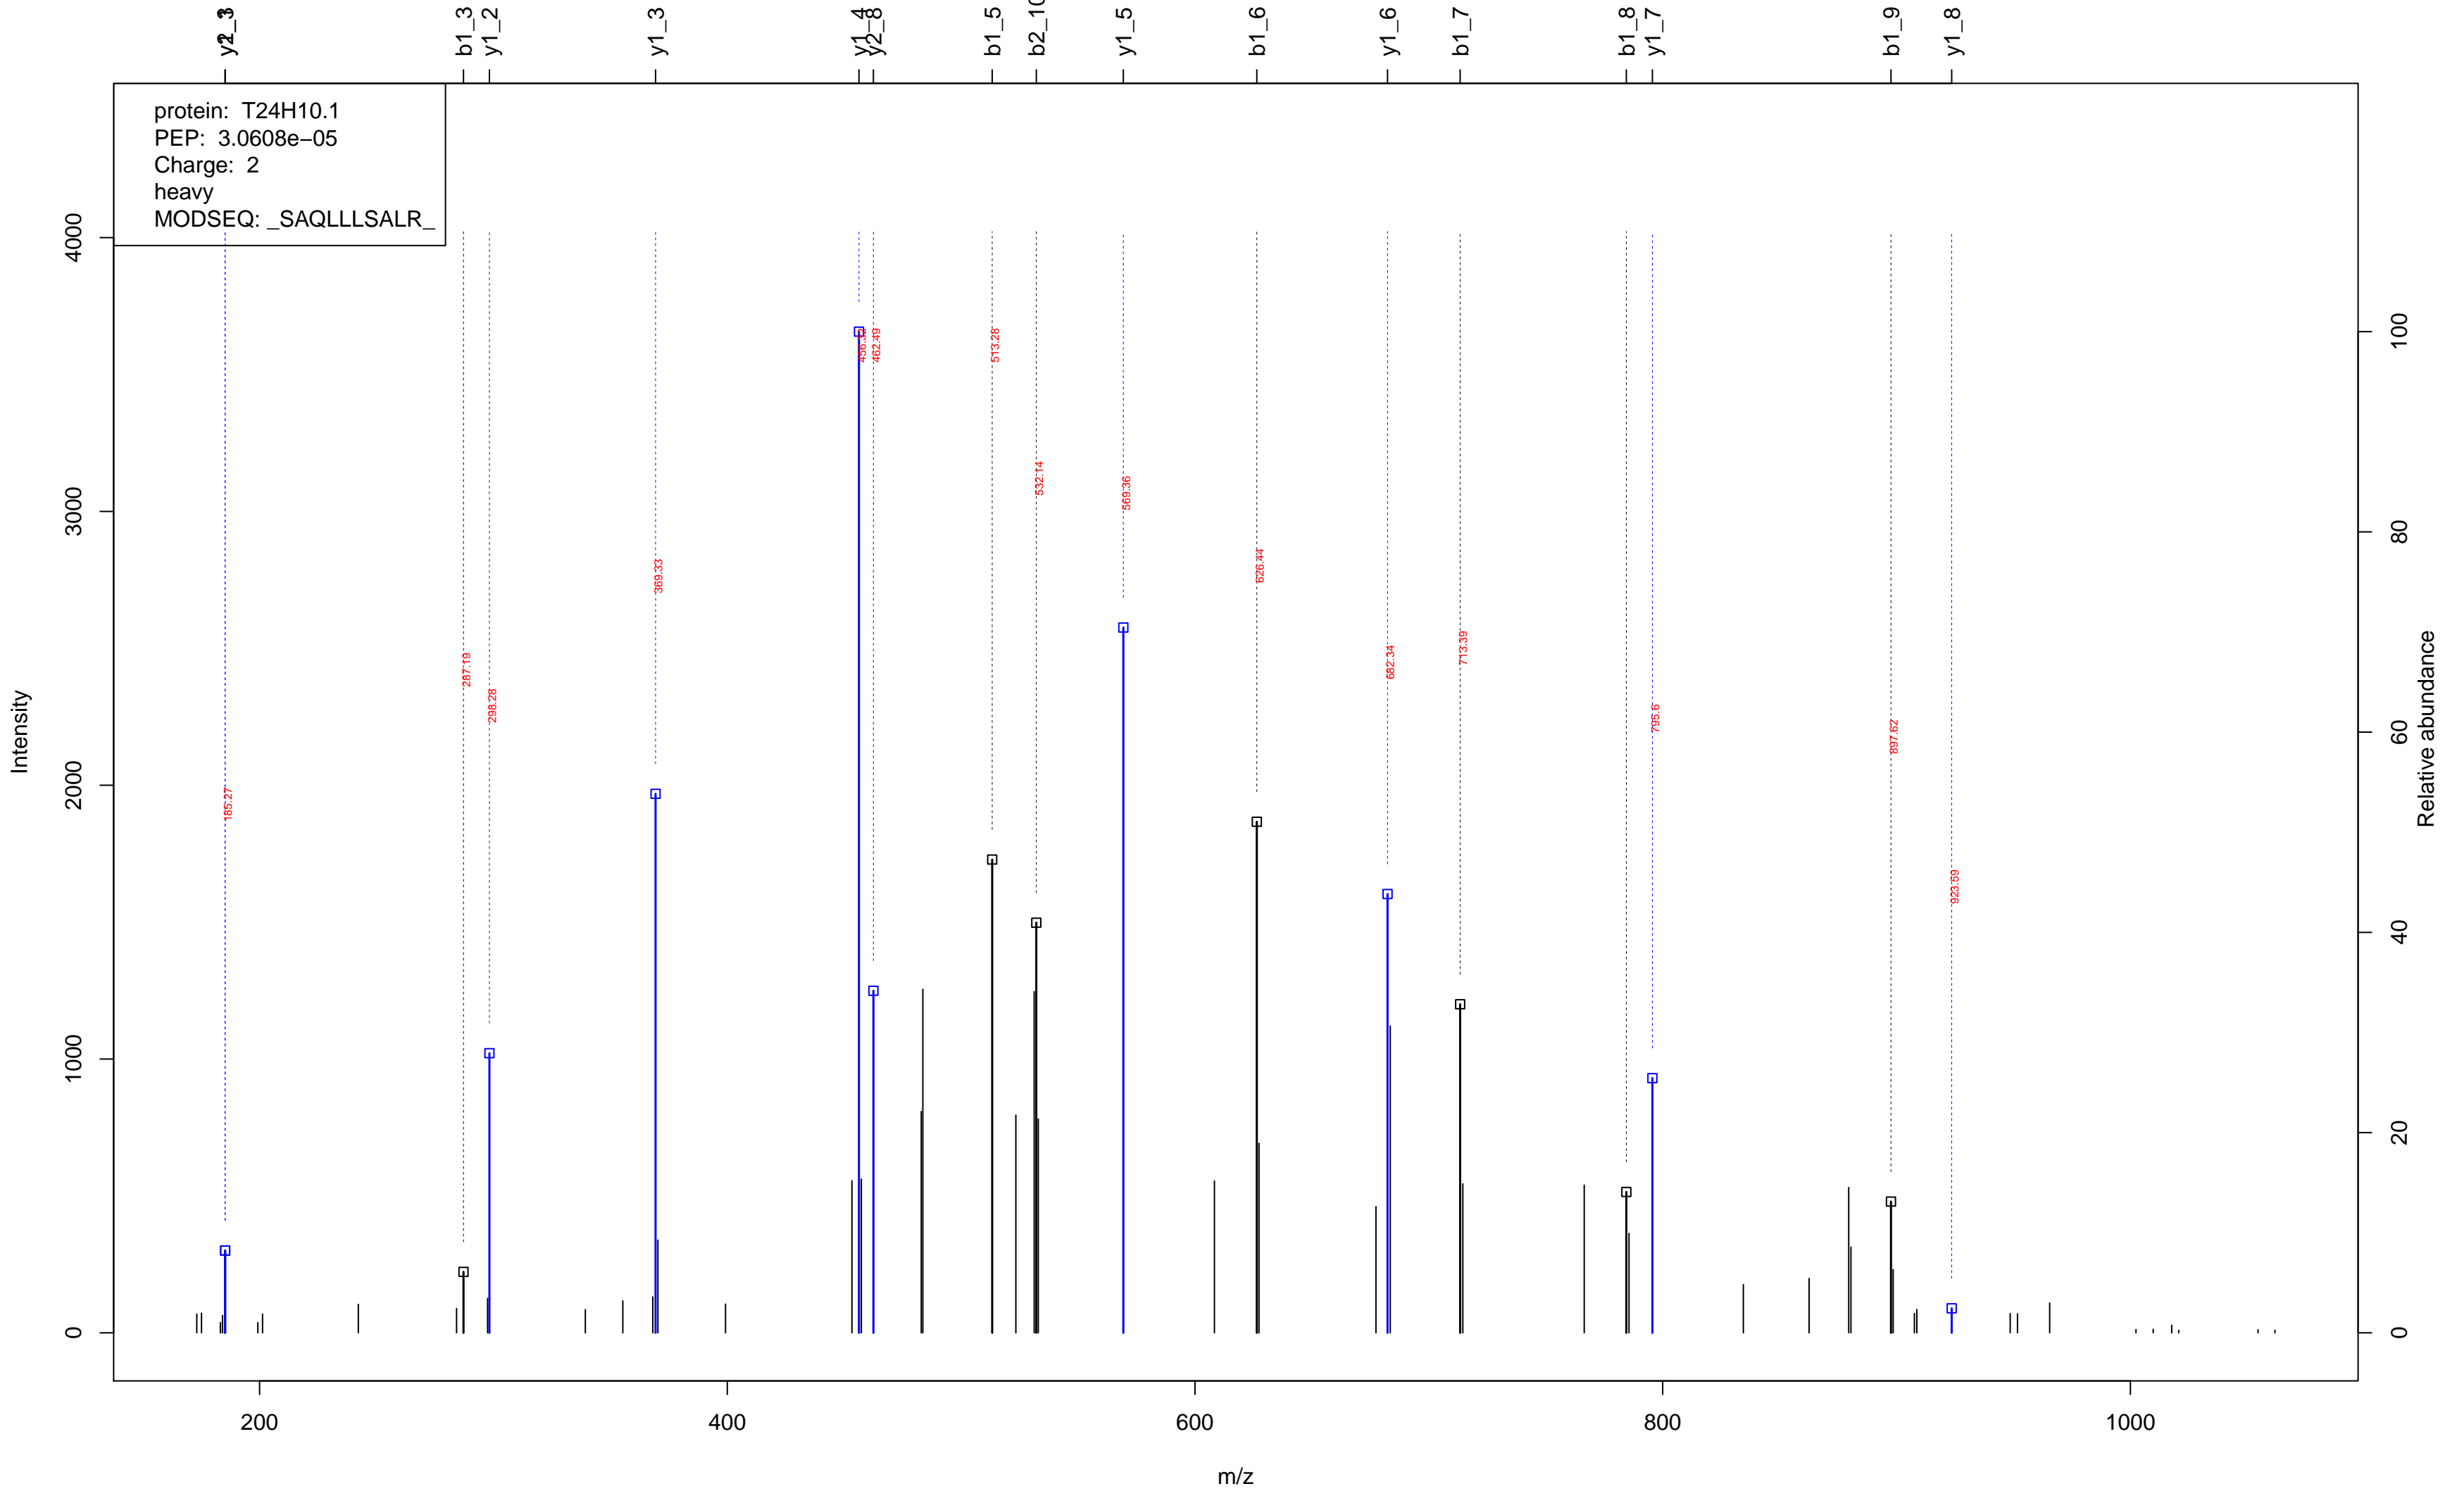

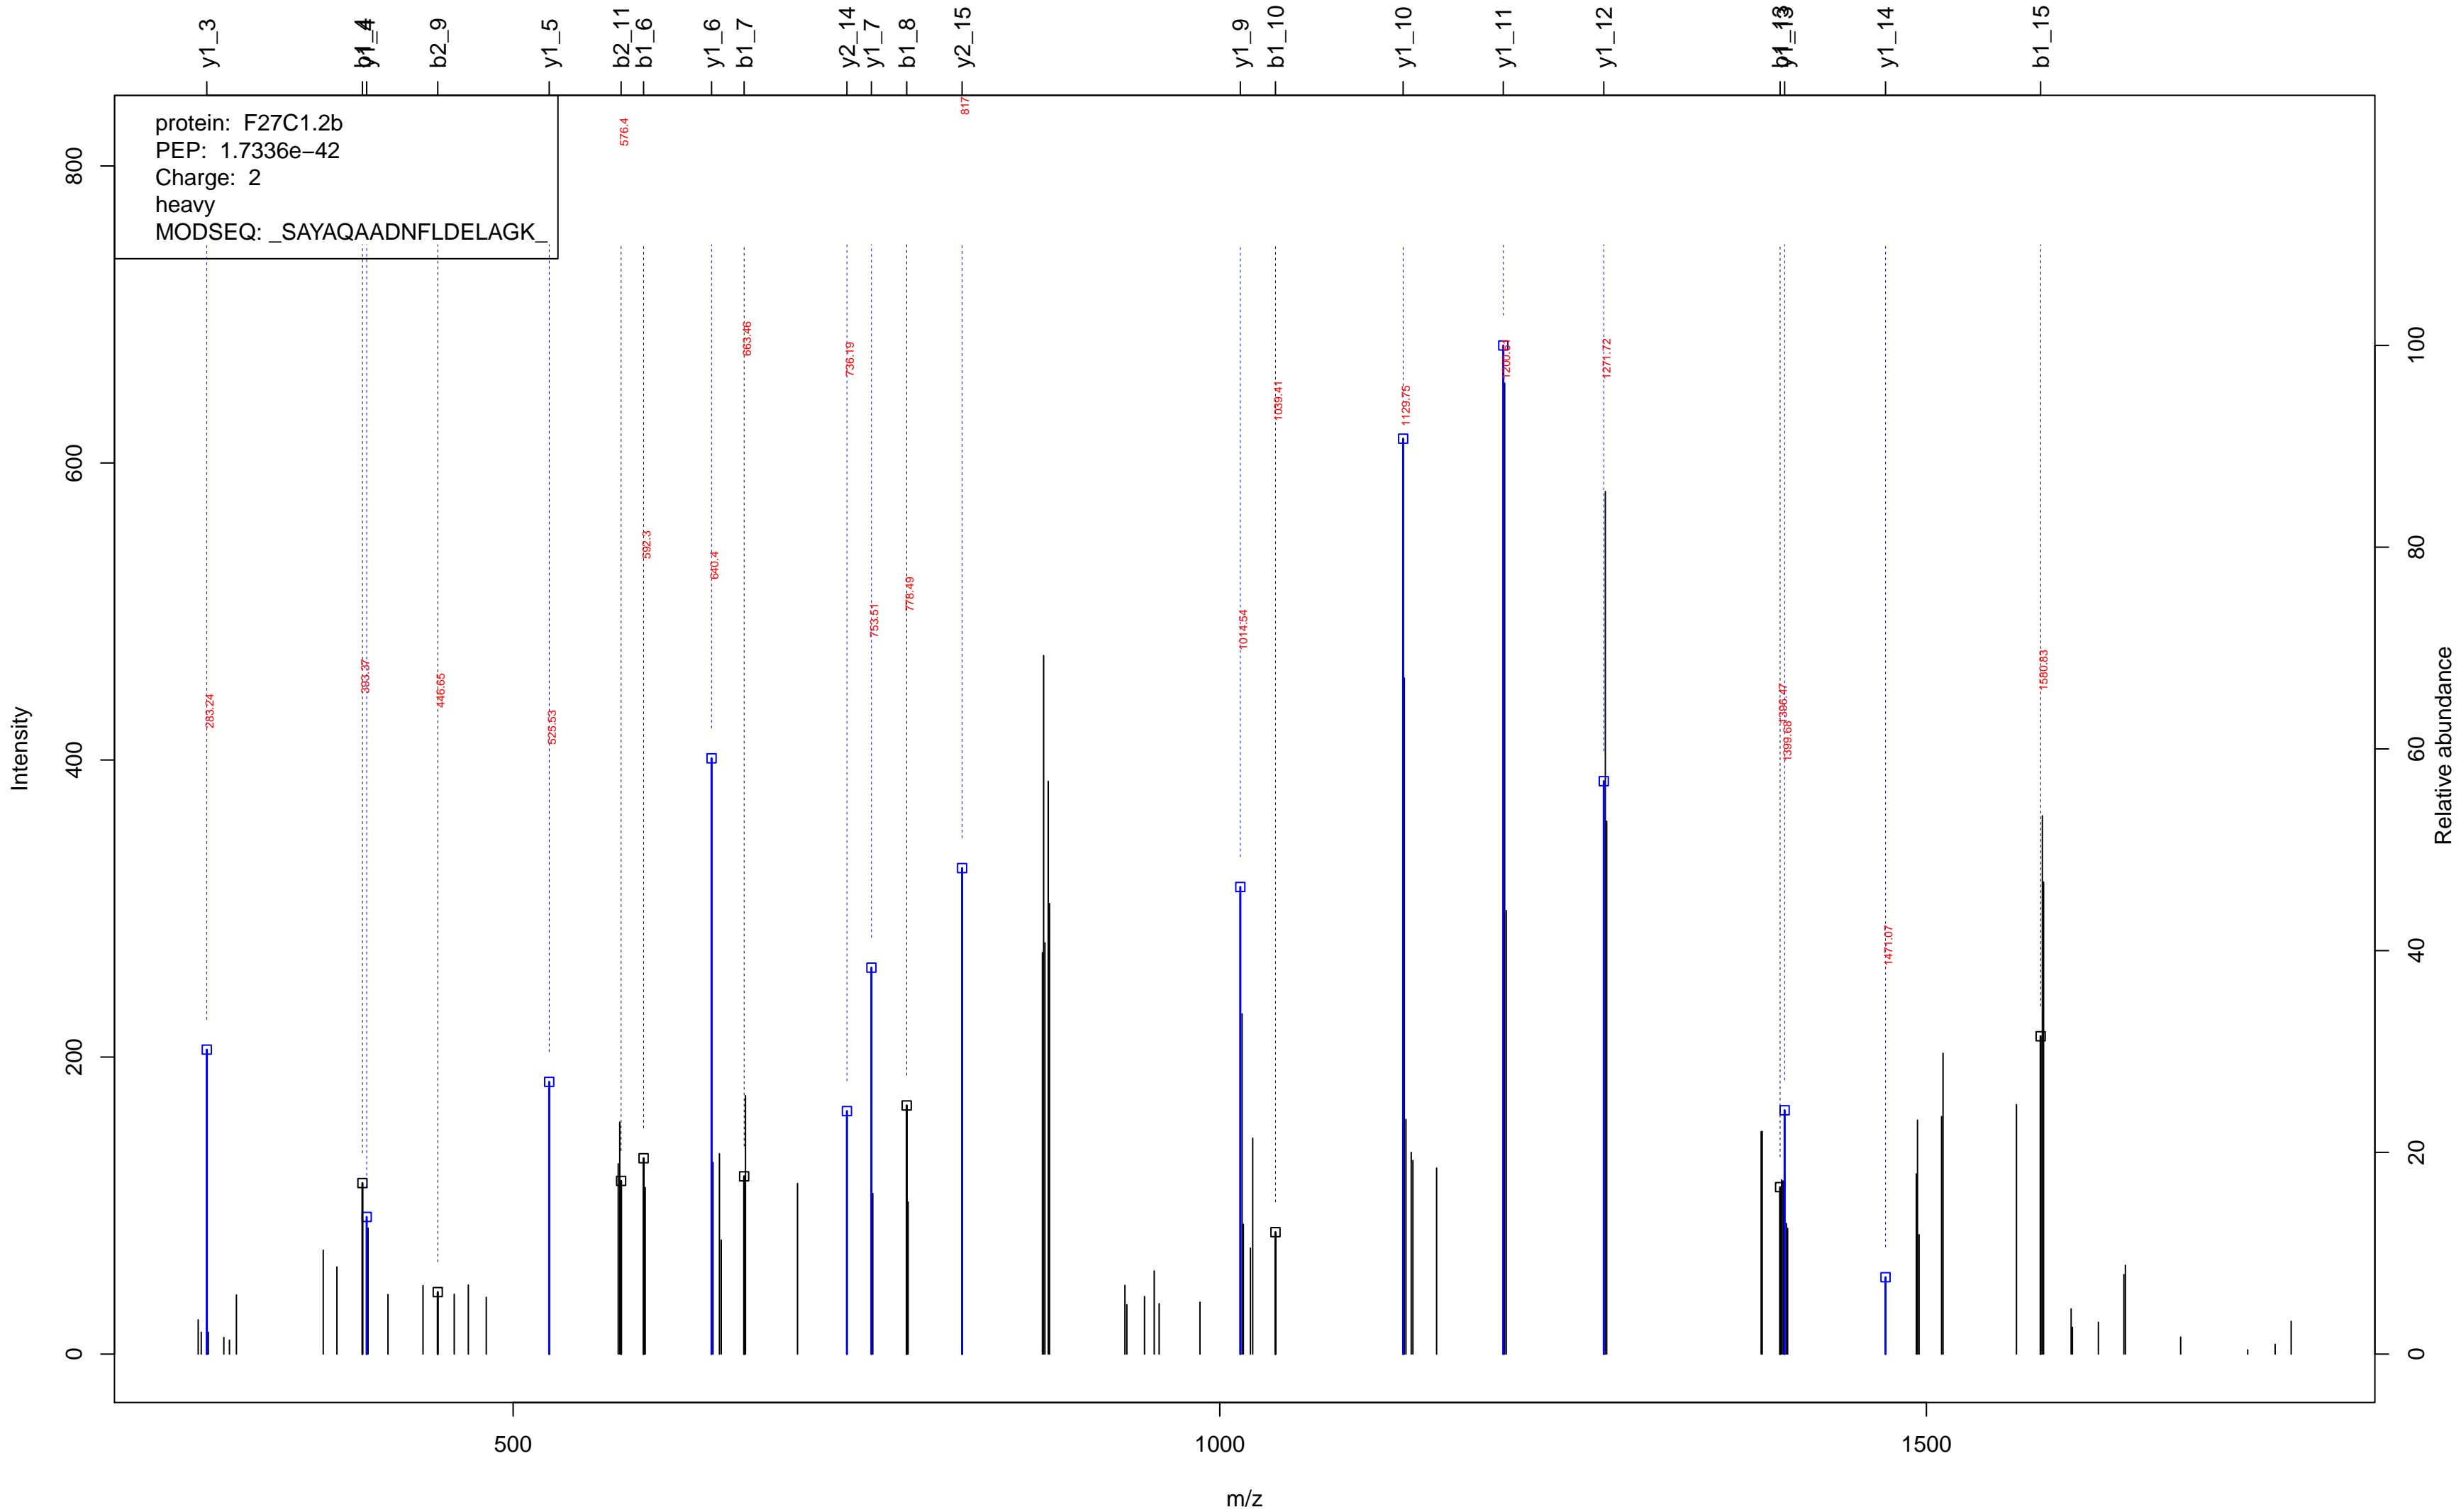

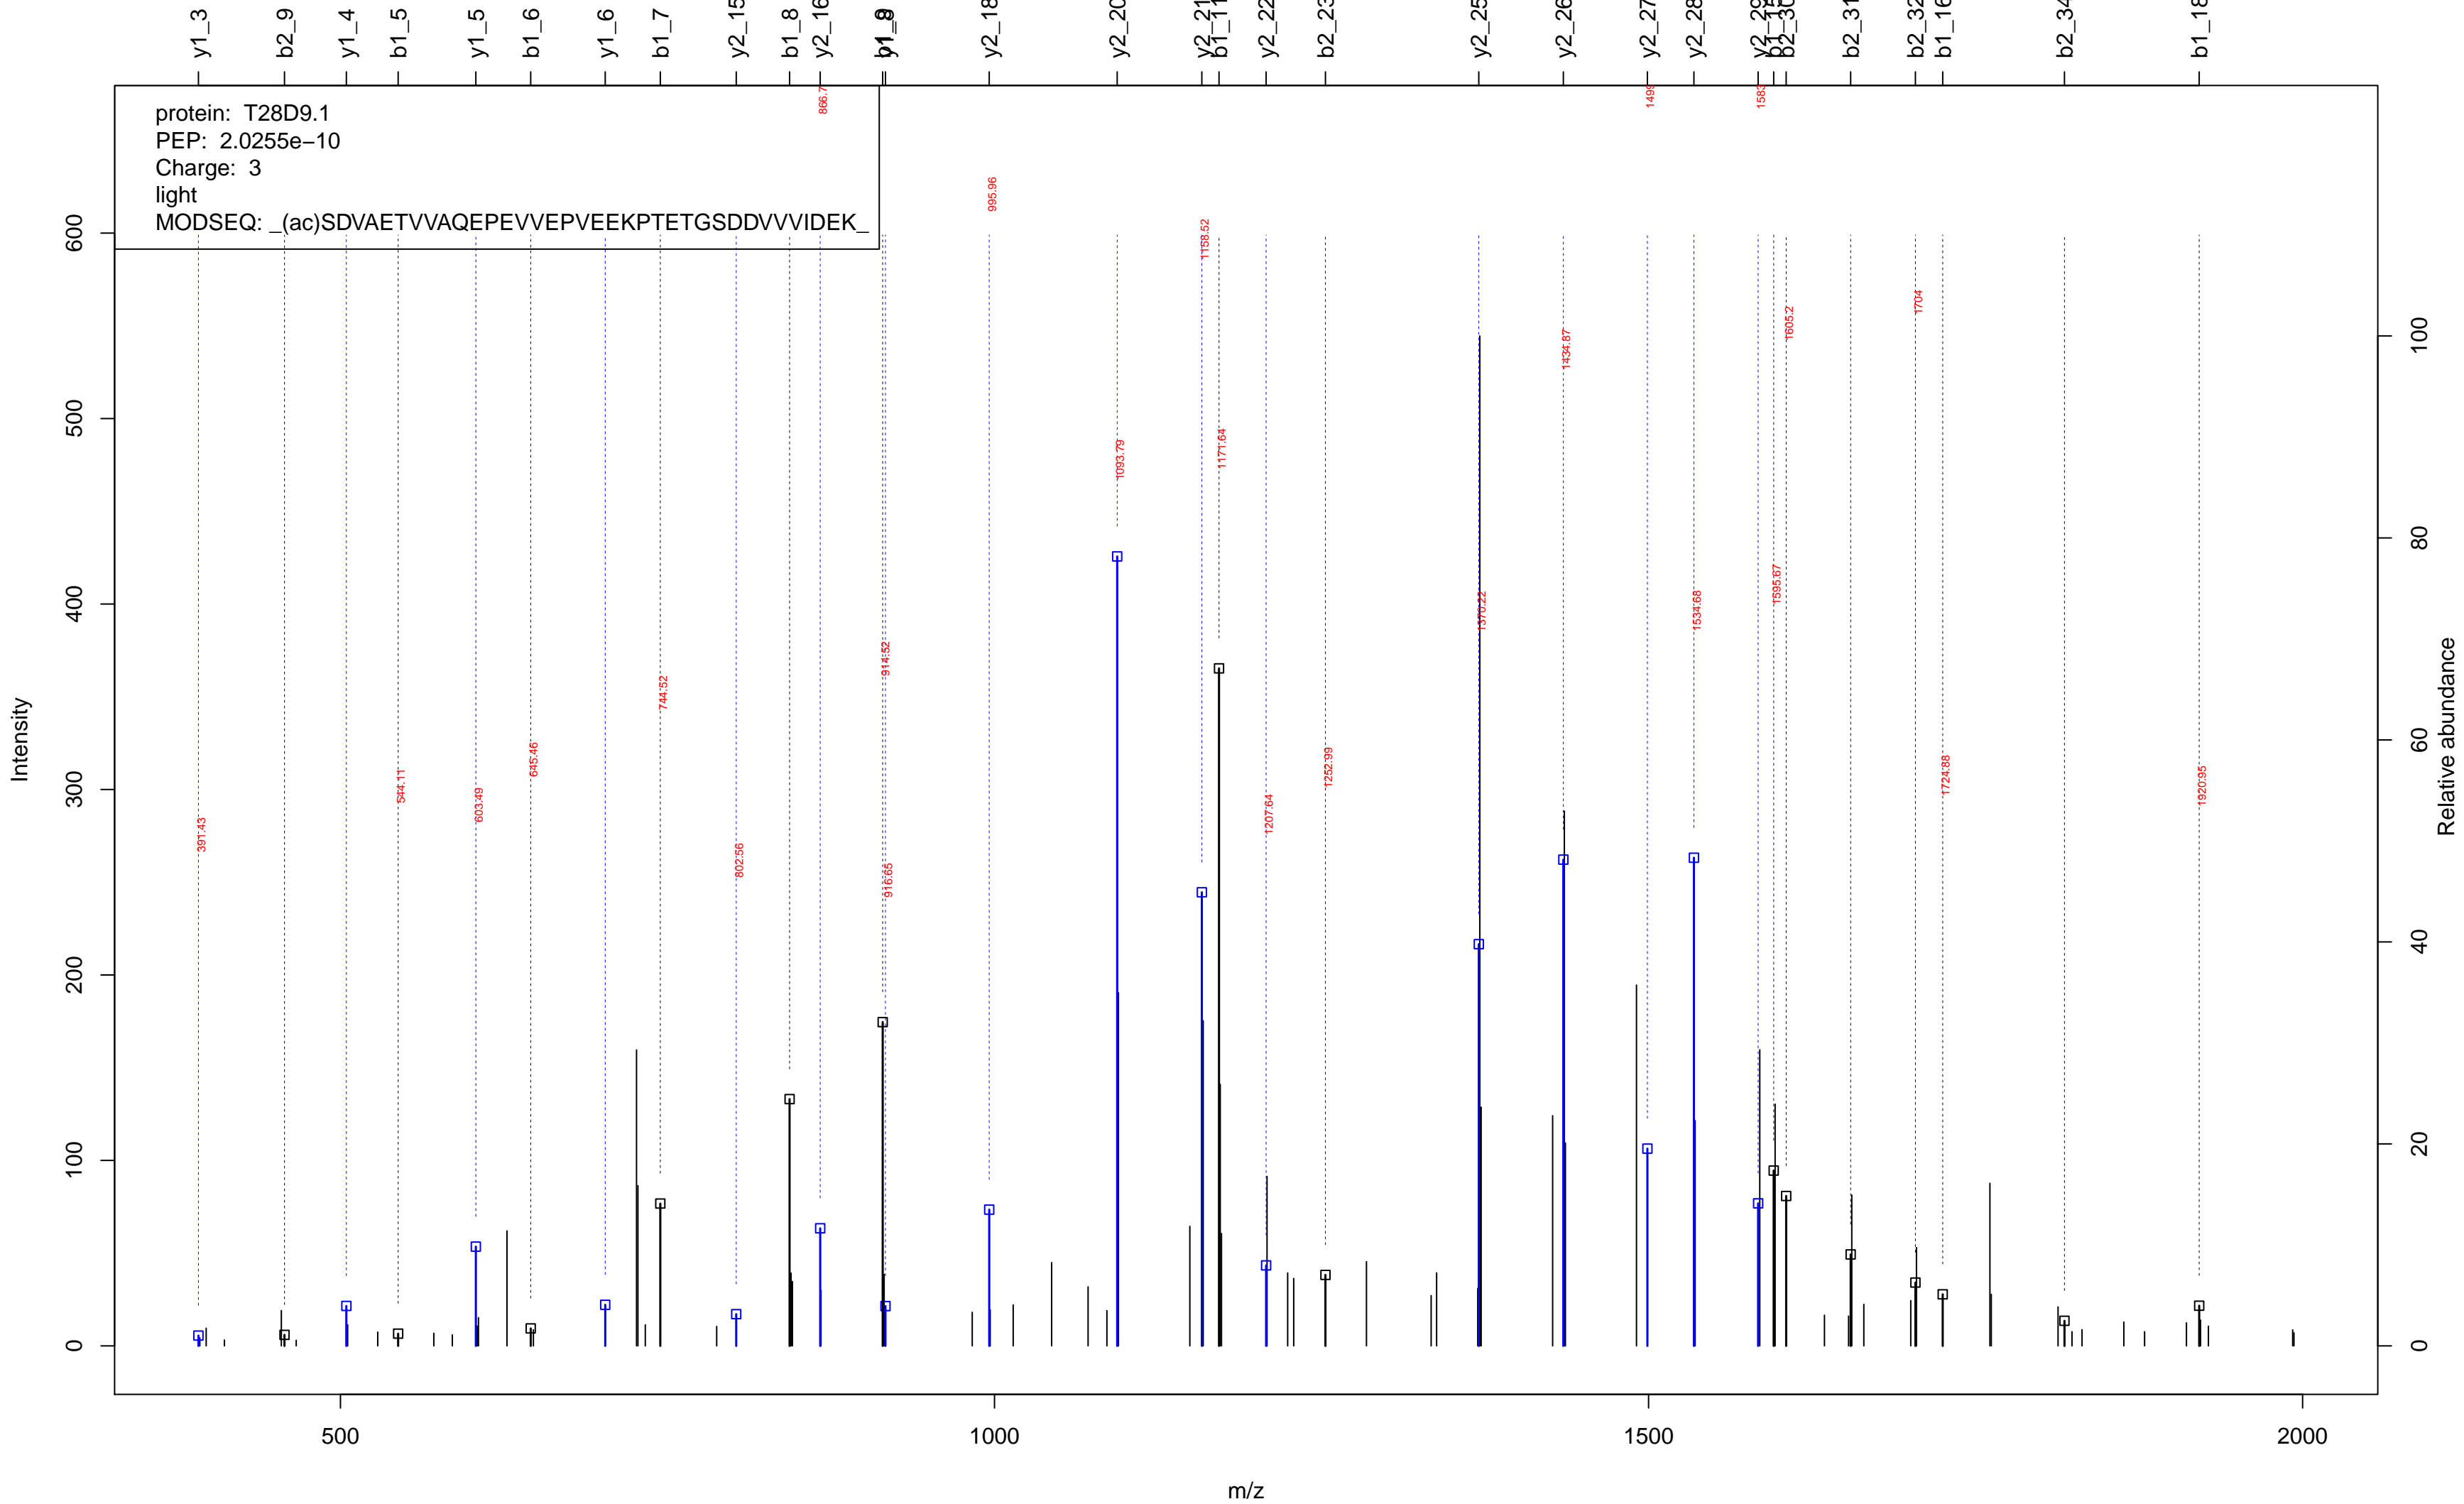

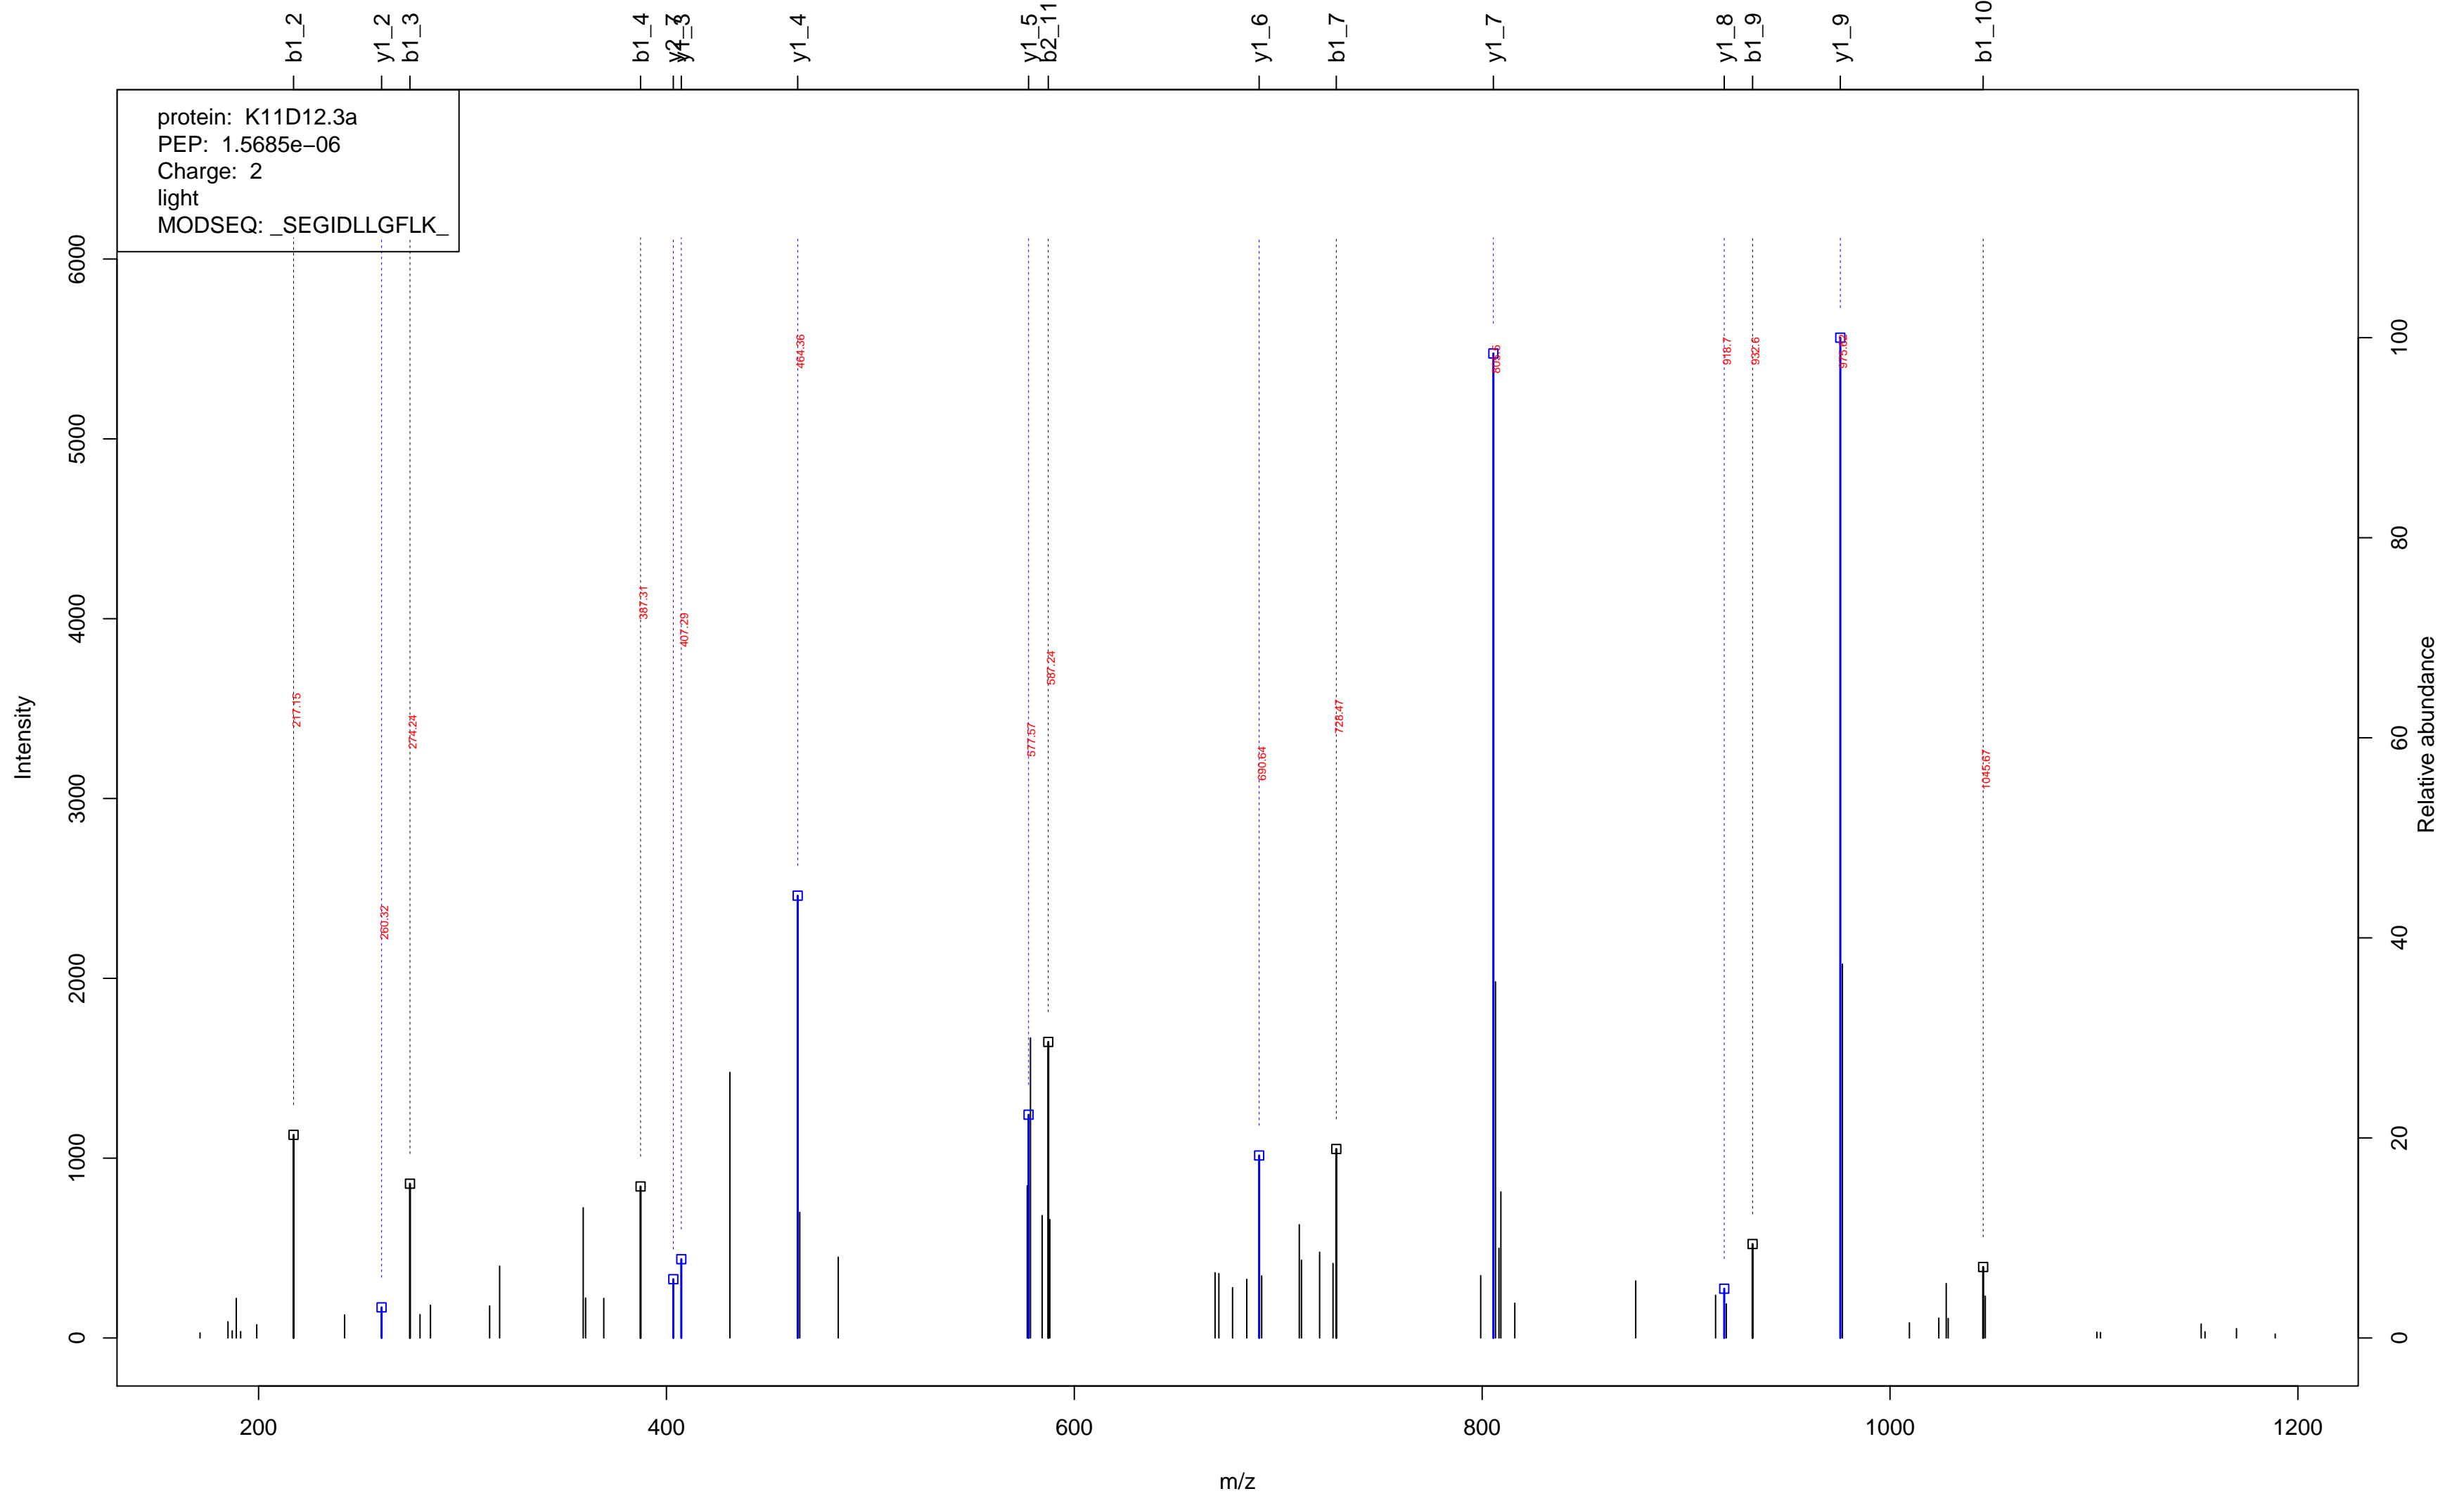

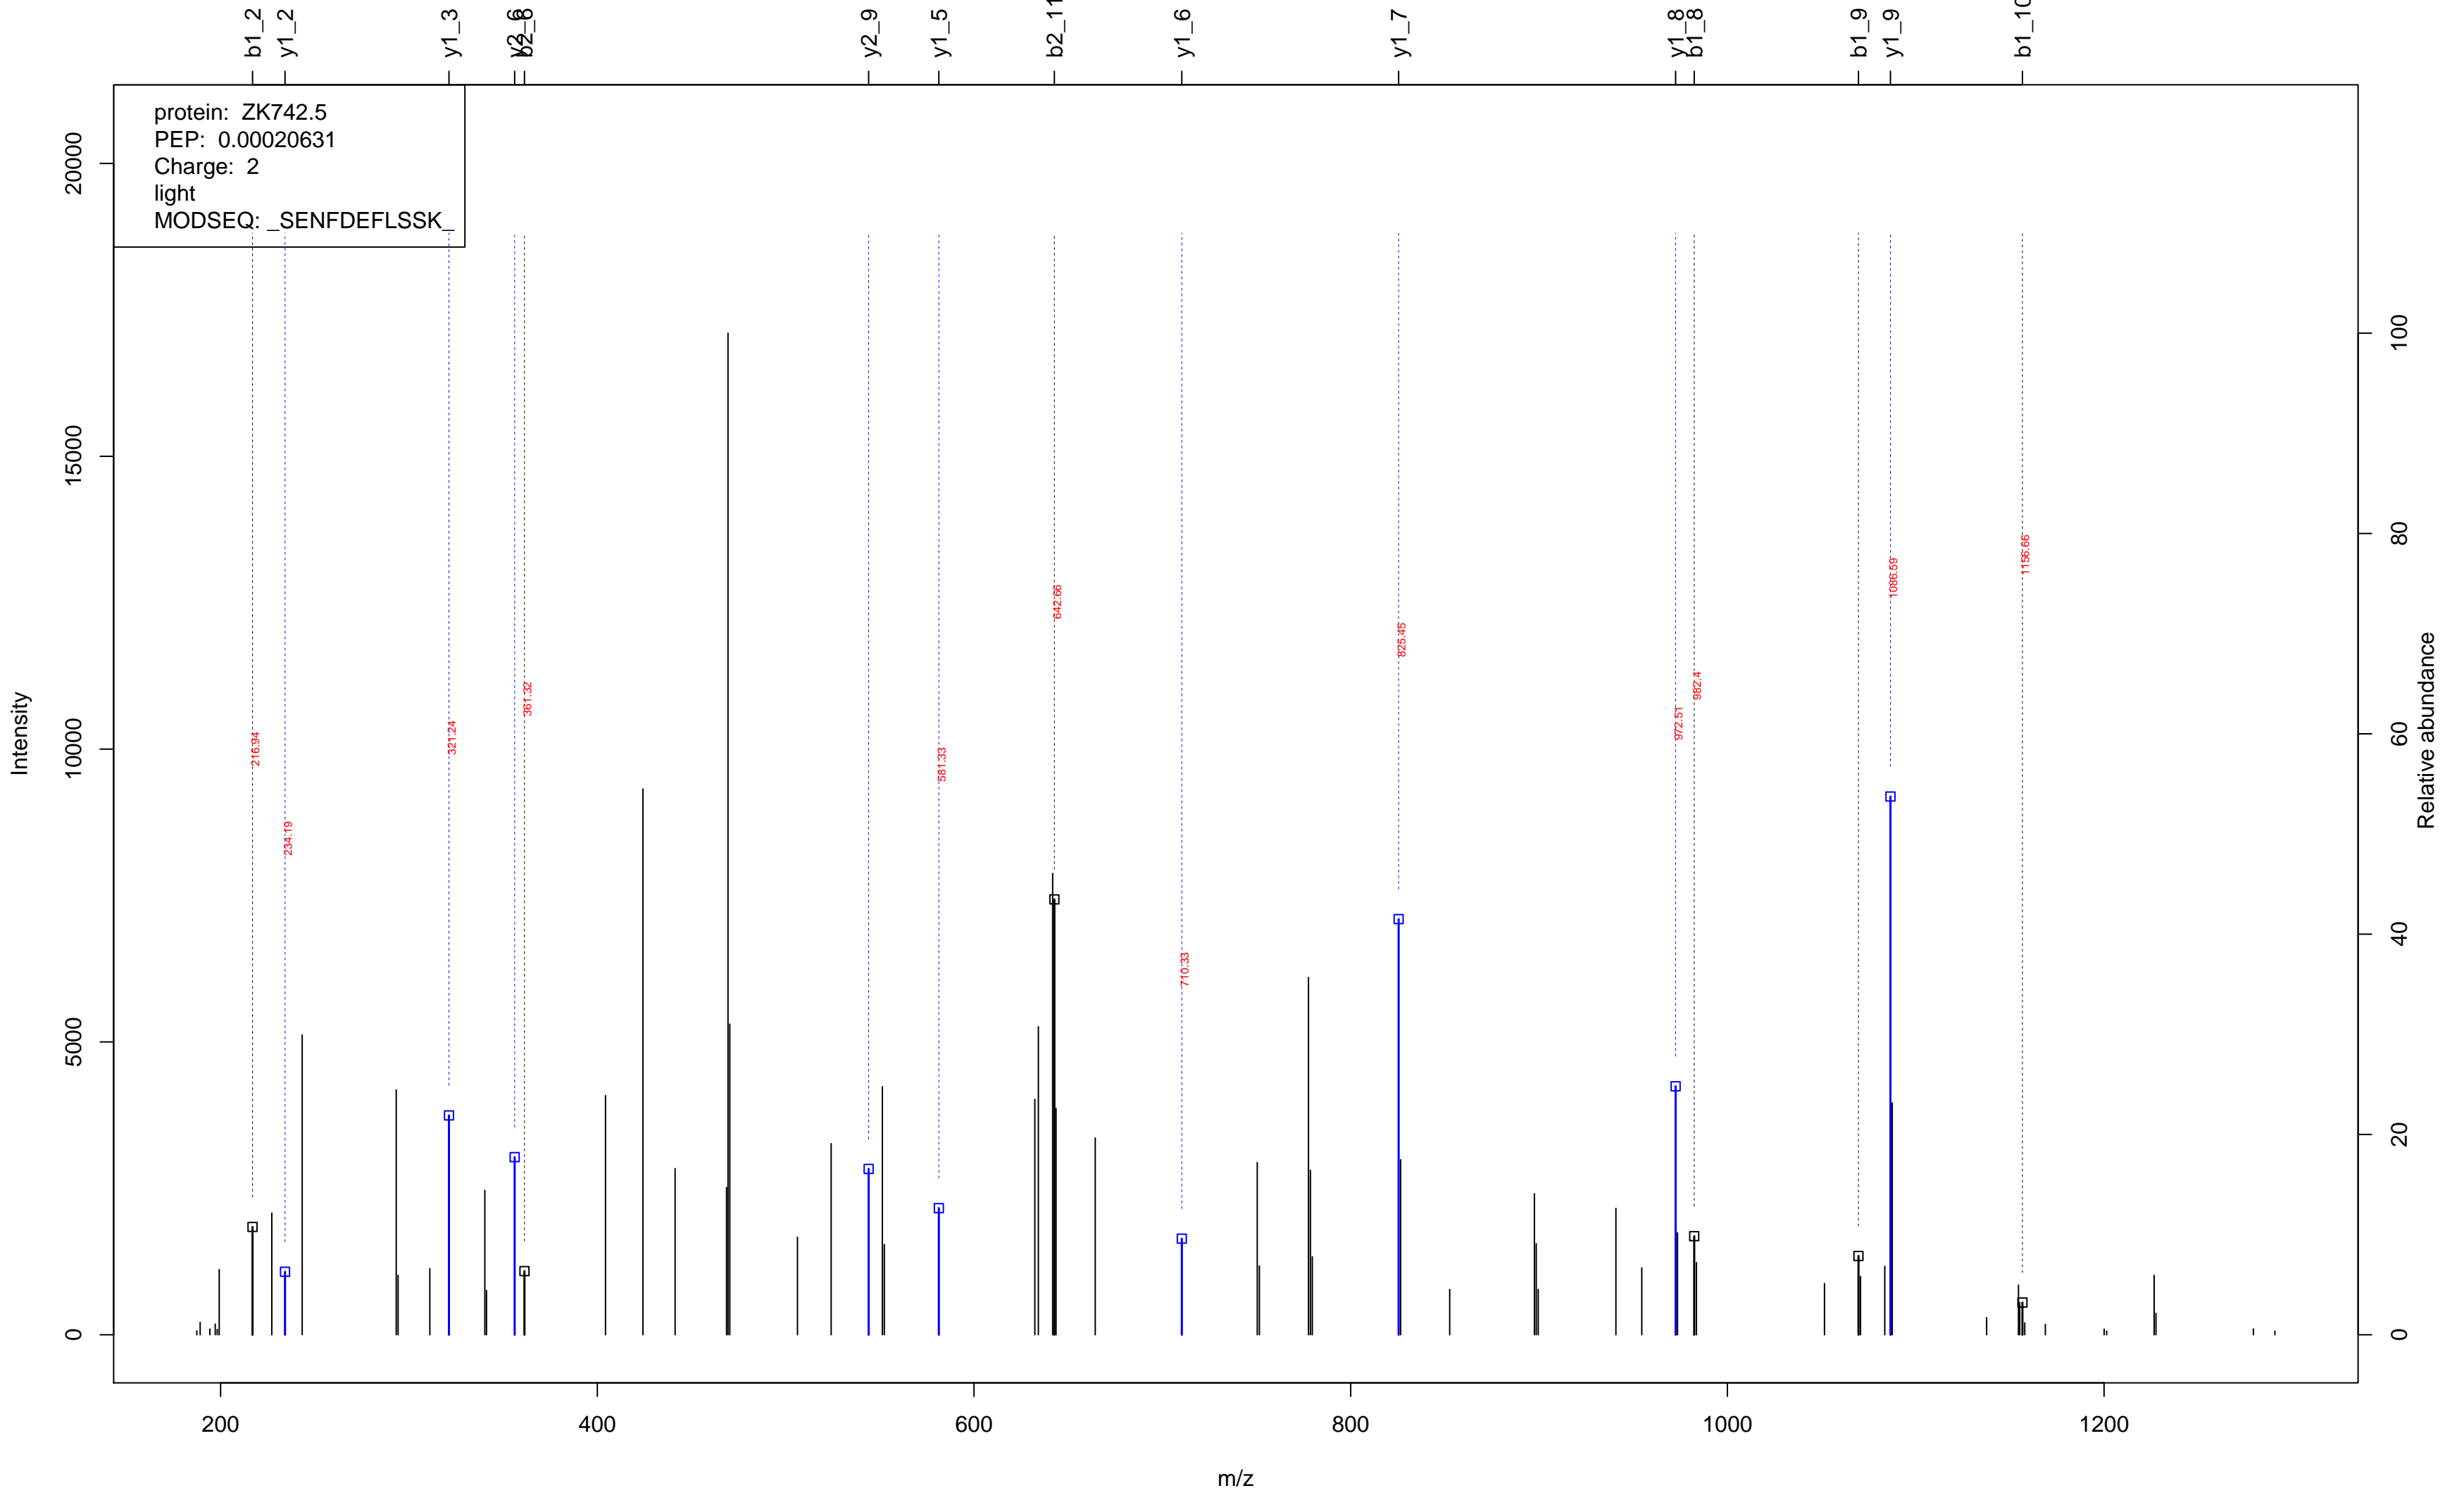



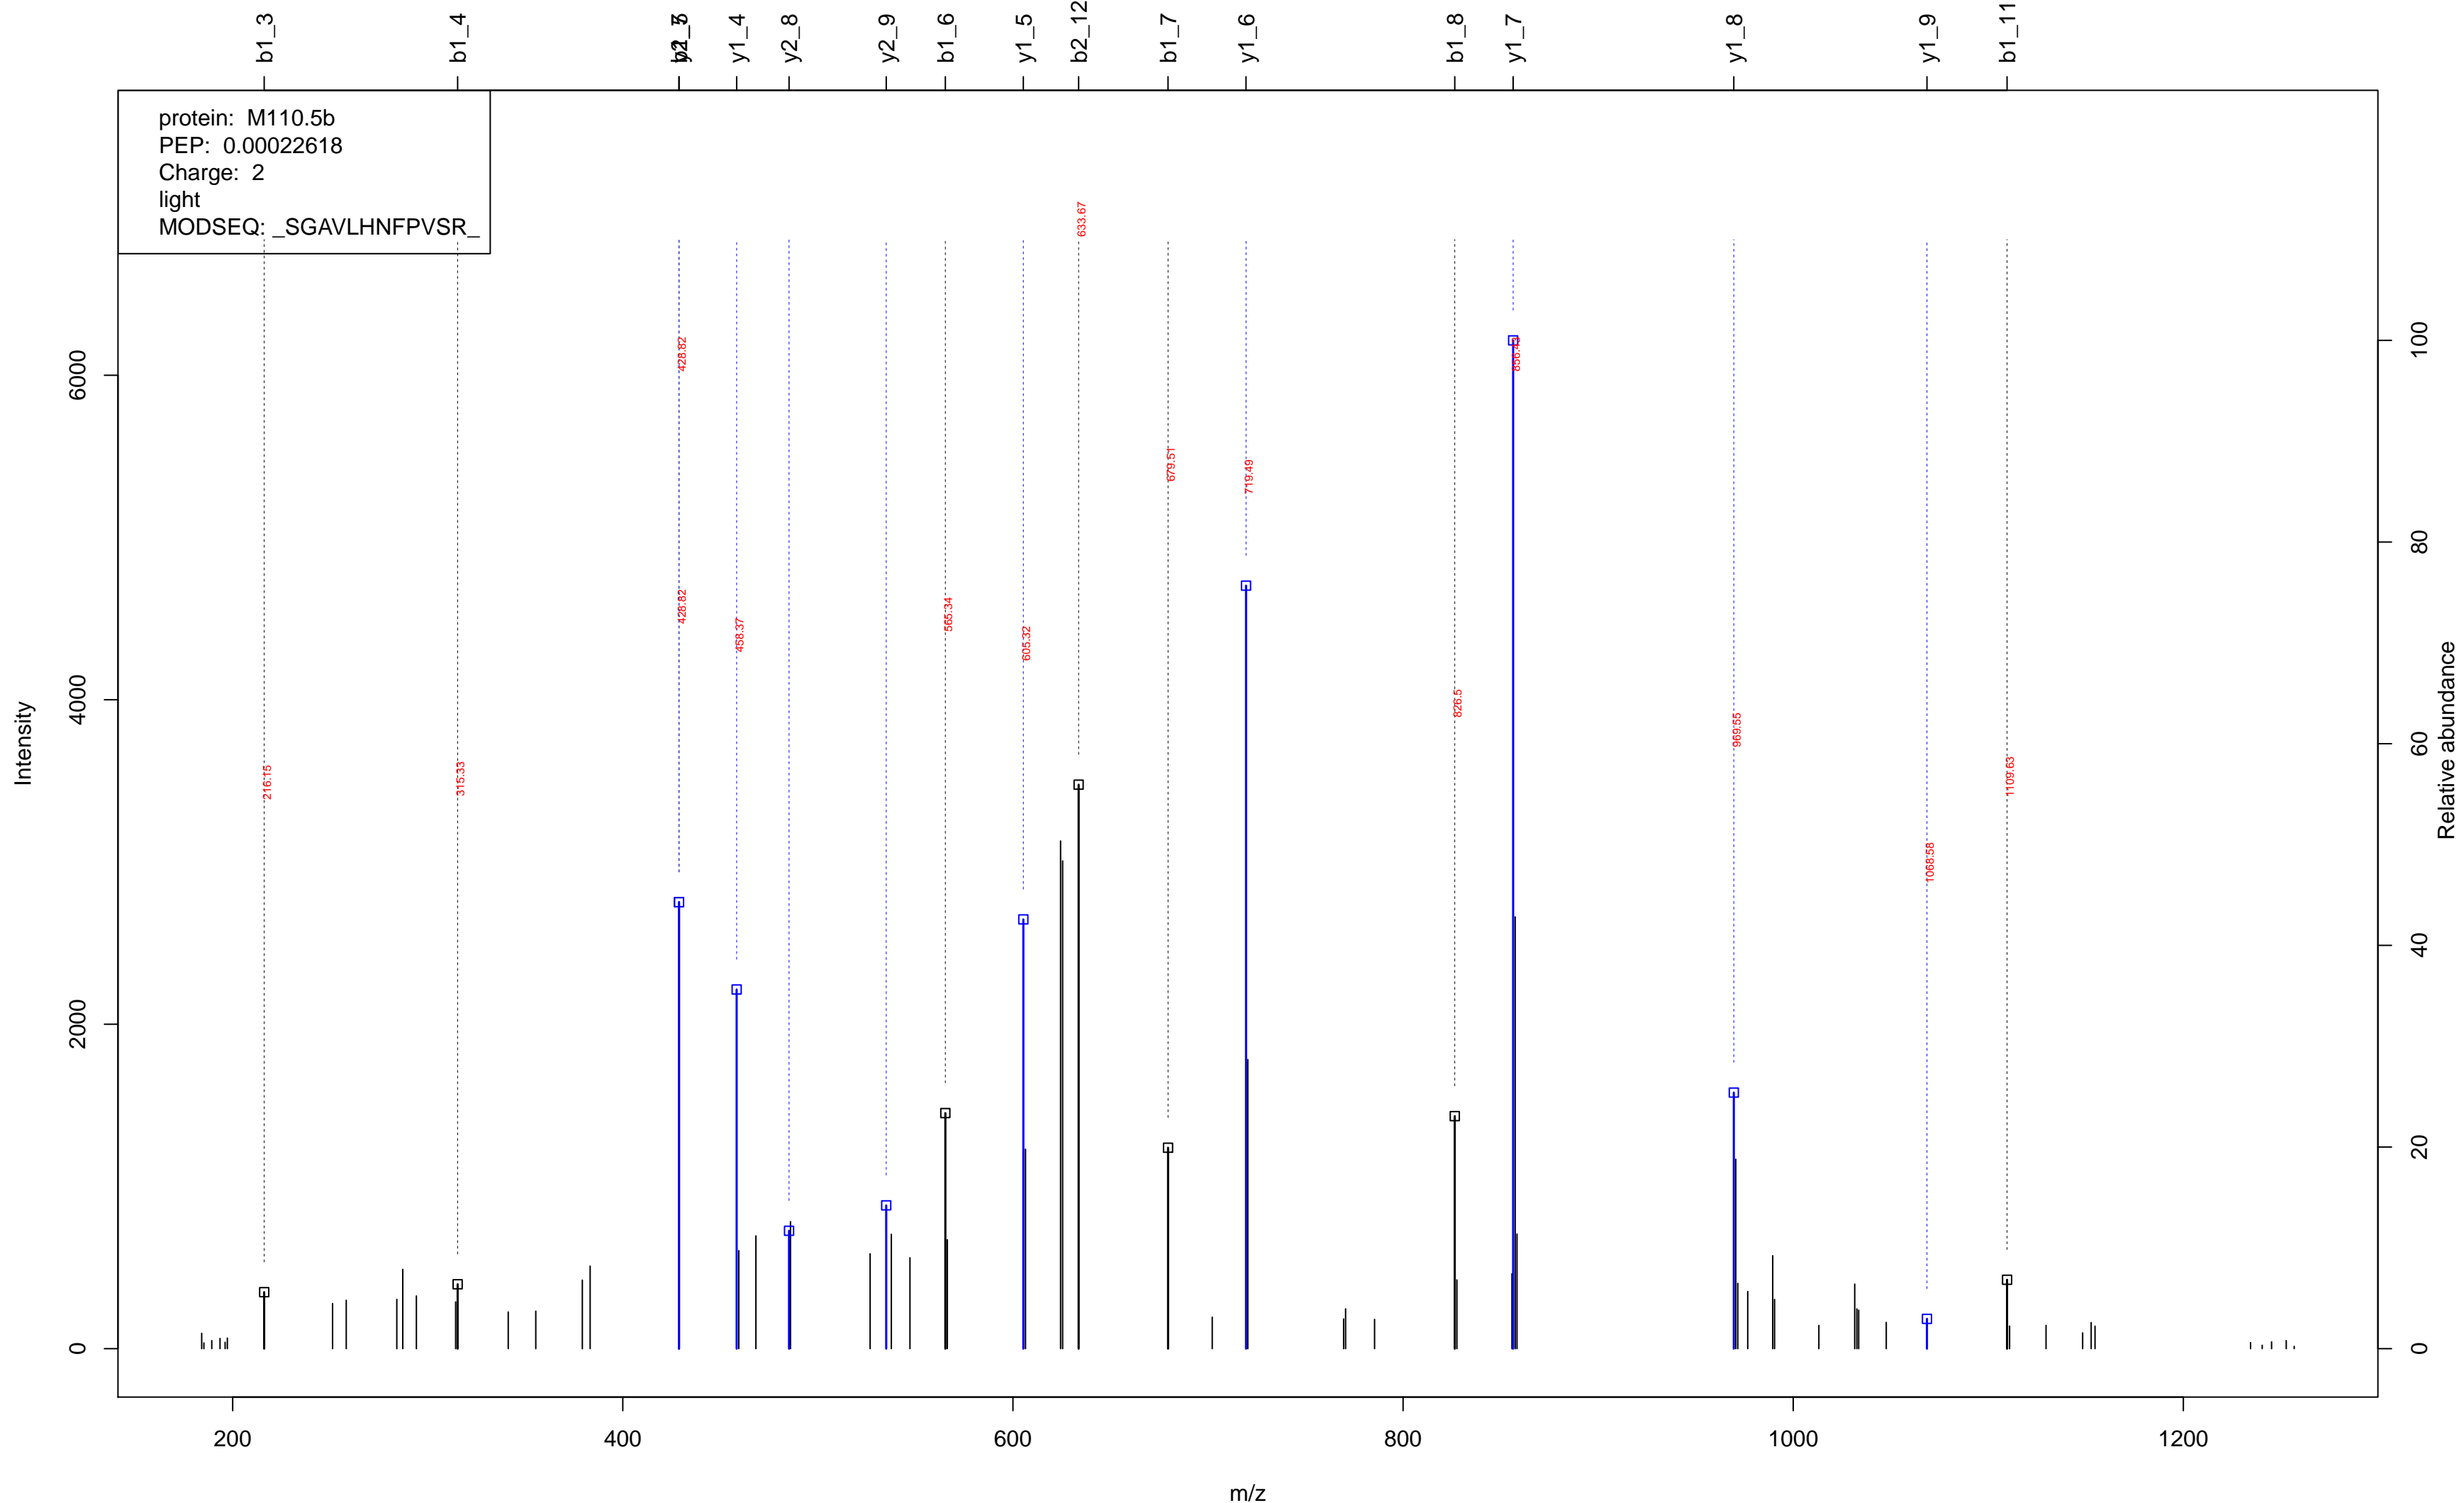

y1\_3  
b1\_4  
b2\_9  
b1\_5  
b1\_6  
b2\_12  
b2\_13  
y1\_7  
b1\_8  
b1\_9  
y1\_8  
b1\_10  
y1\_10  
y1\_11  
y1\_12  
y1\_13  
b1\_14  
b1\_15  
b1\_16

protein: C41G7.1b  
PEP: 3.7102e-06  
Charge: 2  
light  
MODSEQ: \_SGDMEVDDVWDDTELIK\_

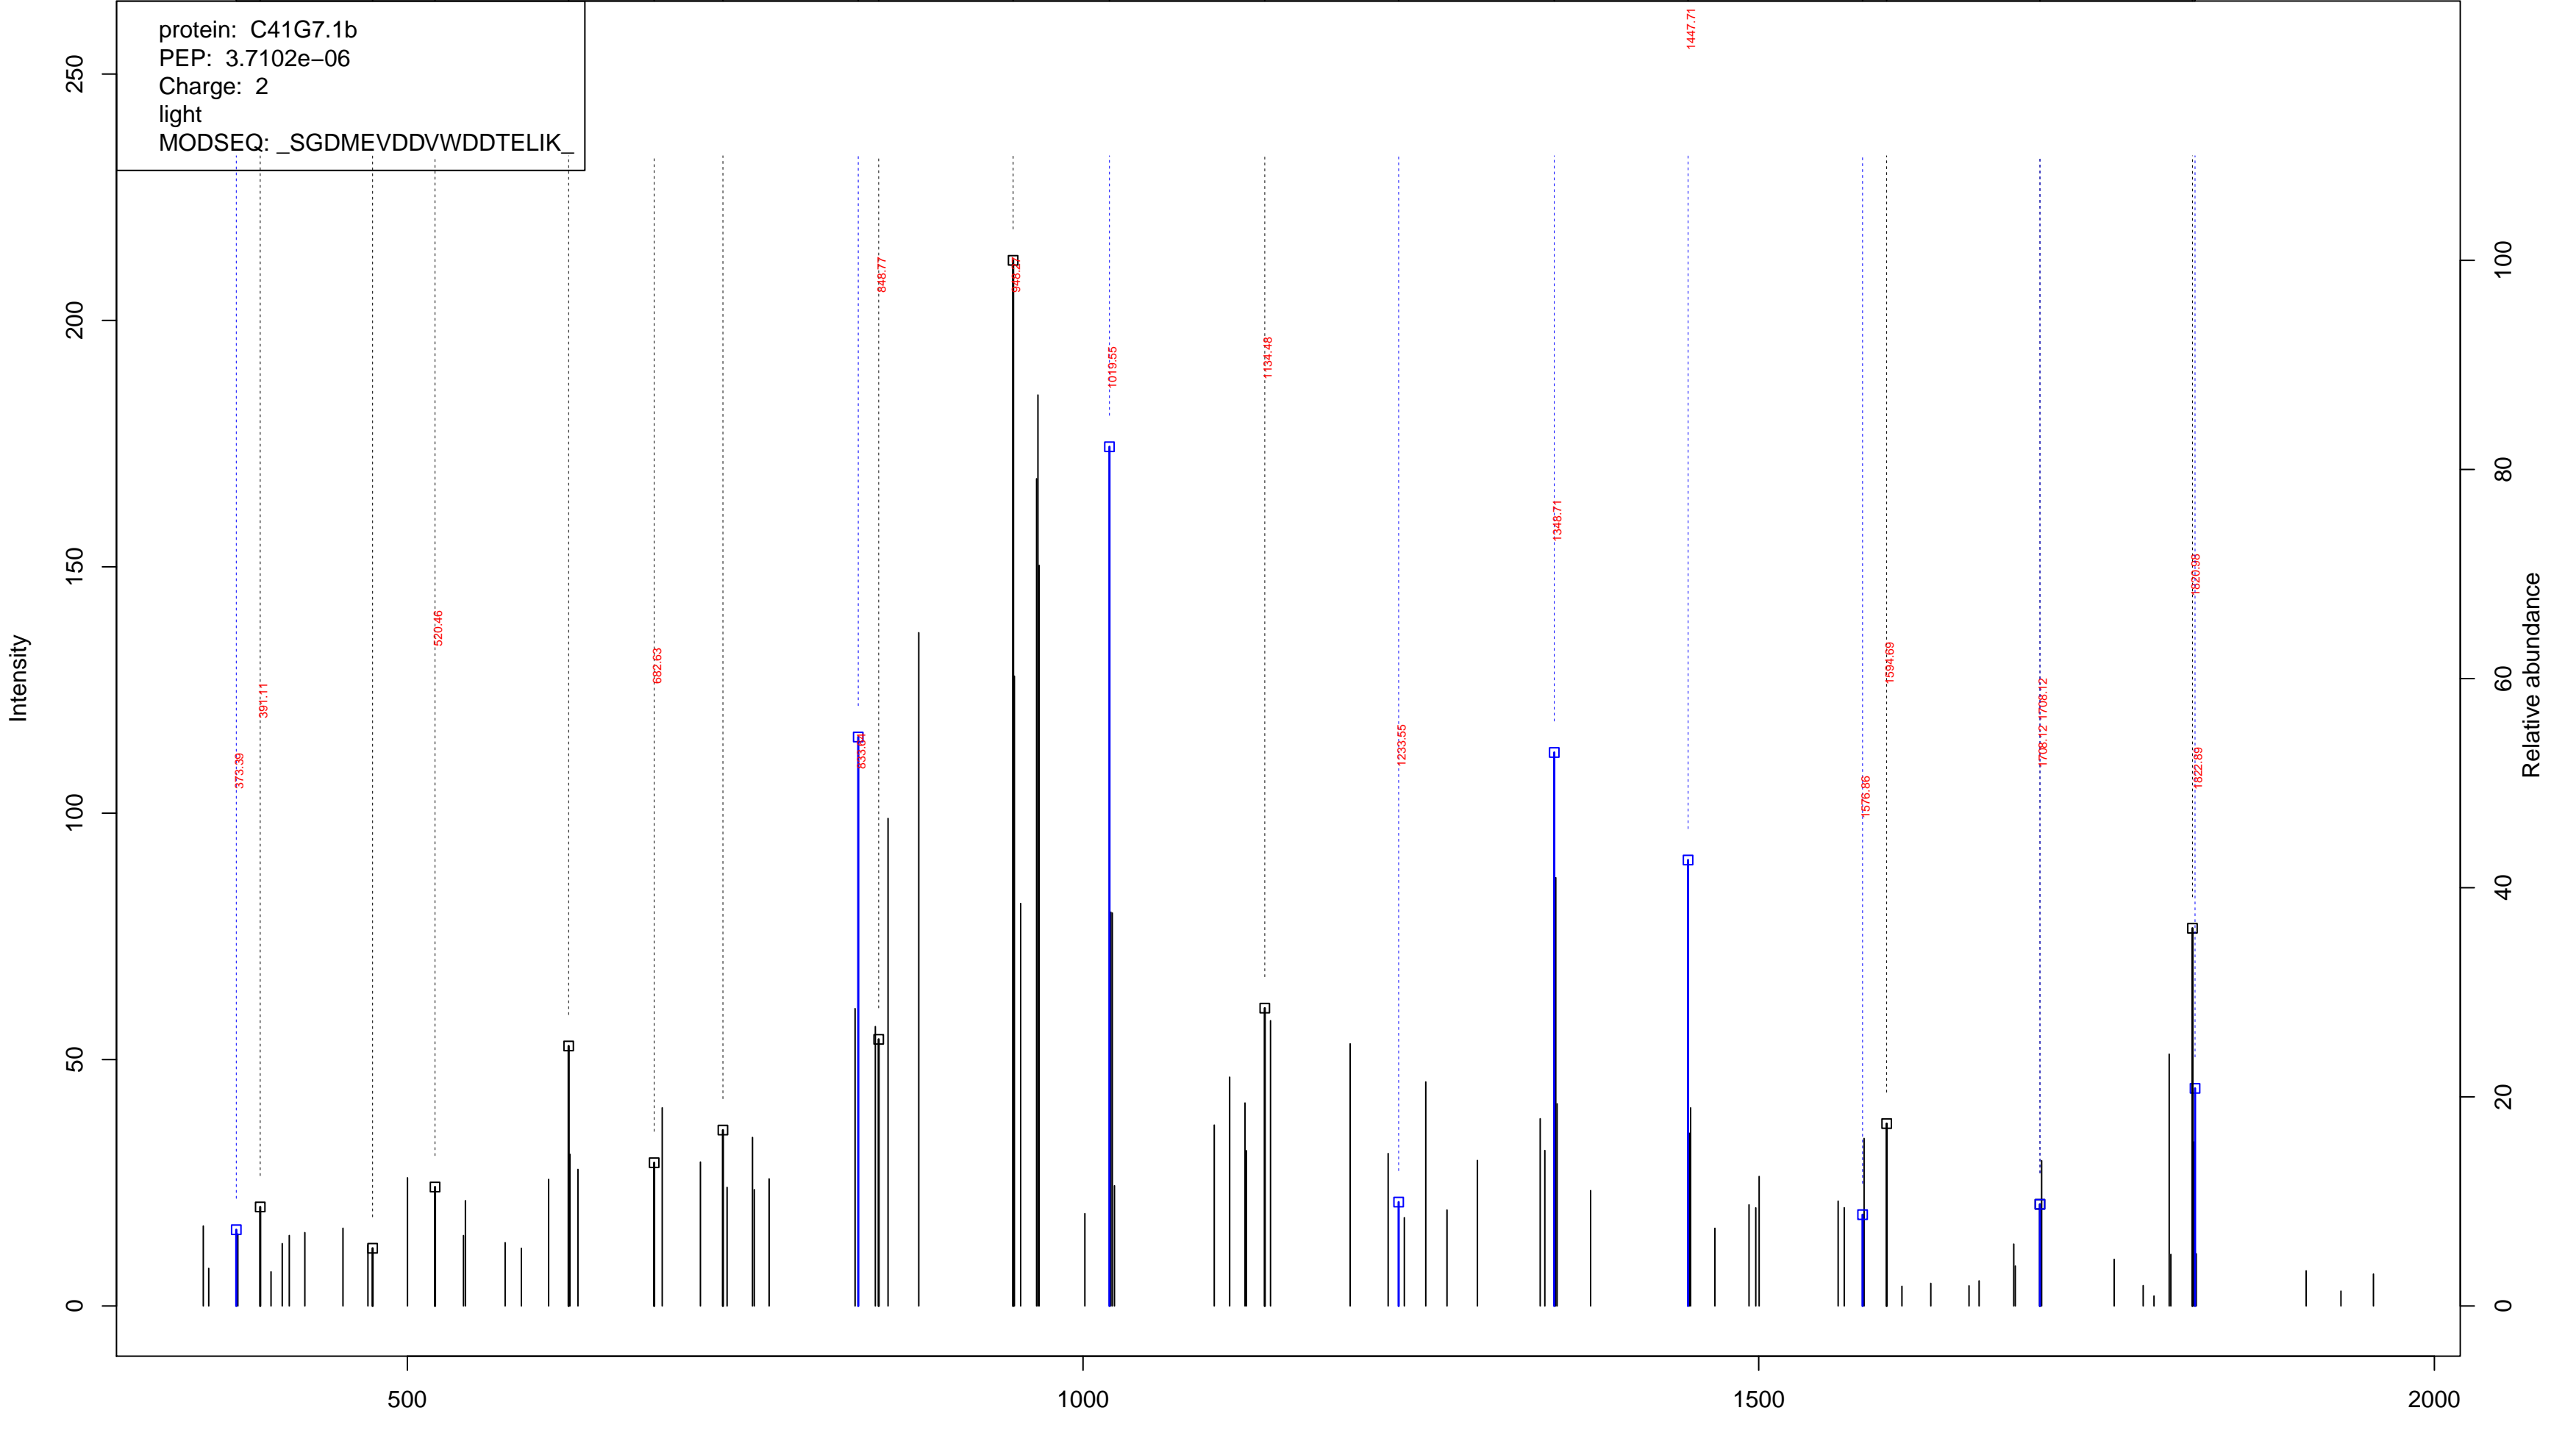

y1\_1 y1\_2 b1\_3 y1\_3 y1\_4 b1\_4 y1\_5 b1\_6 y1\_7 b1\_7 b1\_8 y1\_8 b1\_9

protein: F42A6.6  
PEP: 0.00016154  
Charge: 2  
heavy  
MODSEQ: \_(ac)SGIFGVIVSGR\_

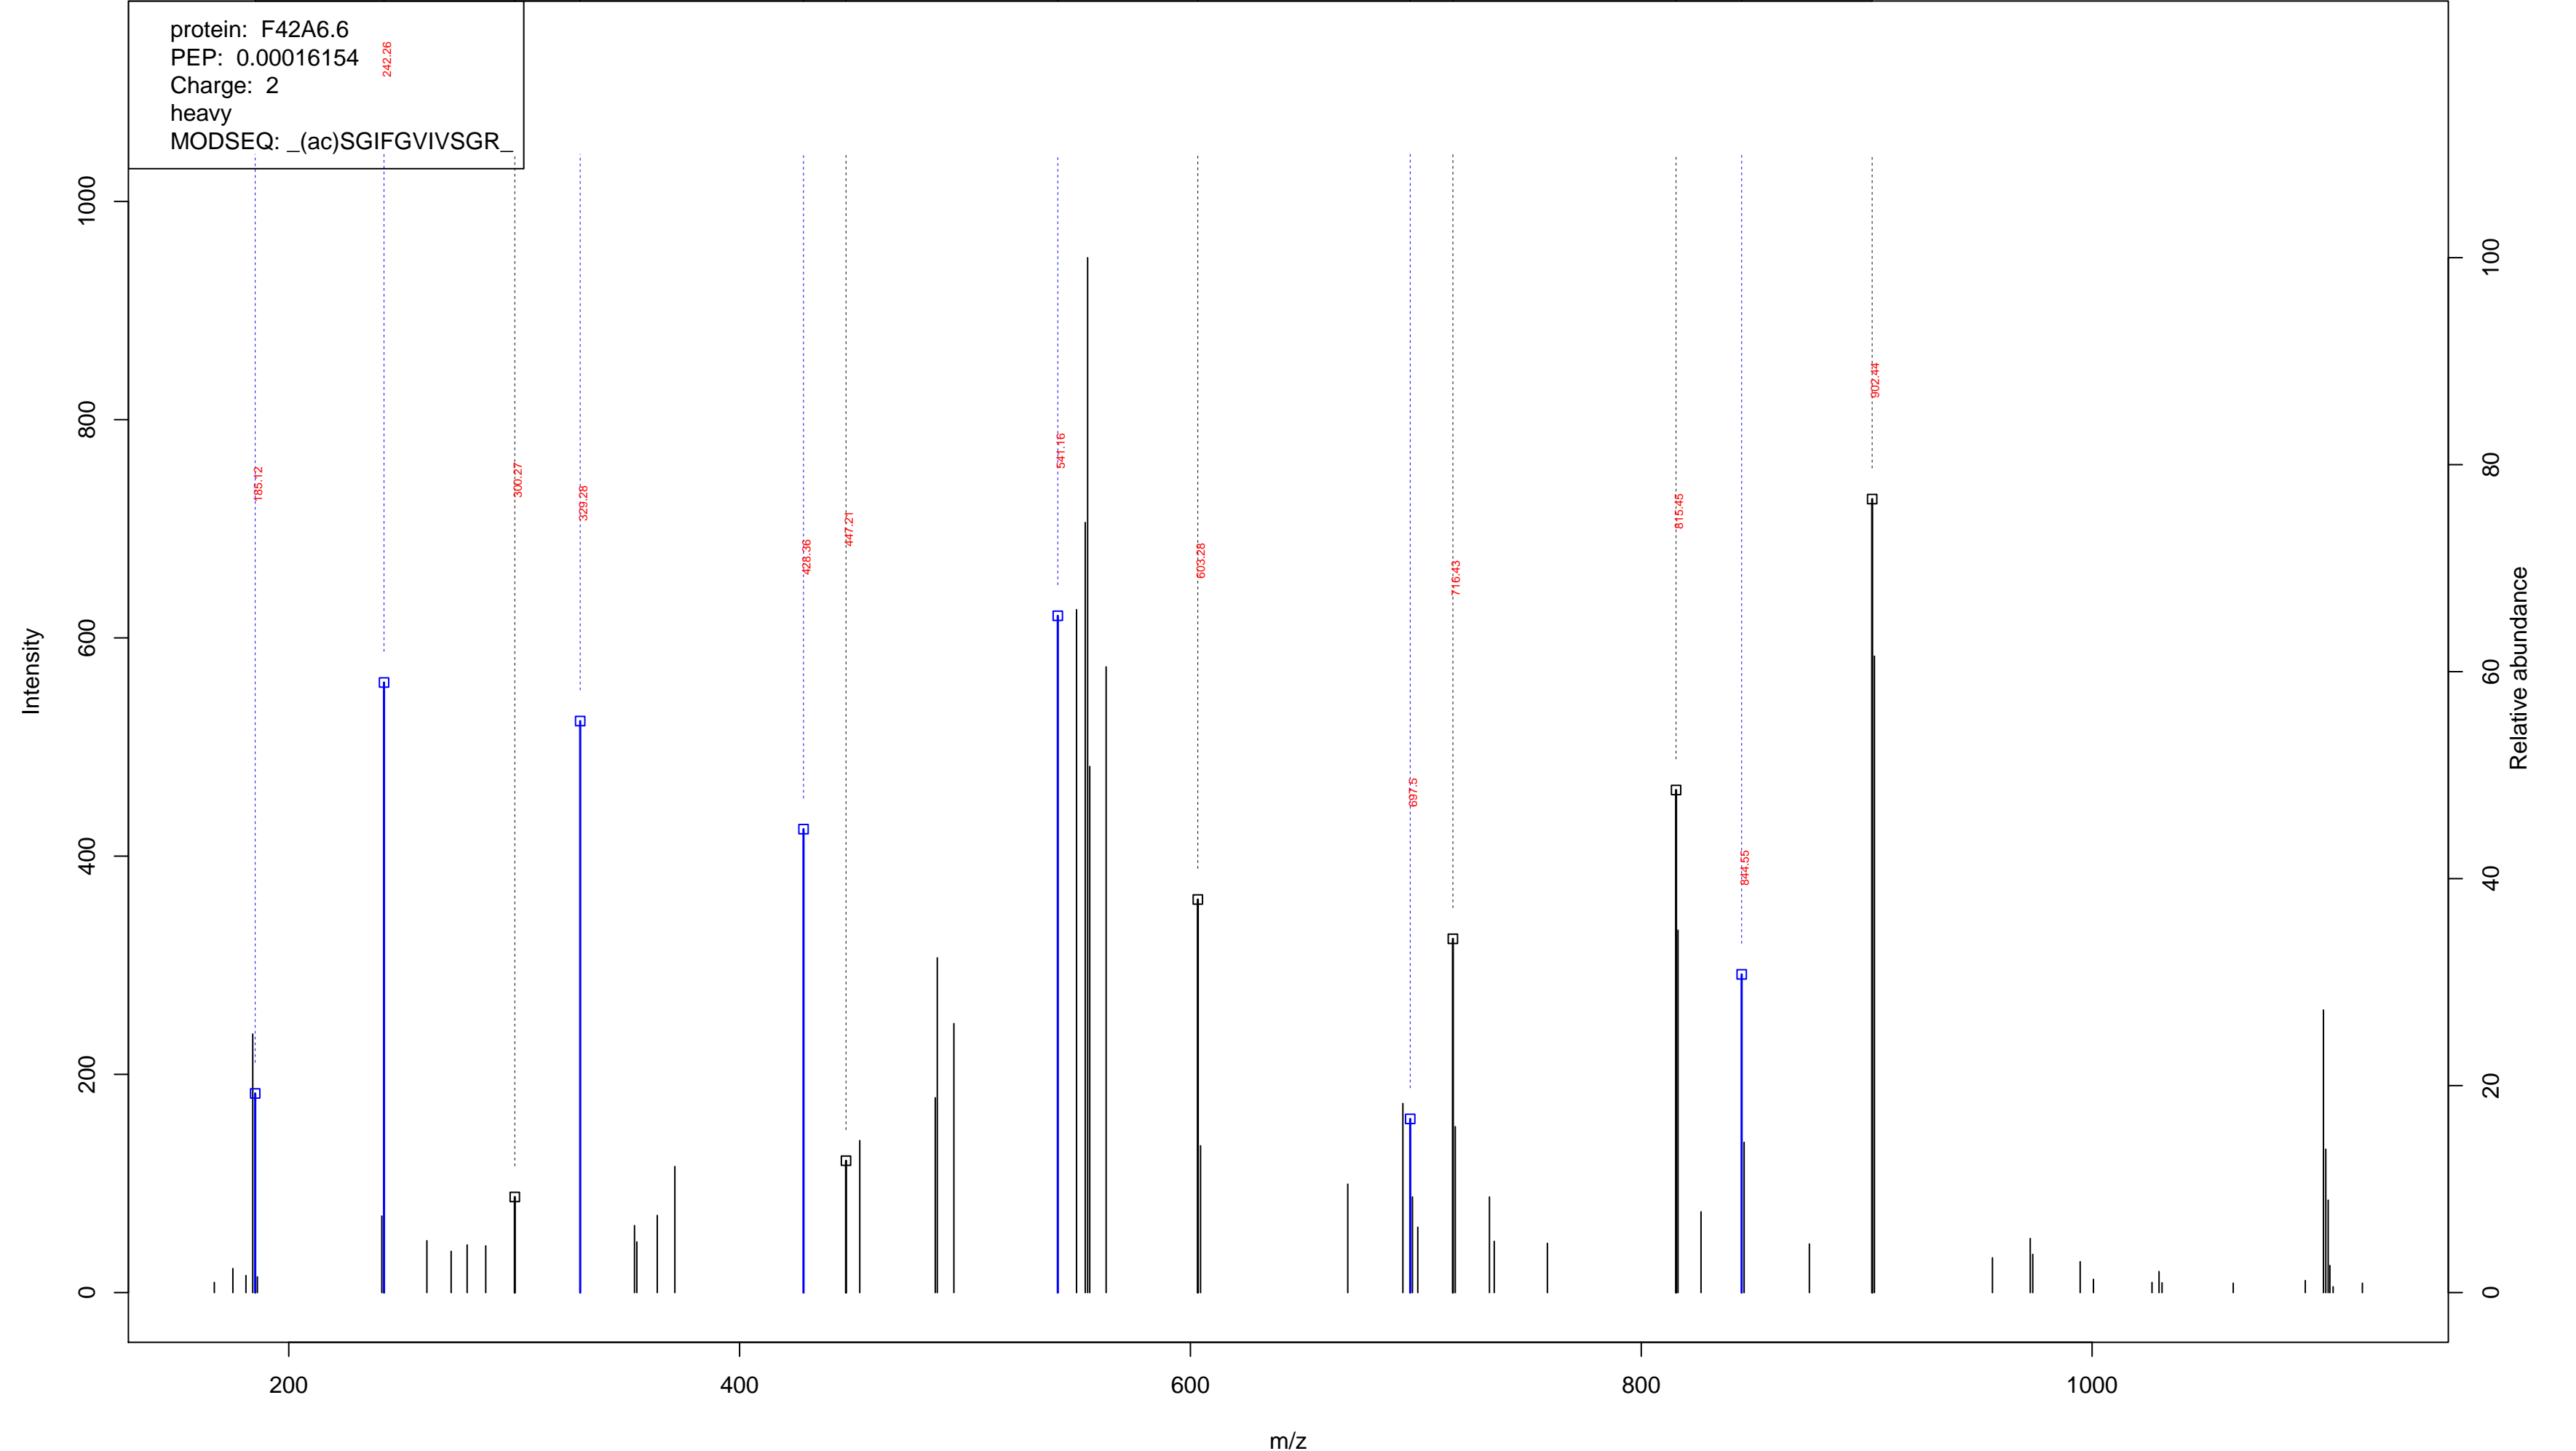

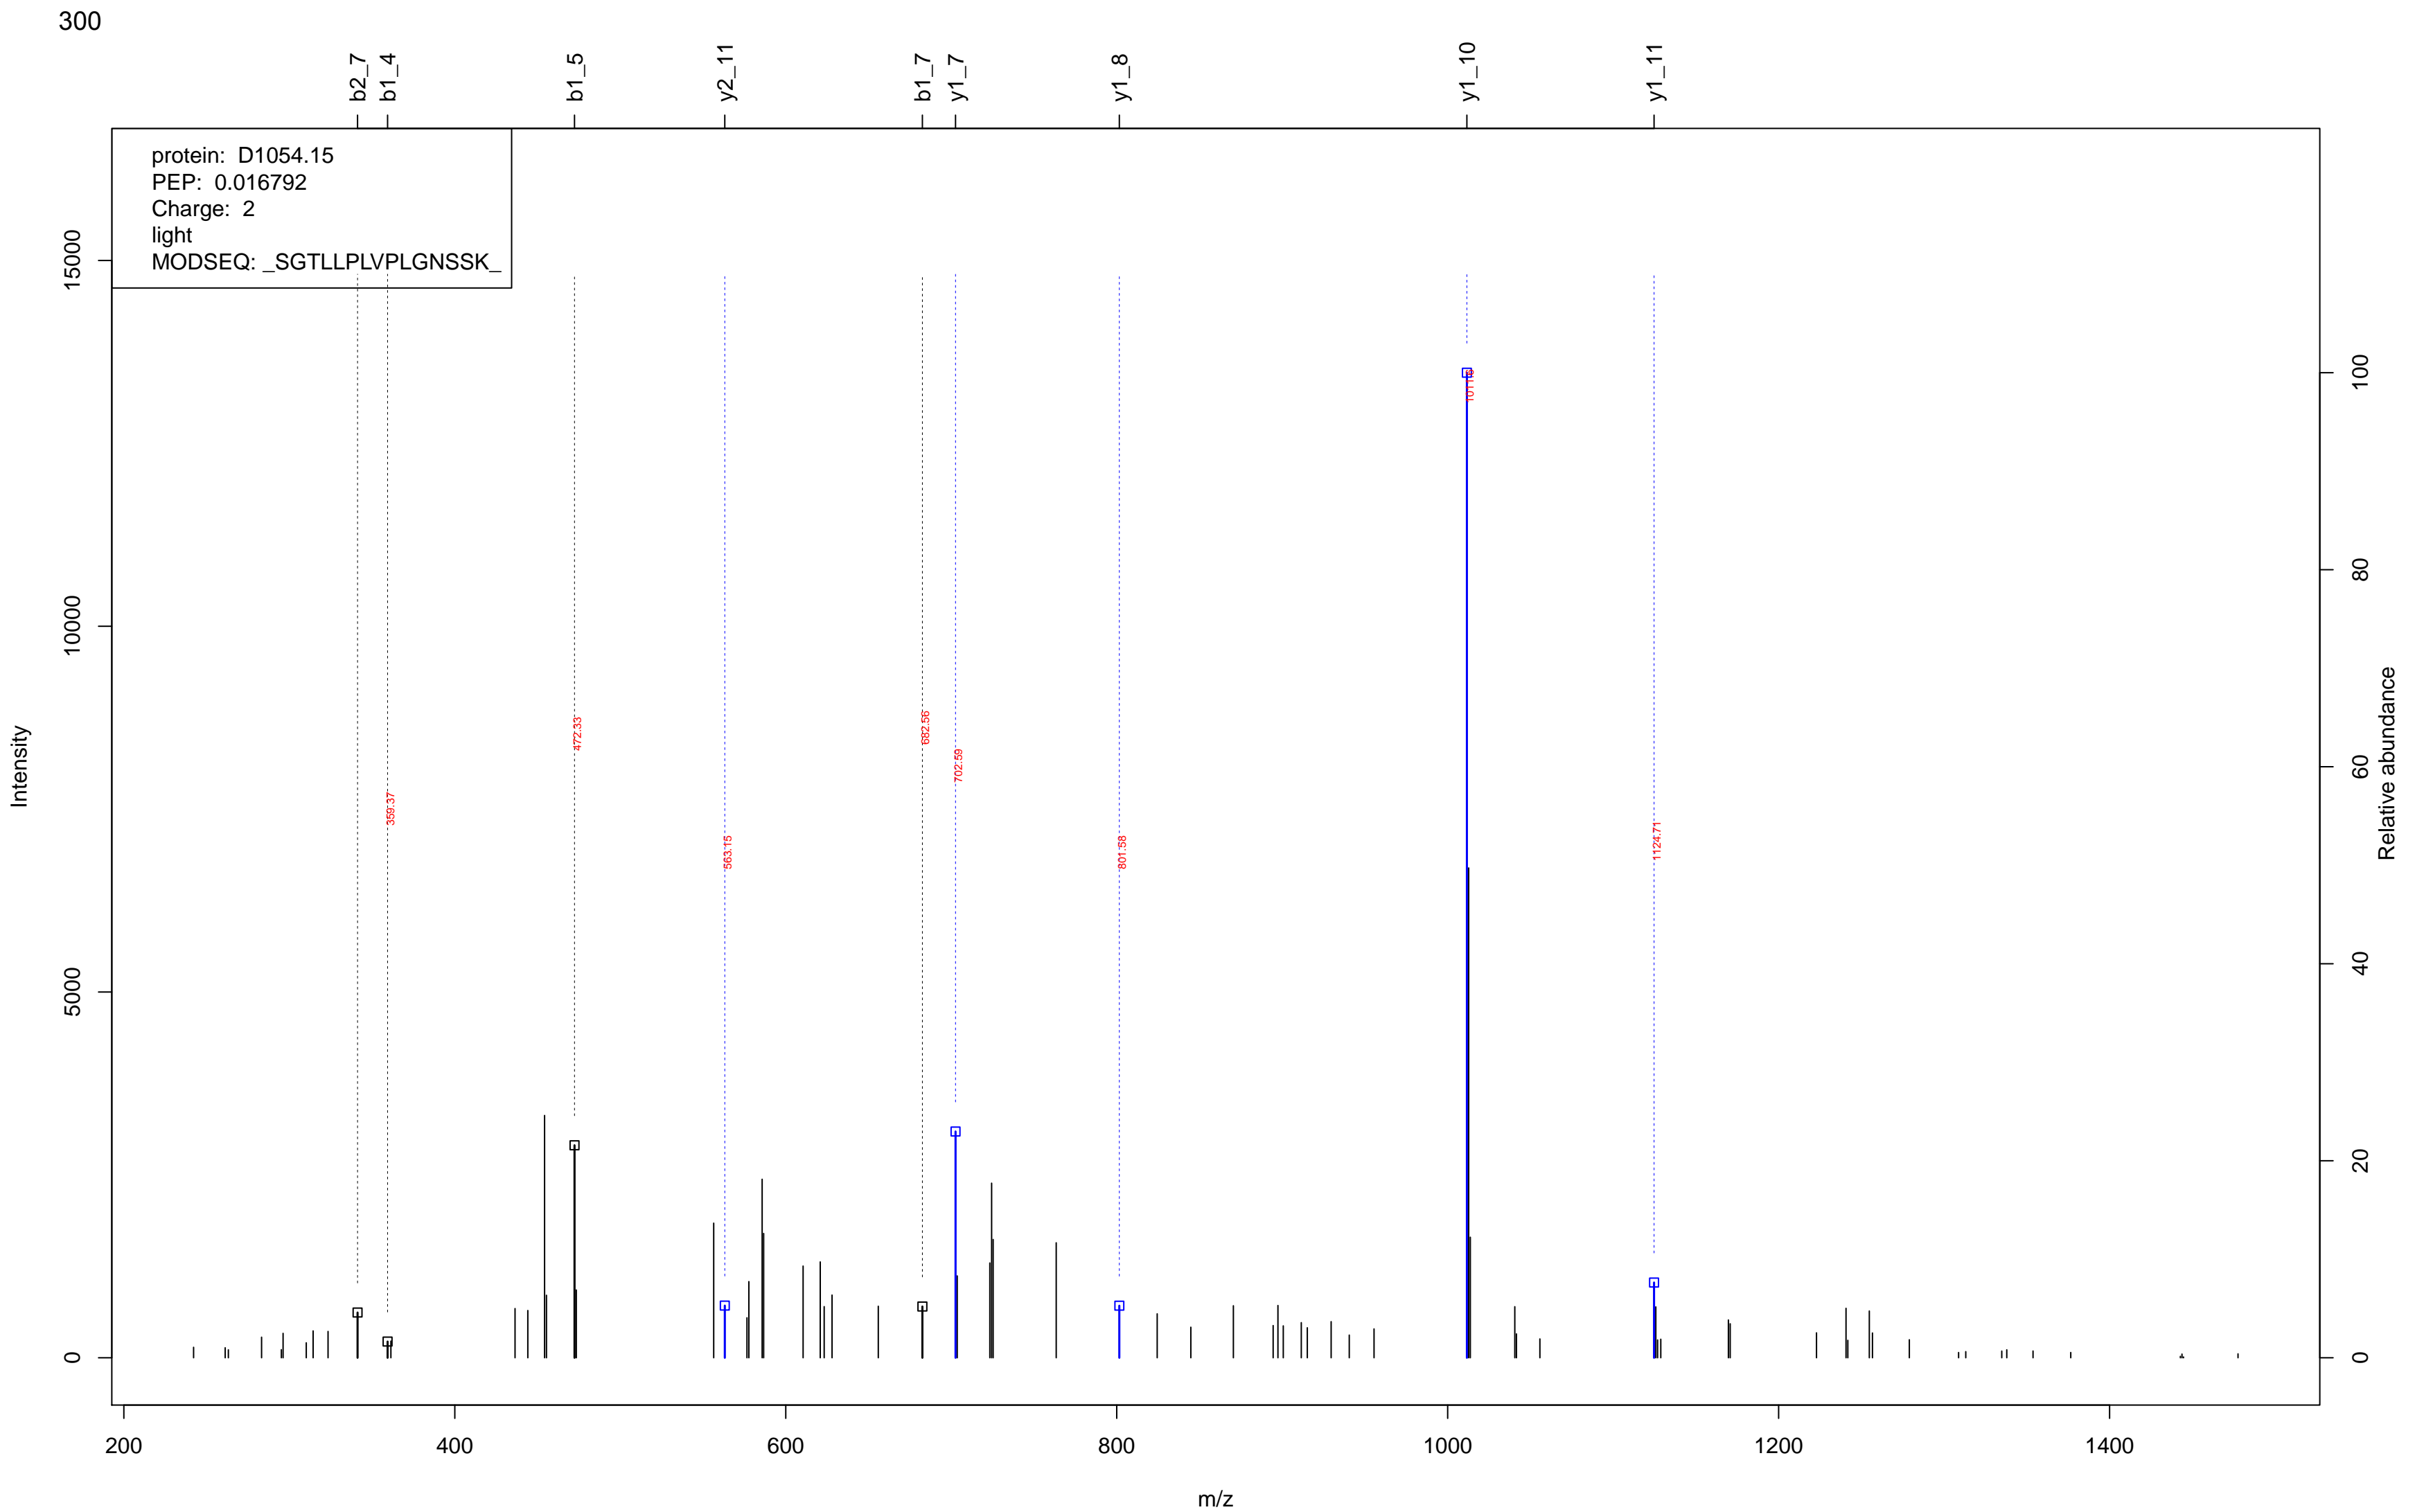

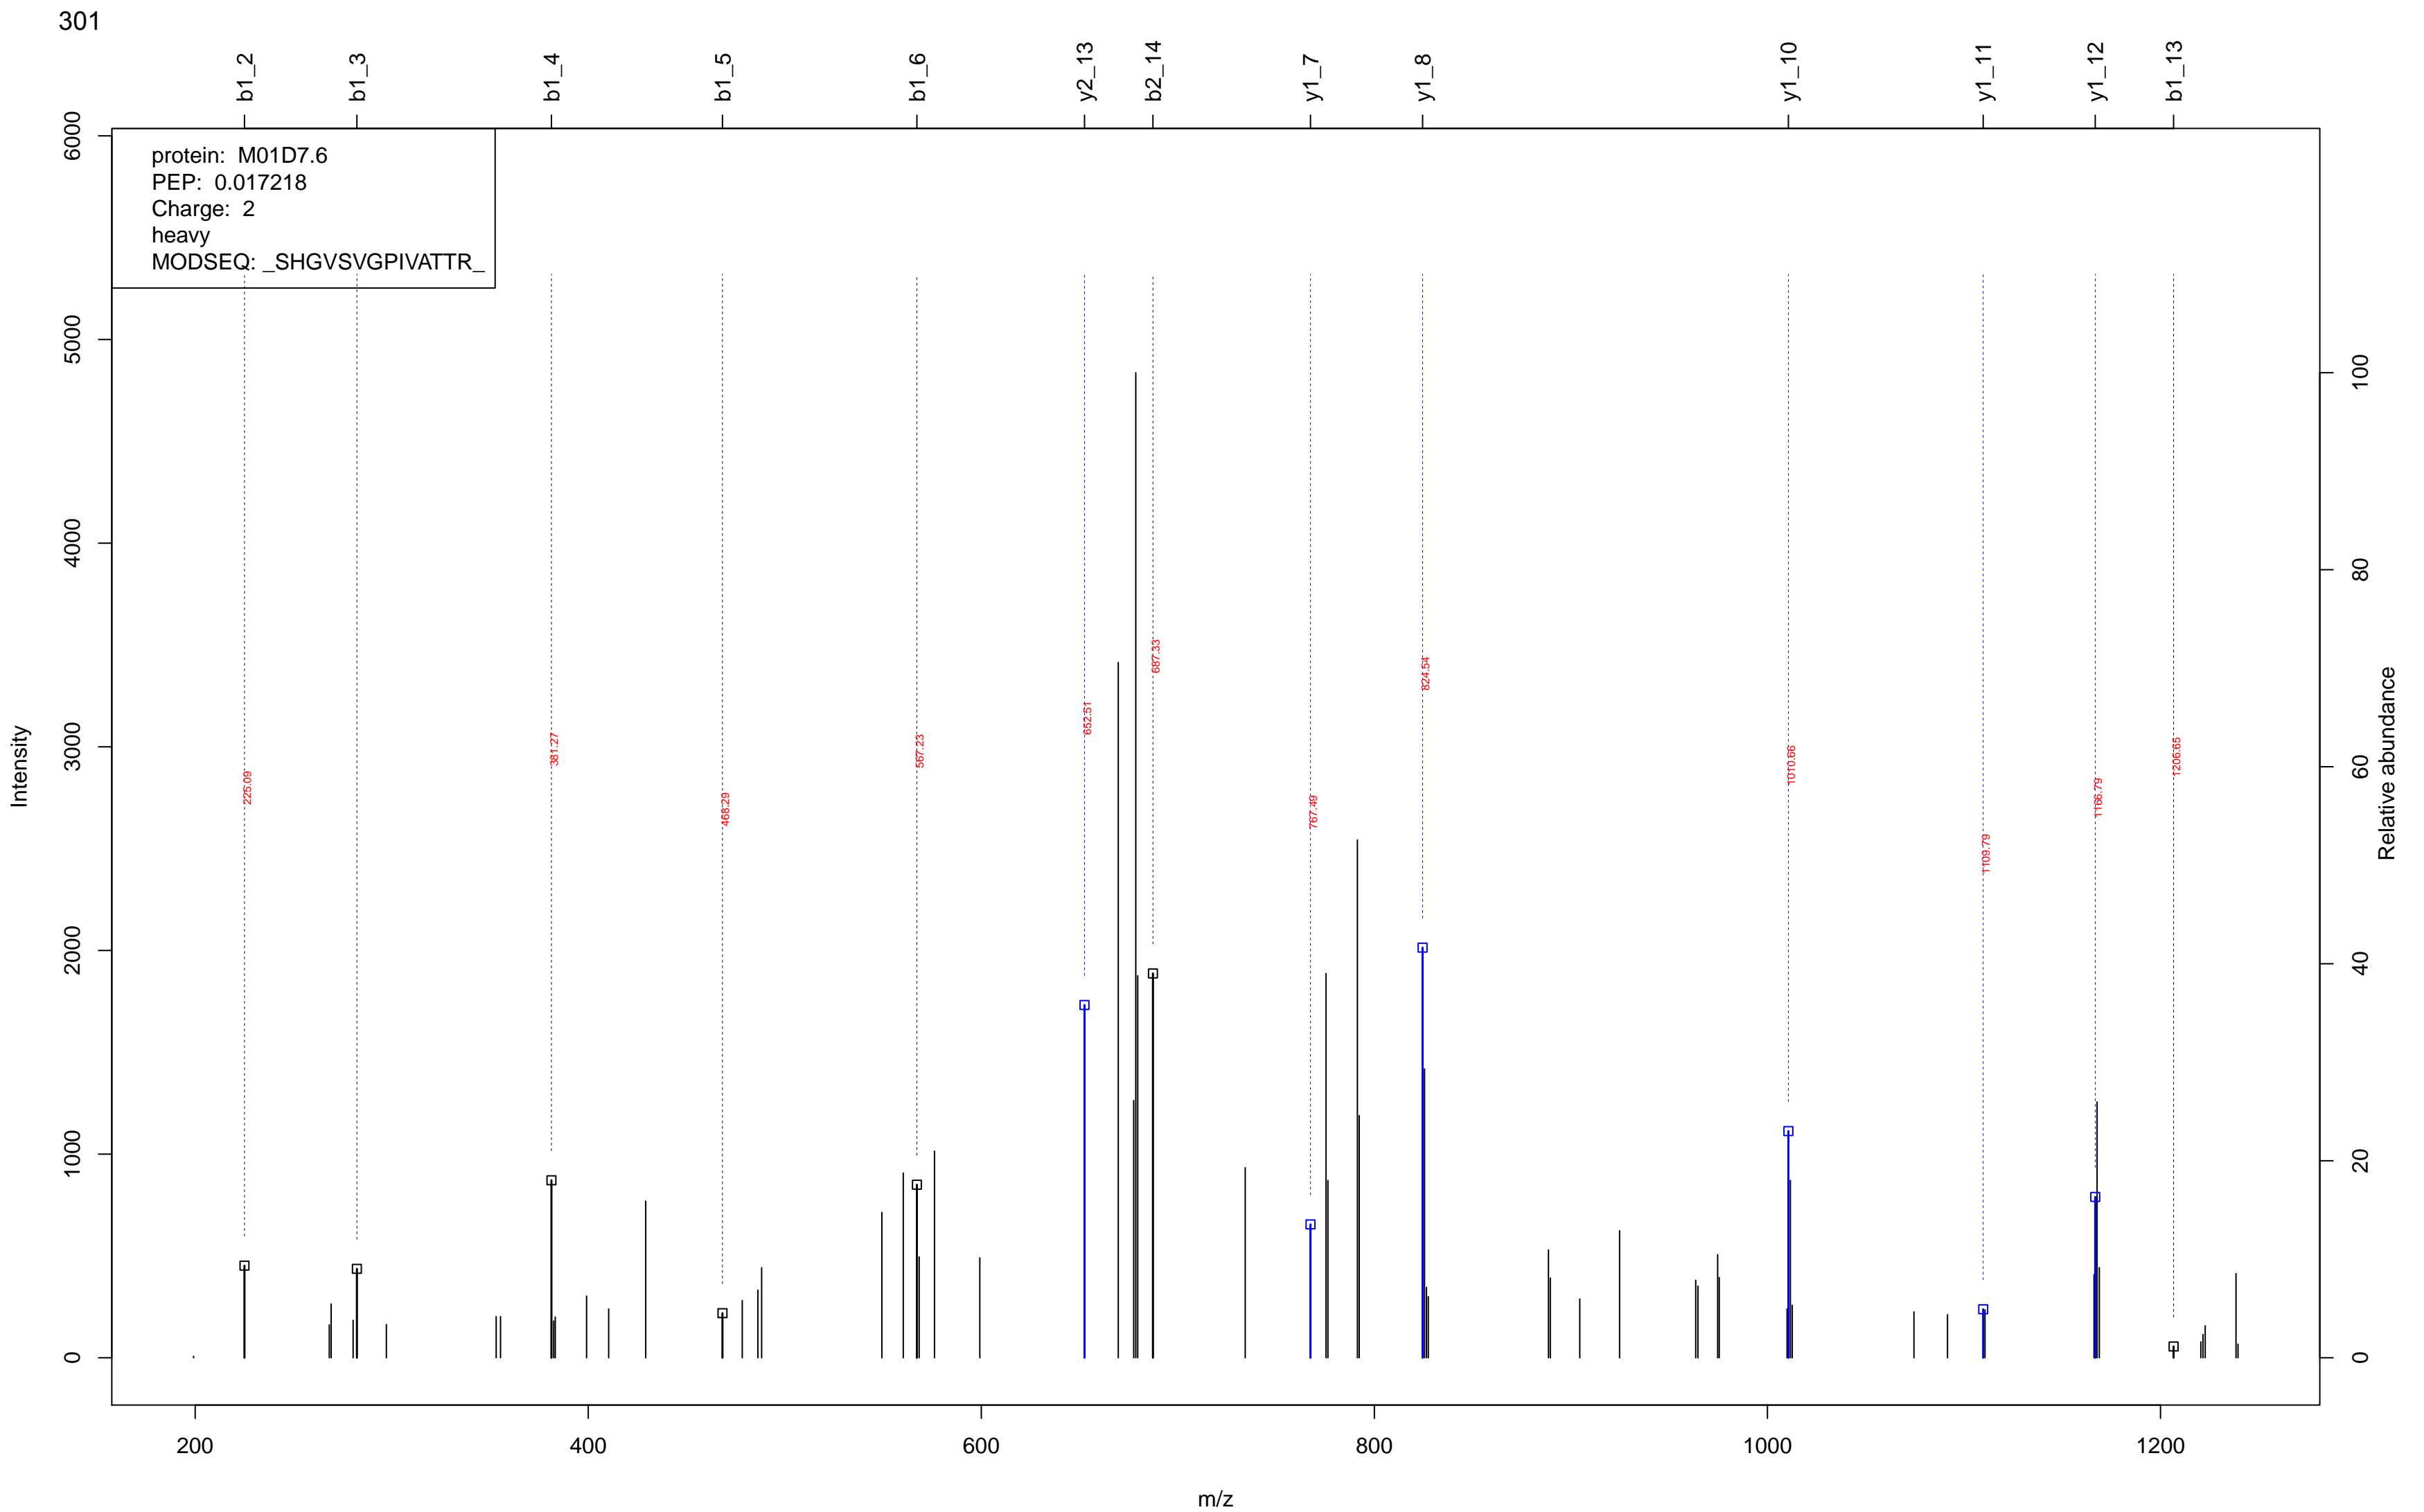

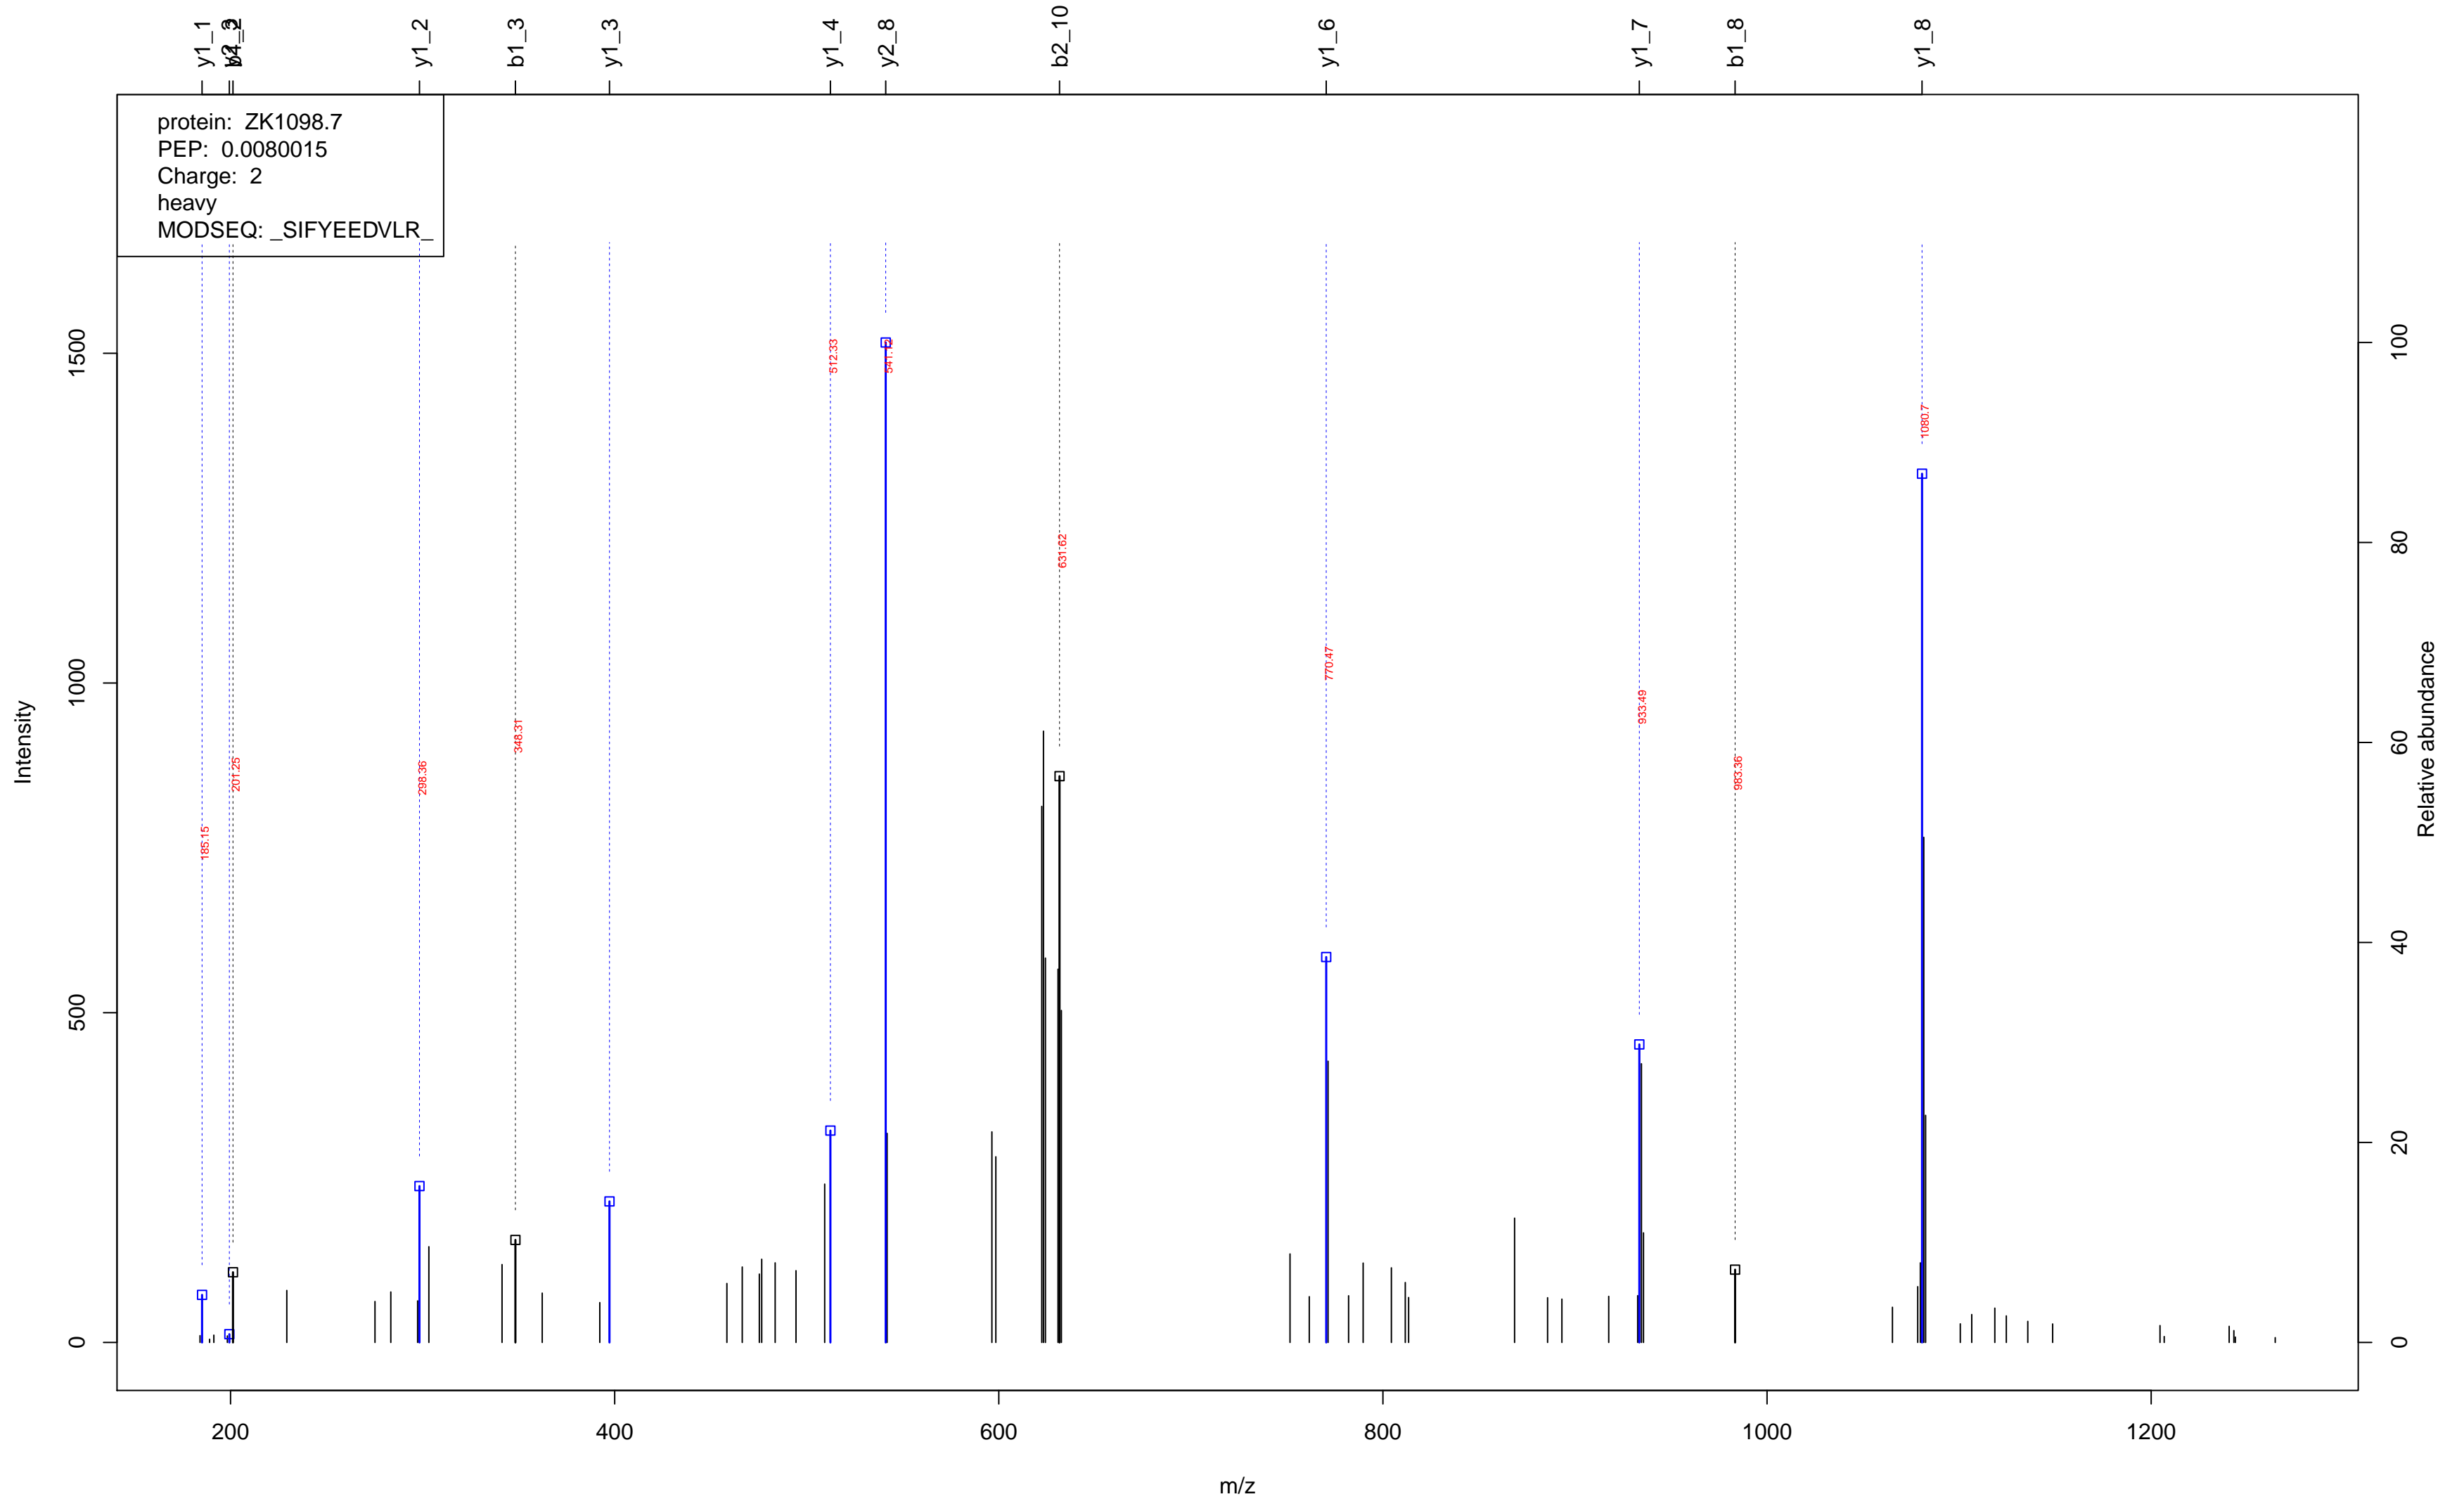

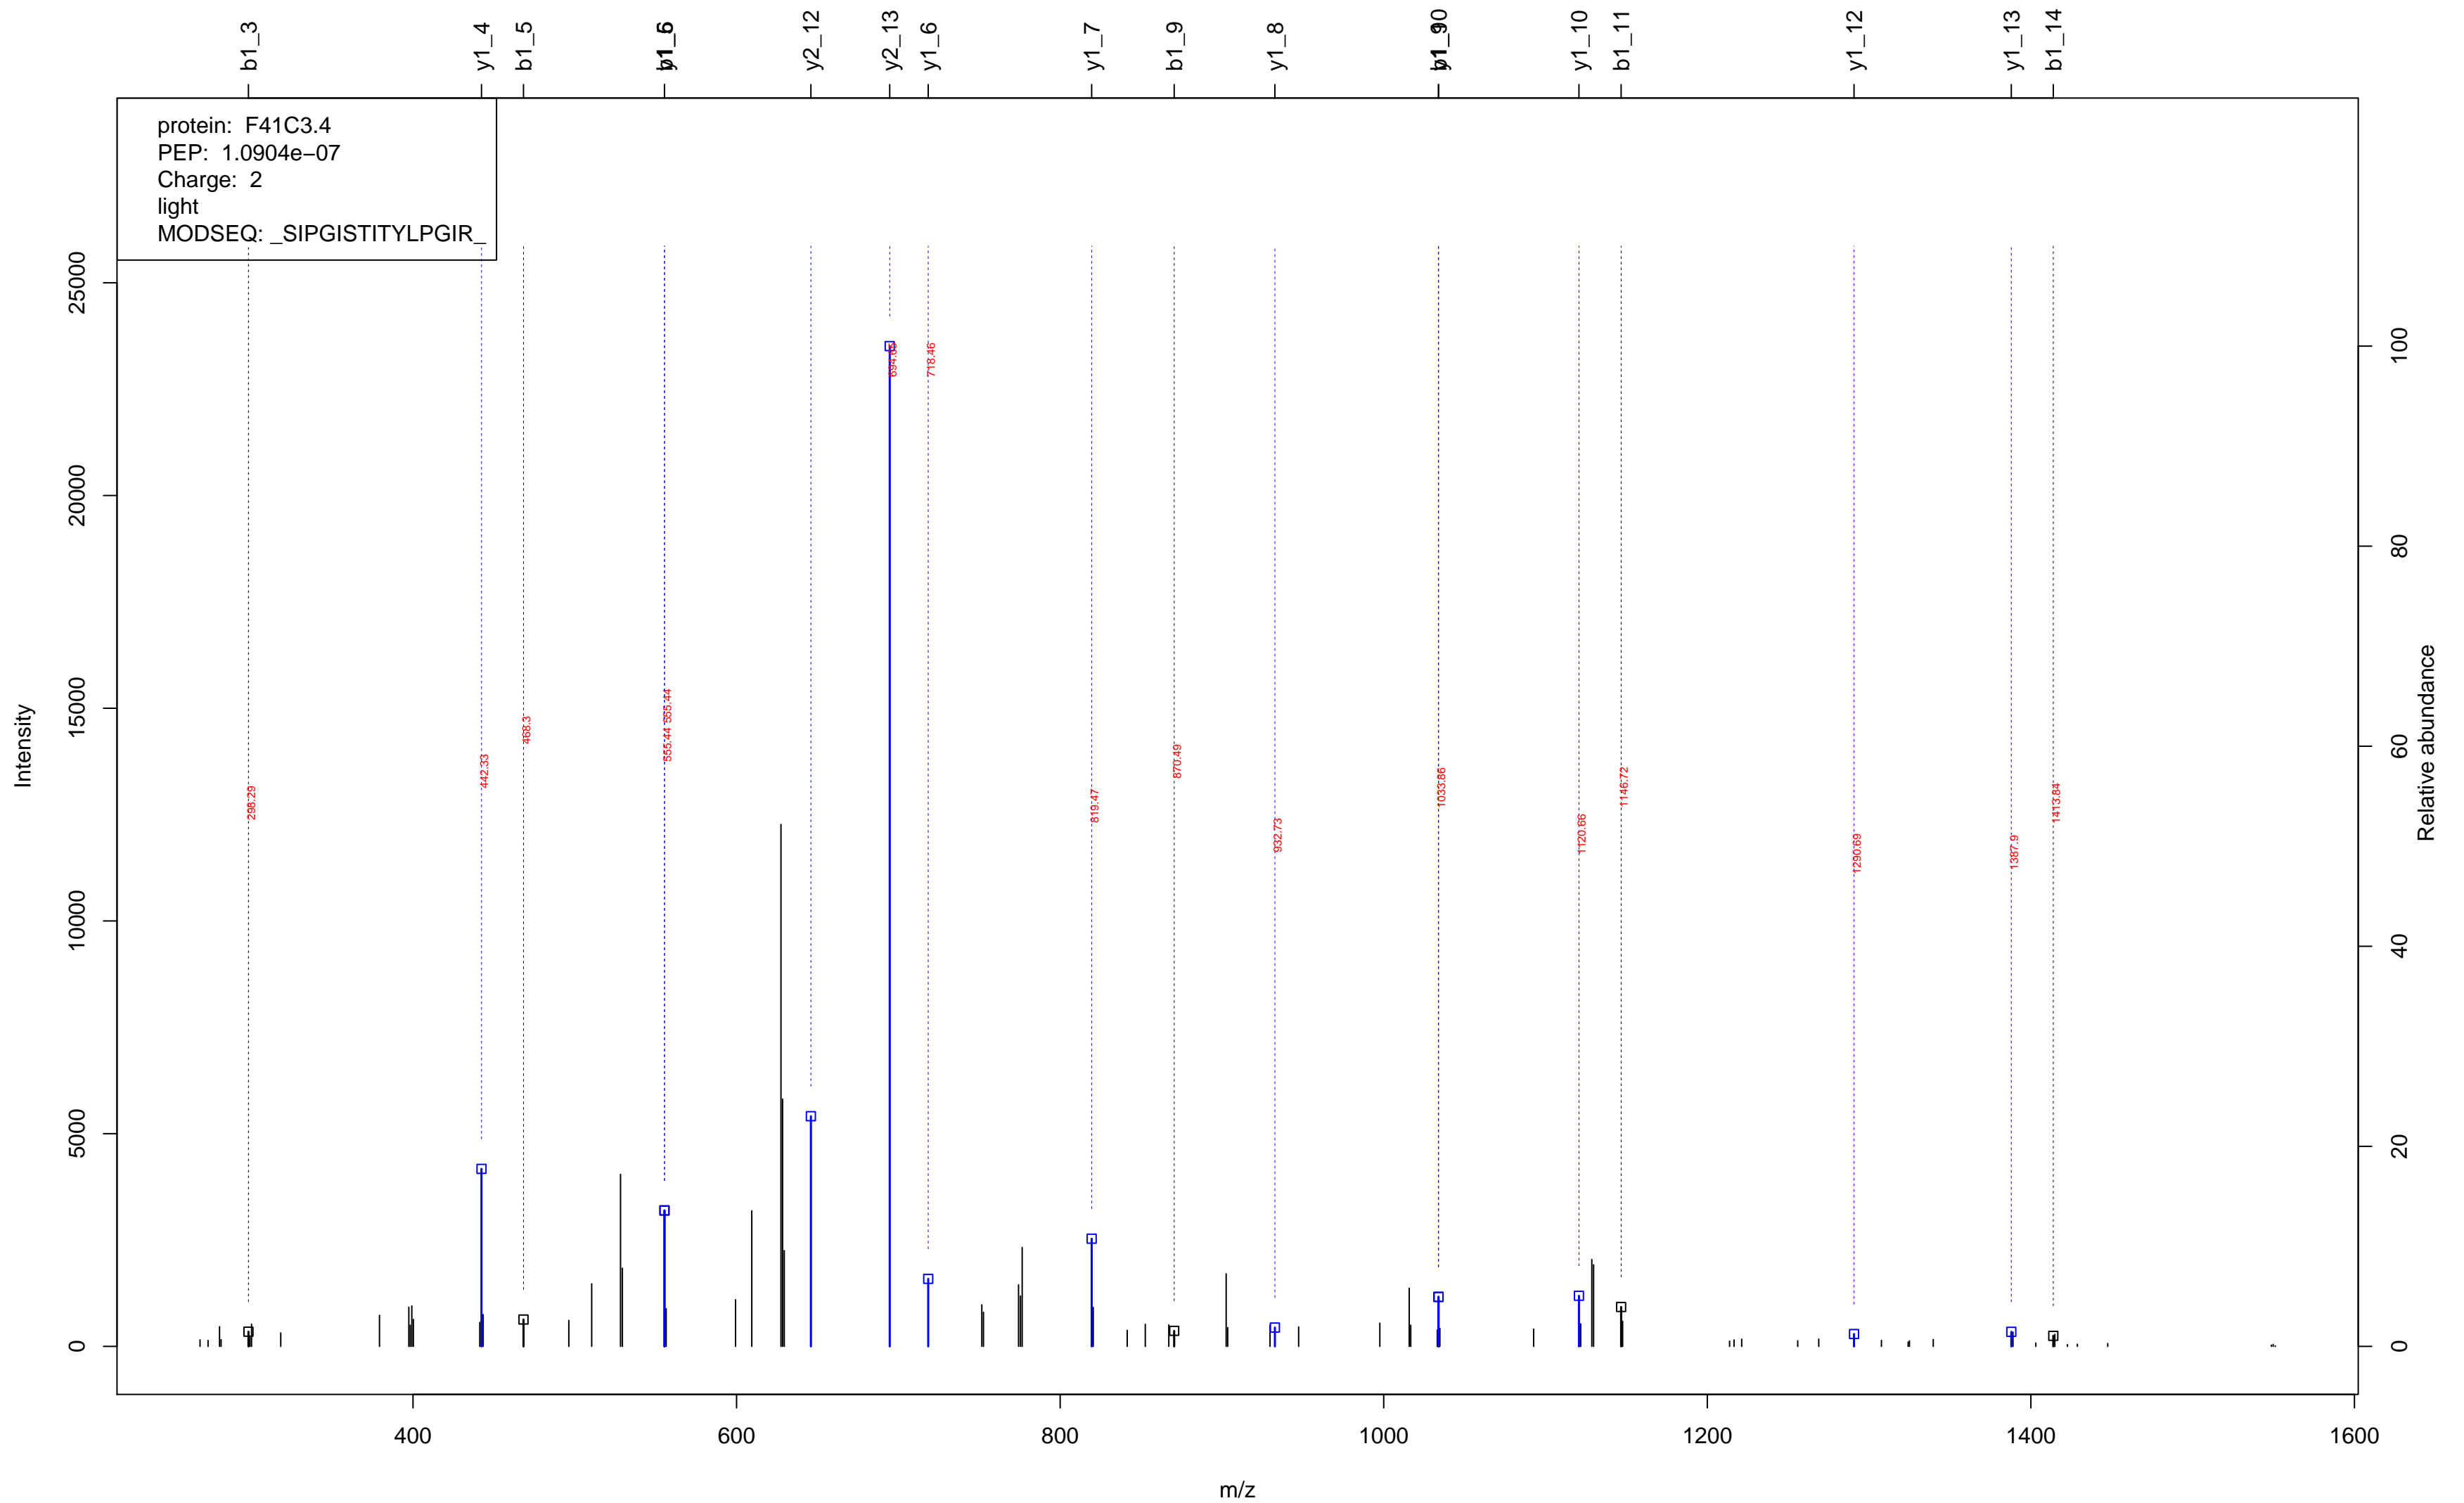

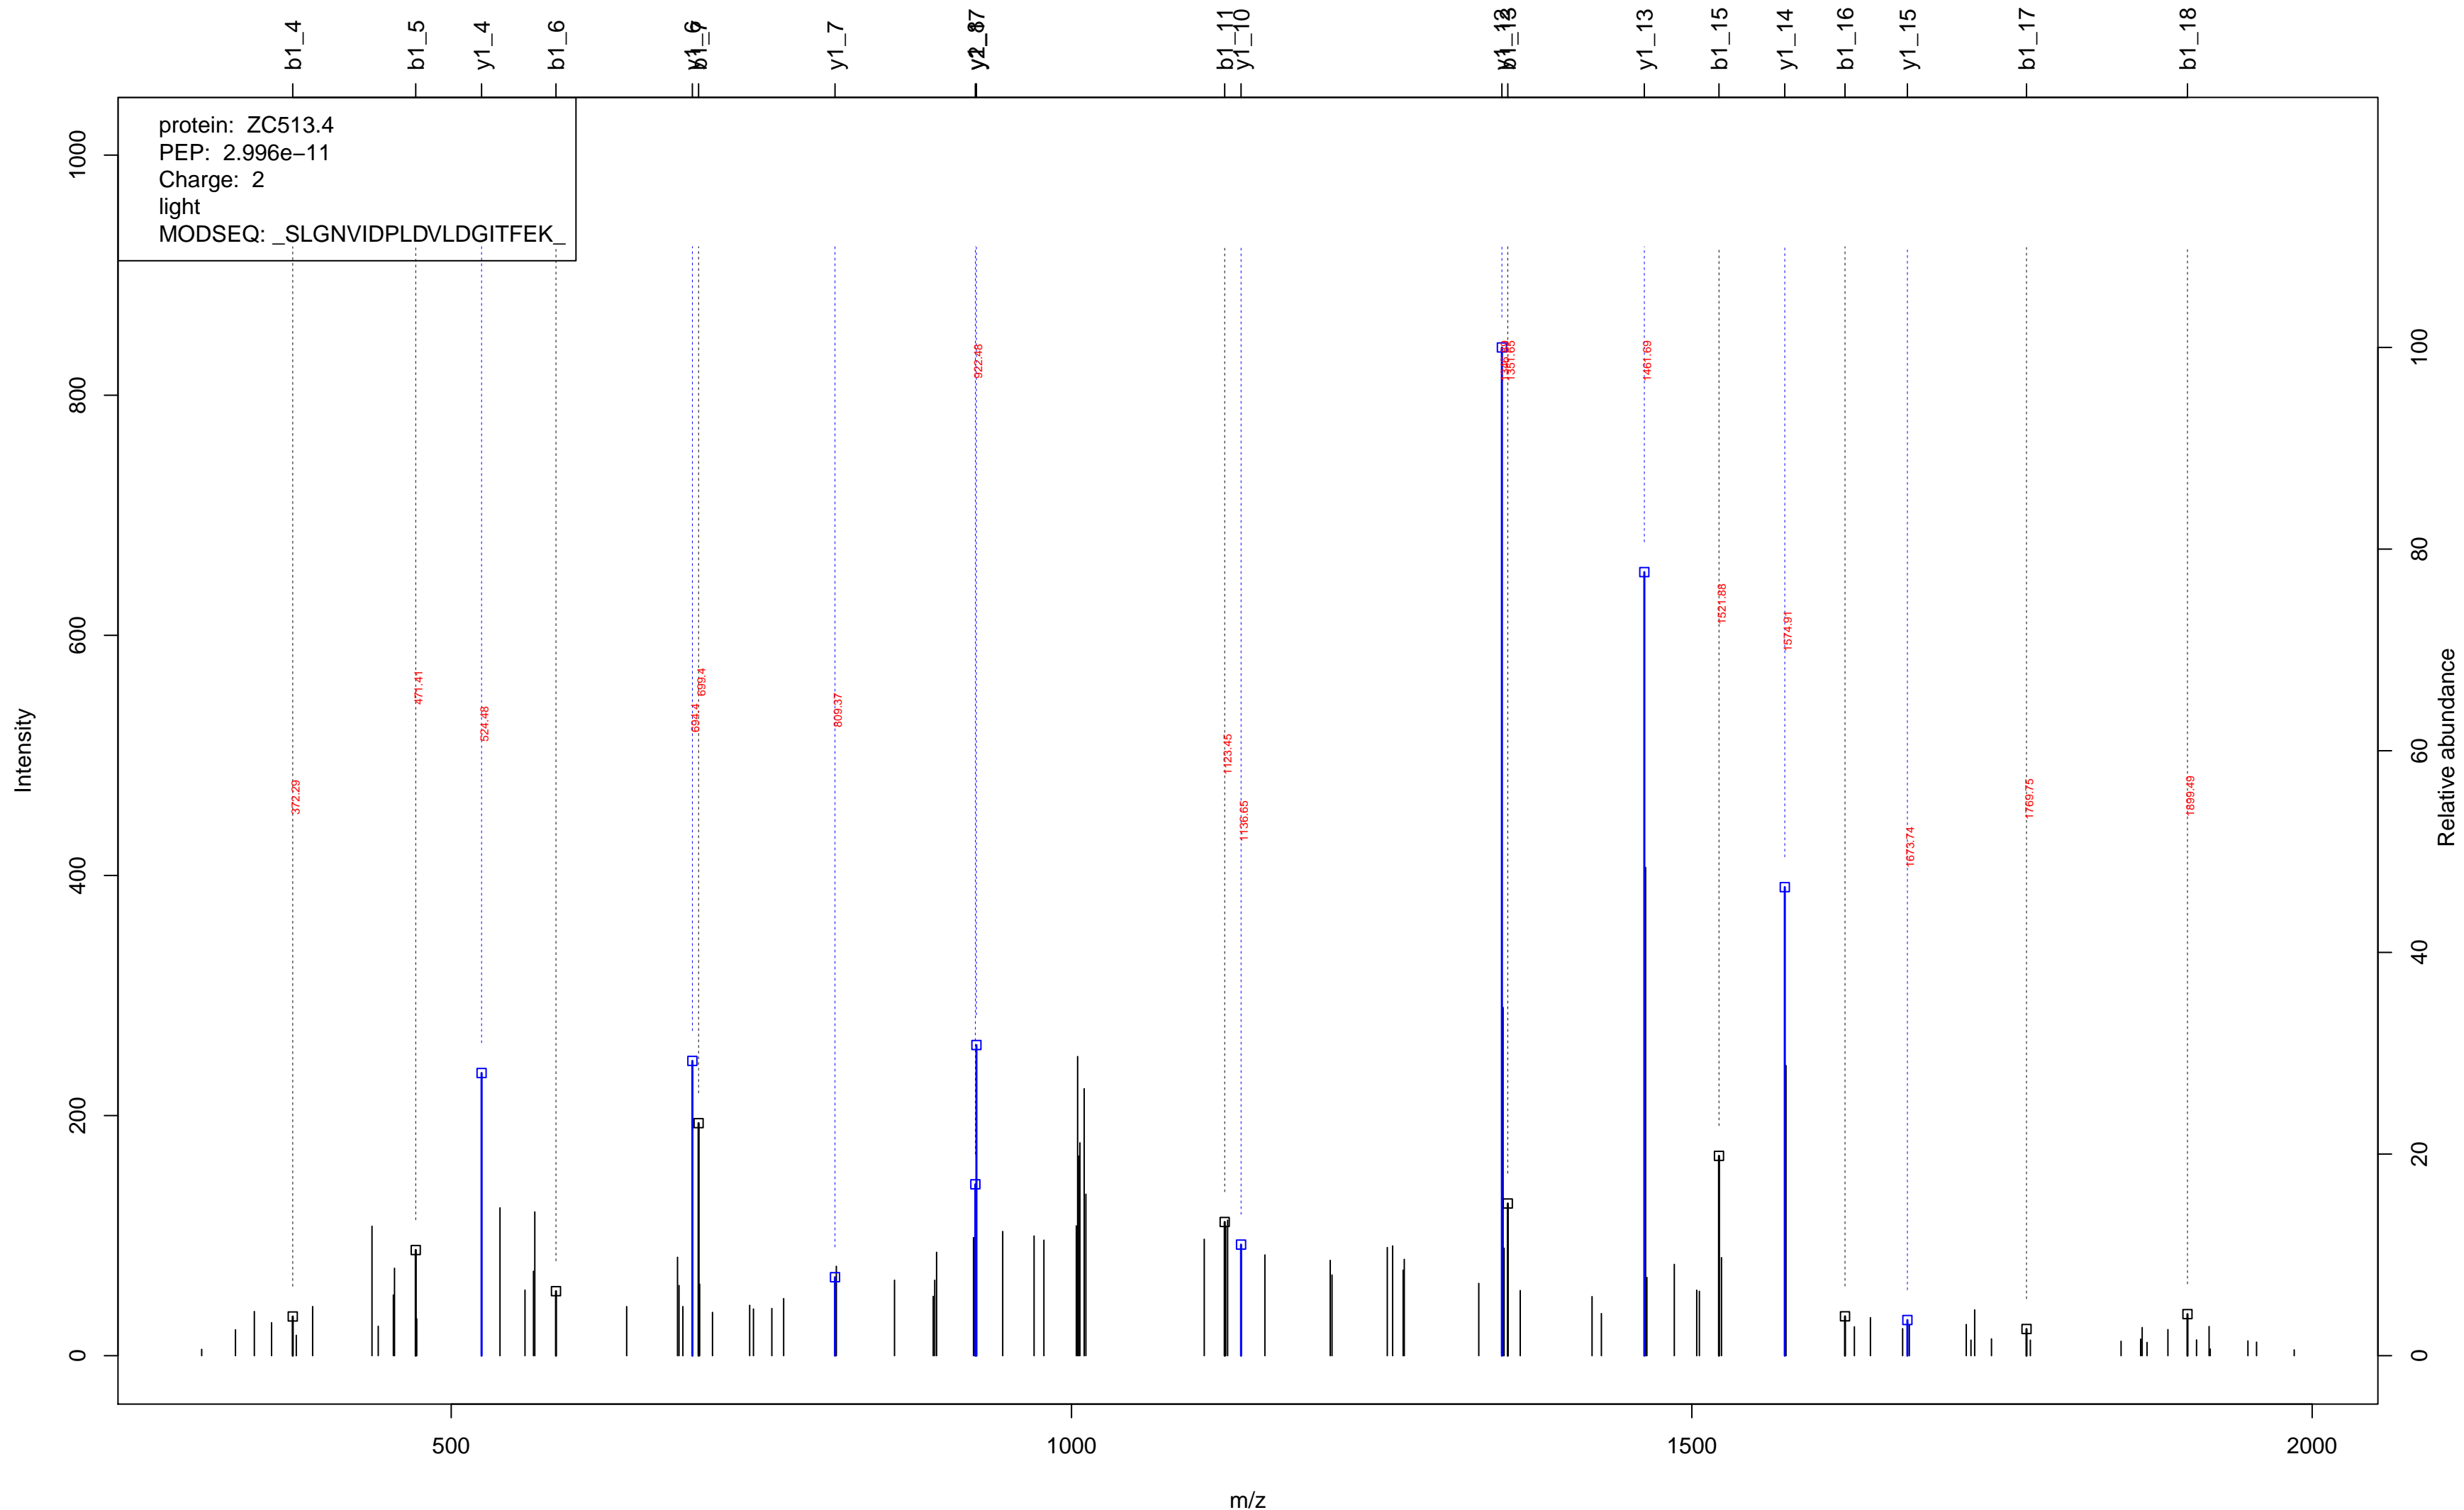



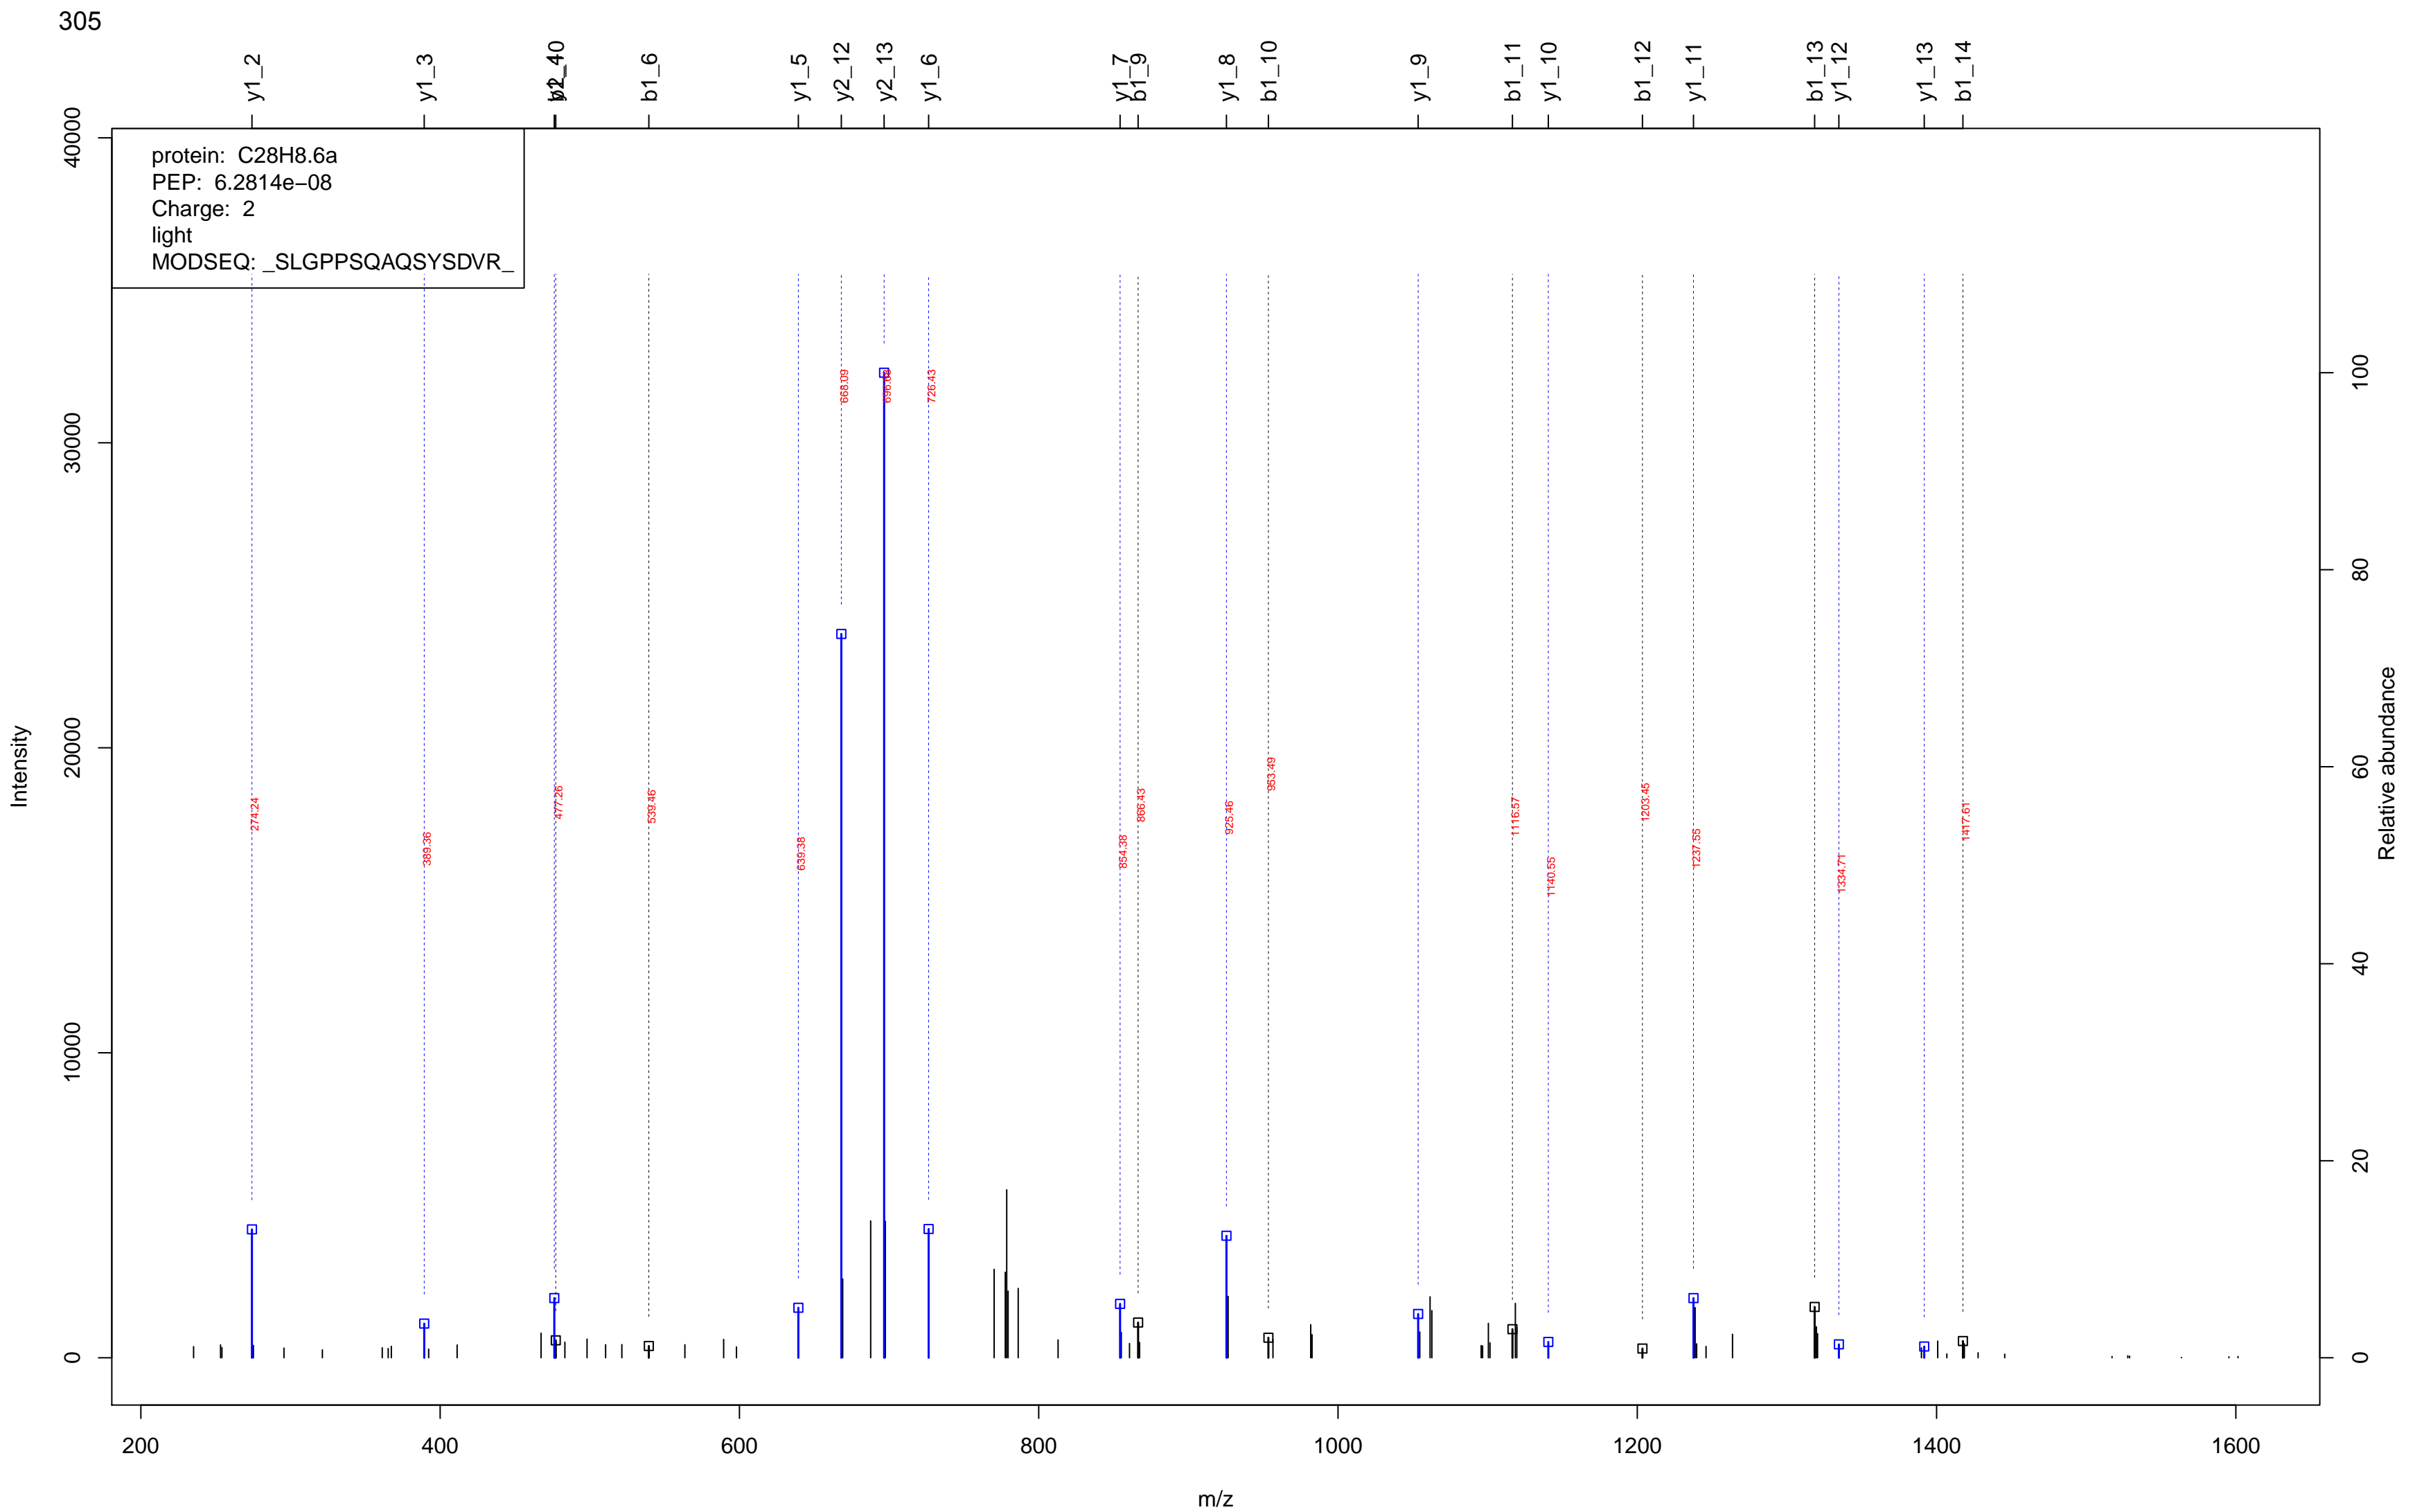

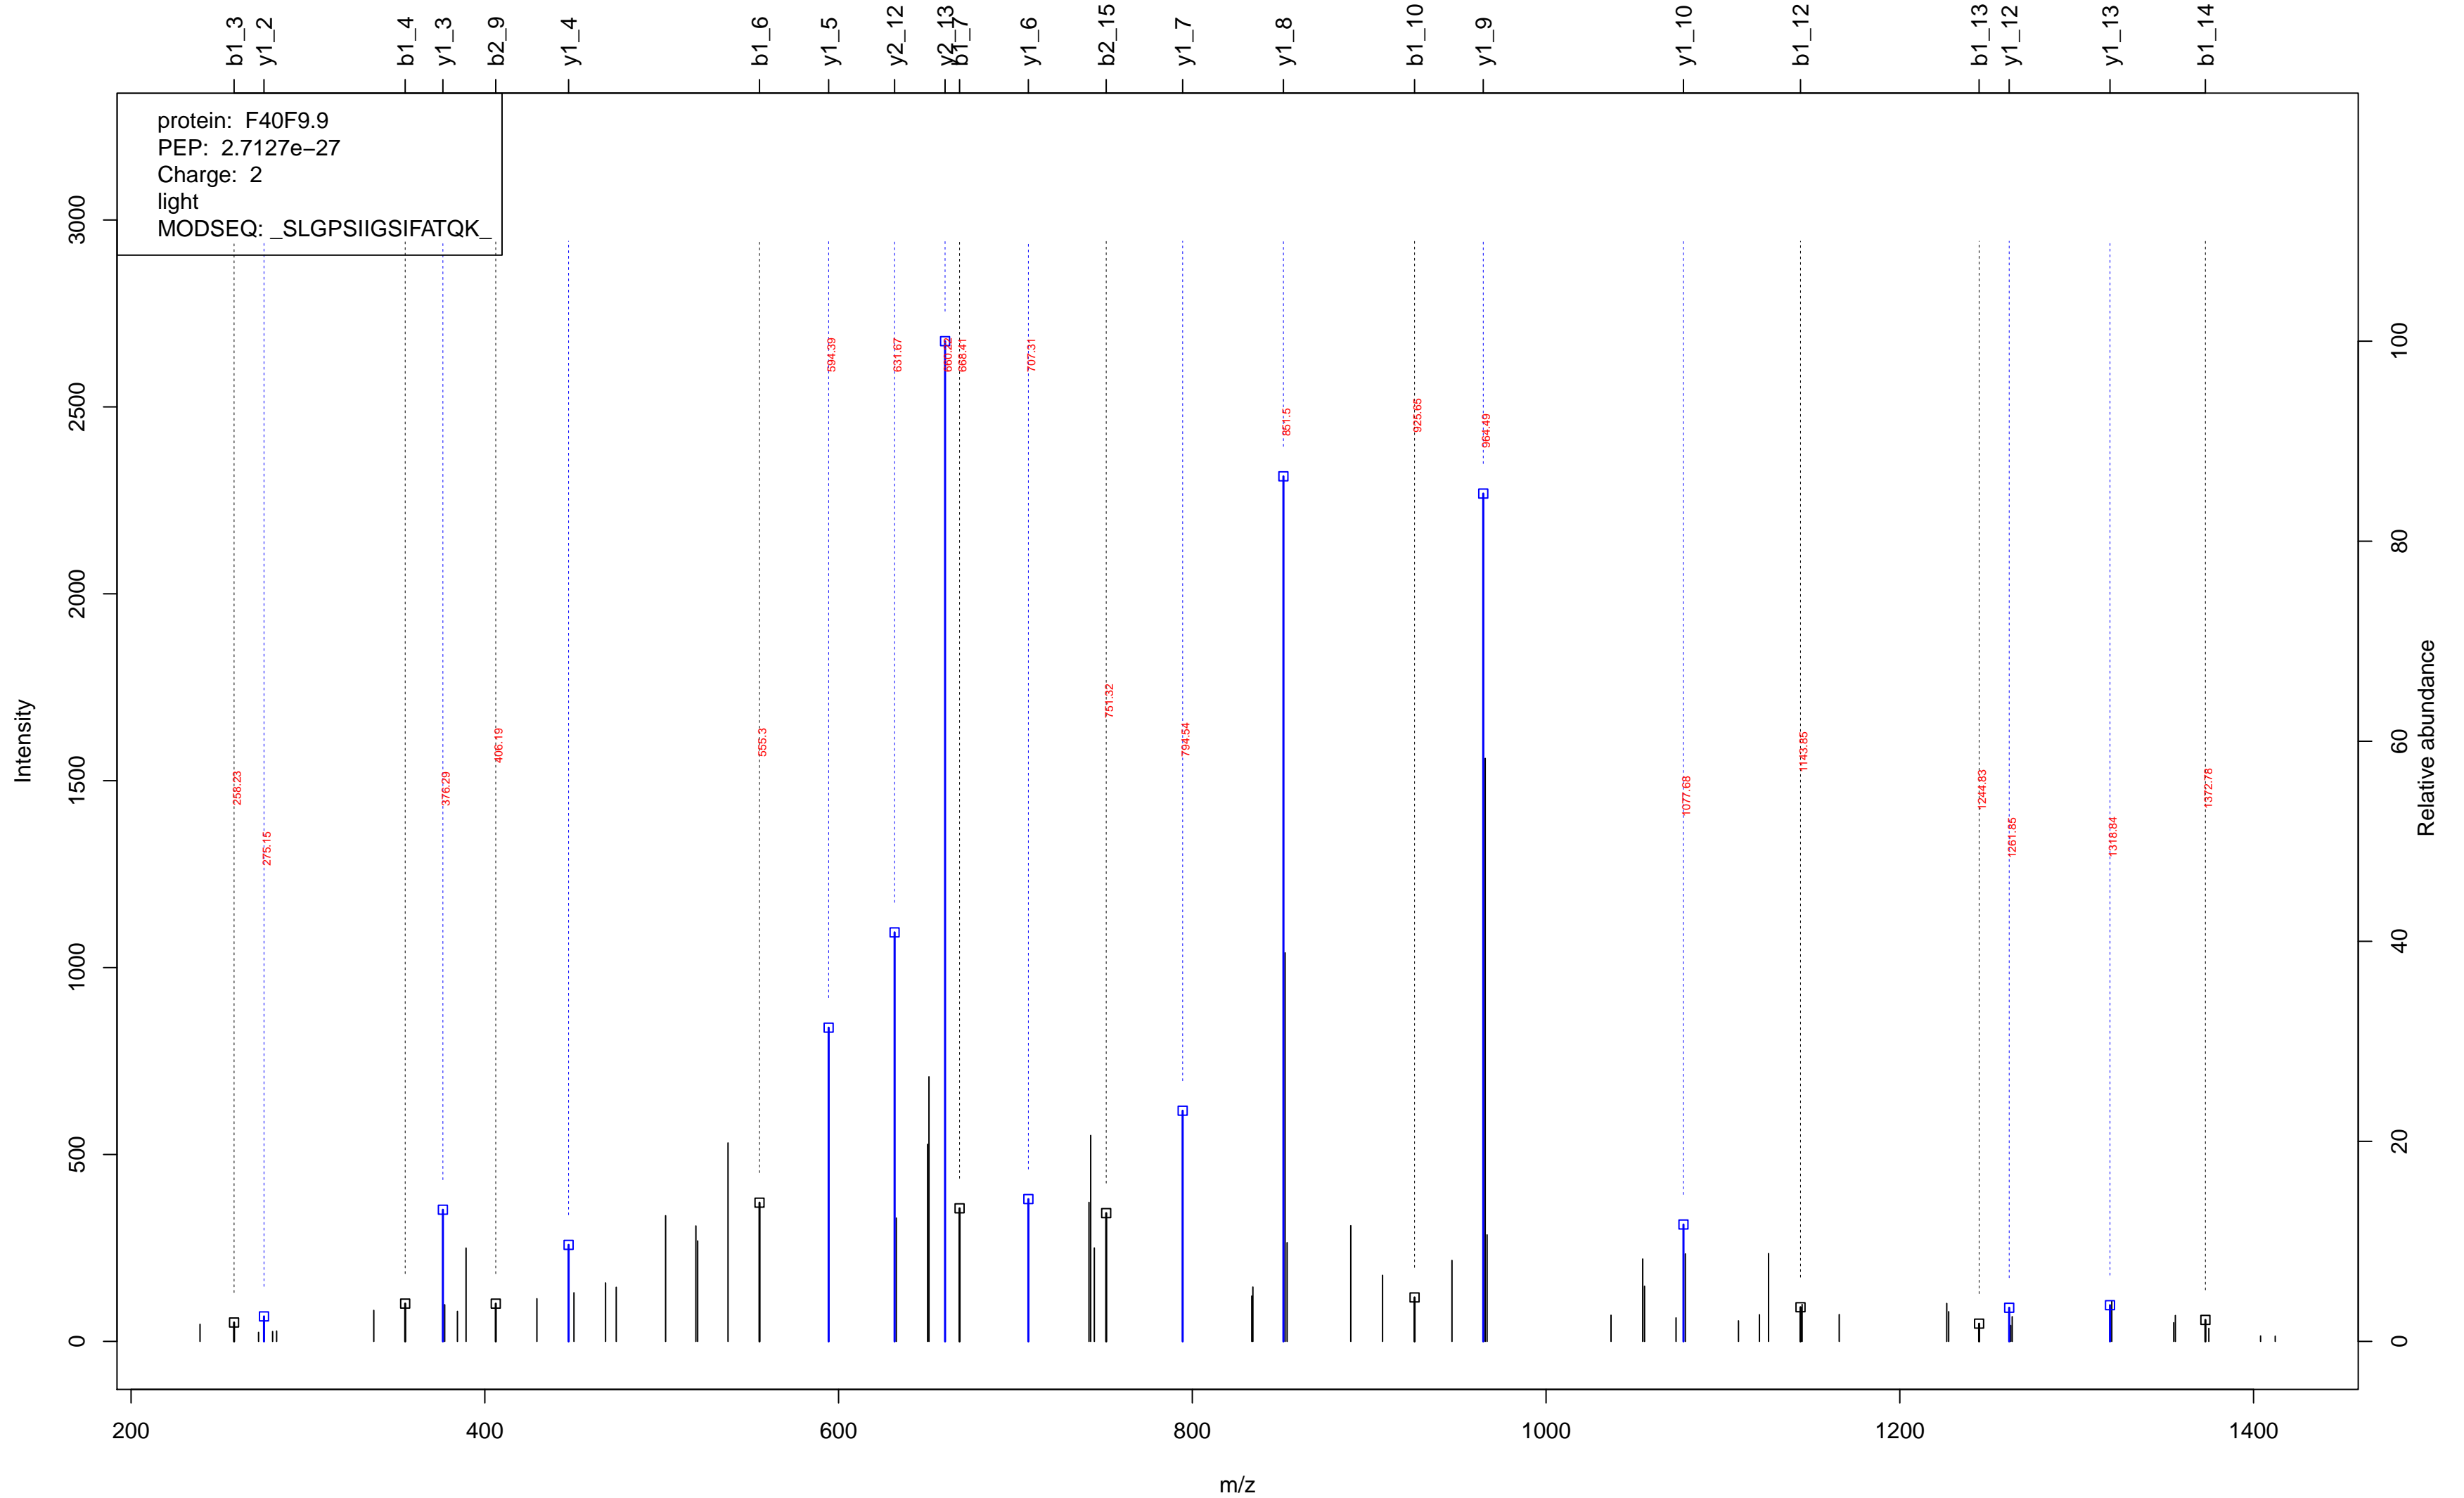

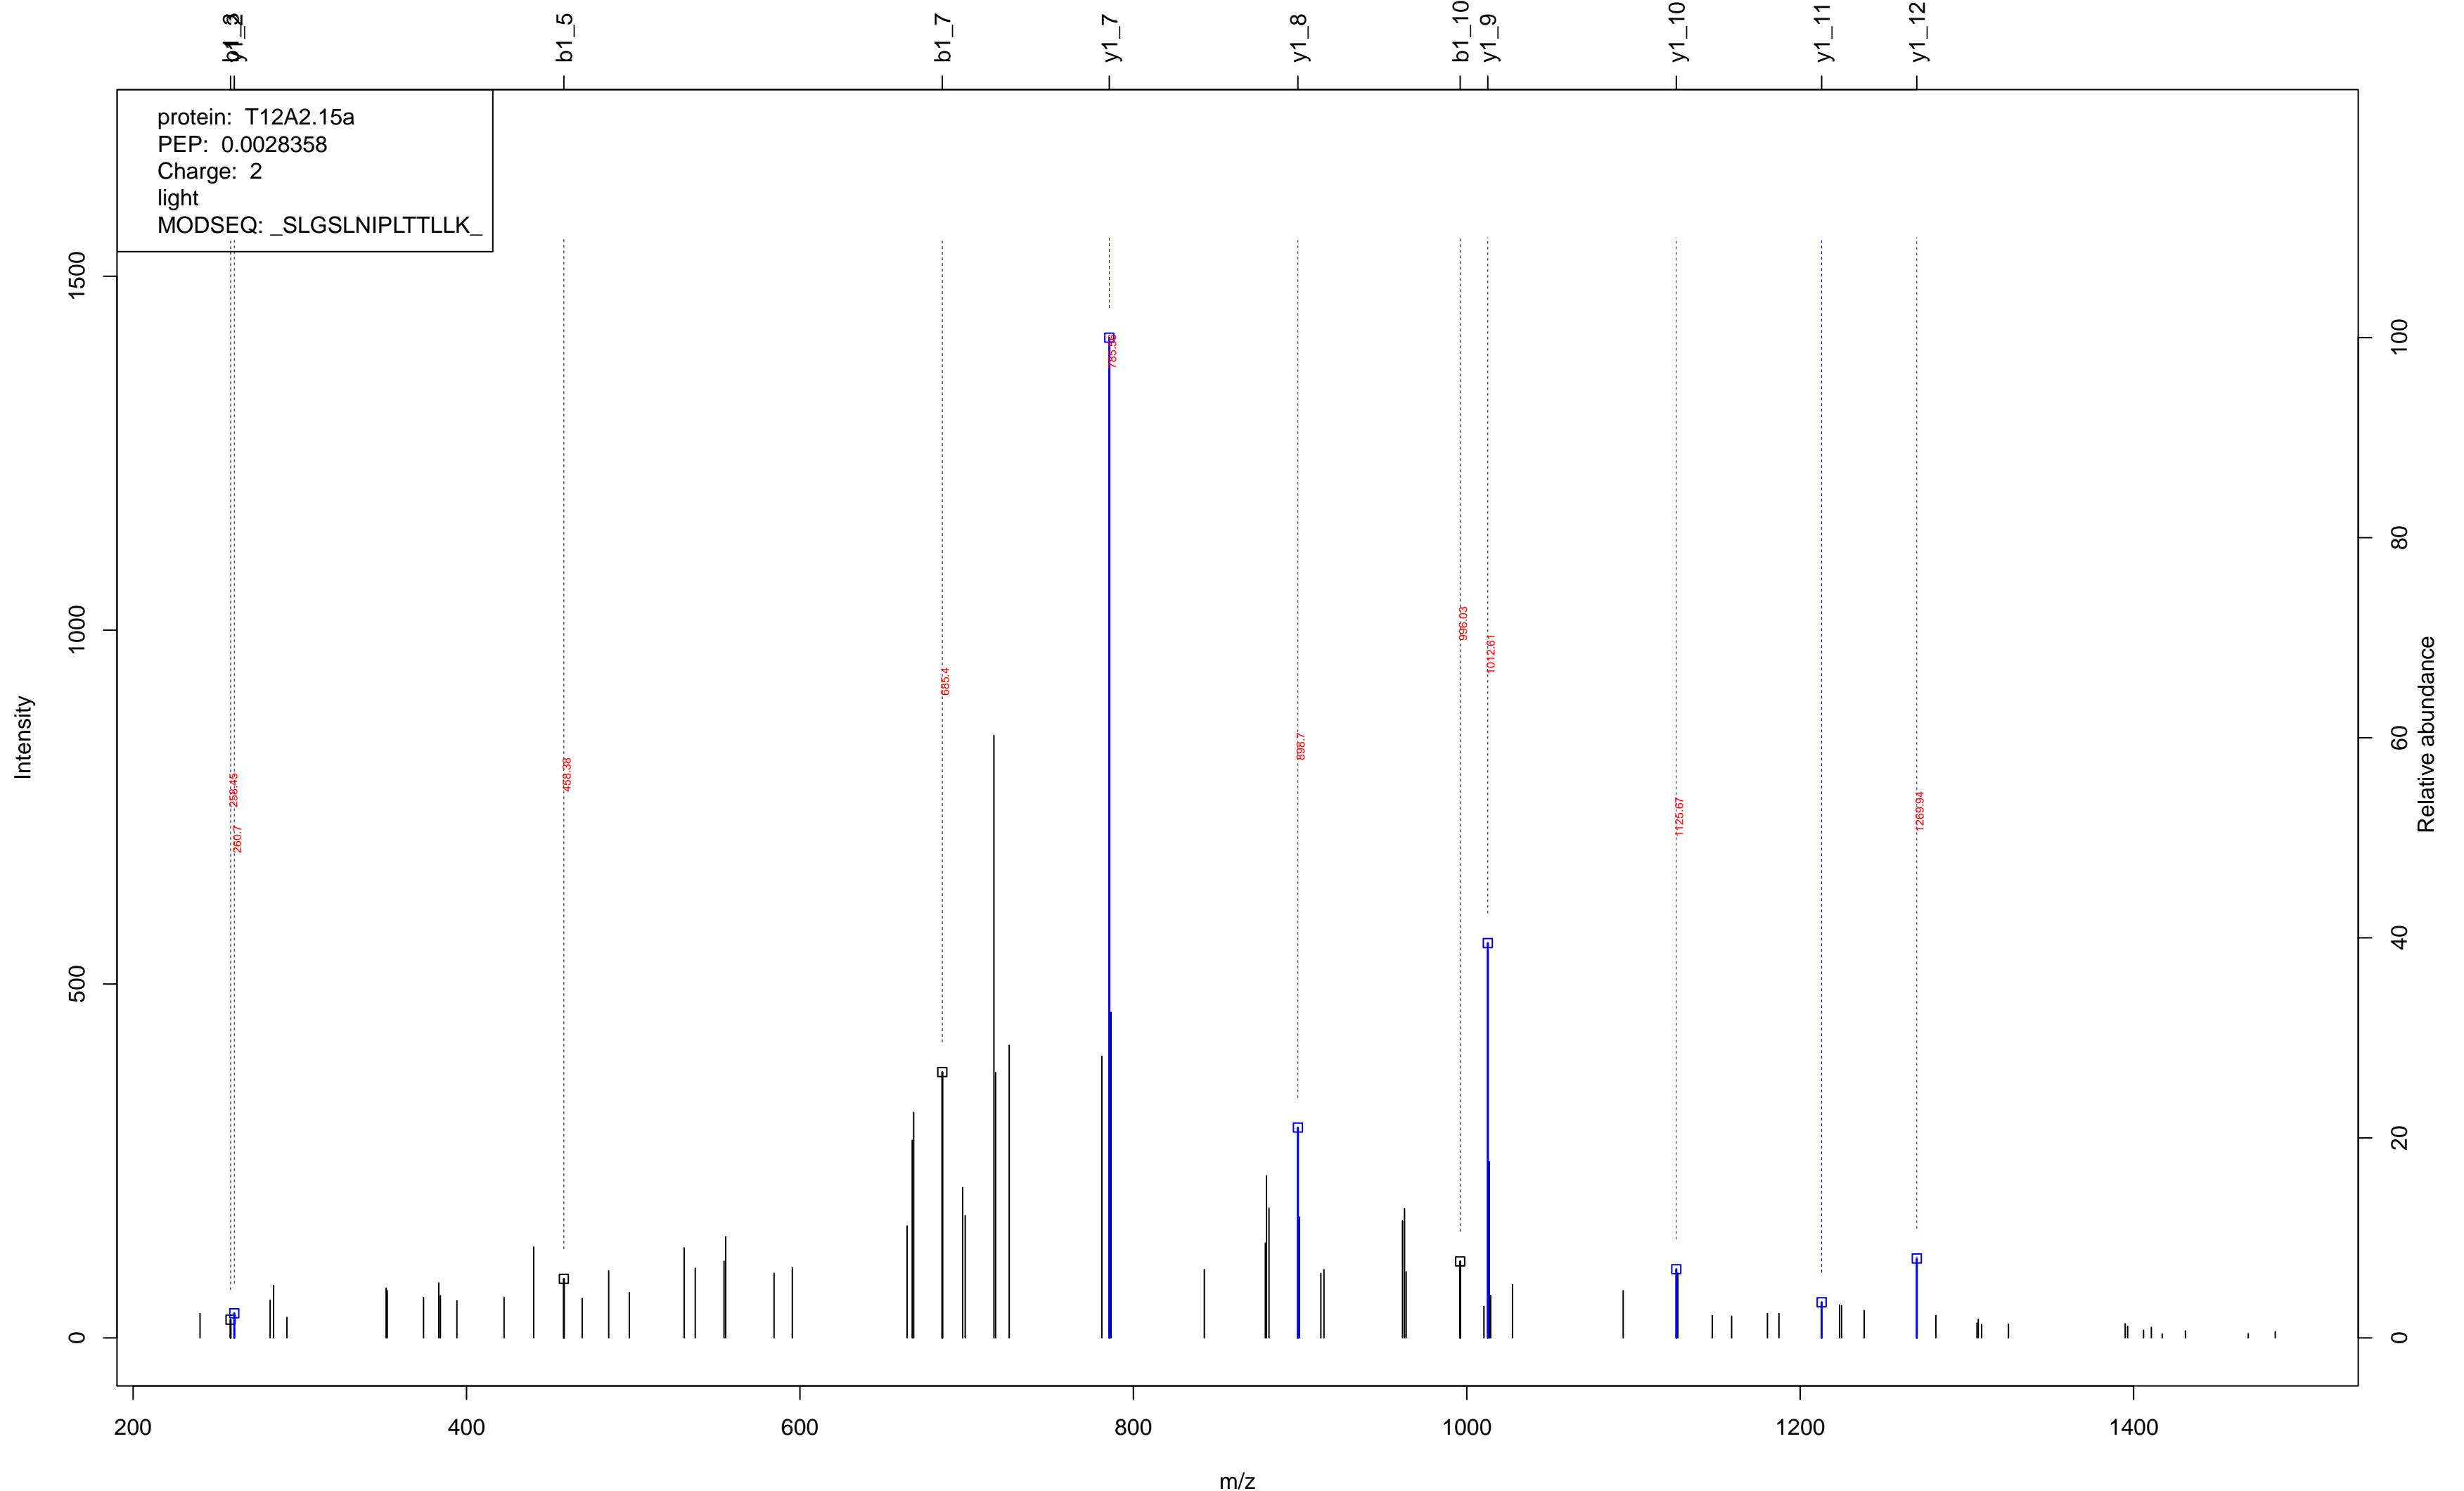

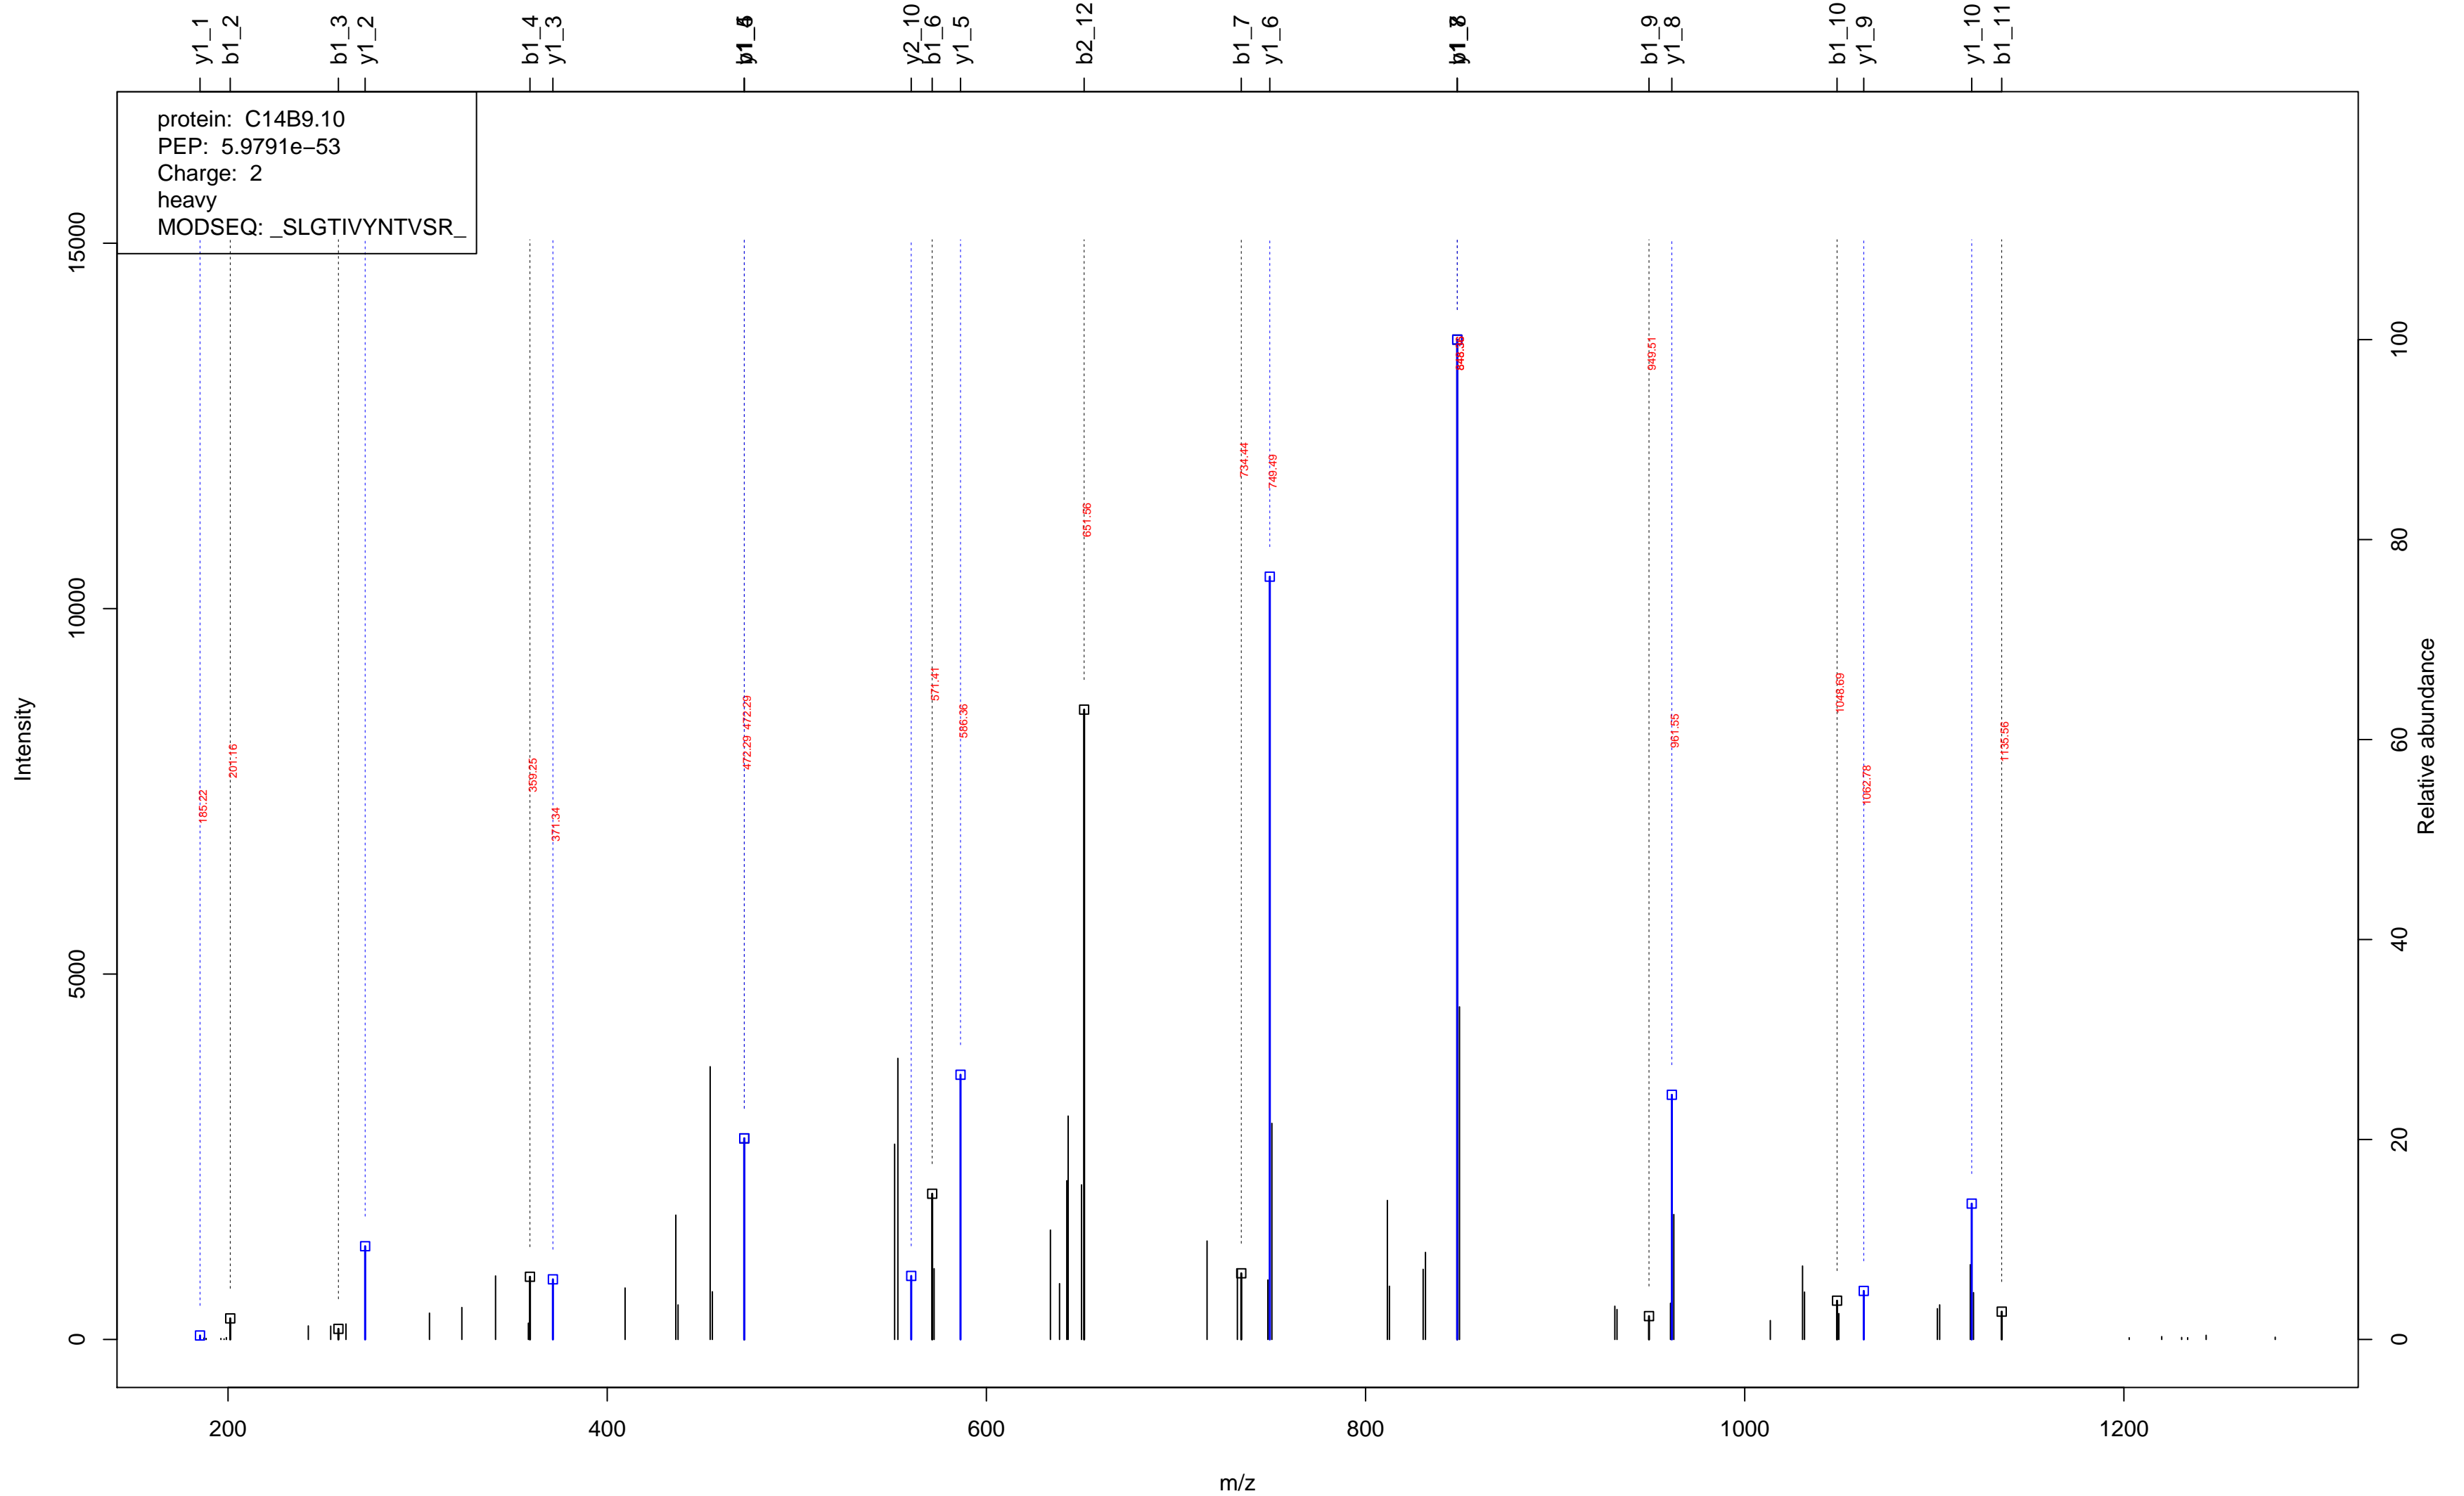

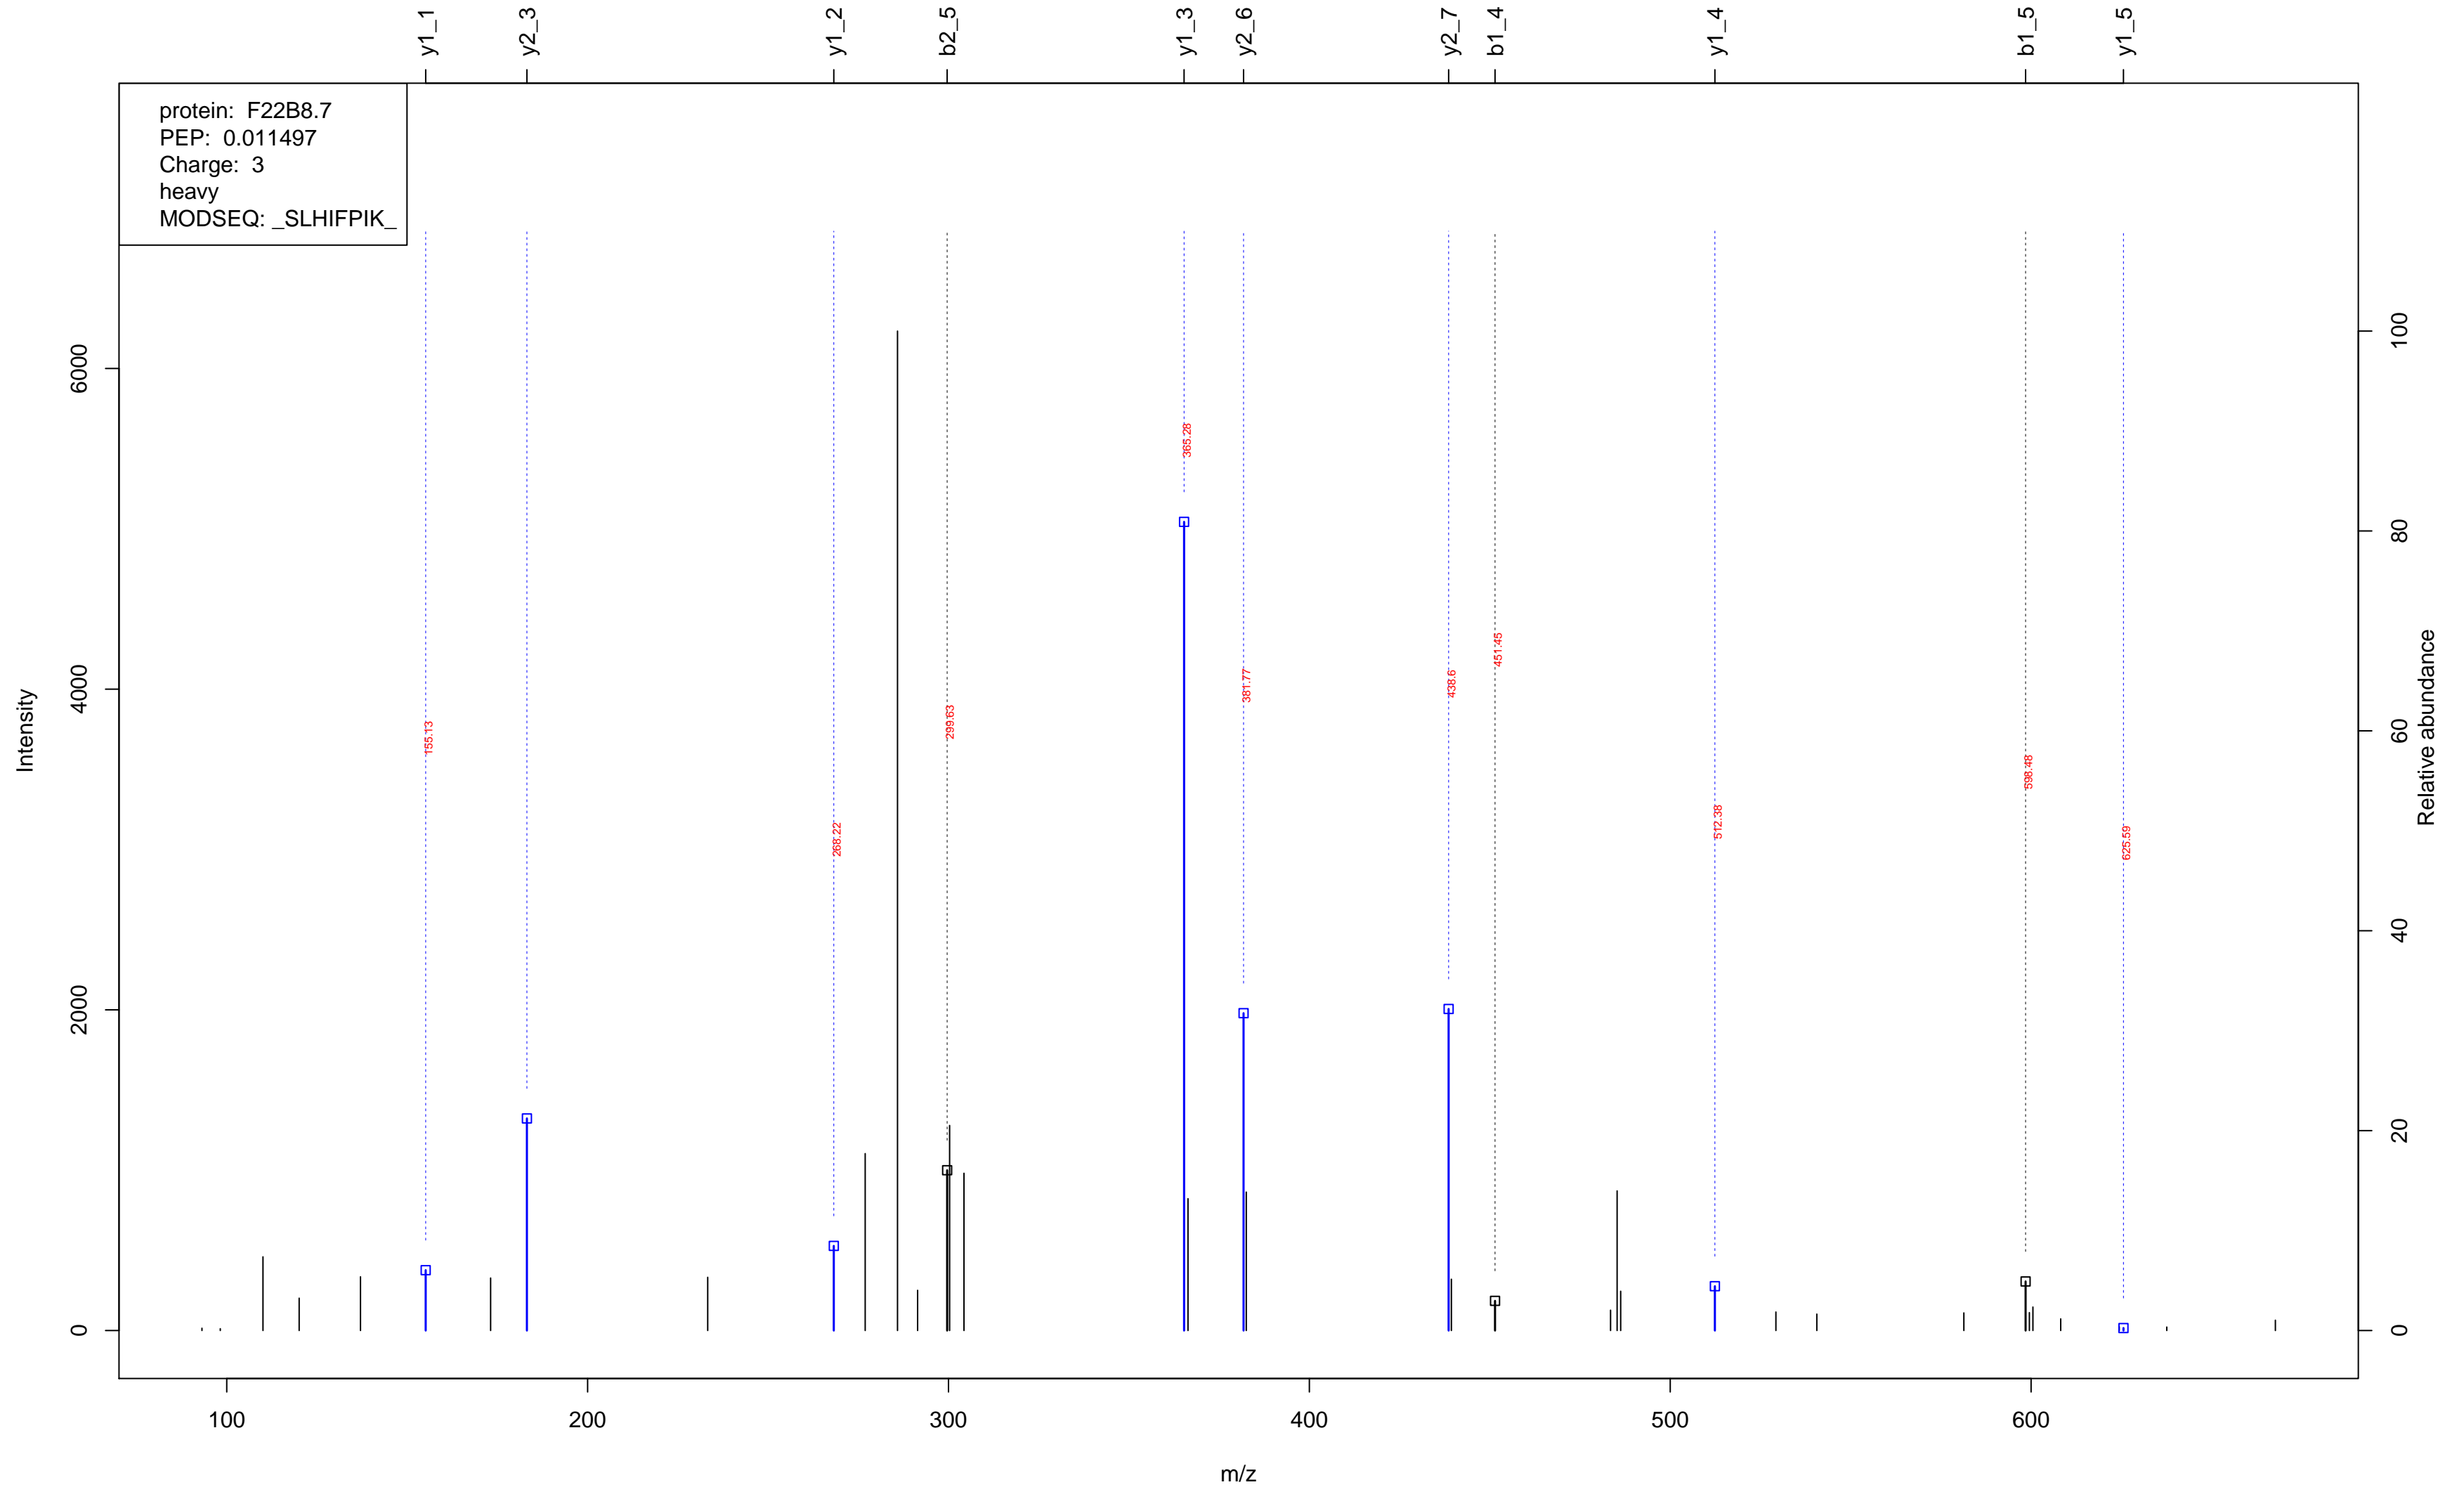

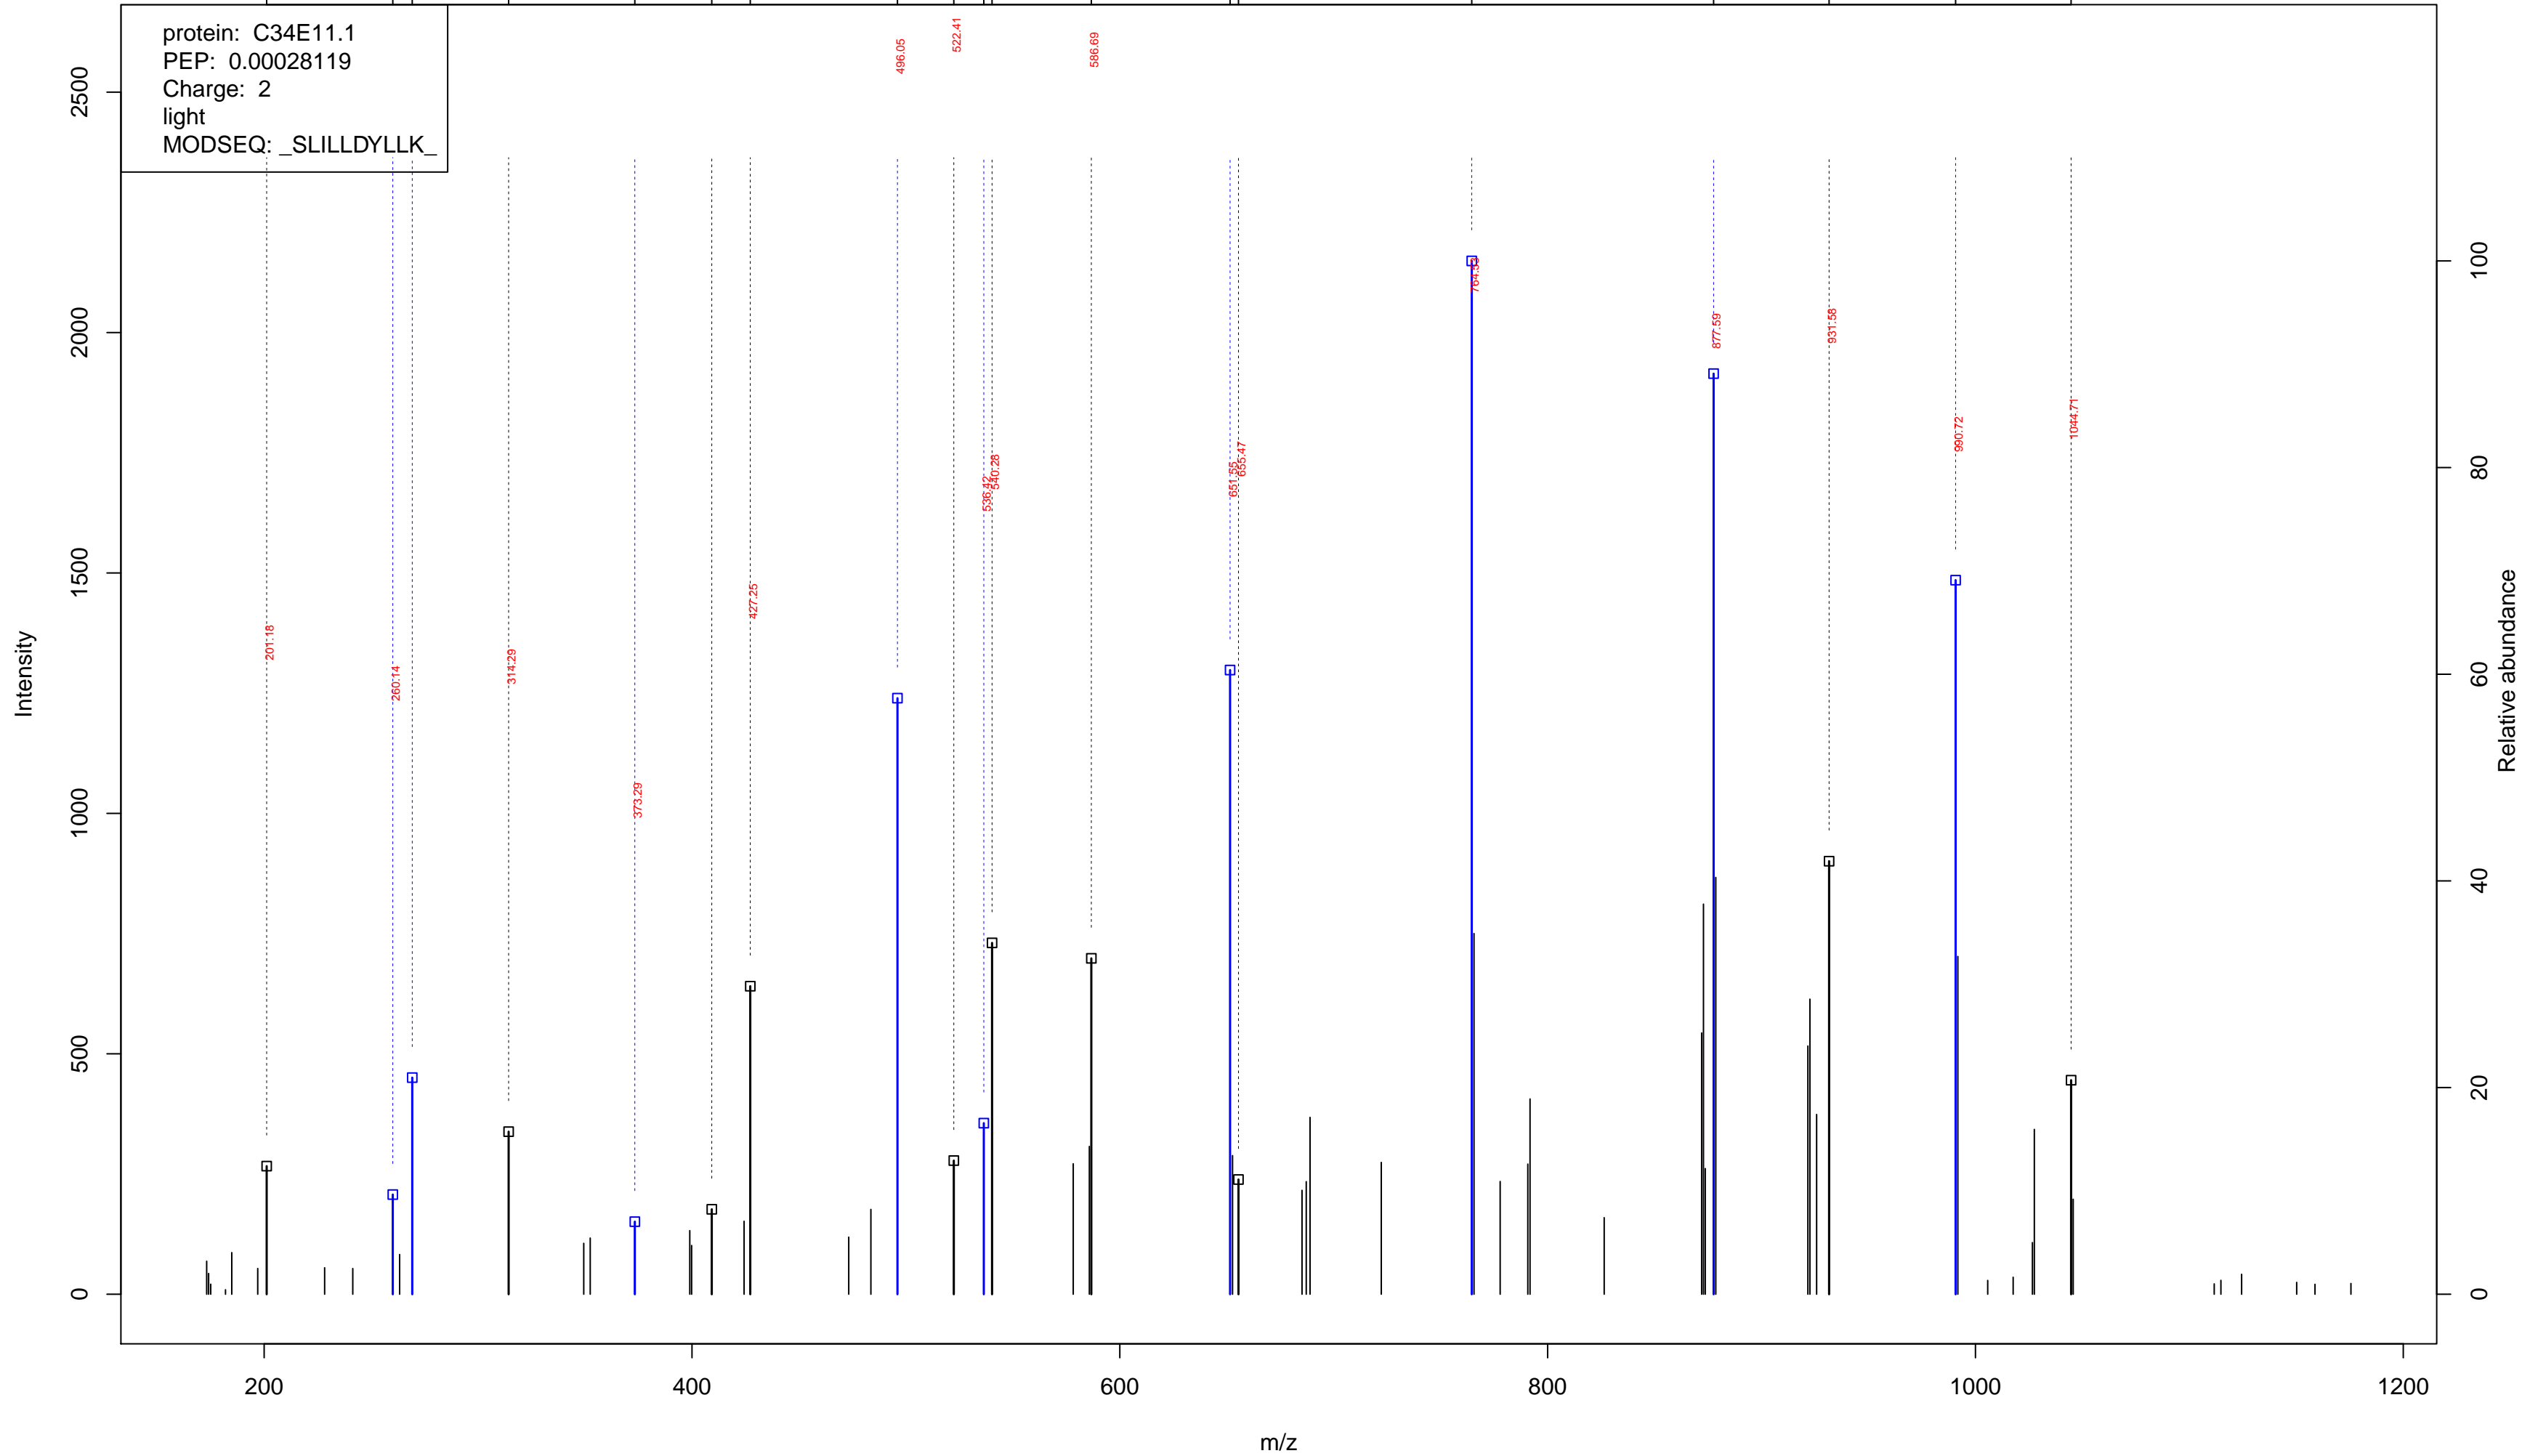

protein: C34E11.1  
PEP: 0.00028119  
Charge: 2  
light  
MODSEQ: \_SLILLDYLLK\_

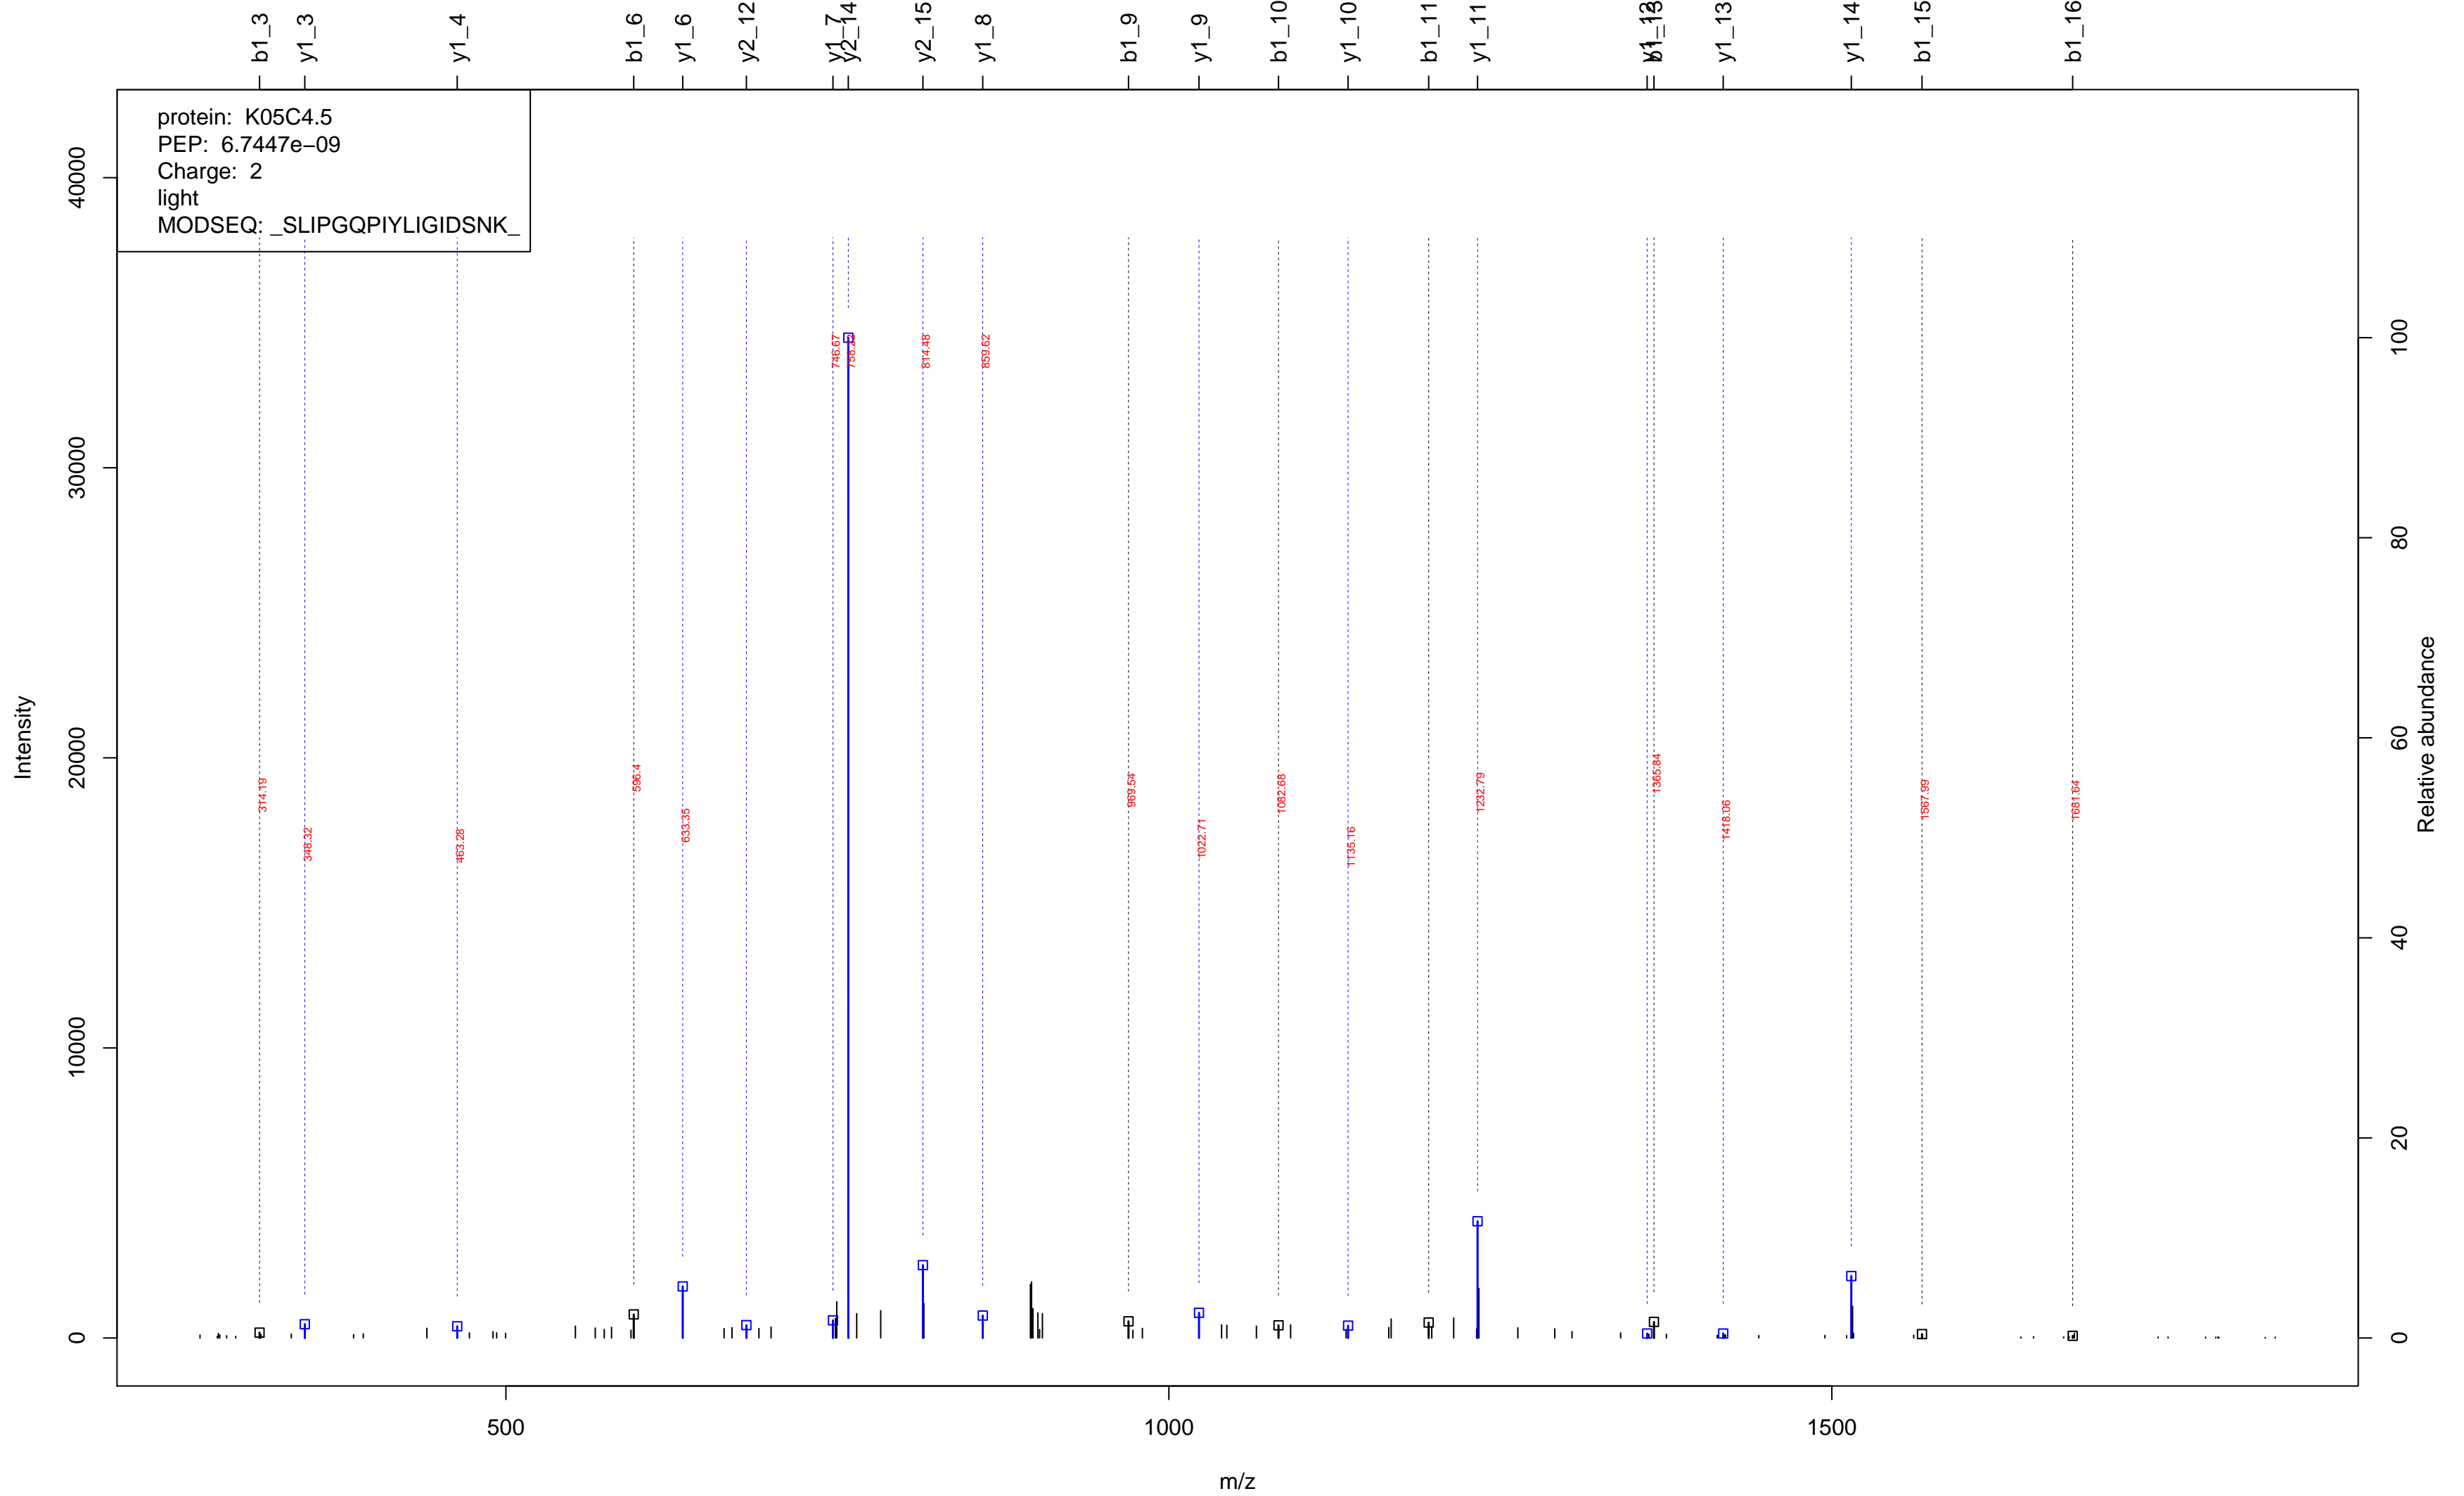

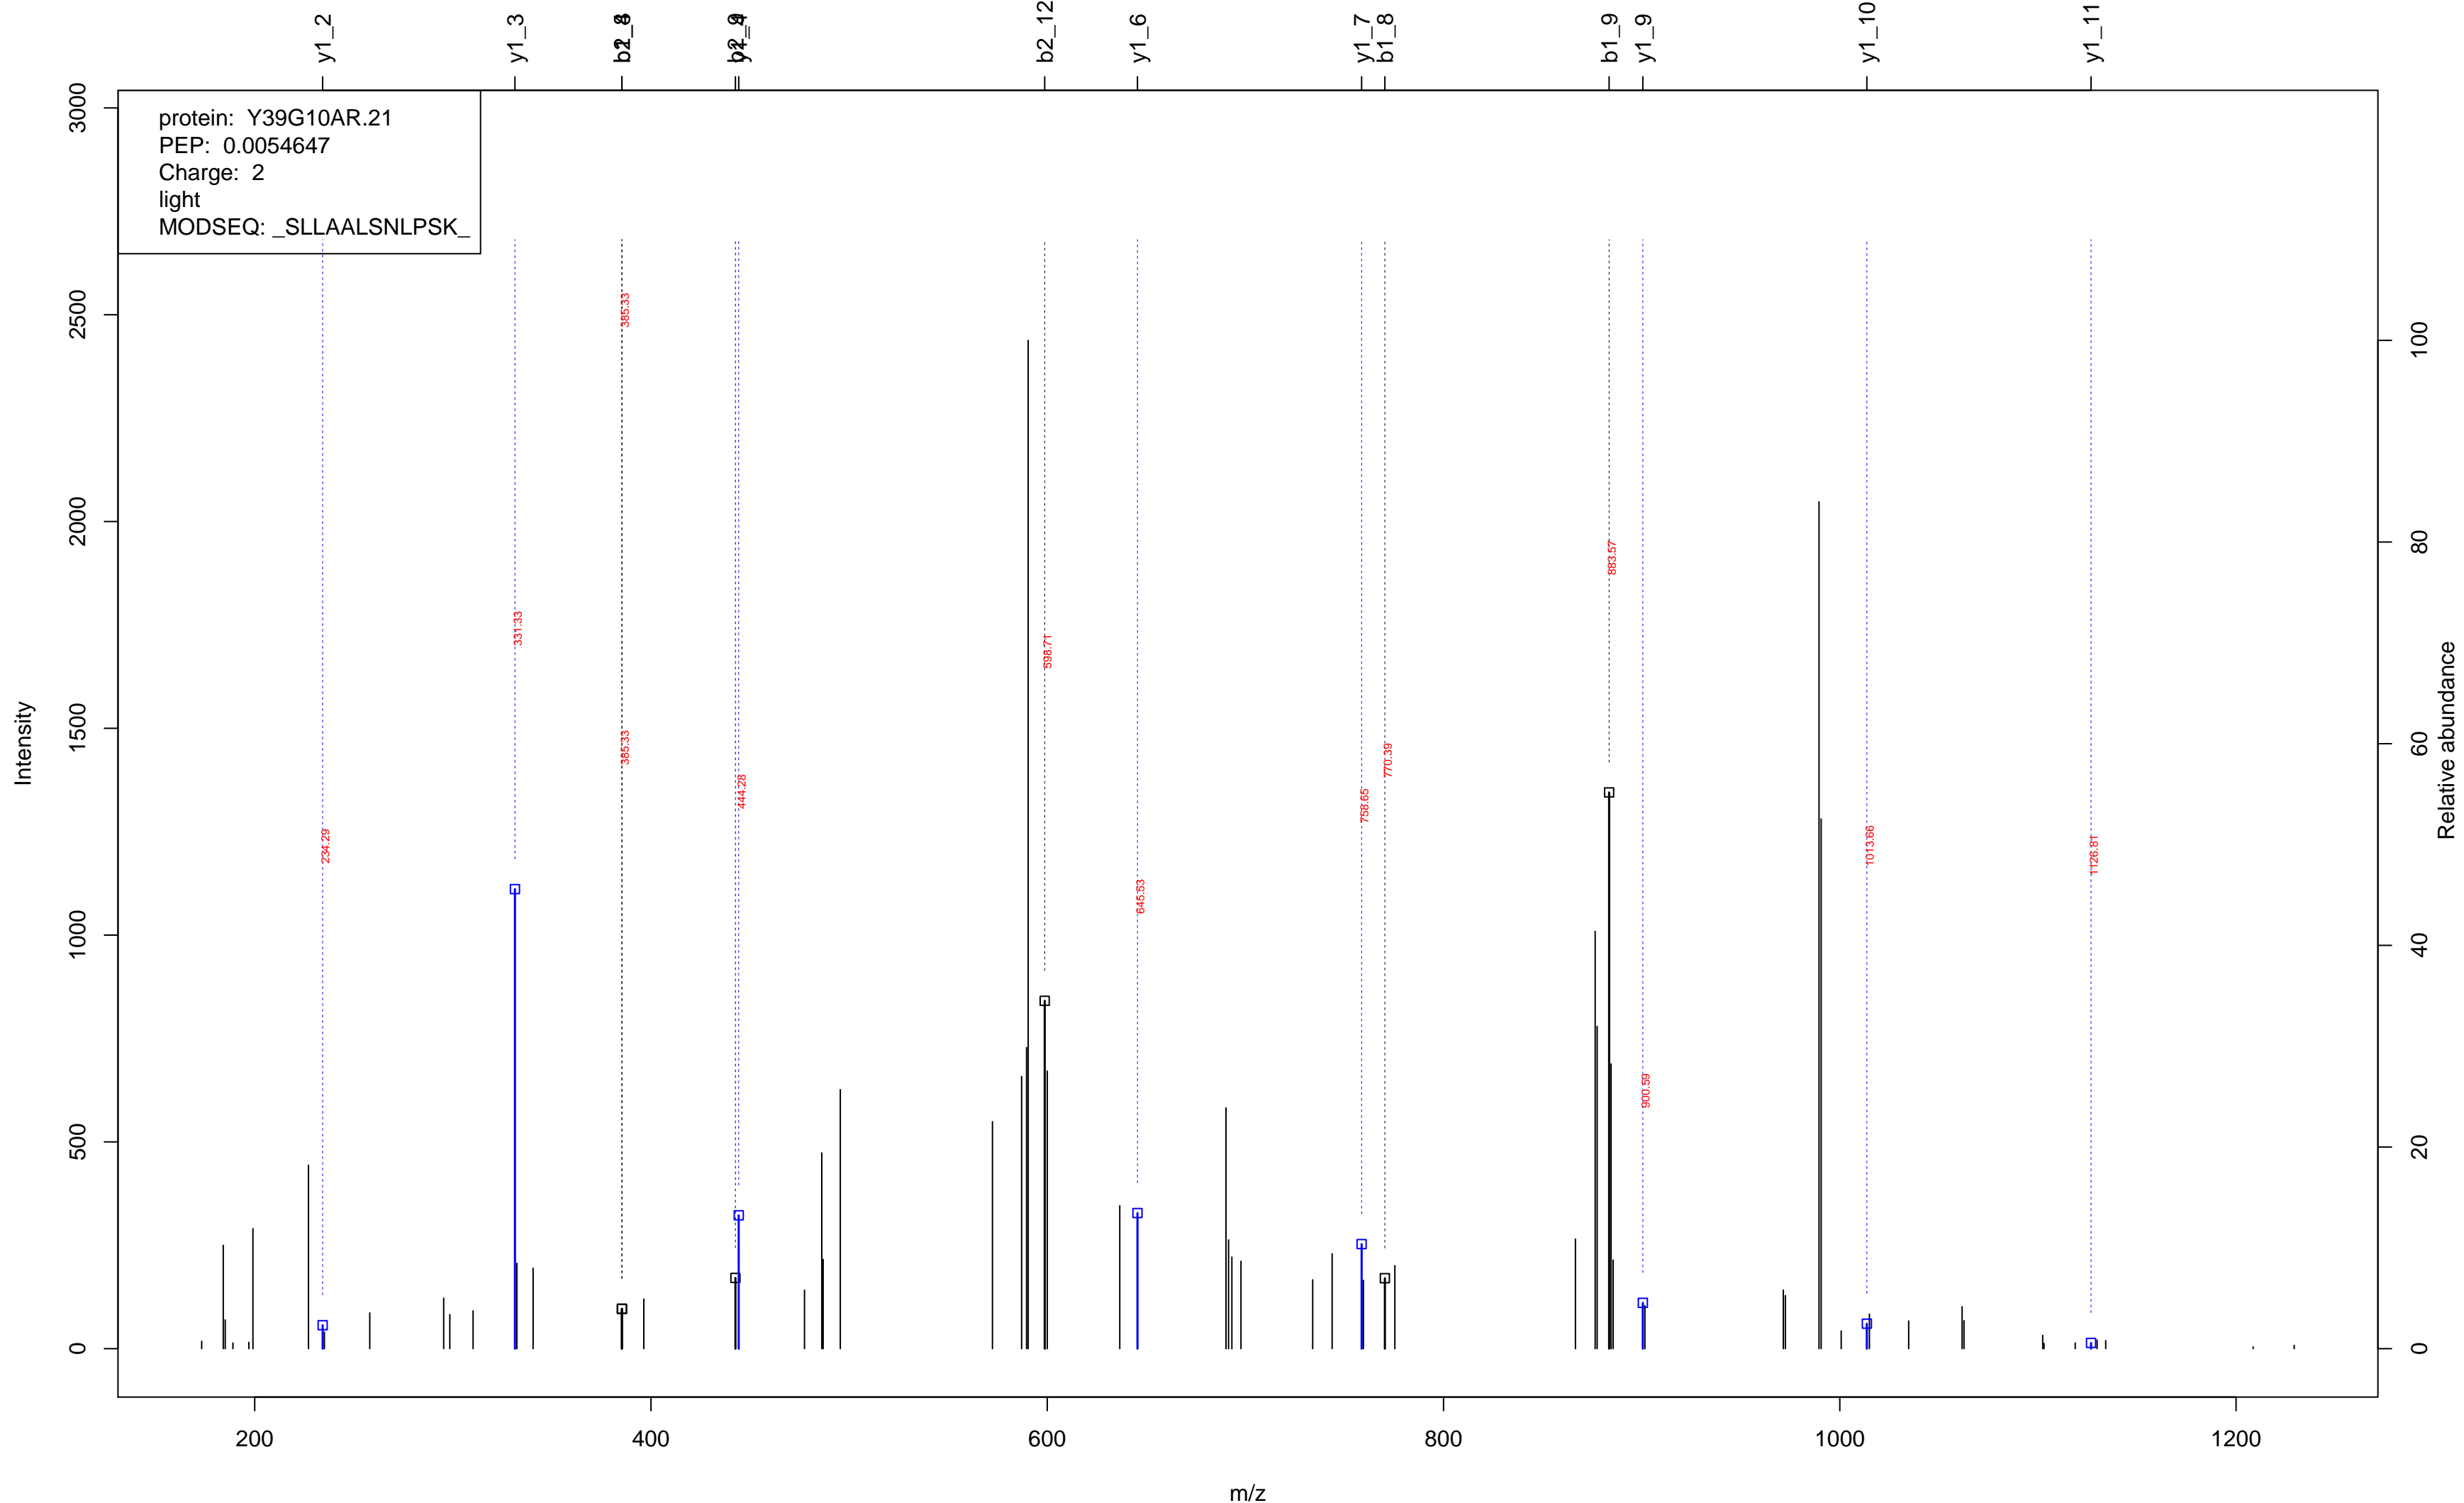



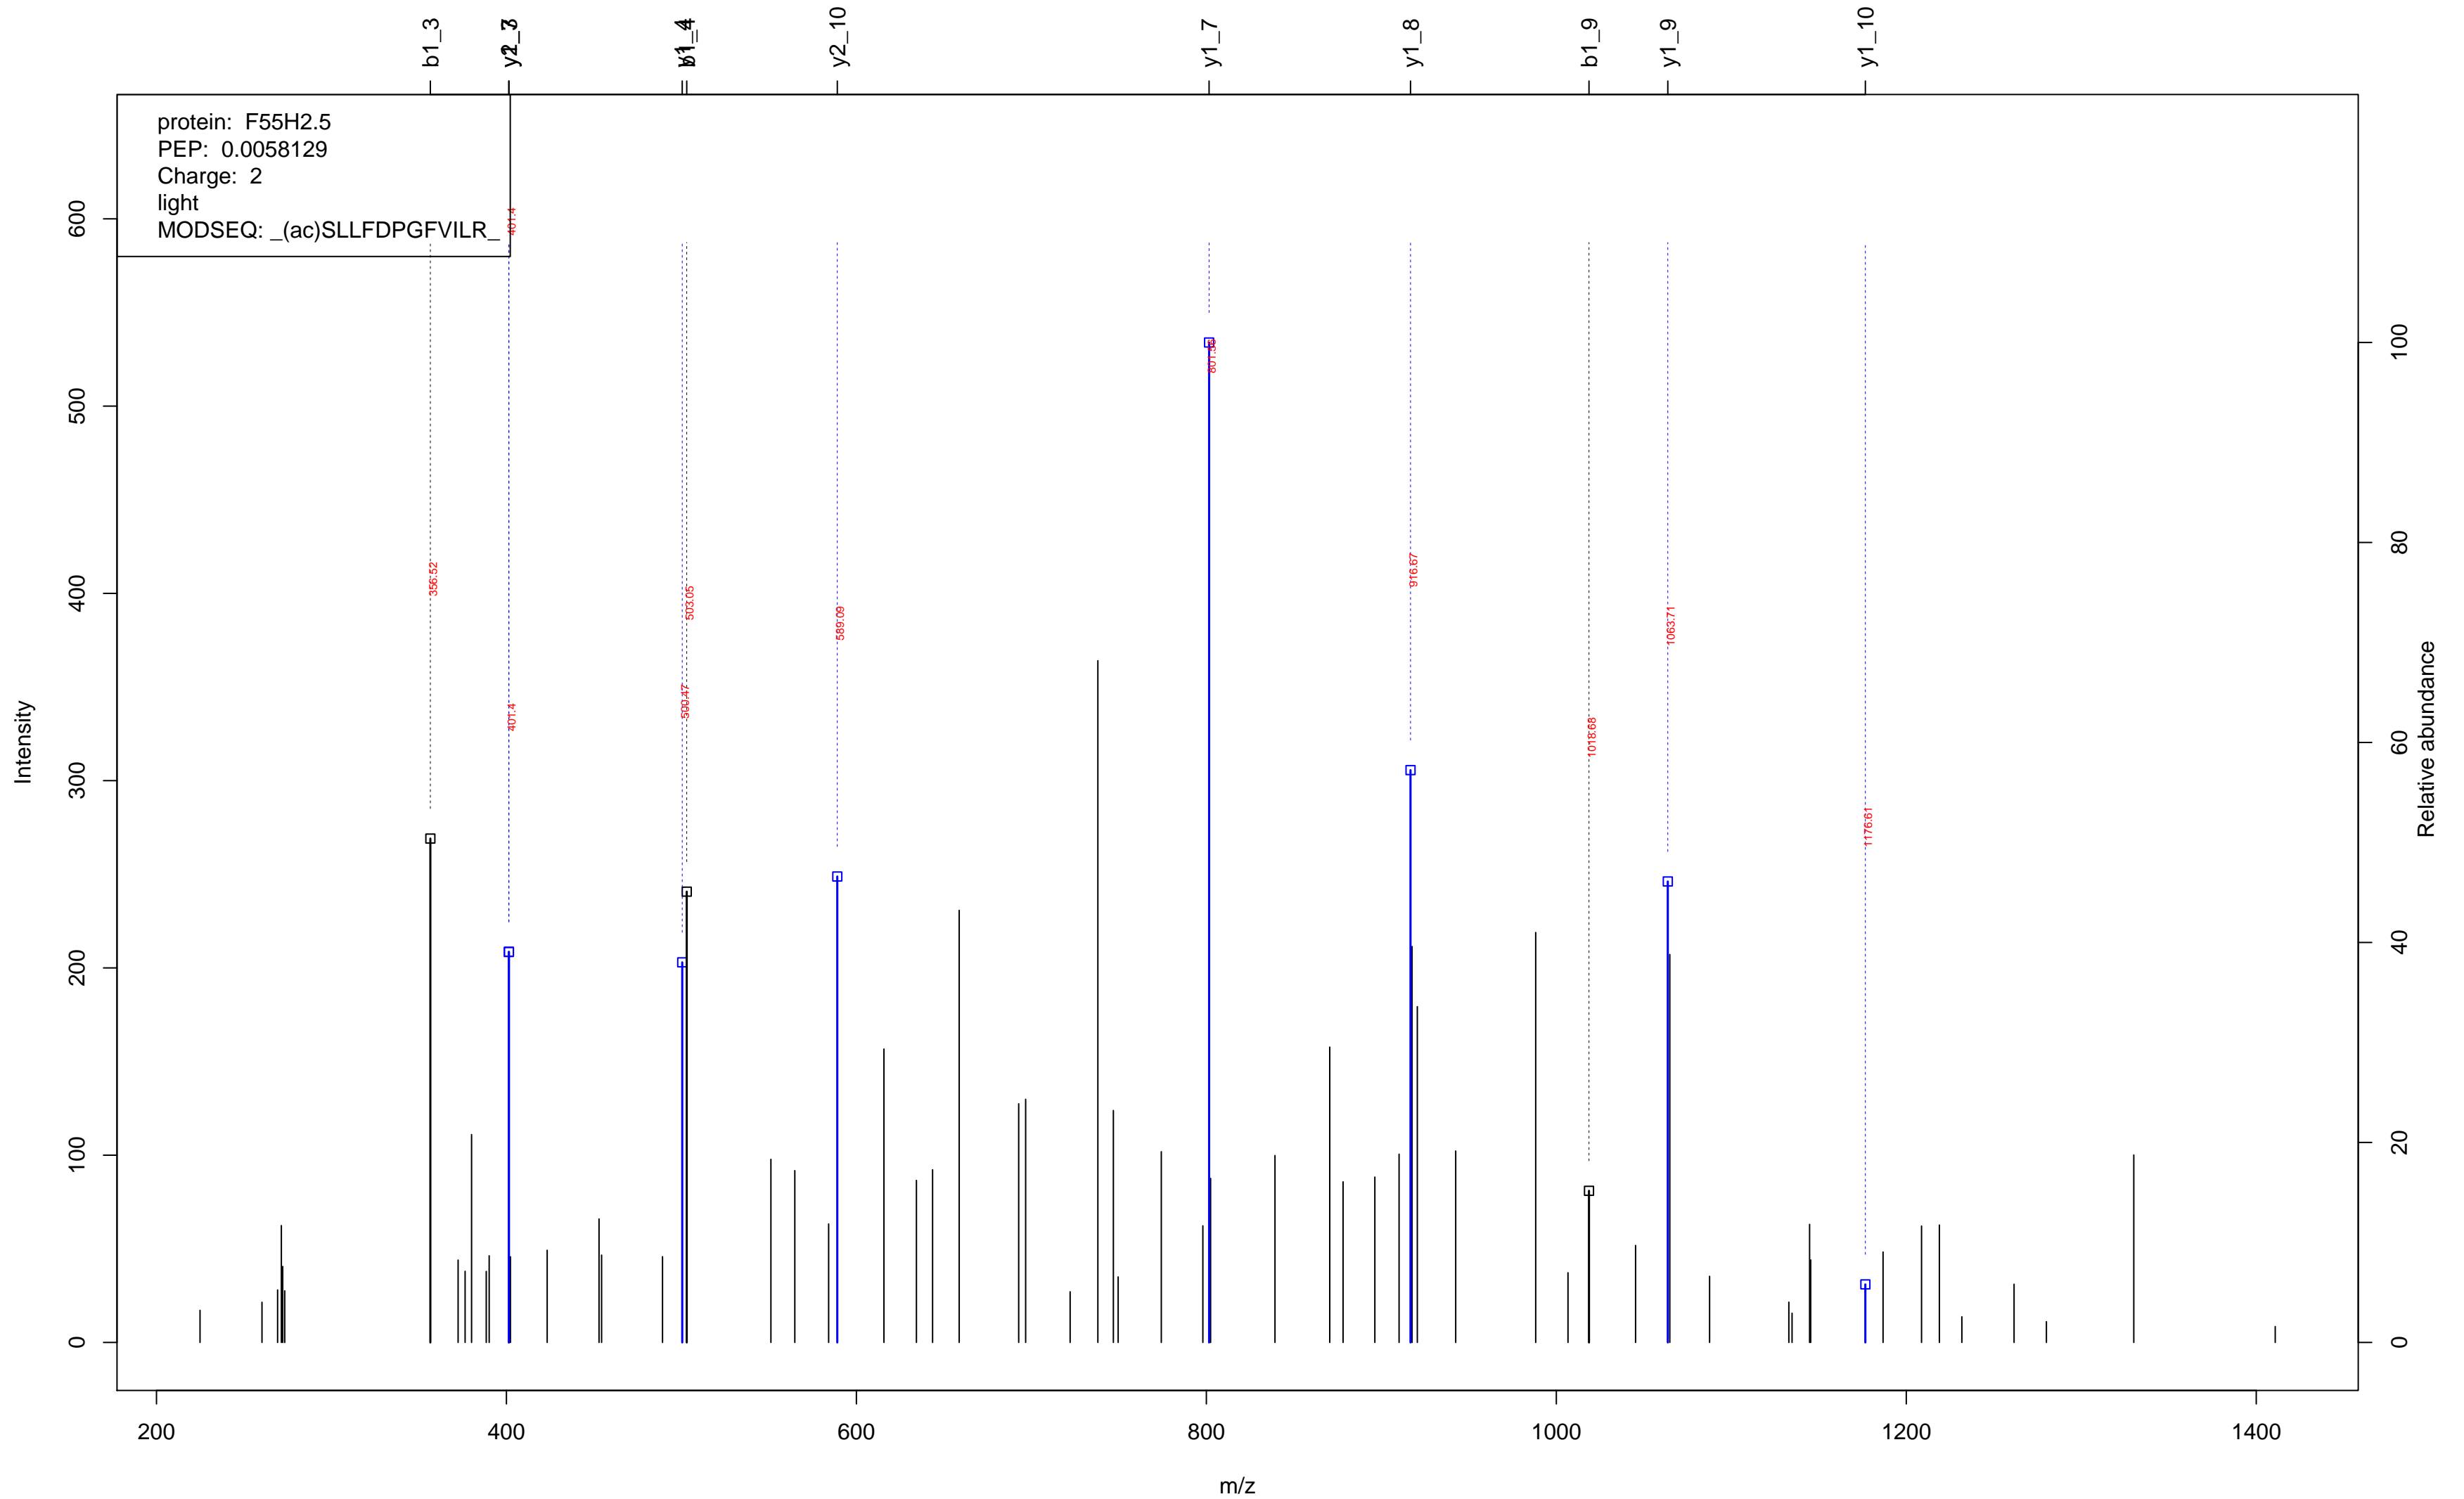

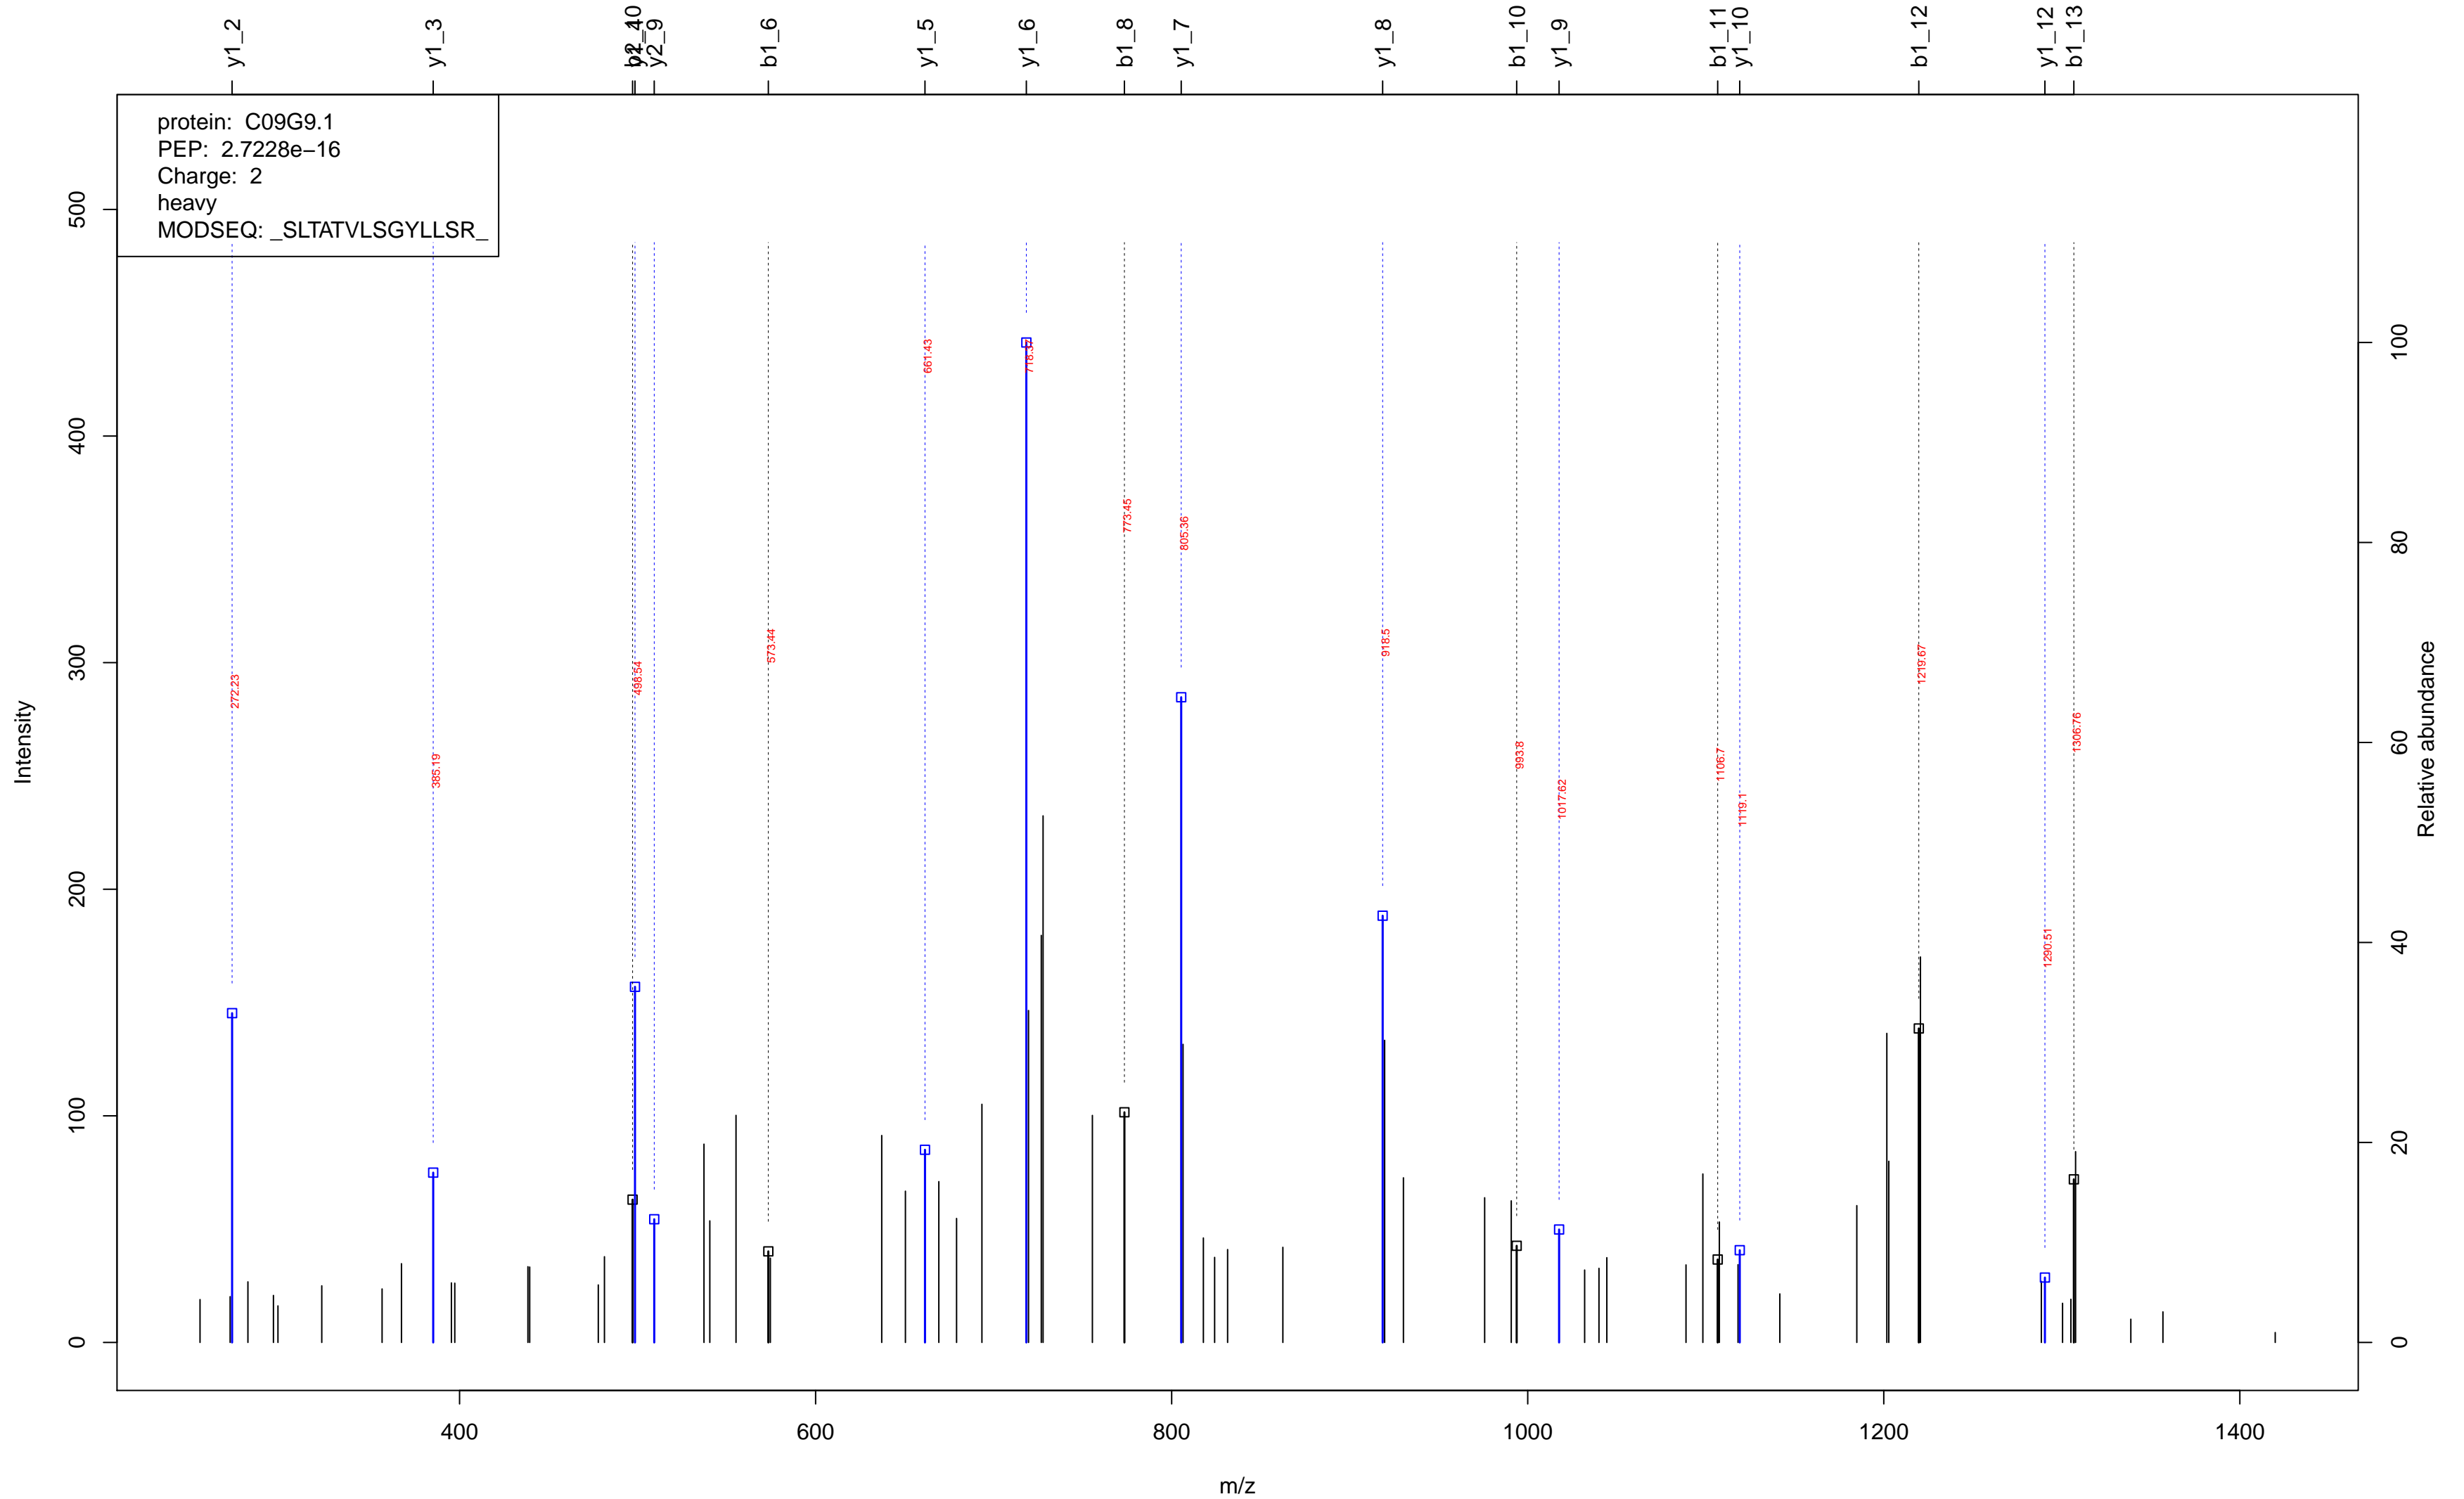

315

y1\_4 y1\_5 y1\_6 b1\_6 b1\_7 y2\_15 b2\_17 y1\_10 y1\_11 b1\_11 y1\_12 b1\_12 y1\_13 b1\_13 y1\_14 b1\_15 b1\_16 y1\_16

protein: Y48G9A.8  
PEP: 0.00018468  
Charge: 2  
light  
MODSEQ: \_SLTSYEPEPDLLDGSAK\_

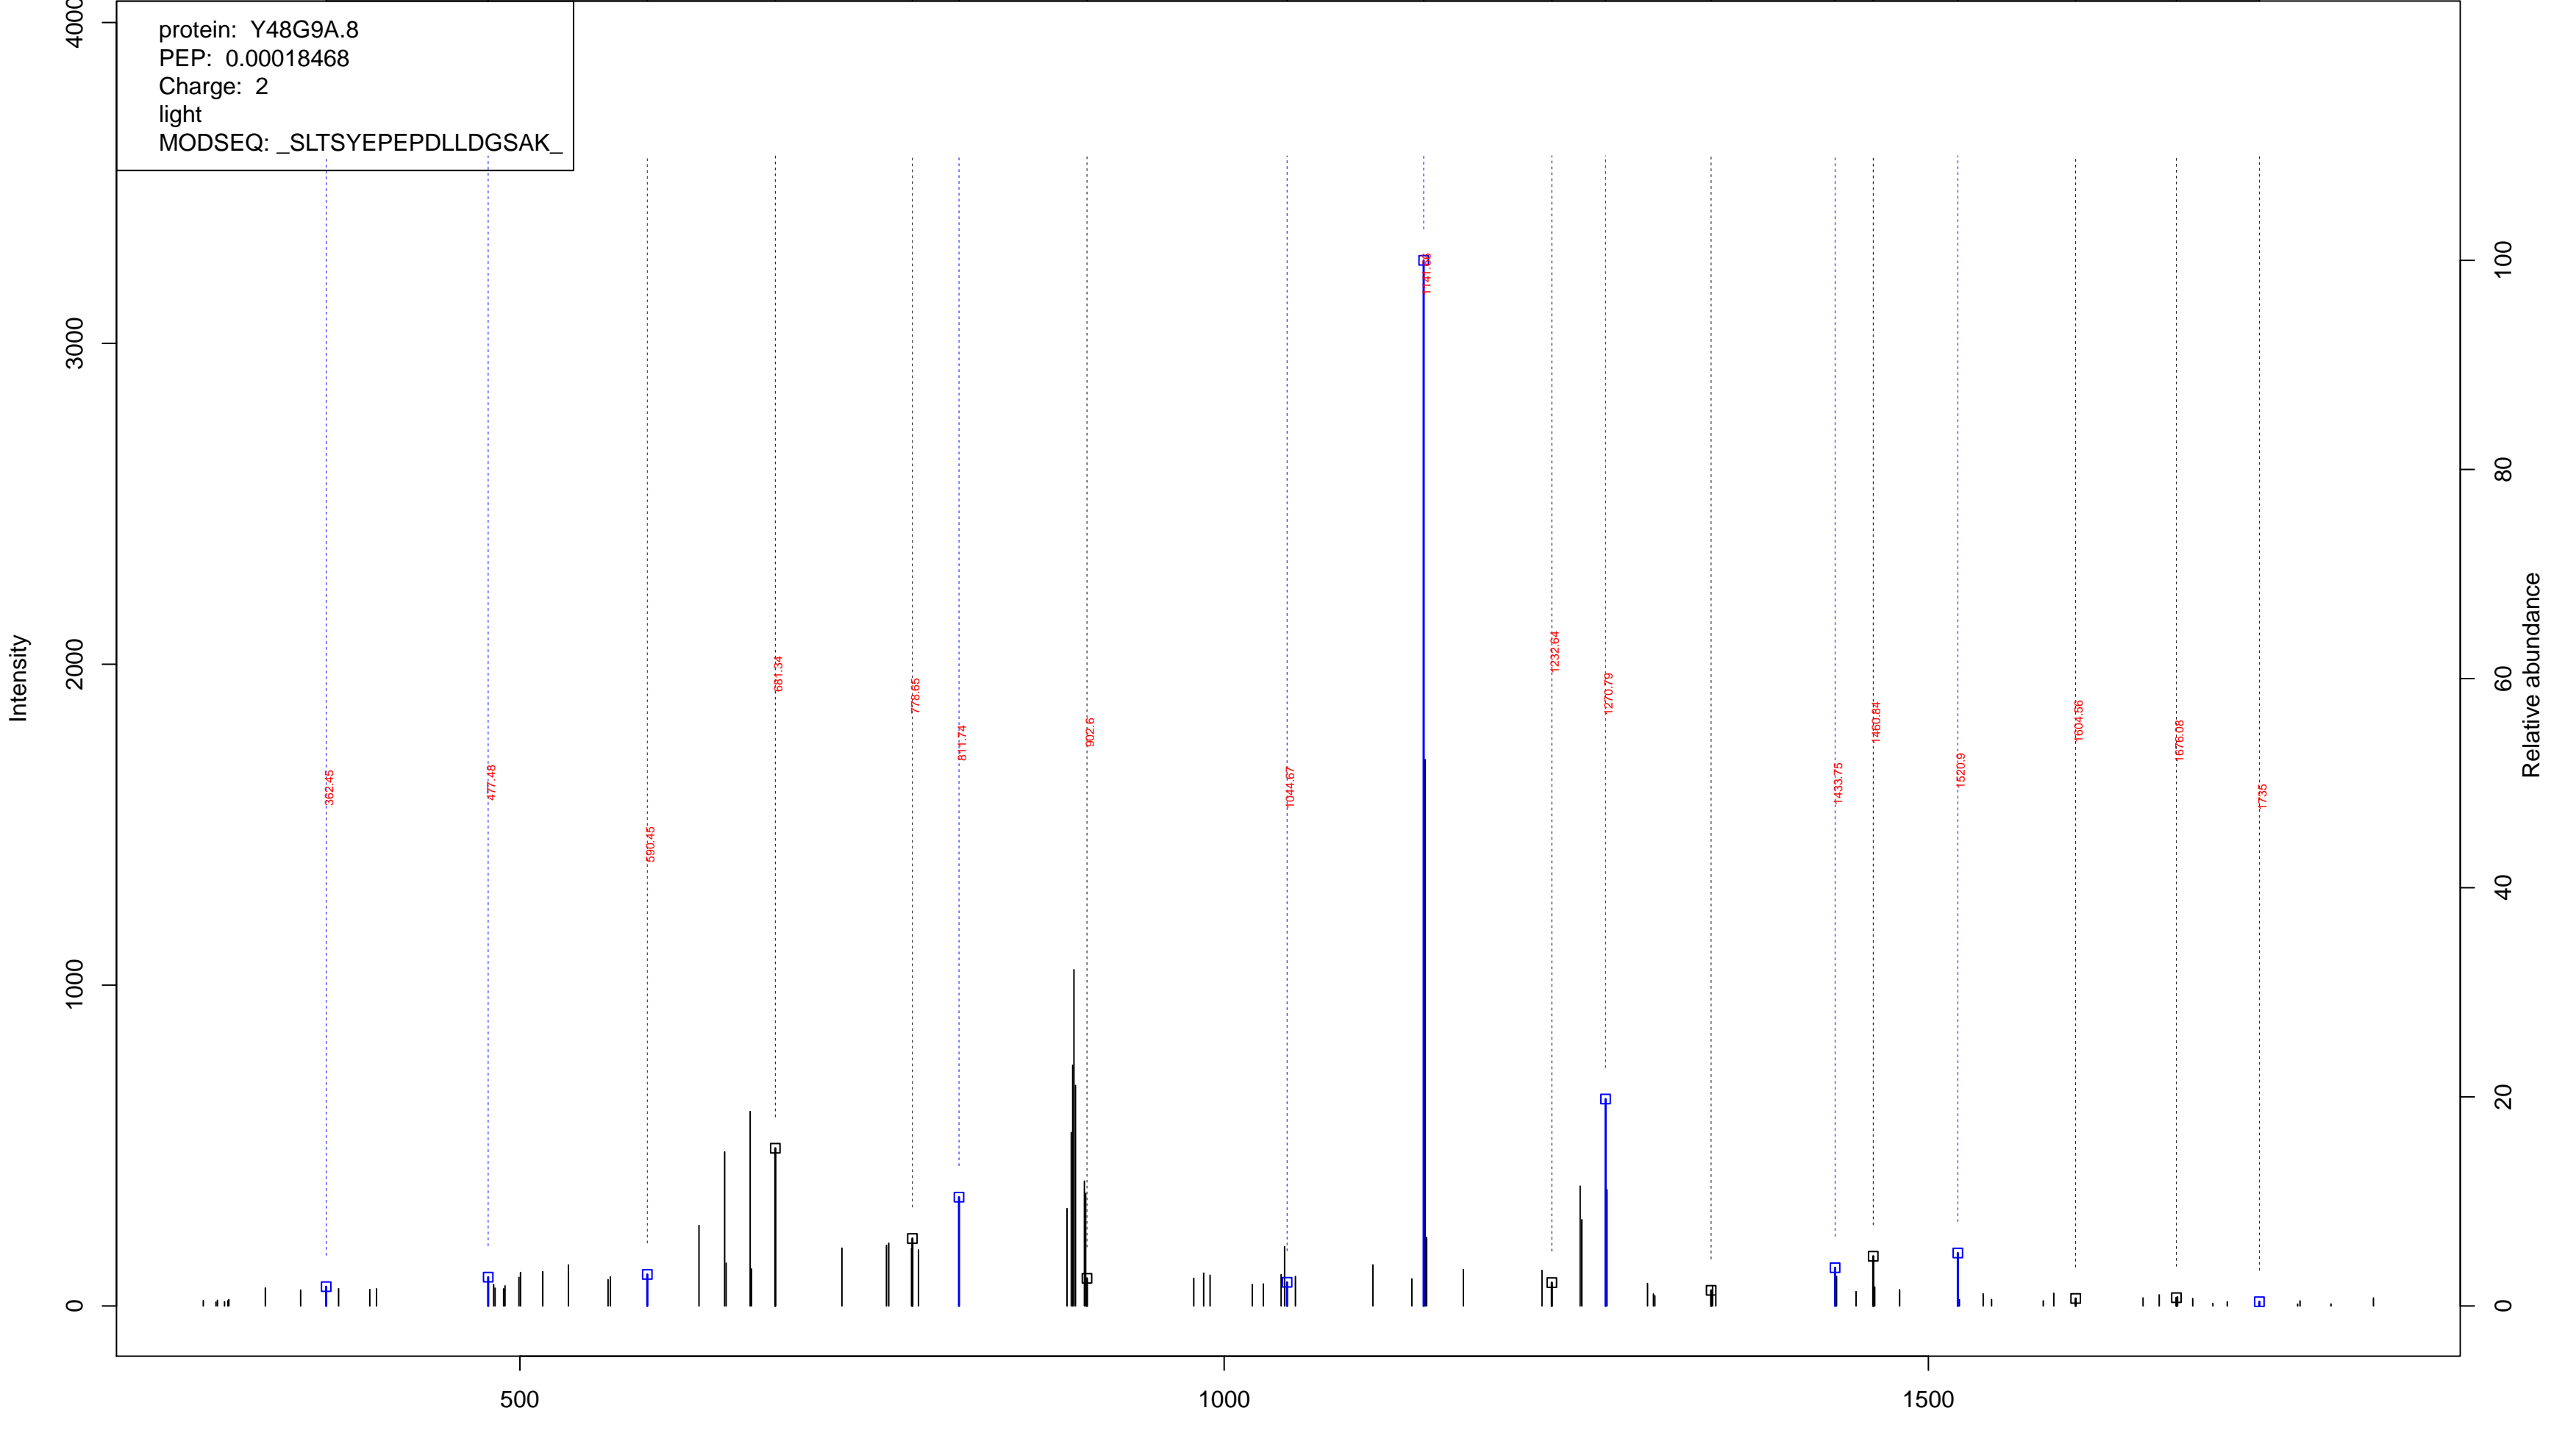

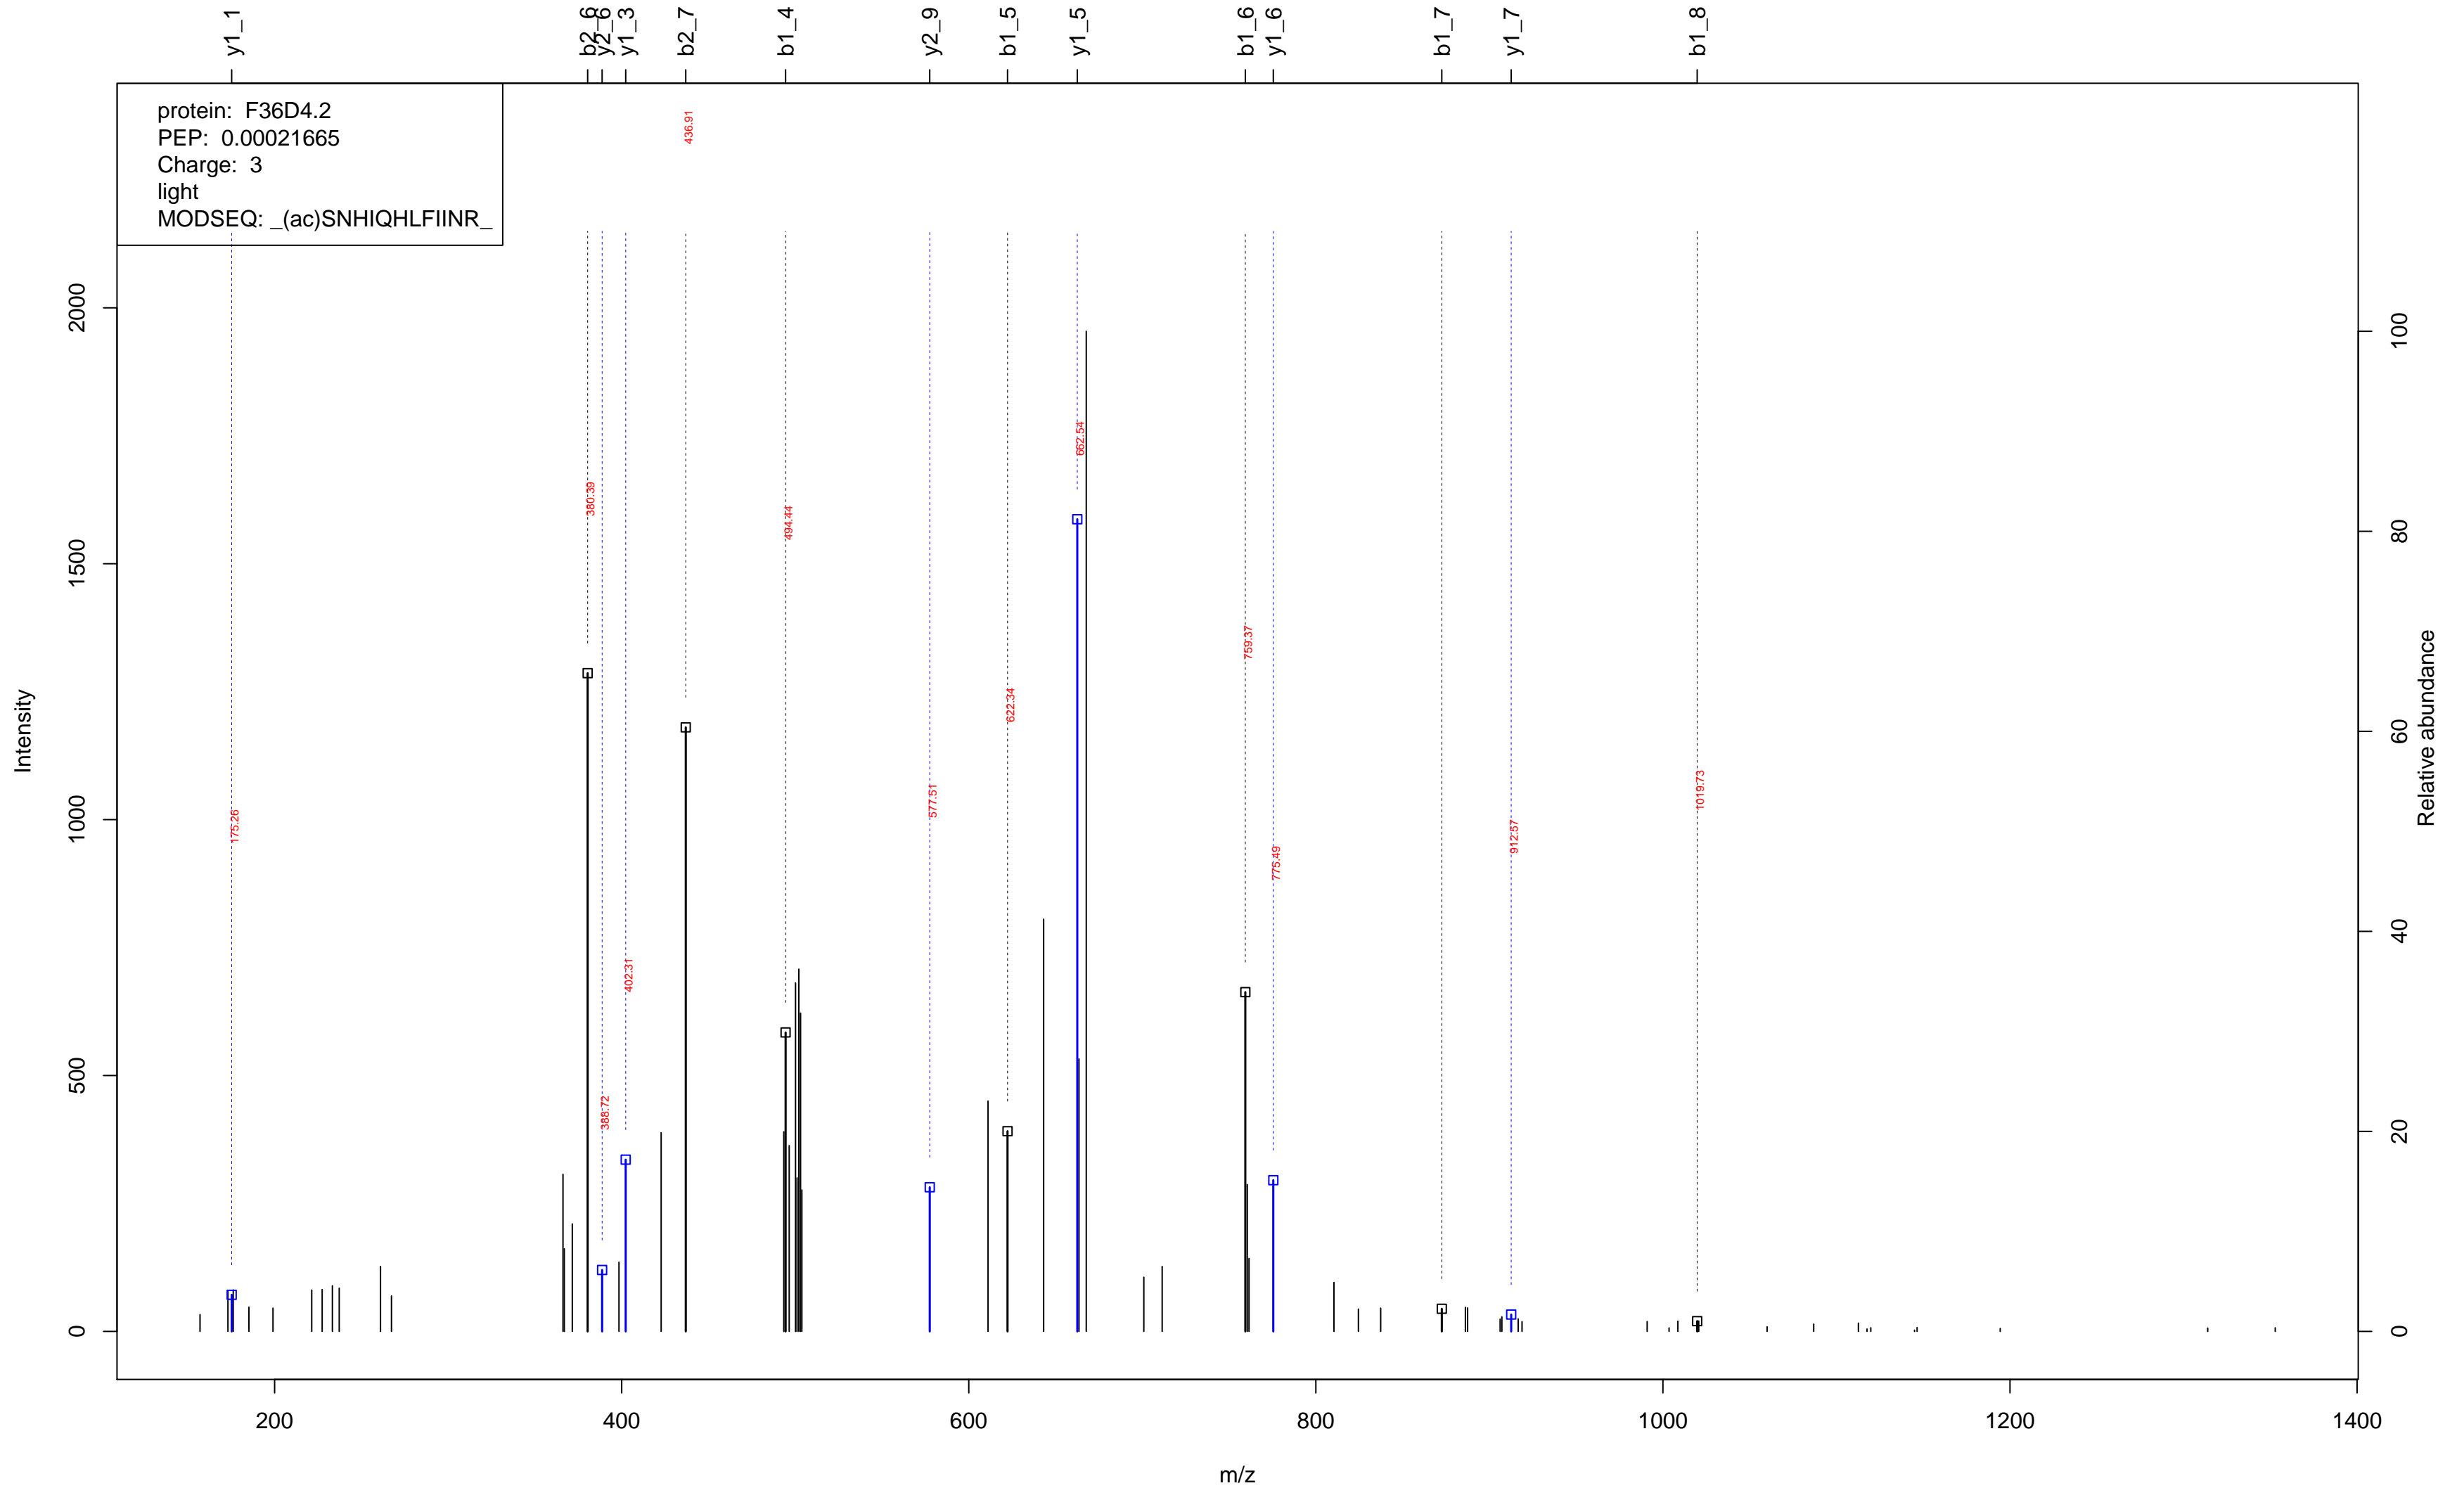

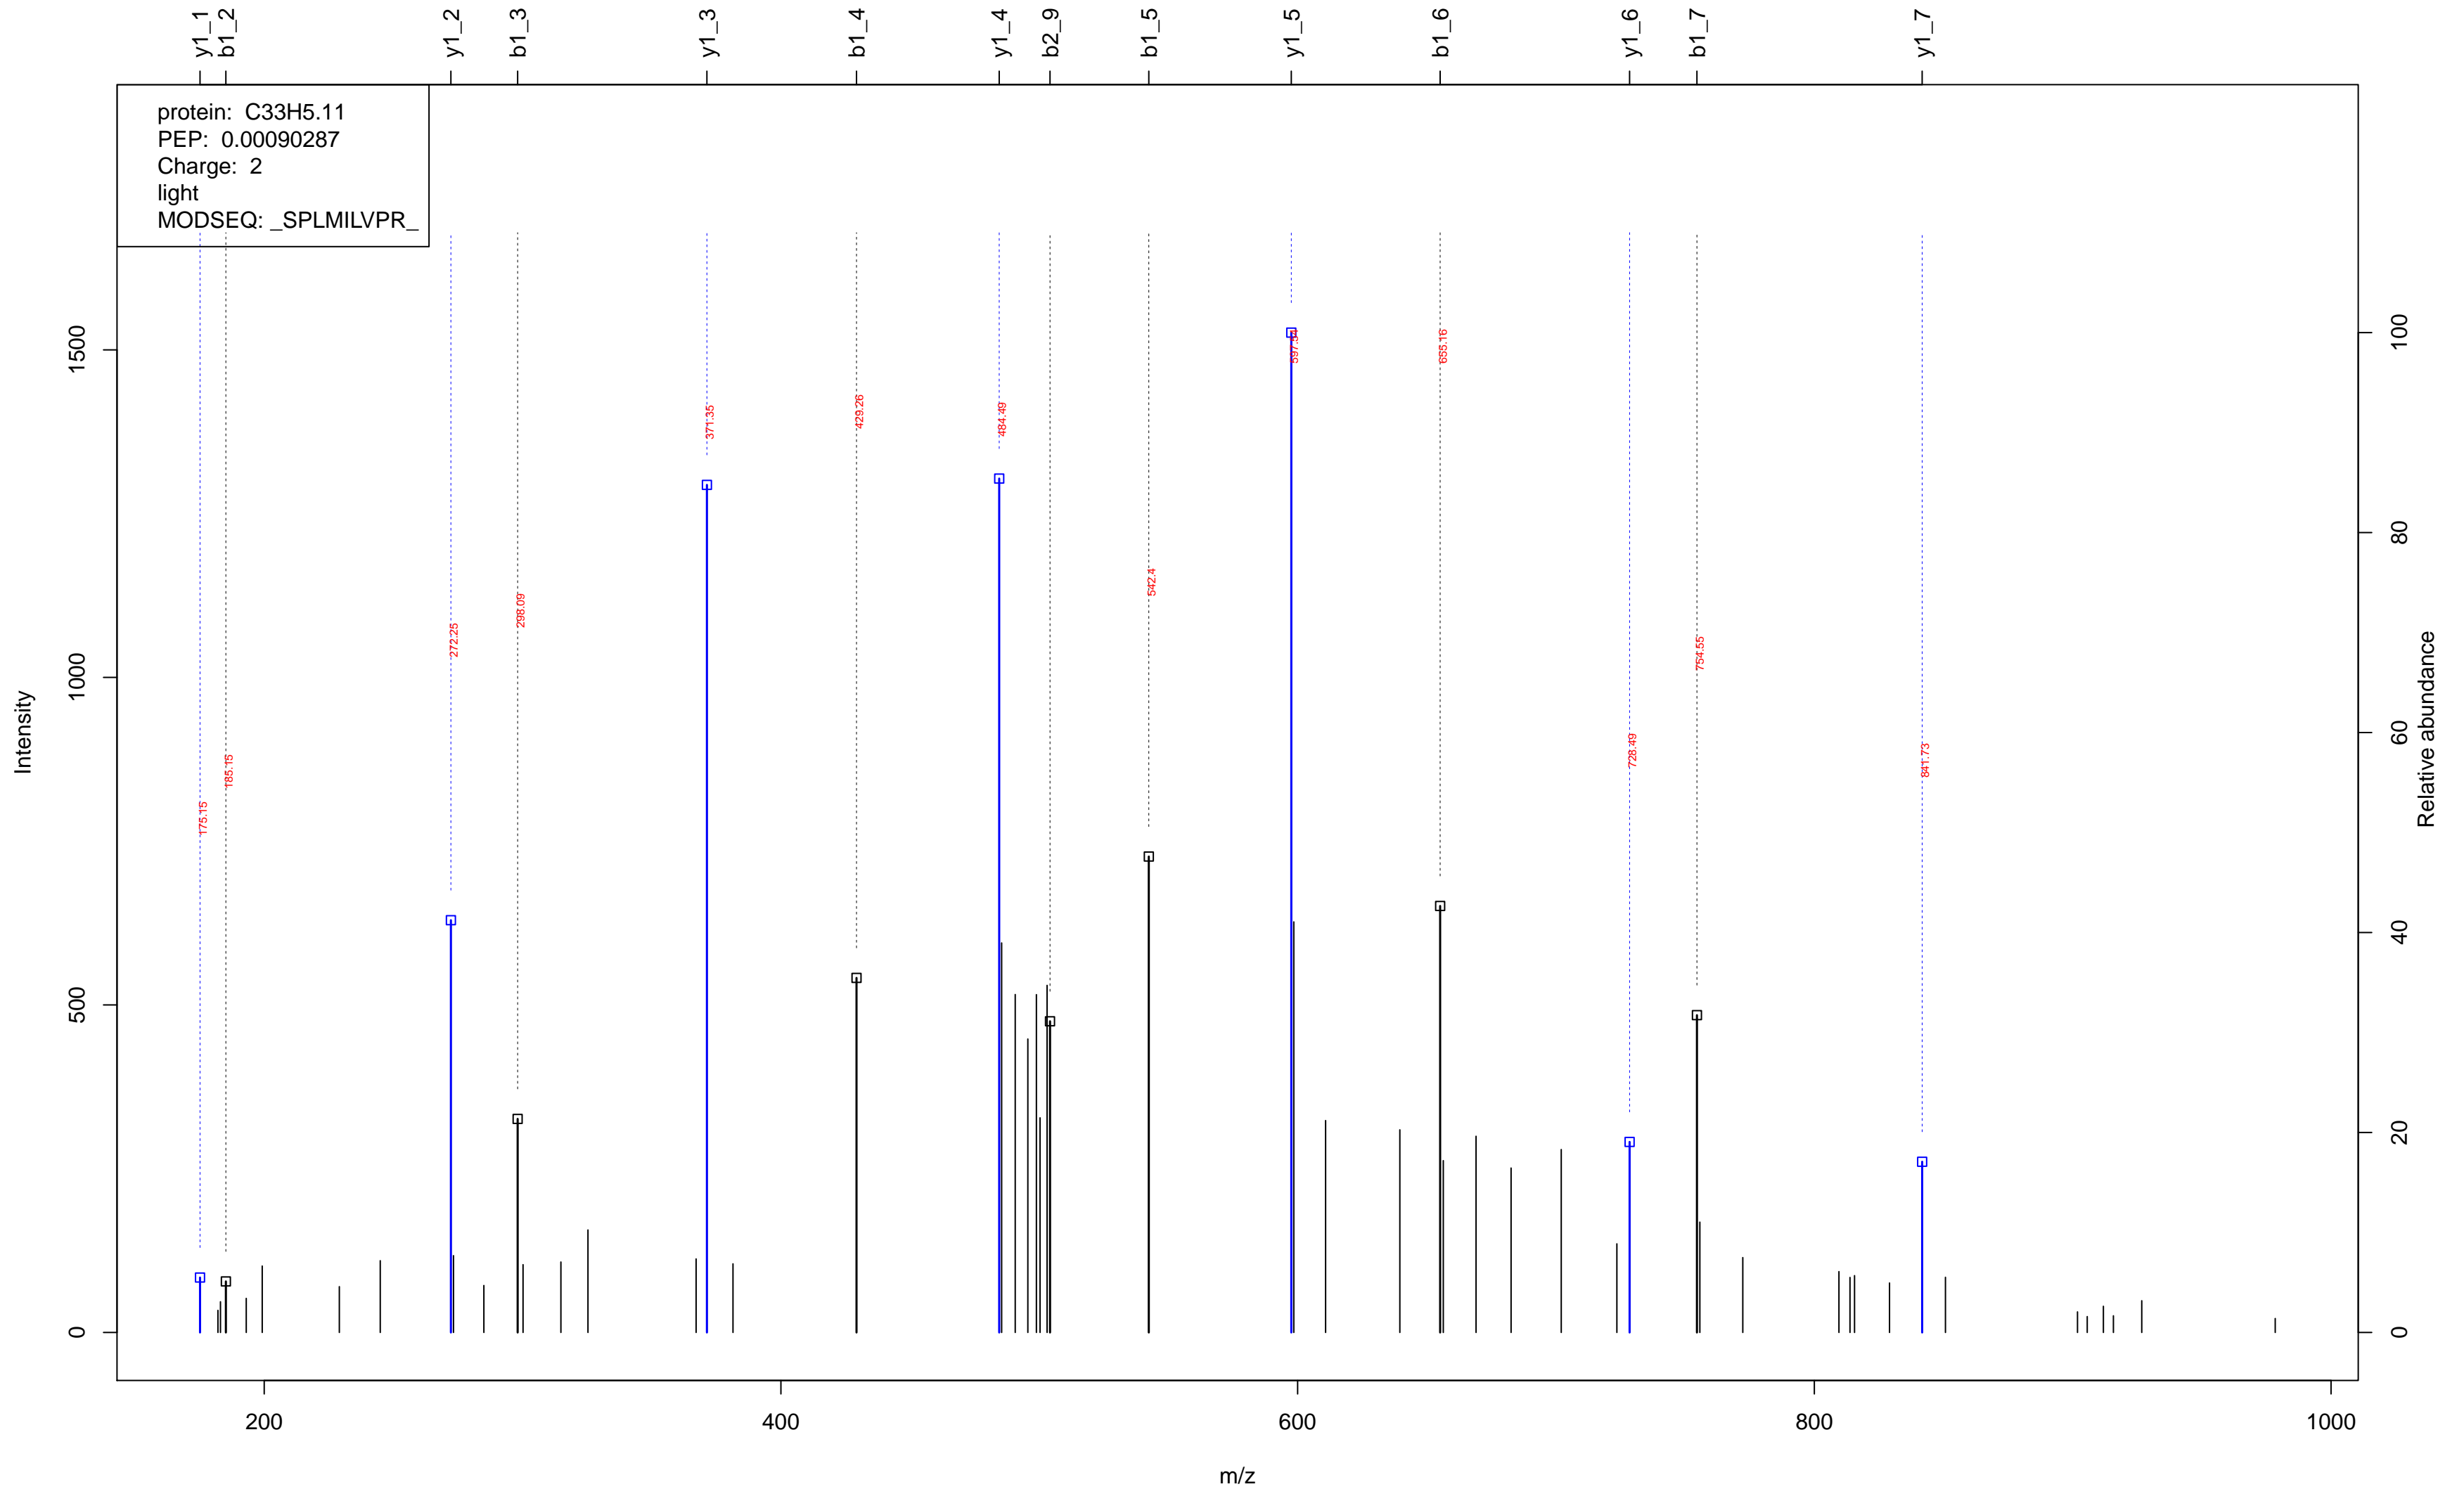

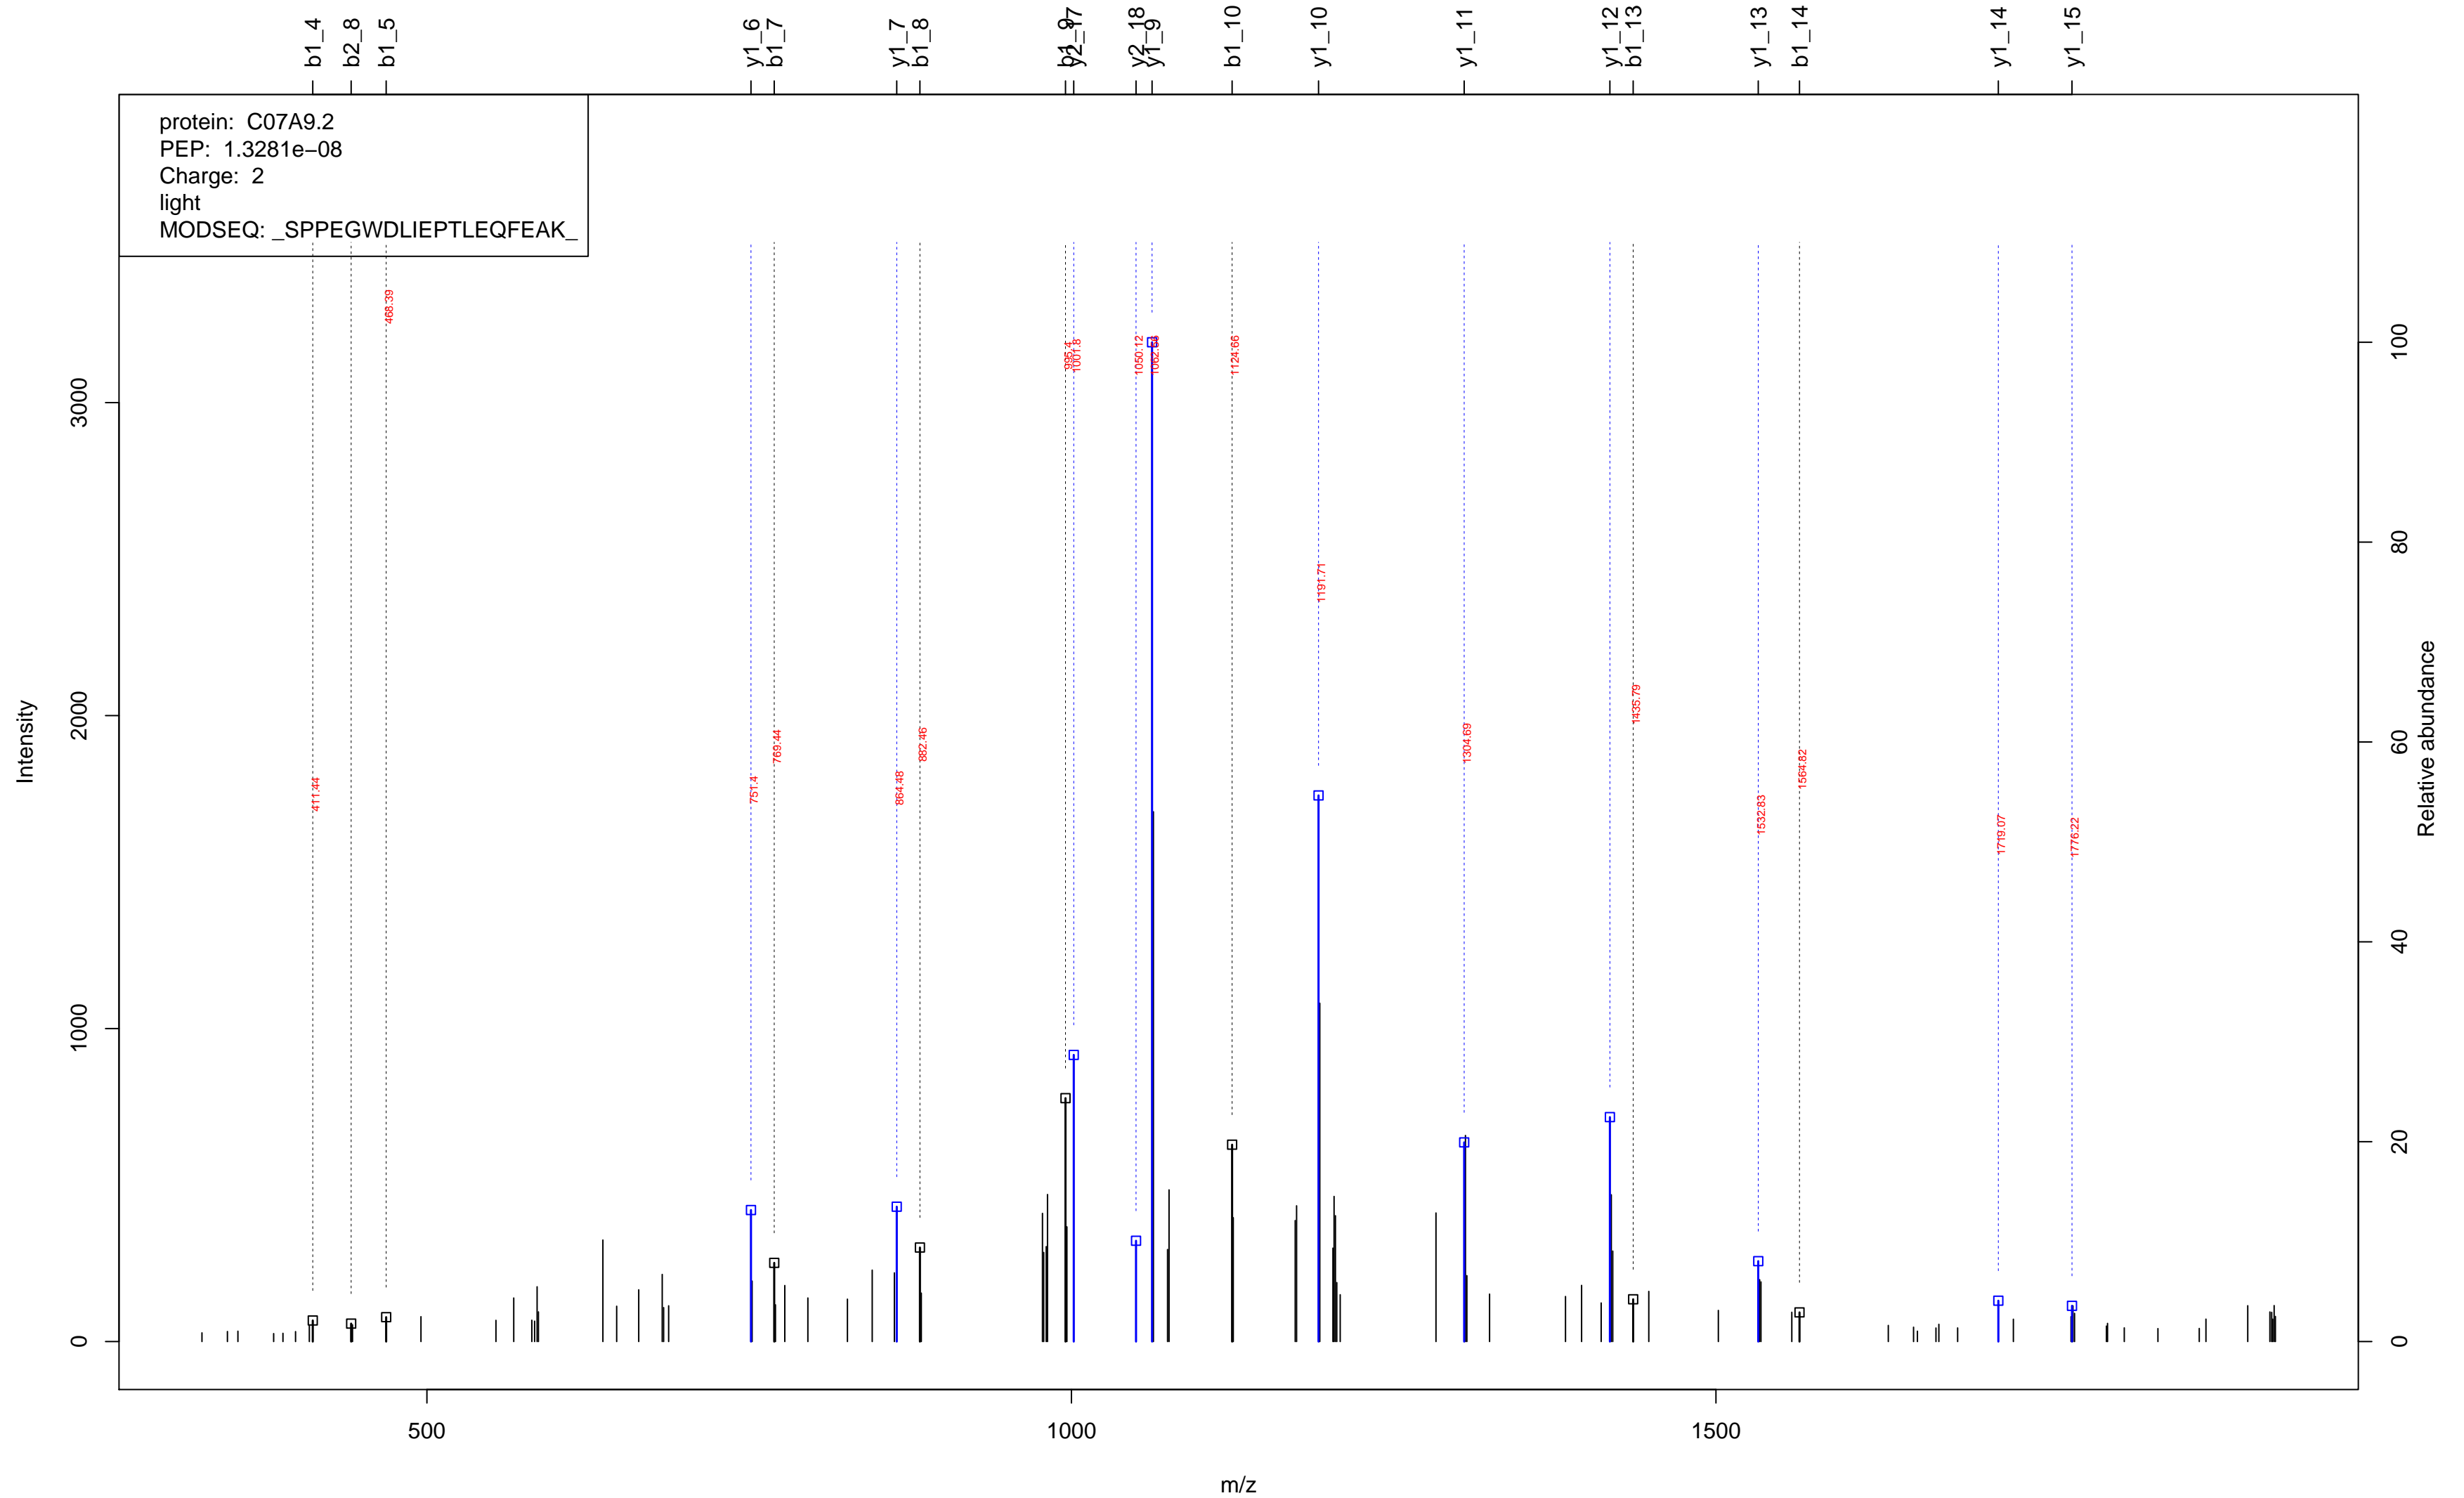

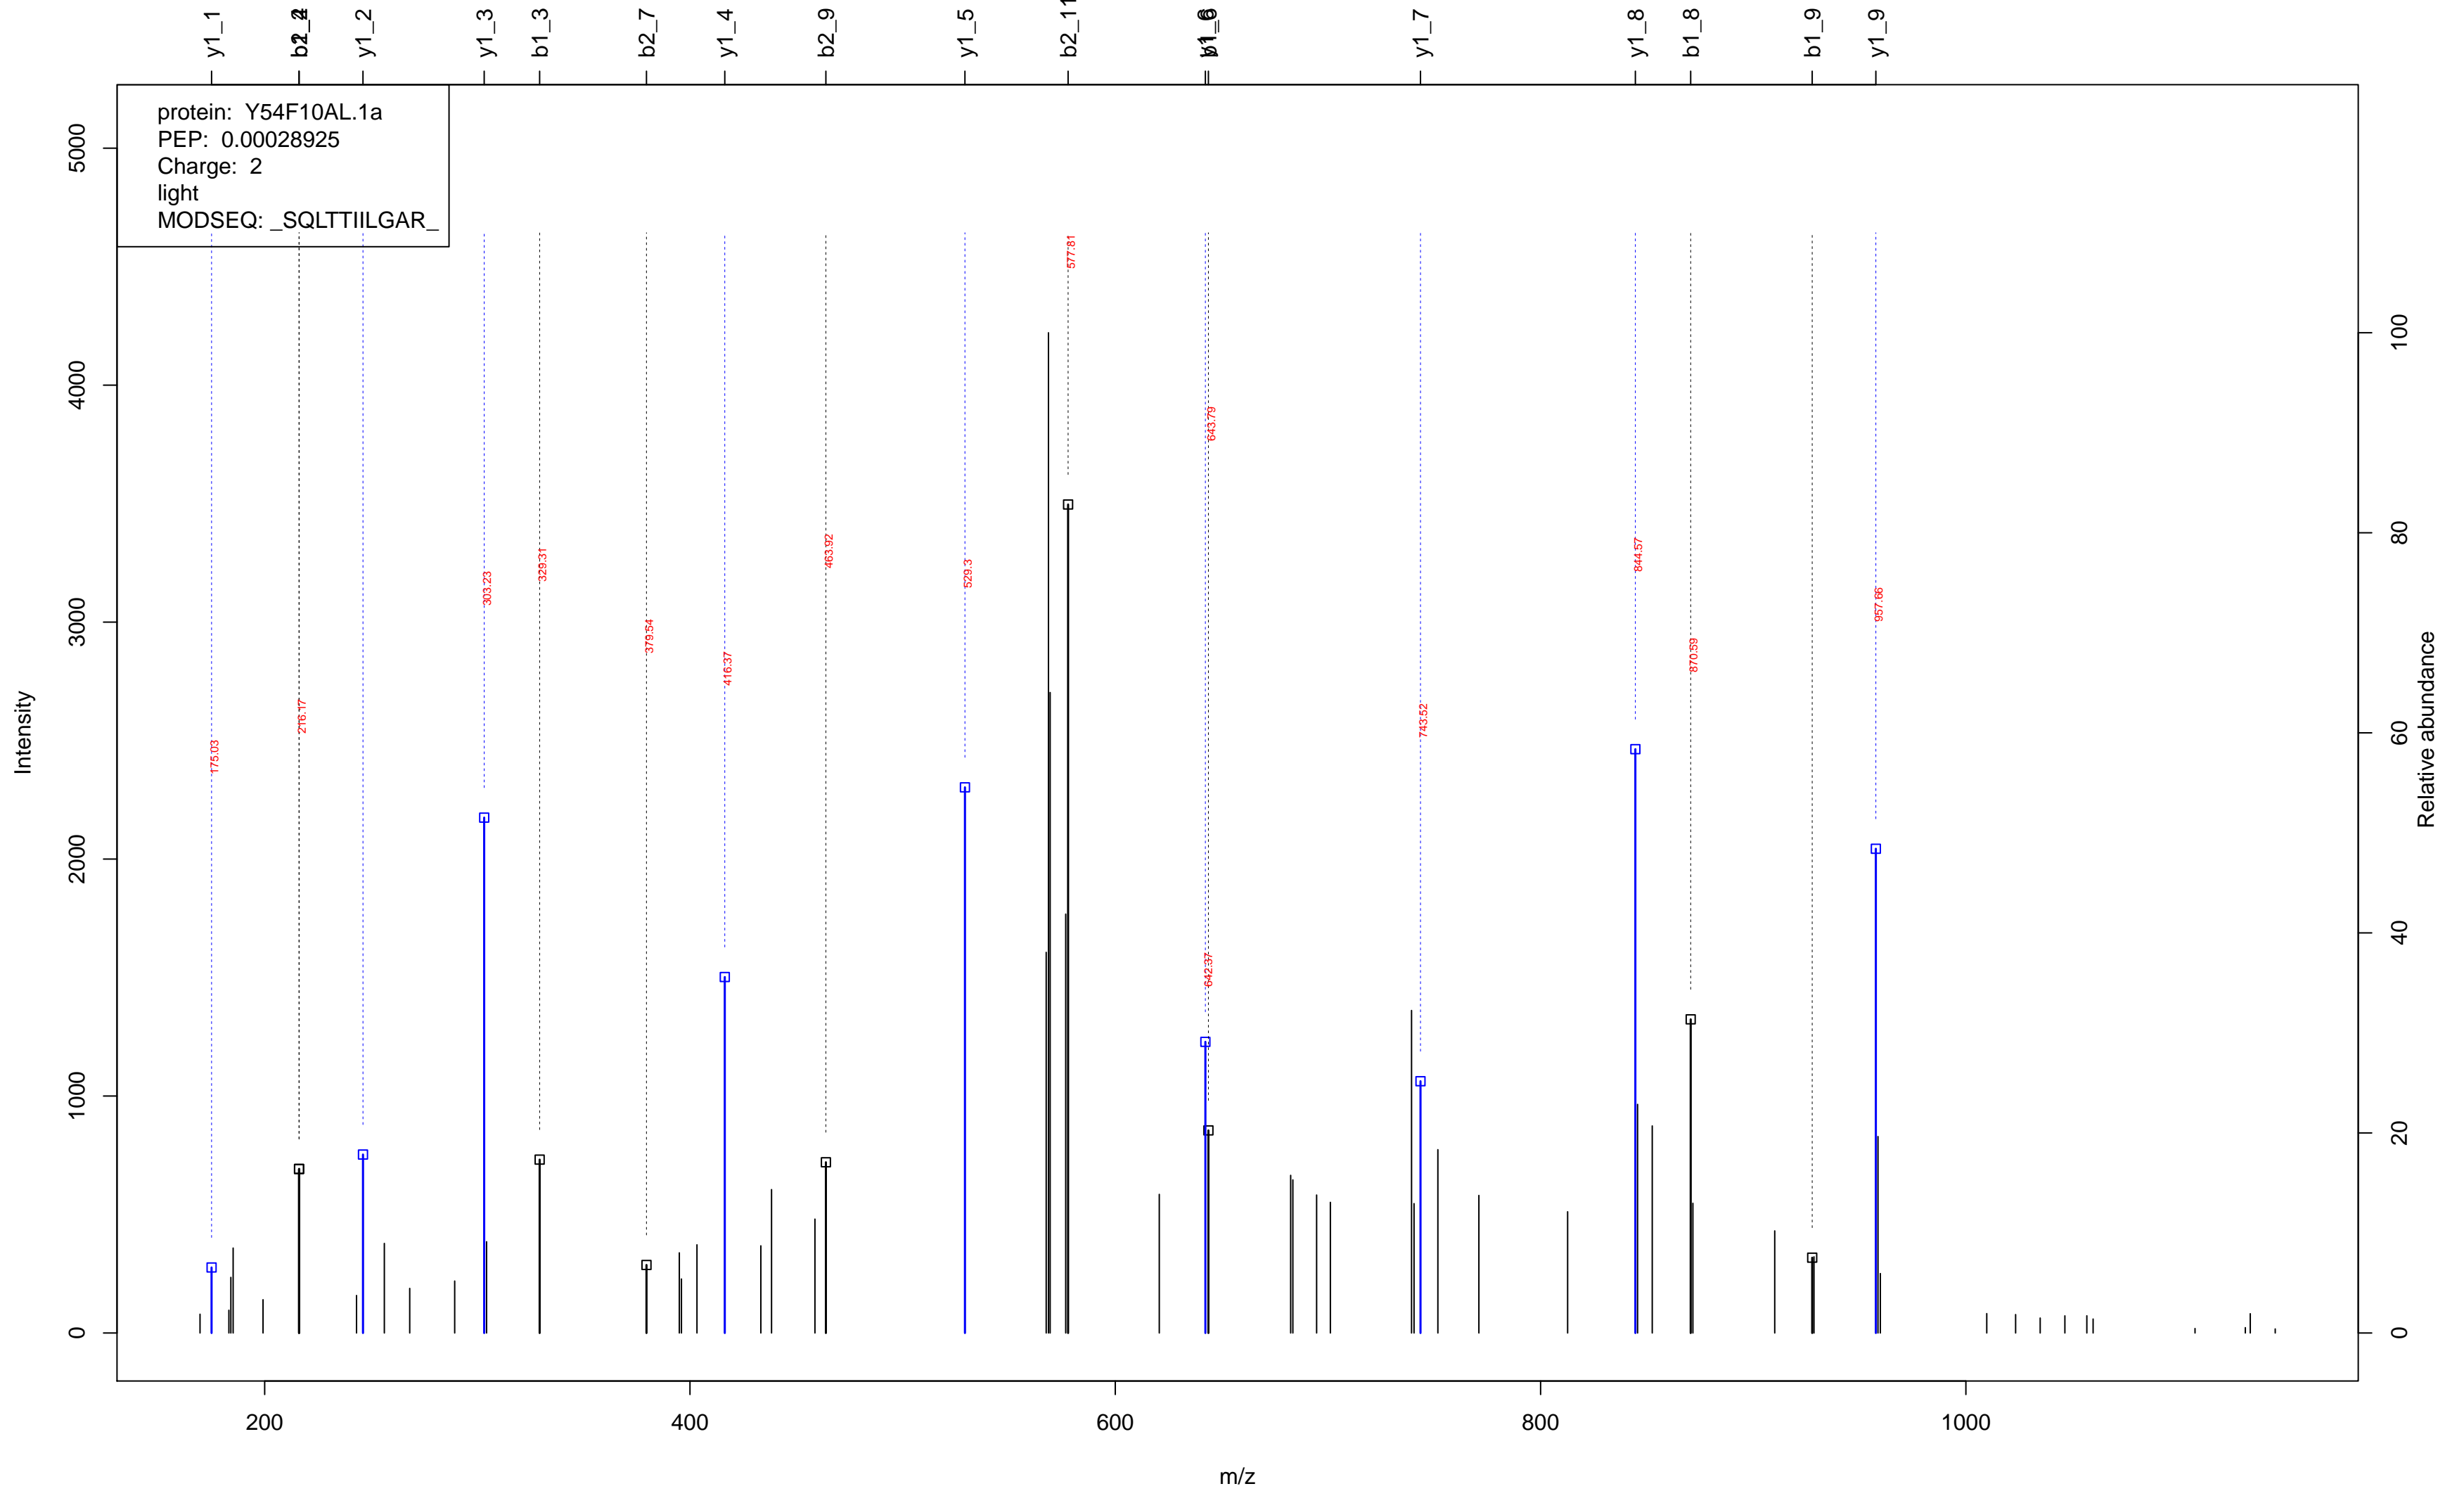

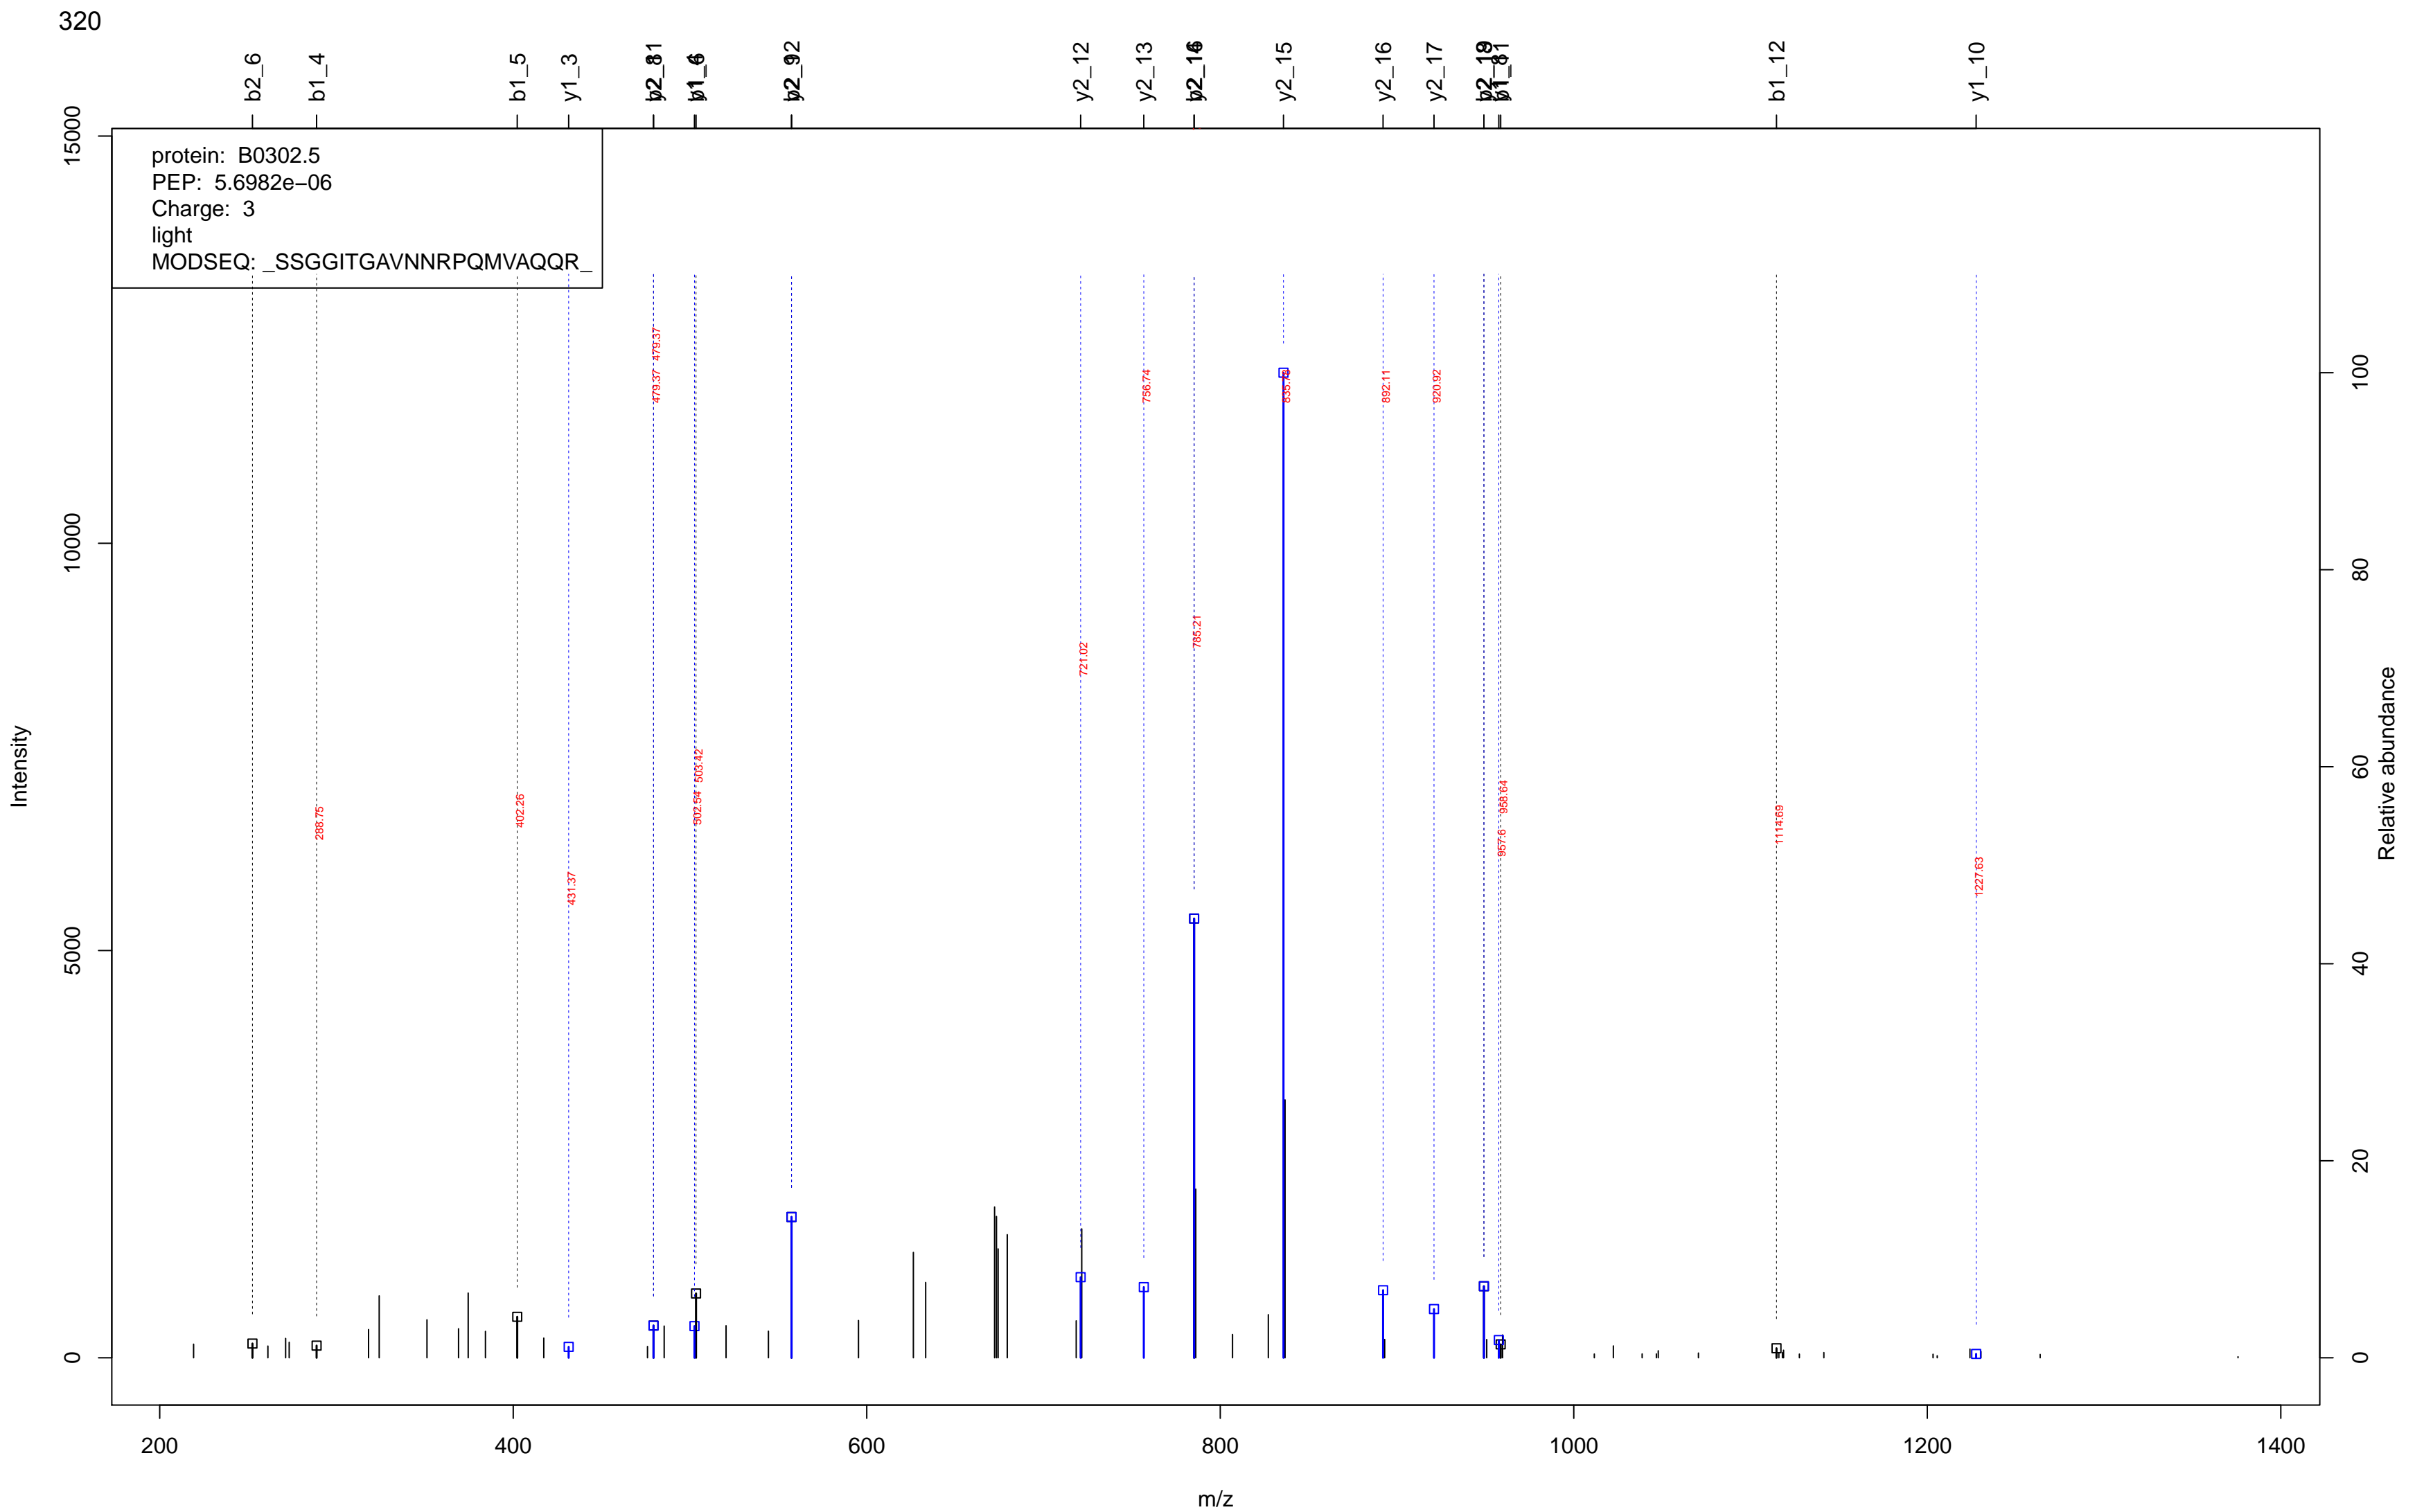



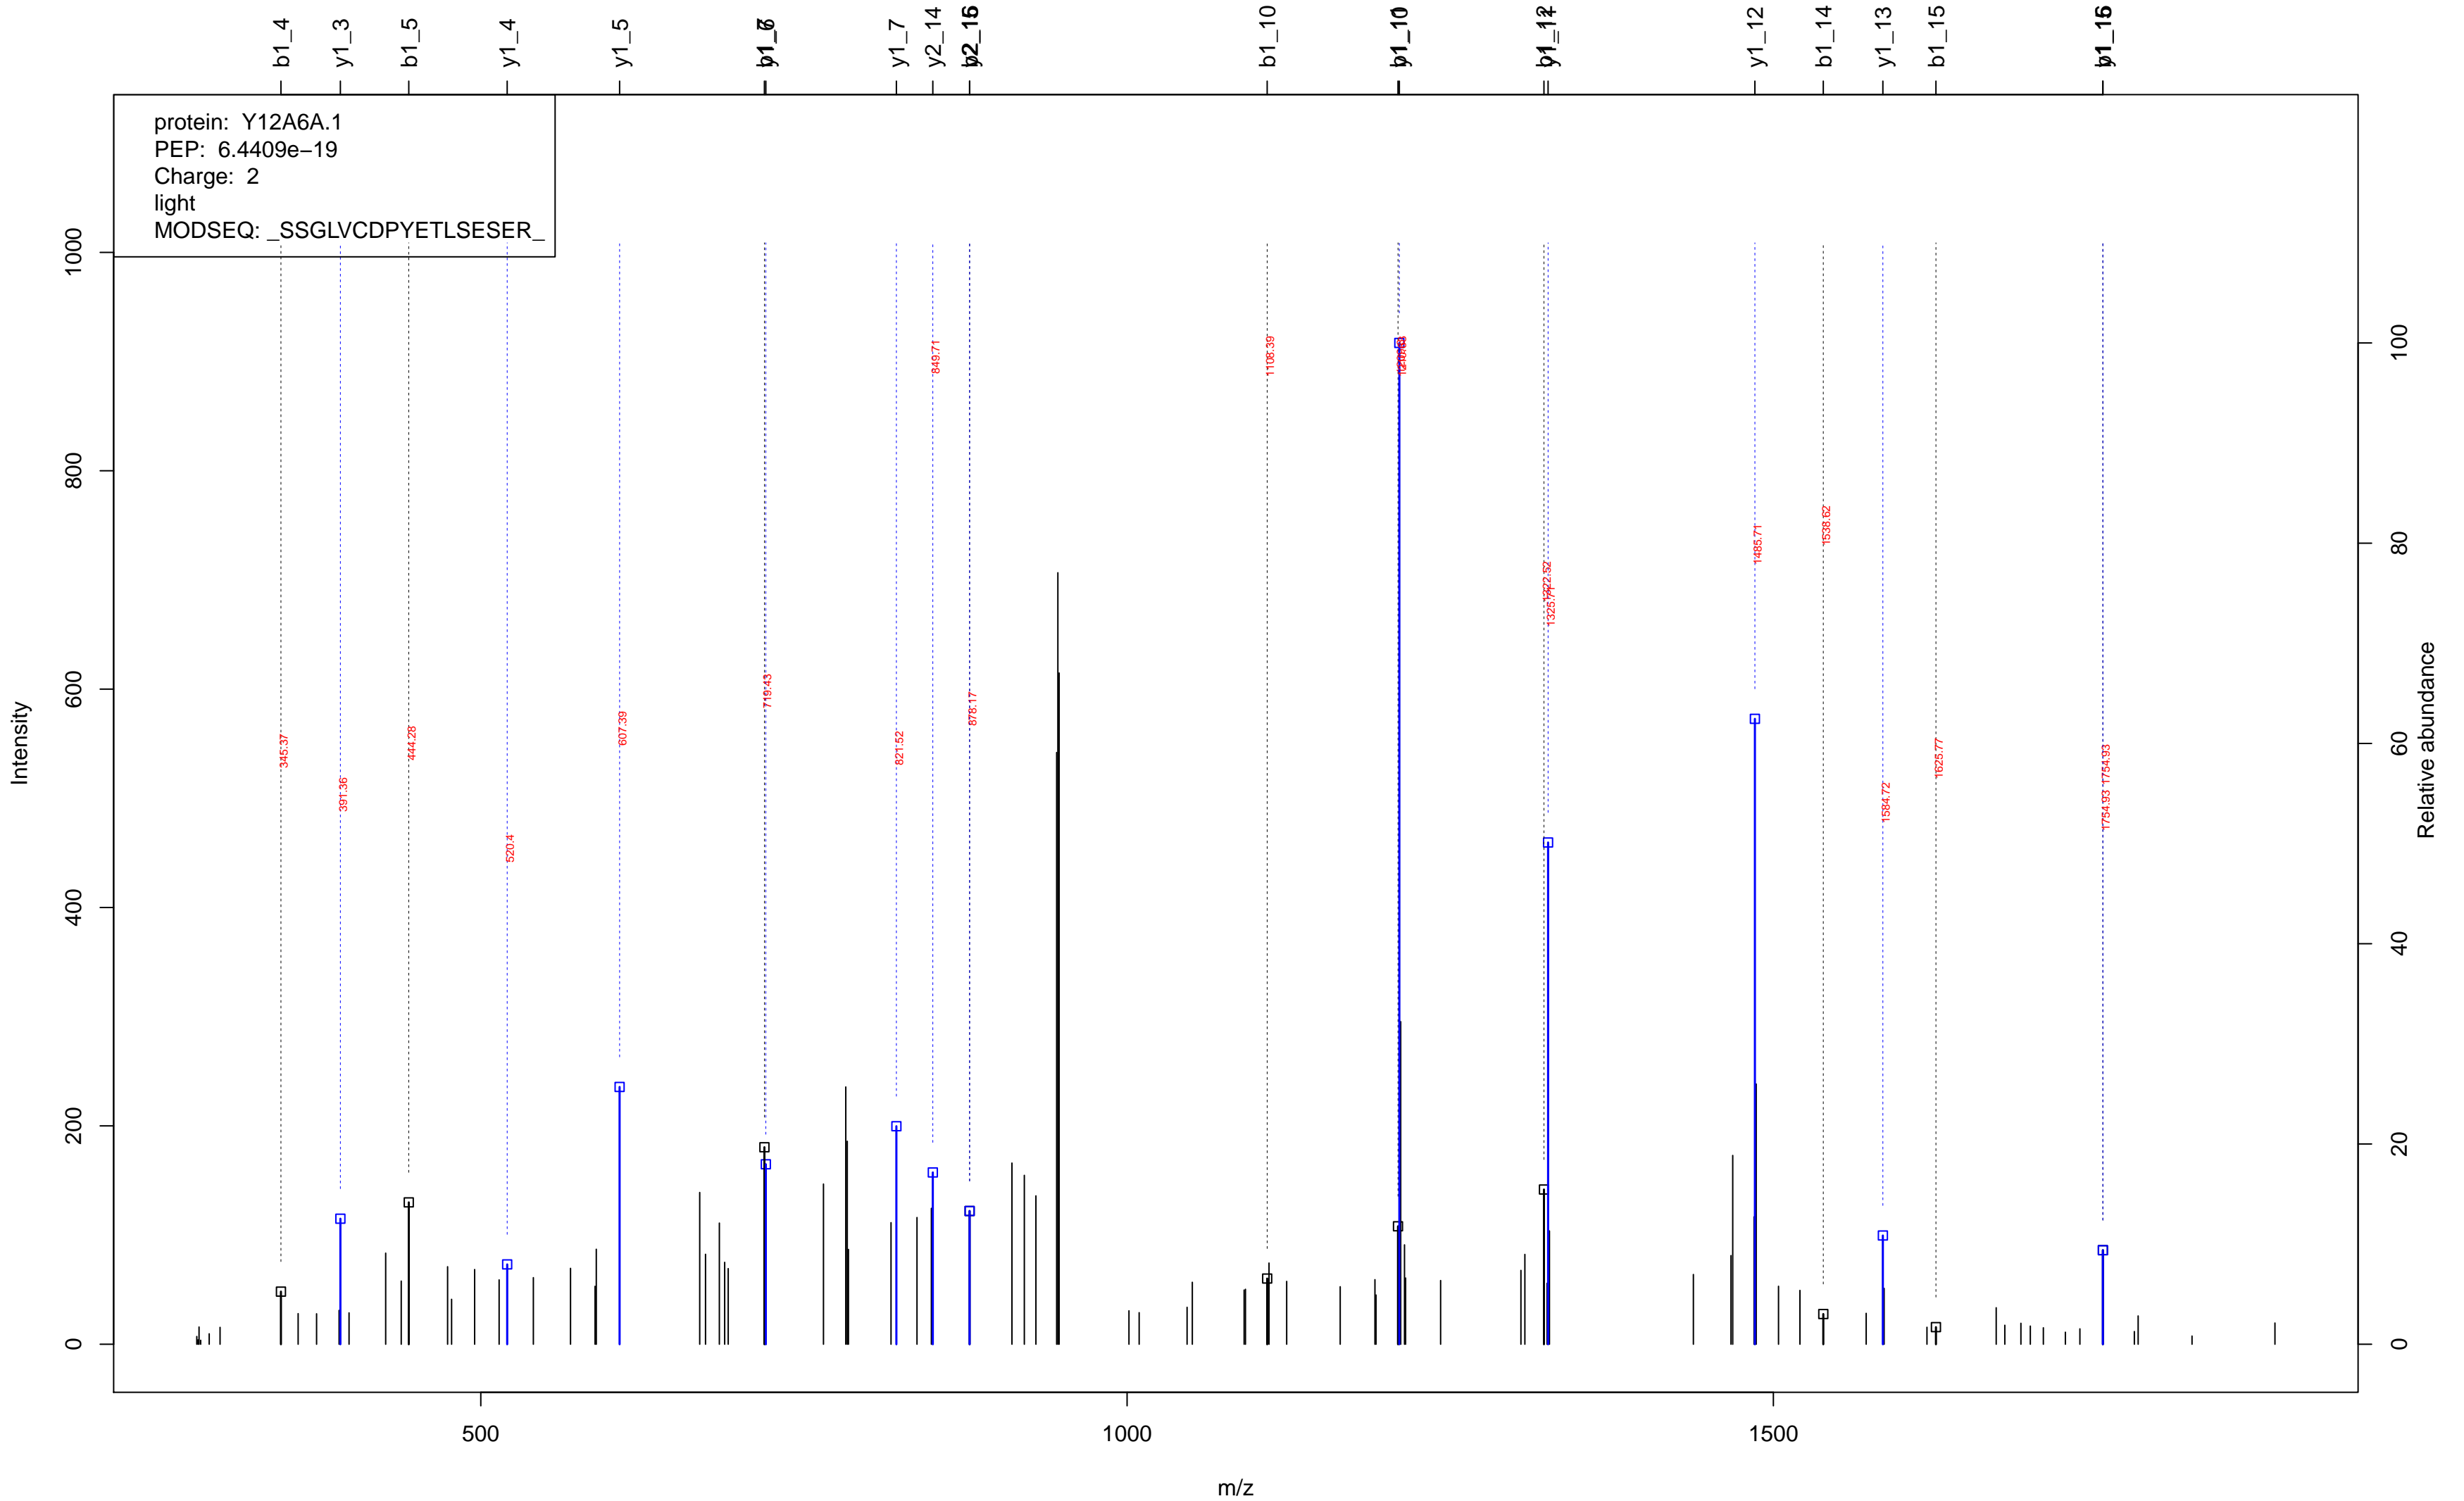

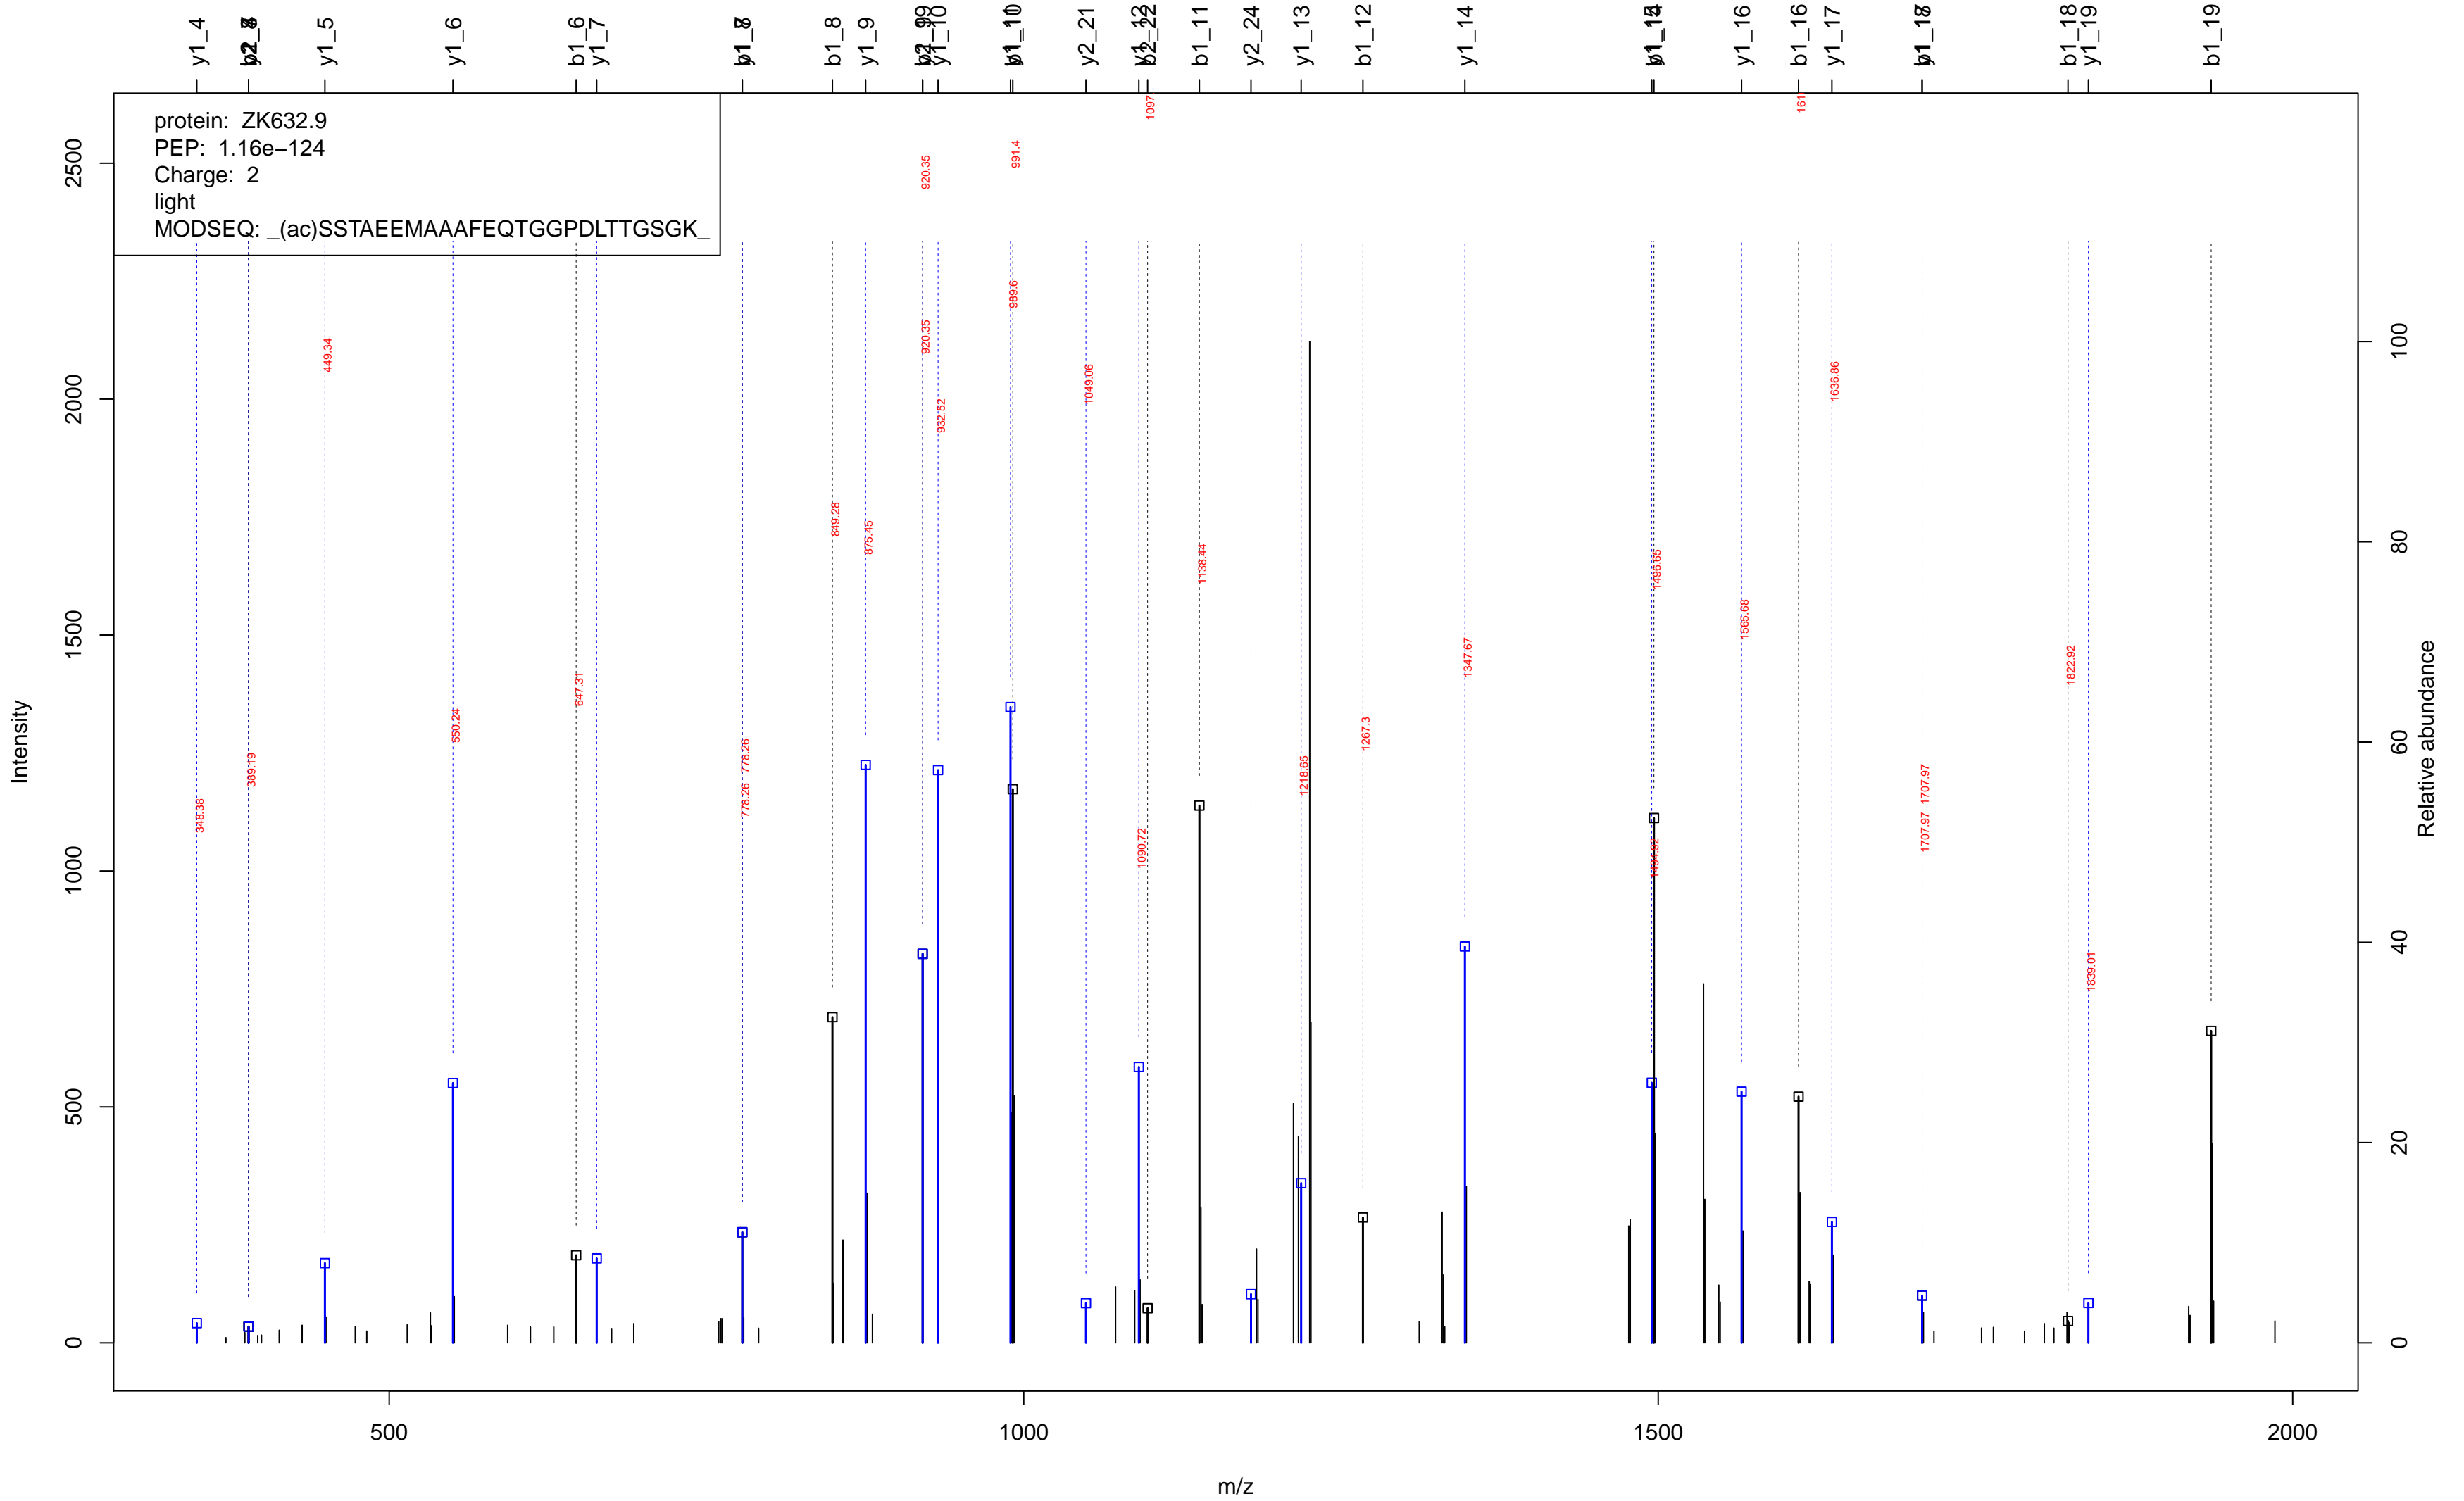

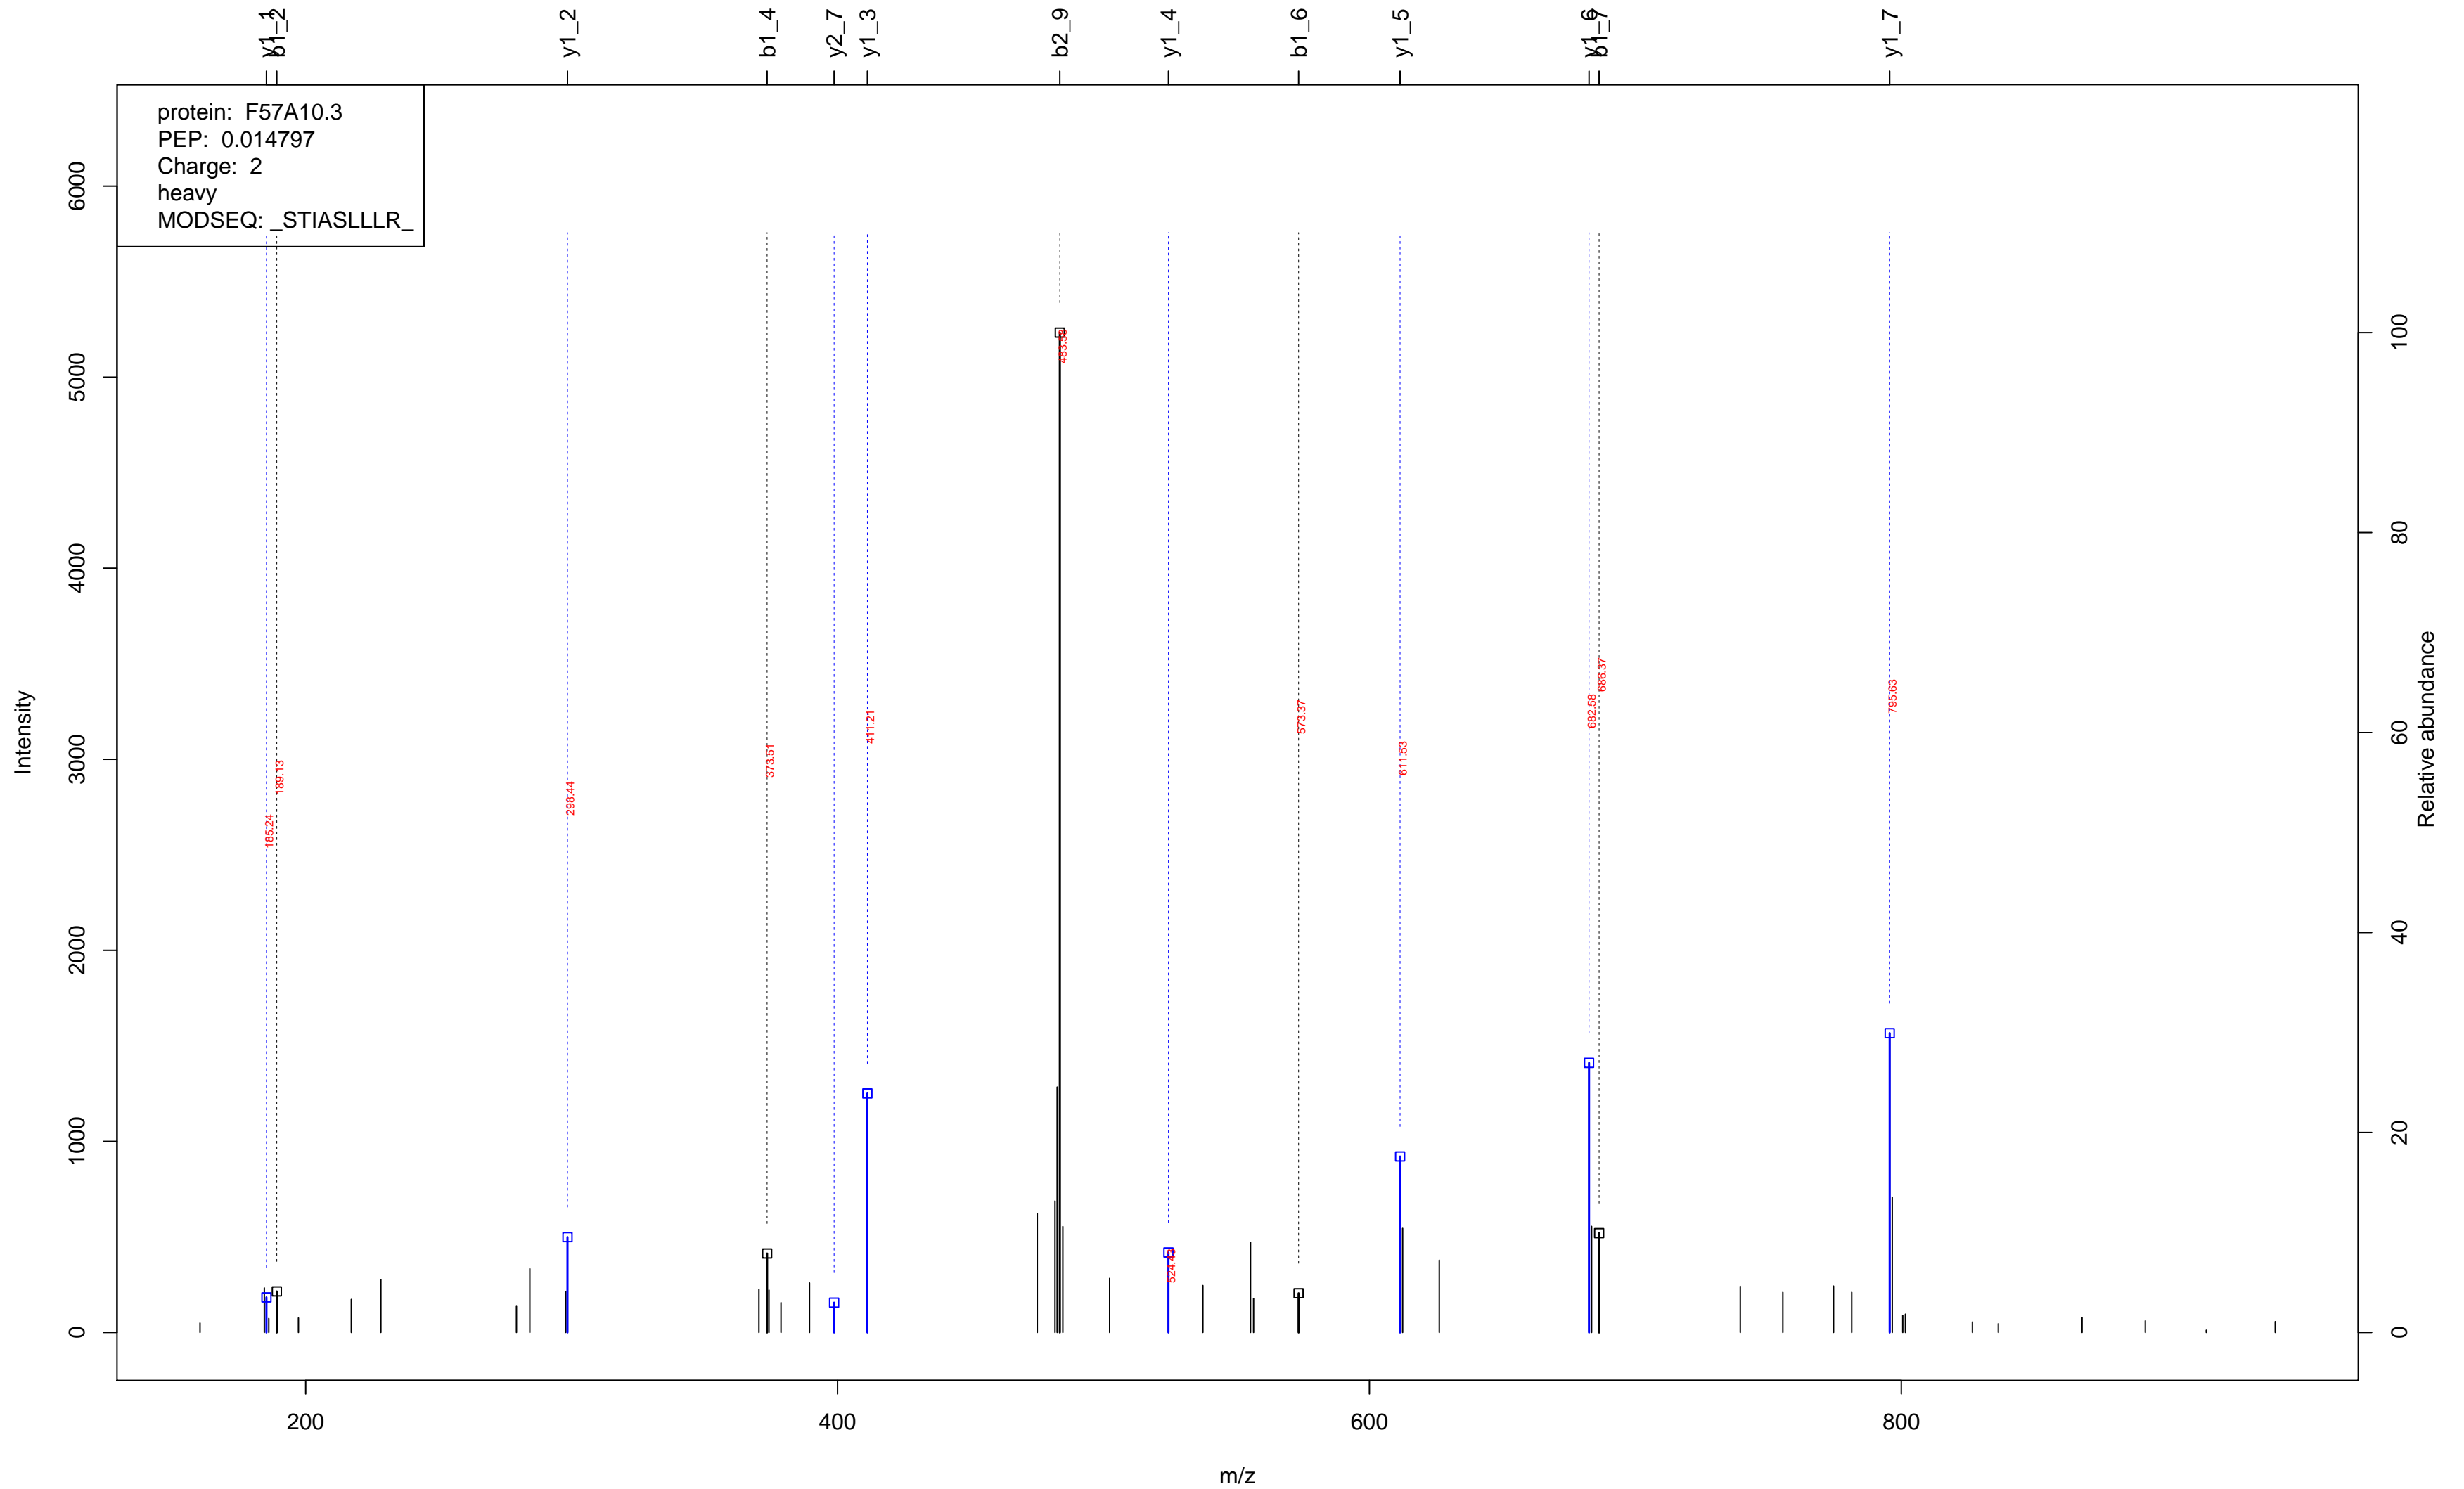

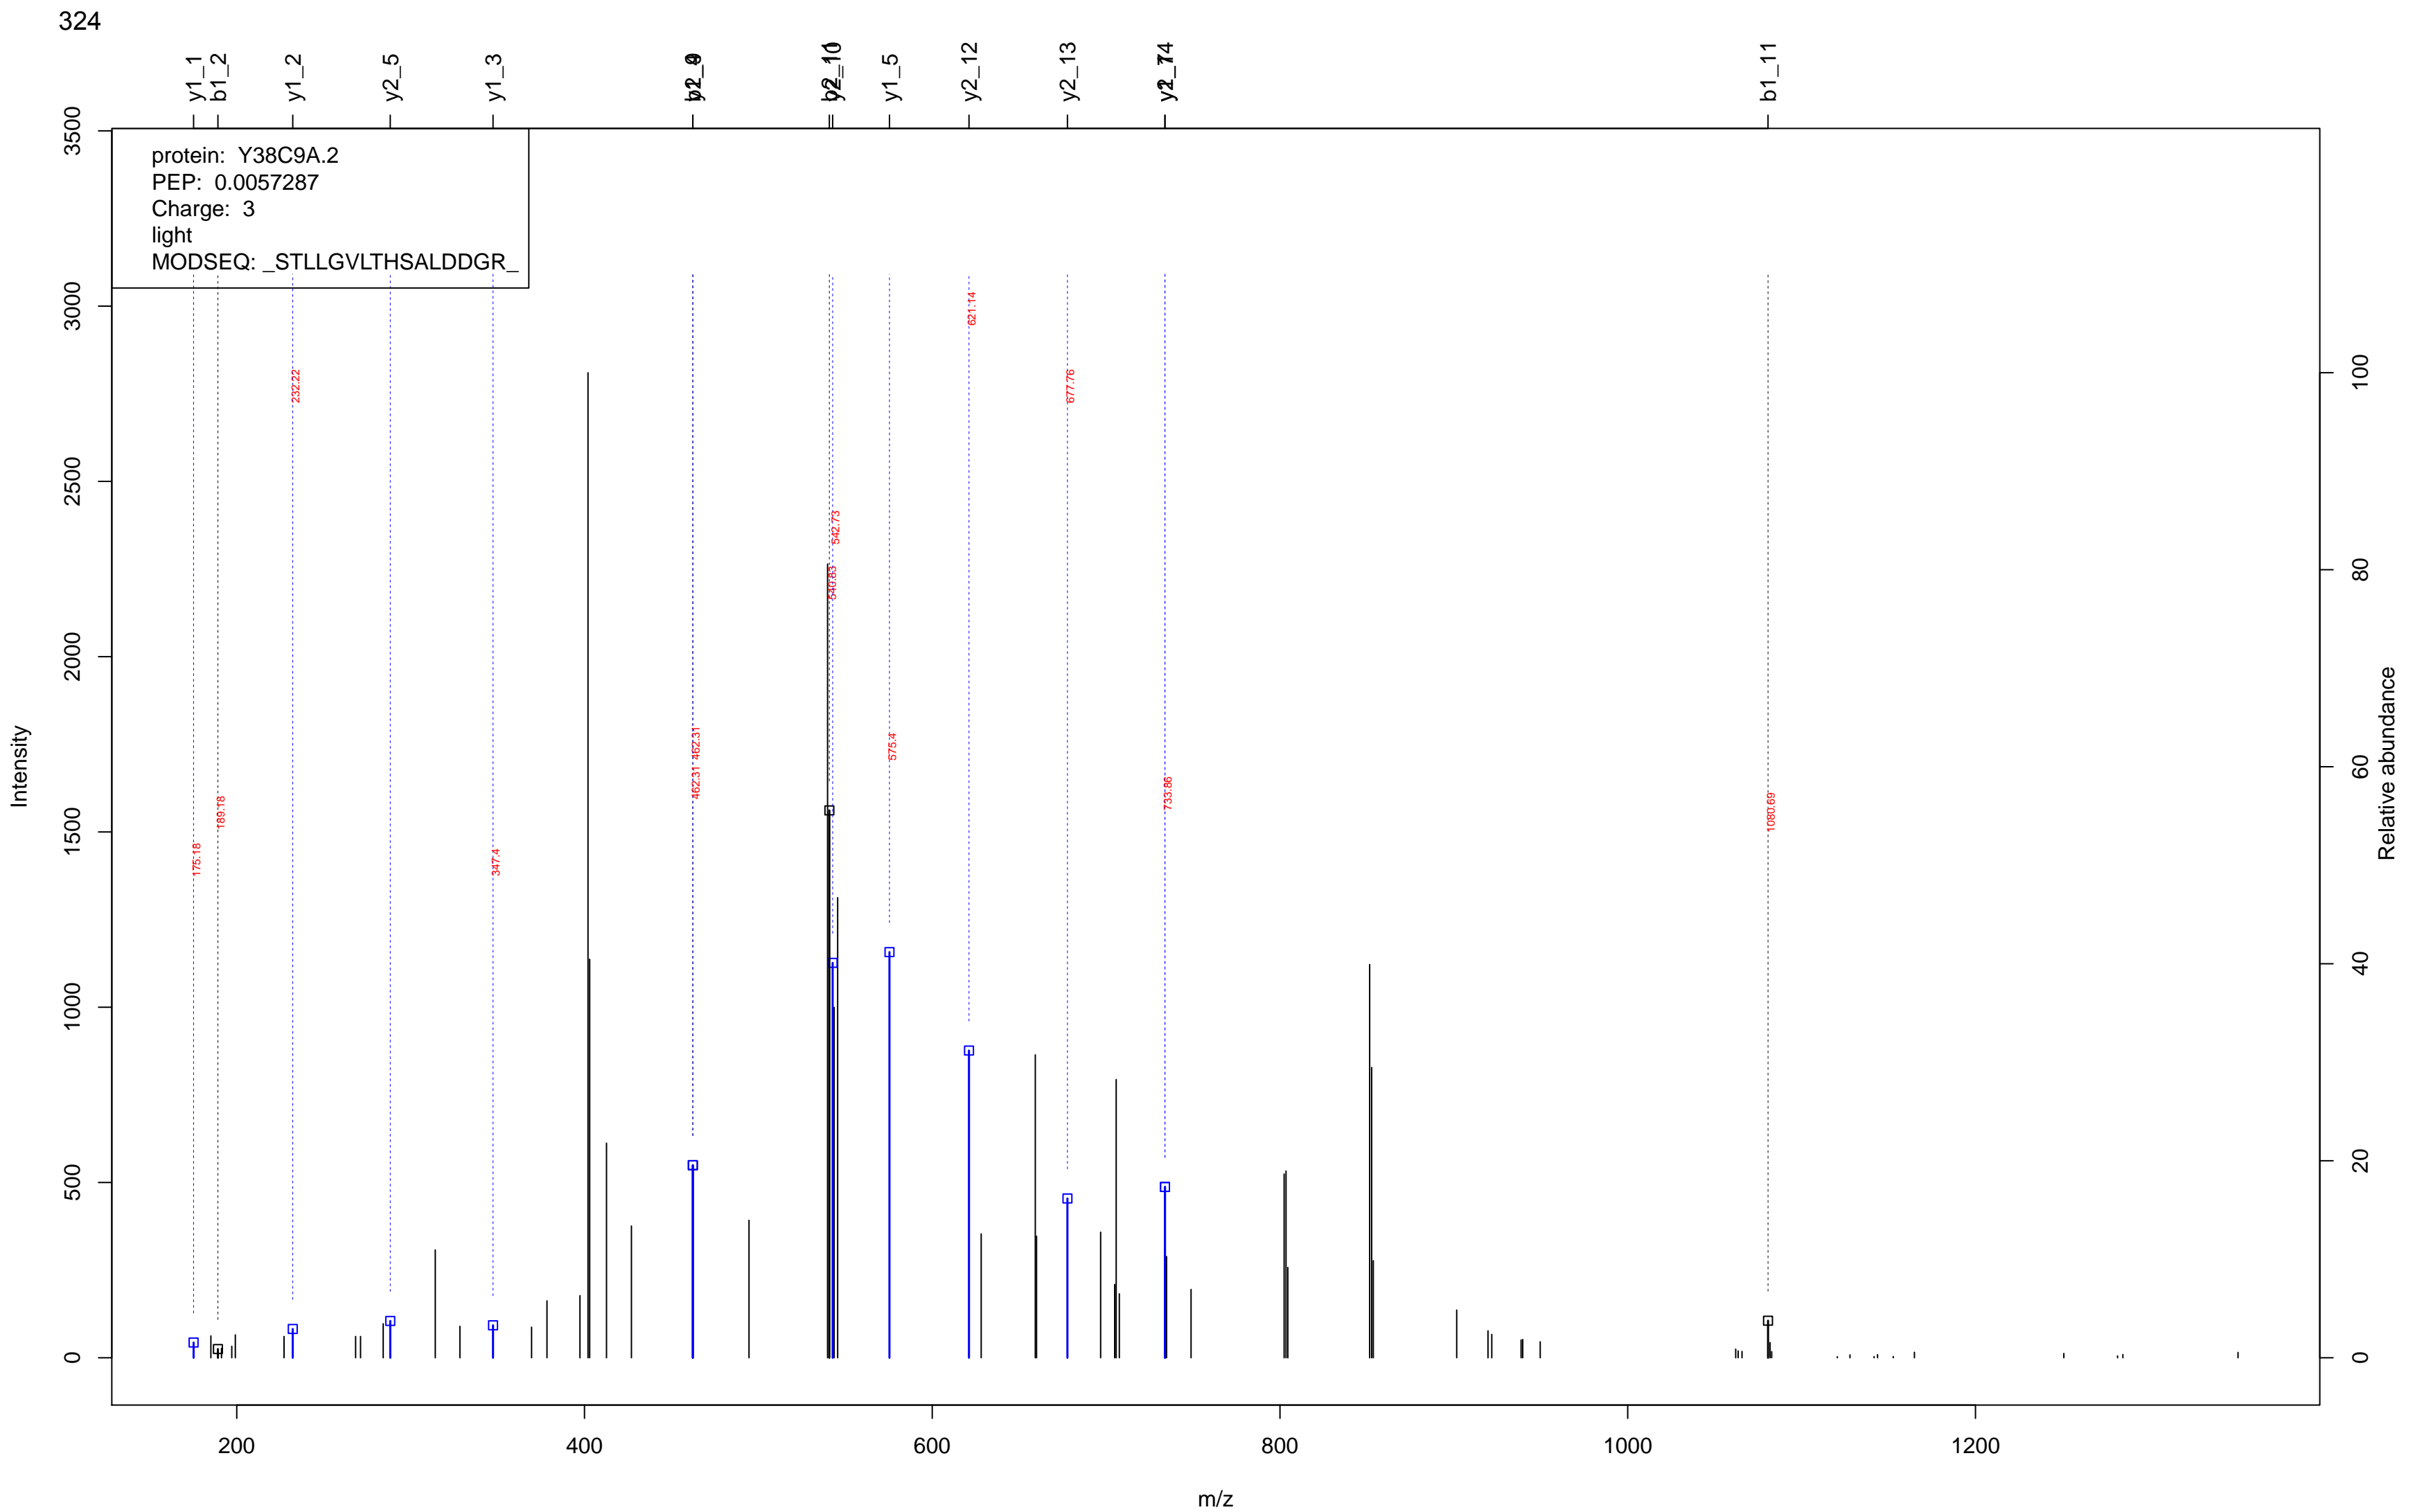

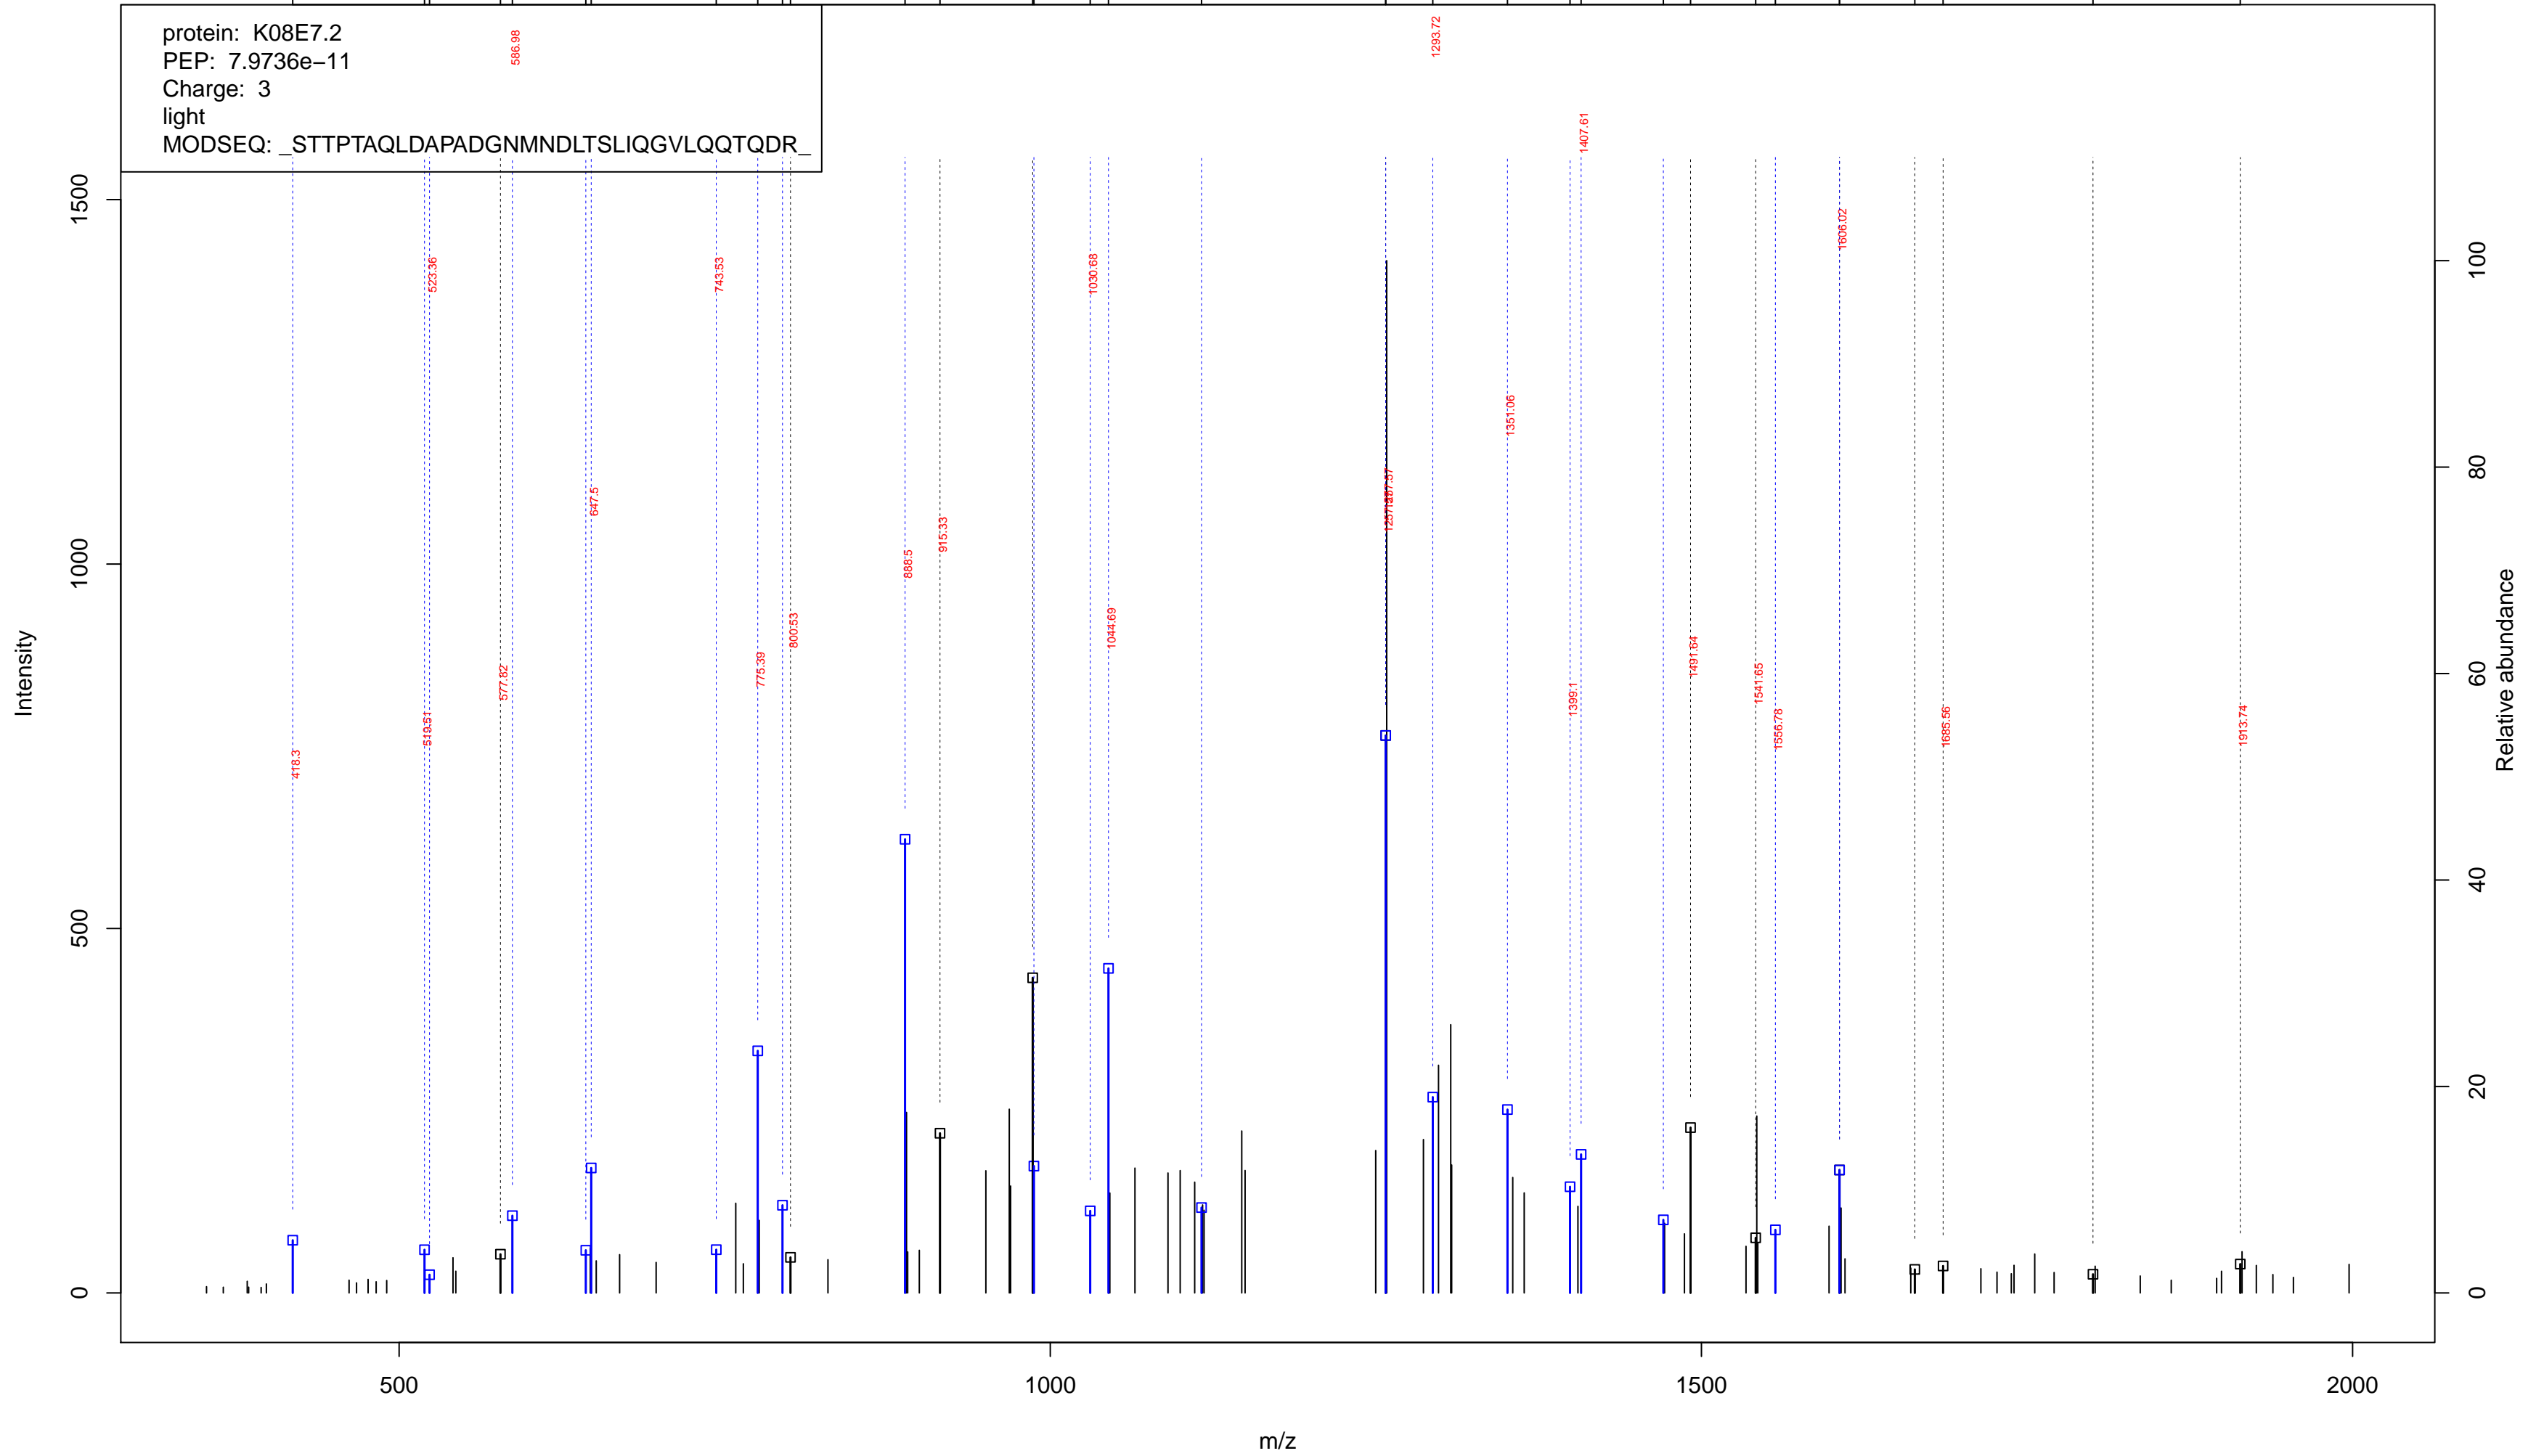

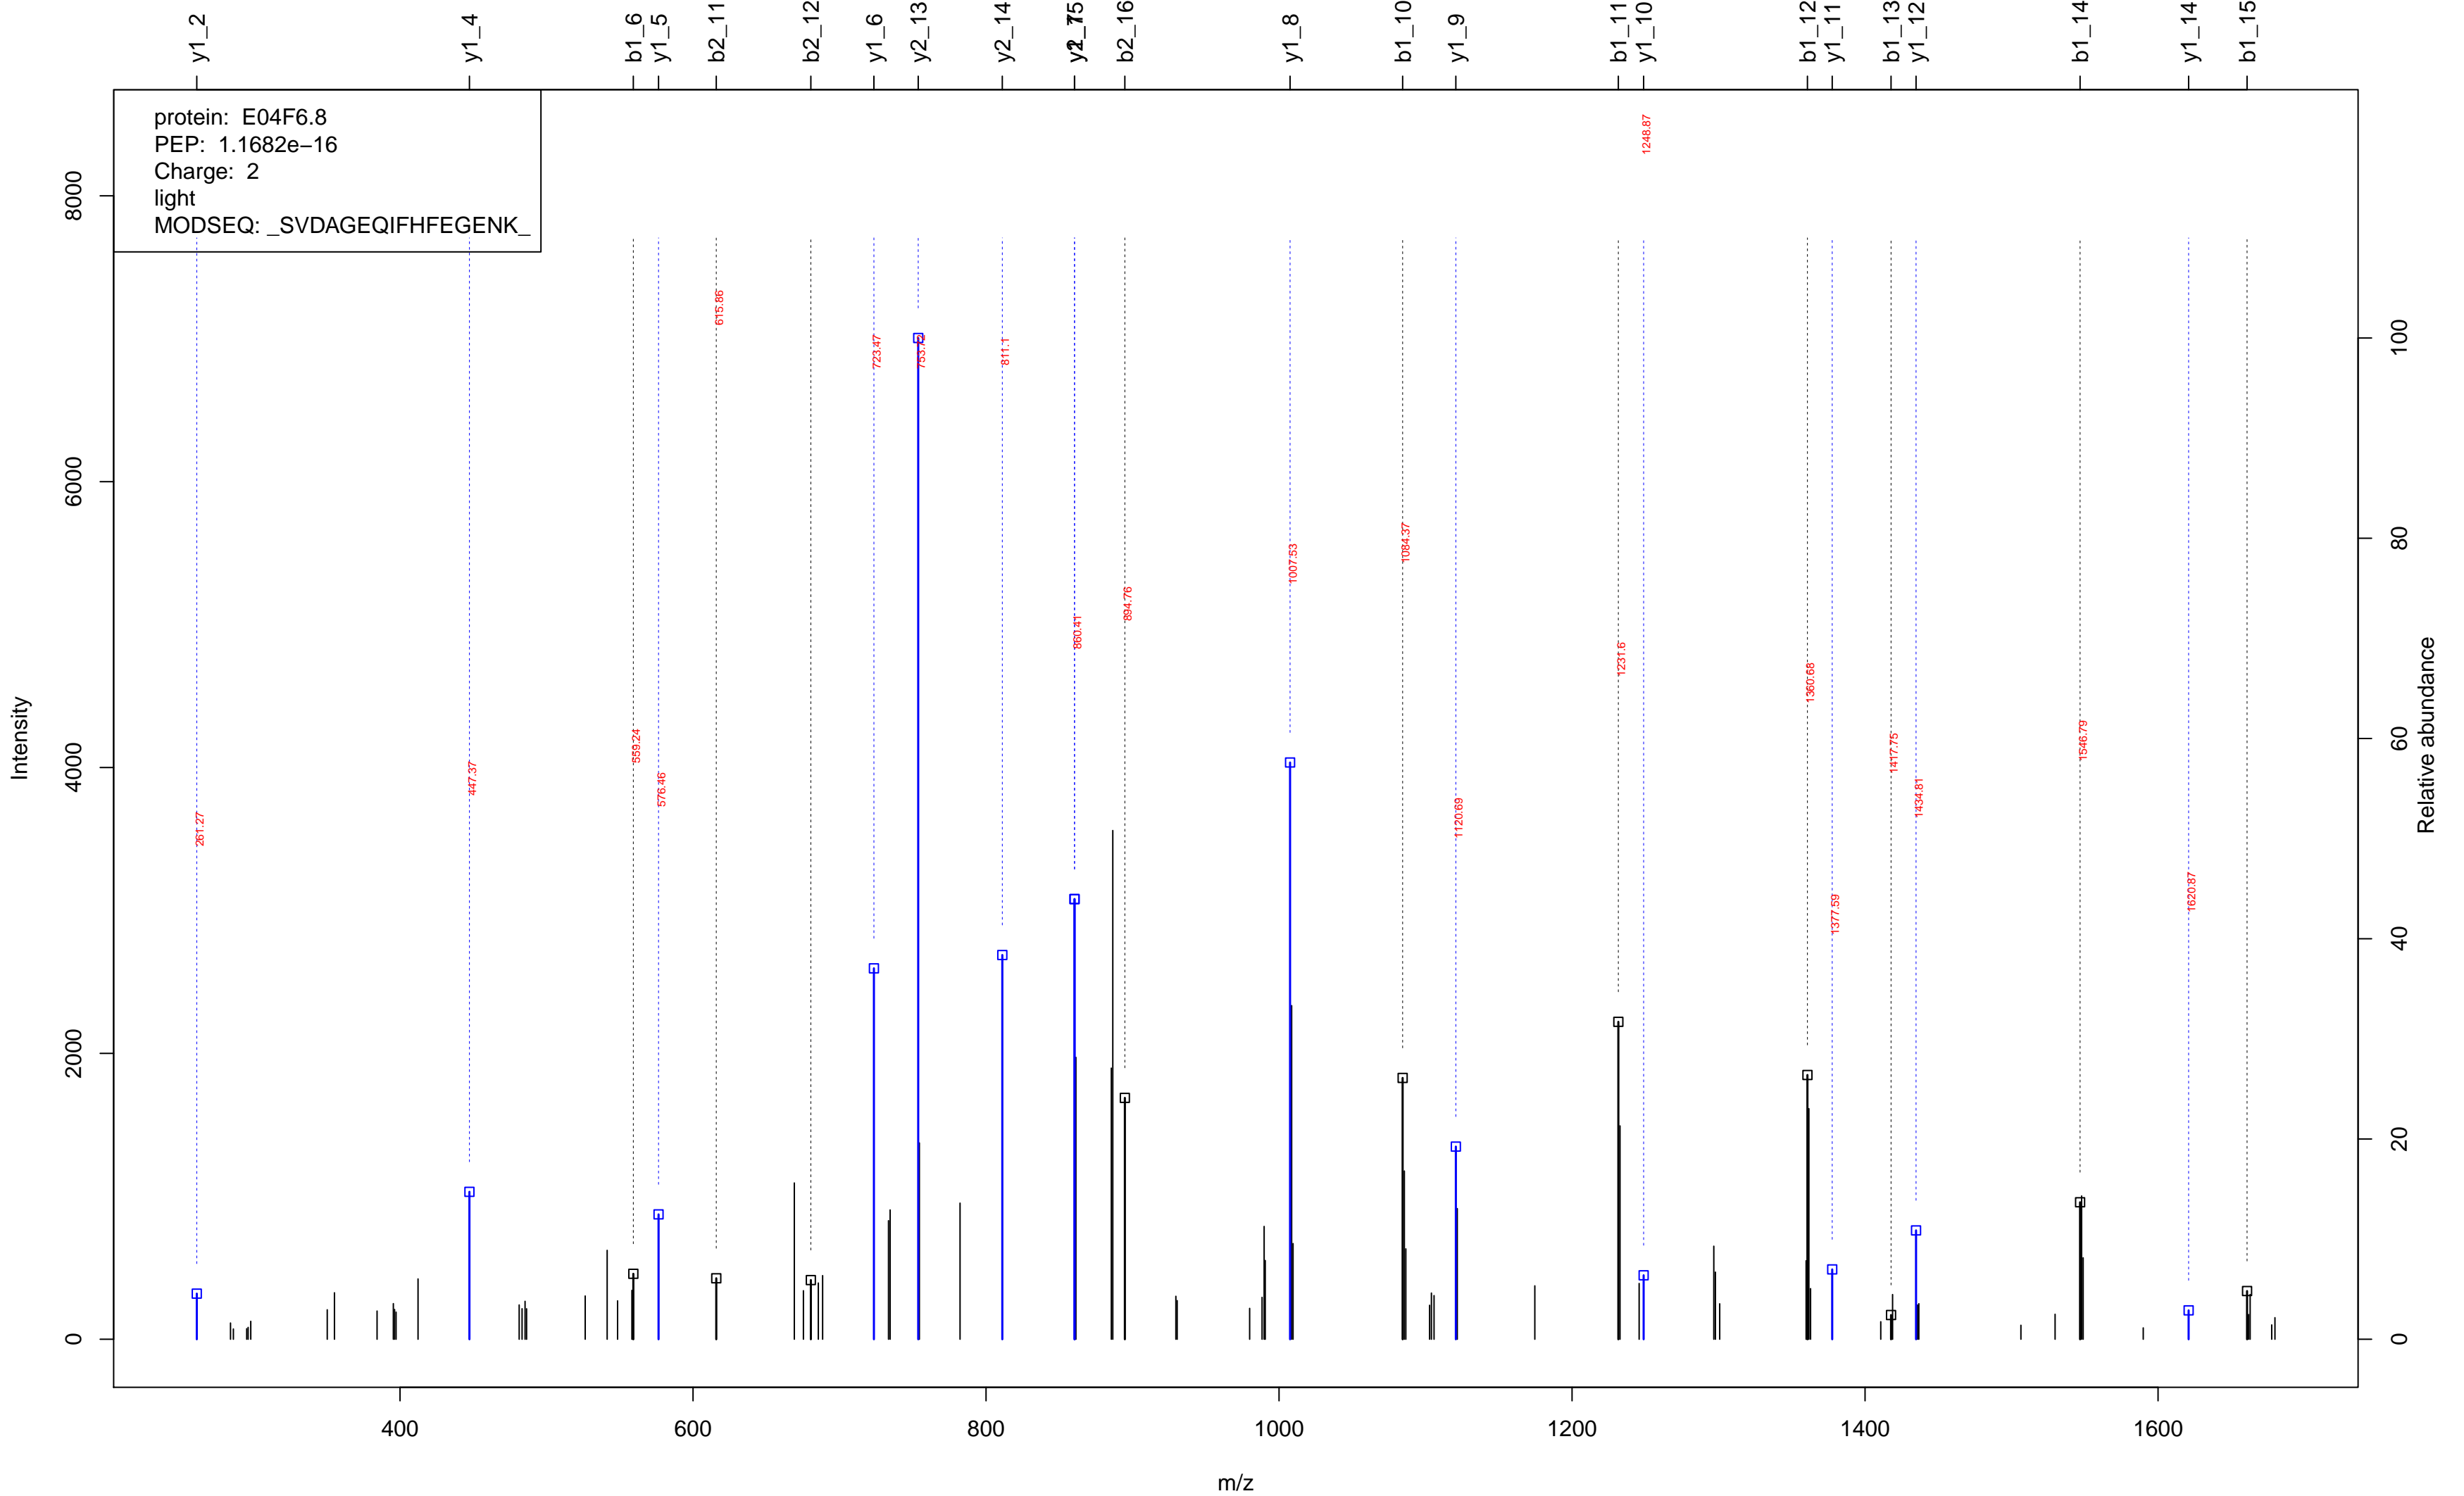

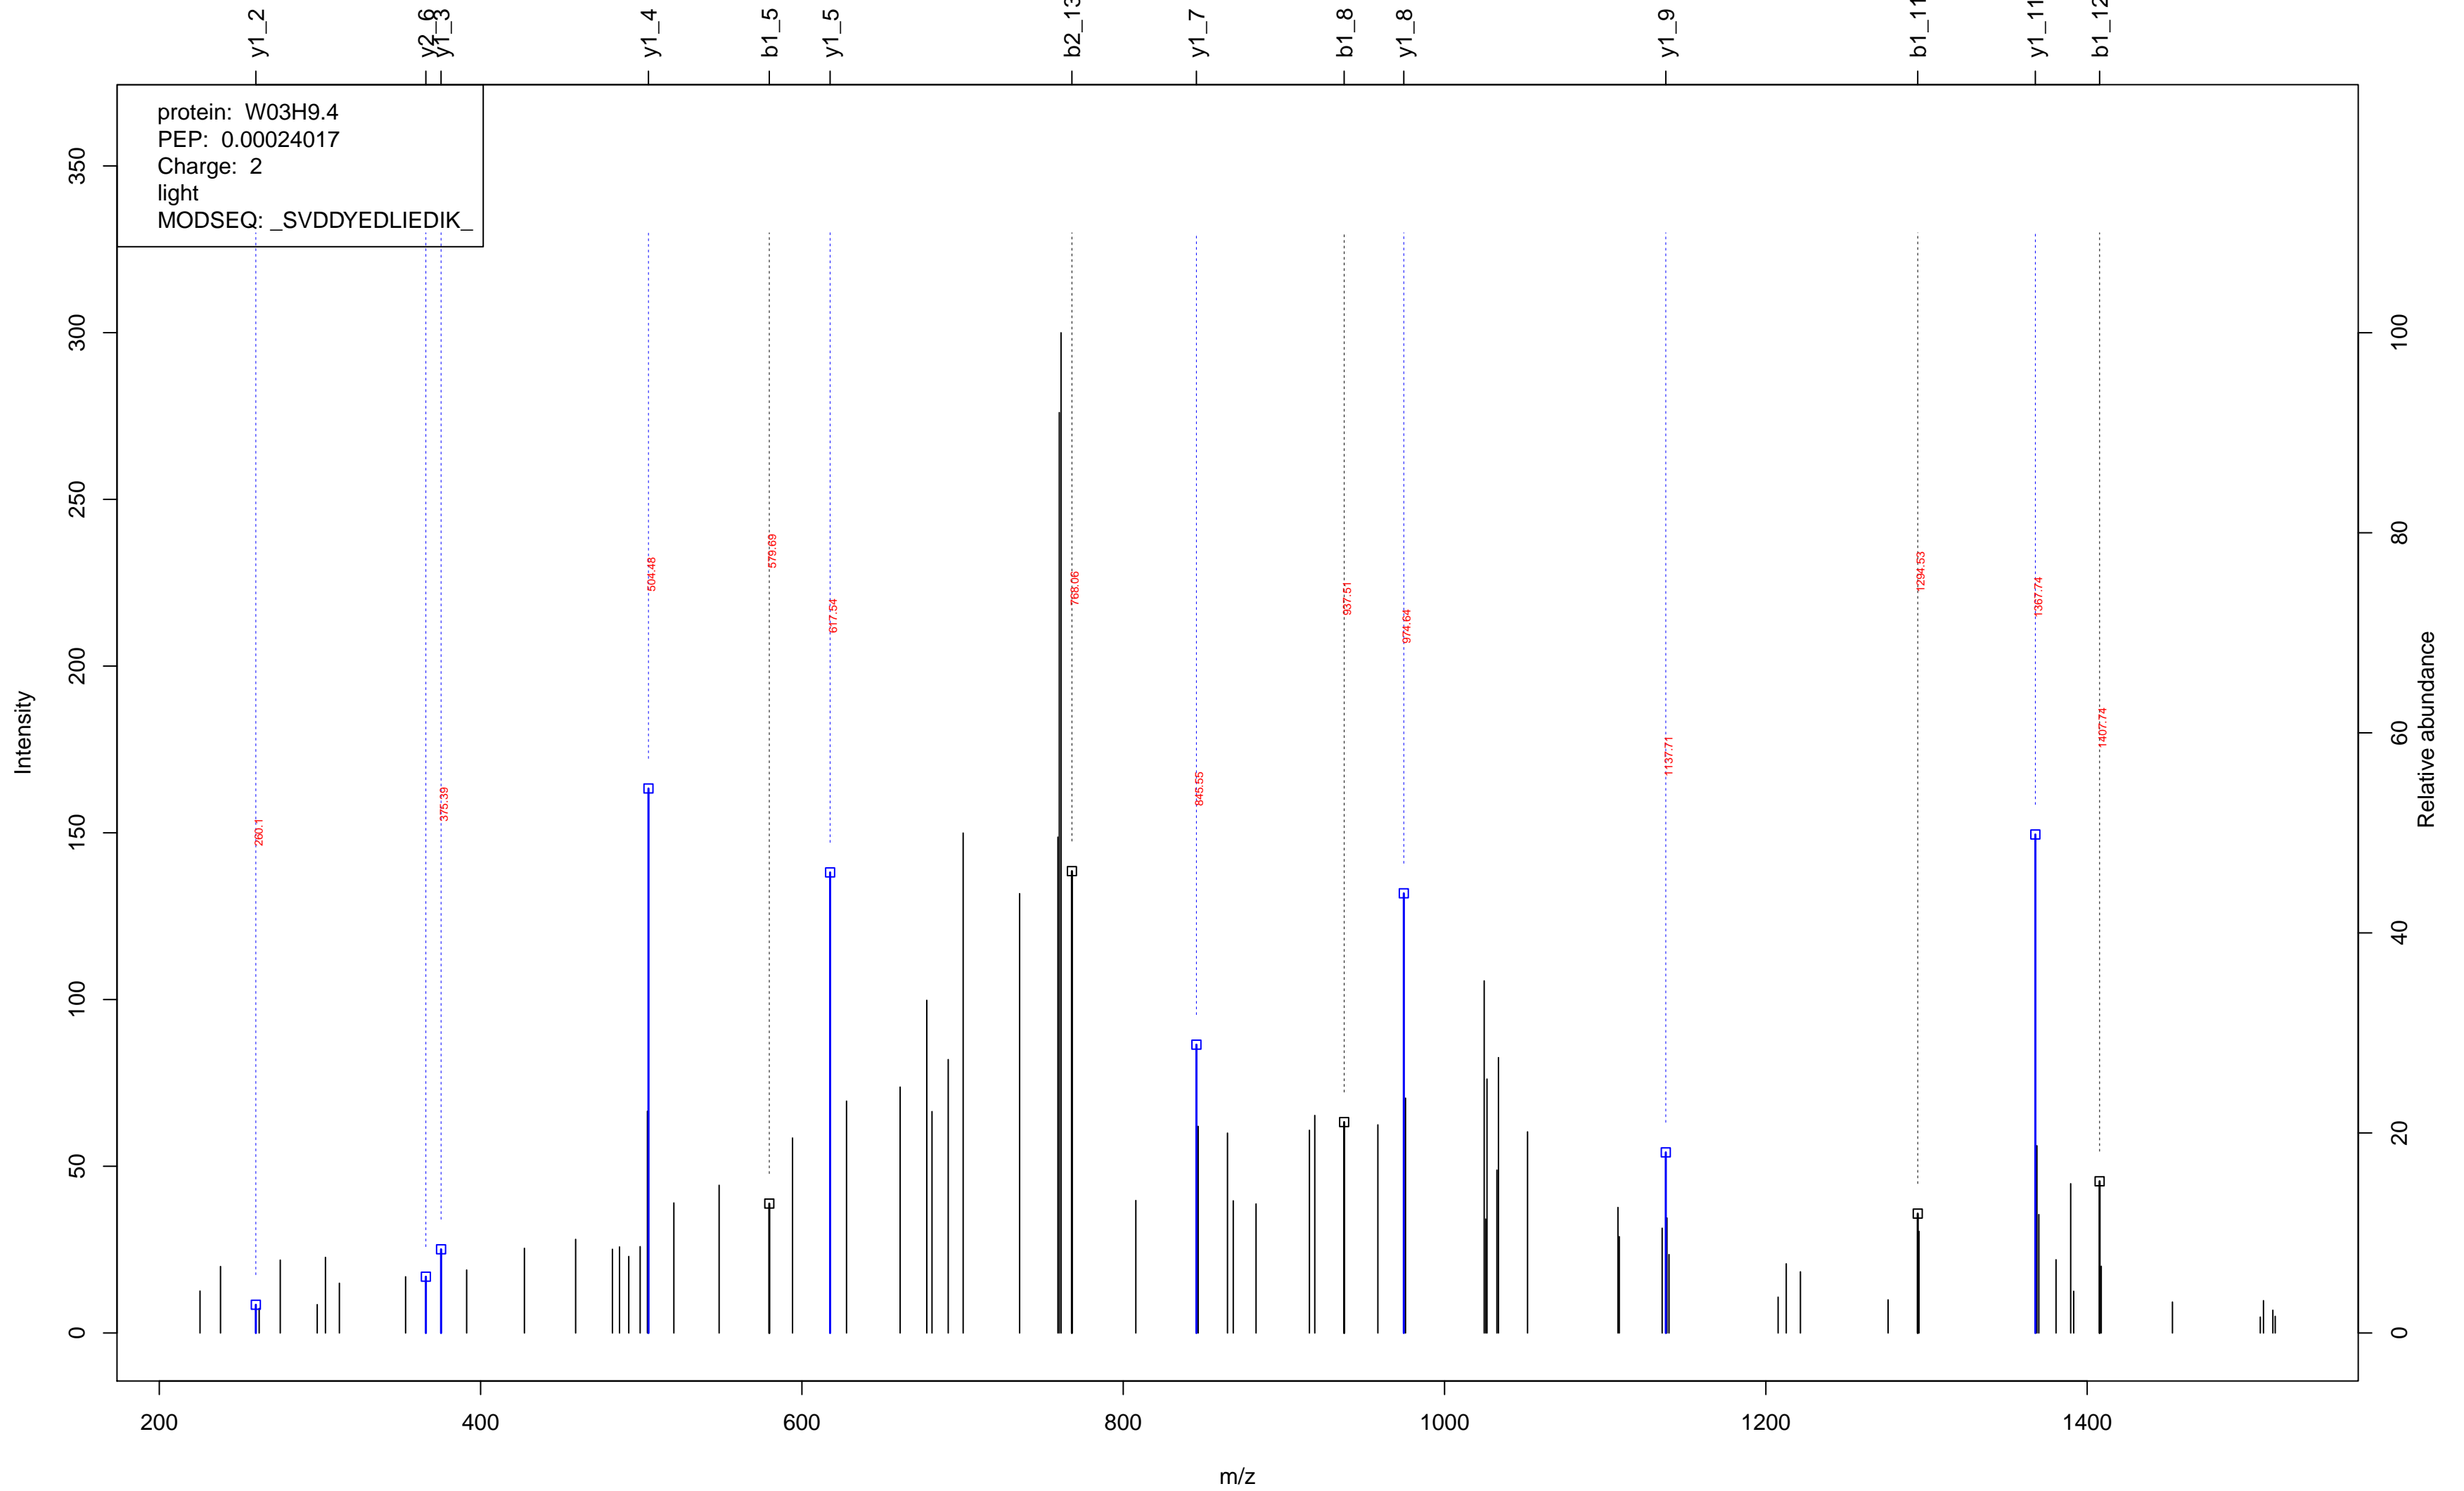

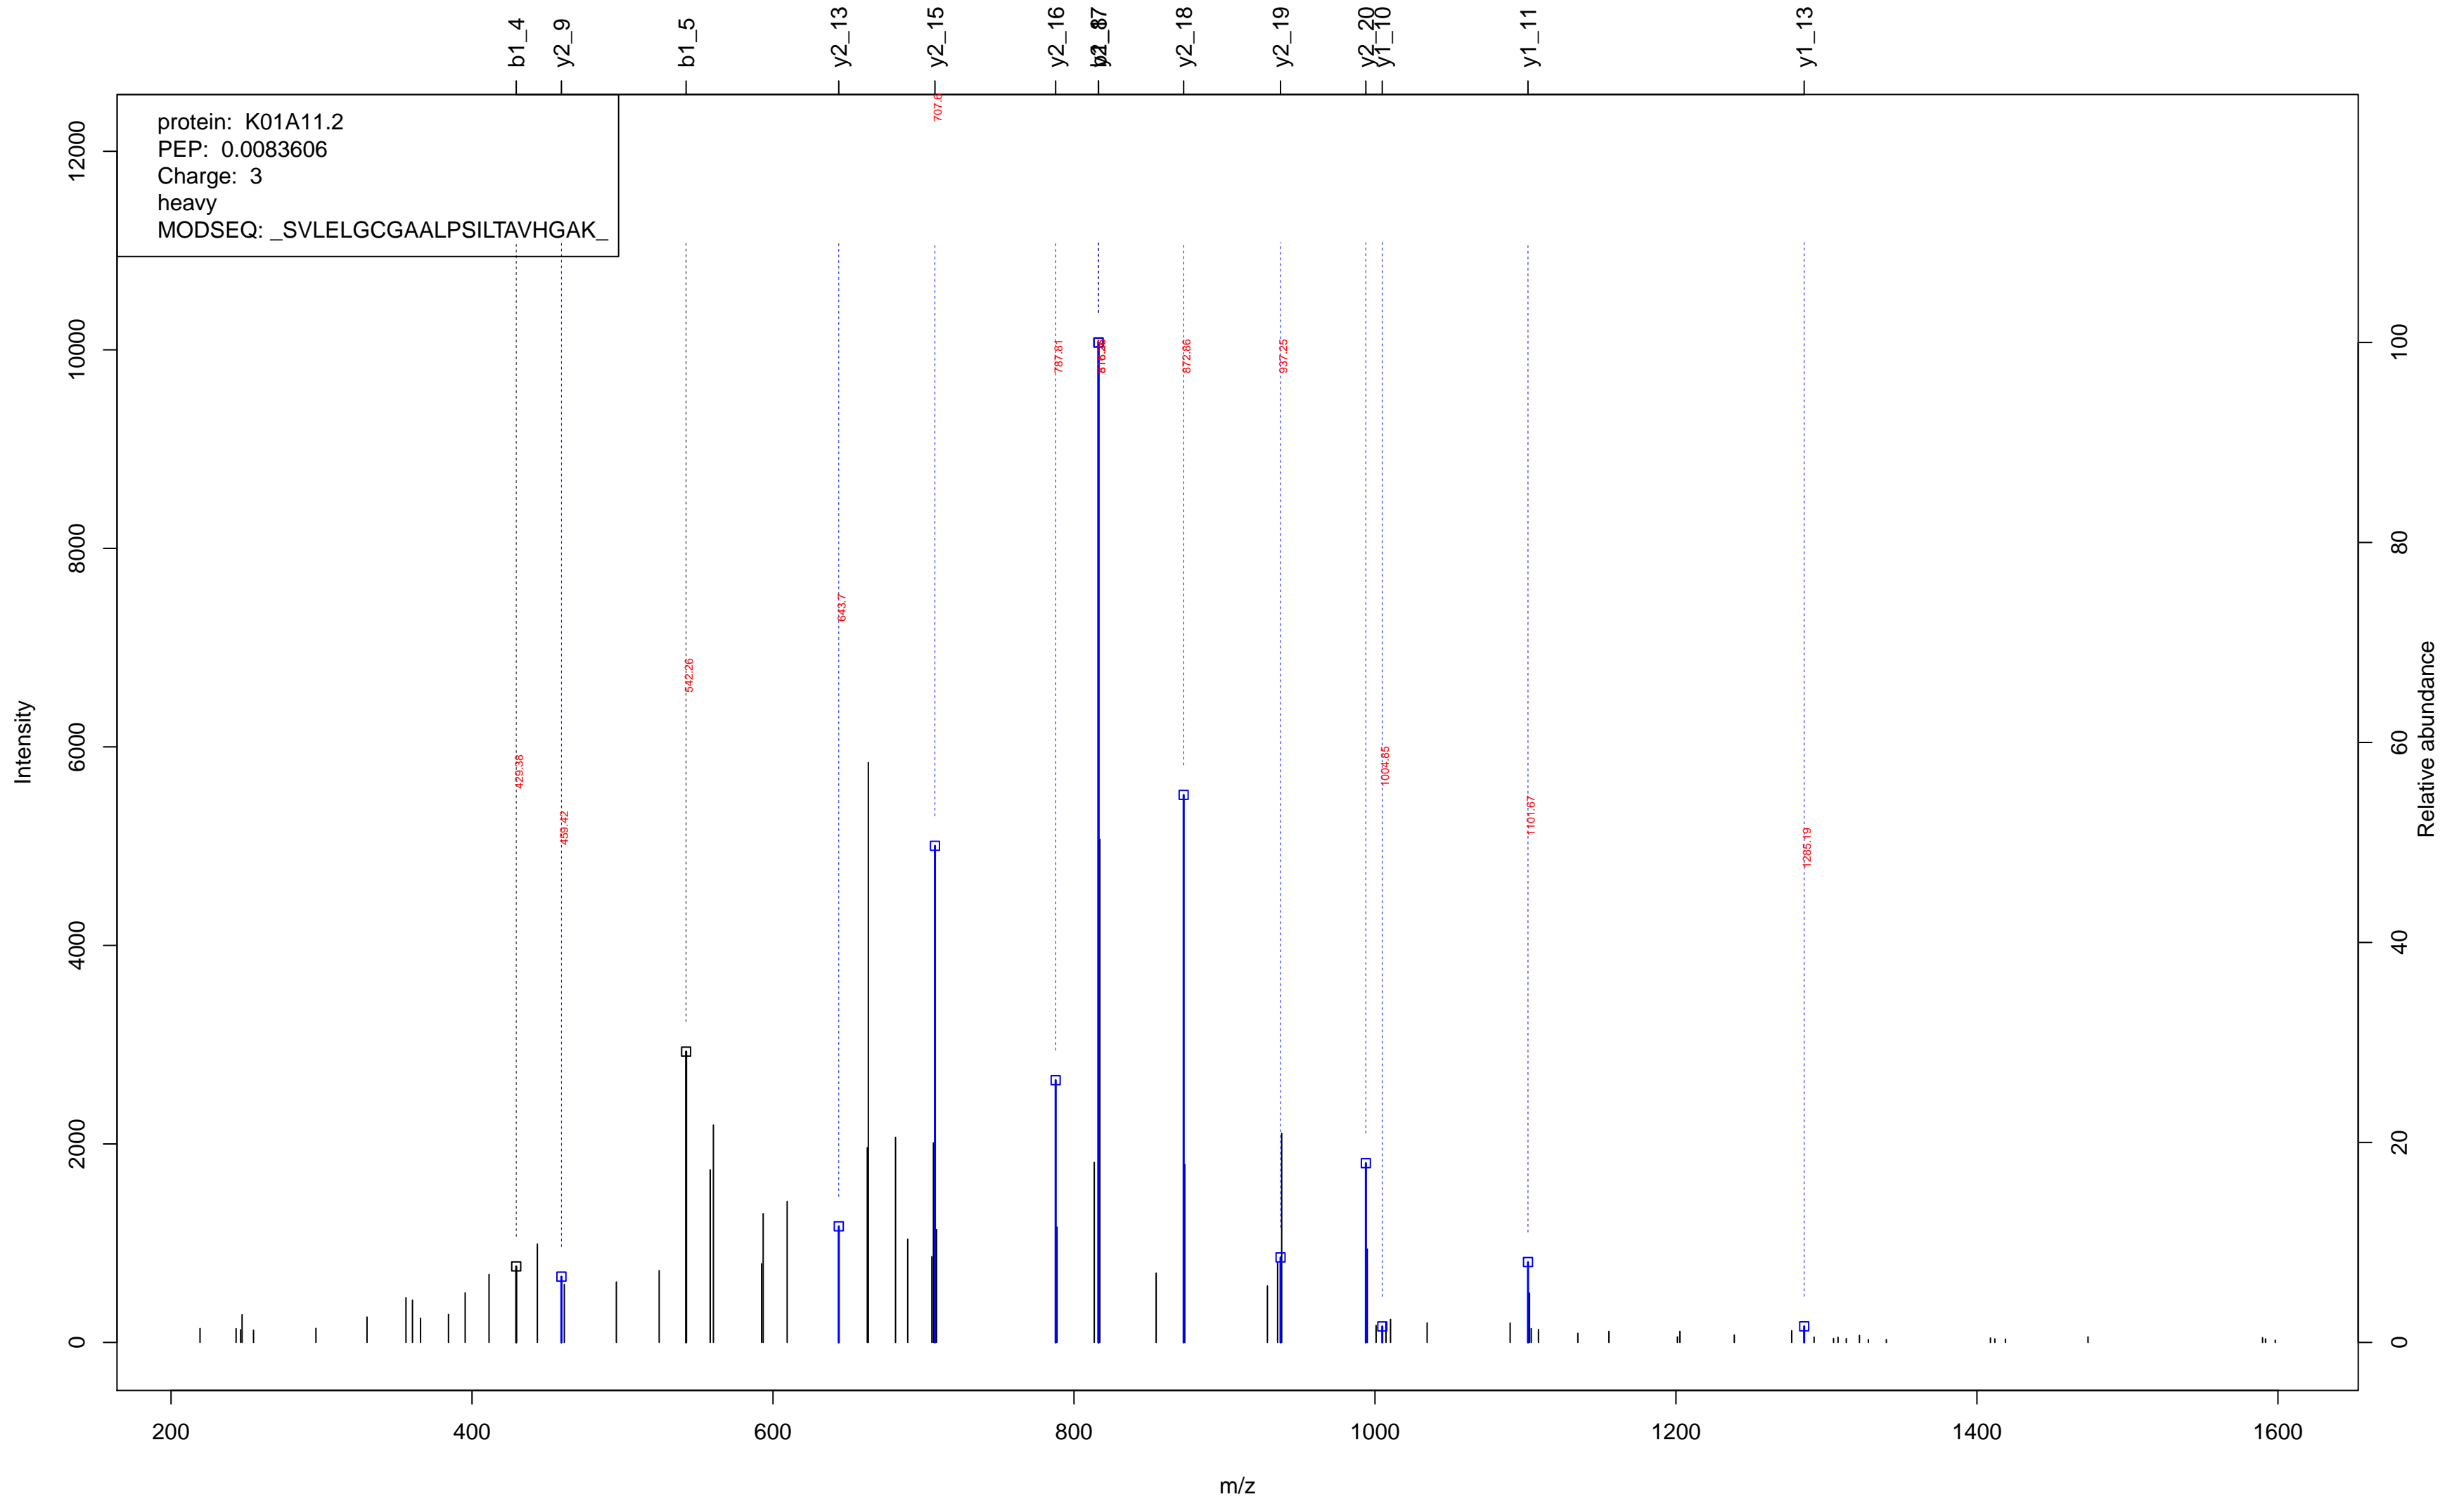



b1\_3 b1\_4 y1\_4 y1\_5 y1\_6 b2\_12 y1\_7 y1\_8 y2\_16 b1\_9 y2\_98 b1\_10 b1\_11 b1\_13 b1\_14 b1\_16 b1\_17 b1\_18

protein: T22C1.10a  
PEP: 1.9635e-06  
Charge: 2  
light  
MODSEQ: \_(ac)SVTPVILEAYCAVSDEVAK\_

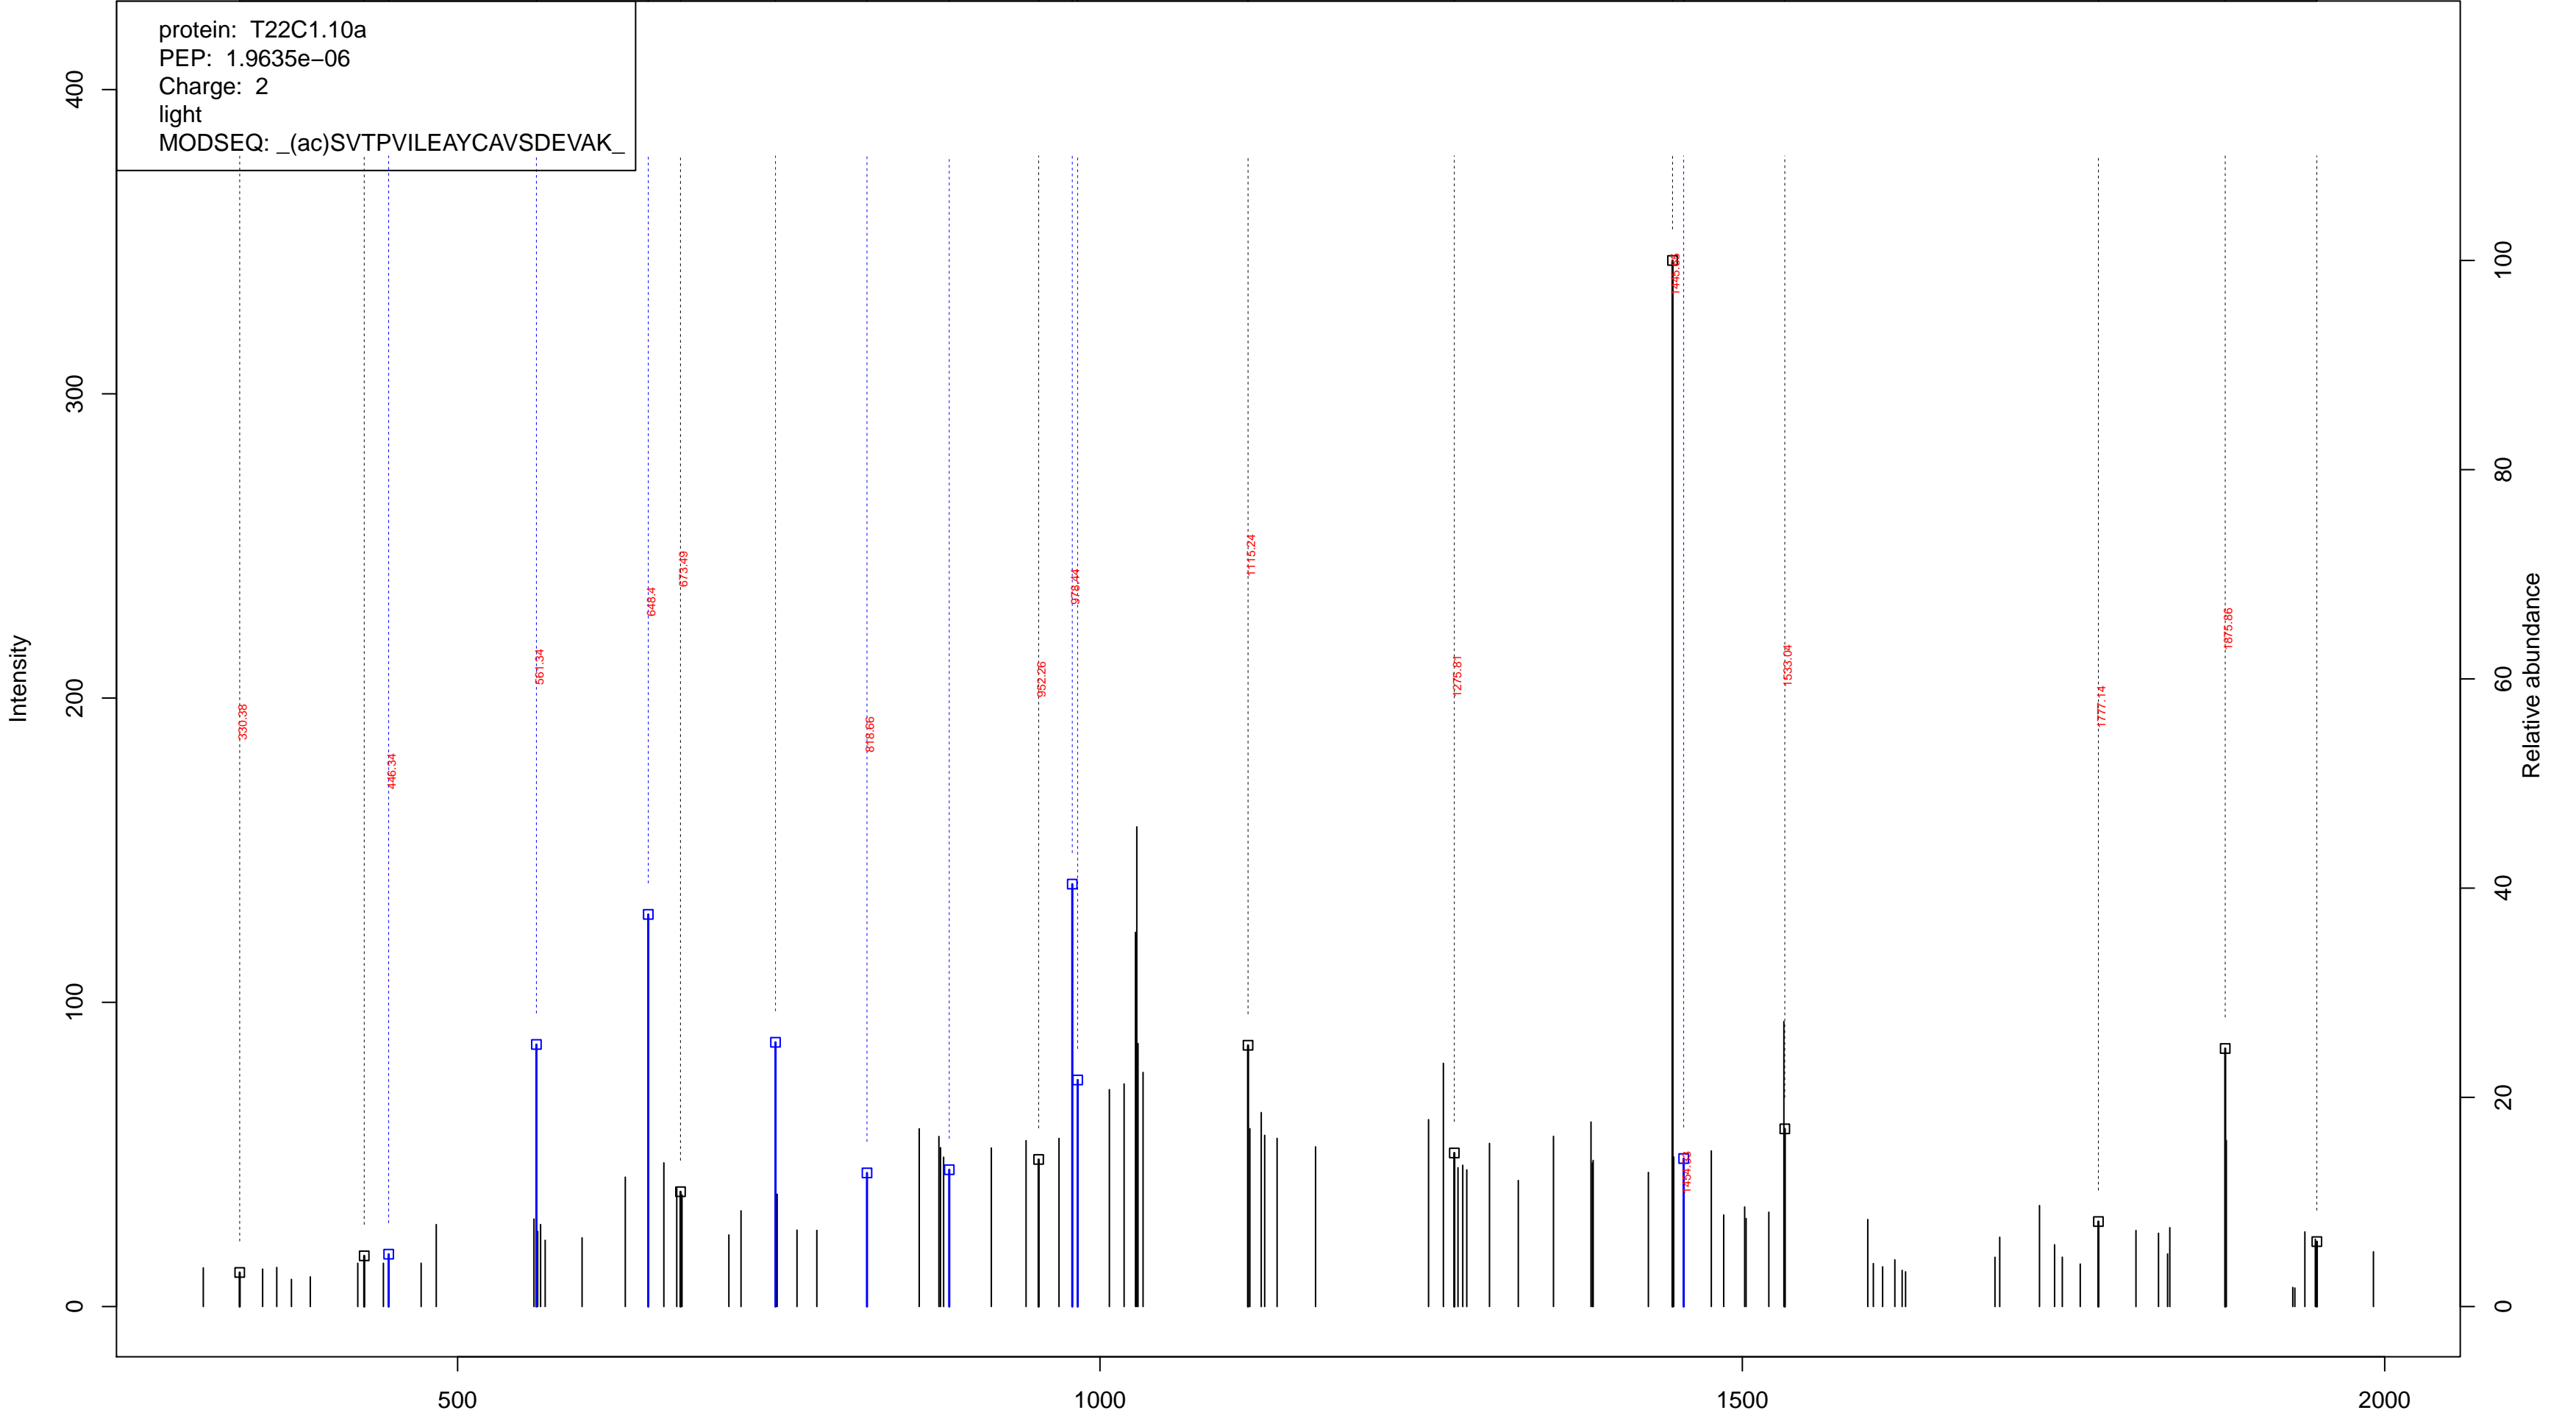

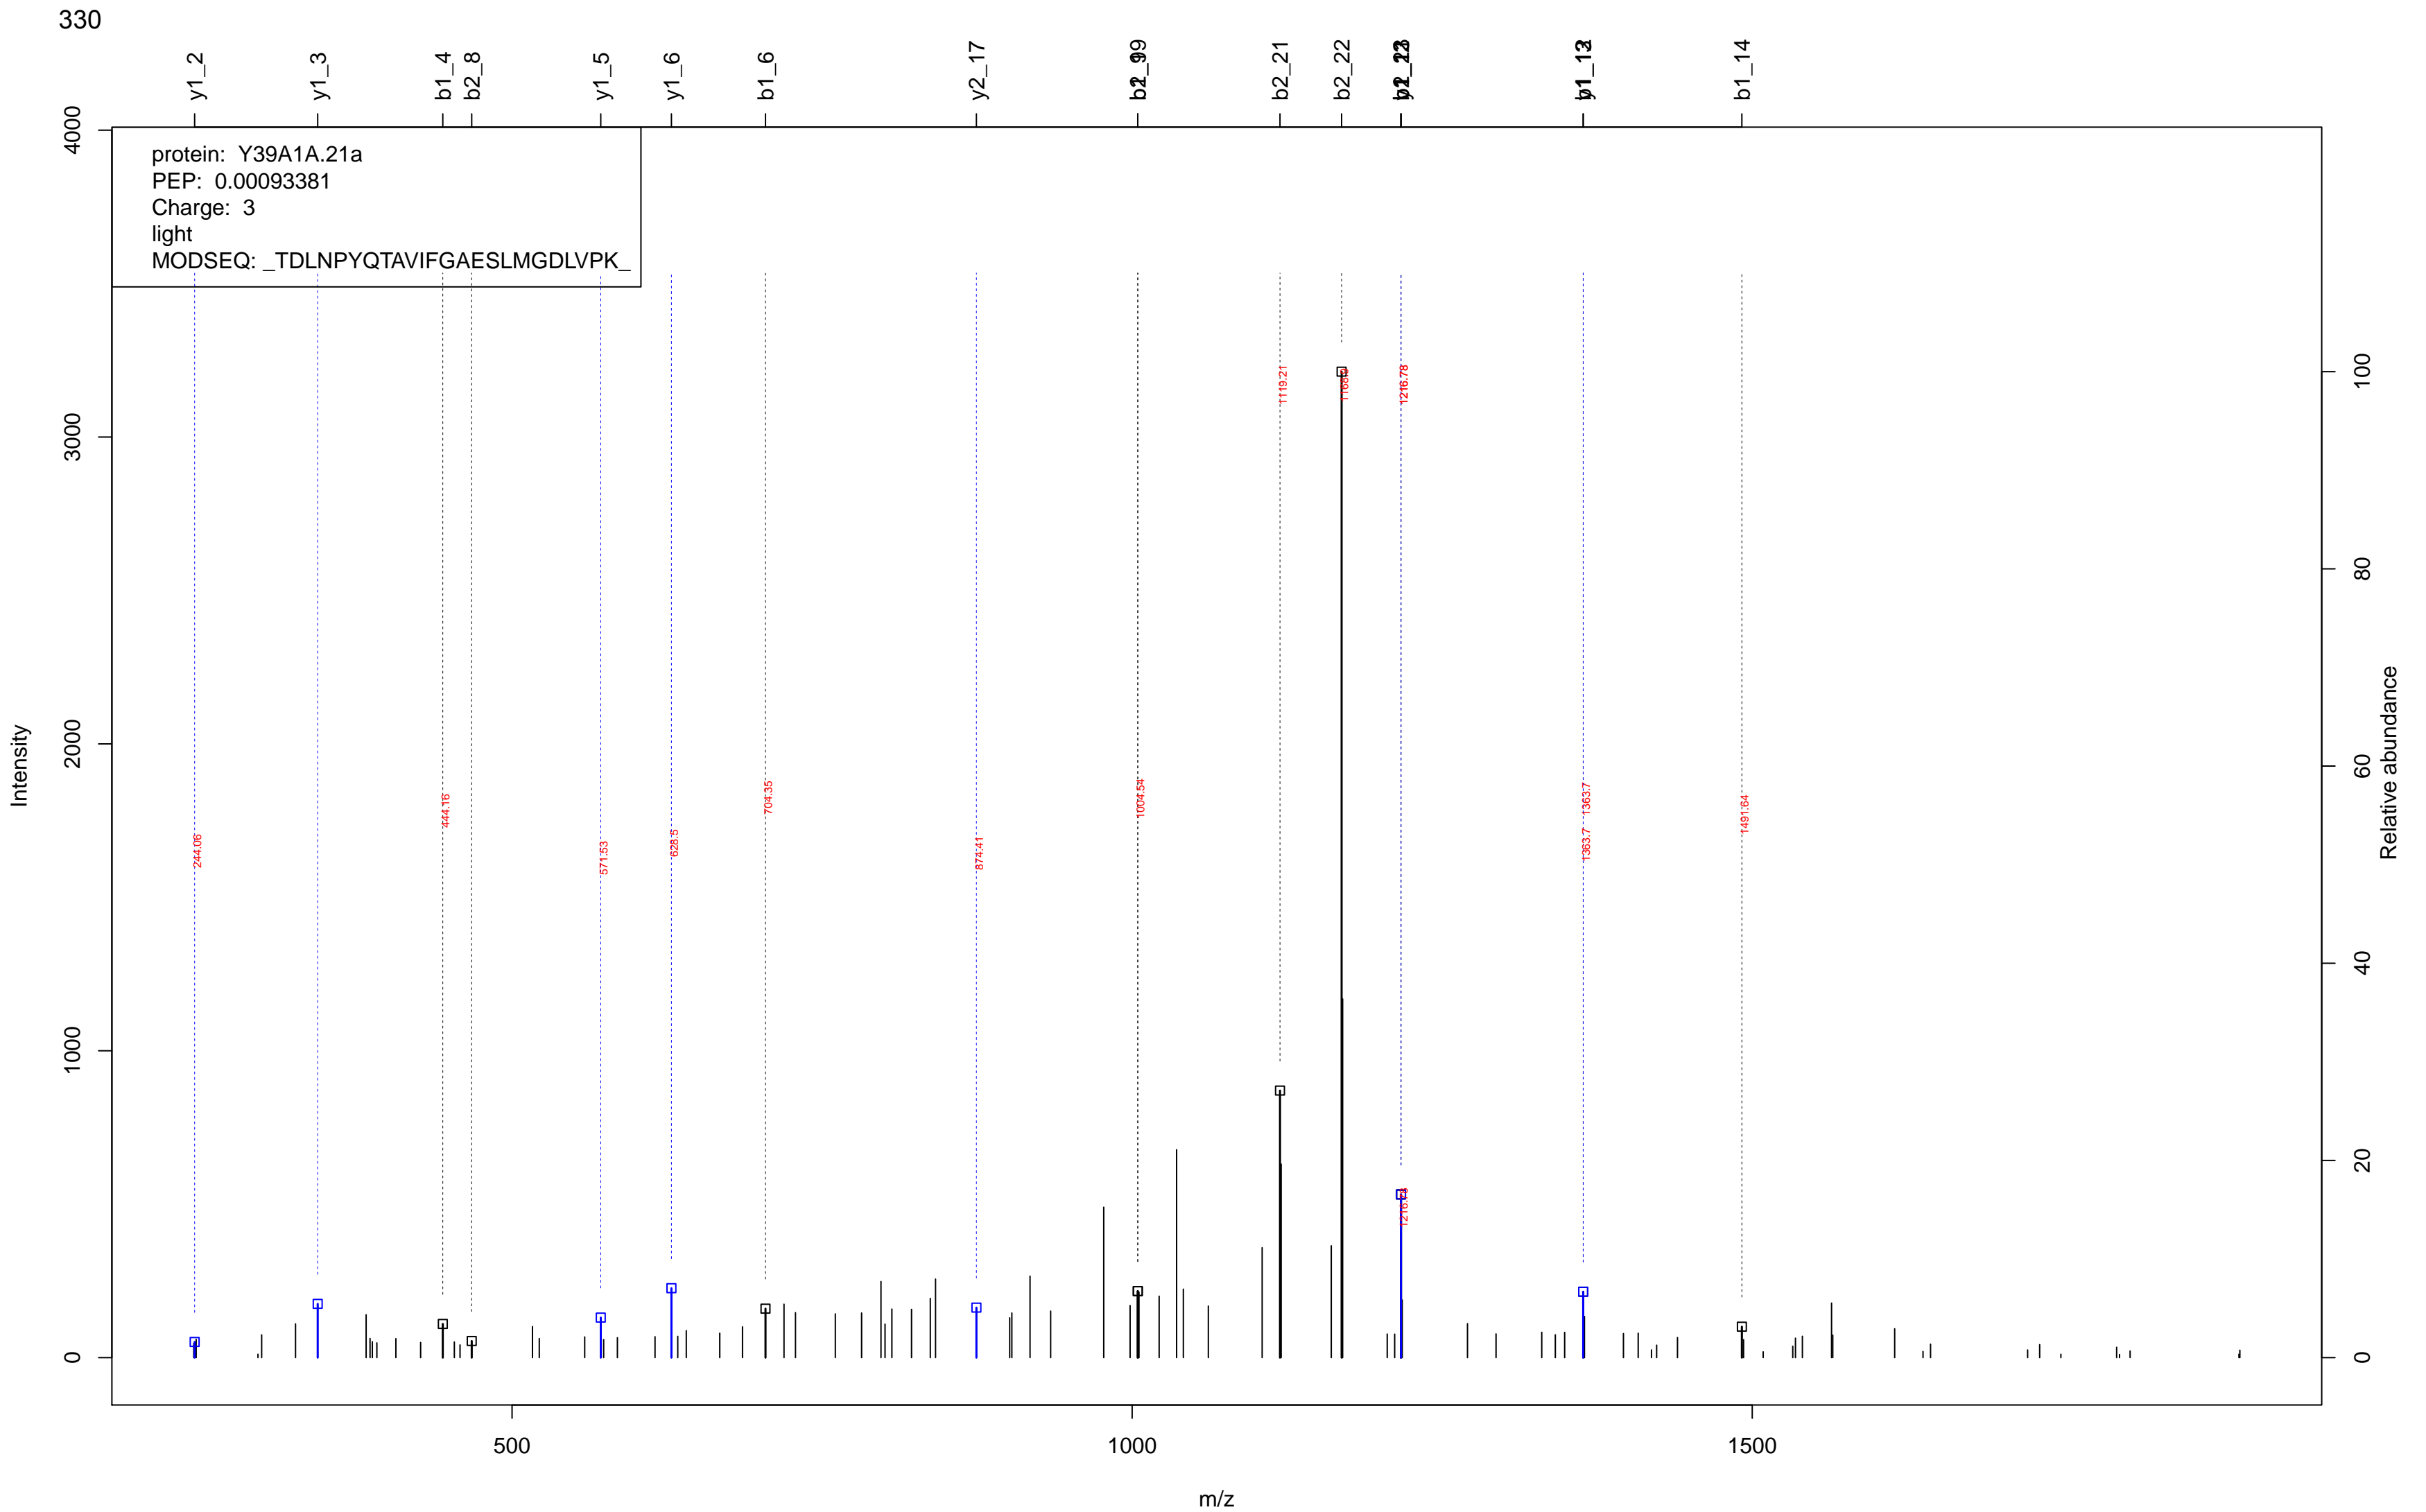

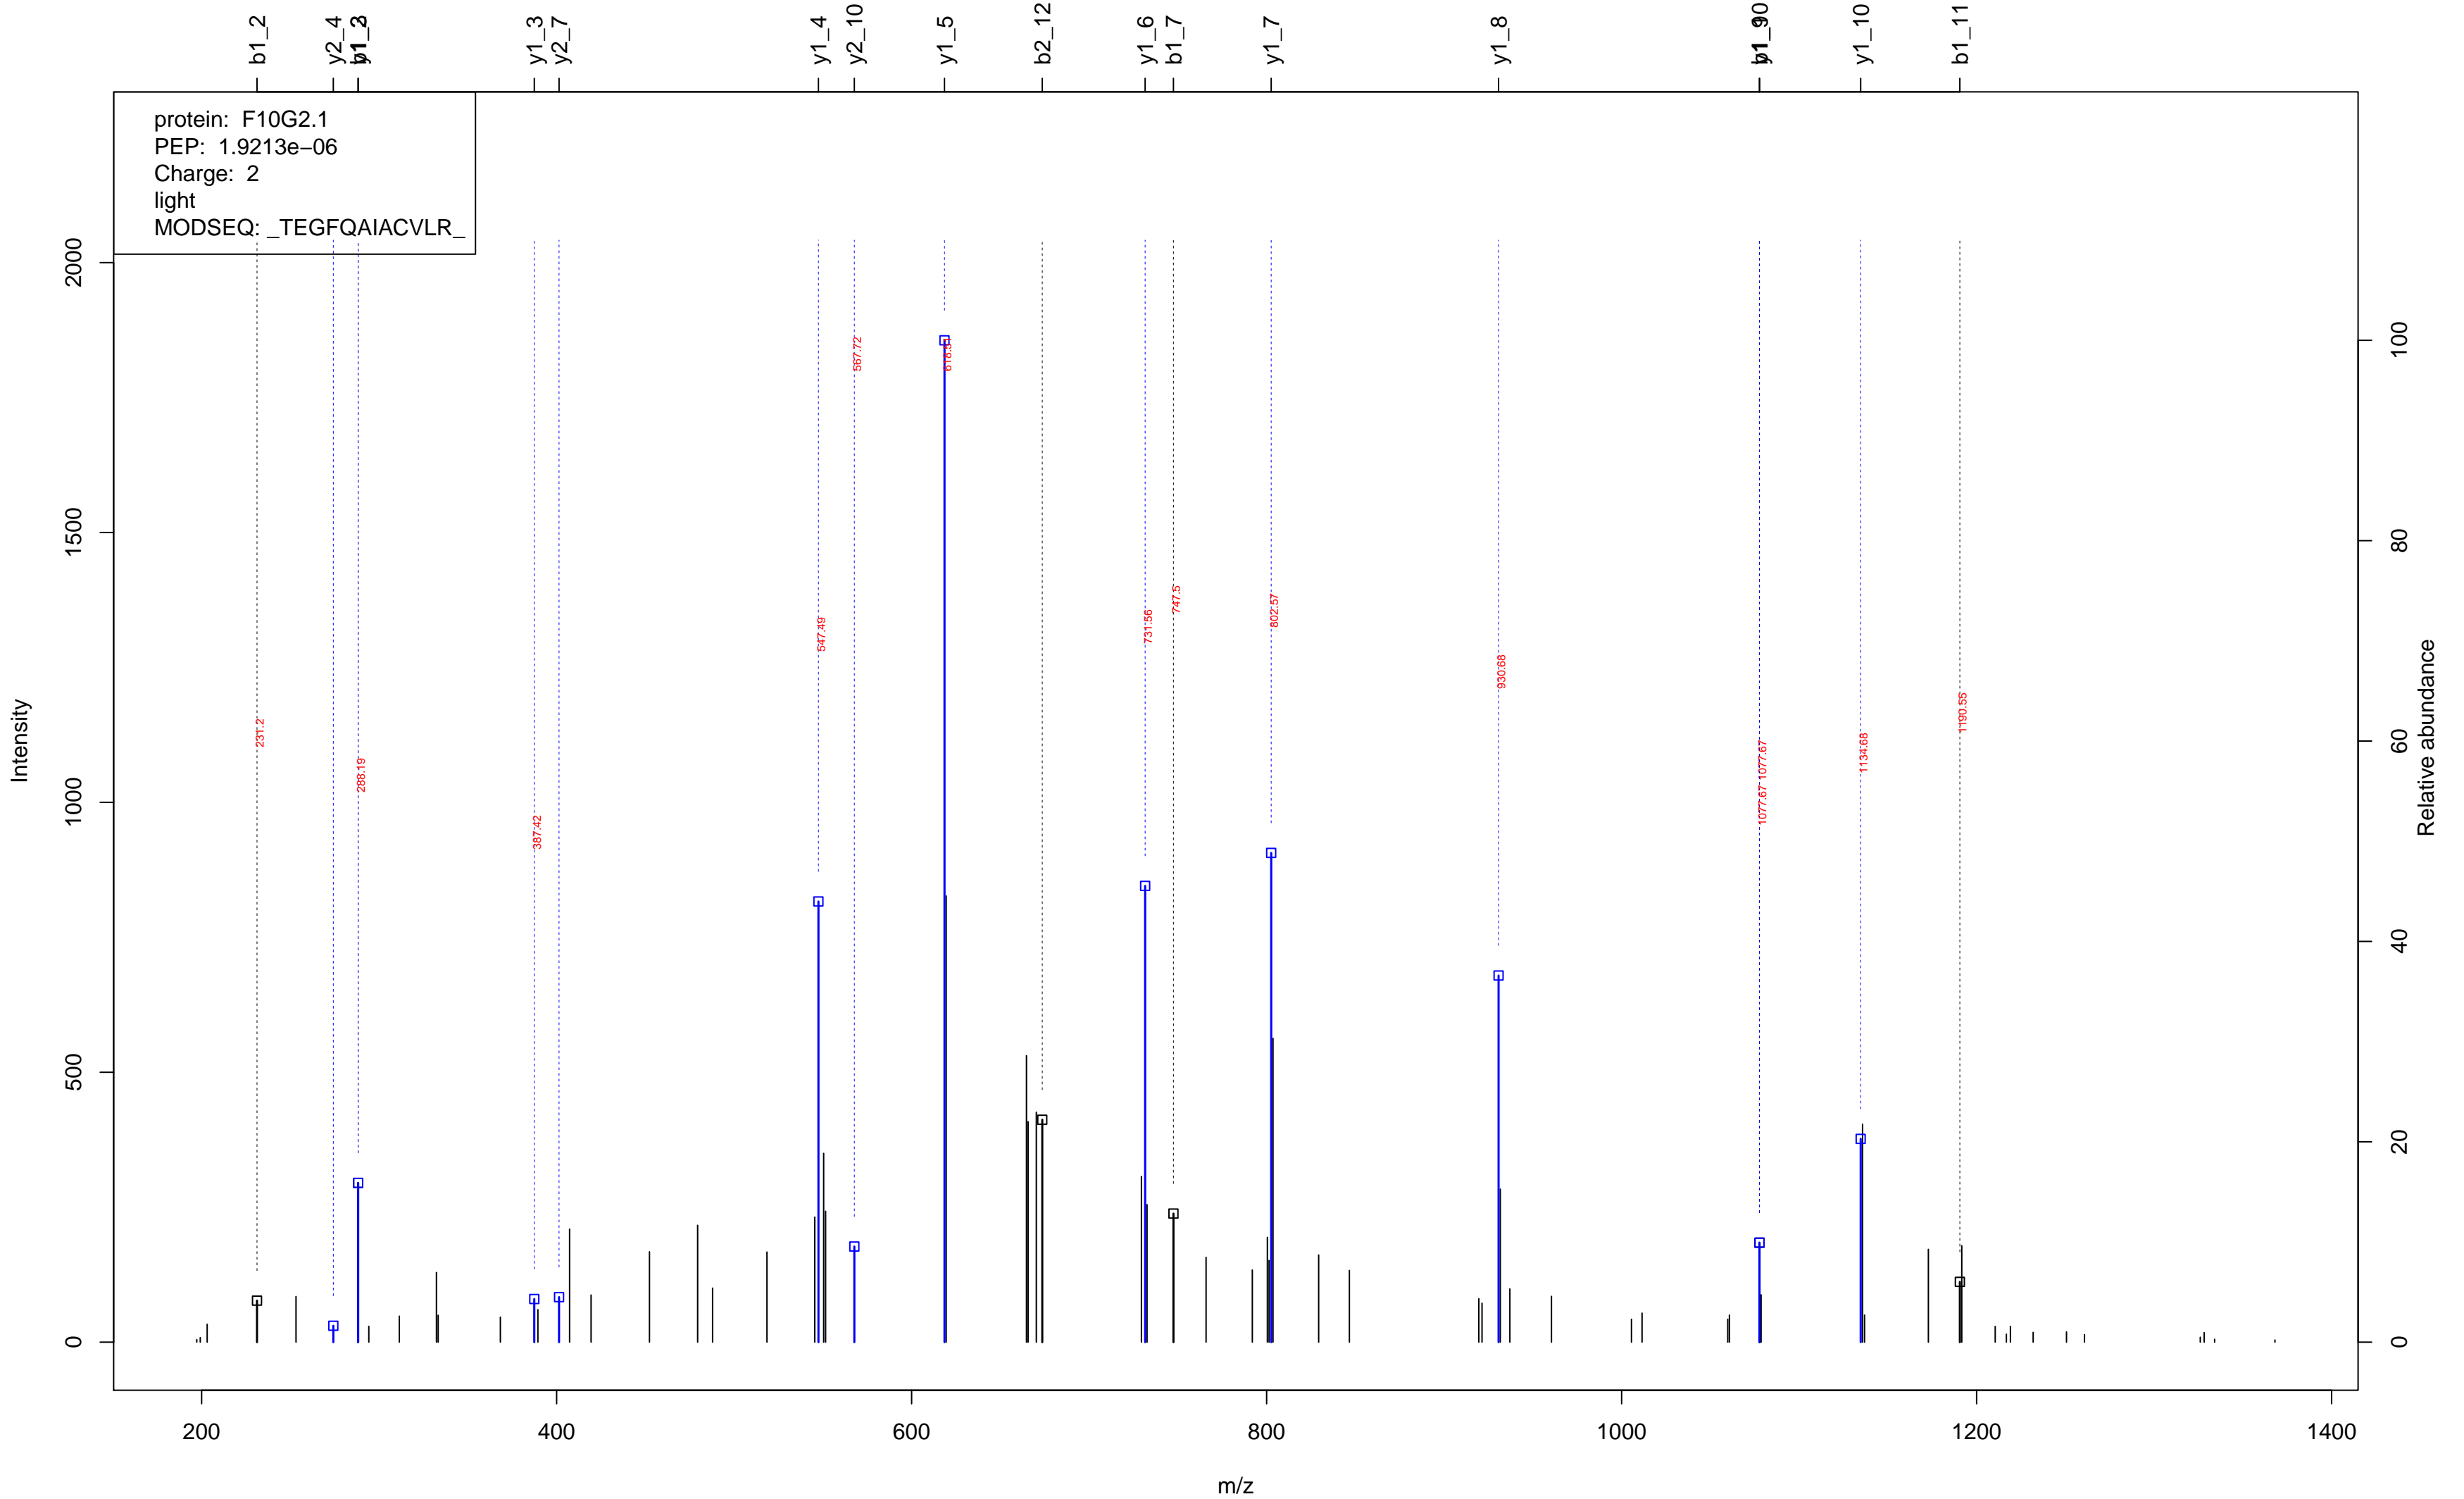

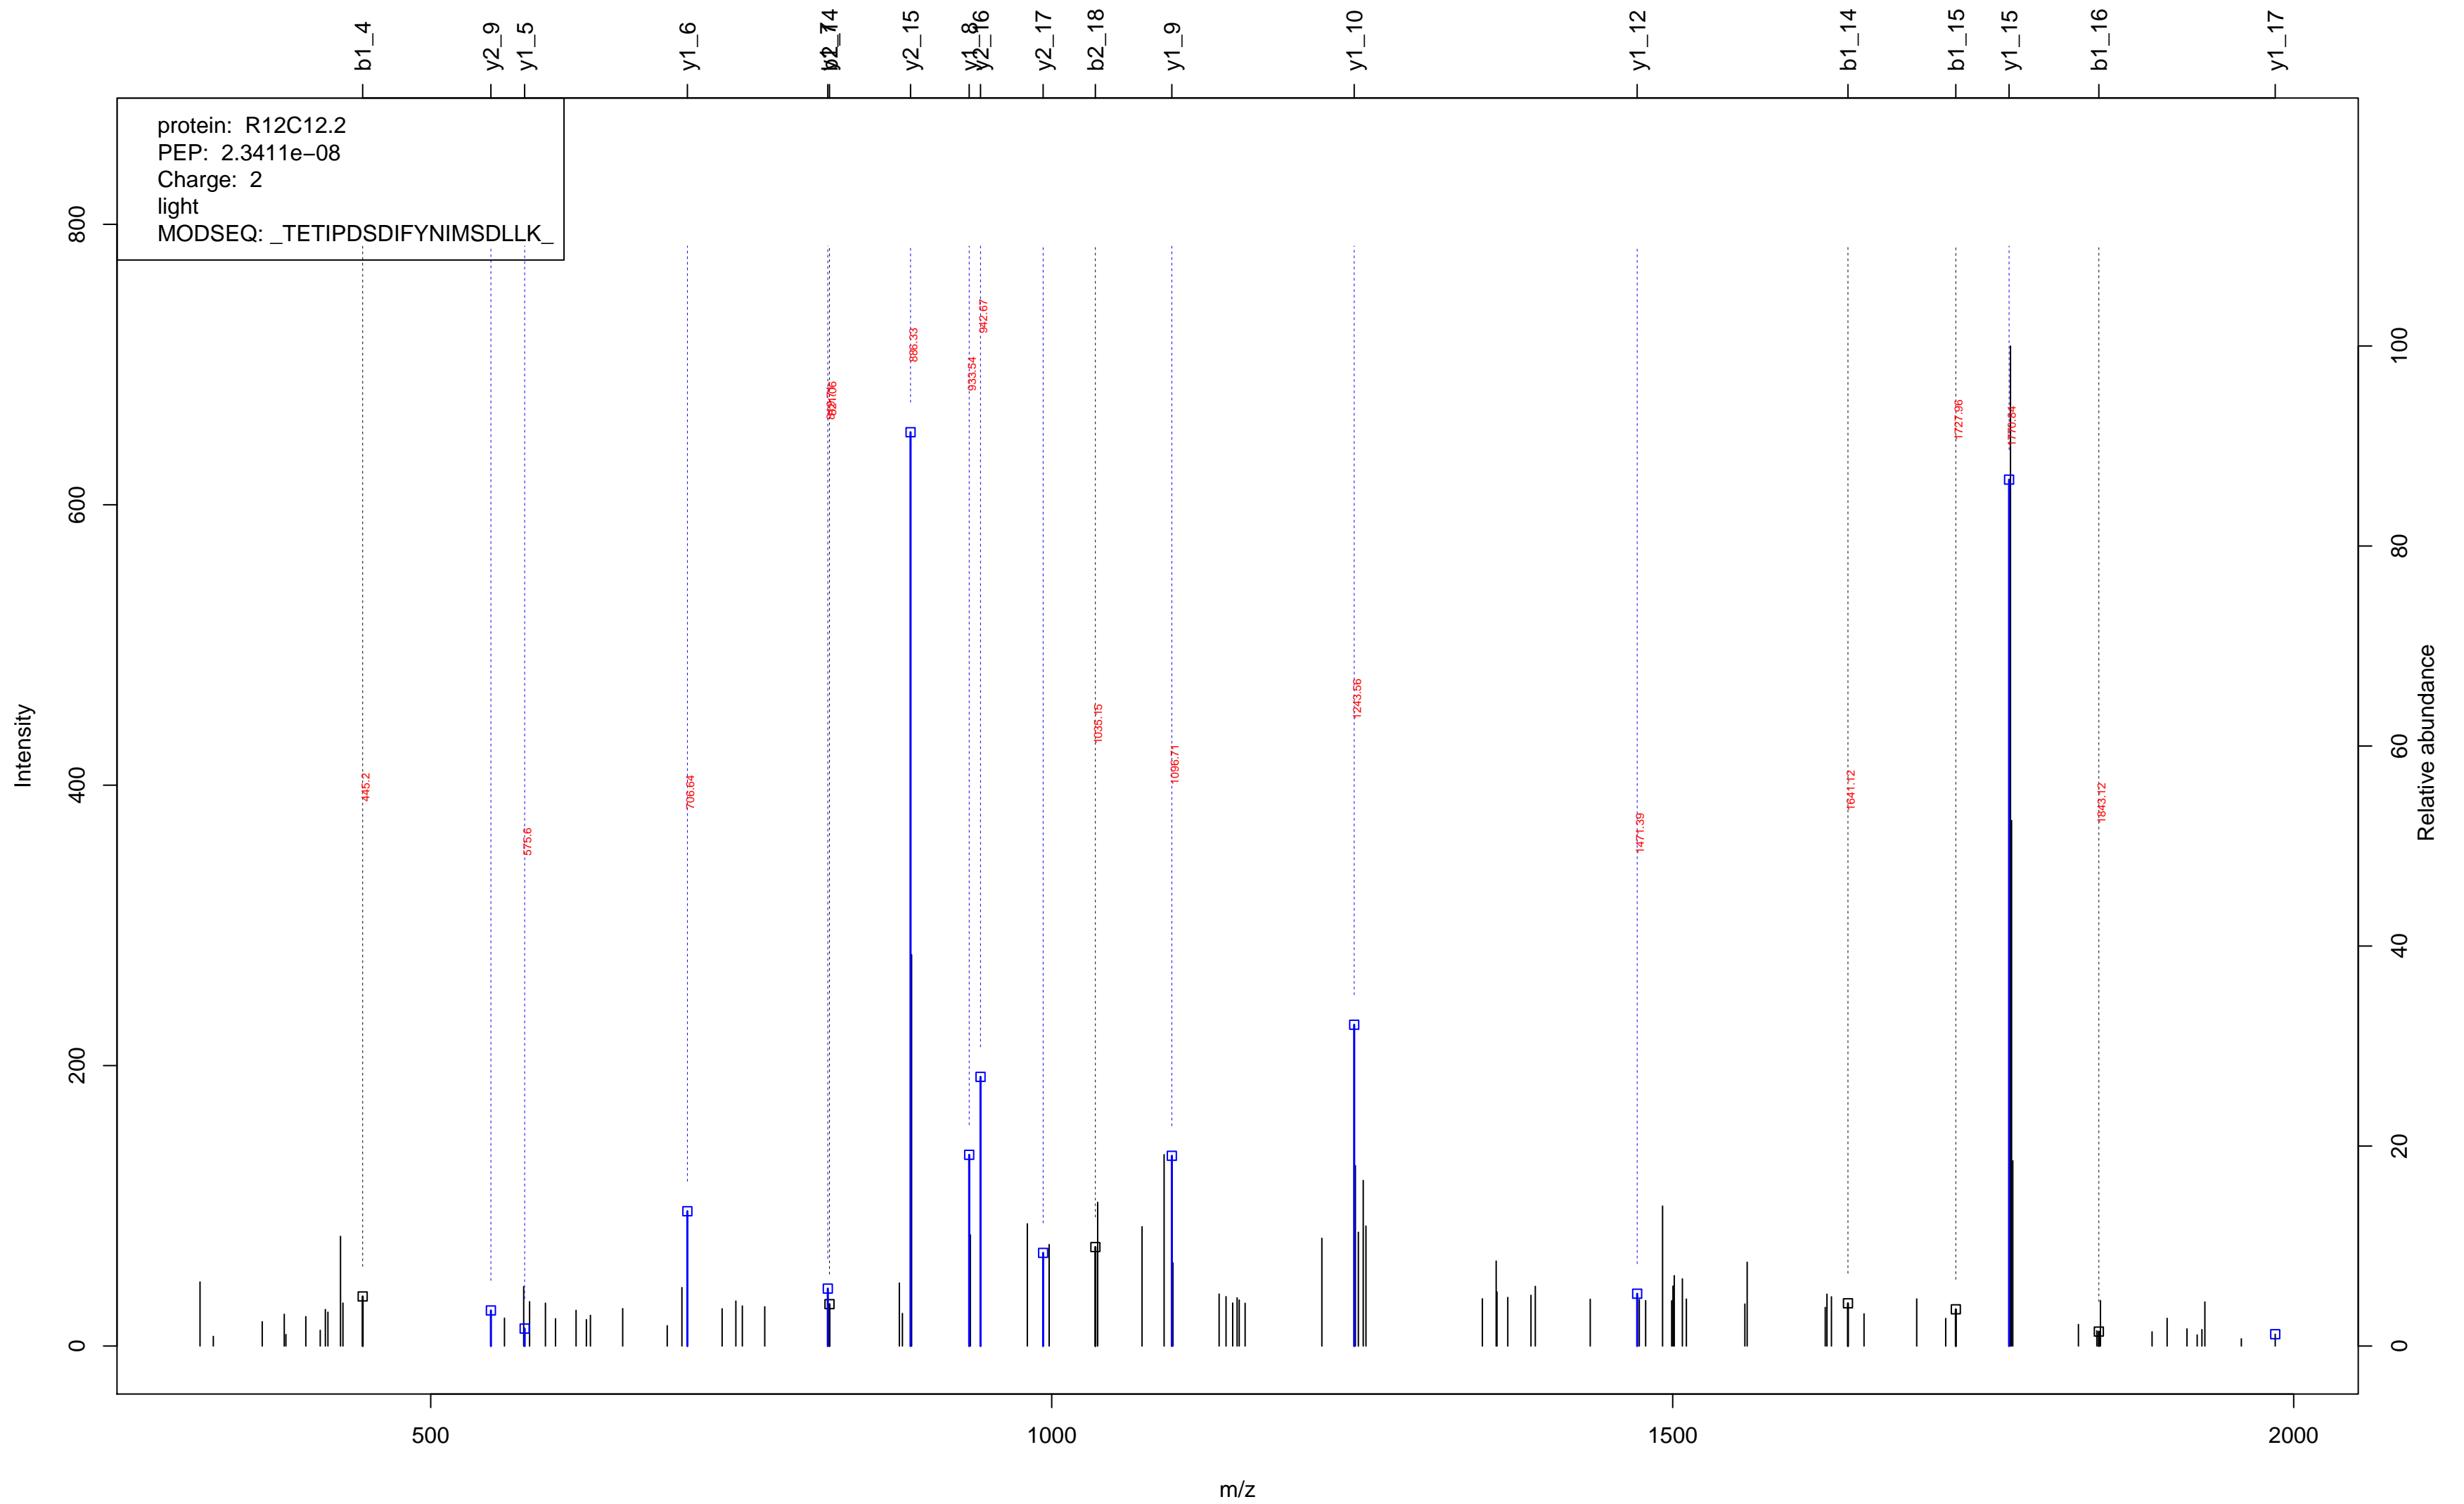

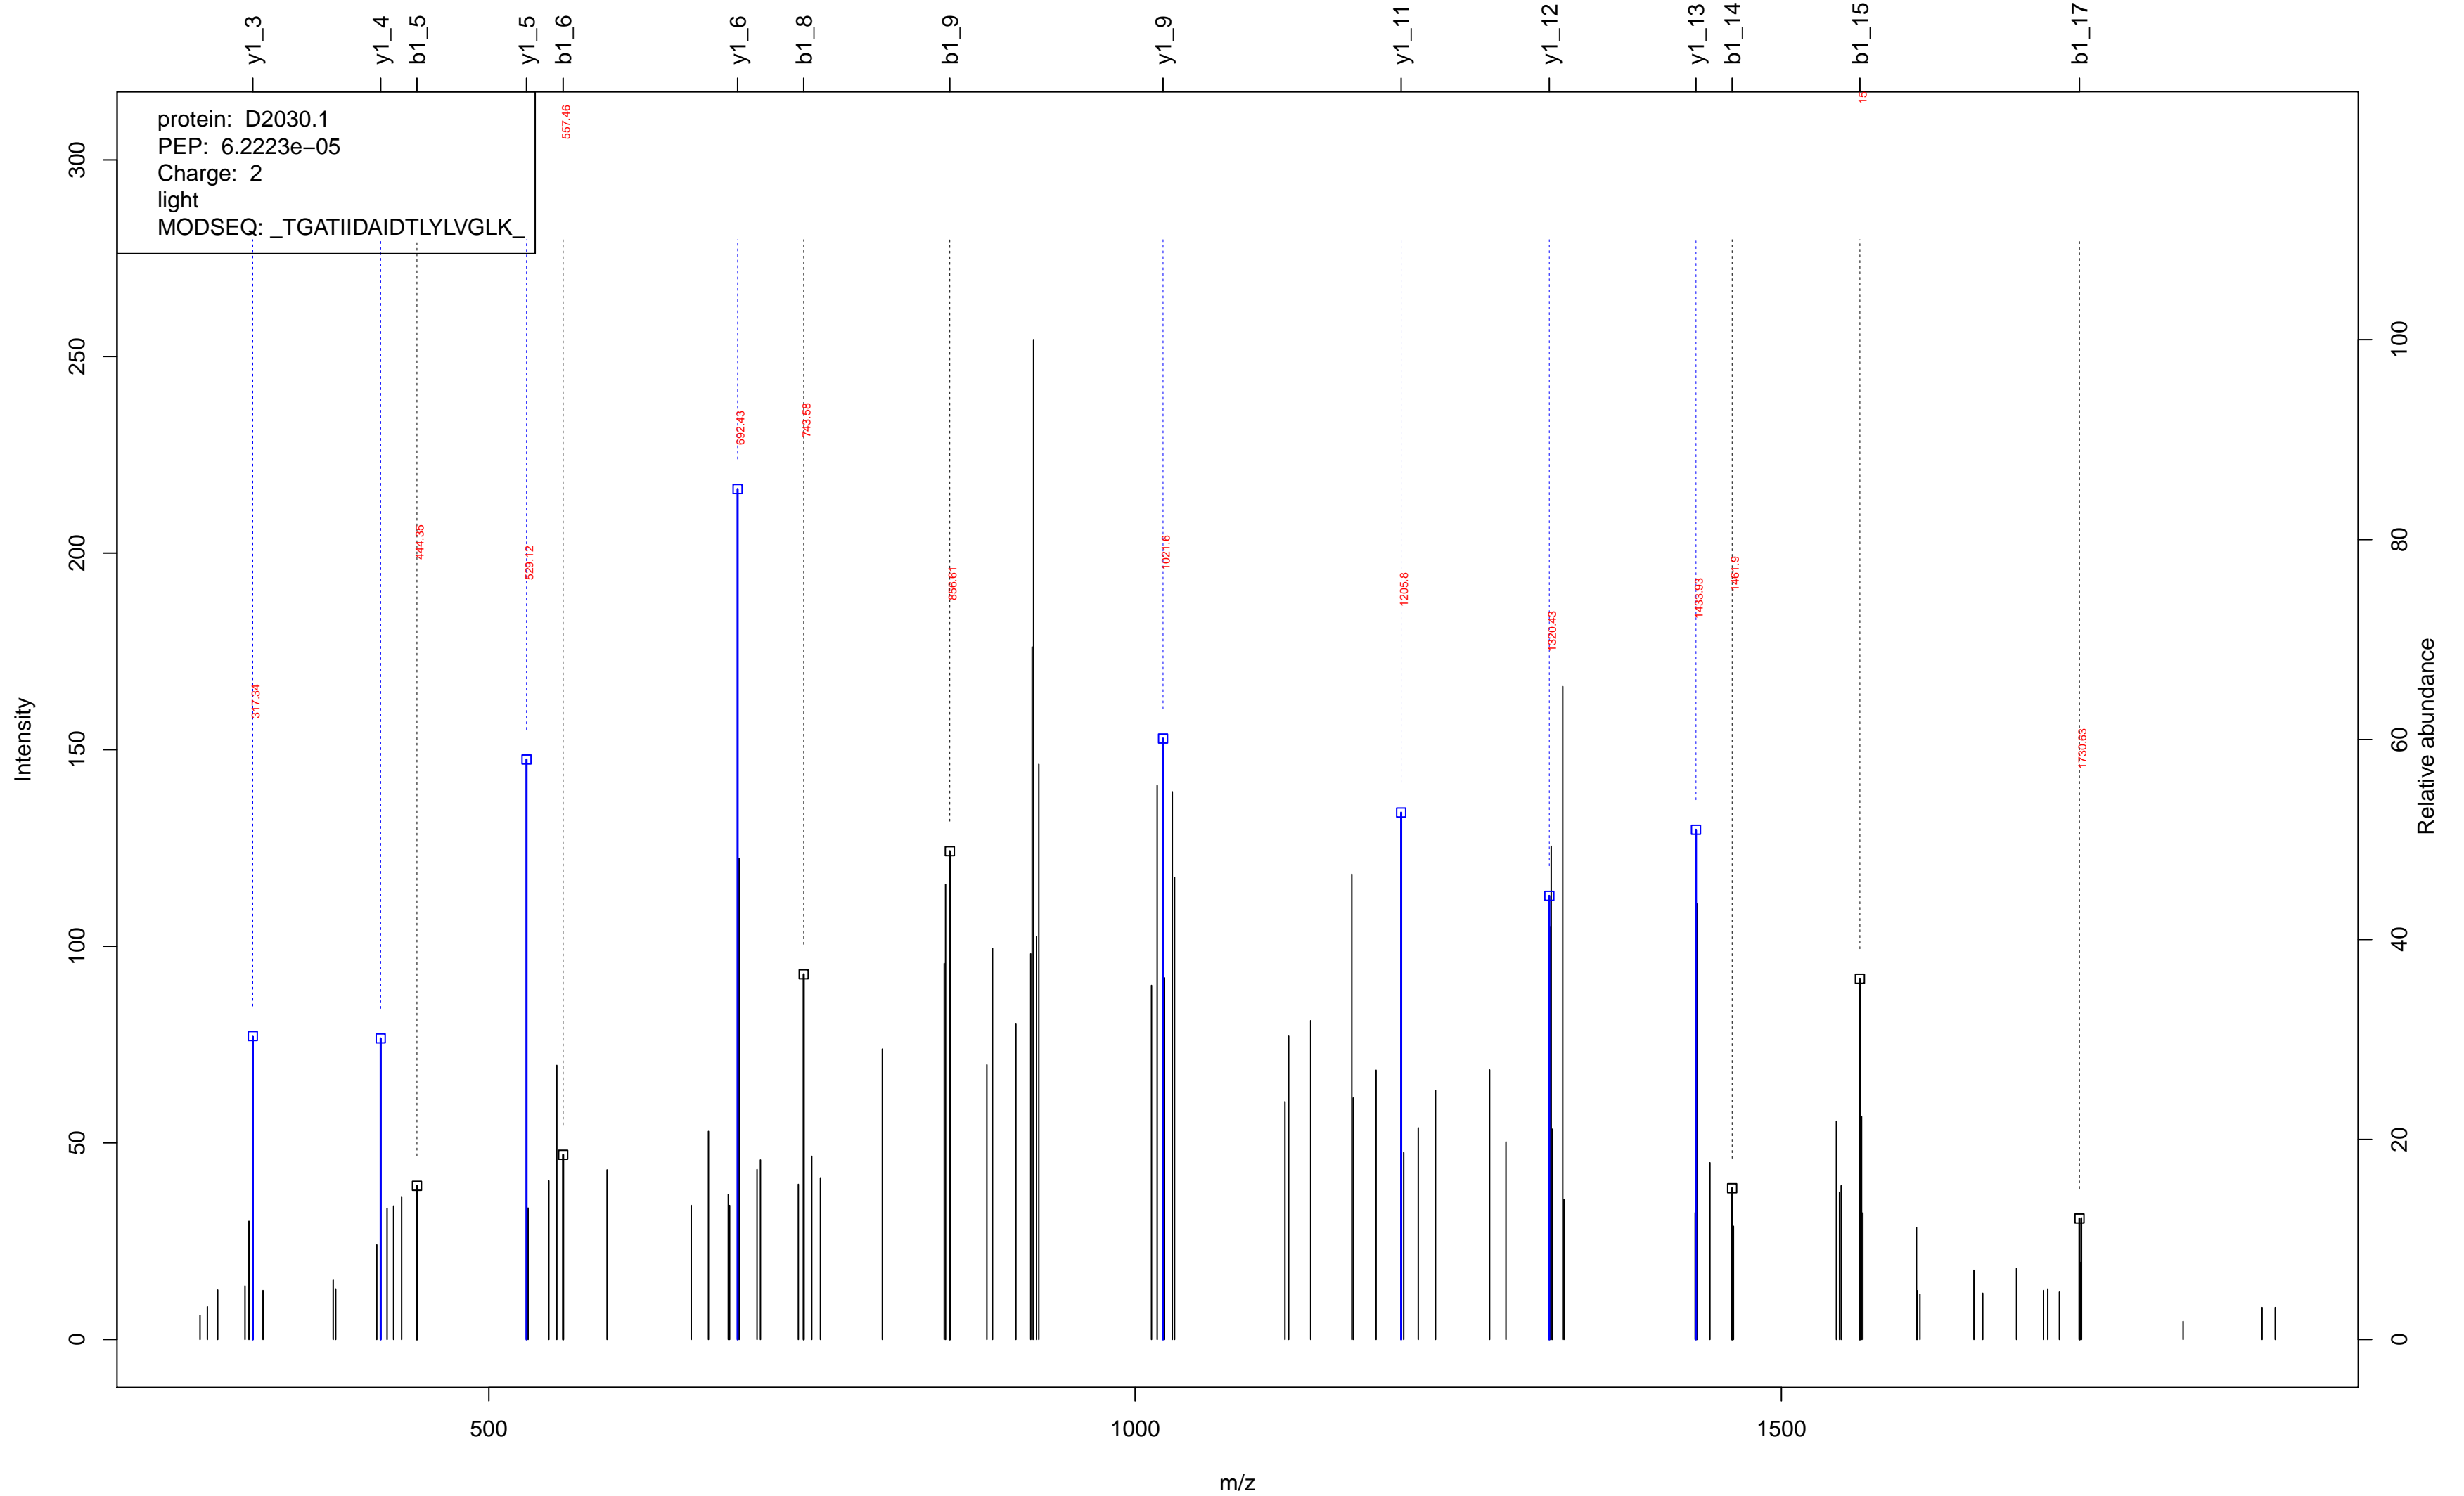

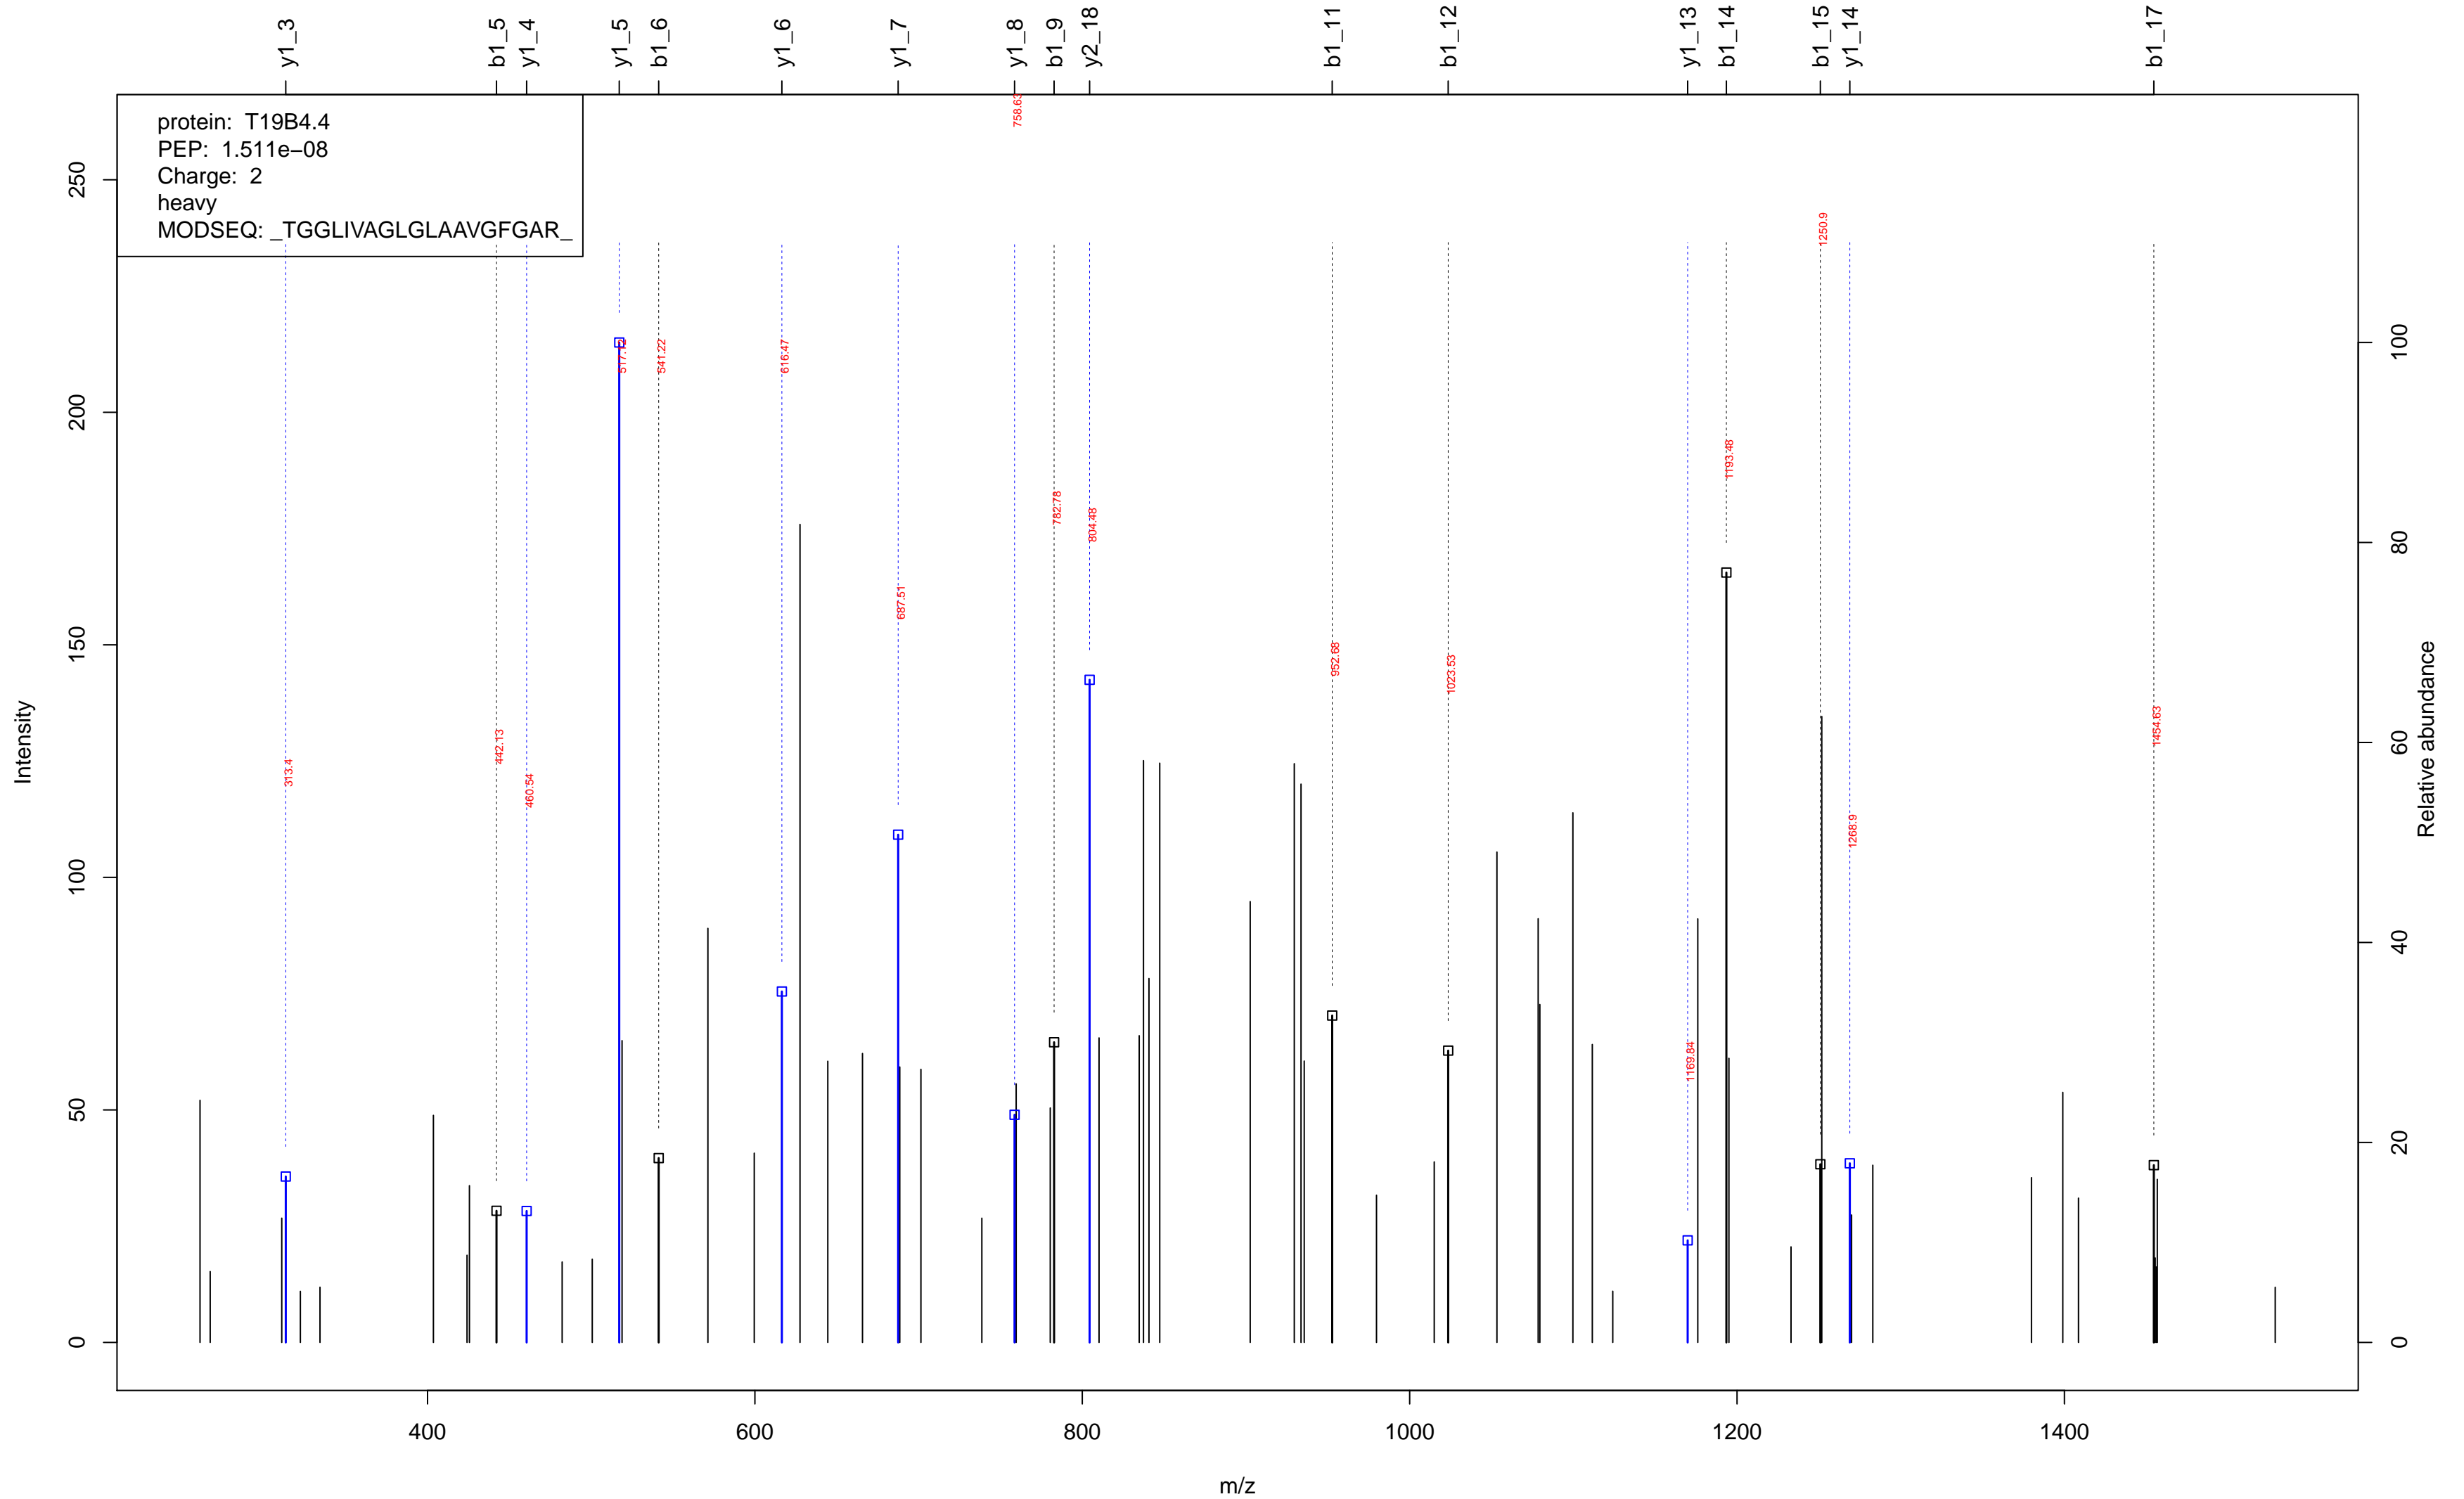

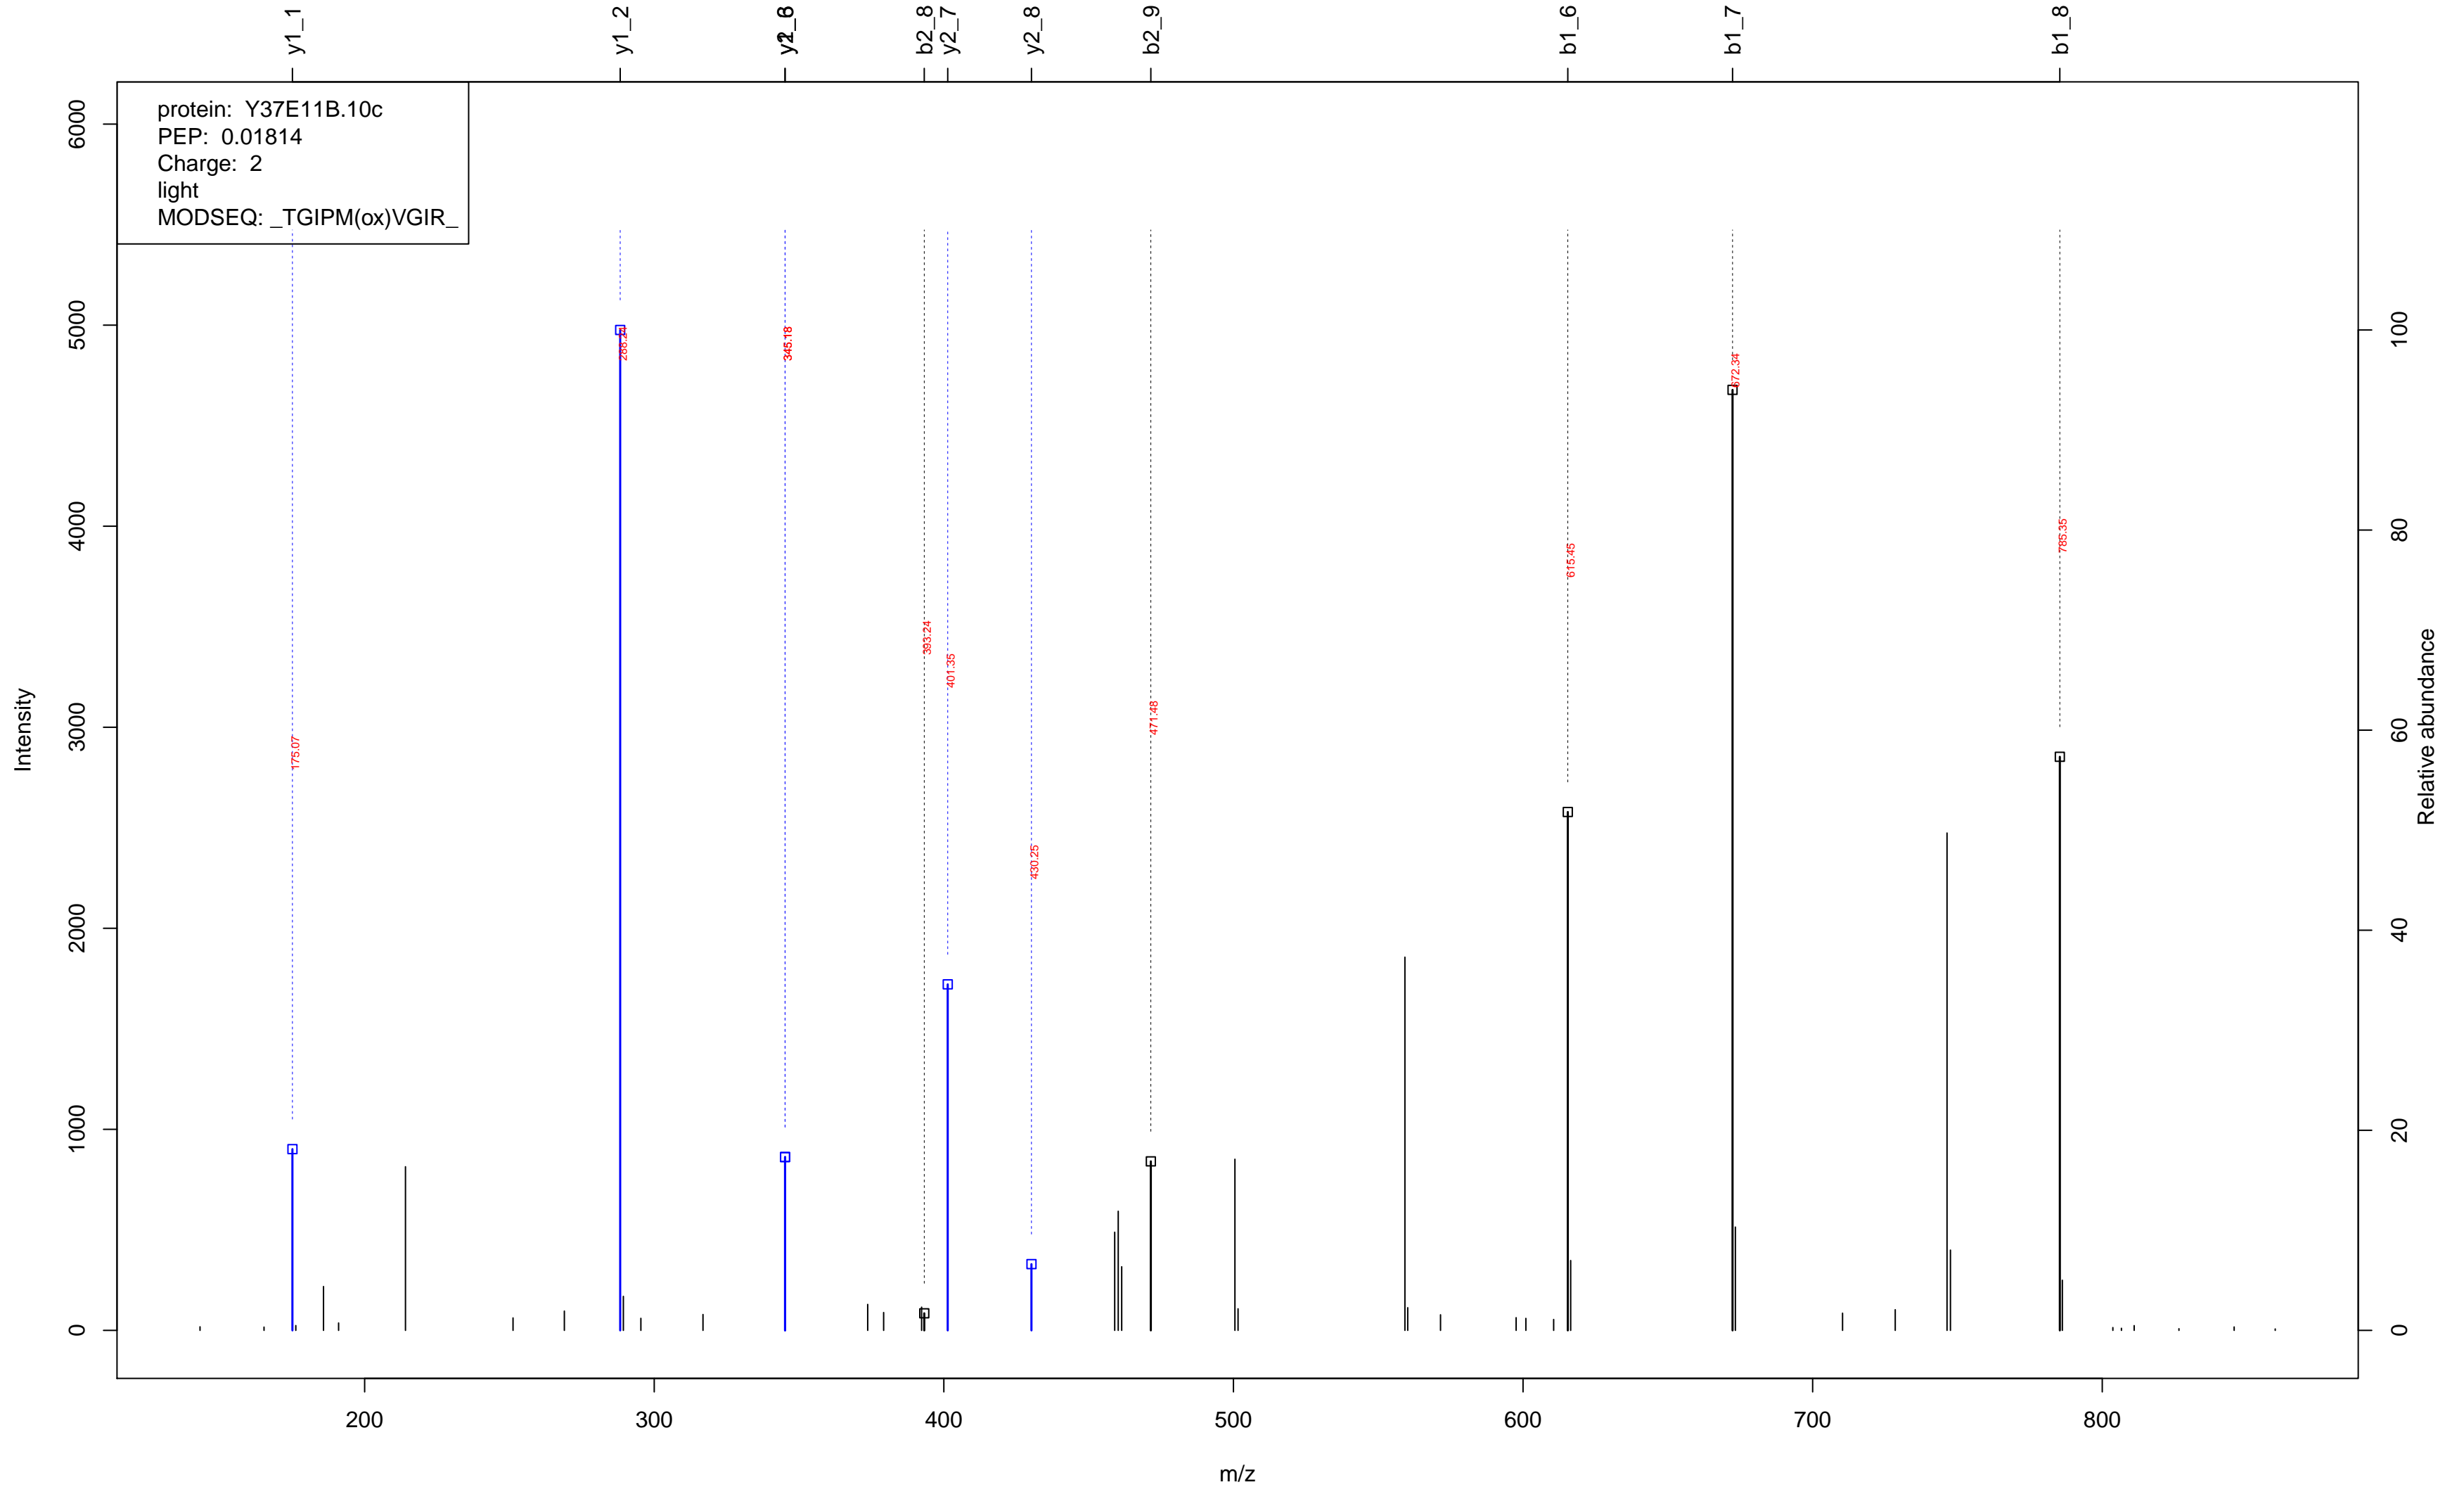

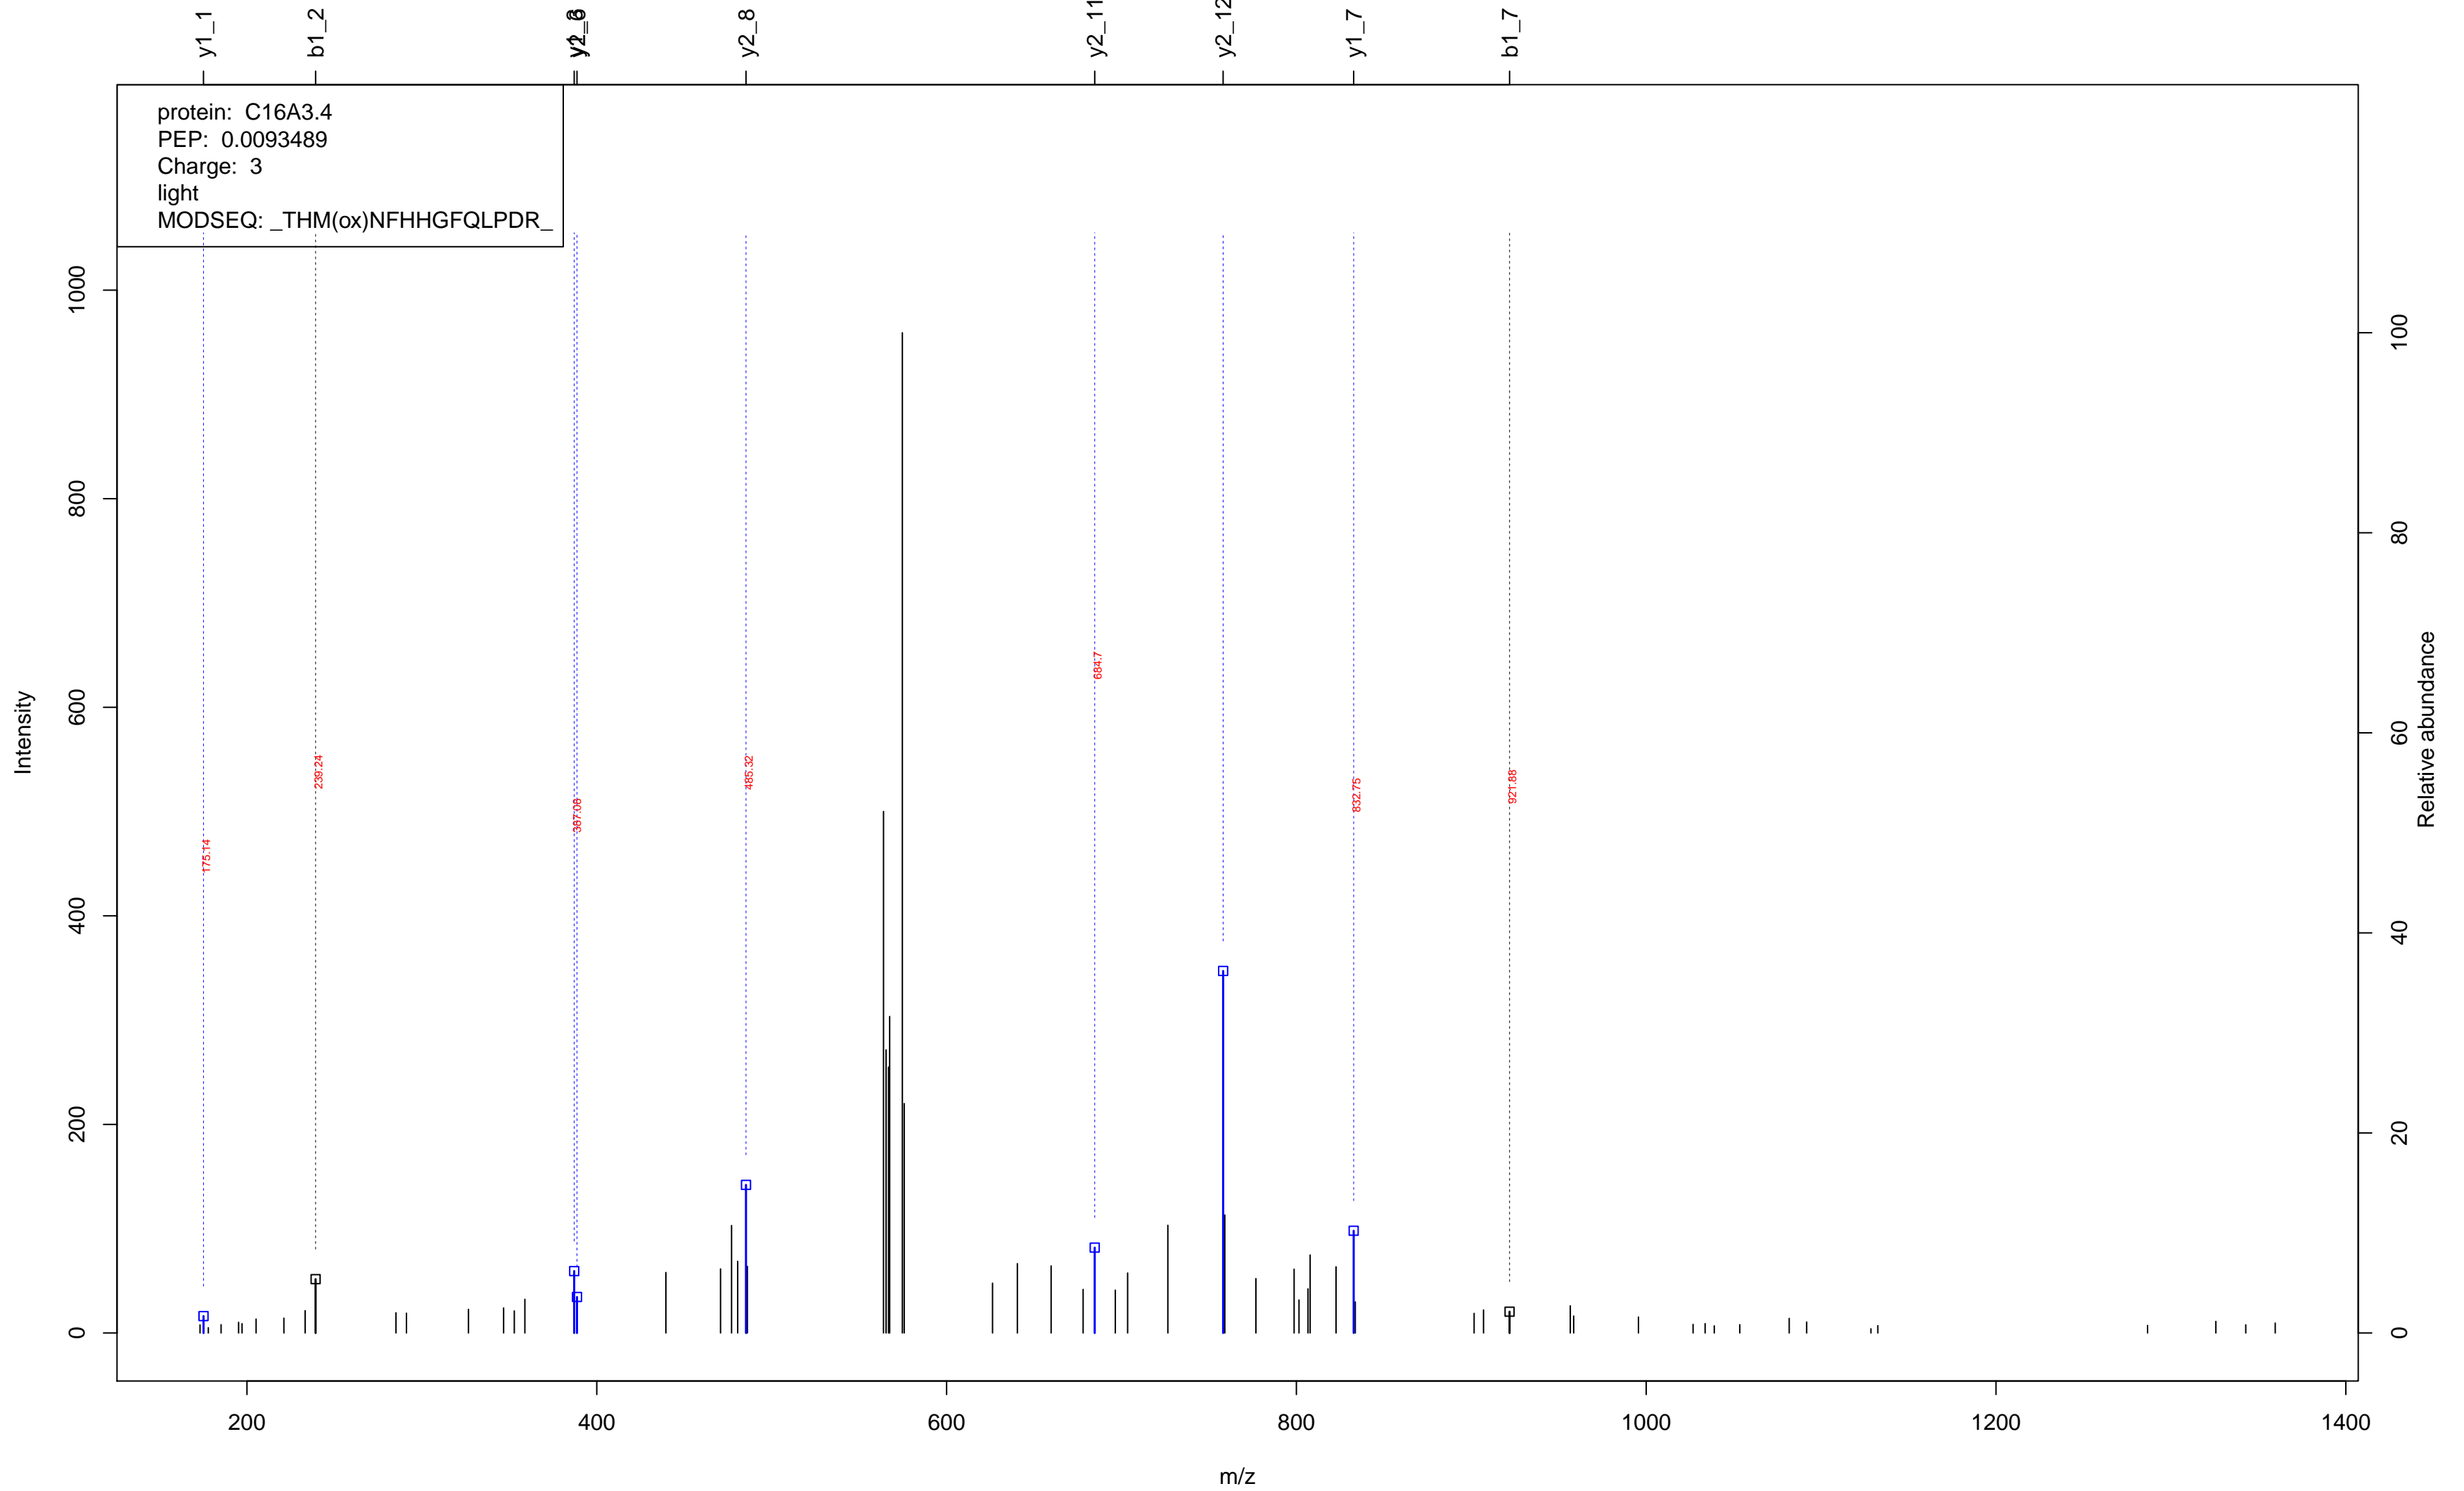



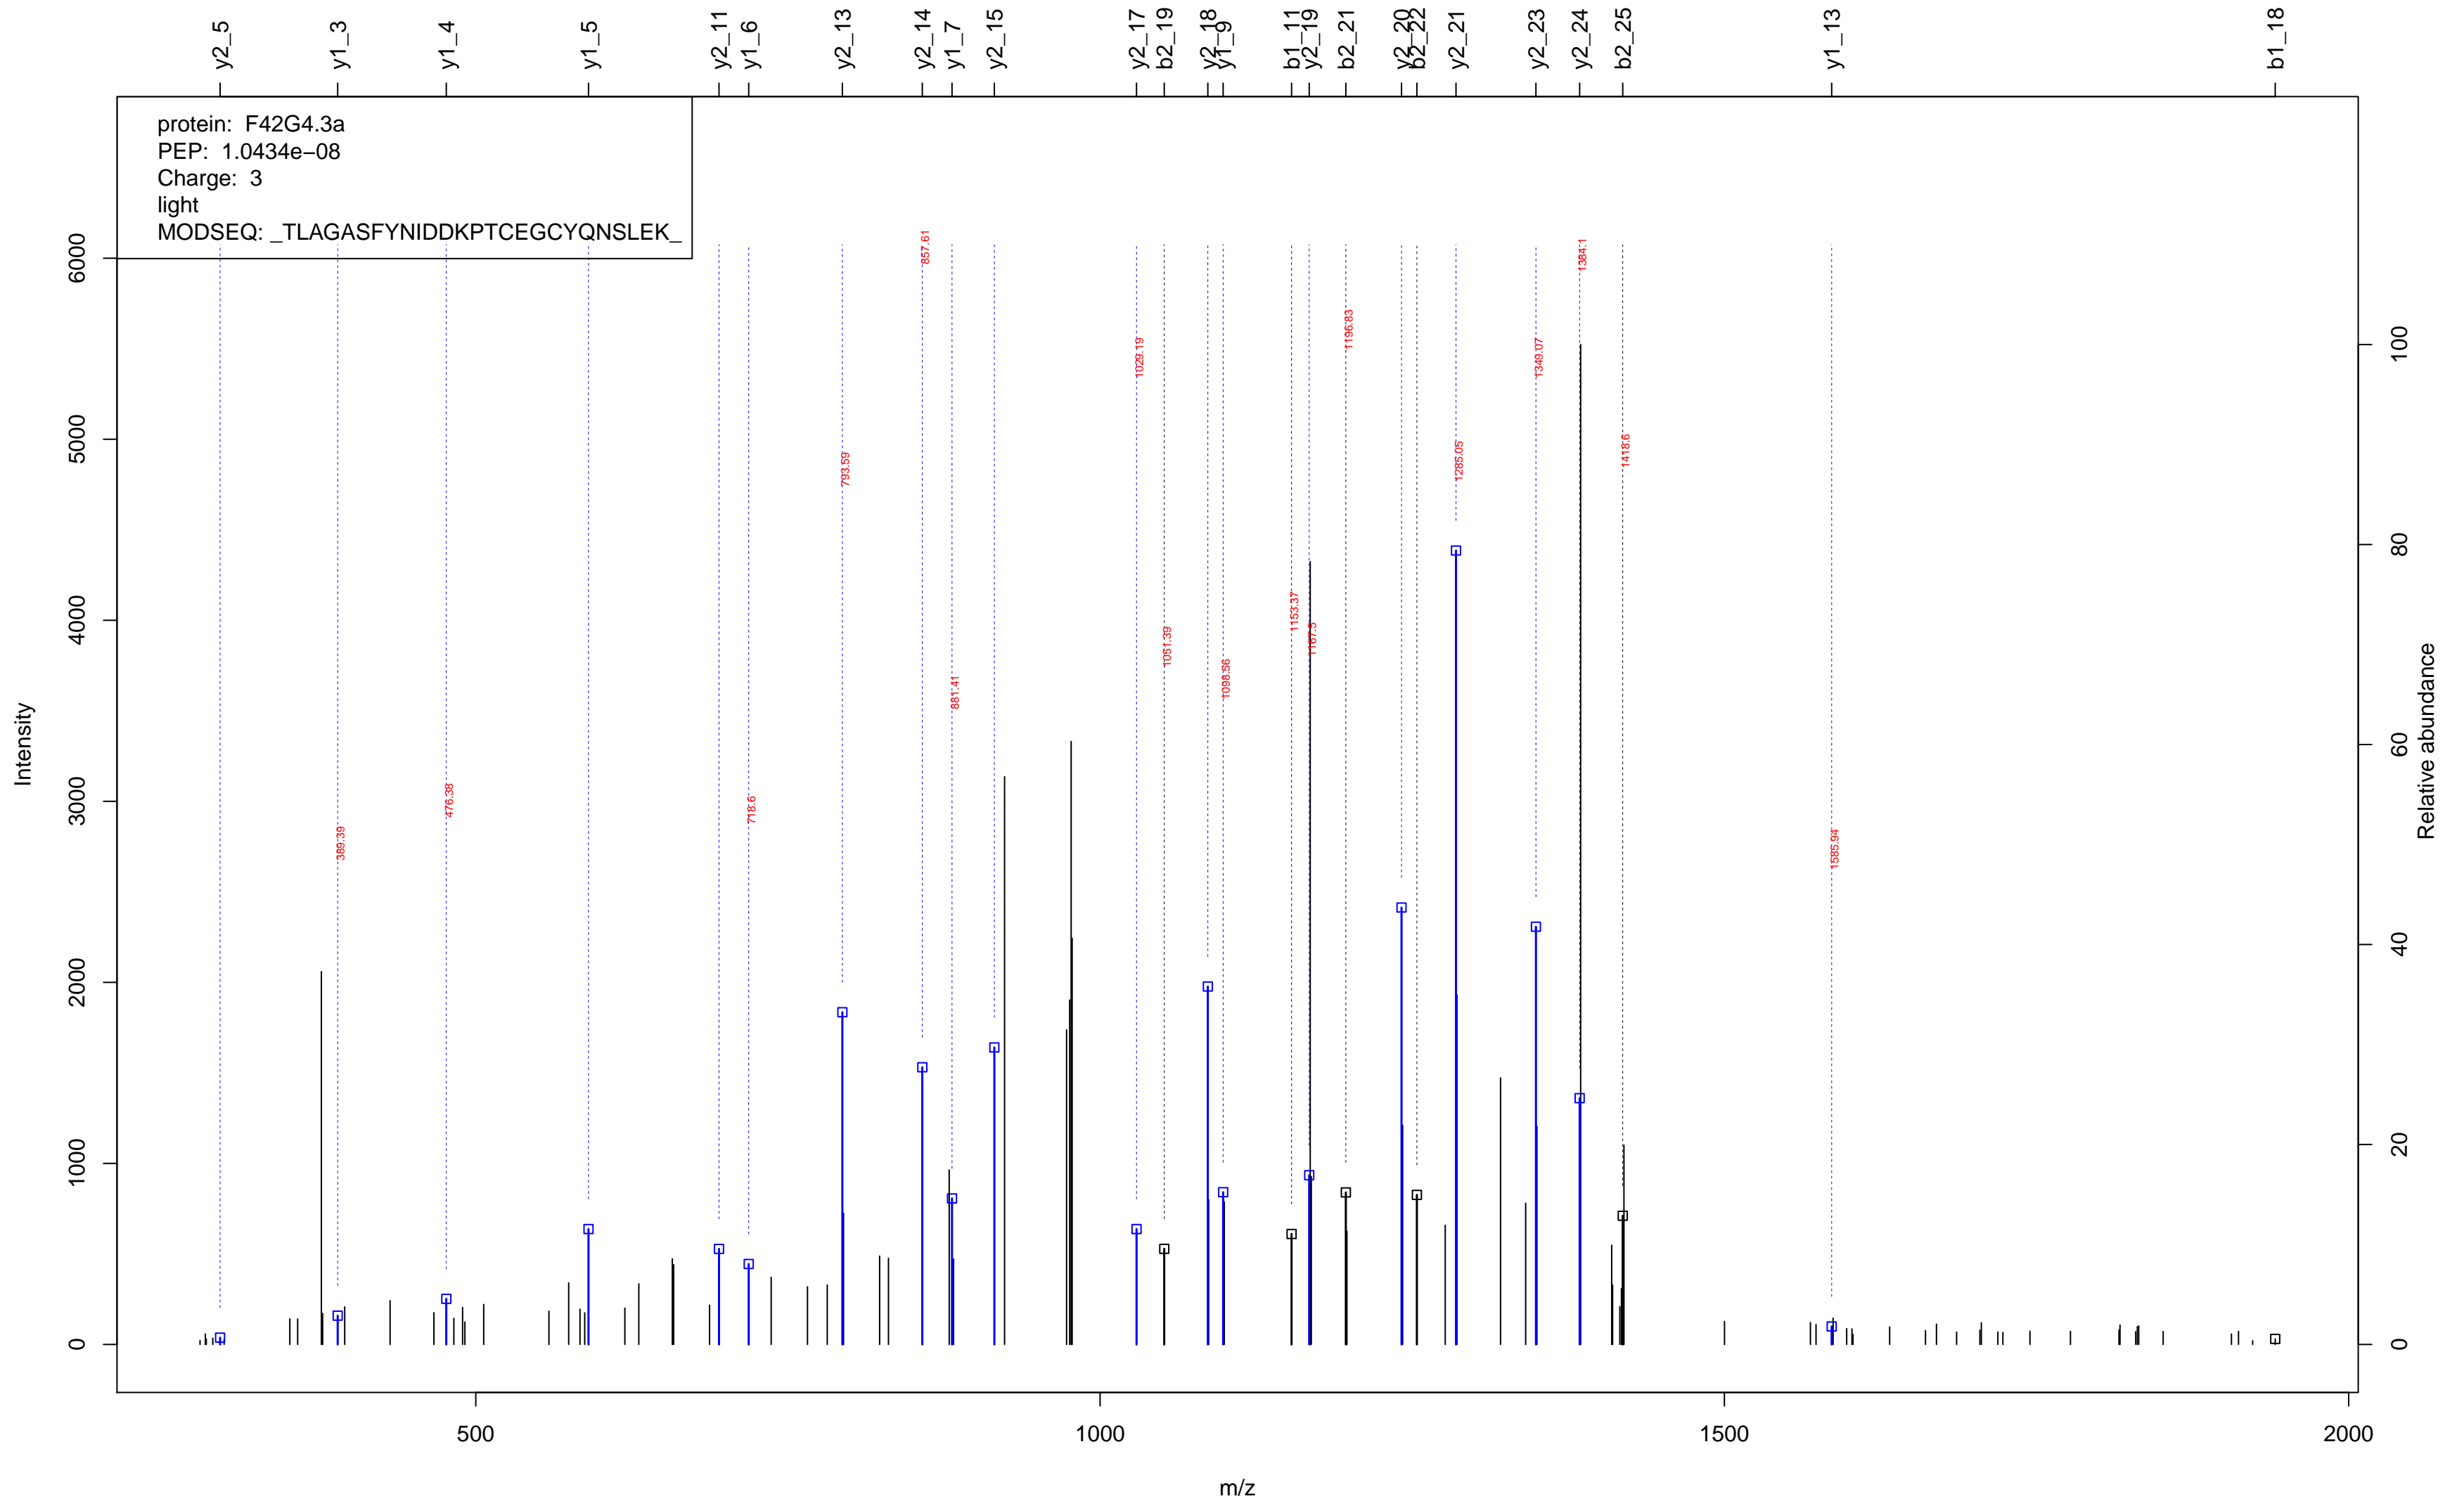

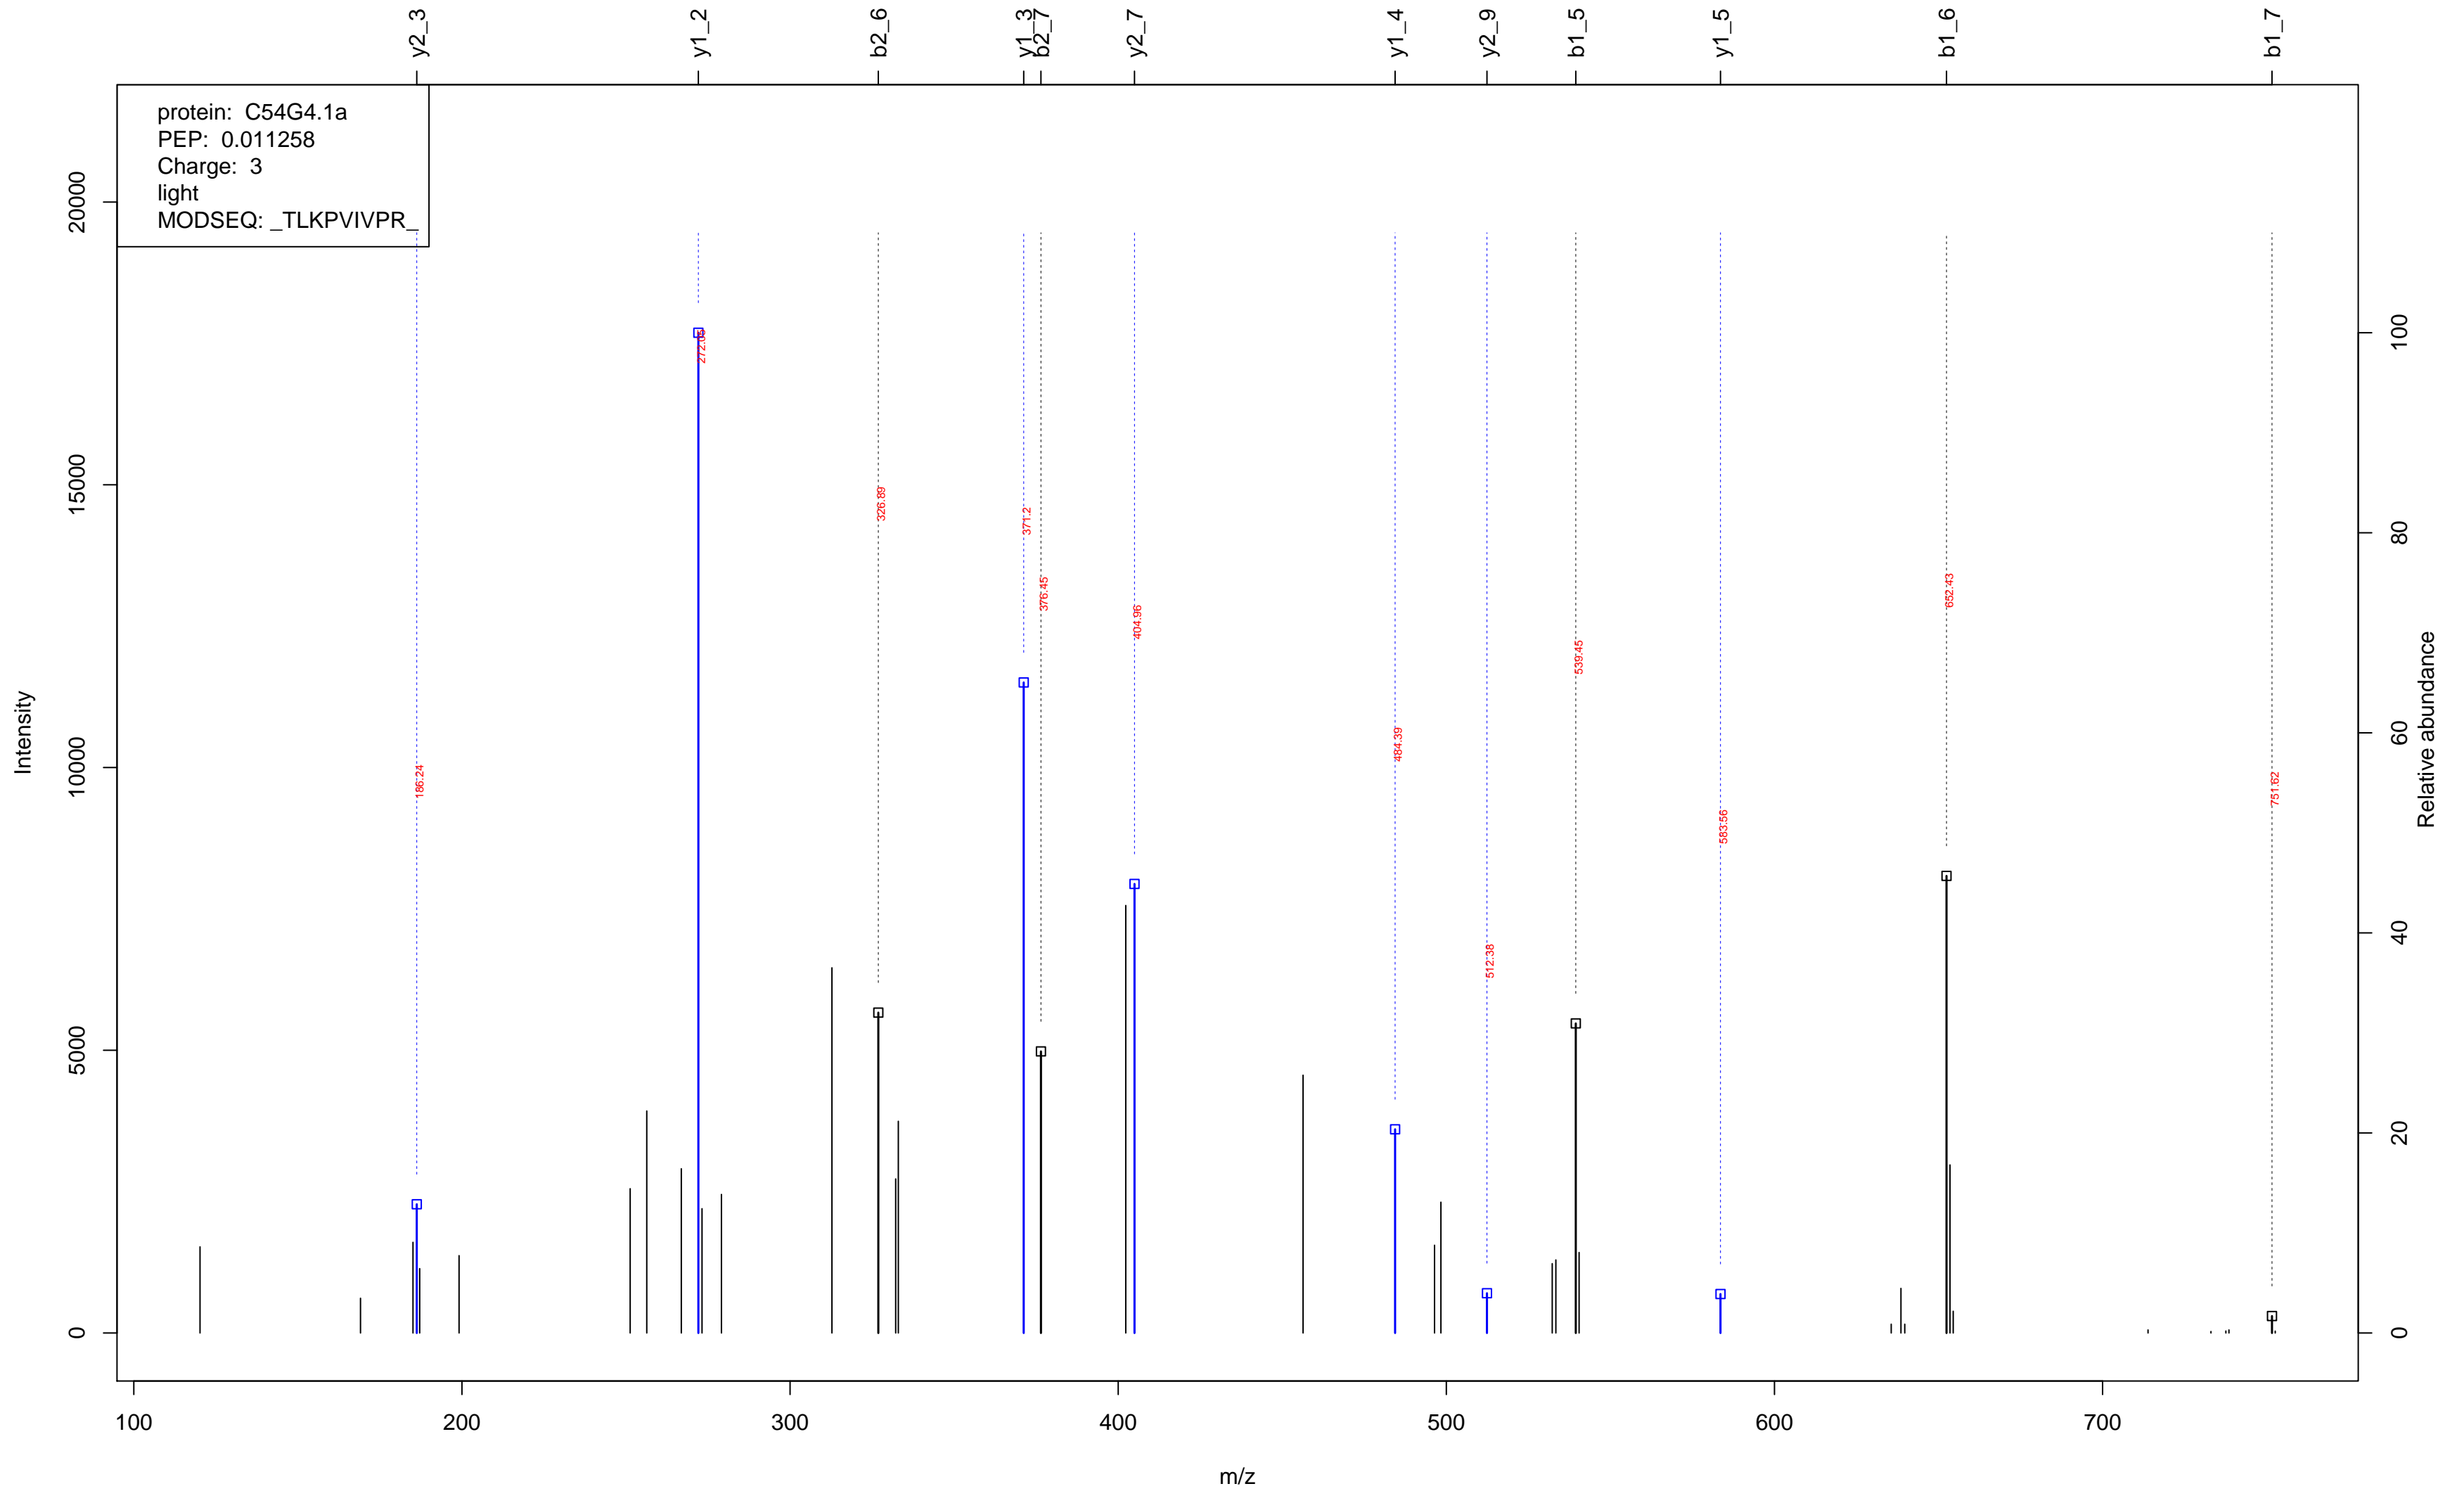

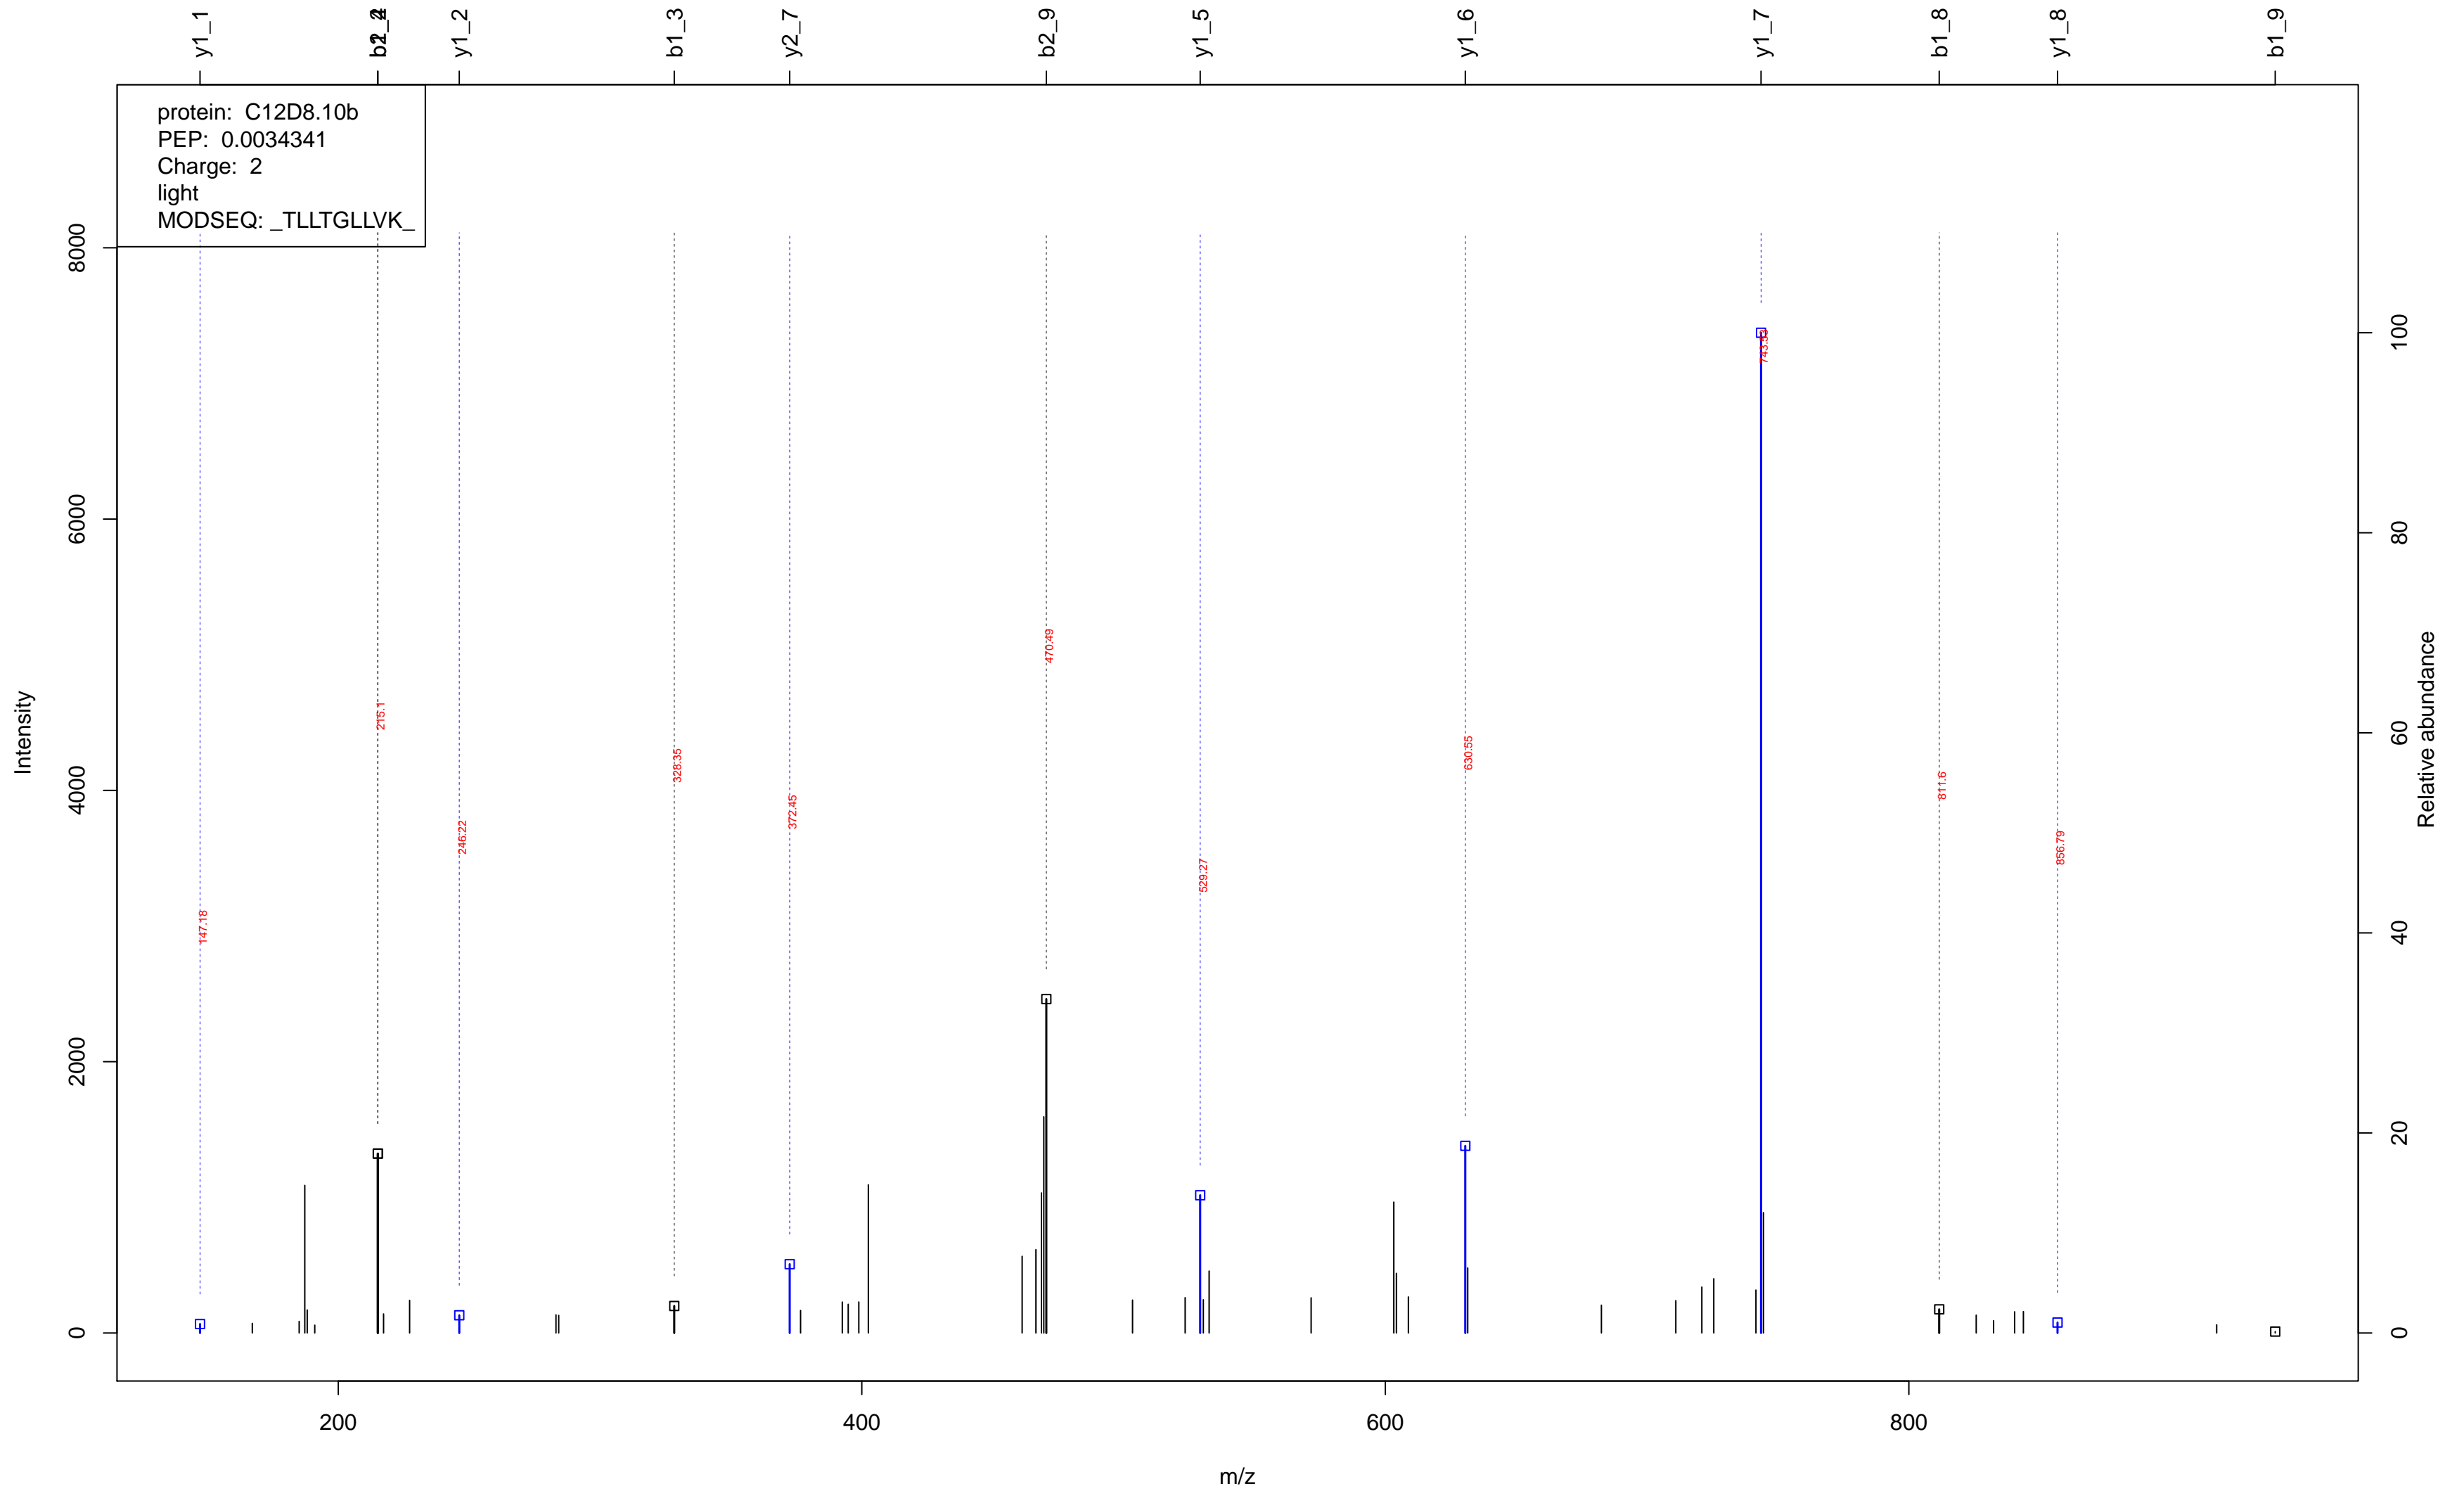

340

y1\_1

b1\_2

y1\_2

b2\_6

y1\_3

y2\_8

b2\_10

y1\_6

b1\_7

y1\_8

protein: C36B7.6  
PEP: 0.011682  
Charge: 2  
heavy  
MODSEQ: \_TNPILGVIPR\_

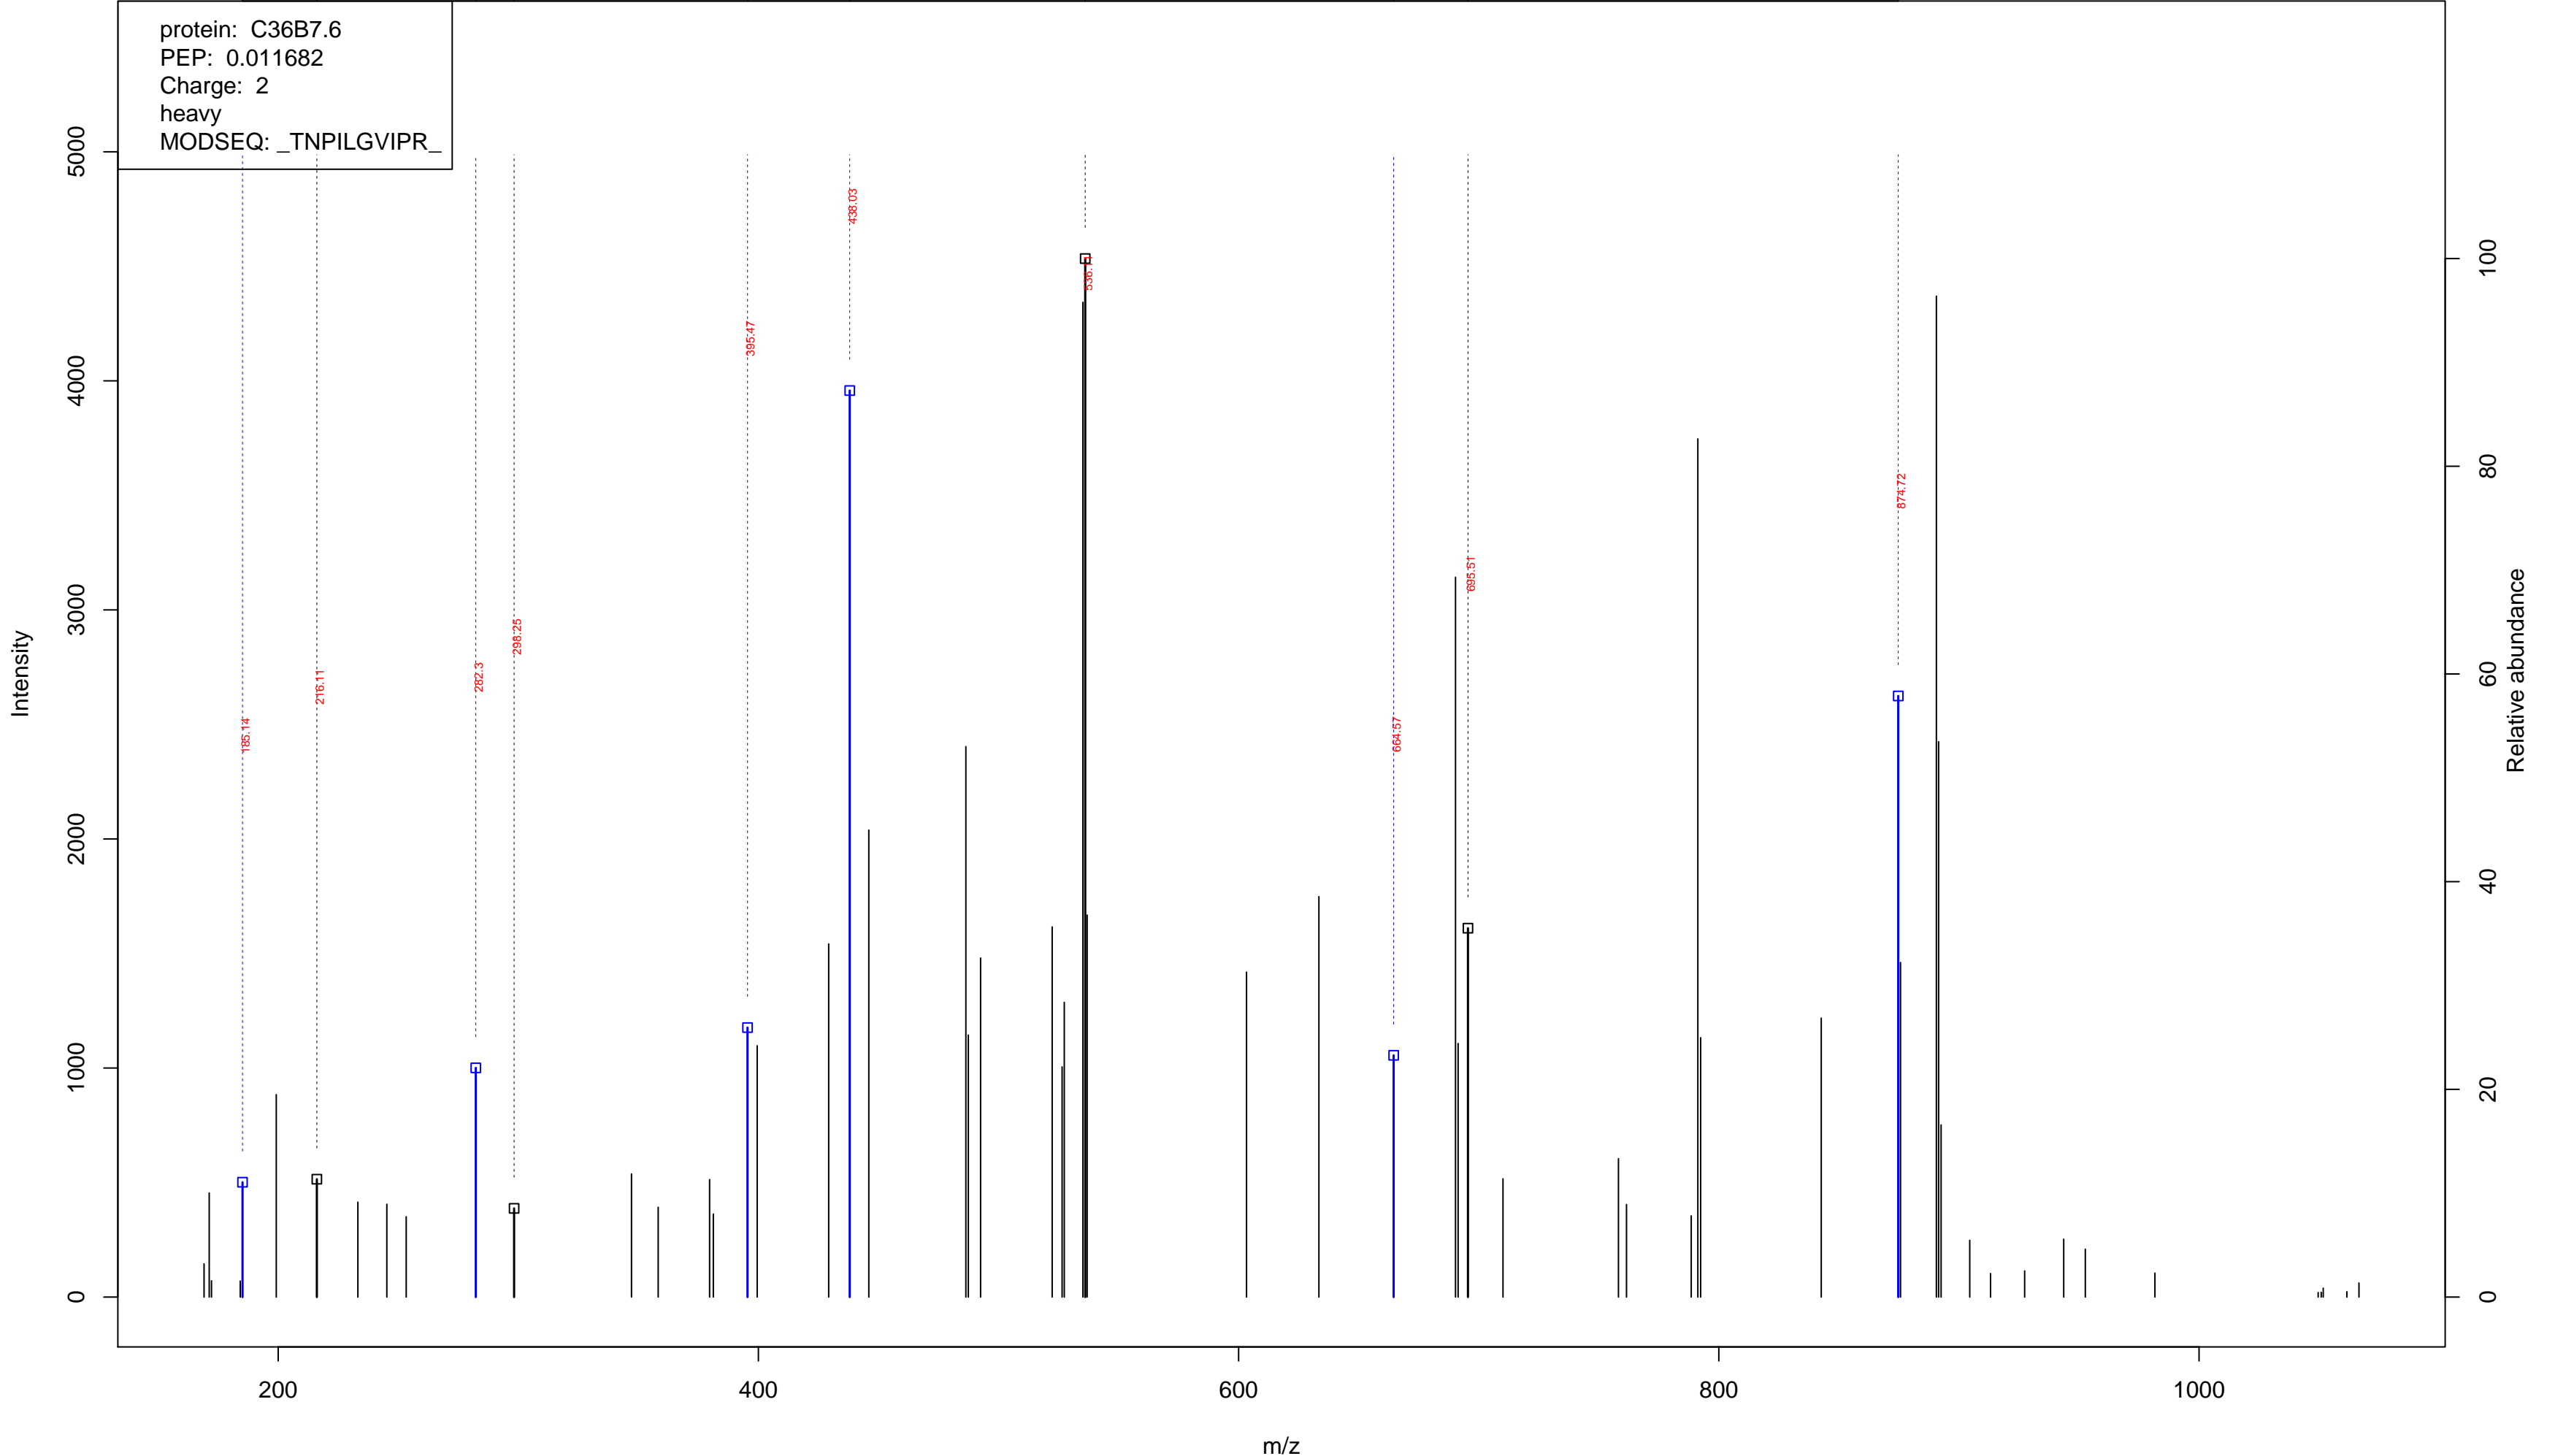

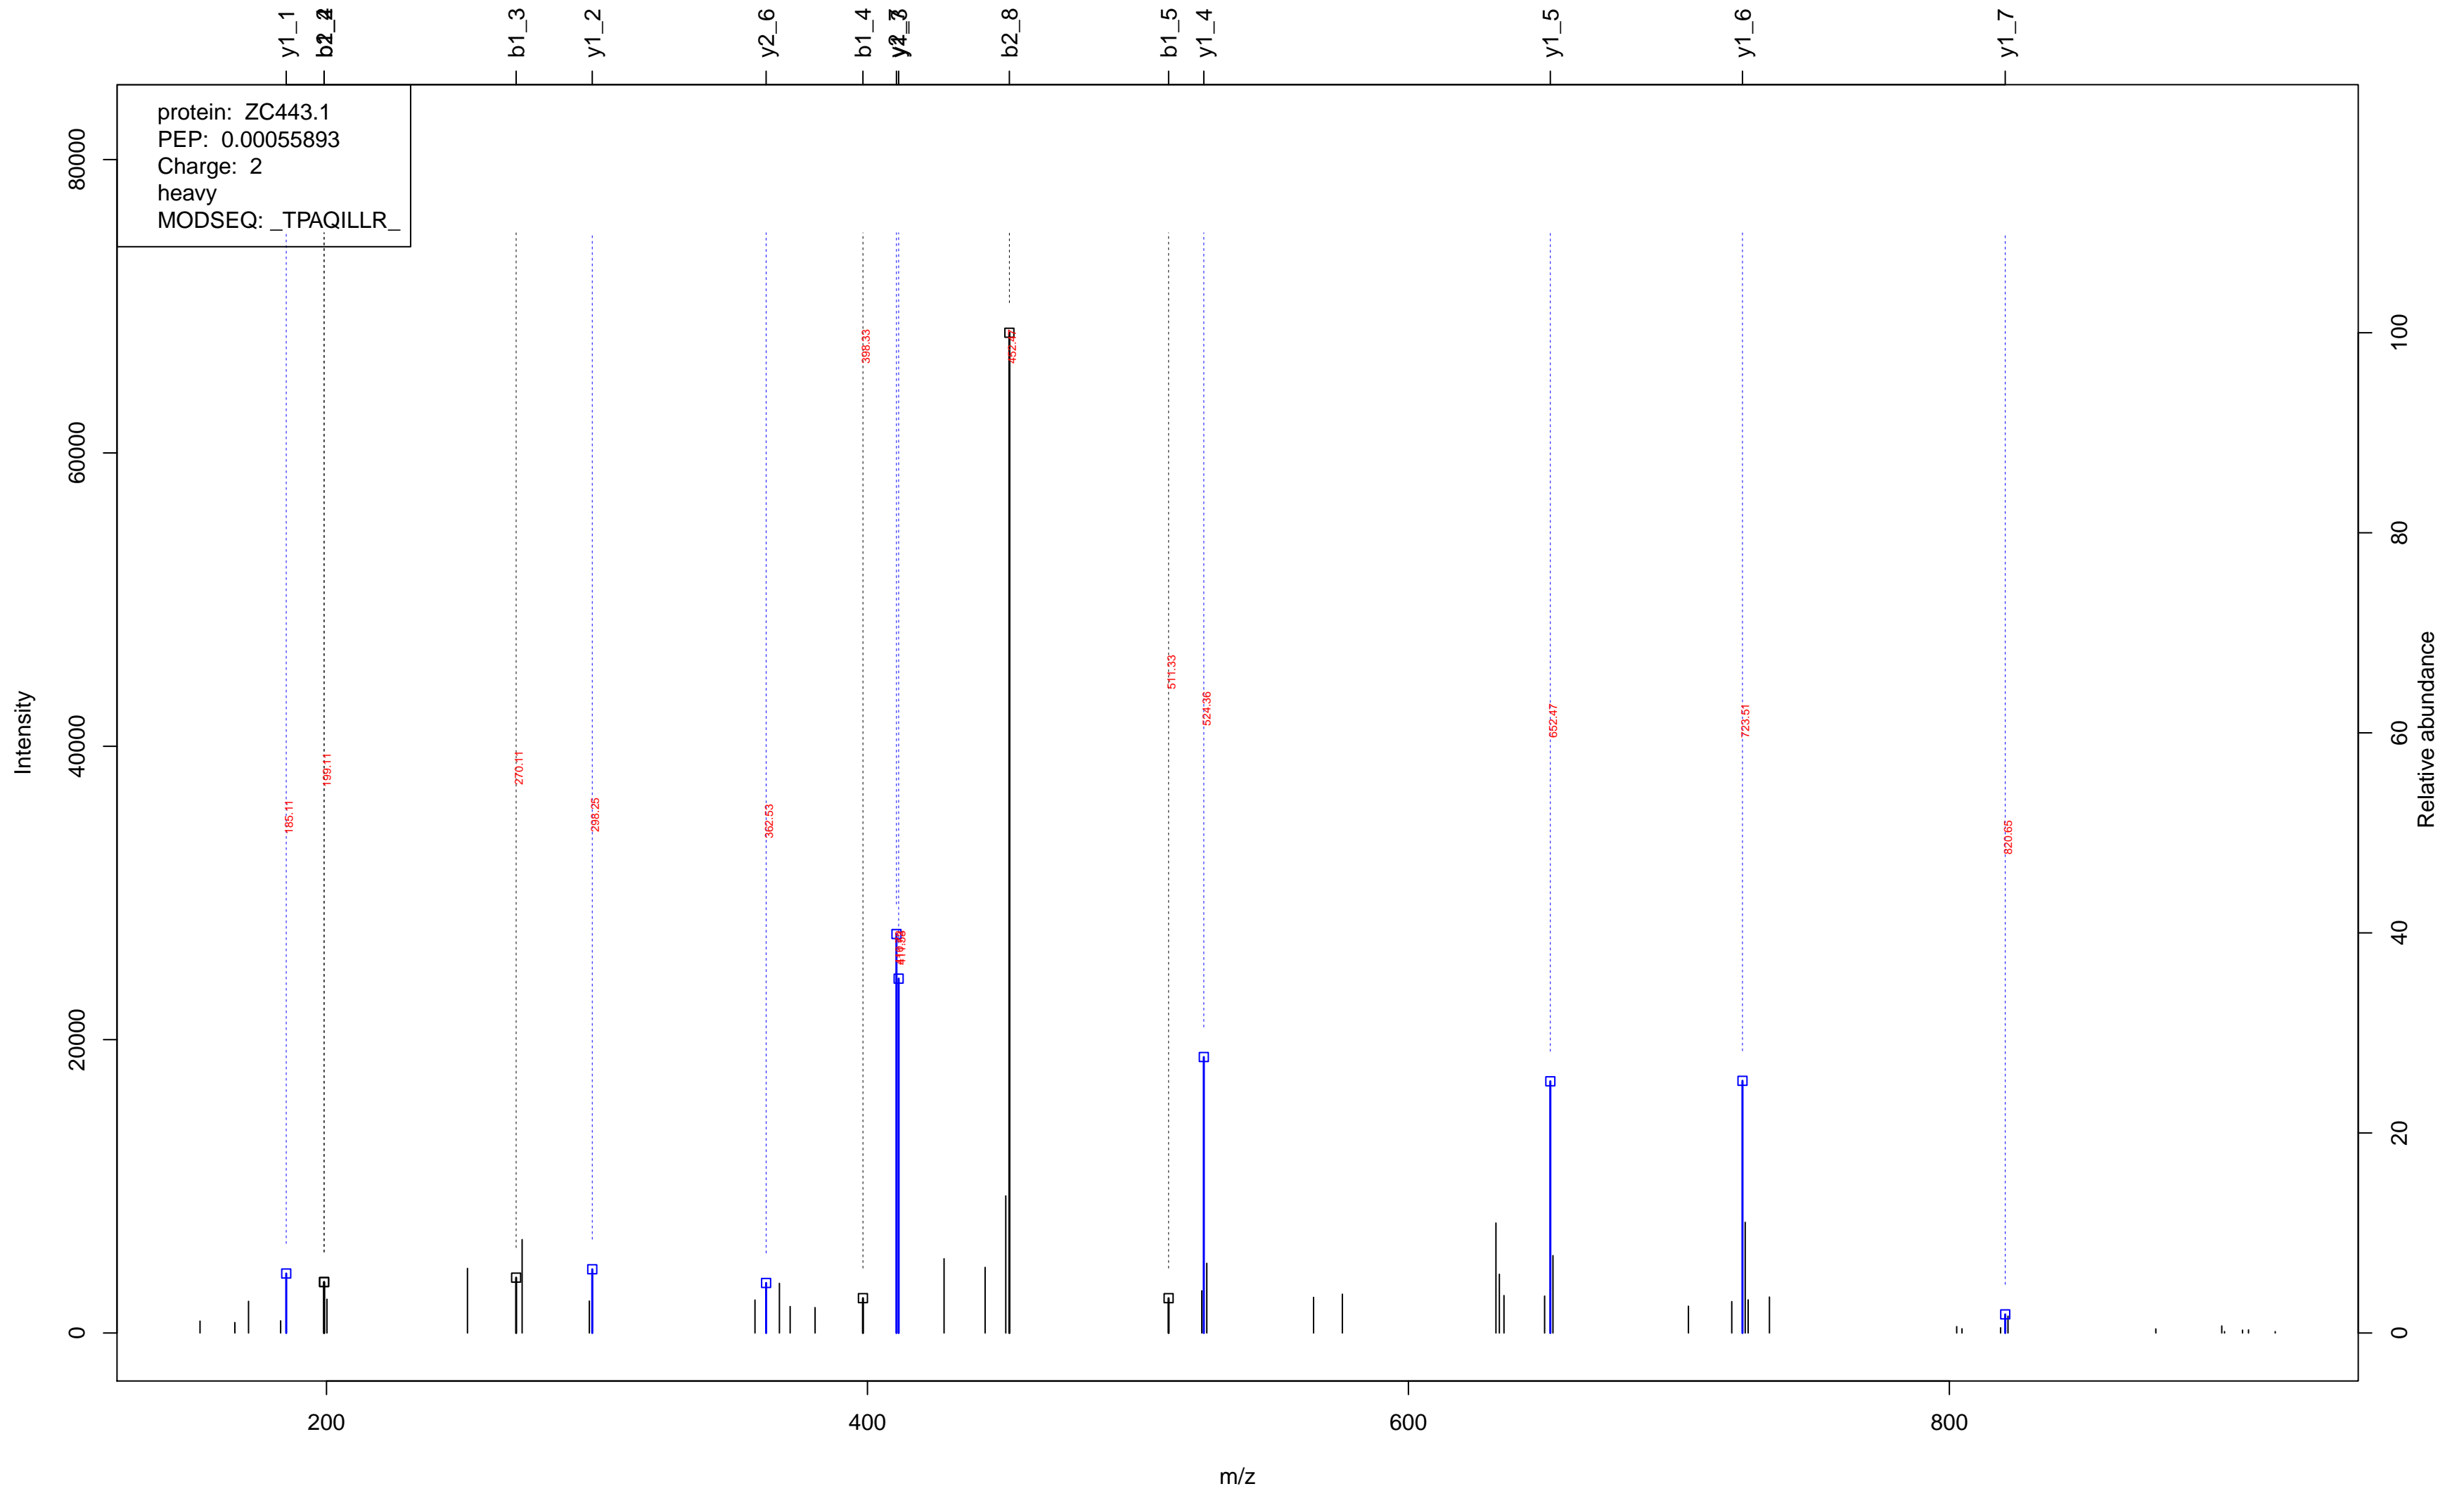

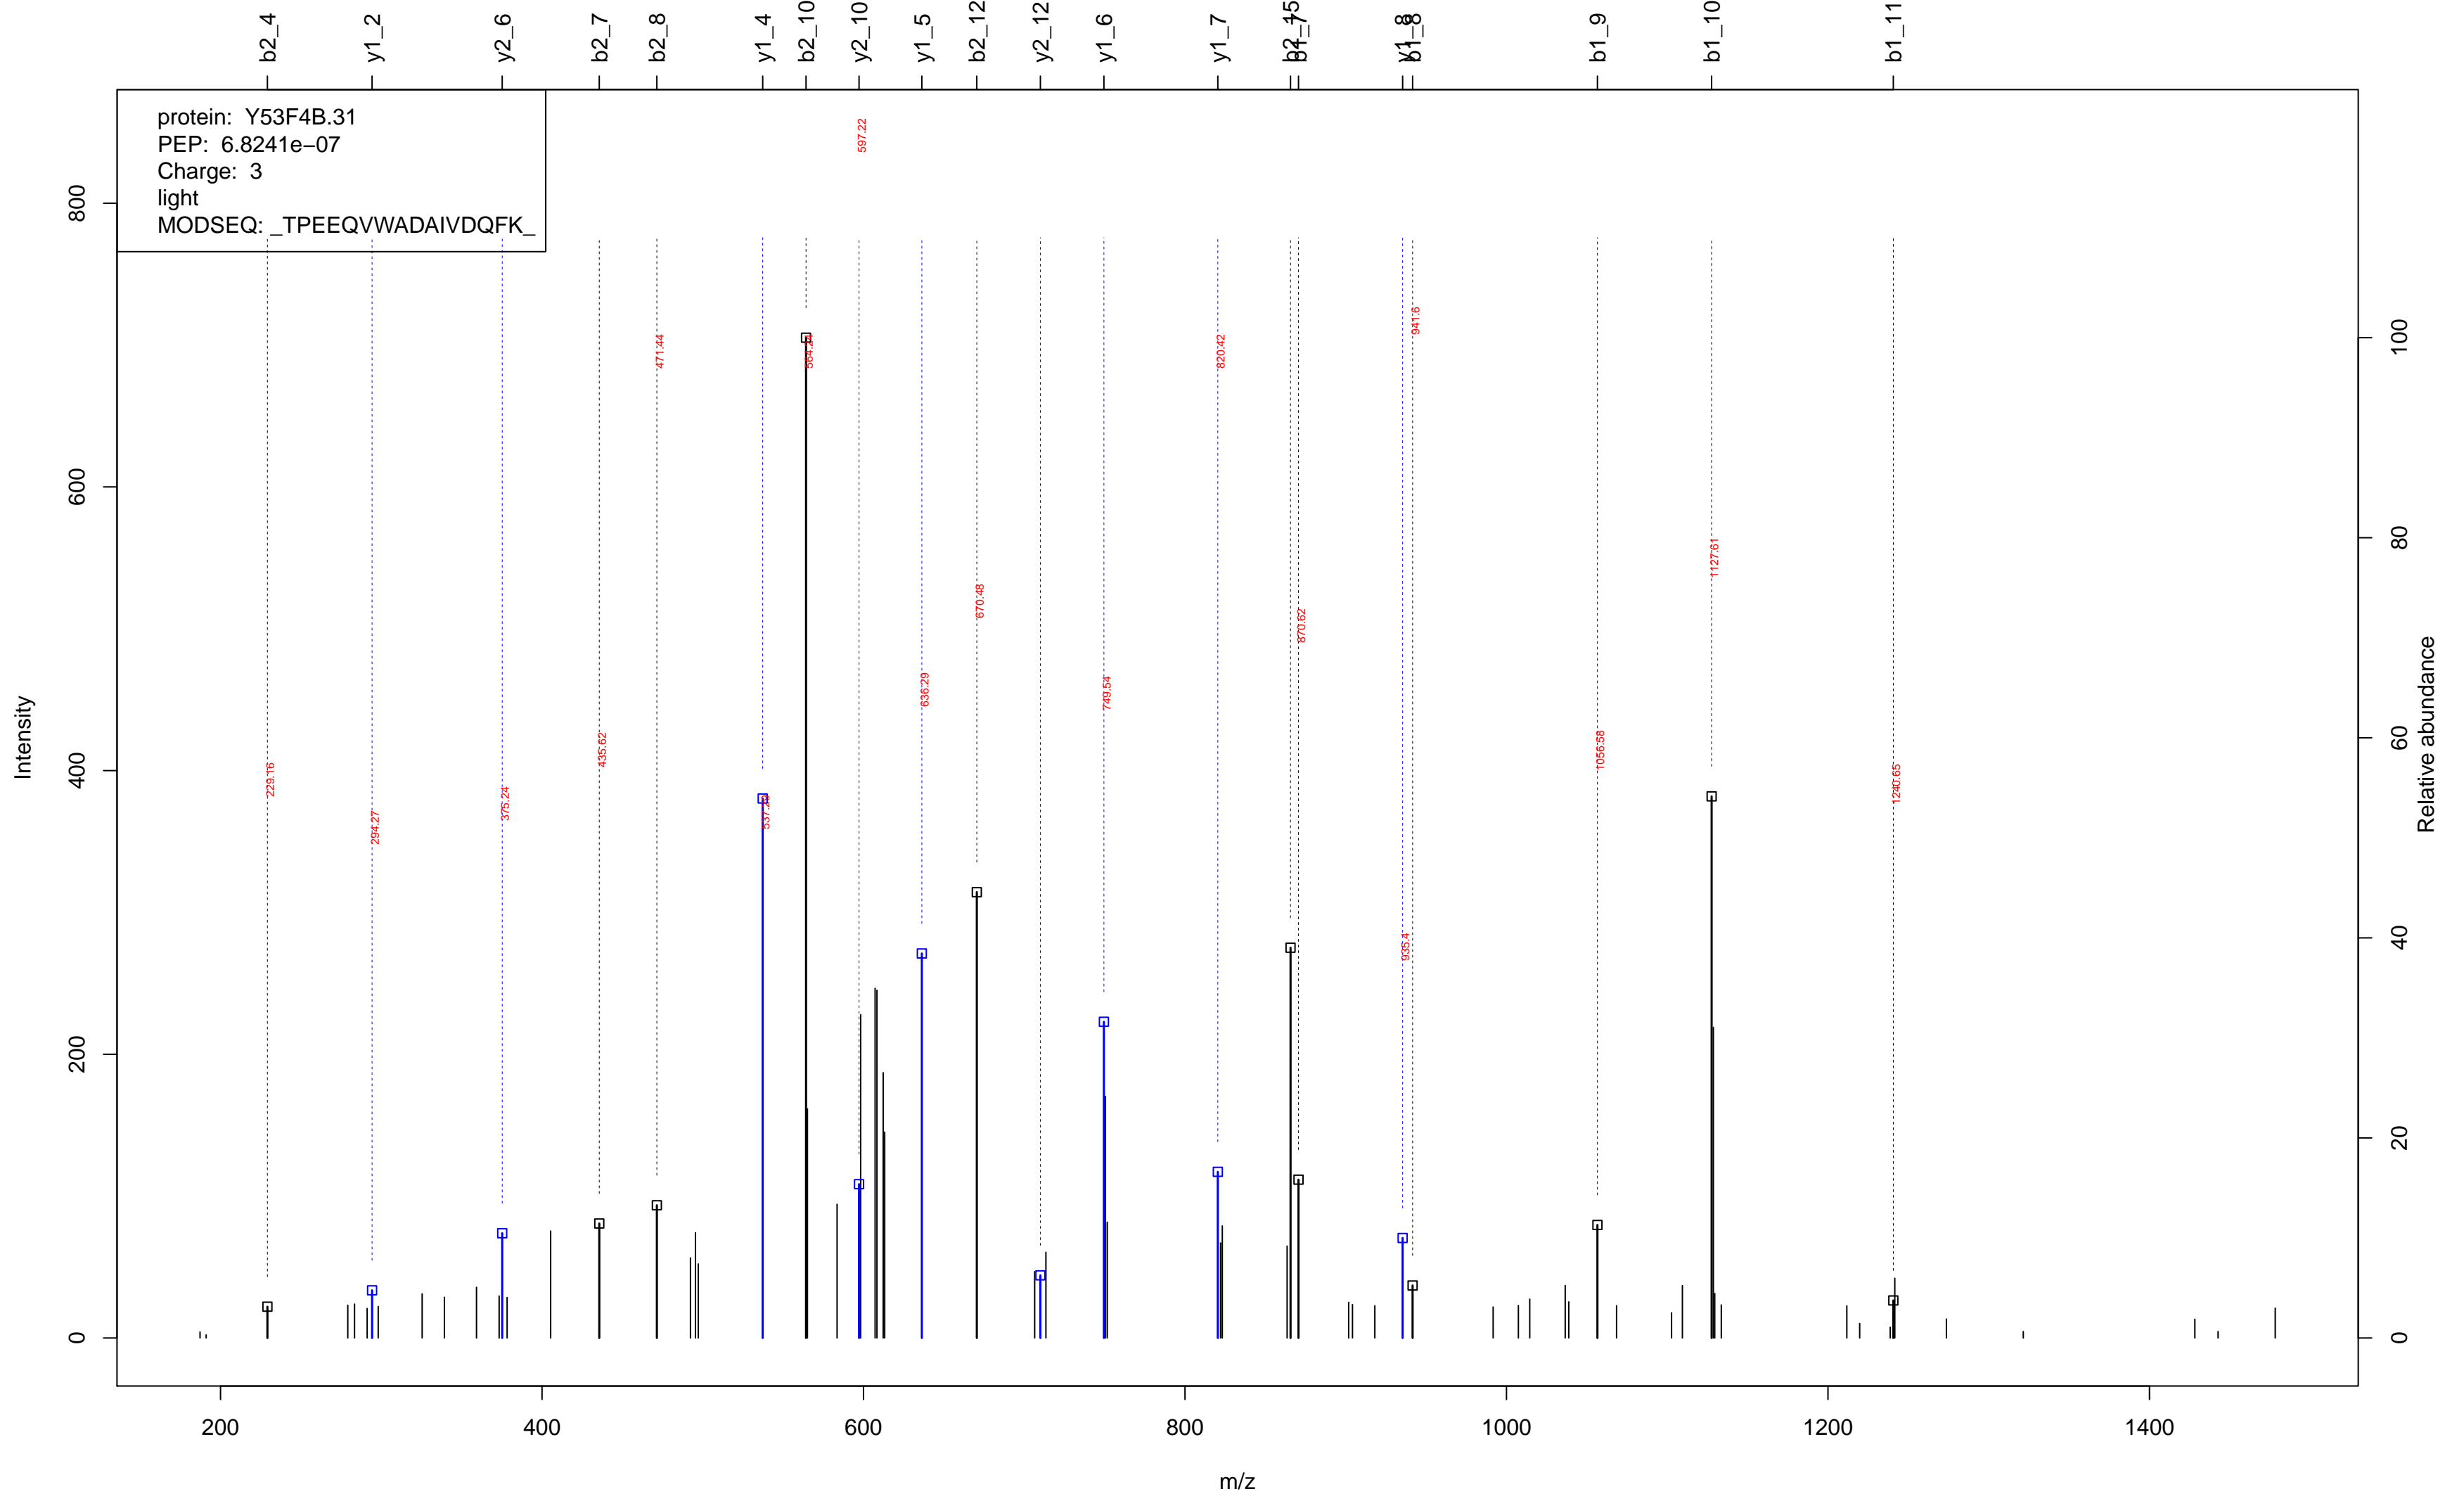

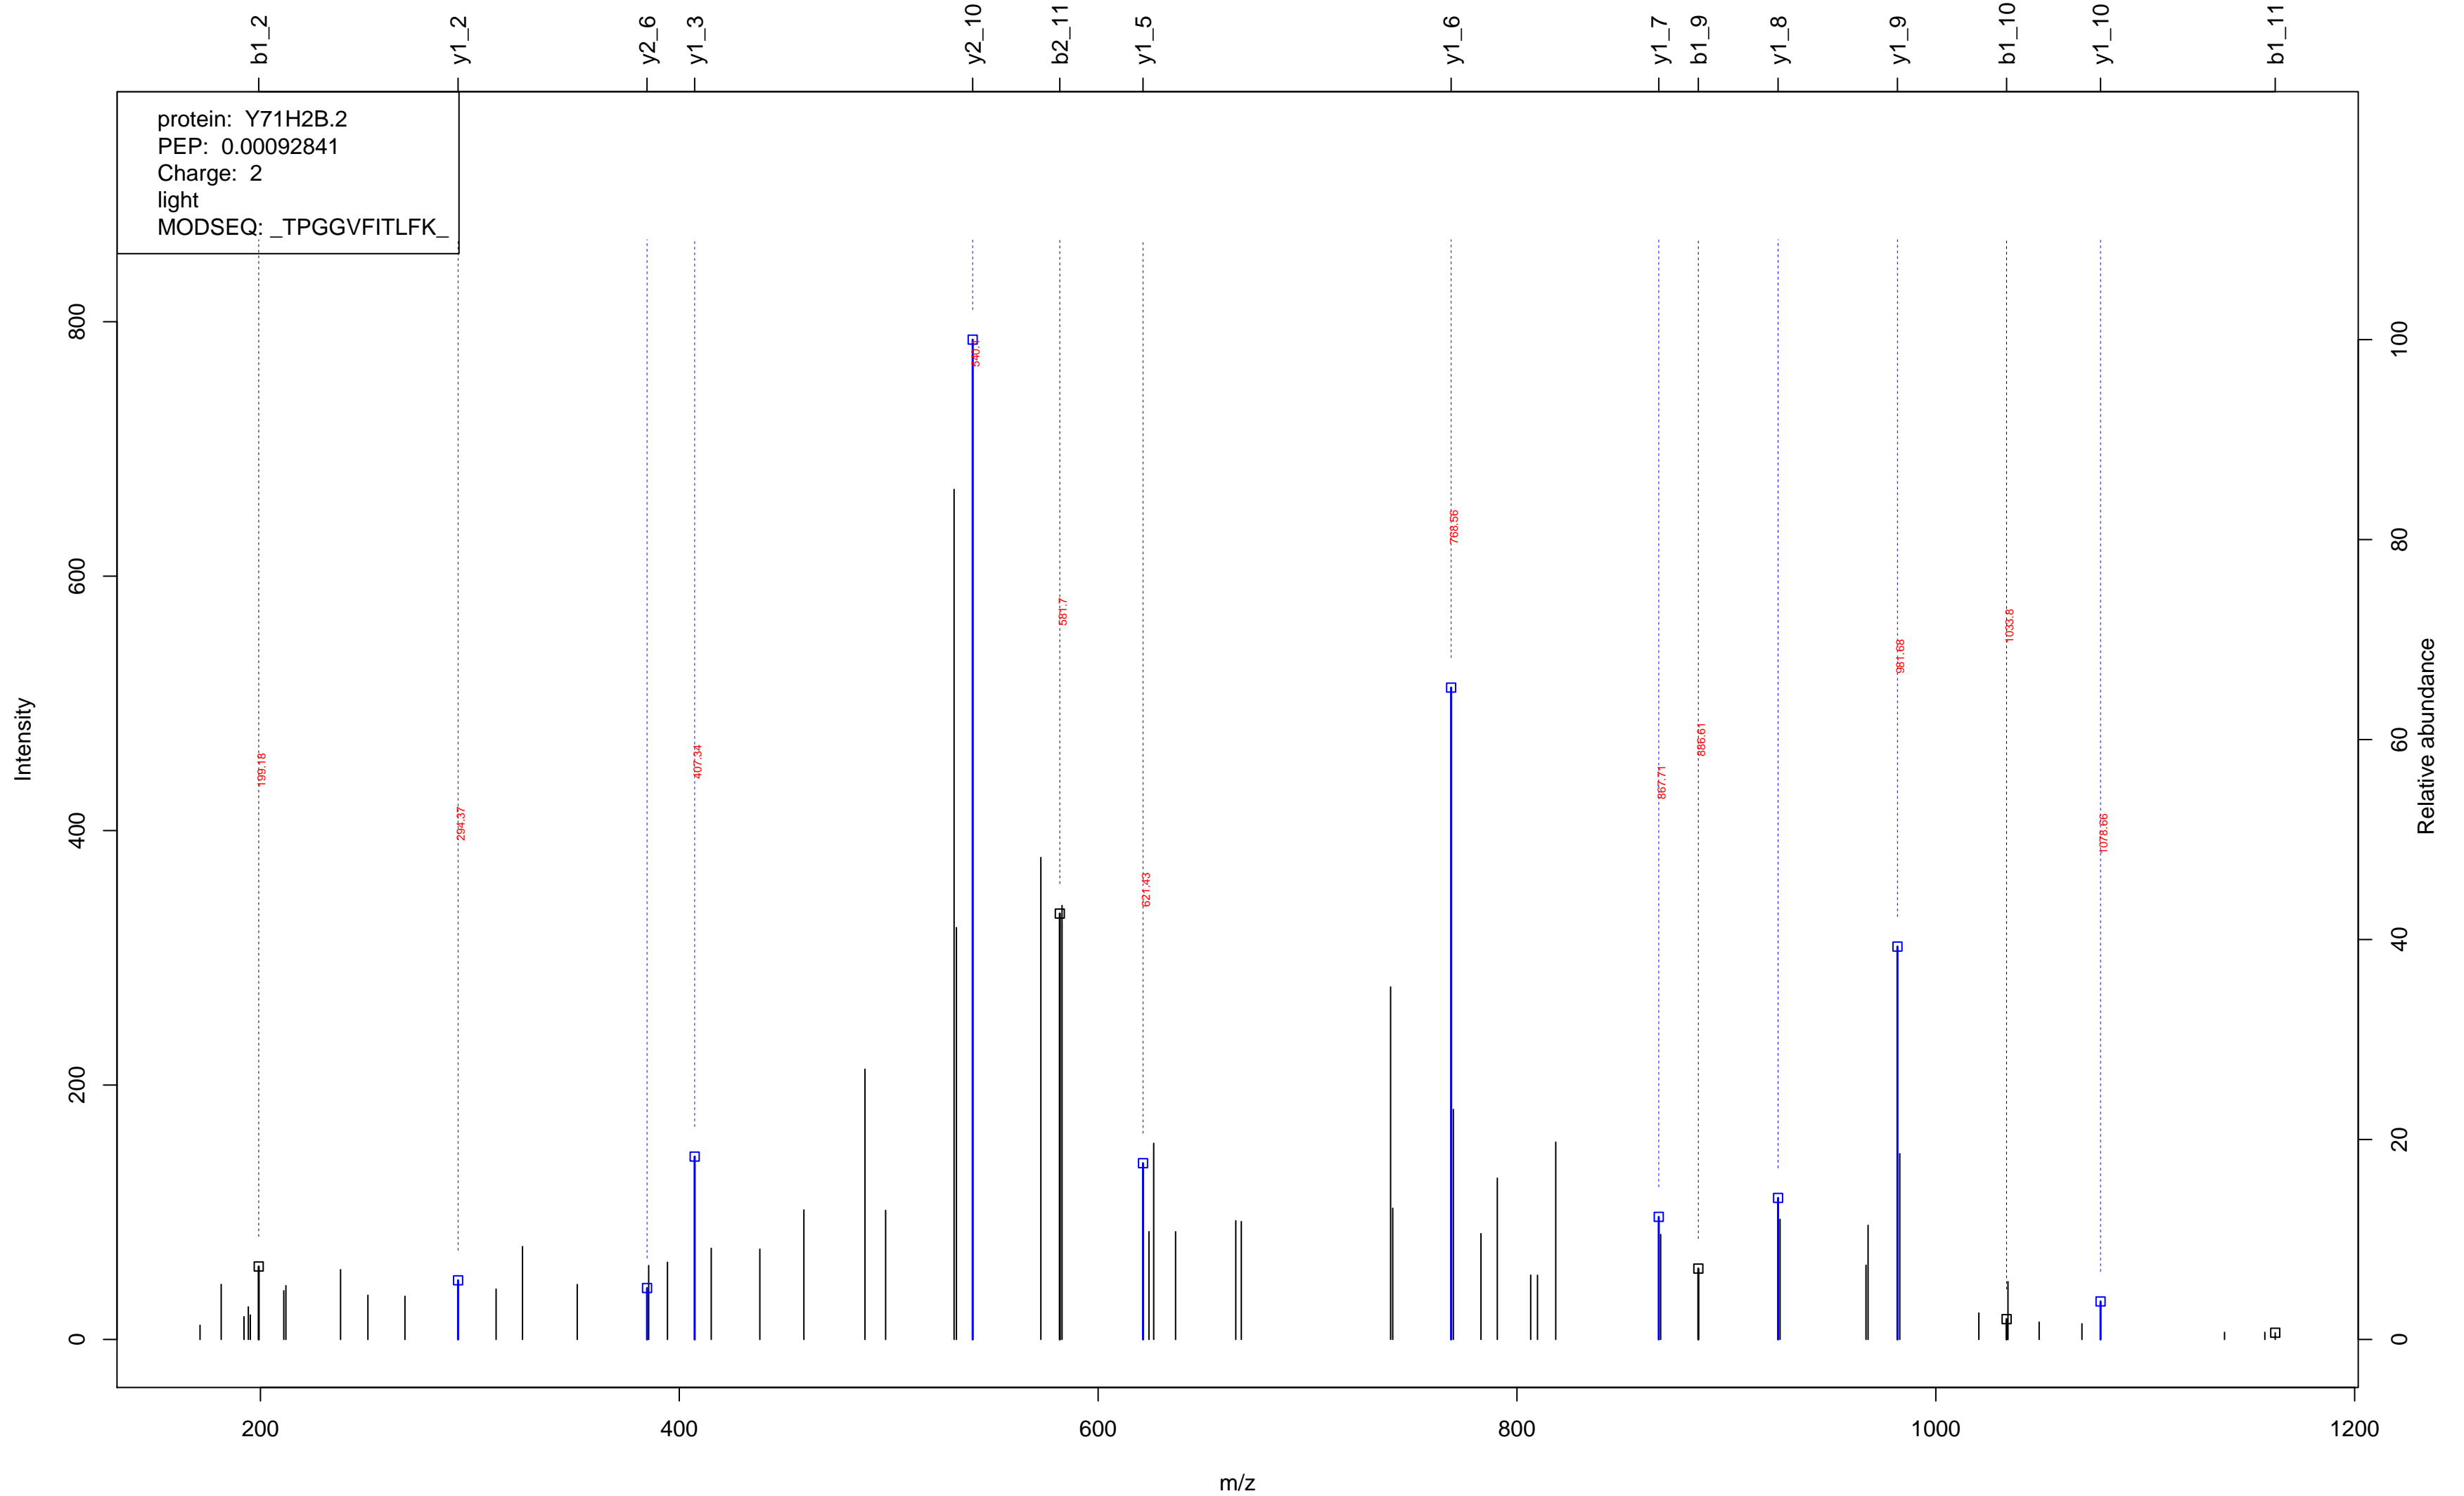

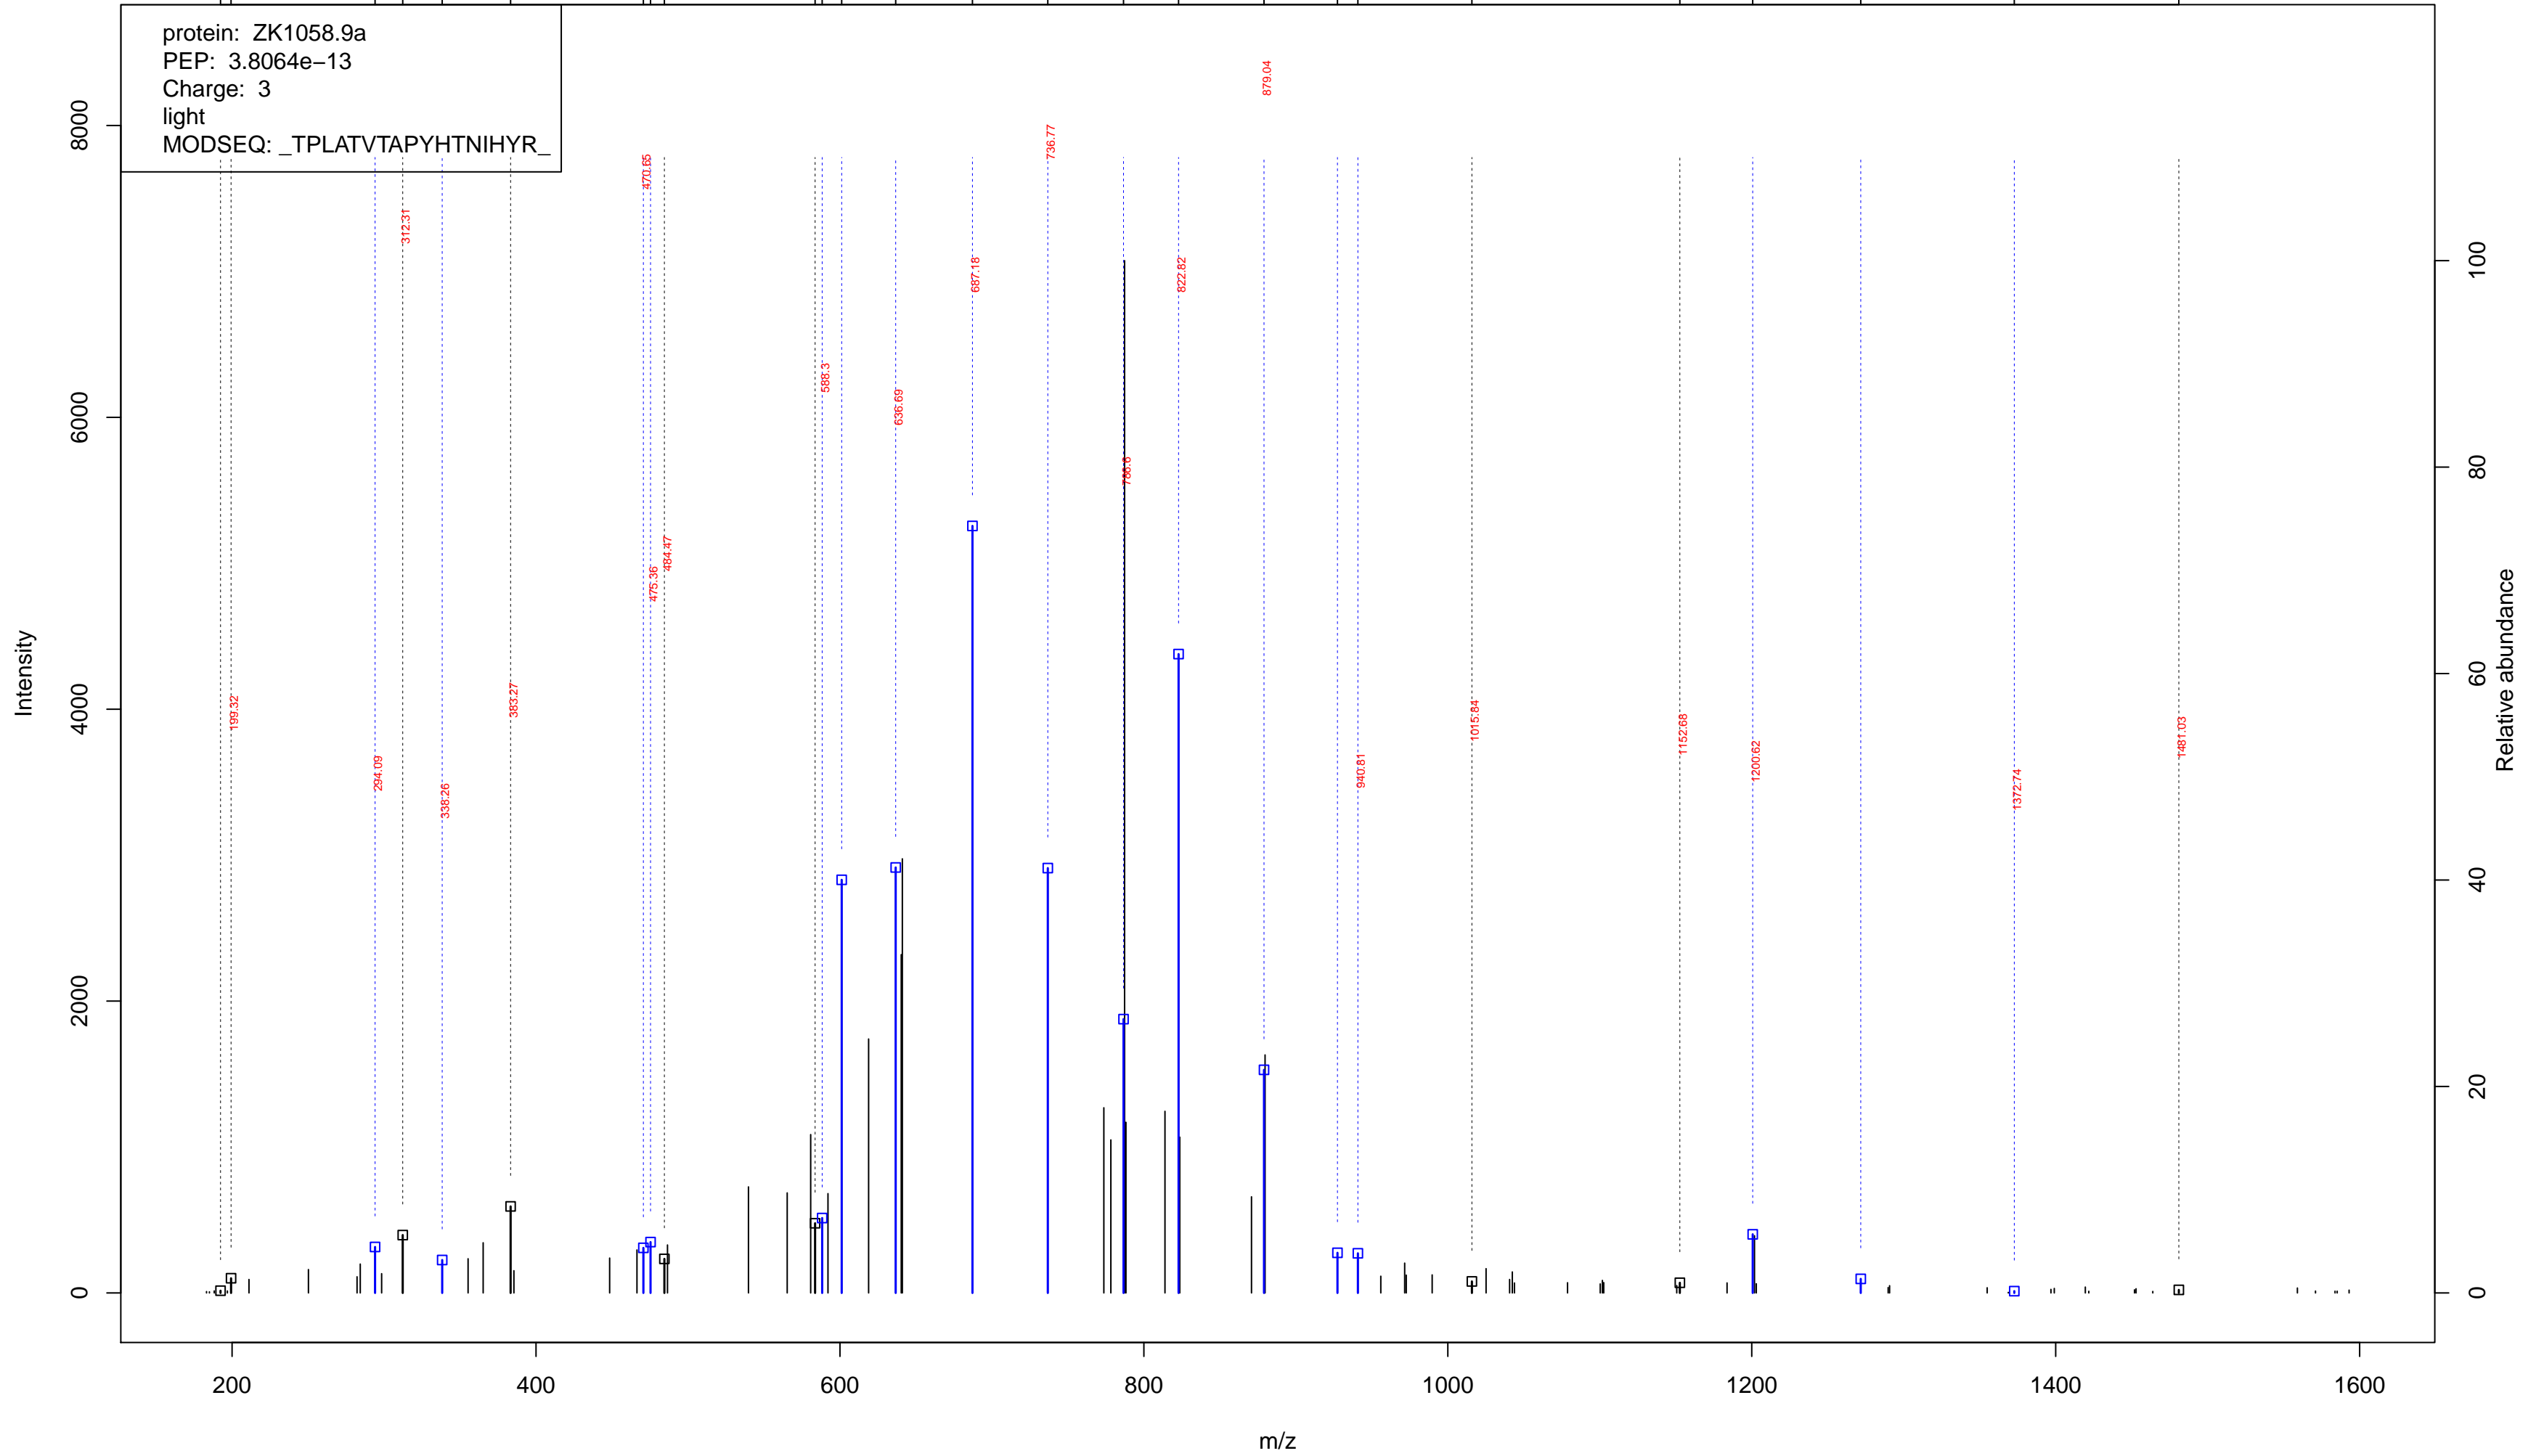

protein: ZK1058.9a  
PEP: 3.8064e-13  
Charge: 3  
light  
MODSEQ: \_TPLATVTAPYHTNIHYR\_



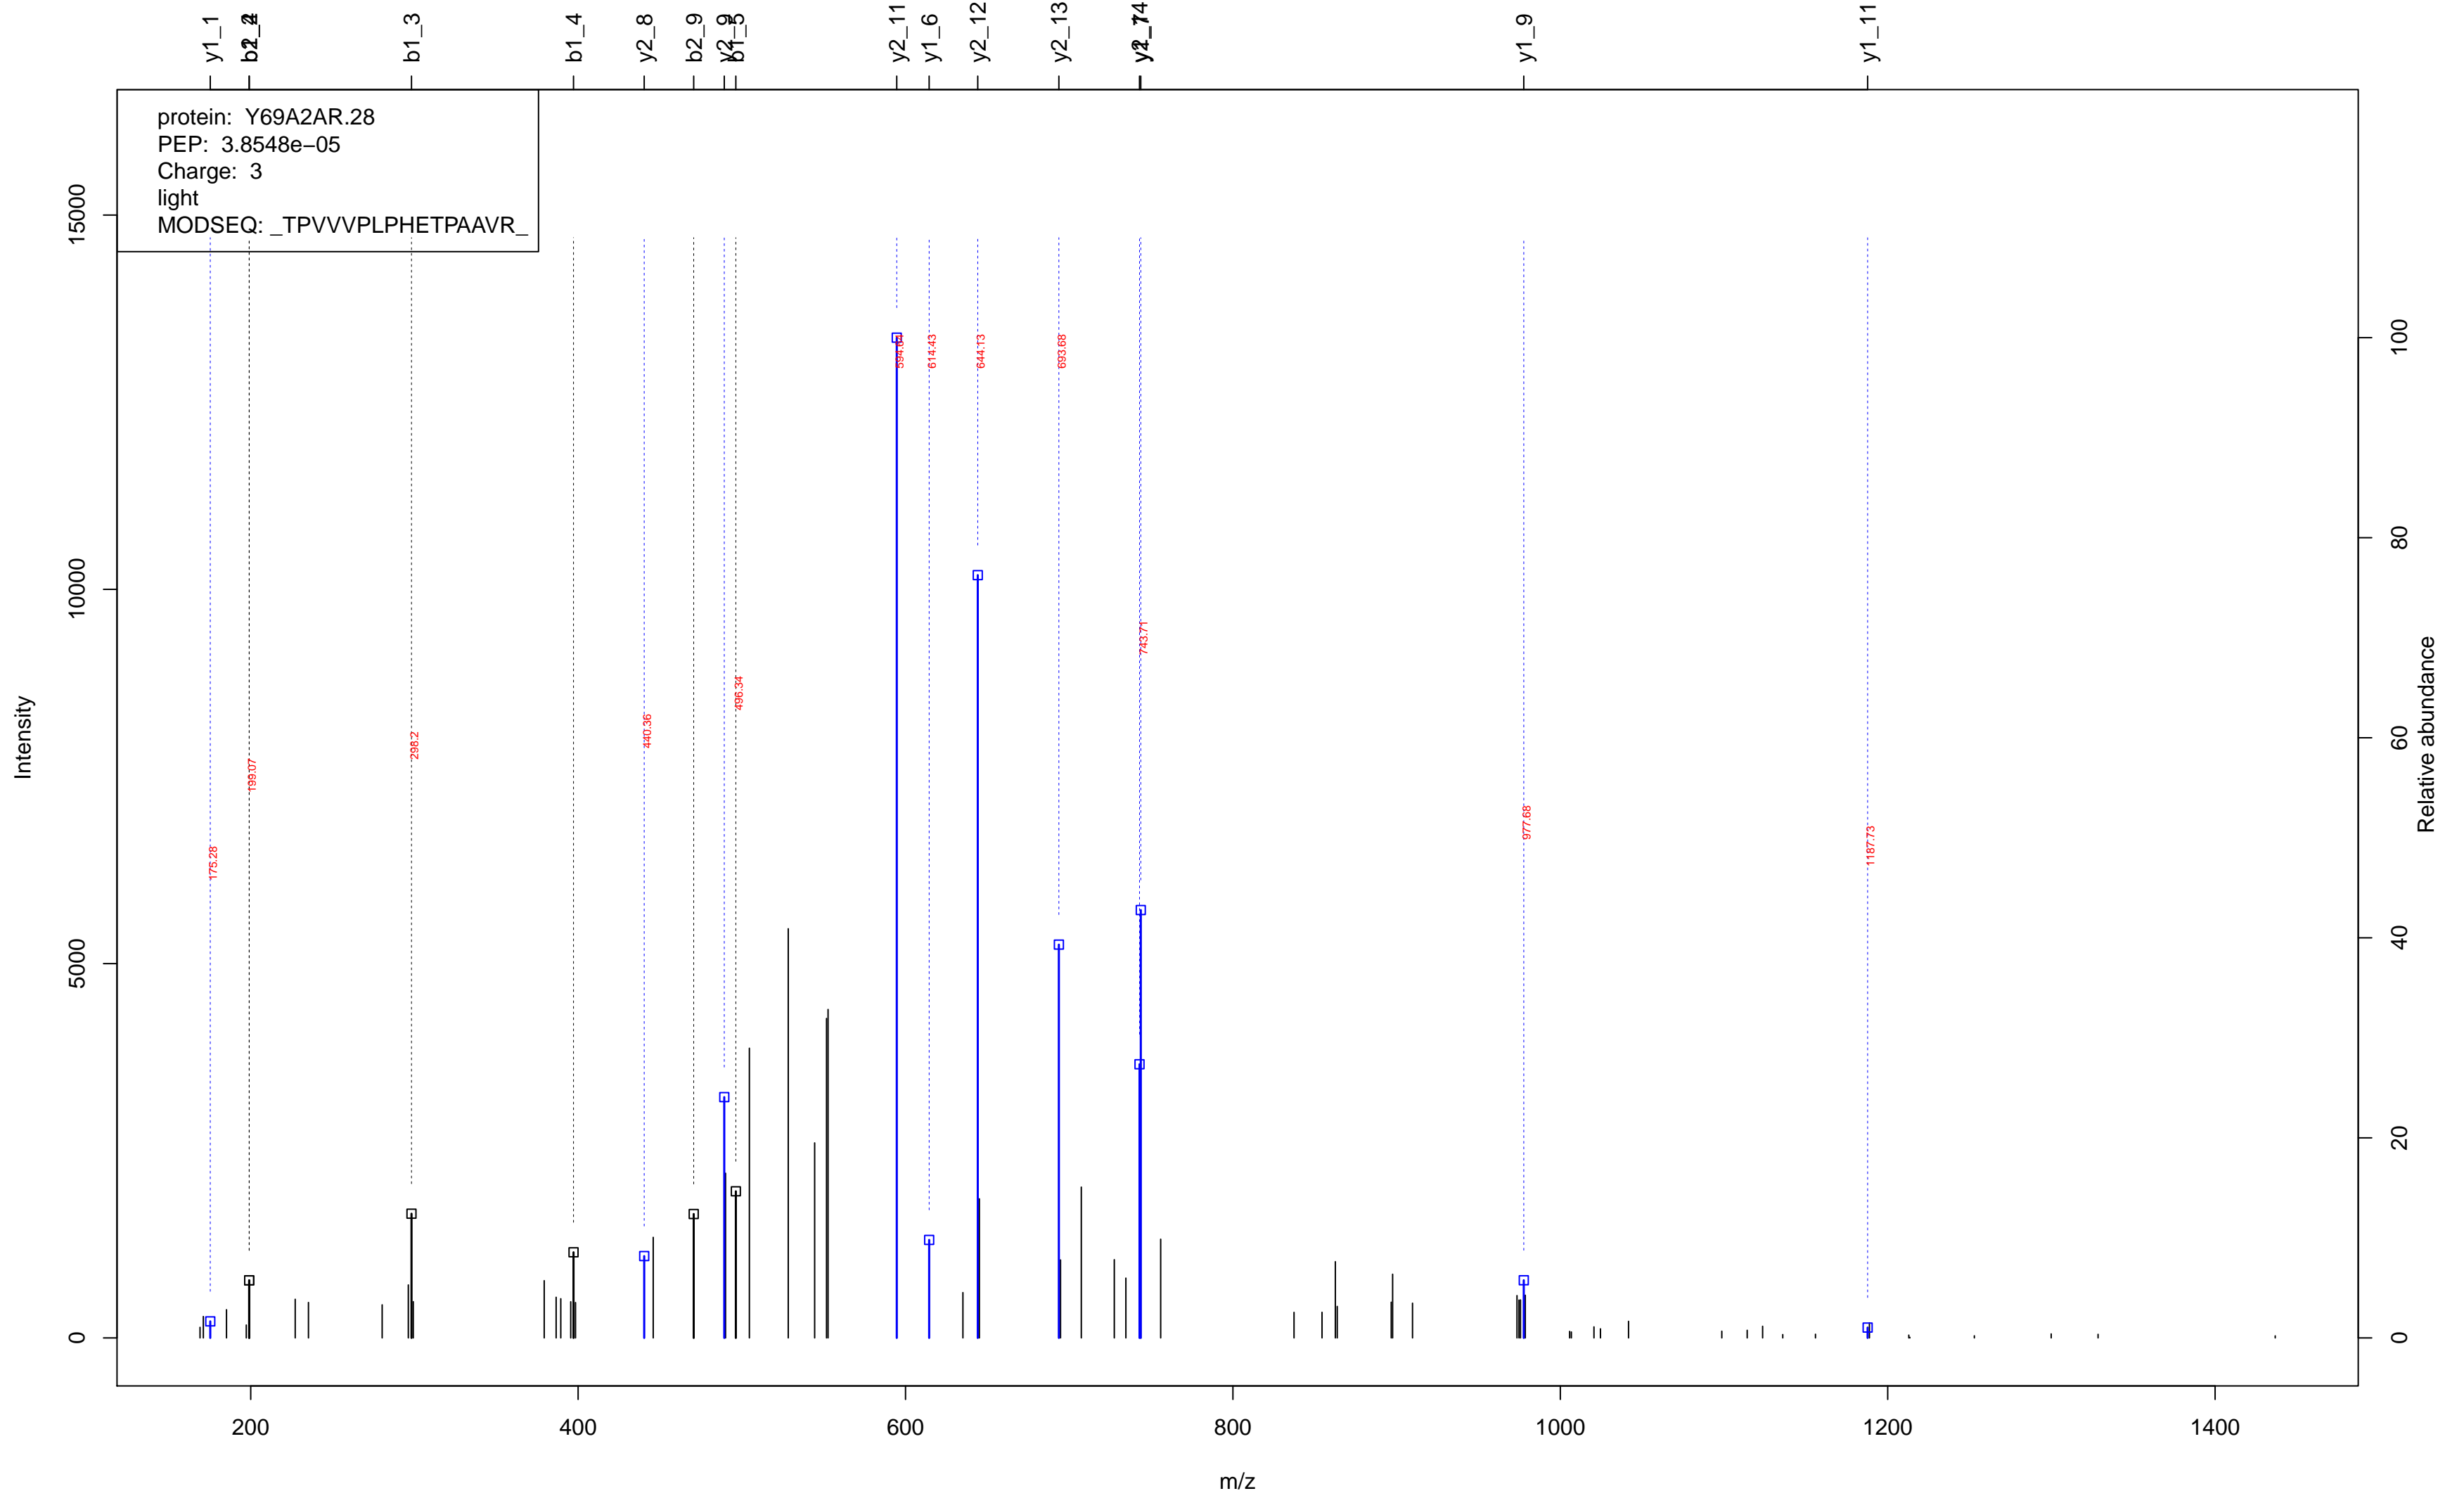

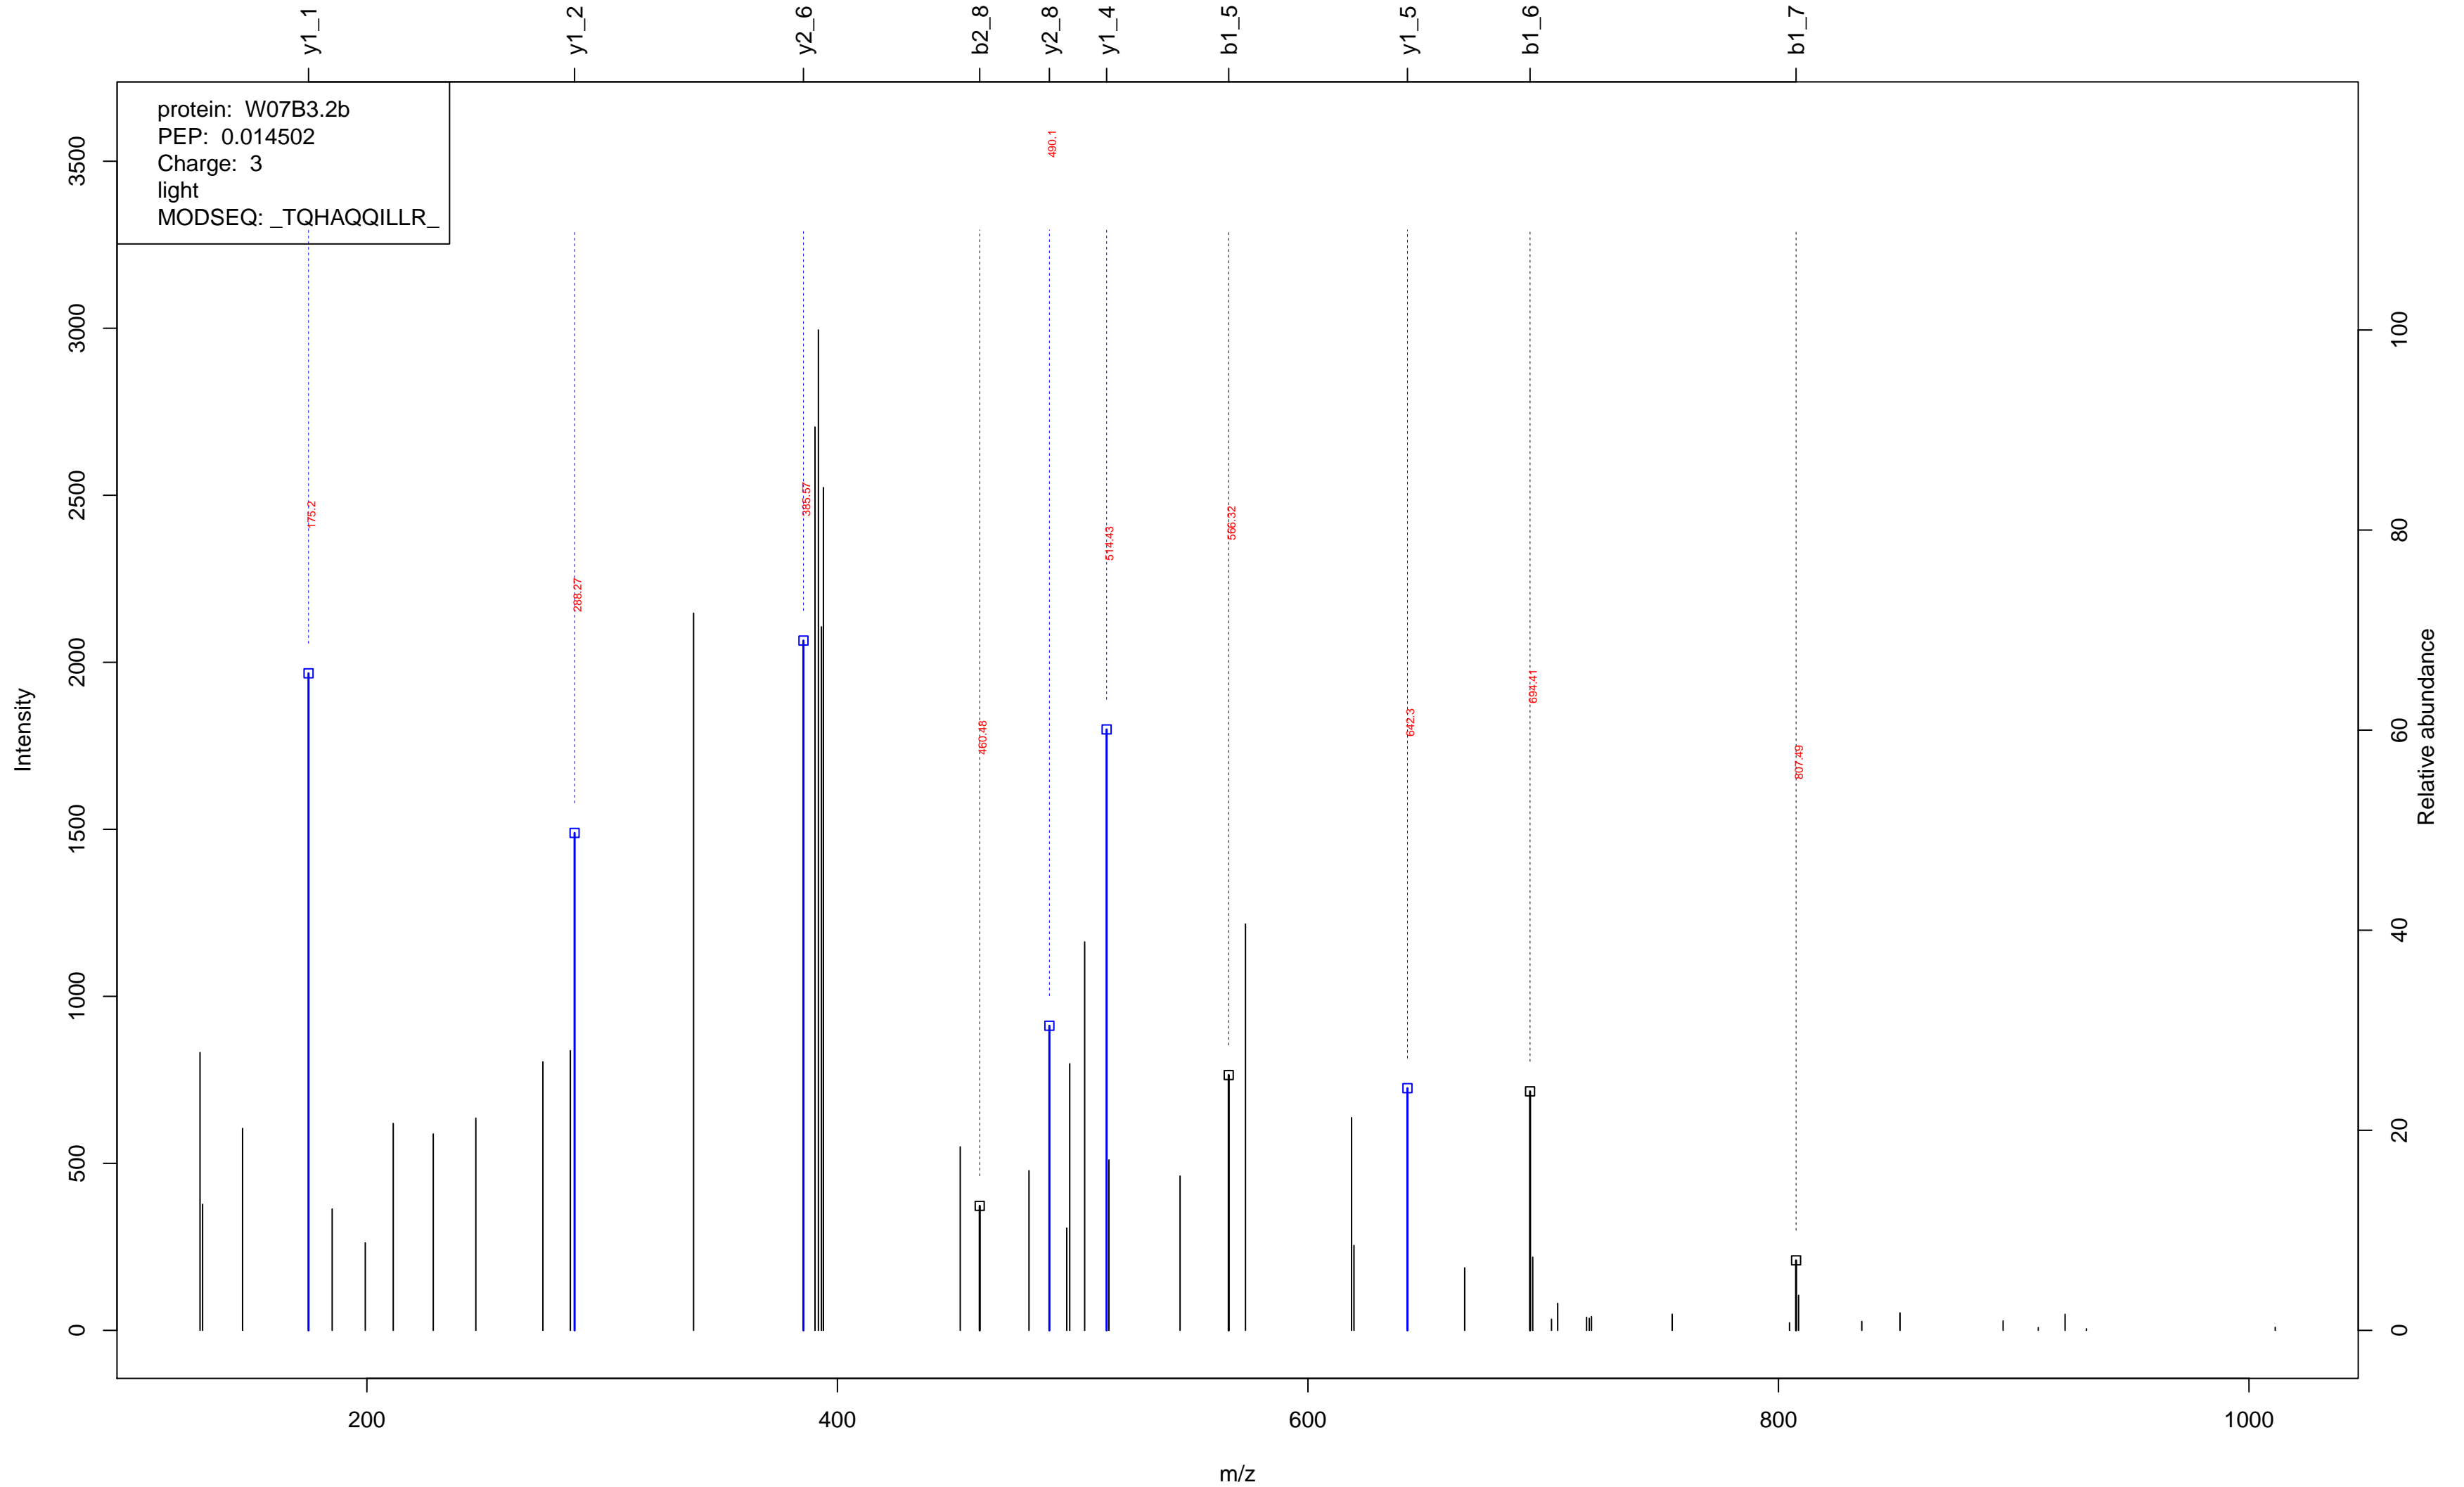

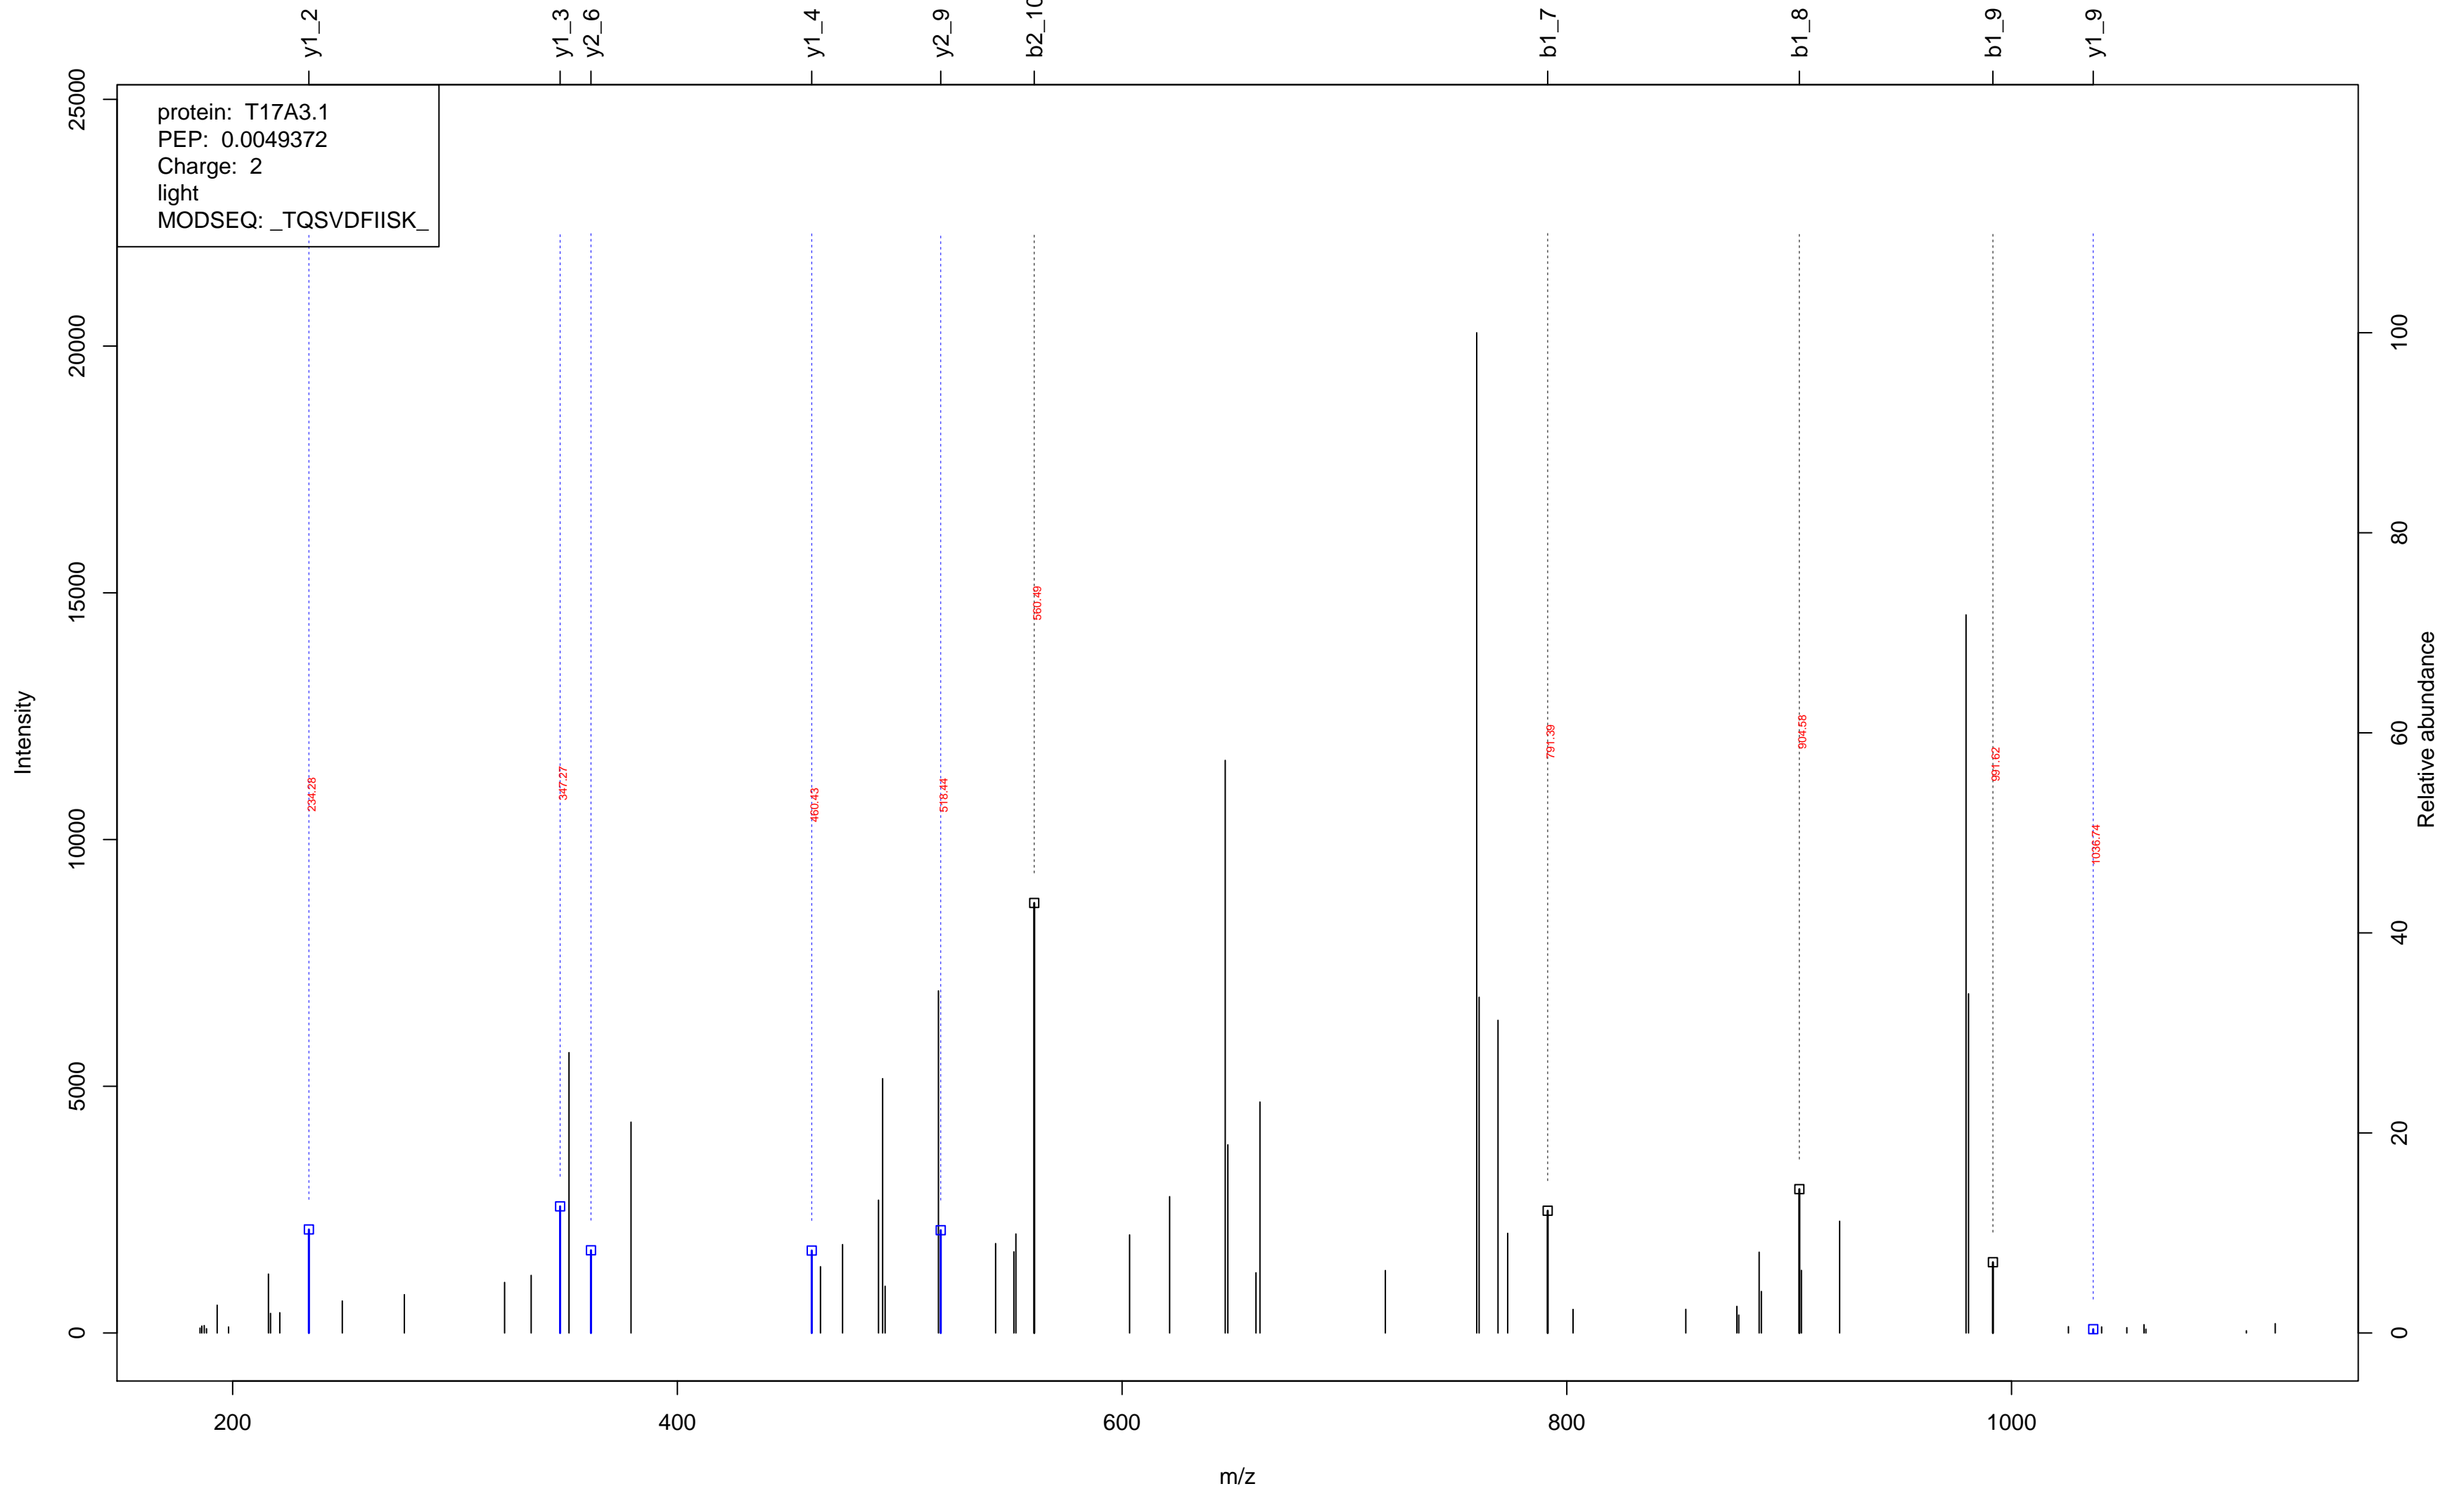

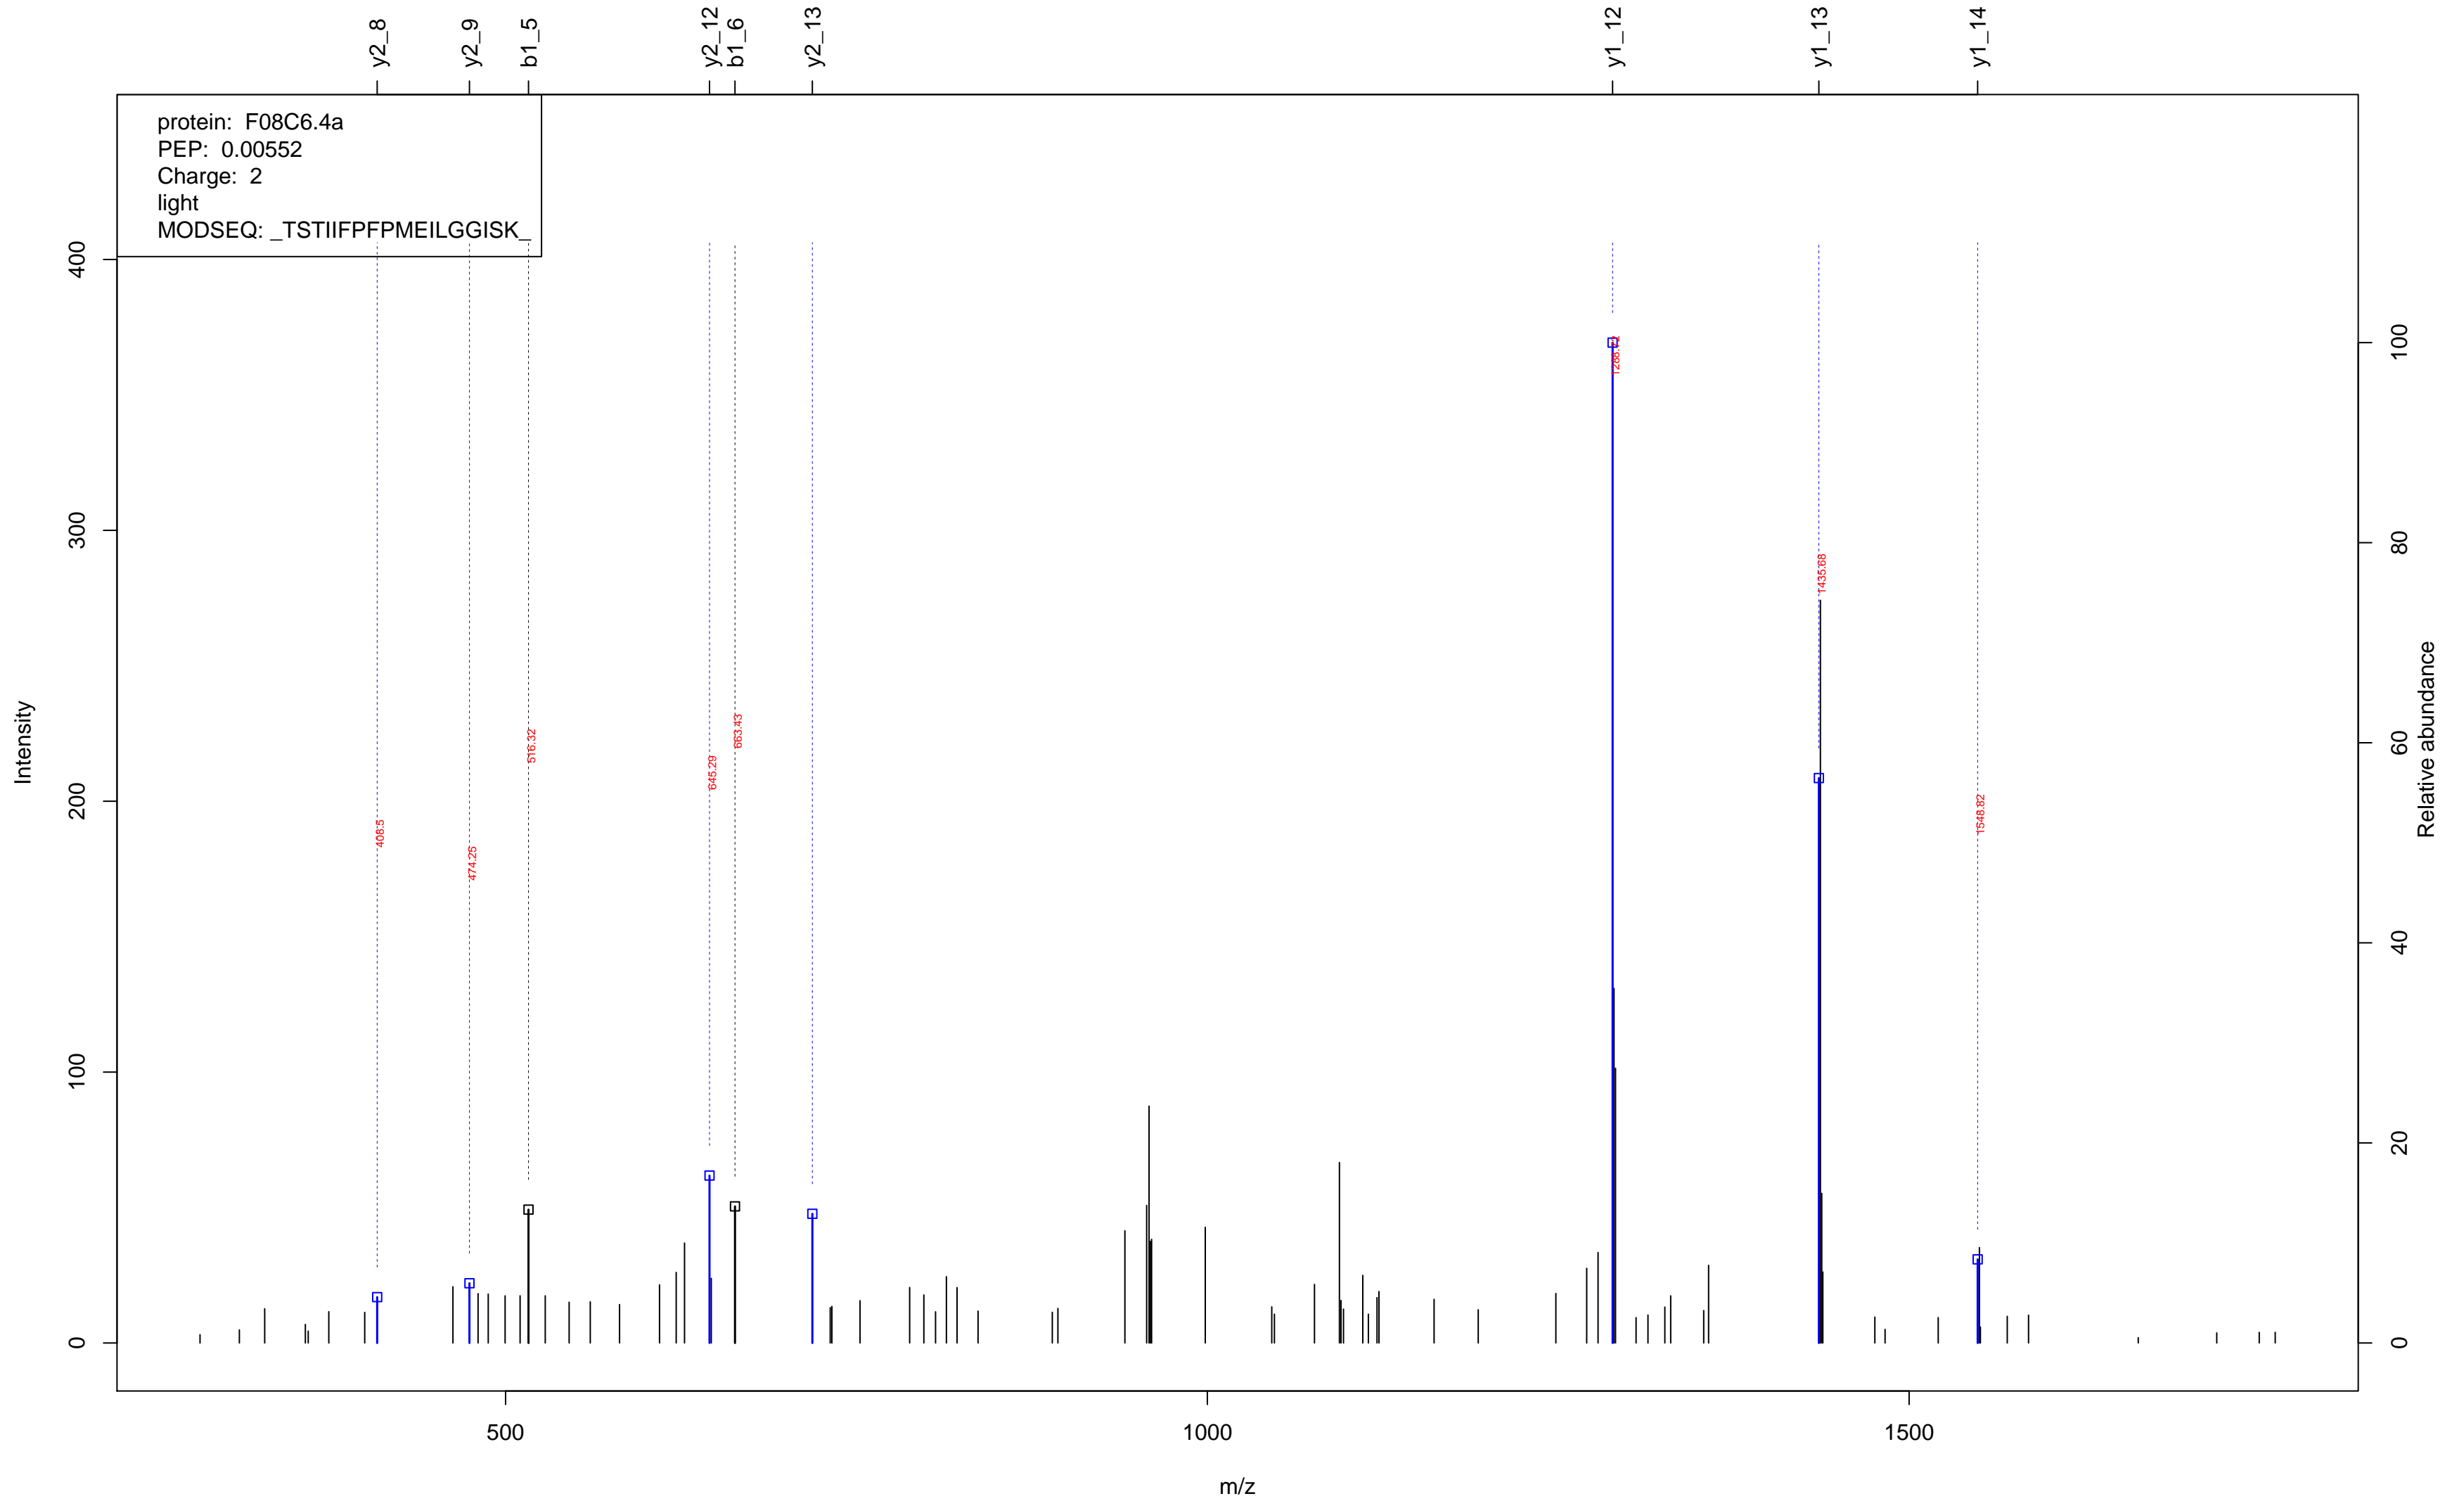

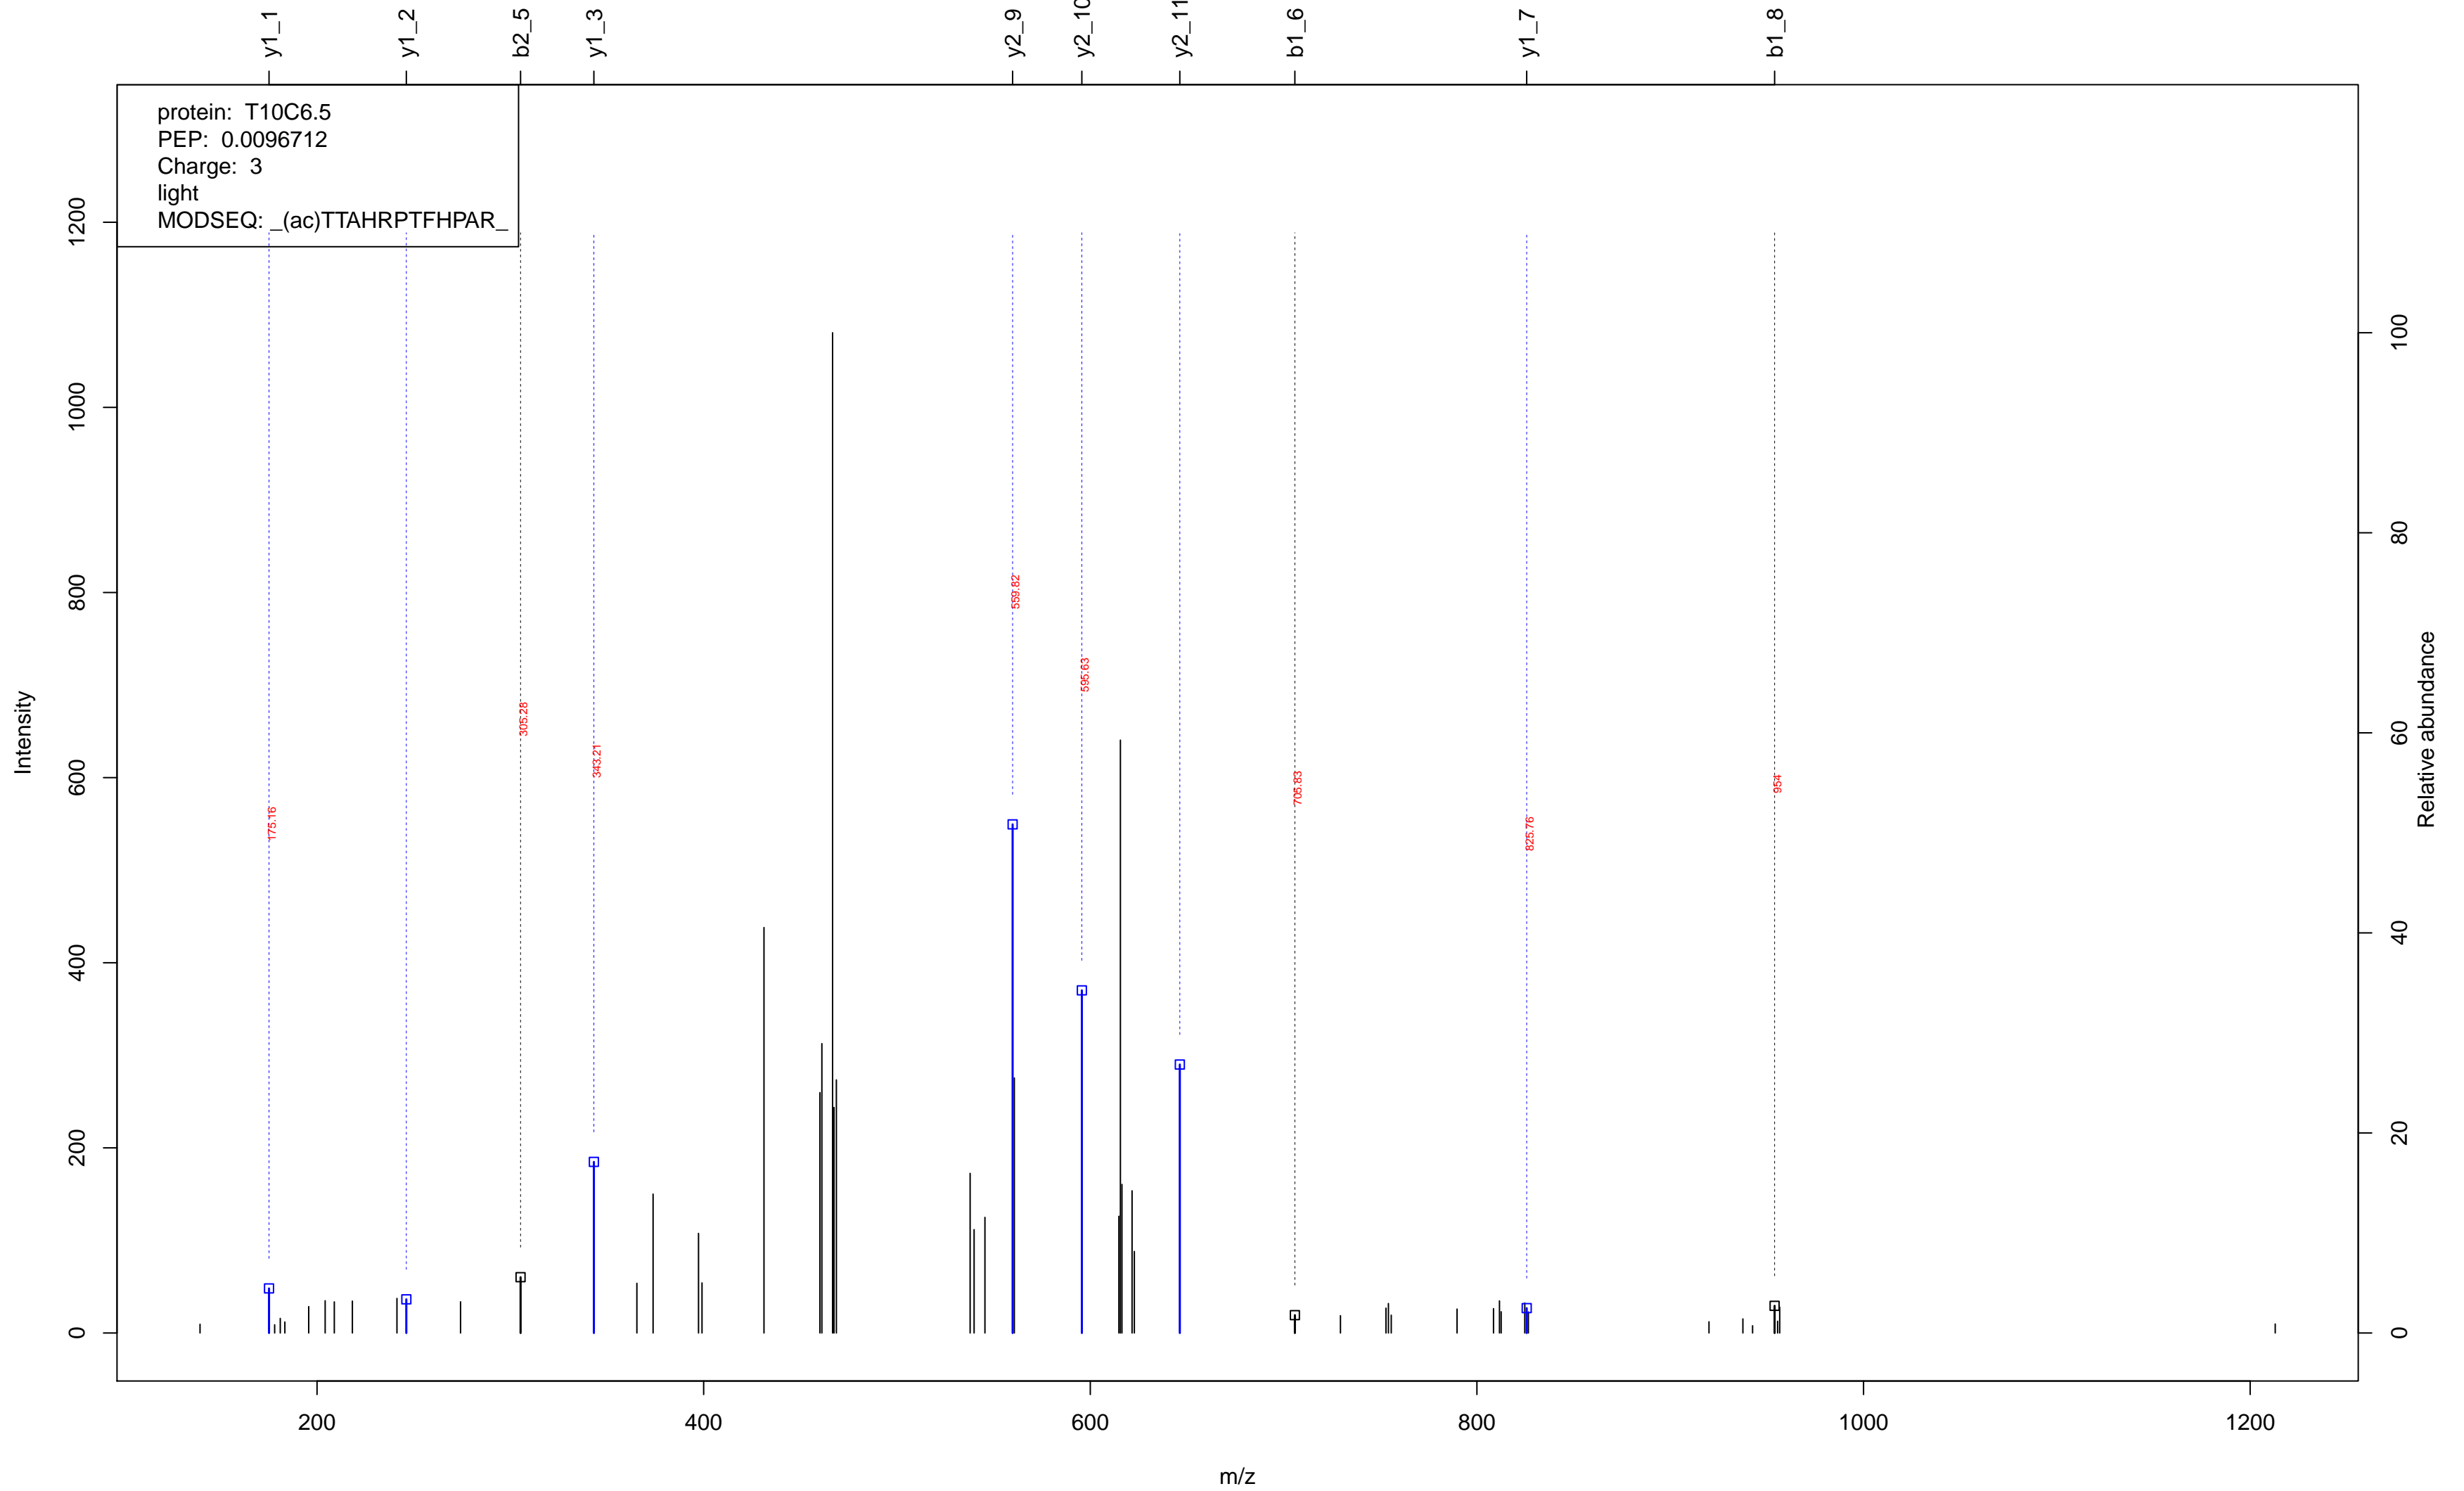

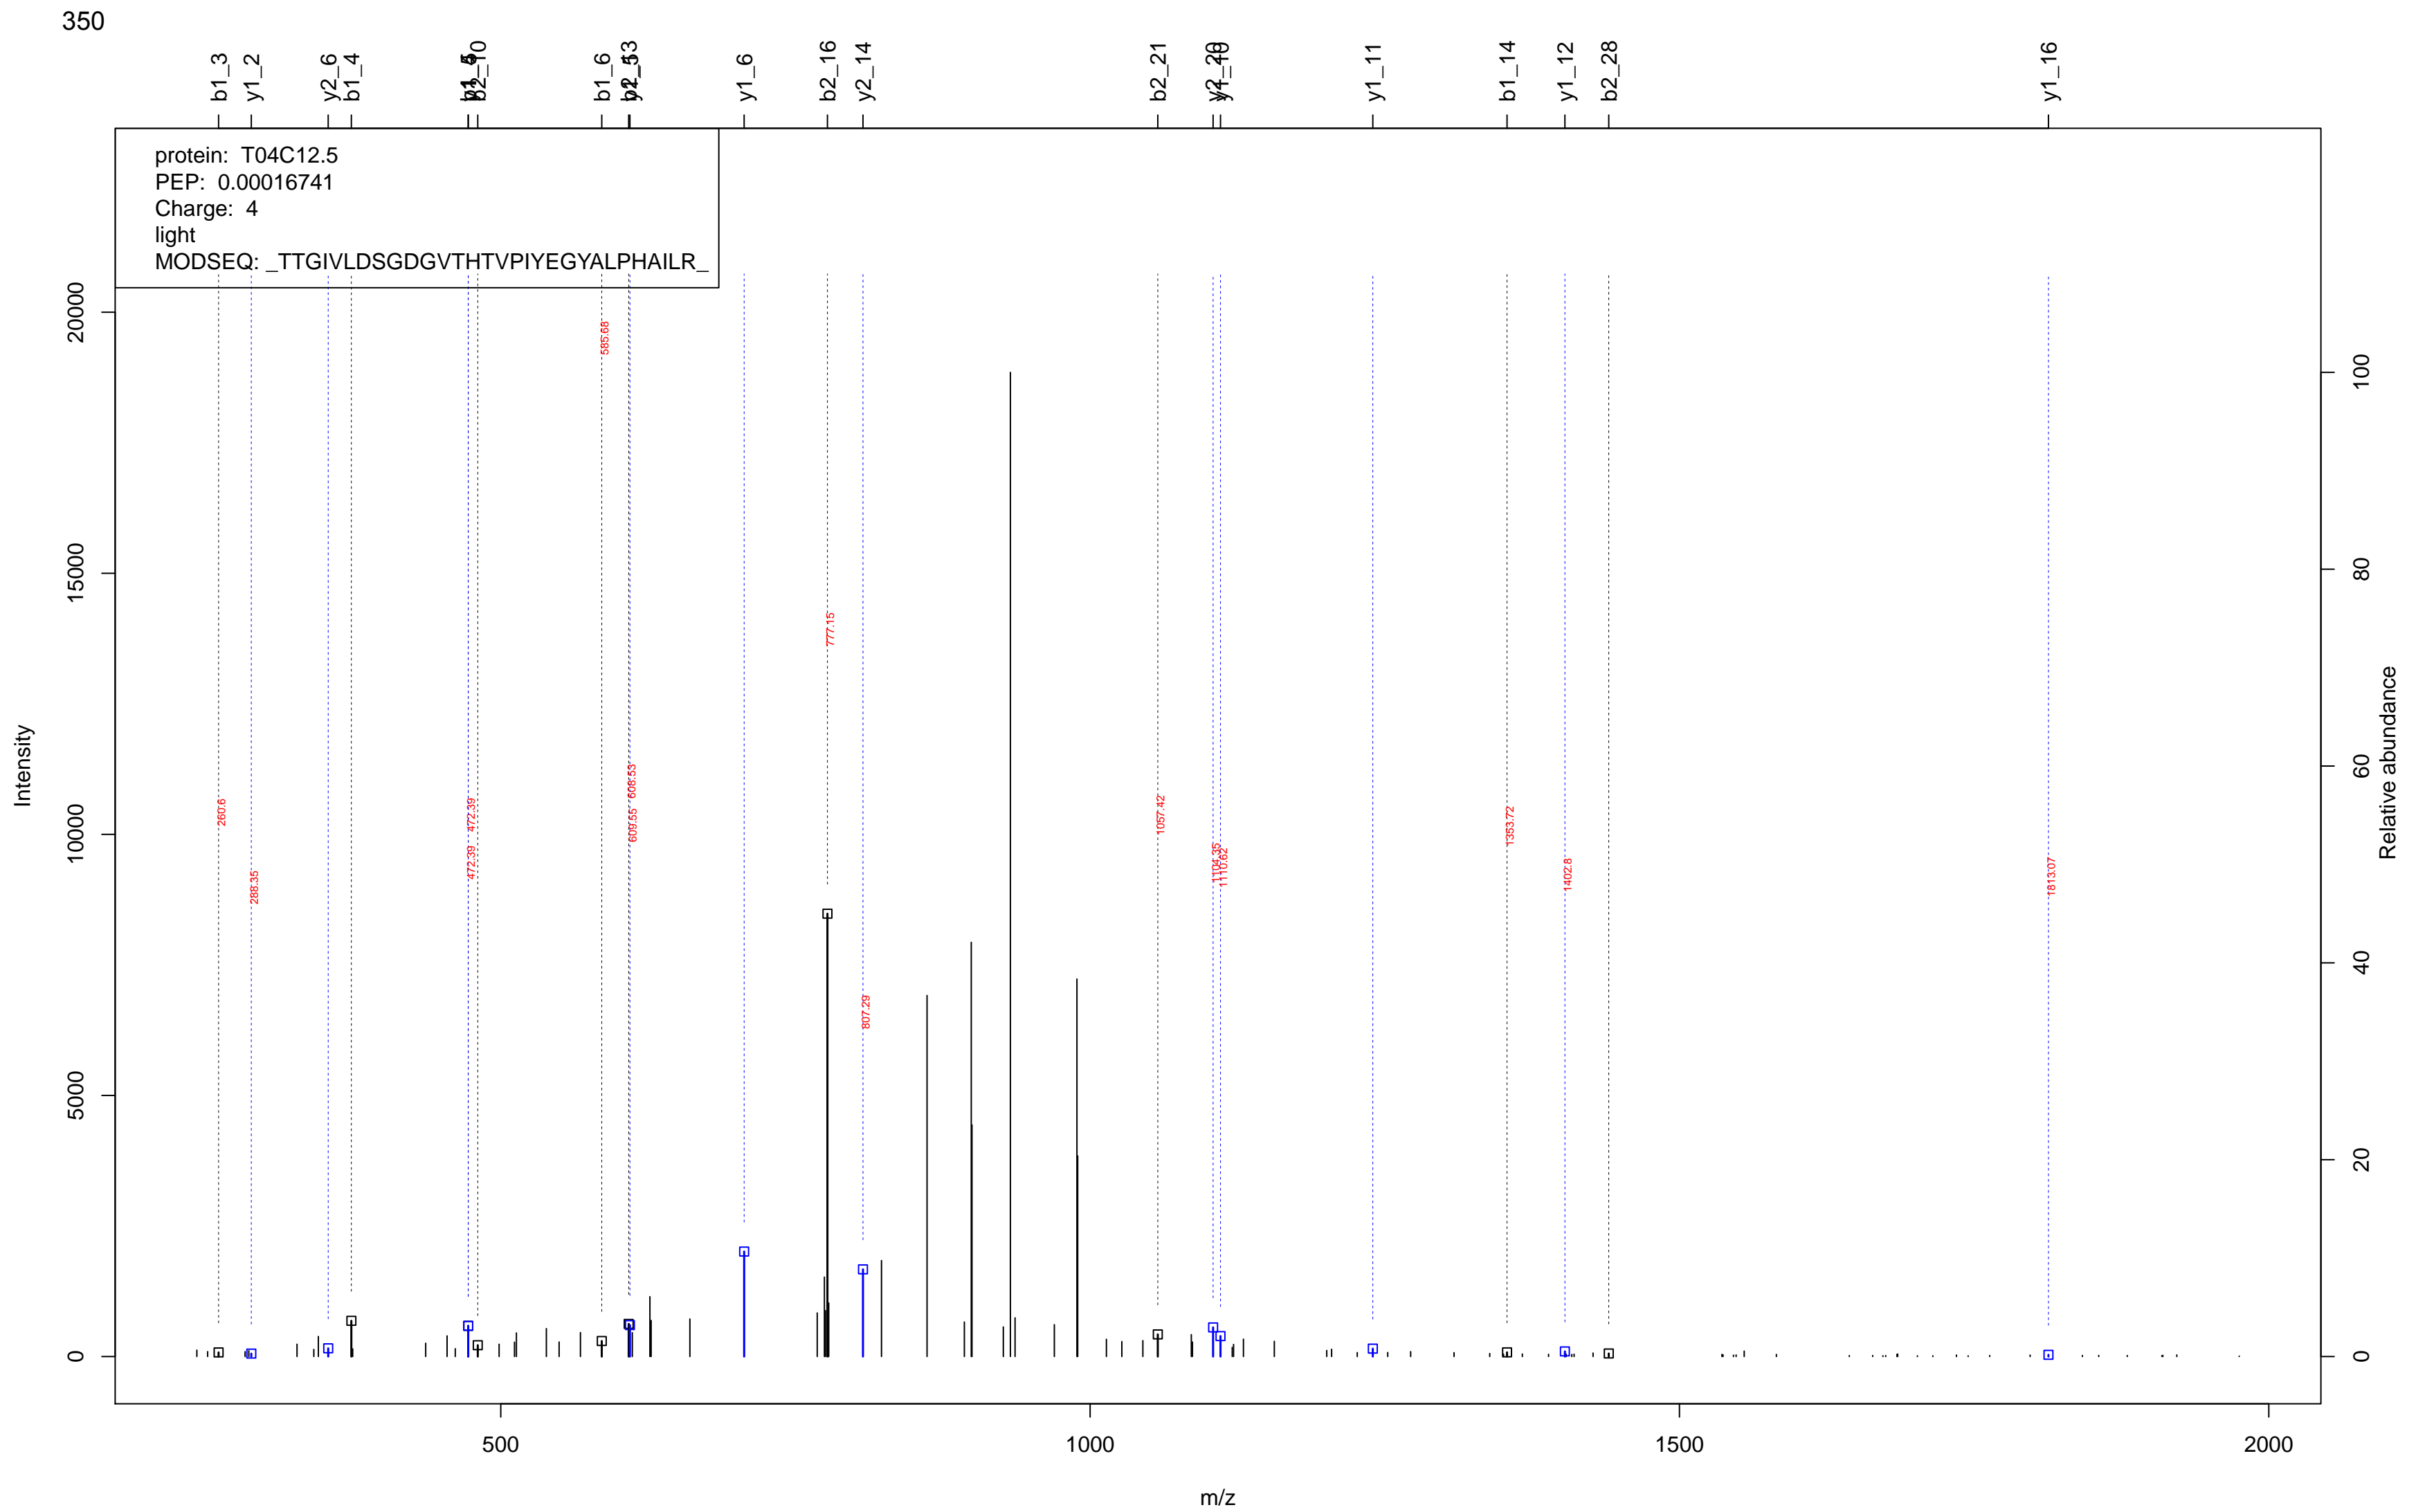

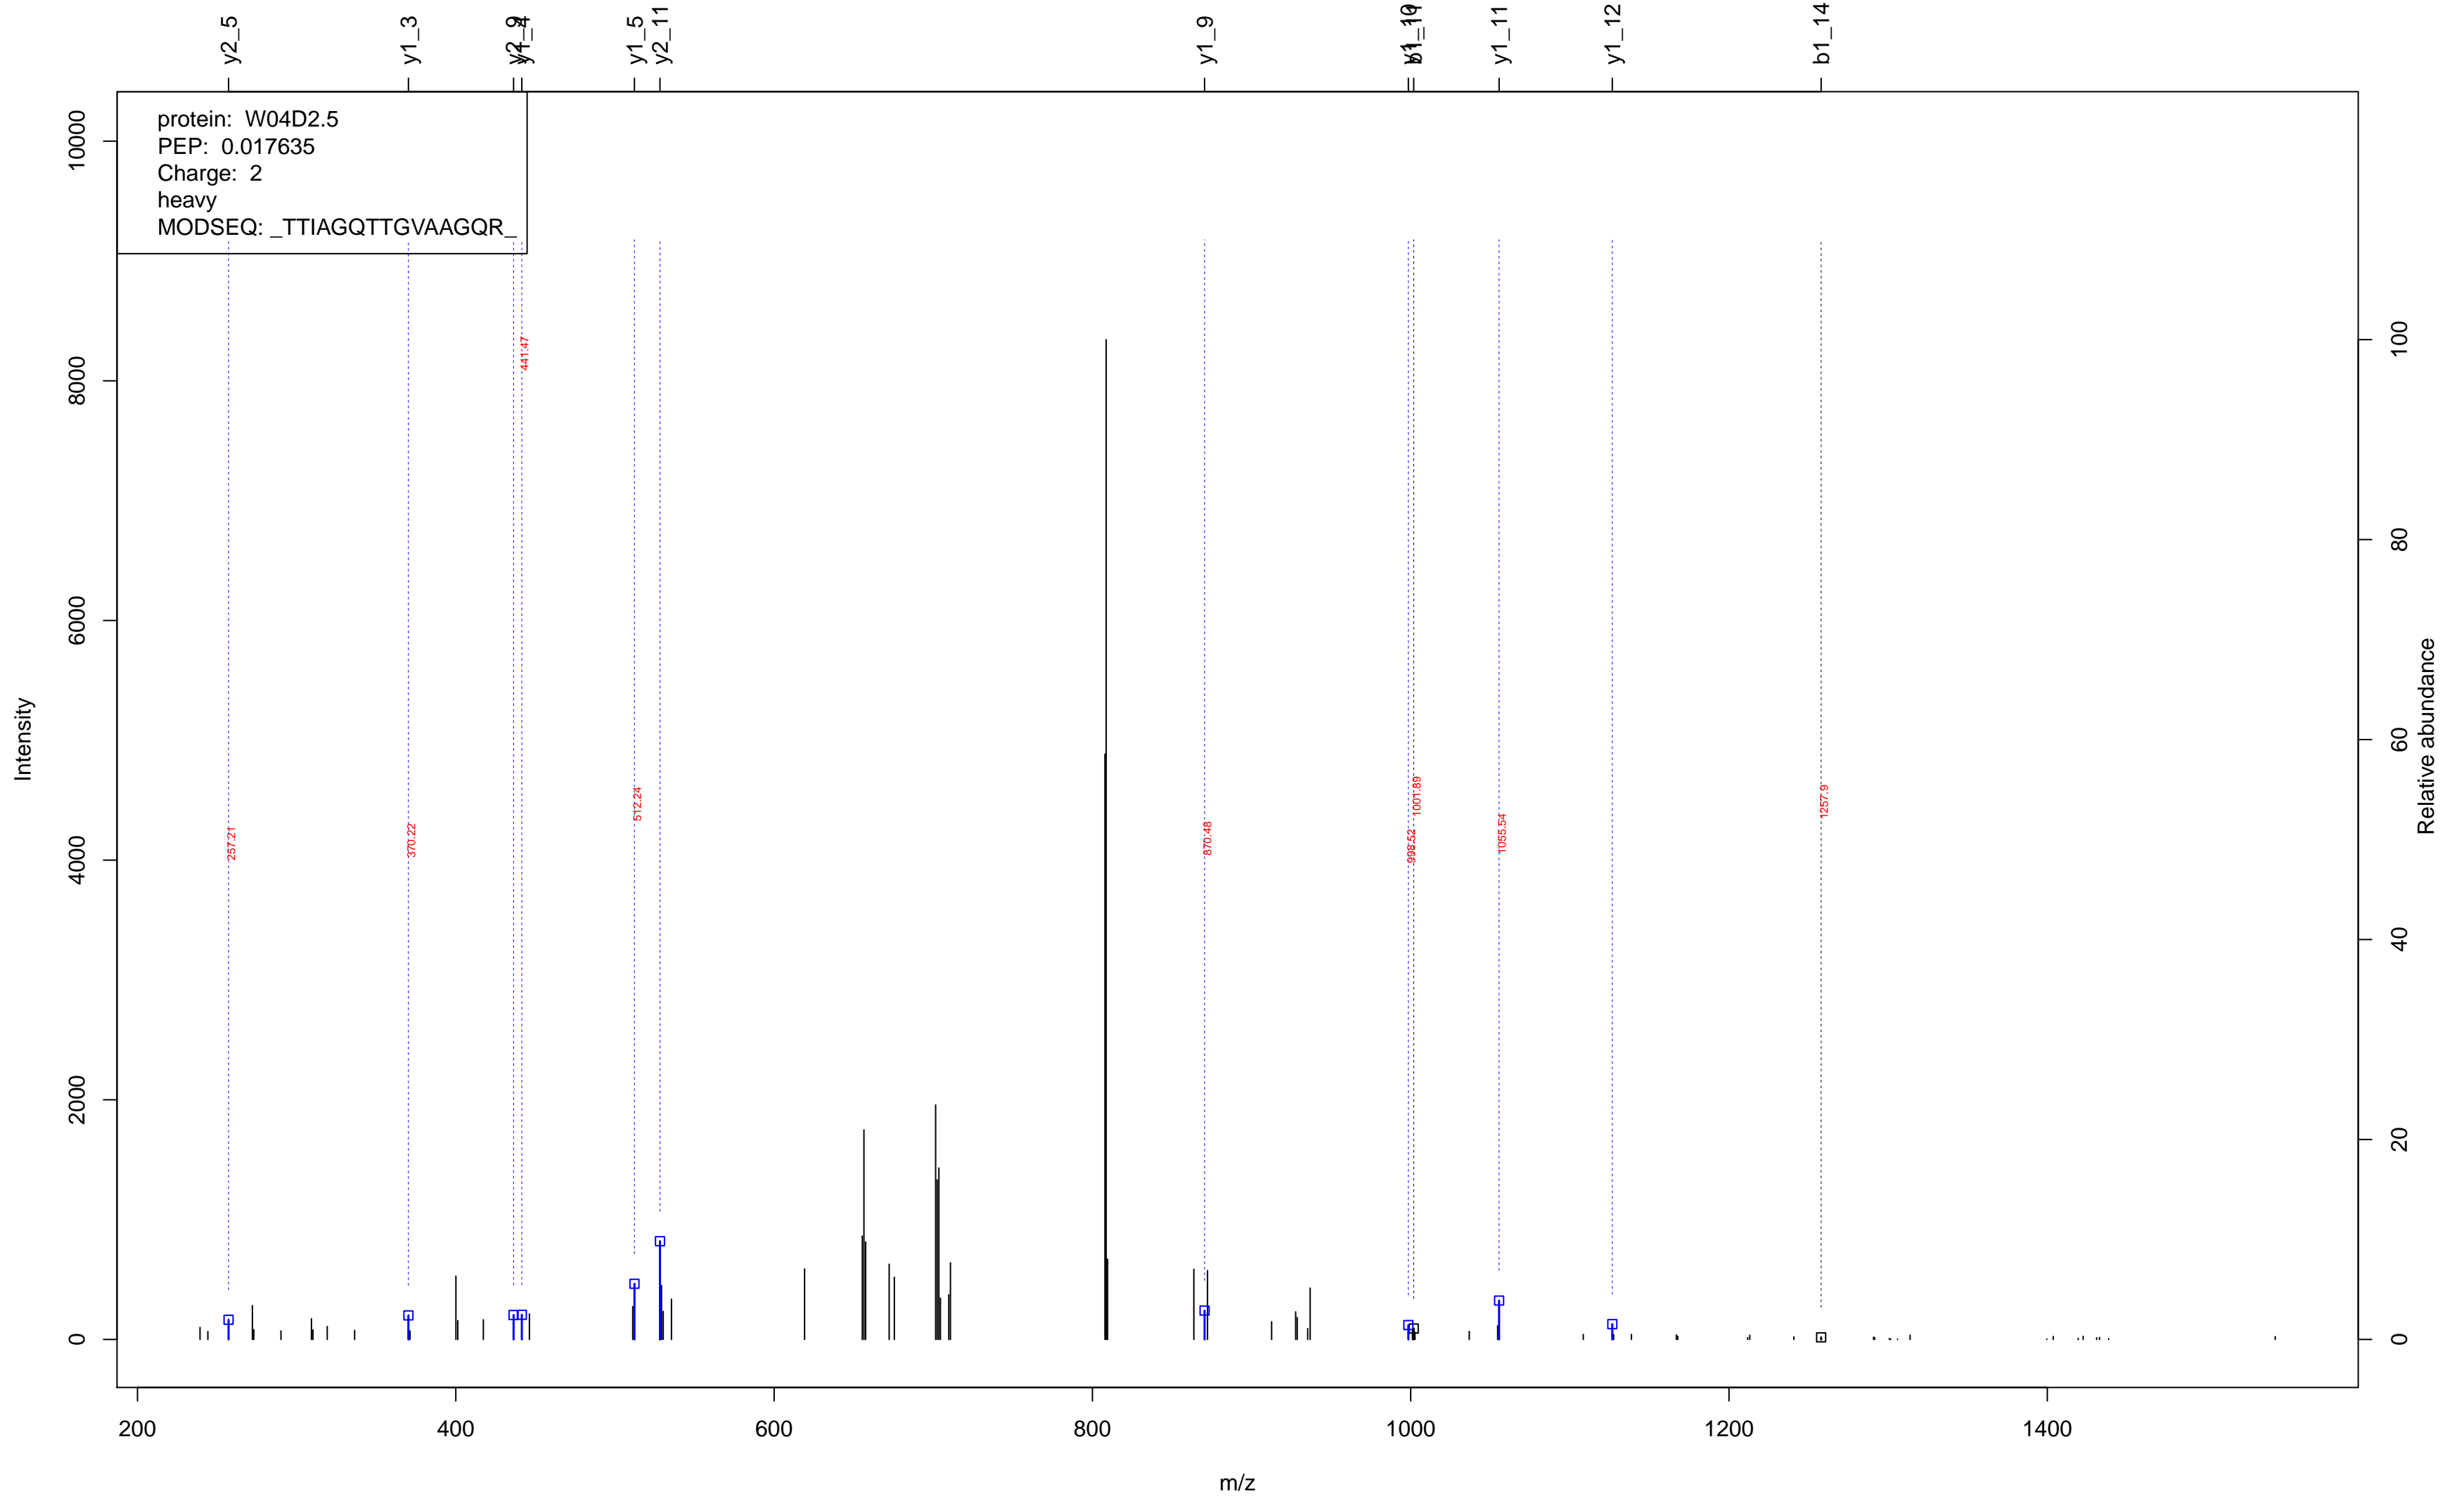

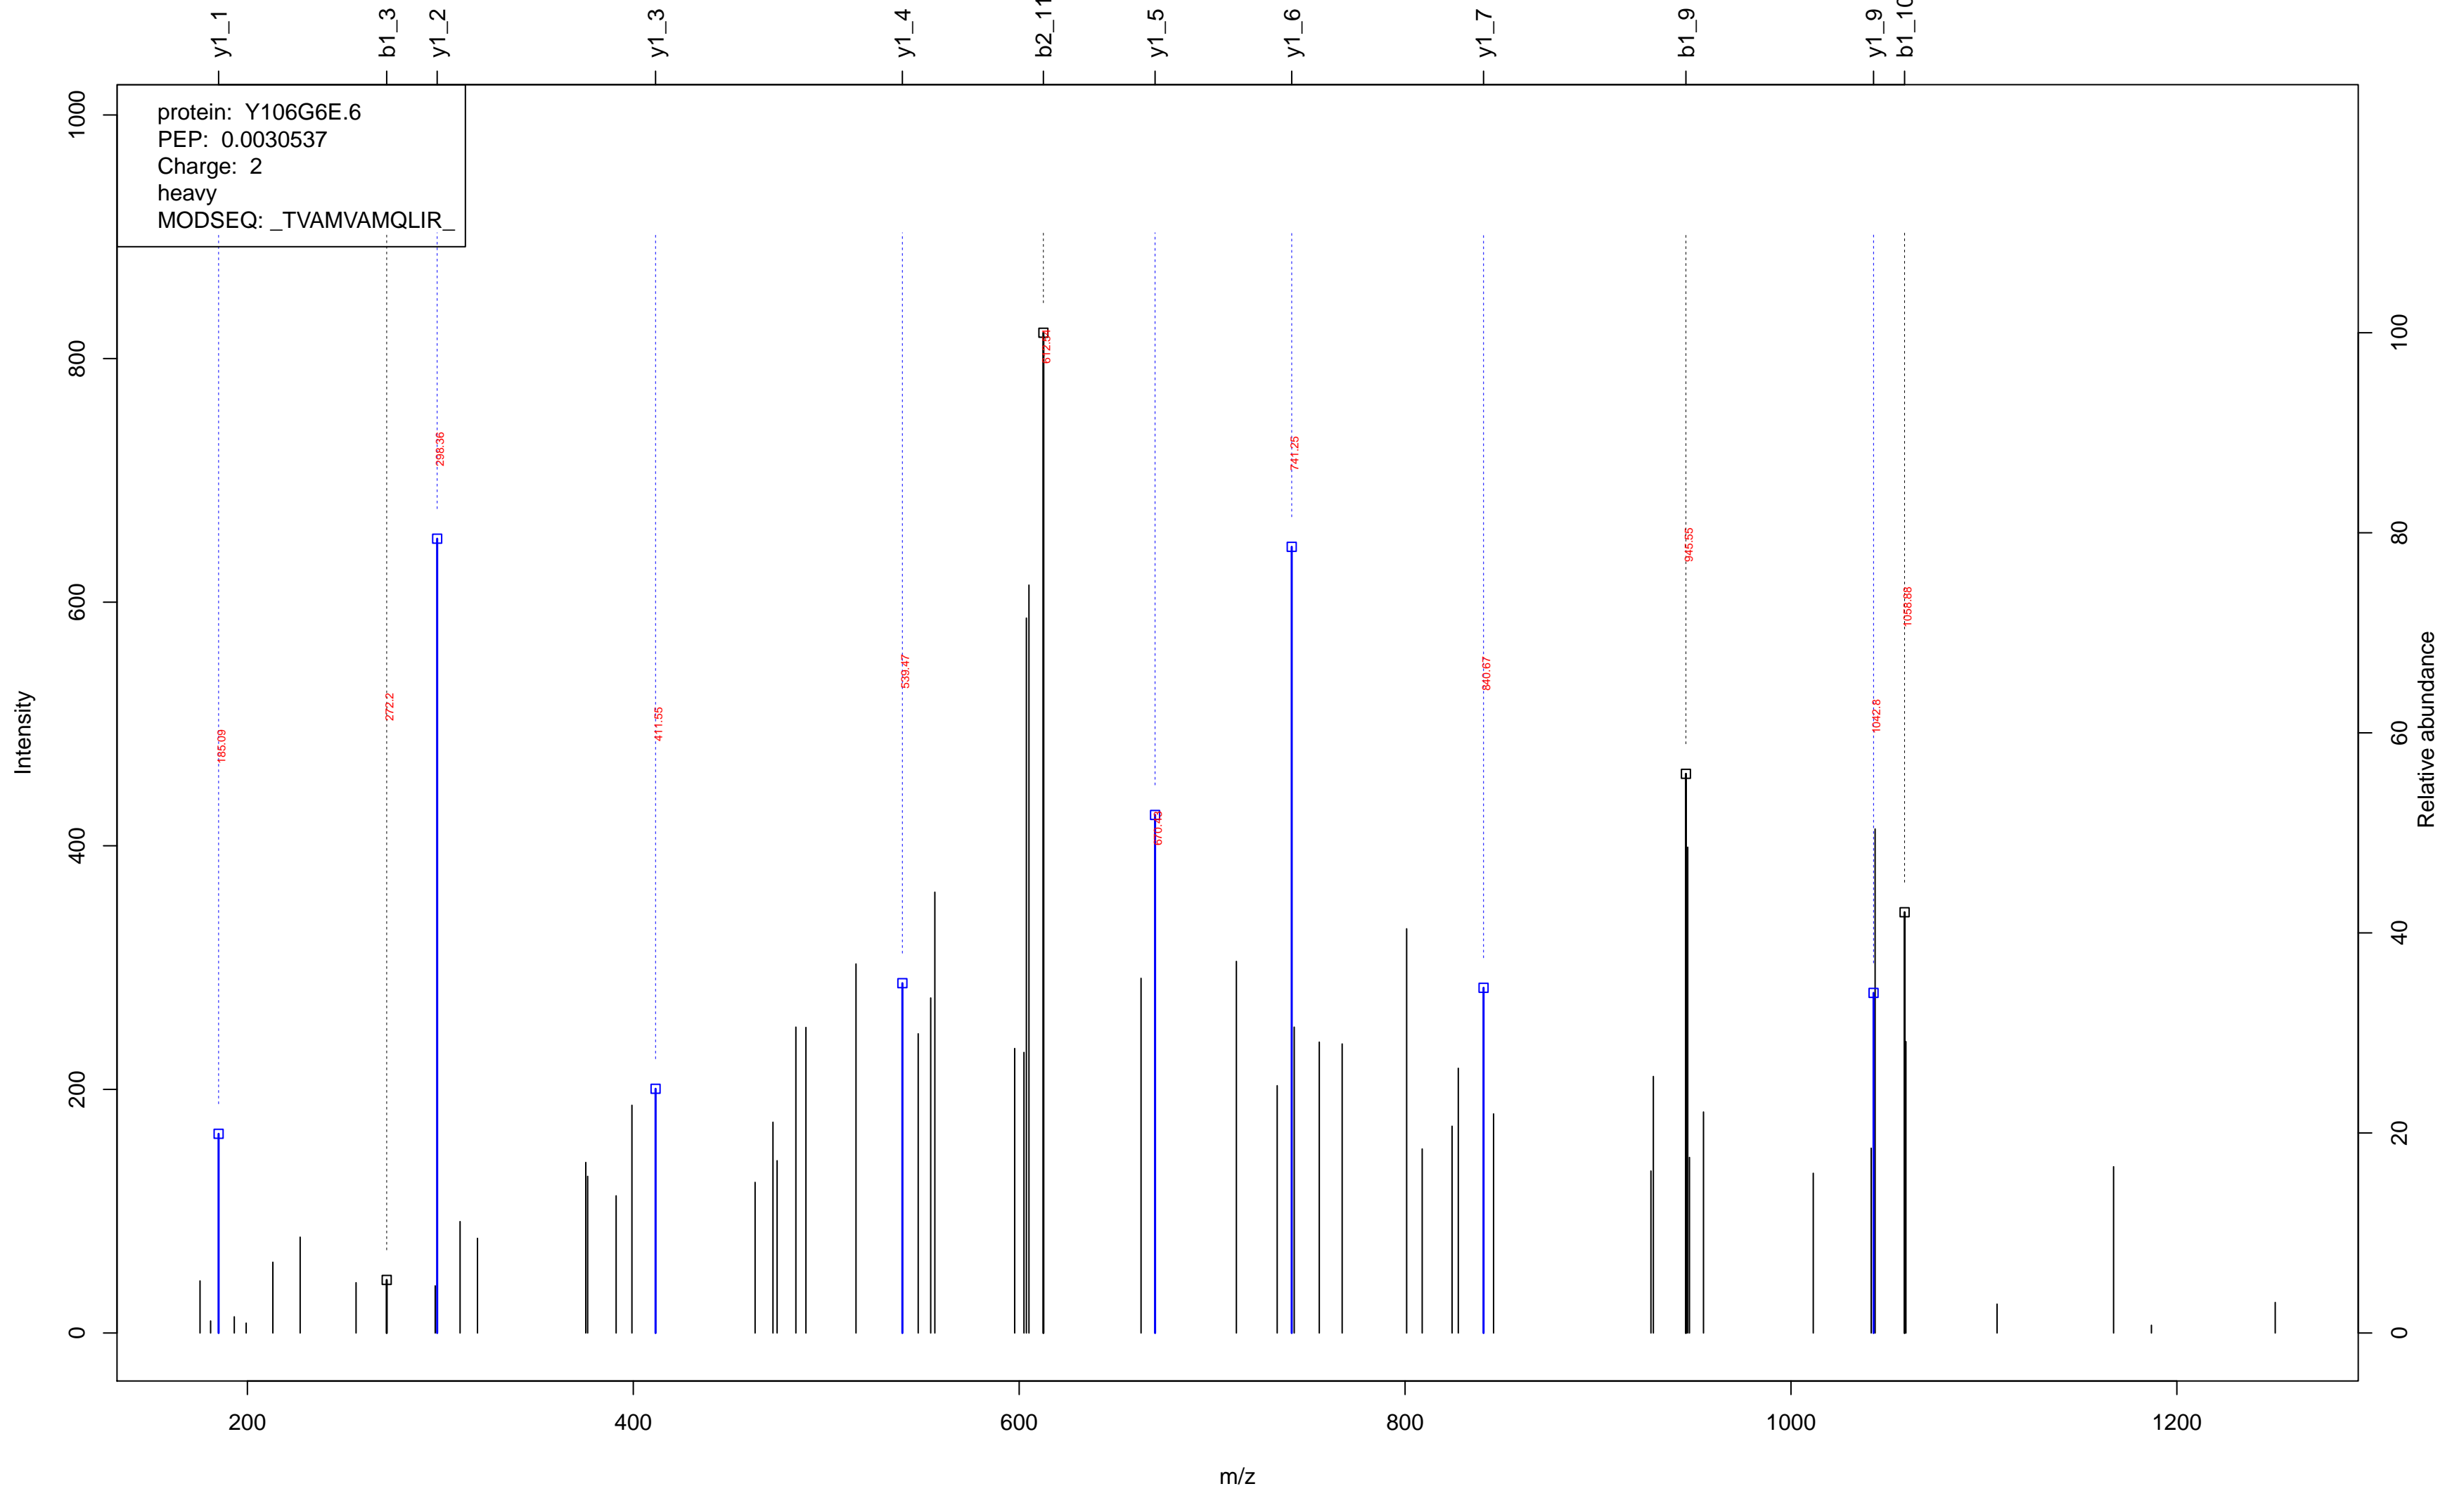

protein: Y106G6E.6  
PEP: 0.0030537  
Charge: 2  
heavy  
MODSEQ: \_TVAMVAMQLIR\_



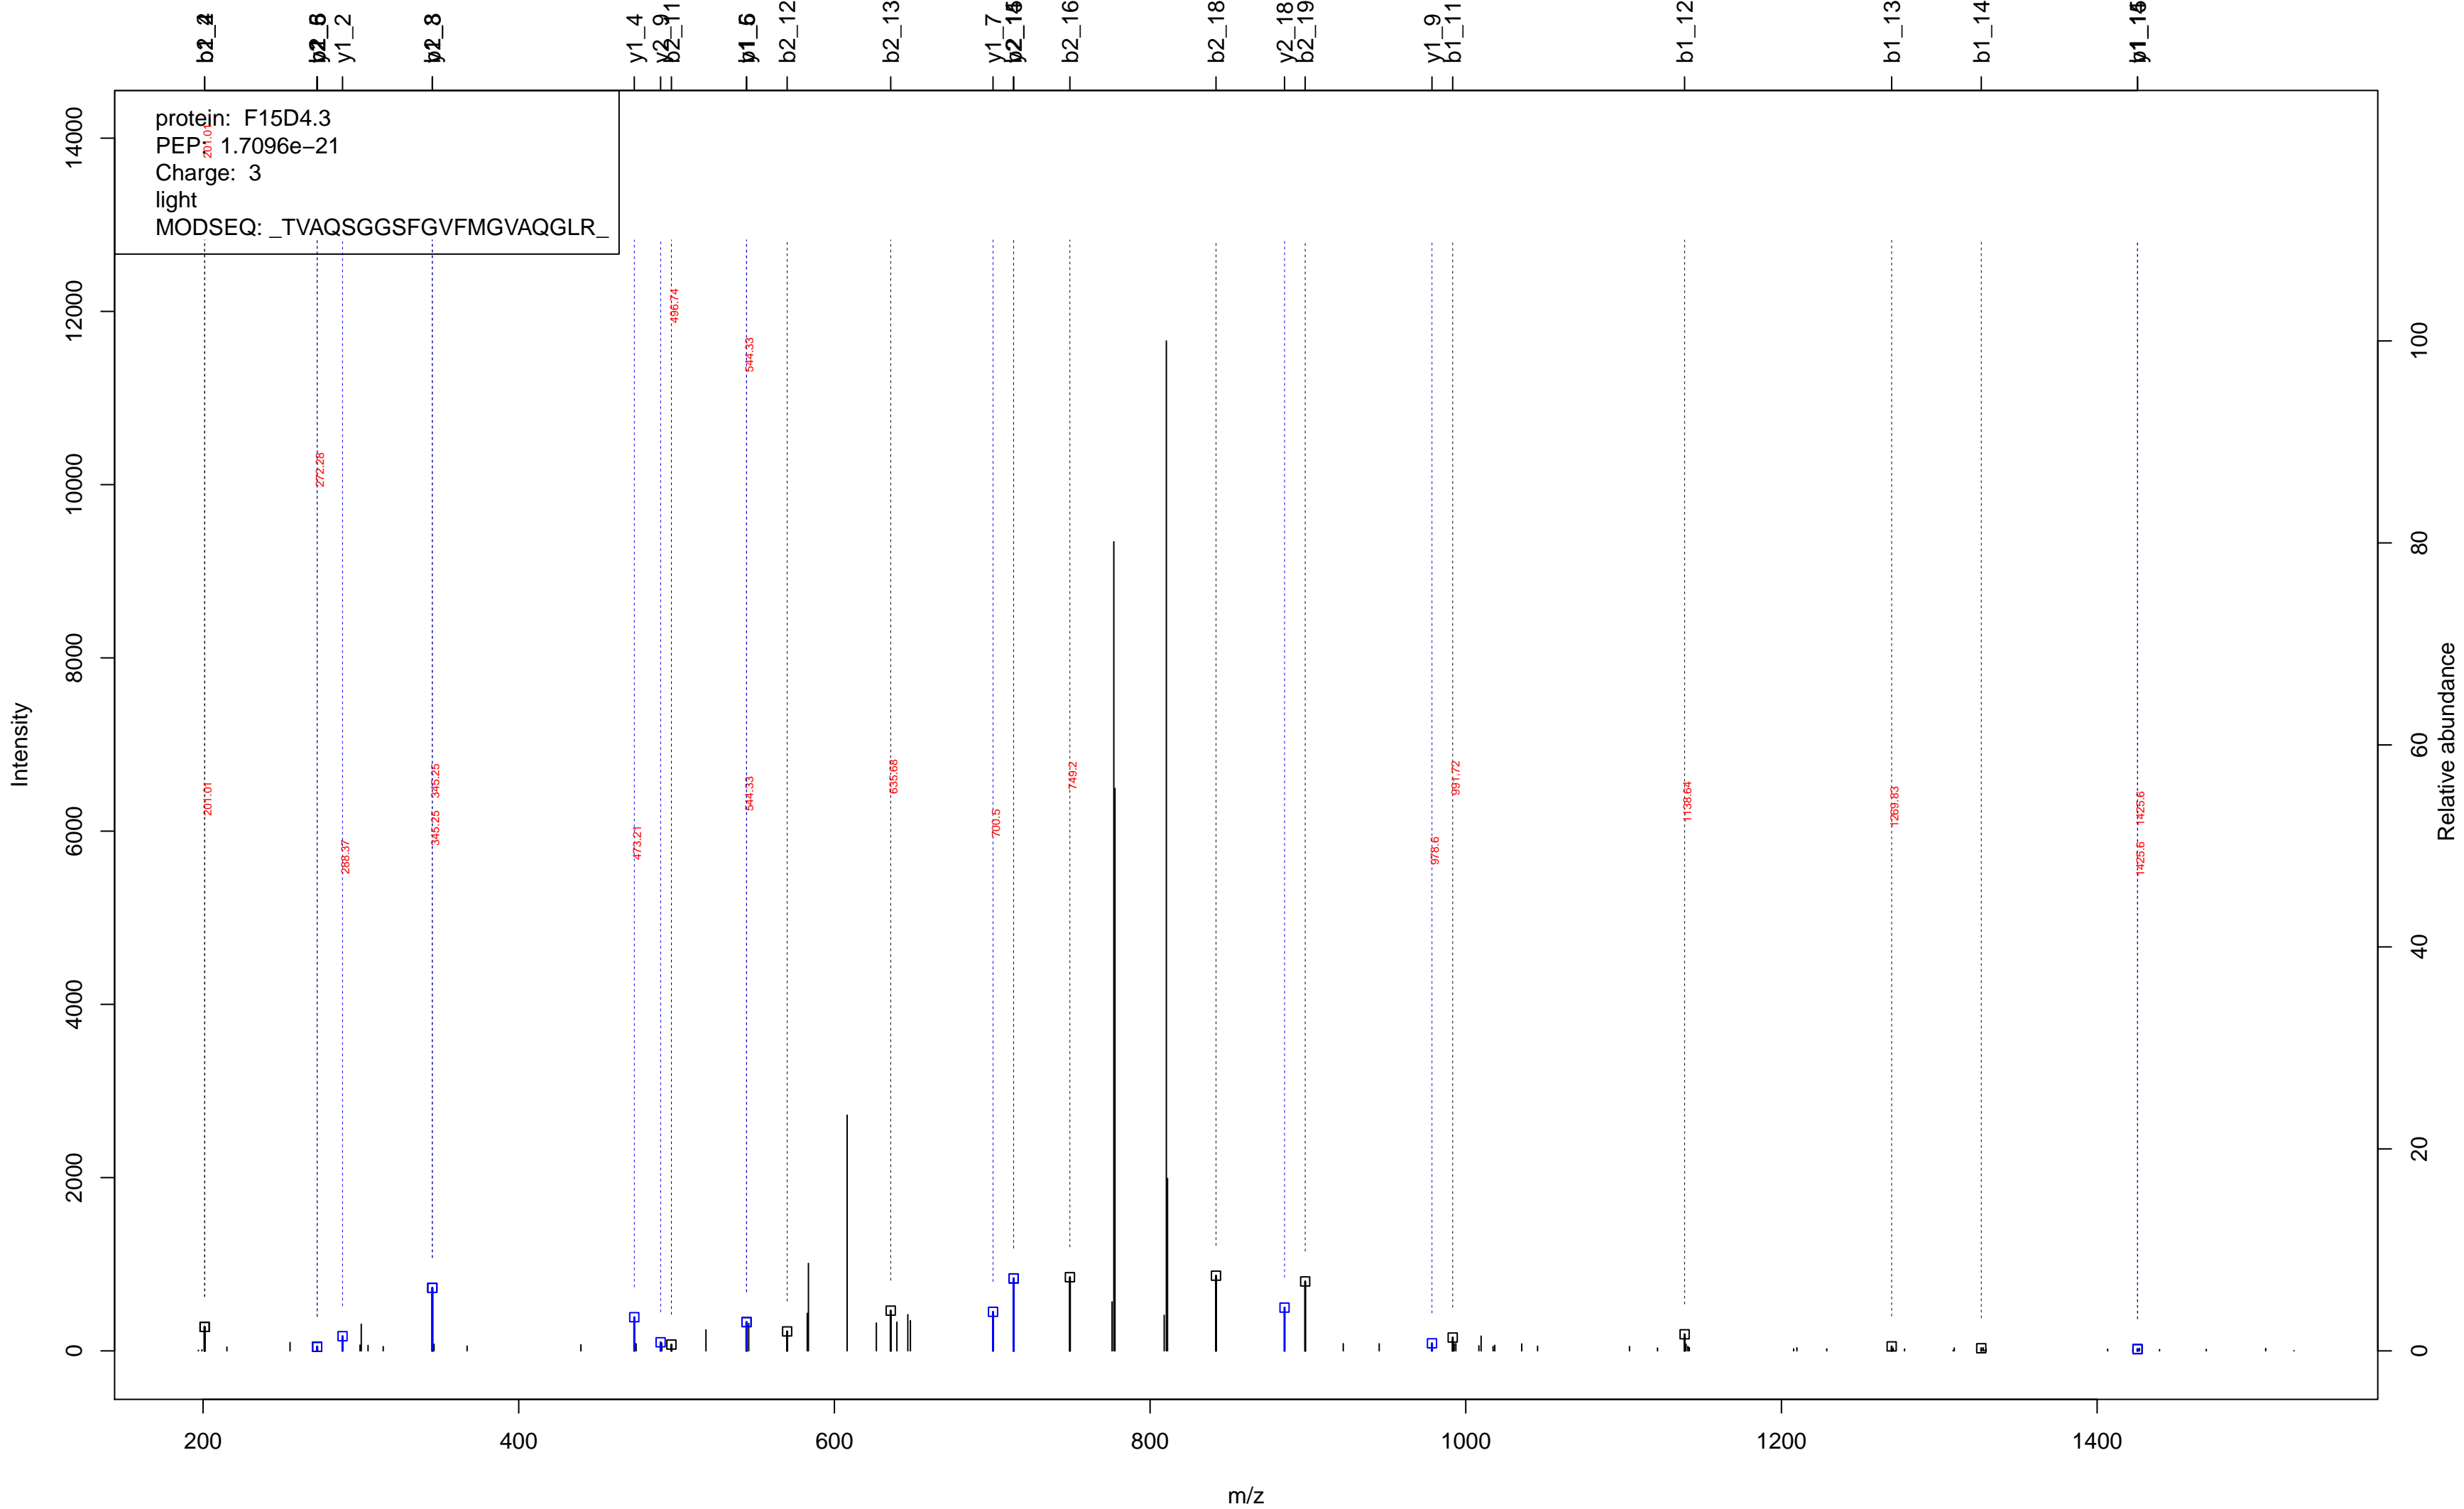

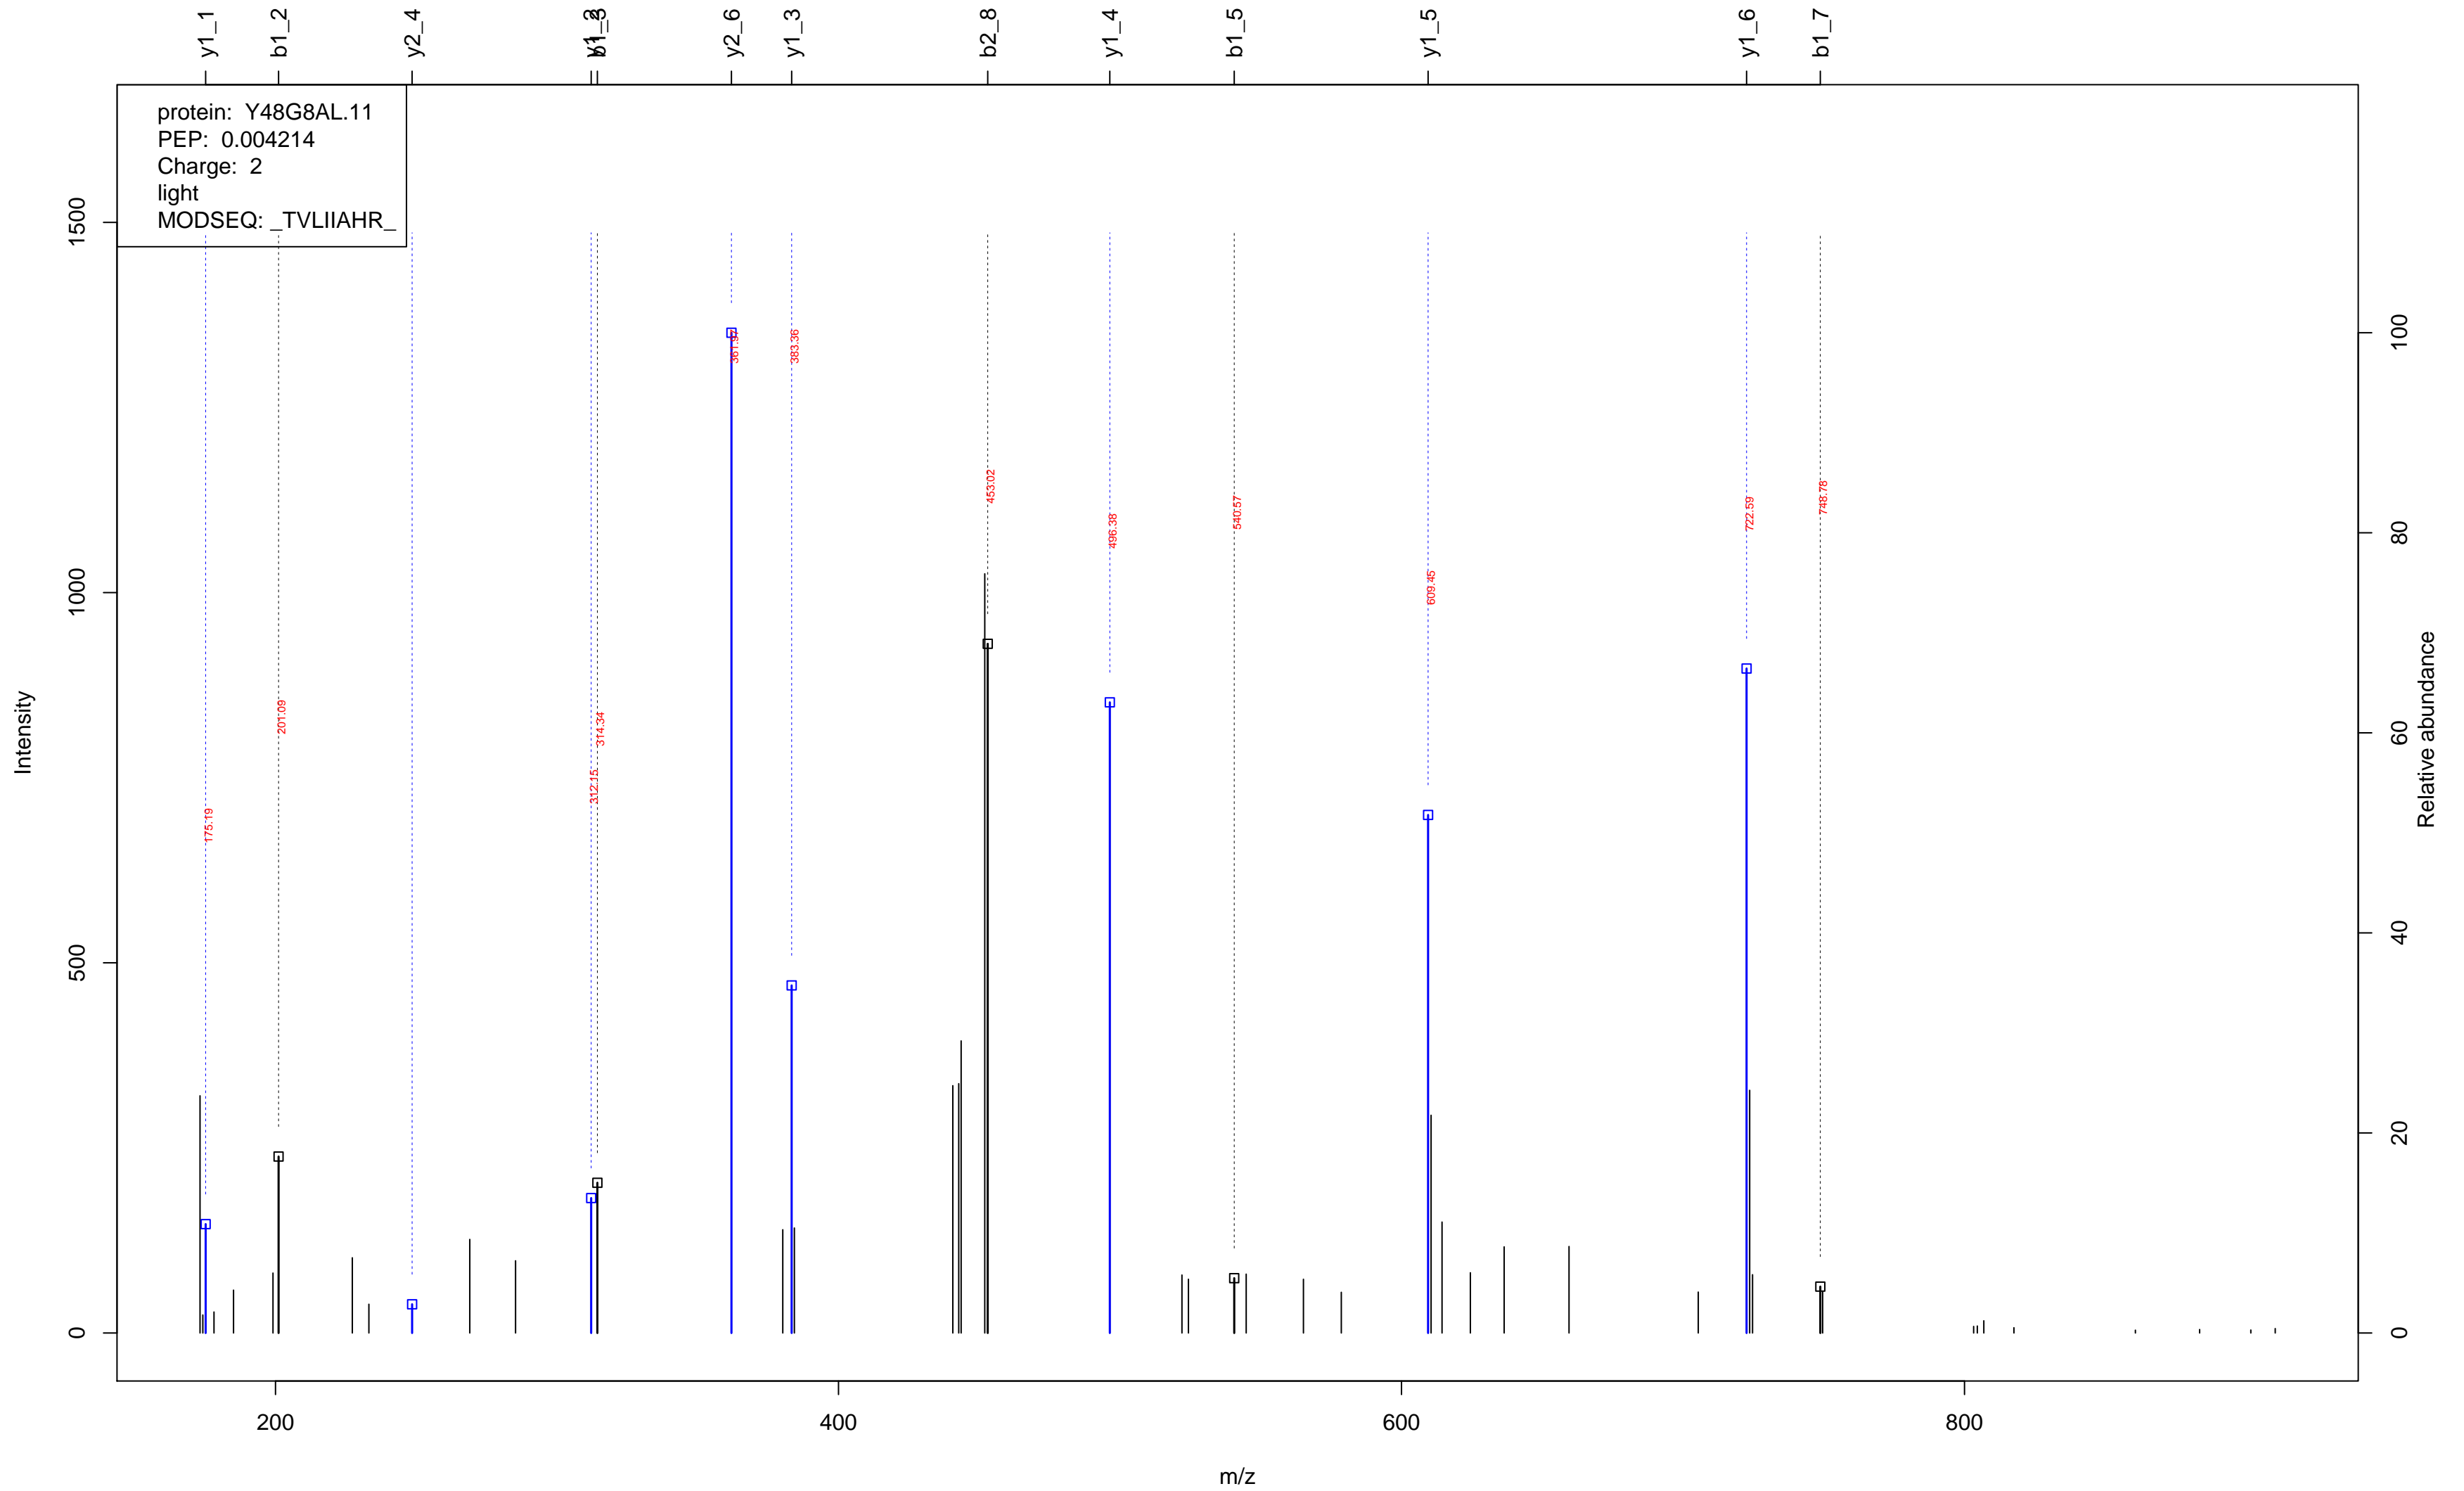

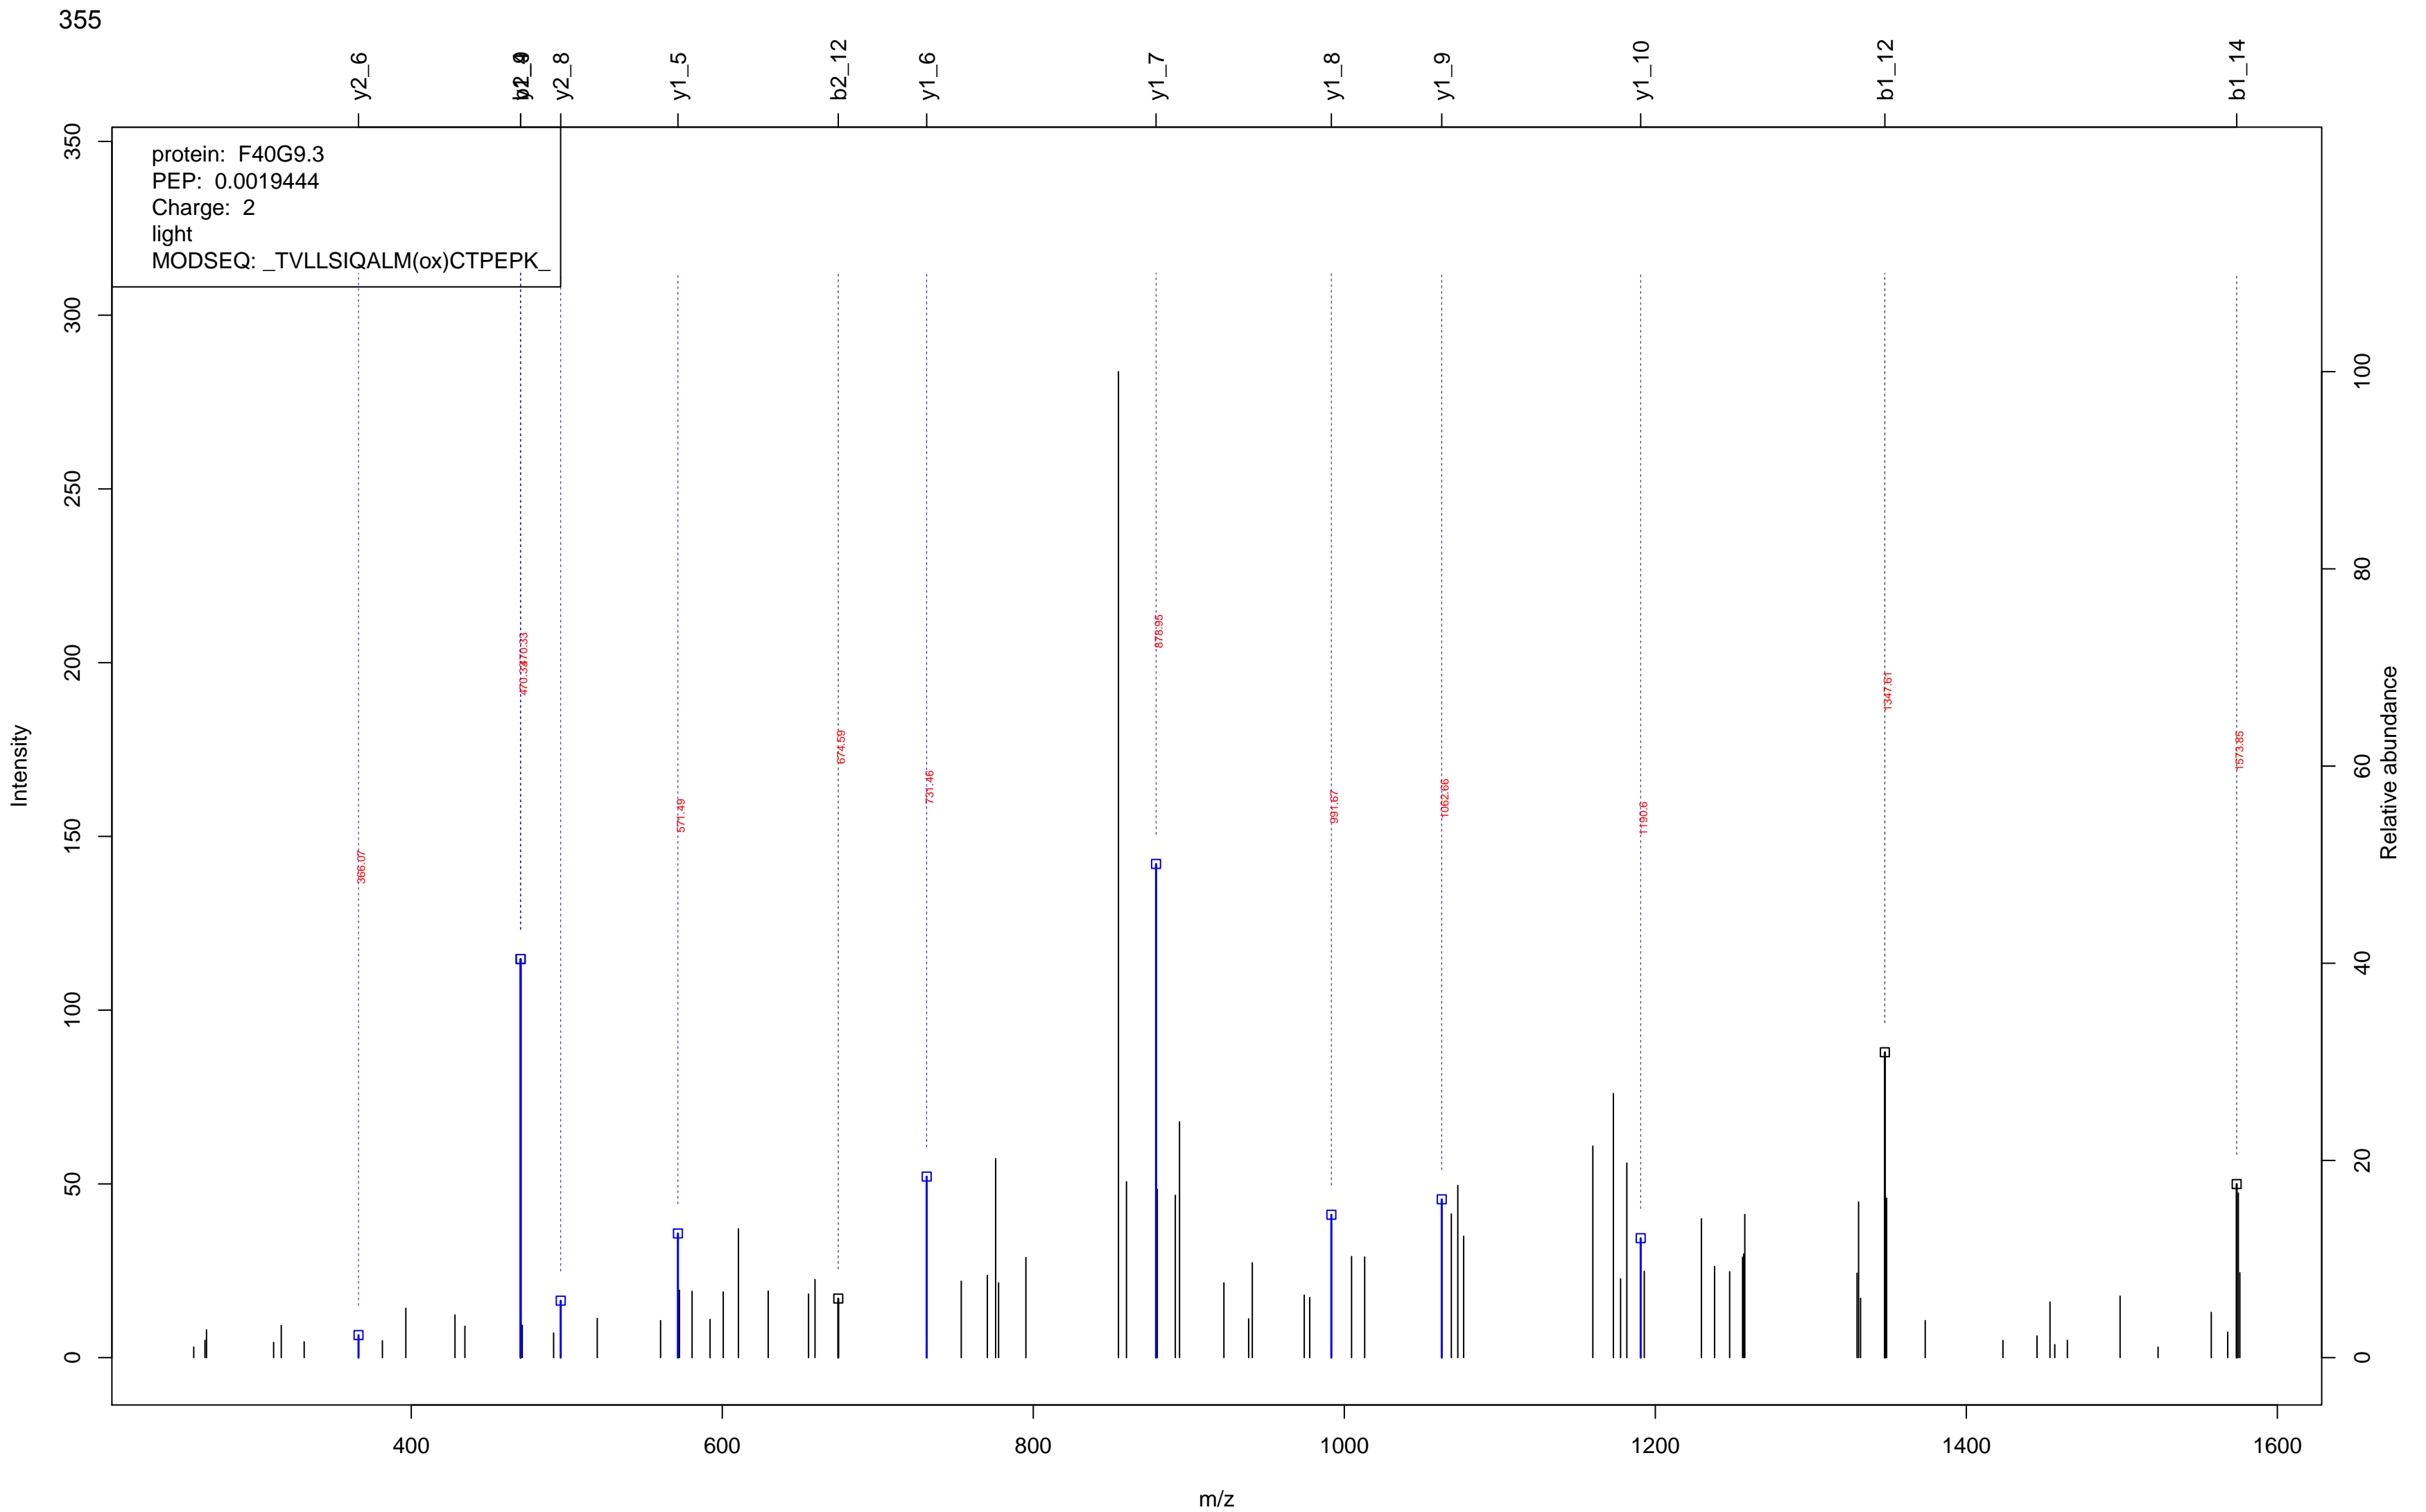

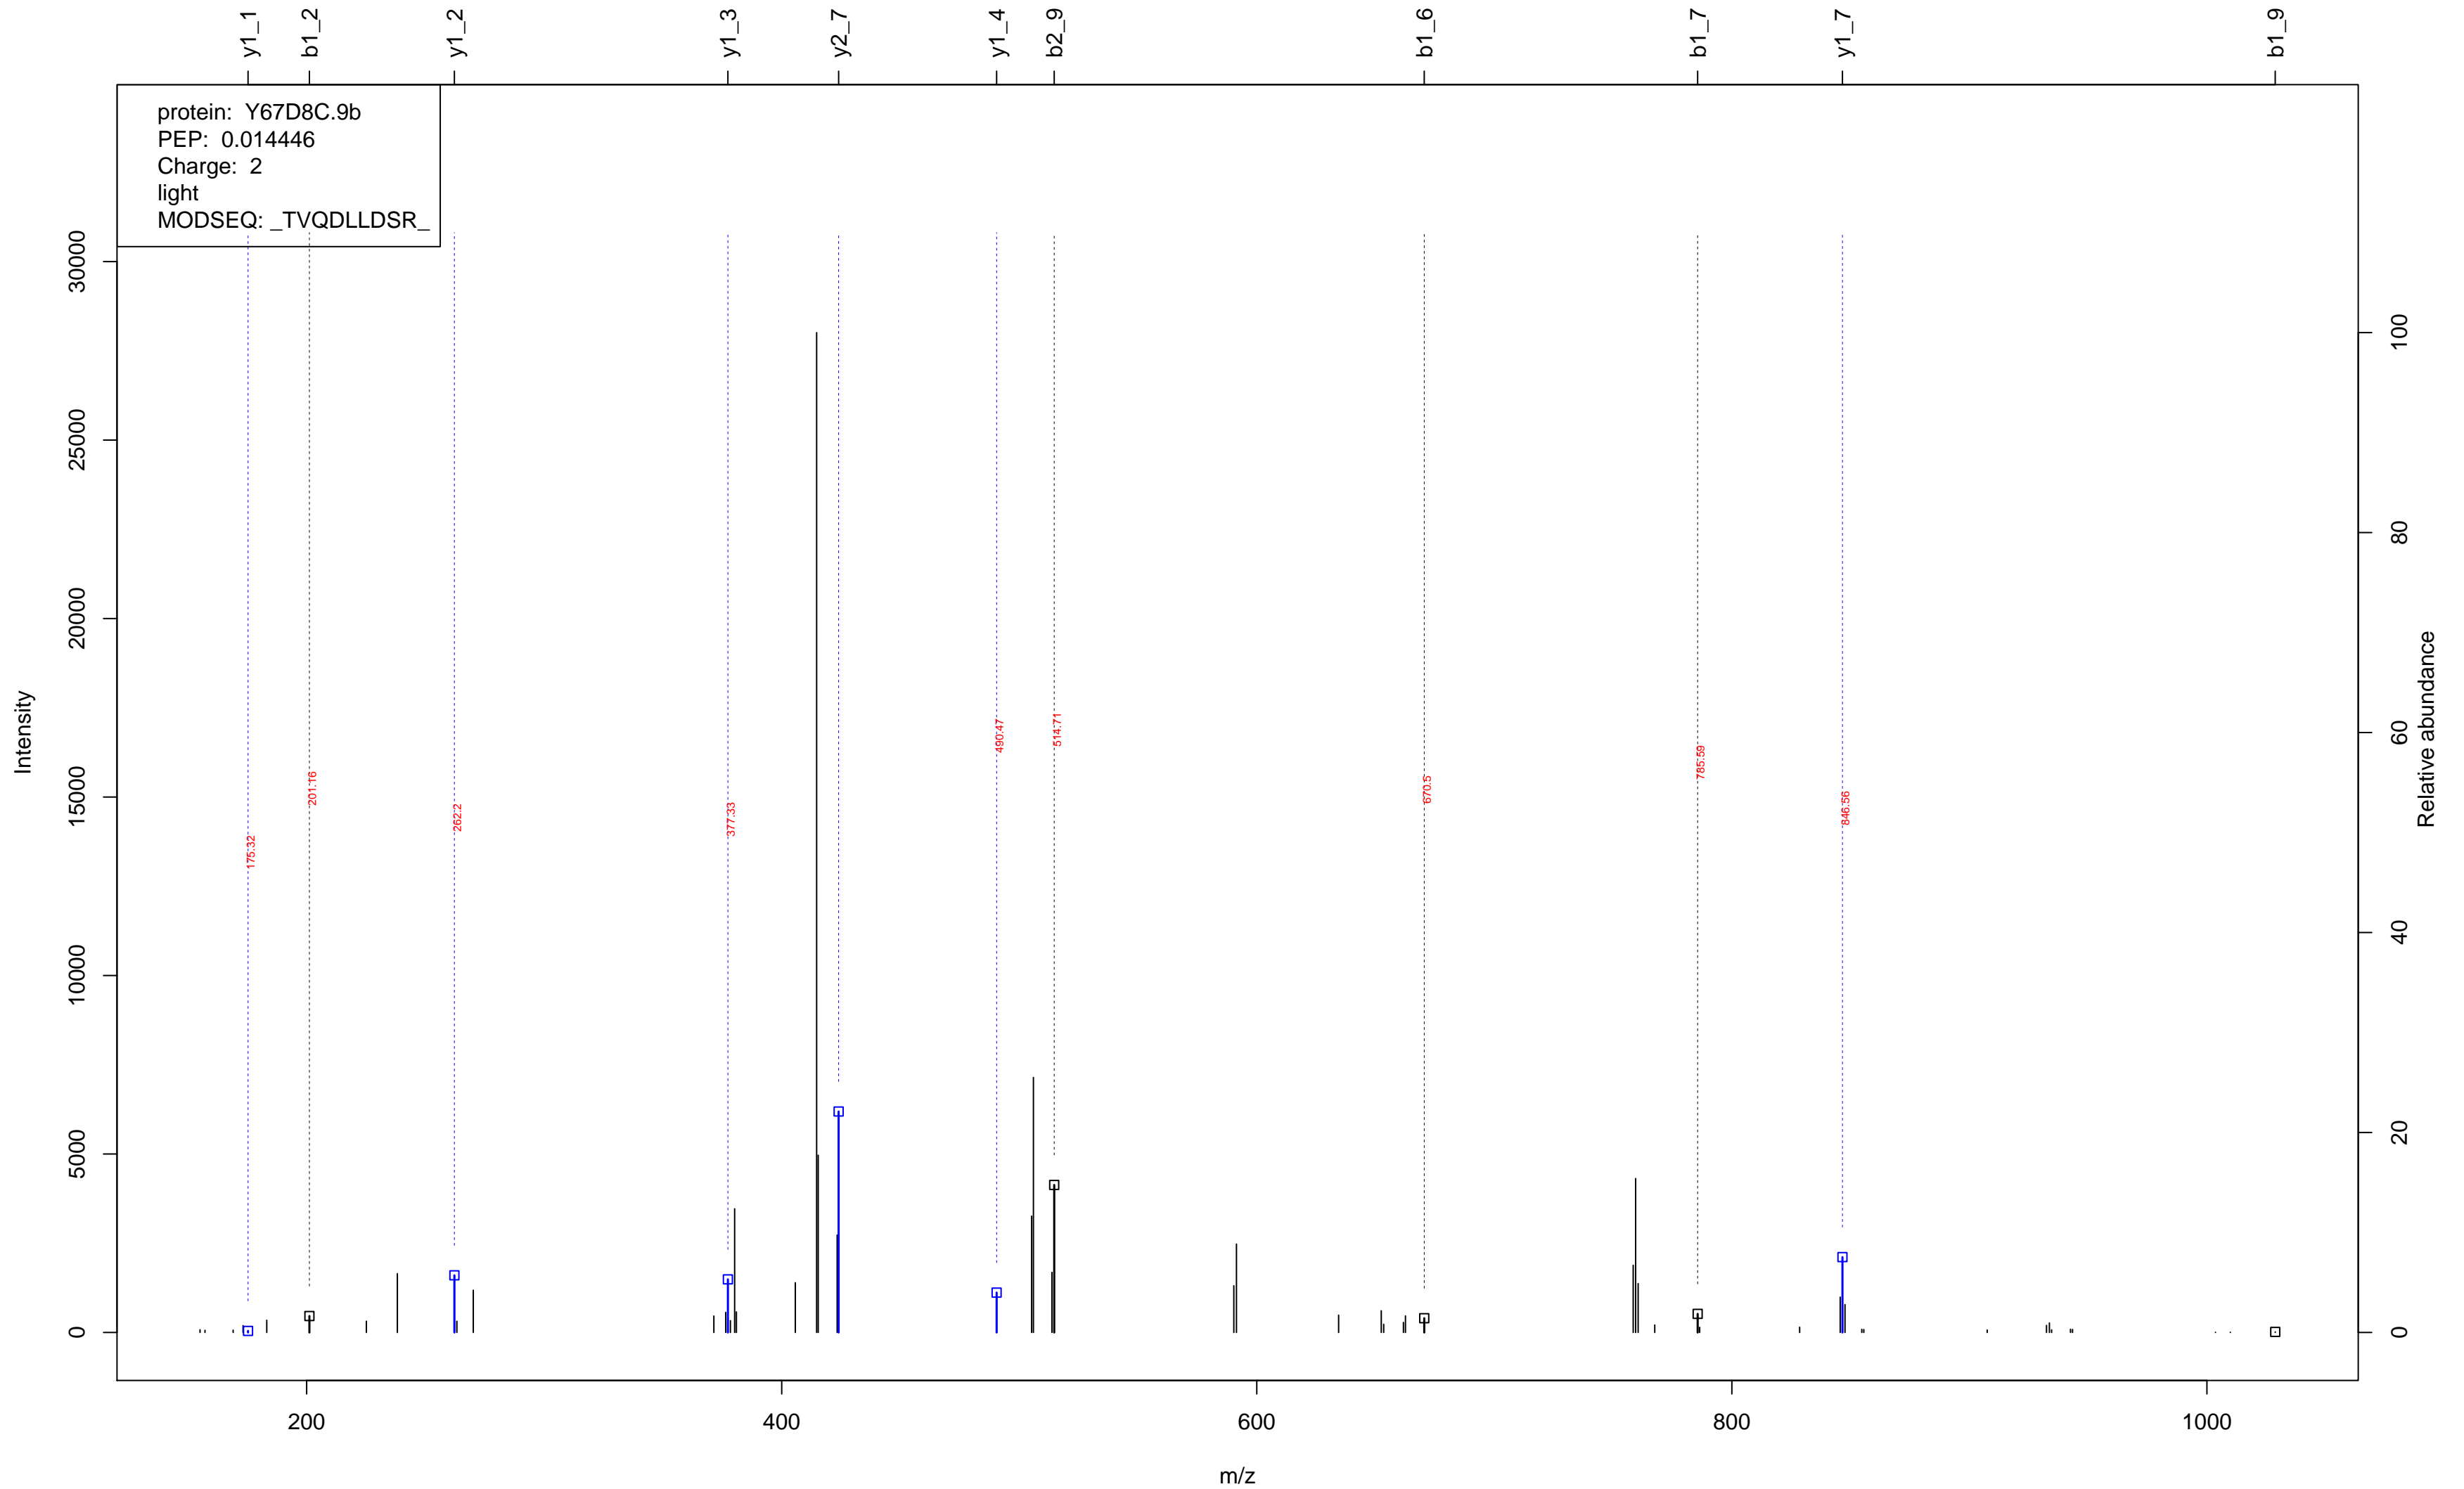

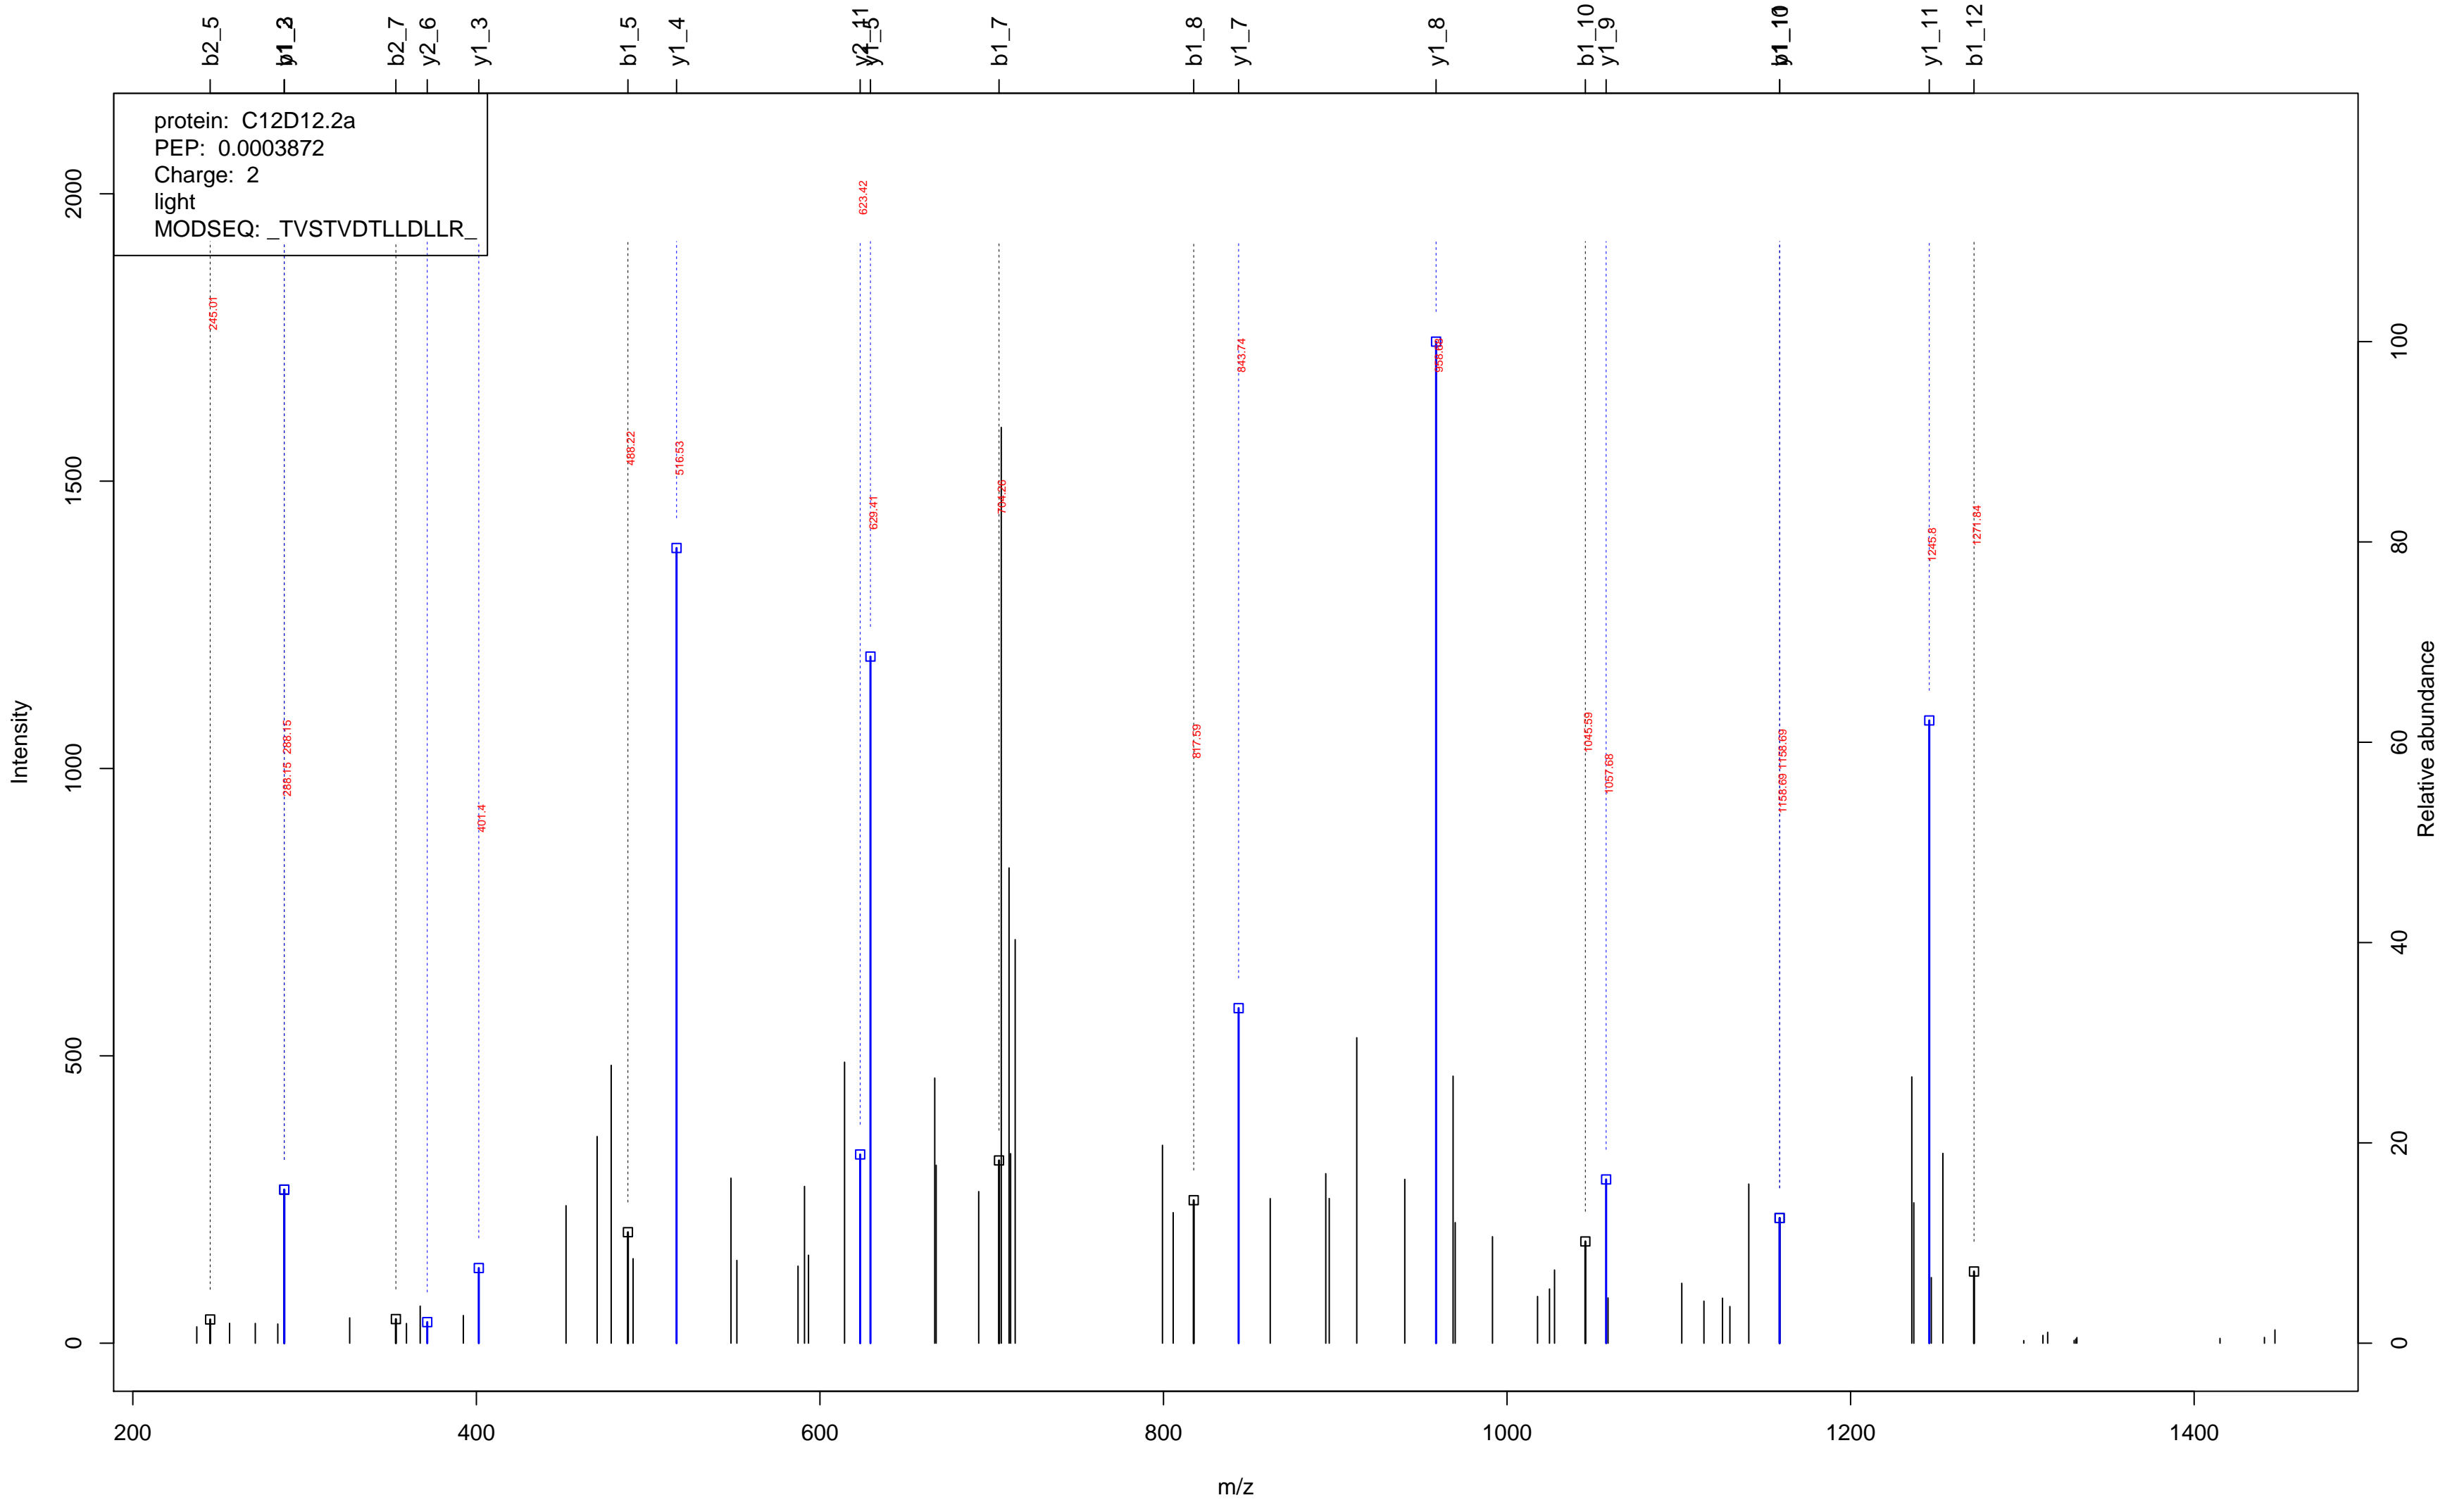

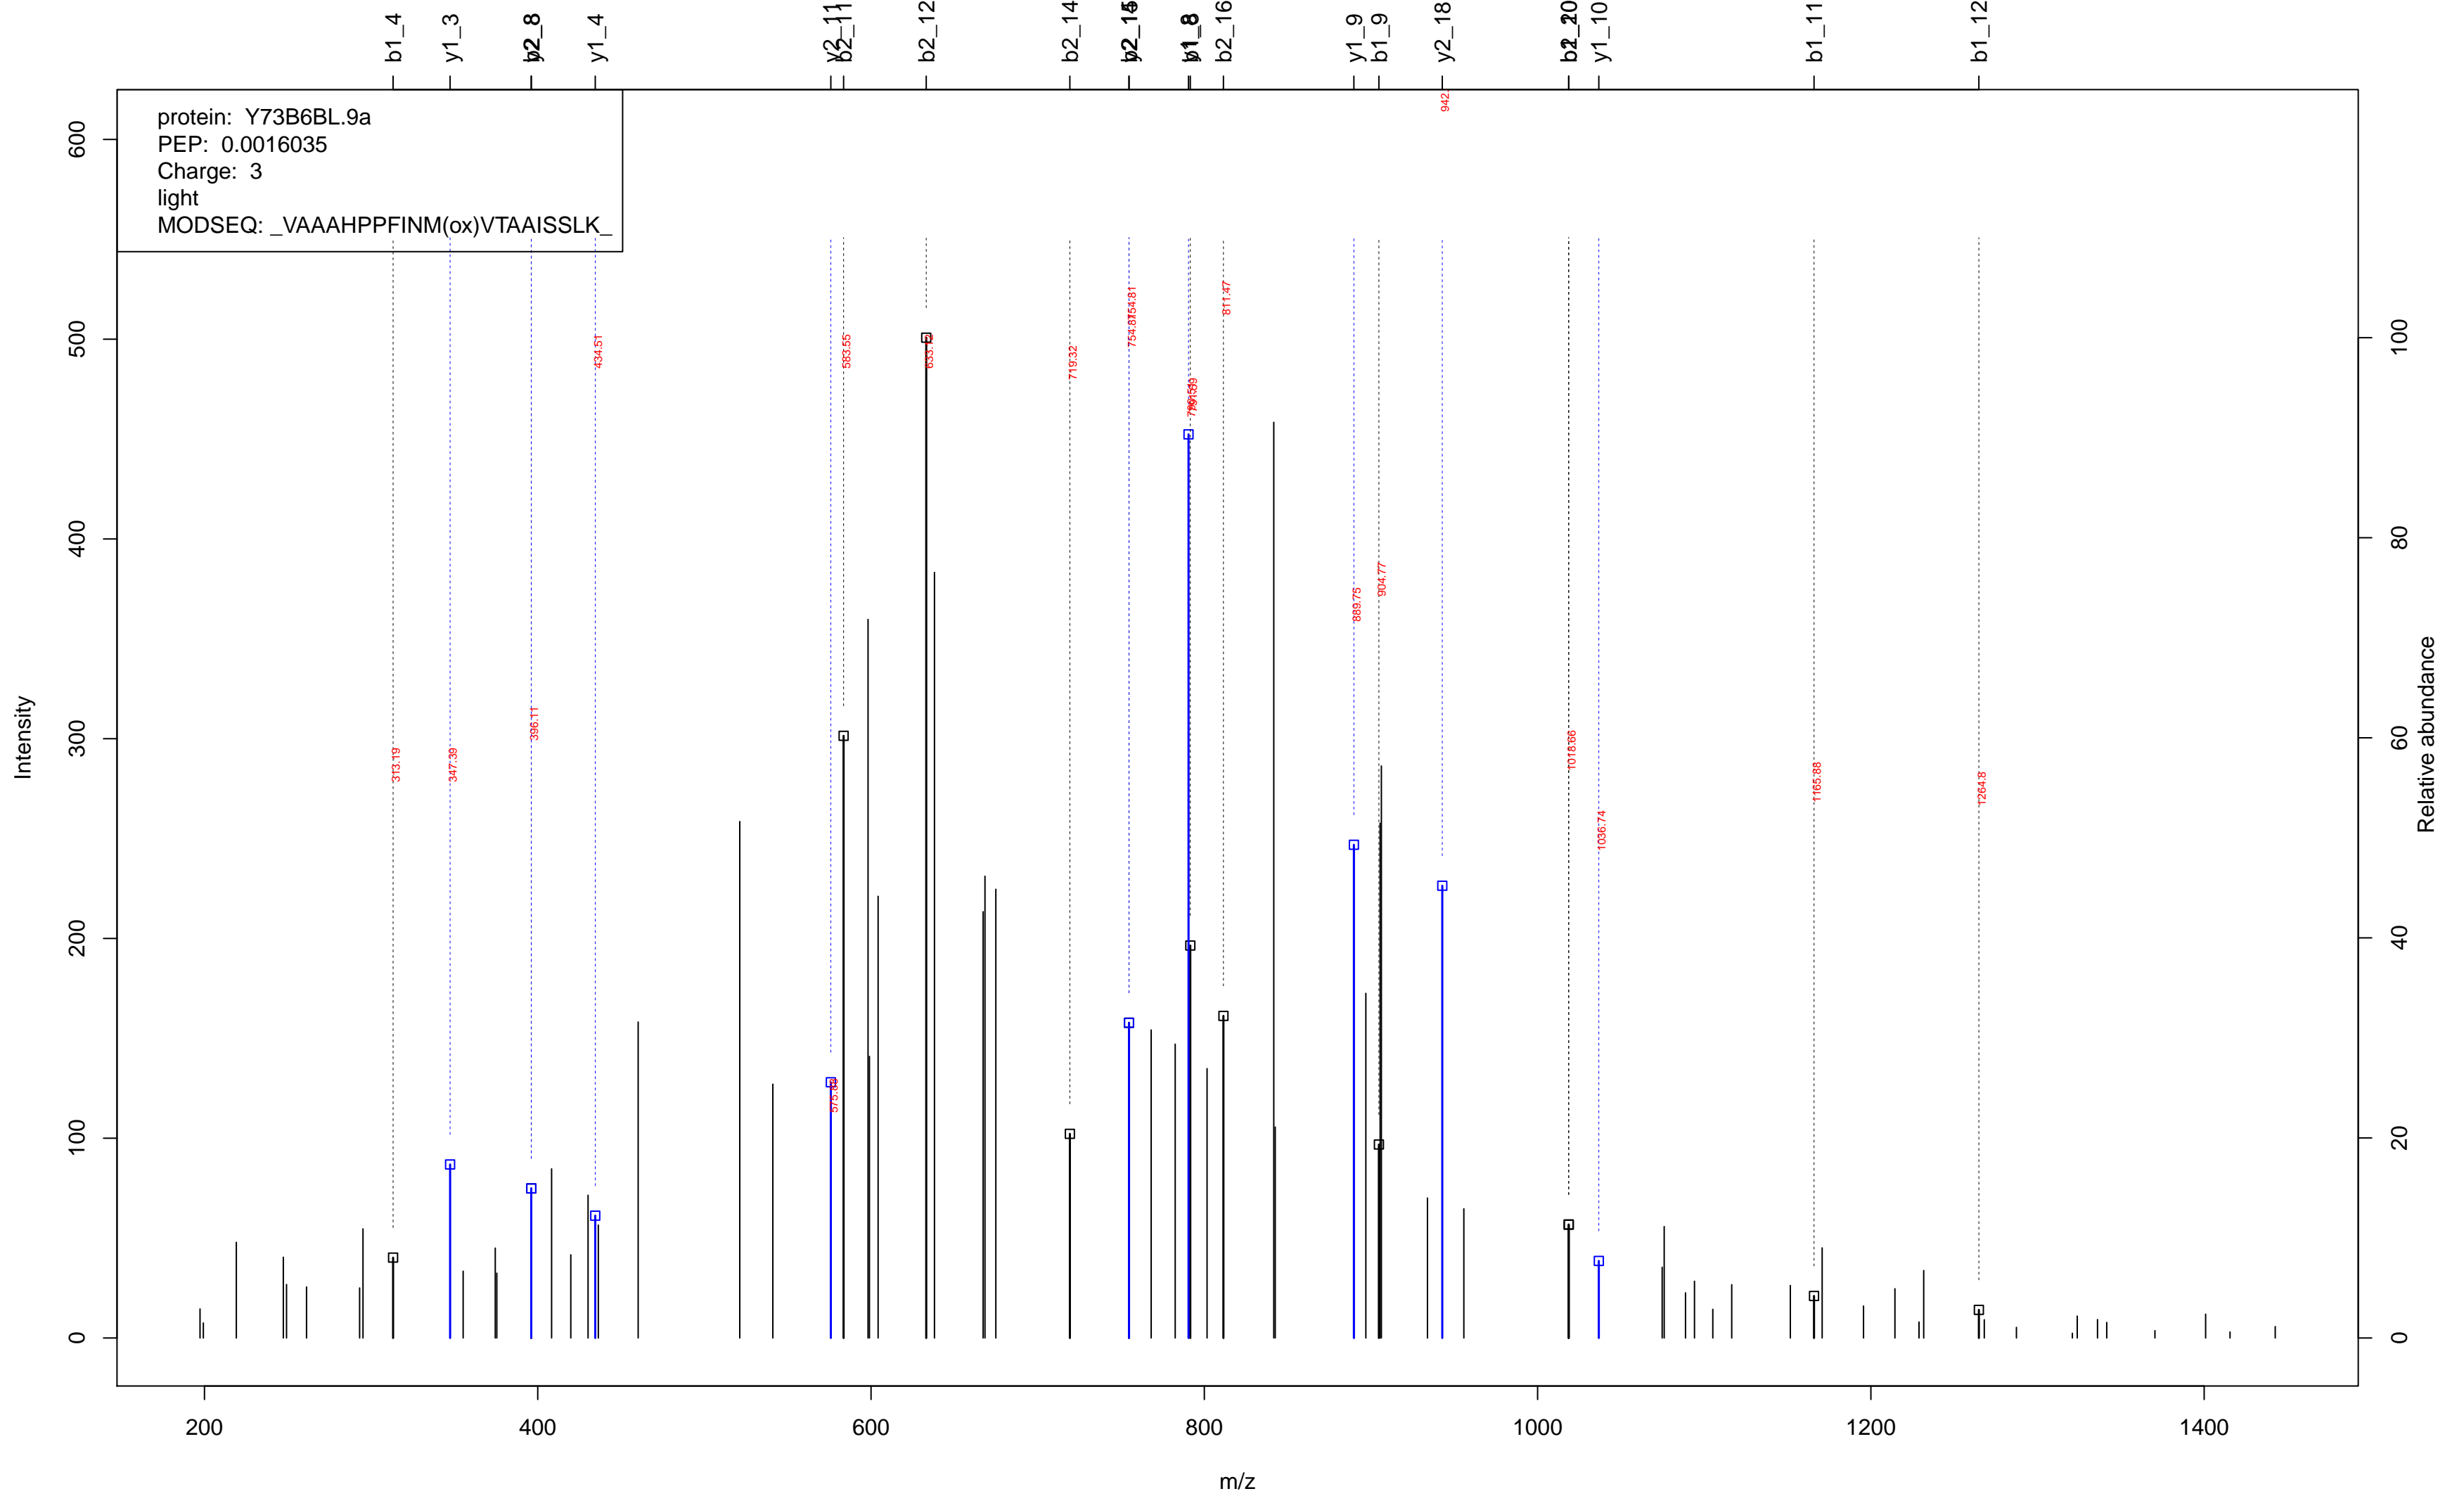

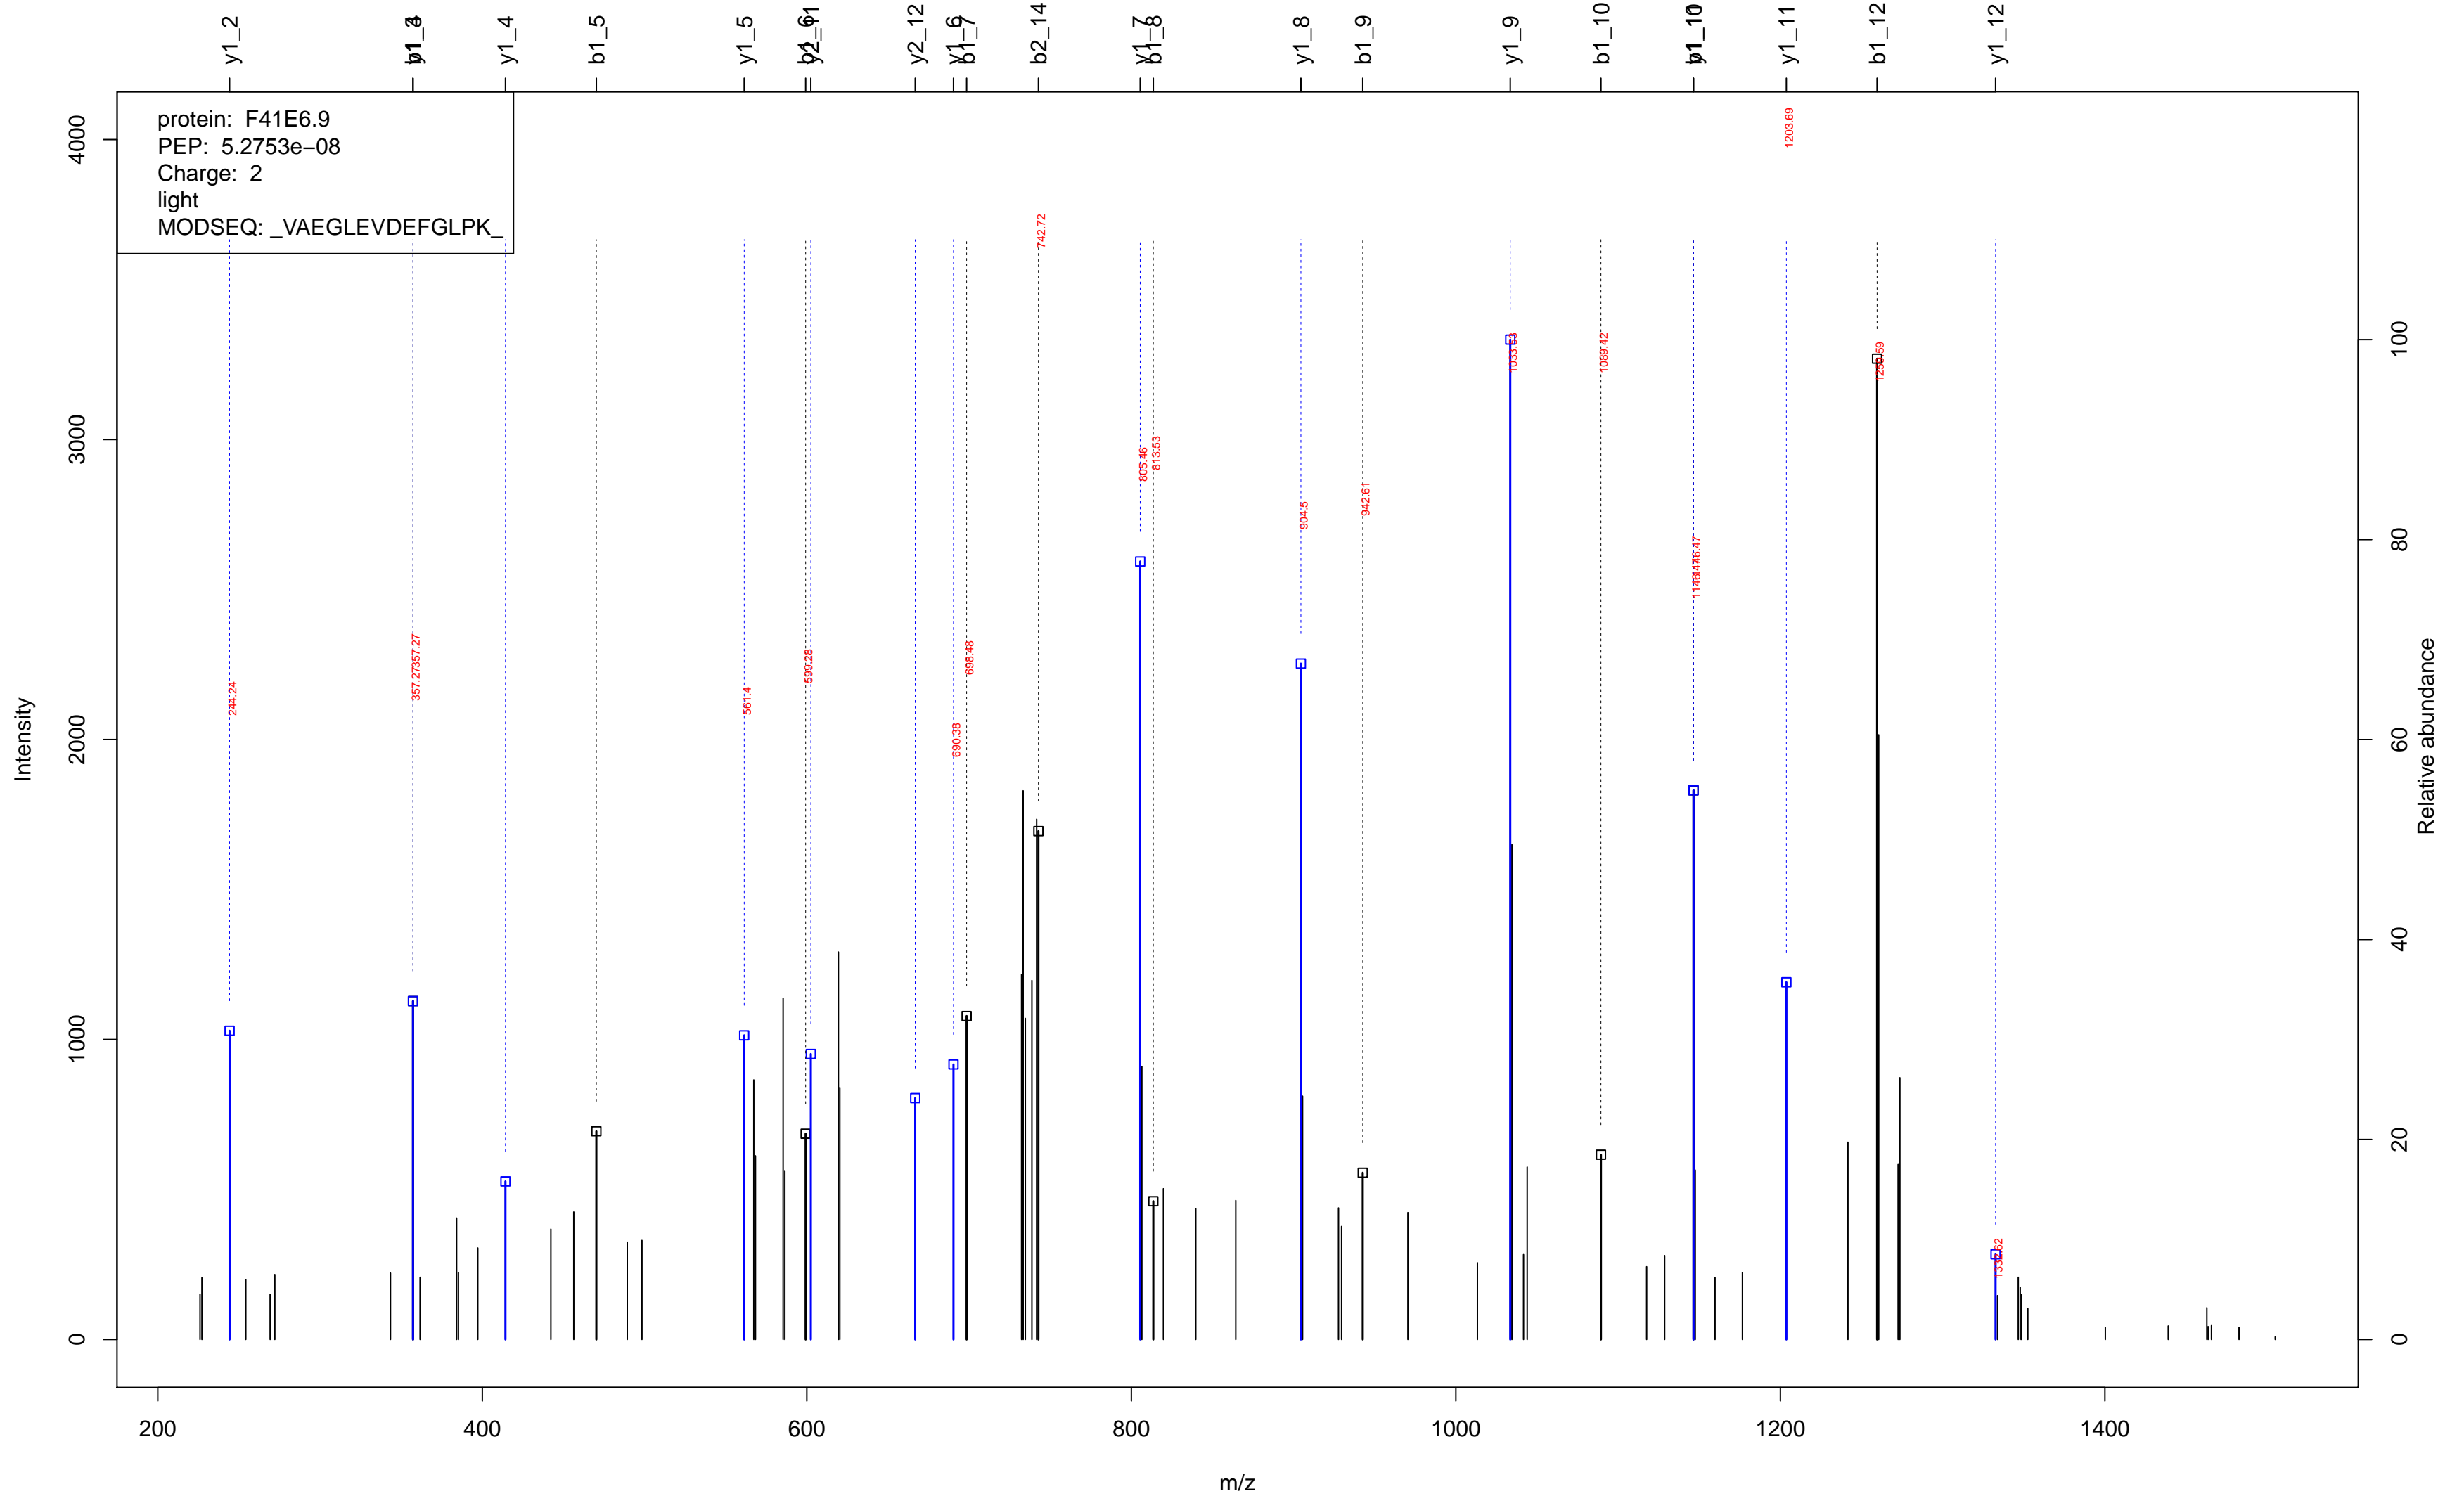

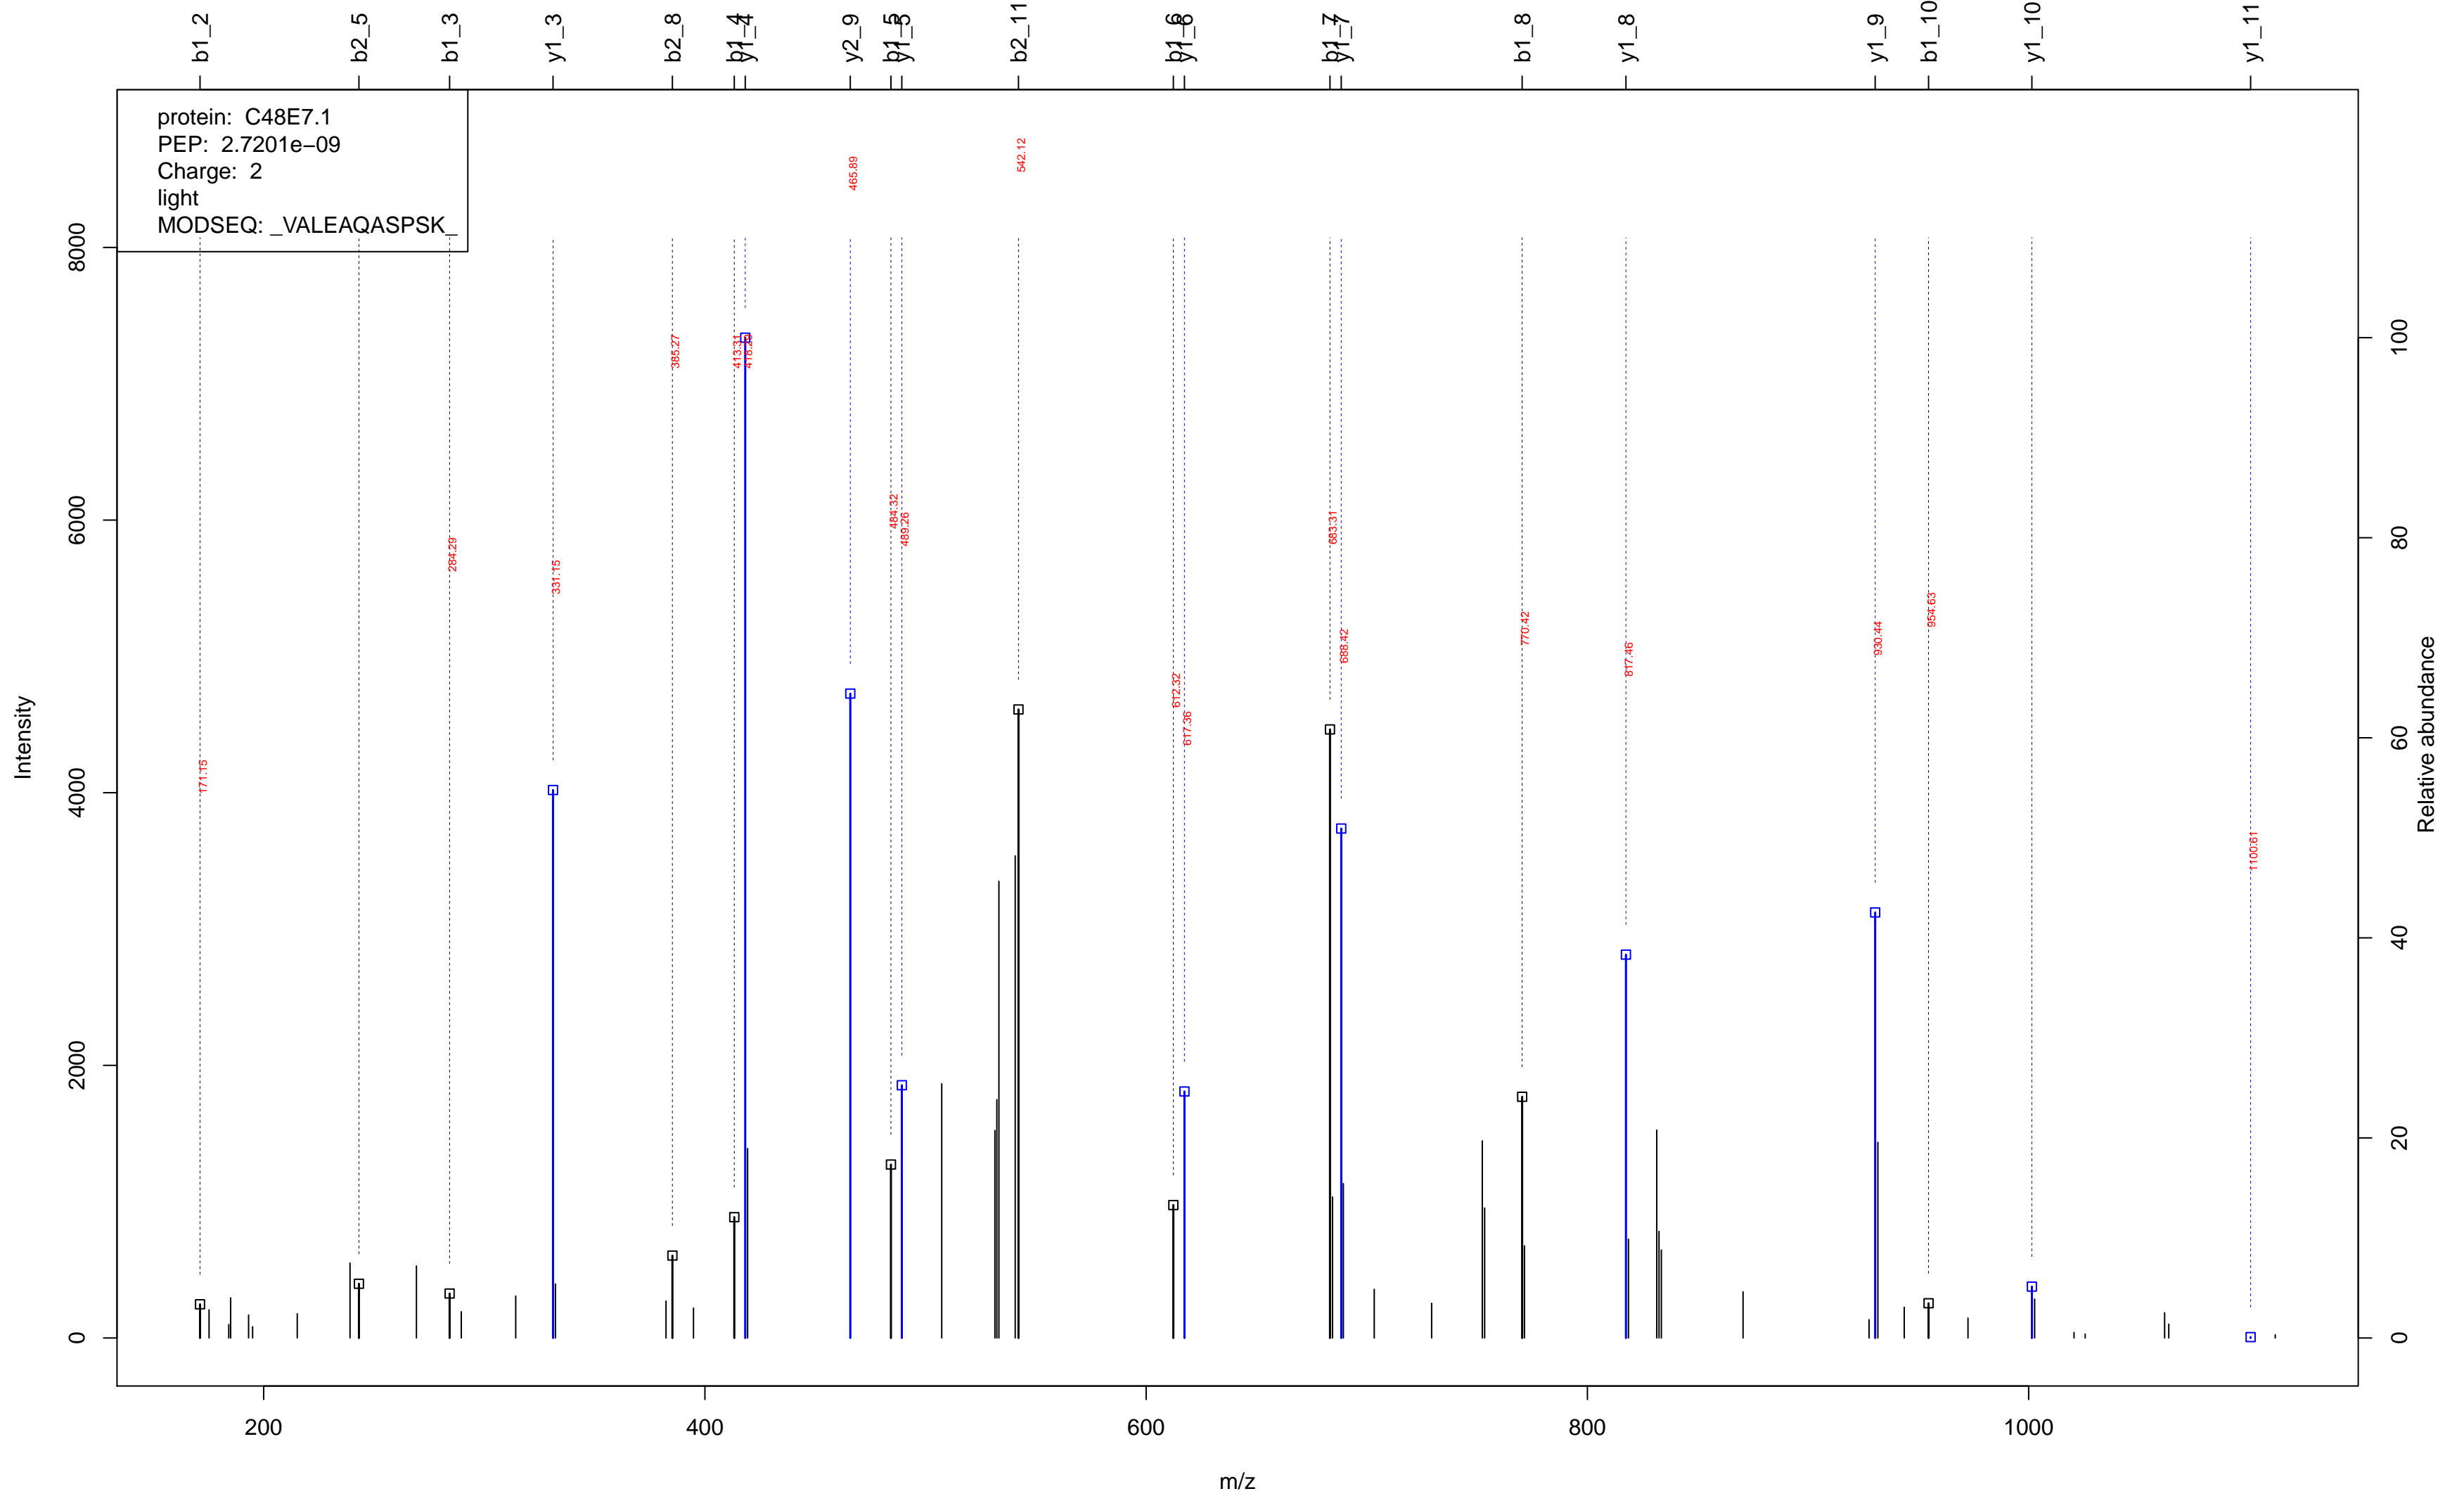



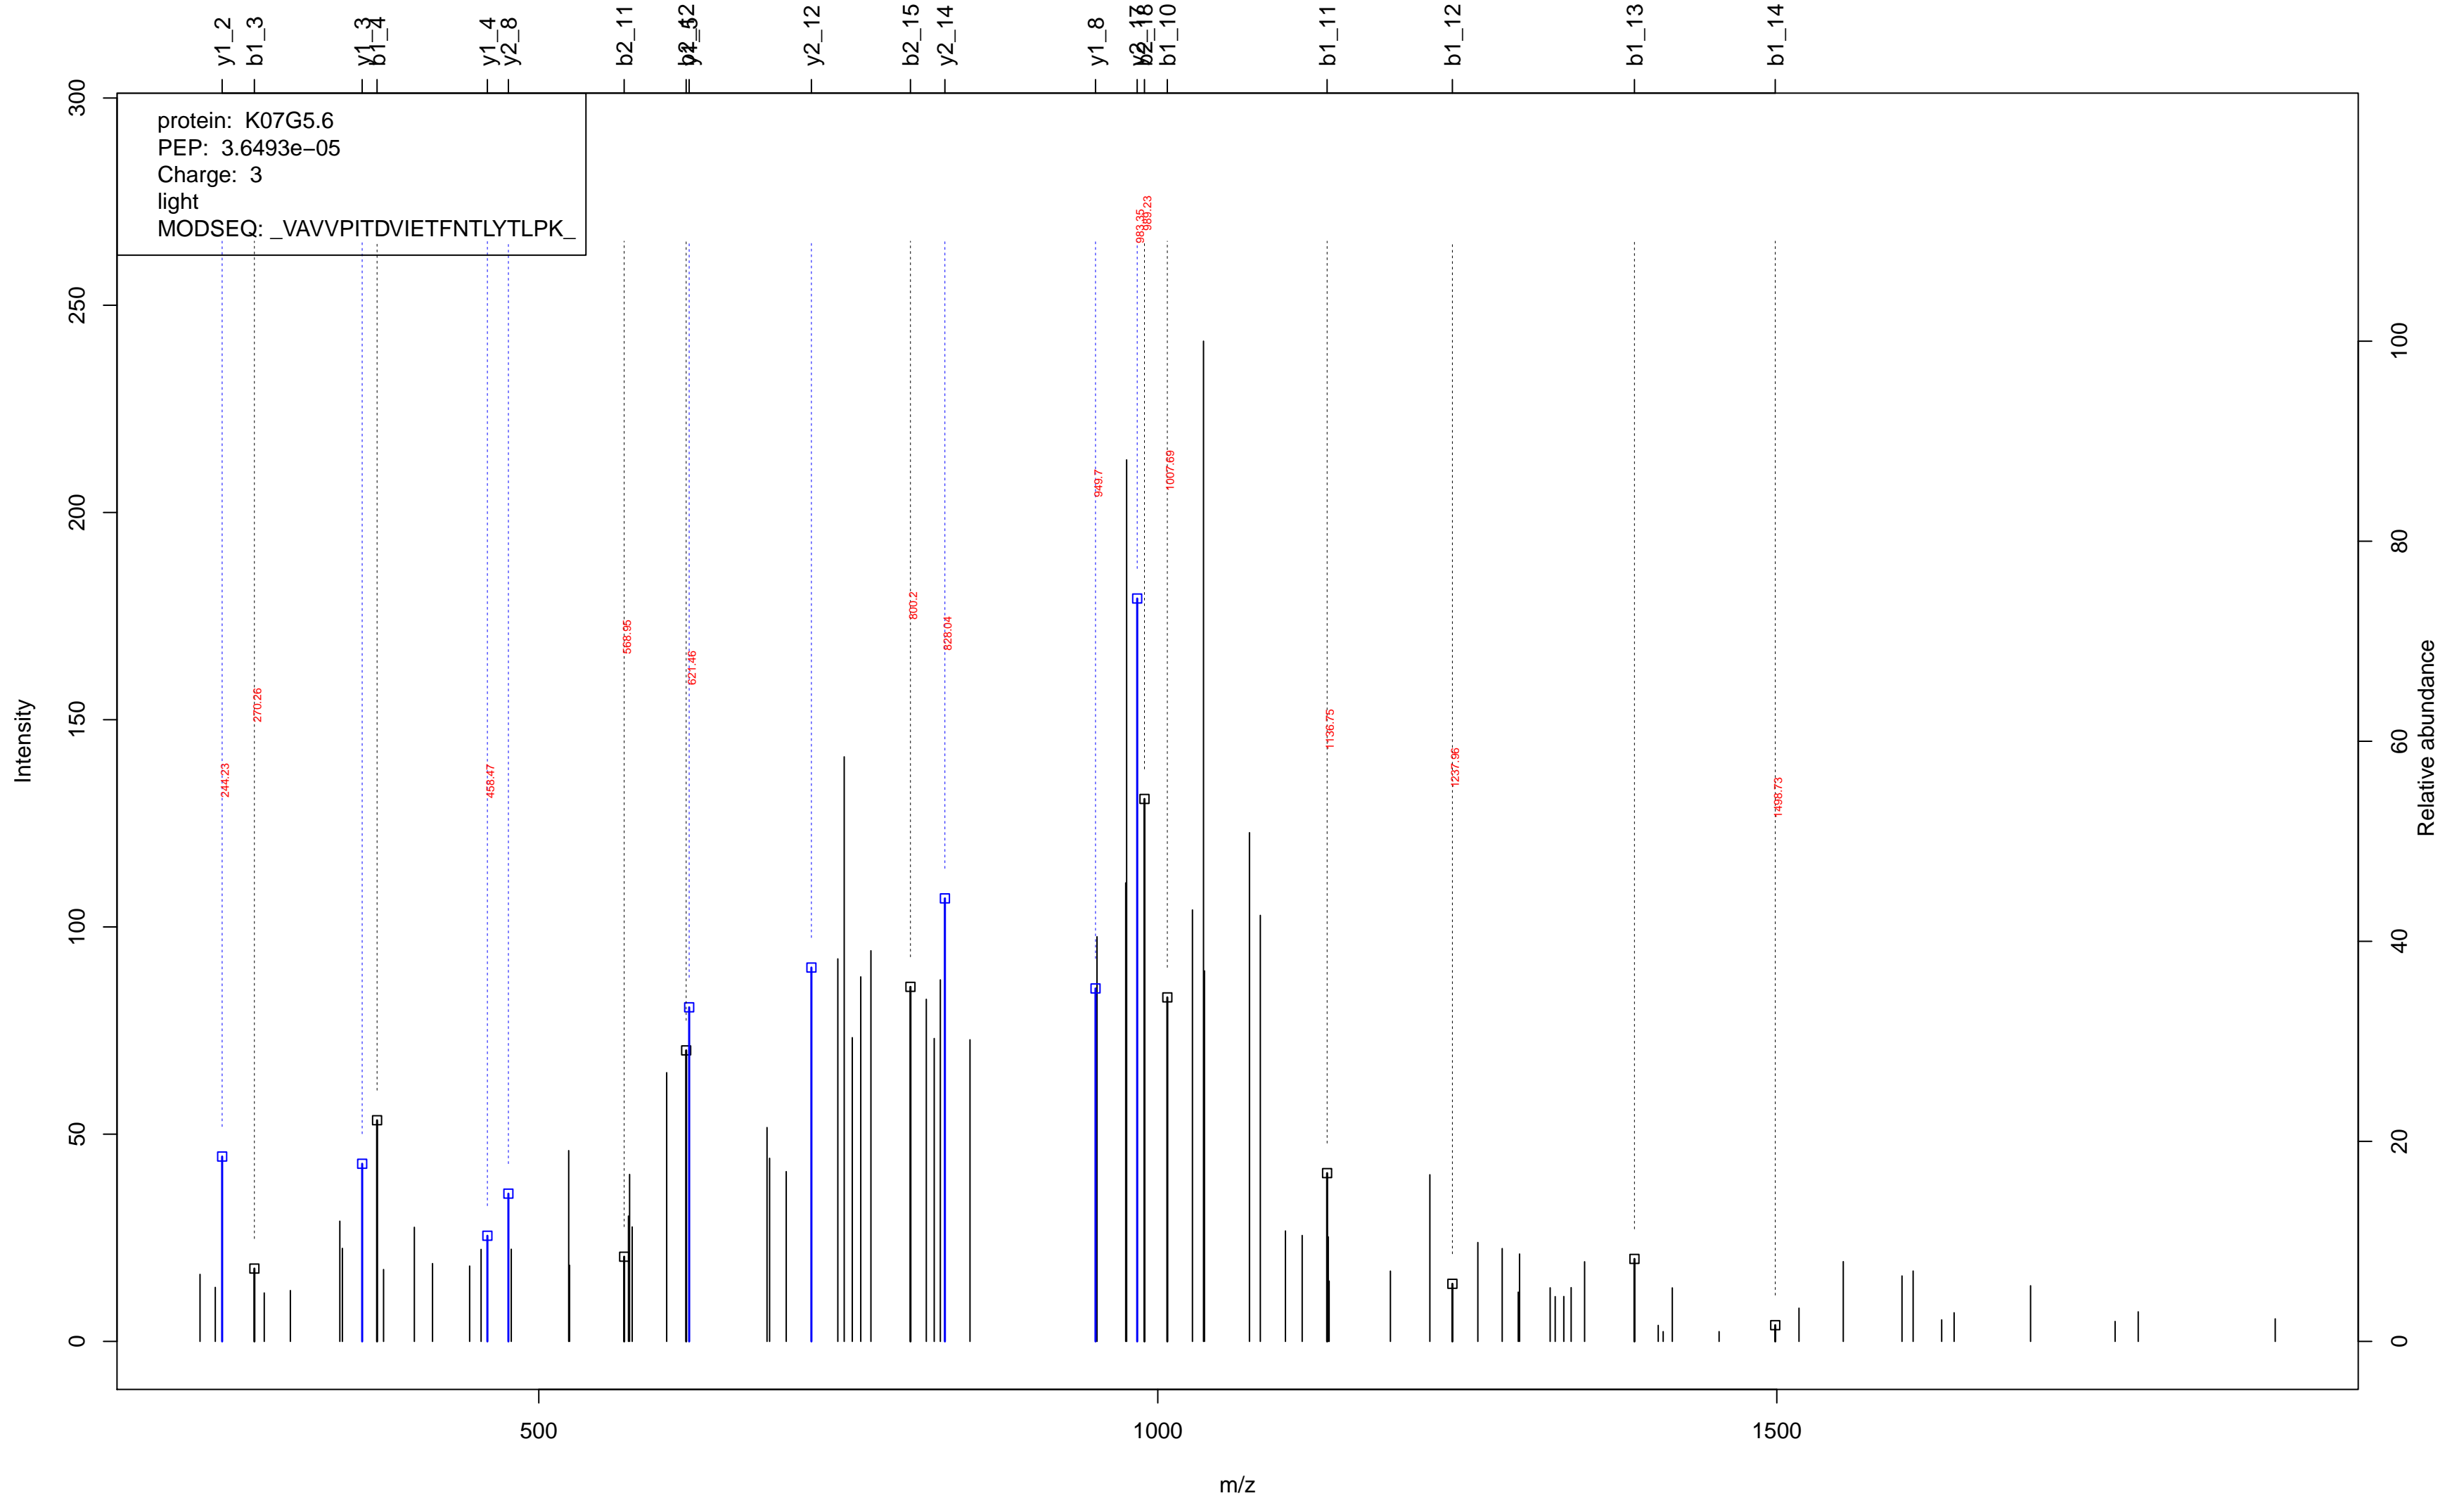

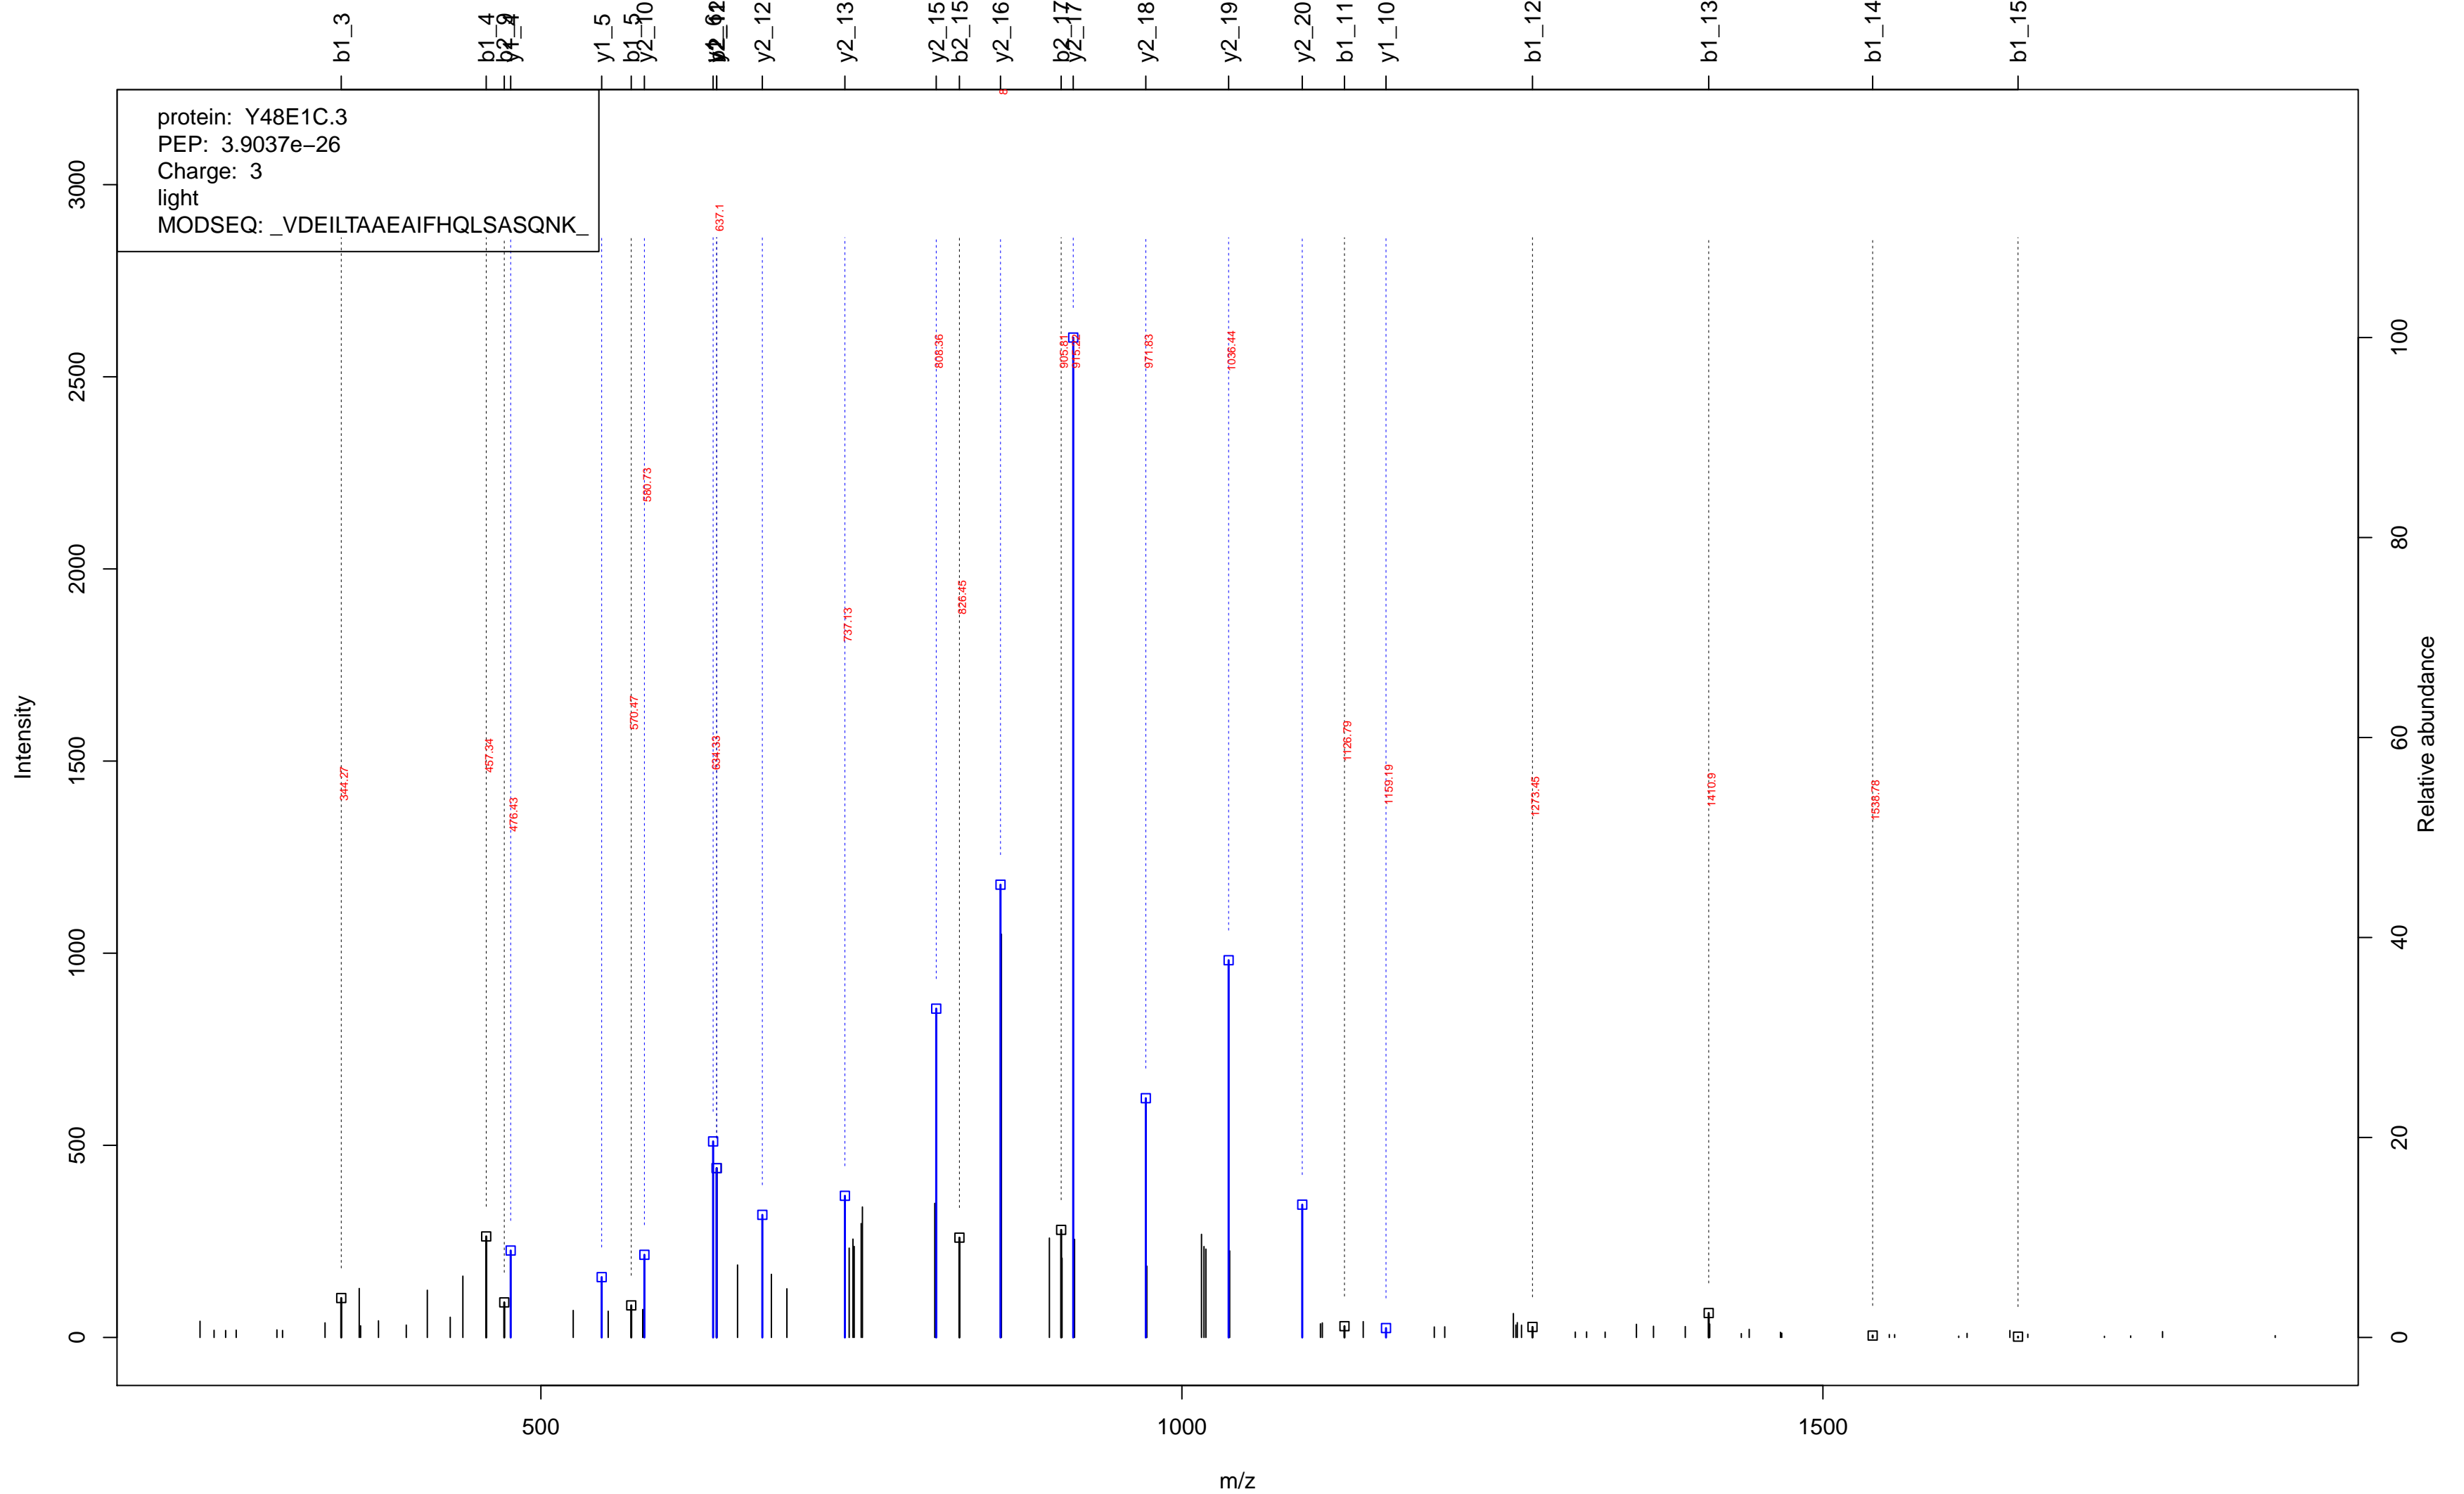

y1\_1 b1\_2 y1\_2 b1\_3 b2\_6 y1\_3 b2\_8 y1\_4 b1\_5 y1\_5 b1\_6 y1\_6 b1\_7 y1\_7

protein: Y55F3AM.12  
PEP: 0.00068965  
Charge: 2  
heavy  
MODSEQ: \_VDLLQLIK\_

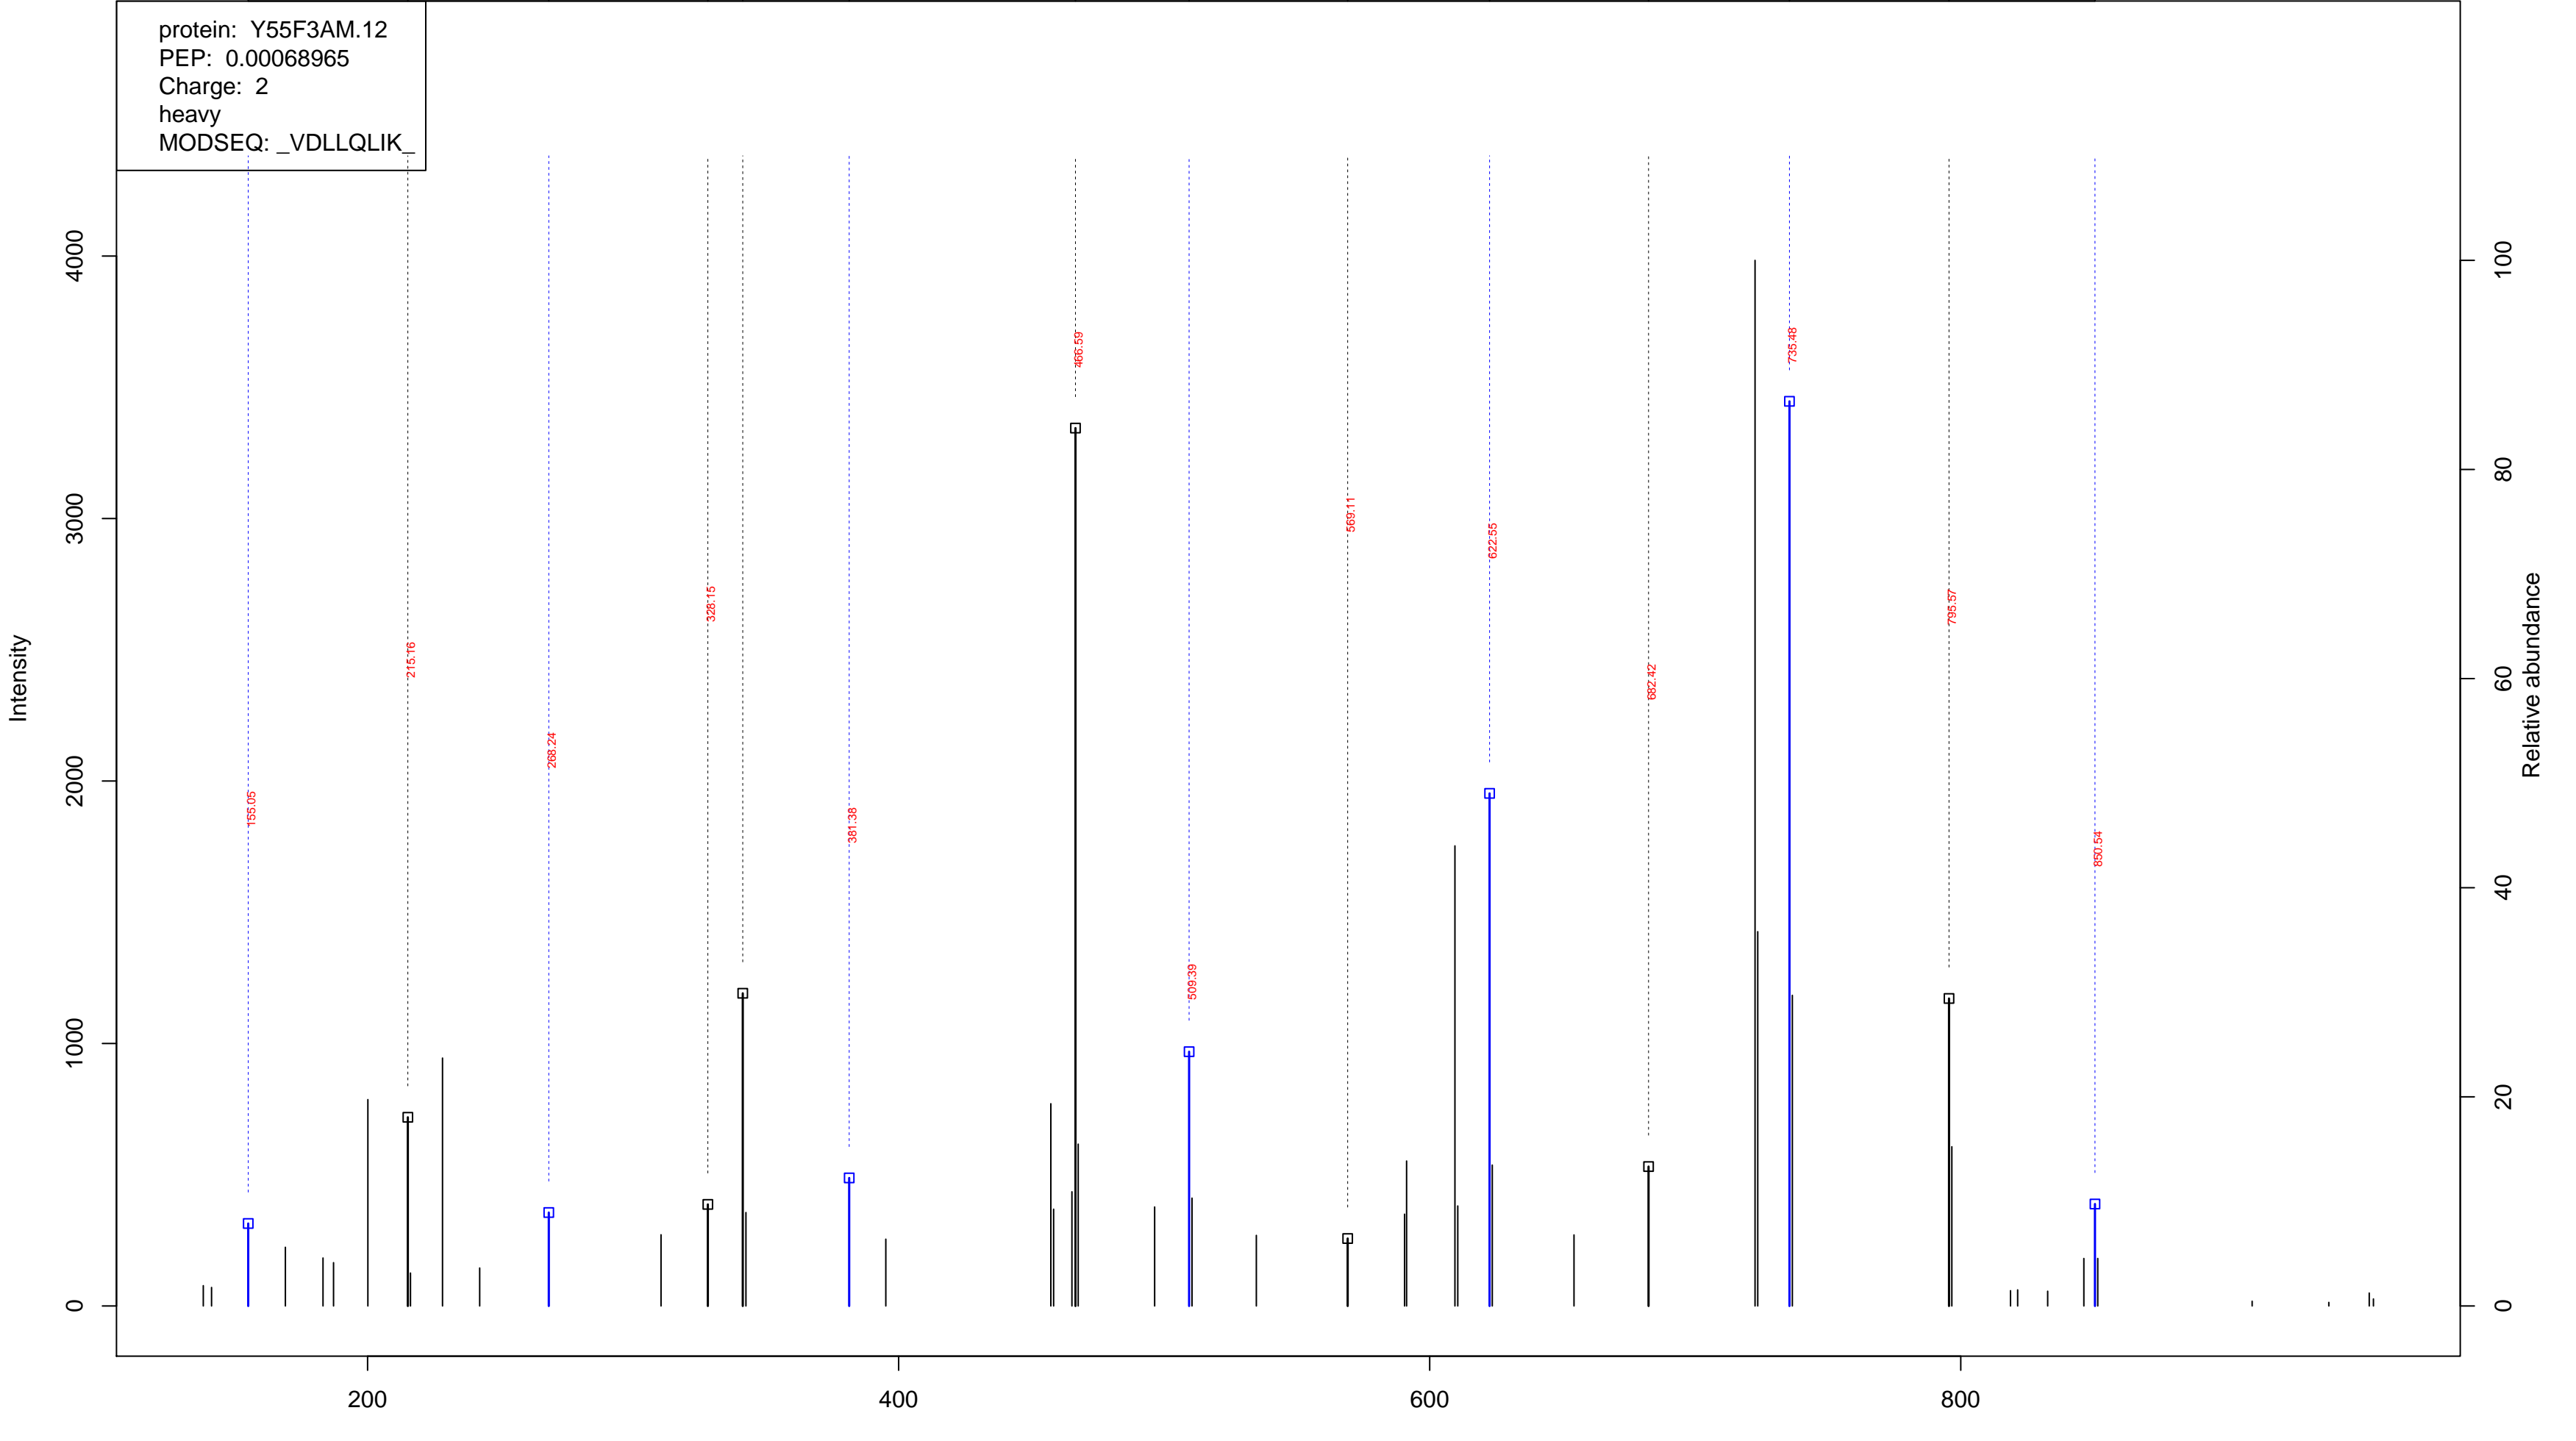

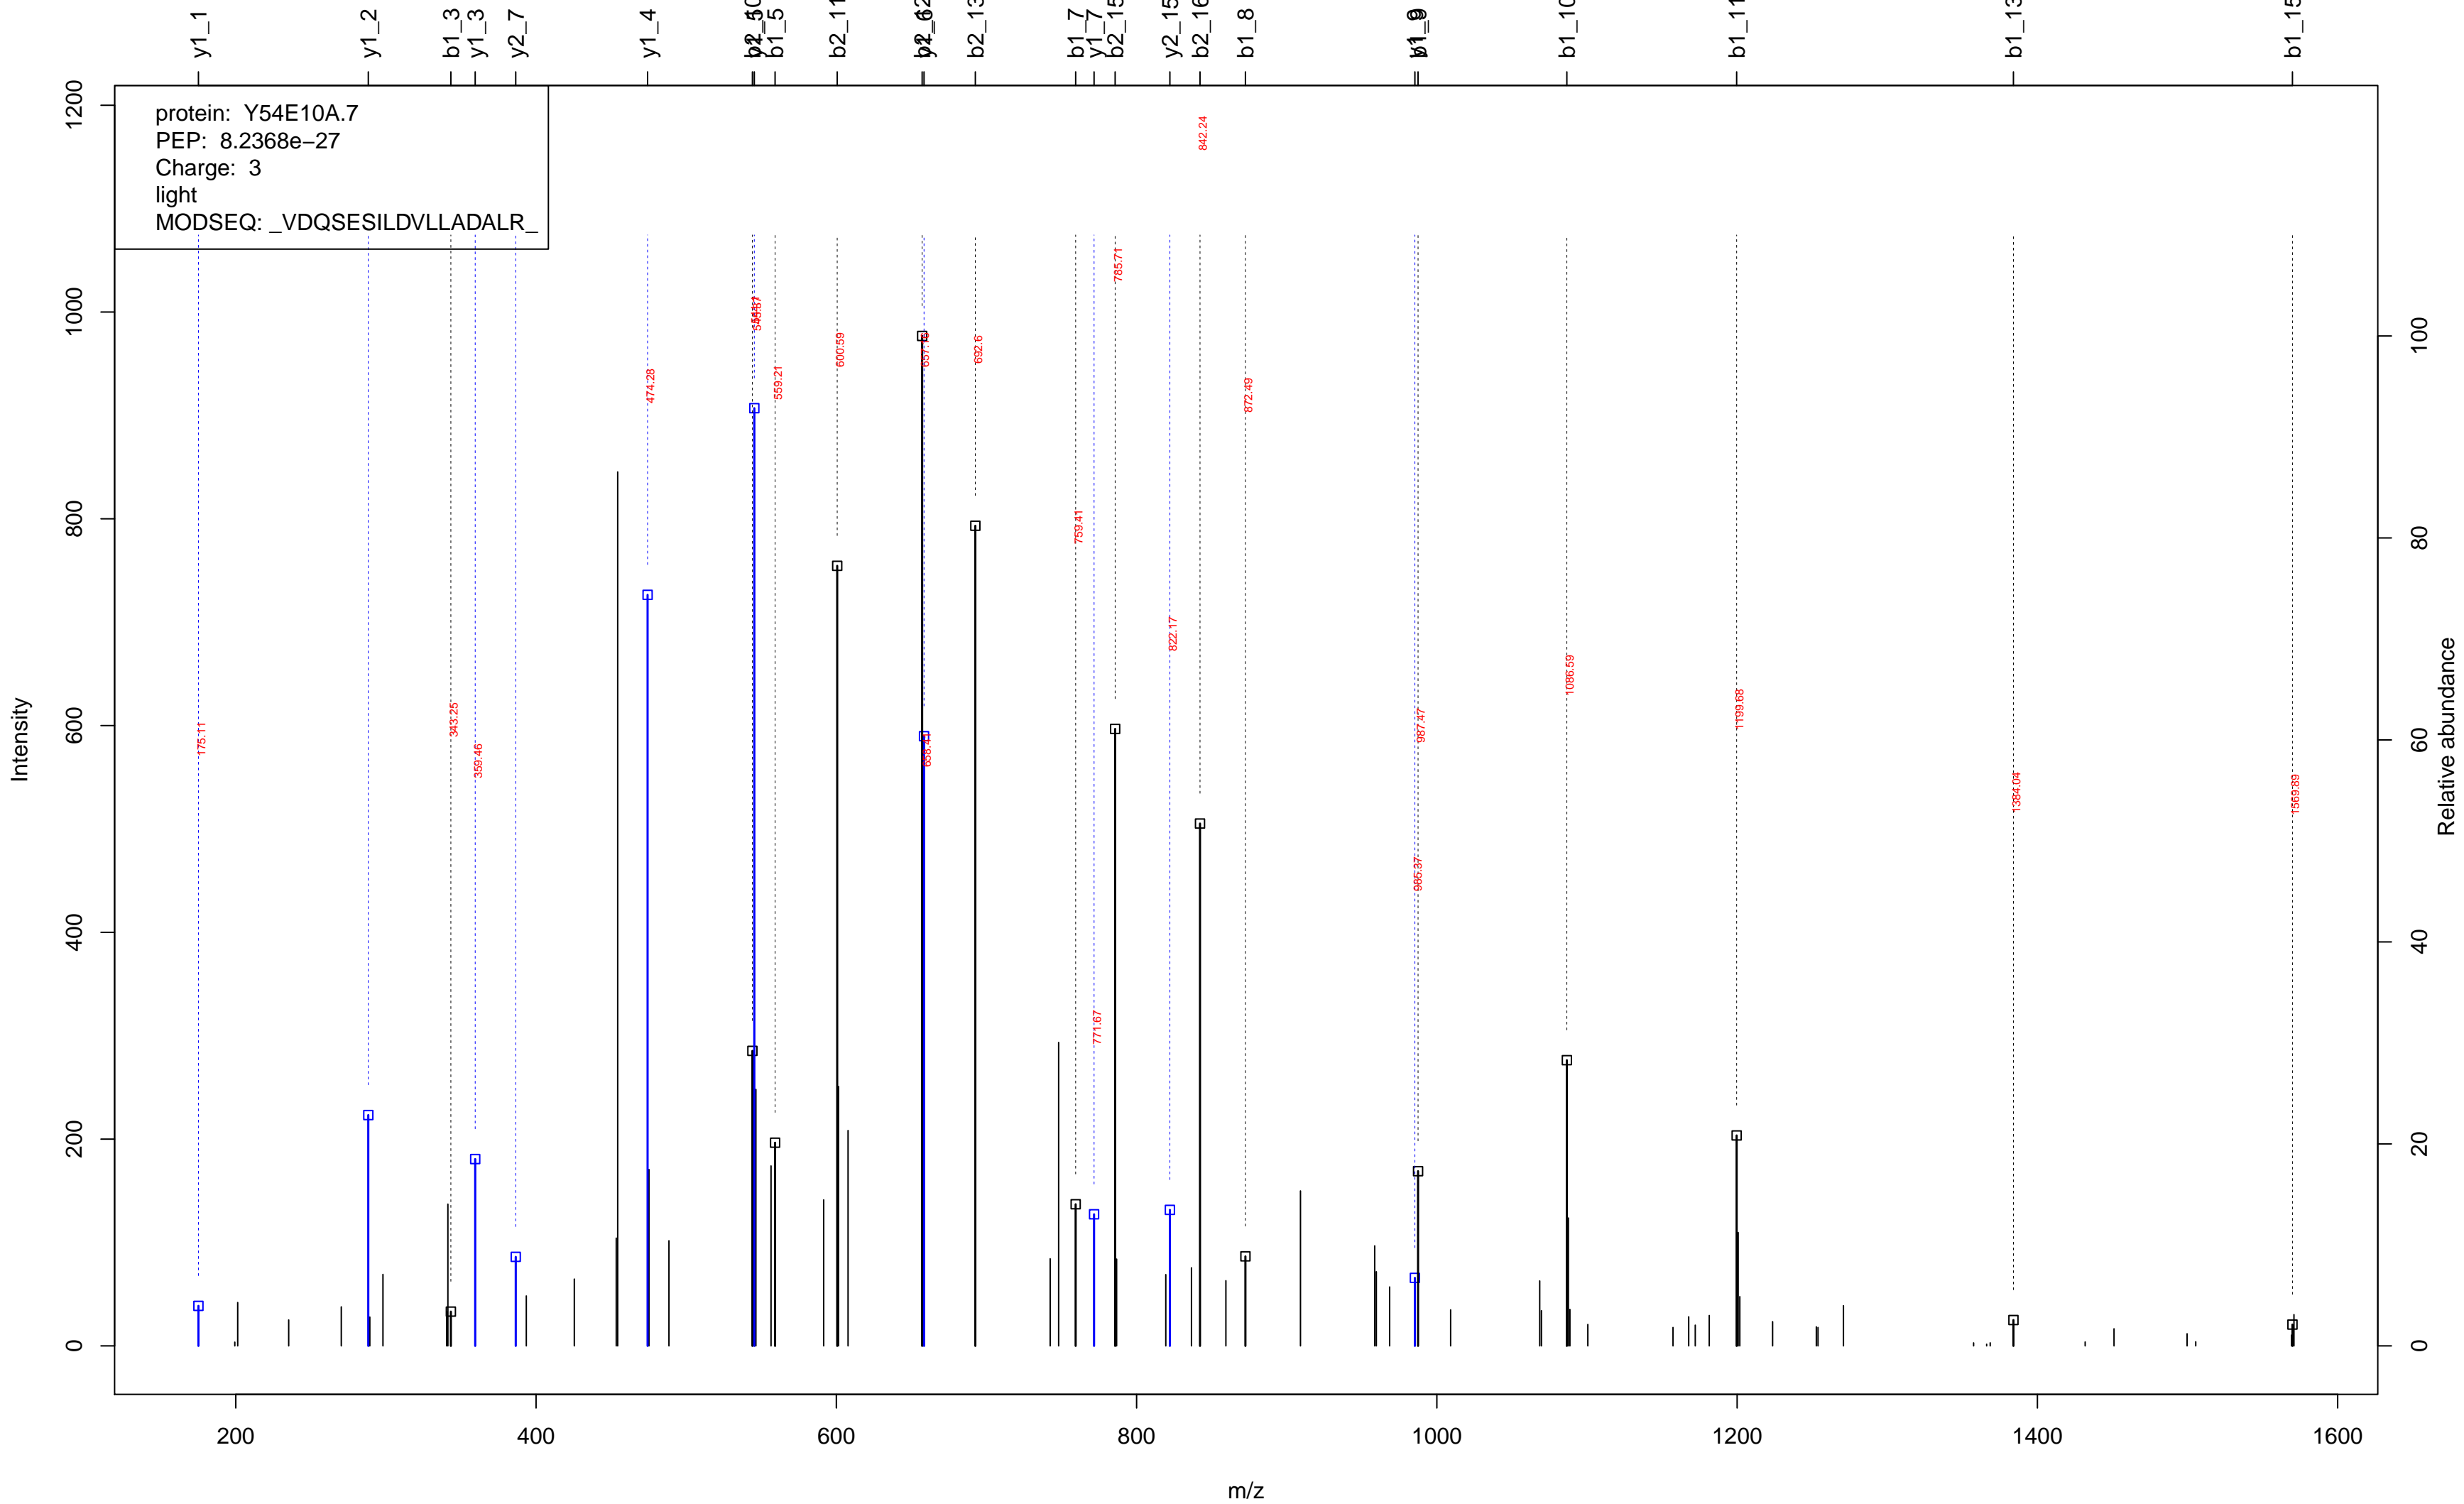

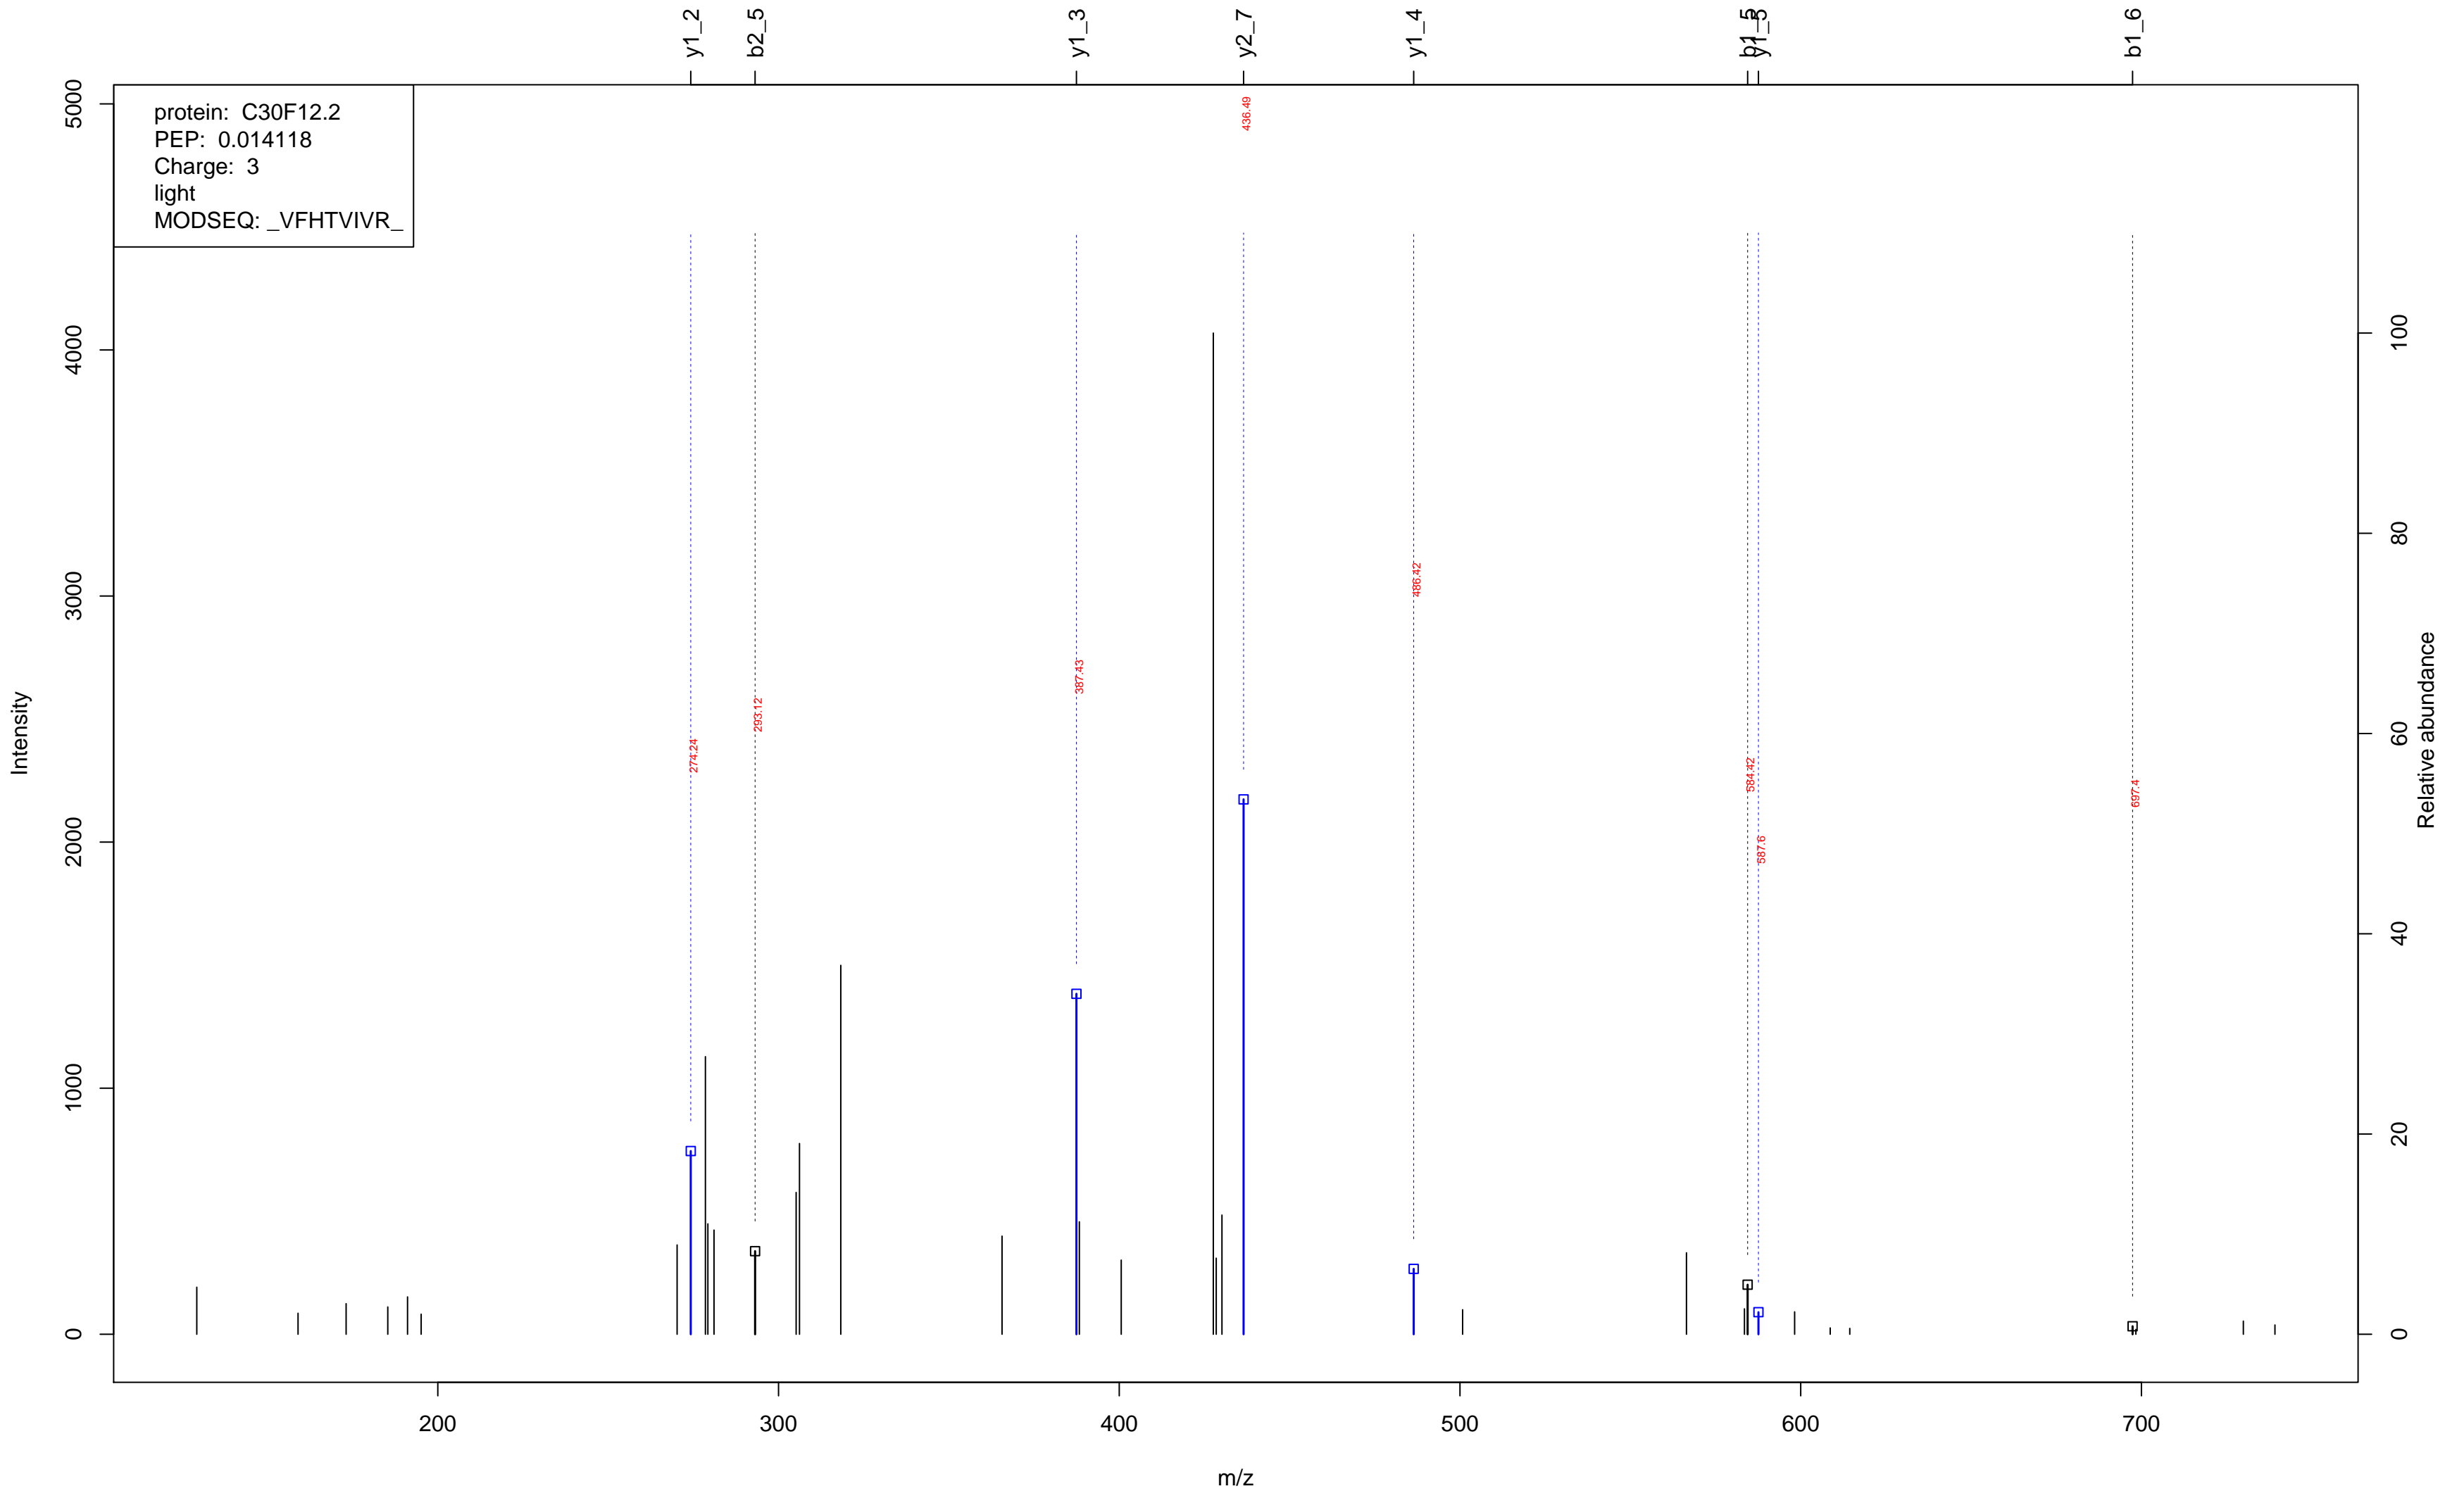

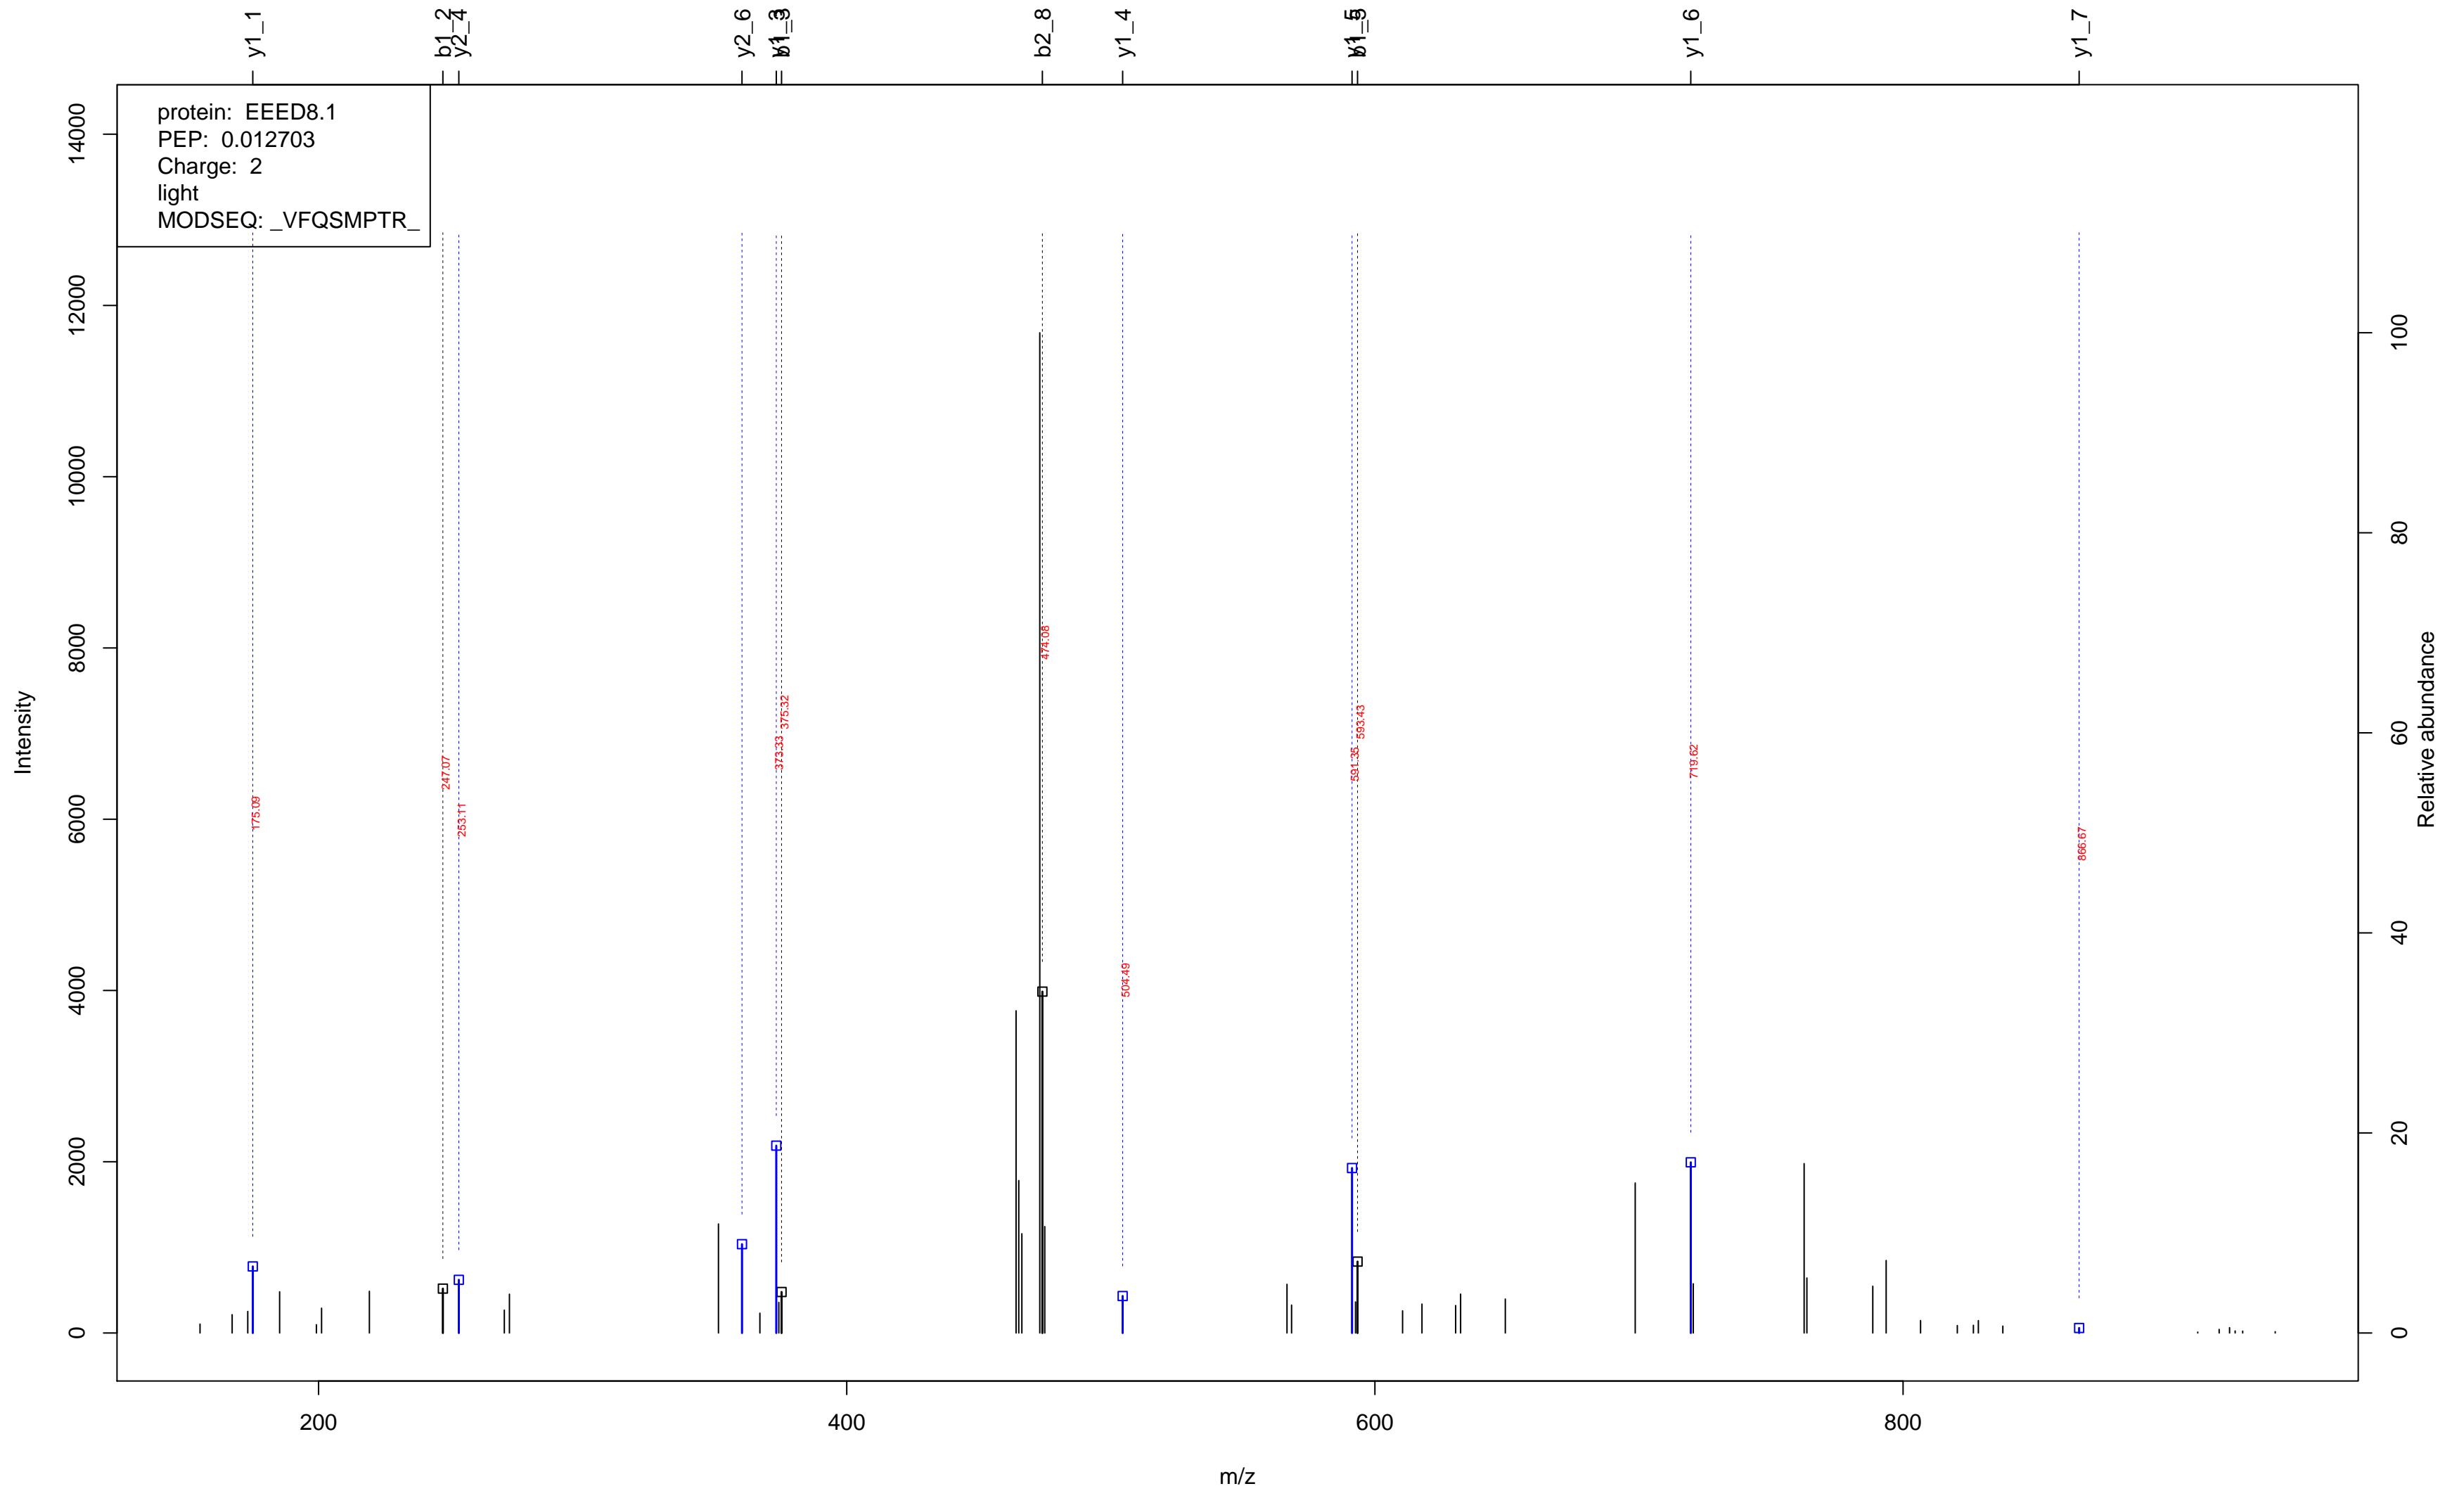

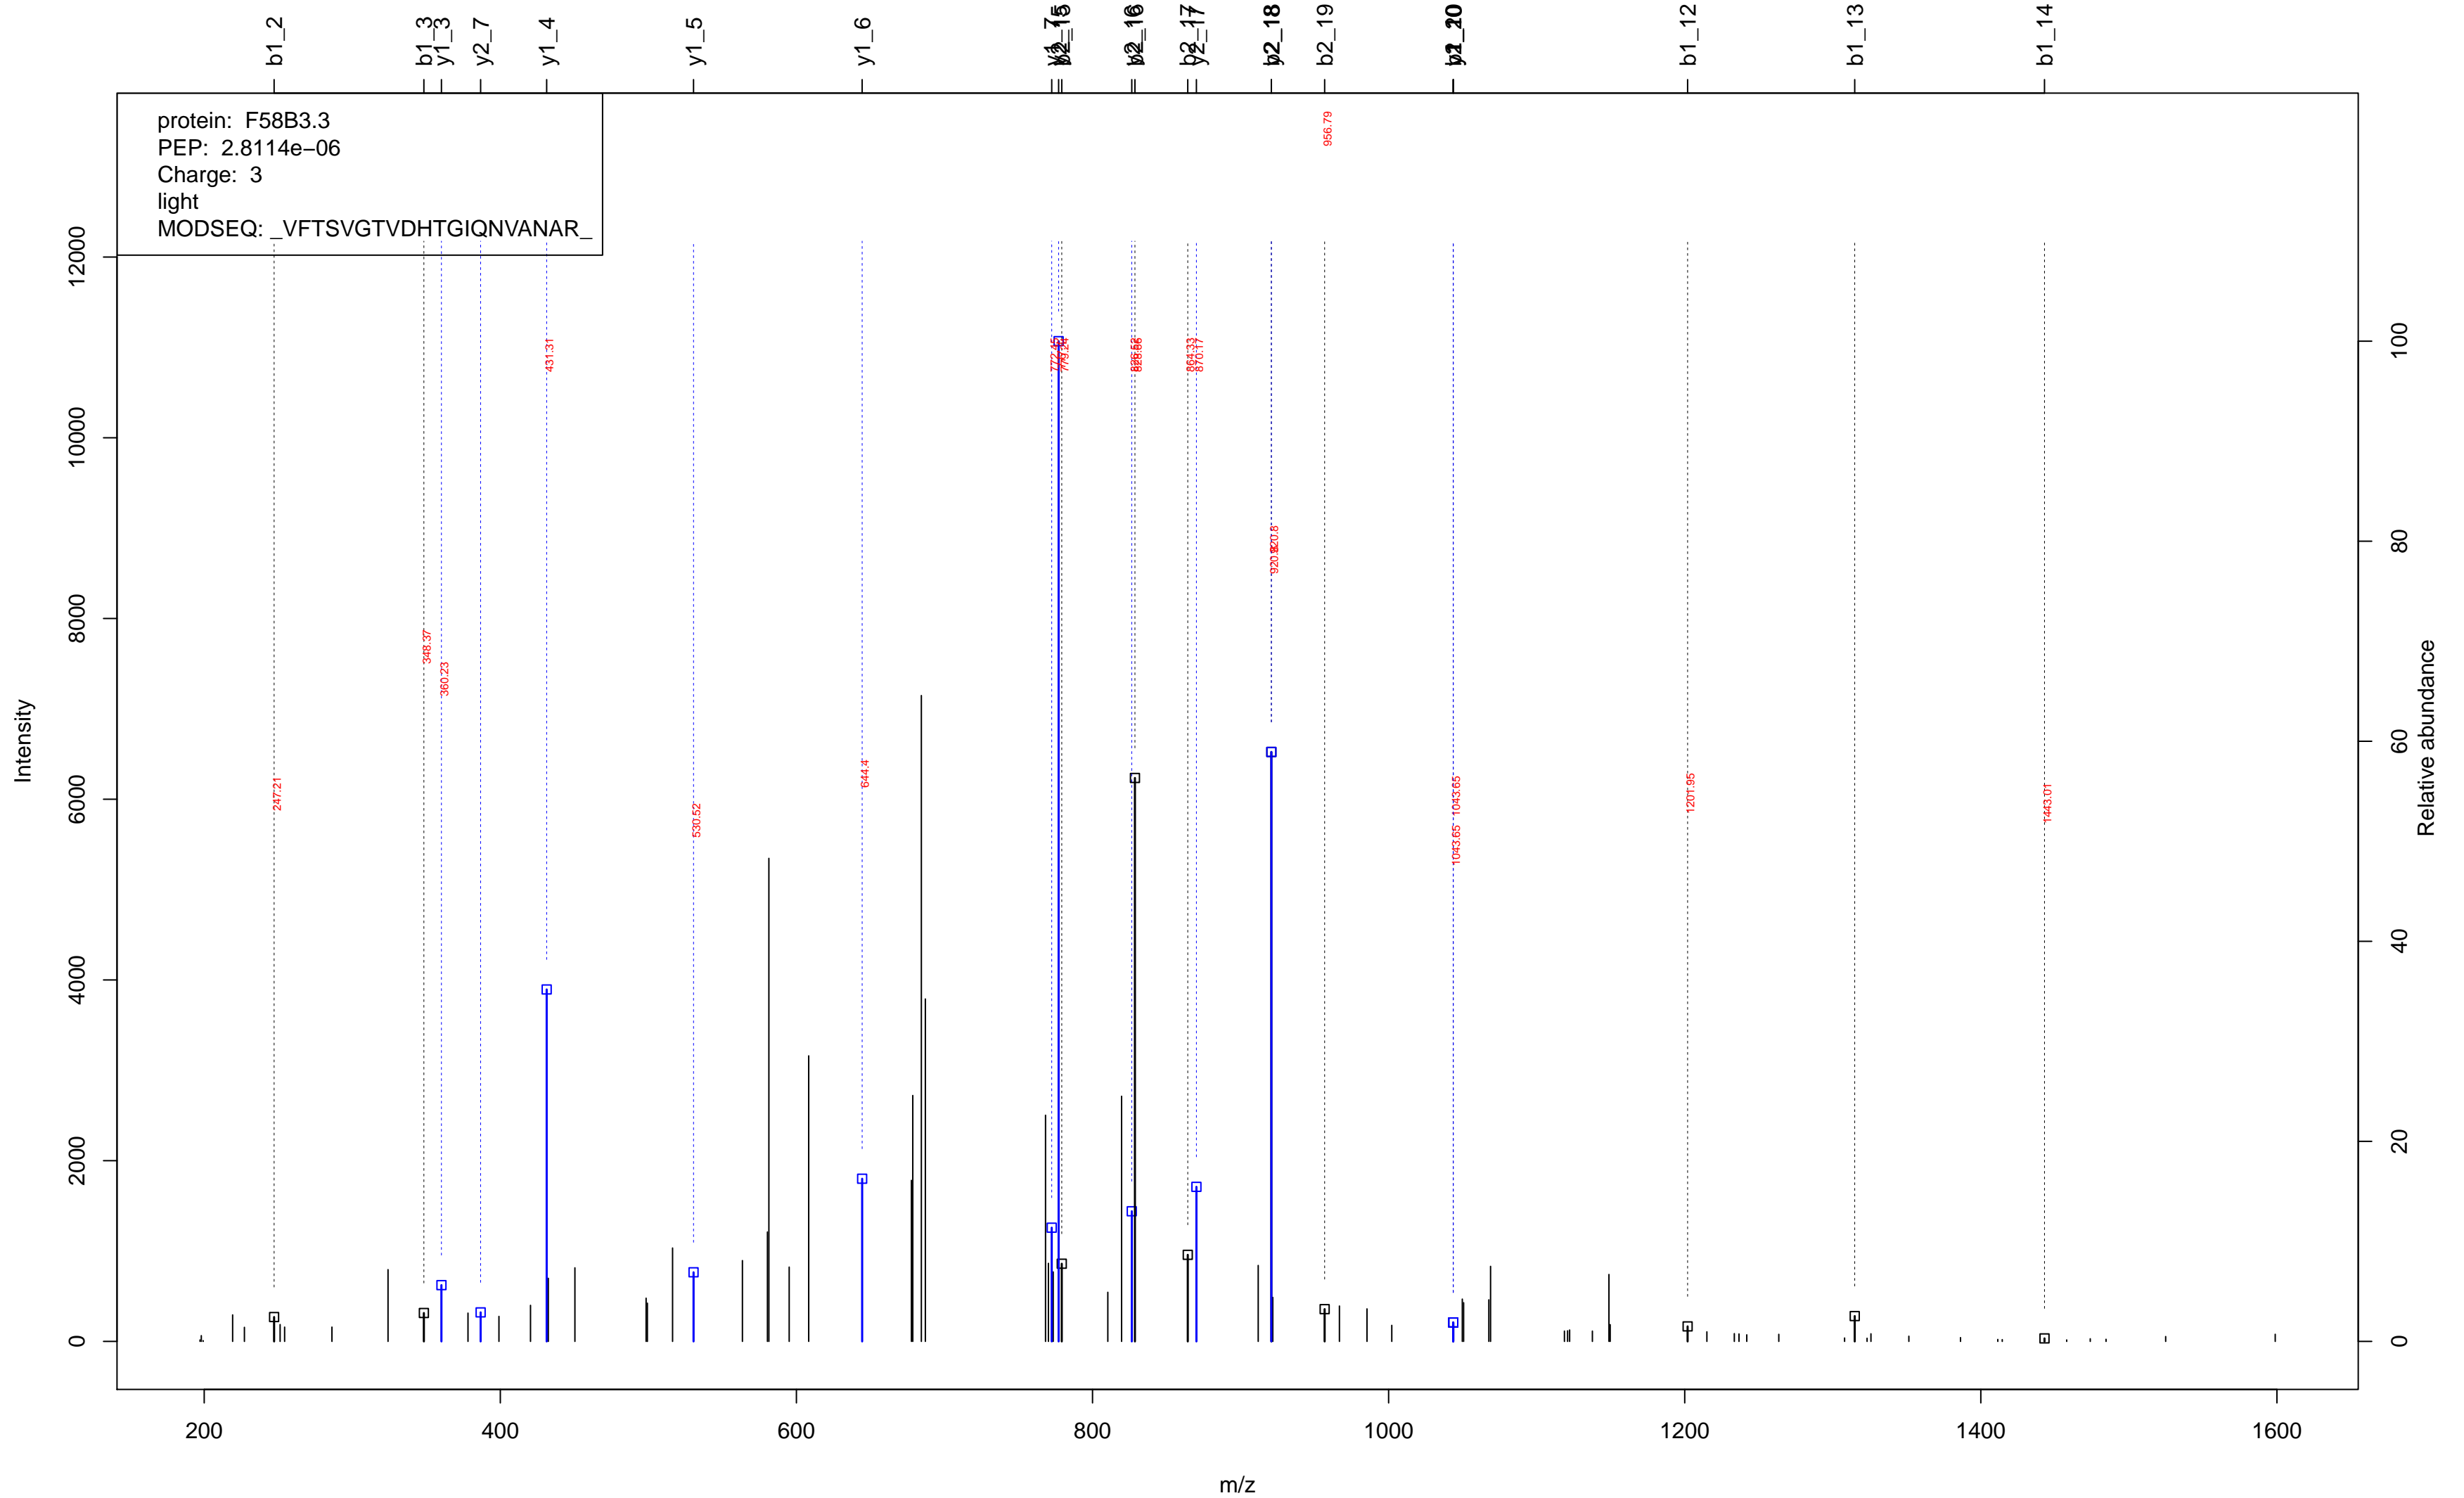

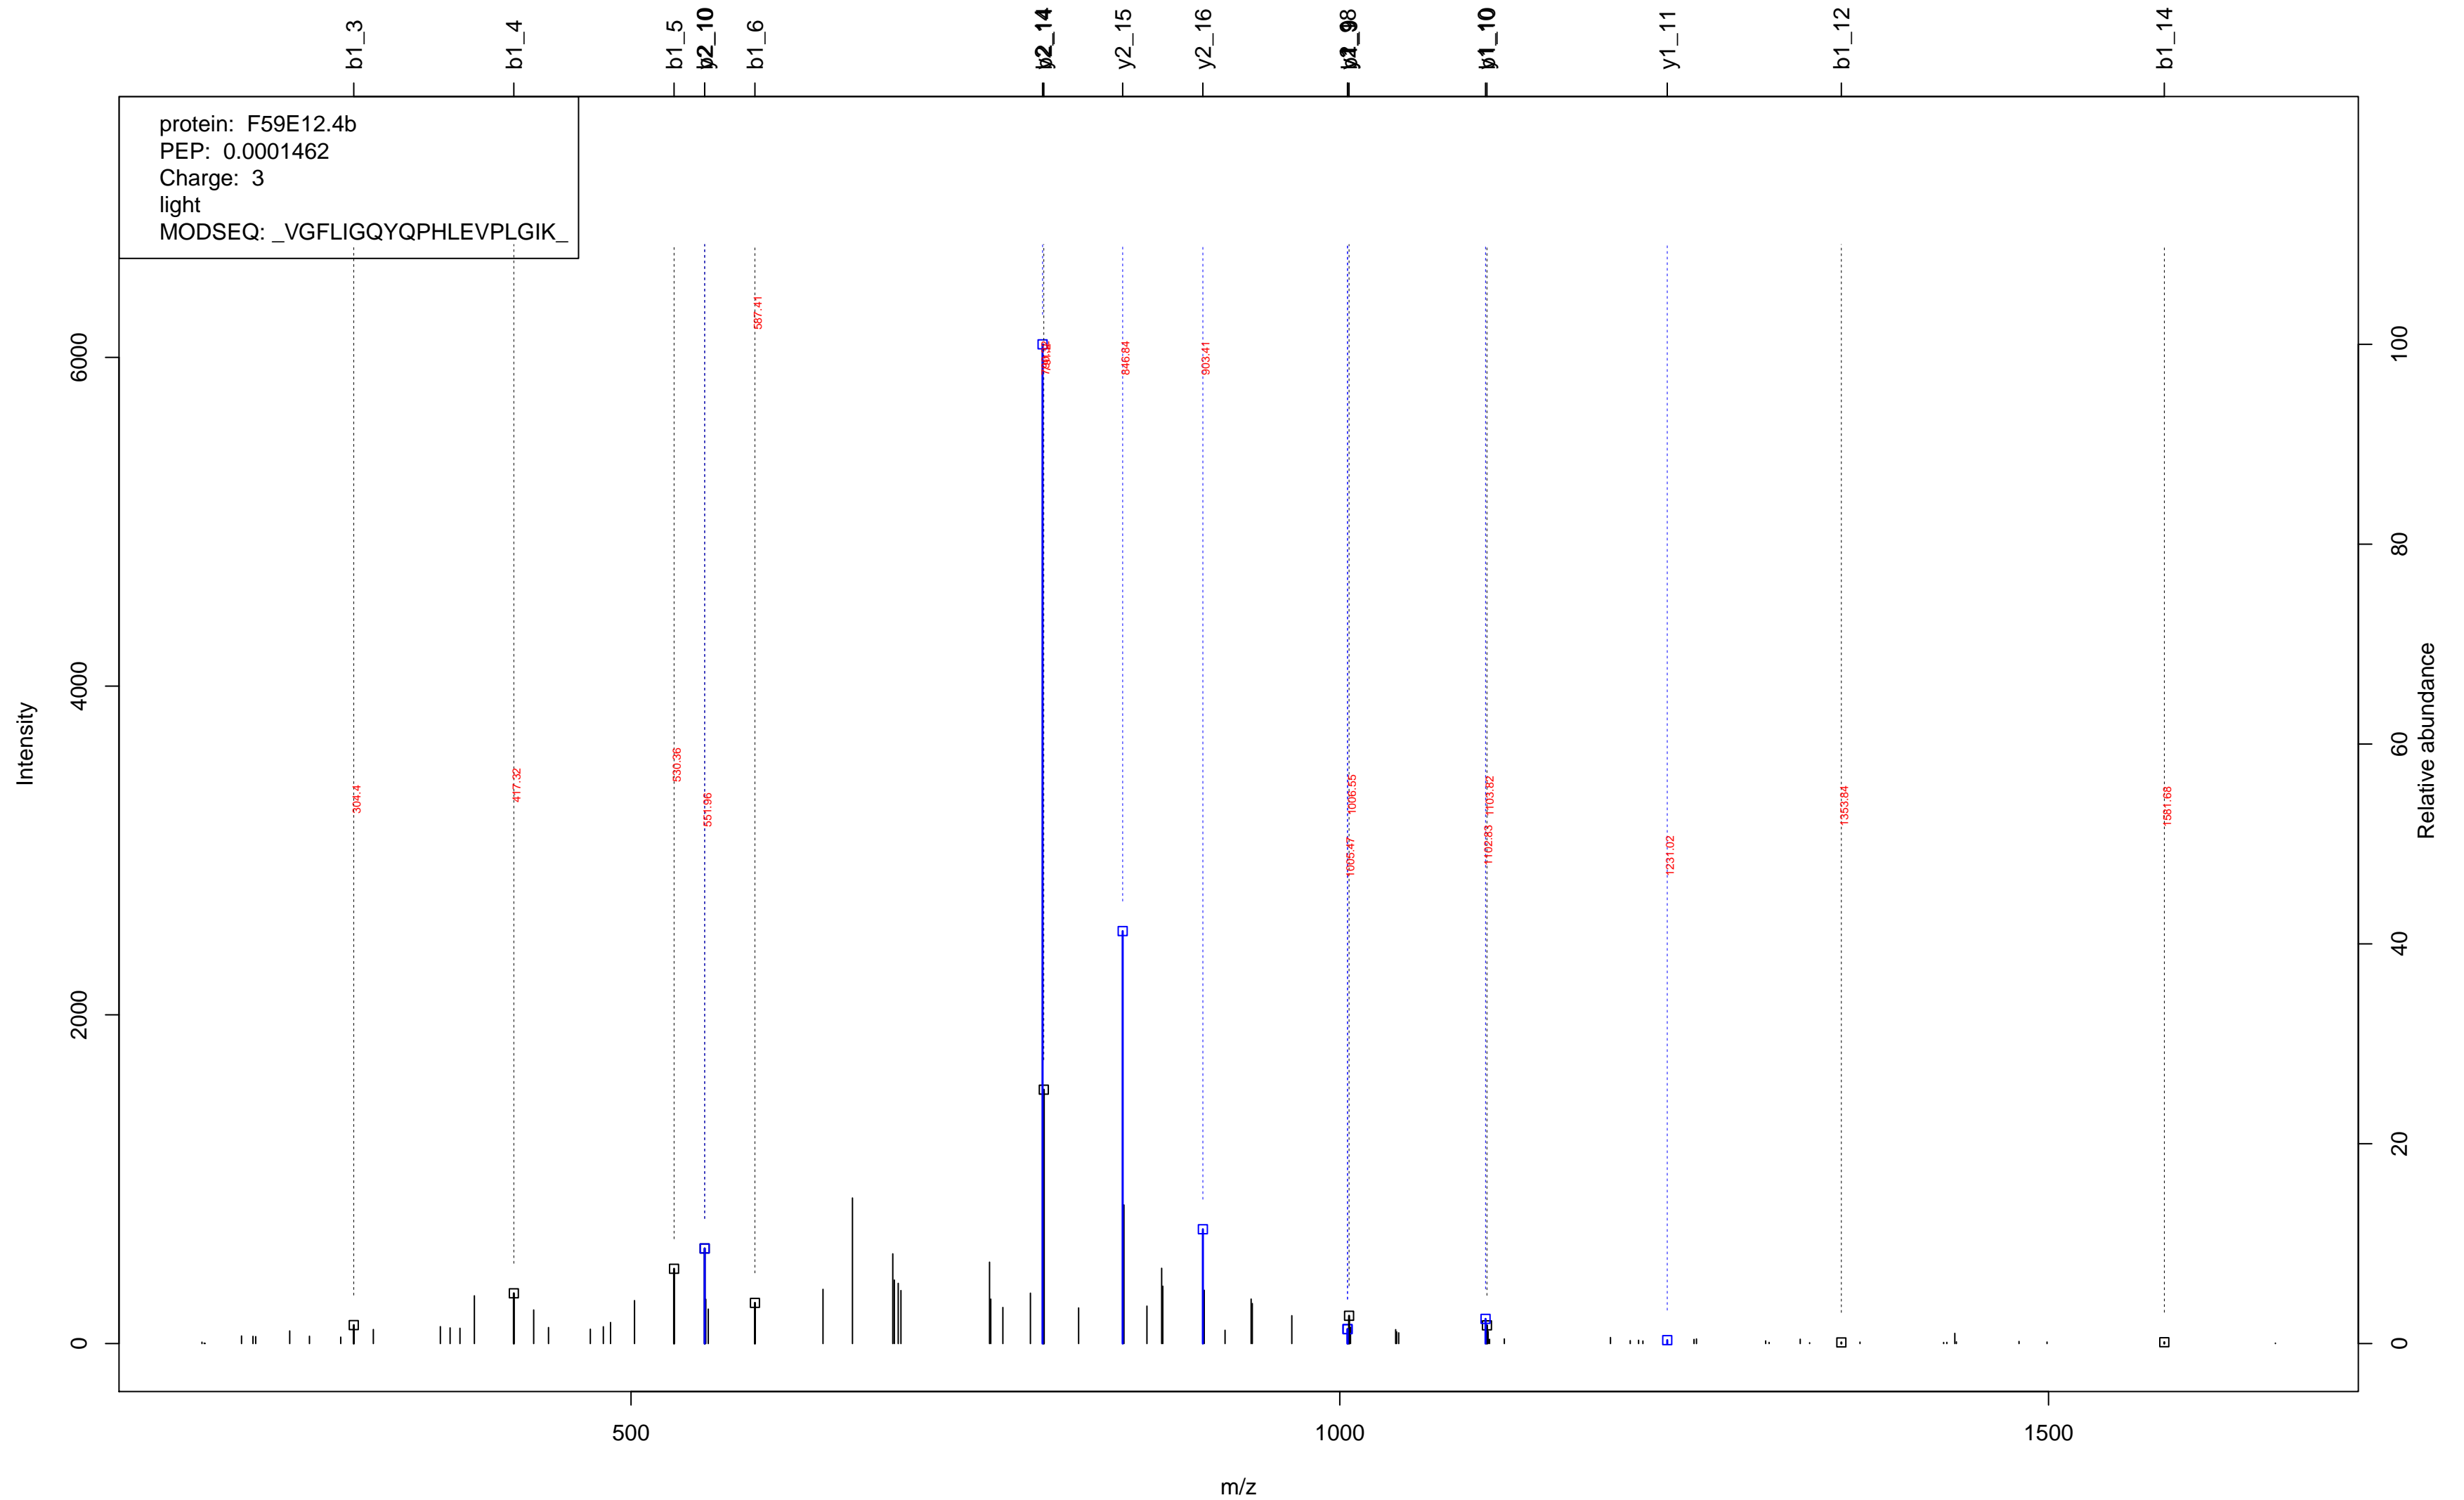



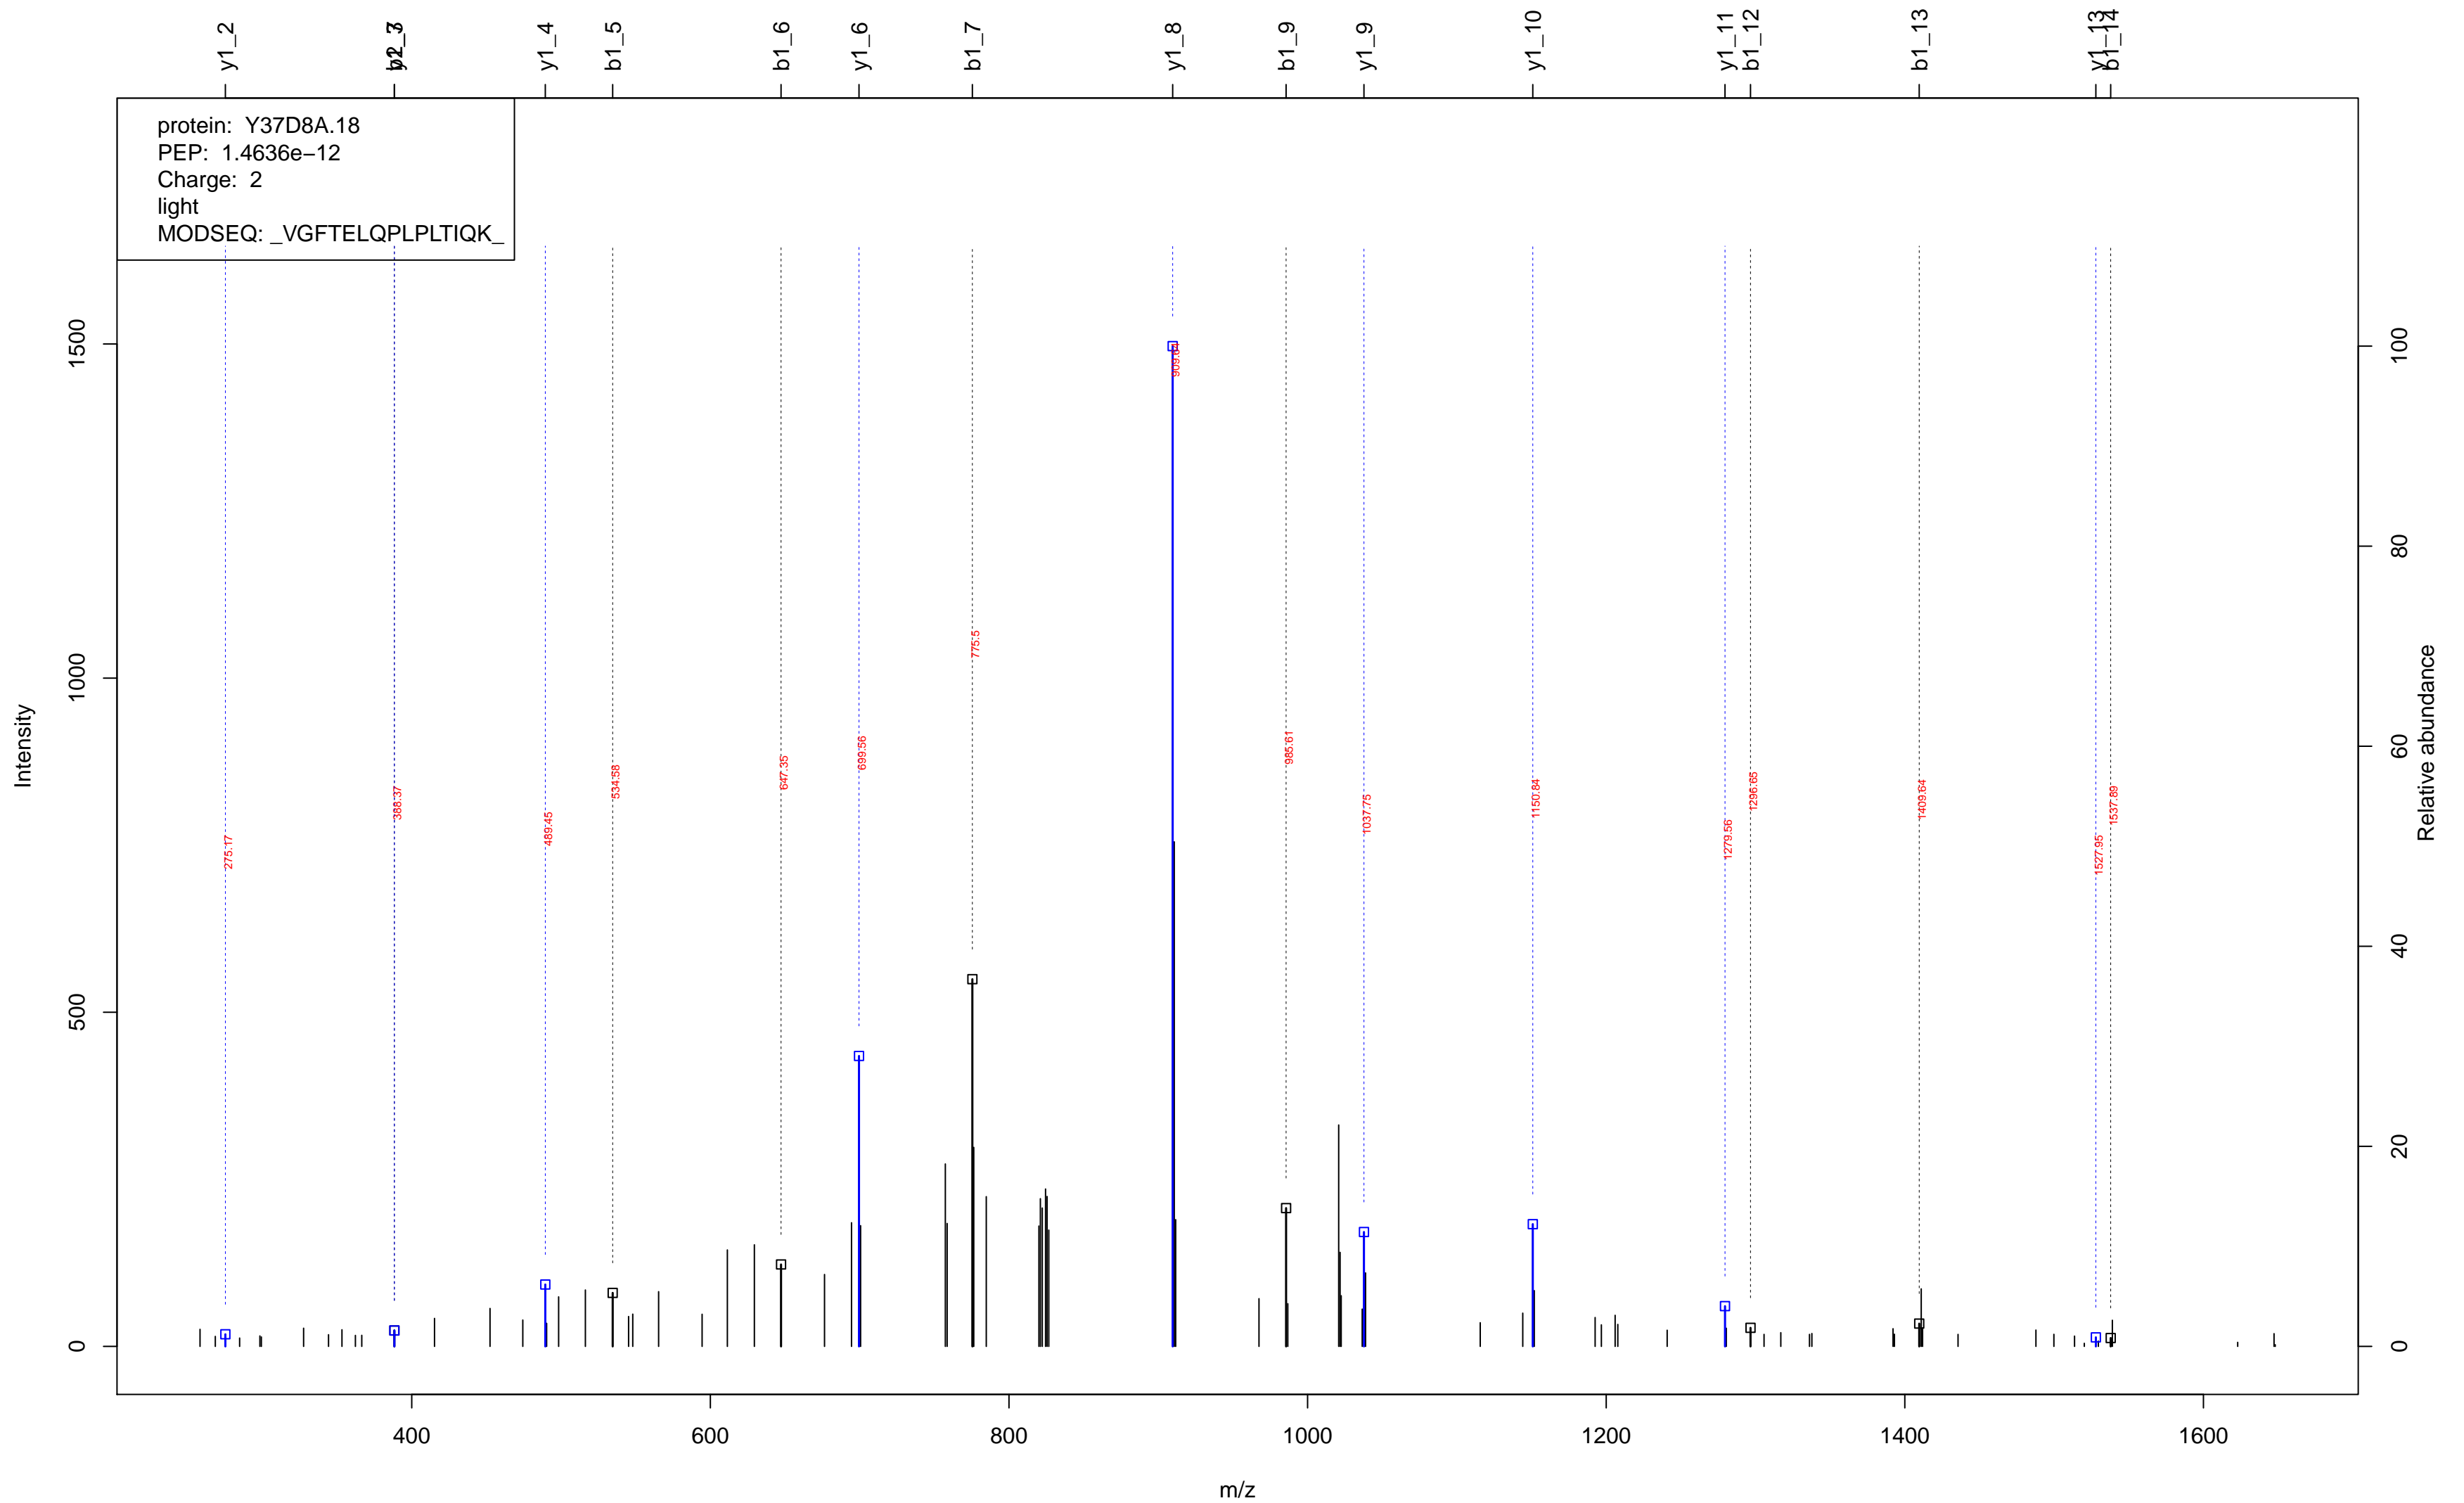

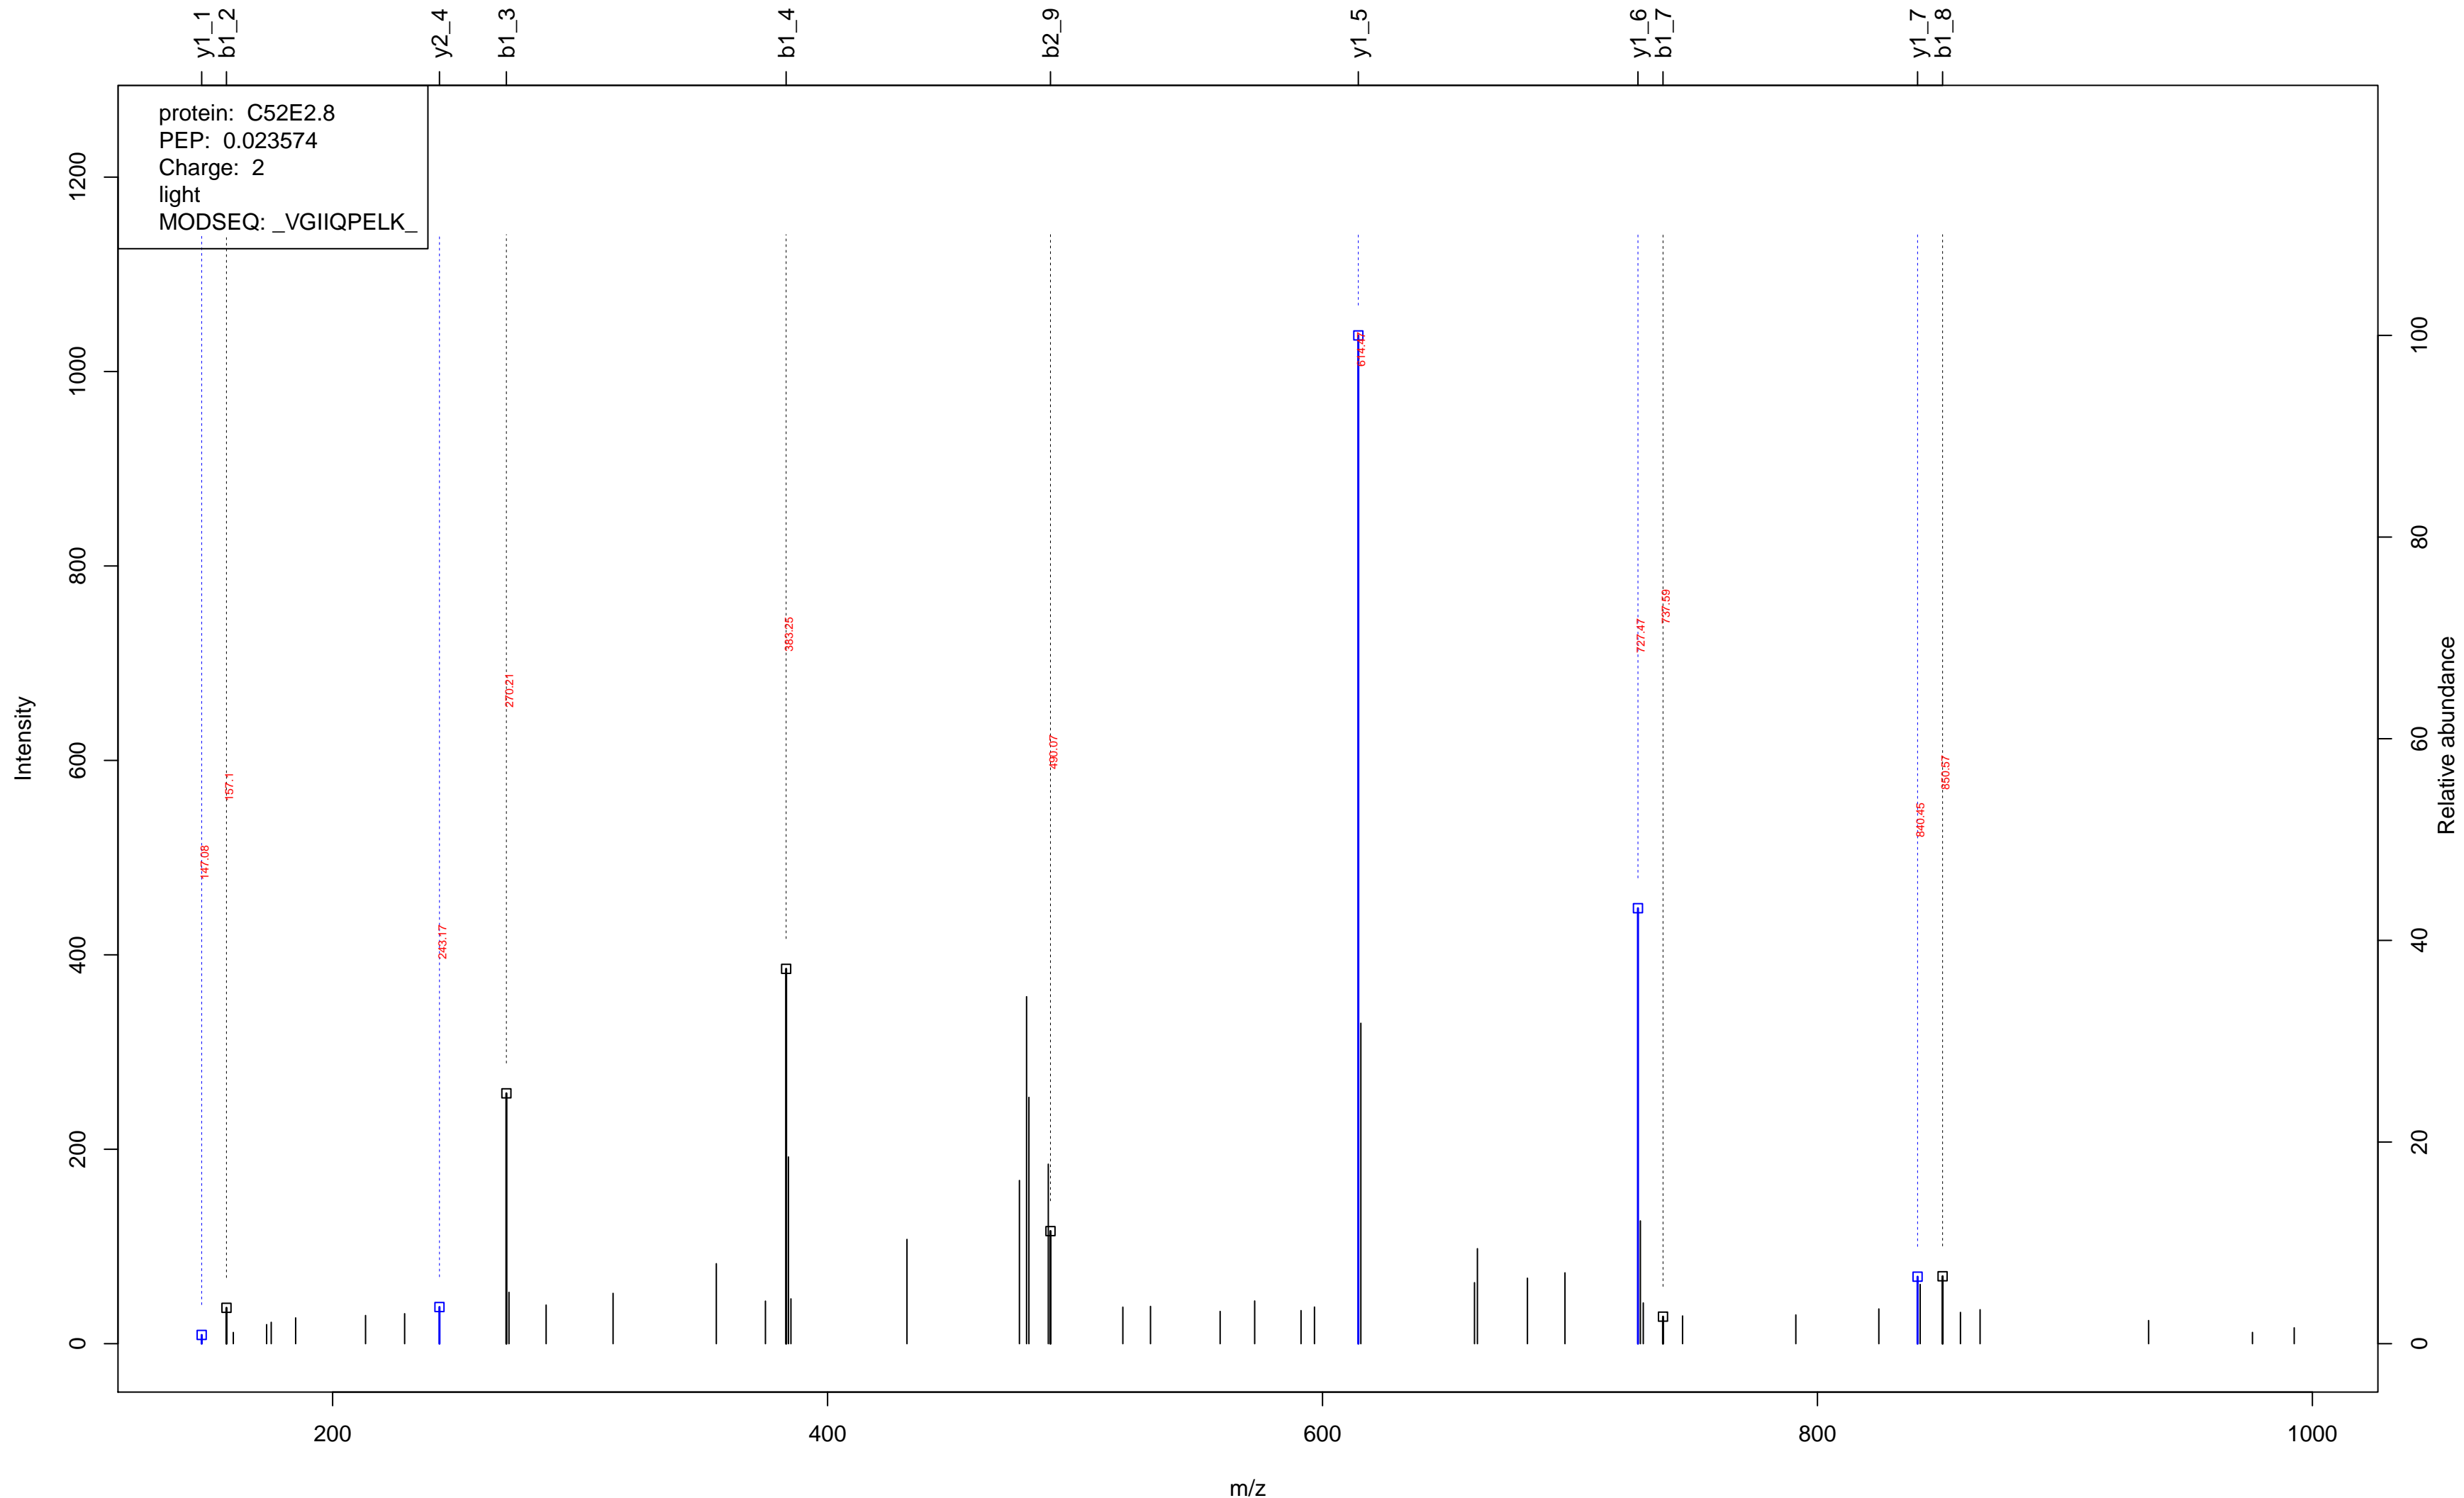

y1\_1

y1\_2

b2\_5

y2\_6

b2\_7

b2\_8

y1\_4

b1\_5

b1\_6

protein: F19B10.11  
PEP: 0.0088921  
Charge: 3  
light  
MODSEQ: \_VHYLEEEAR\_

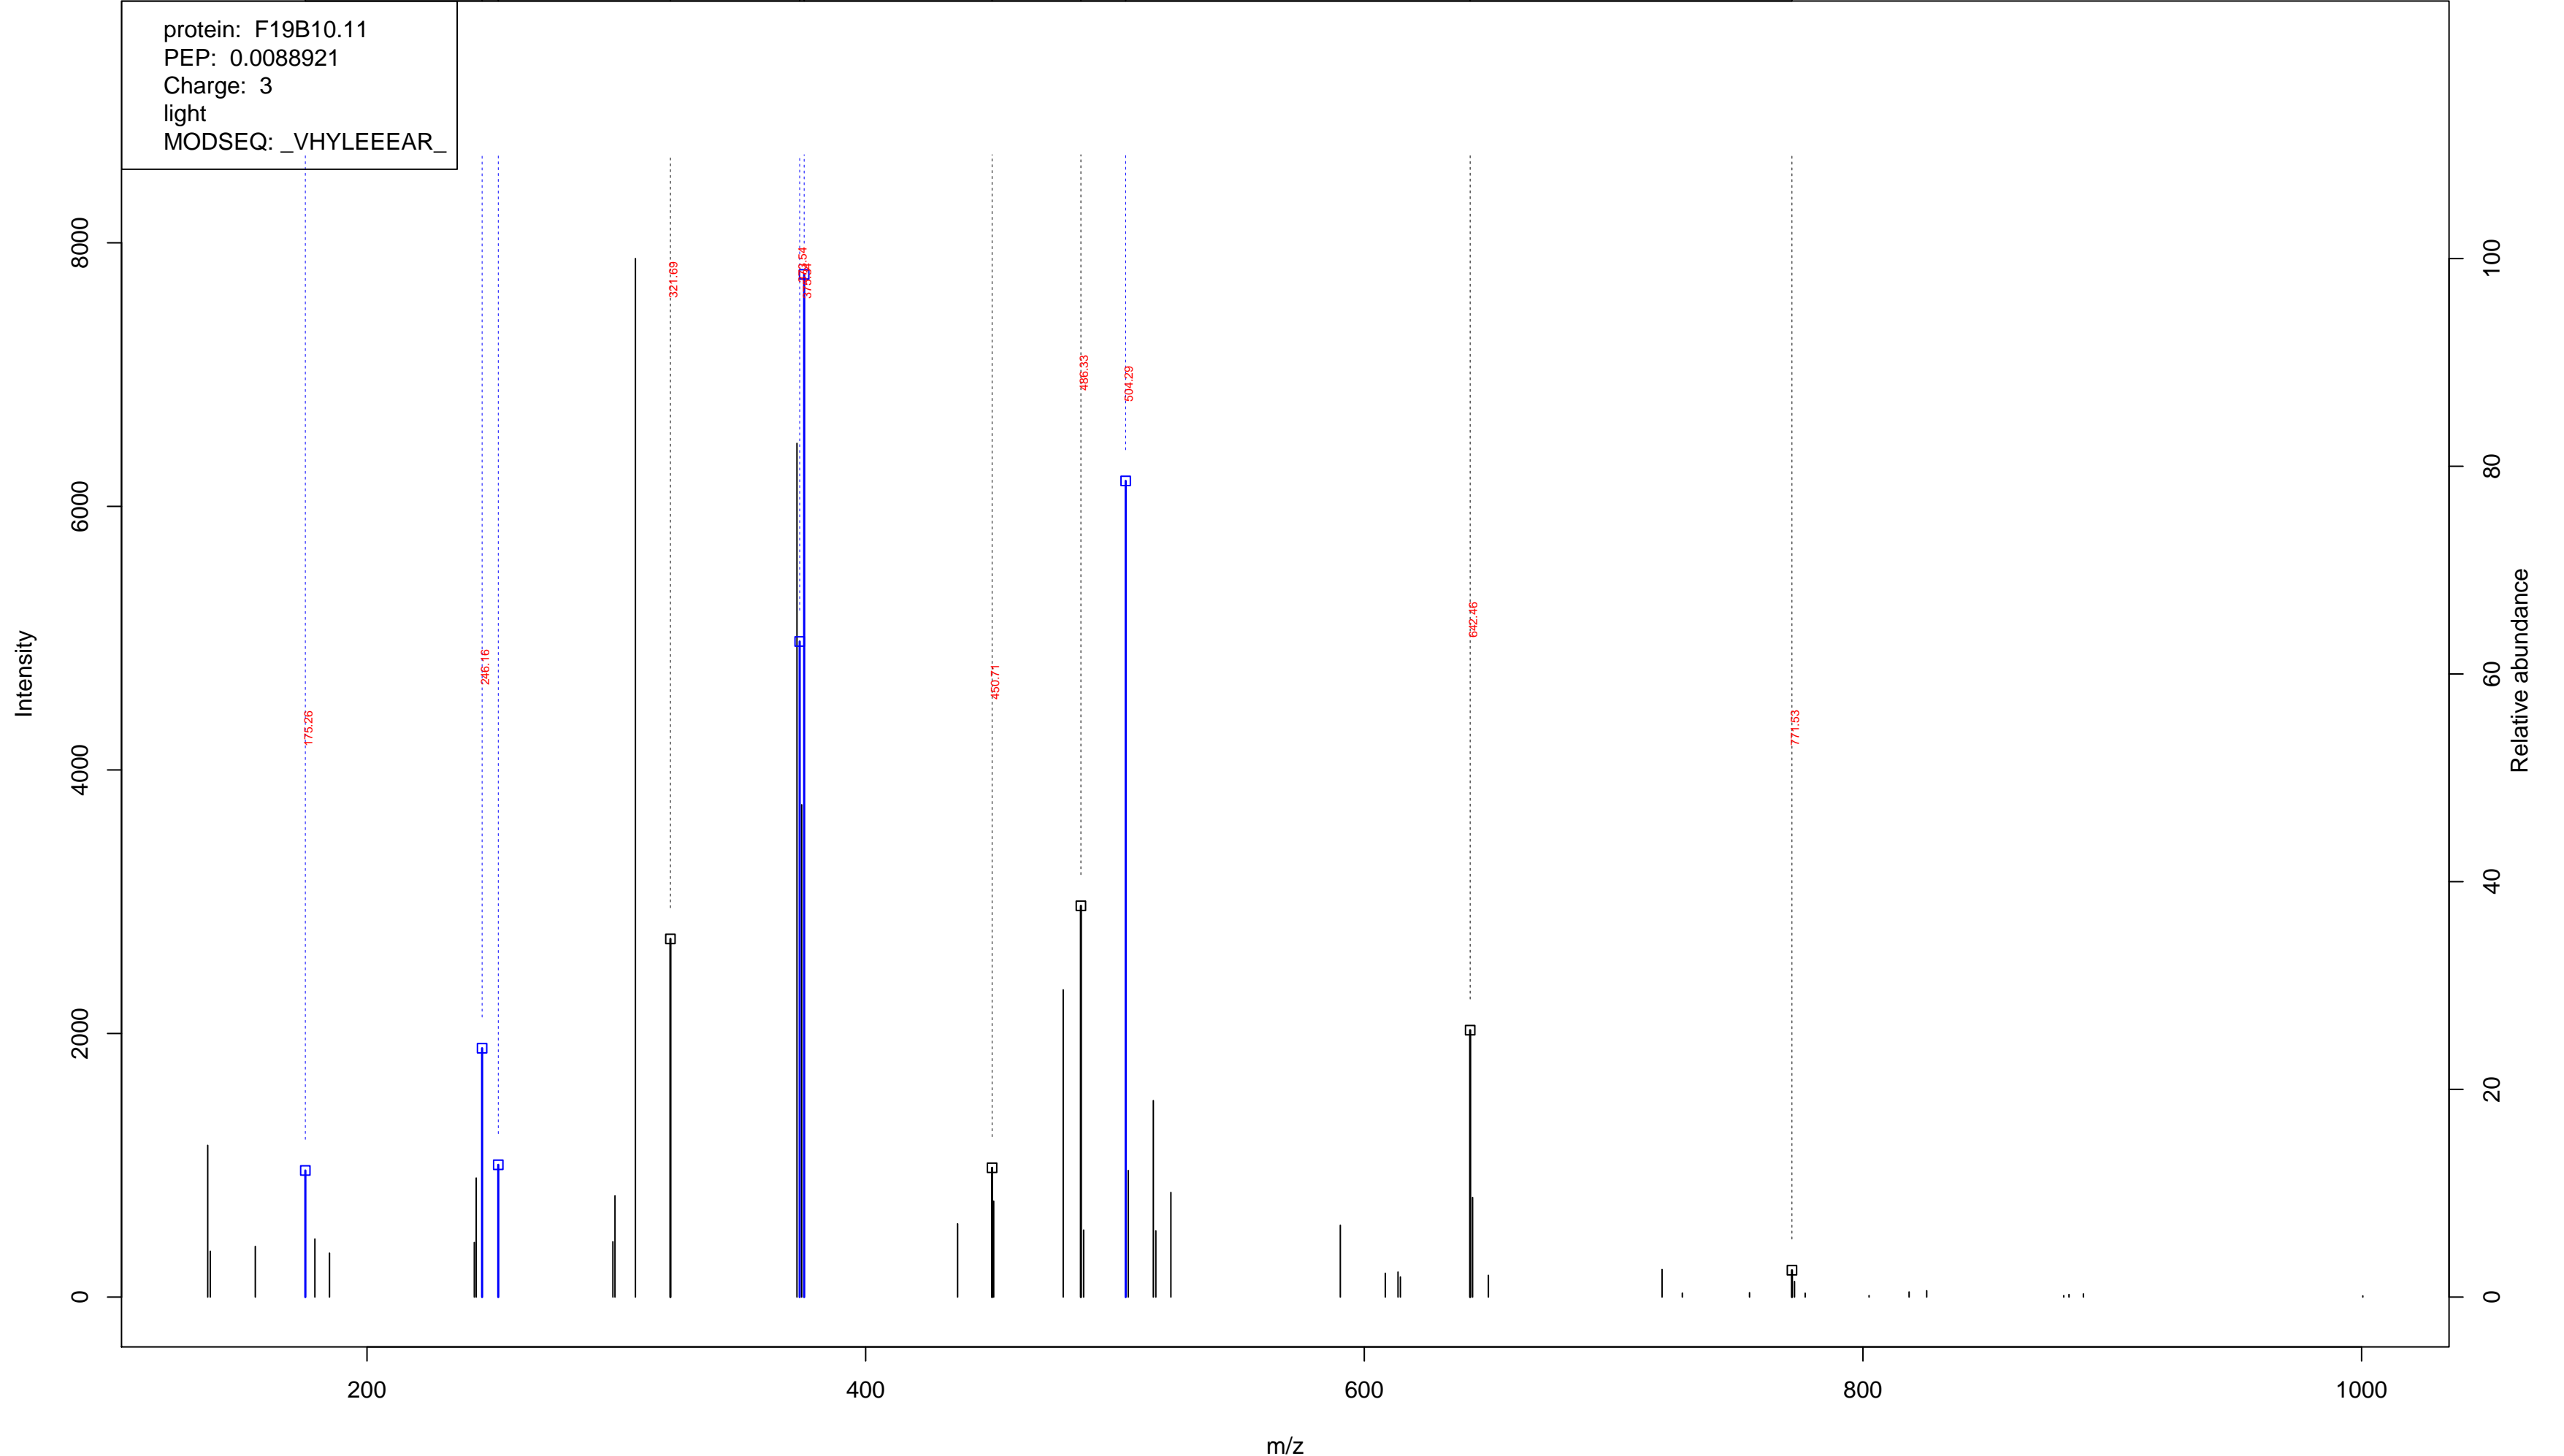

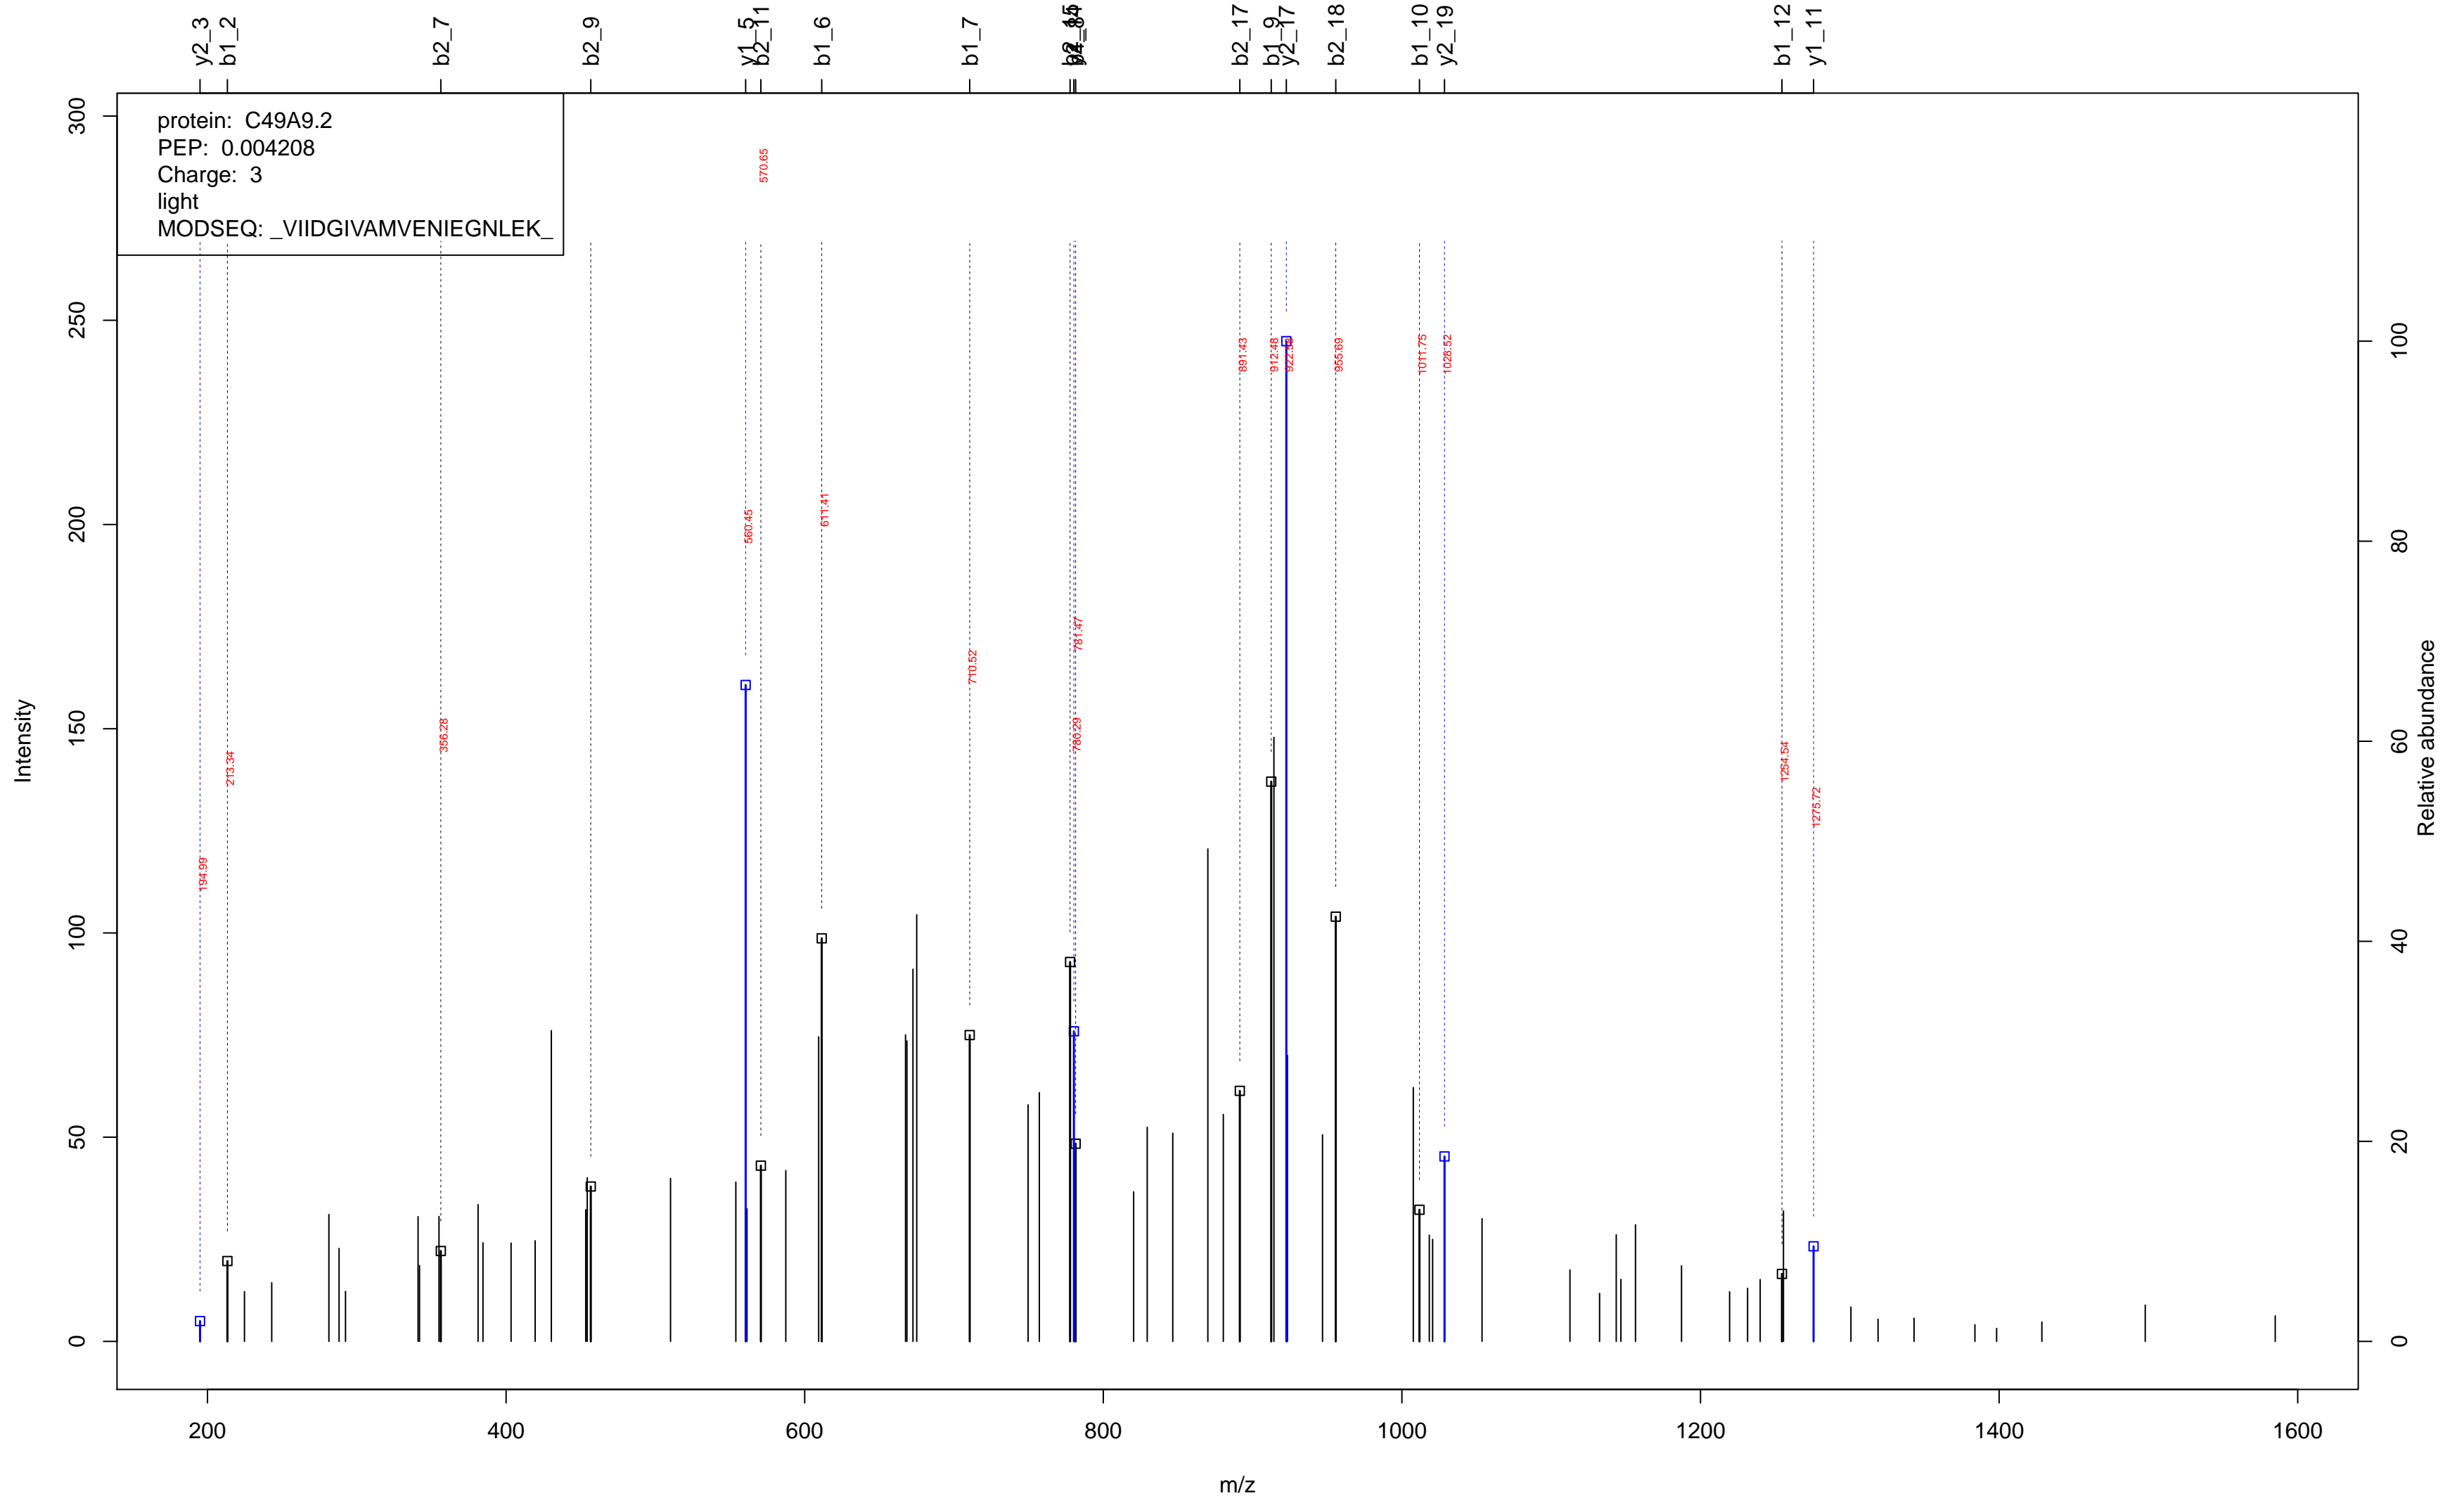

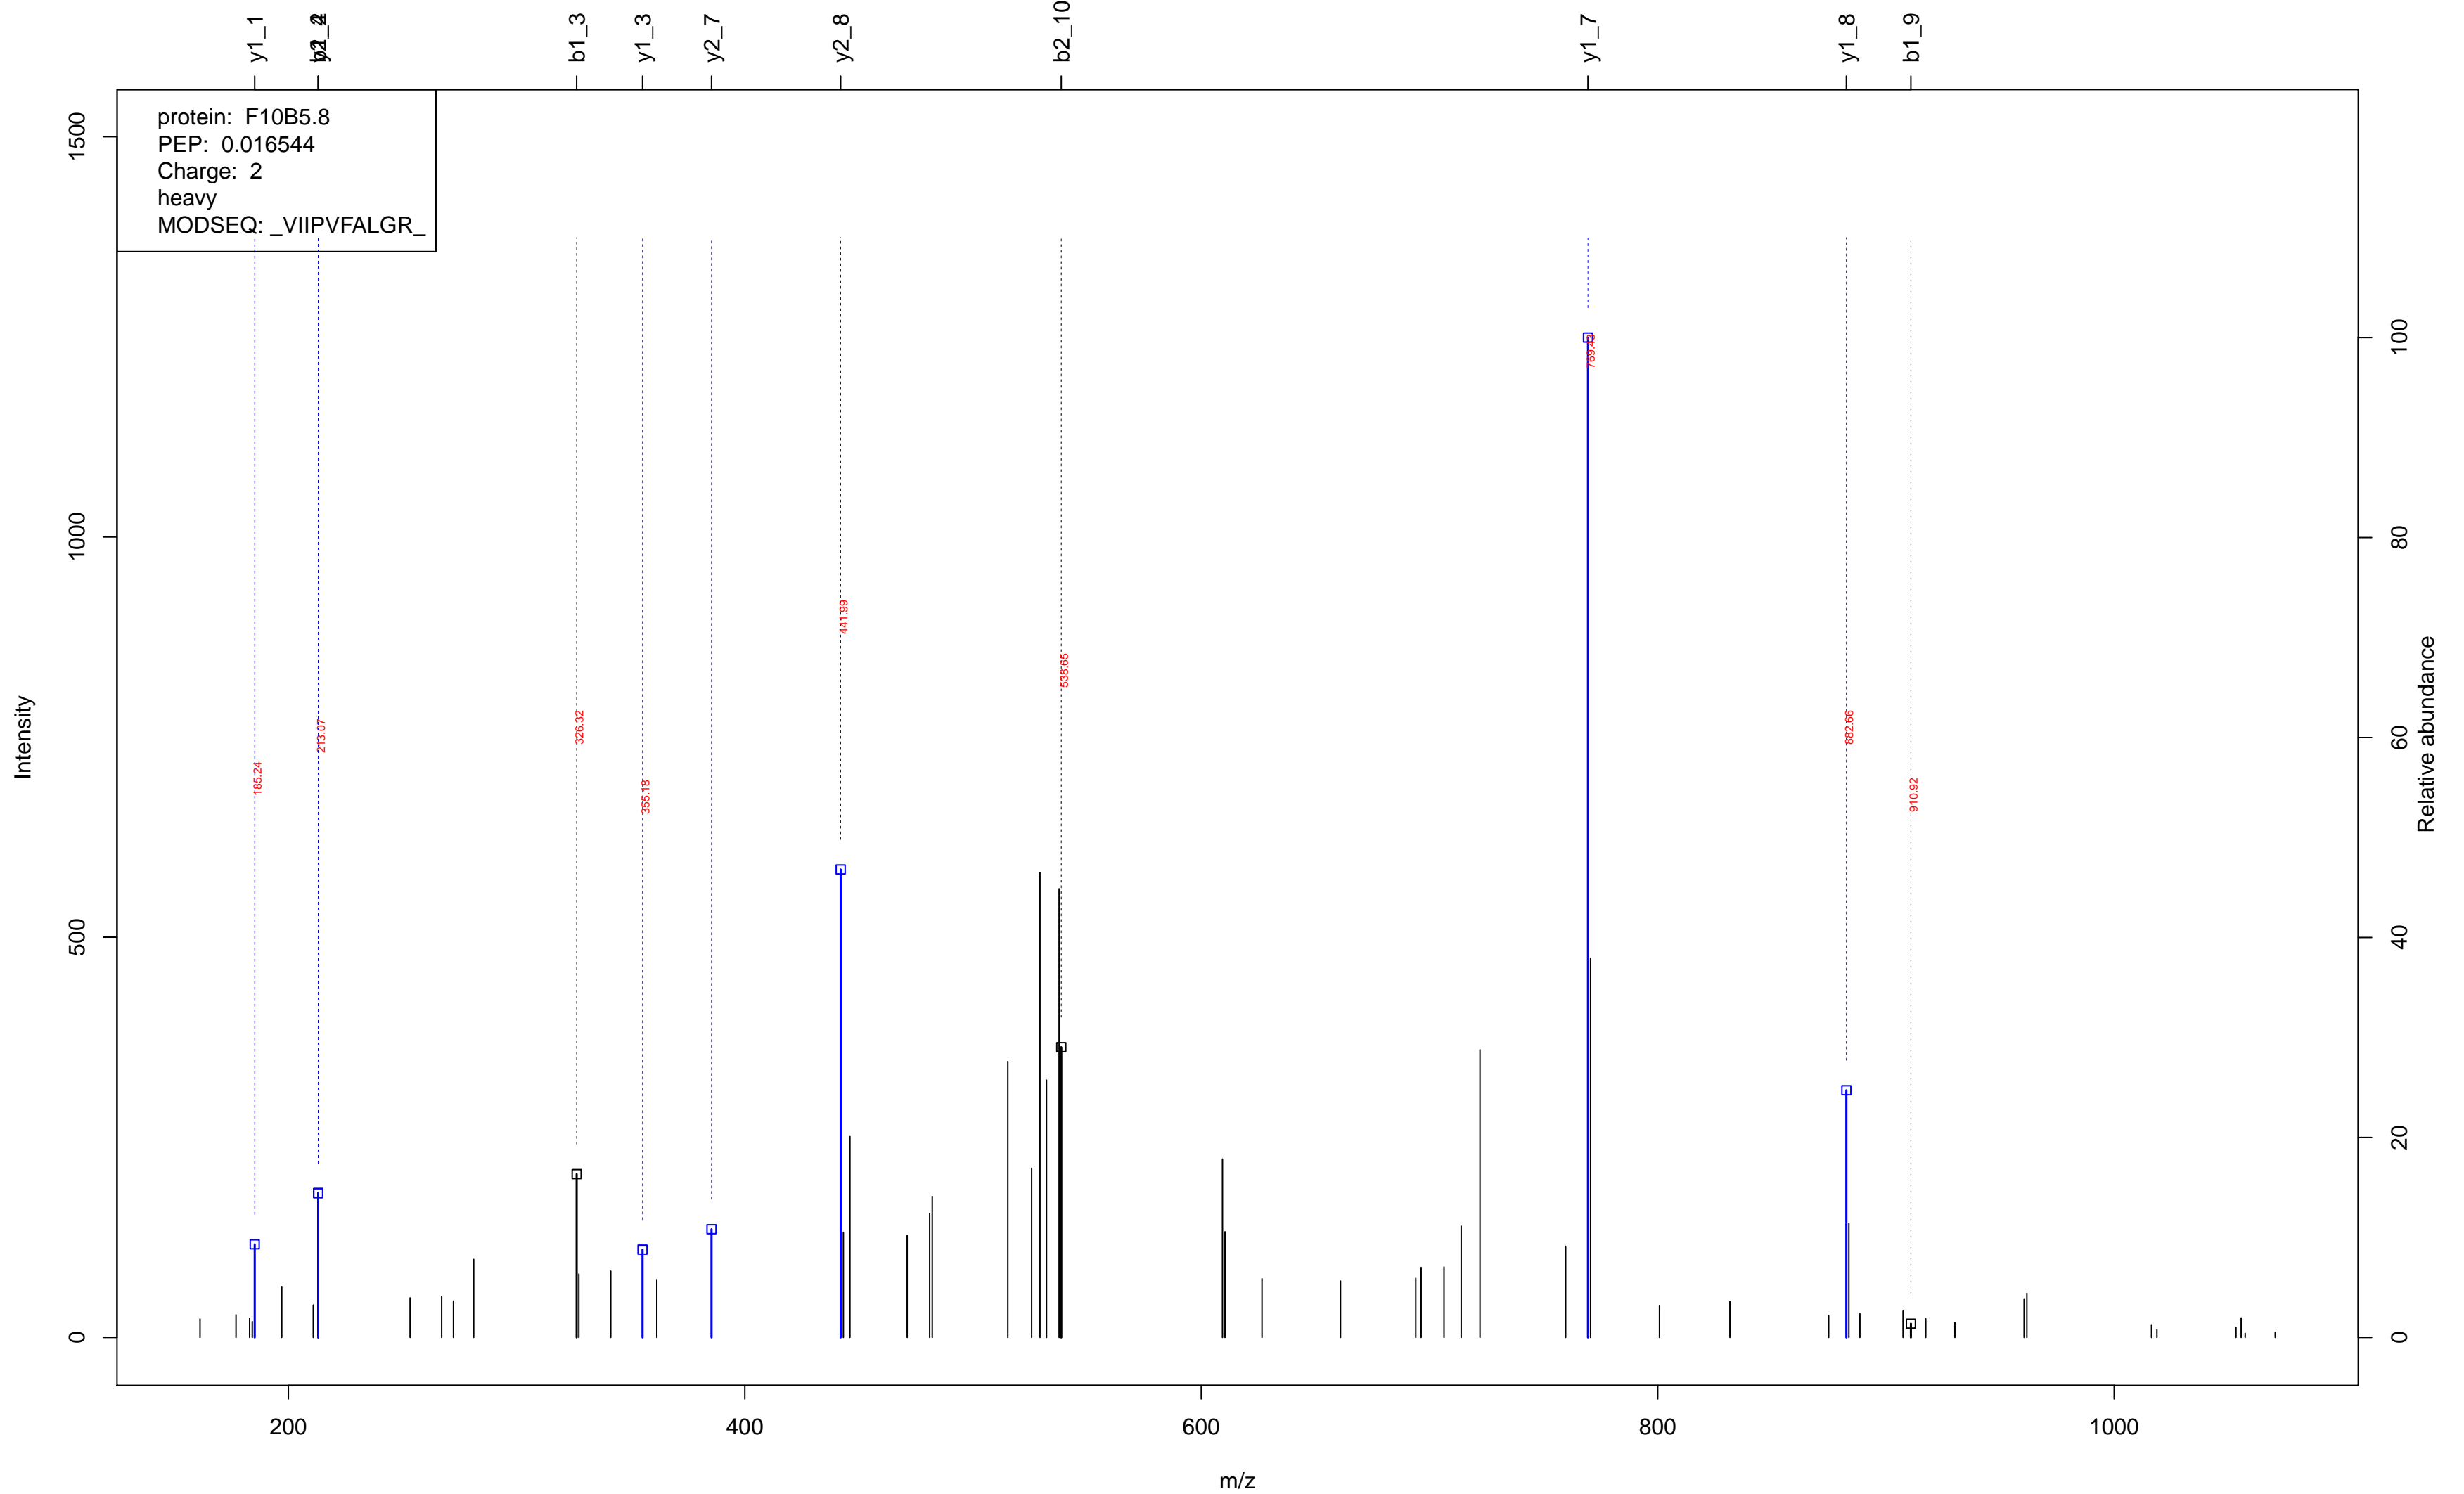

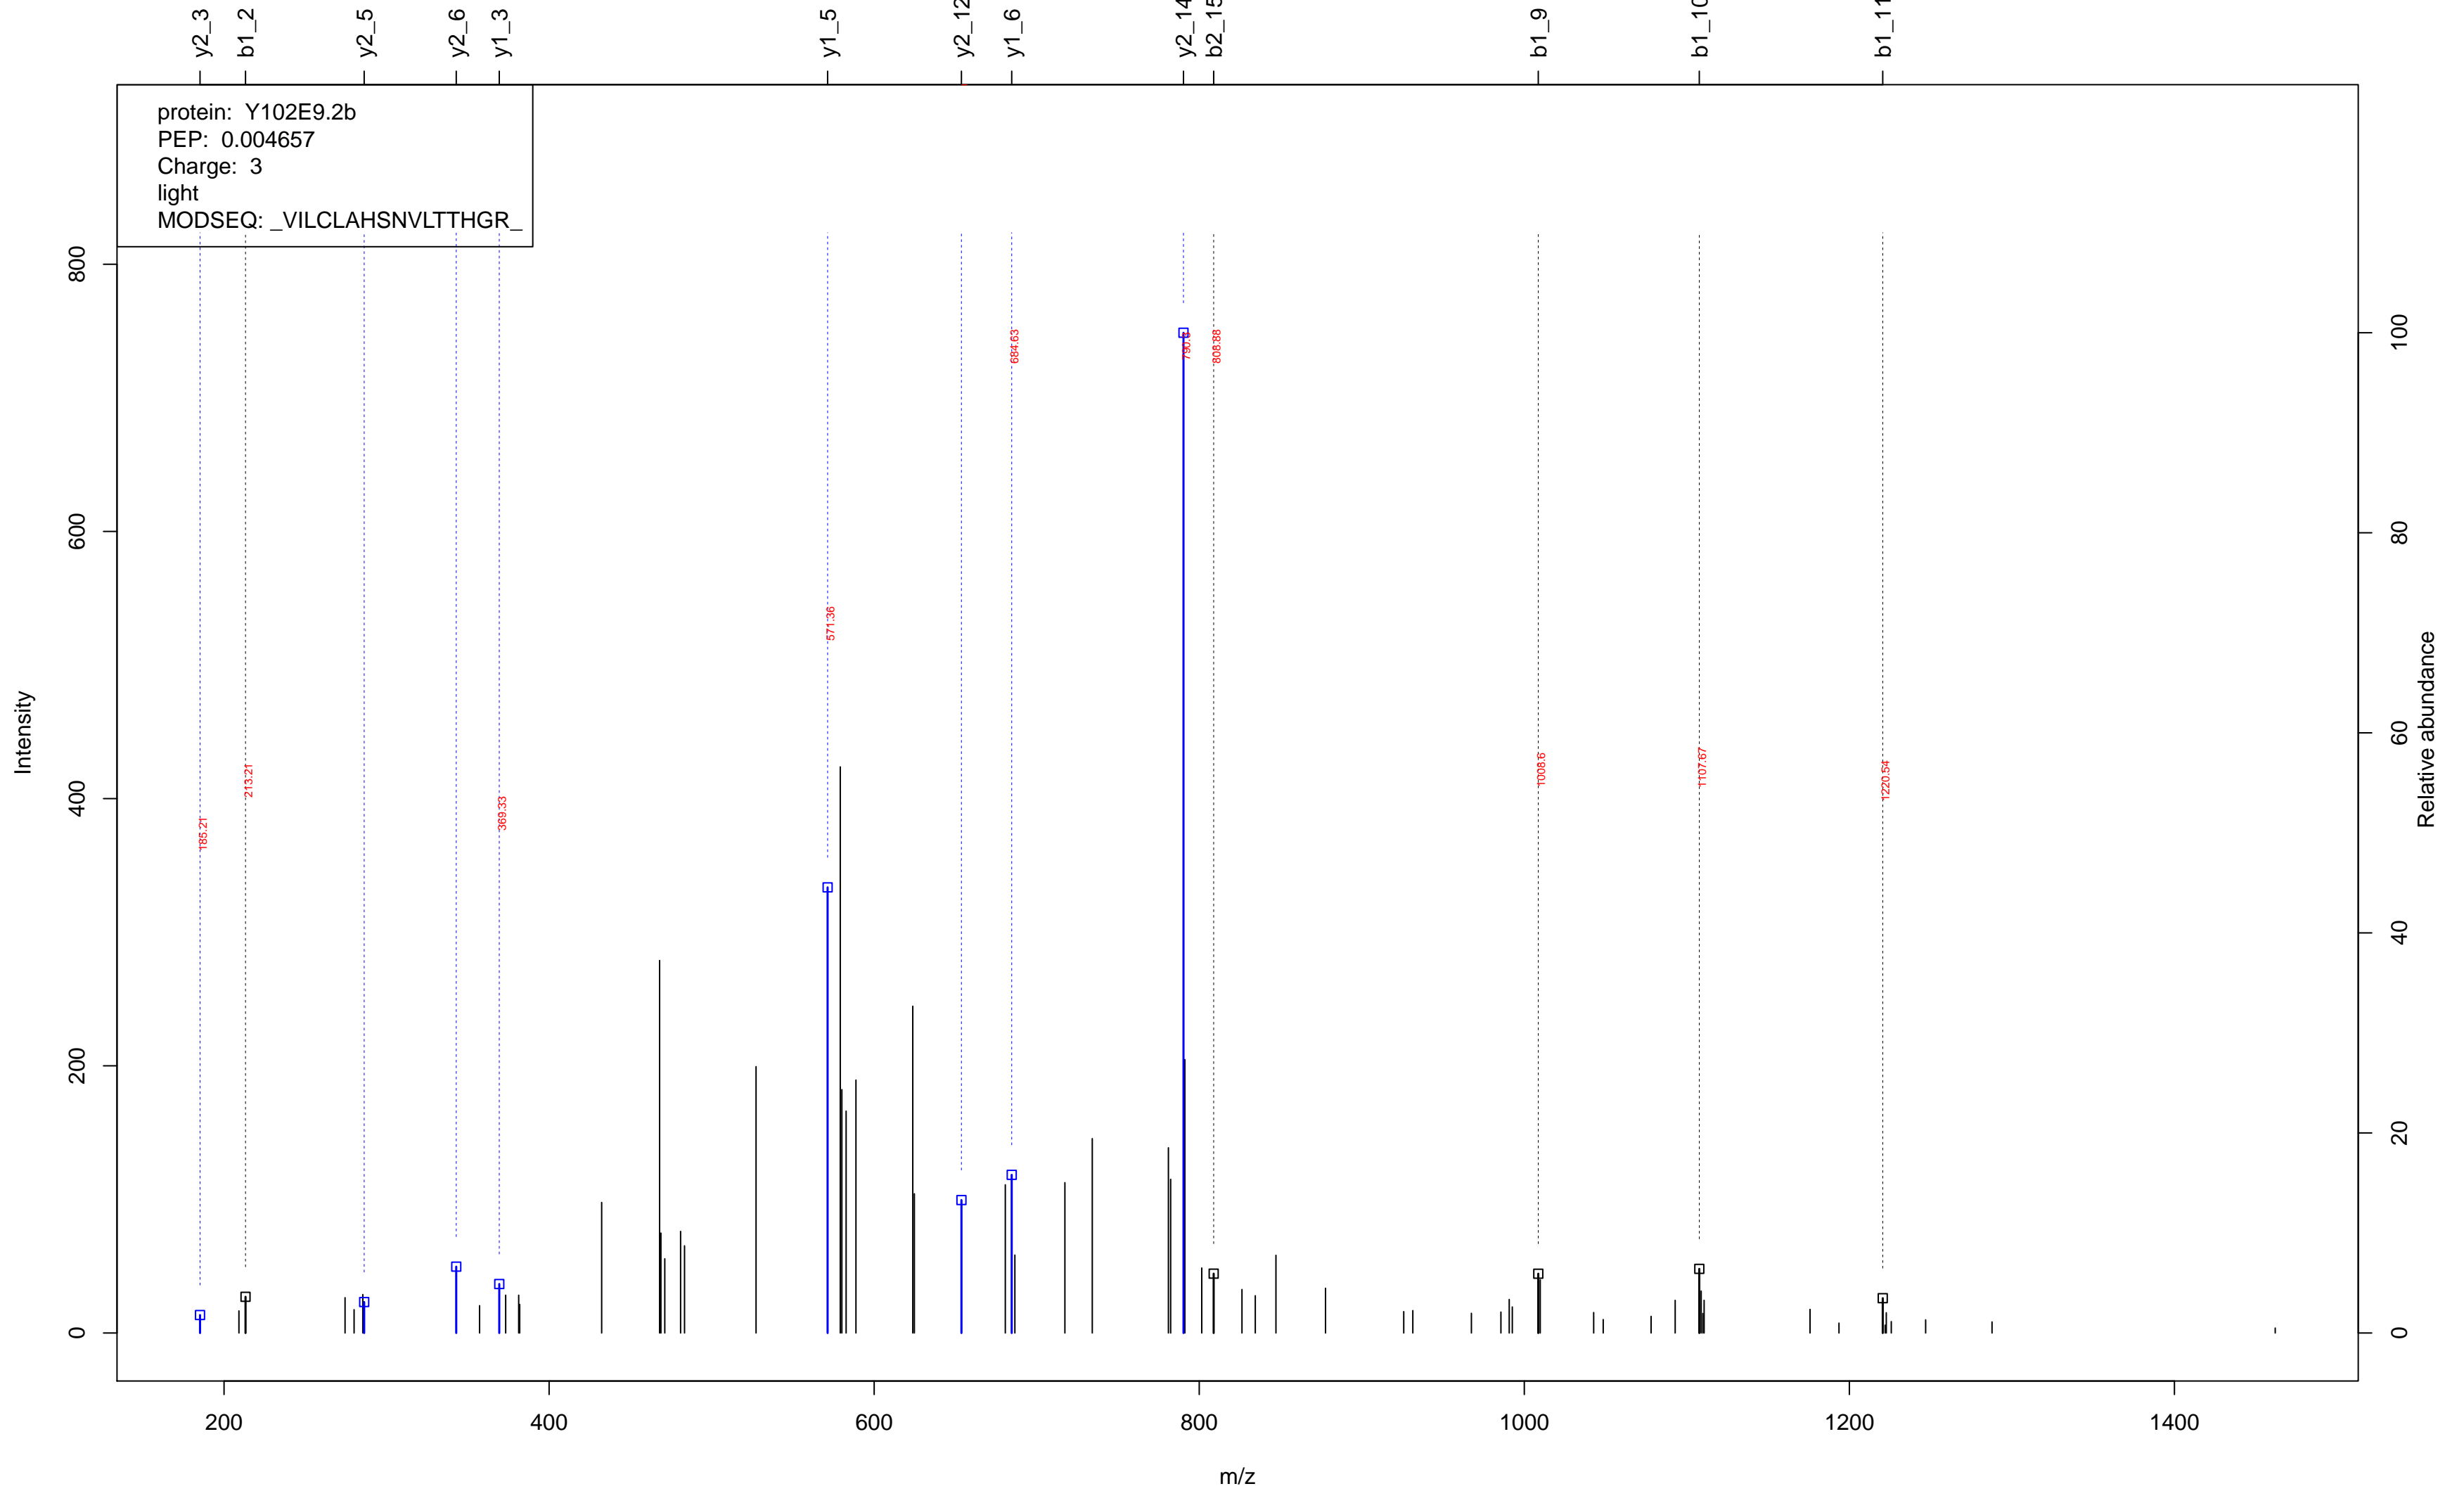

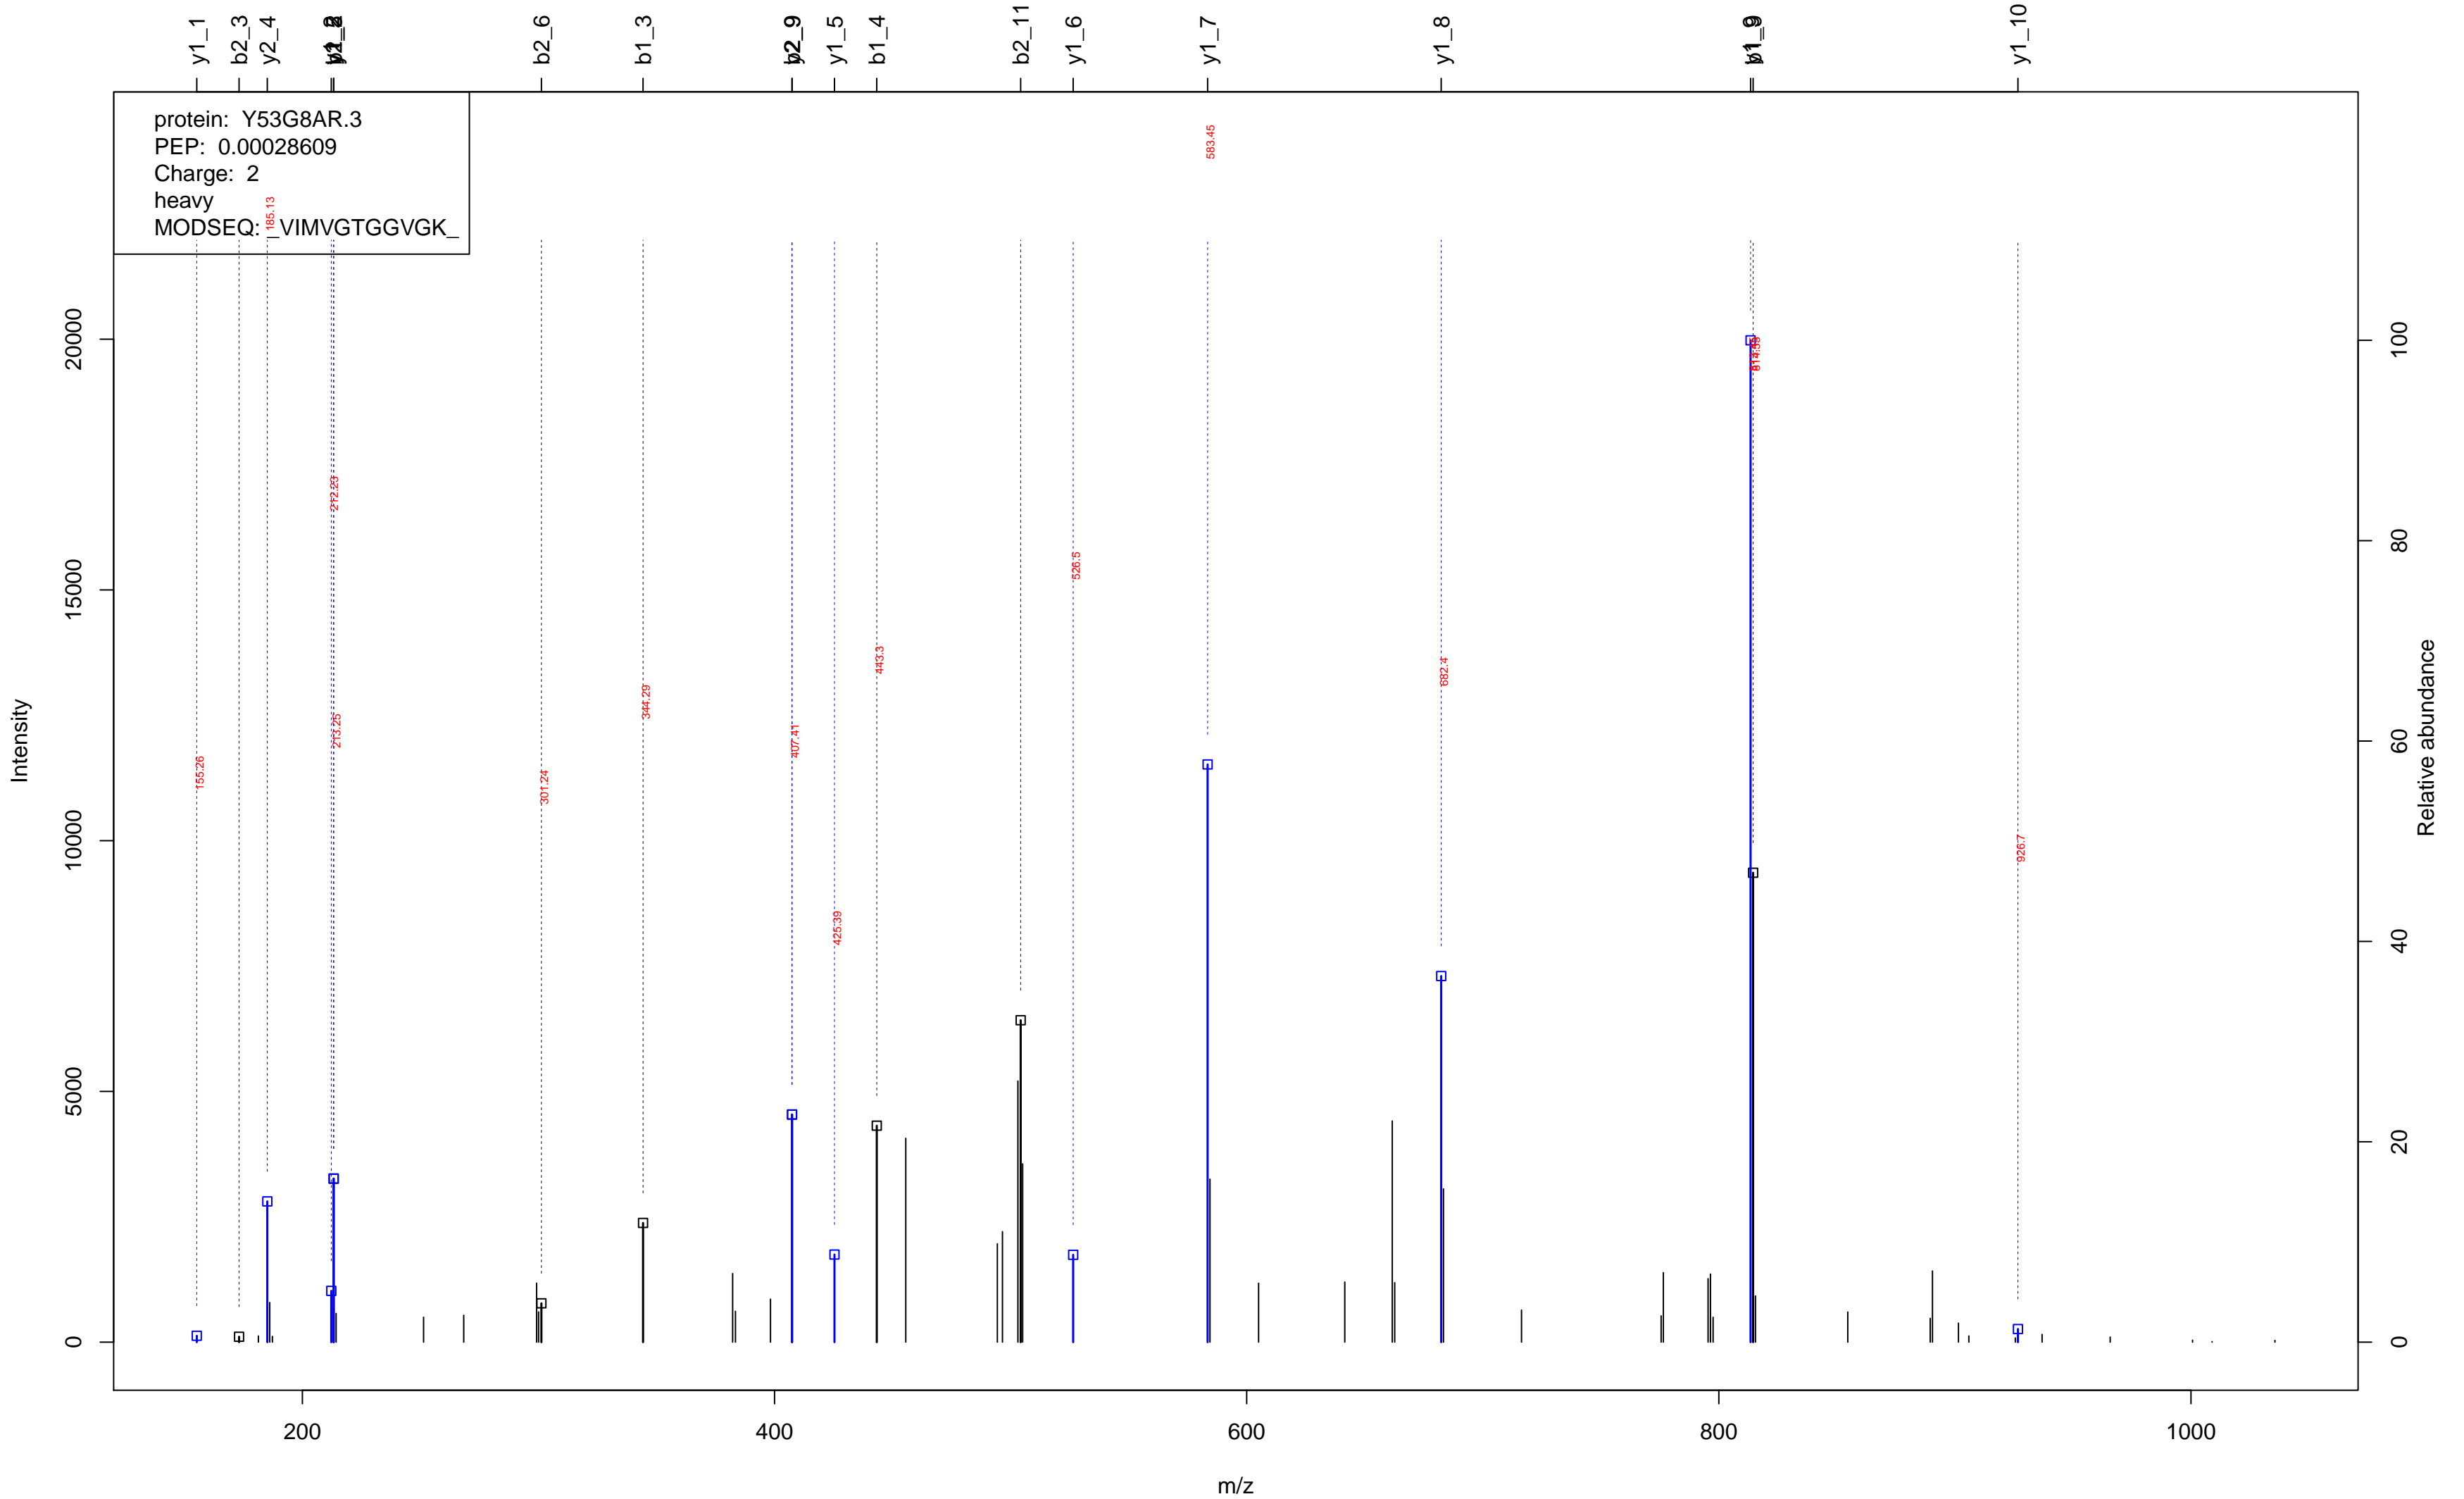

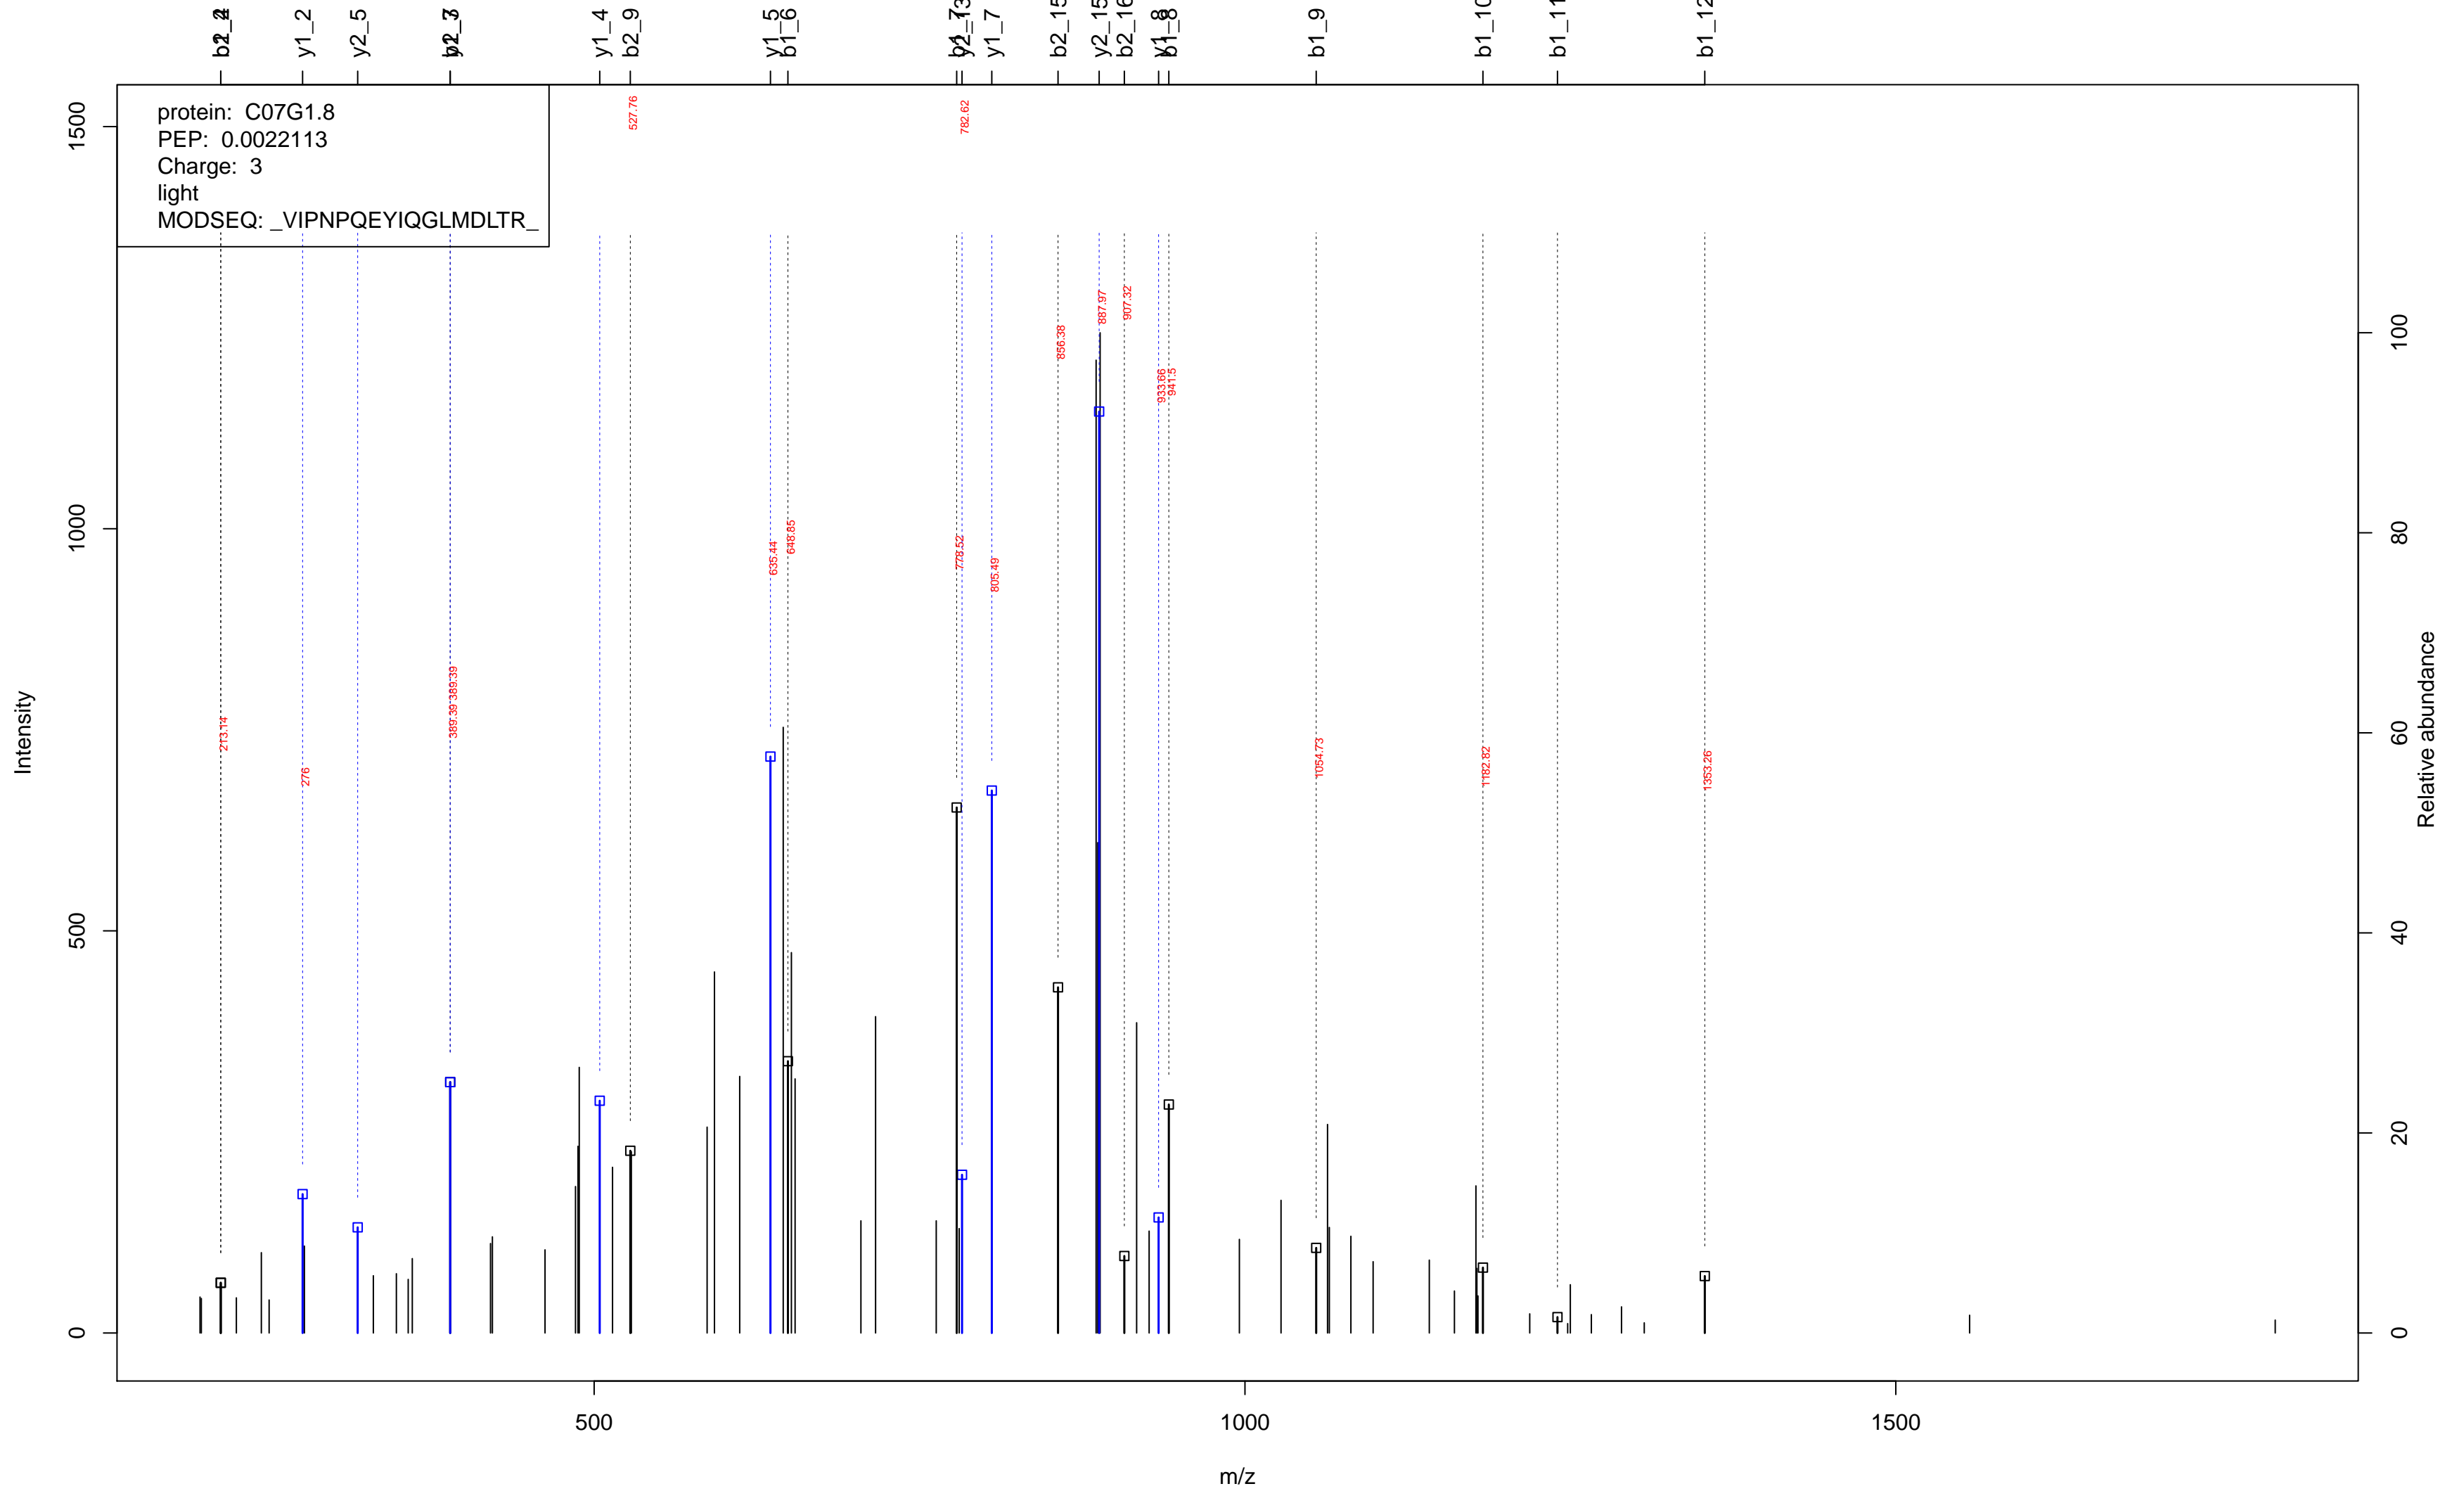



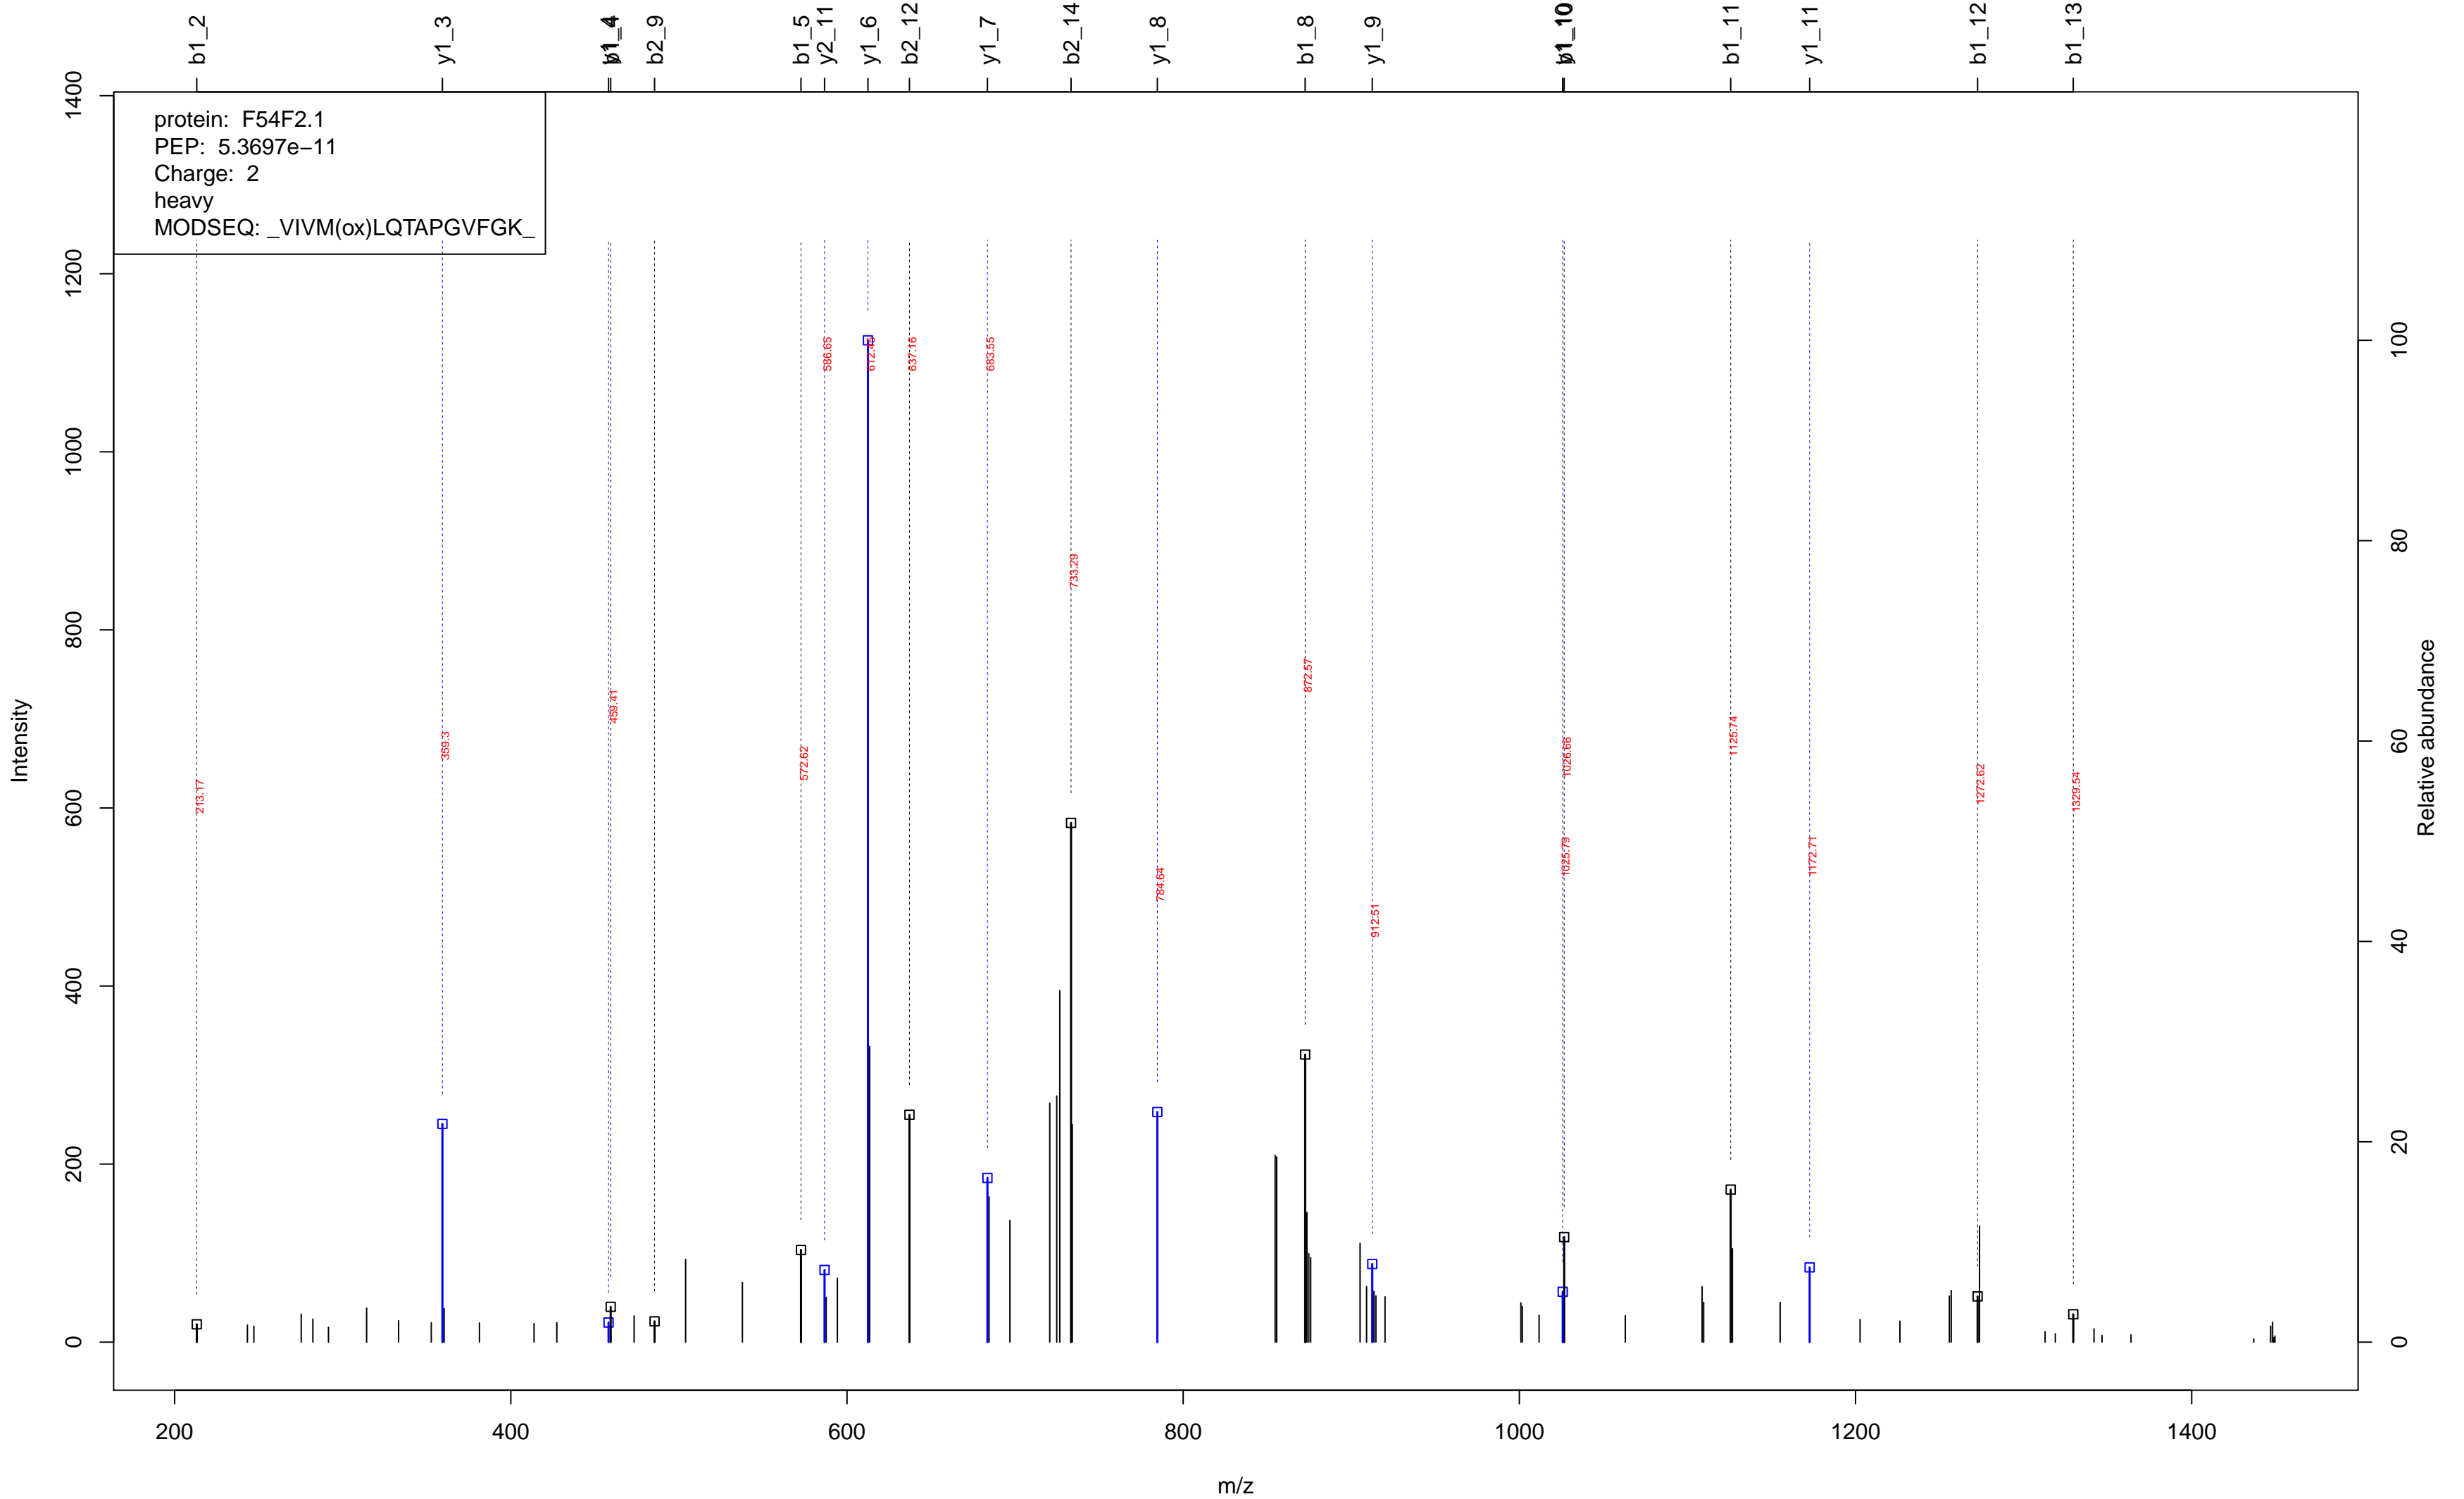

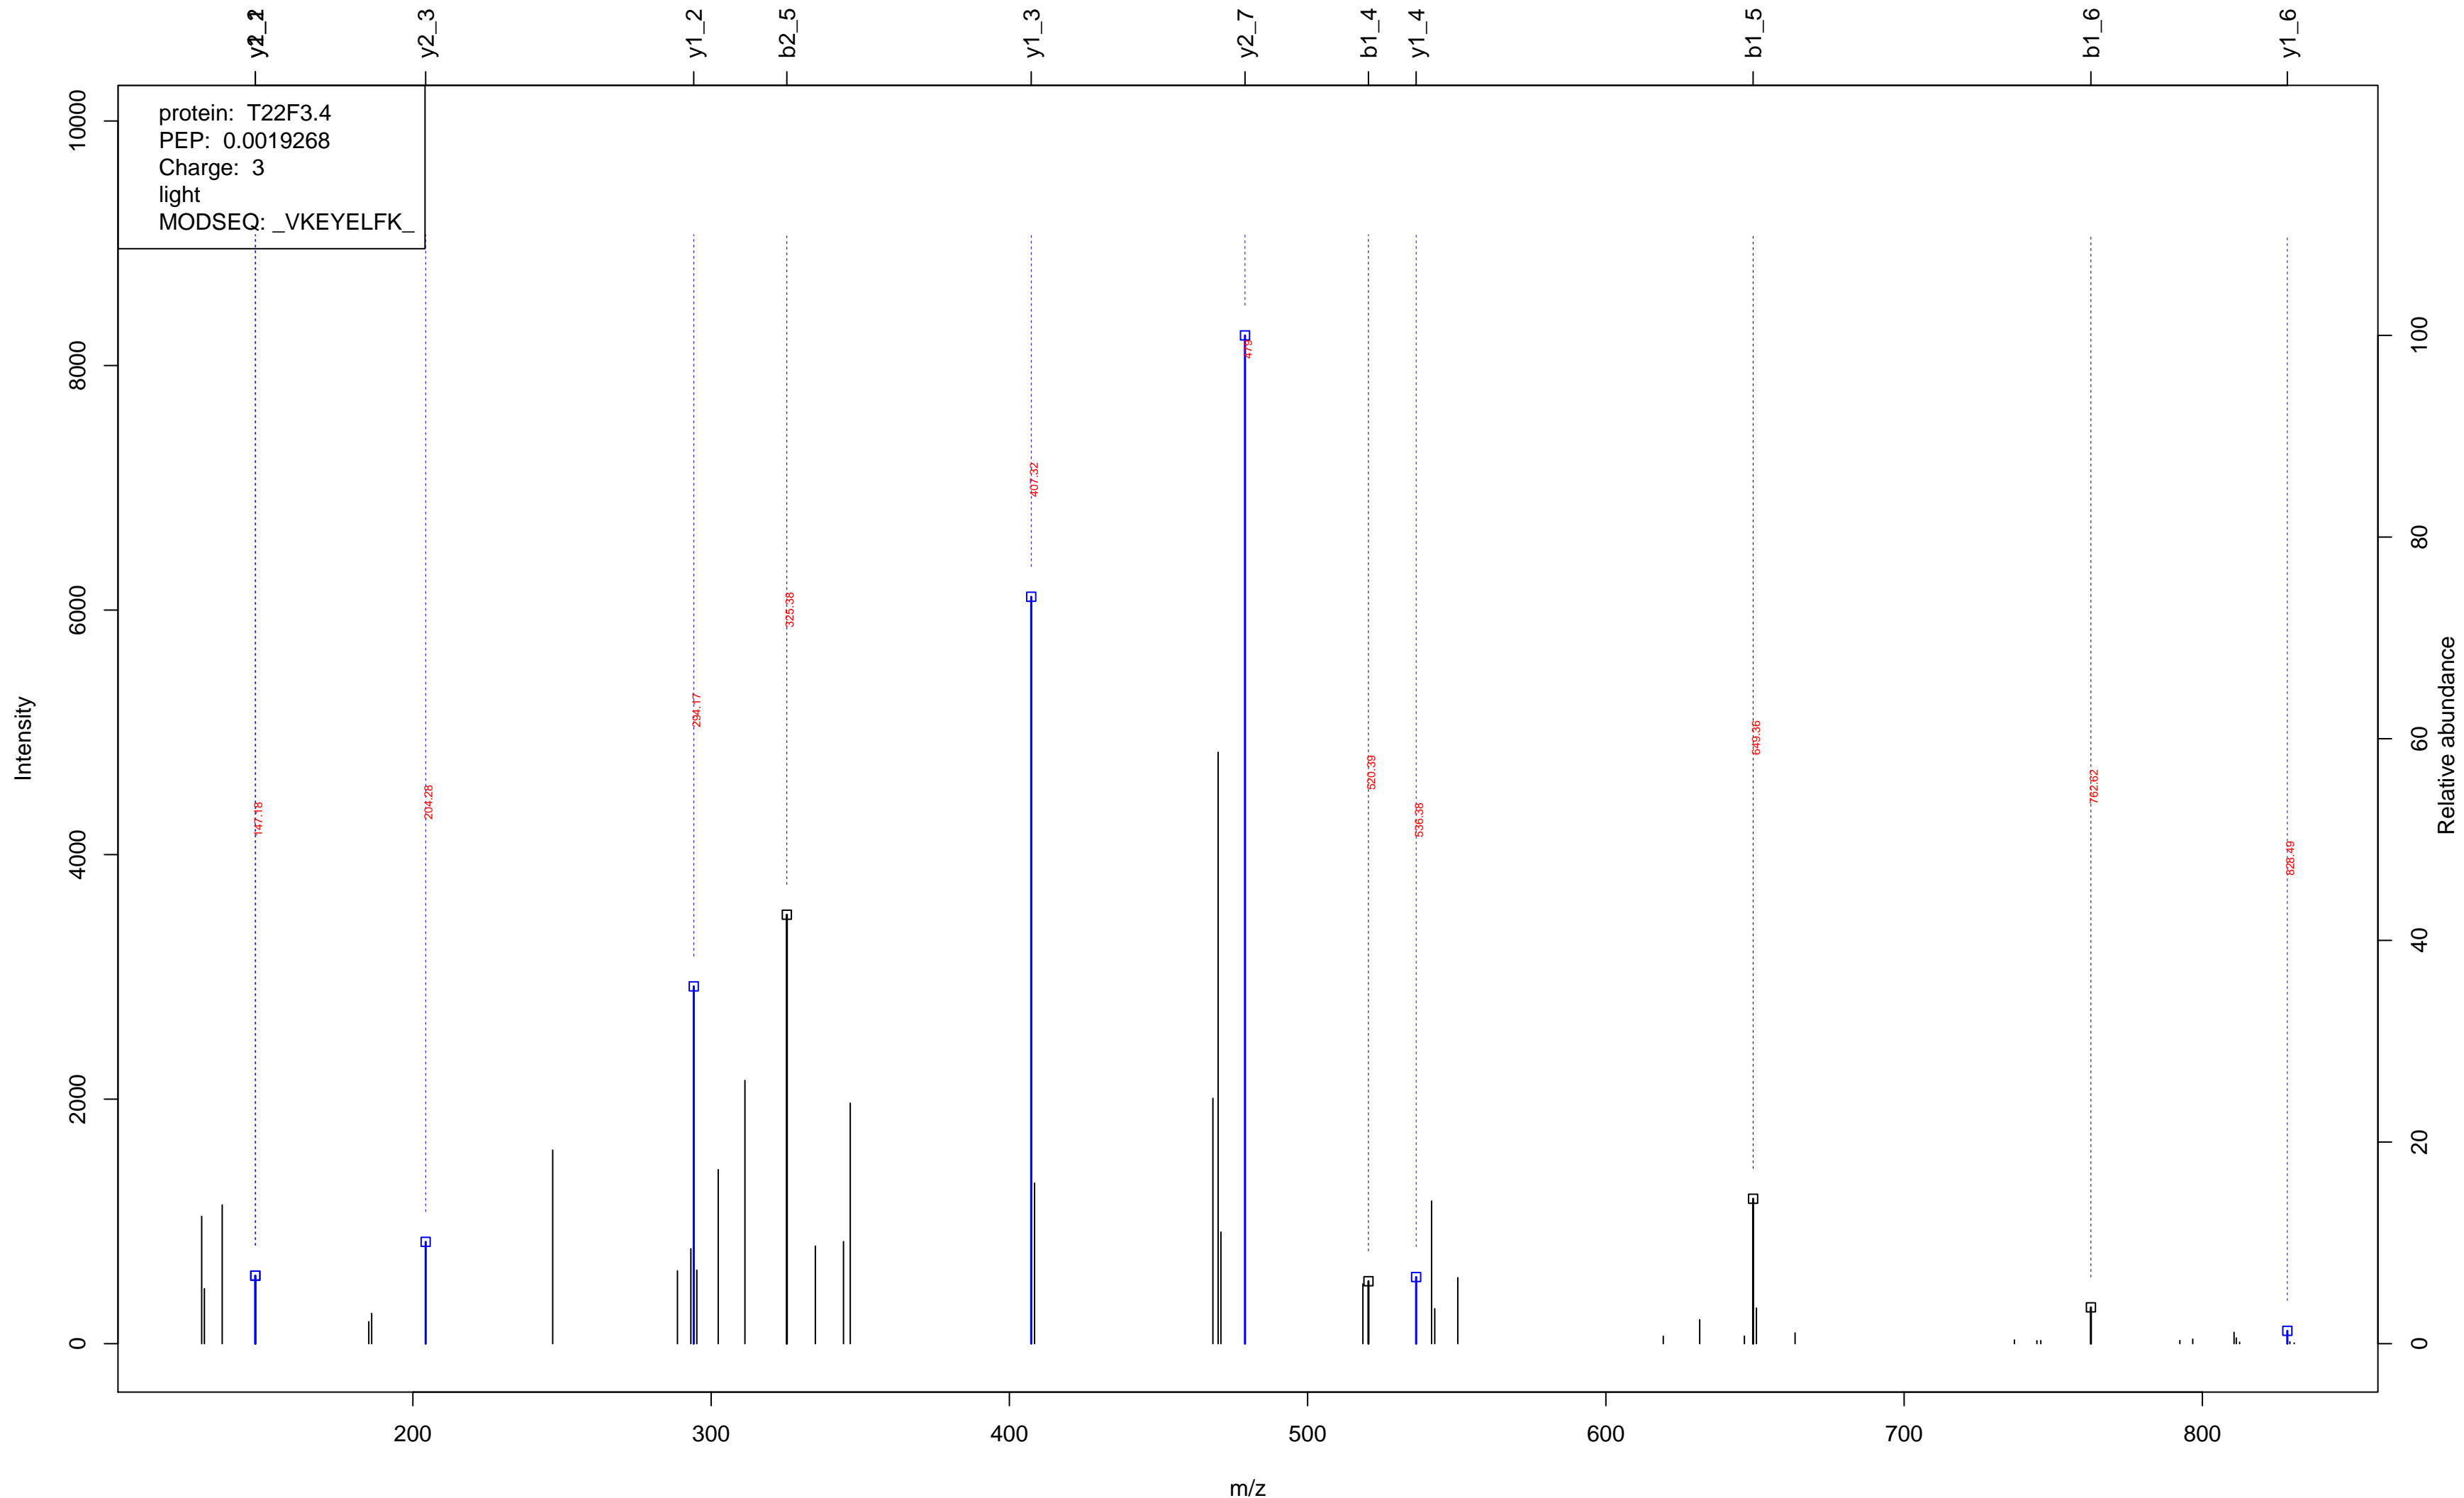

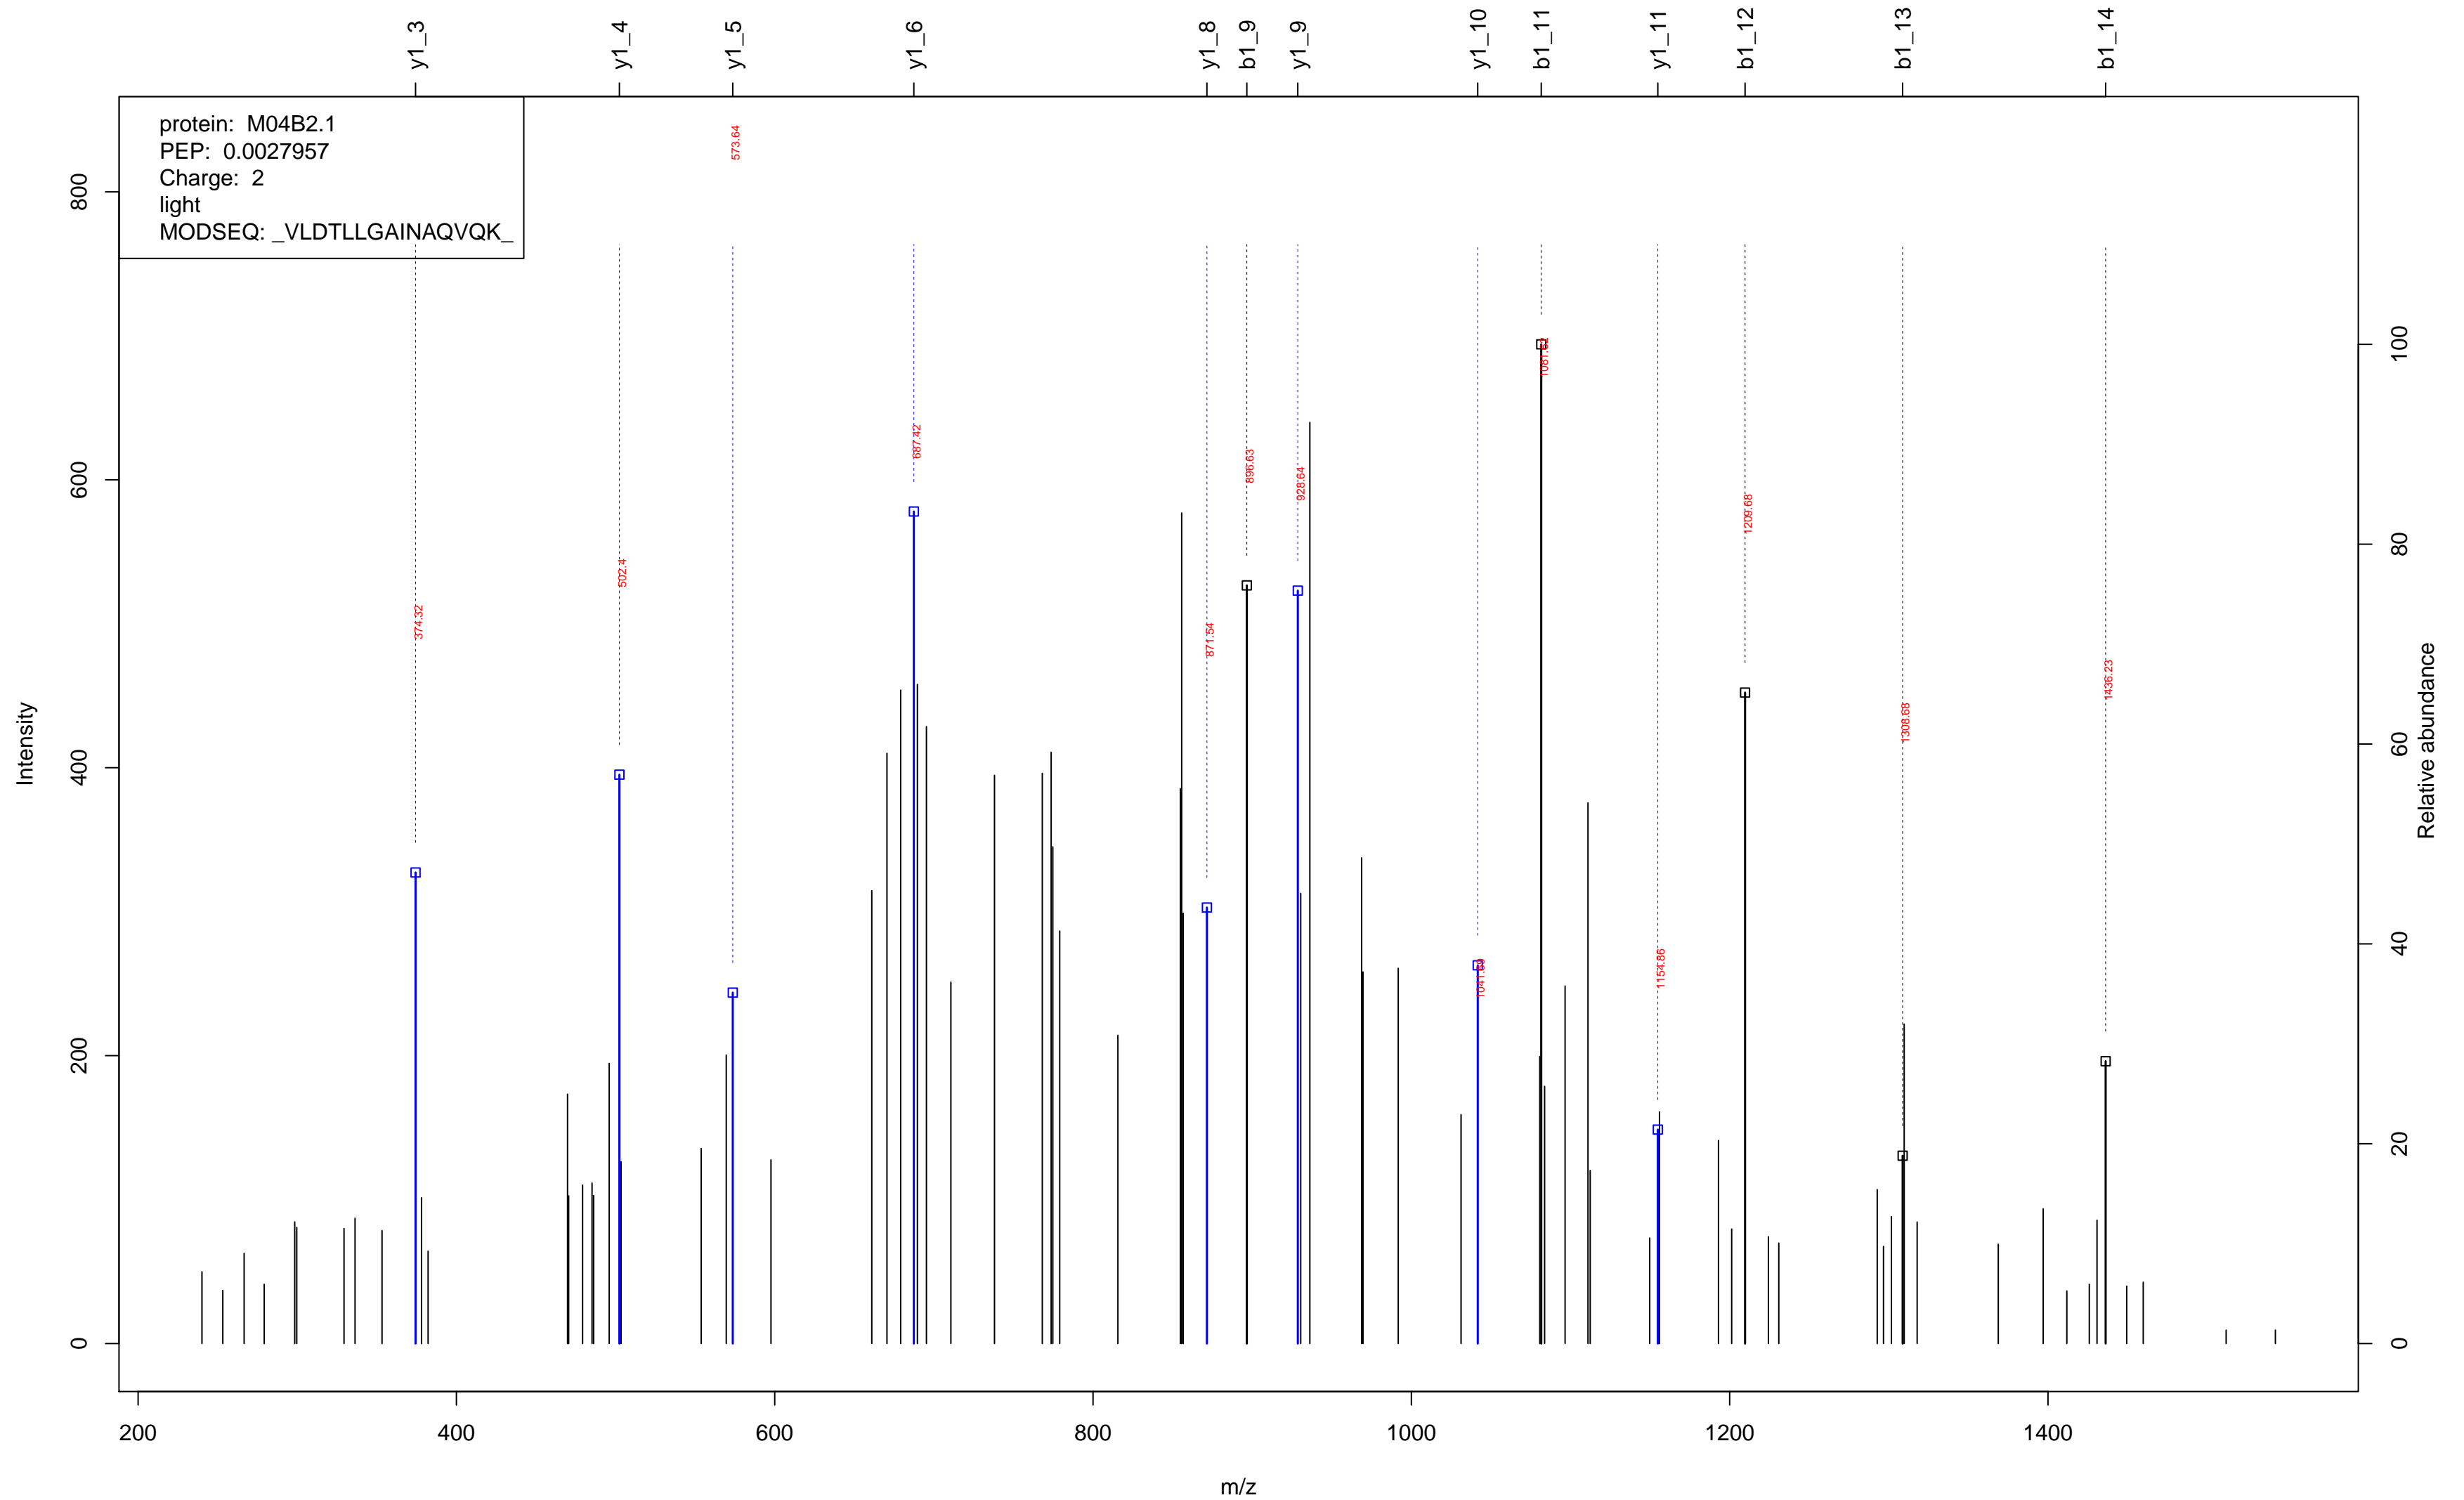

380

y1\_2 b1\_3 y1\_3 b1\_4 y1\_4 b1\_5 y1\_5 b1\_6 y1\_6 b1\_7 y1\_7 b1\_8 y1\_8 b1\_9 y1\_9 b1\_10 y1\_10 b1\_11

protein: C05C8.2  
PEP: 5.2969e-06  
Charge: 2  
light  
MODSEQ: \_VLEDEIYCEIIK\_

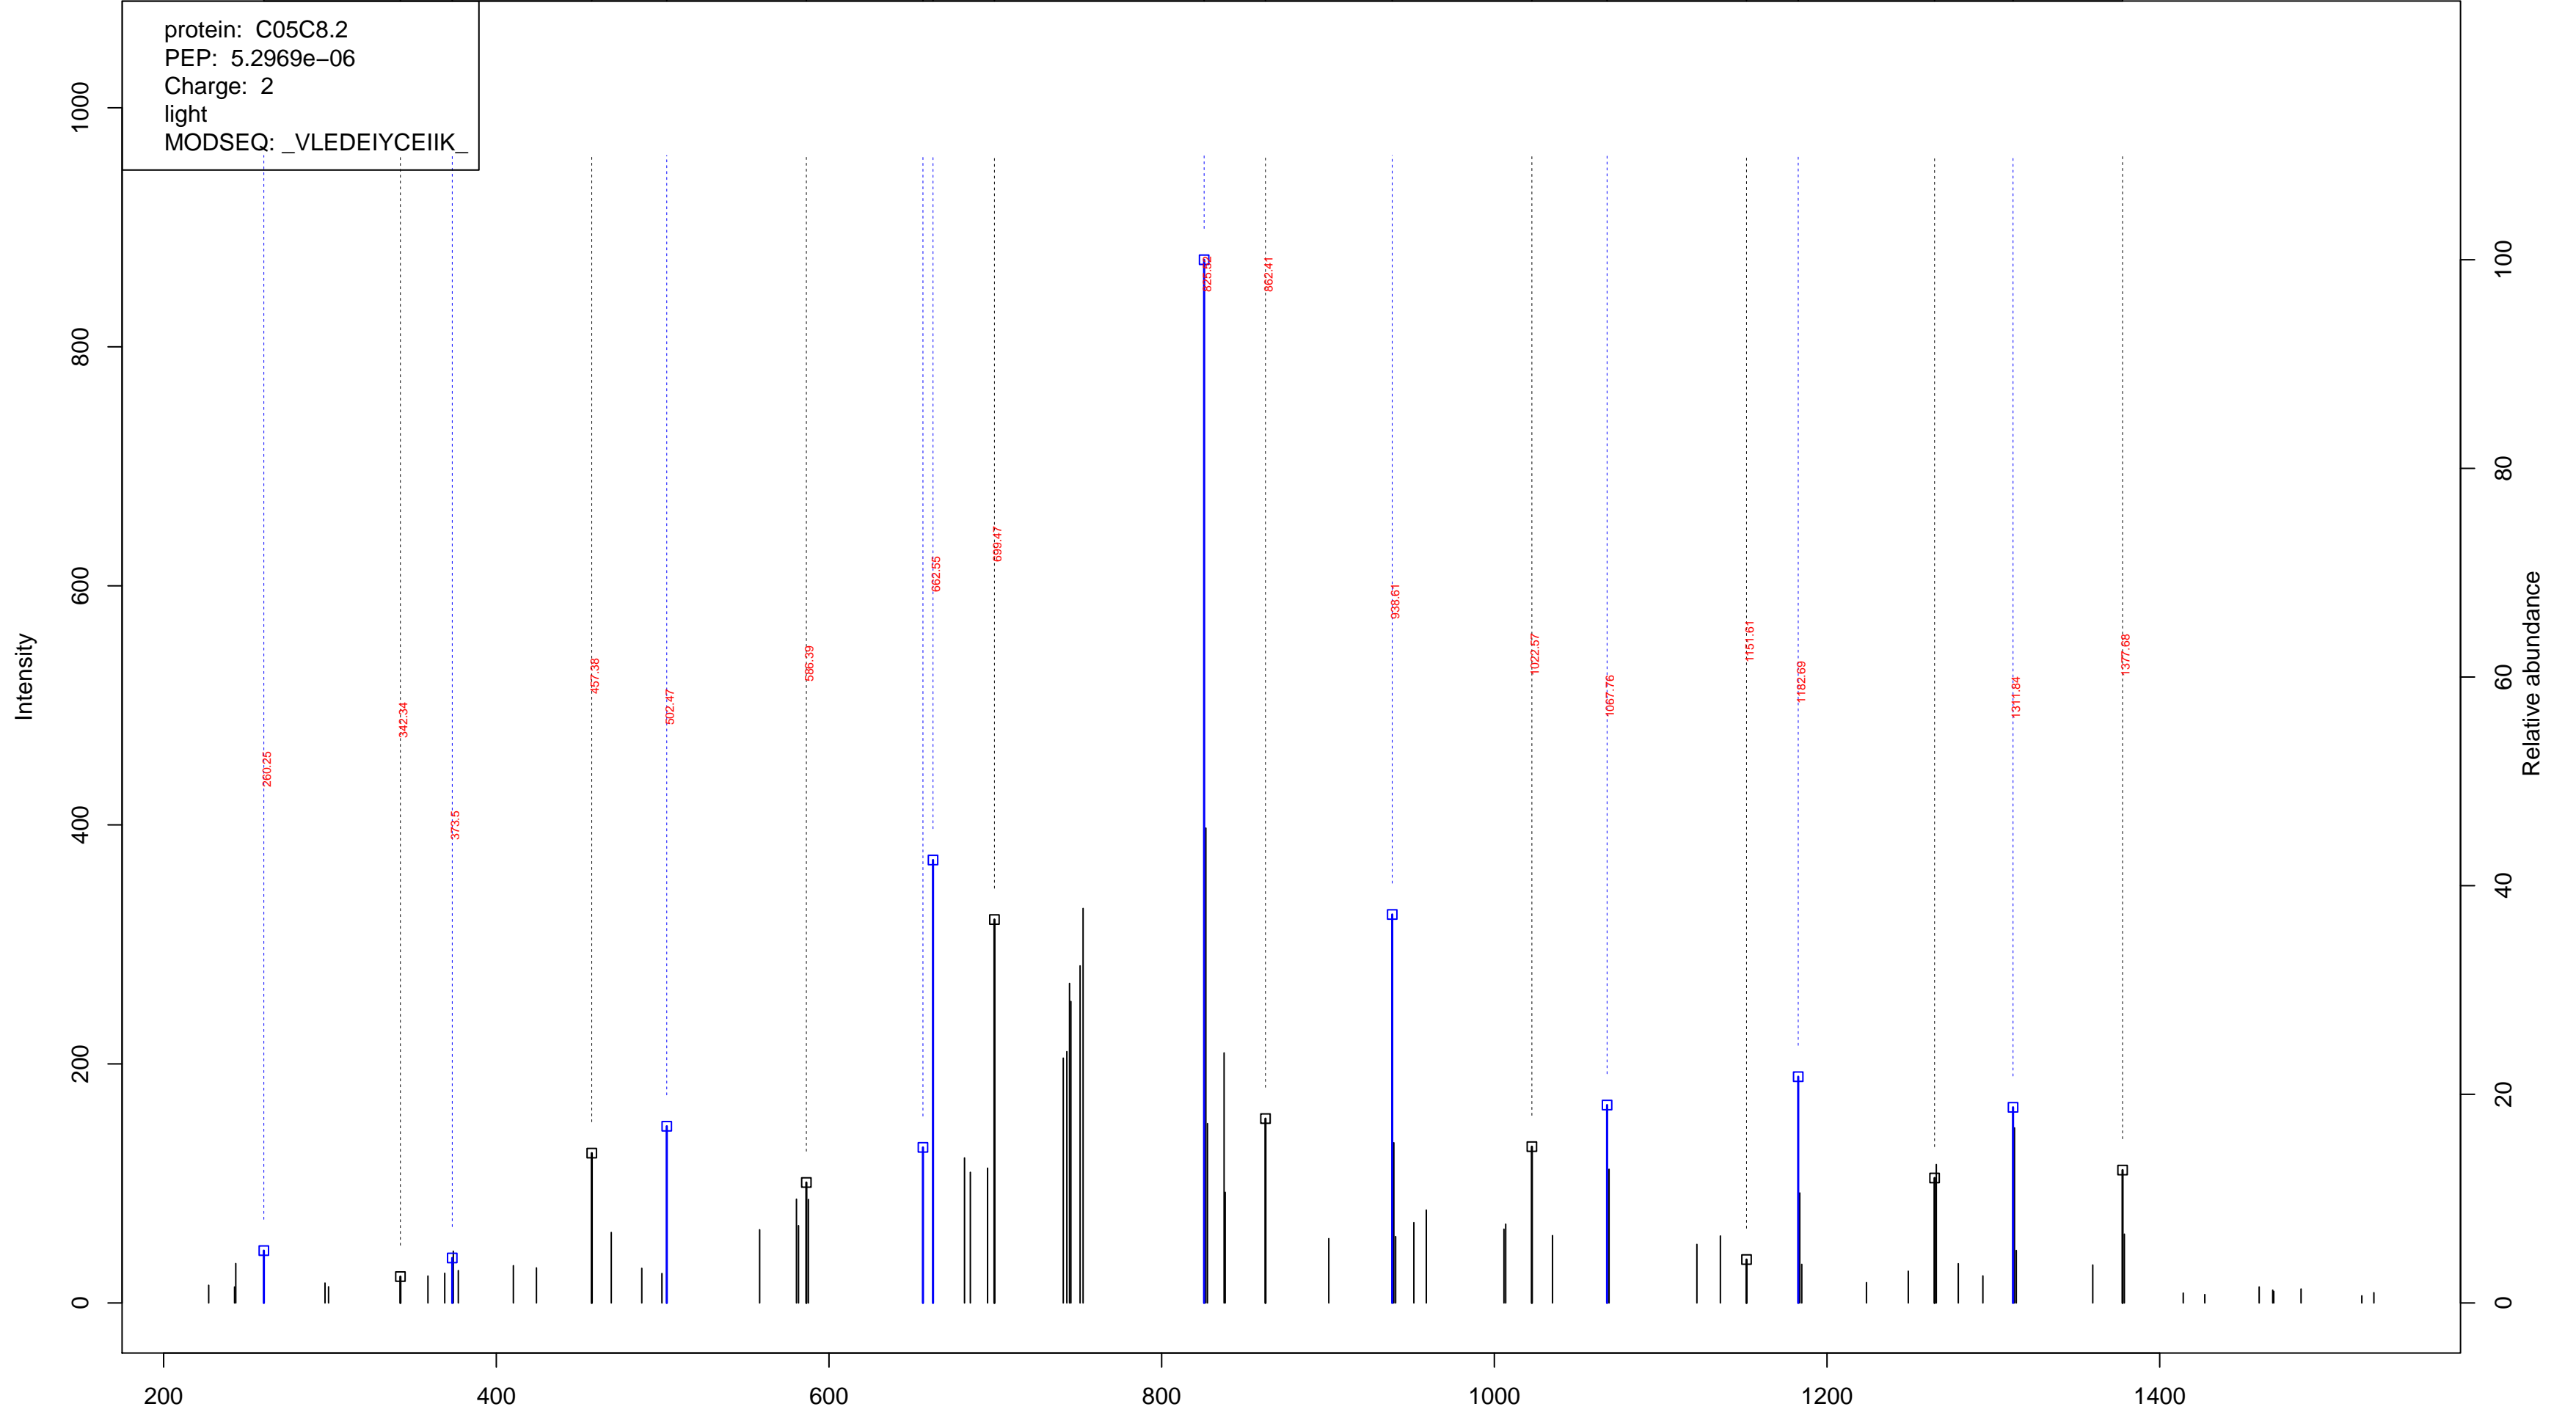

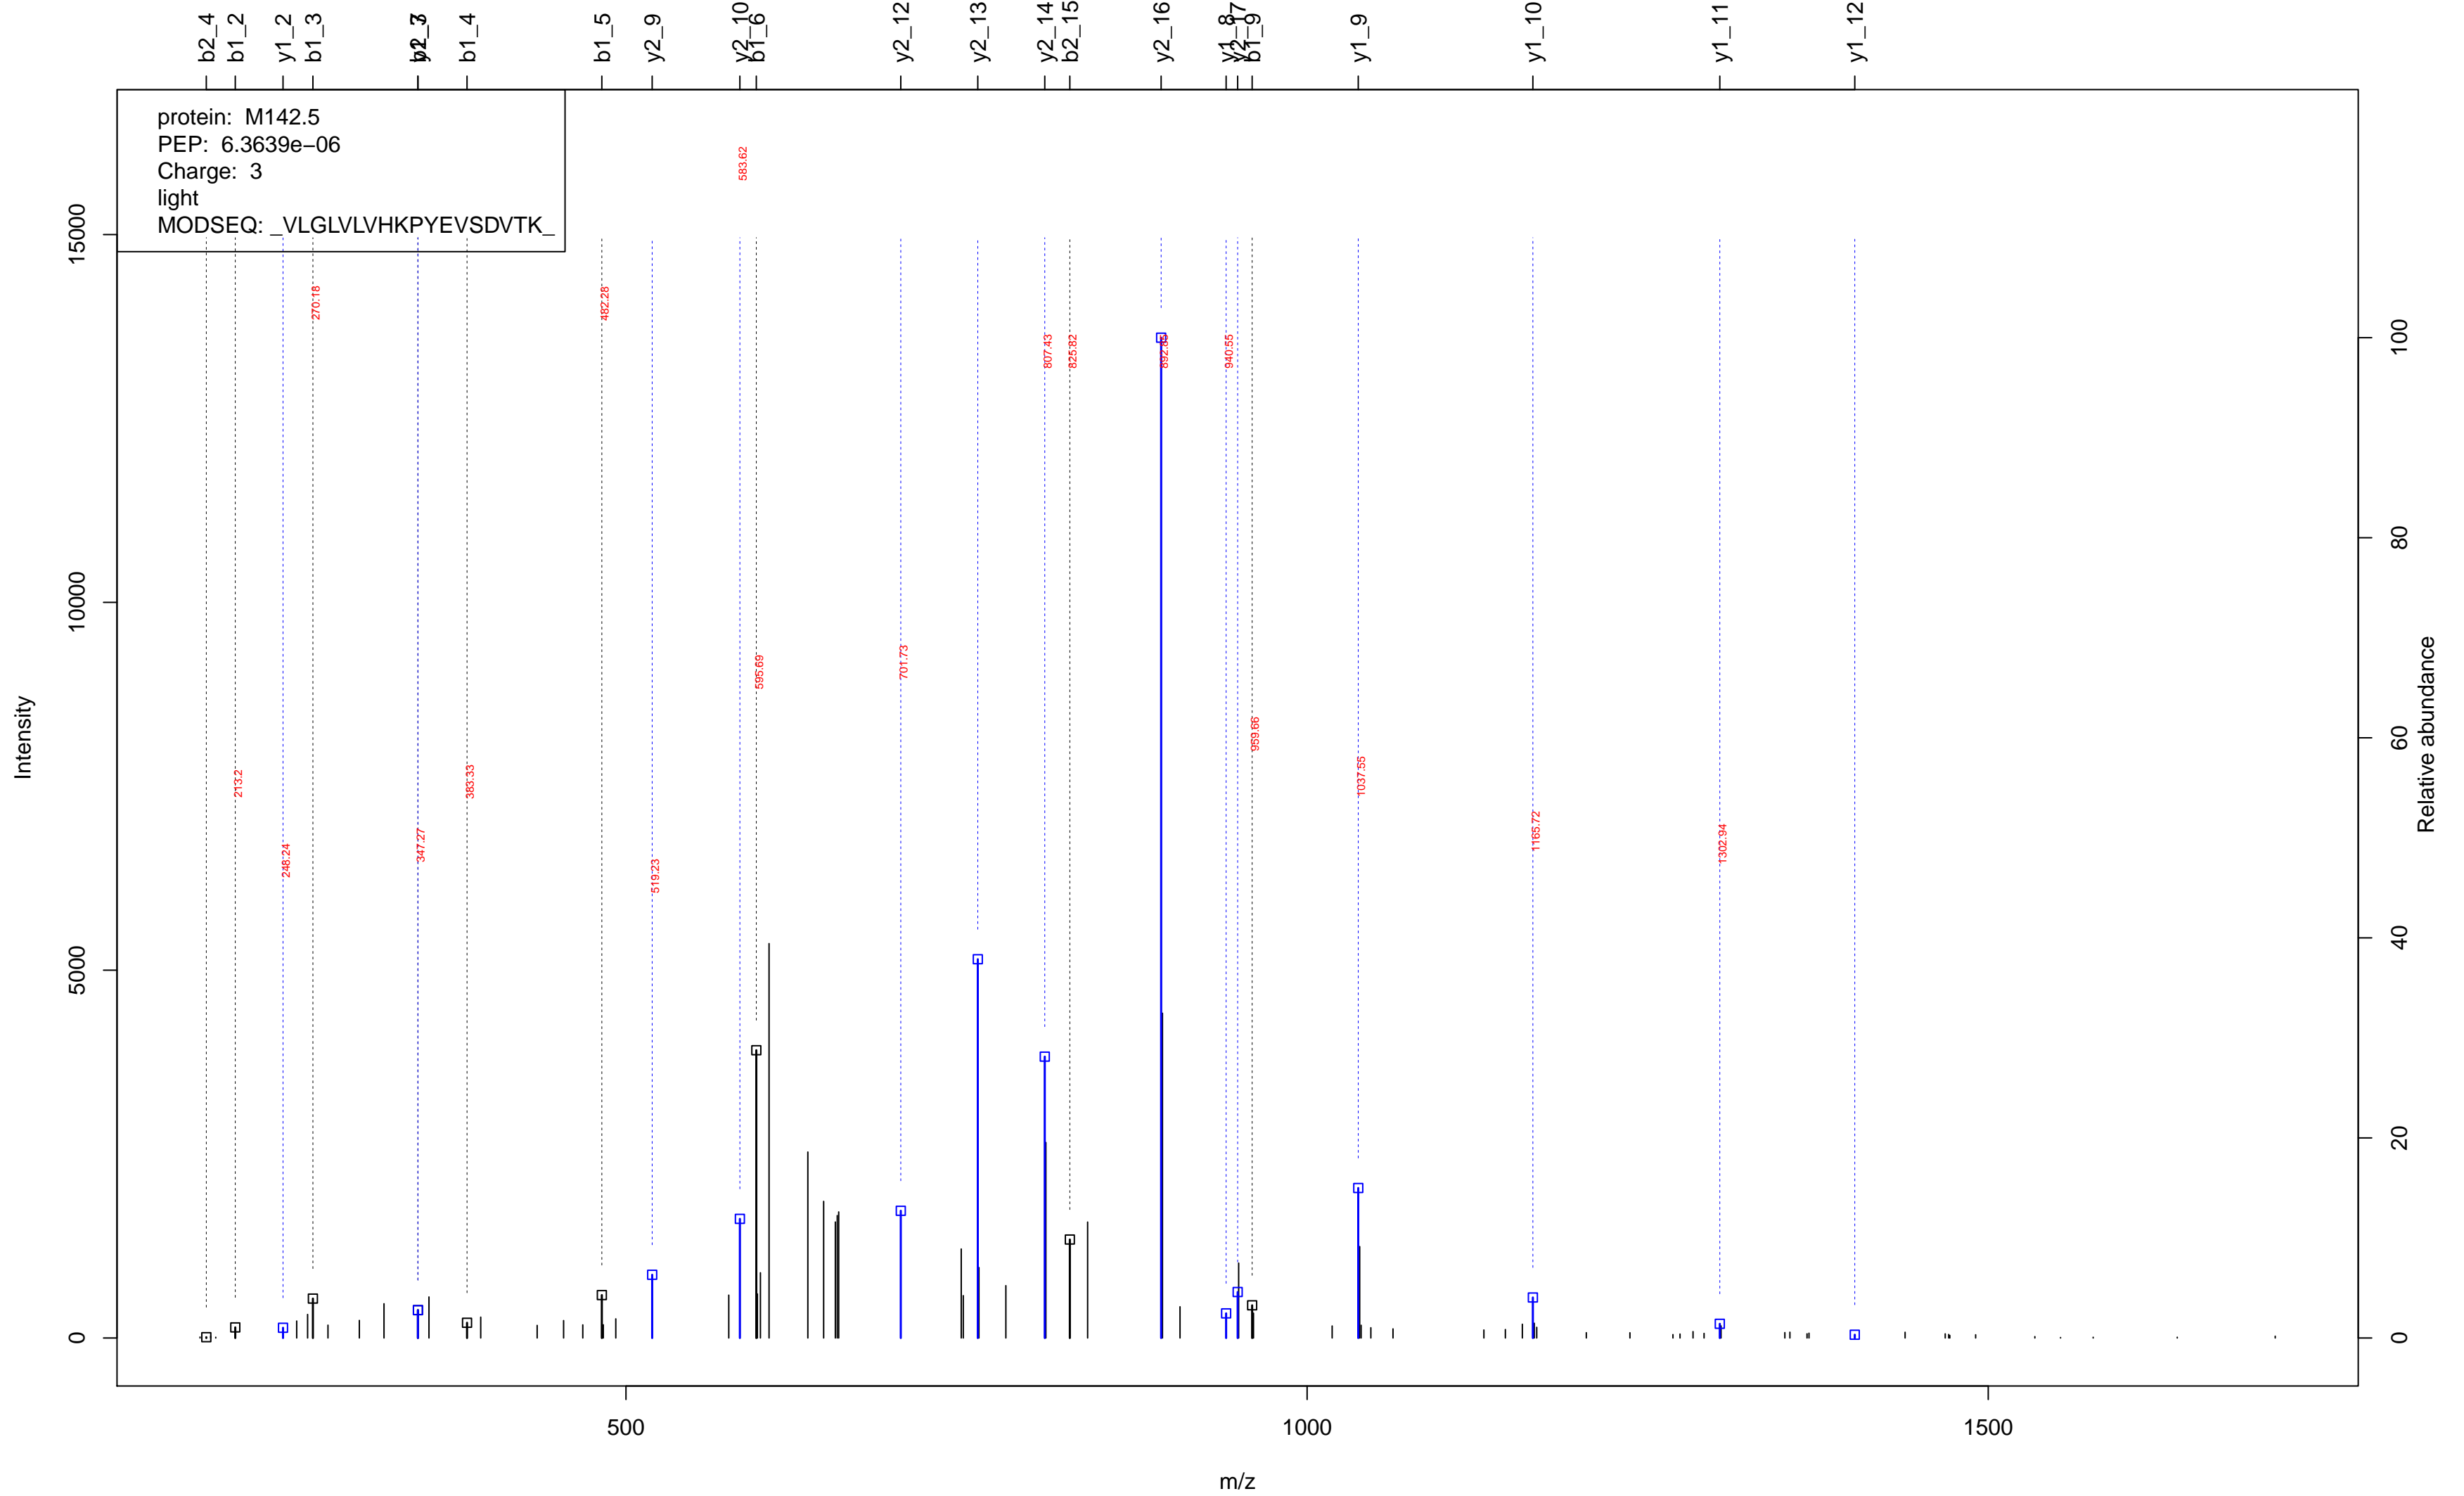

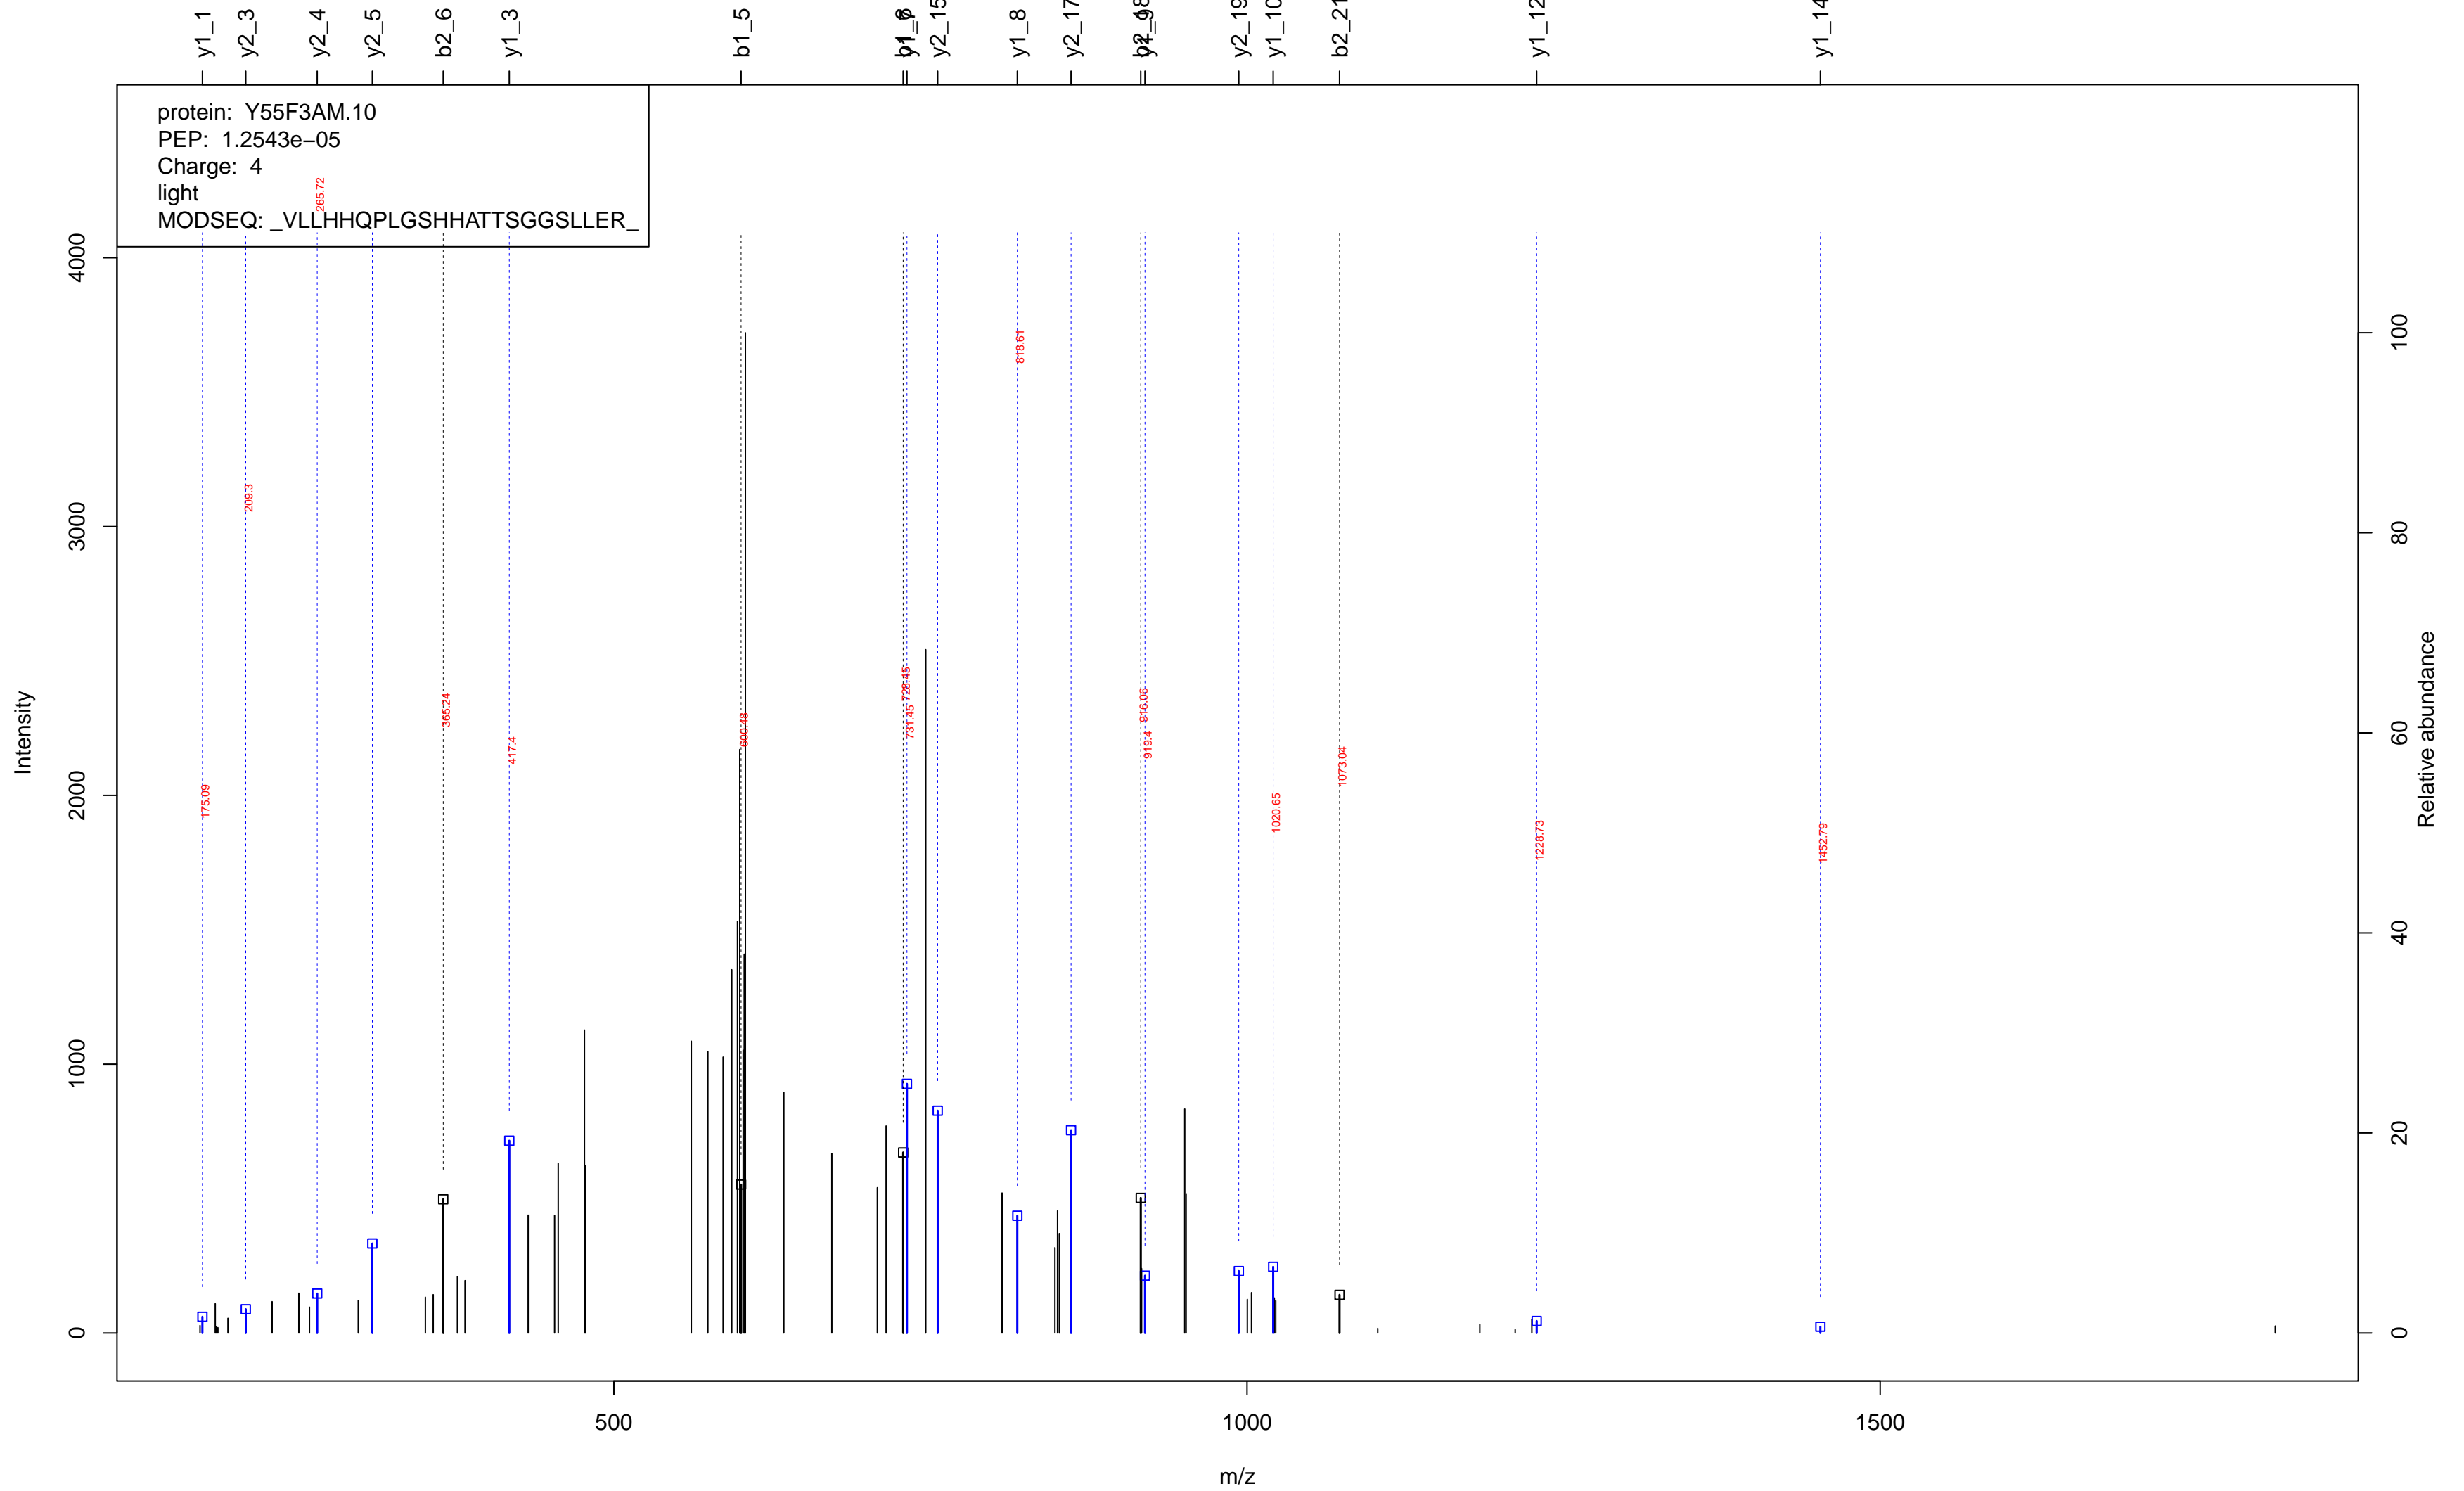

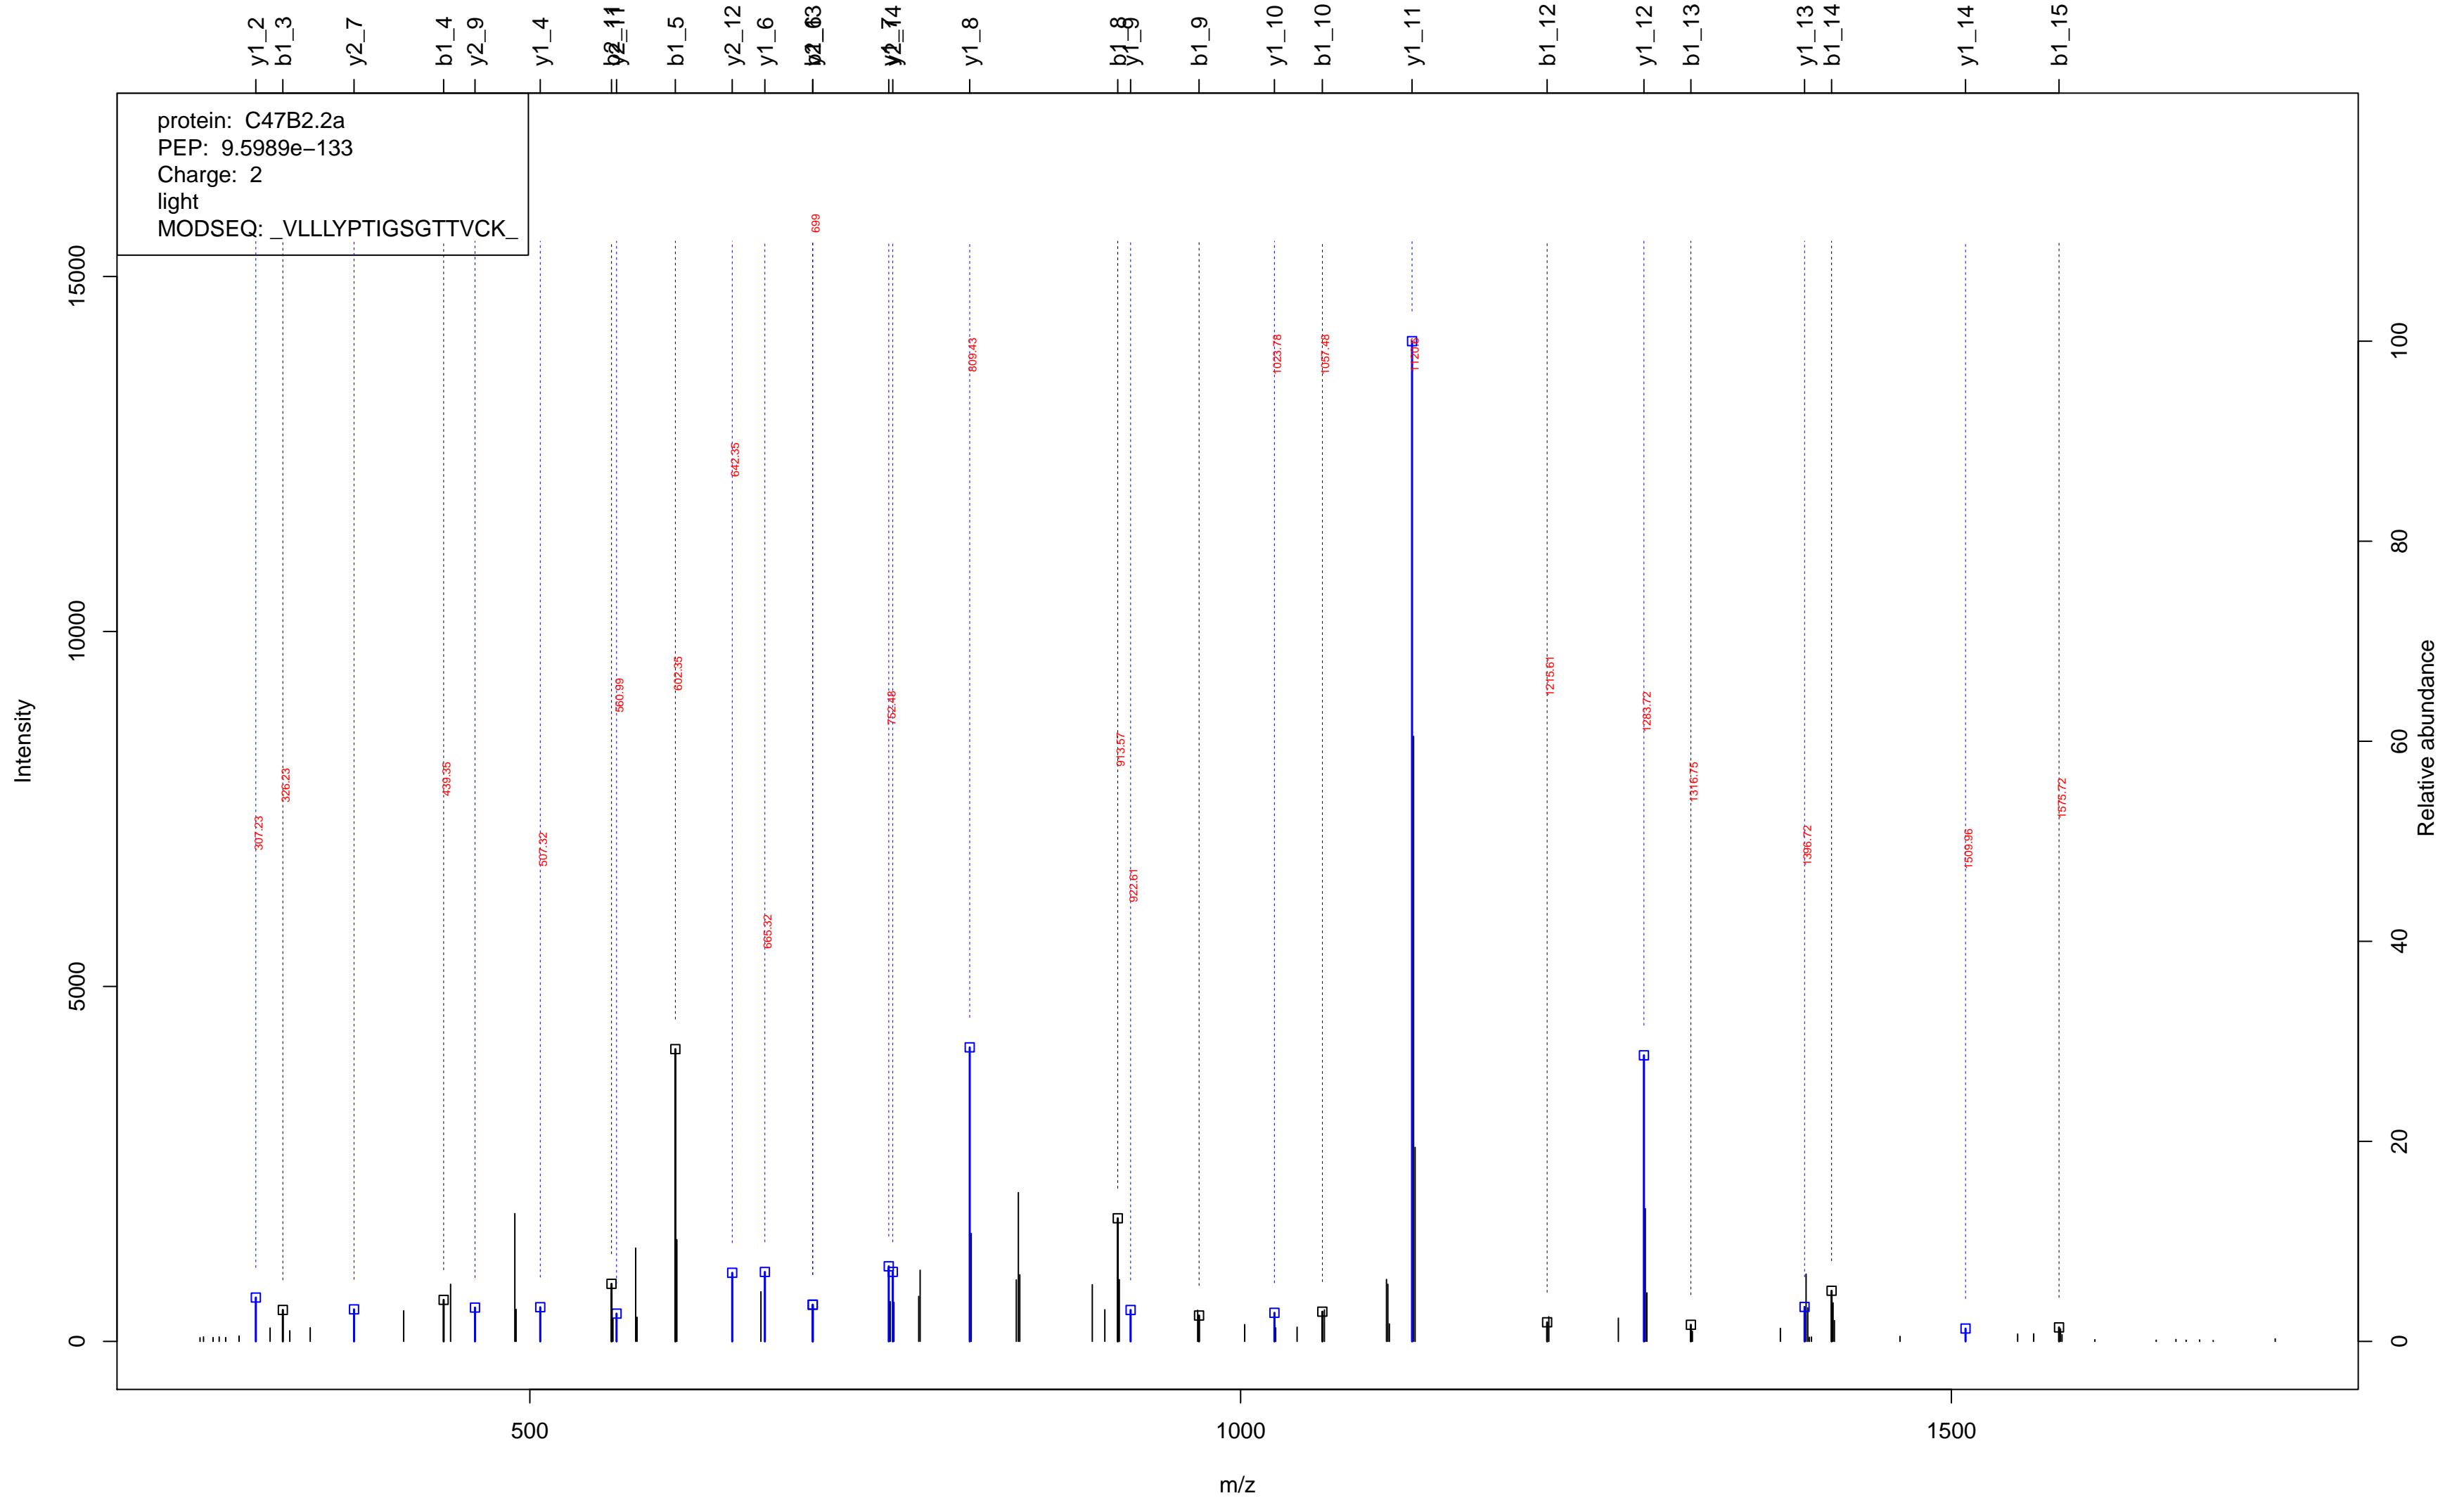

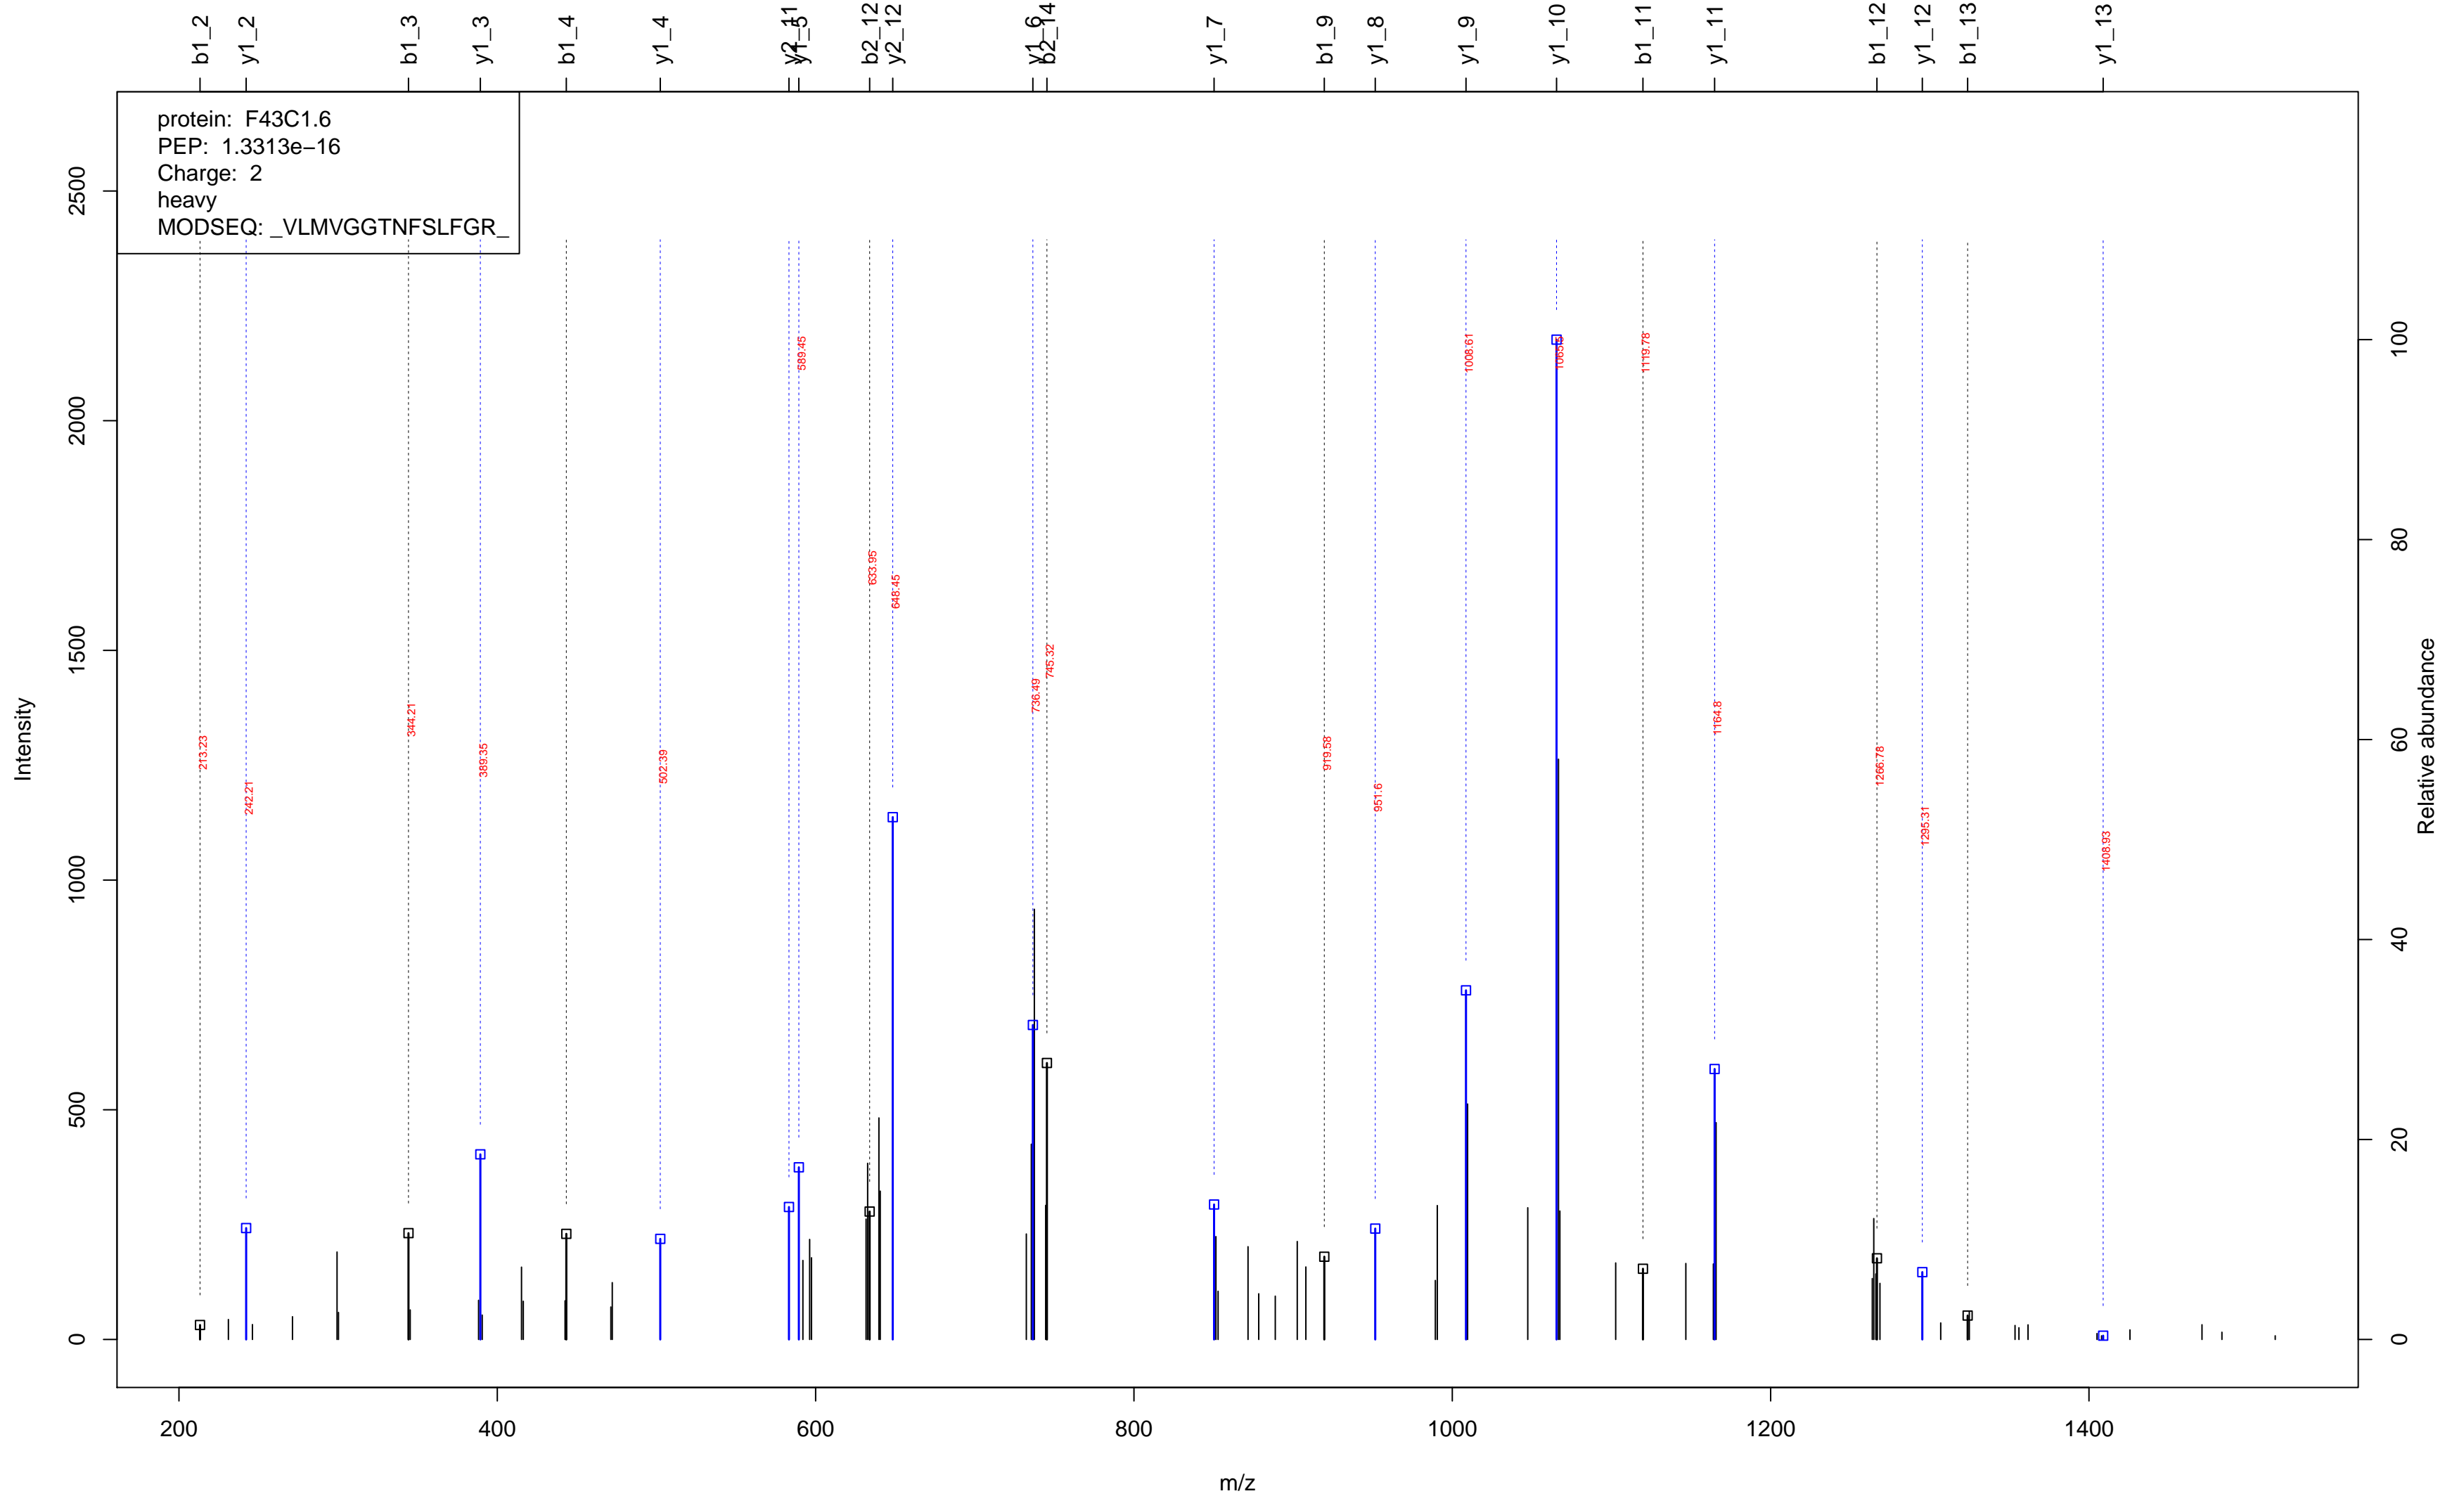



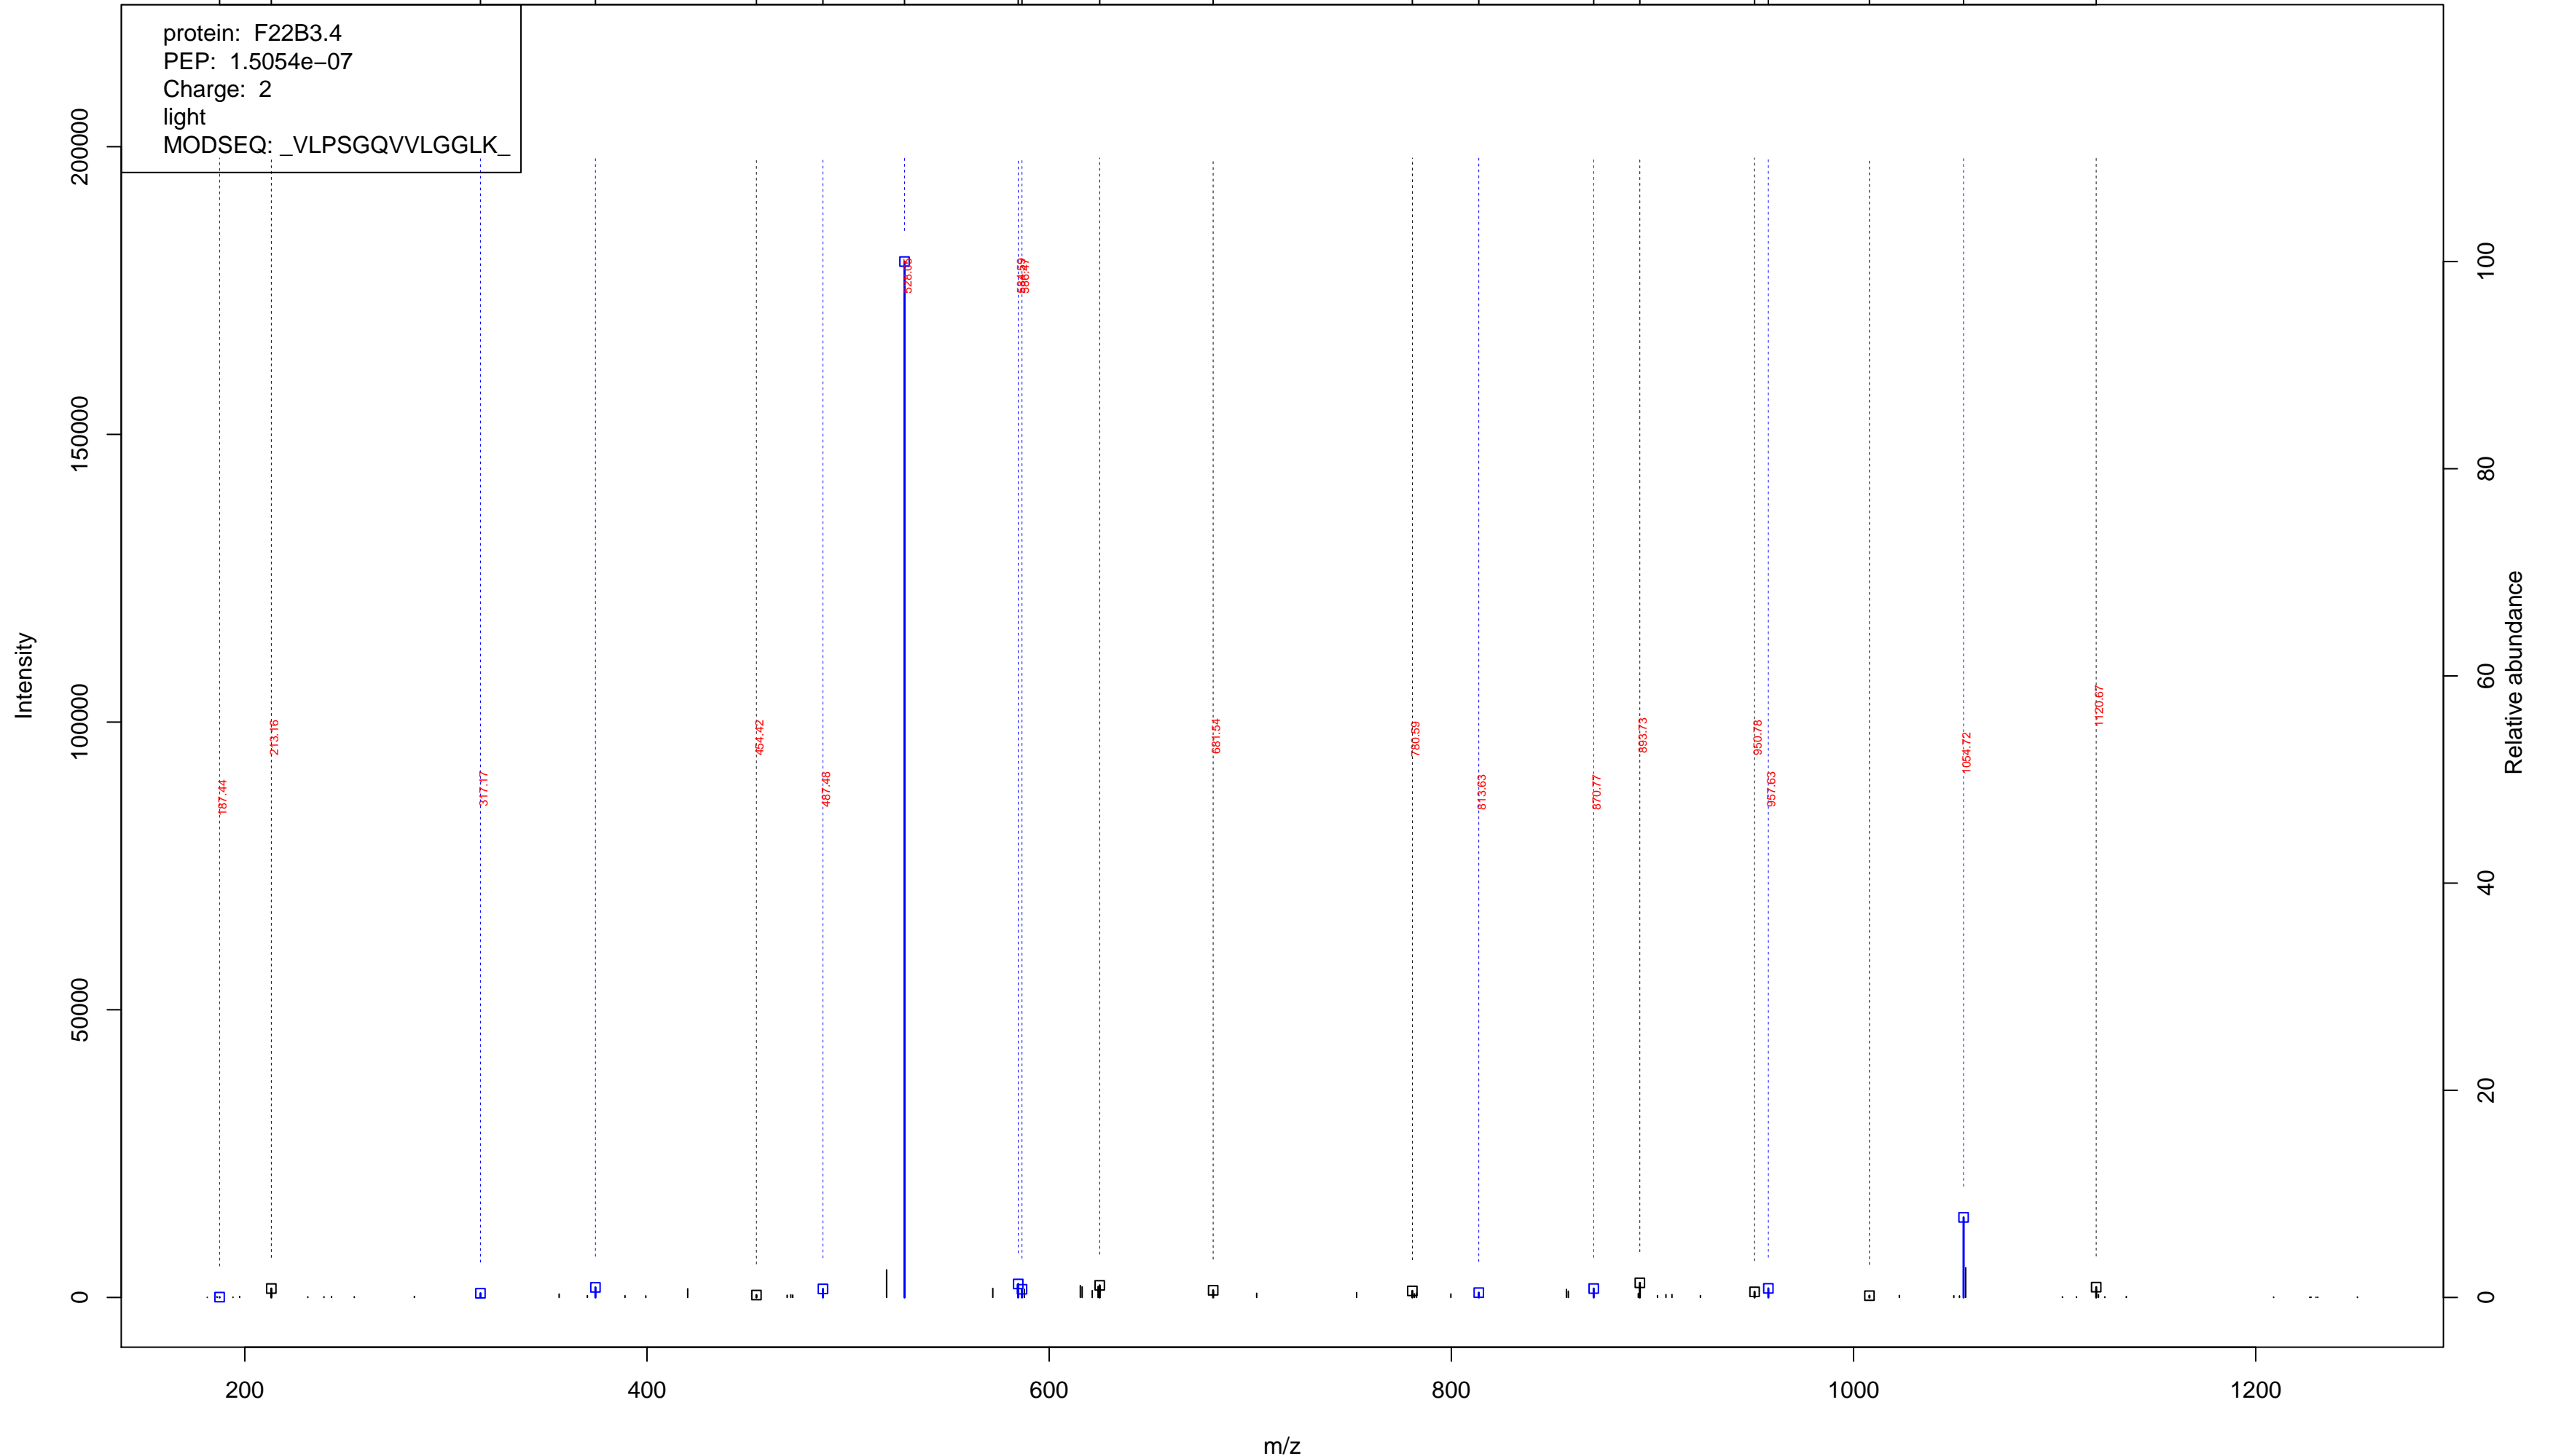

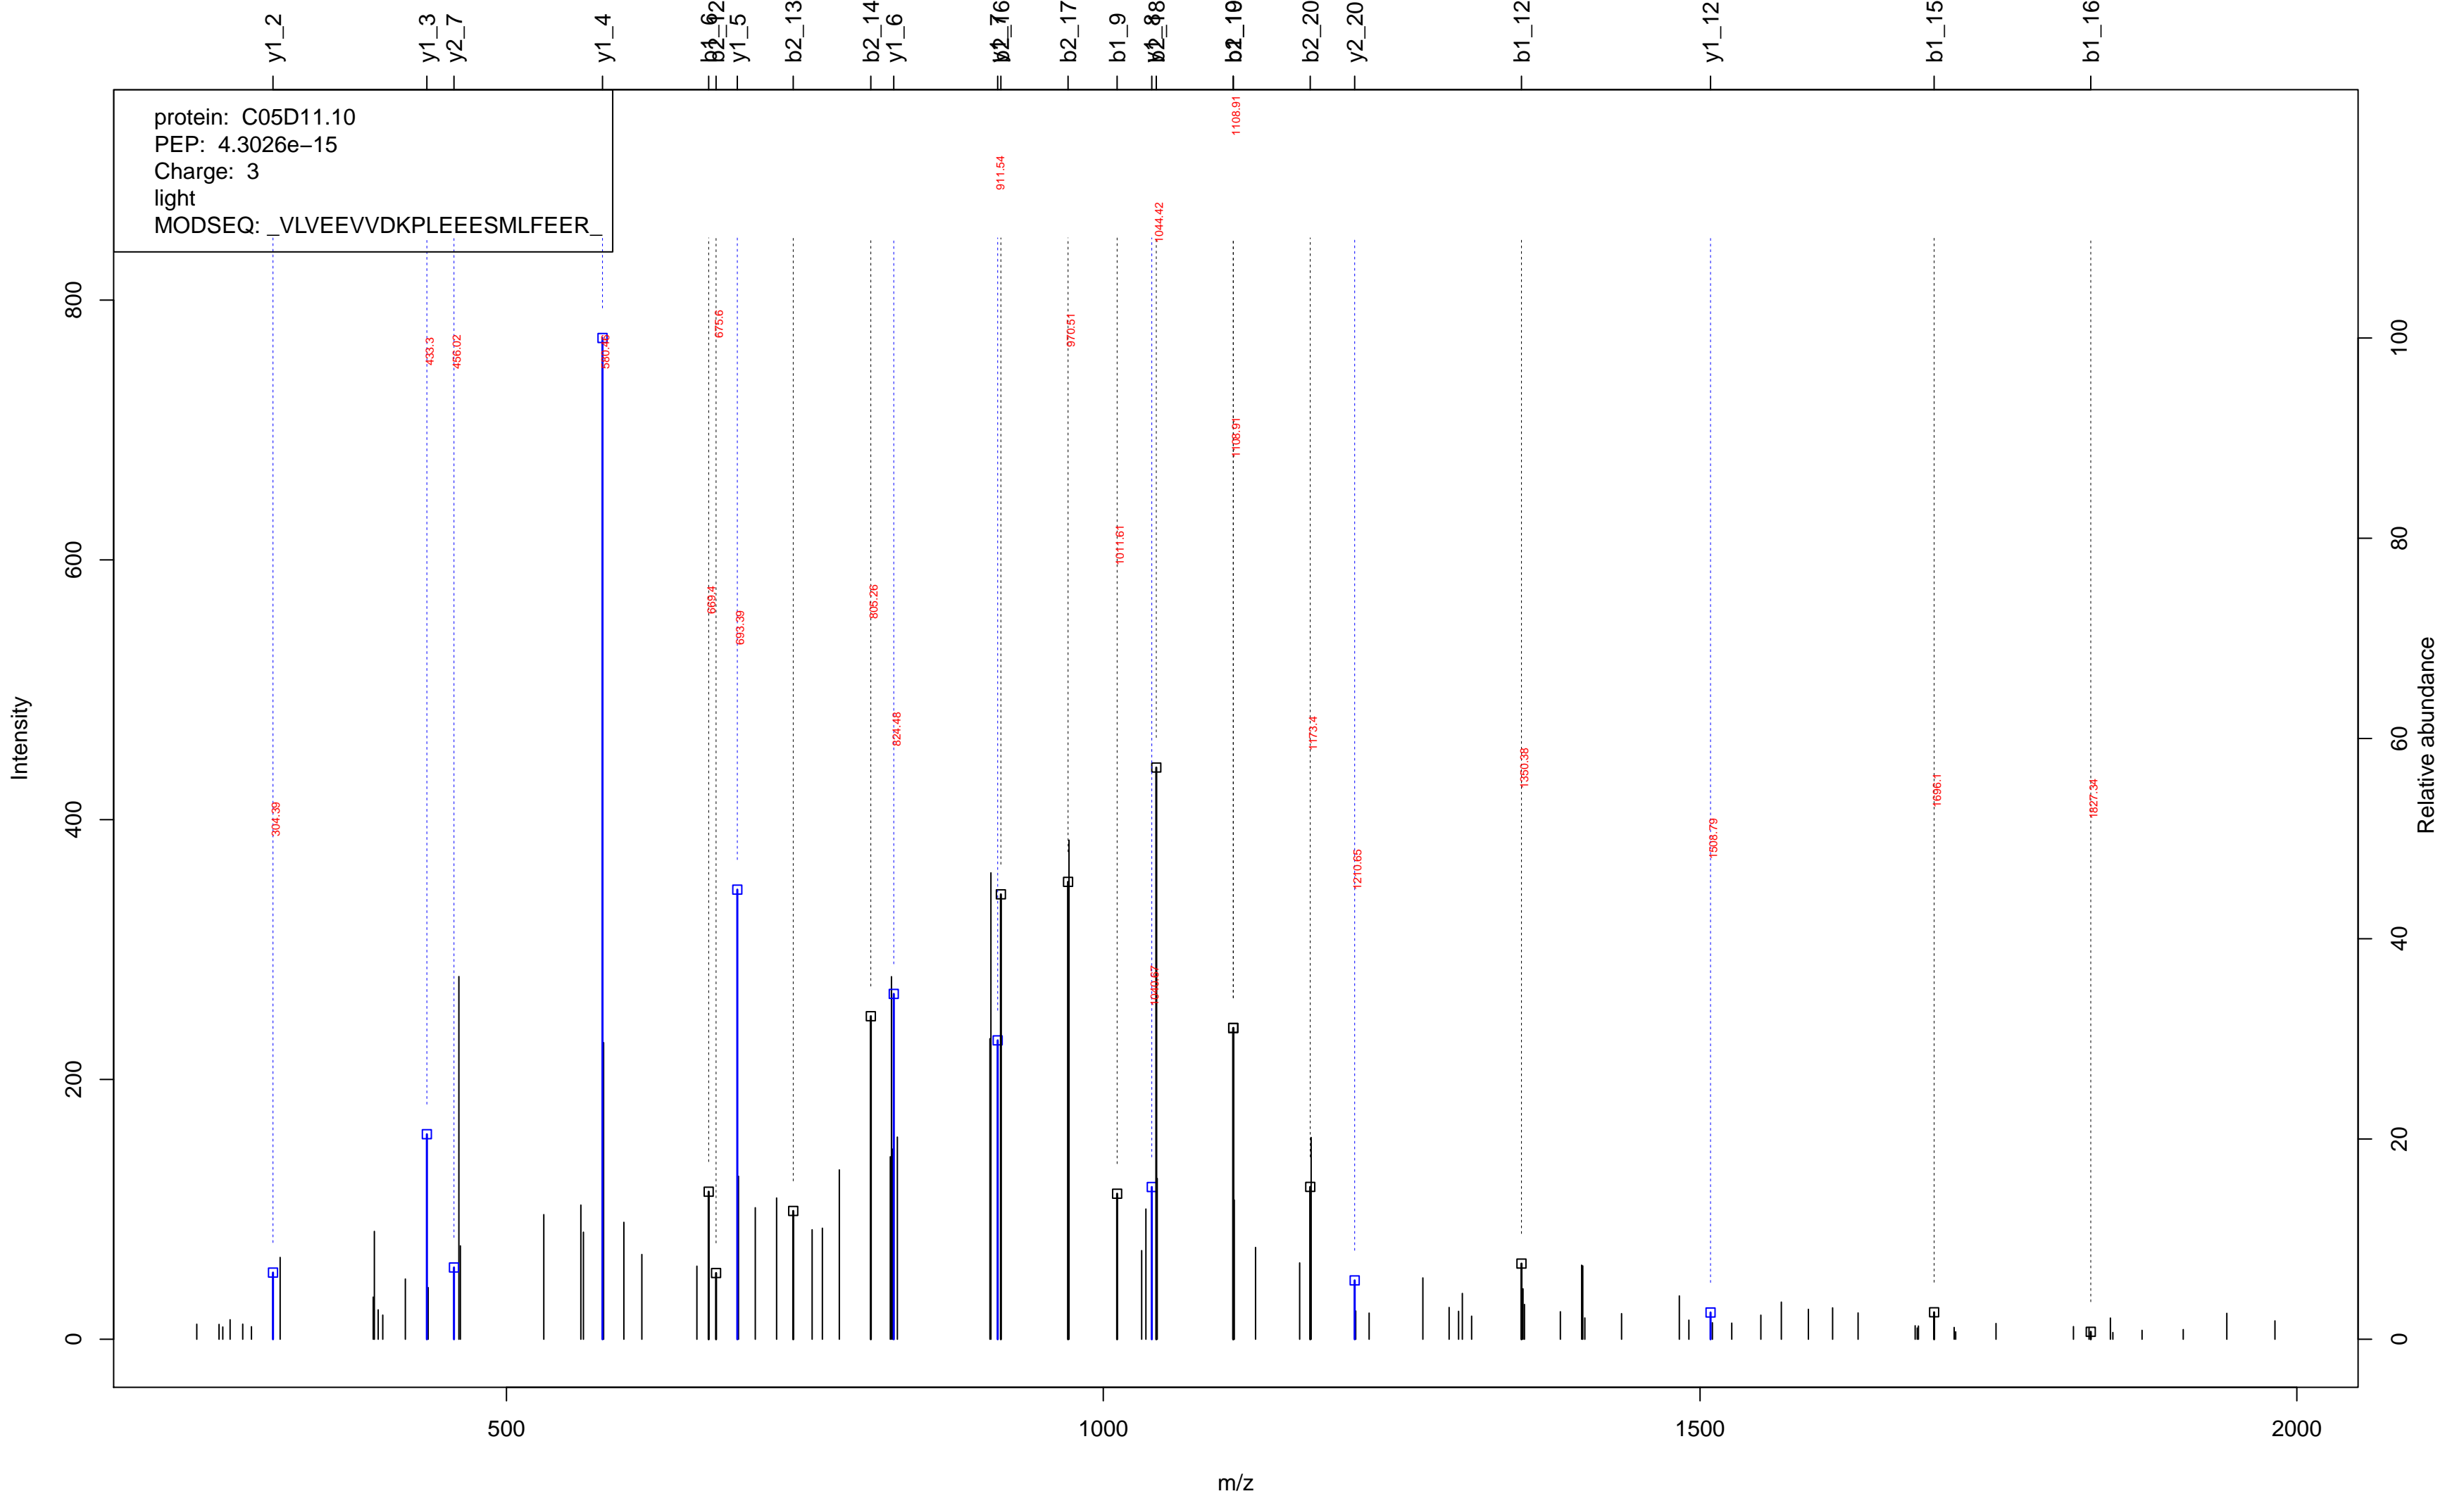

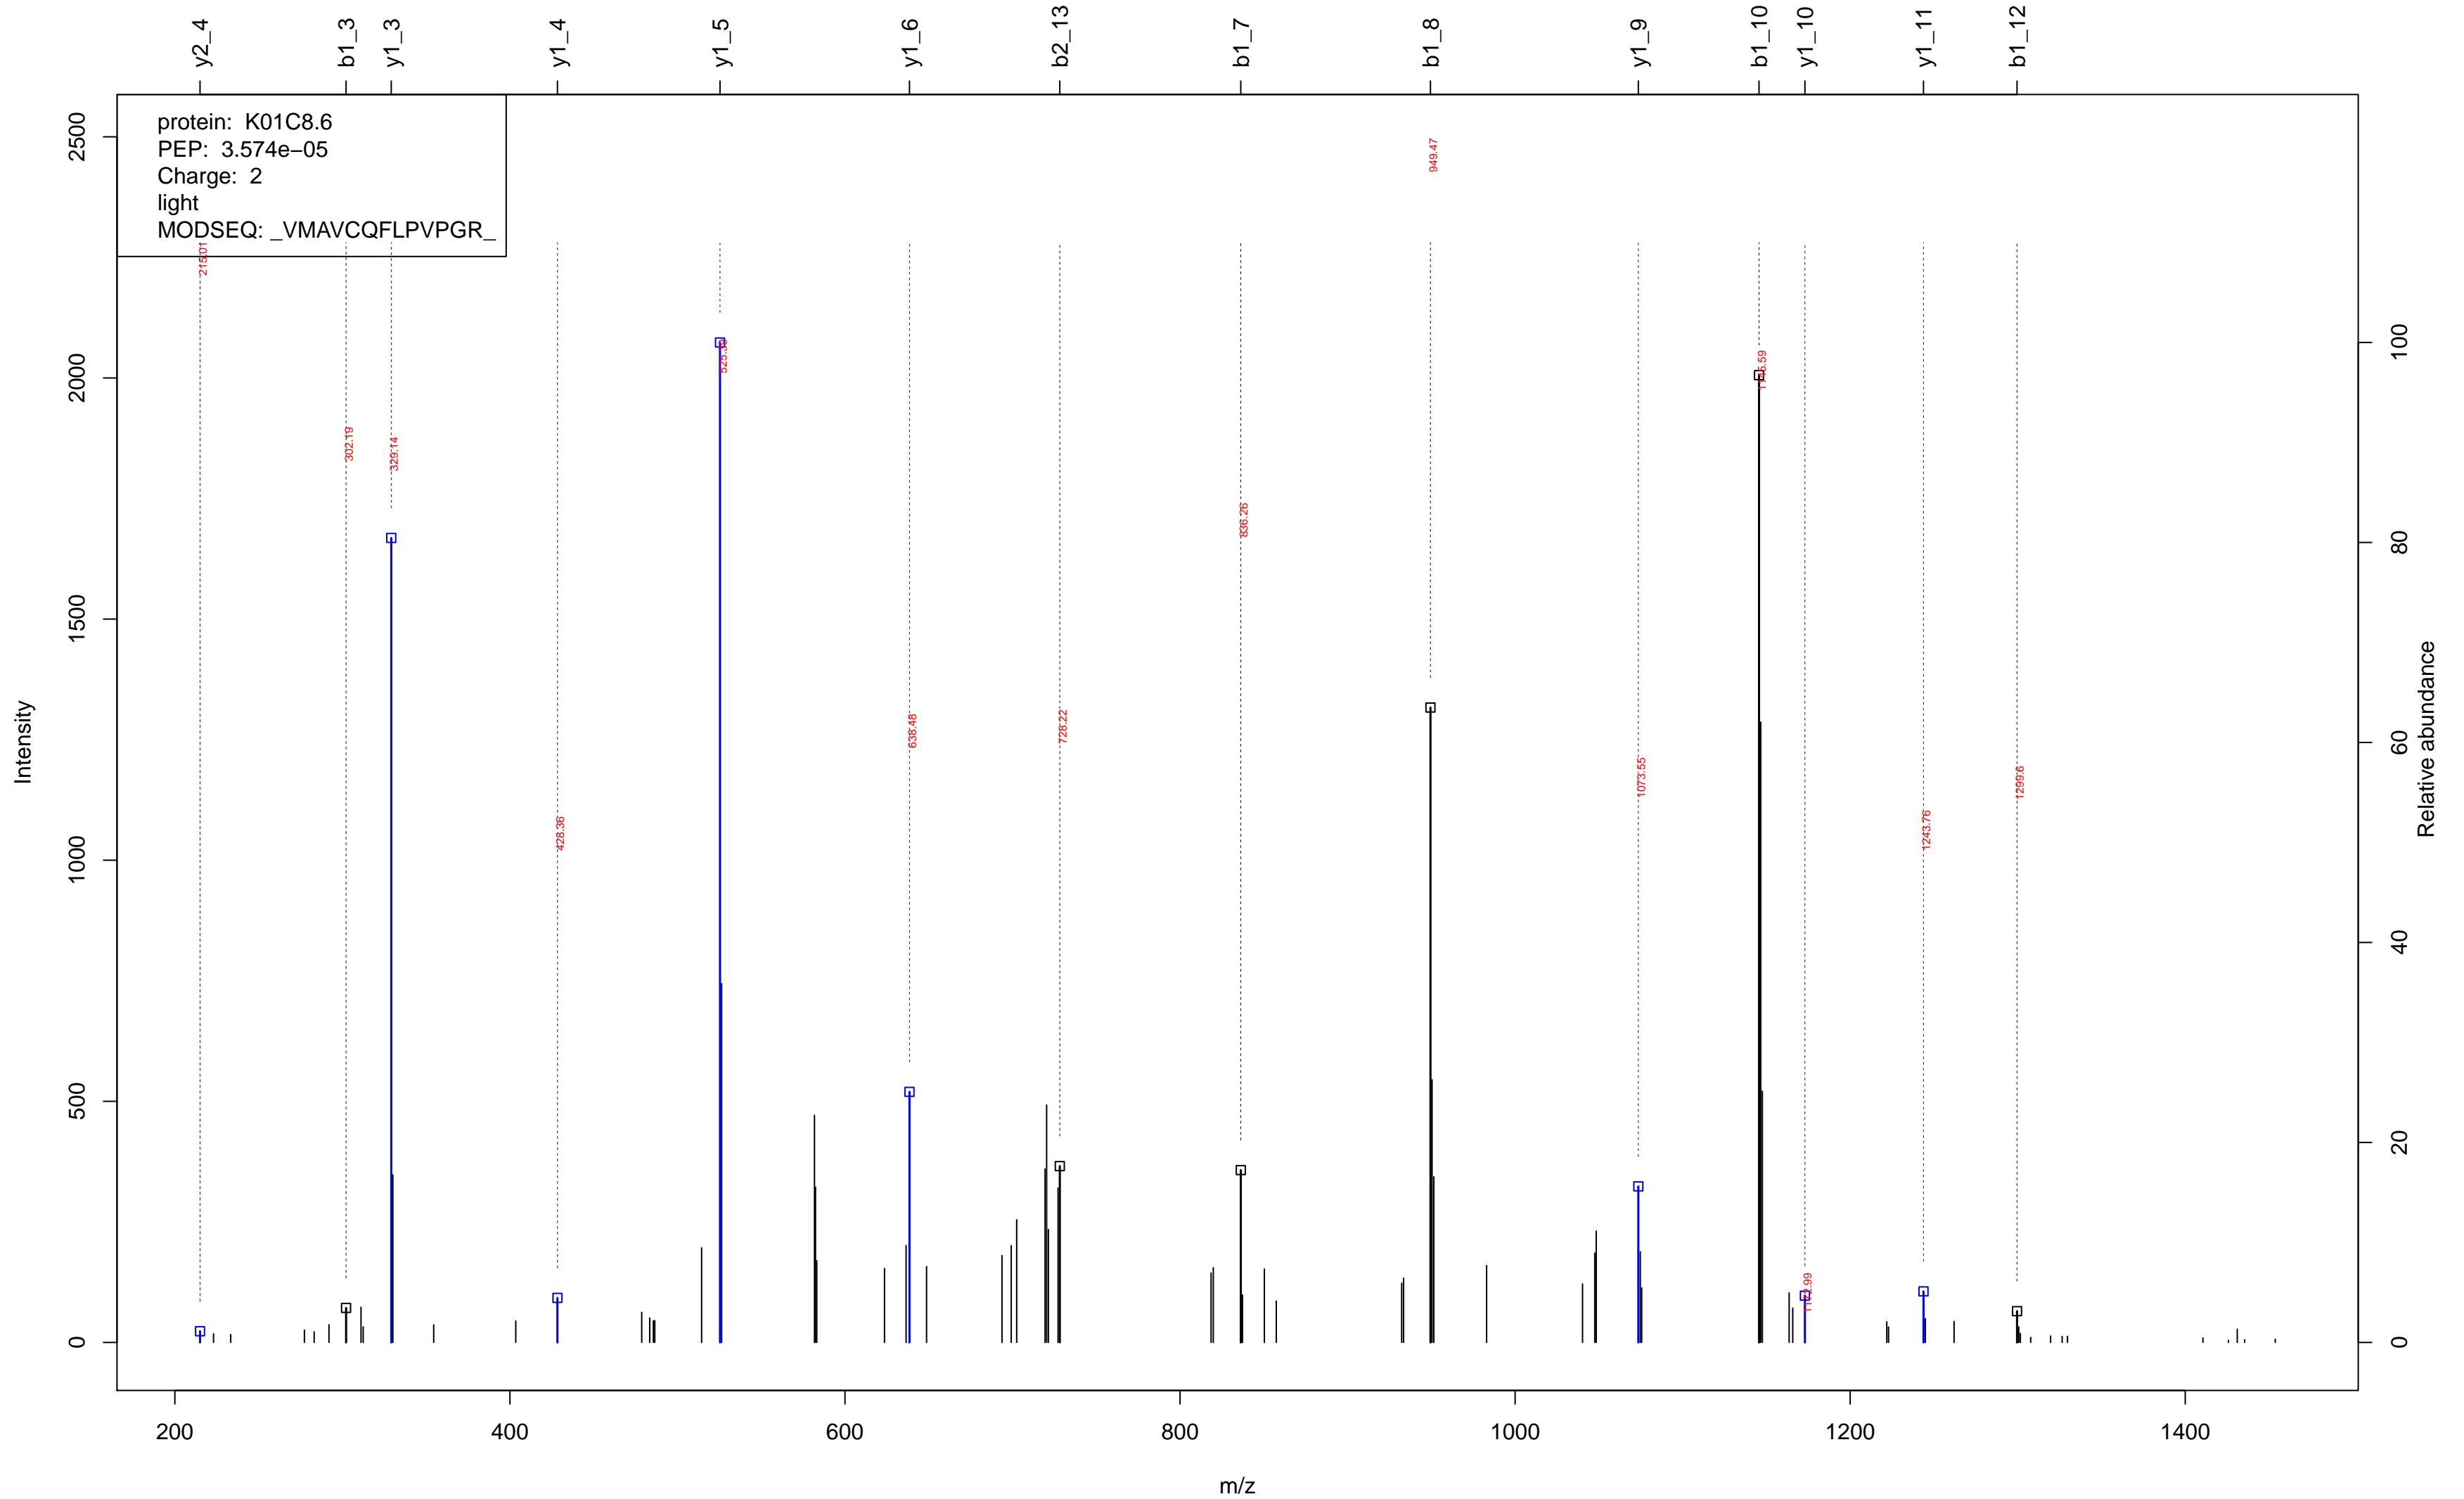

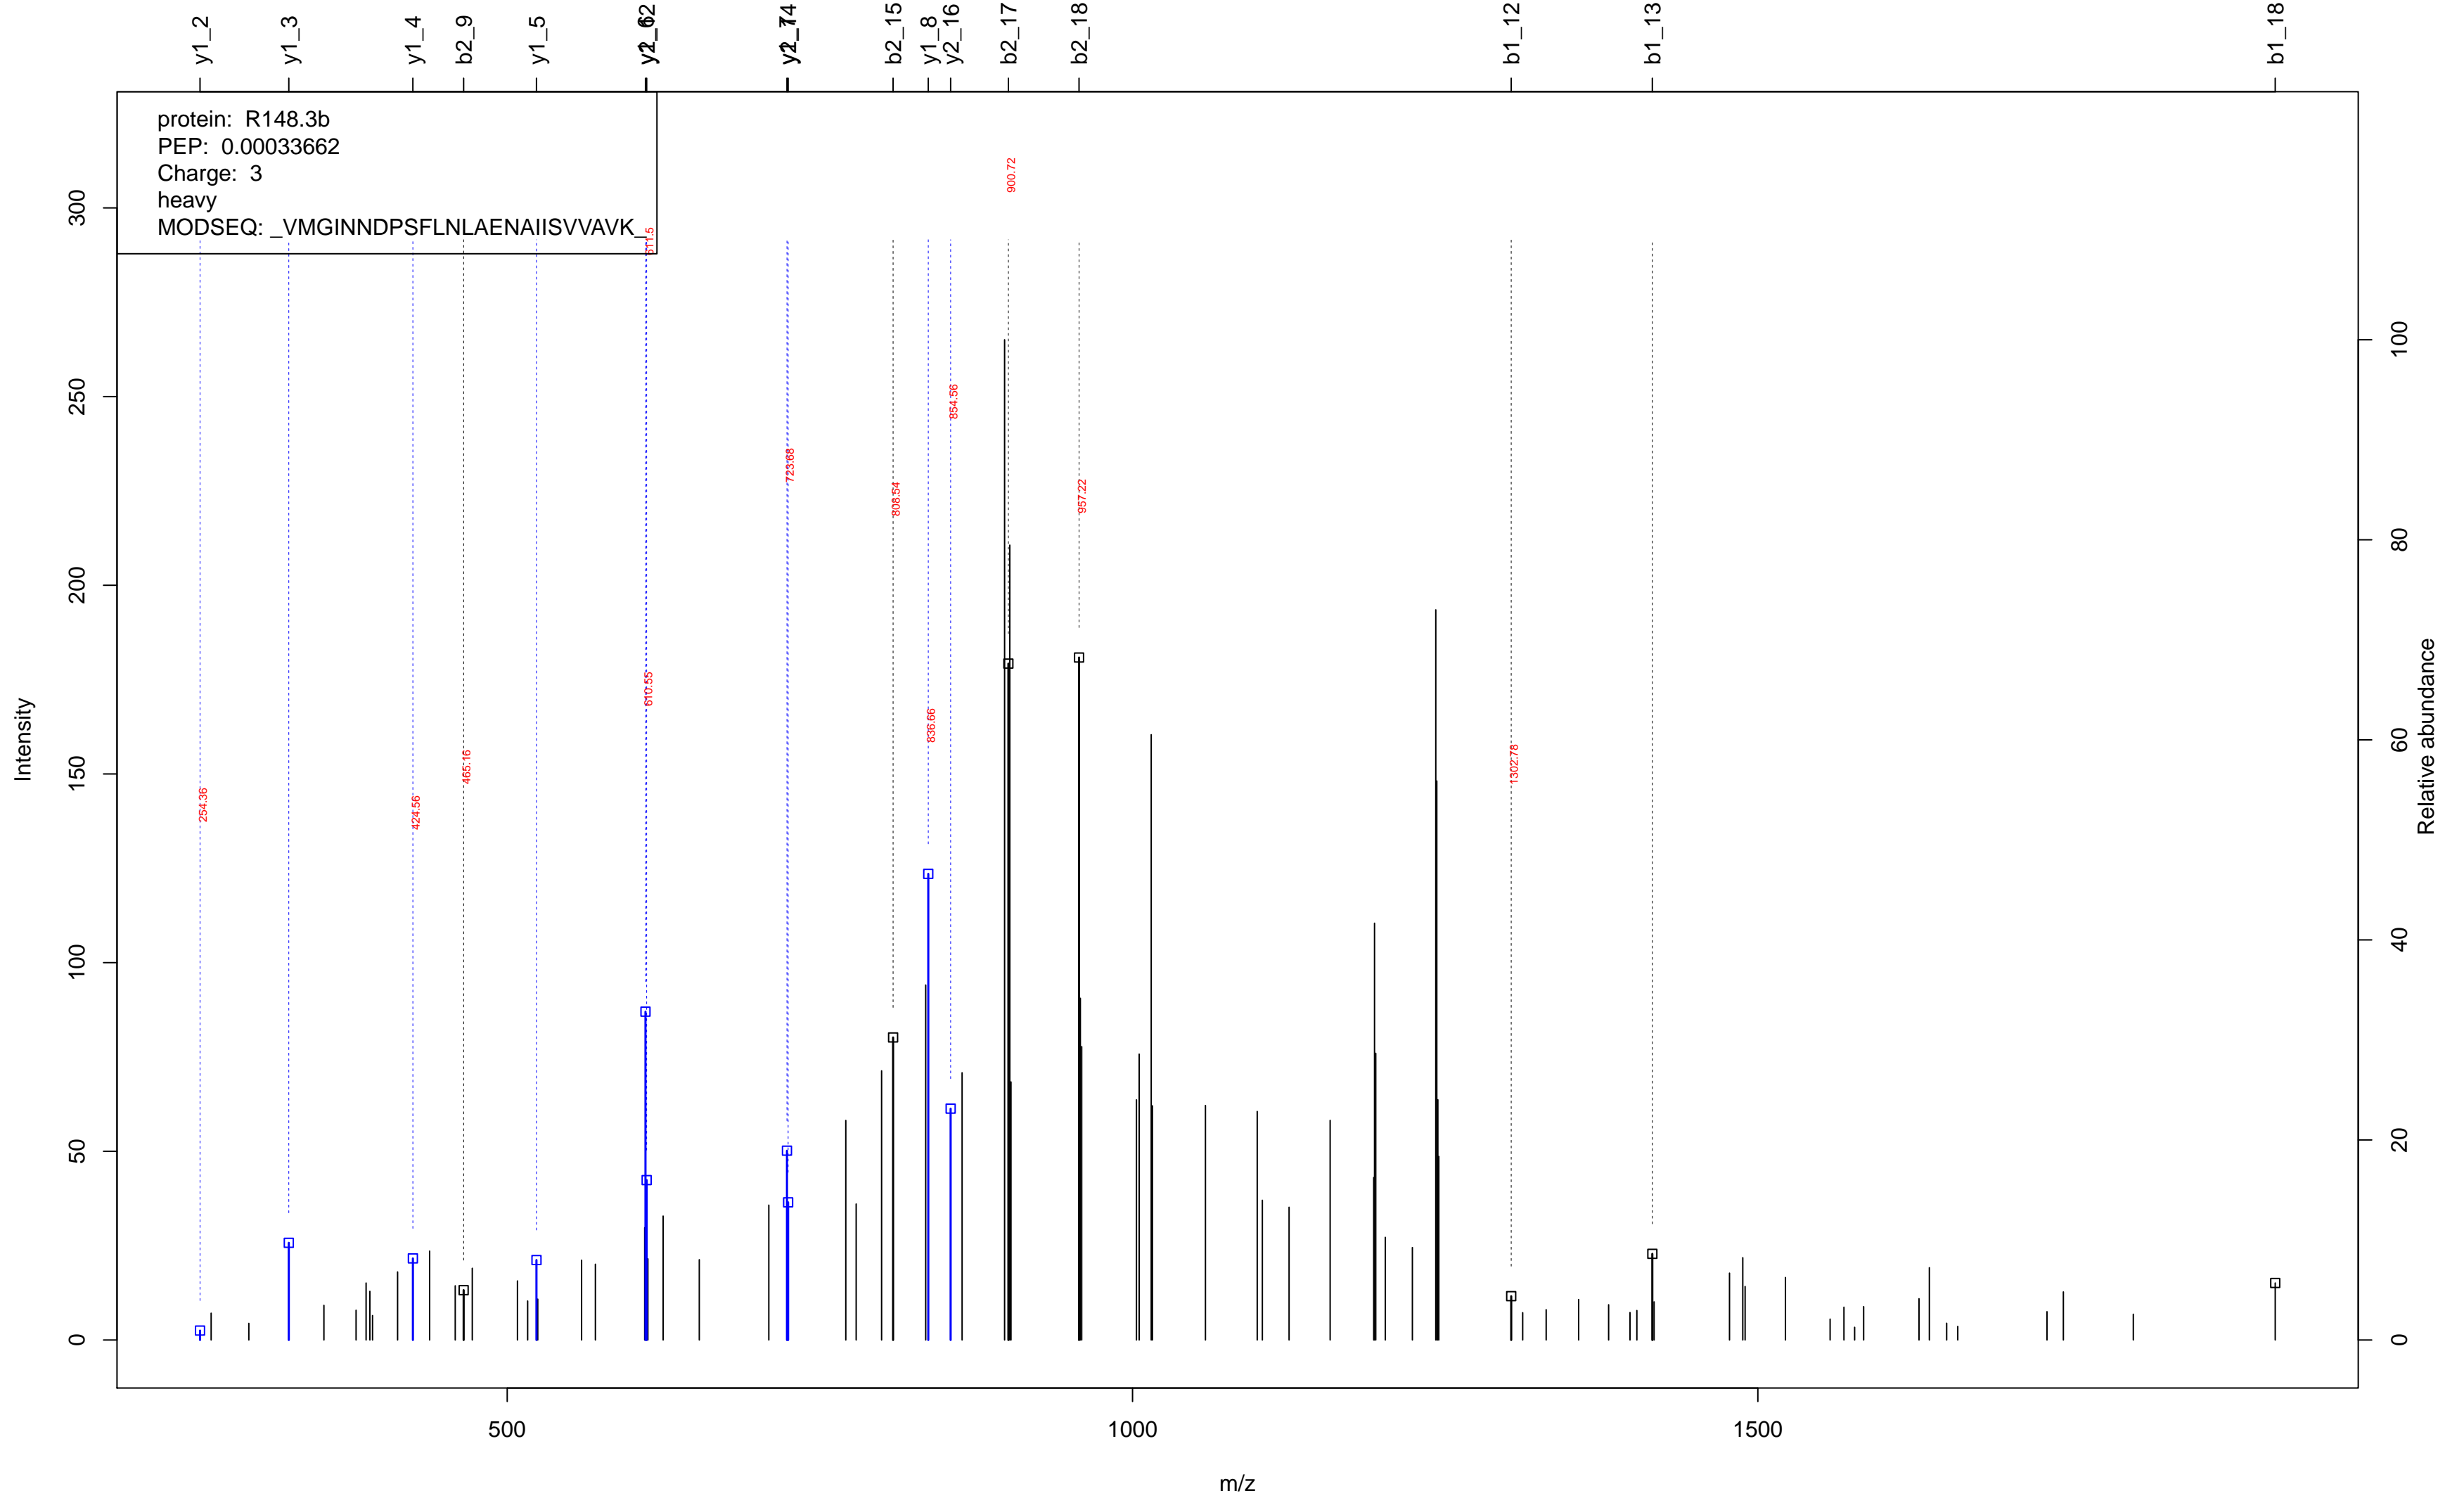

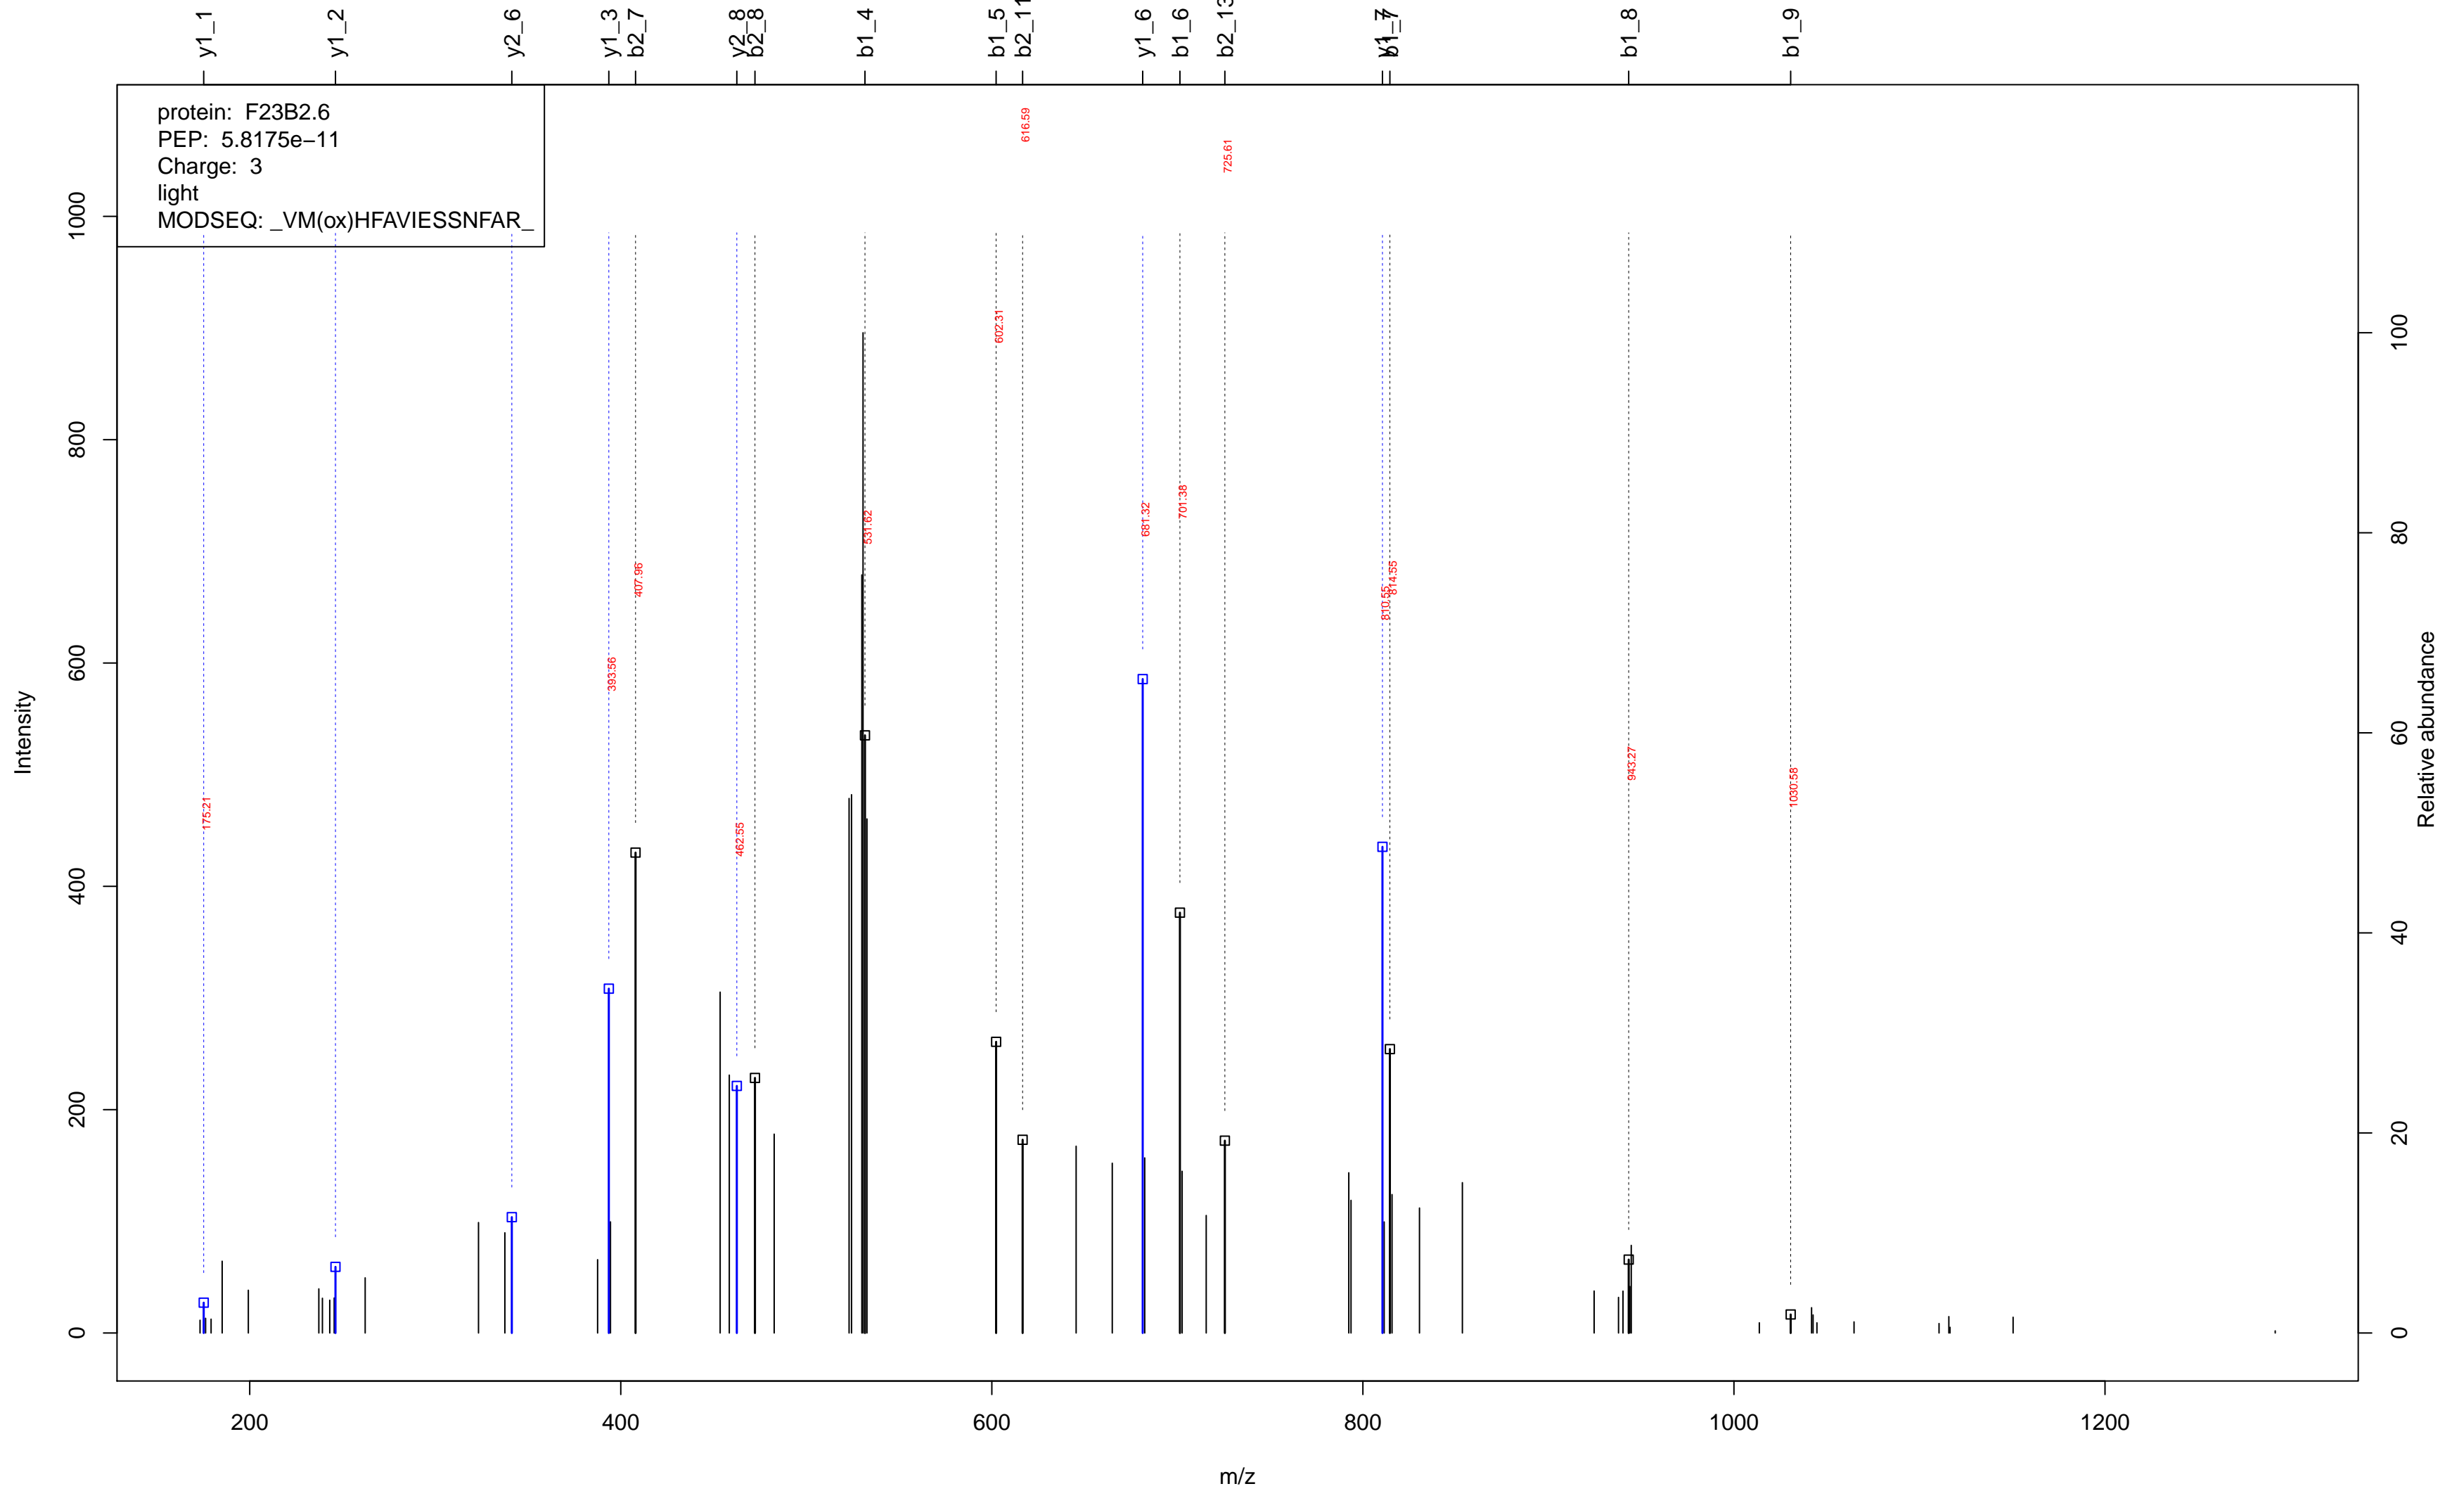

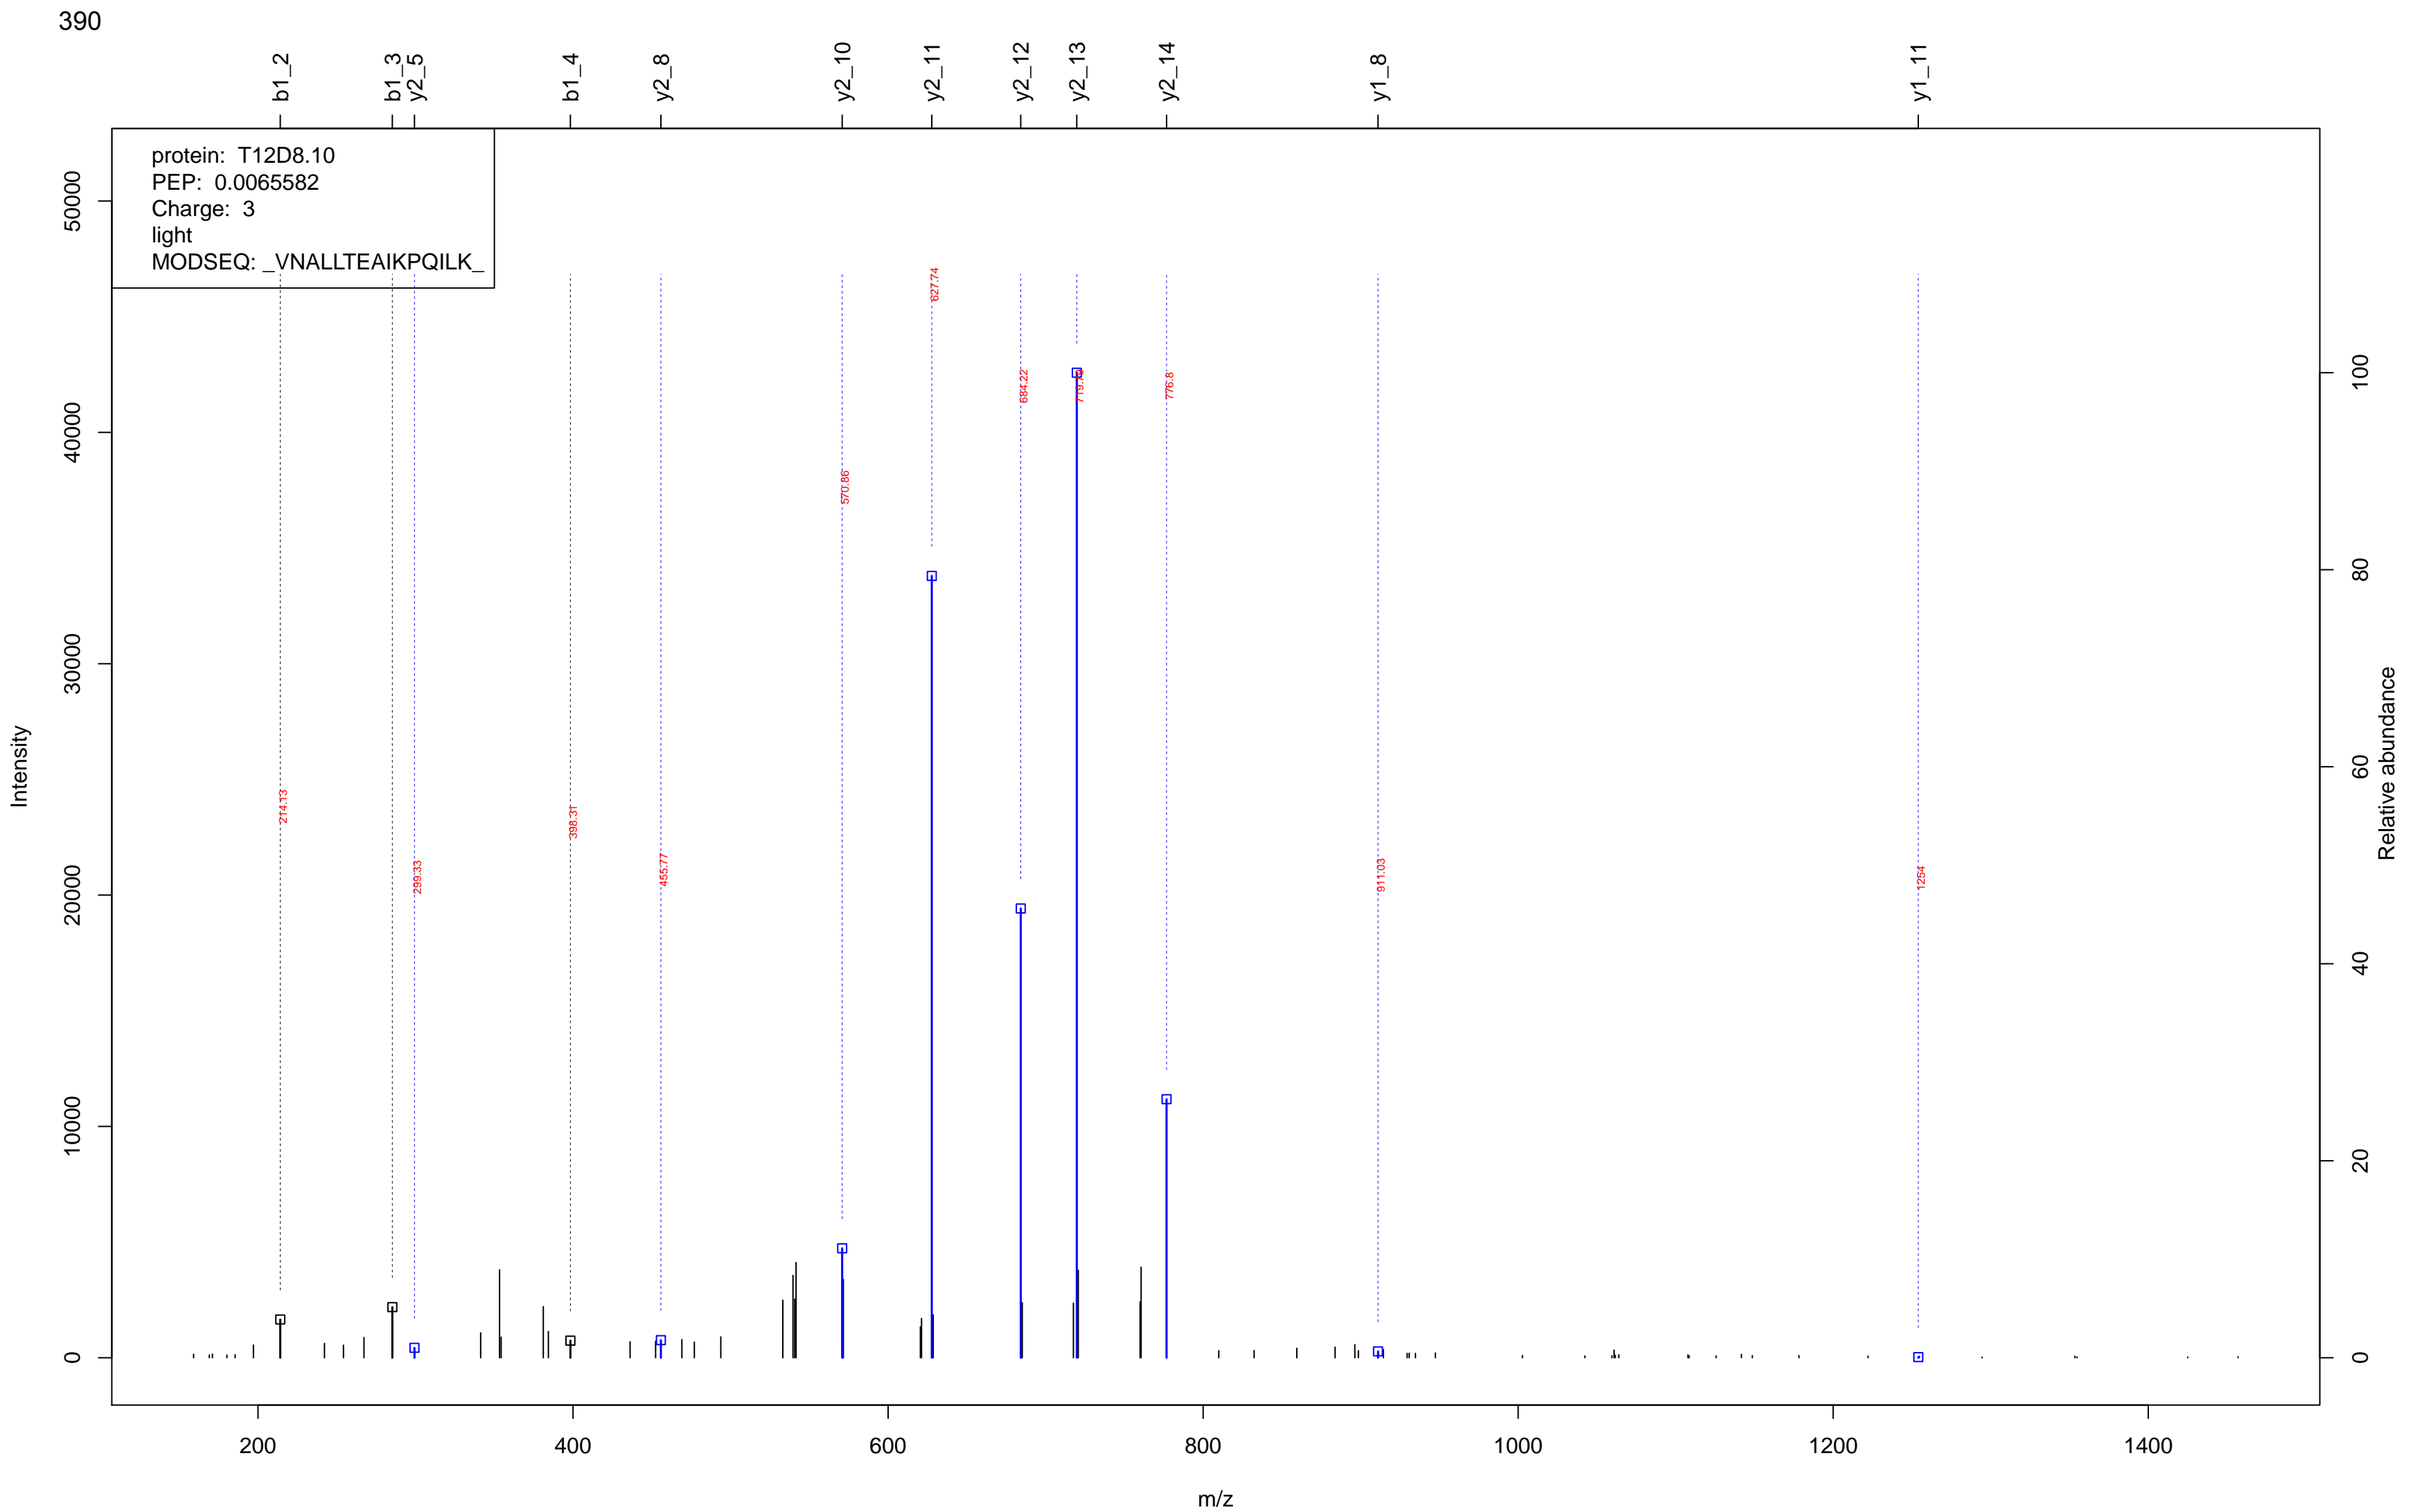

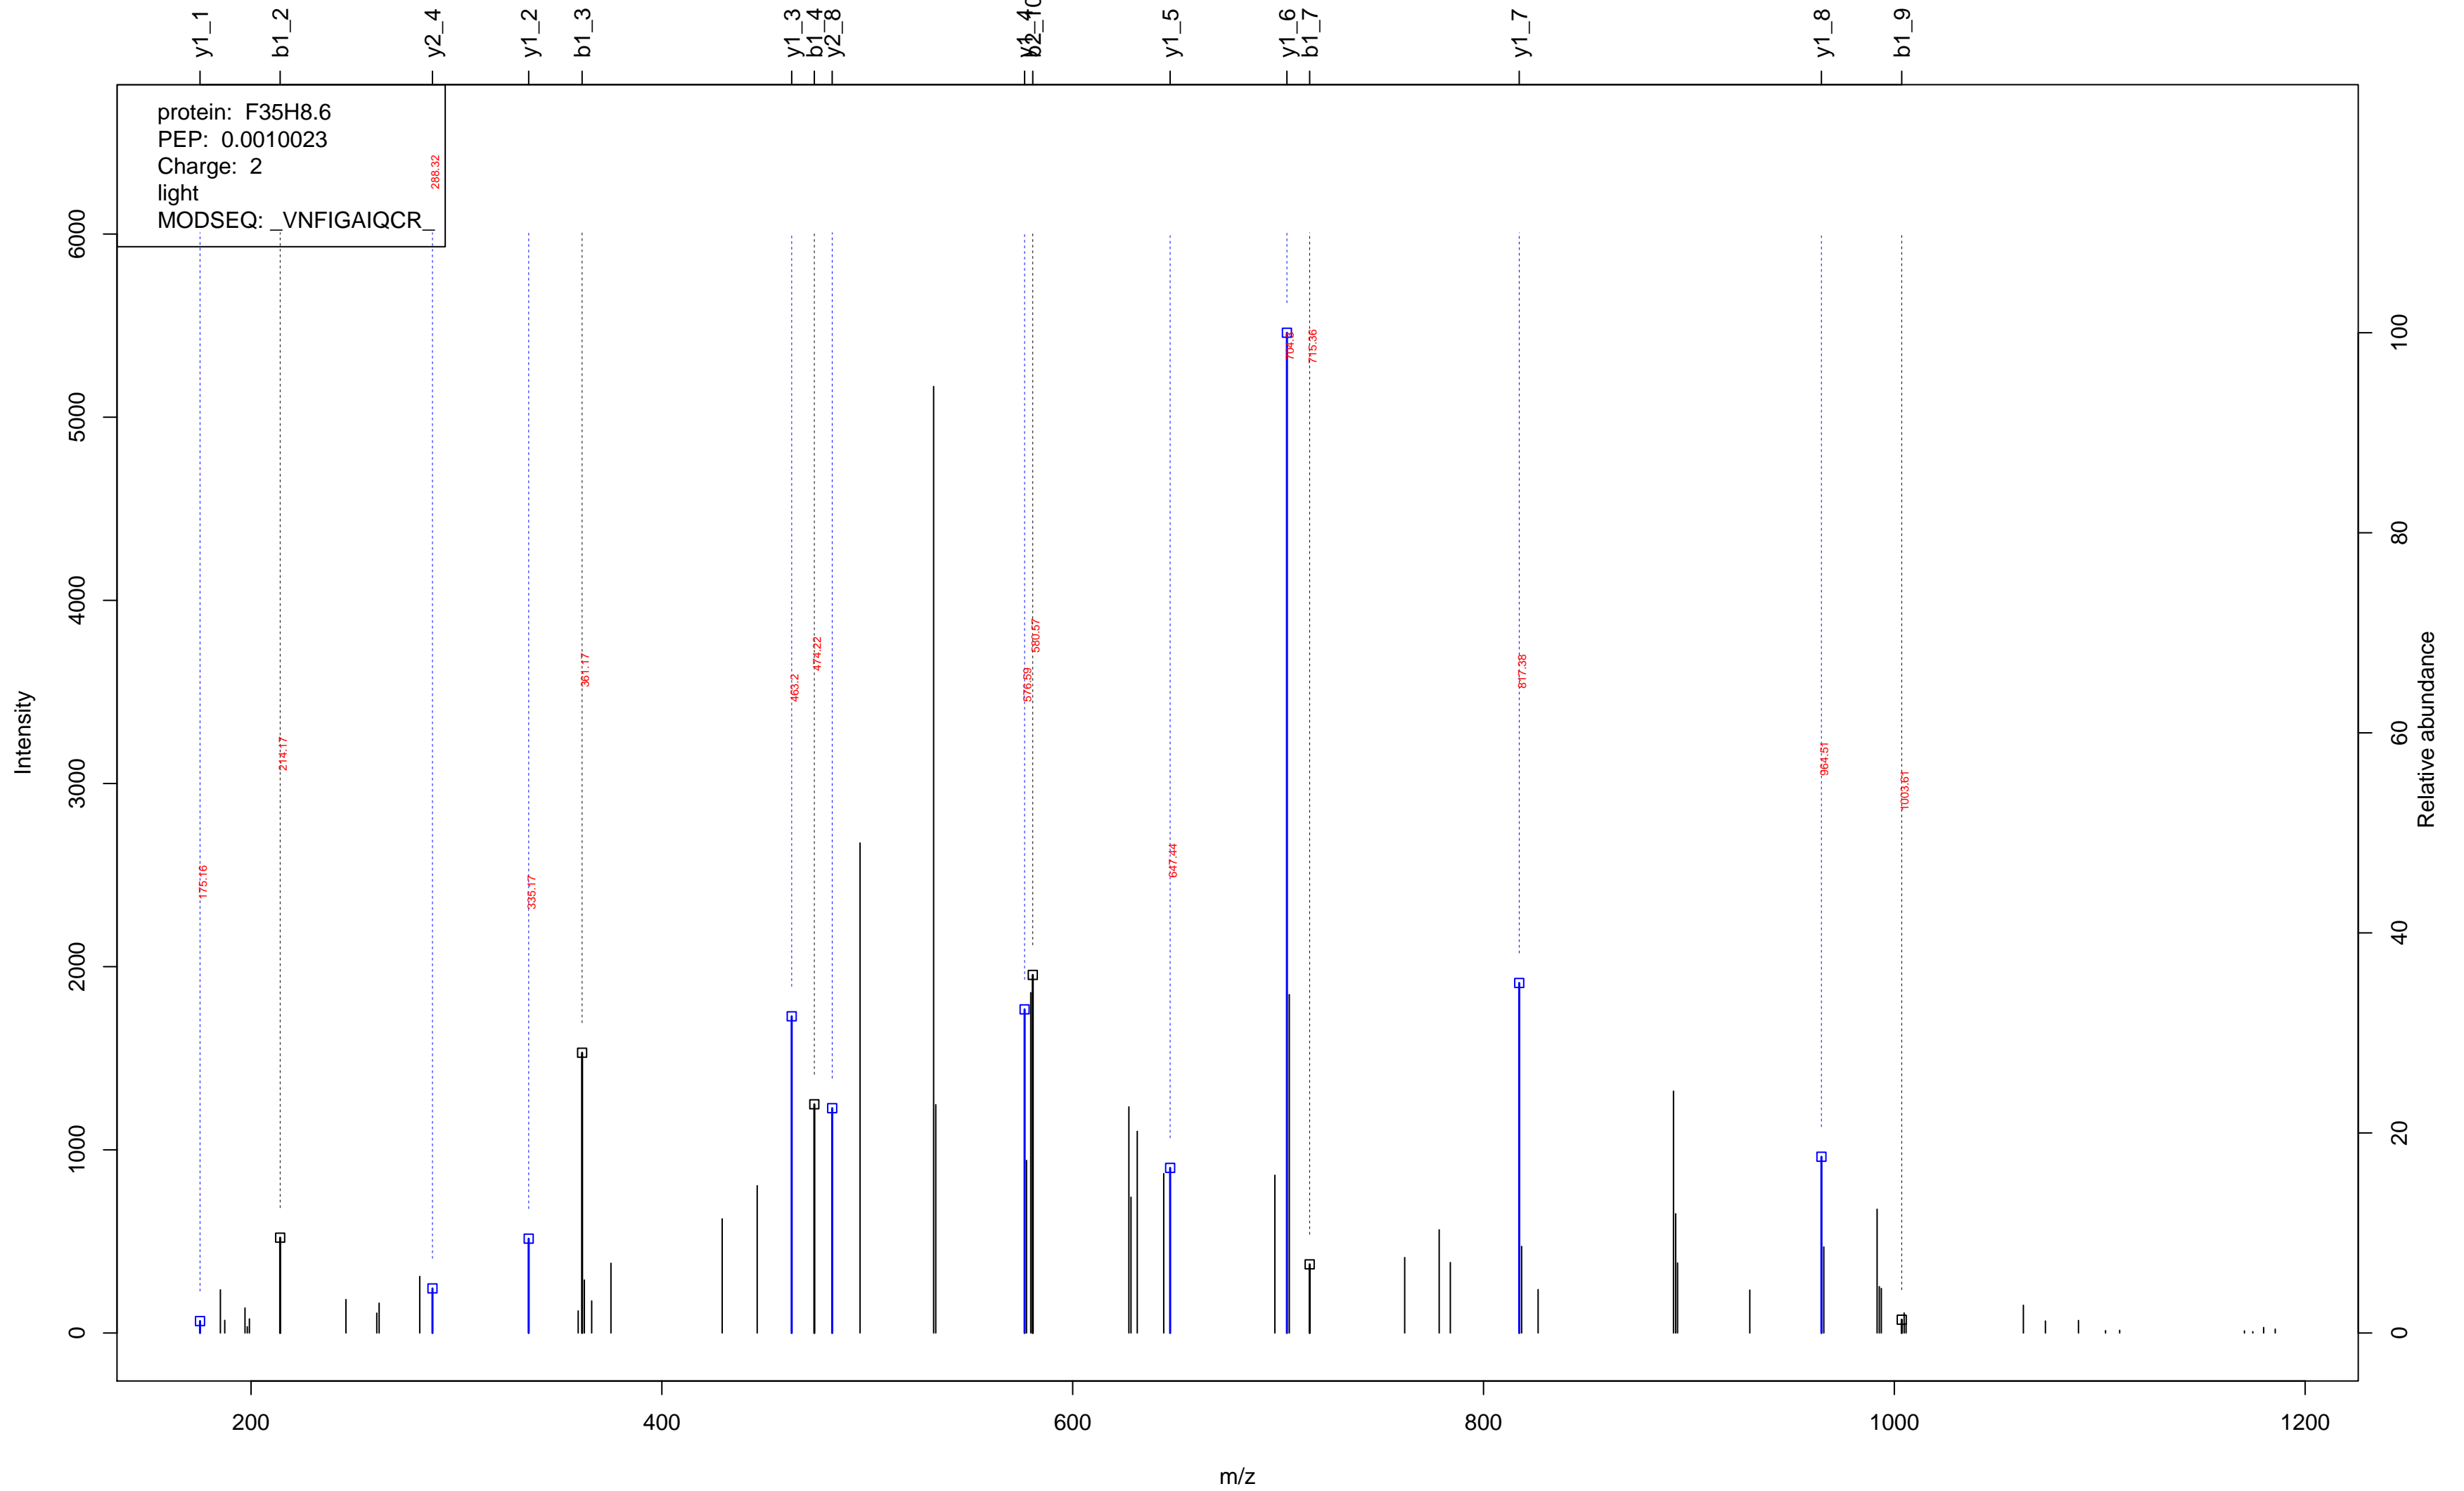

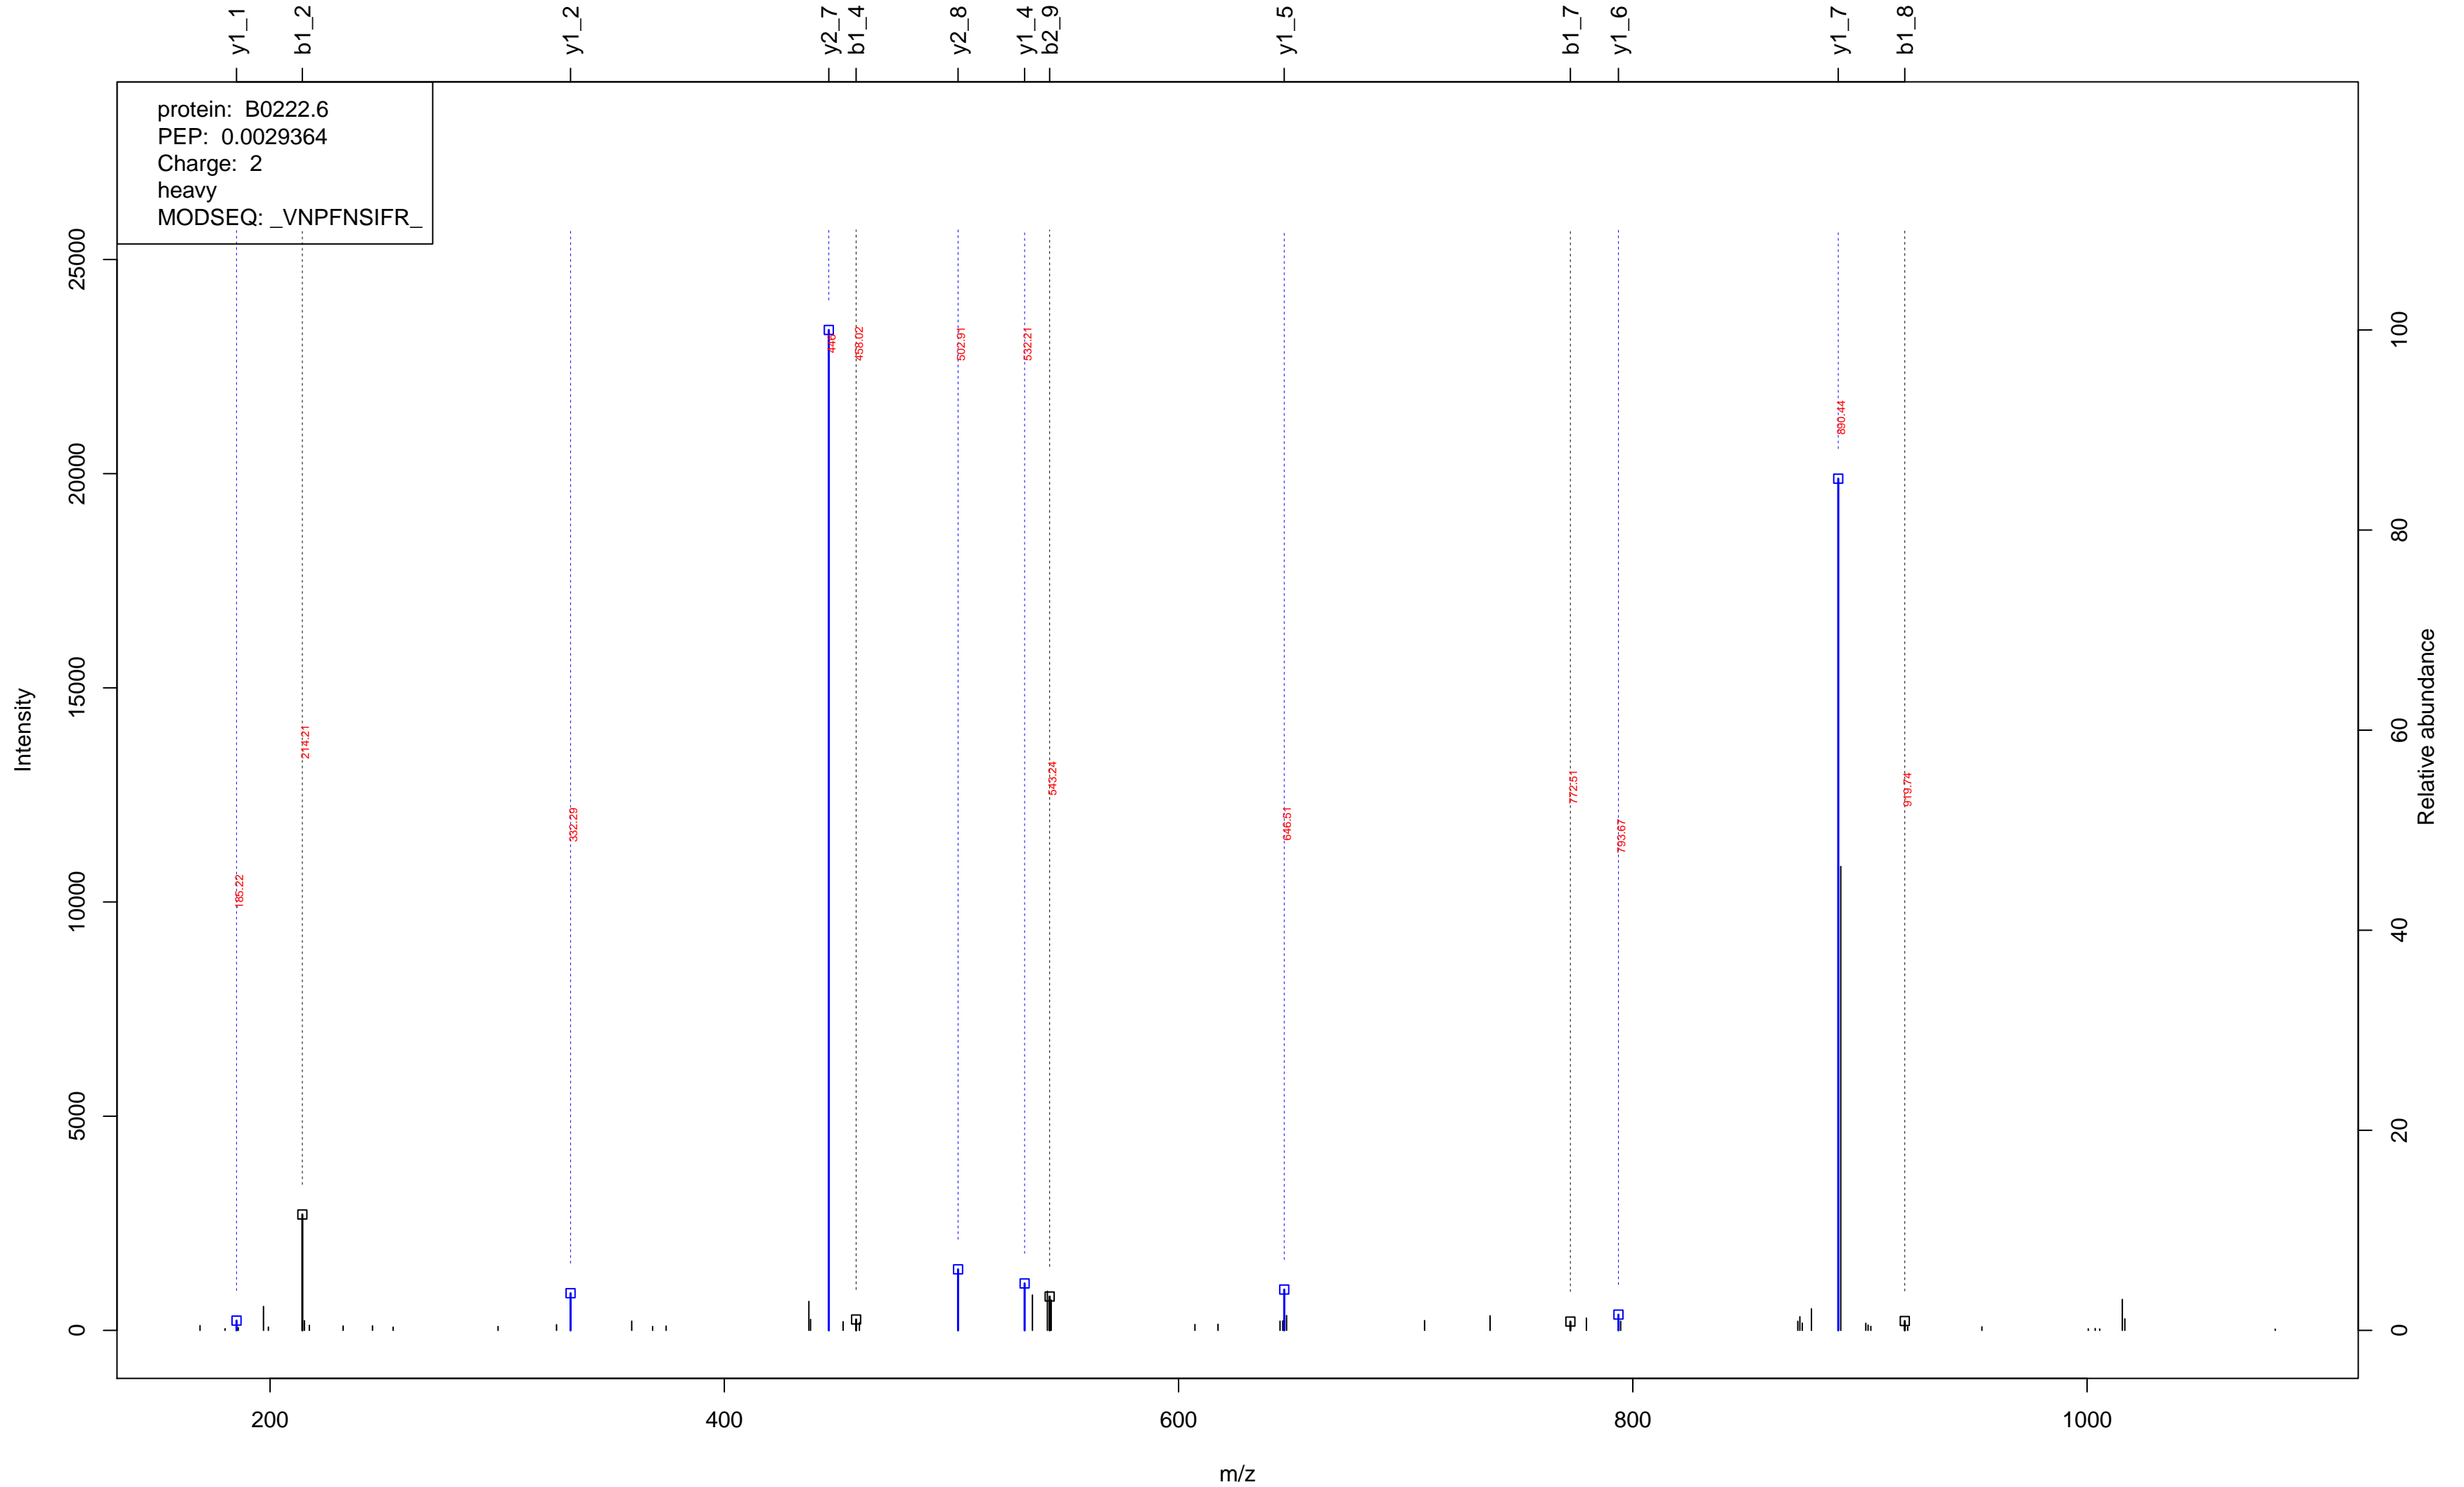



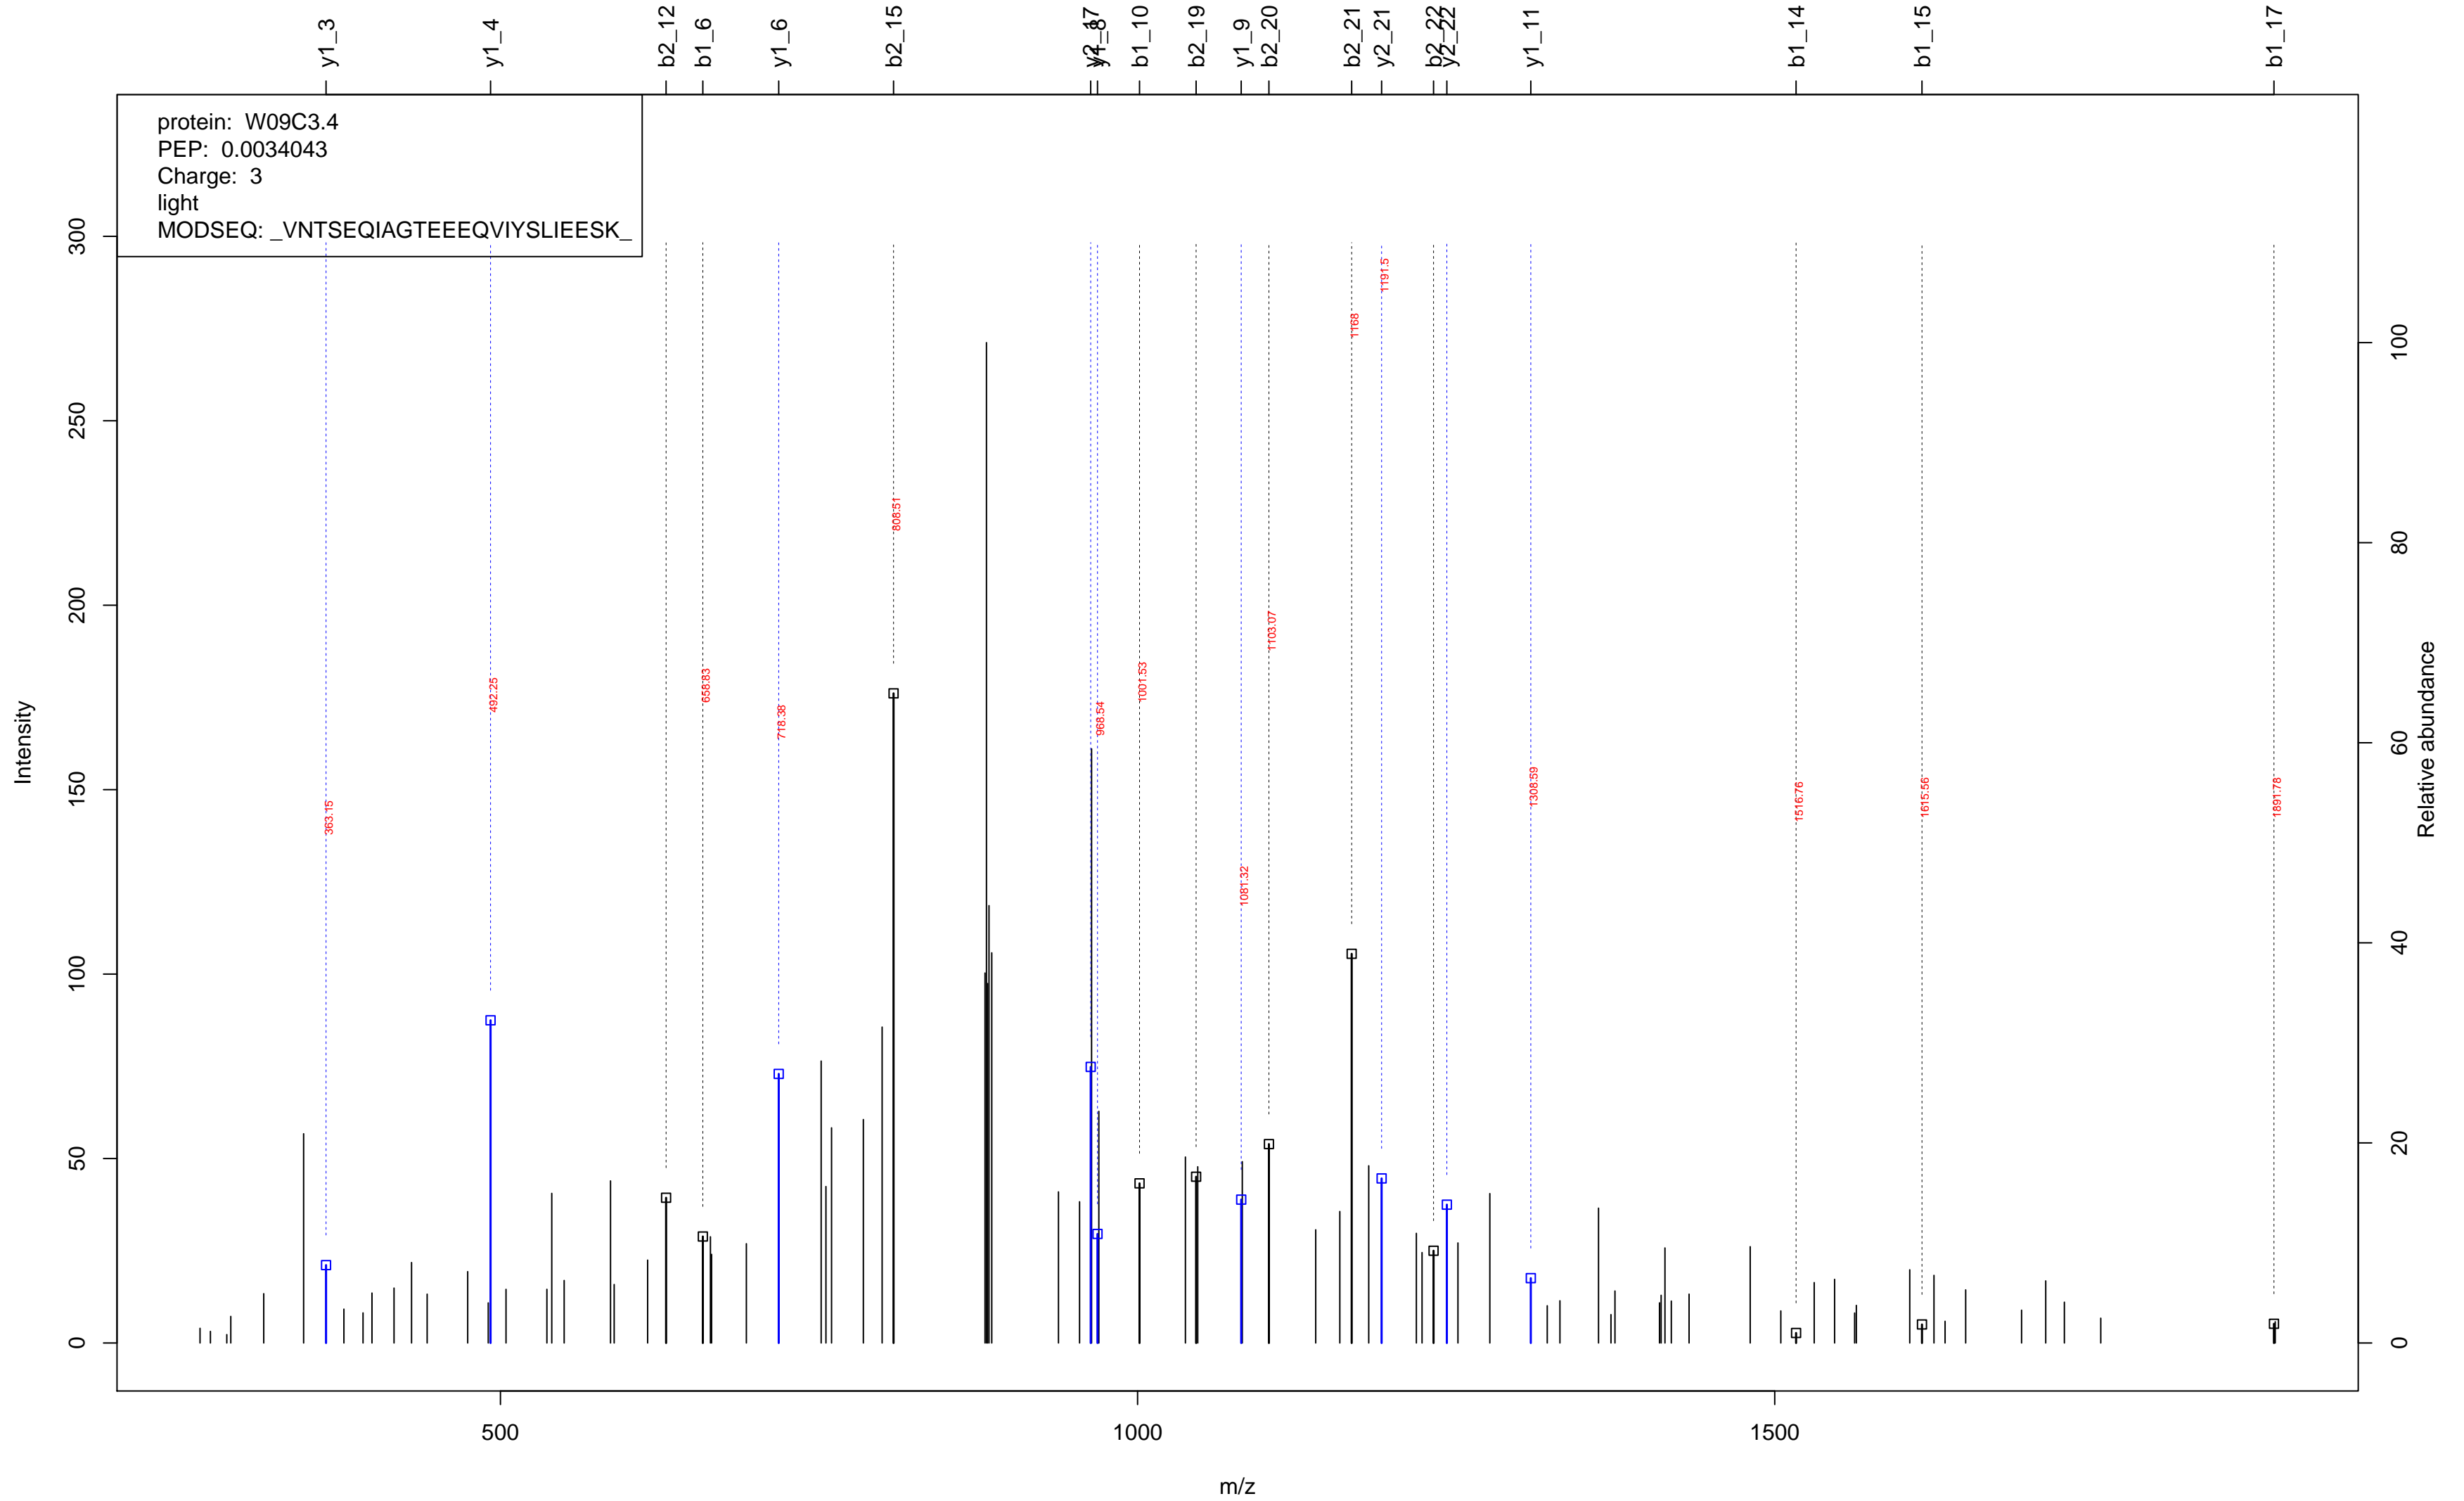

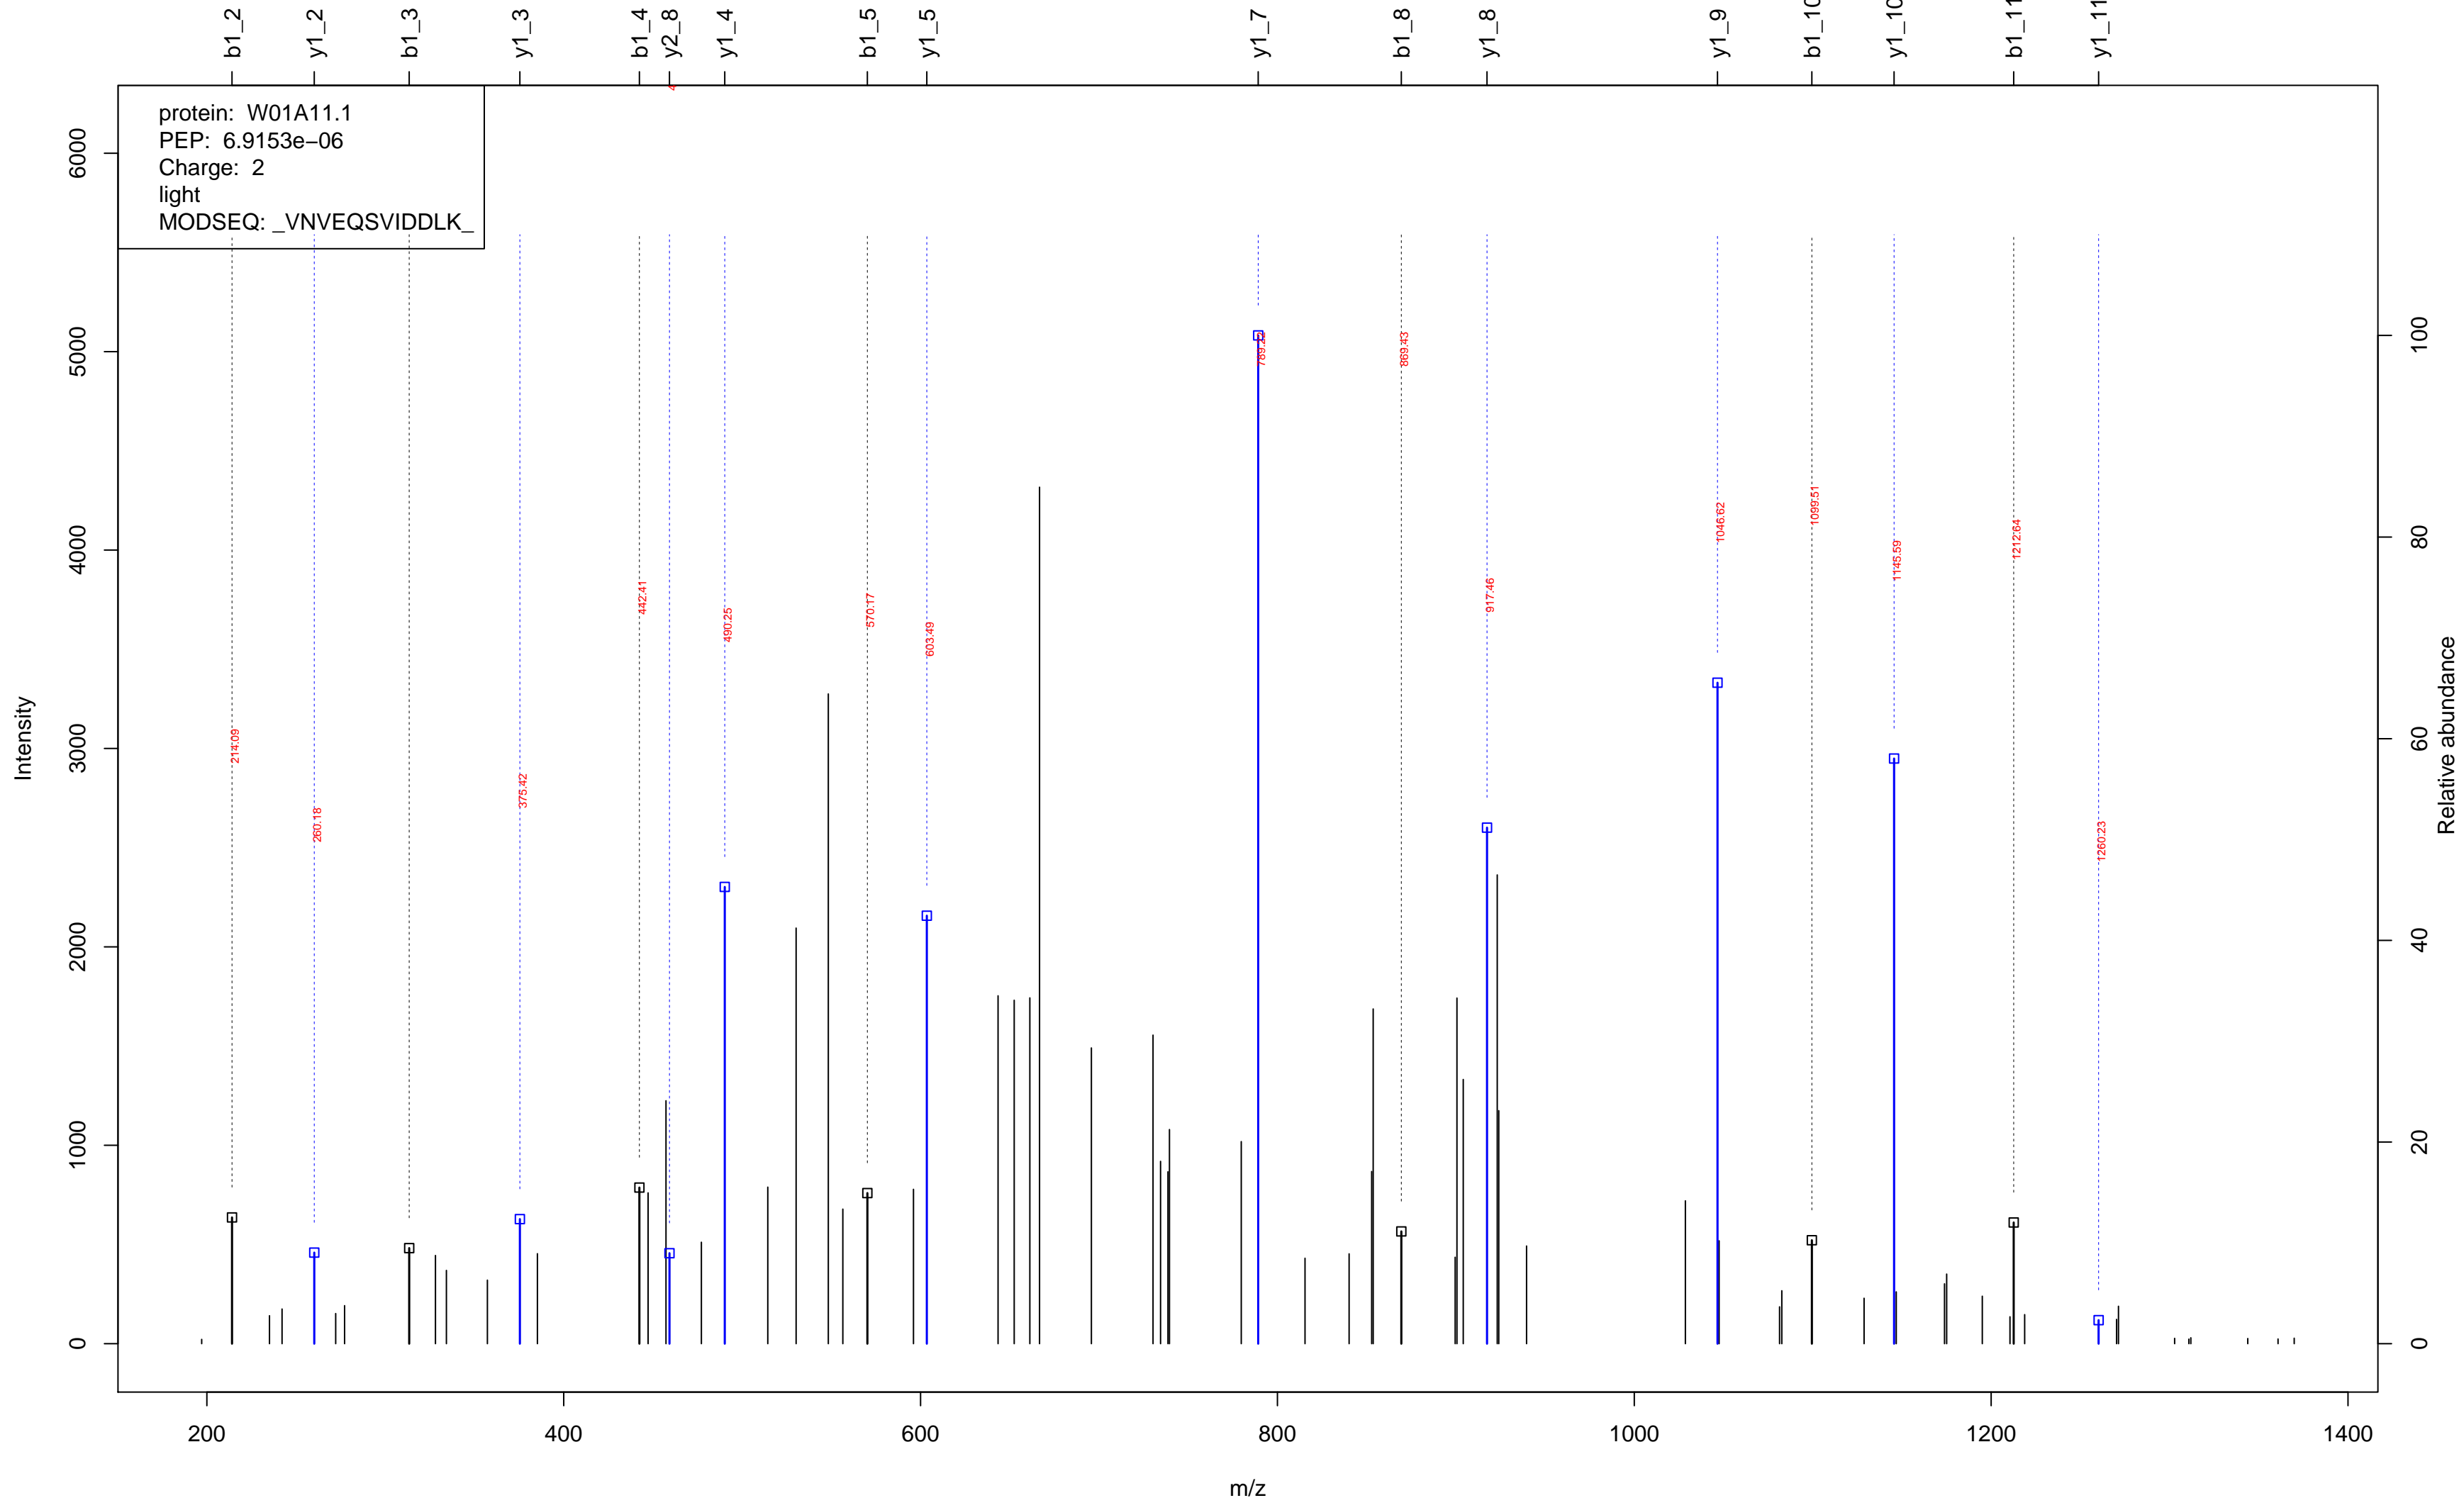

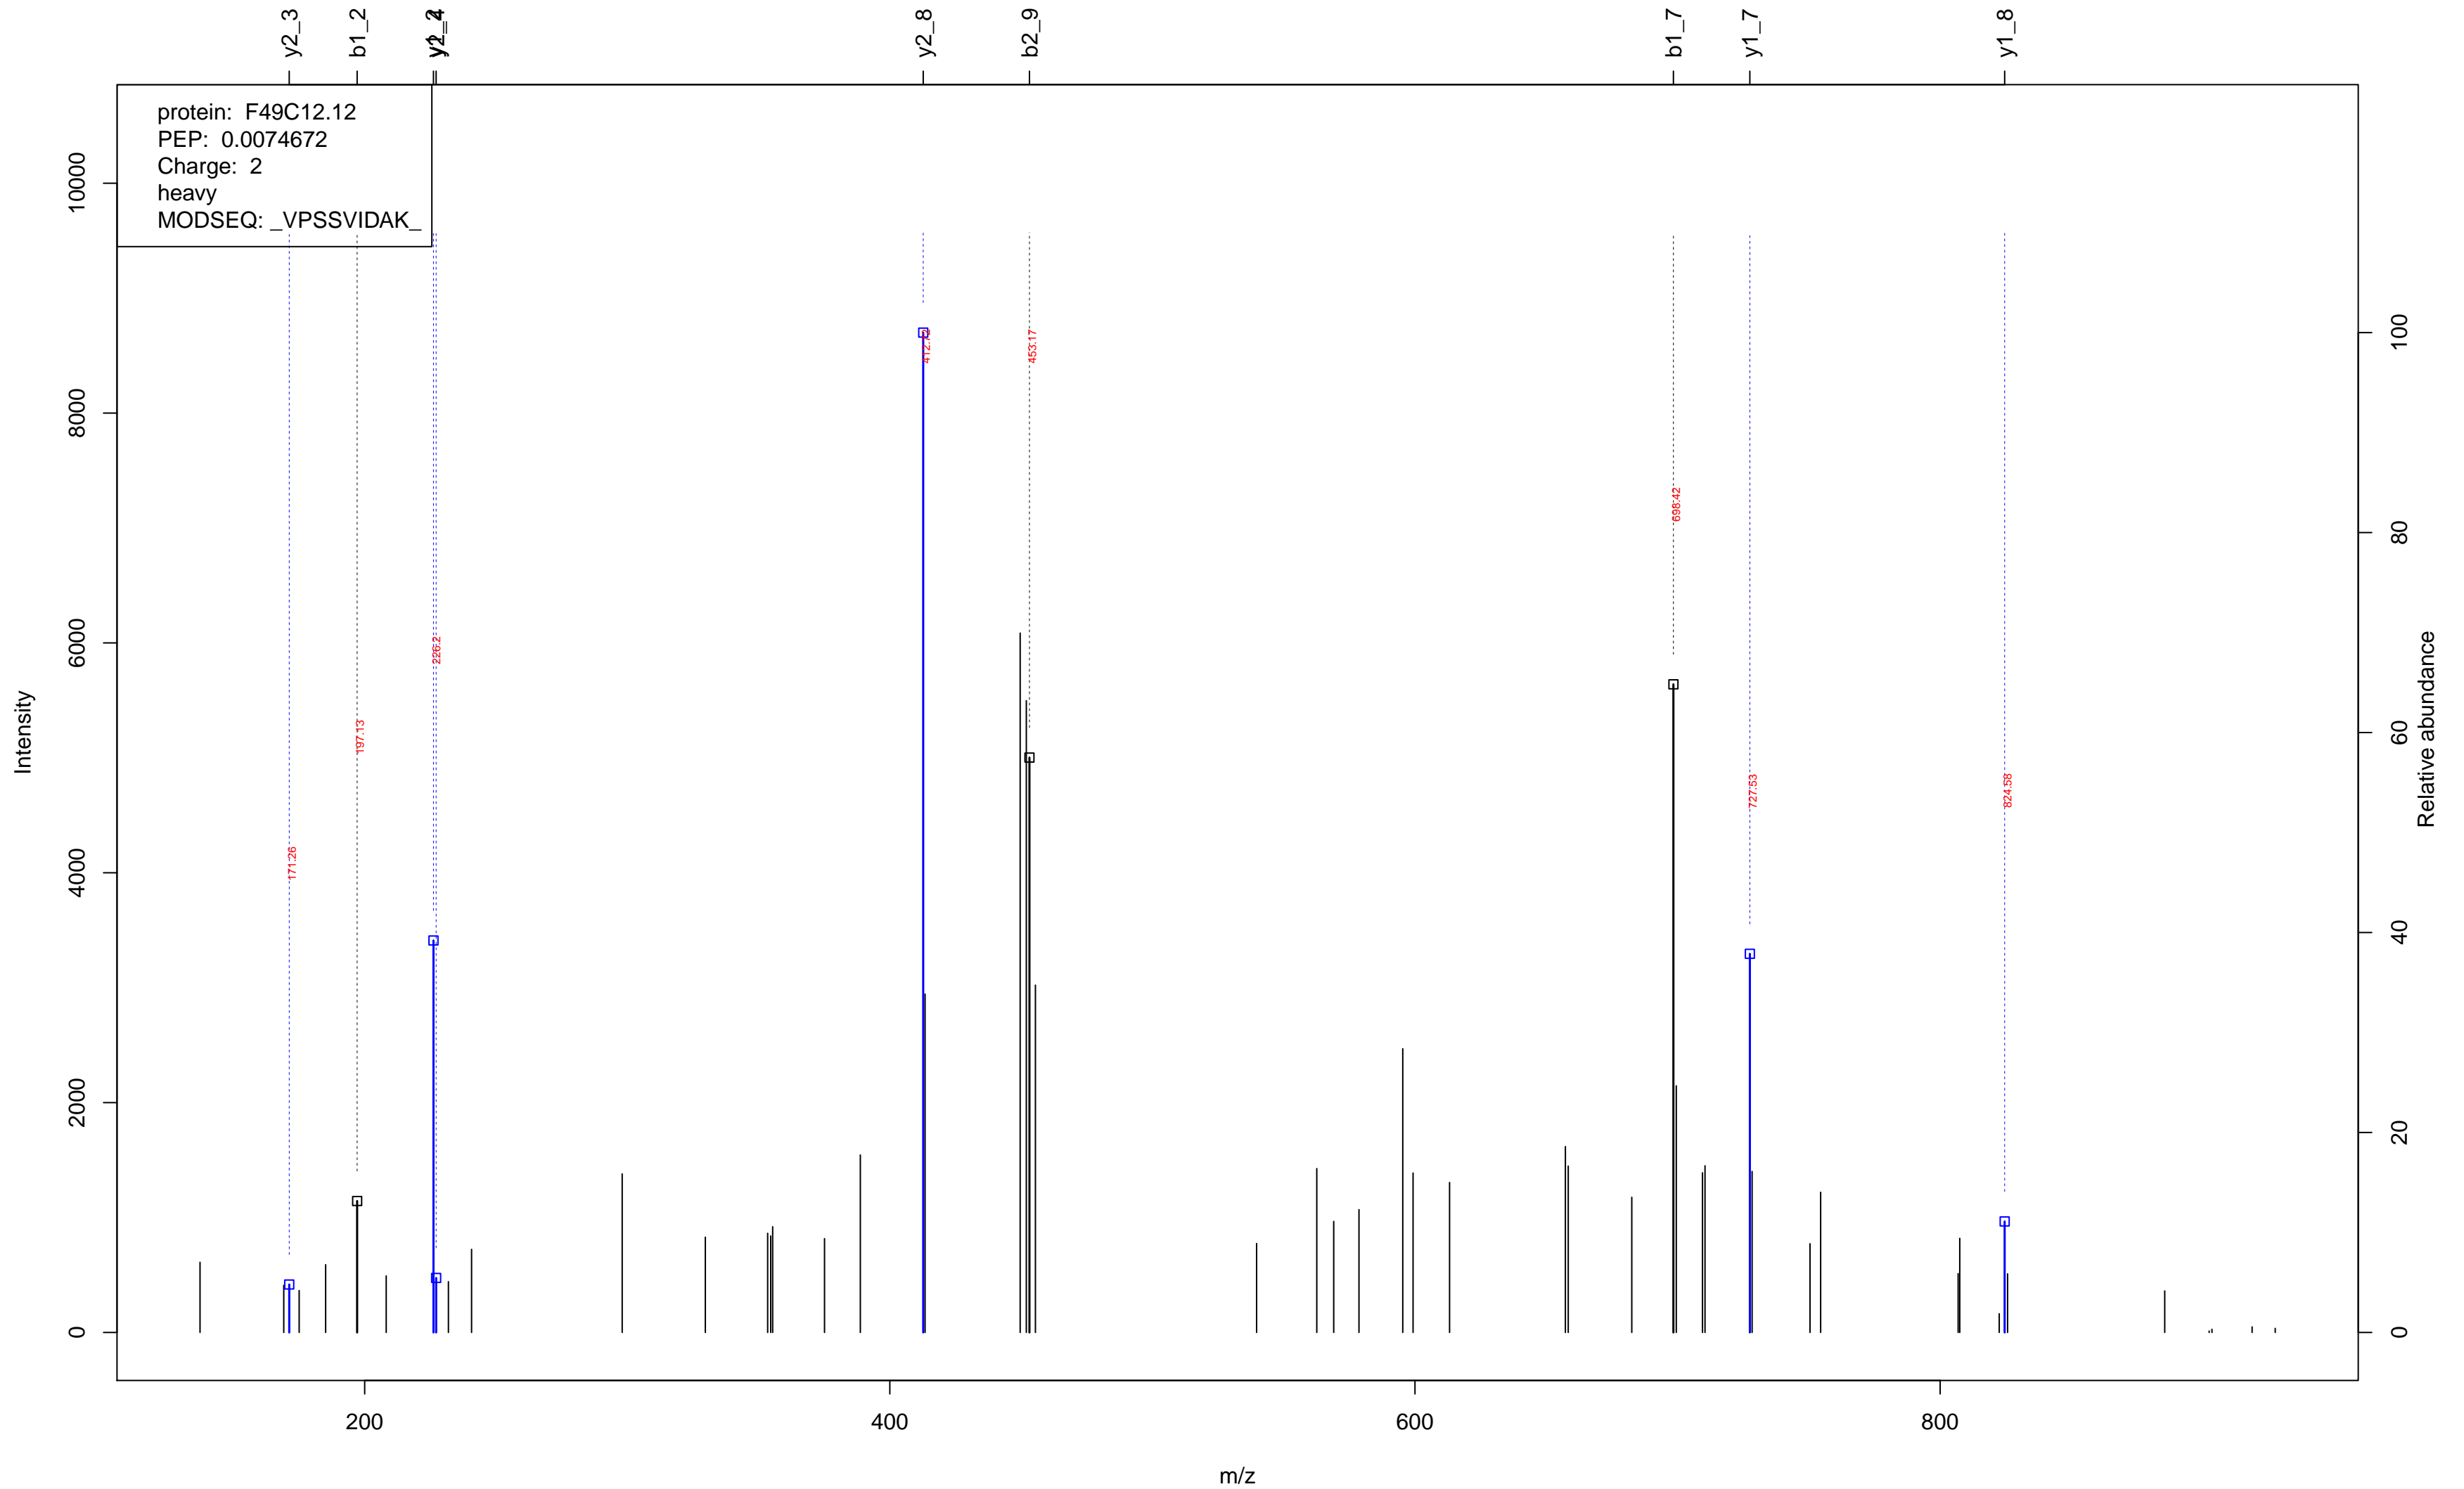

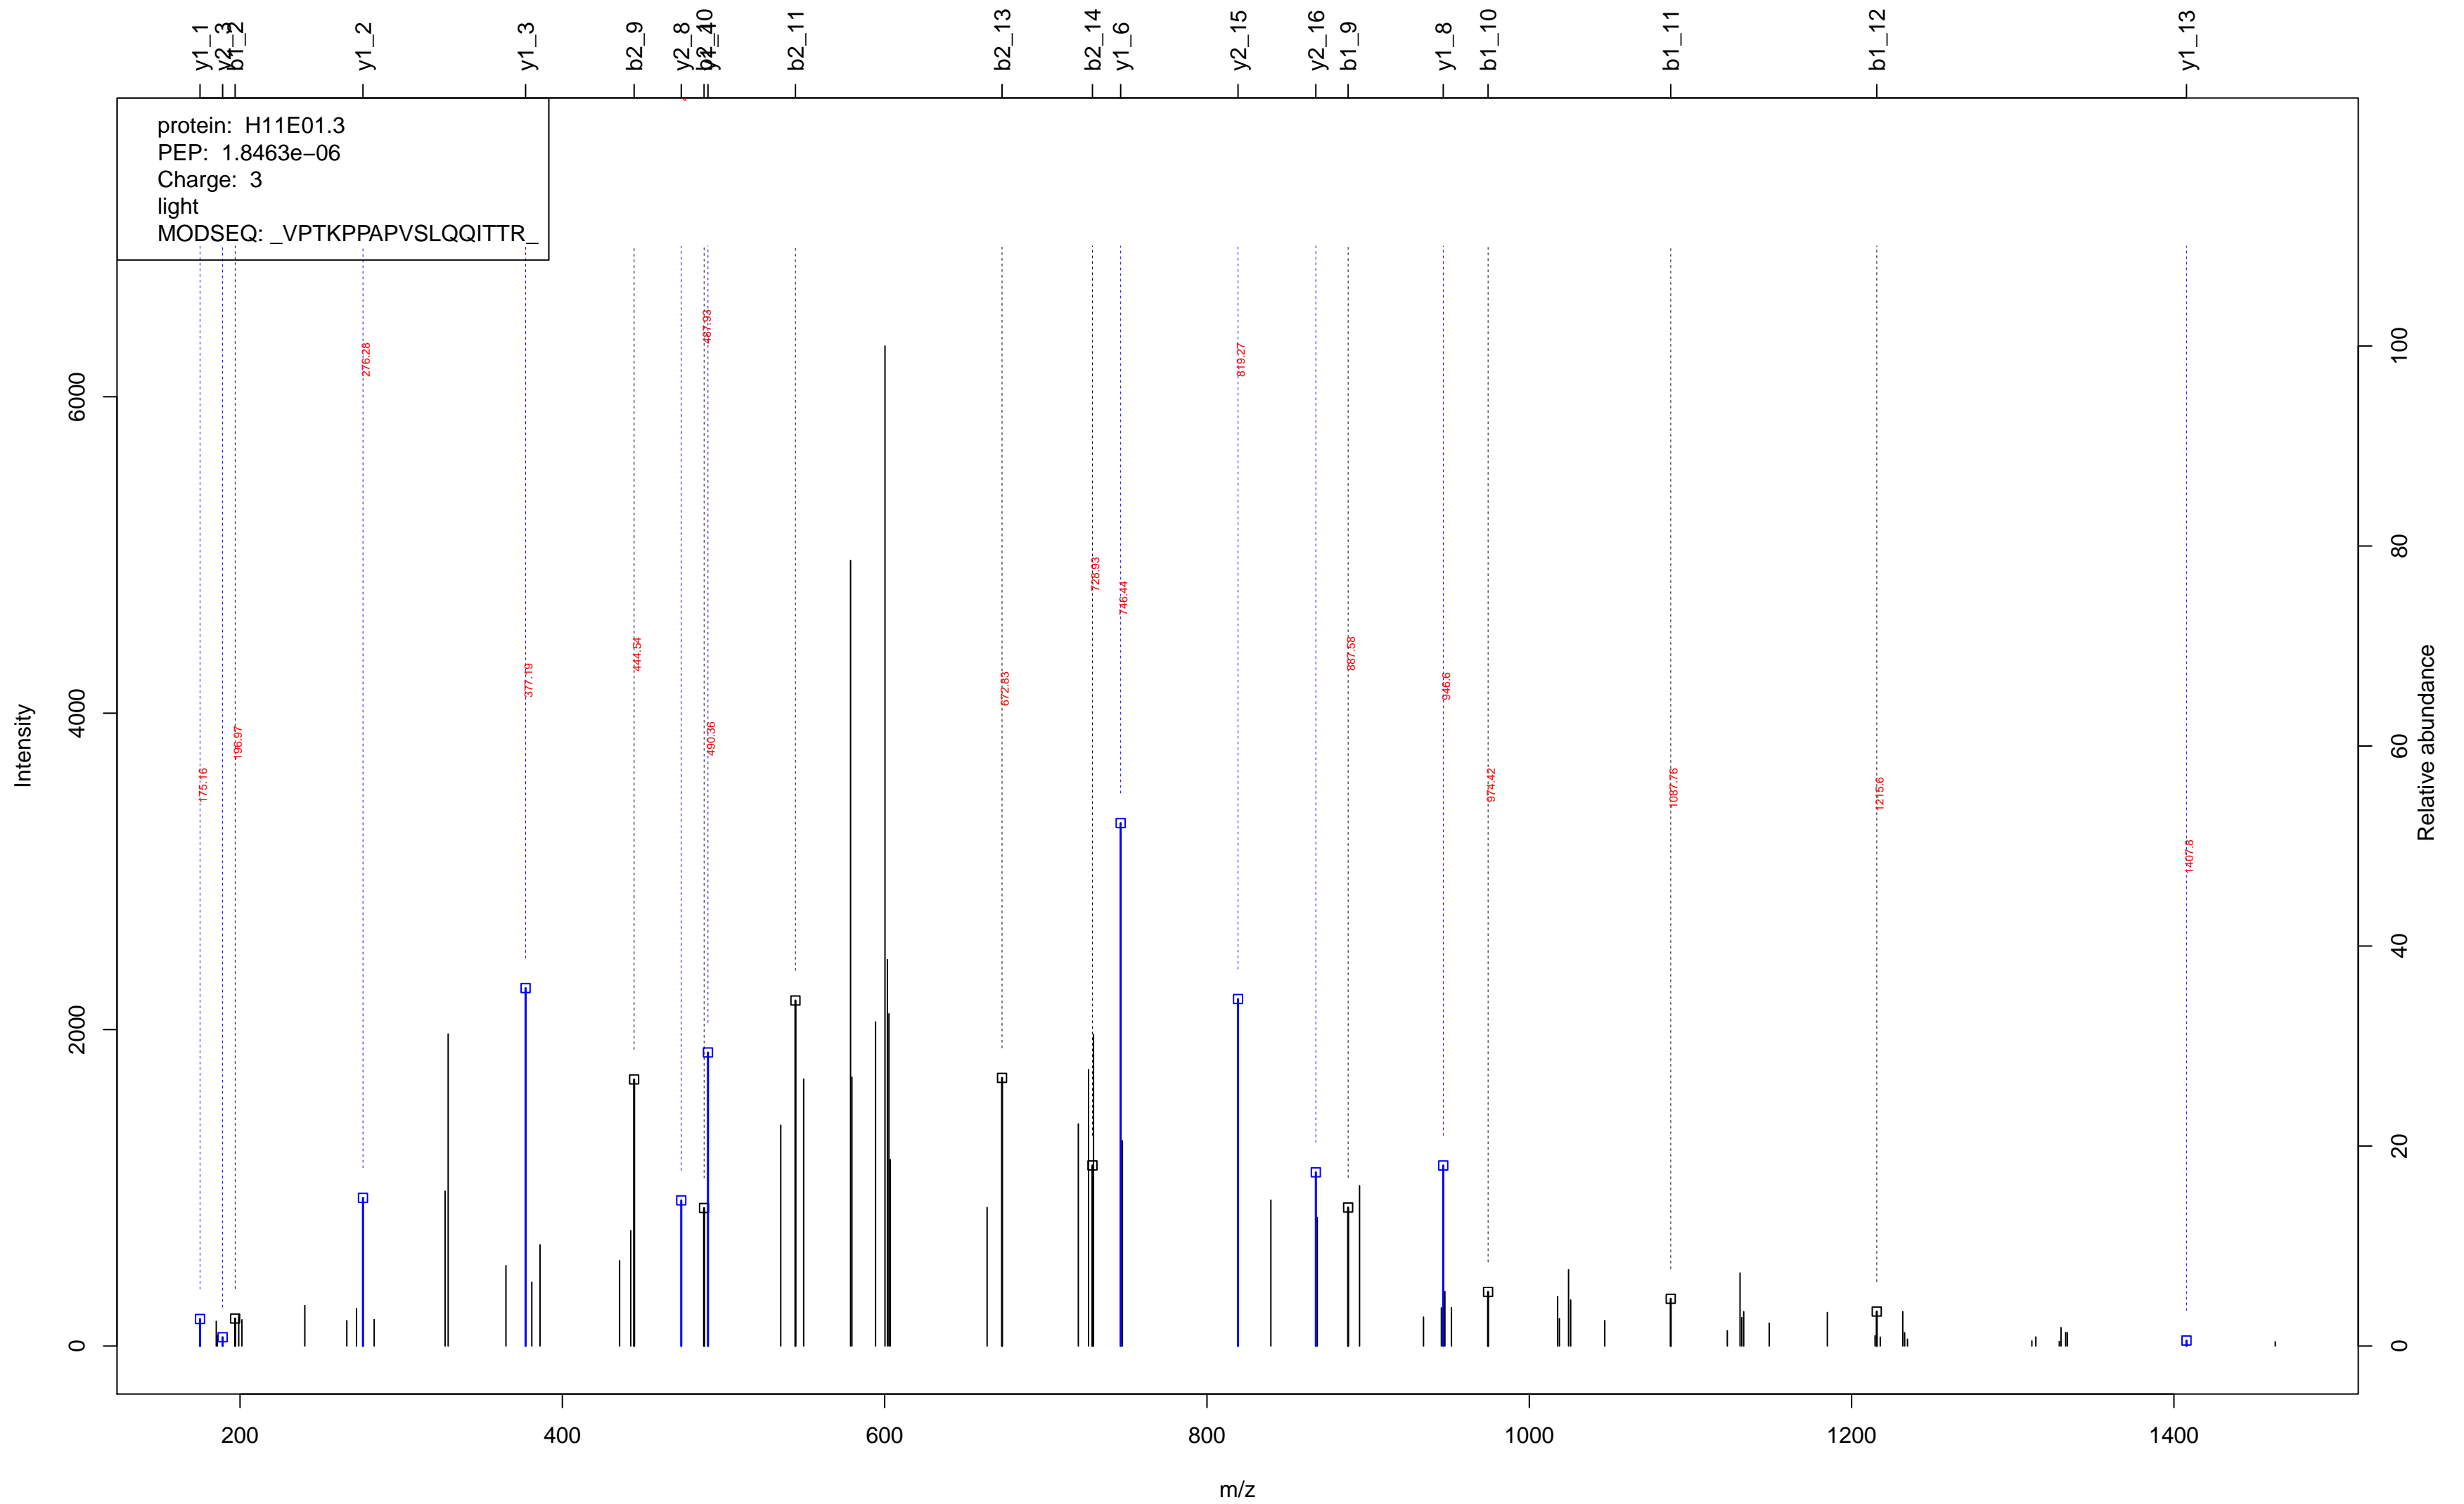

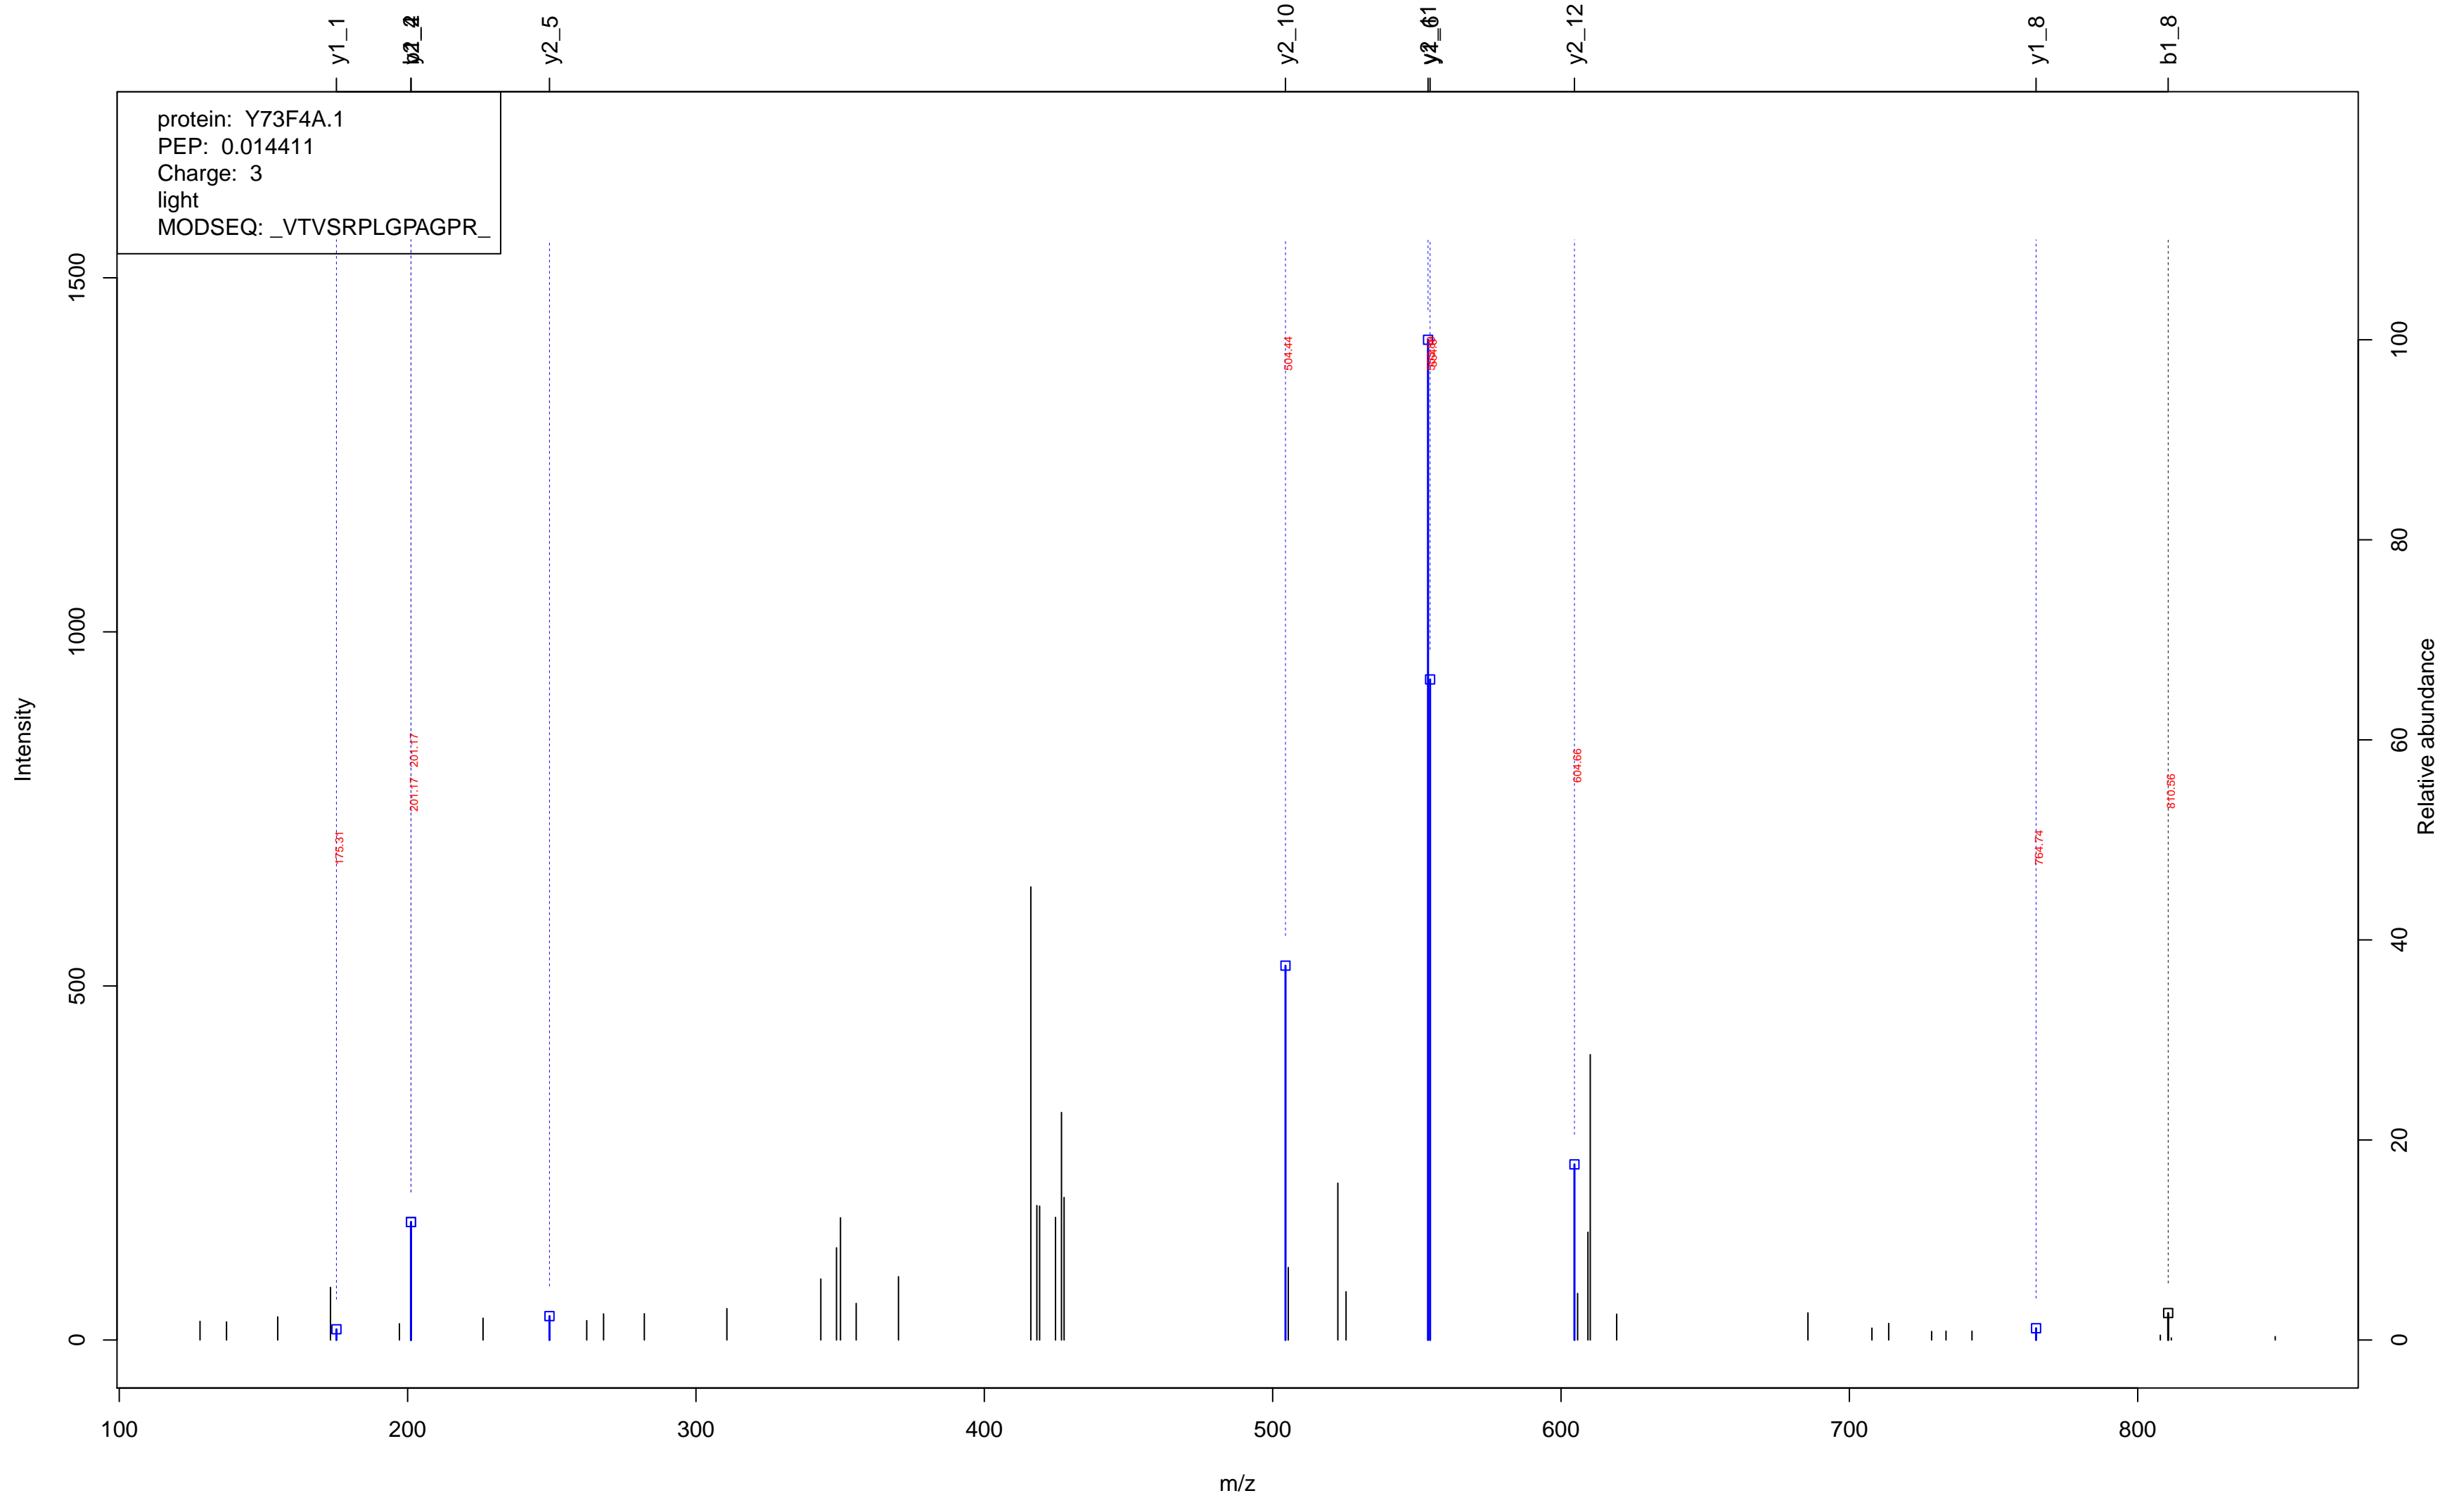

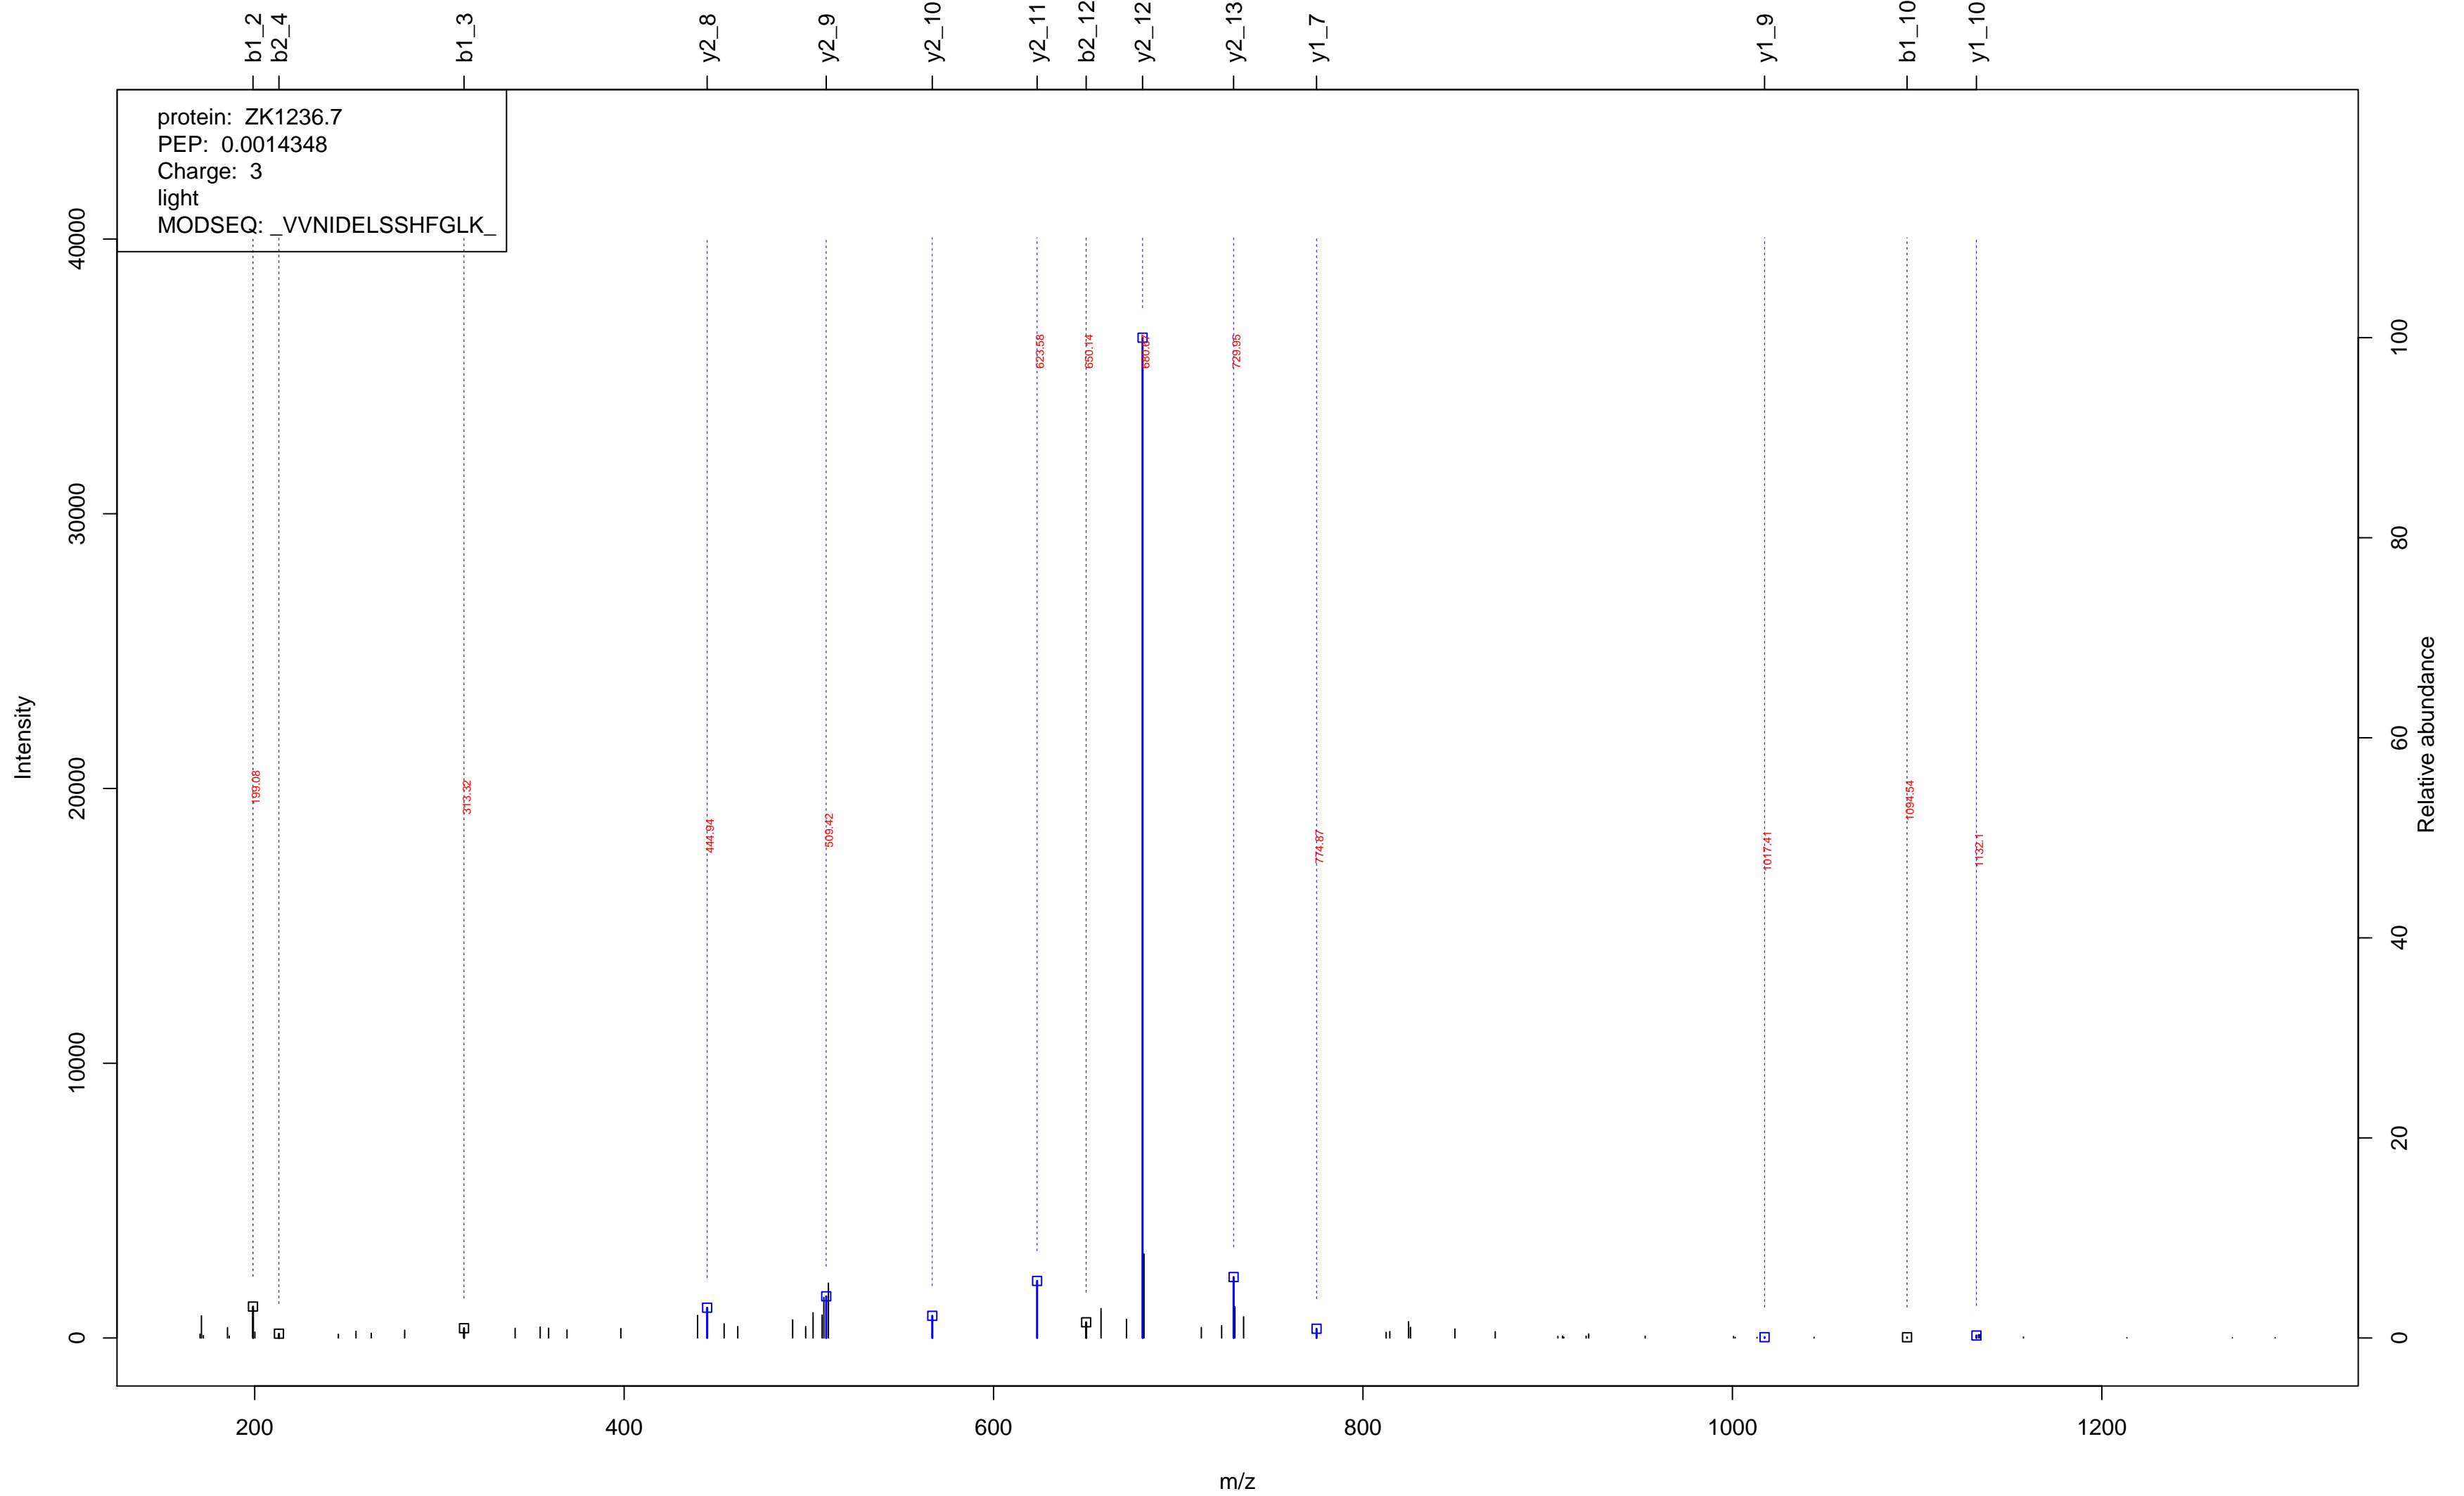

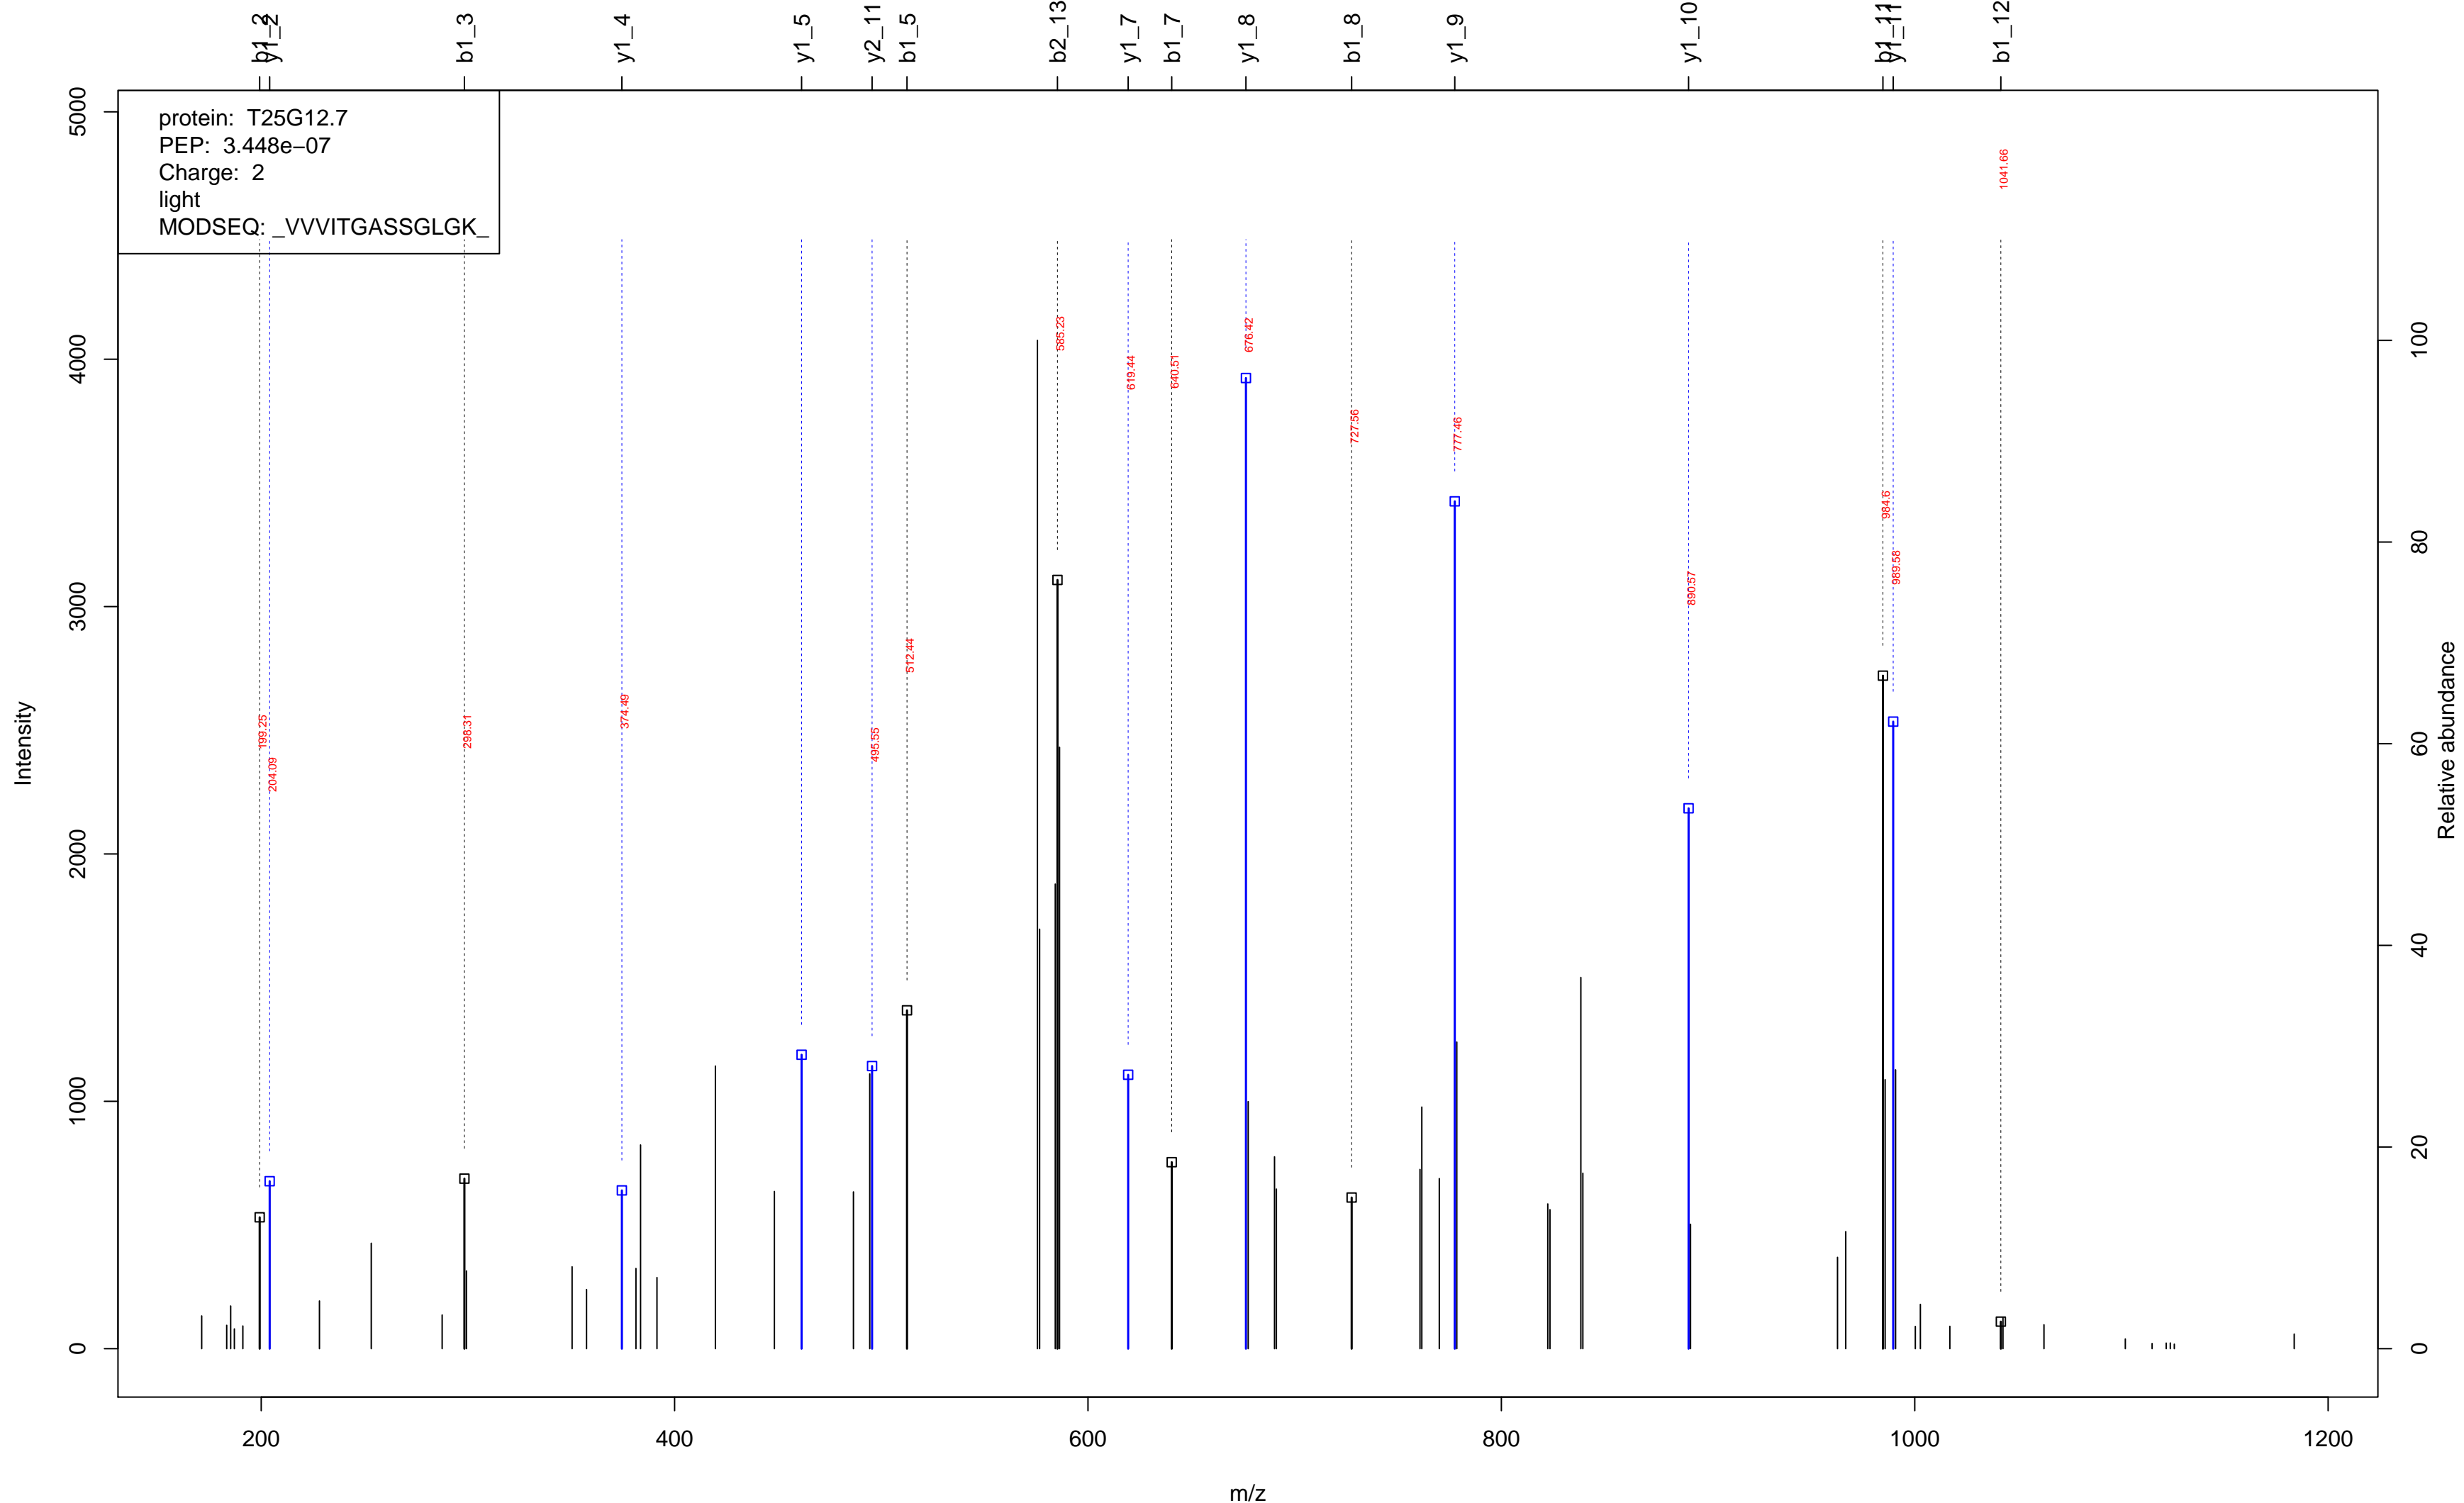

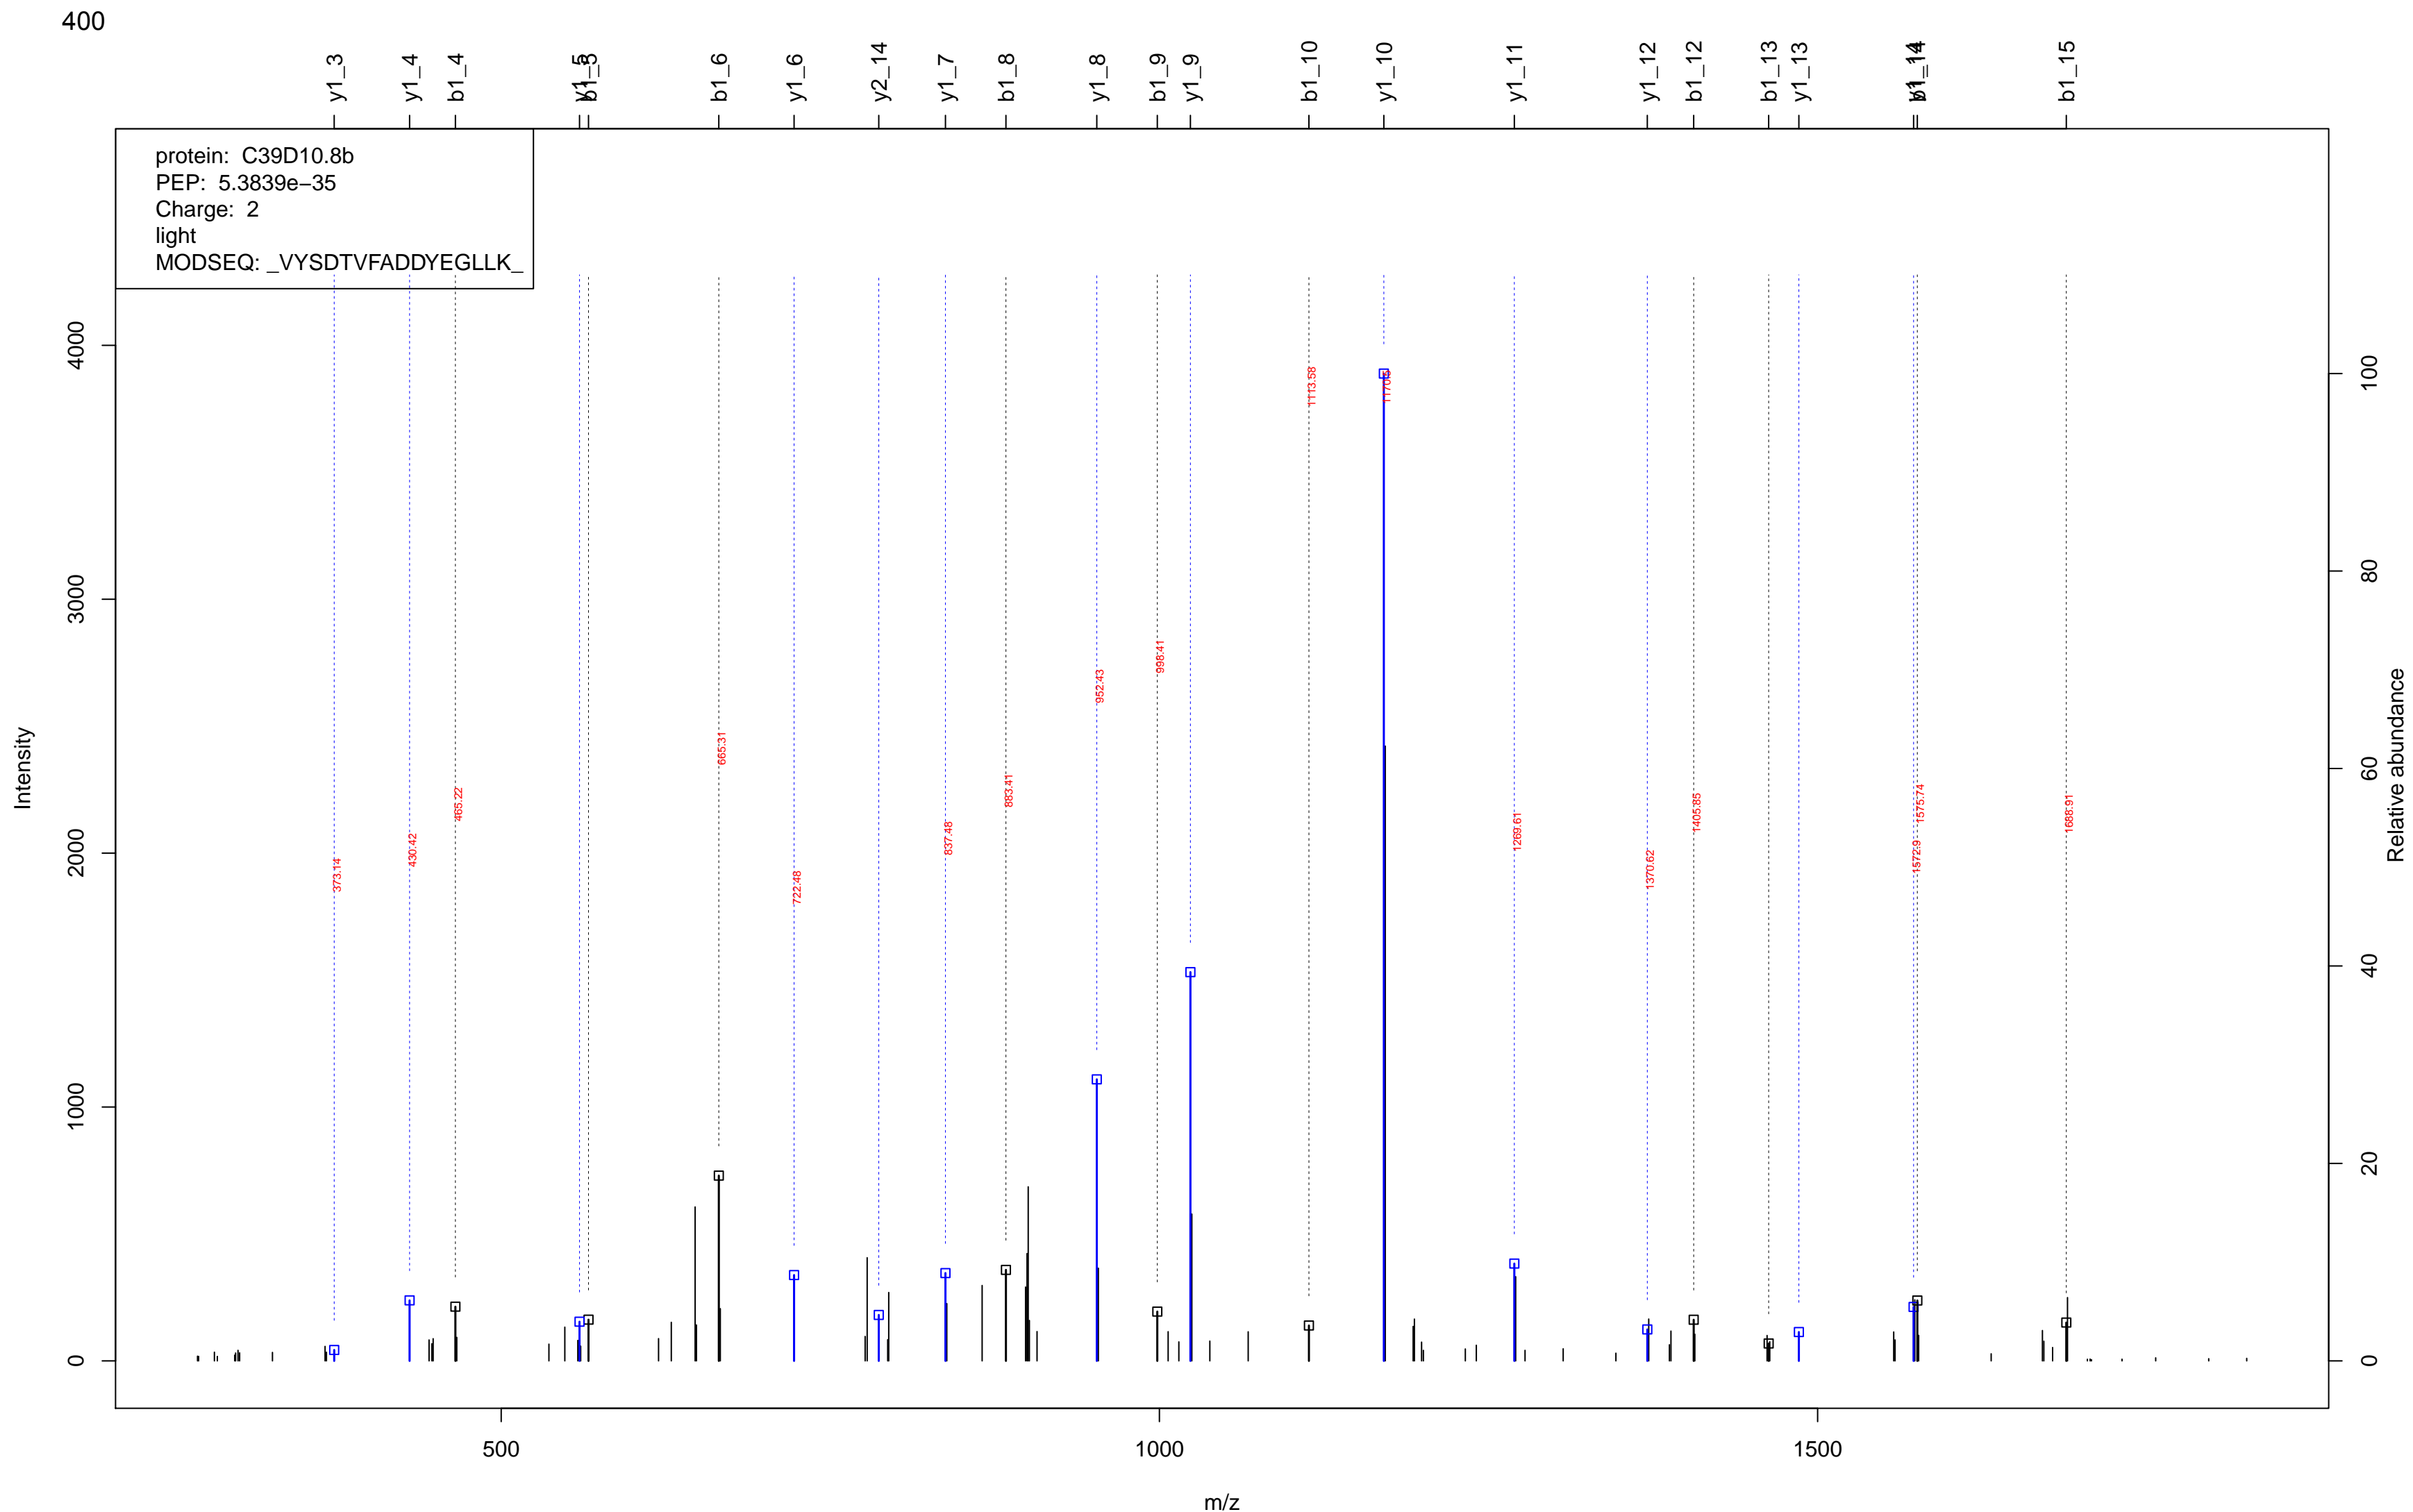



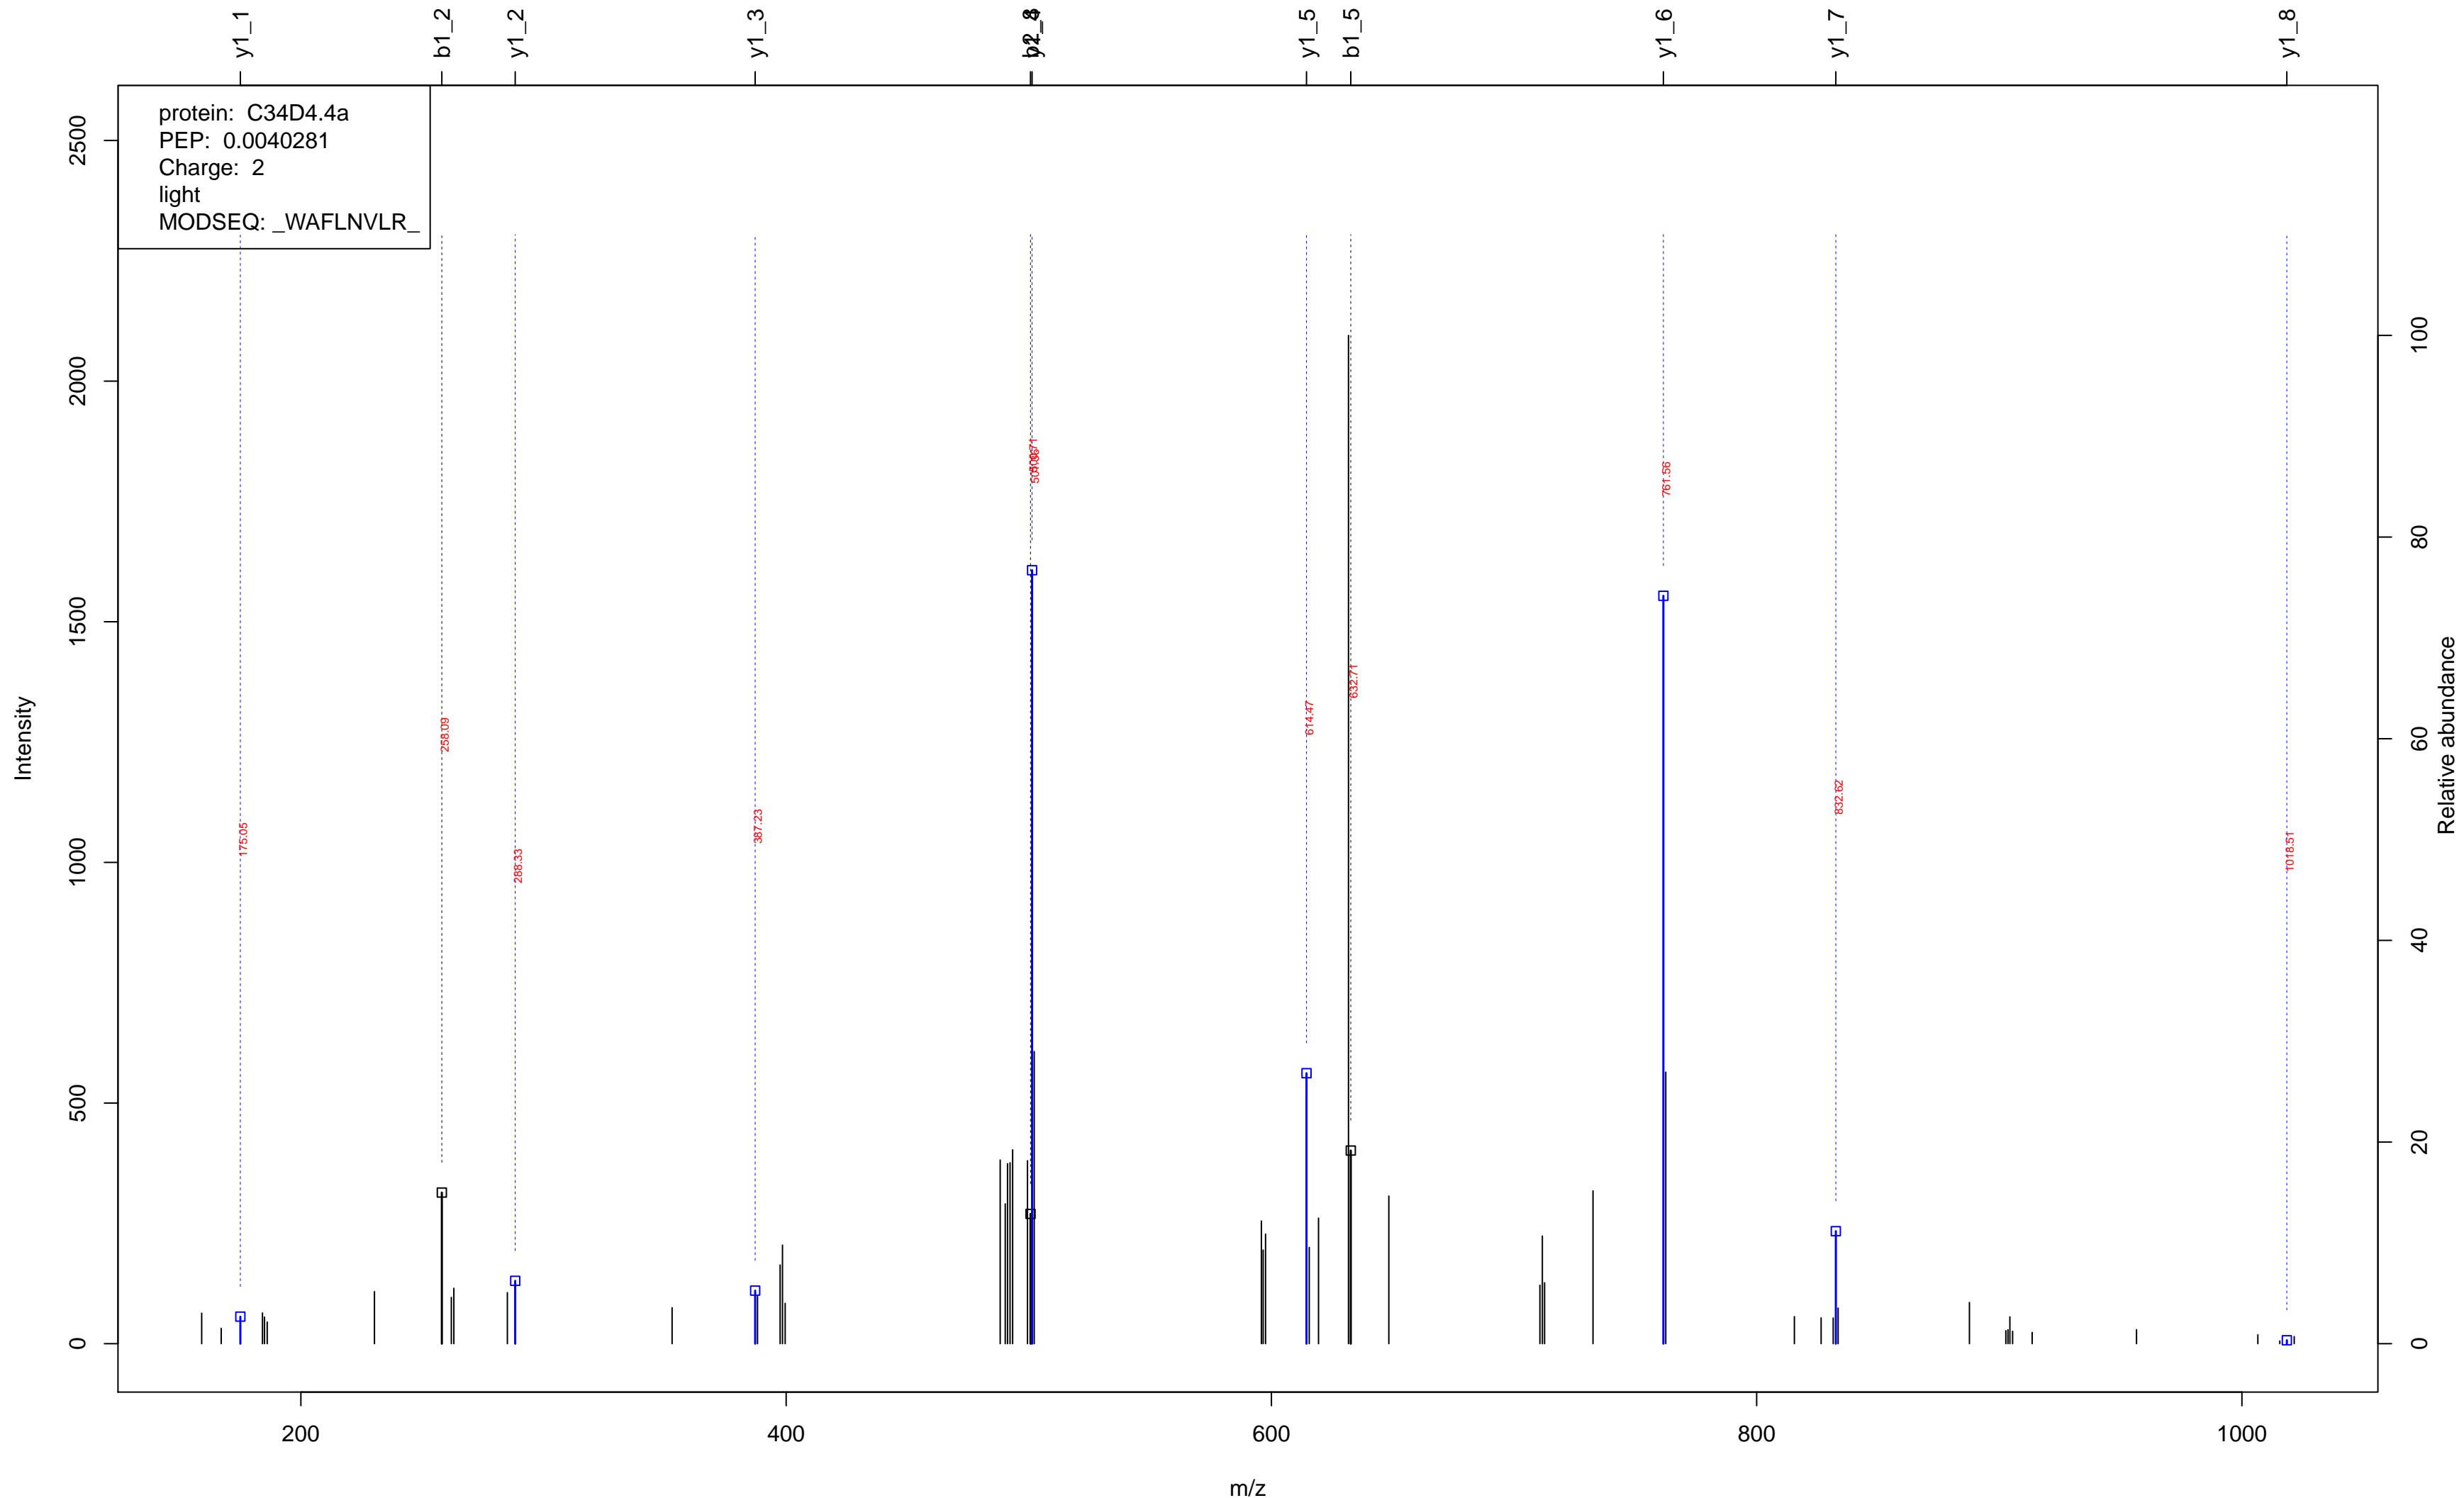

y1\_1  
y2\_3  
y1\_2  
b1\_2  
y2\_6  
y2\_8  
y2\_9  
y2\_10  
y2\_11  
b1\_5  
y2\_12  
y1\_7  
y1\_8  
y1\_9

protein: W04G3.3  
PEP: 0.00065098  
Charge: 3  
heavy  
MODSEQ: \_WFQVINS~~PH~~VIR\_

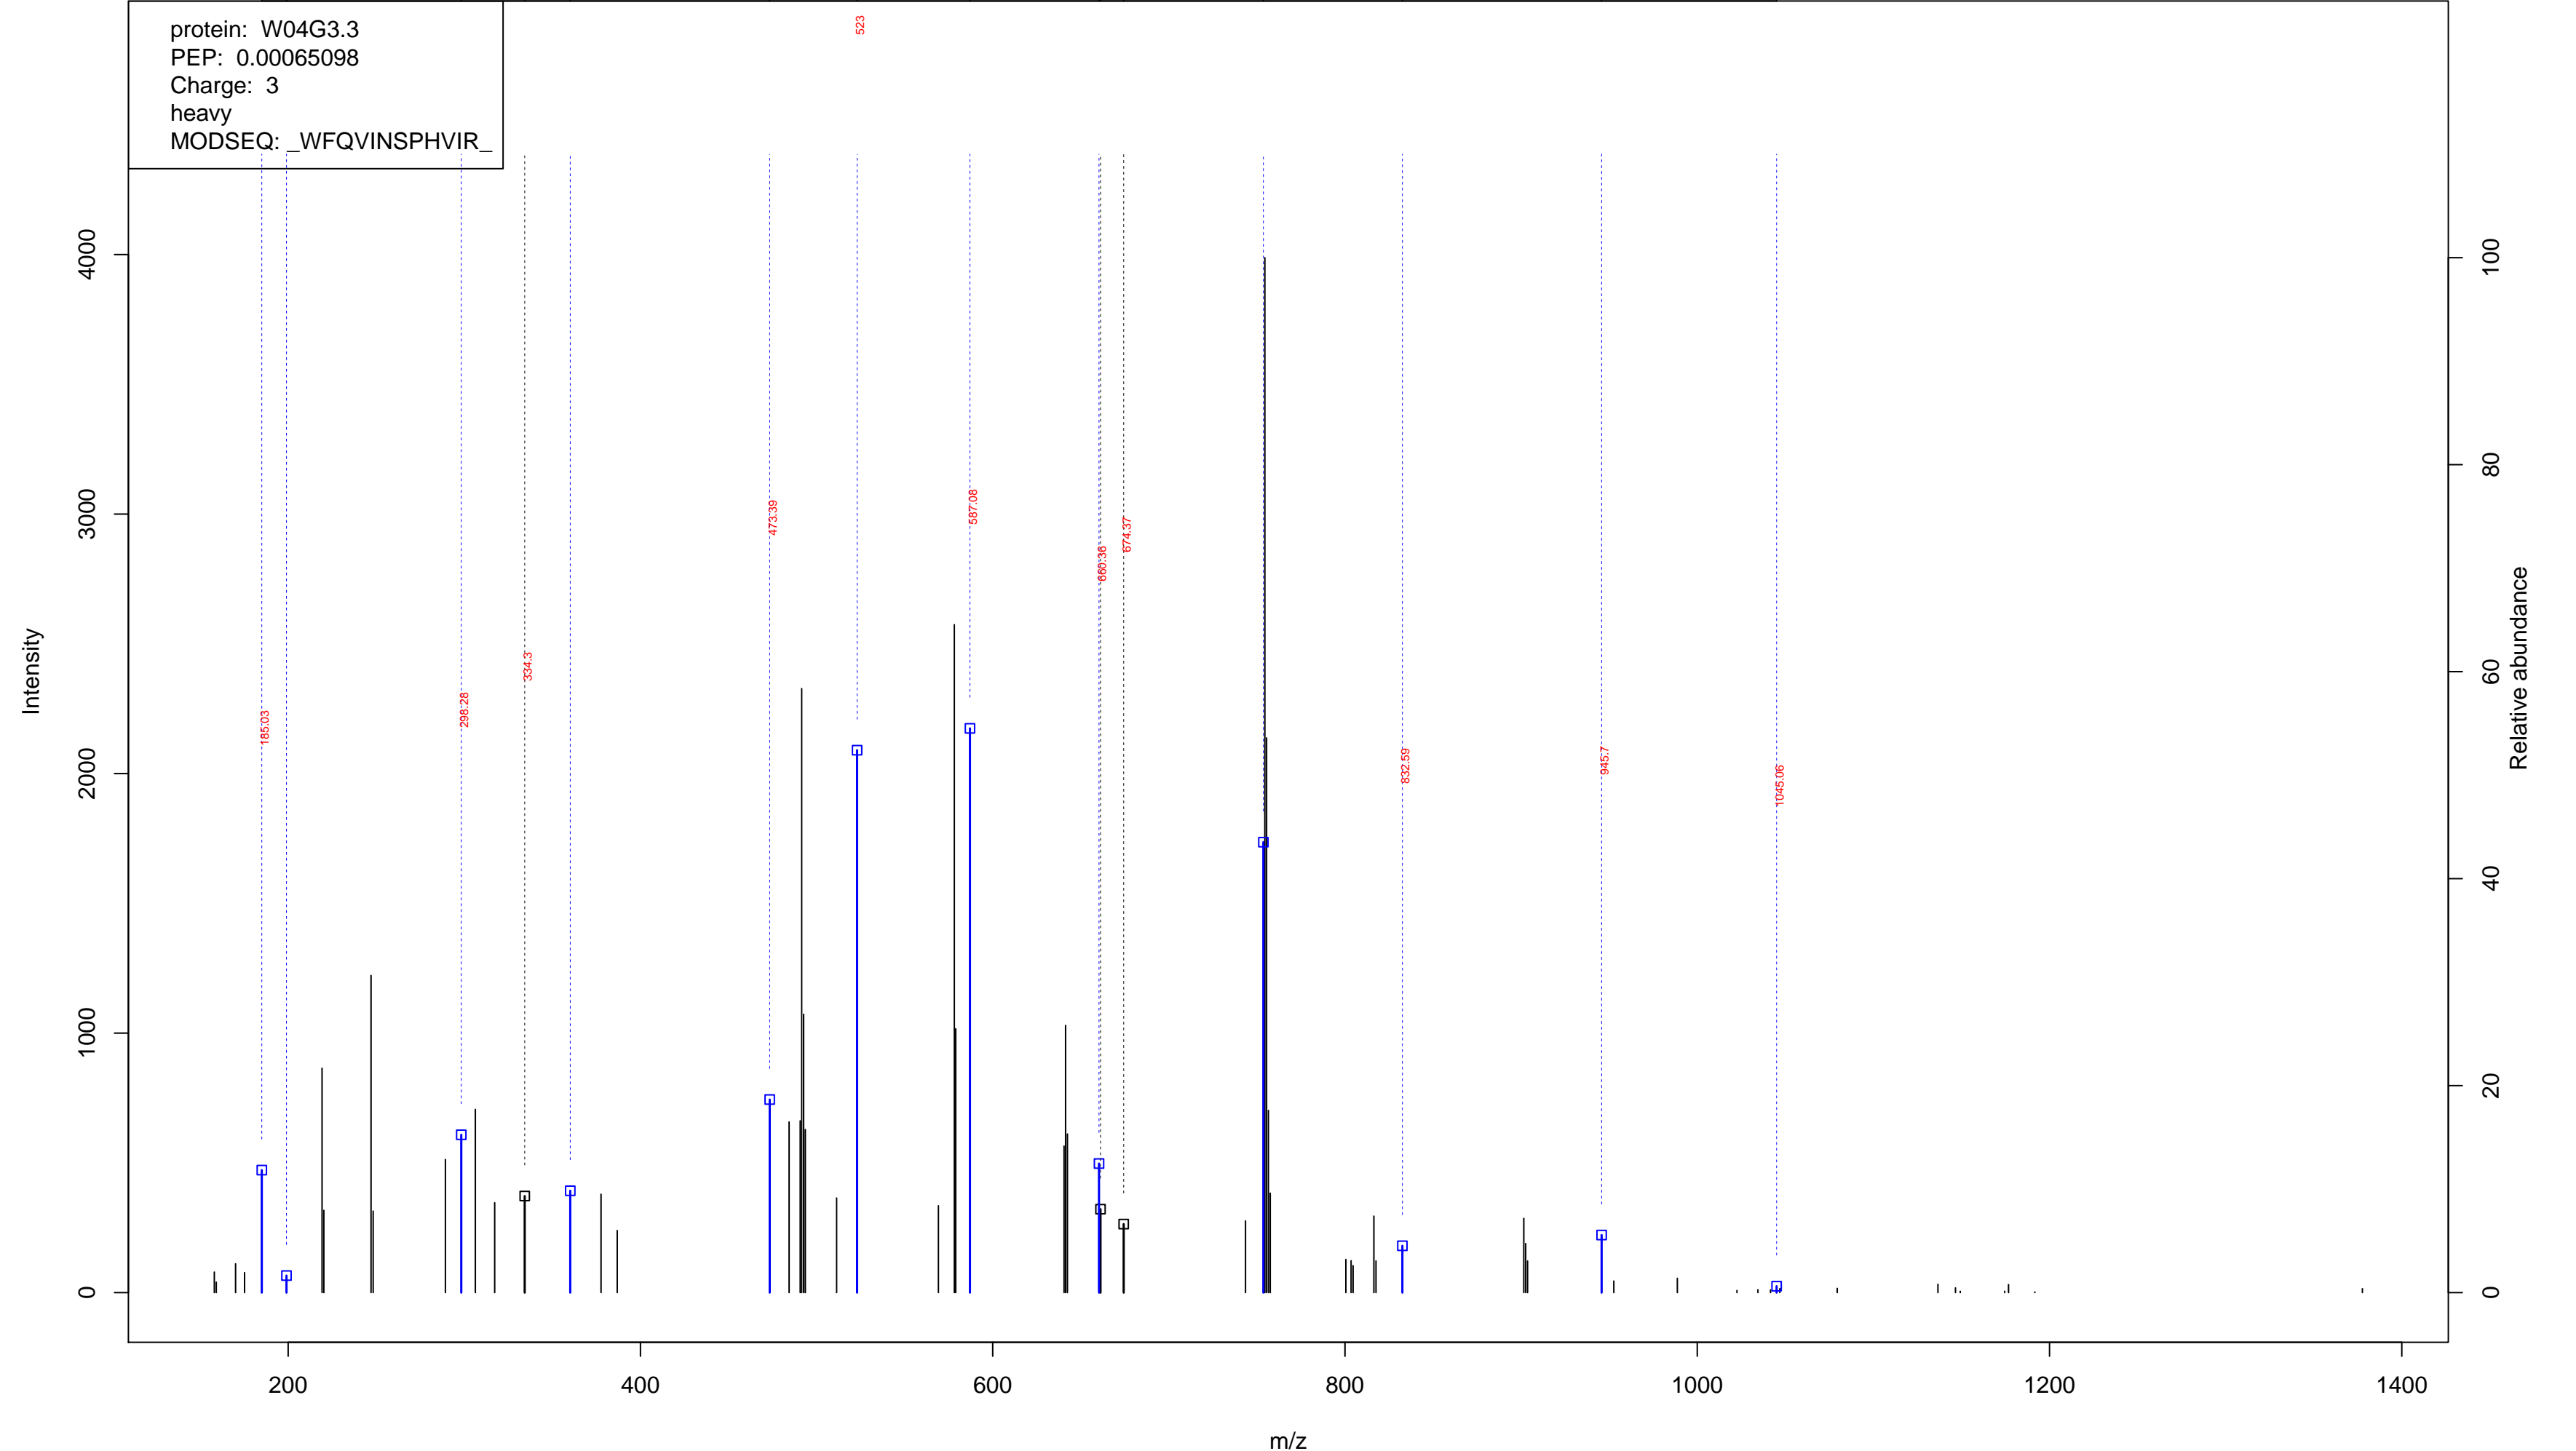

b1\_3 y1\_3 b1\_3 y1\_4 b1\_4 y1\_5 b1\_5 b2\_12 y1\_6 b2\_8 b1\_5 y1\_7 y1\_9 y1\_10 b1\_10 y1\_11 b1\_11 y1\_12 y1\_13 b1\_14 y1\_15

protein: ZC513.8  
PEP: 3.1747e-05  
Charge: 2  
light  
MODSEQ: \_YCALDGGVFFEDGTR\_

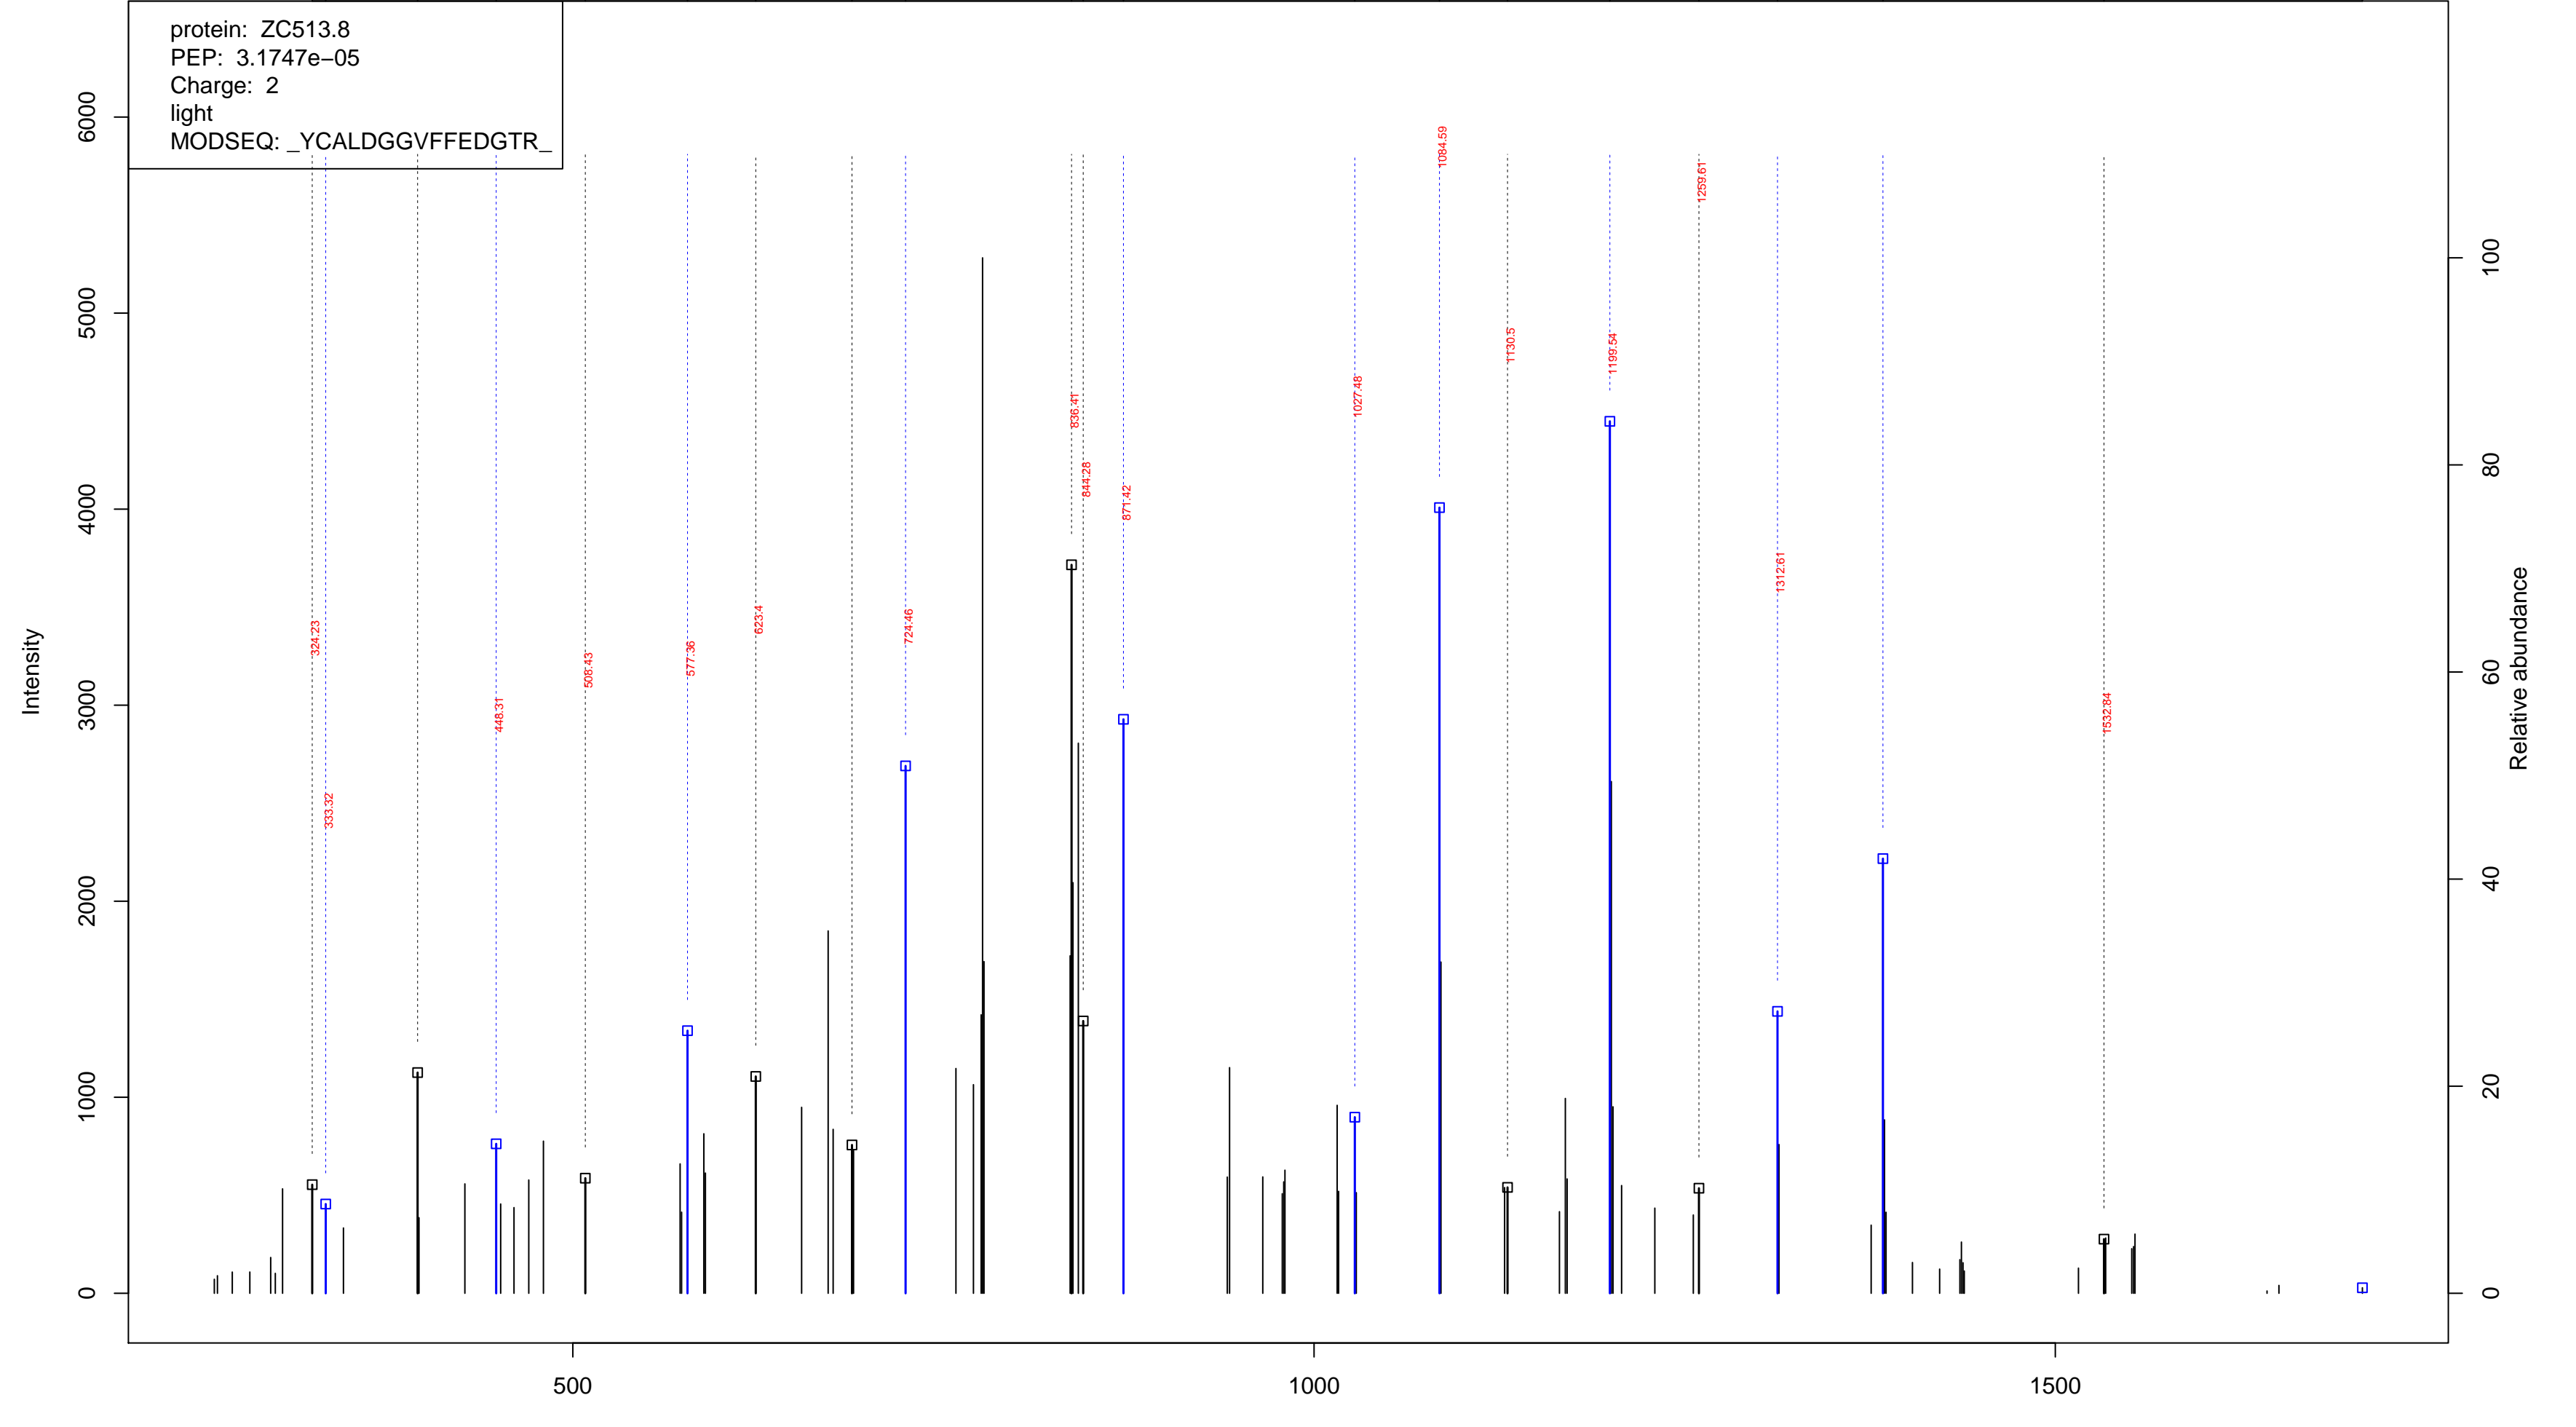

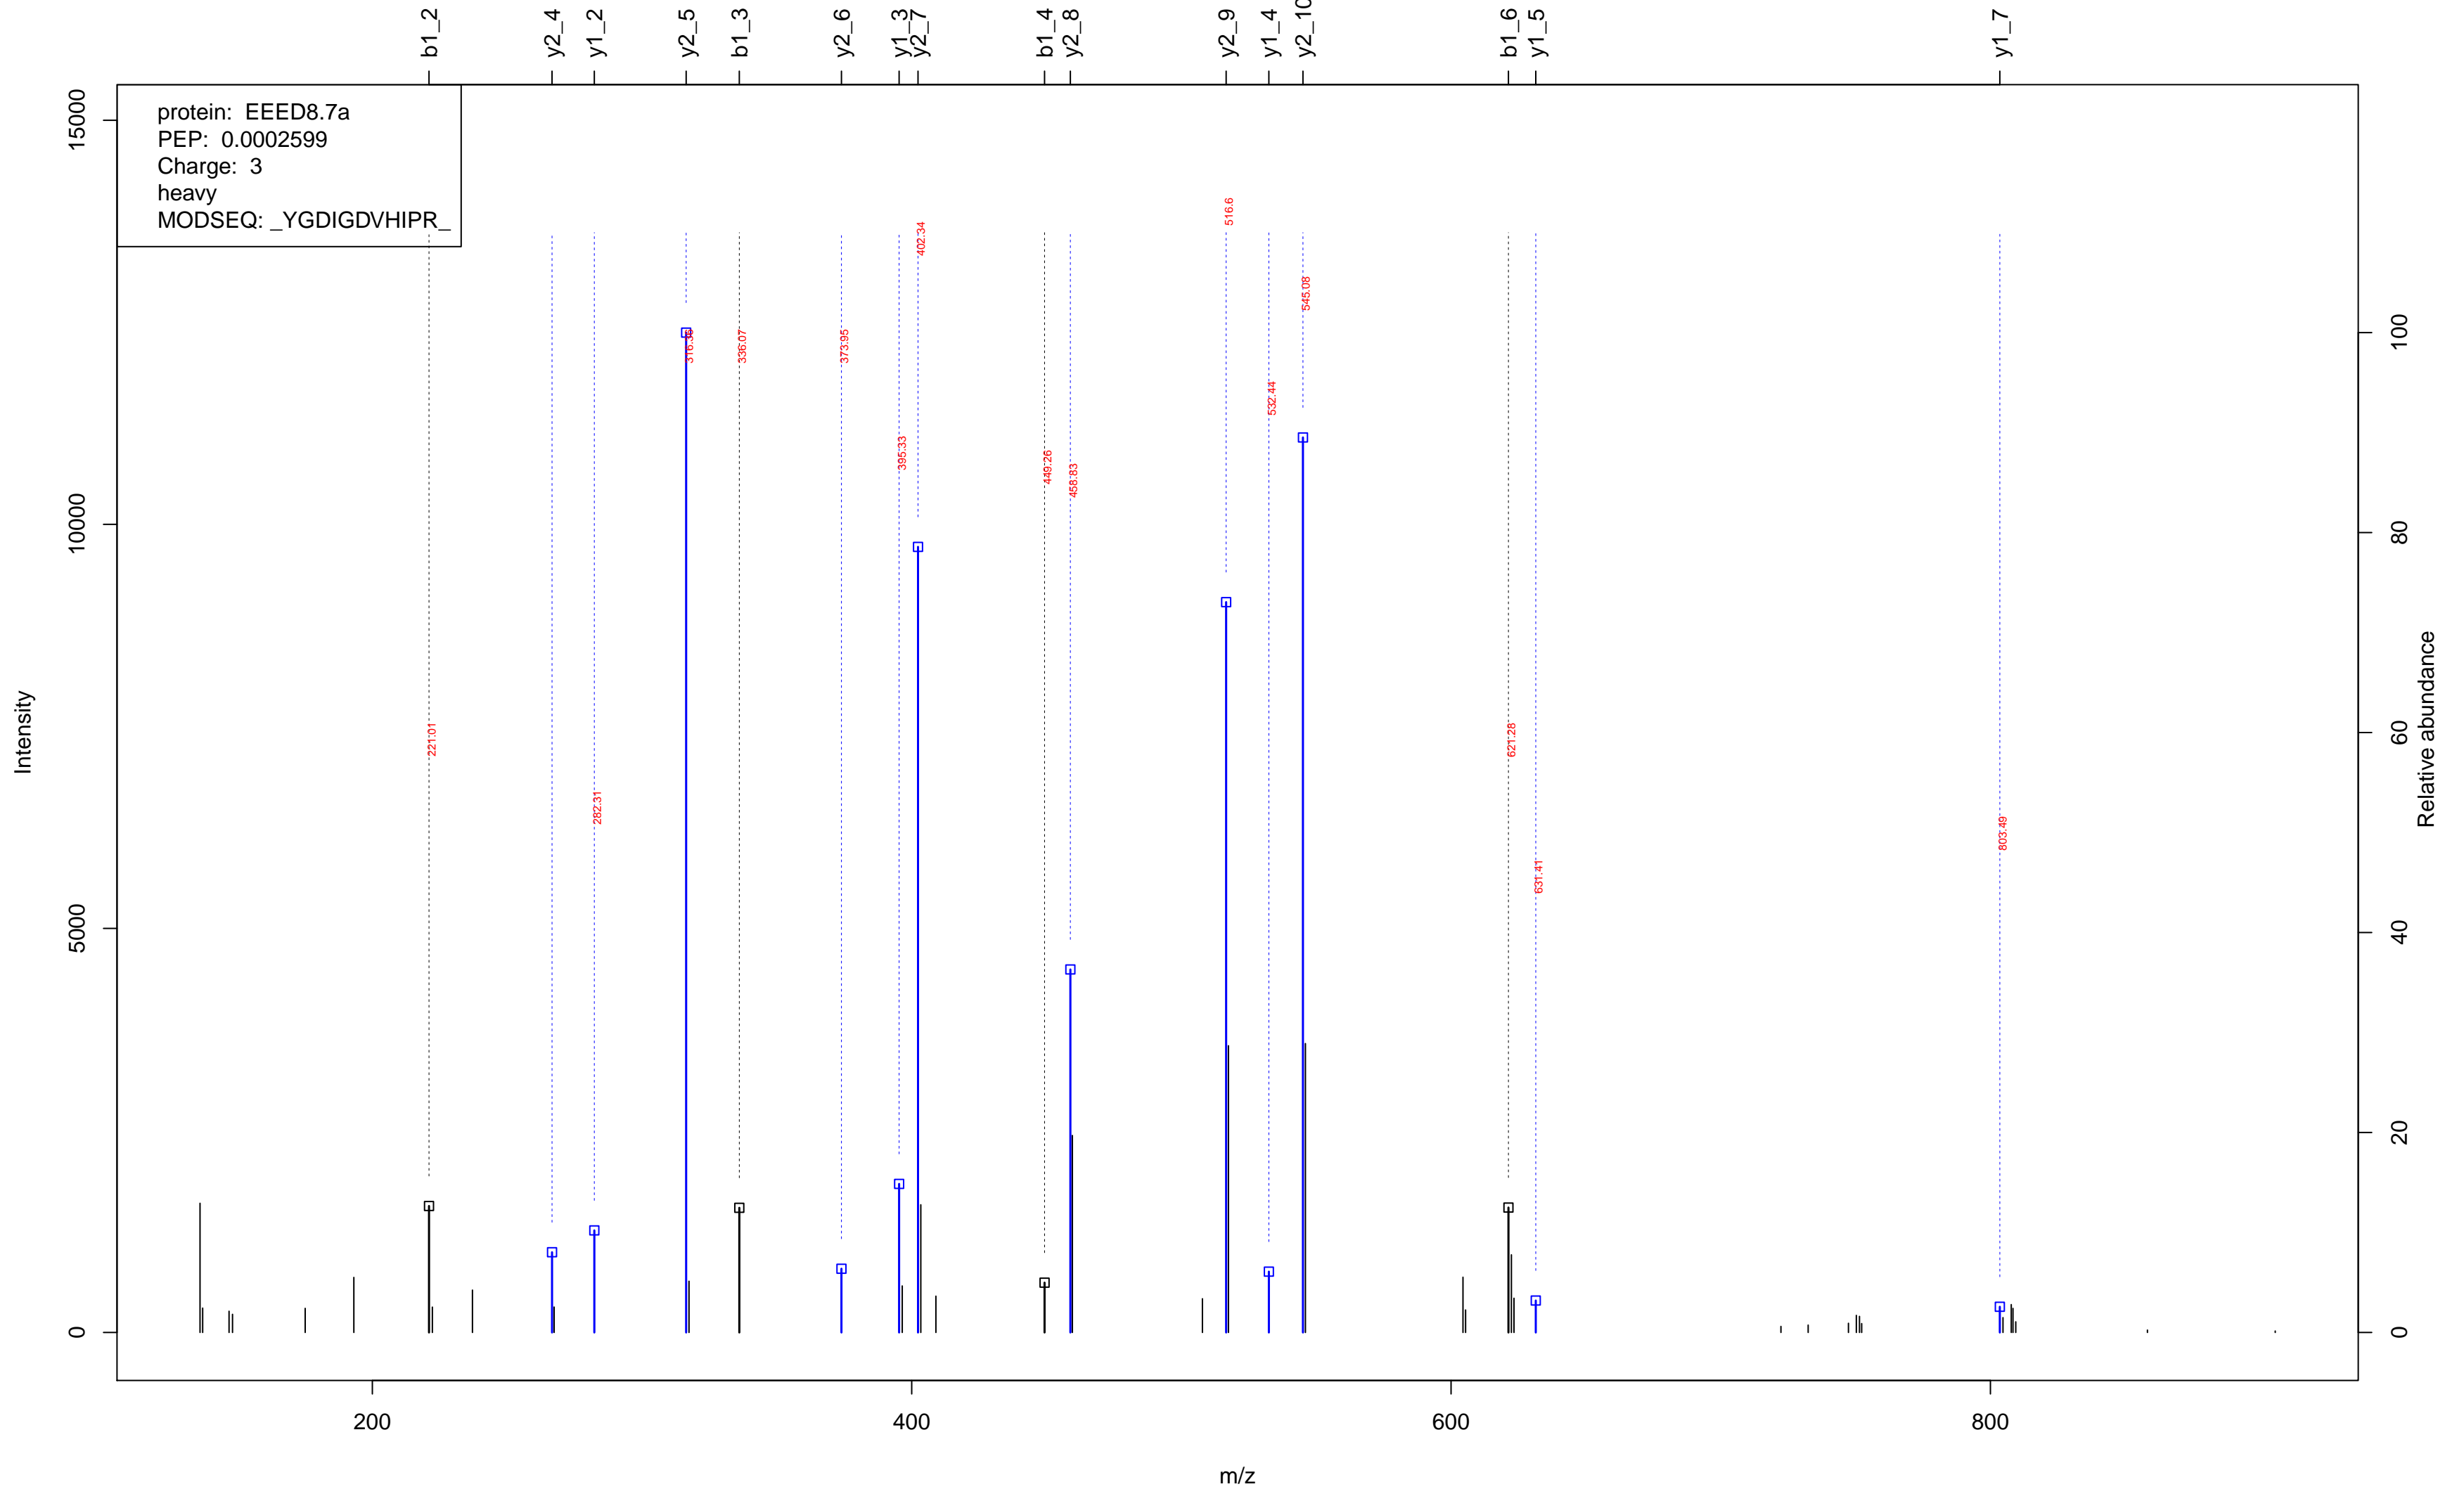

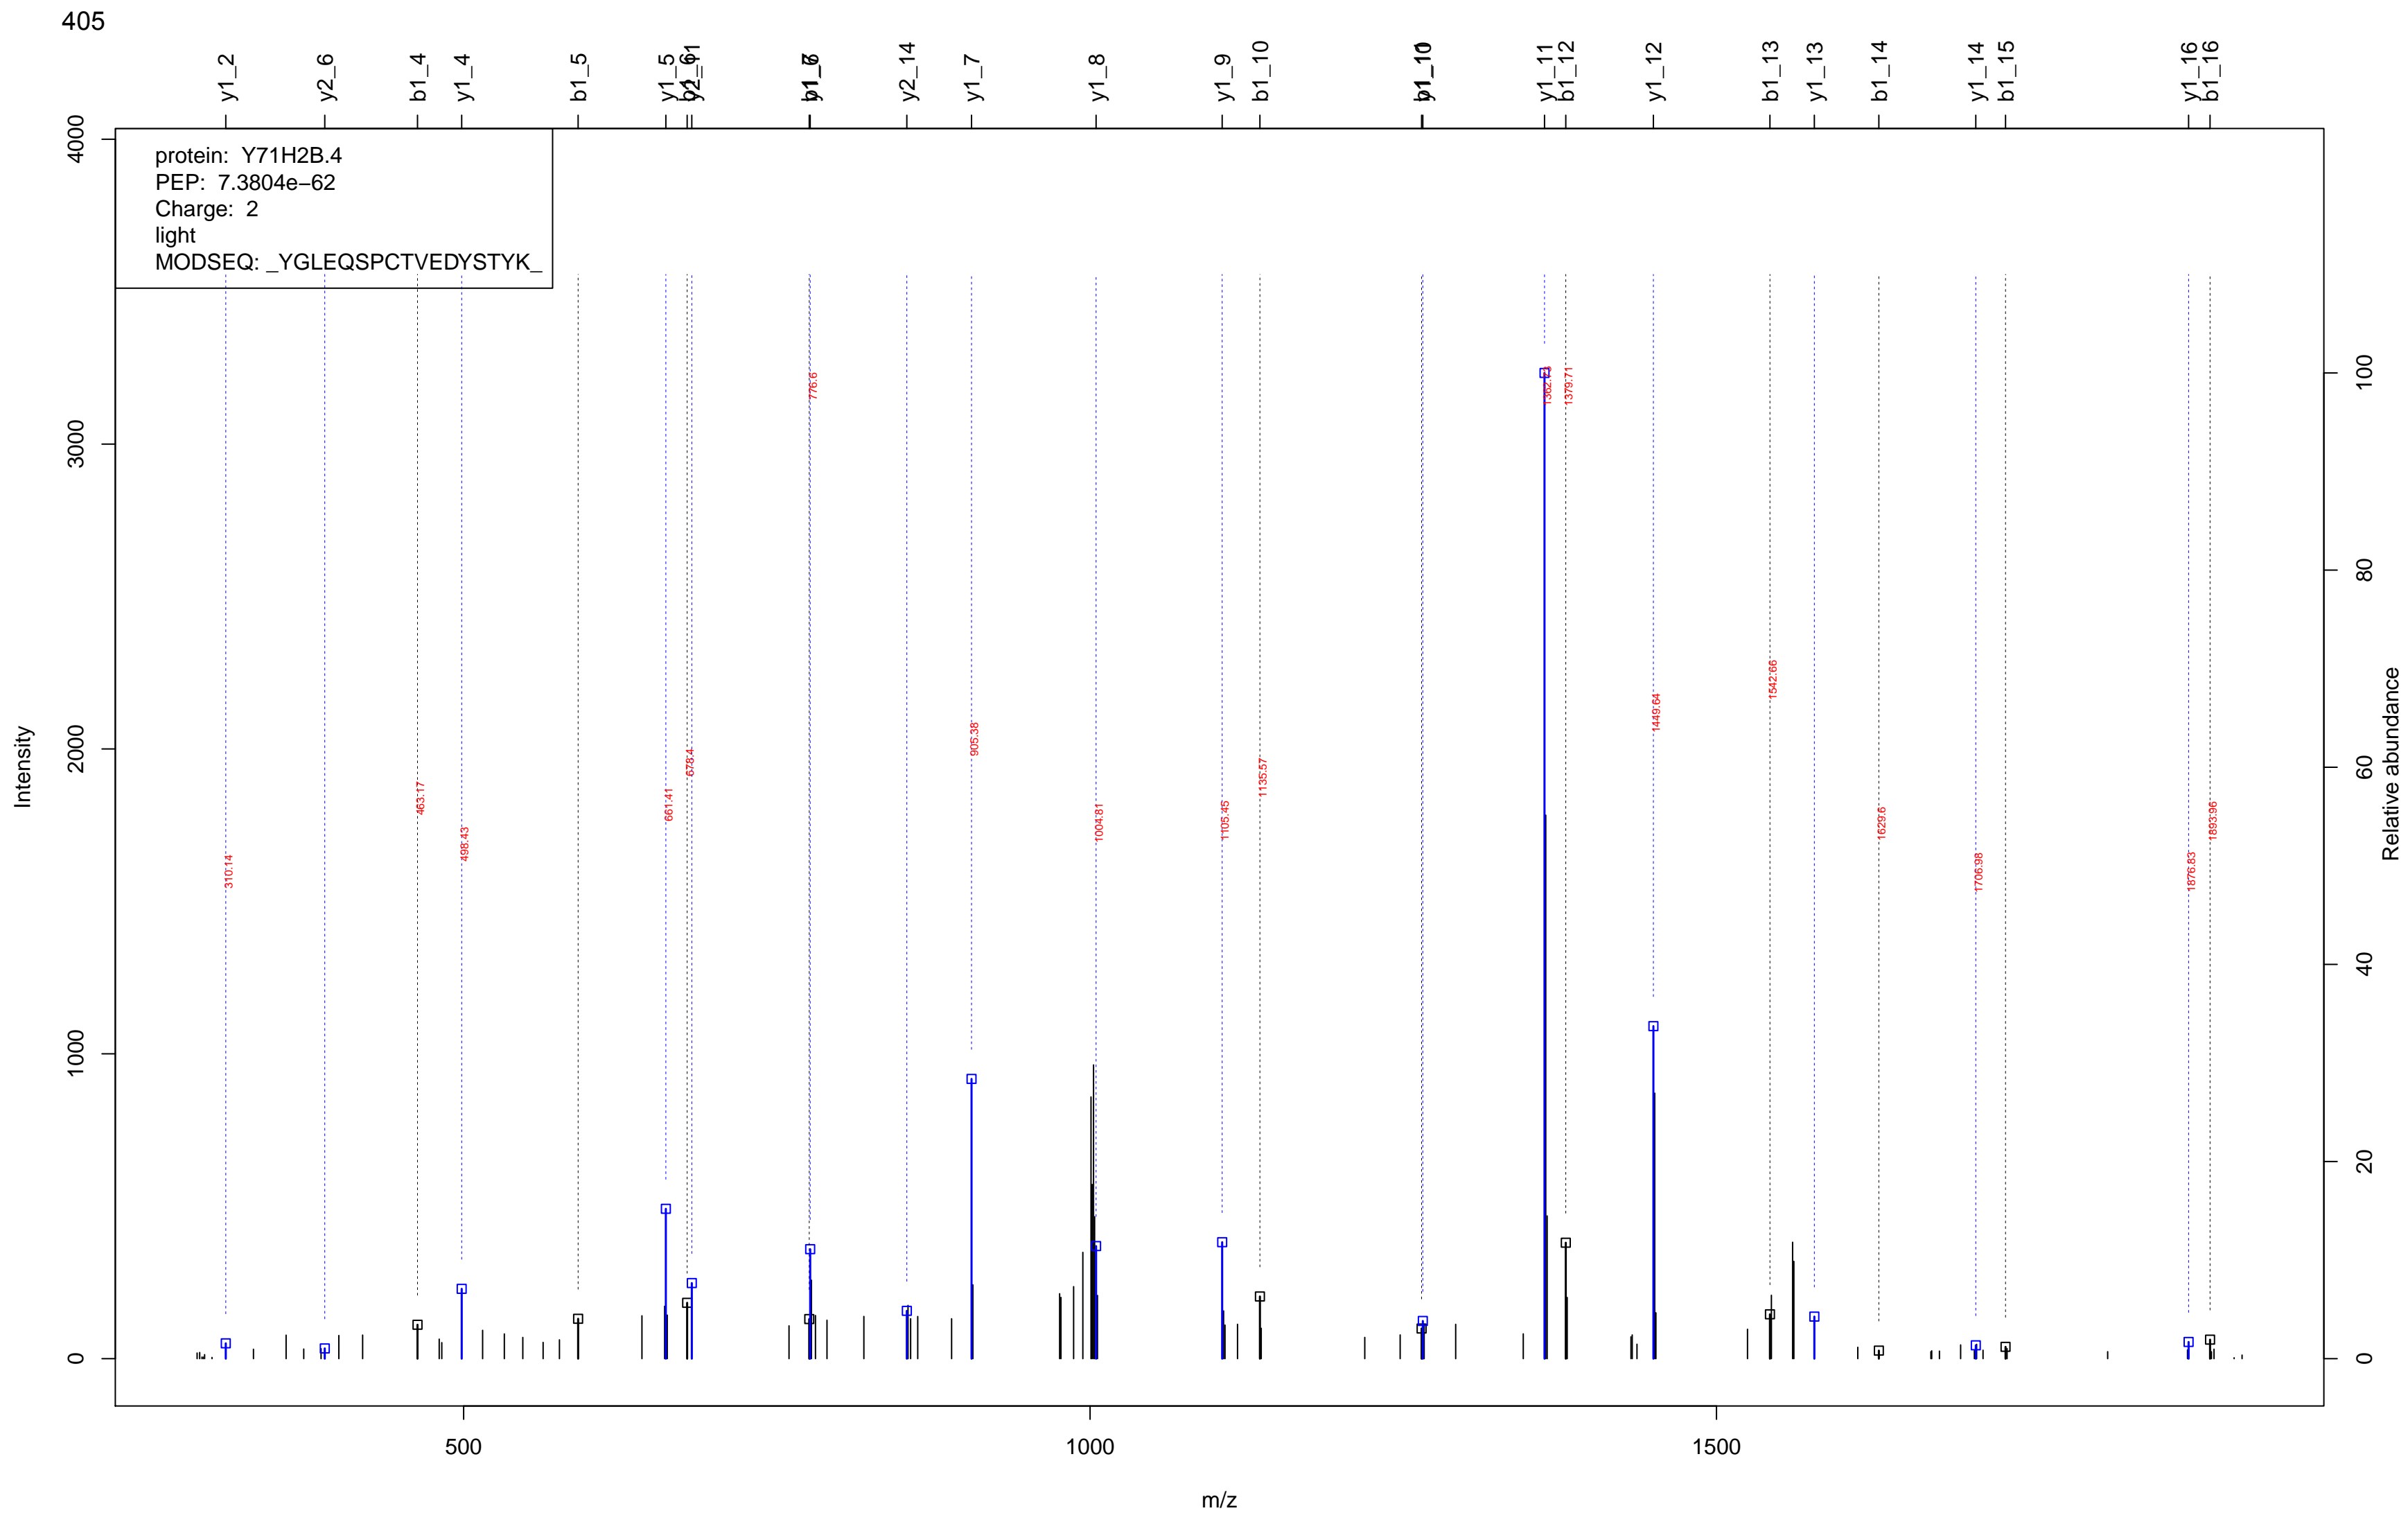

b1\_2  
b1\_3  
b1\_4  
y2\_9  
b2\_12  
y2\_12  
b2\_63  
y2\_13  
y2\_16  
b1\_9  
y1\_9  
b2\_19  
b2\_22  
b1\_12  
b1\_13

protein: W04C9.2  
PEP: 0.00012562  
Charge: 3  
light  
MODSEQ: \_YILPGTVVFPEQLPTVEDVQLK\_

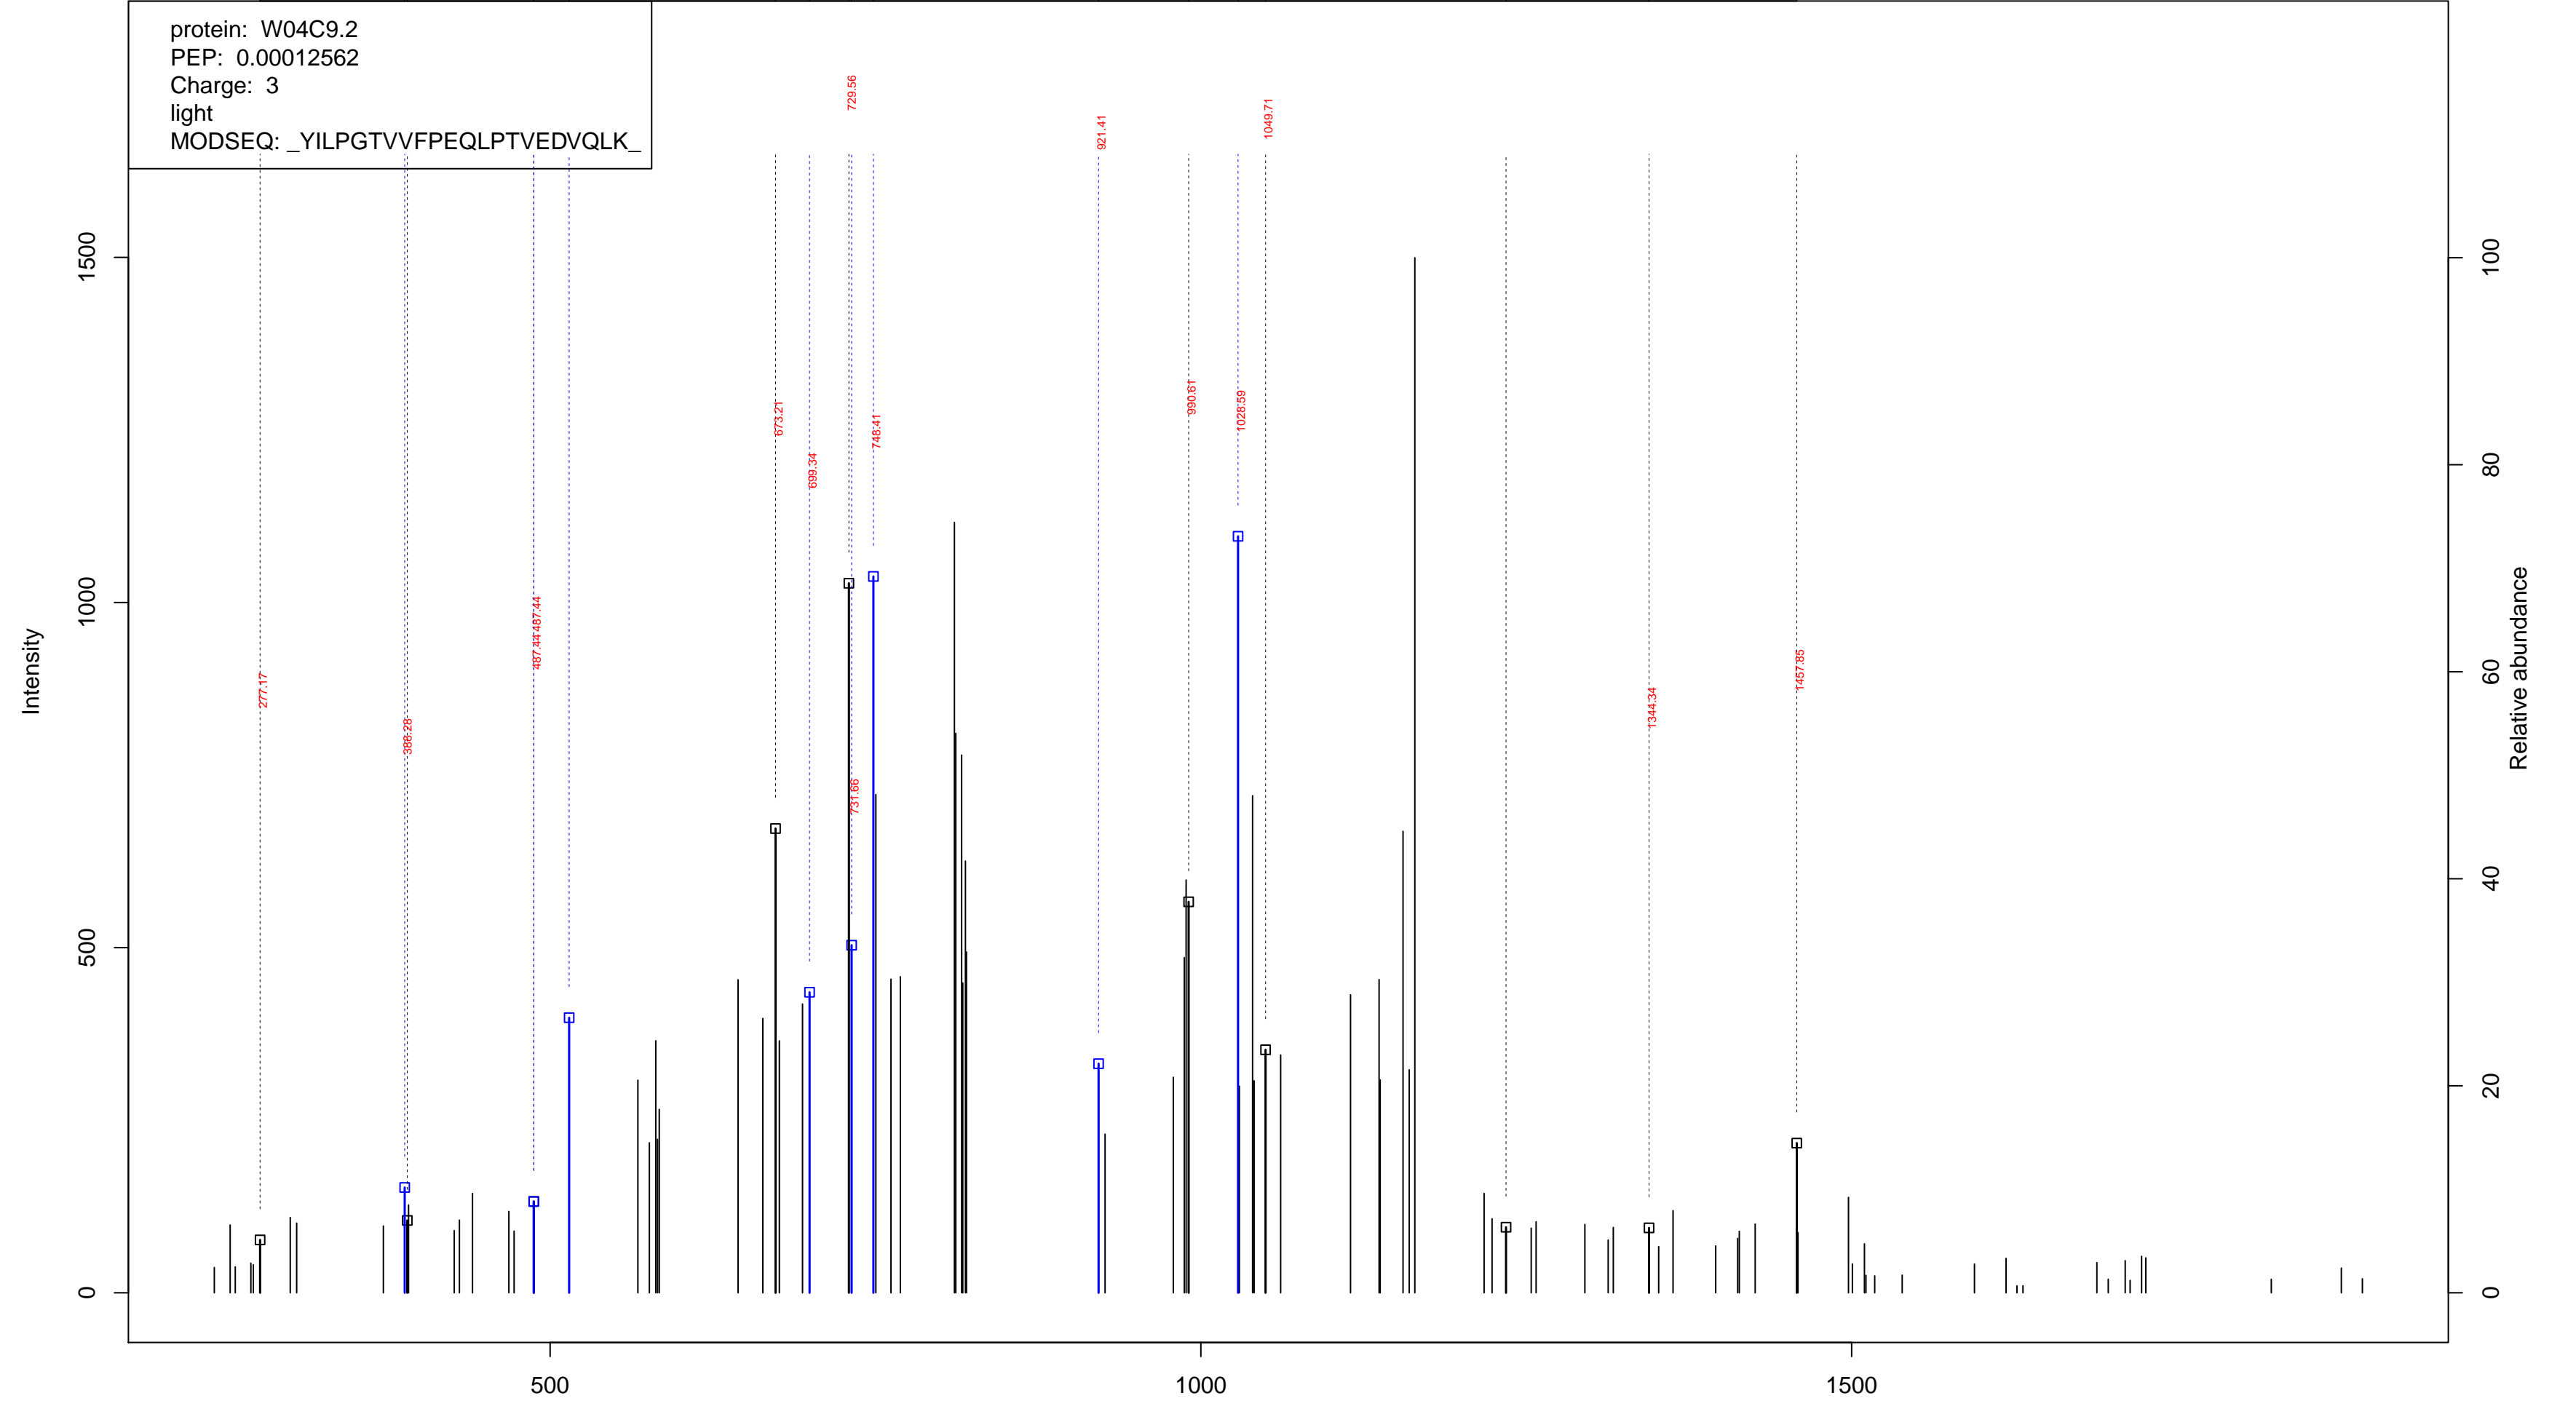

407

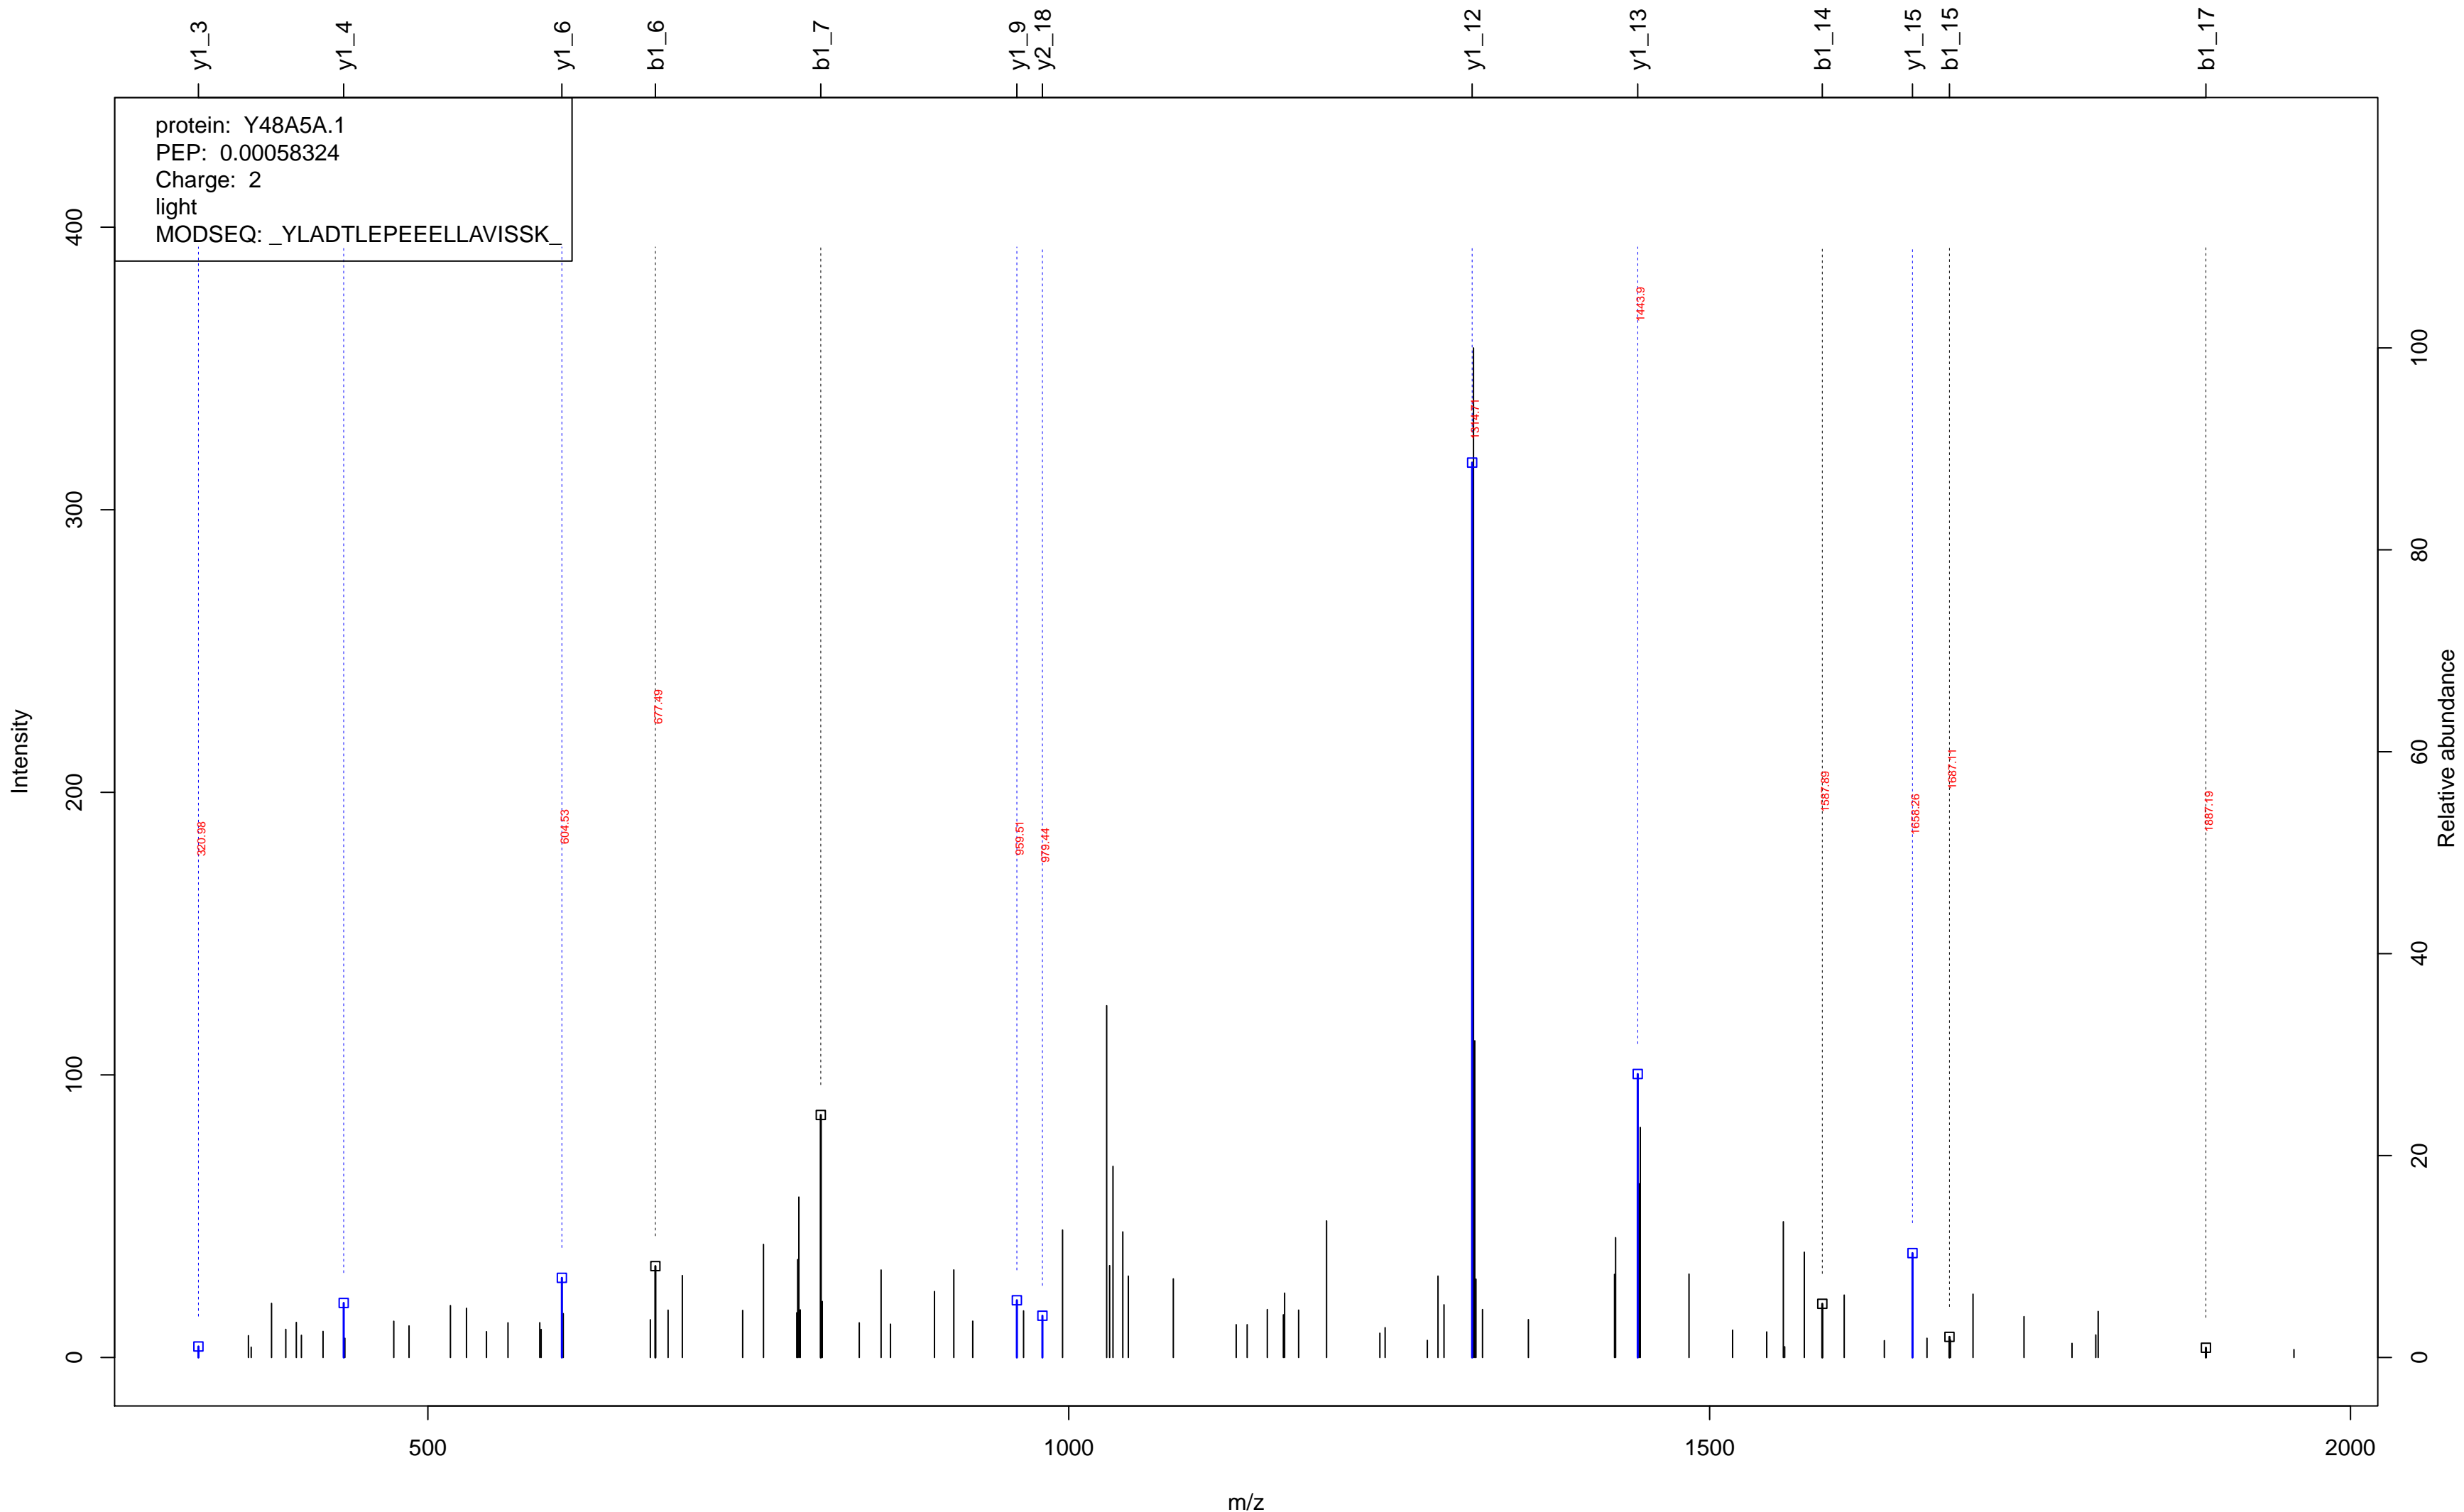

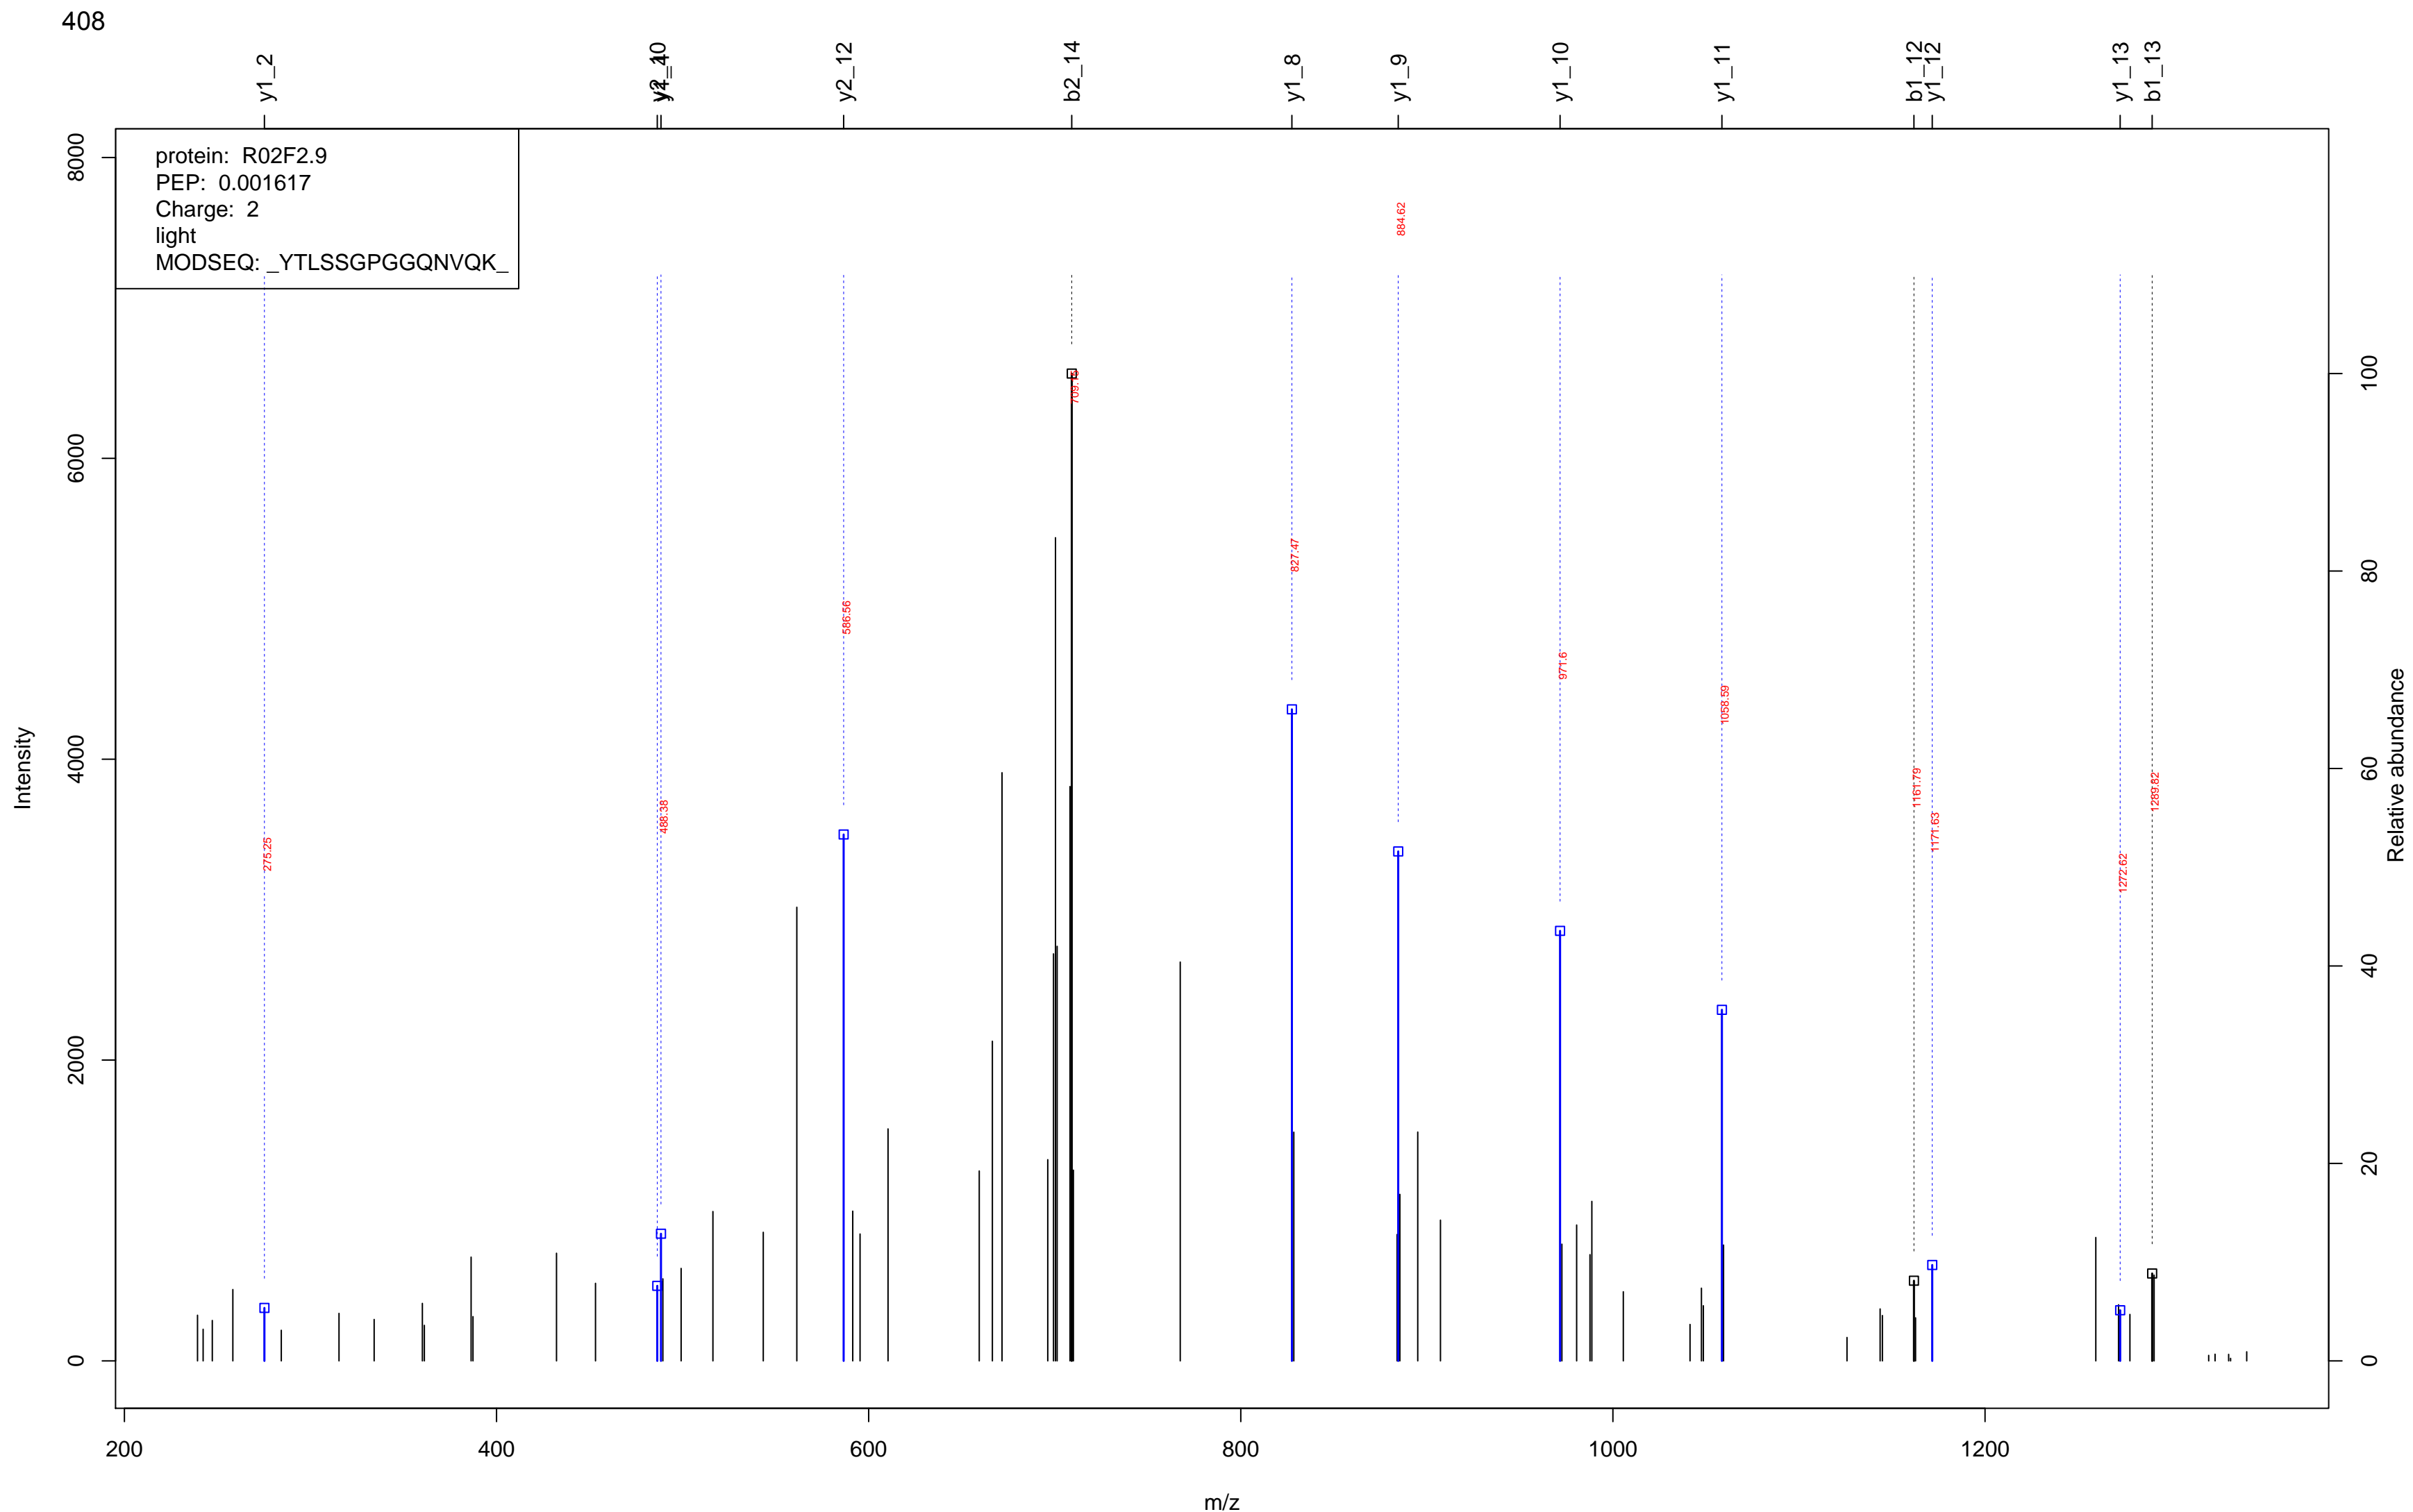



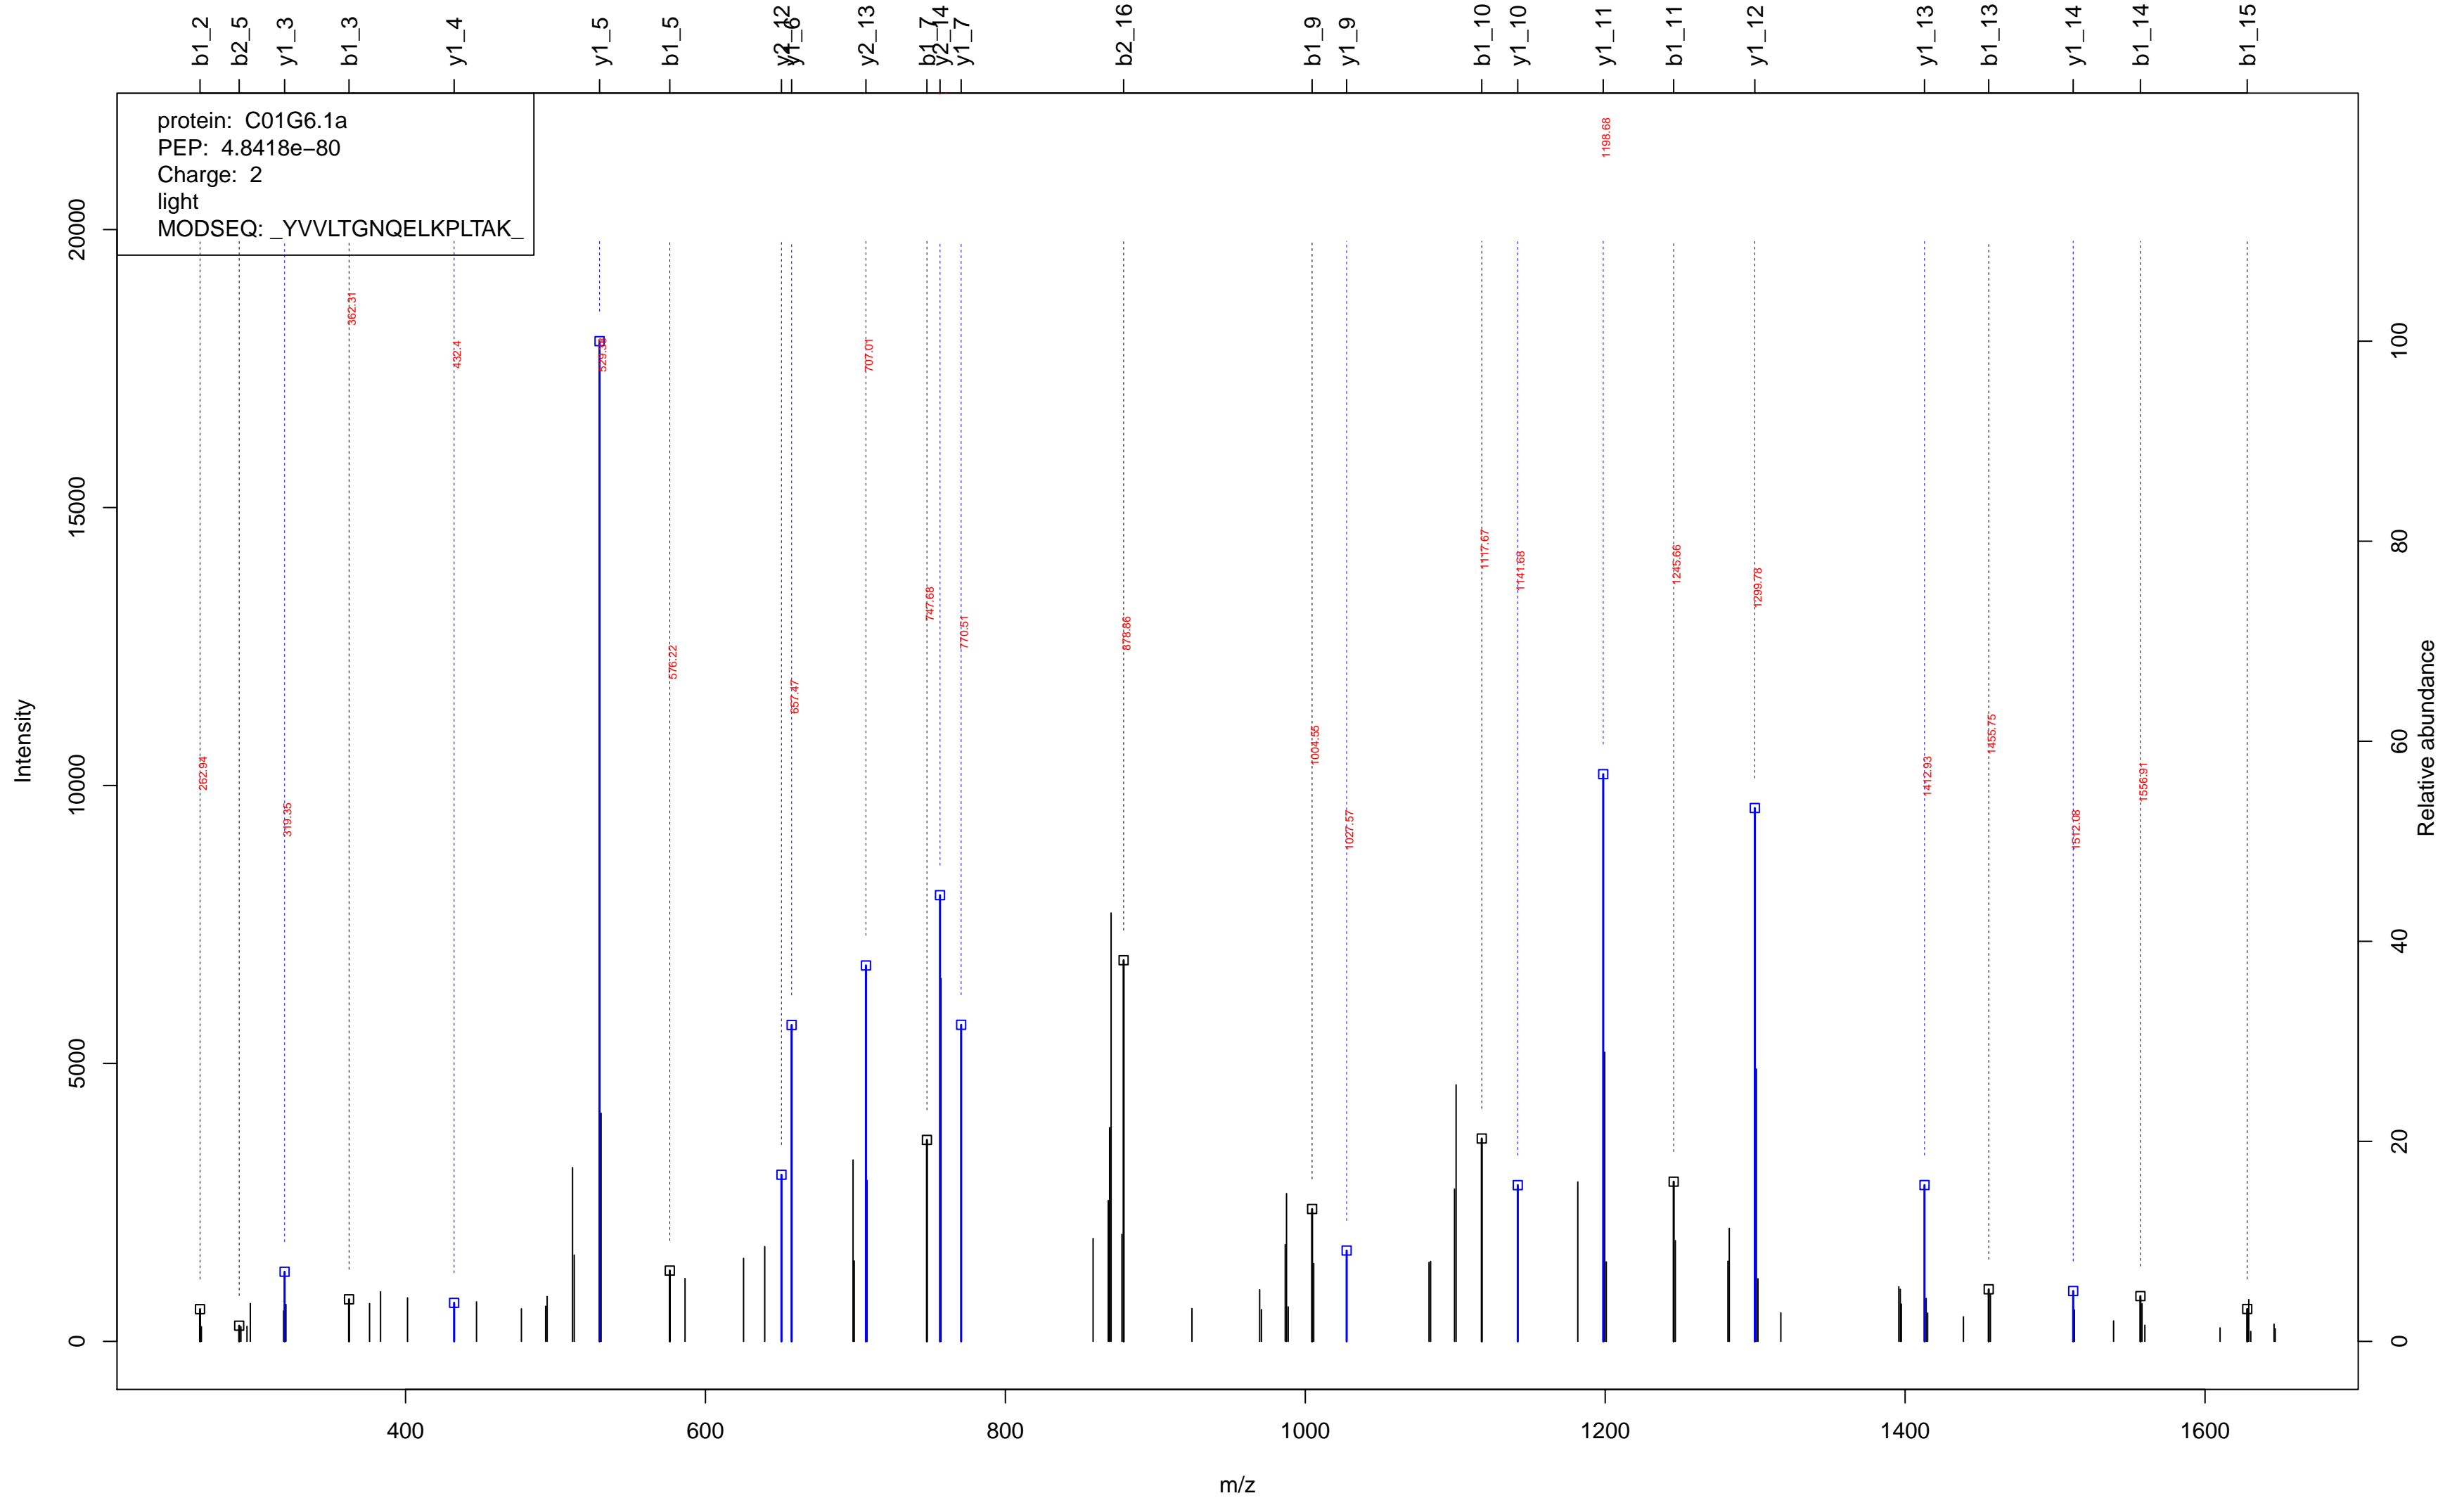

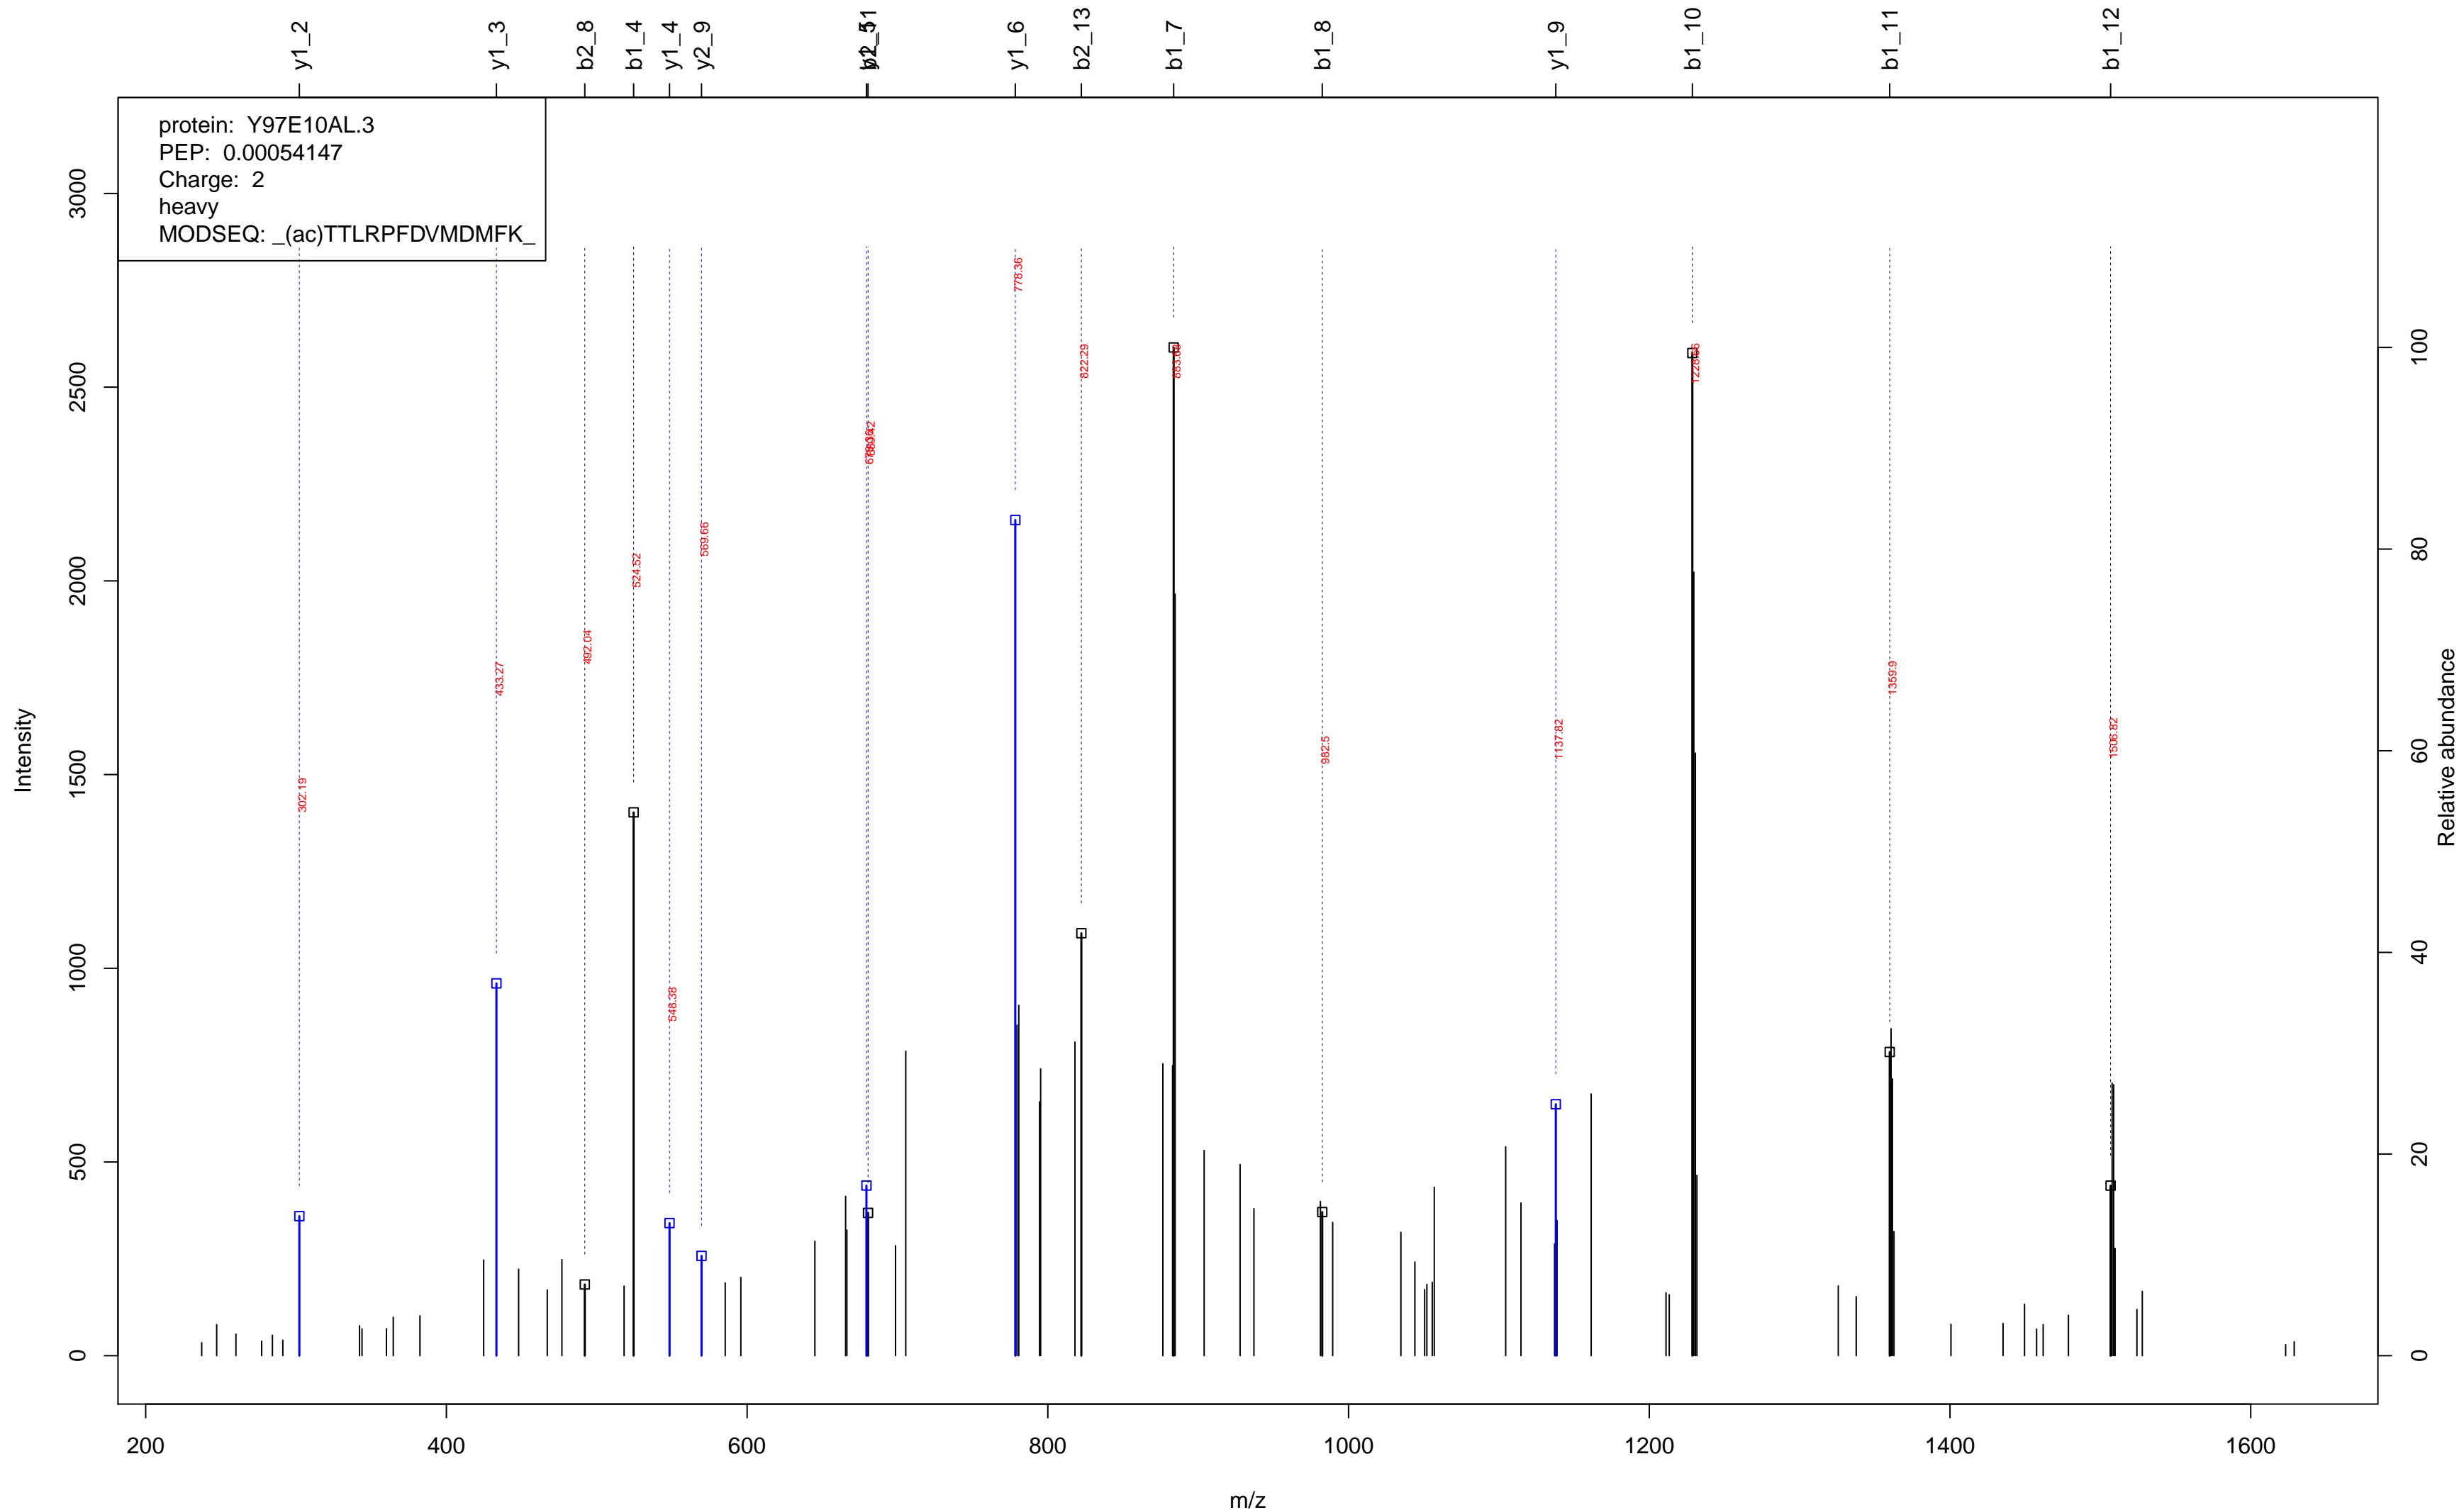

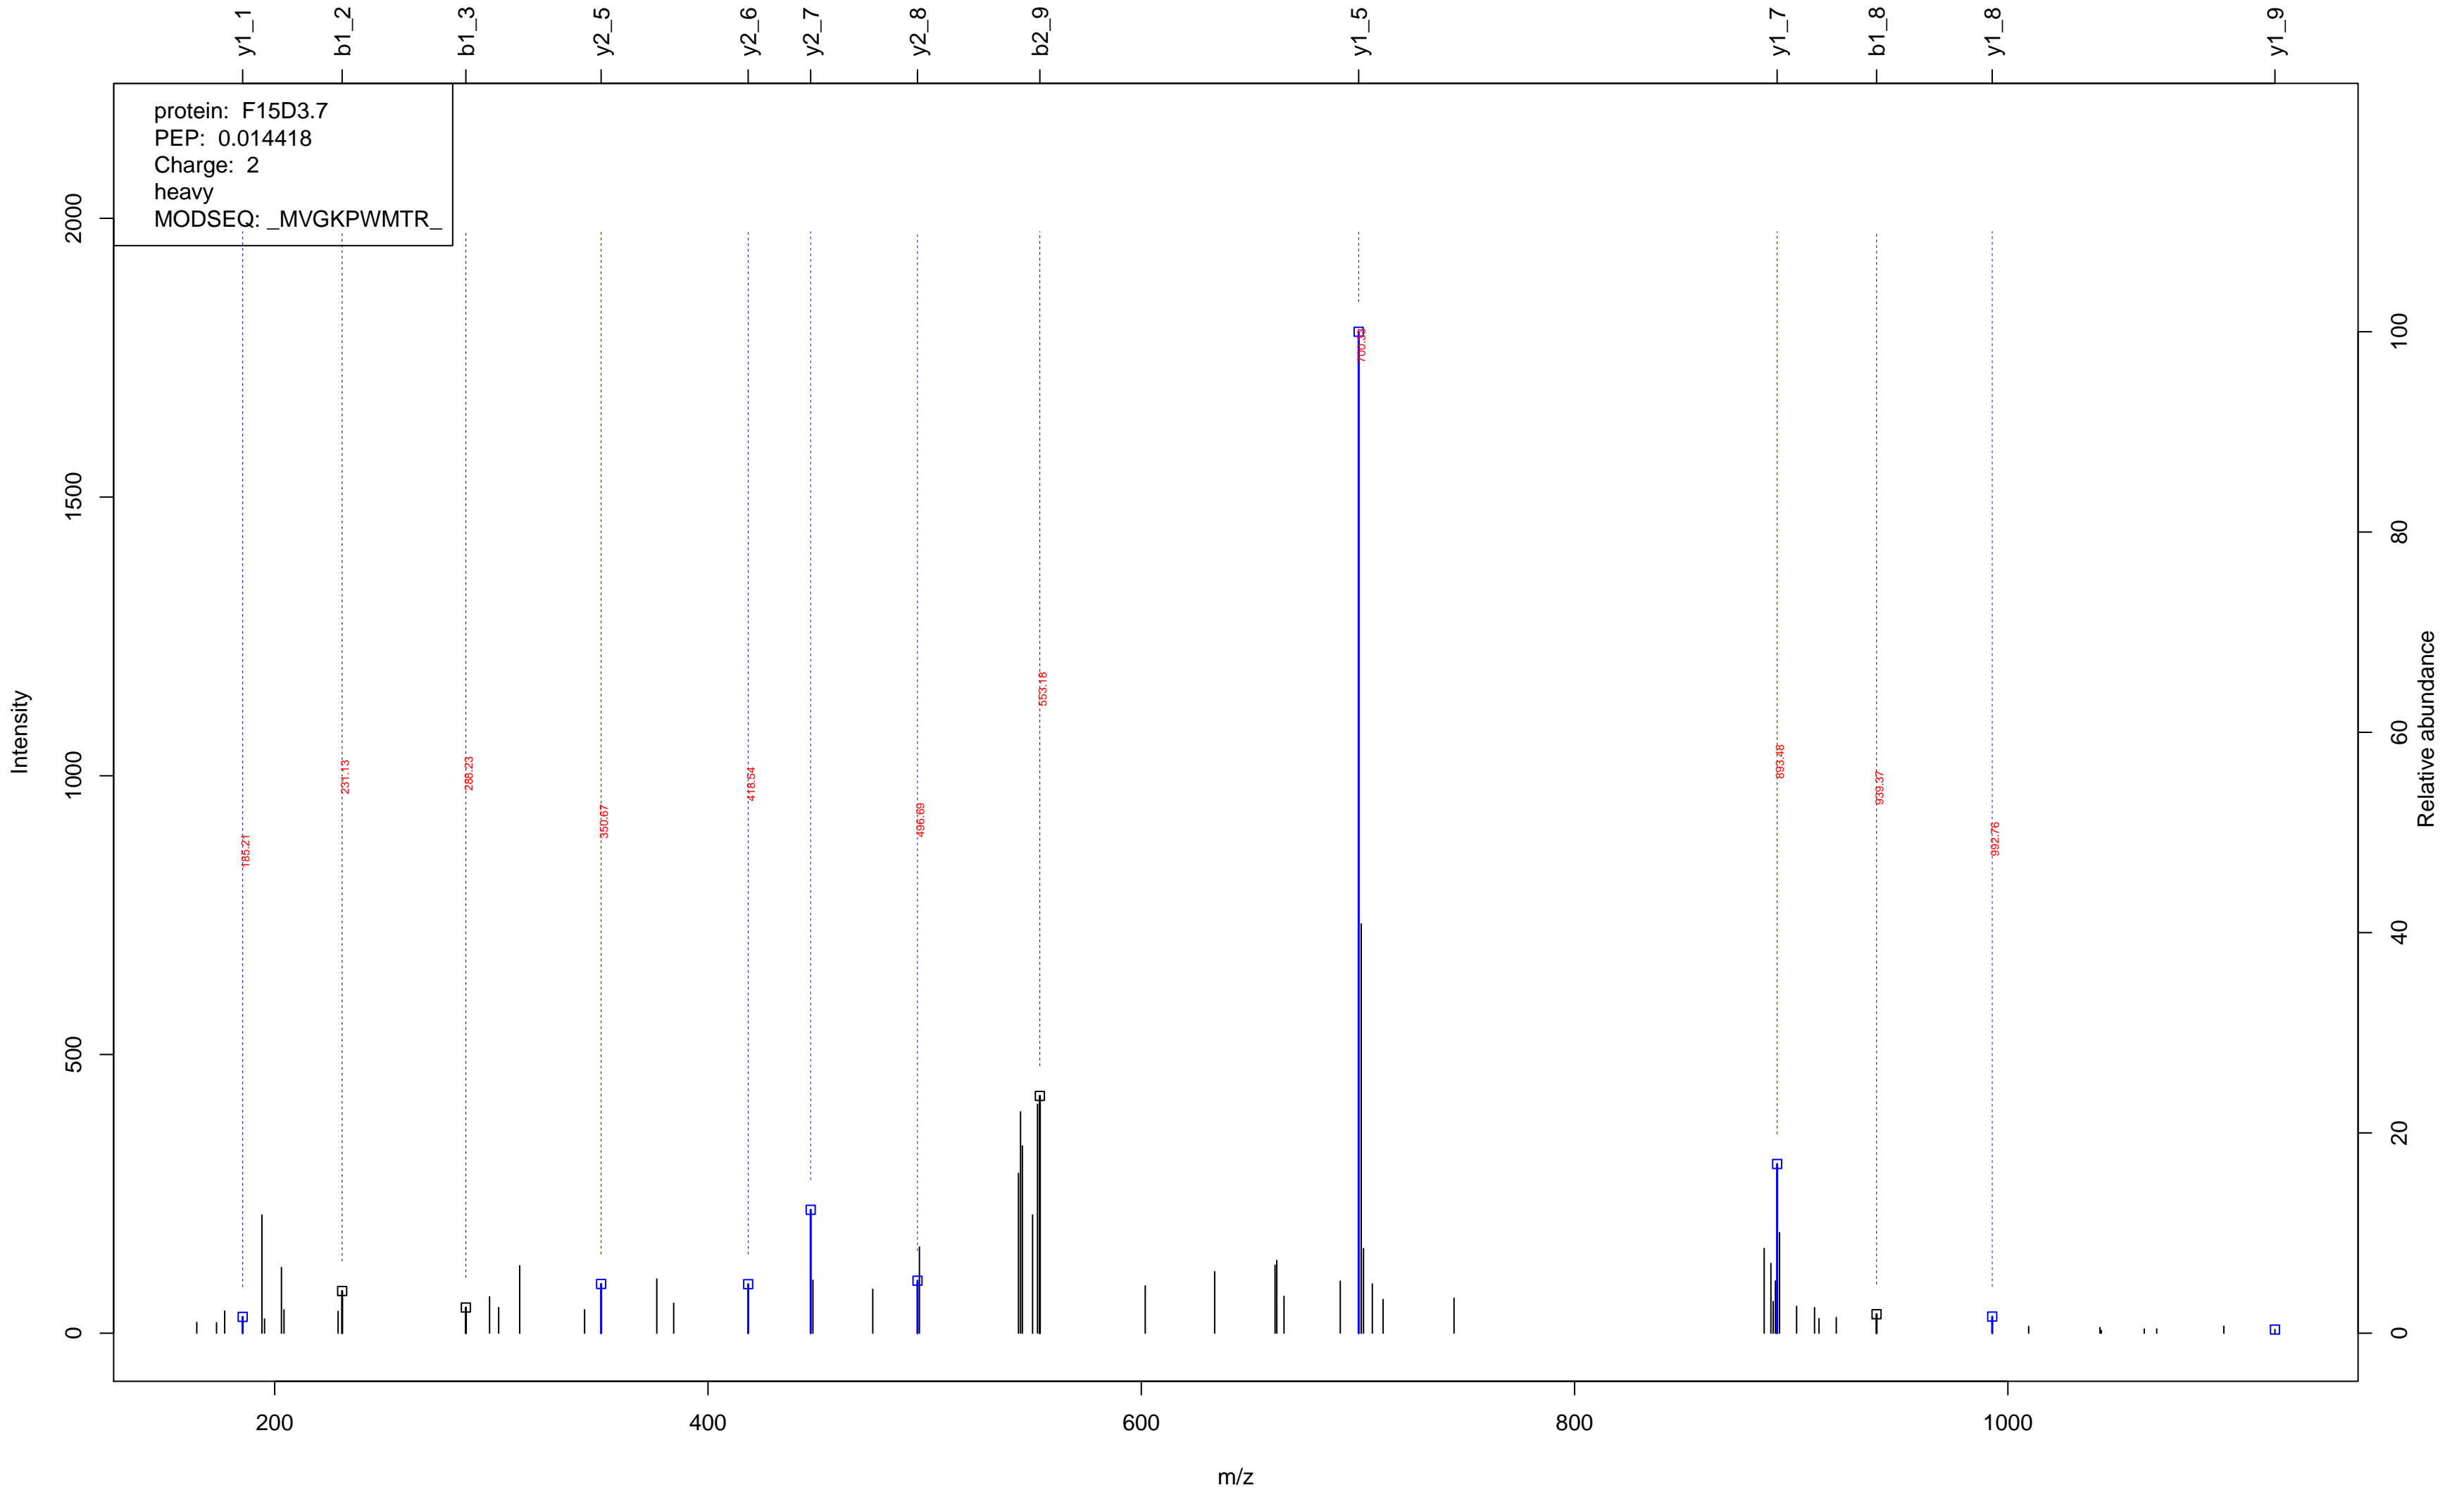

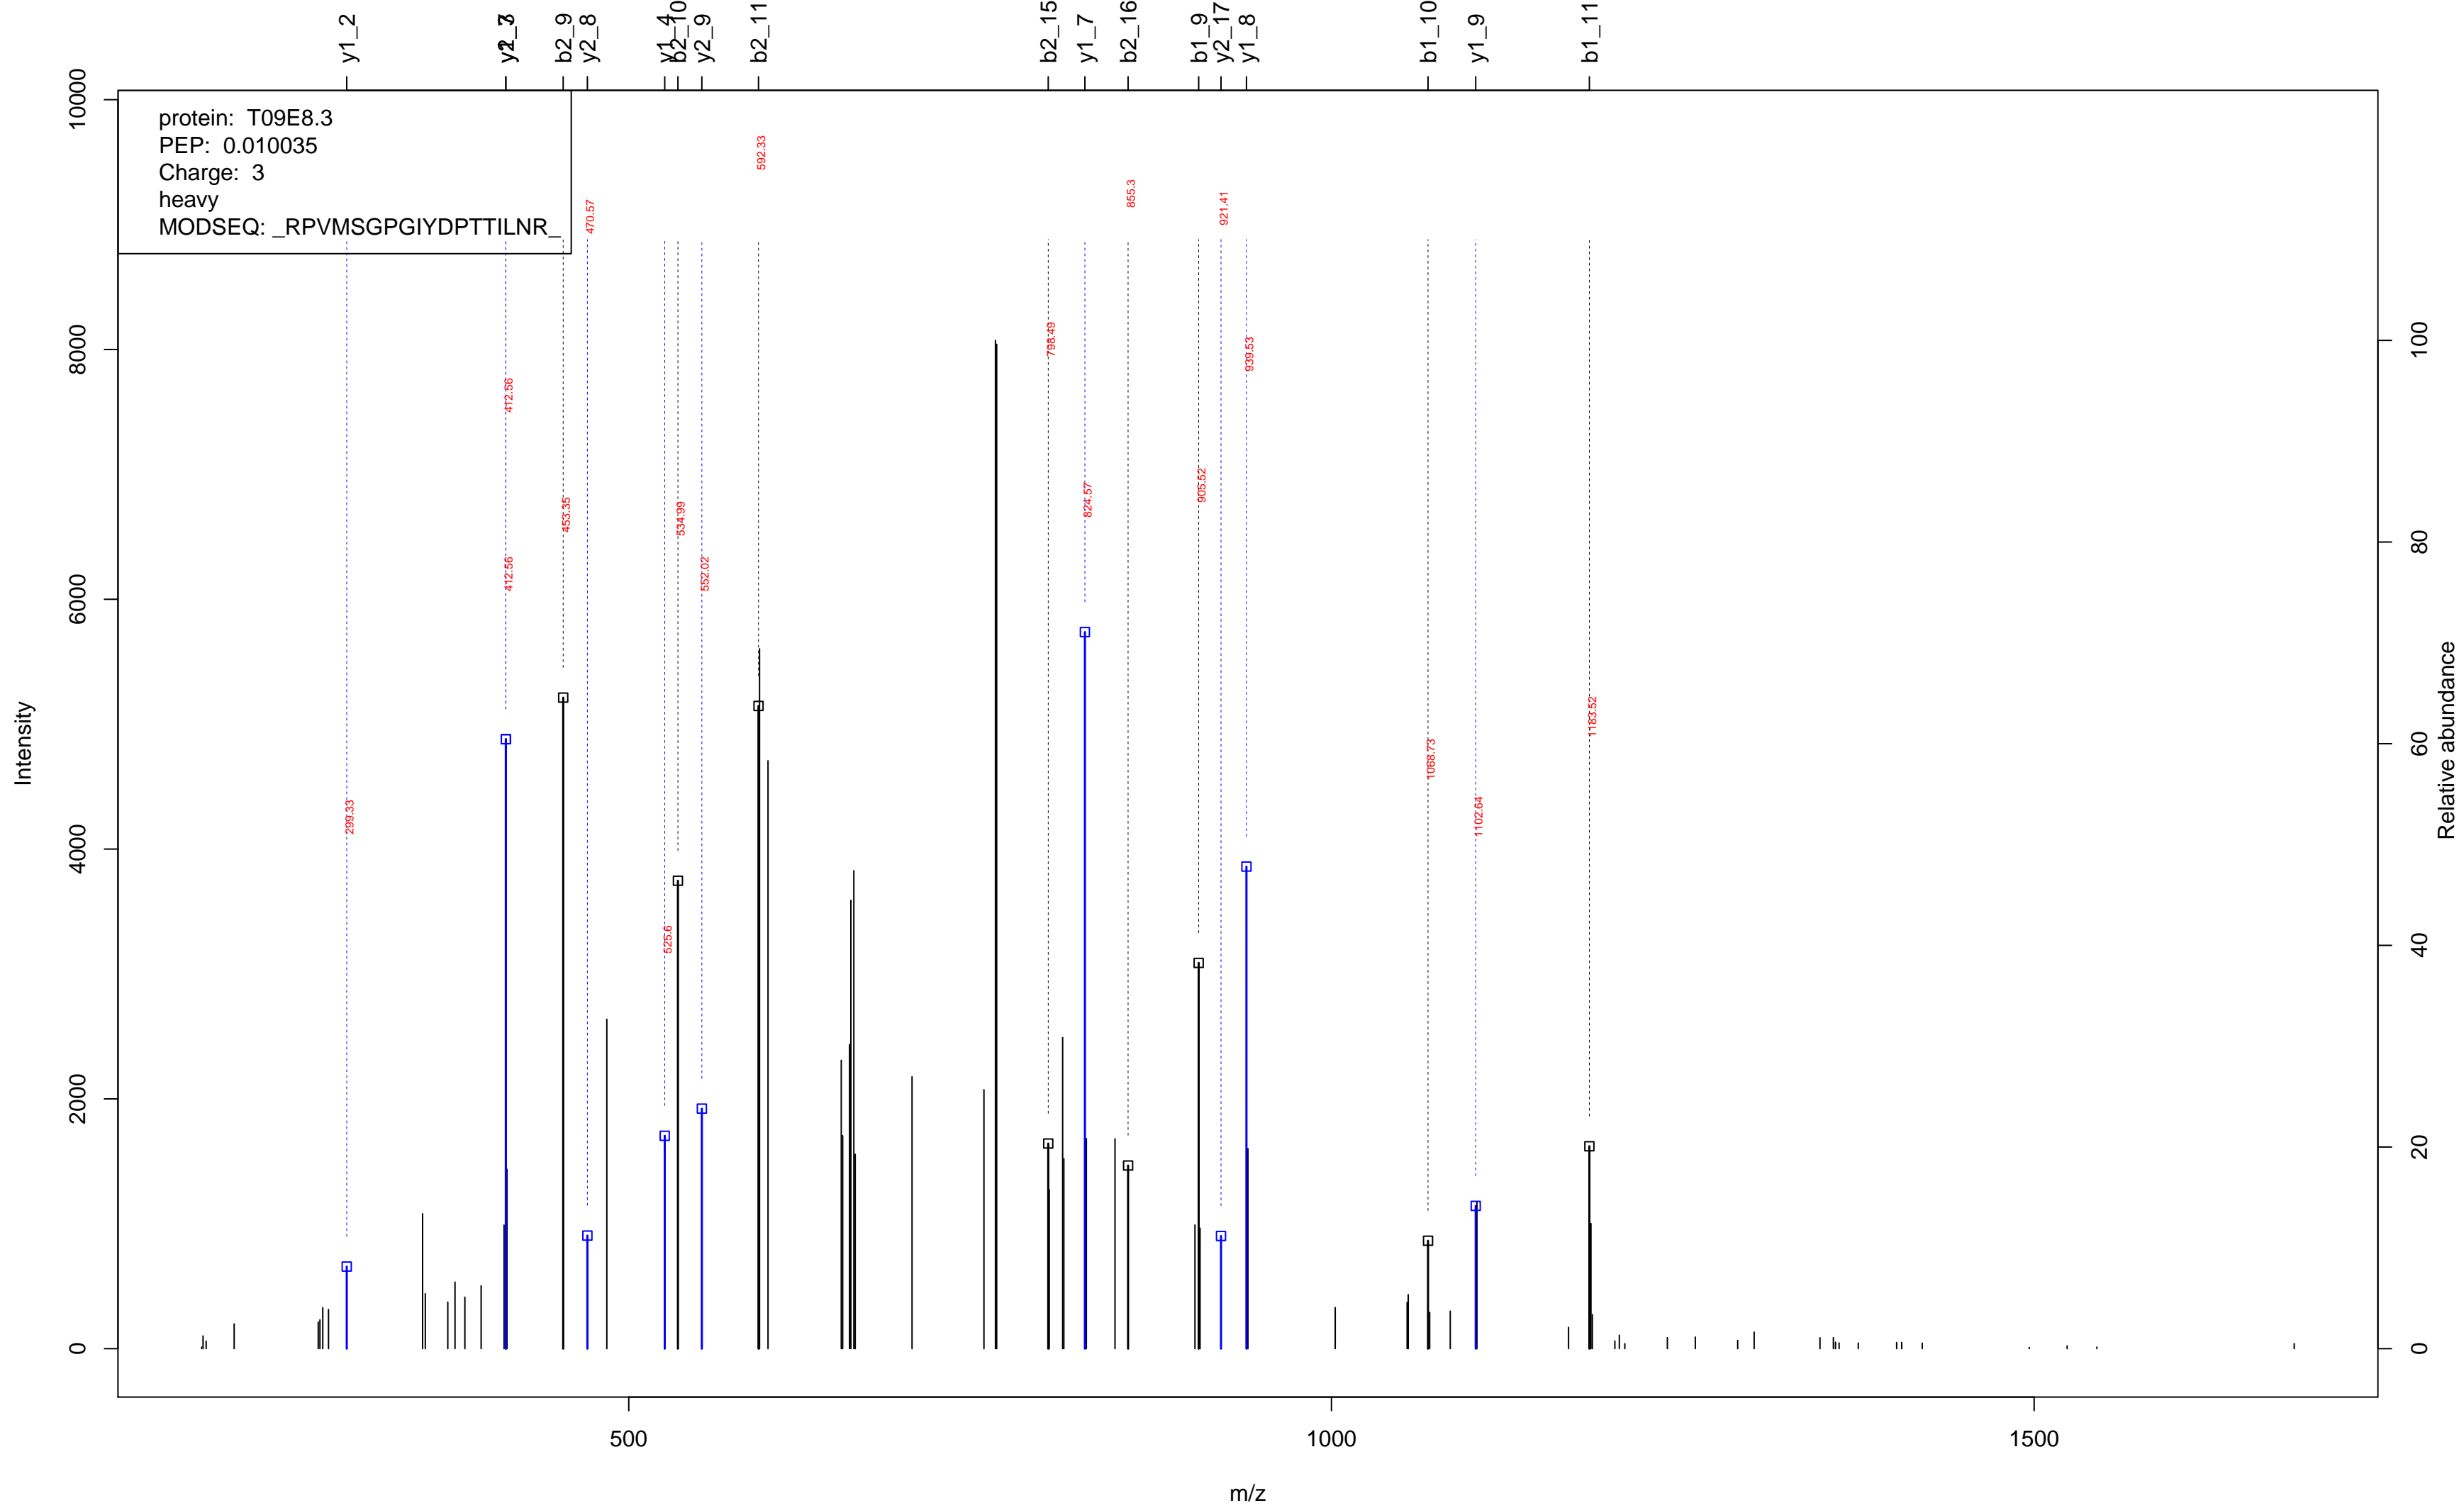

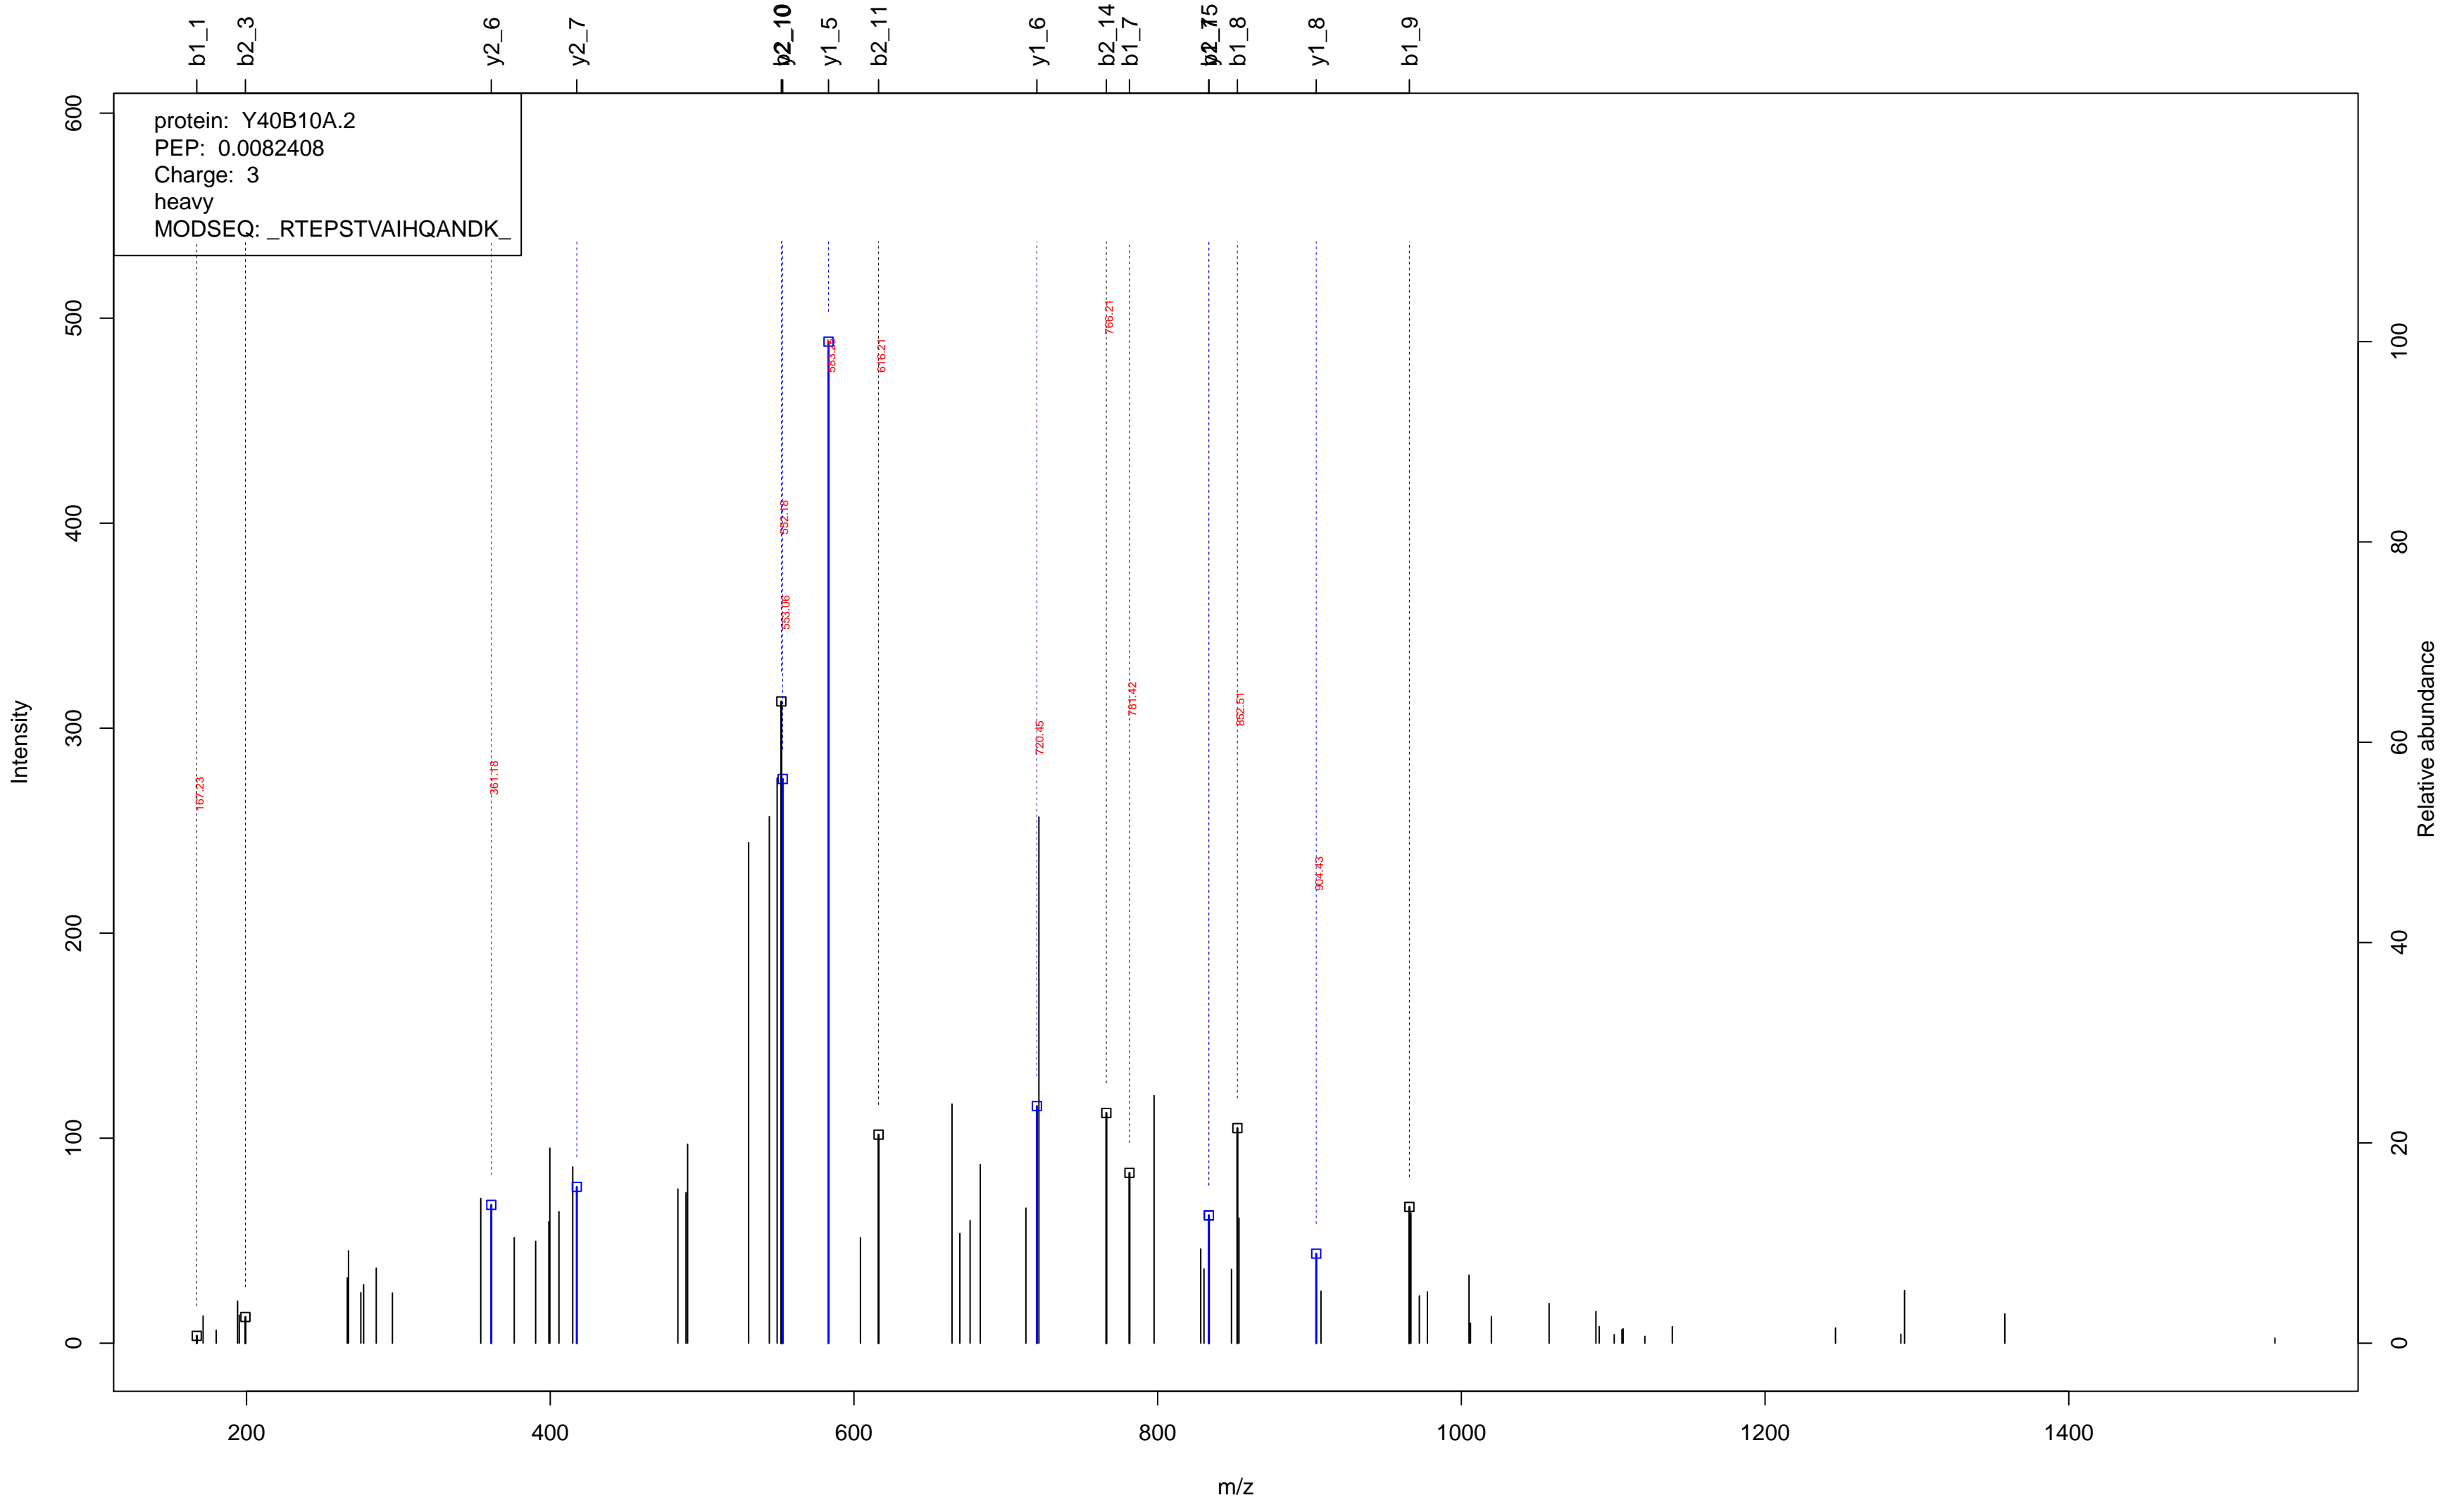

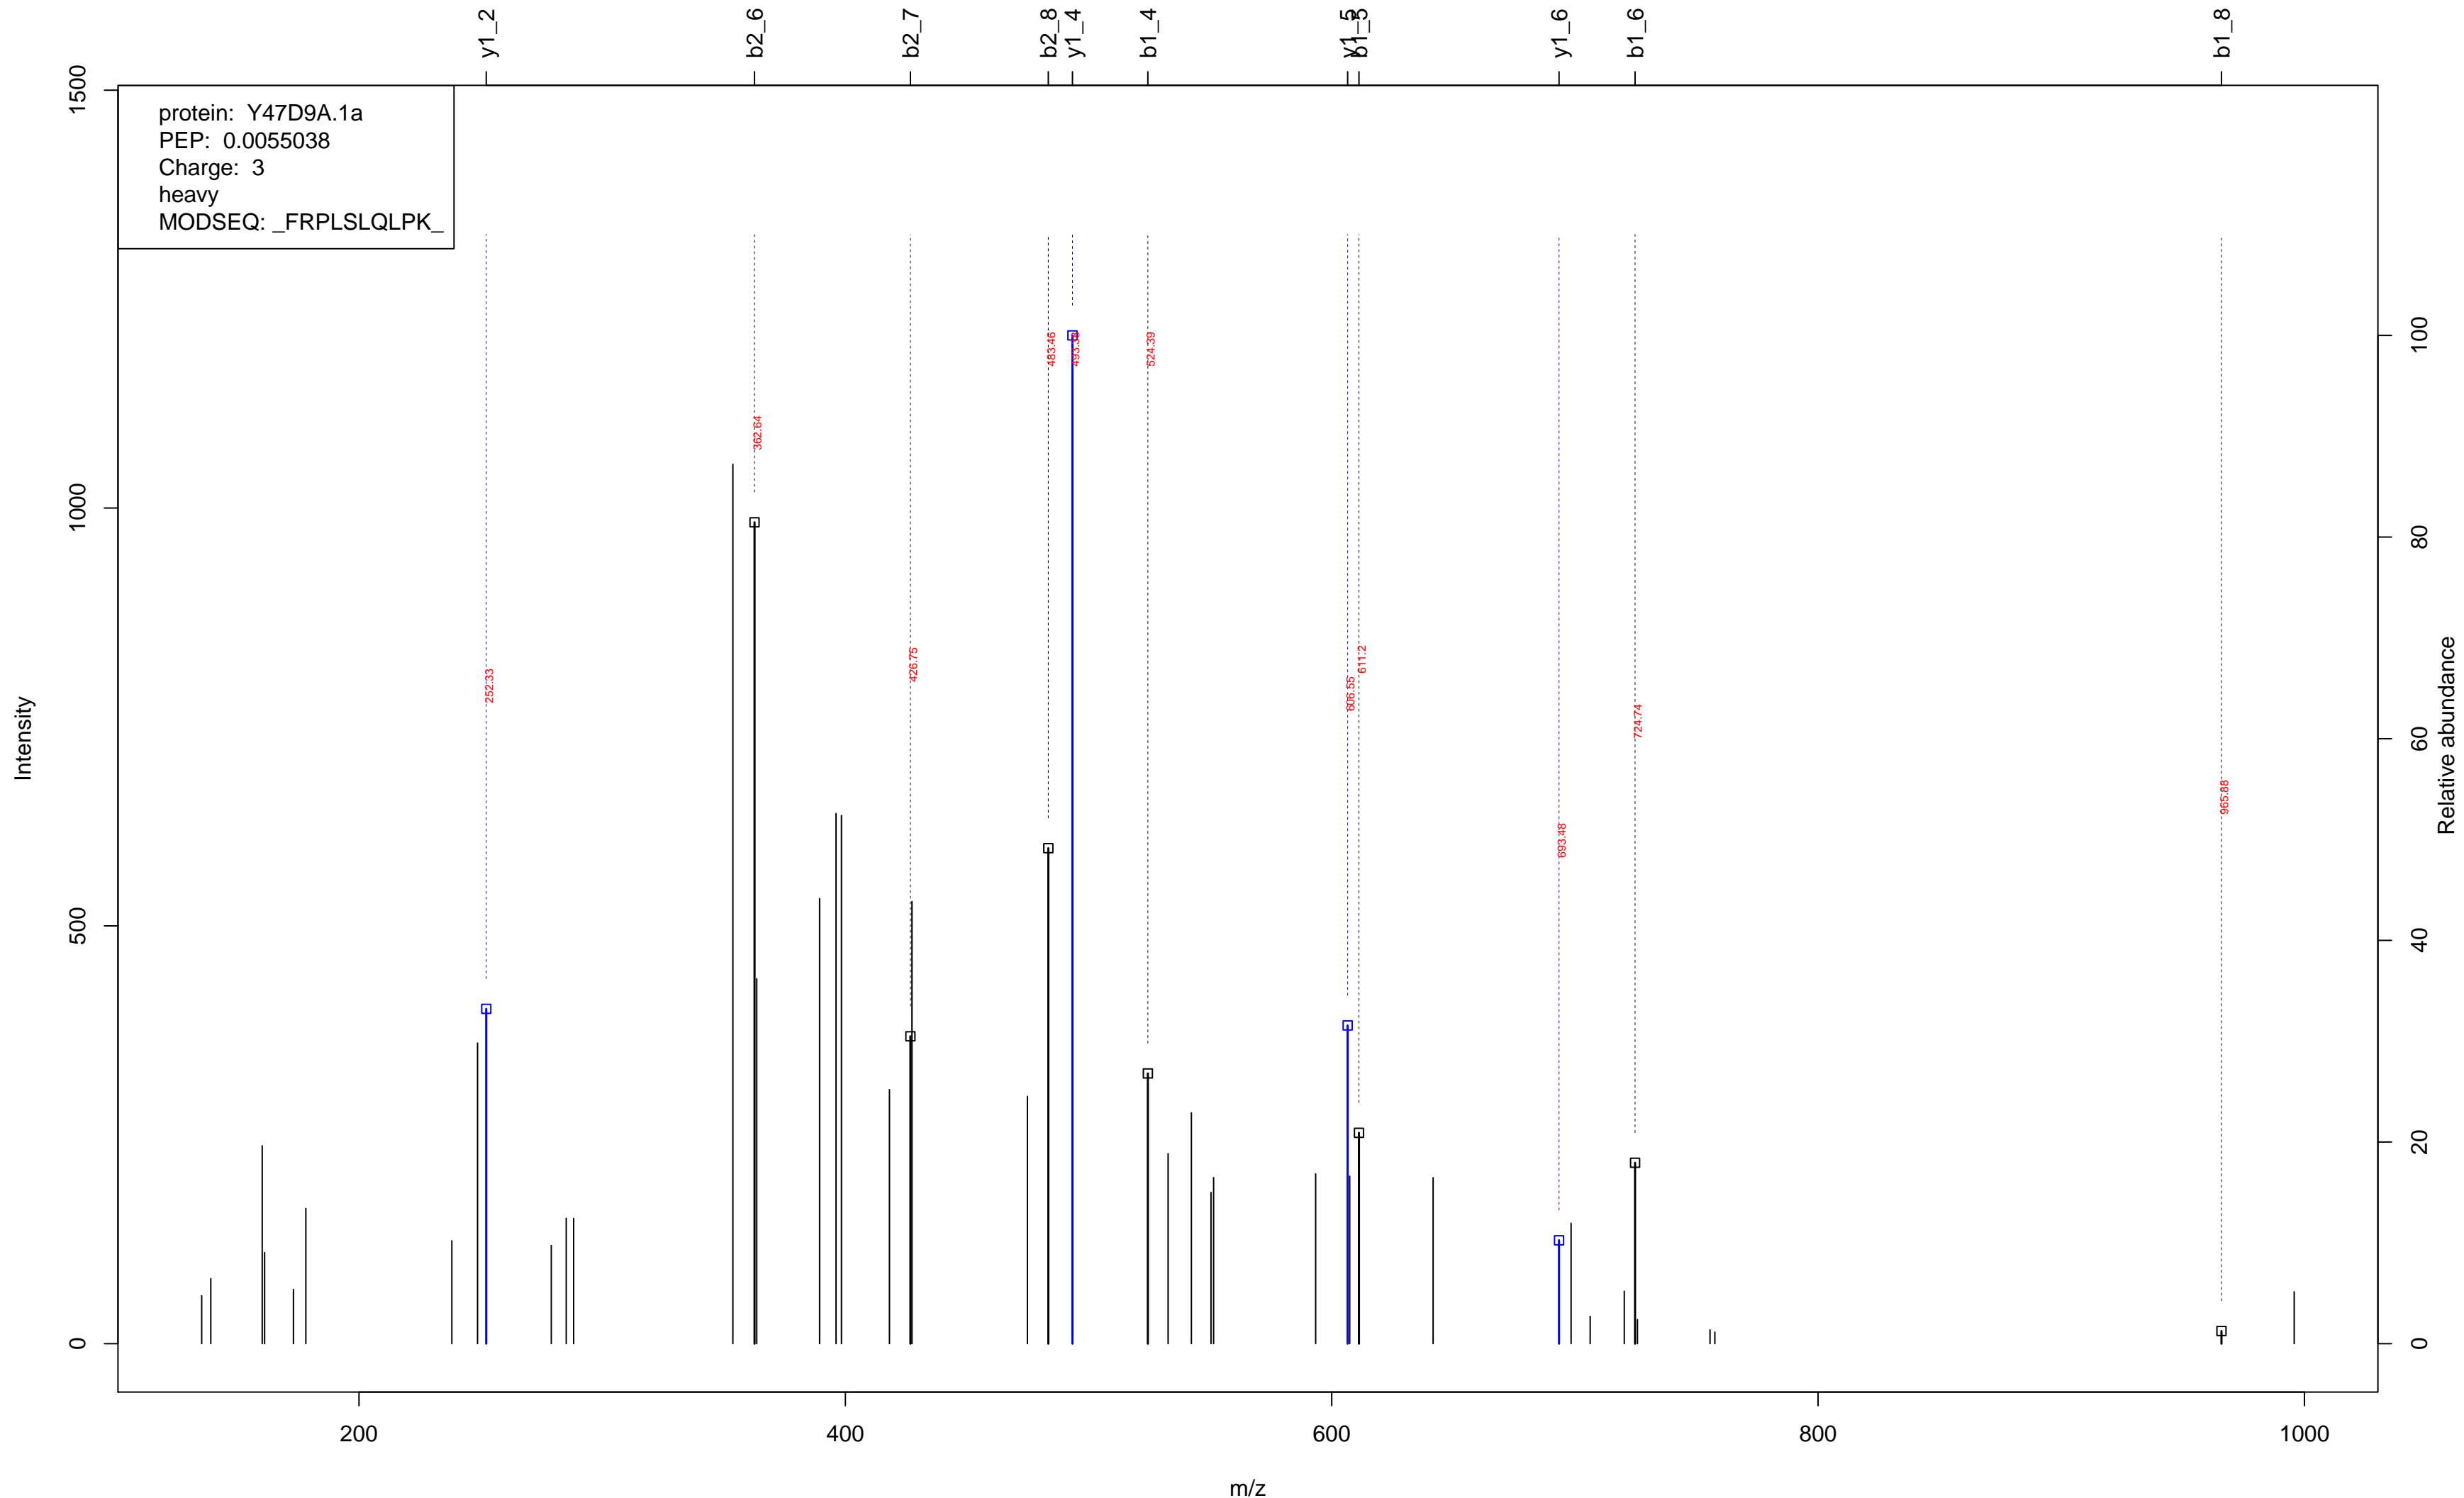

Supplement: 10.1074_M115.052548_mcp.M115.052548-5.pdf [file 10.1074_M115.052548_mcp.M115.052548-5.pdf]
