# Supplementary material
Source: PubMed Central journal article supplement (PMC4858947)

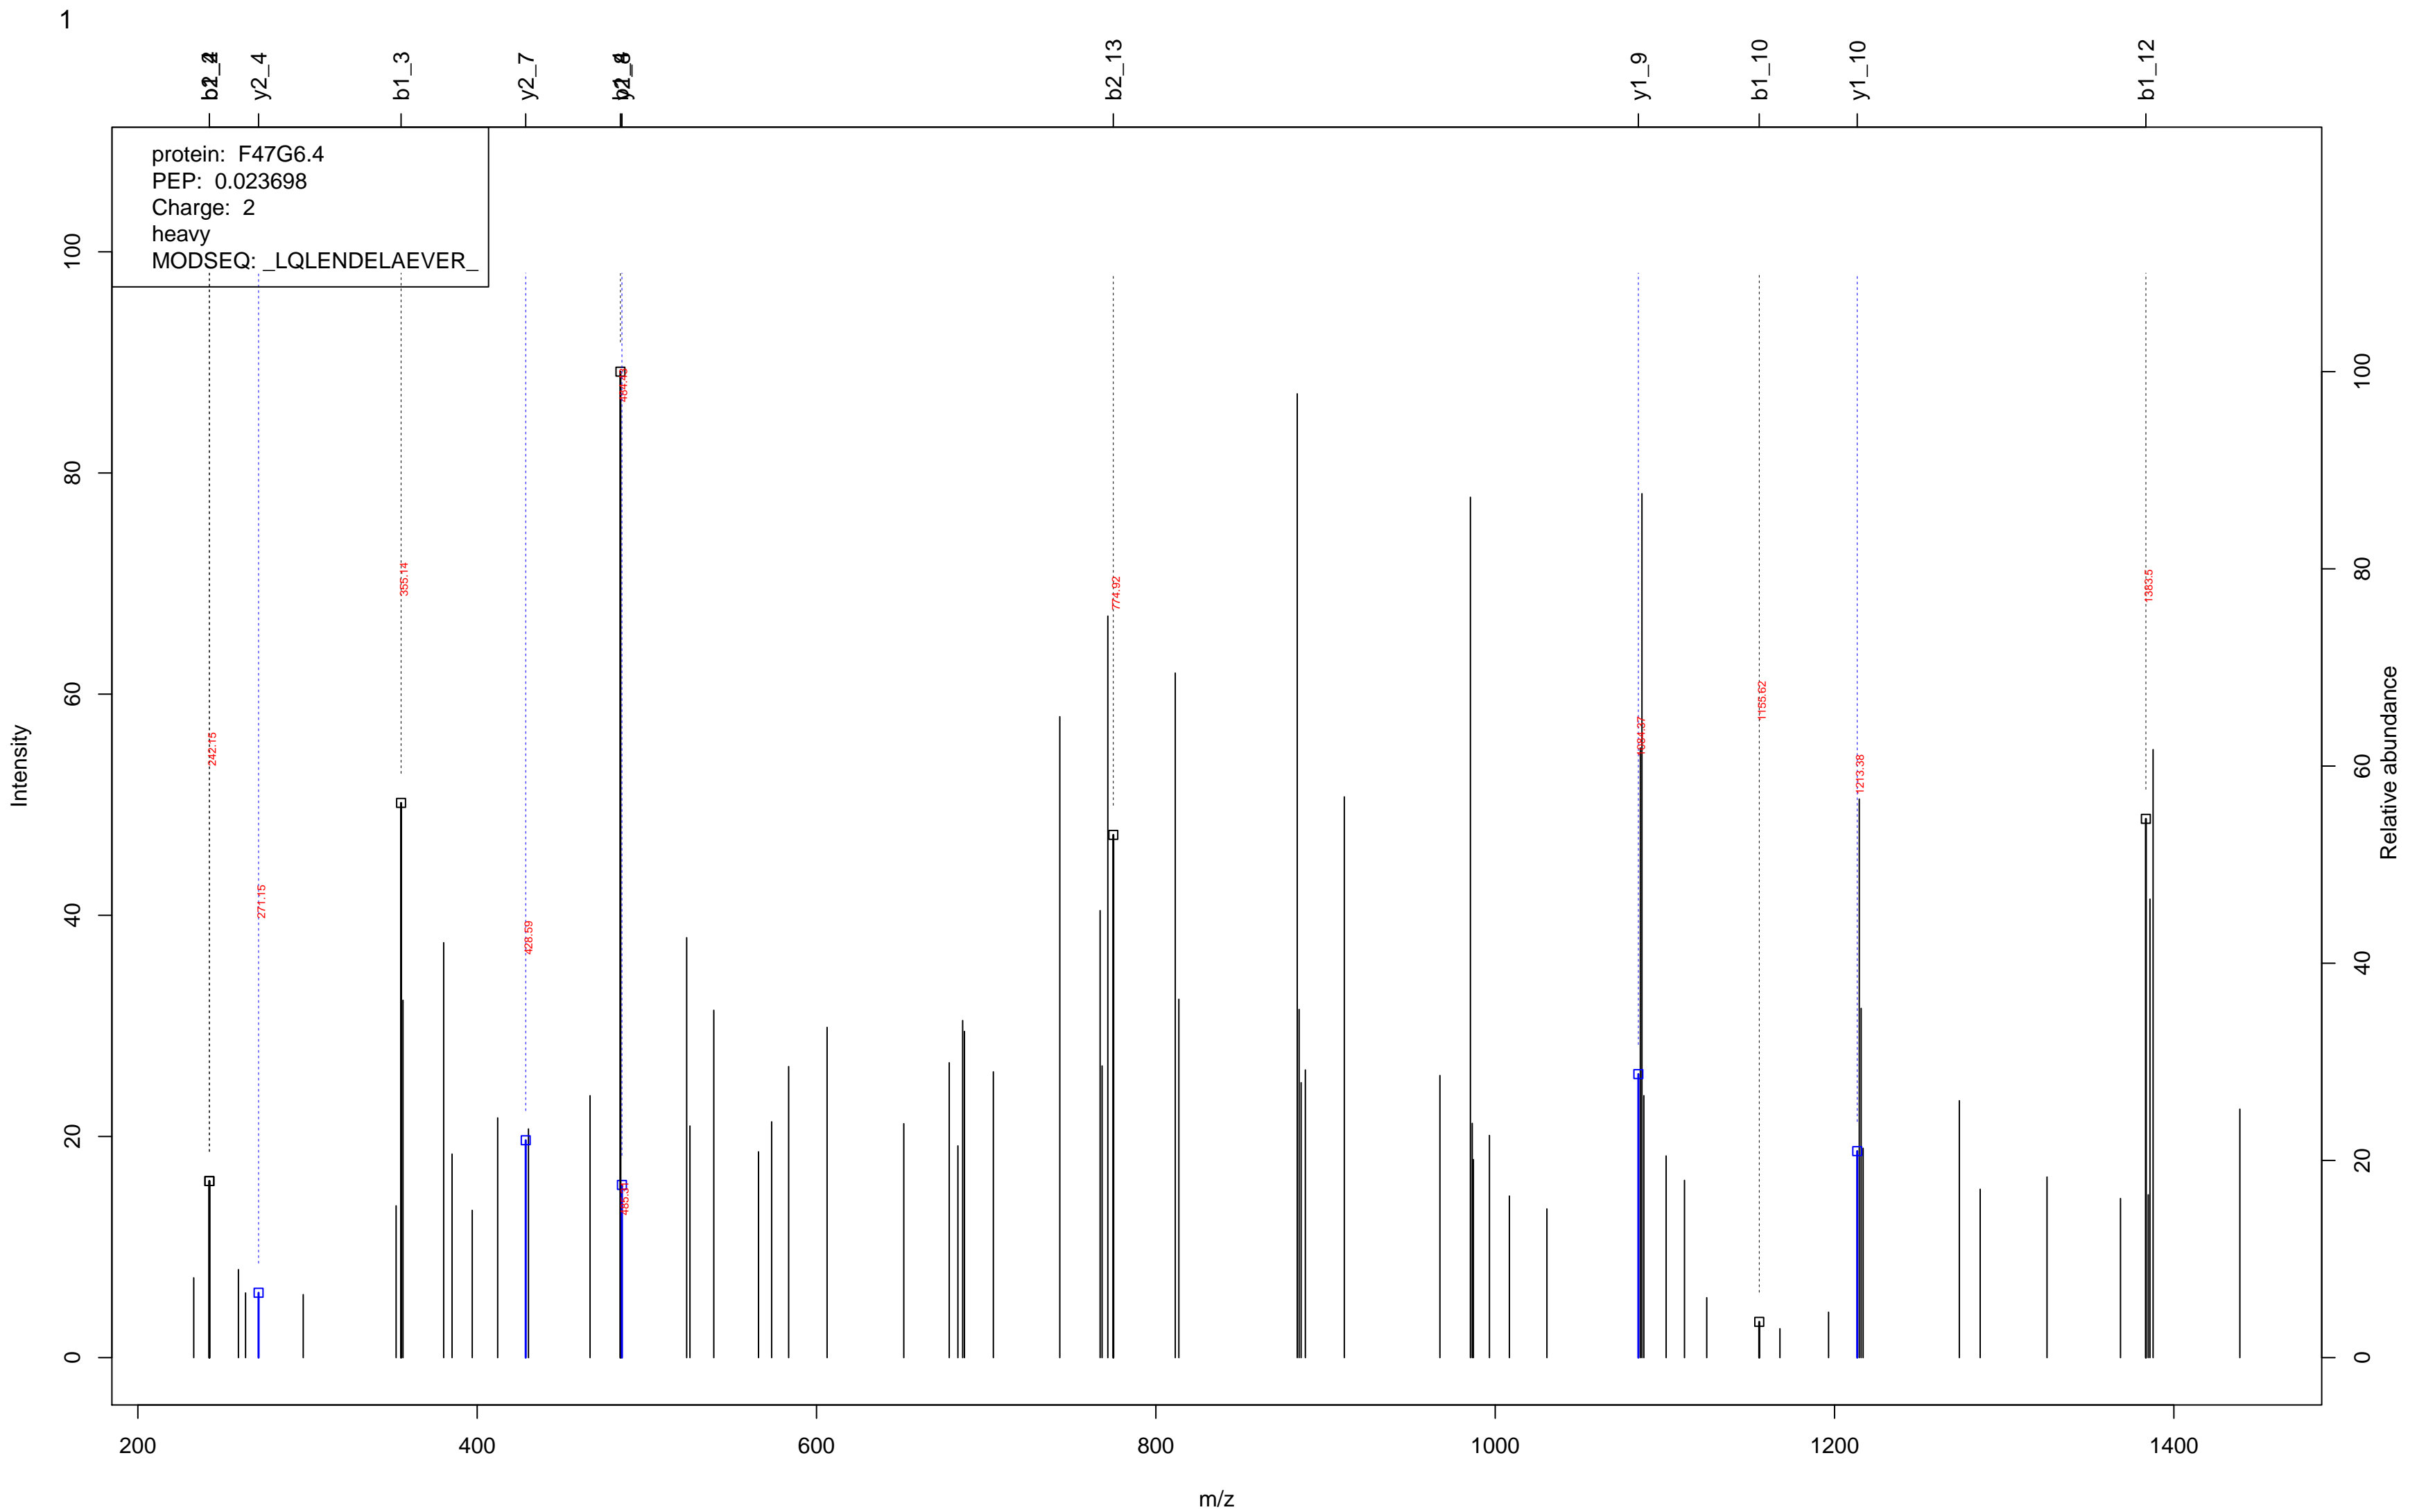

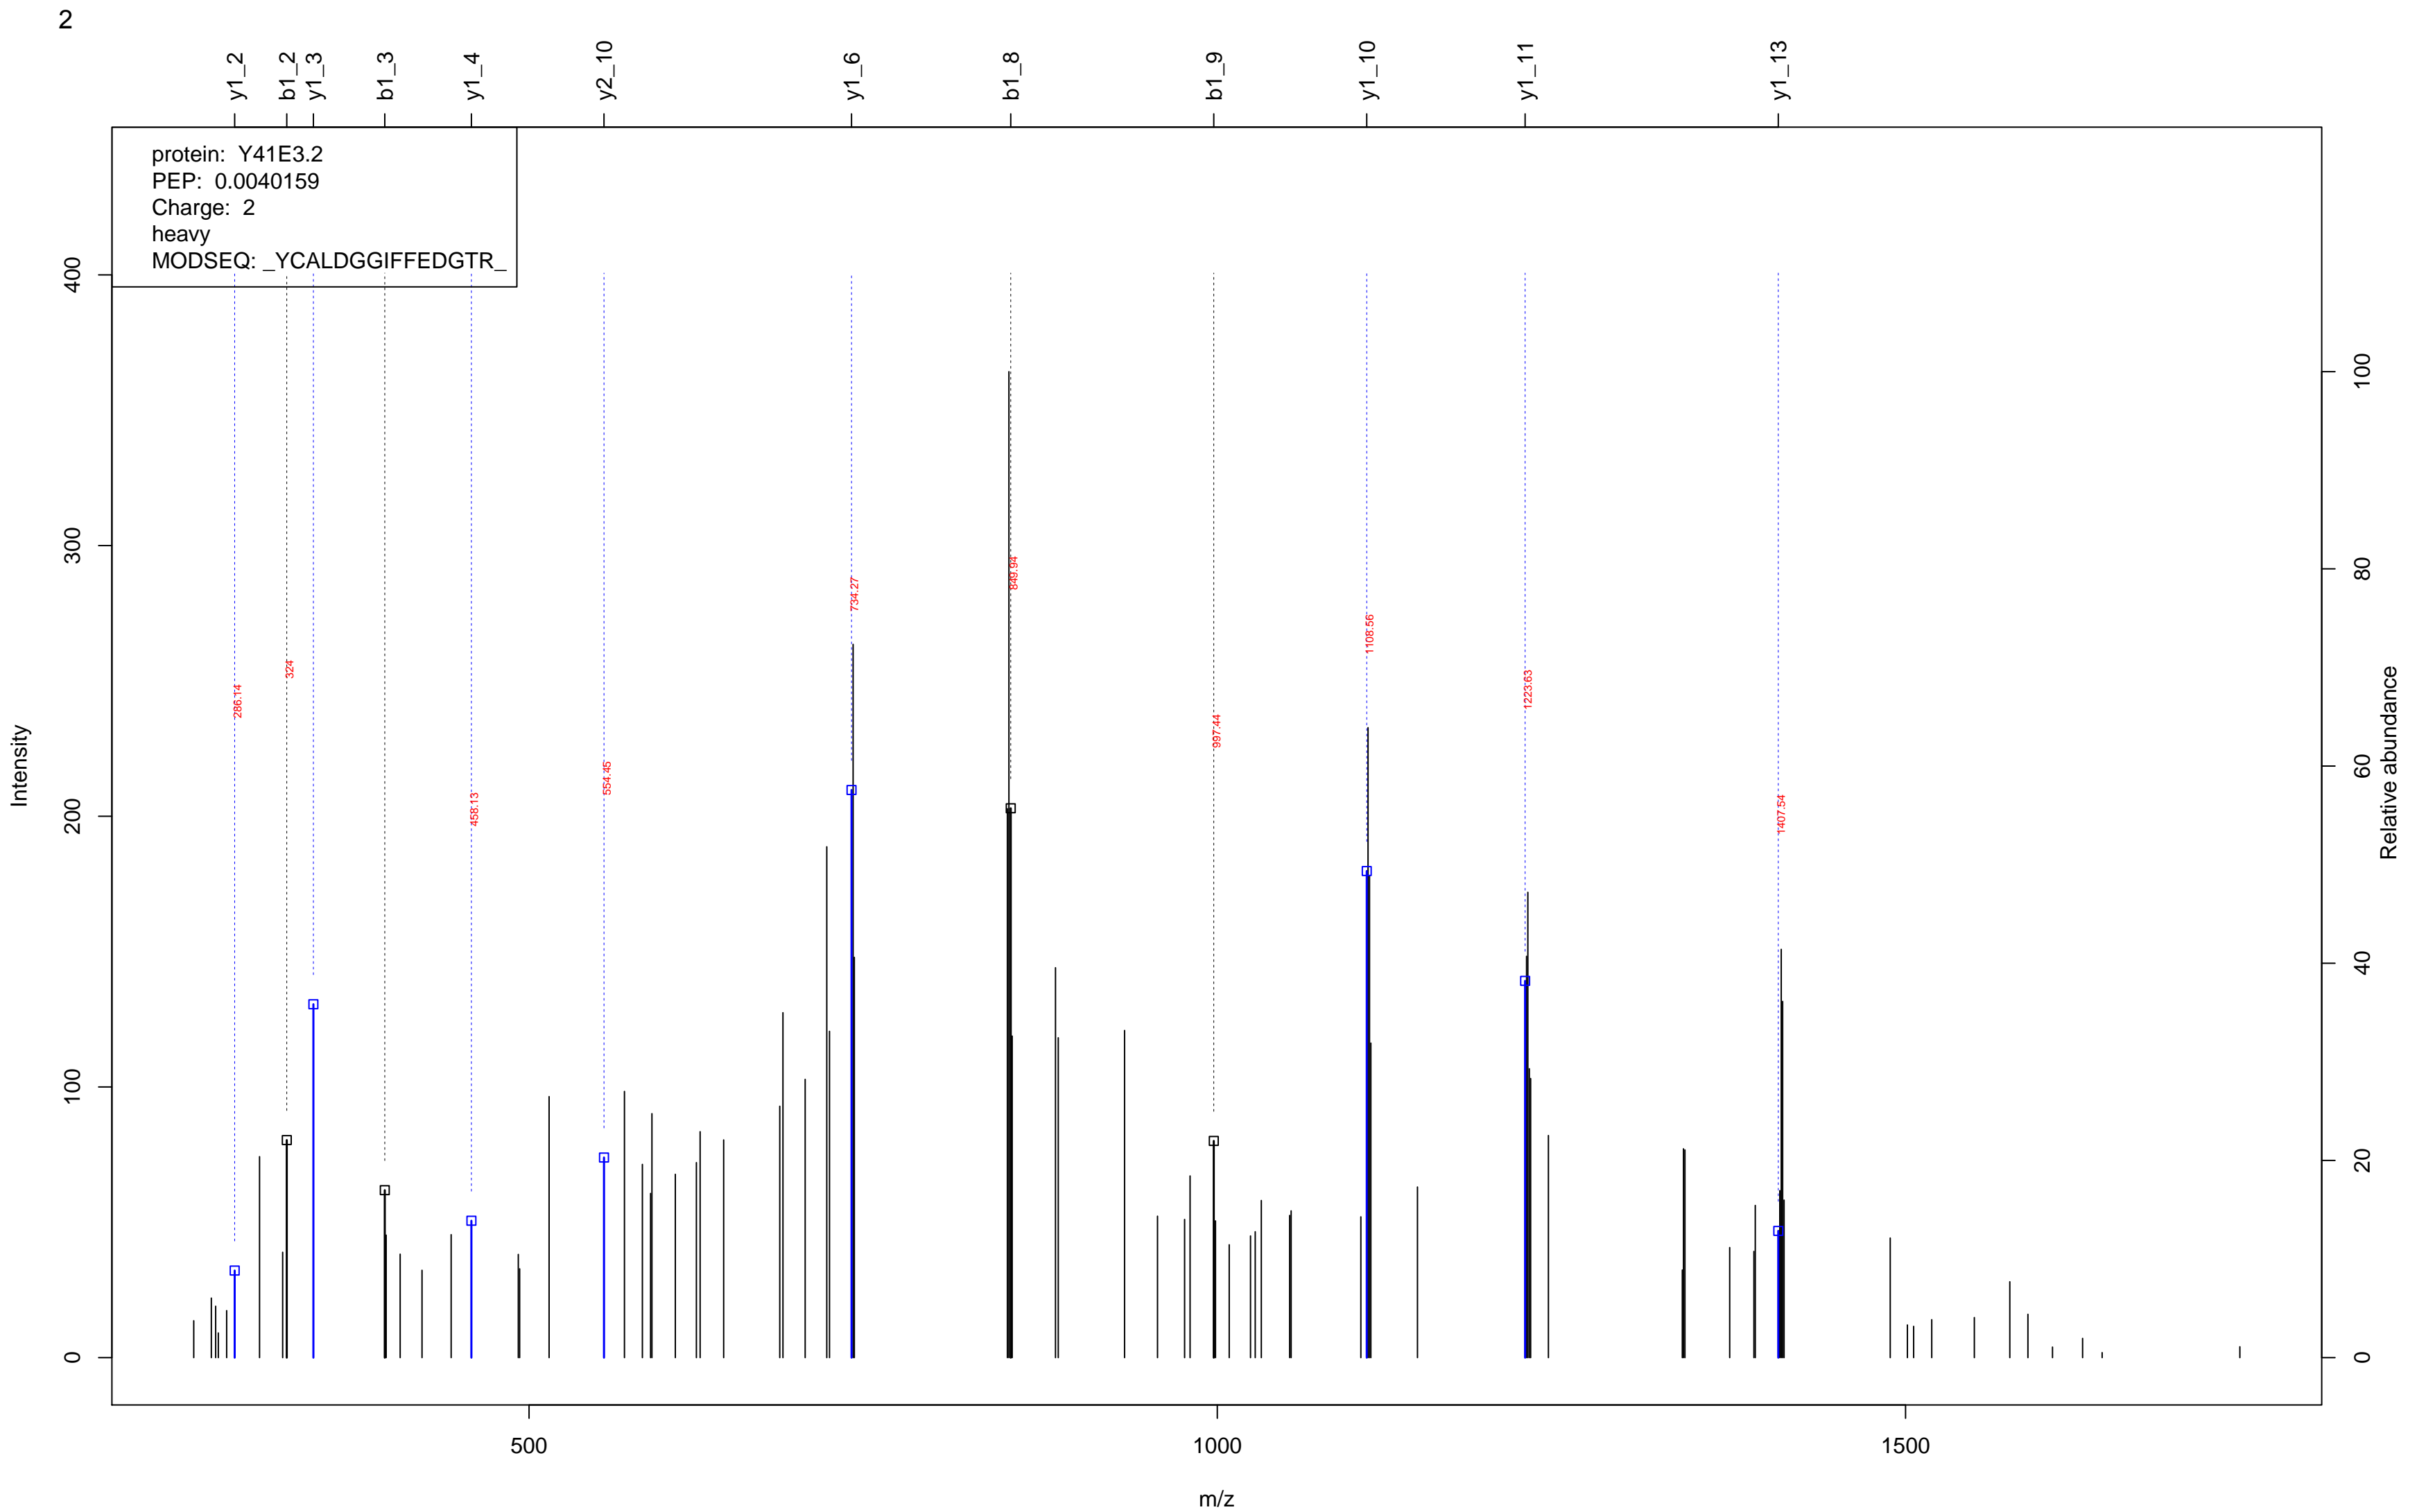

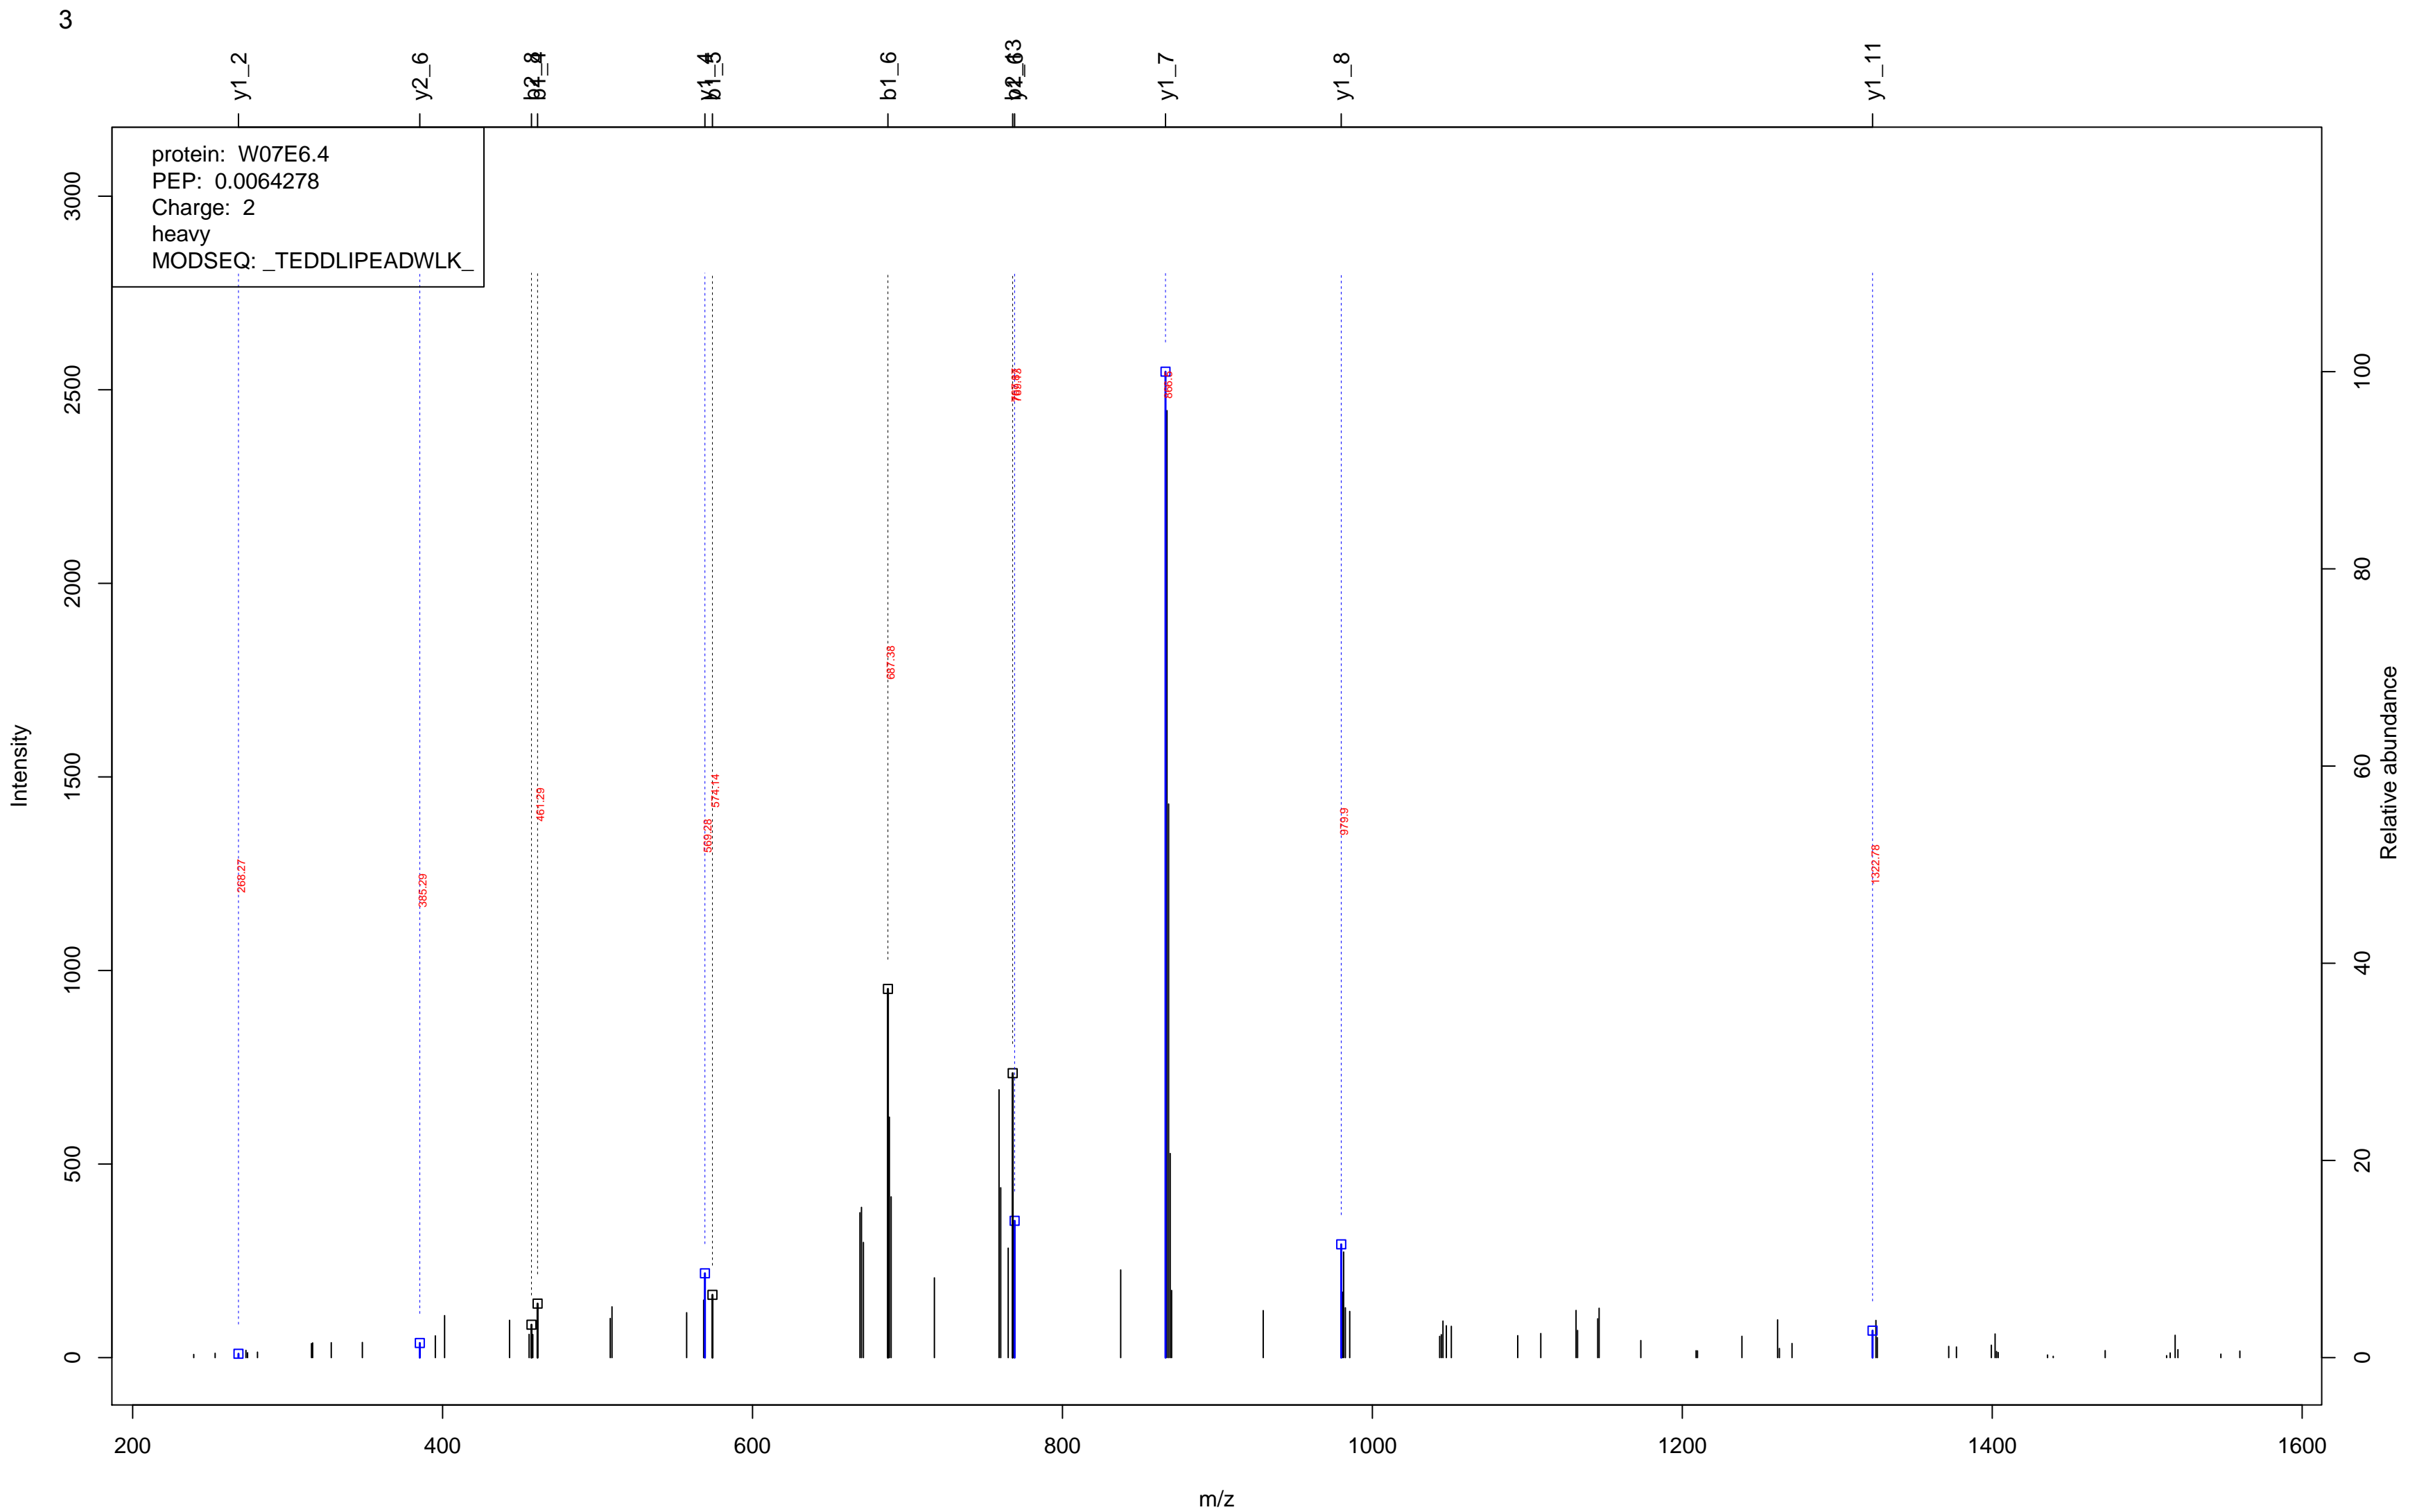

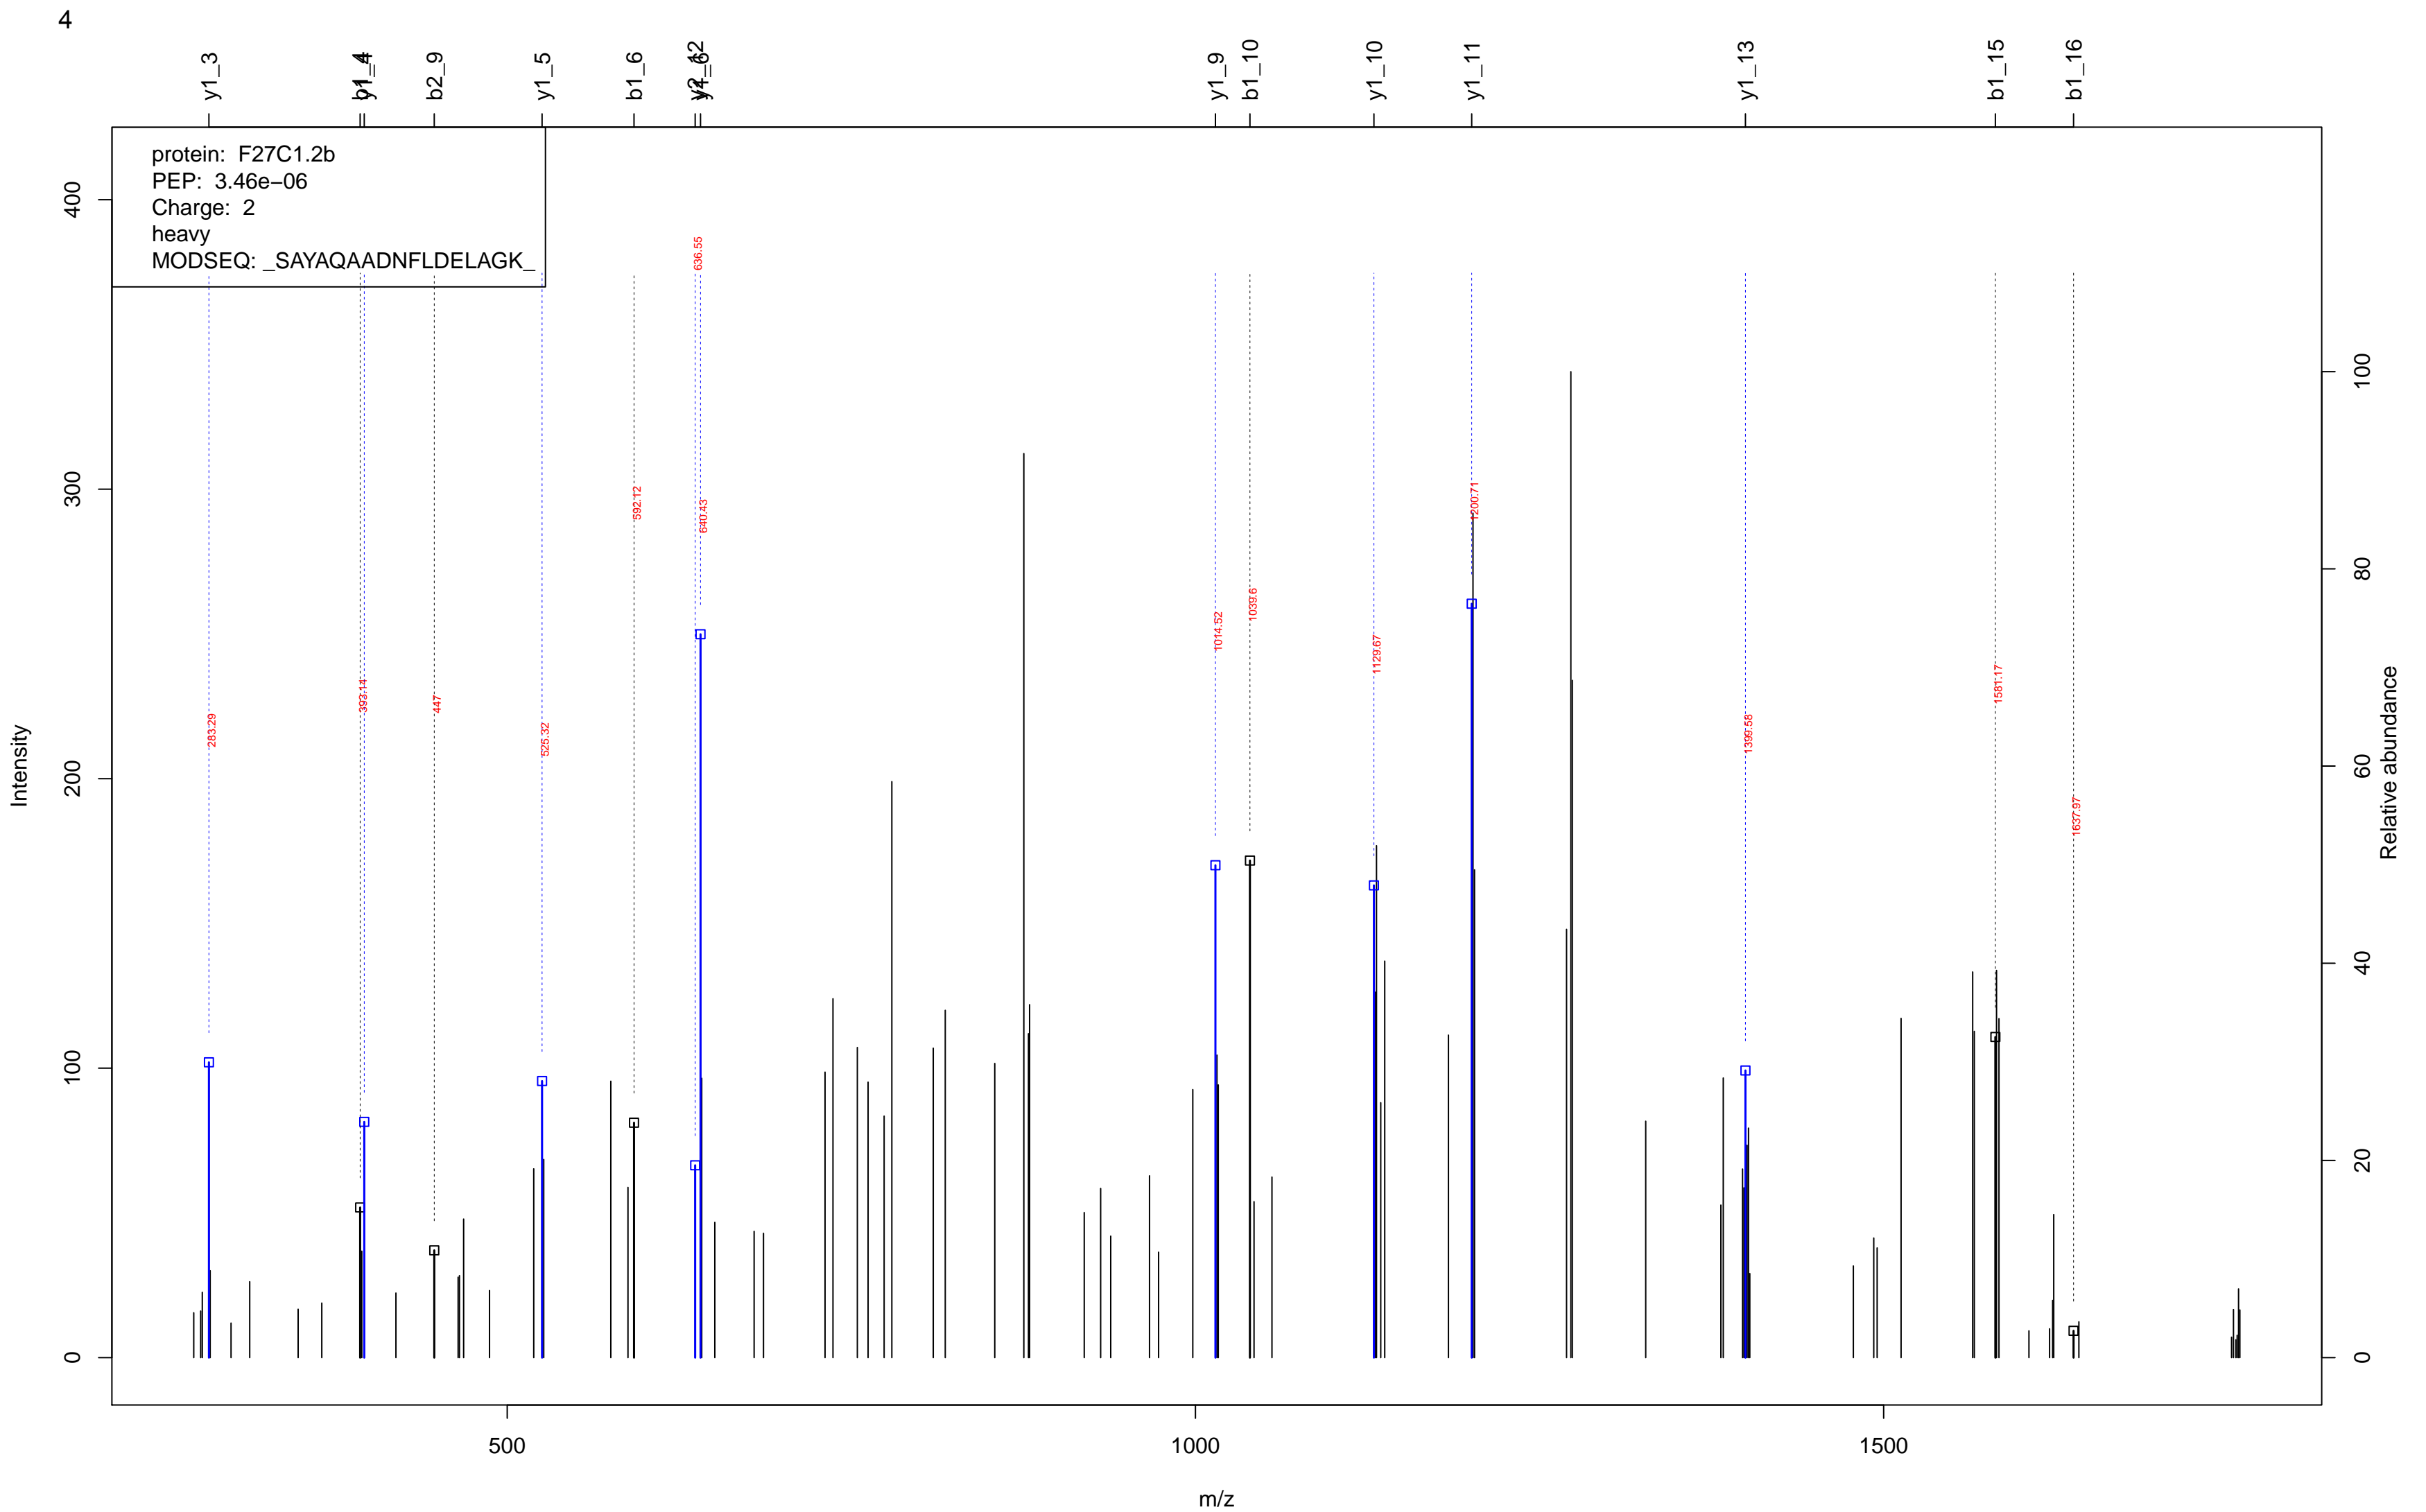

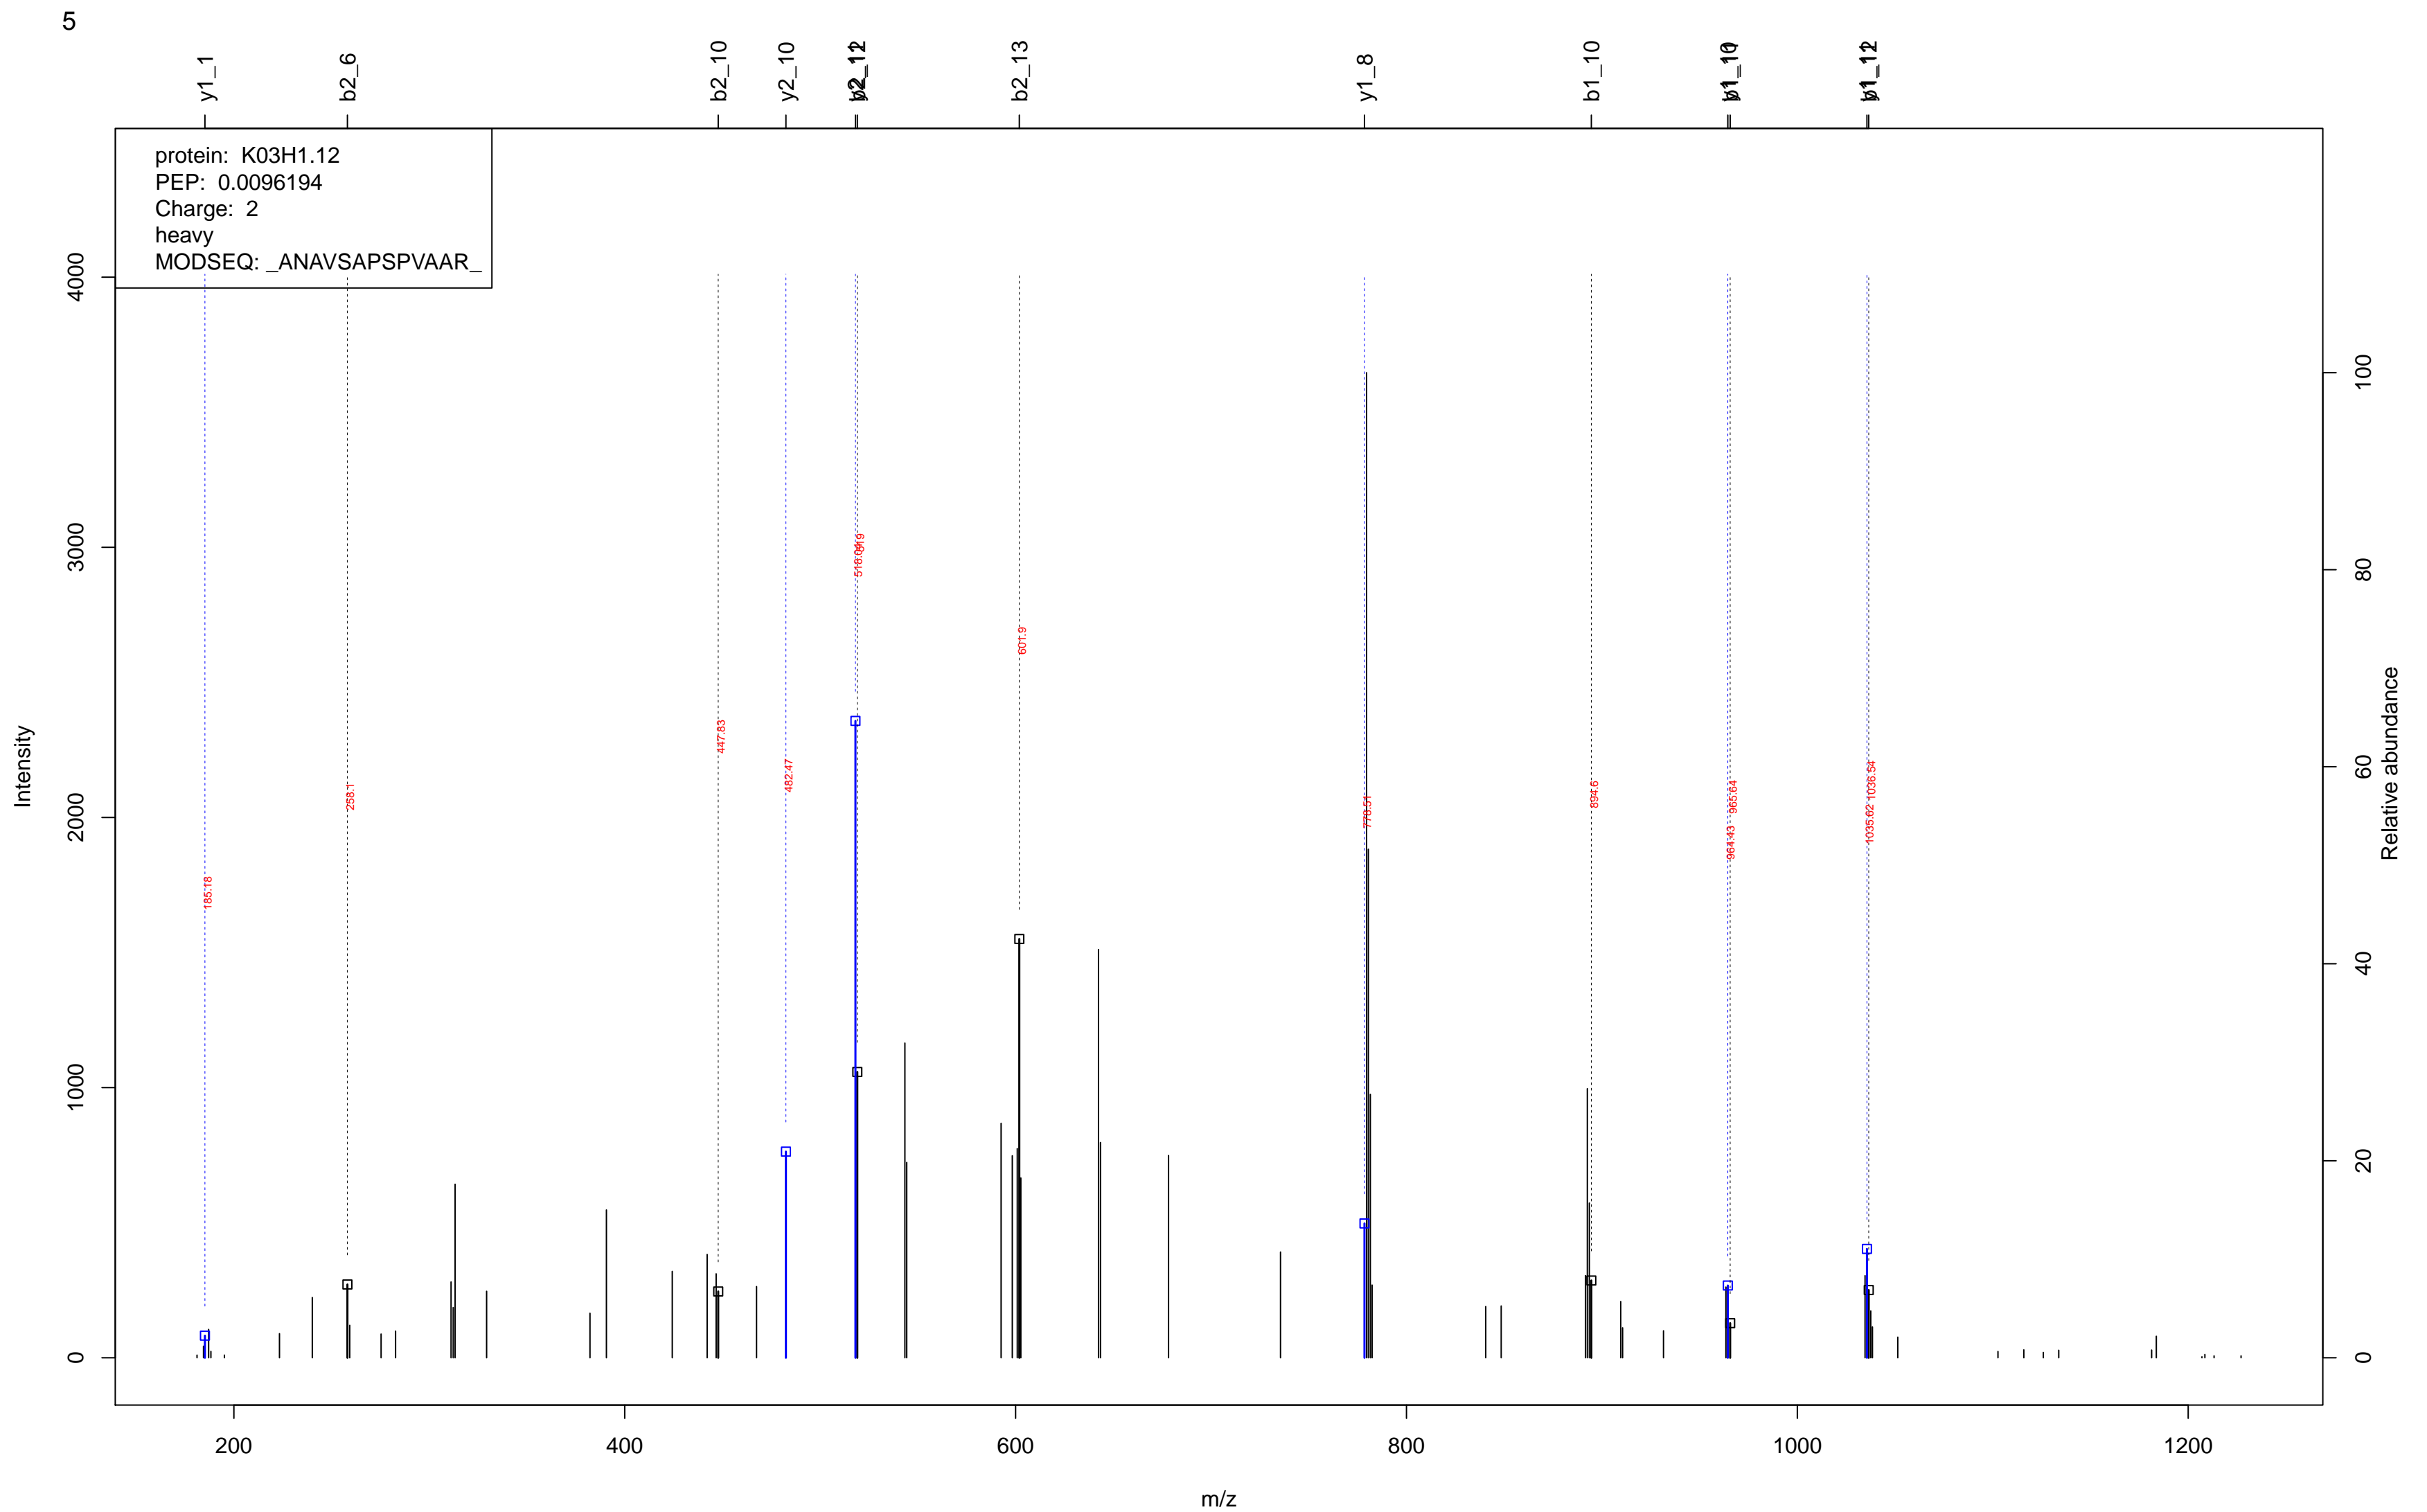

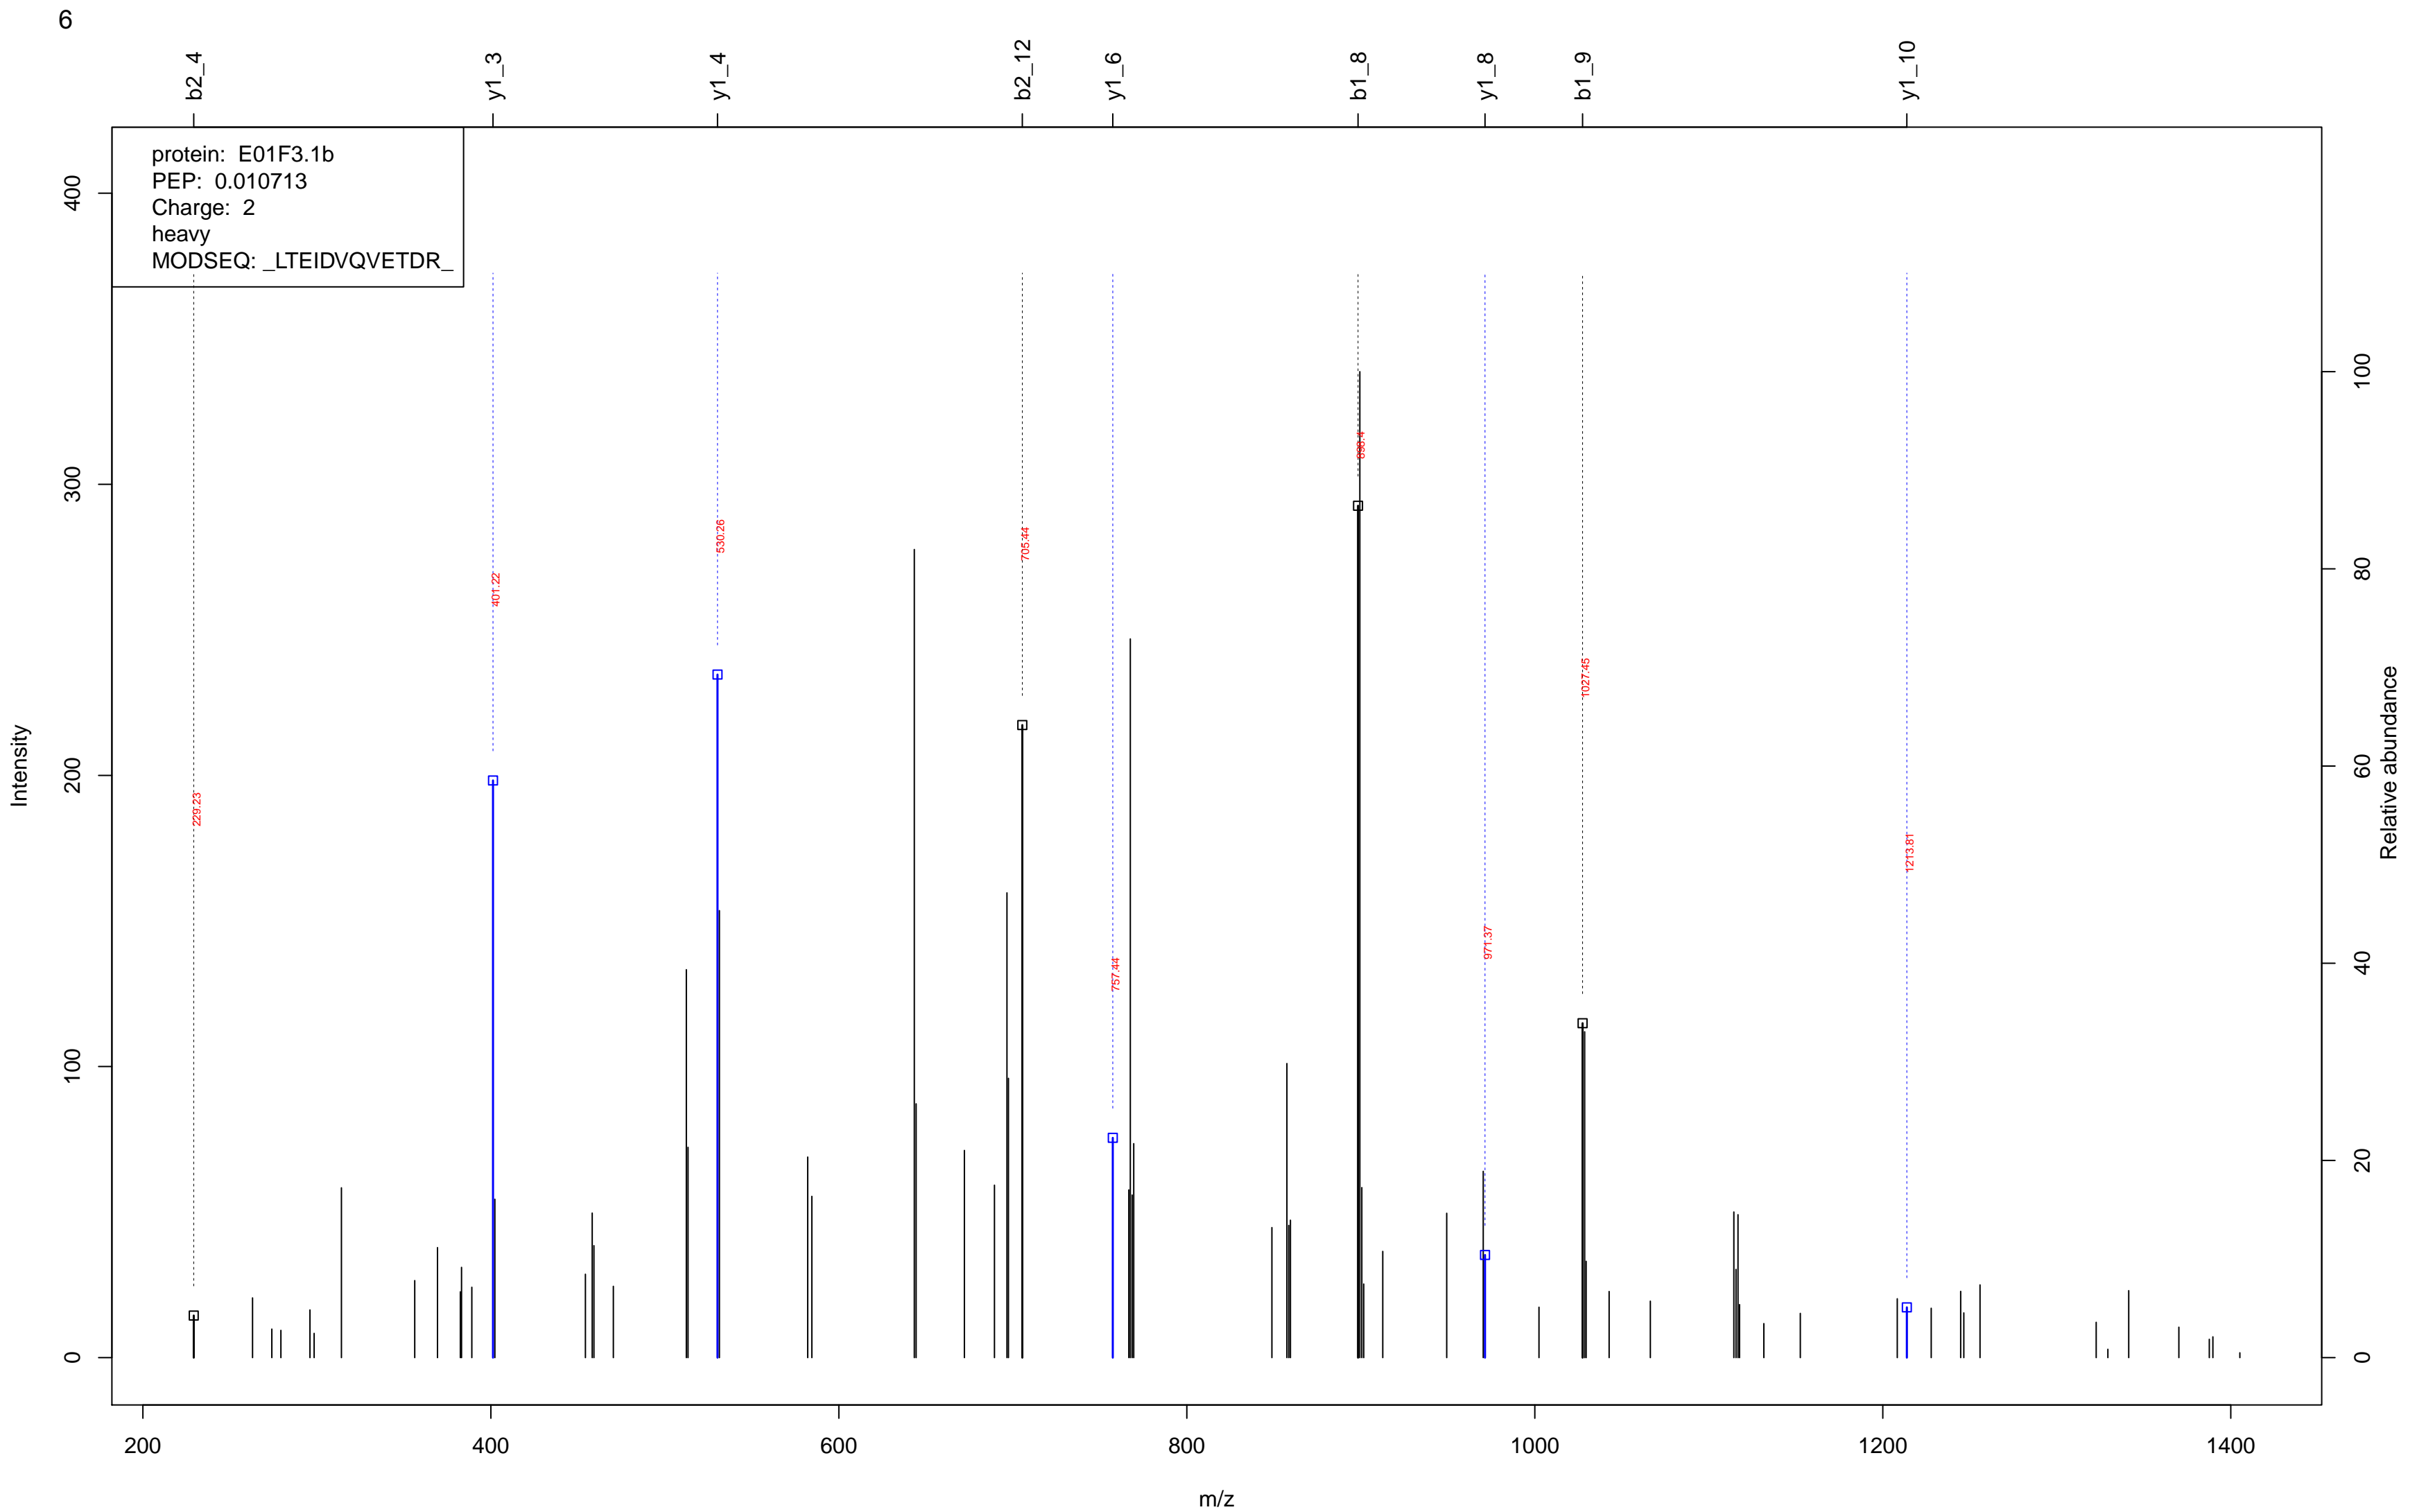

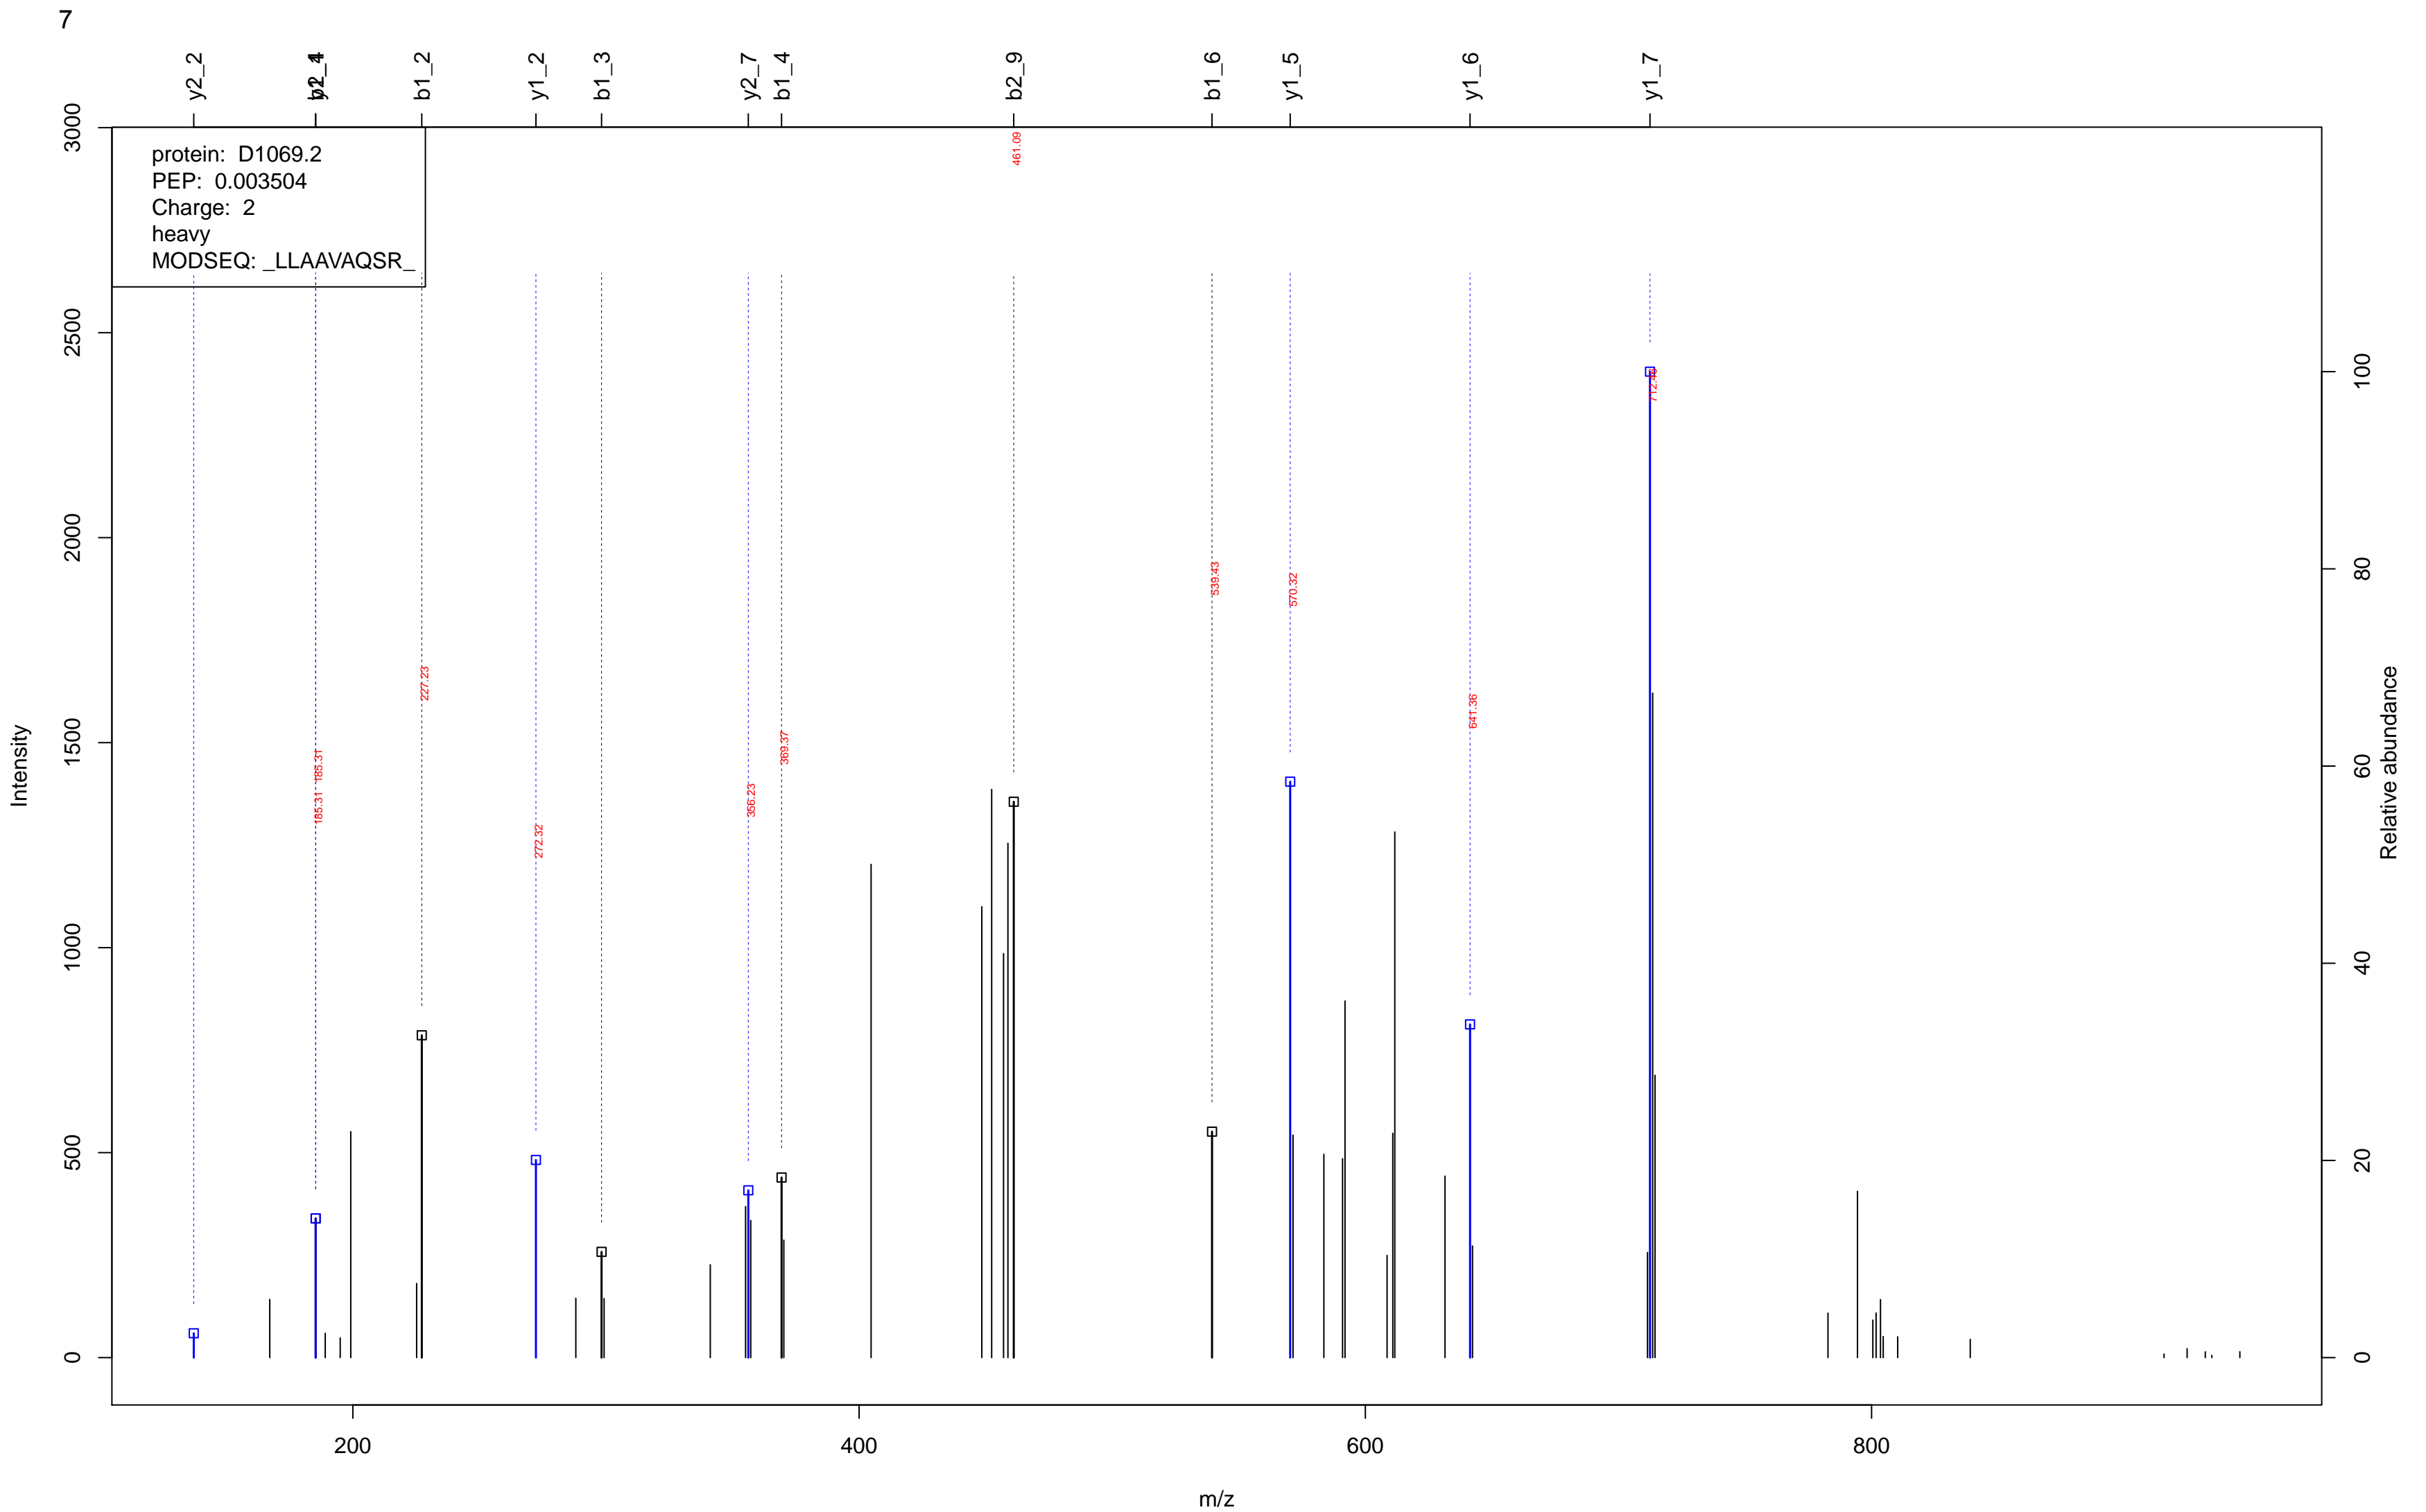

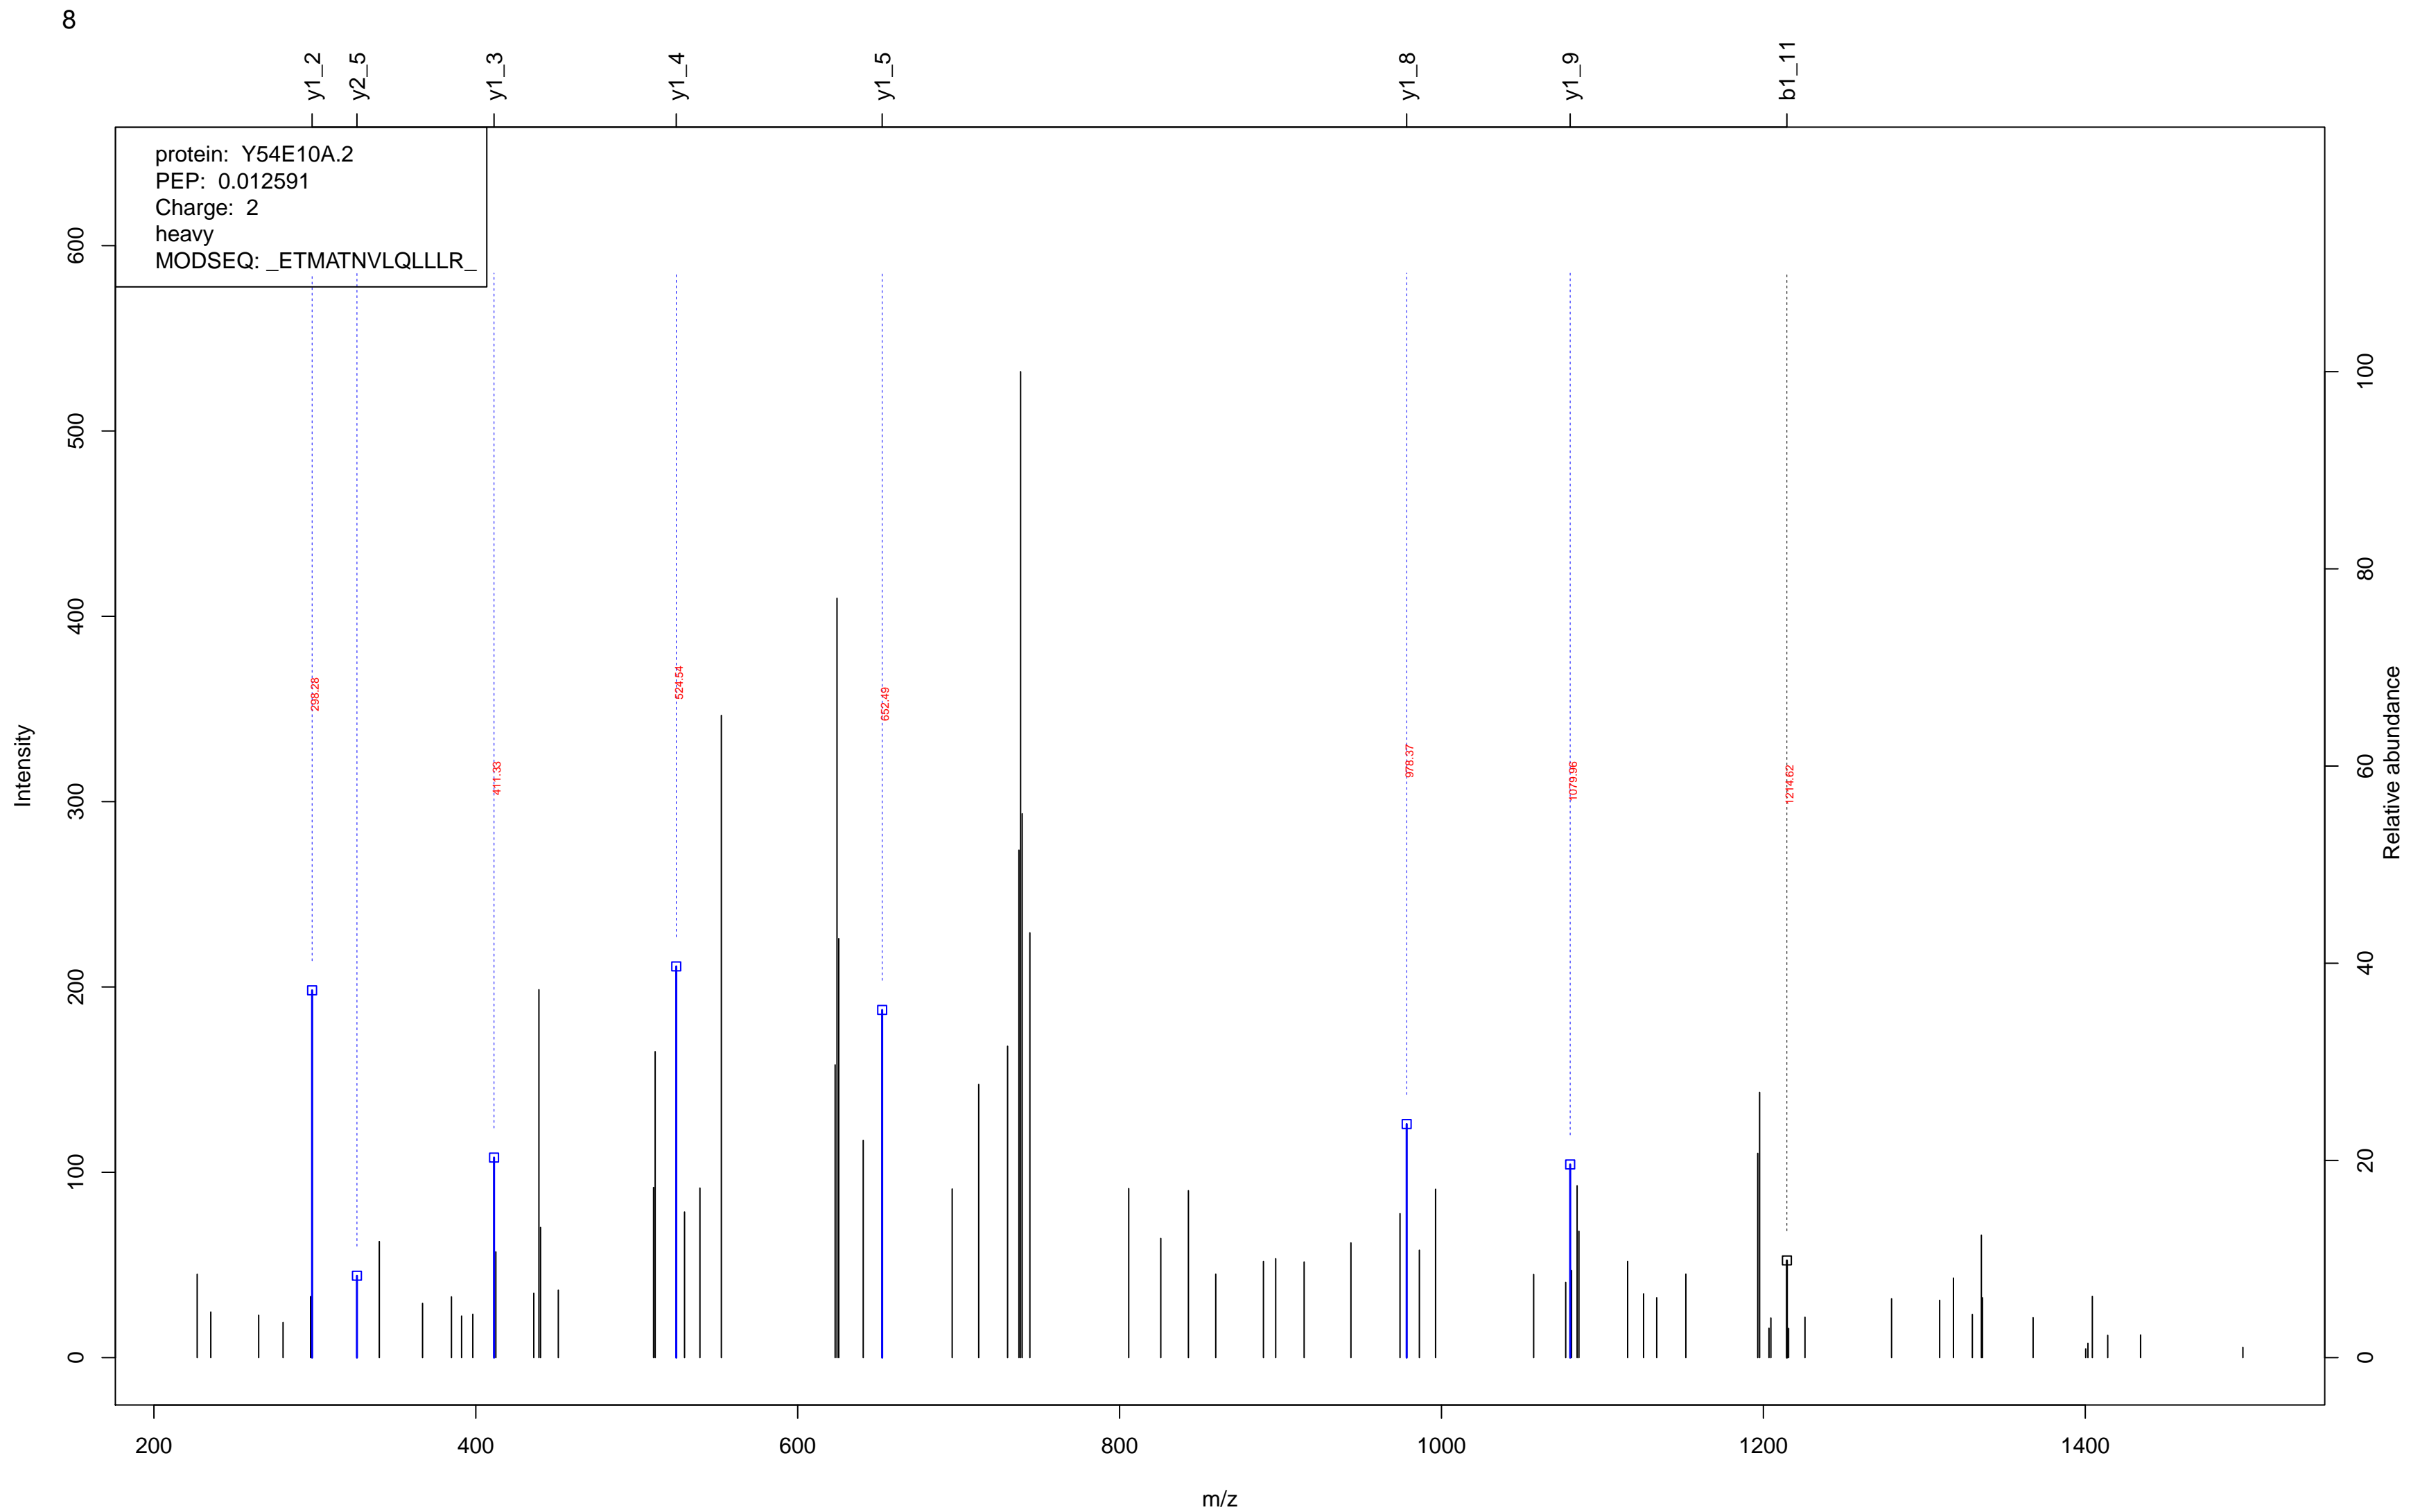



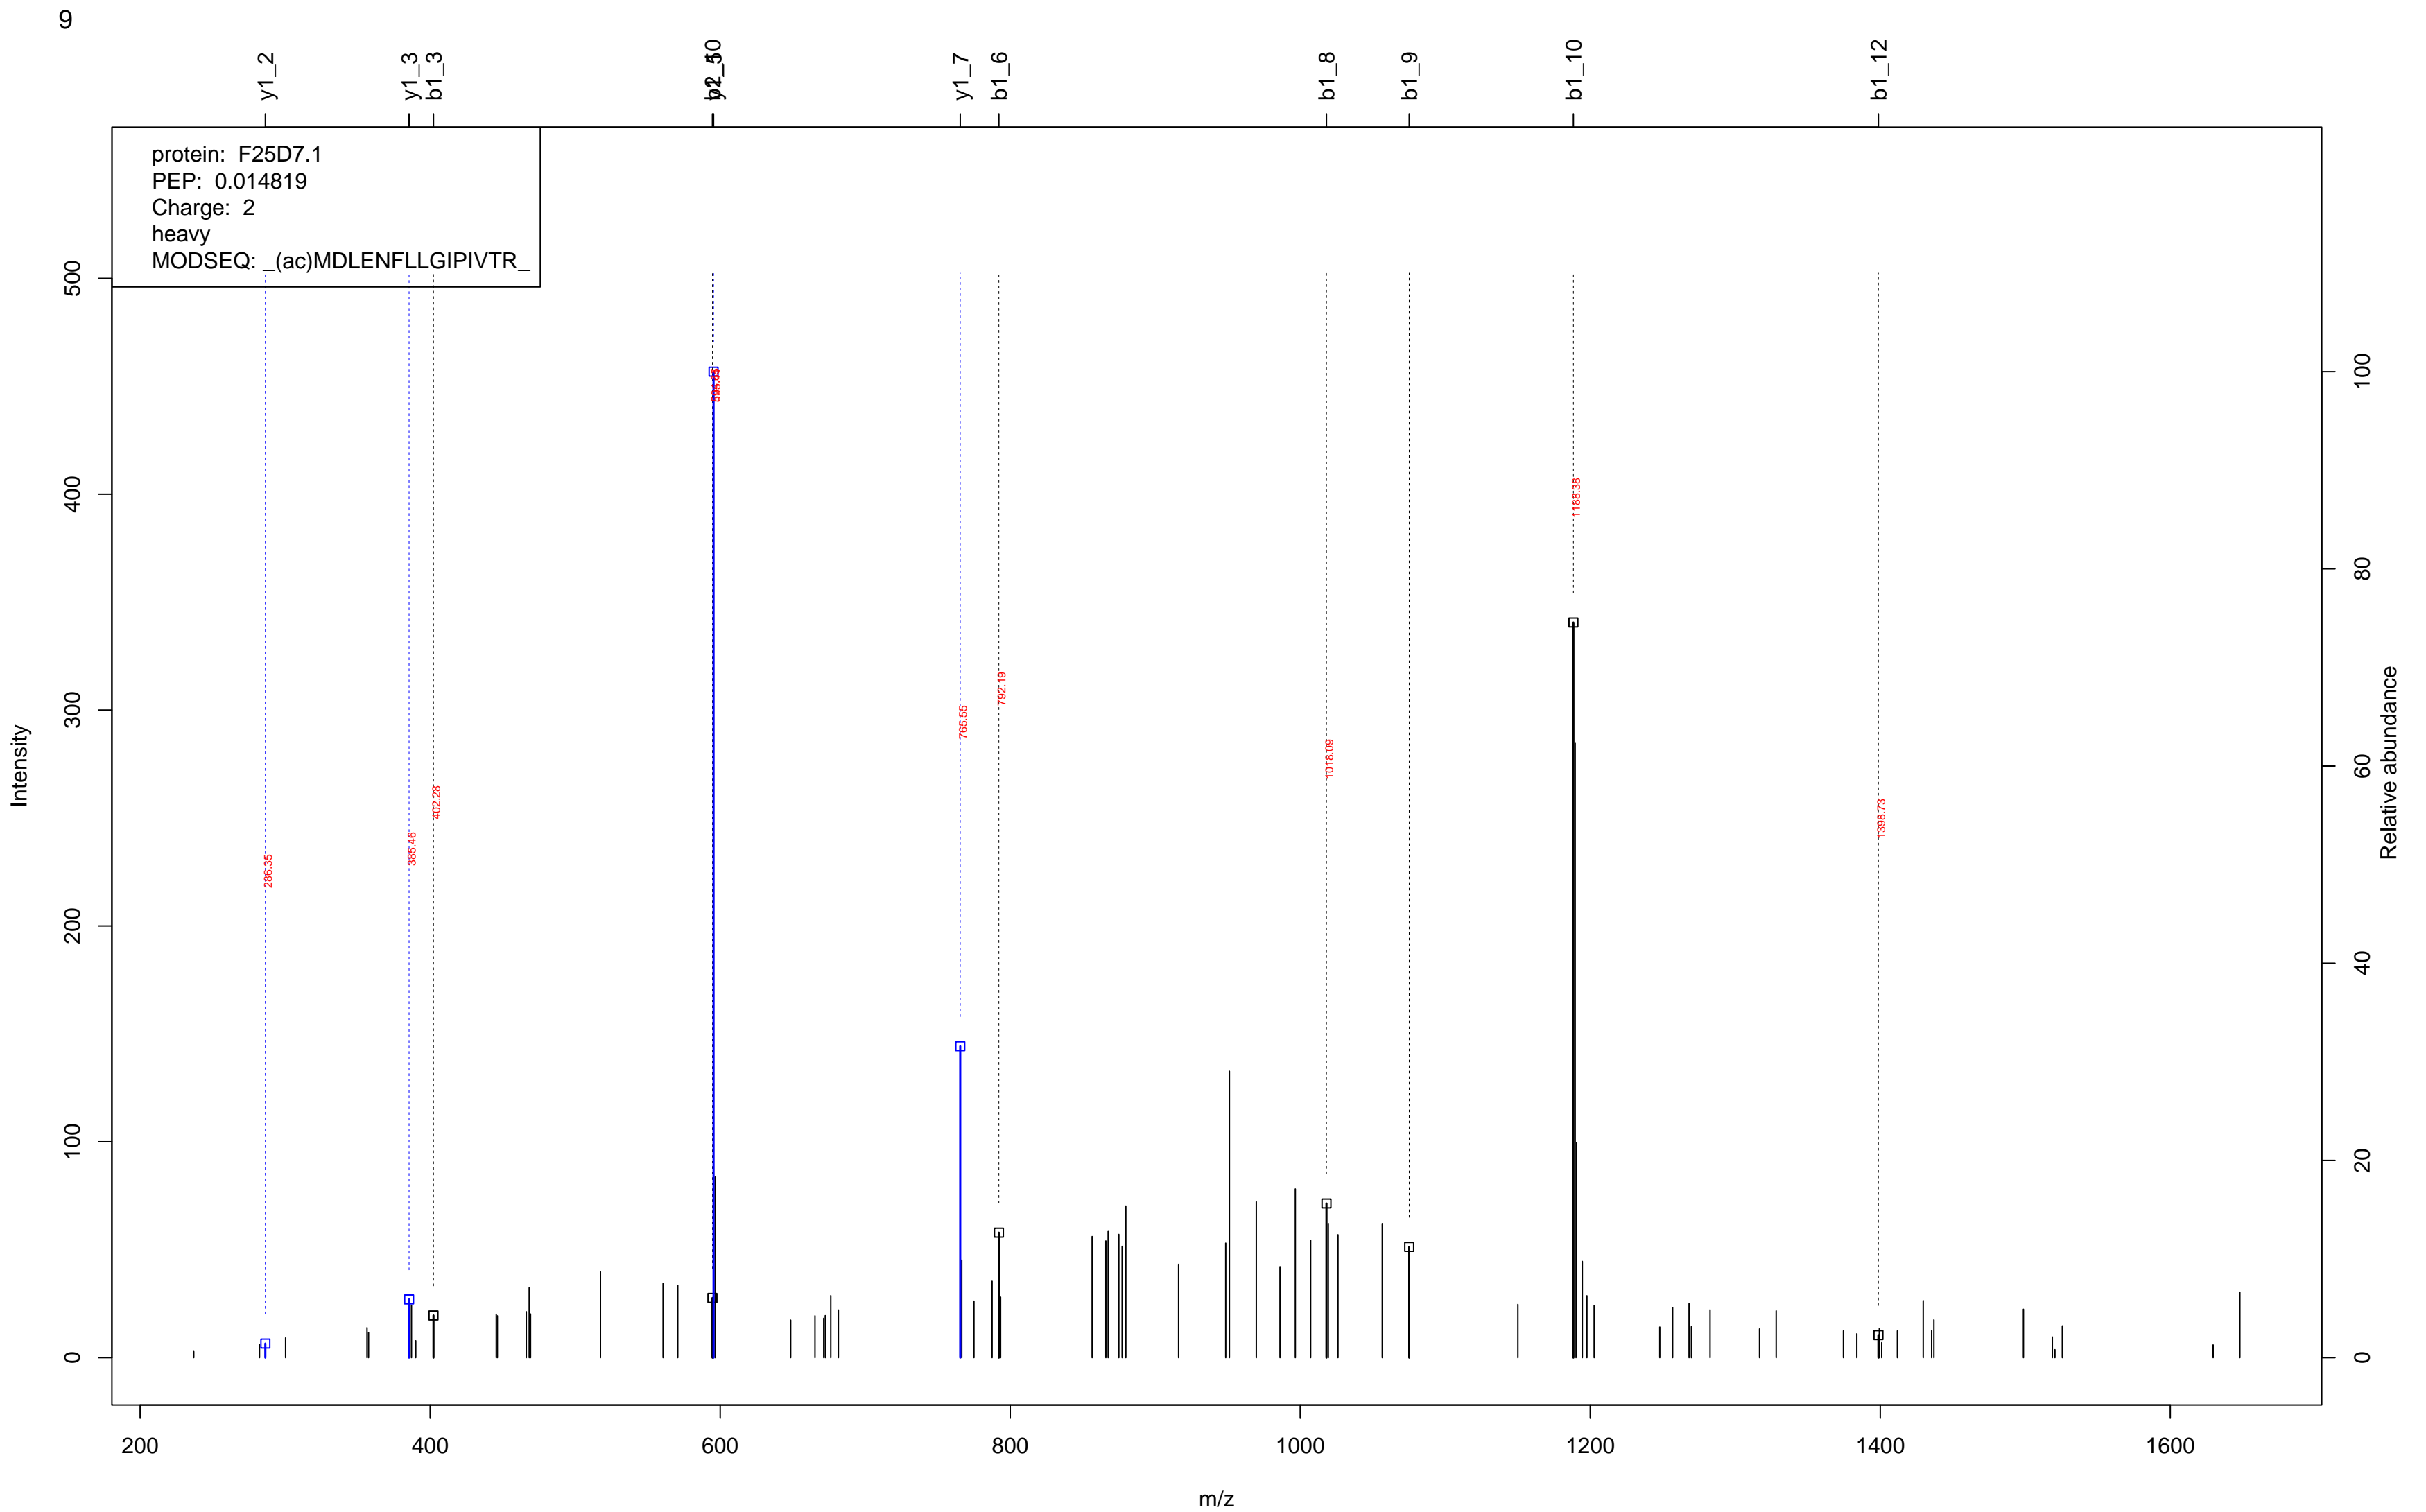

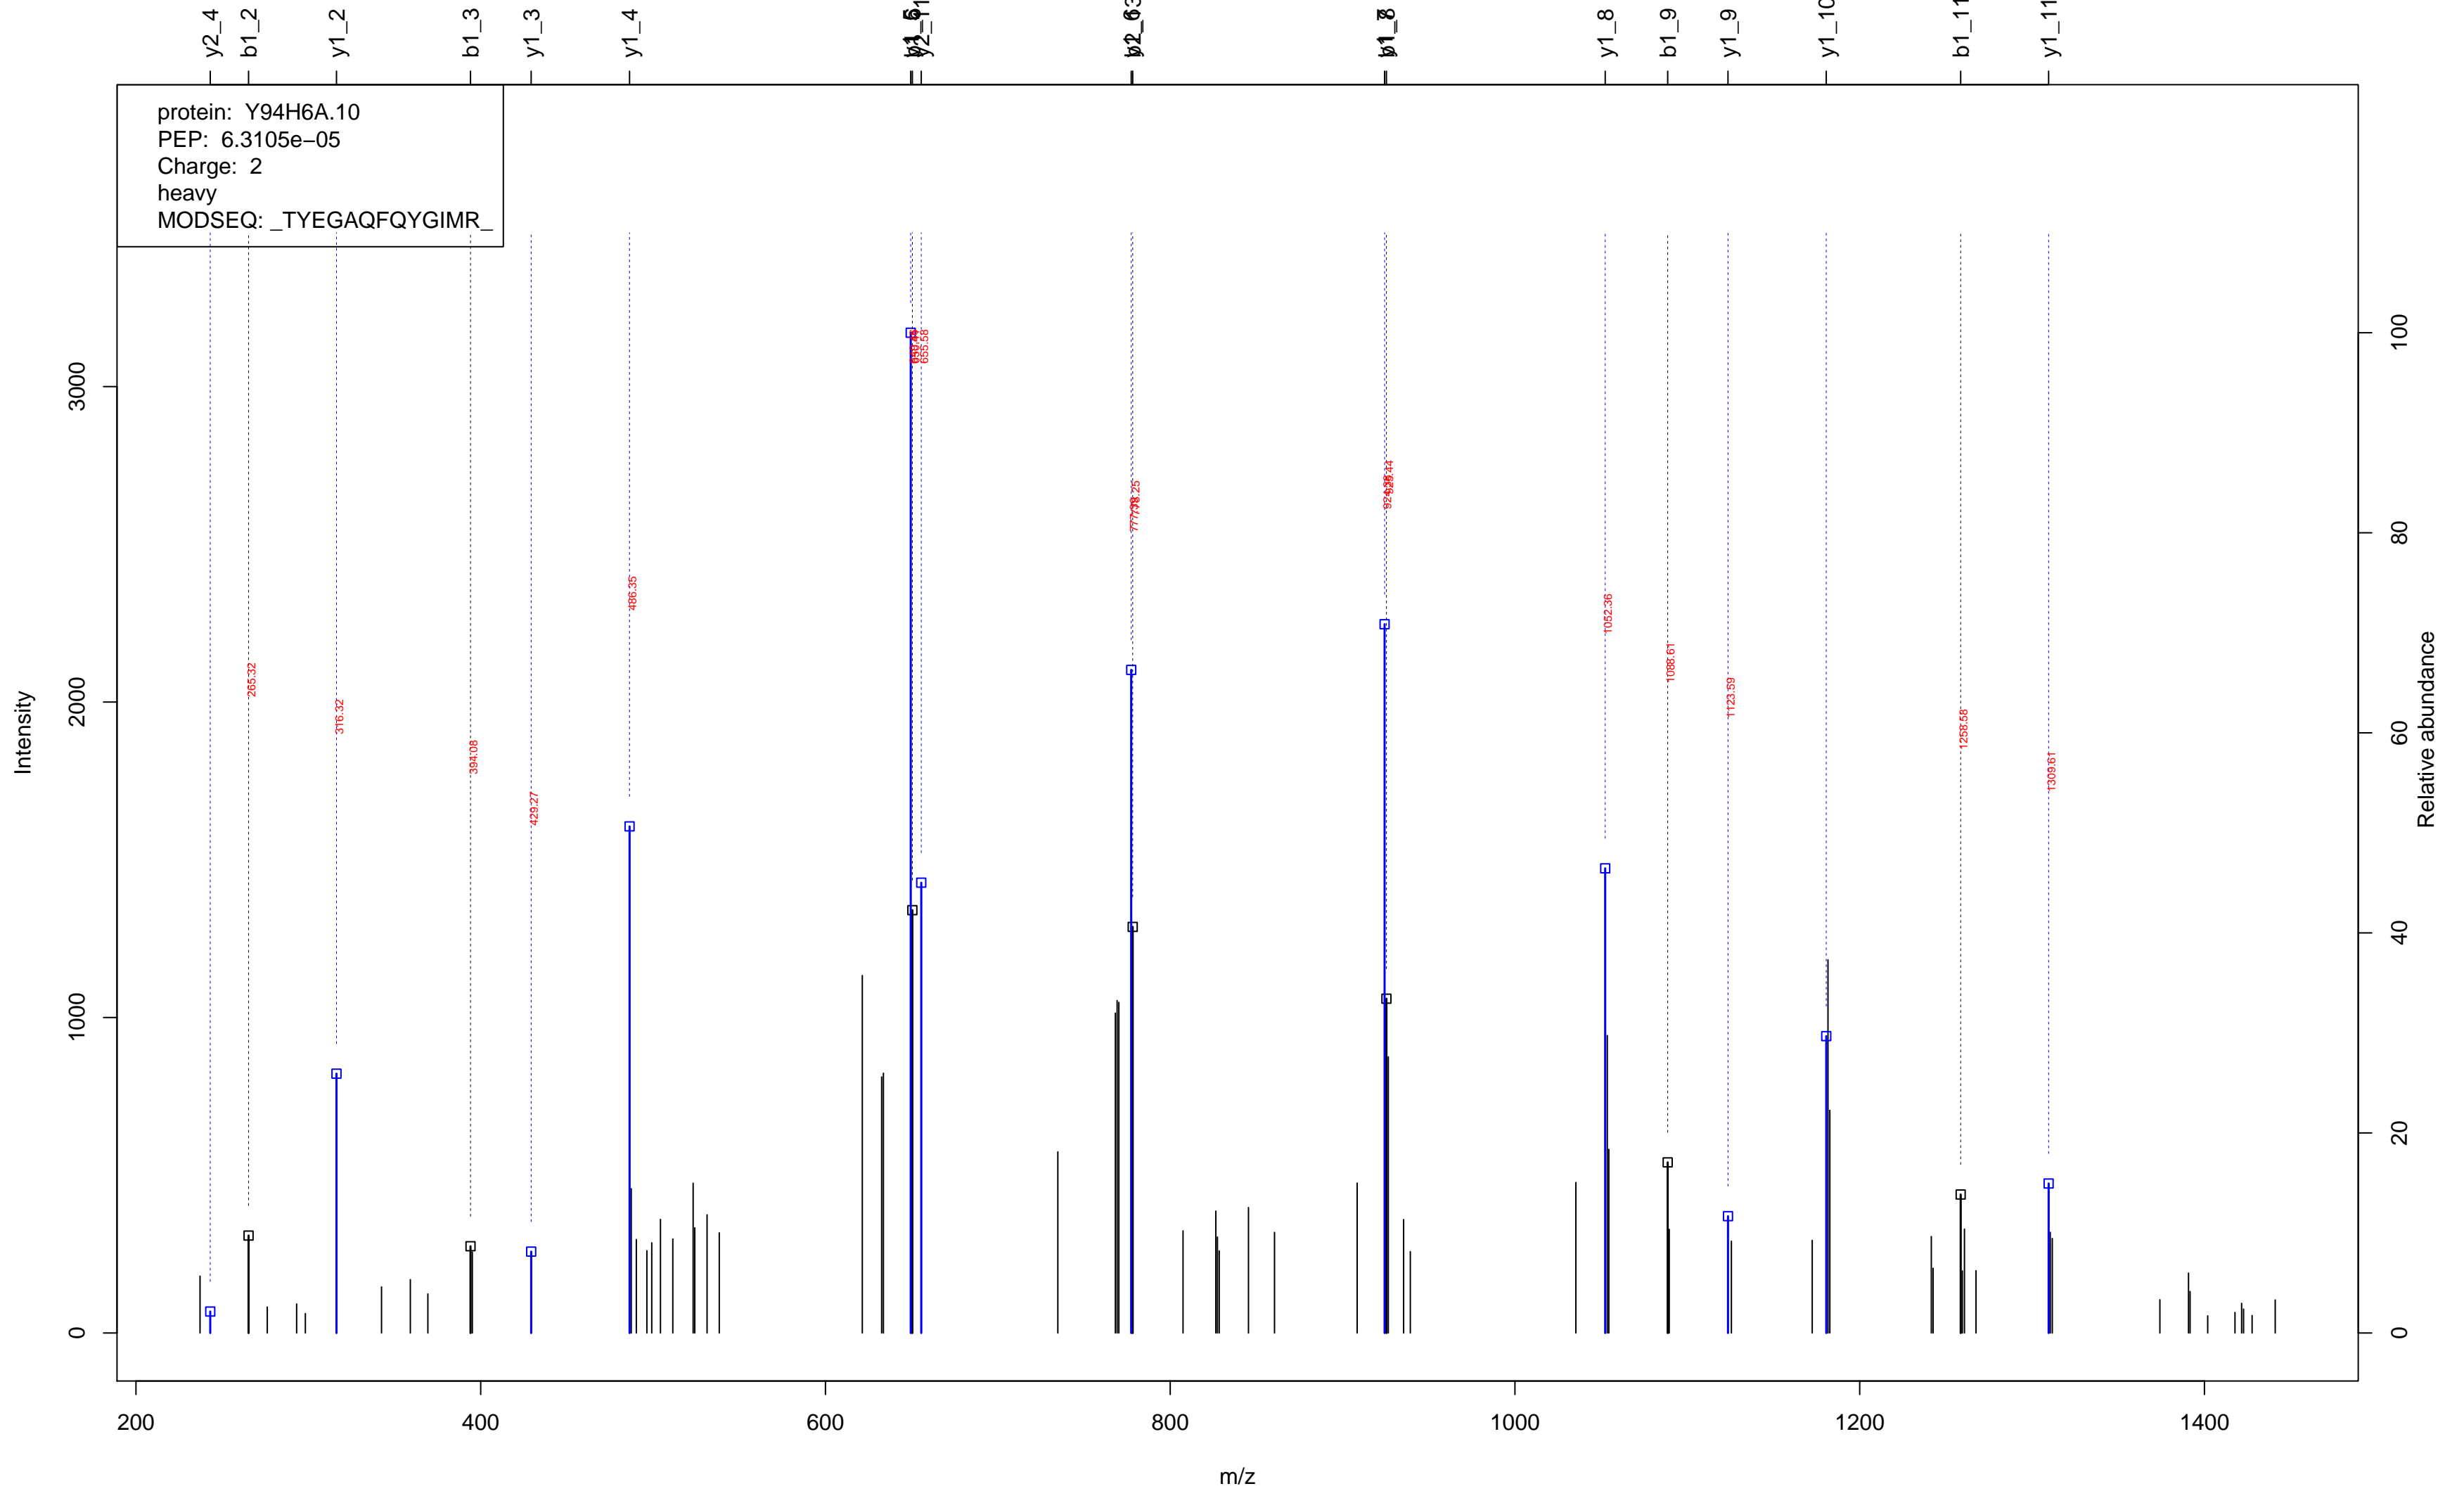

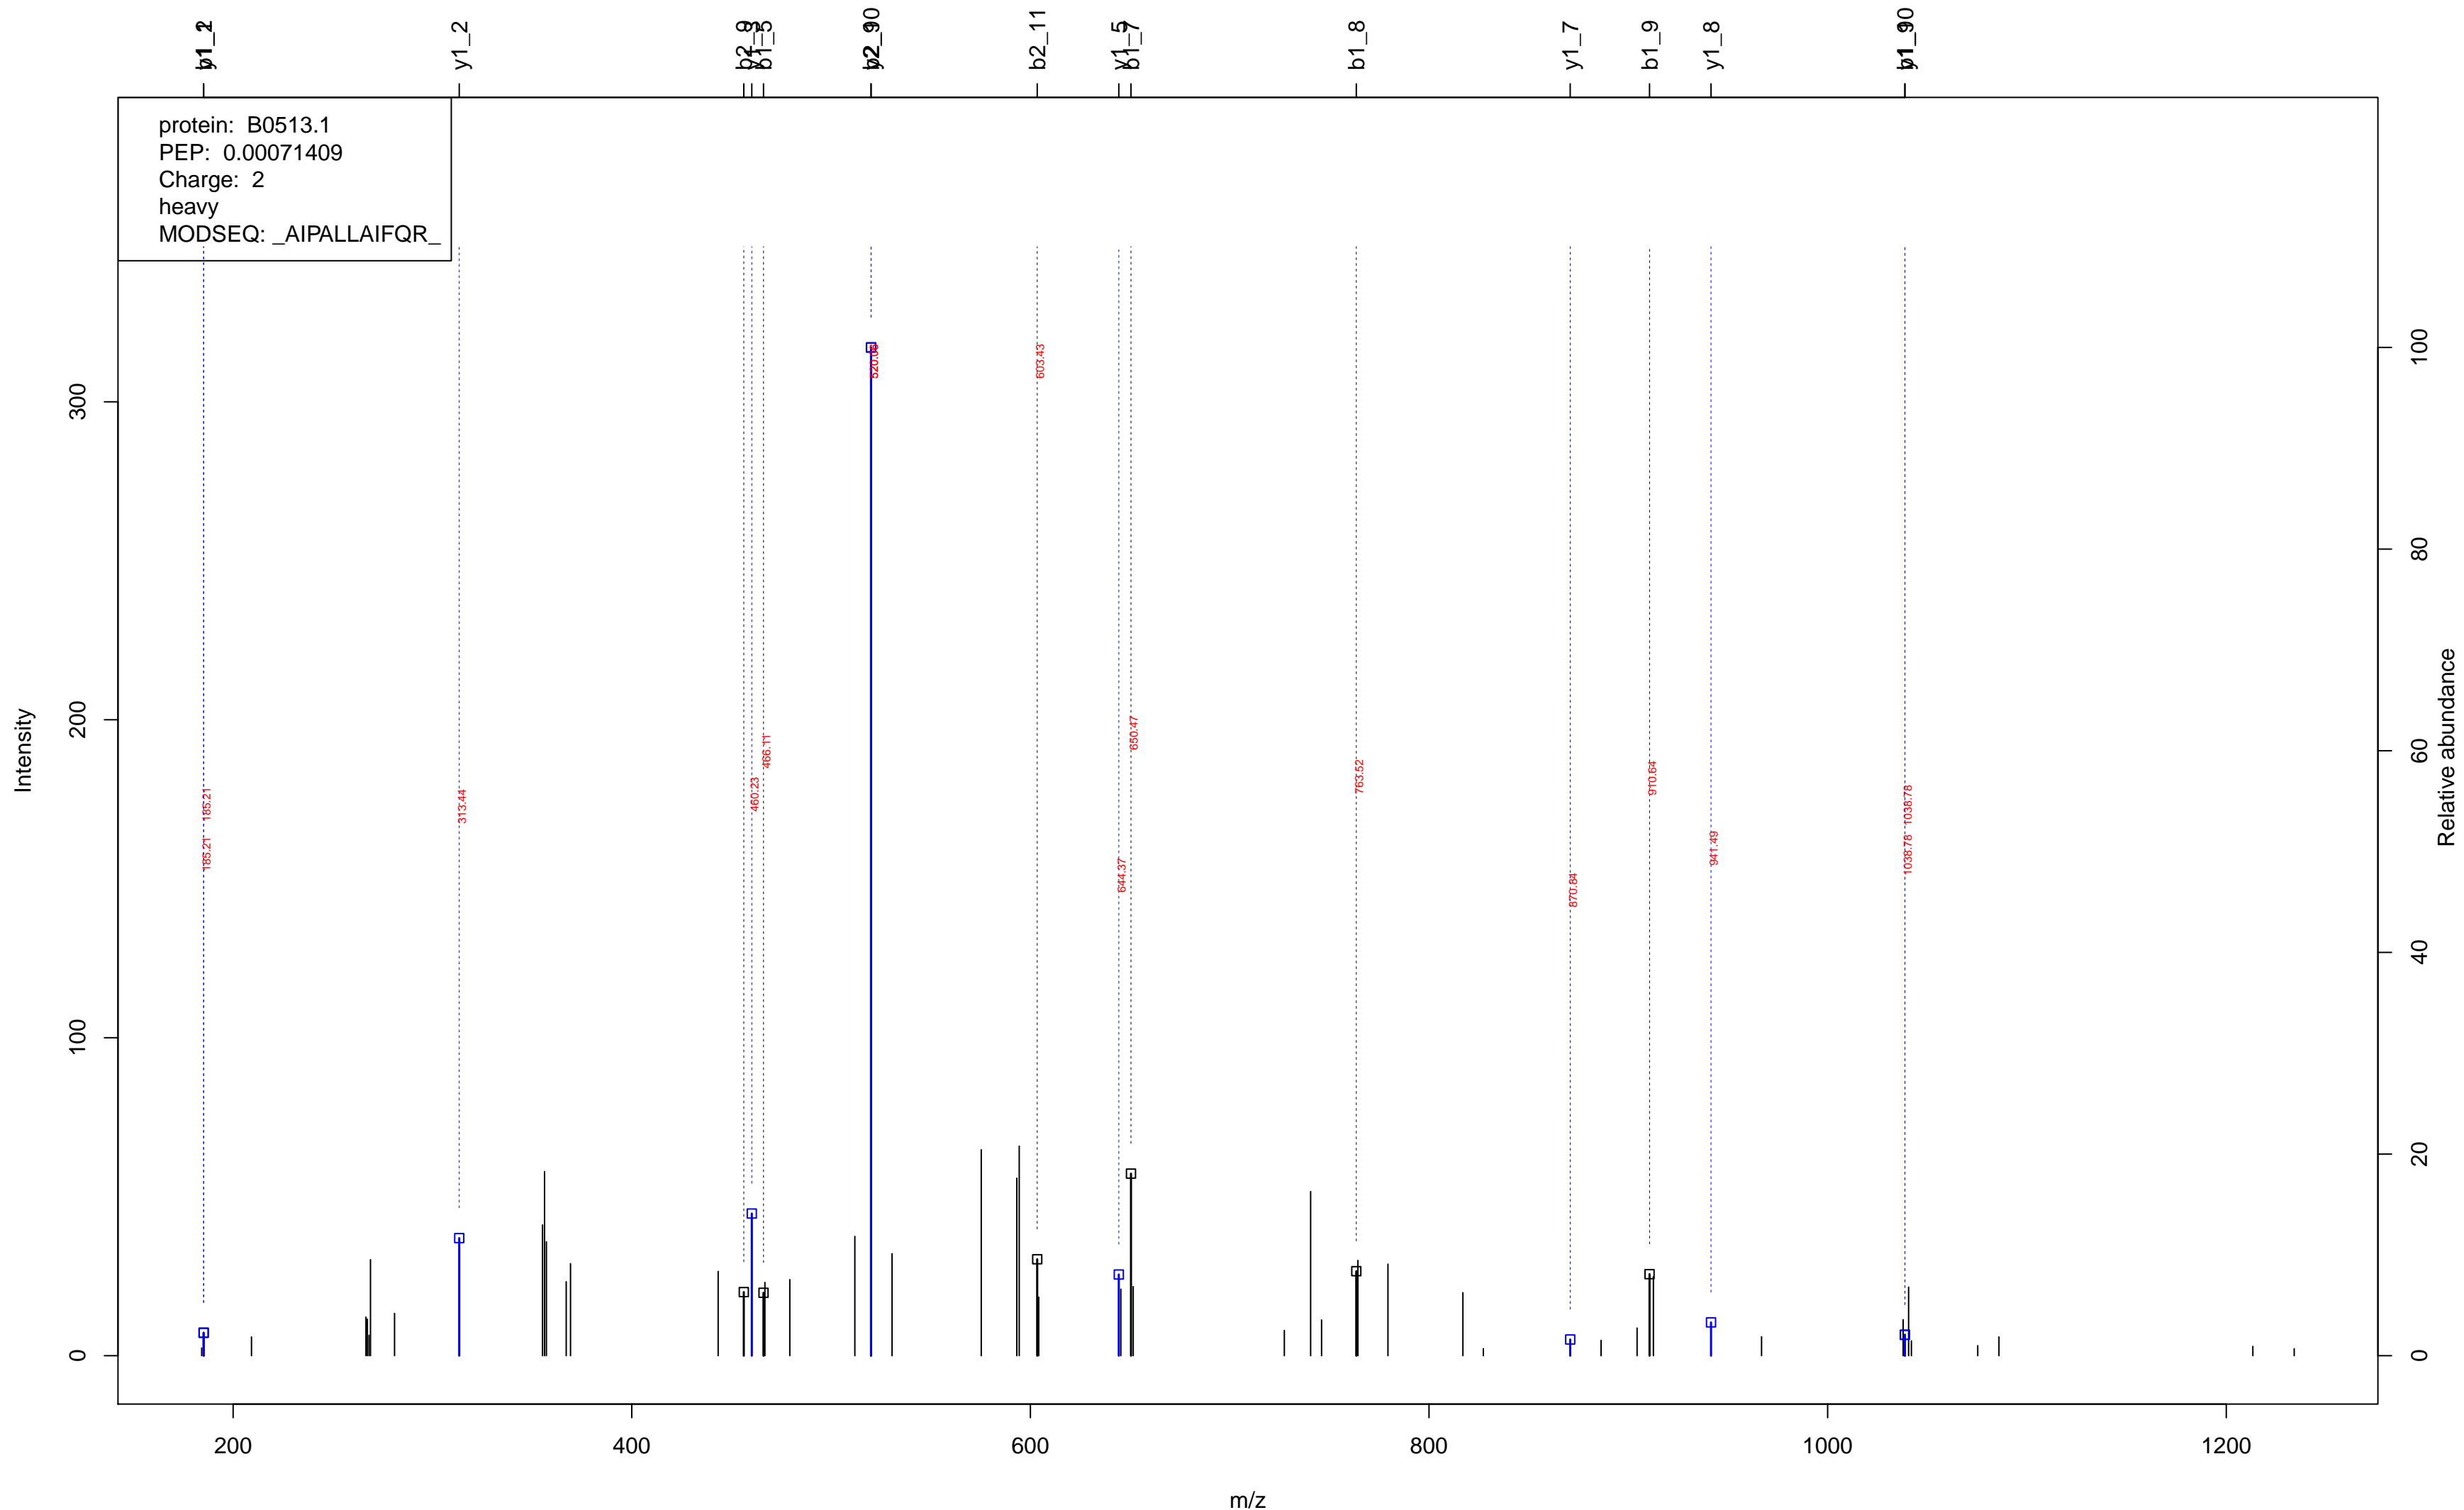

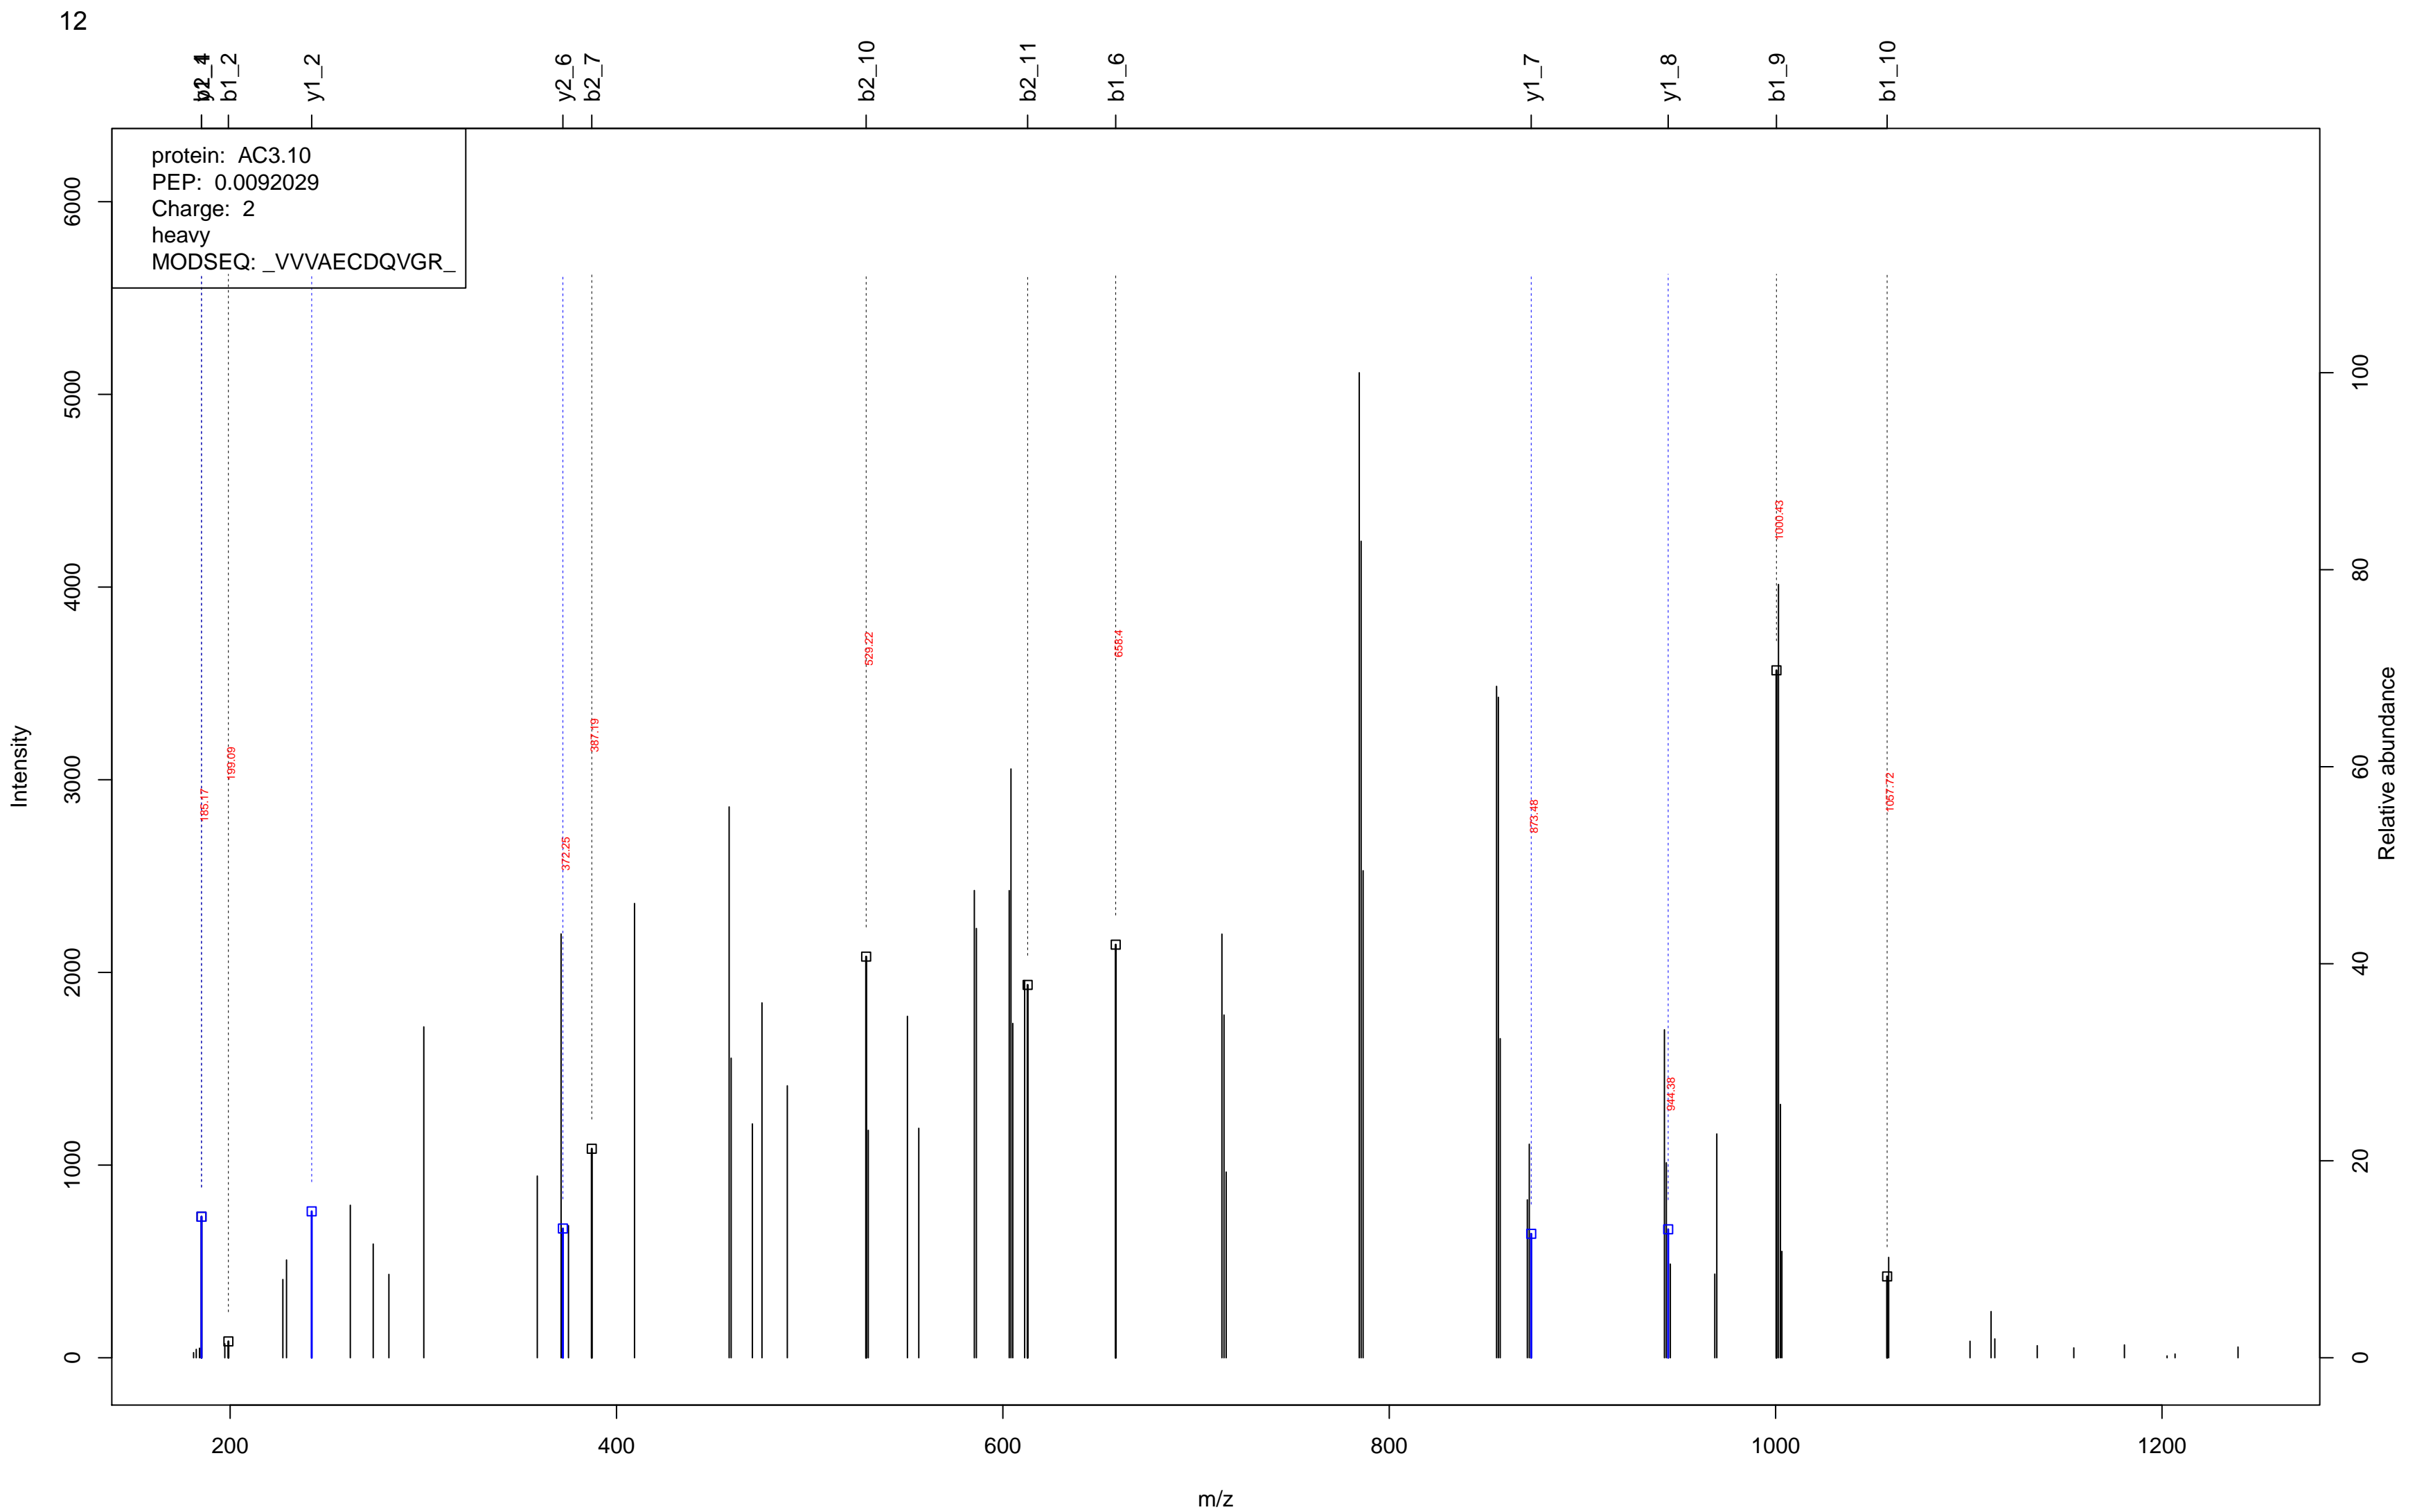

y2\_3

b2\_5  
y1\_2

y1\_3

b1\_4

y2\_4

b1\_5

b2\_10

y1\_5

b1\_6

y1\_6

b1\_7

b1\_8  
y1\_7

b1\_9

y1\_8

protein: T24H10.1  
PEP: 0.00020503  
Charge: 2  
heavy  
MODSEQ: \_SAQLLSALR\_

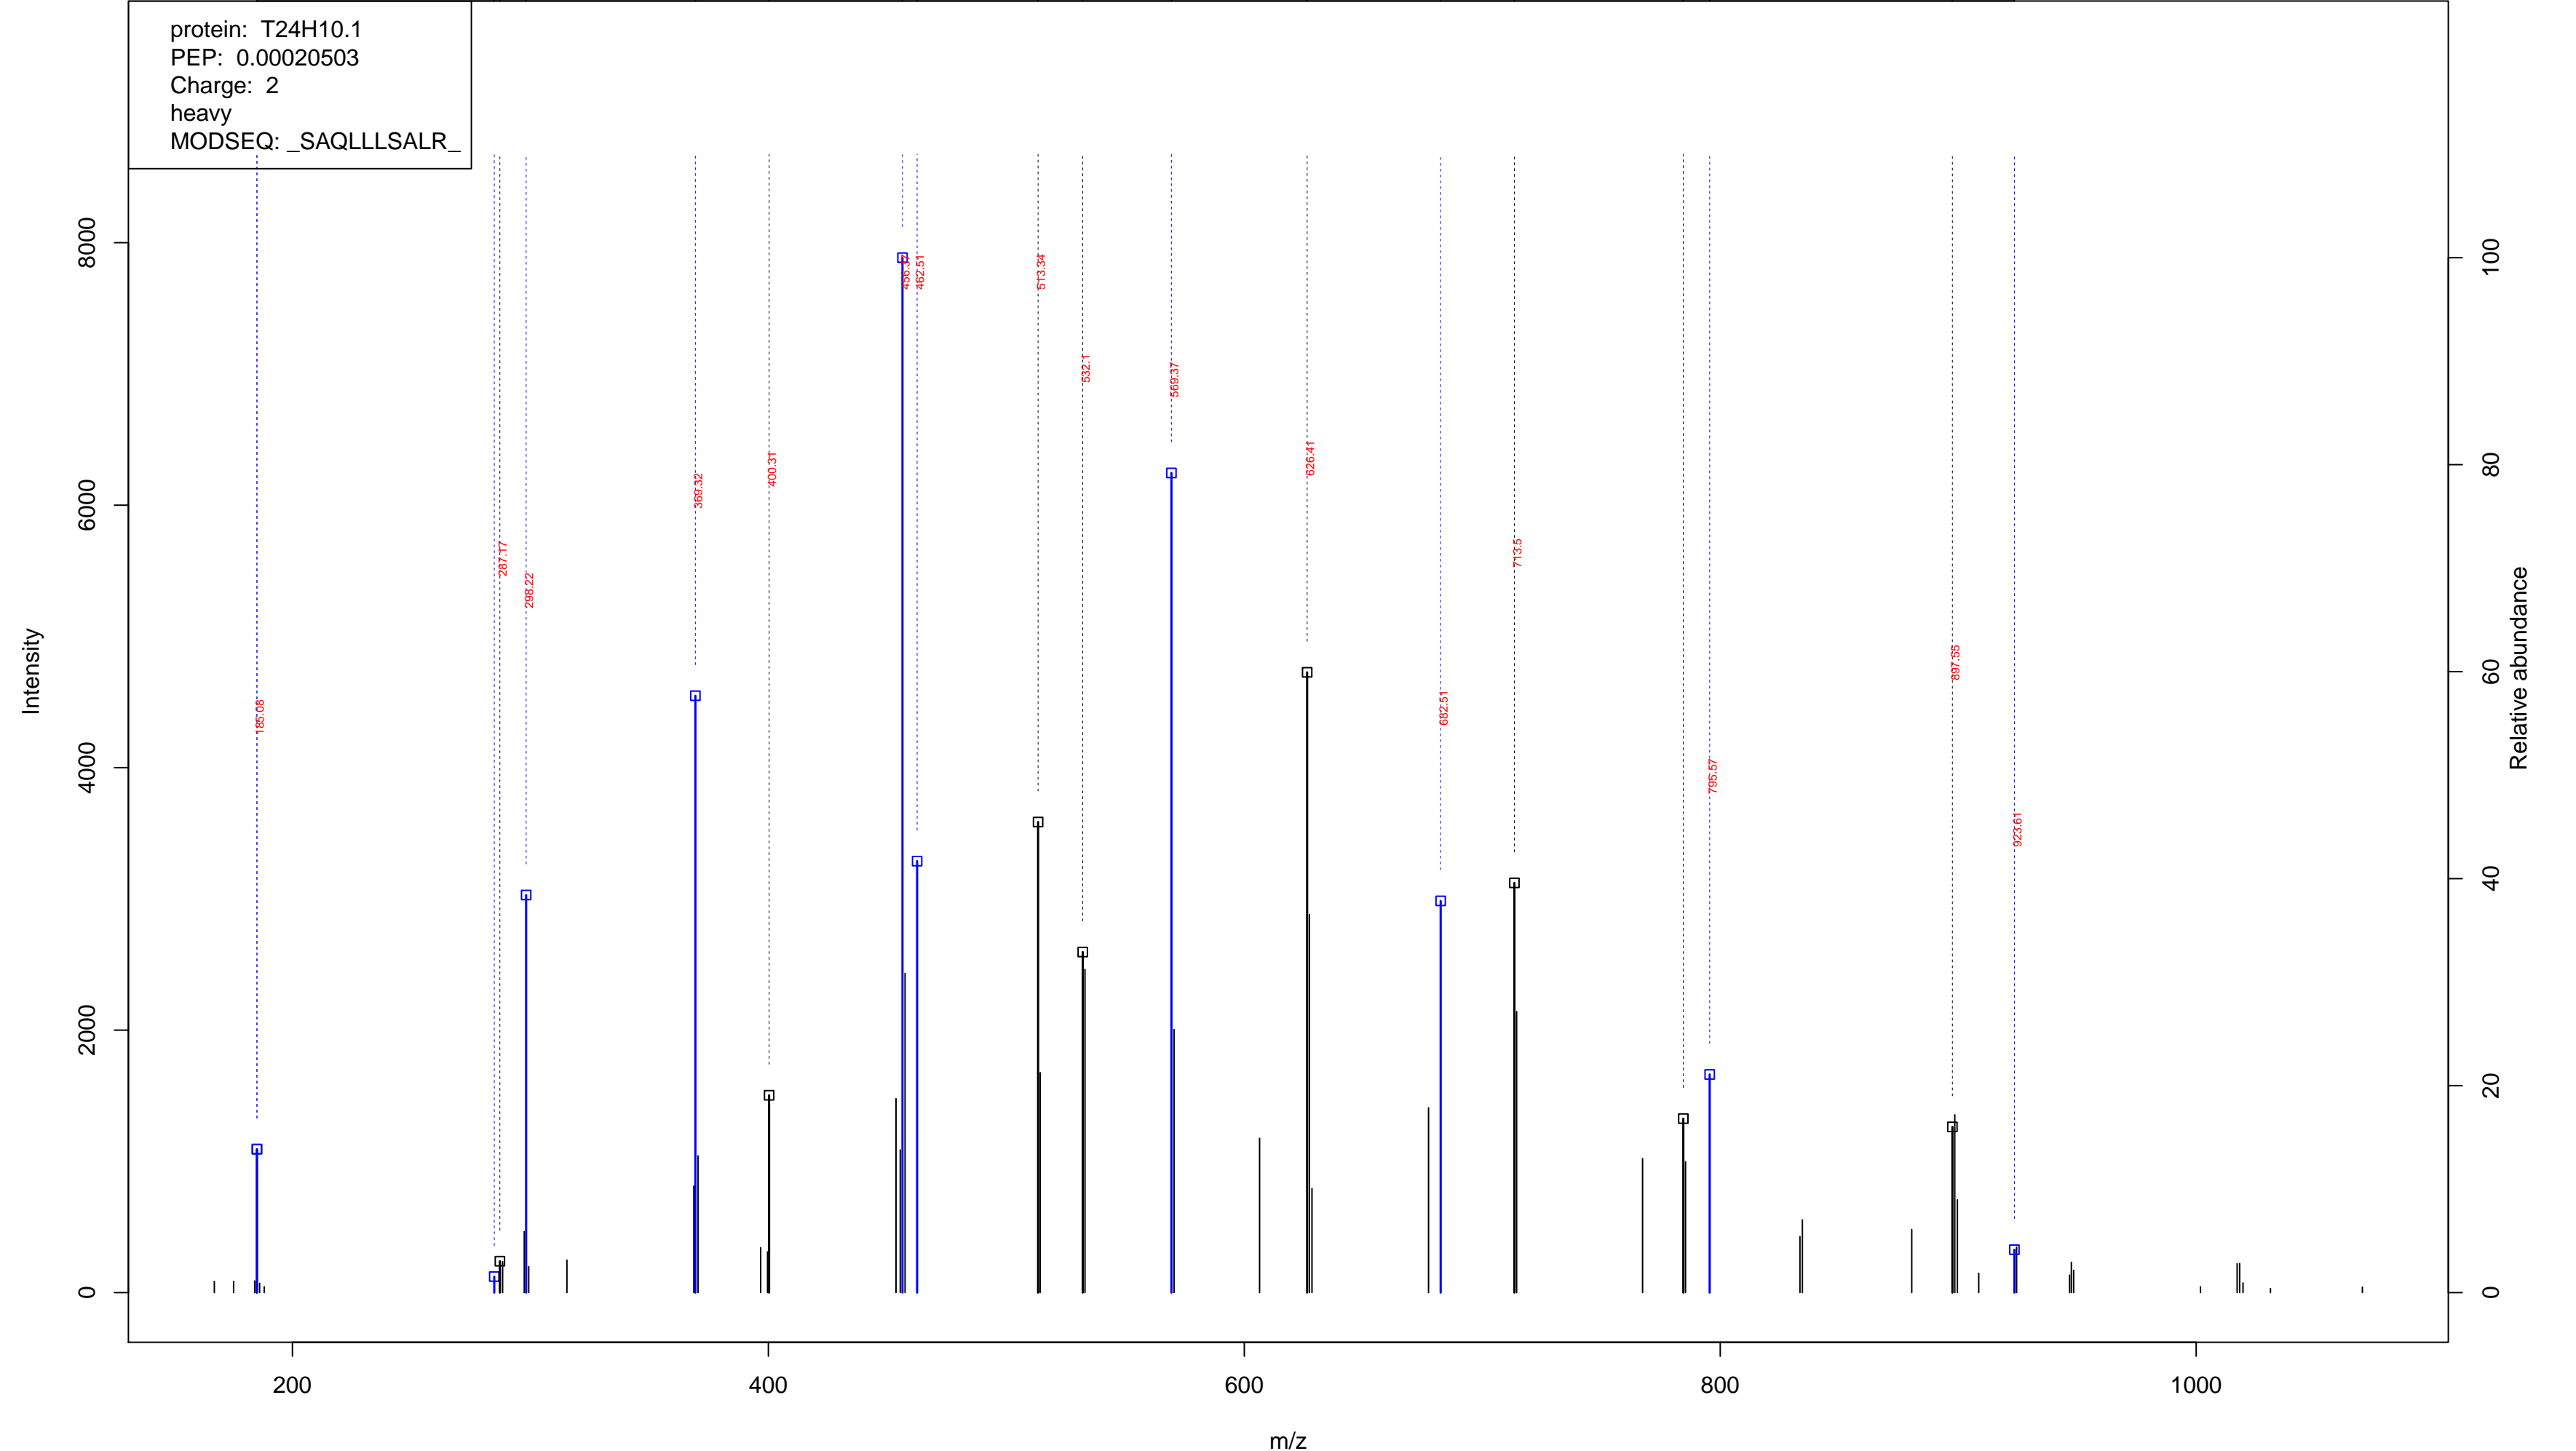

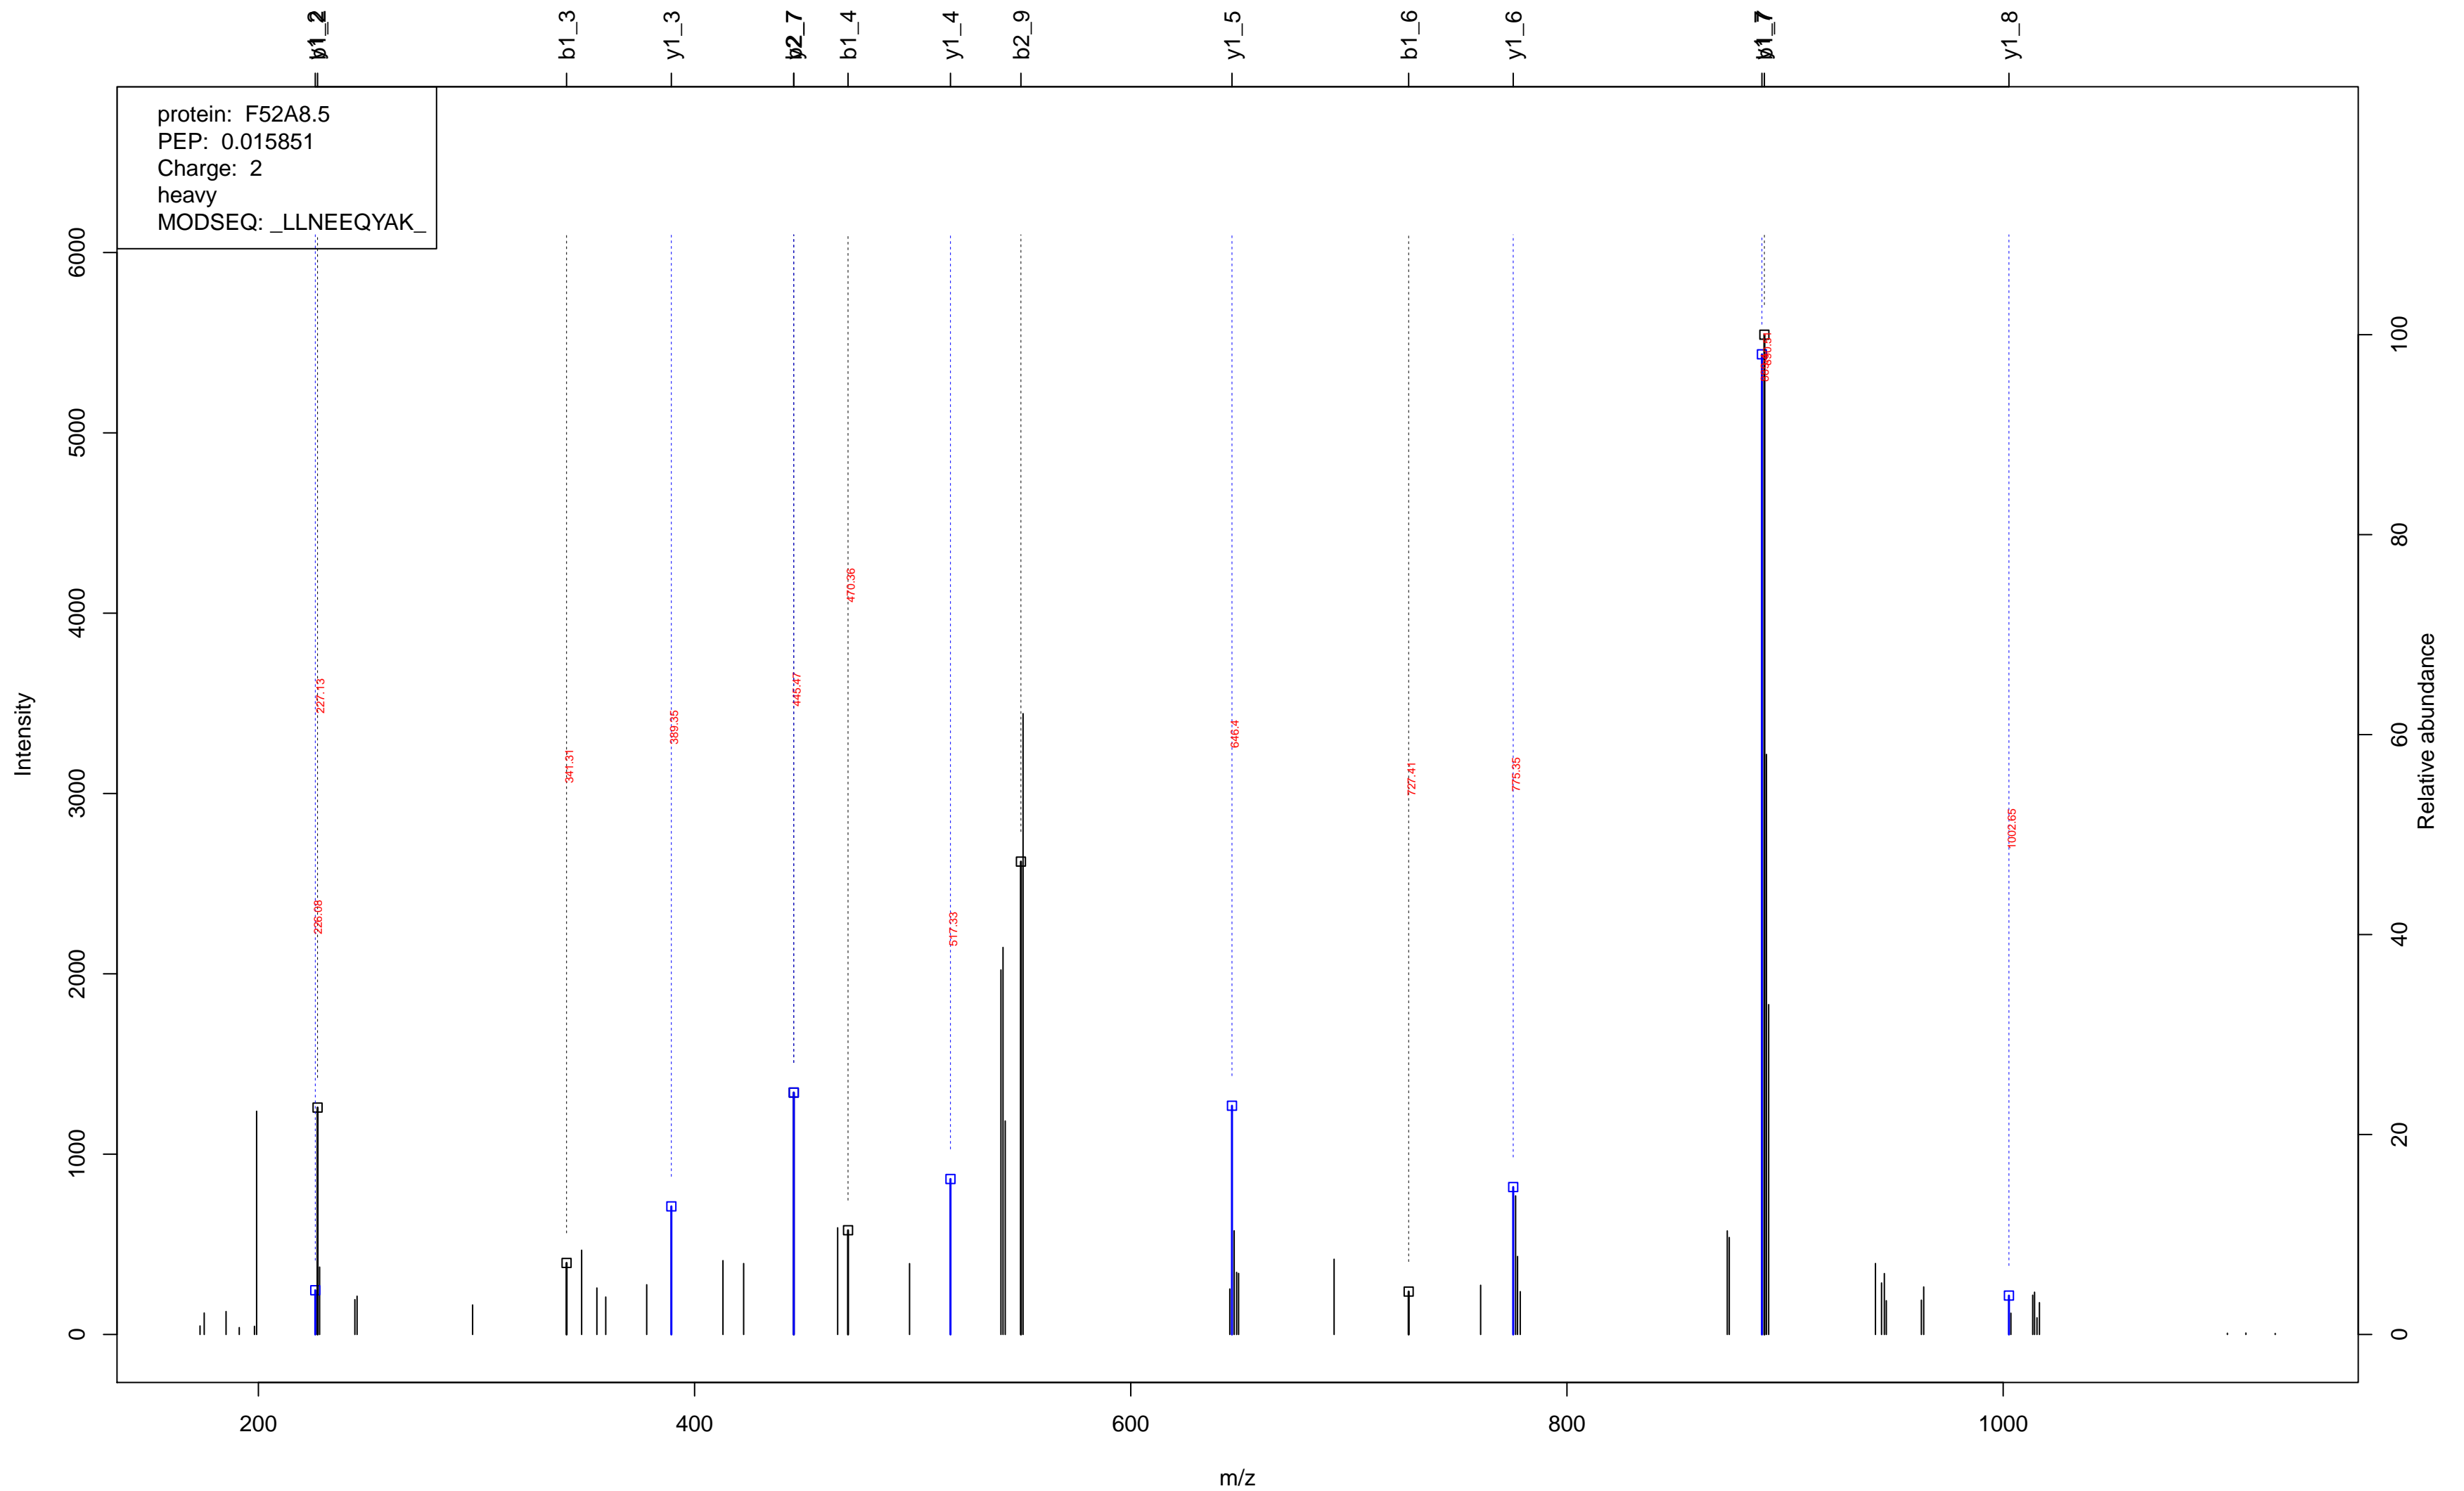

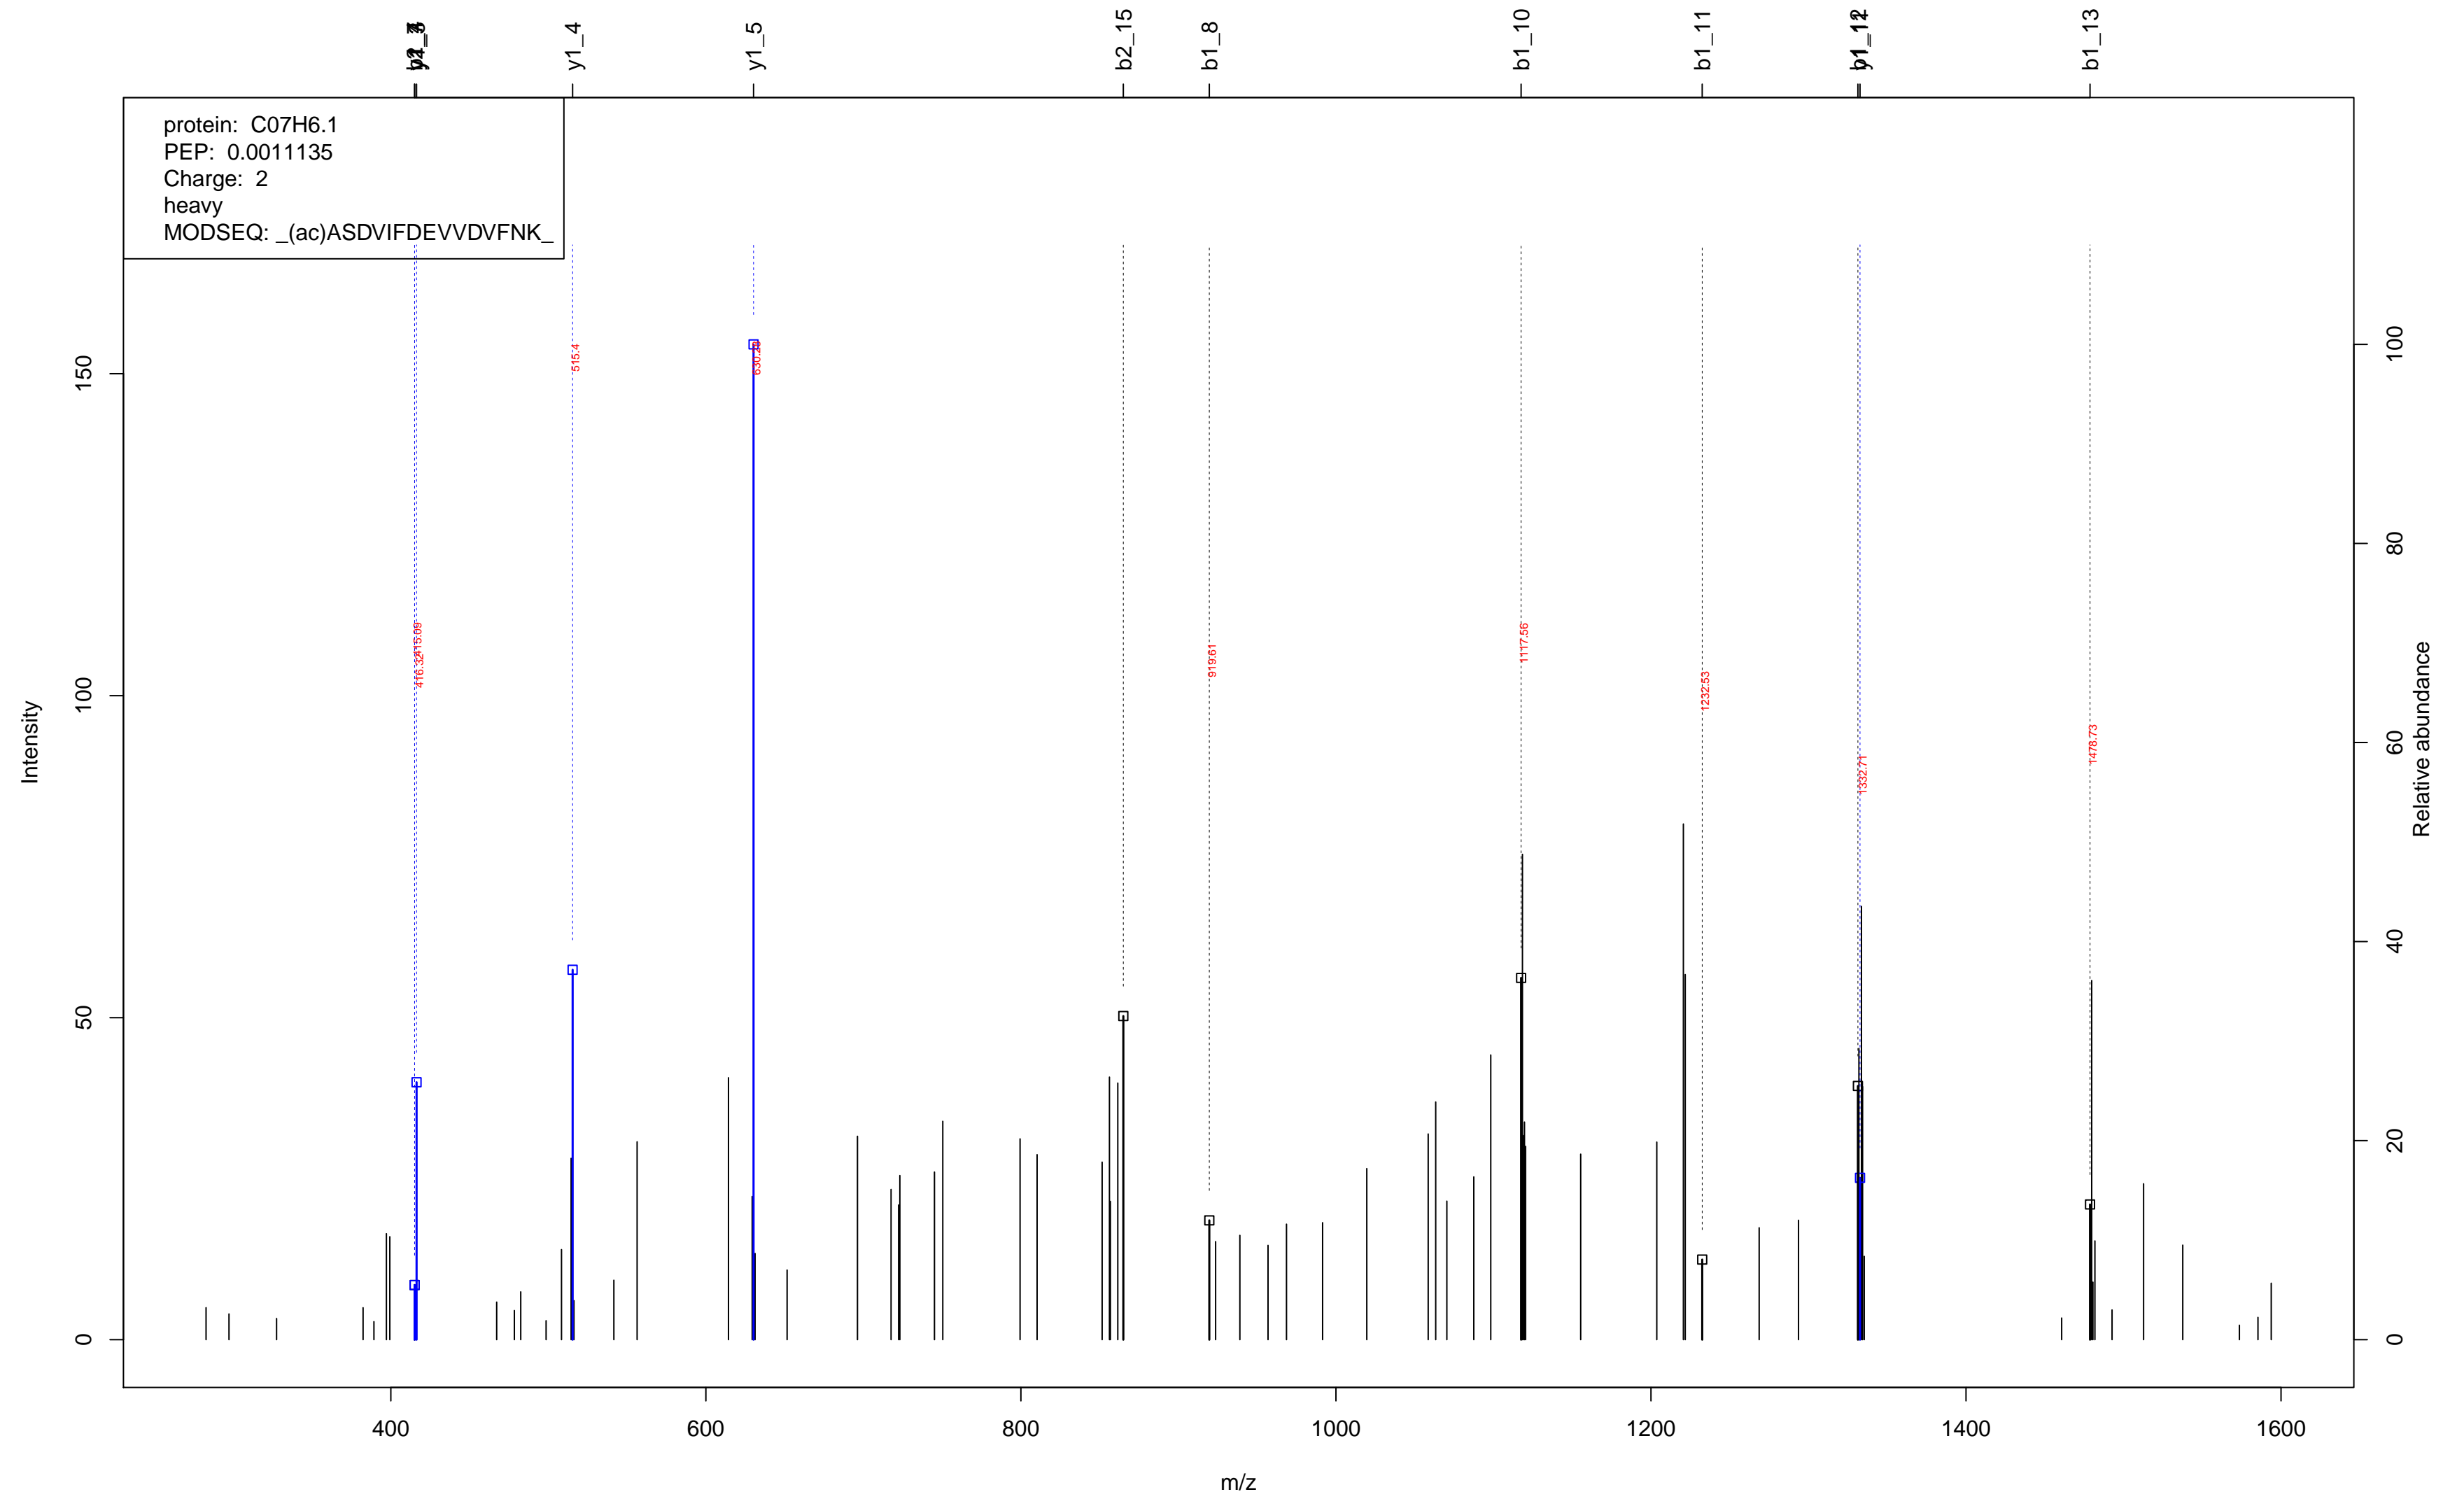

protein: C07H6.1  
PEP: 0.0011135  
Charge: 2  
heavy  
MODSEQ: \_(ac)ASDVIFDEVVDVFNK\_

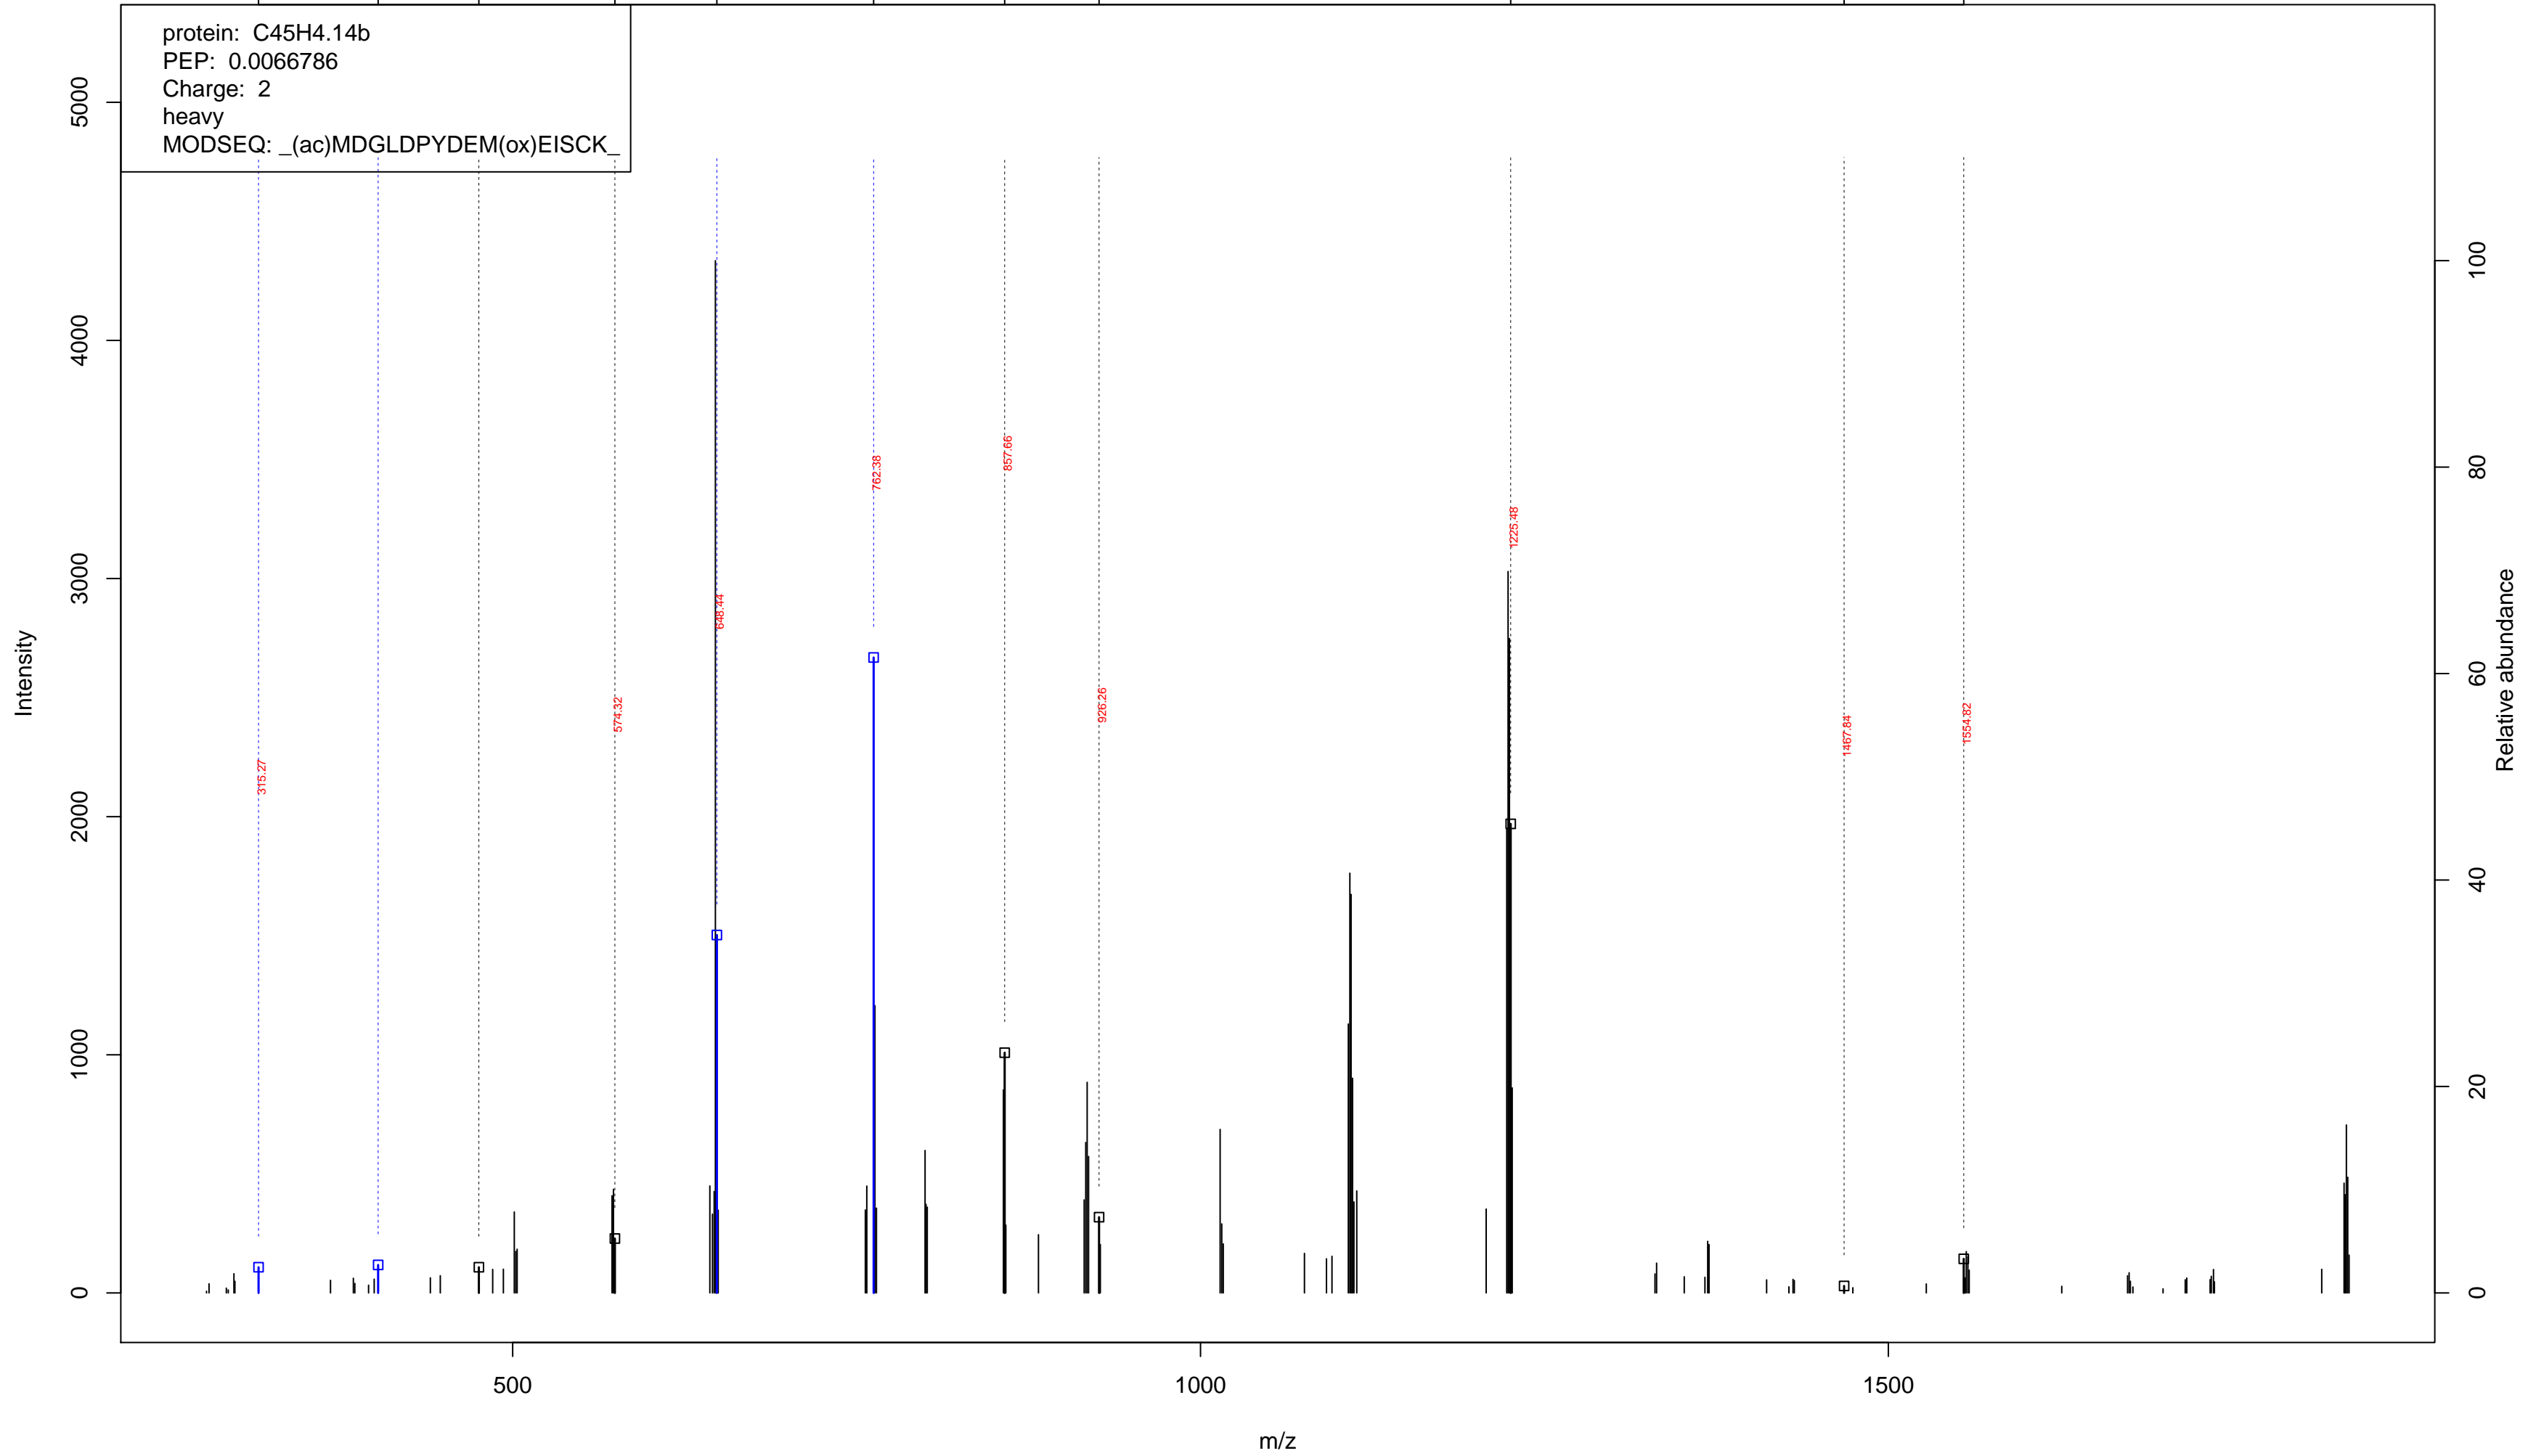



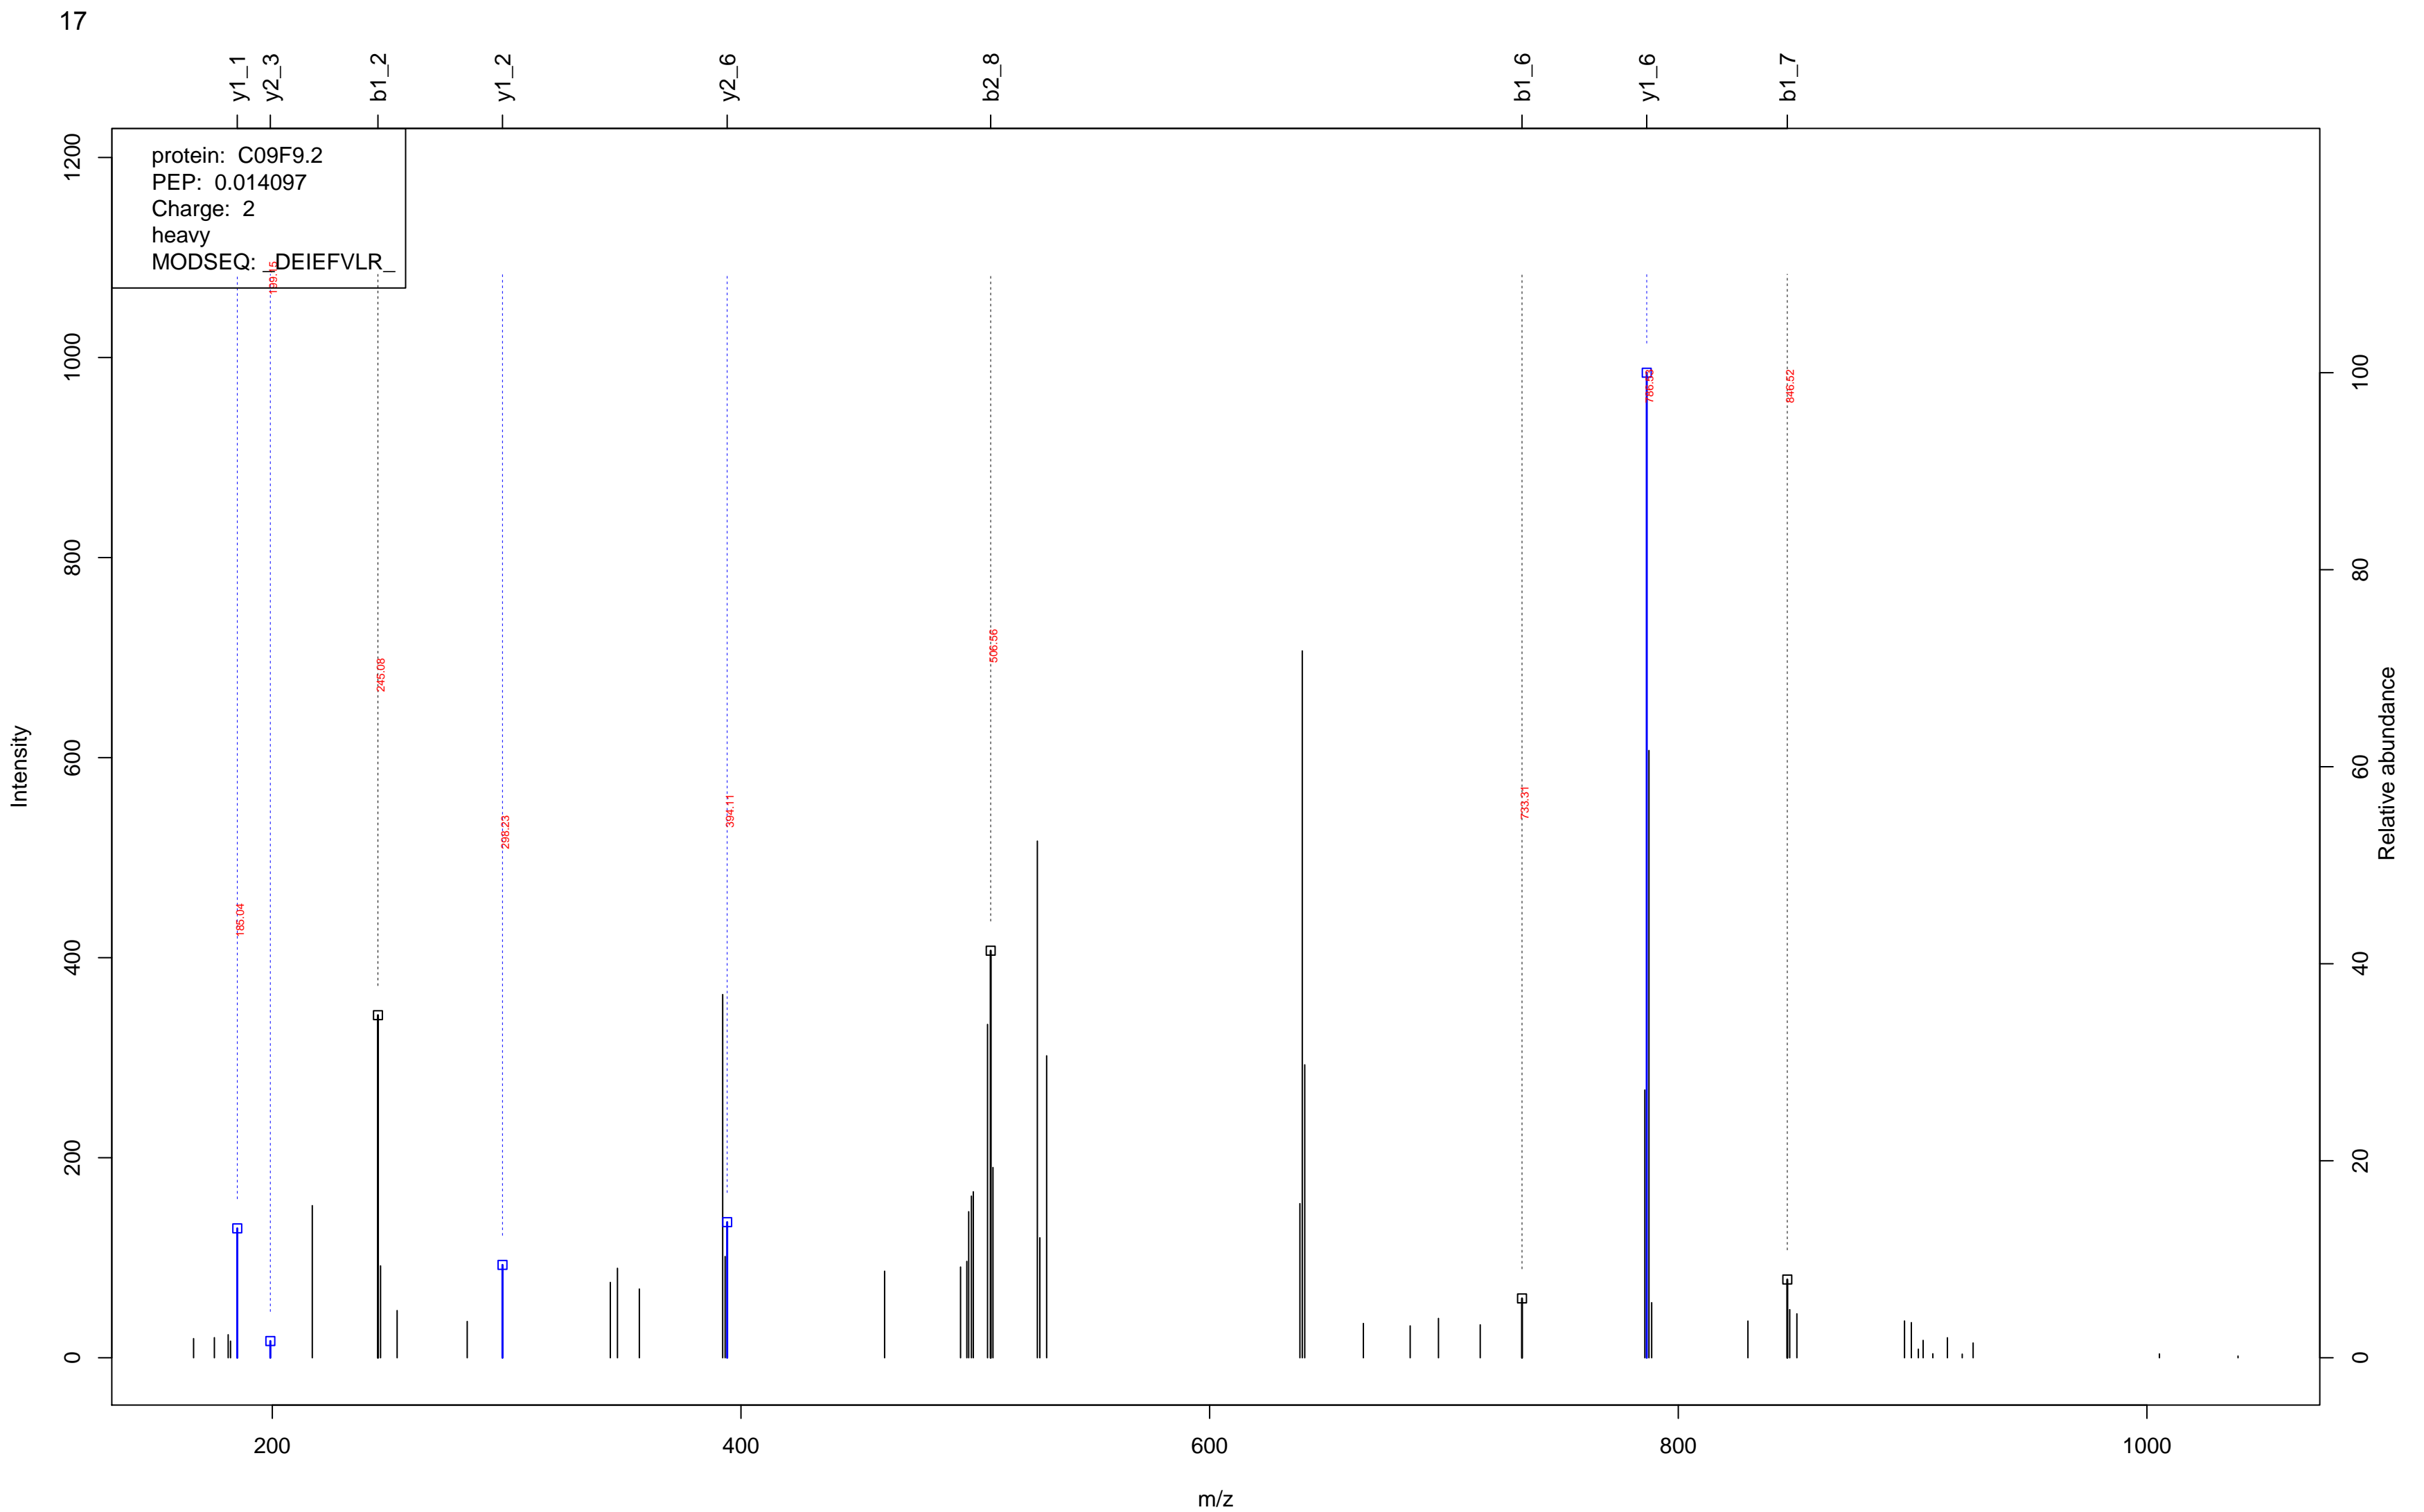

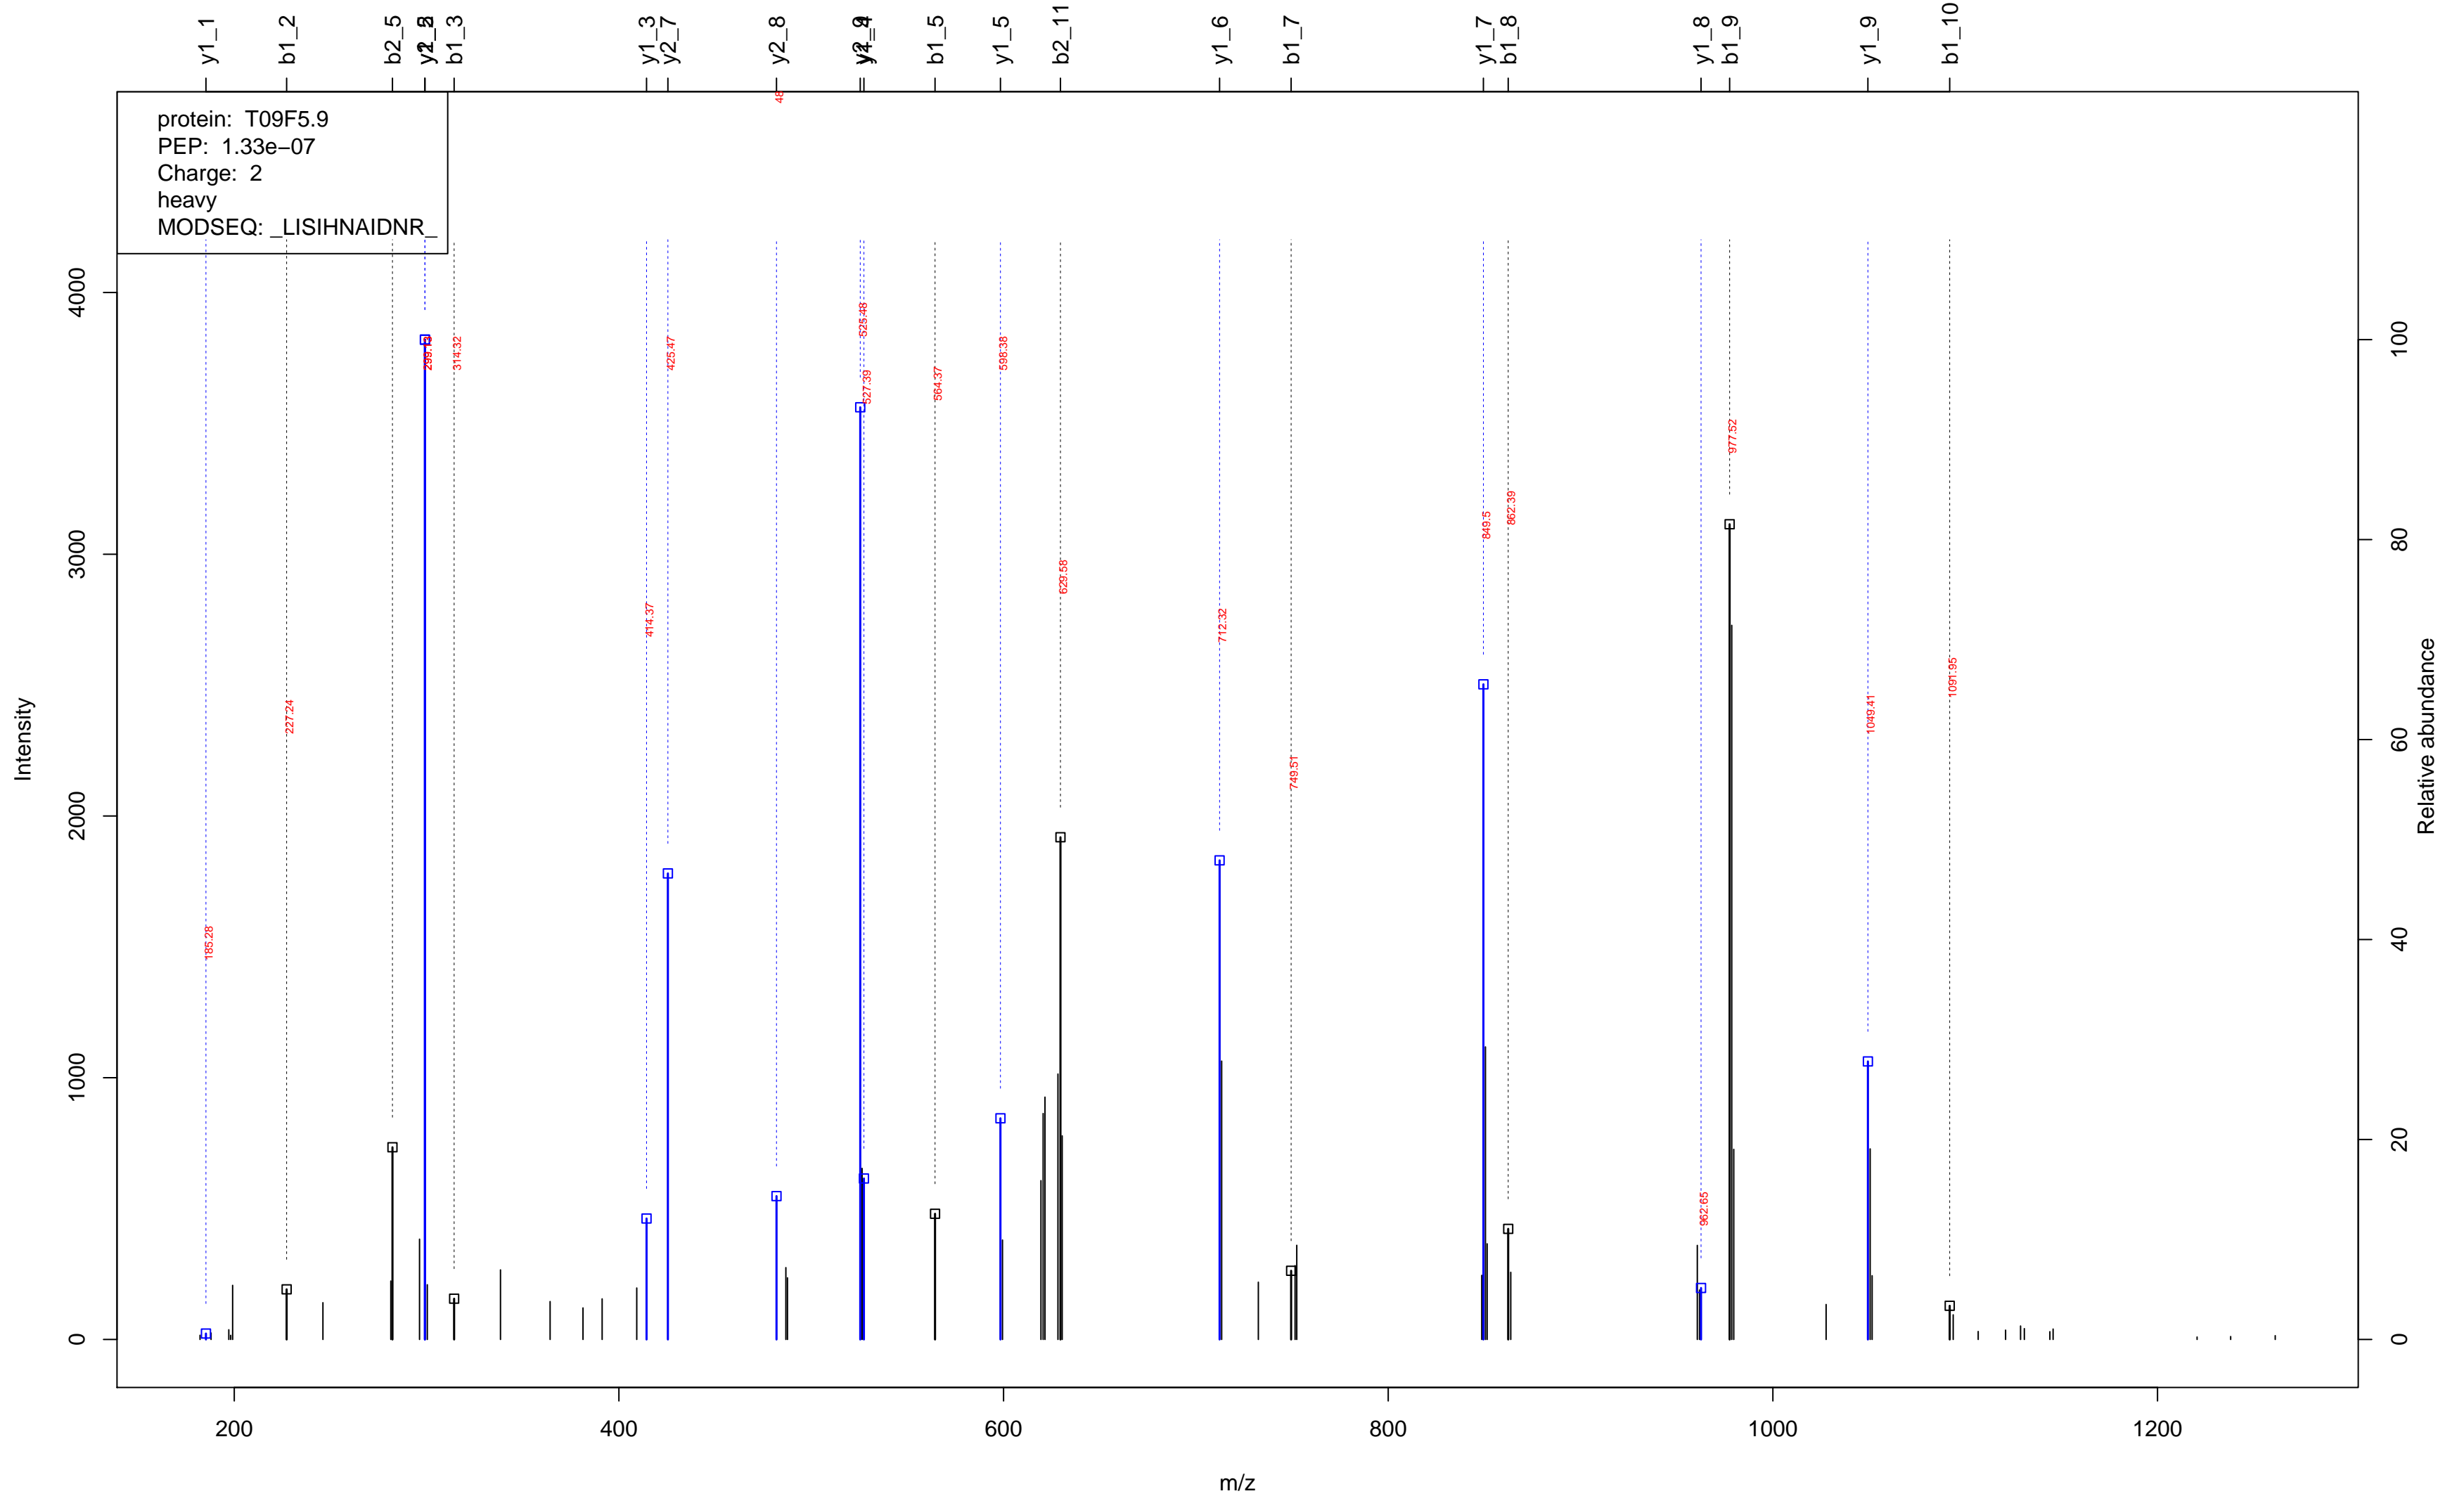

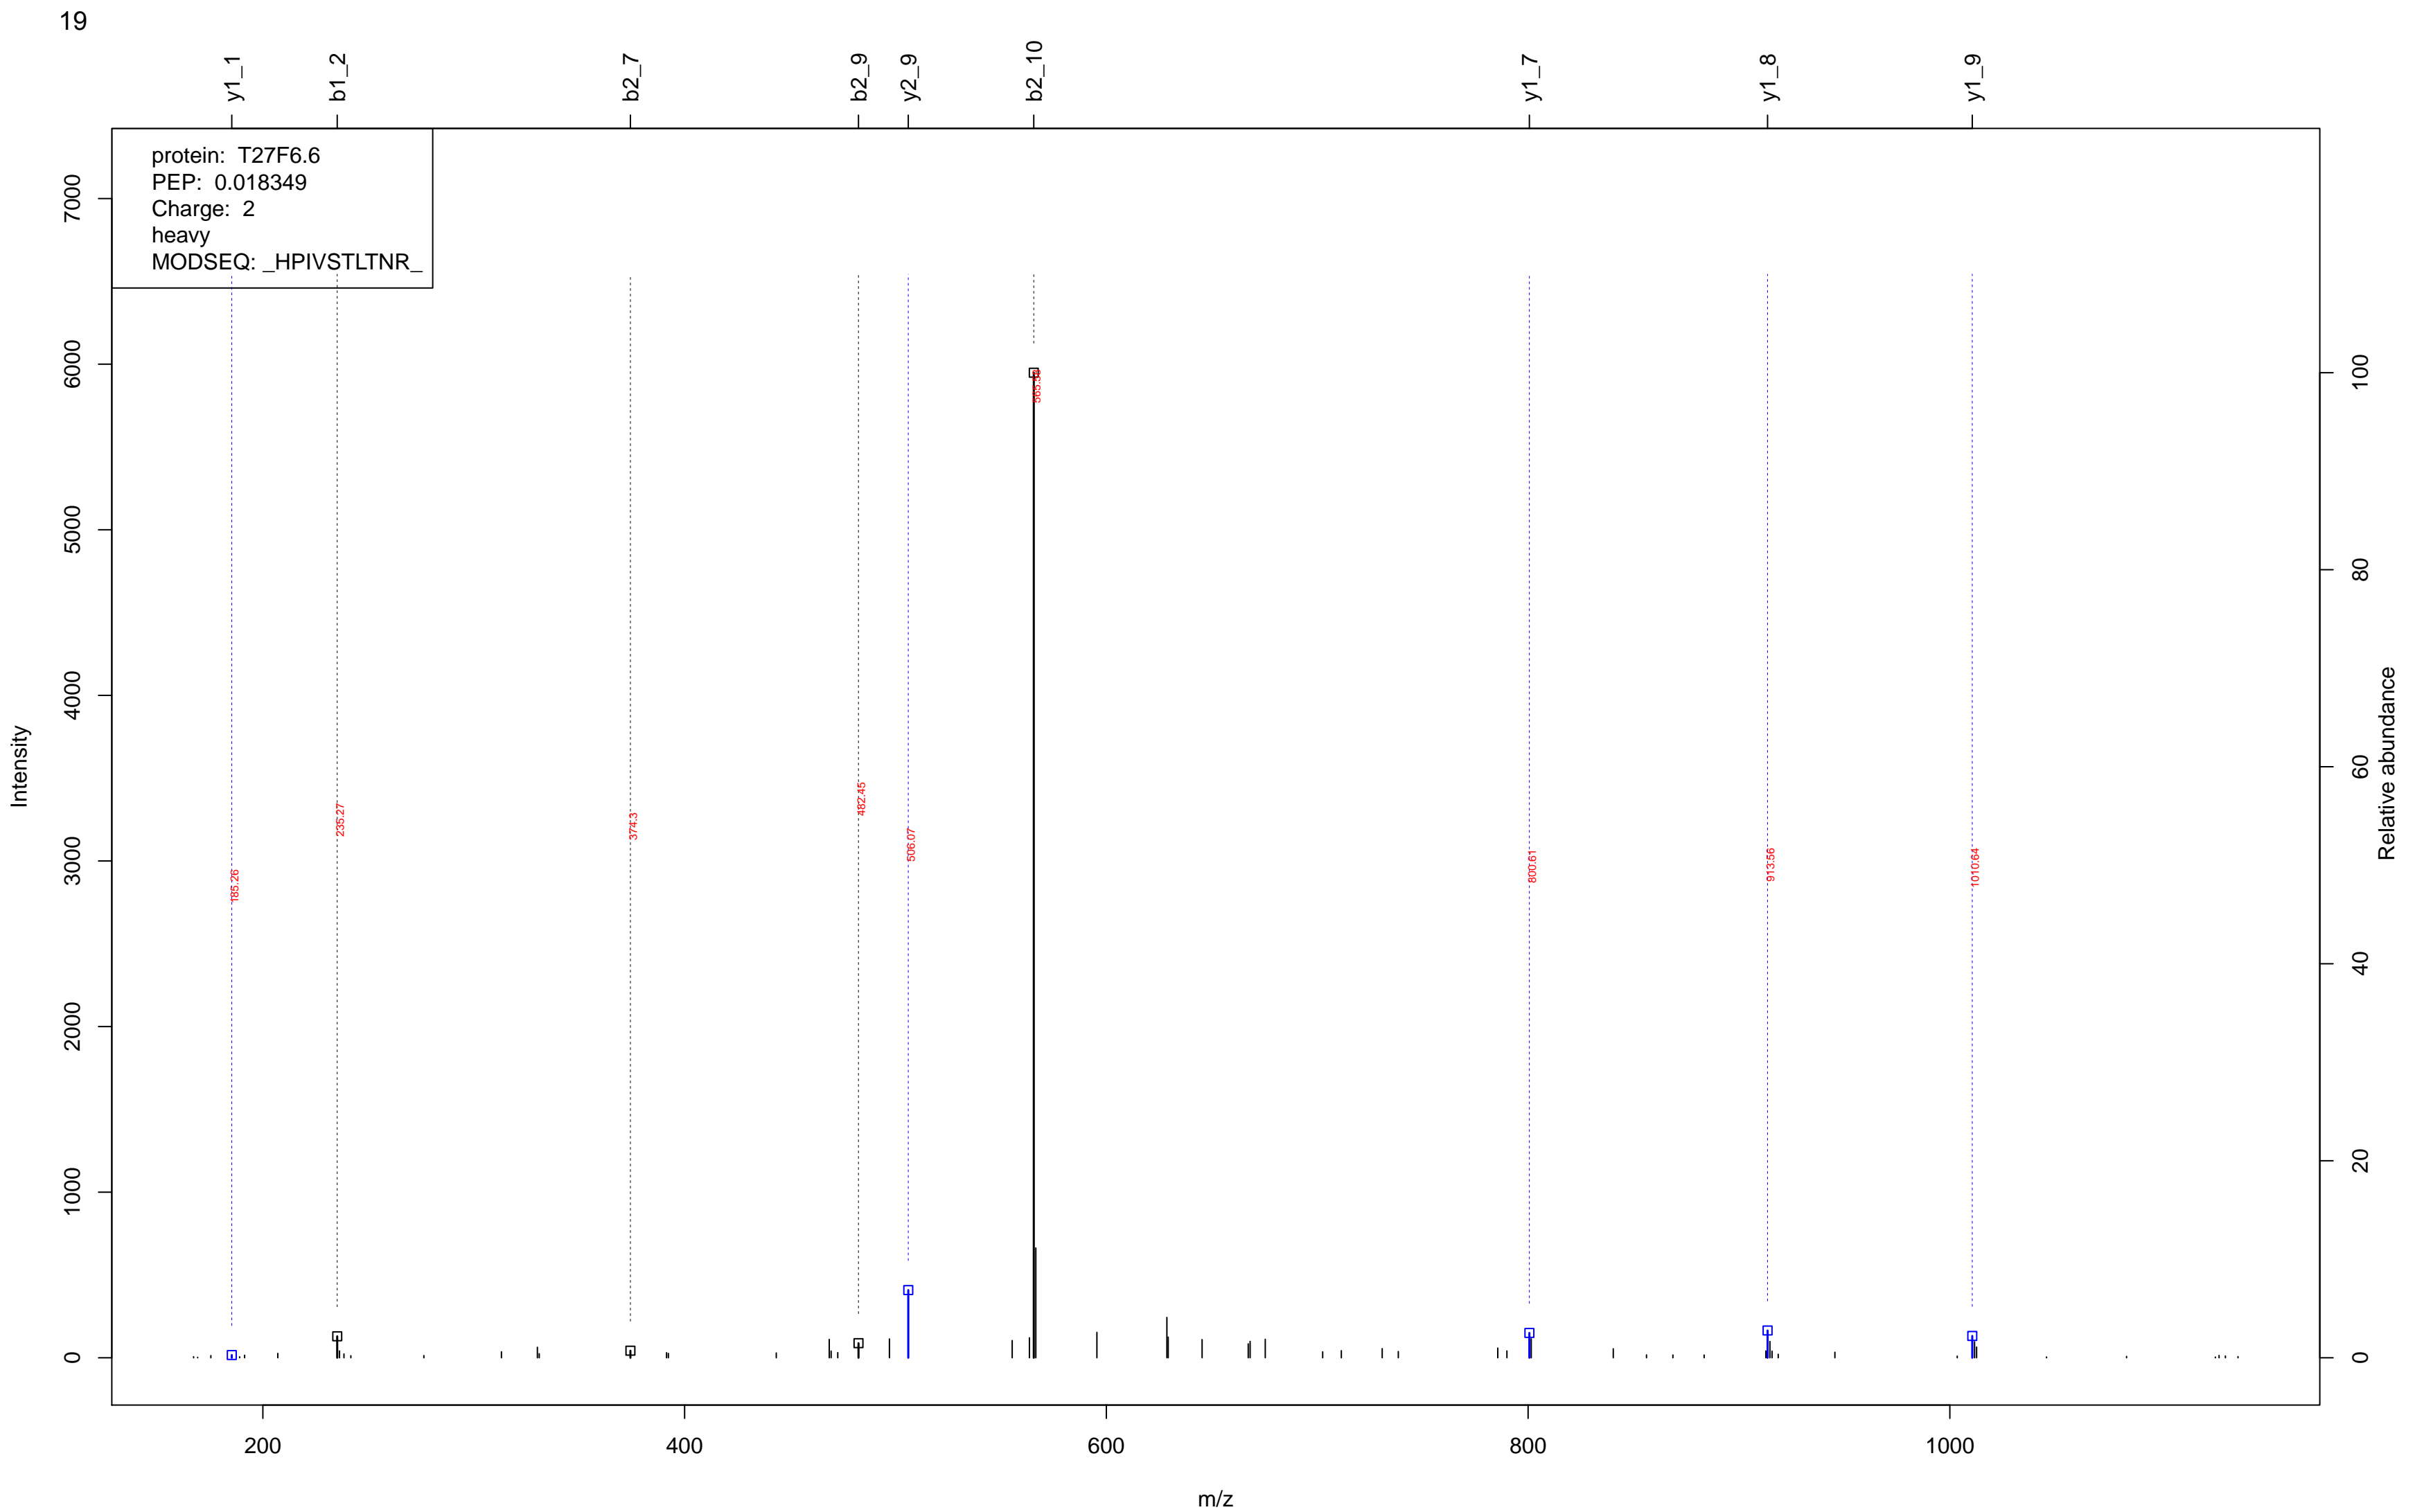

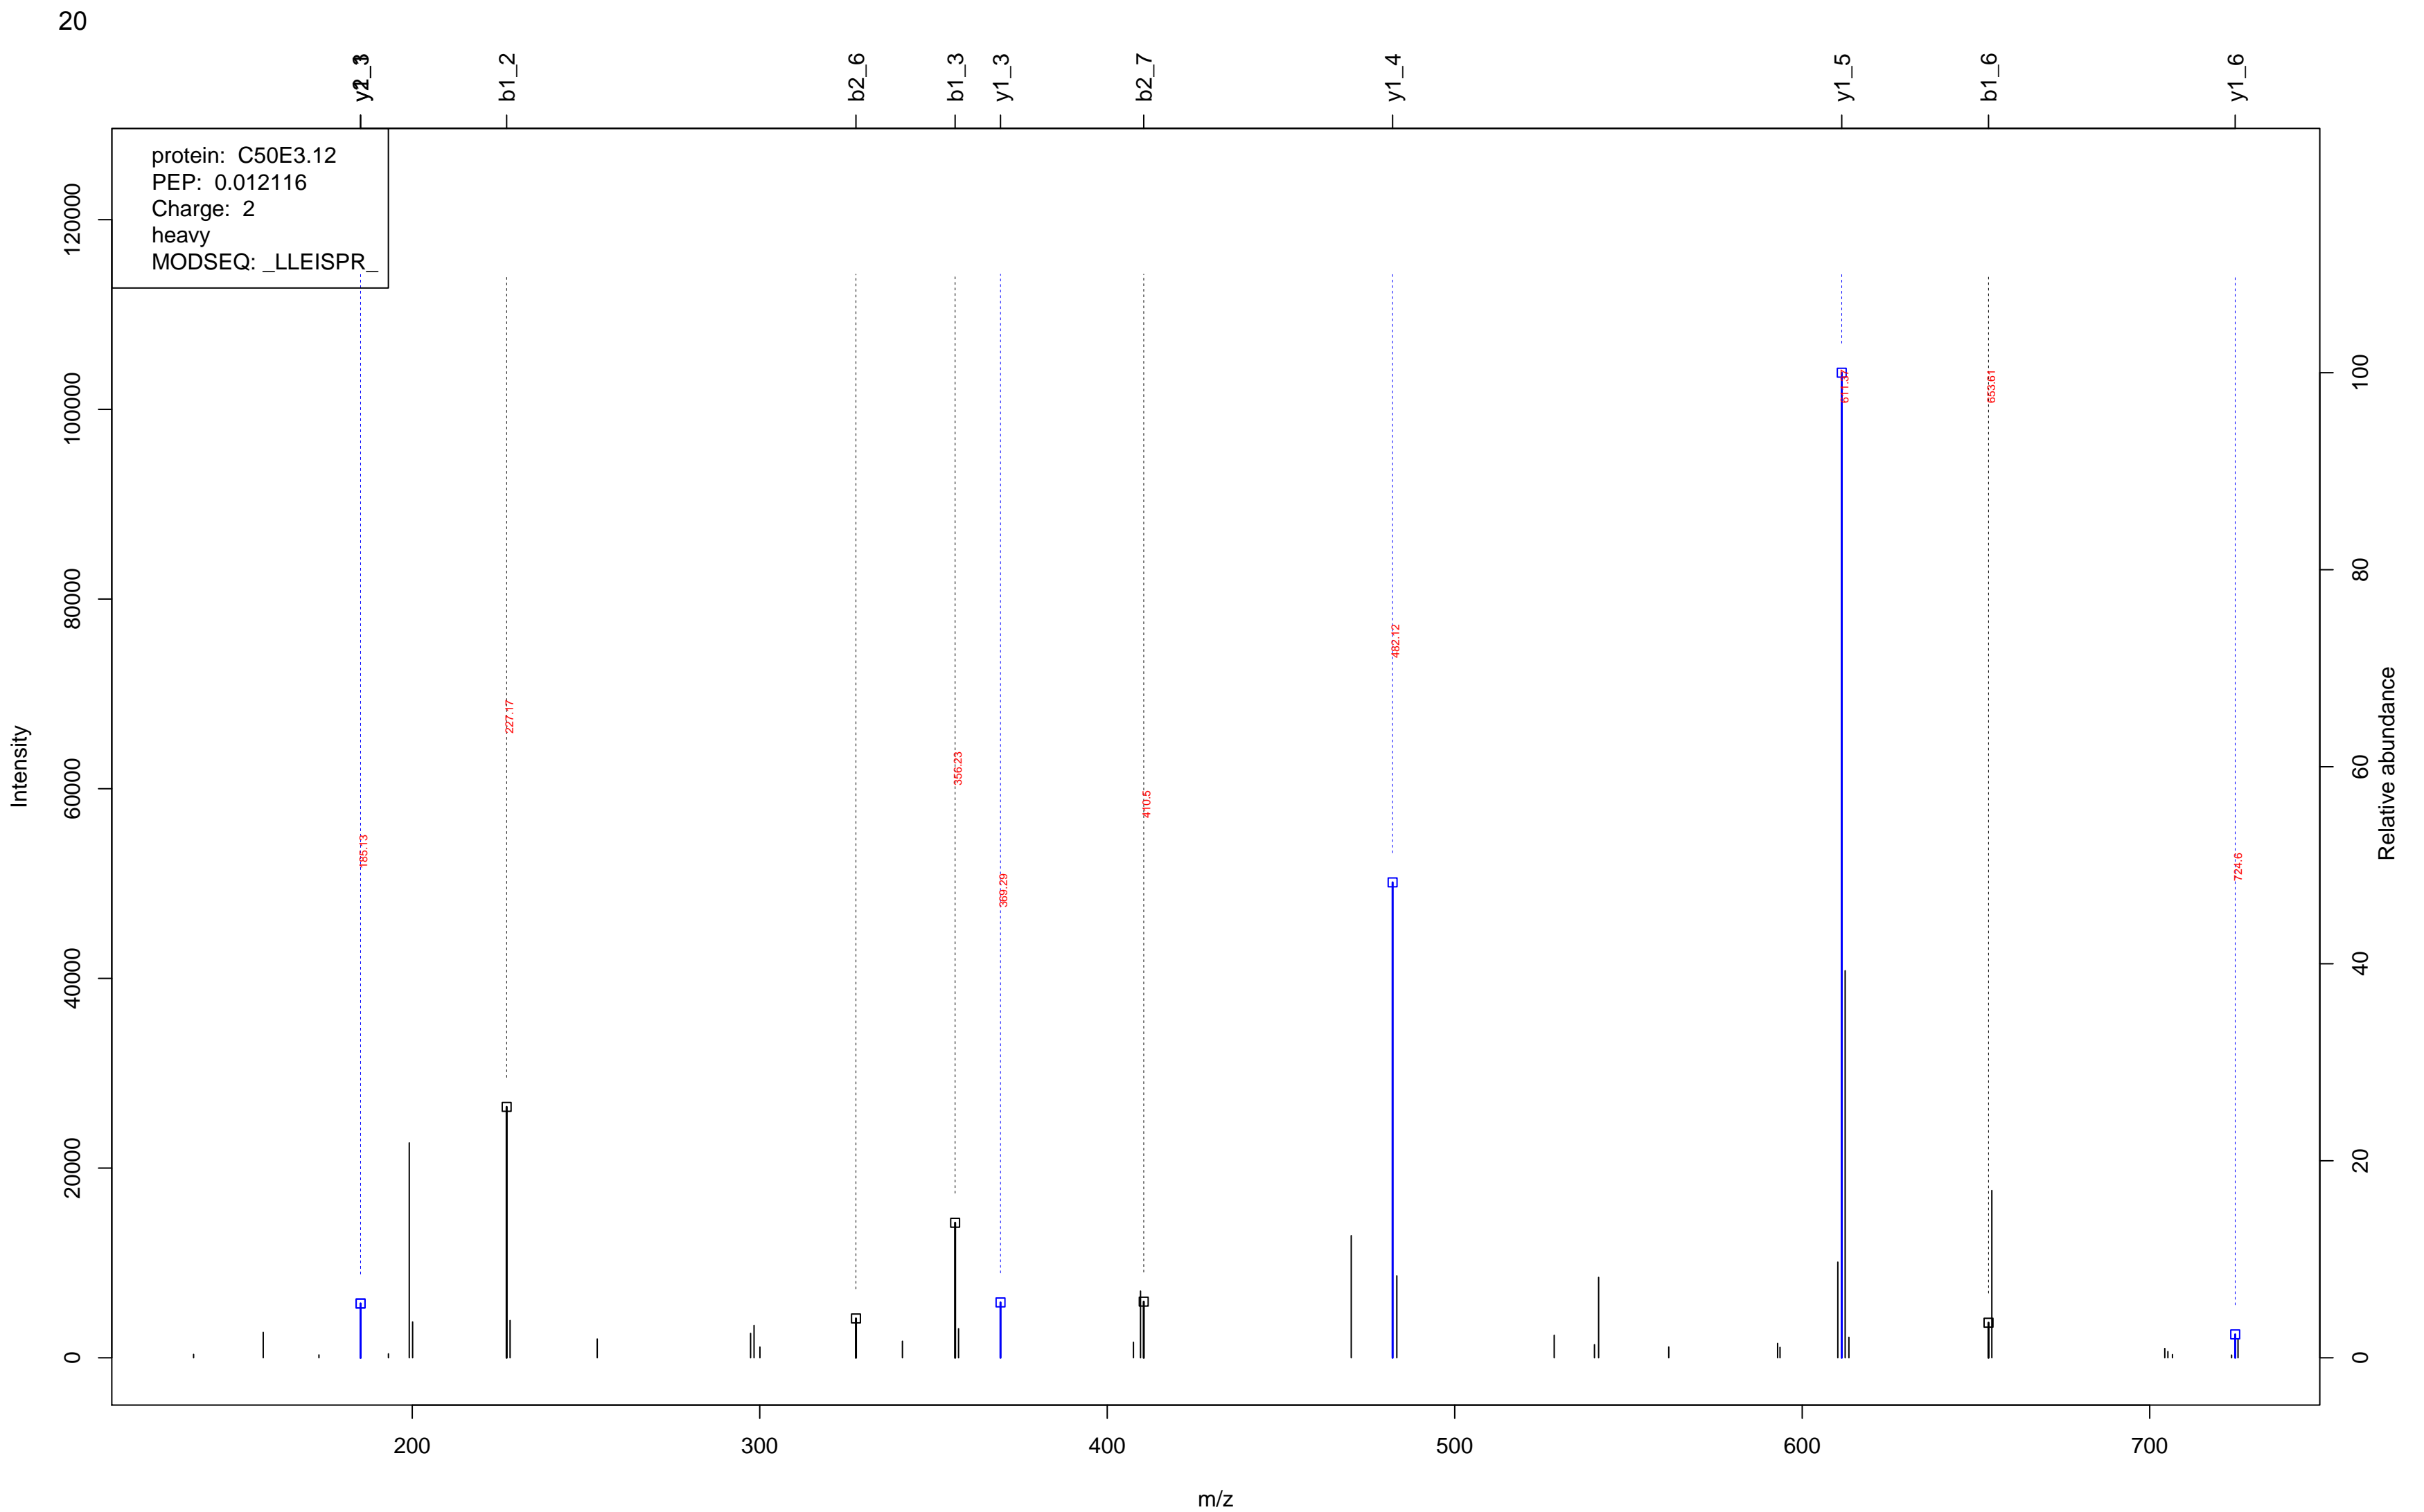

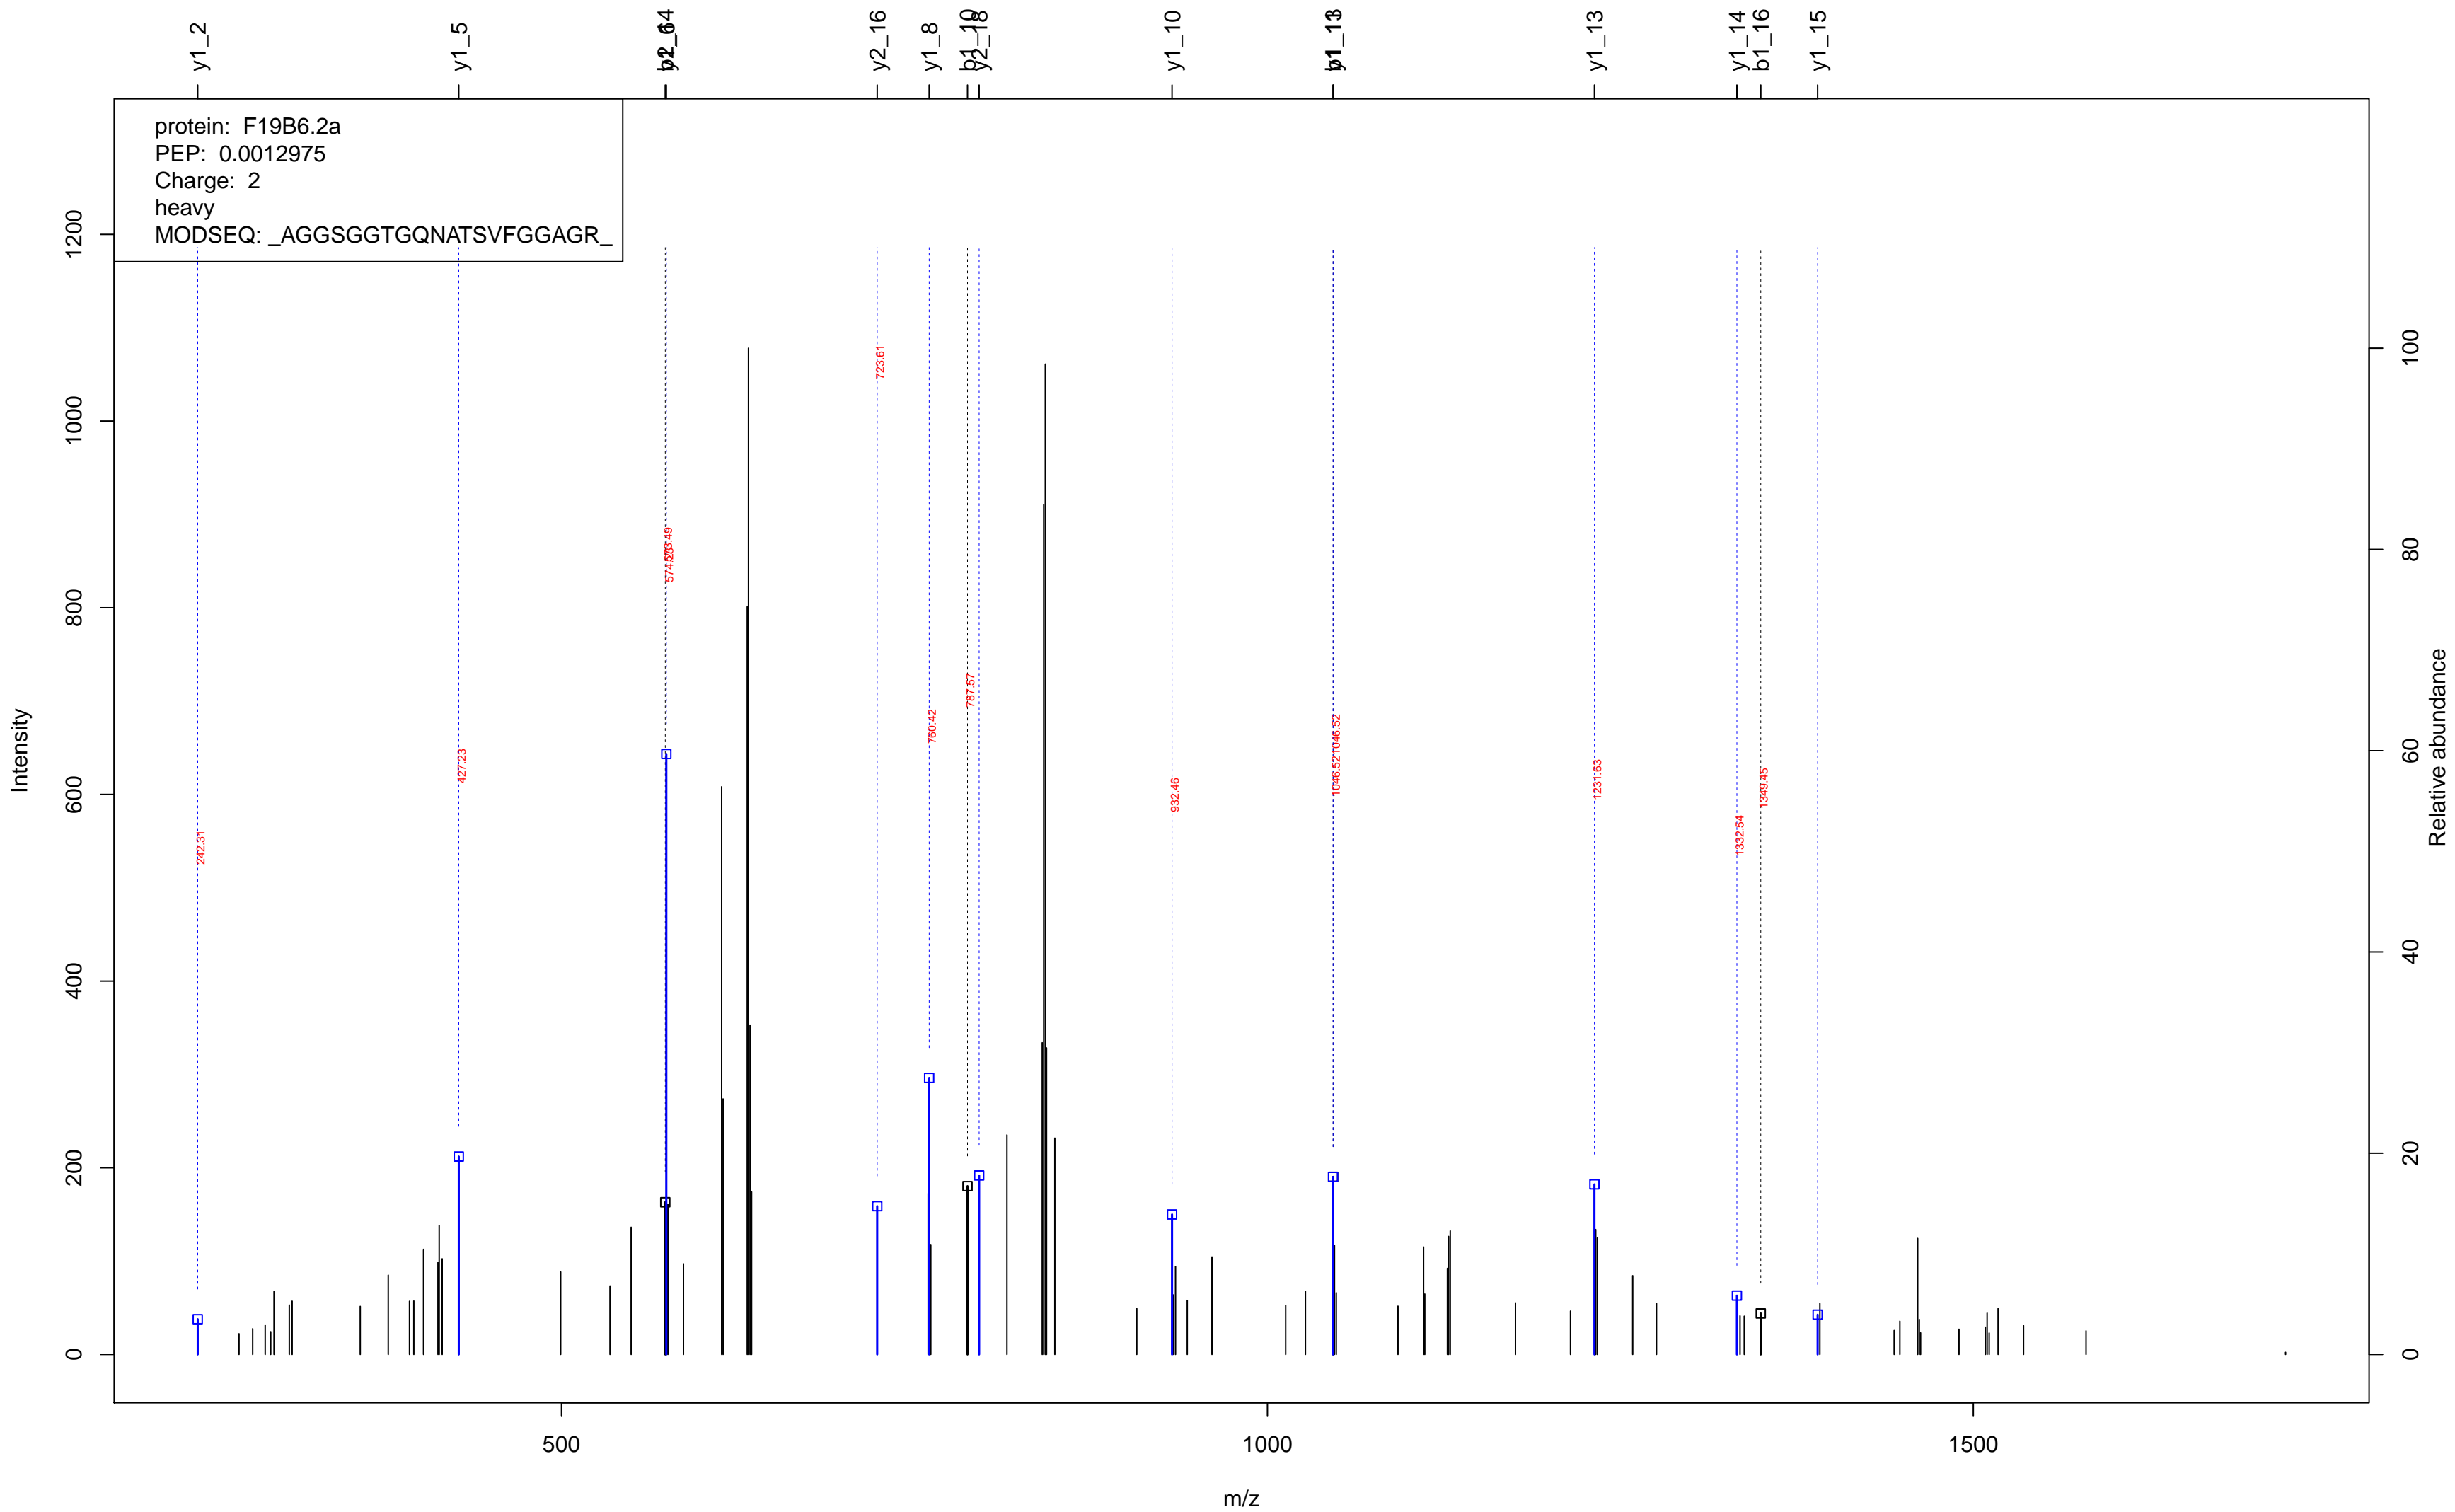

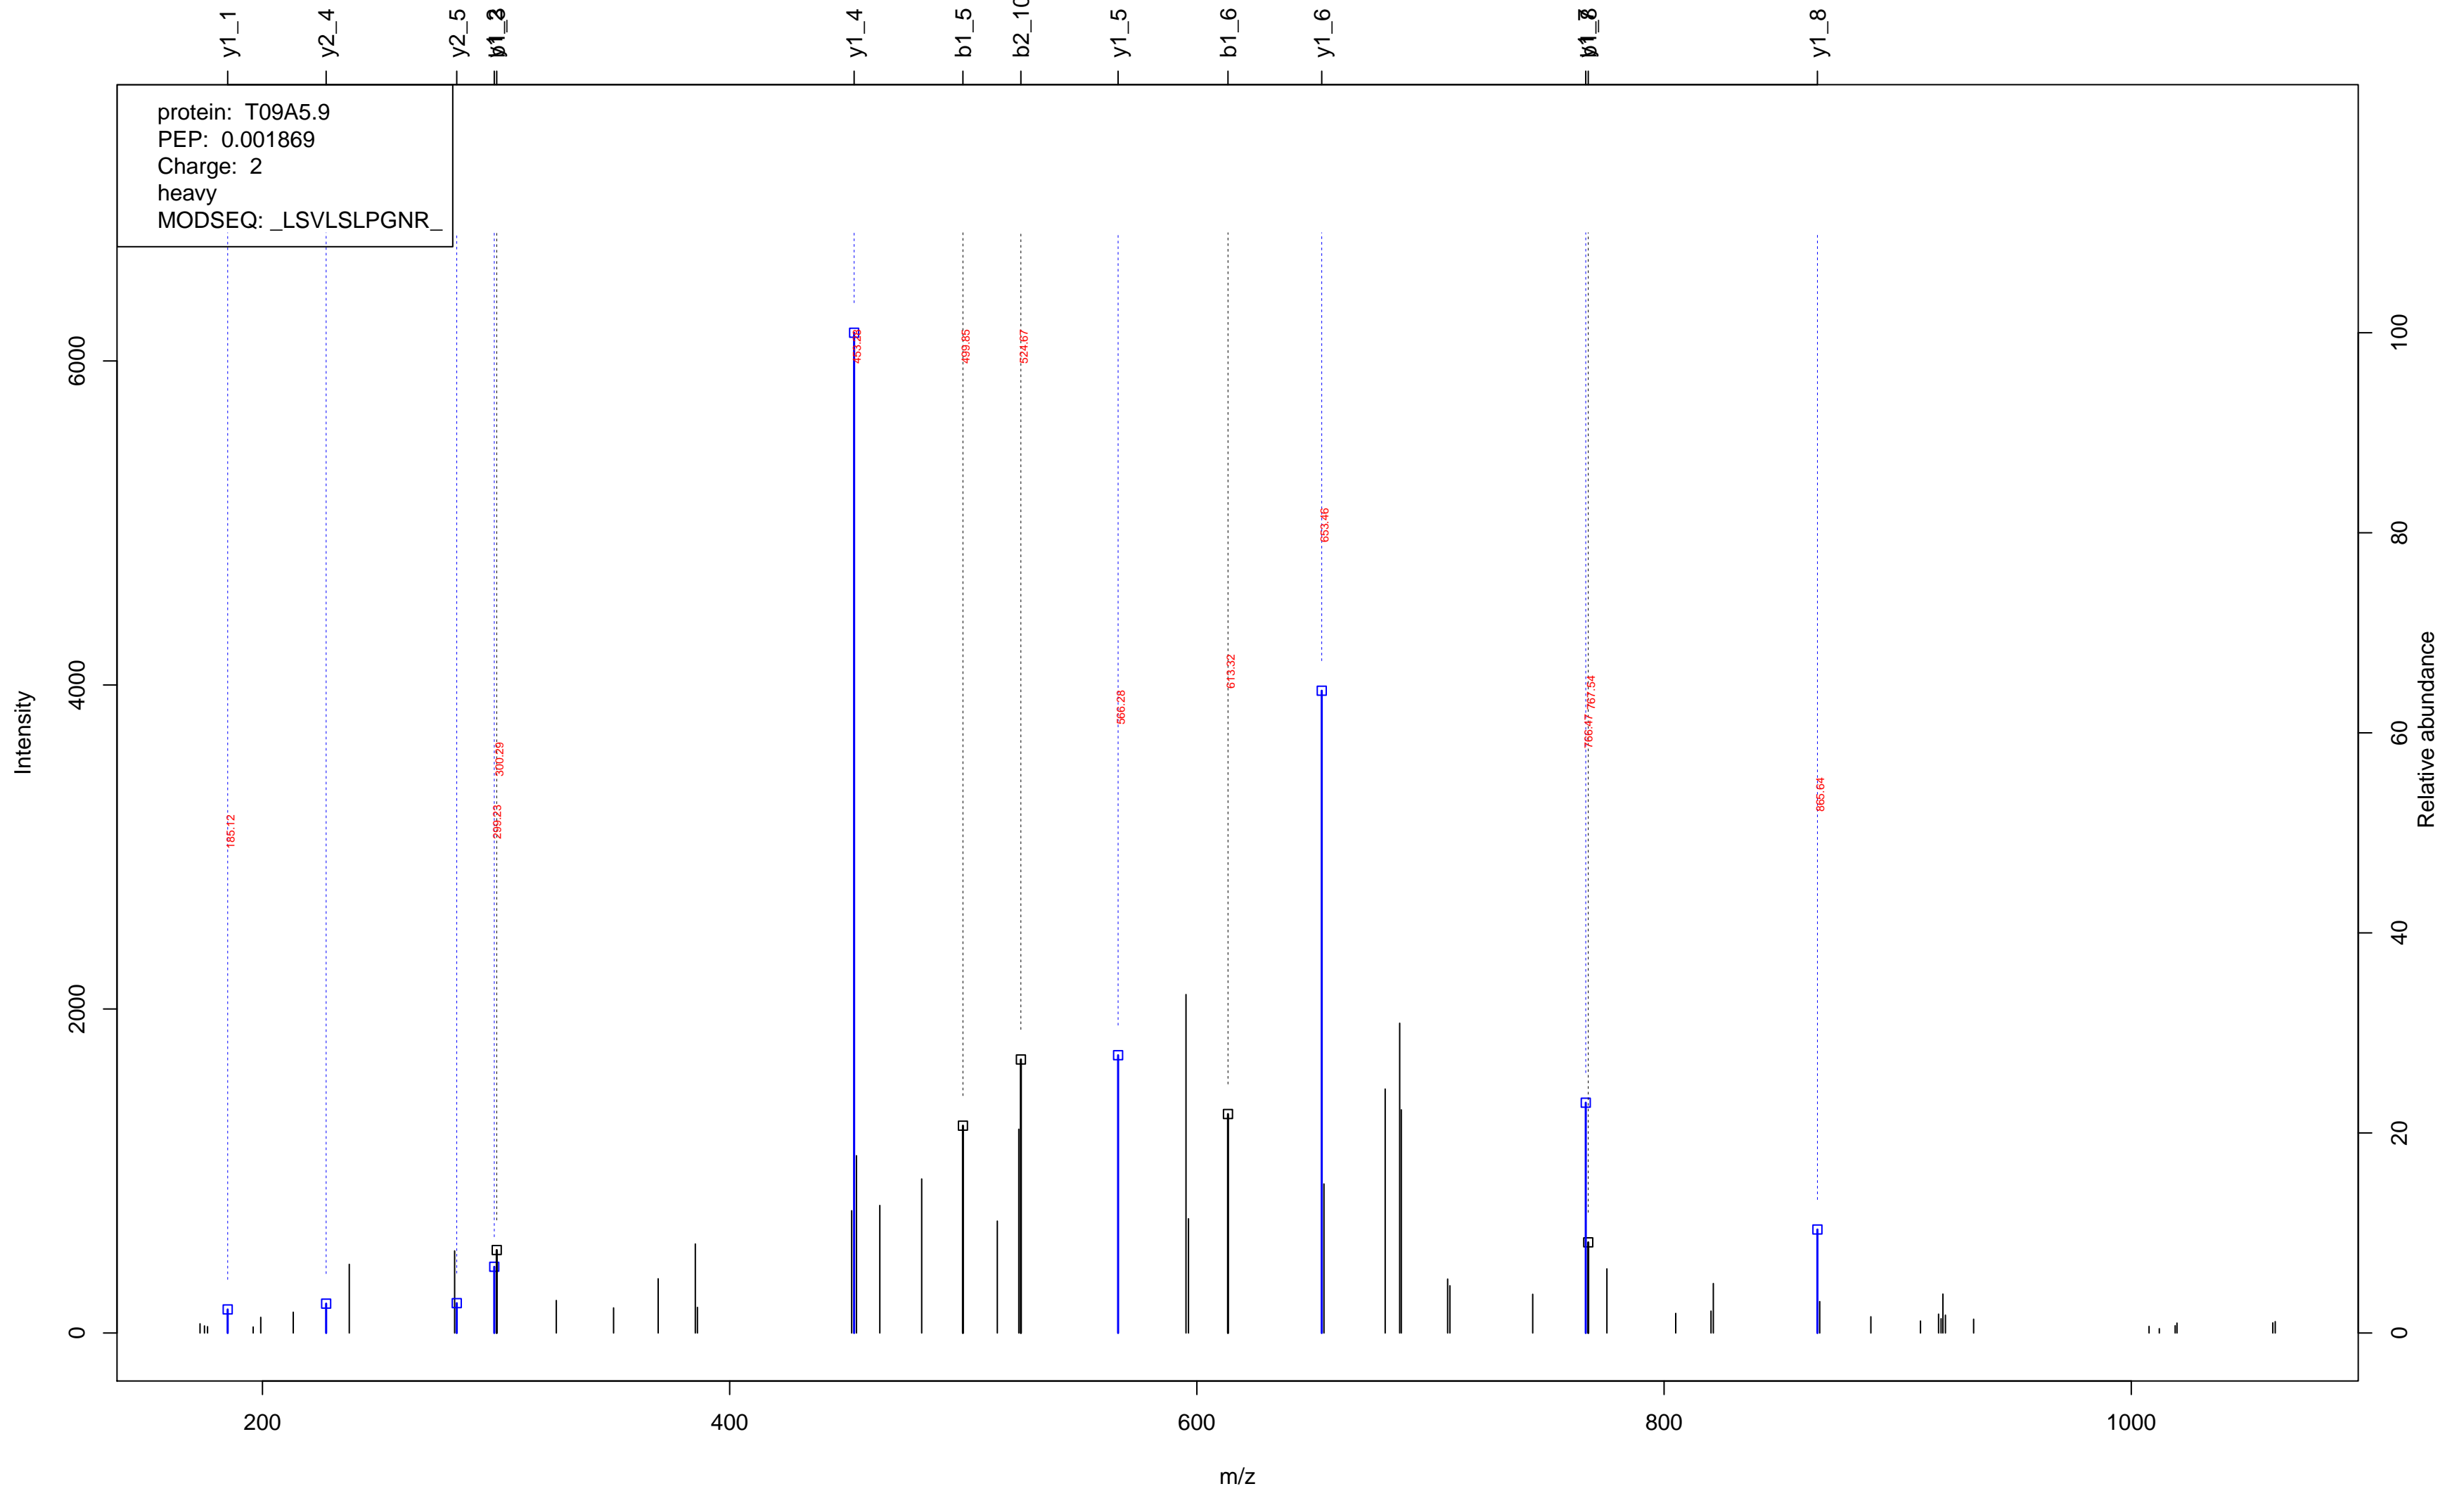

protein: T09A5.9  
PEP: 0.001869  
Charge: 2  
heavy  
MODSEQ: \_LSVLSLPGNR\_

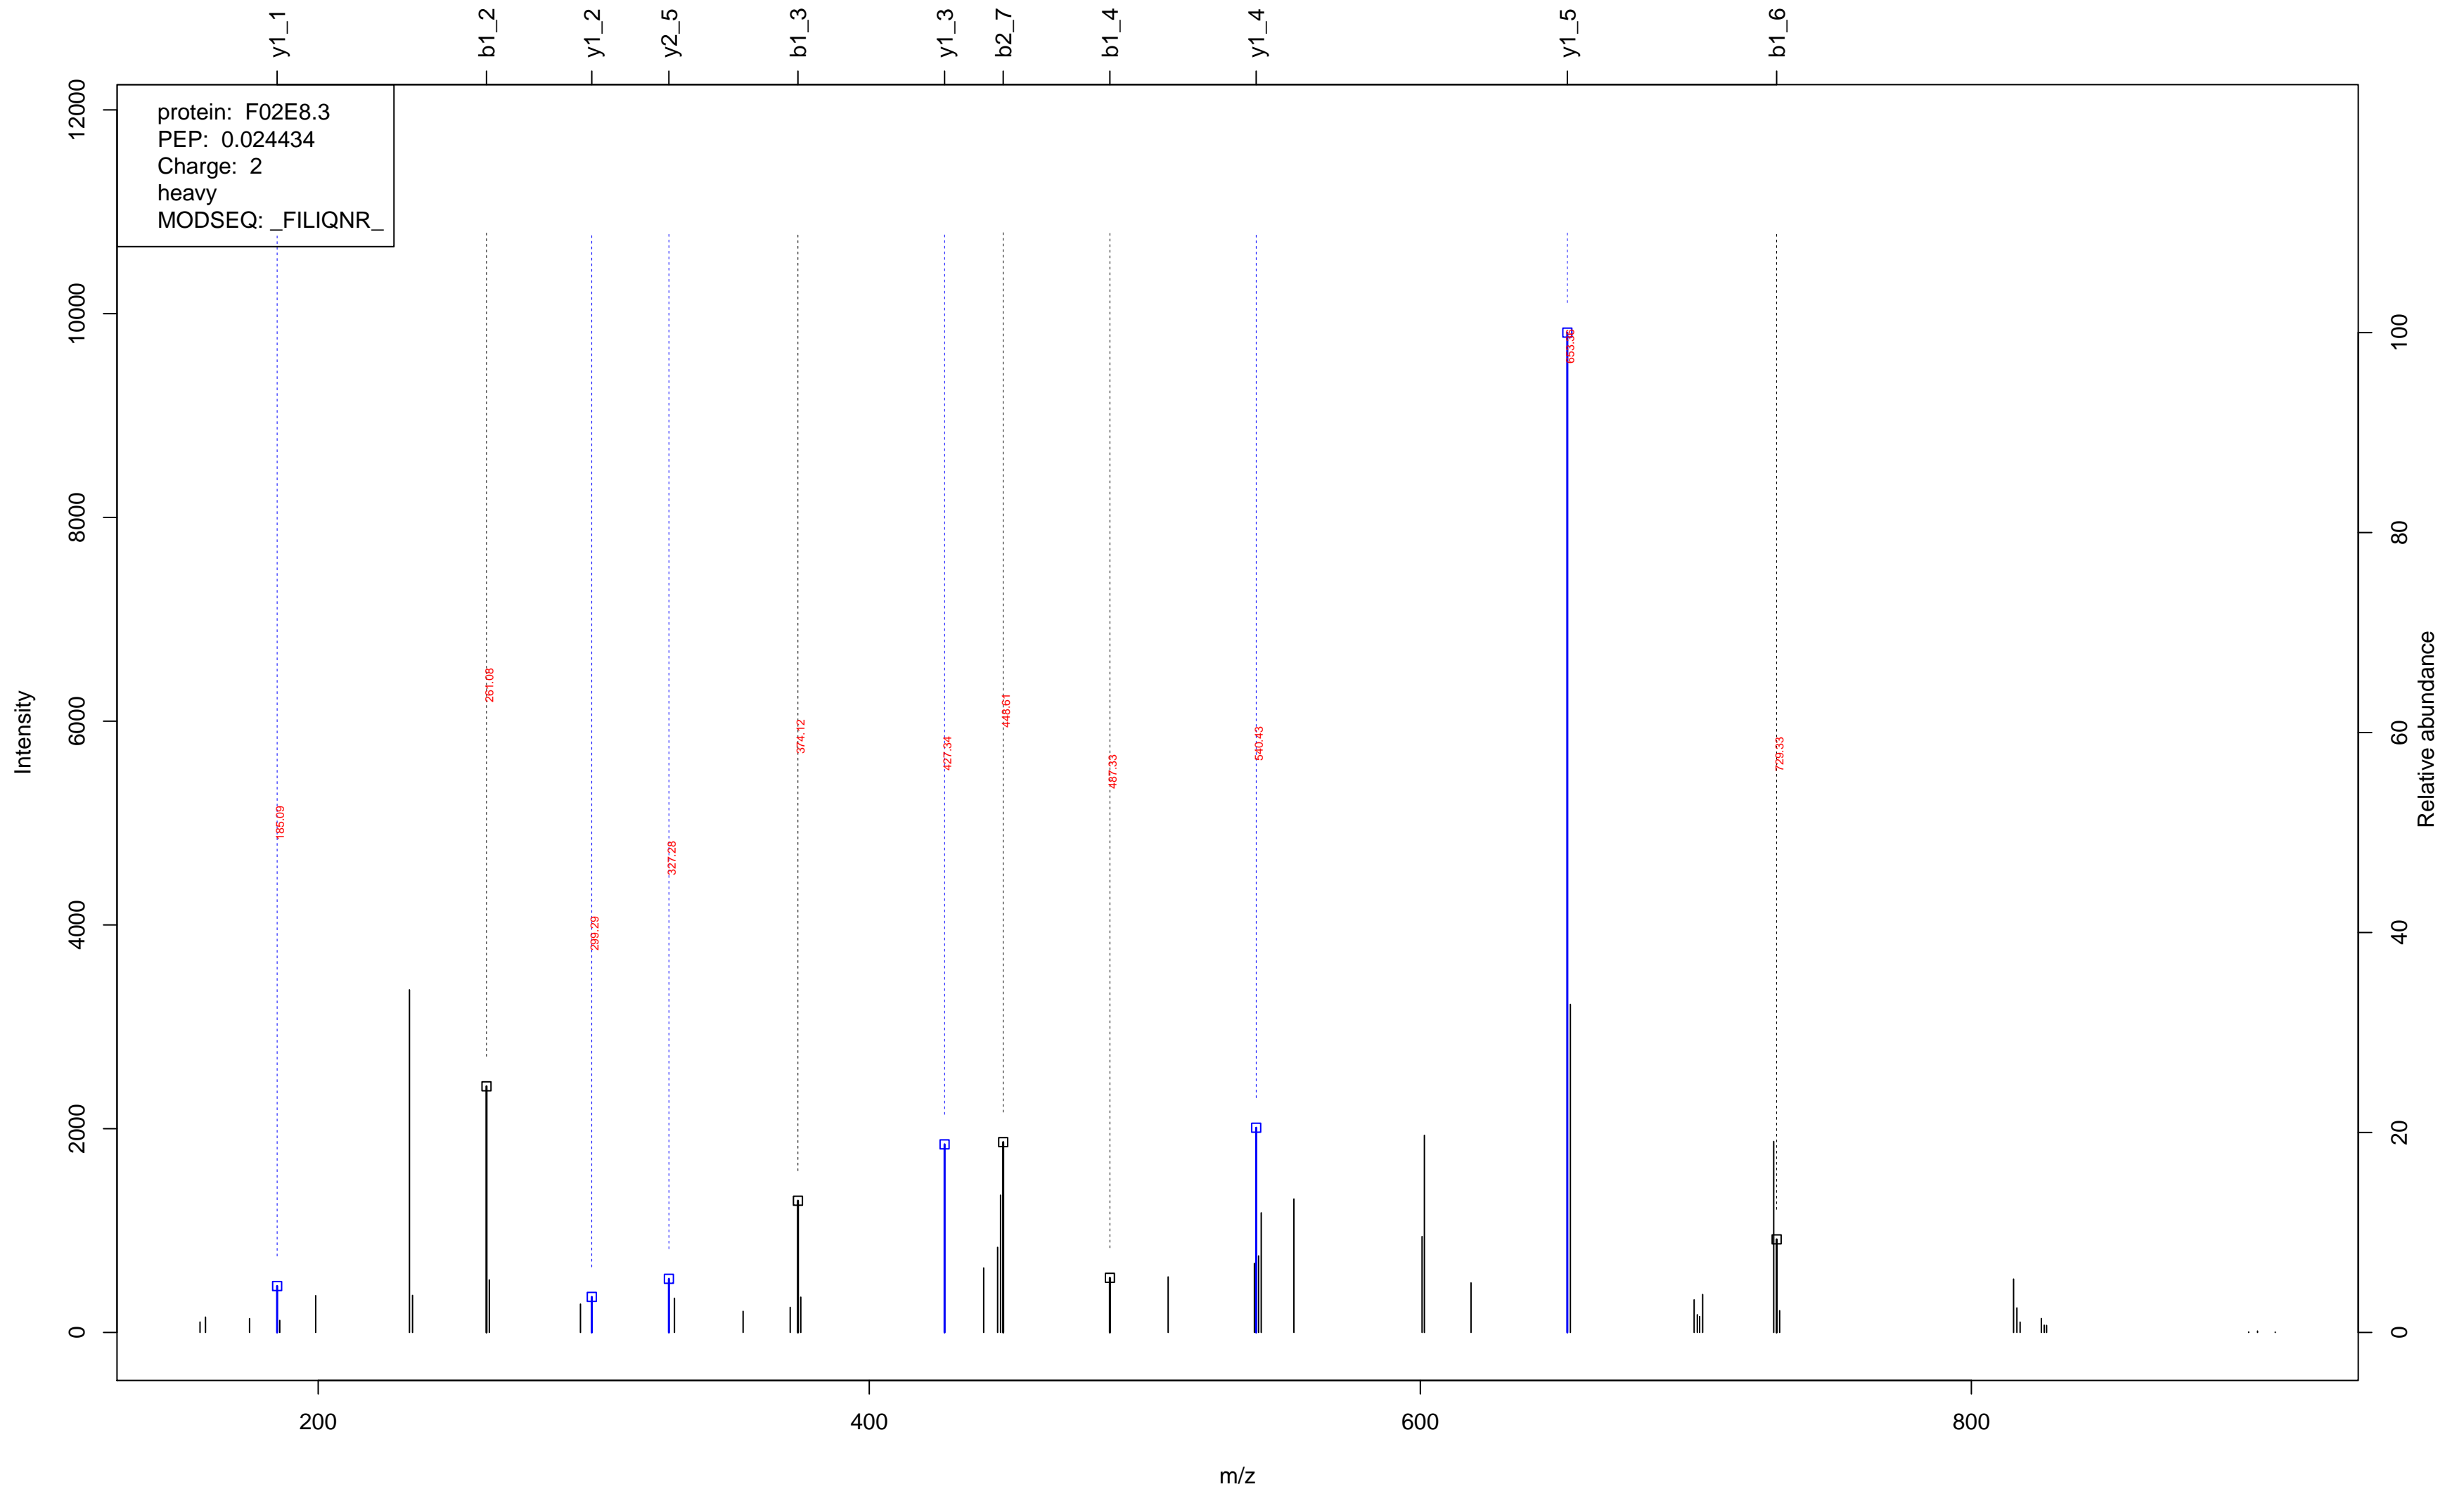

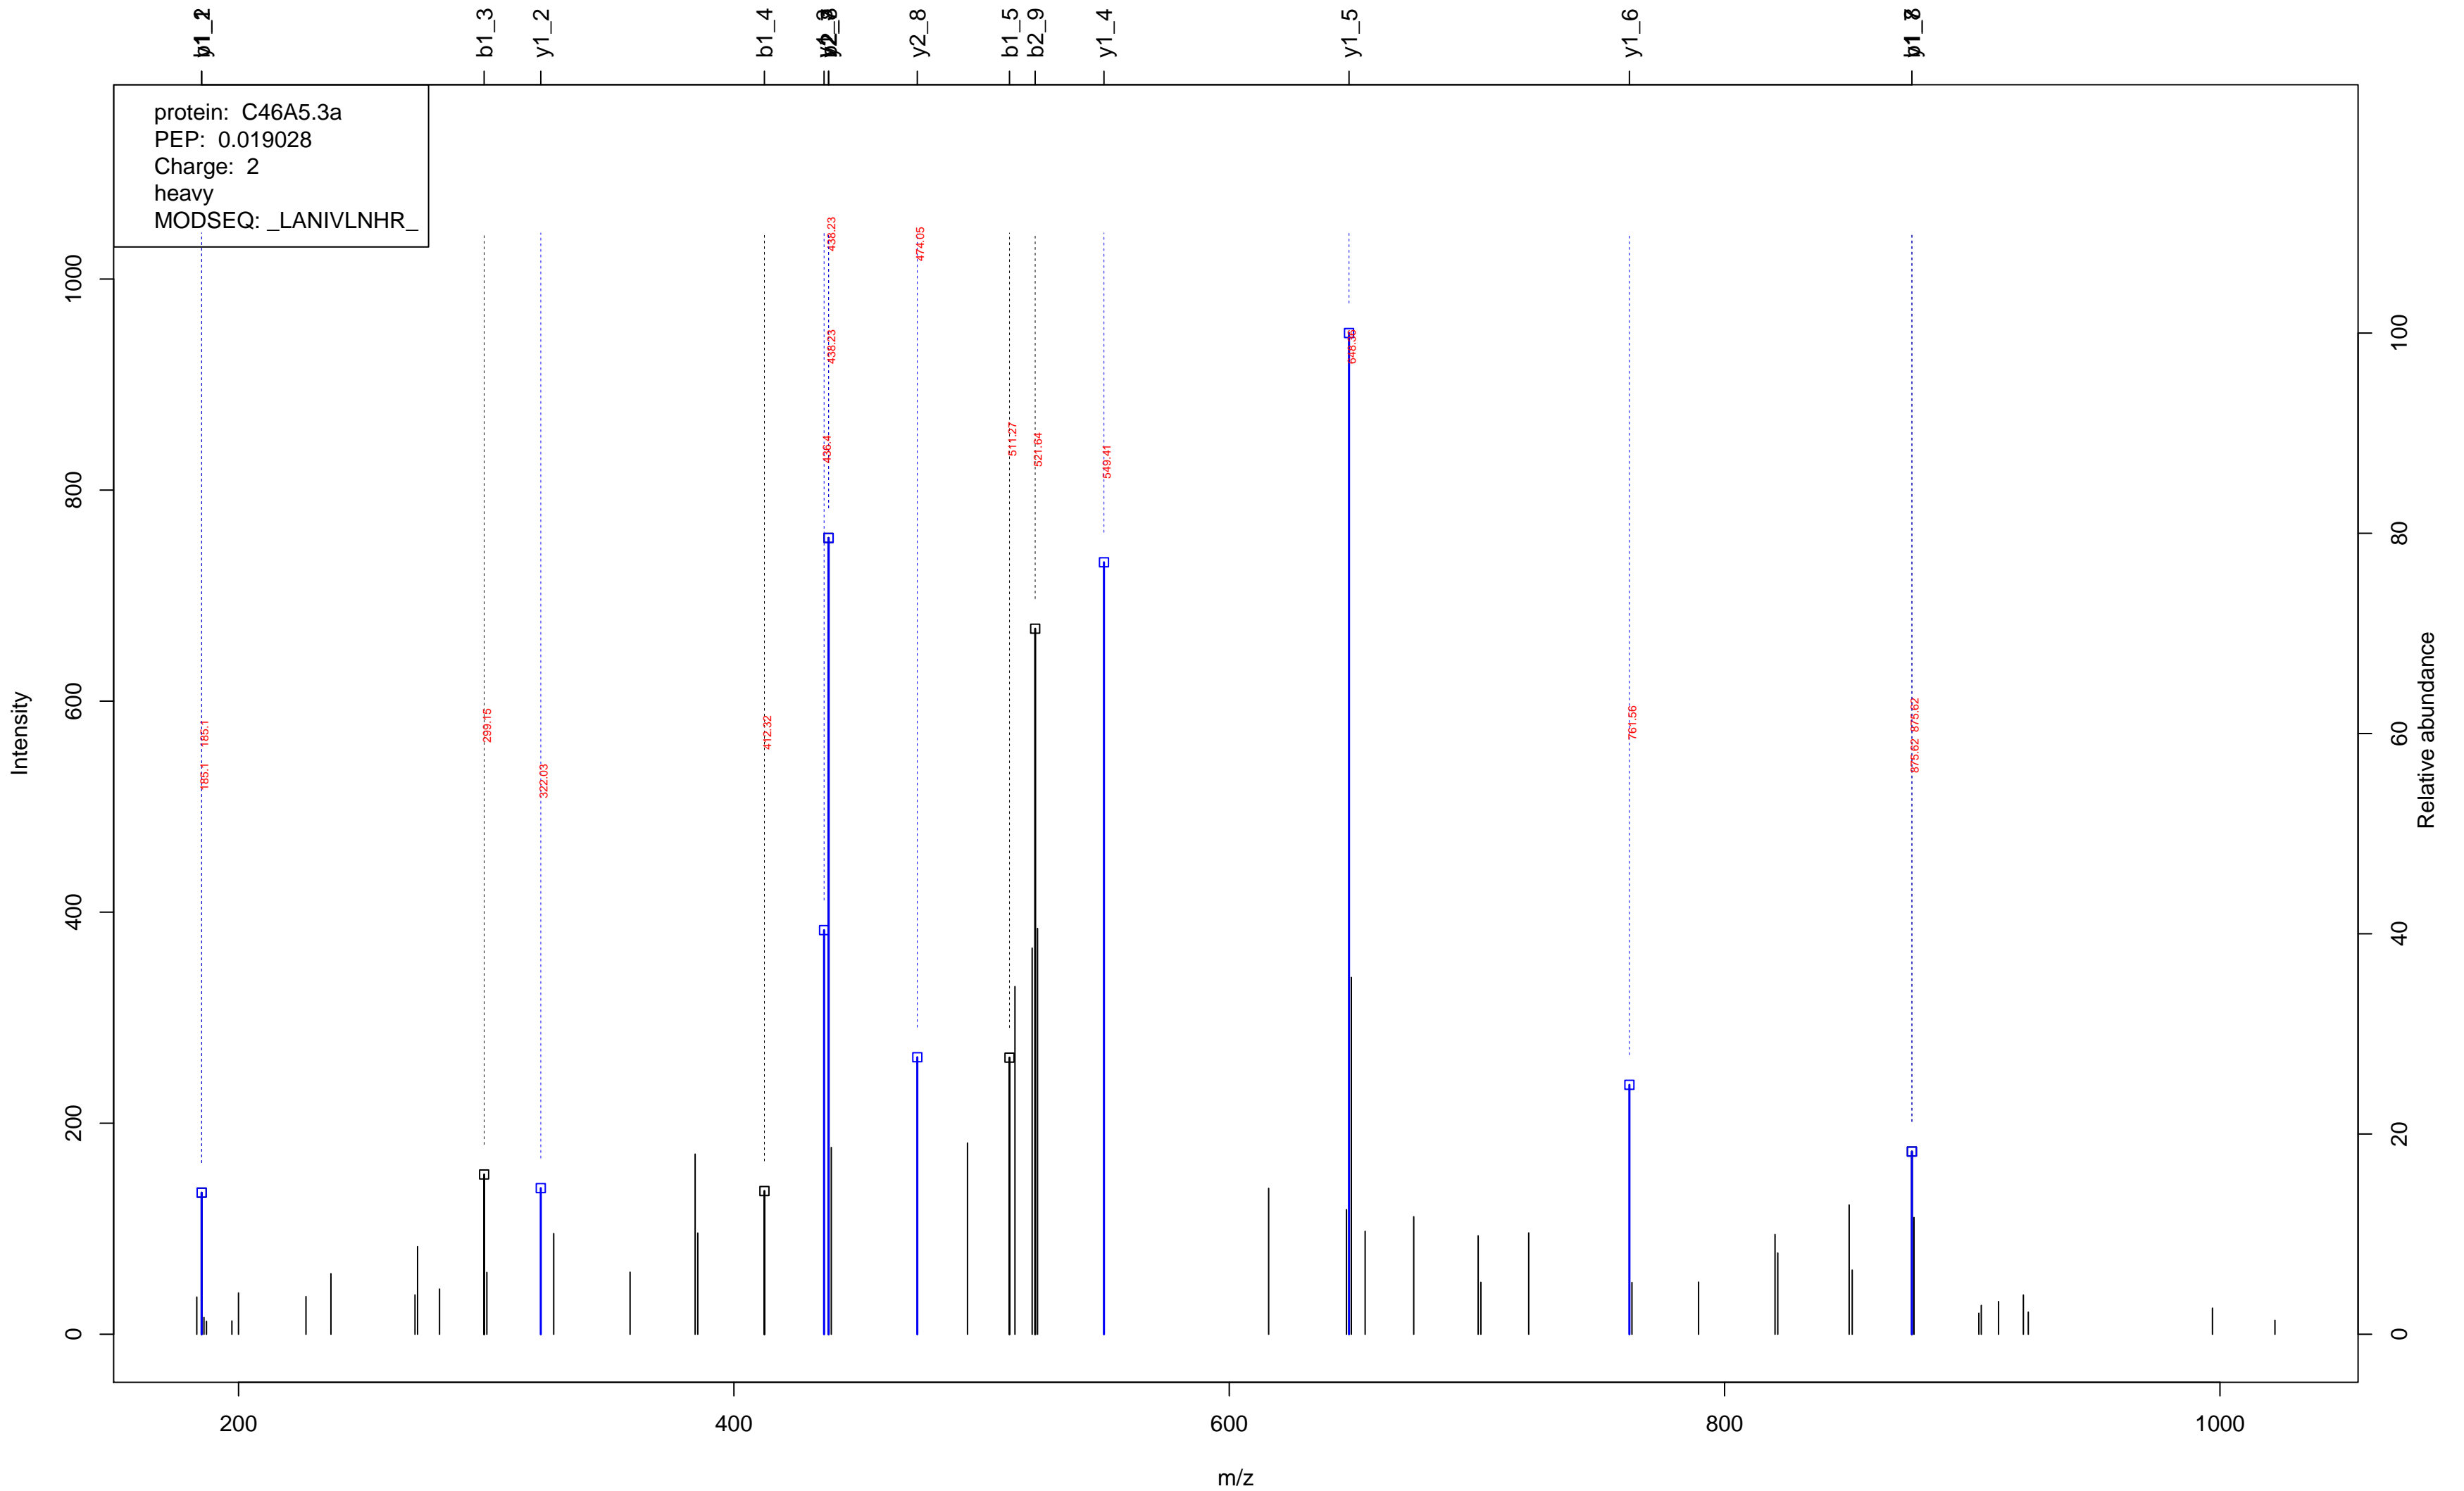



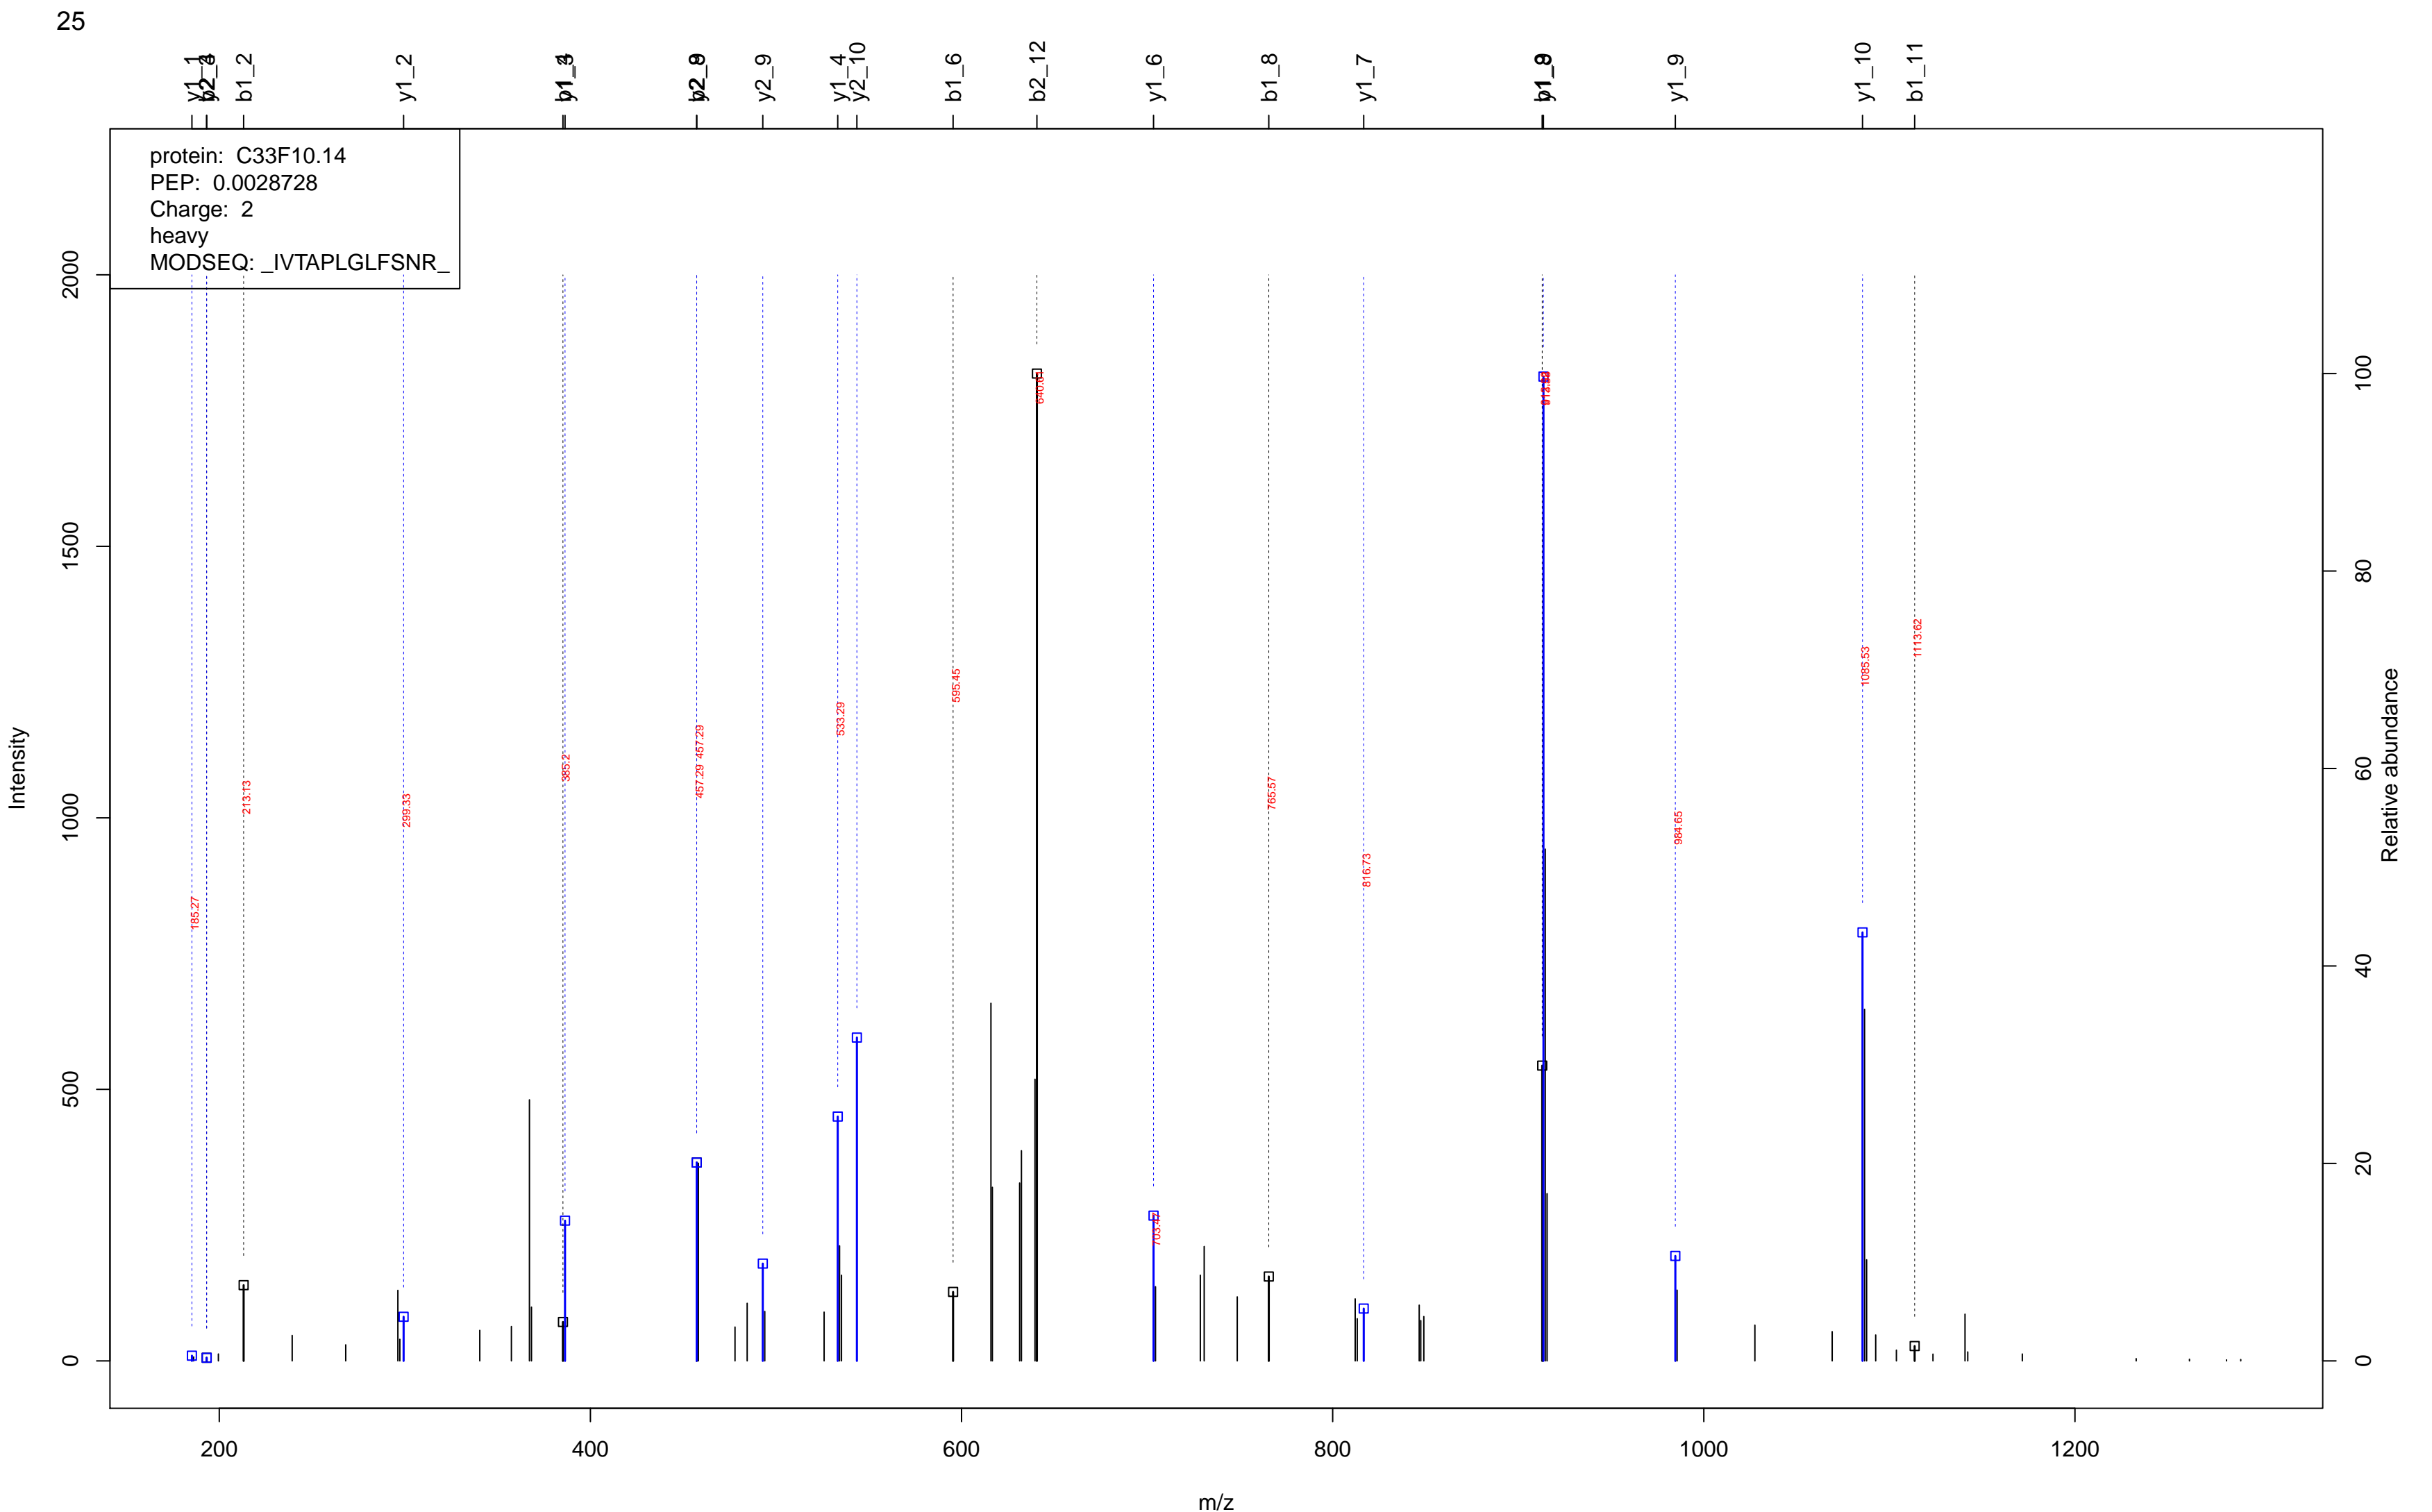

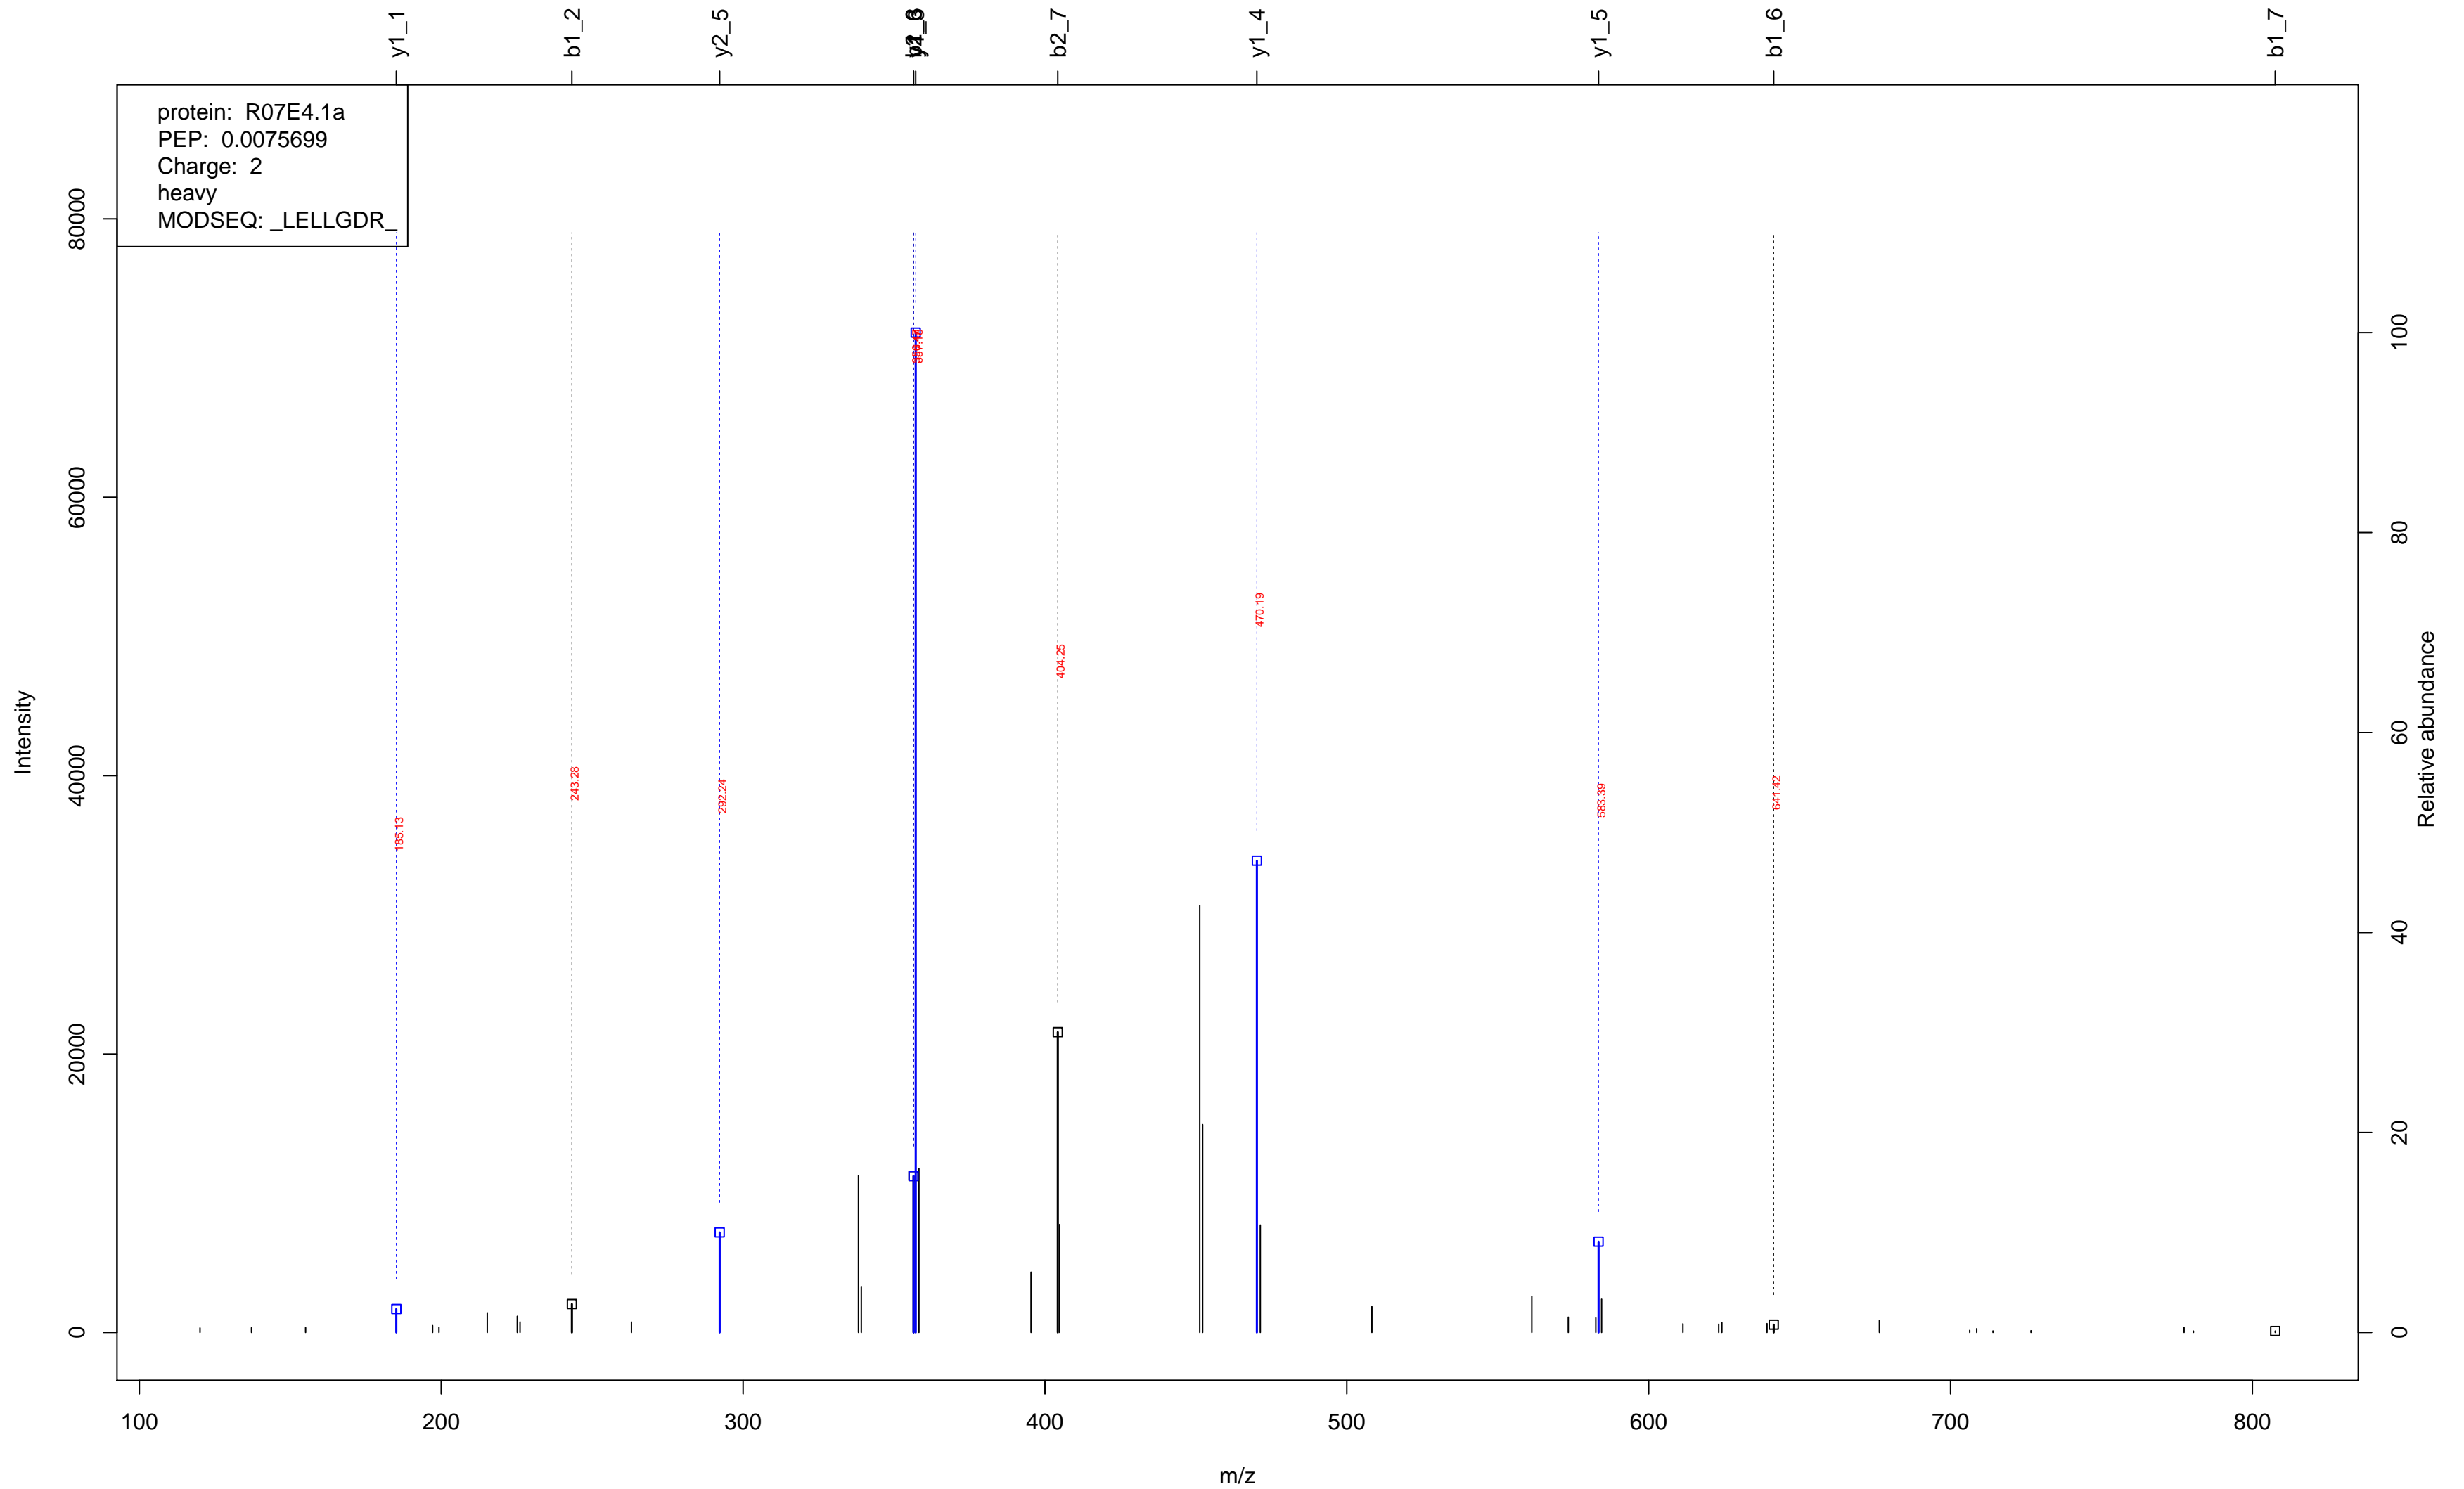

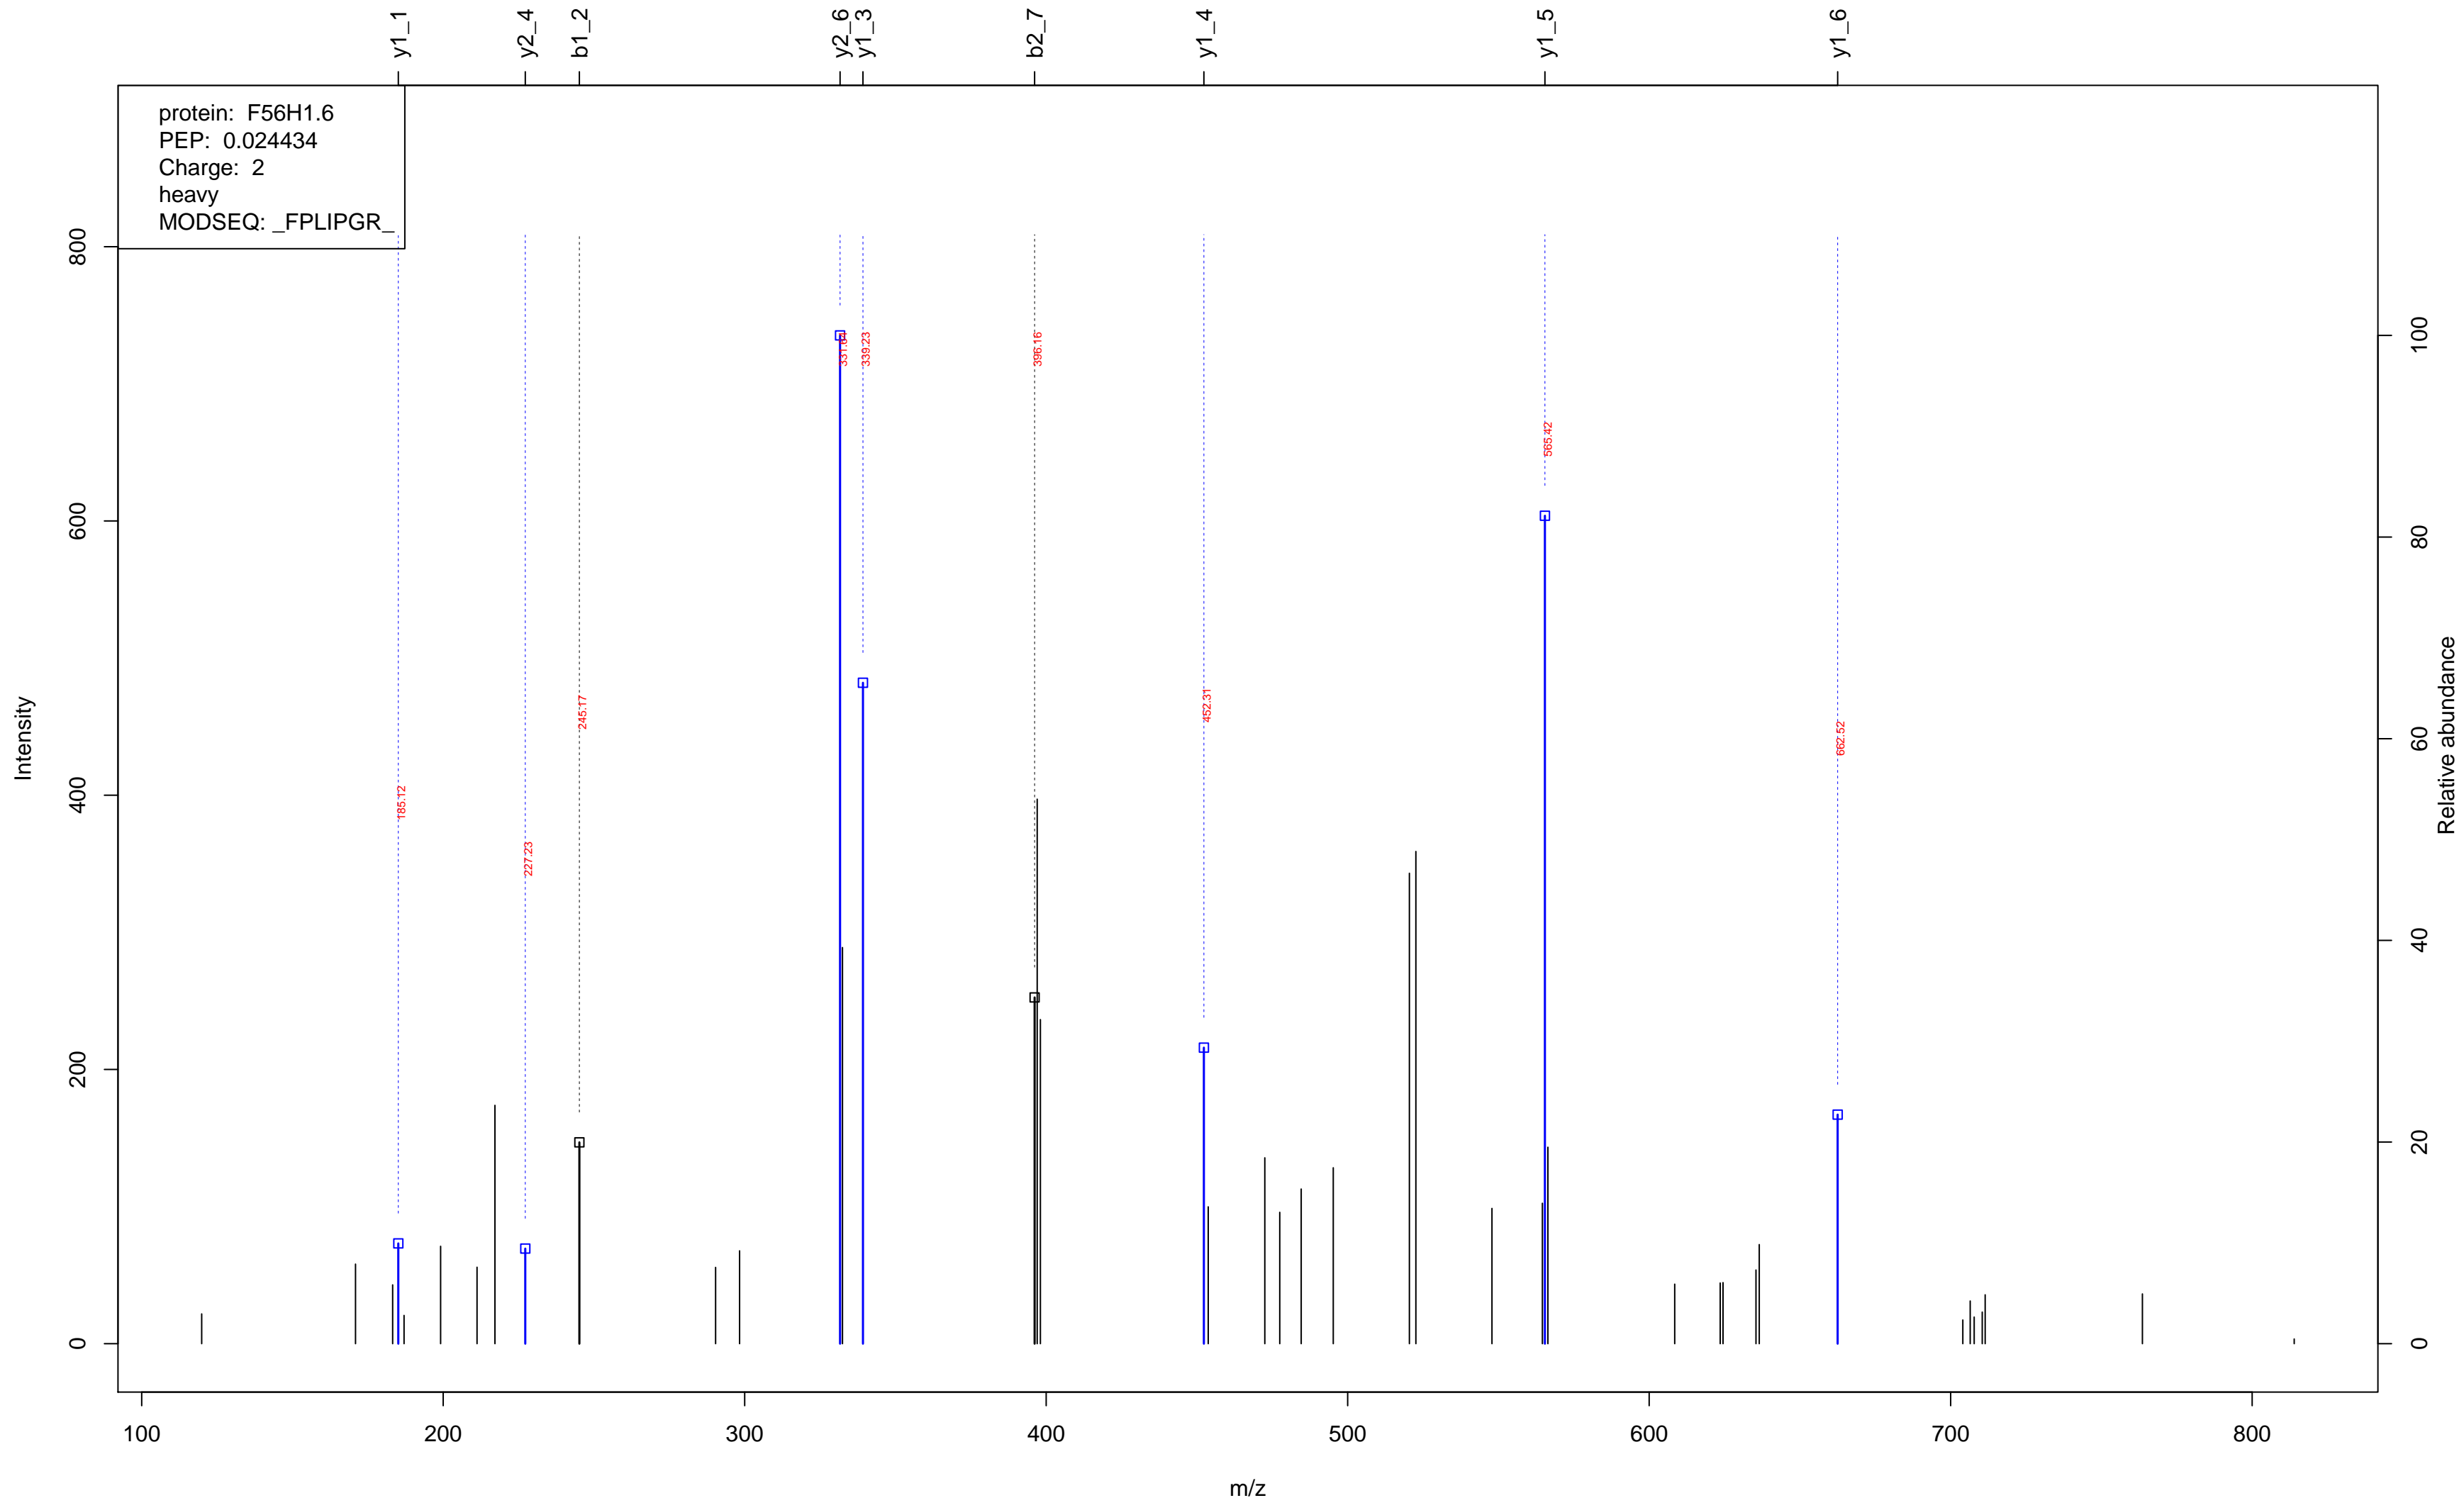

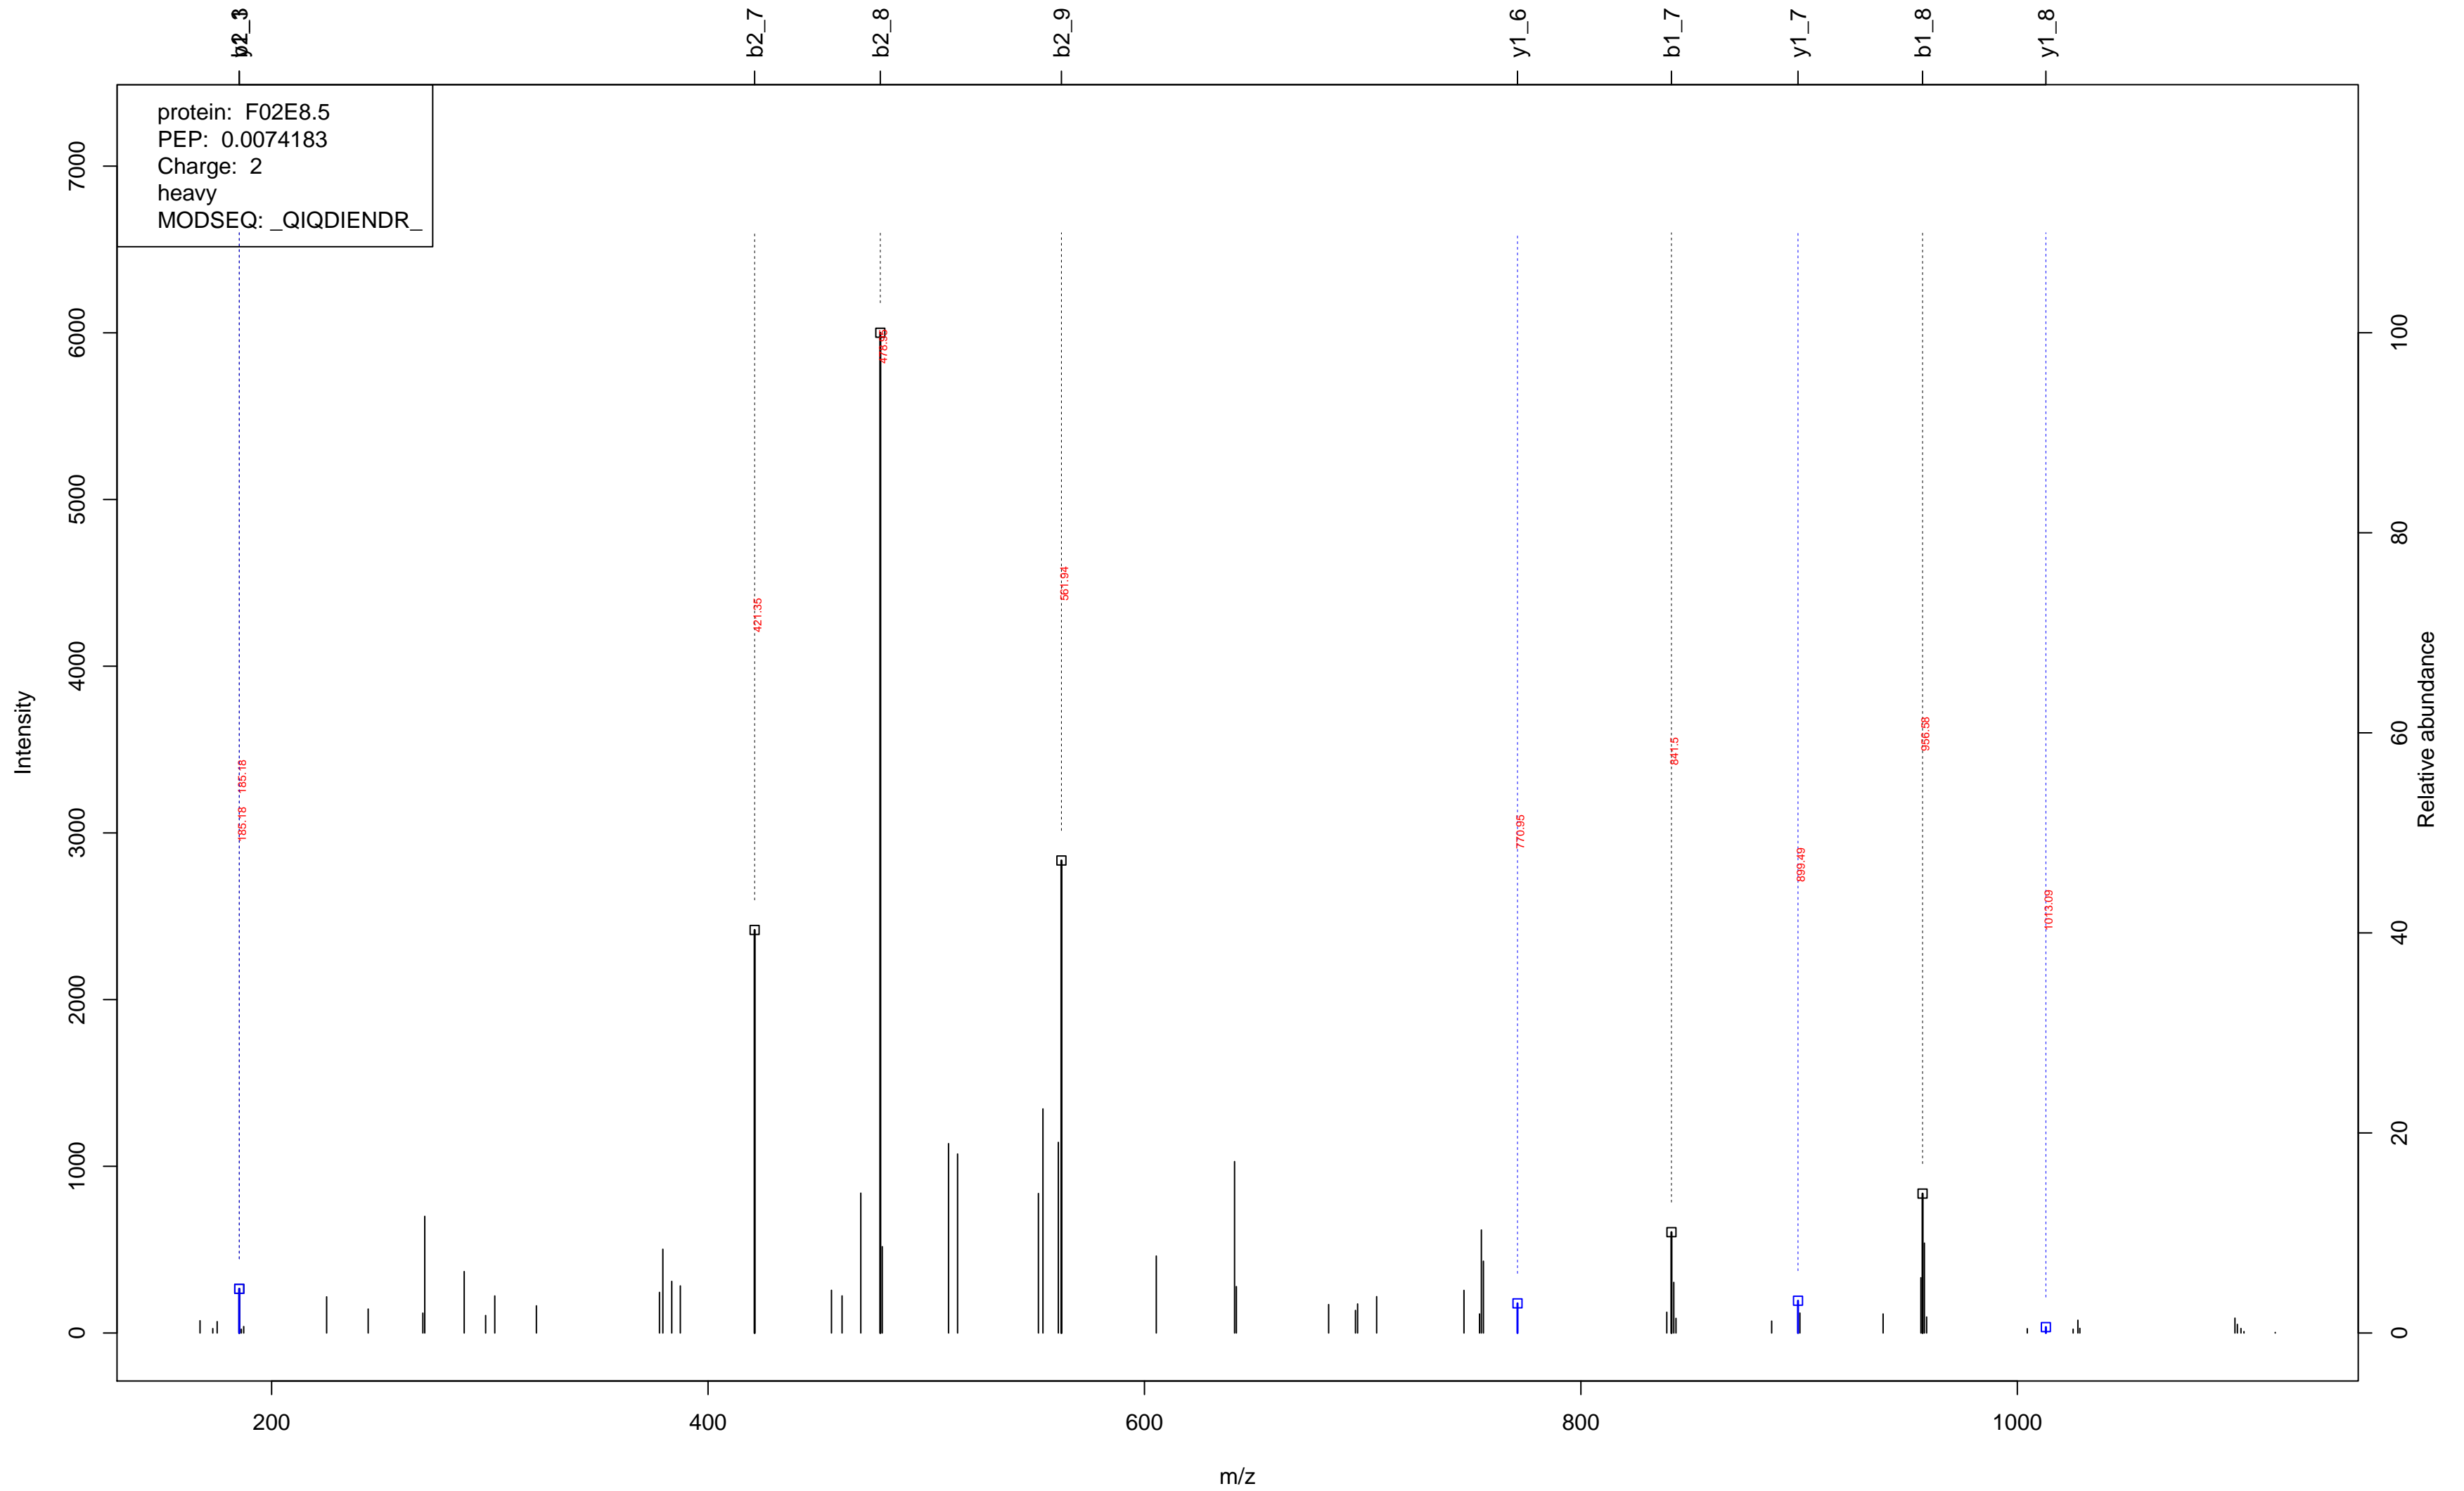

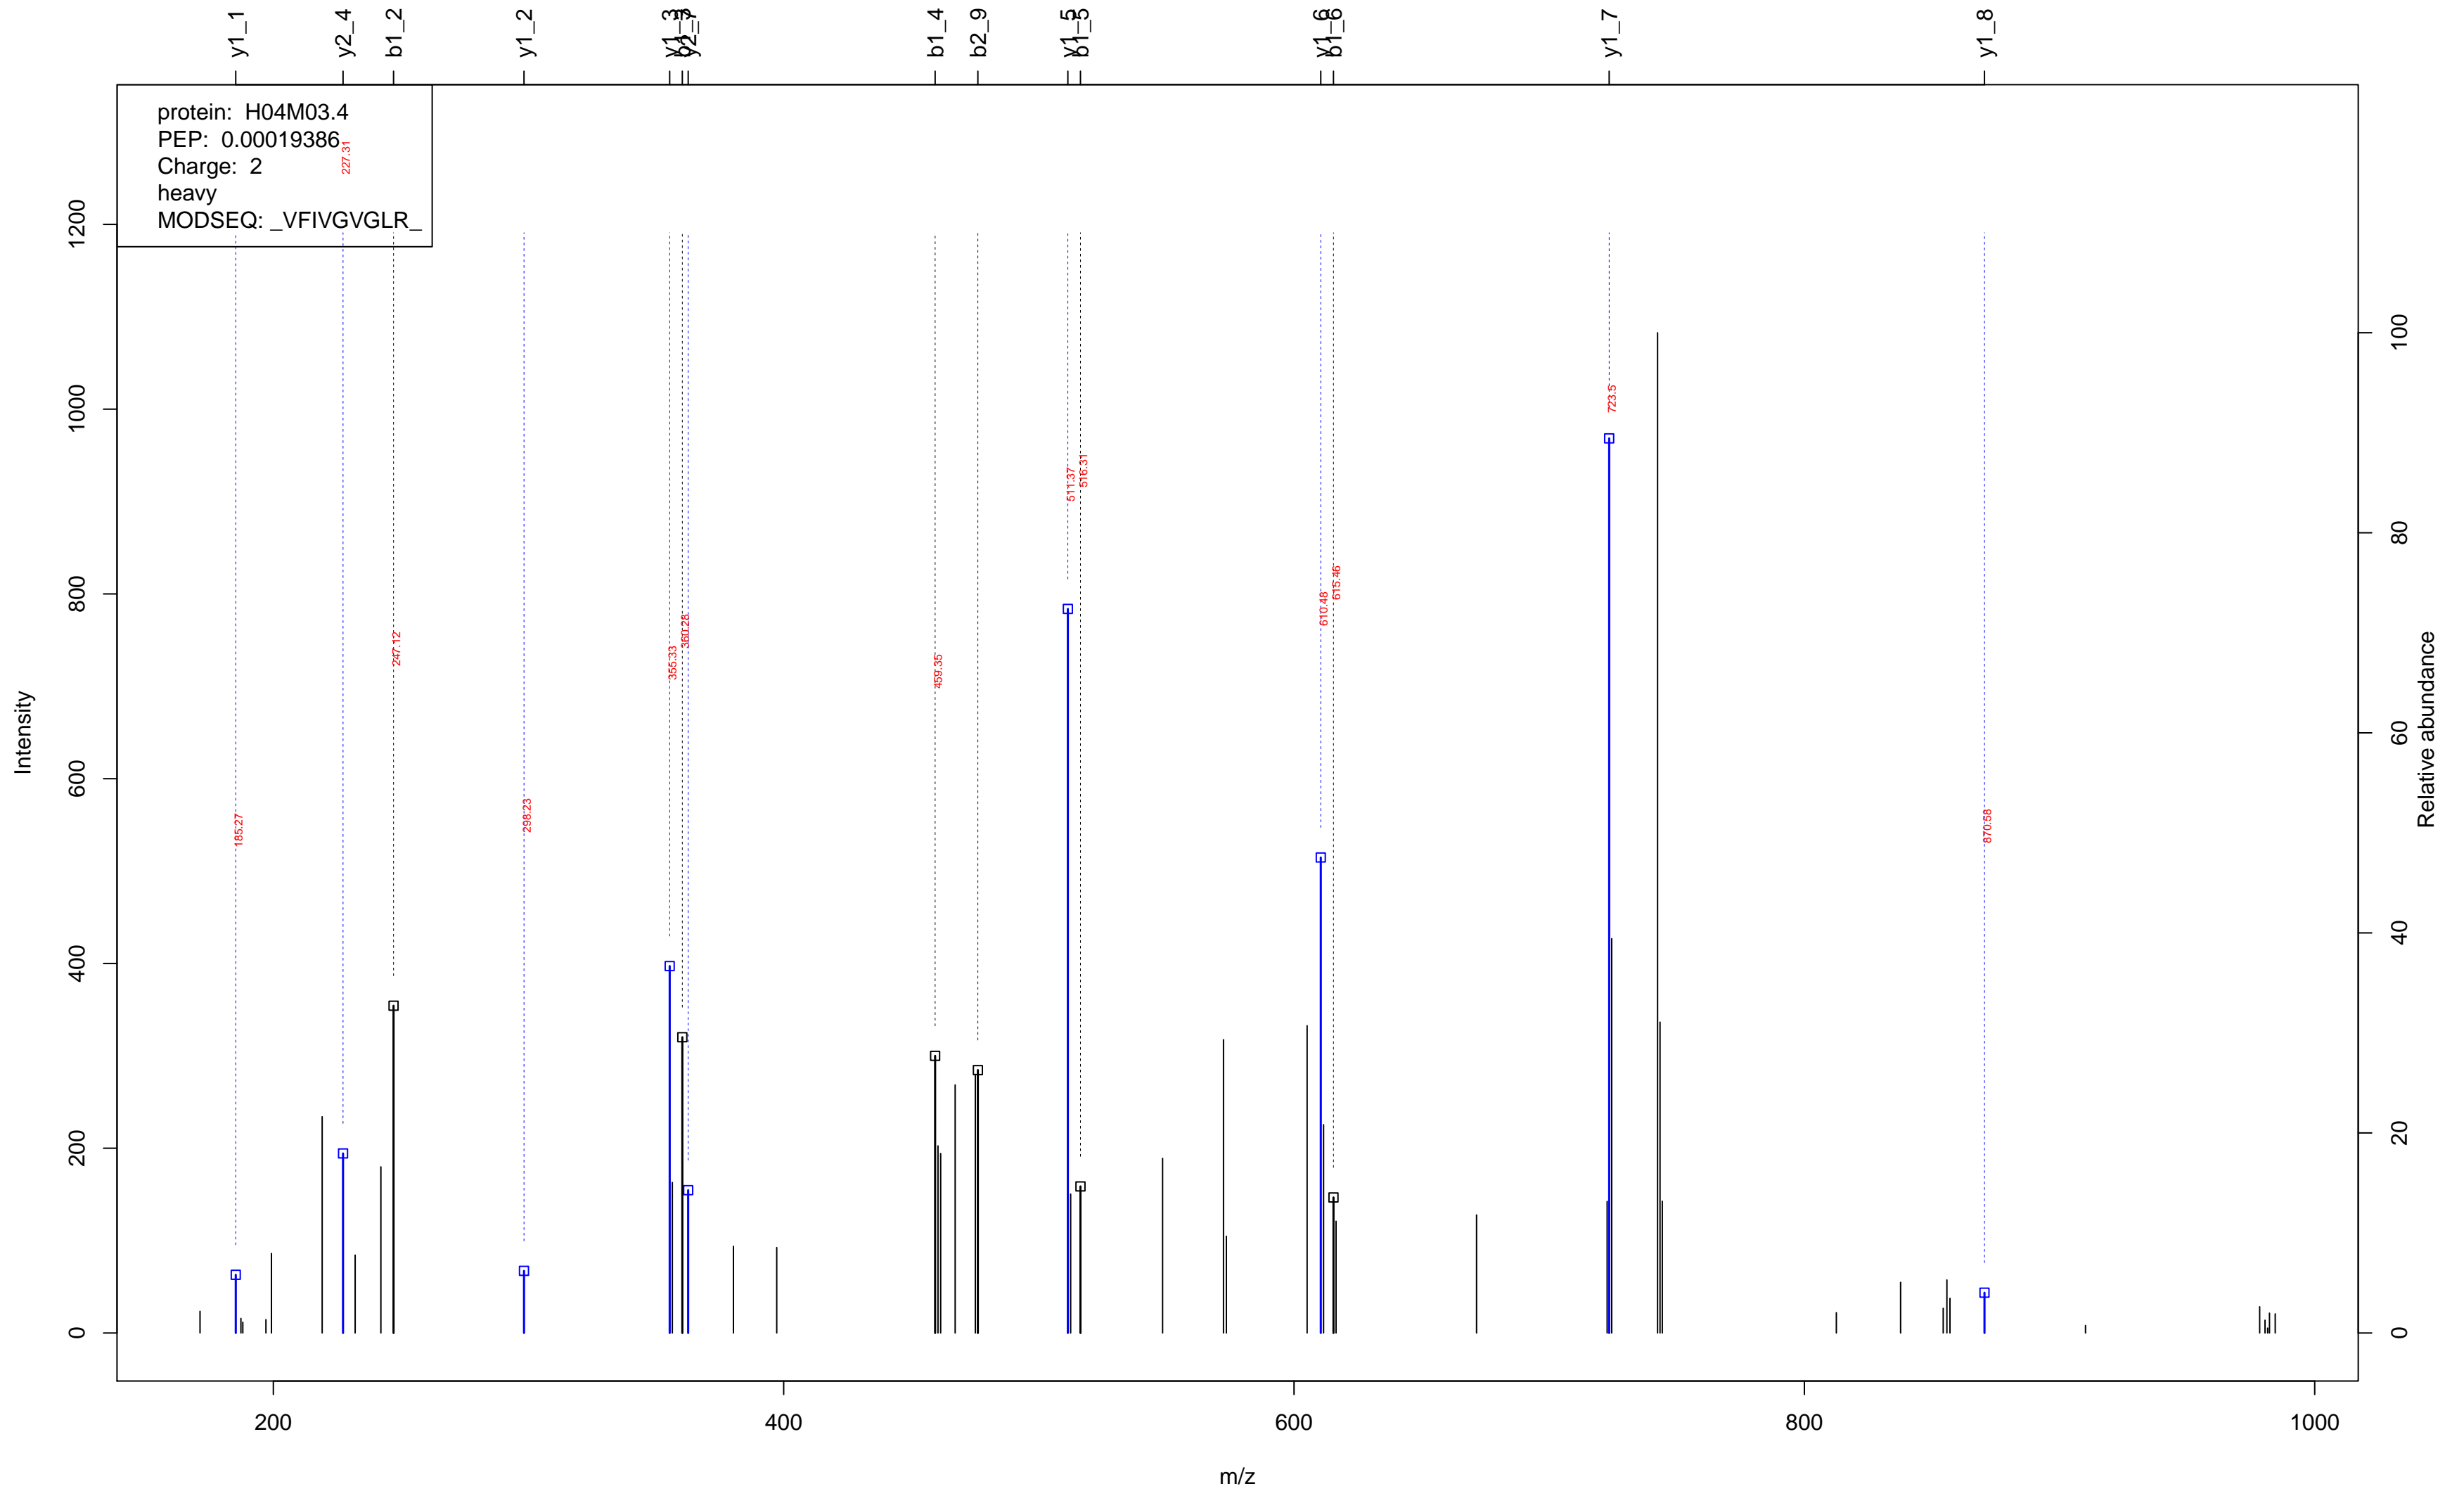

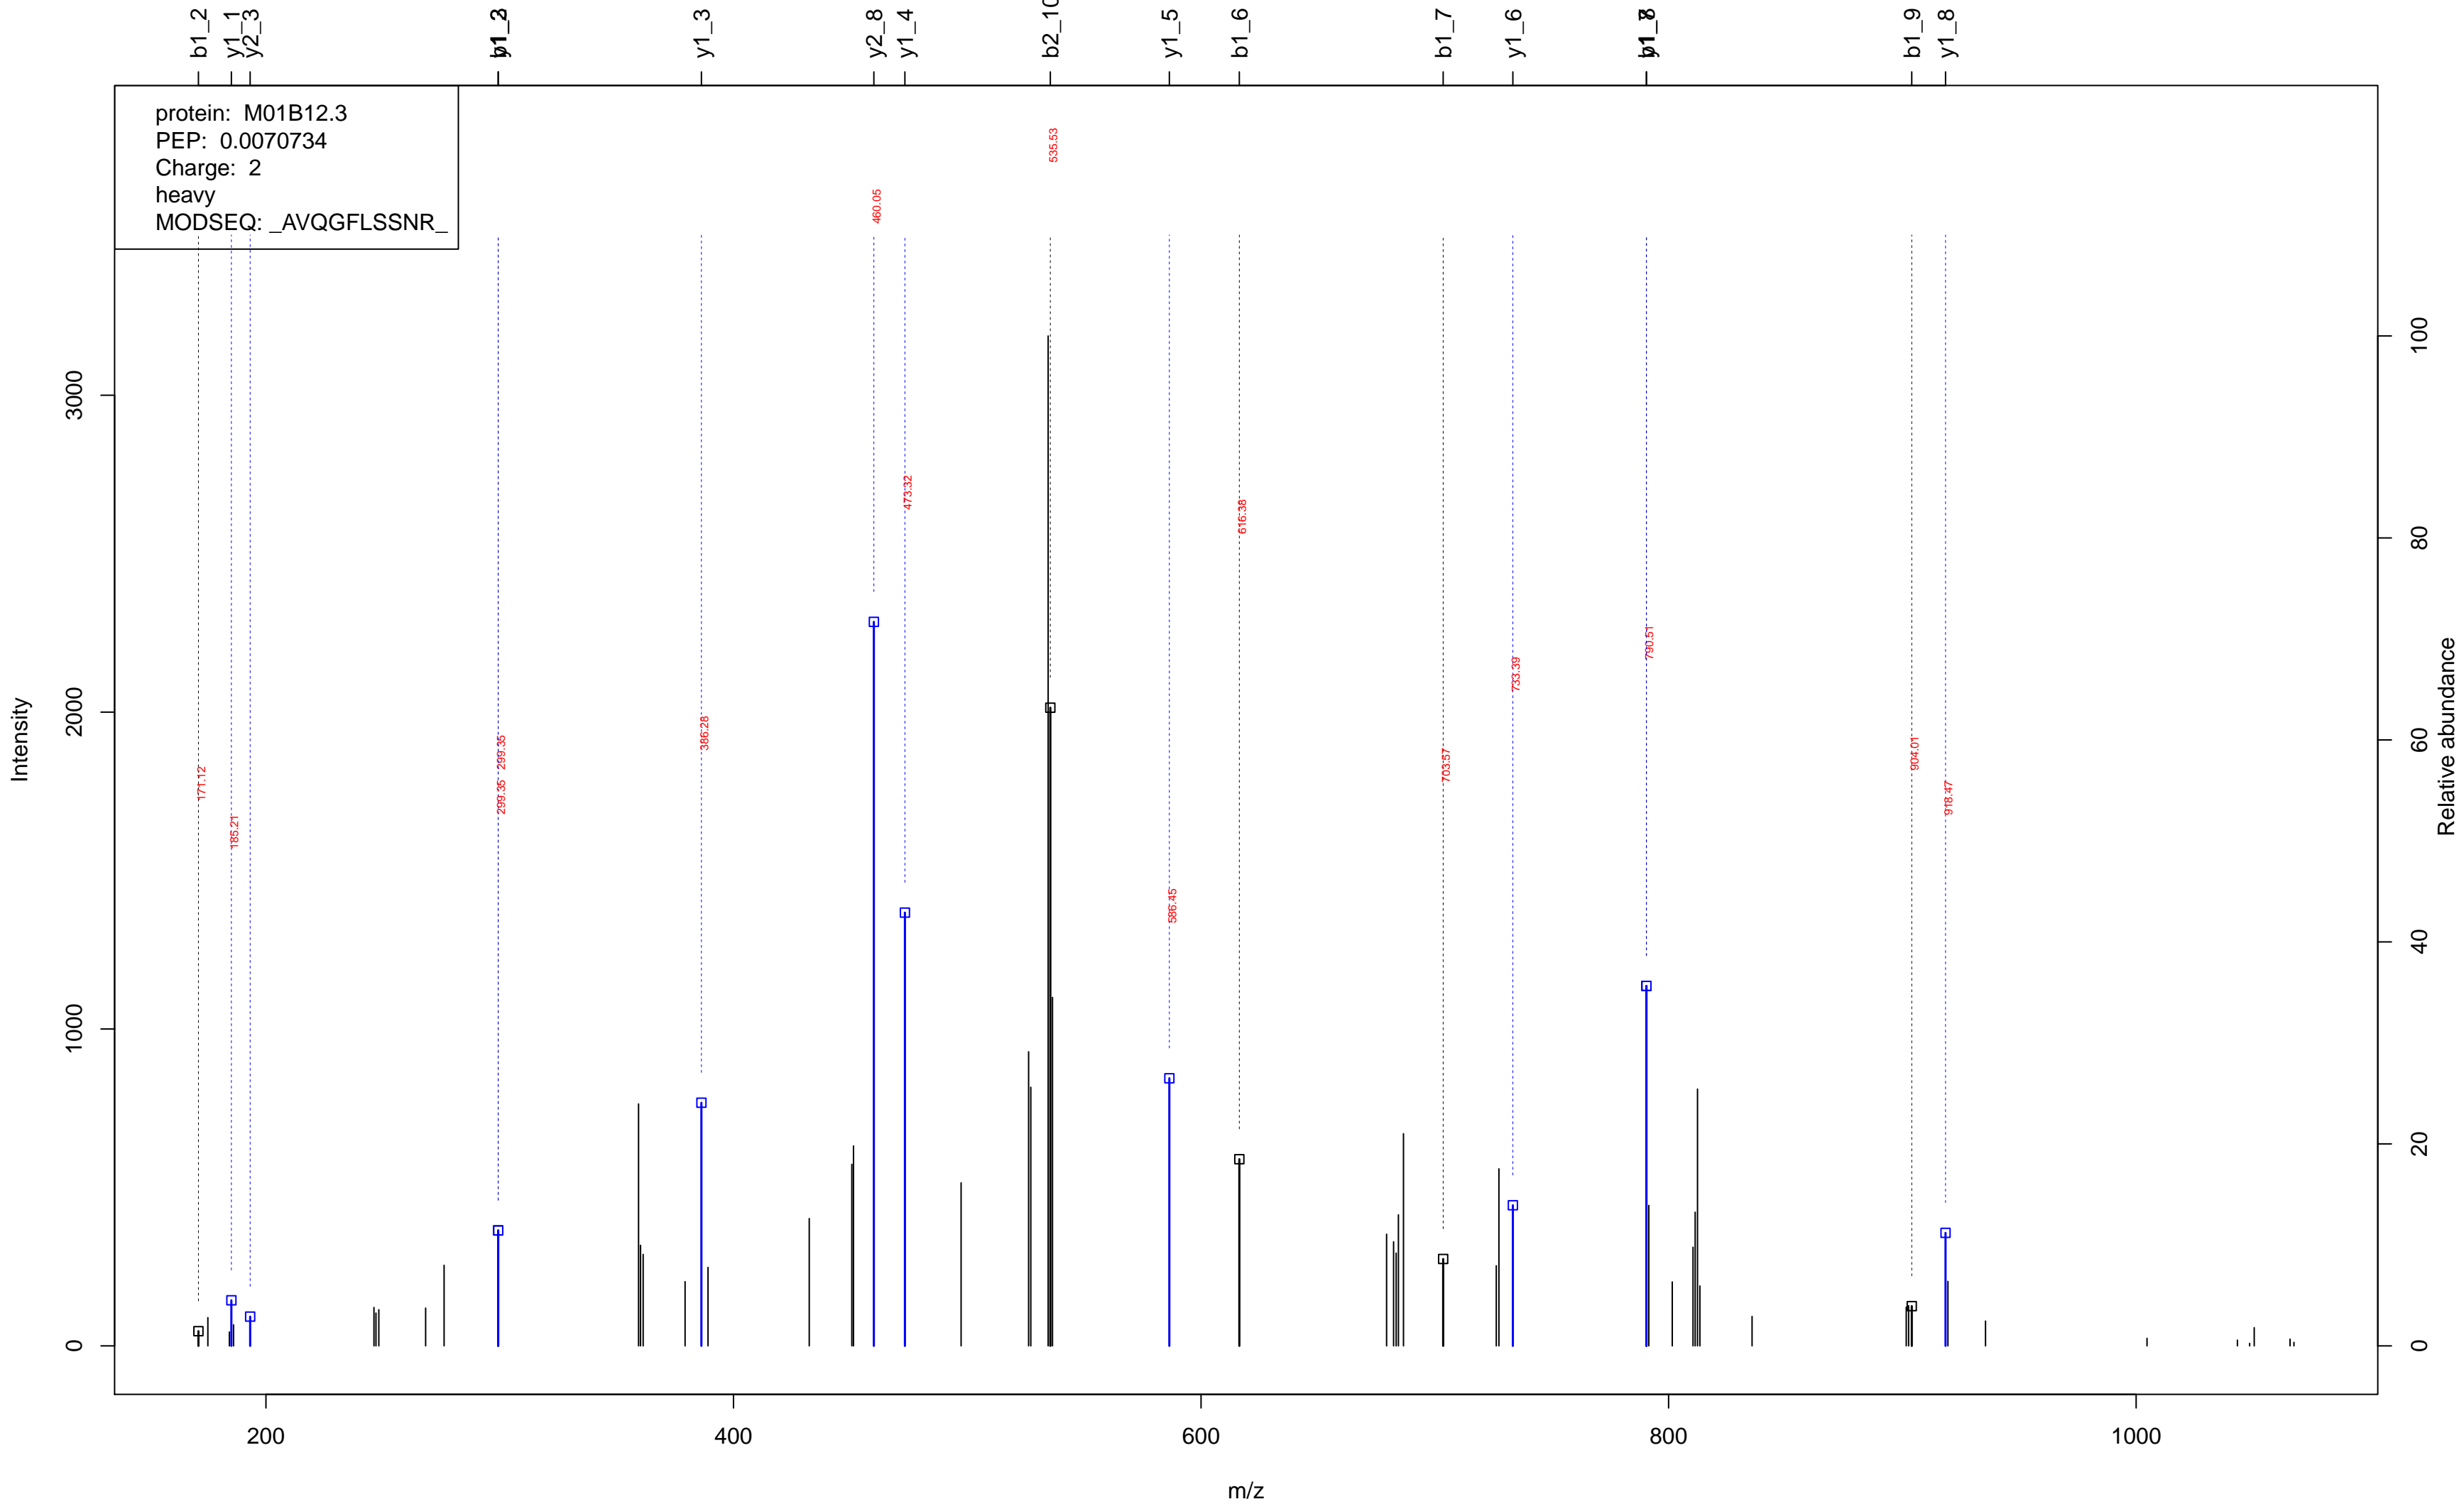

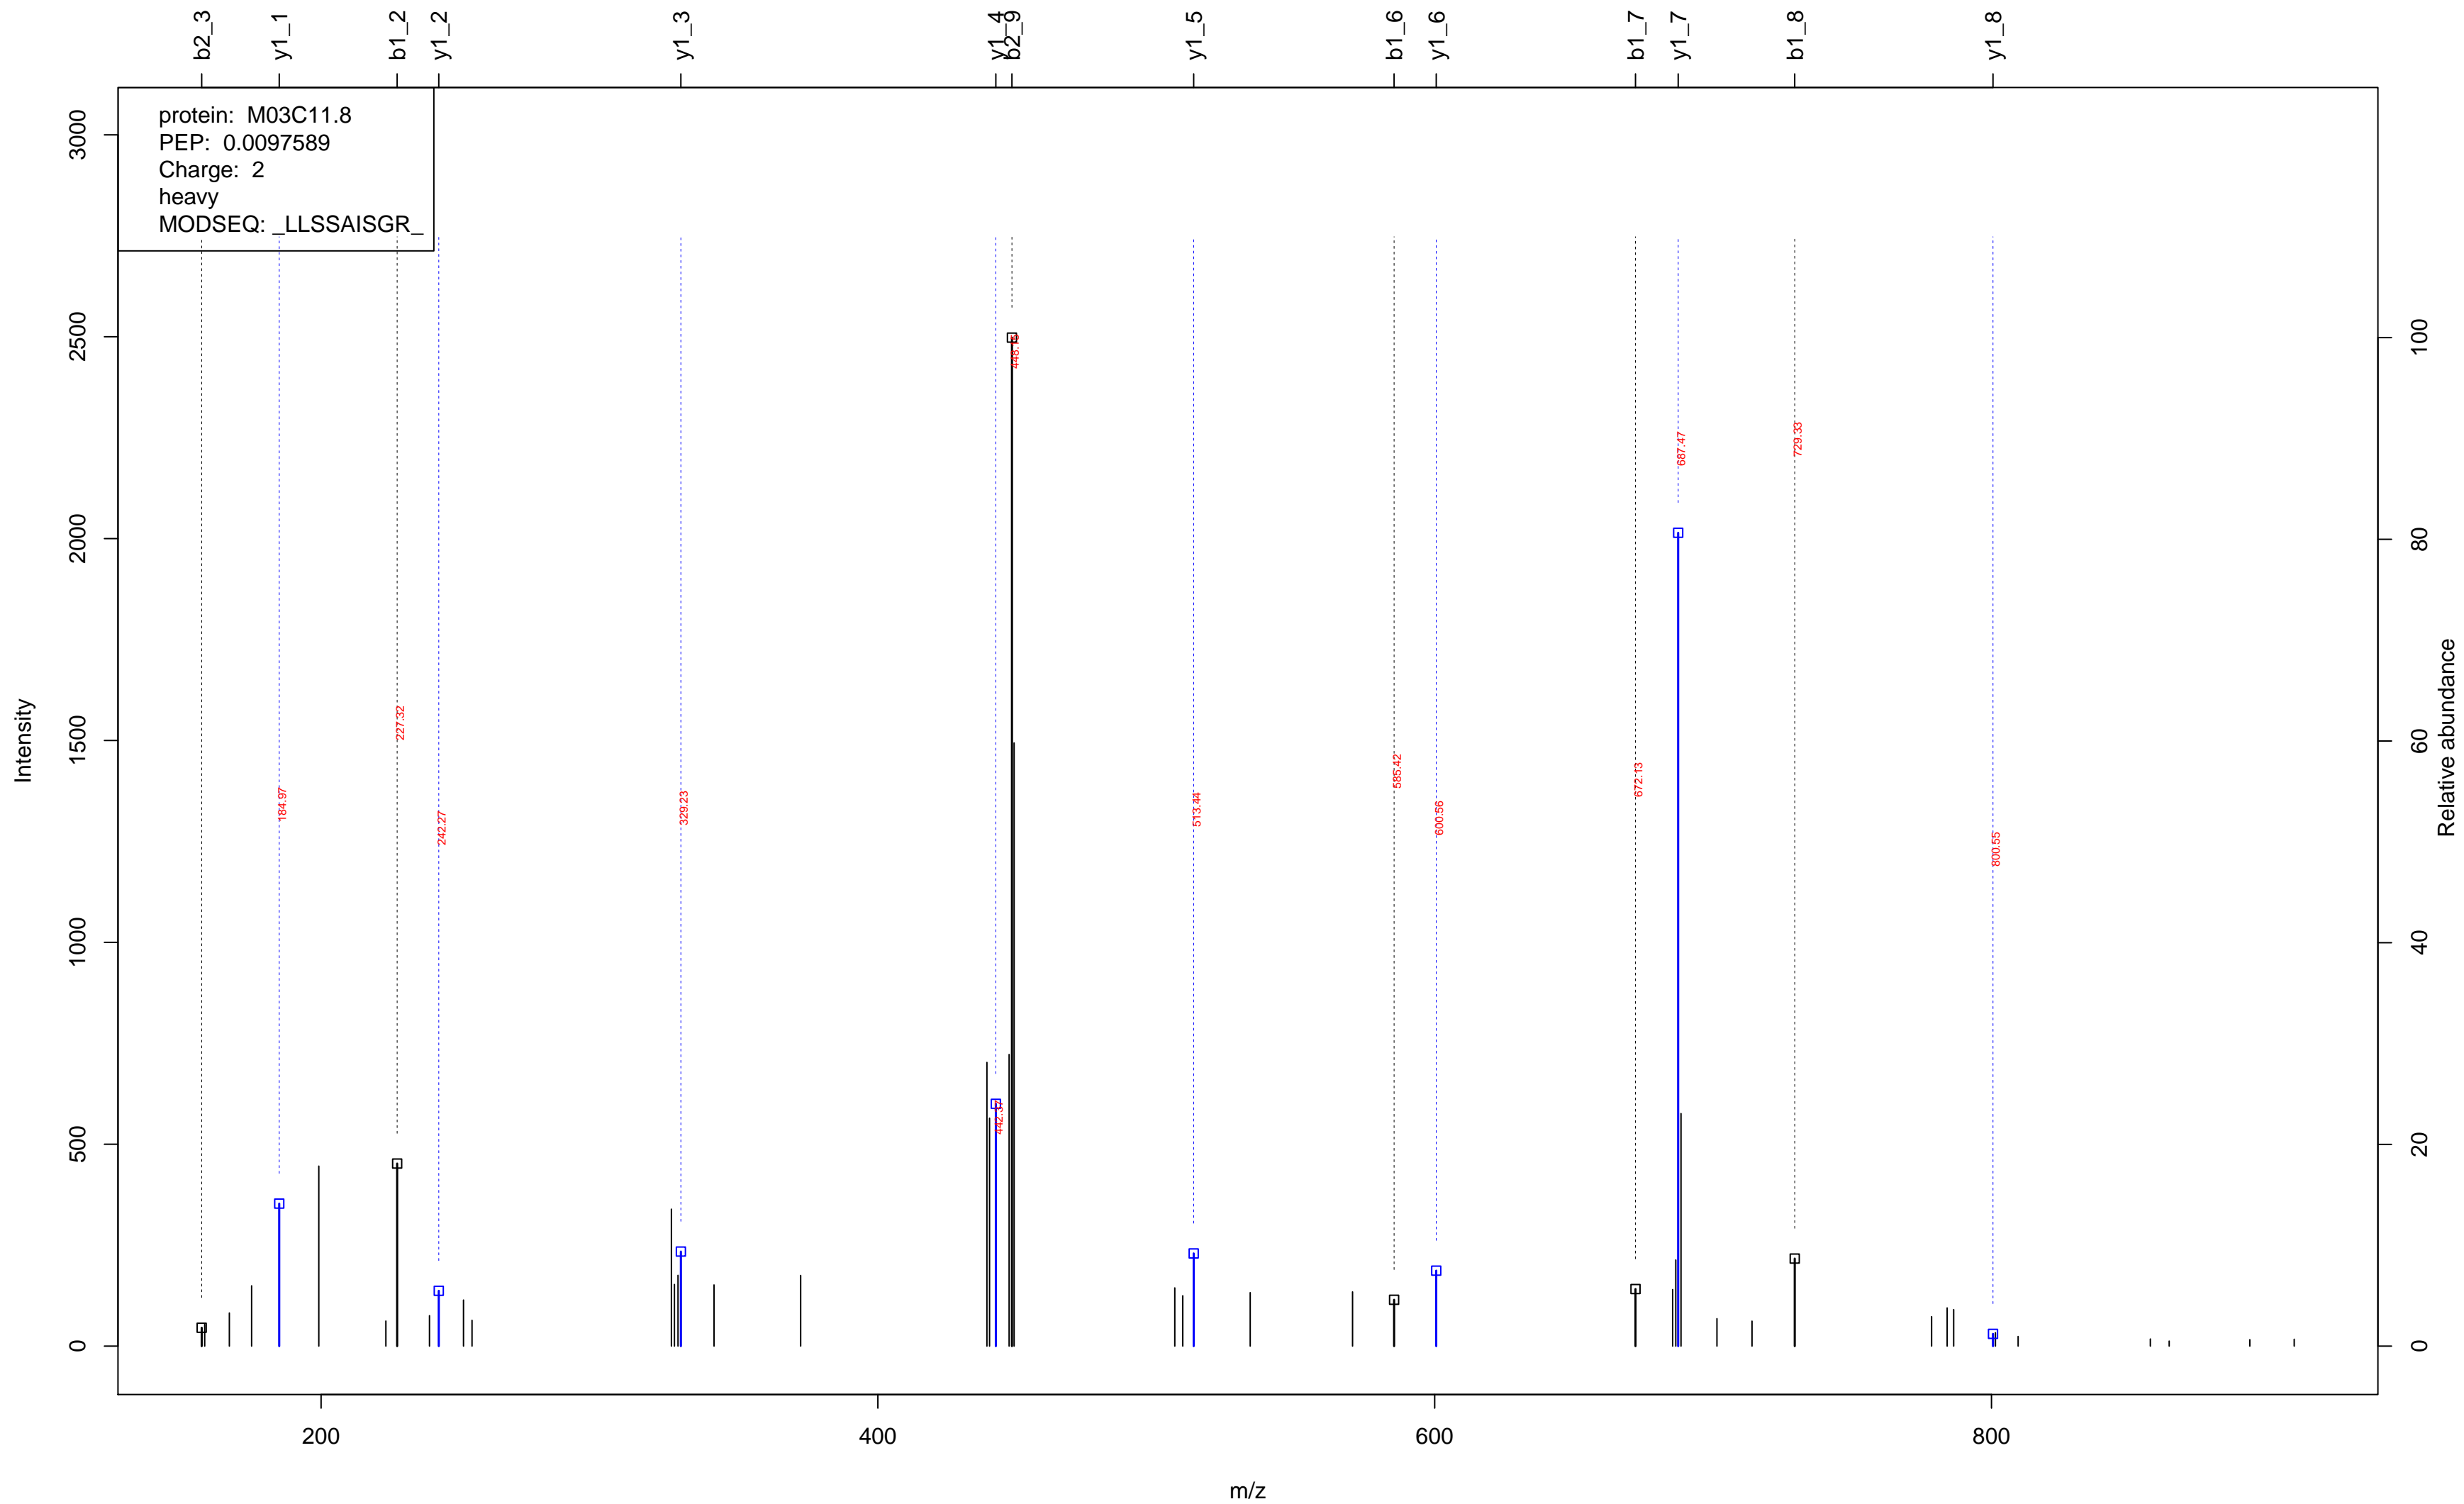

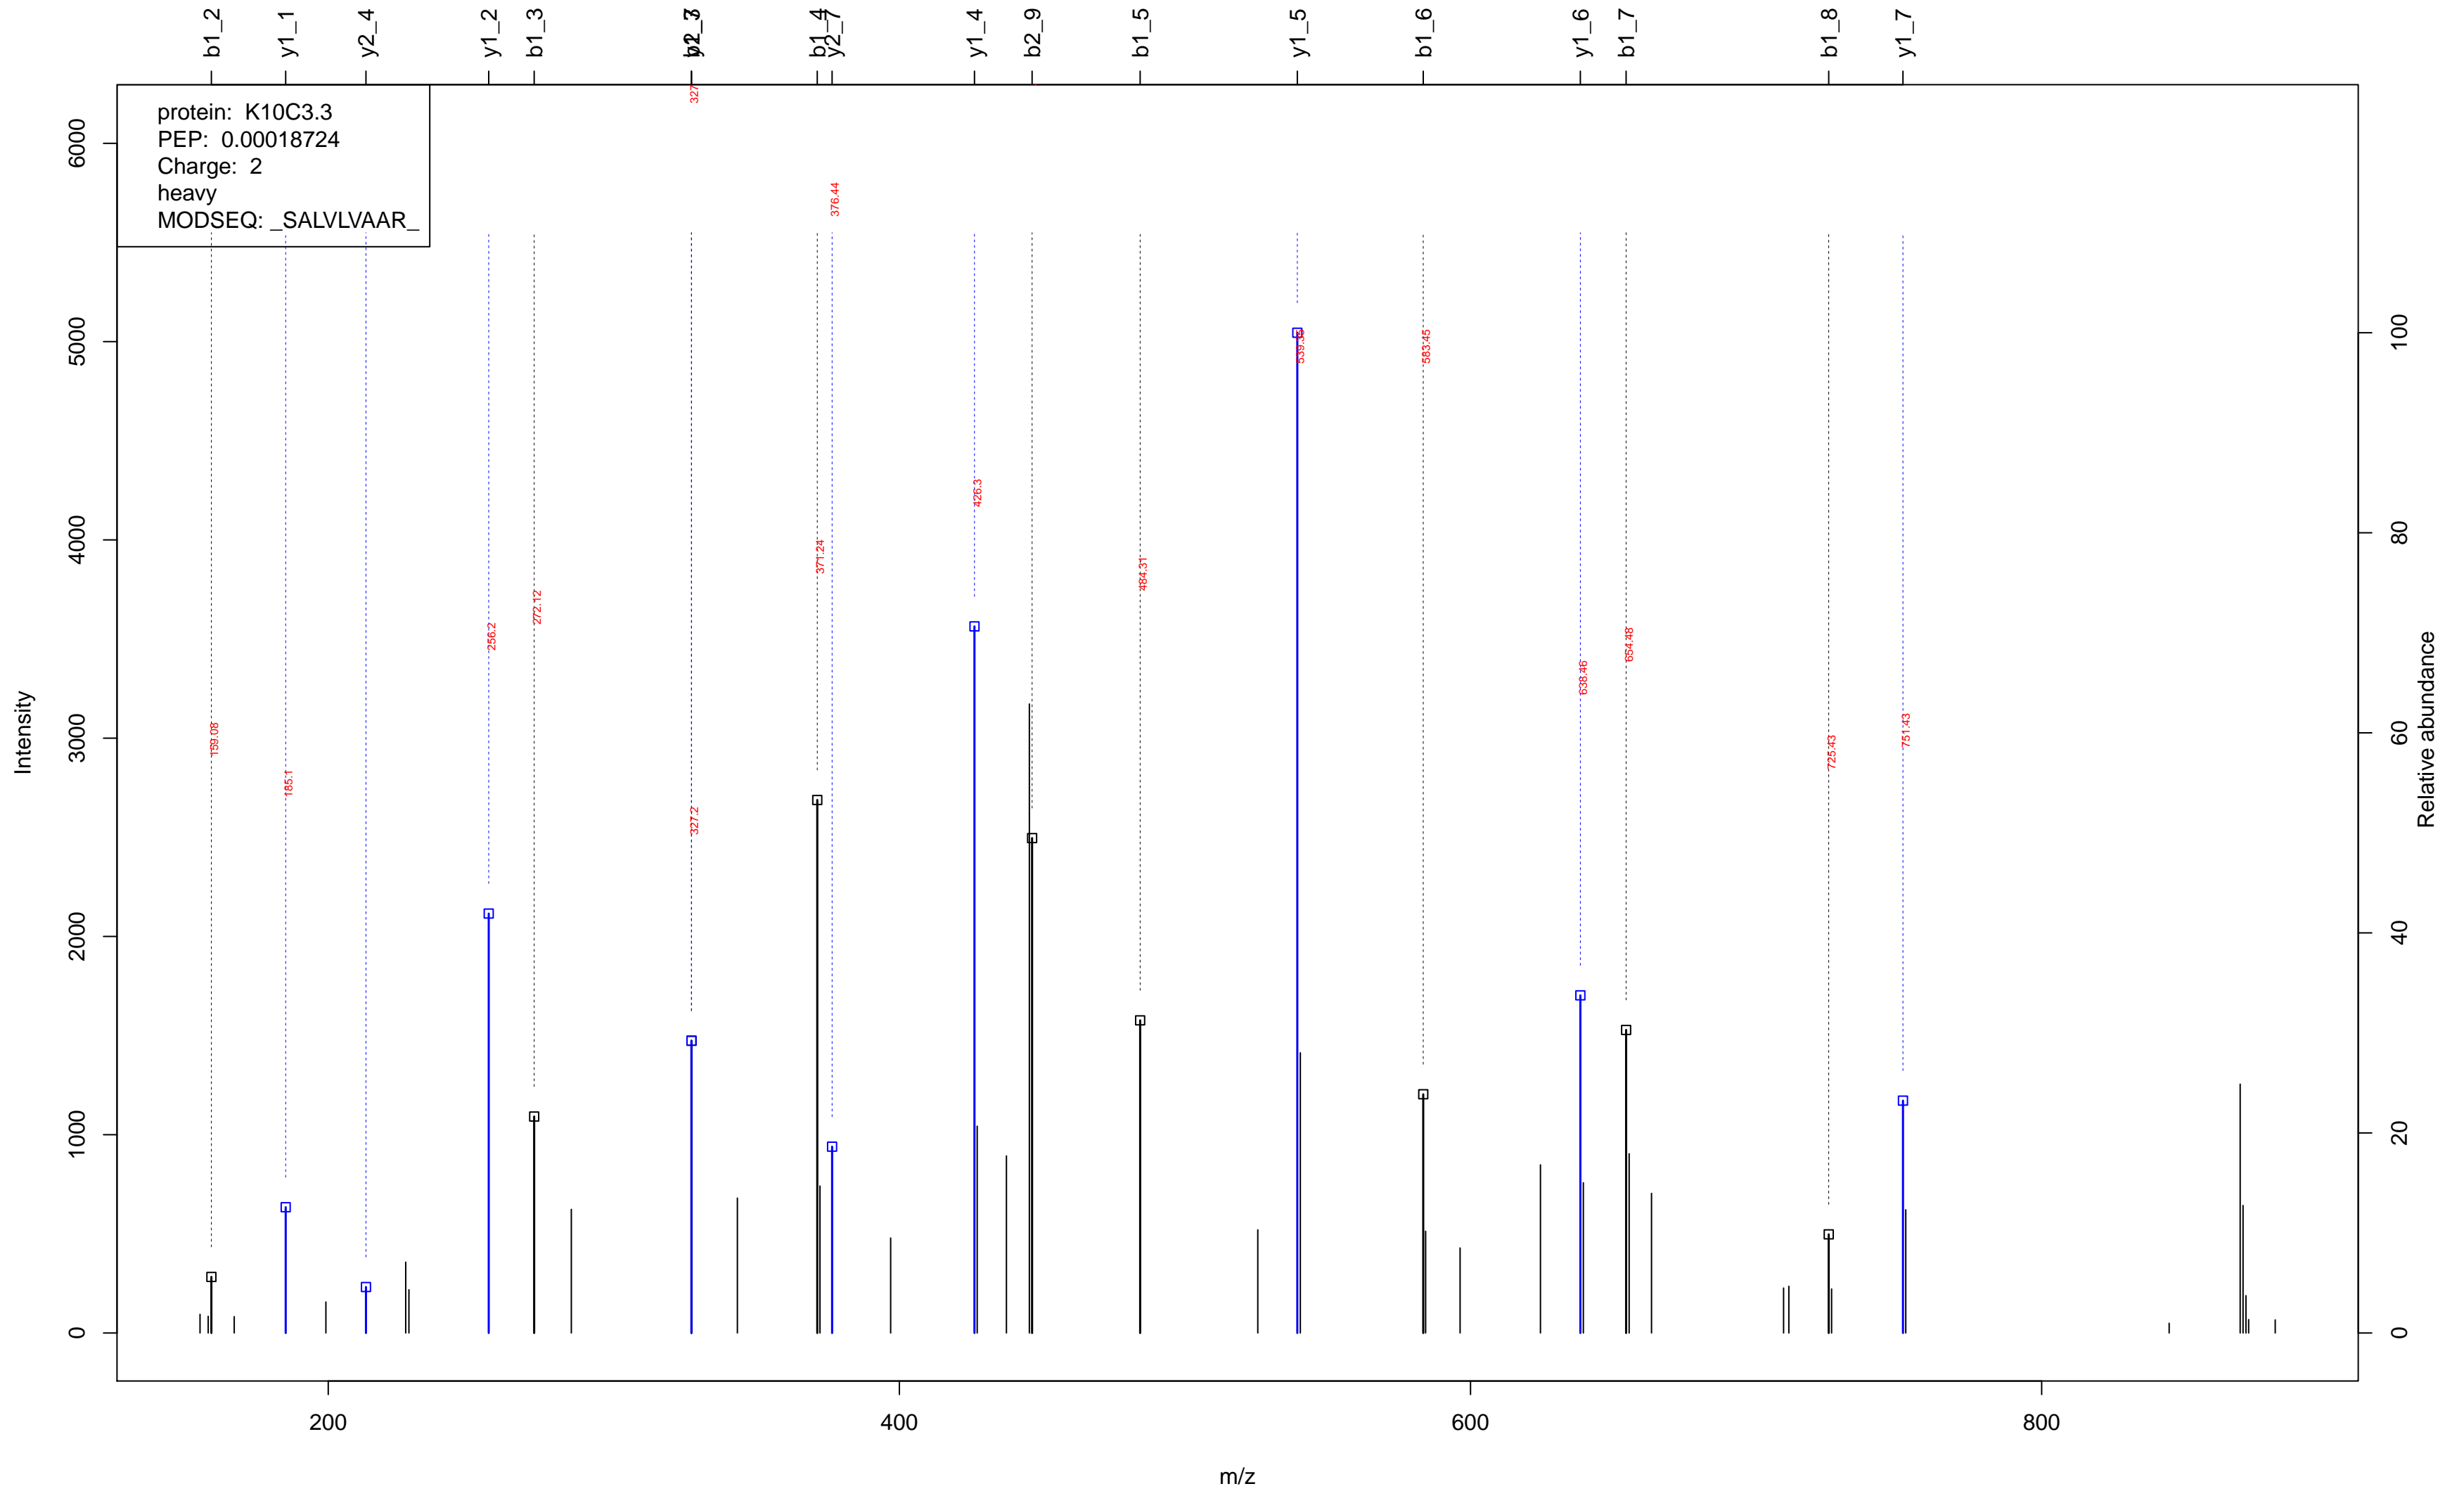

protein: K10C3.3  
PEP: 0.00018724  
Charge: 2  
heavy  
MODSEQ: \_SALVLVAAR\_



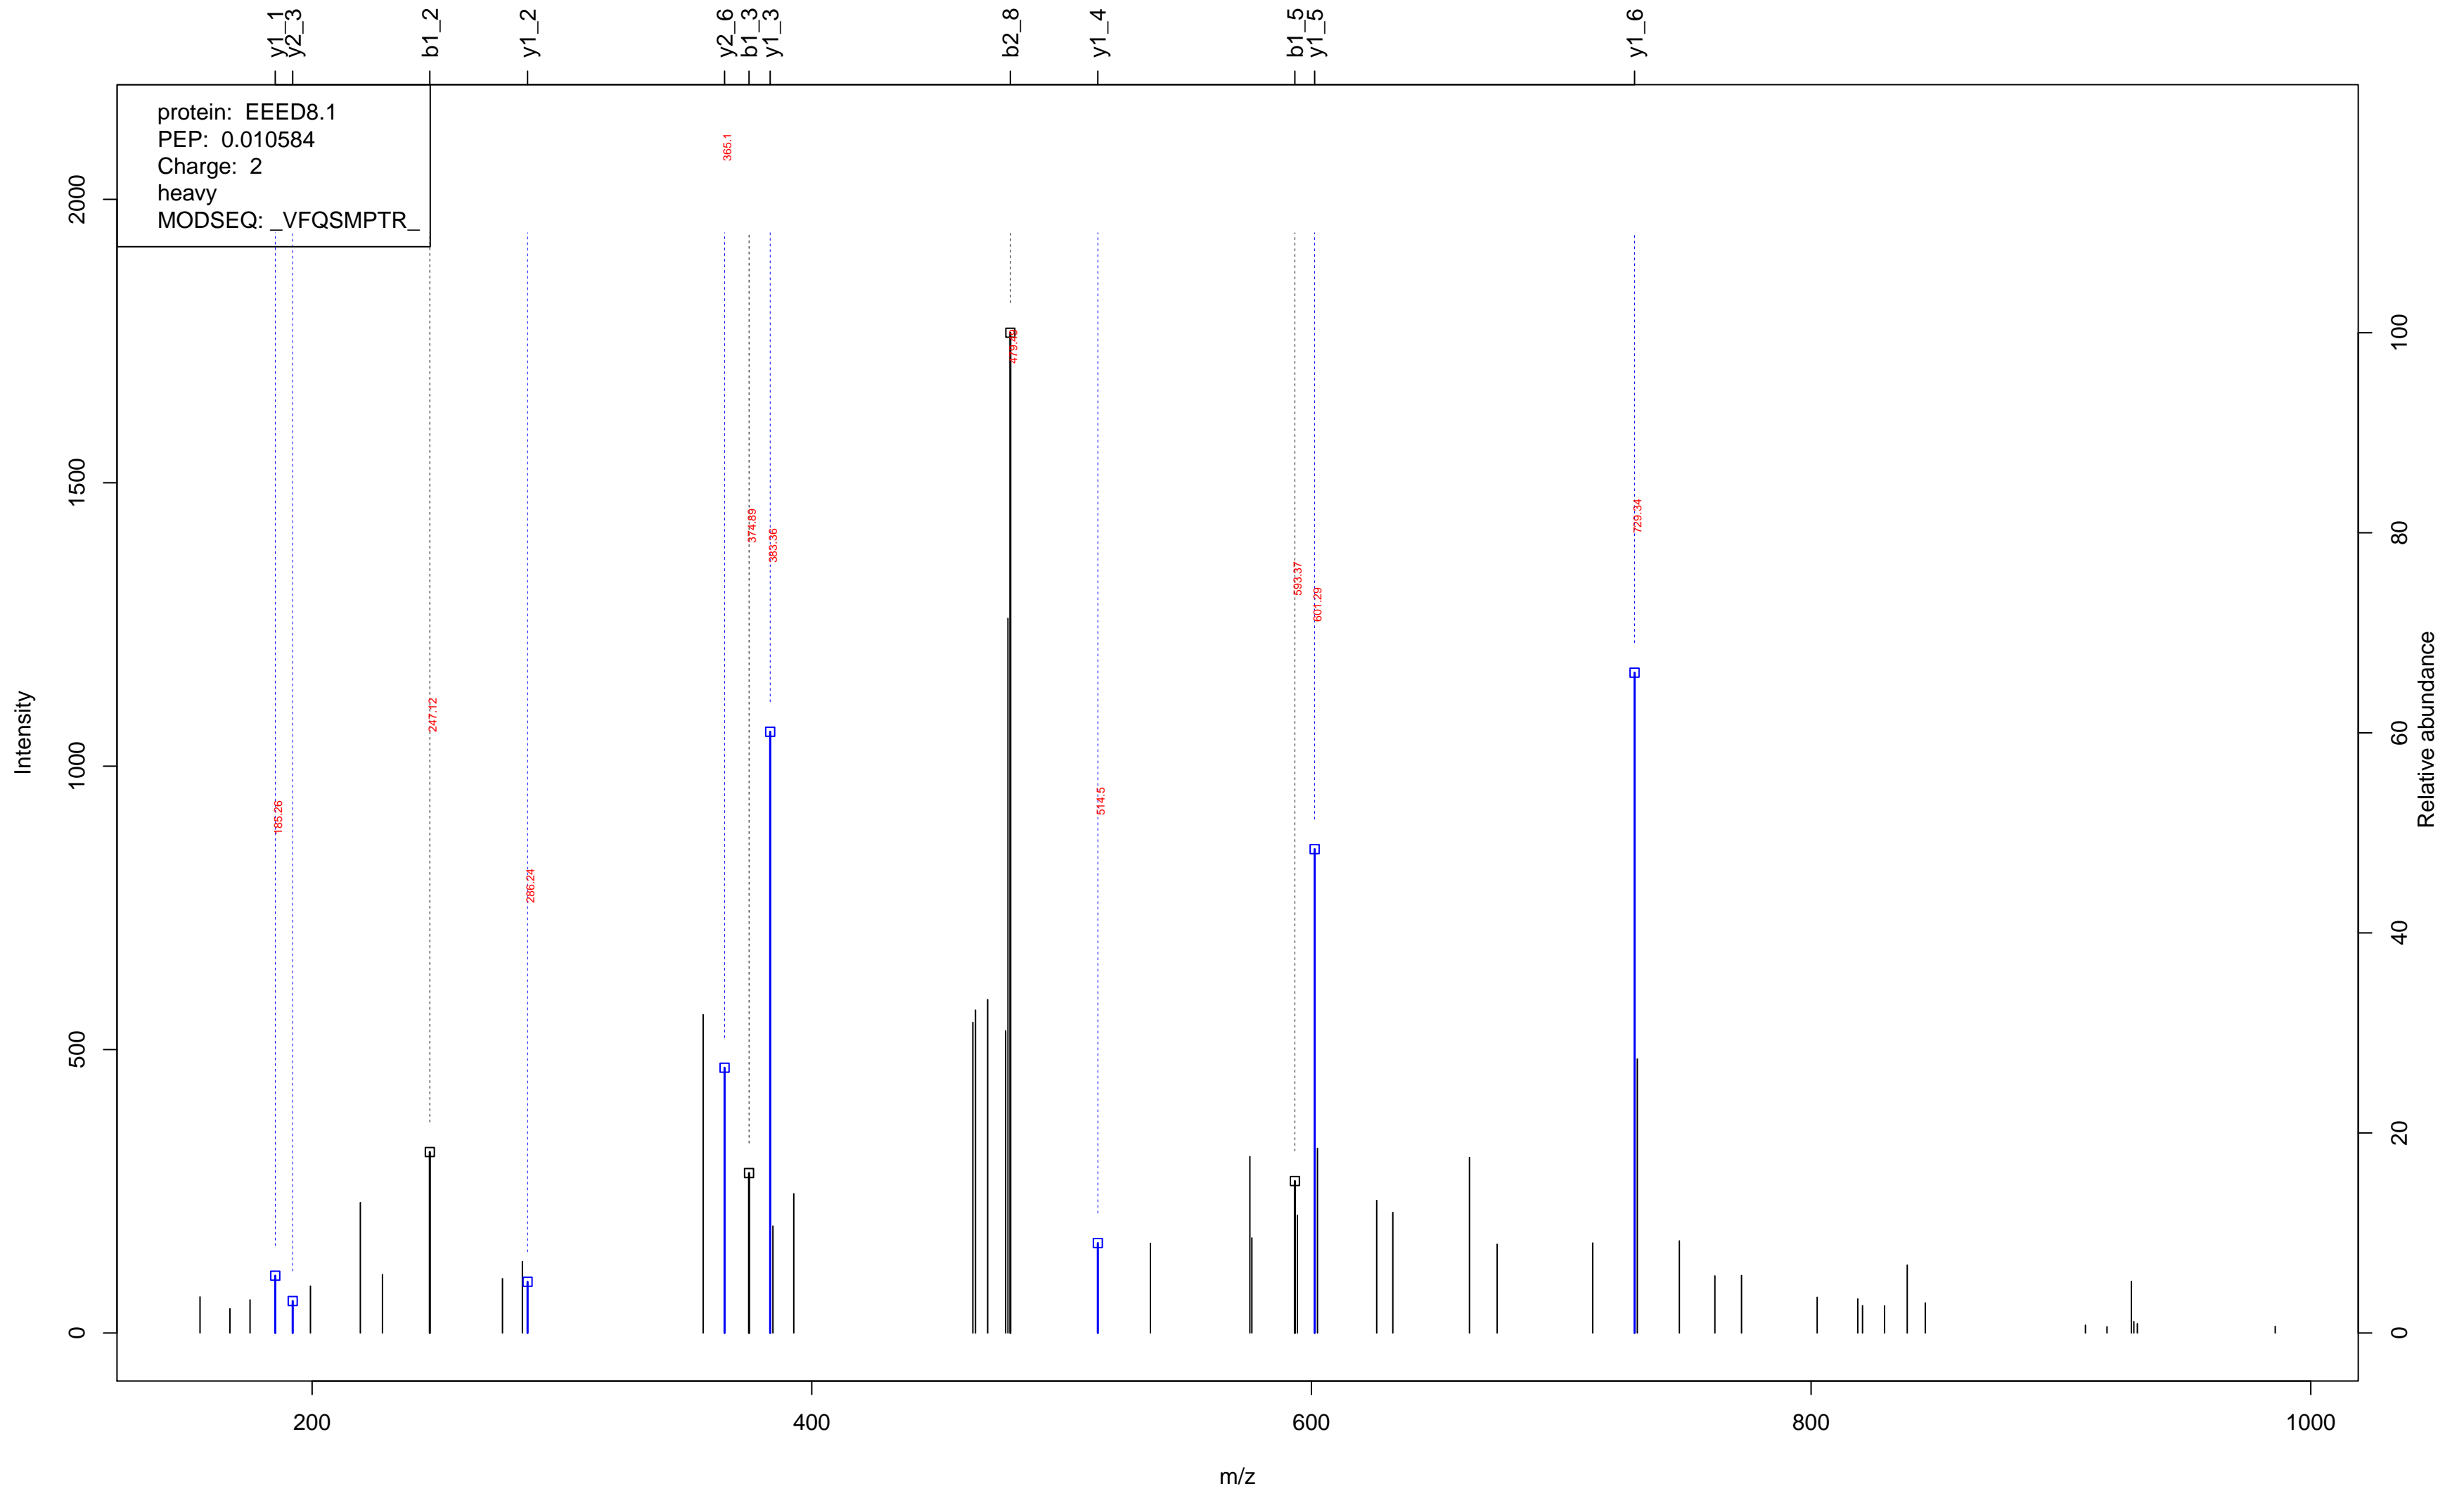

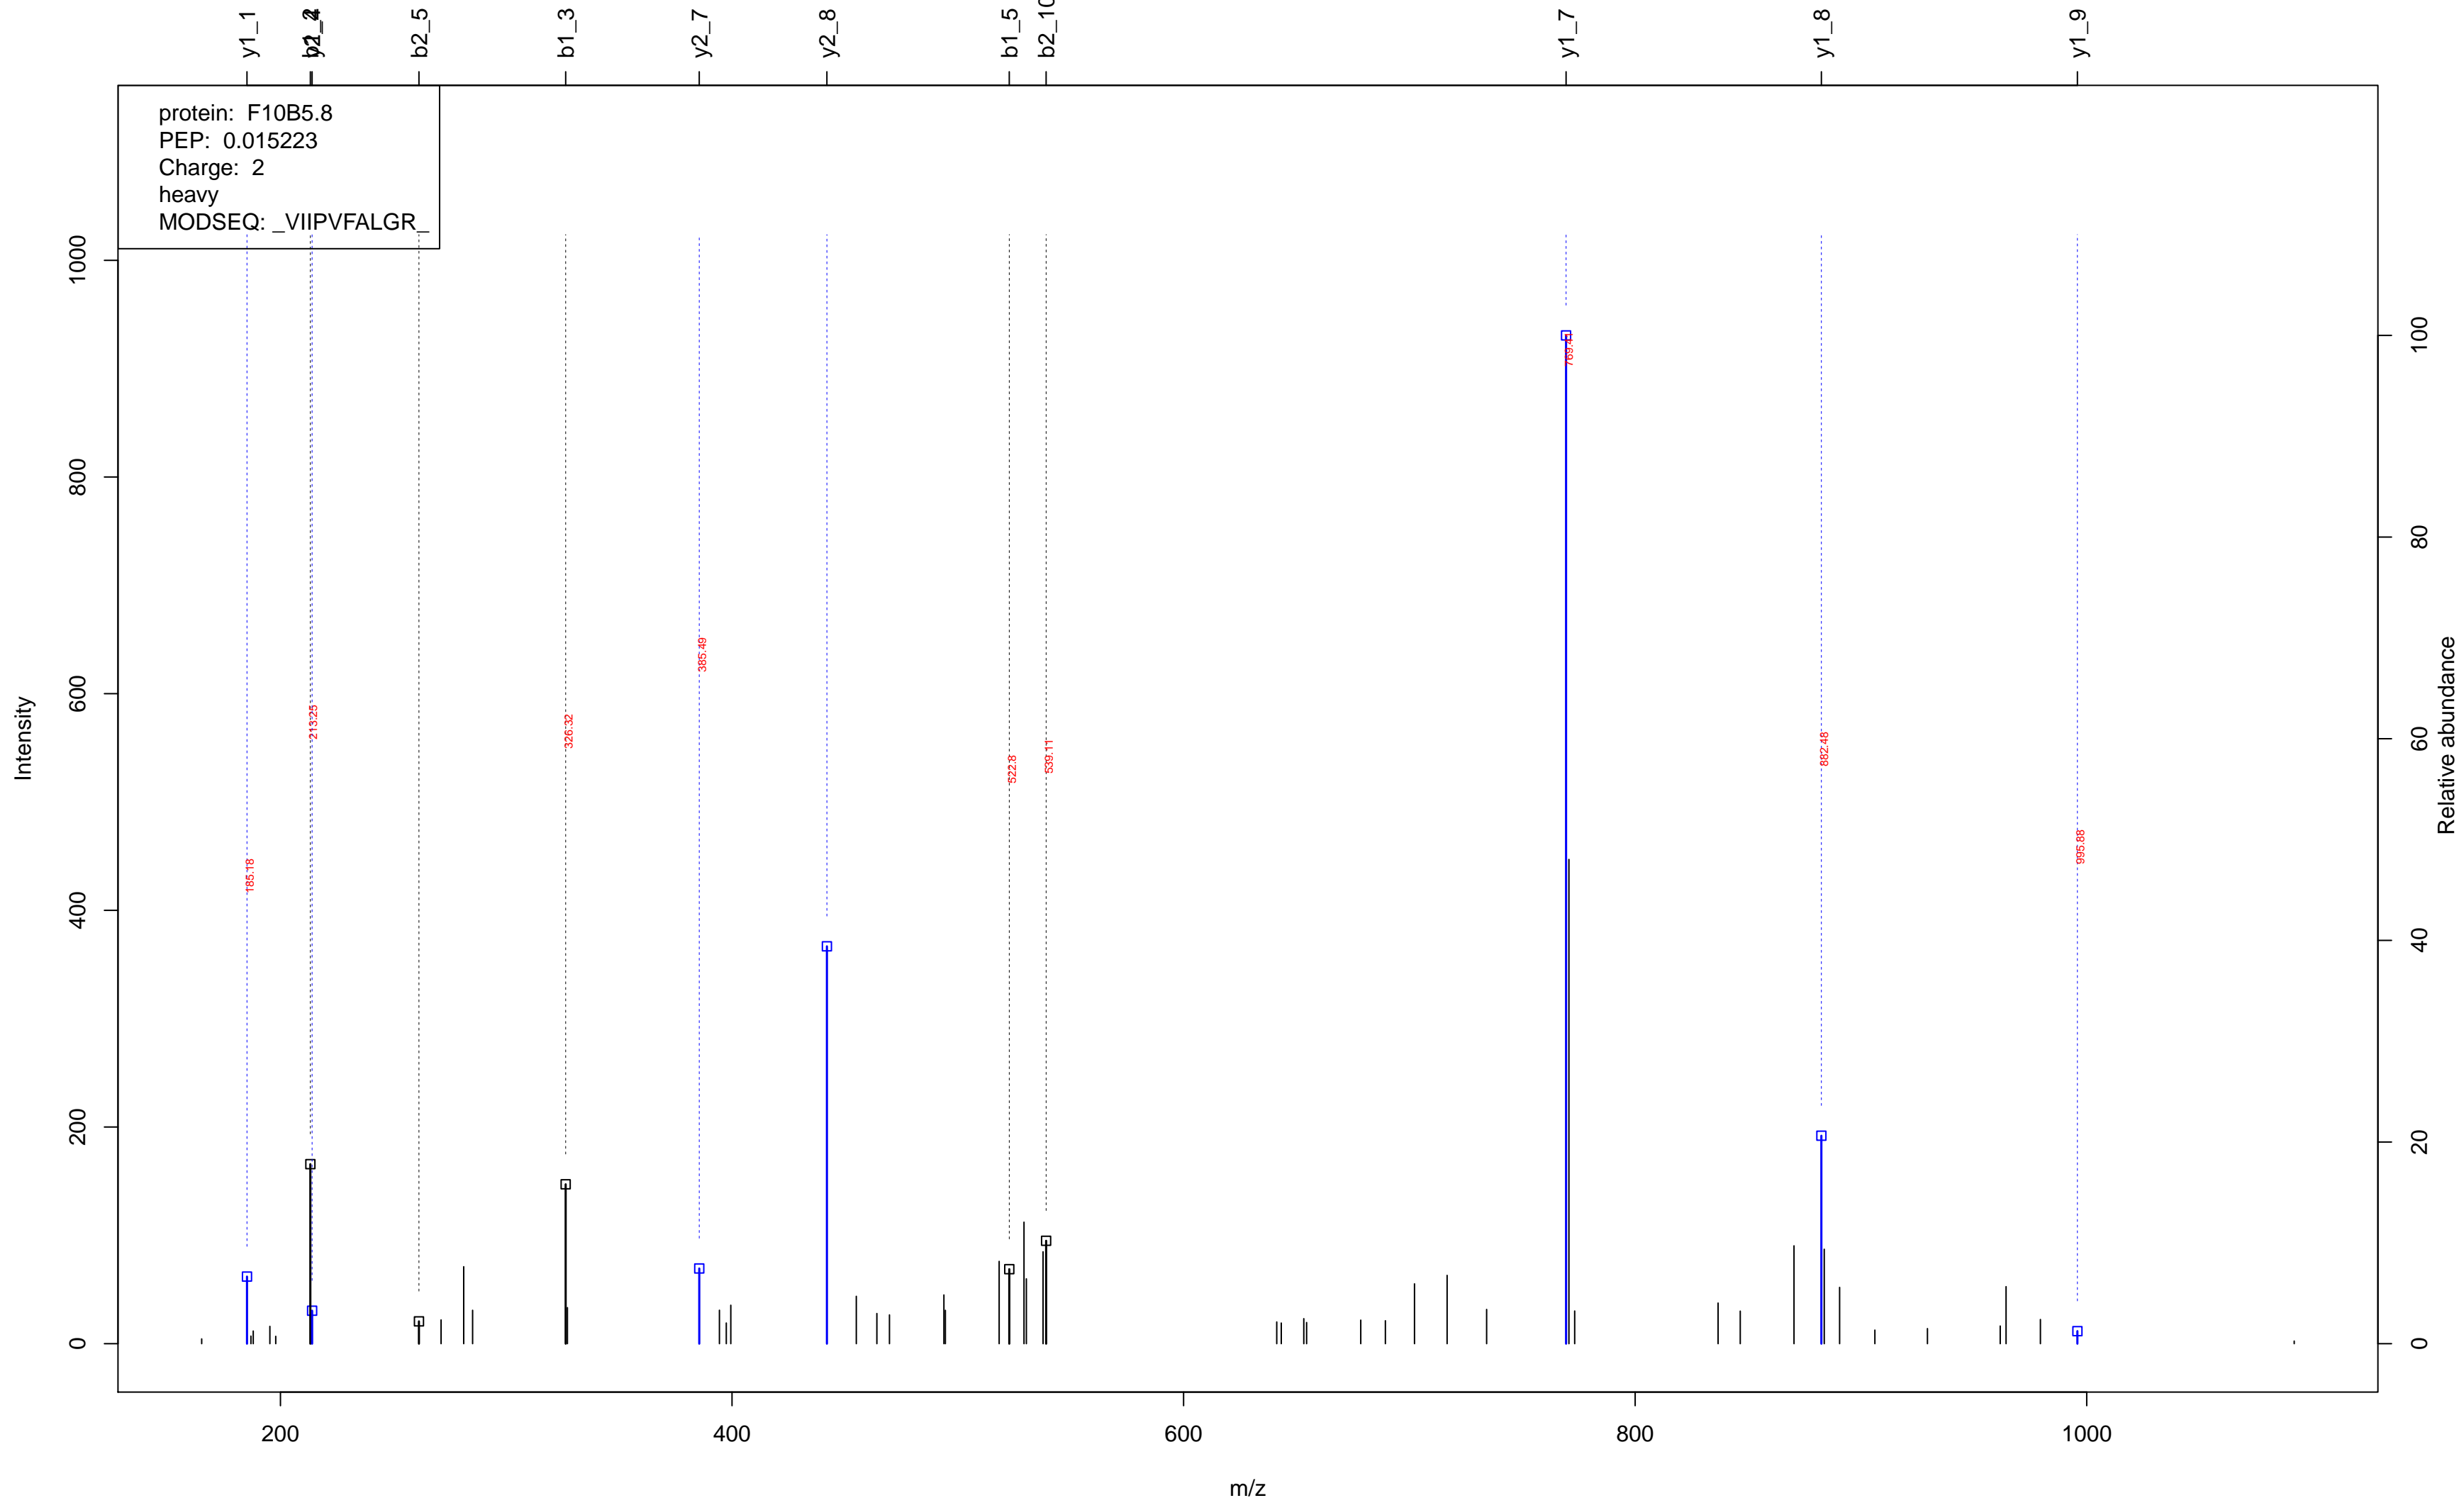

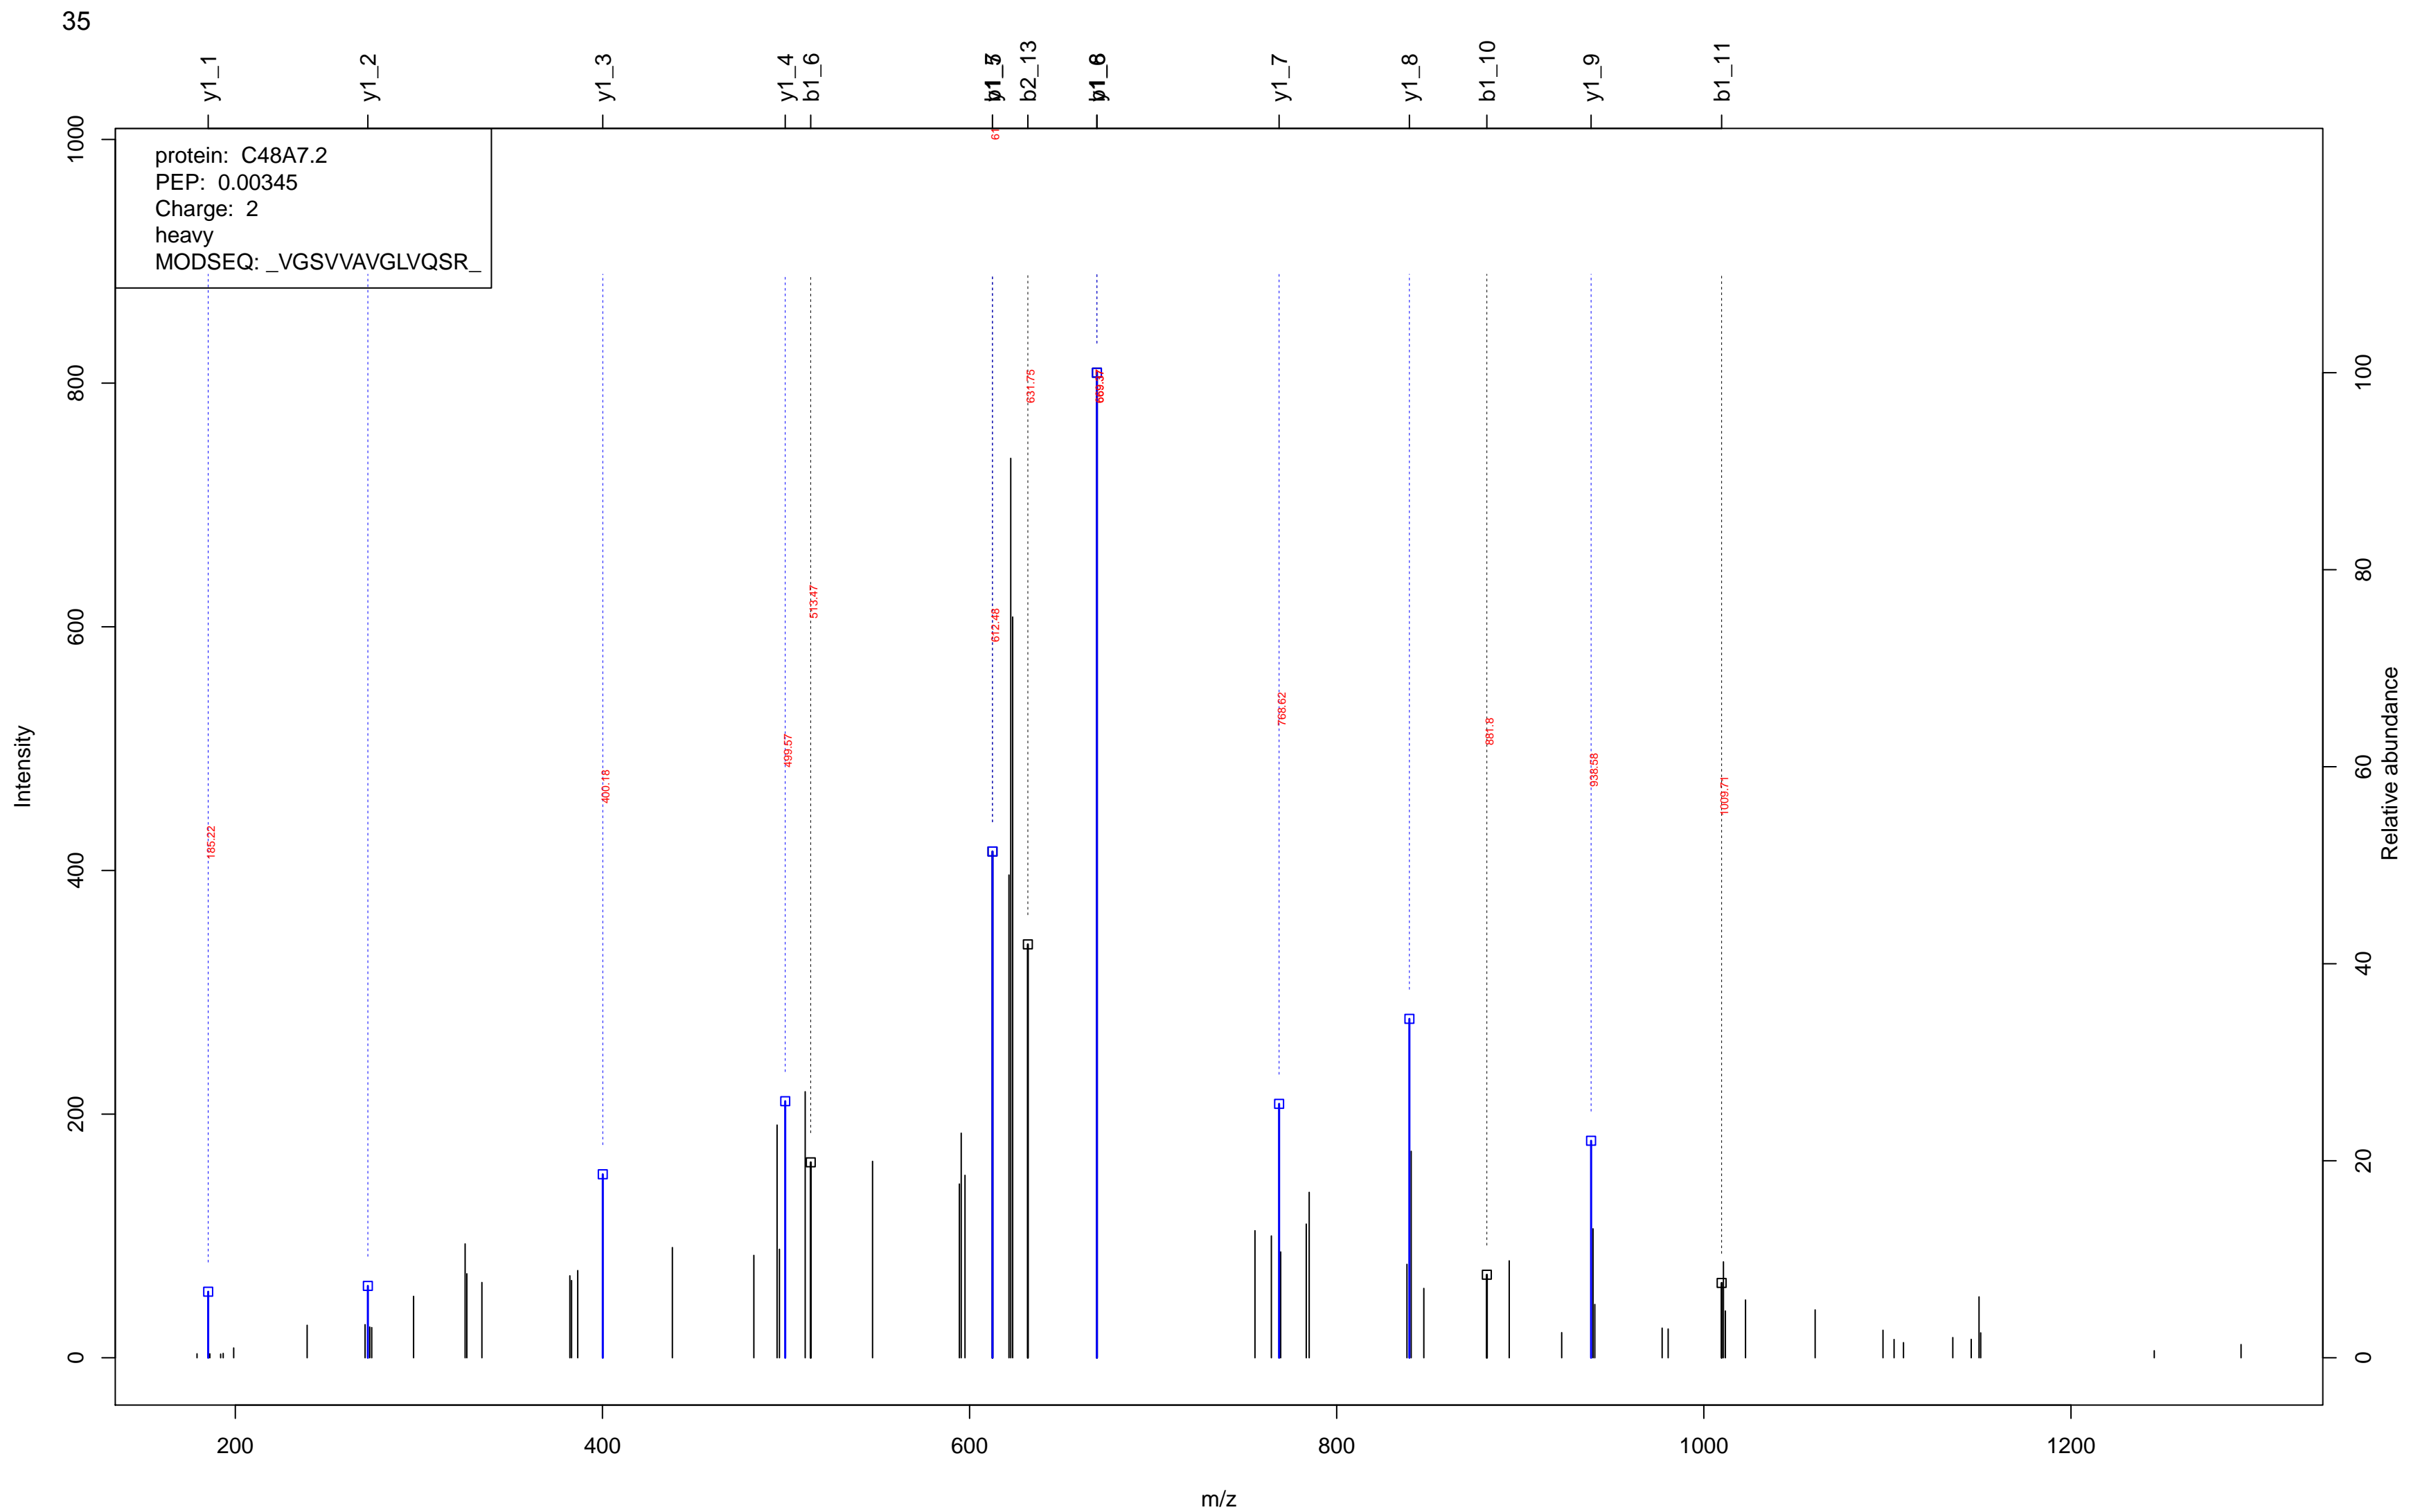

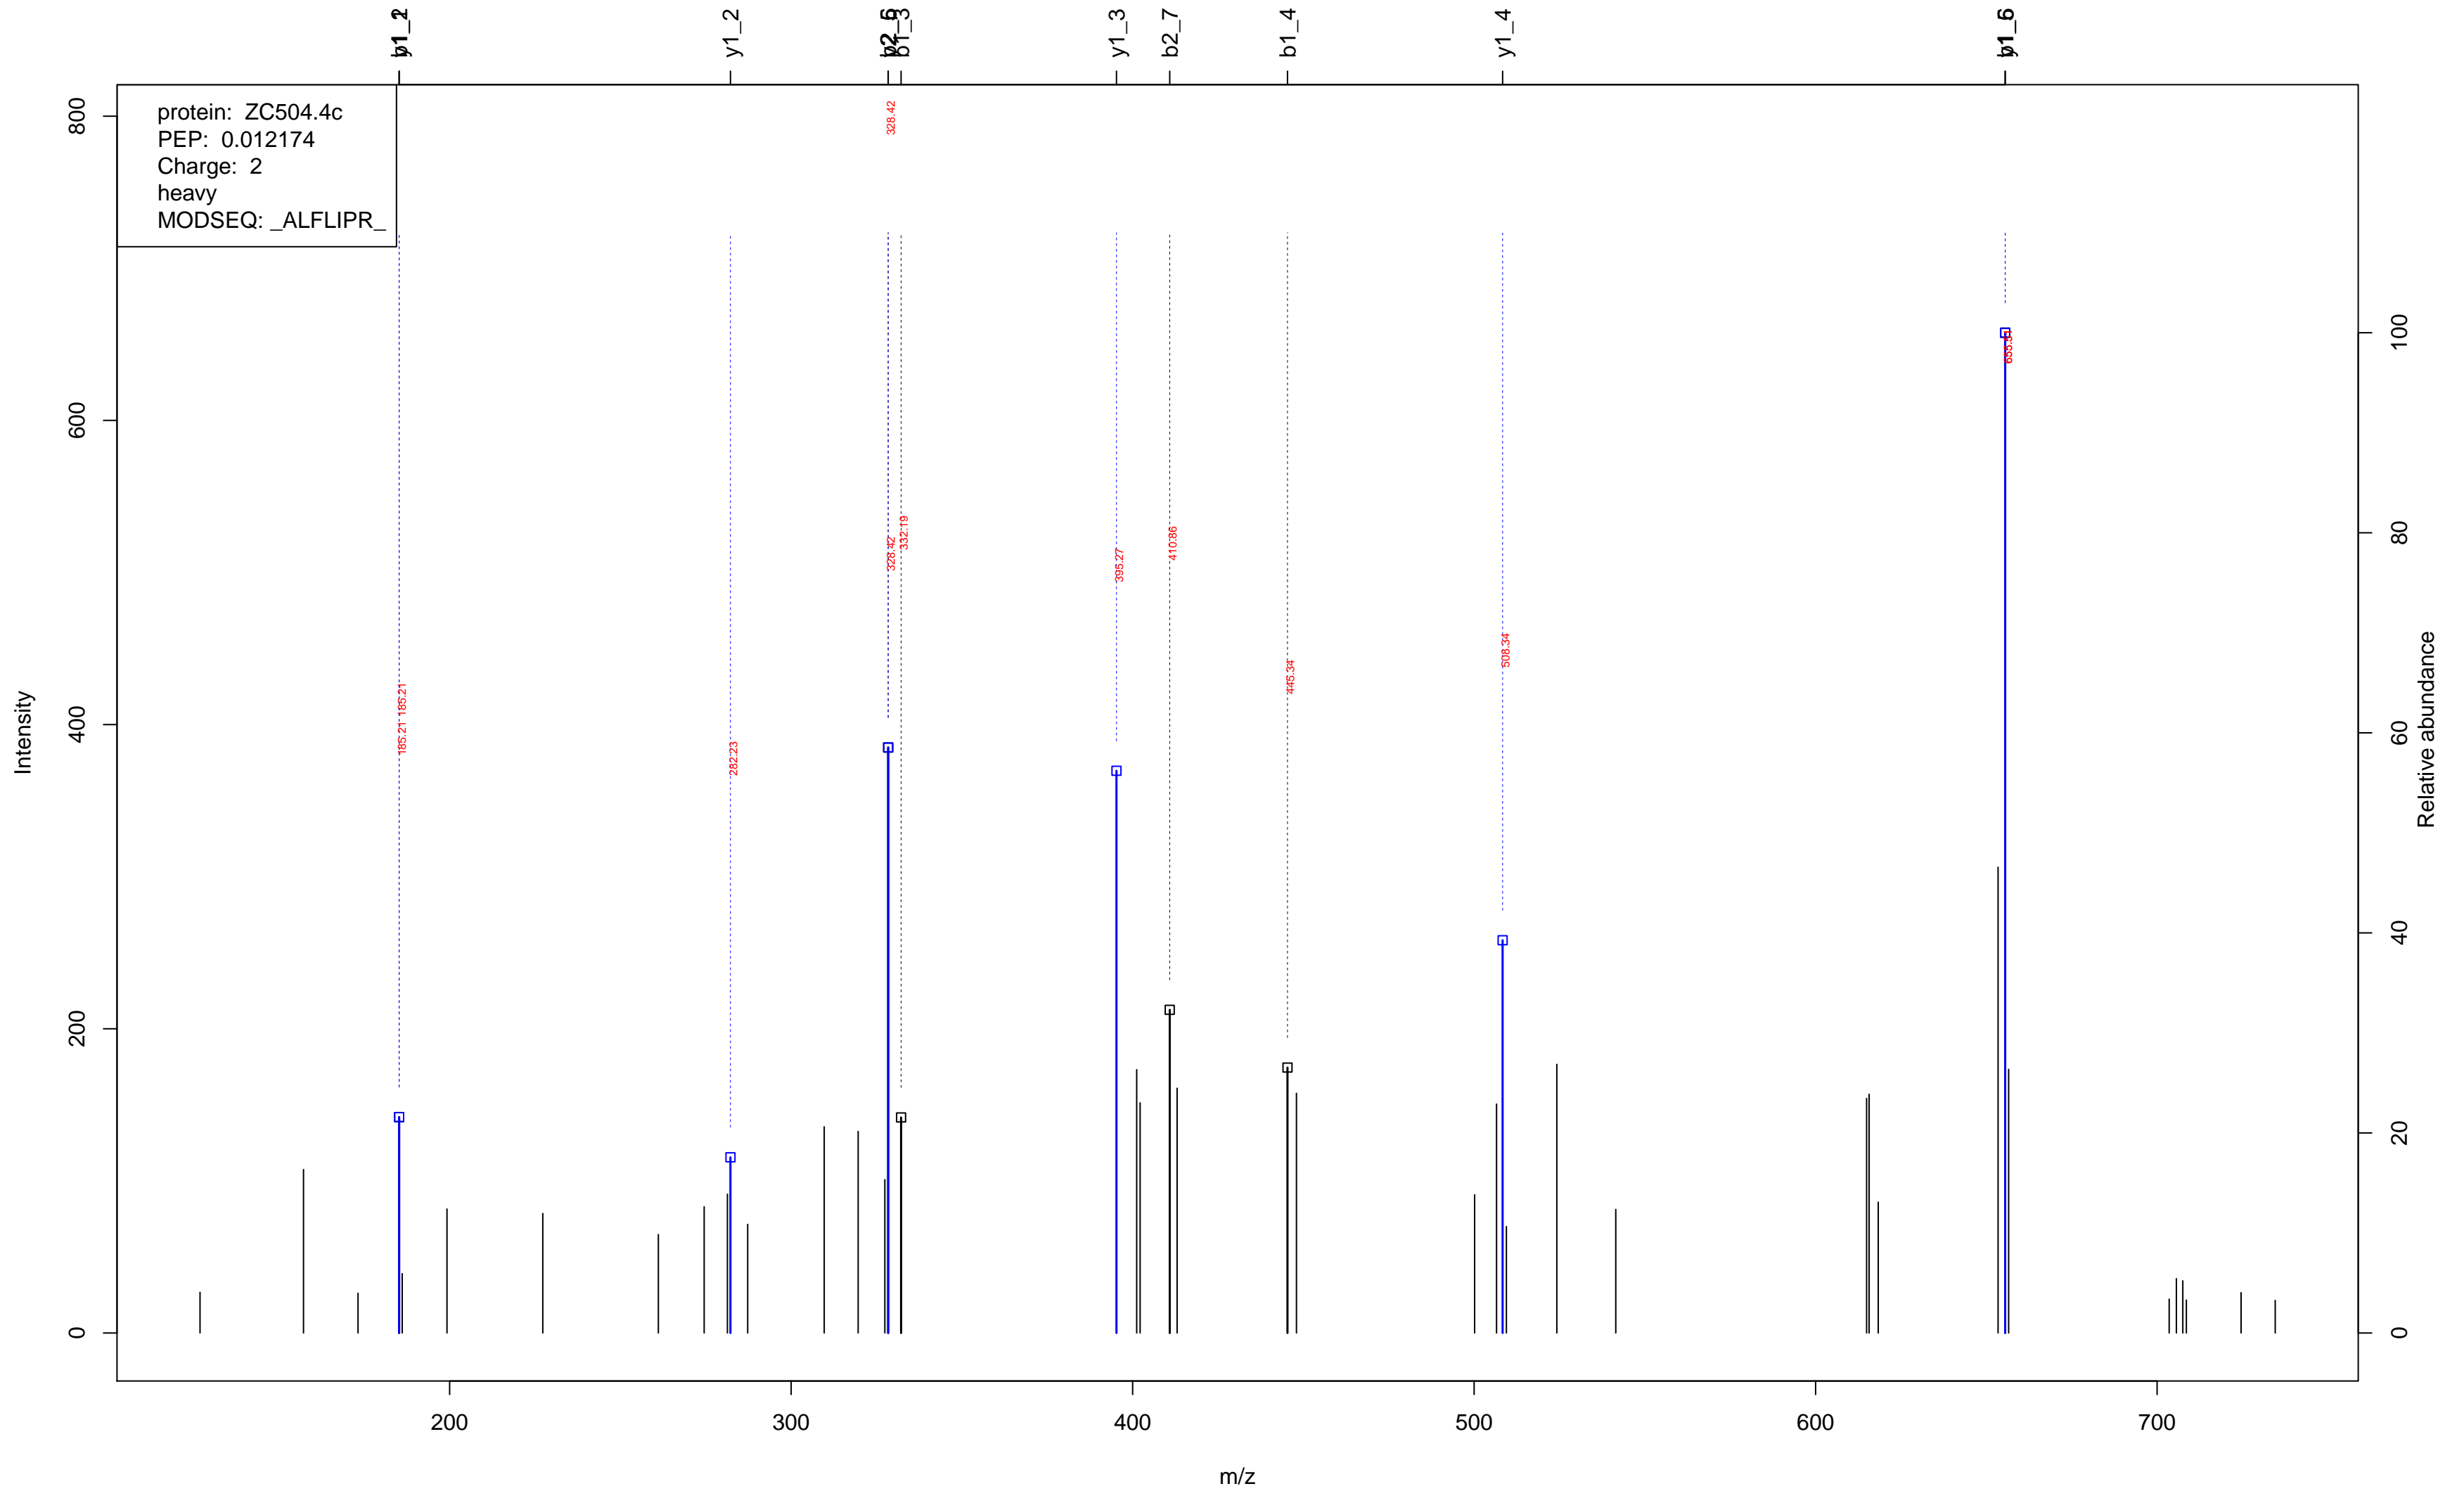

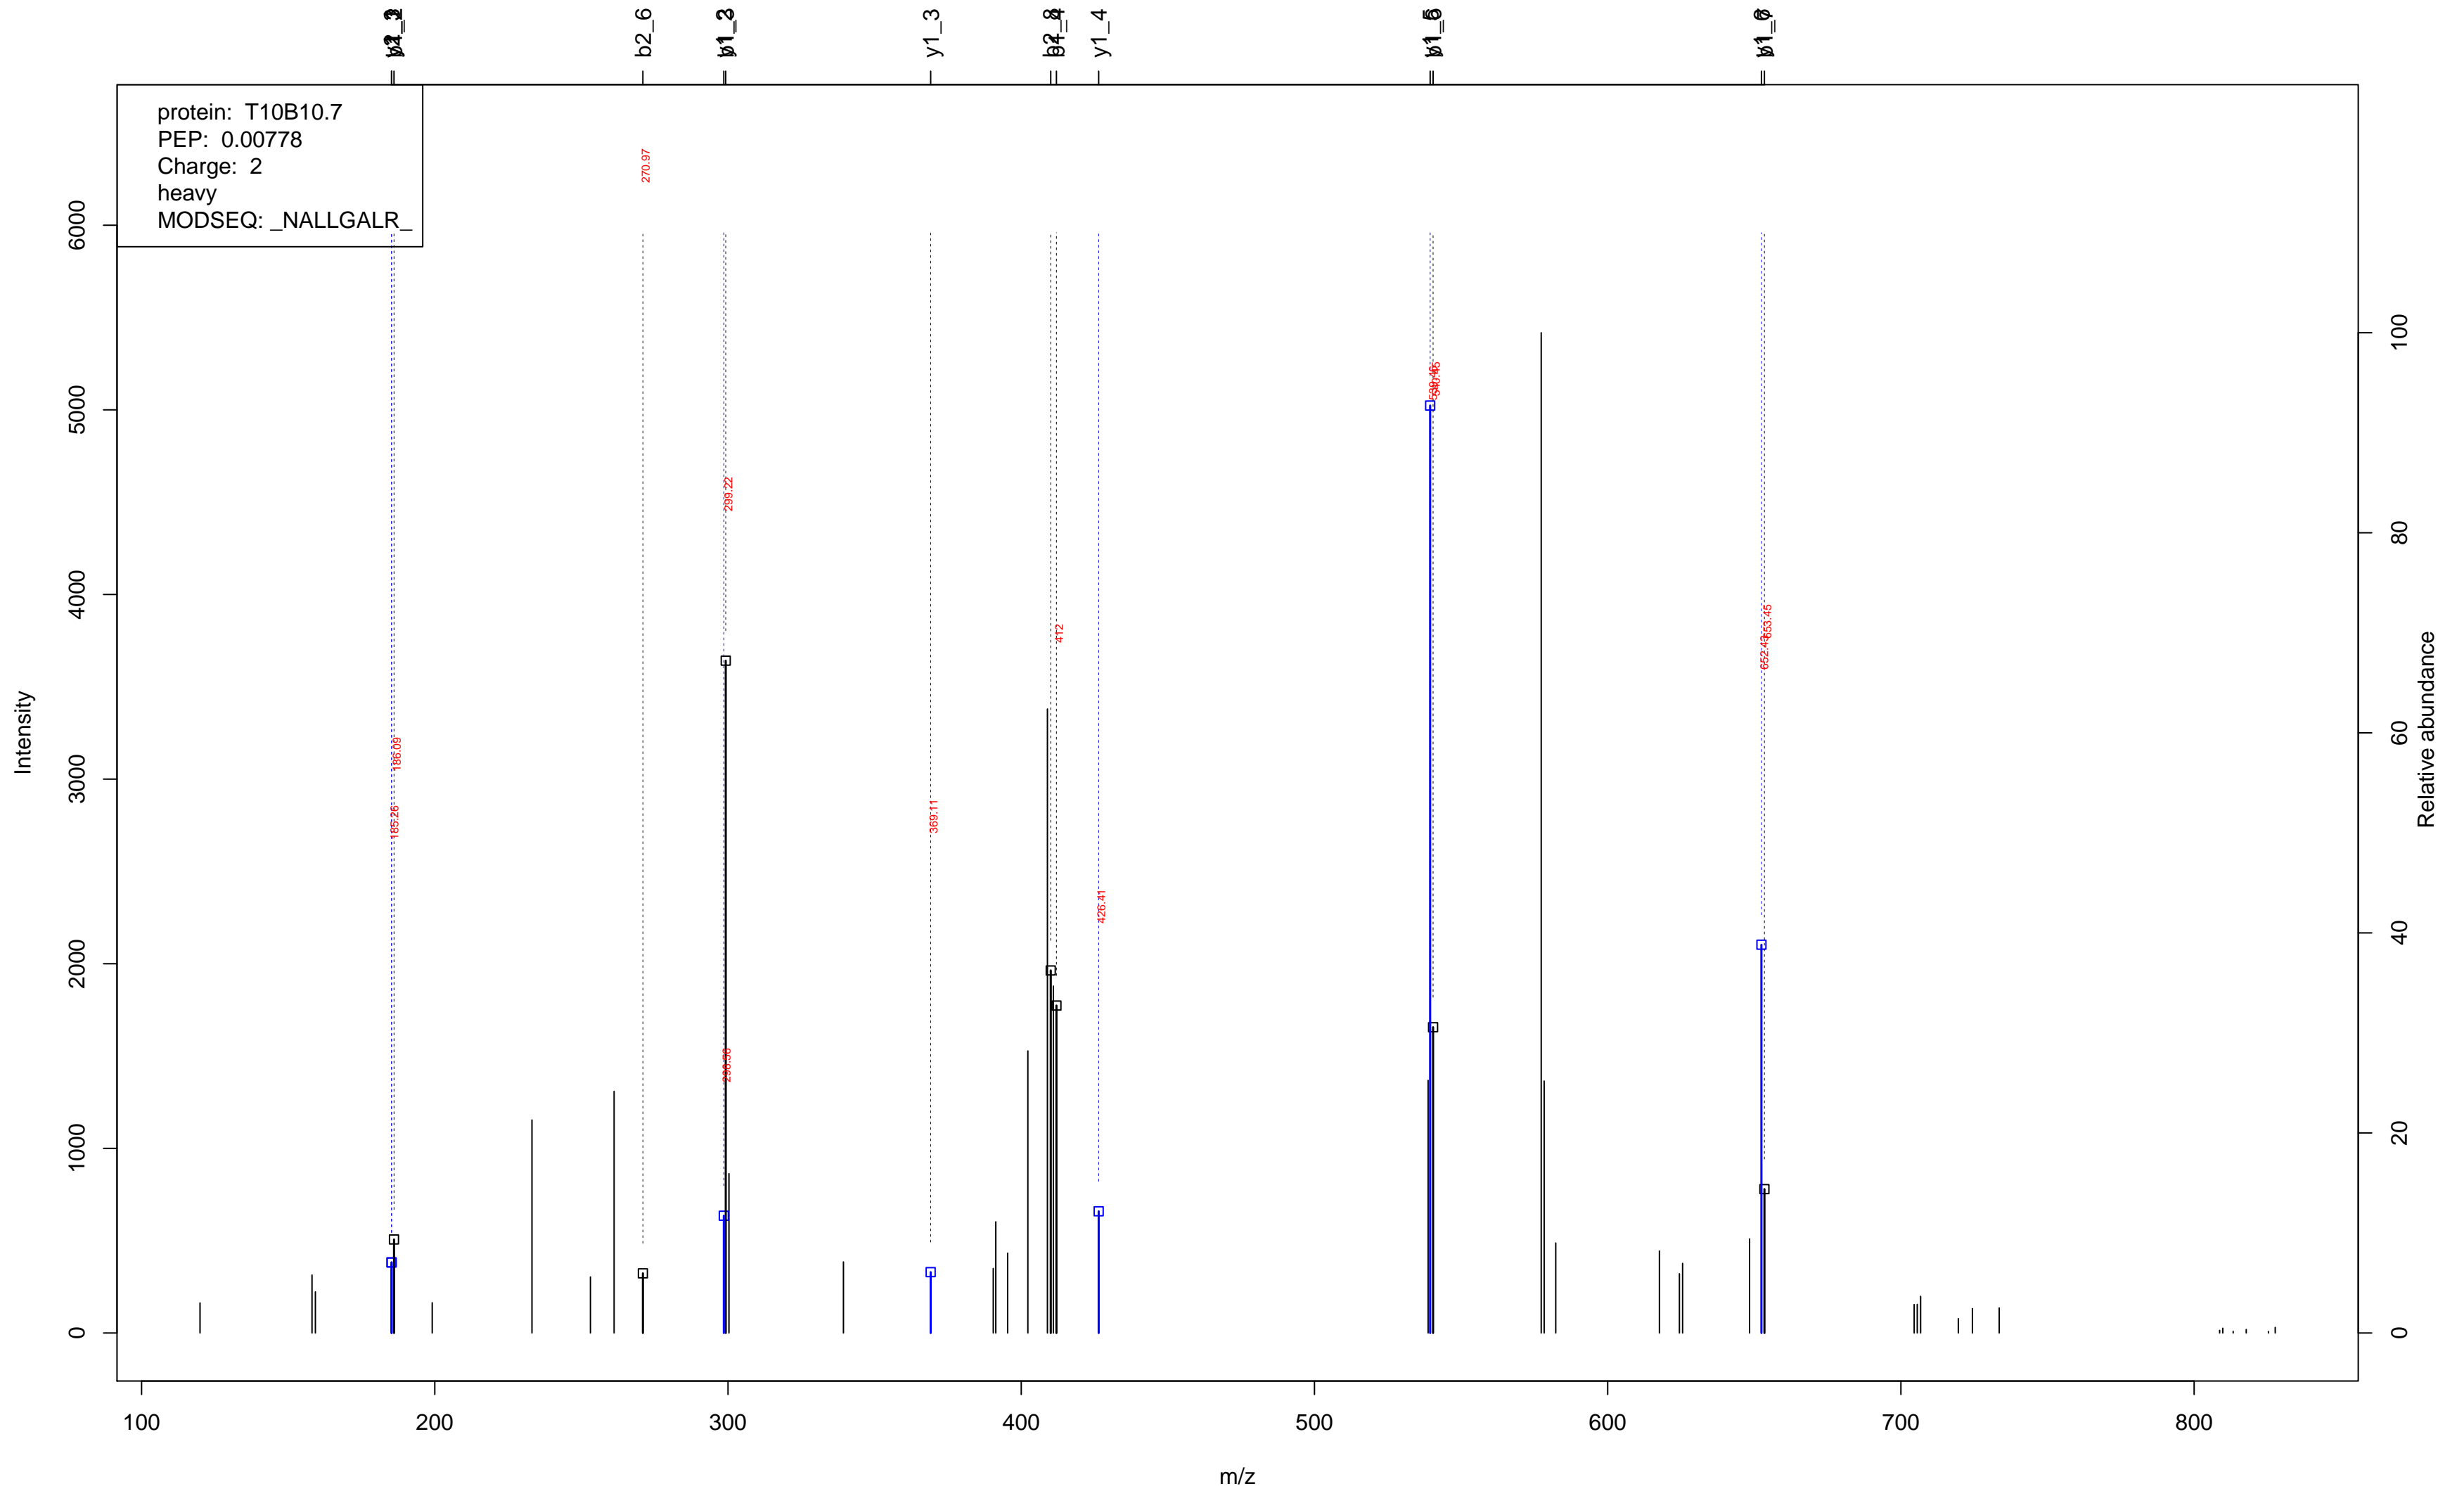

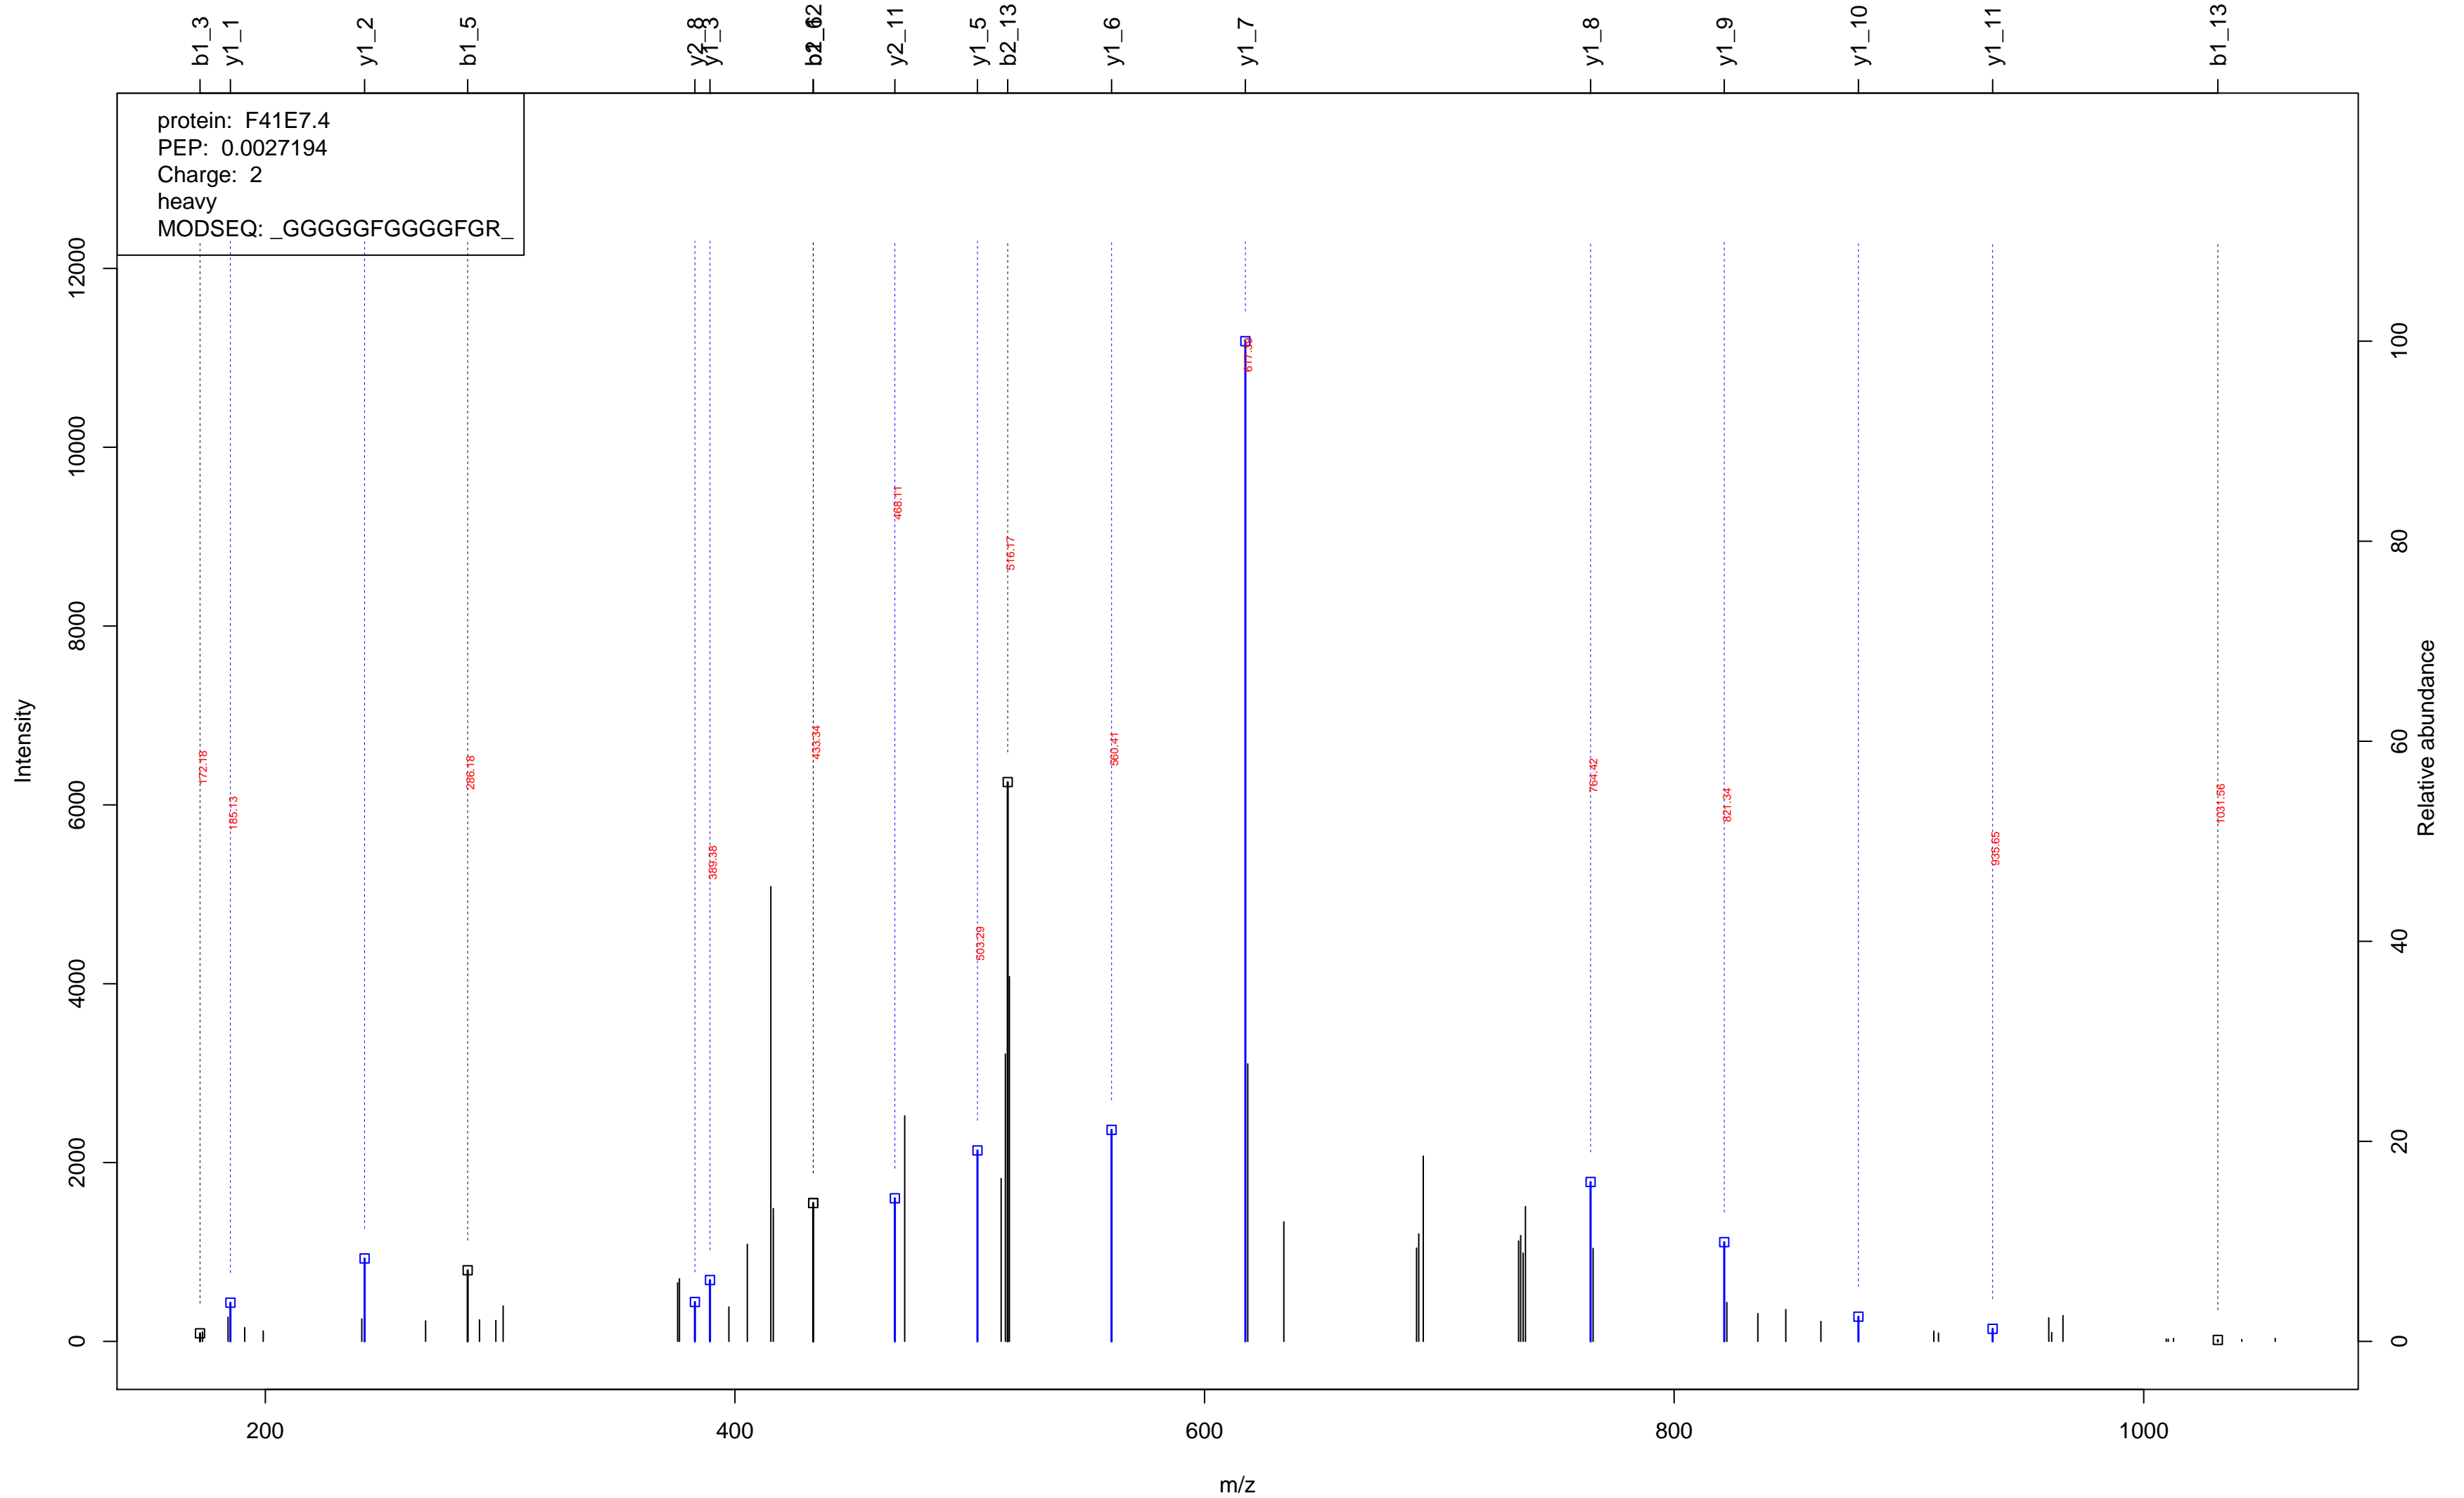

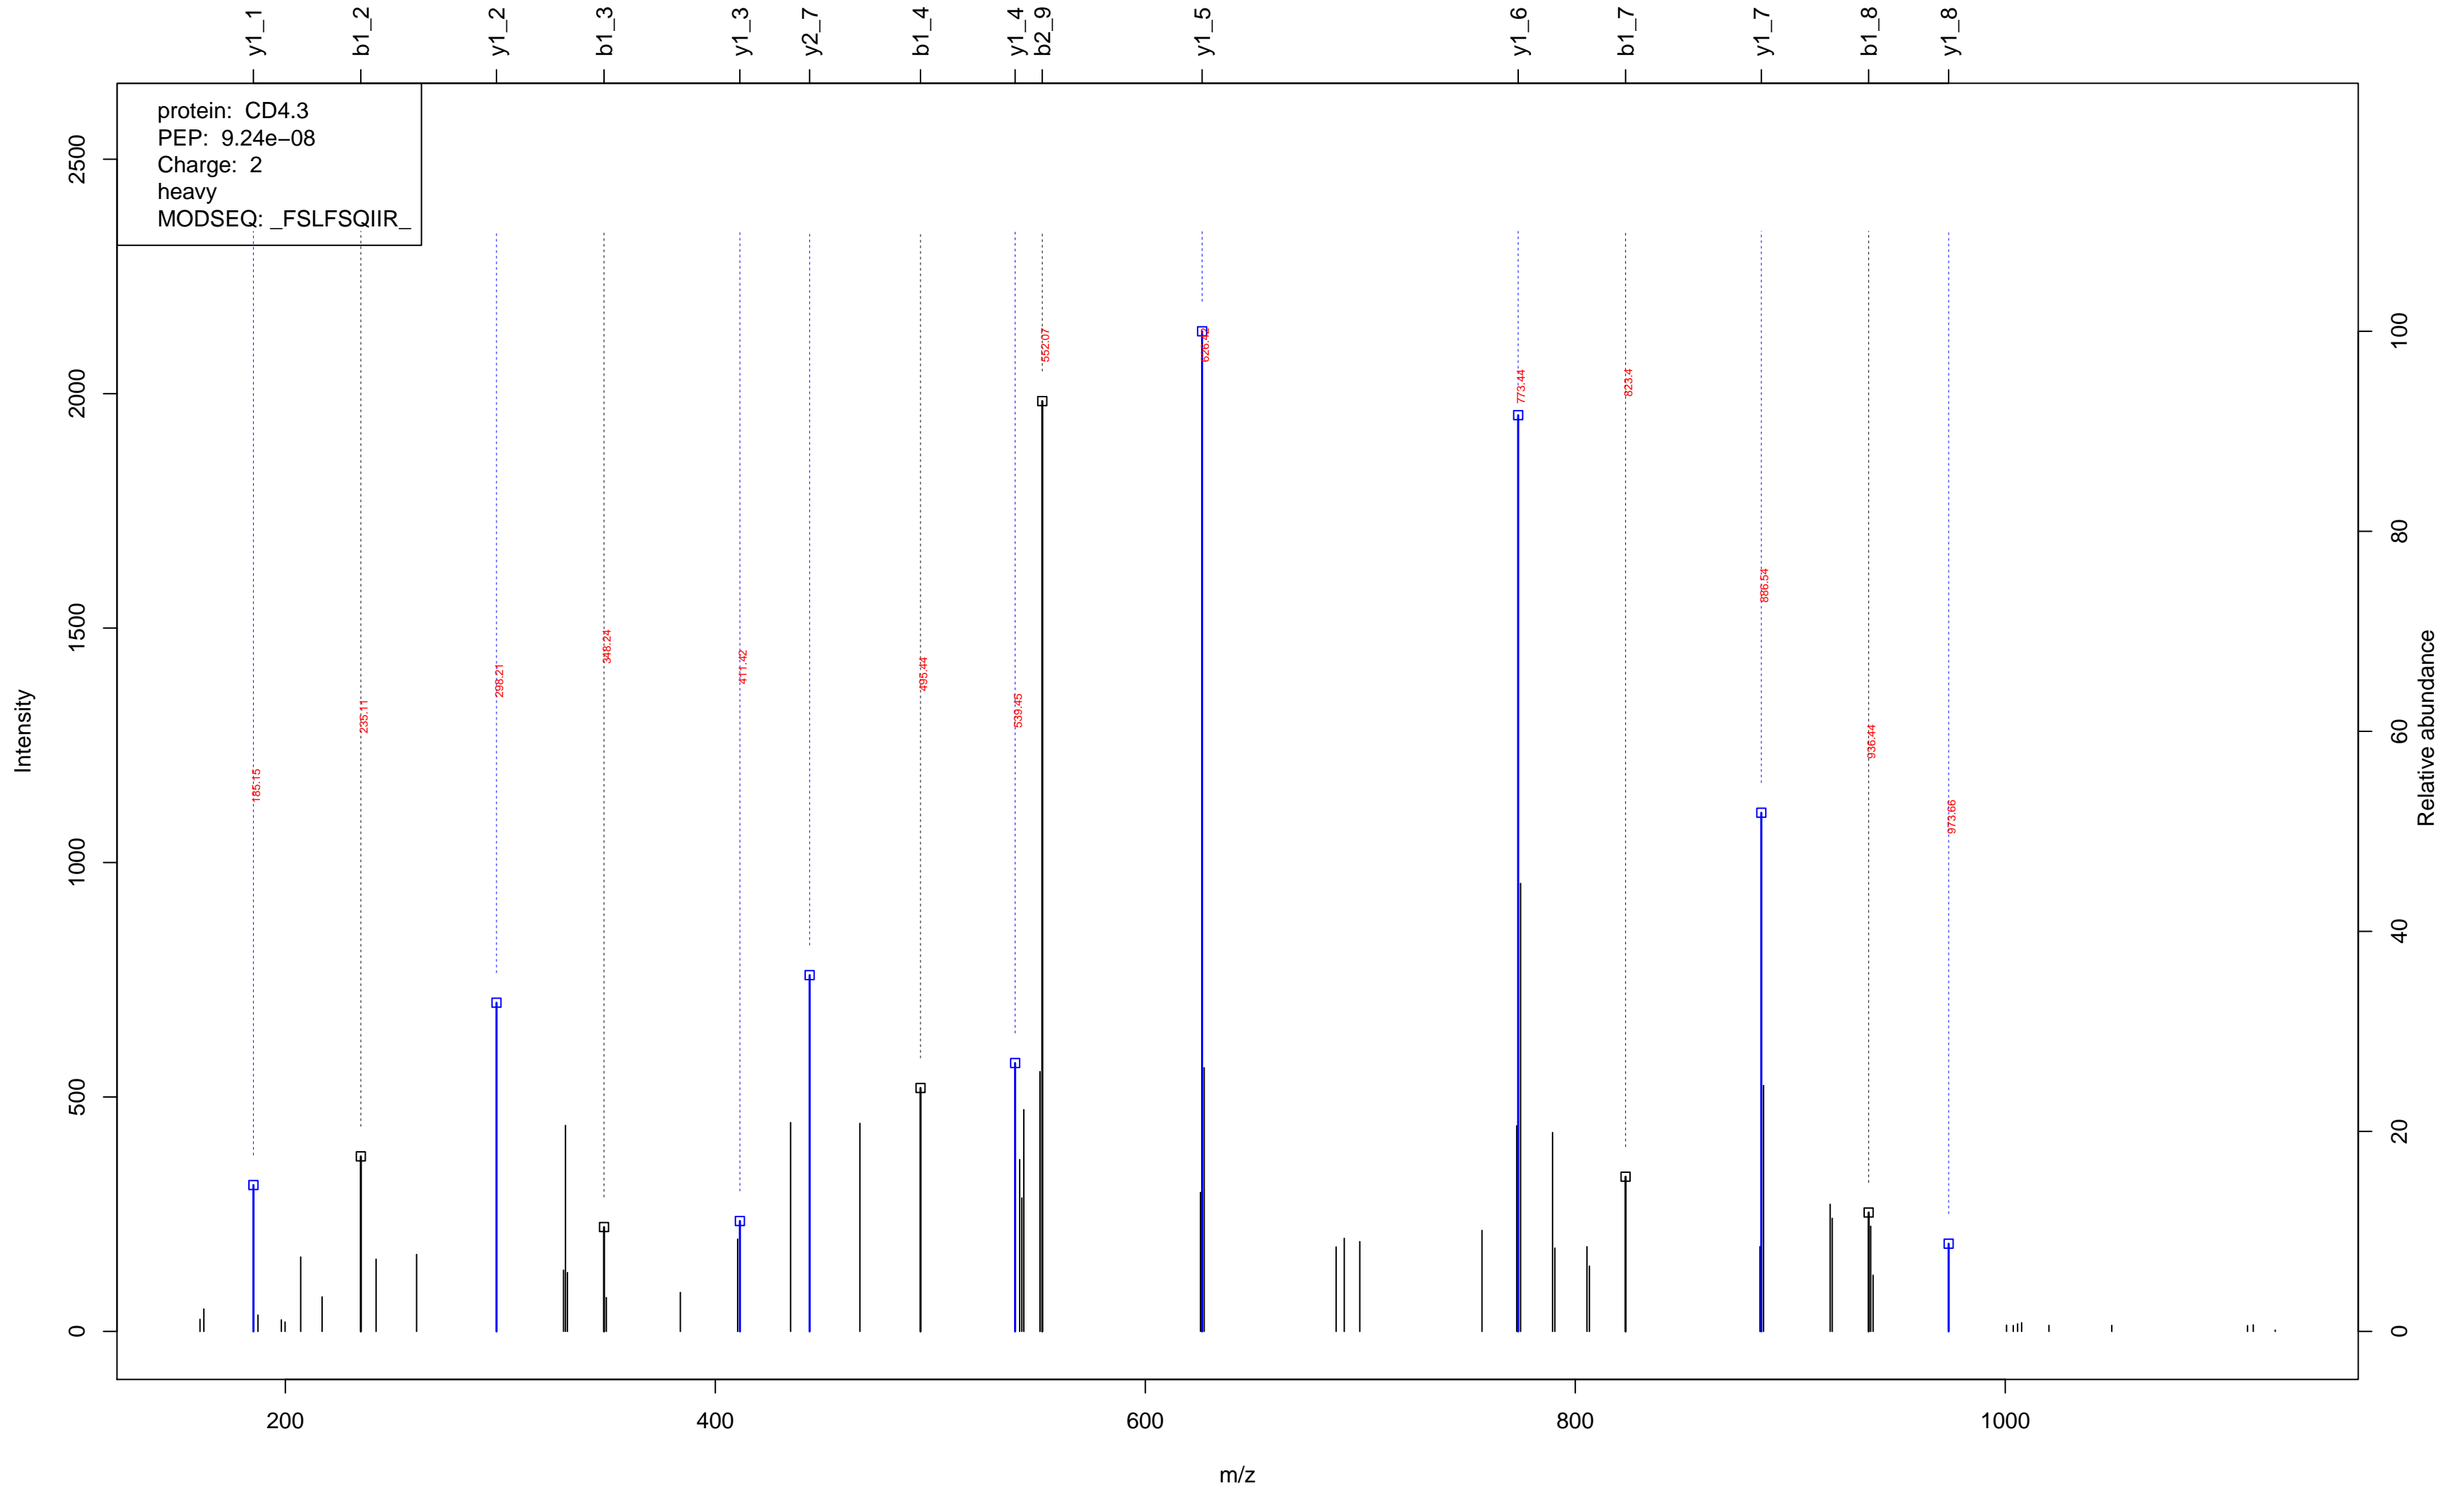

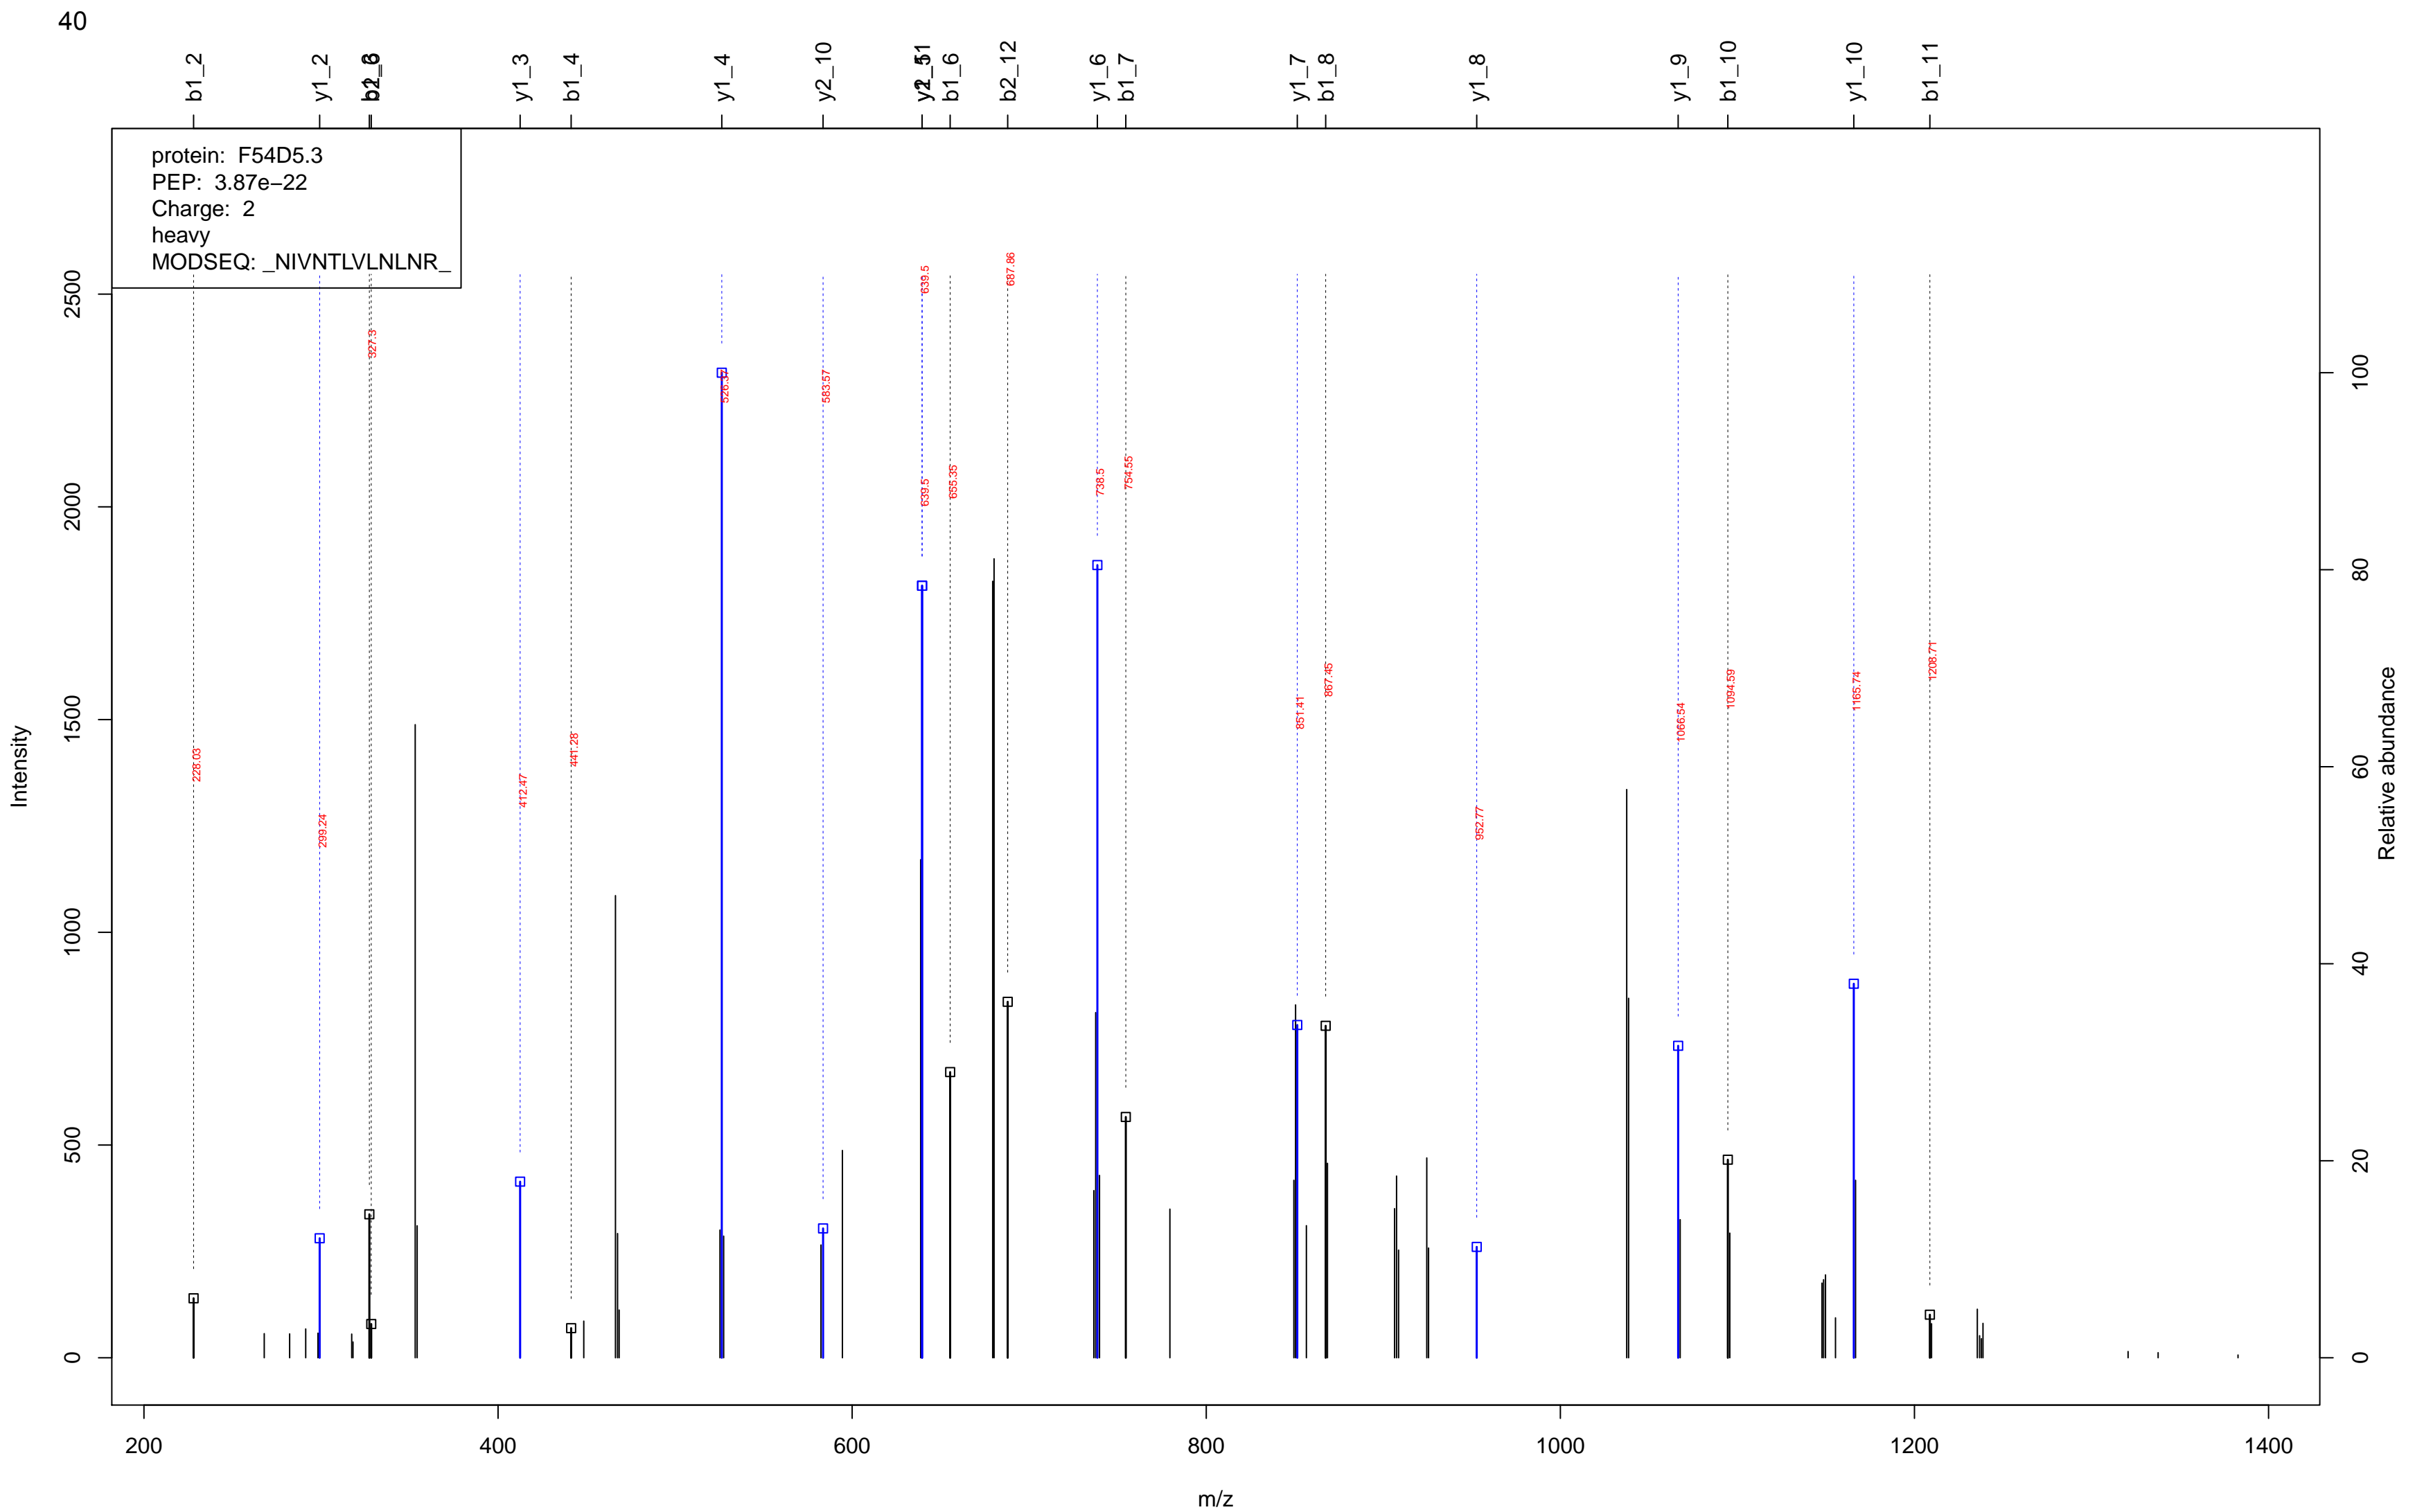



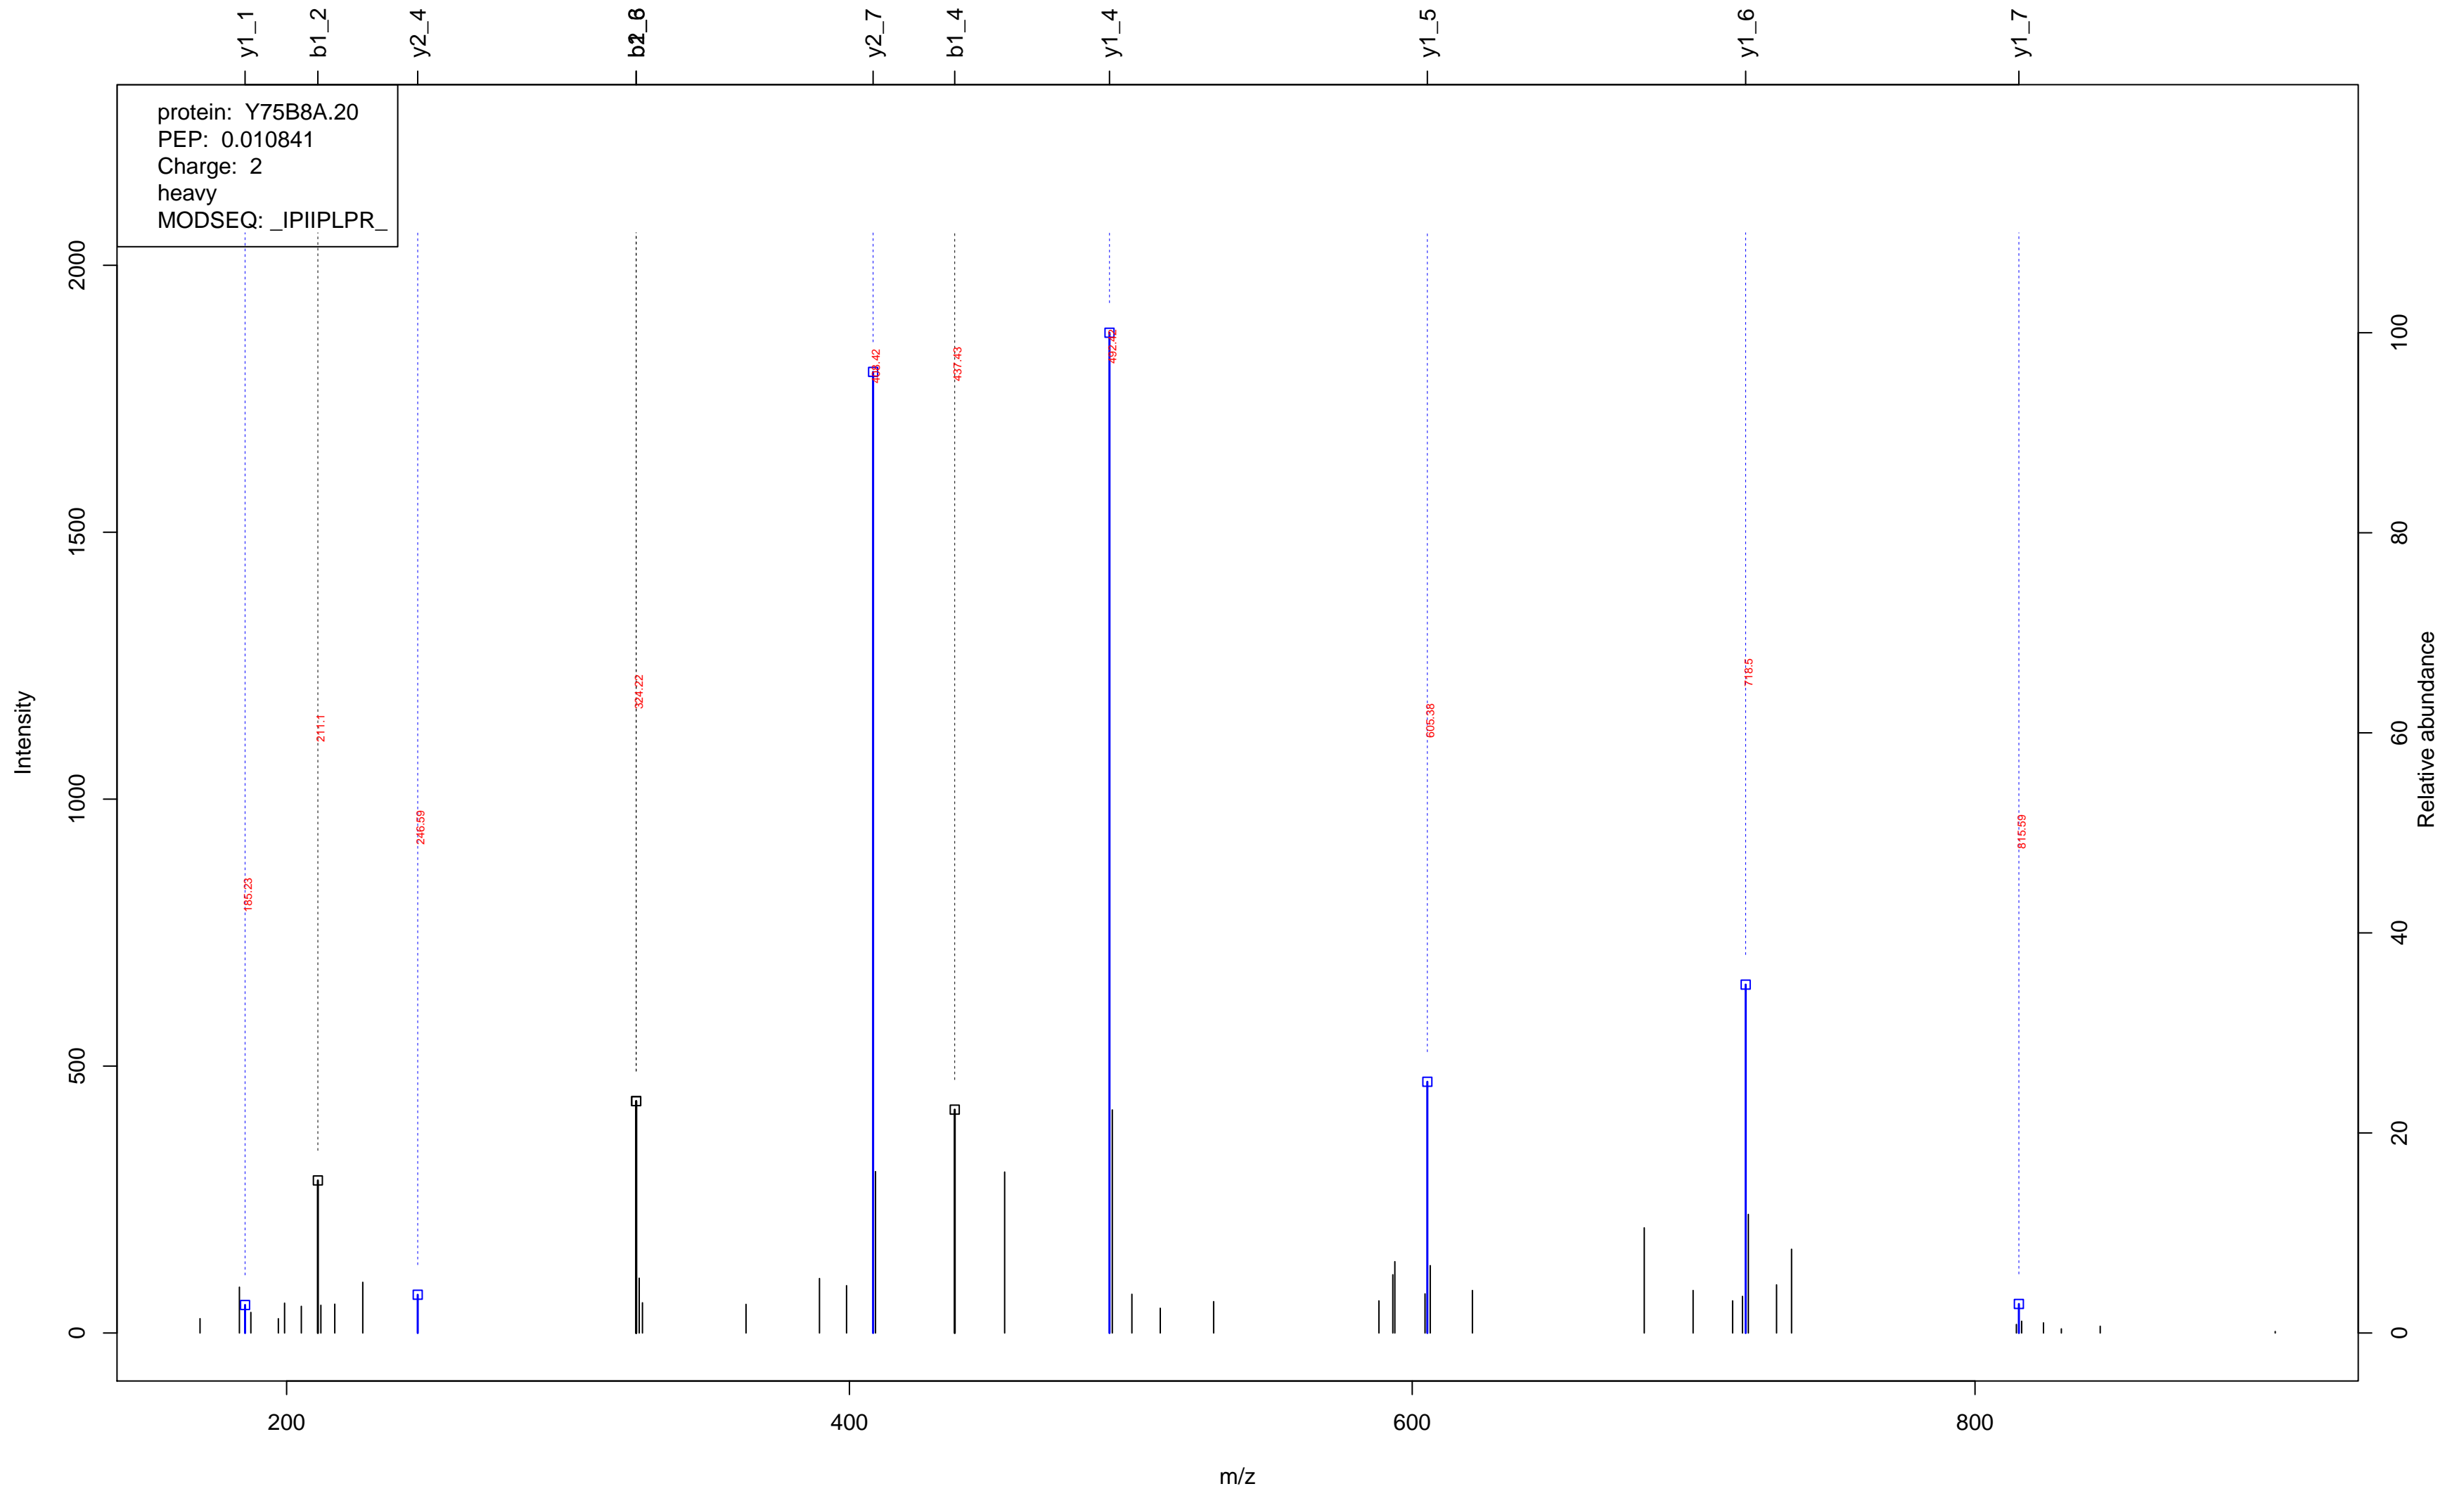

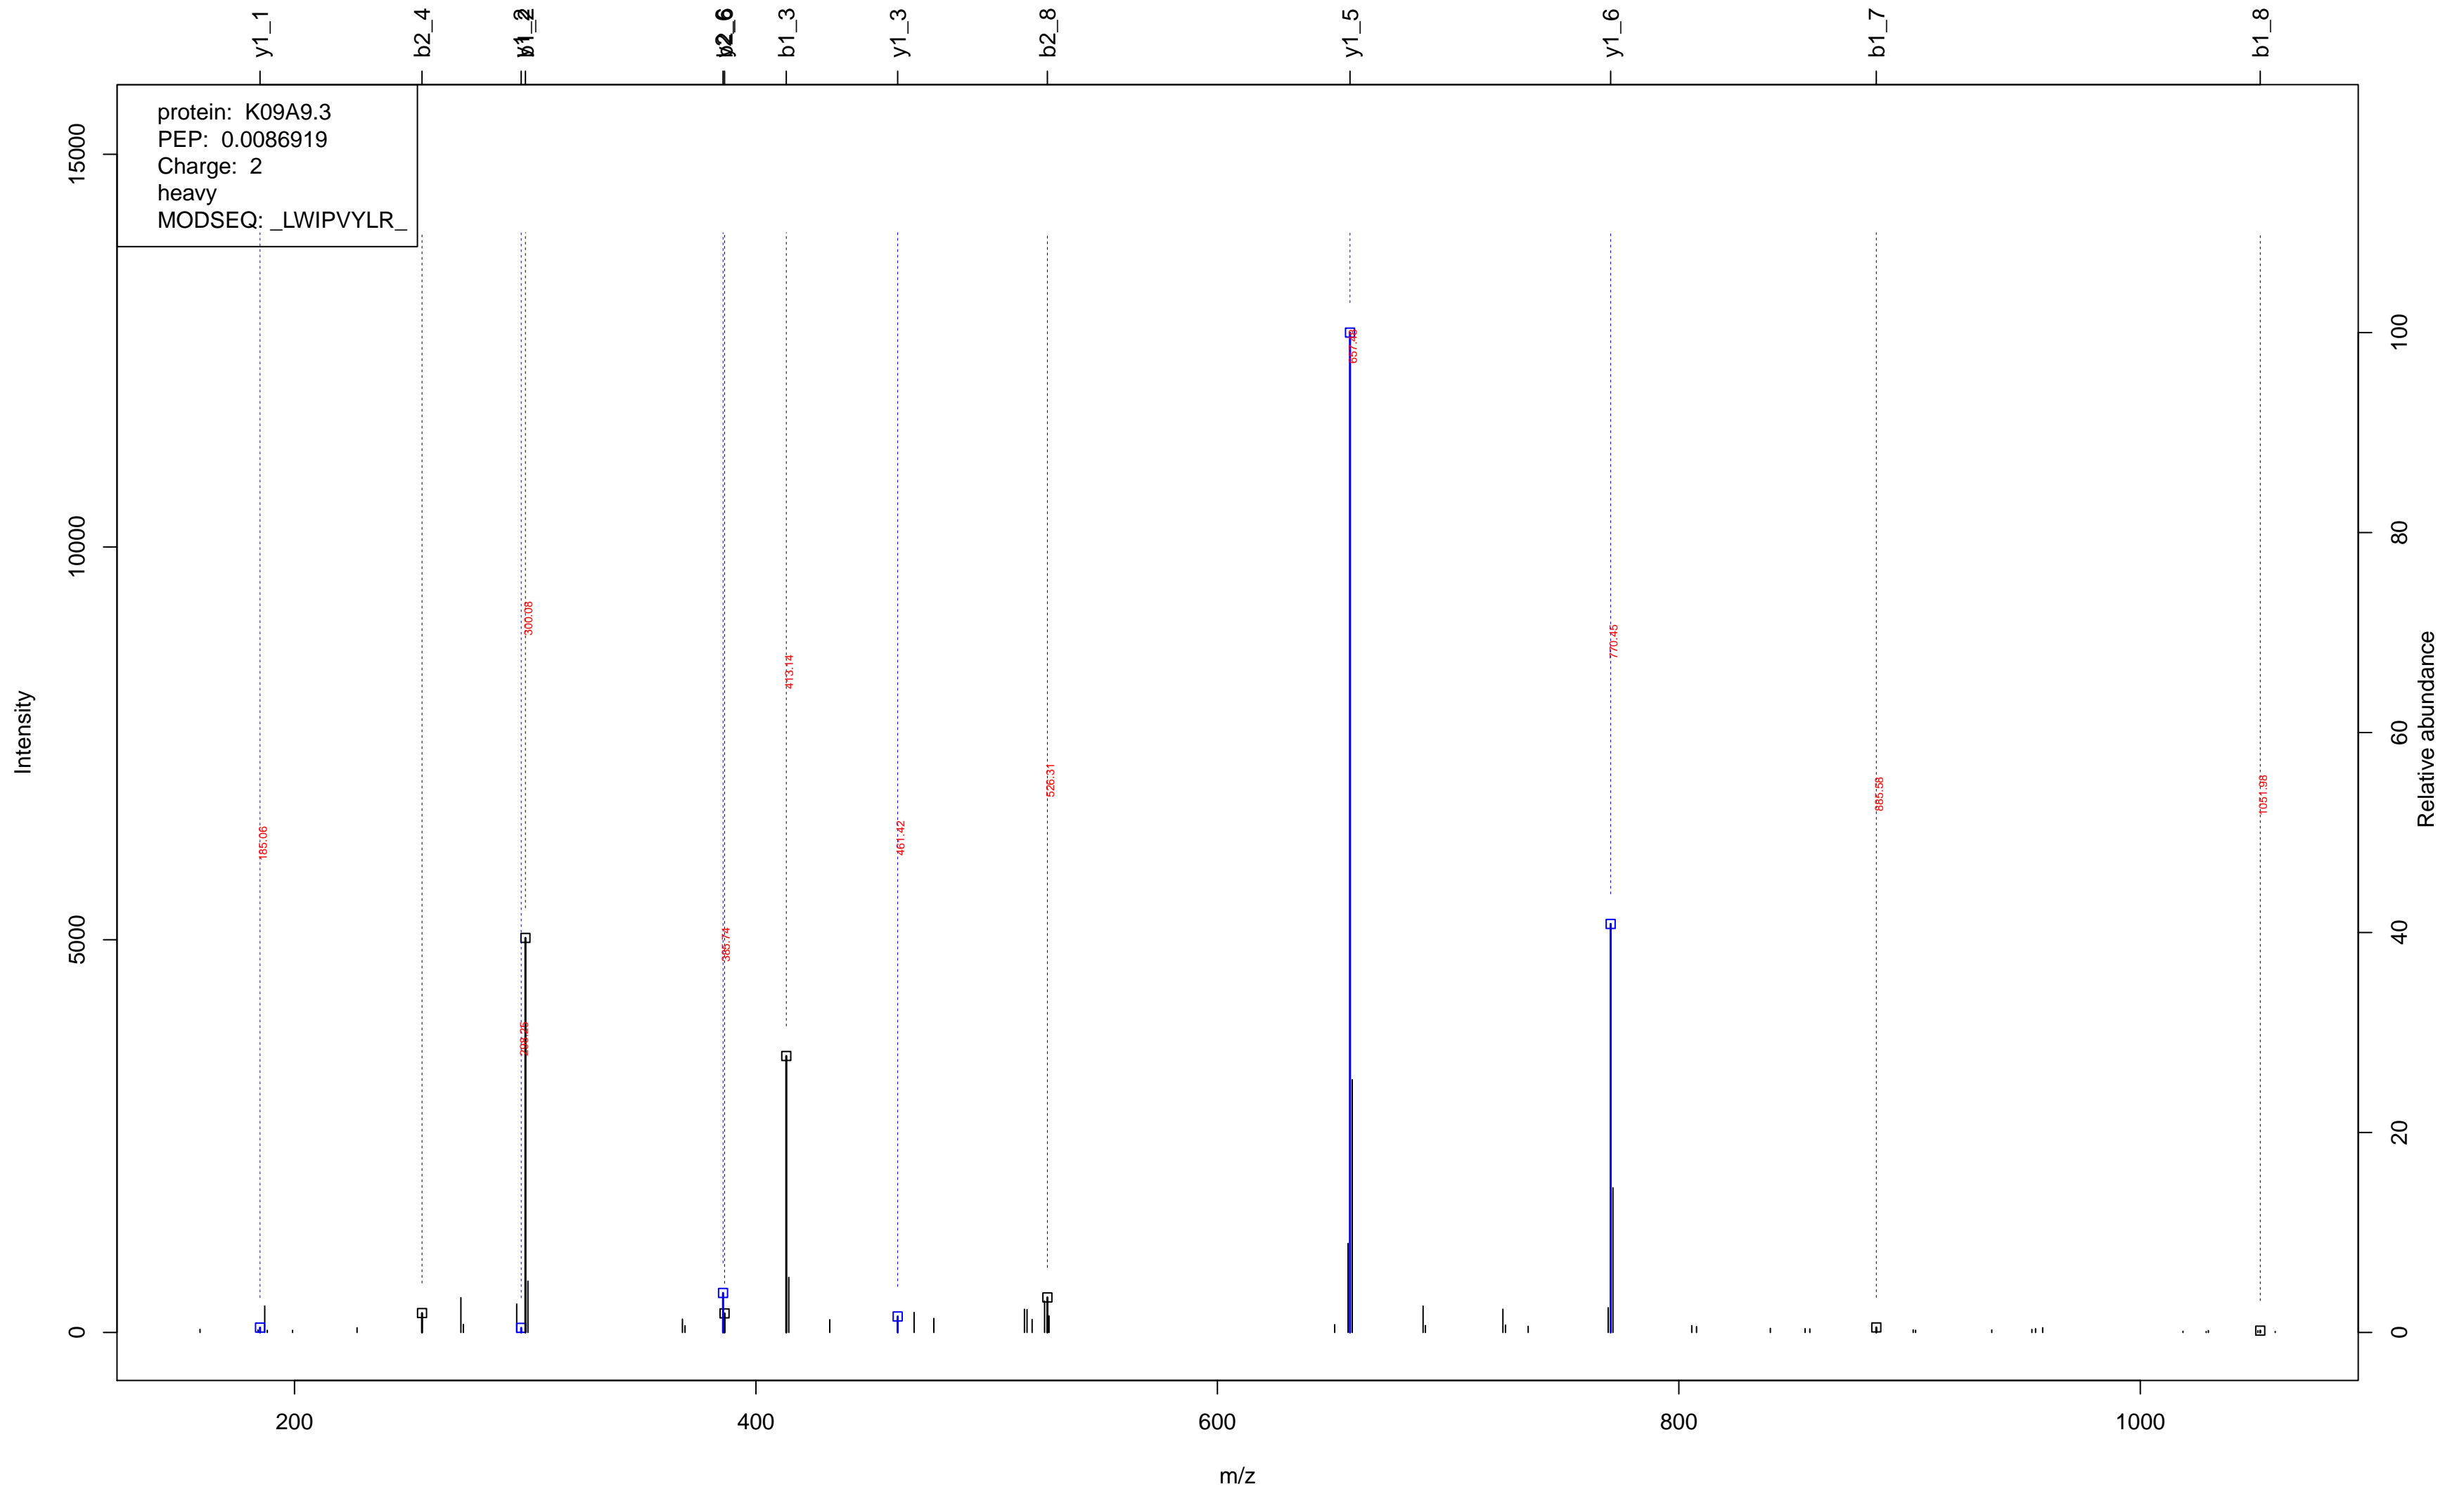

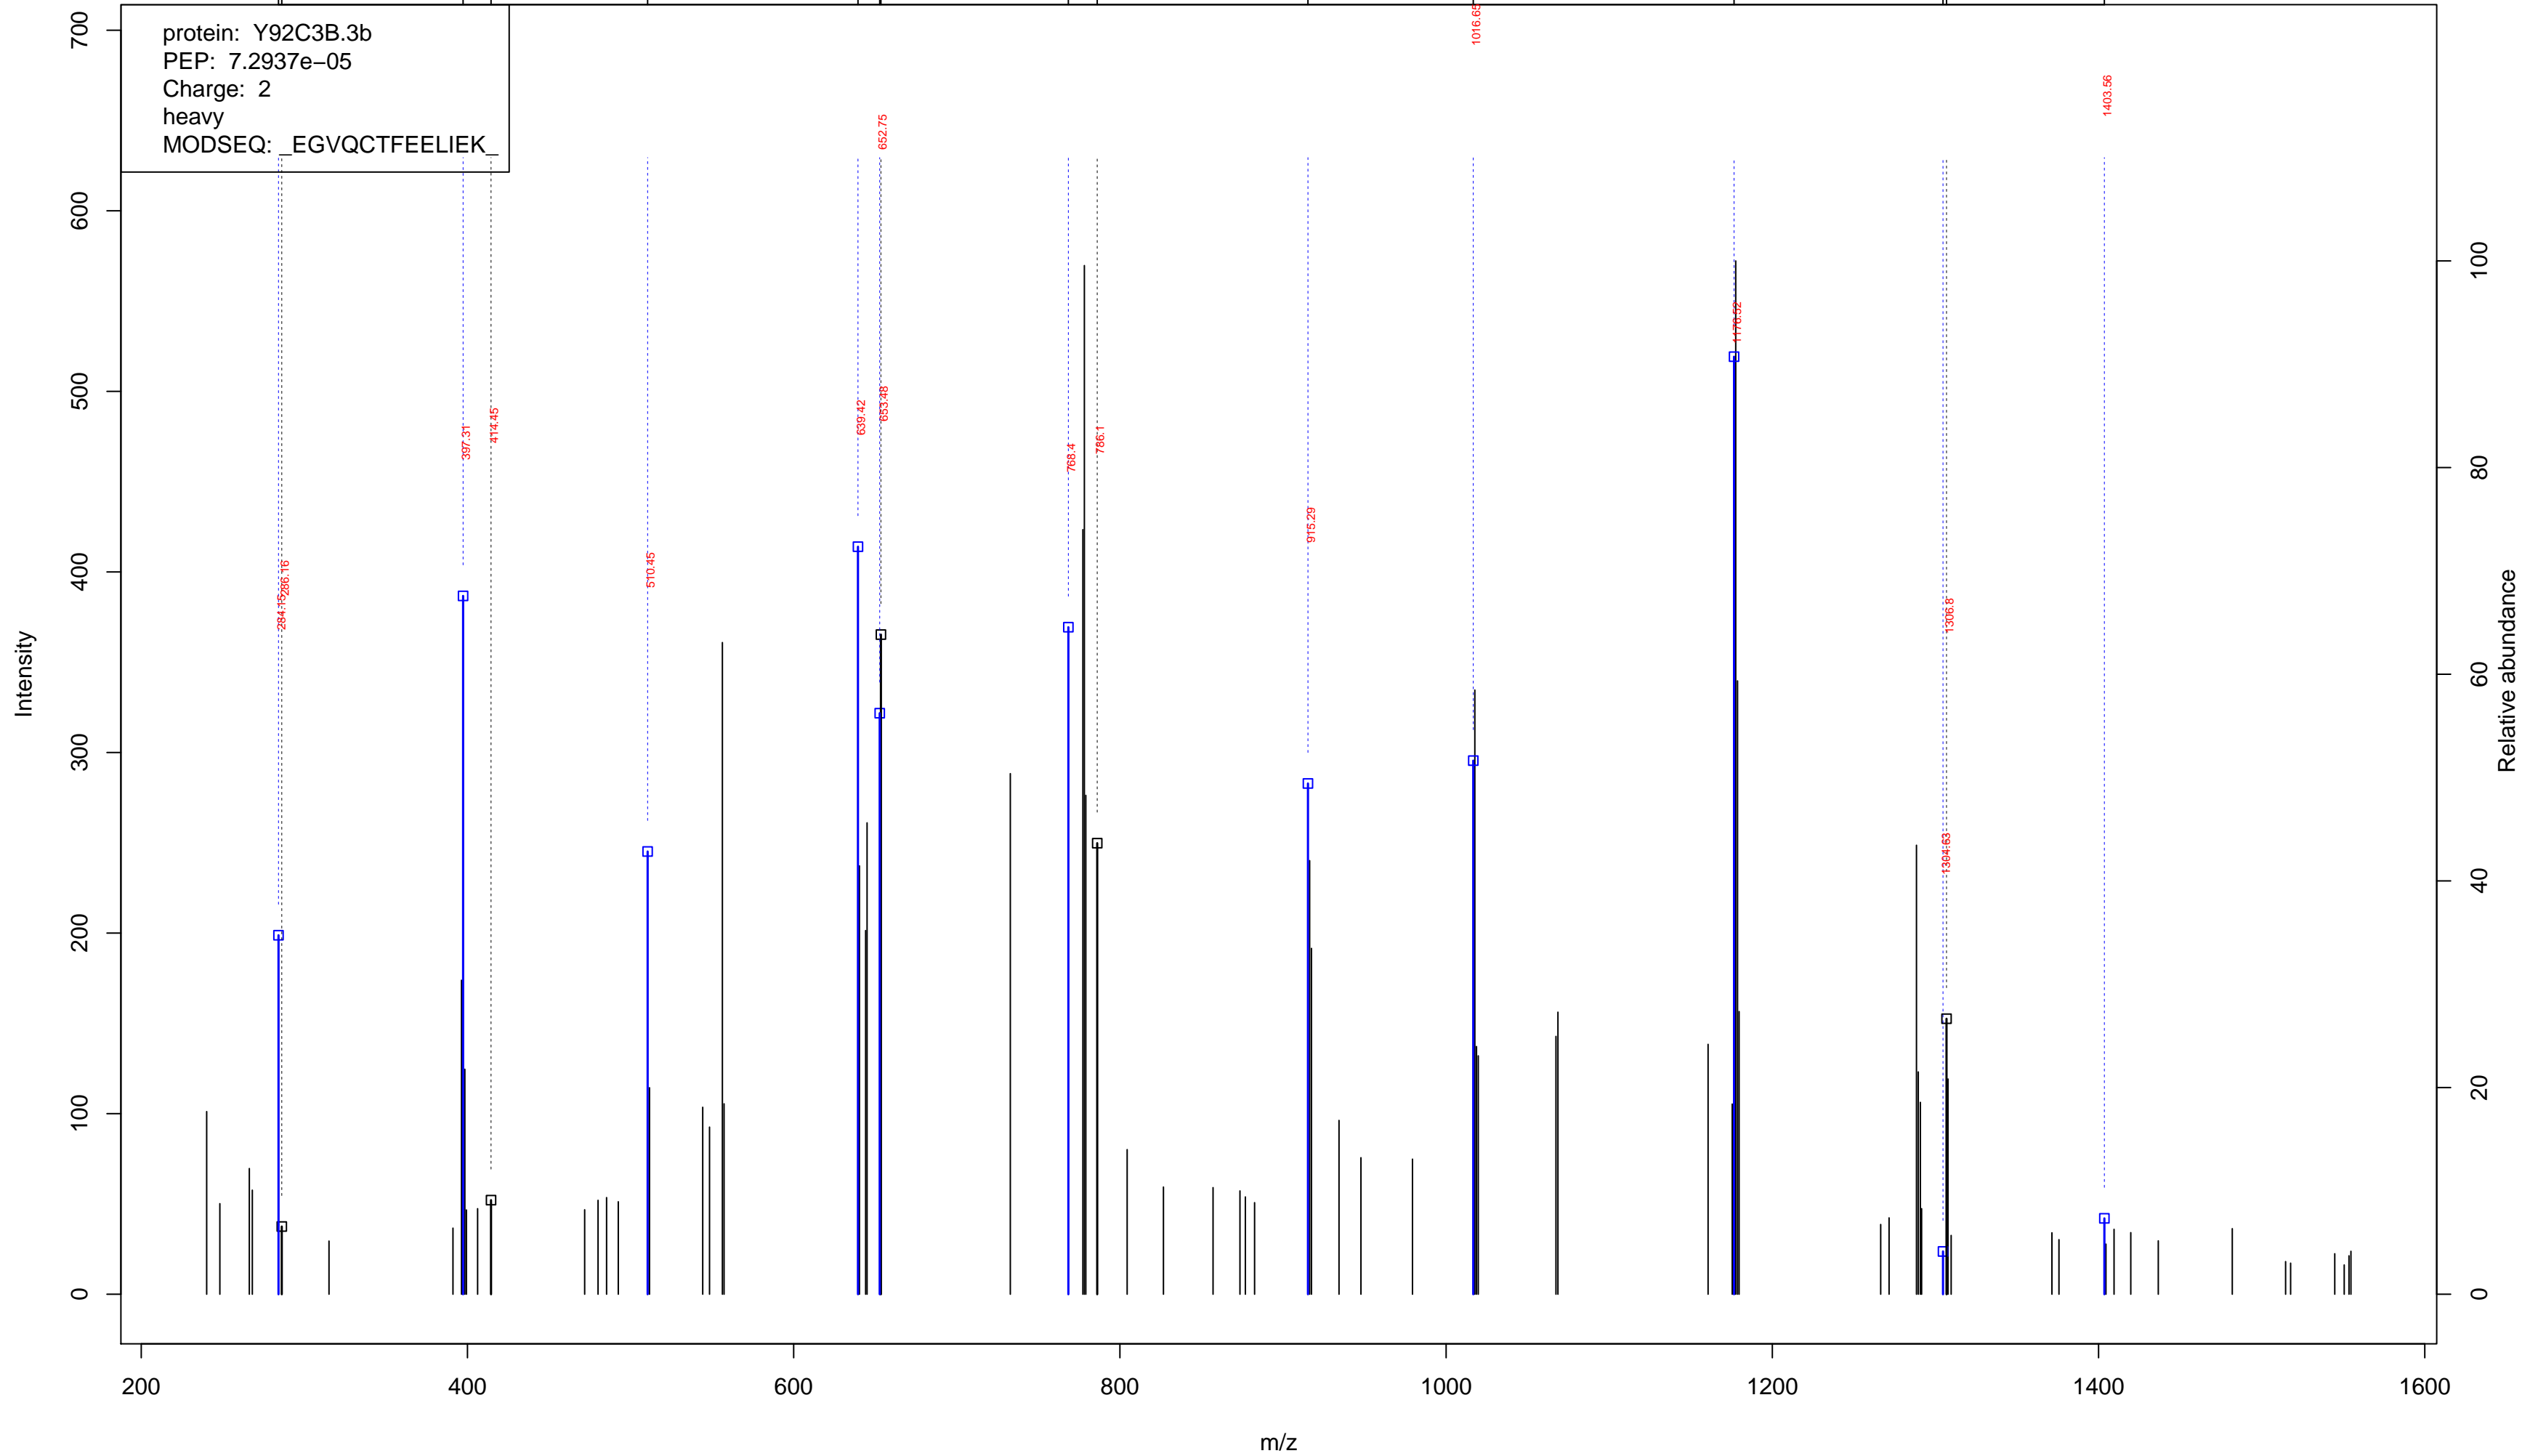

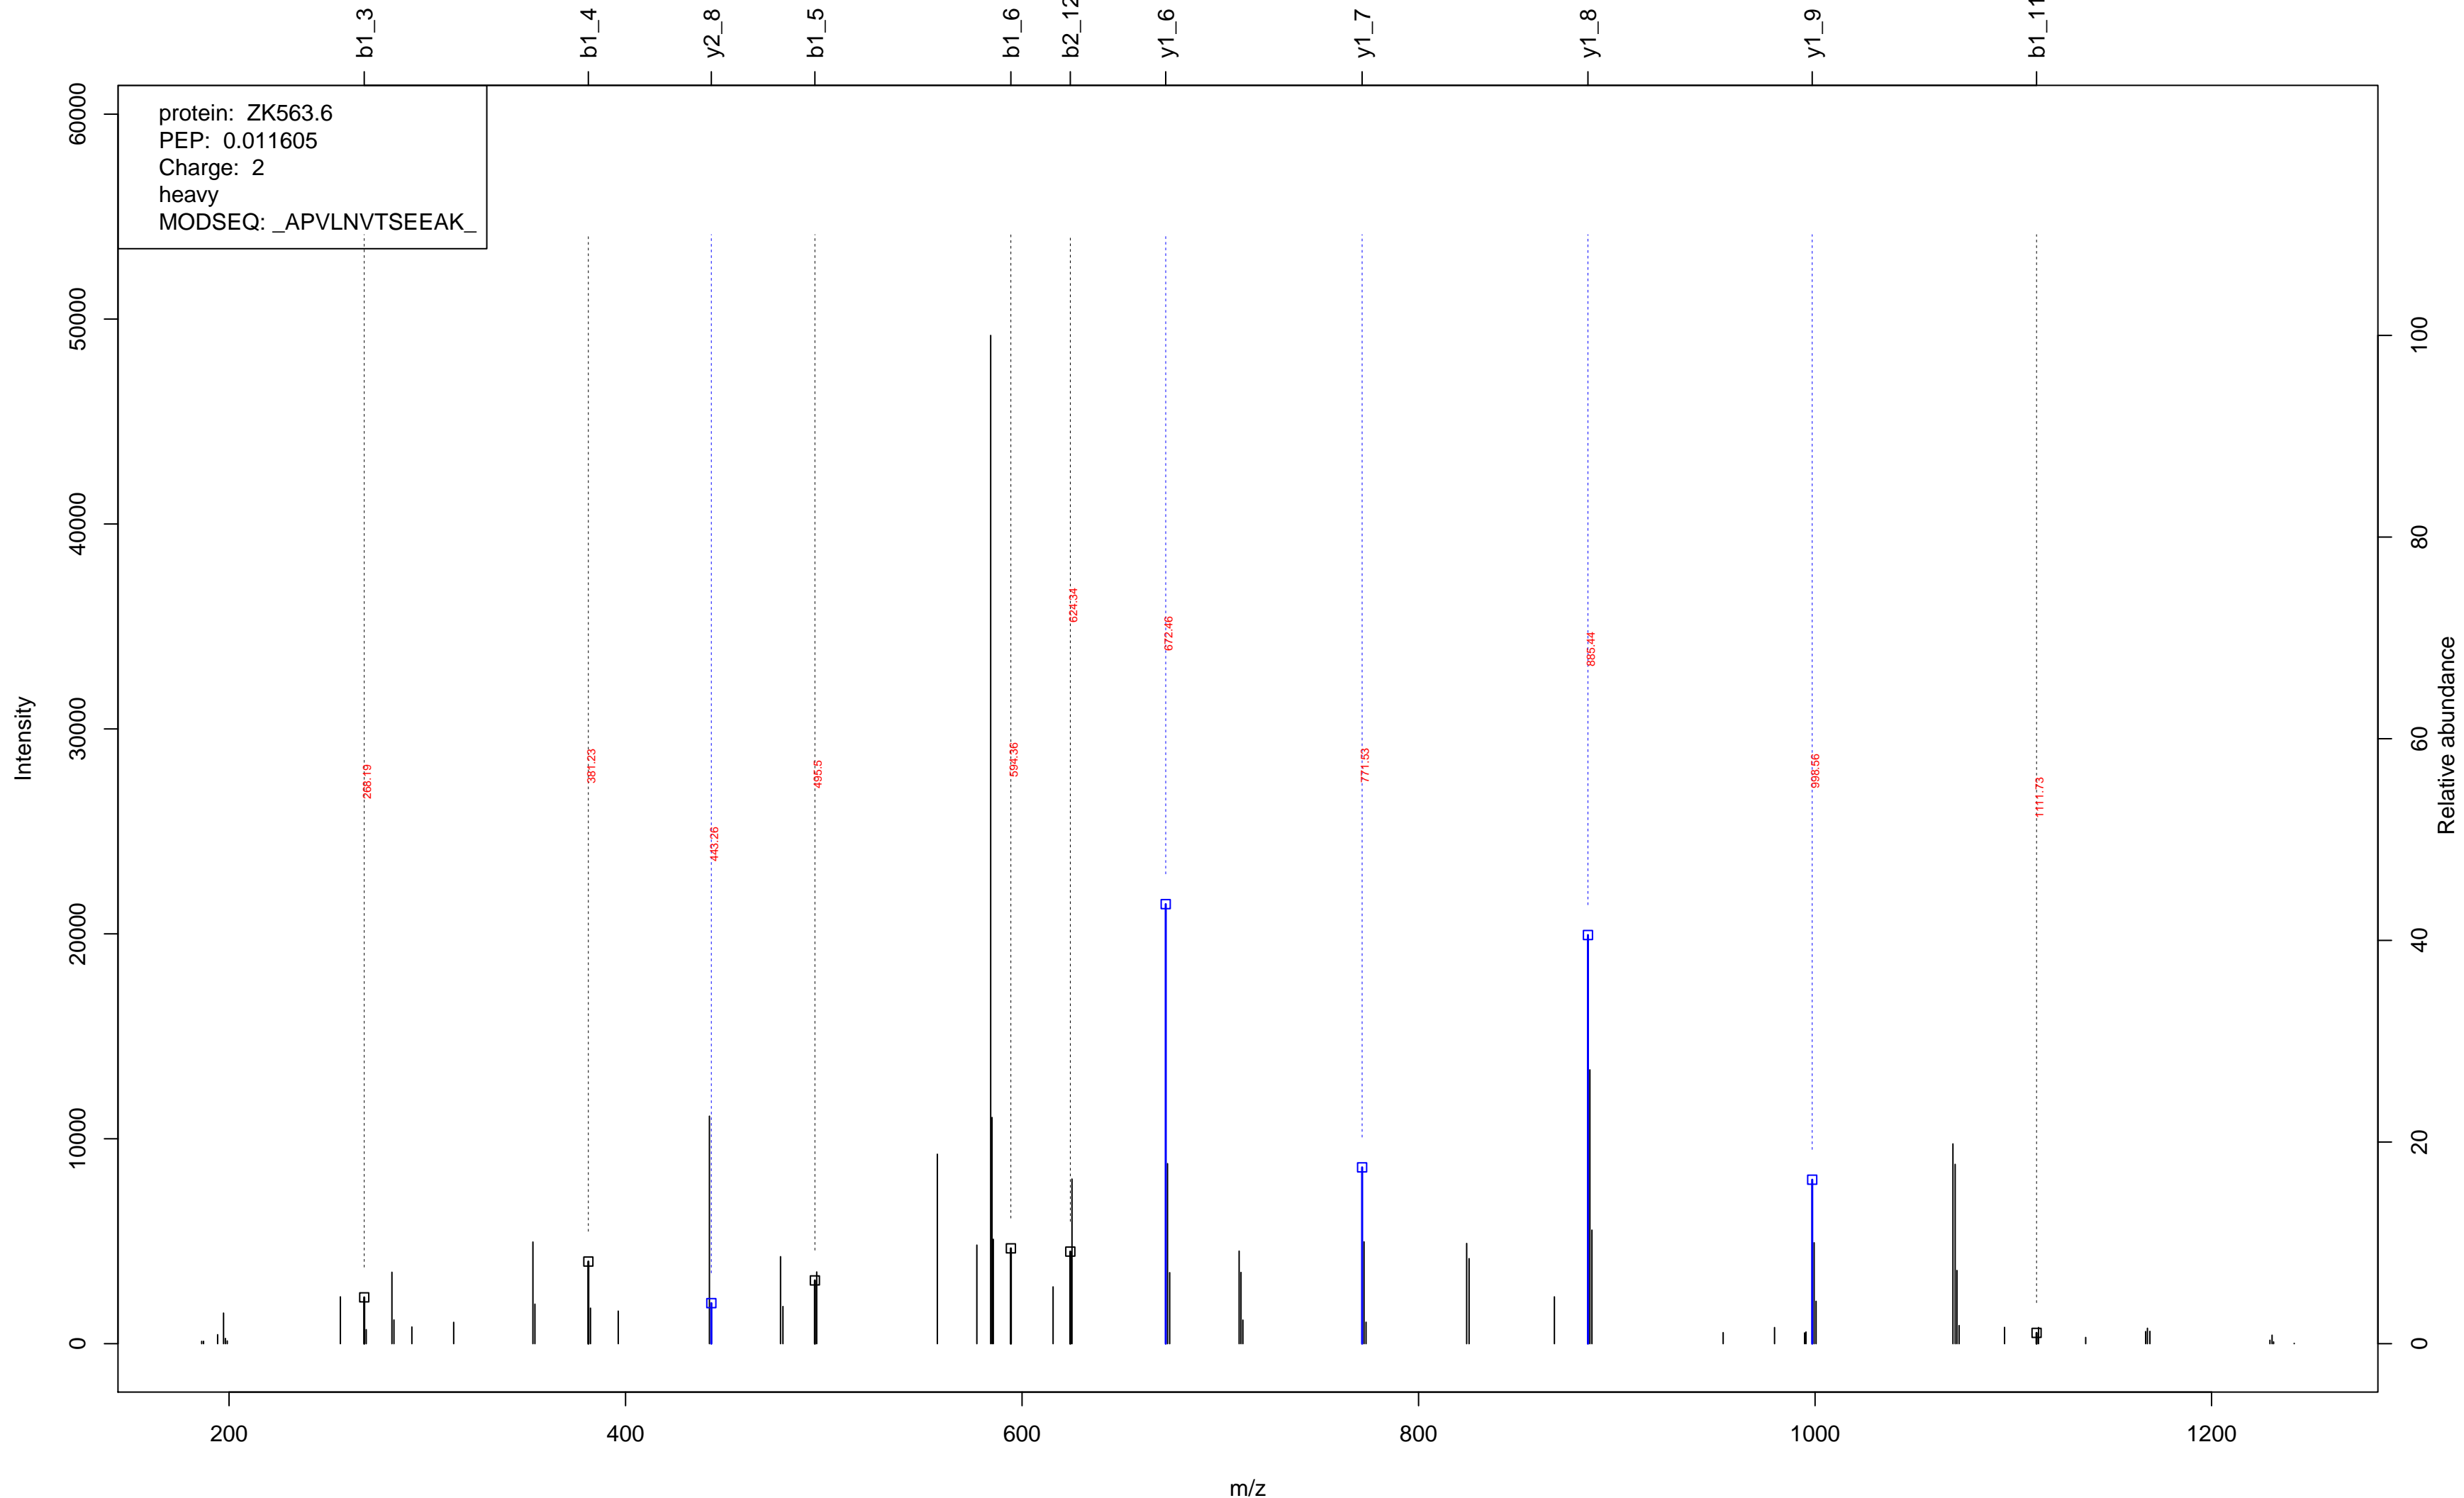

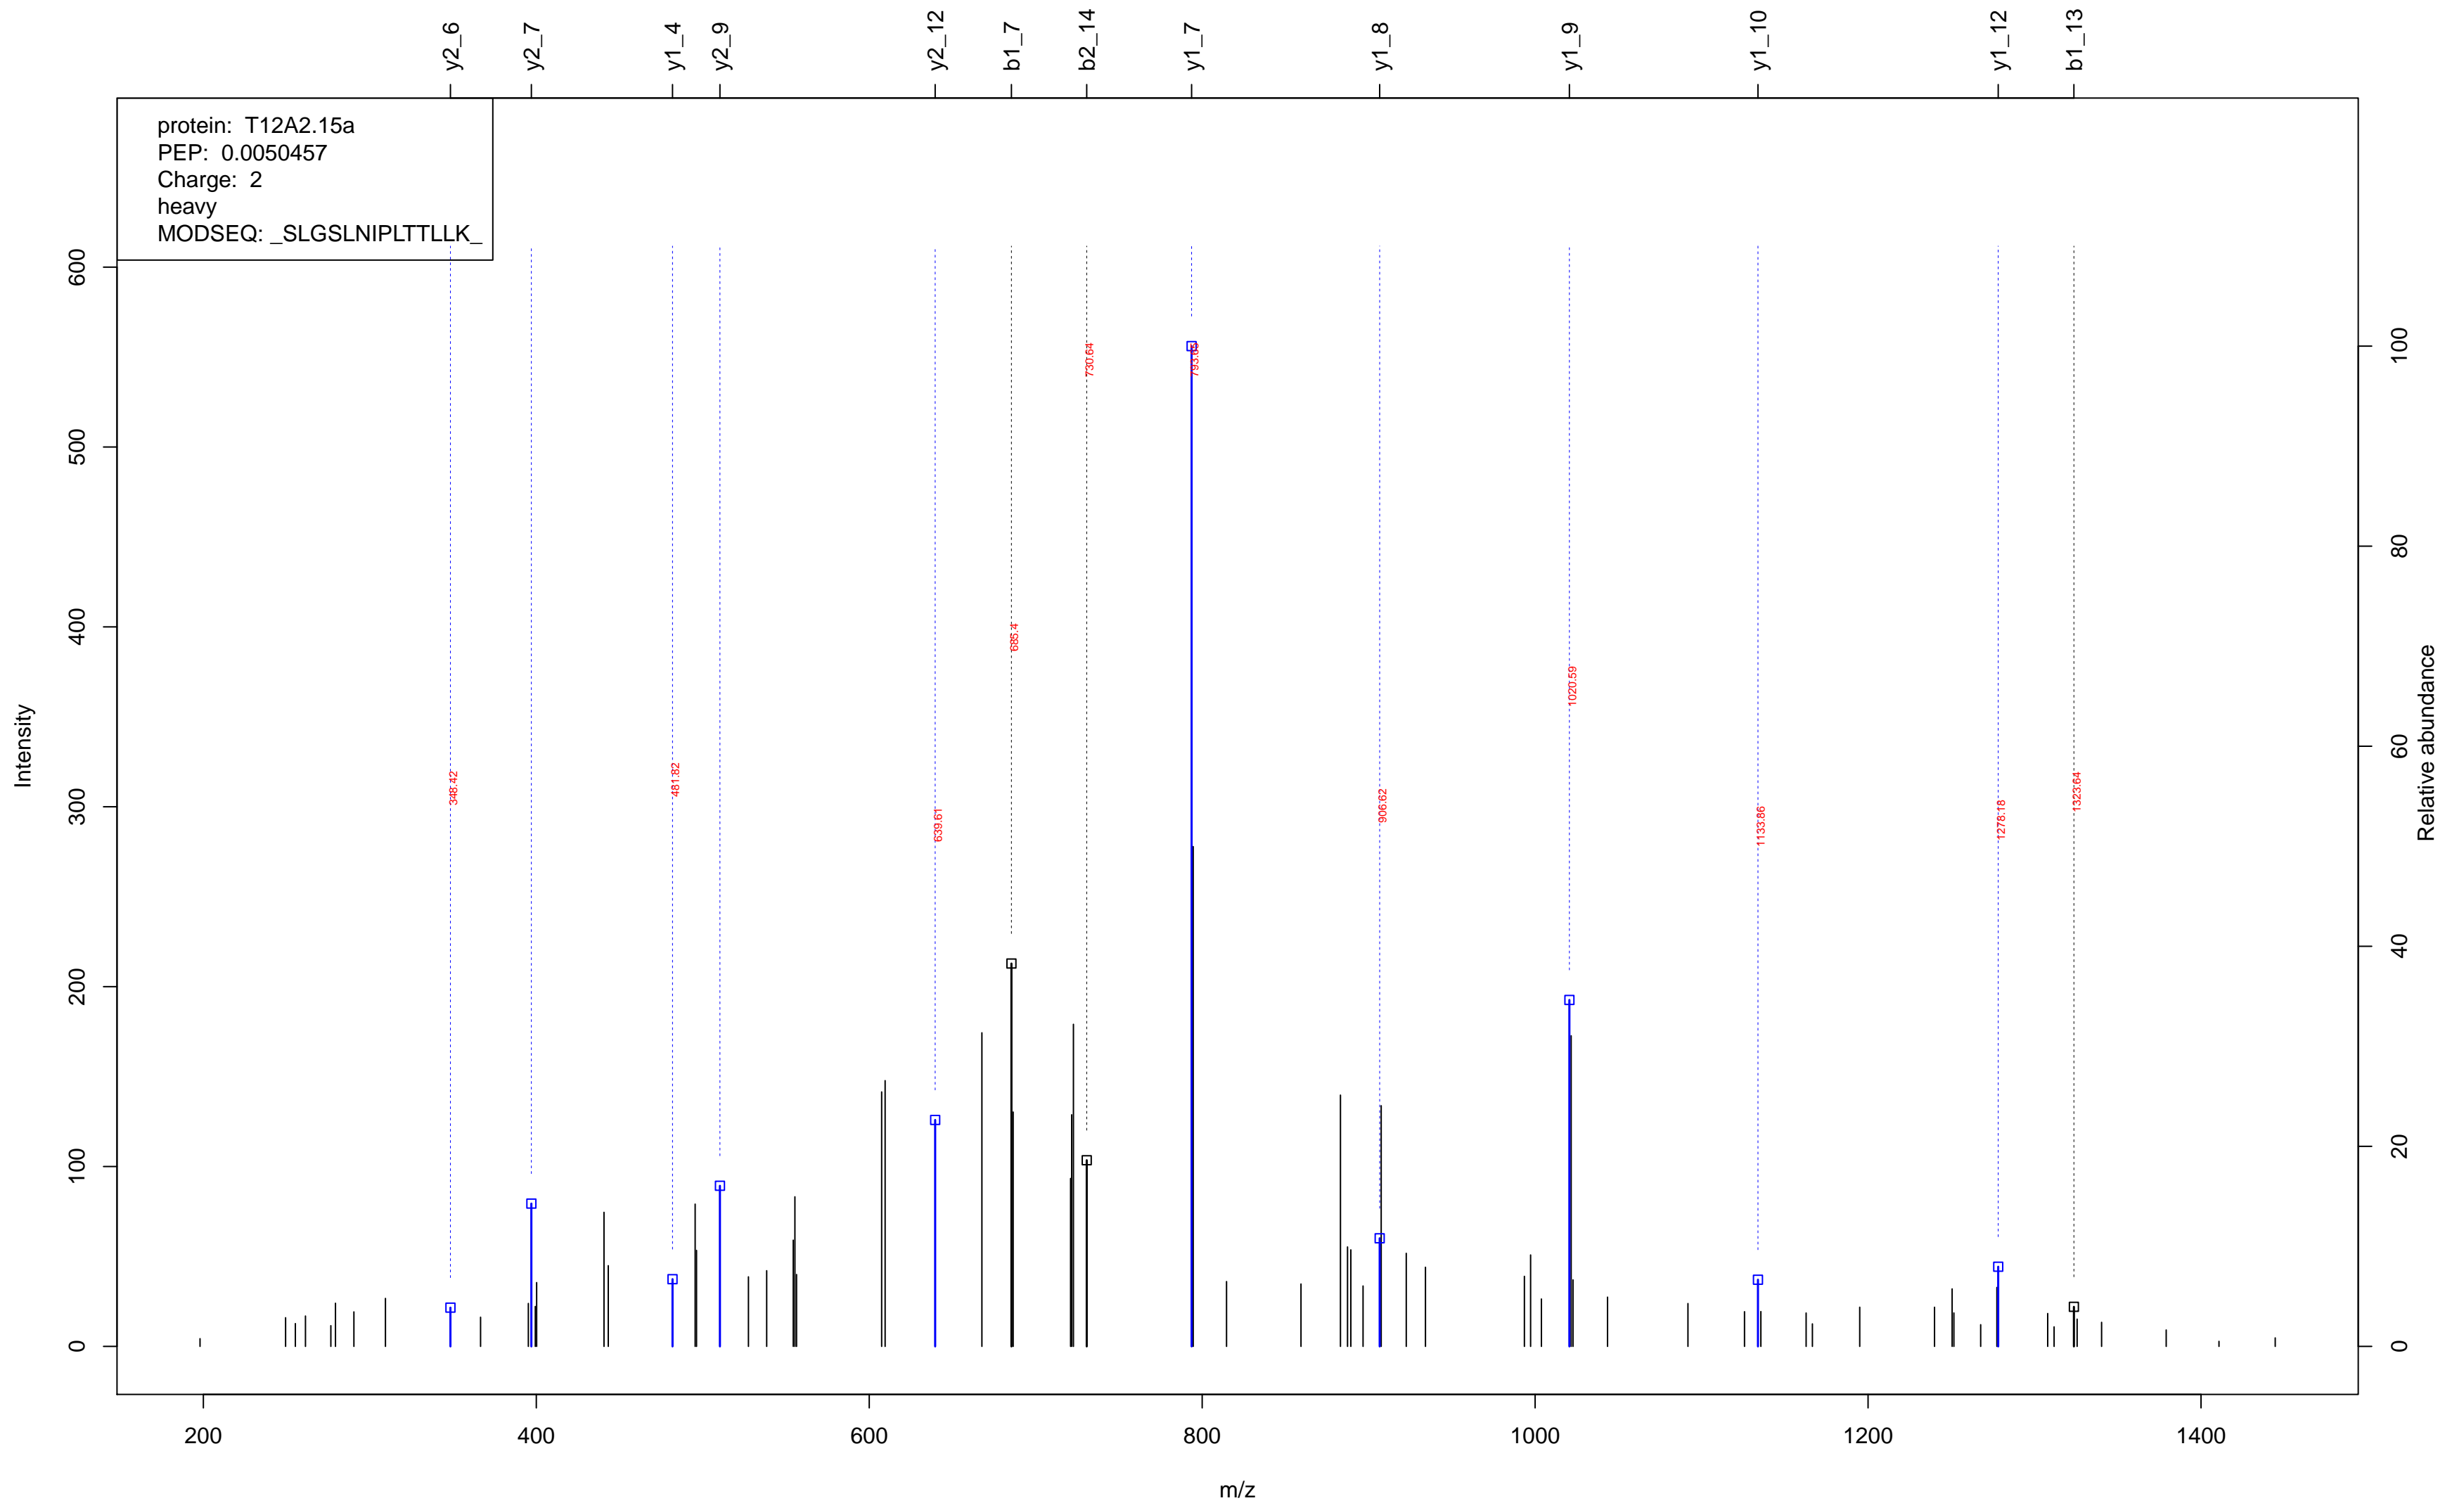

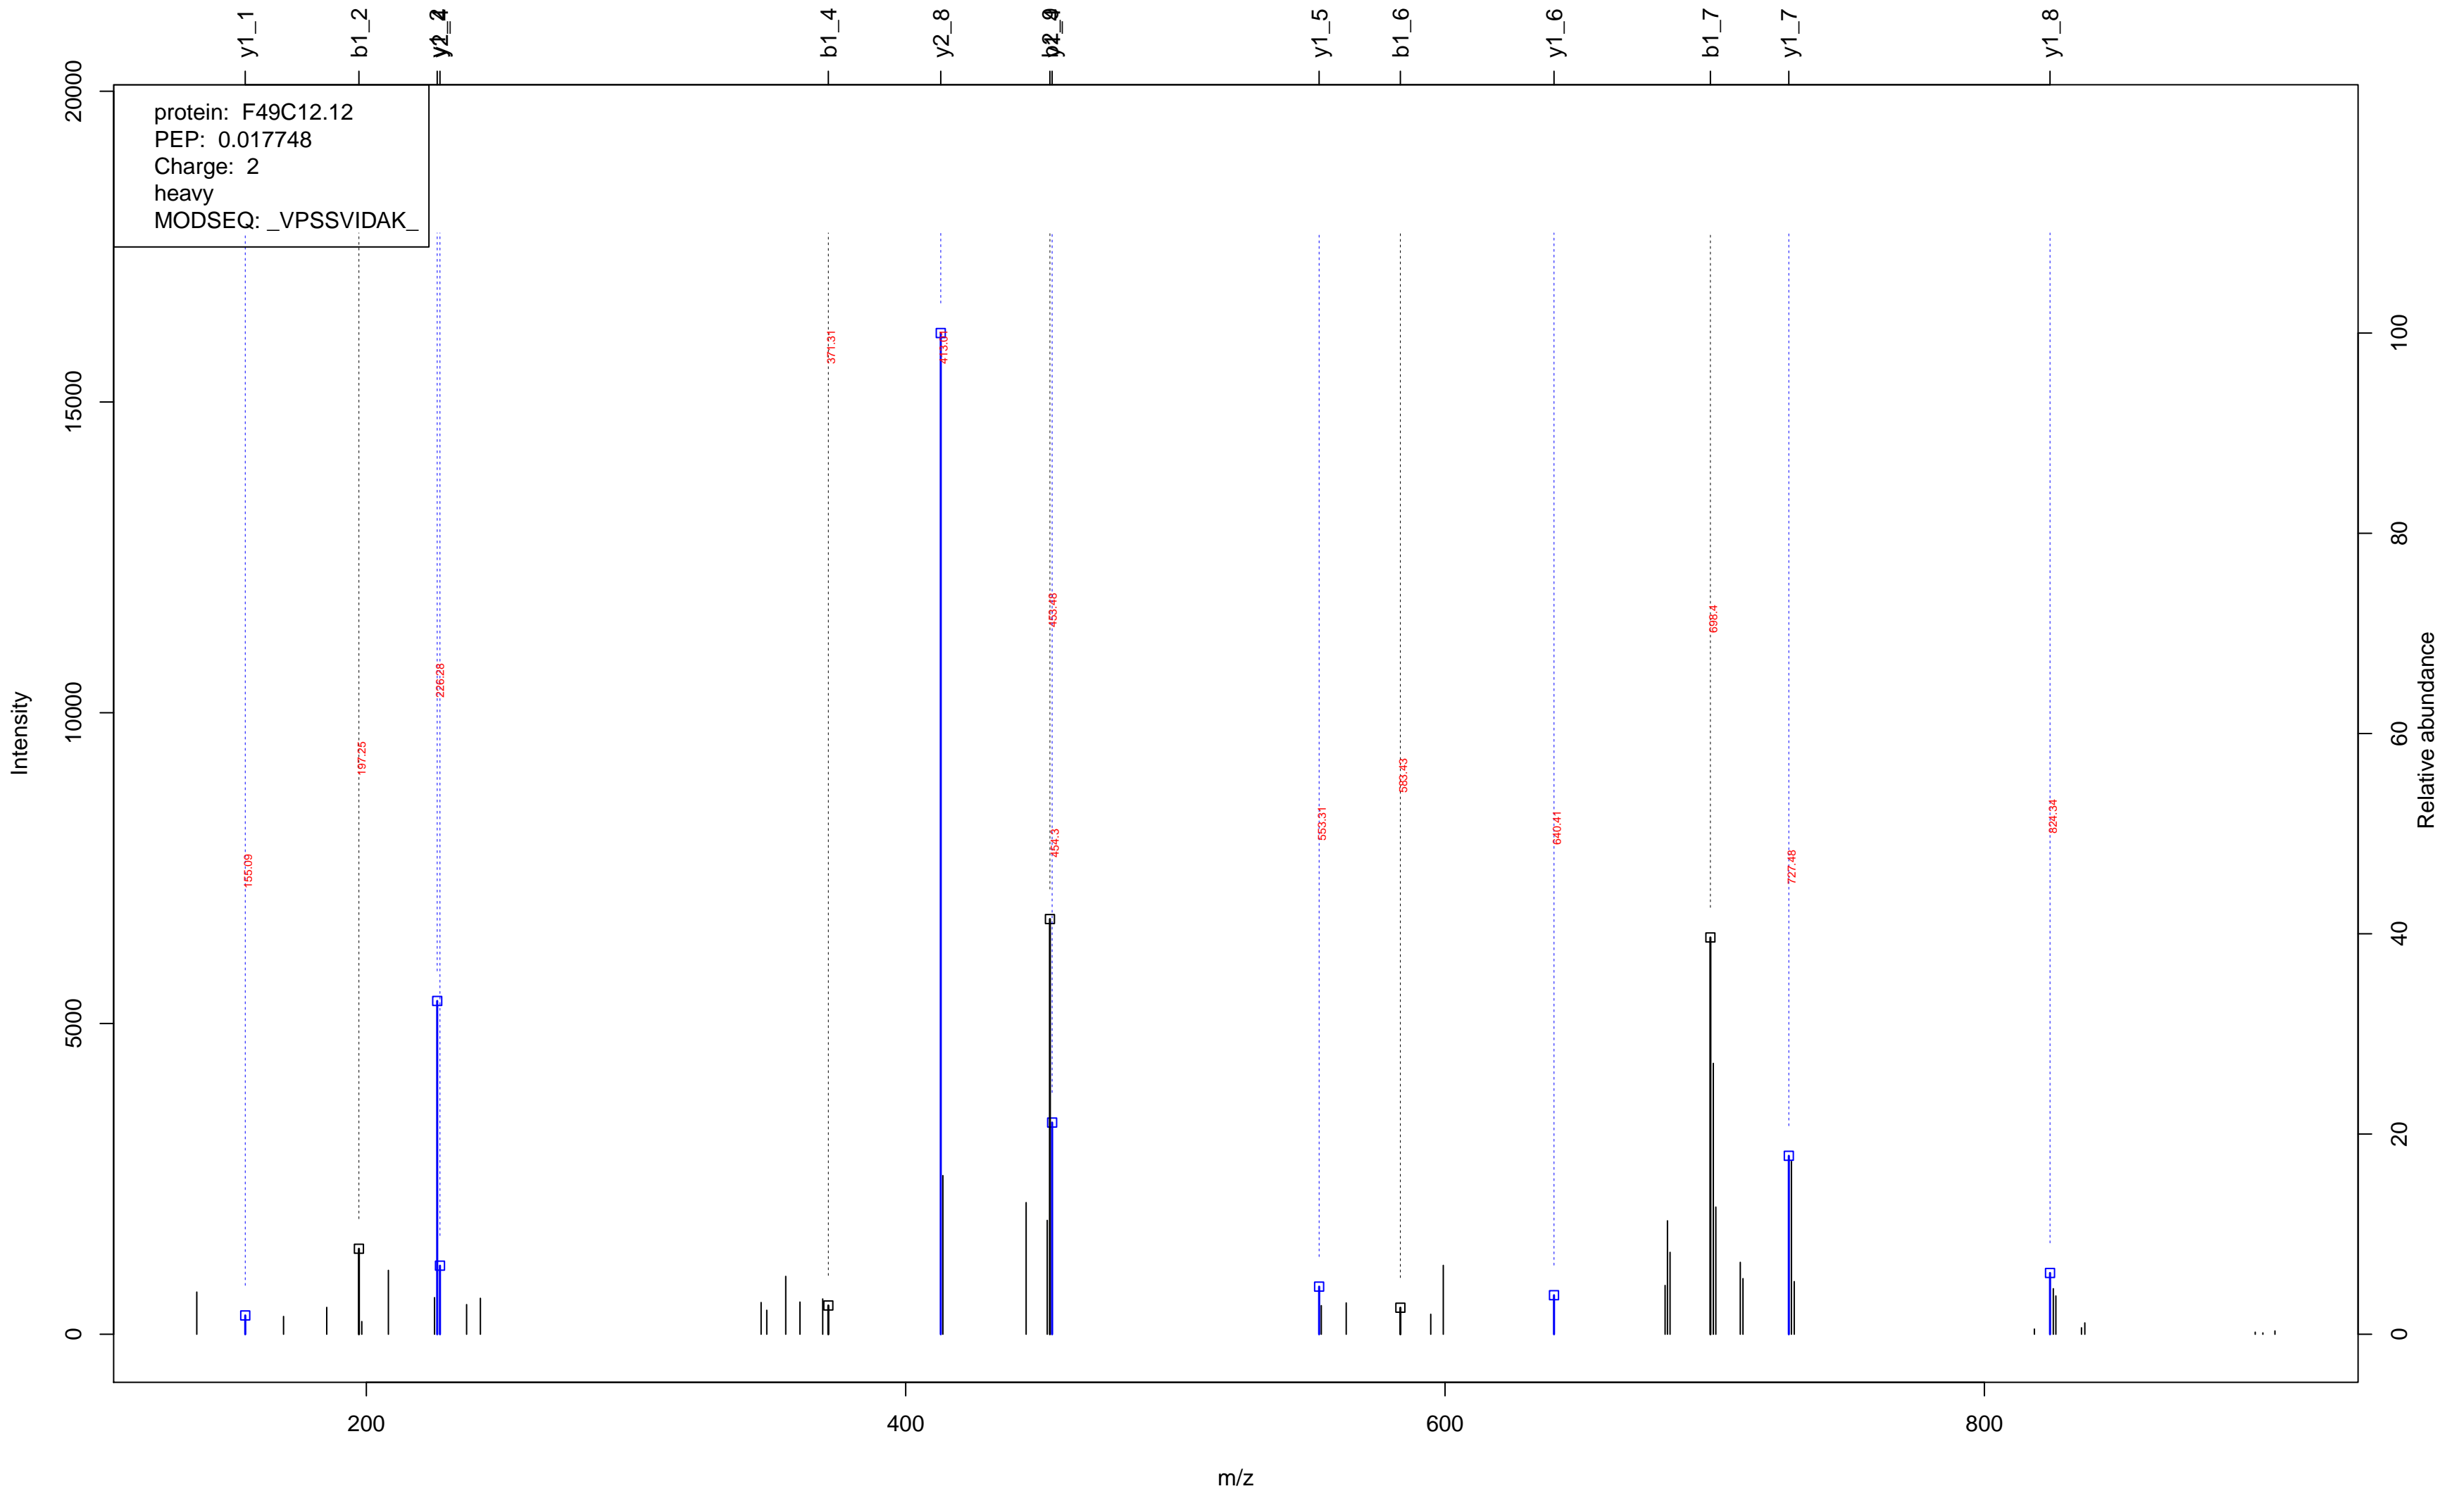

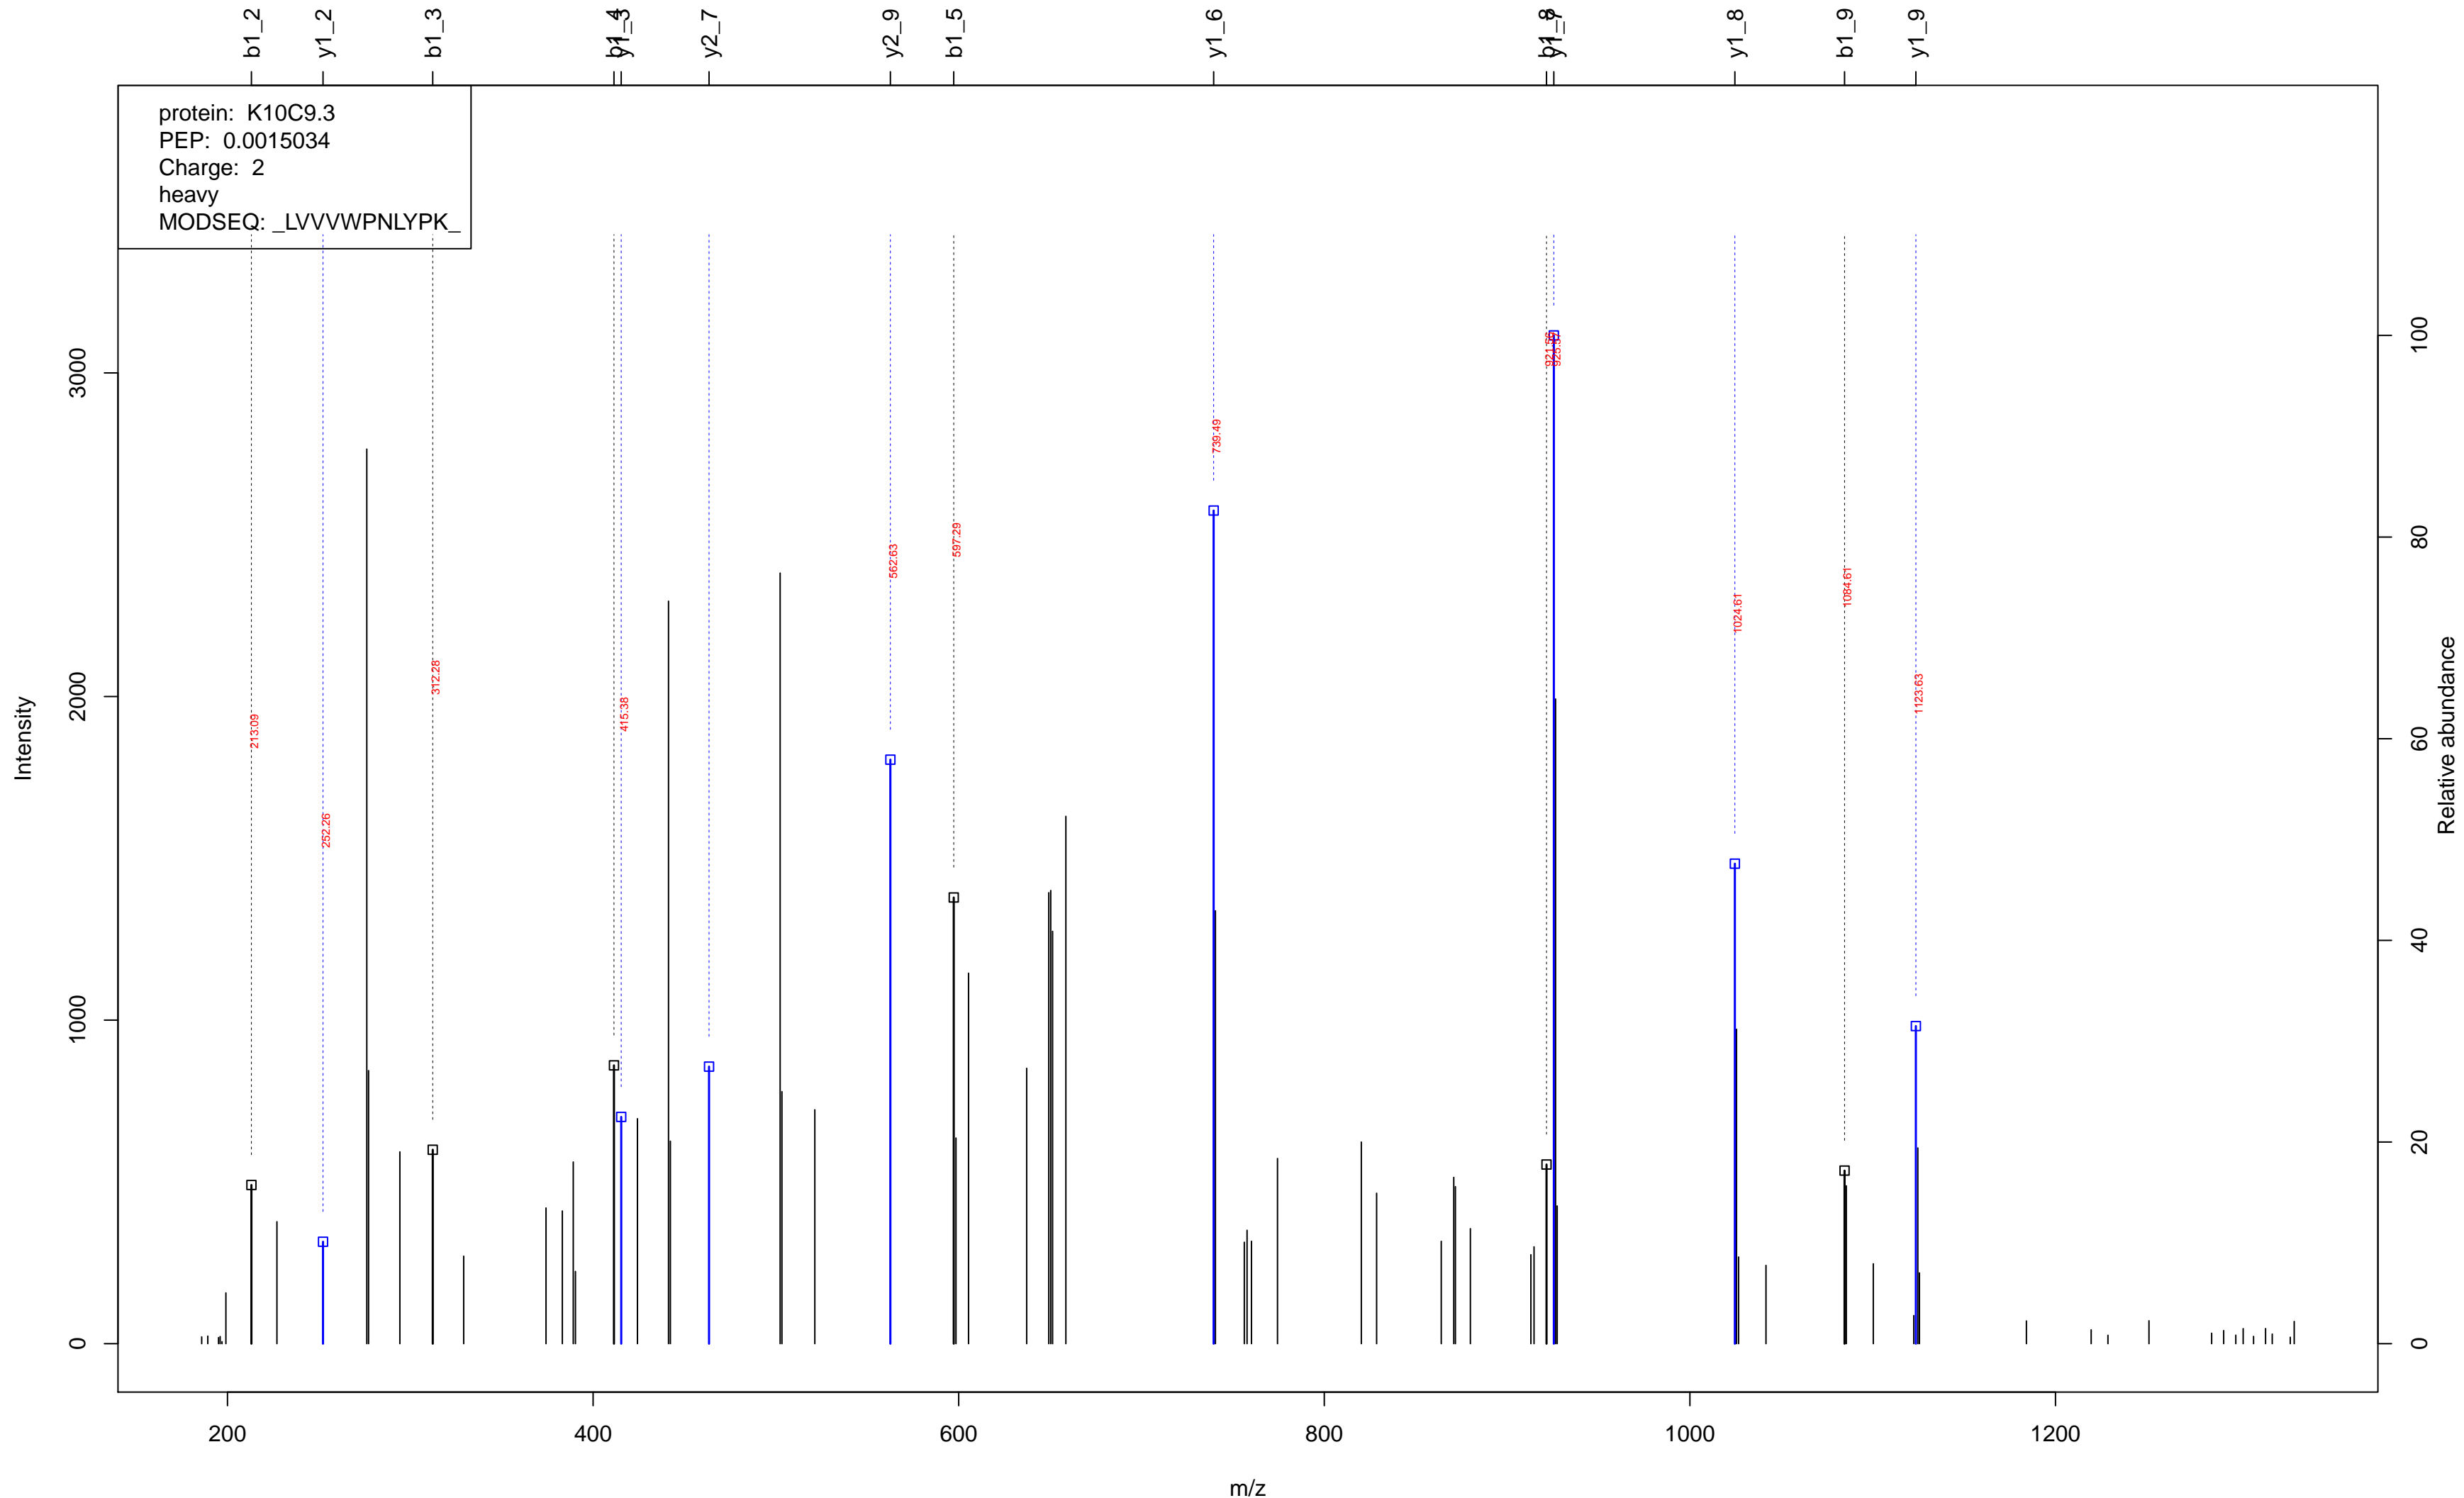

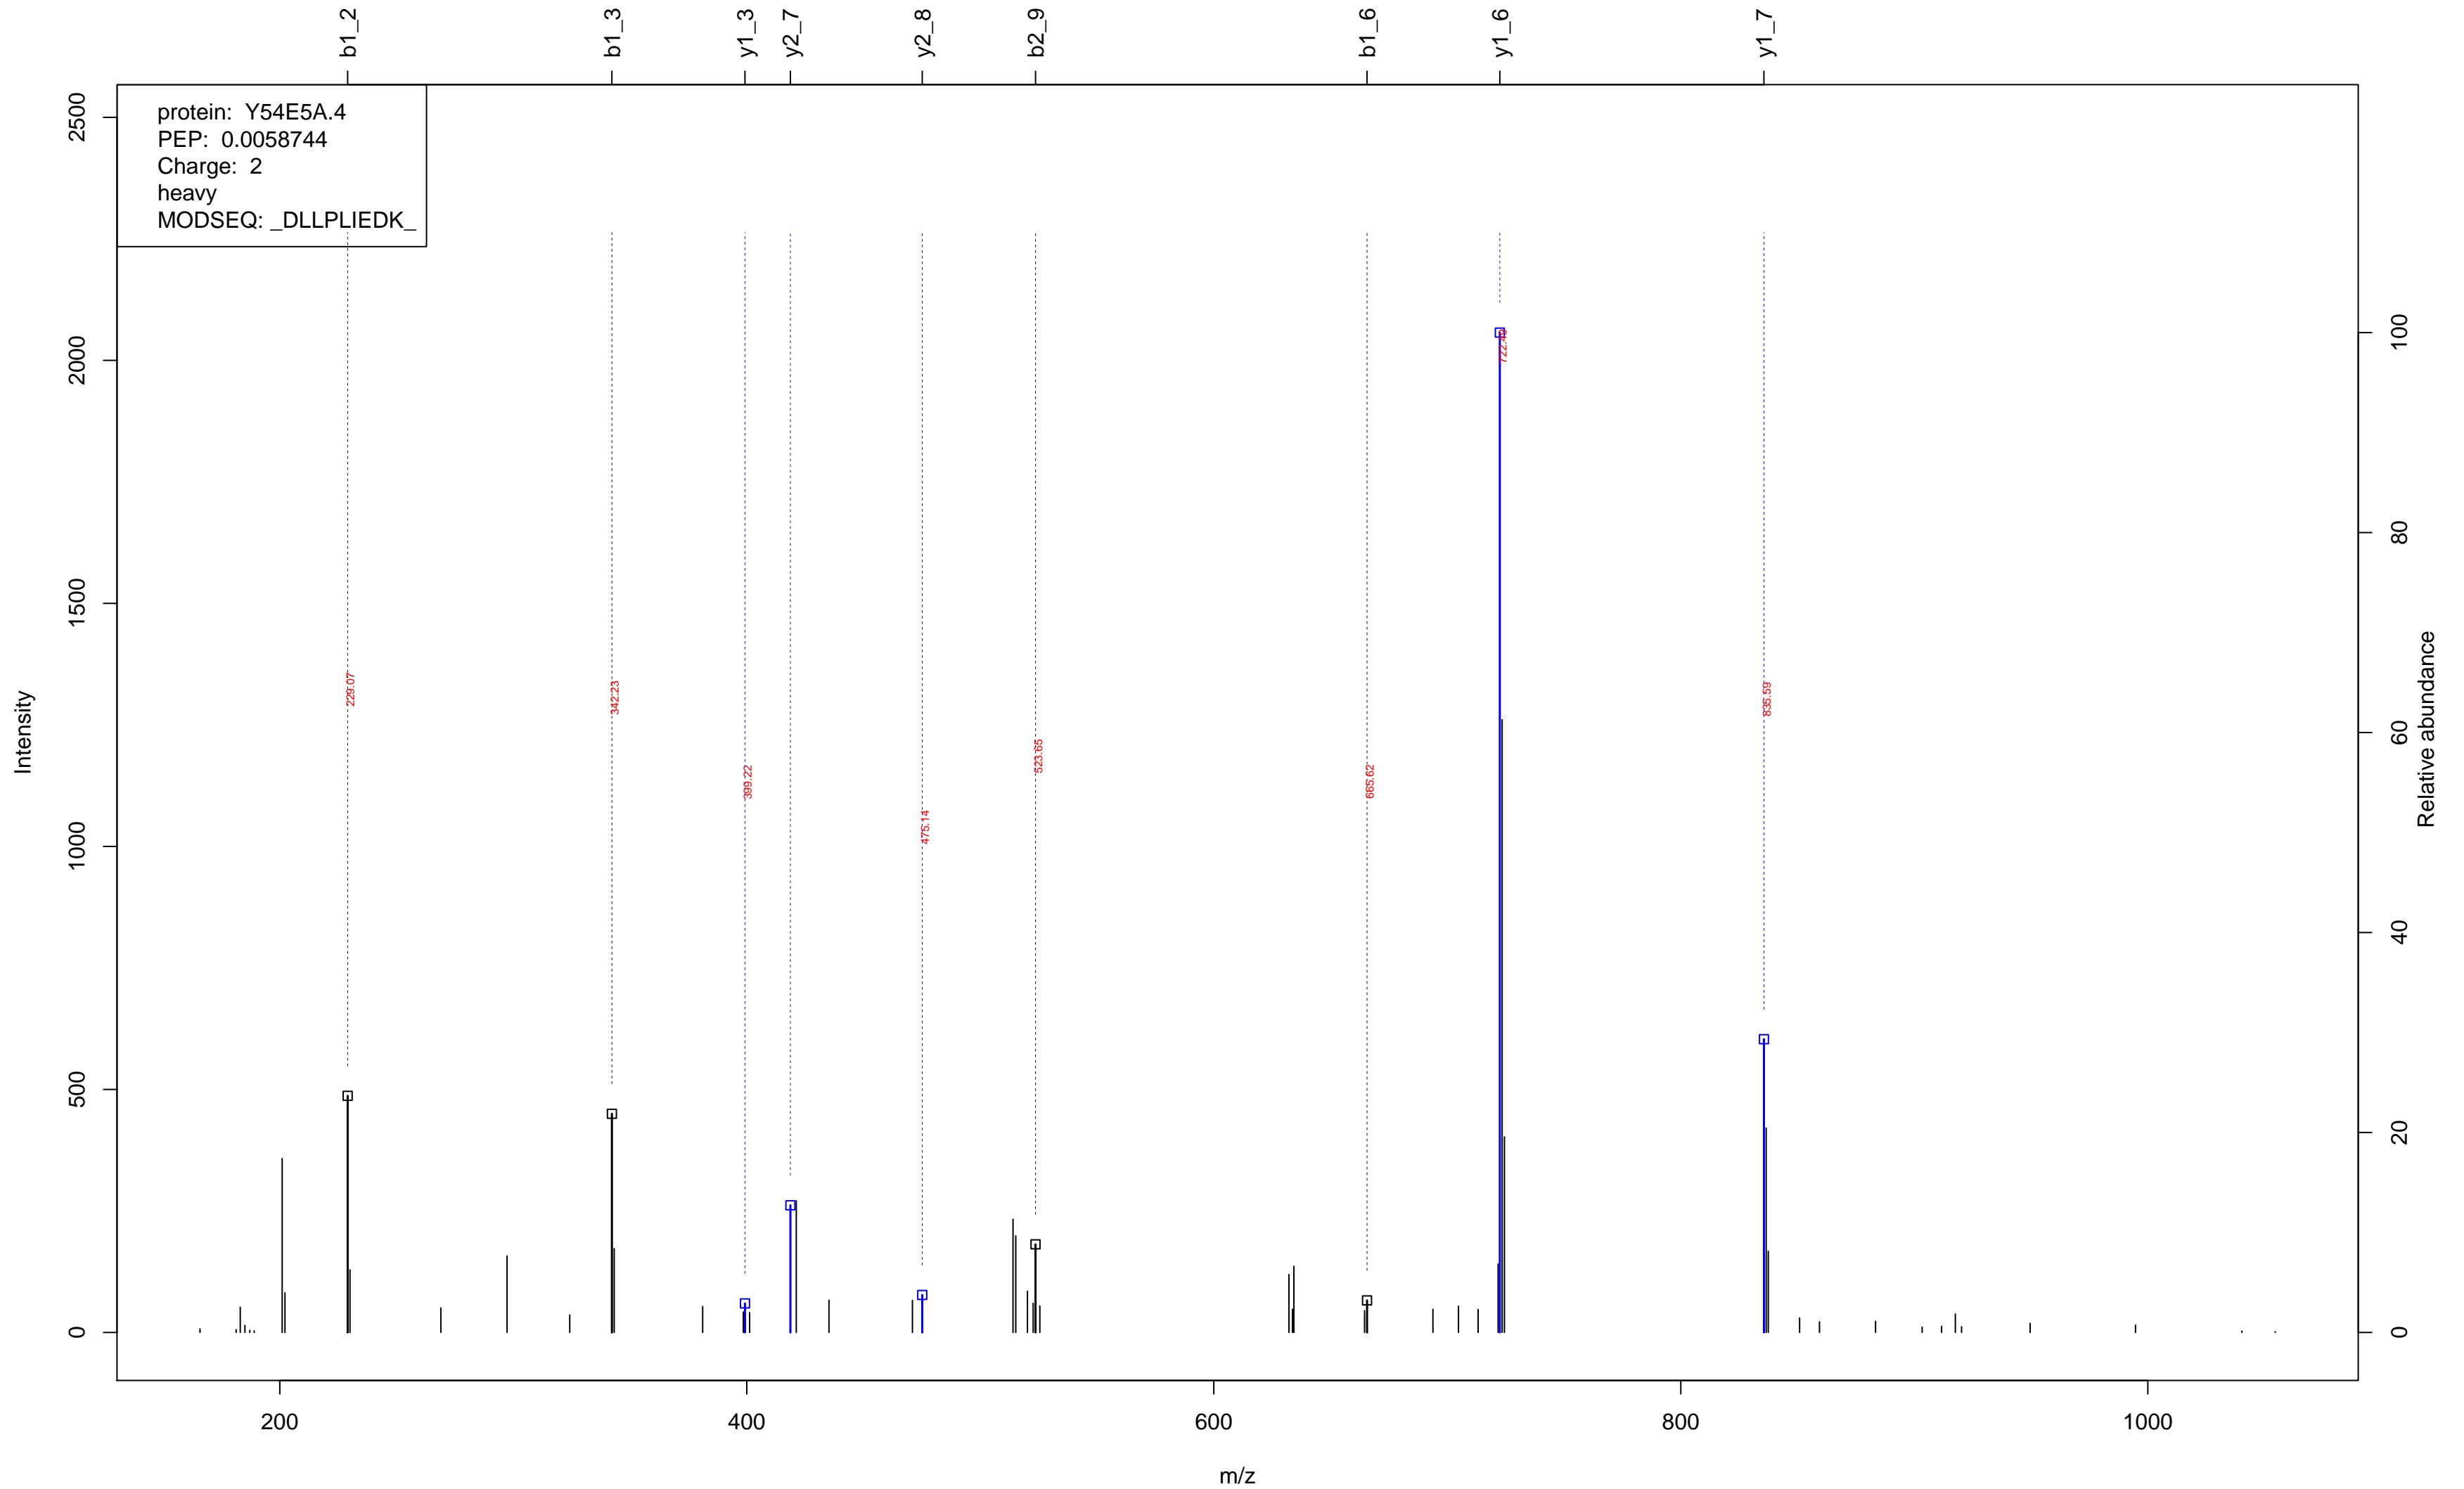



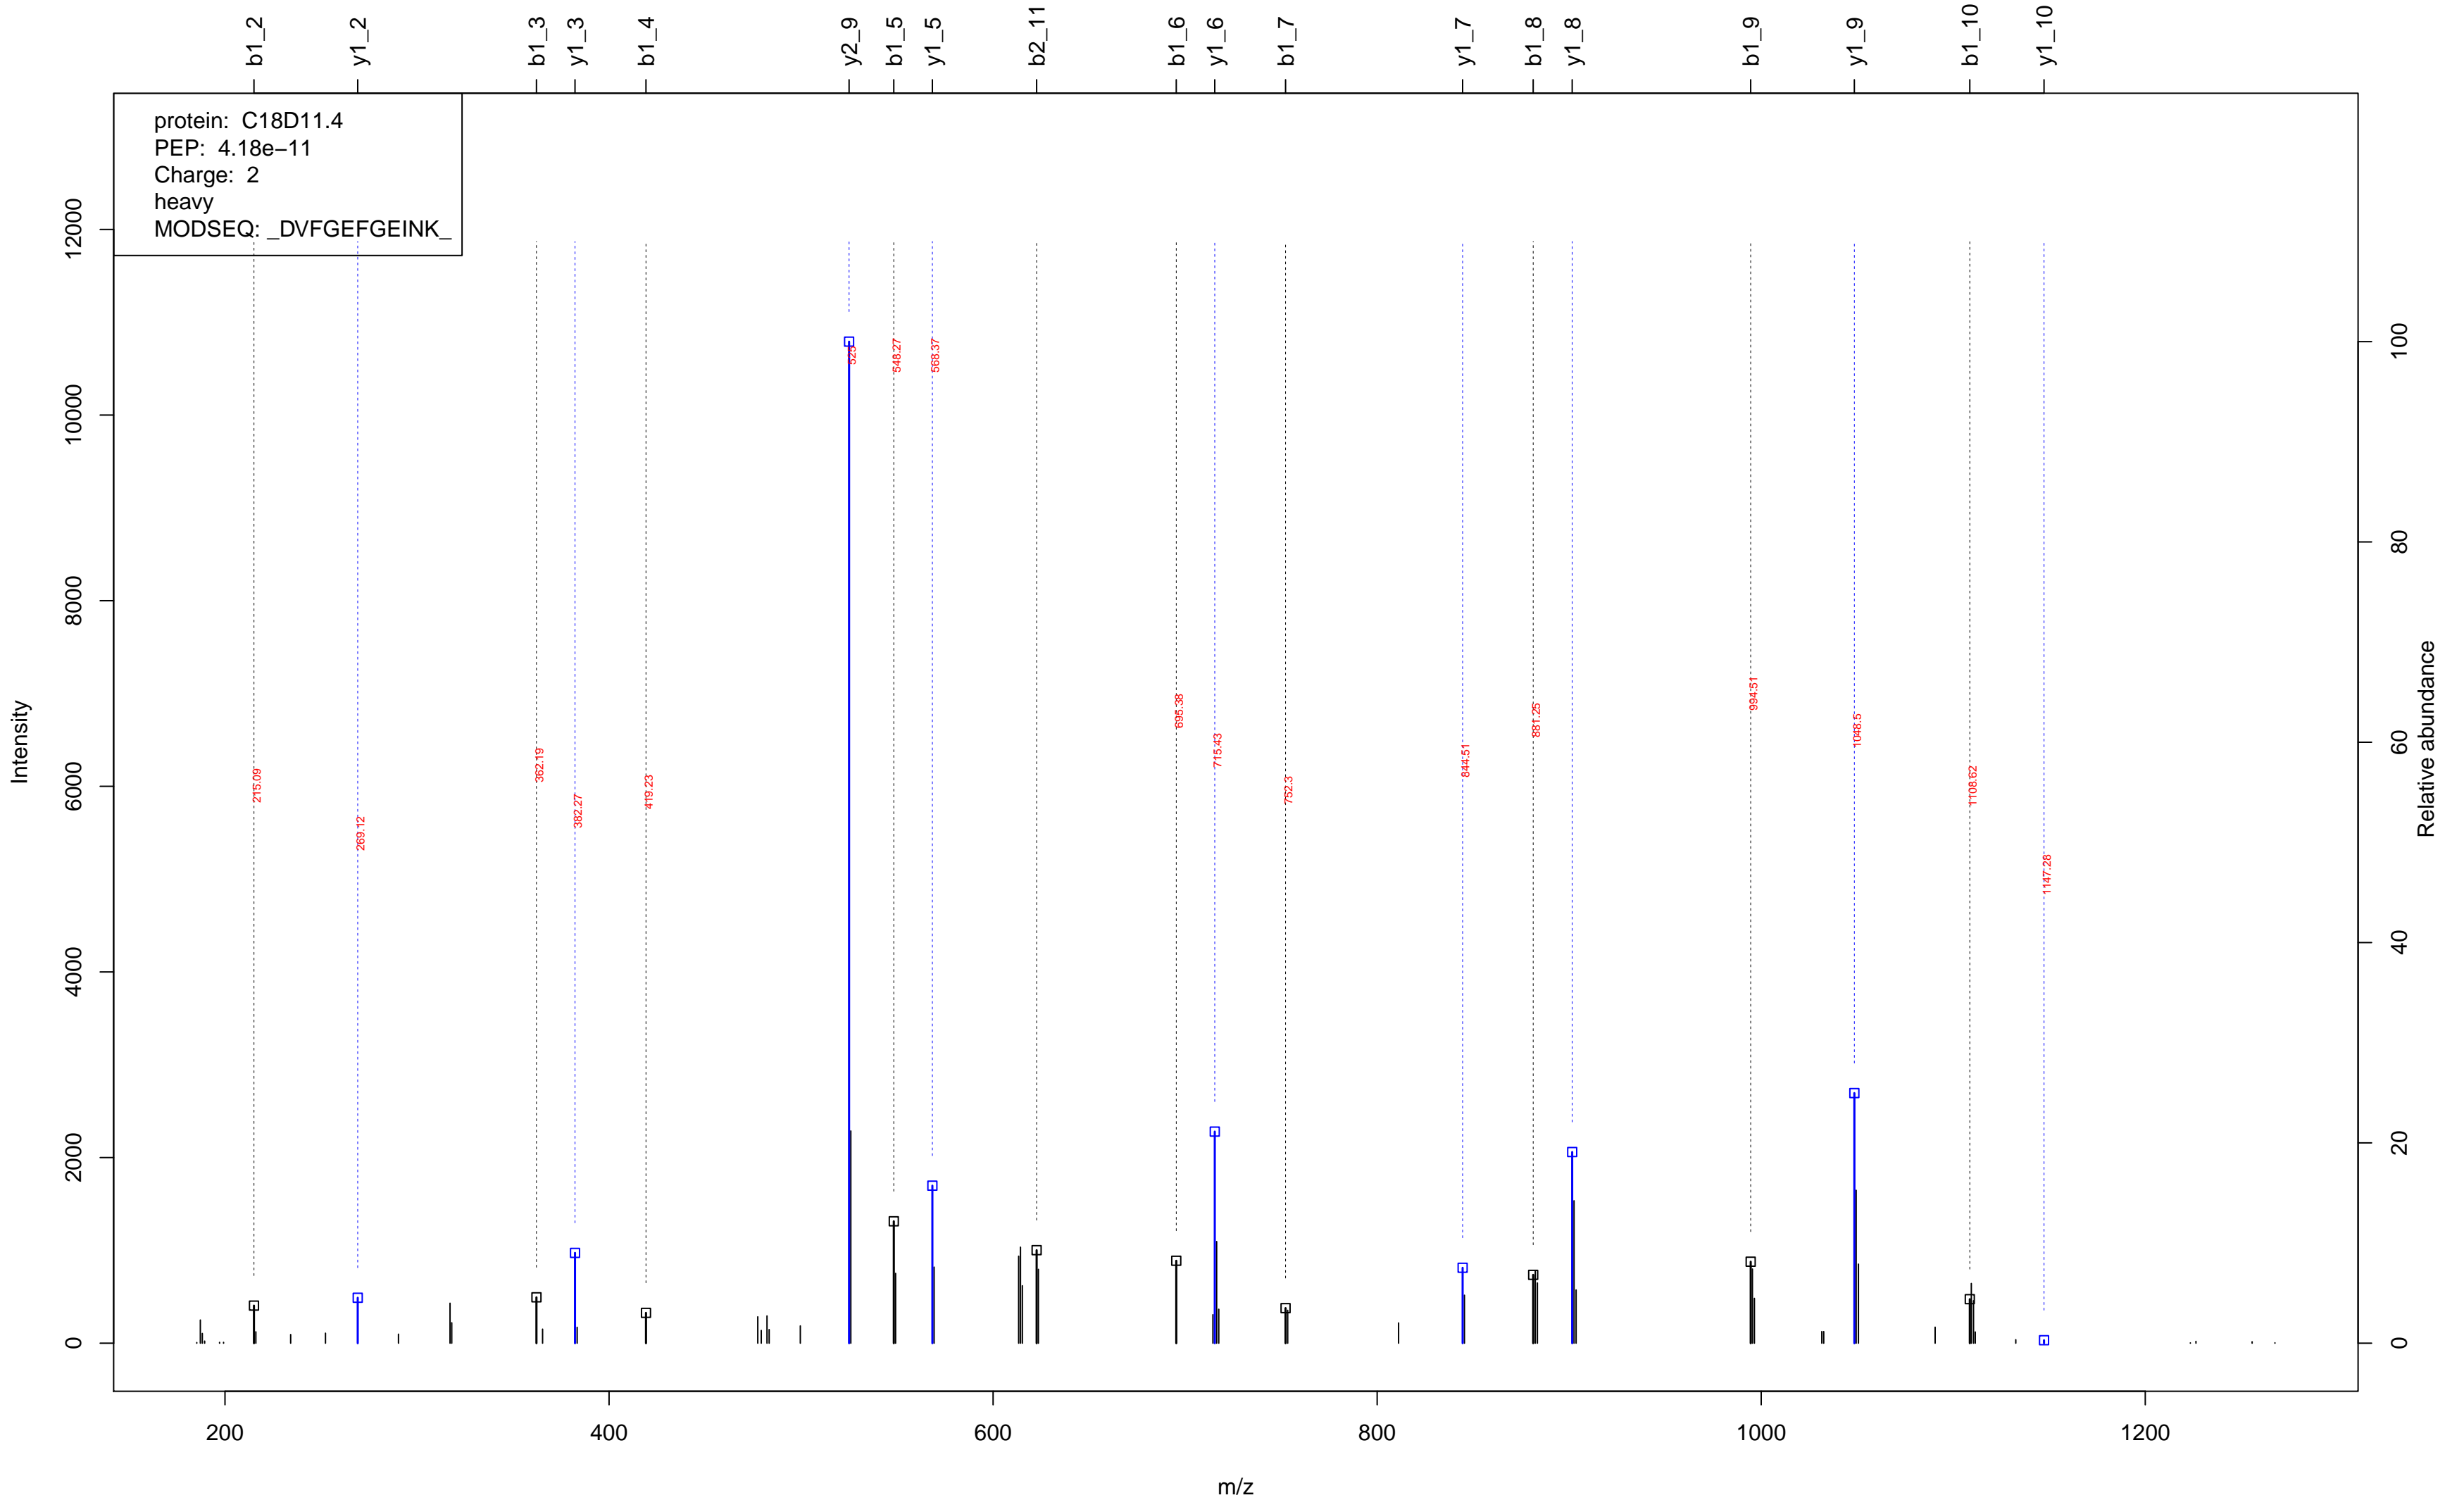

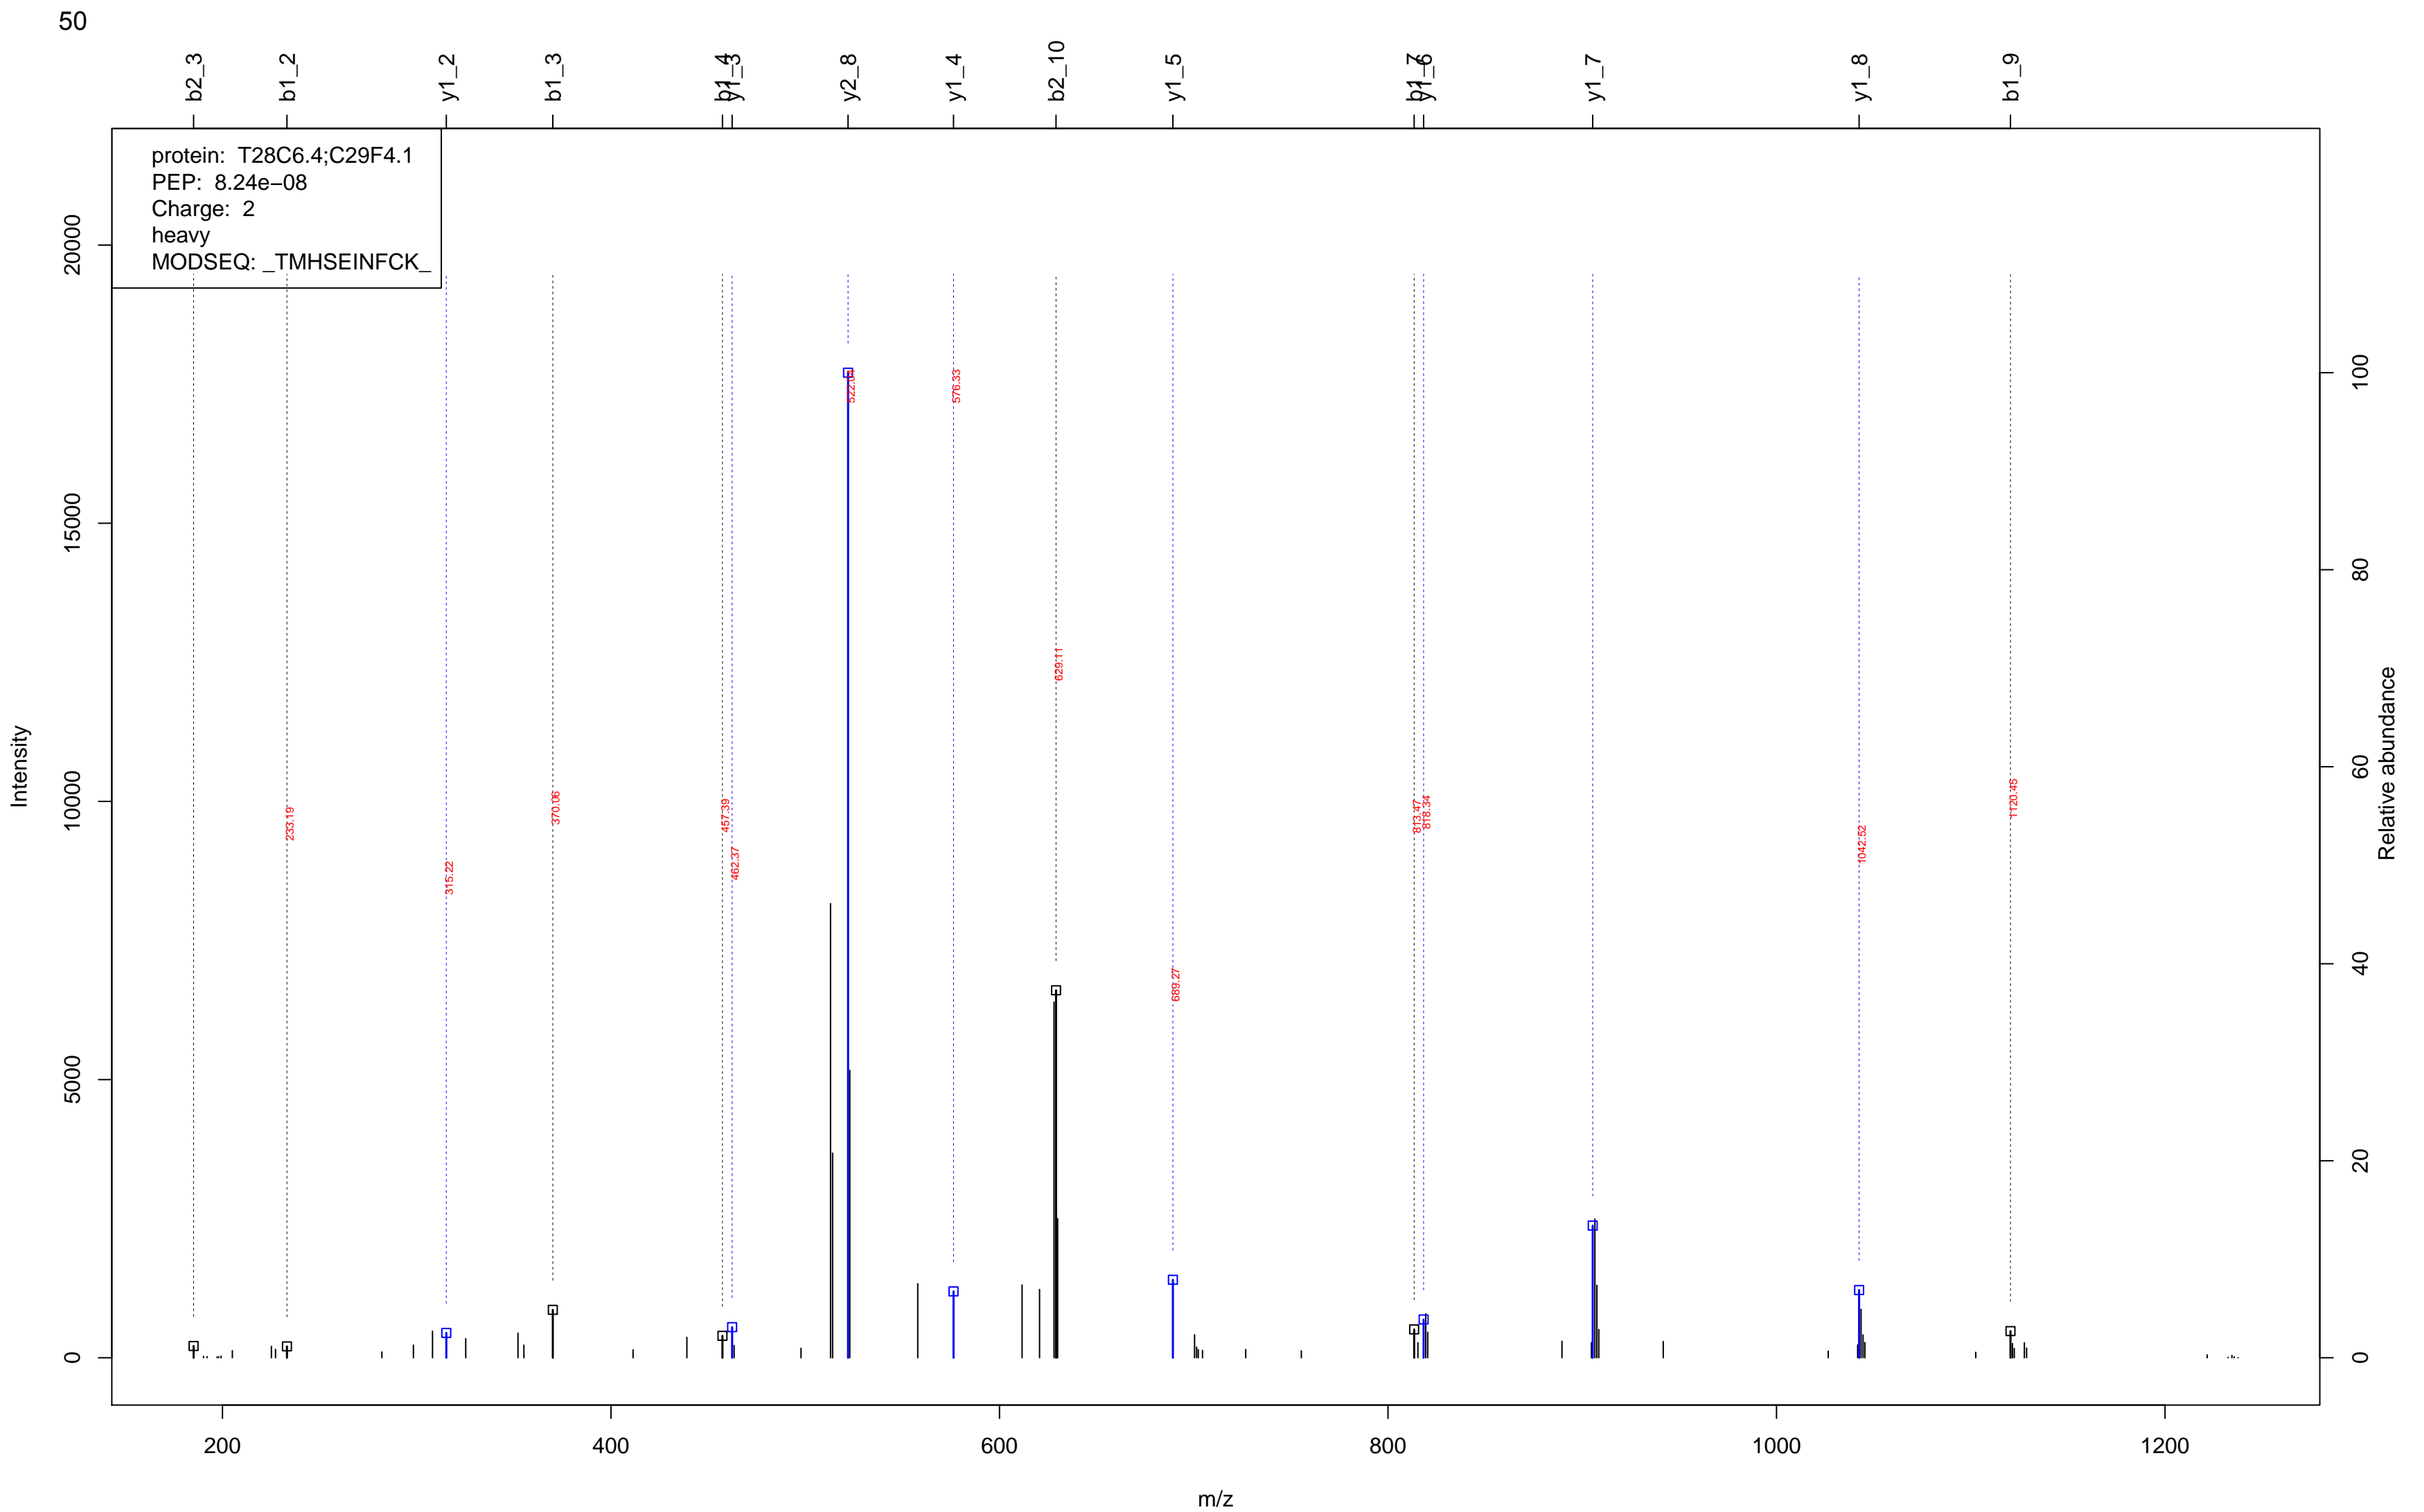

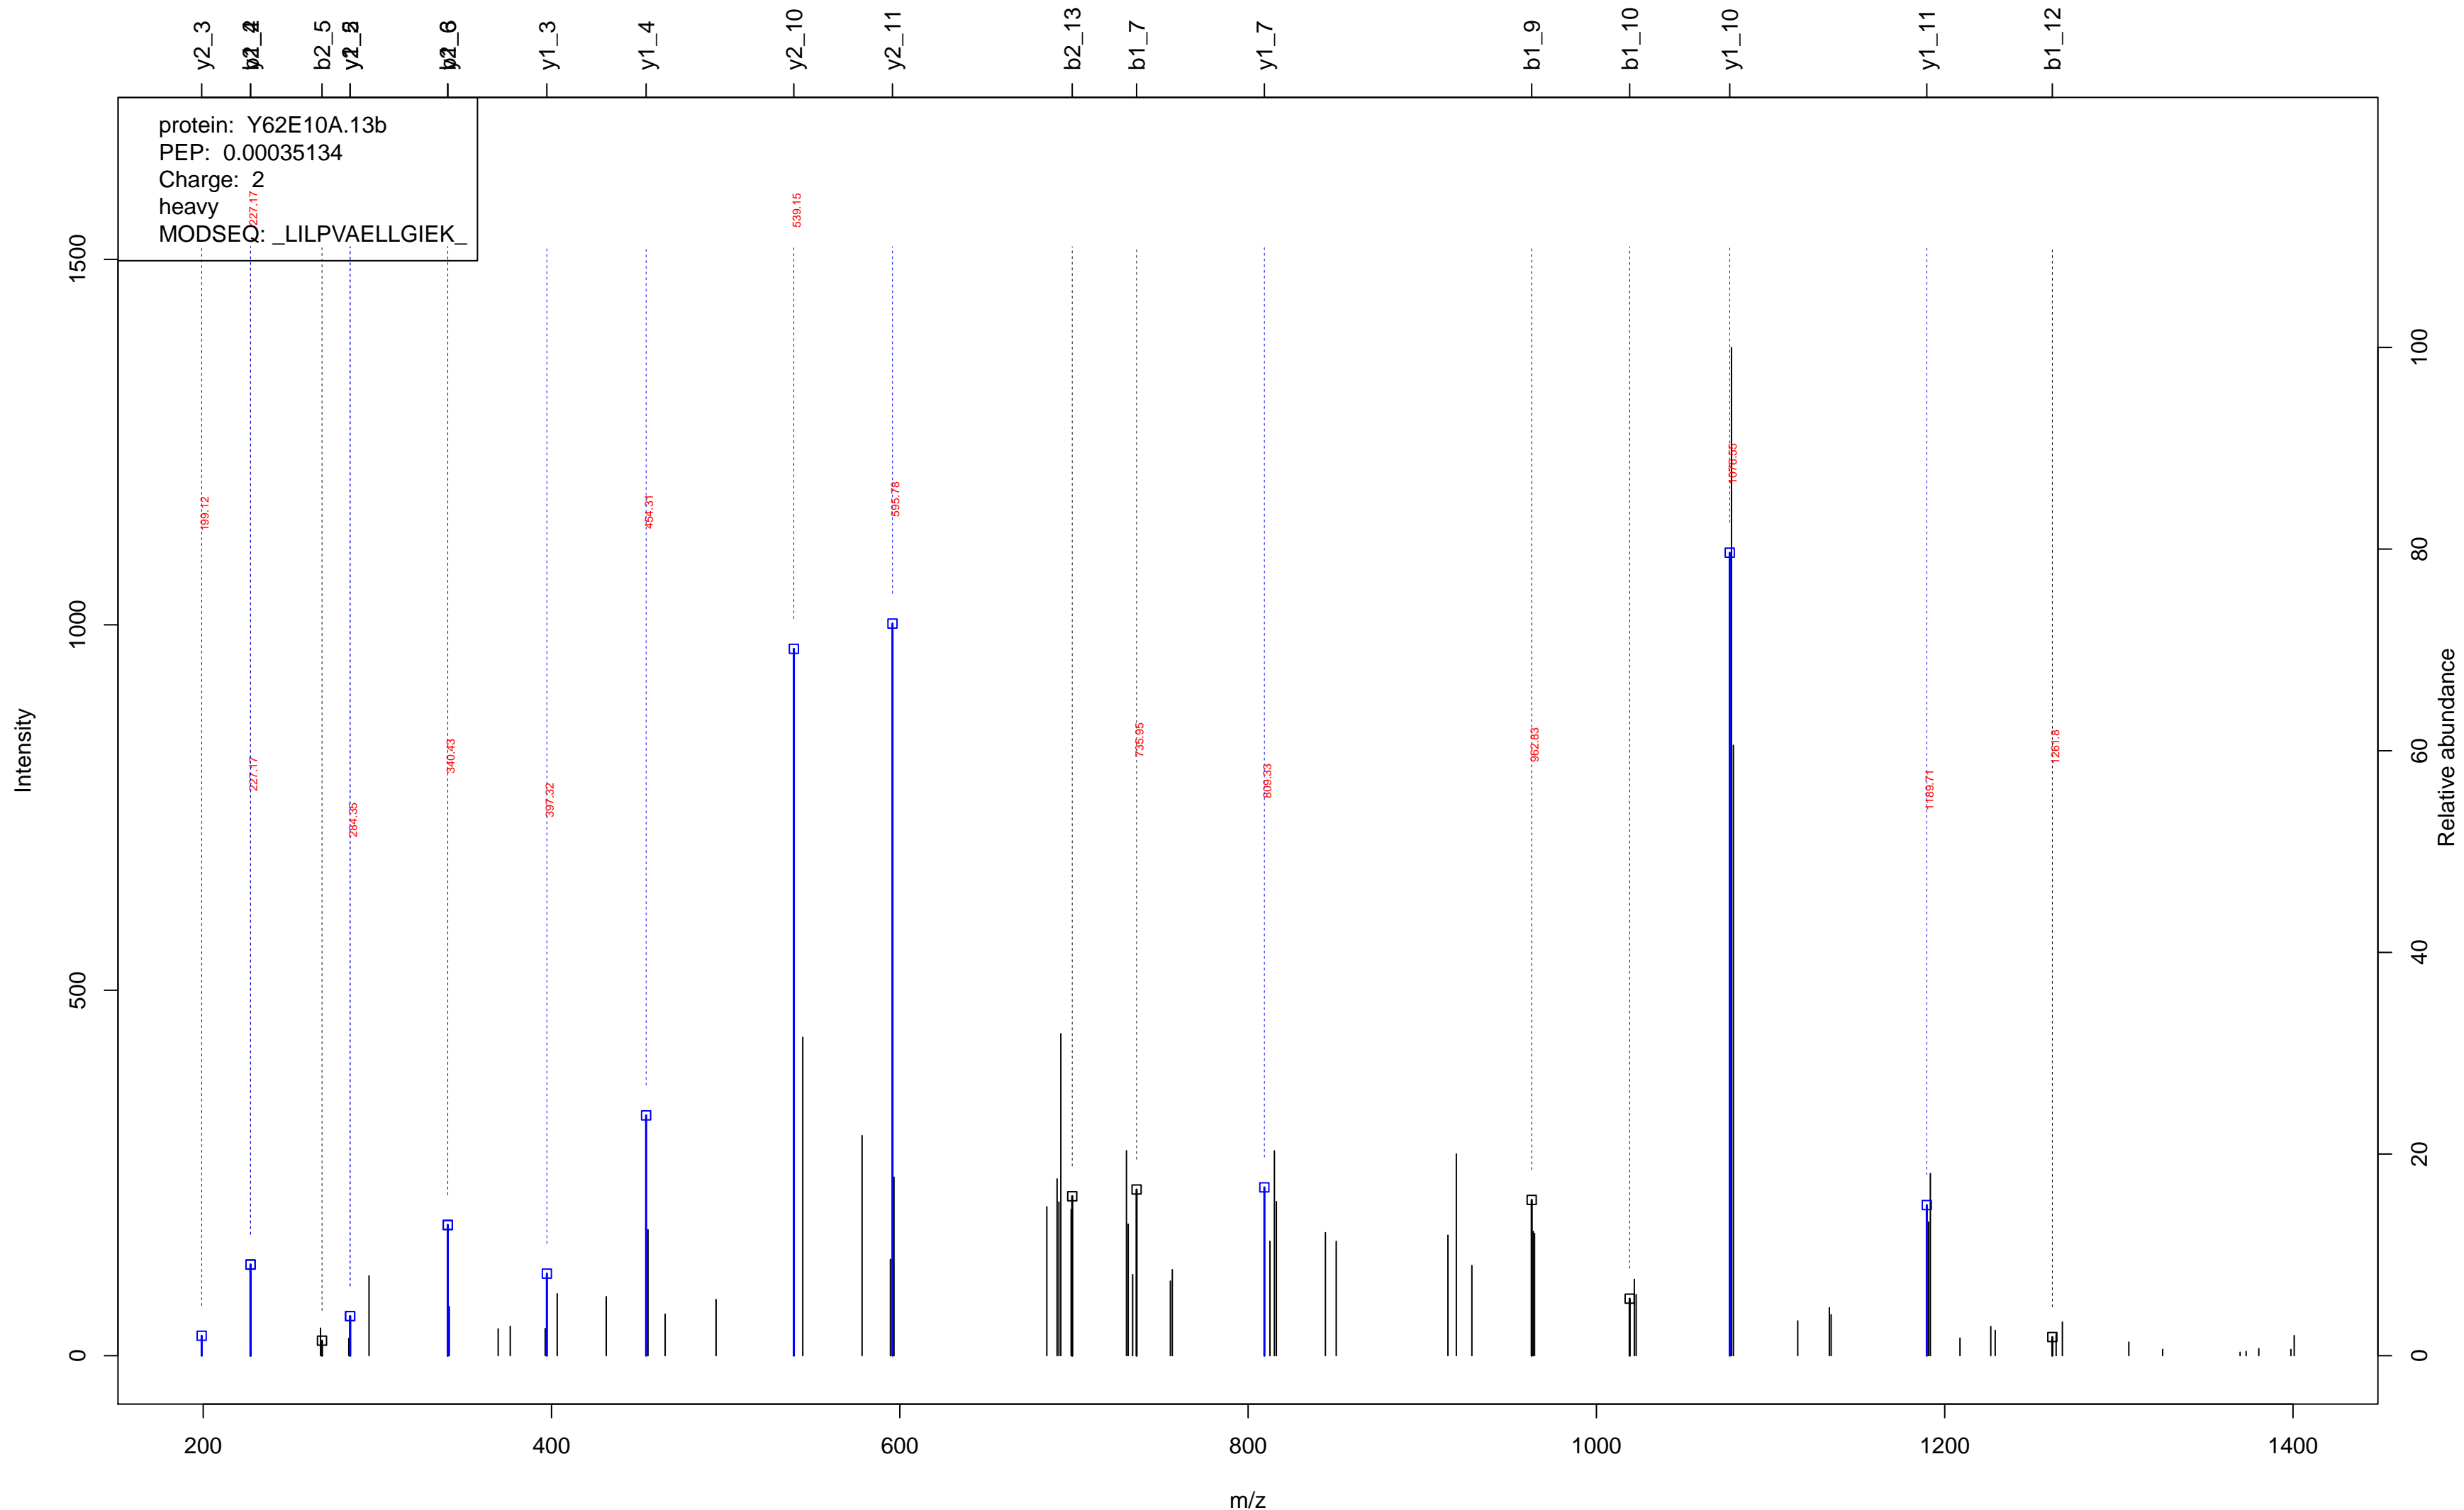

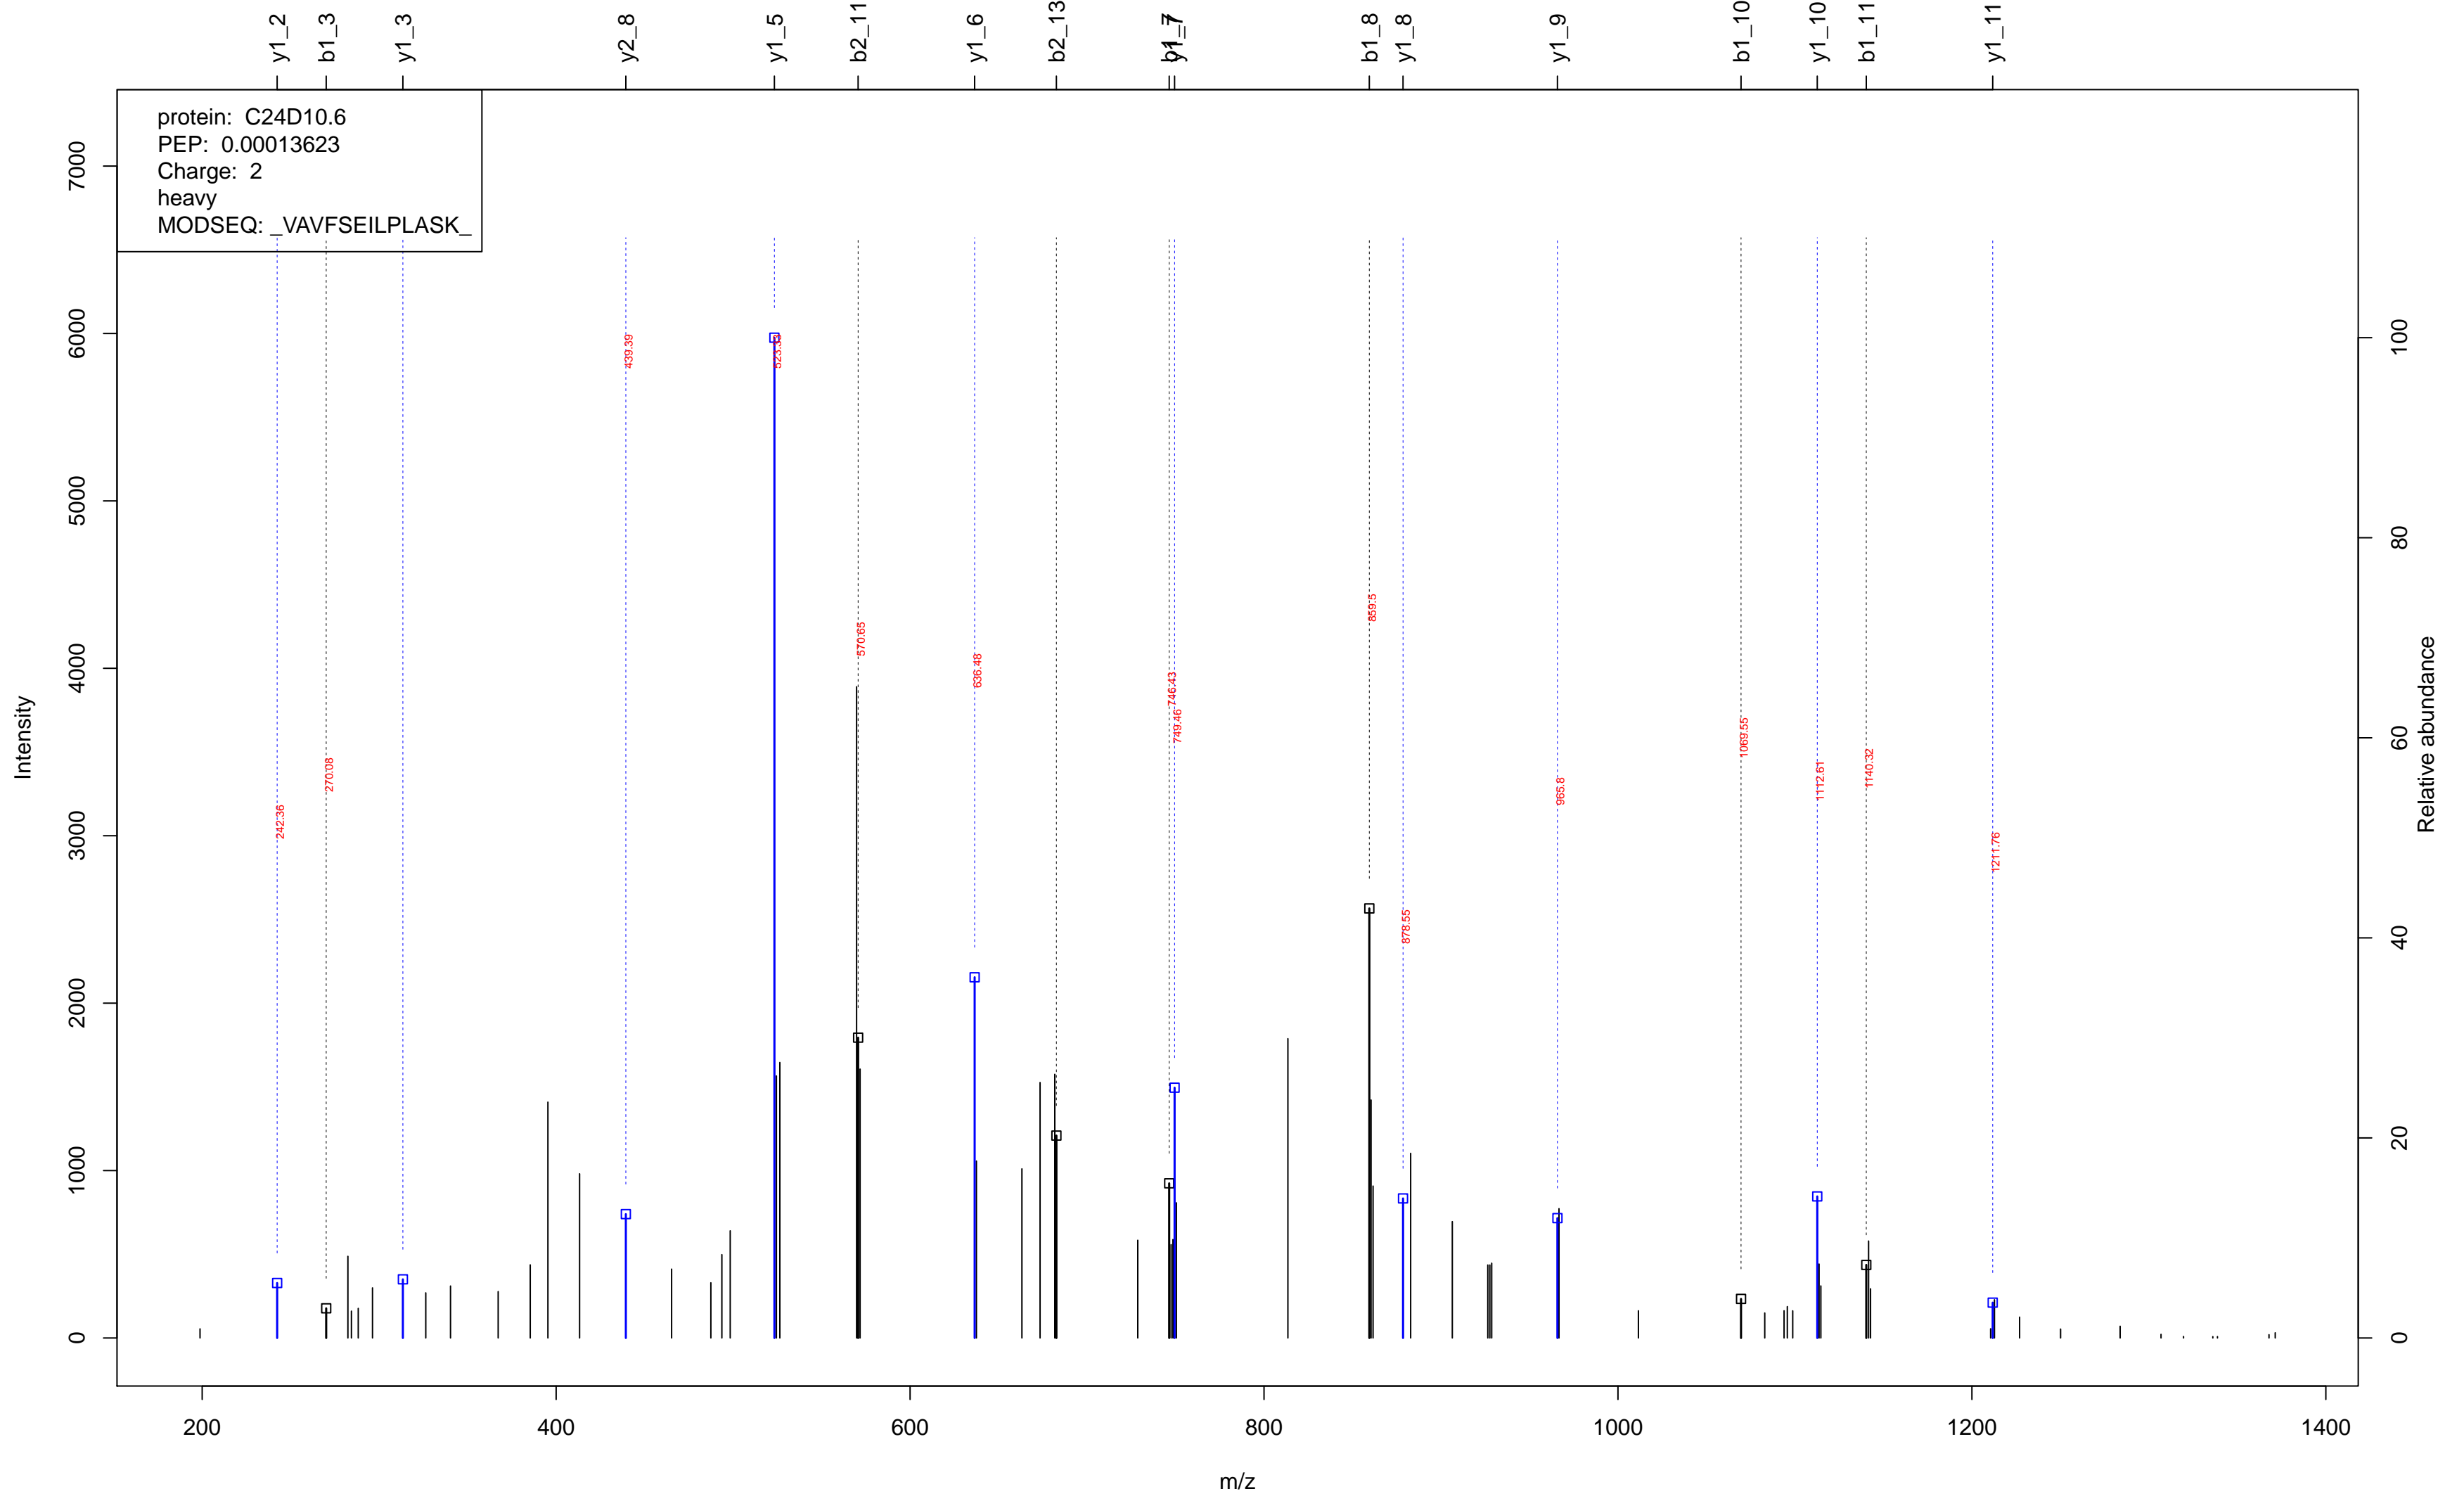

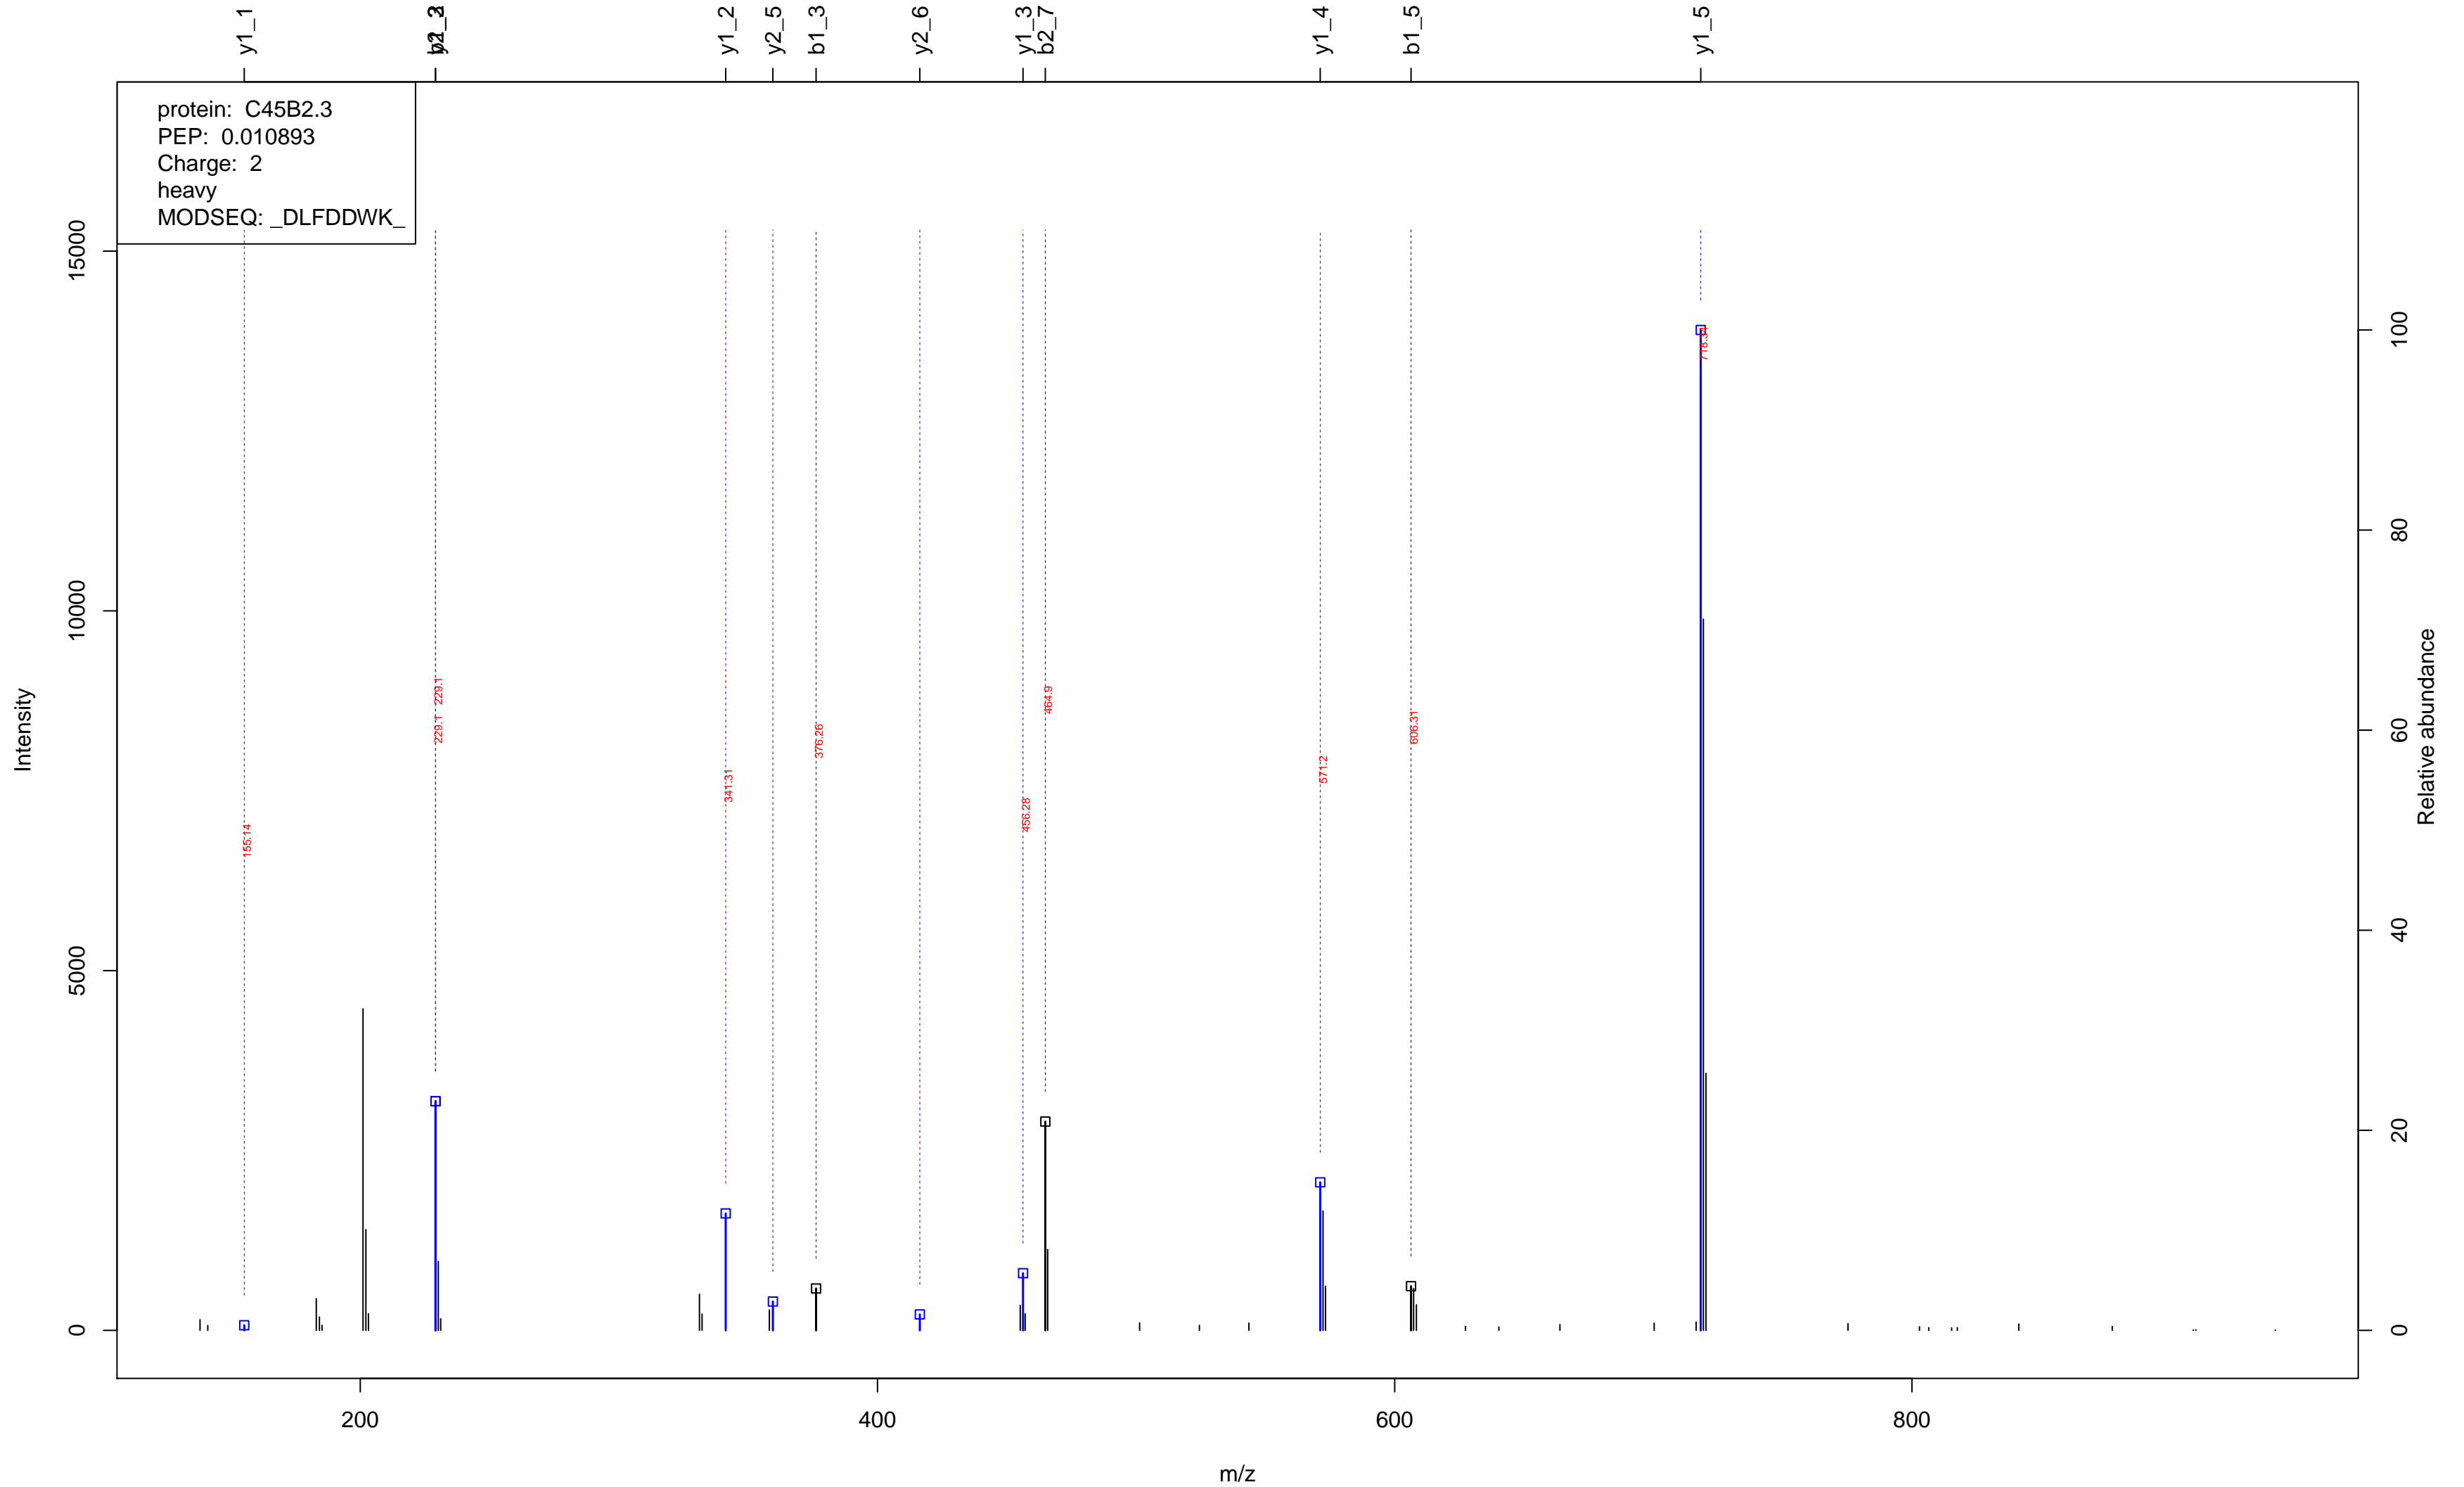

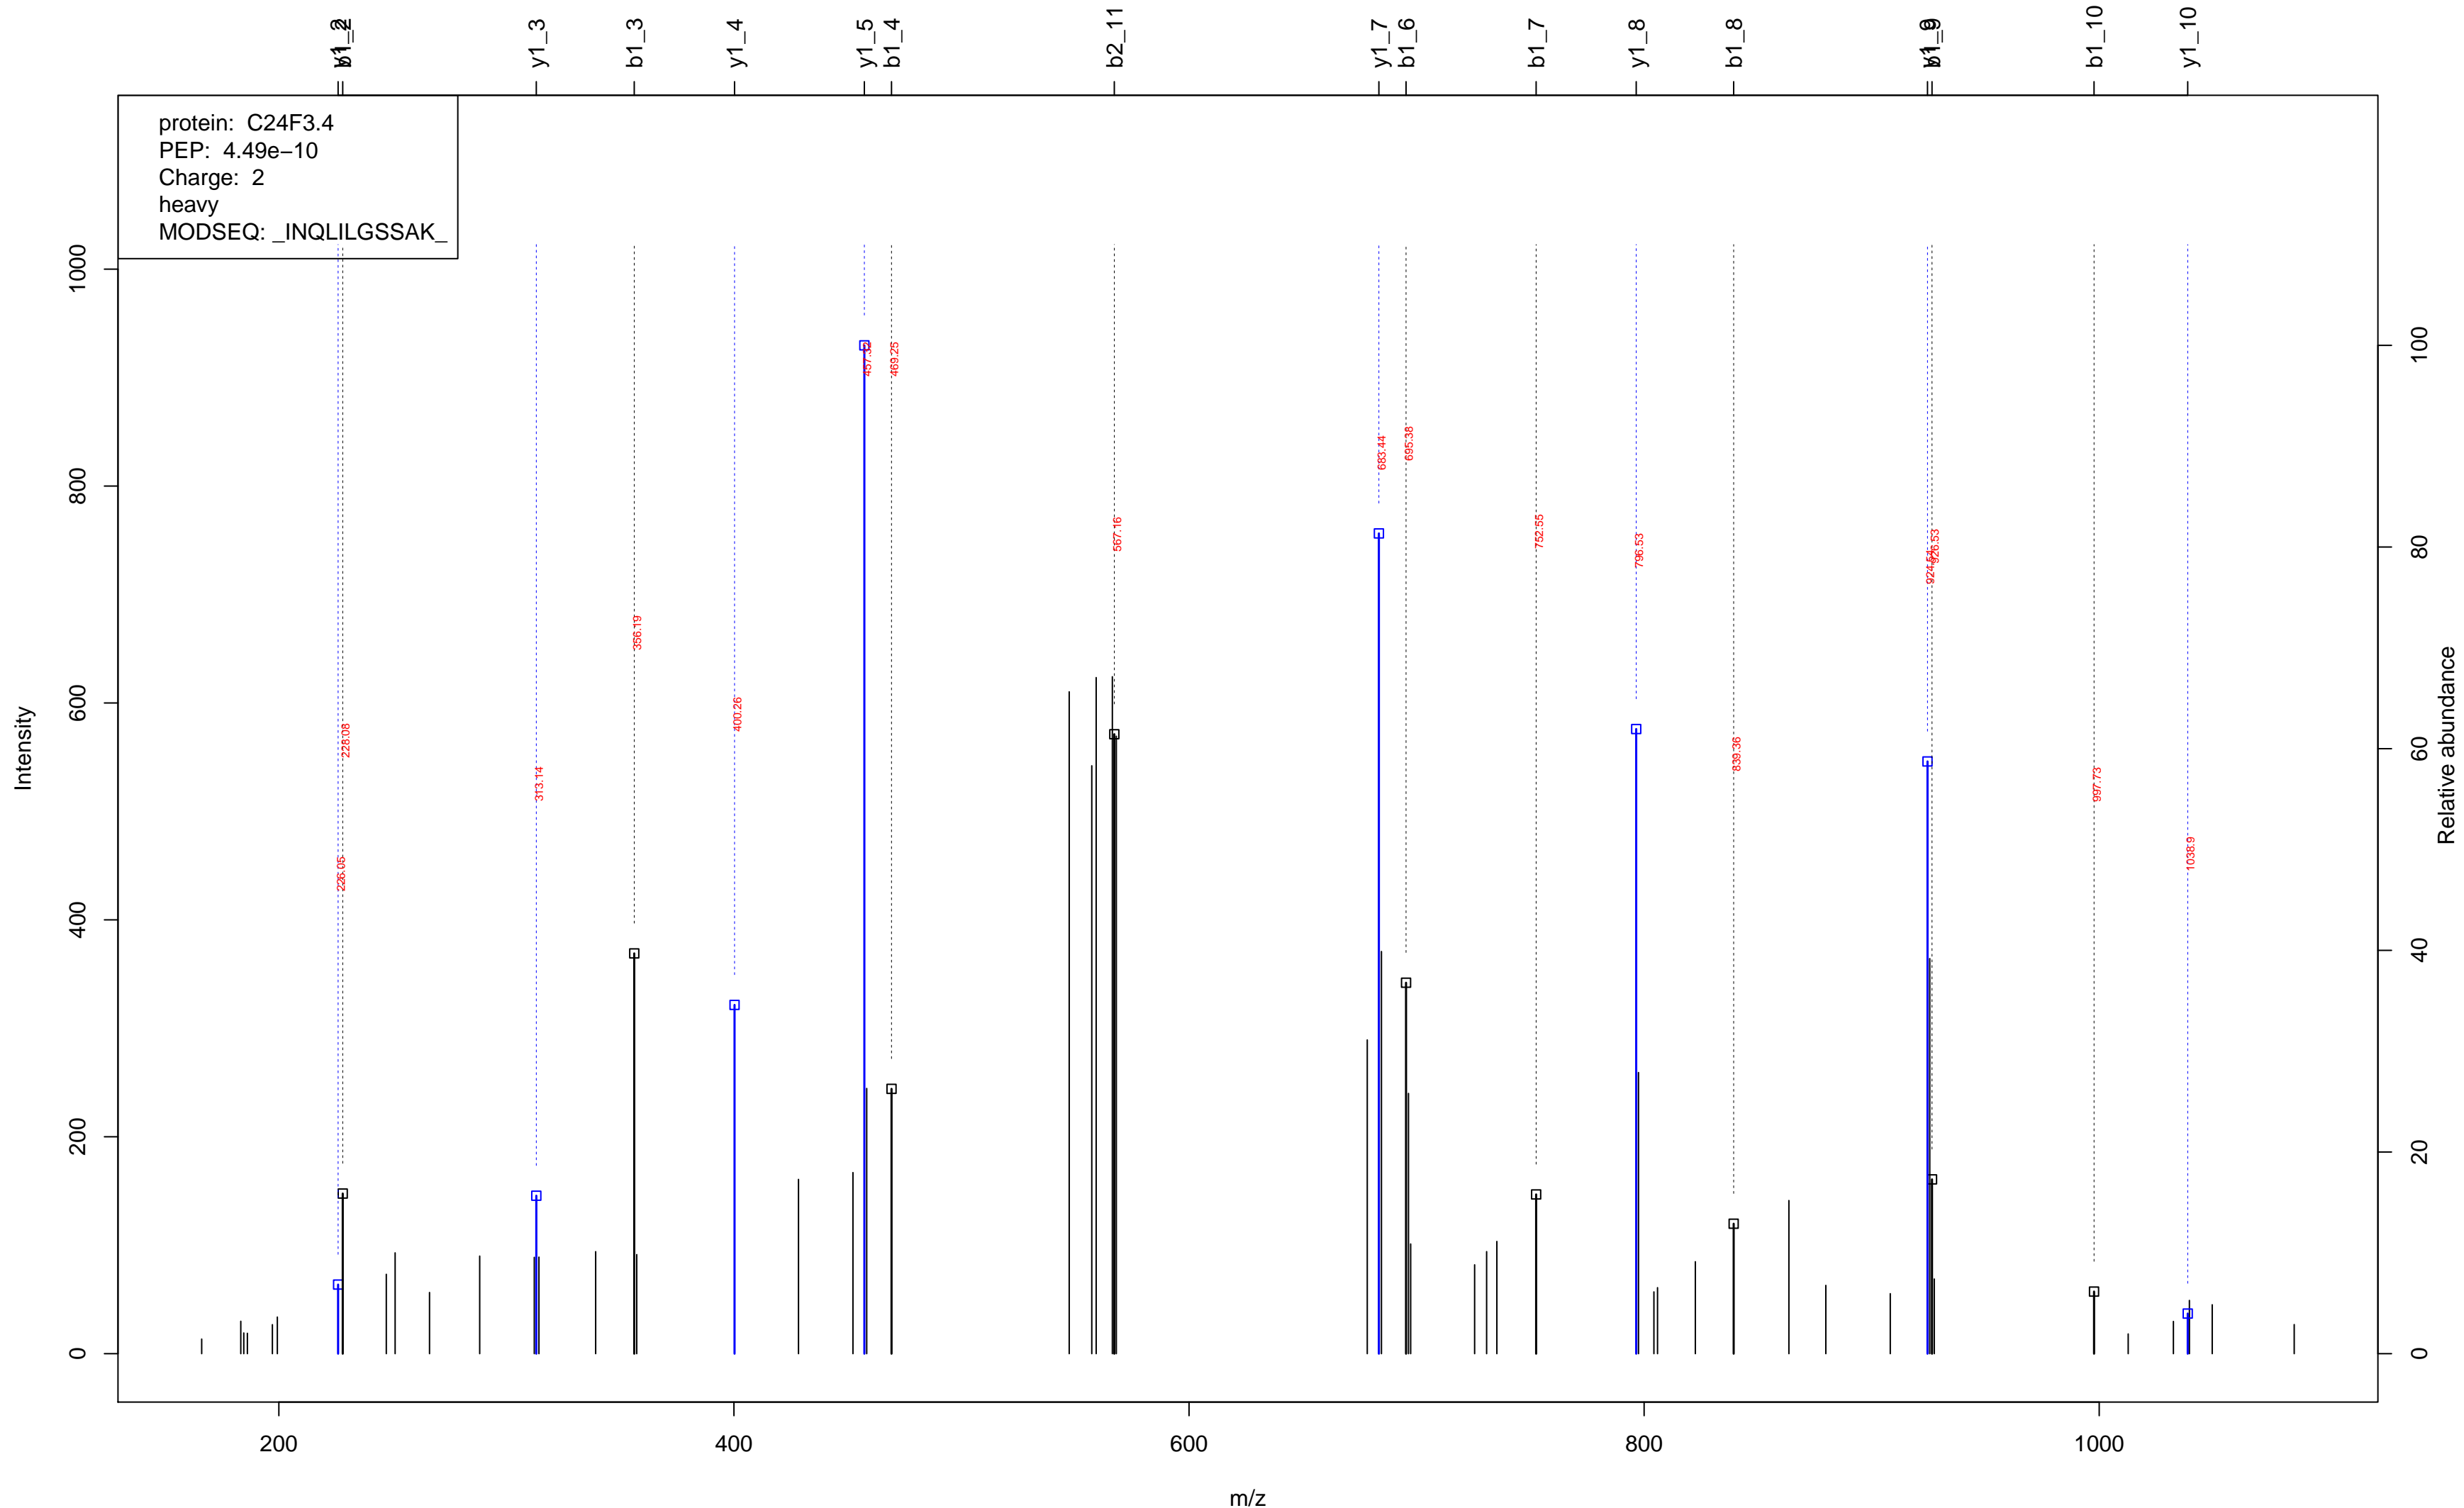

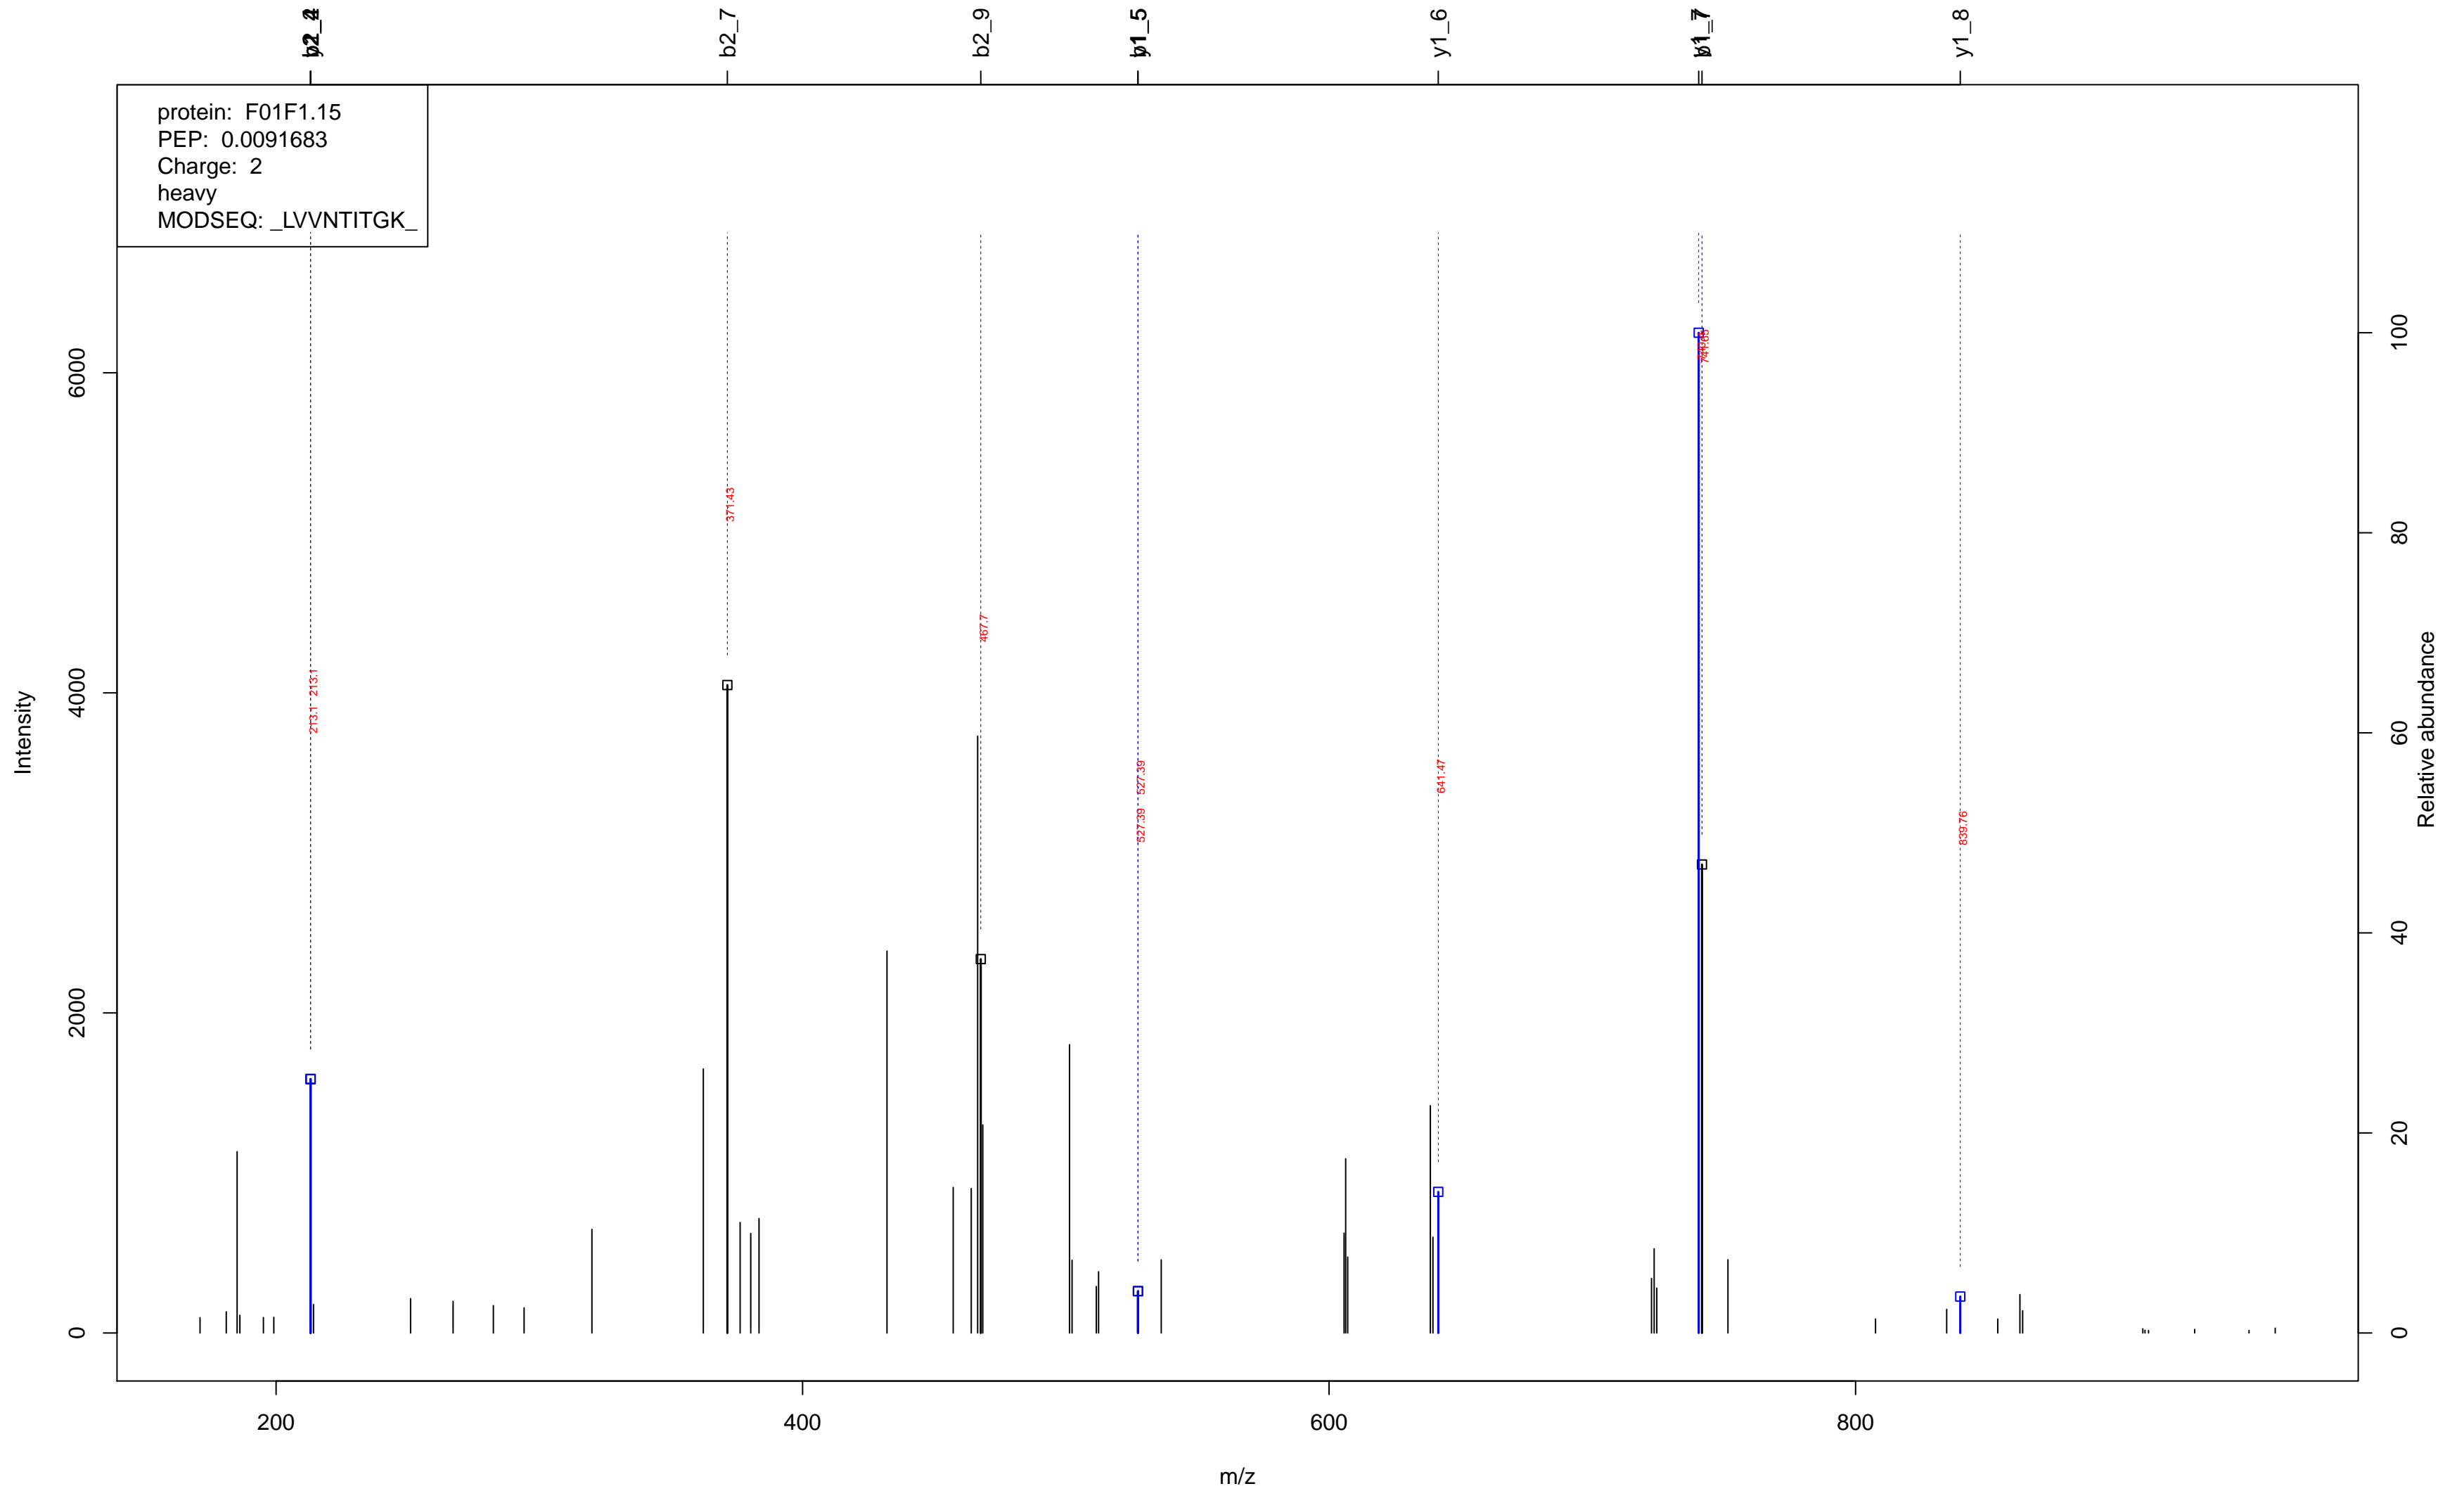

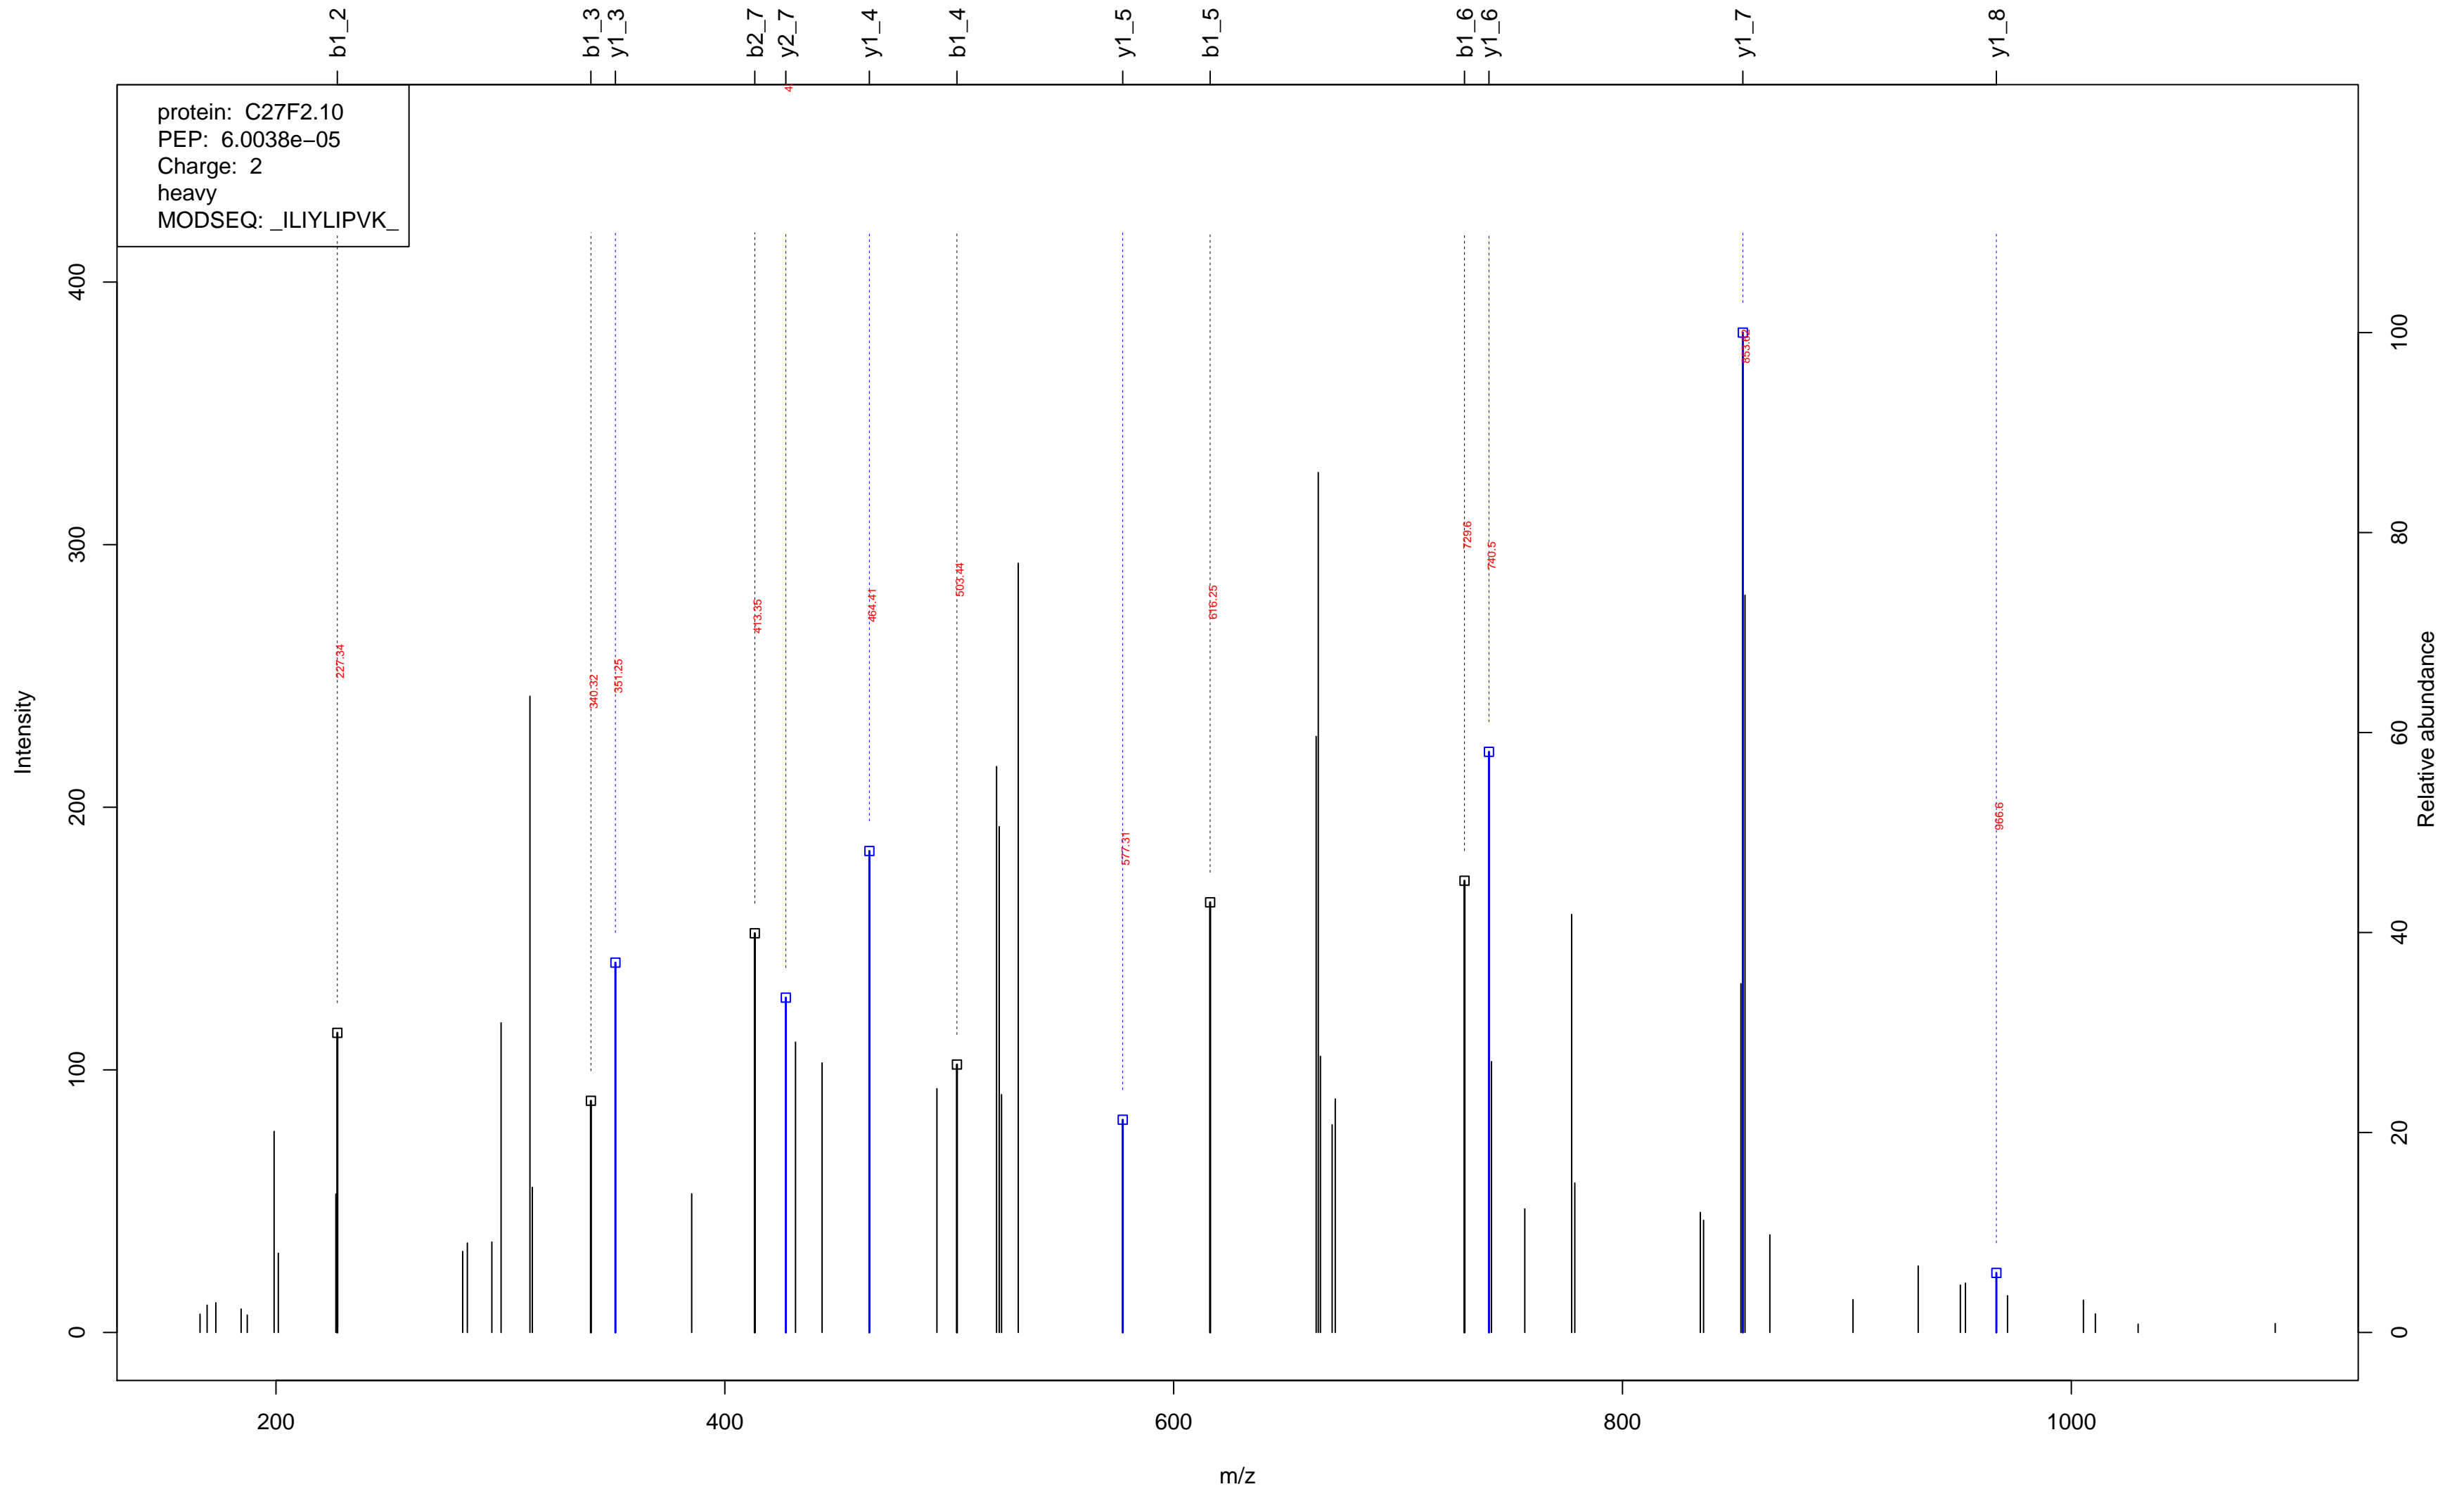



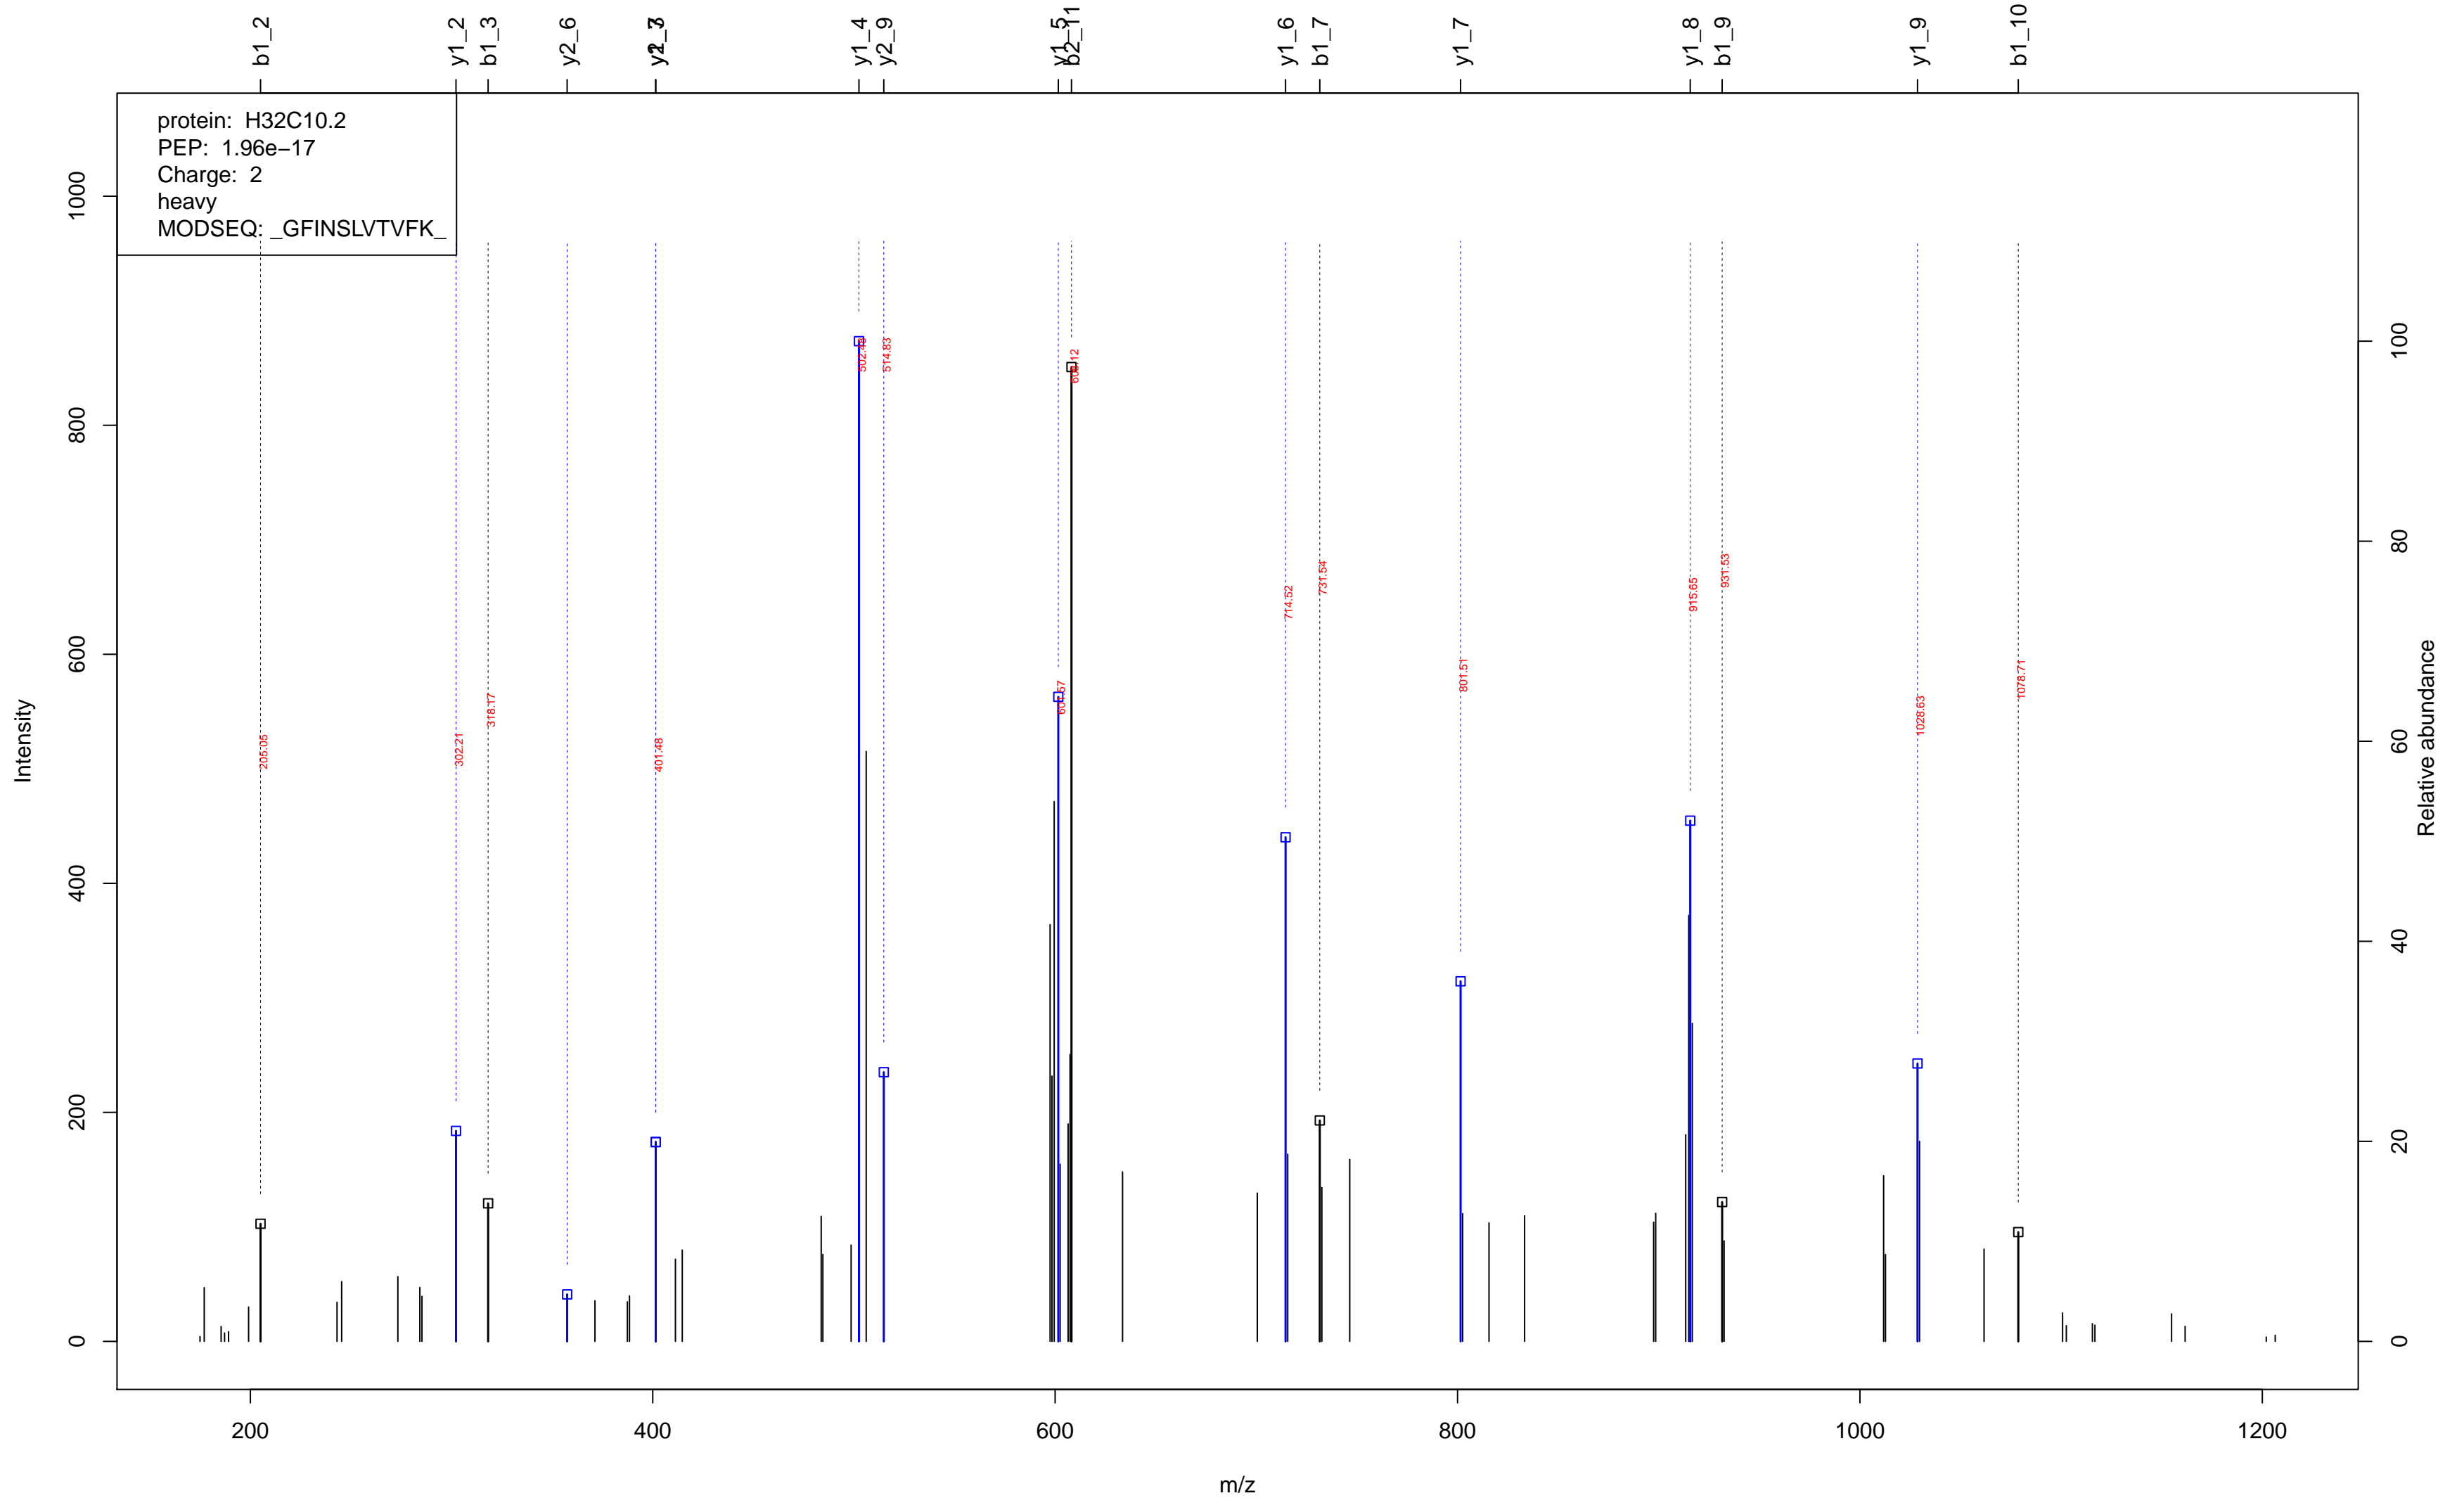

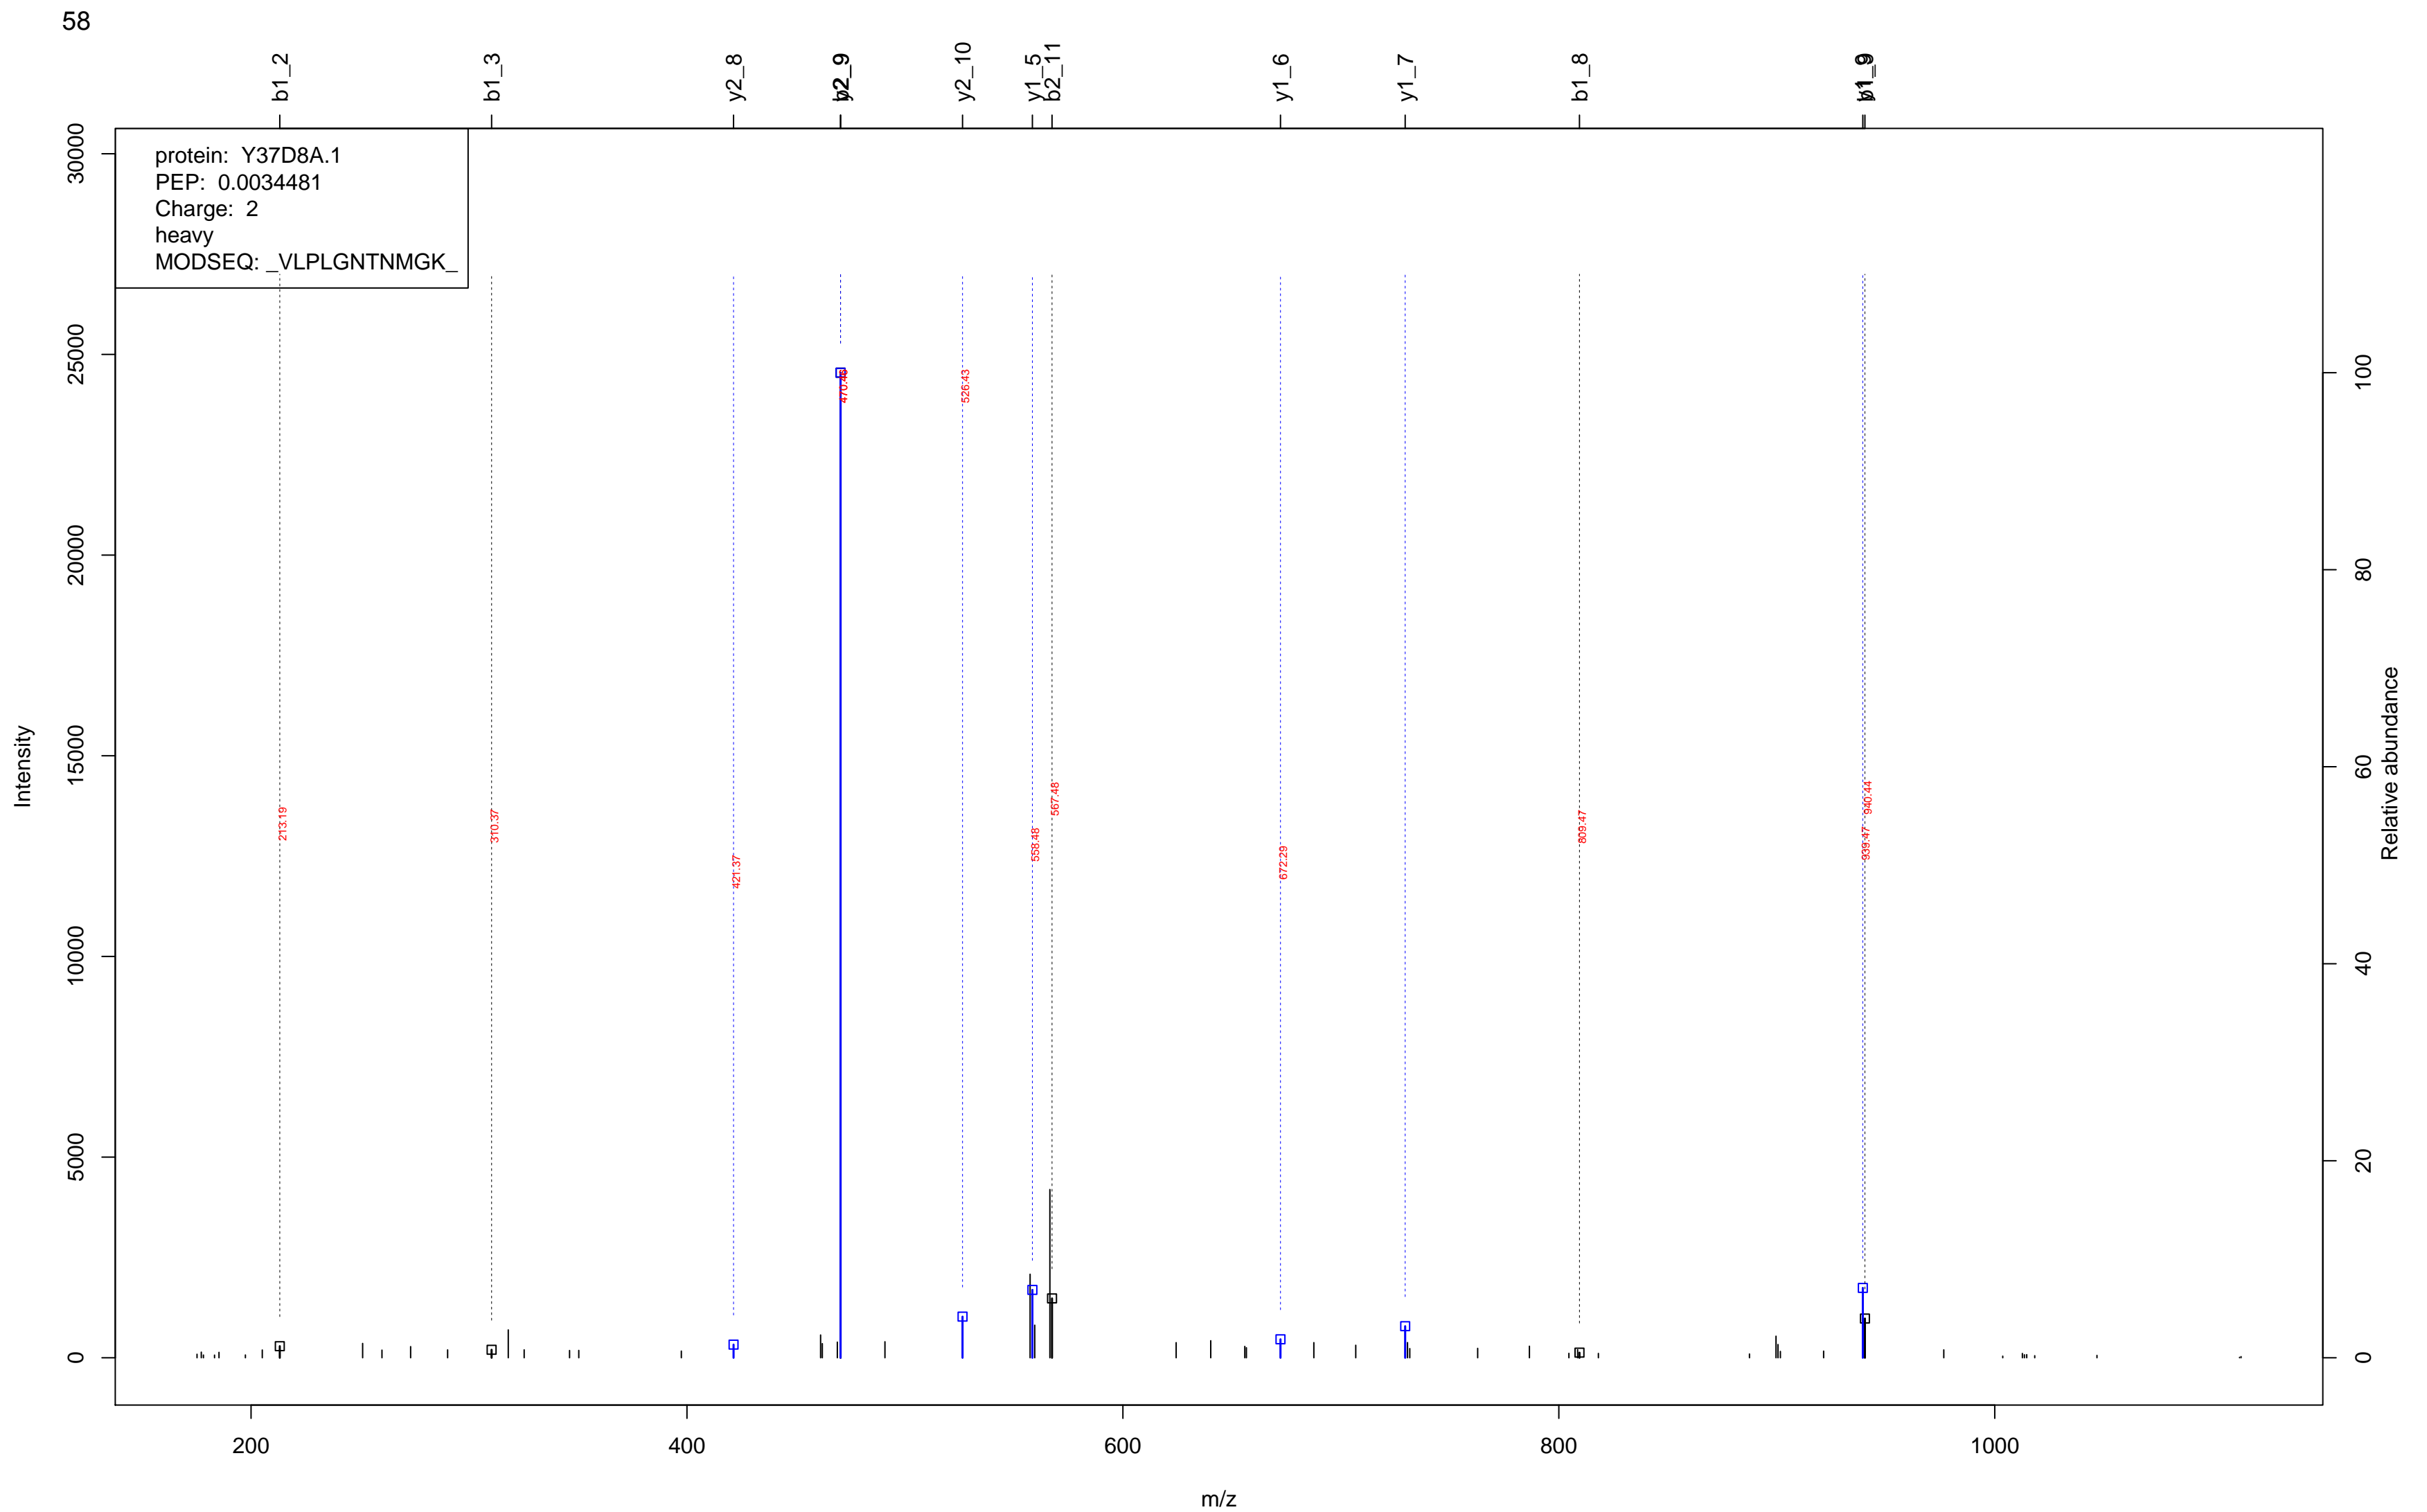

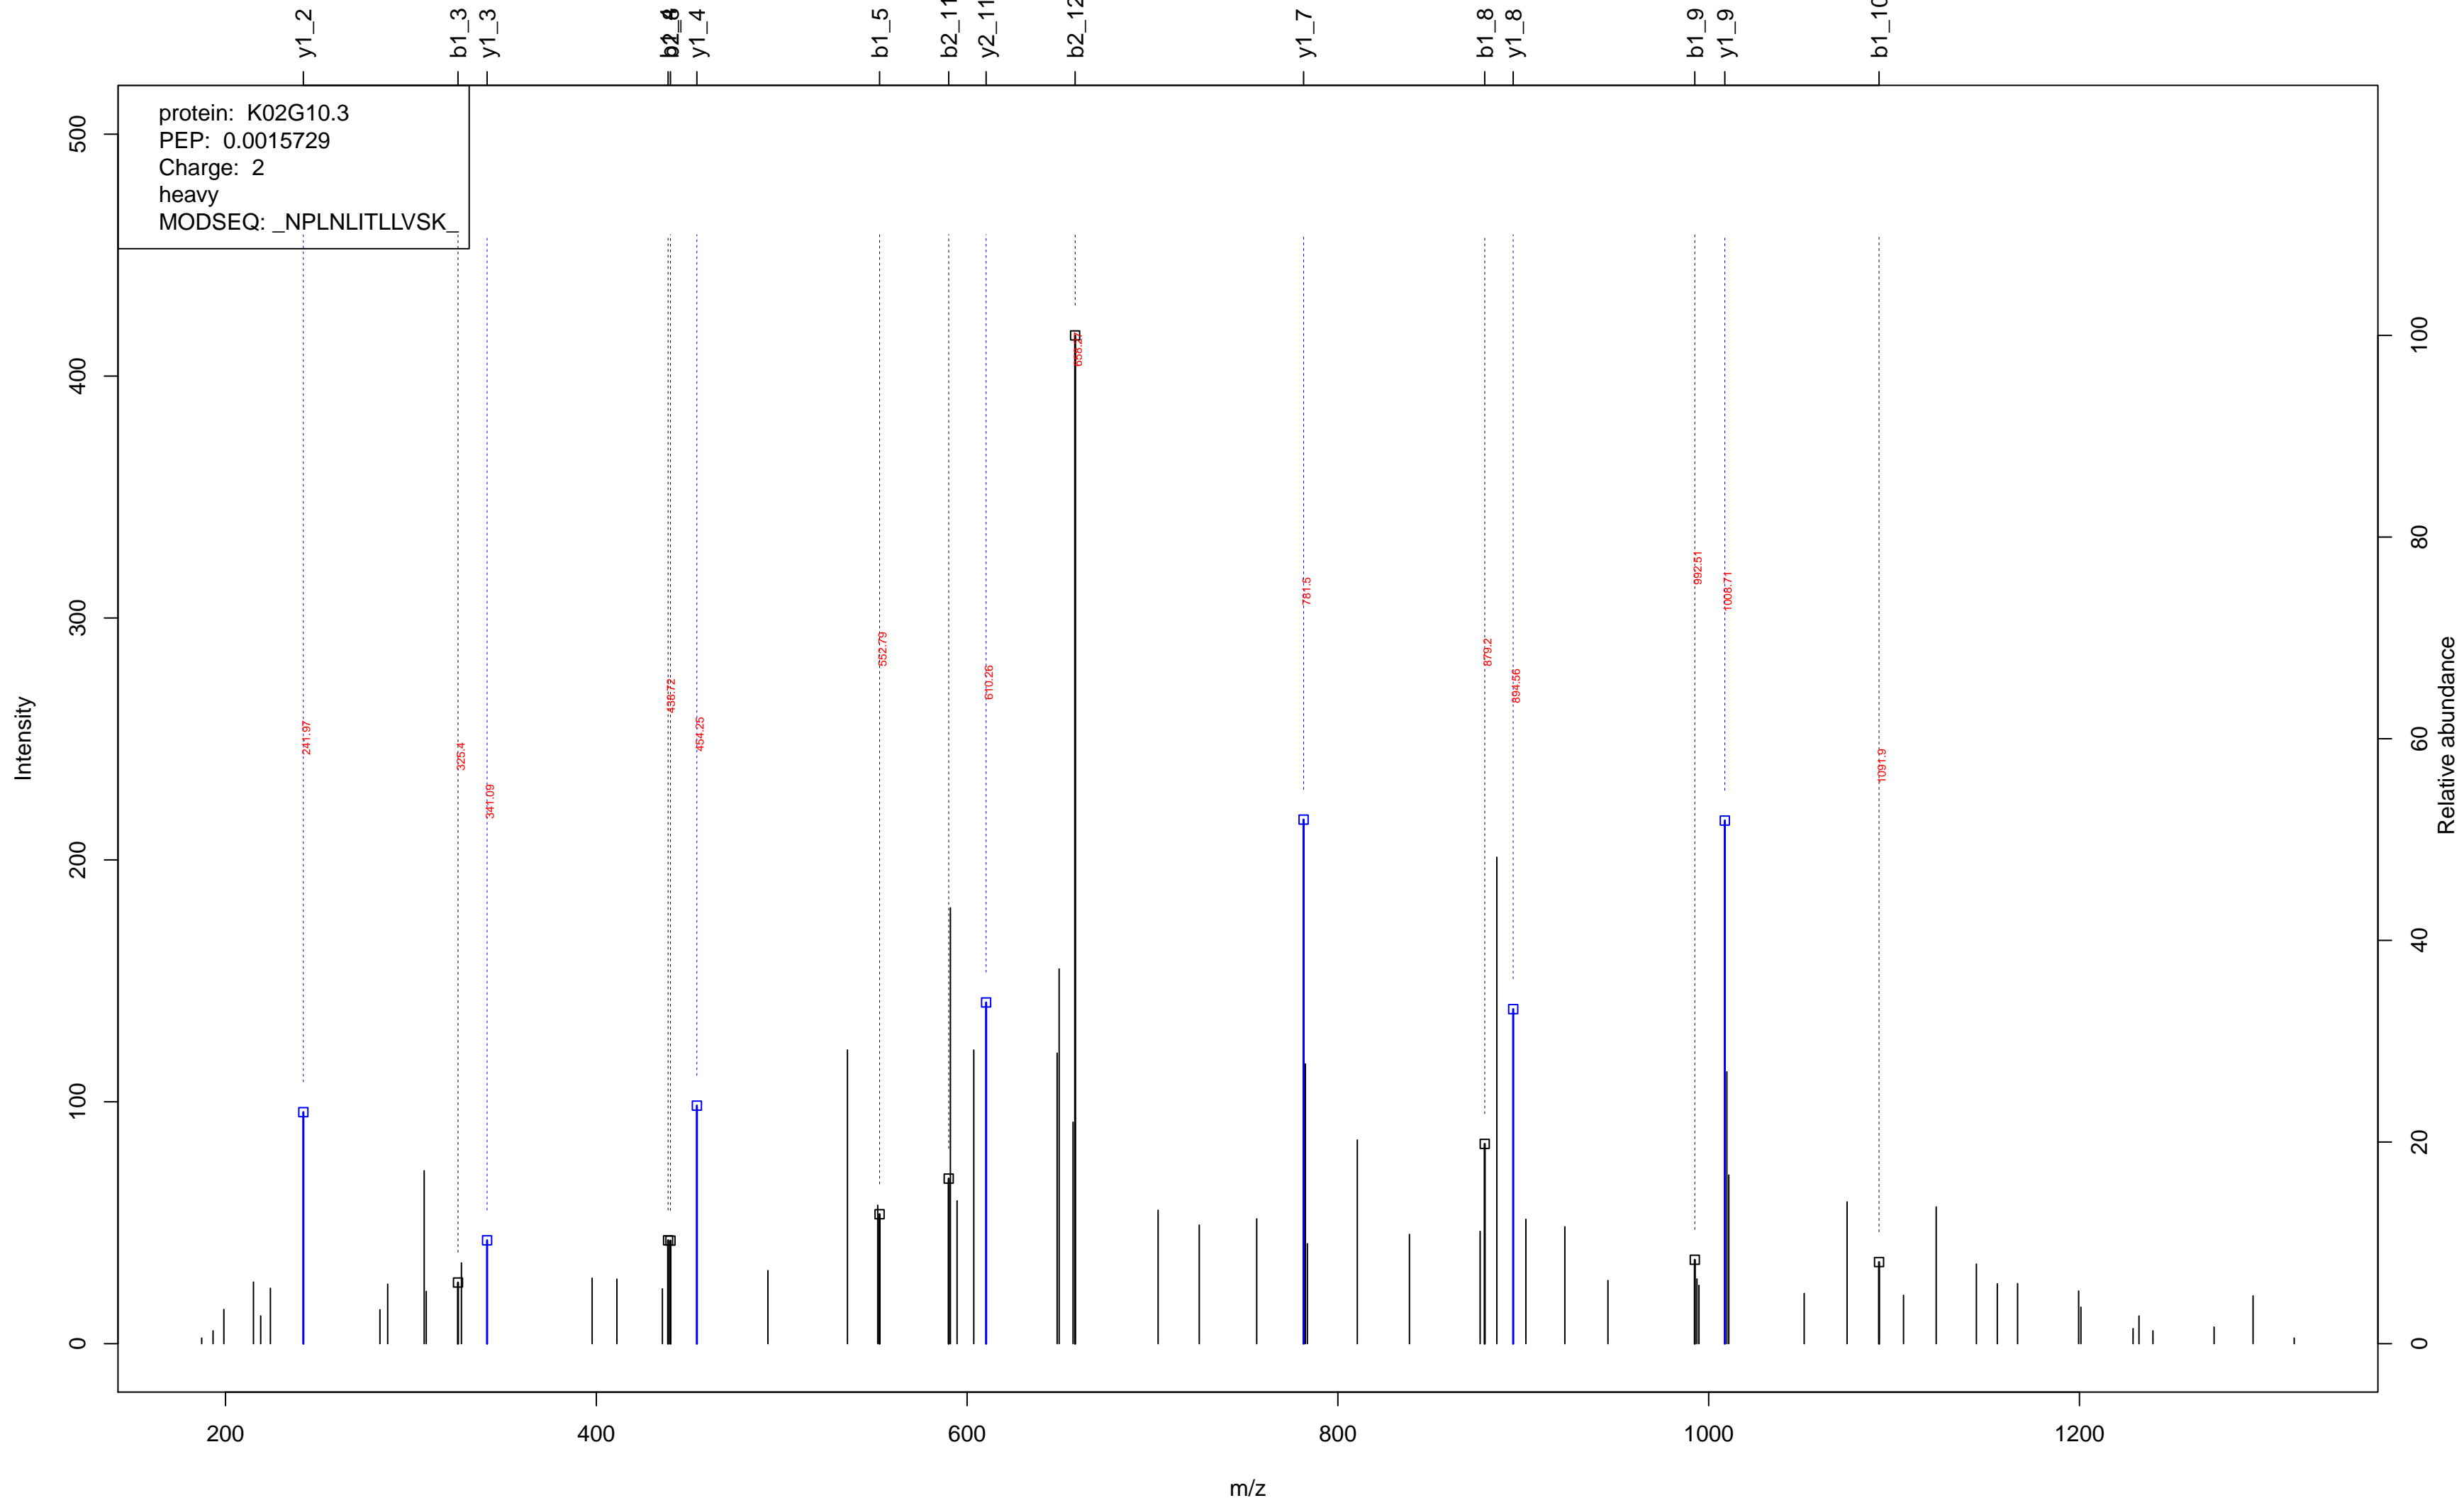

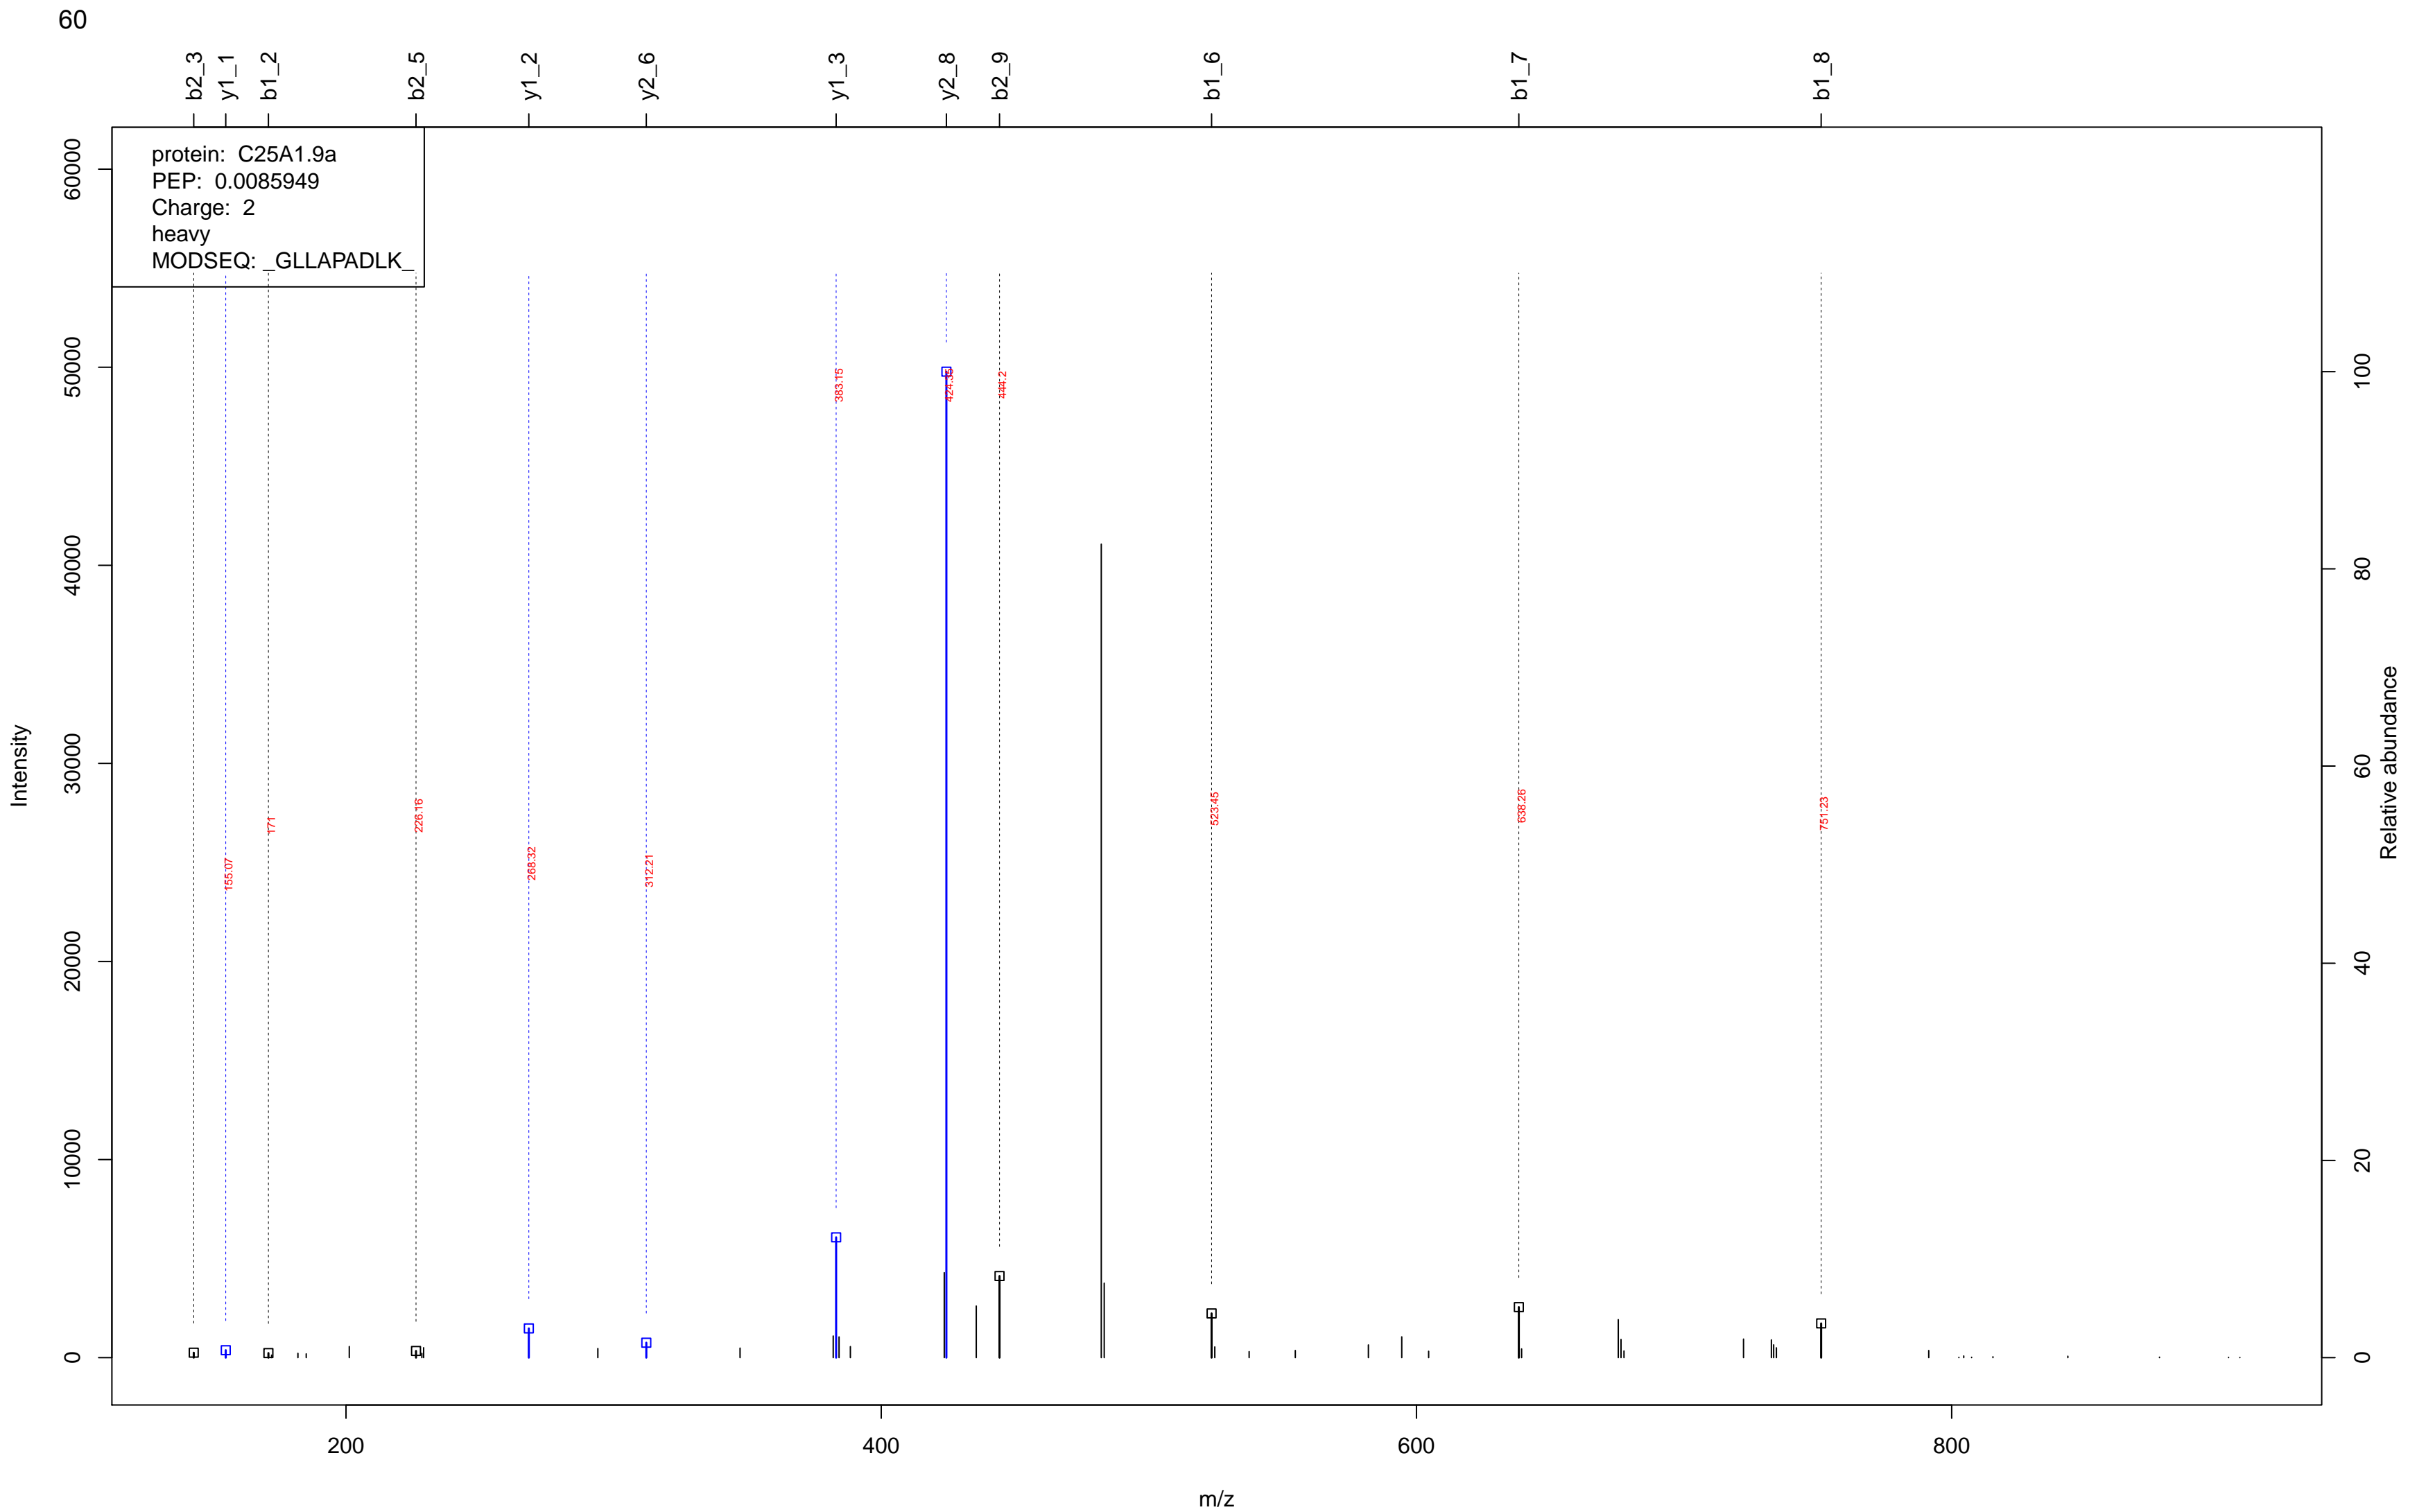

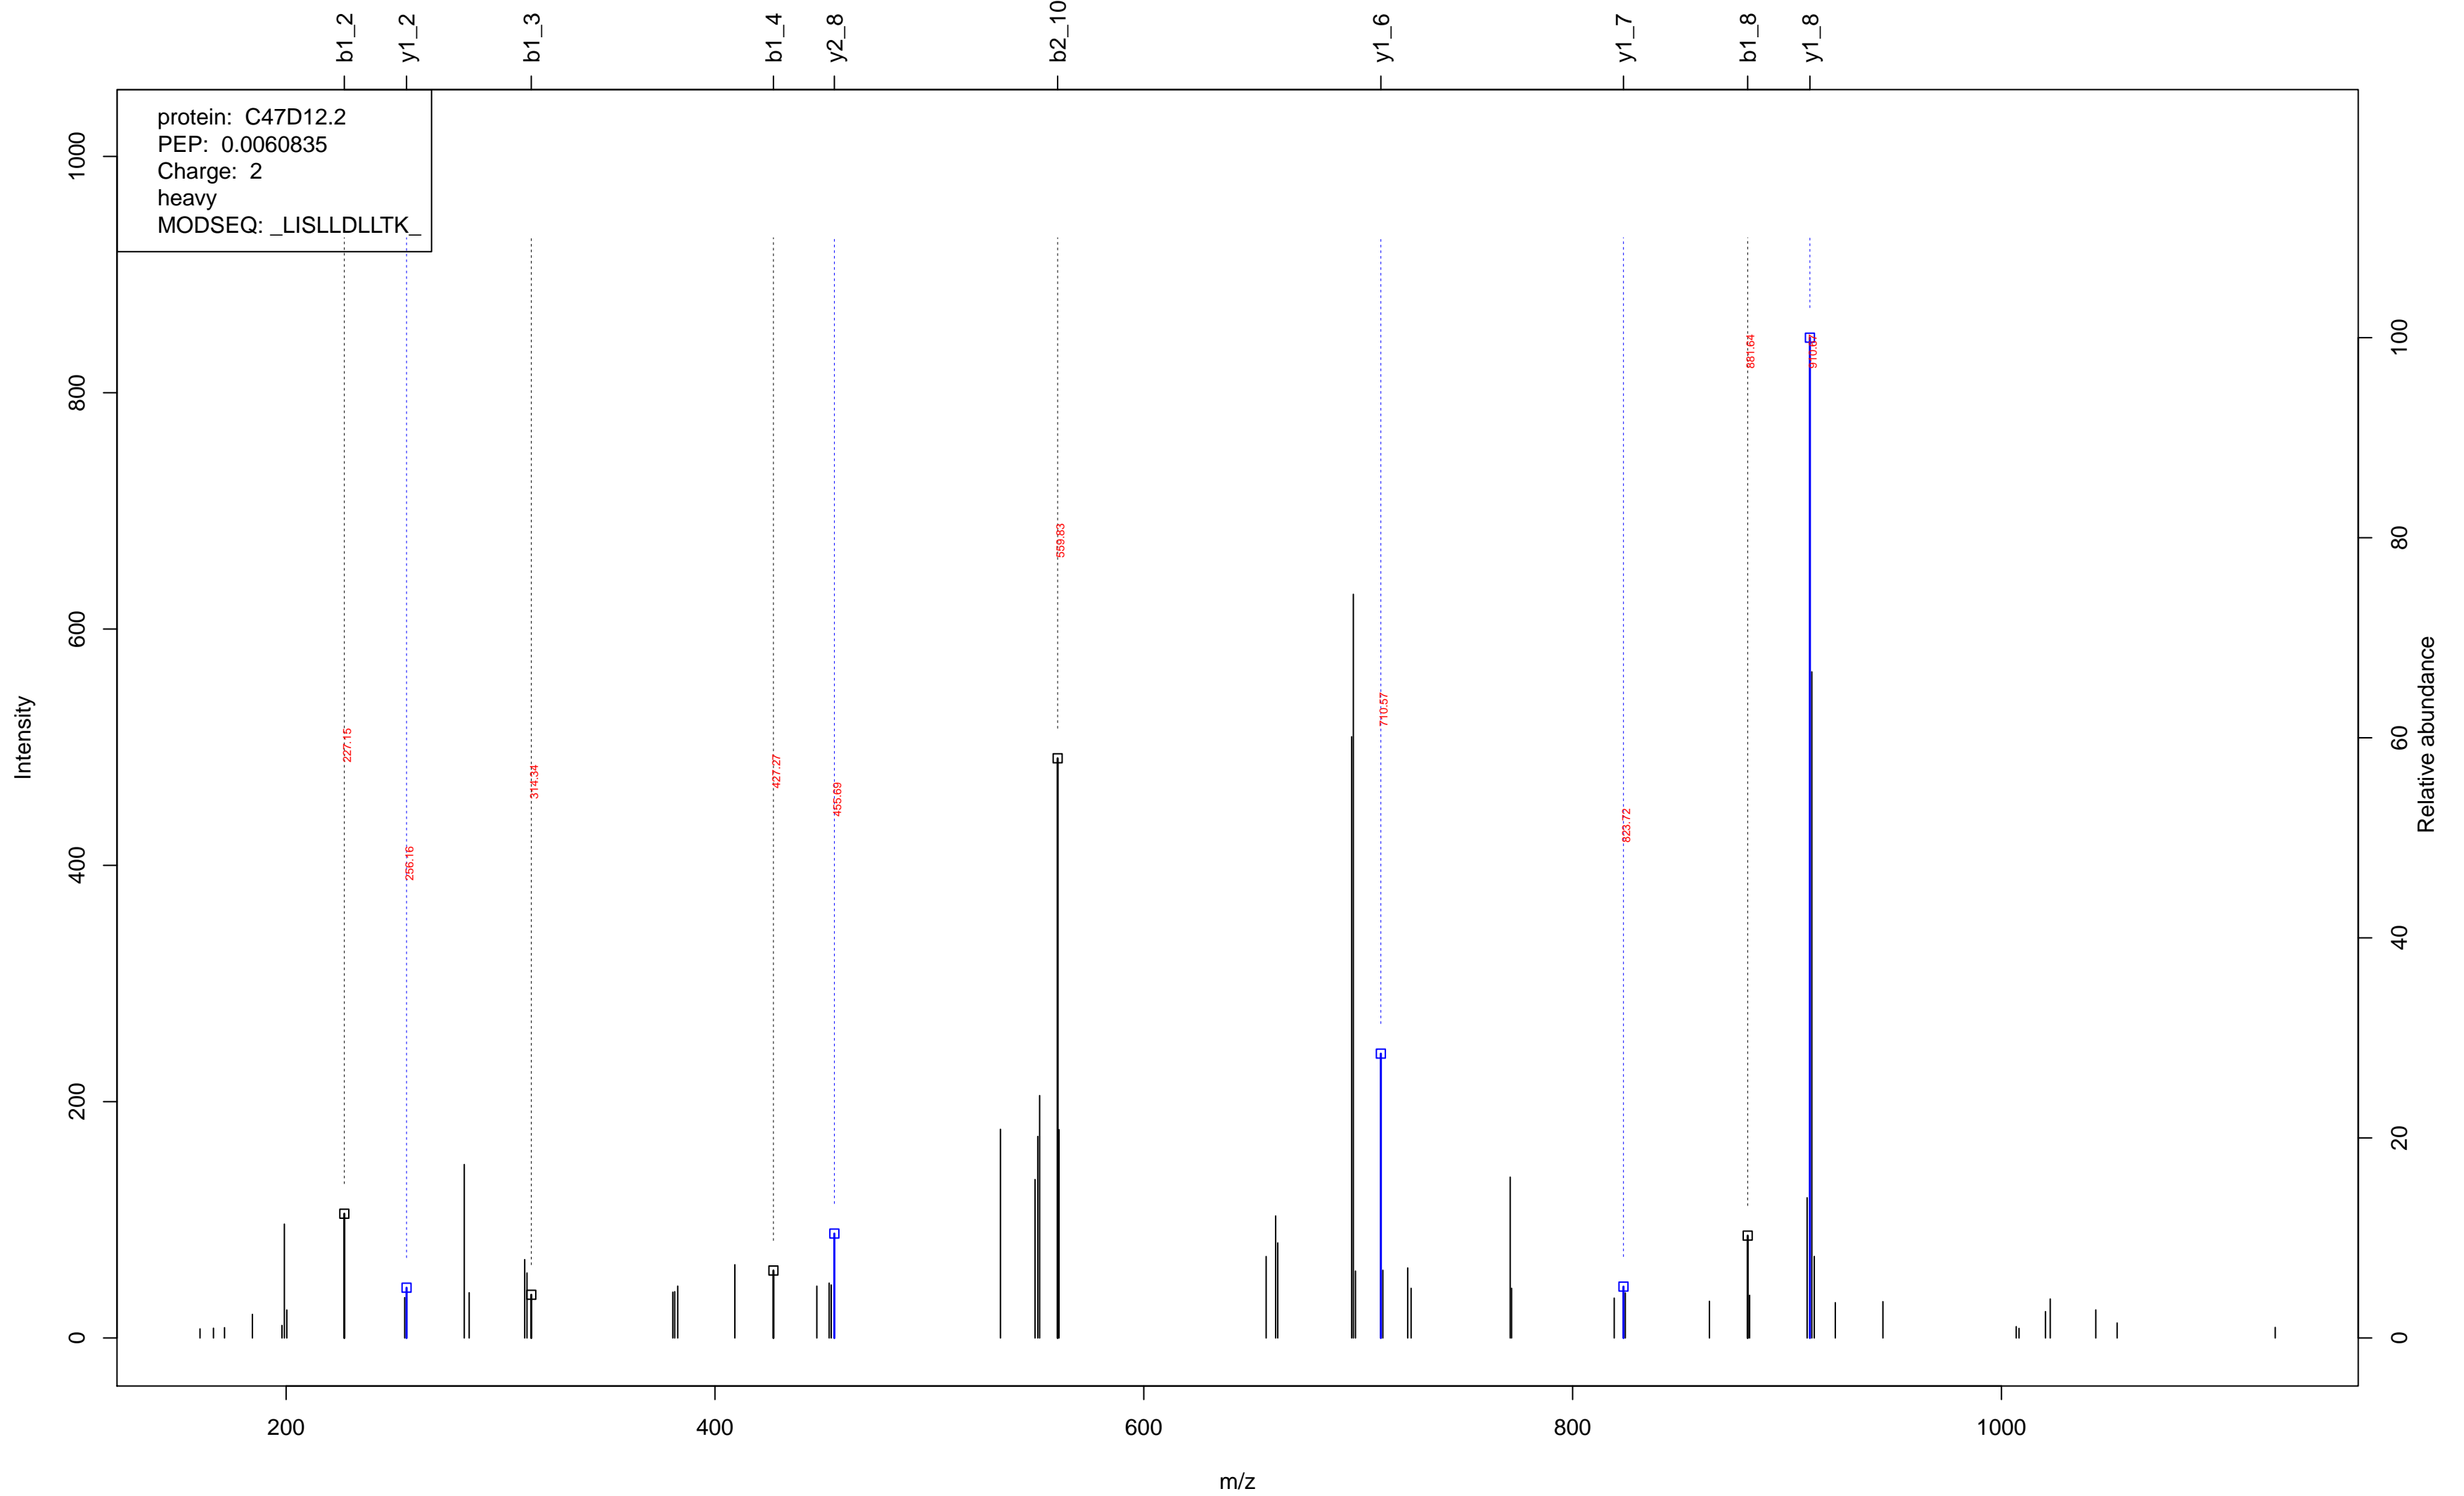

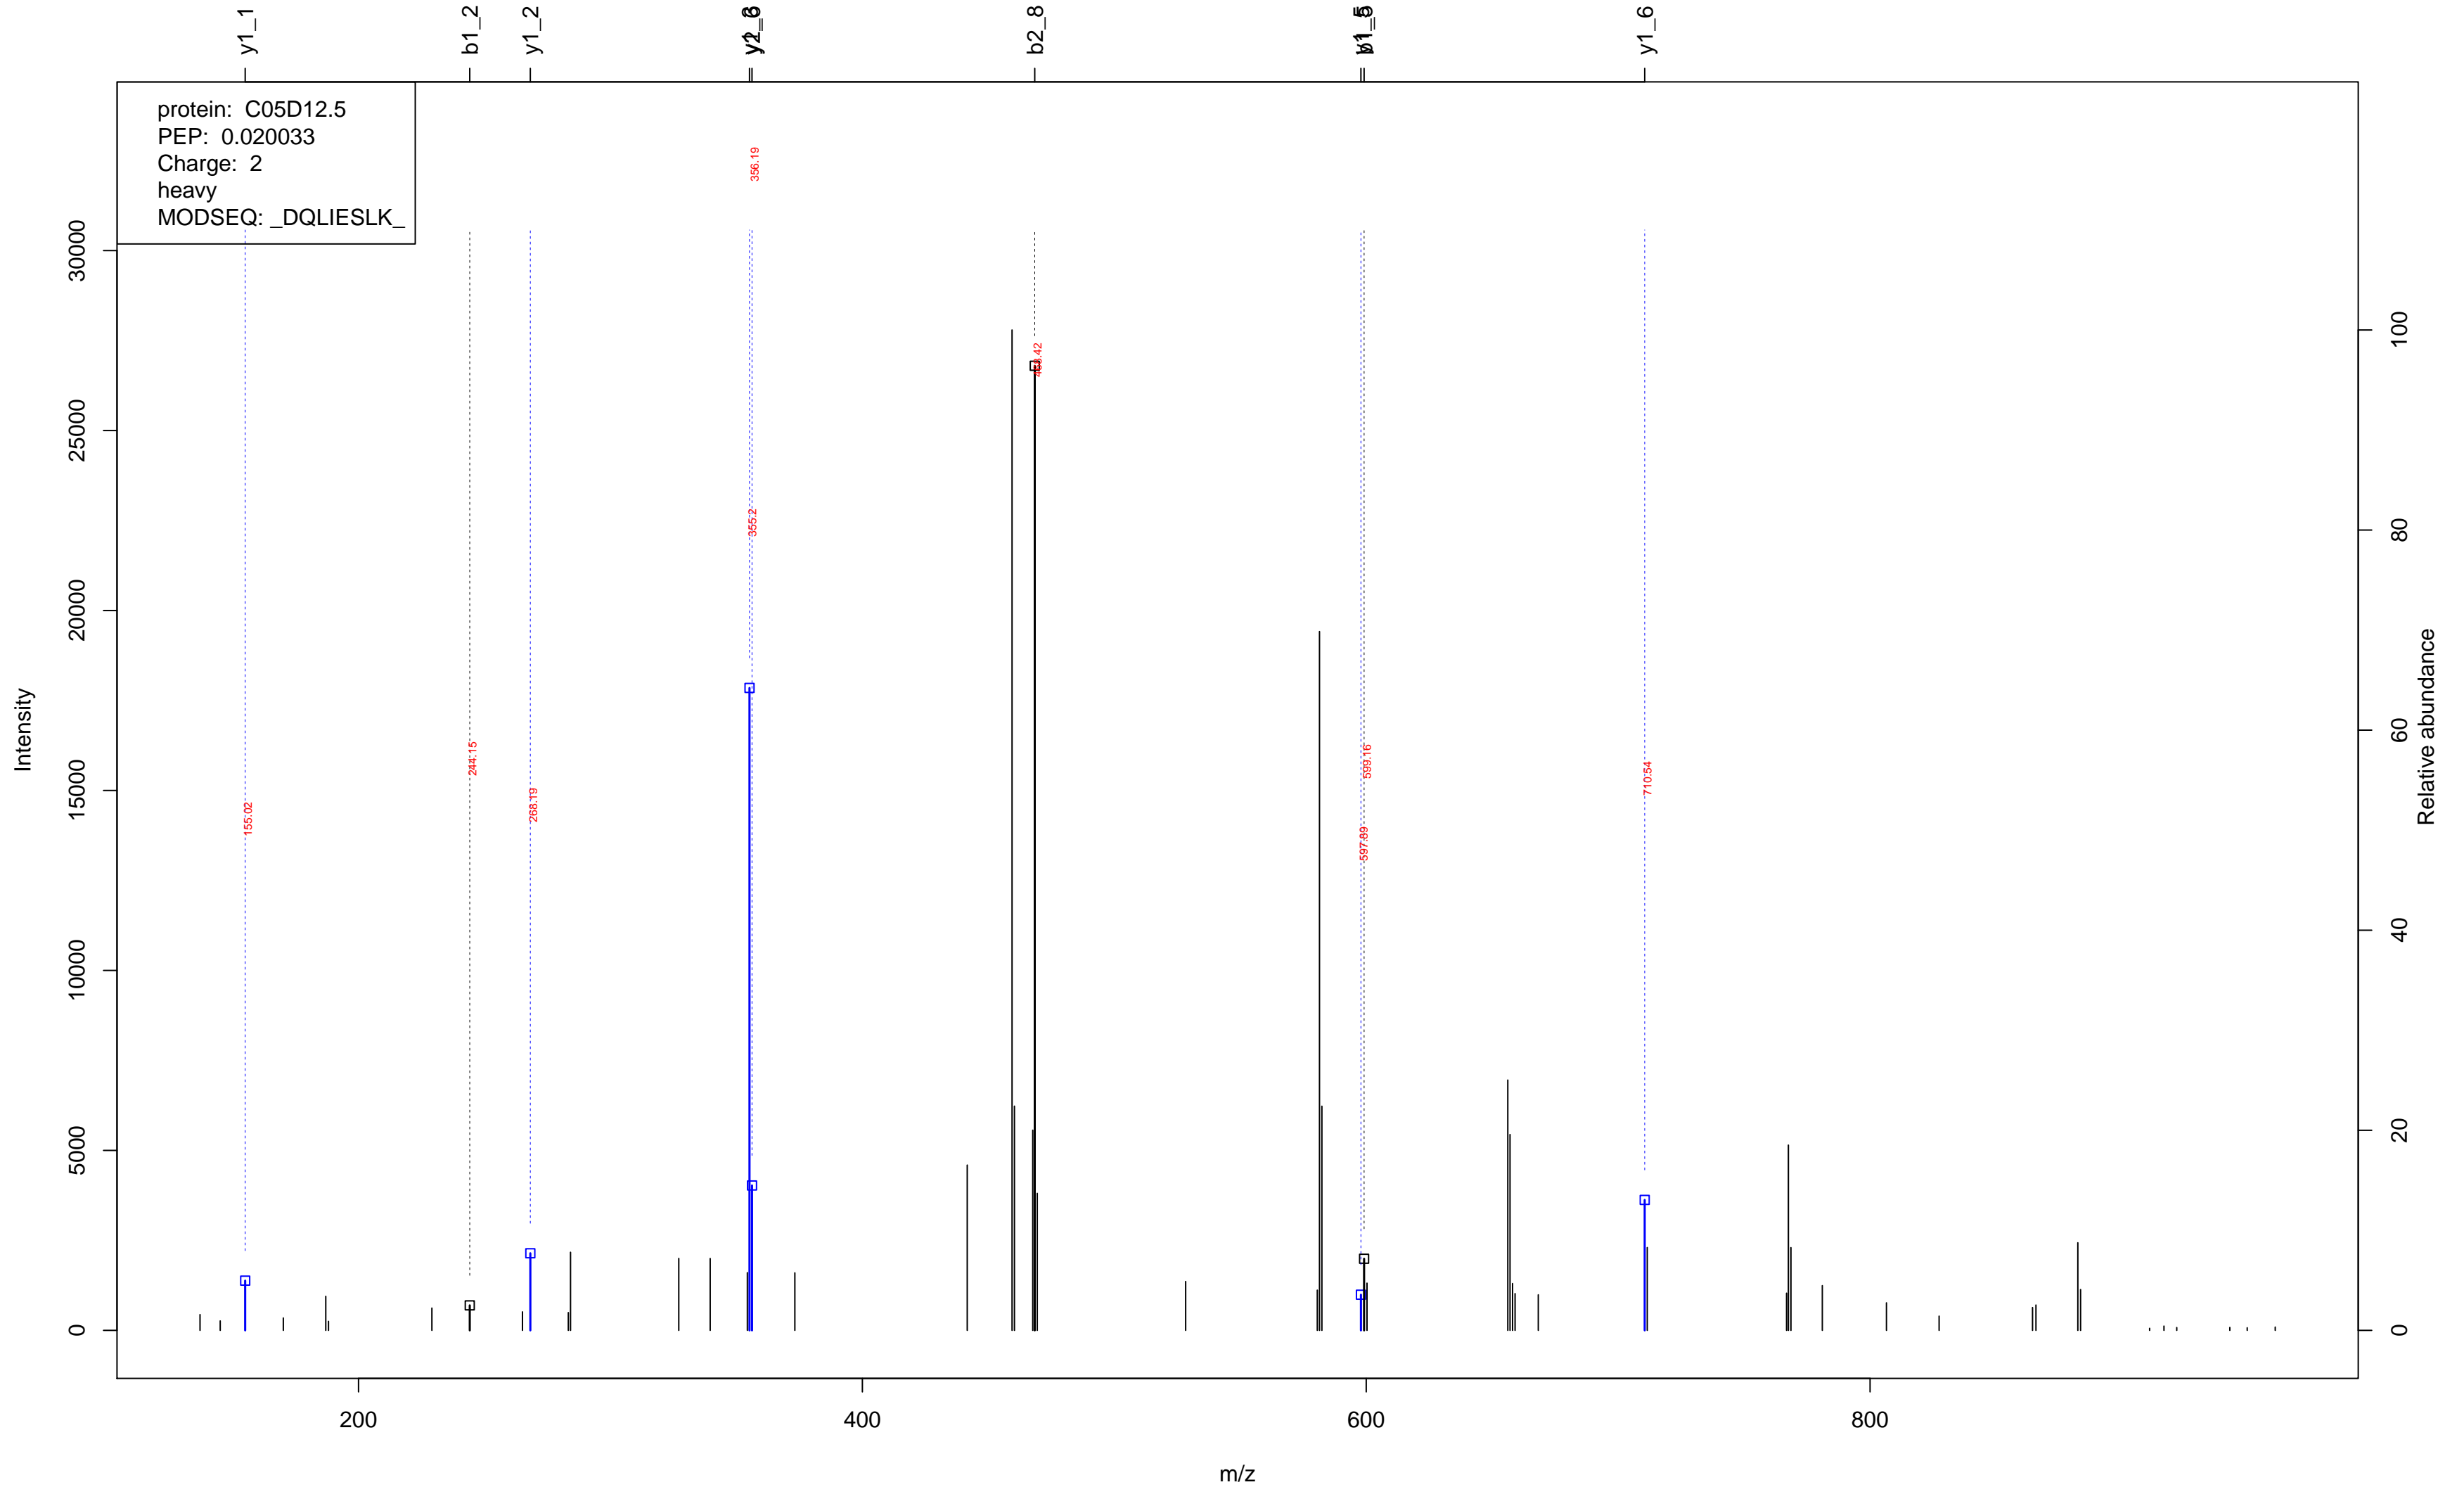

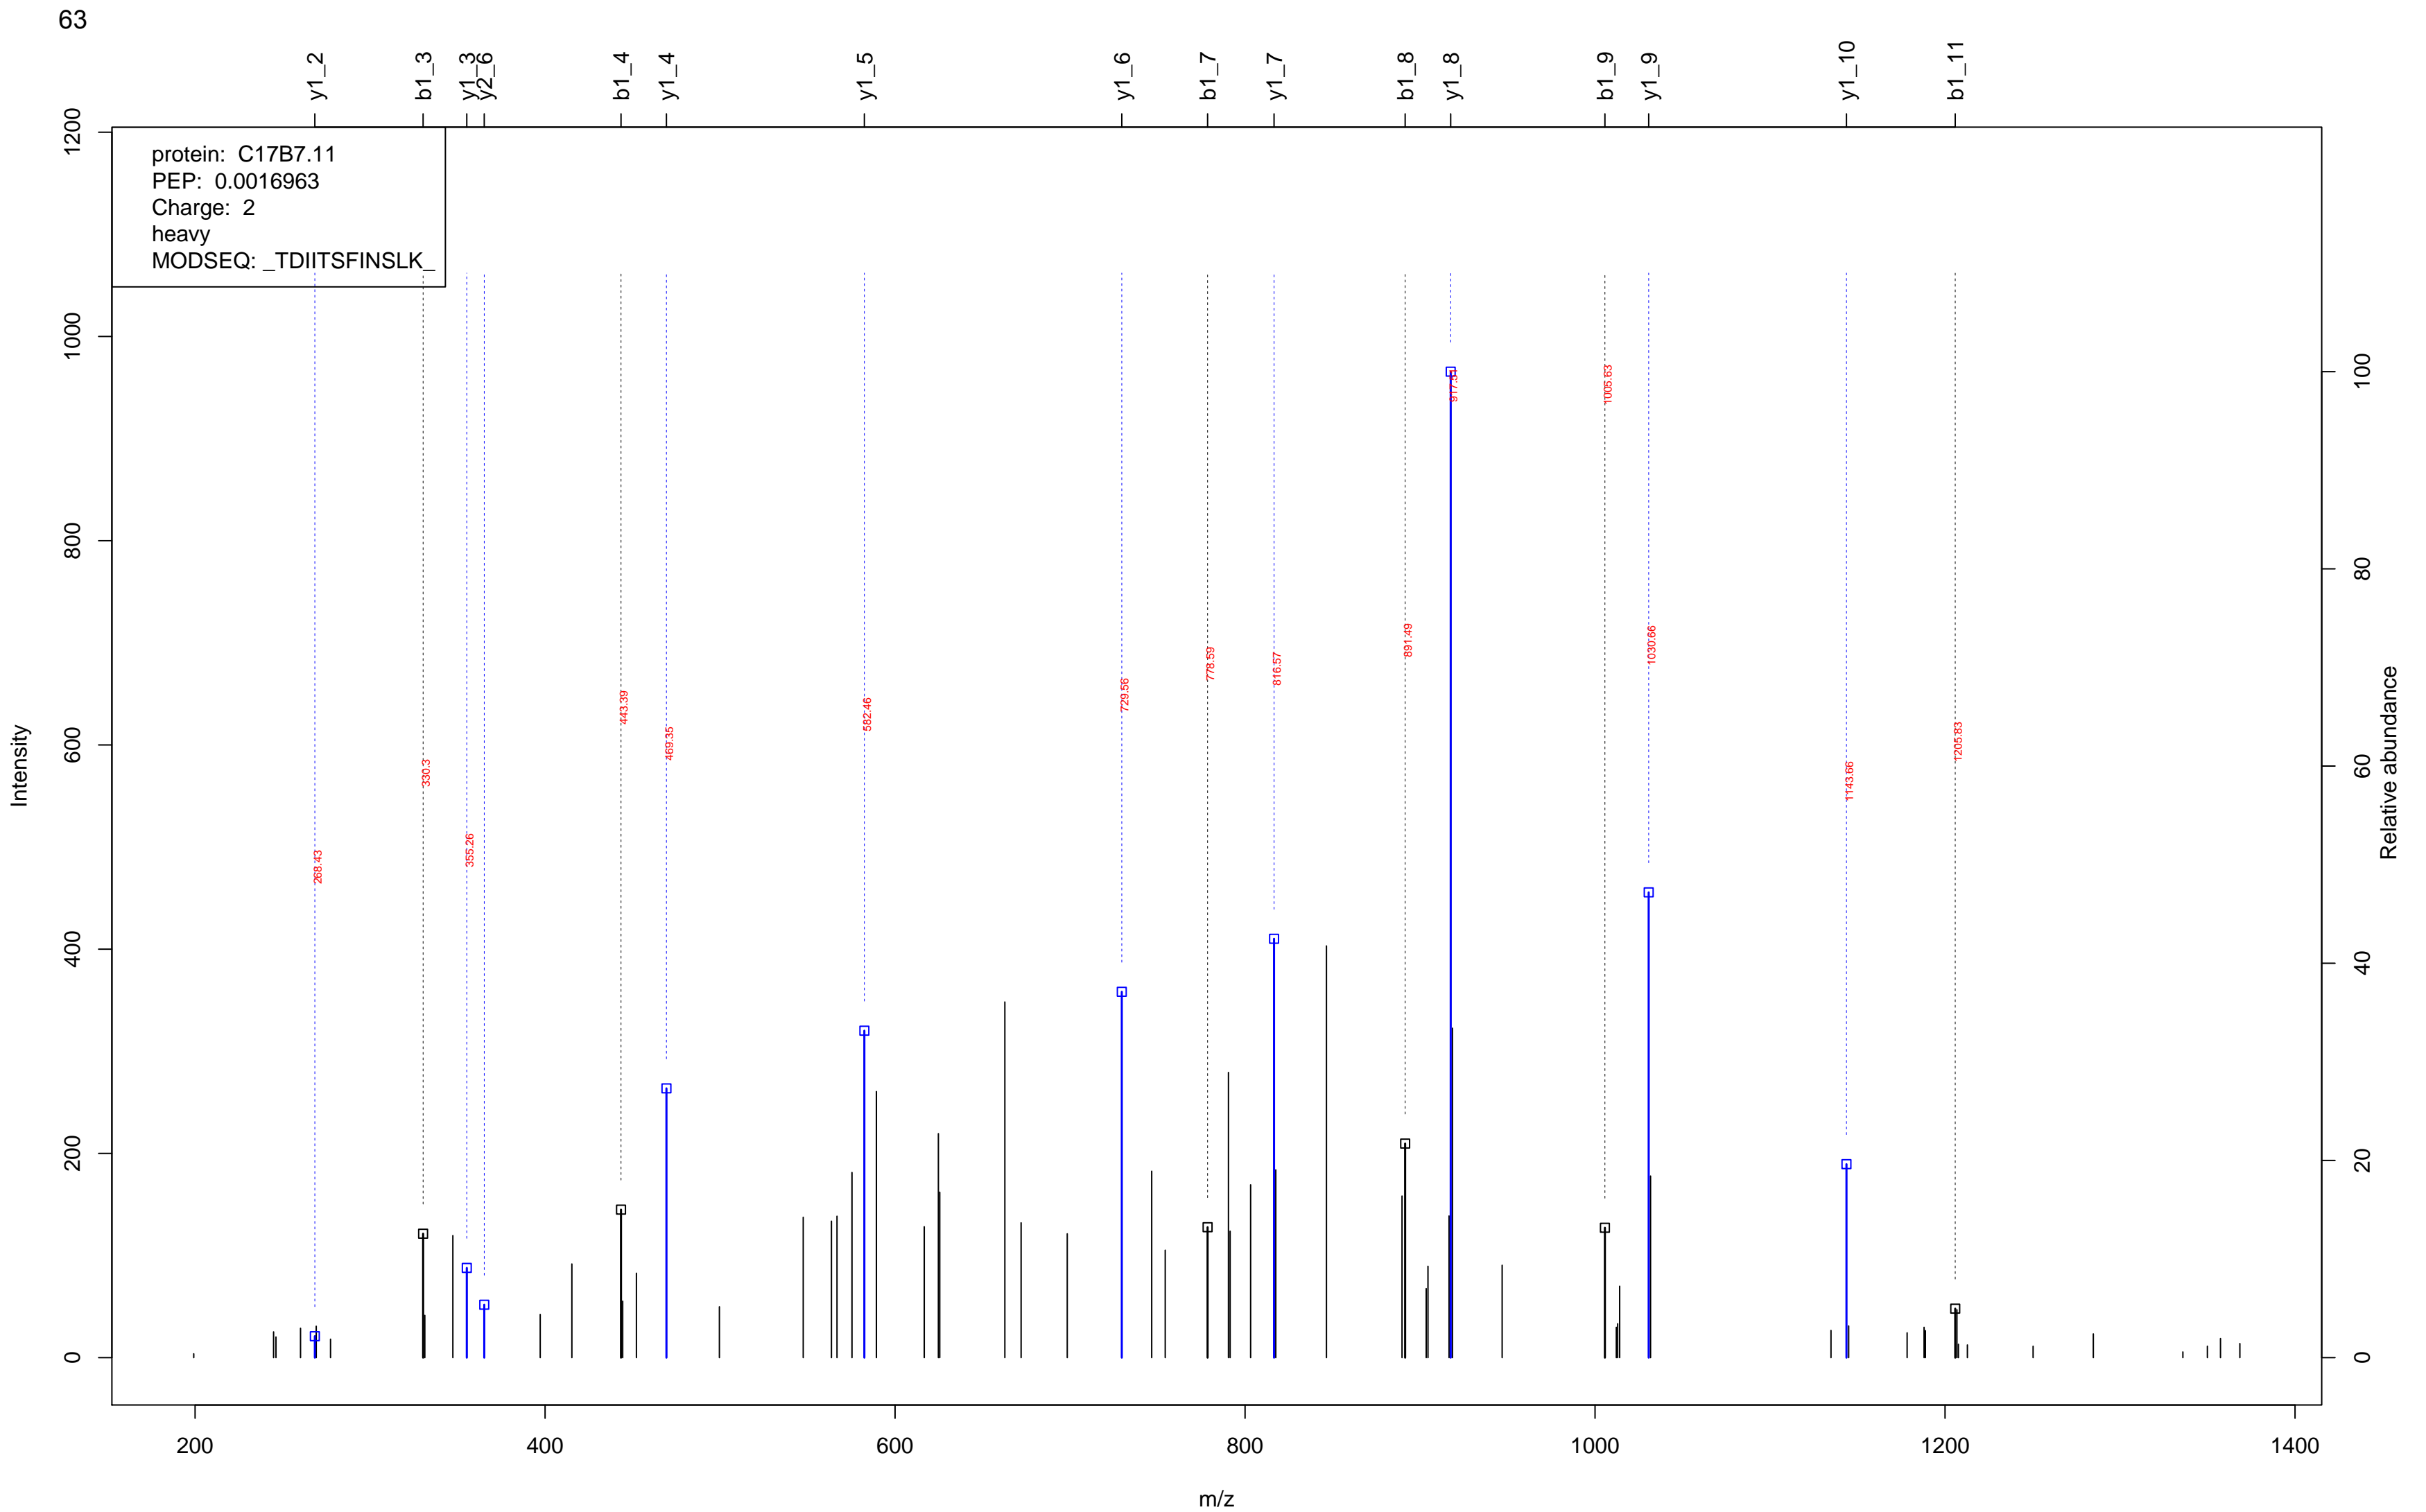

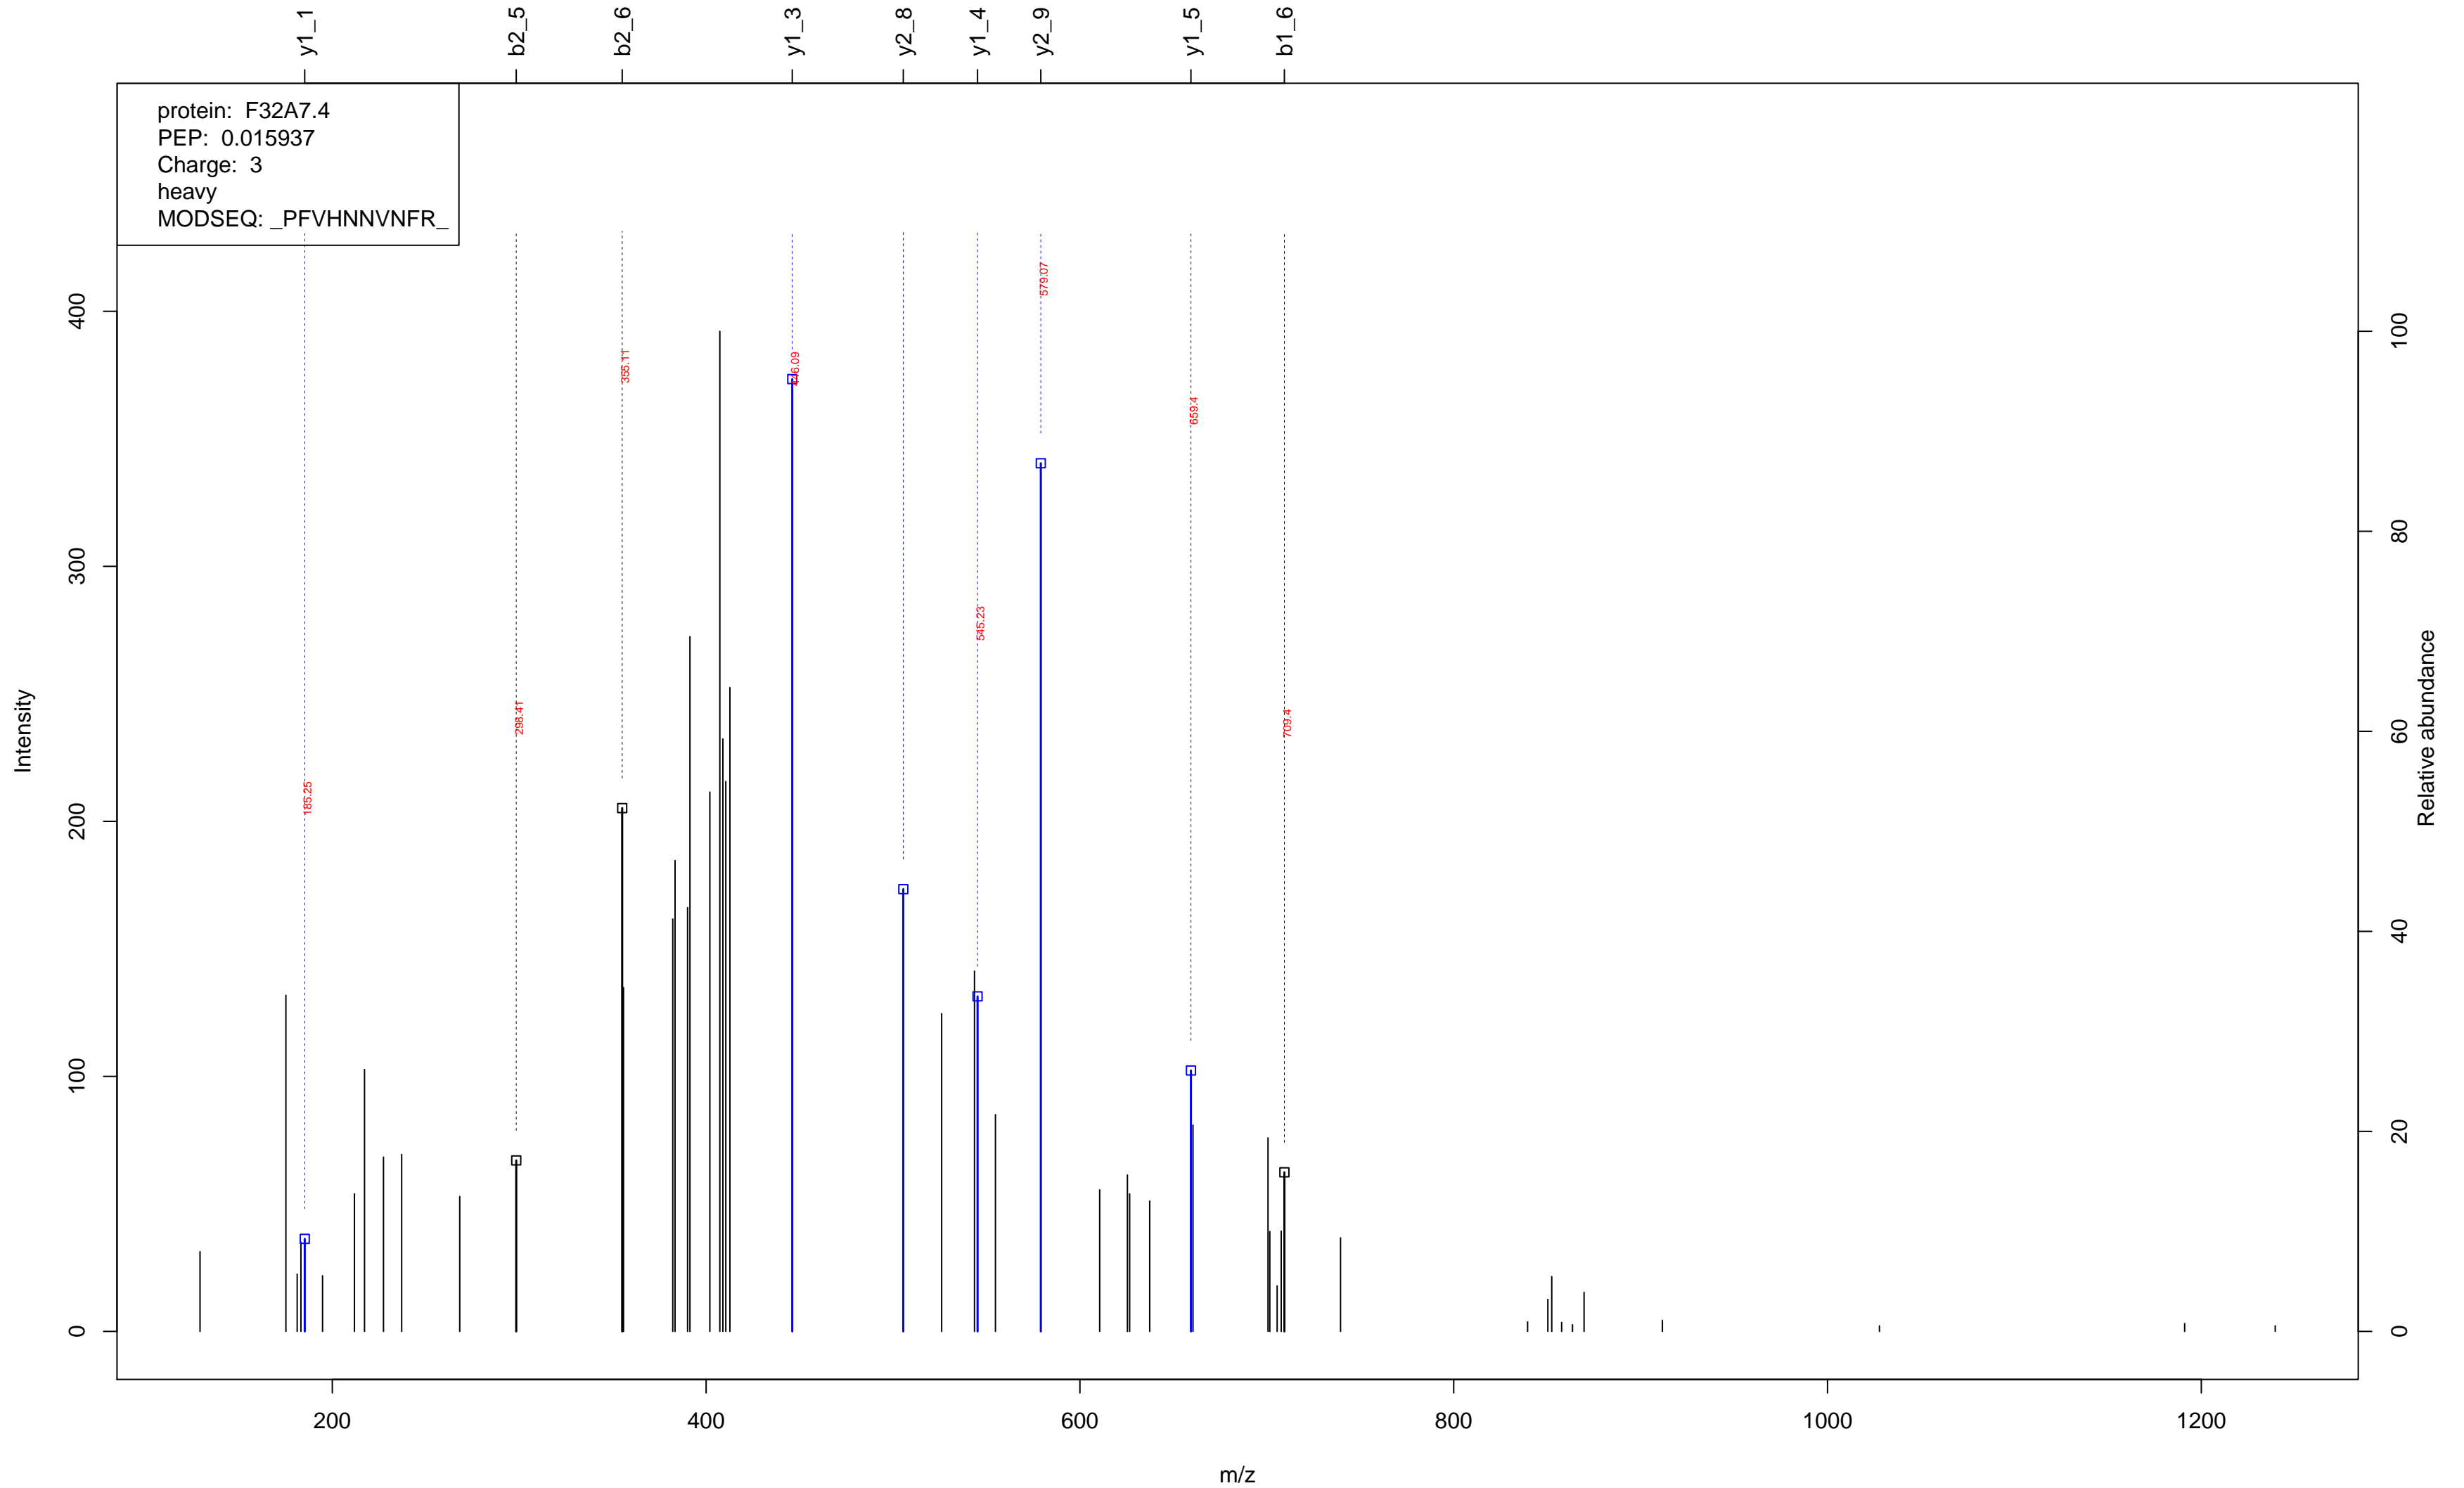



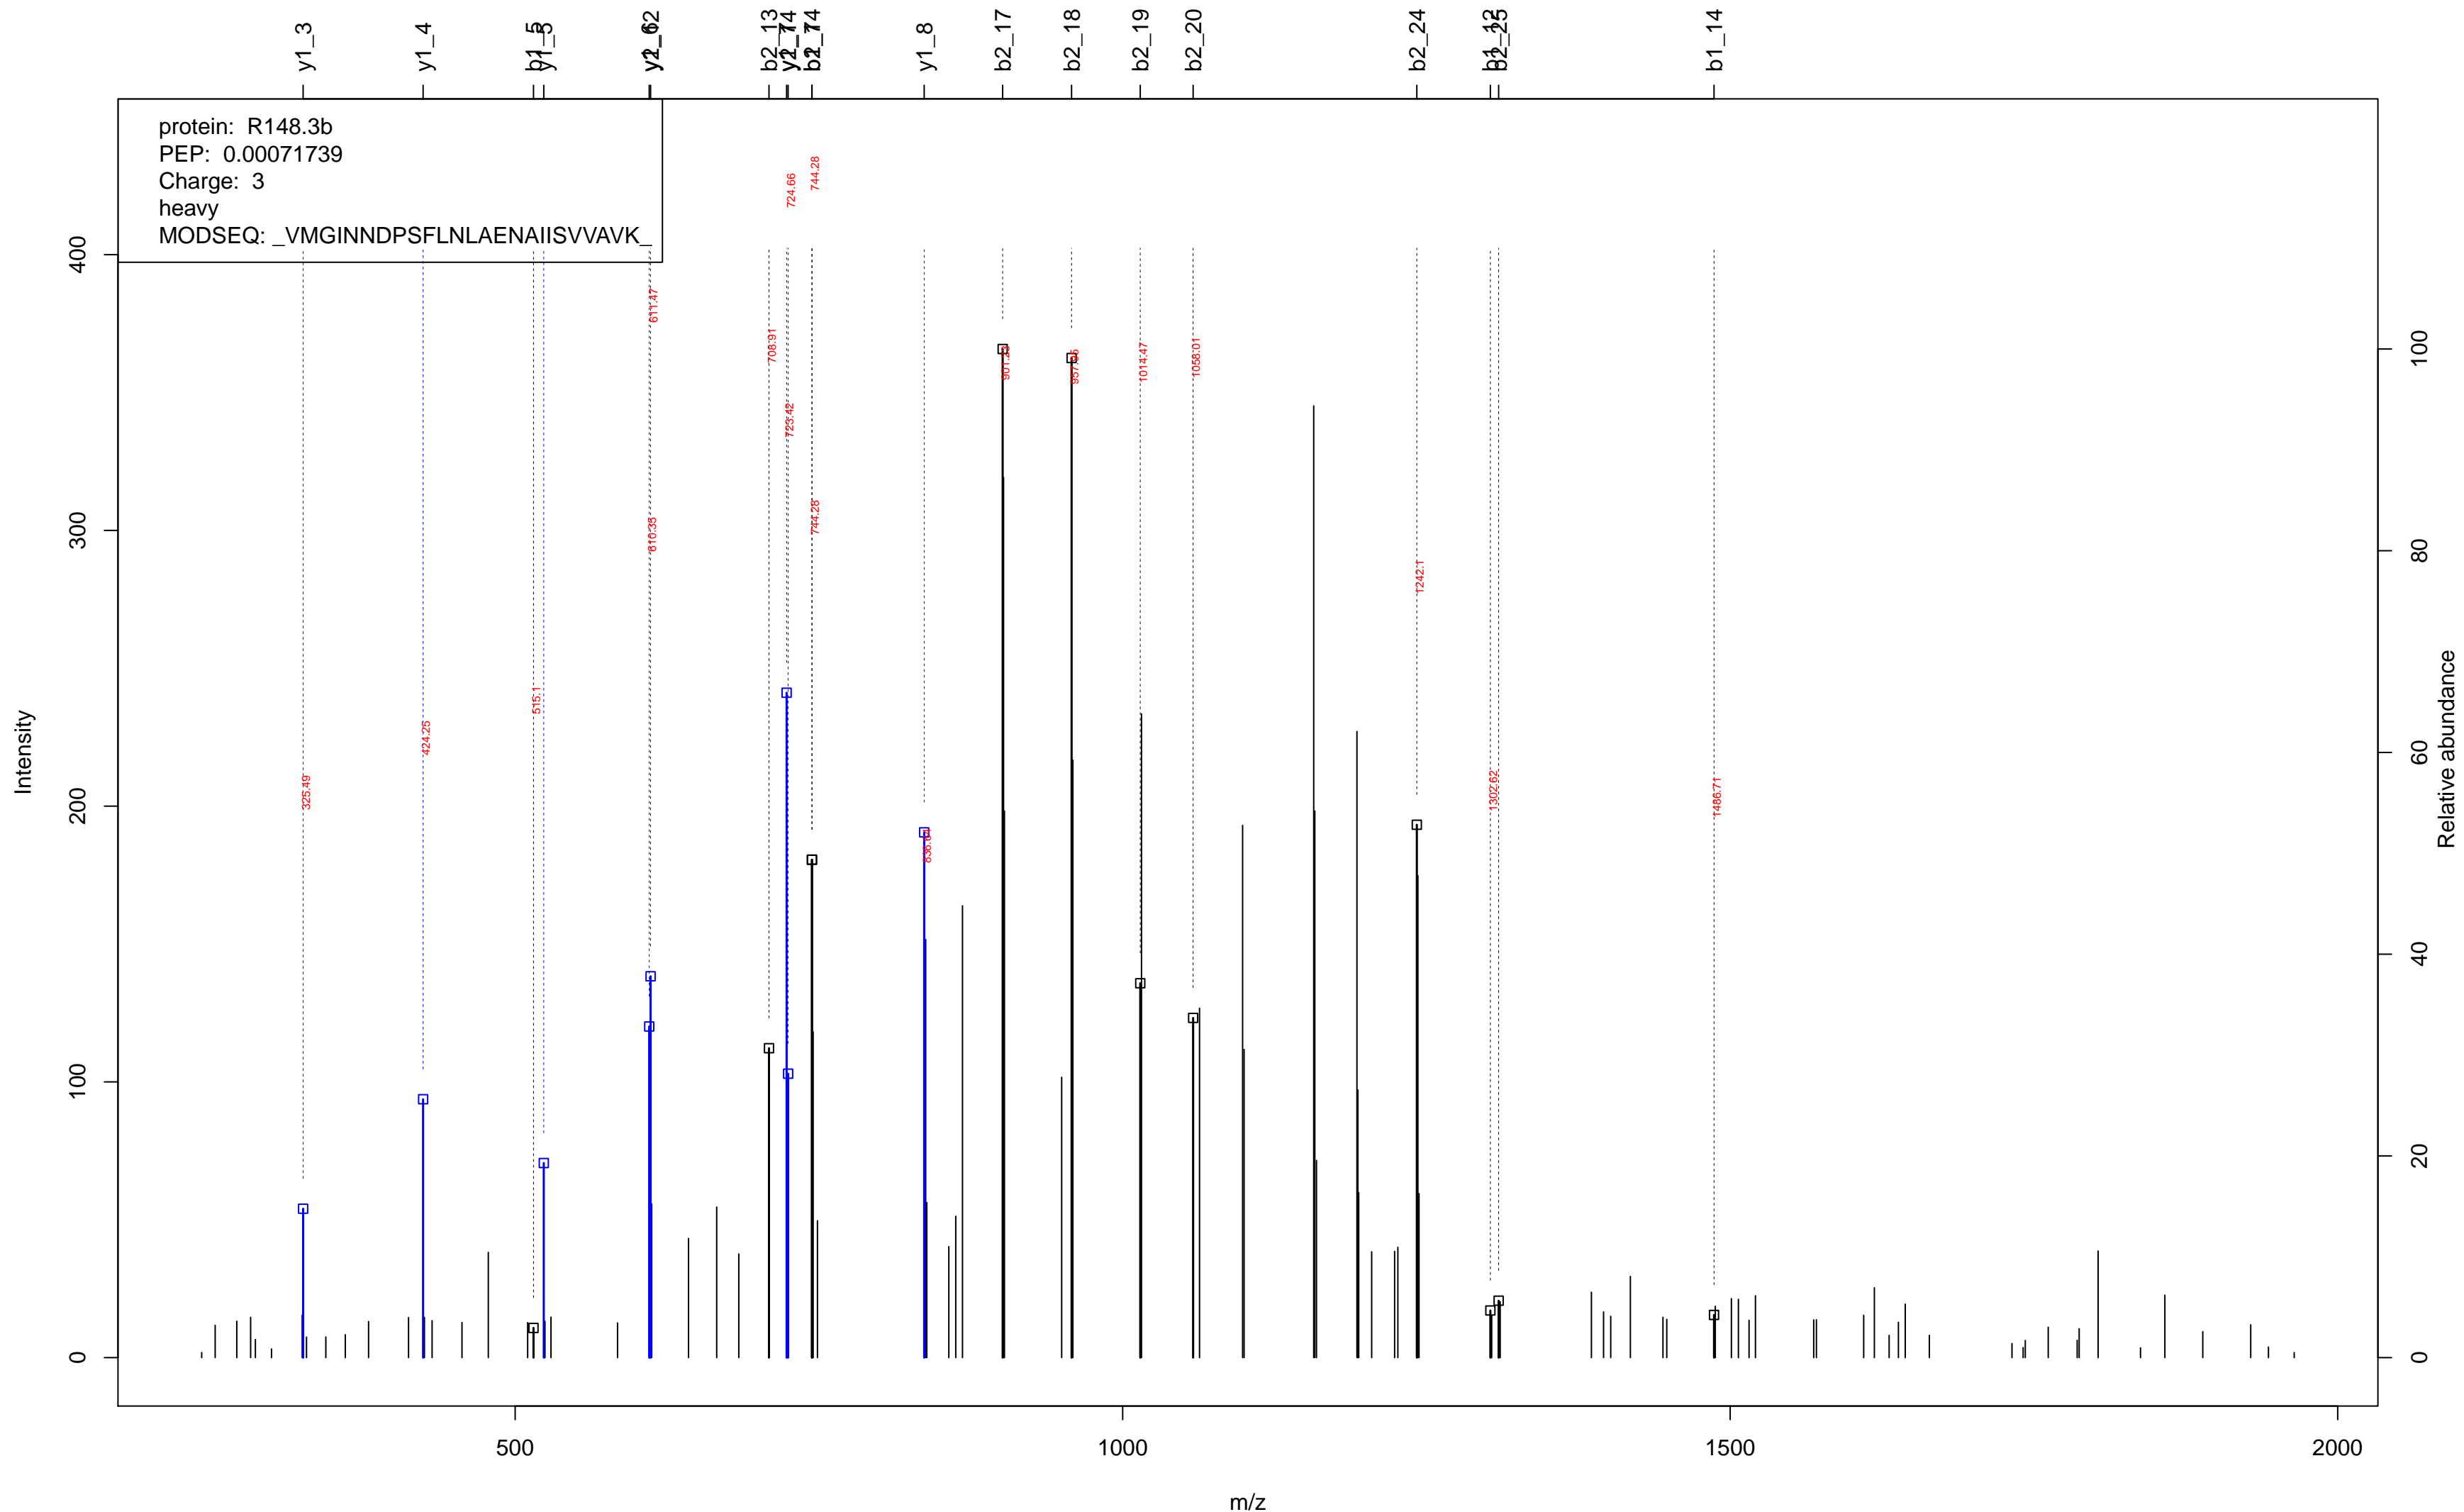

protein: R148.3b  
PEP: 0.00071739  
Charge: 3  
heavy  
MODSEQ: \_VMGINNDPSFLNLAENAIISVVAVK\_

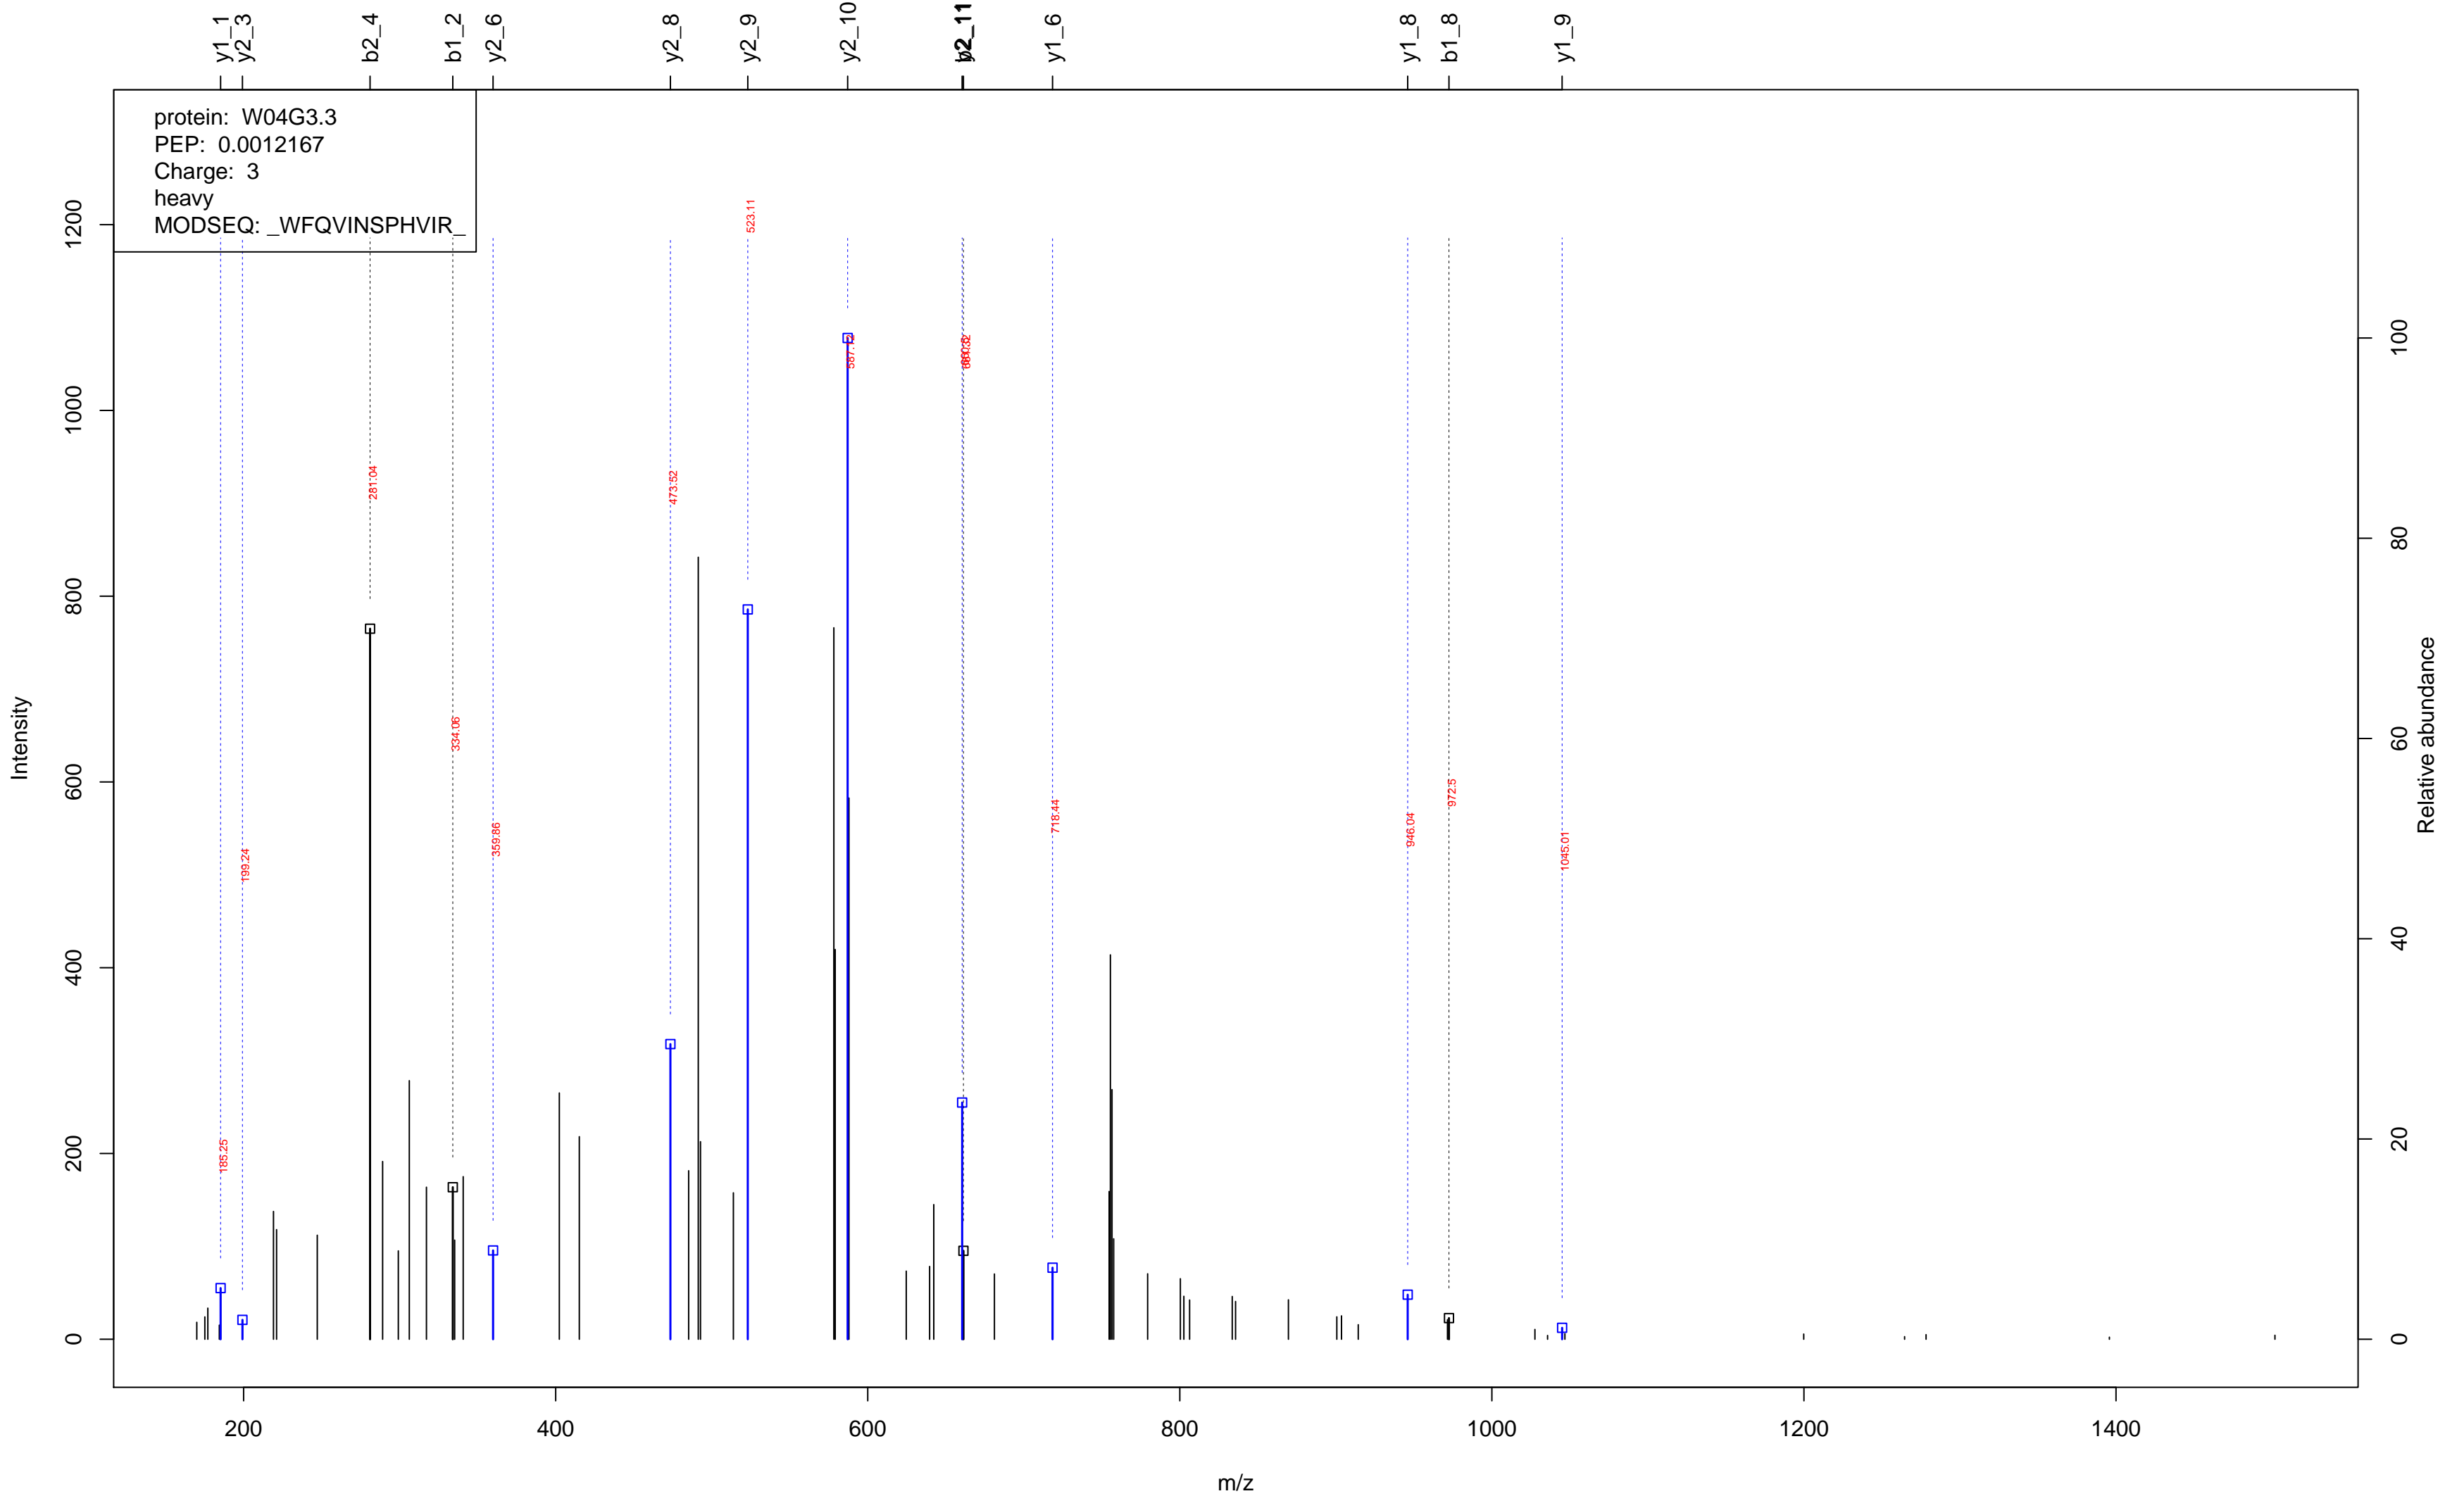

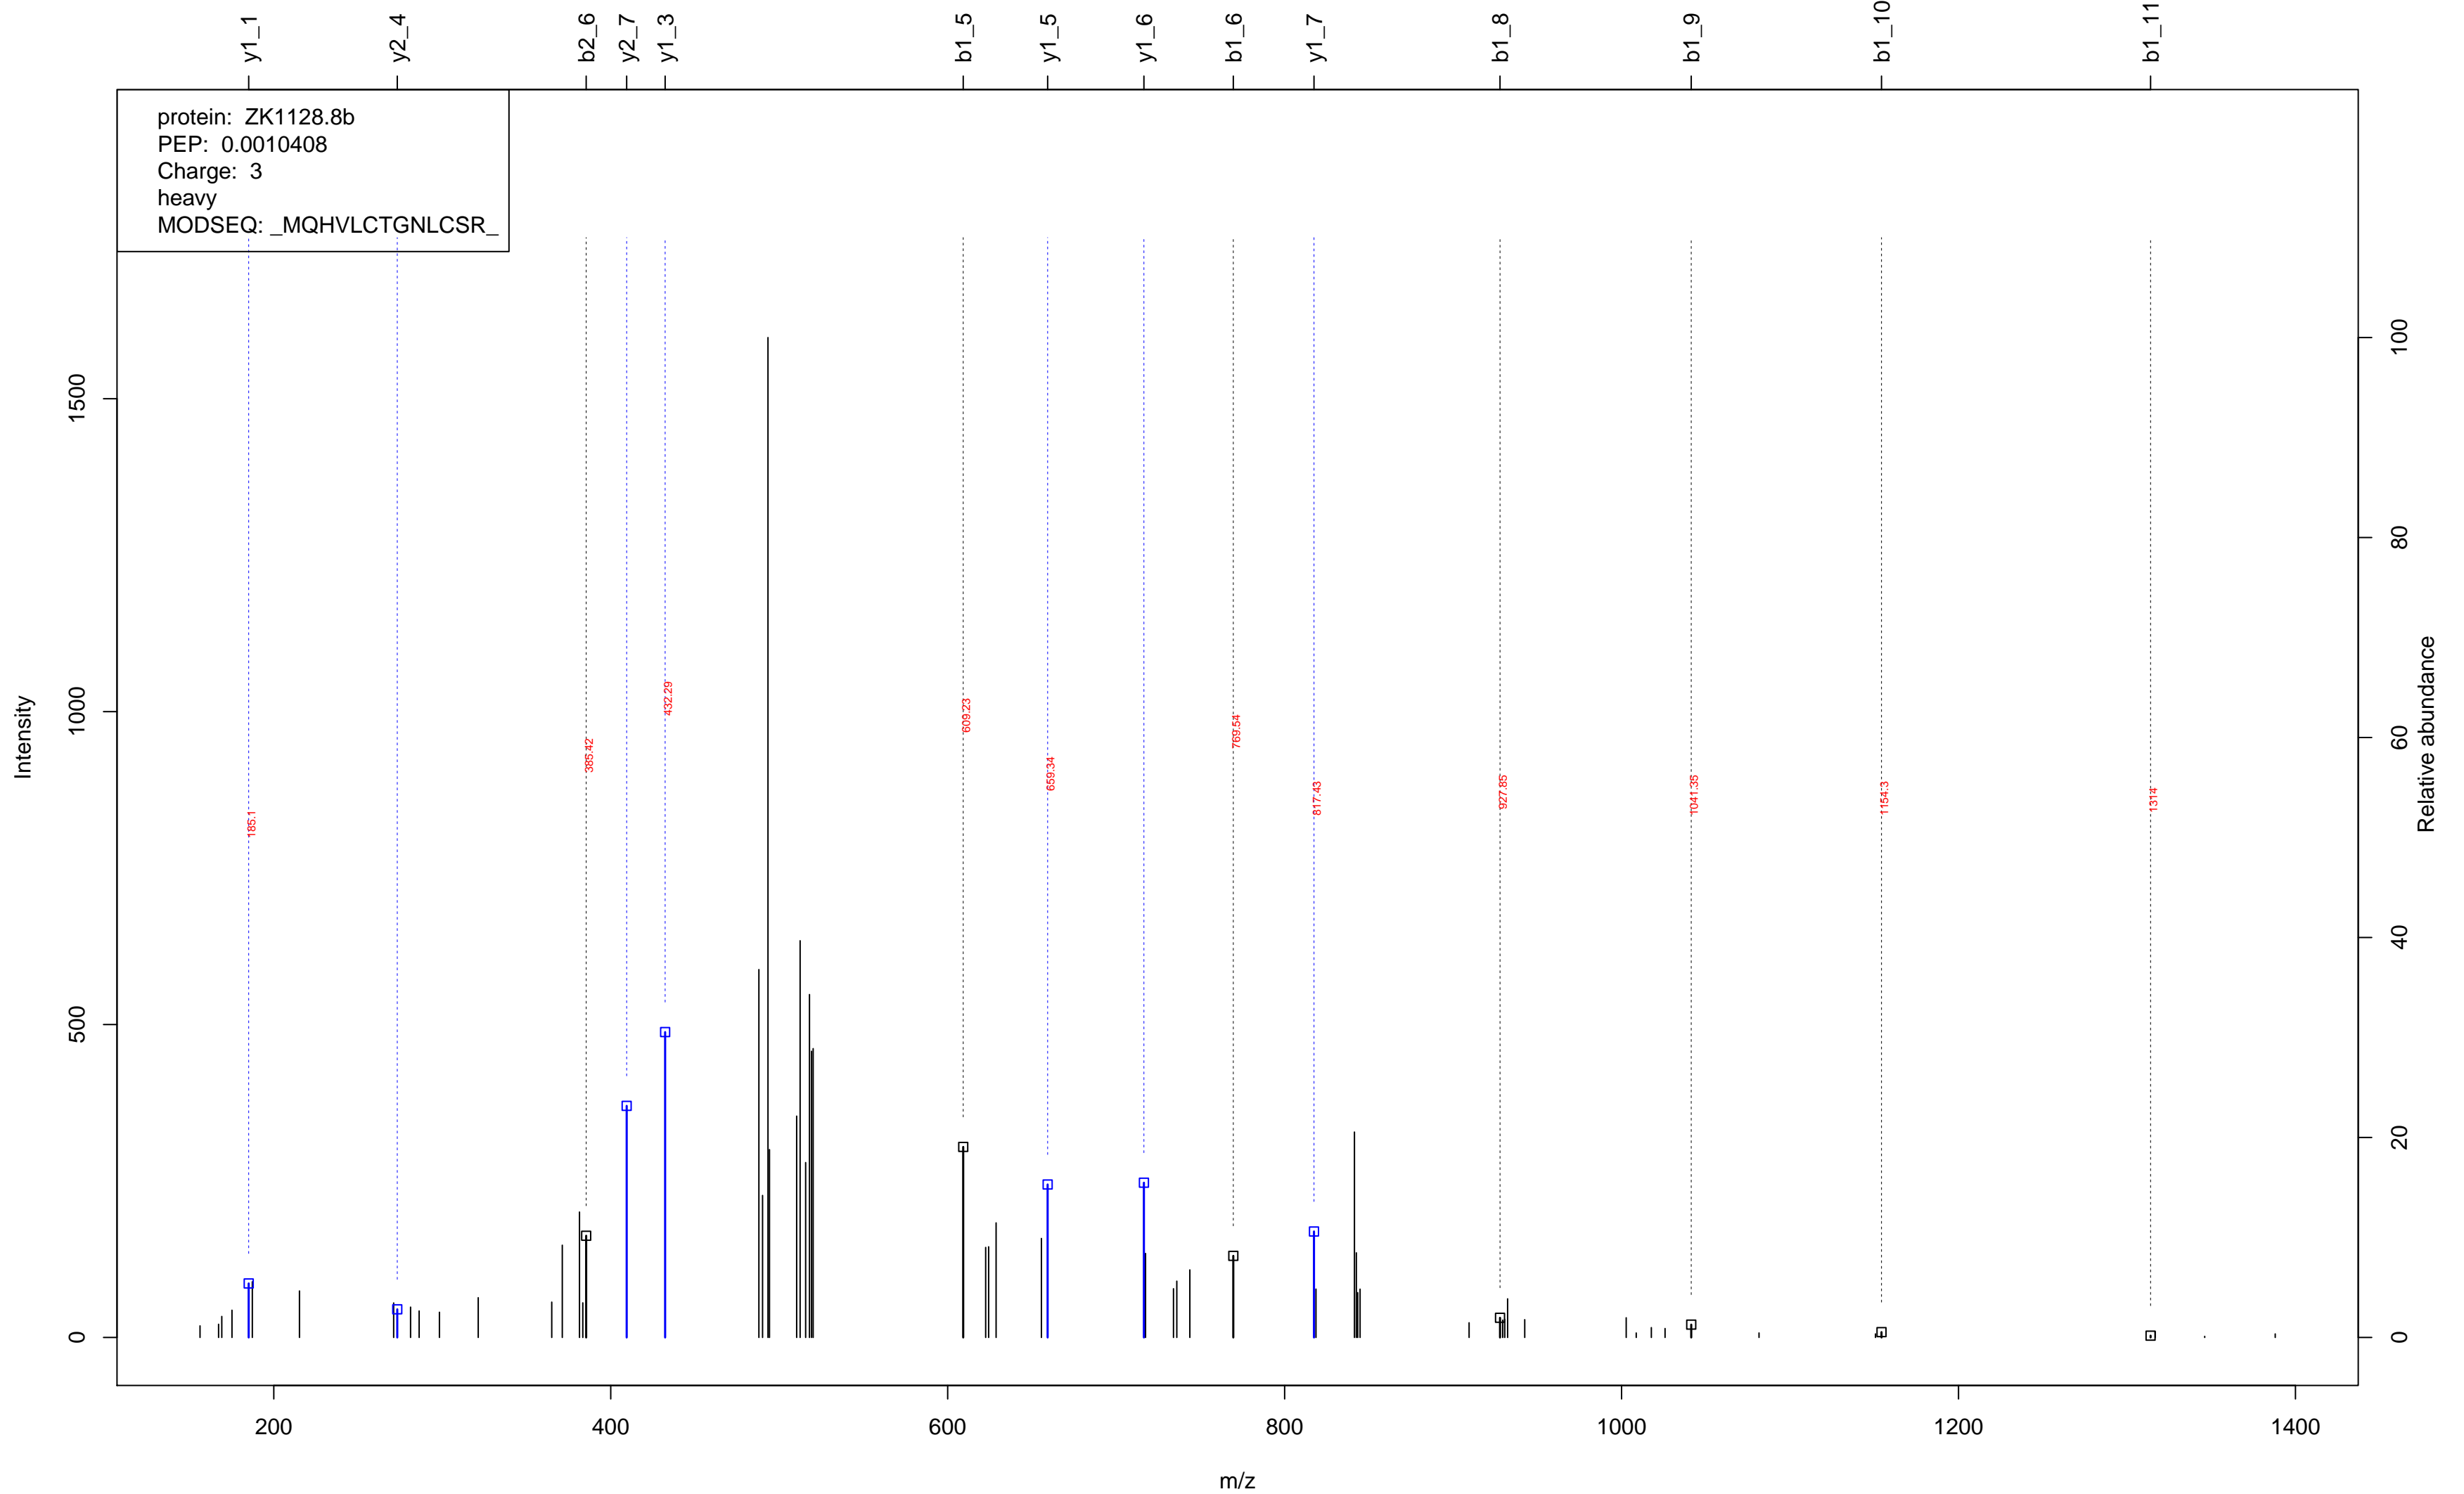

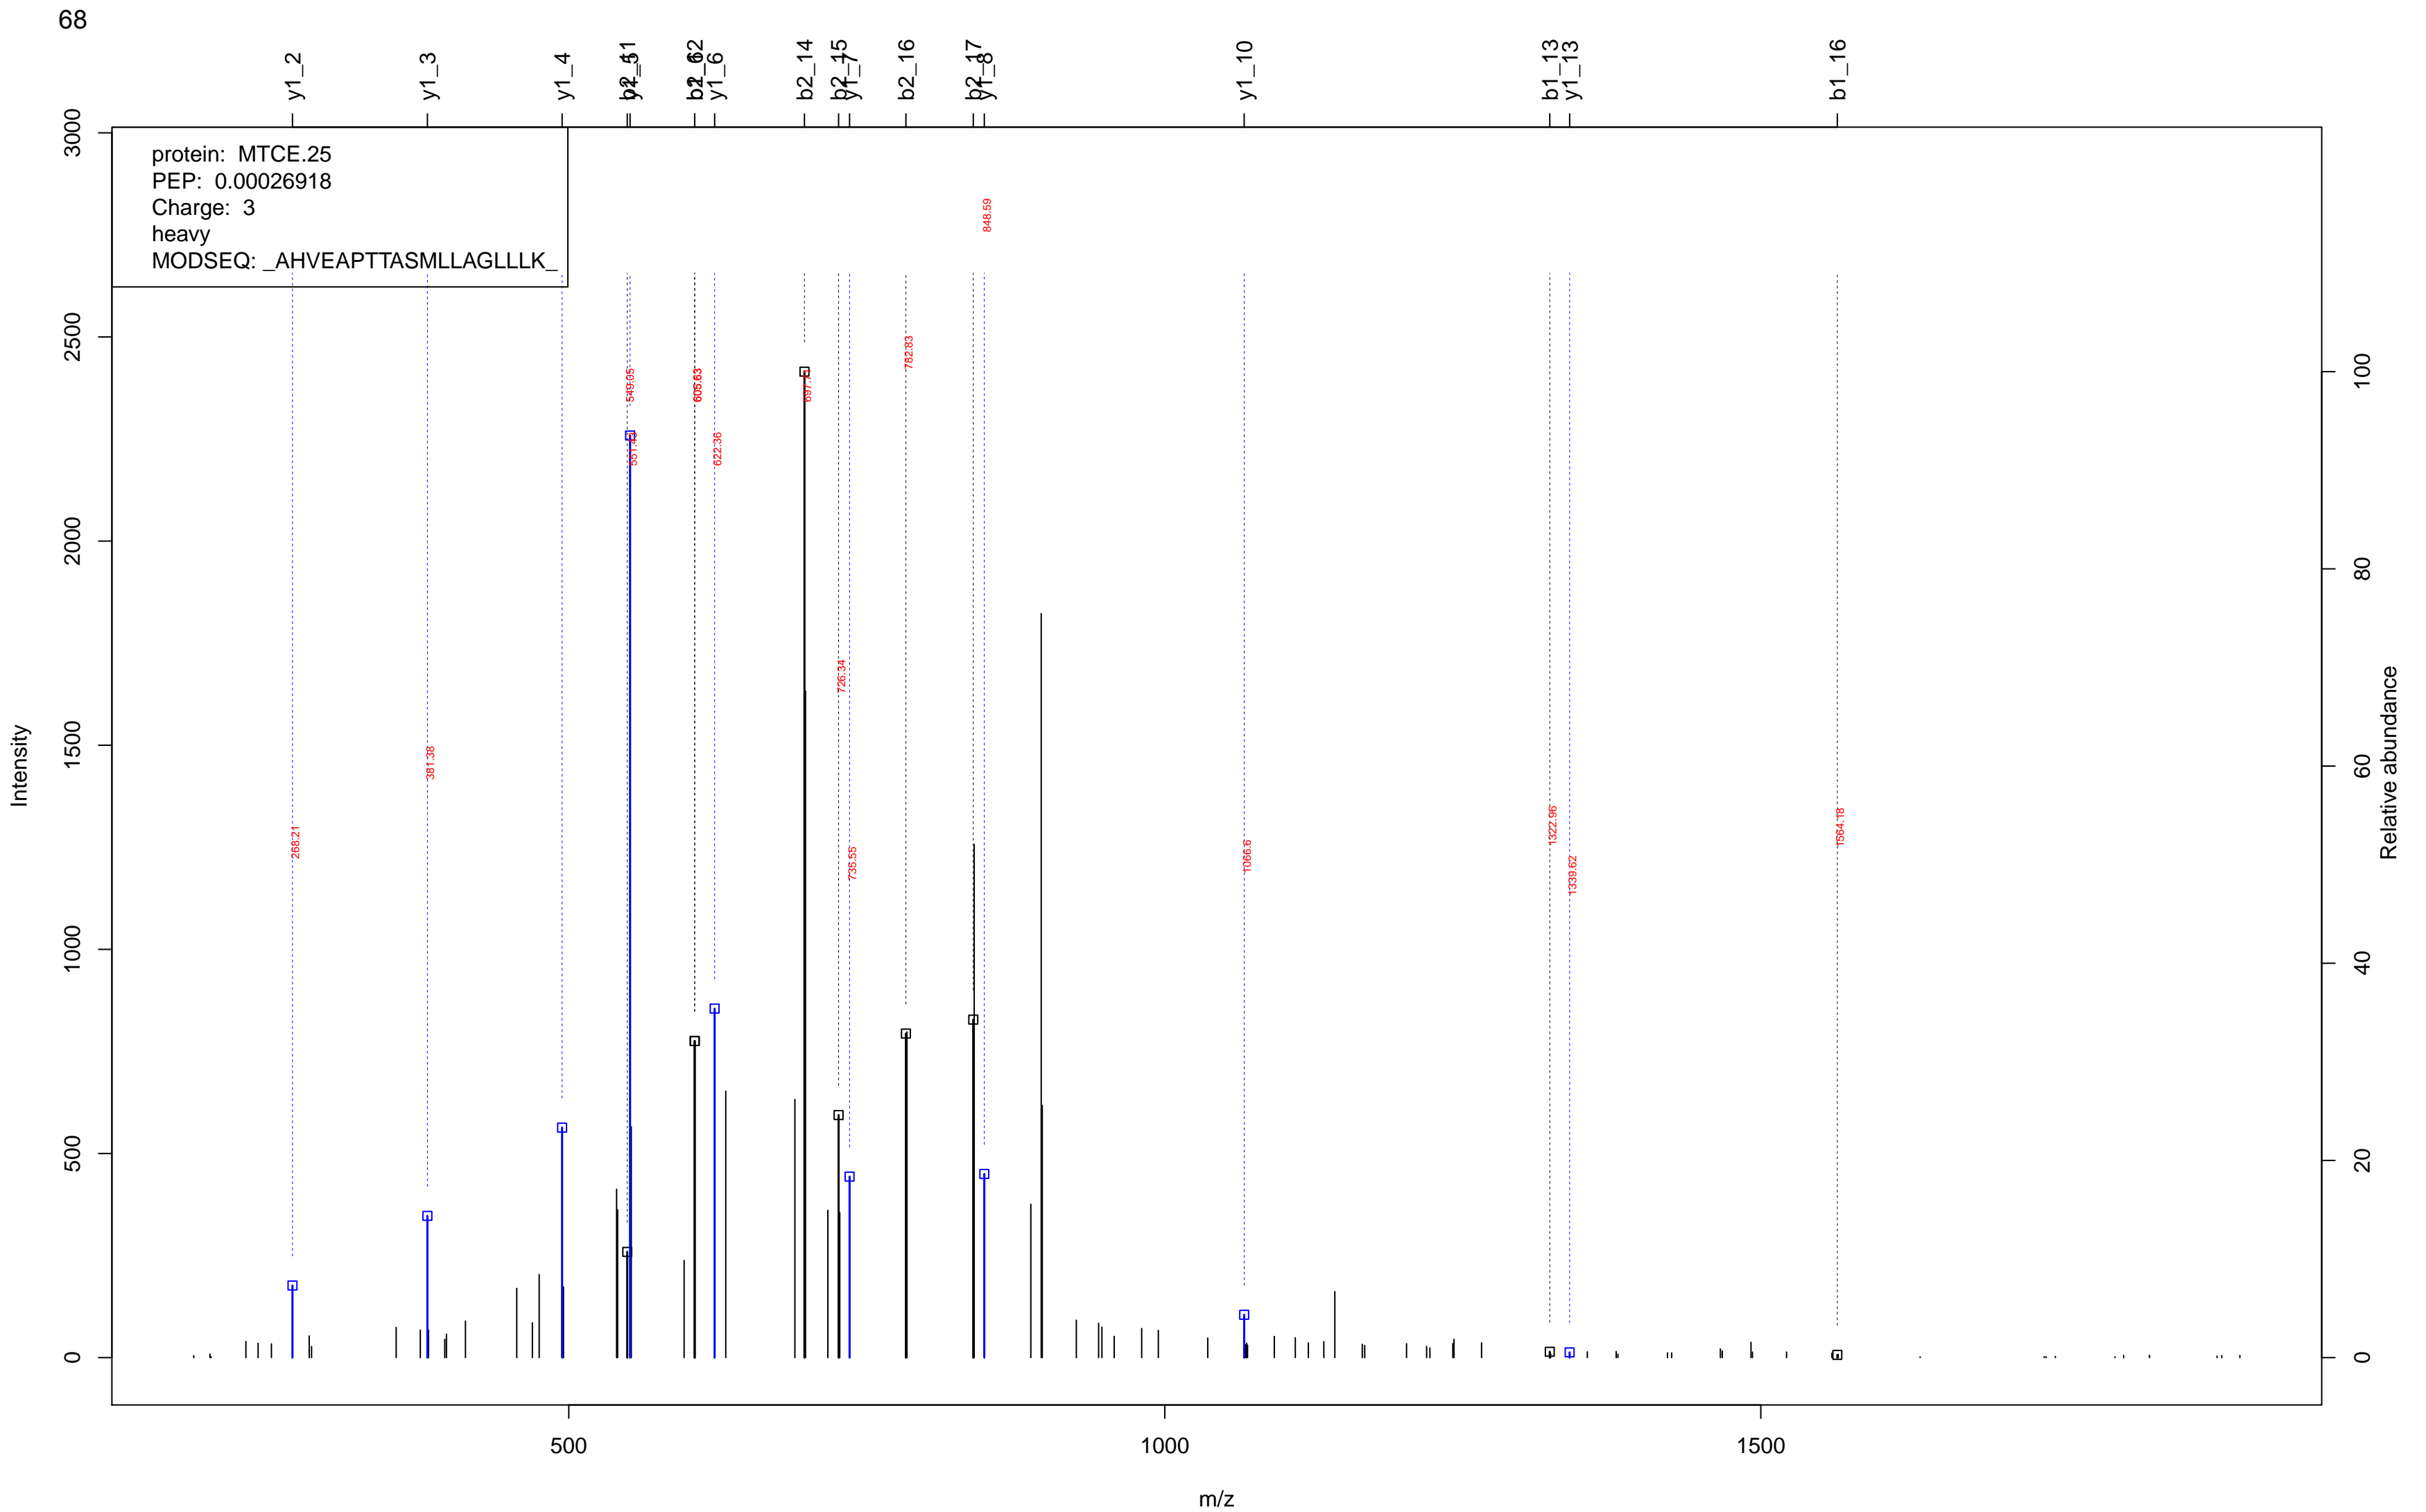

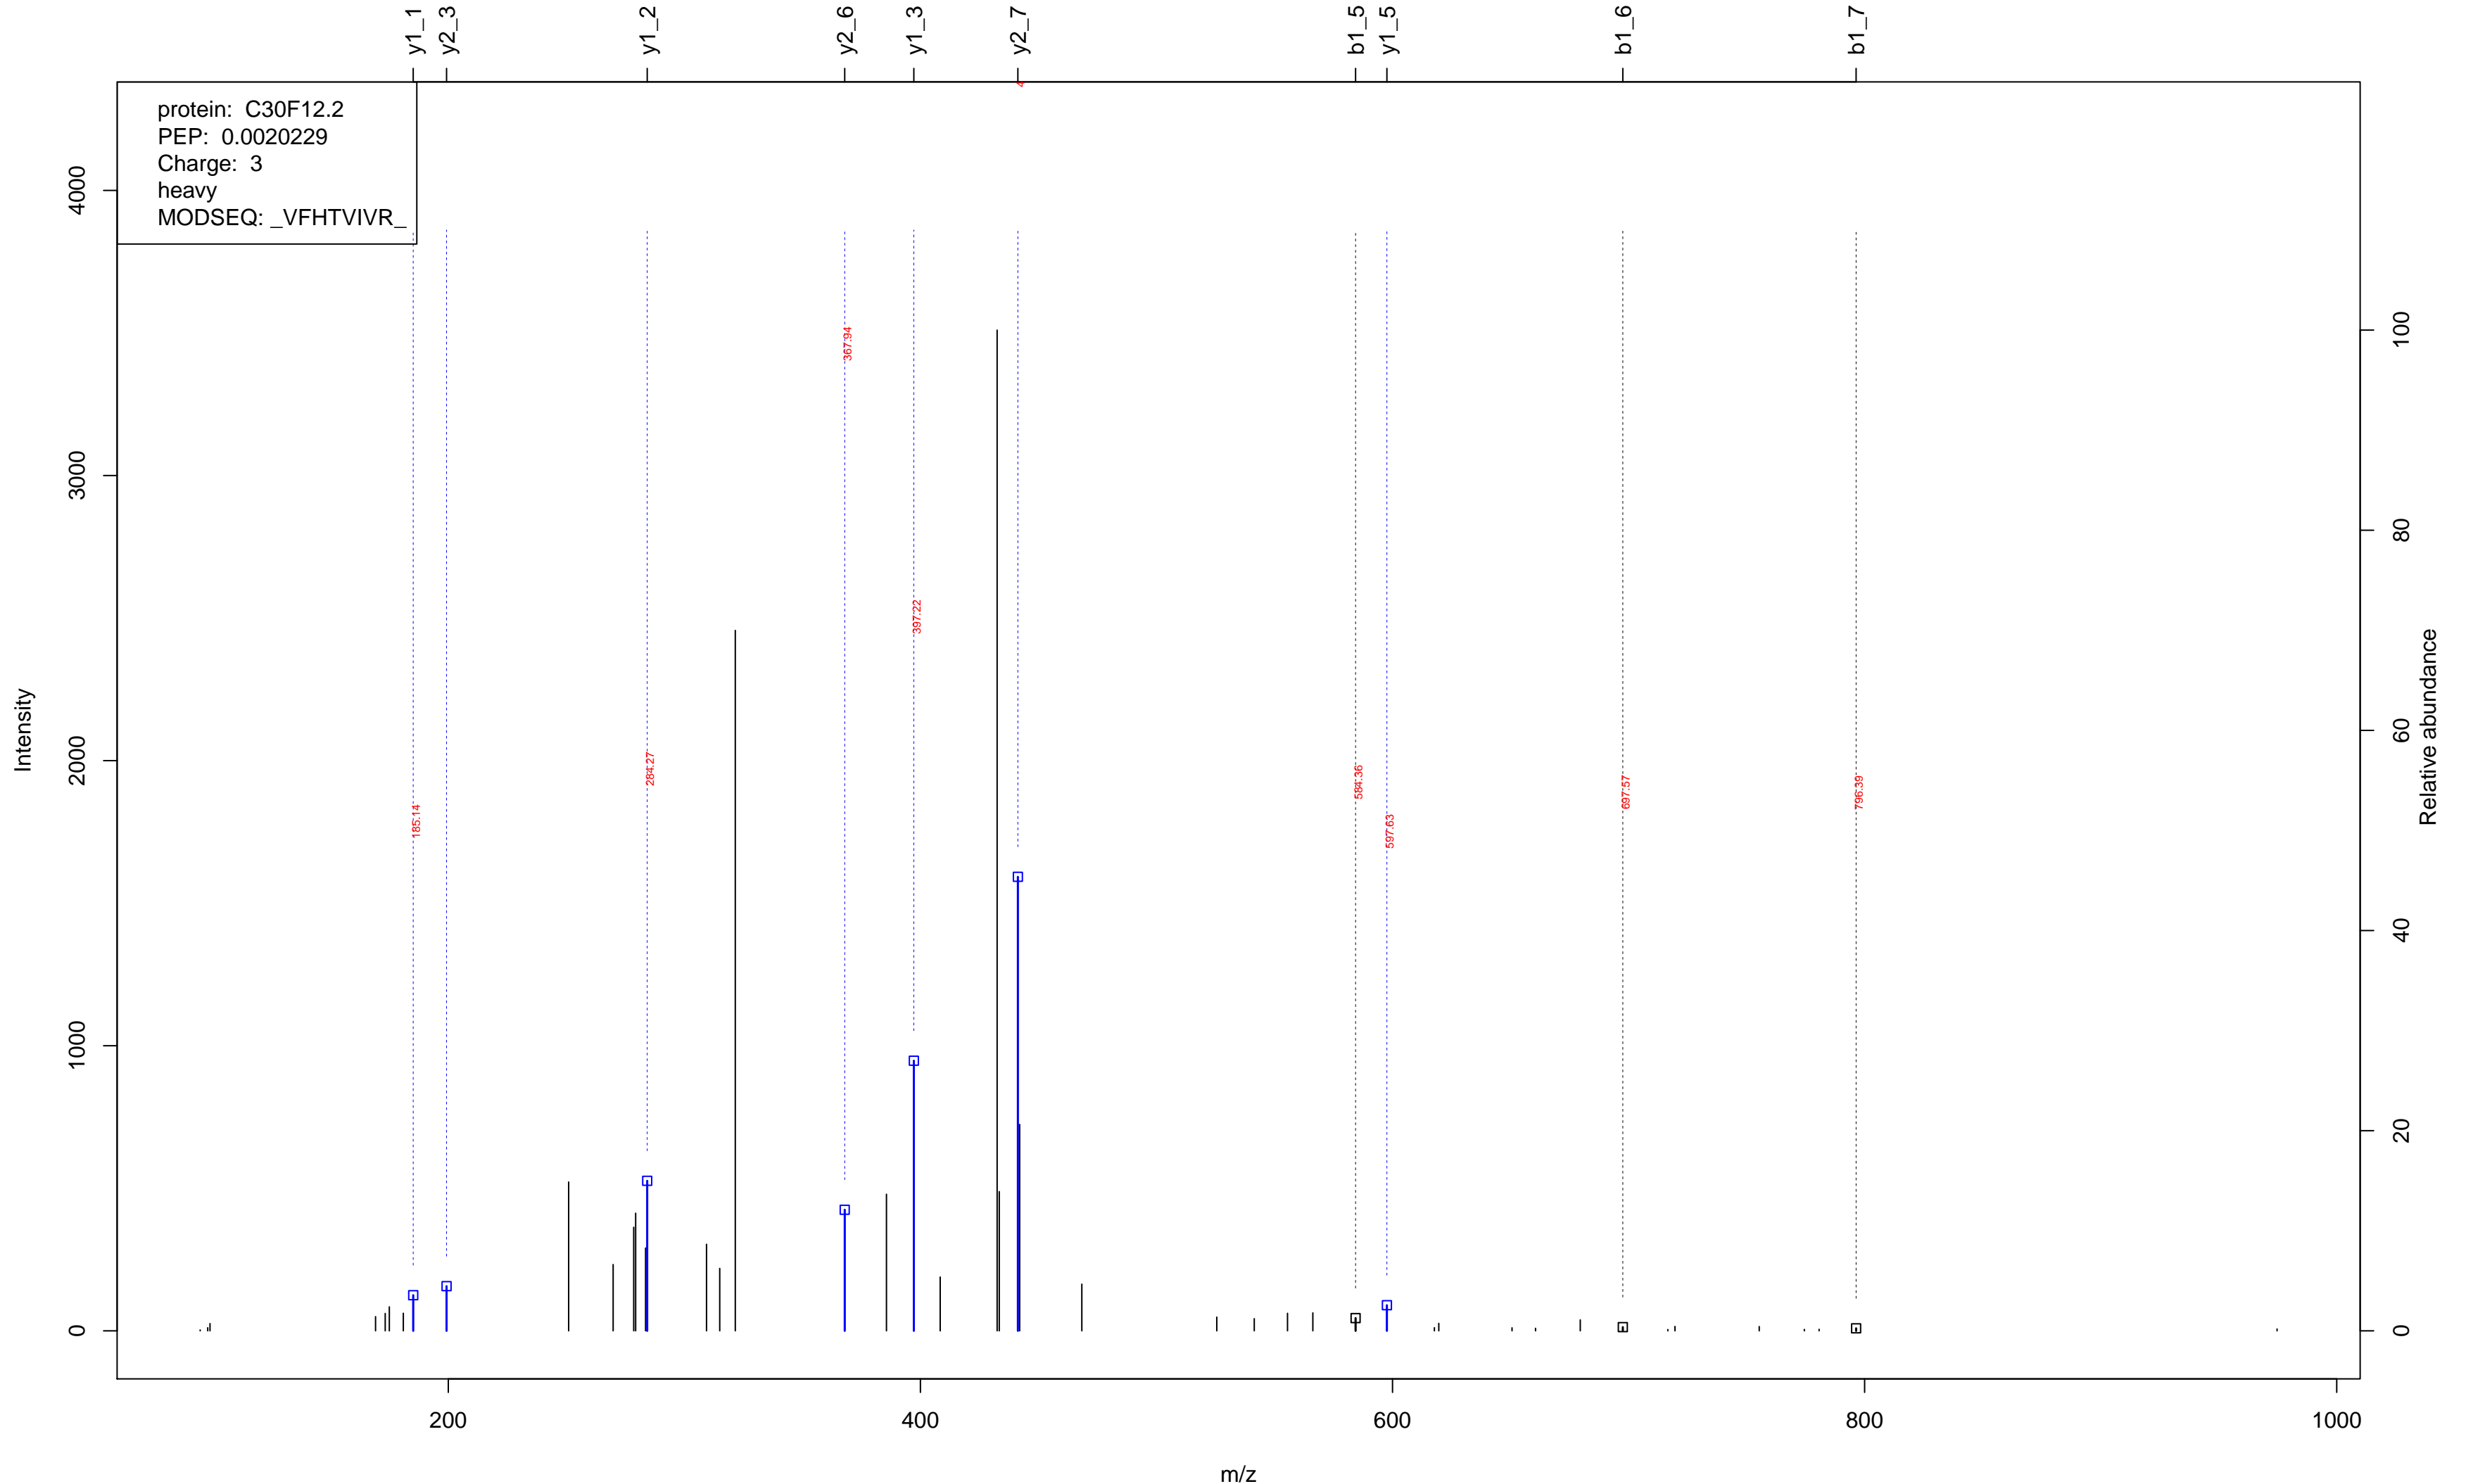

70

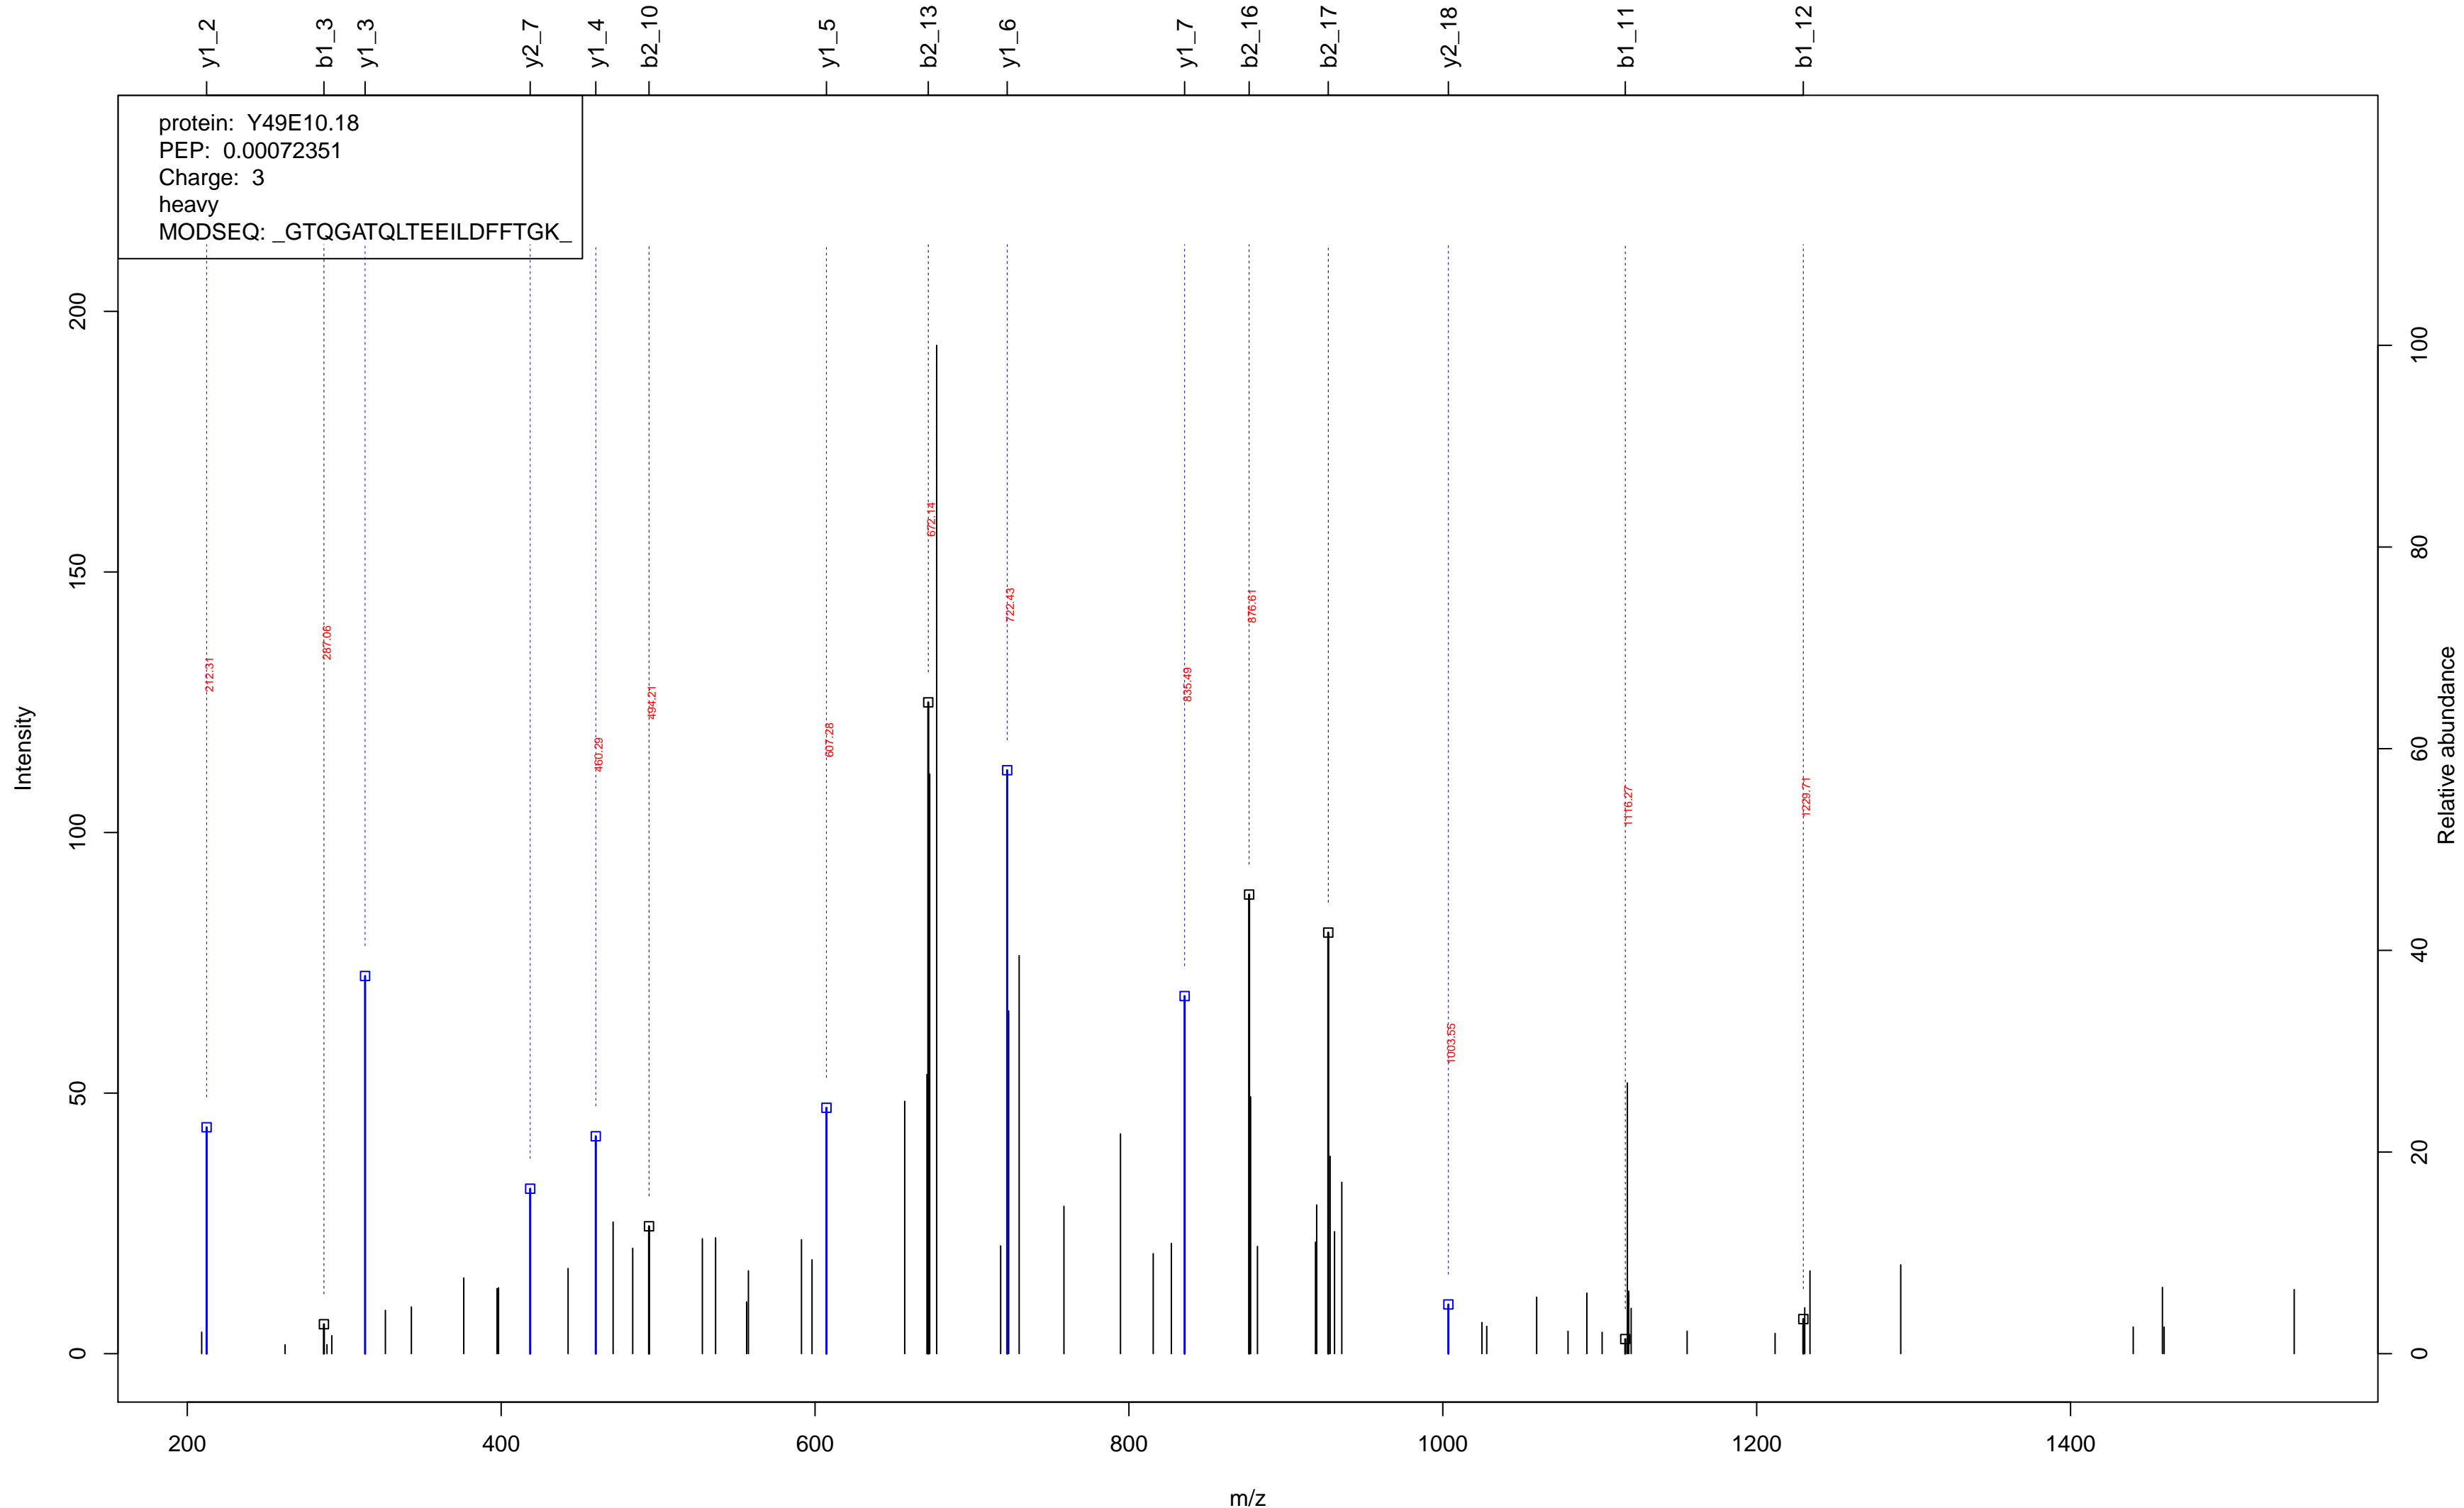

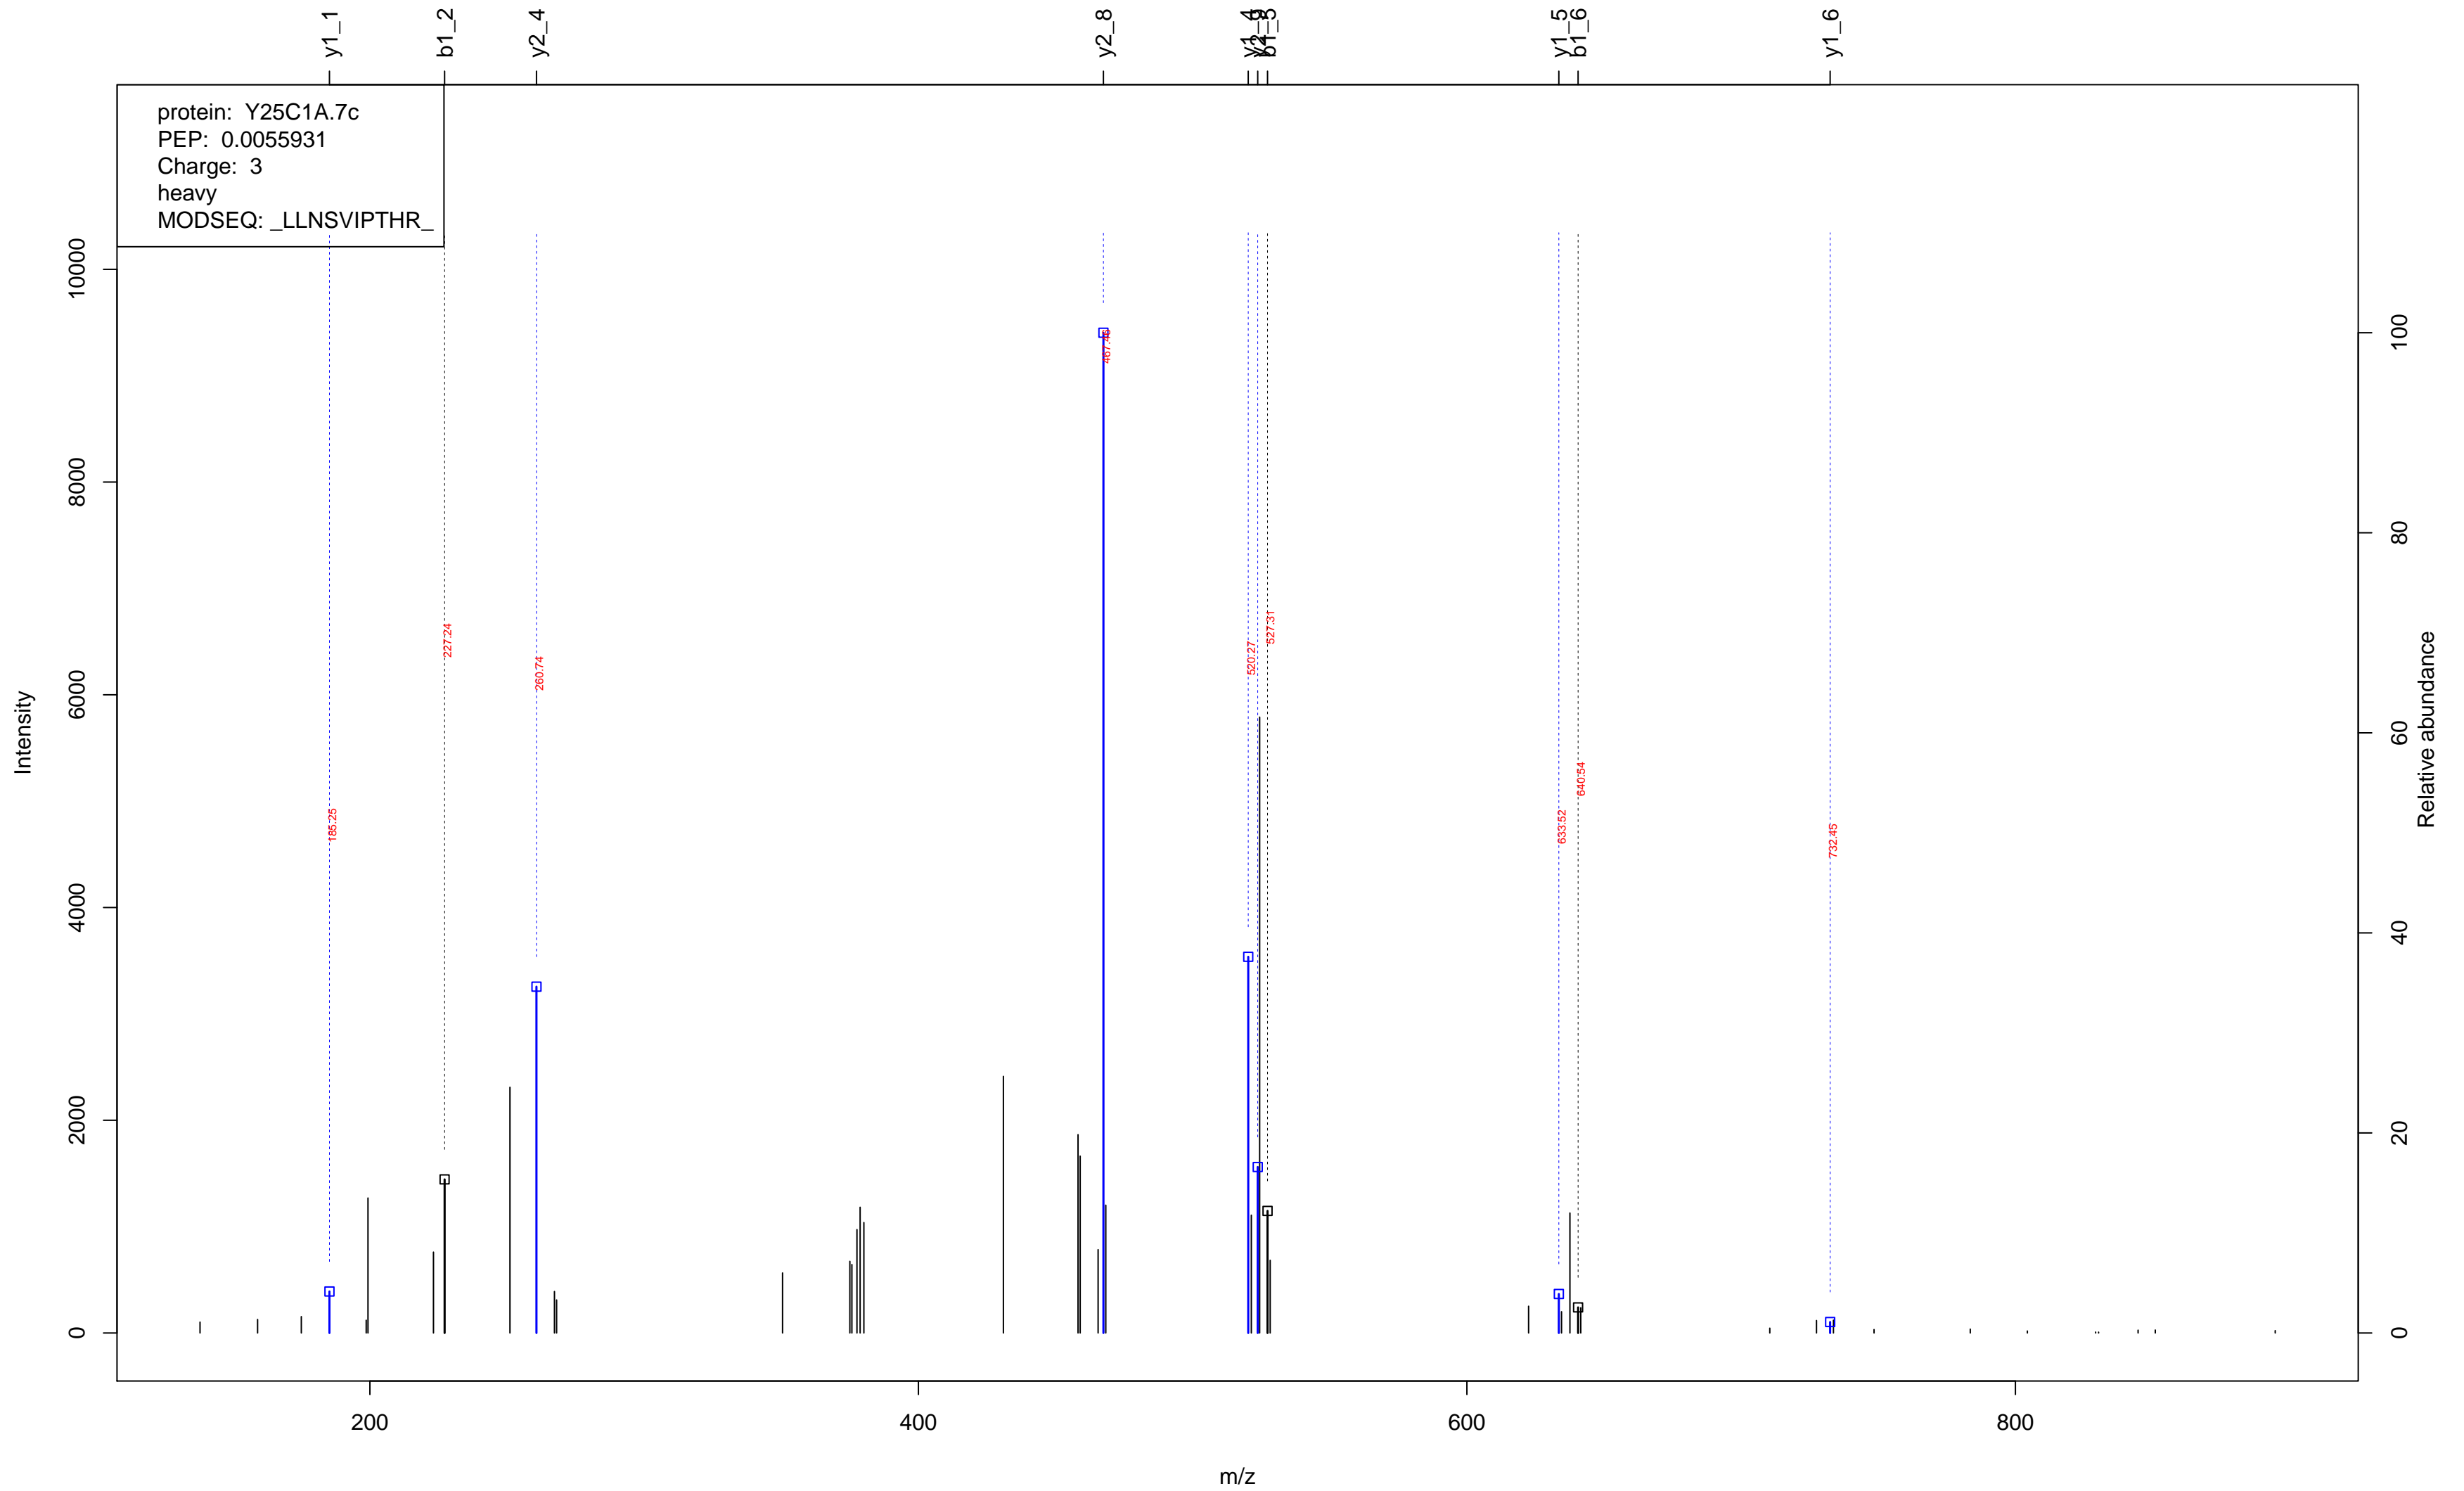

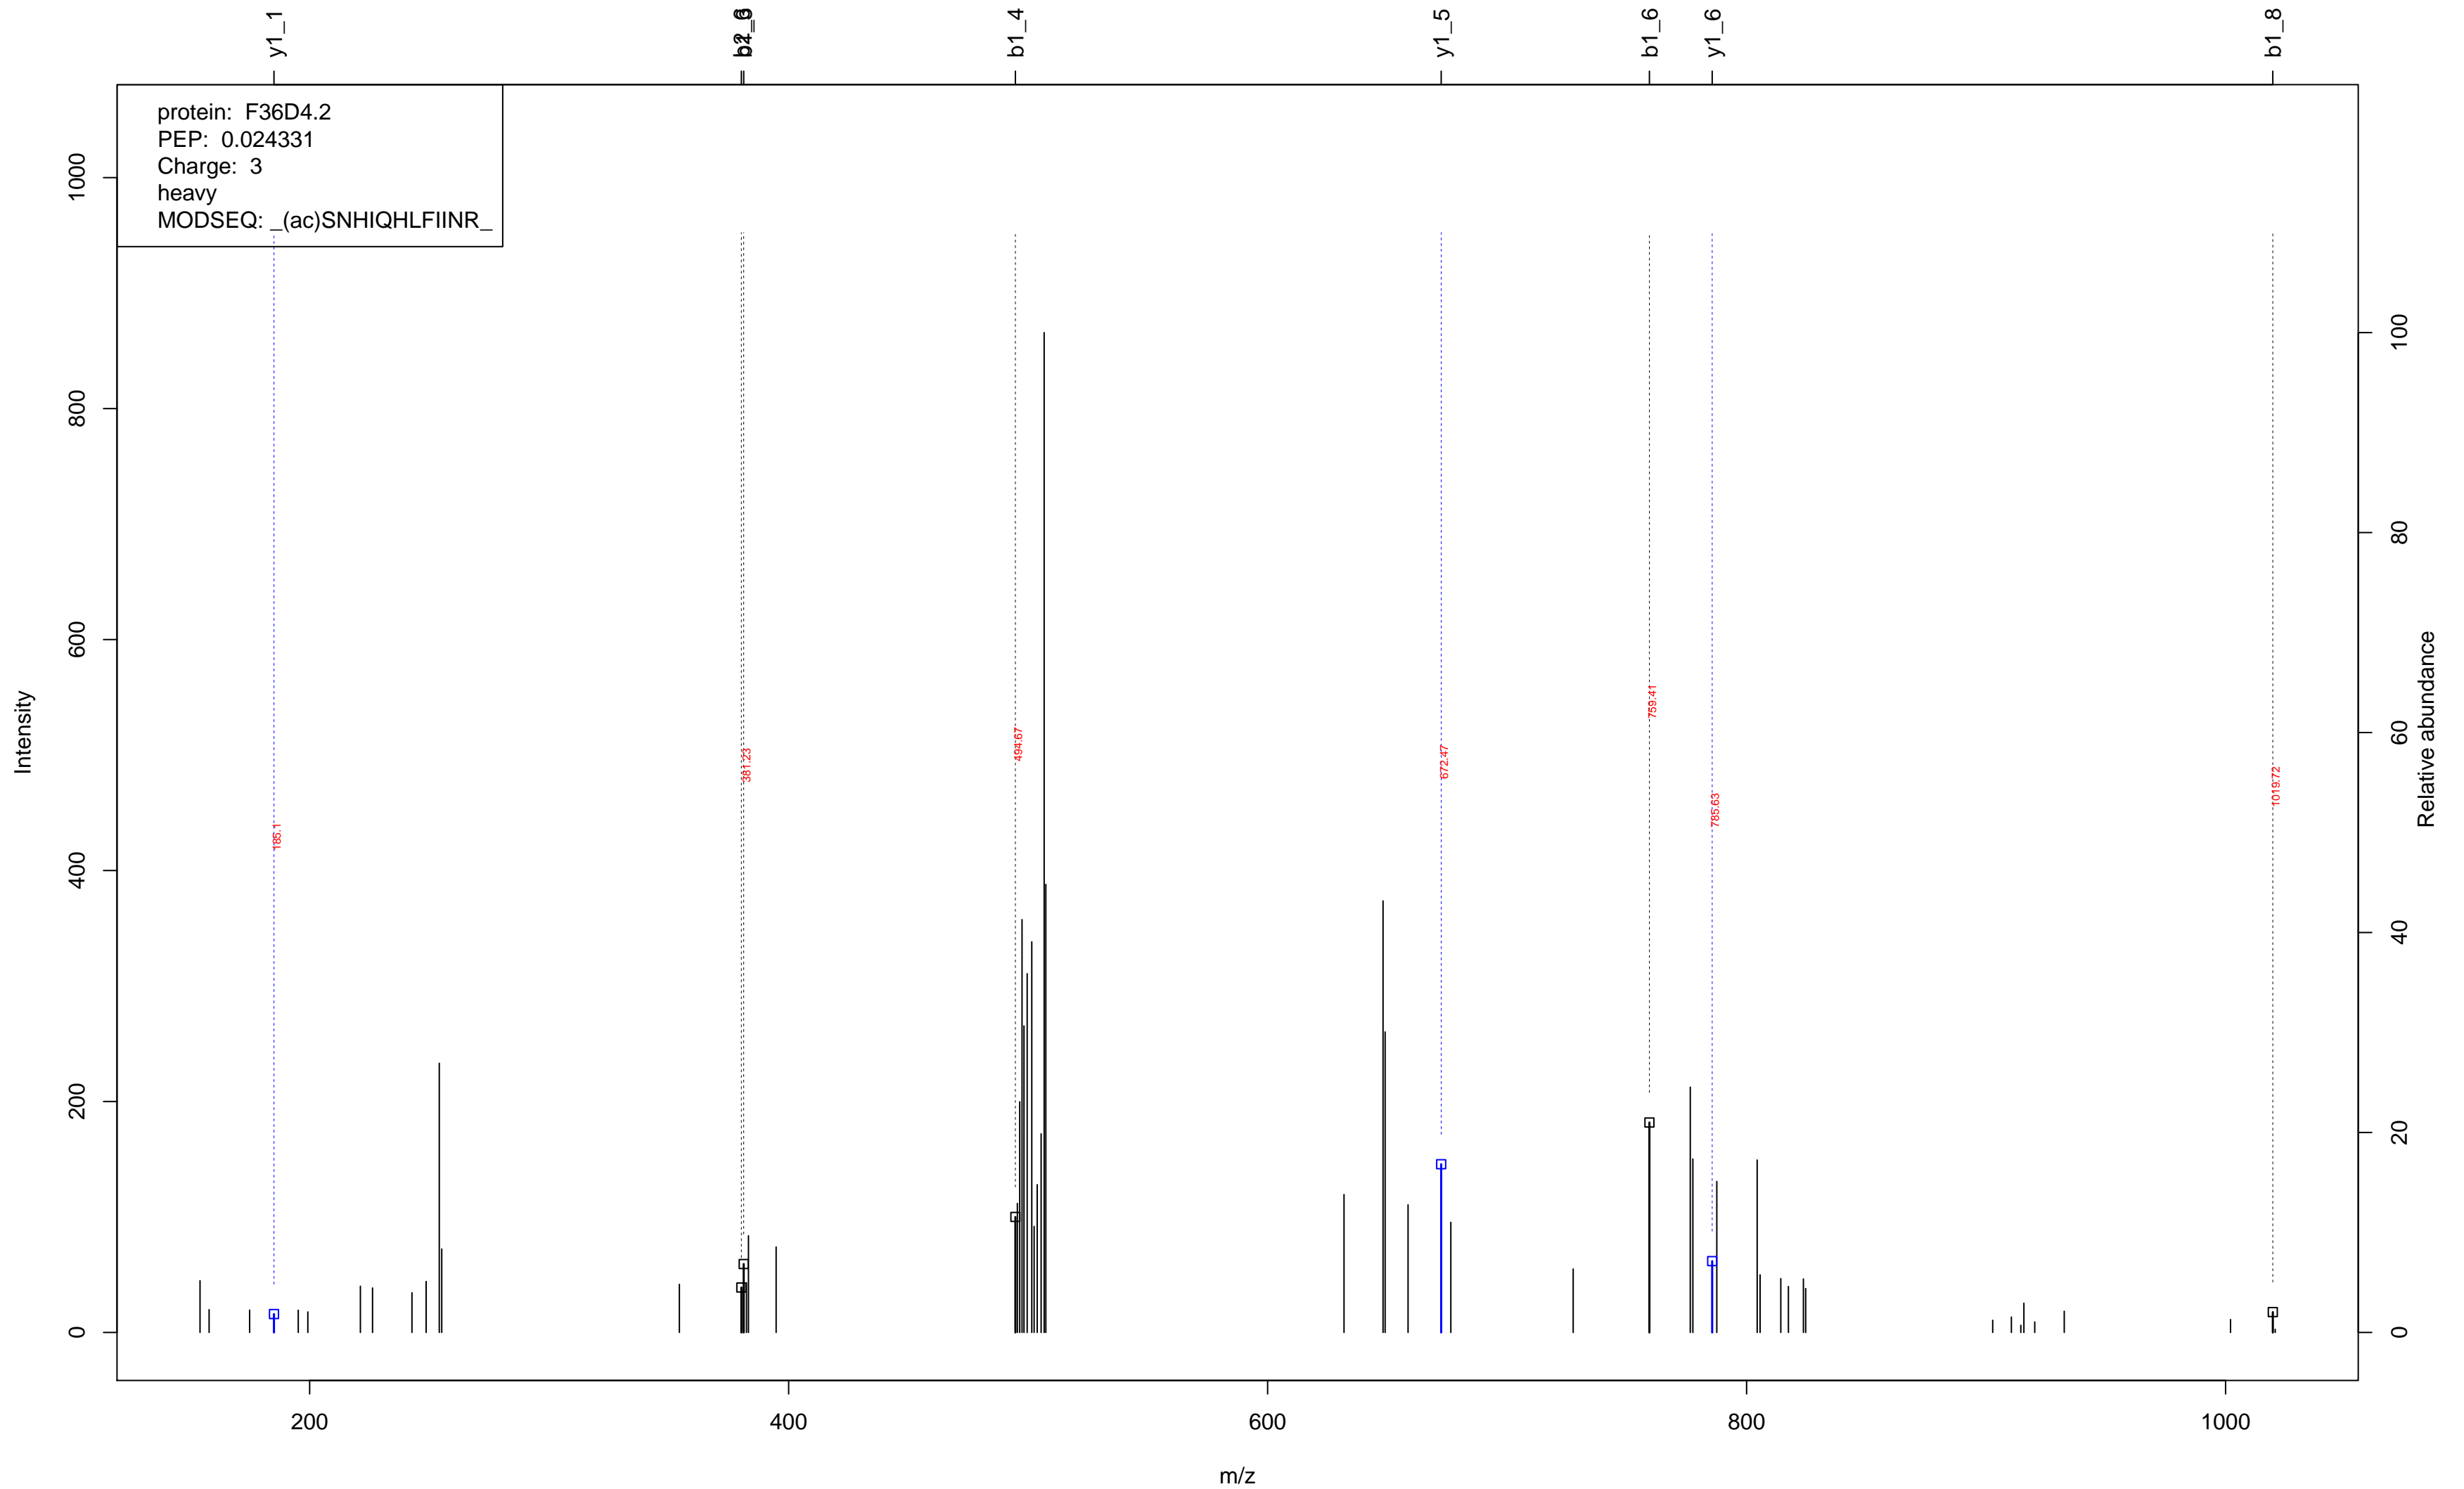



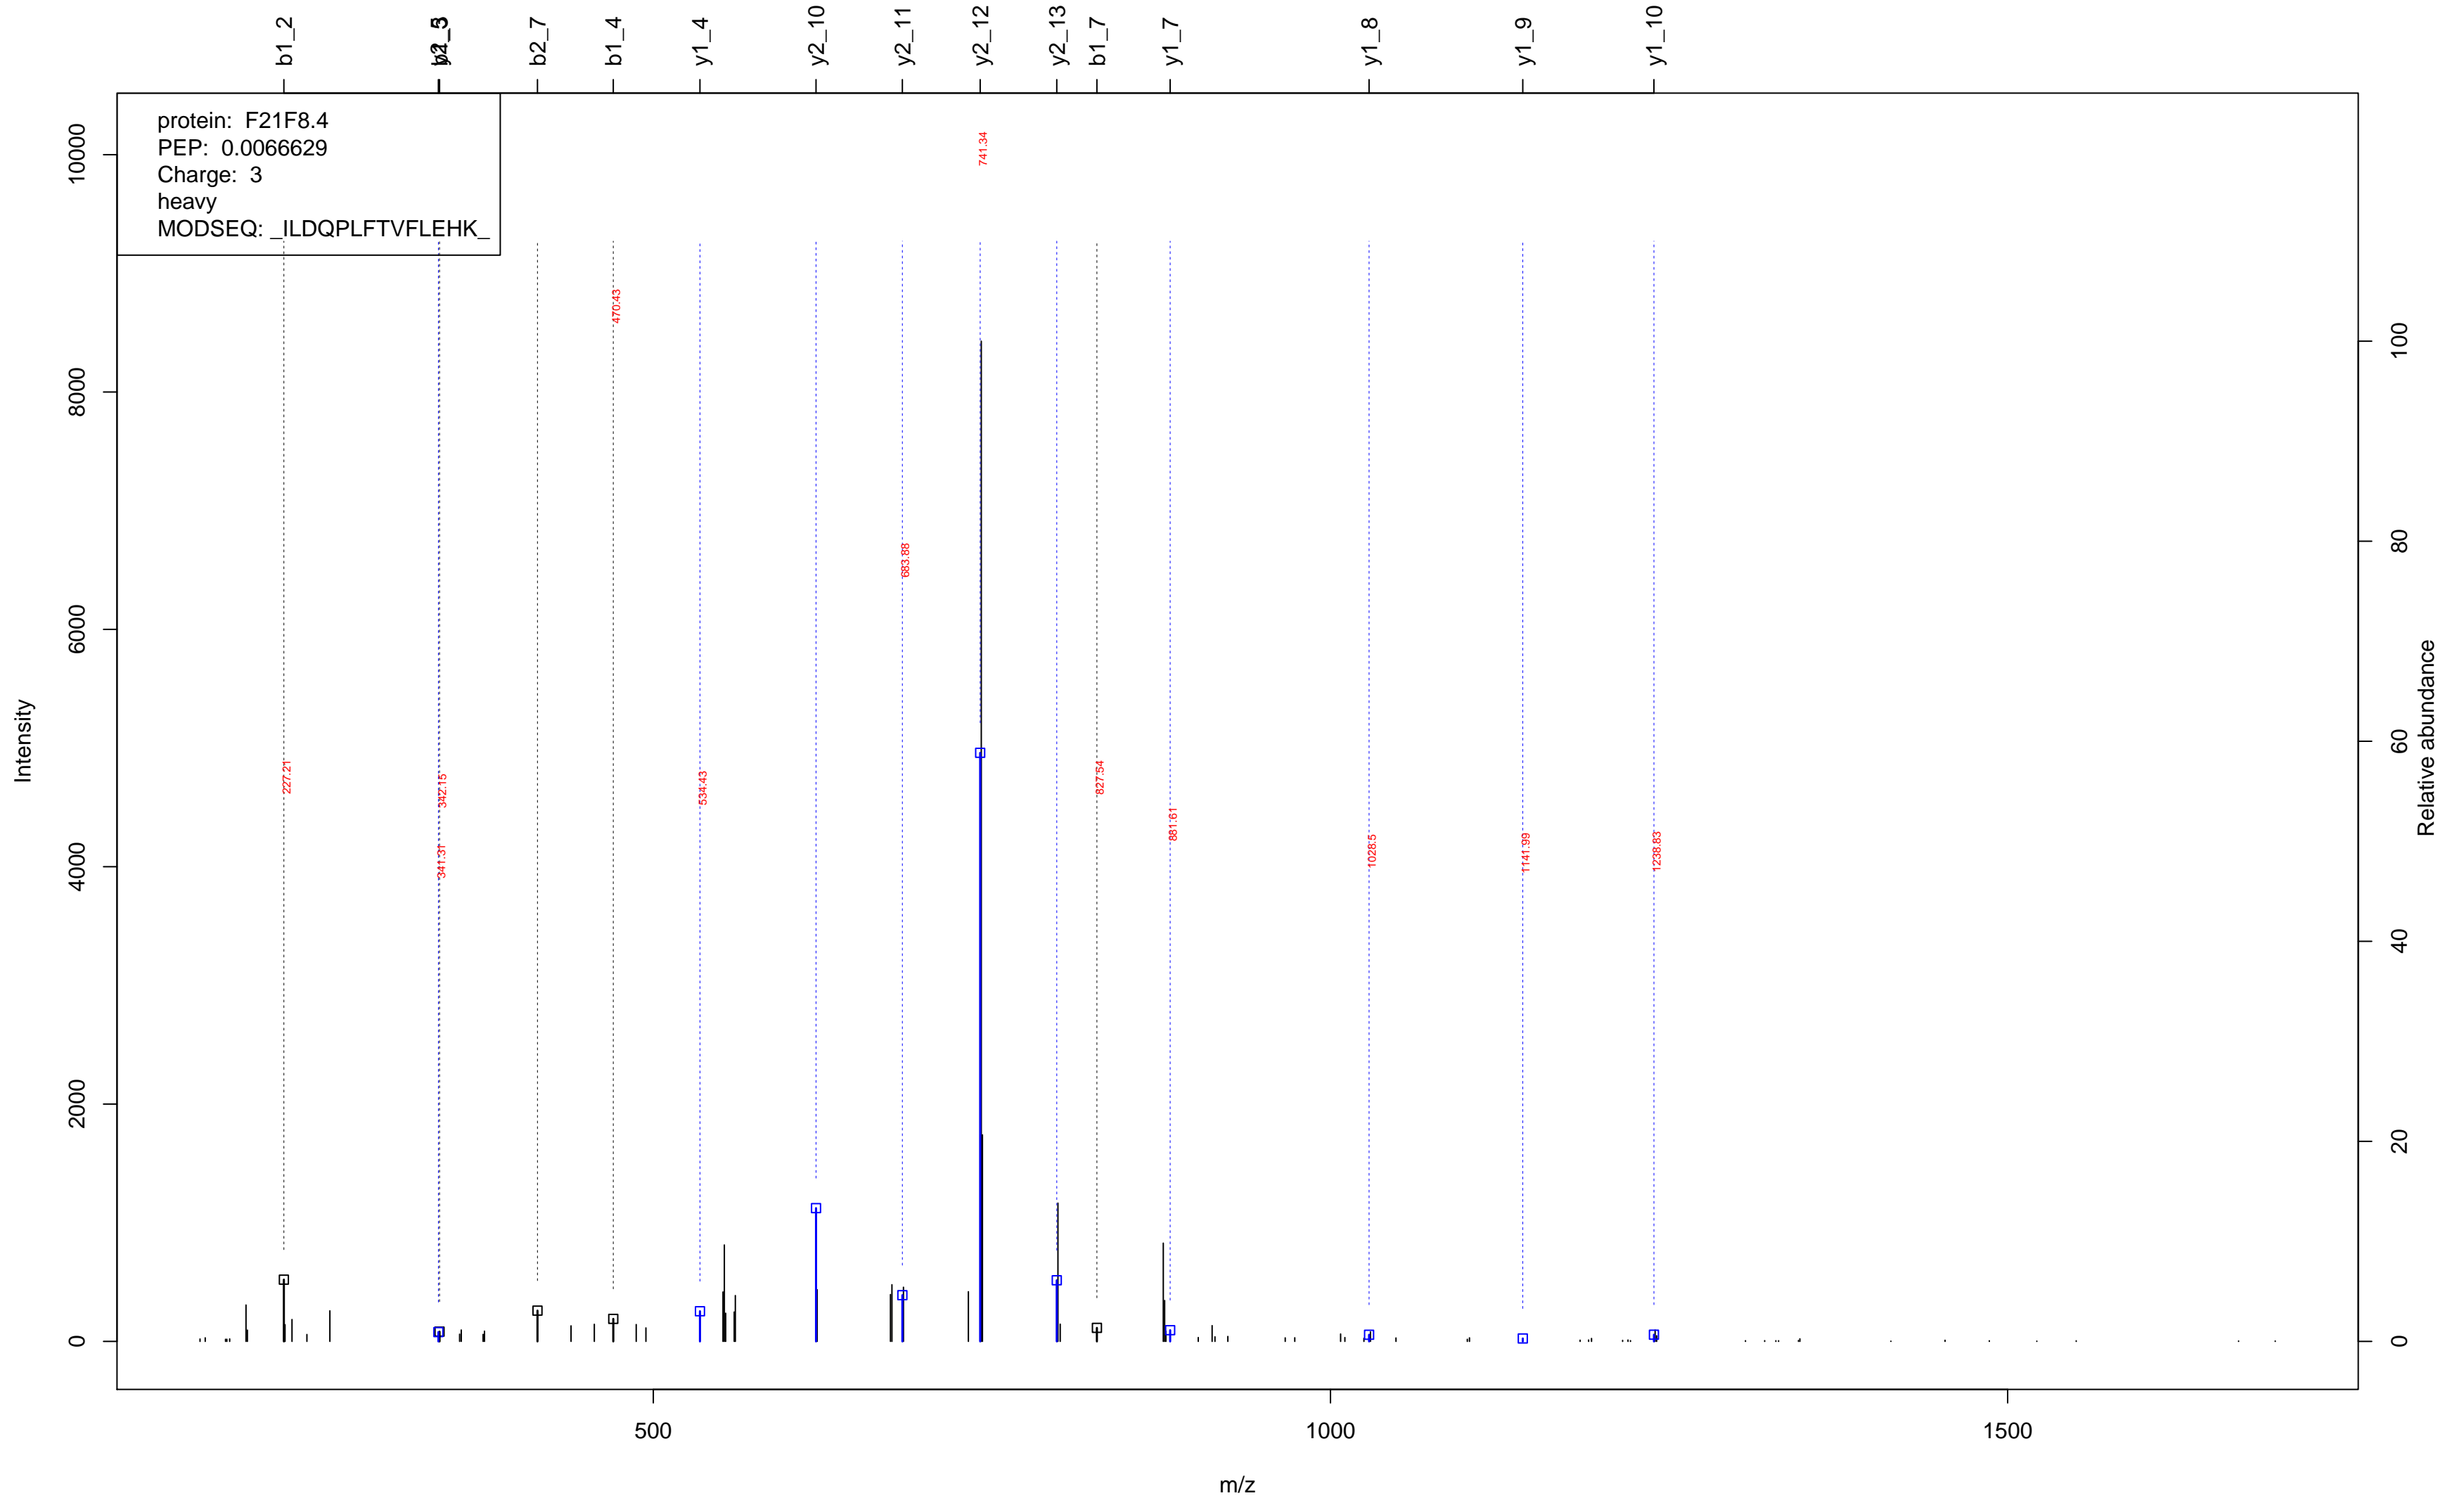

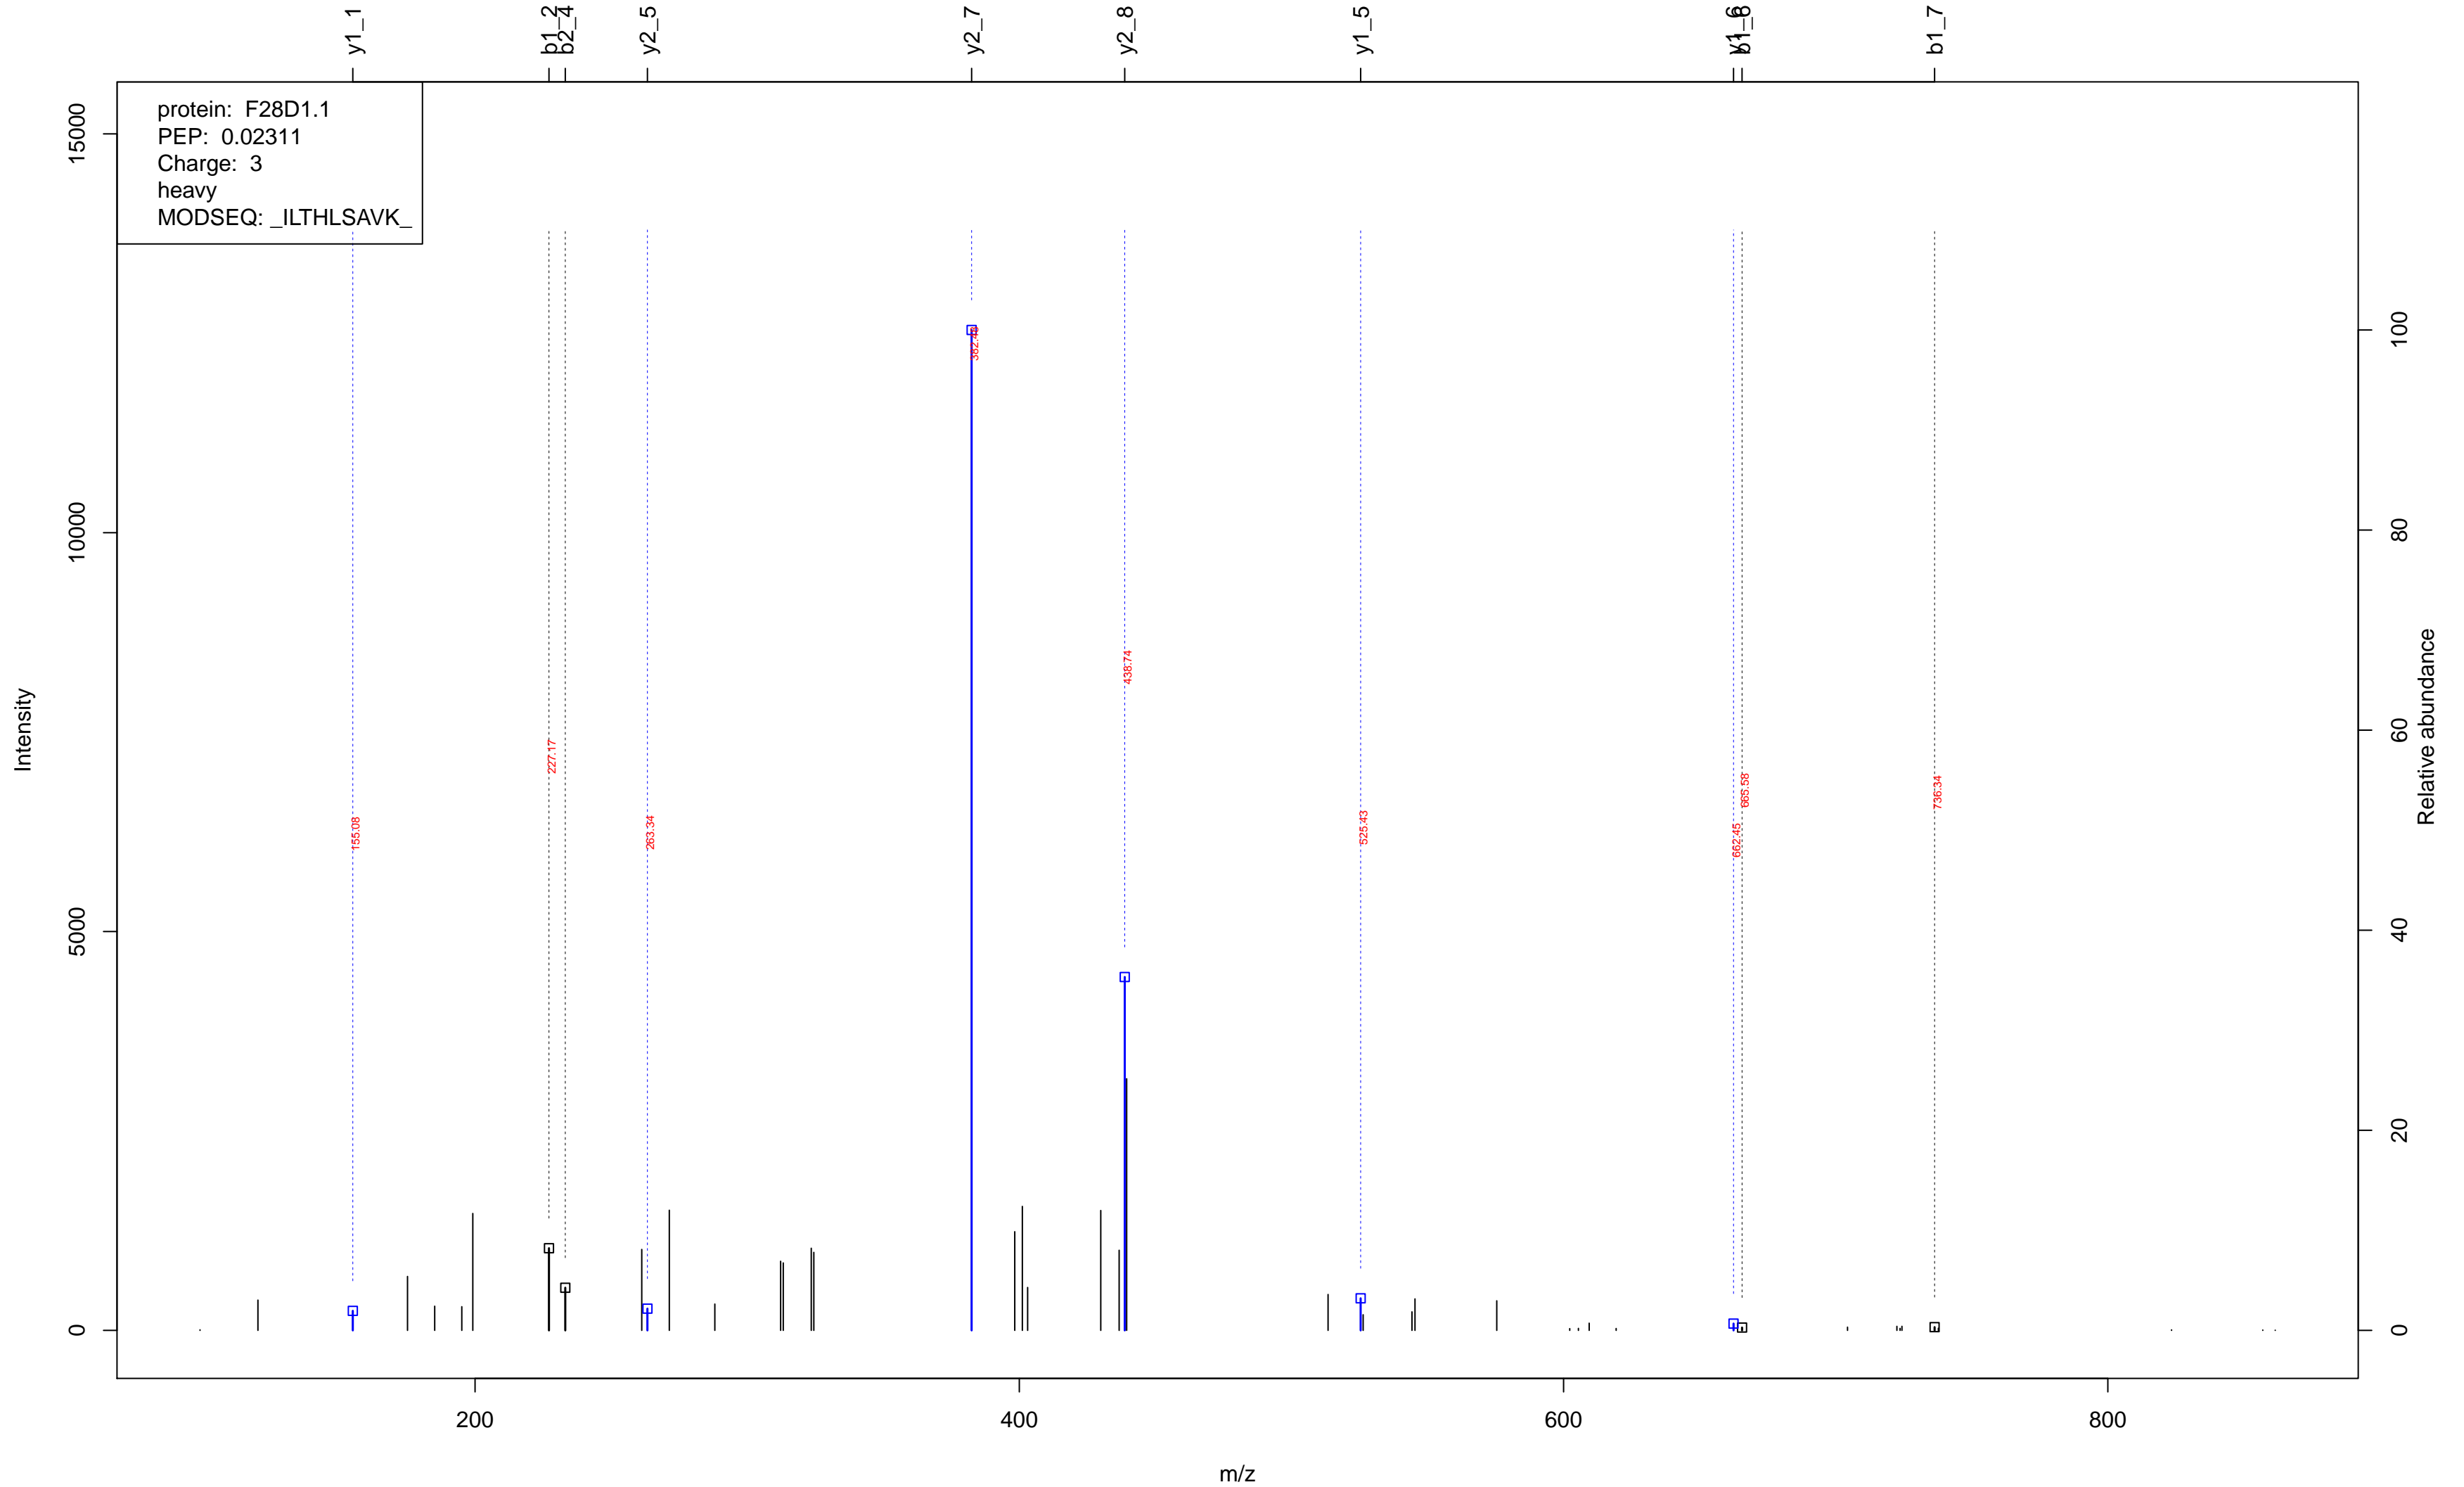

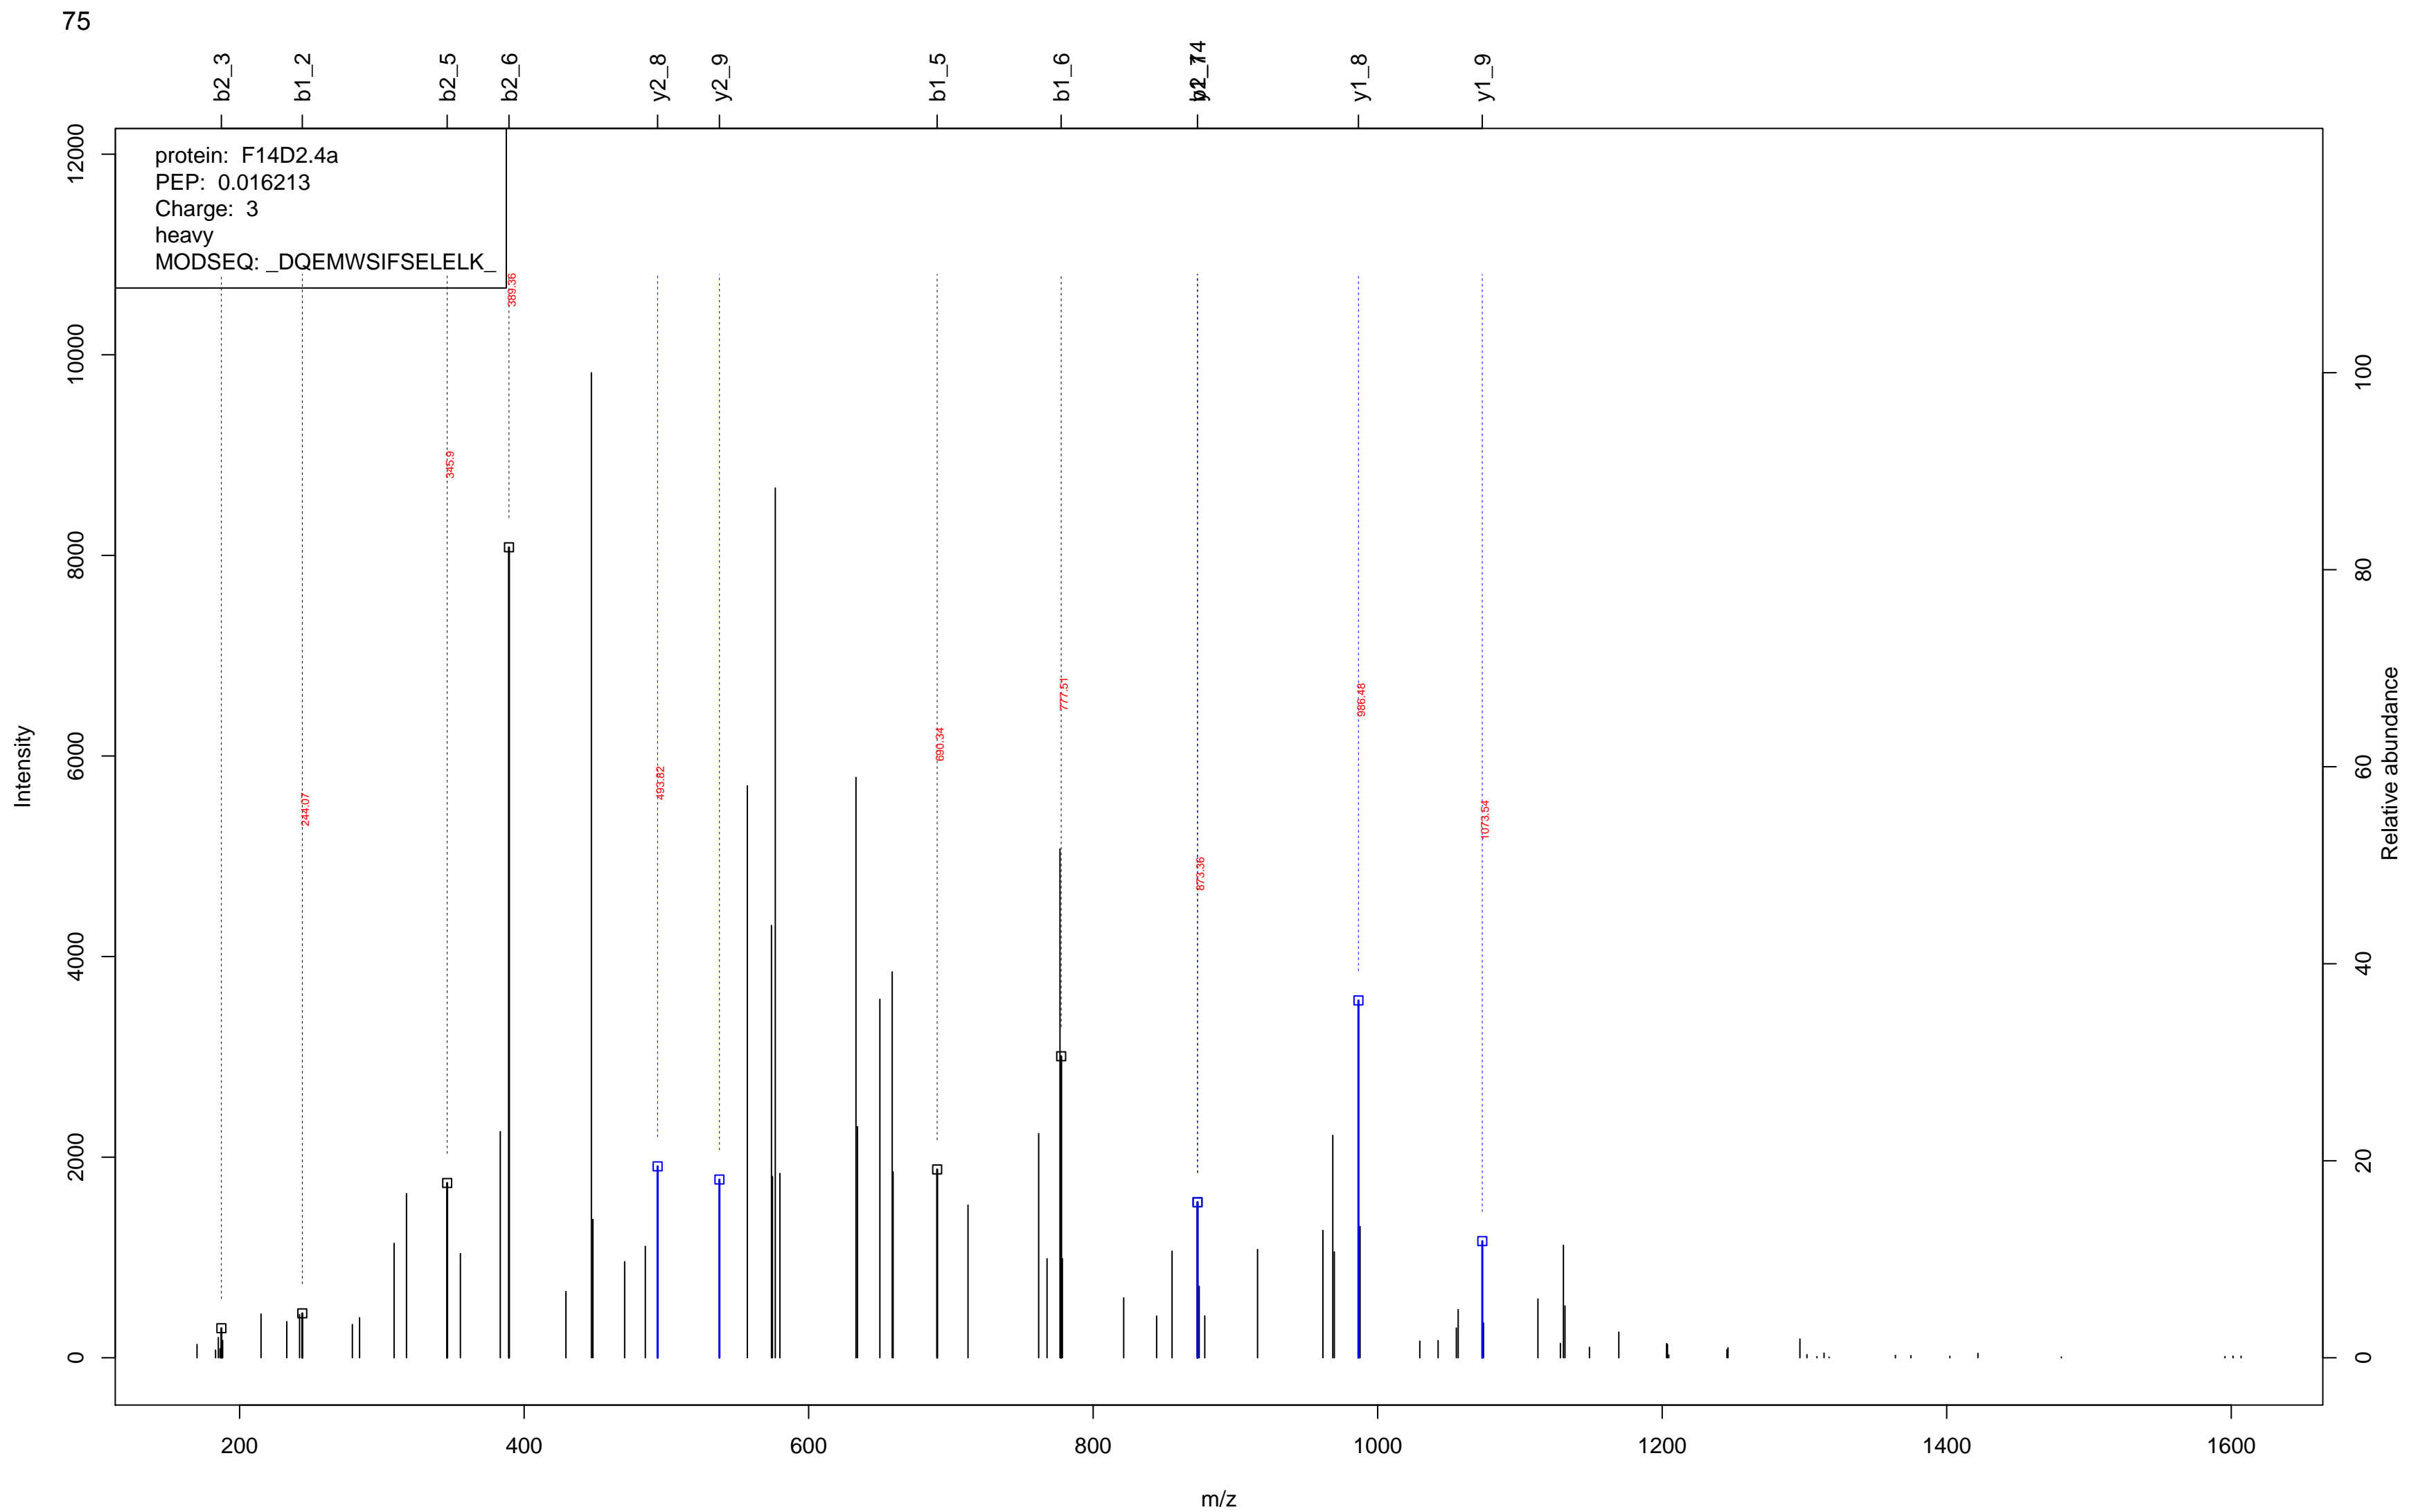

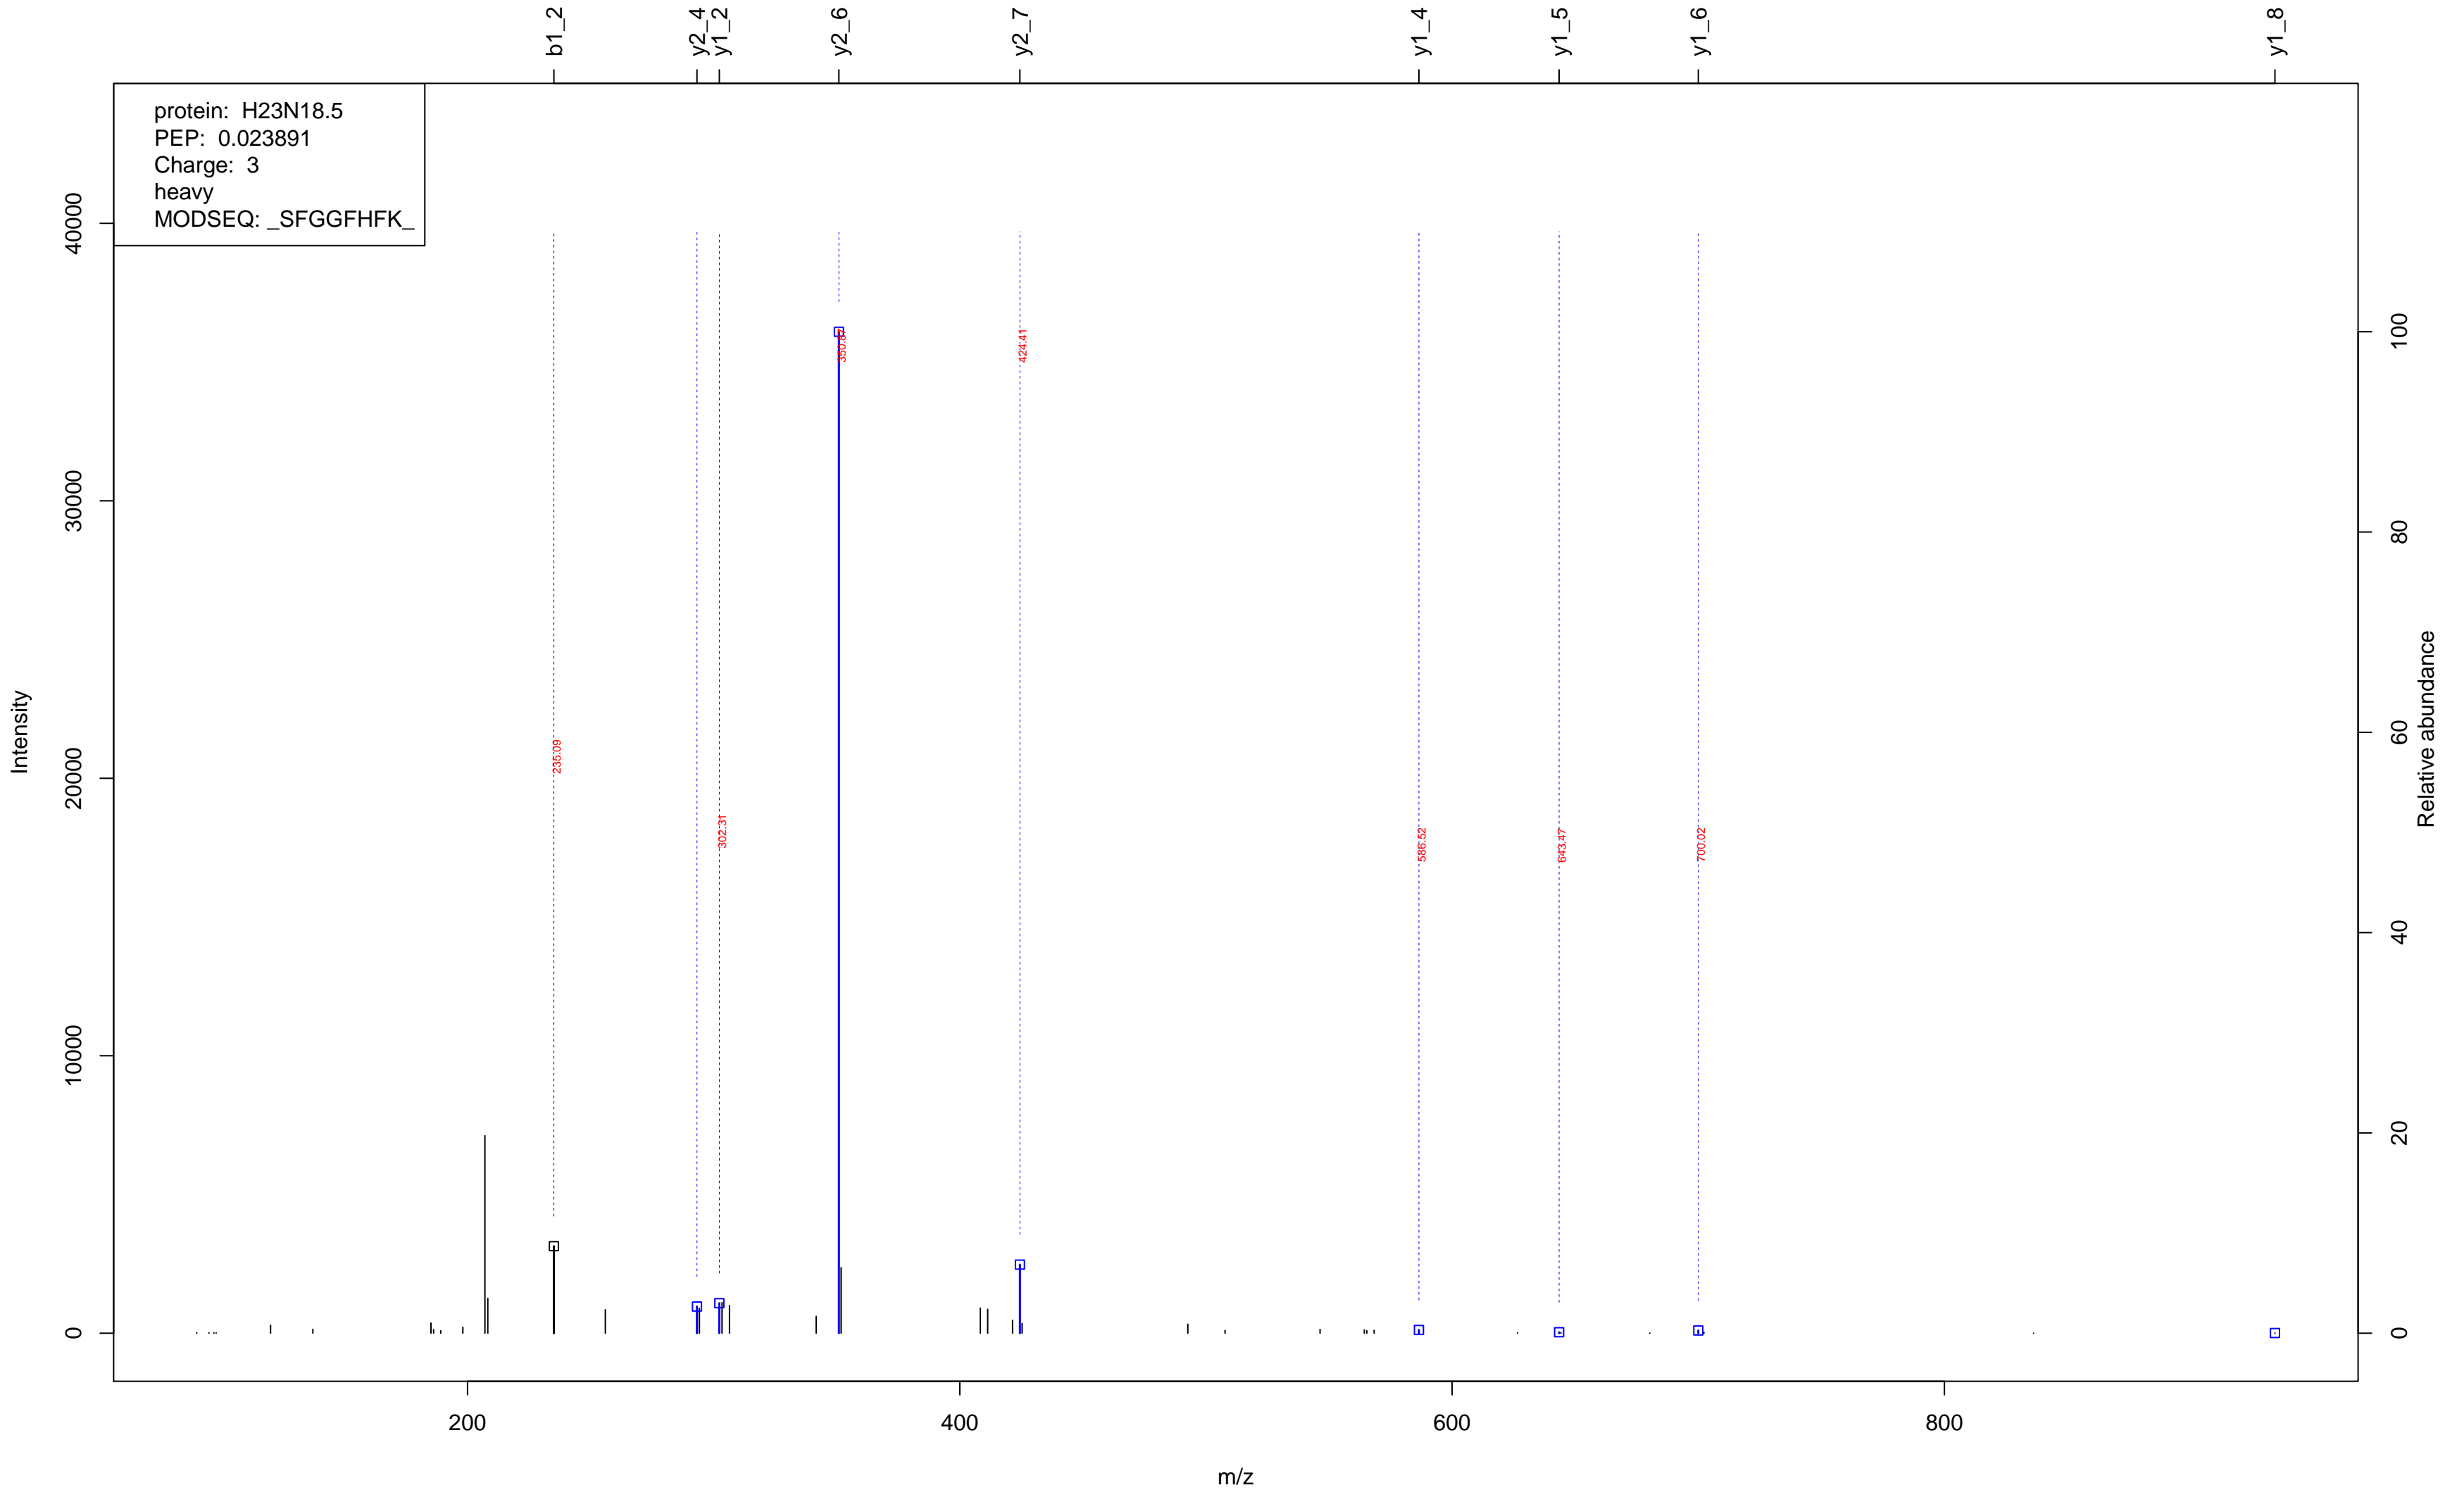

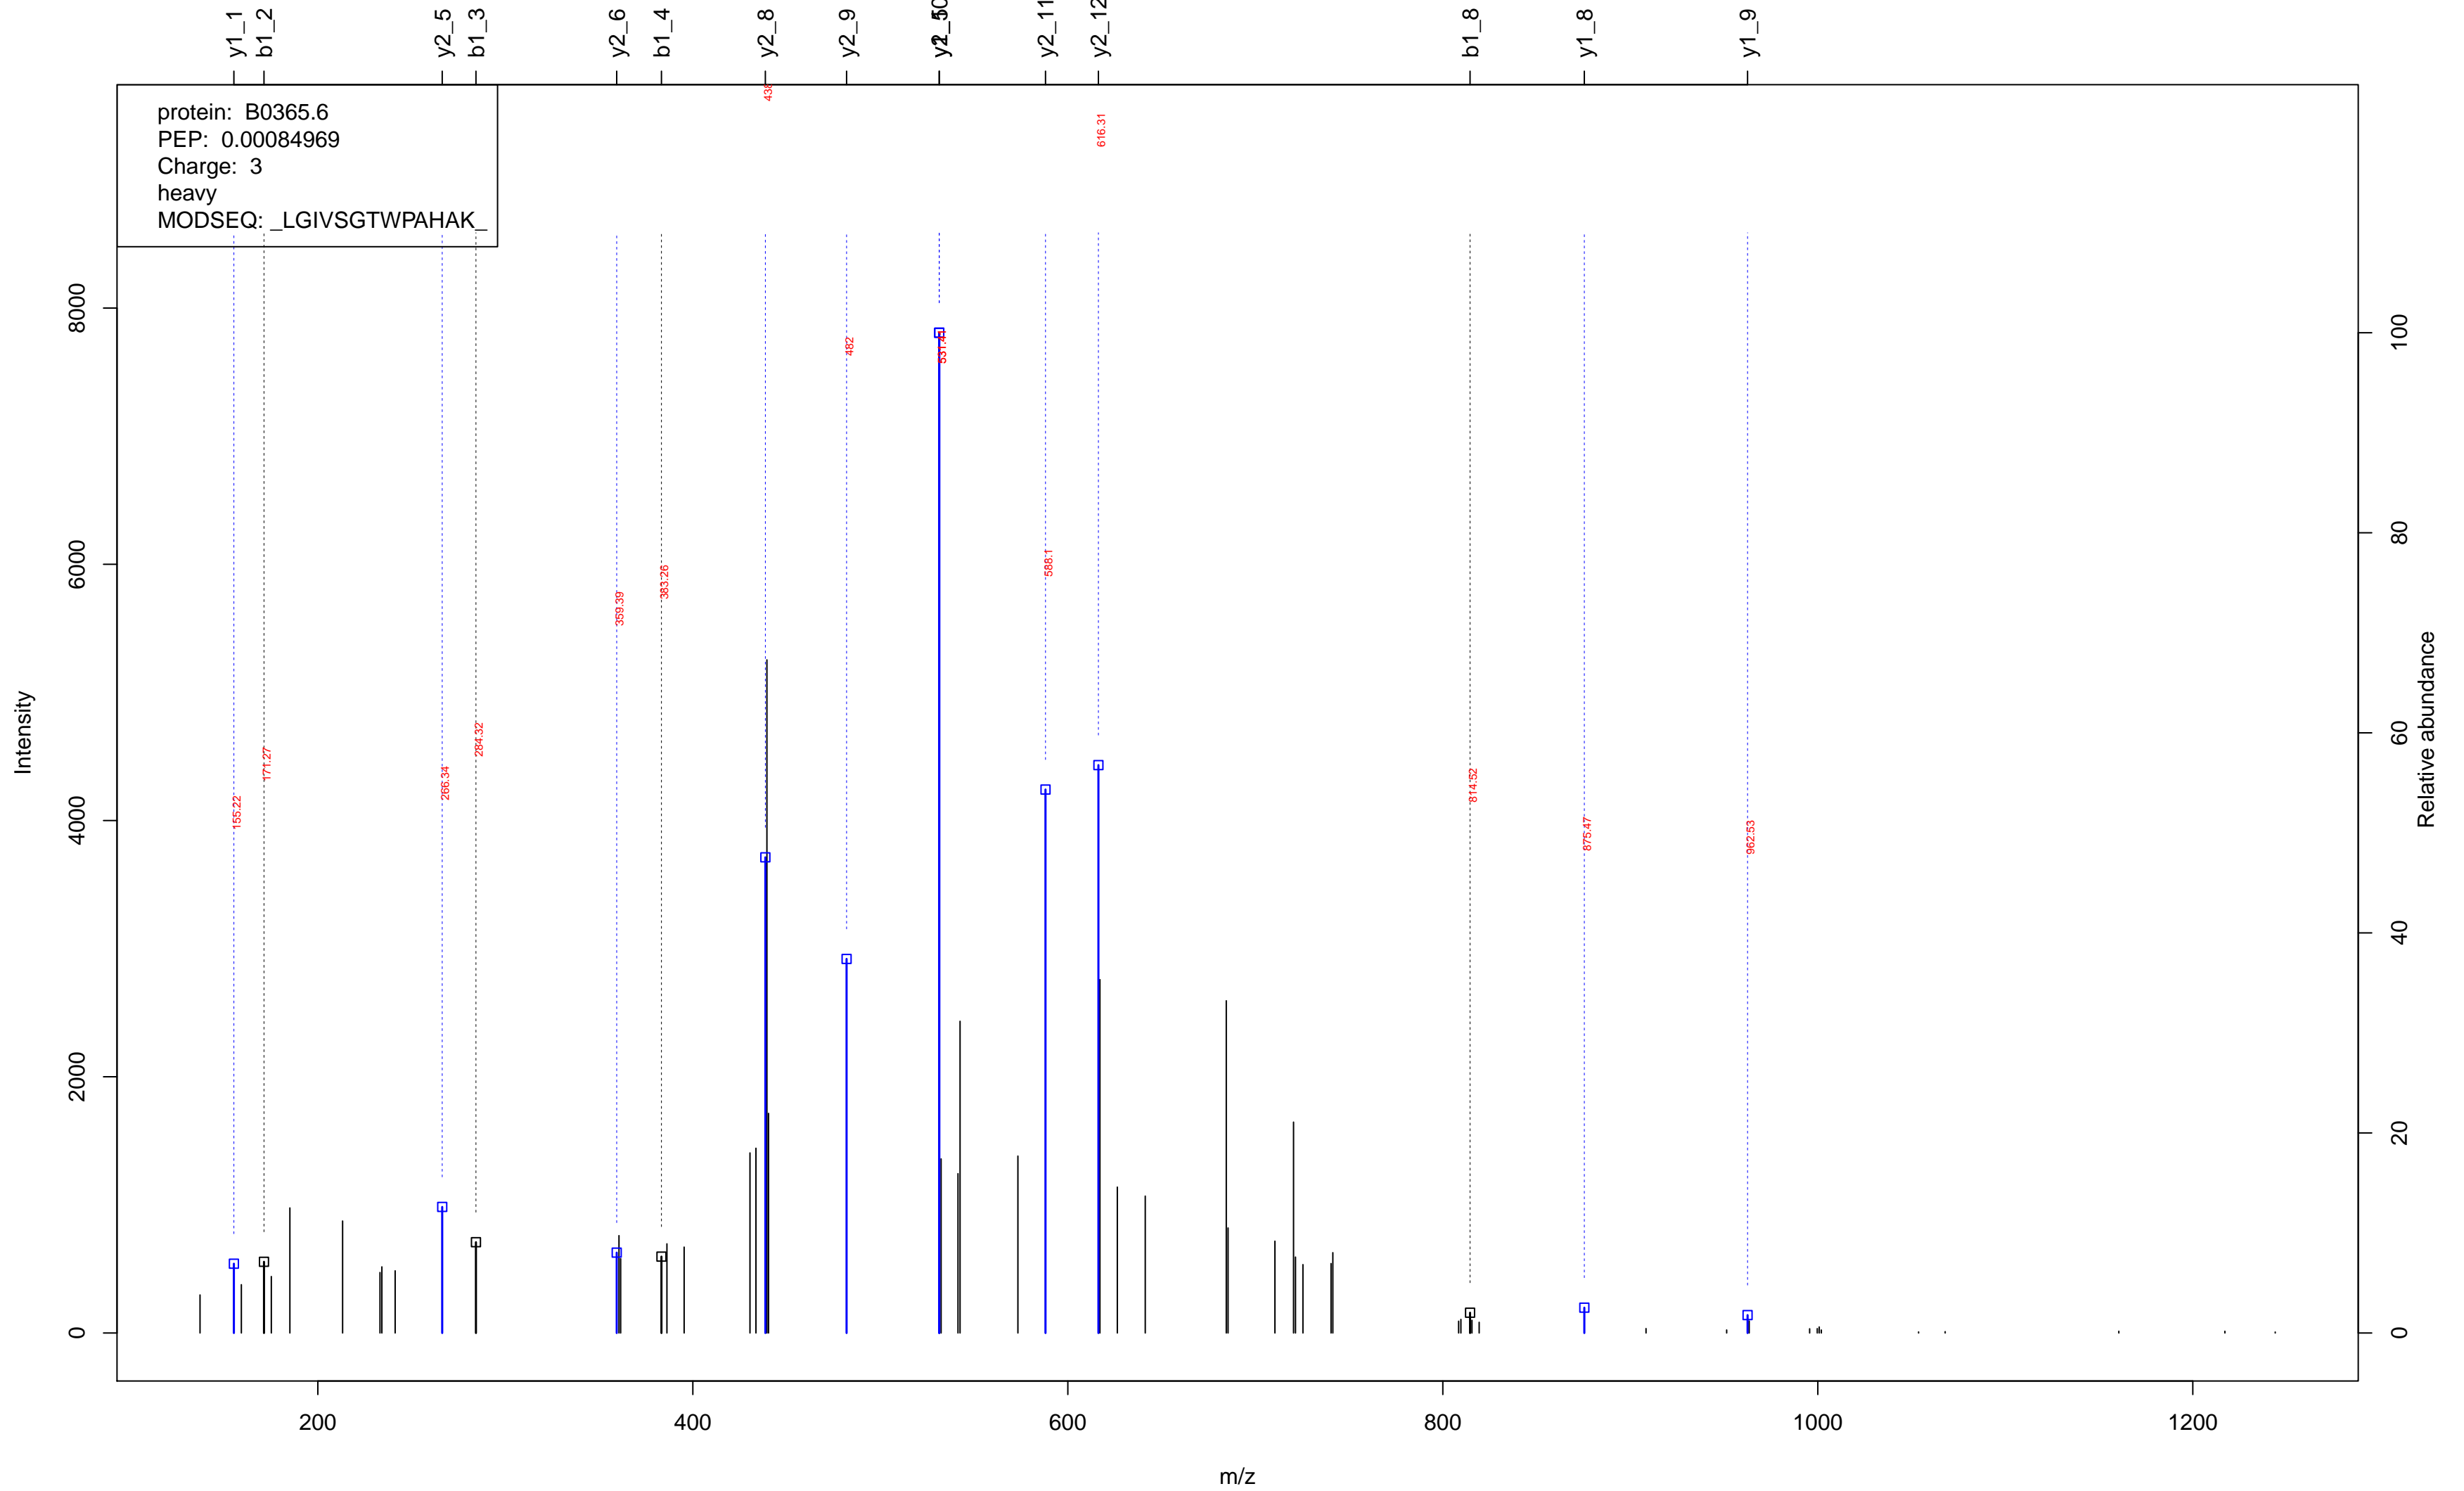

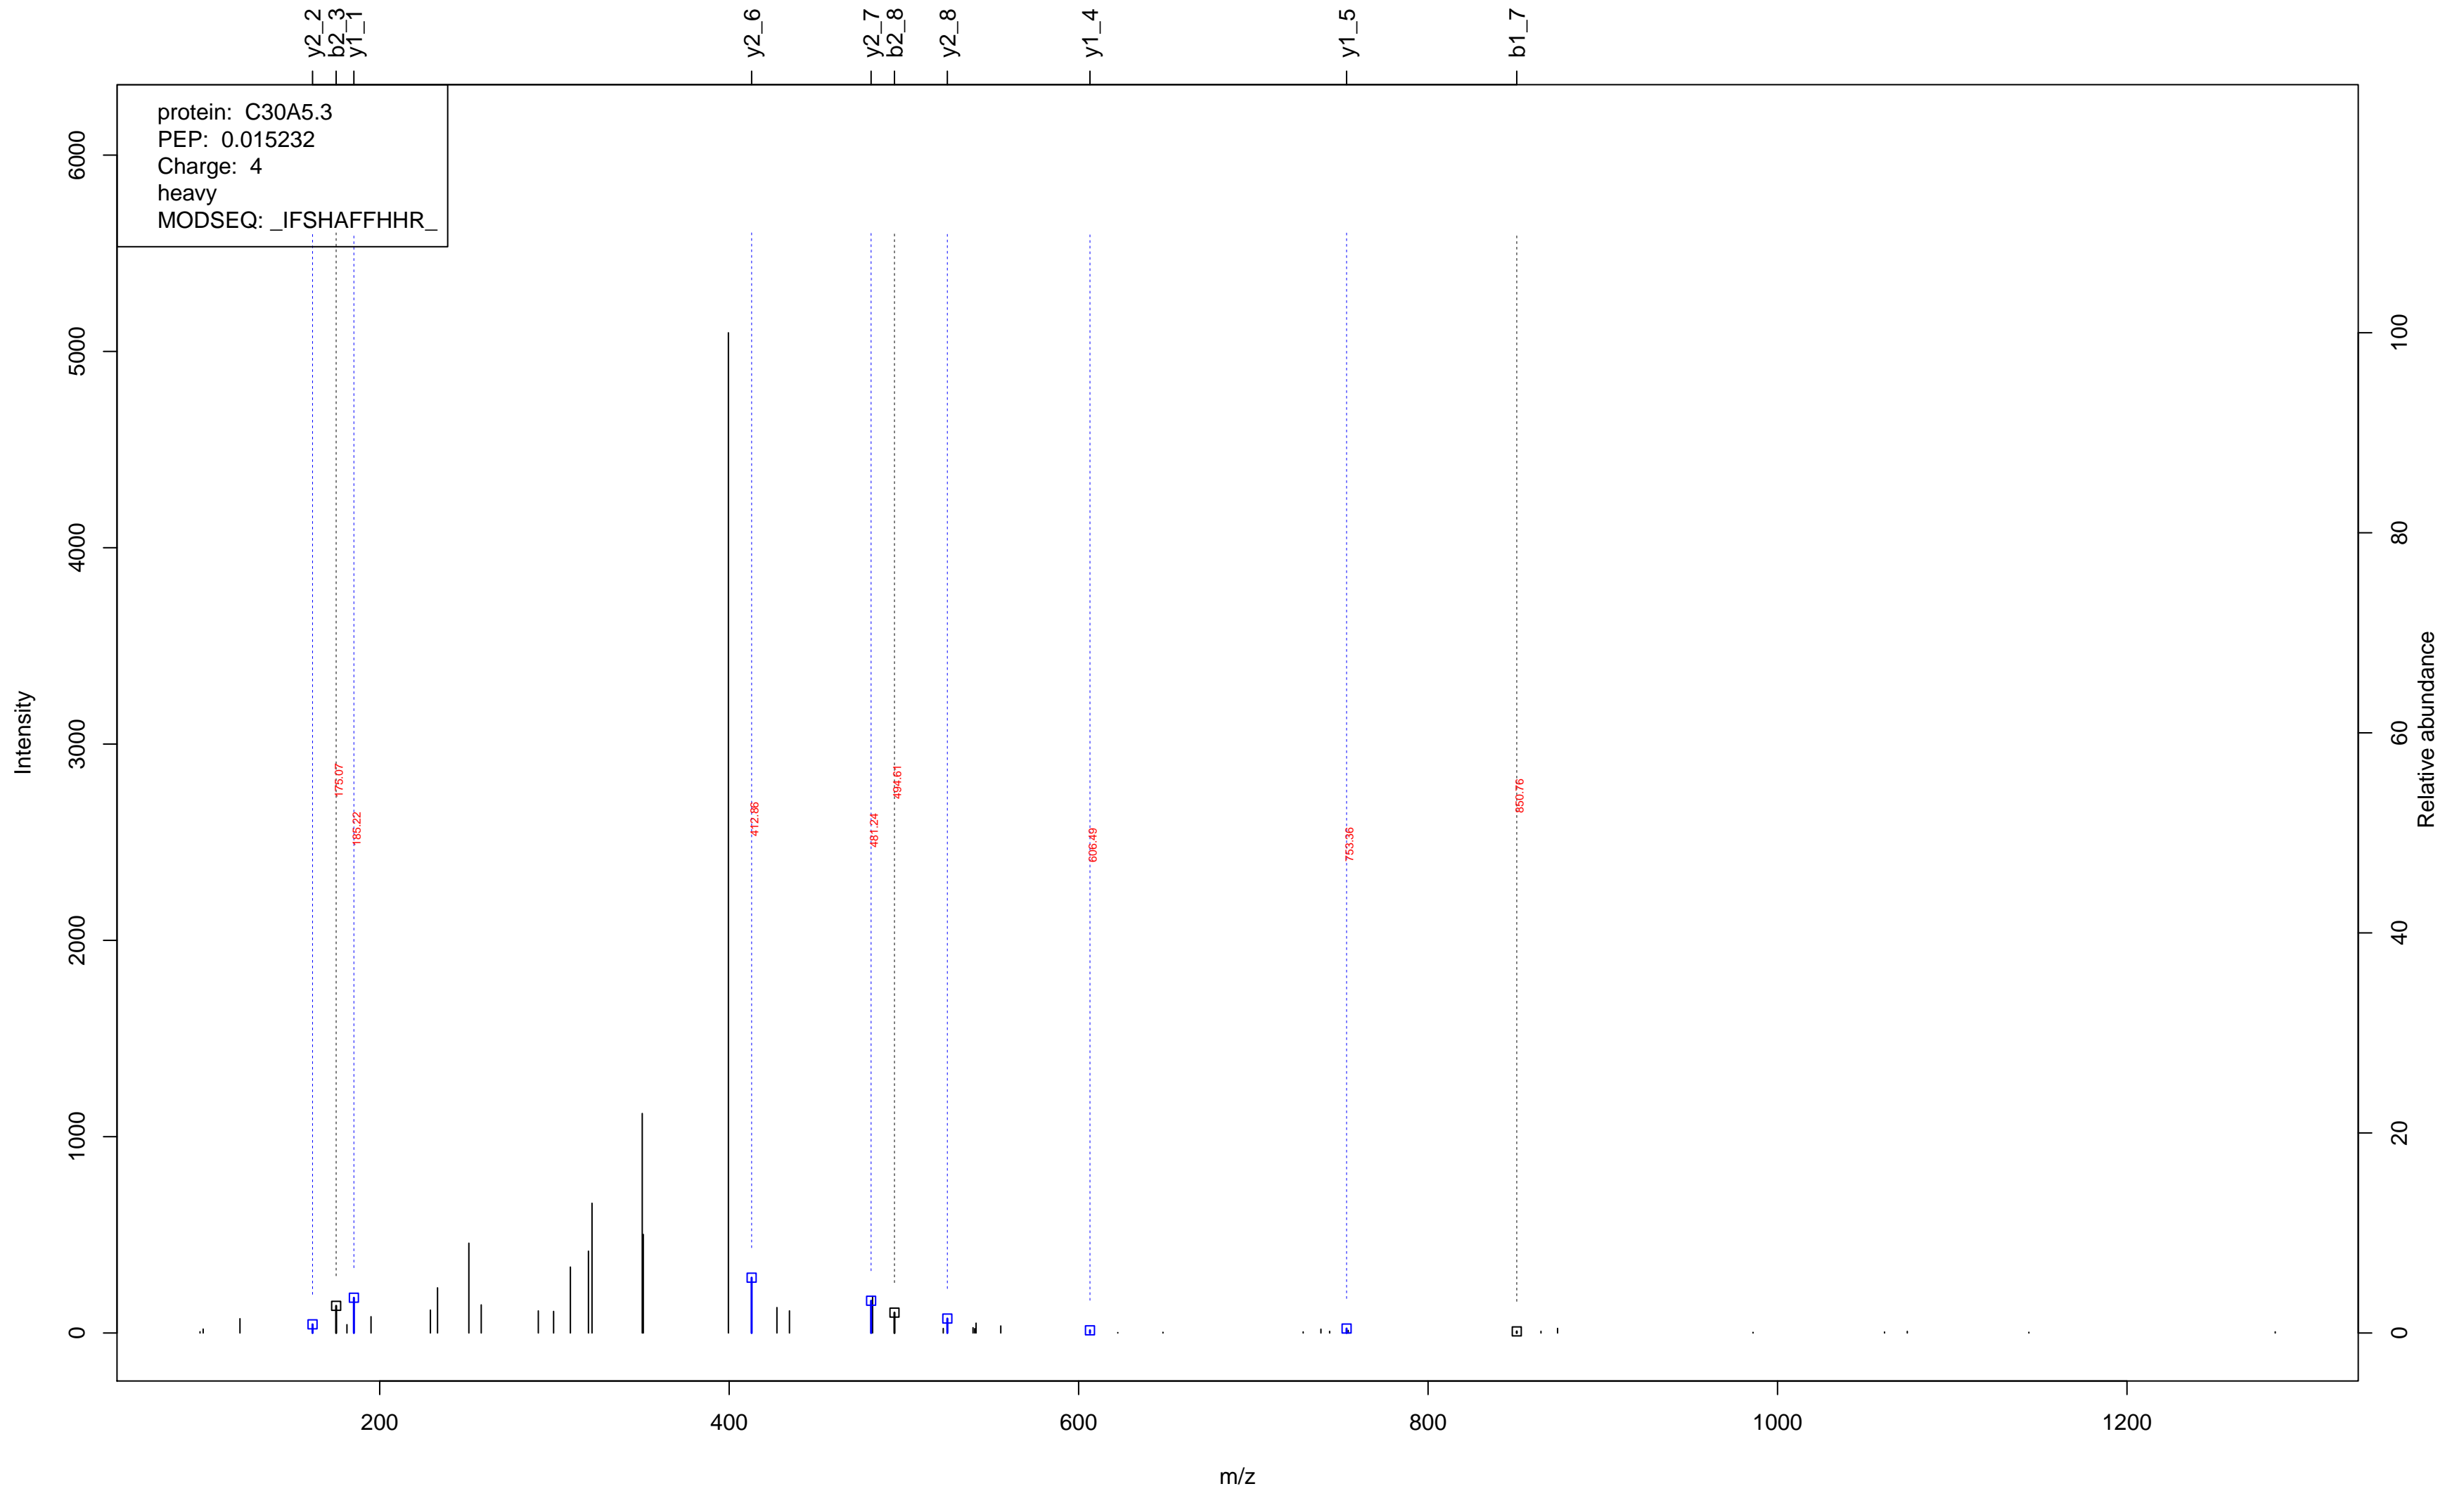

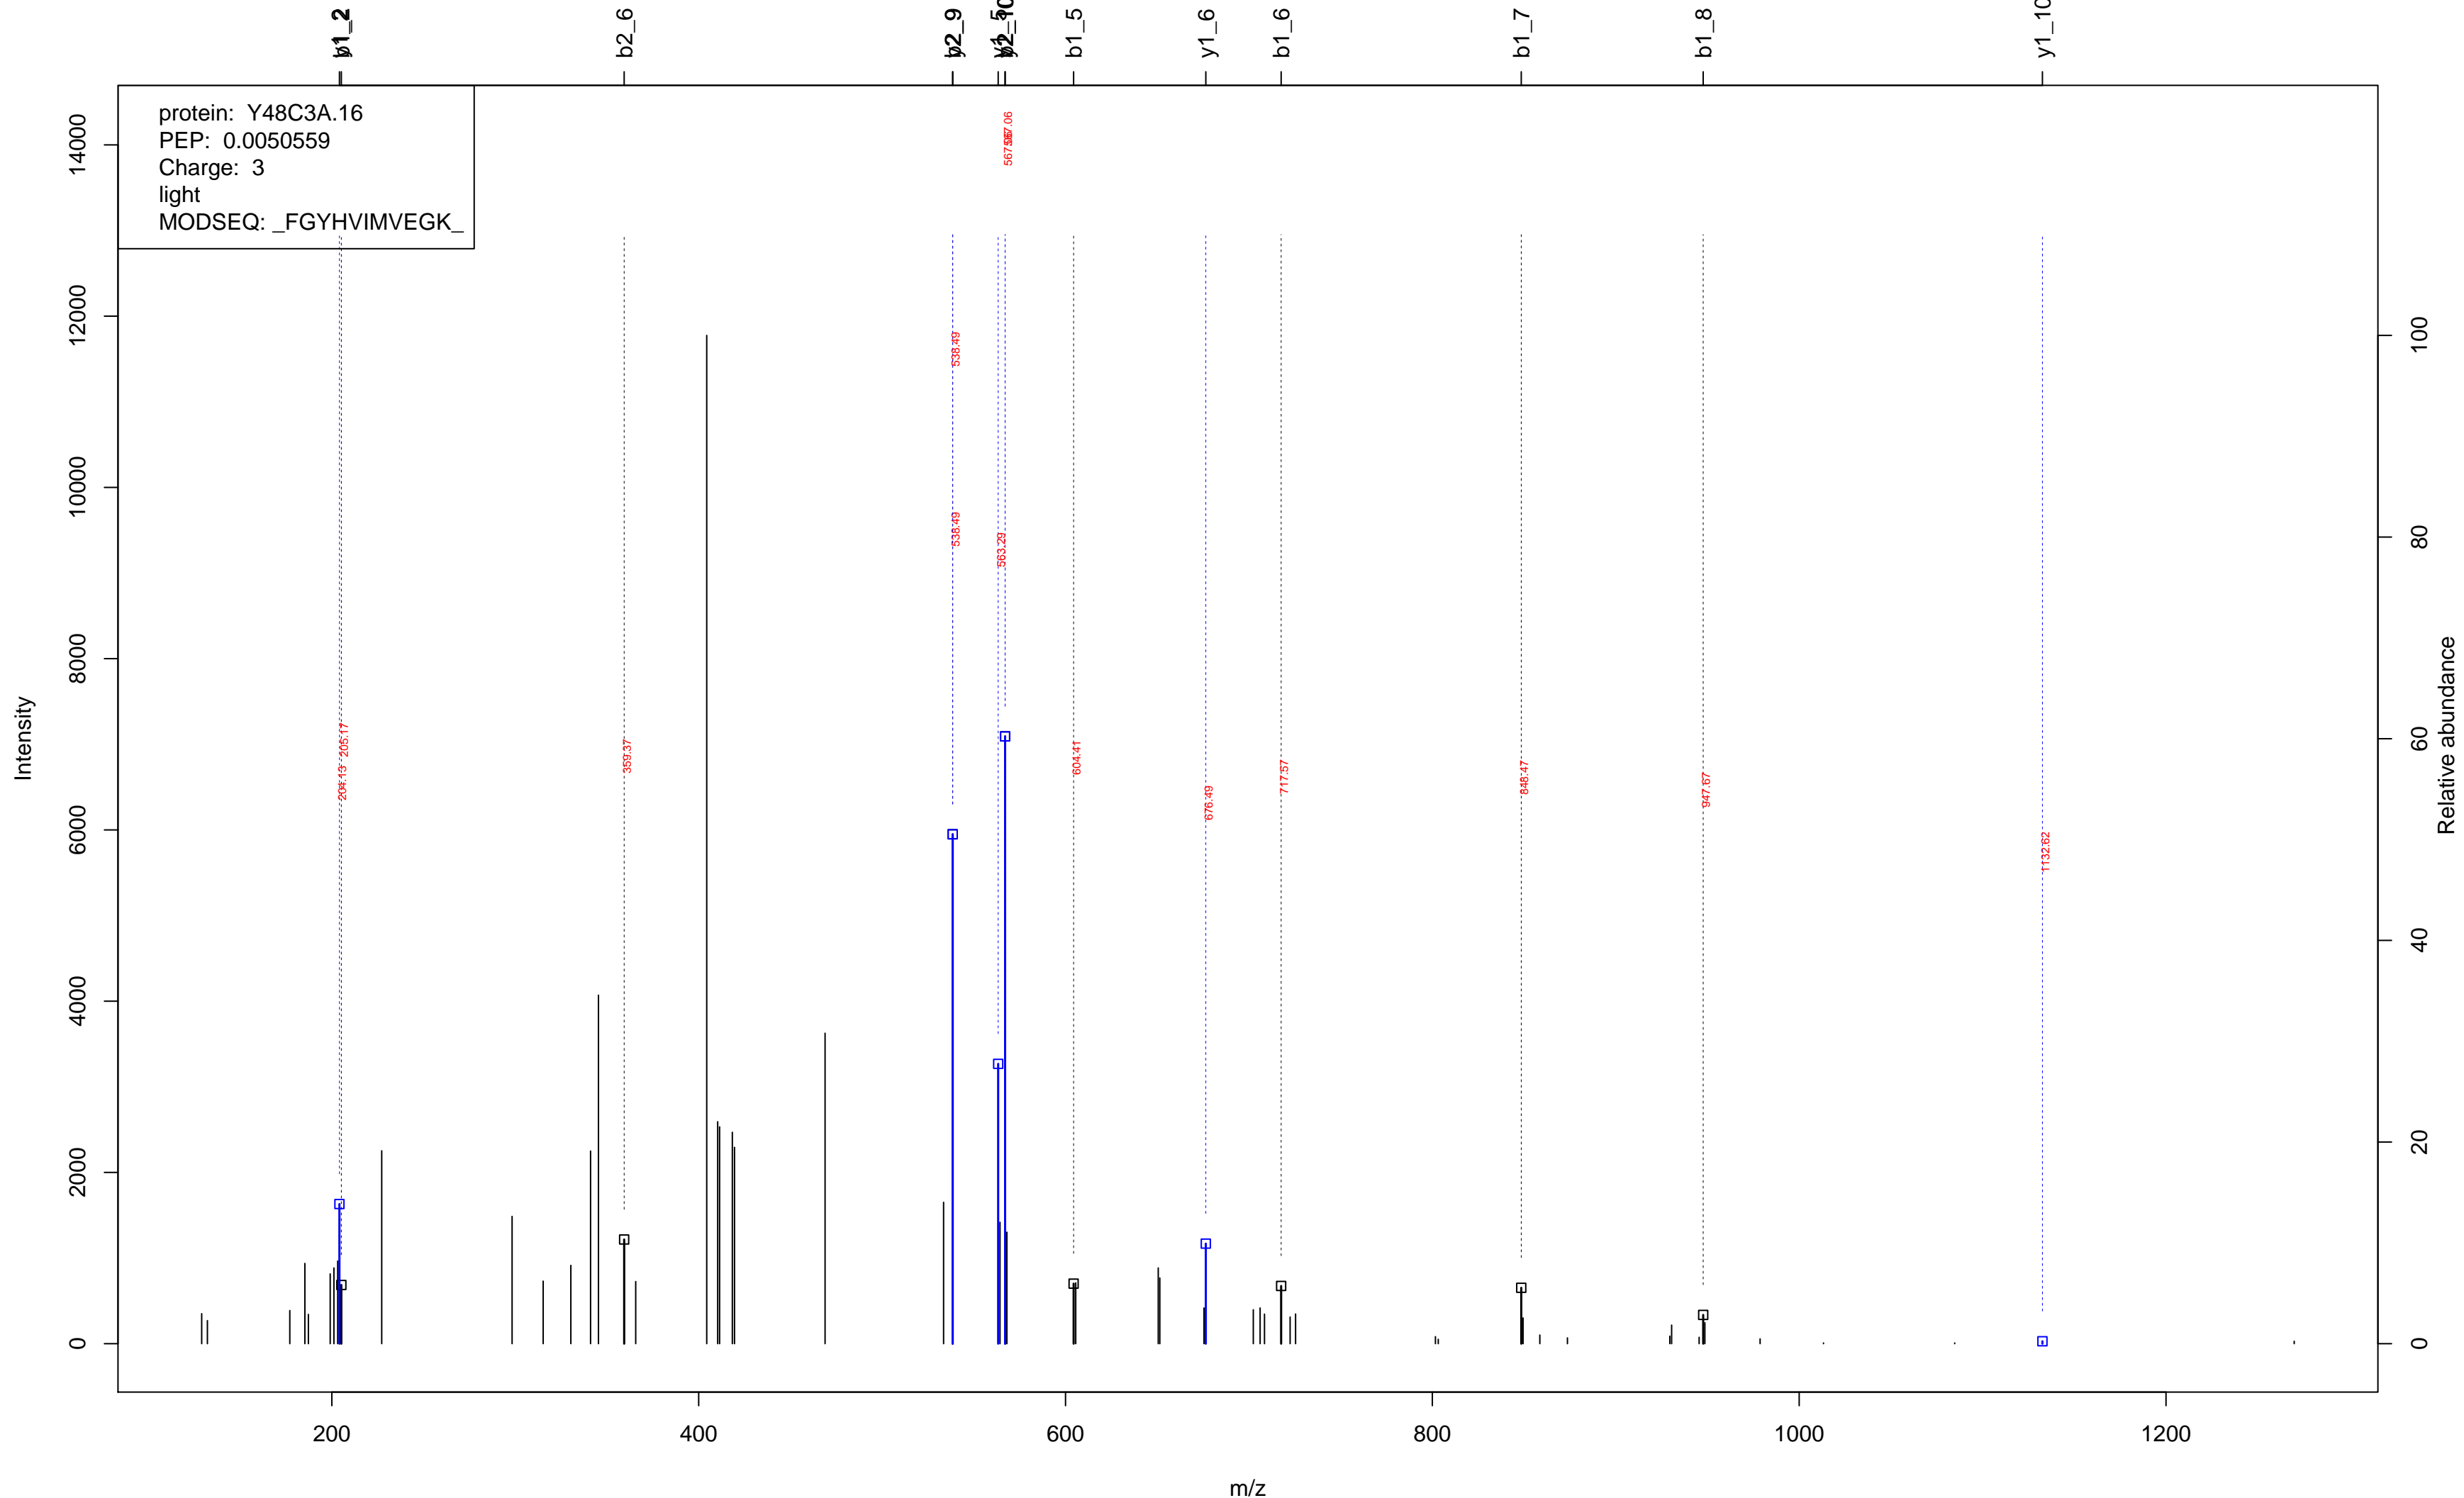

protein: Y48C3A.16  
PEP: 0.0050559  
Charge: 3  
light  
MODSEQ: \_FGYHVIMVEGK\_

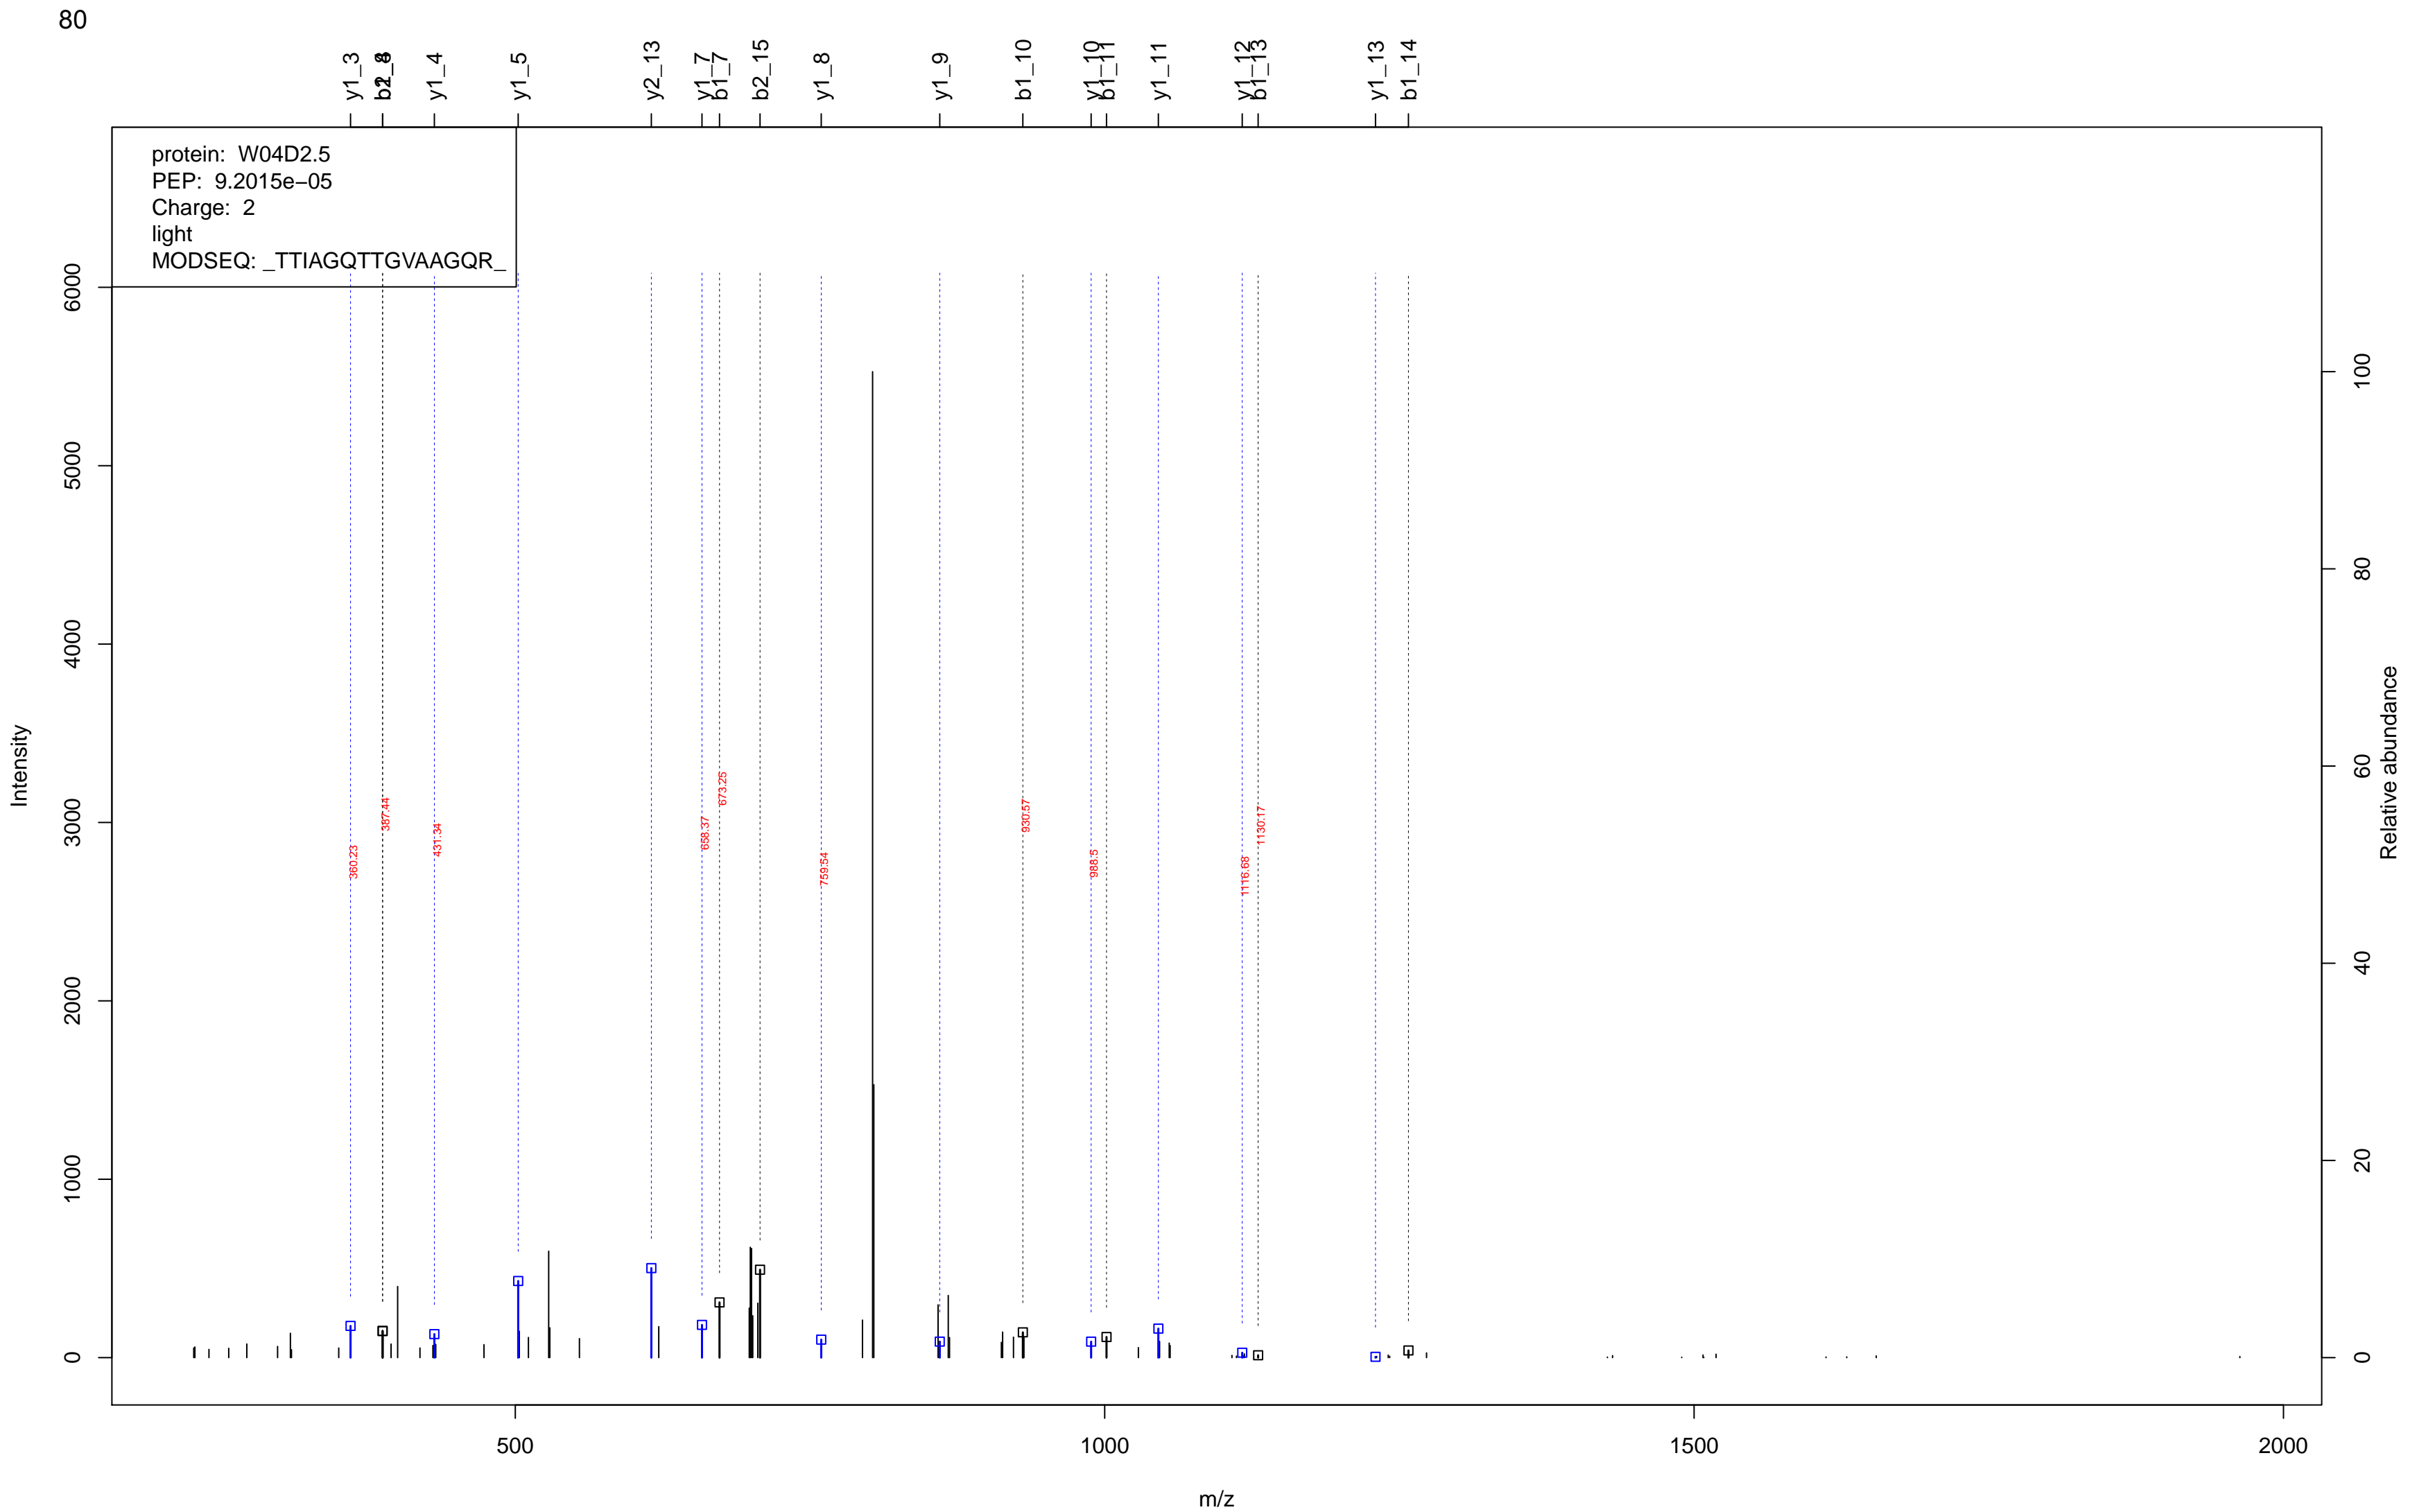



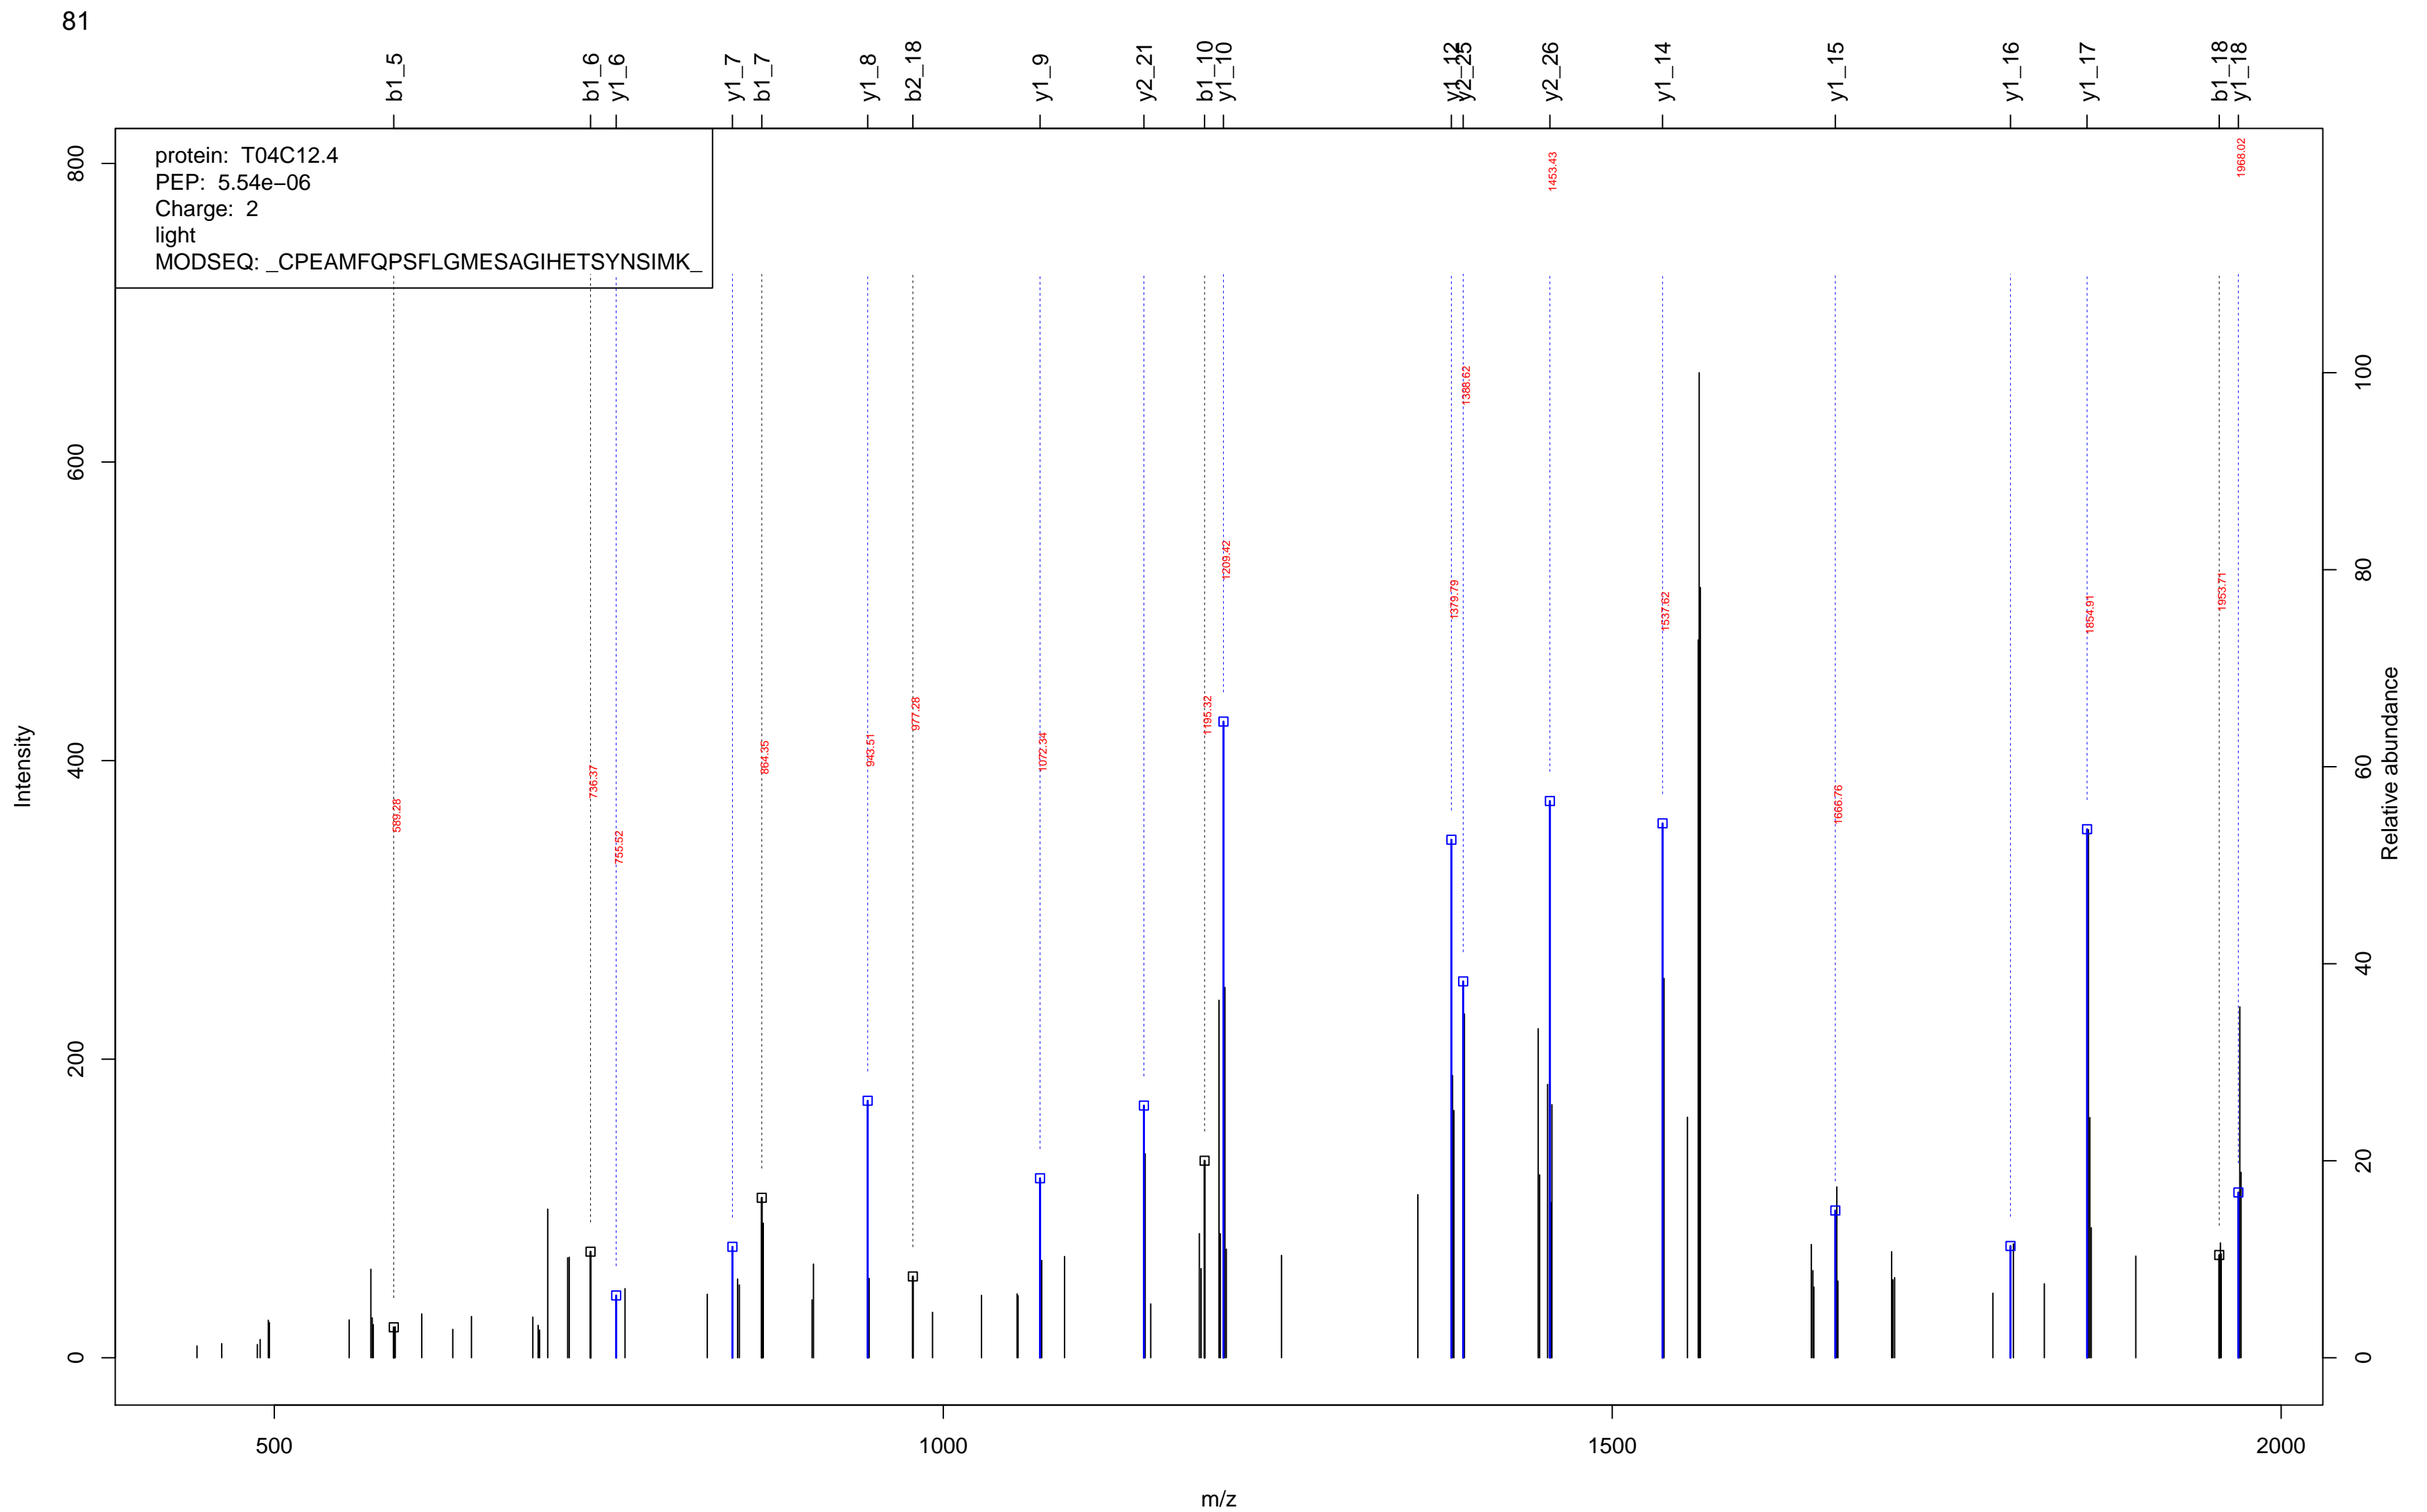

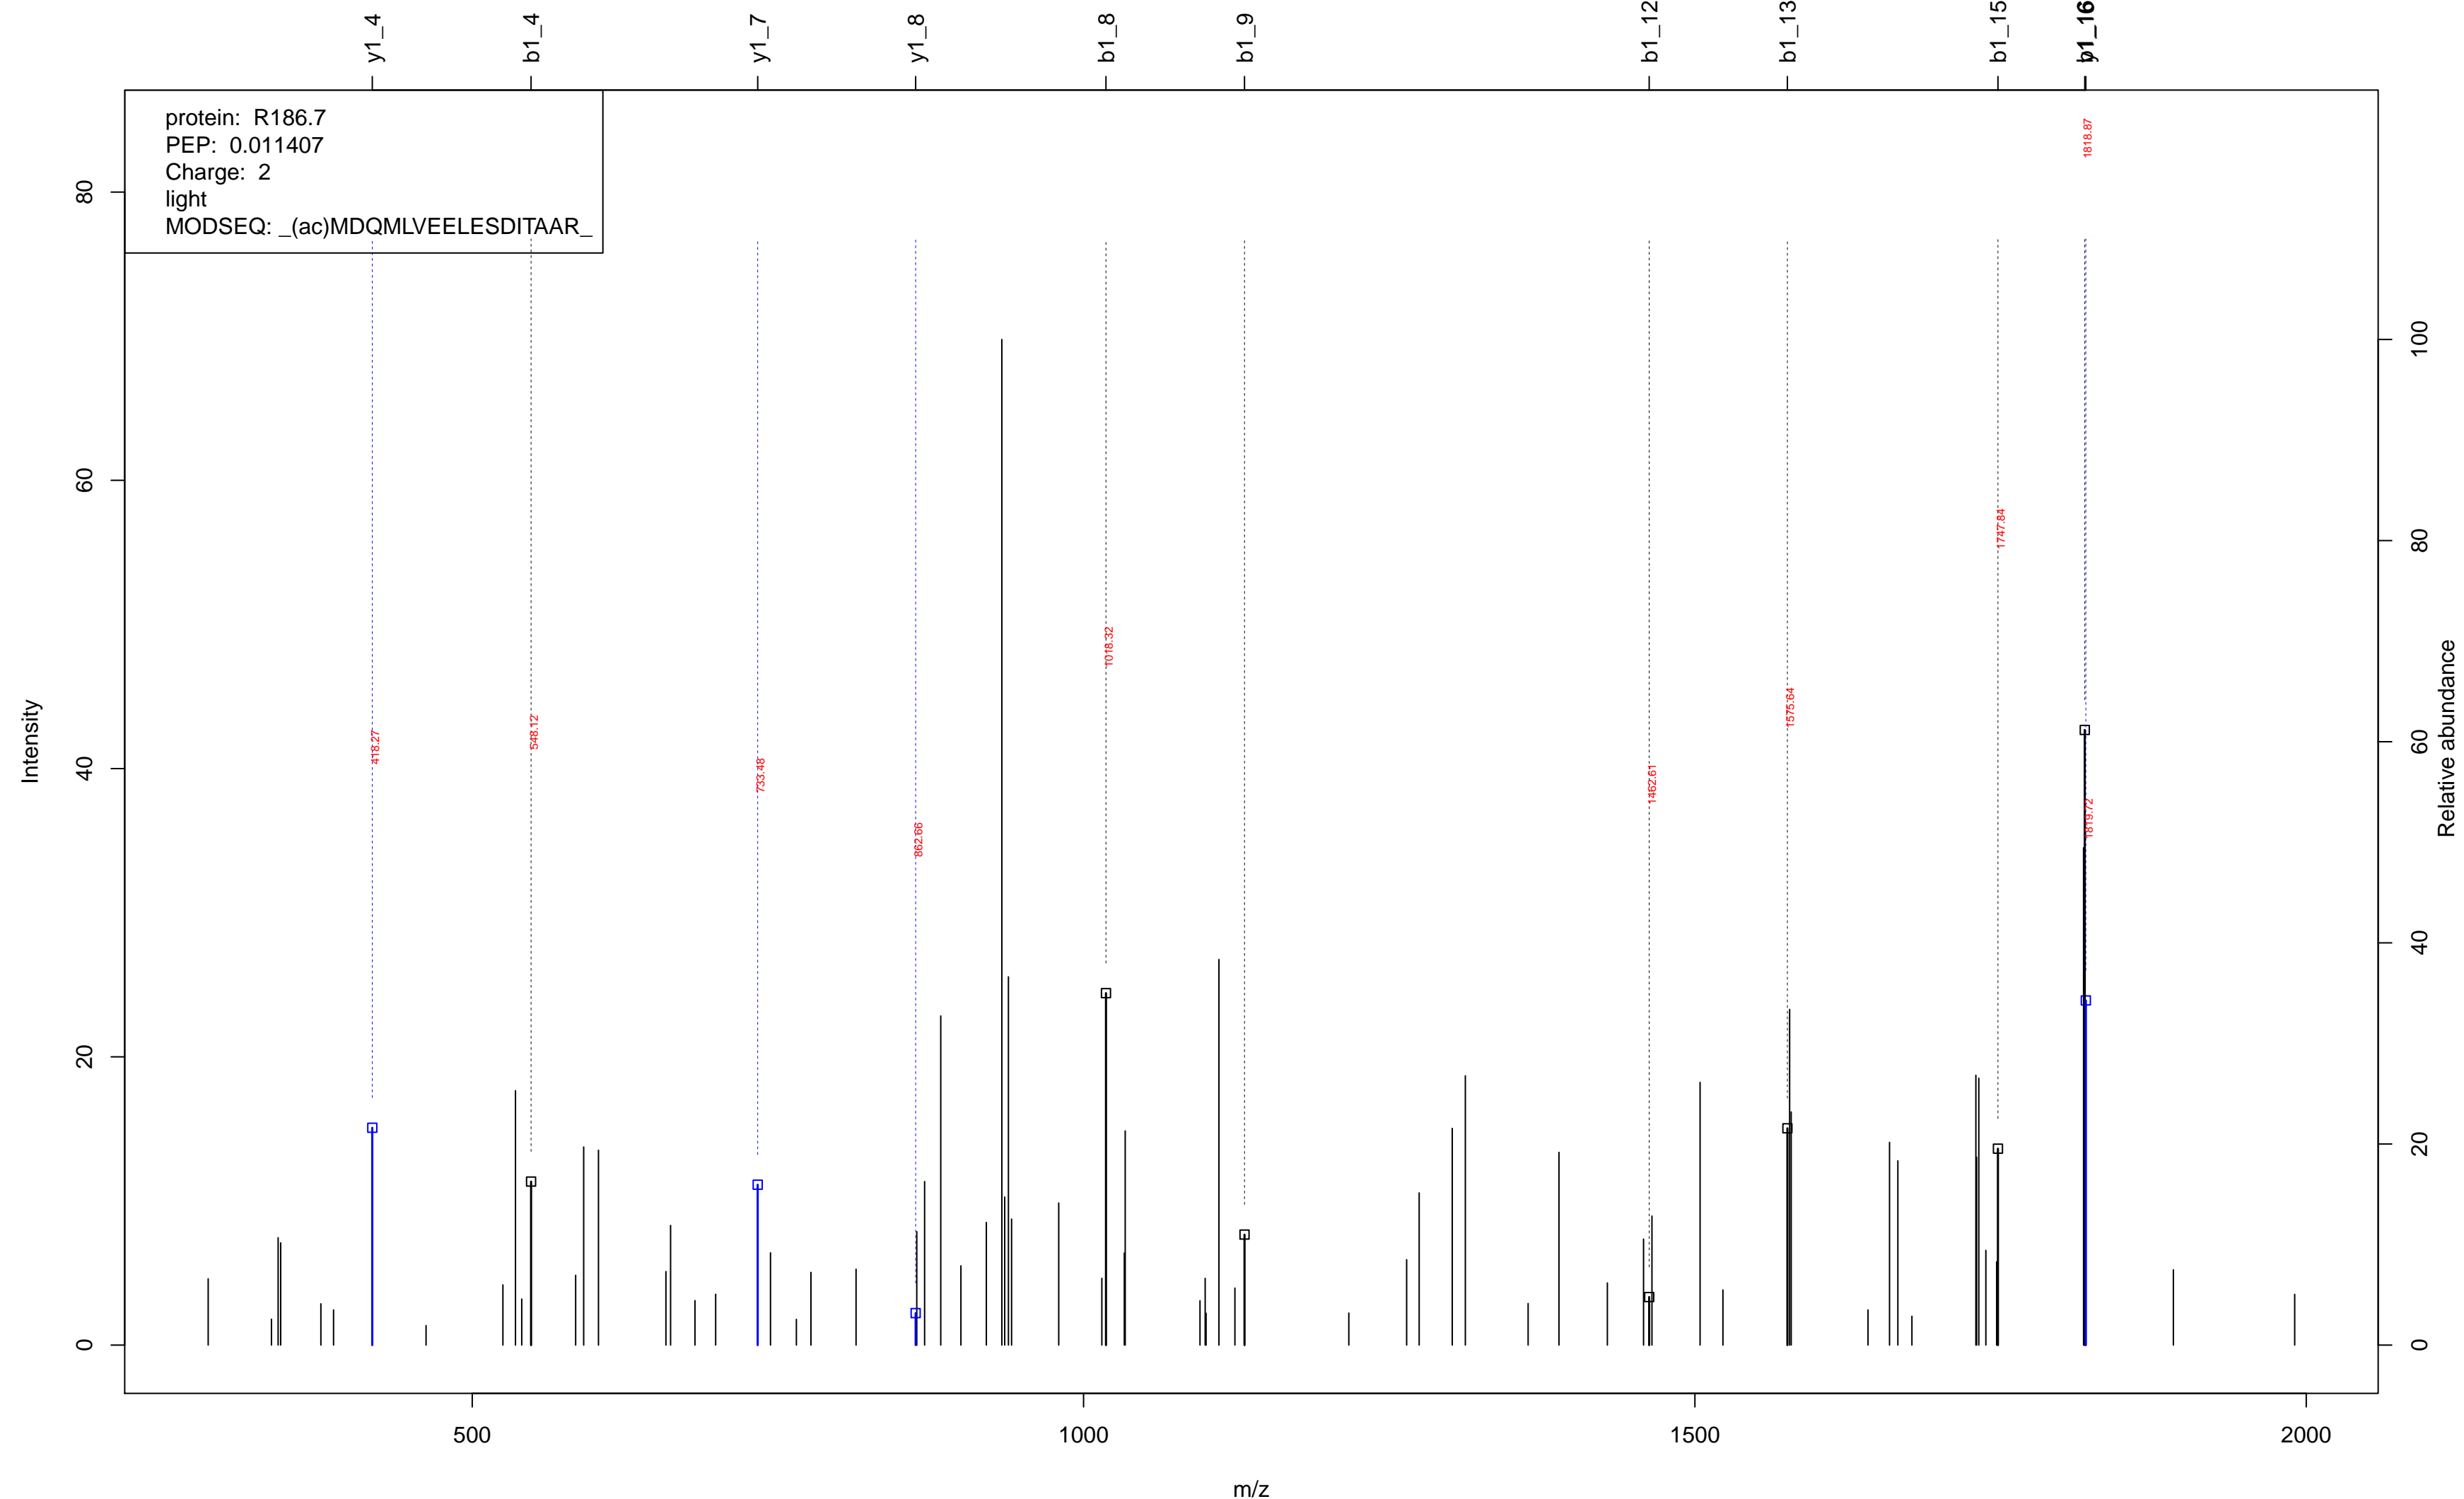

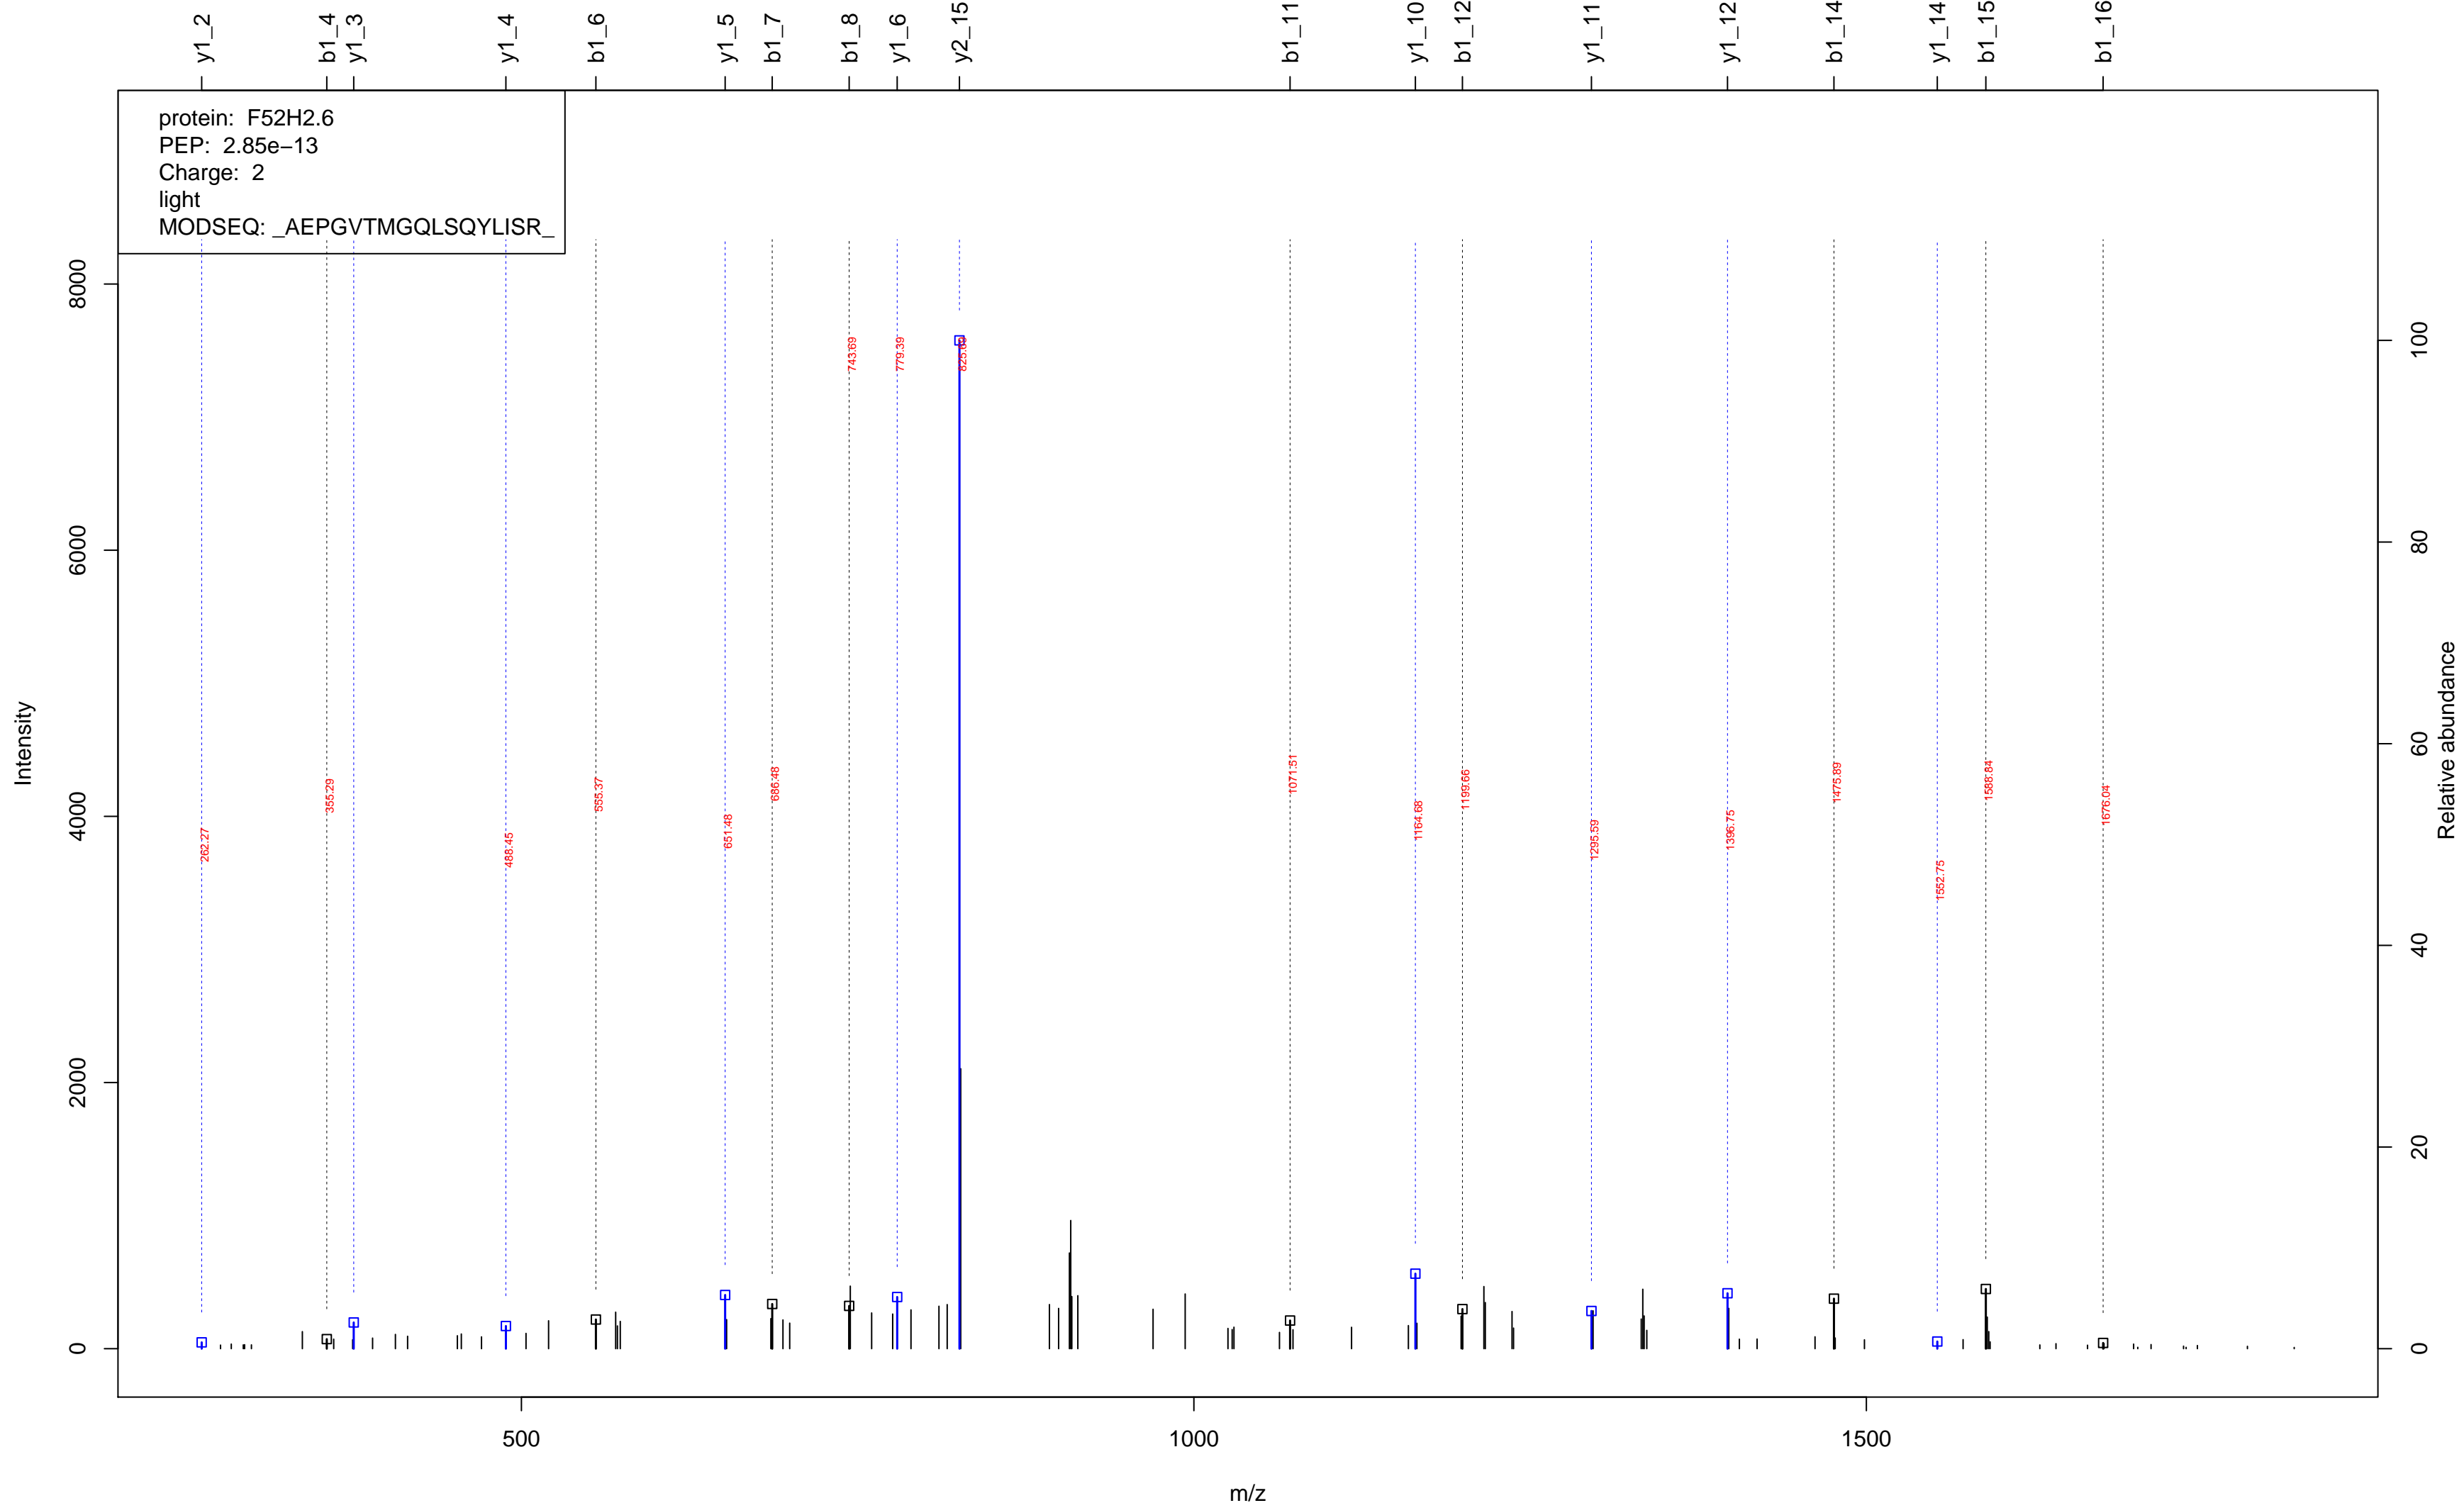

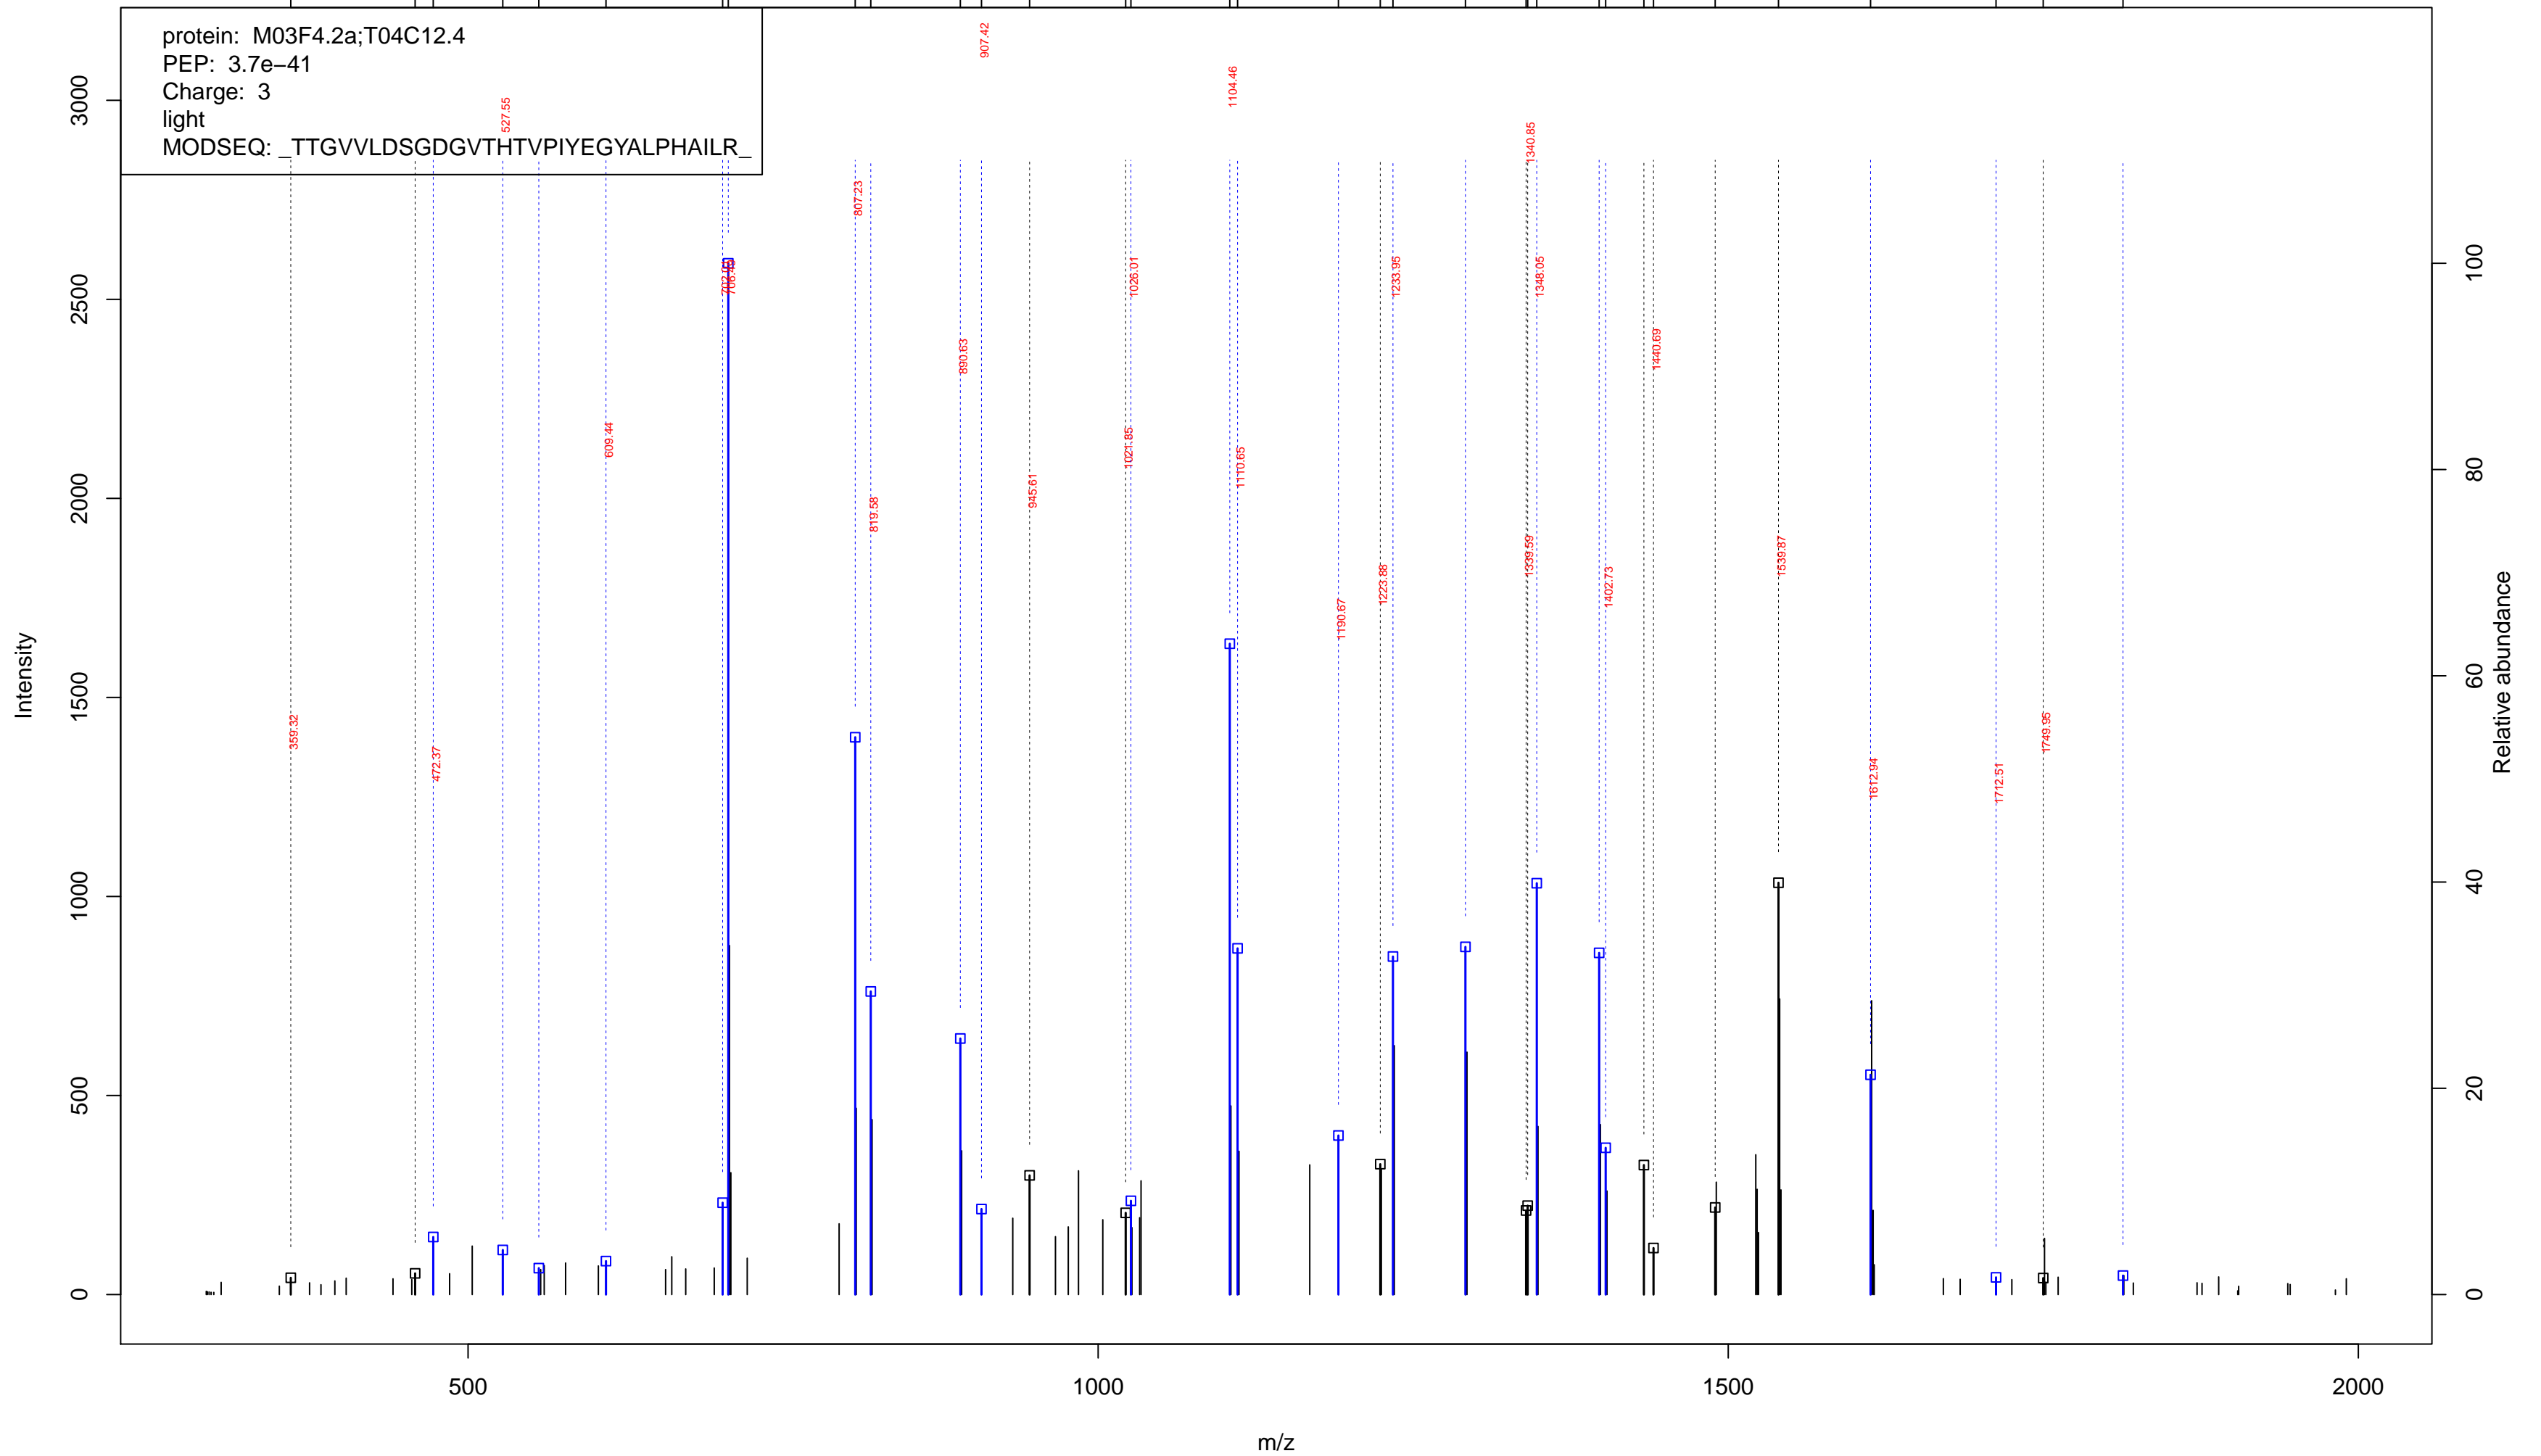

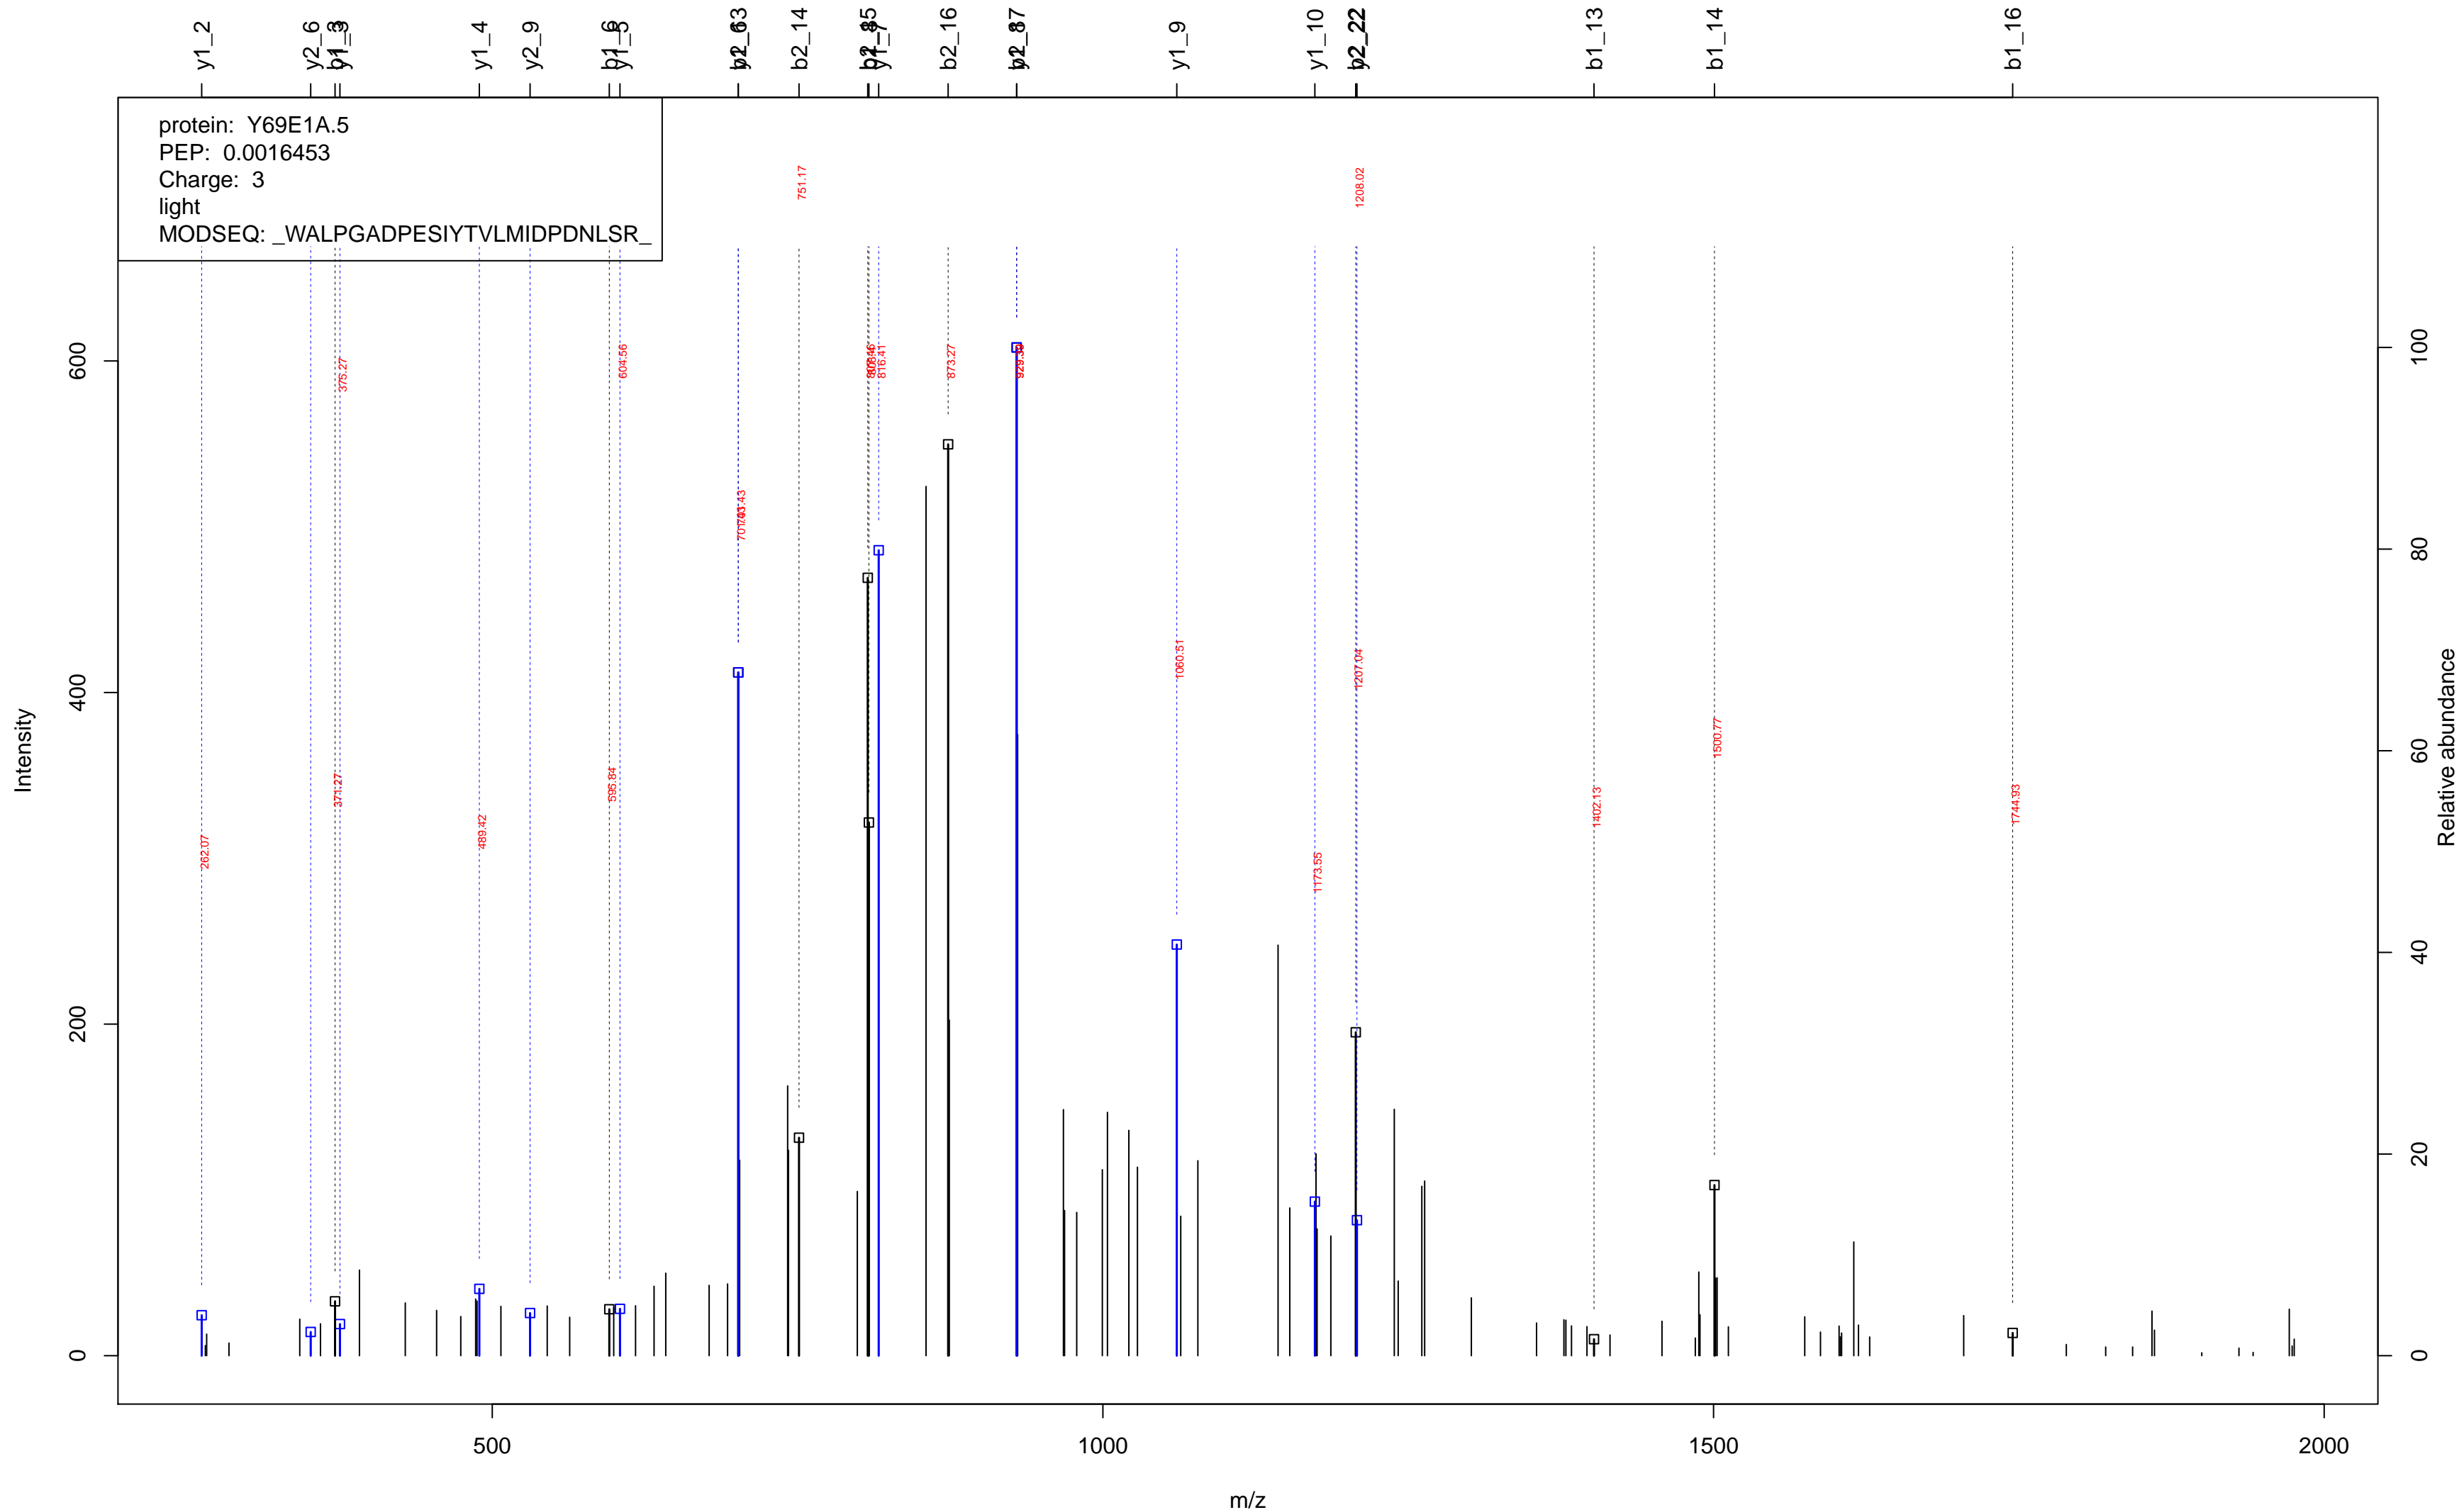

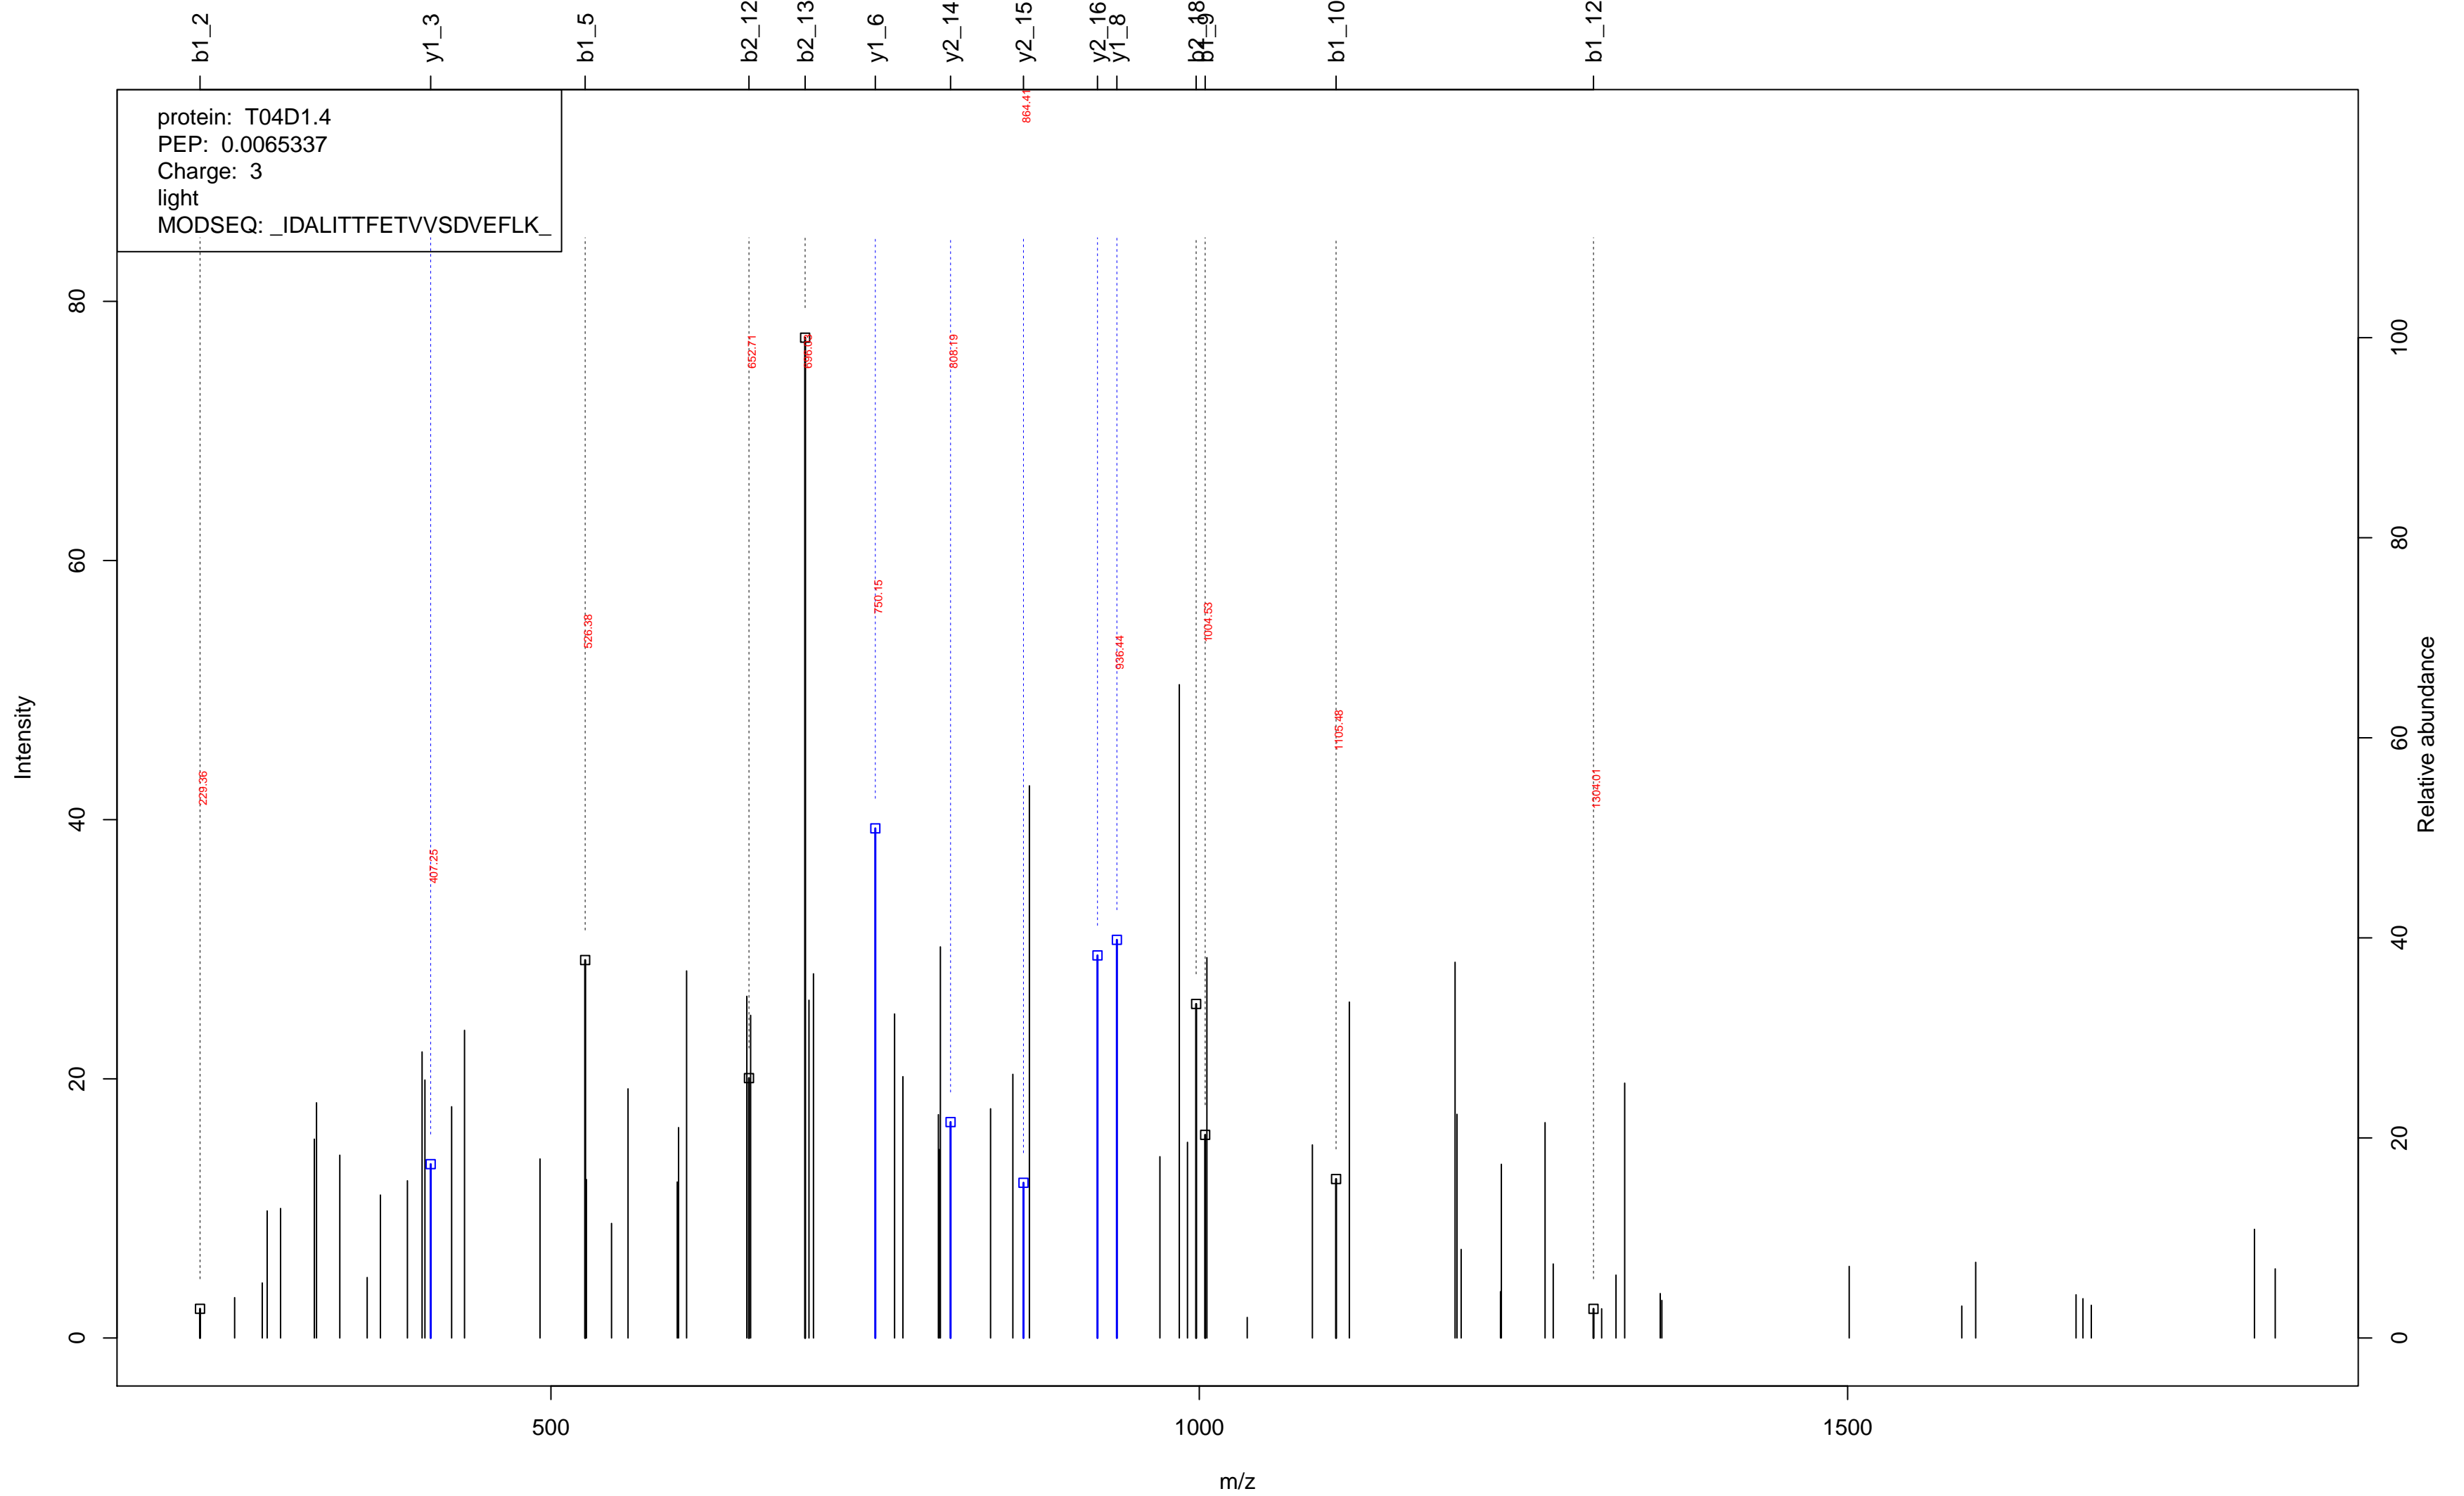

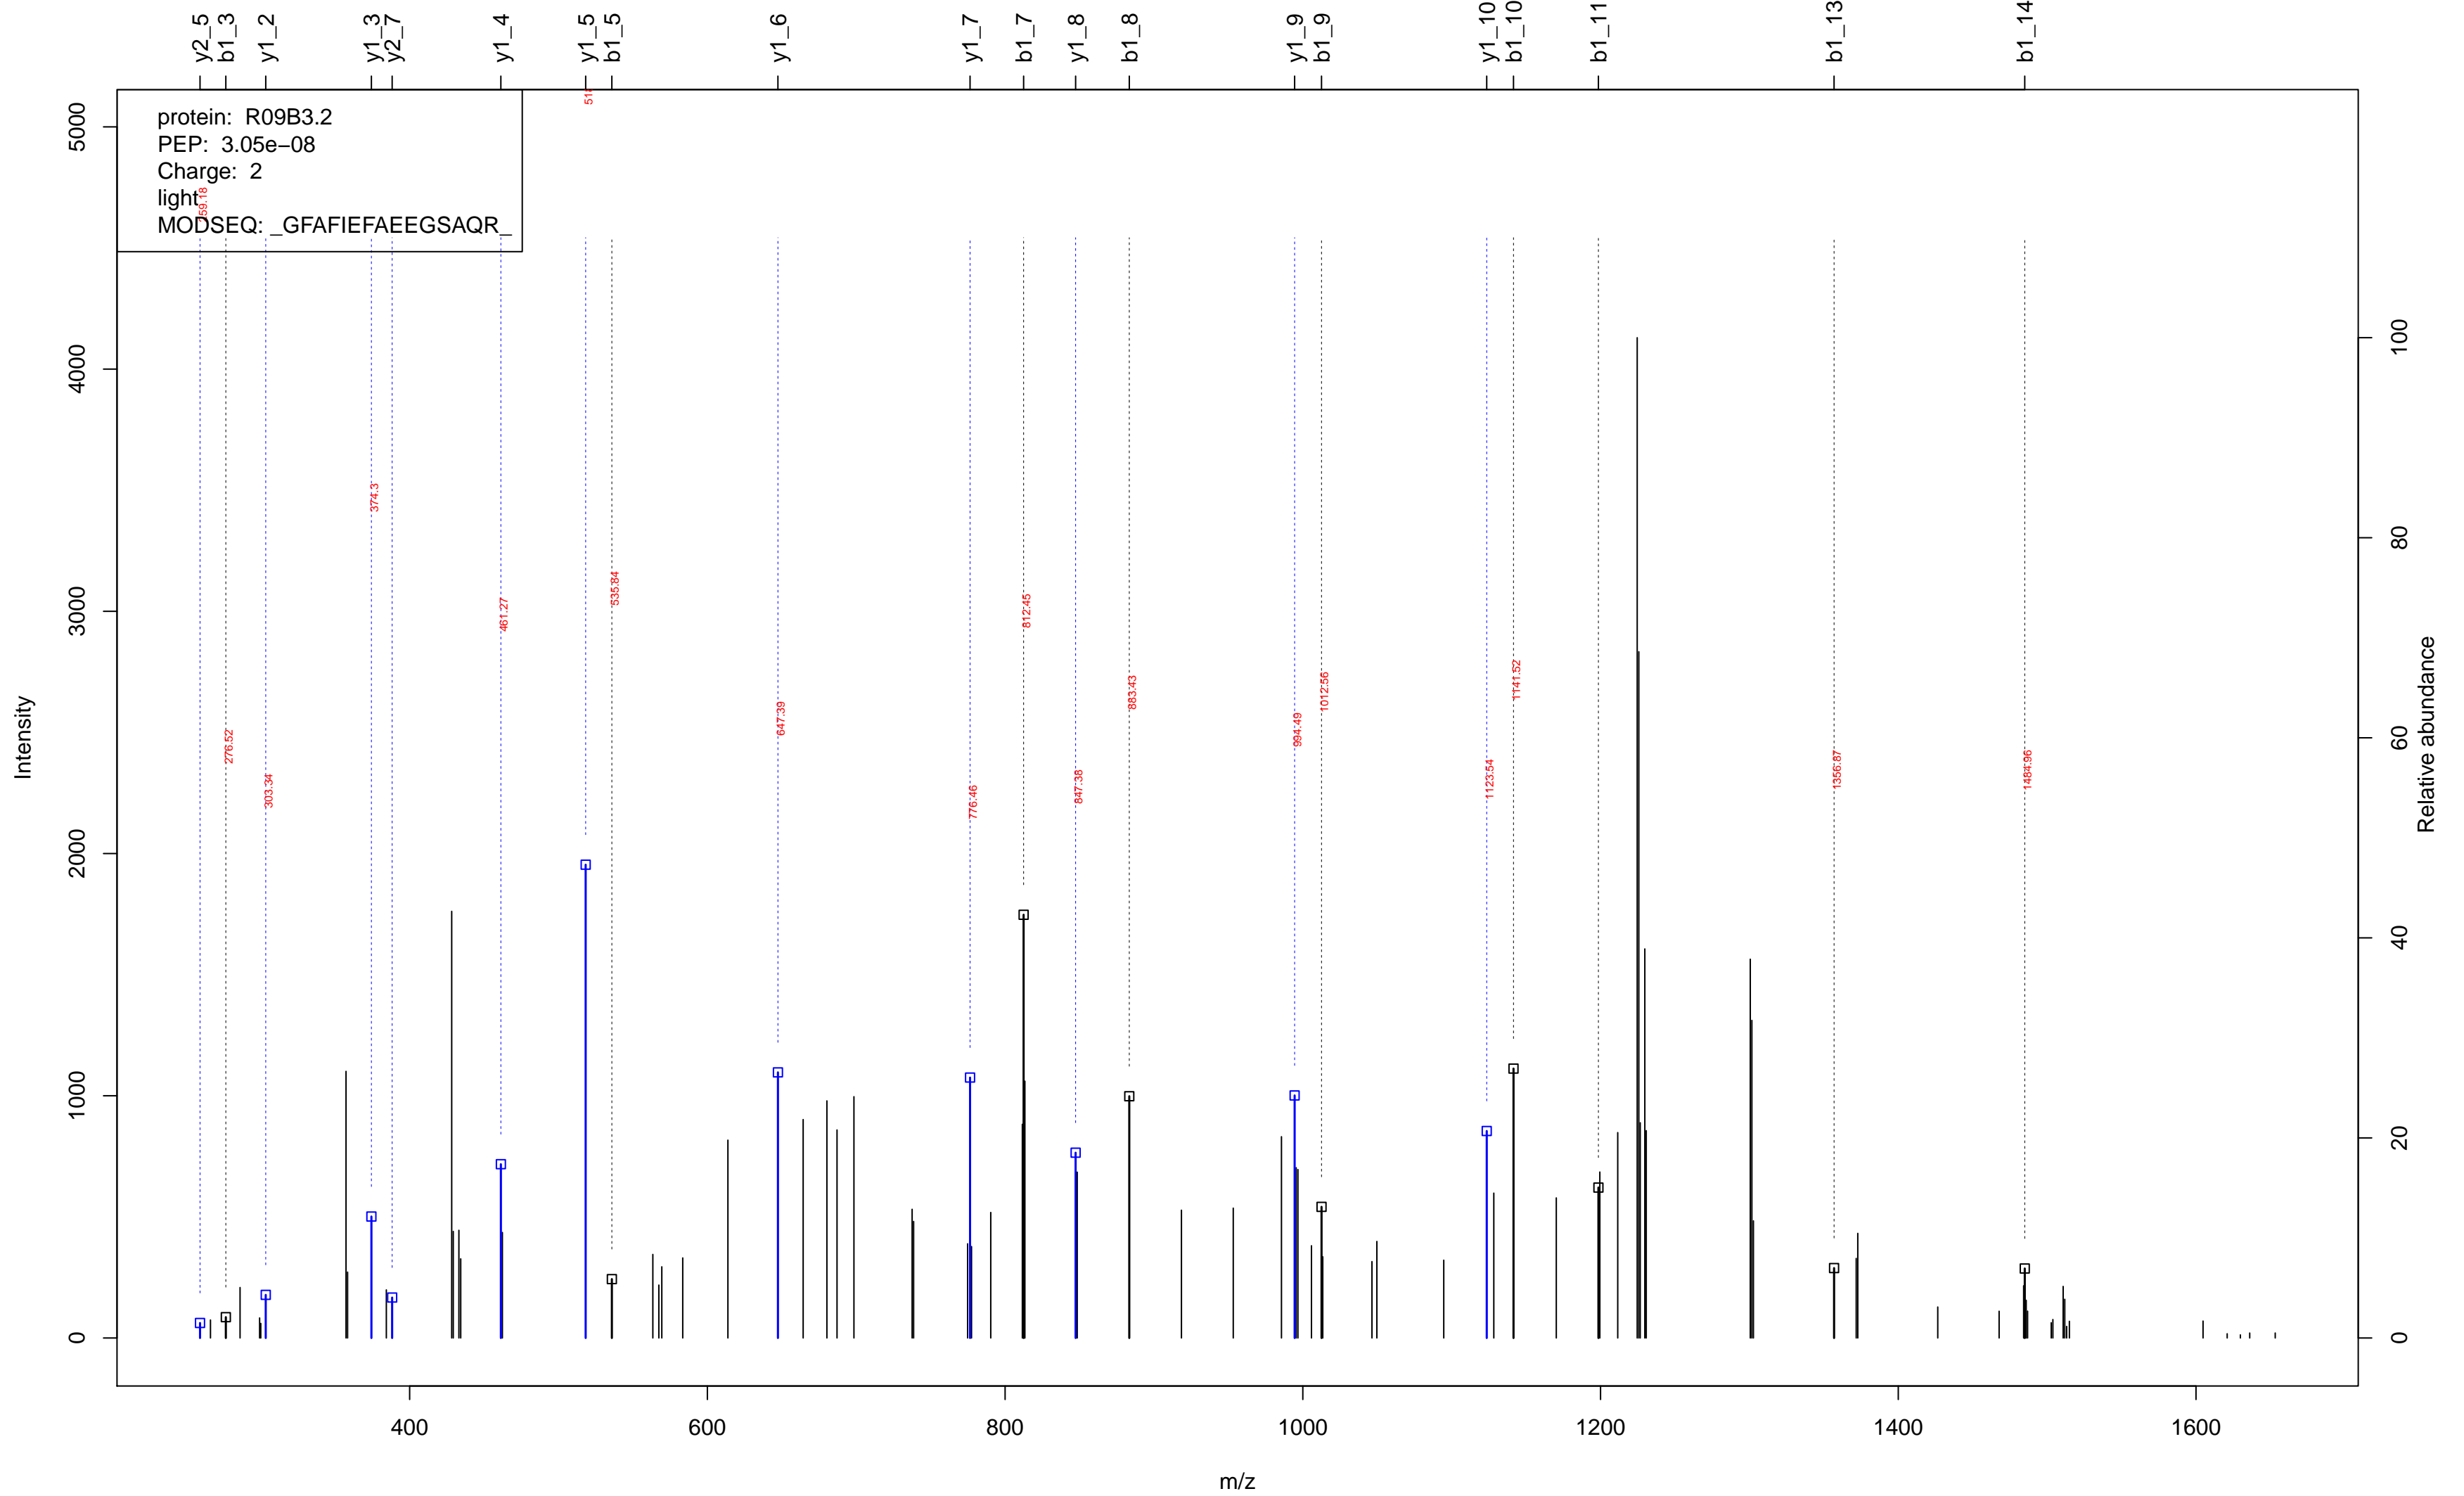

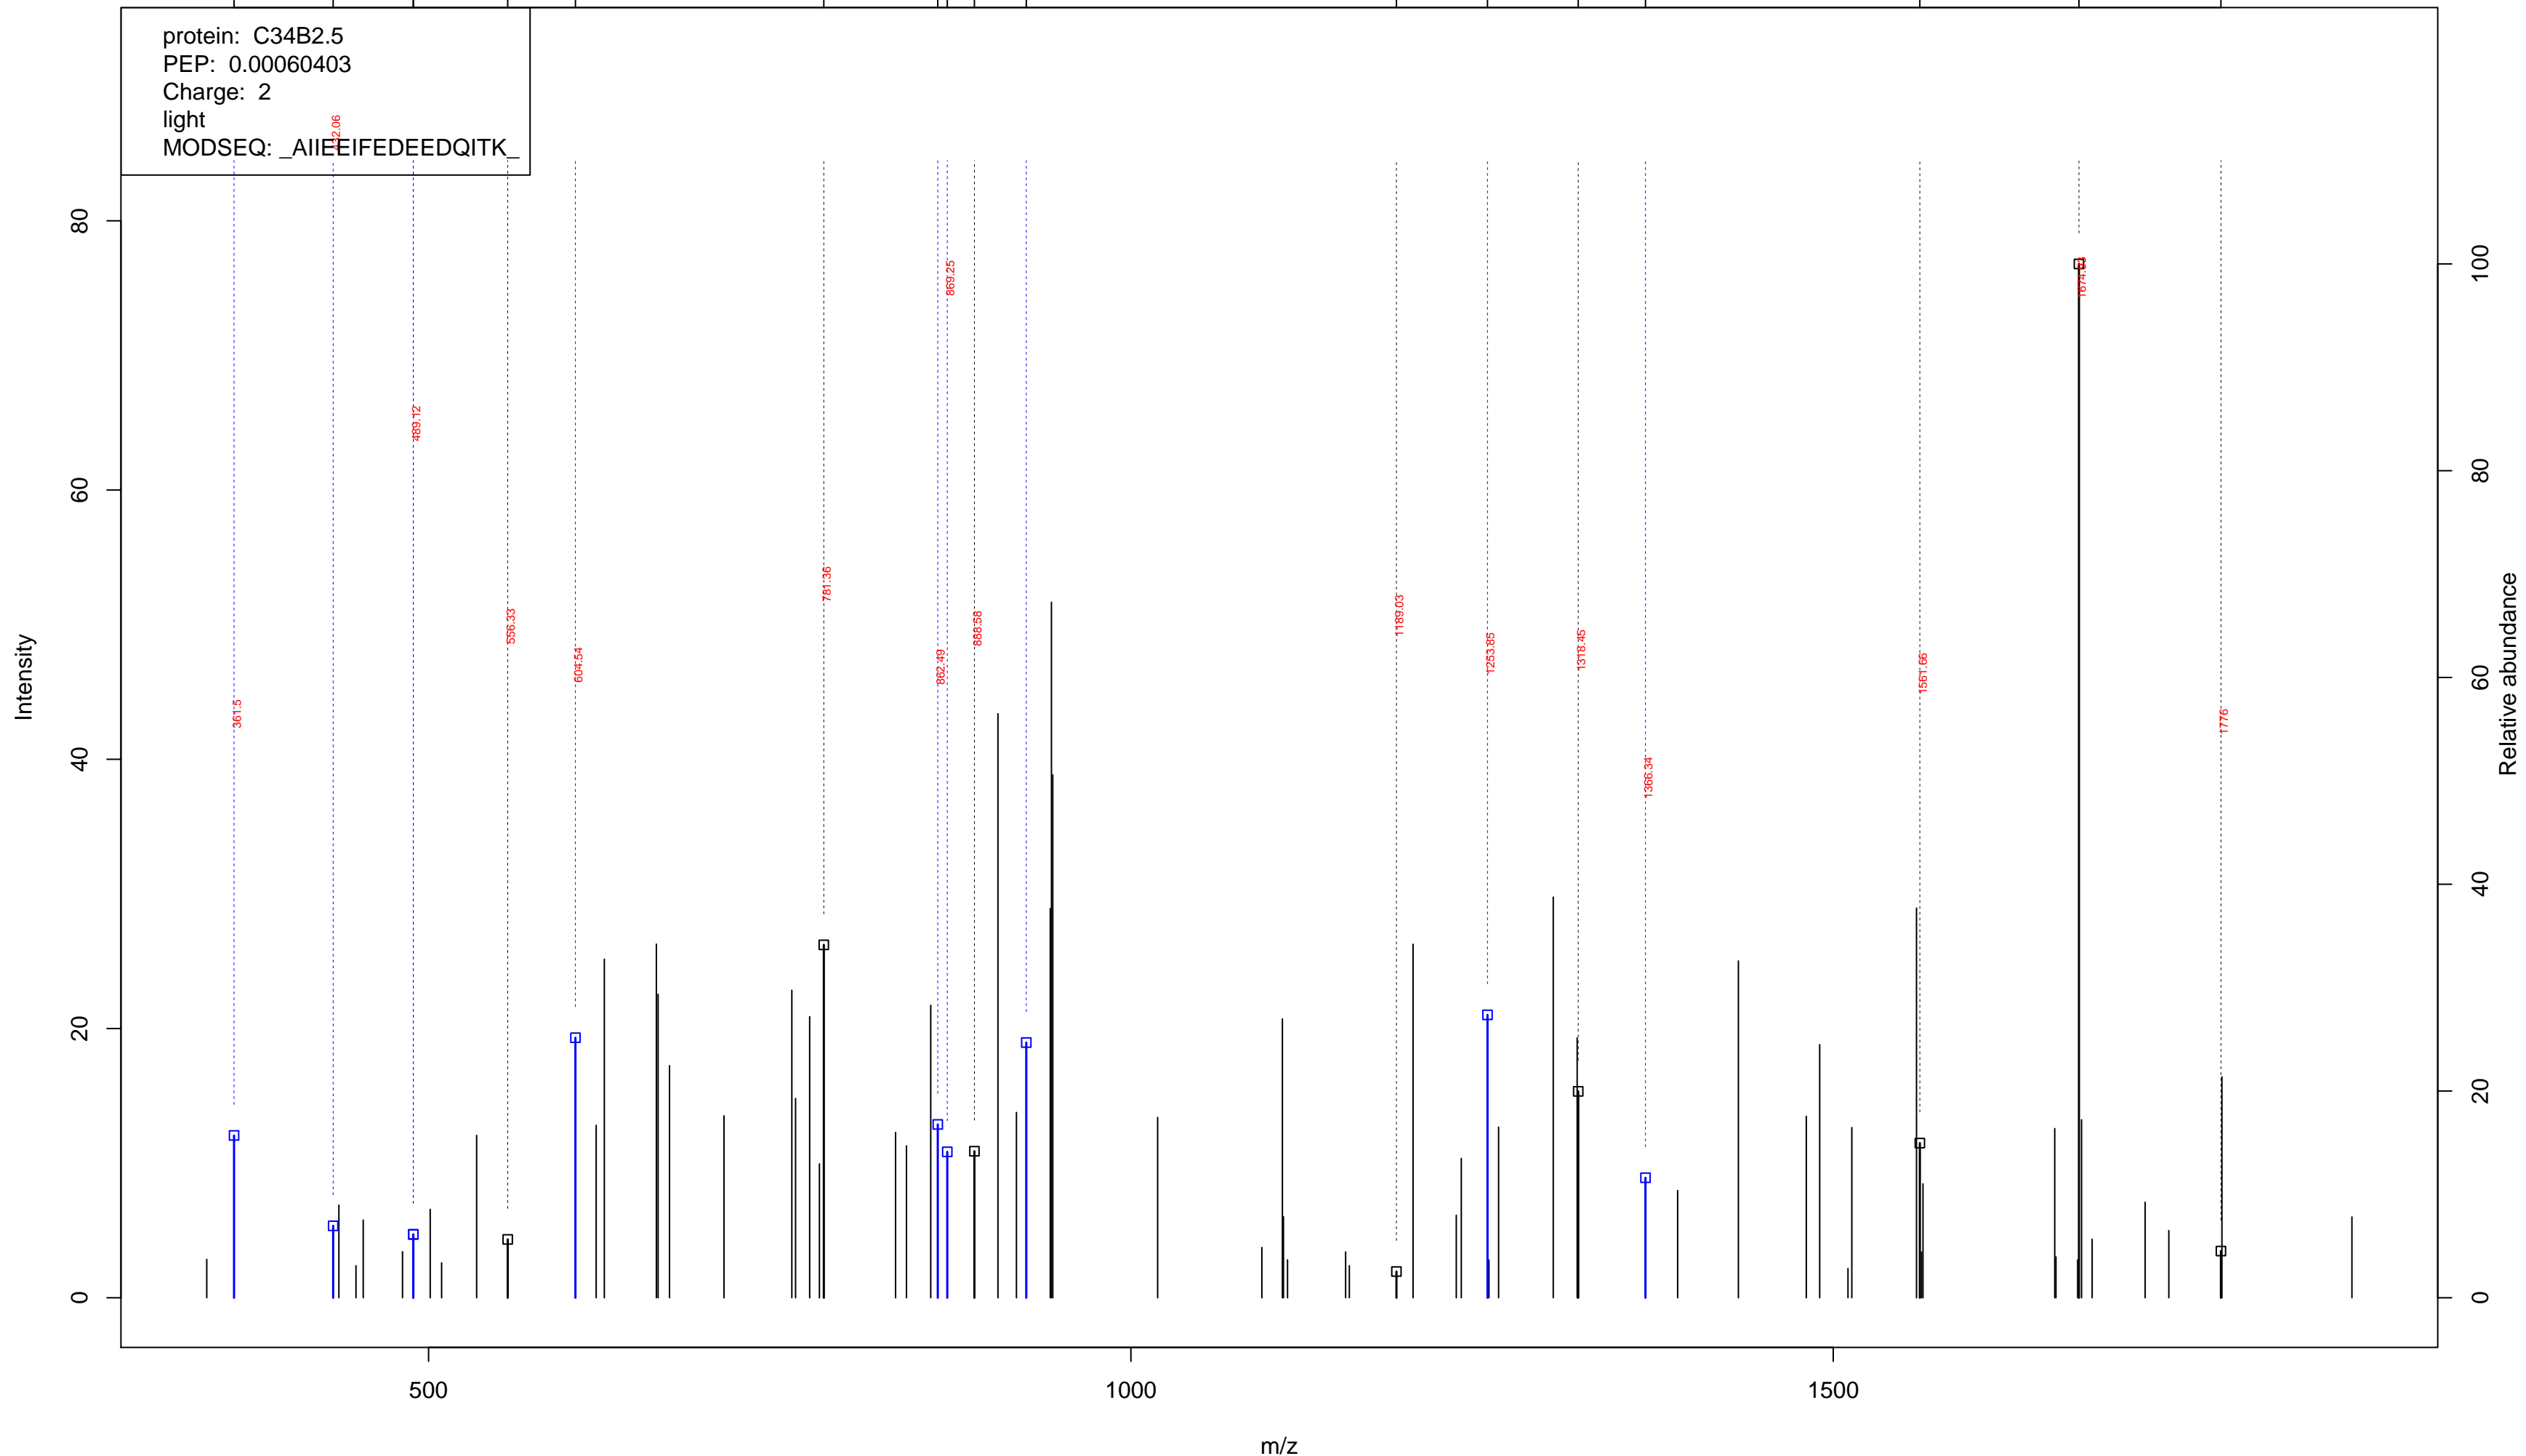



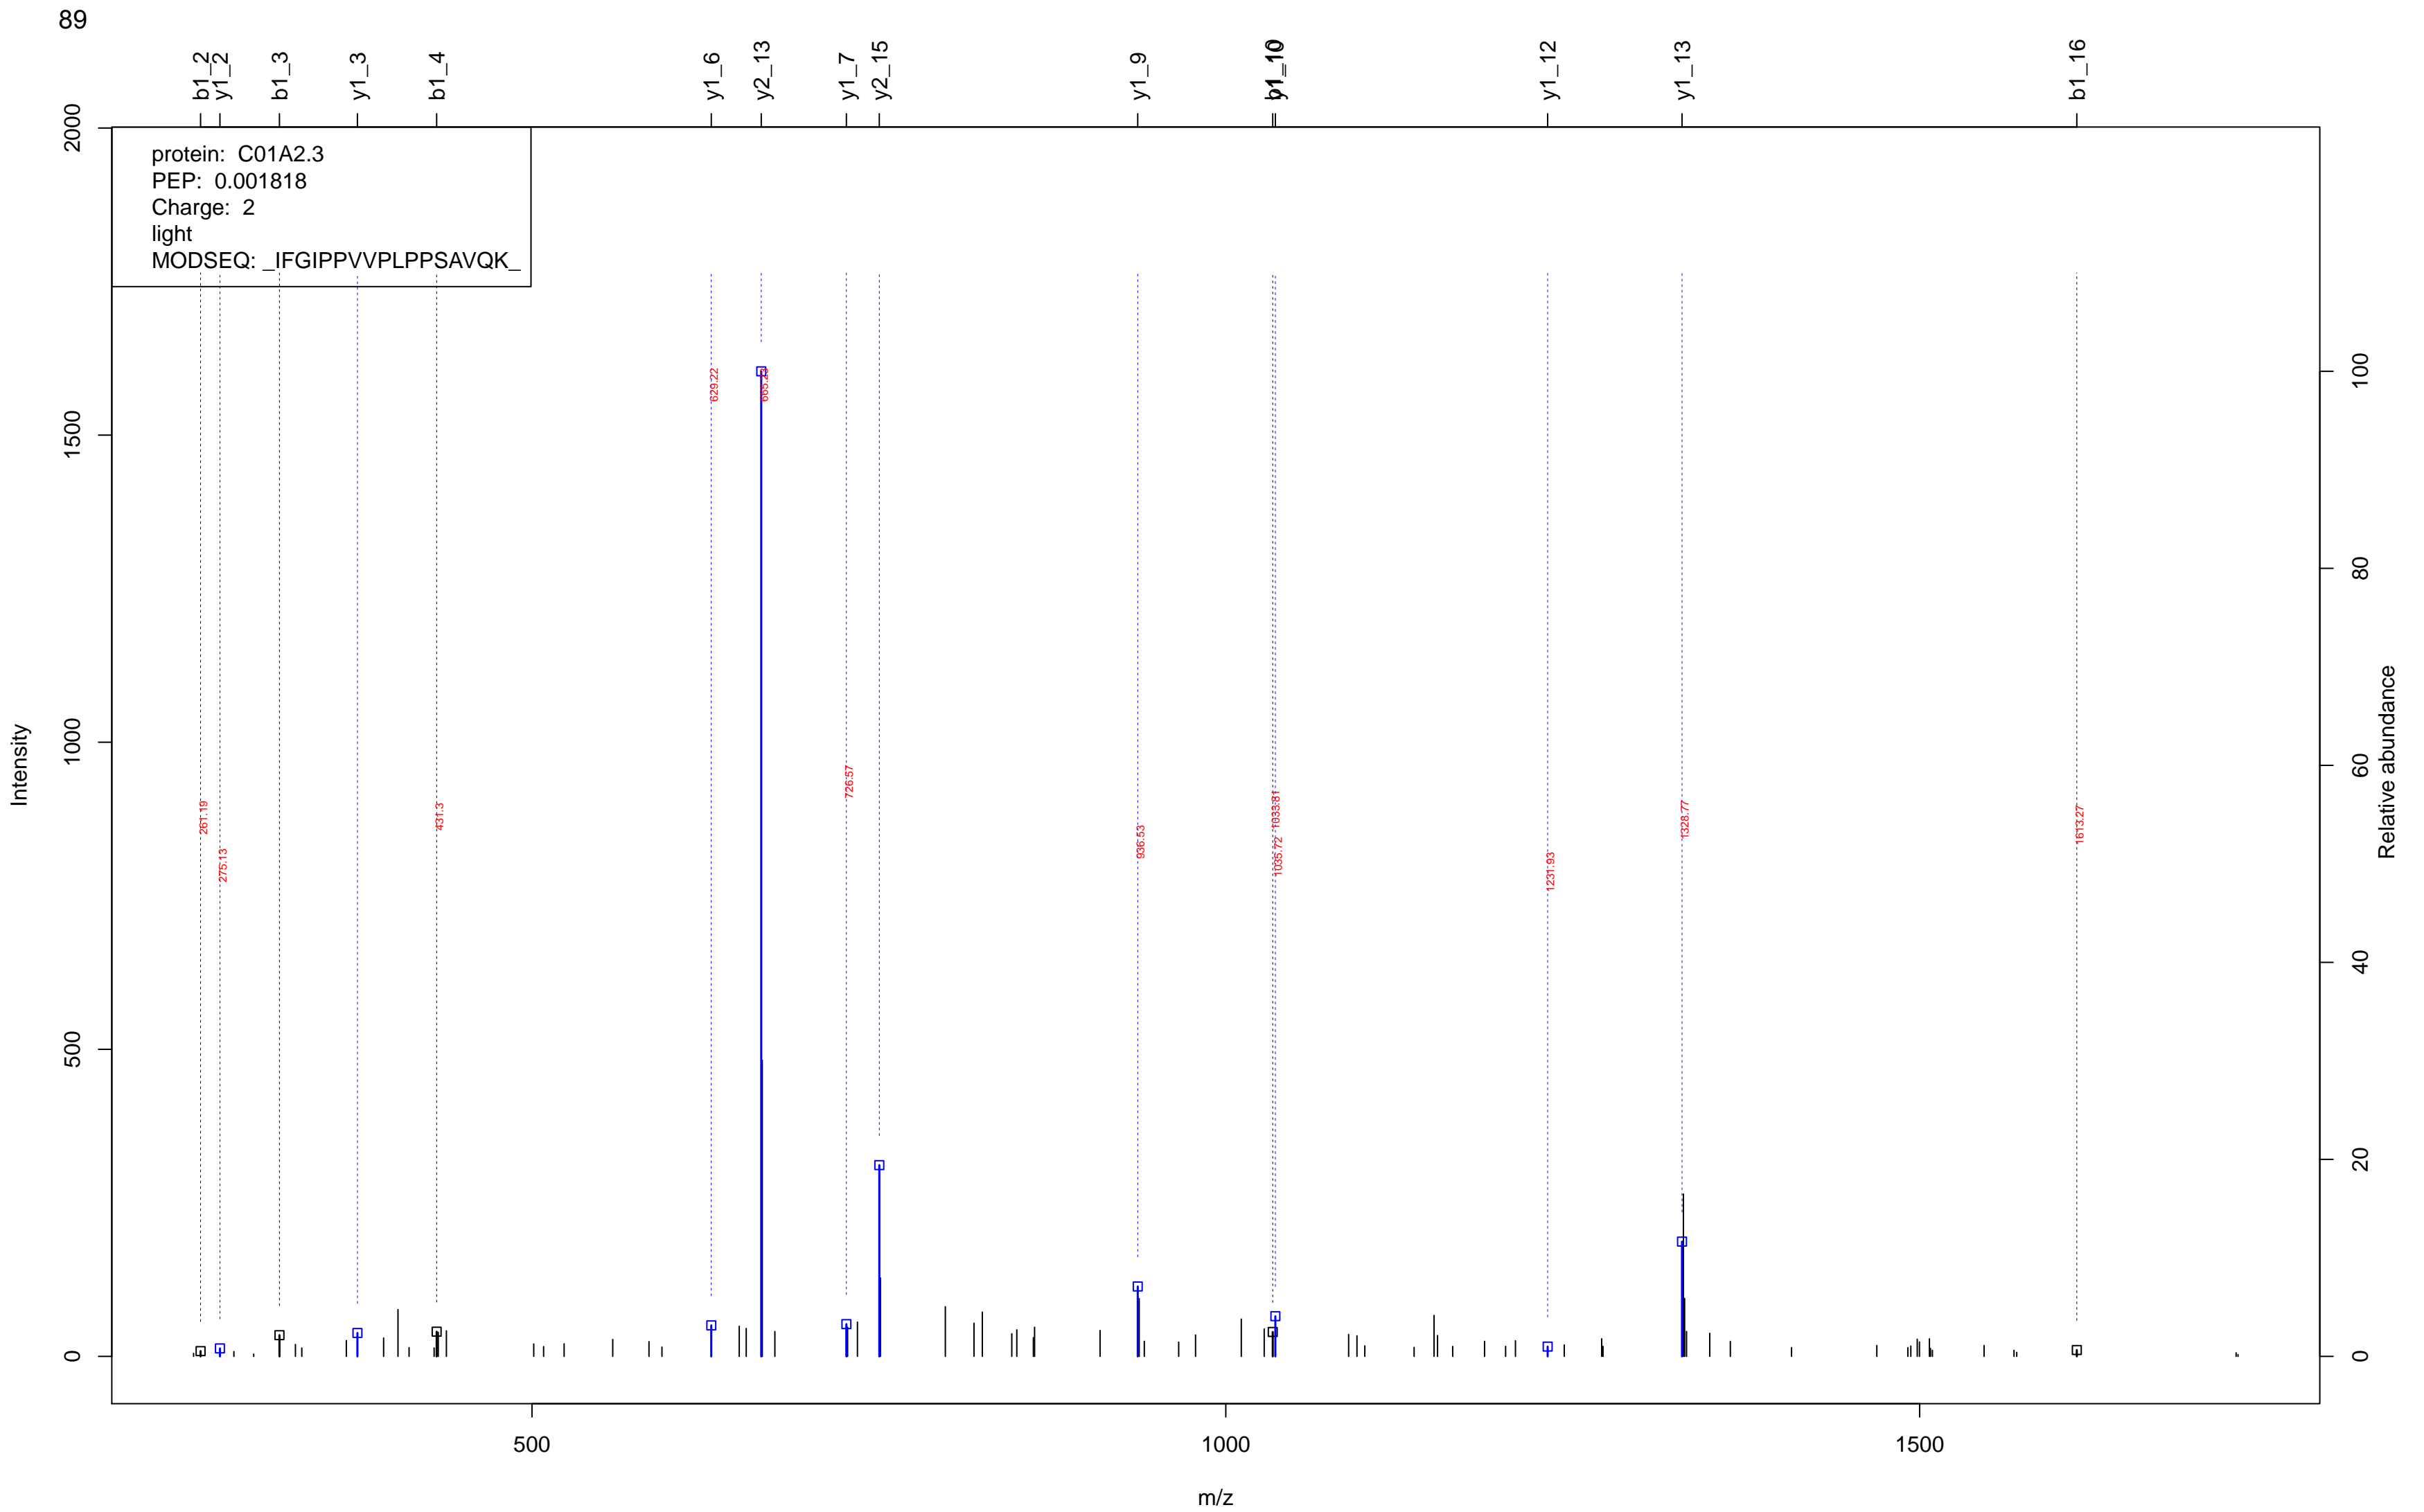

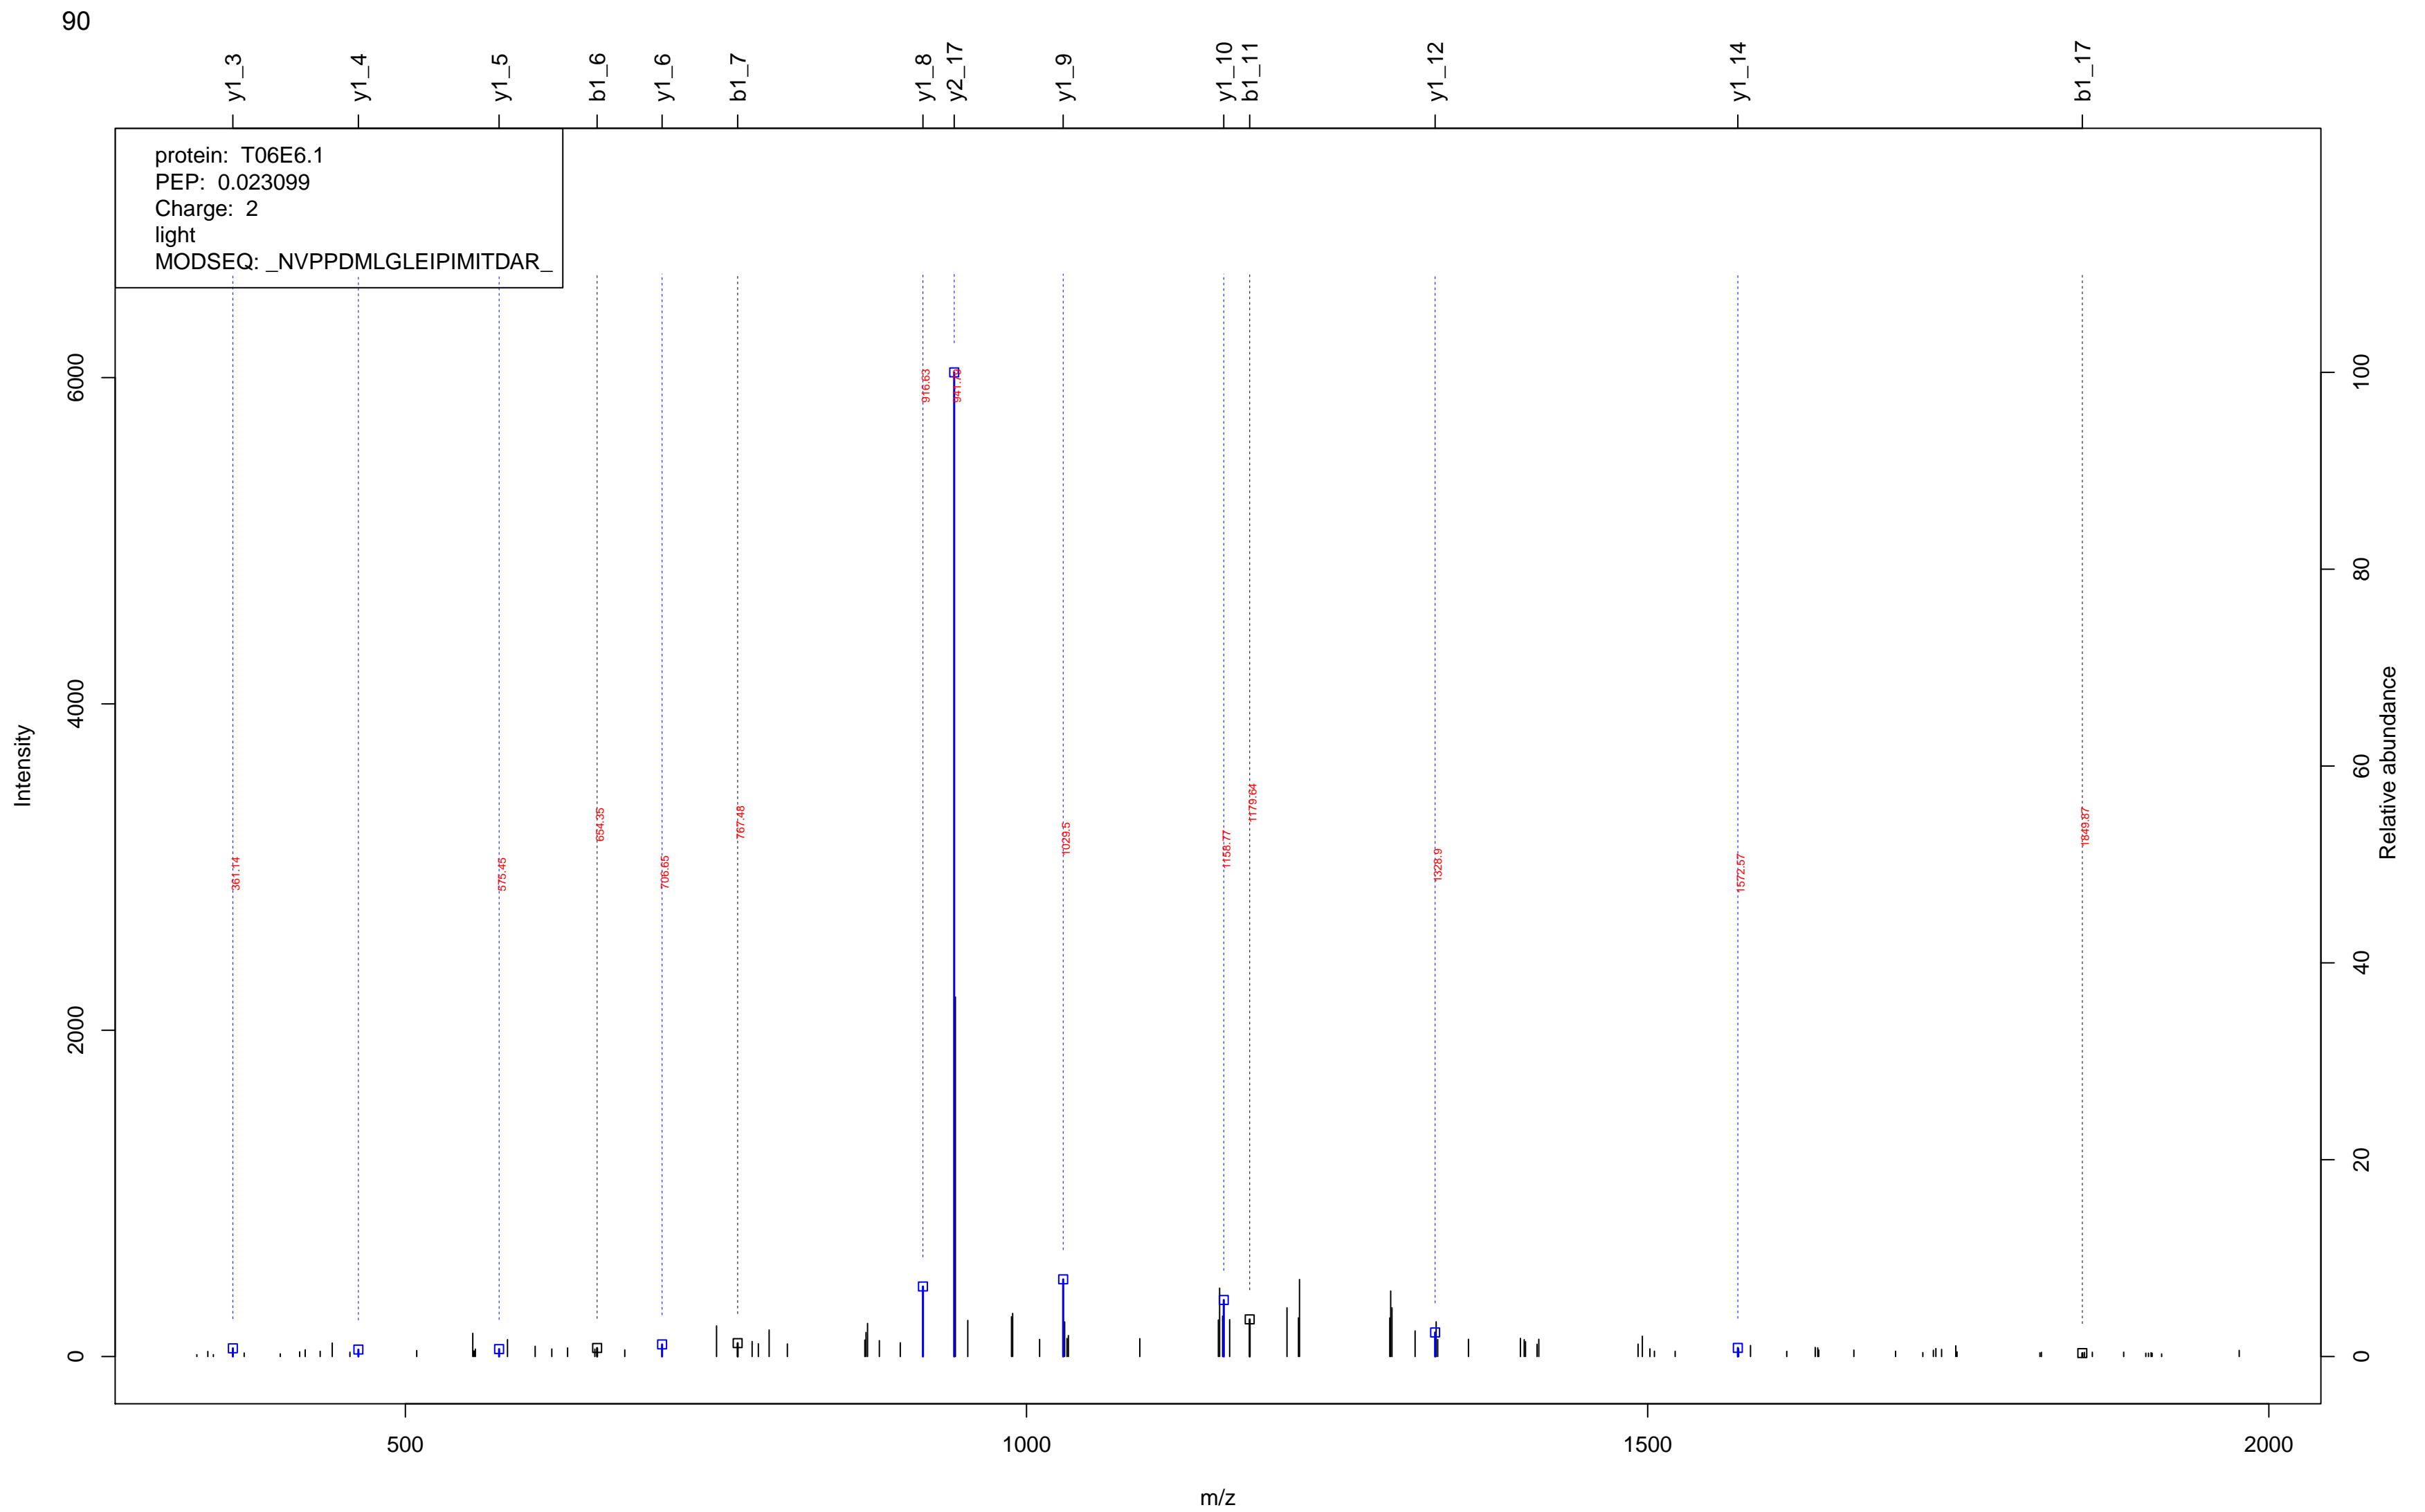

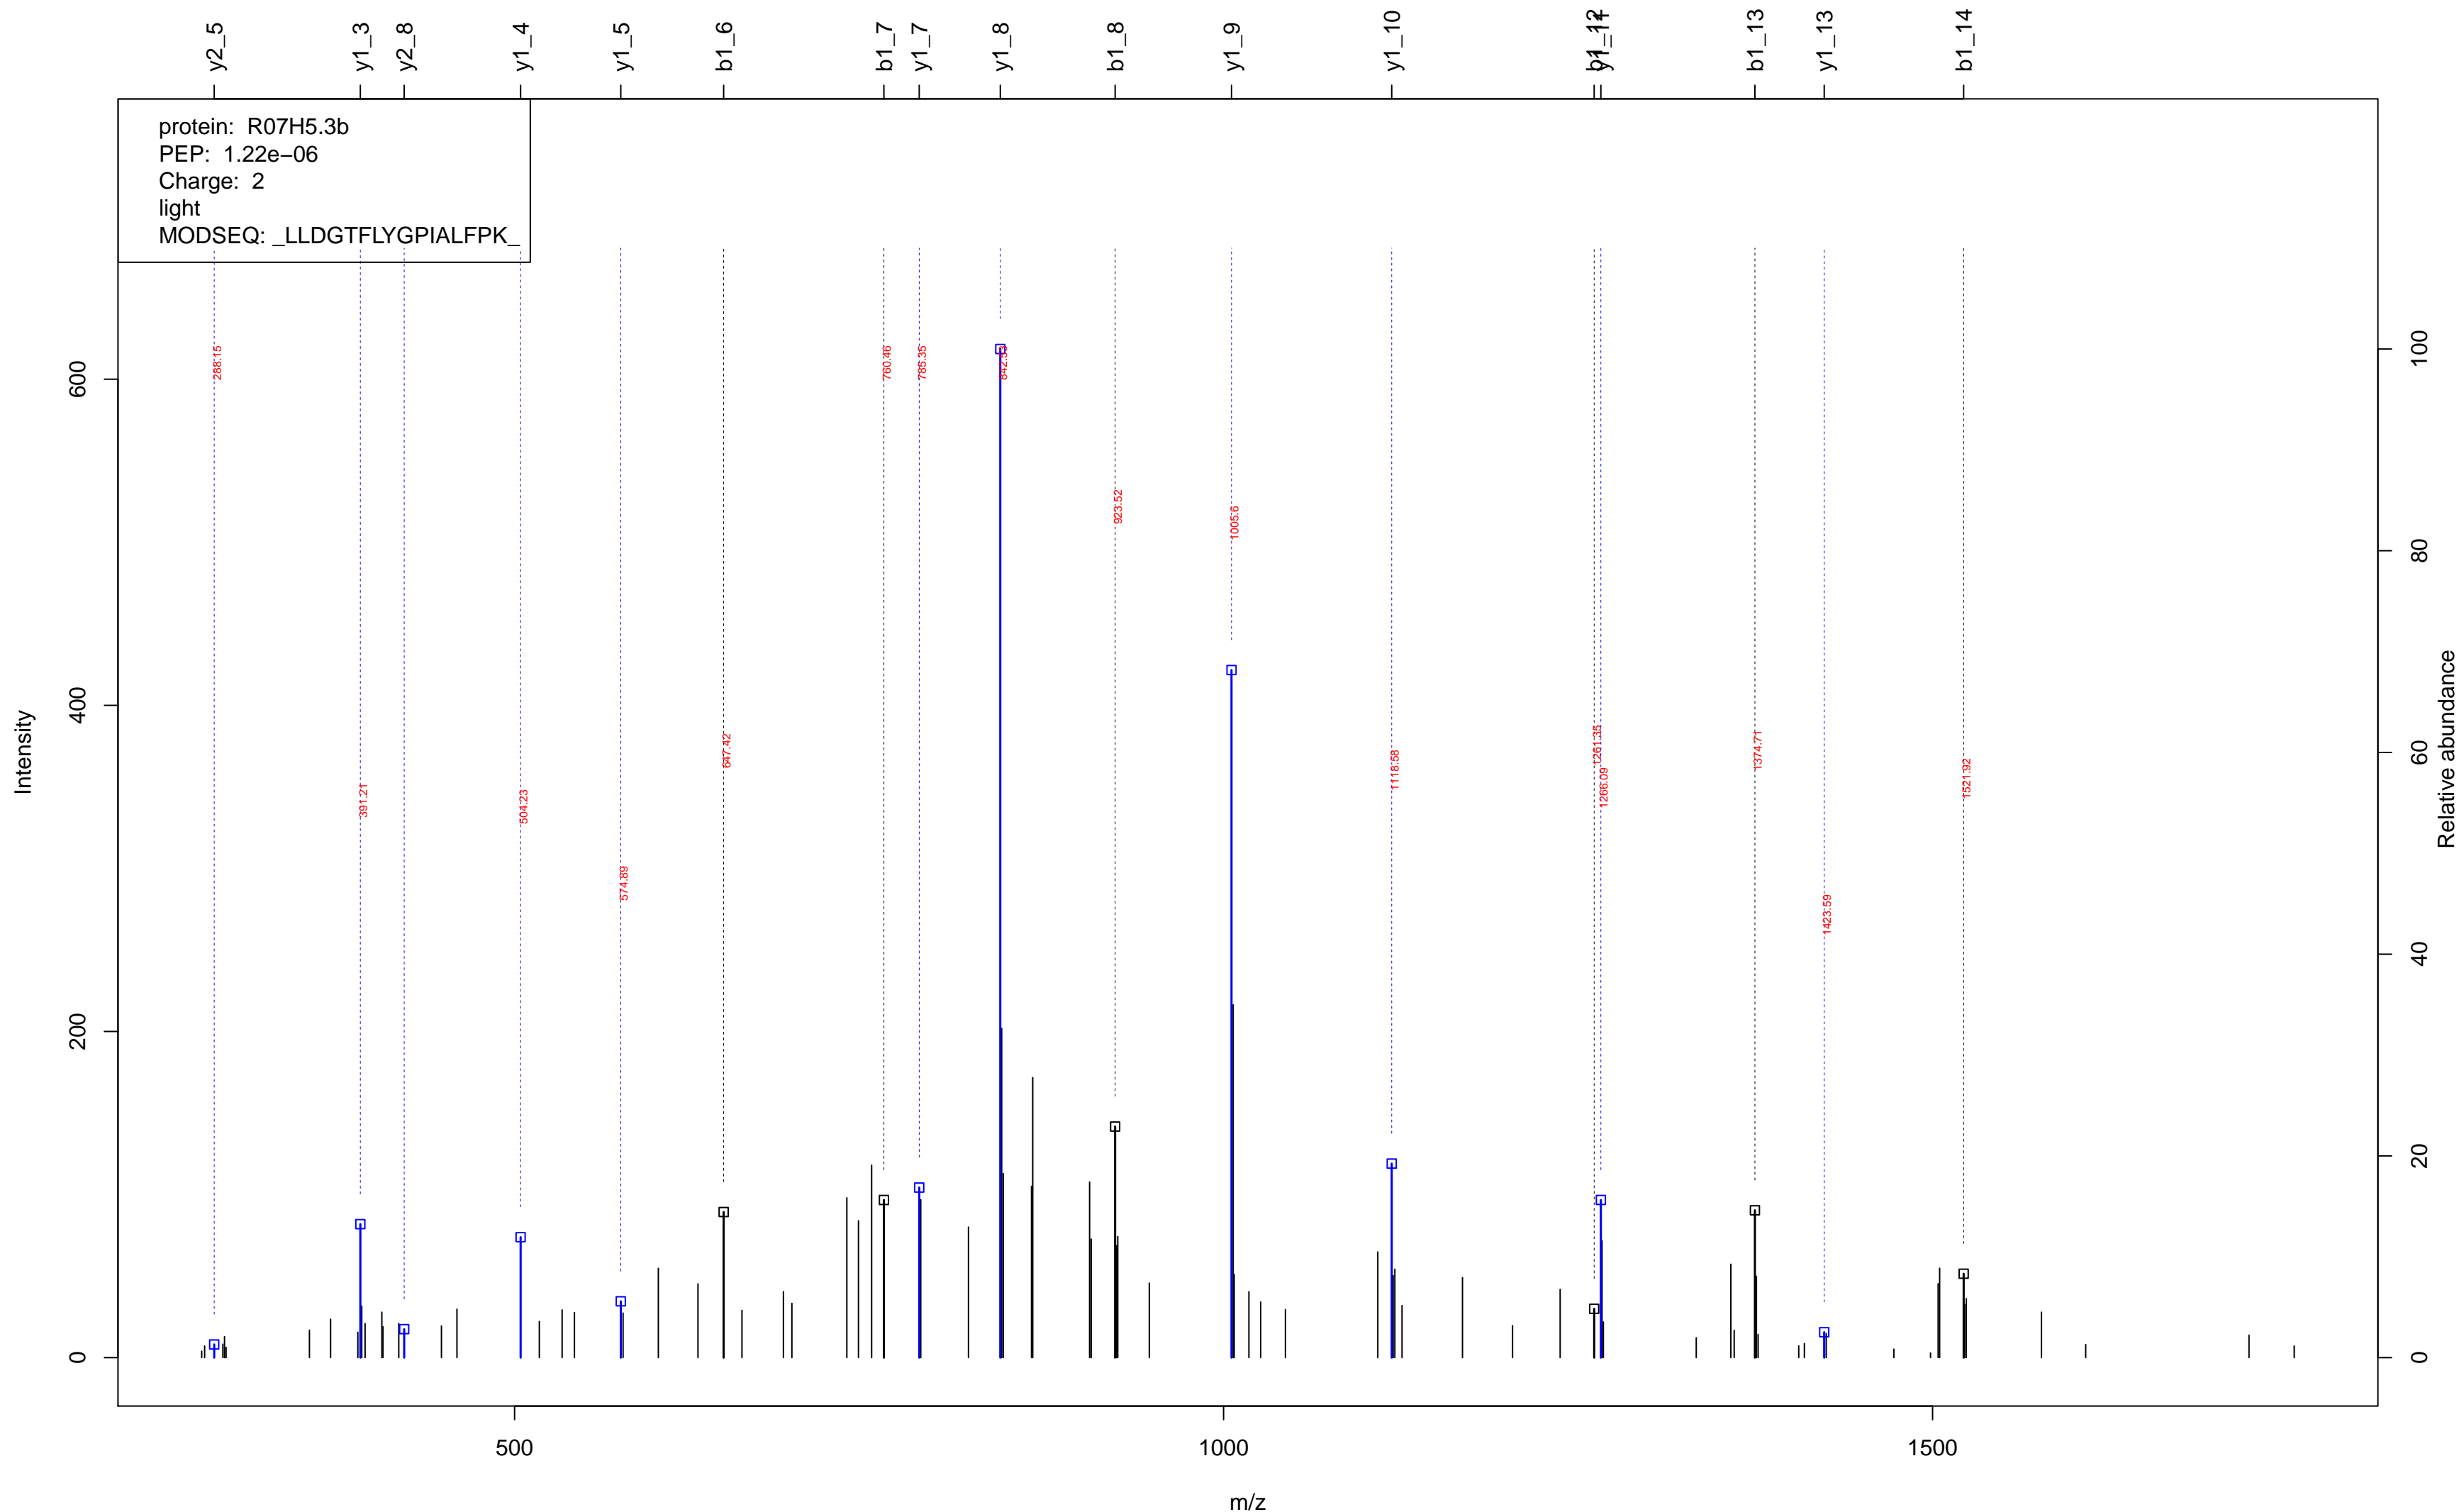

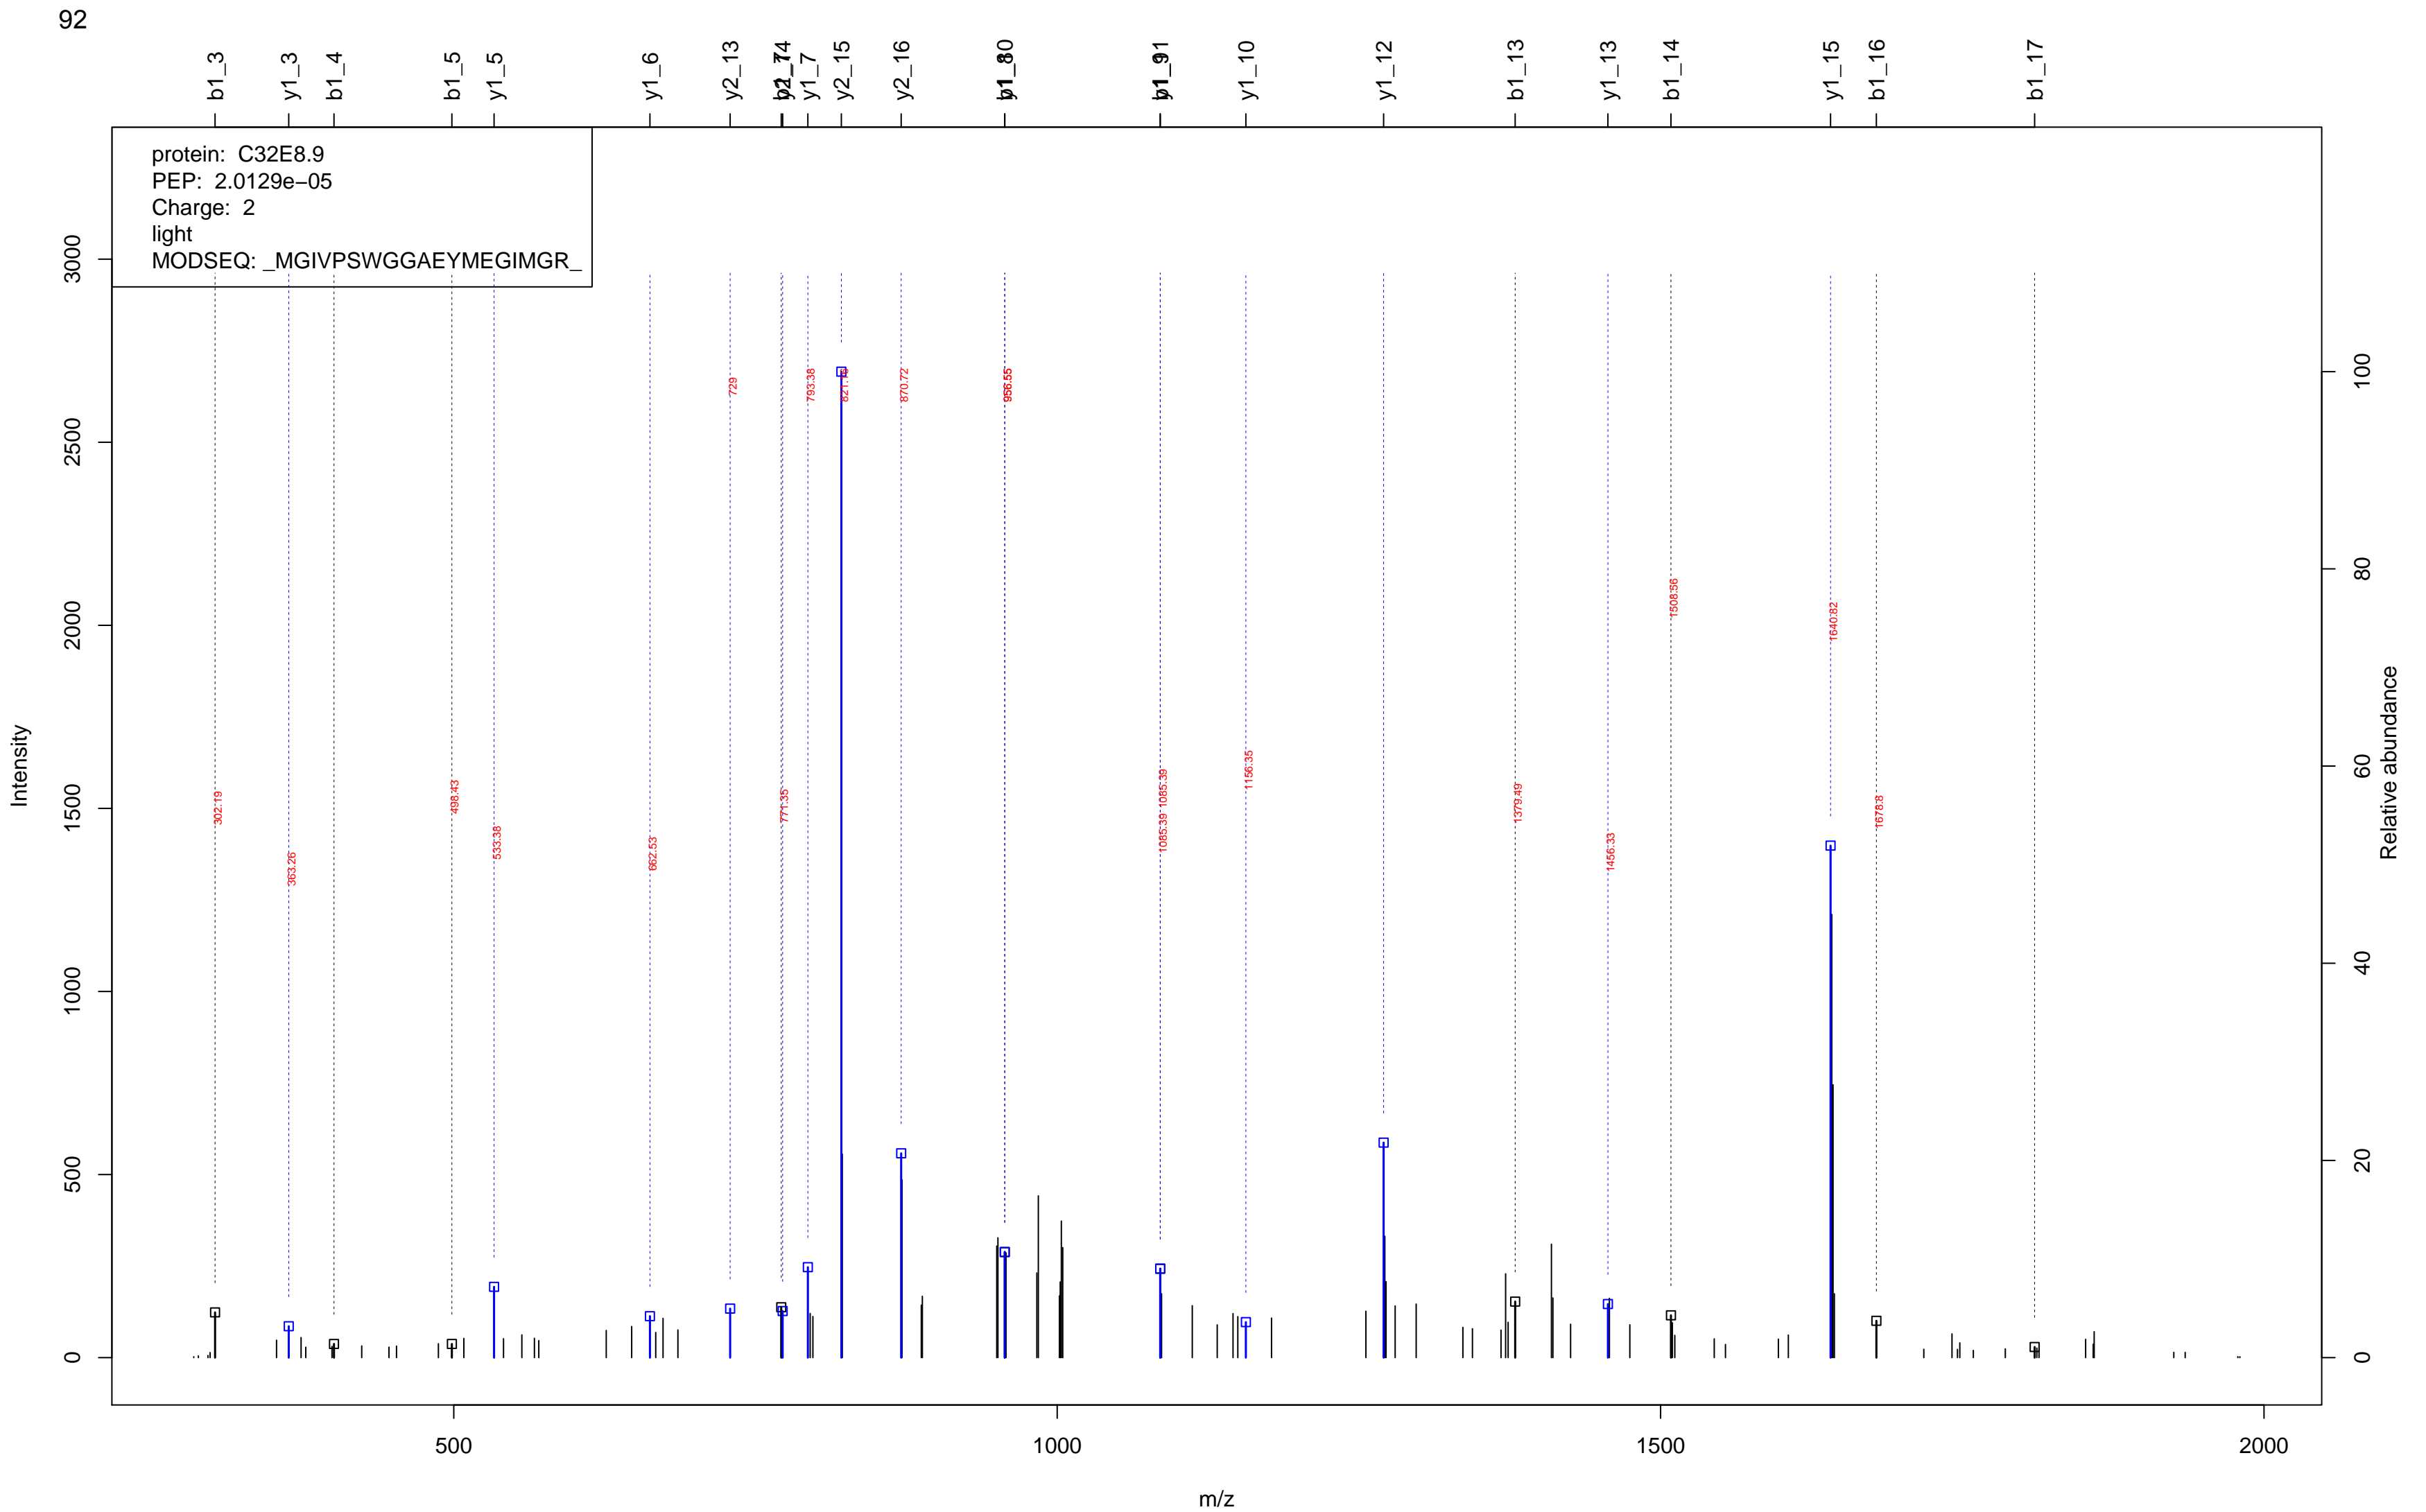

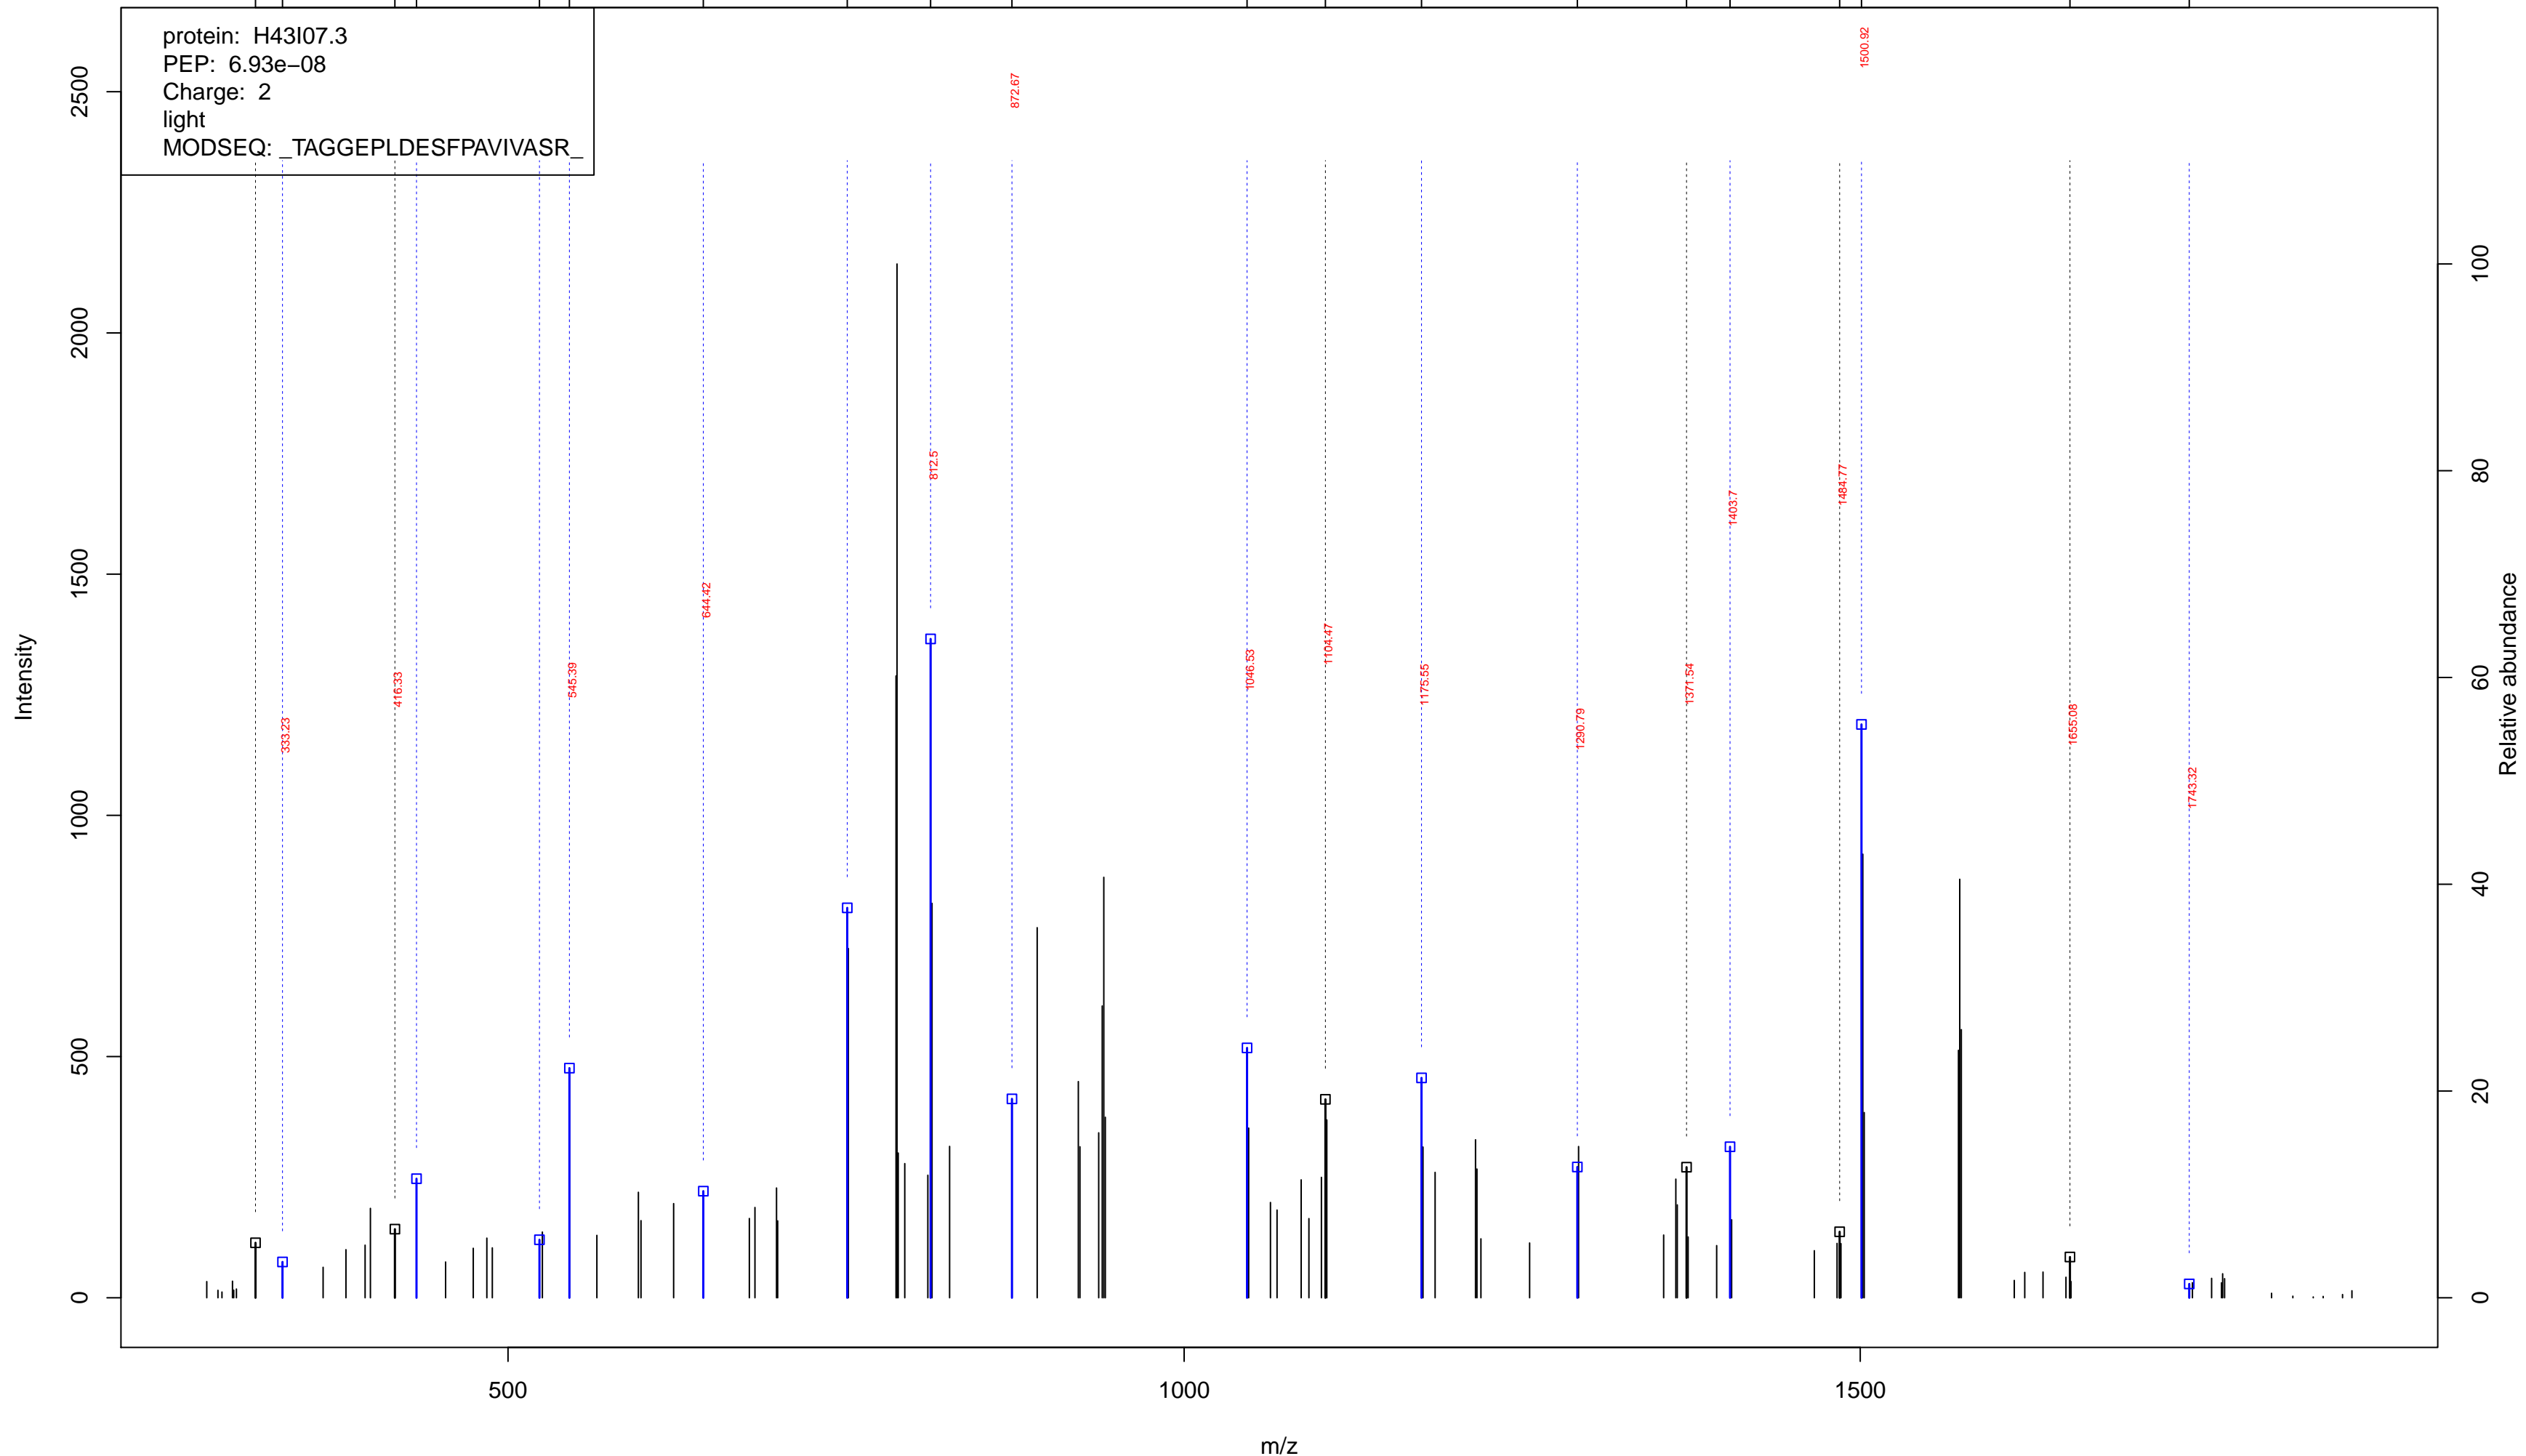

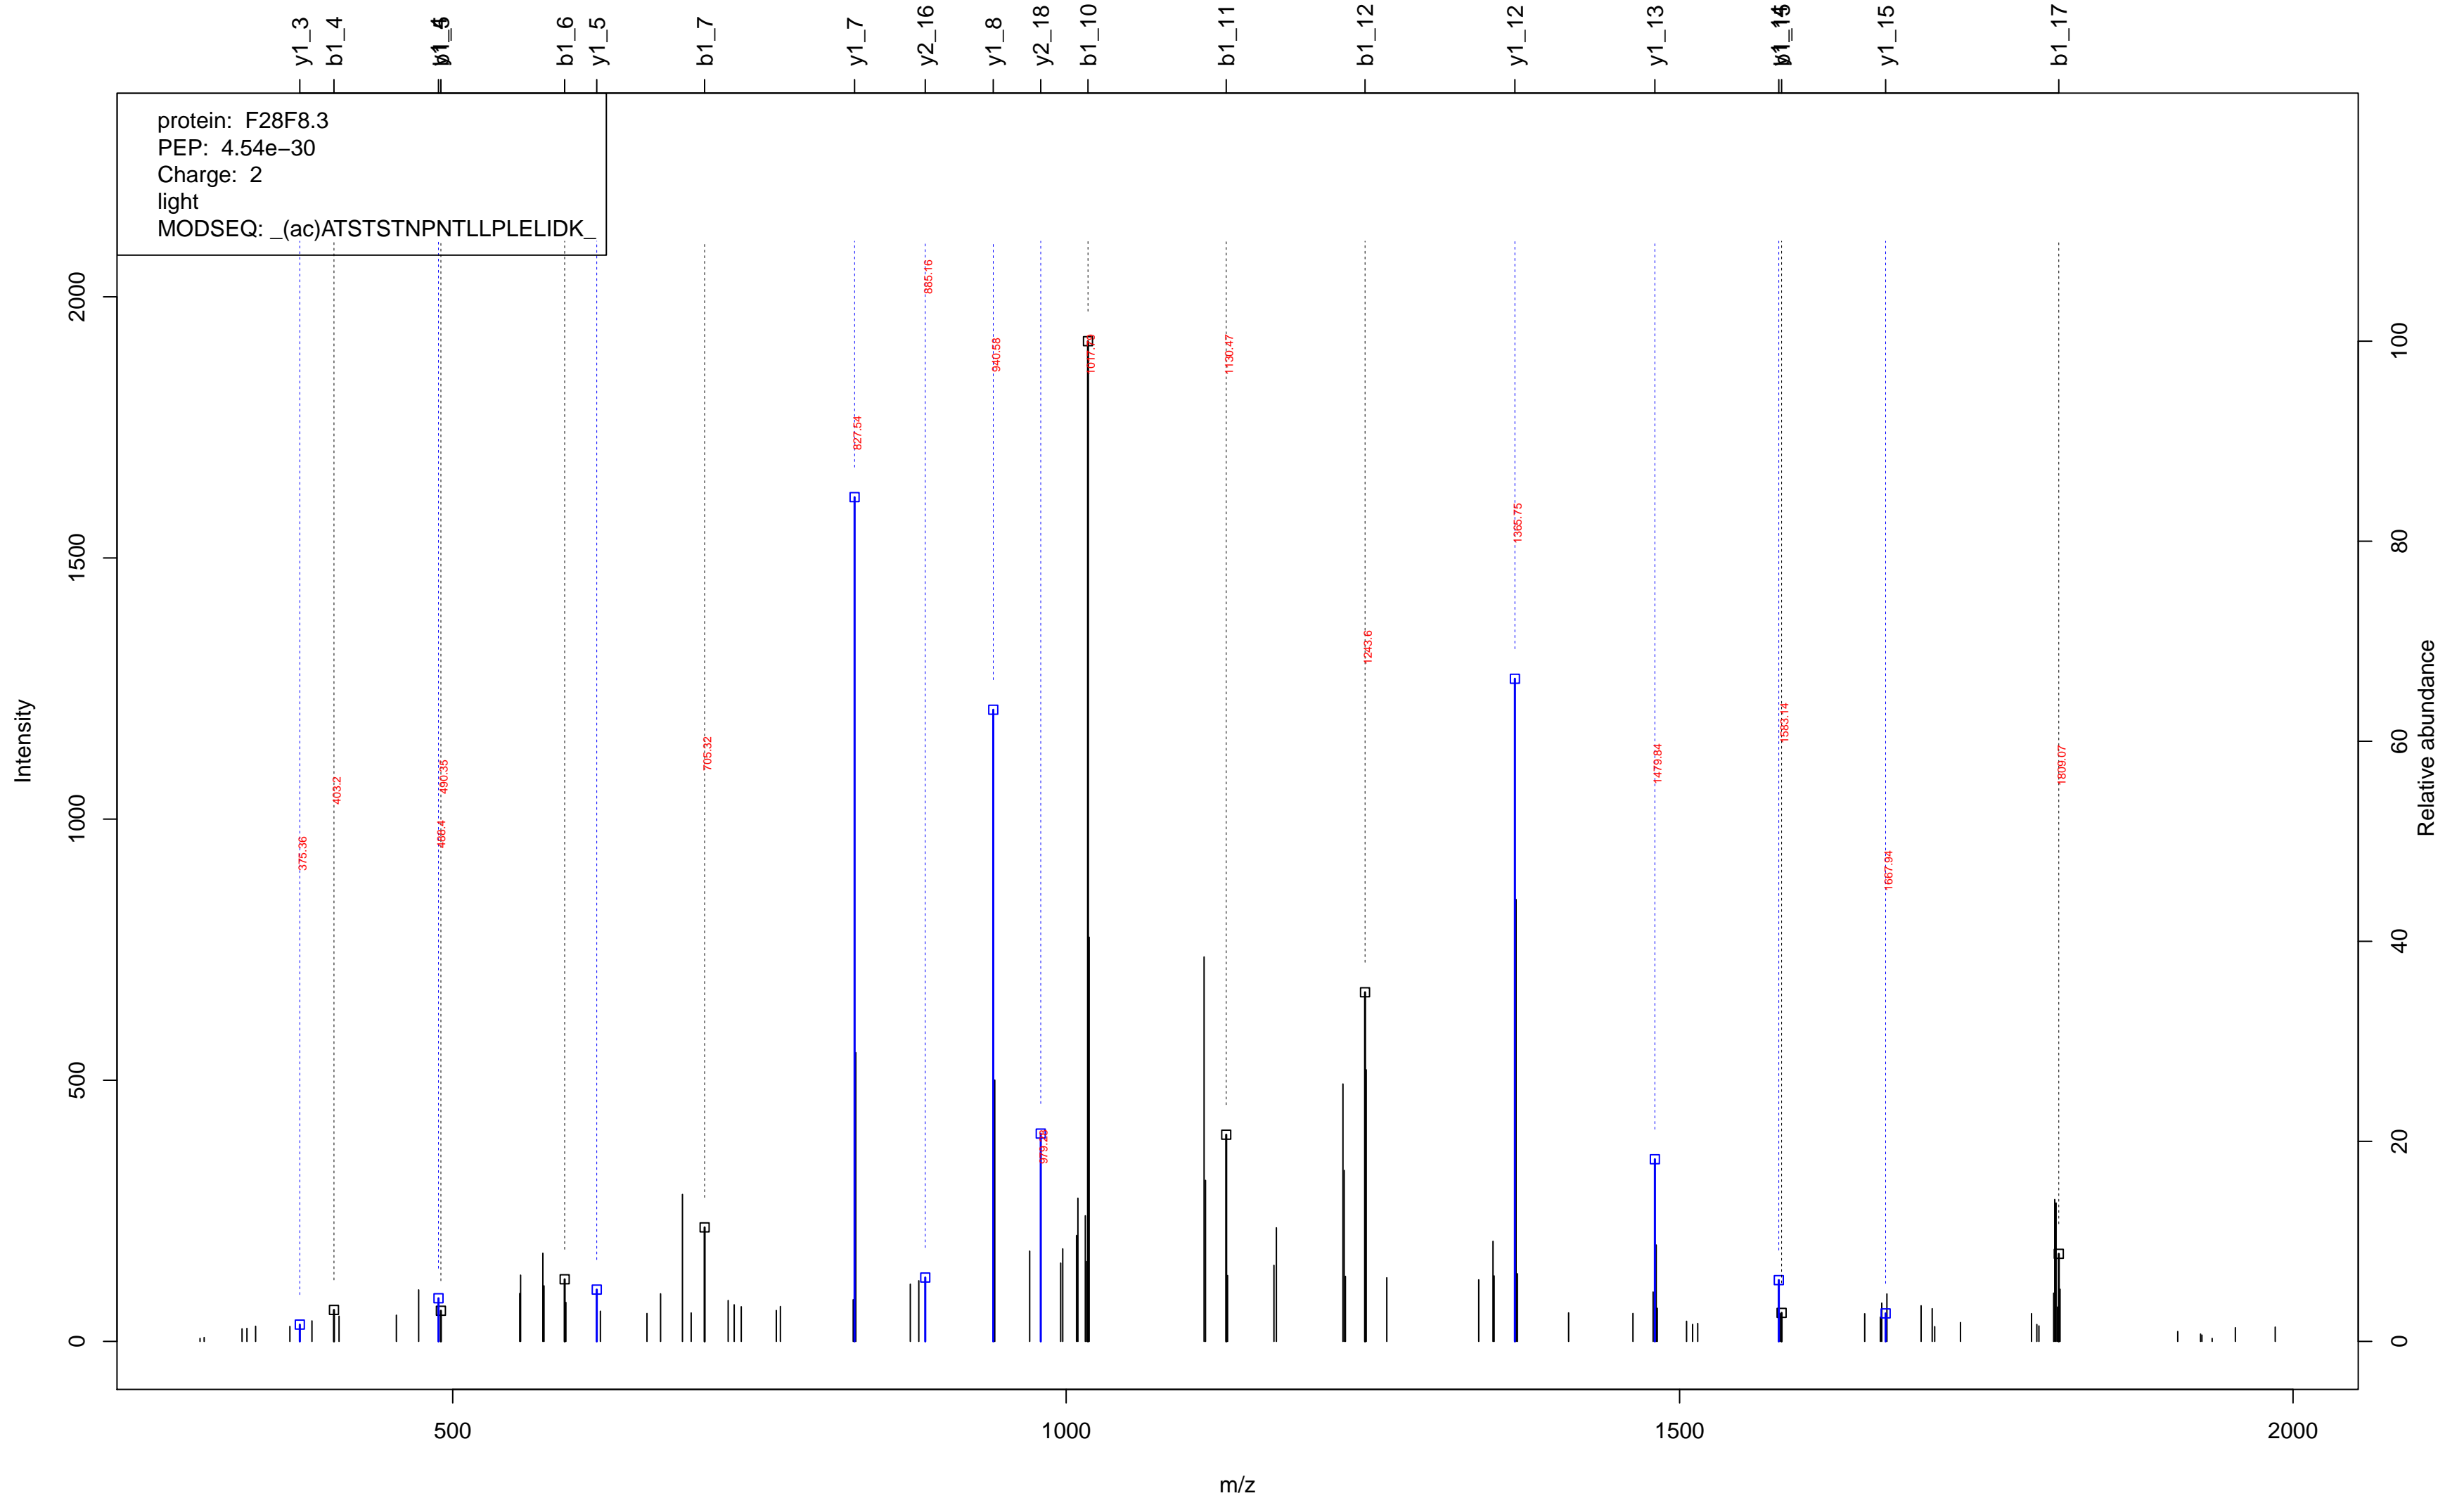

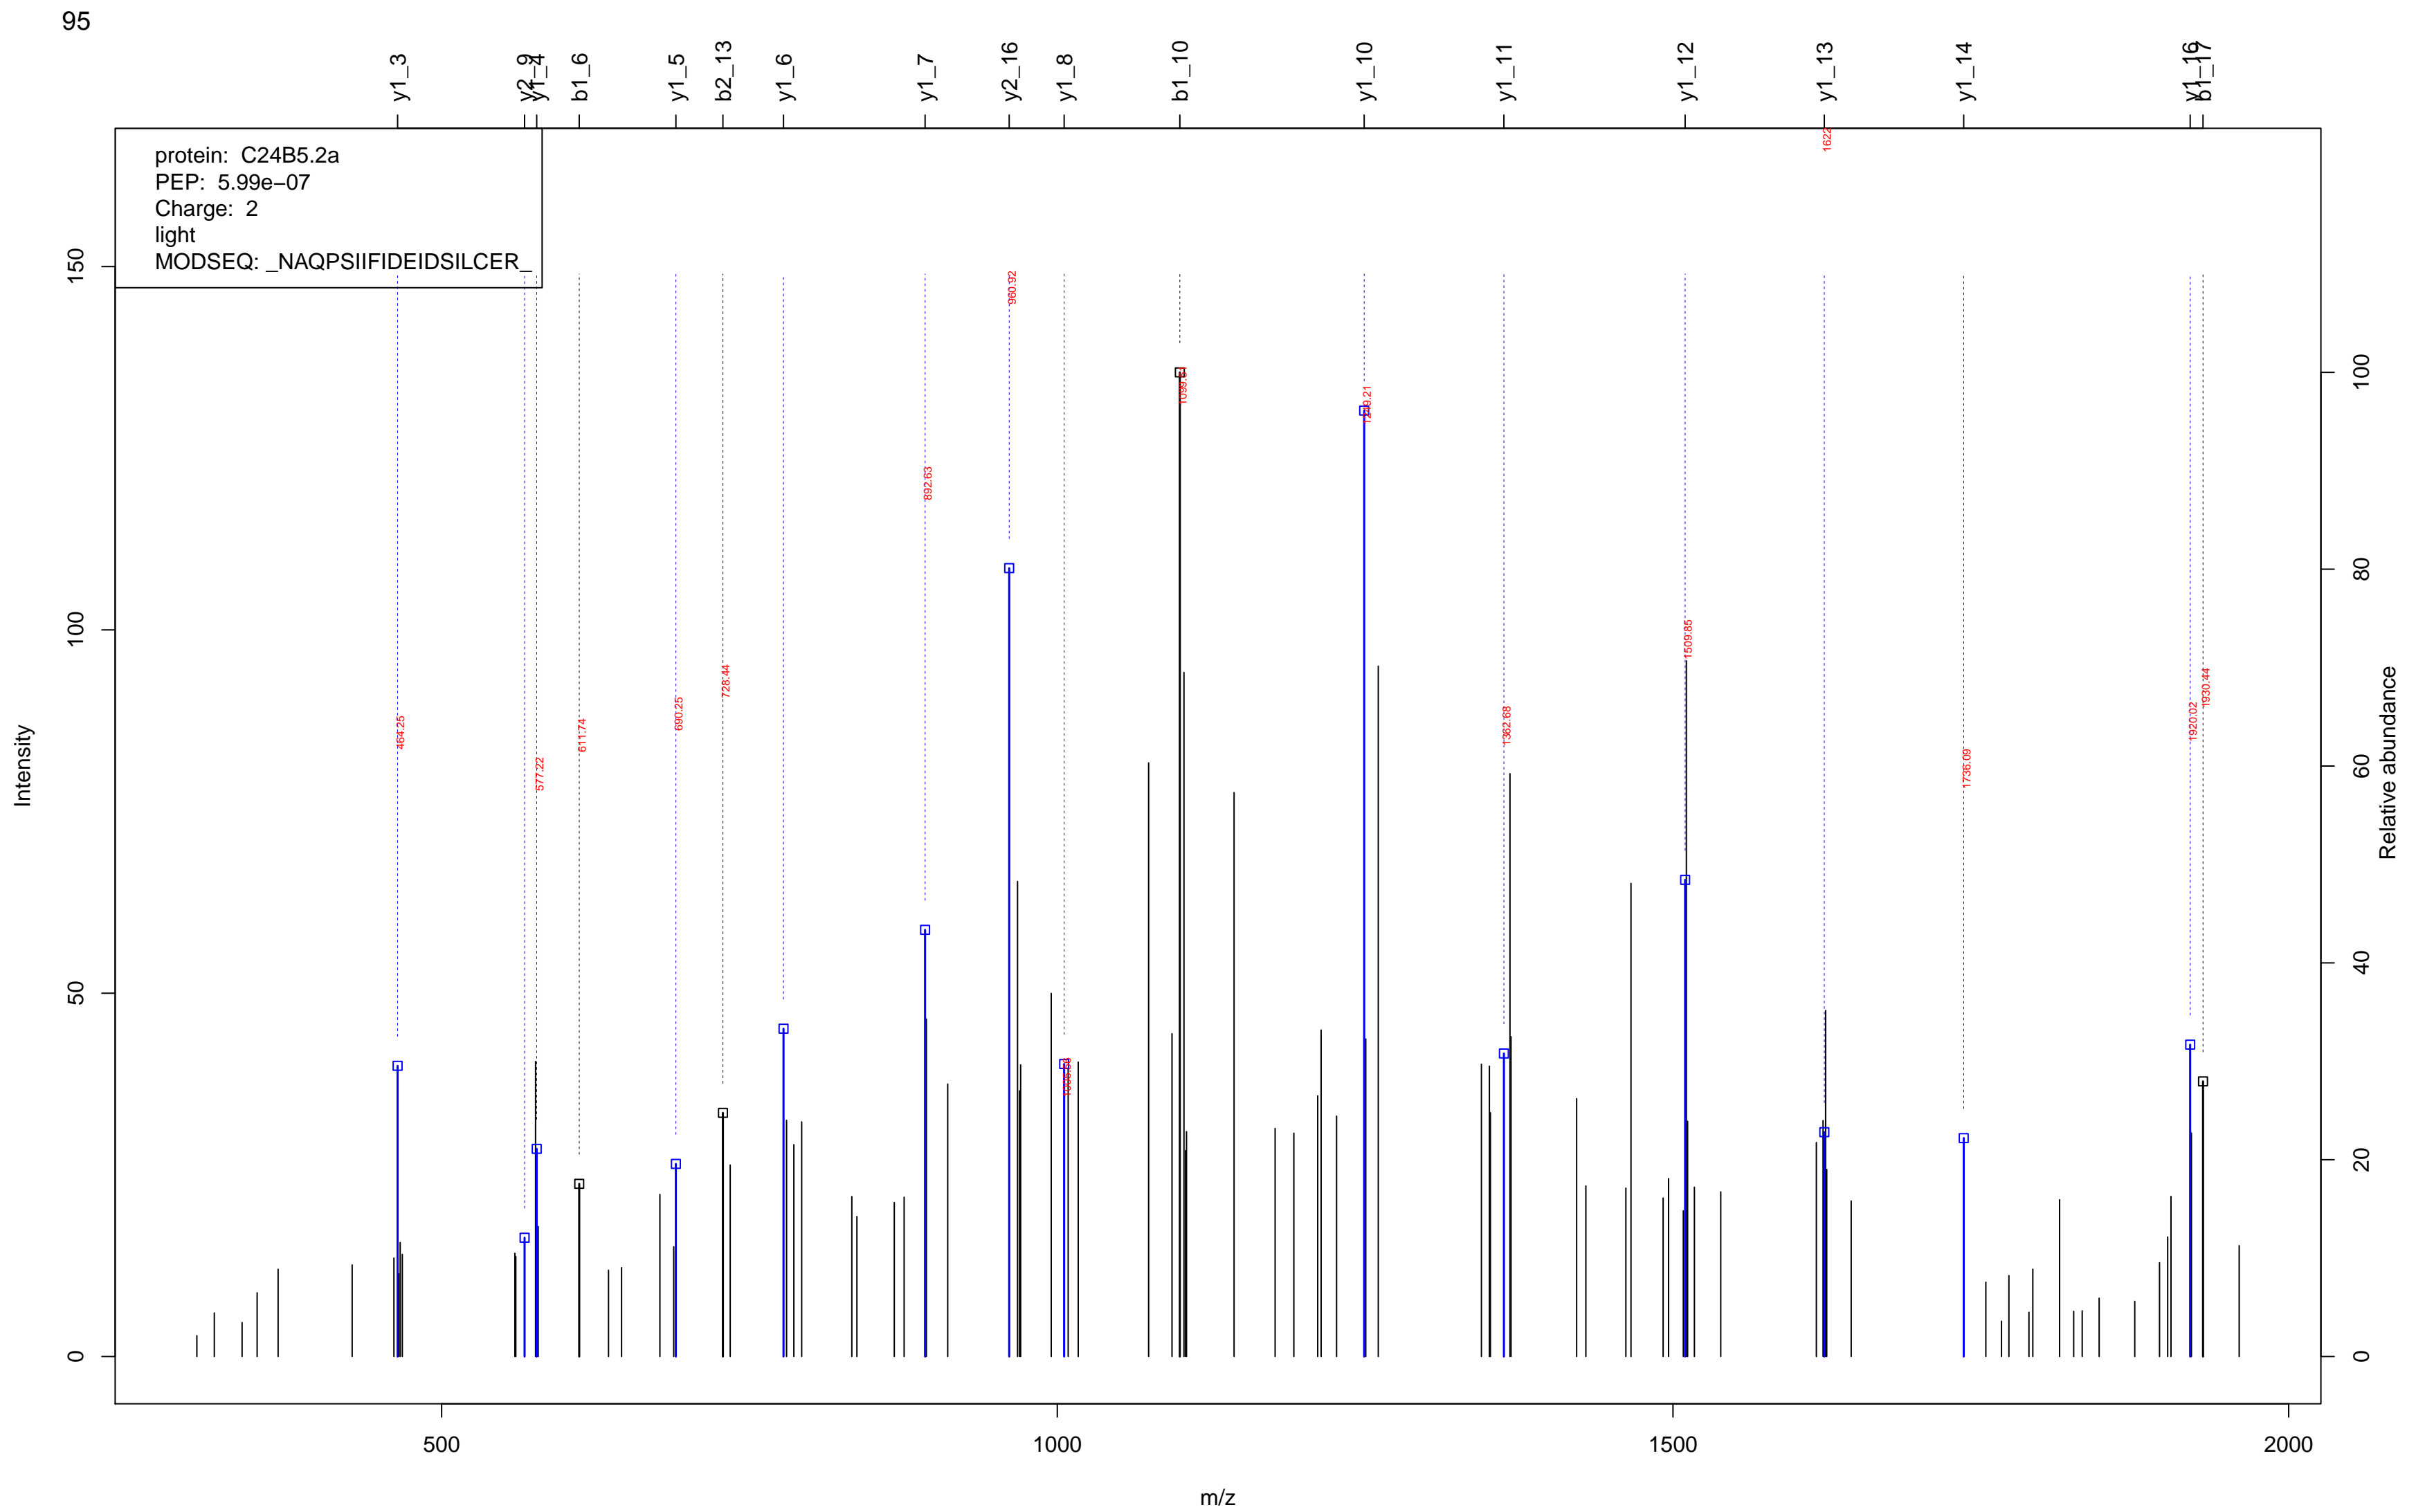

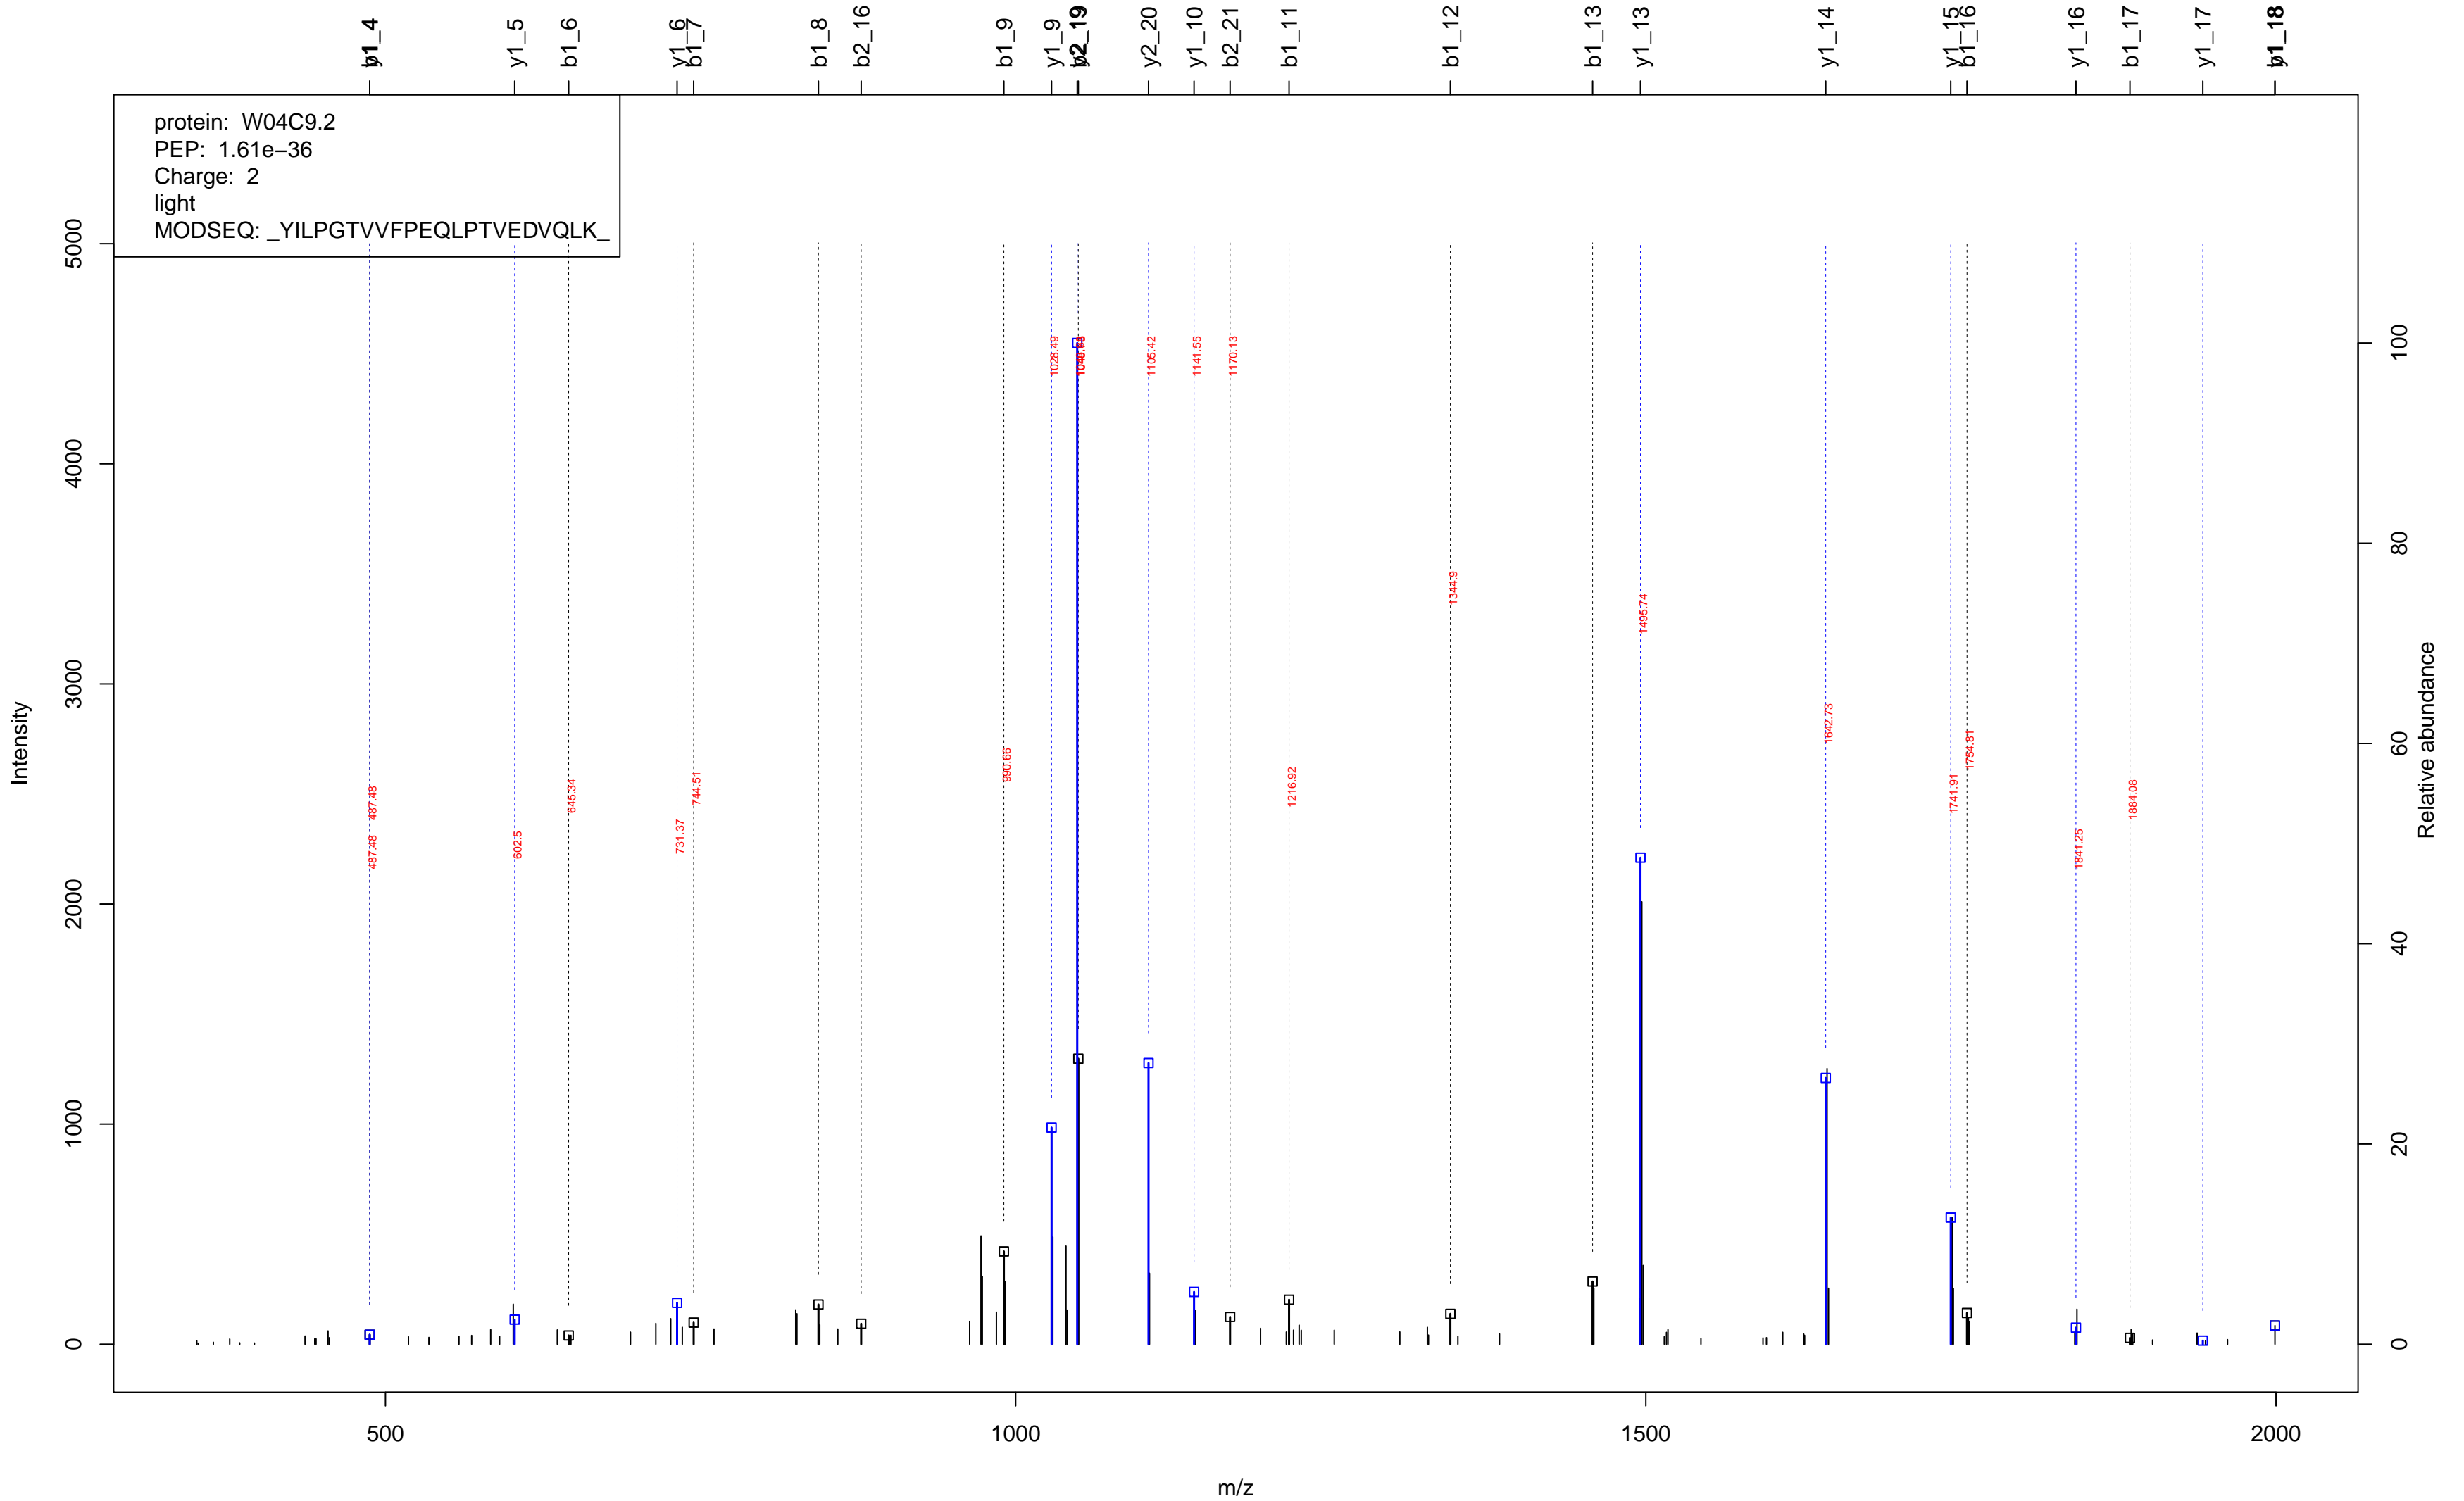



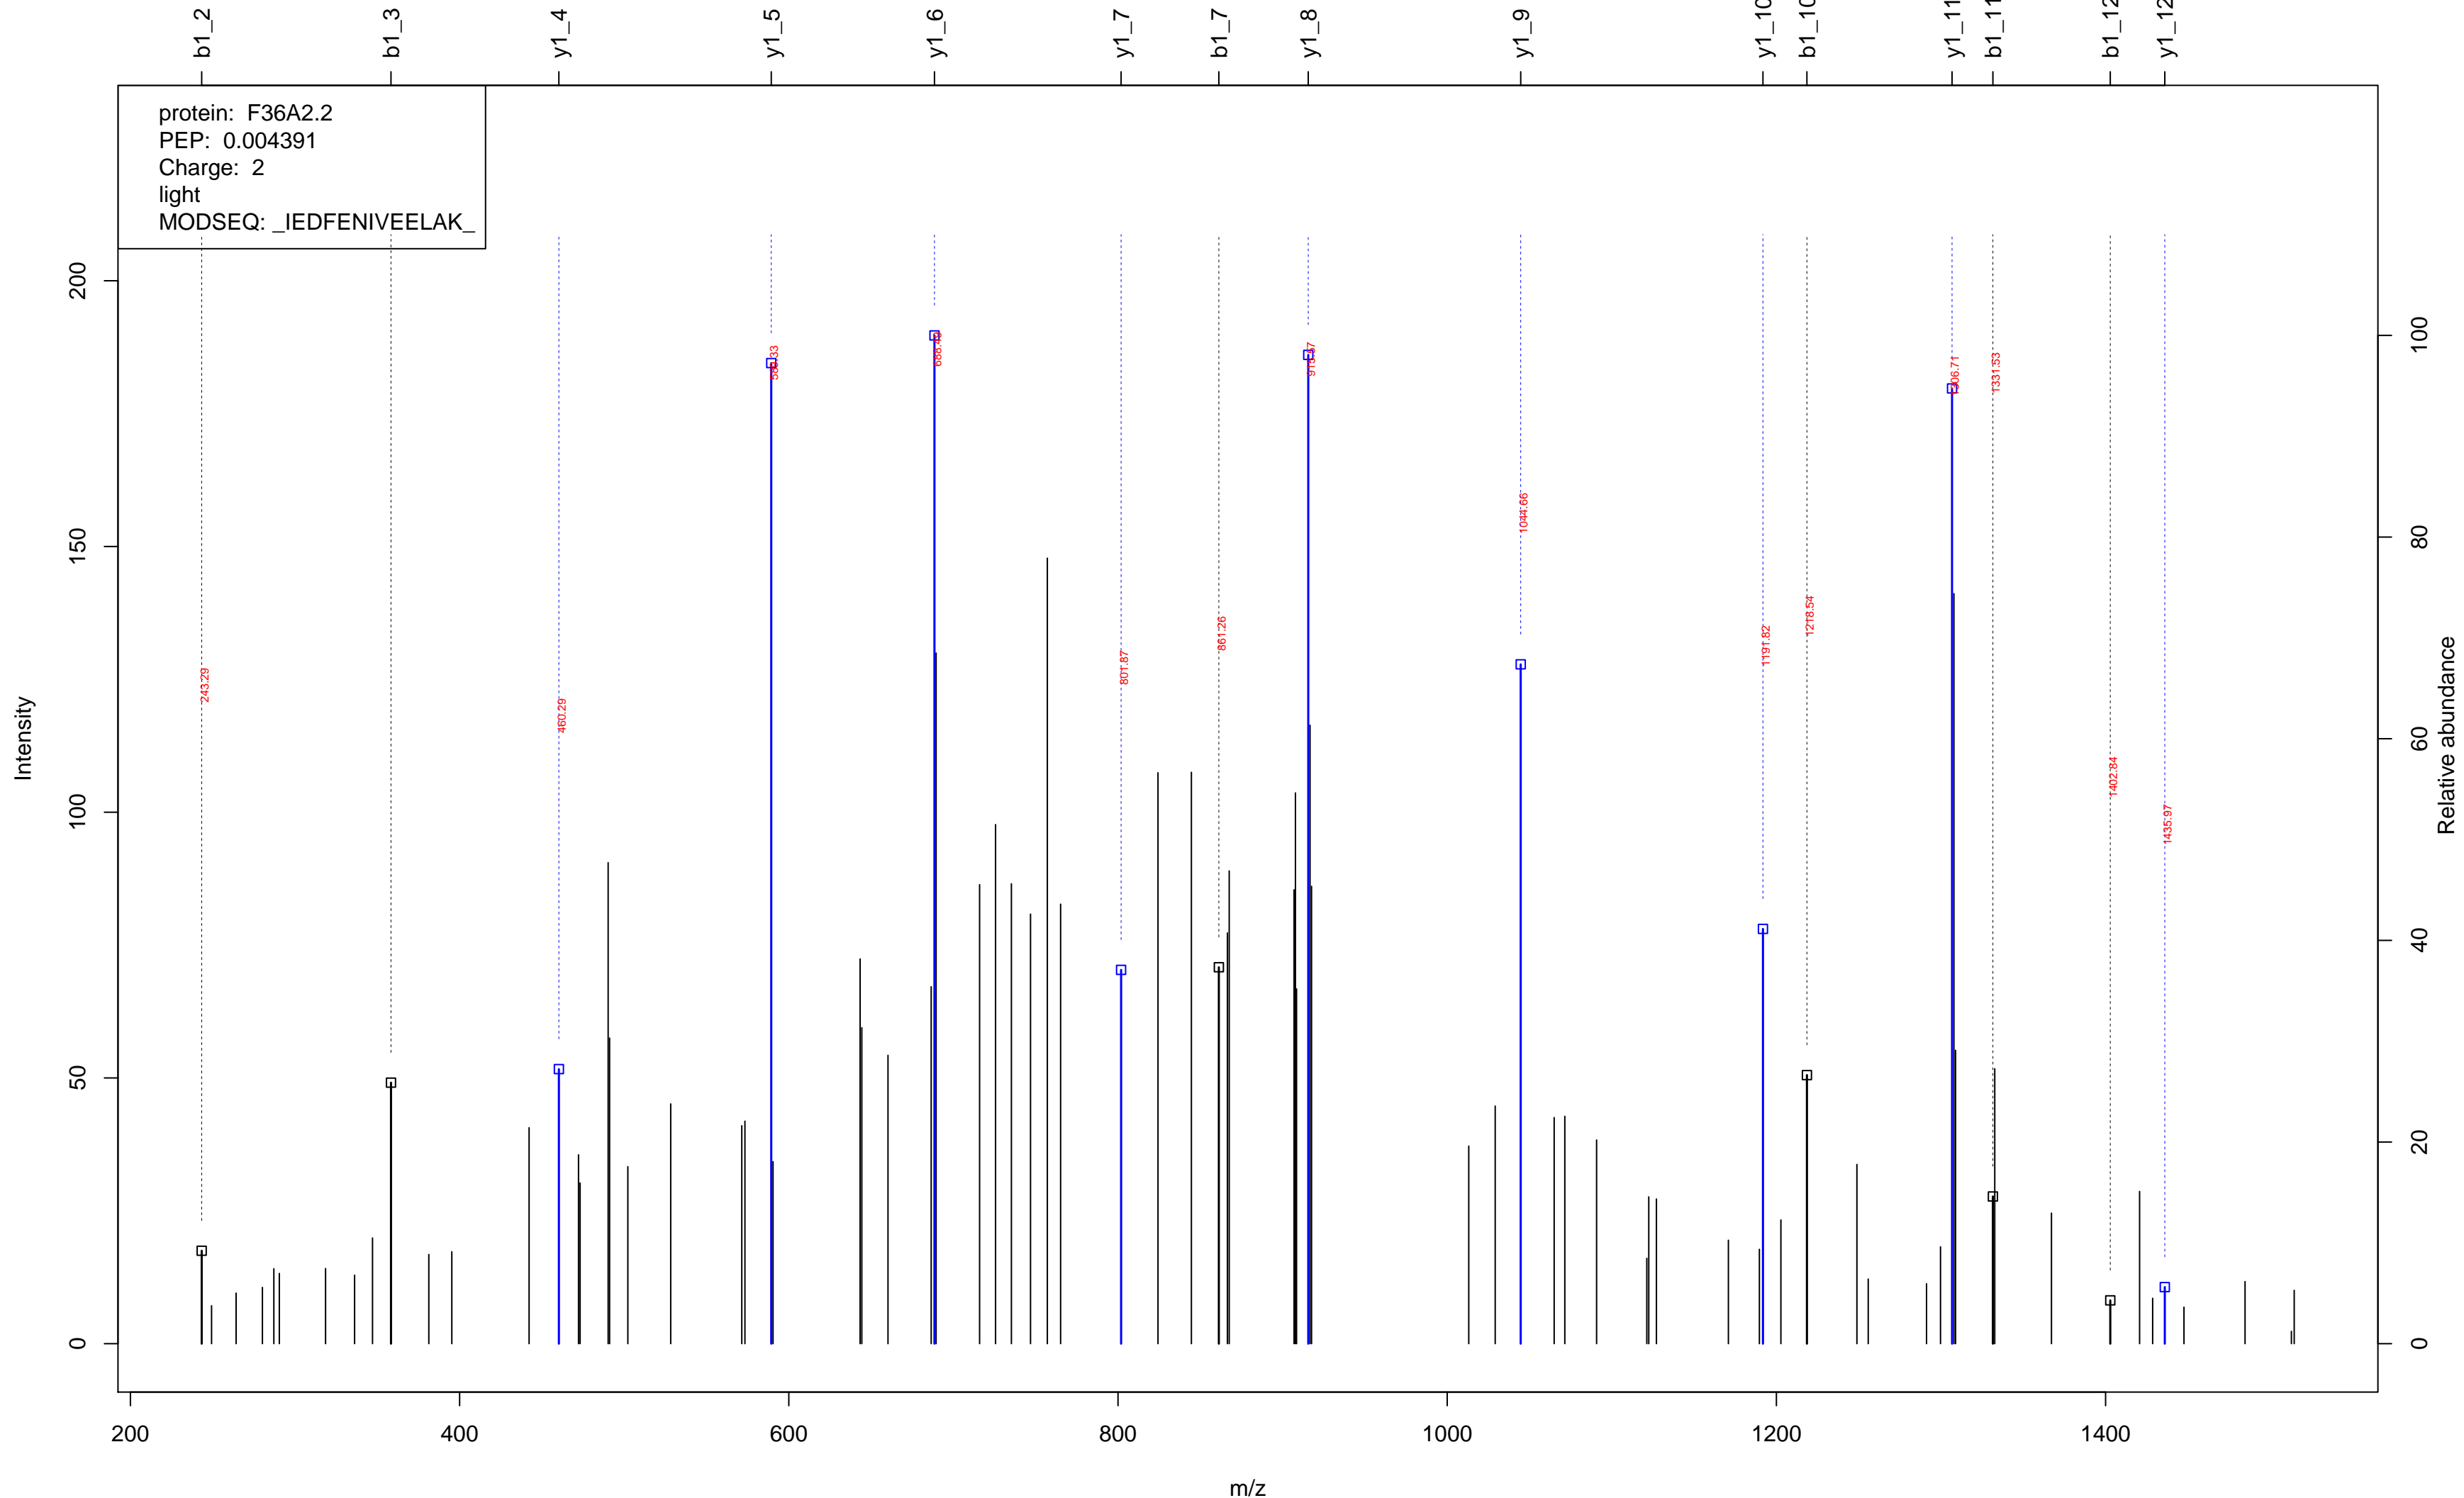

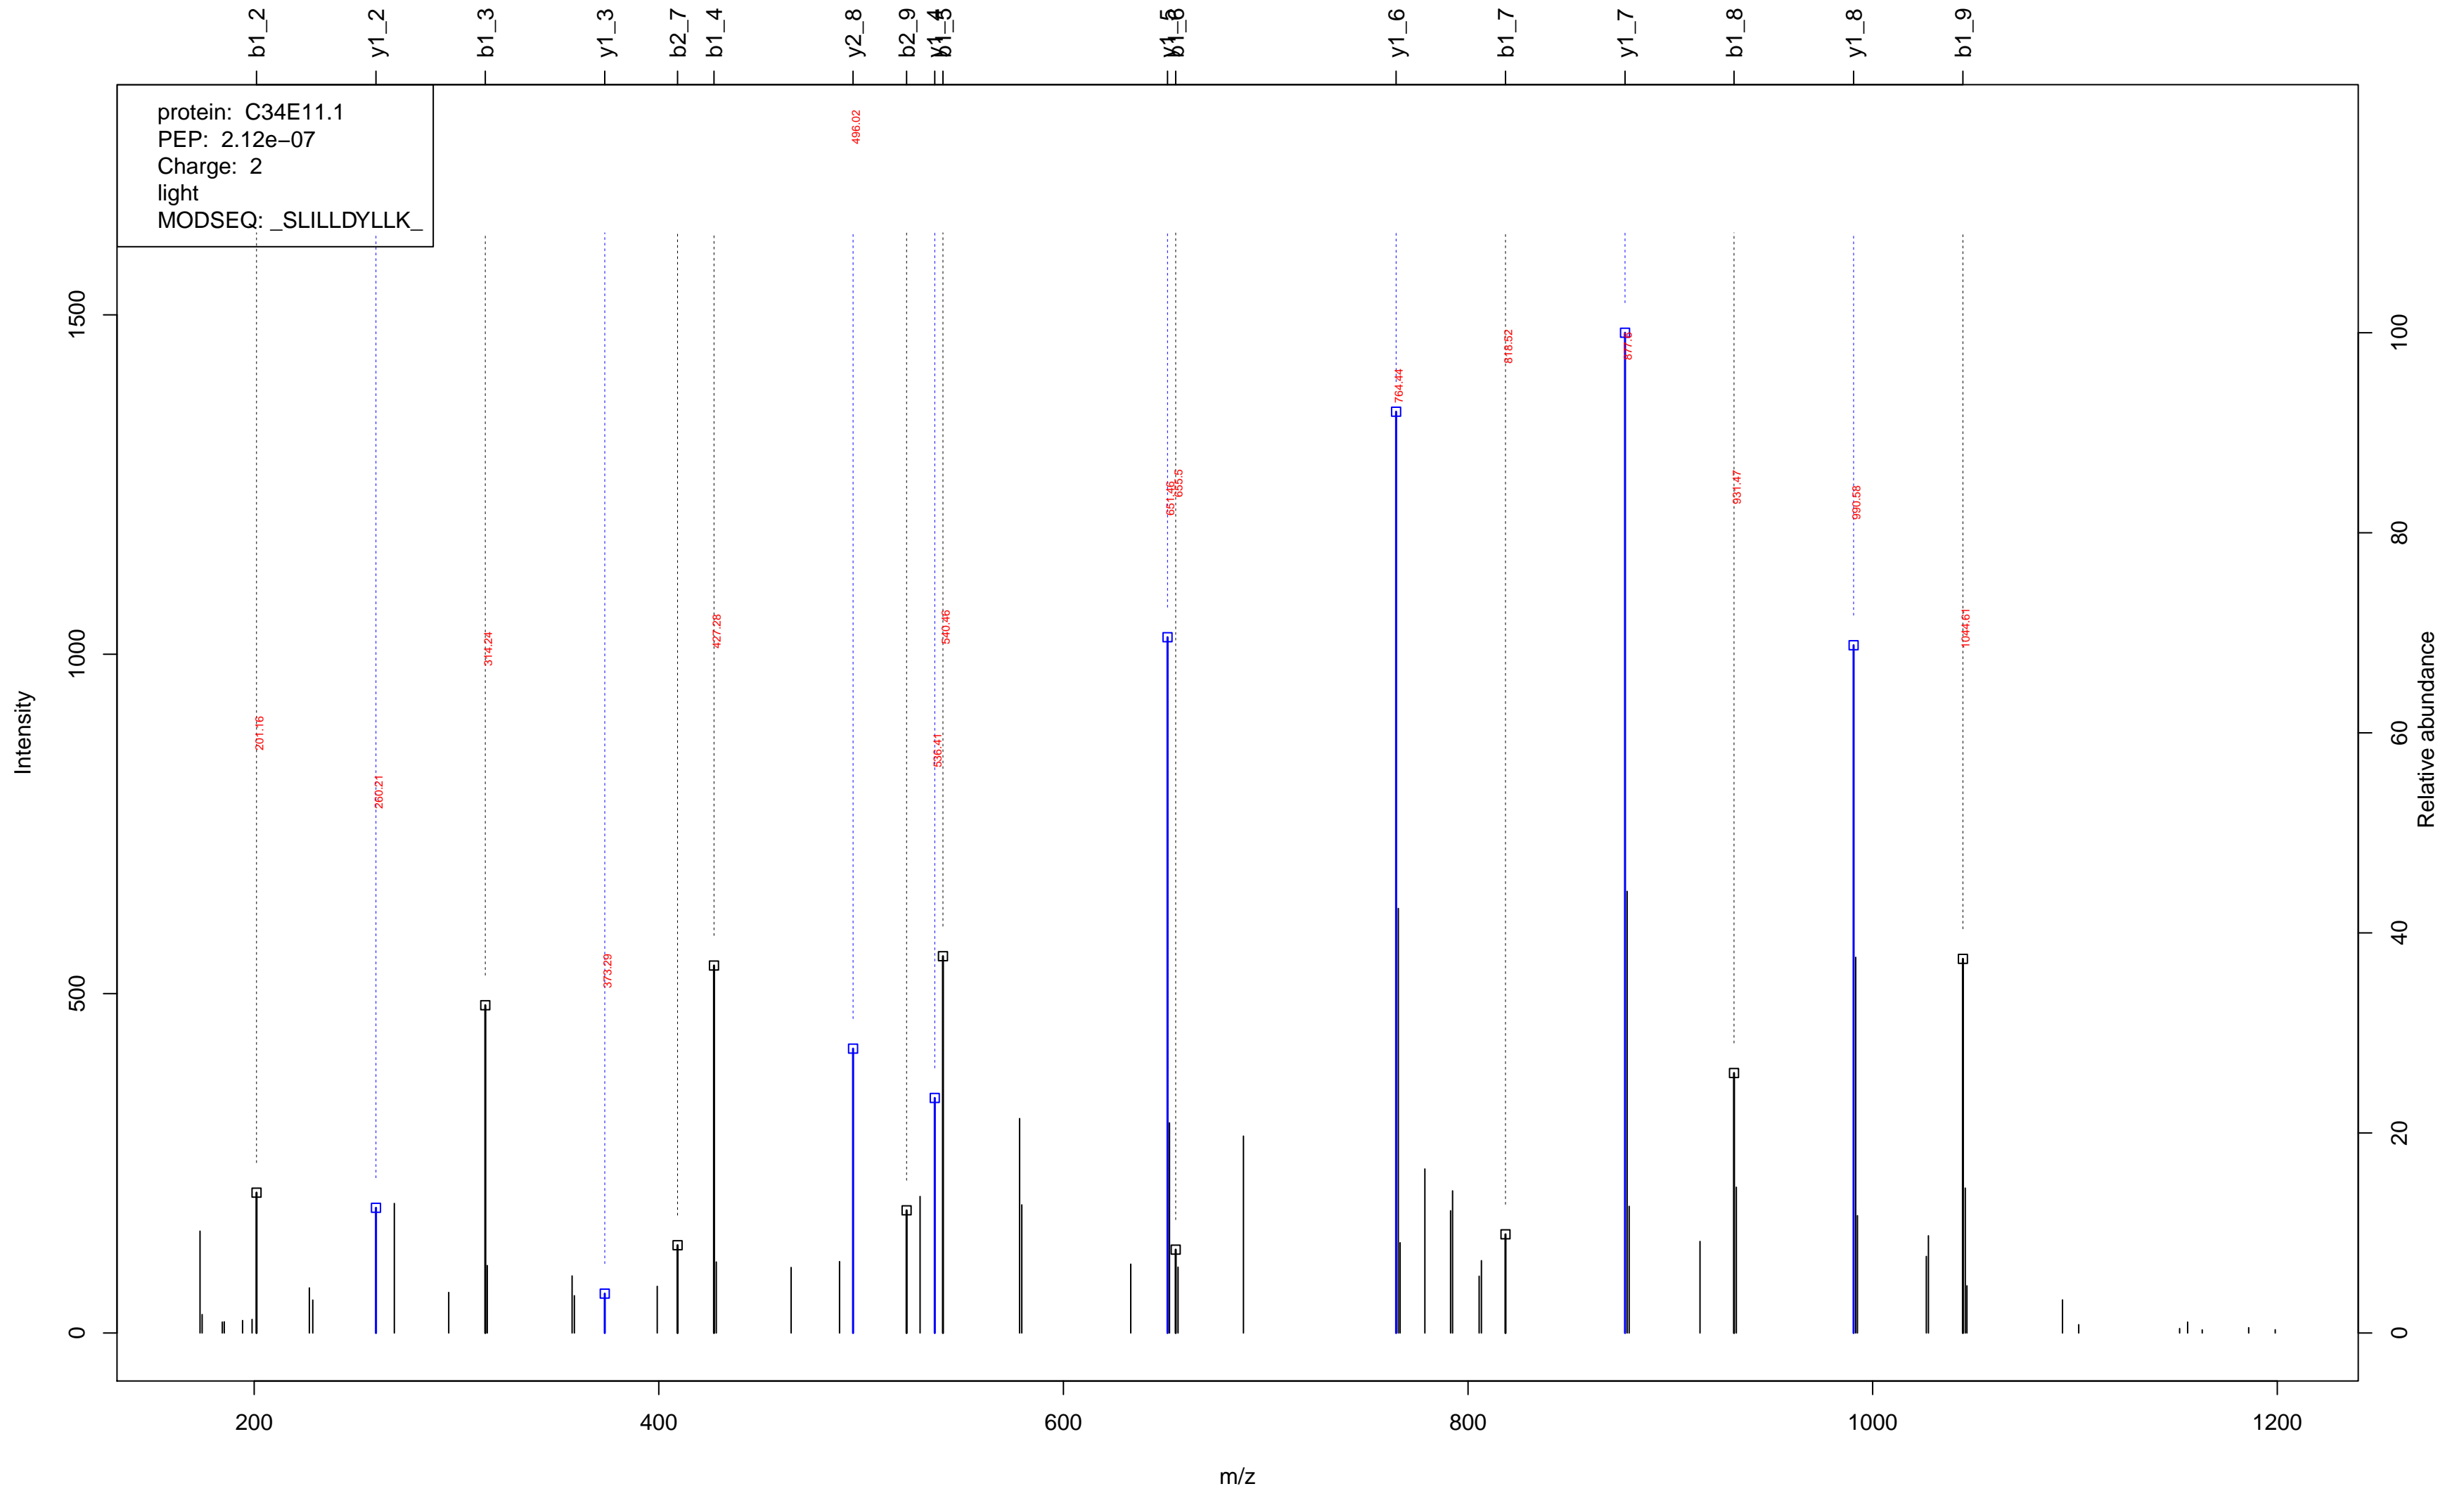

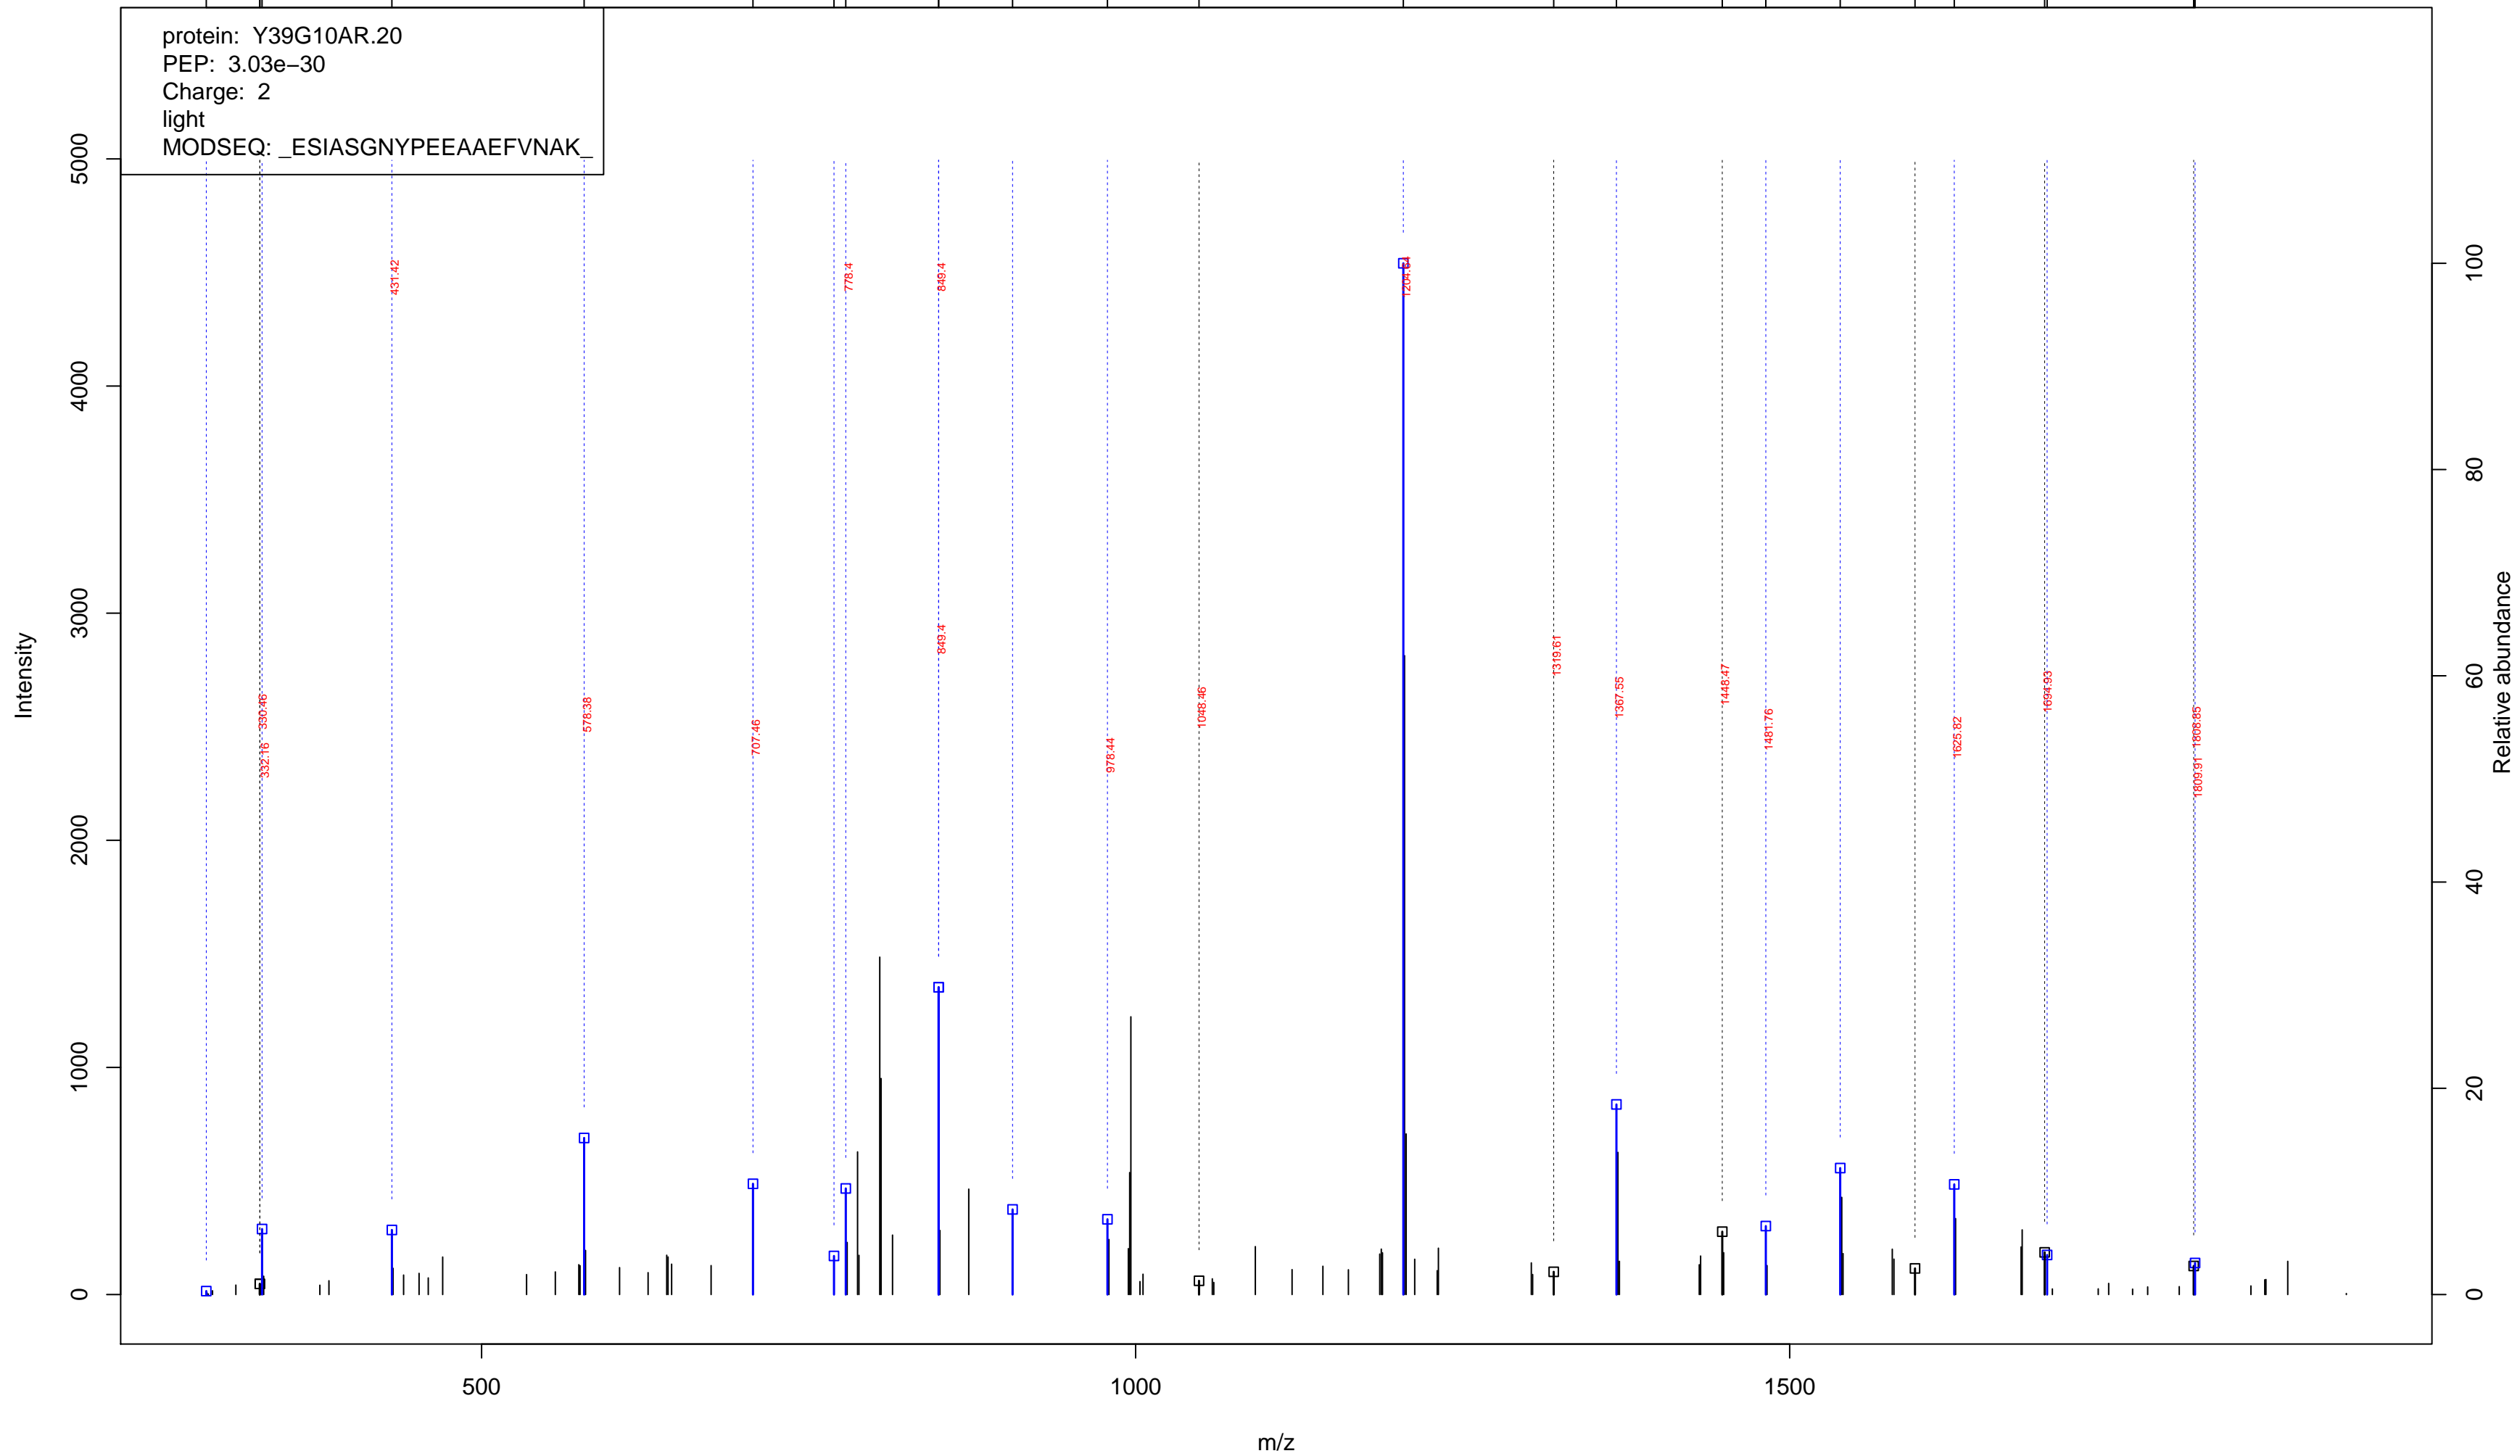

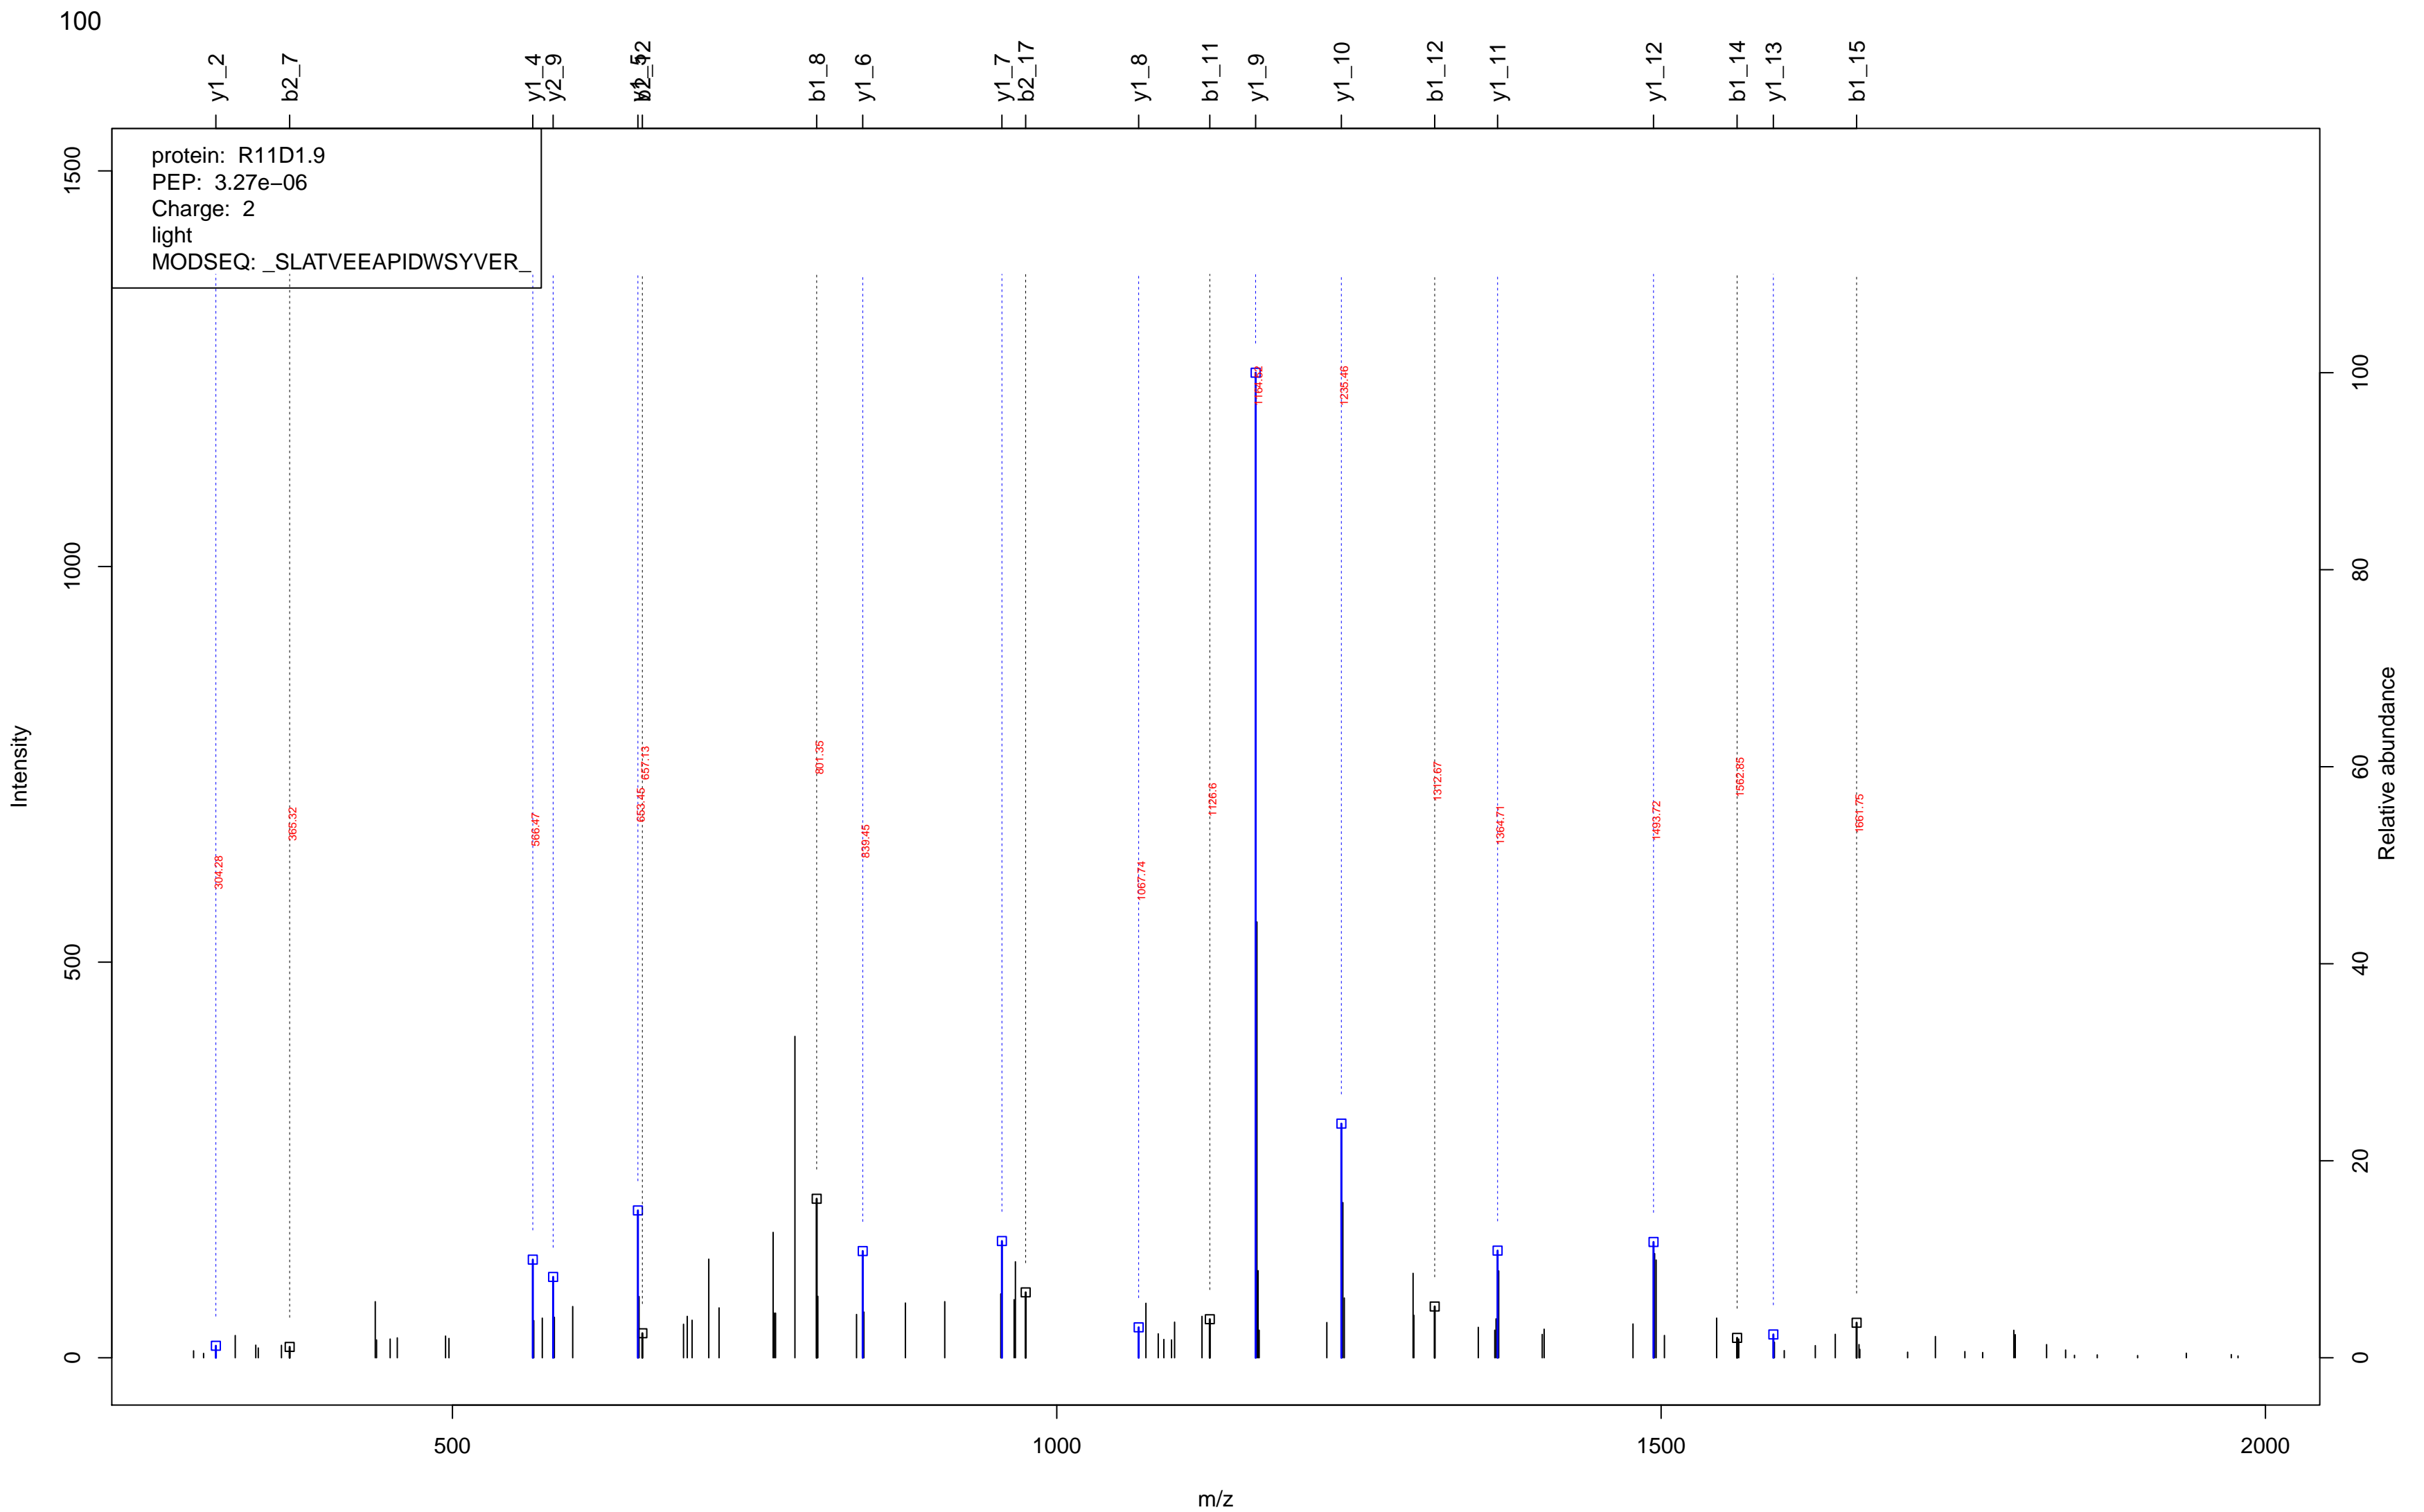

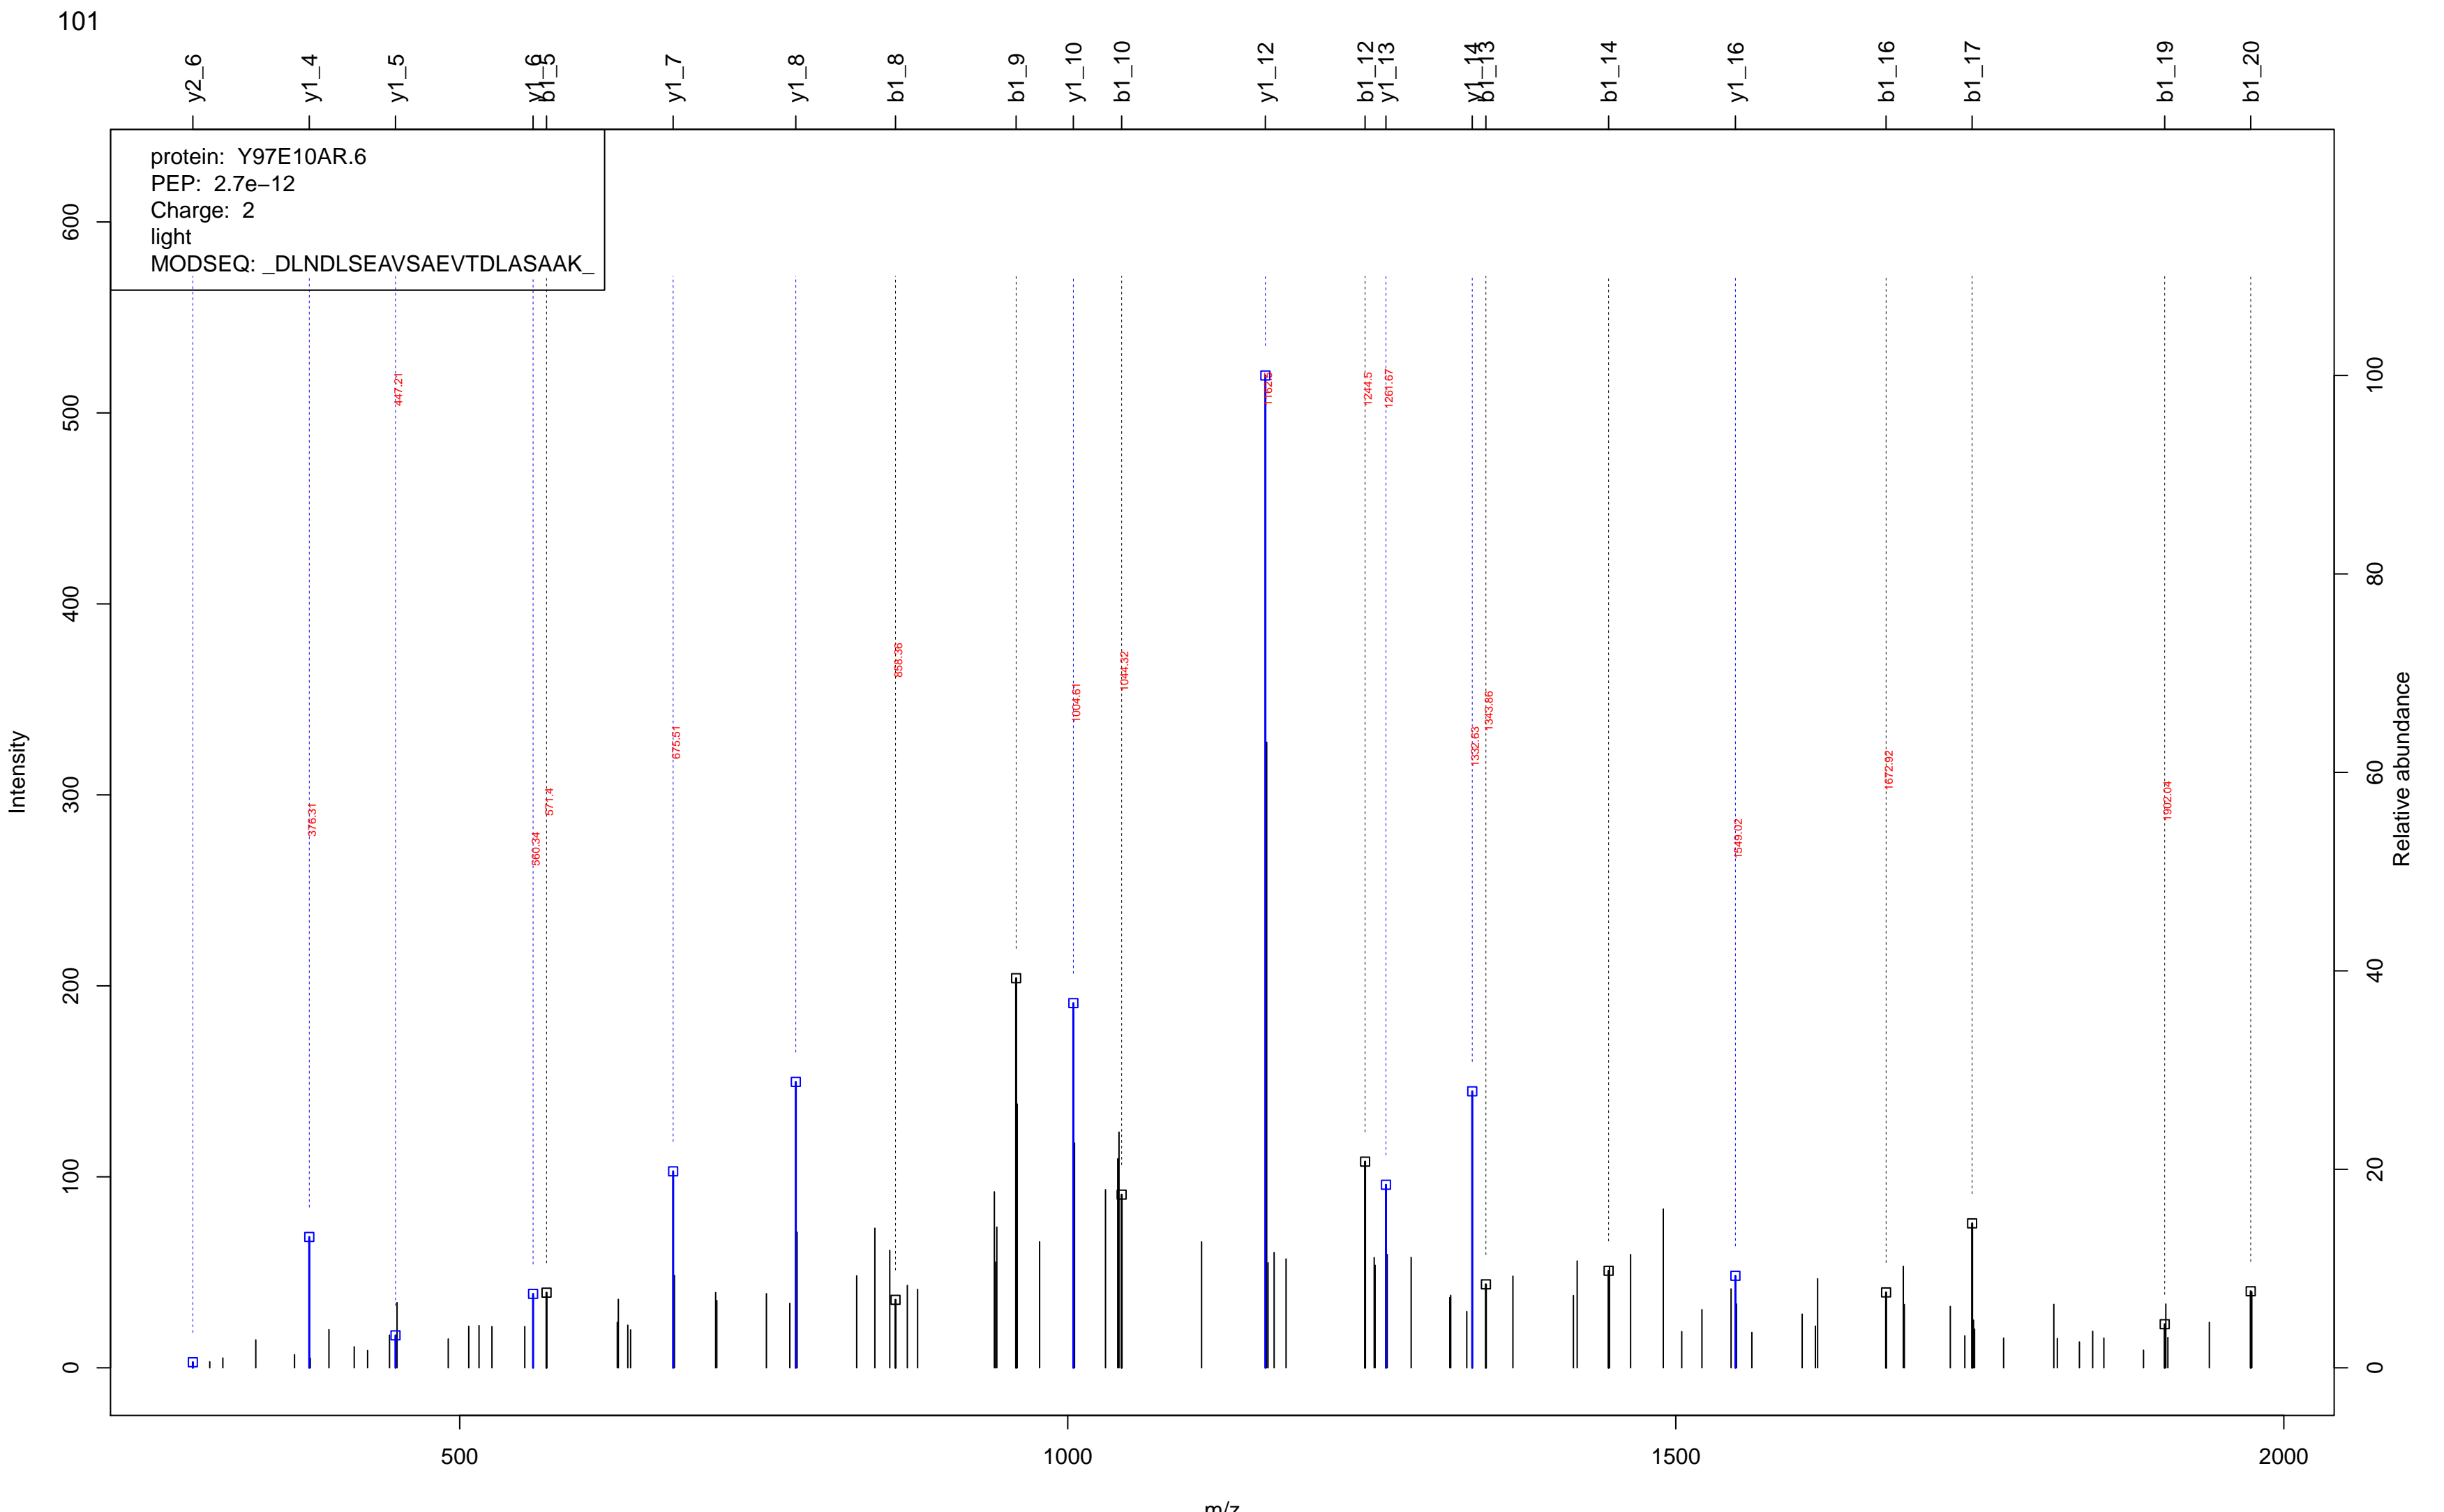

DLNDLSEAVSAEVTDLASAAK / File181846 Spectrum11375 scans: 6948 [S:/p743/Proteomics/ORBI\_2/cpanse\_20160211\_peakplot/20130320\_40\_3Biol\_1BiochL4N2h\_26to28.RAW]

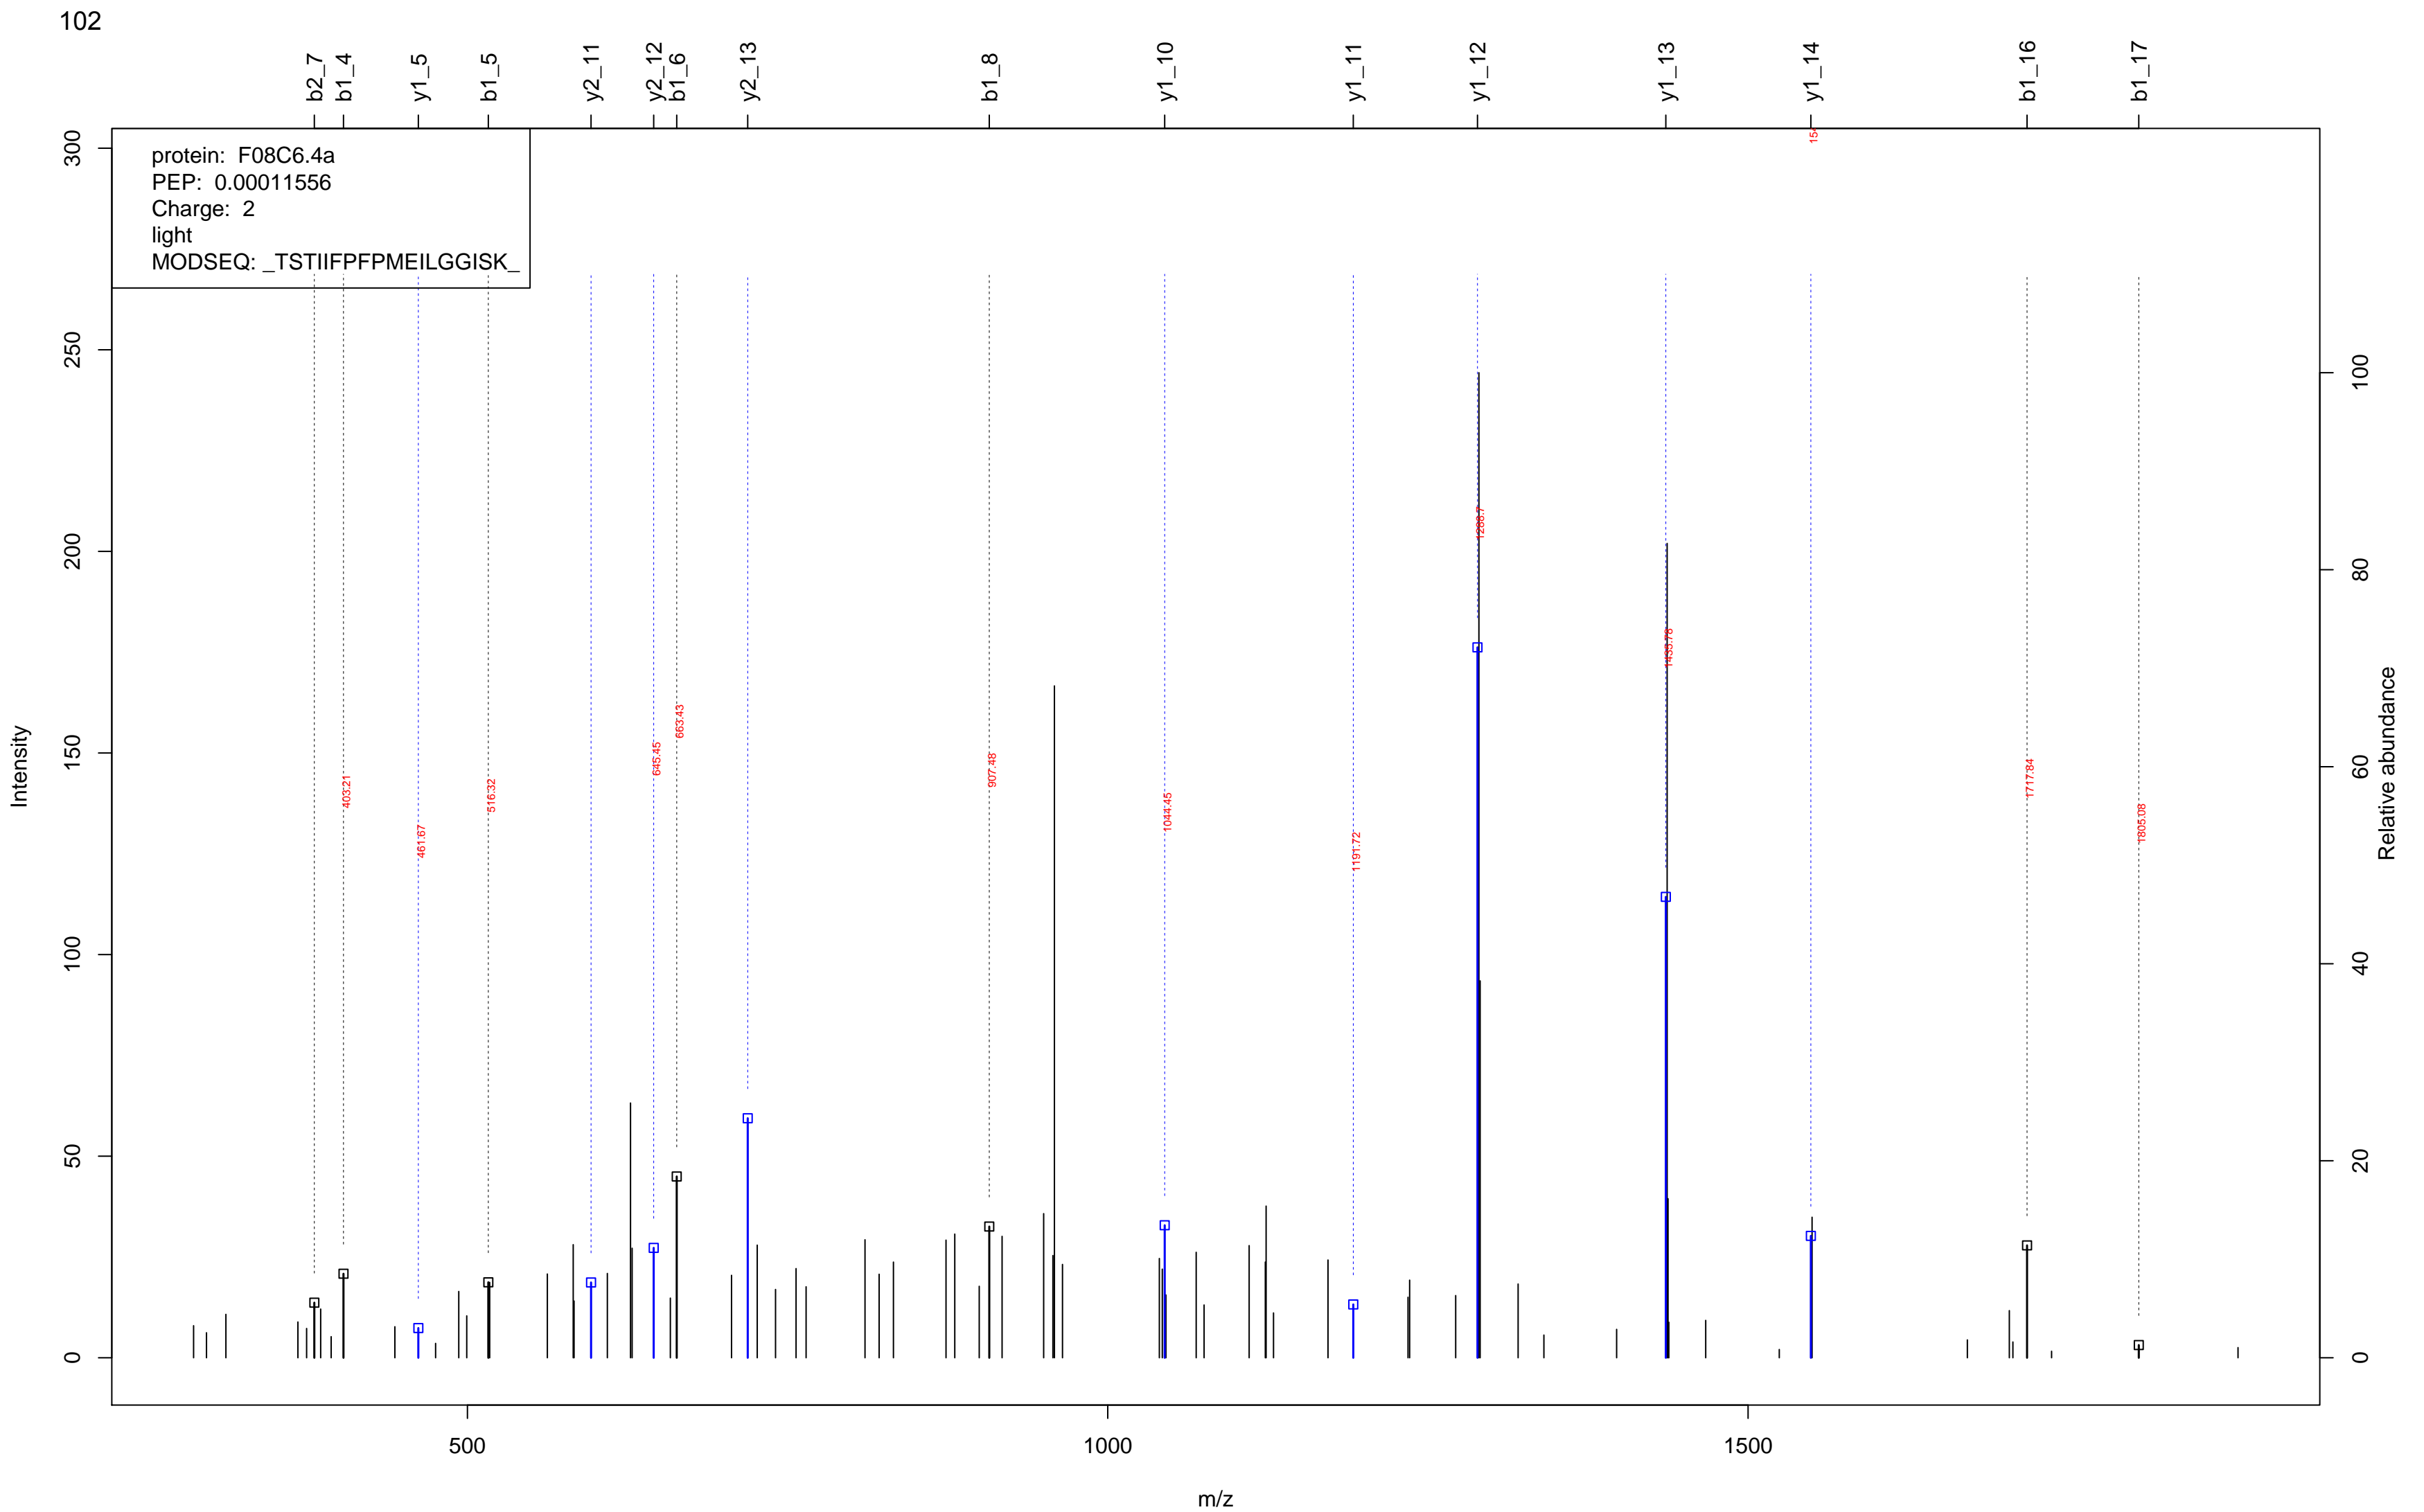

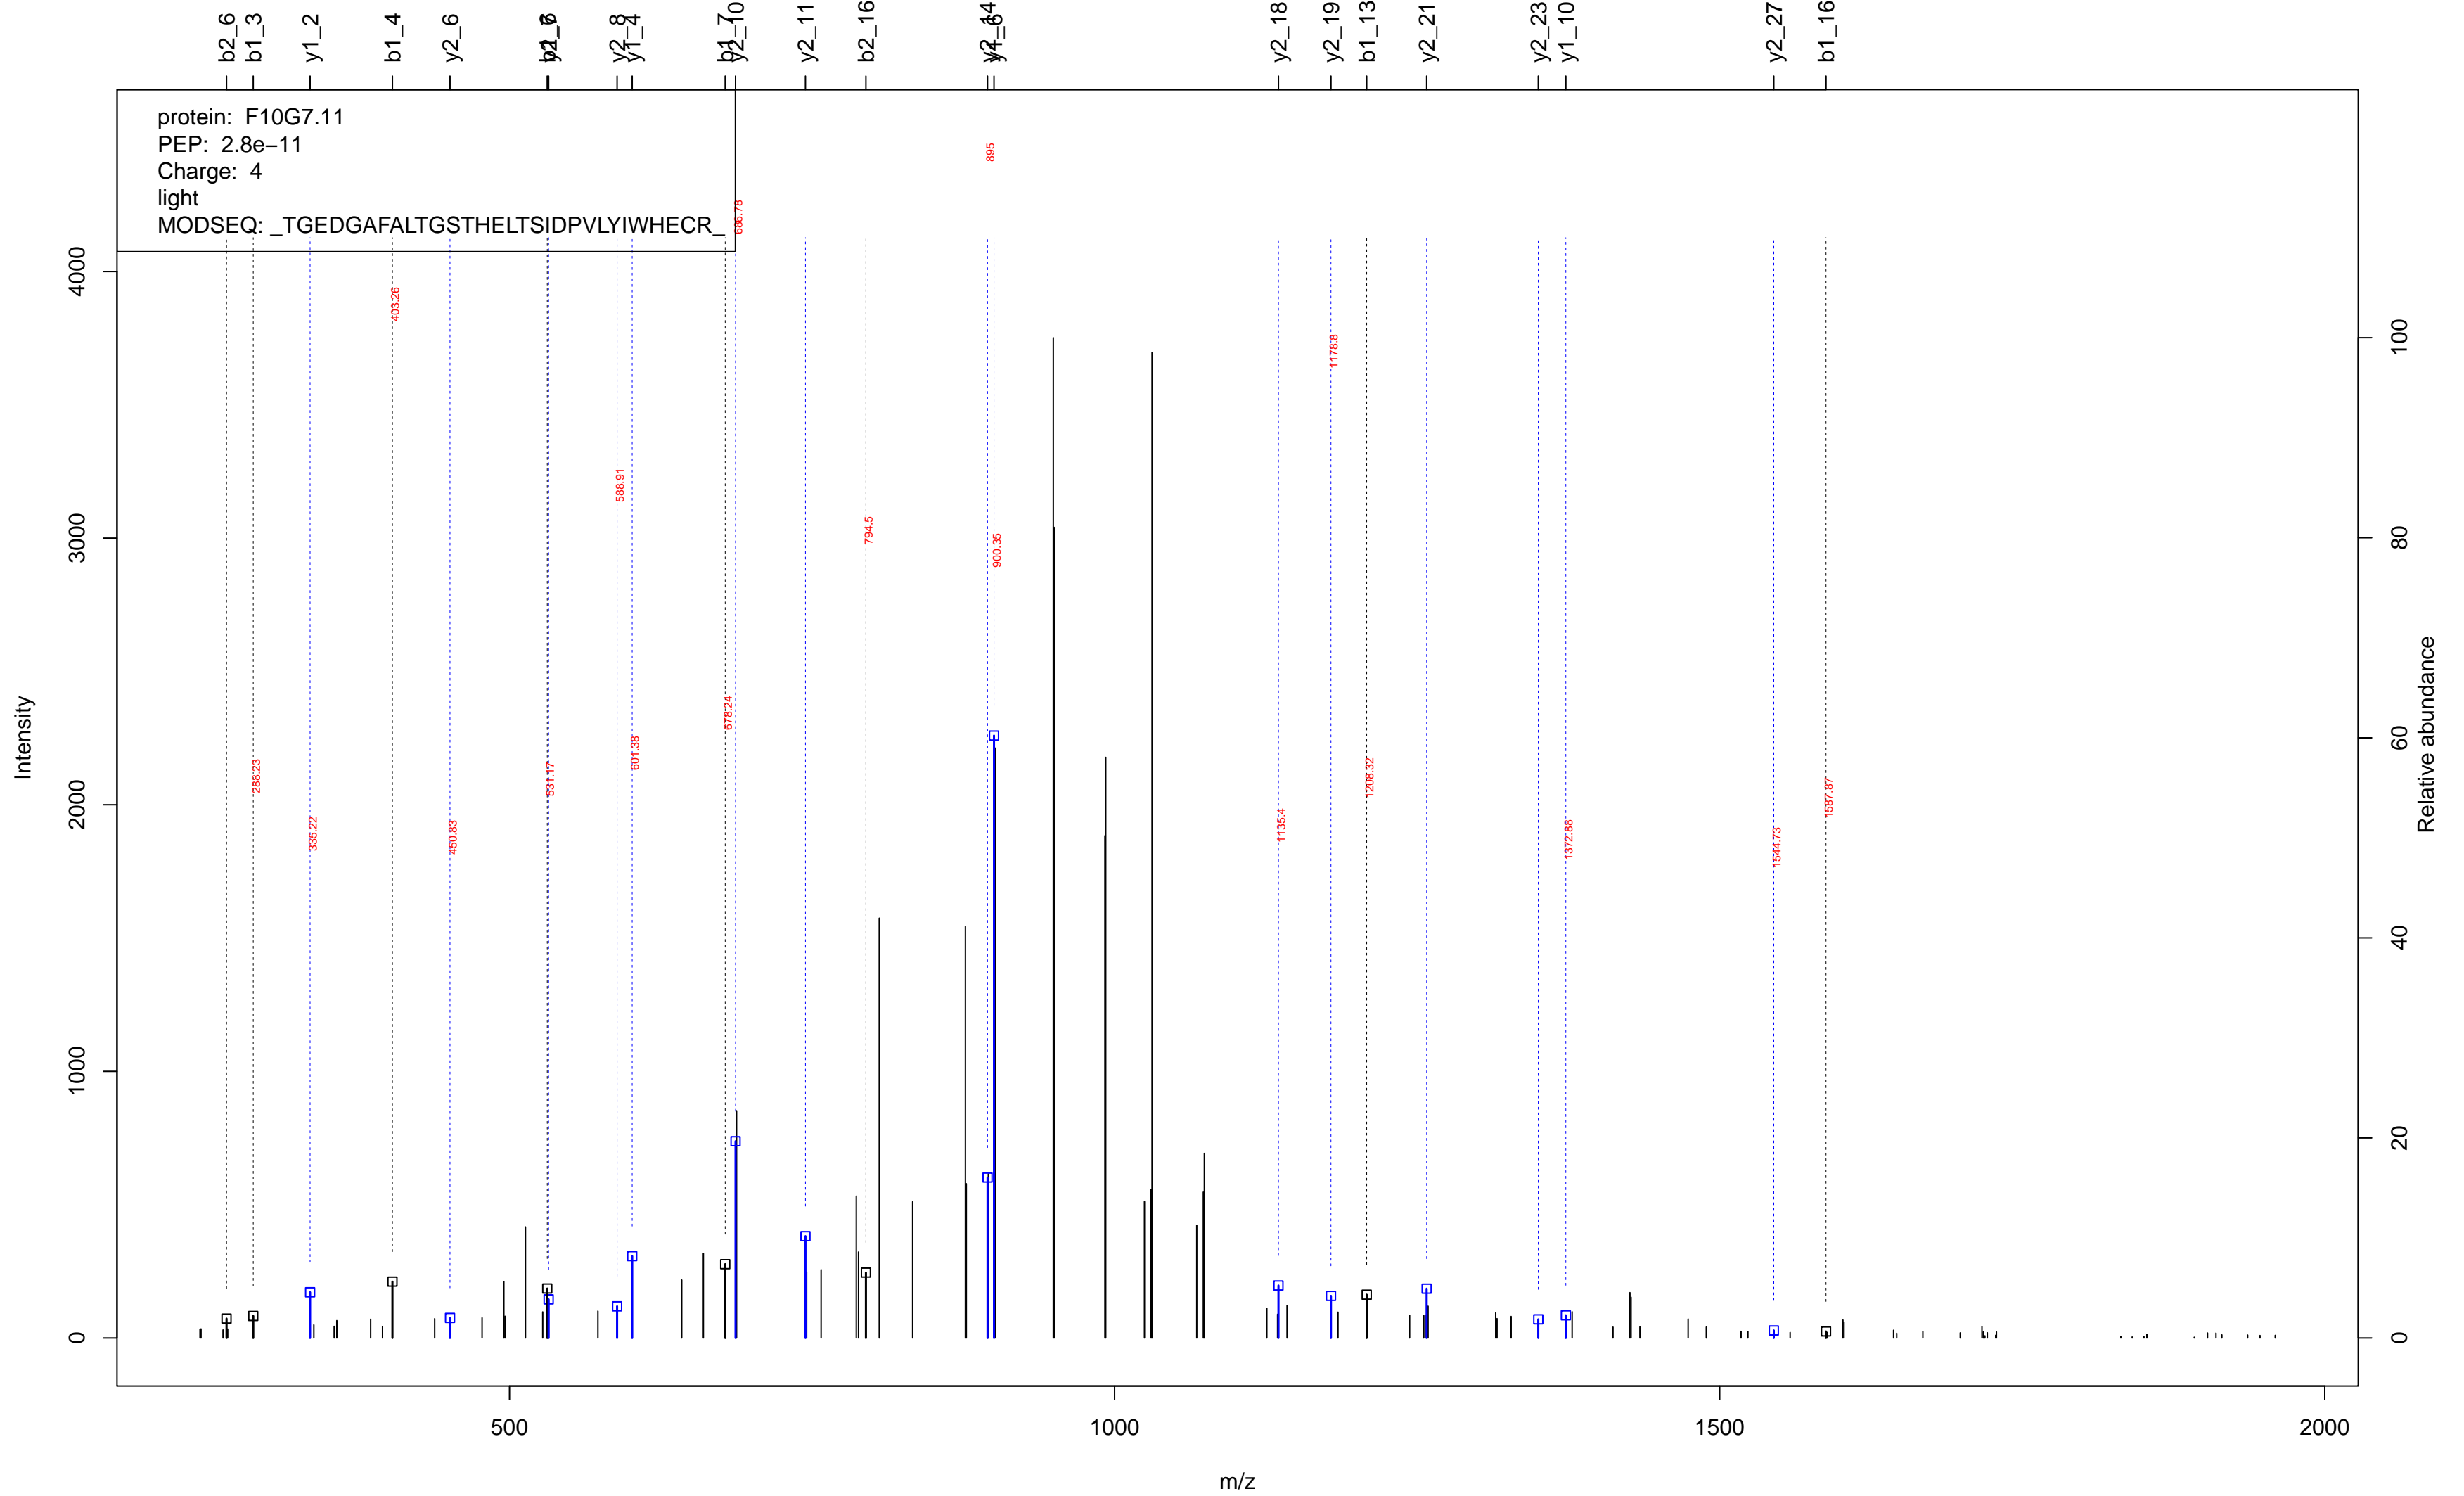

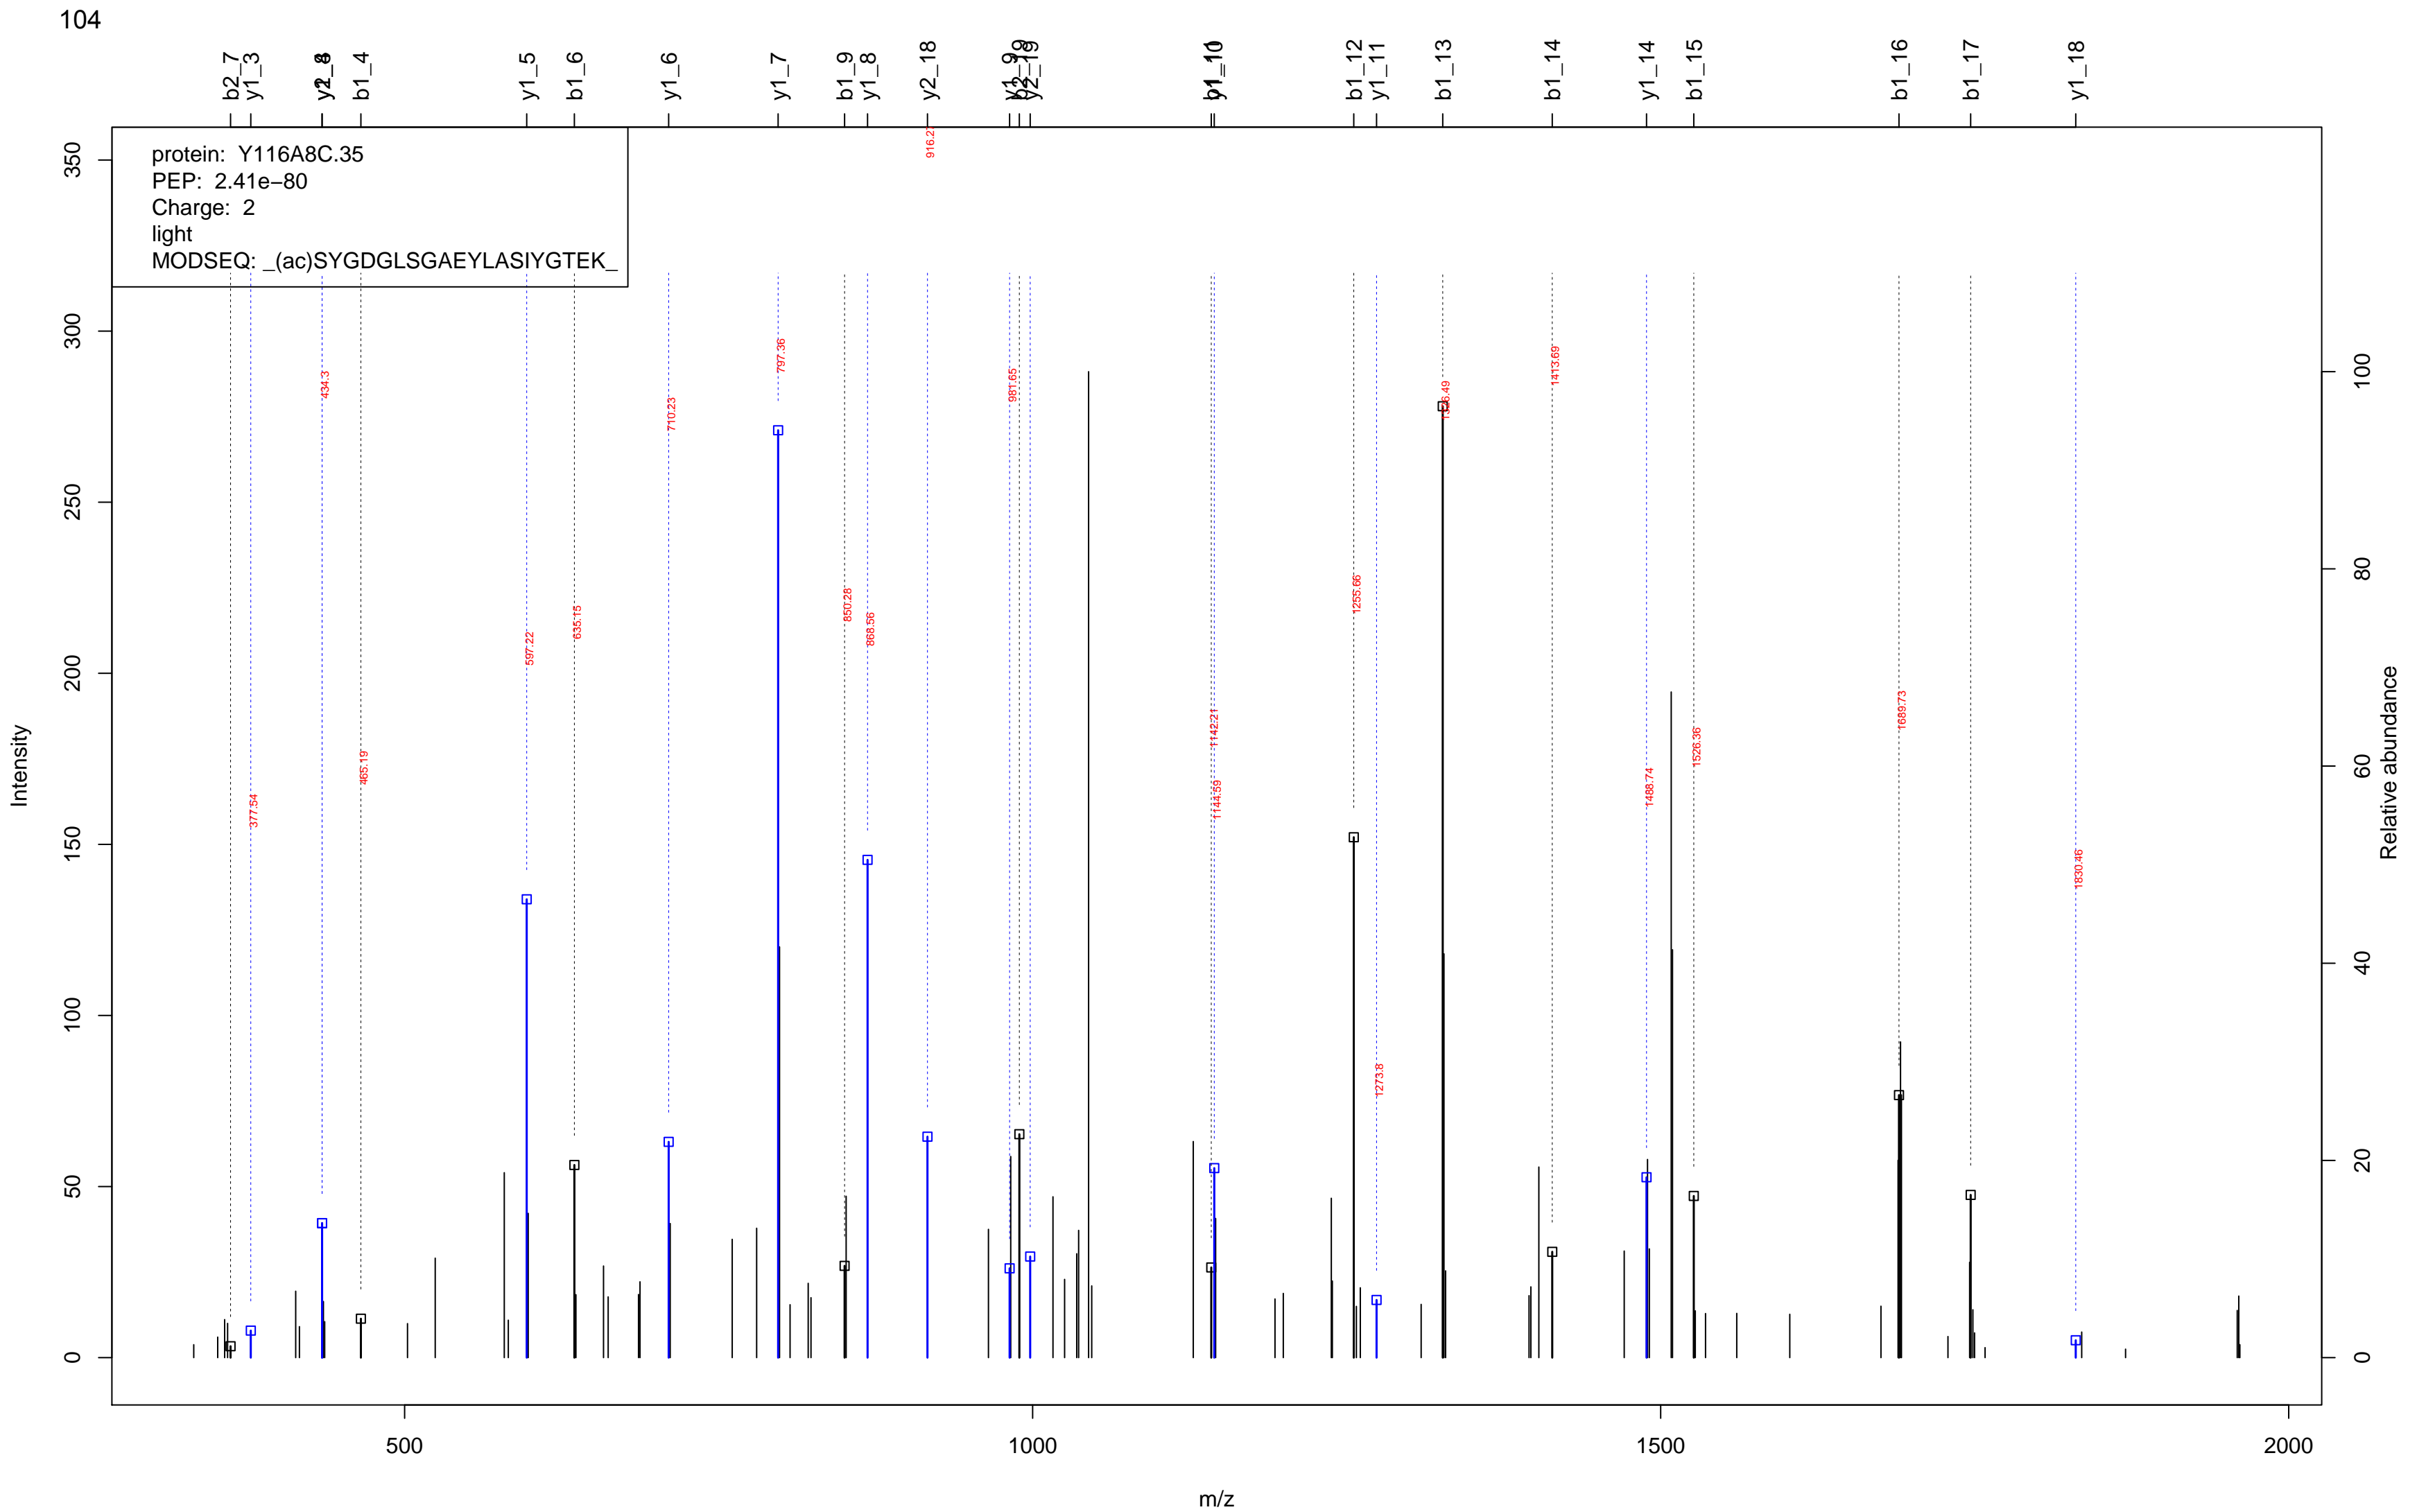



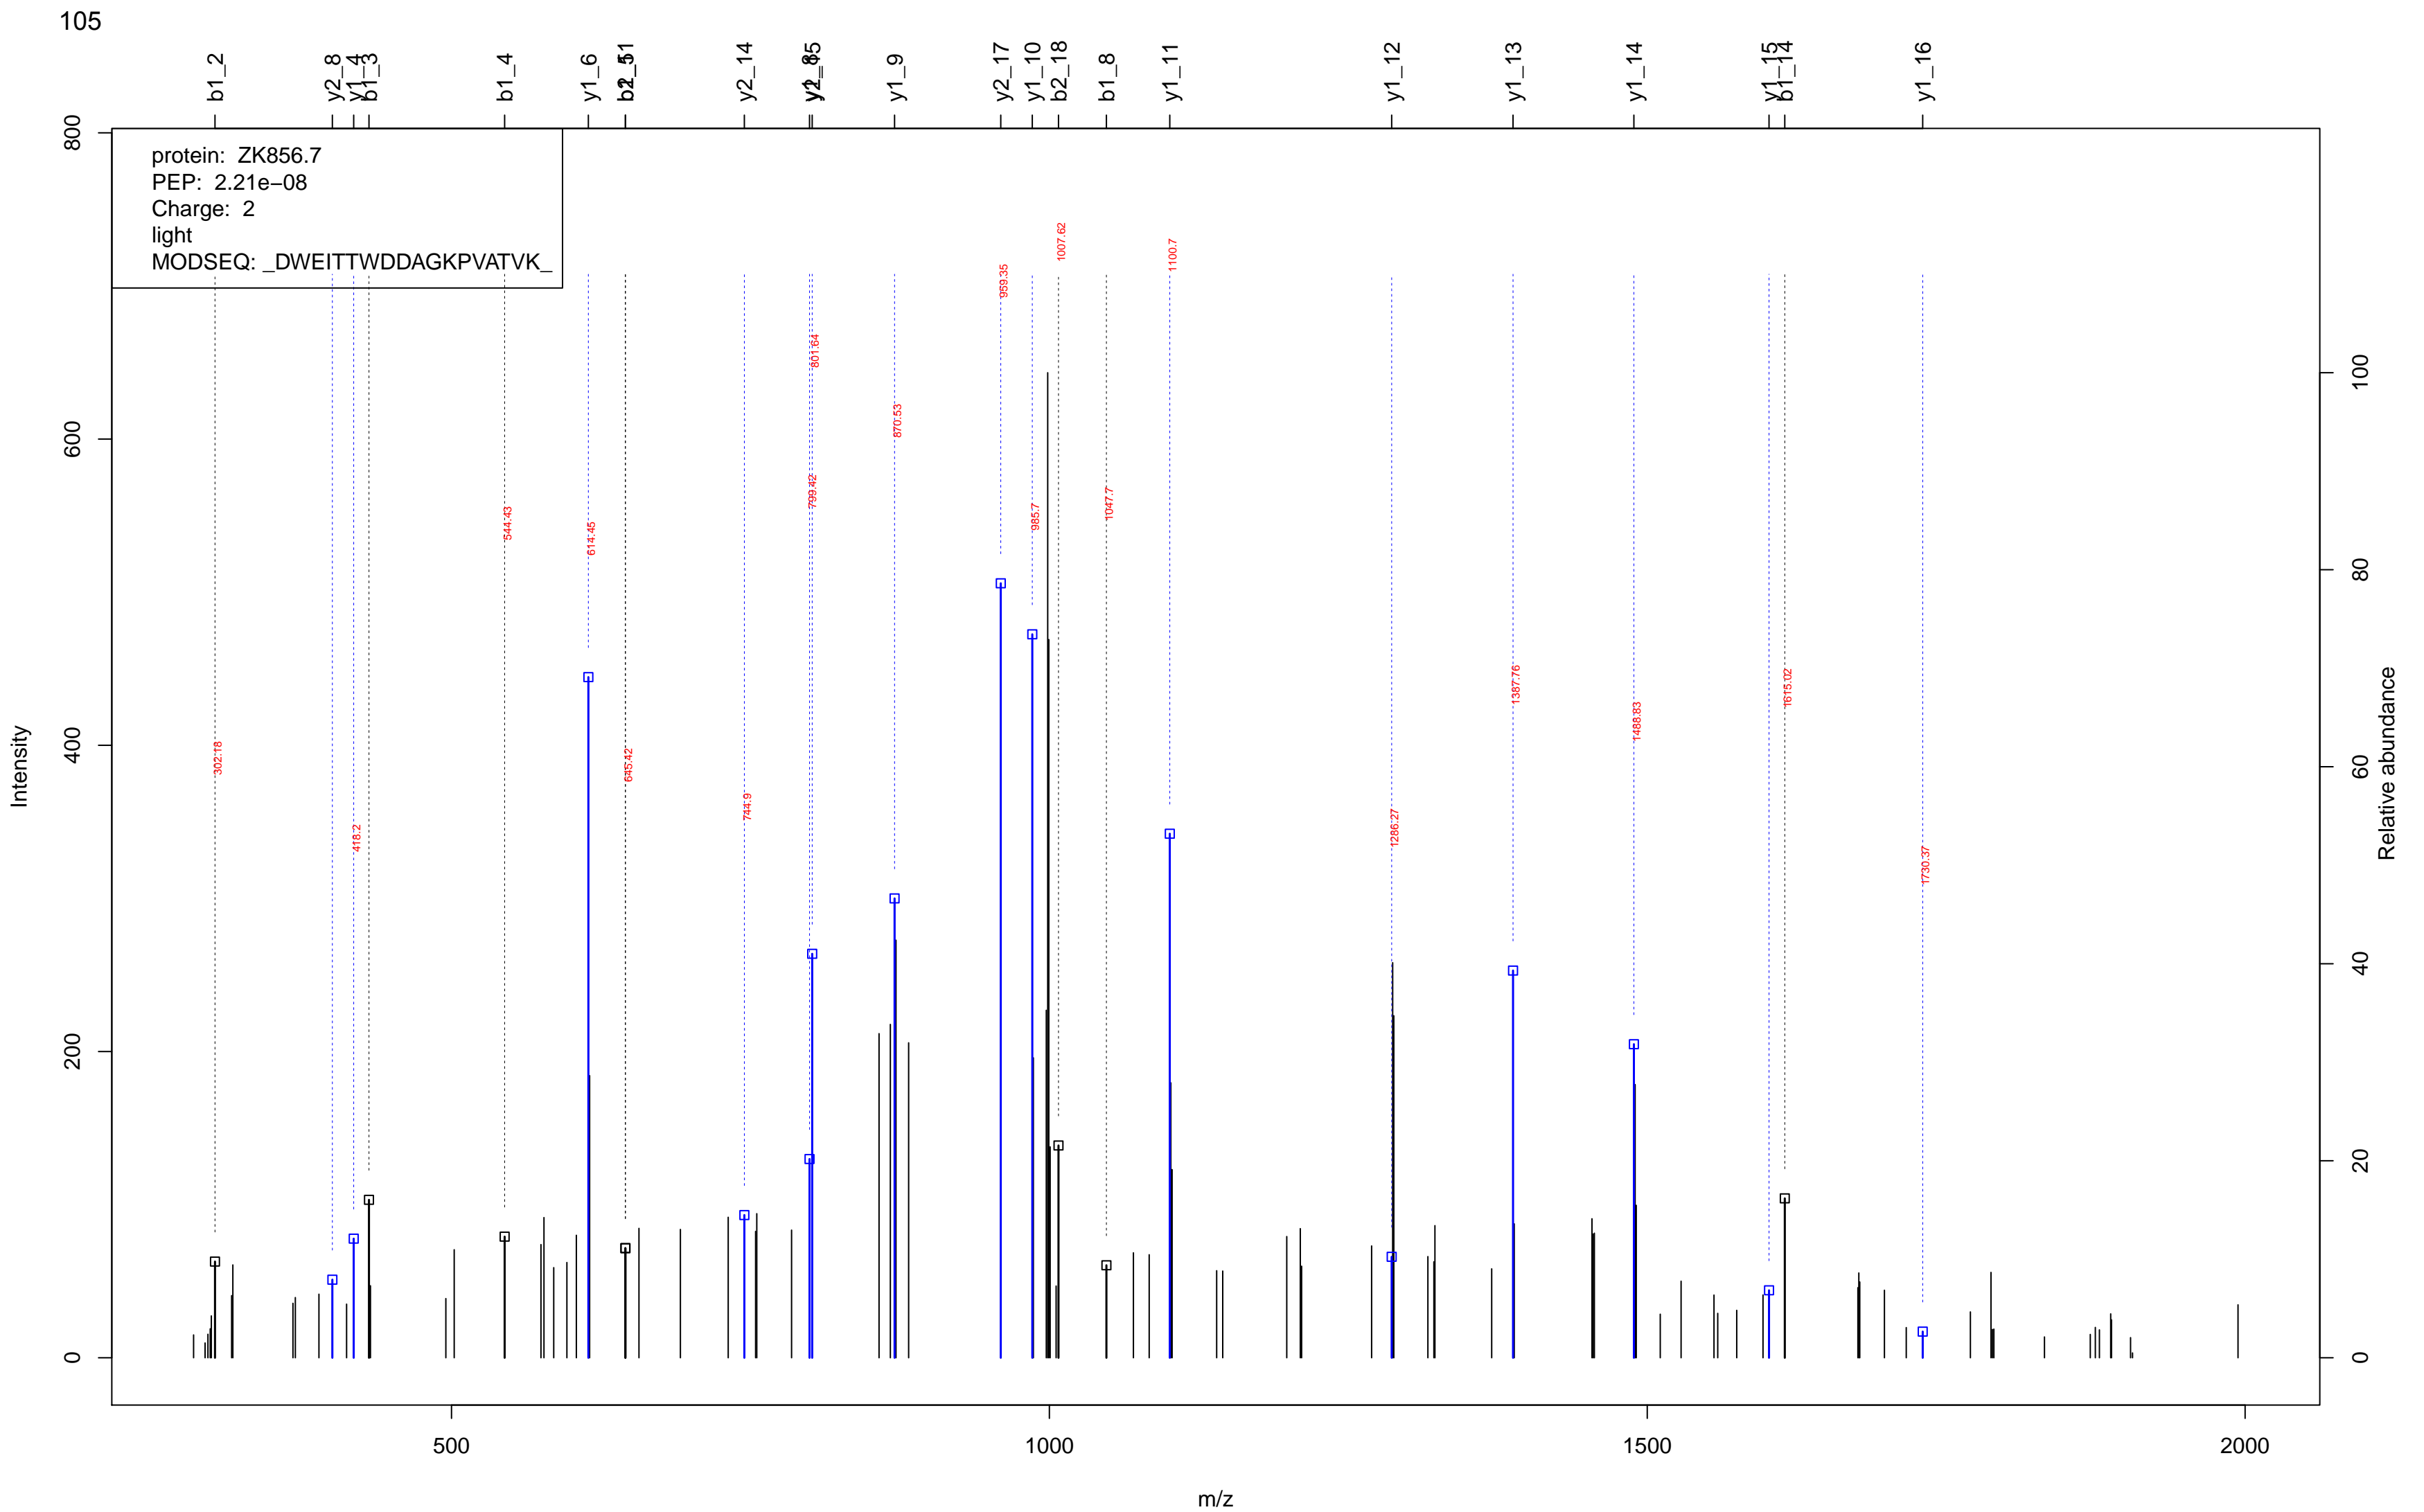

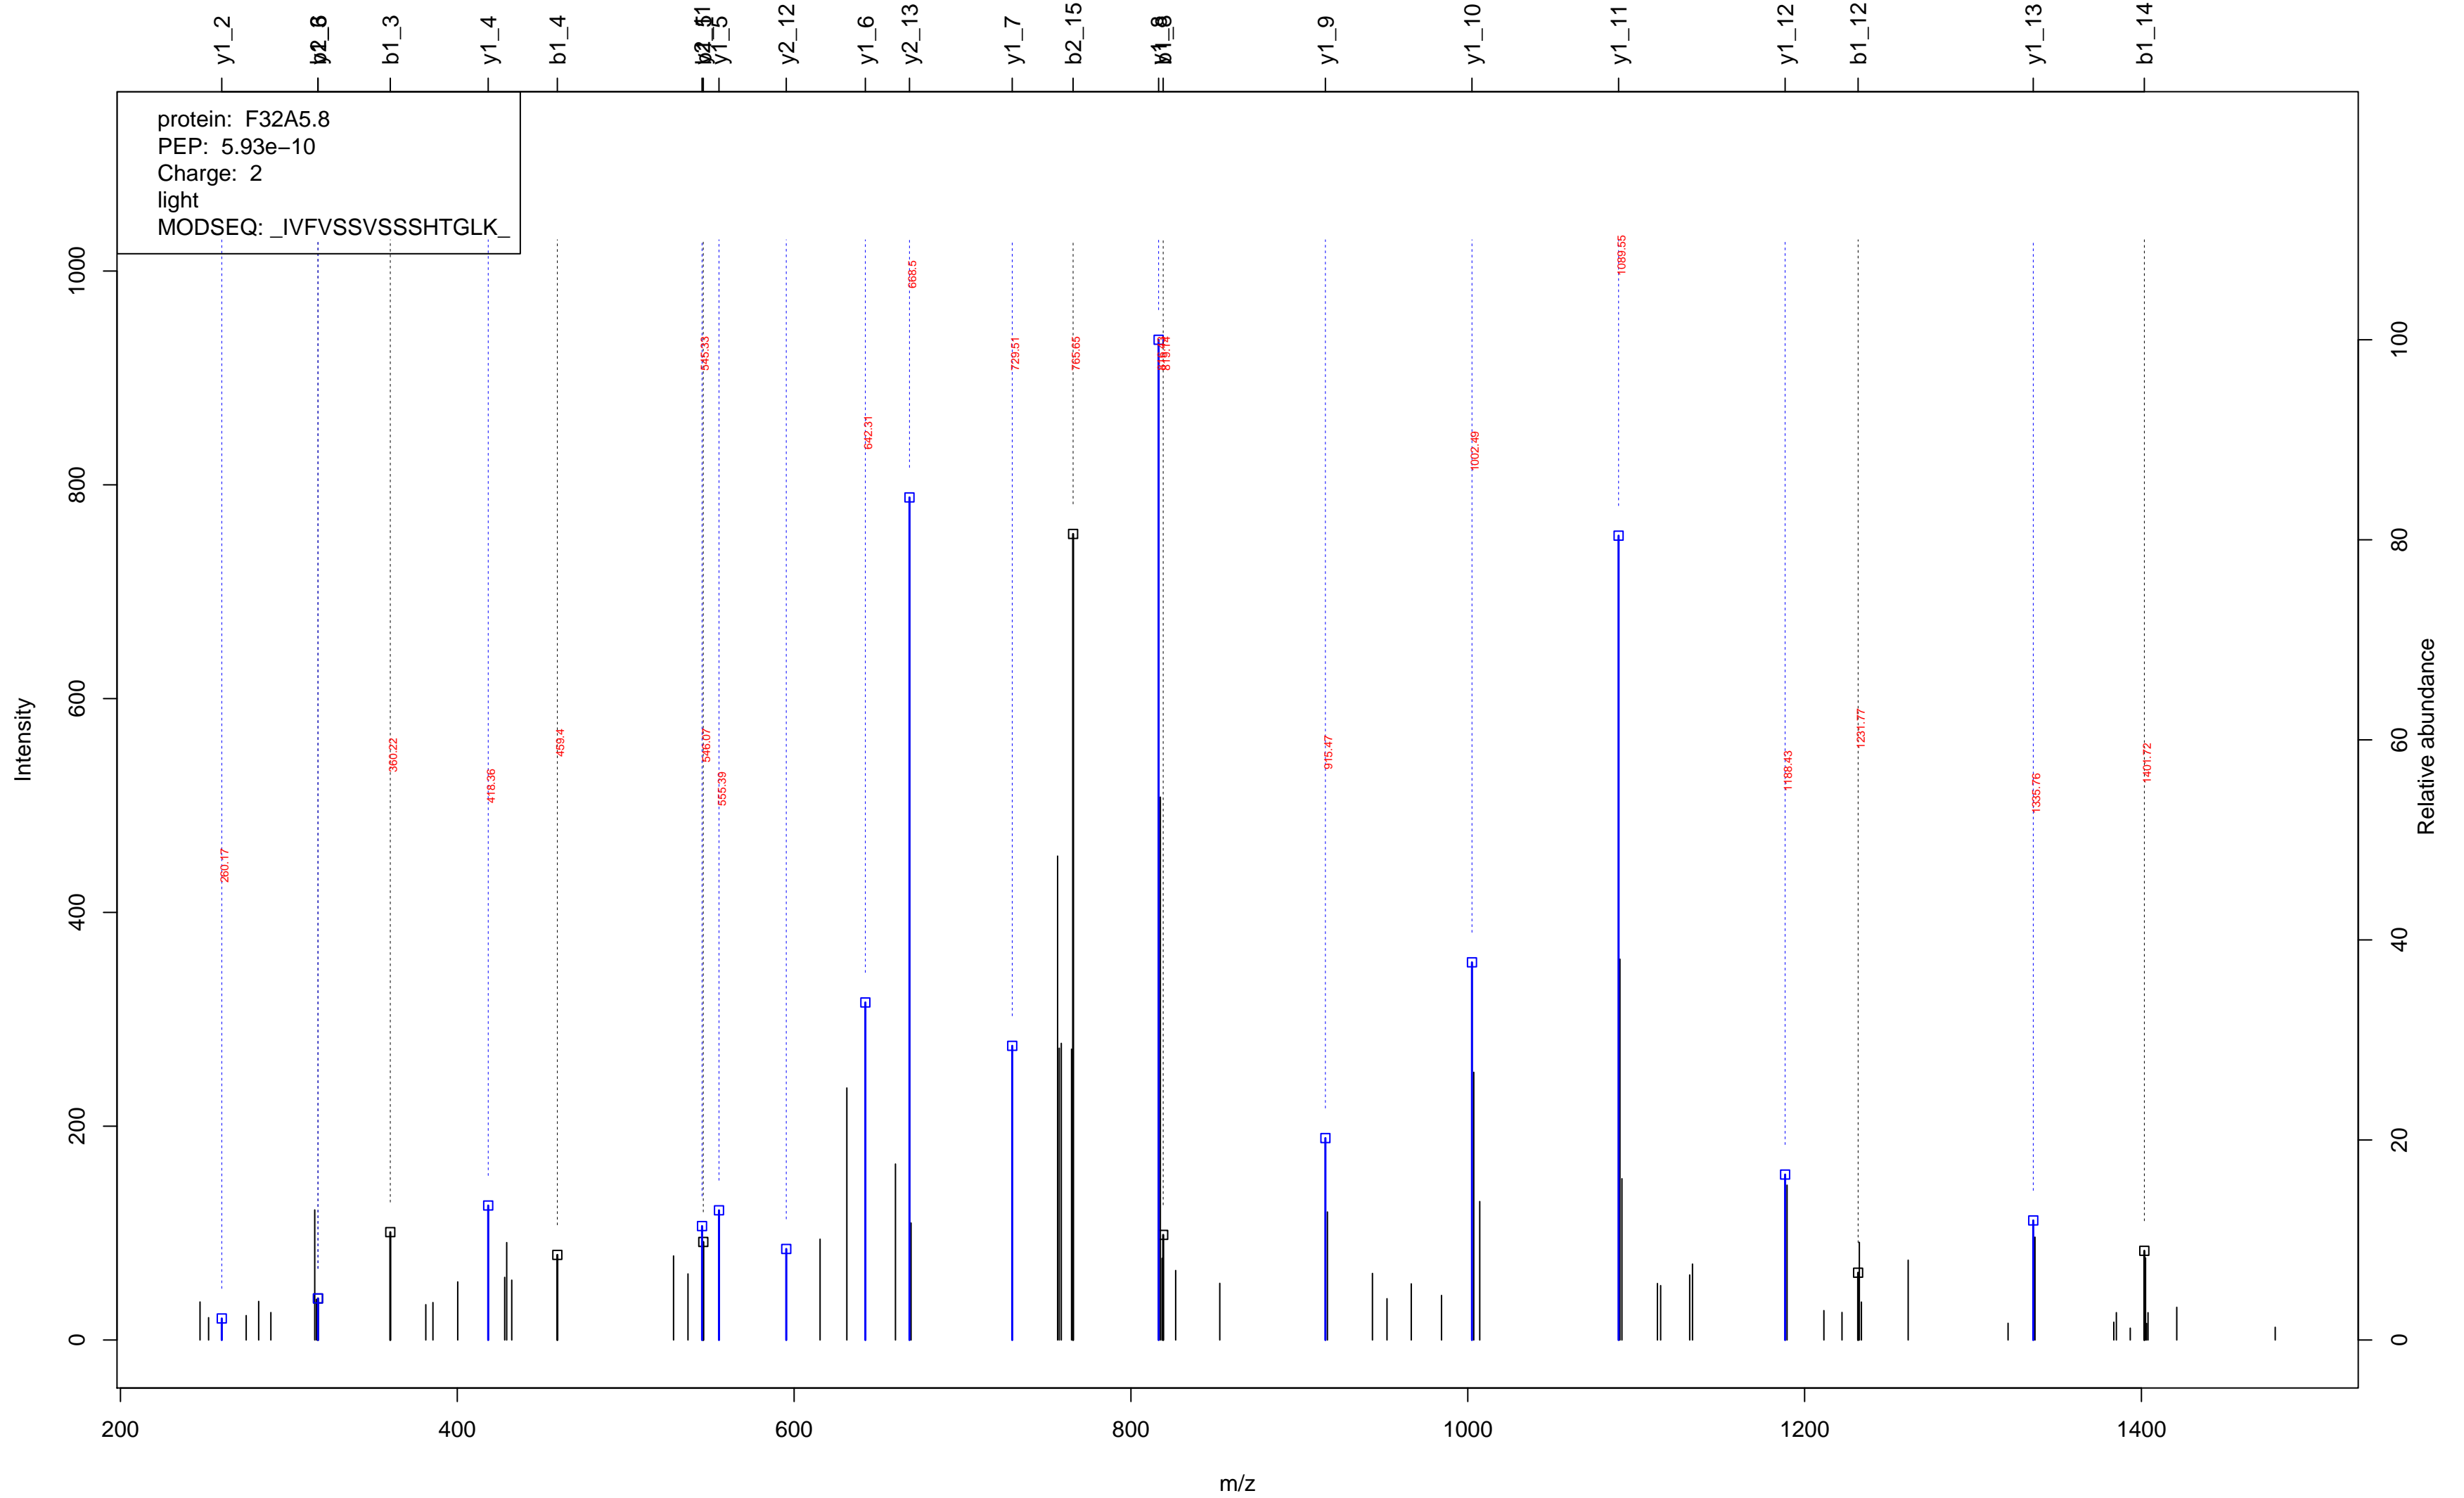

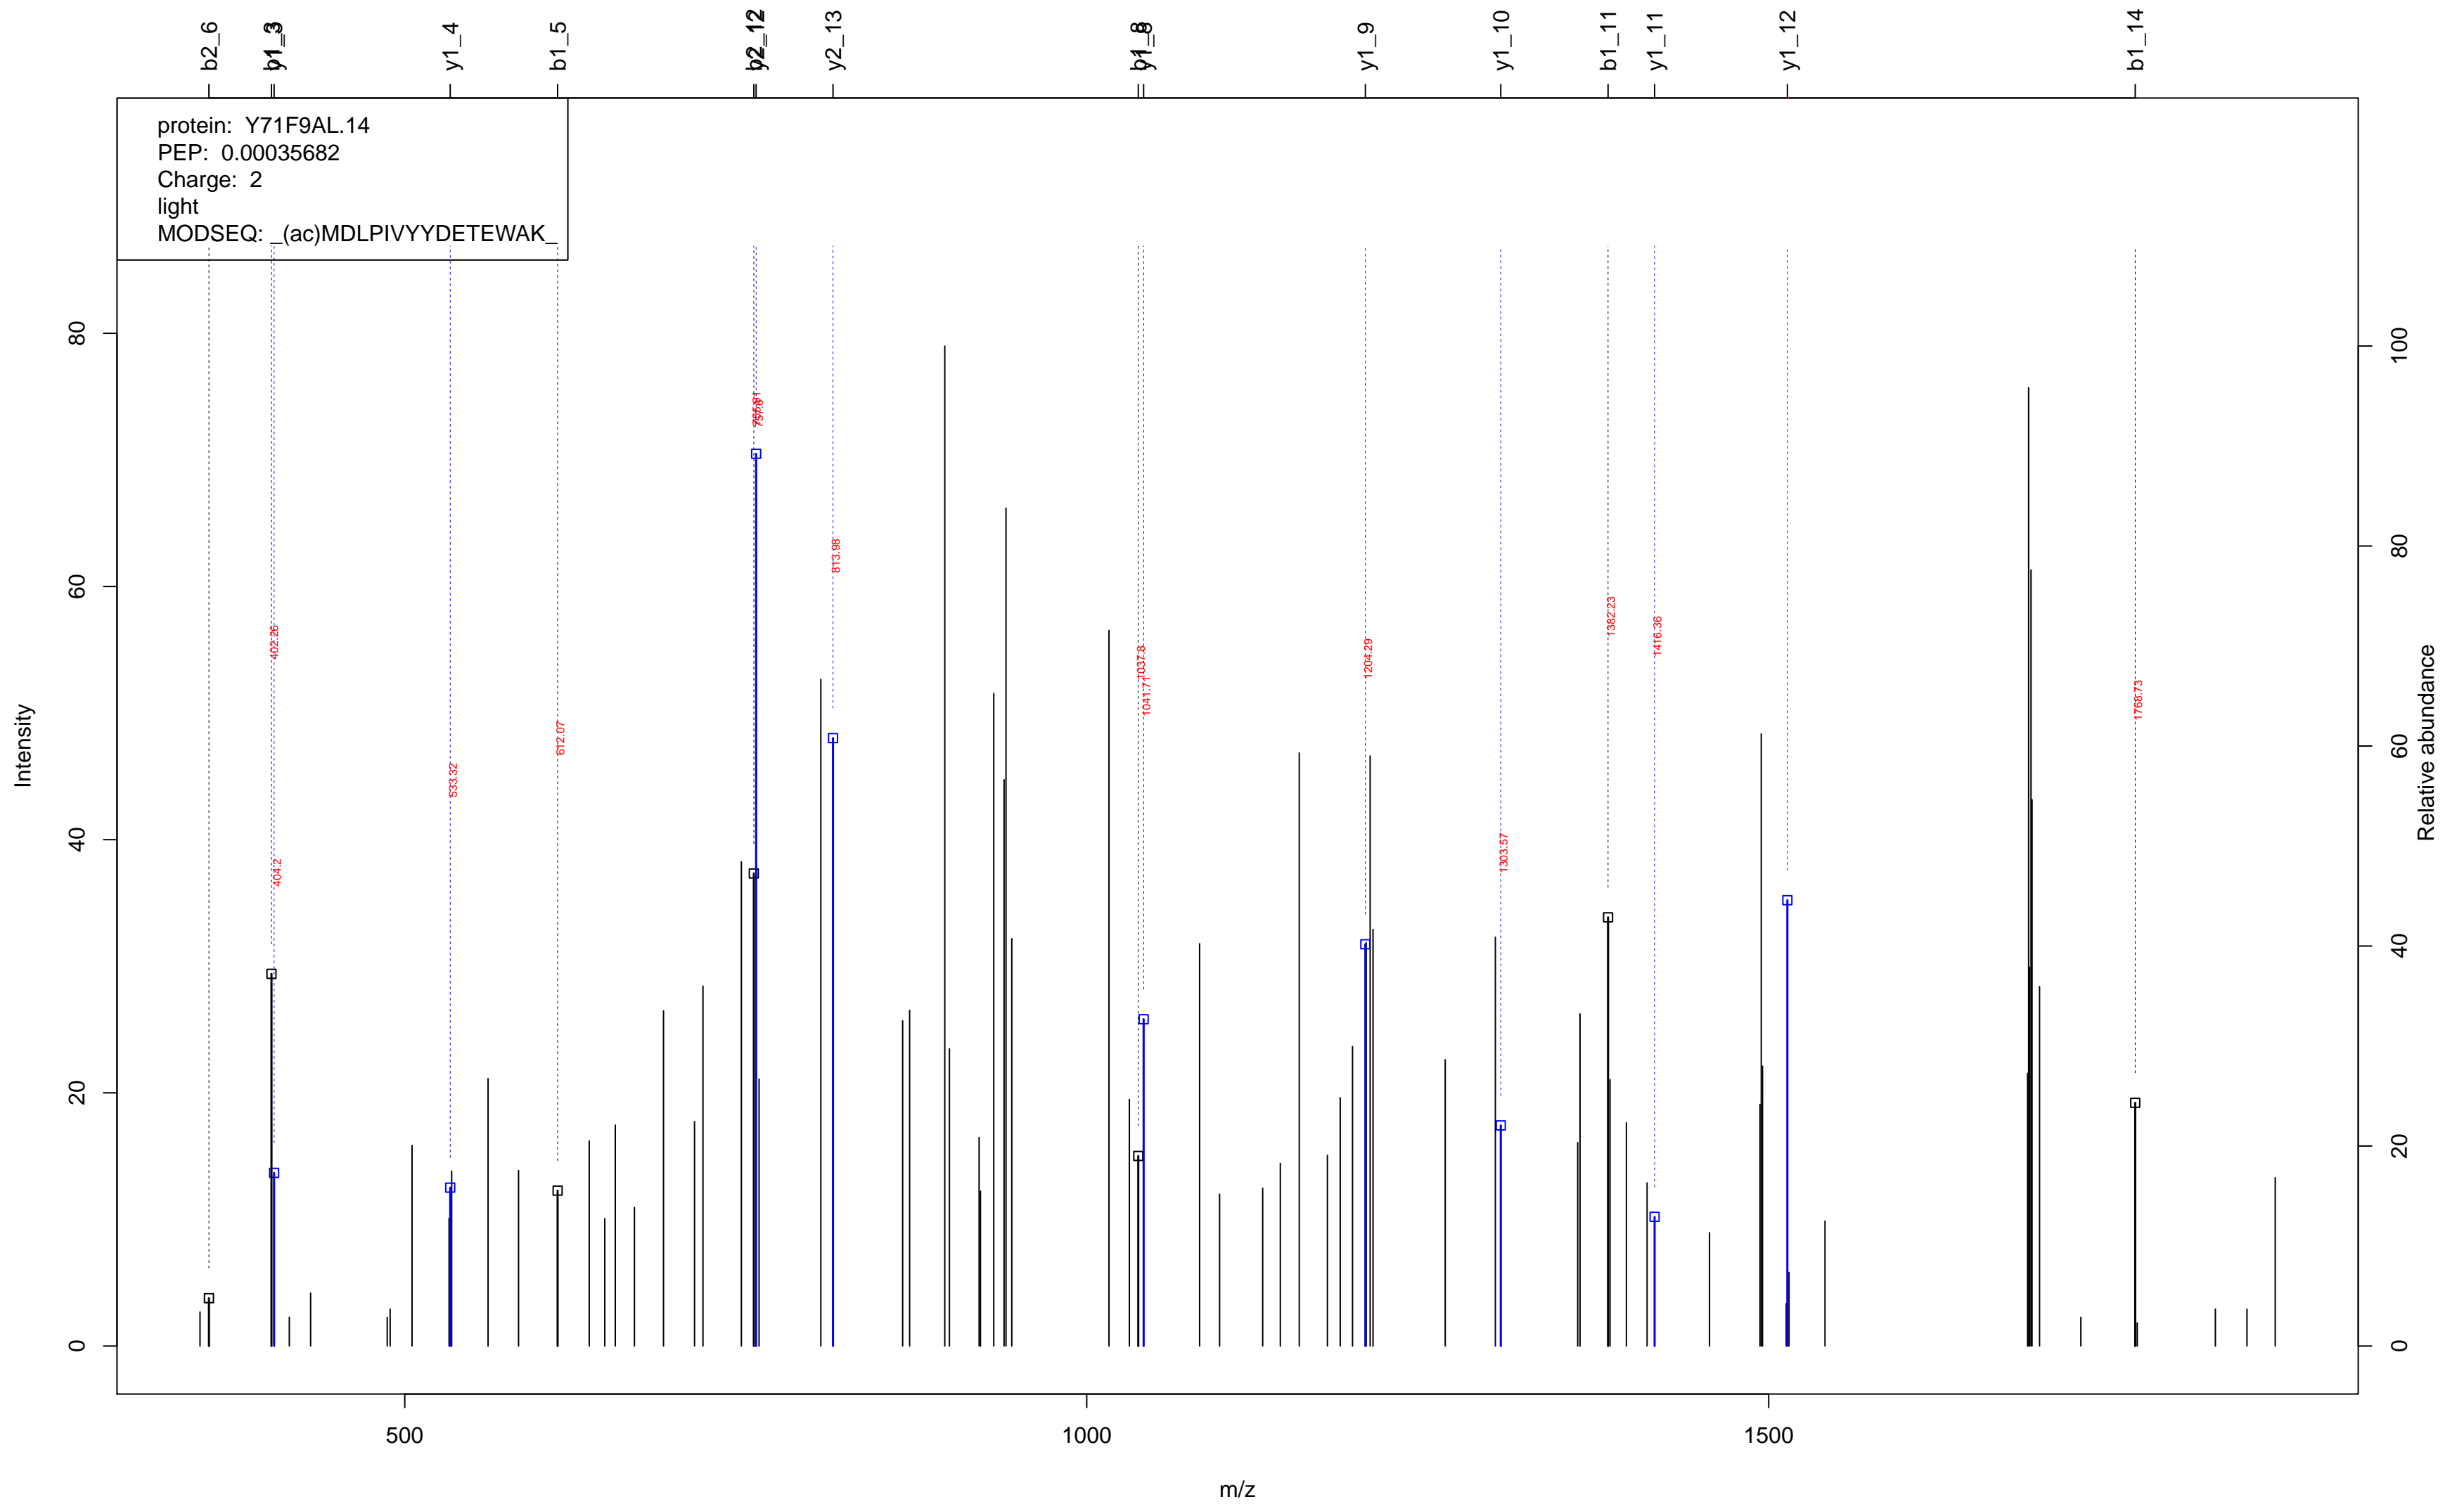

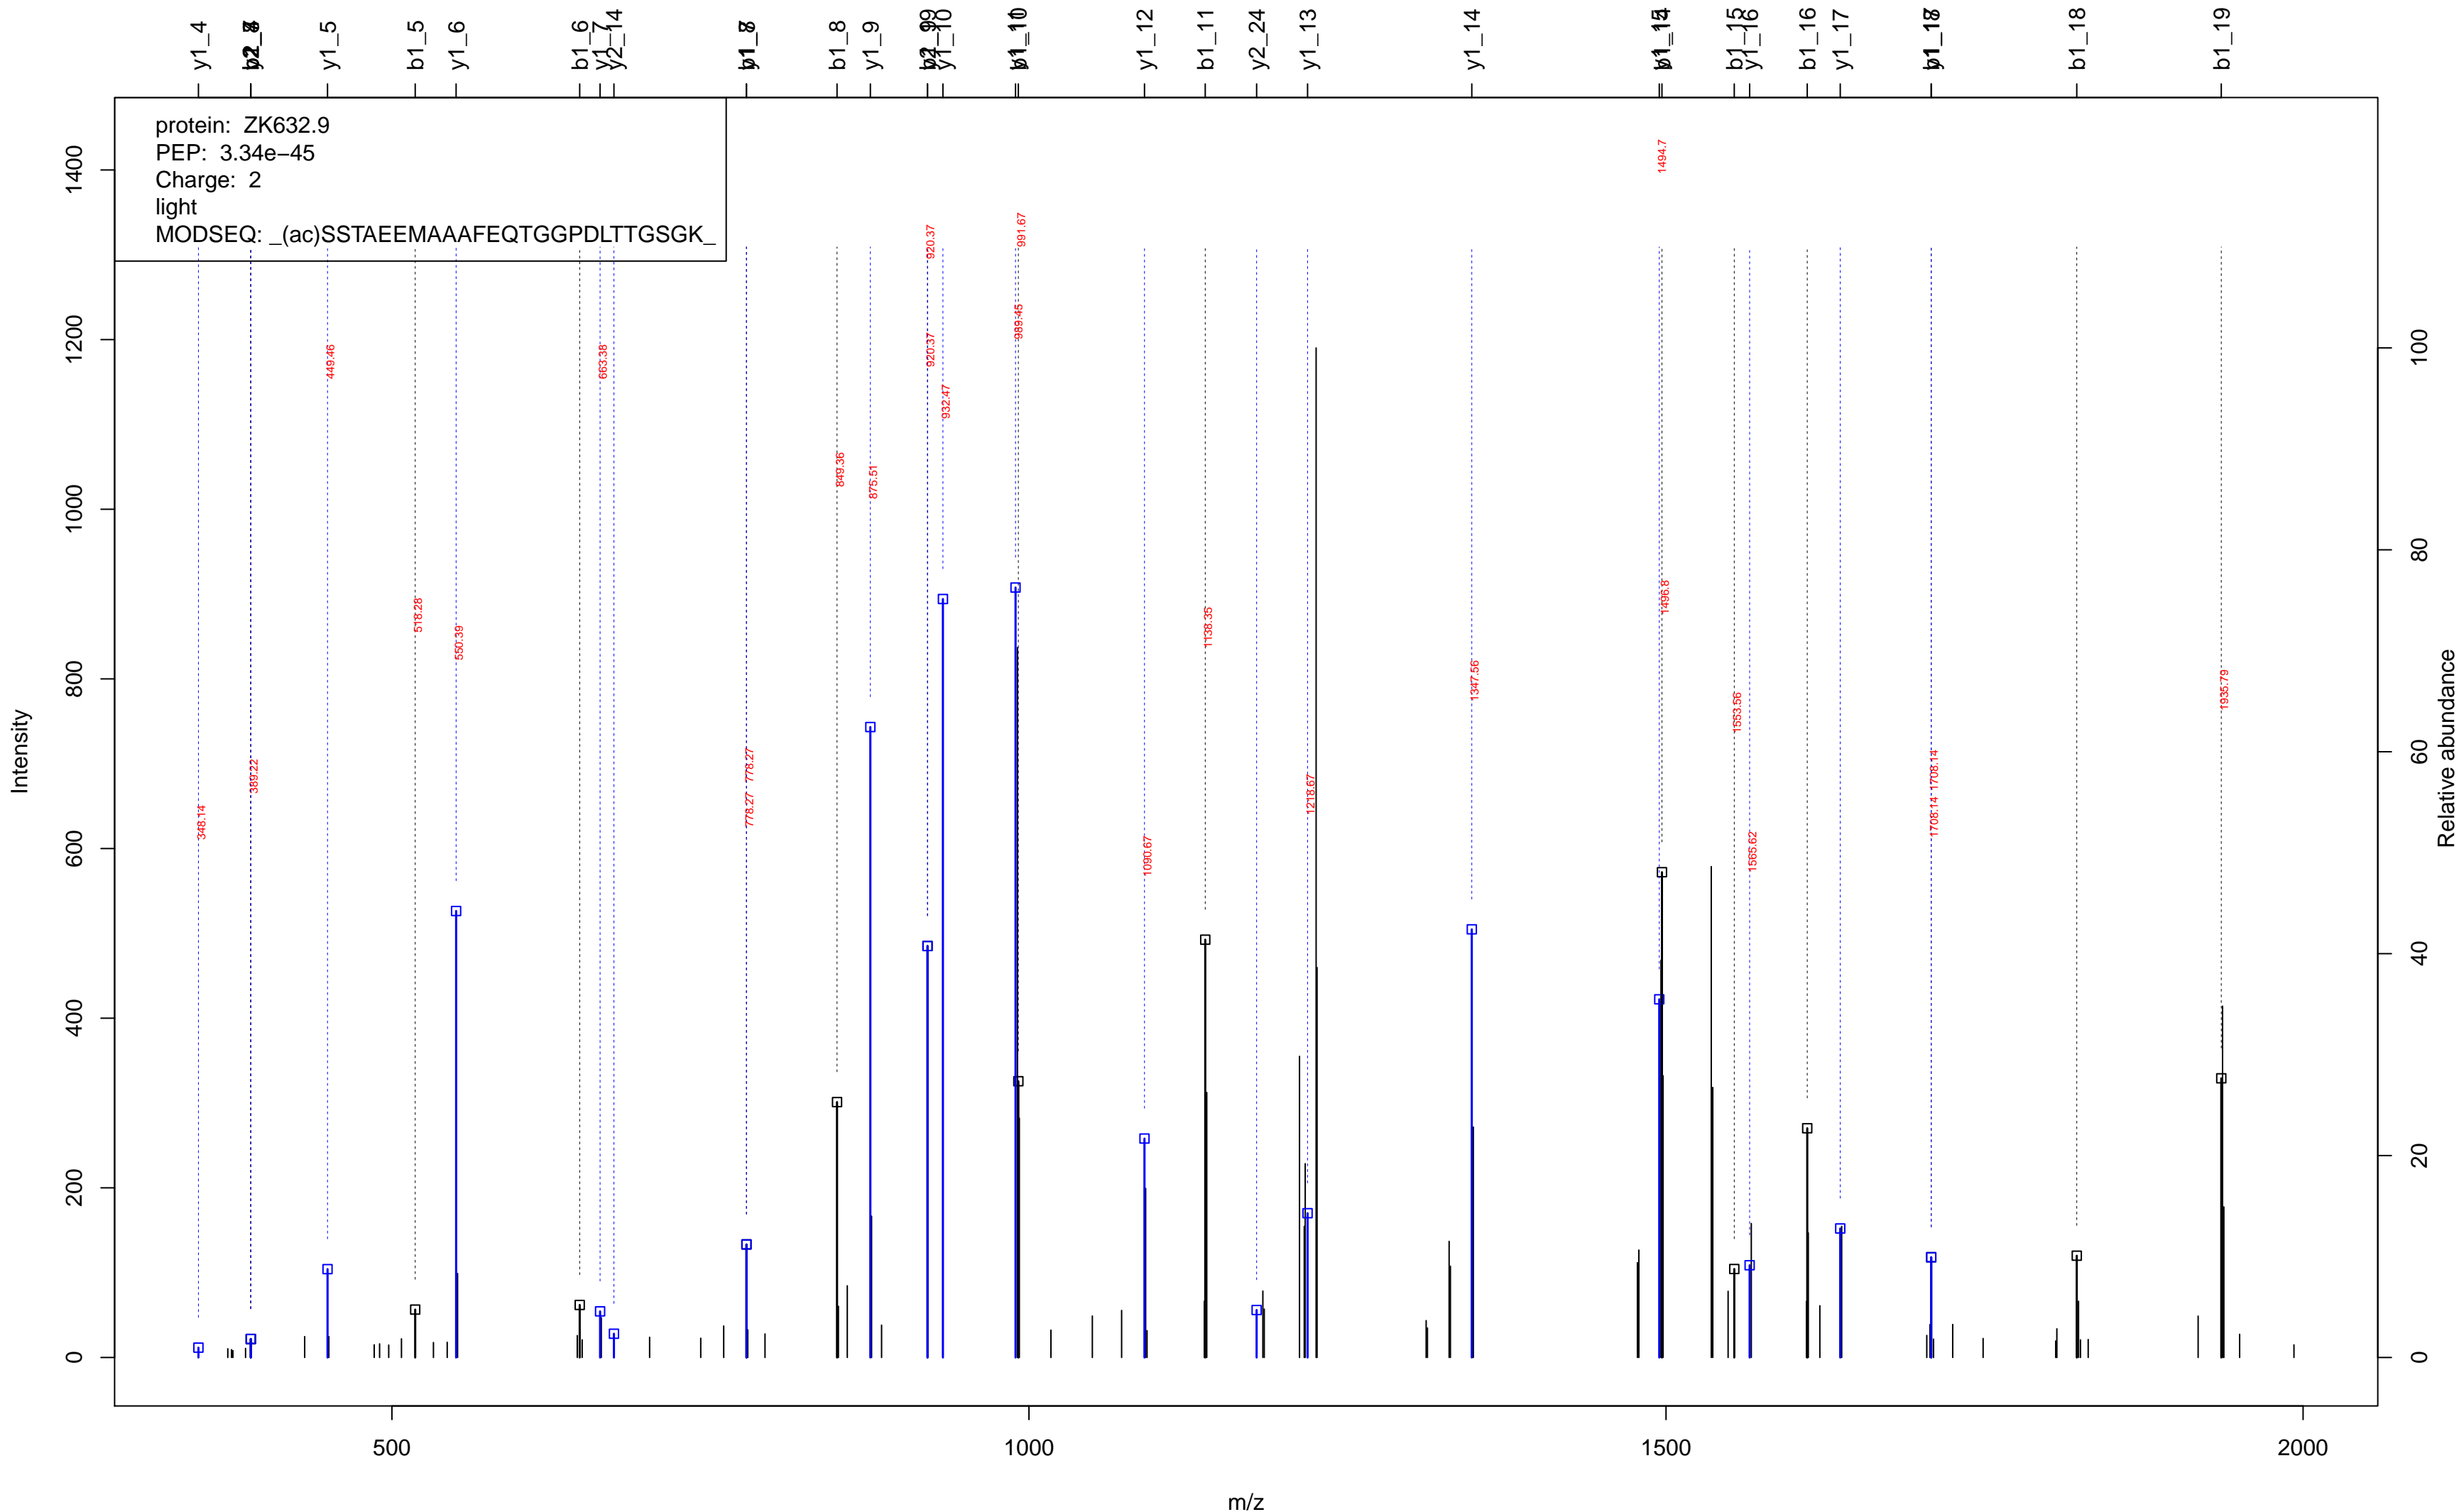

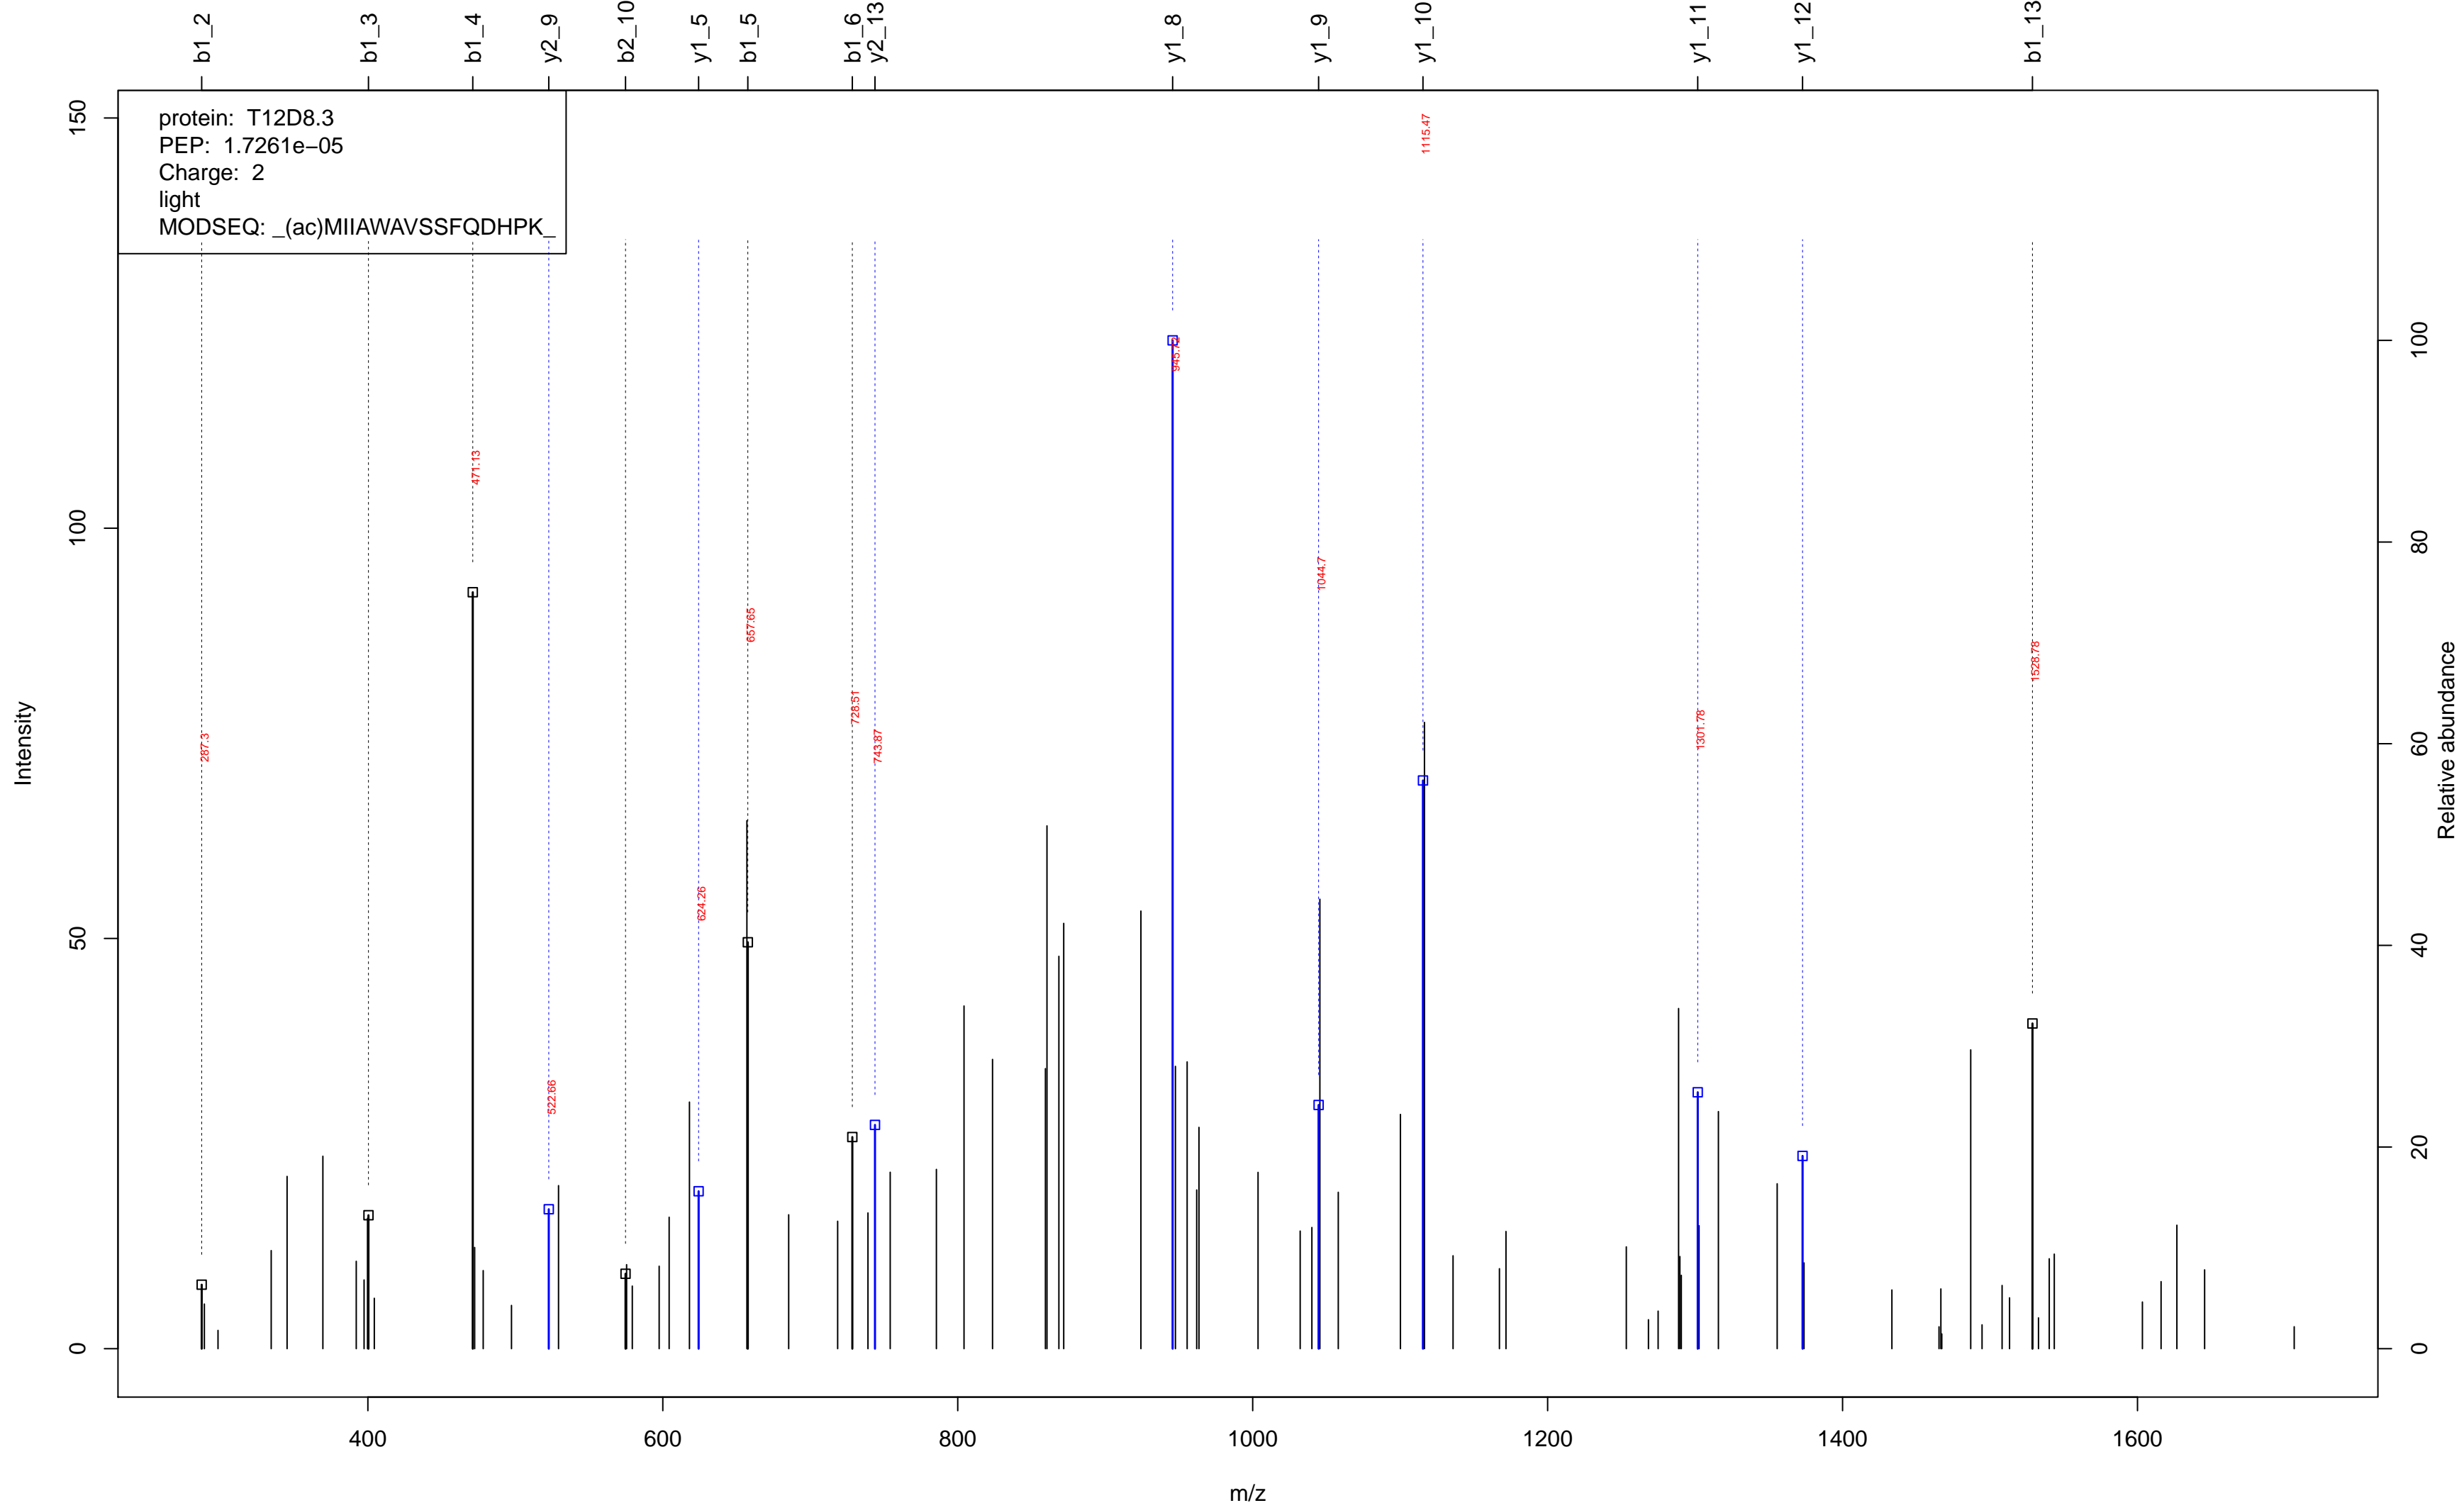

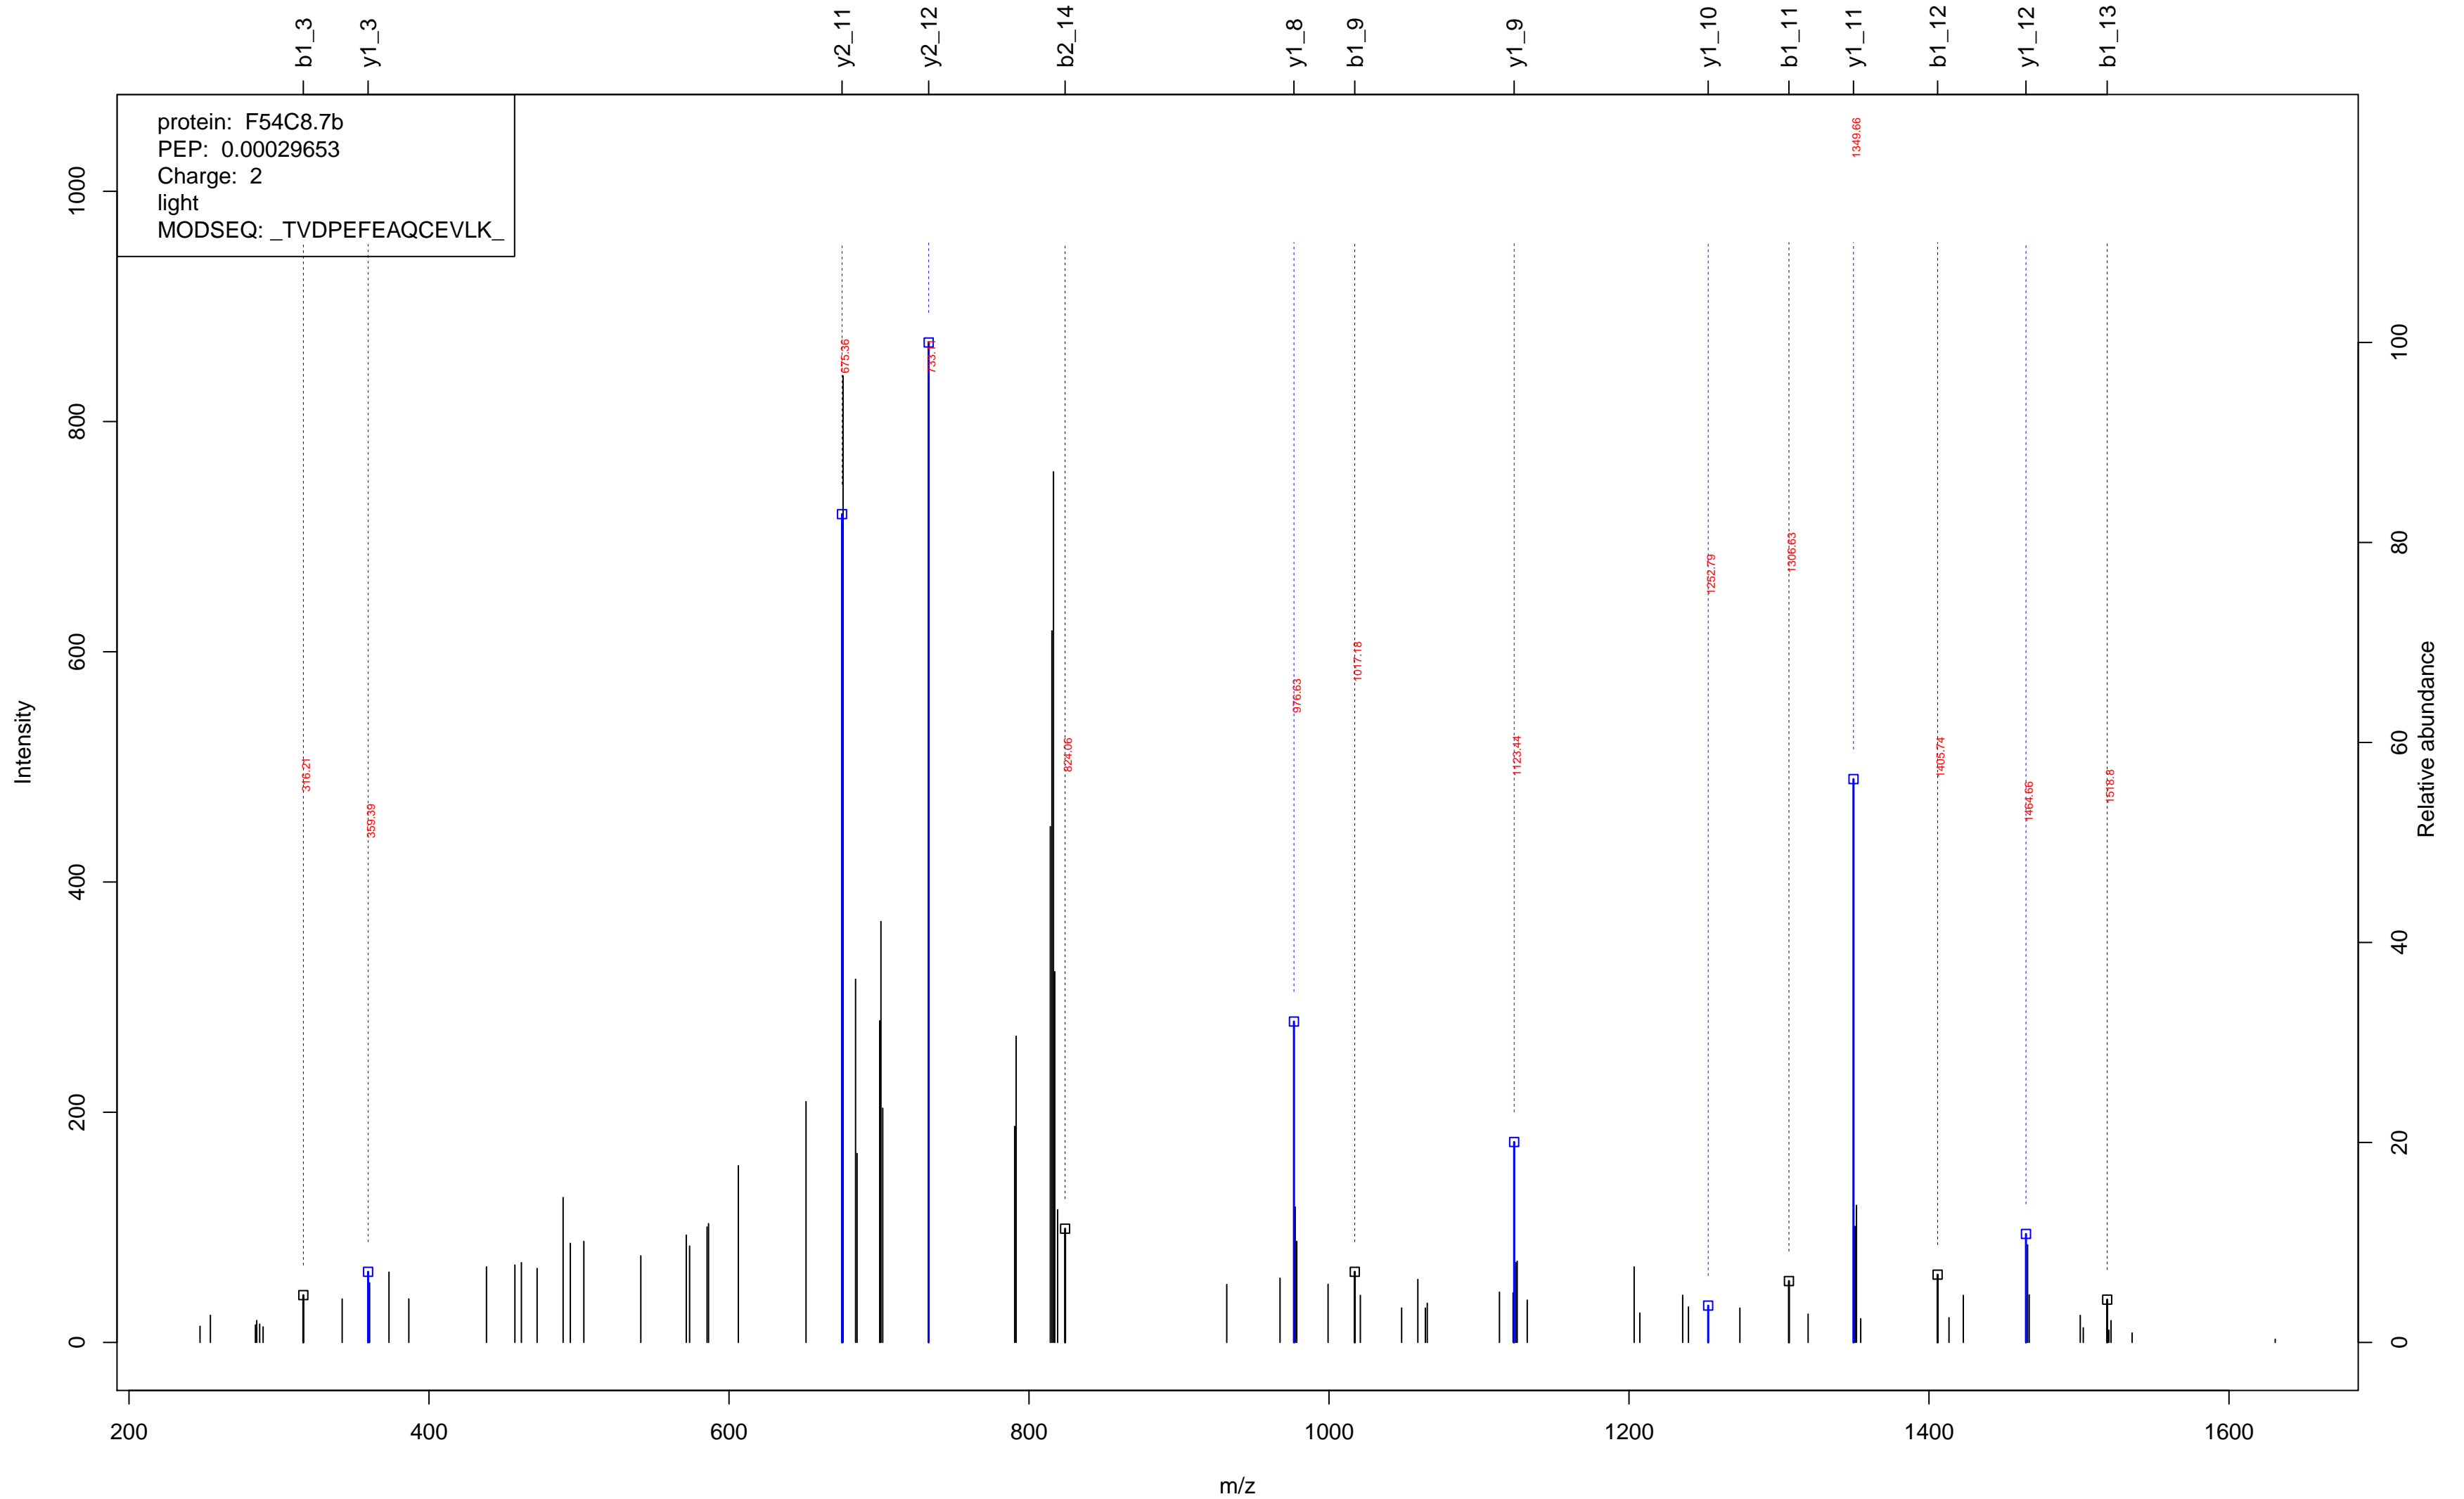

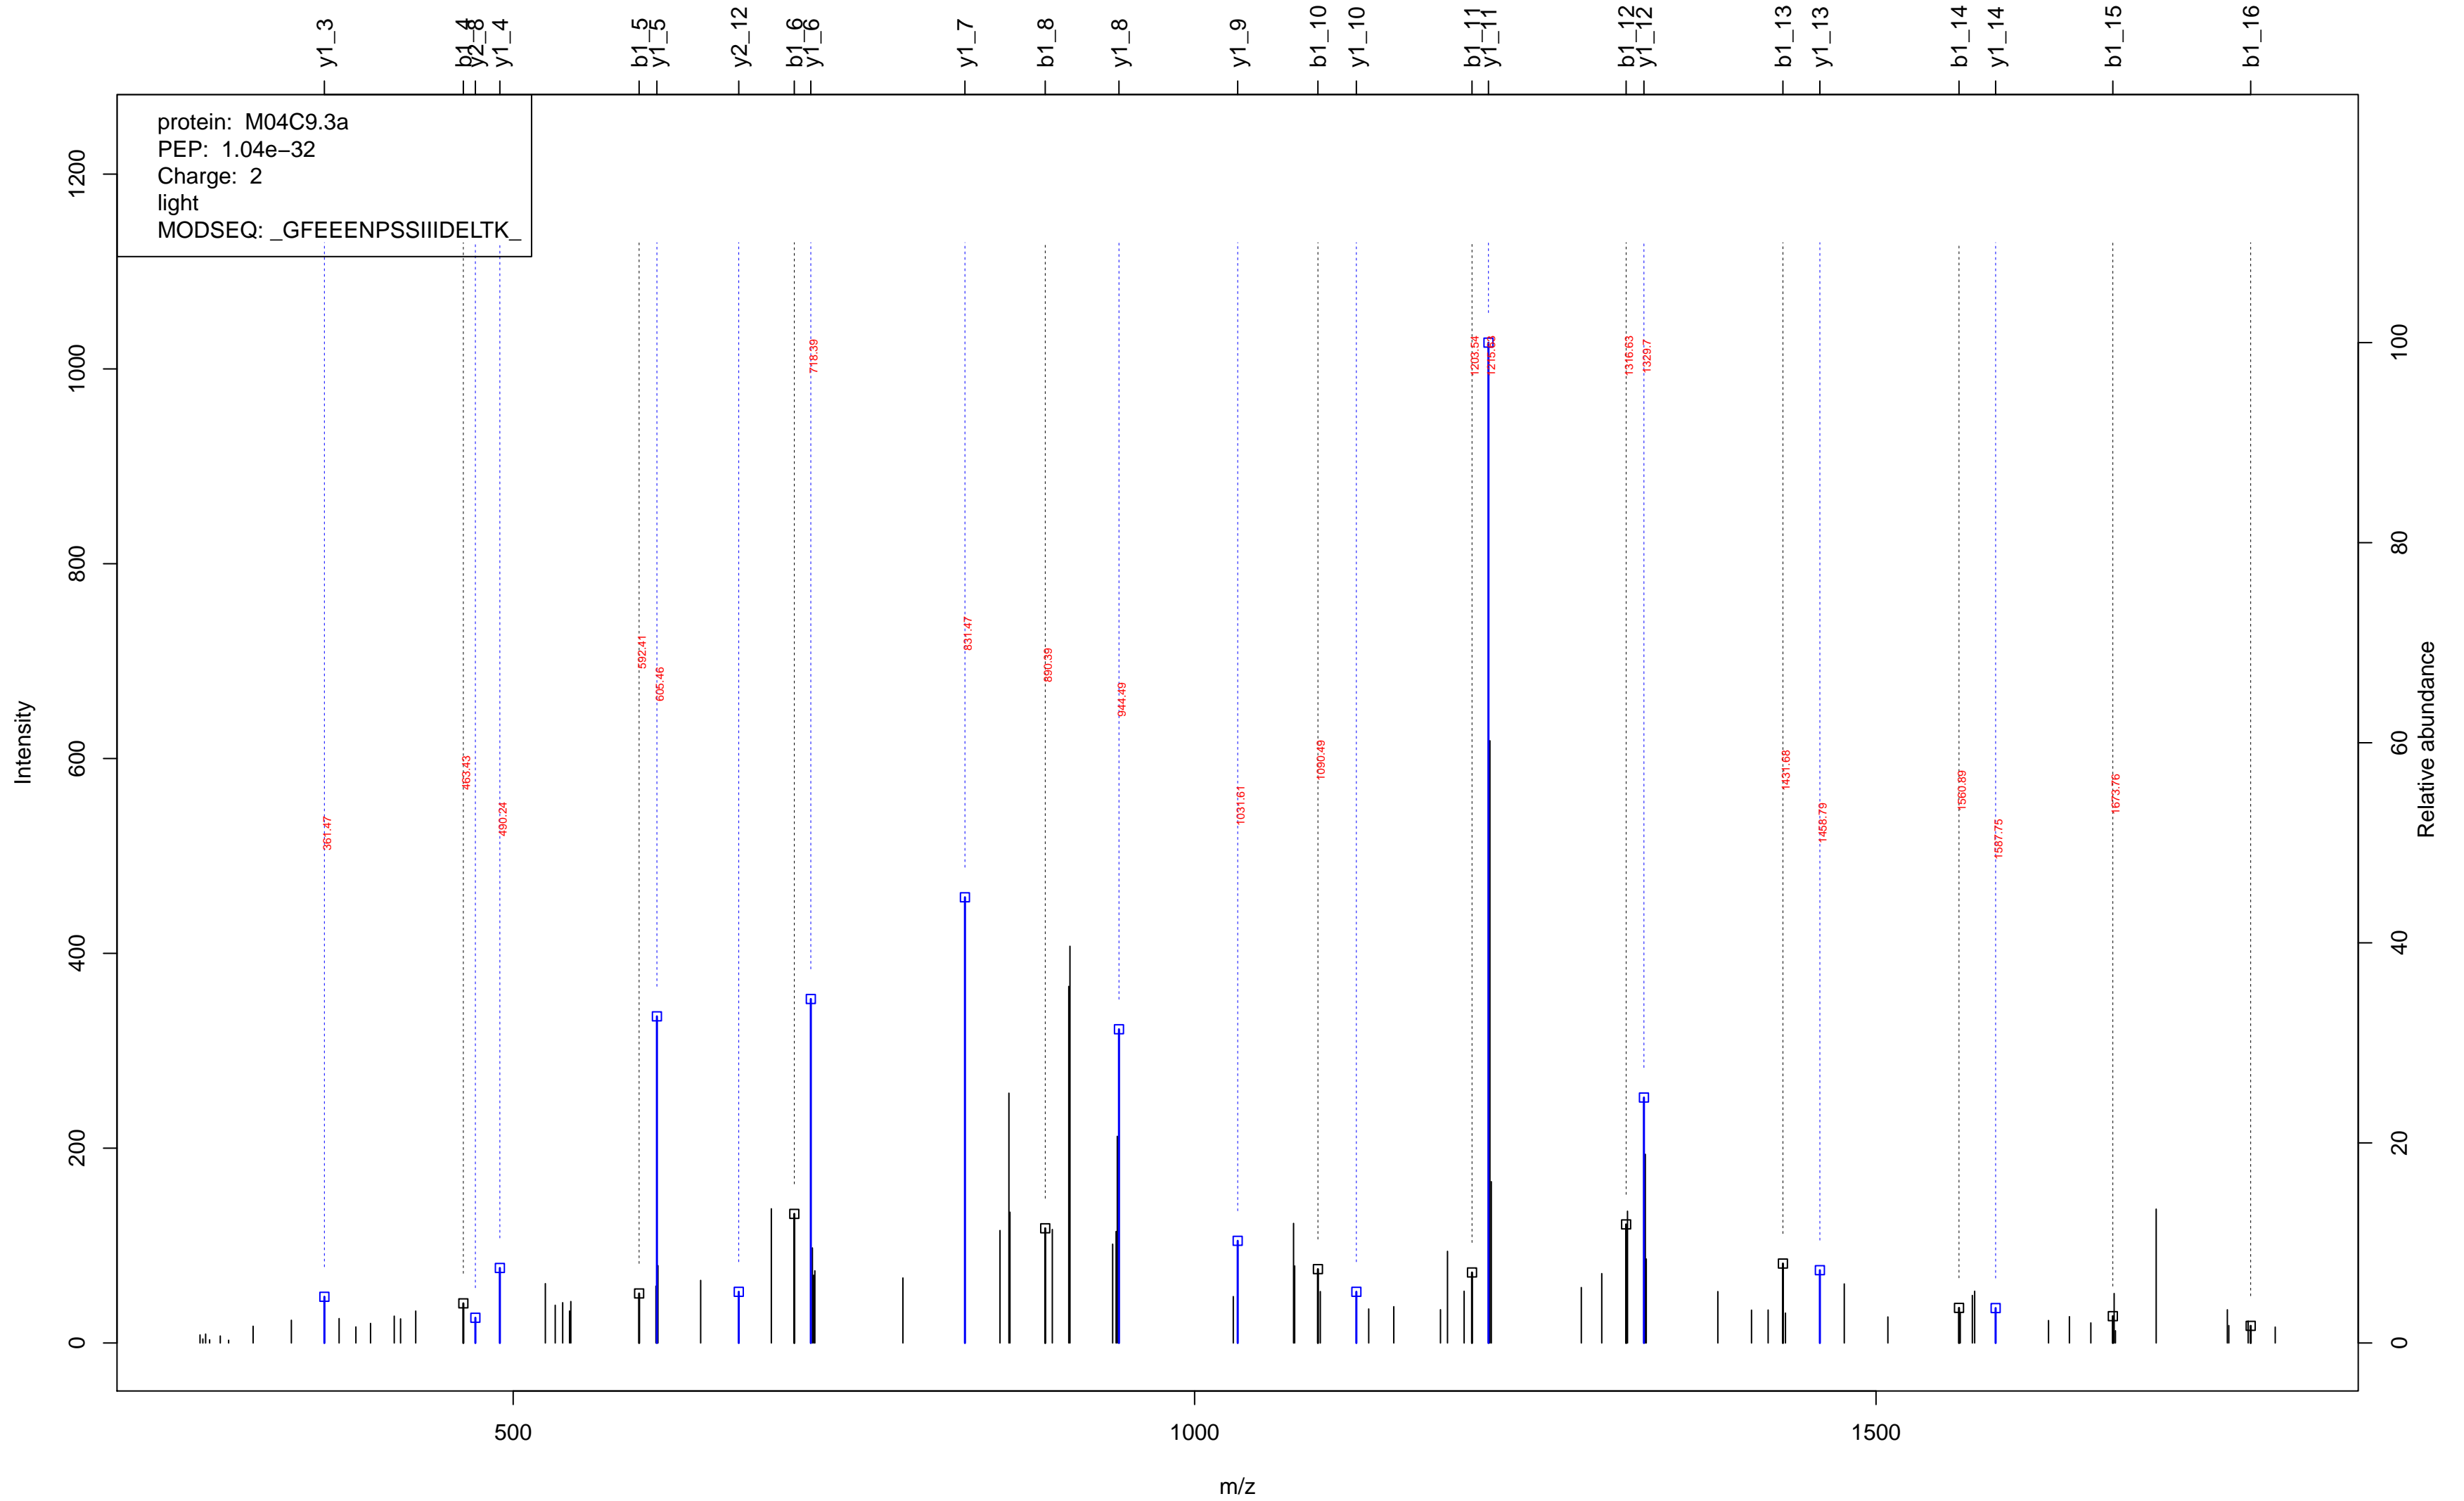

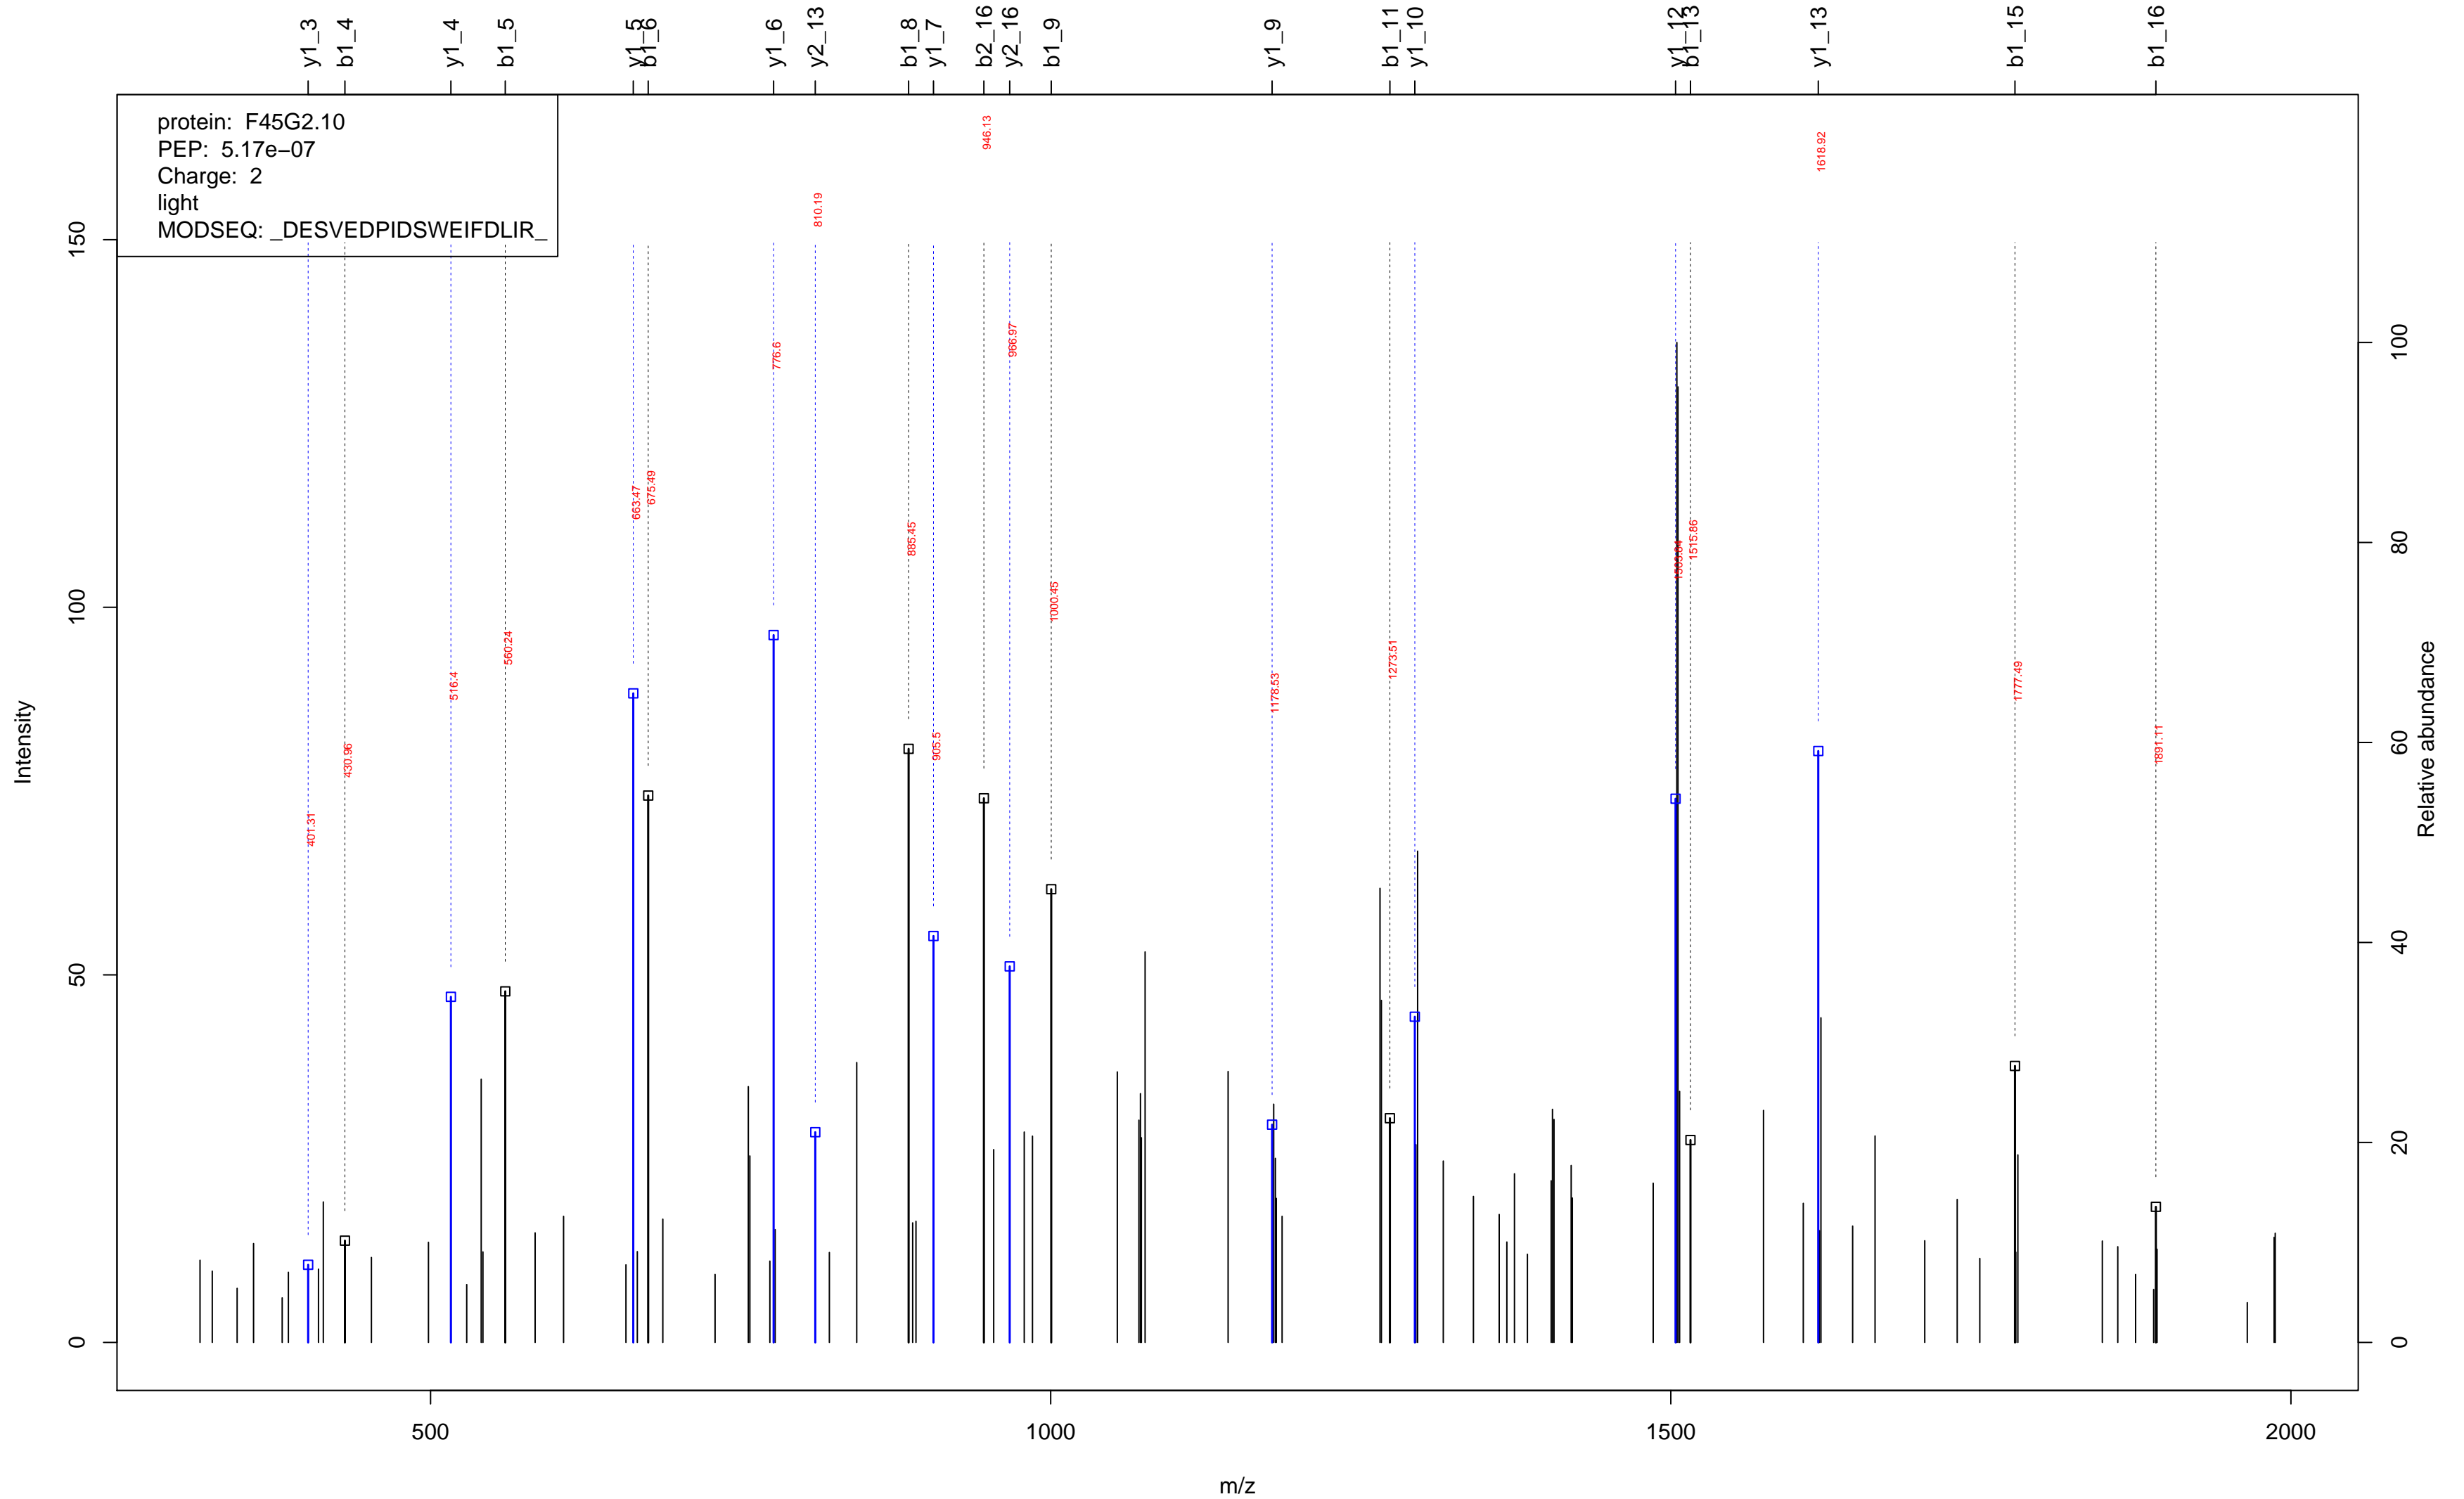



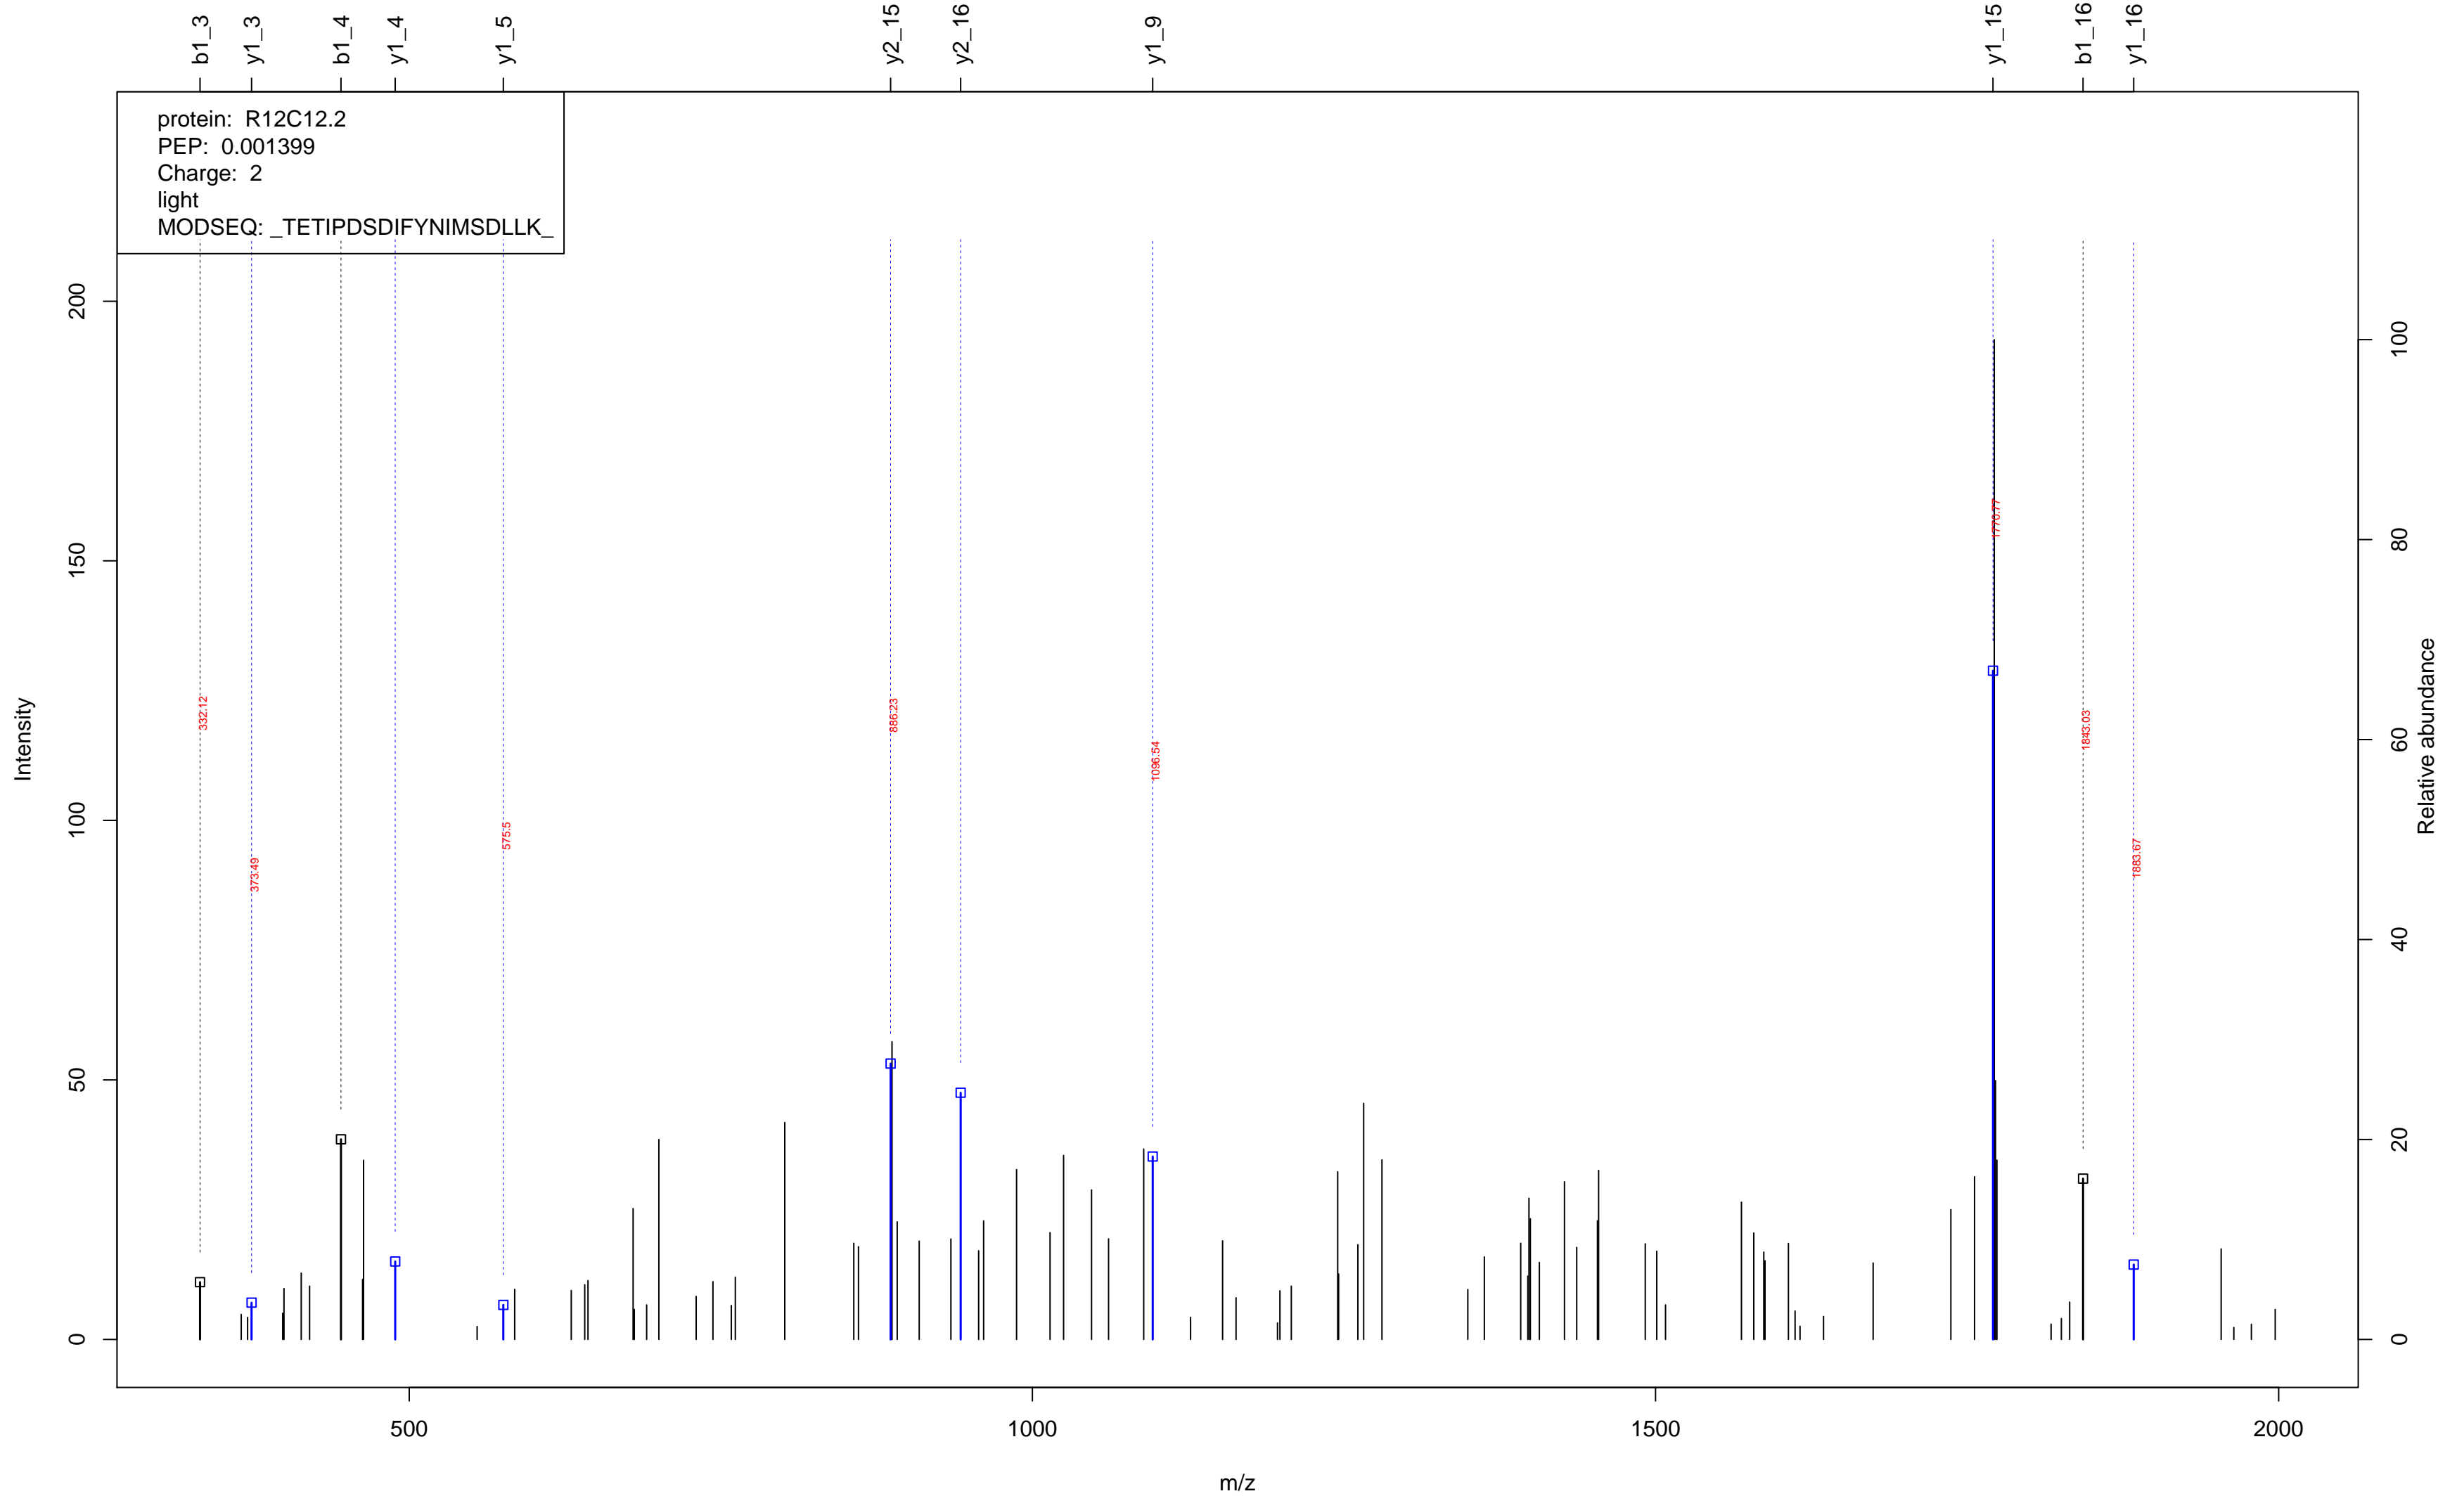

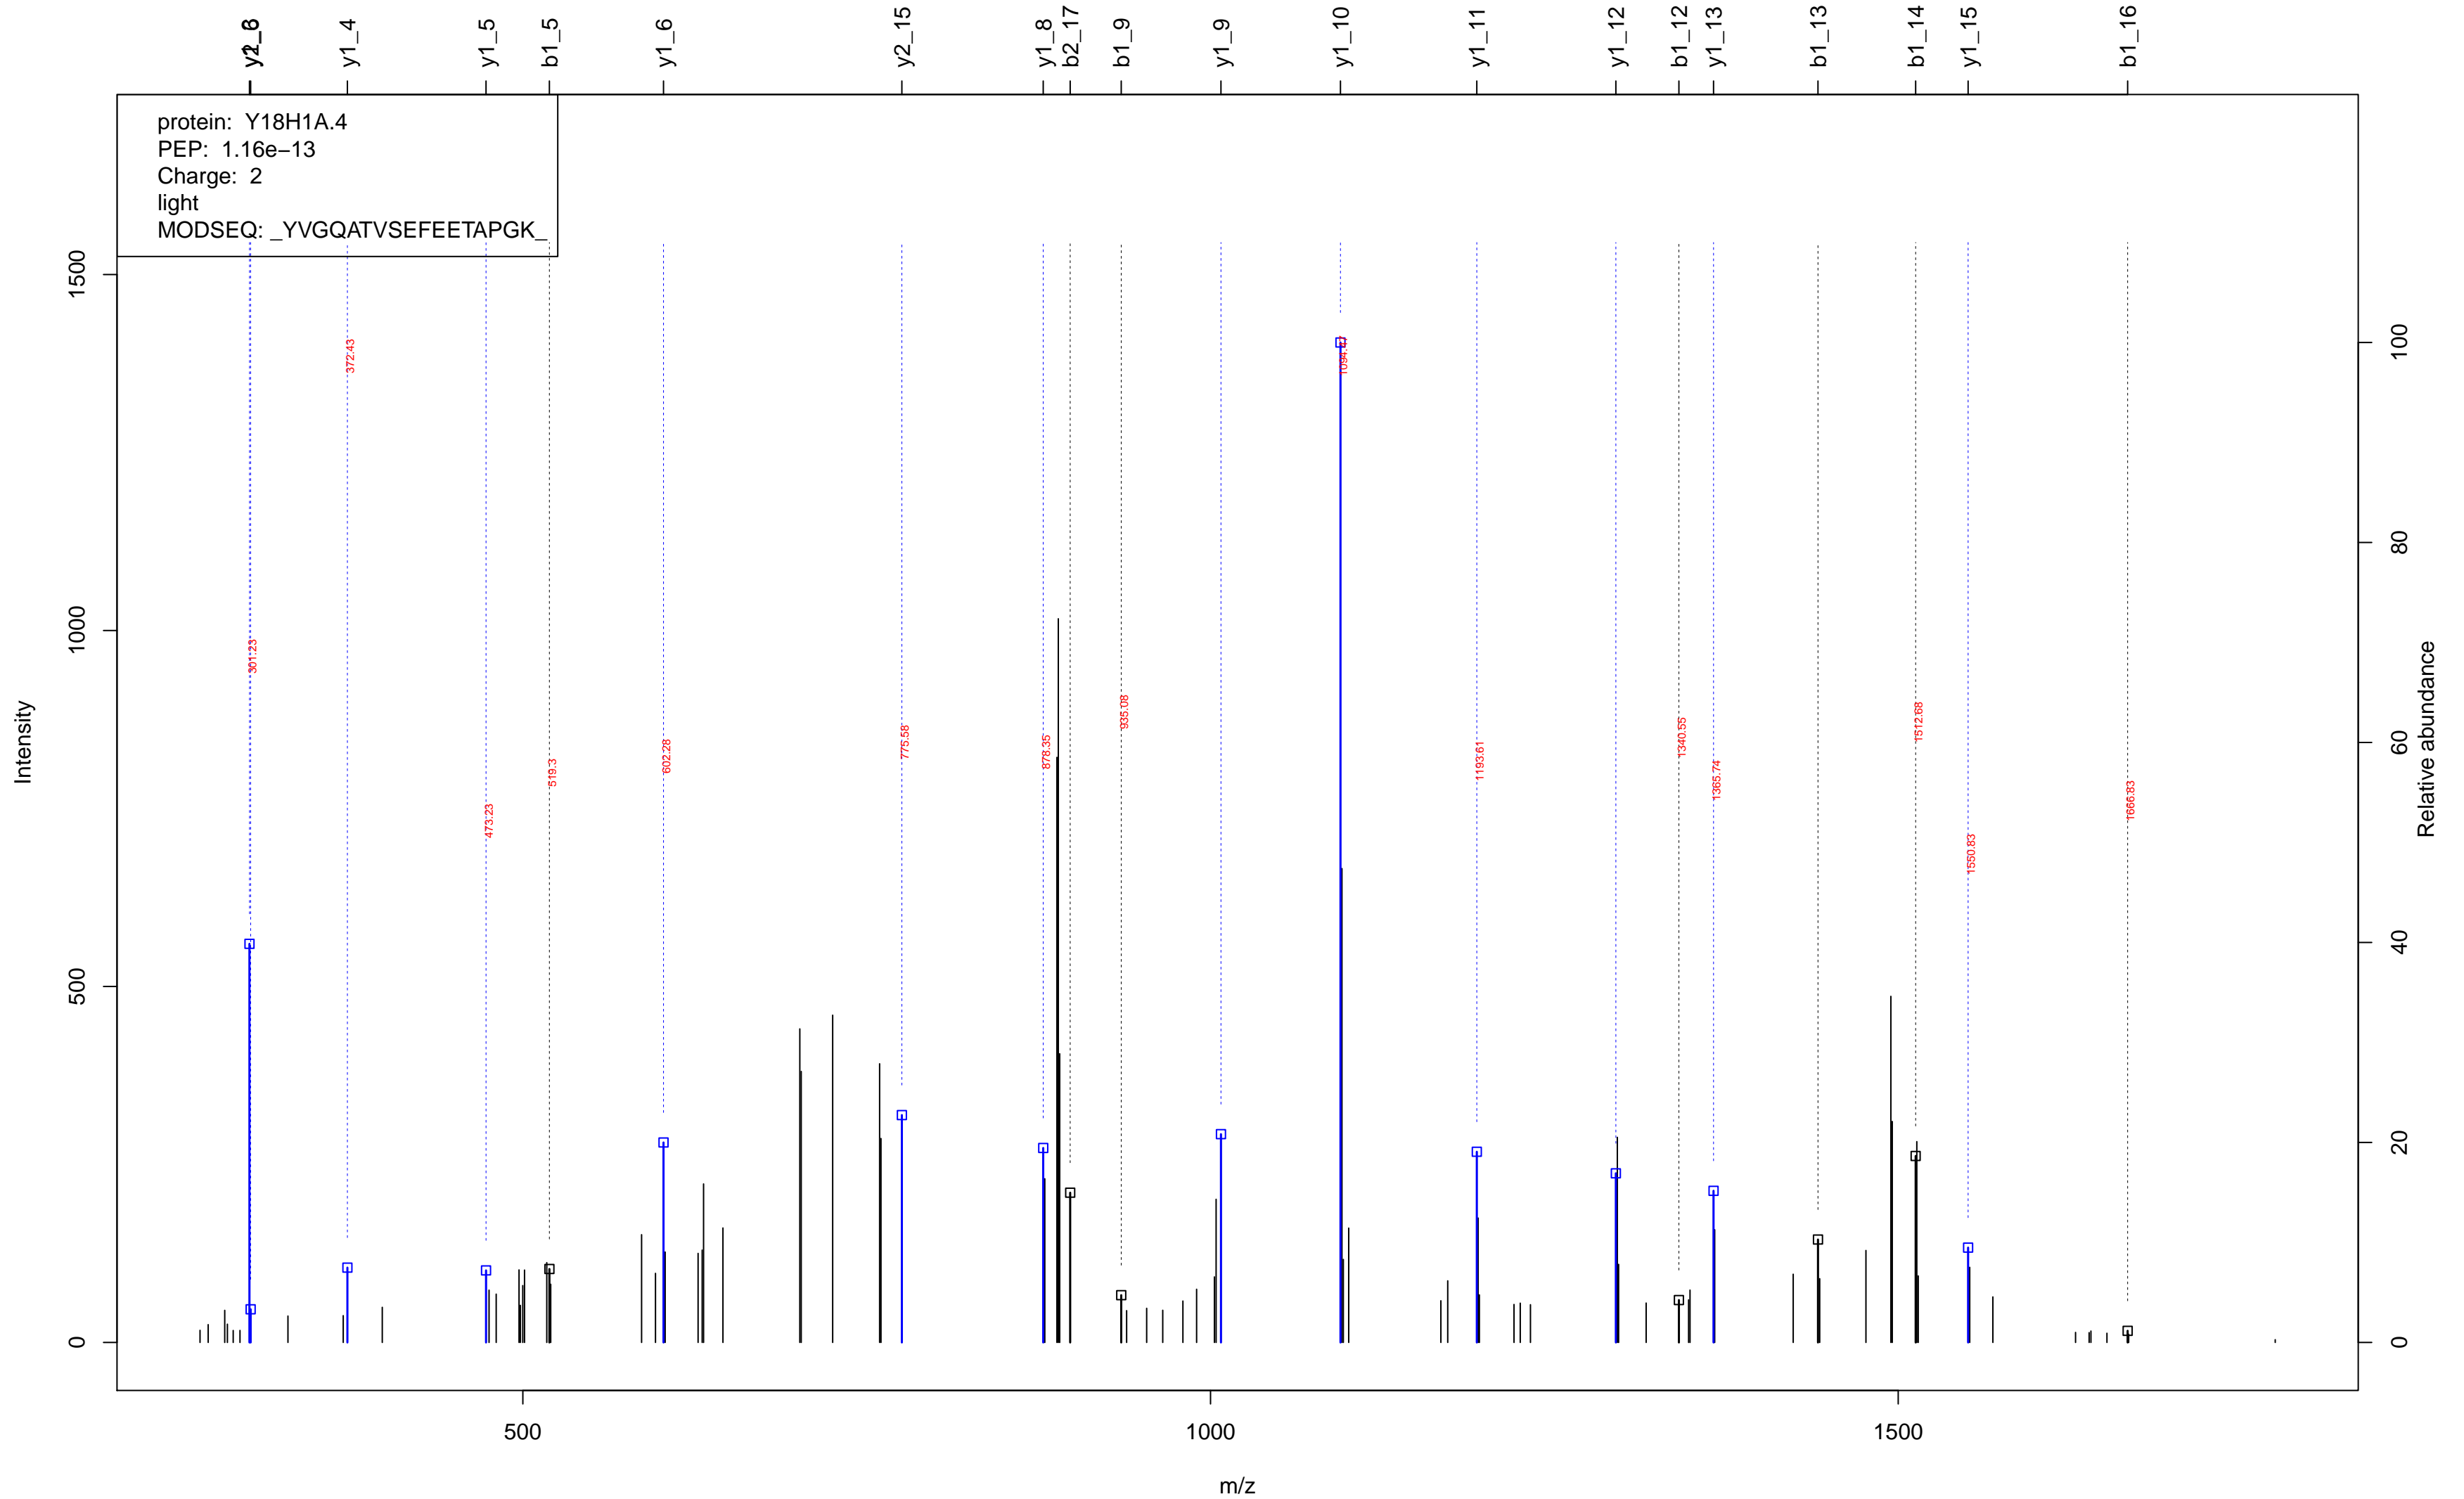

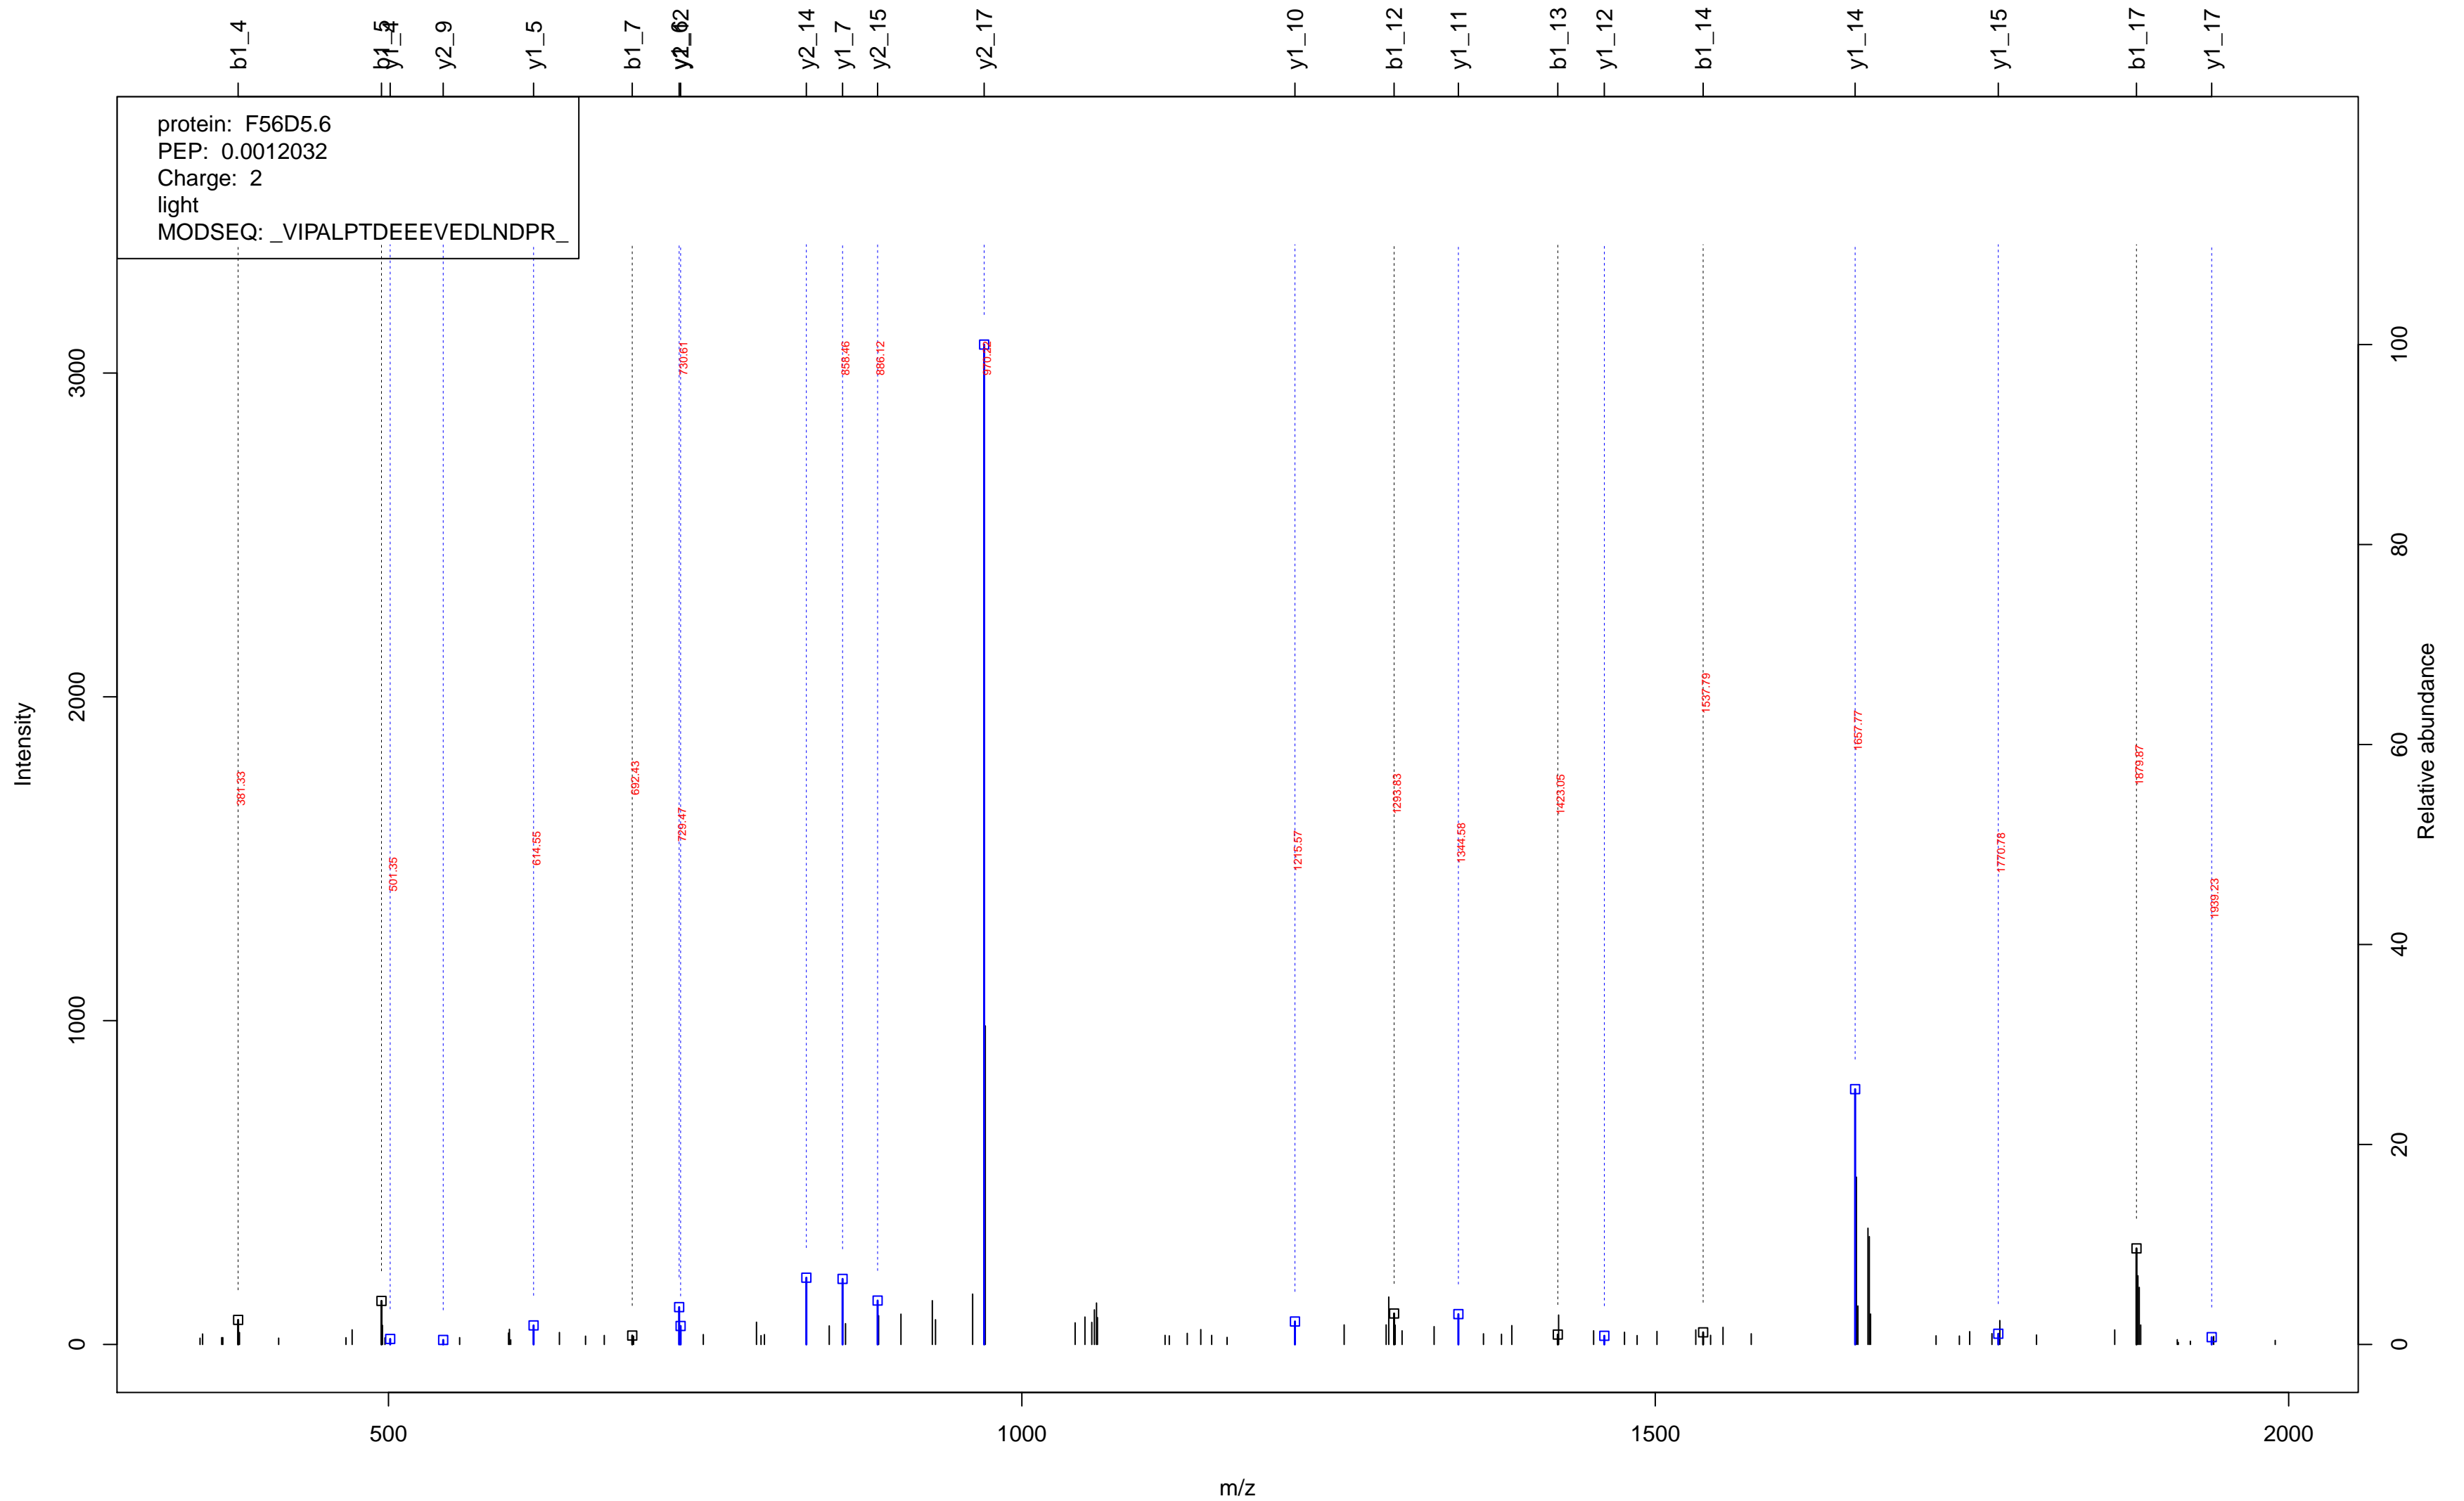

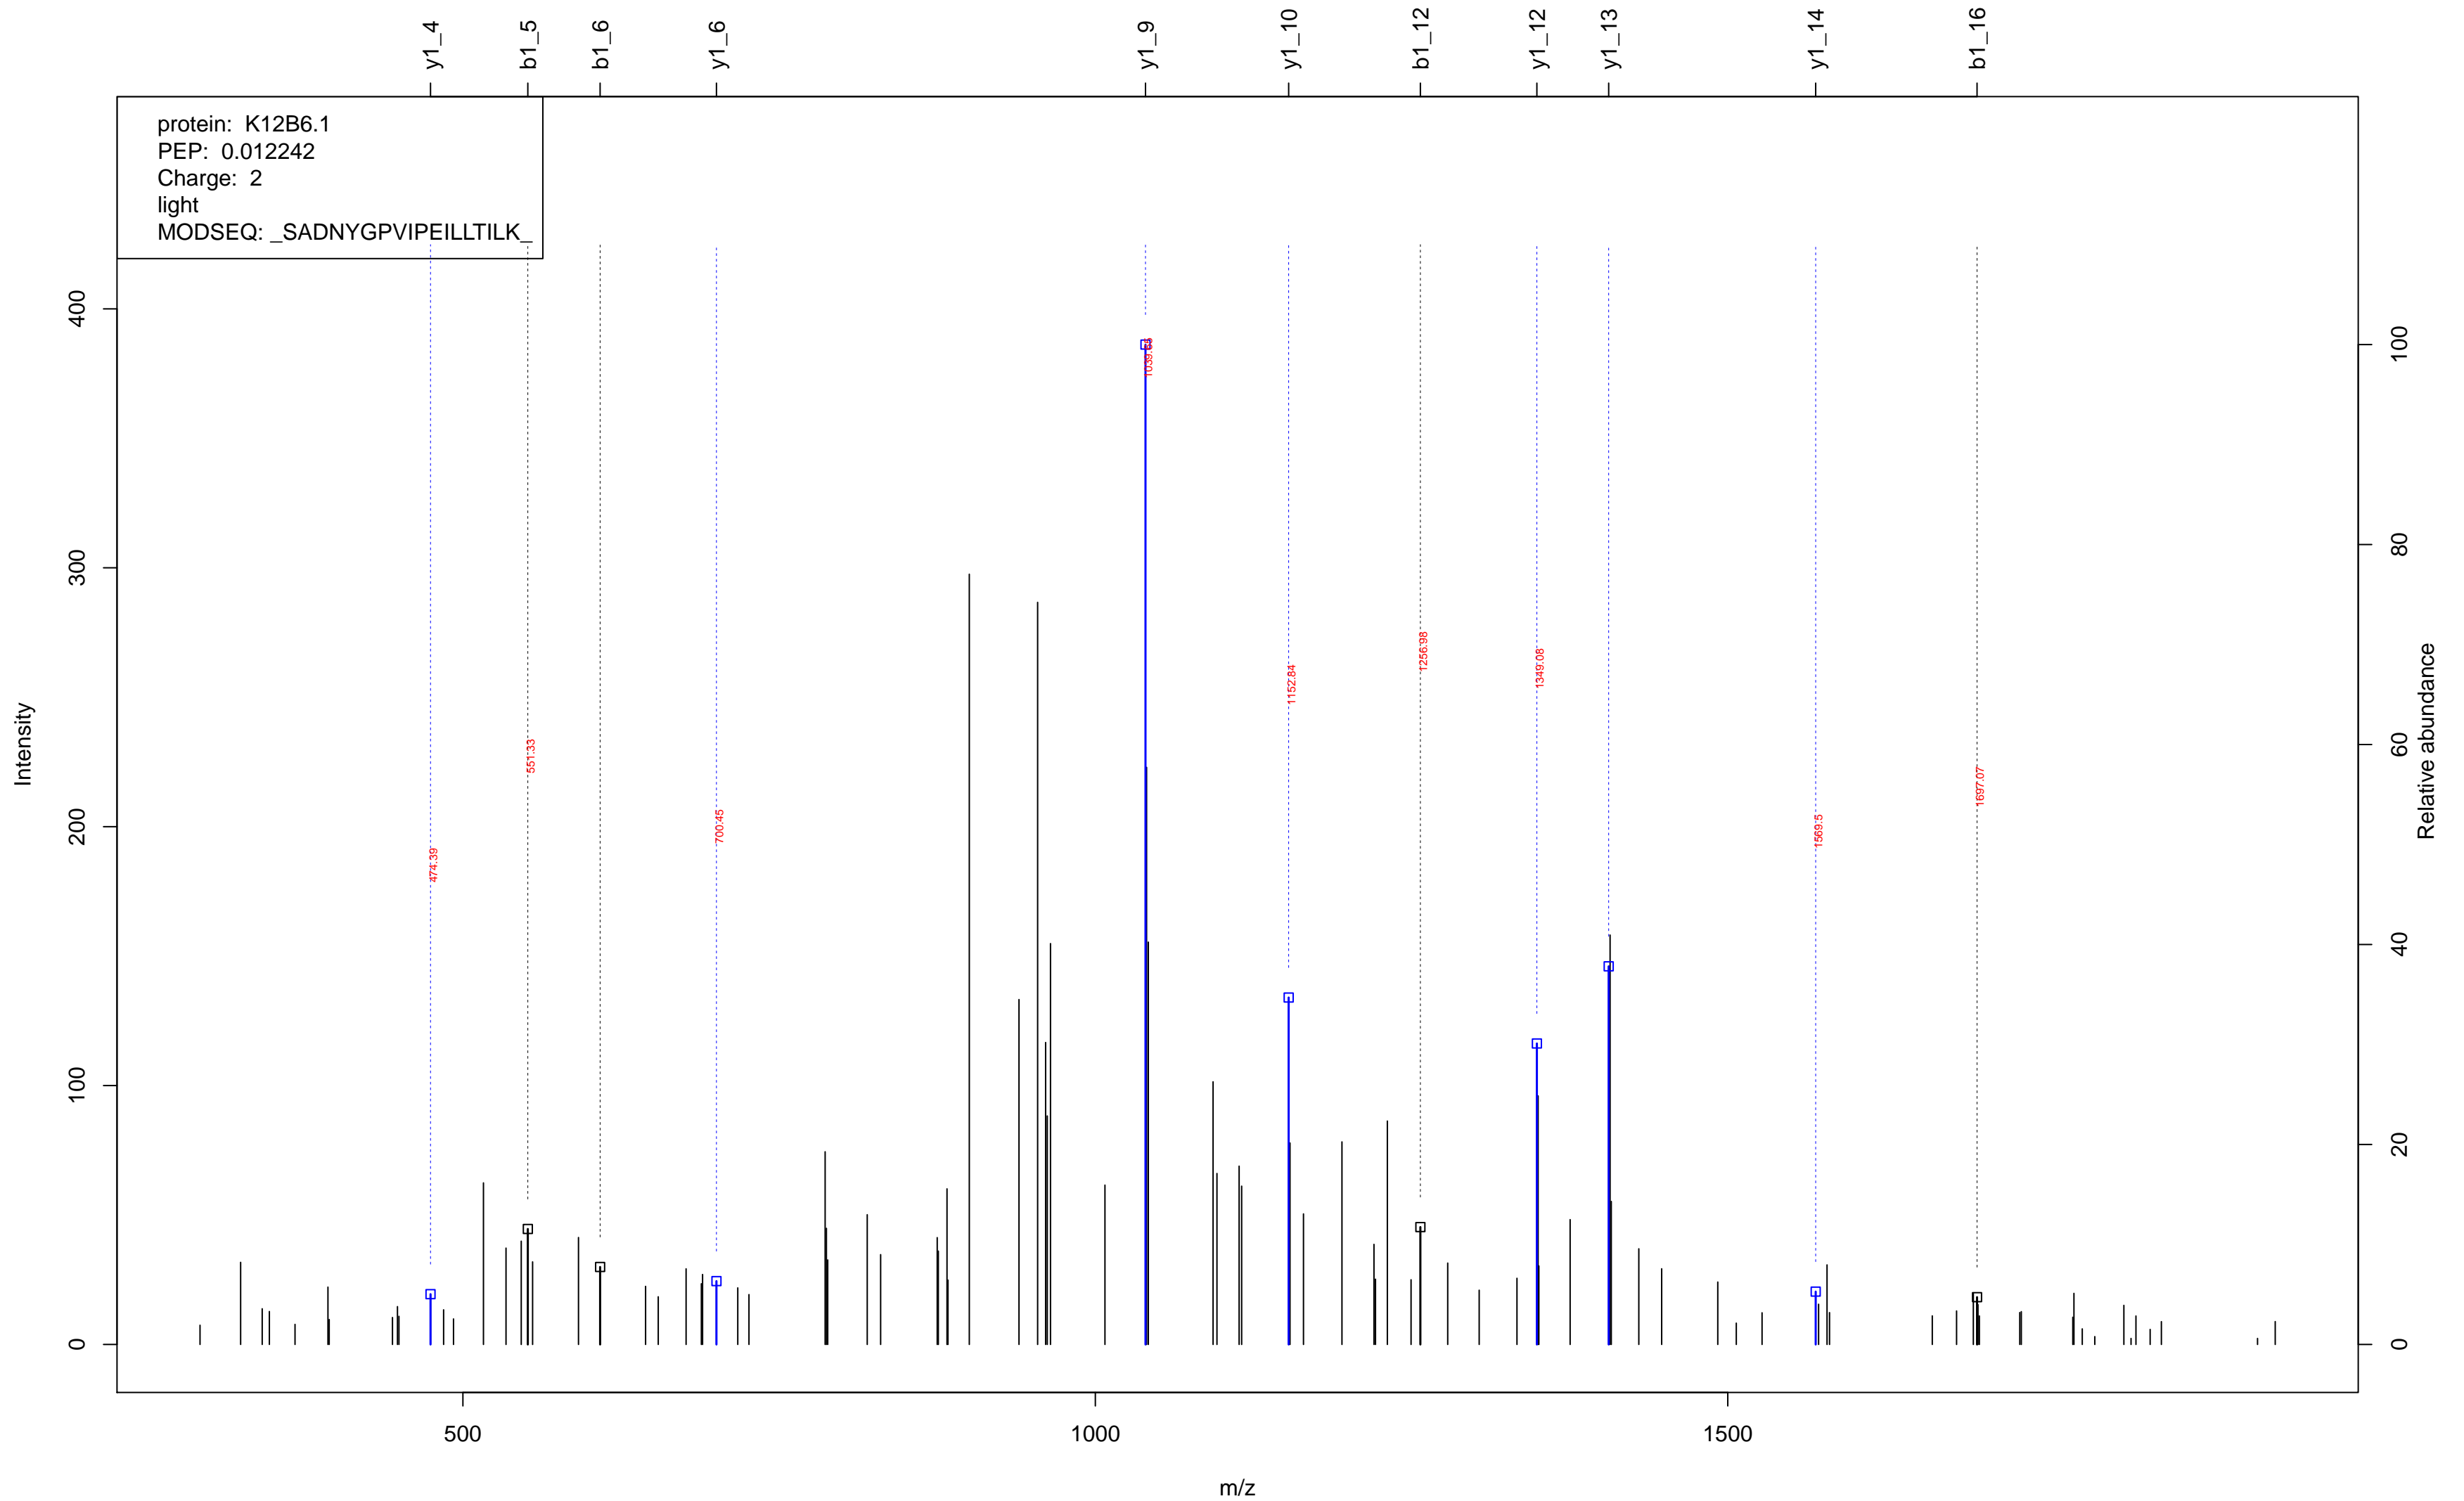

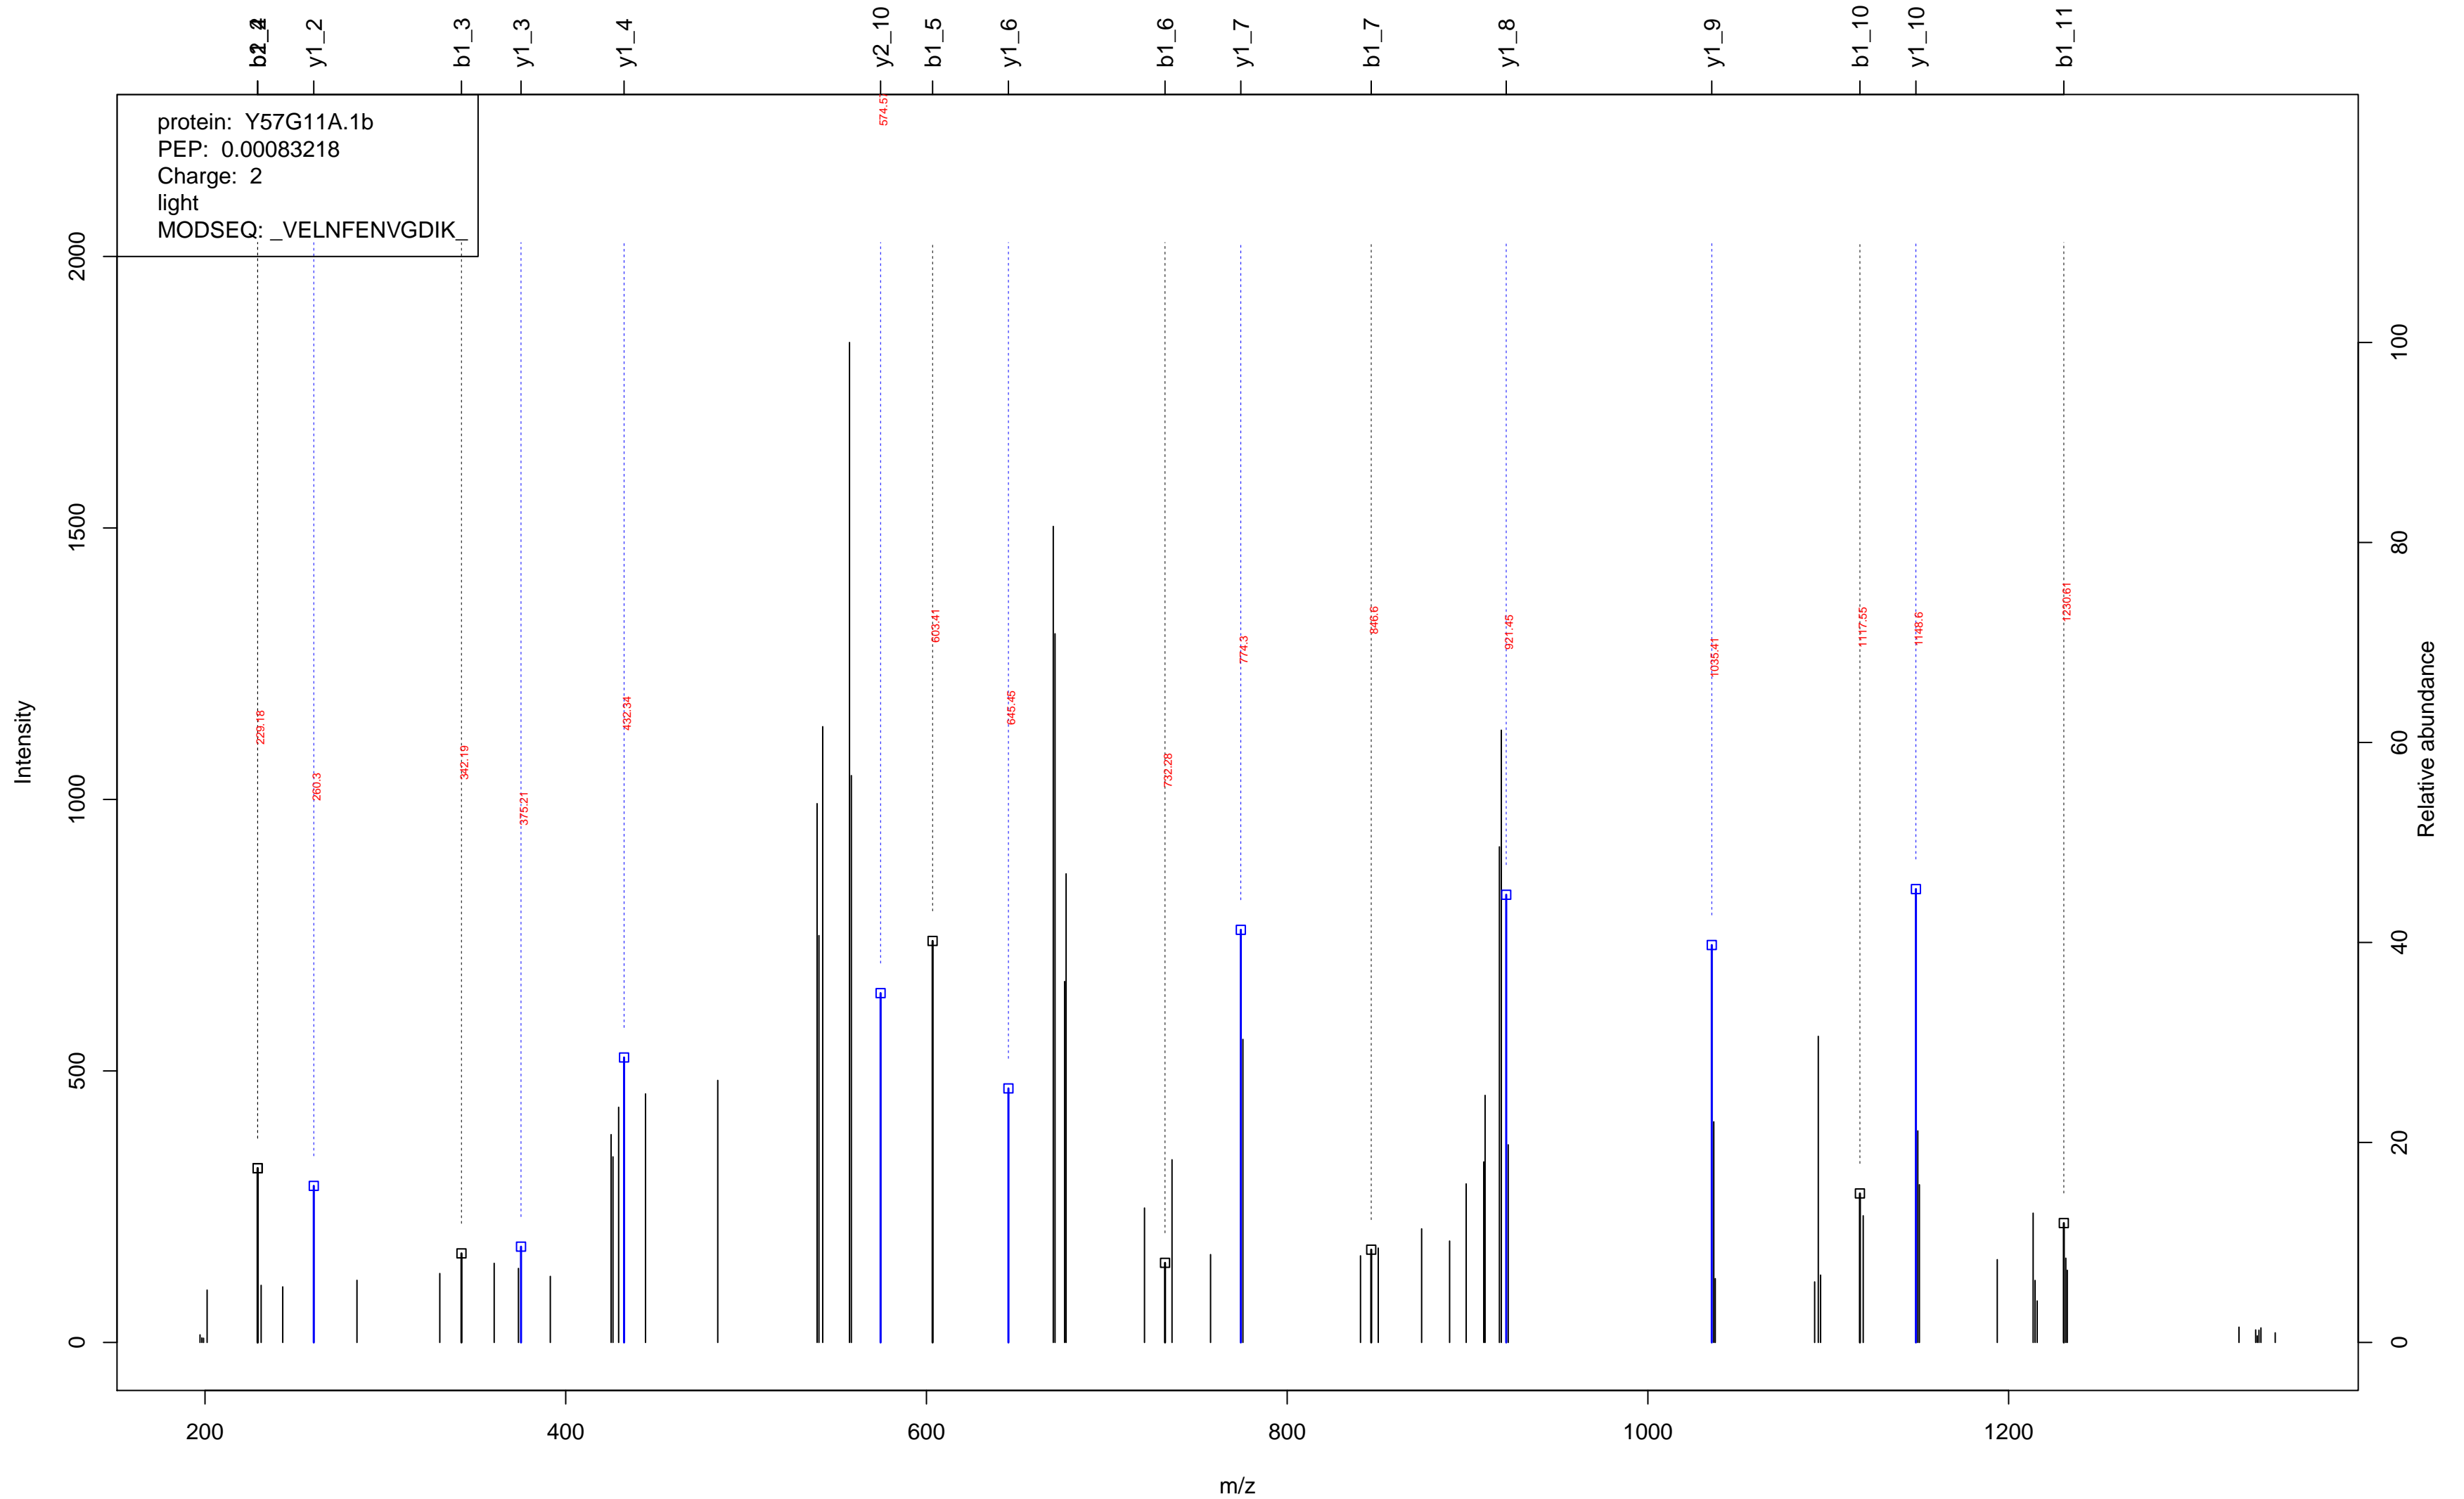

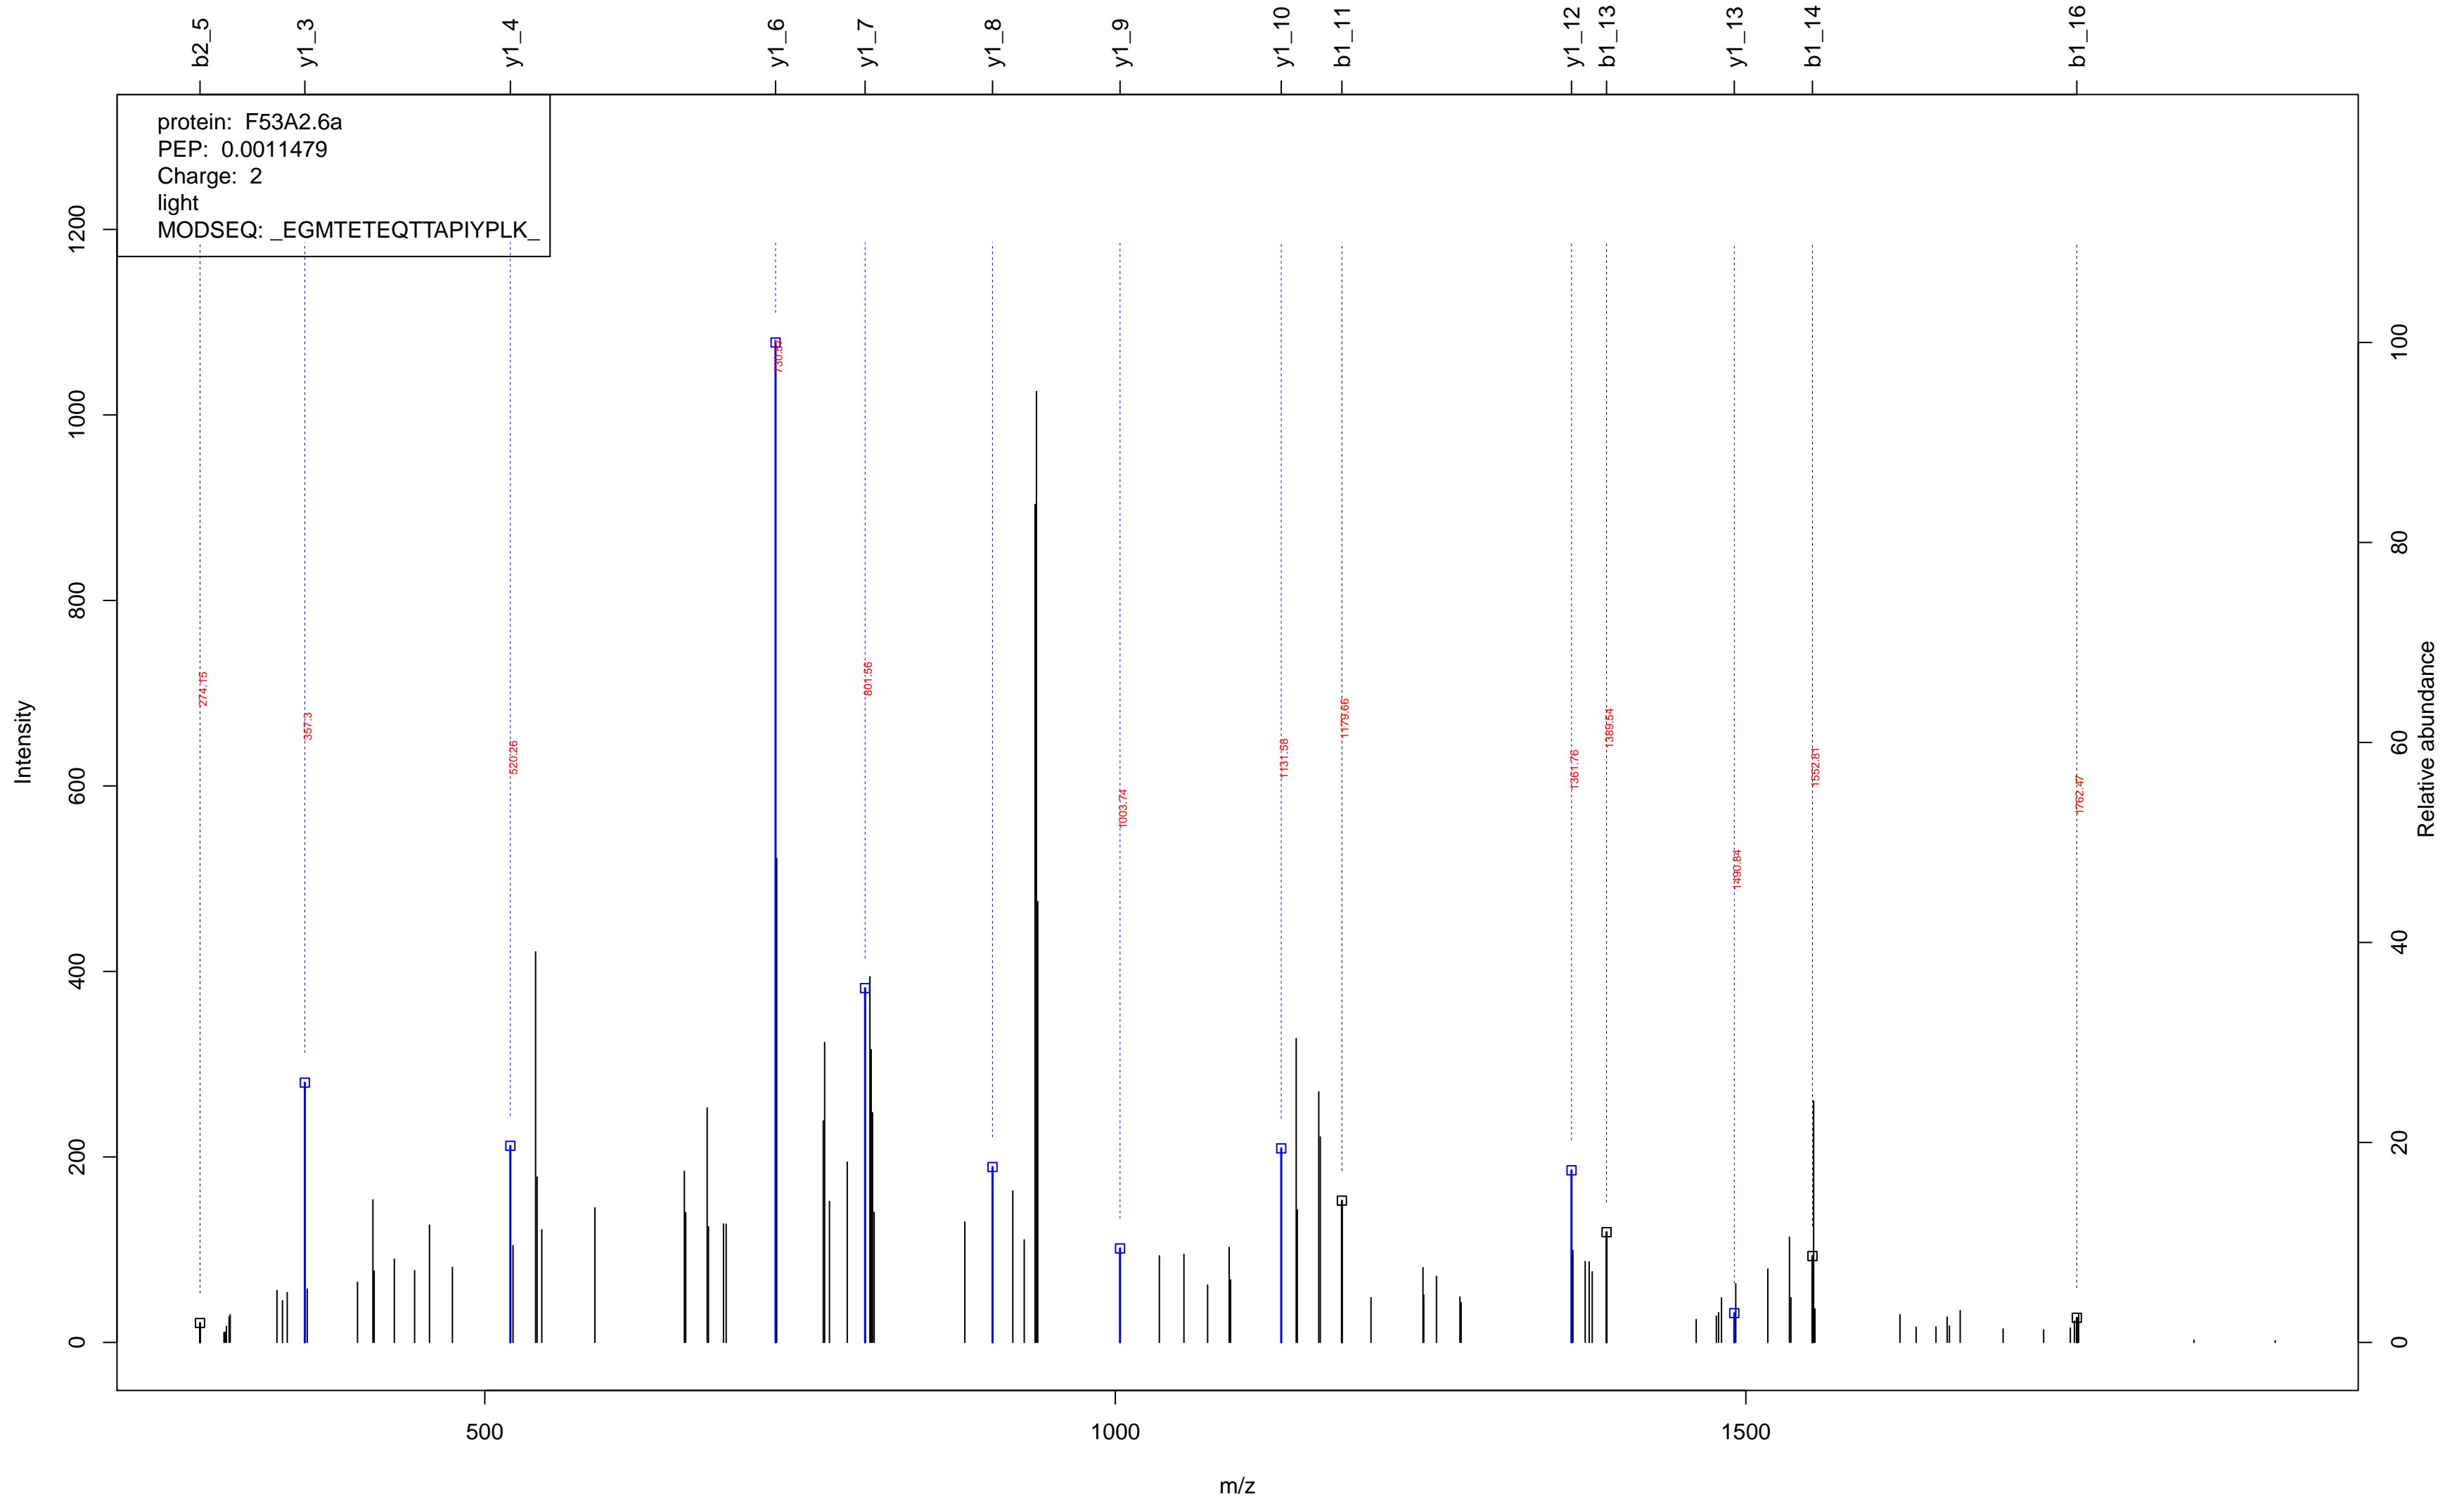

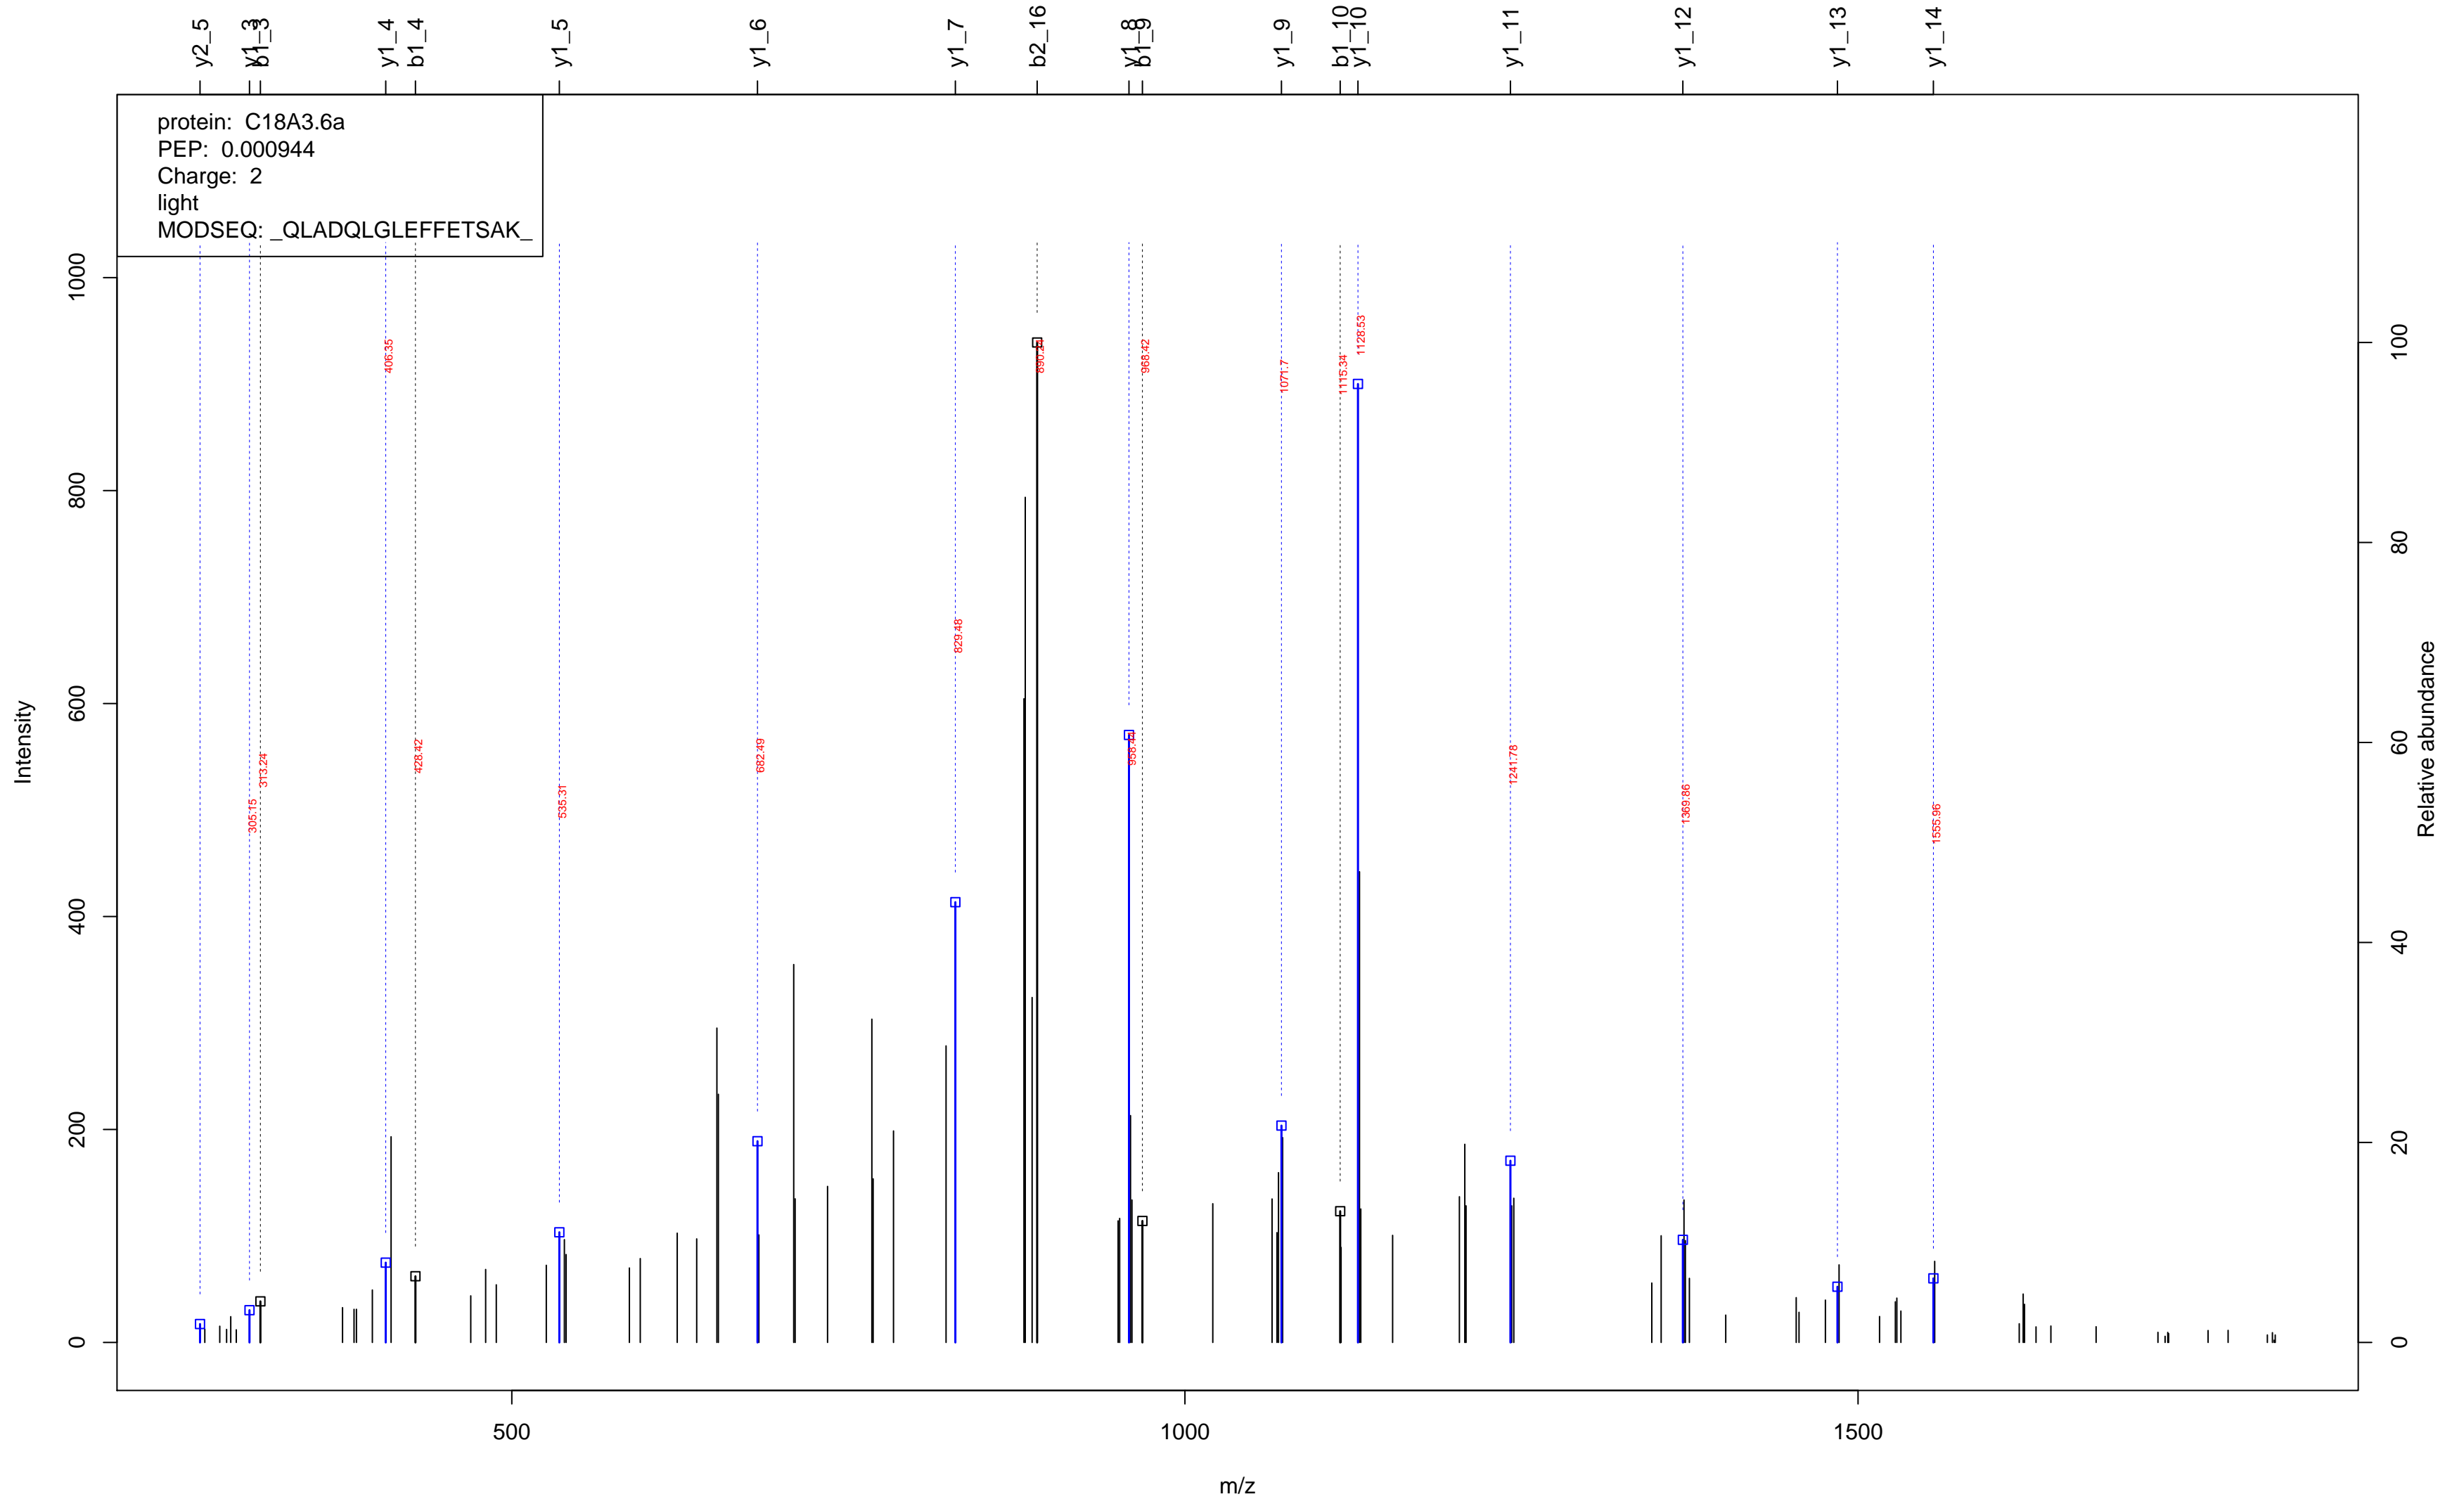

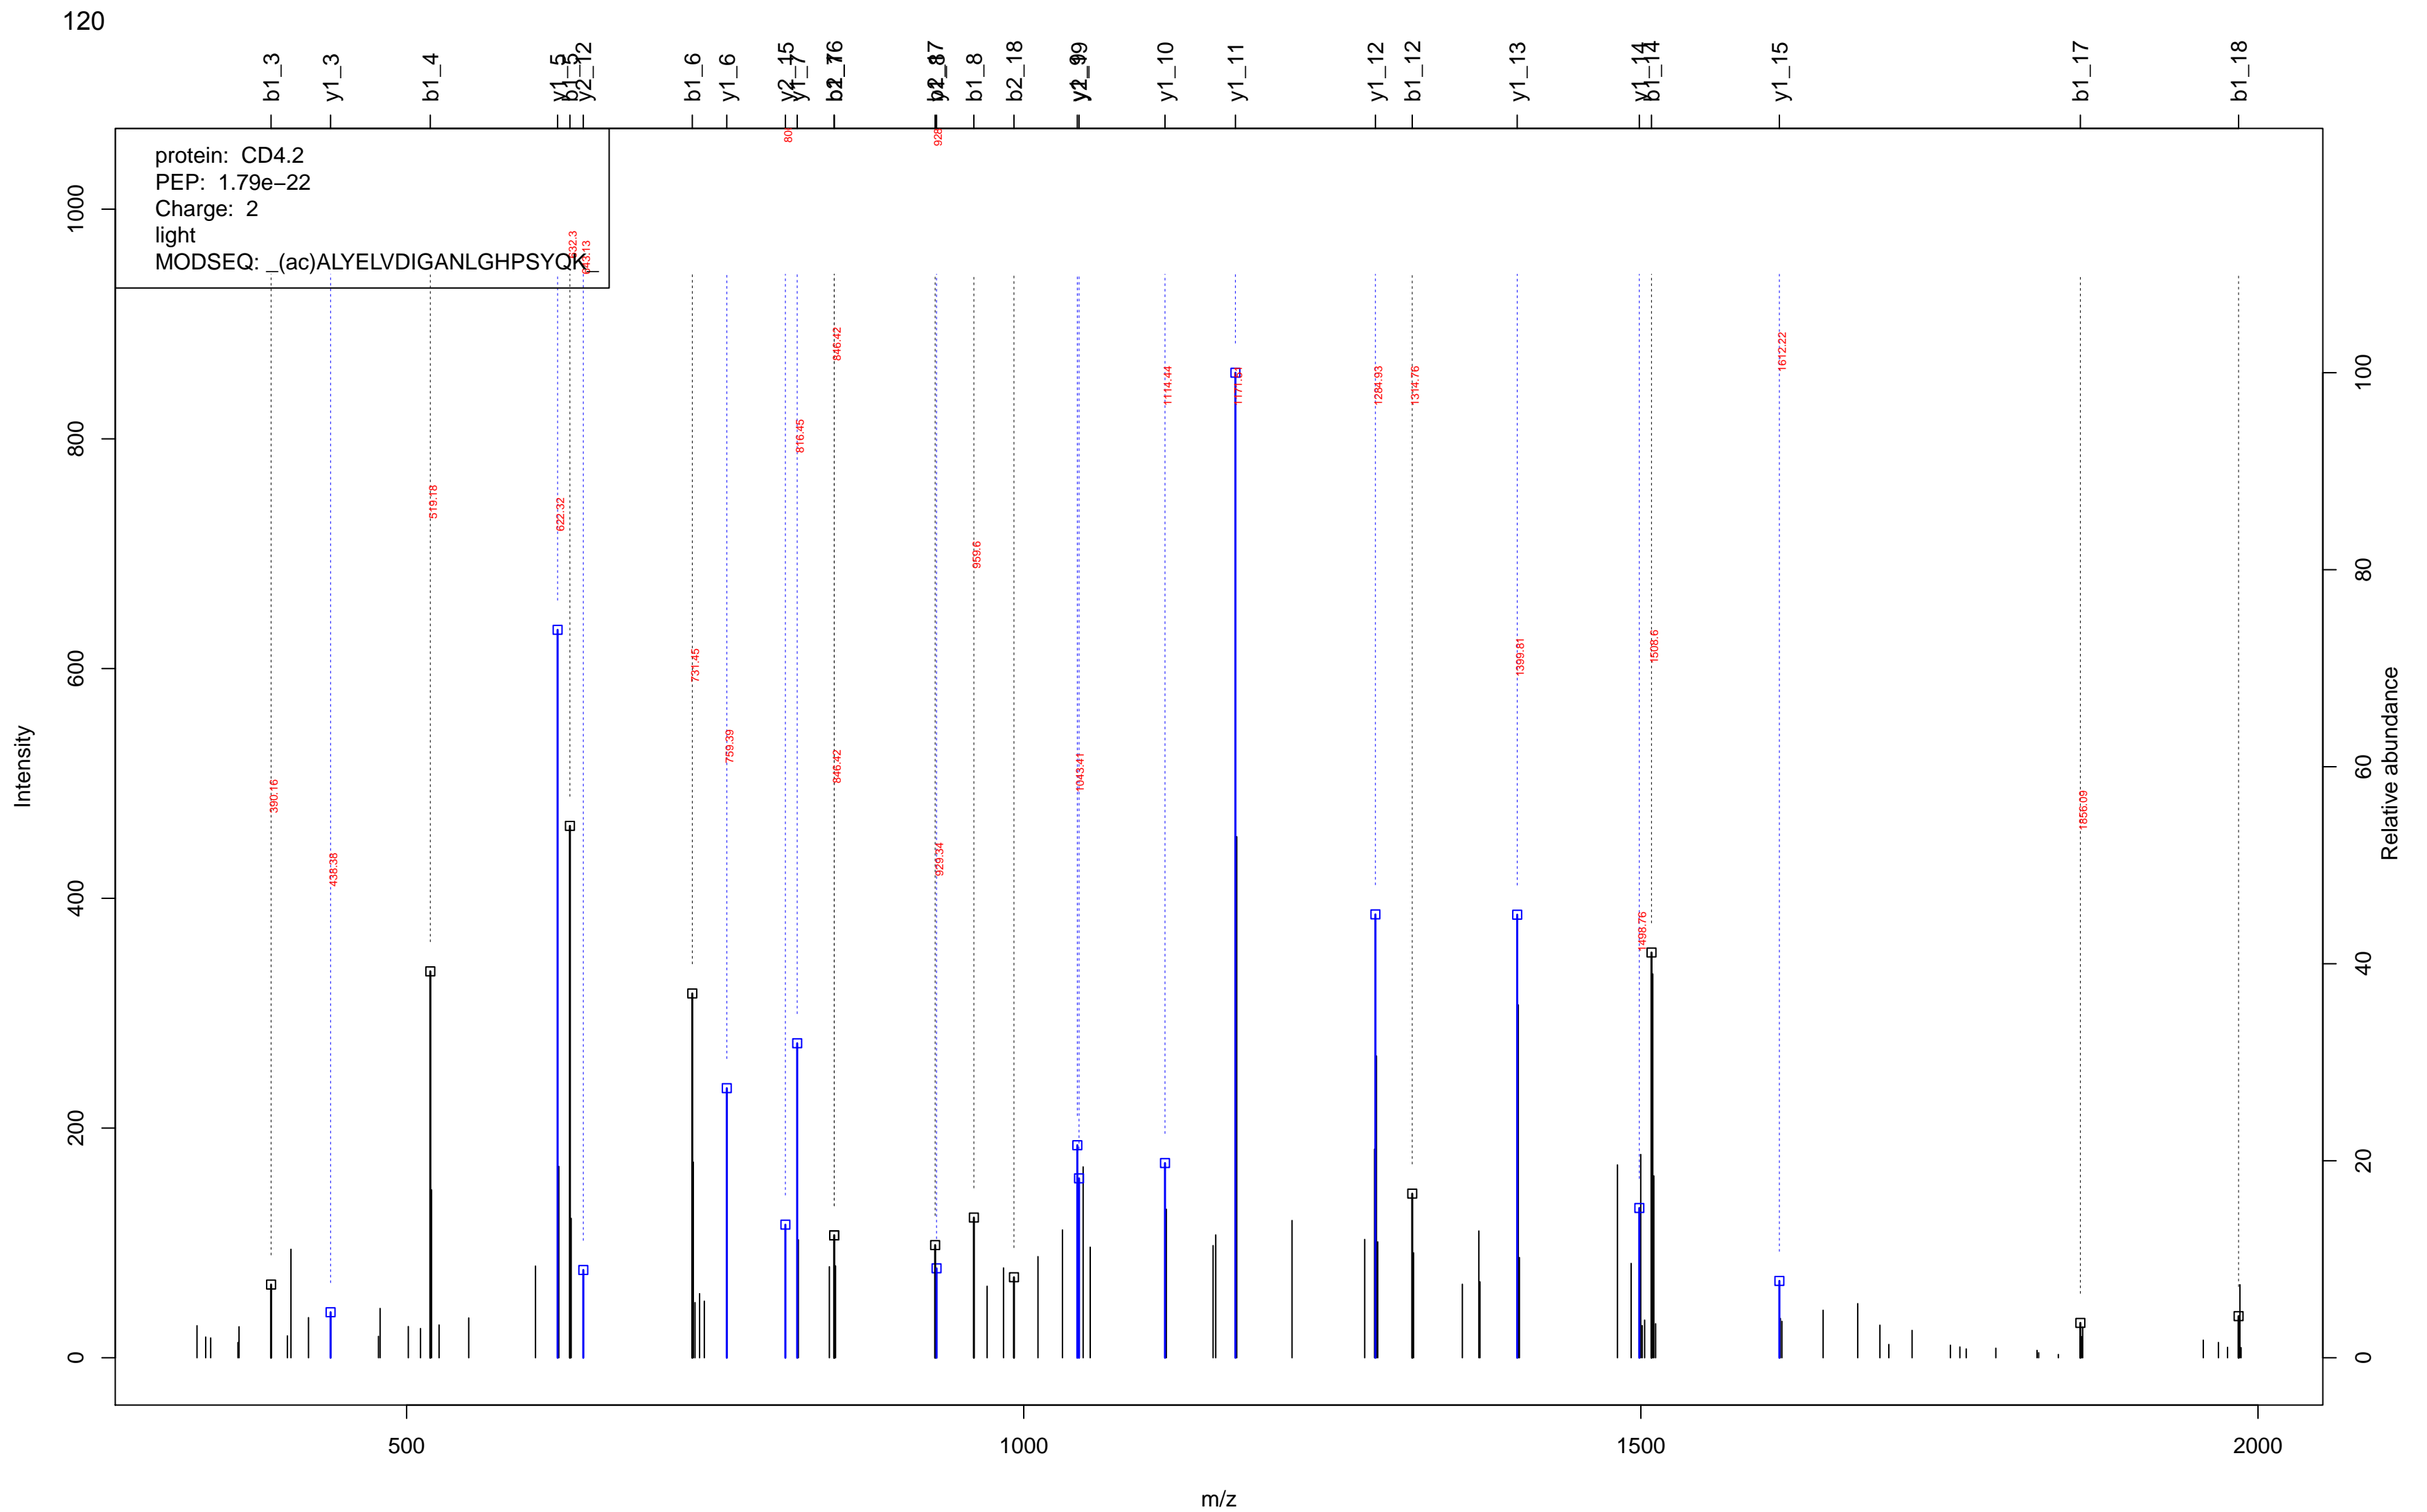



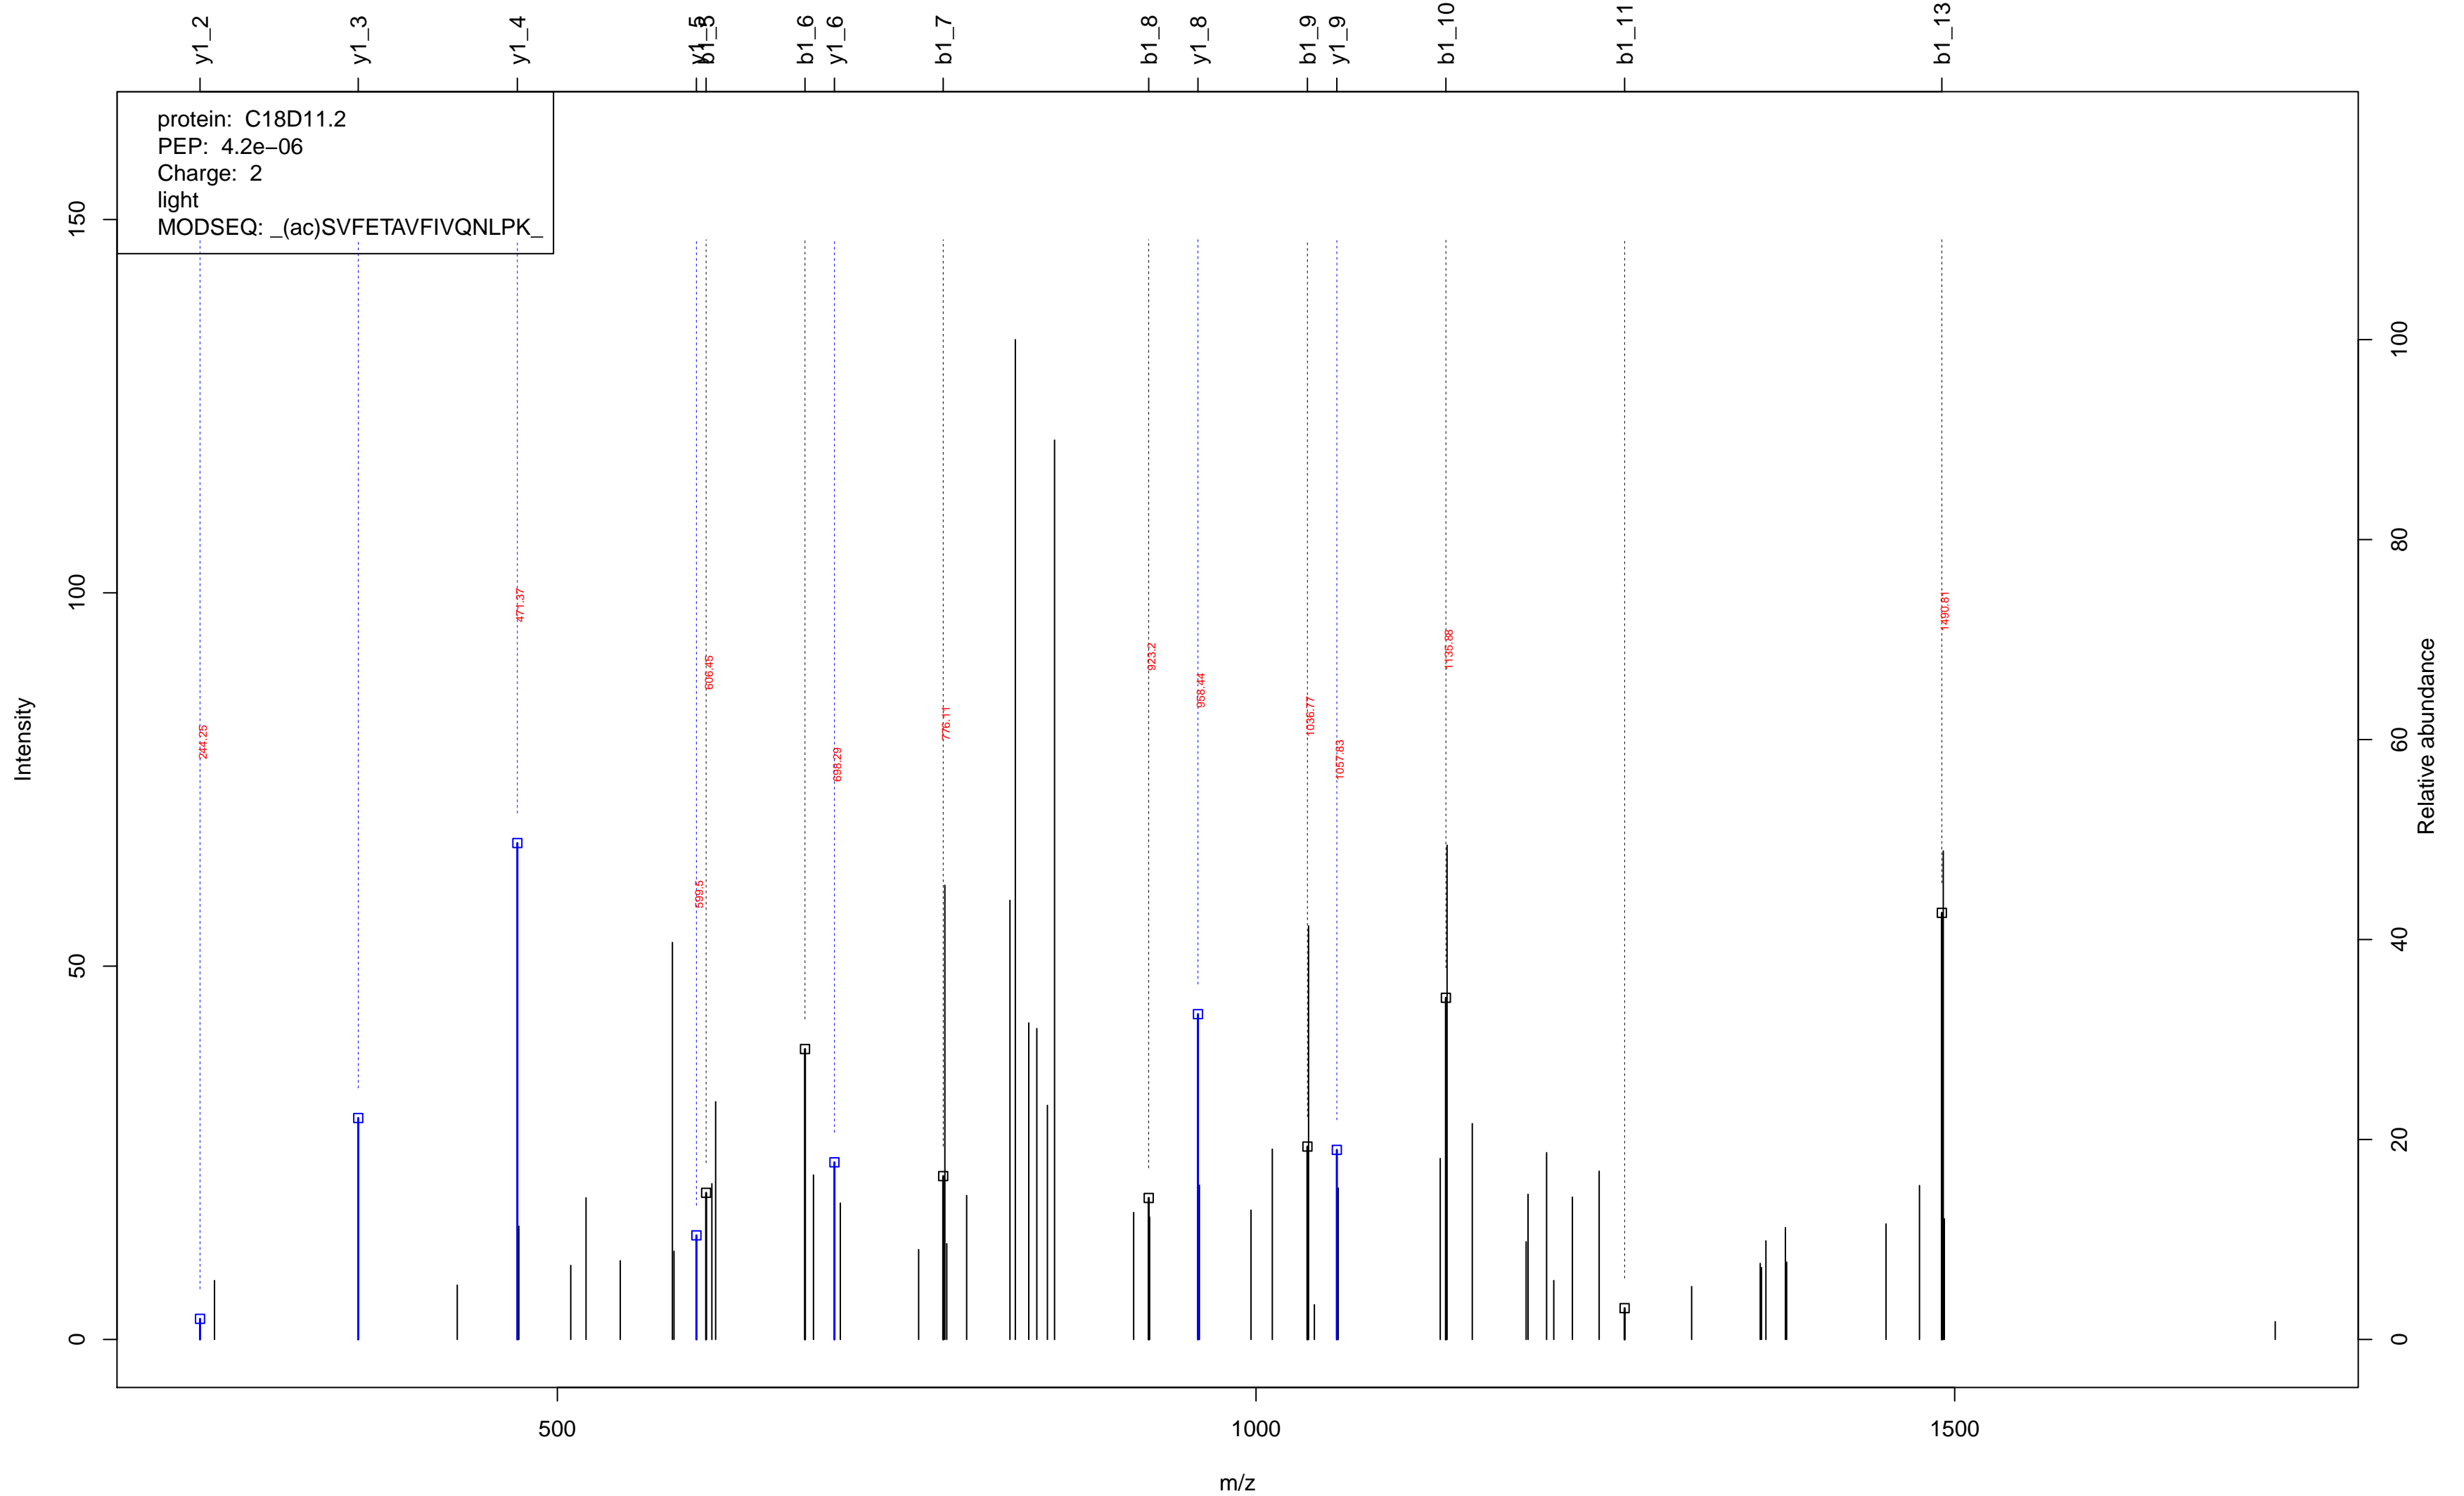

protein: C18D11.2  
PEP: 4.2e-06  
Charge: 2  
light  
MODSEQ: \_(ac)SVFETAVFIVQNLPK\_

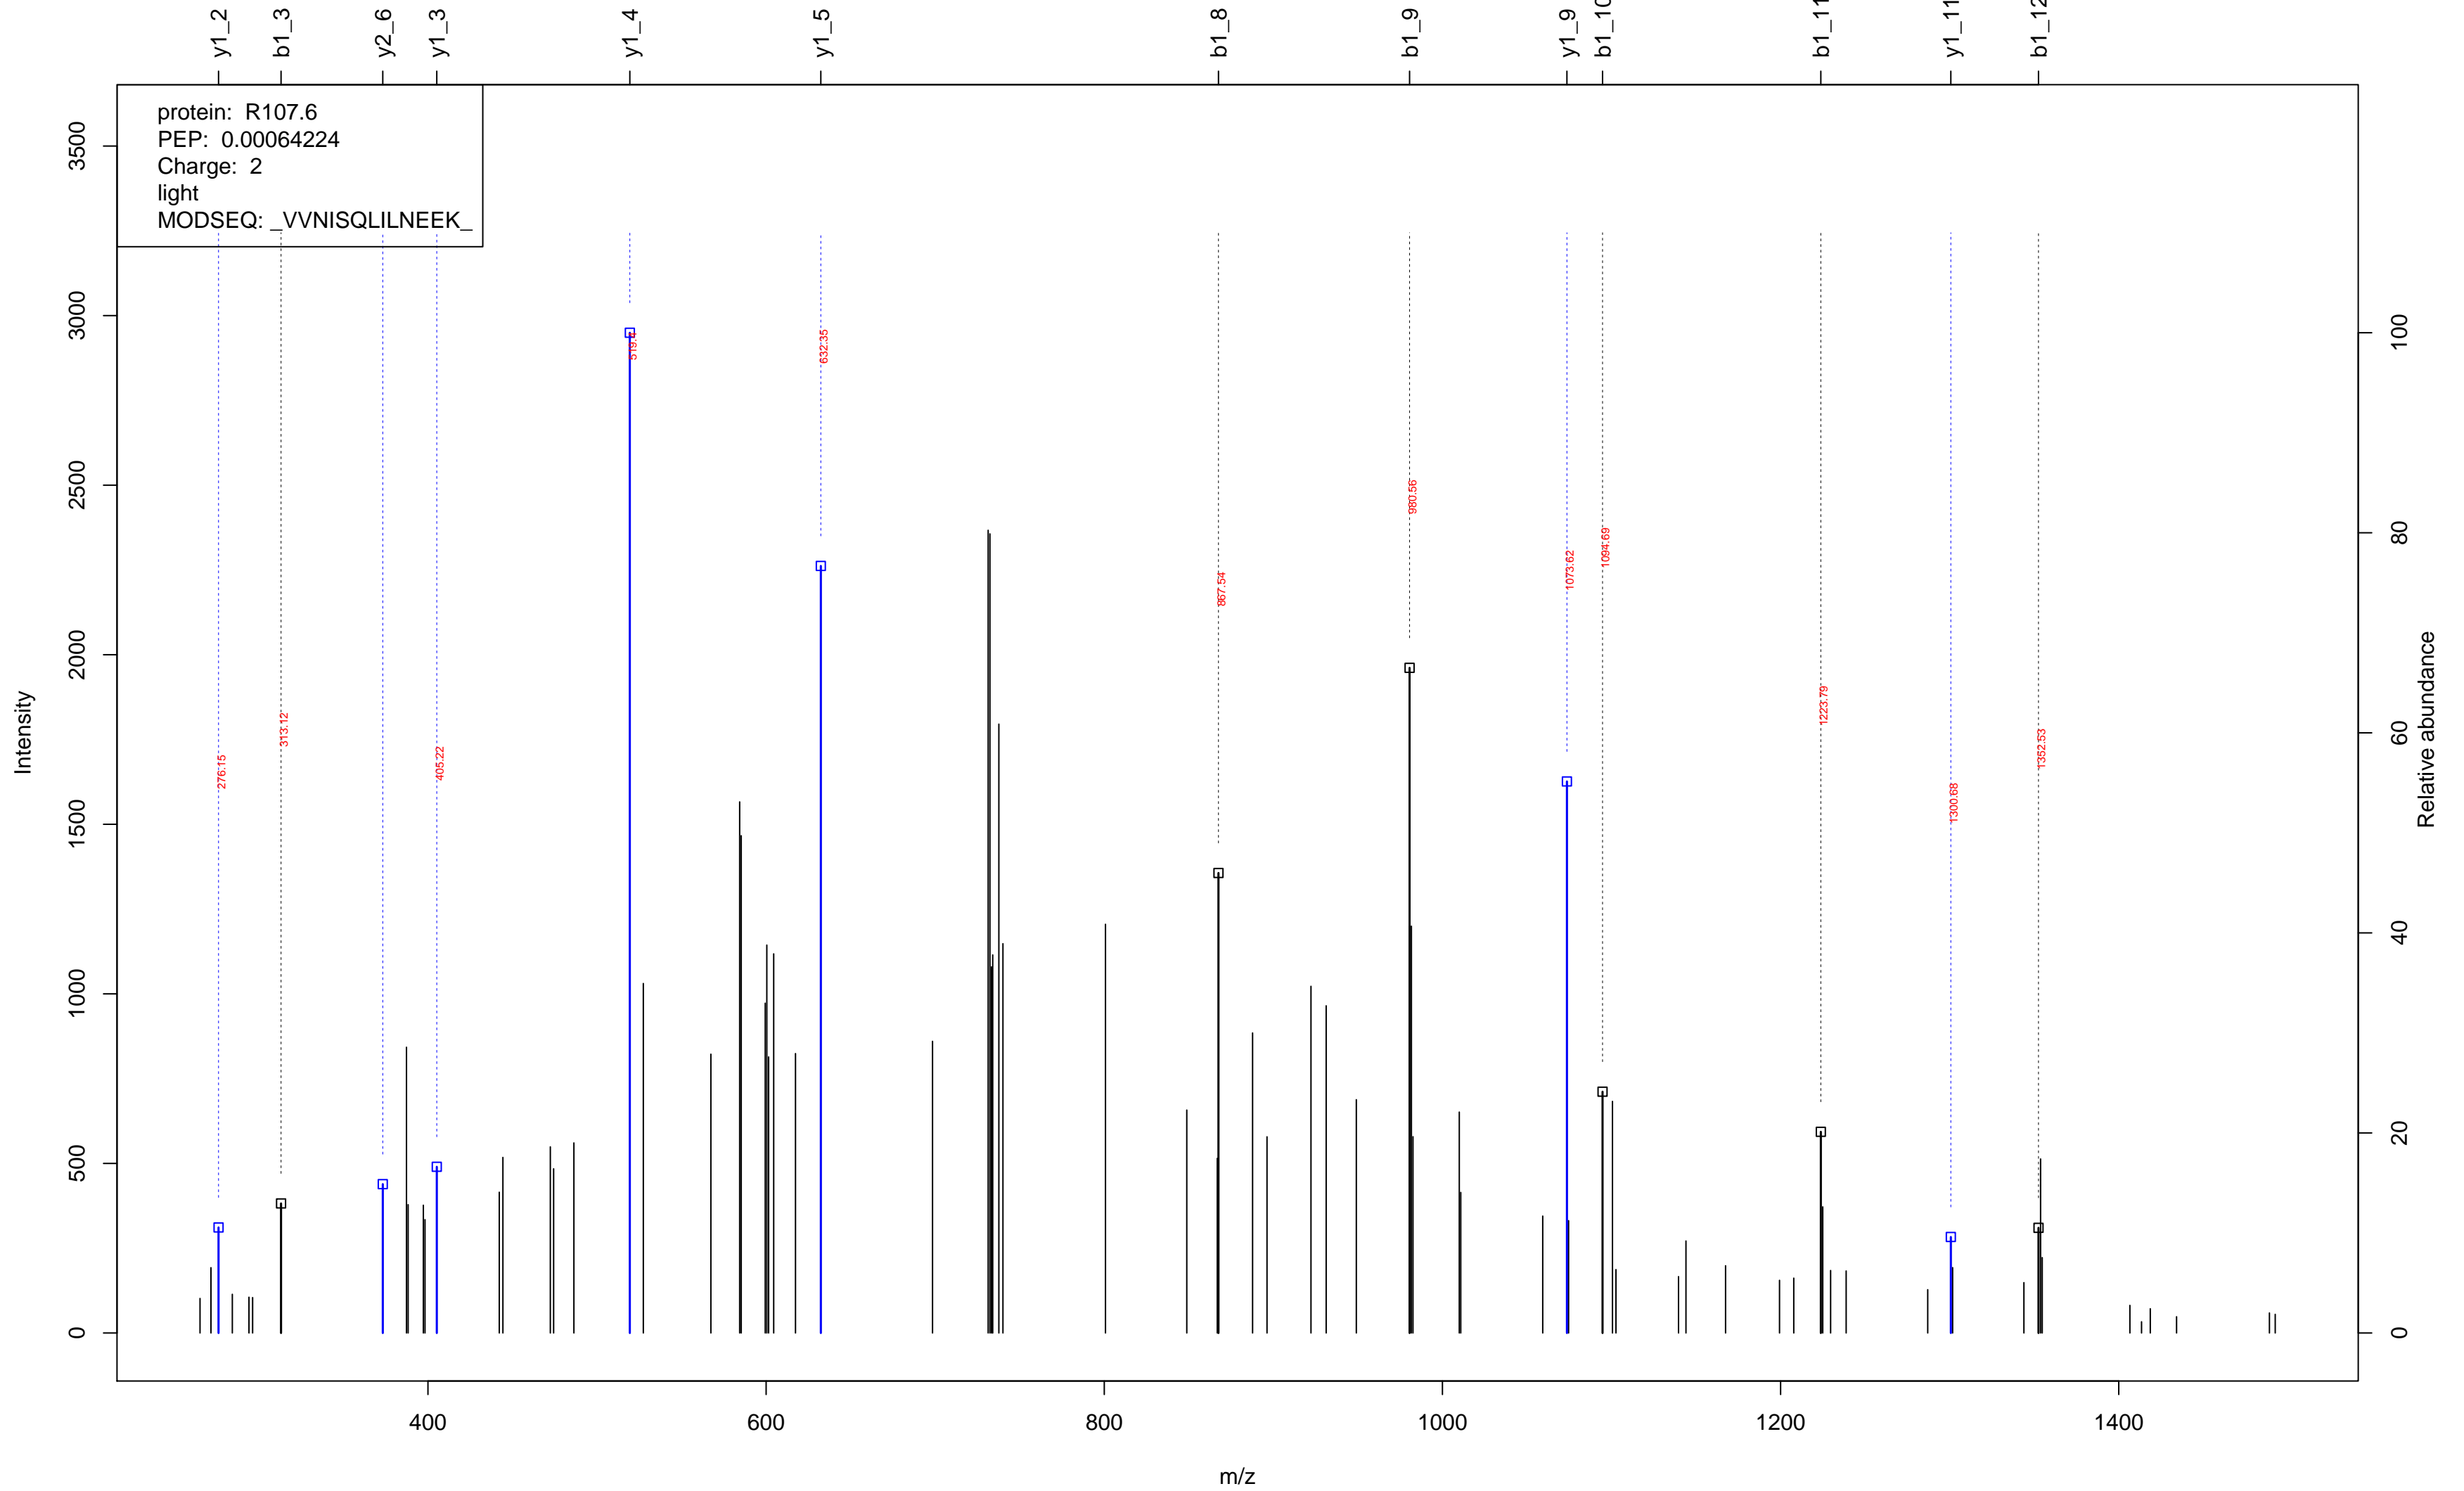

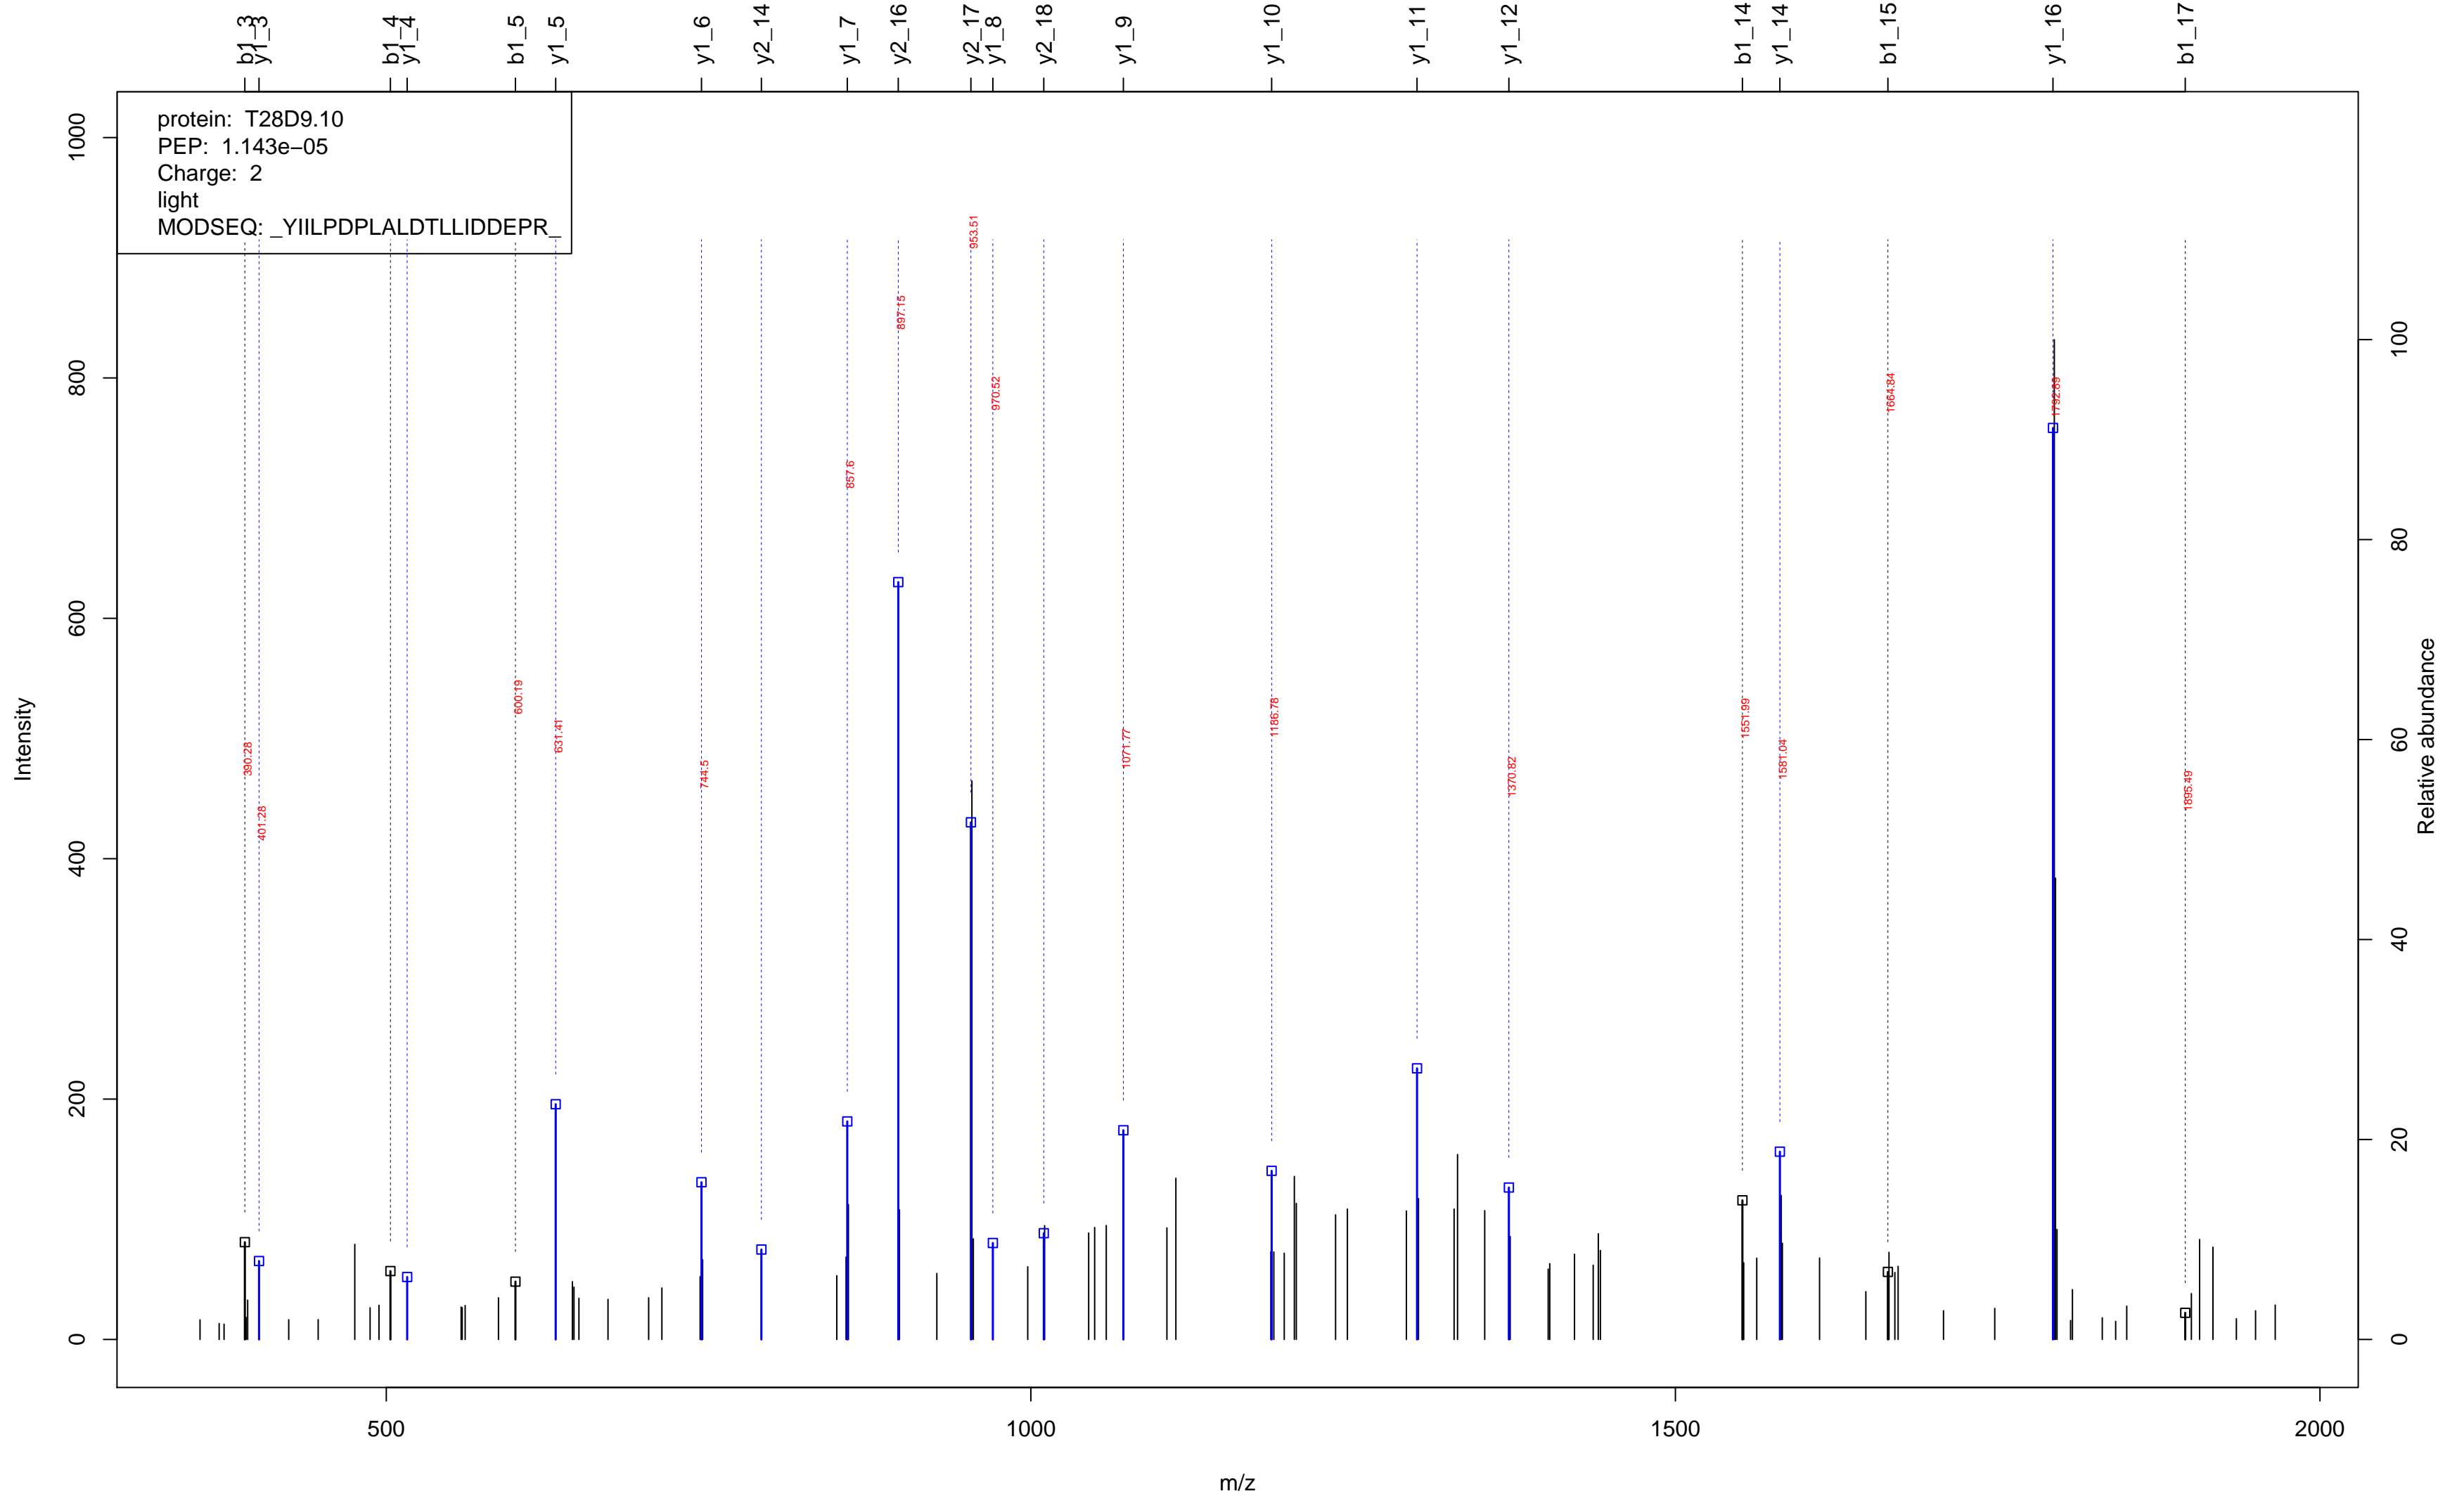

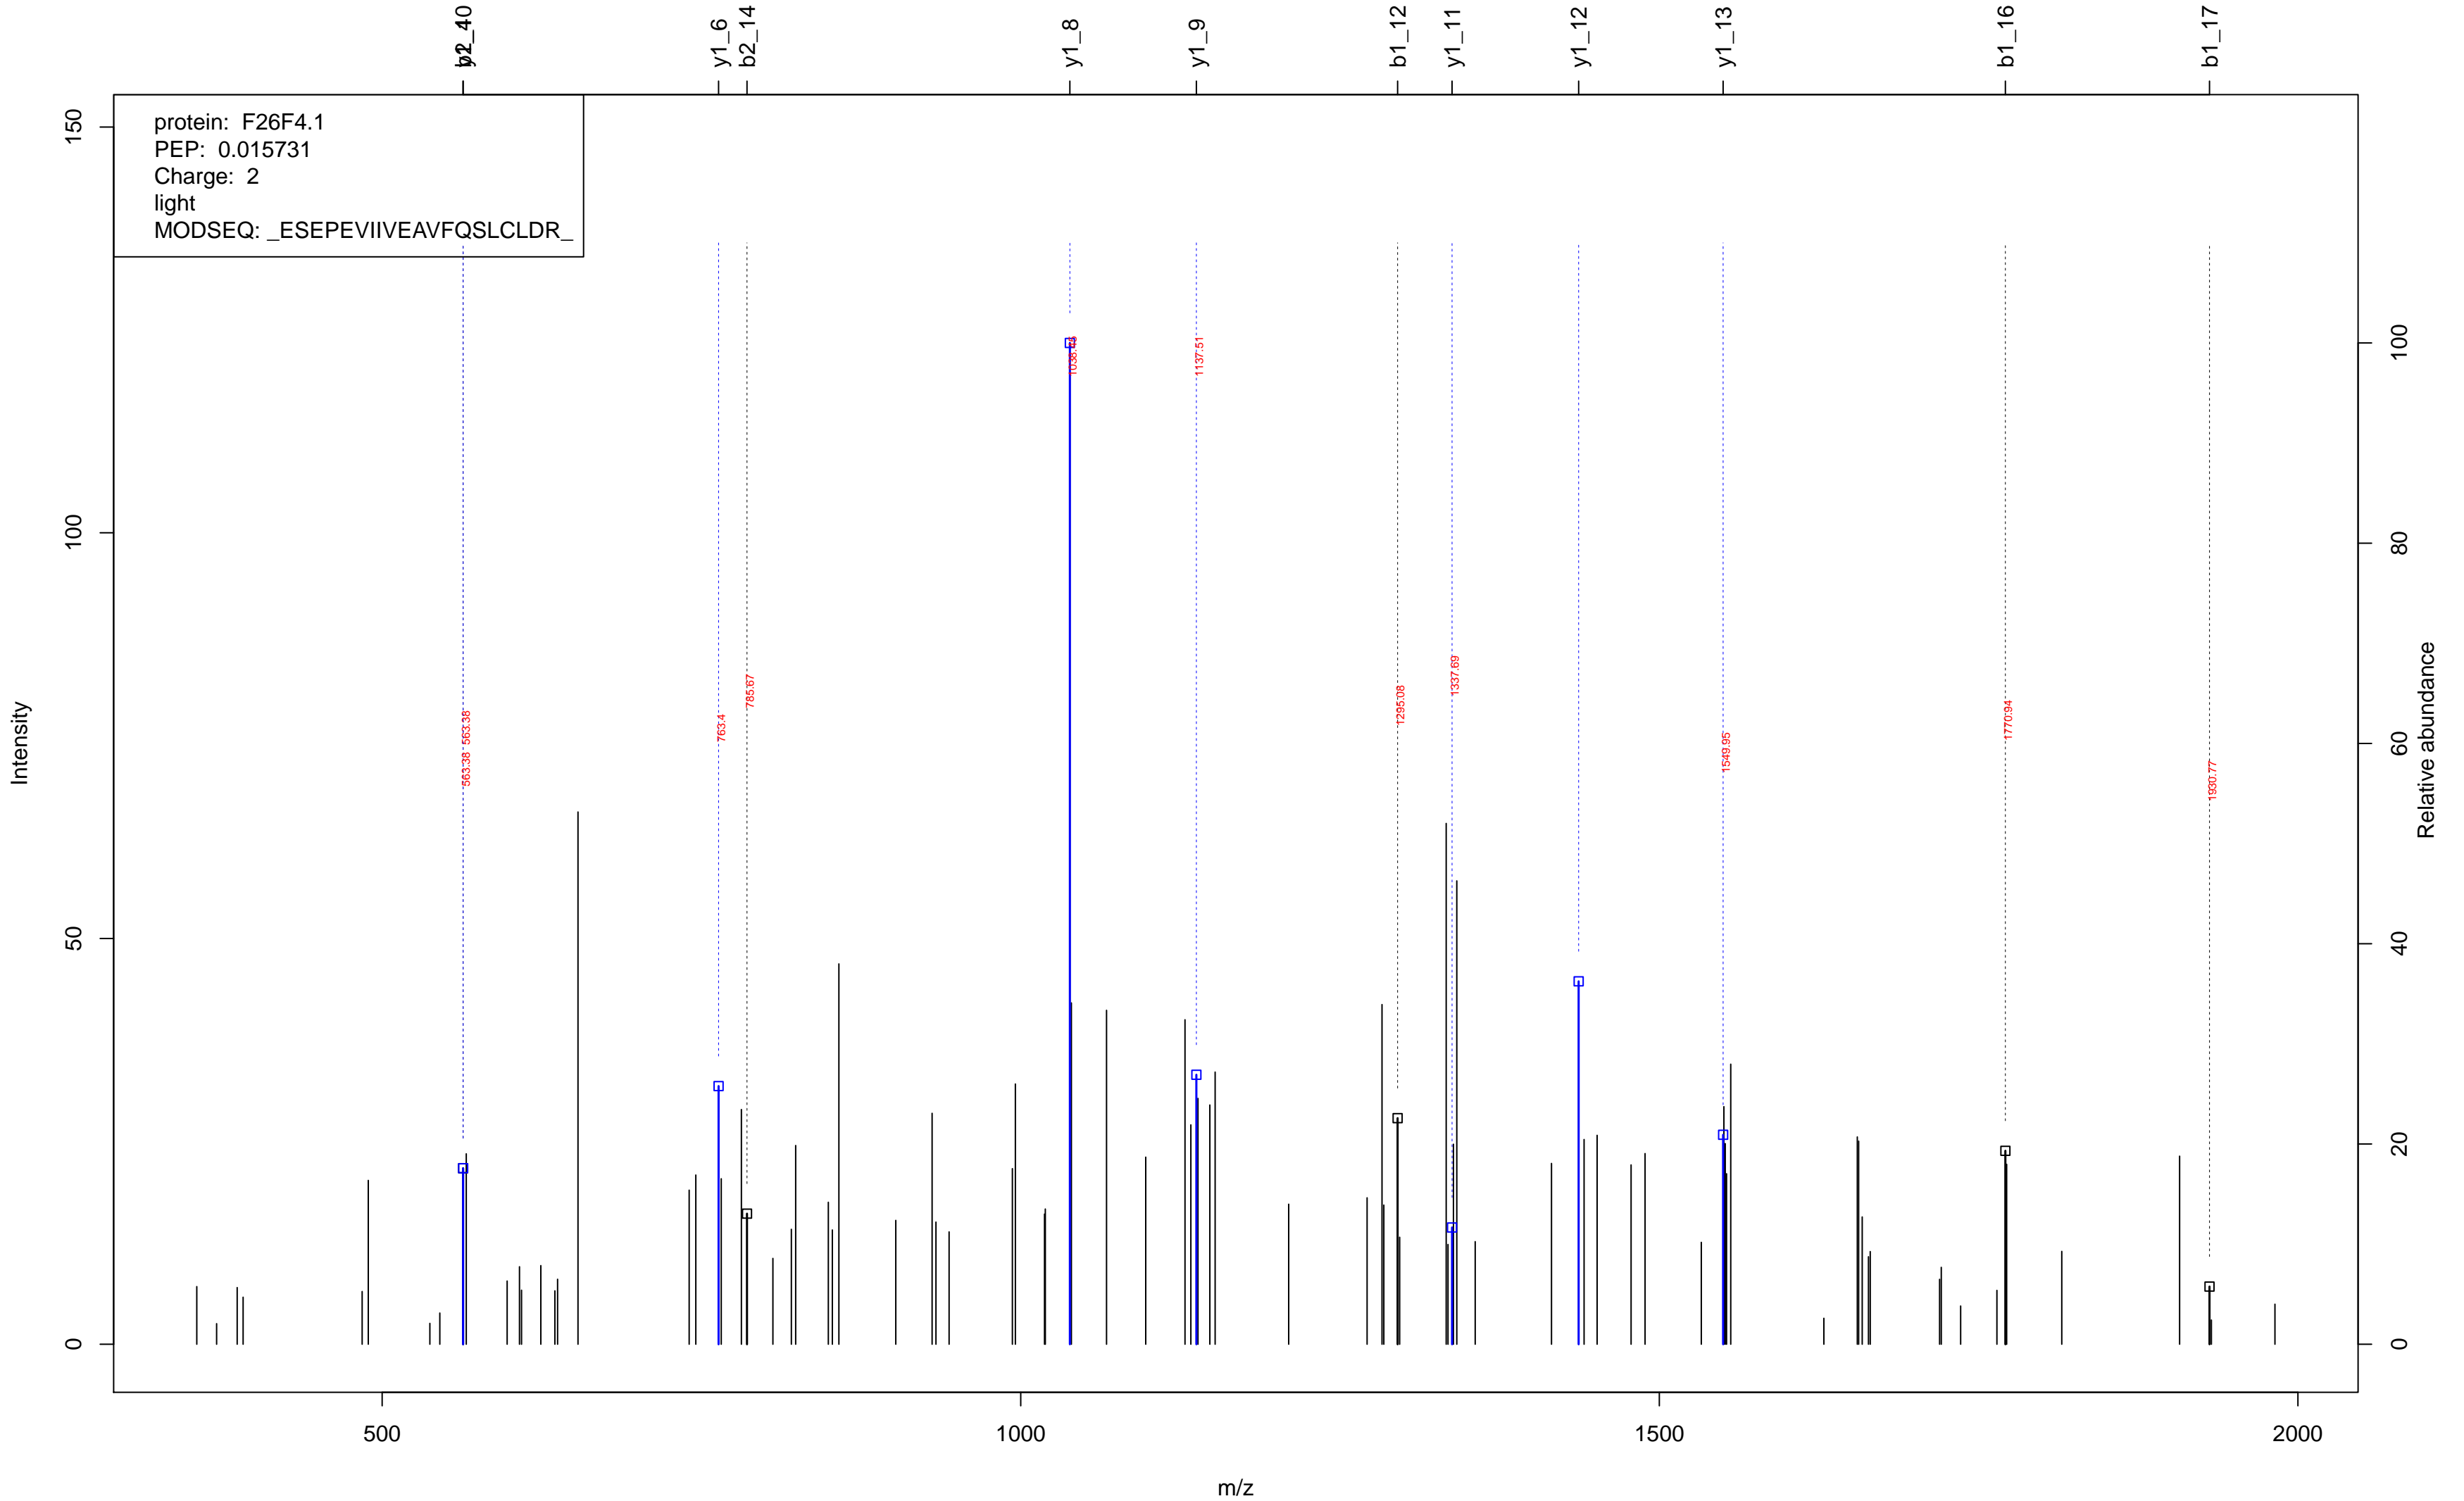

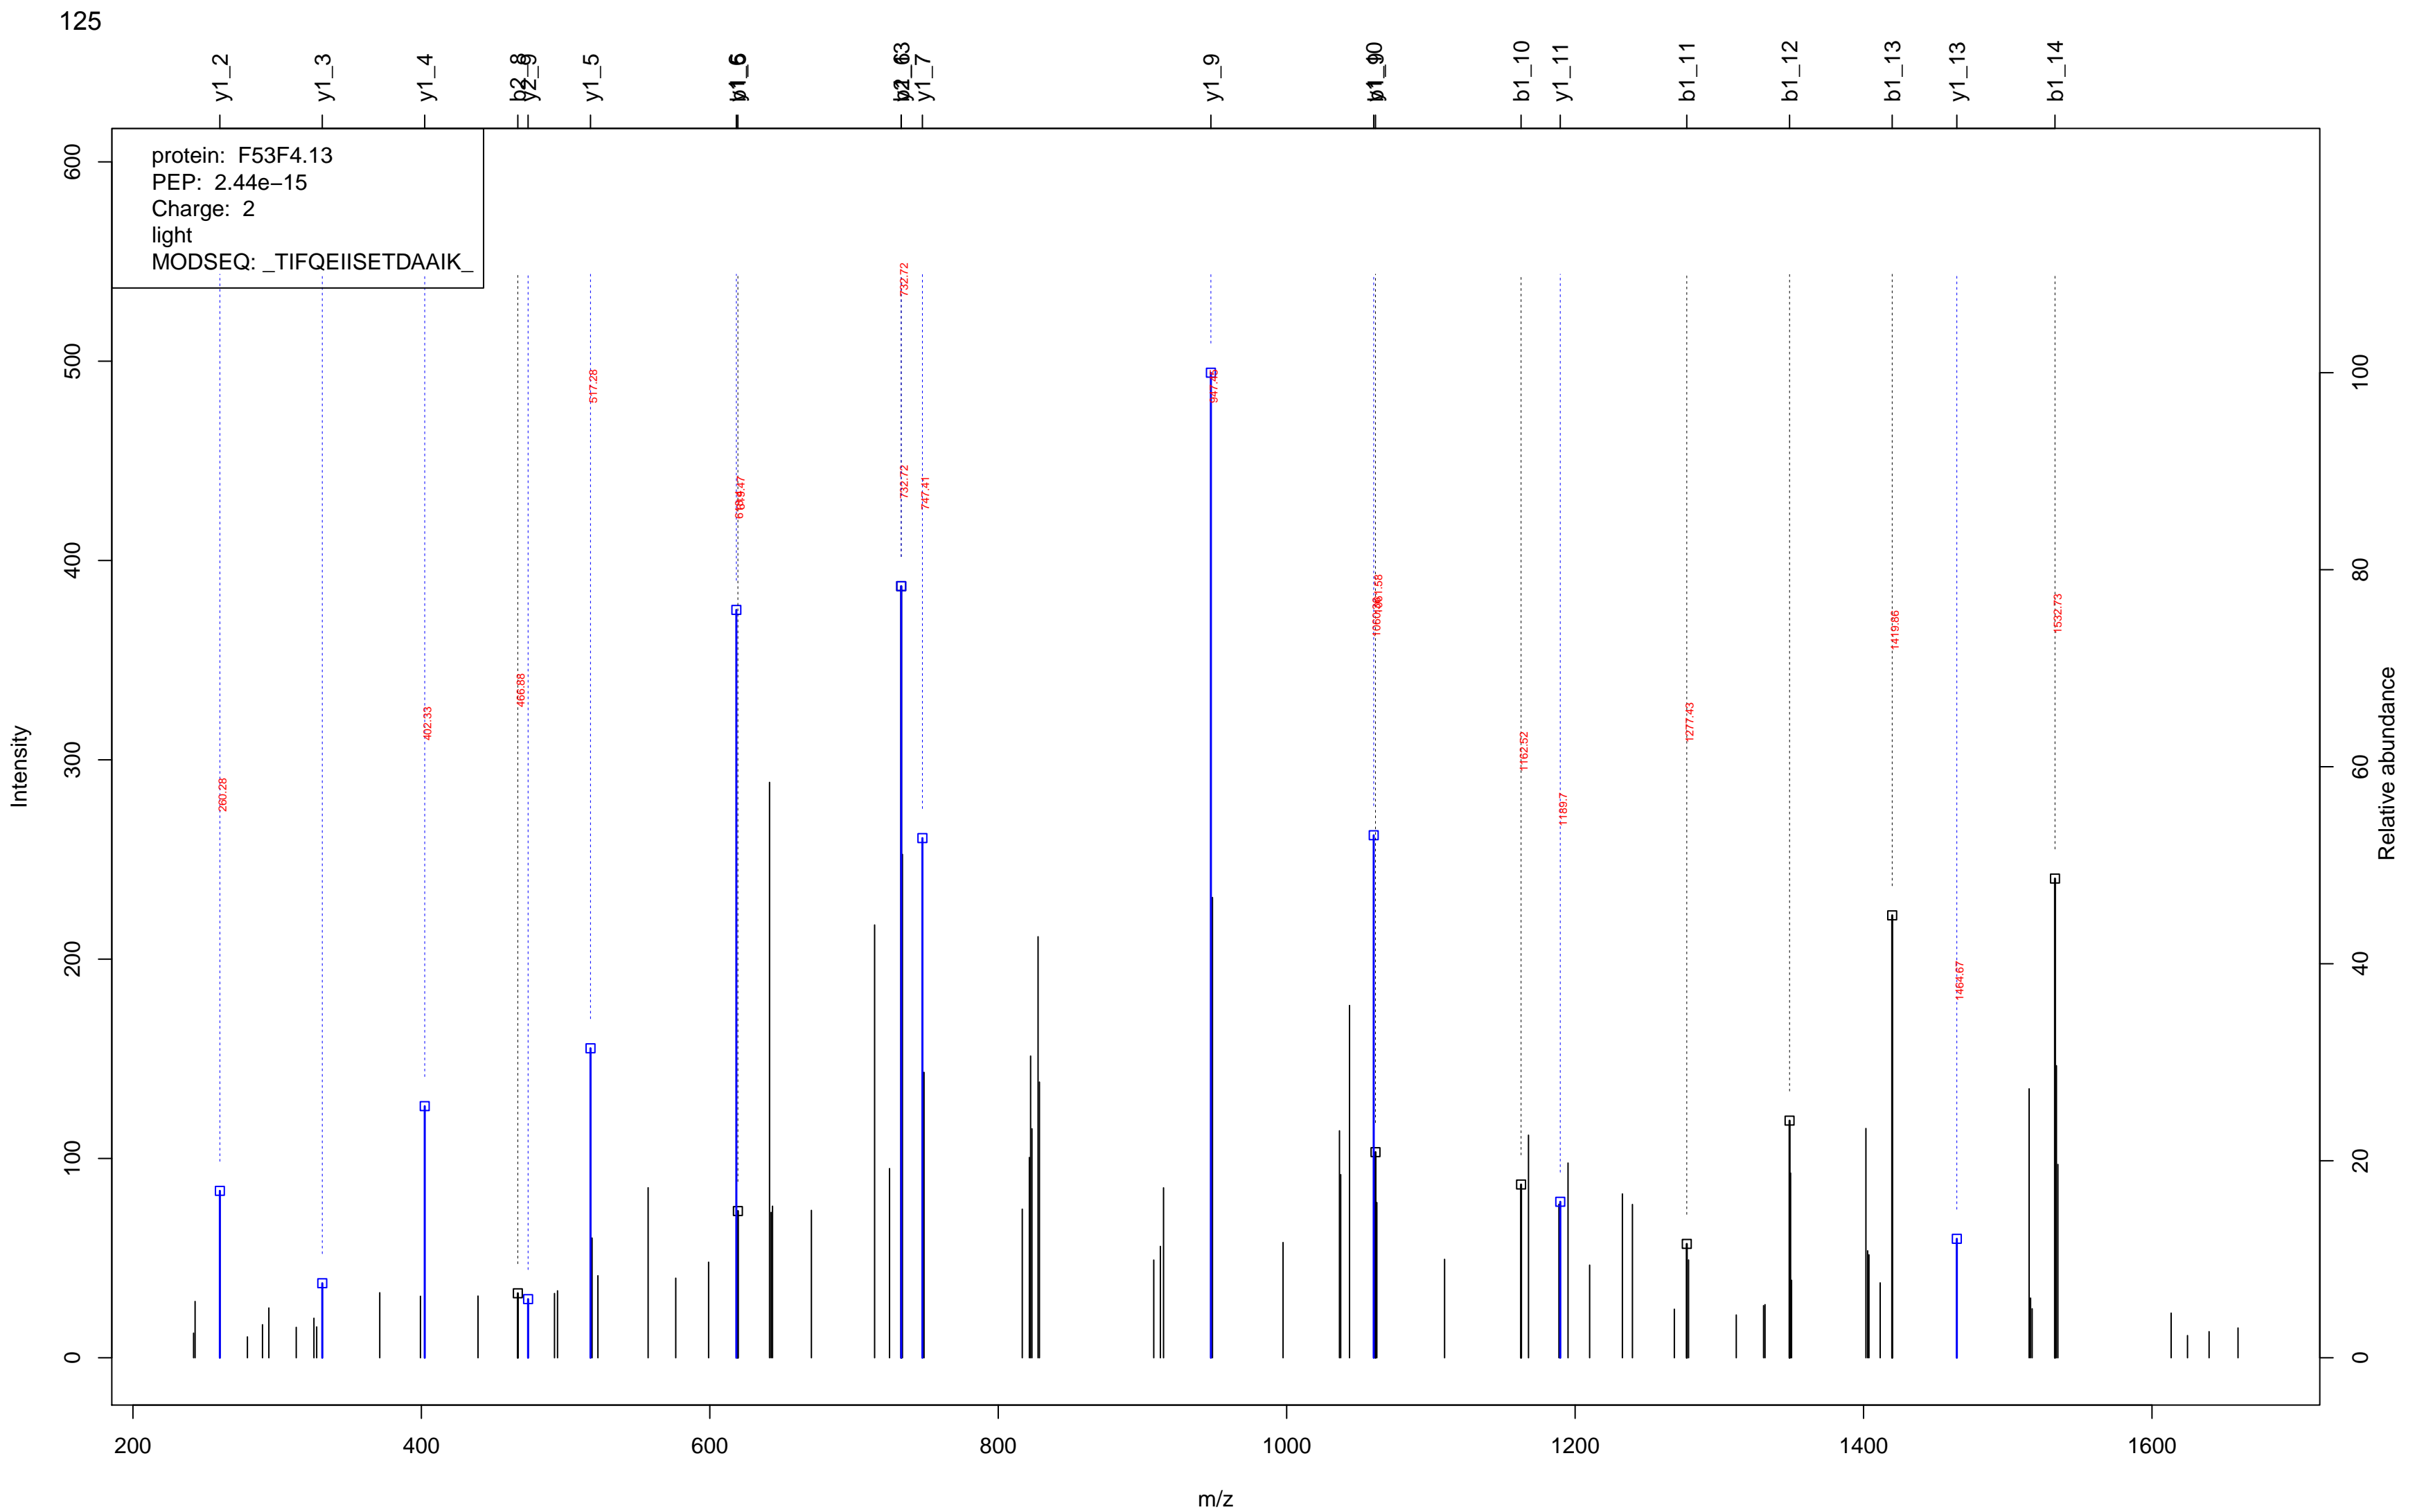

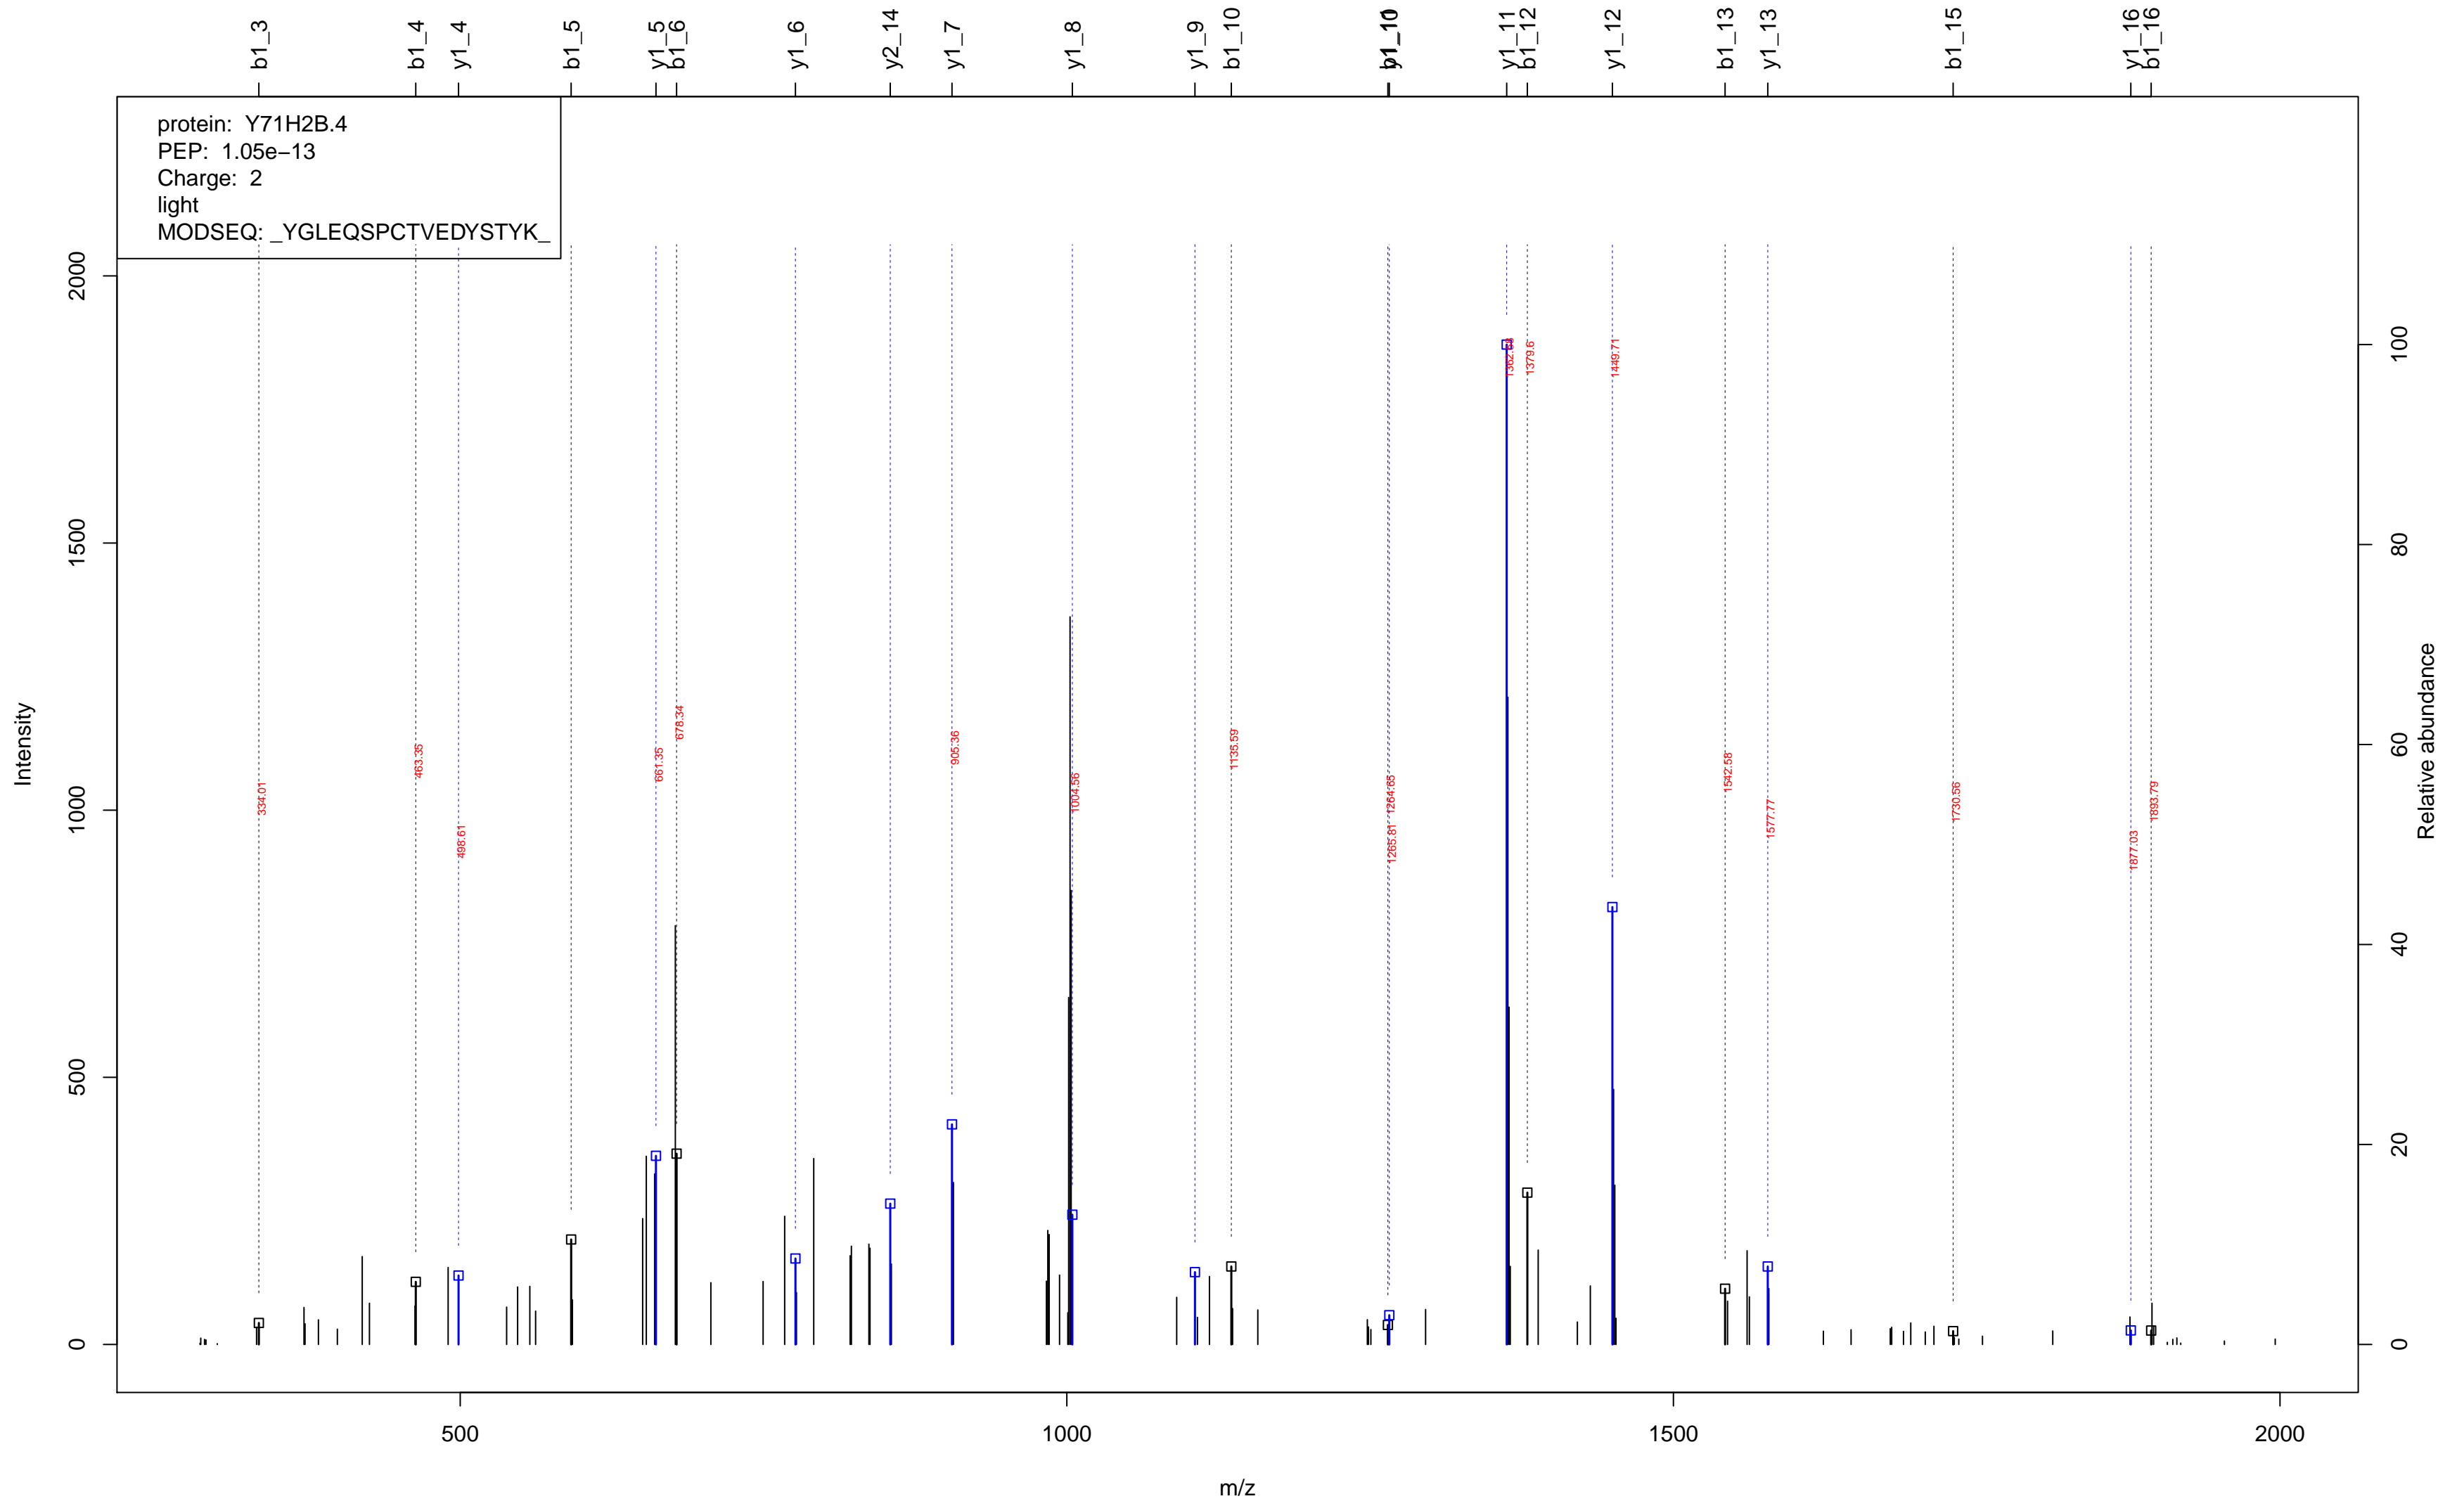

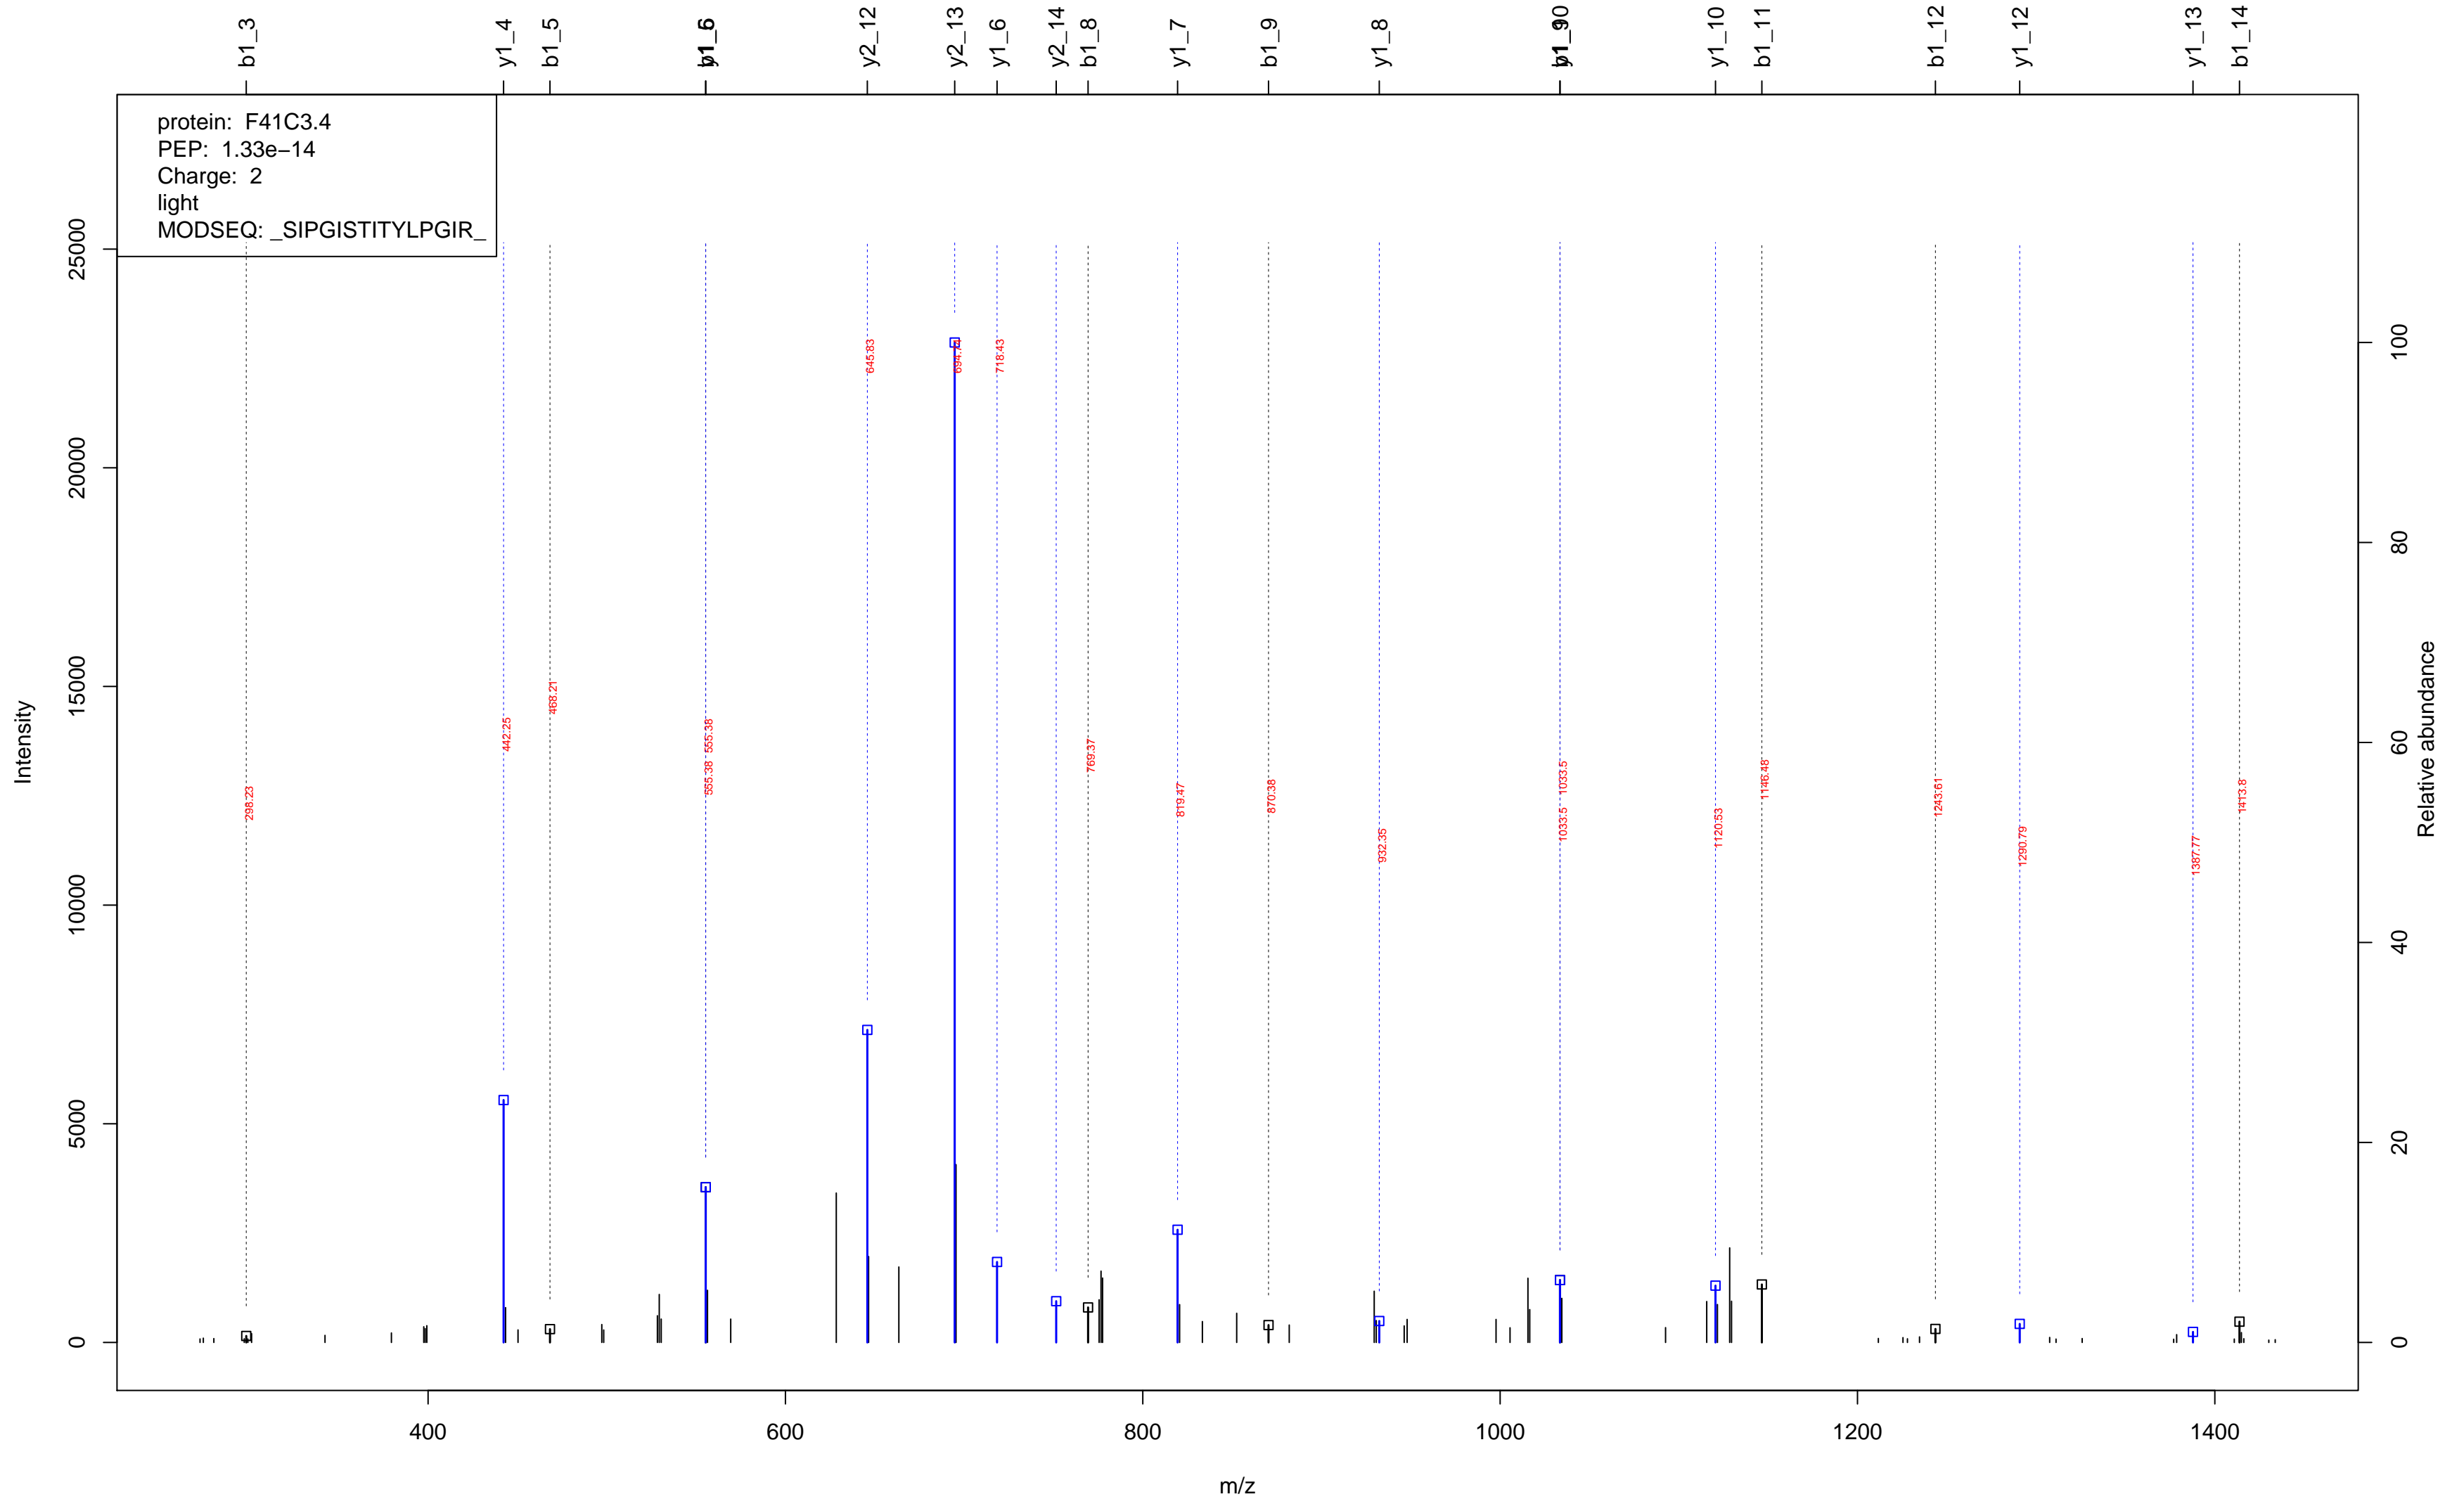

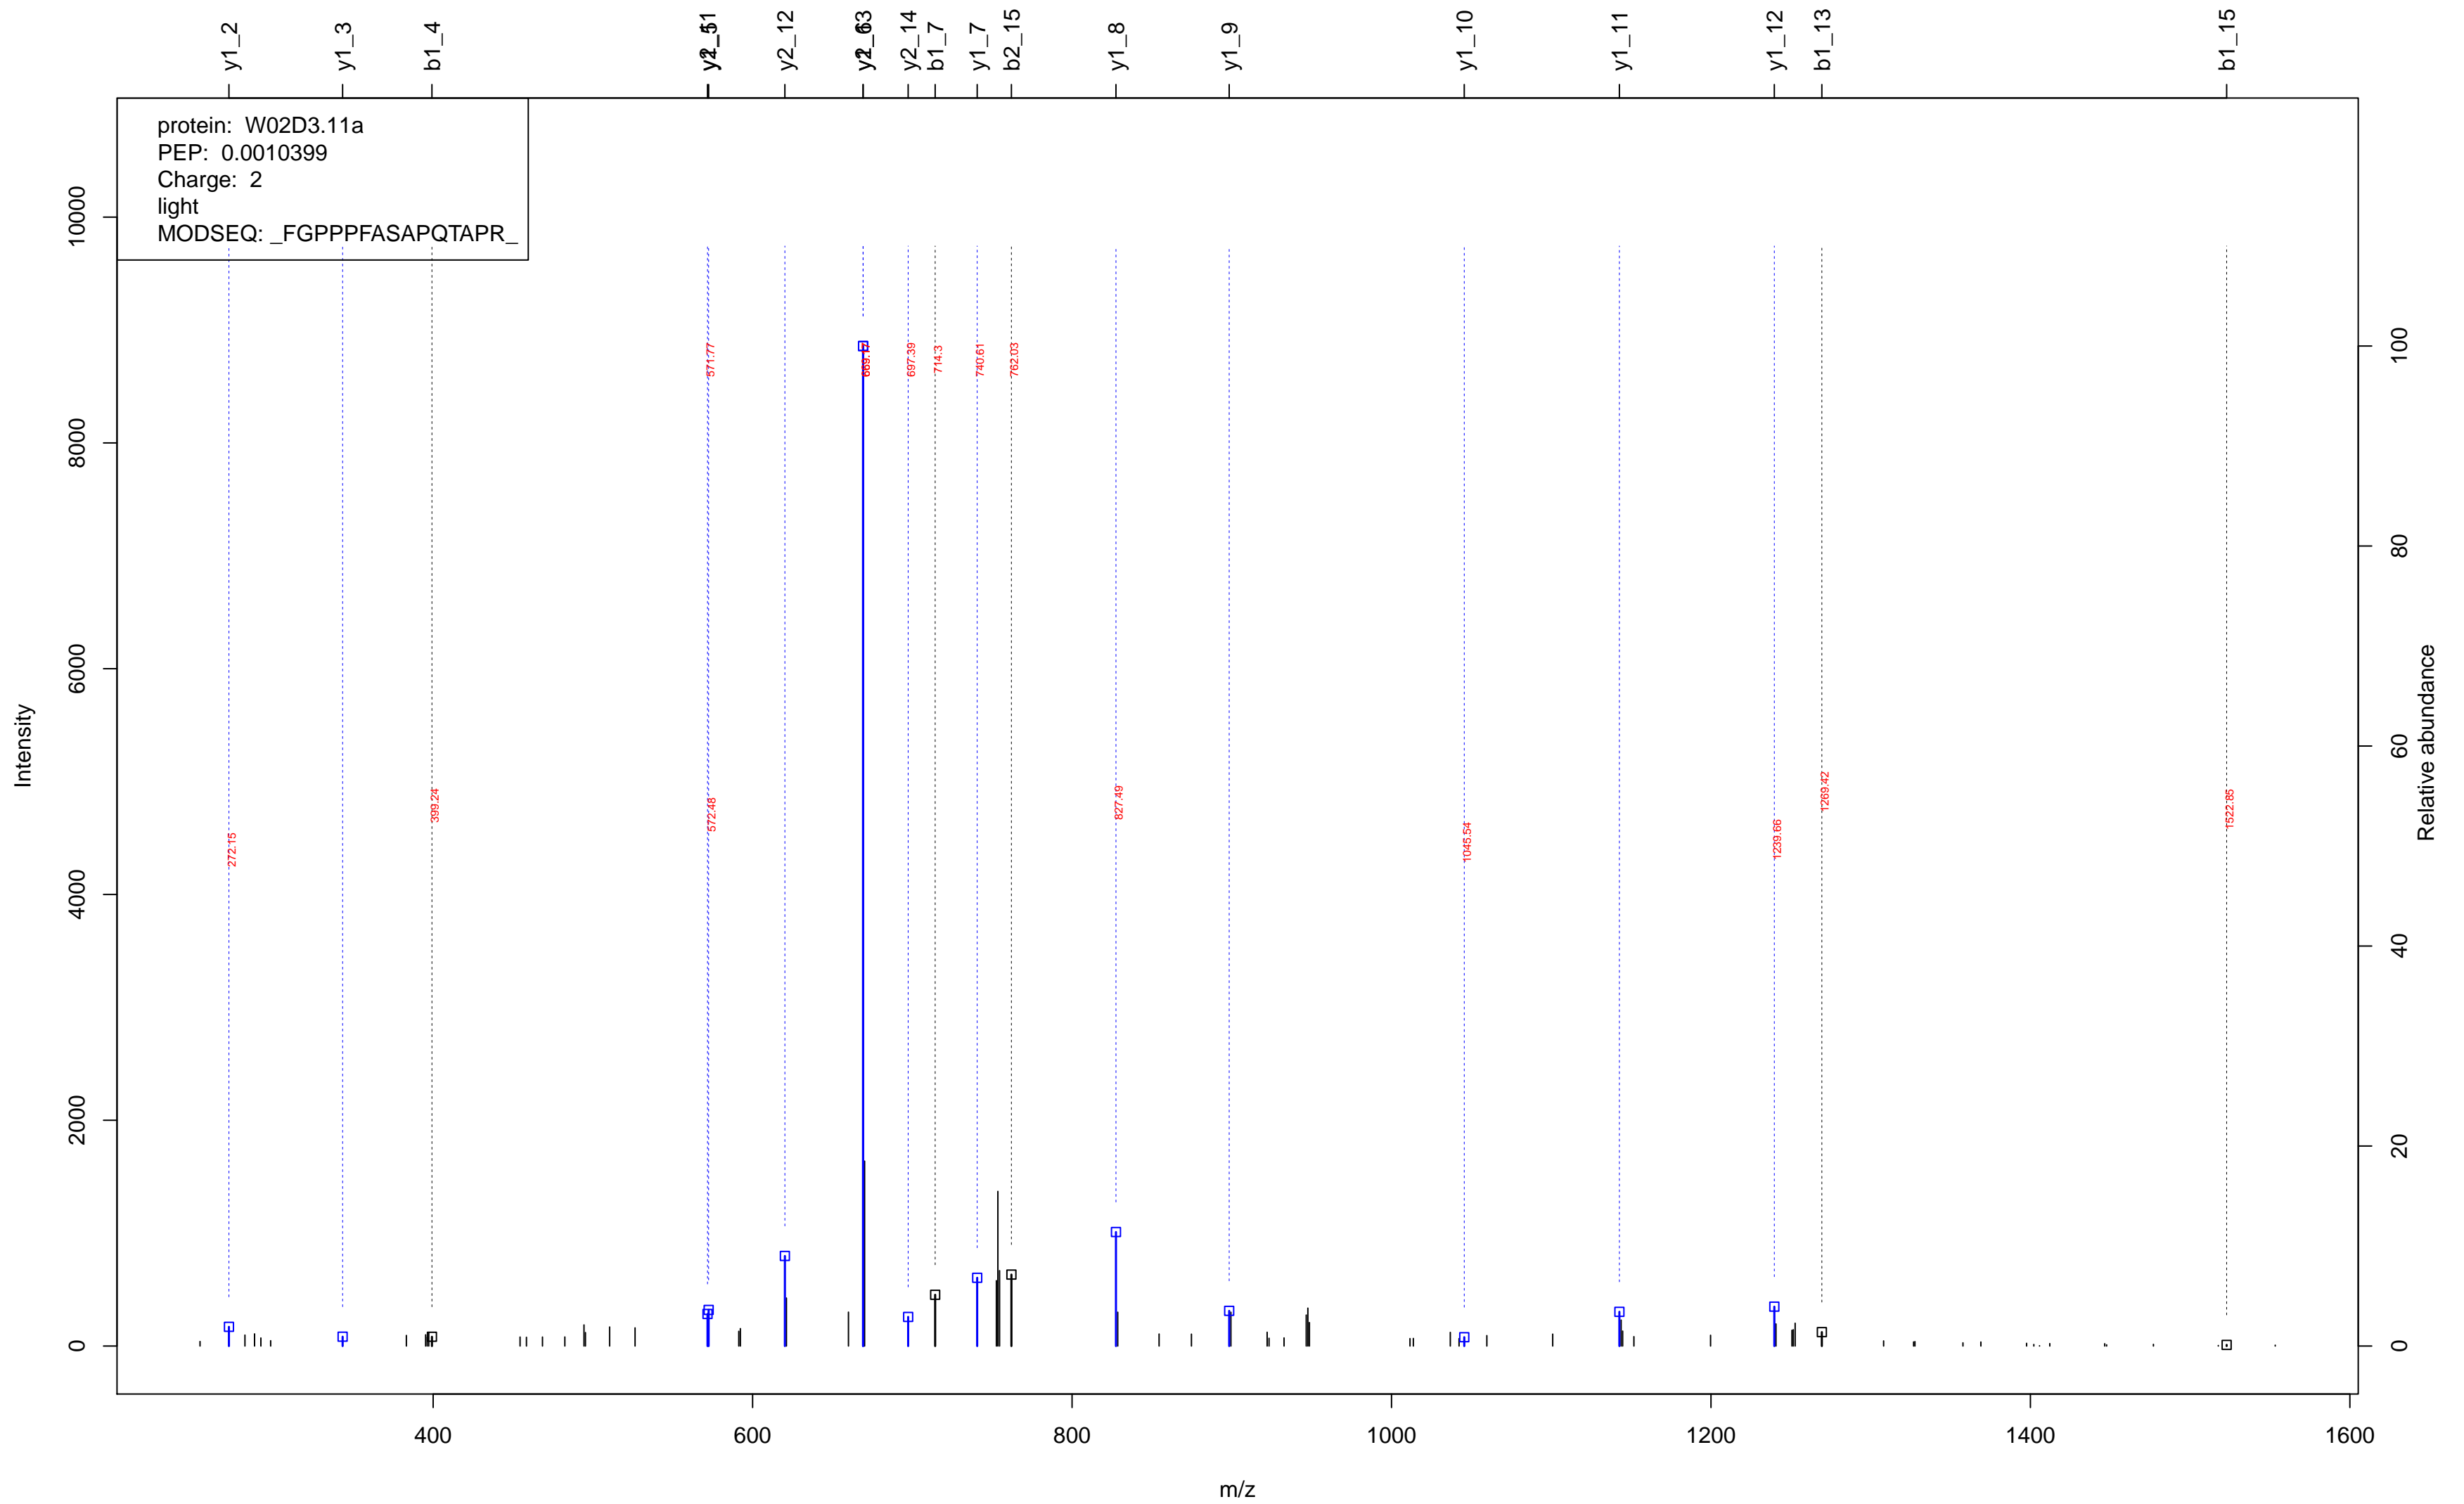



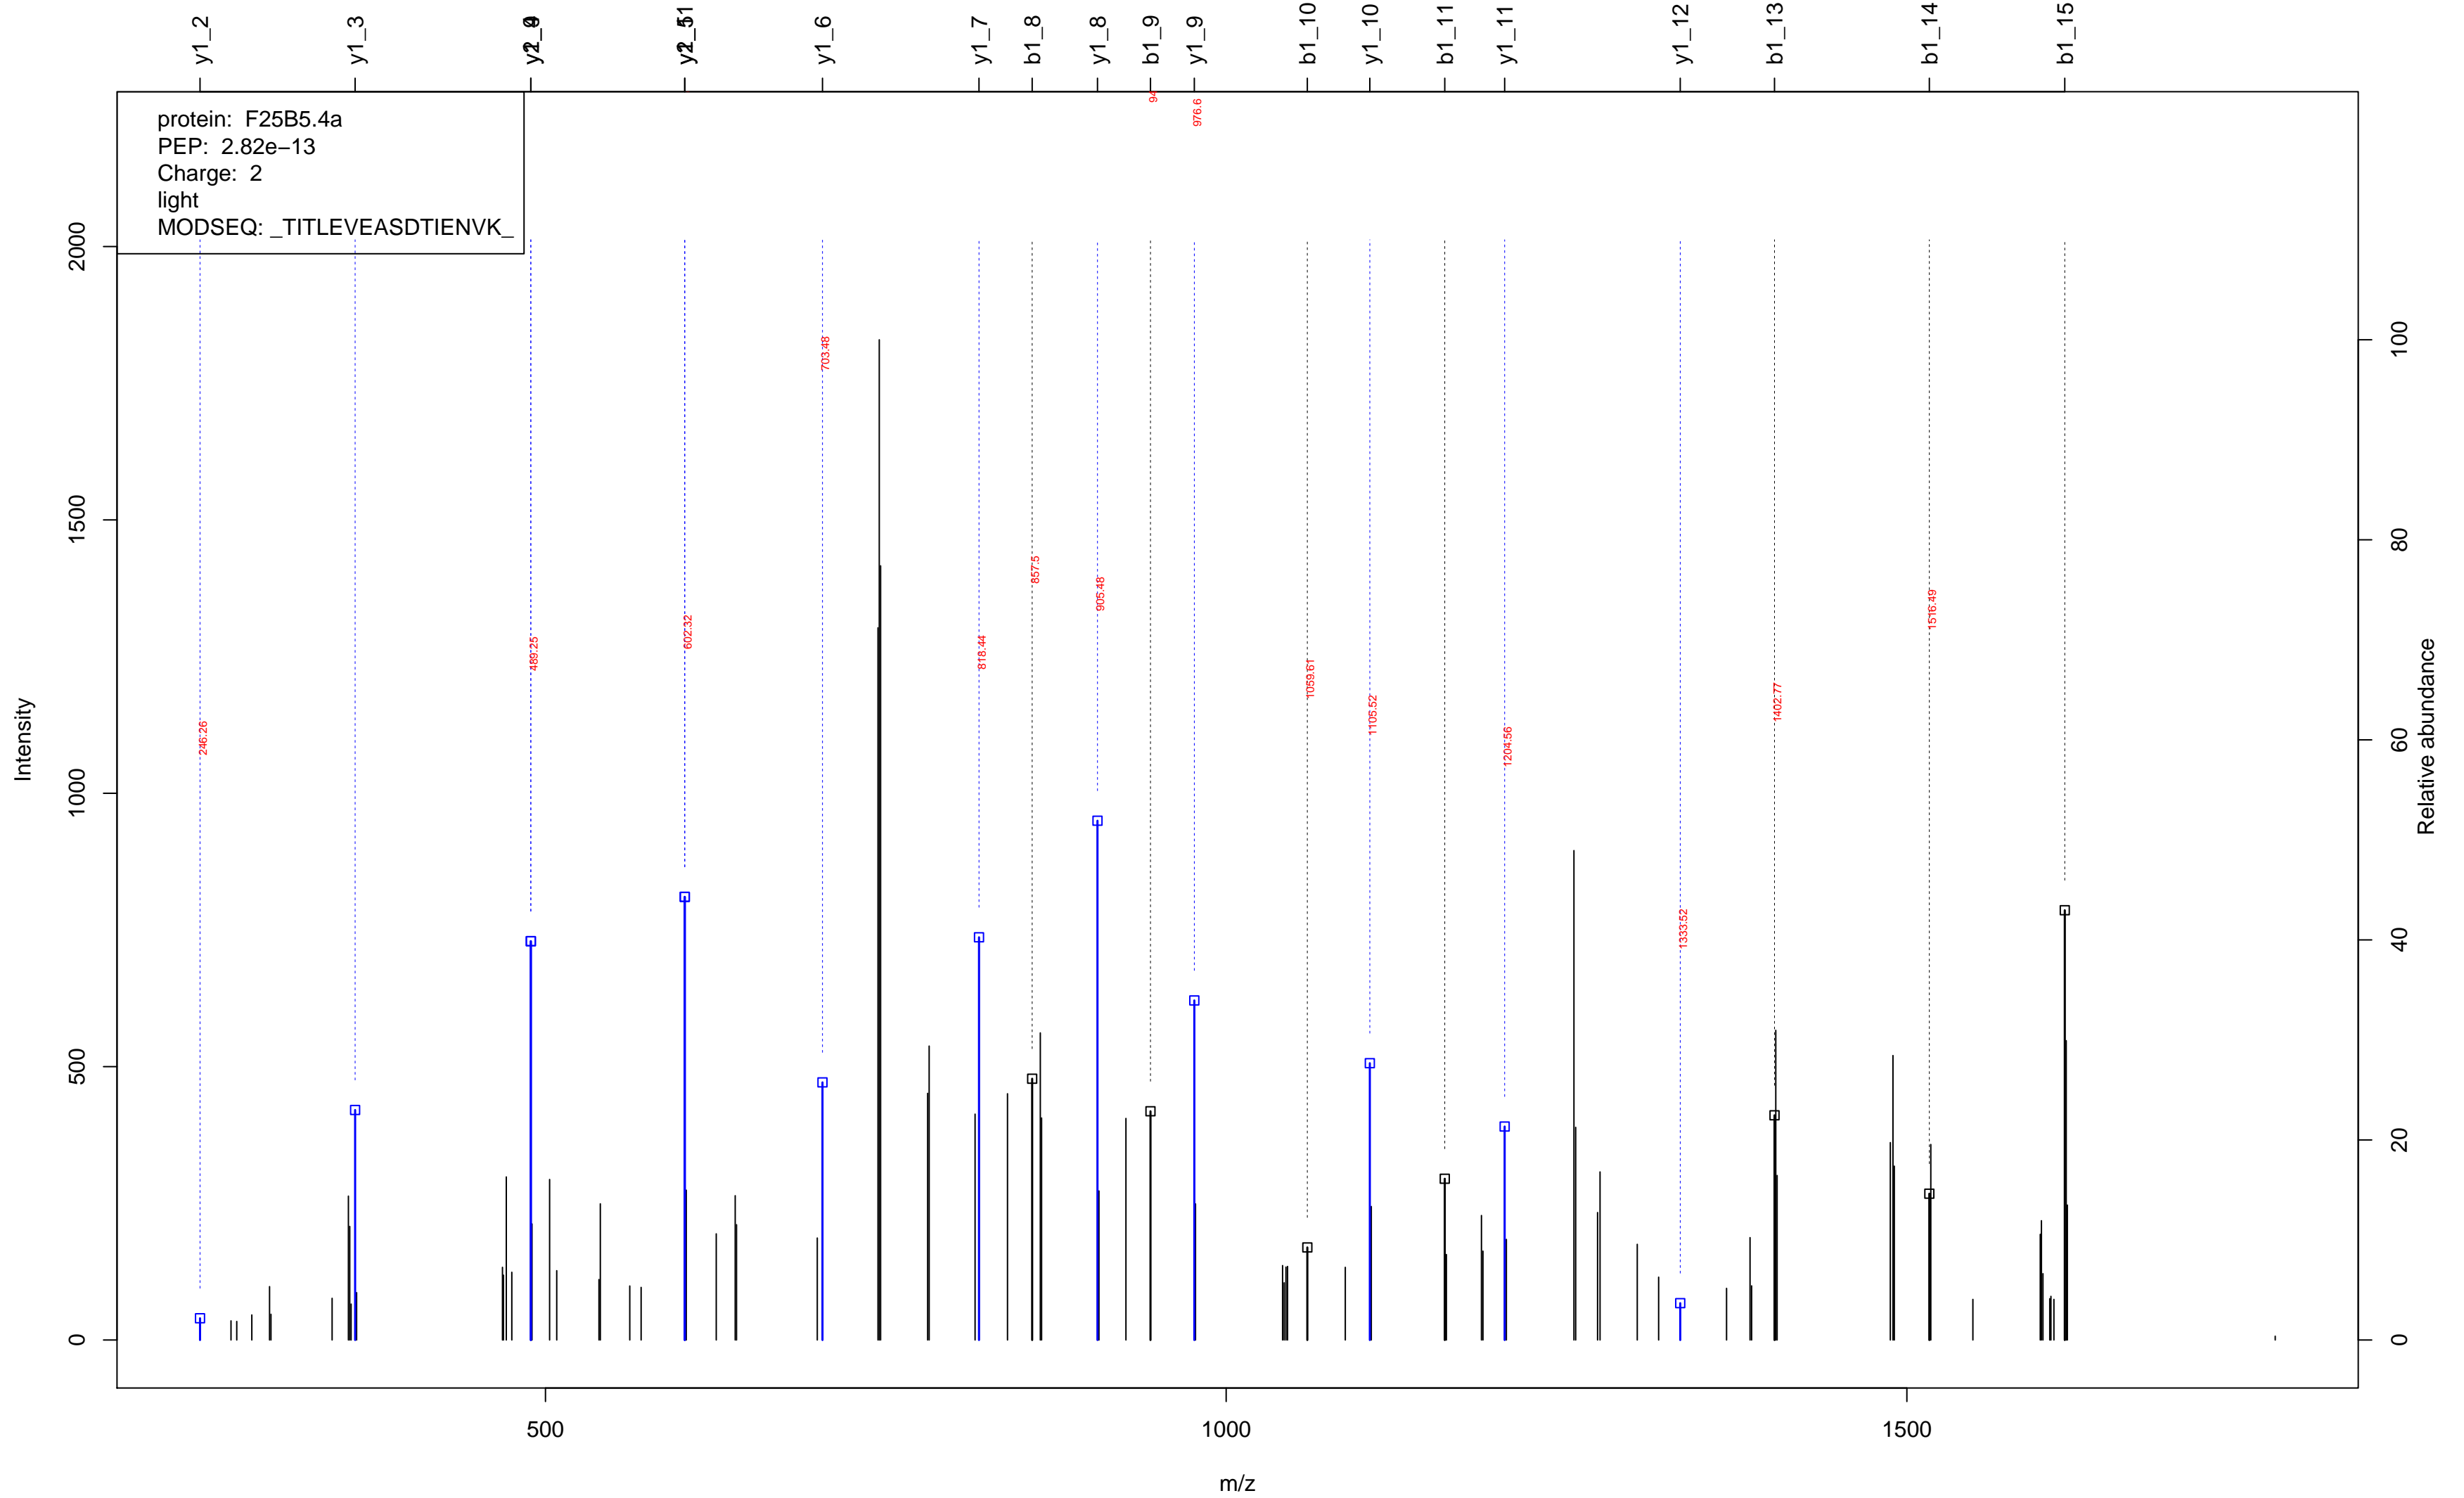

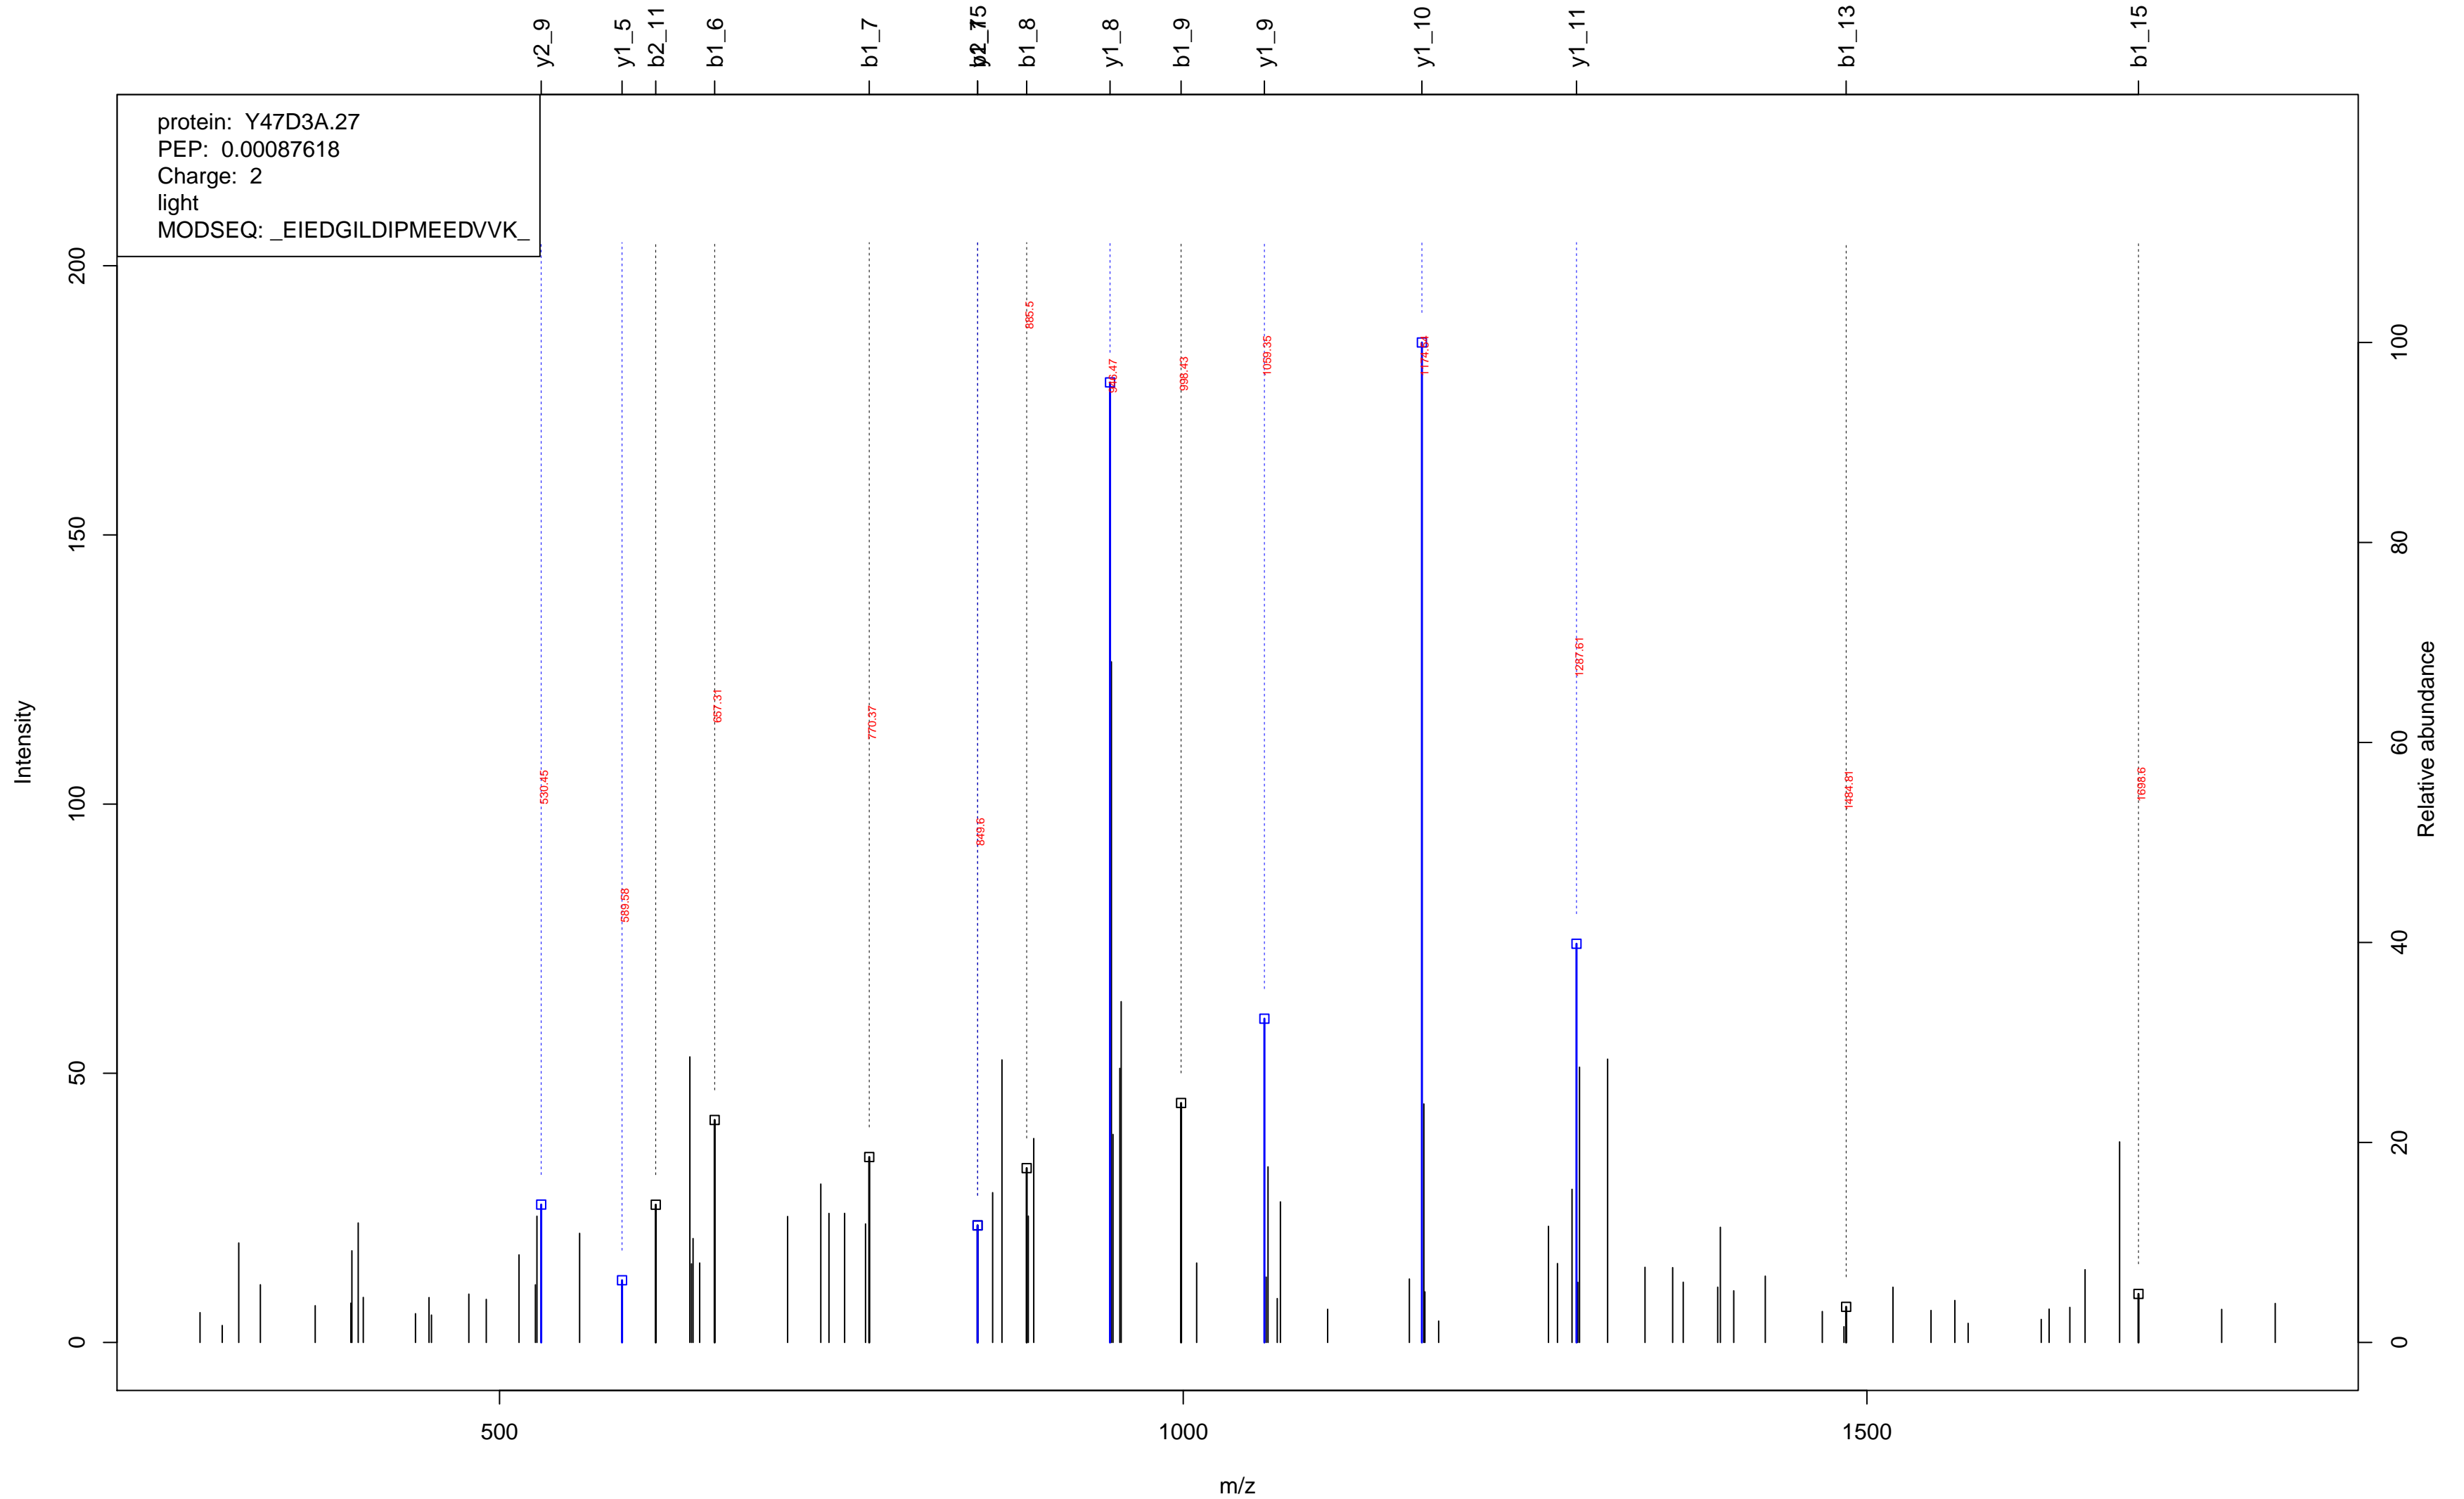

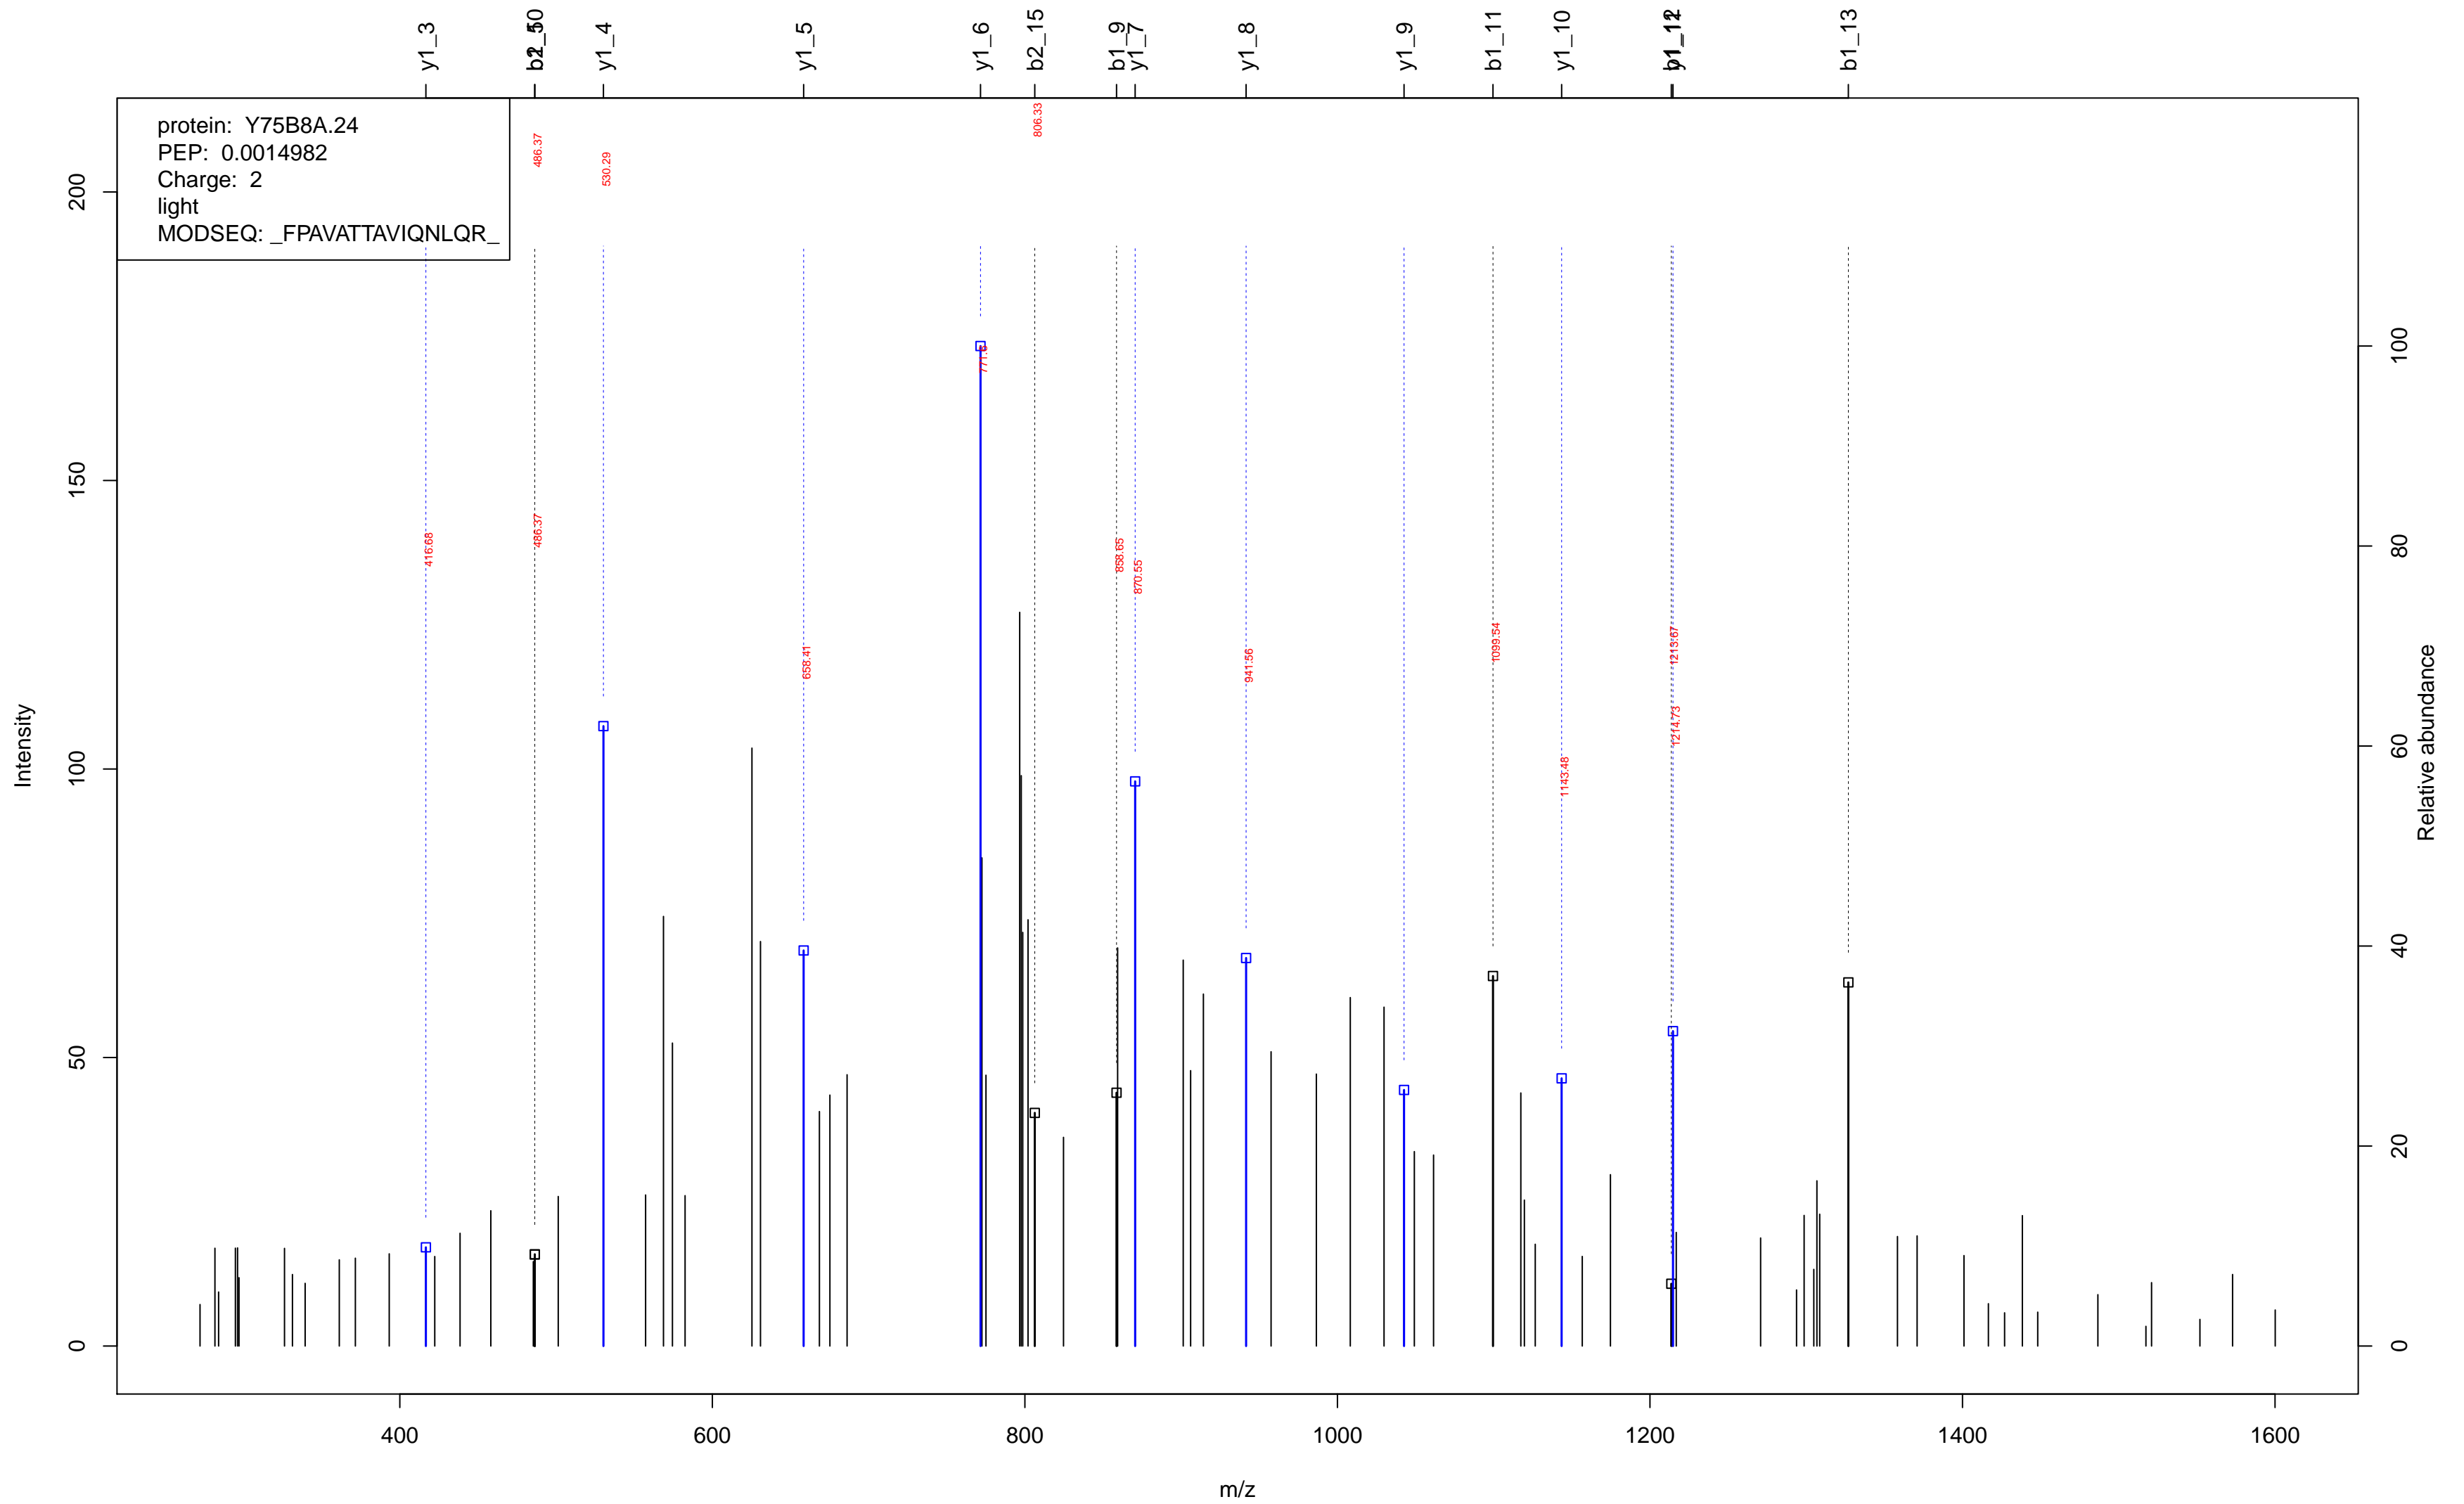

protein: Y75B8A.24  
PEP: 0.0014982  
Charge: 2  
light  
MODSEQ: \_FPAVATTAVIQNLQR\_

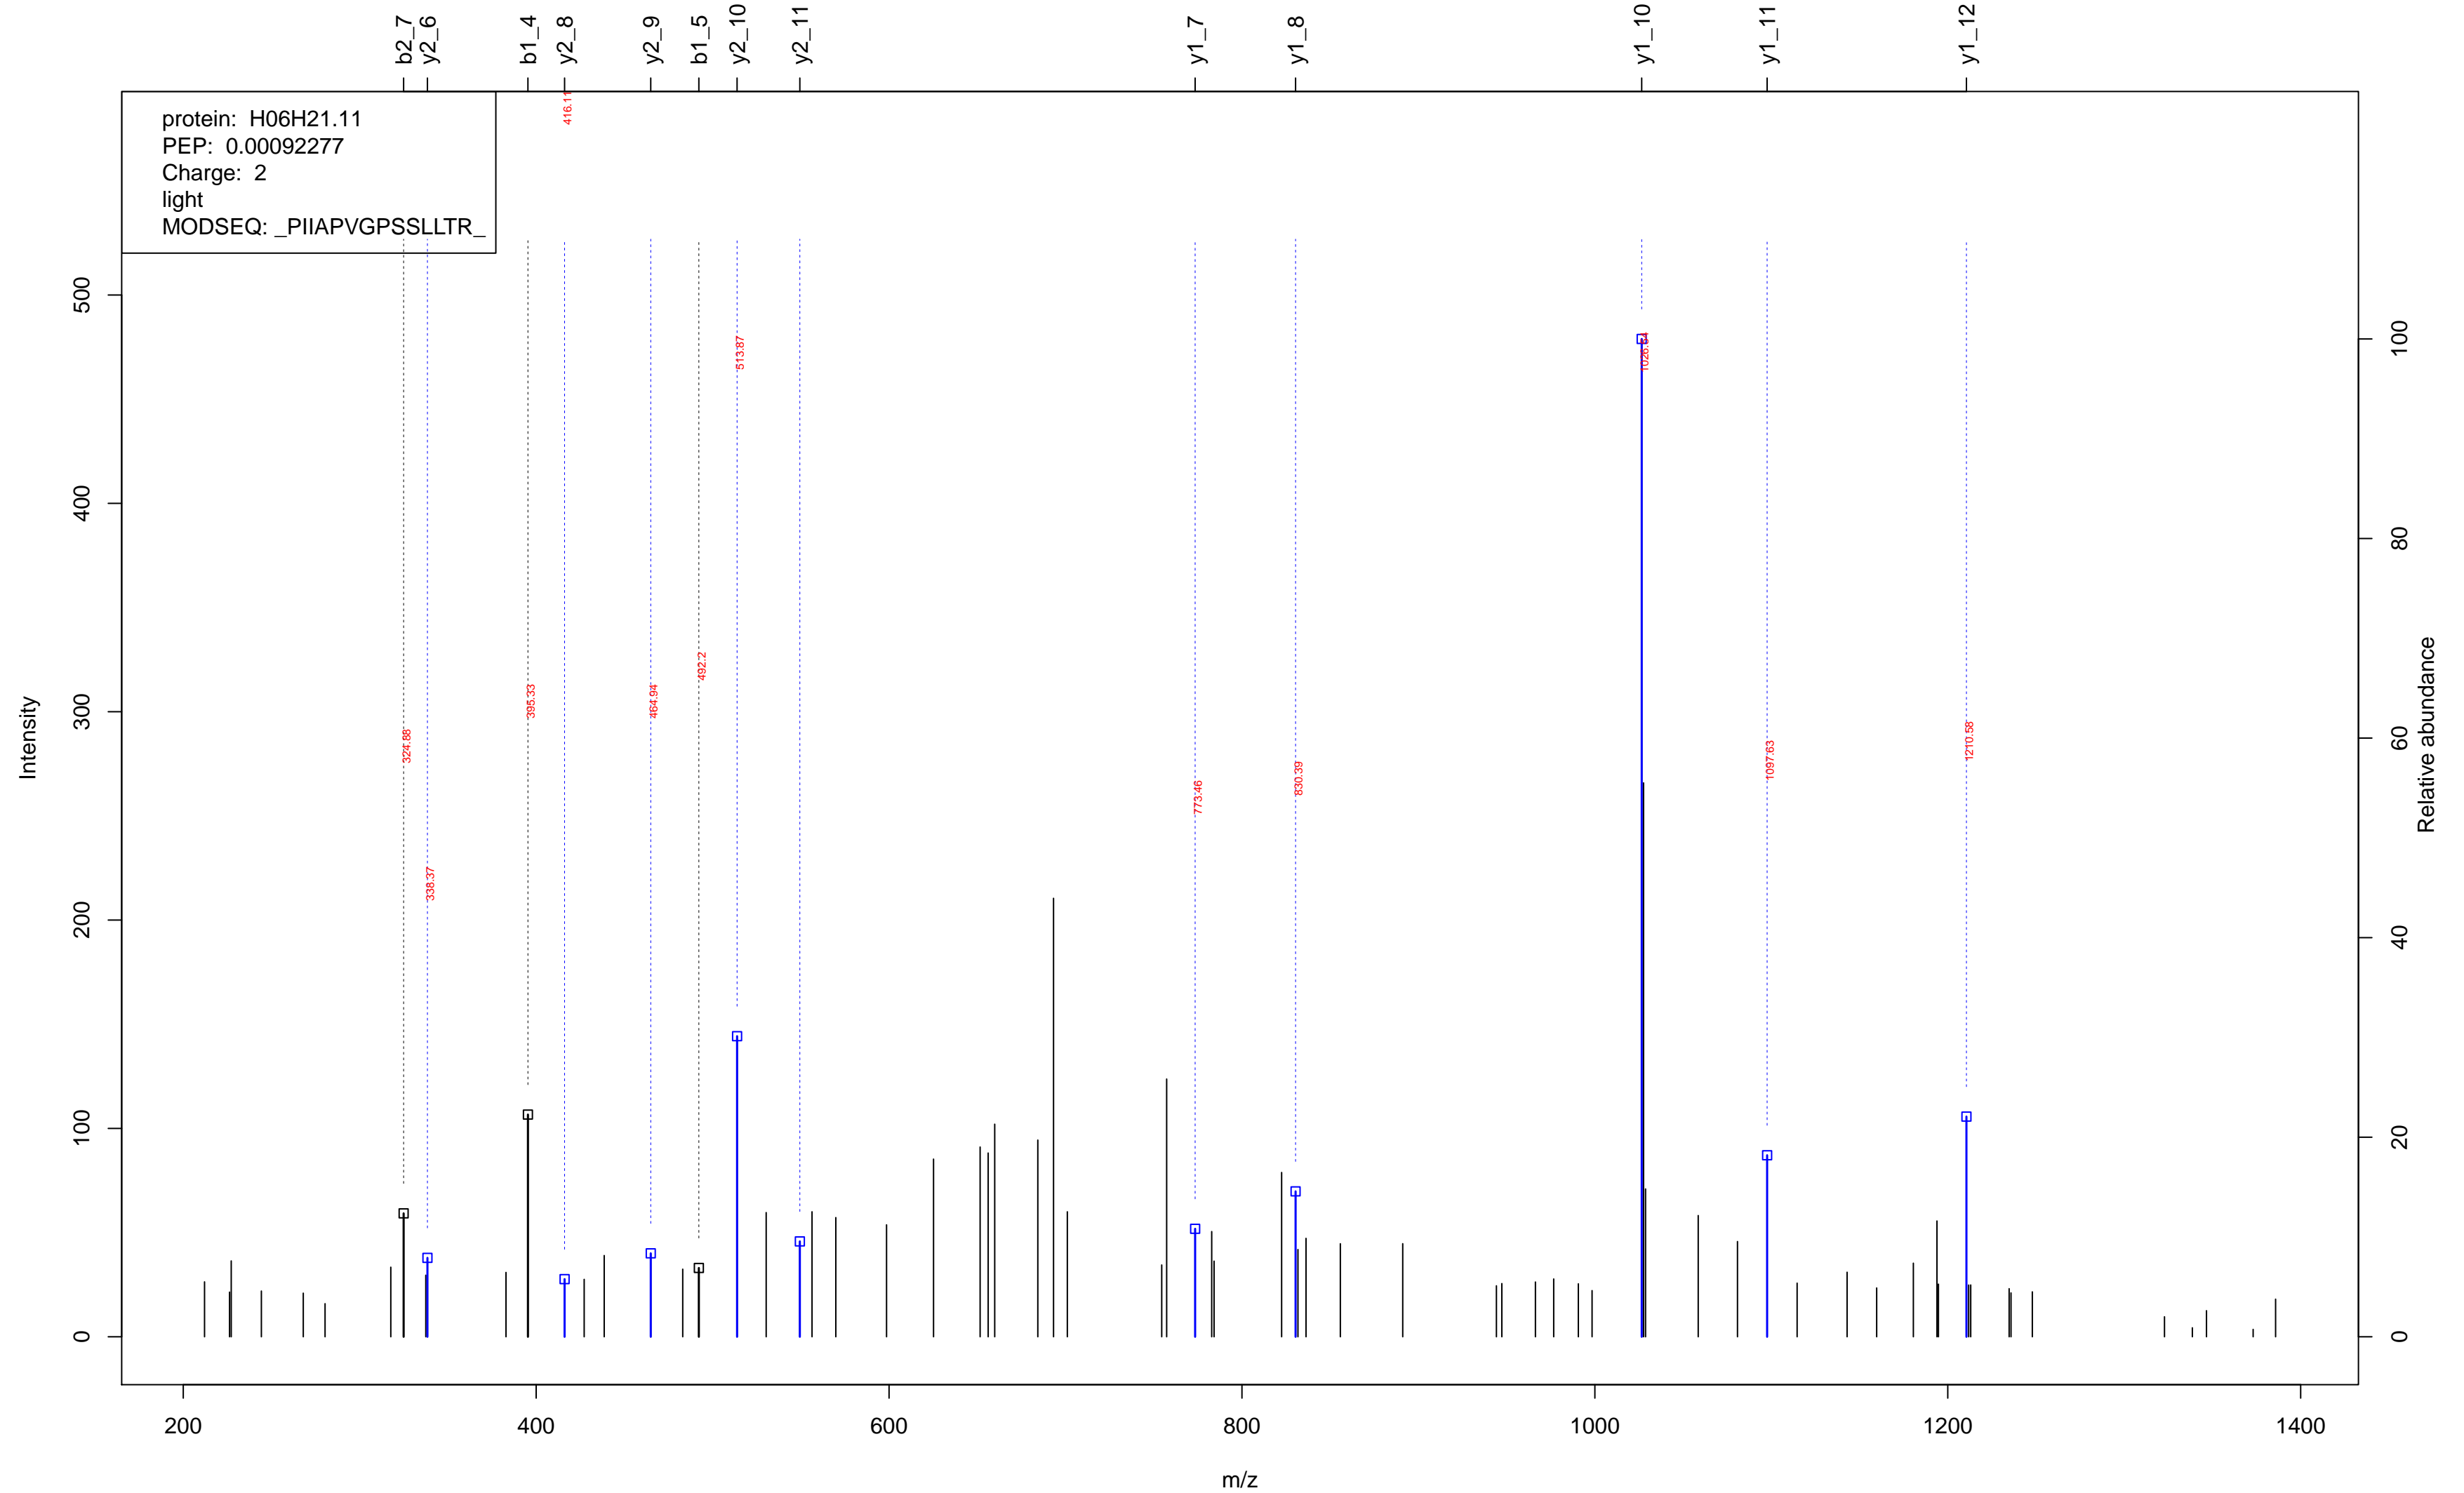

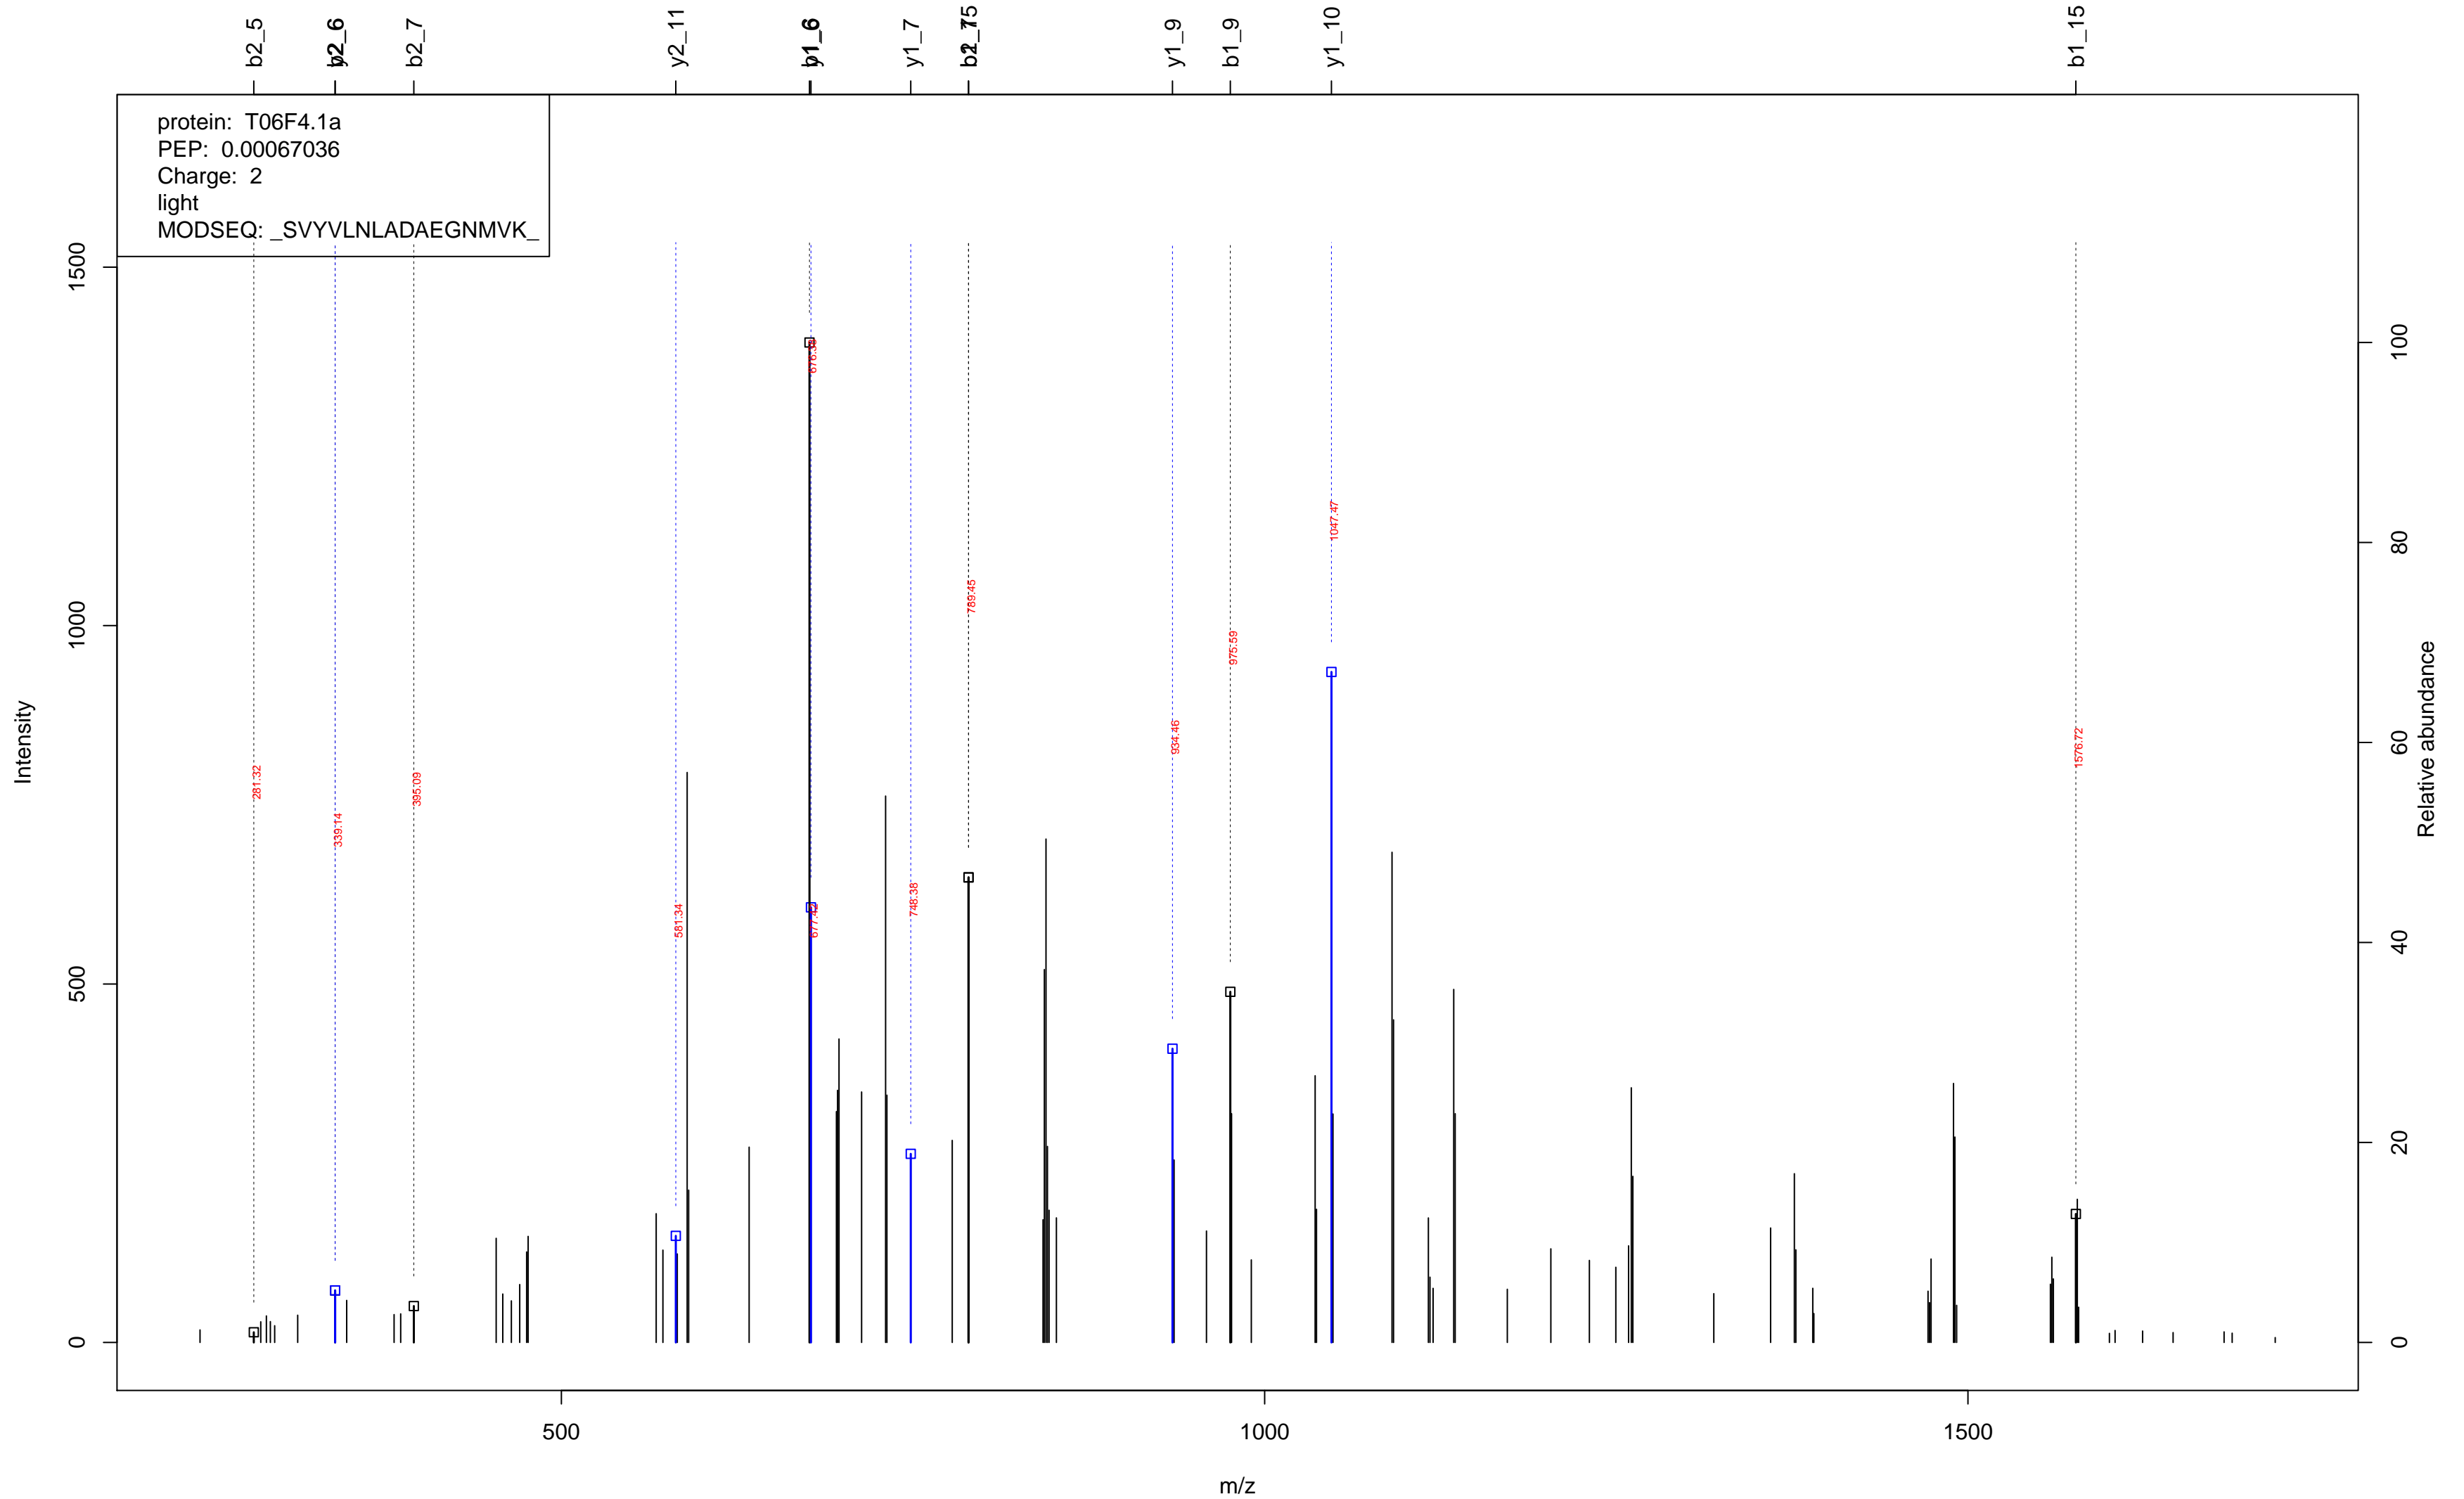

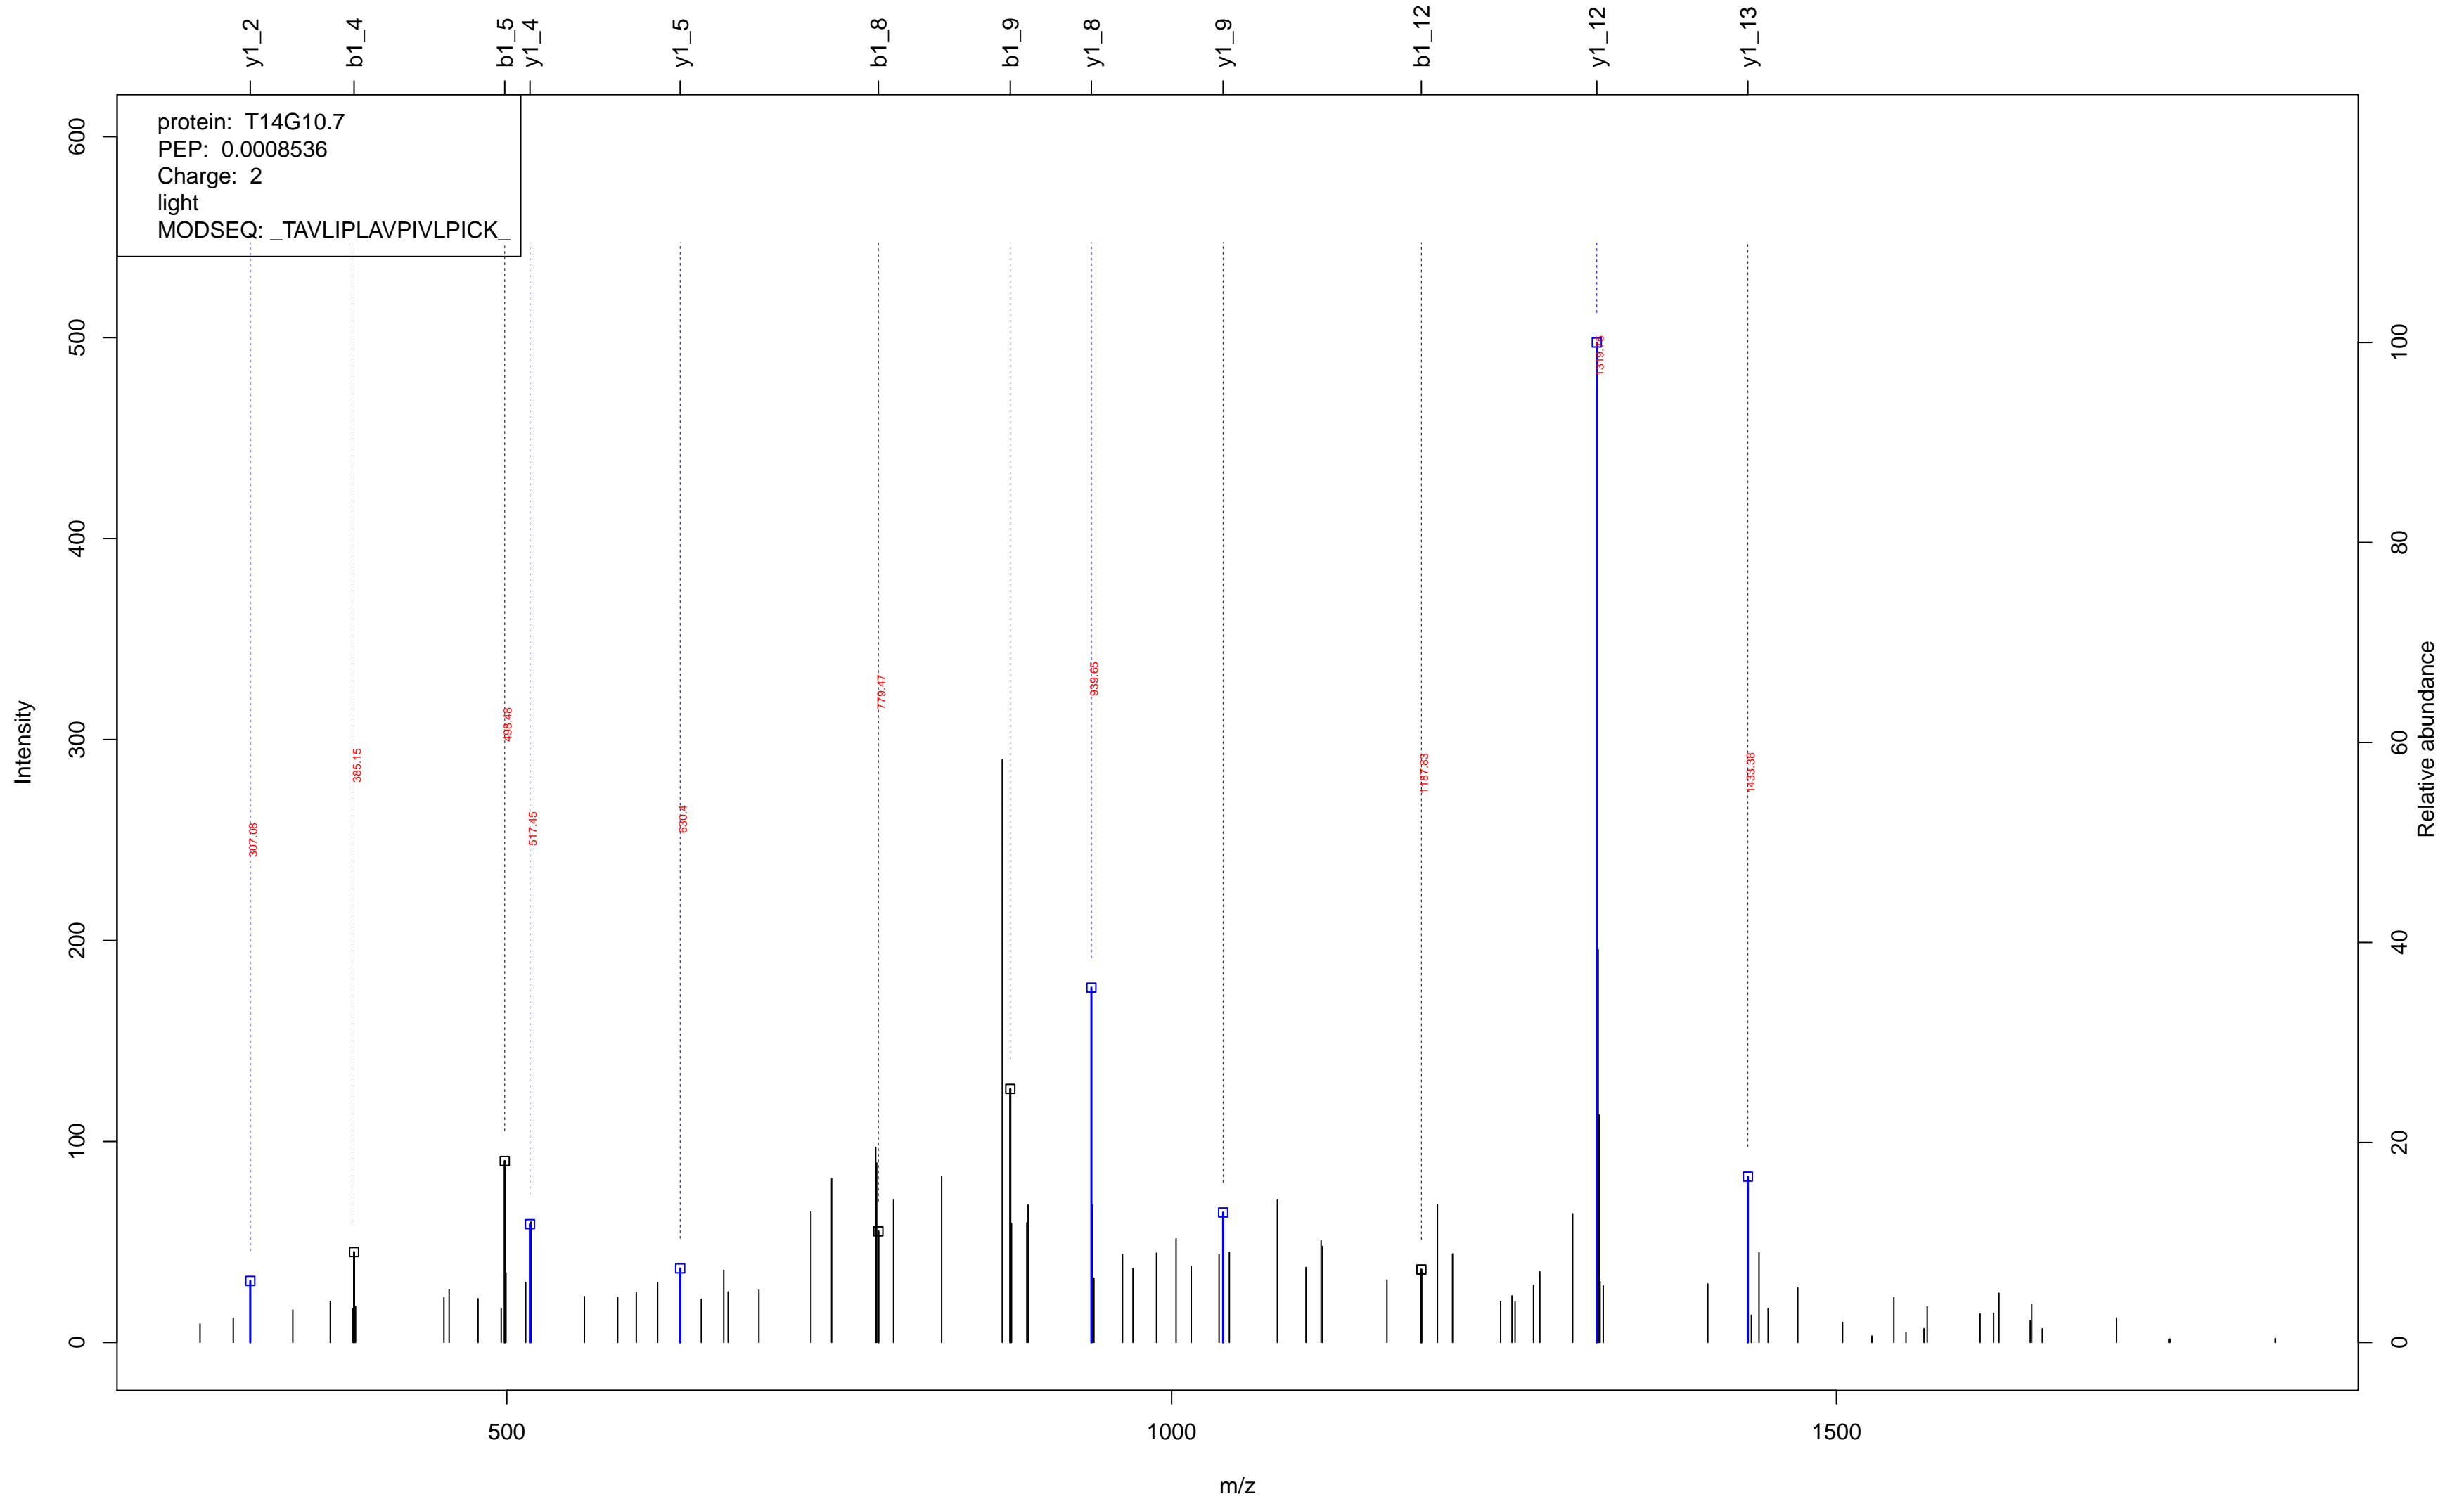

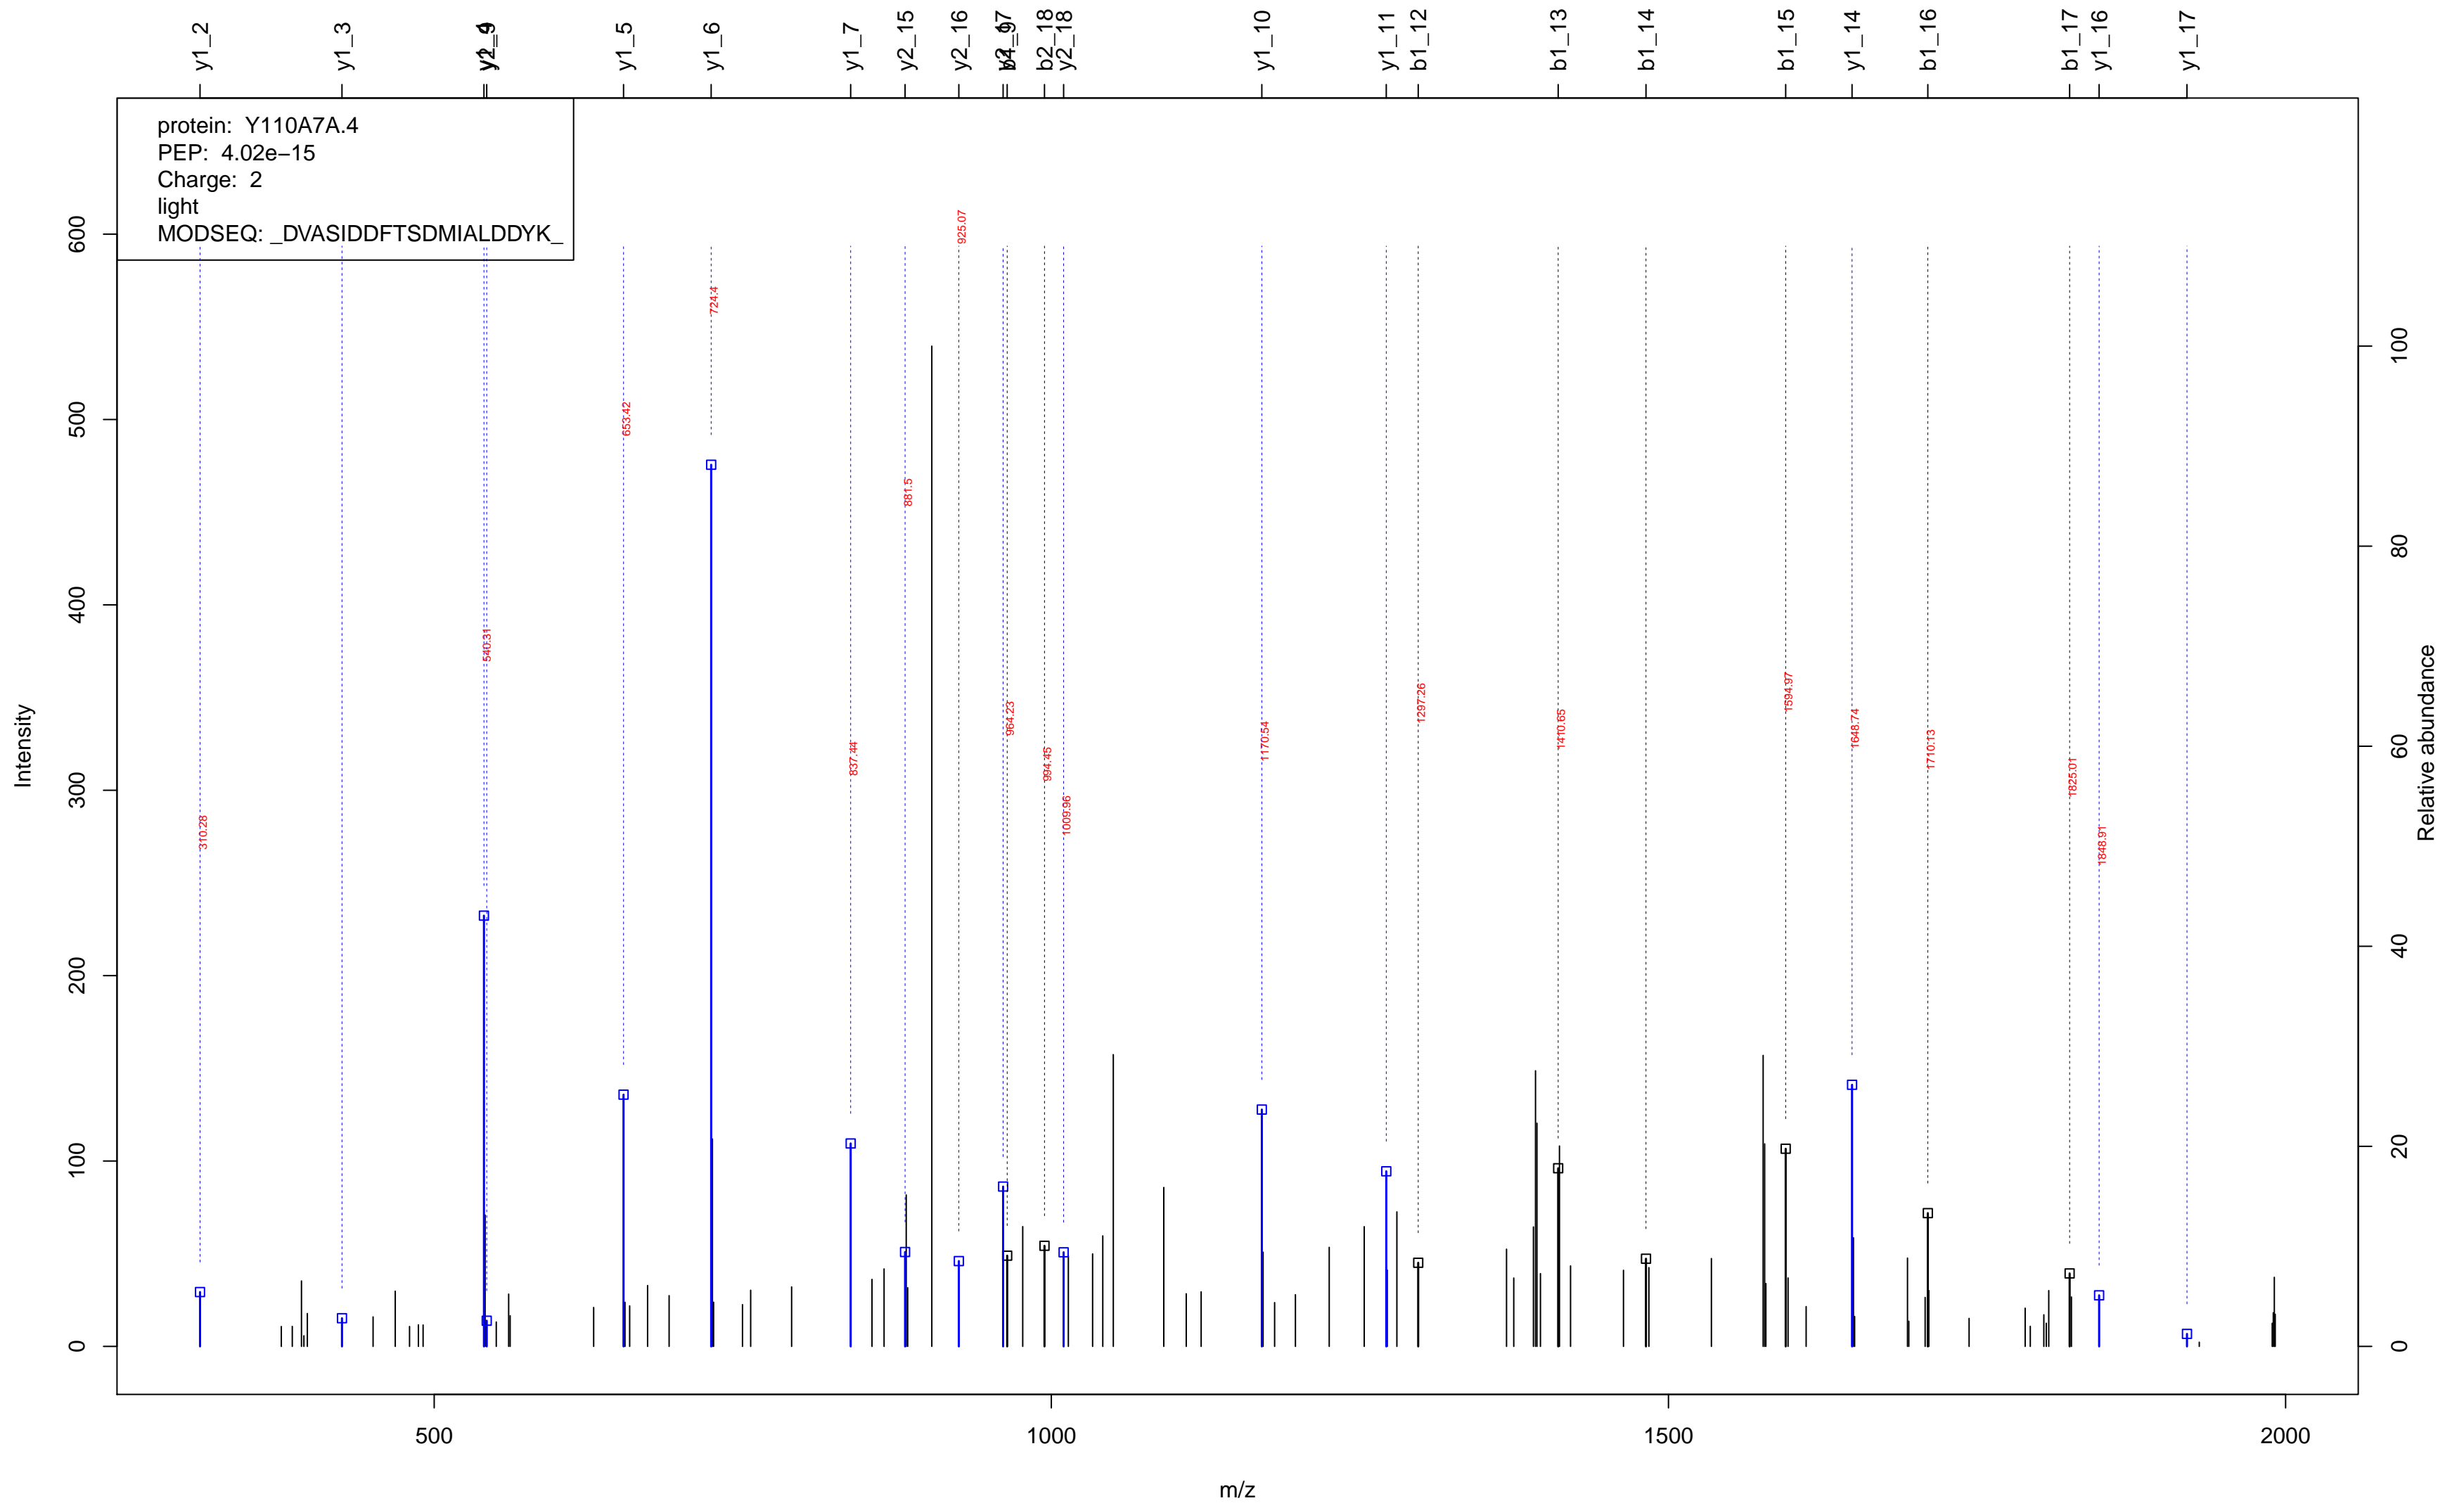

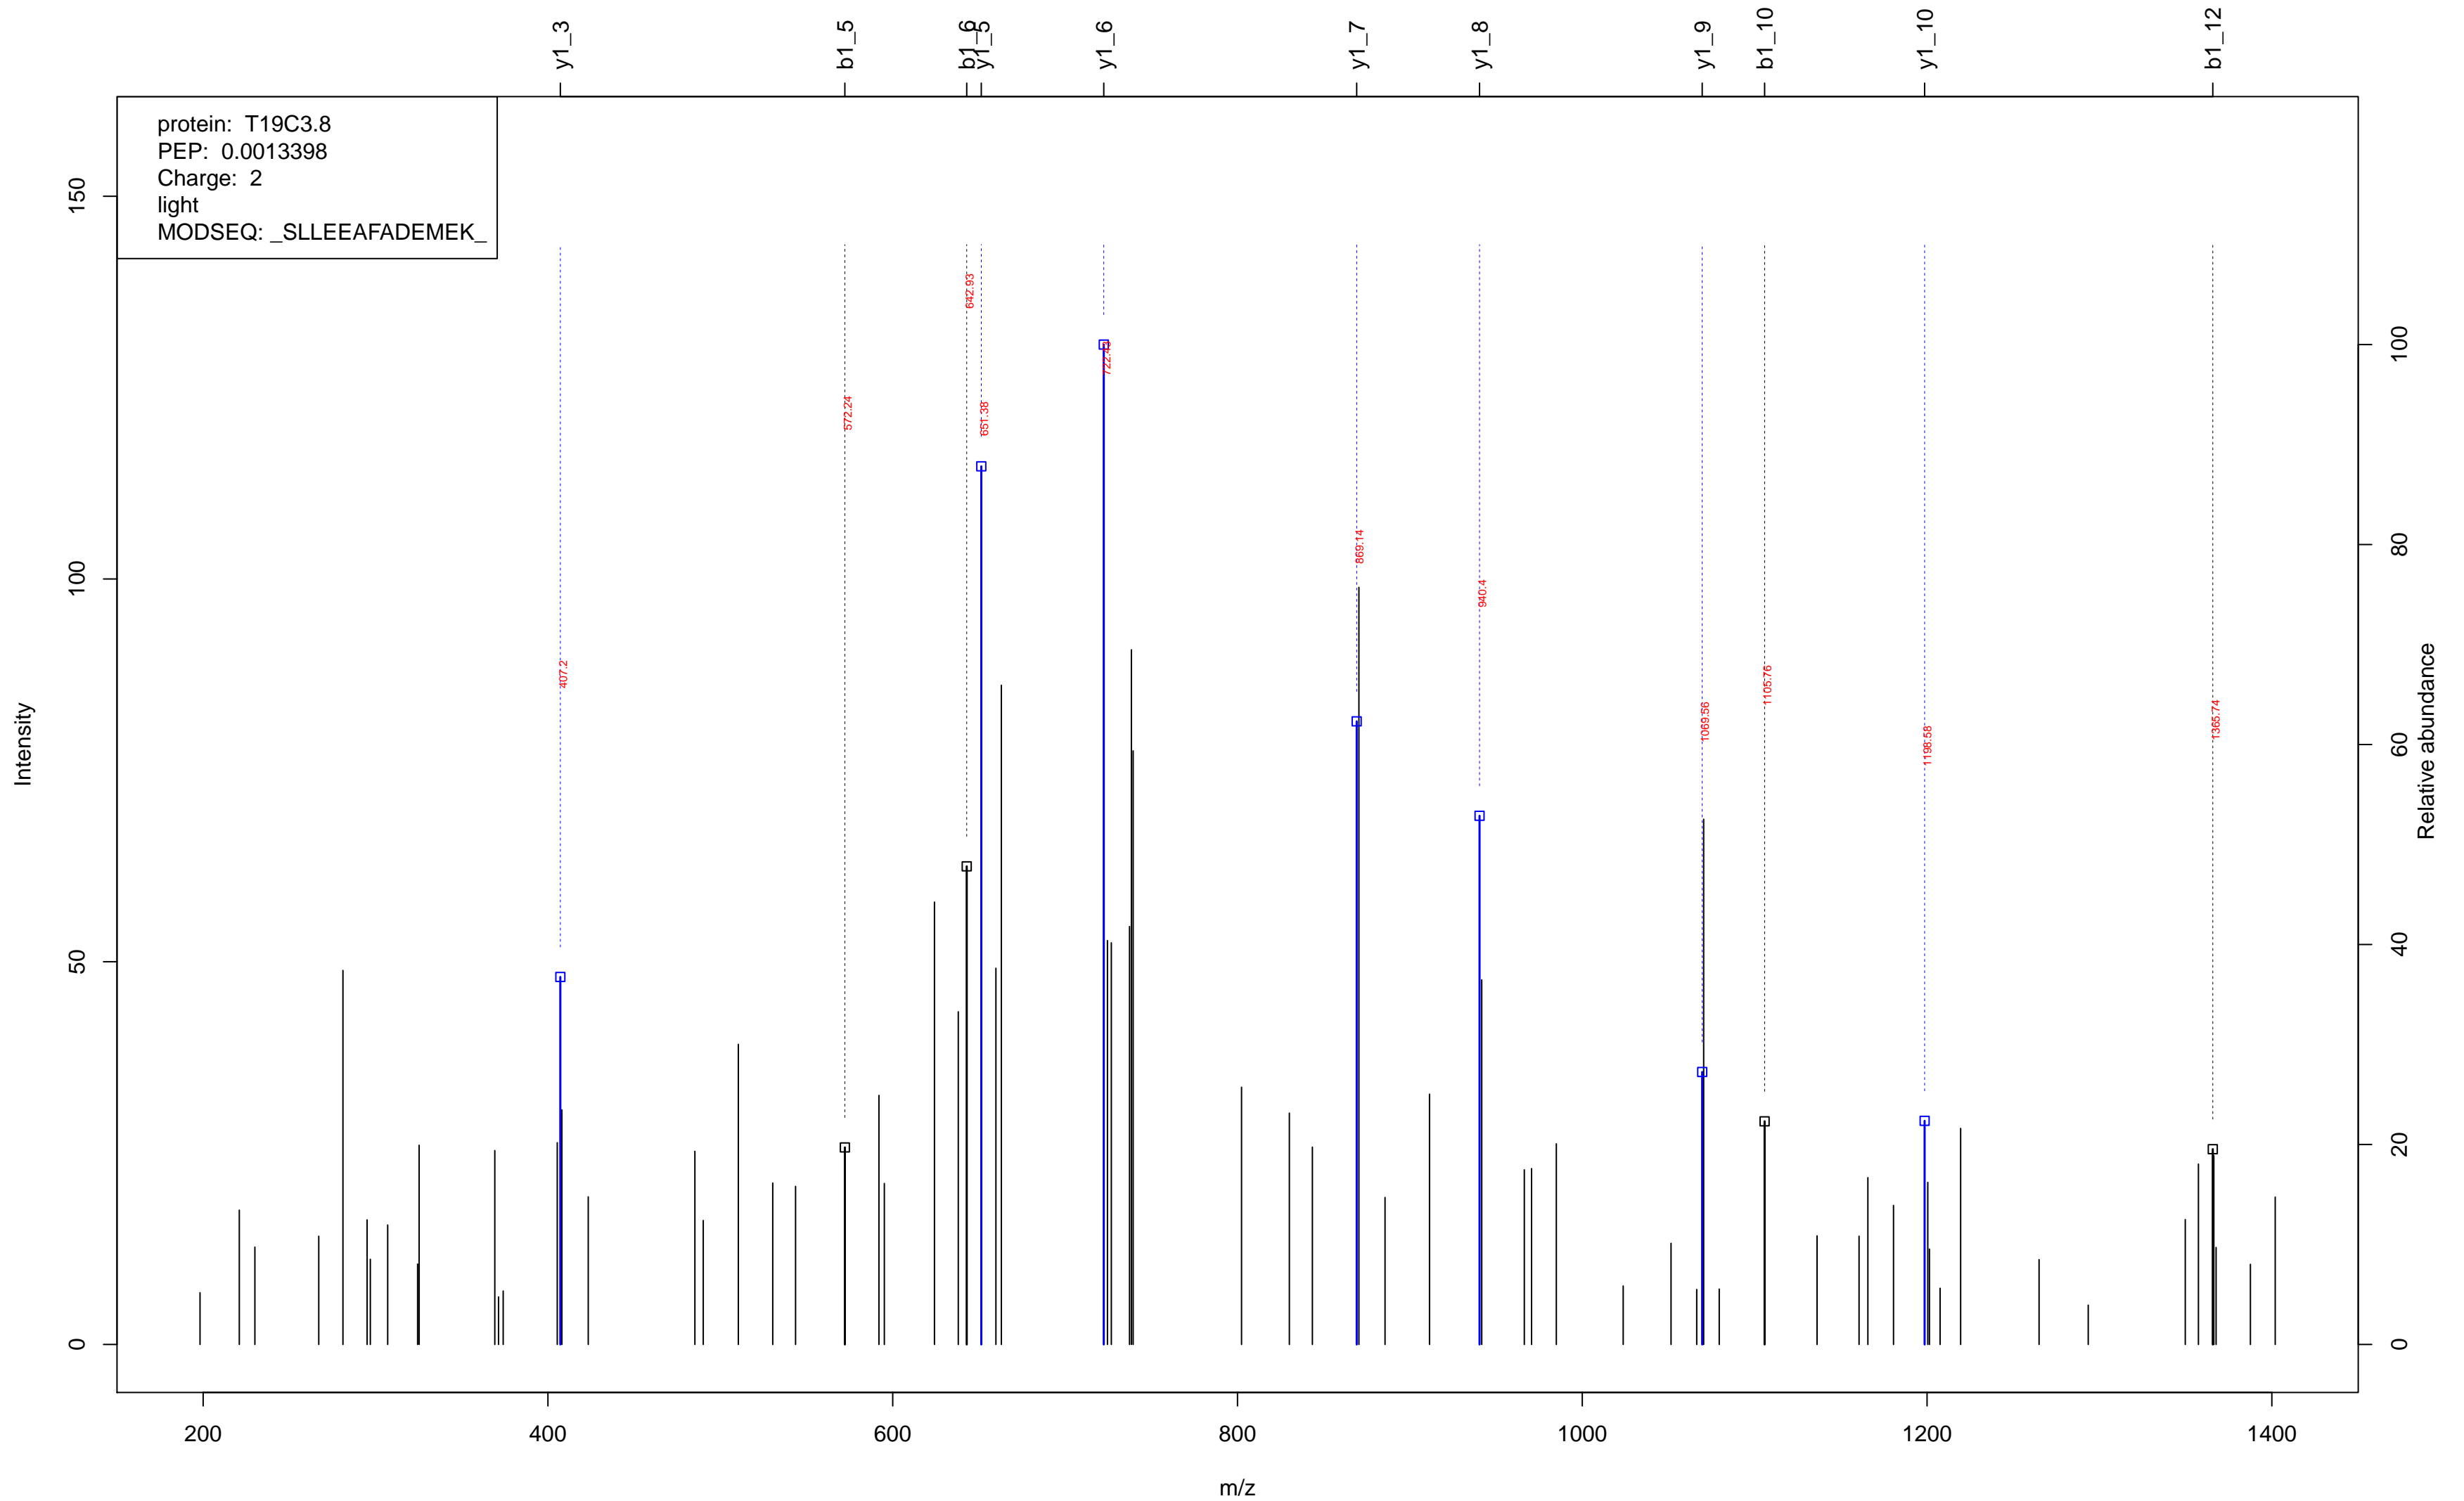



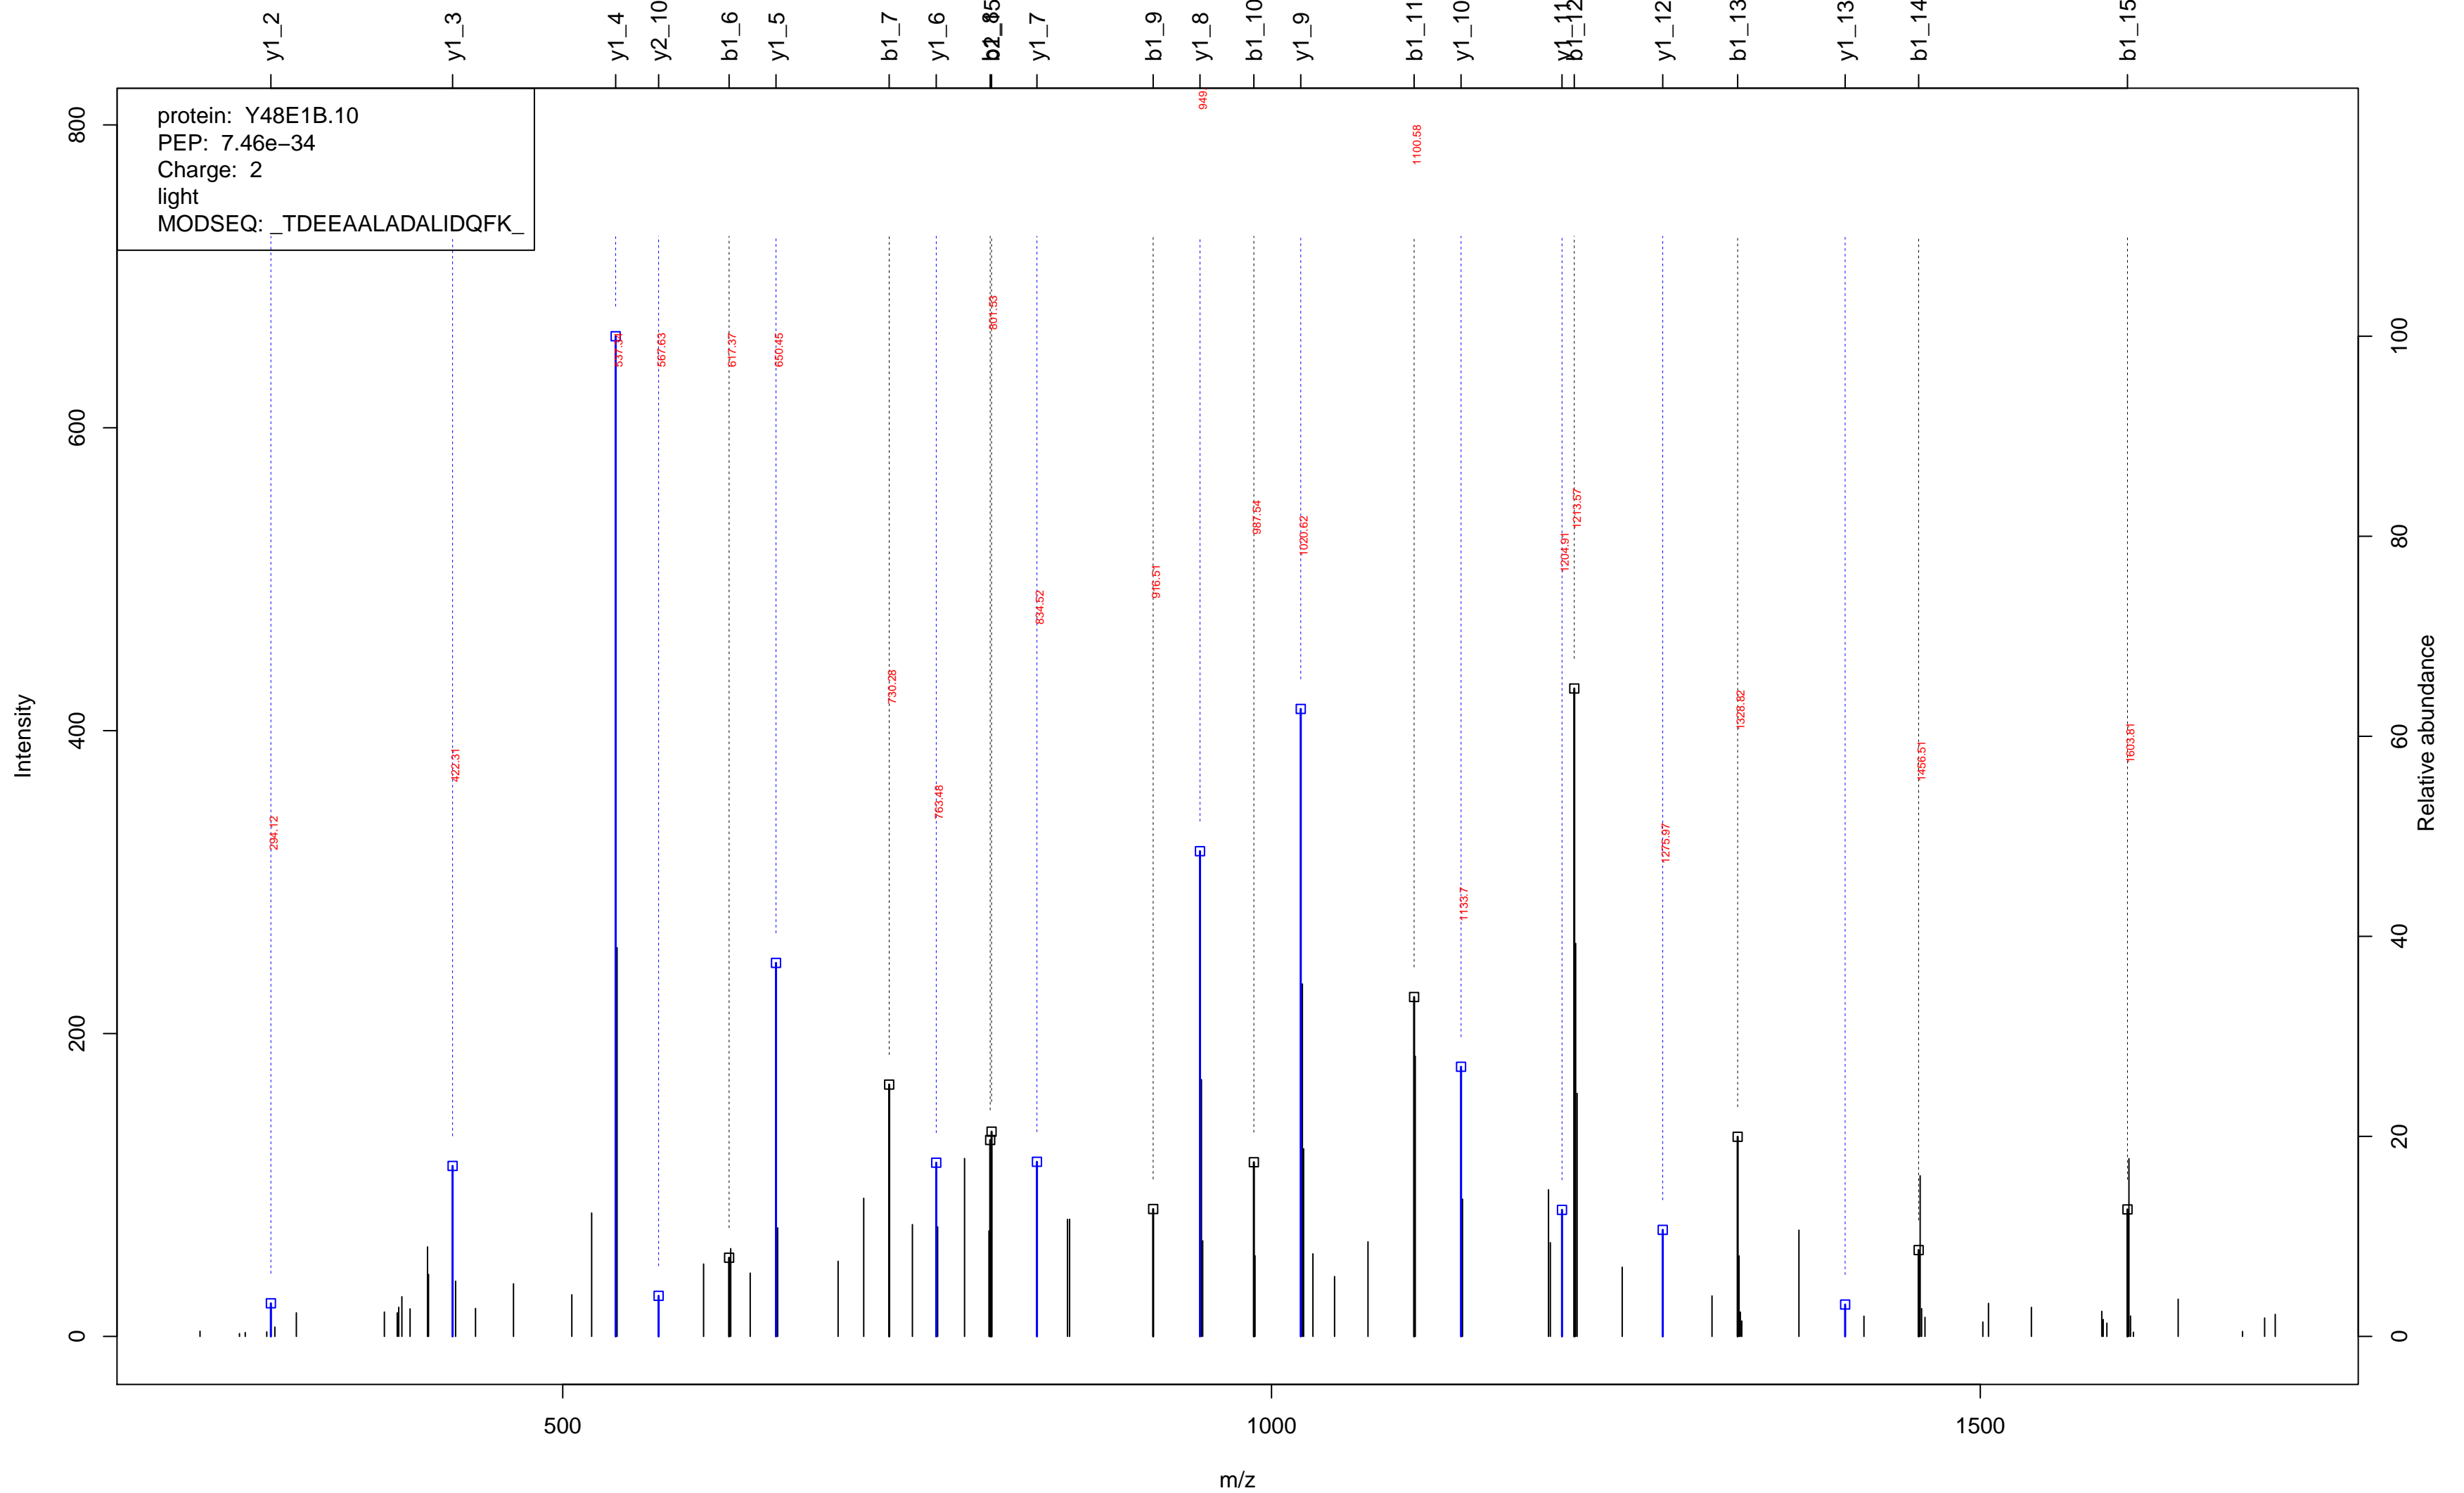

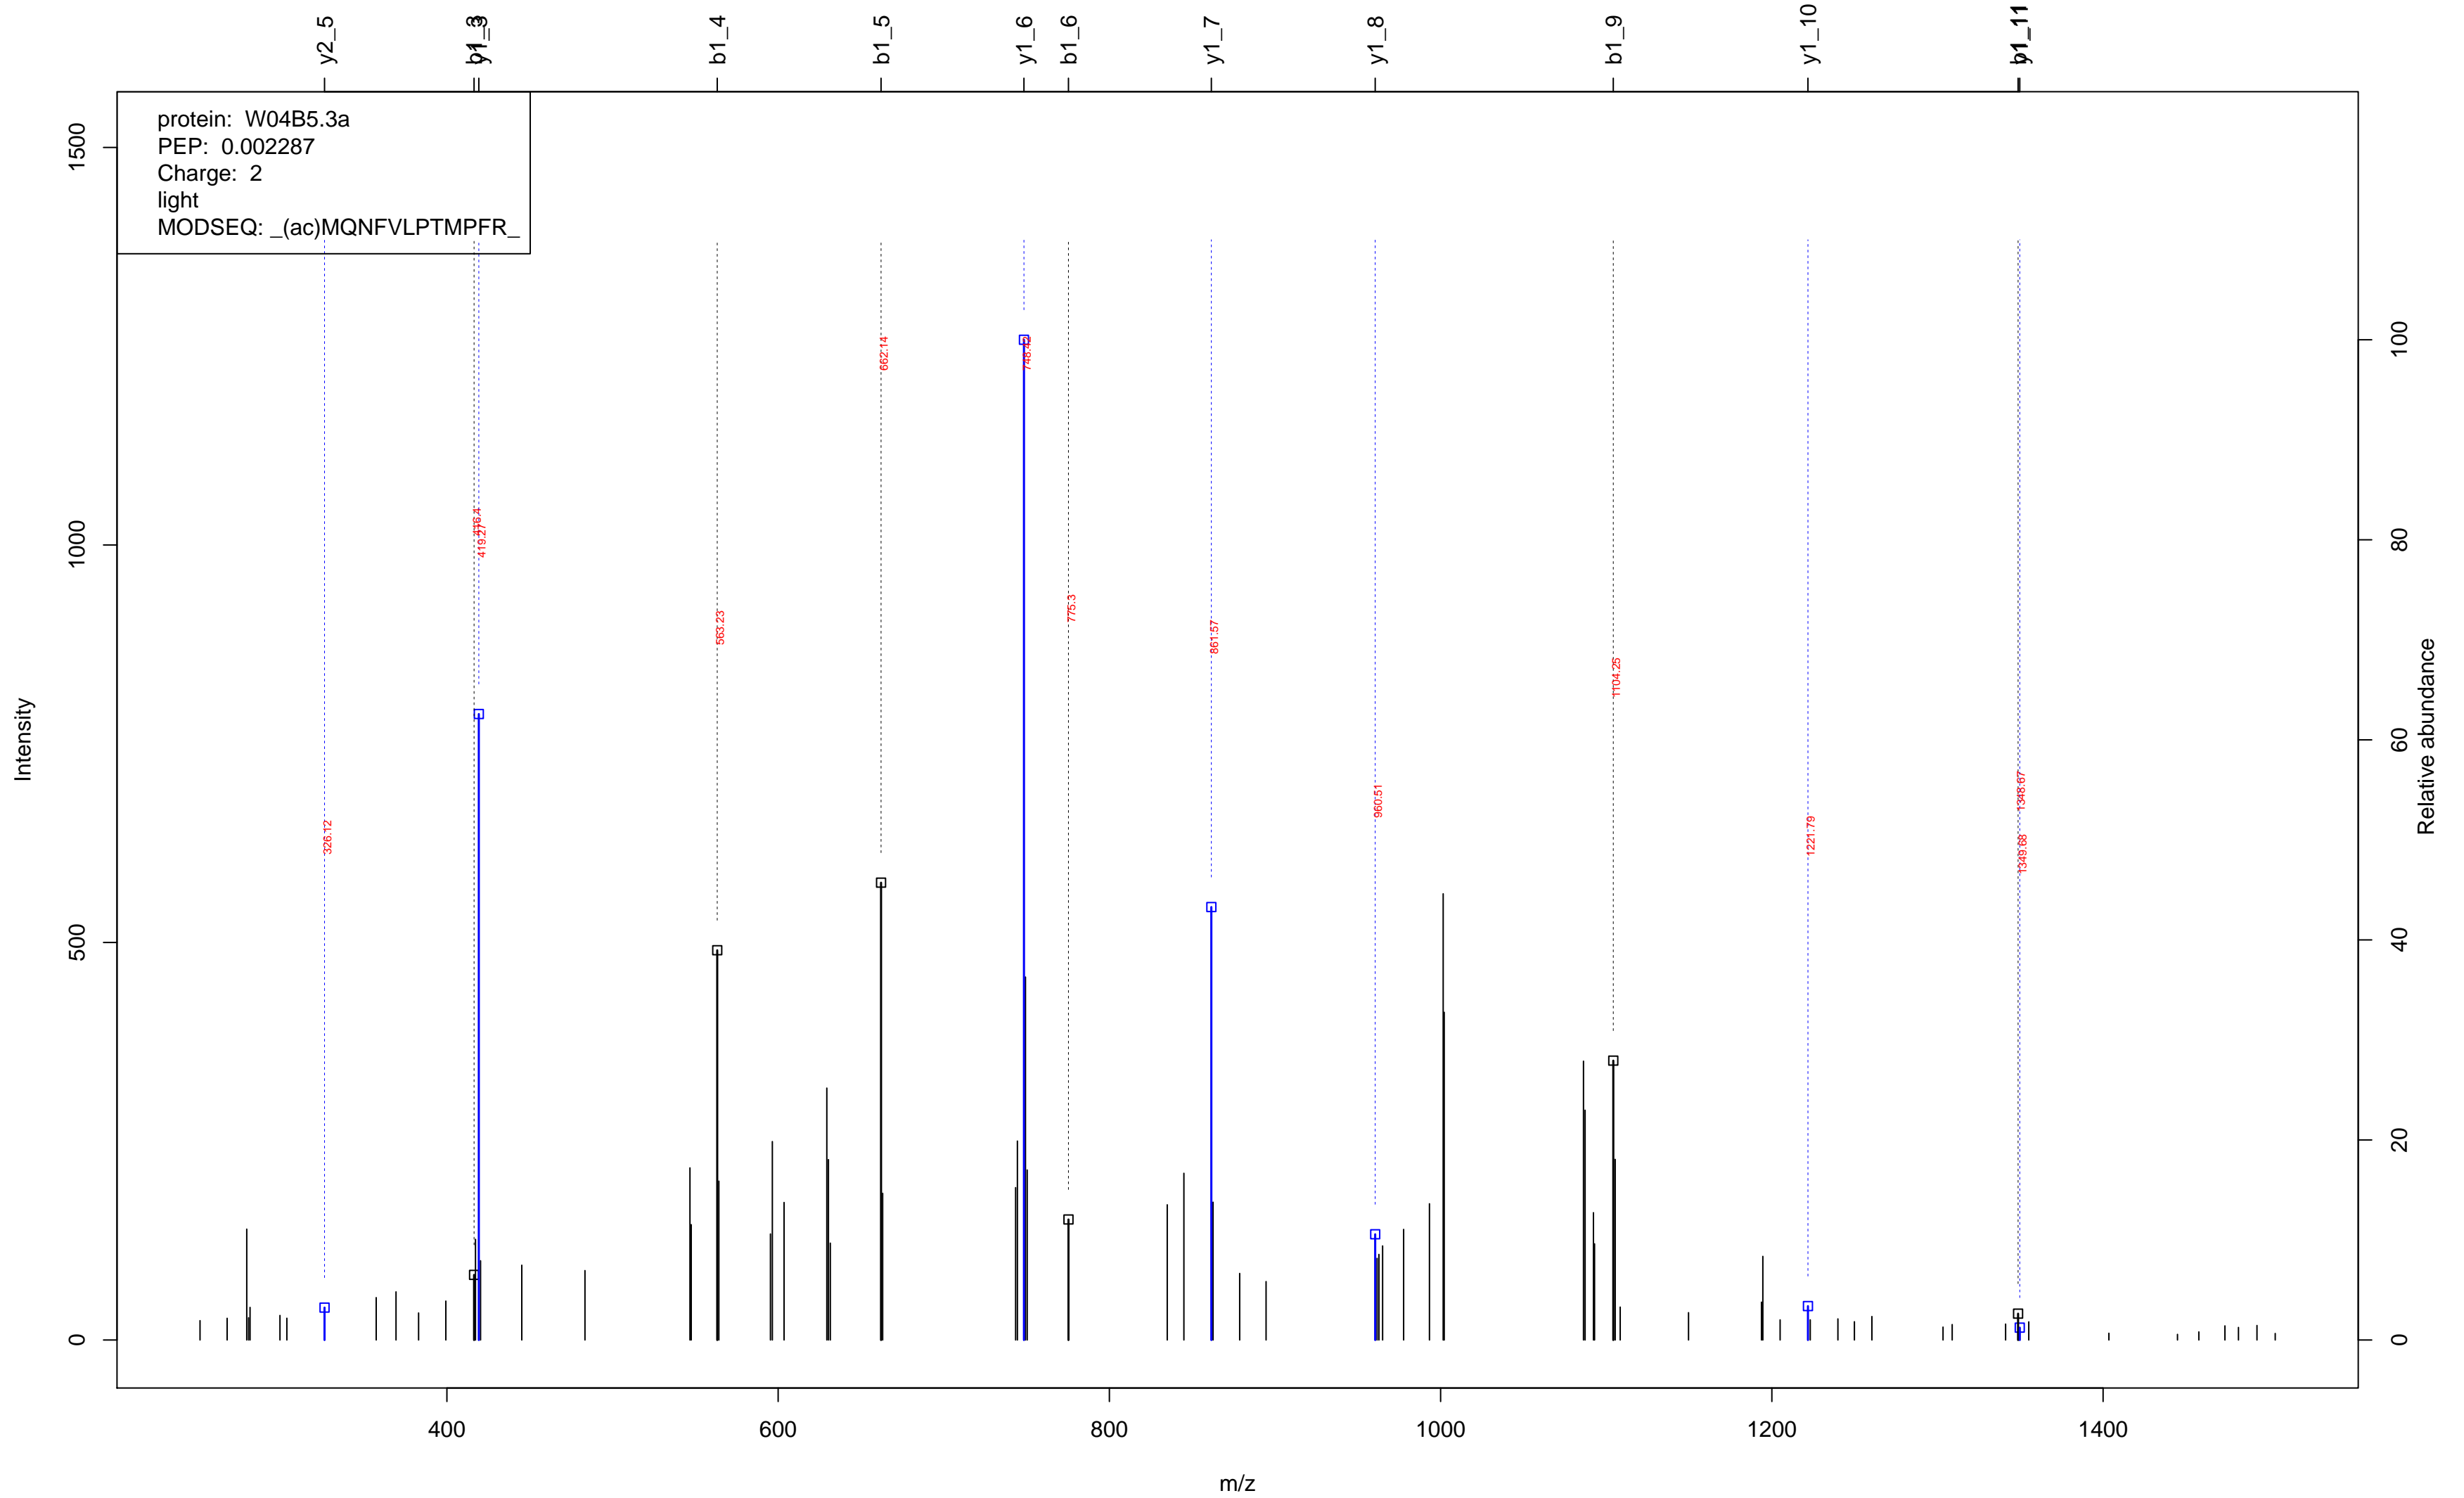

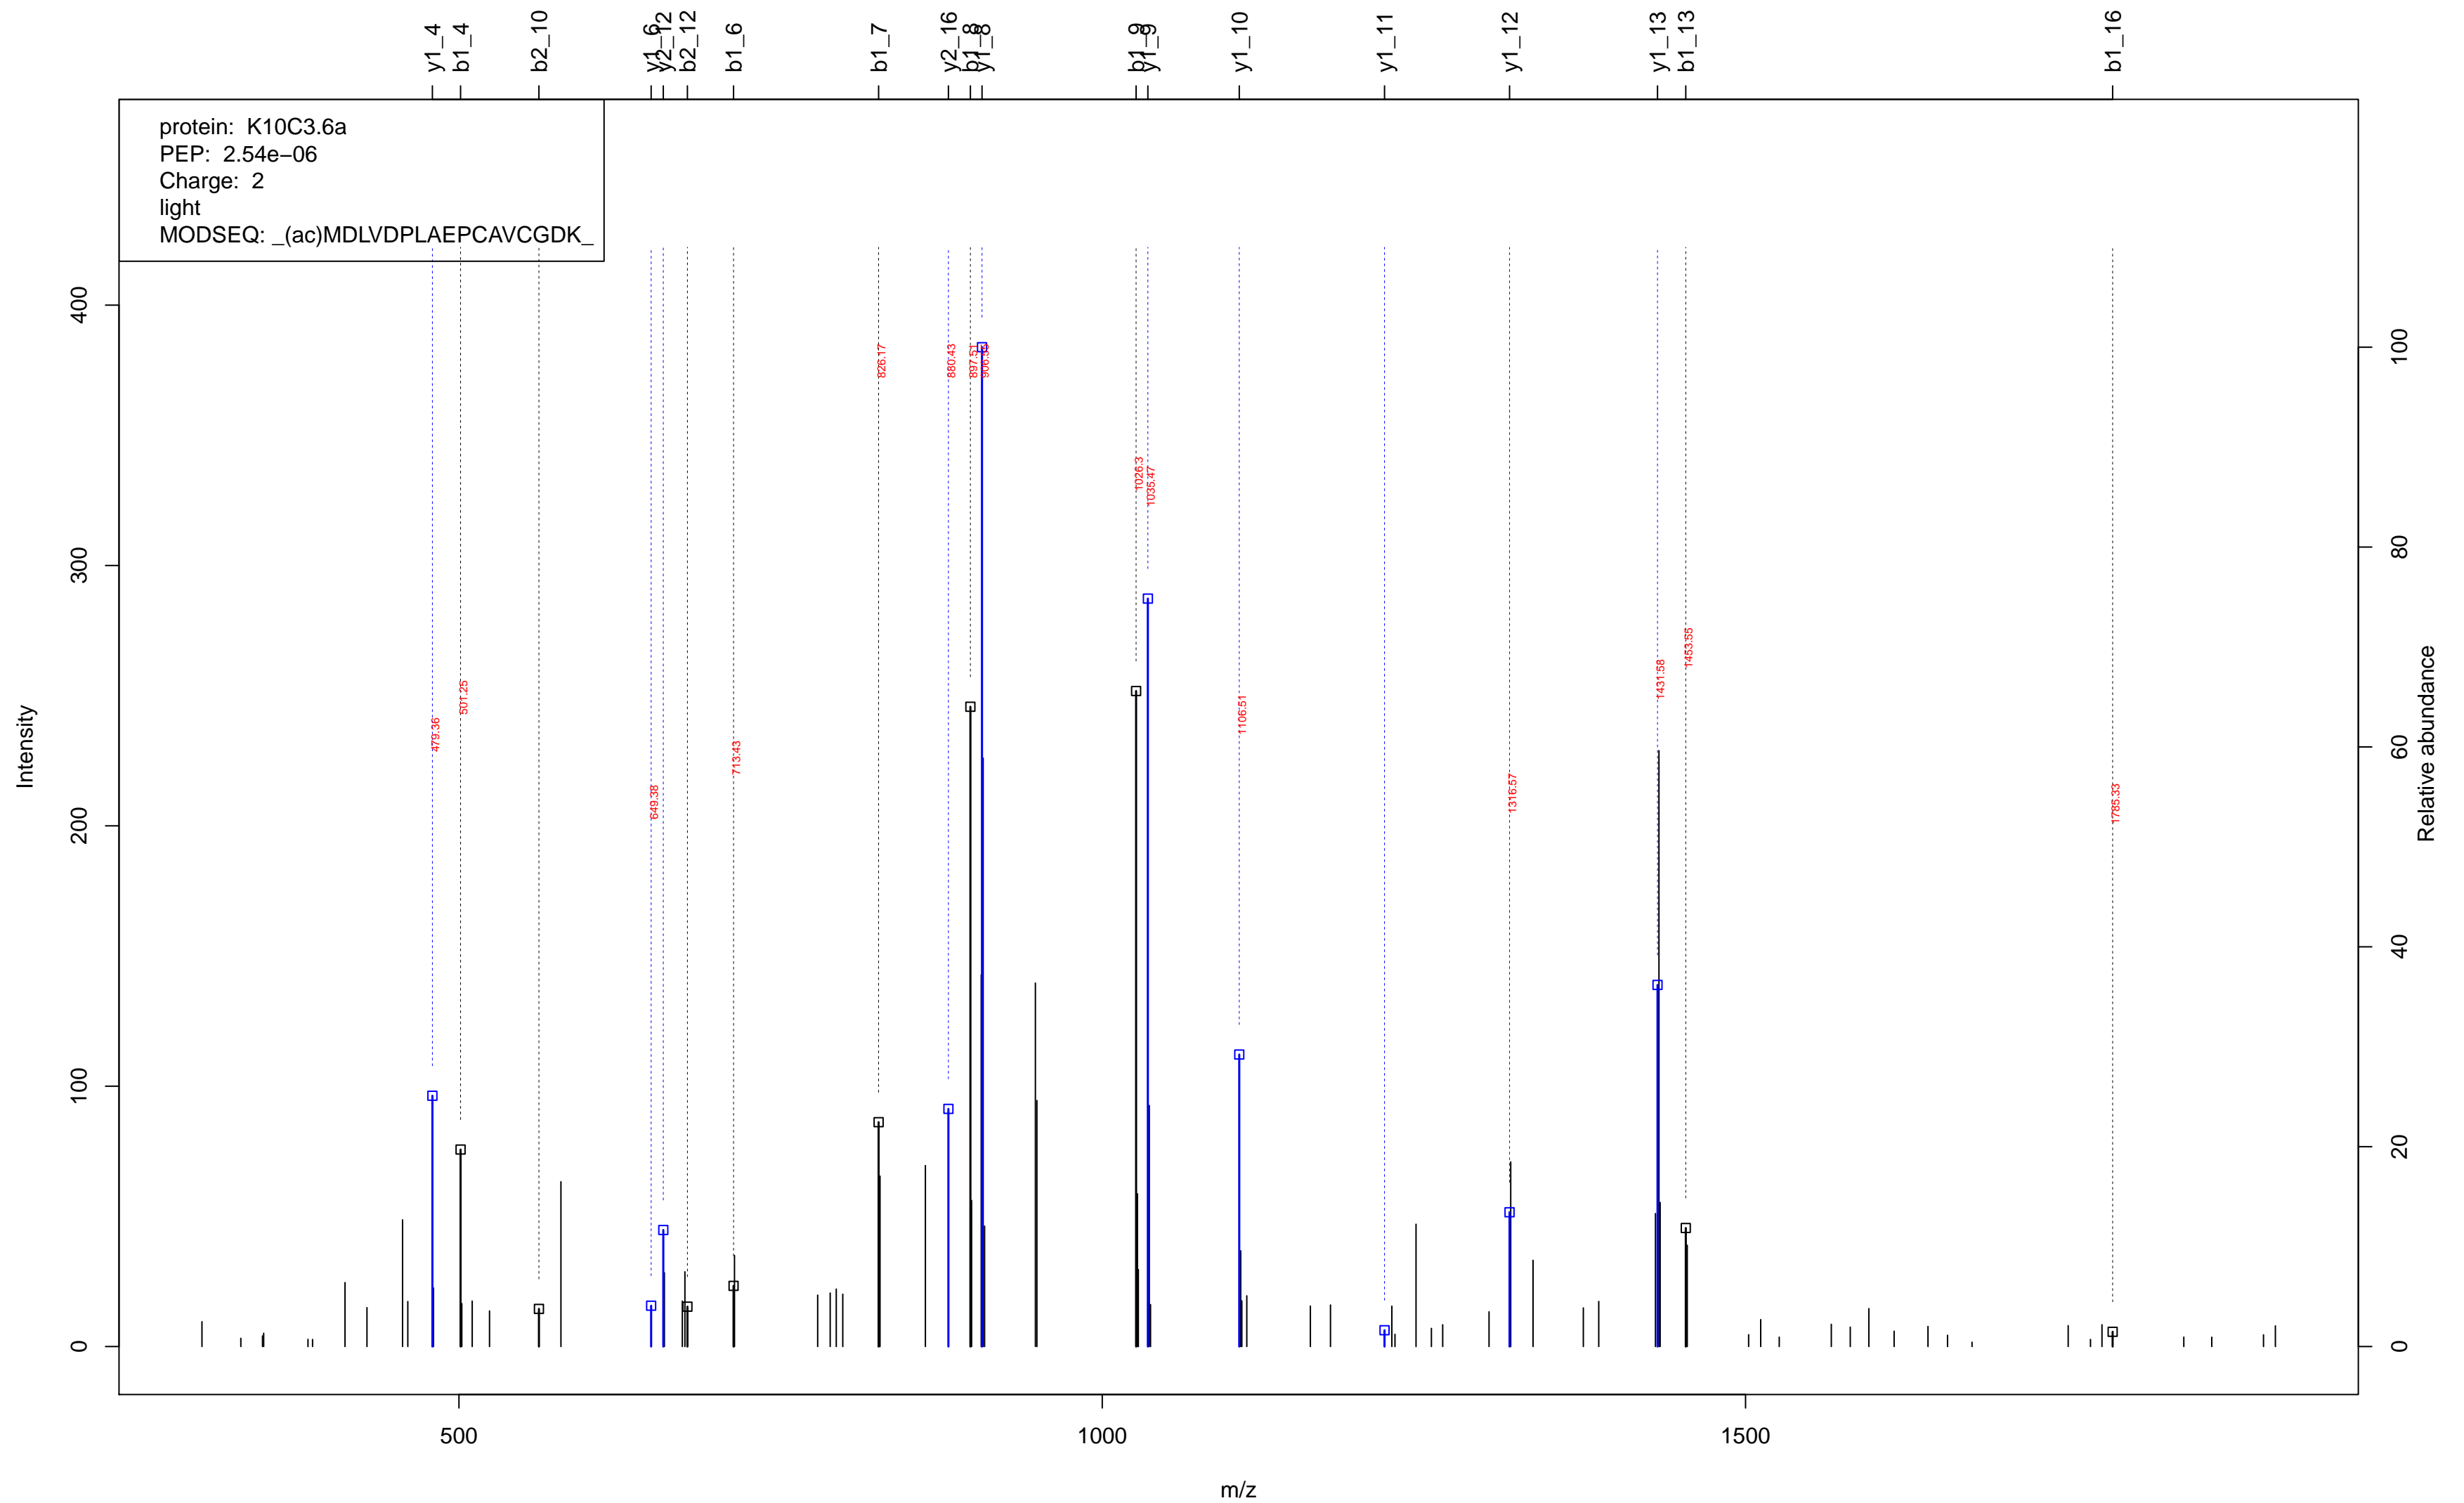

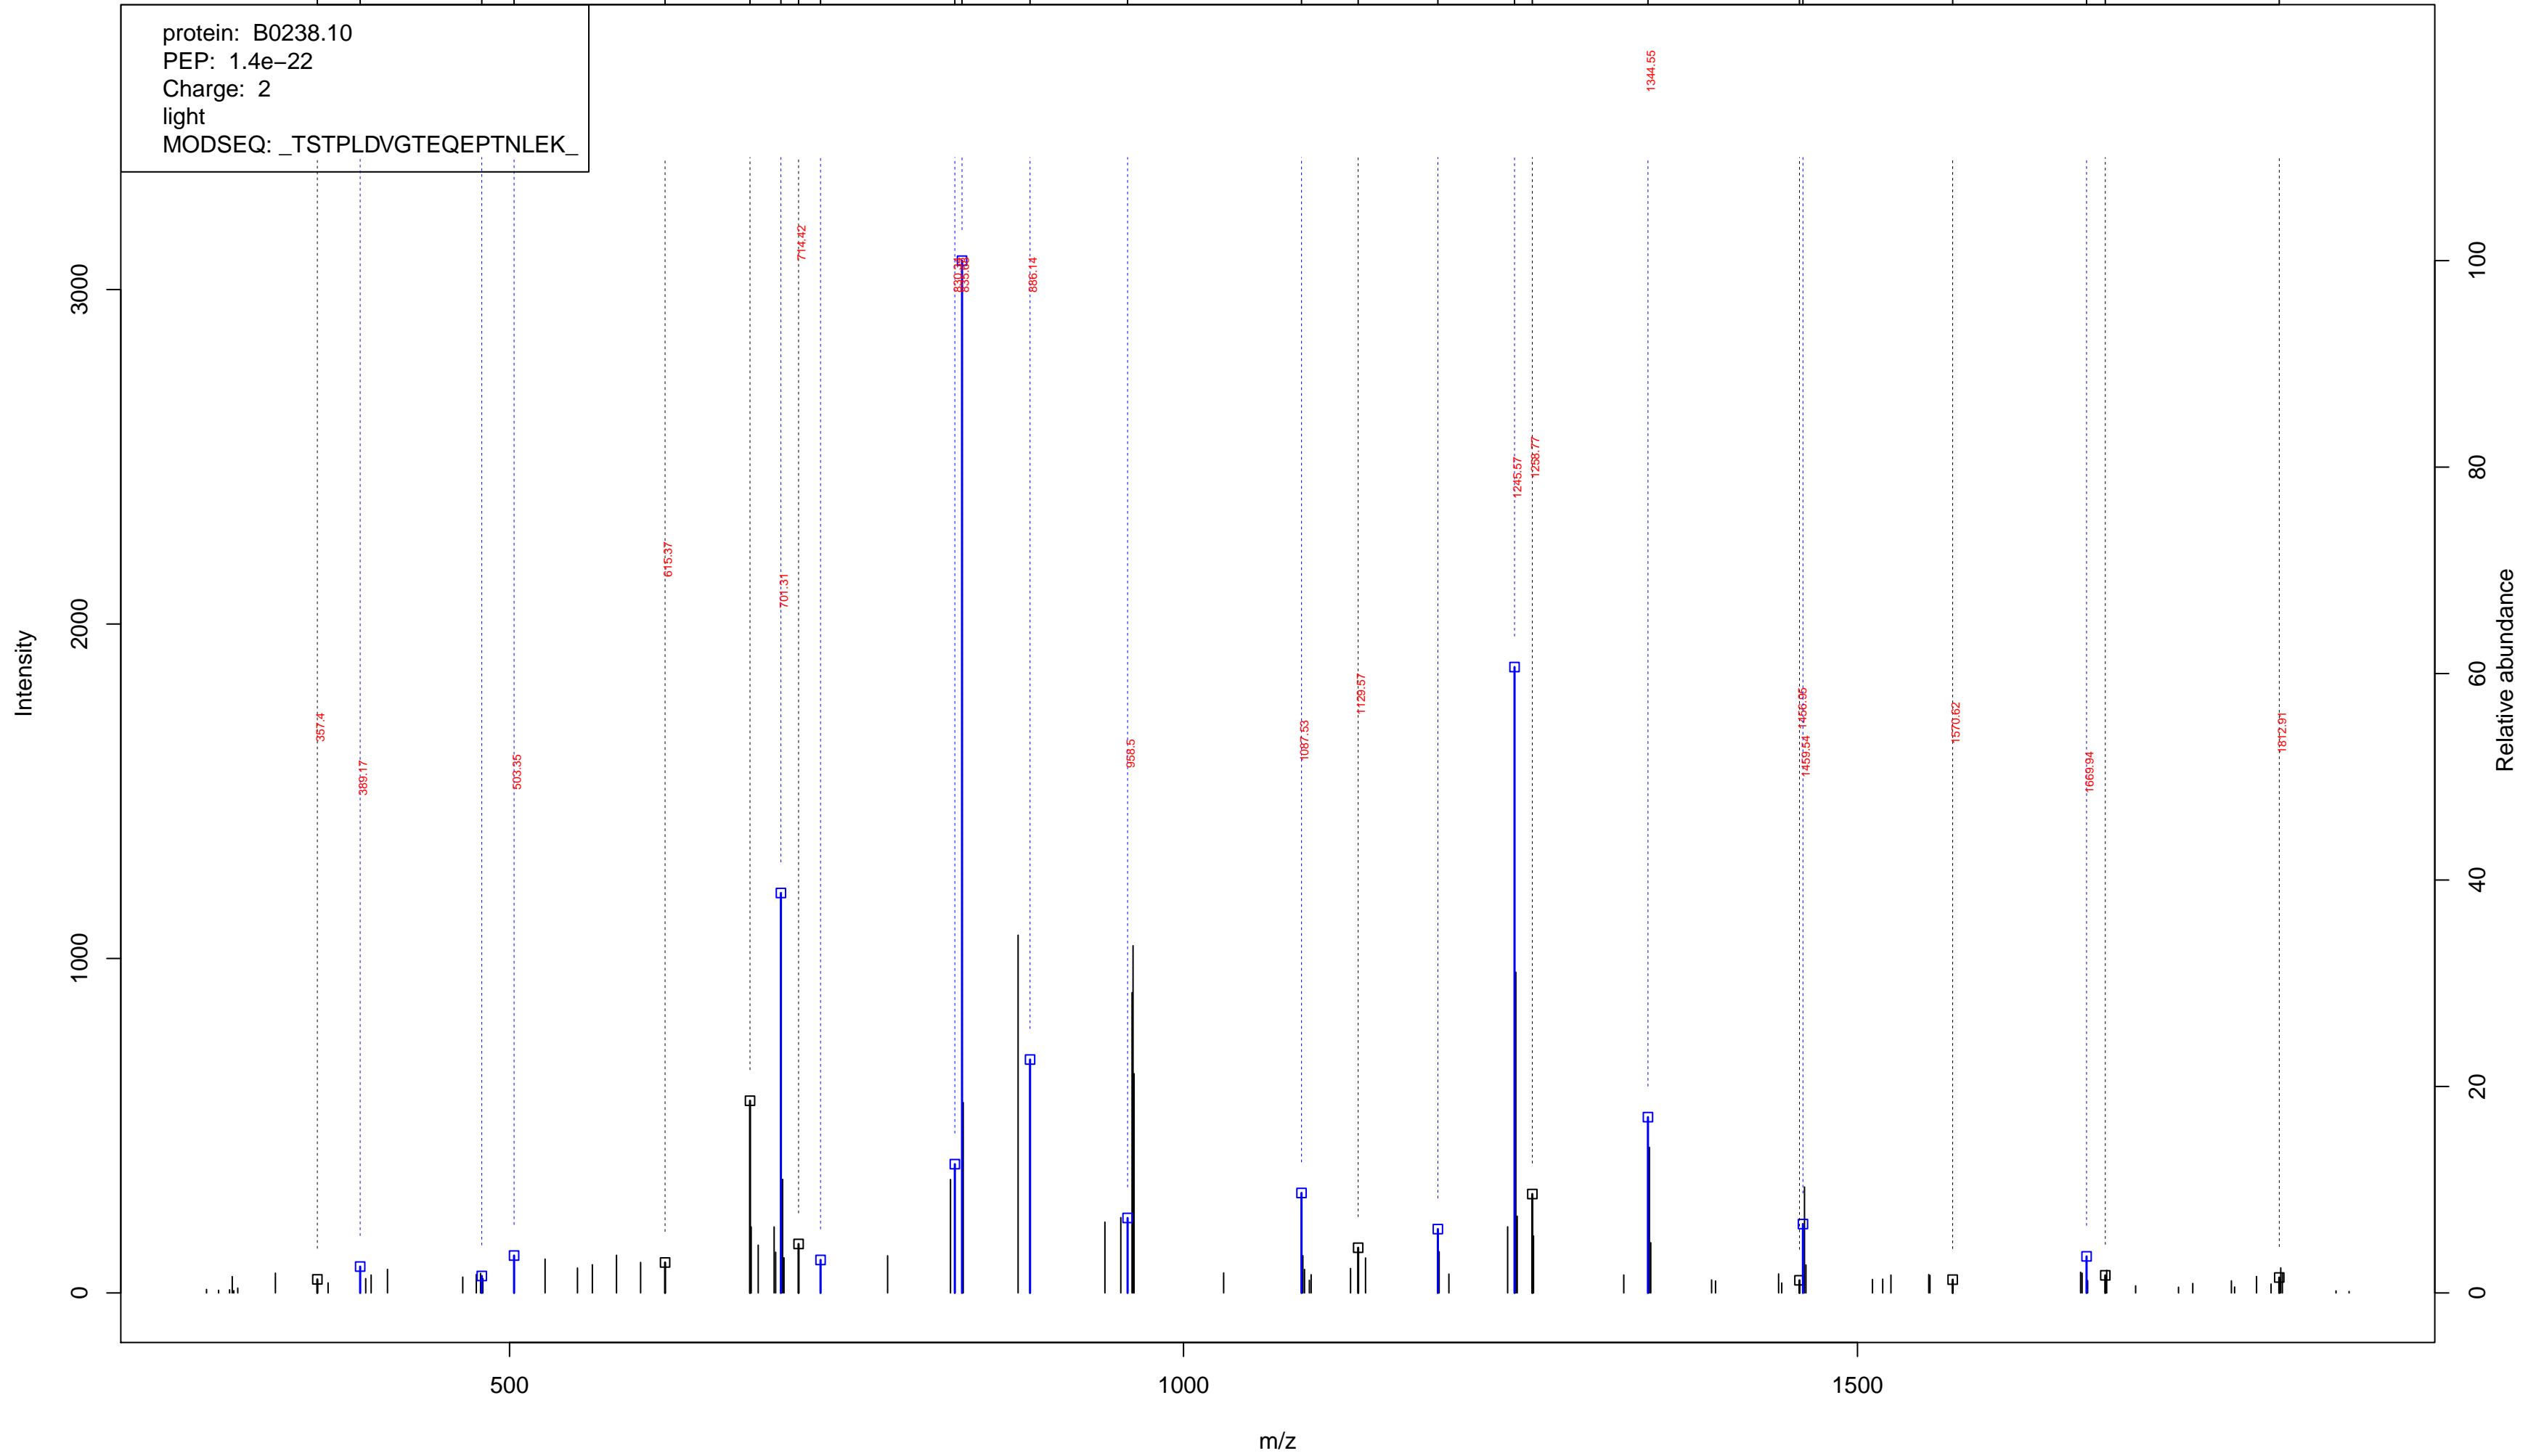

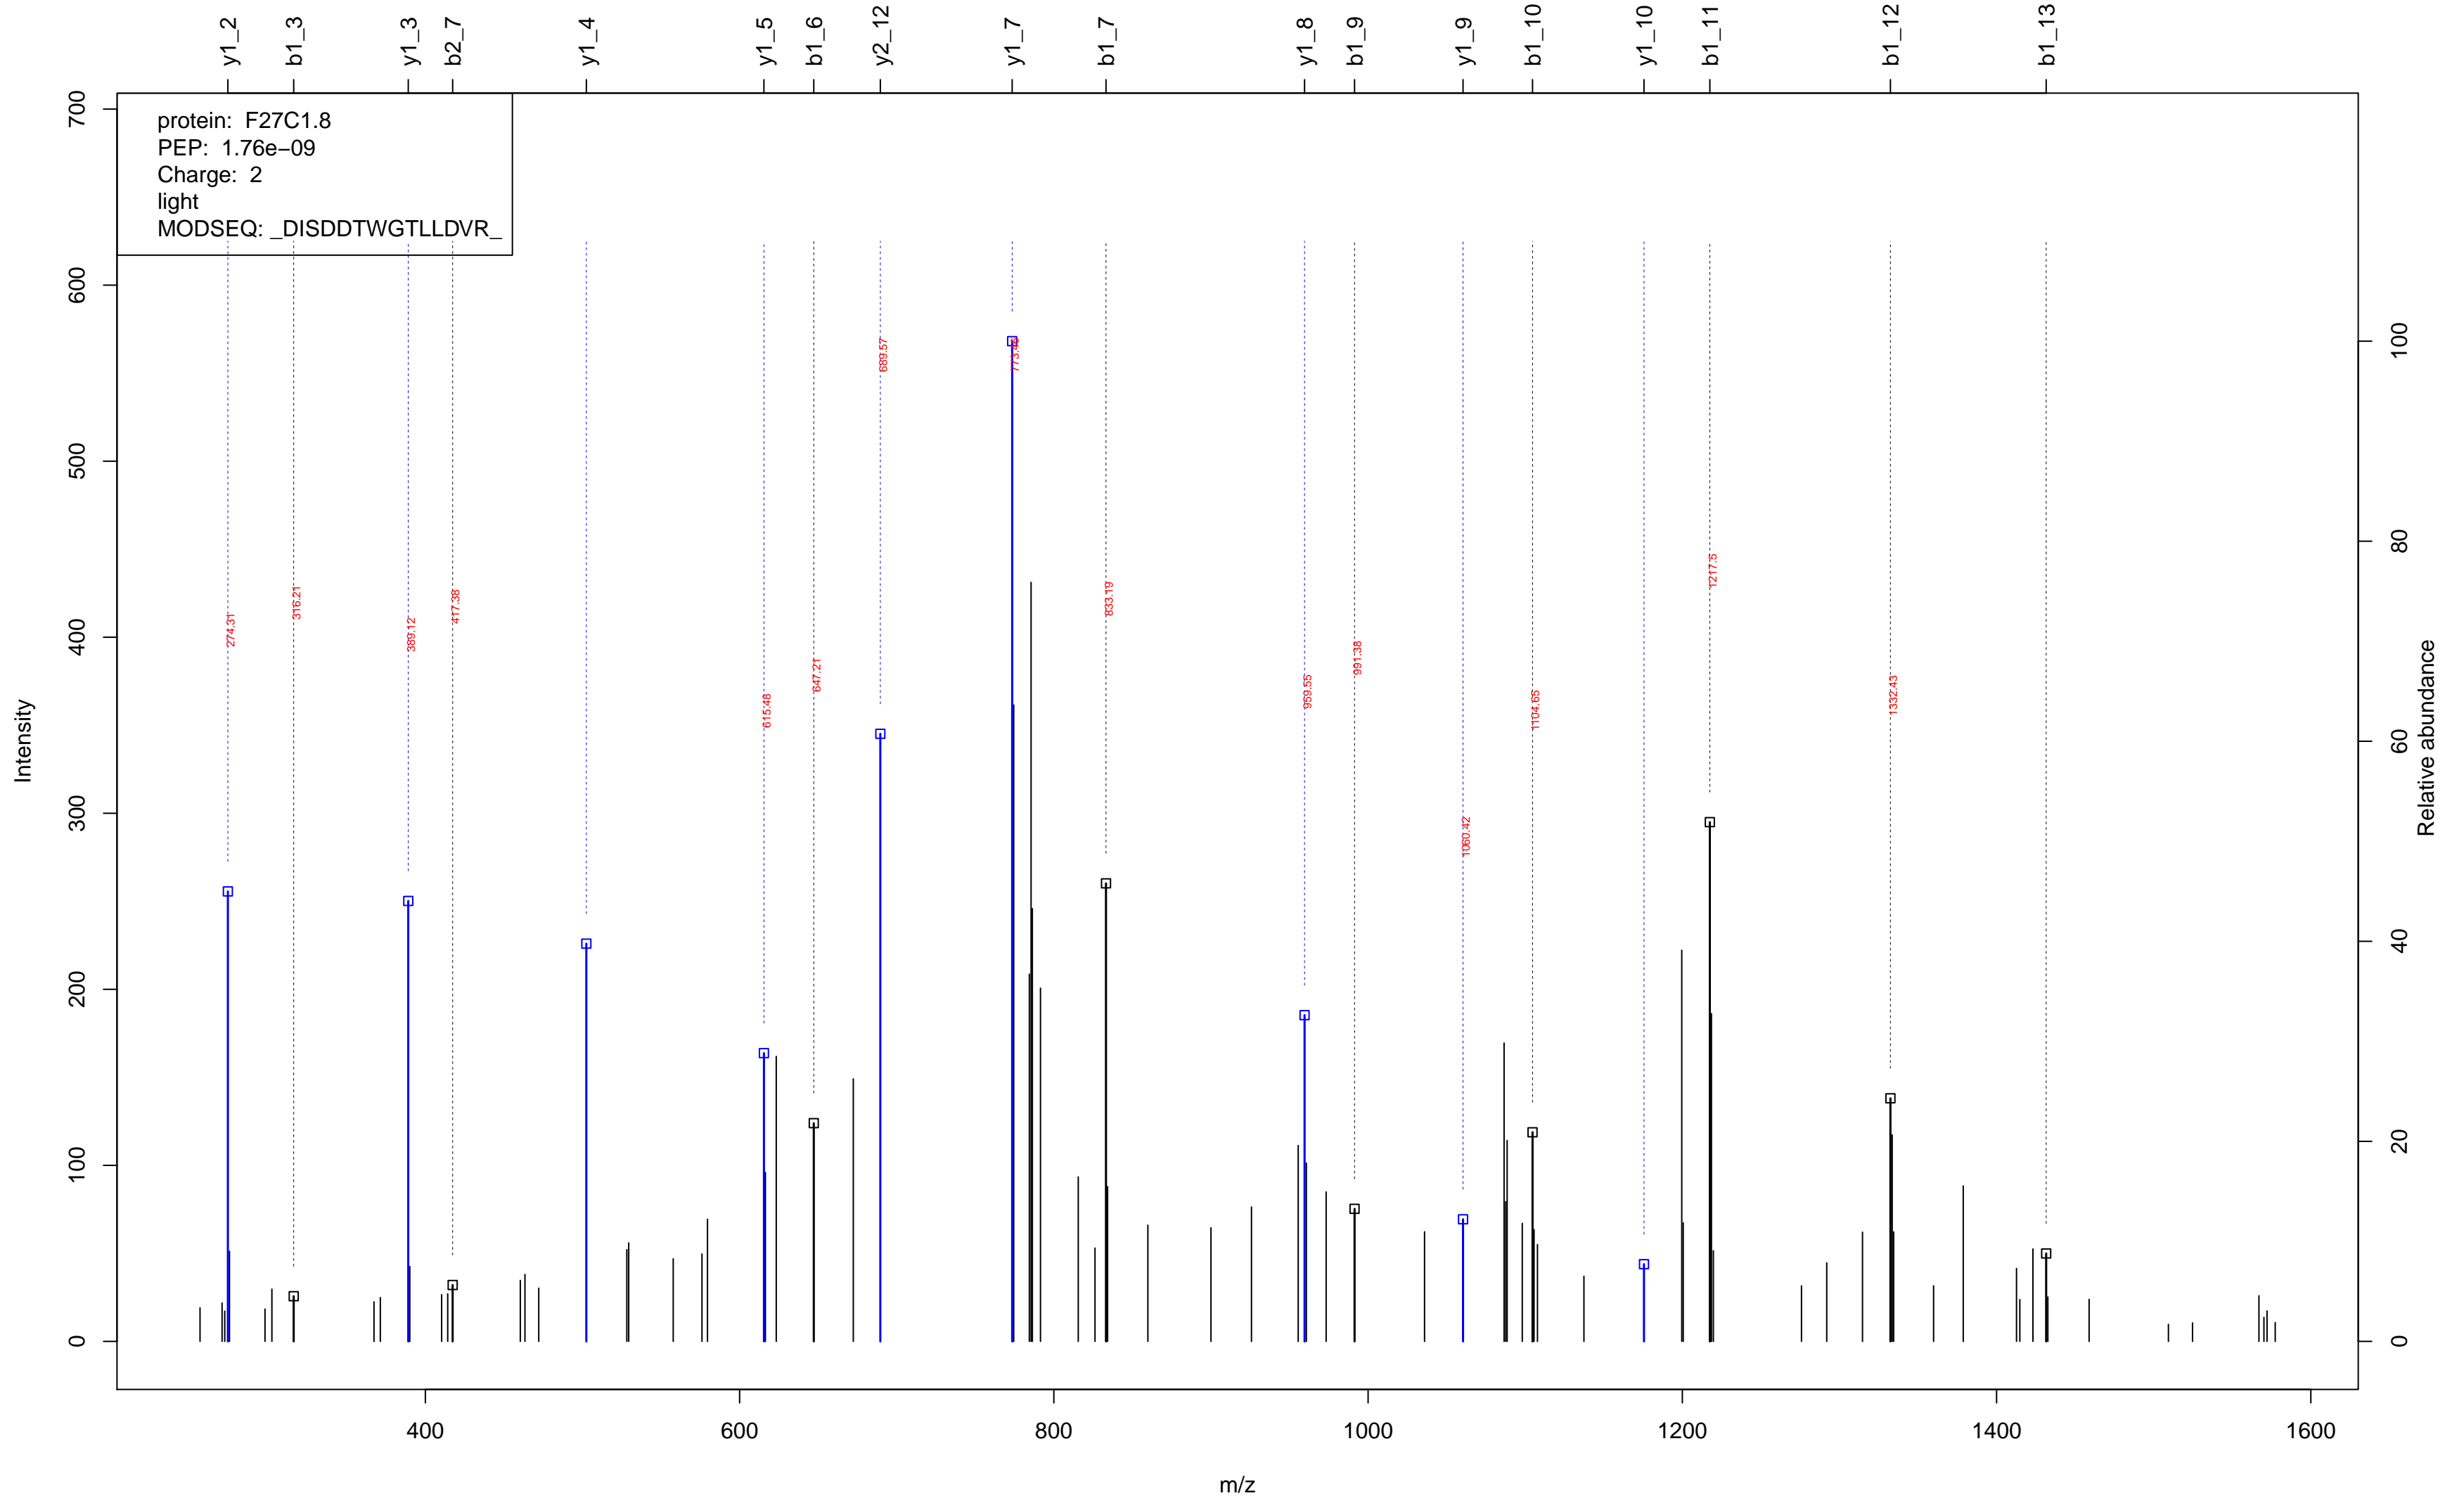

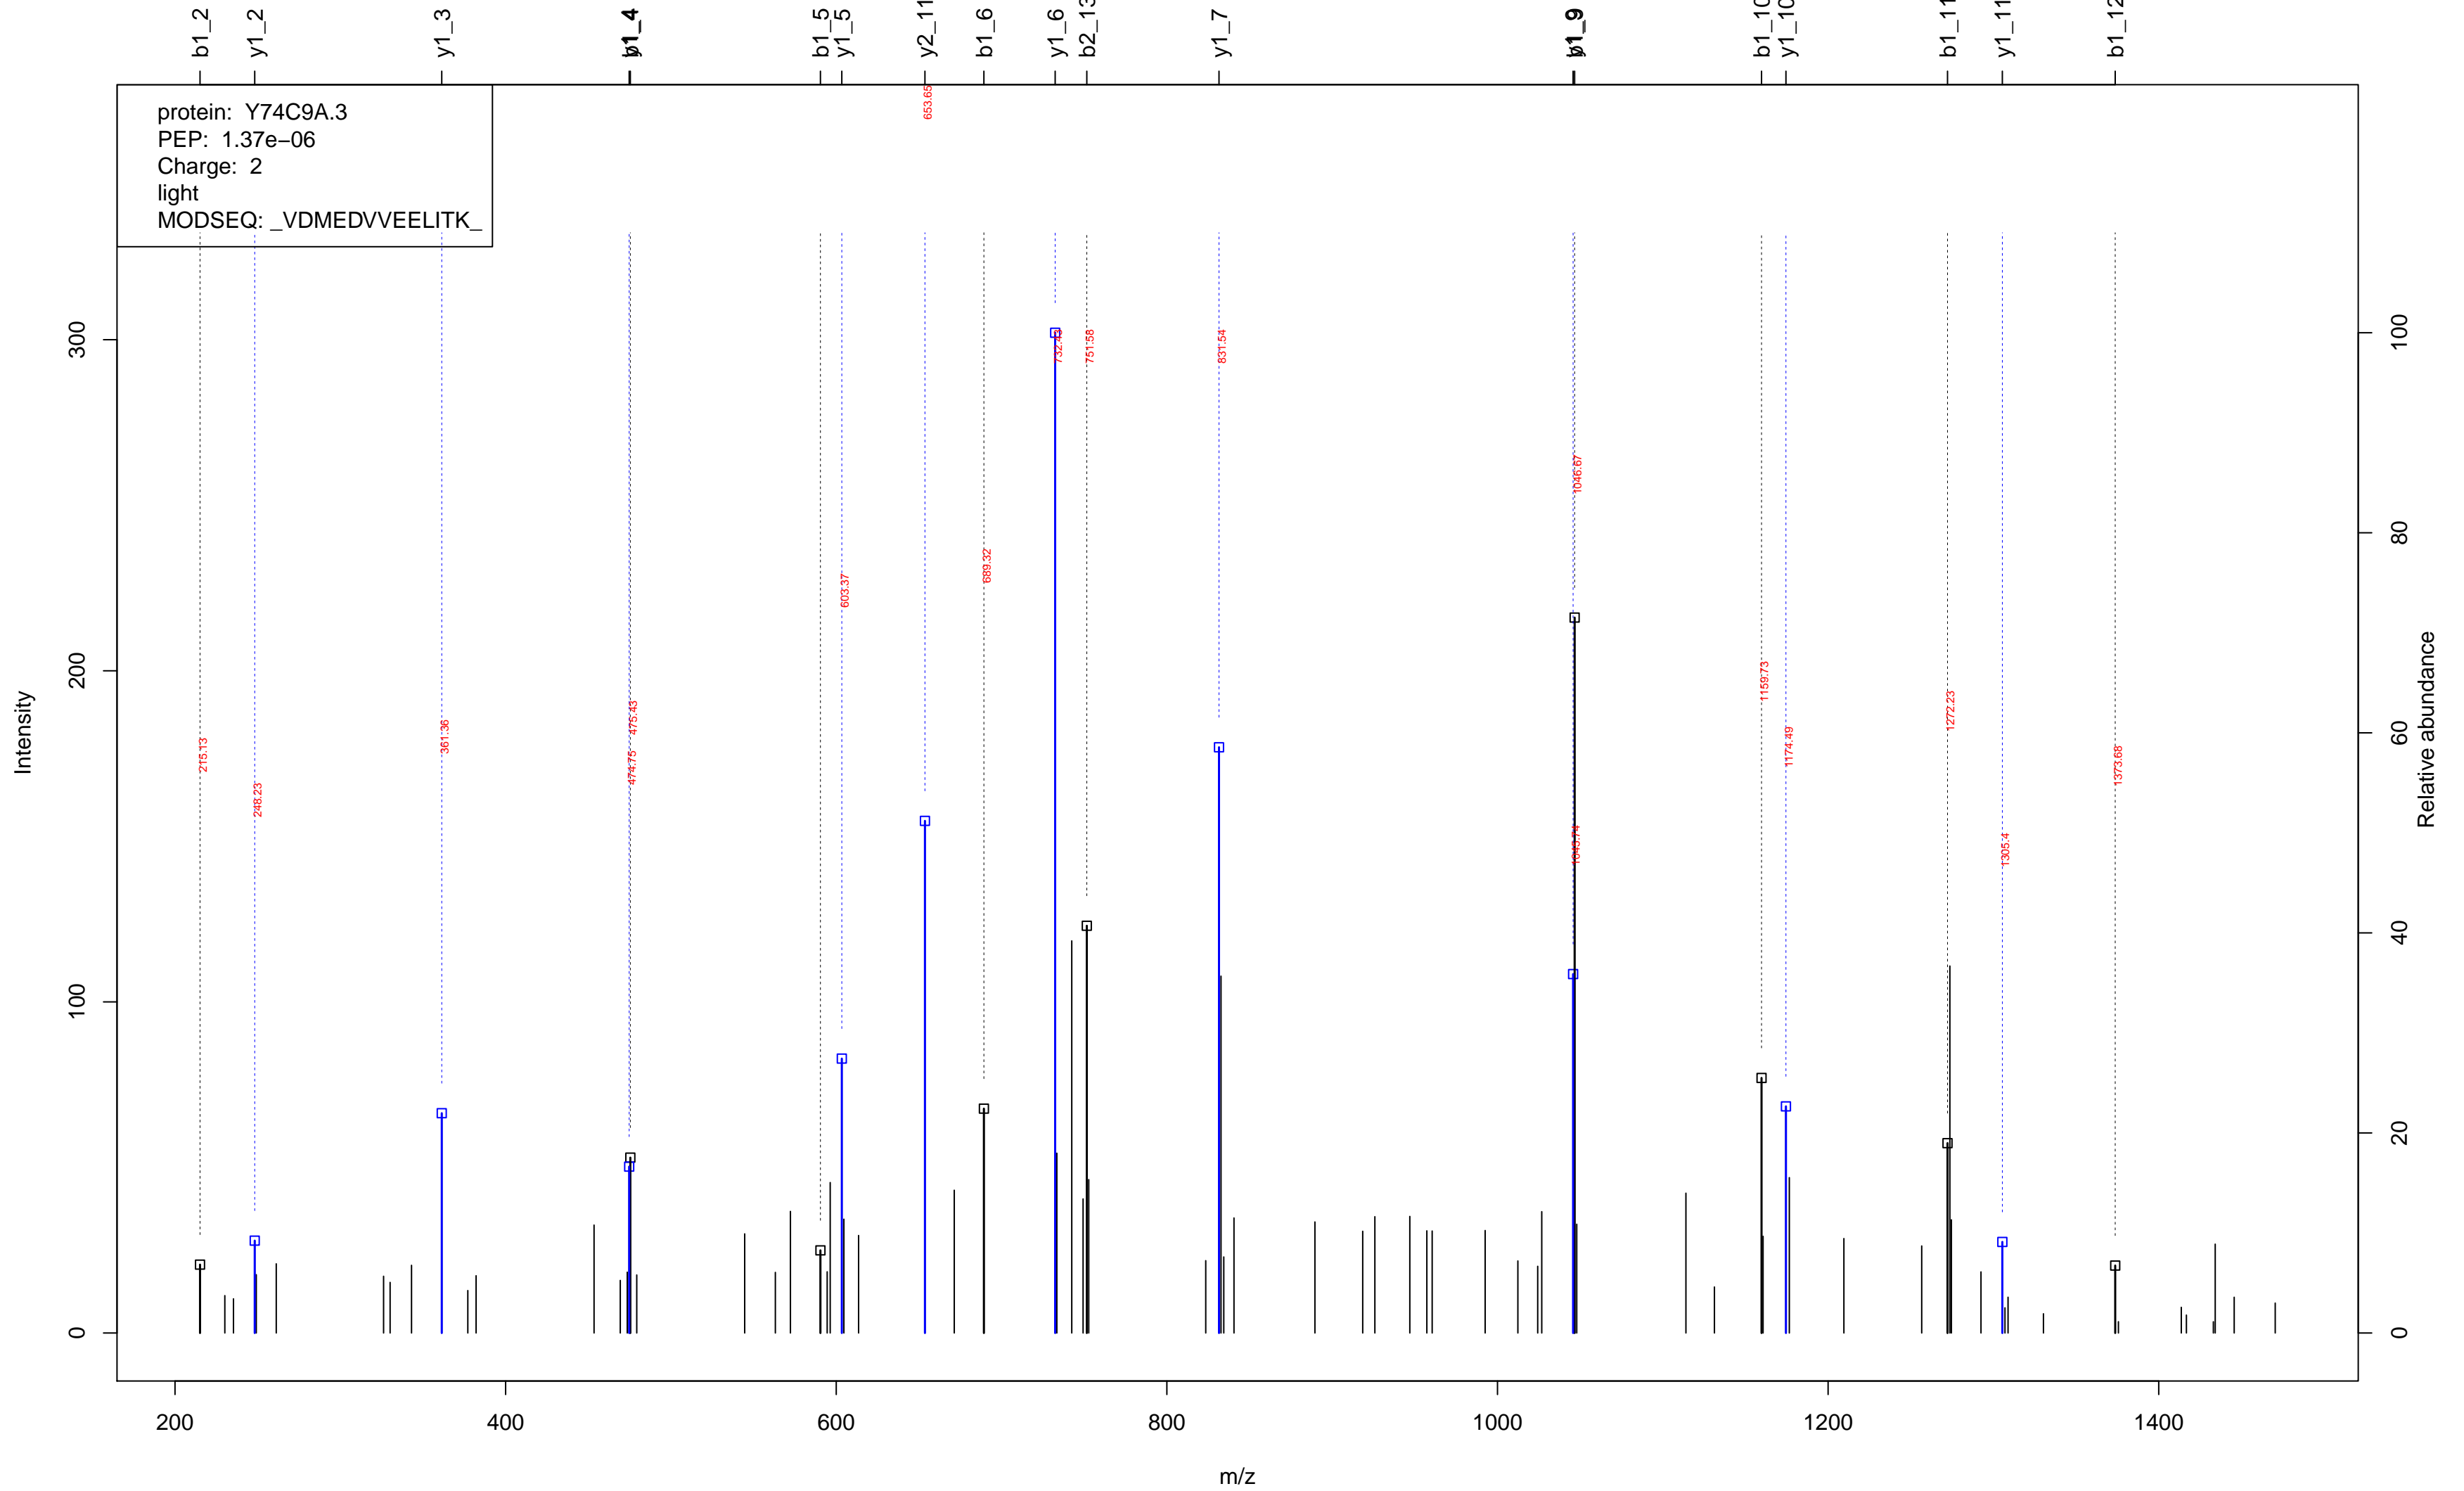

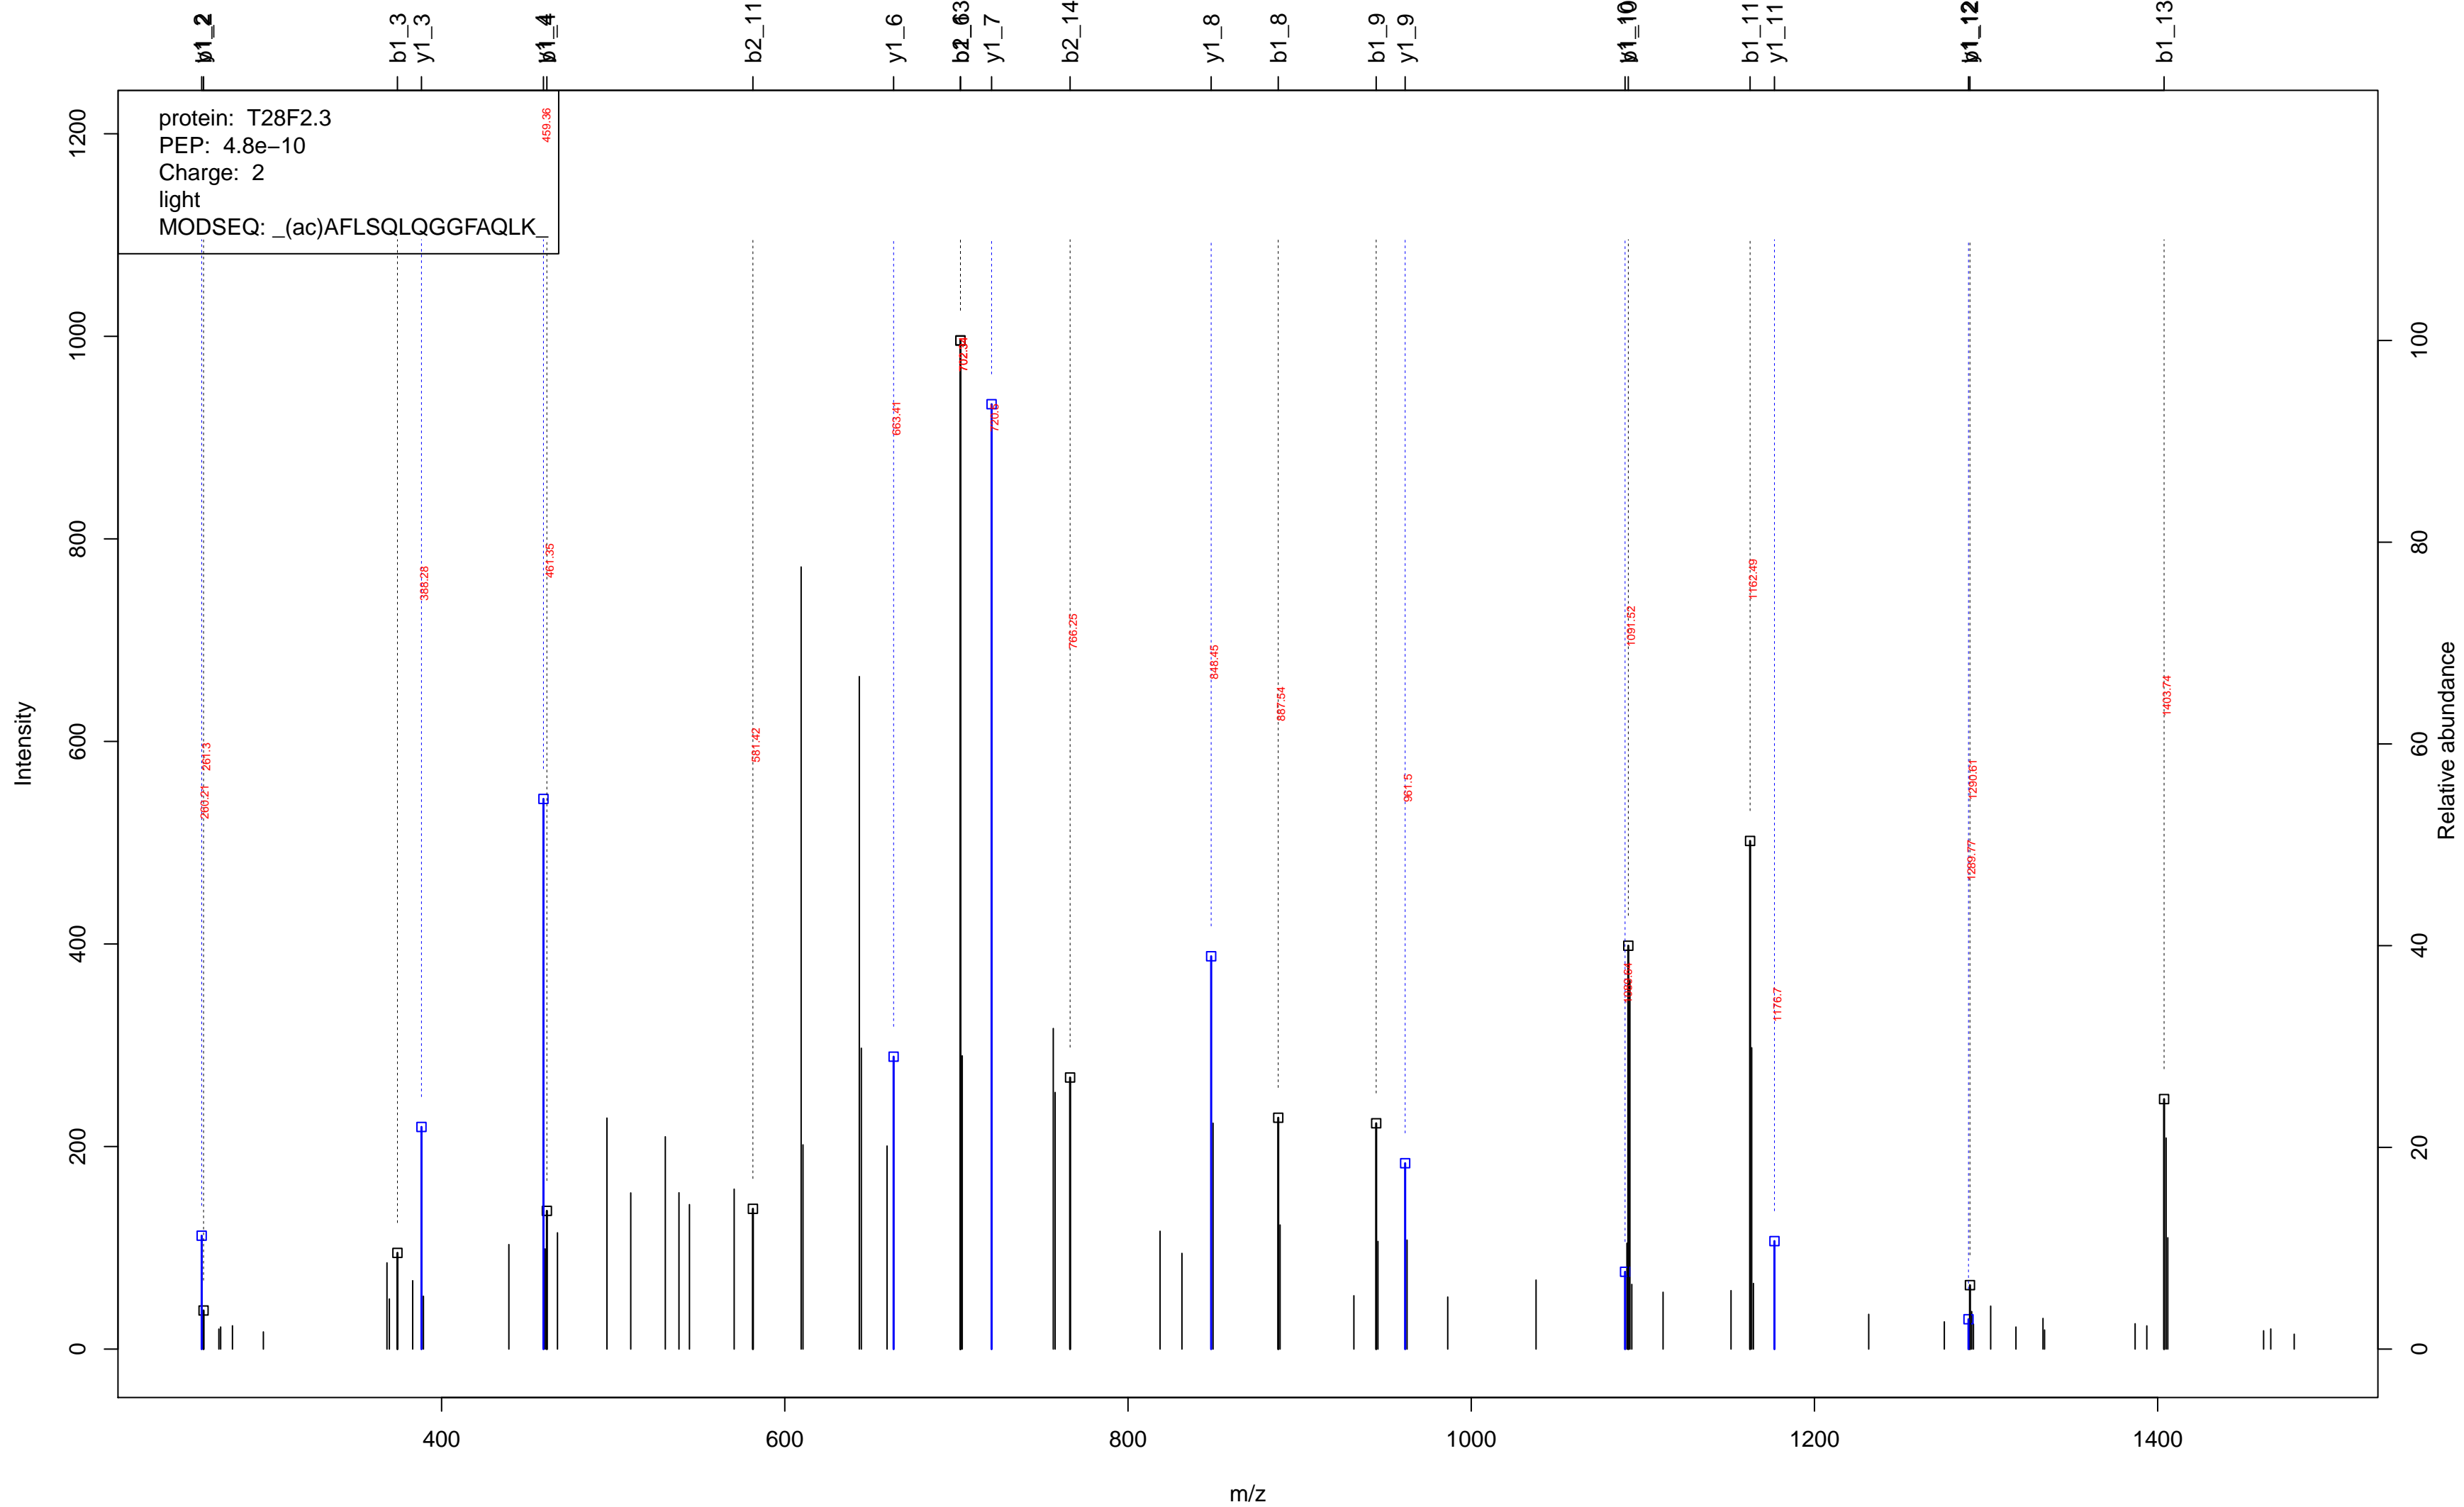

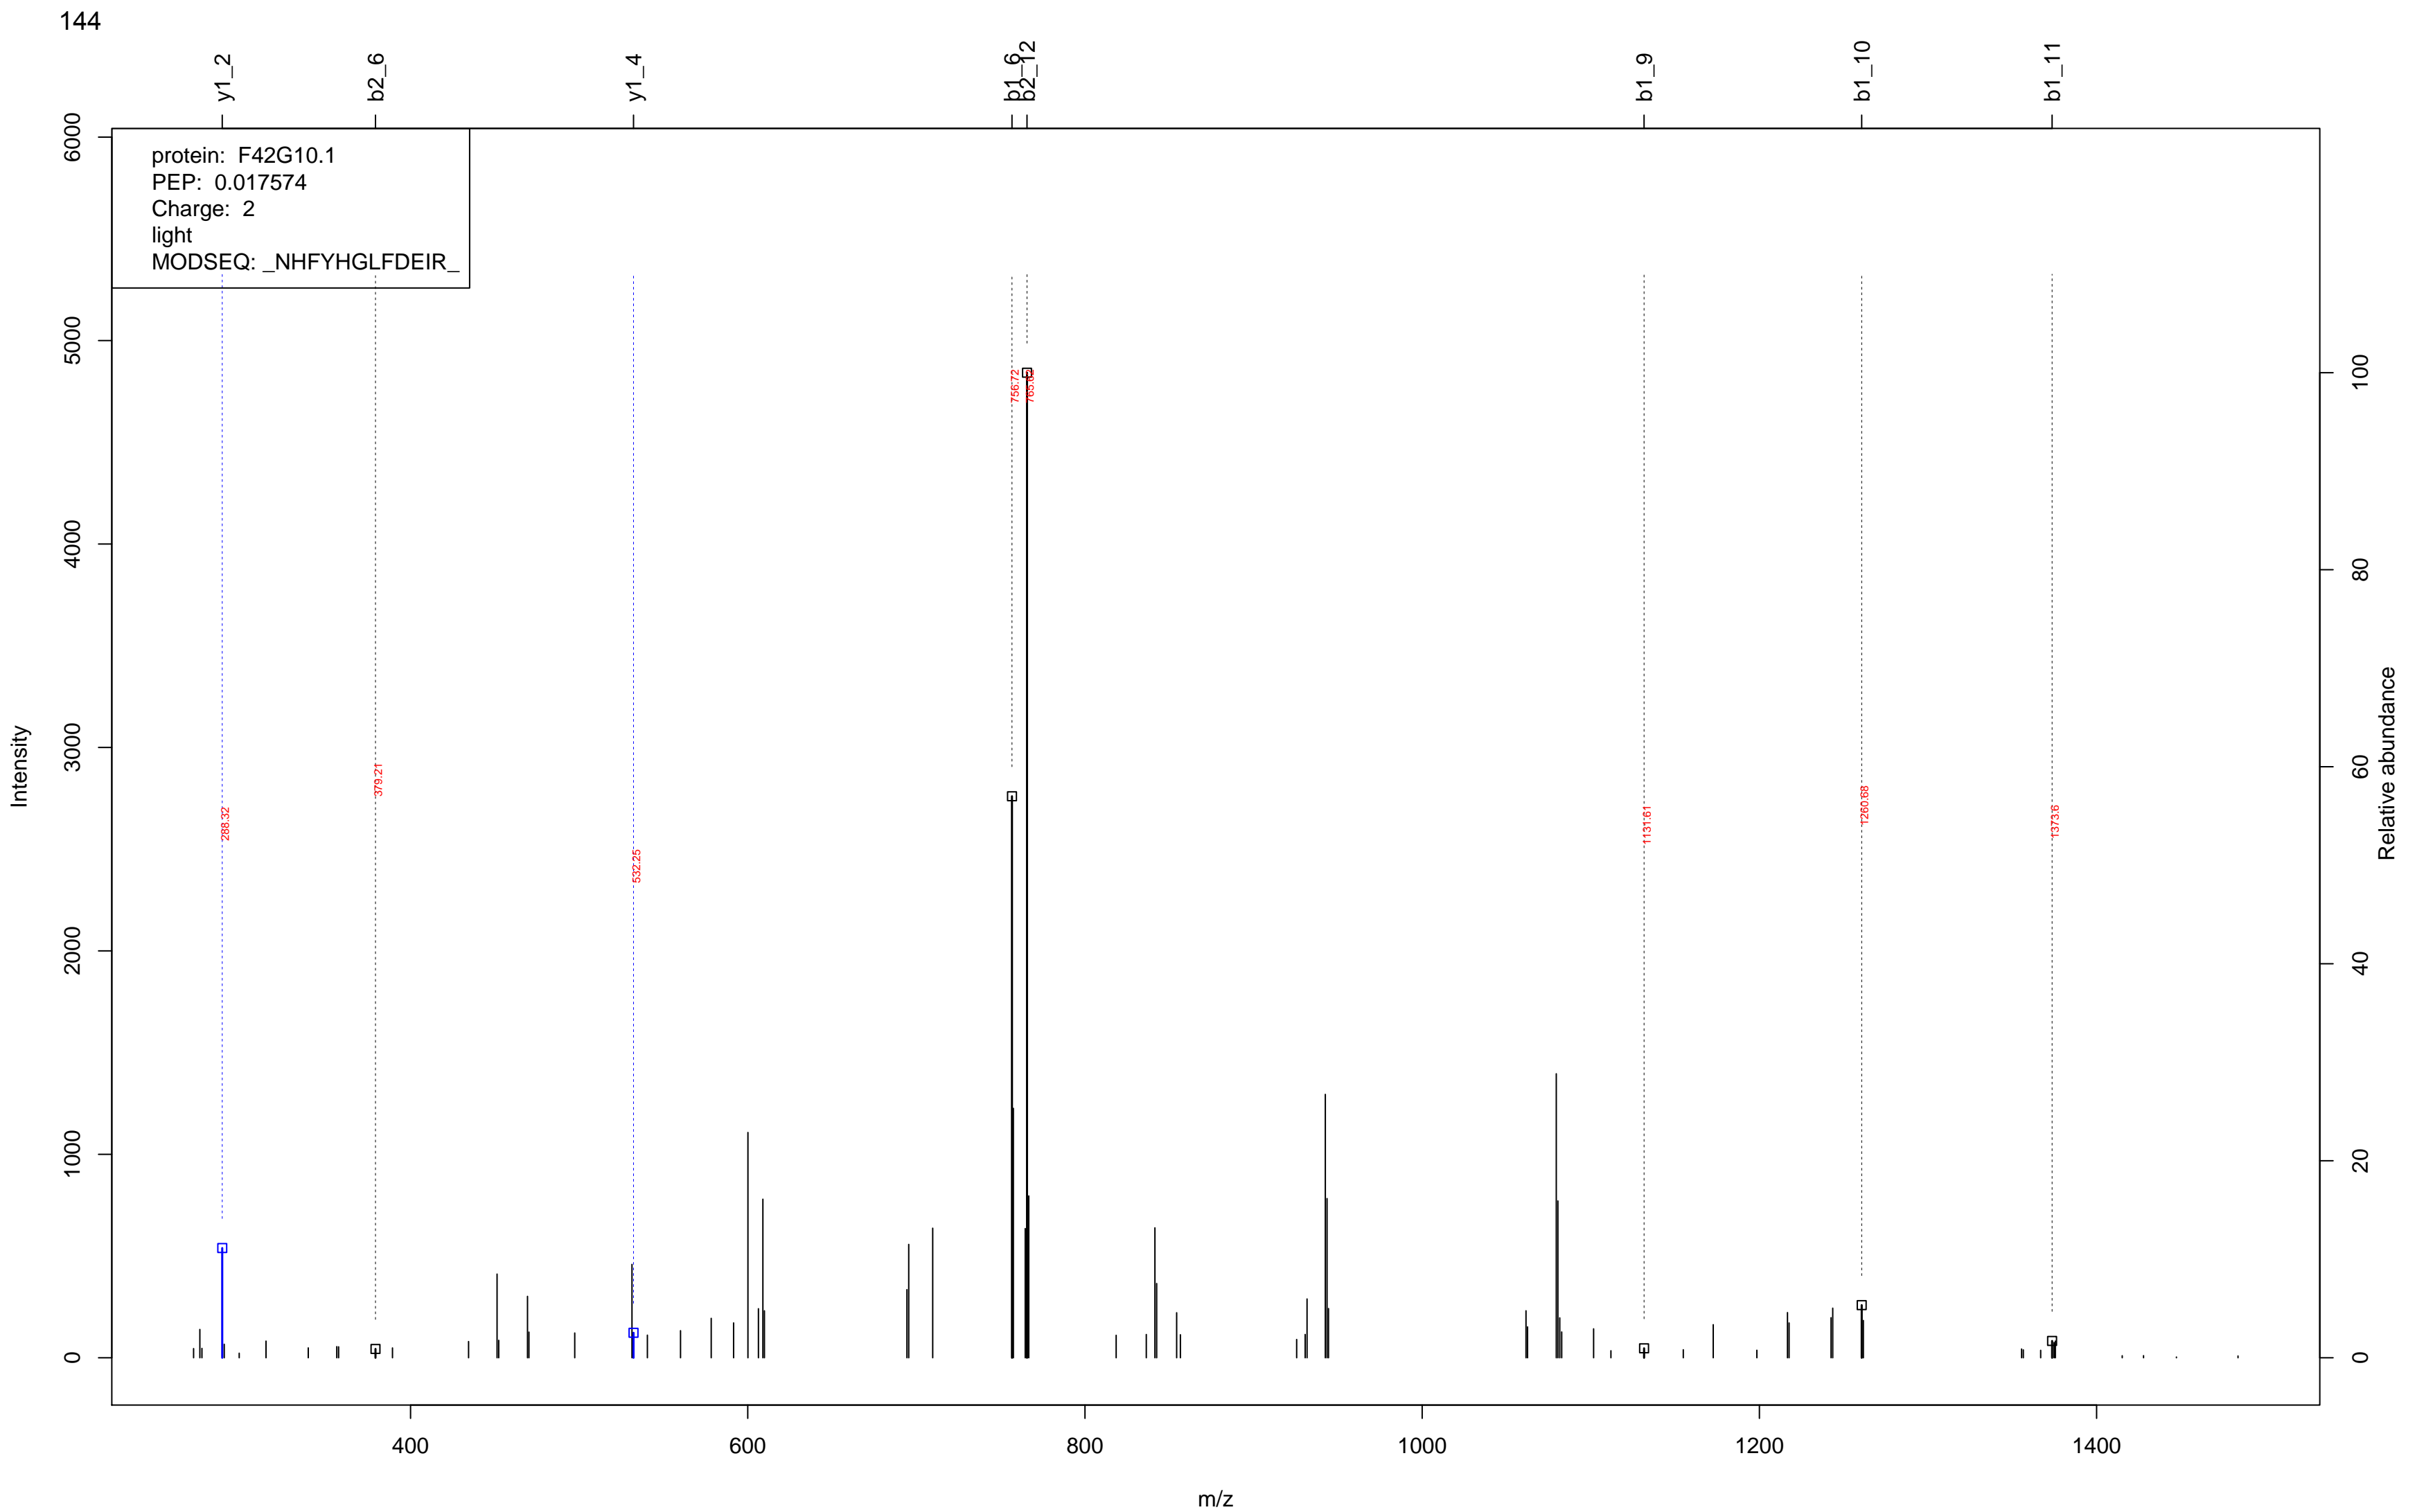



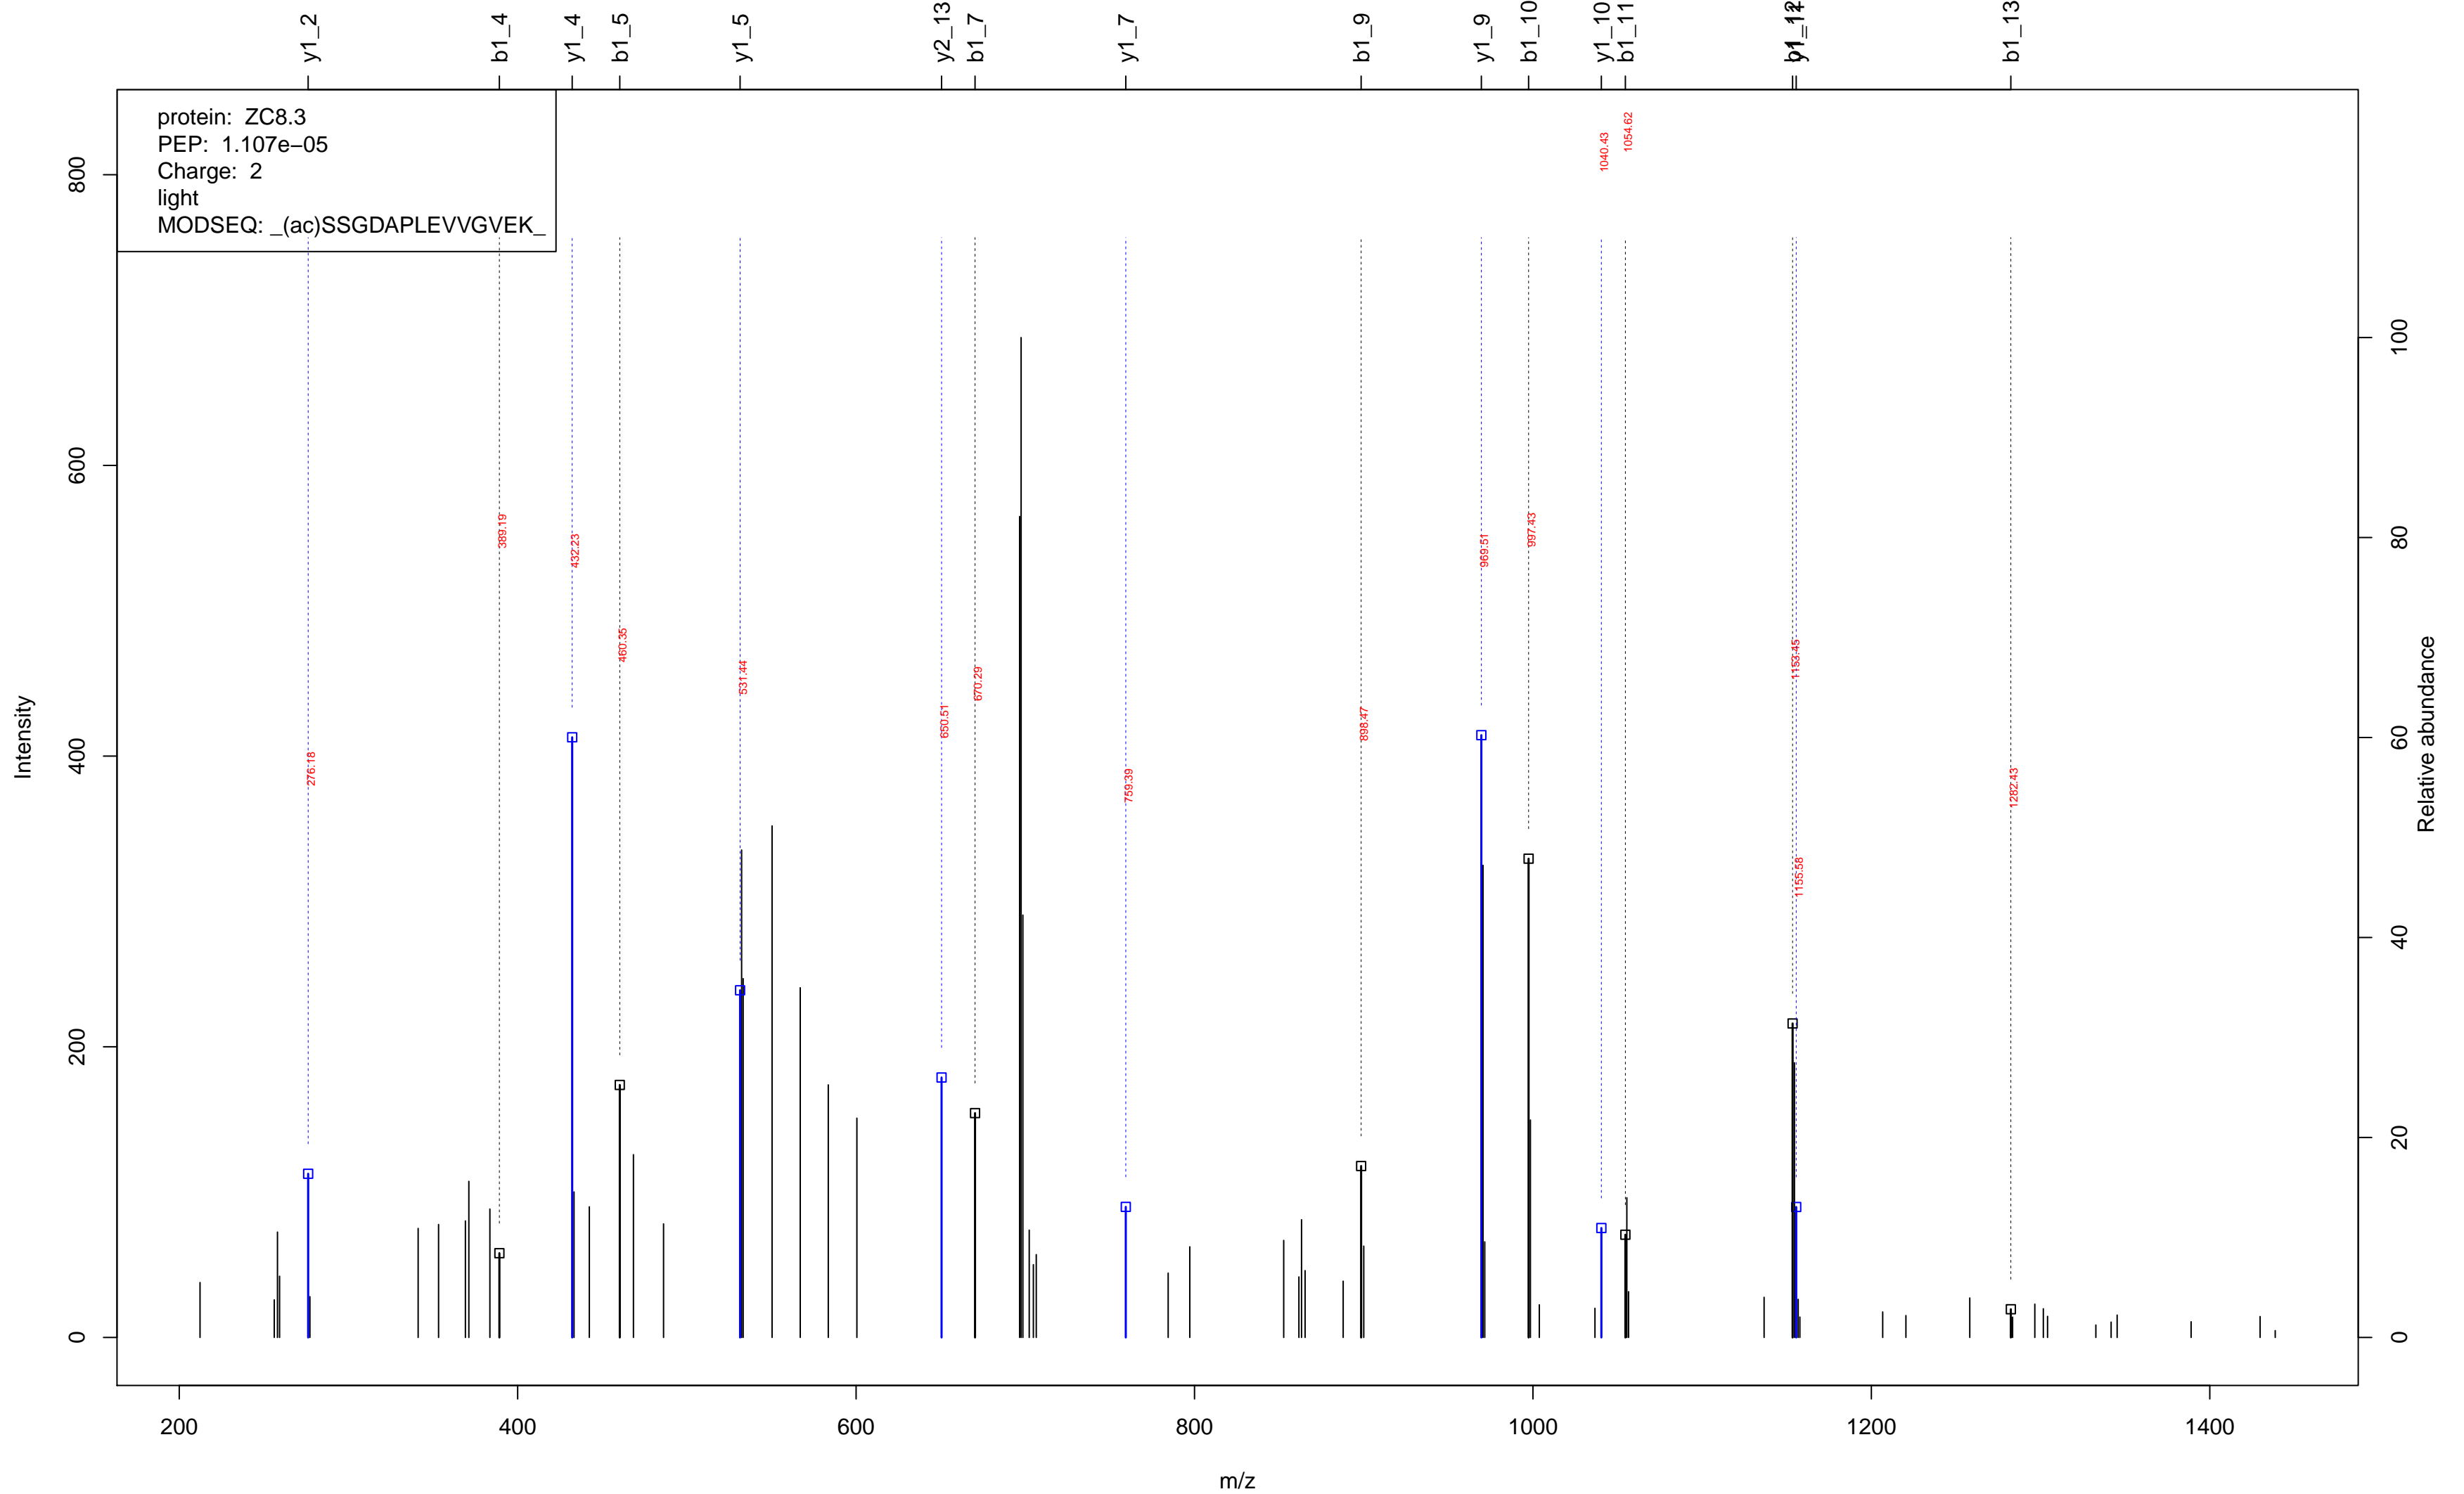

y1\_2 y1\_3 y1\_4 b2\_15 b1\_11 b1\_12 y1\_13 y1\_14

protein: T21C12.1i  
PEP: 0.0042146  
Charge: 2  
light  
MODSEQ: \_(ac)MTVLTETHLM(ox)TGTNR\_

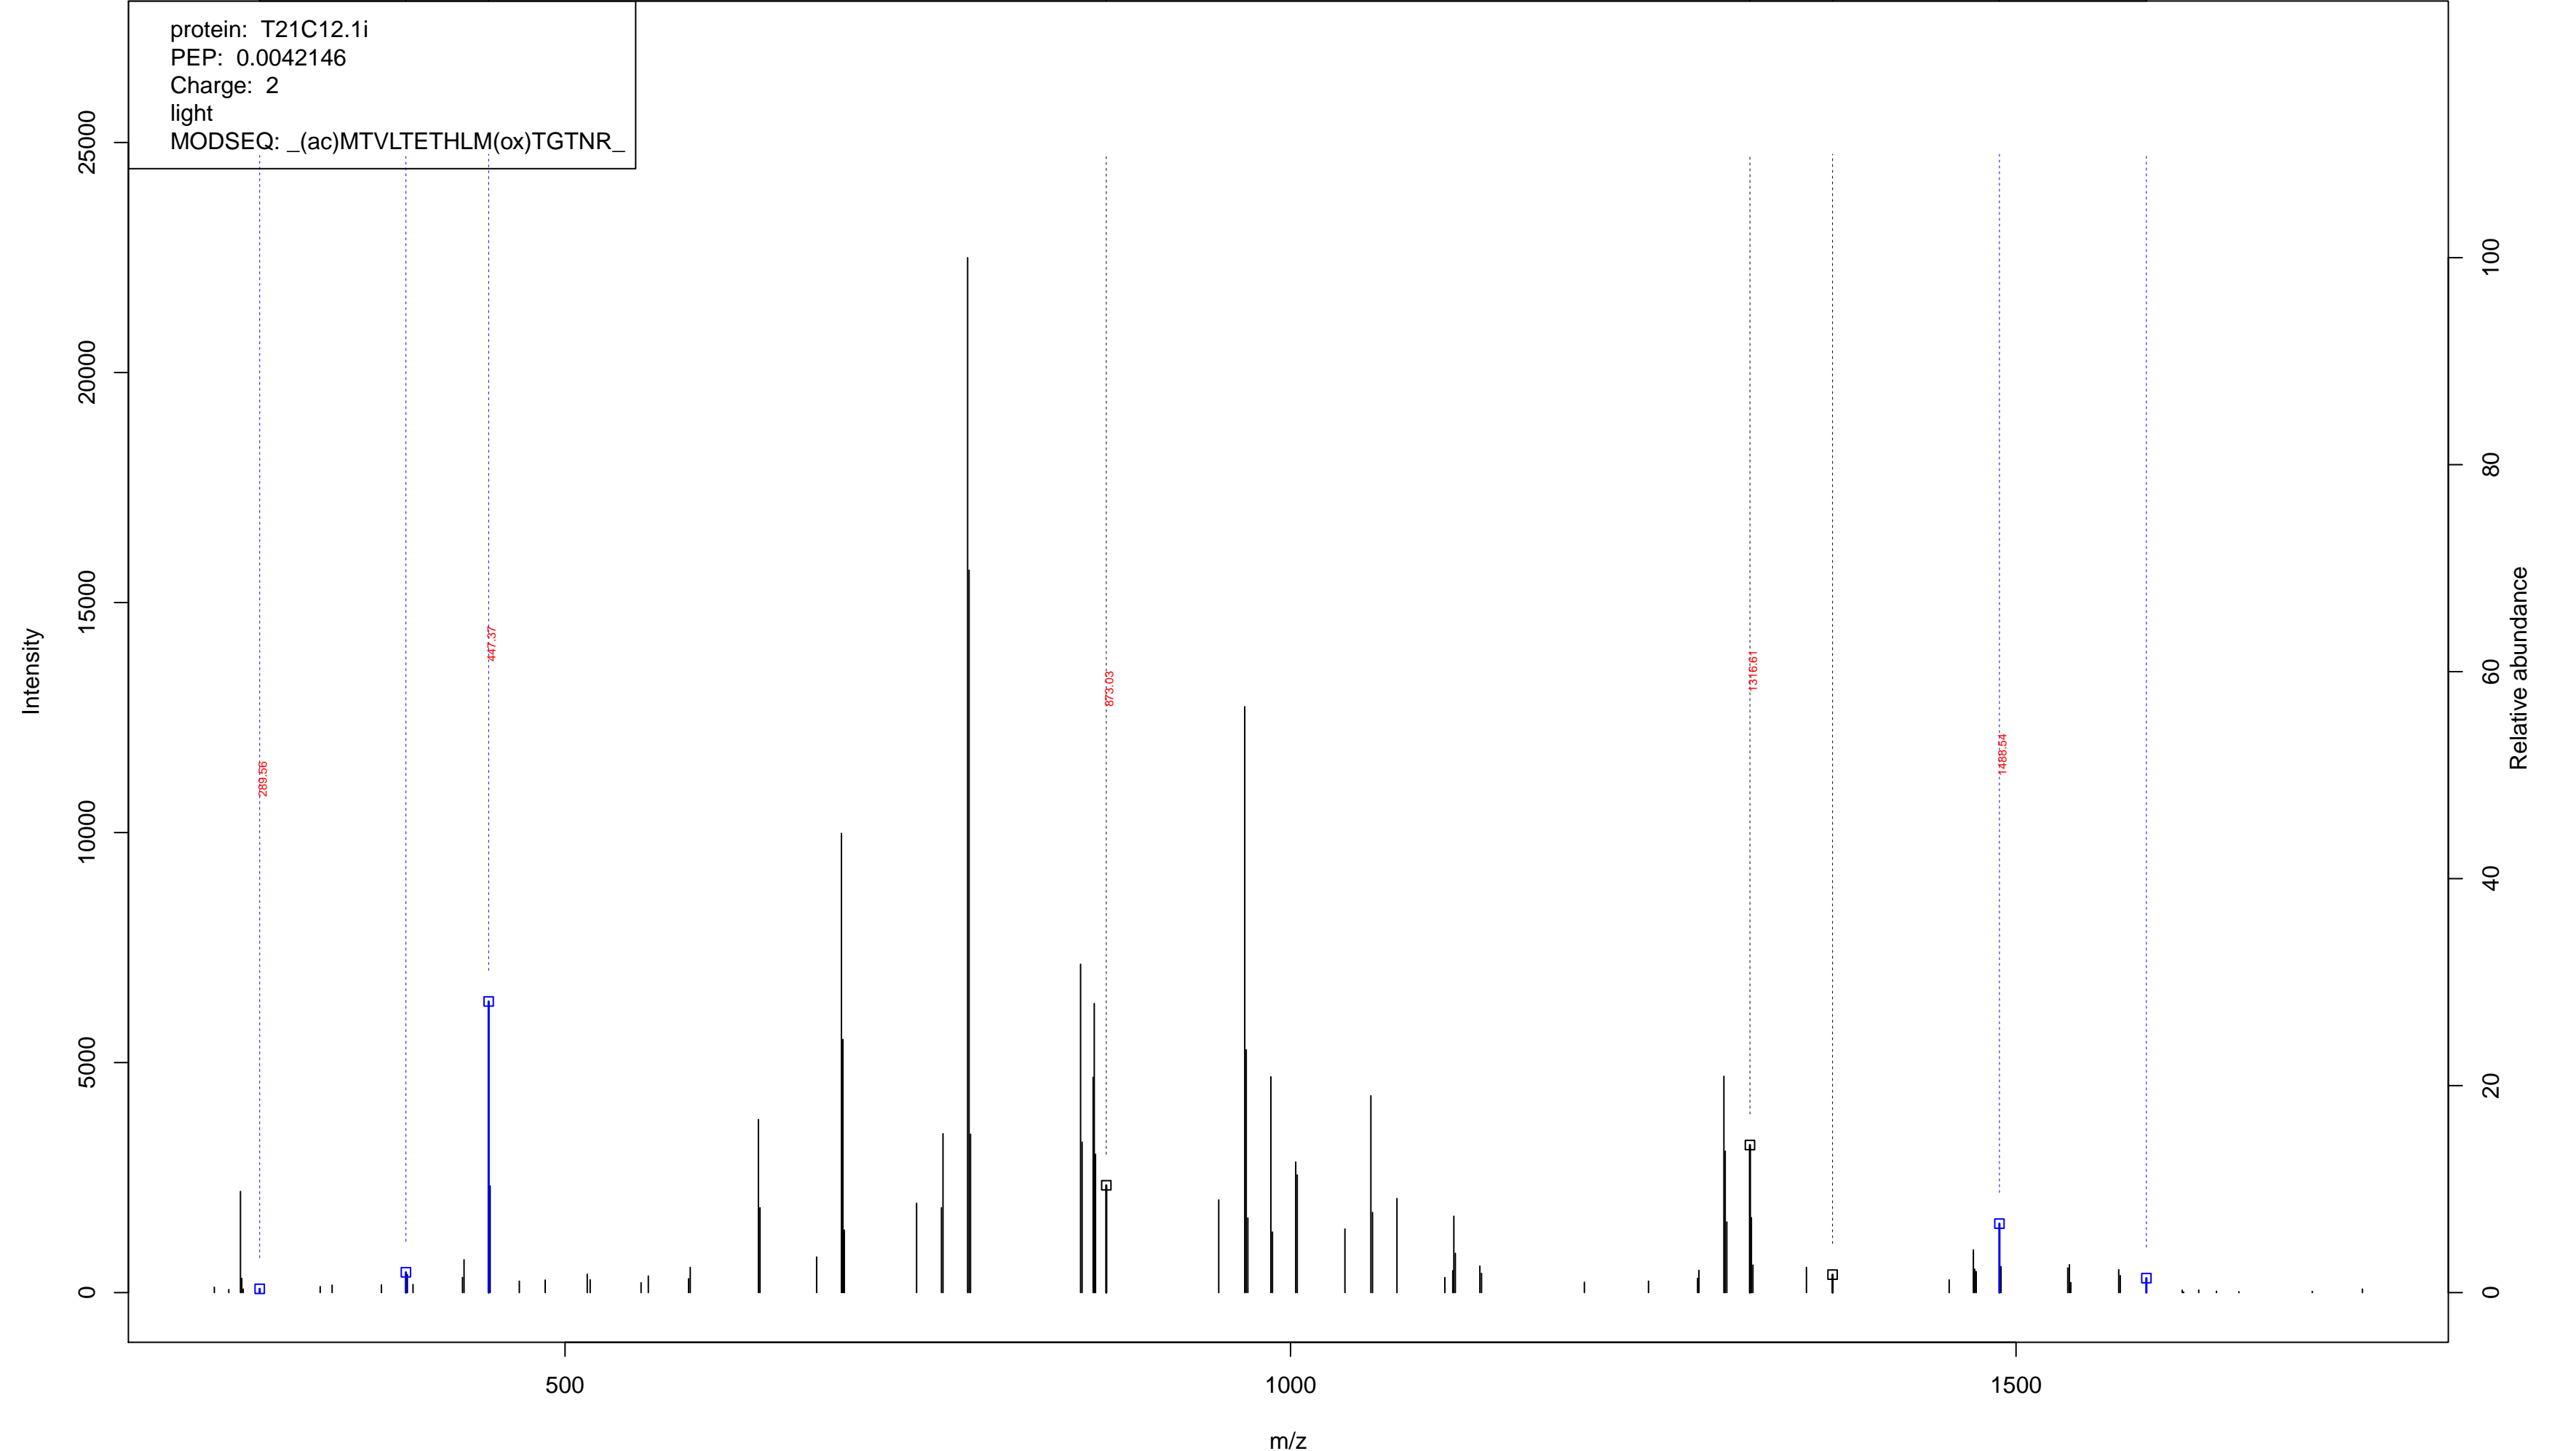

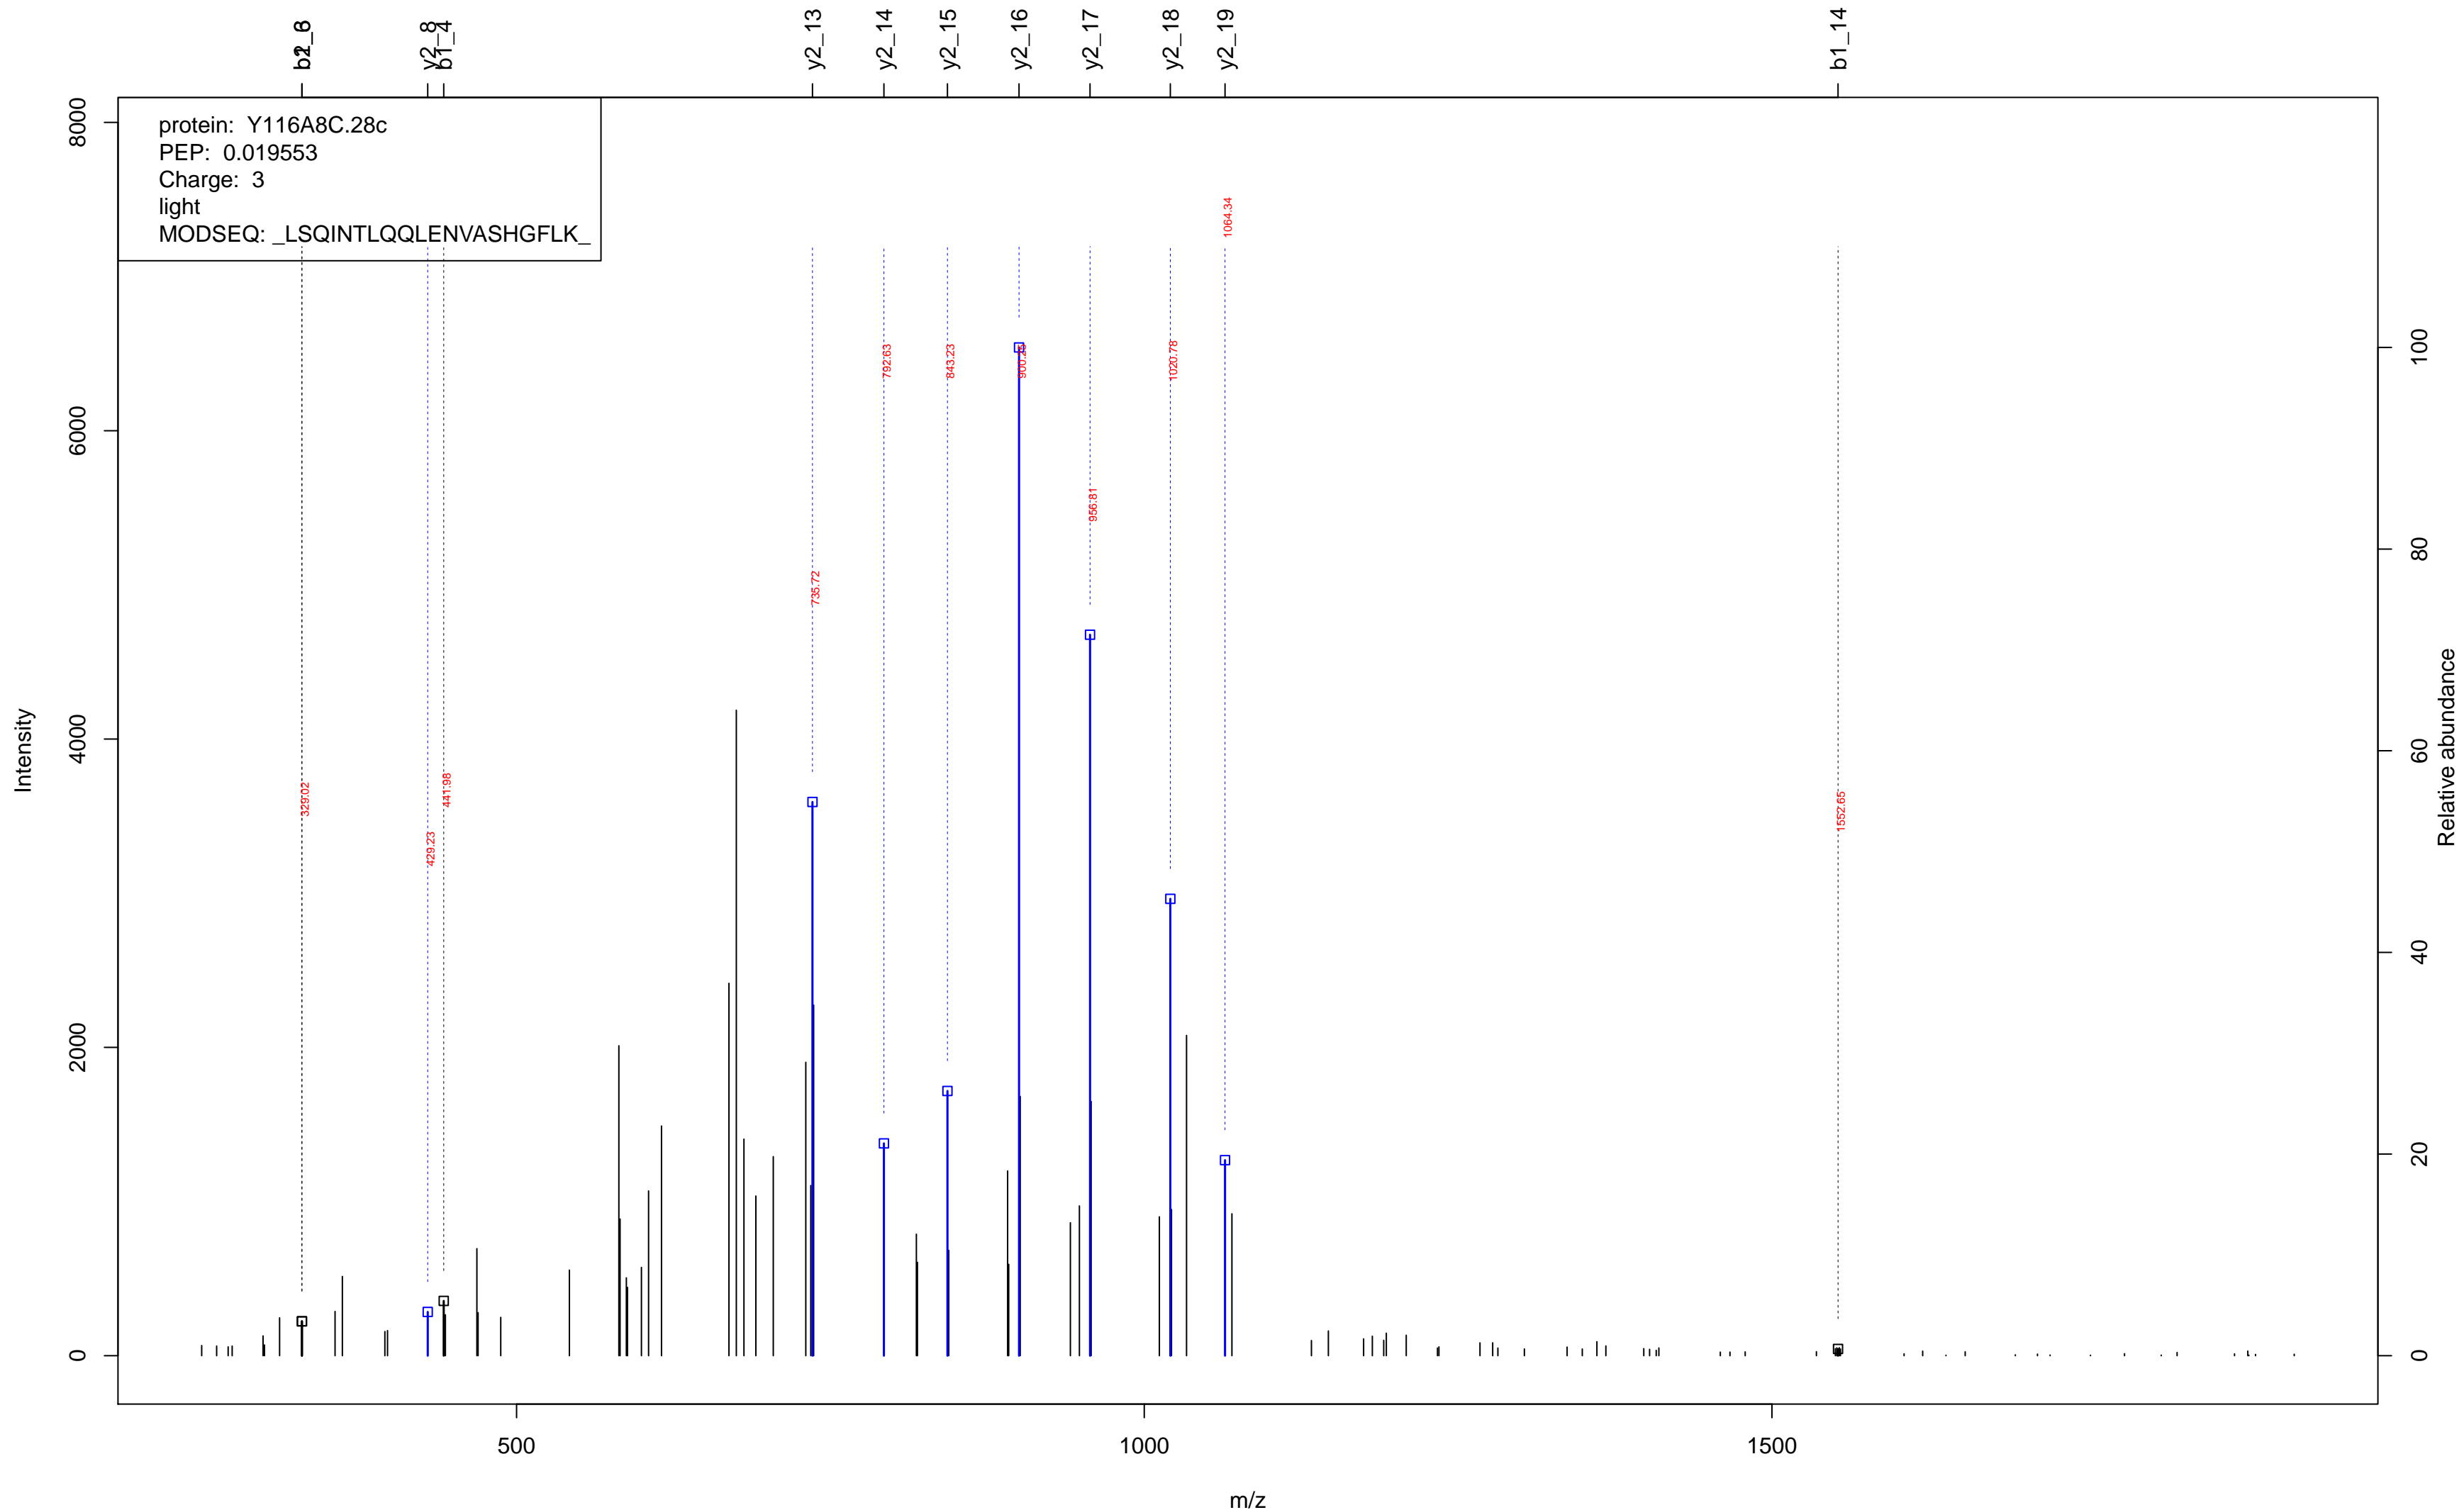

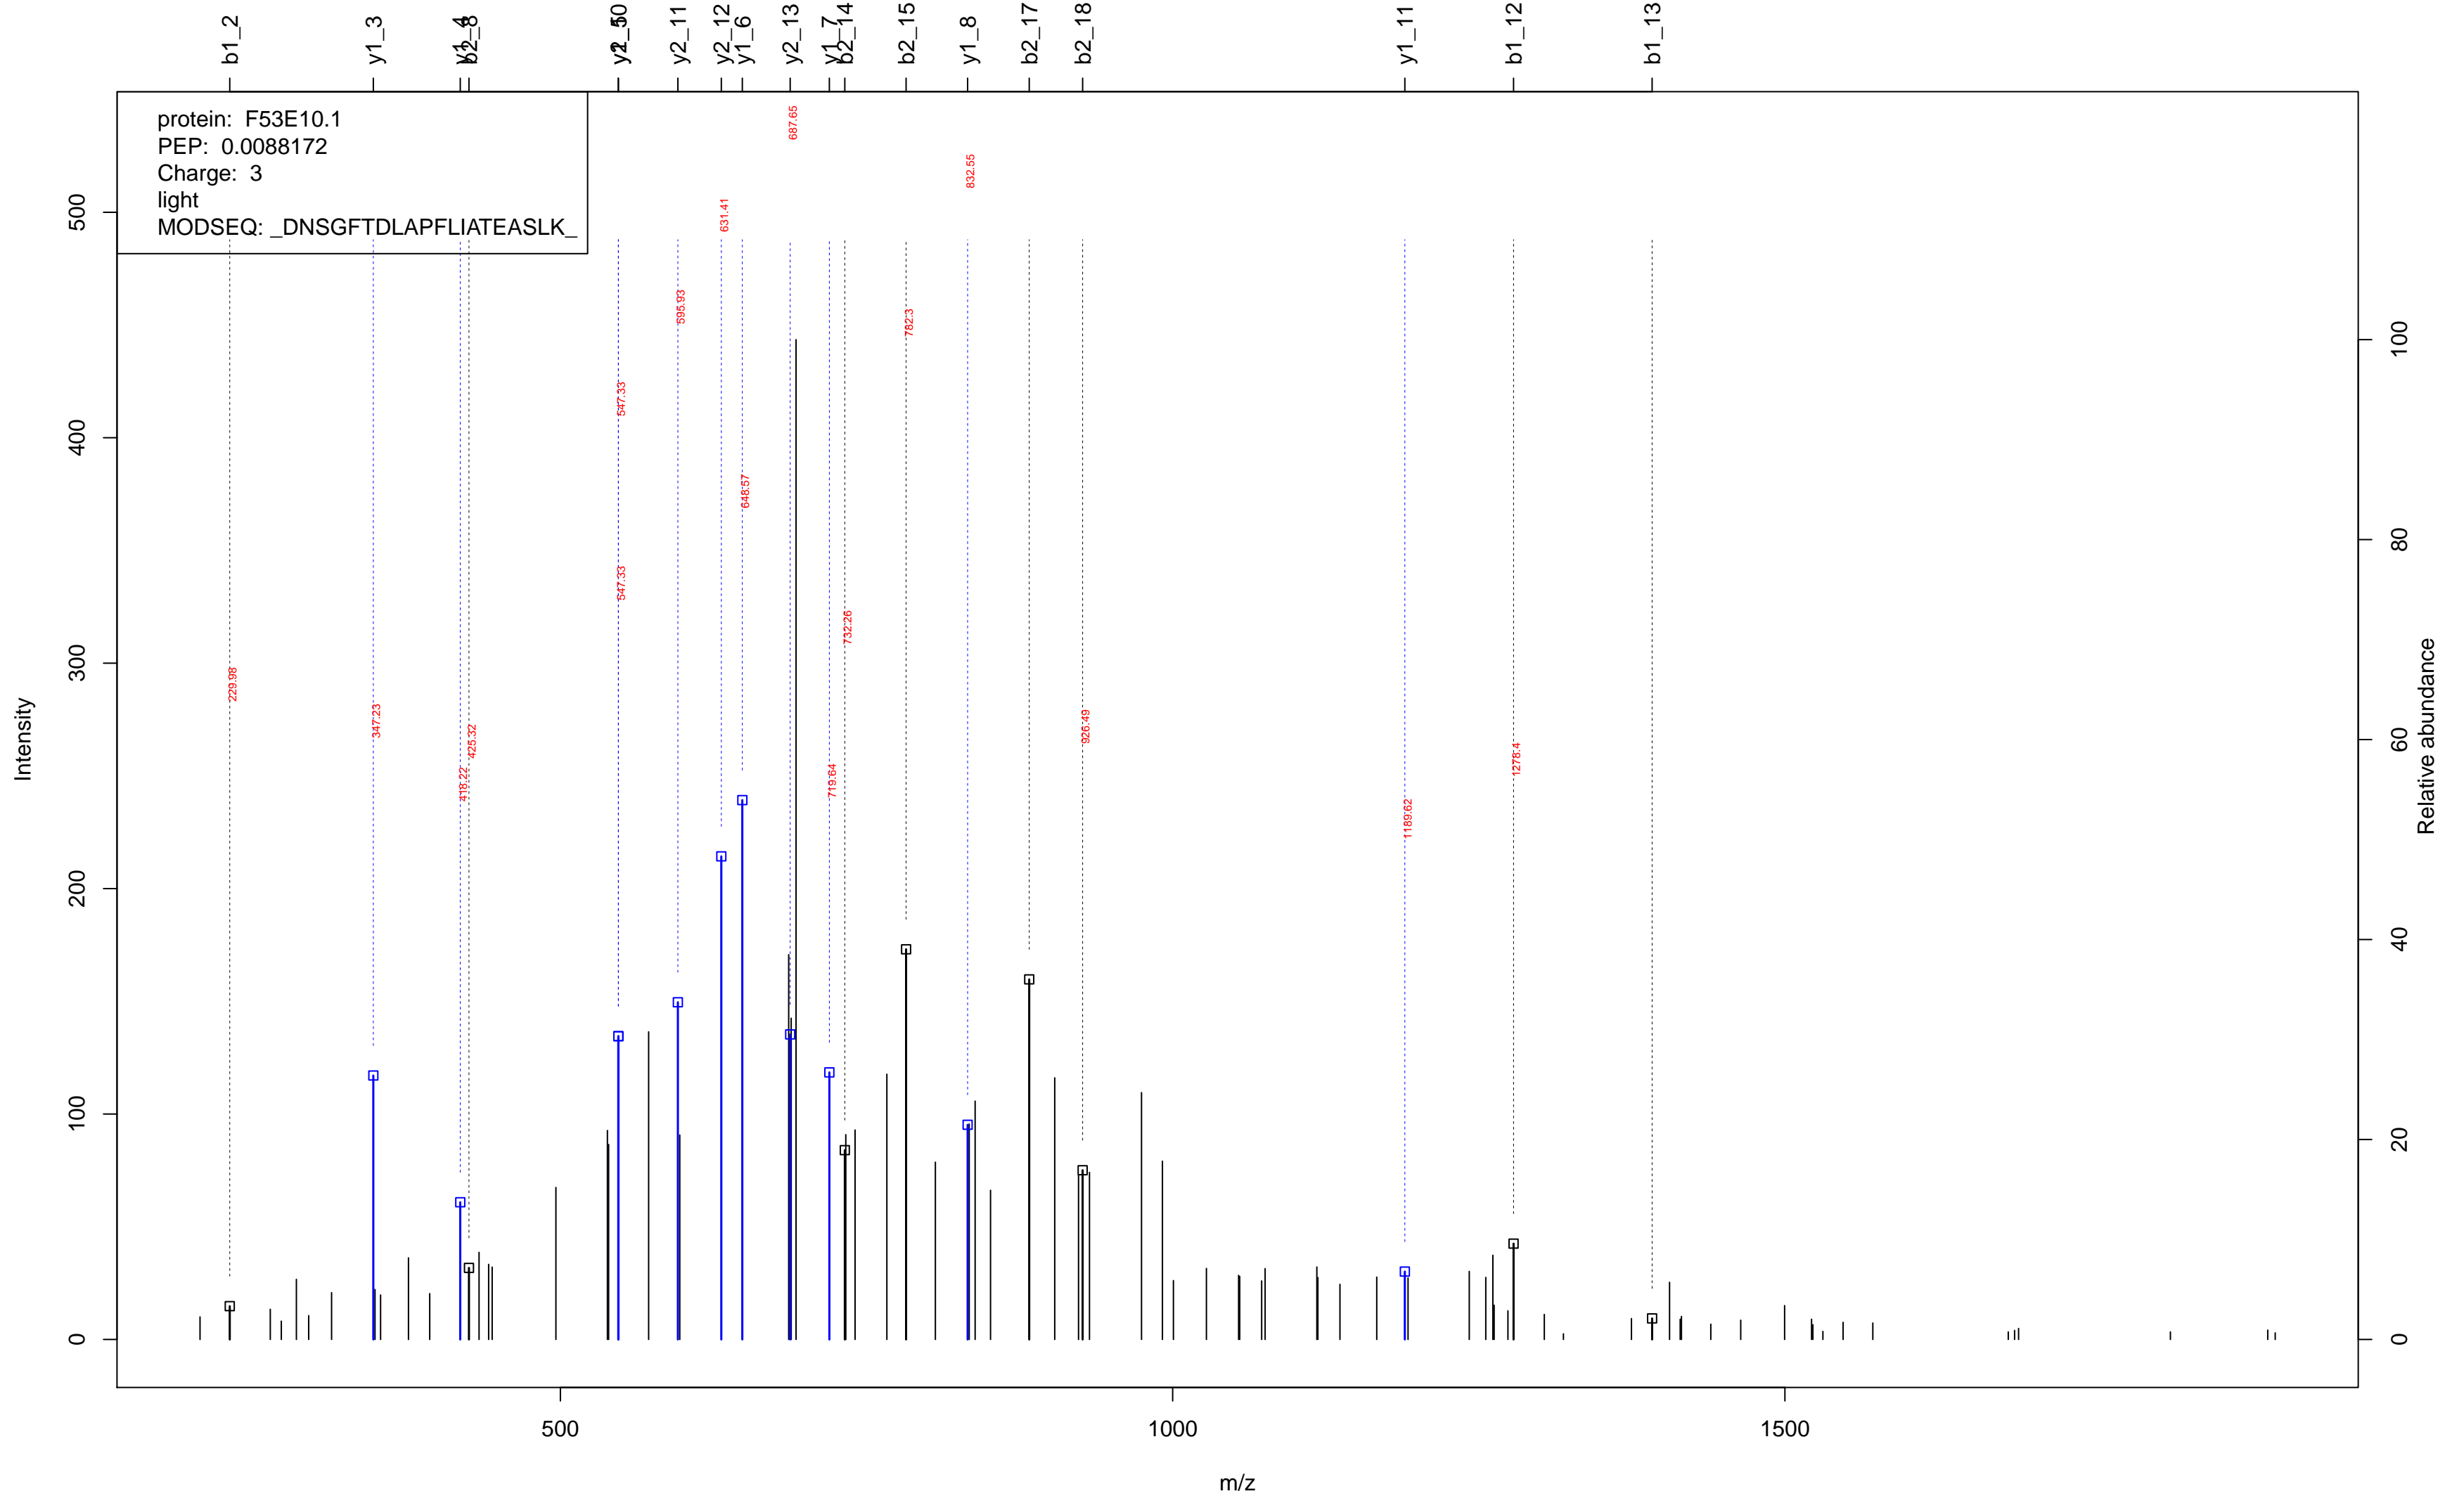

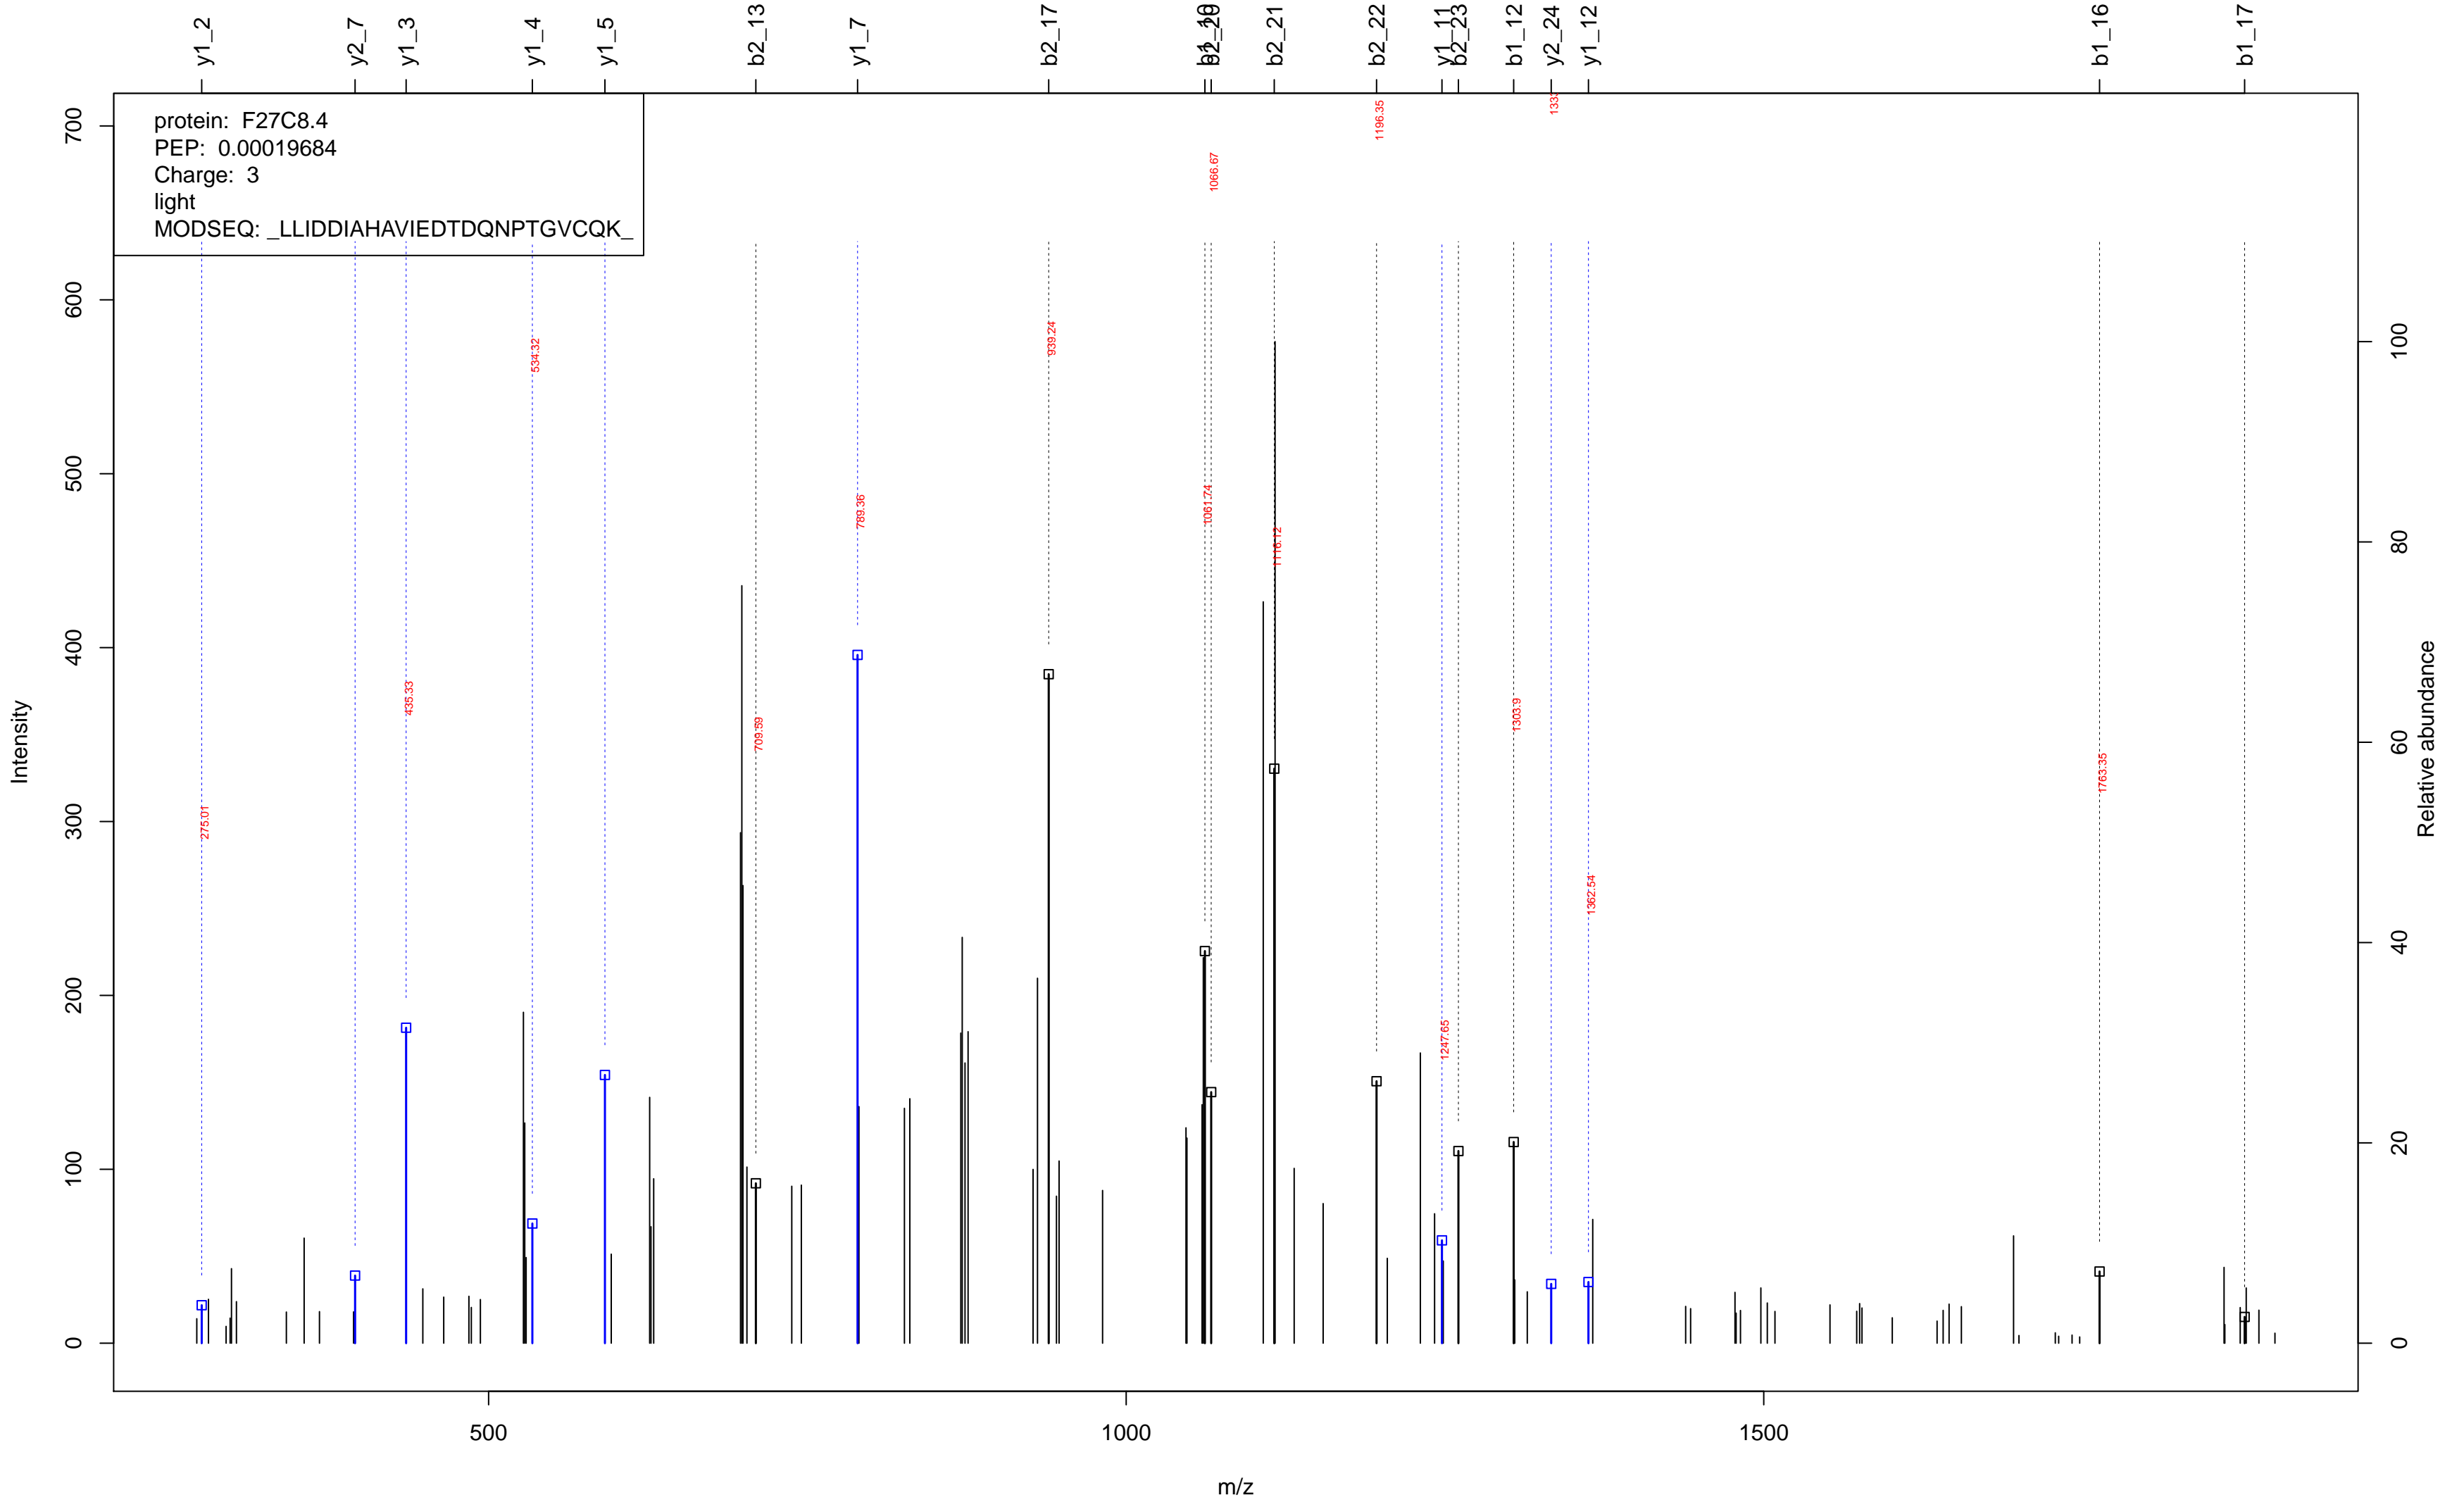

protein: F27C8.4  
PEP: 0.00019684  
Charge: 3  
light  
MODSEQ: \_LLIDDIHAVIEDTDQNPTGVCQK\_

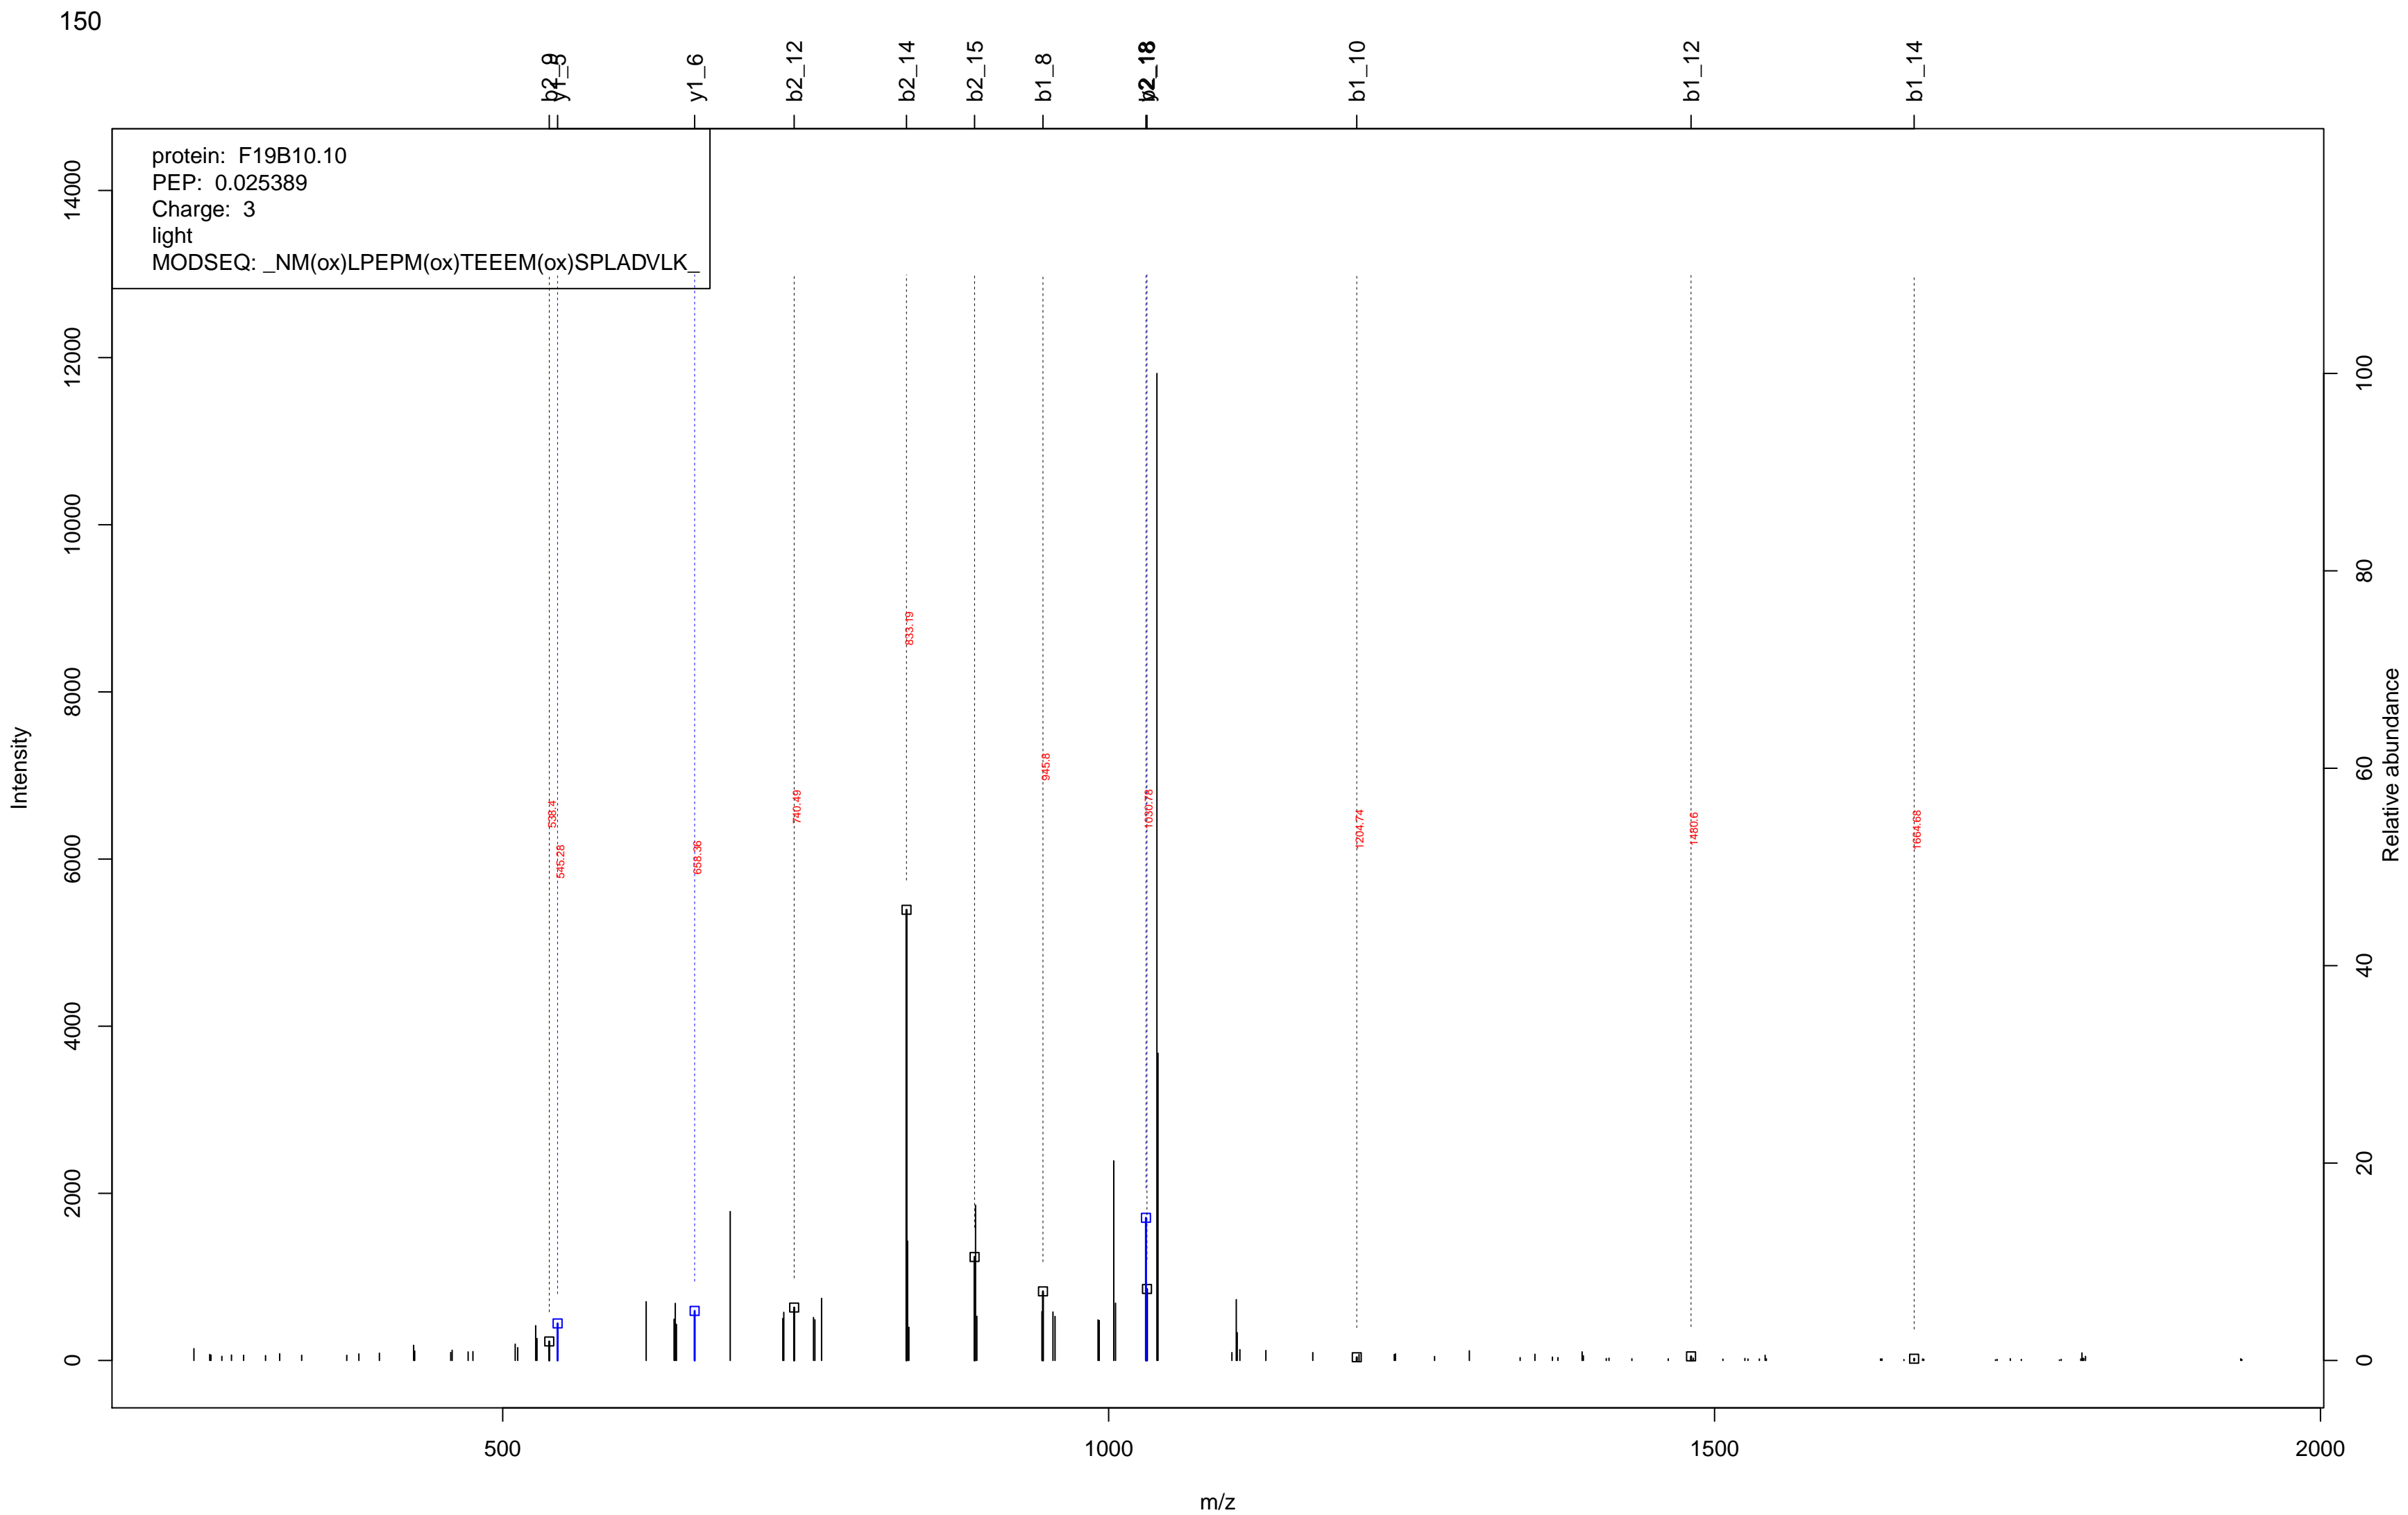

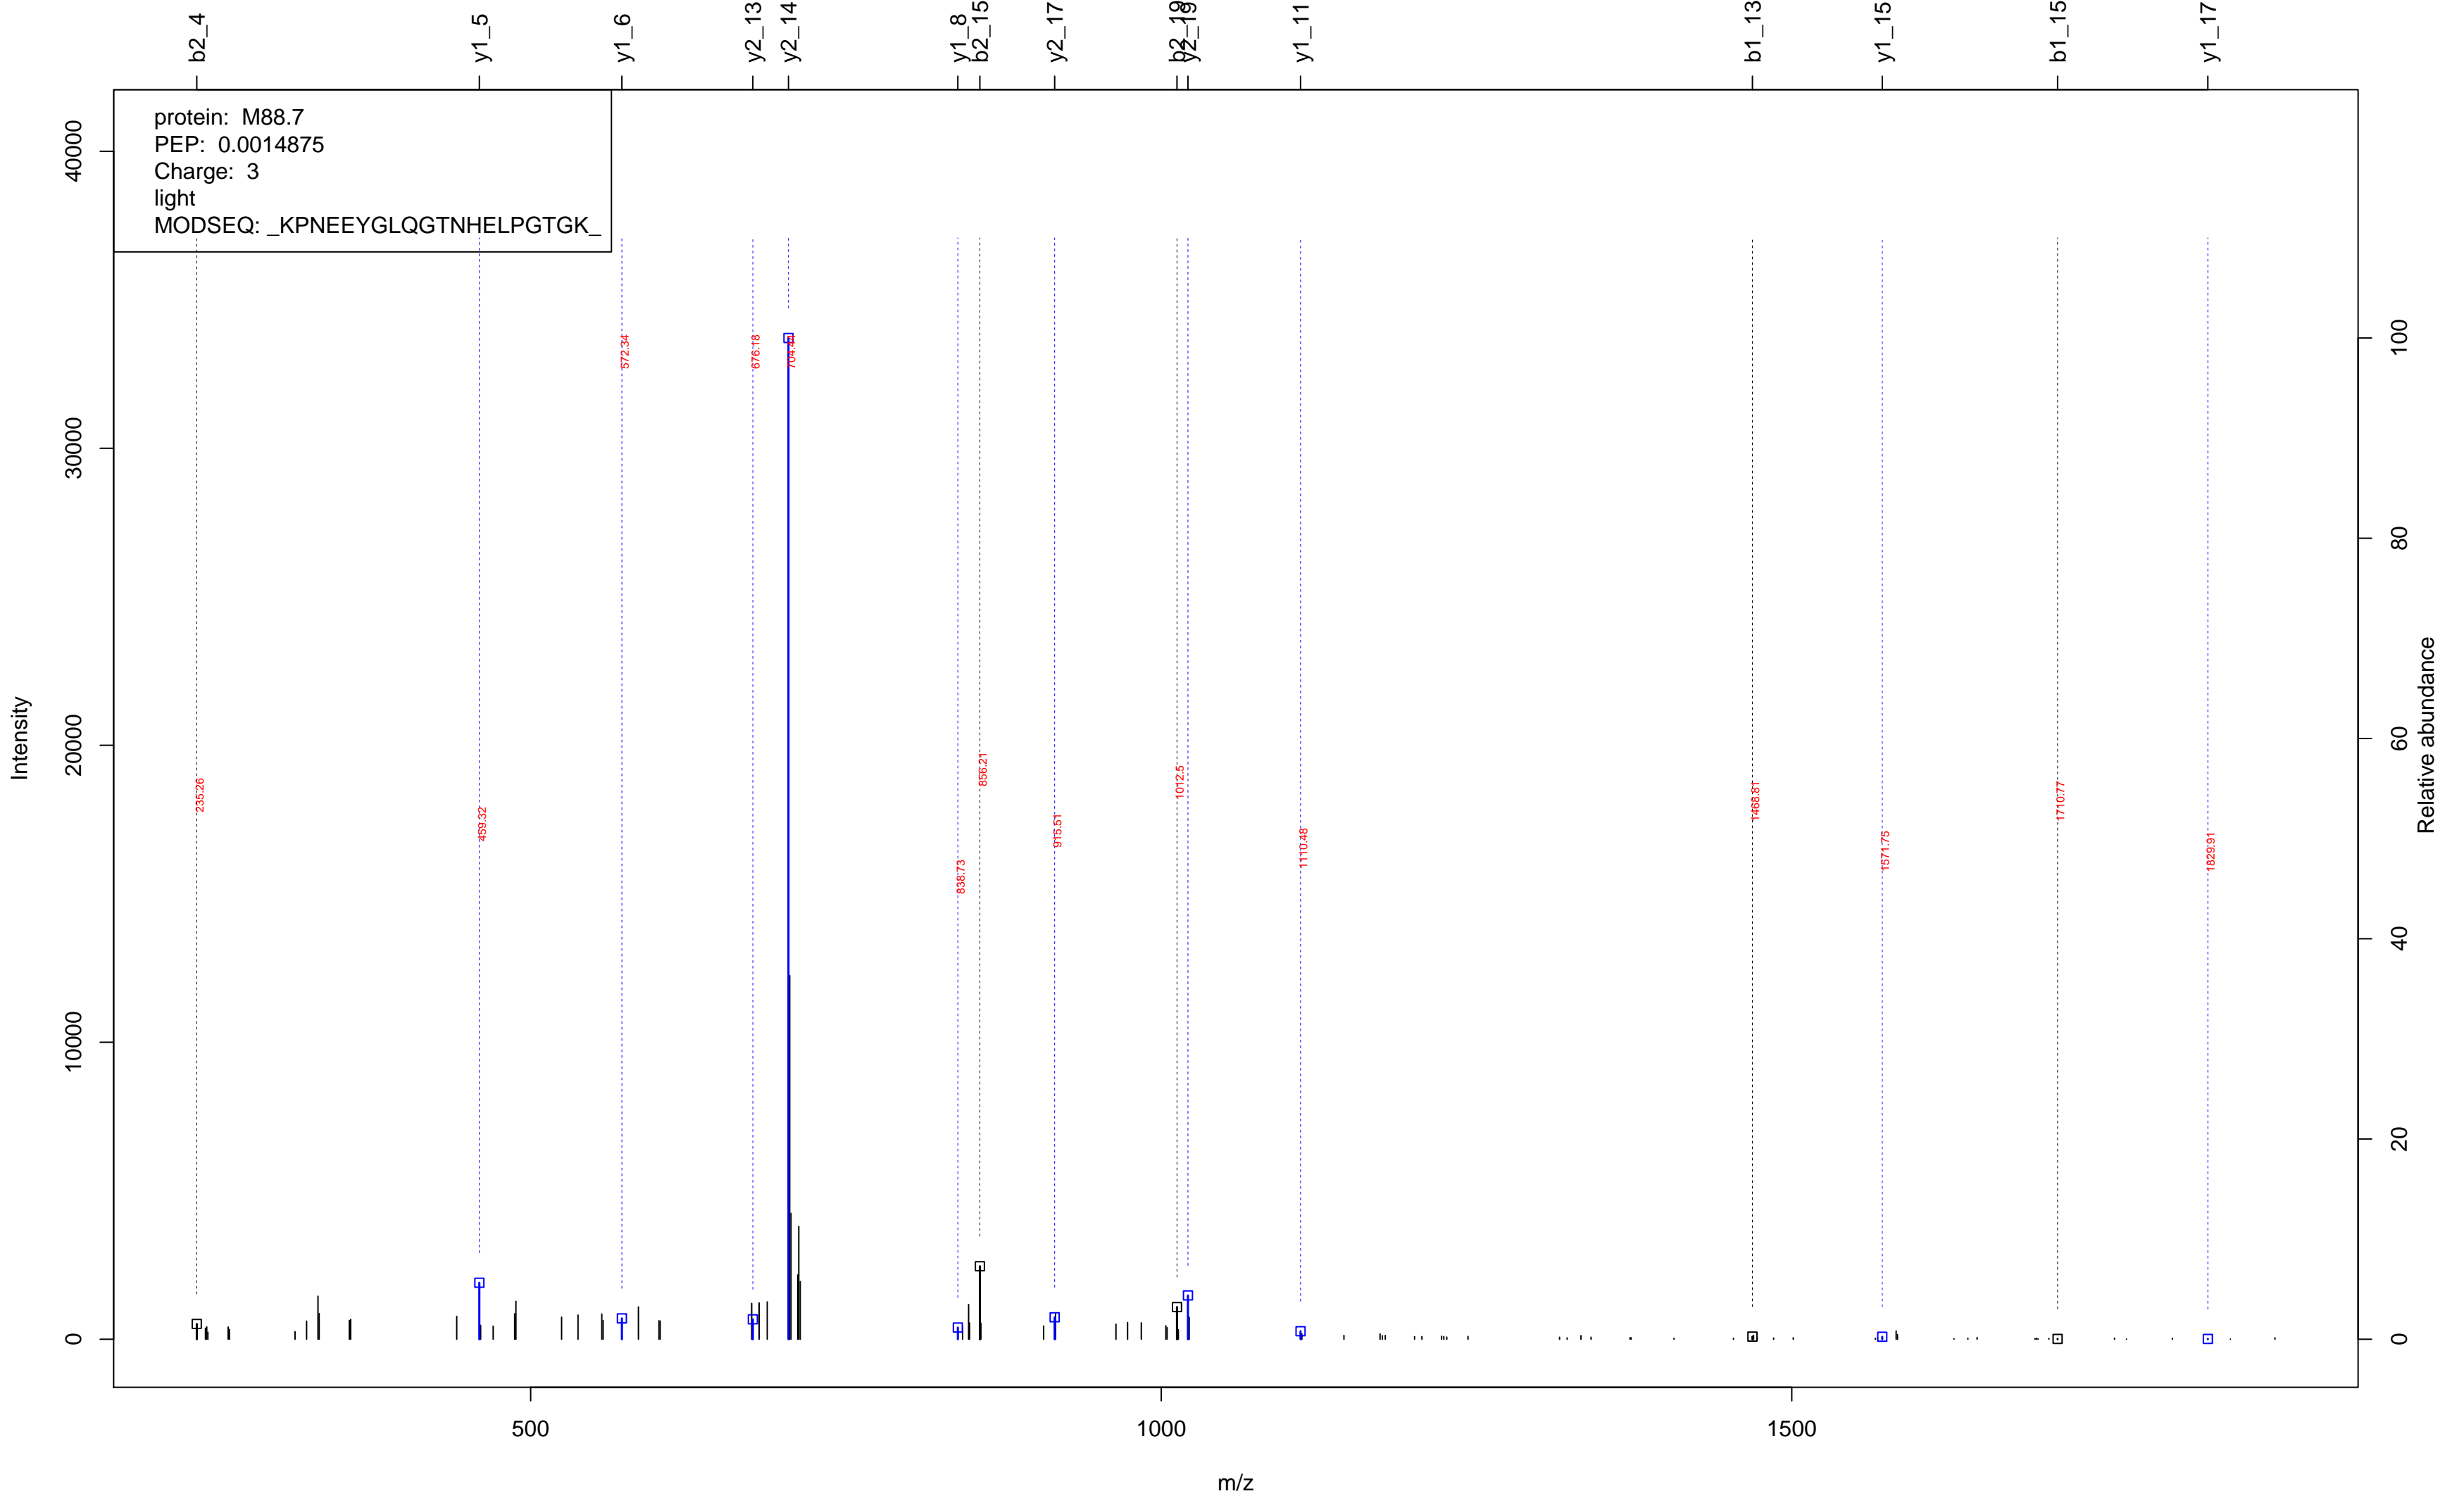

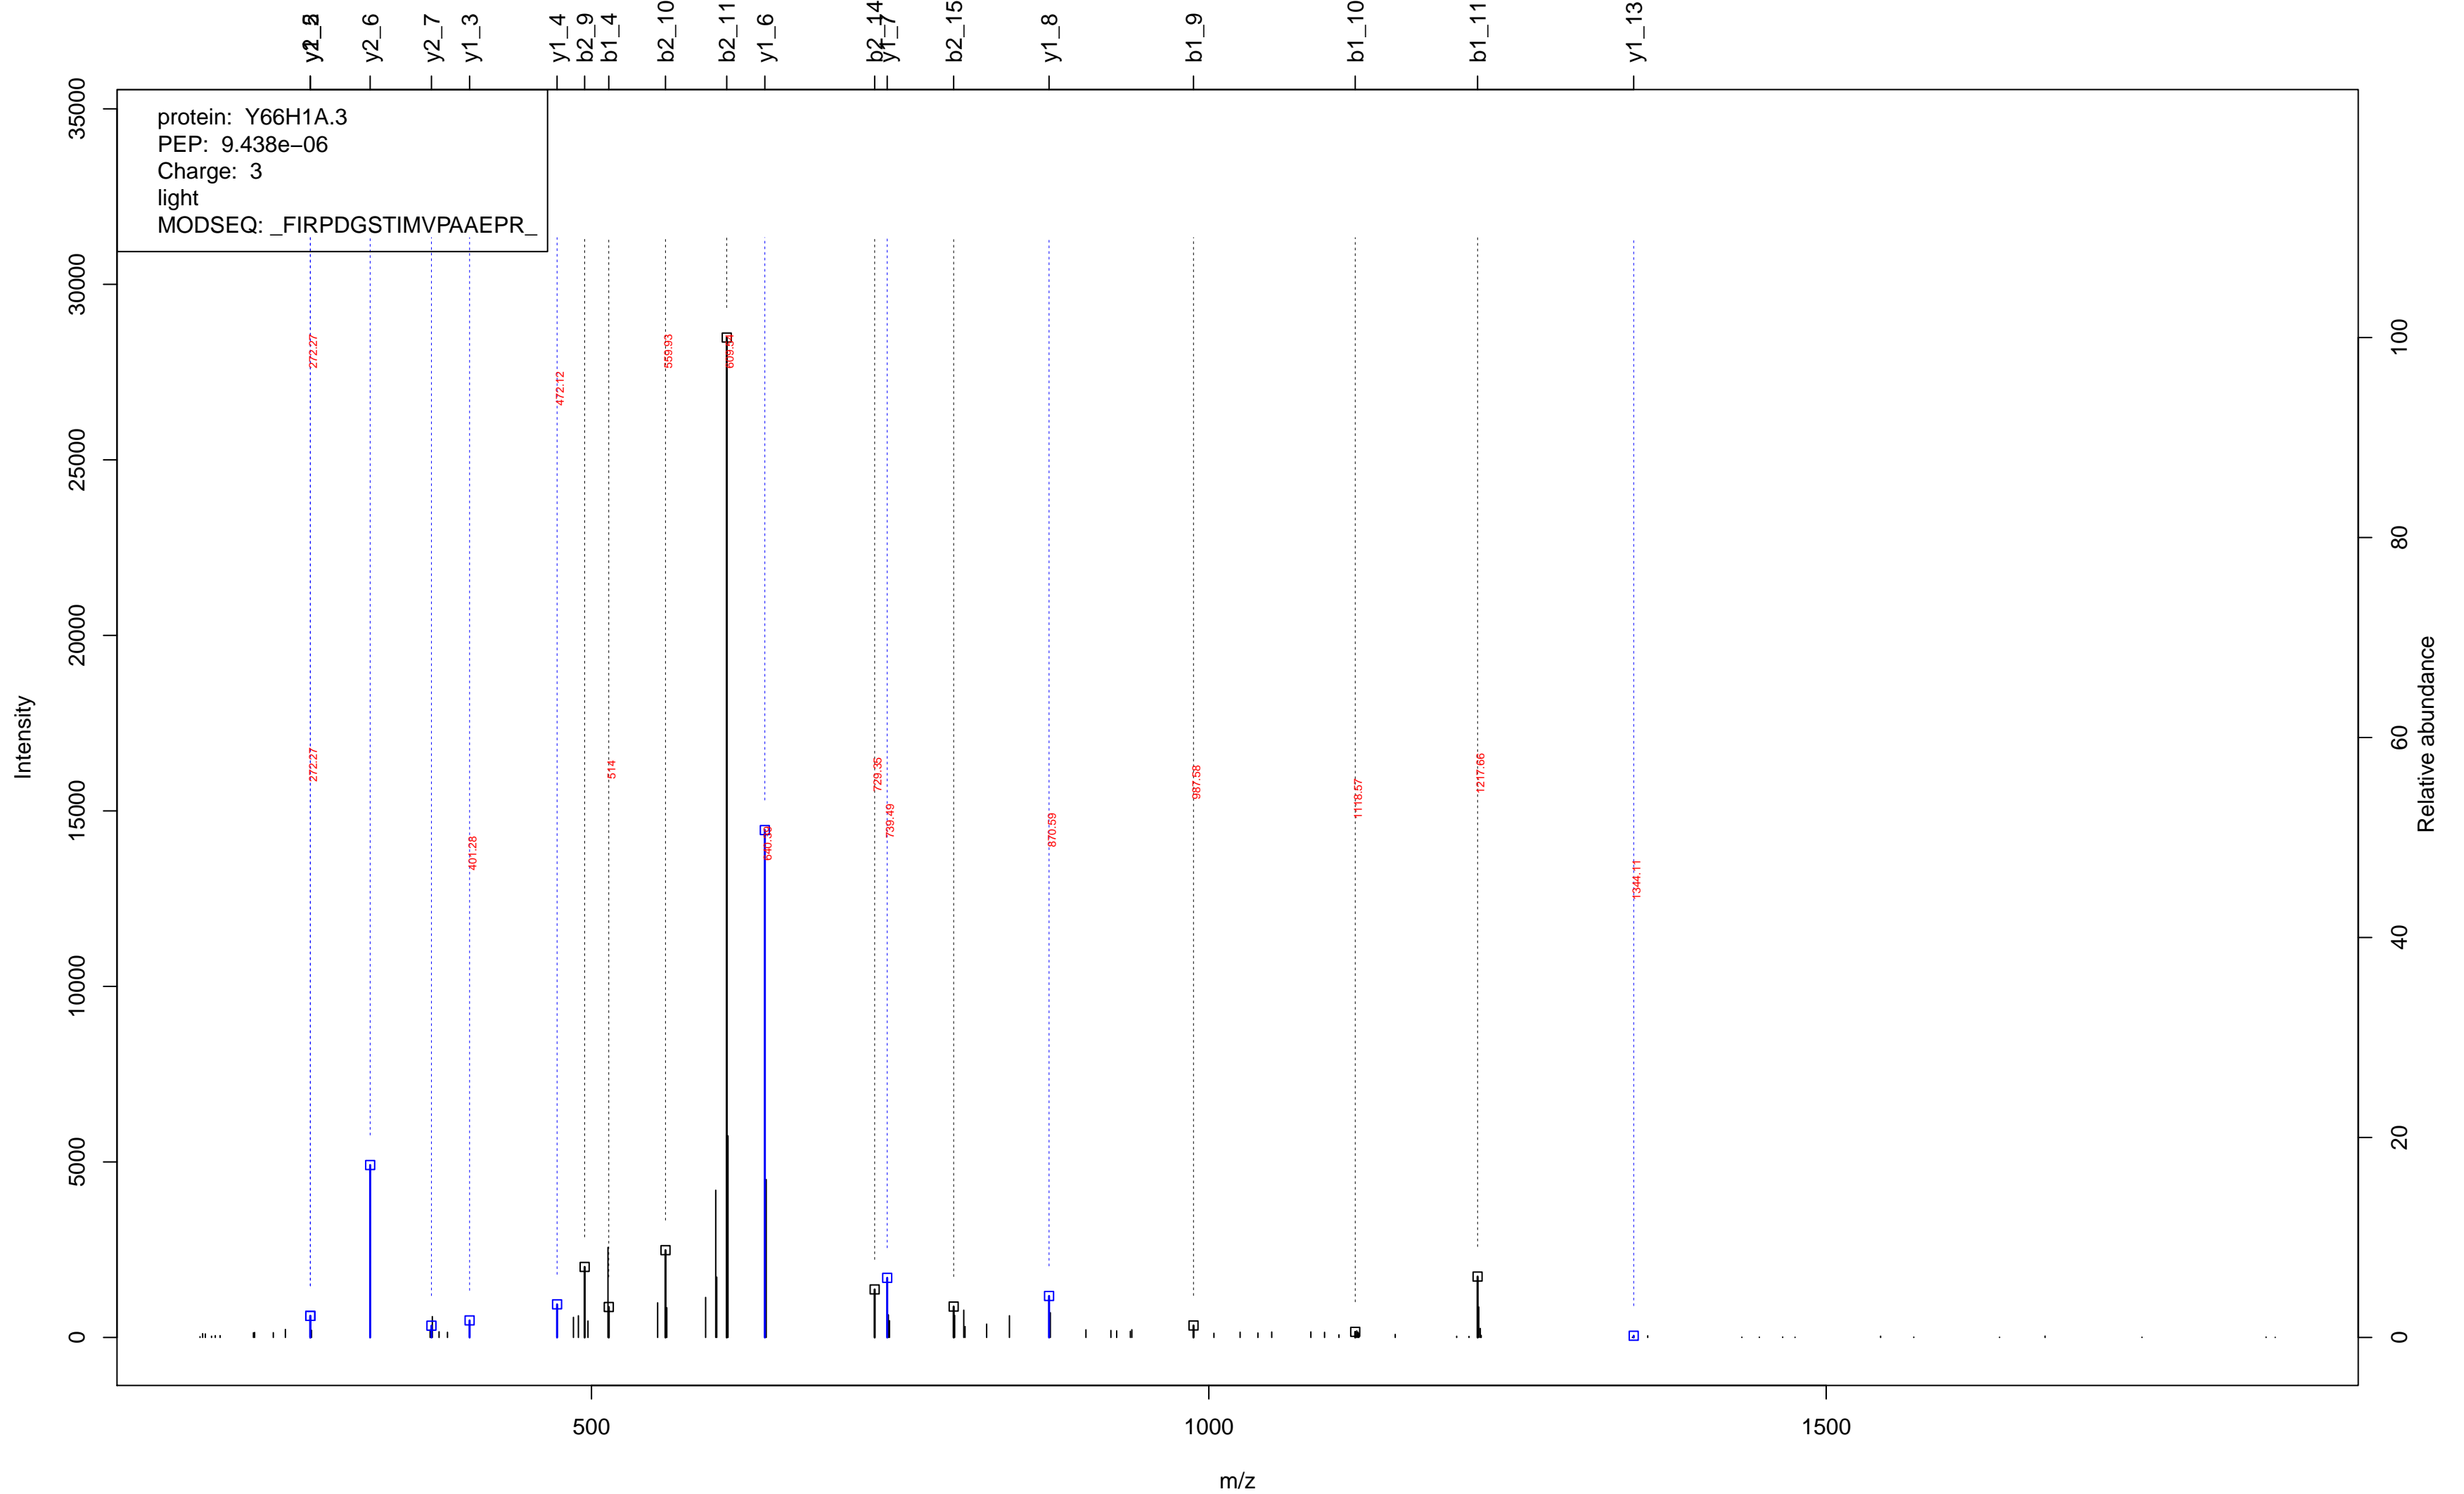



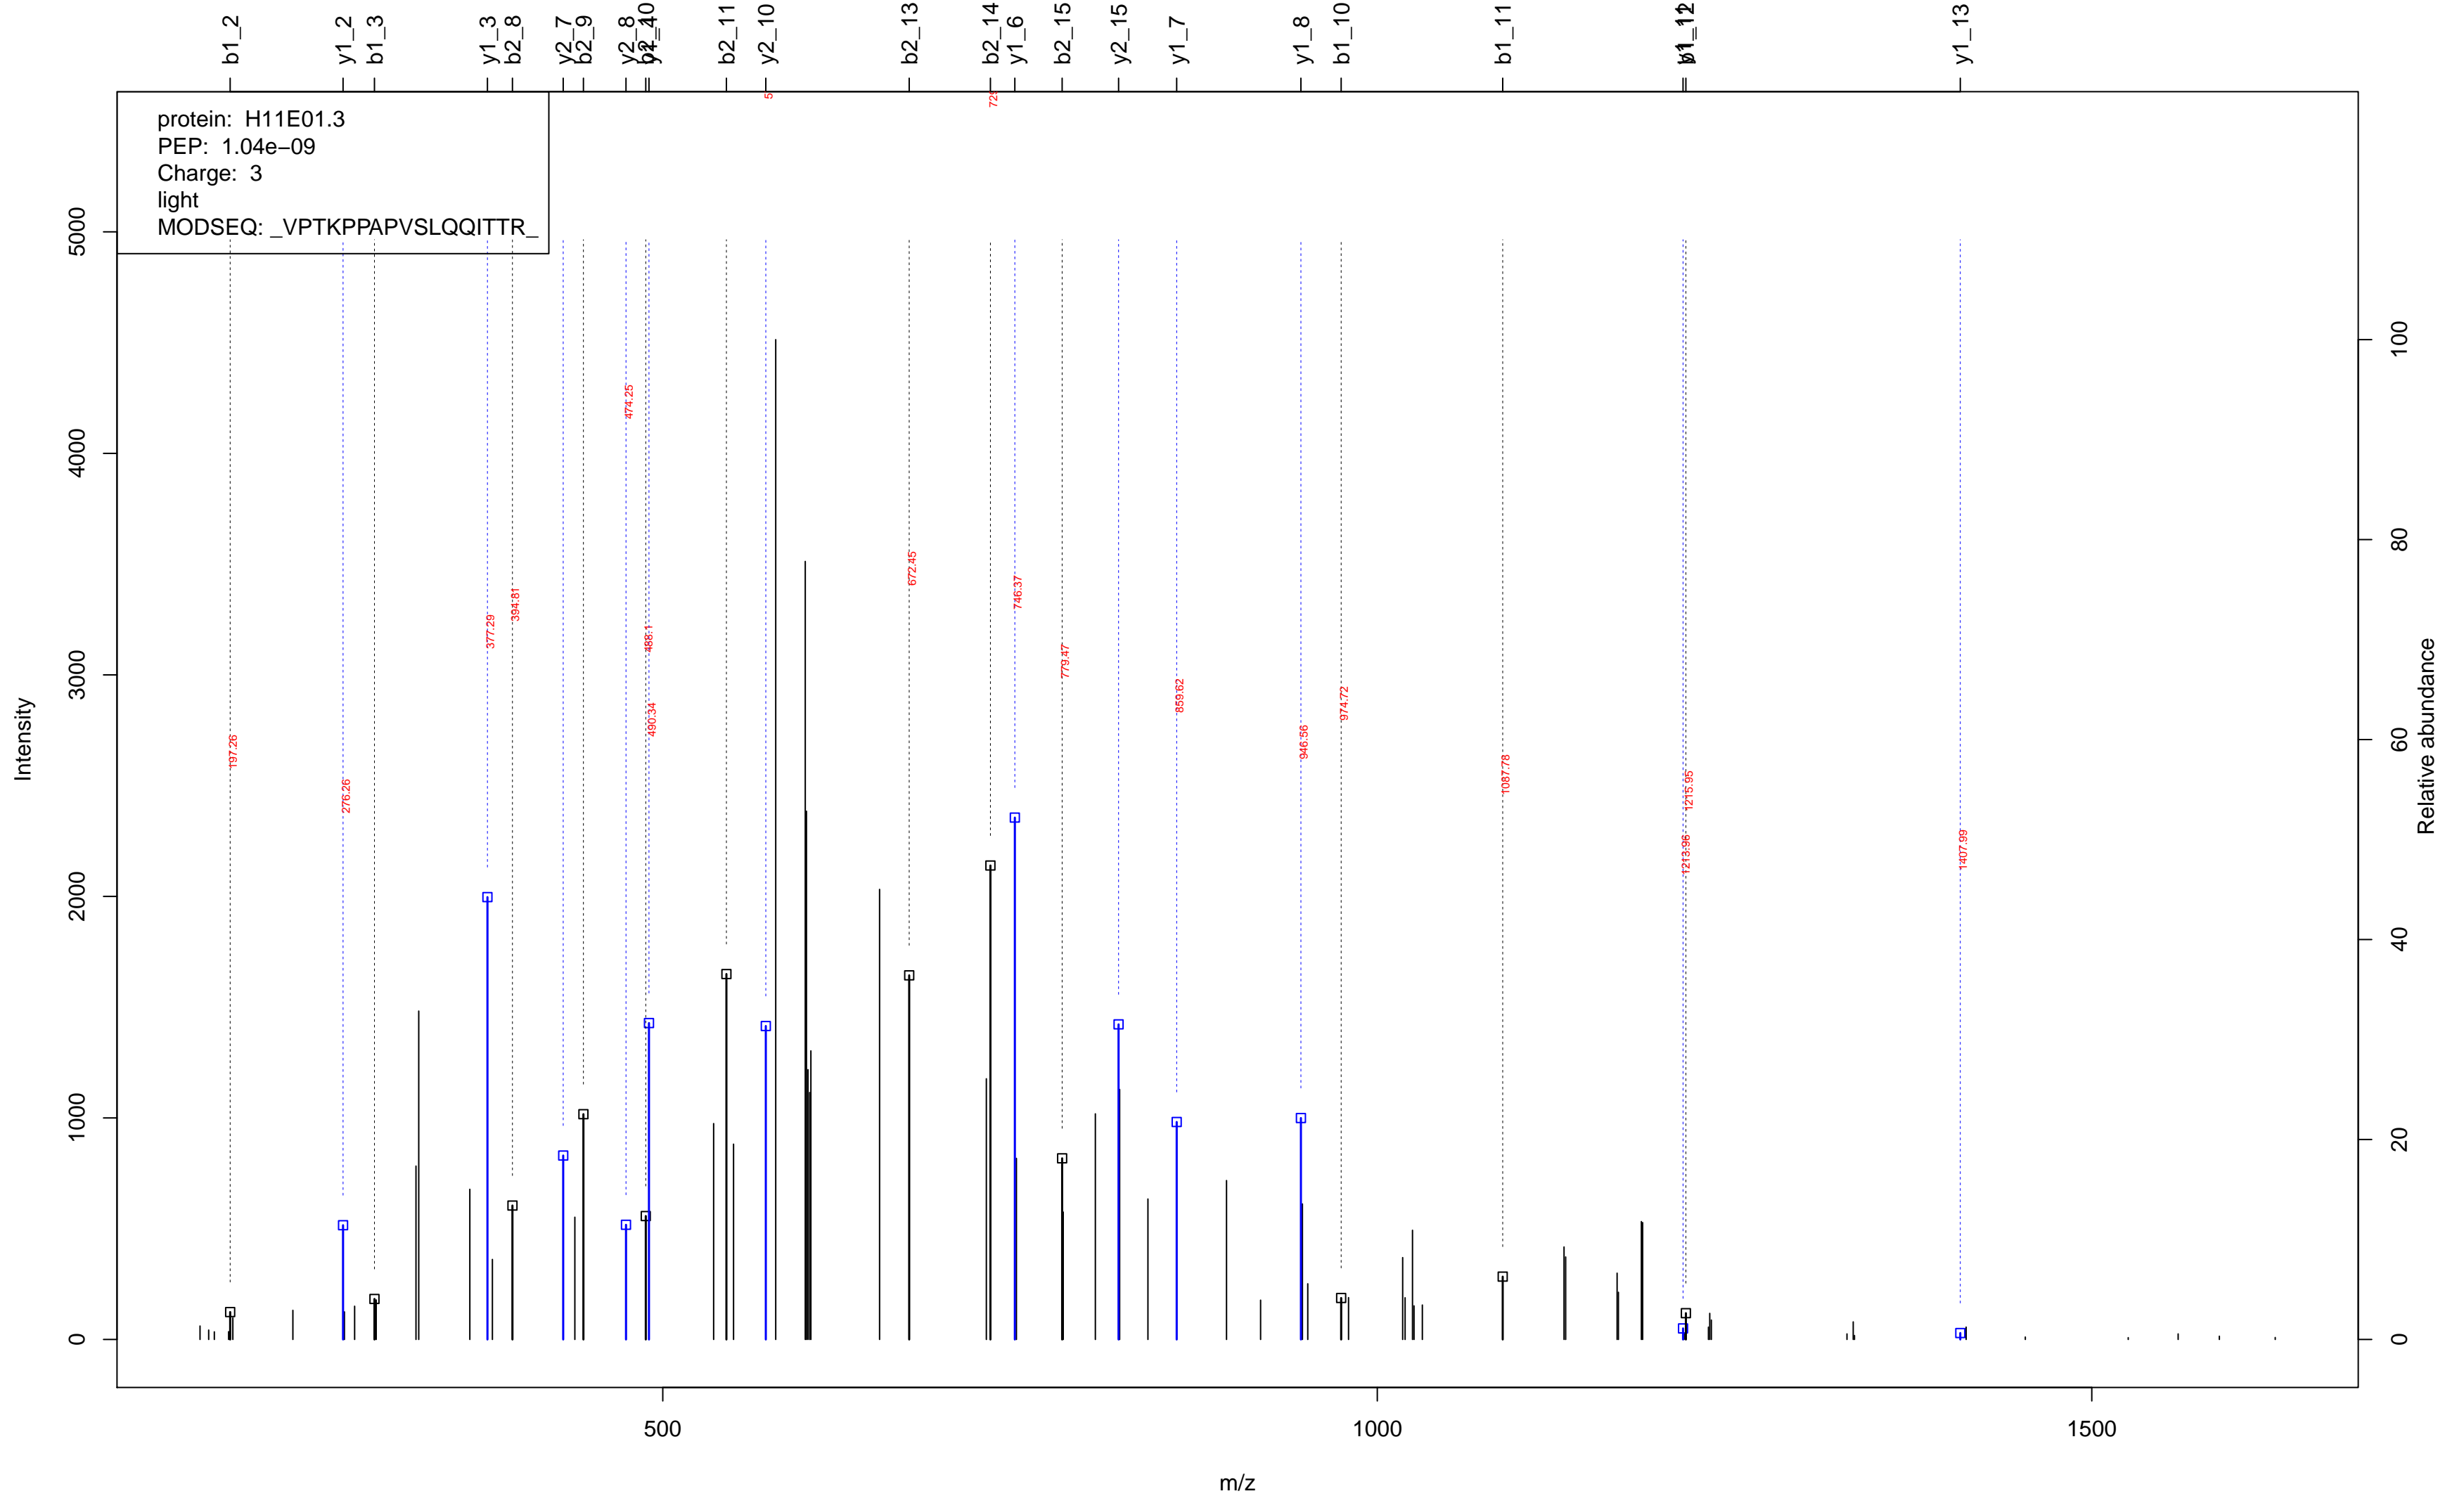

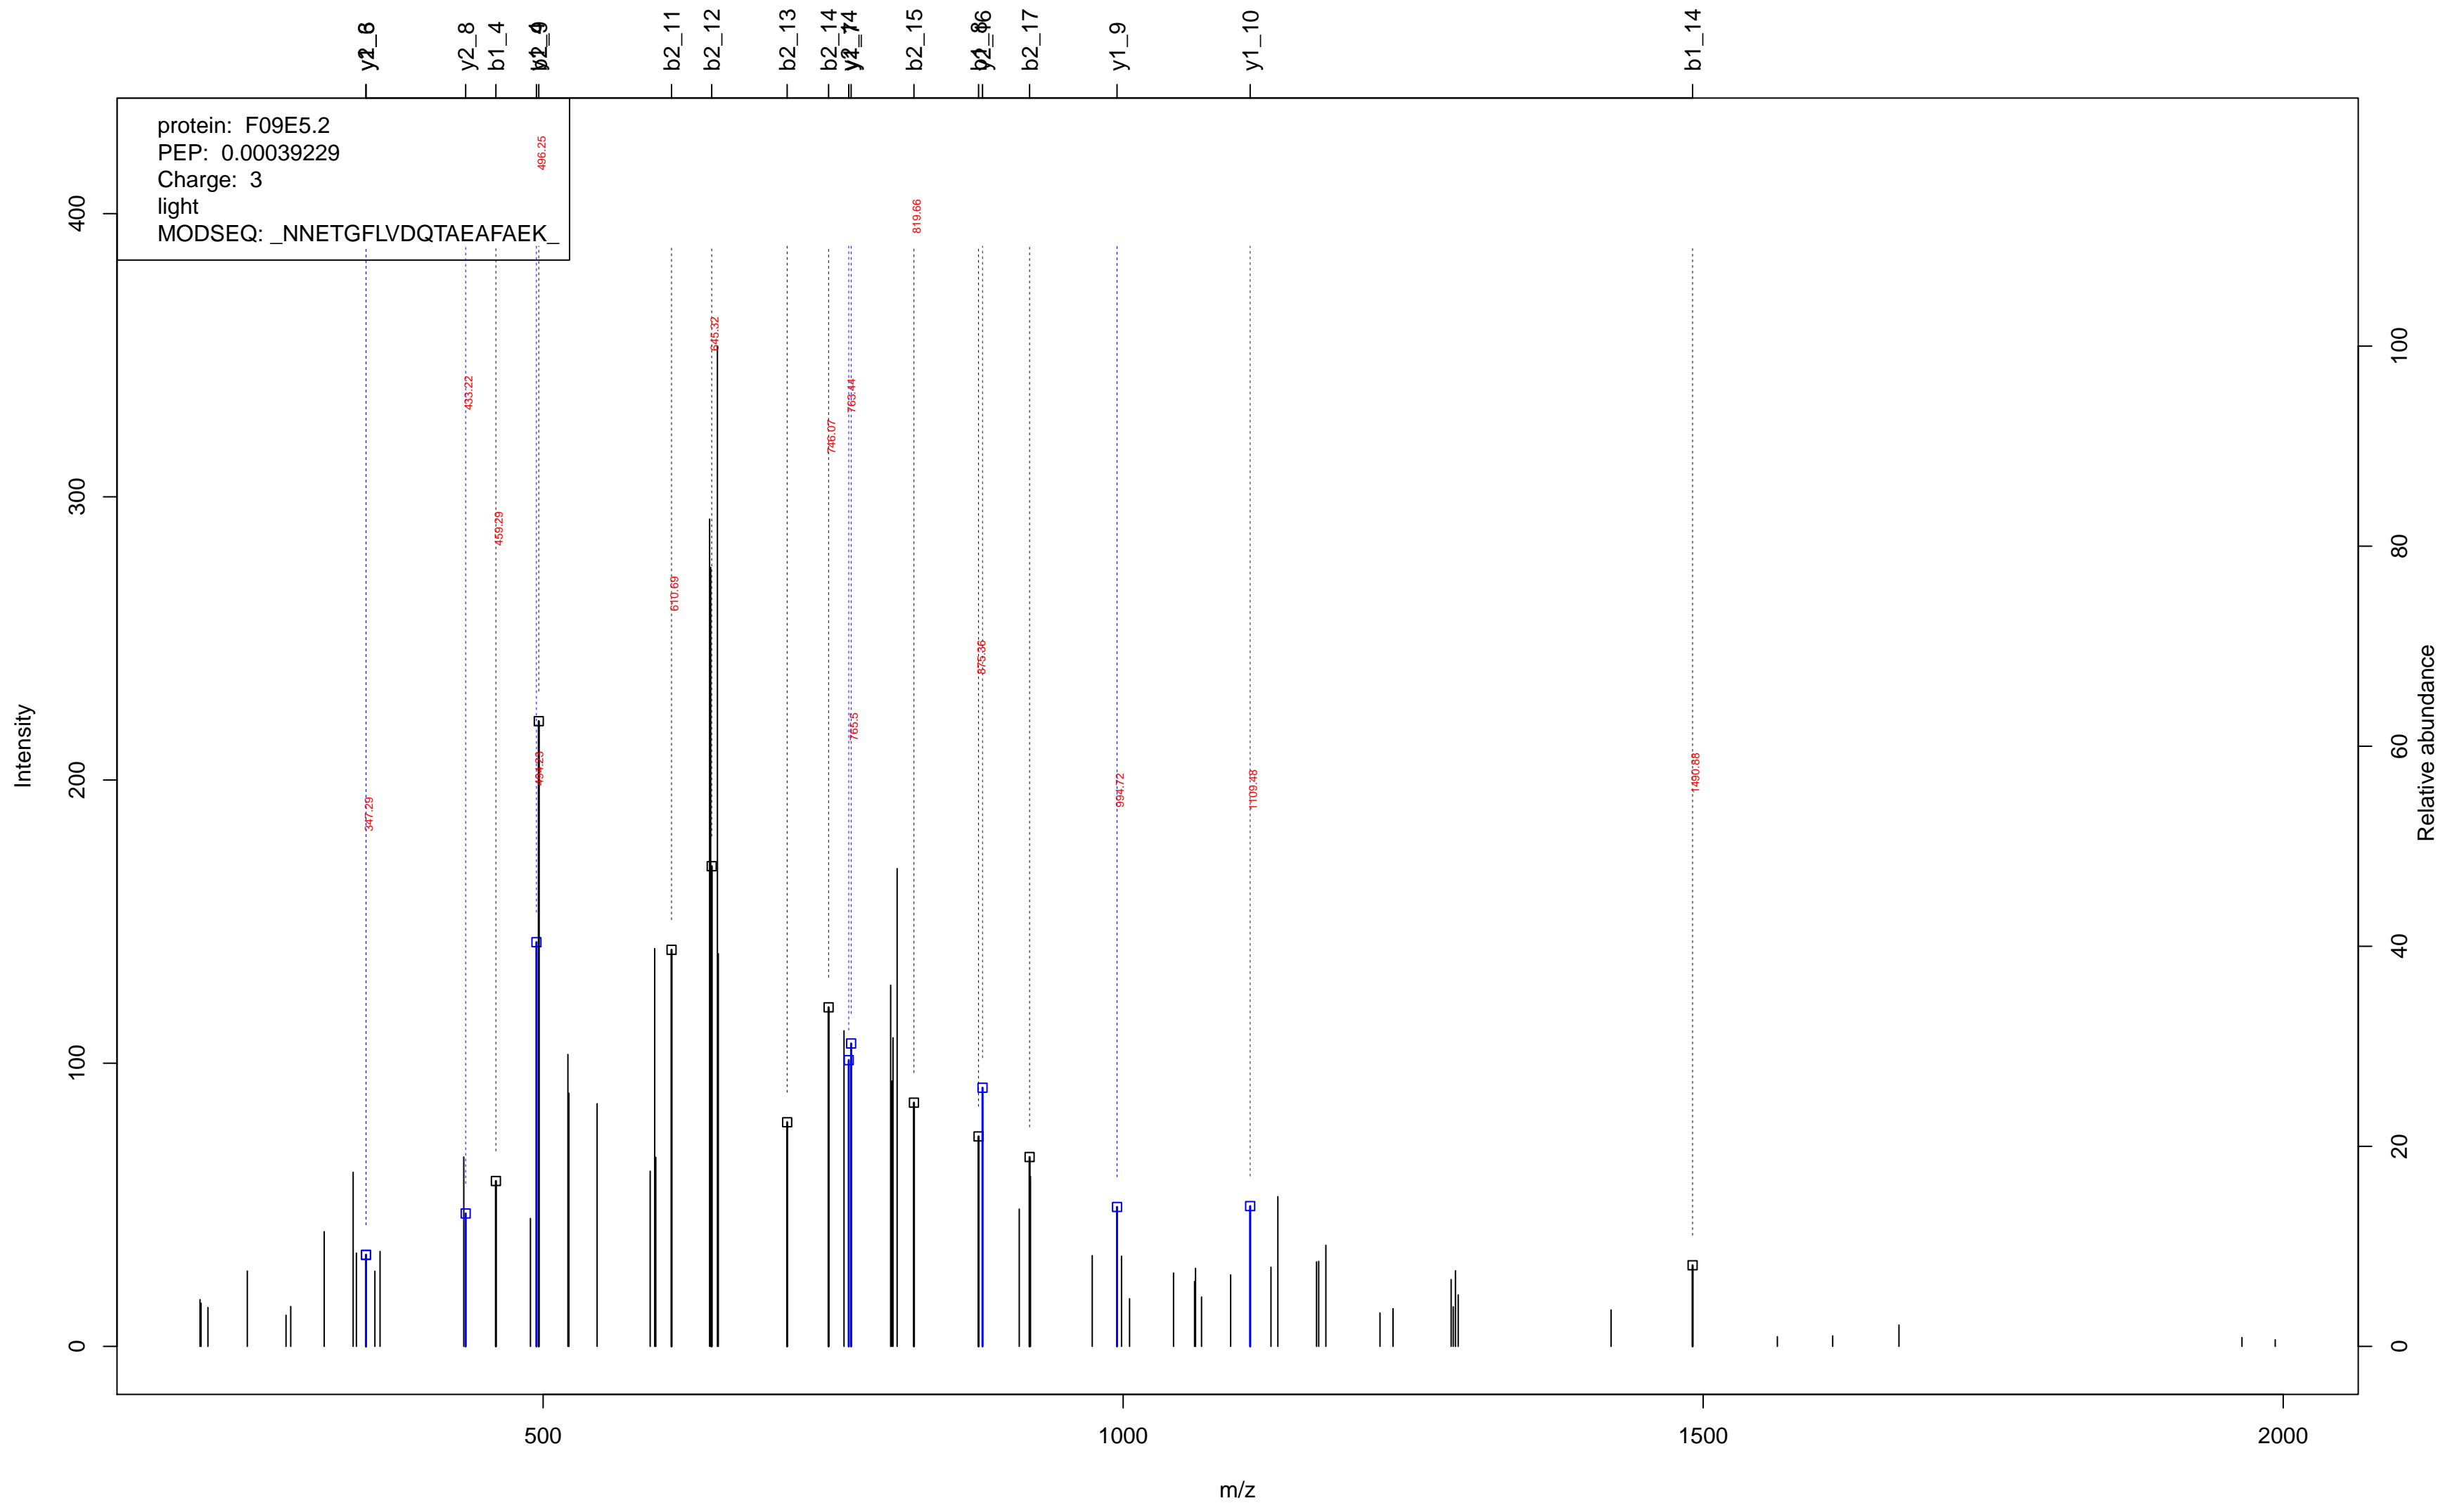

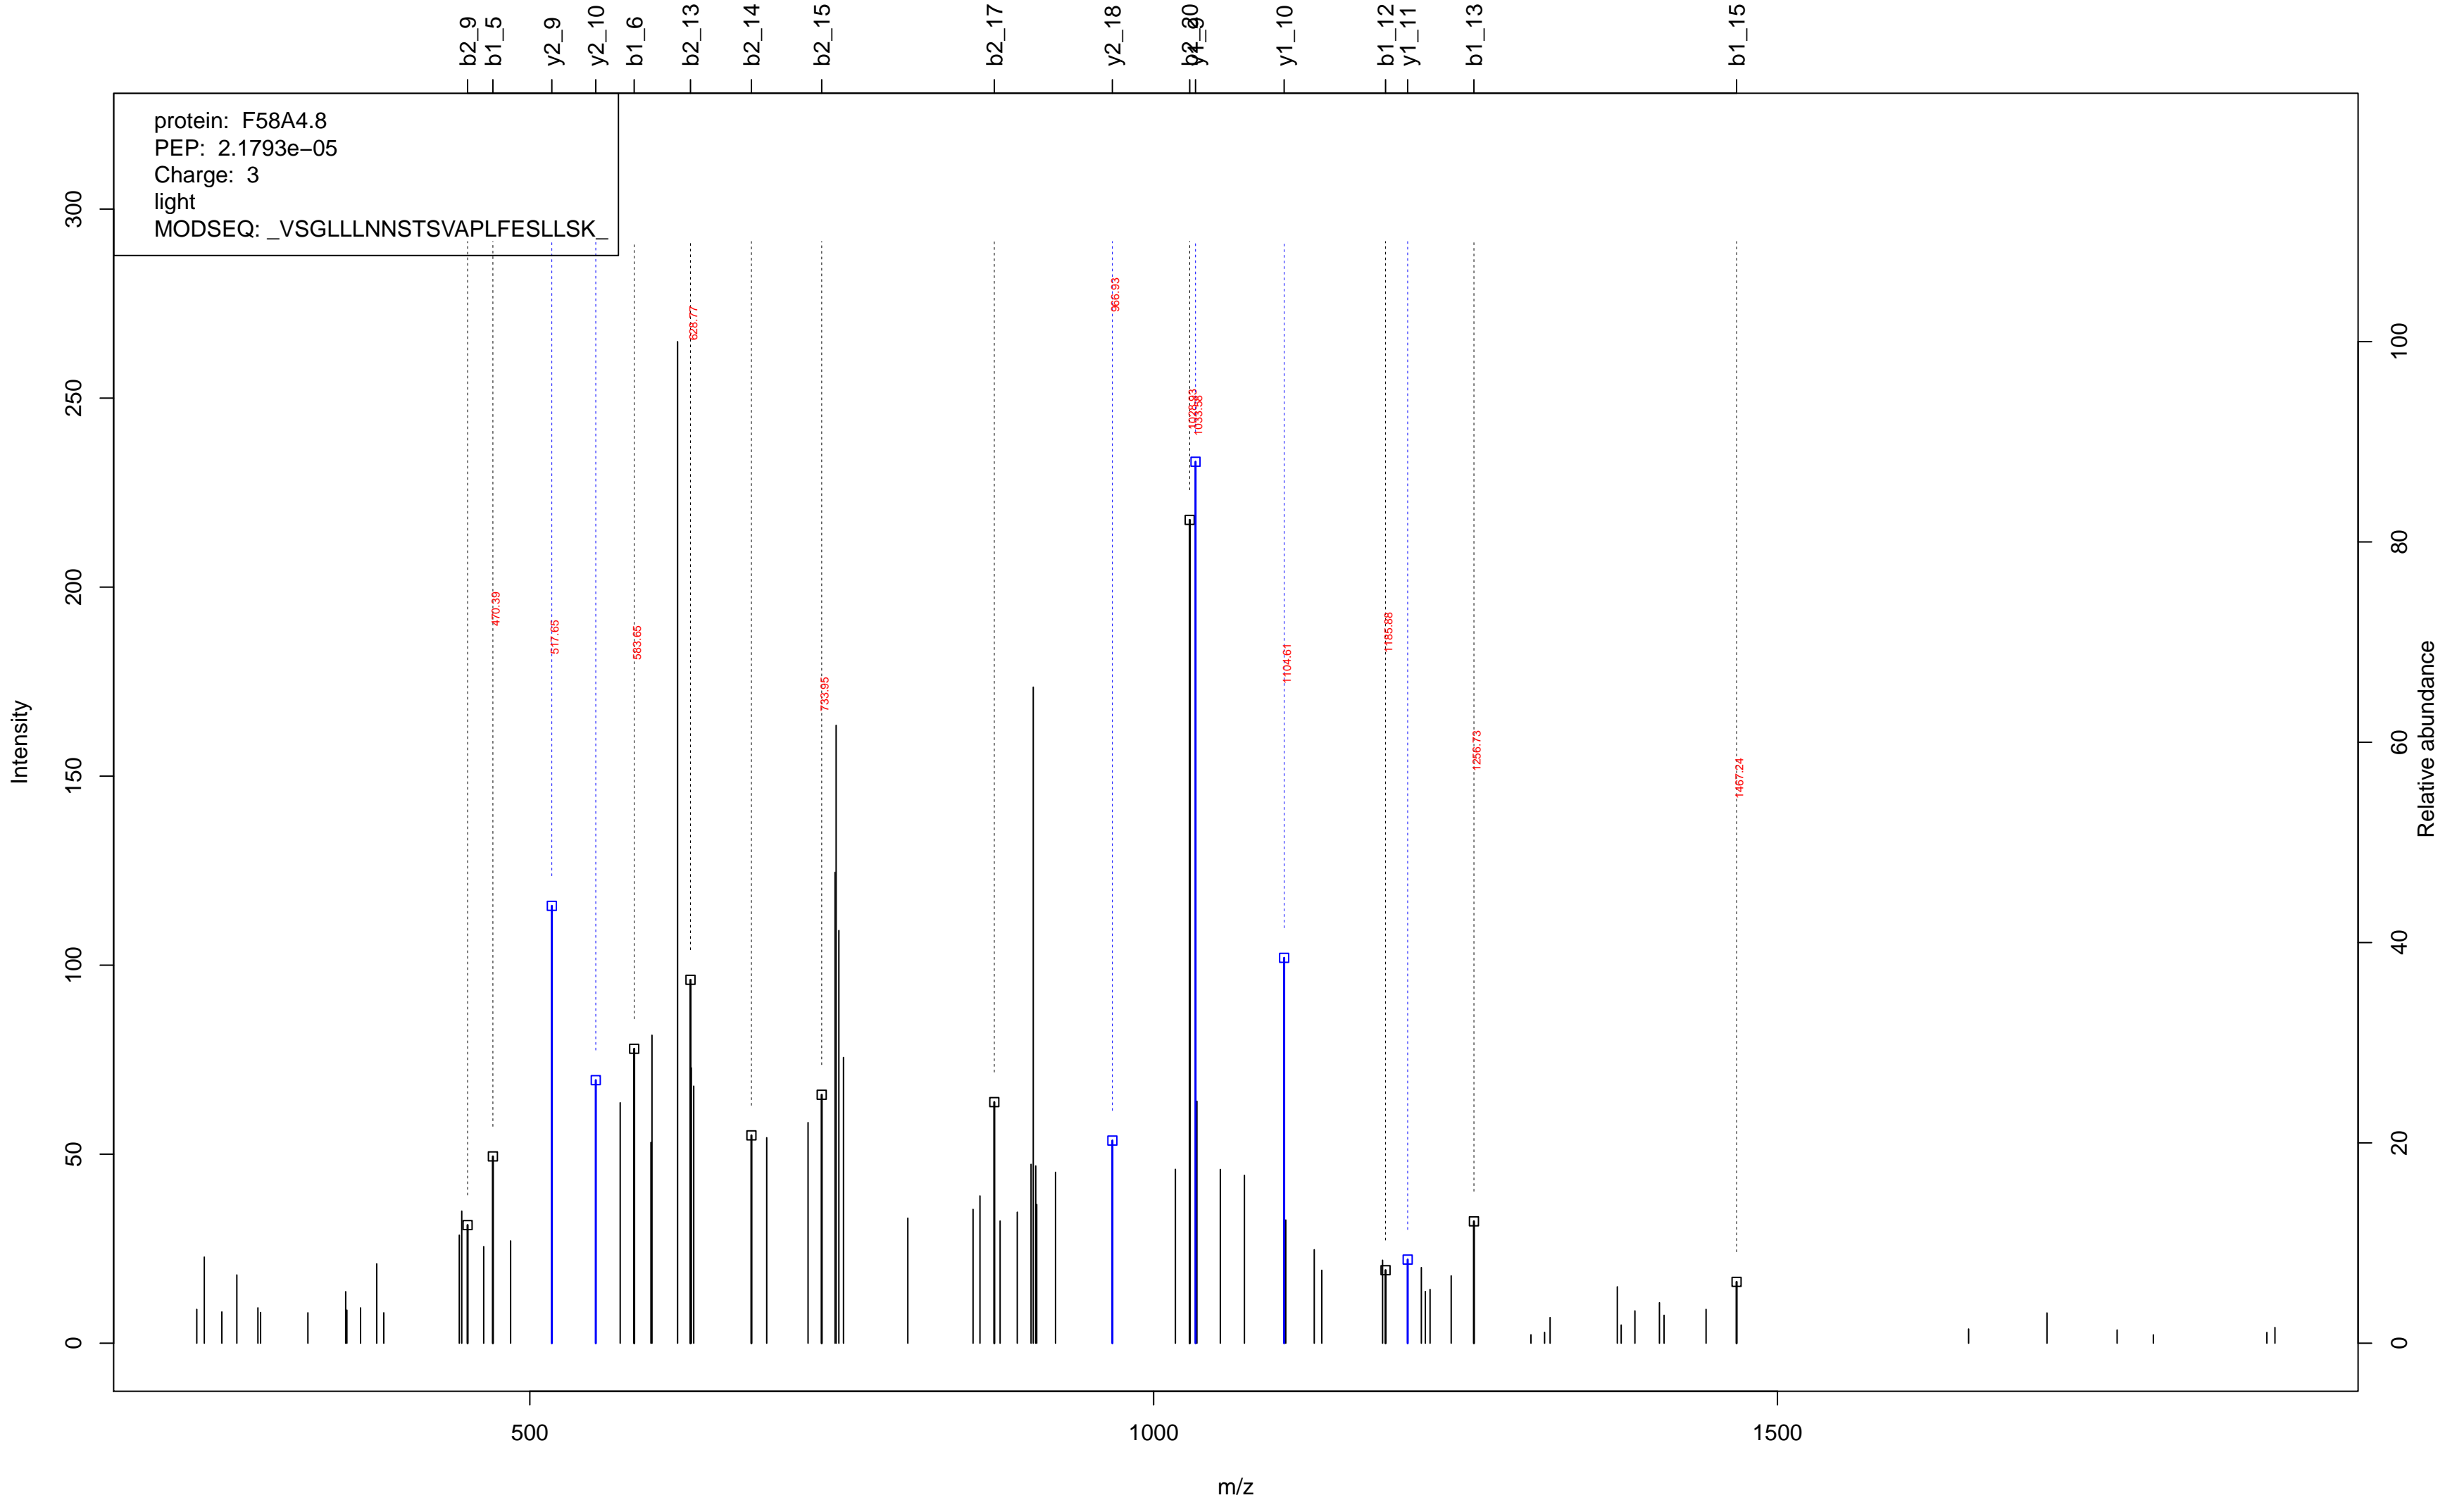

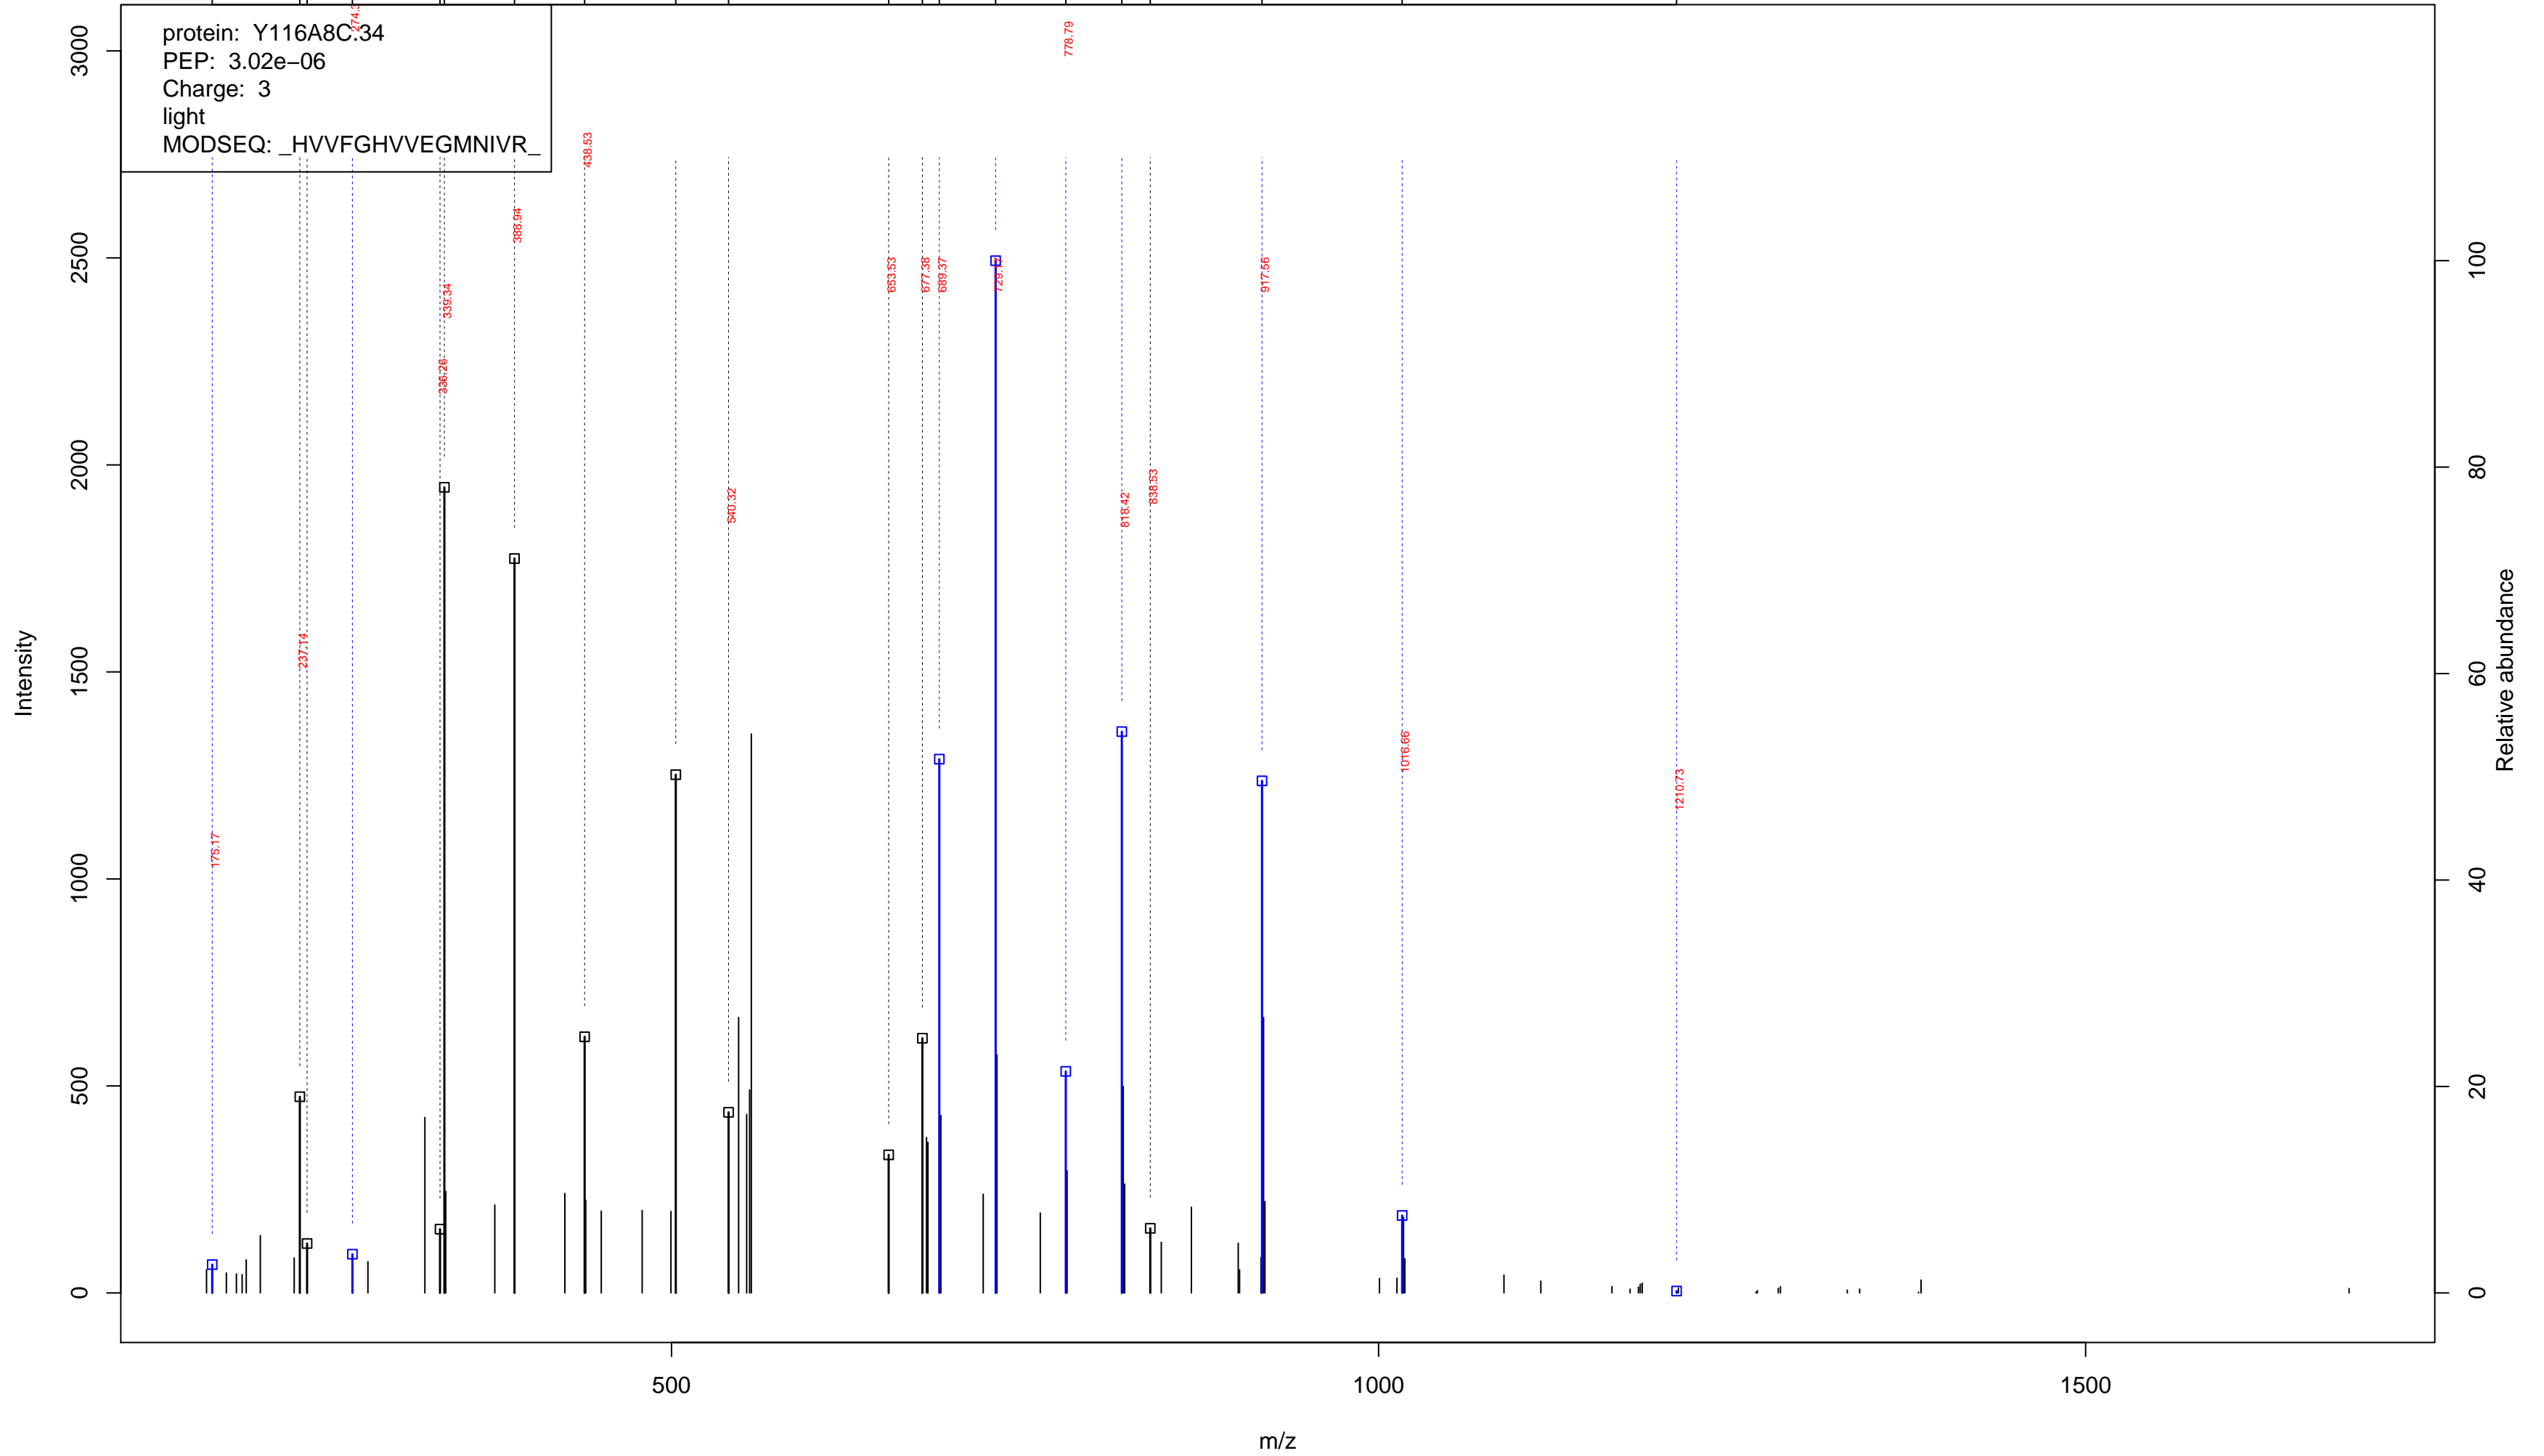

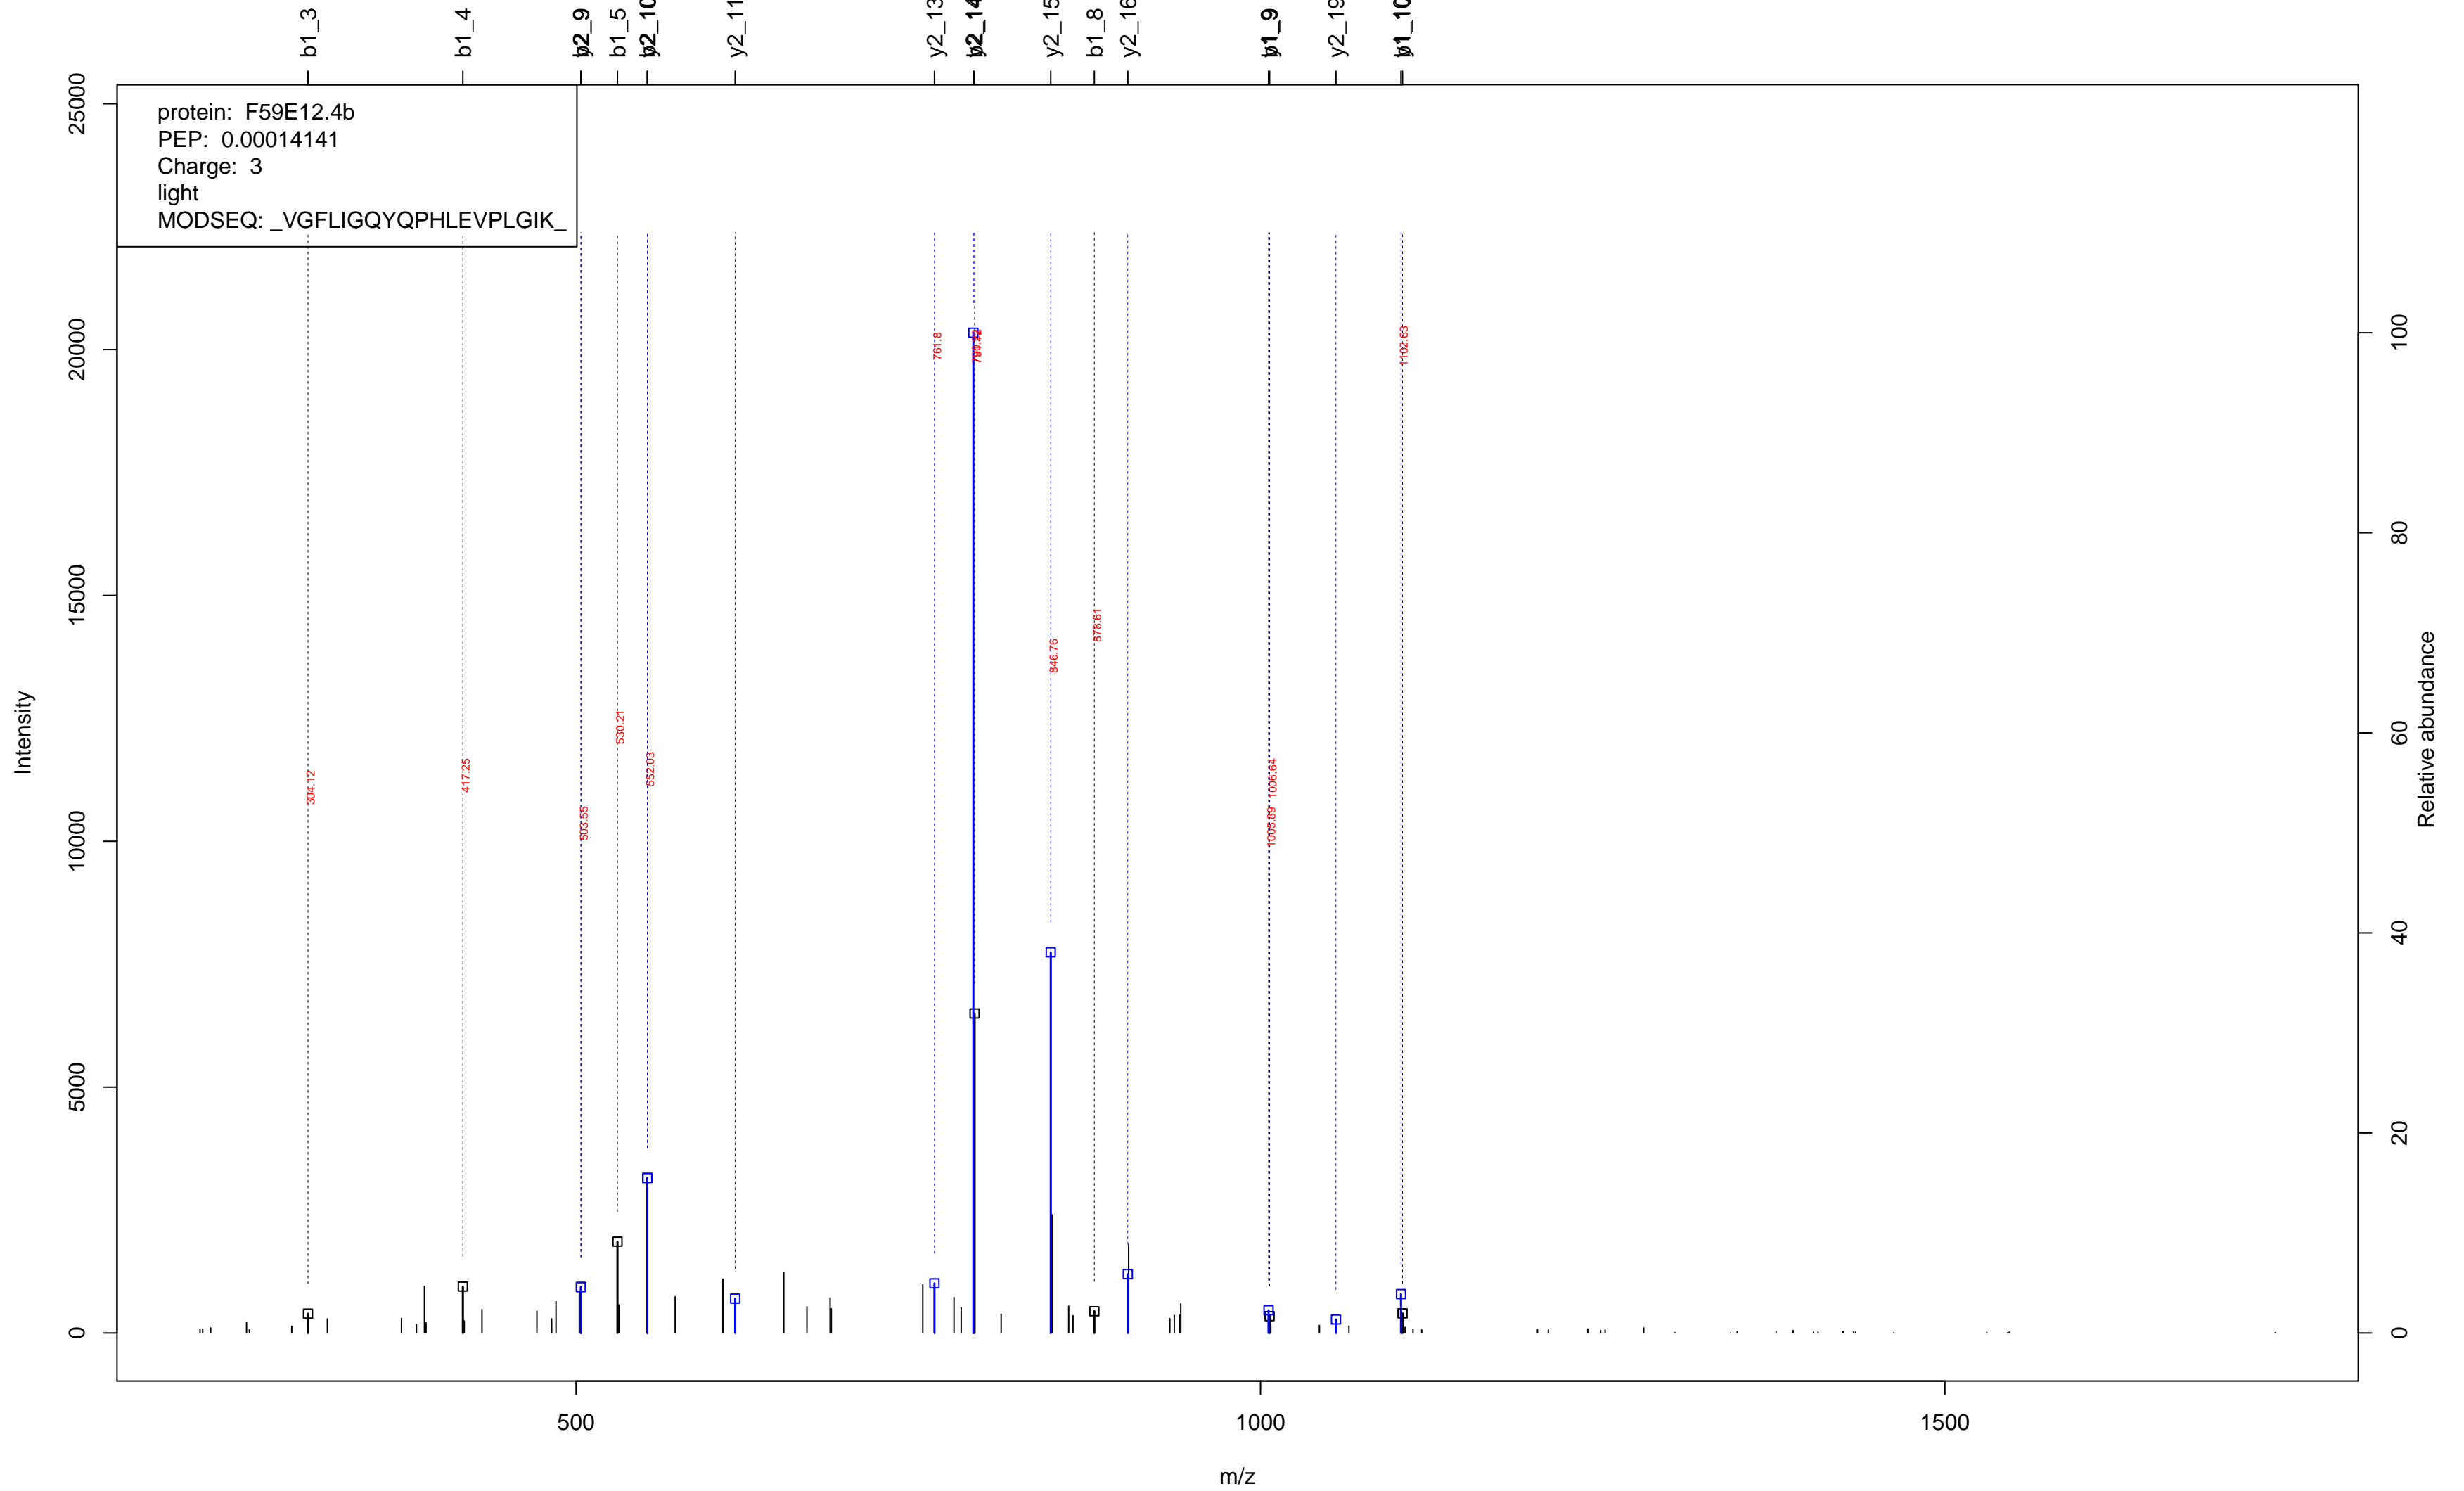

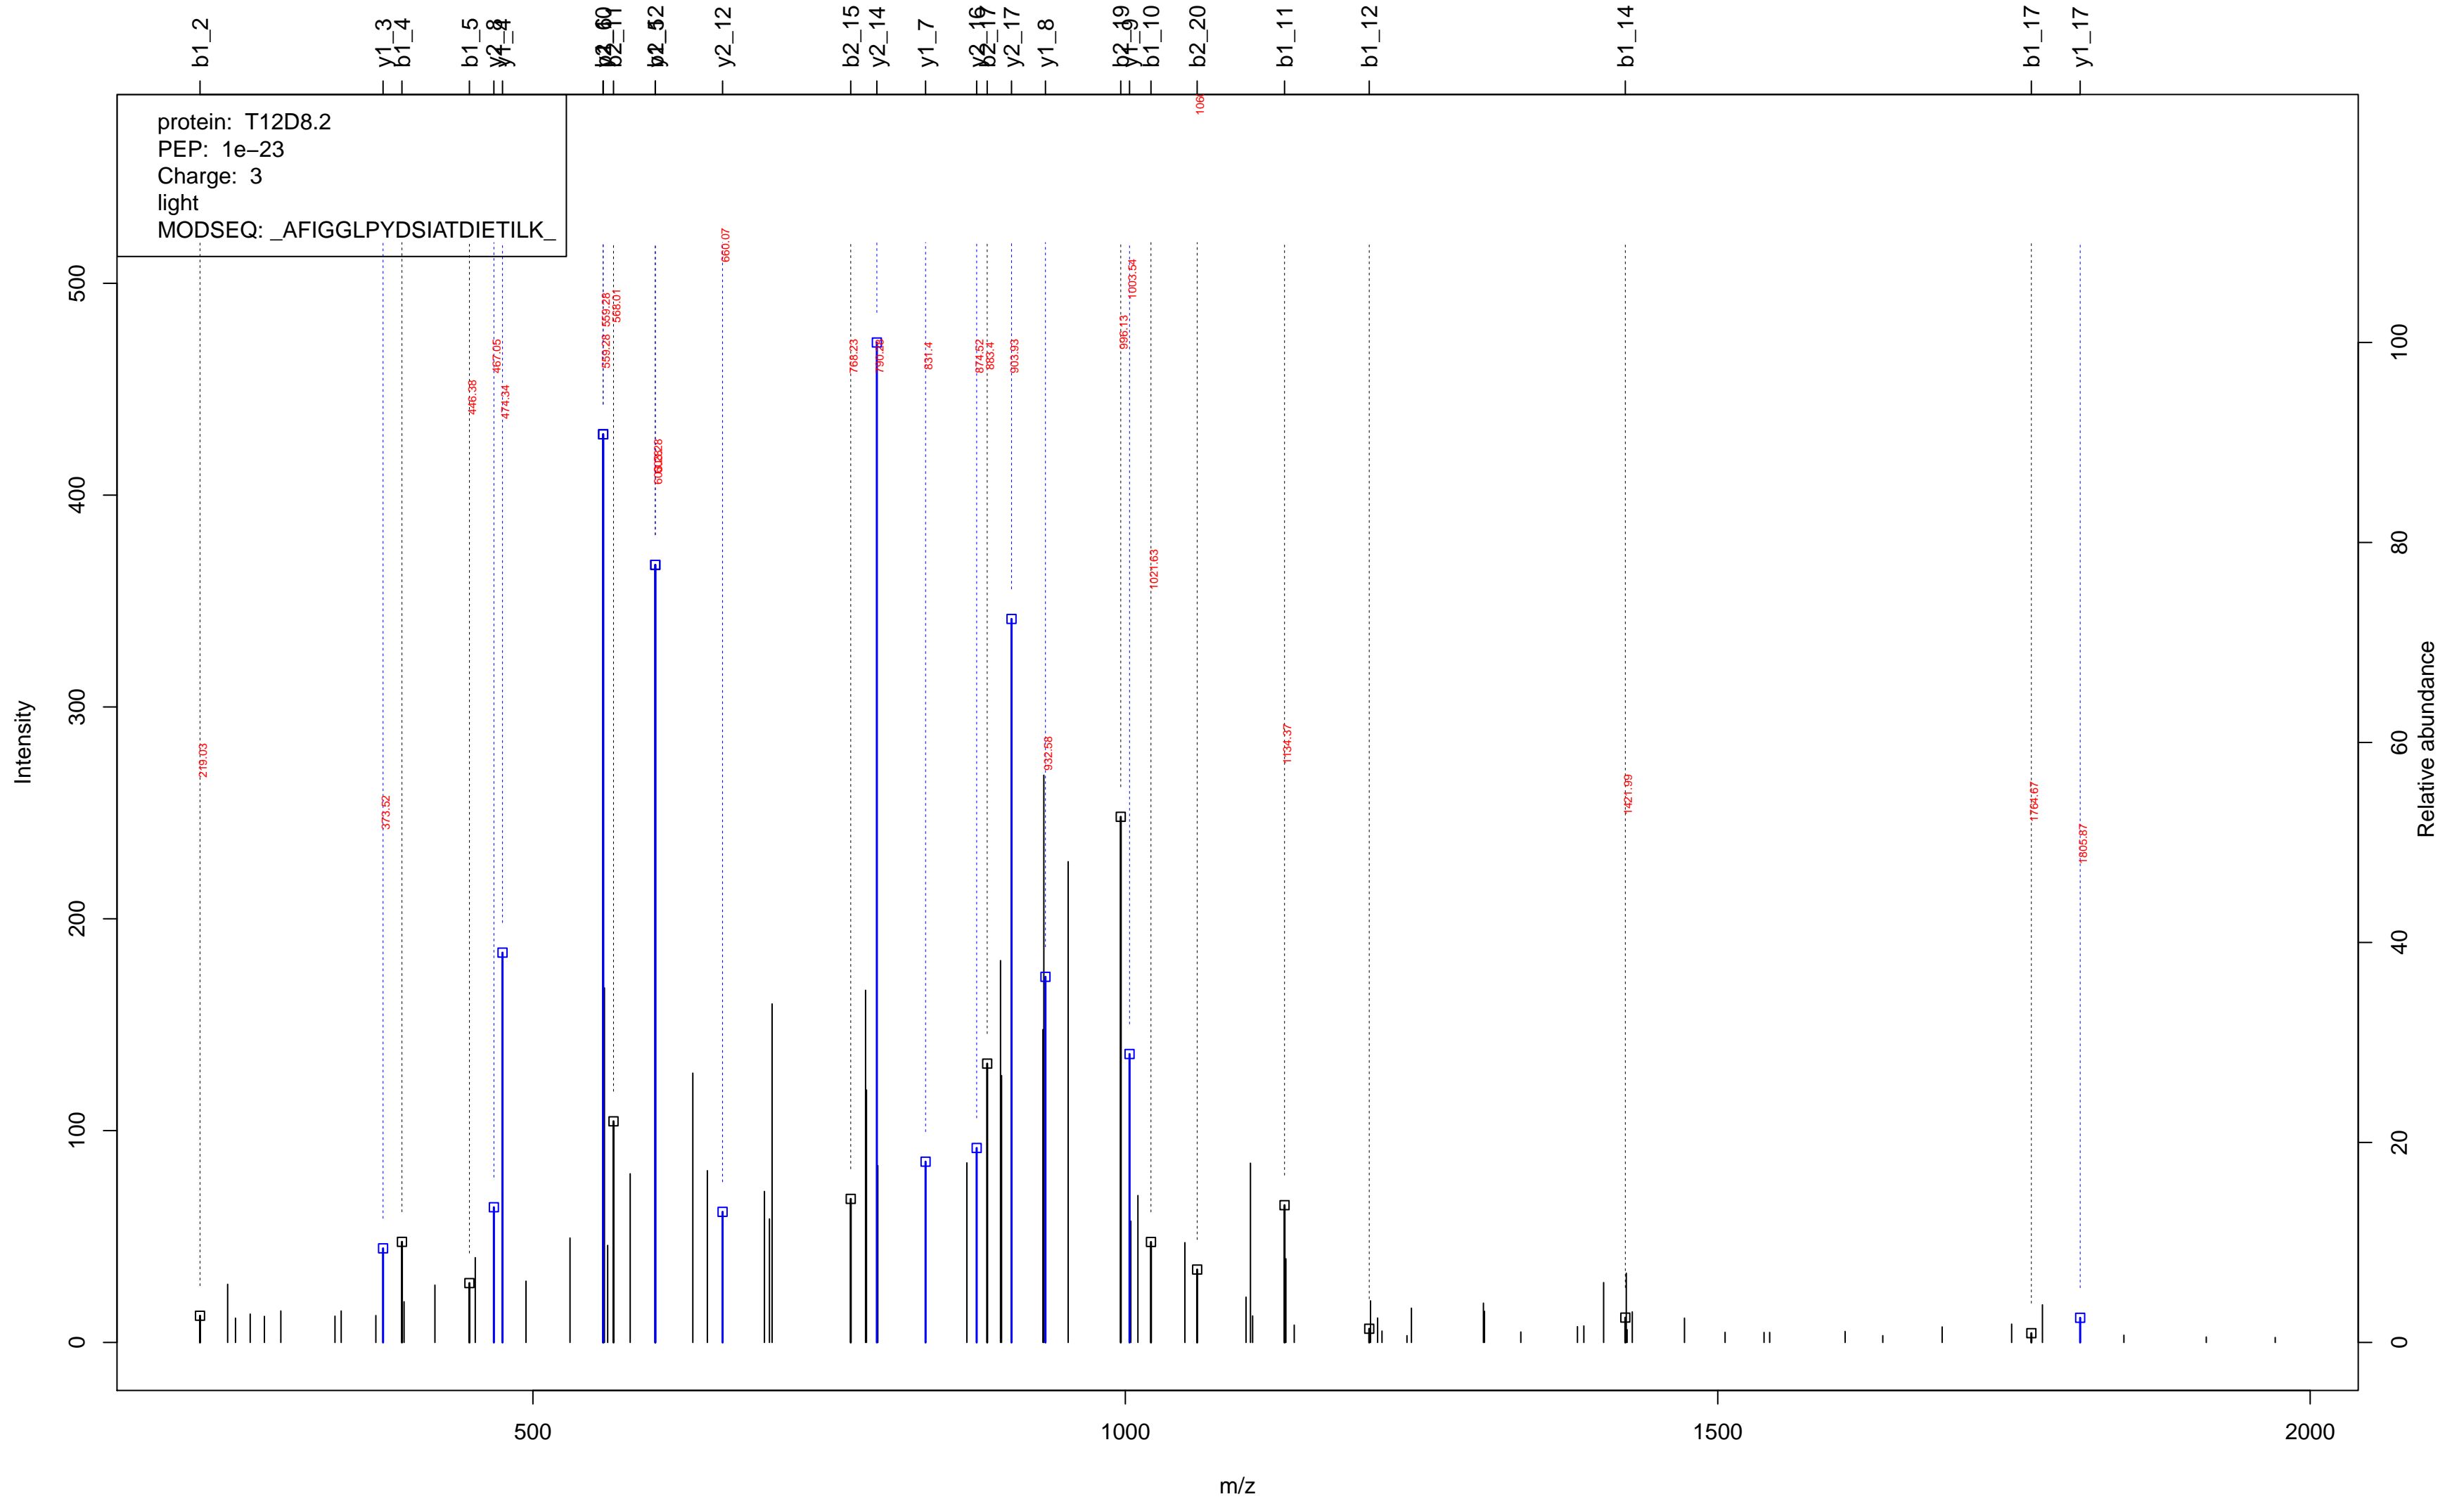

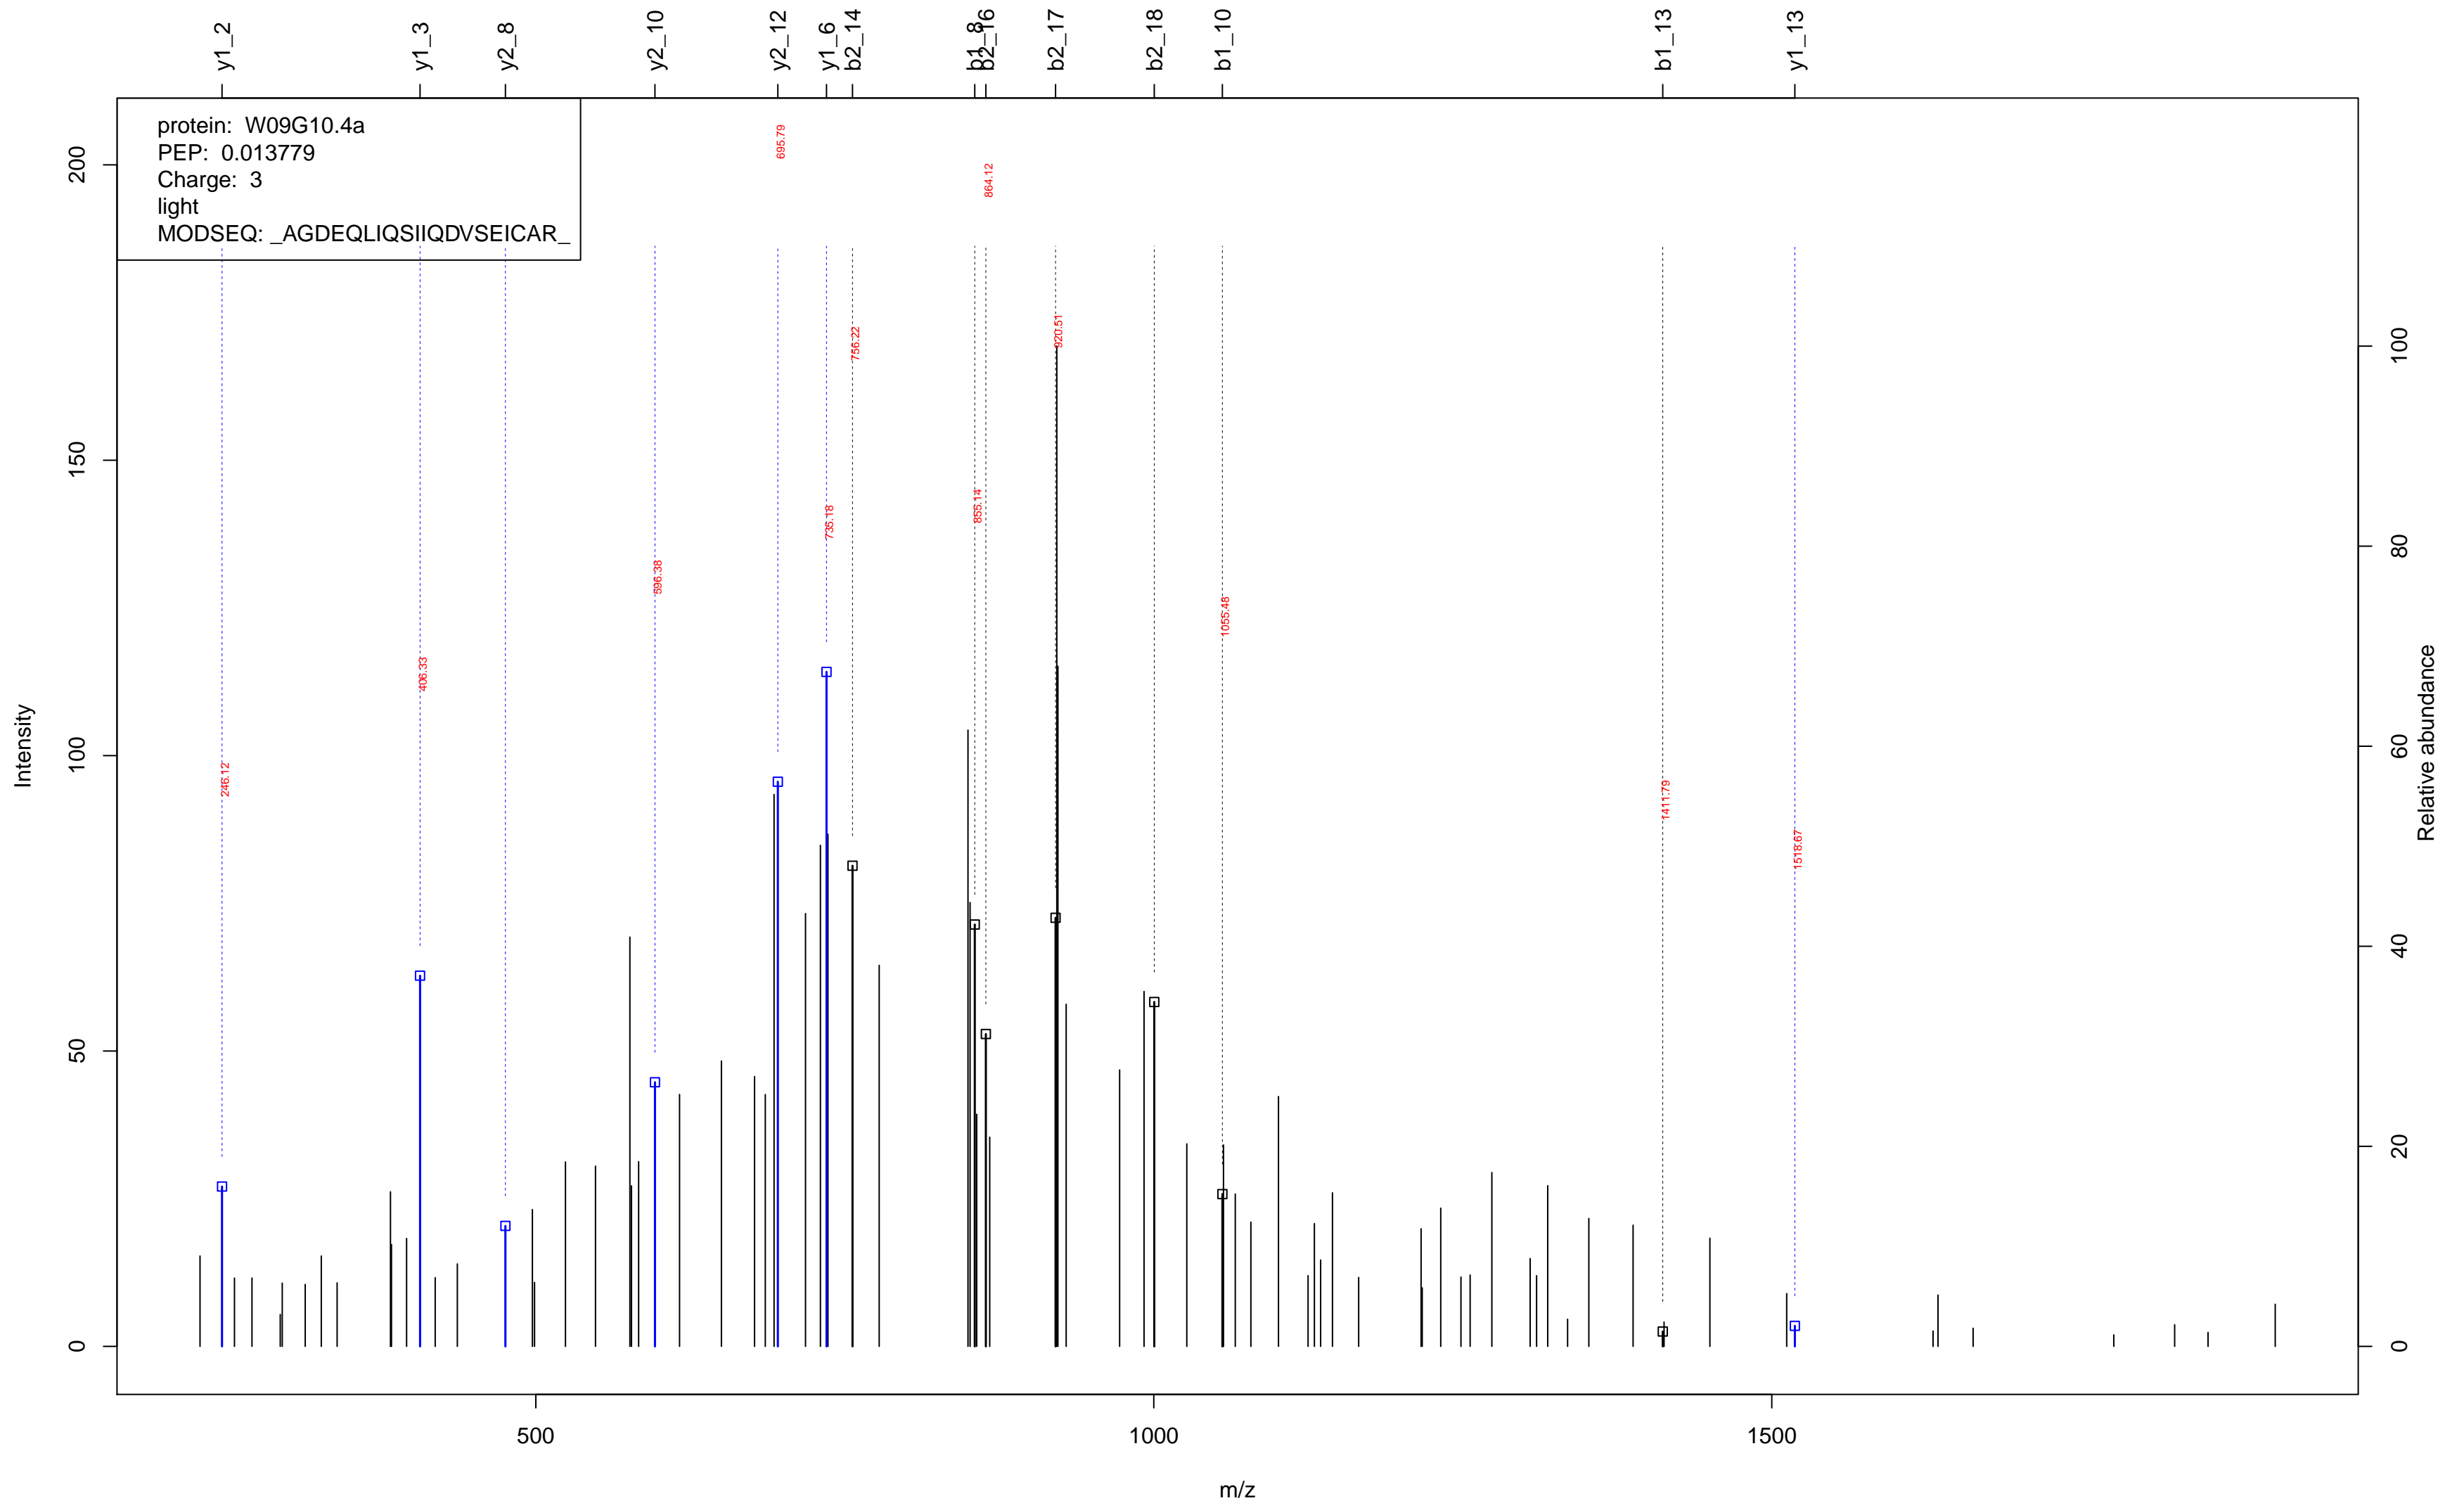

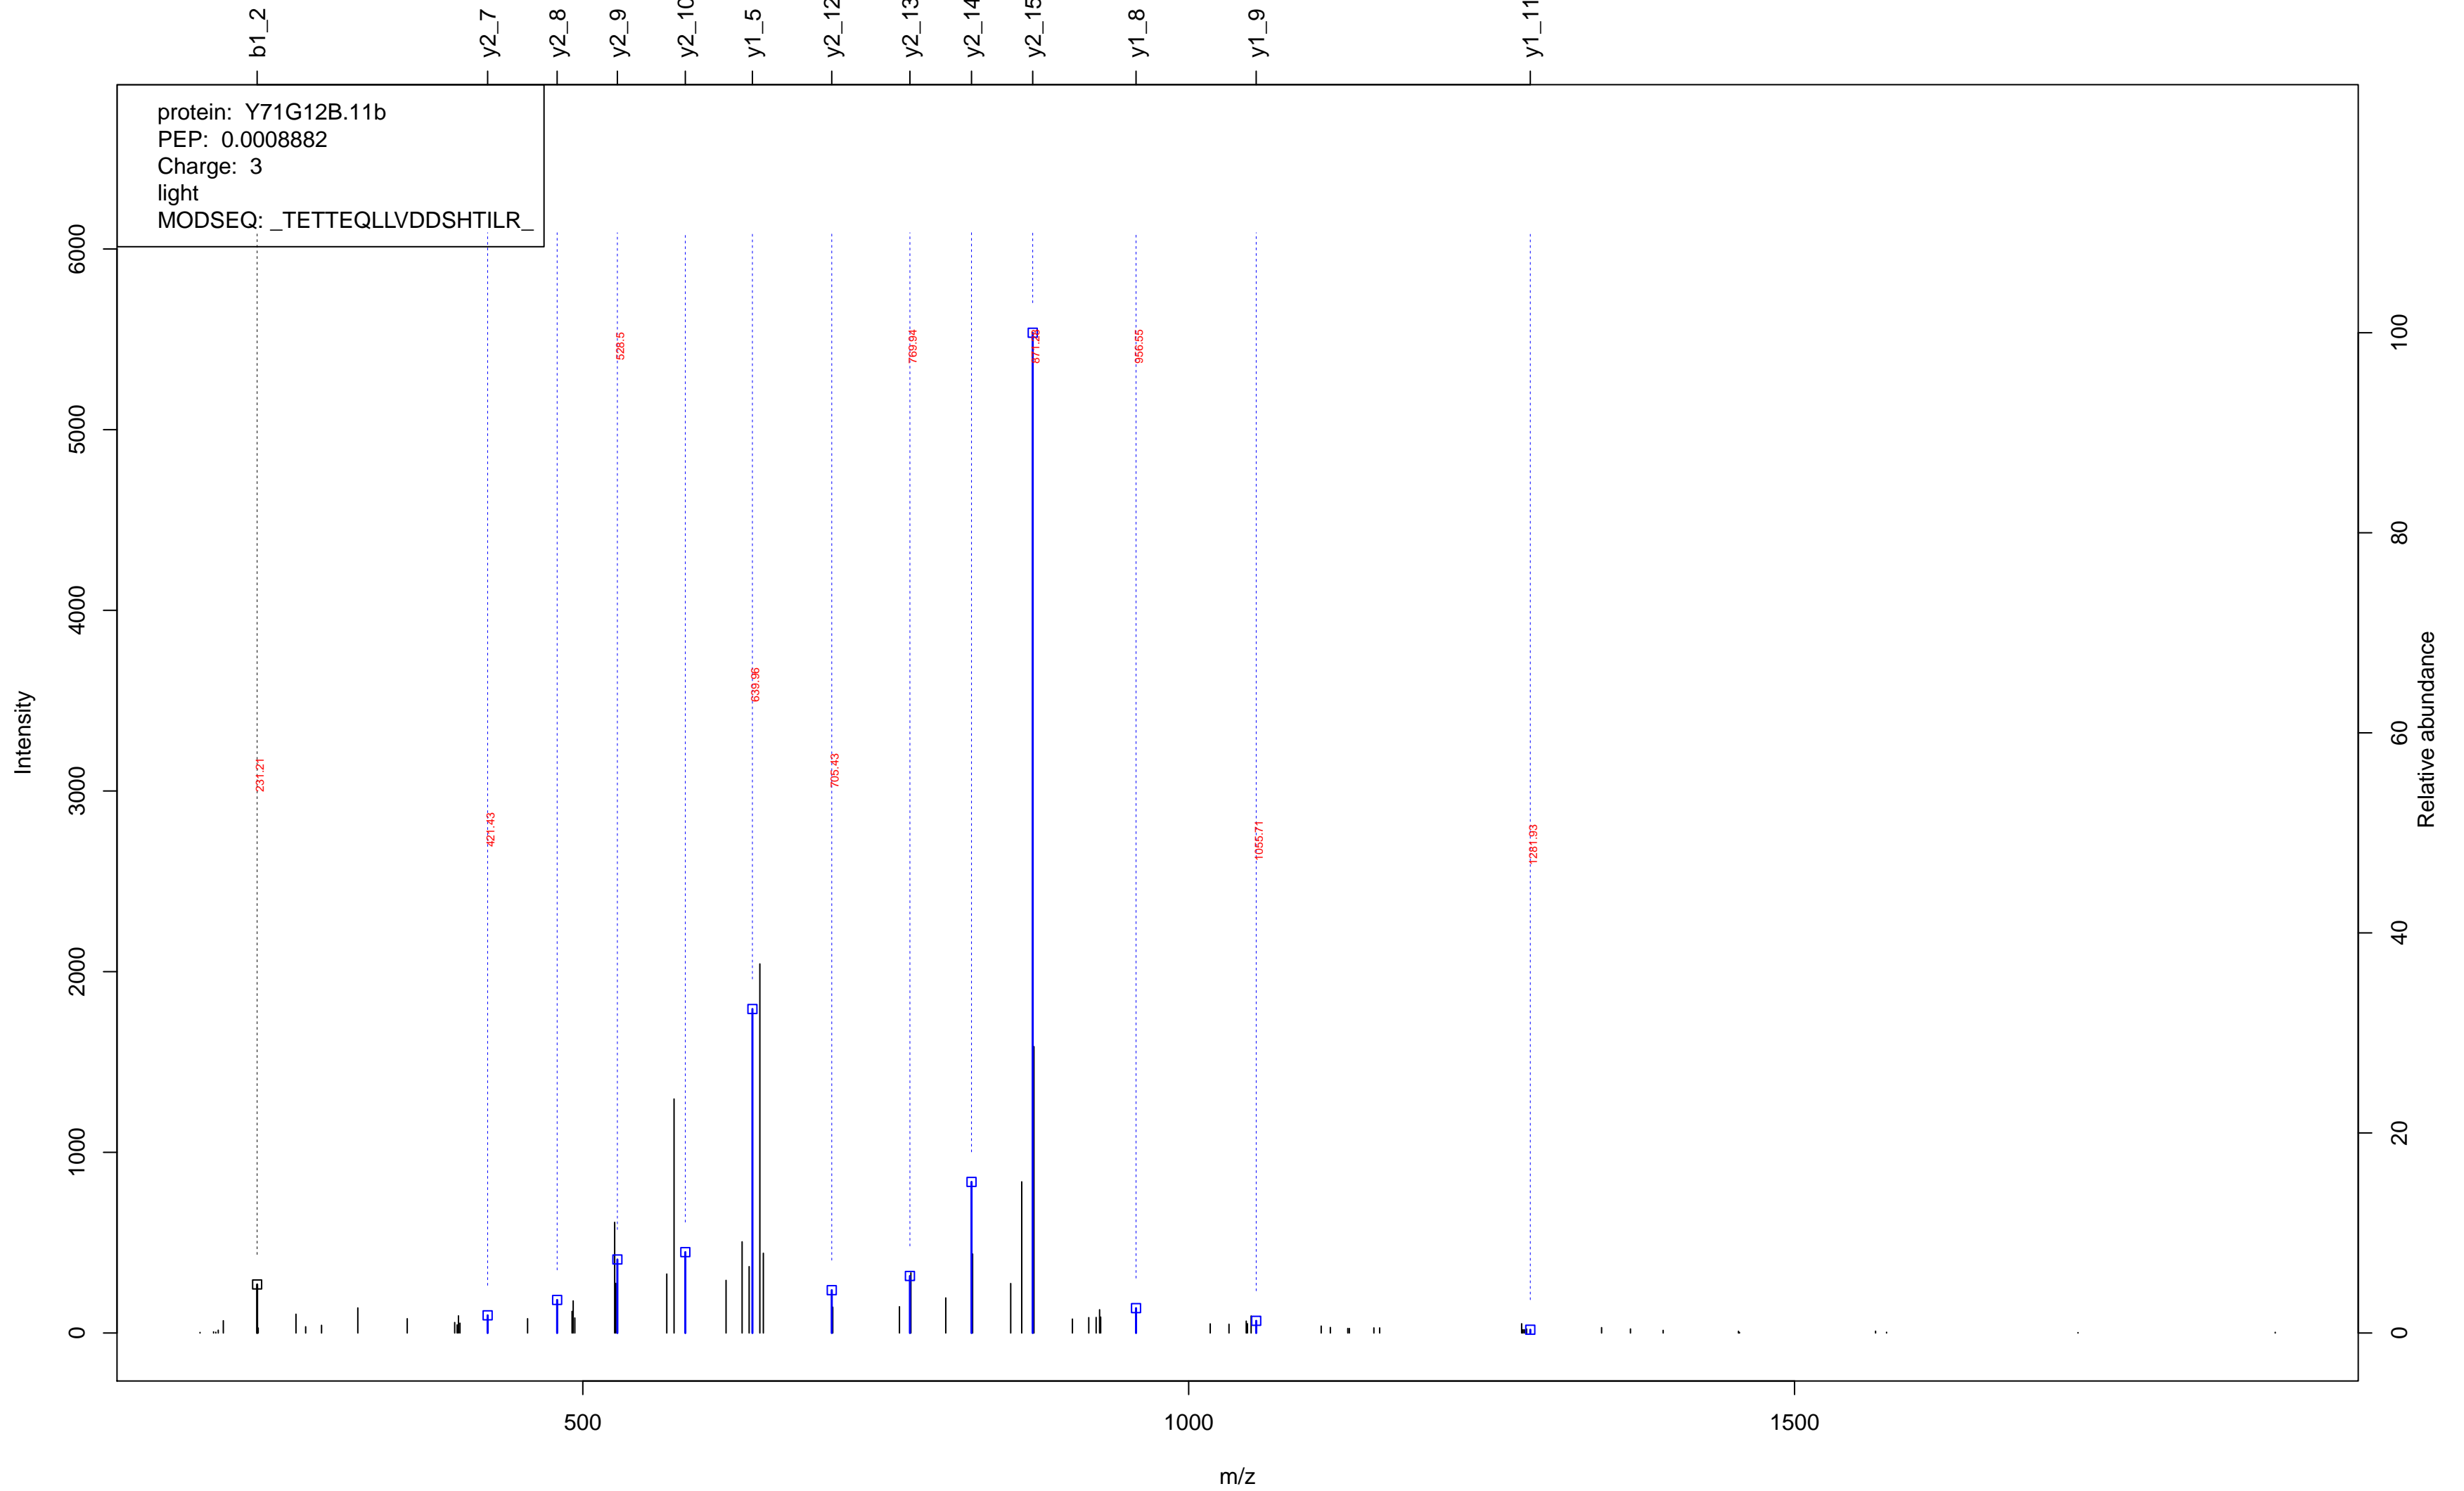



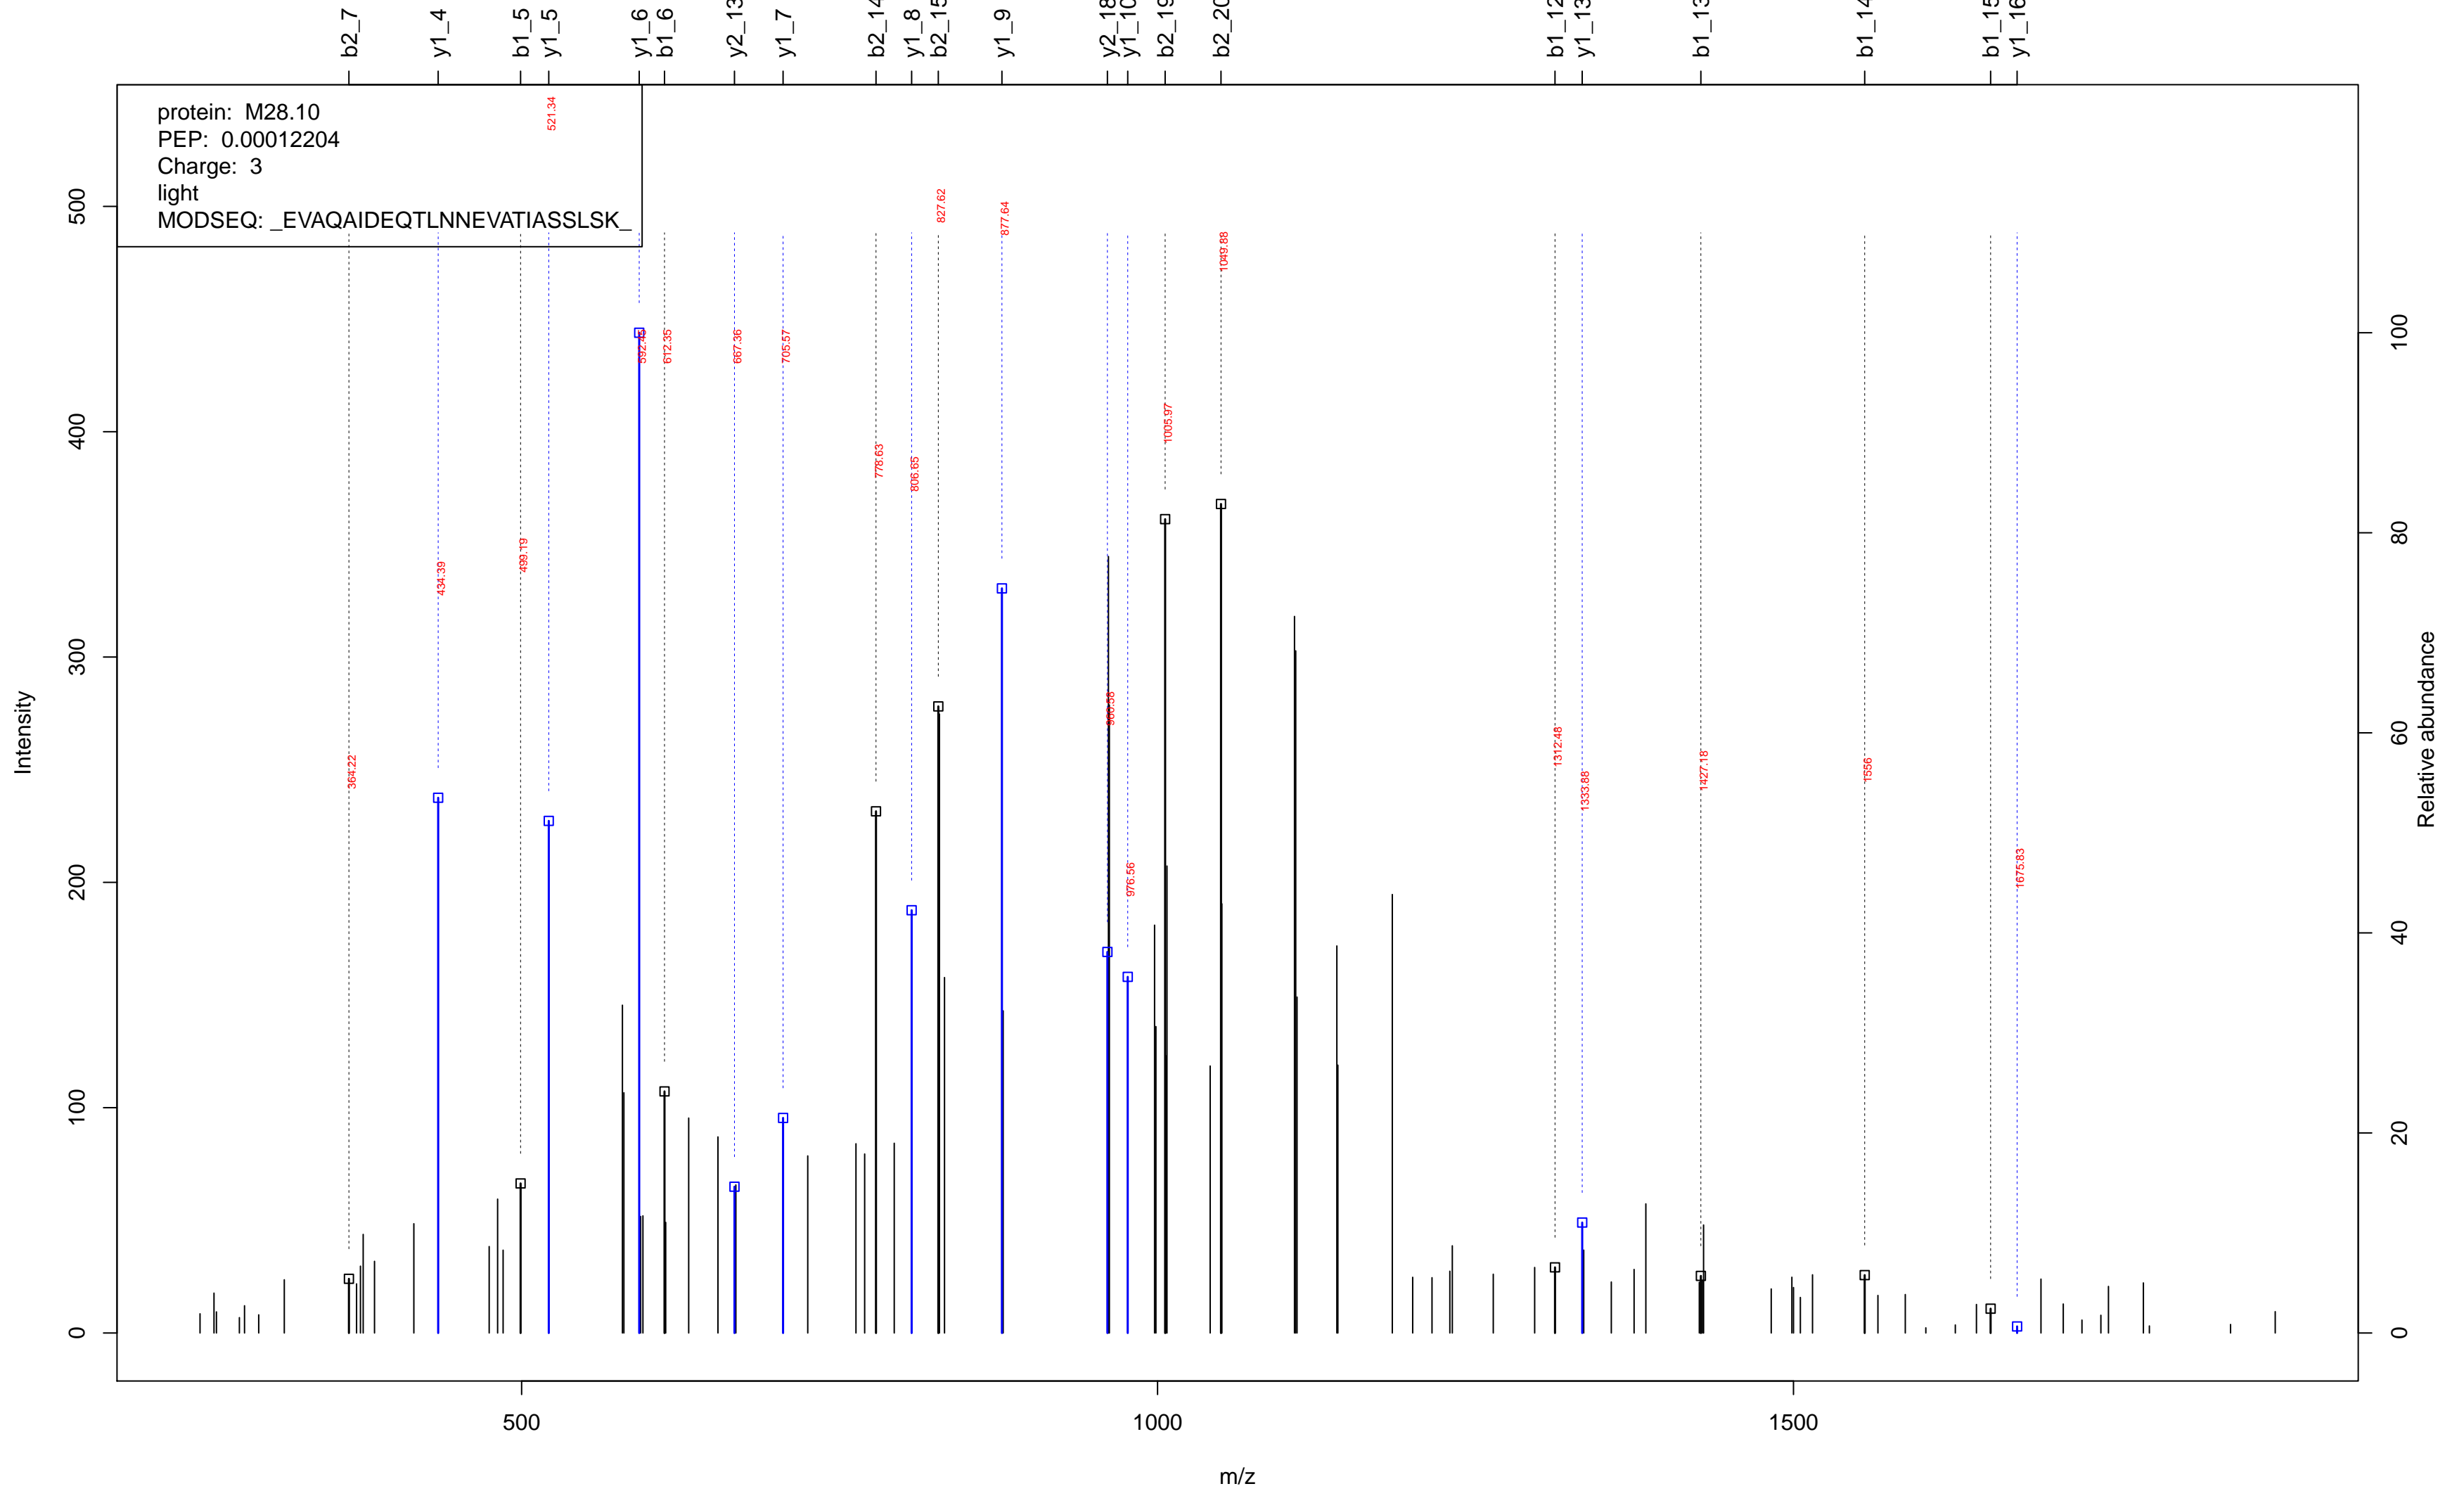

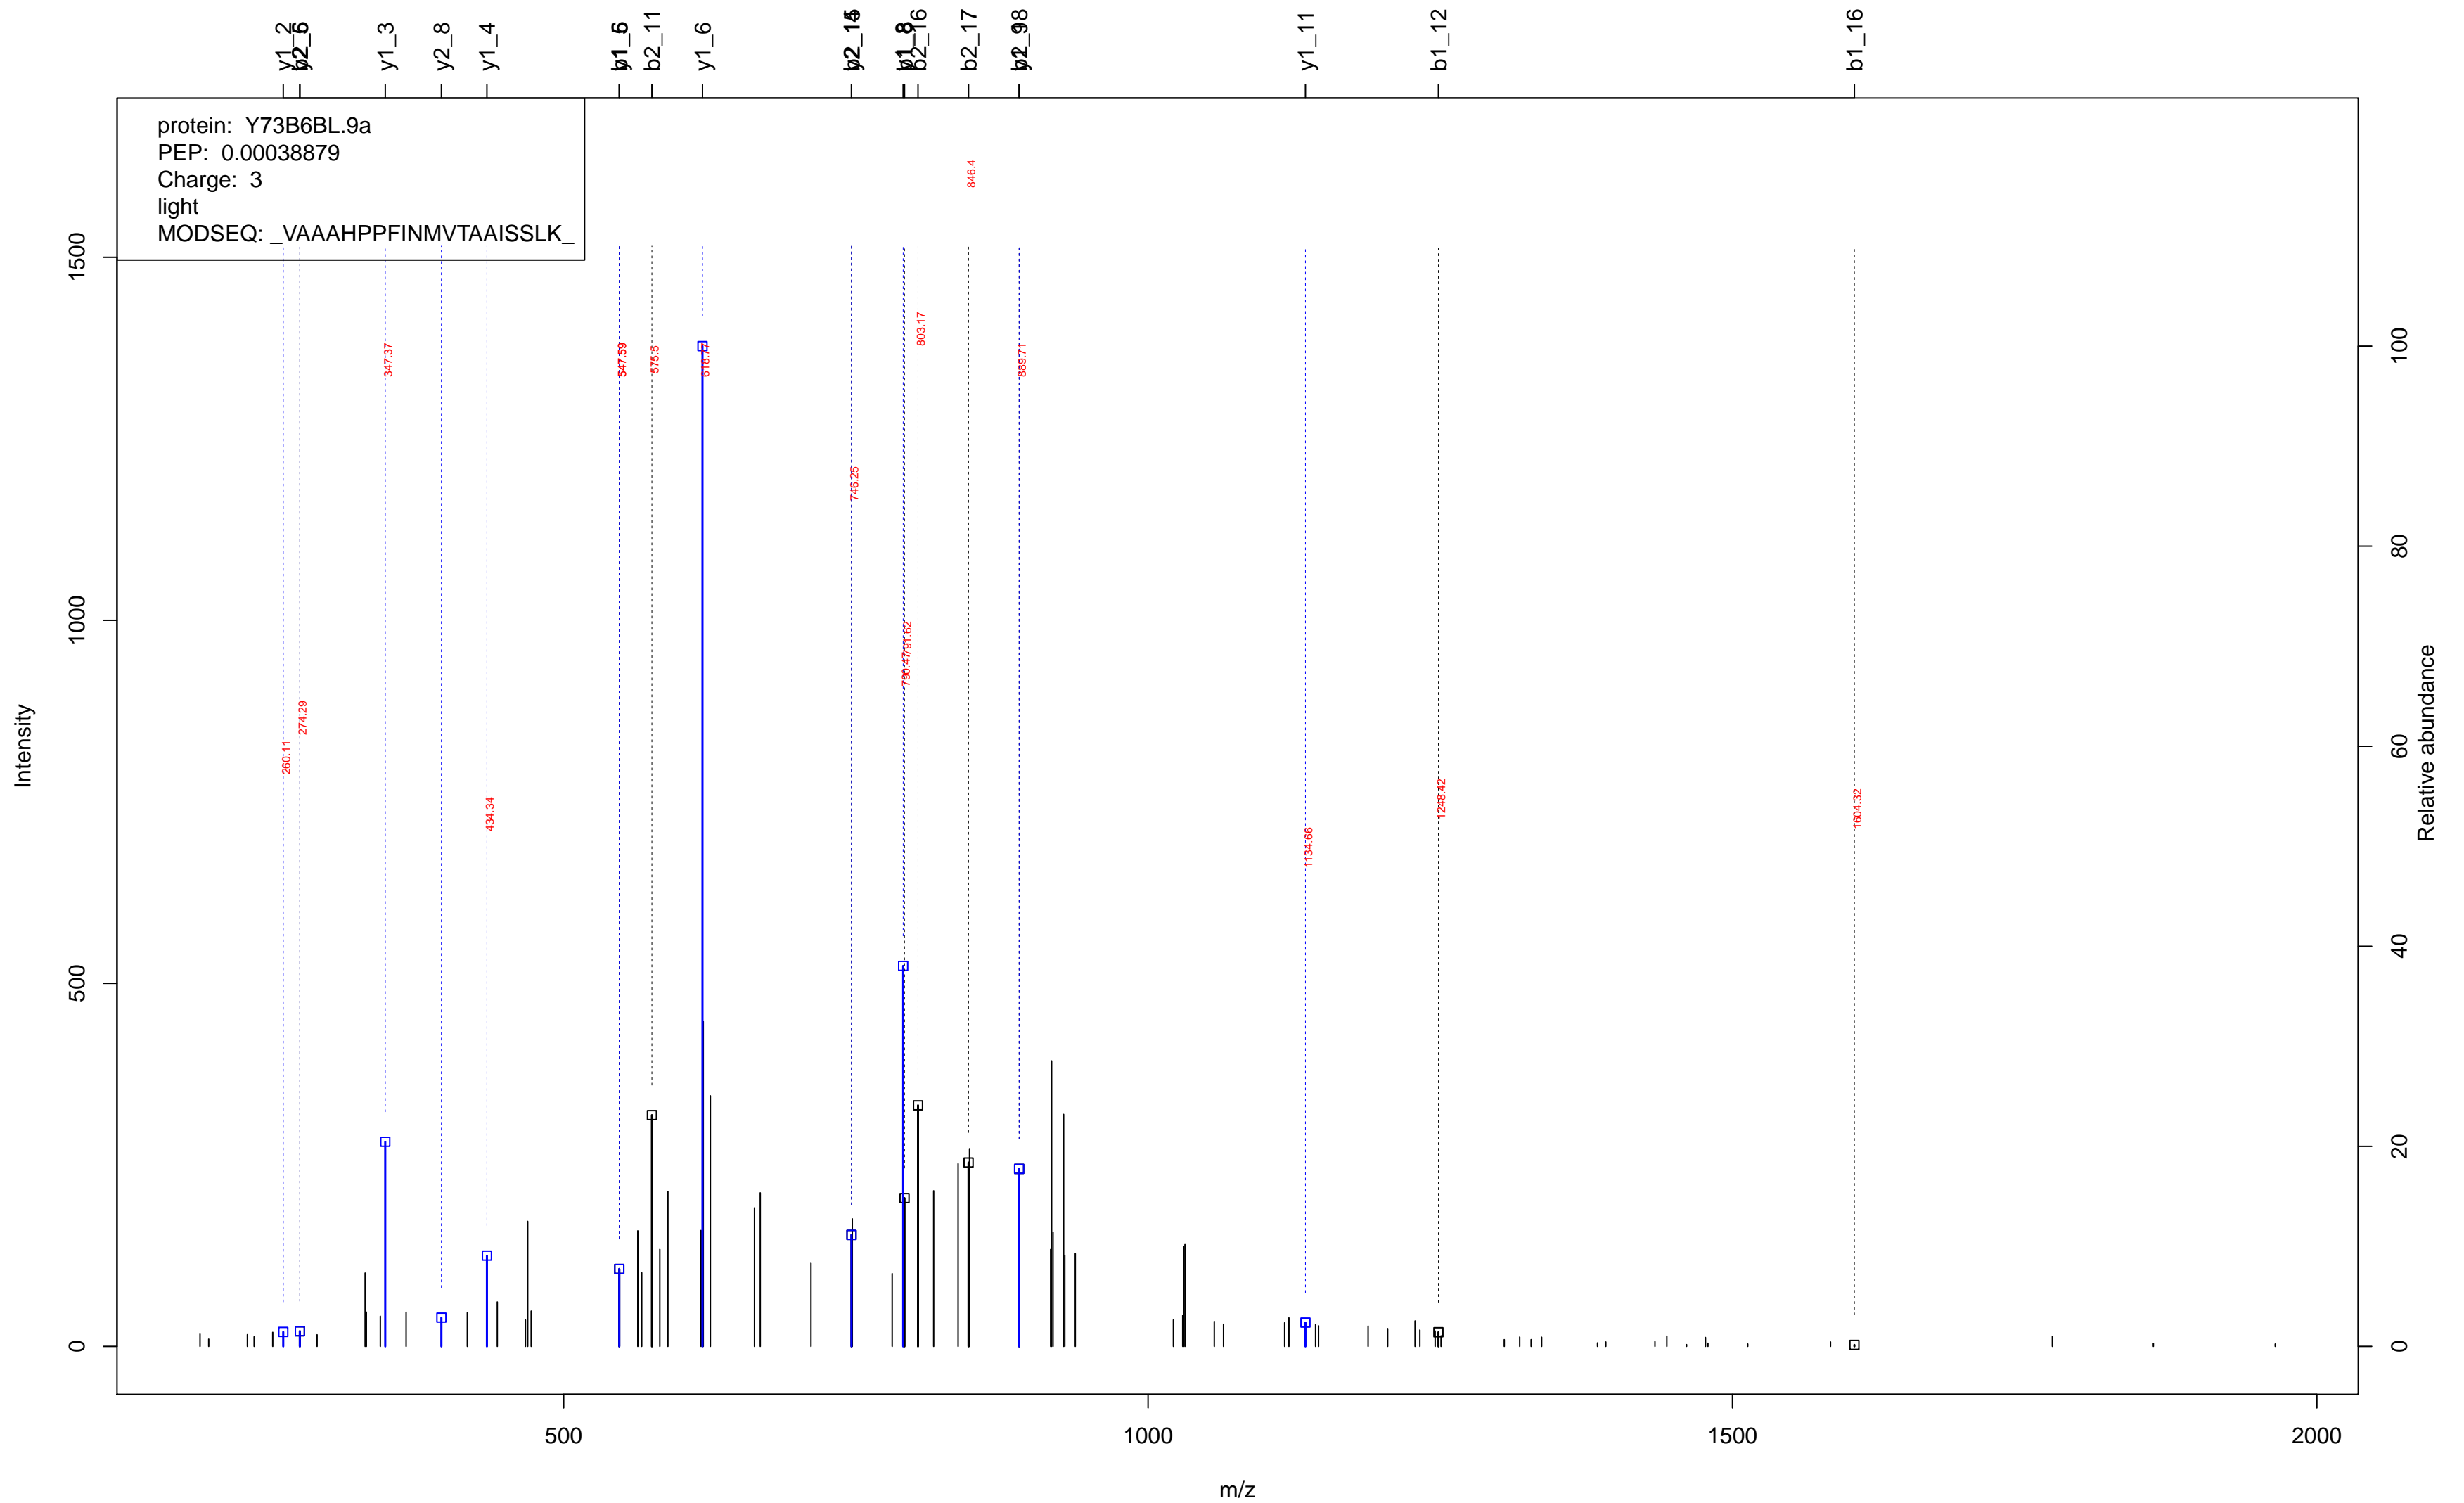

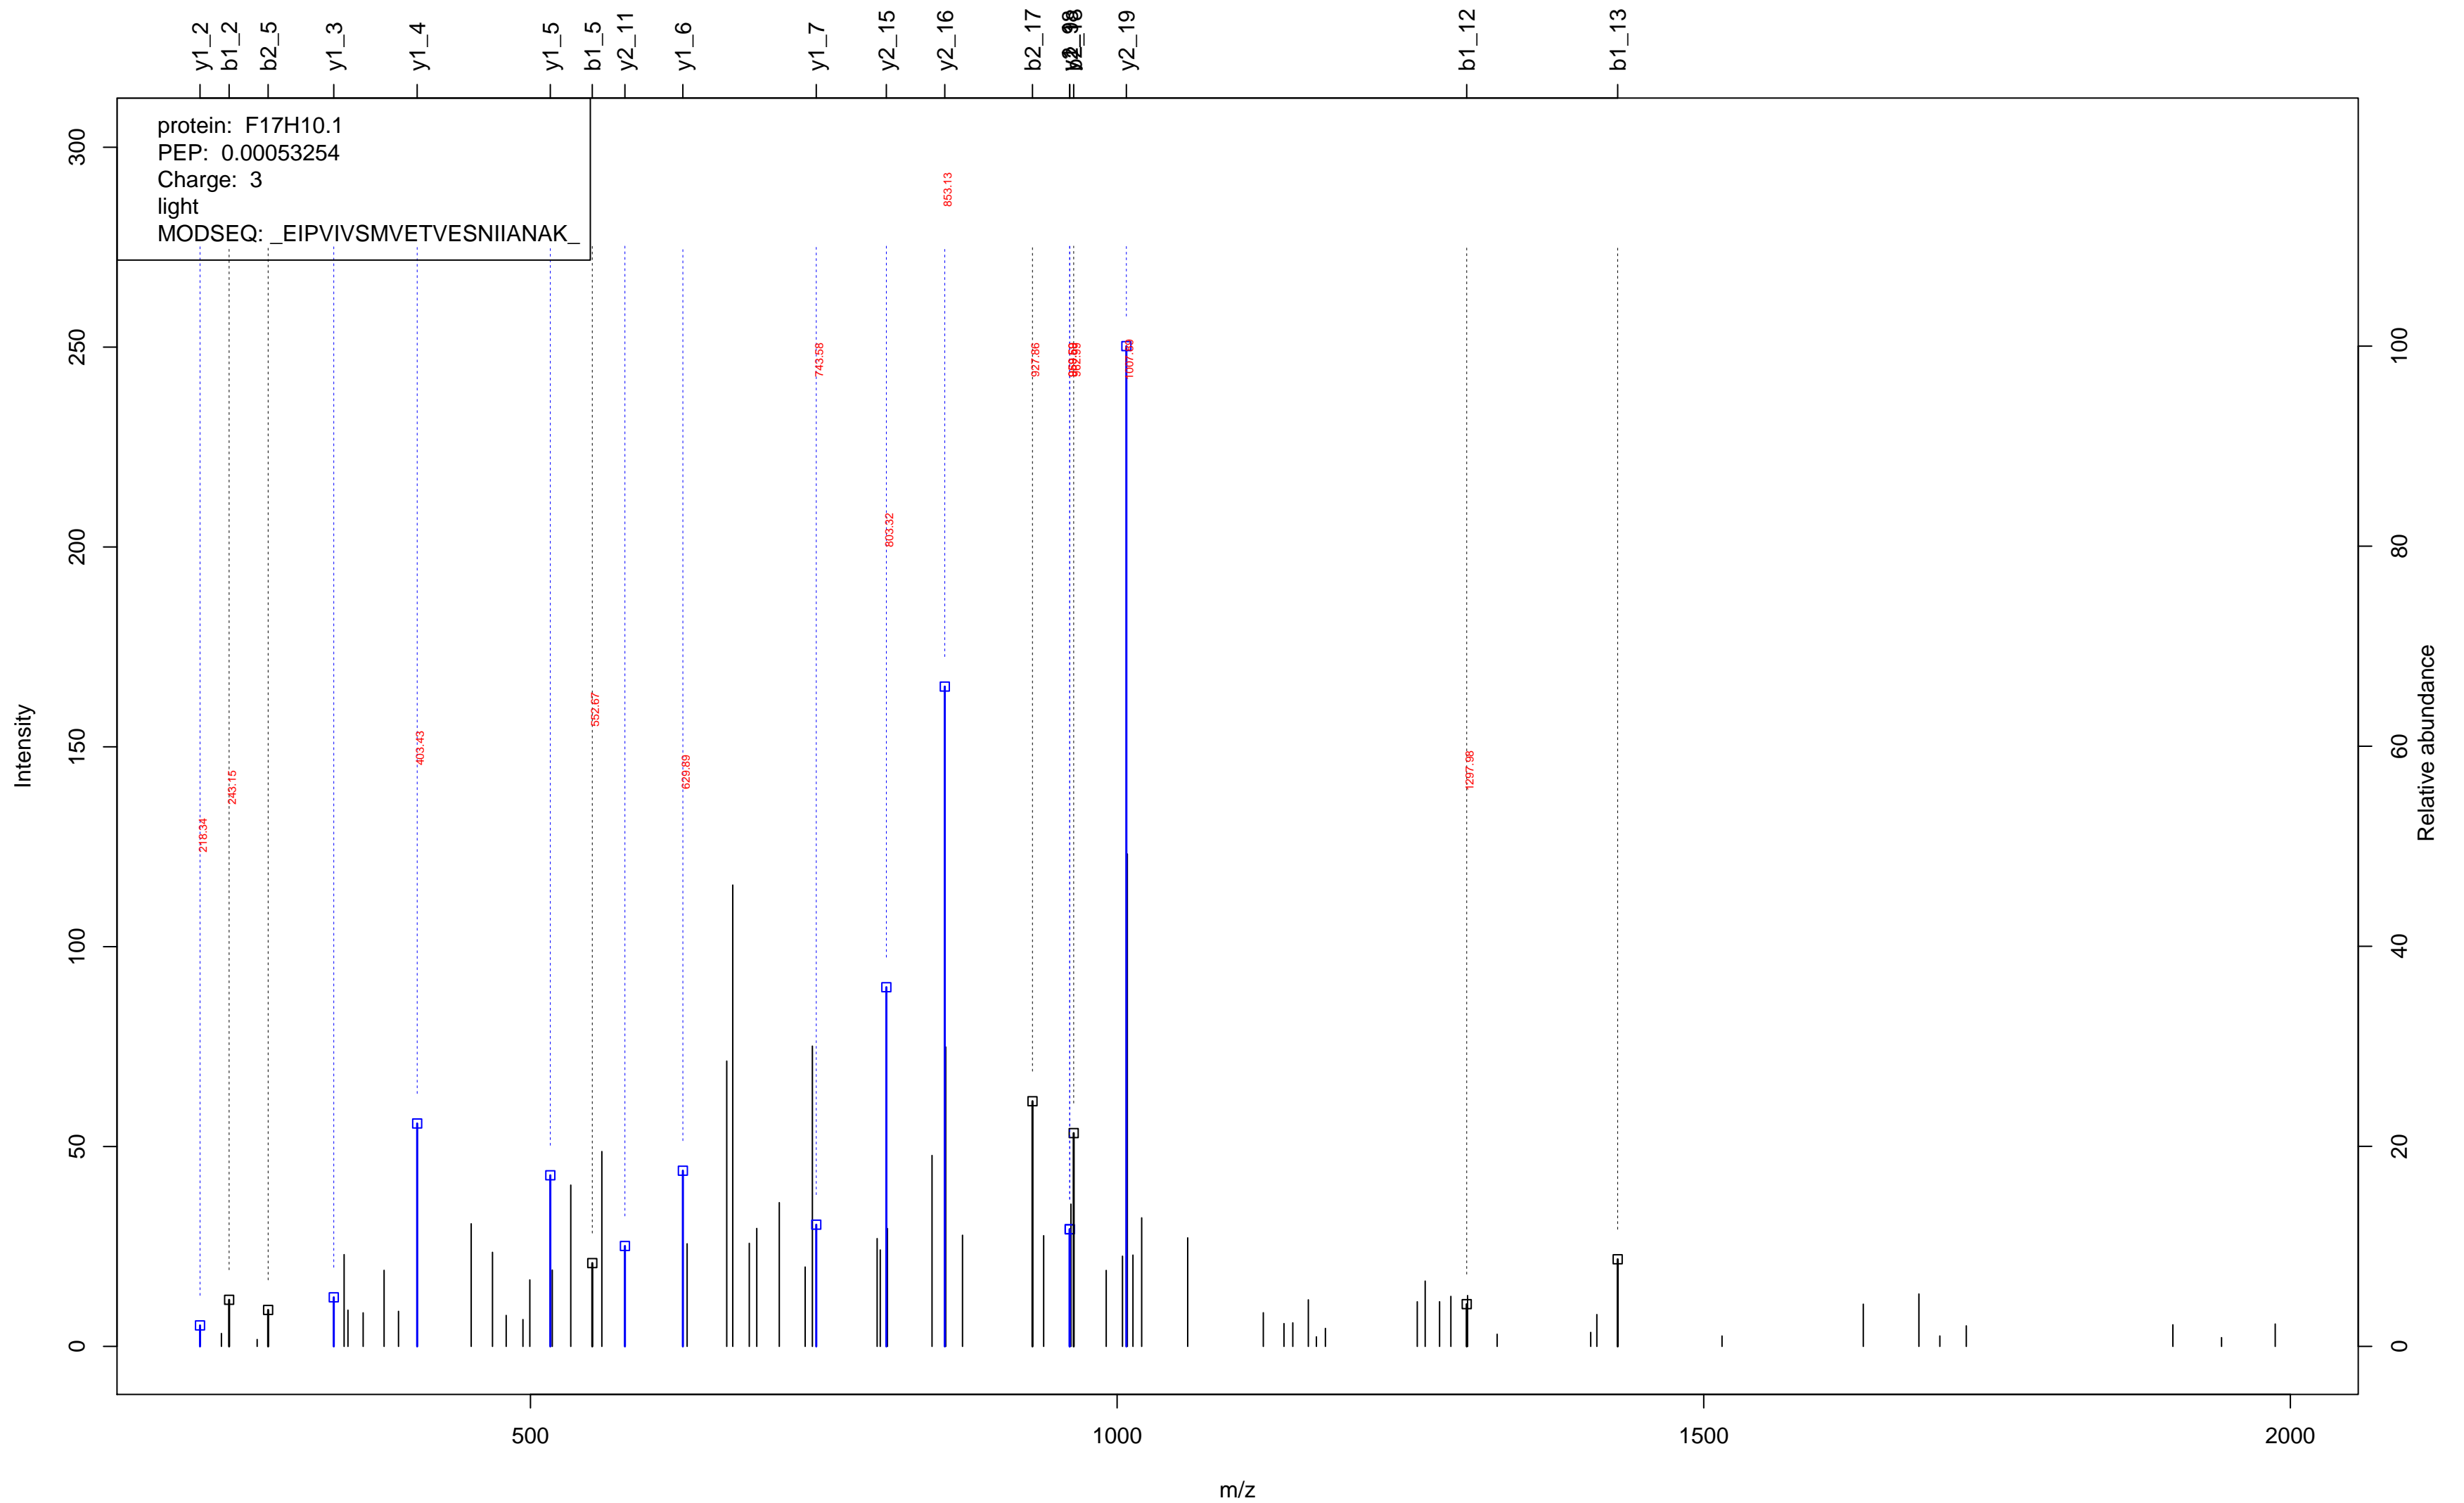

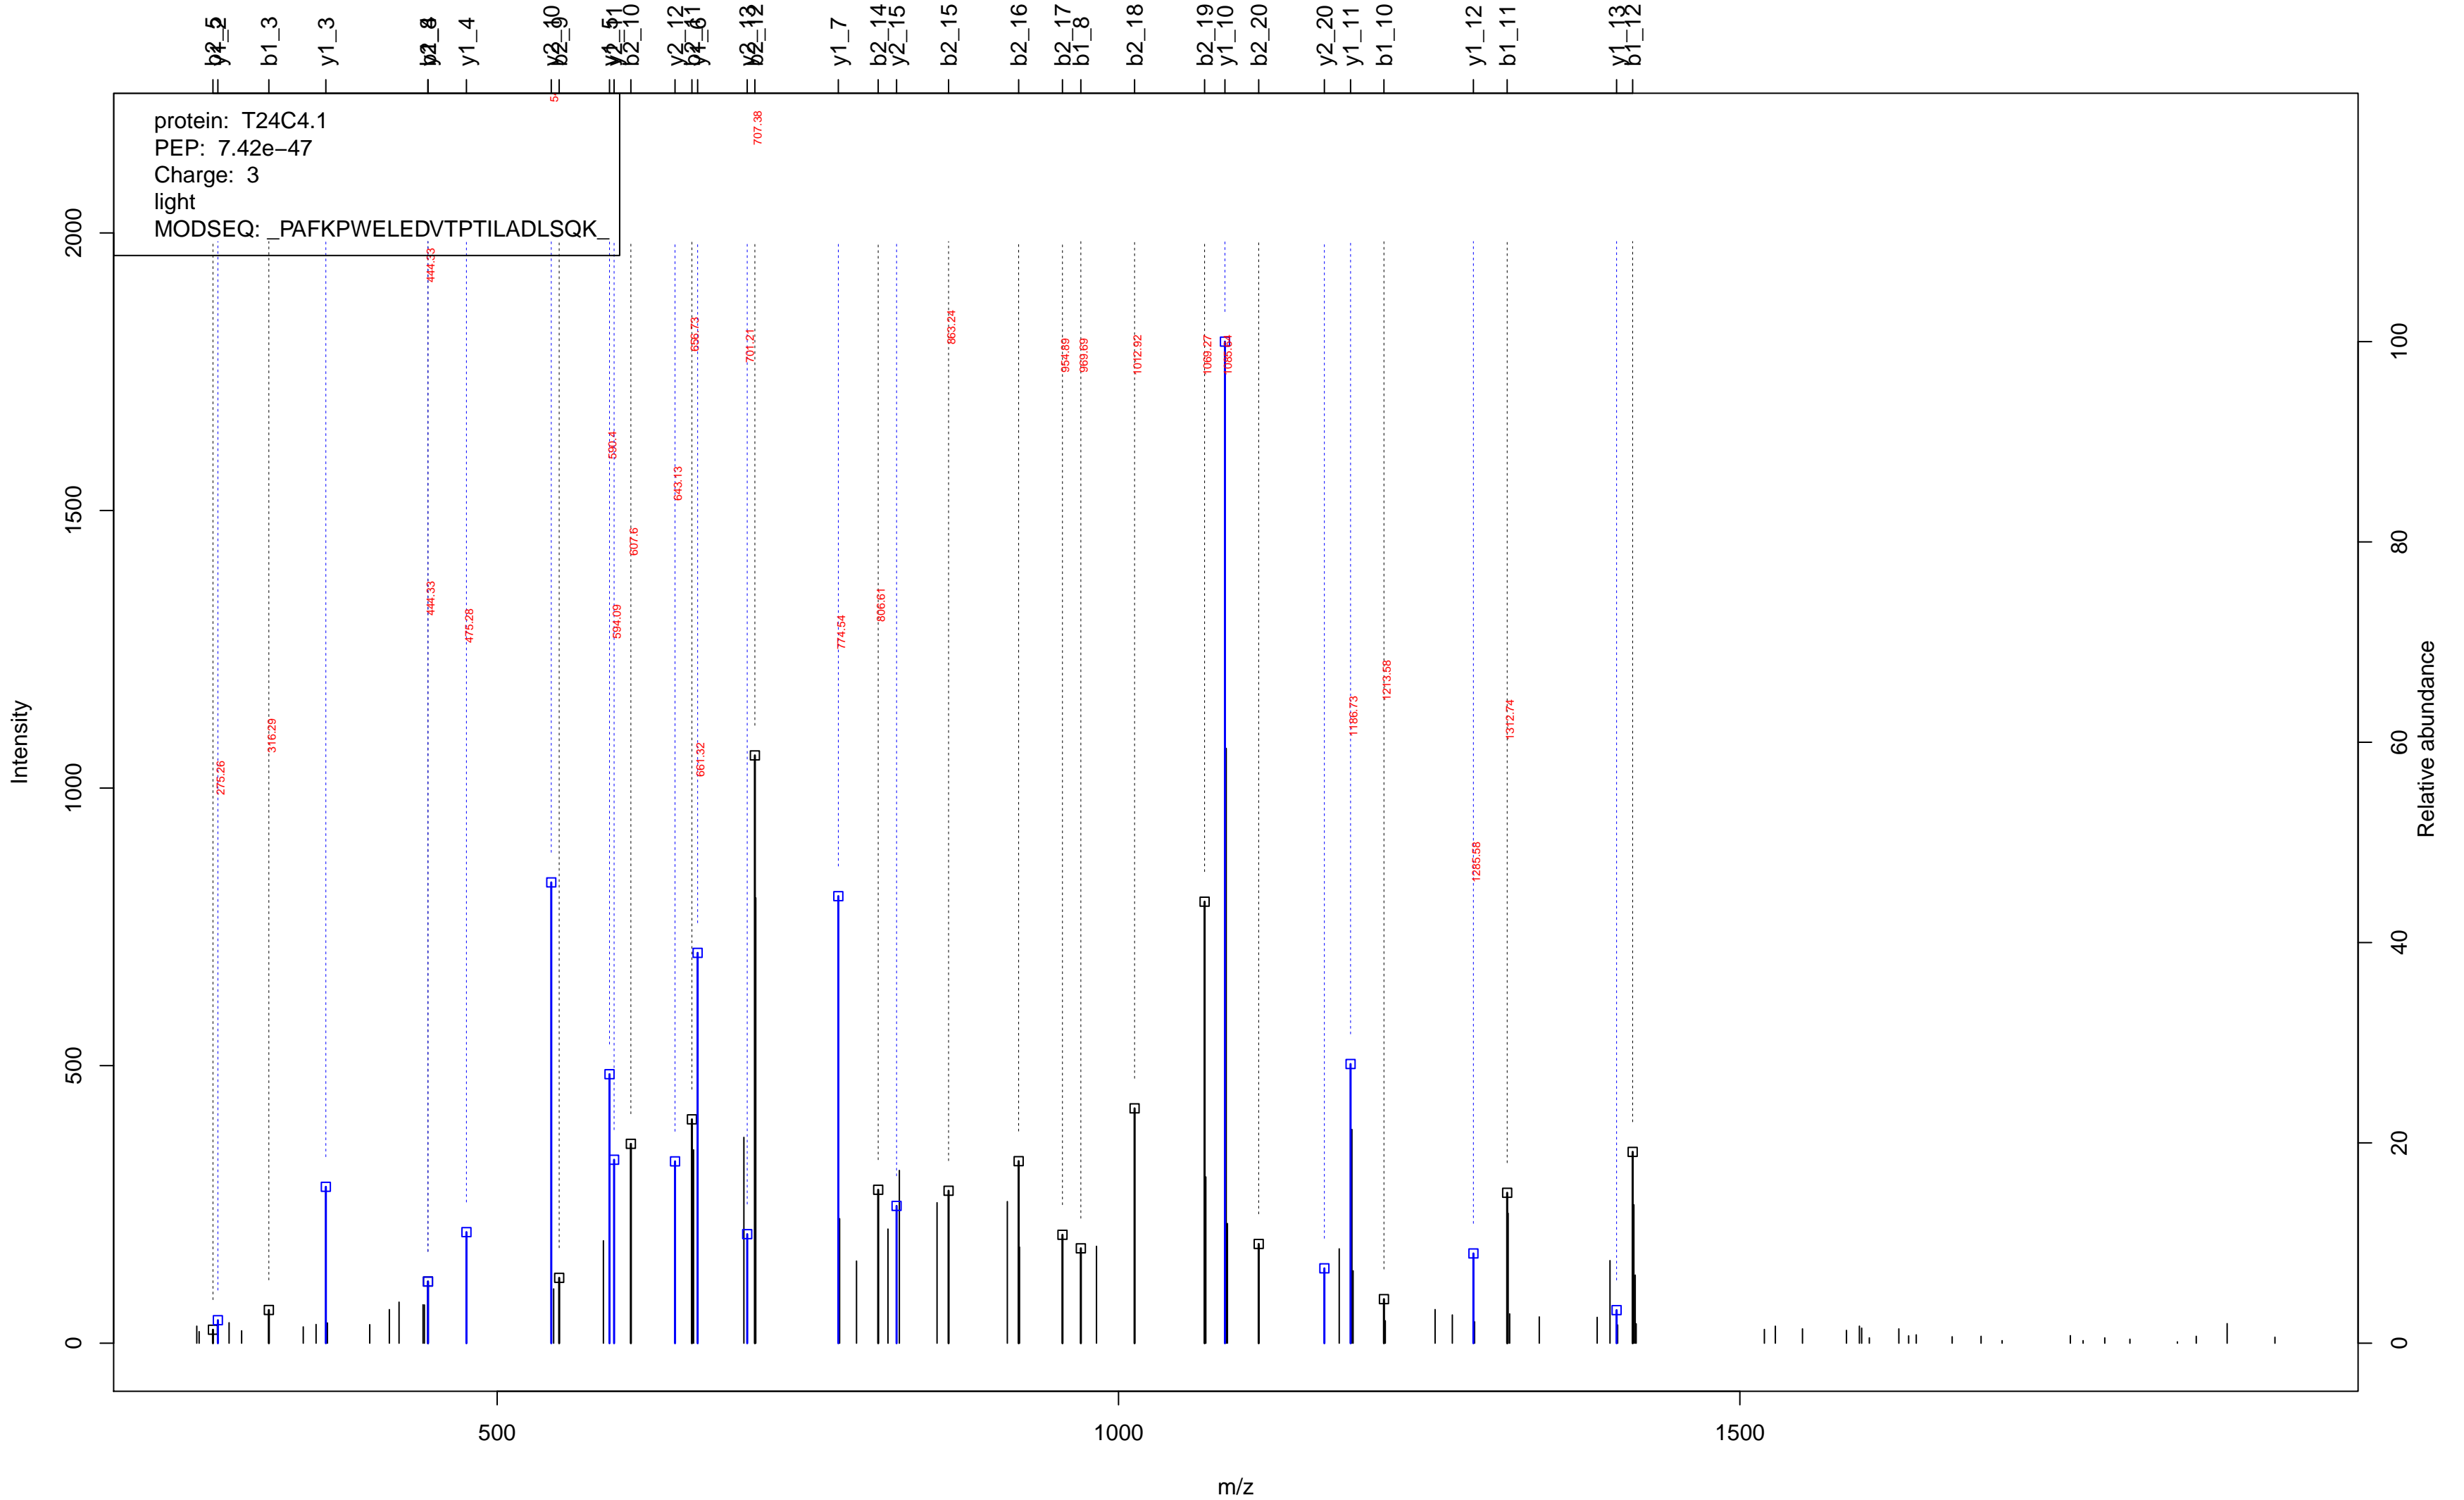

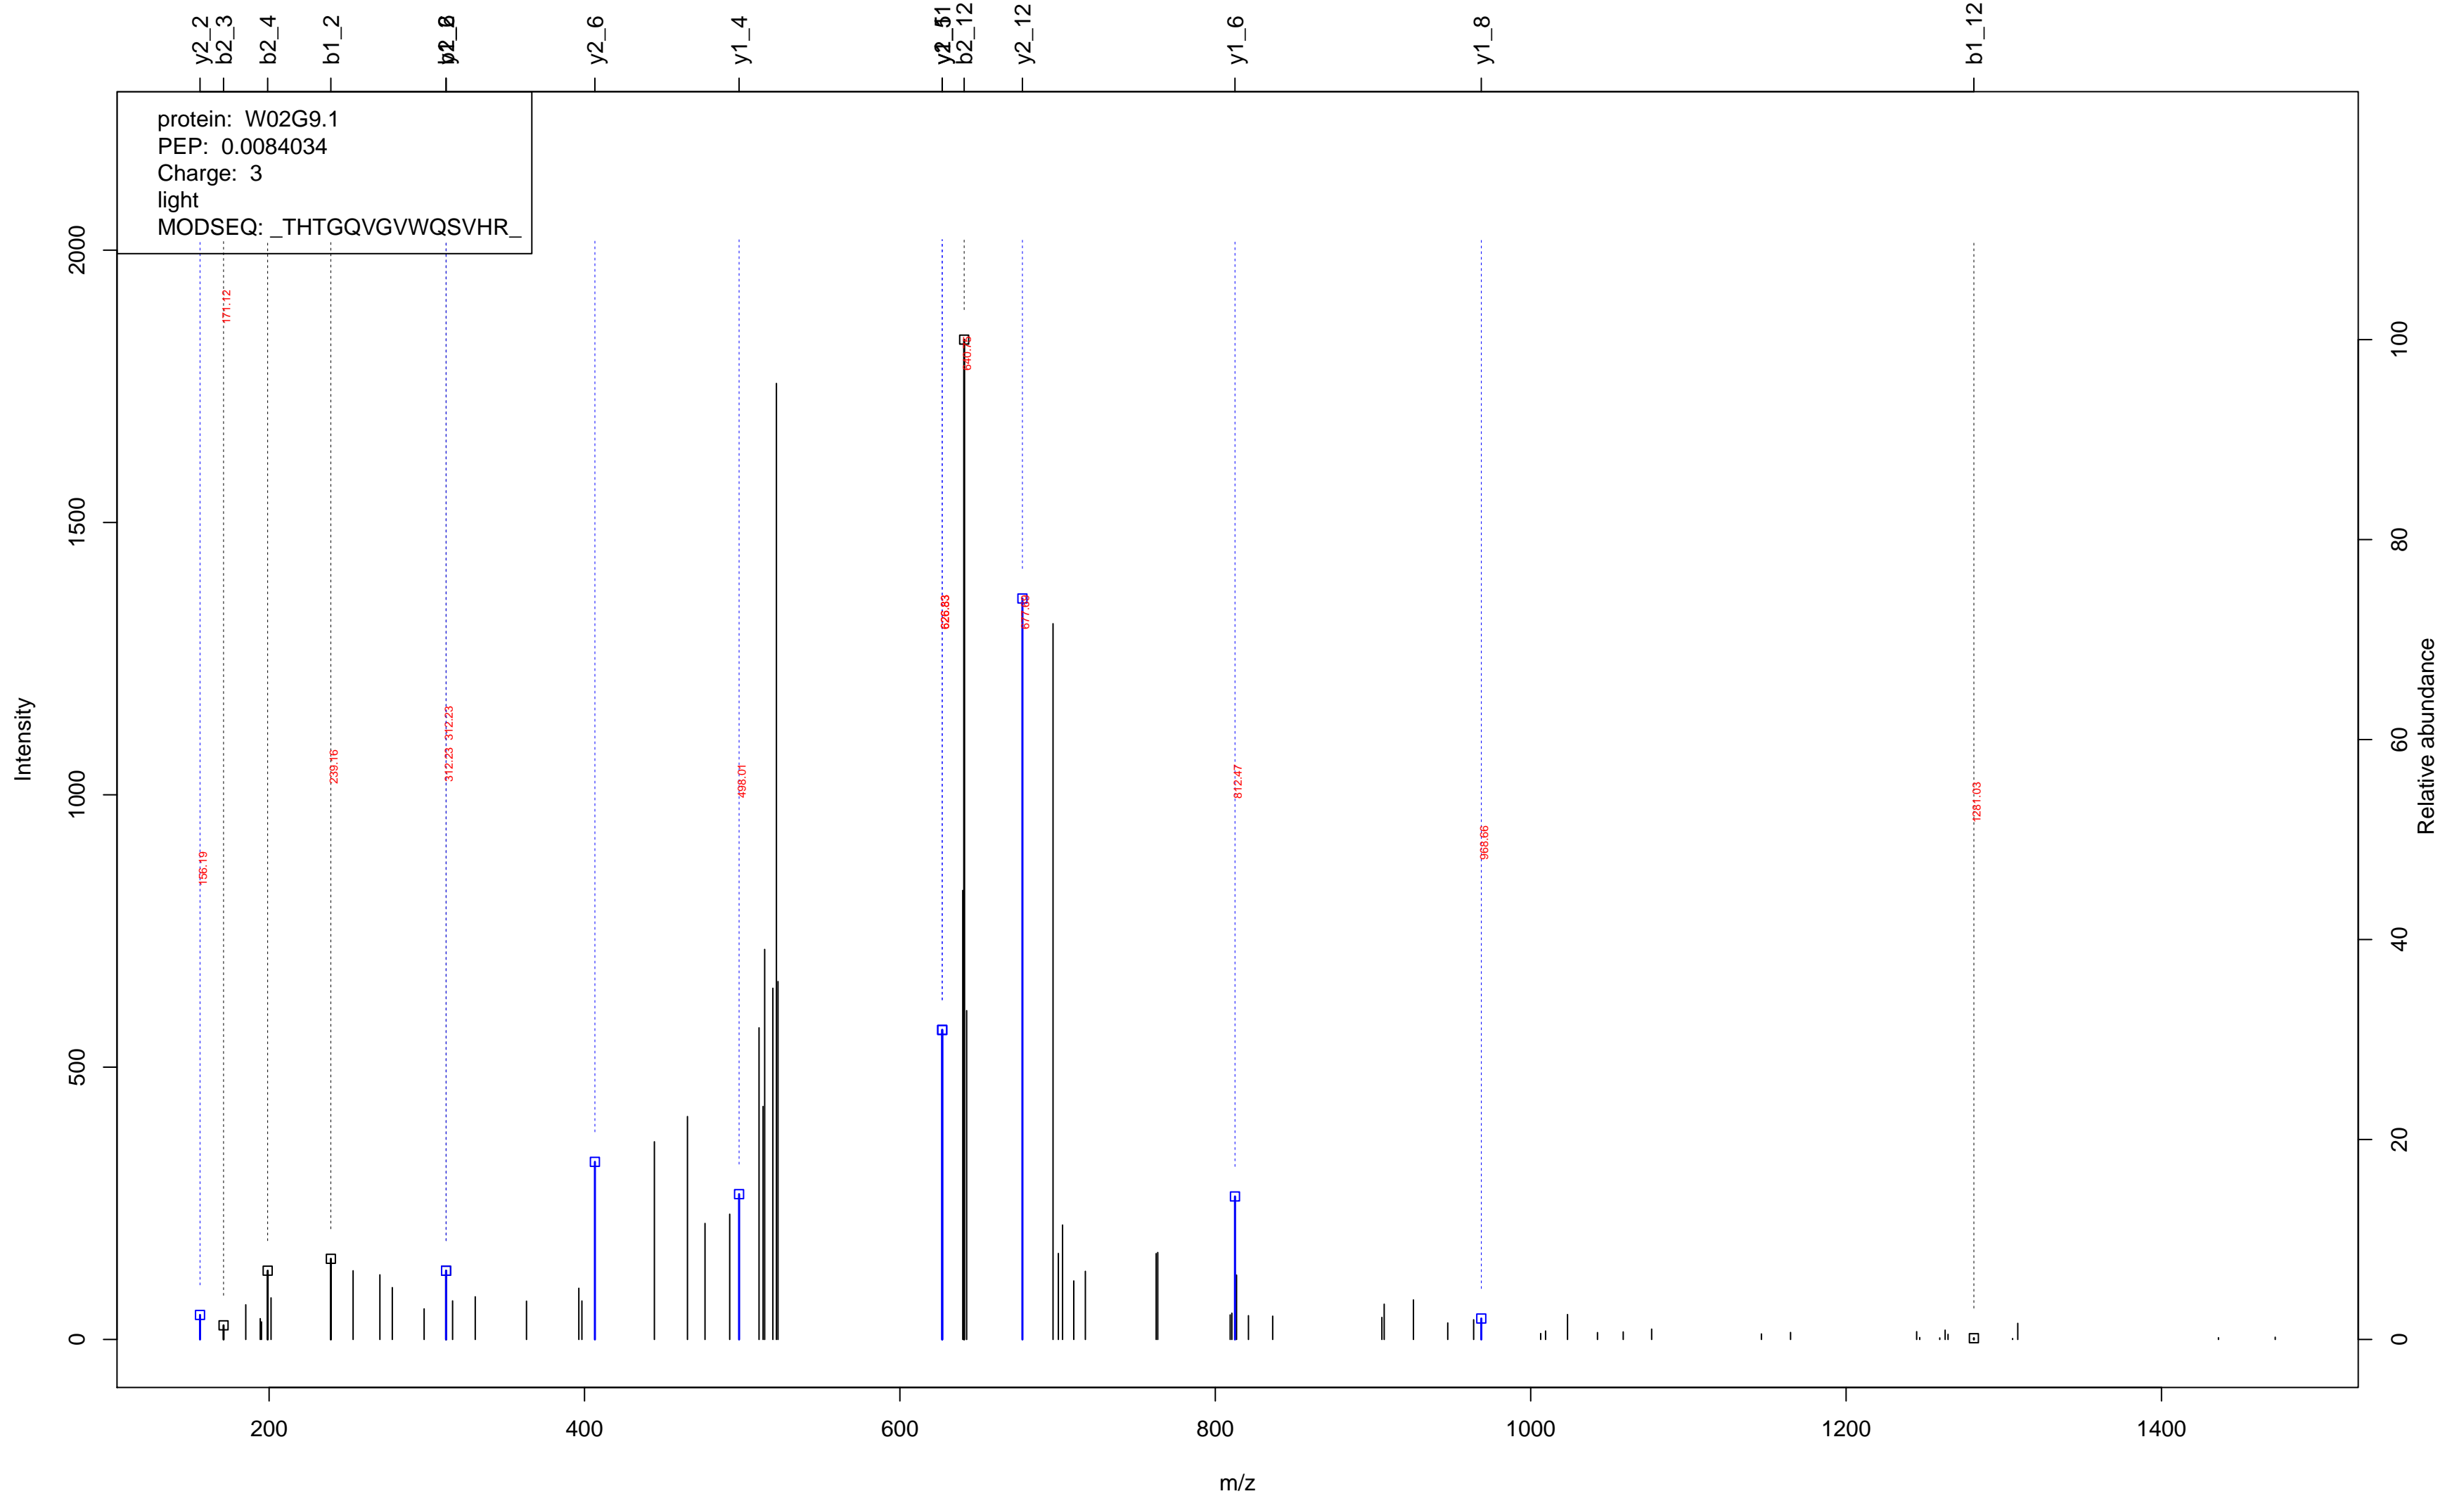

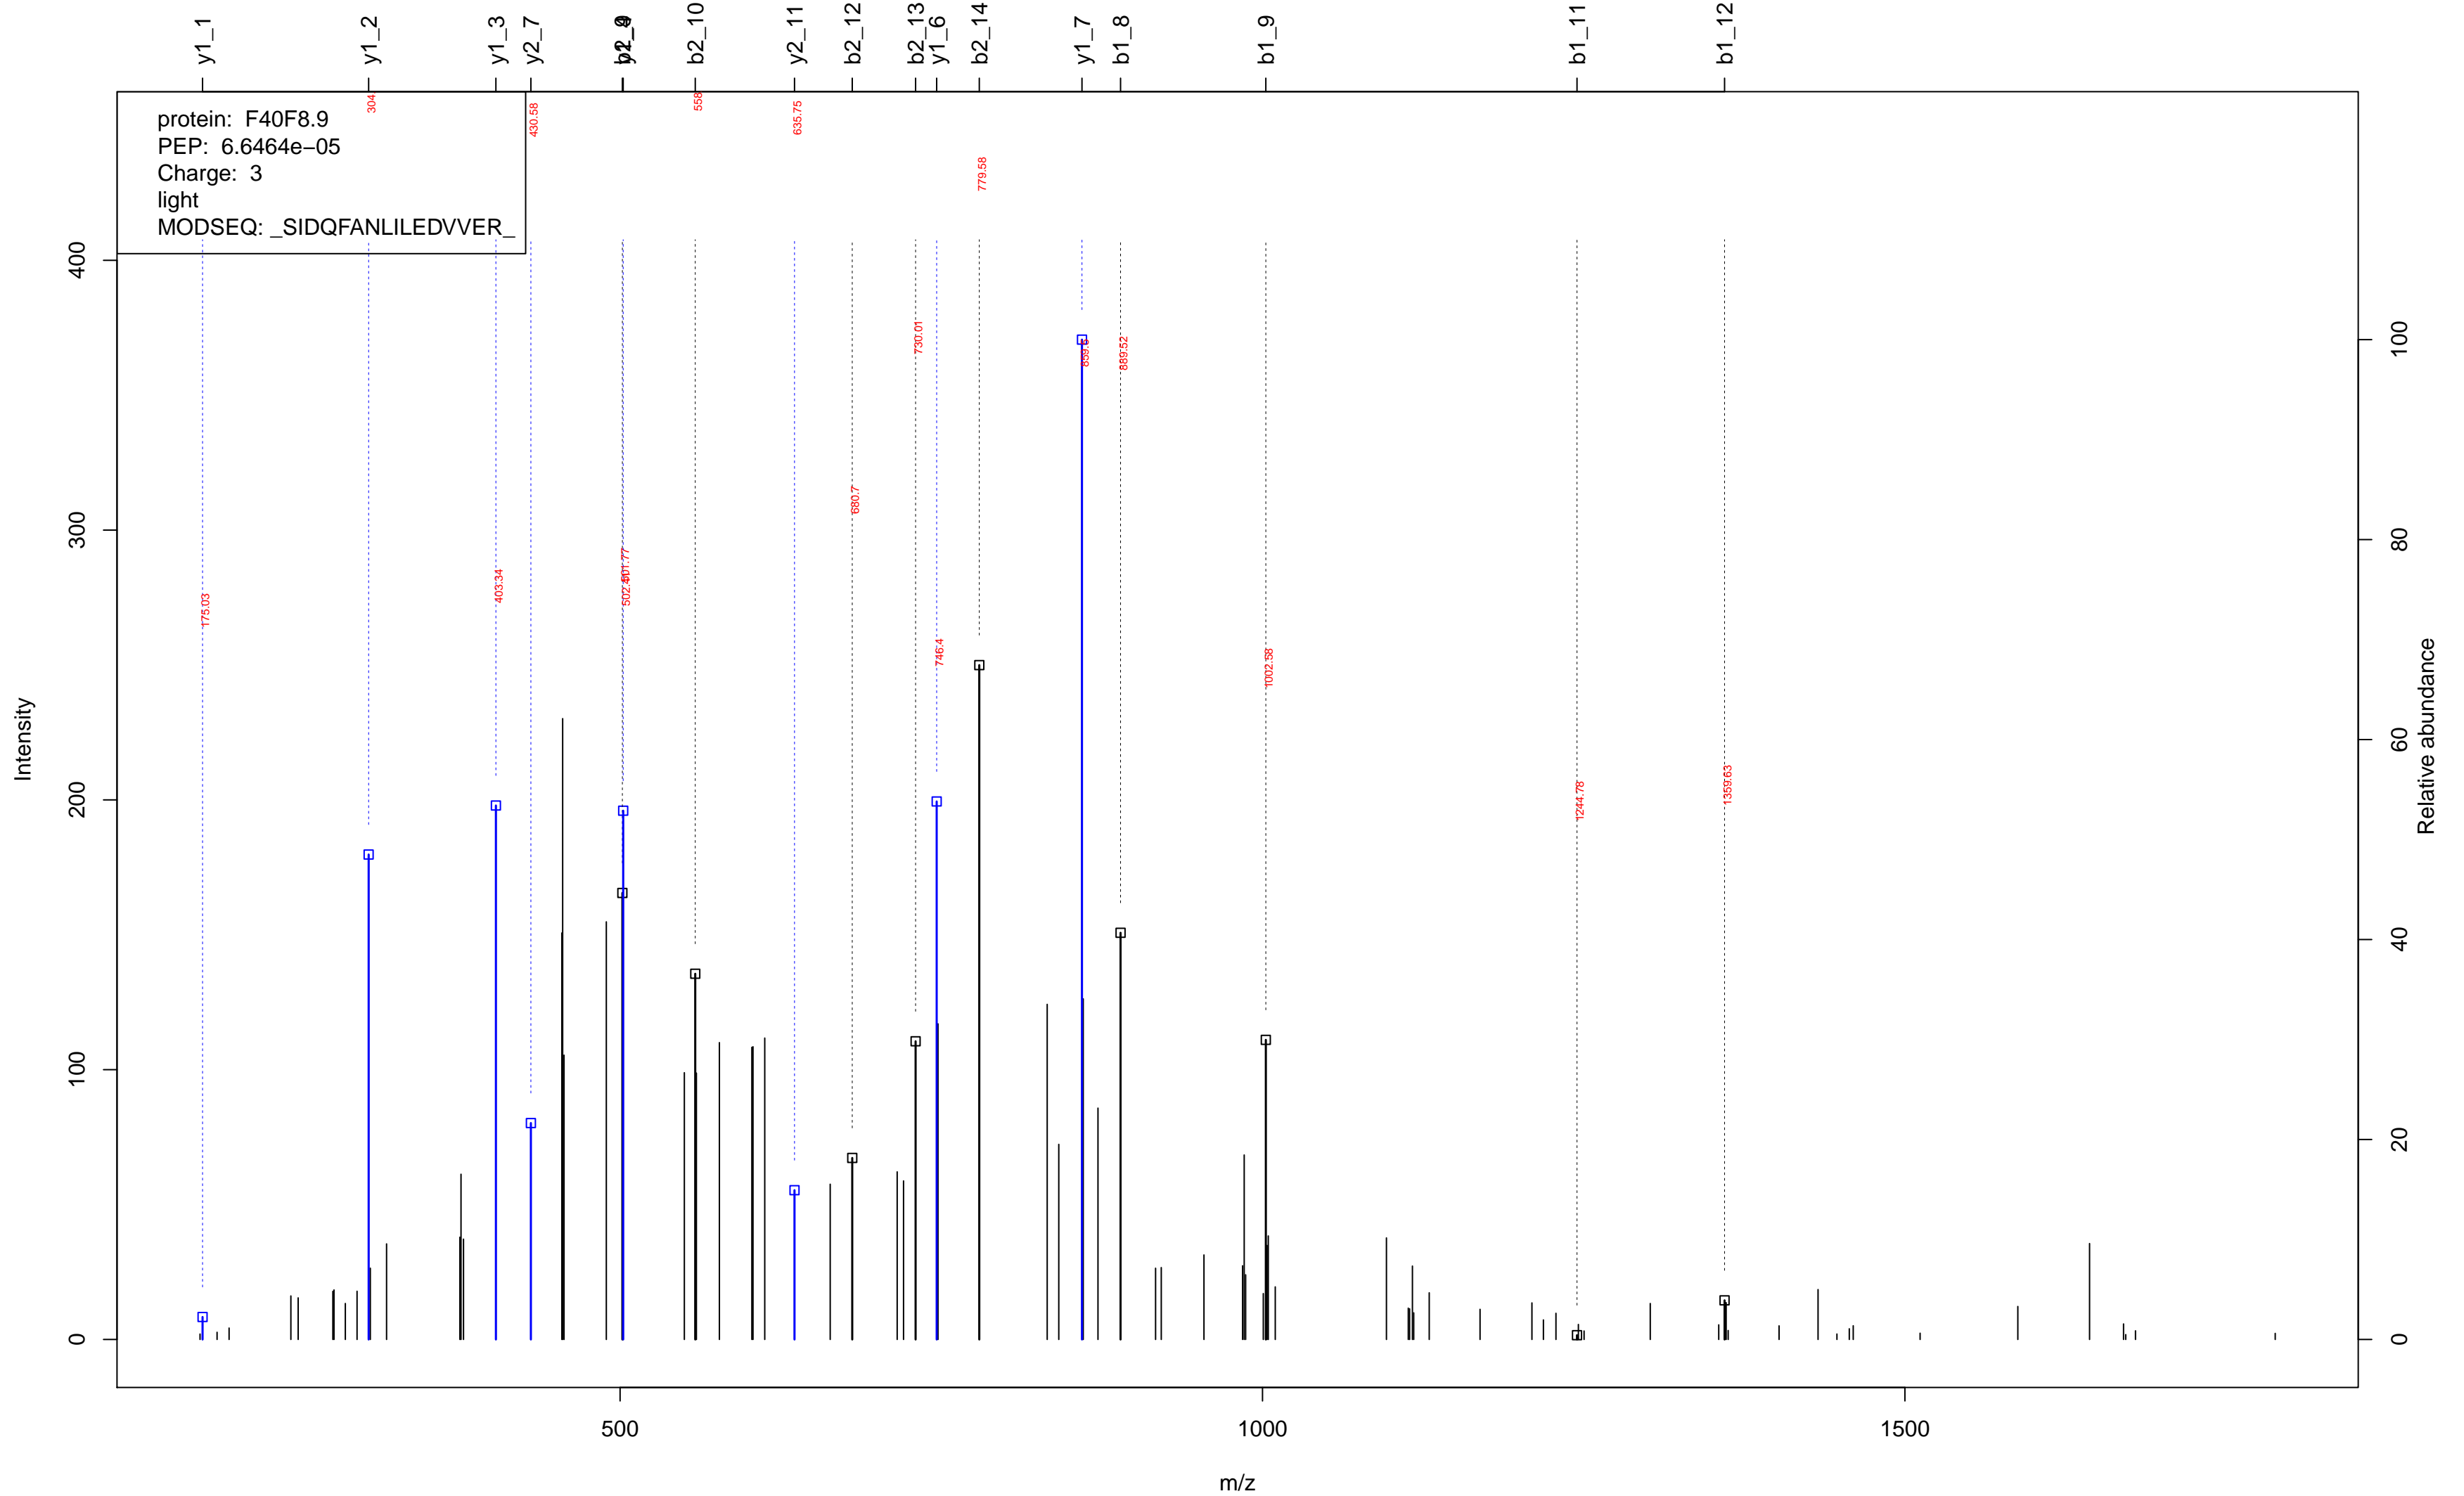

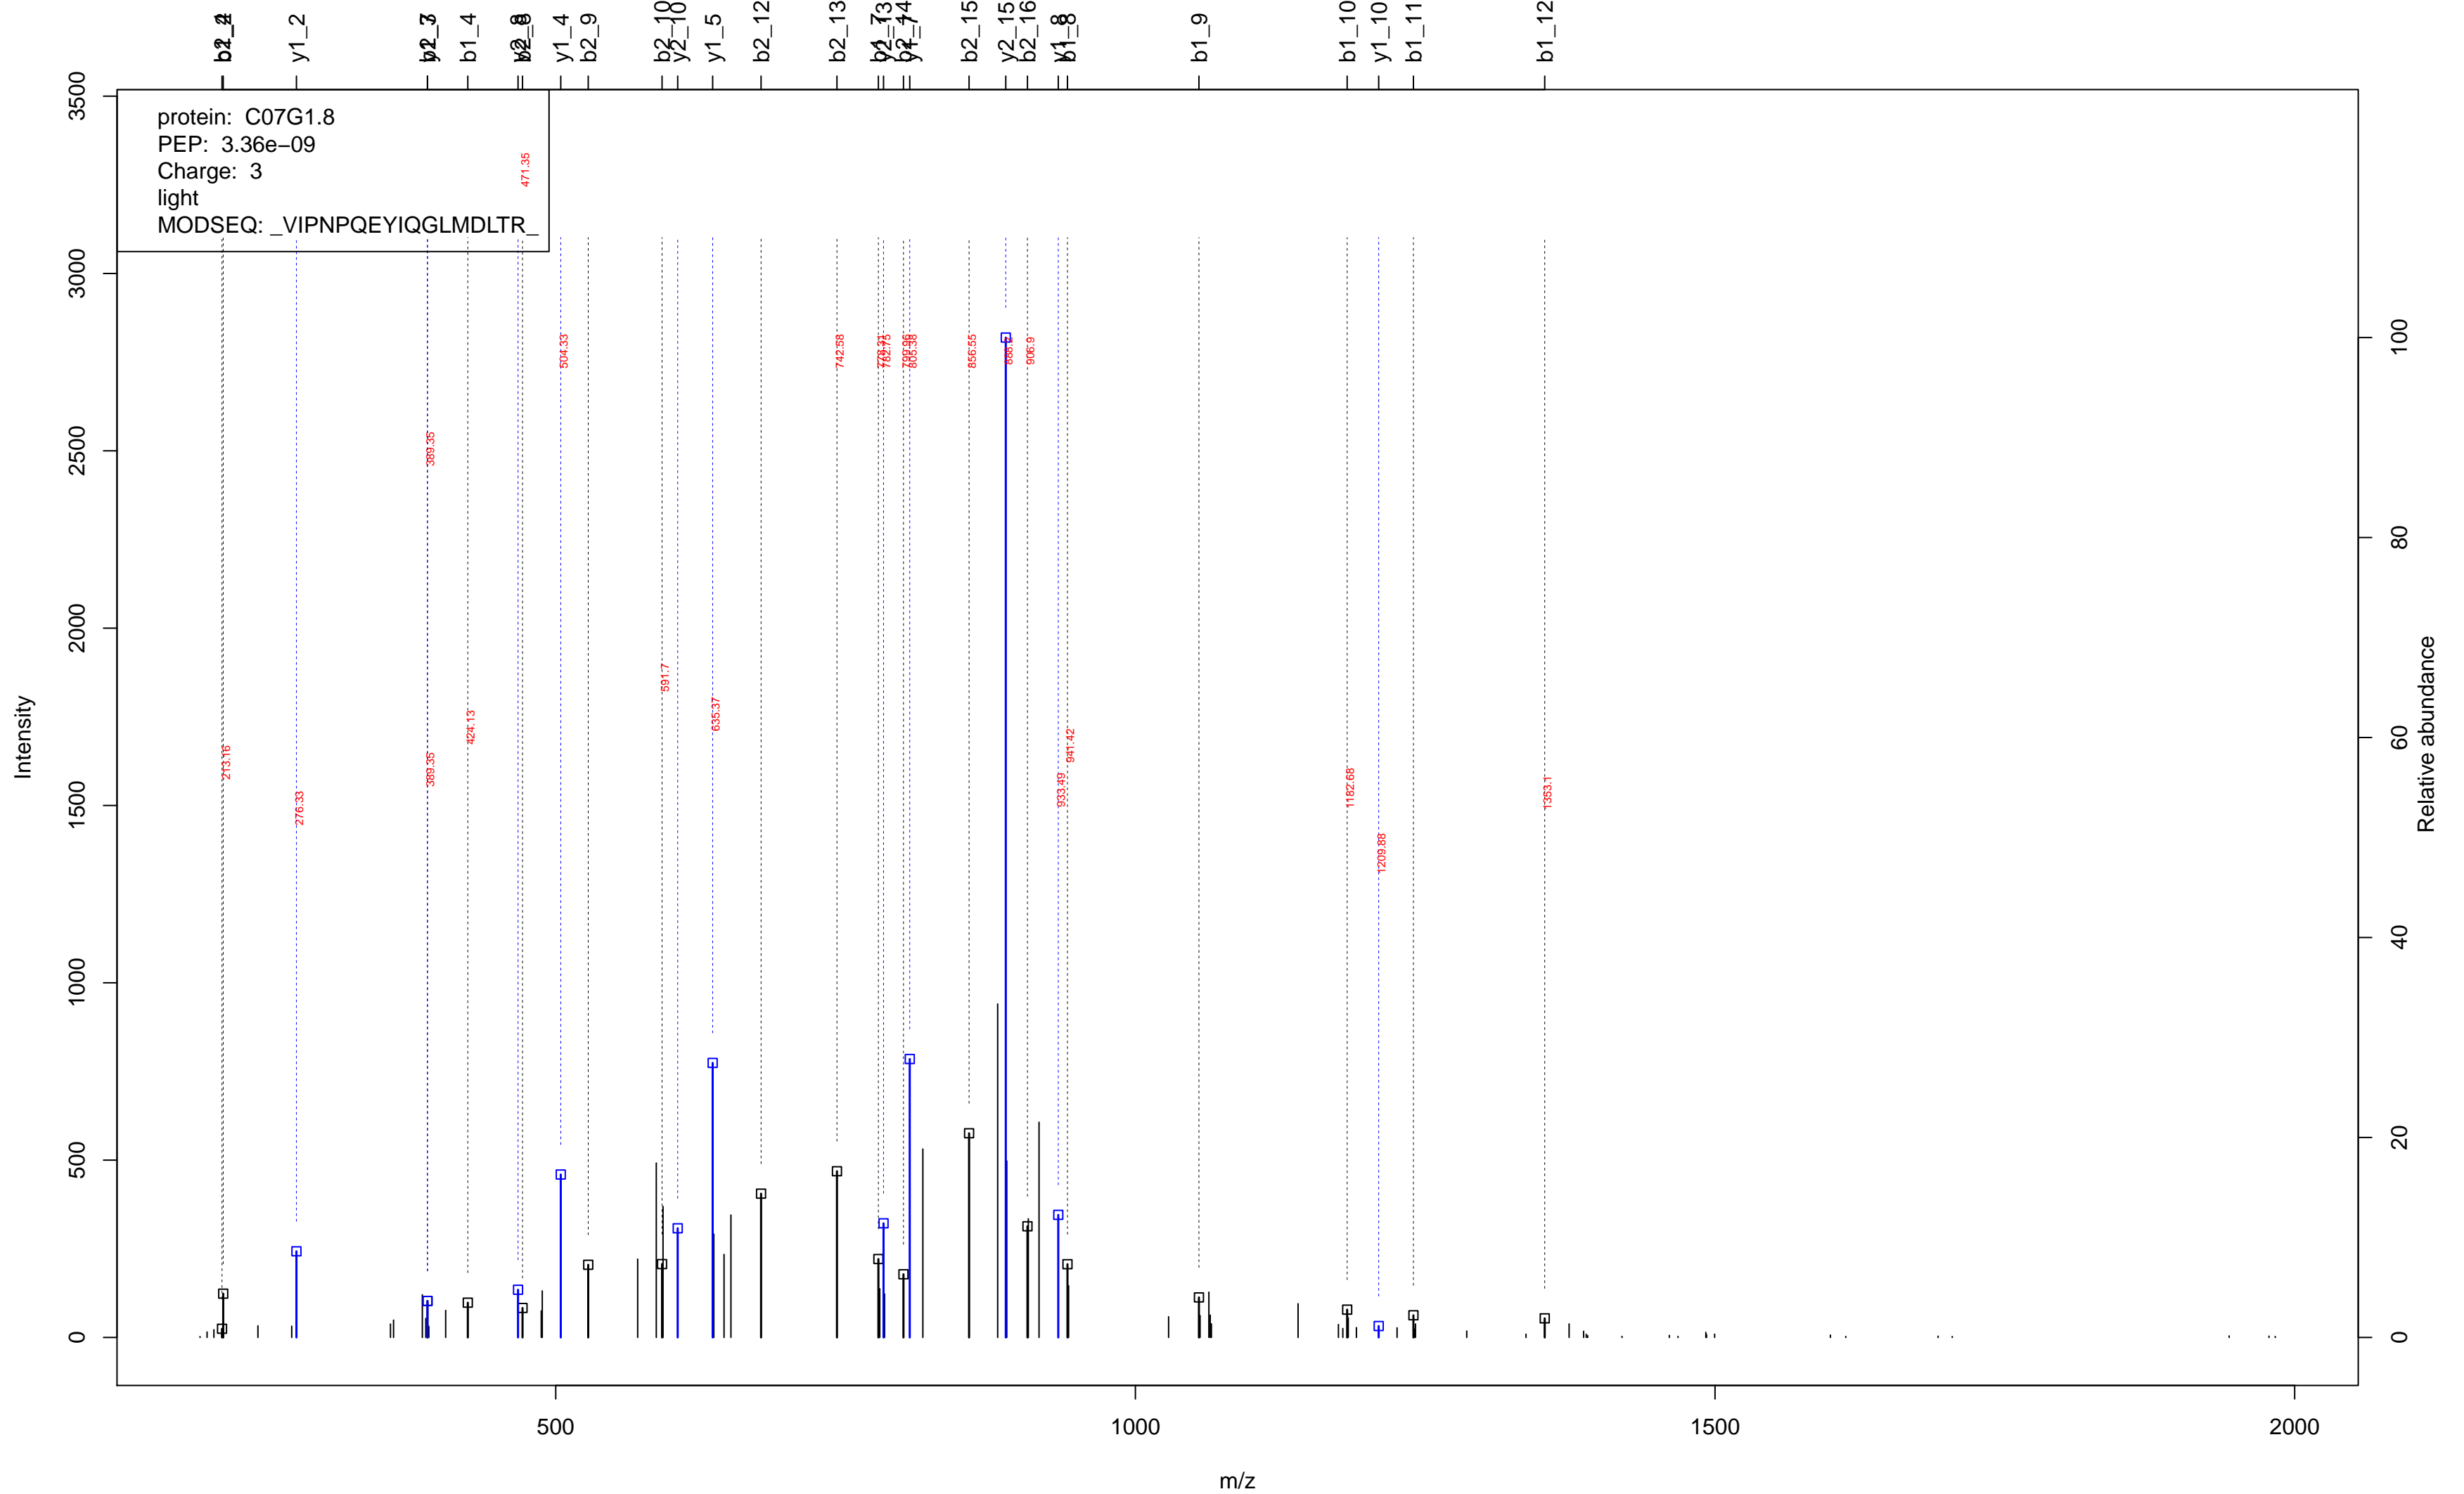

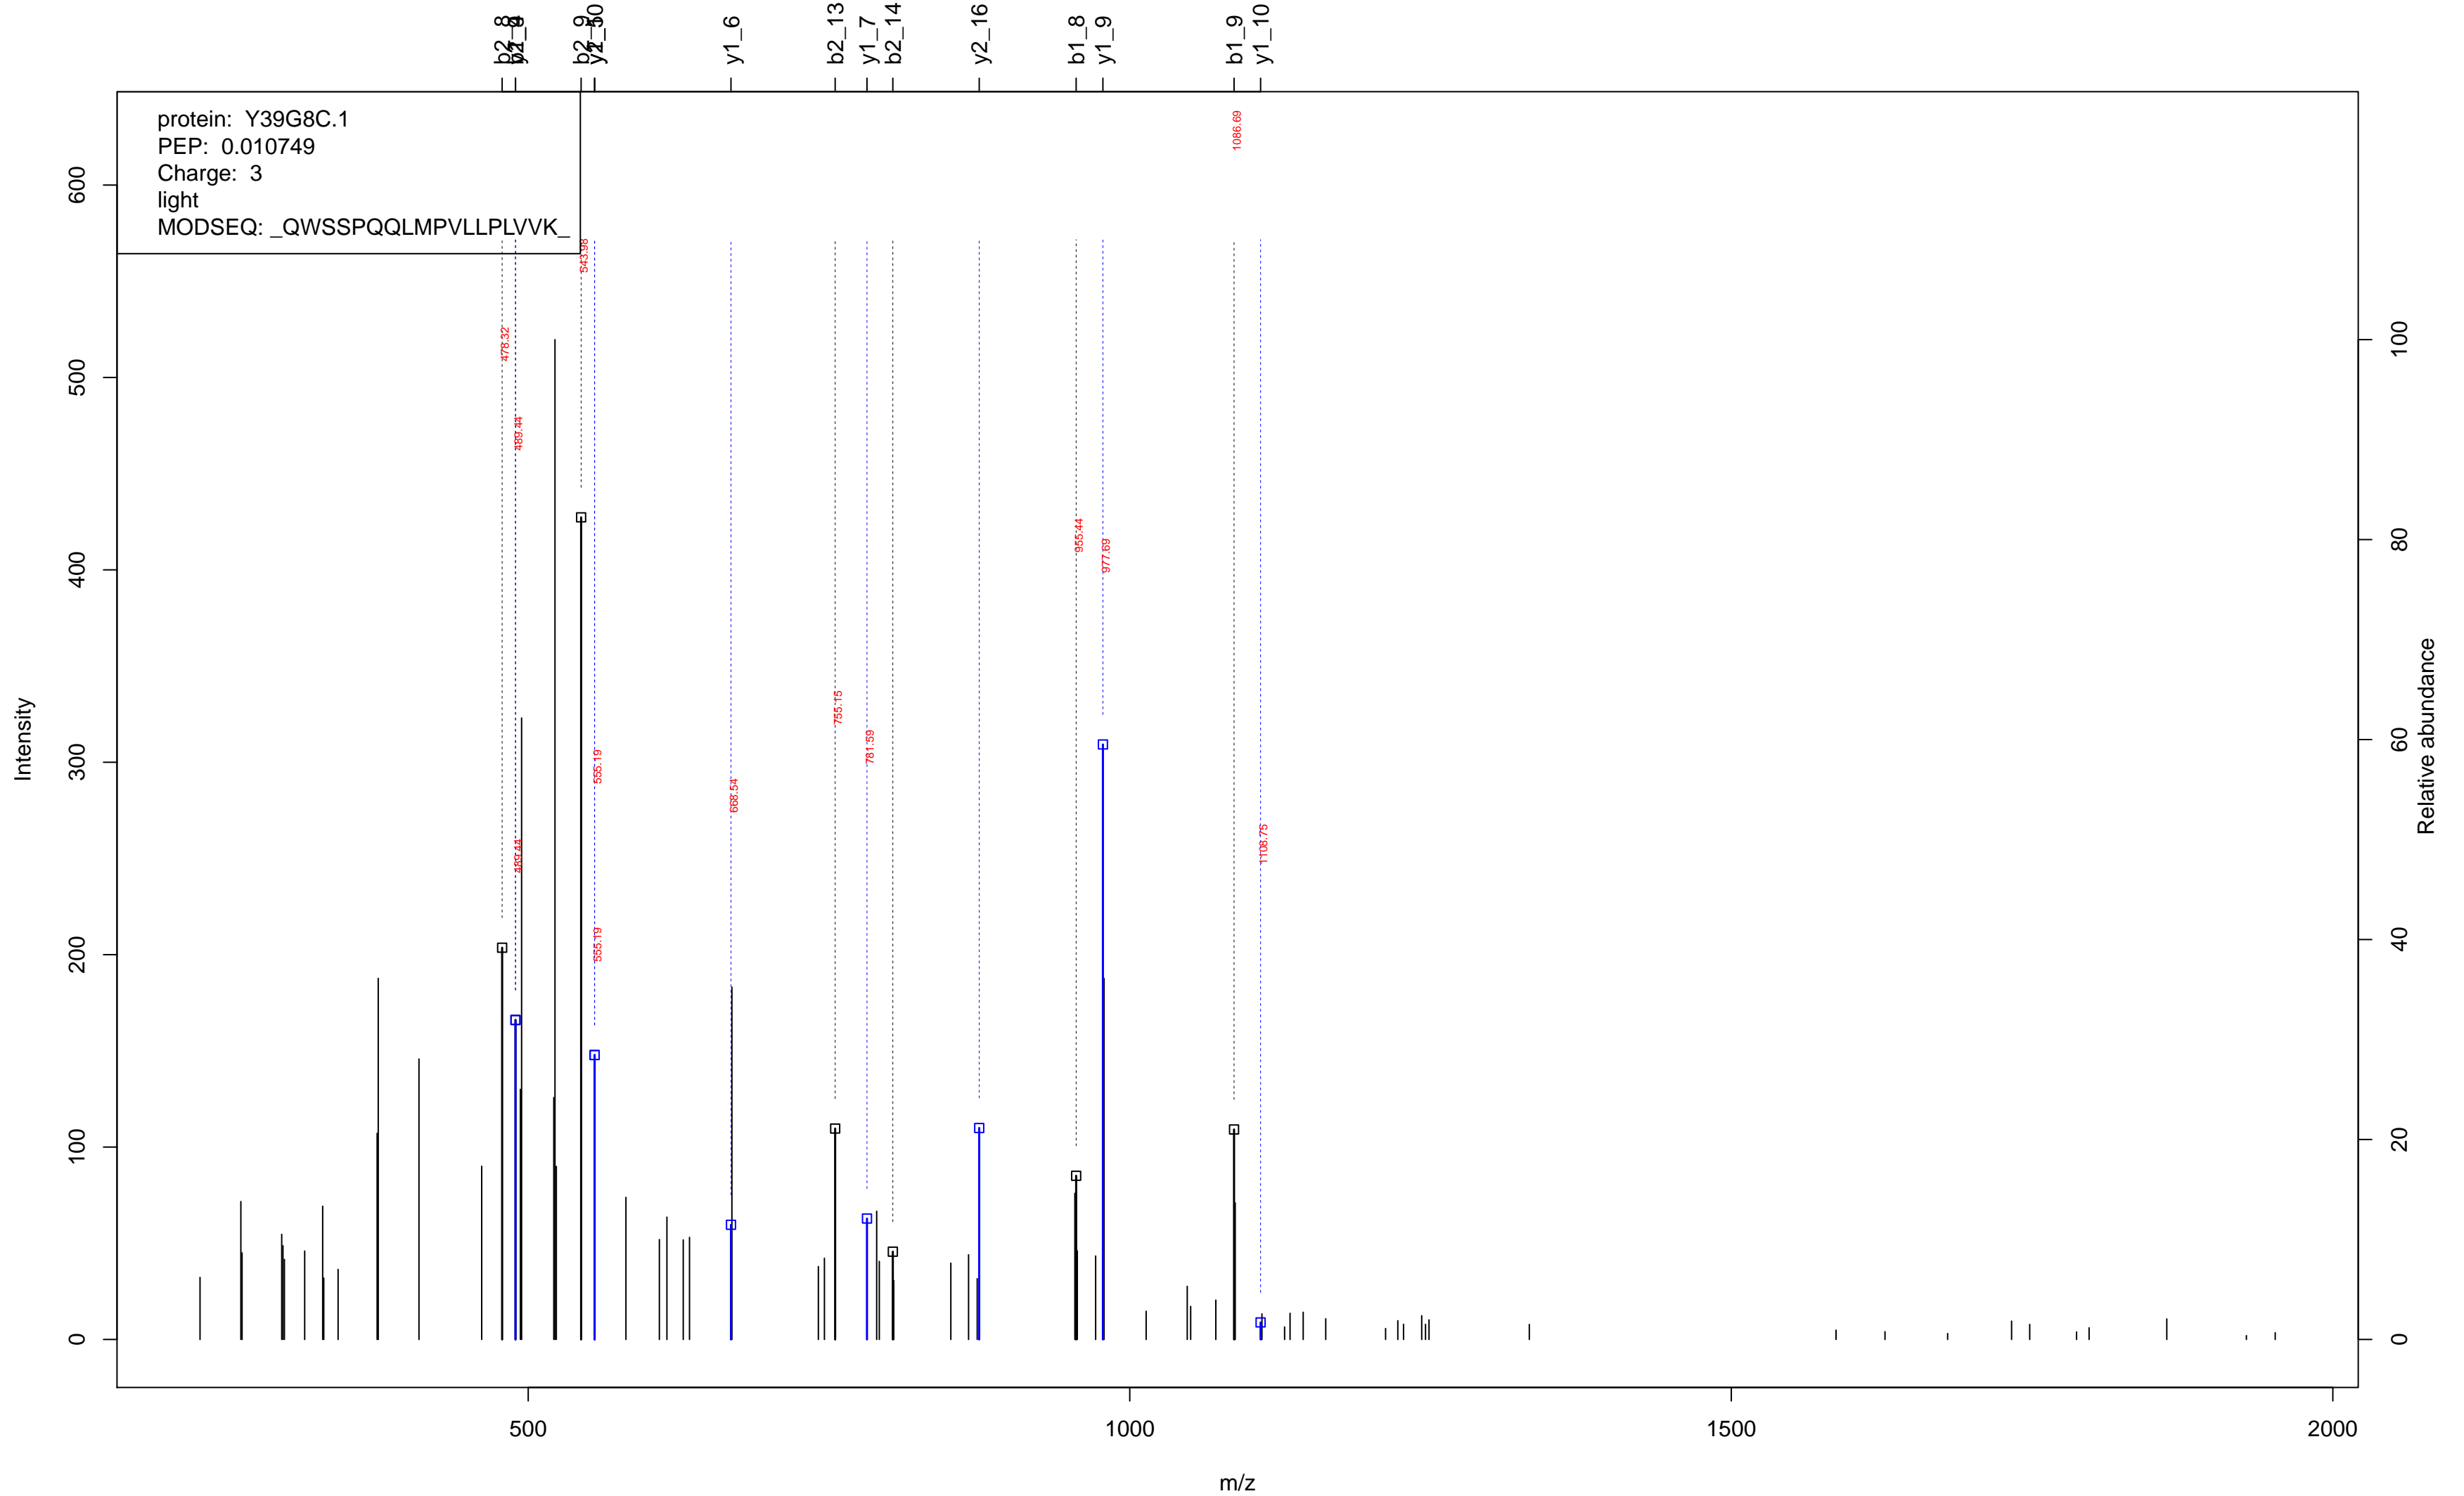



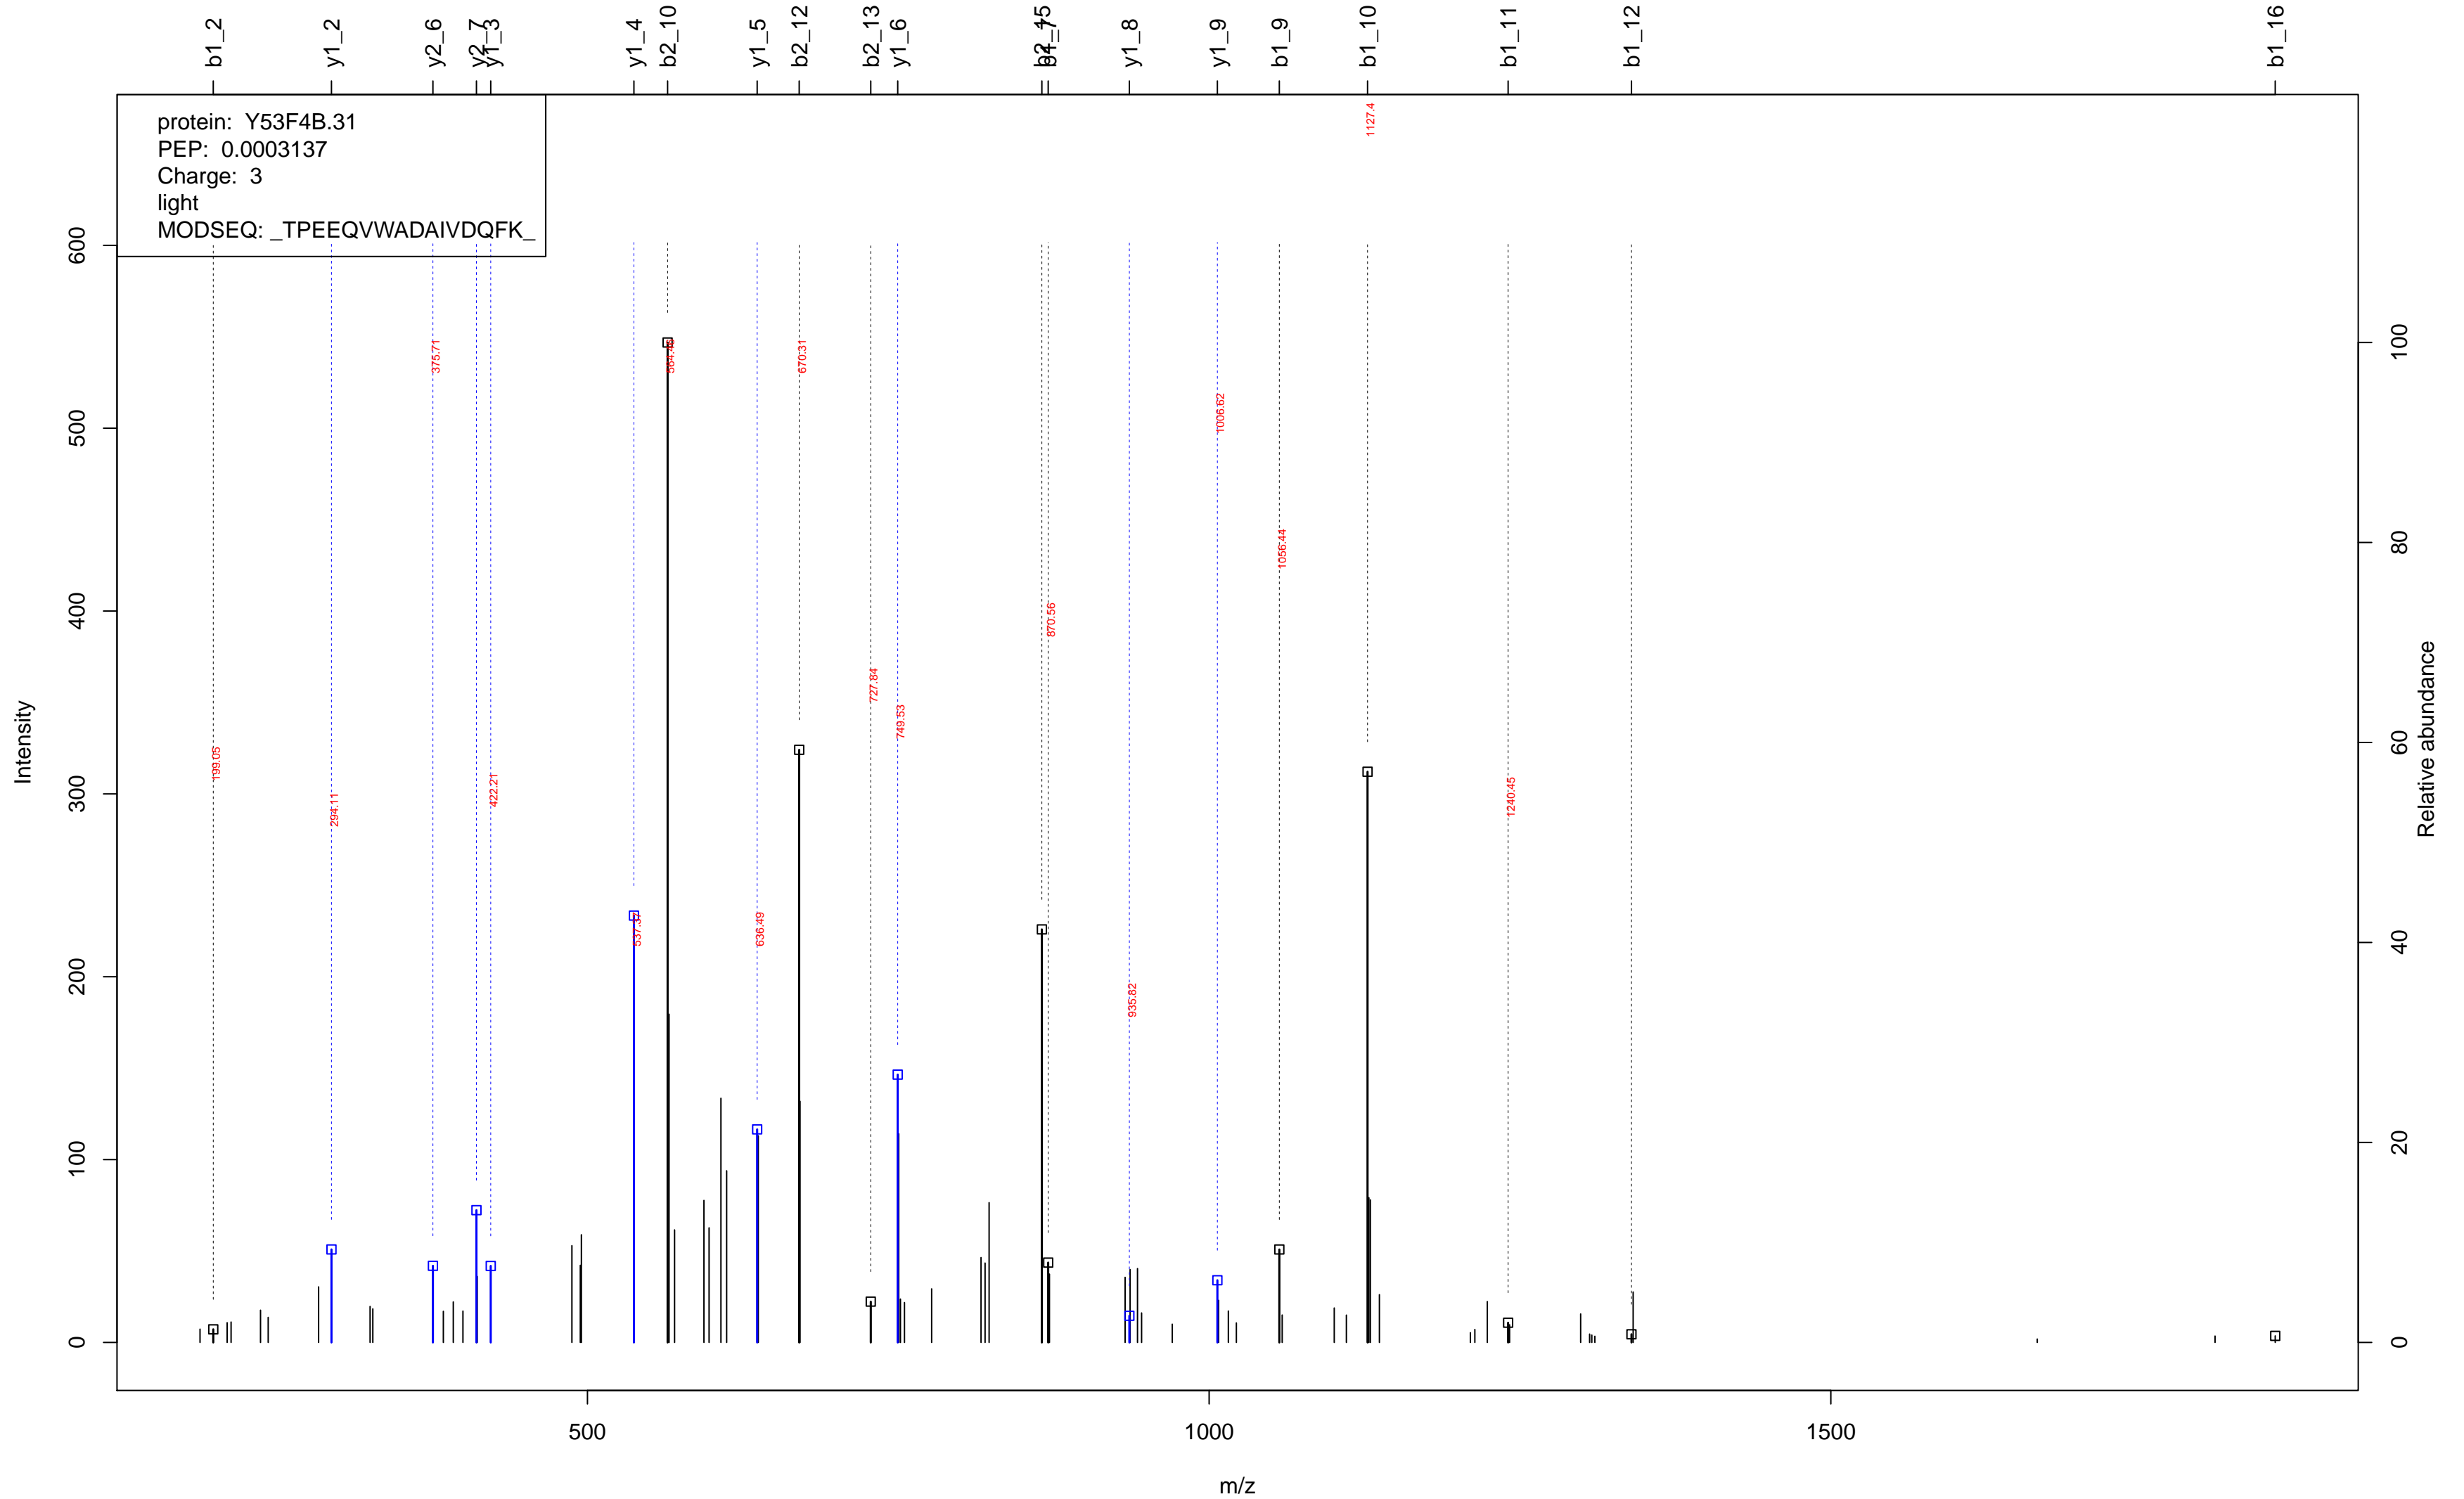

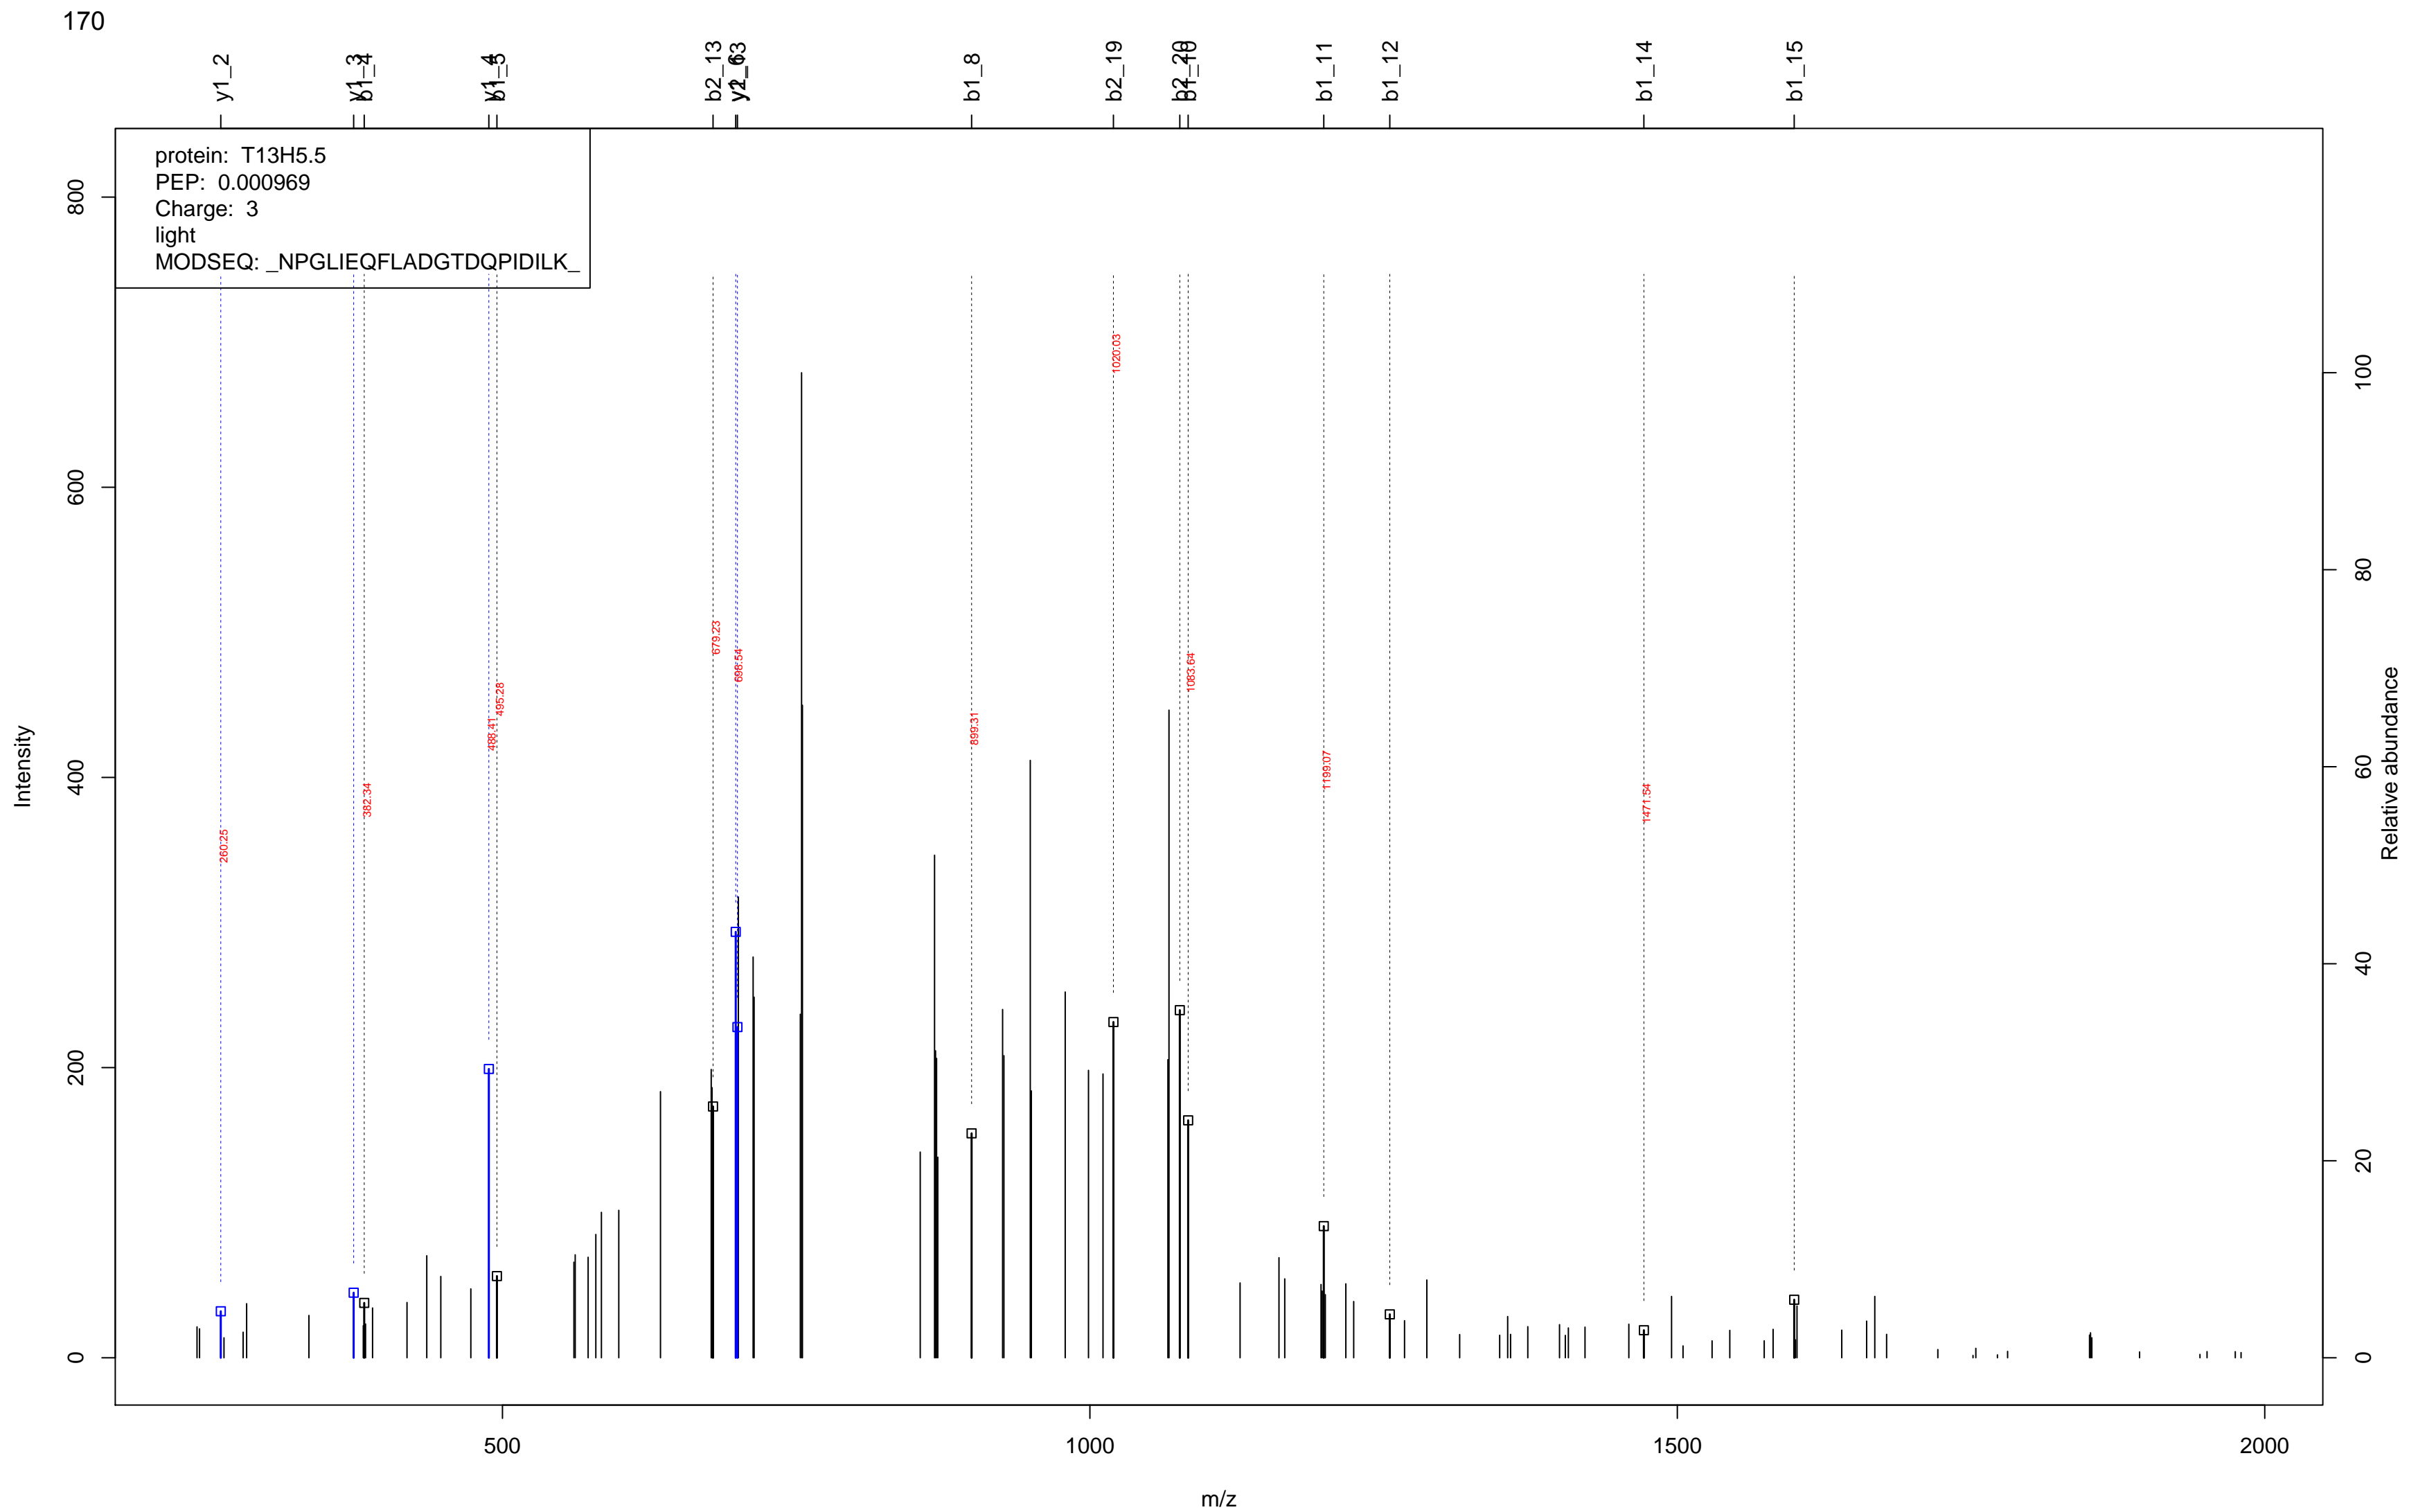

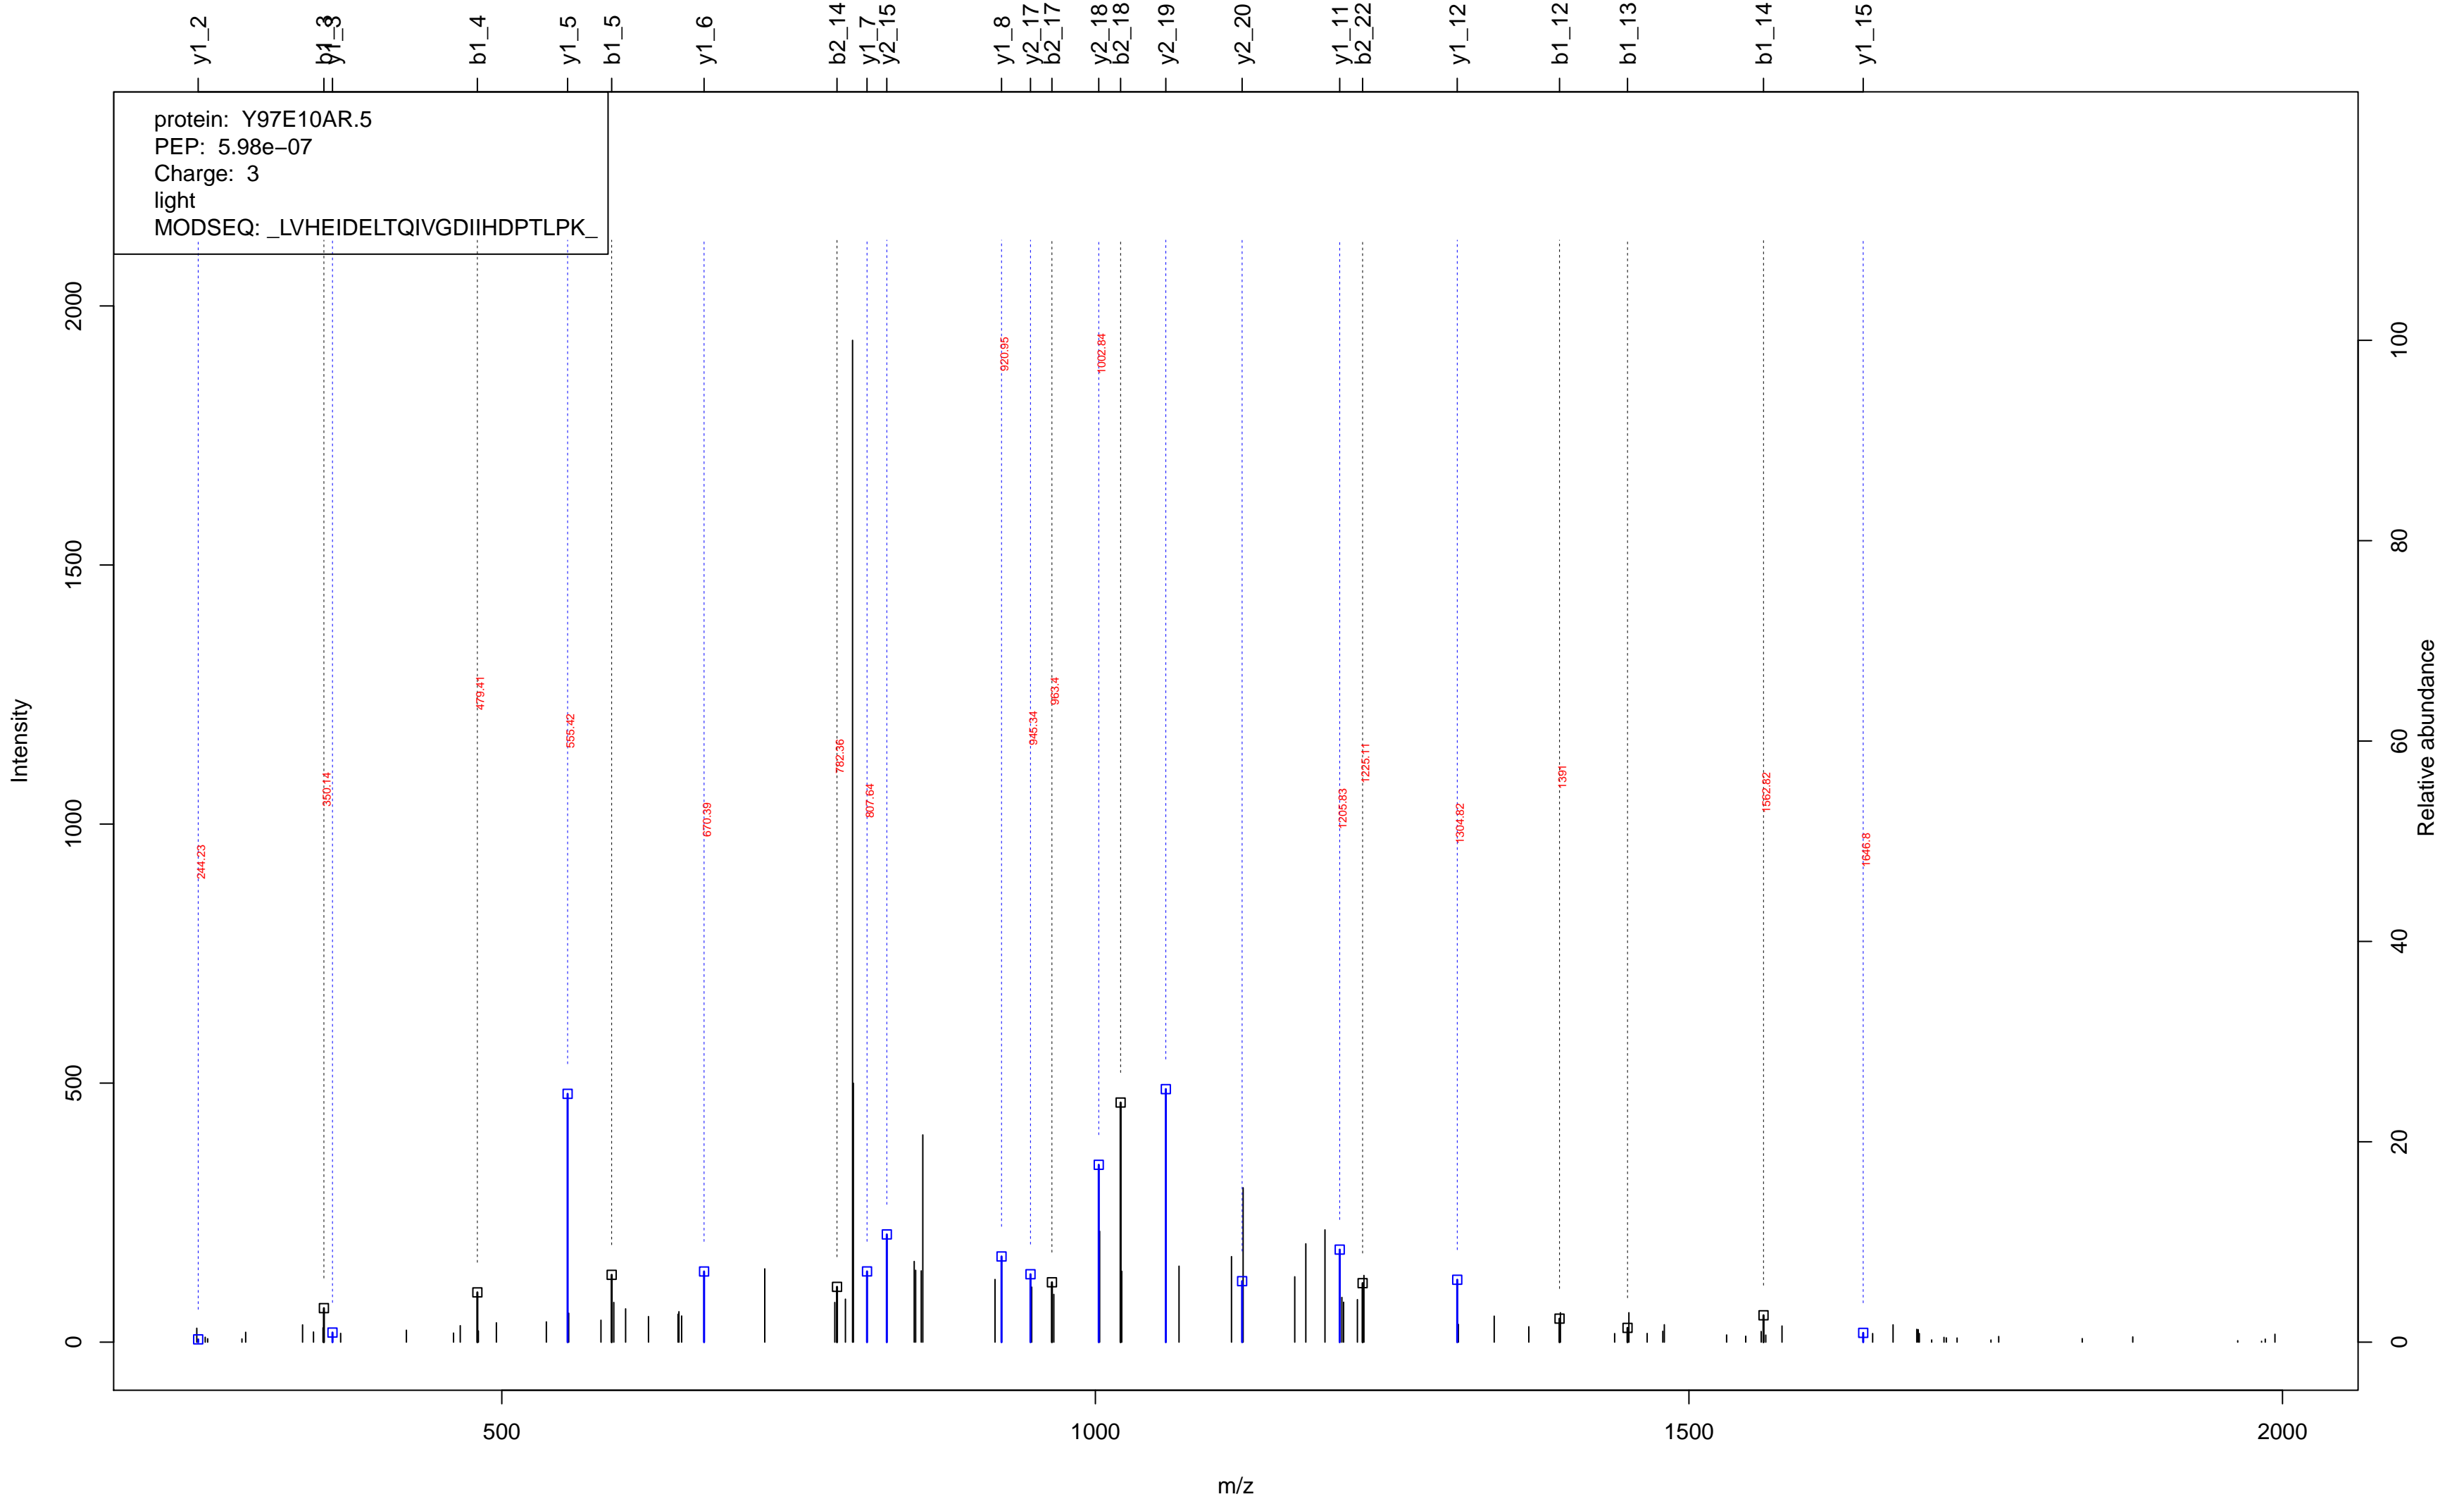

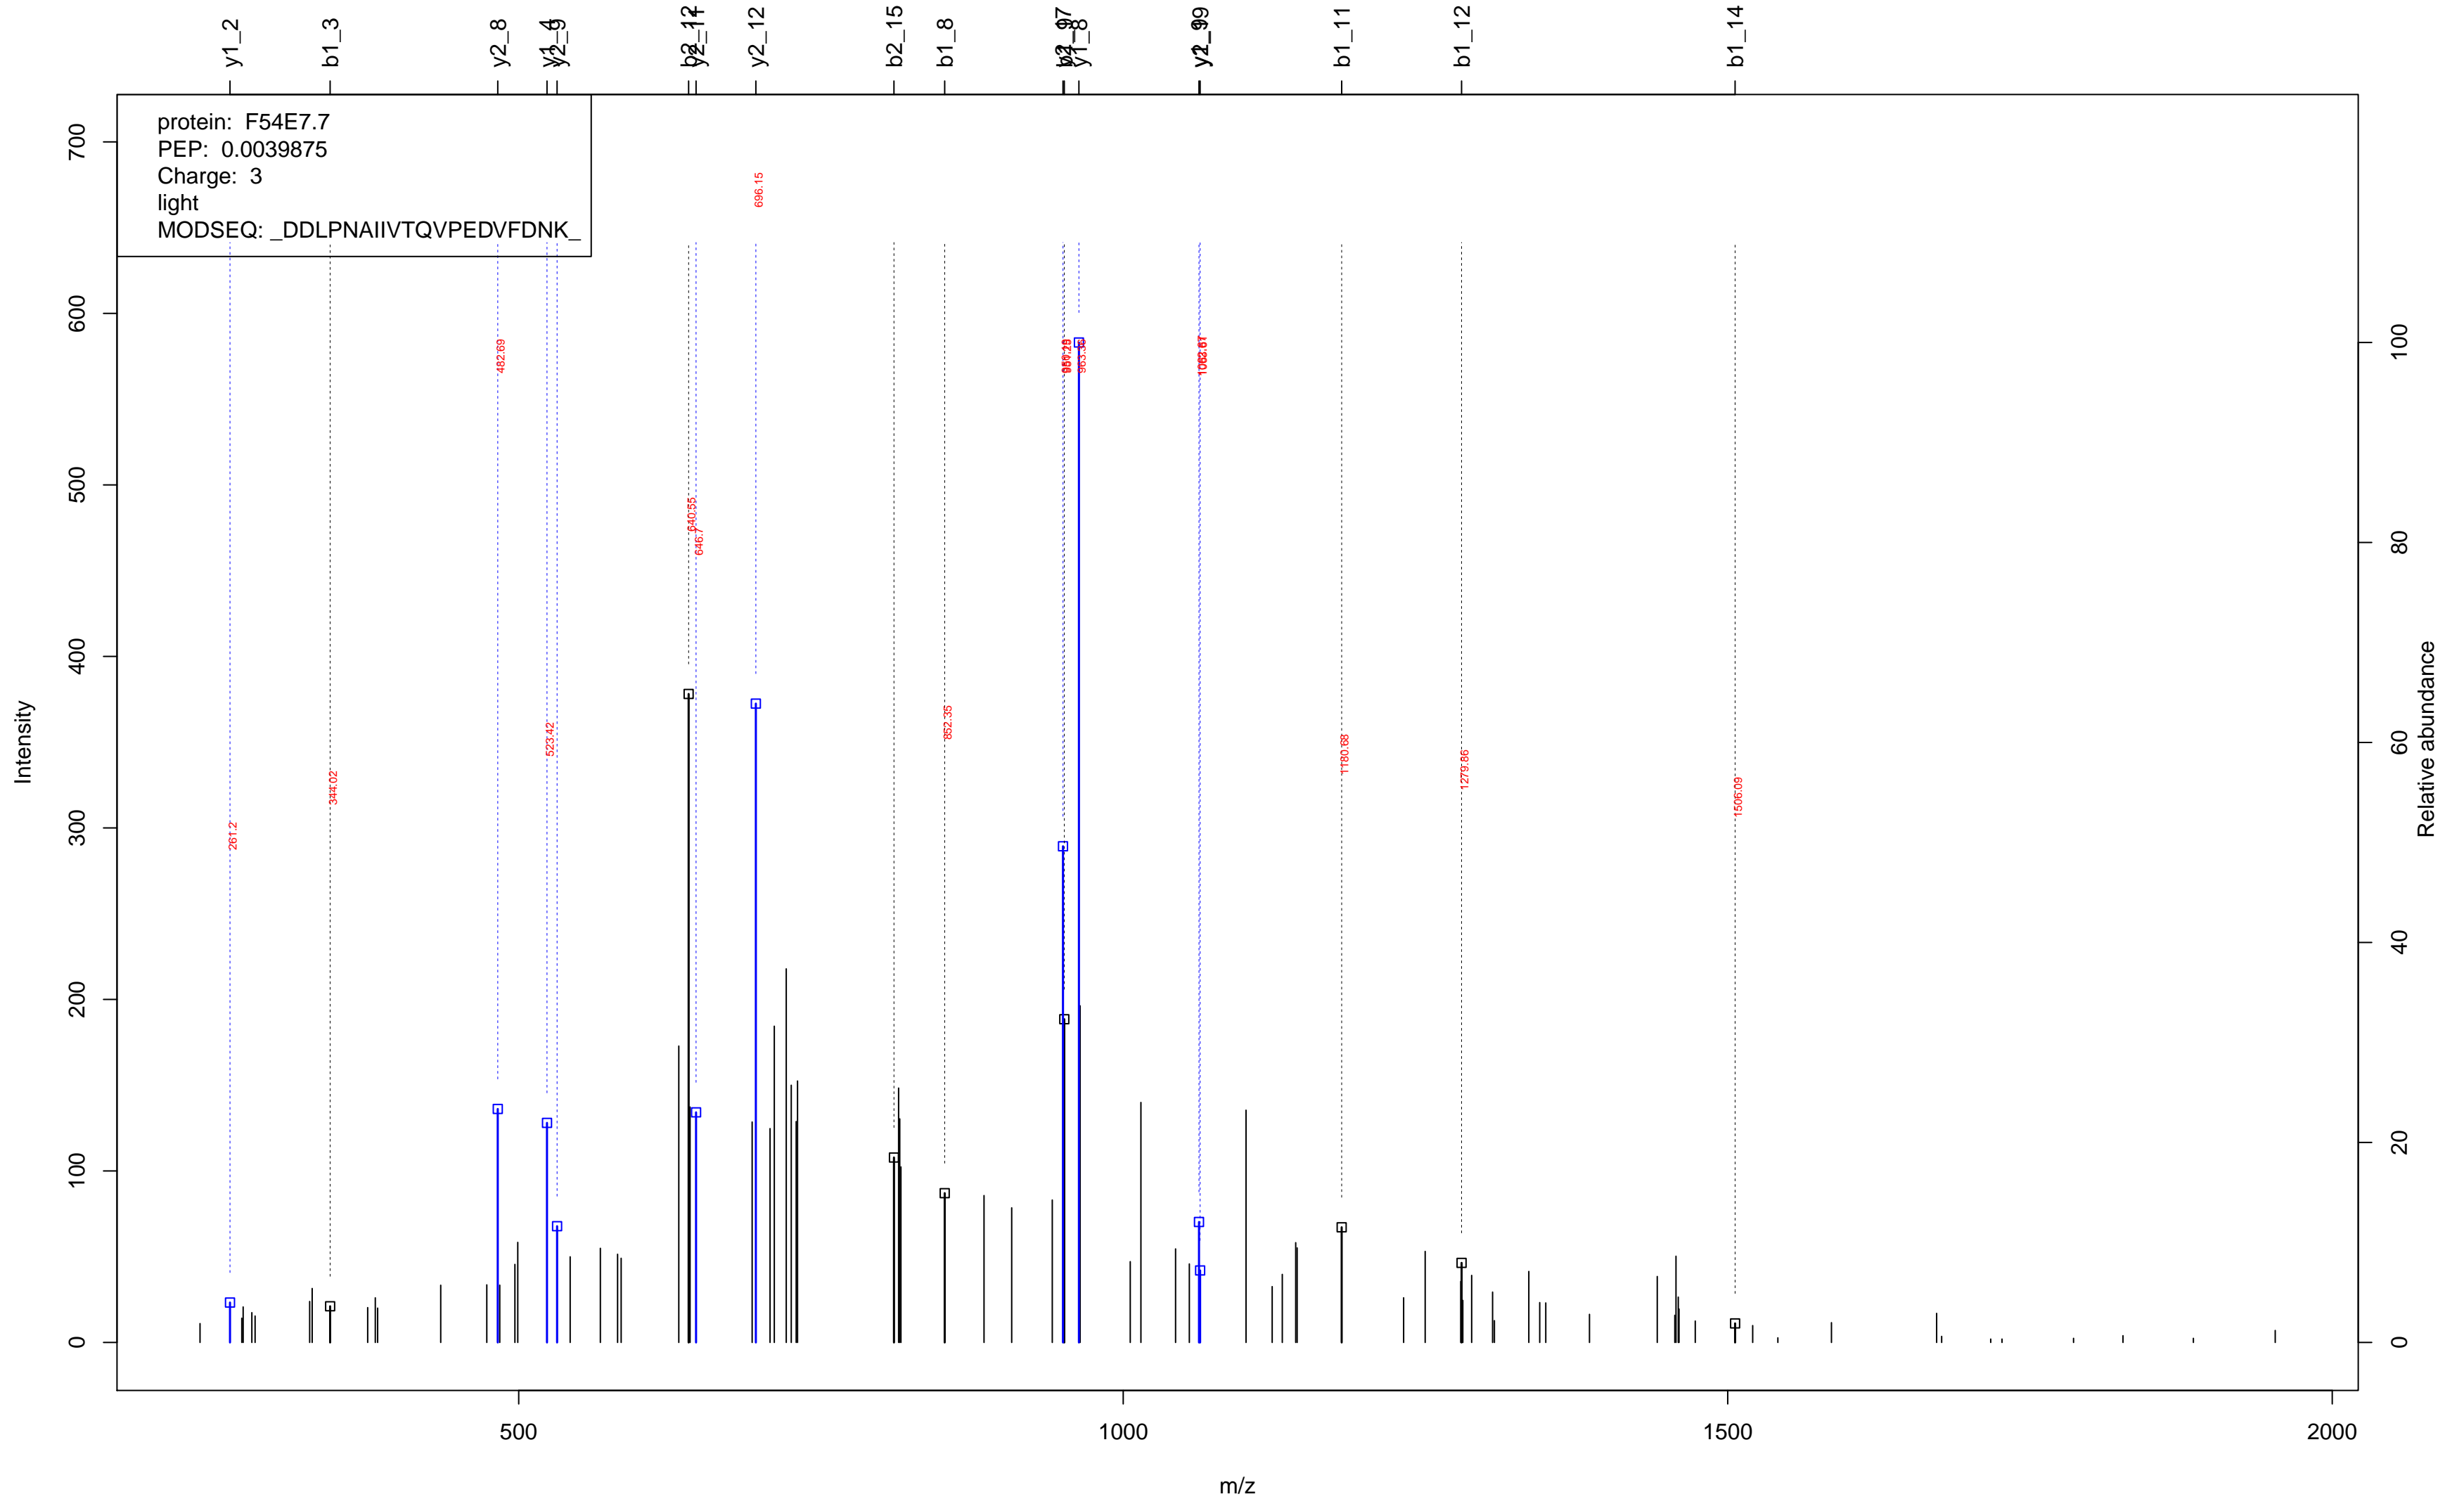

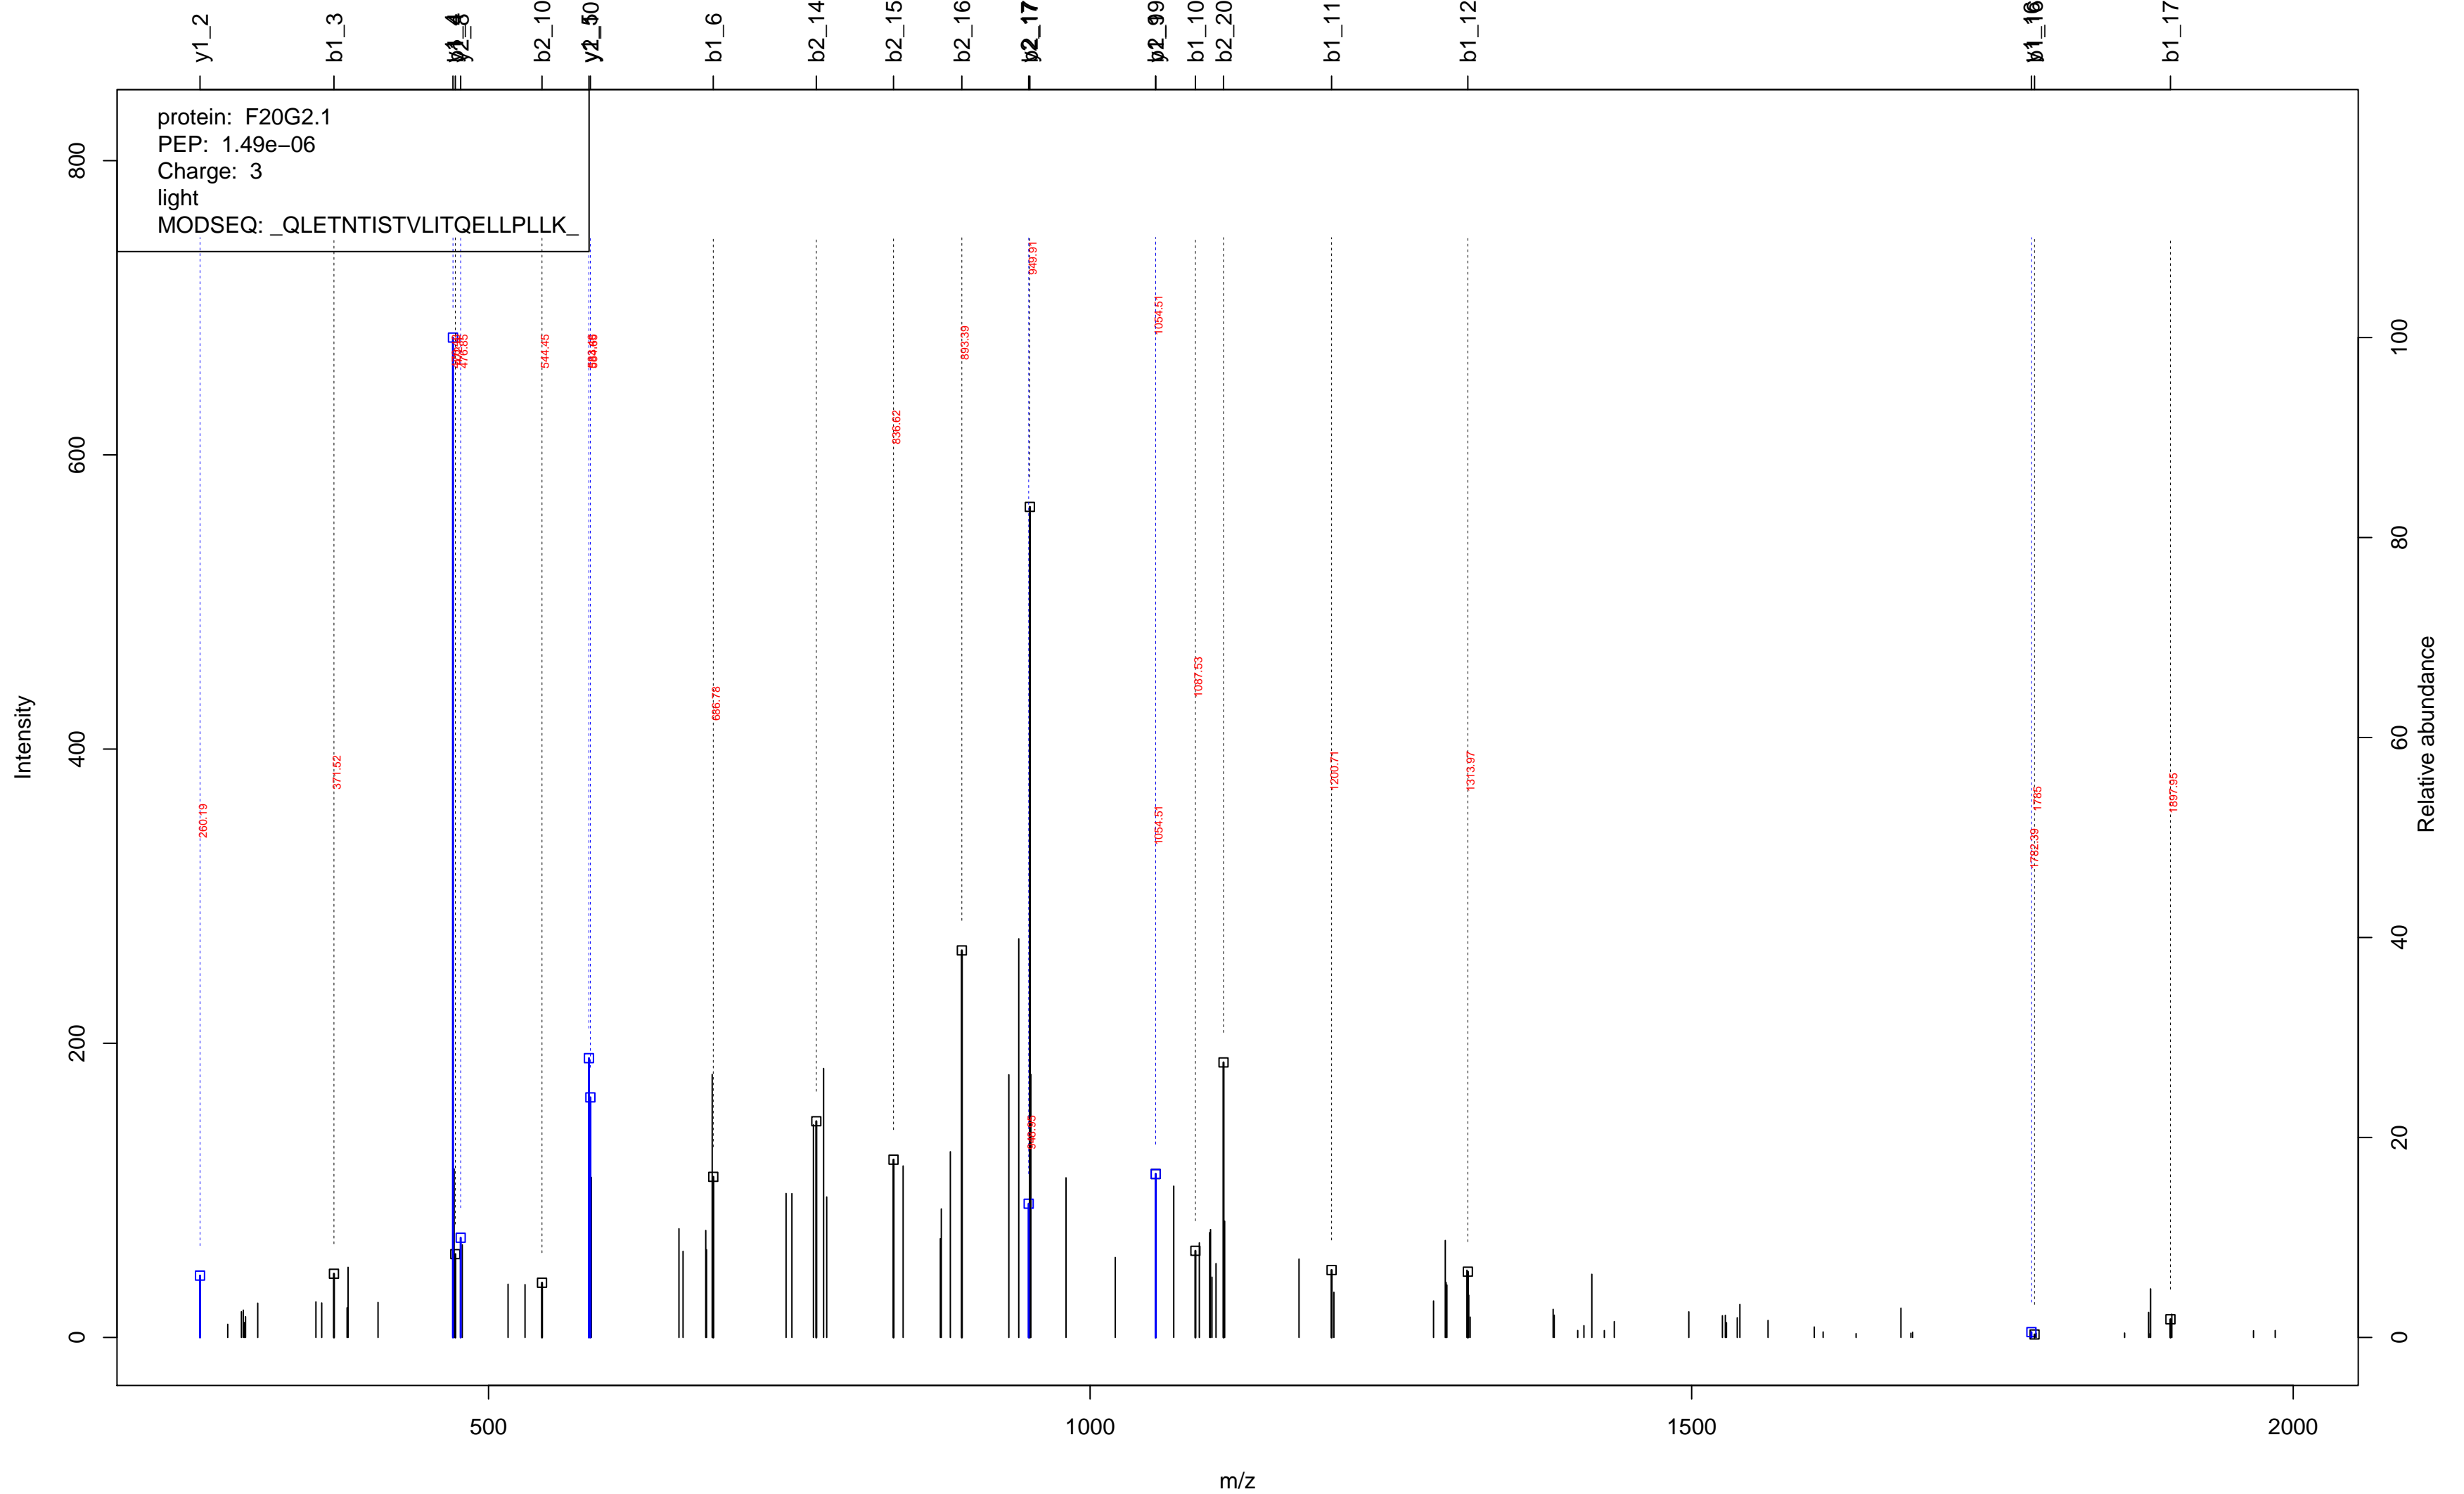

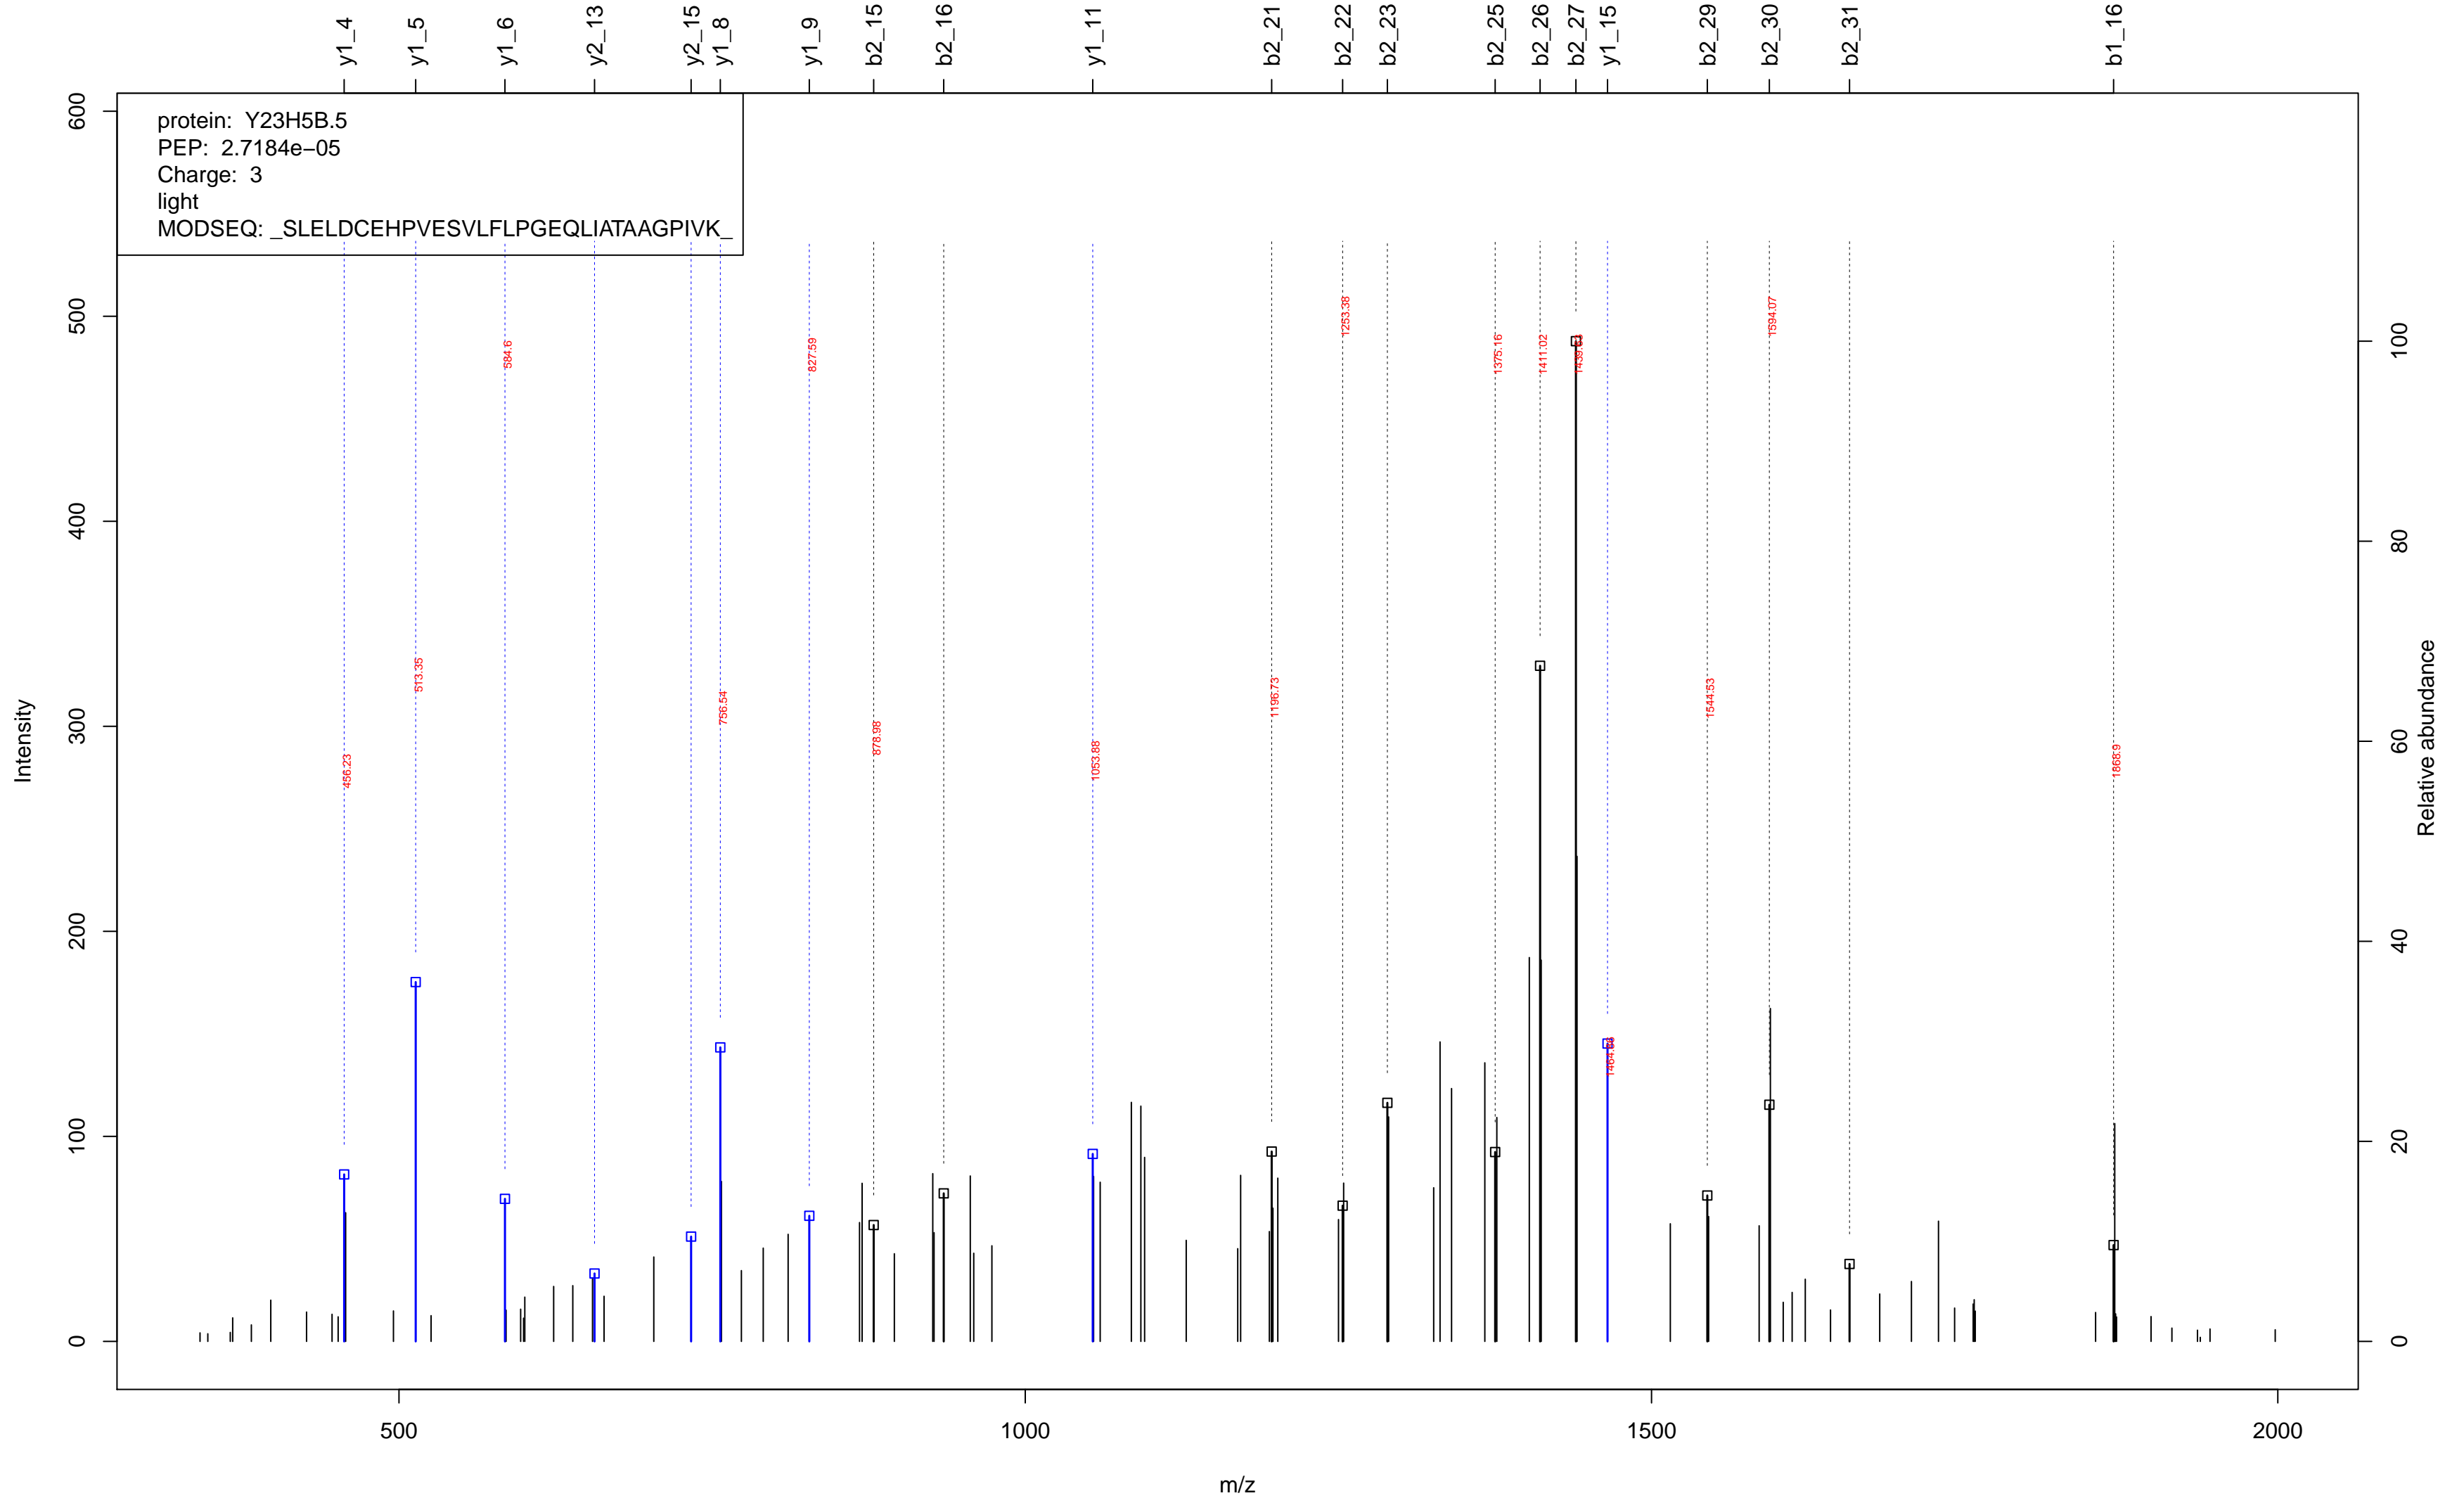

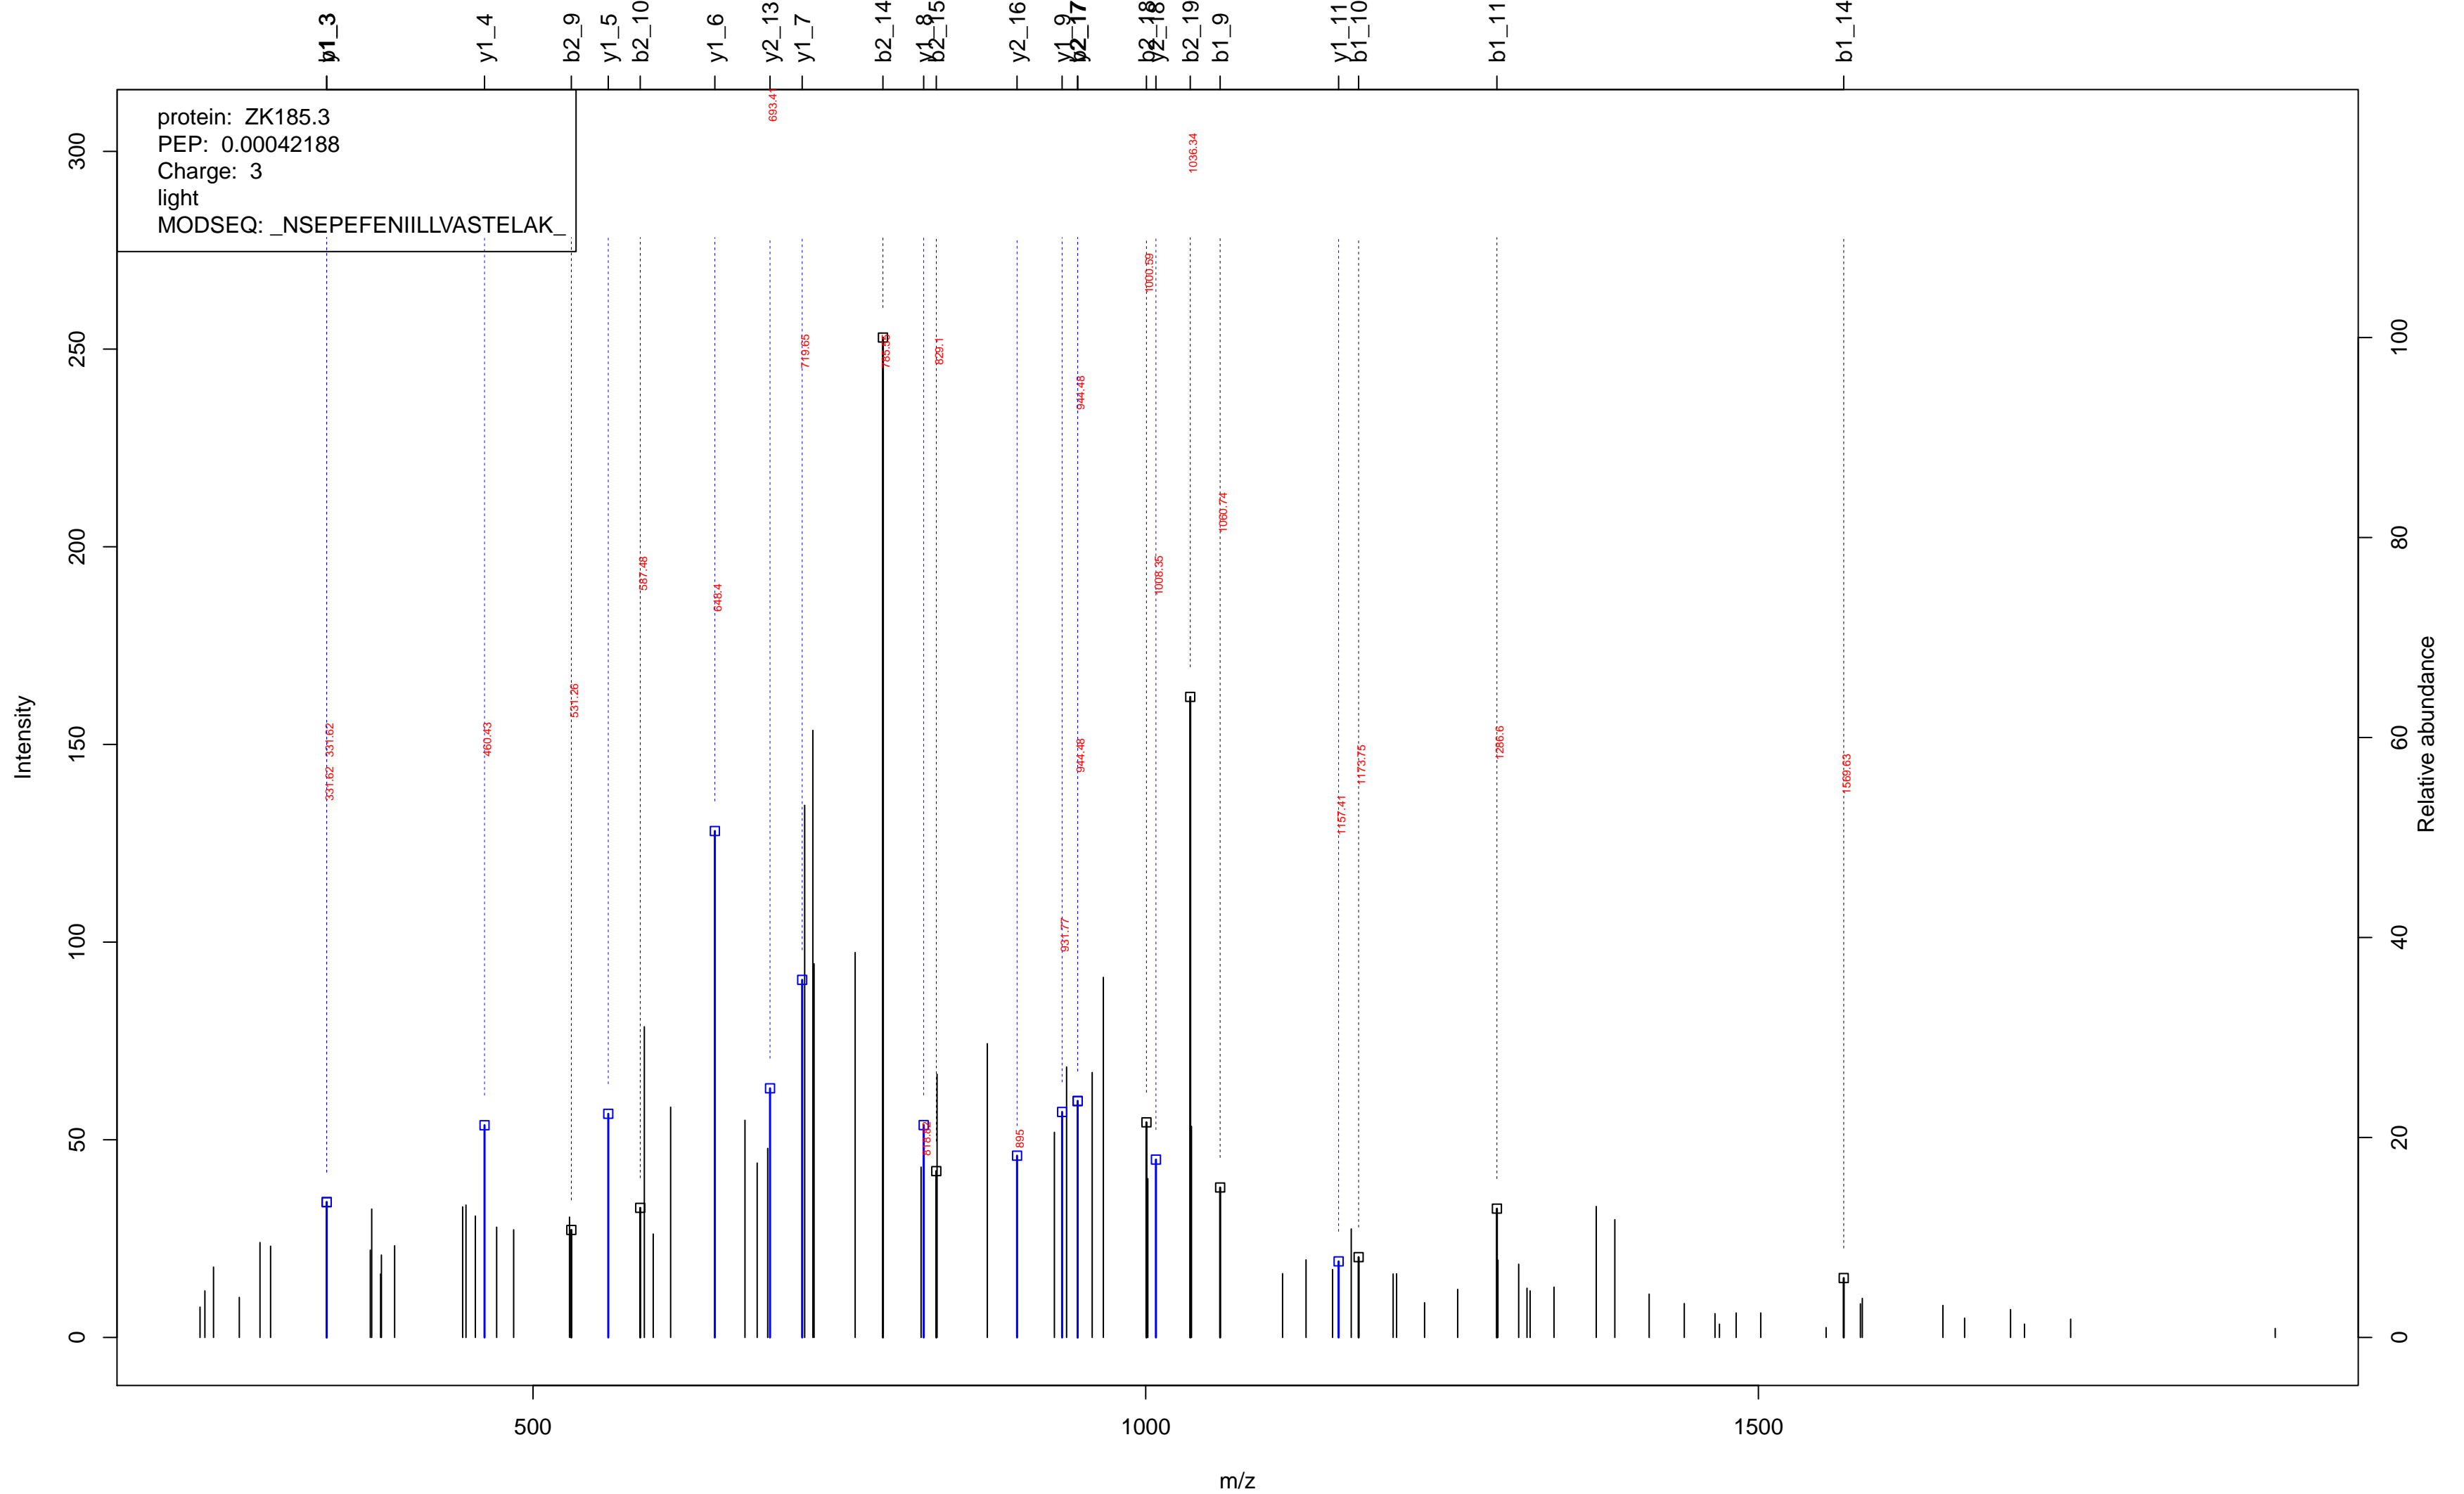

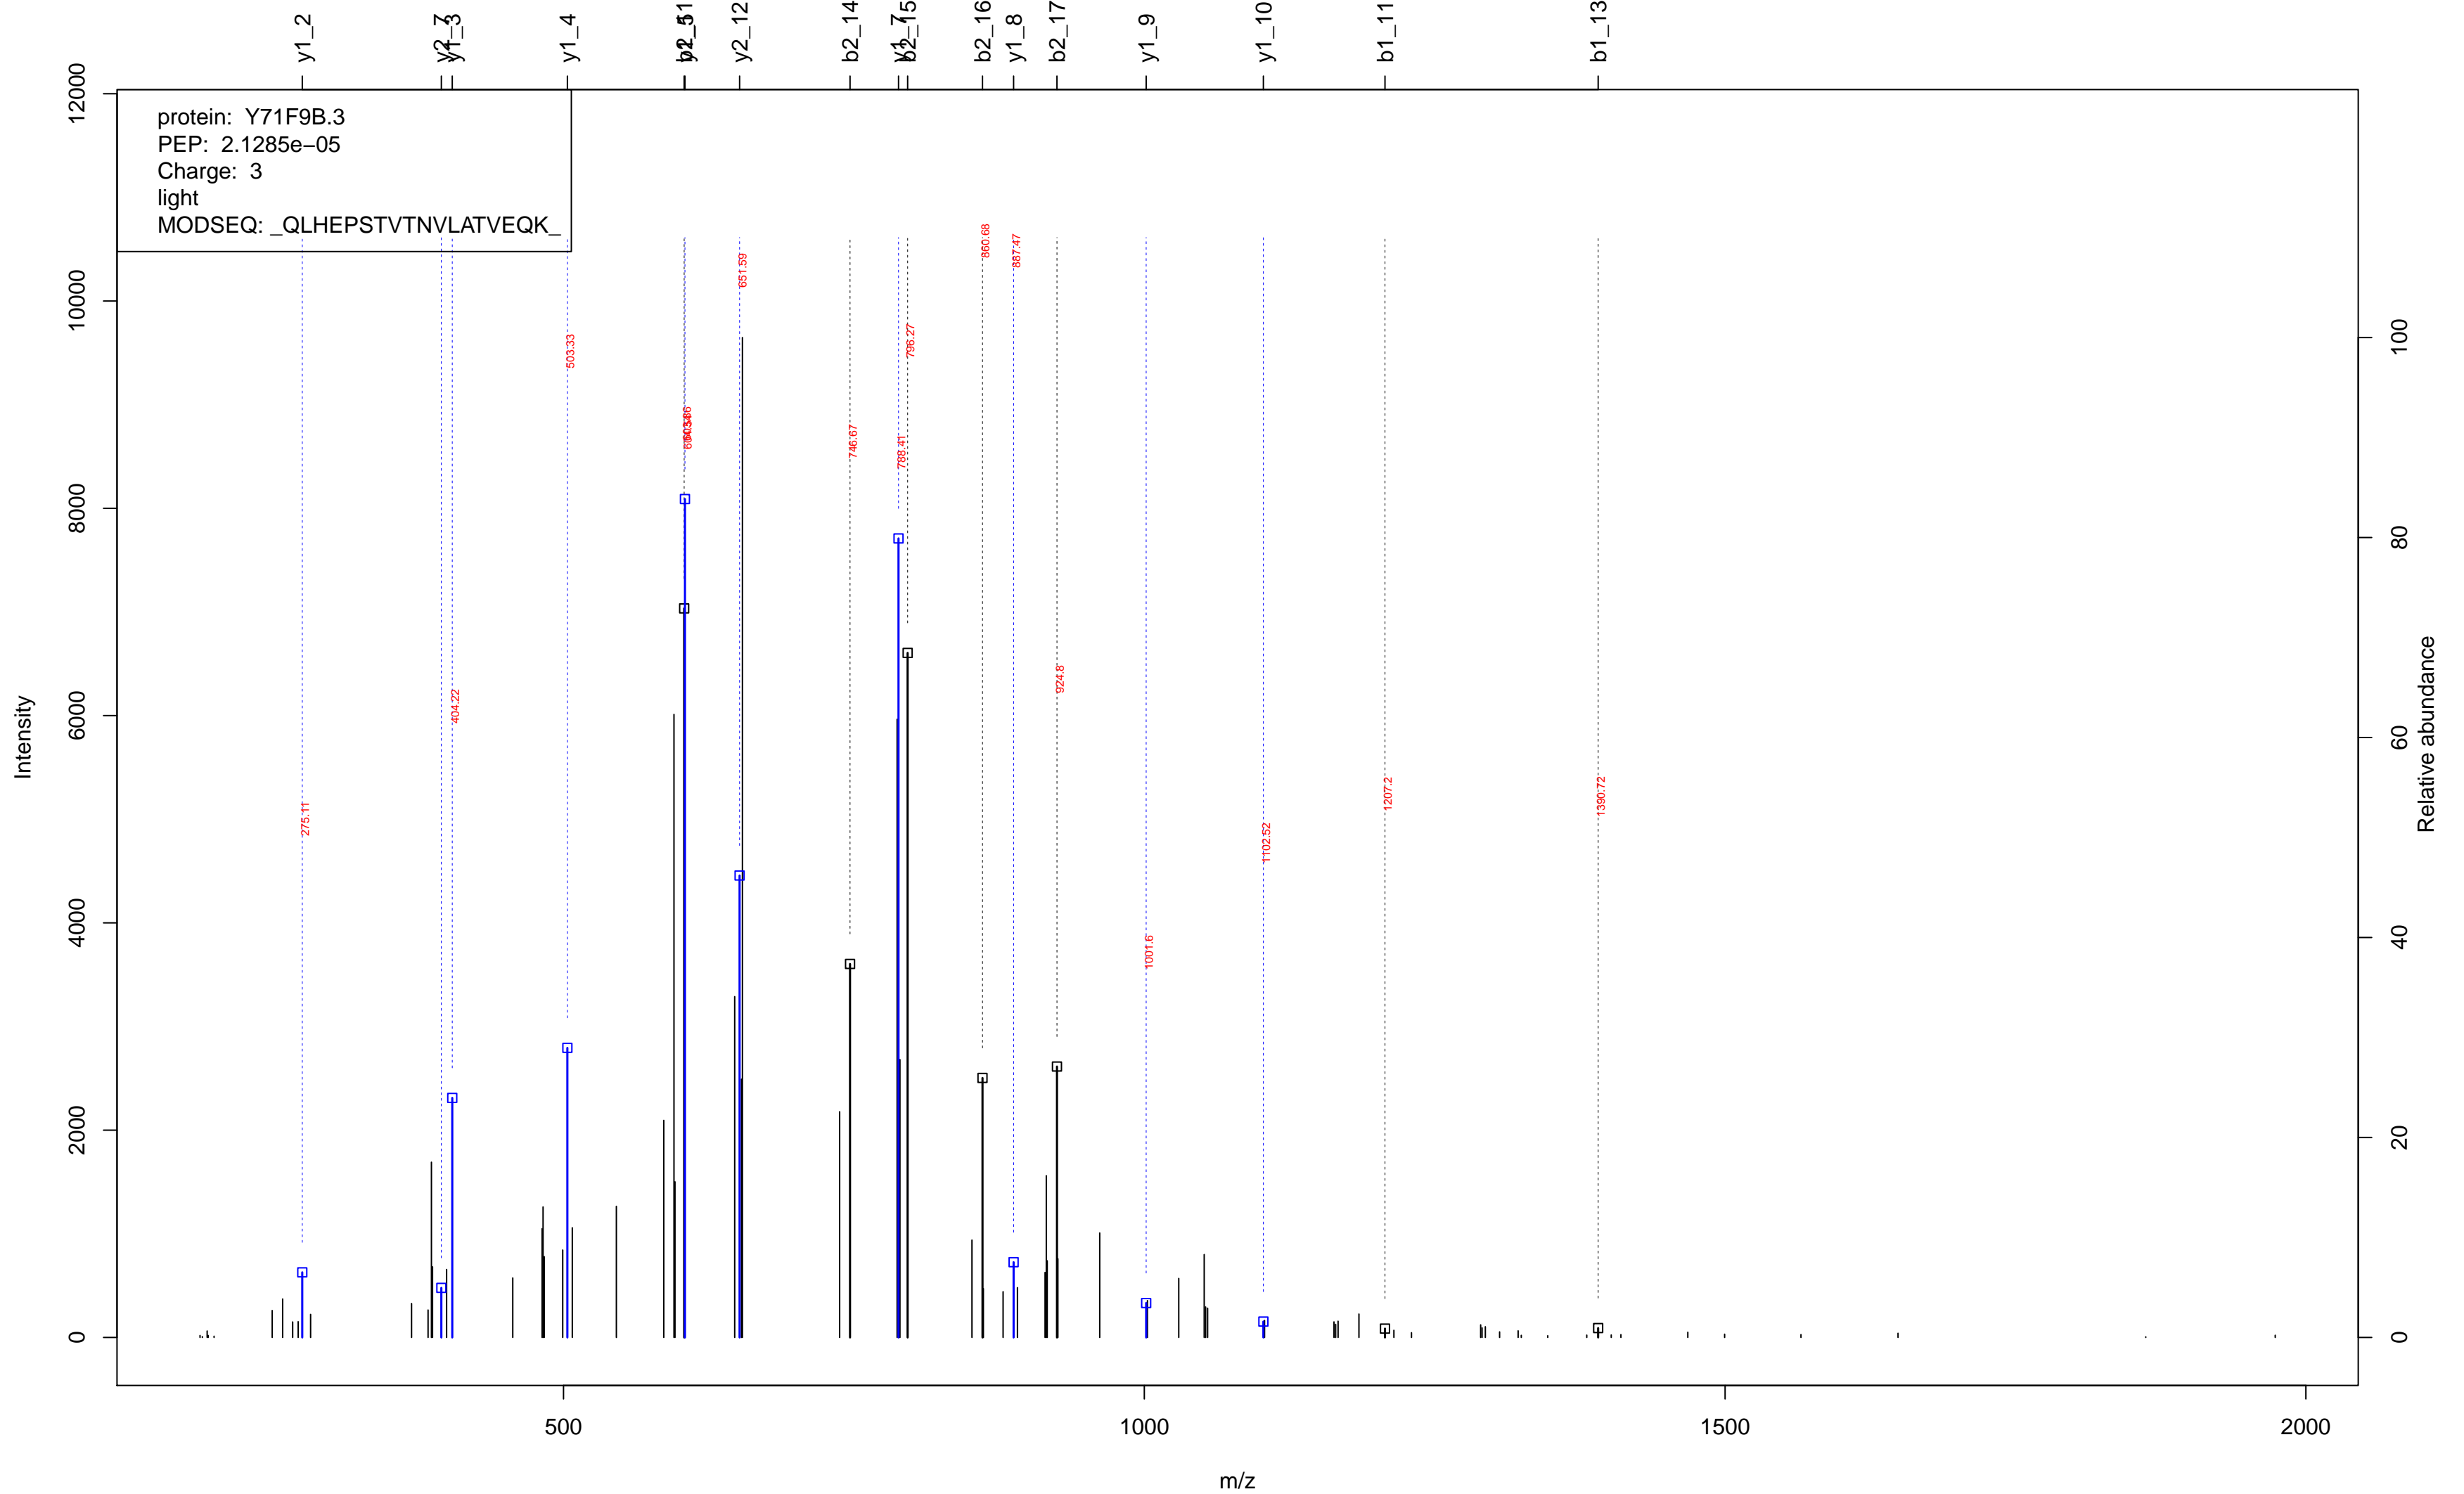



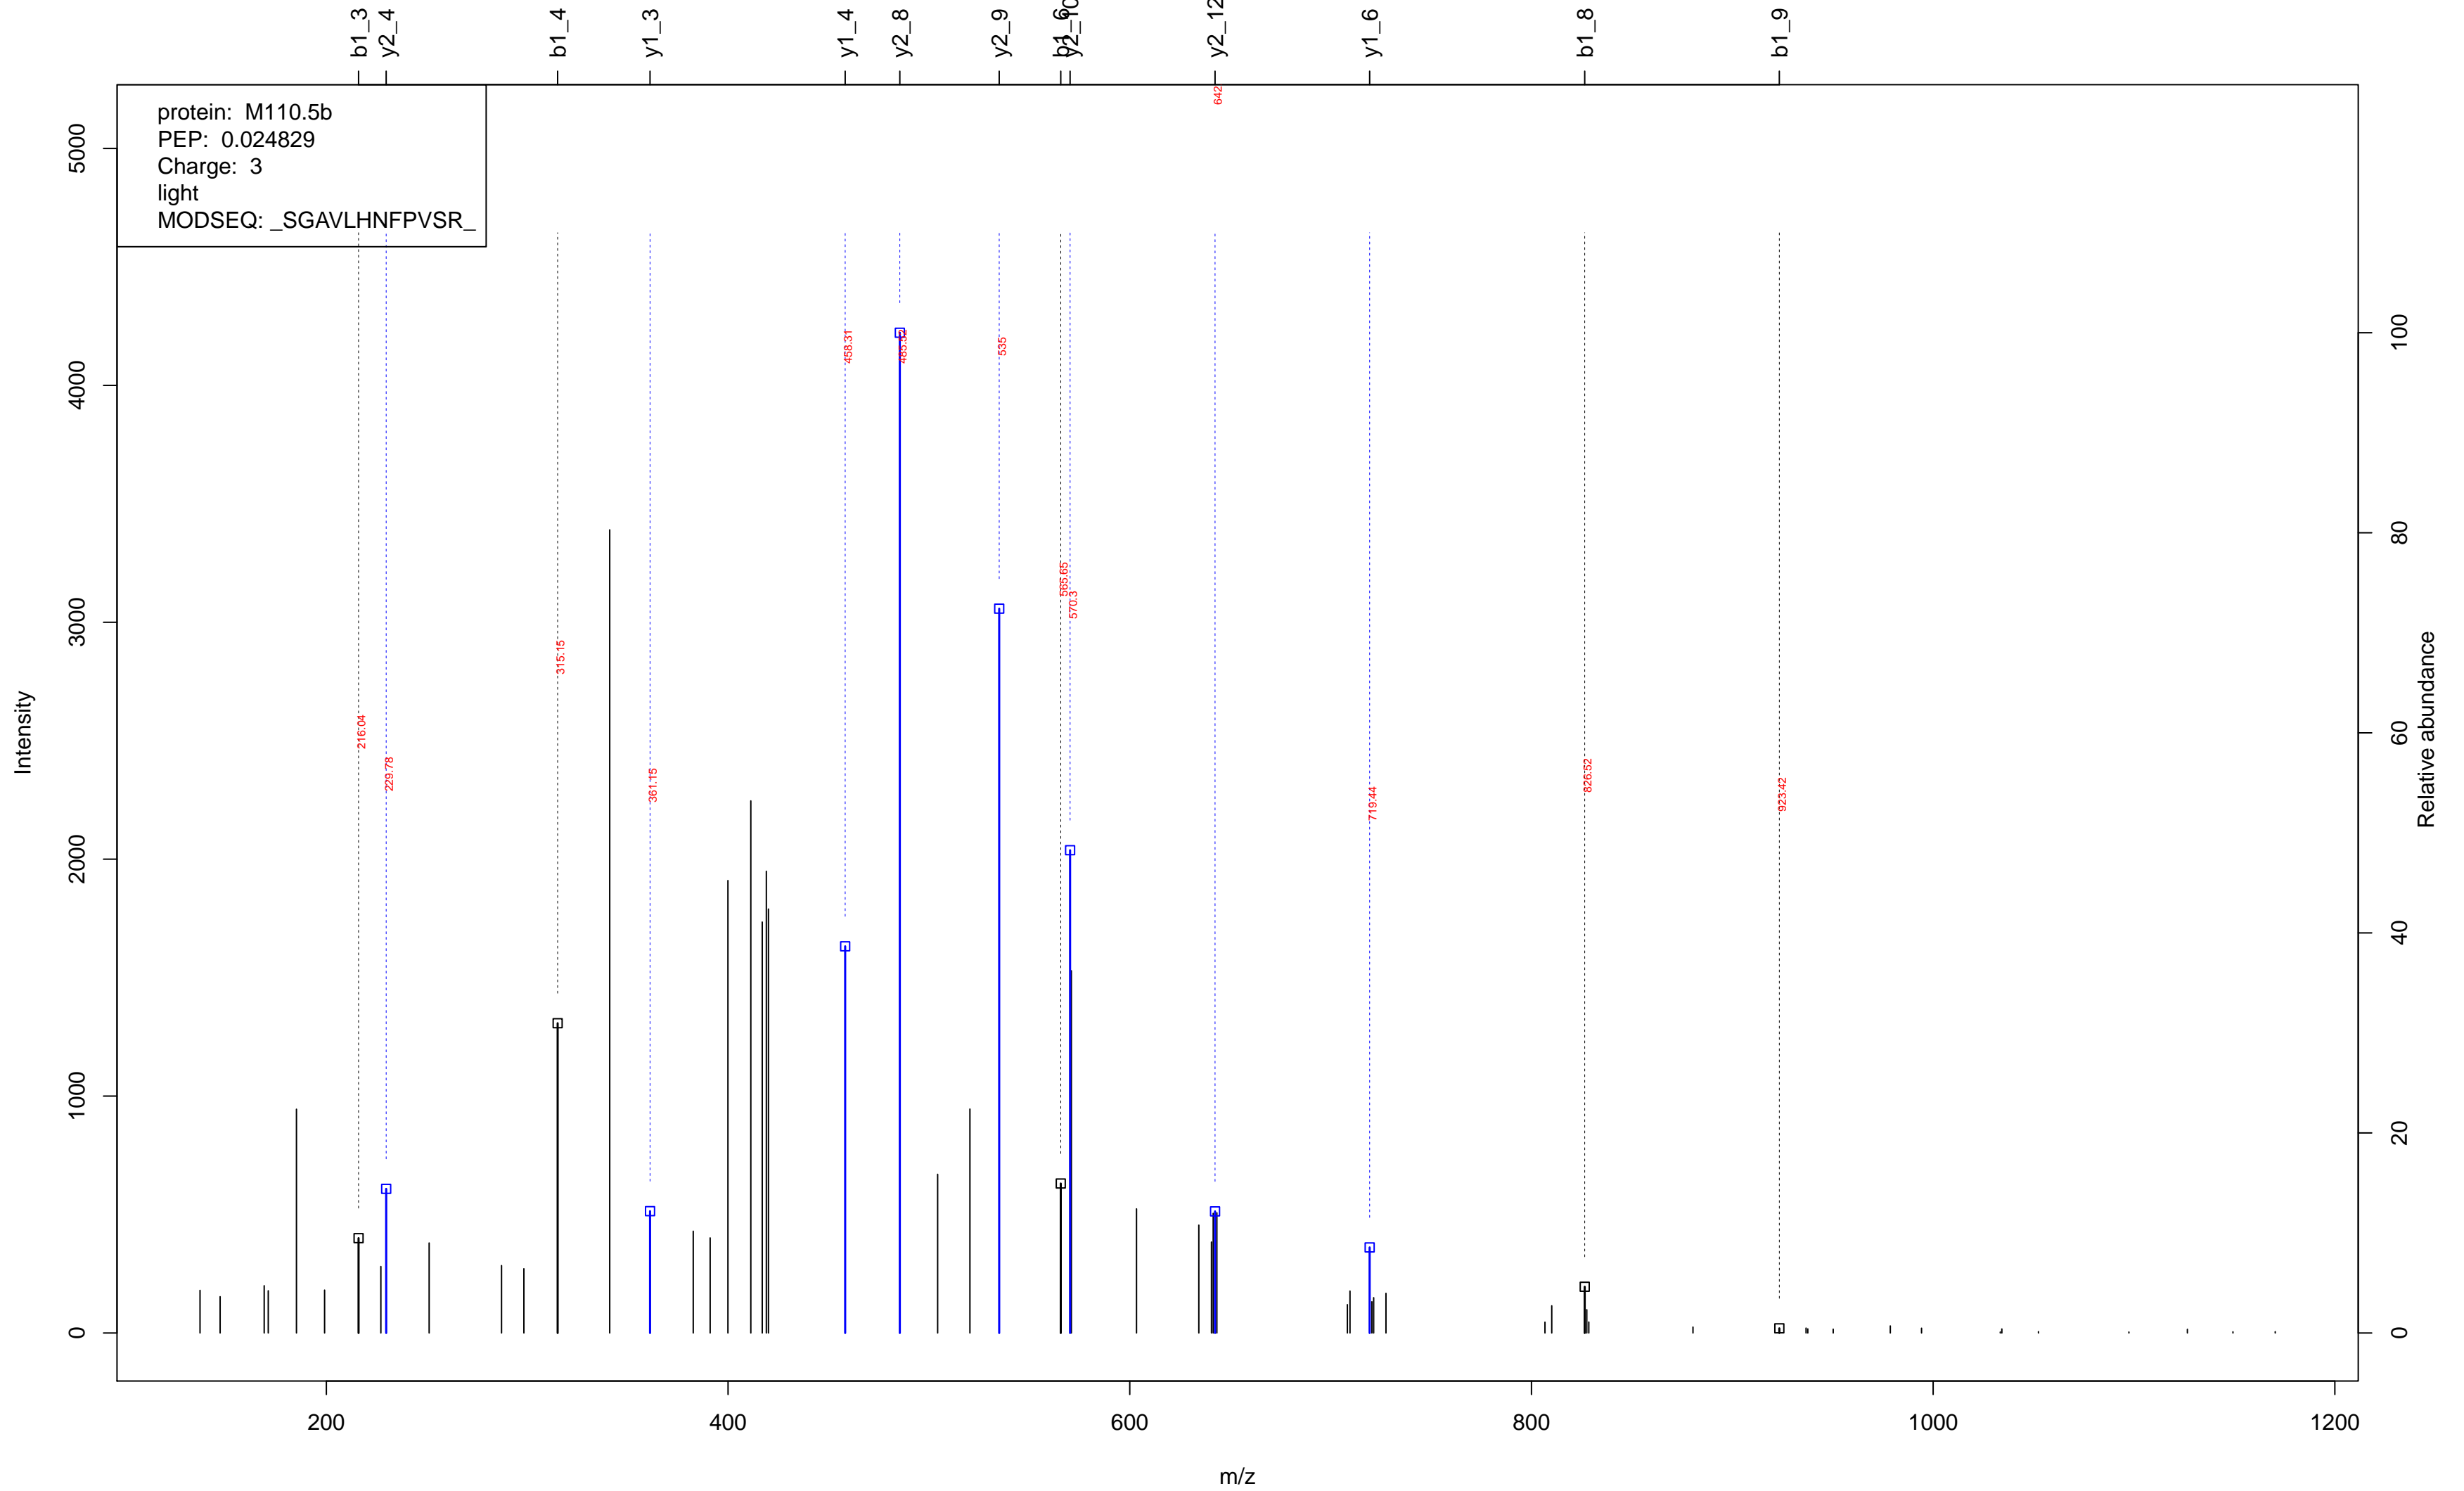

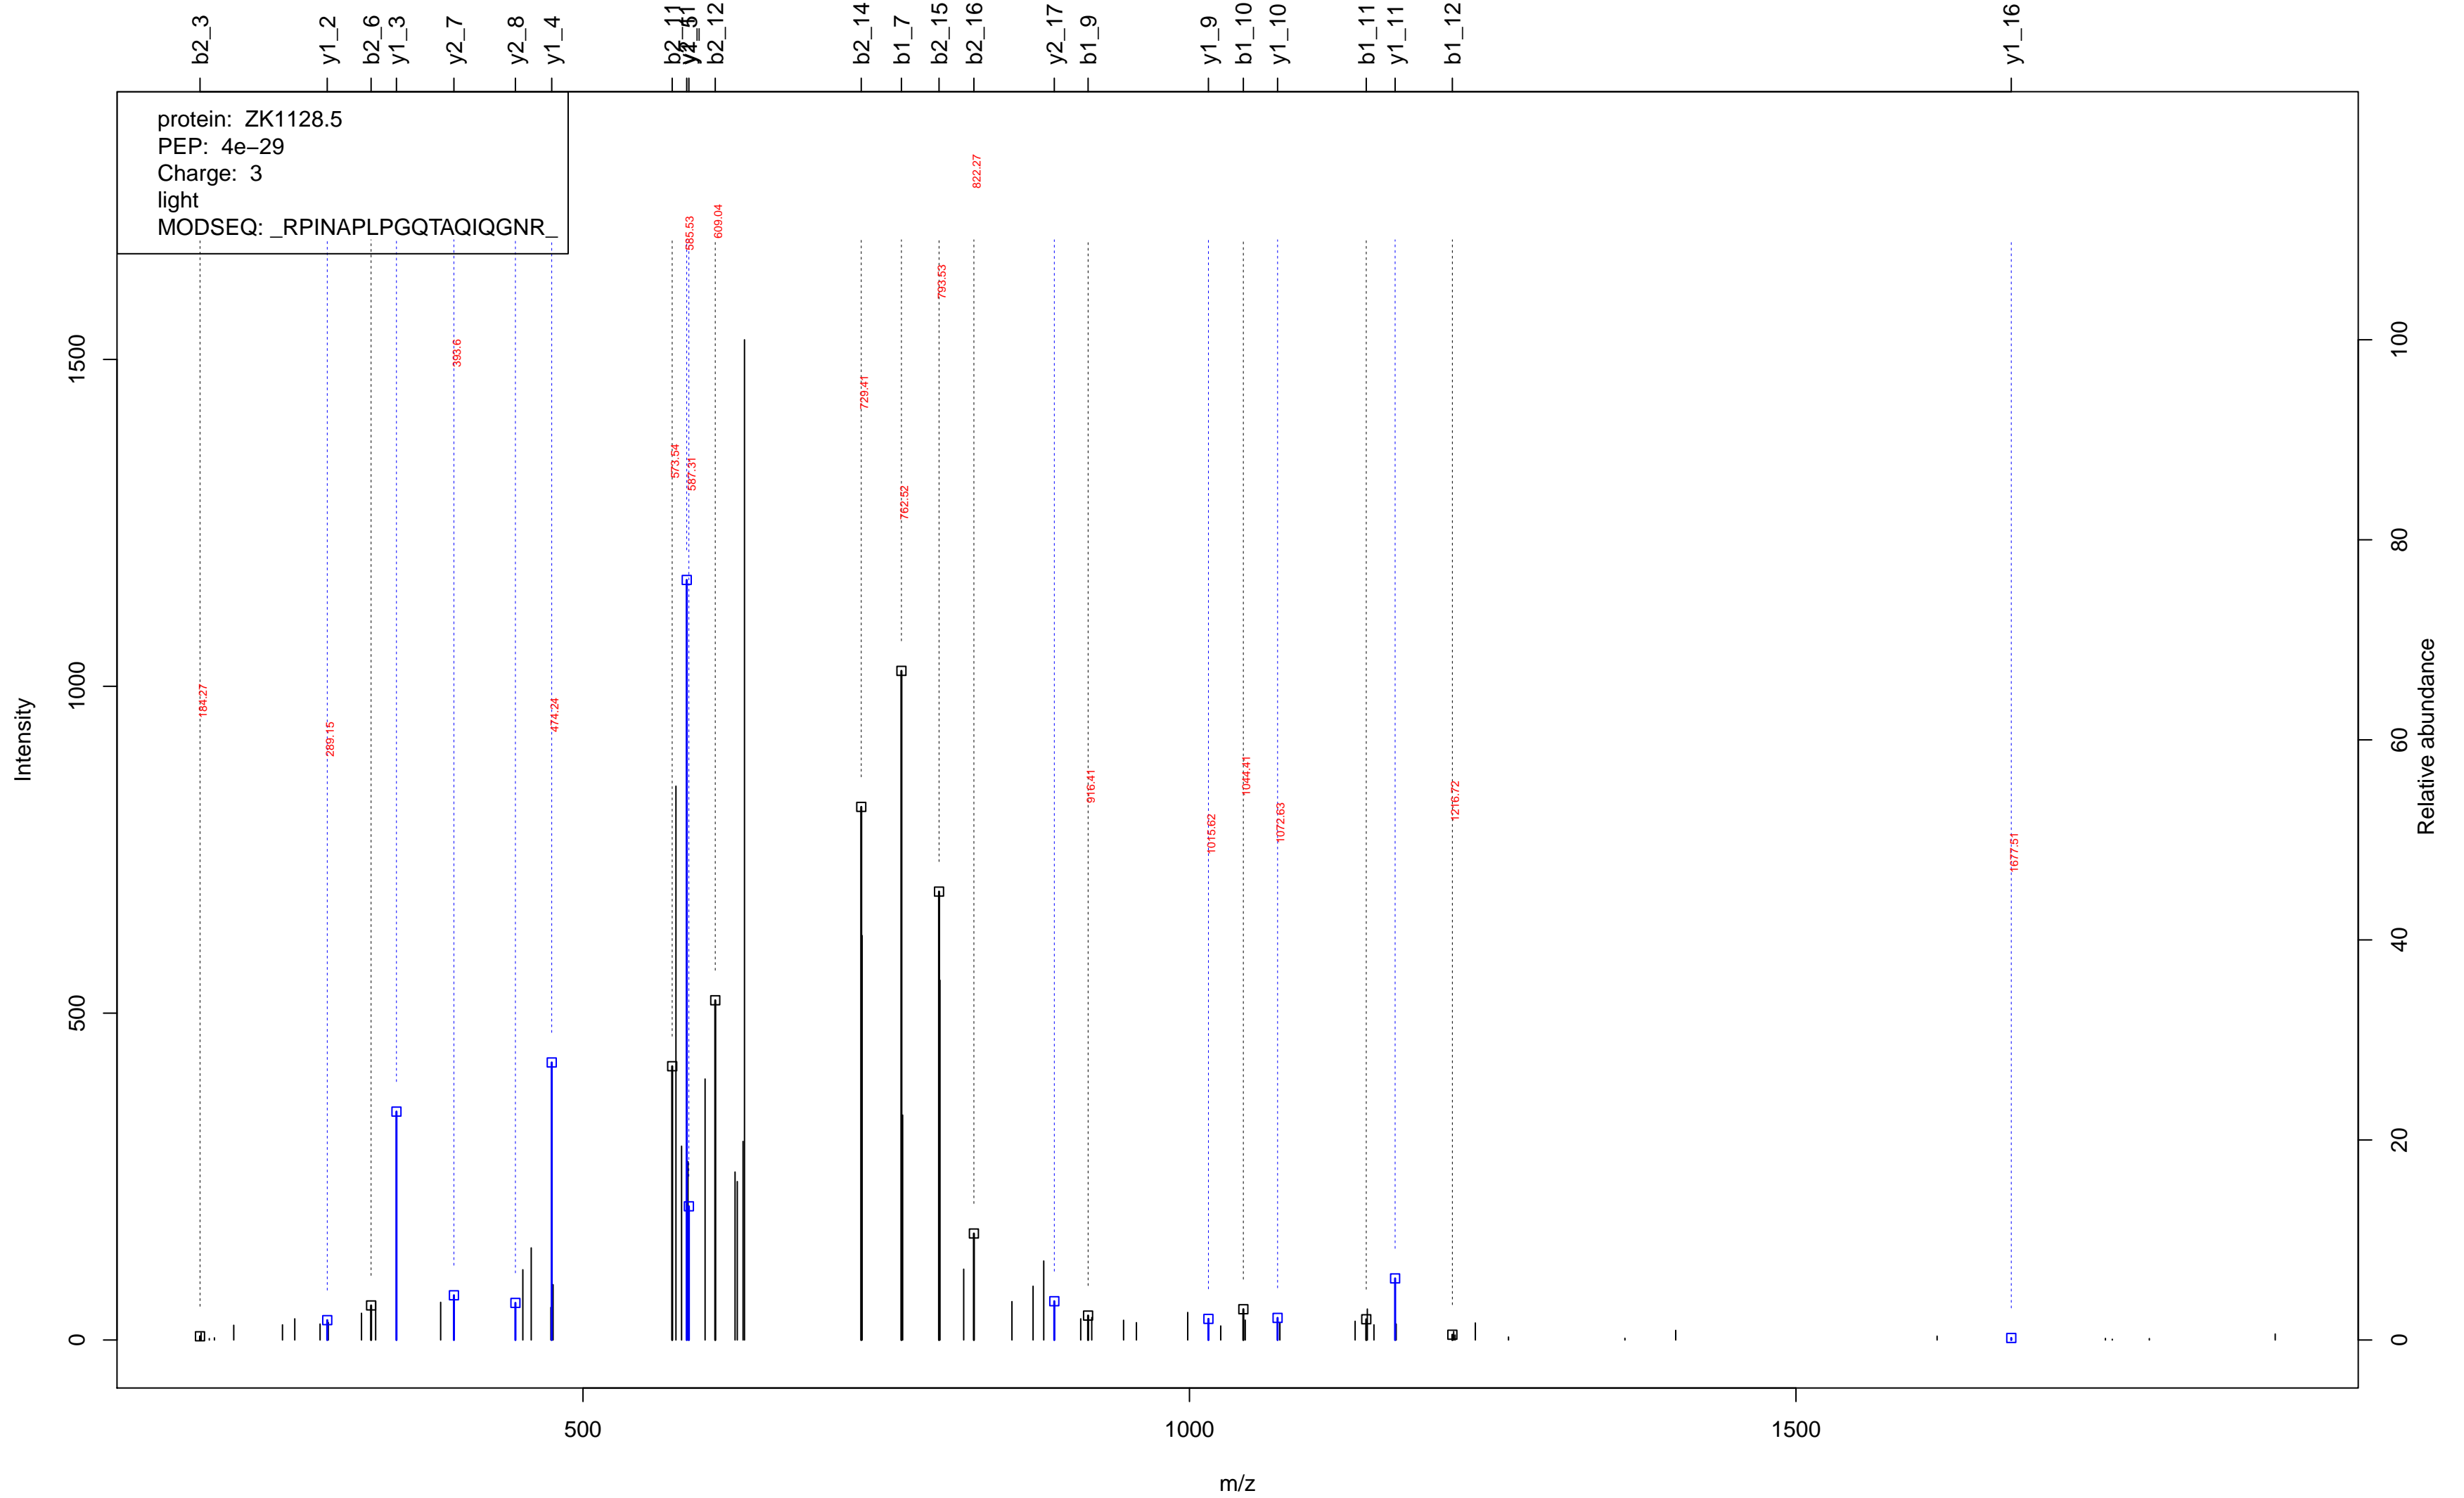

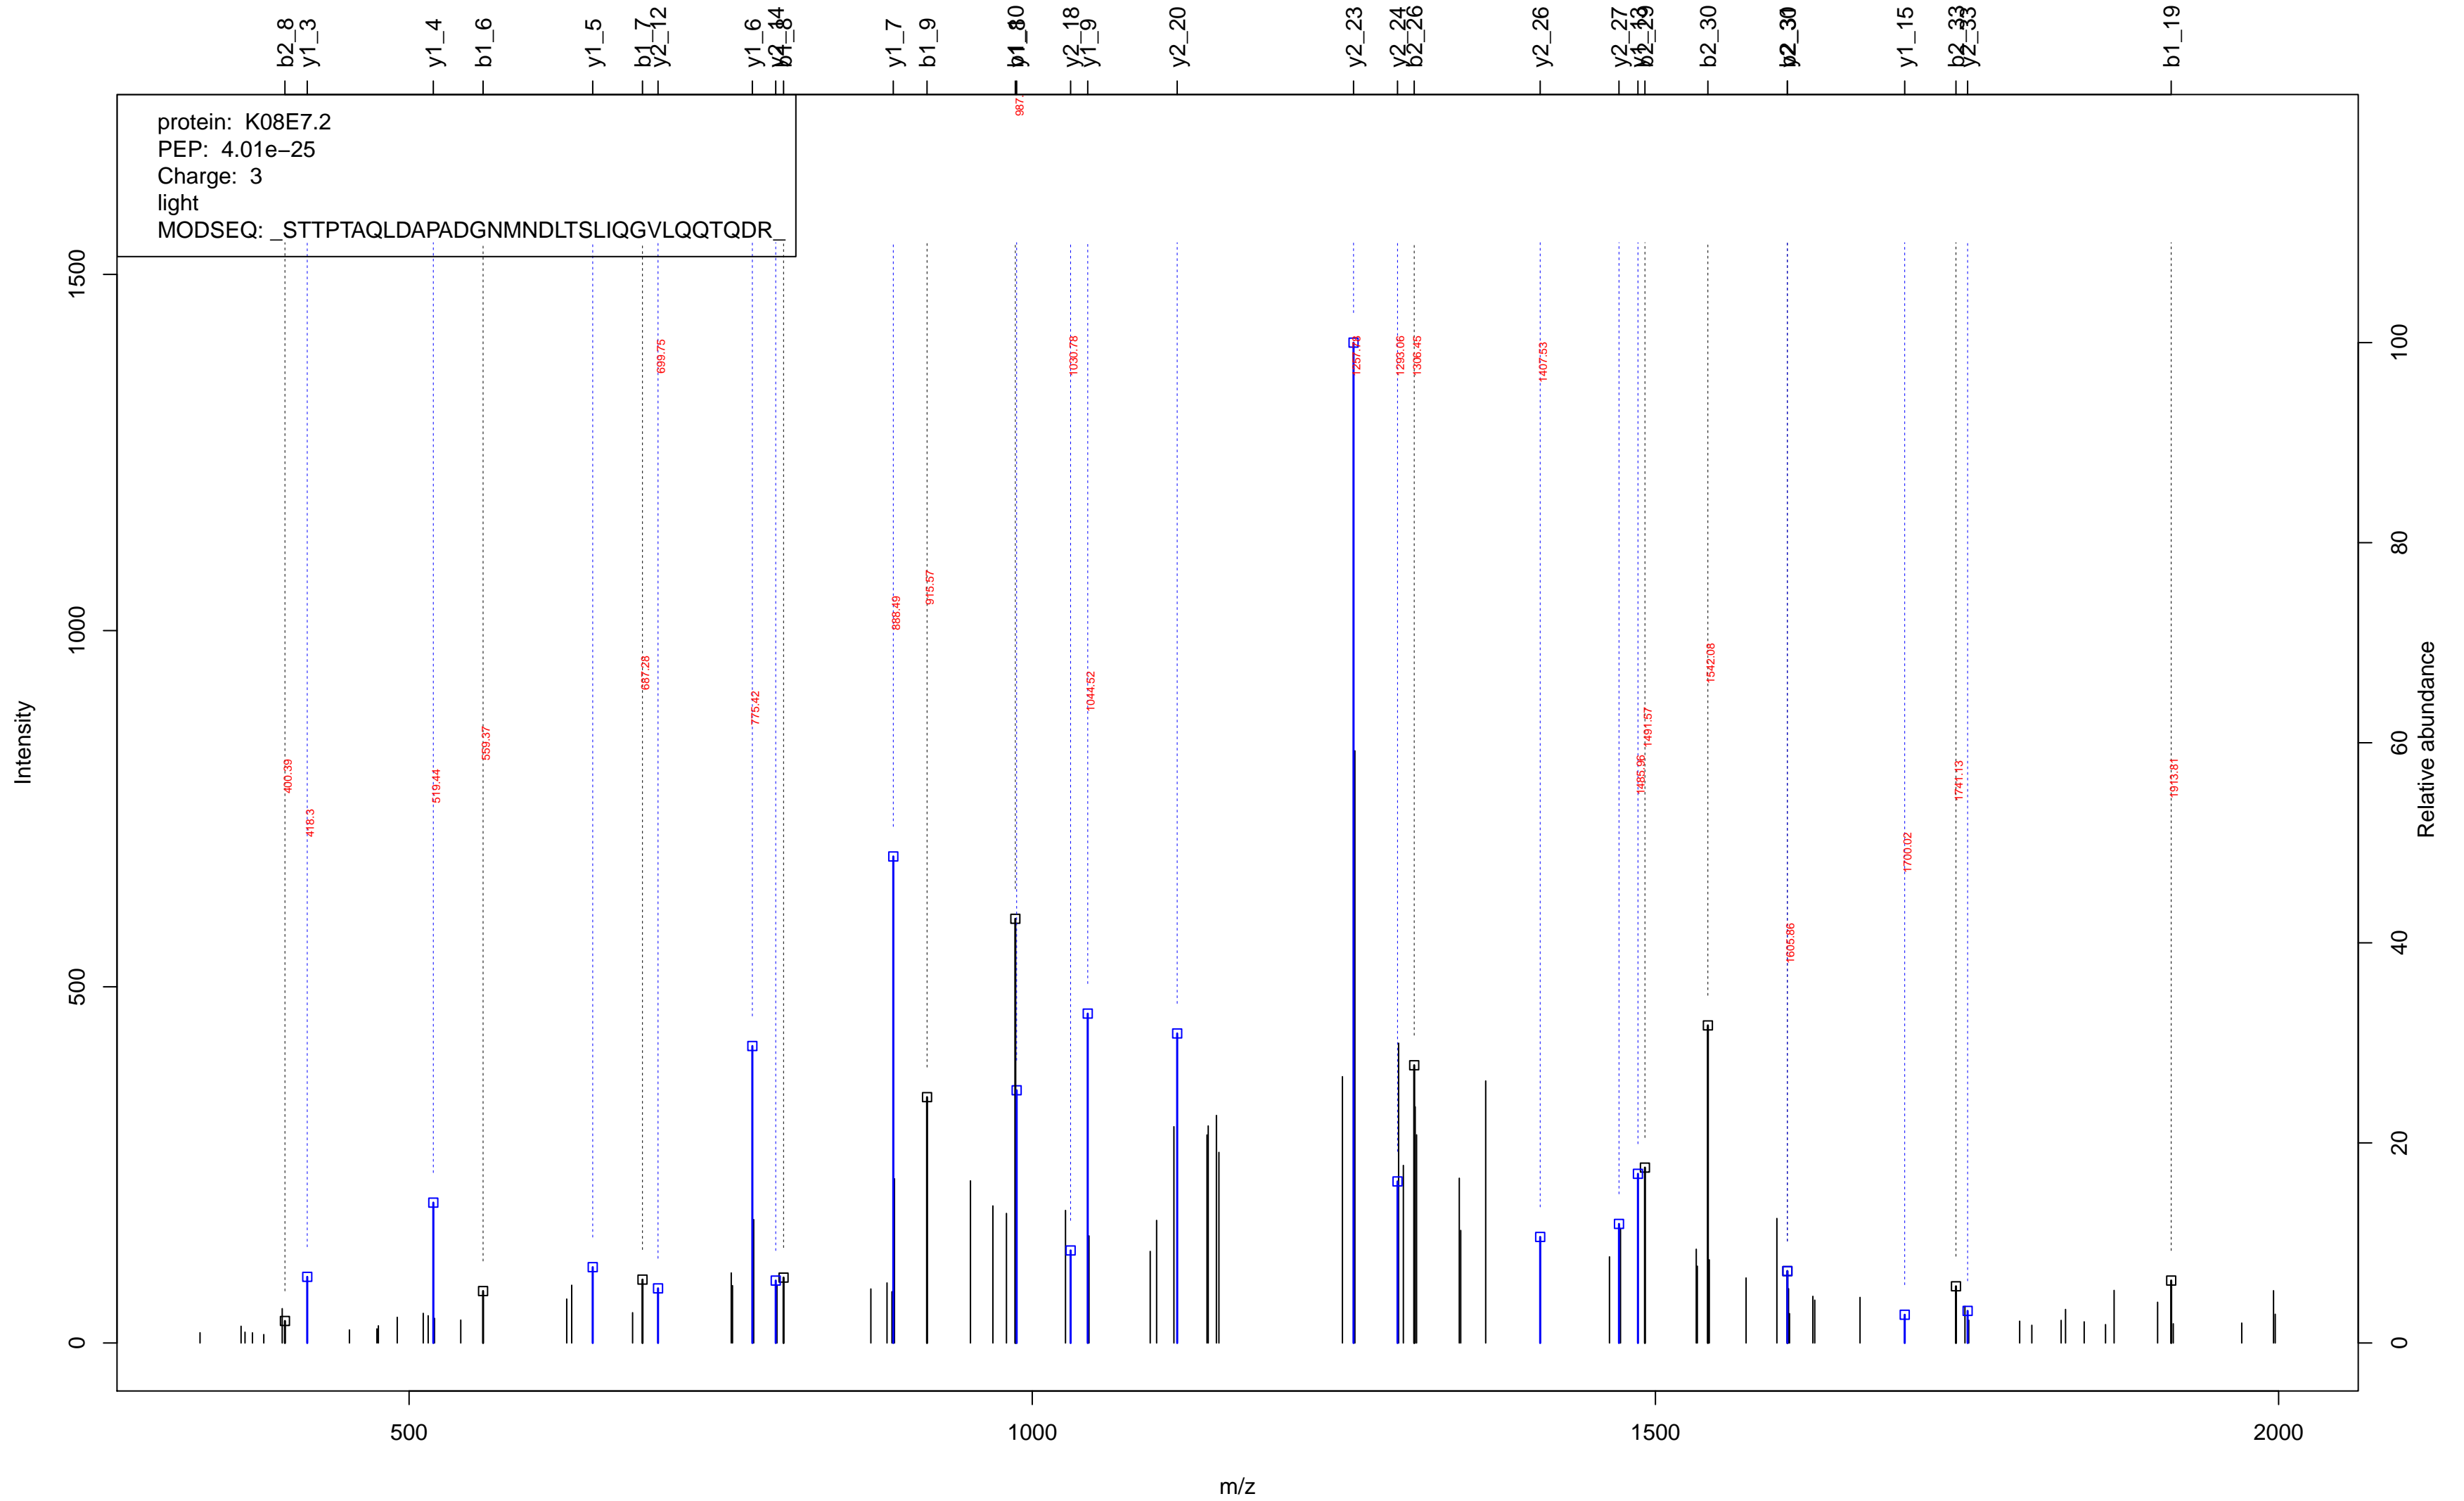

protein: K08E7.2  
PEP: 4.01e-25  
Charge: 3  
light  
MODSEQ: \_STPTAQLDAPADGNMNDLTSLIQGVLQQTQDR\_

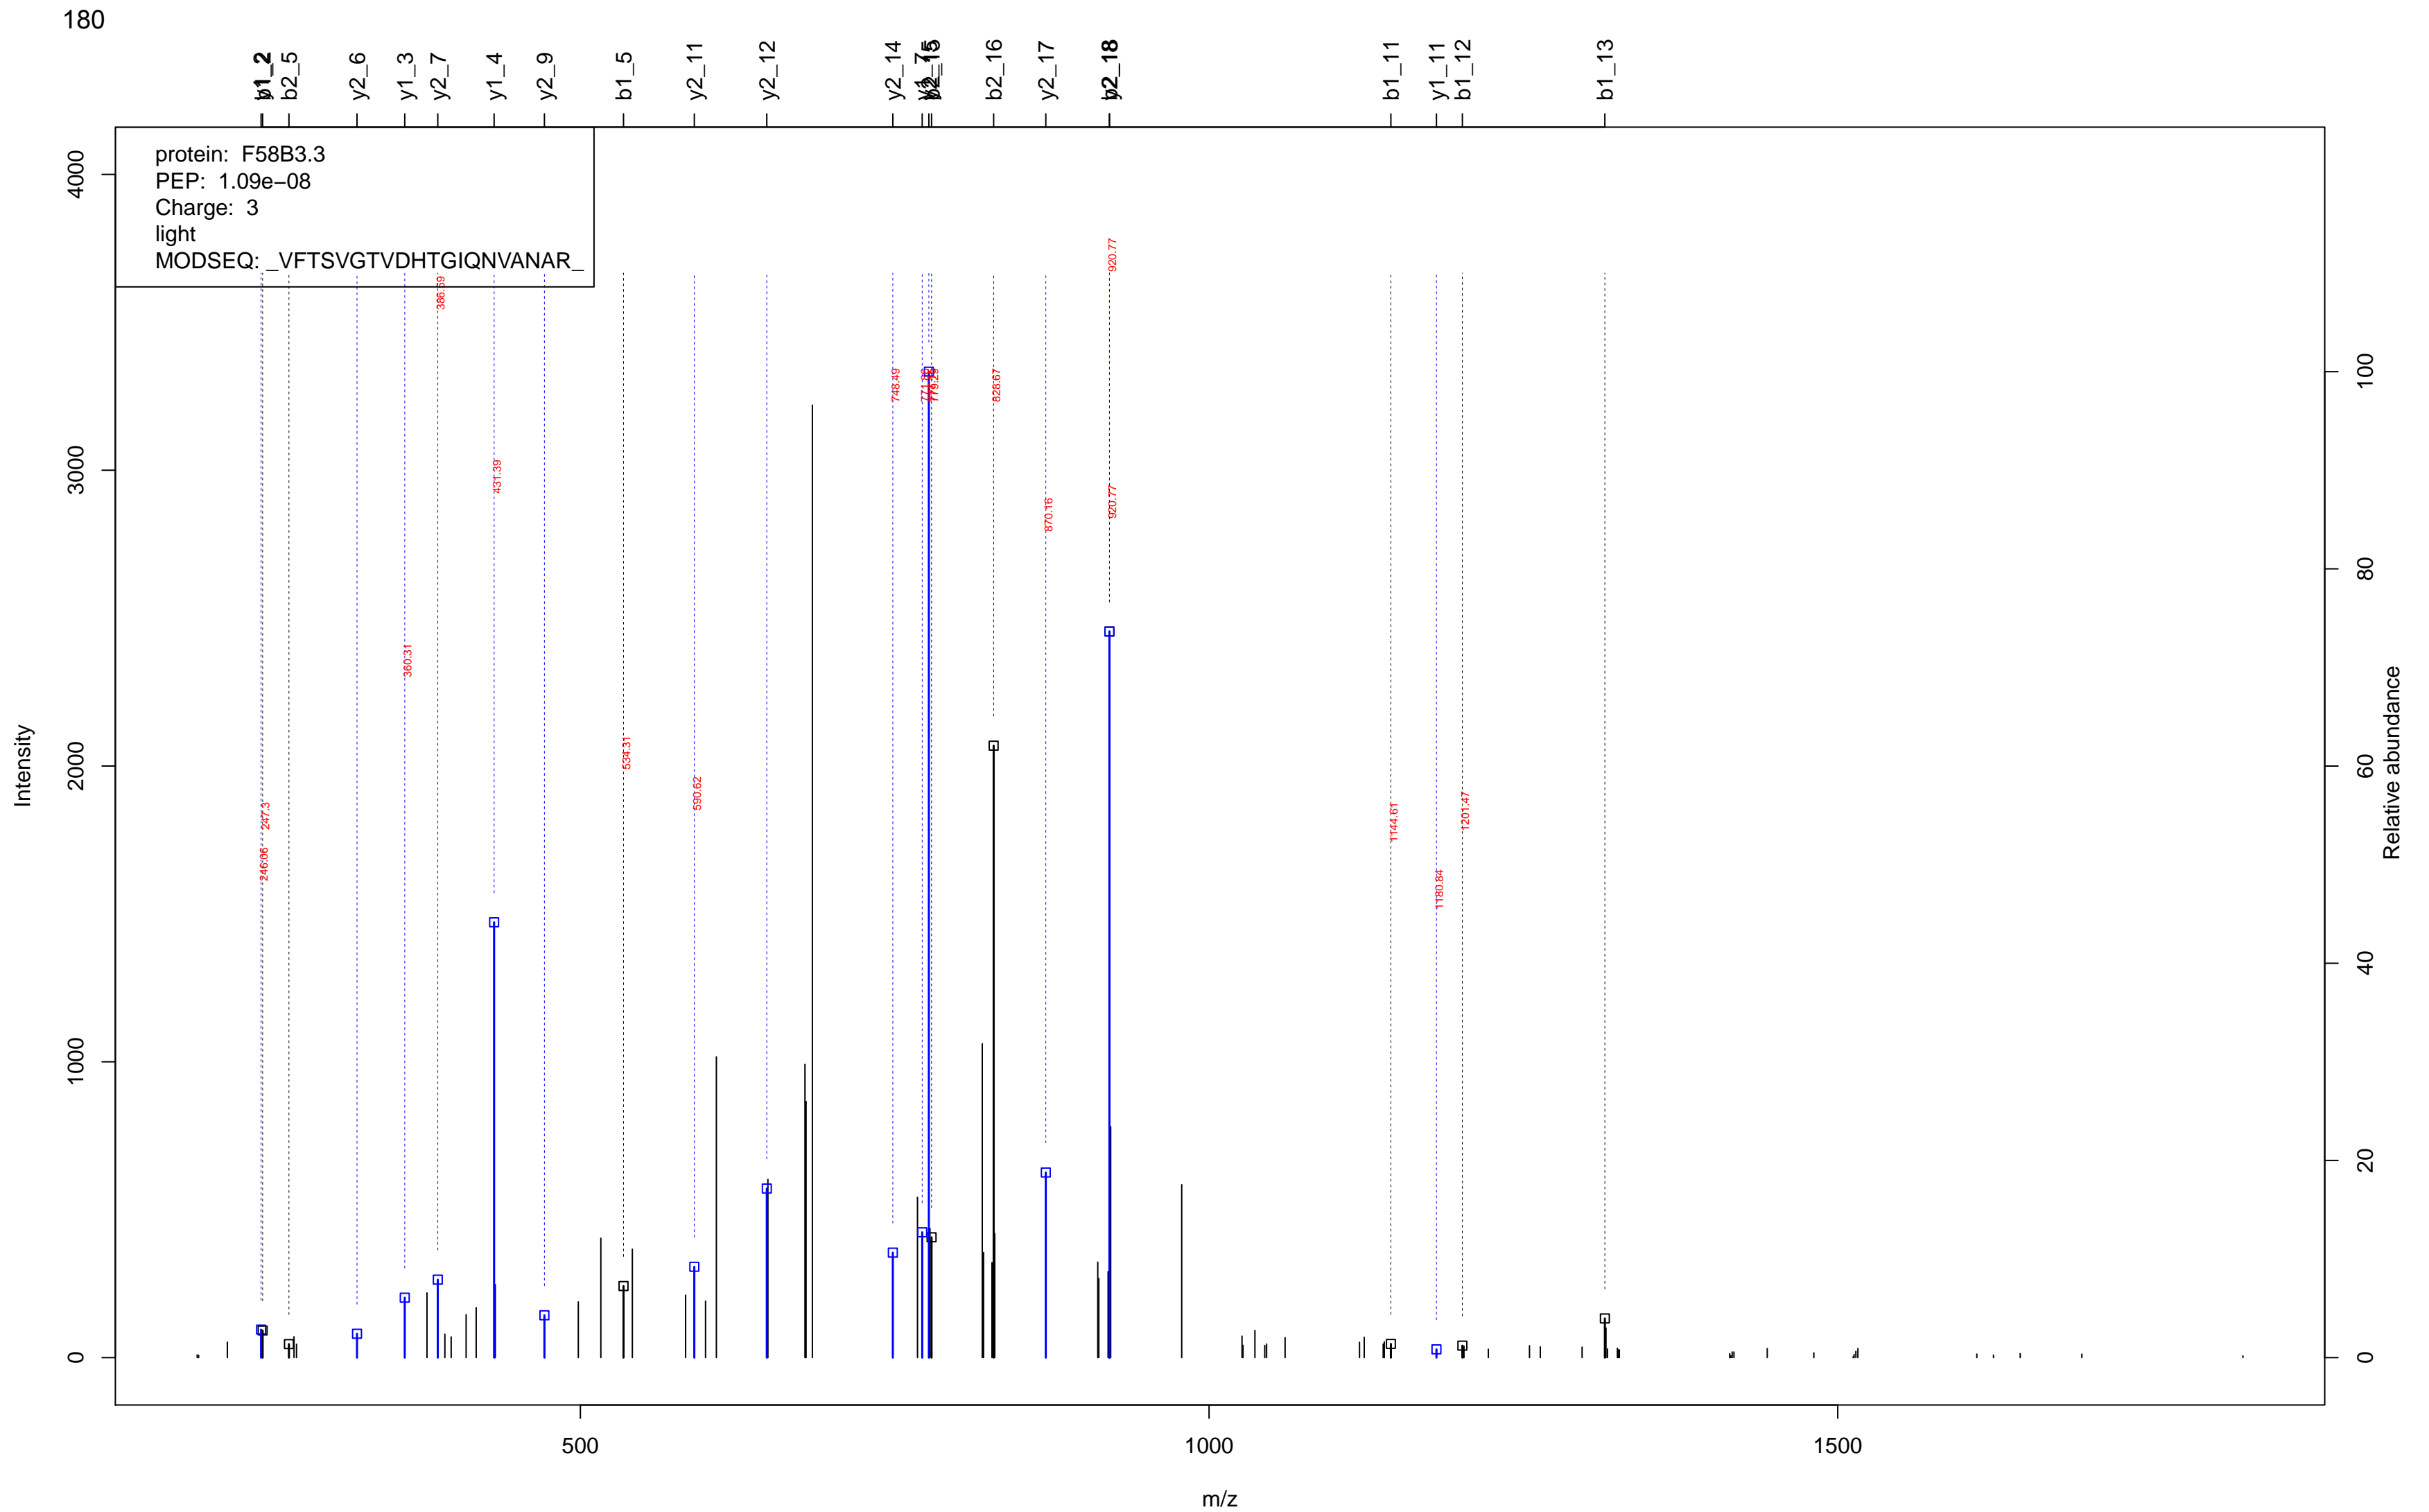

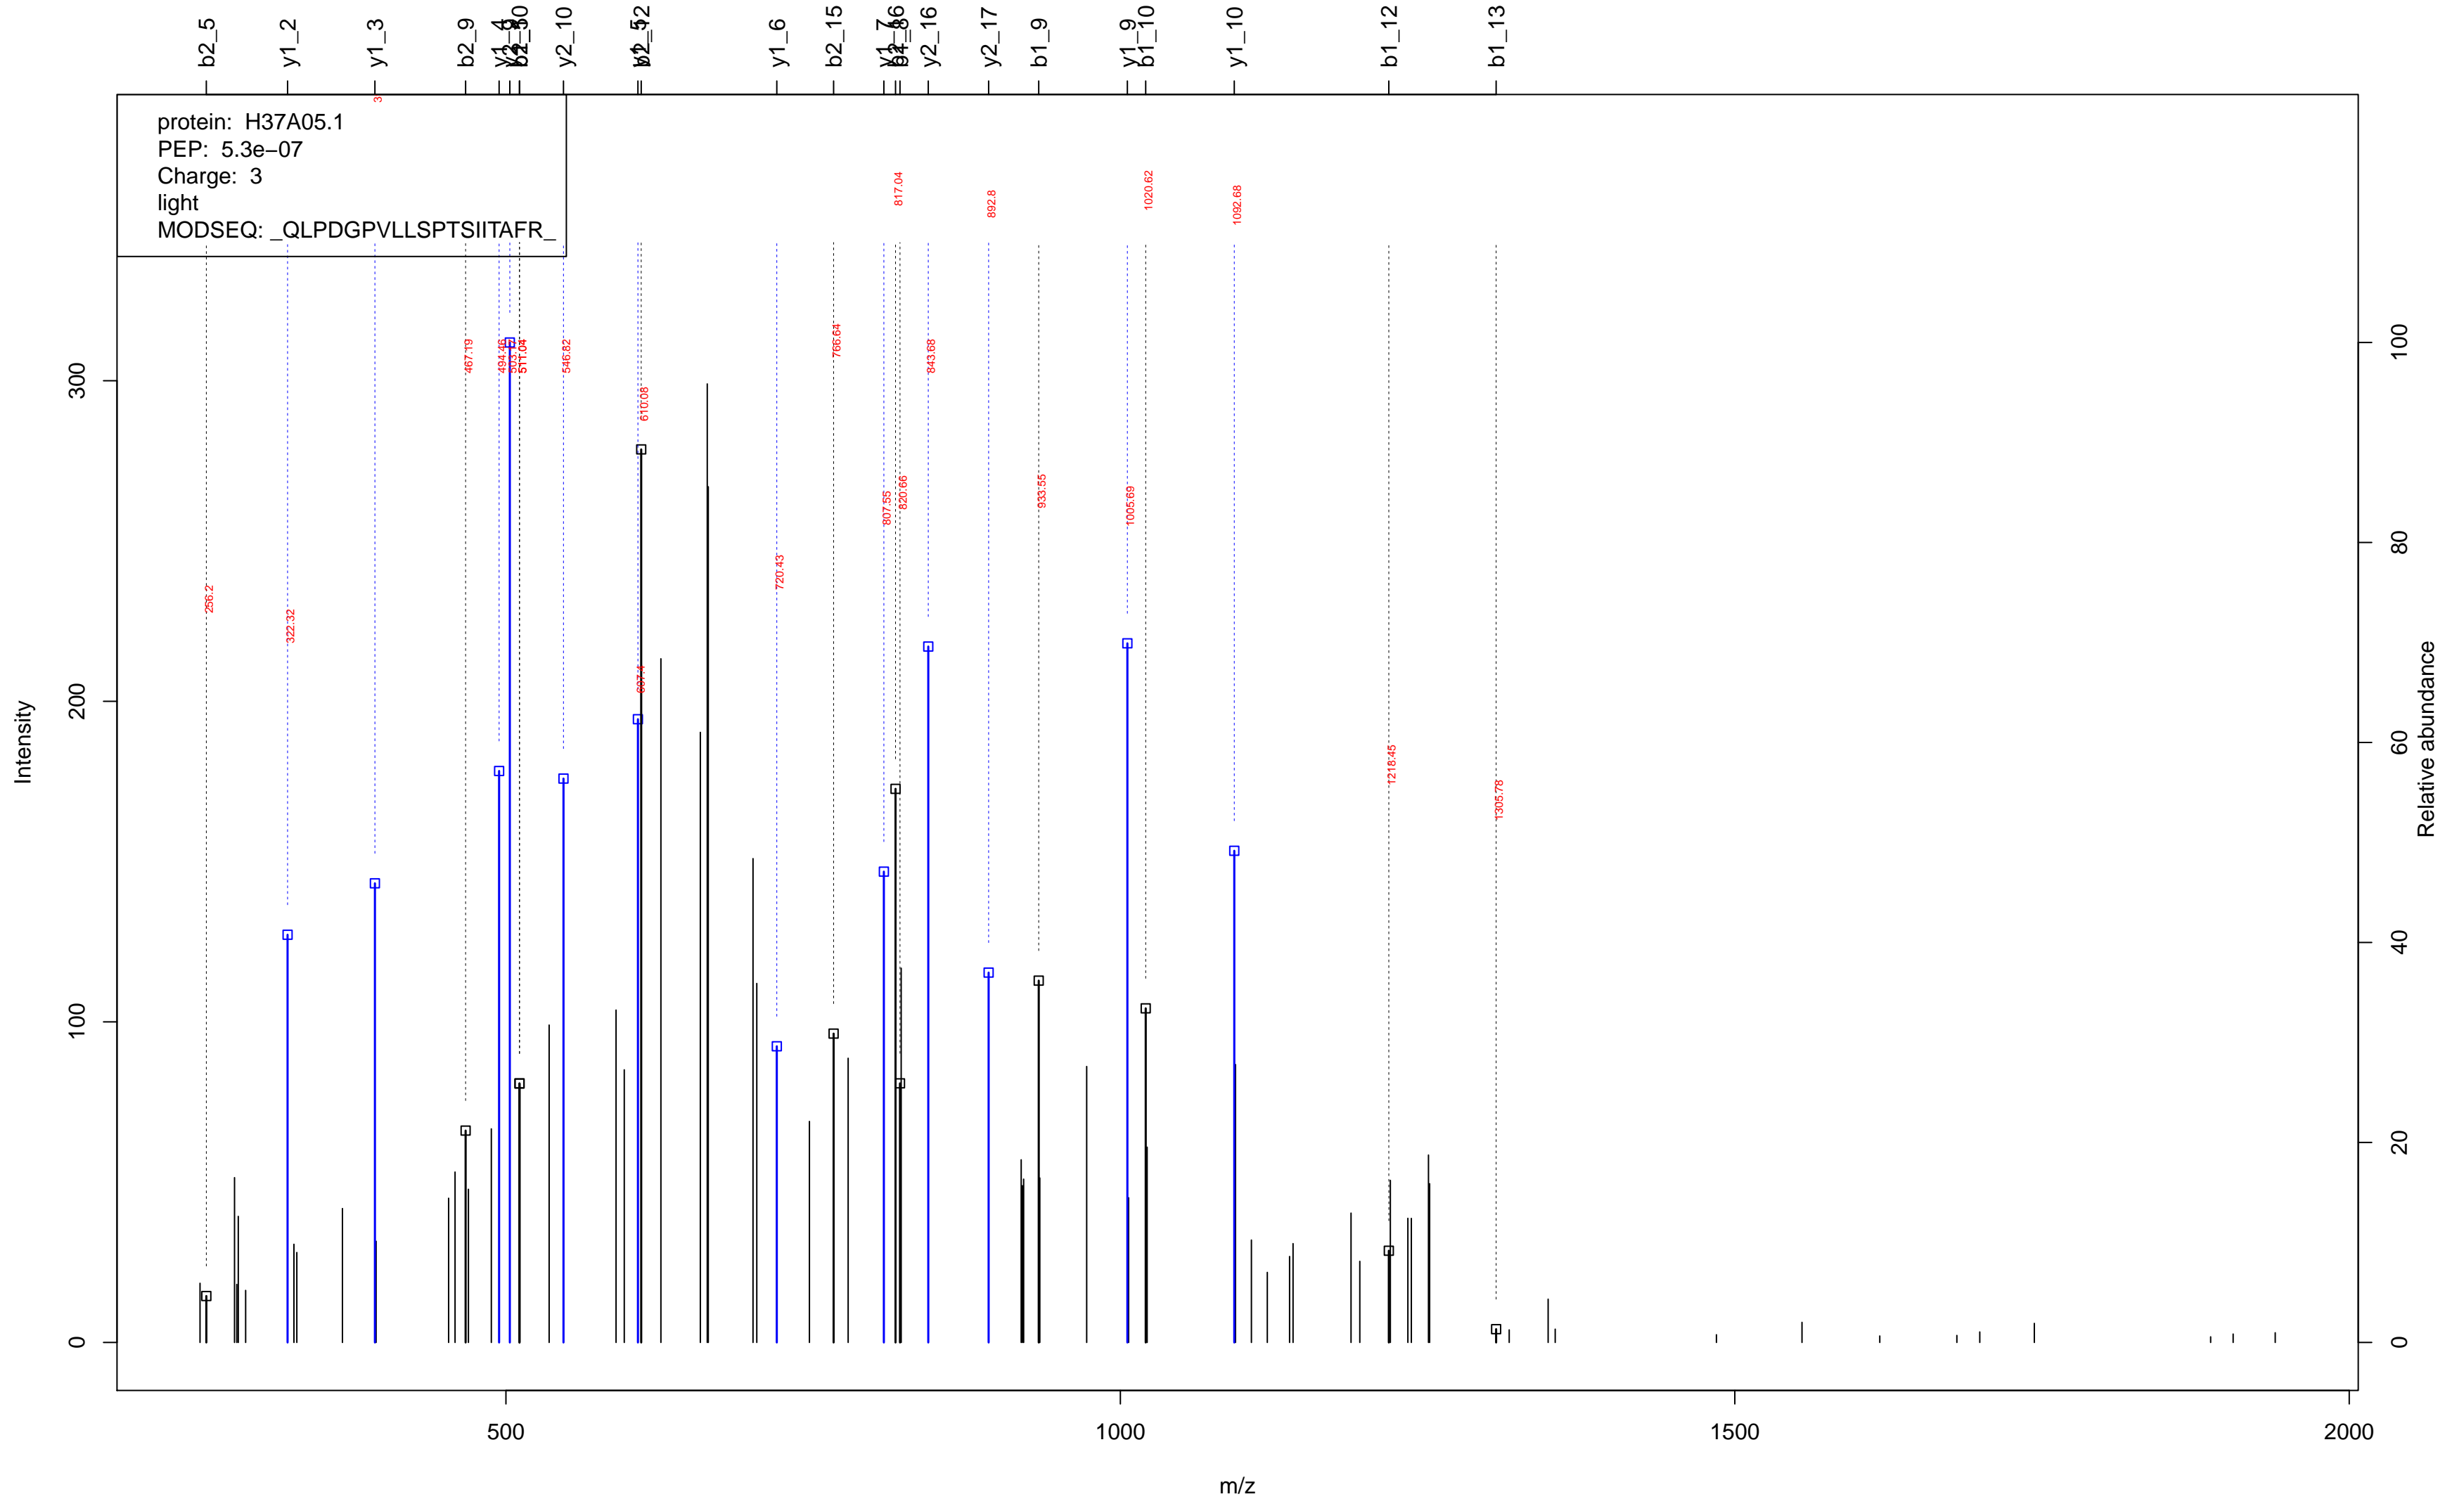

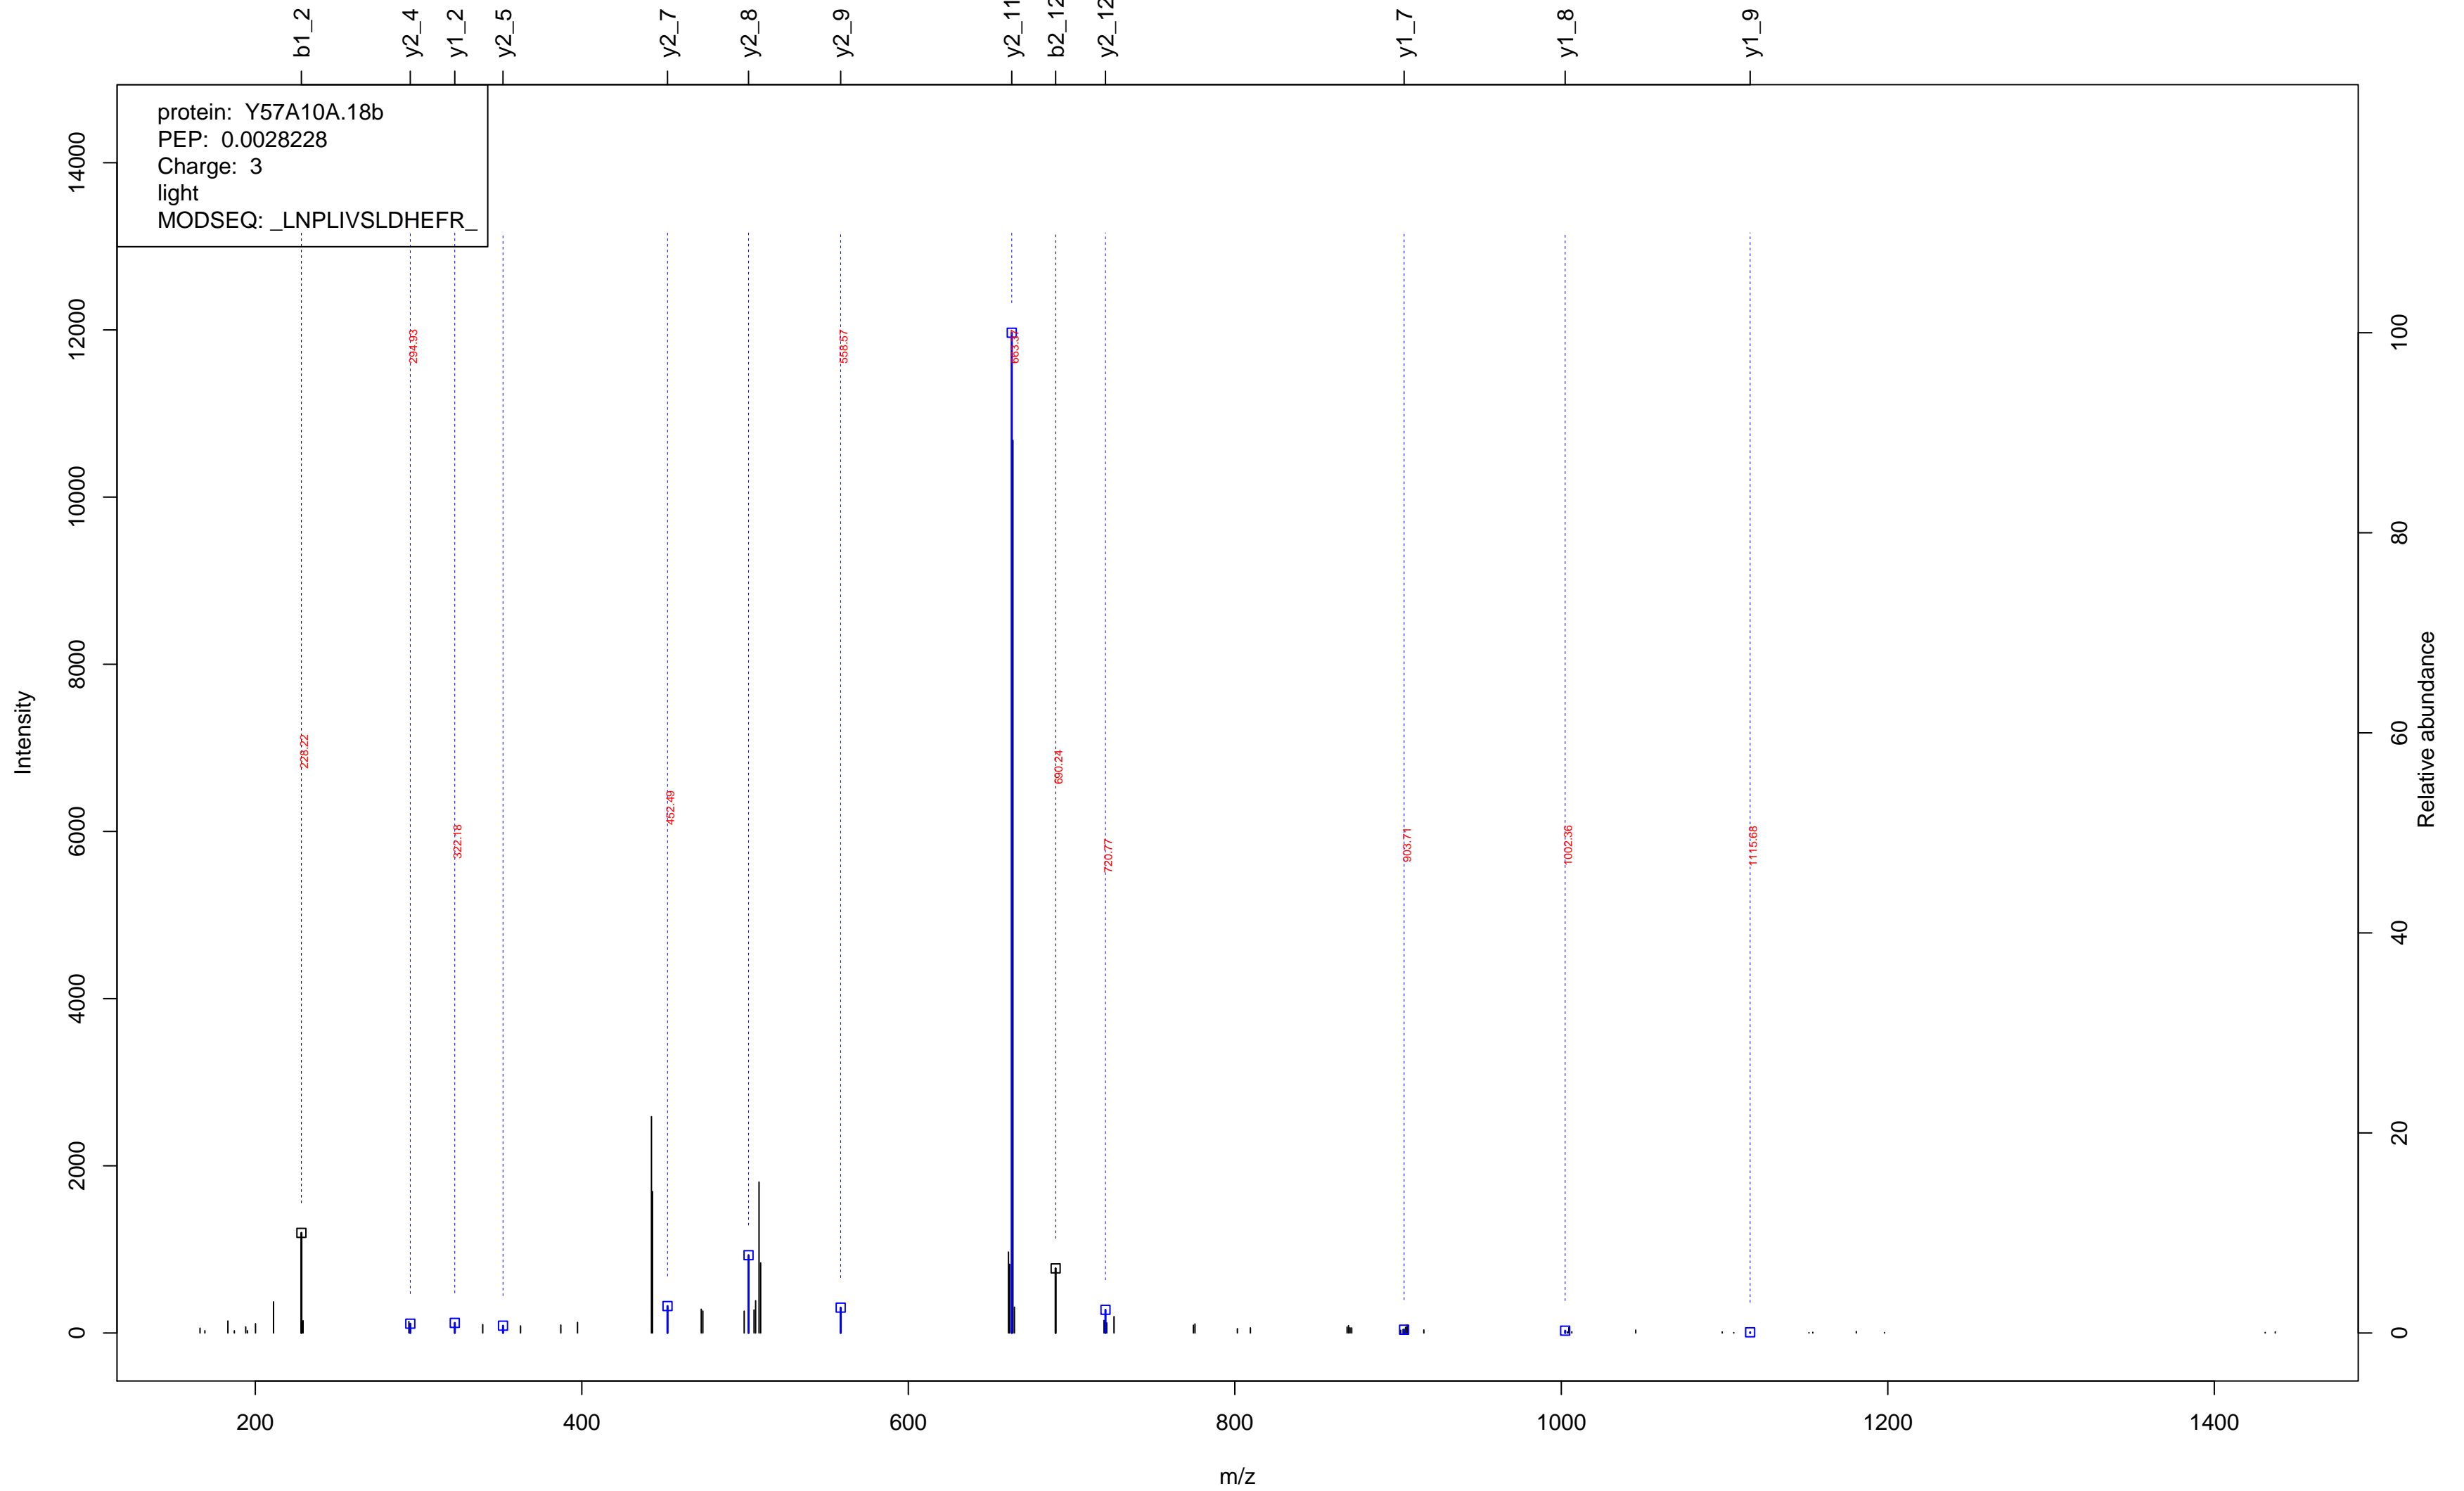

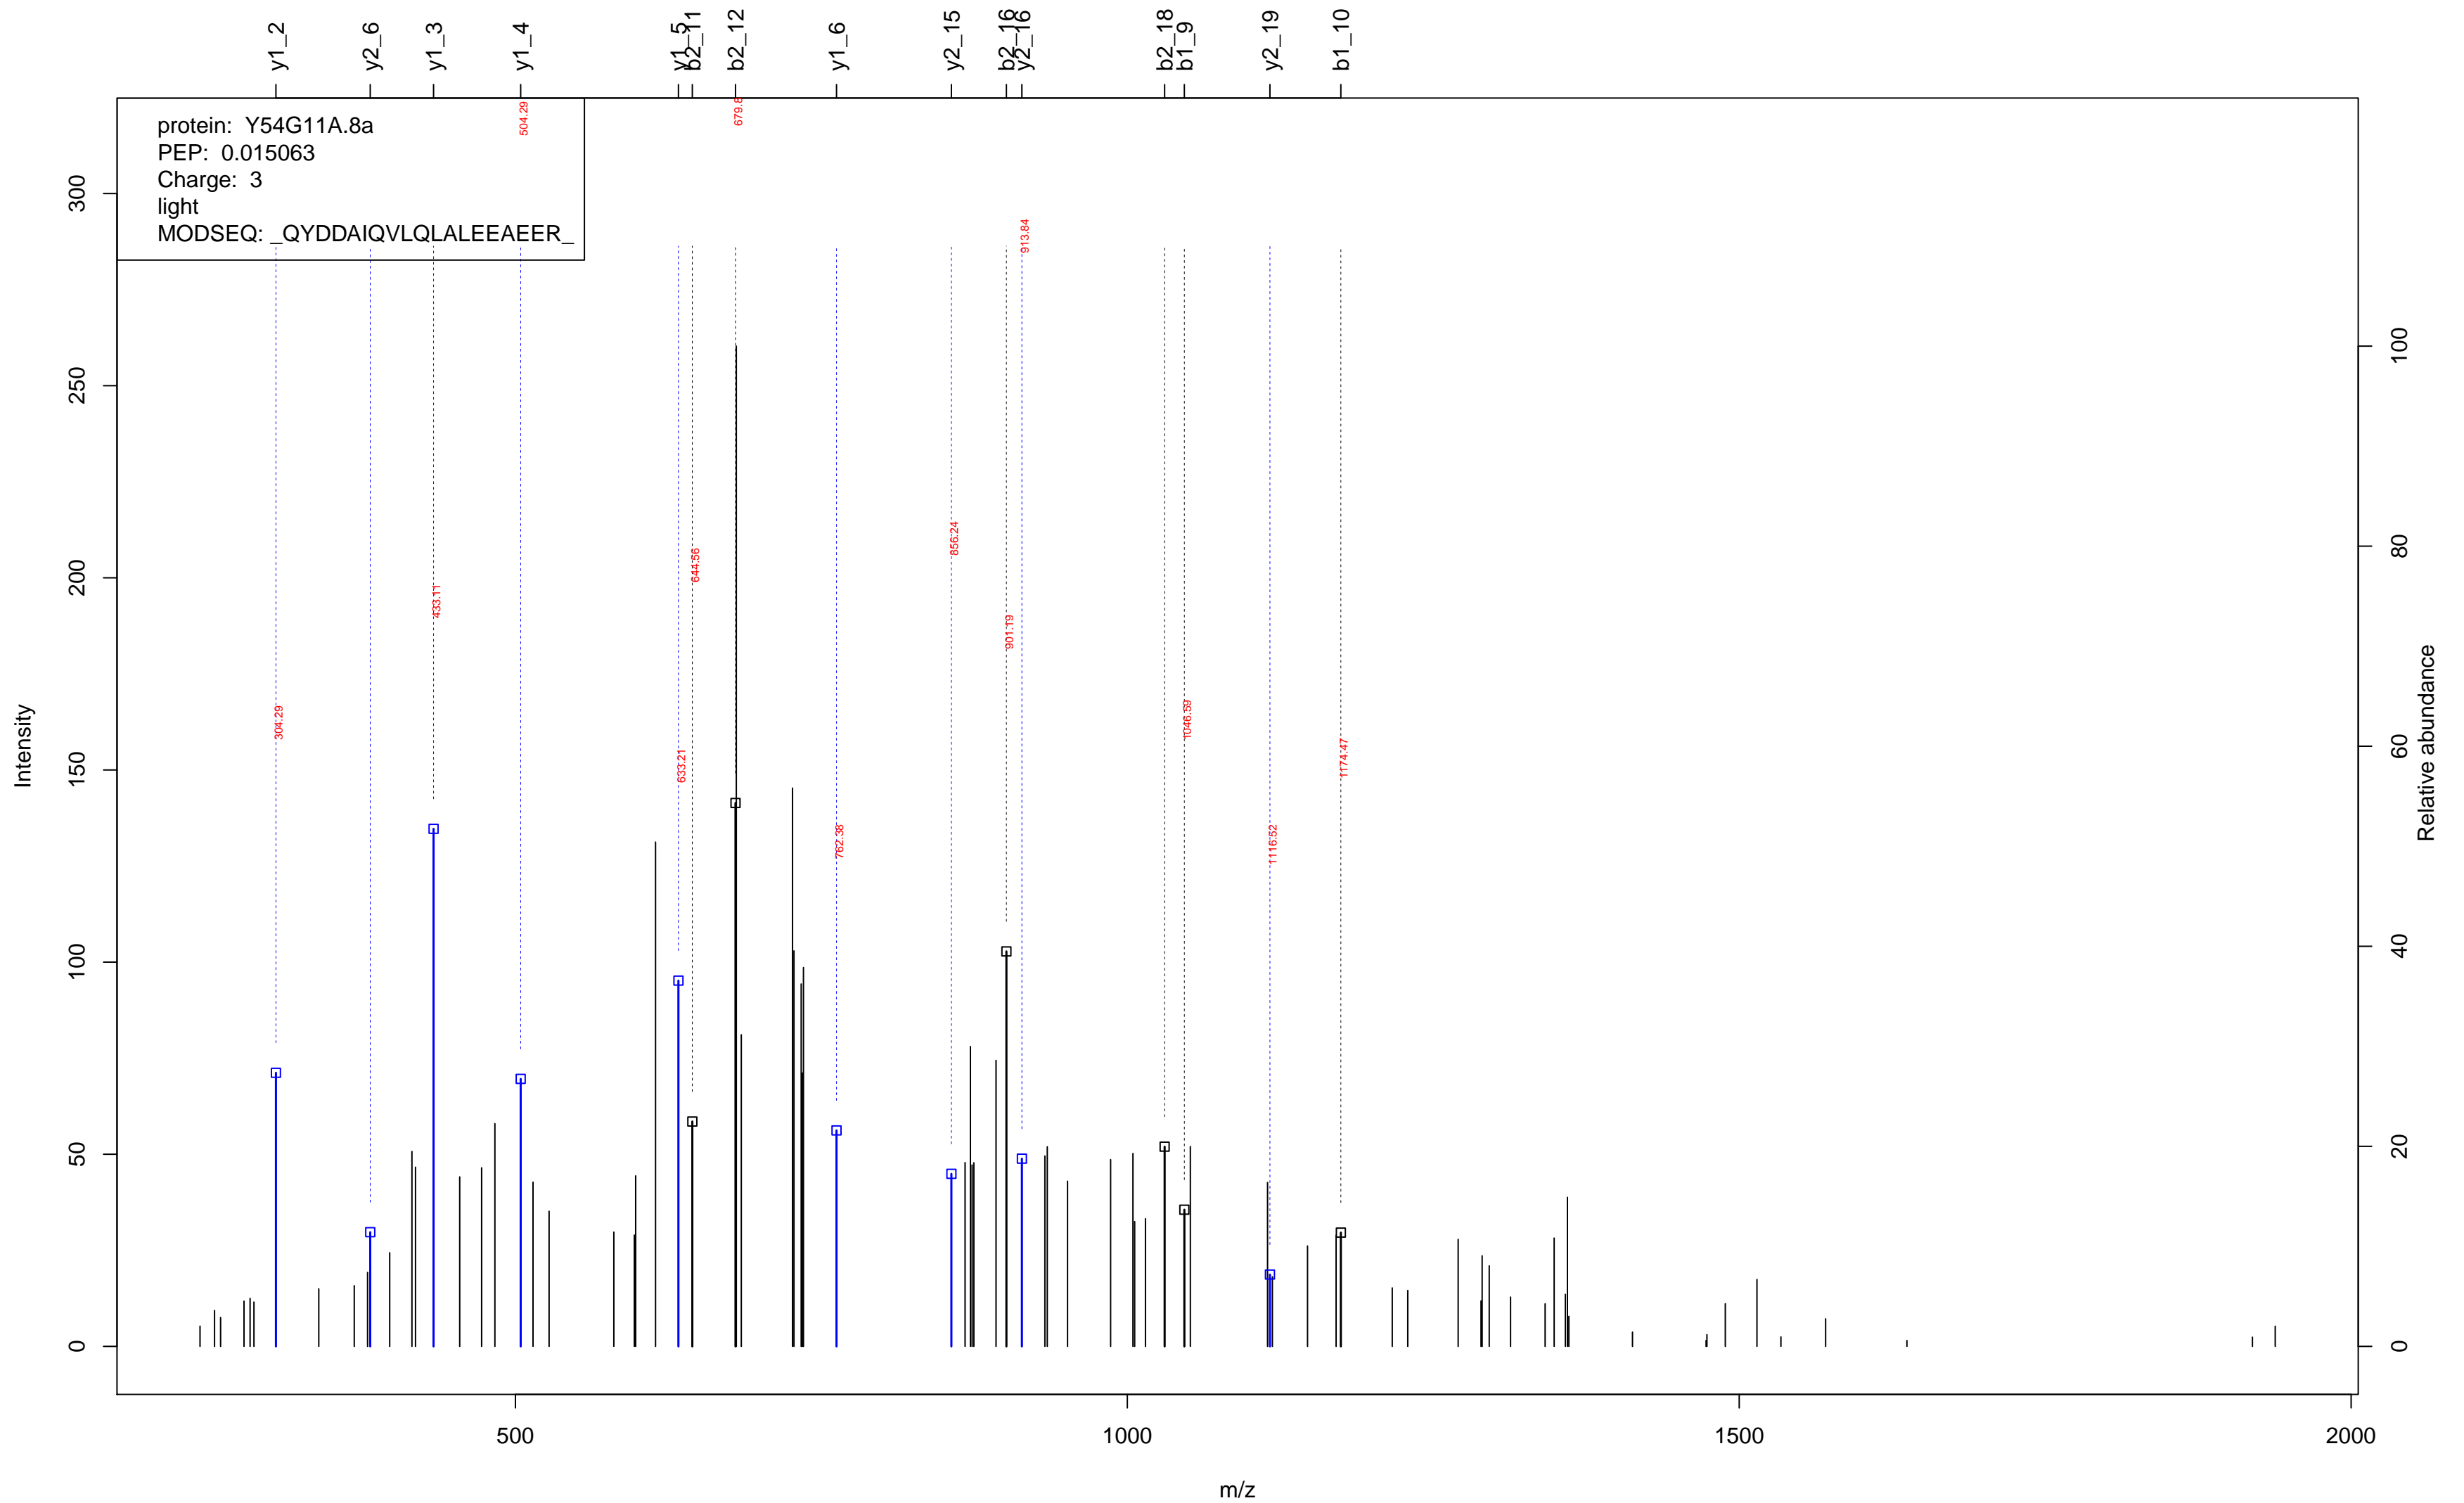

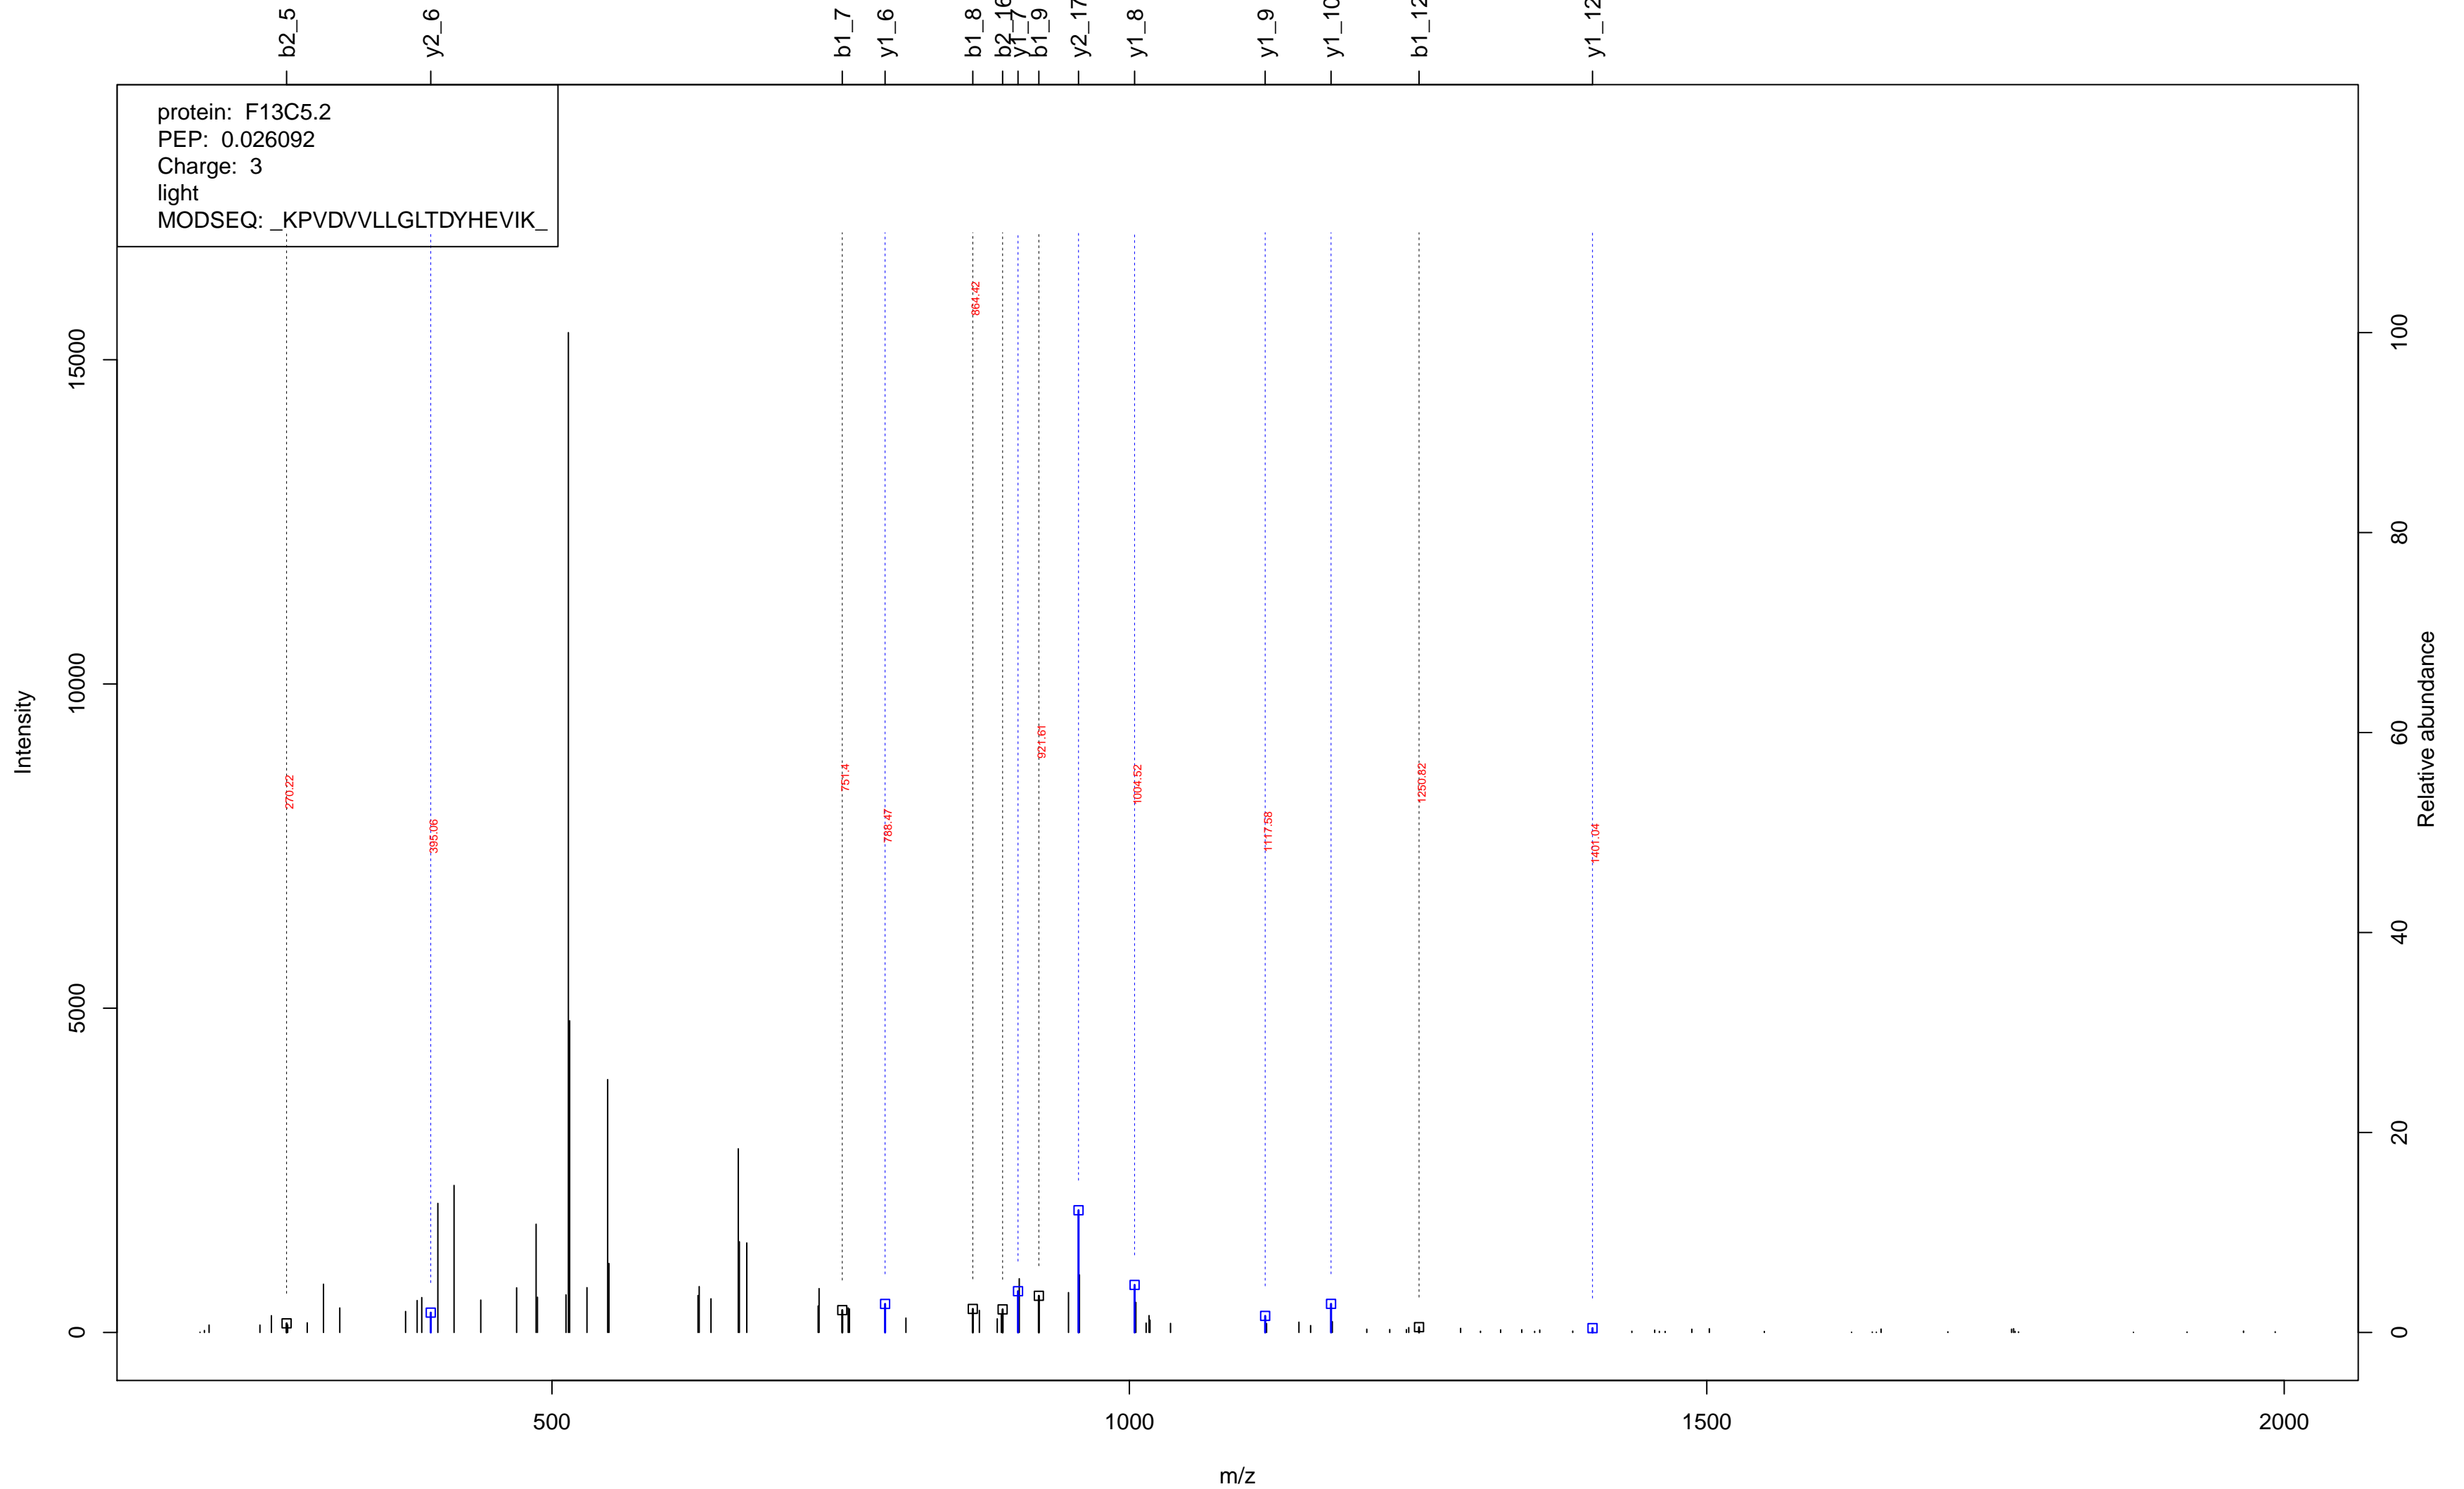



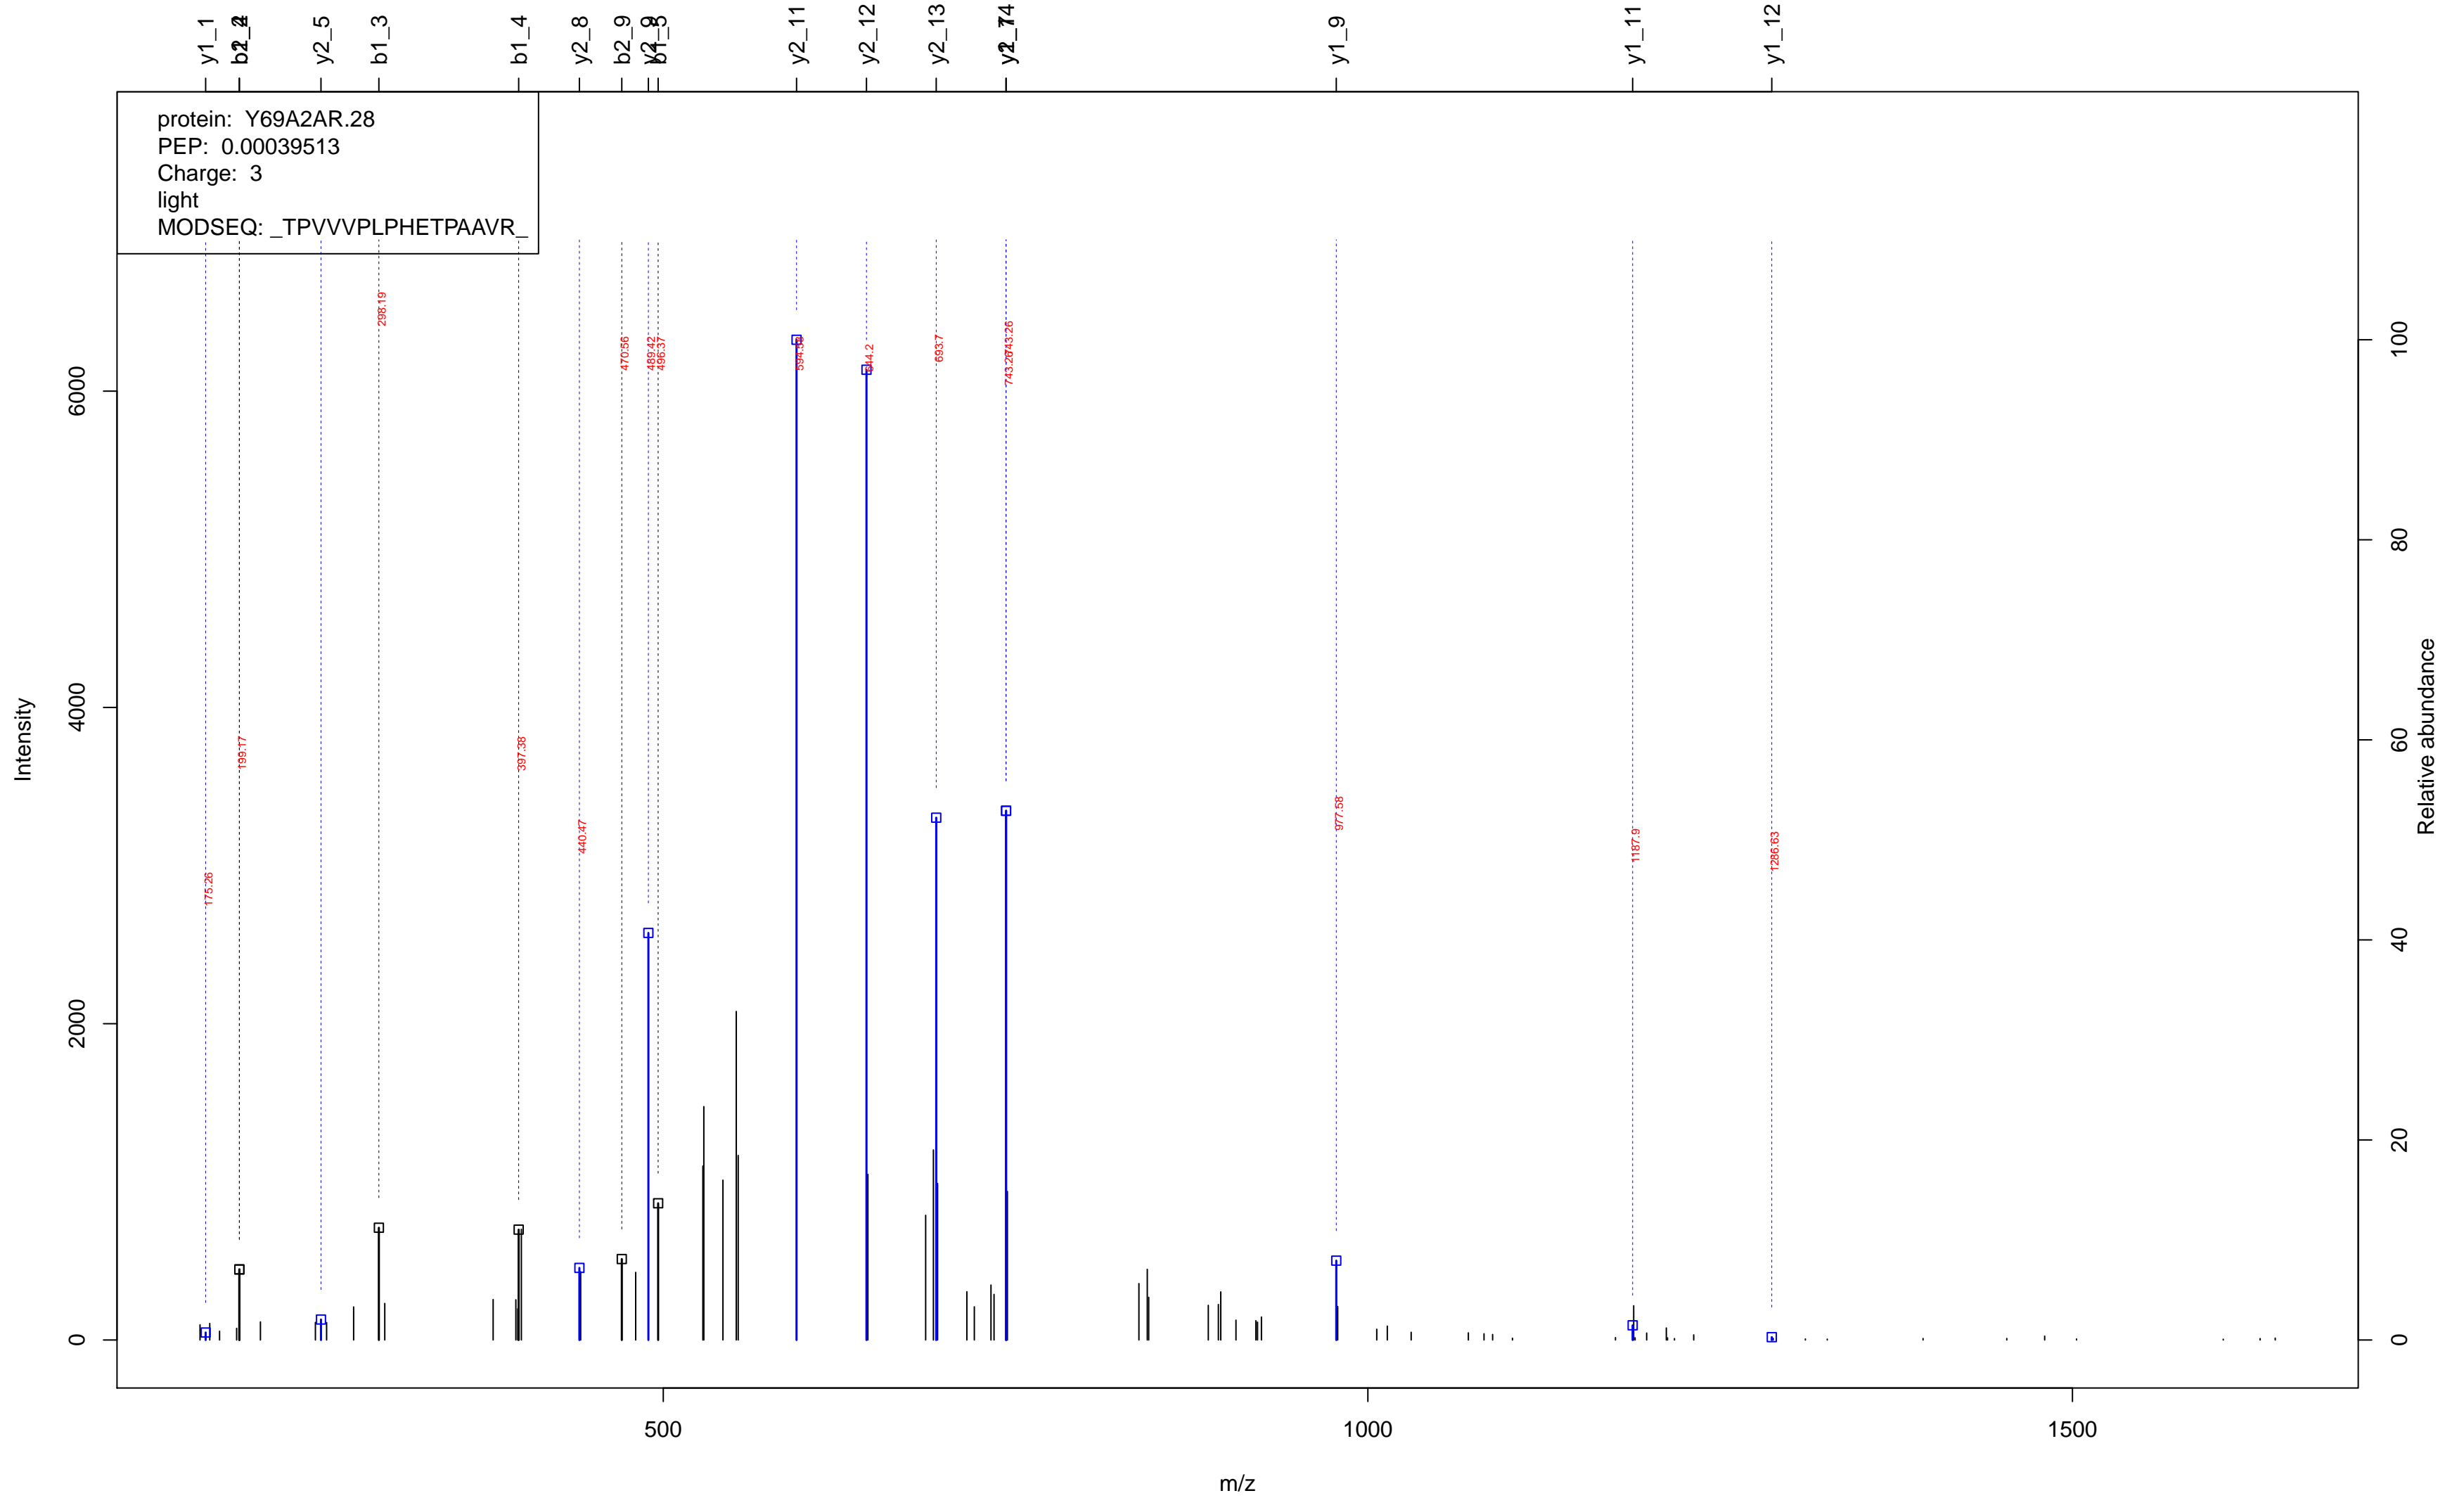

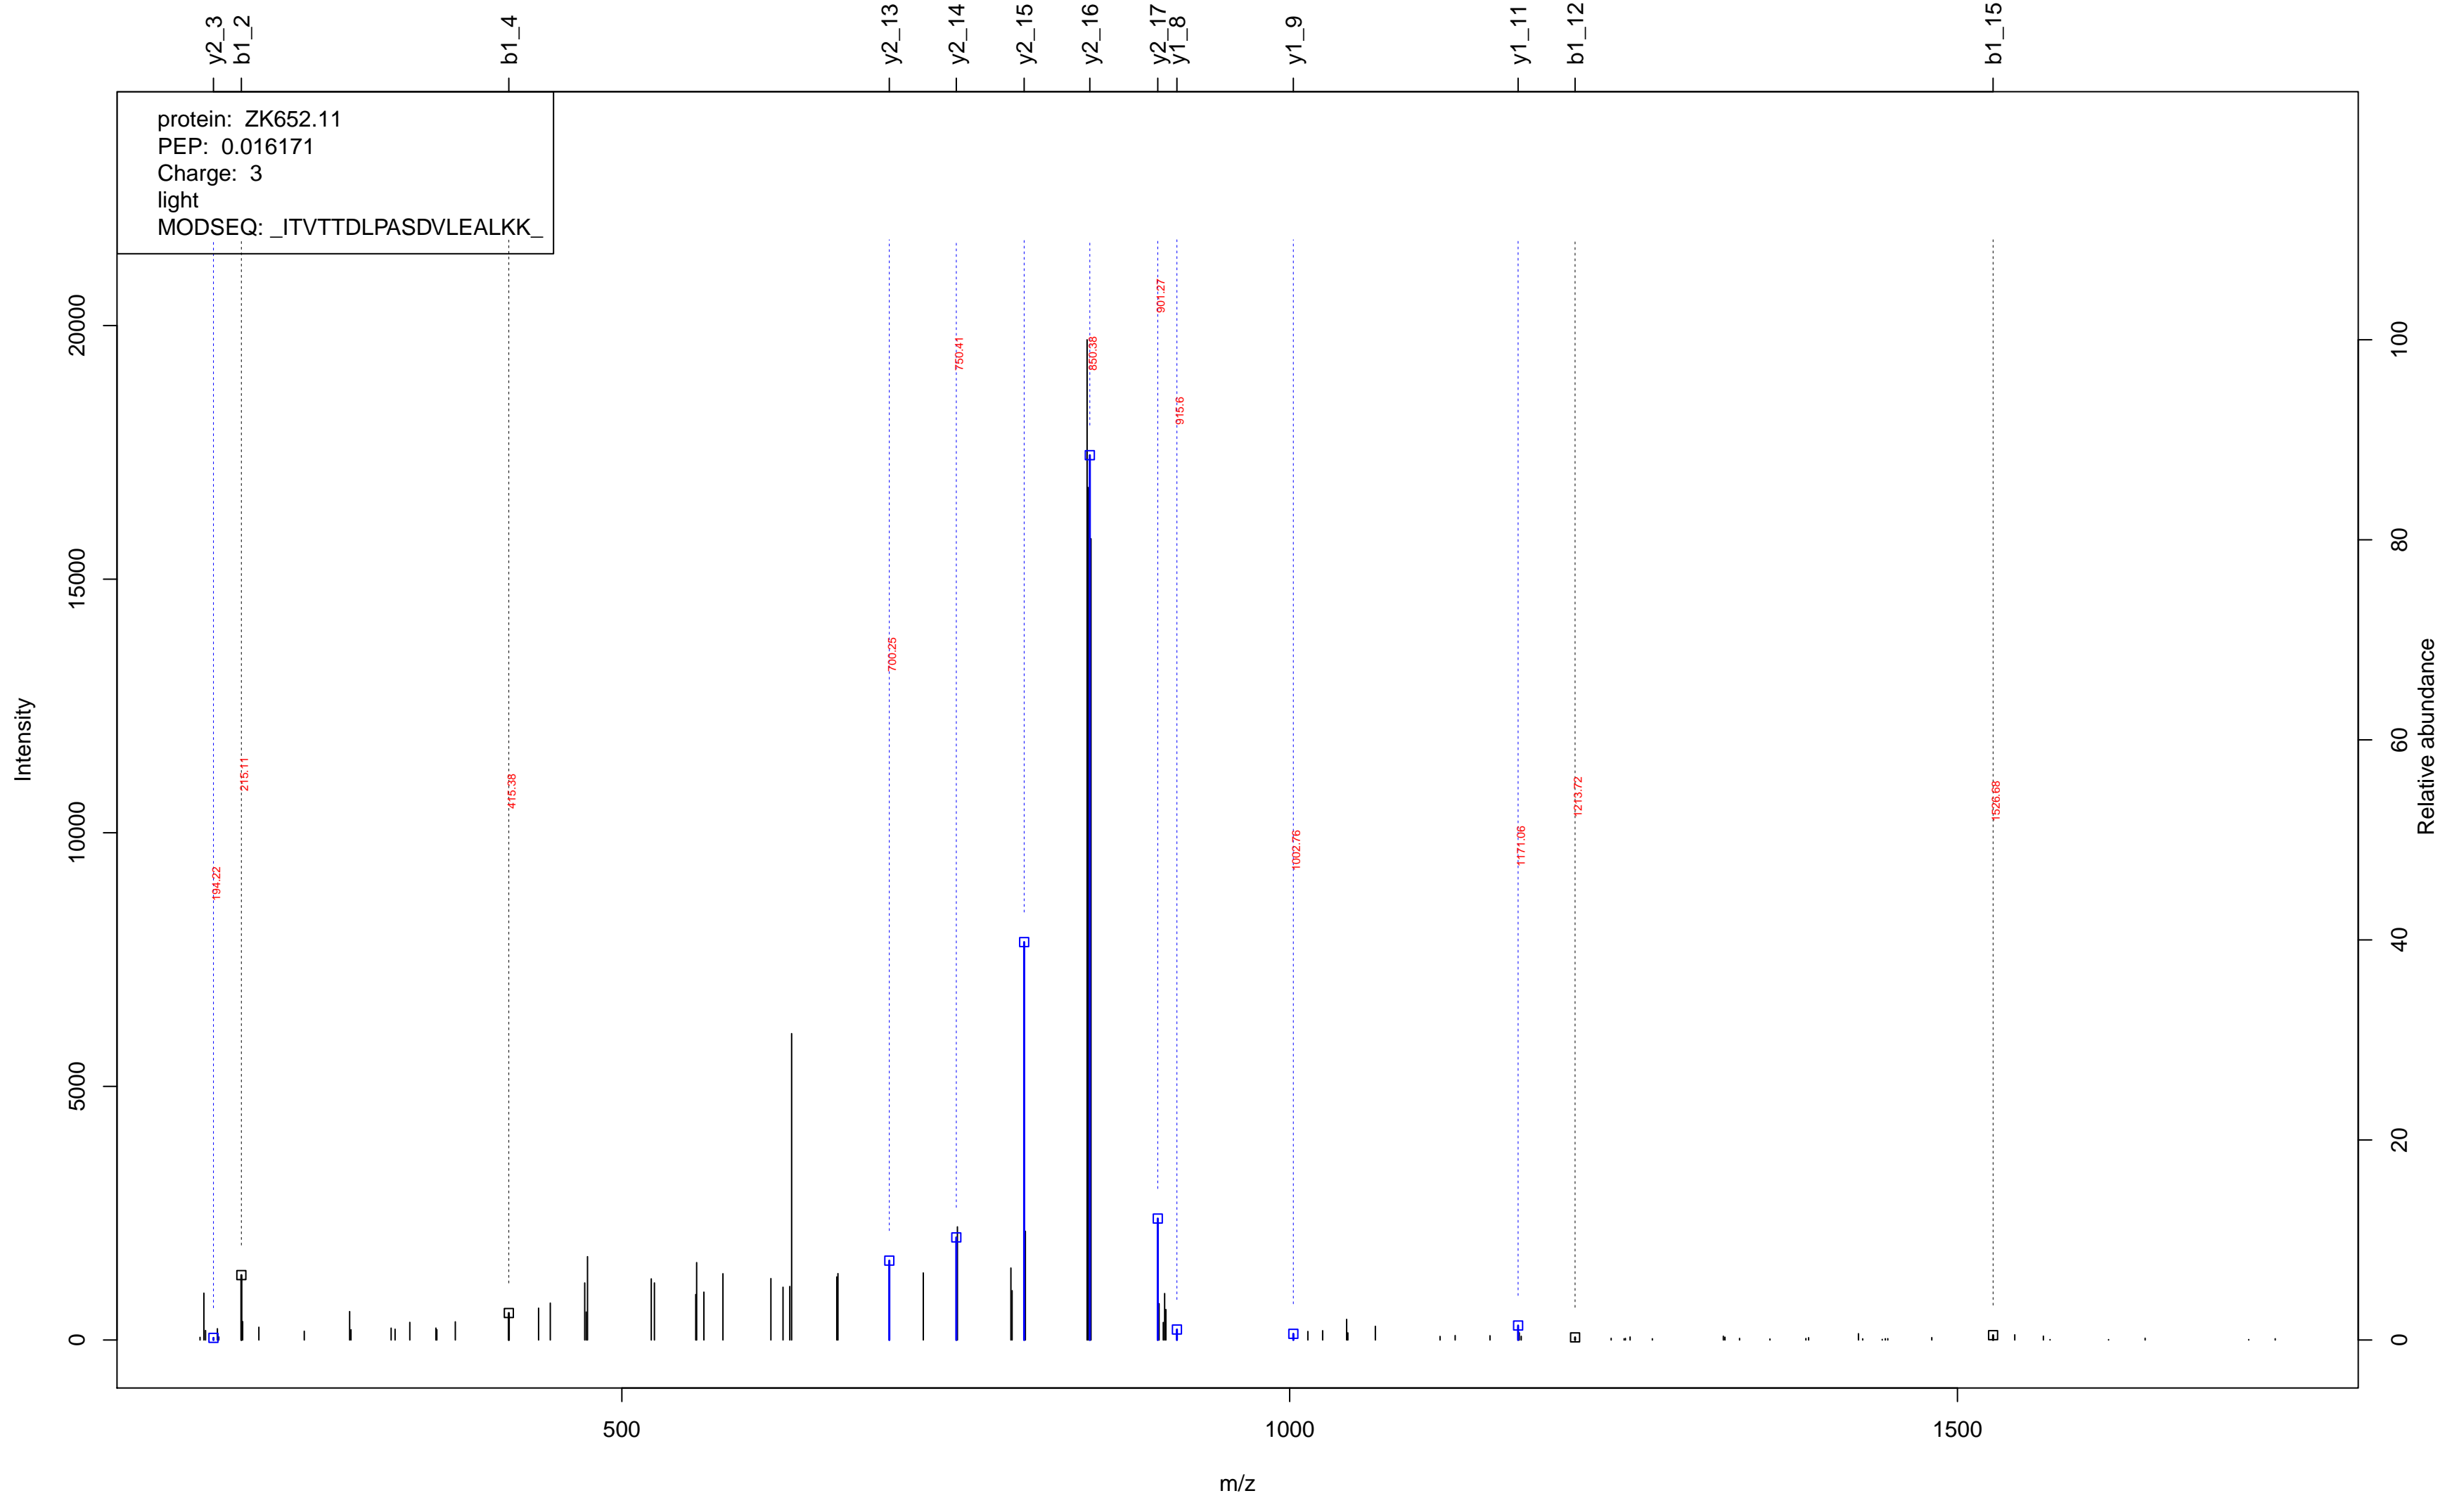

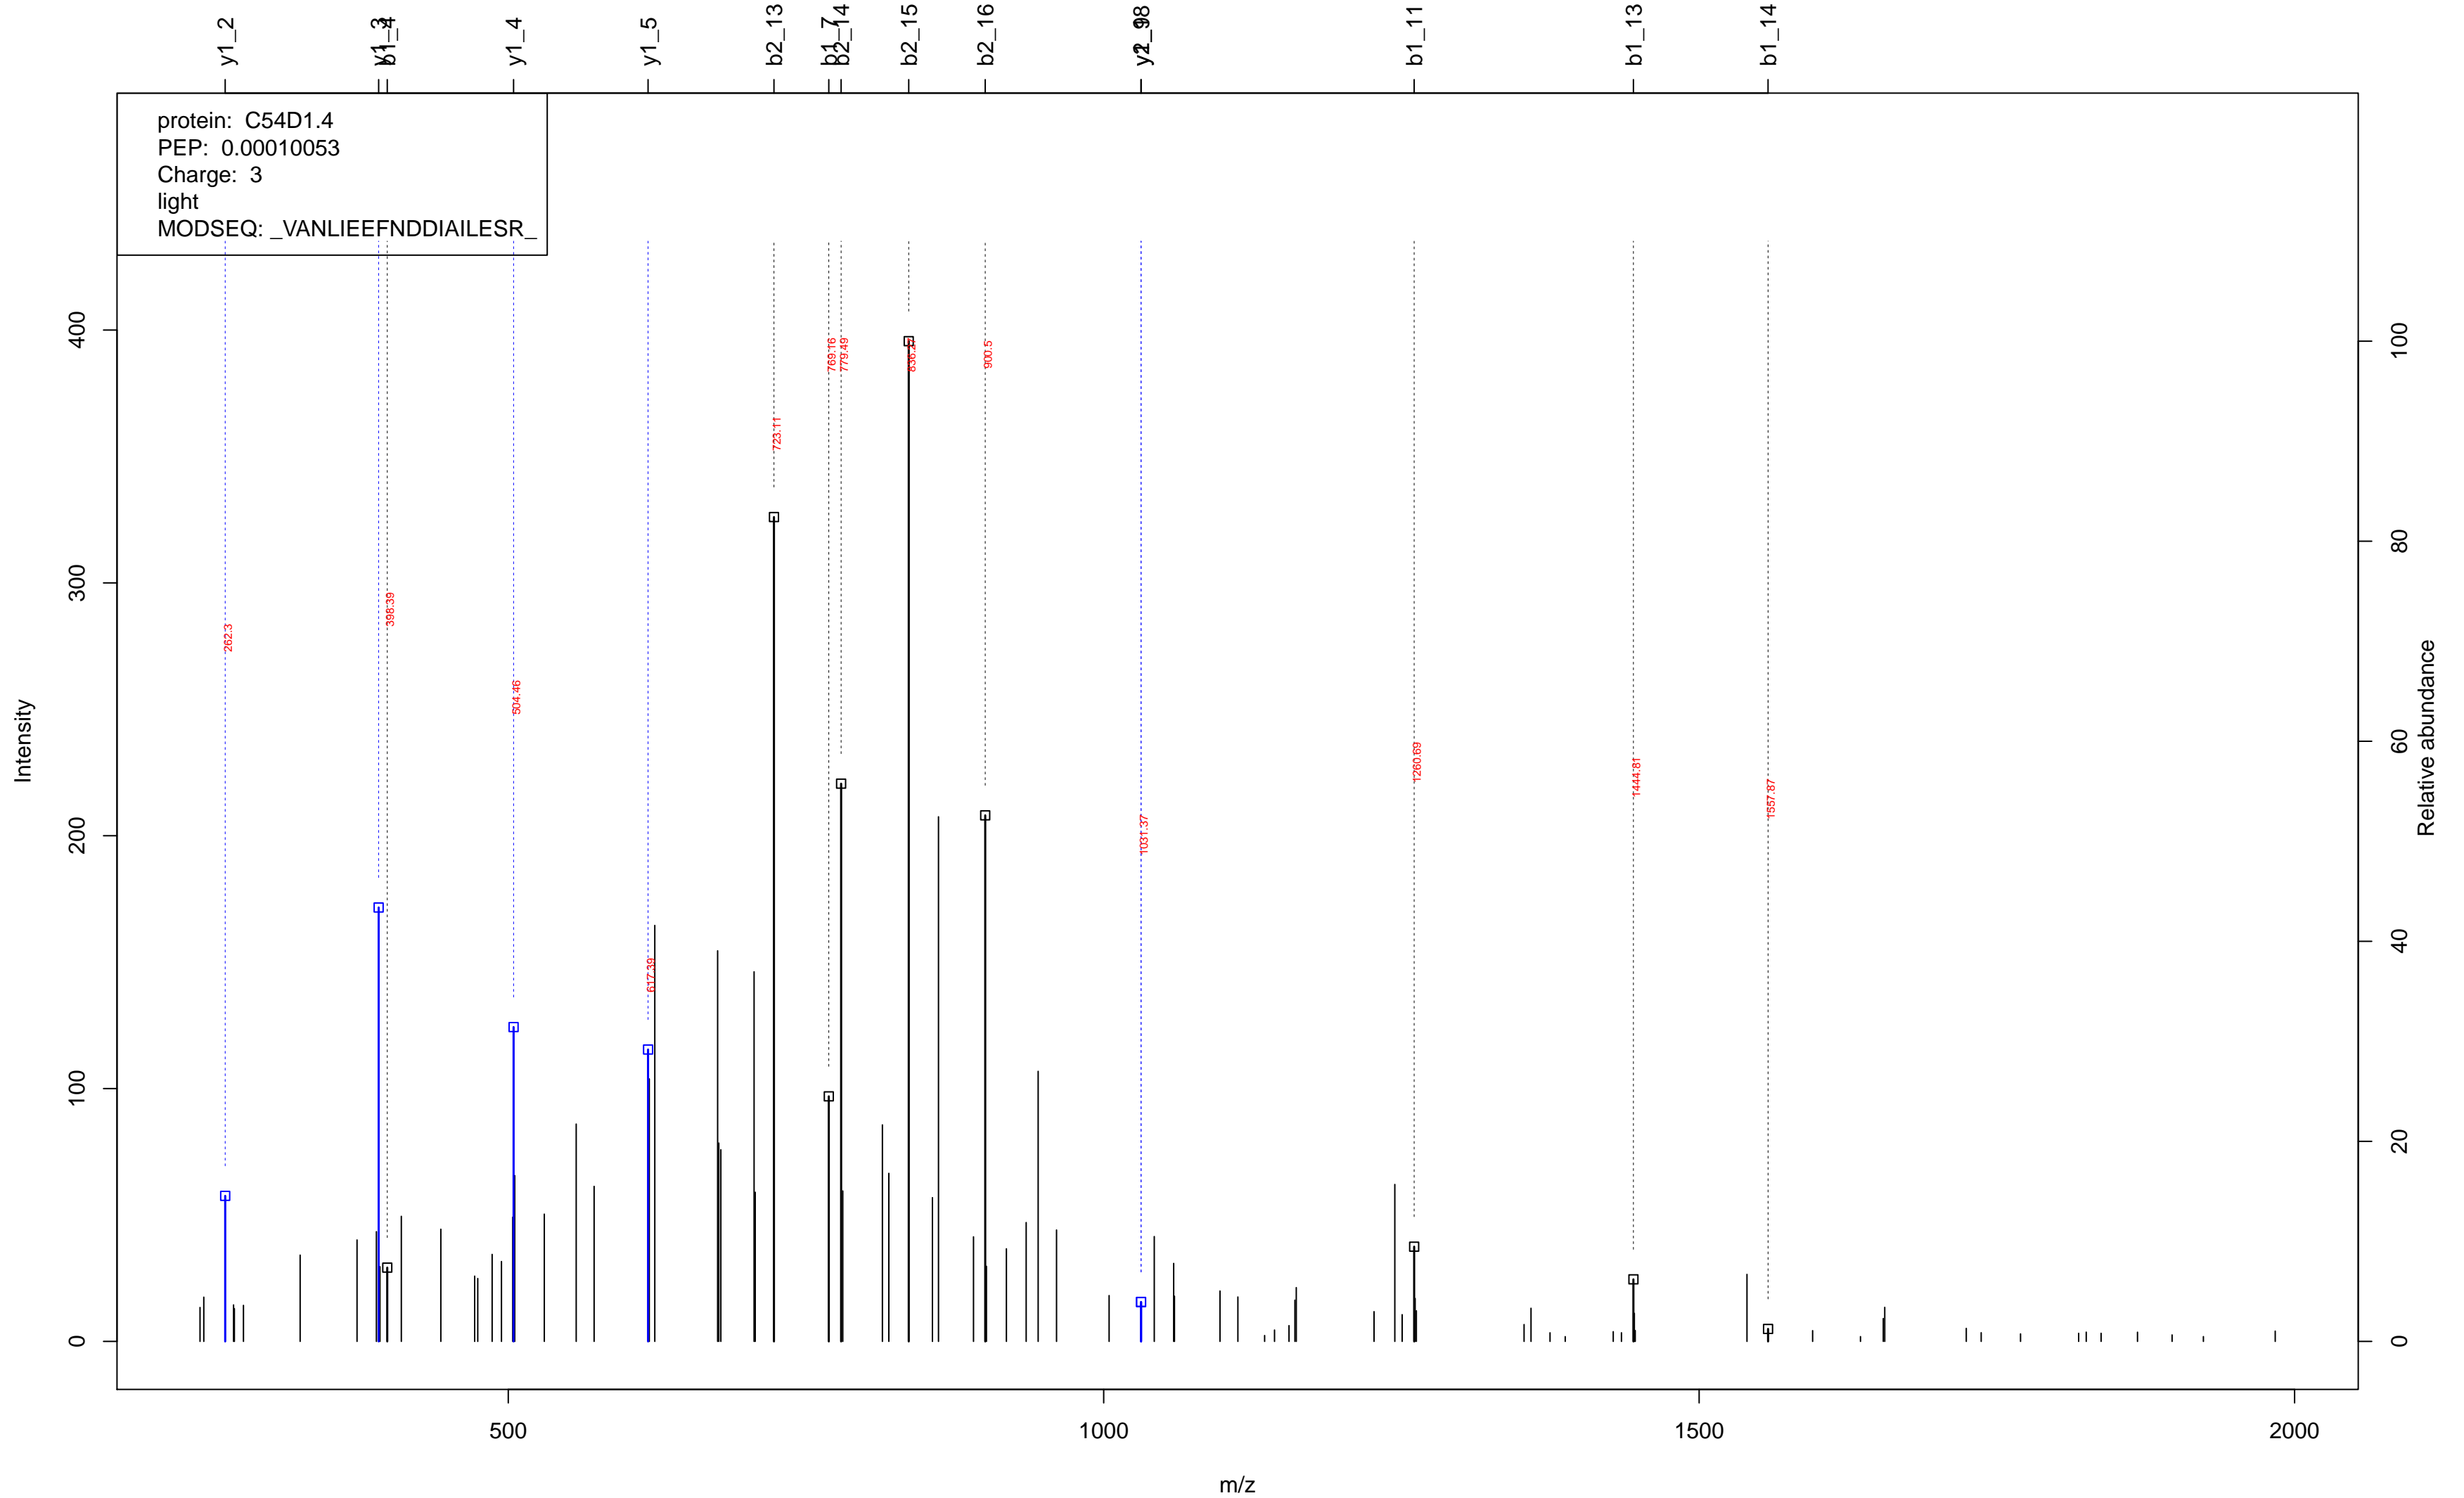

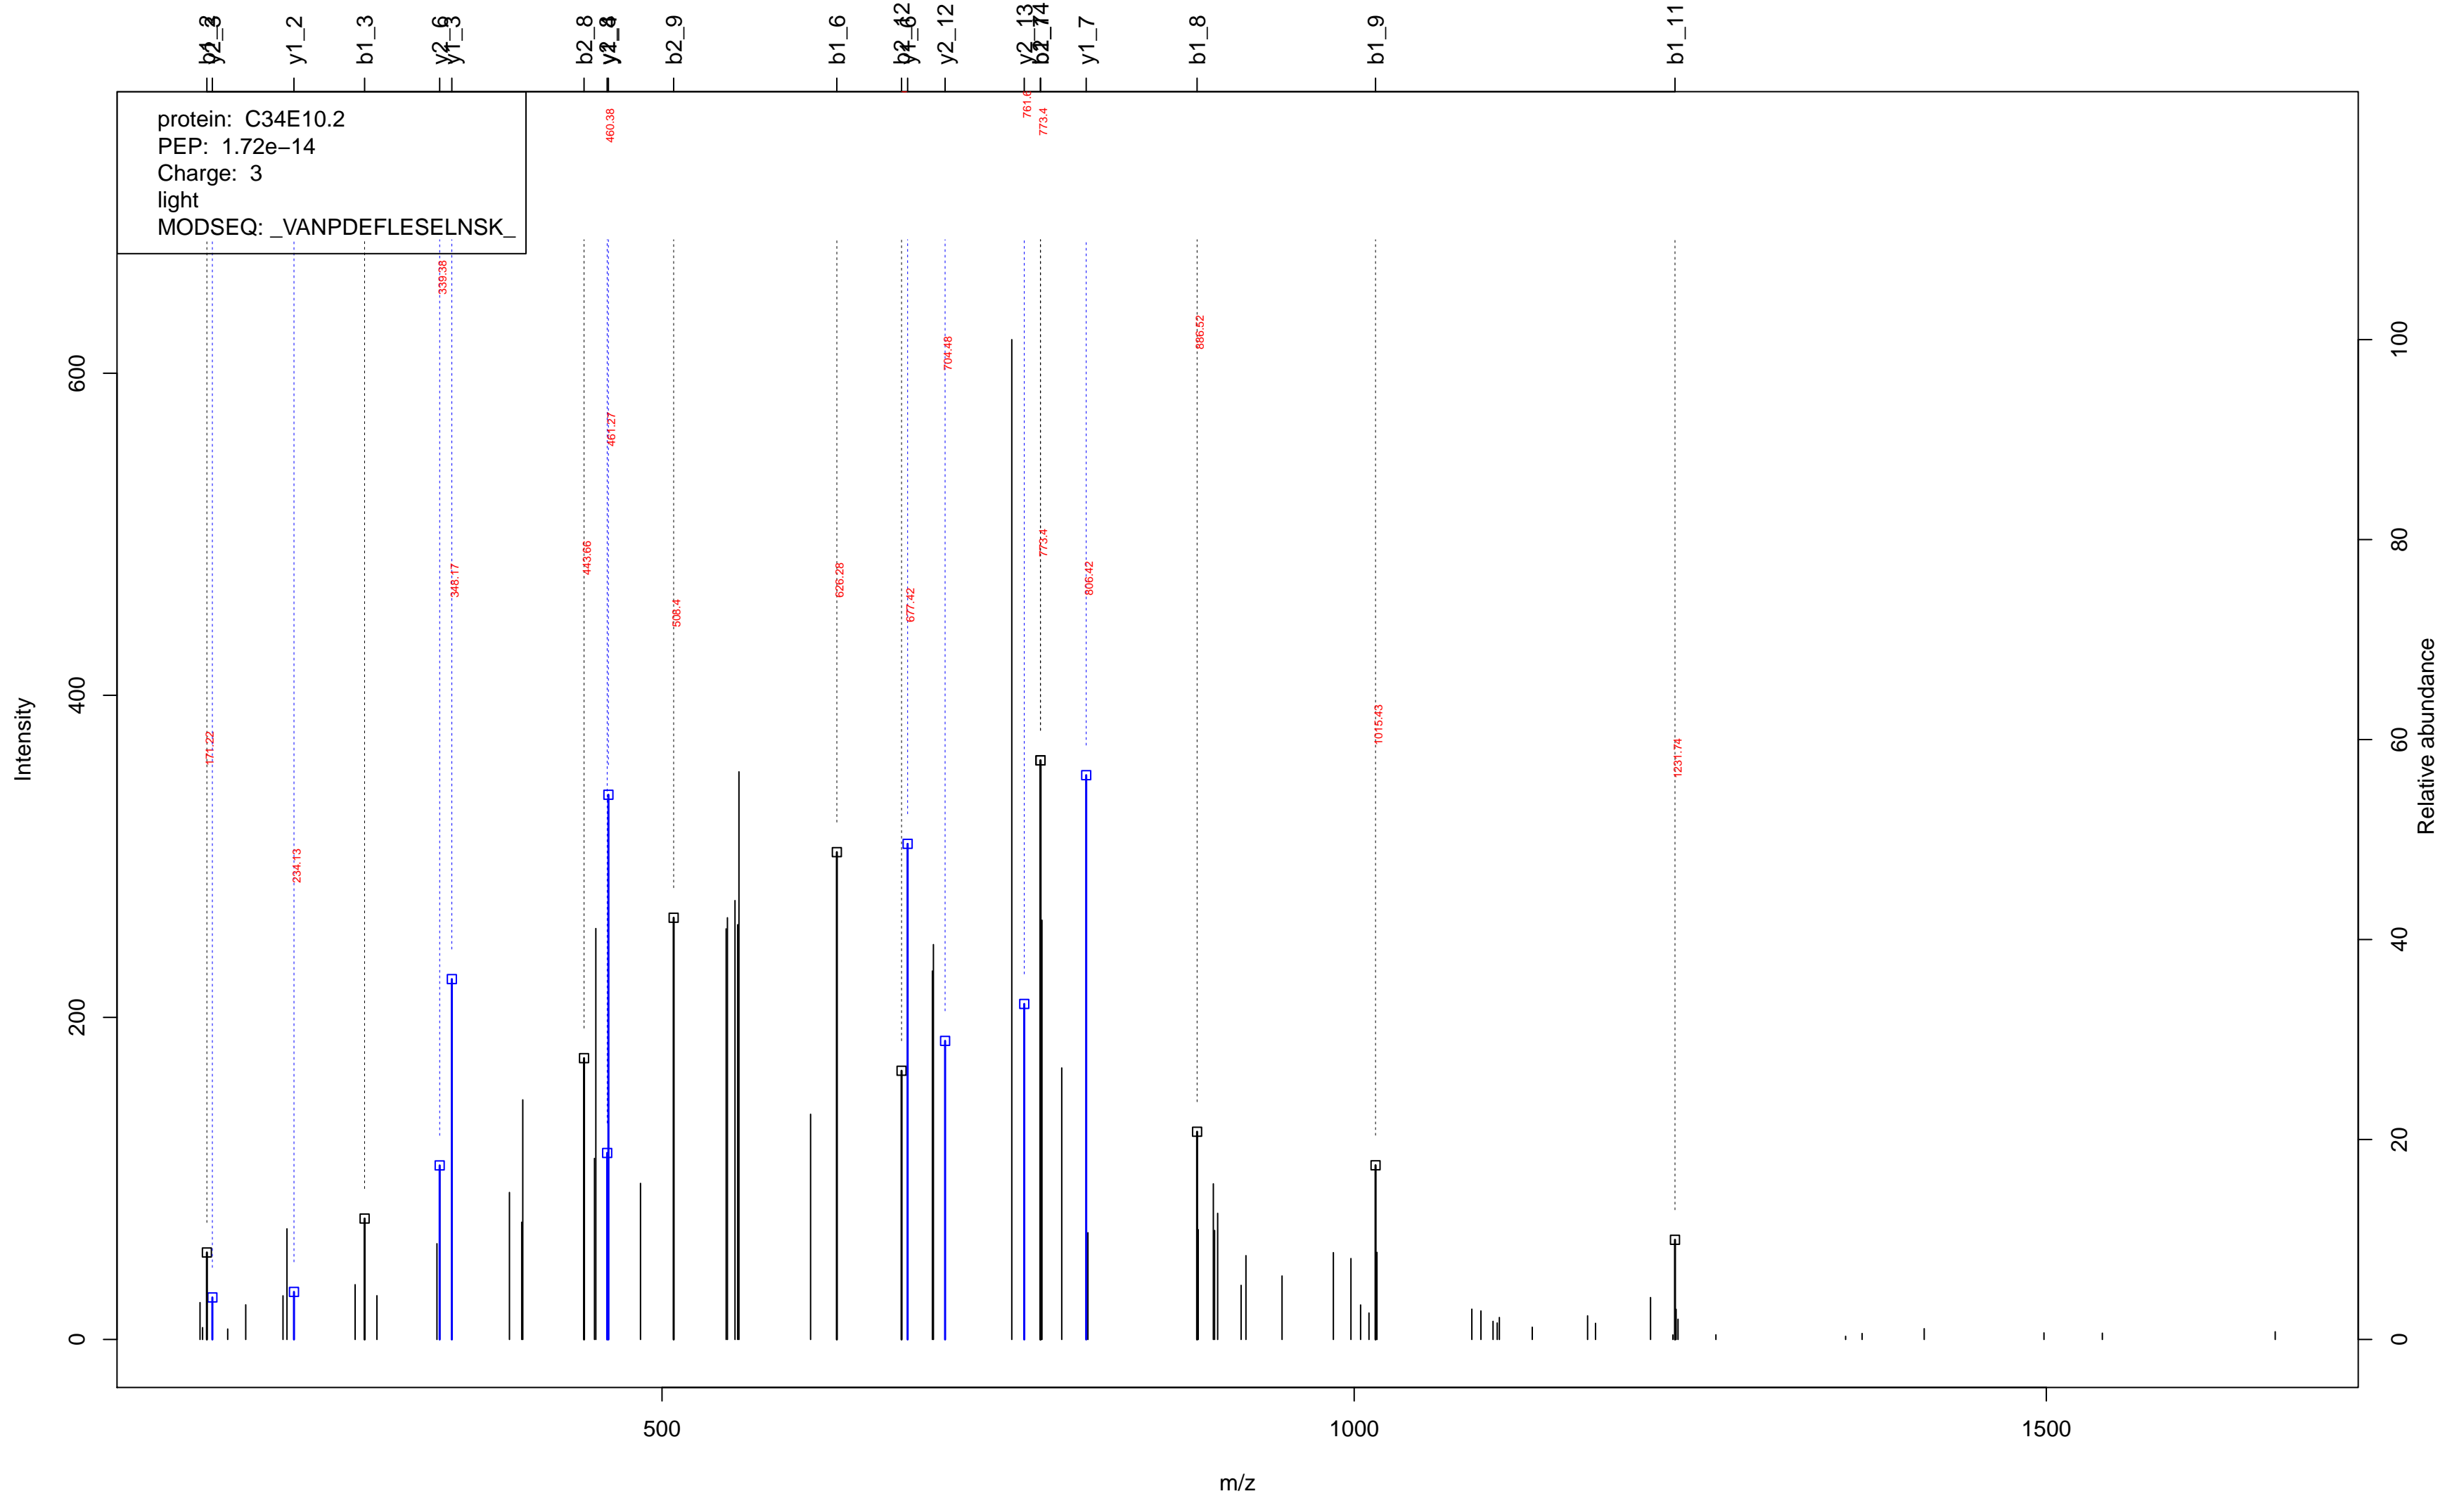

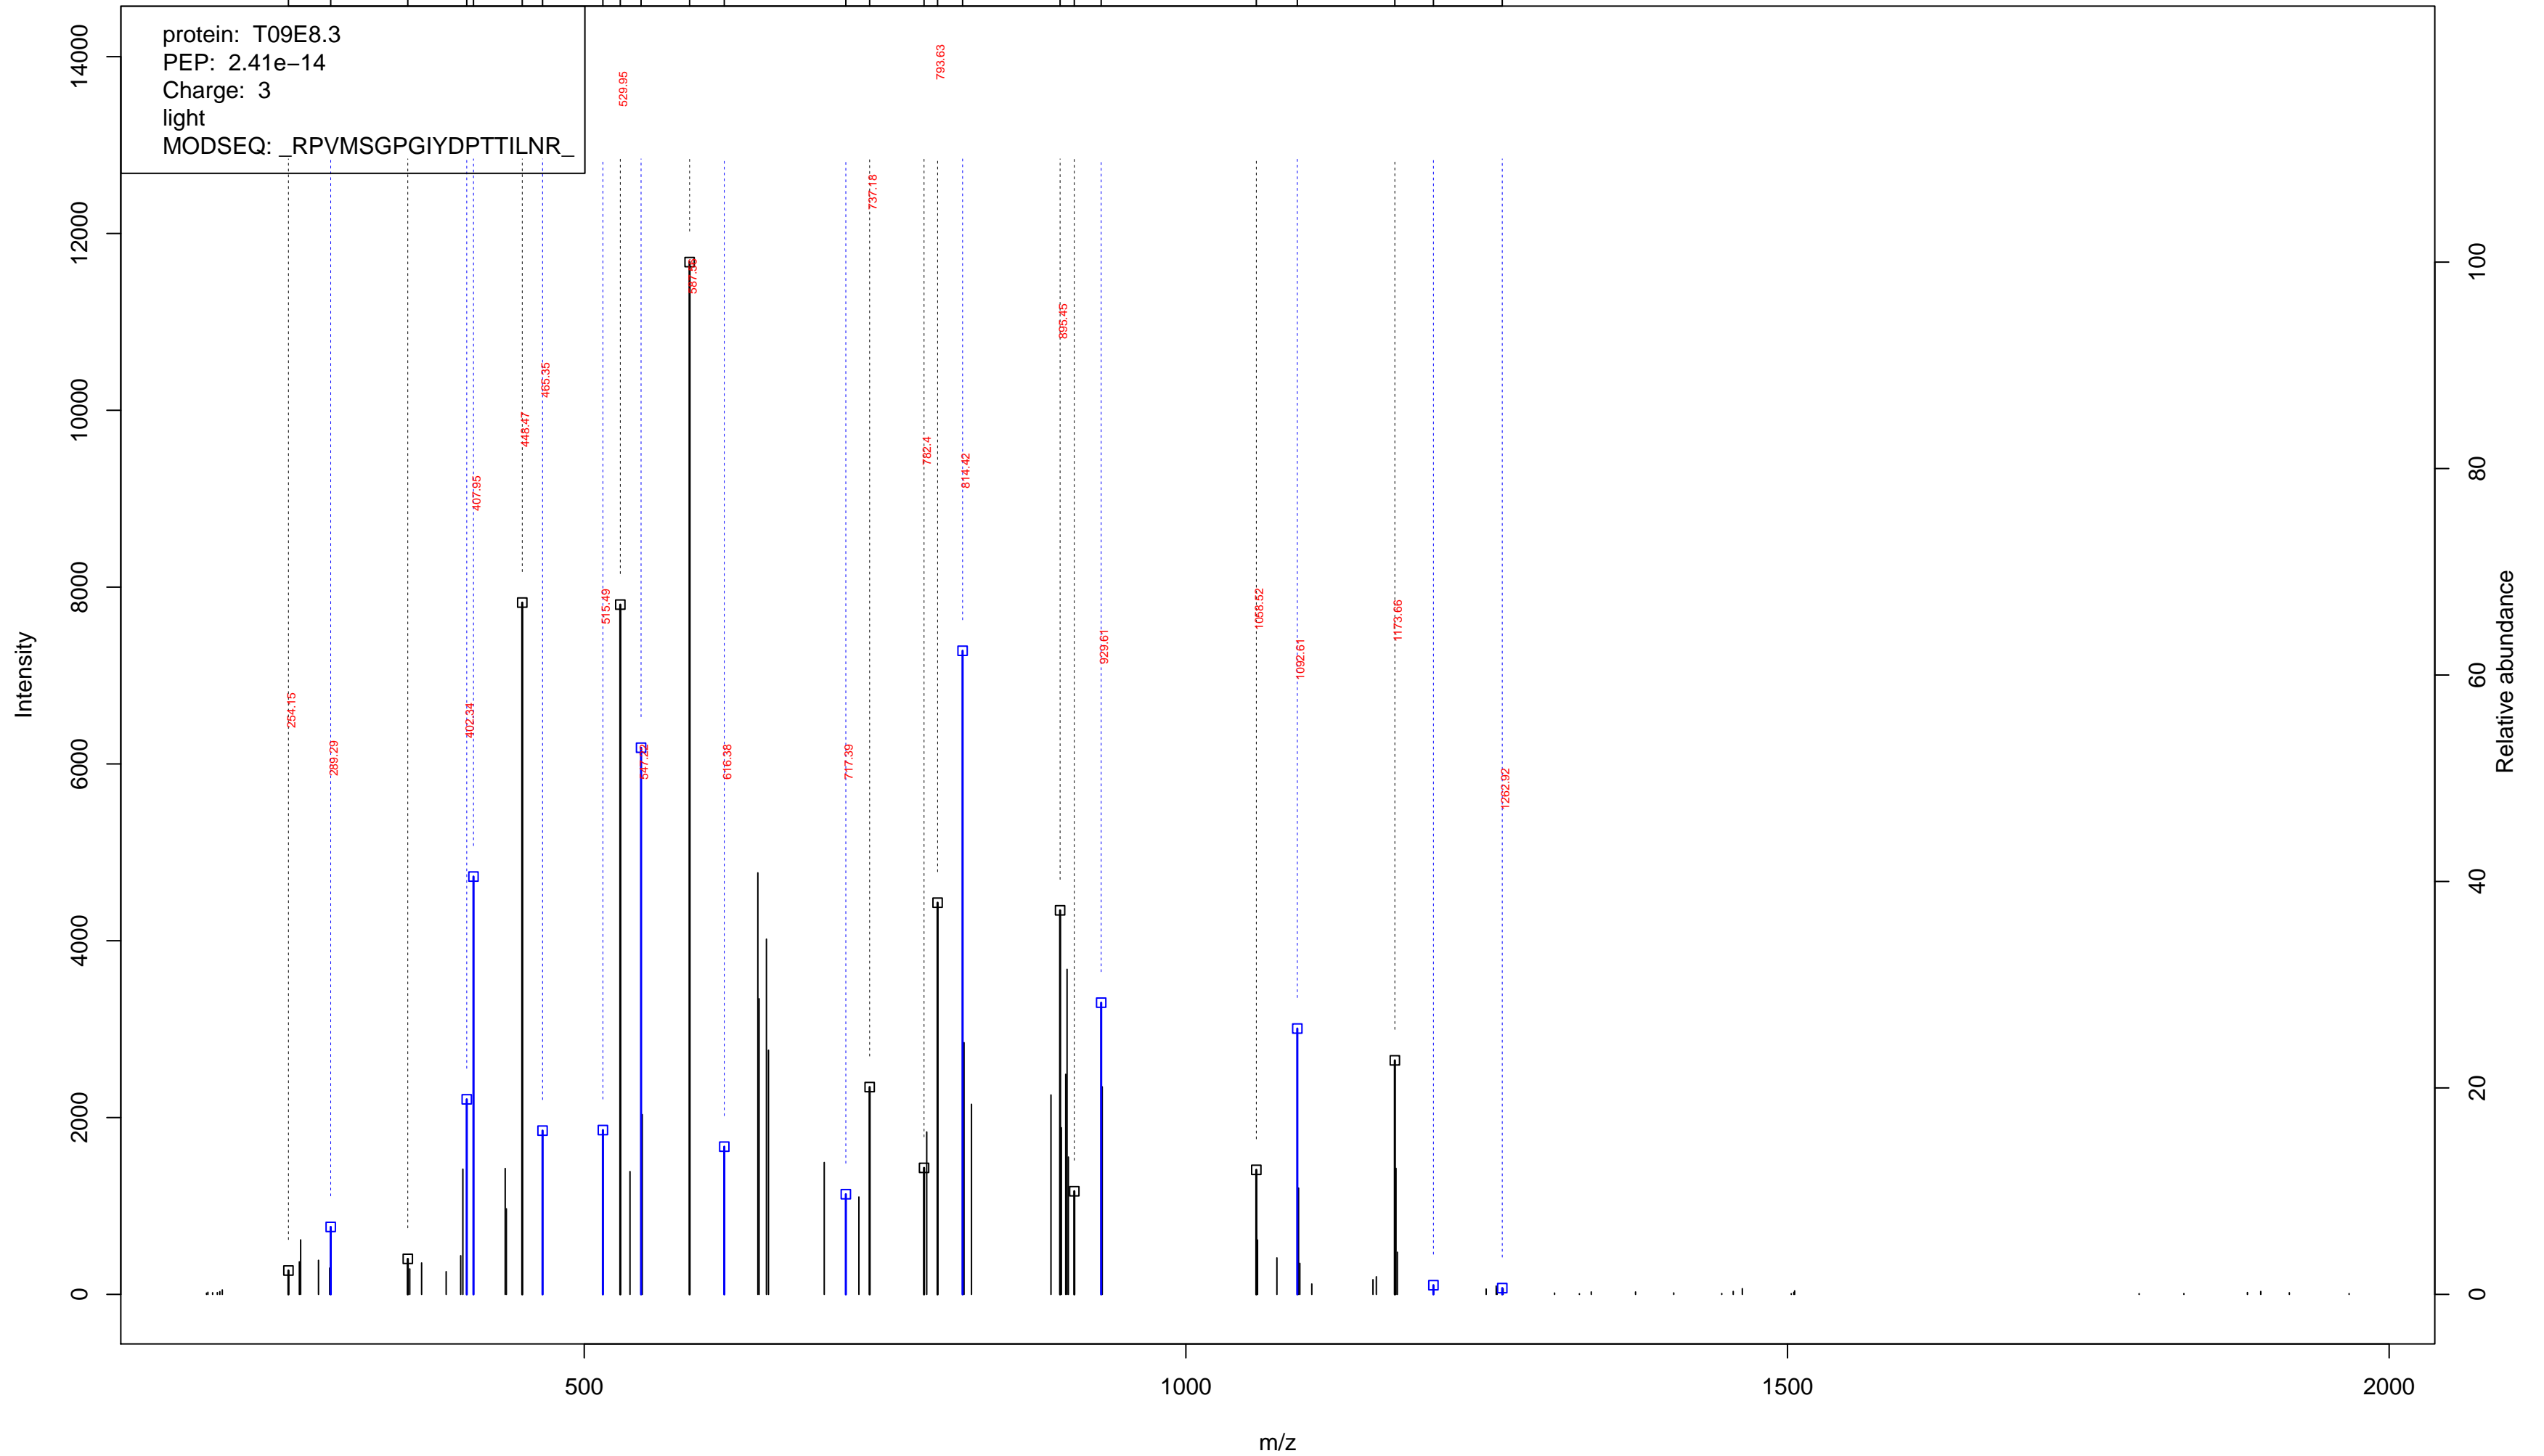

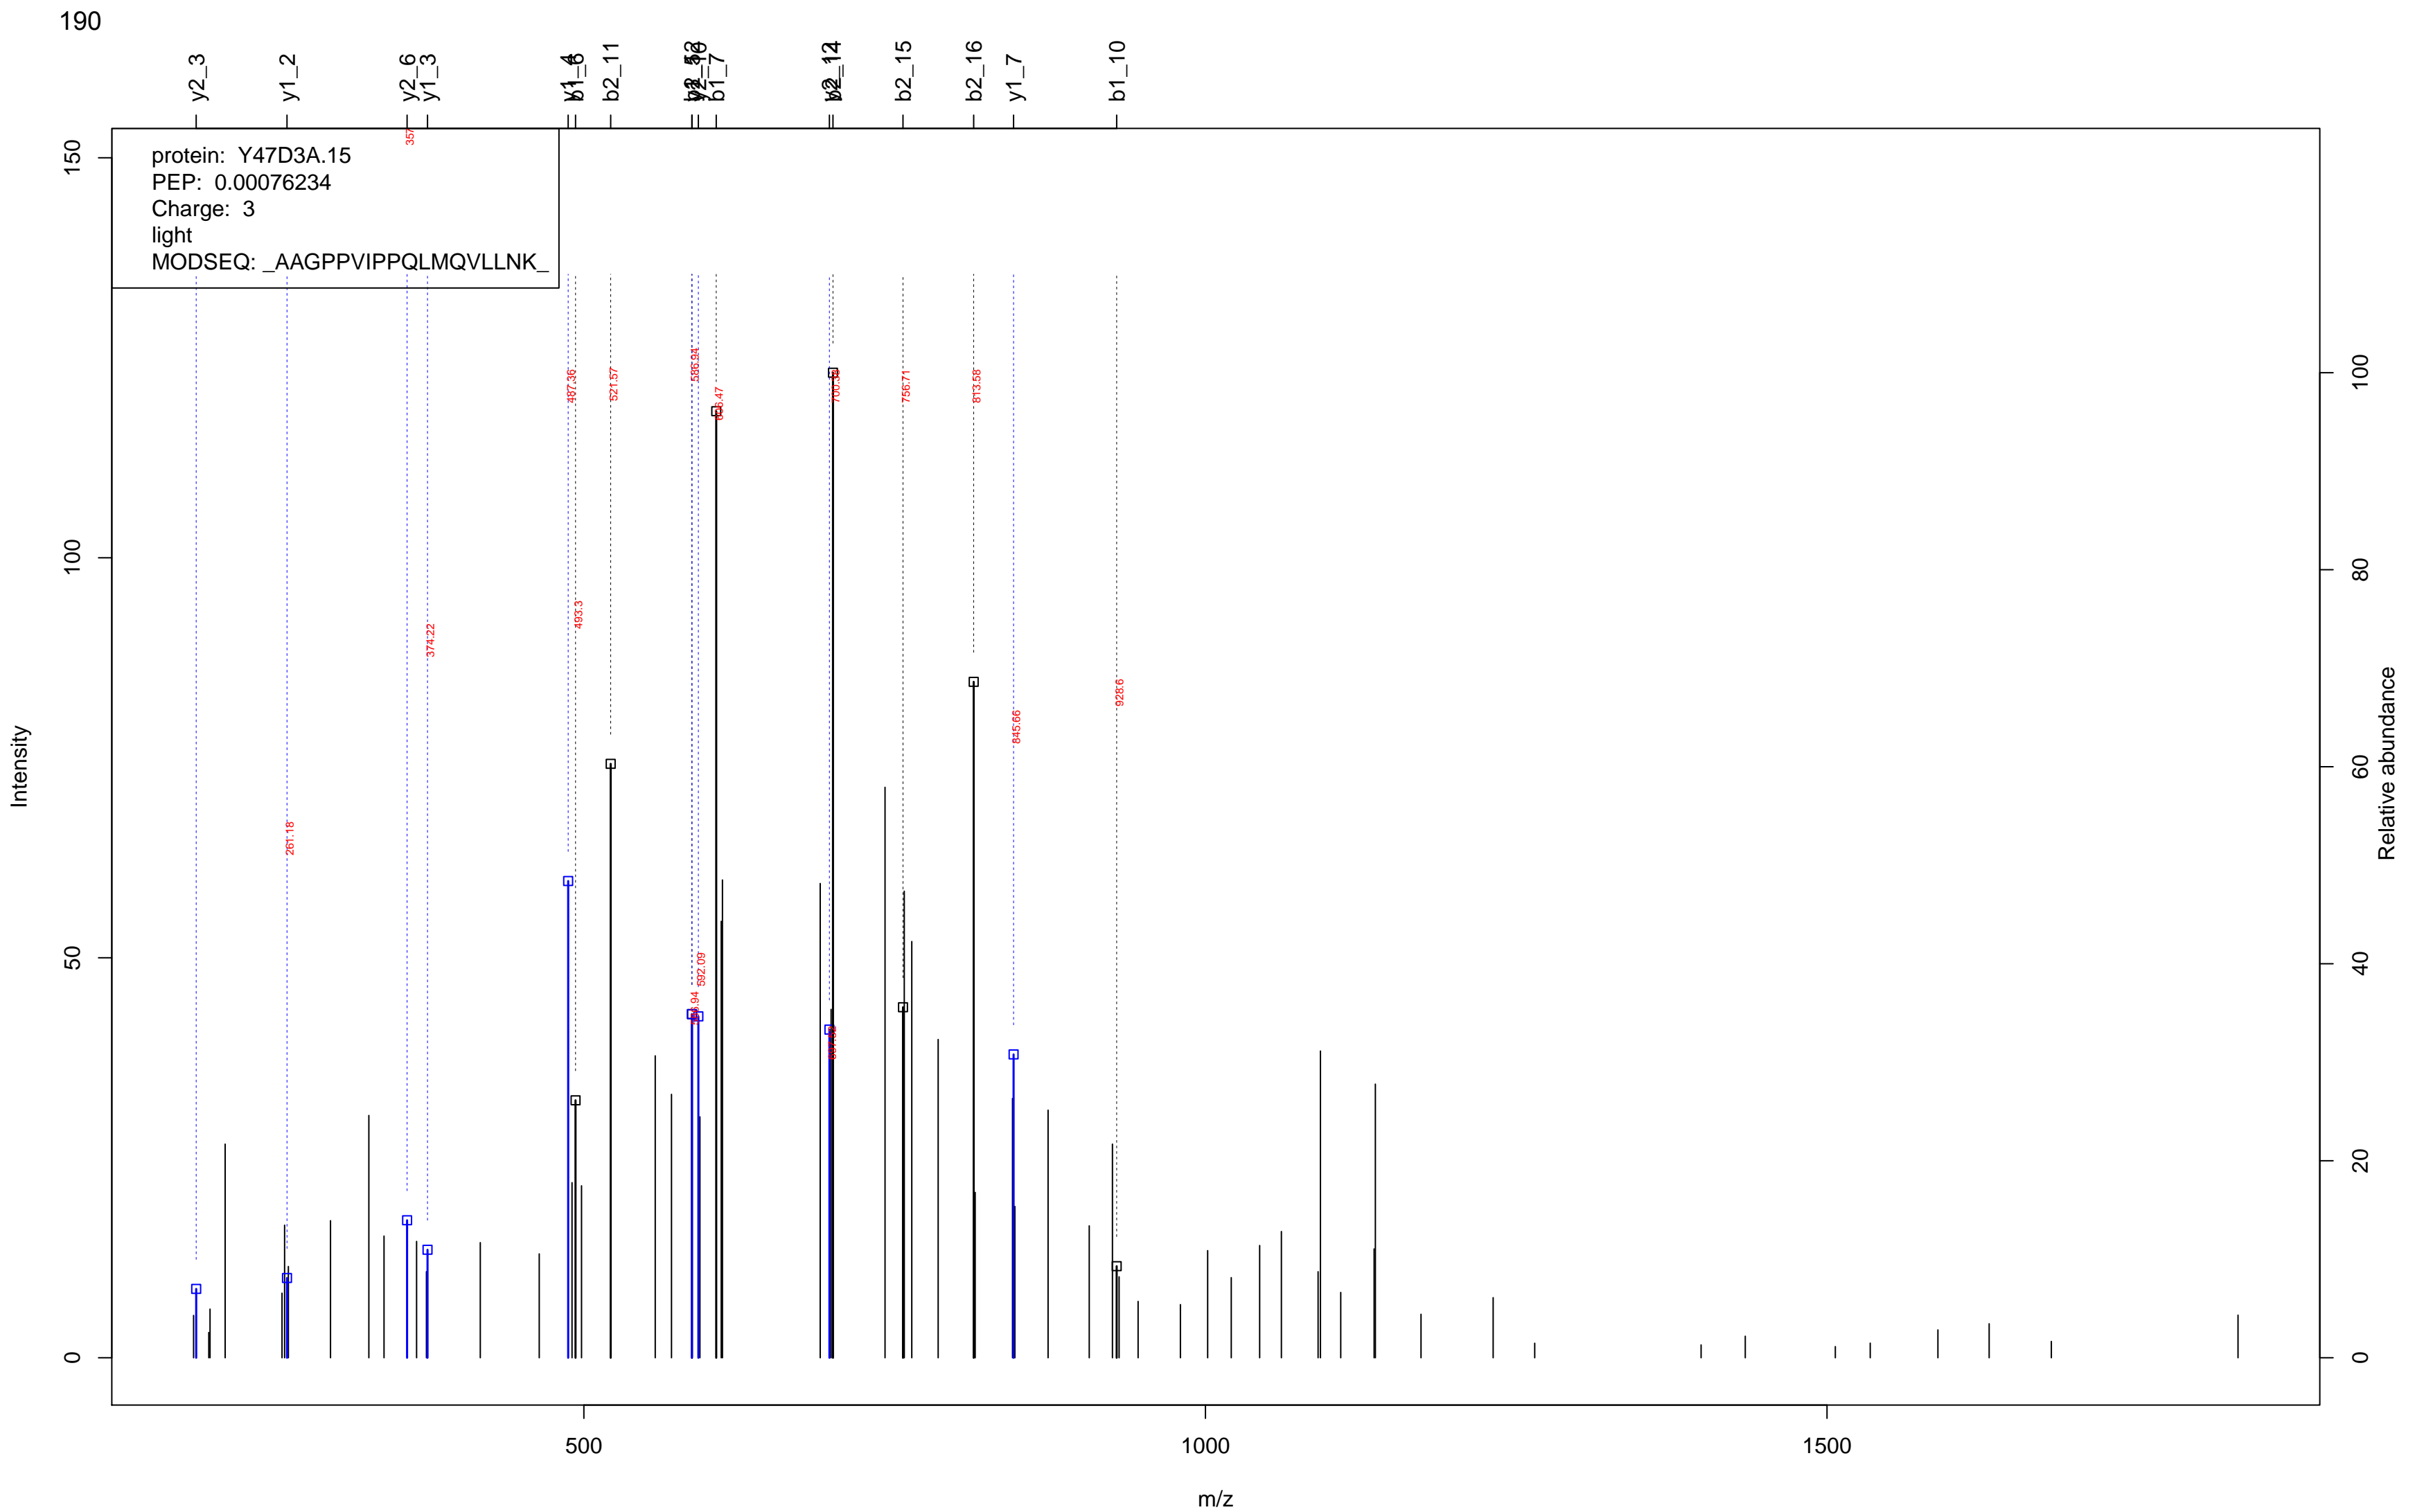

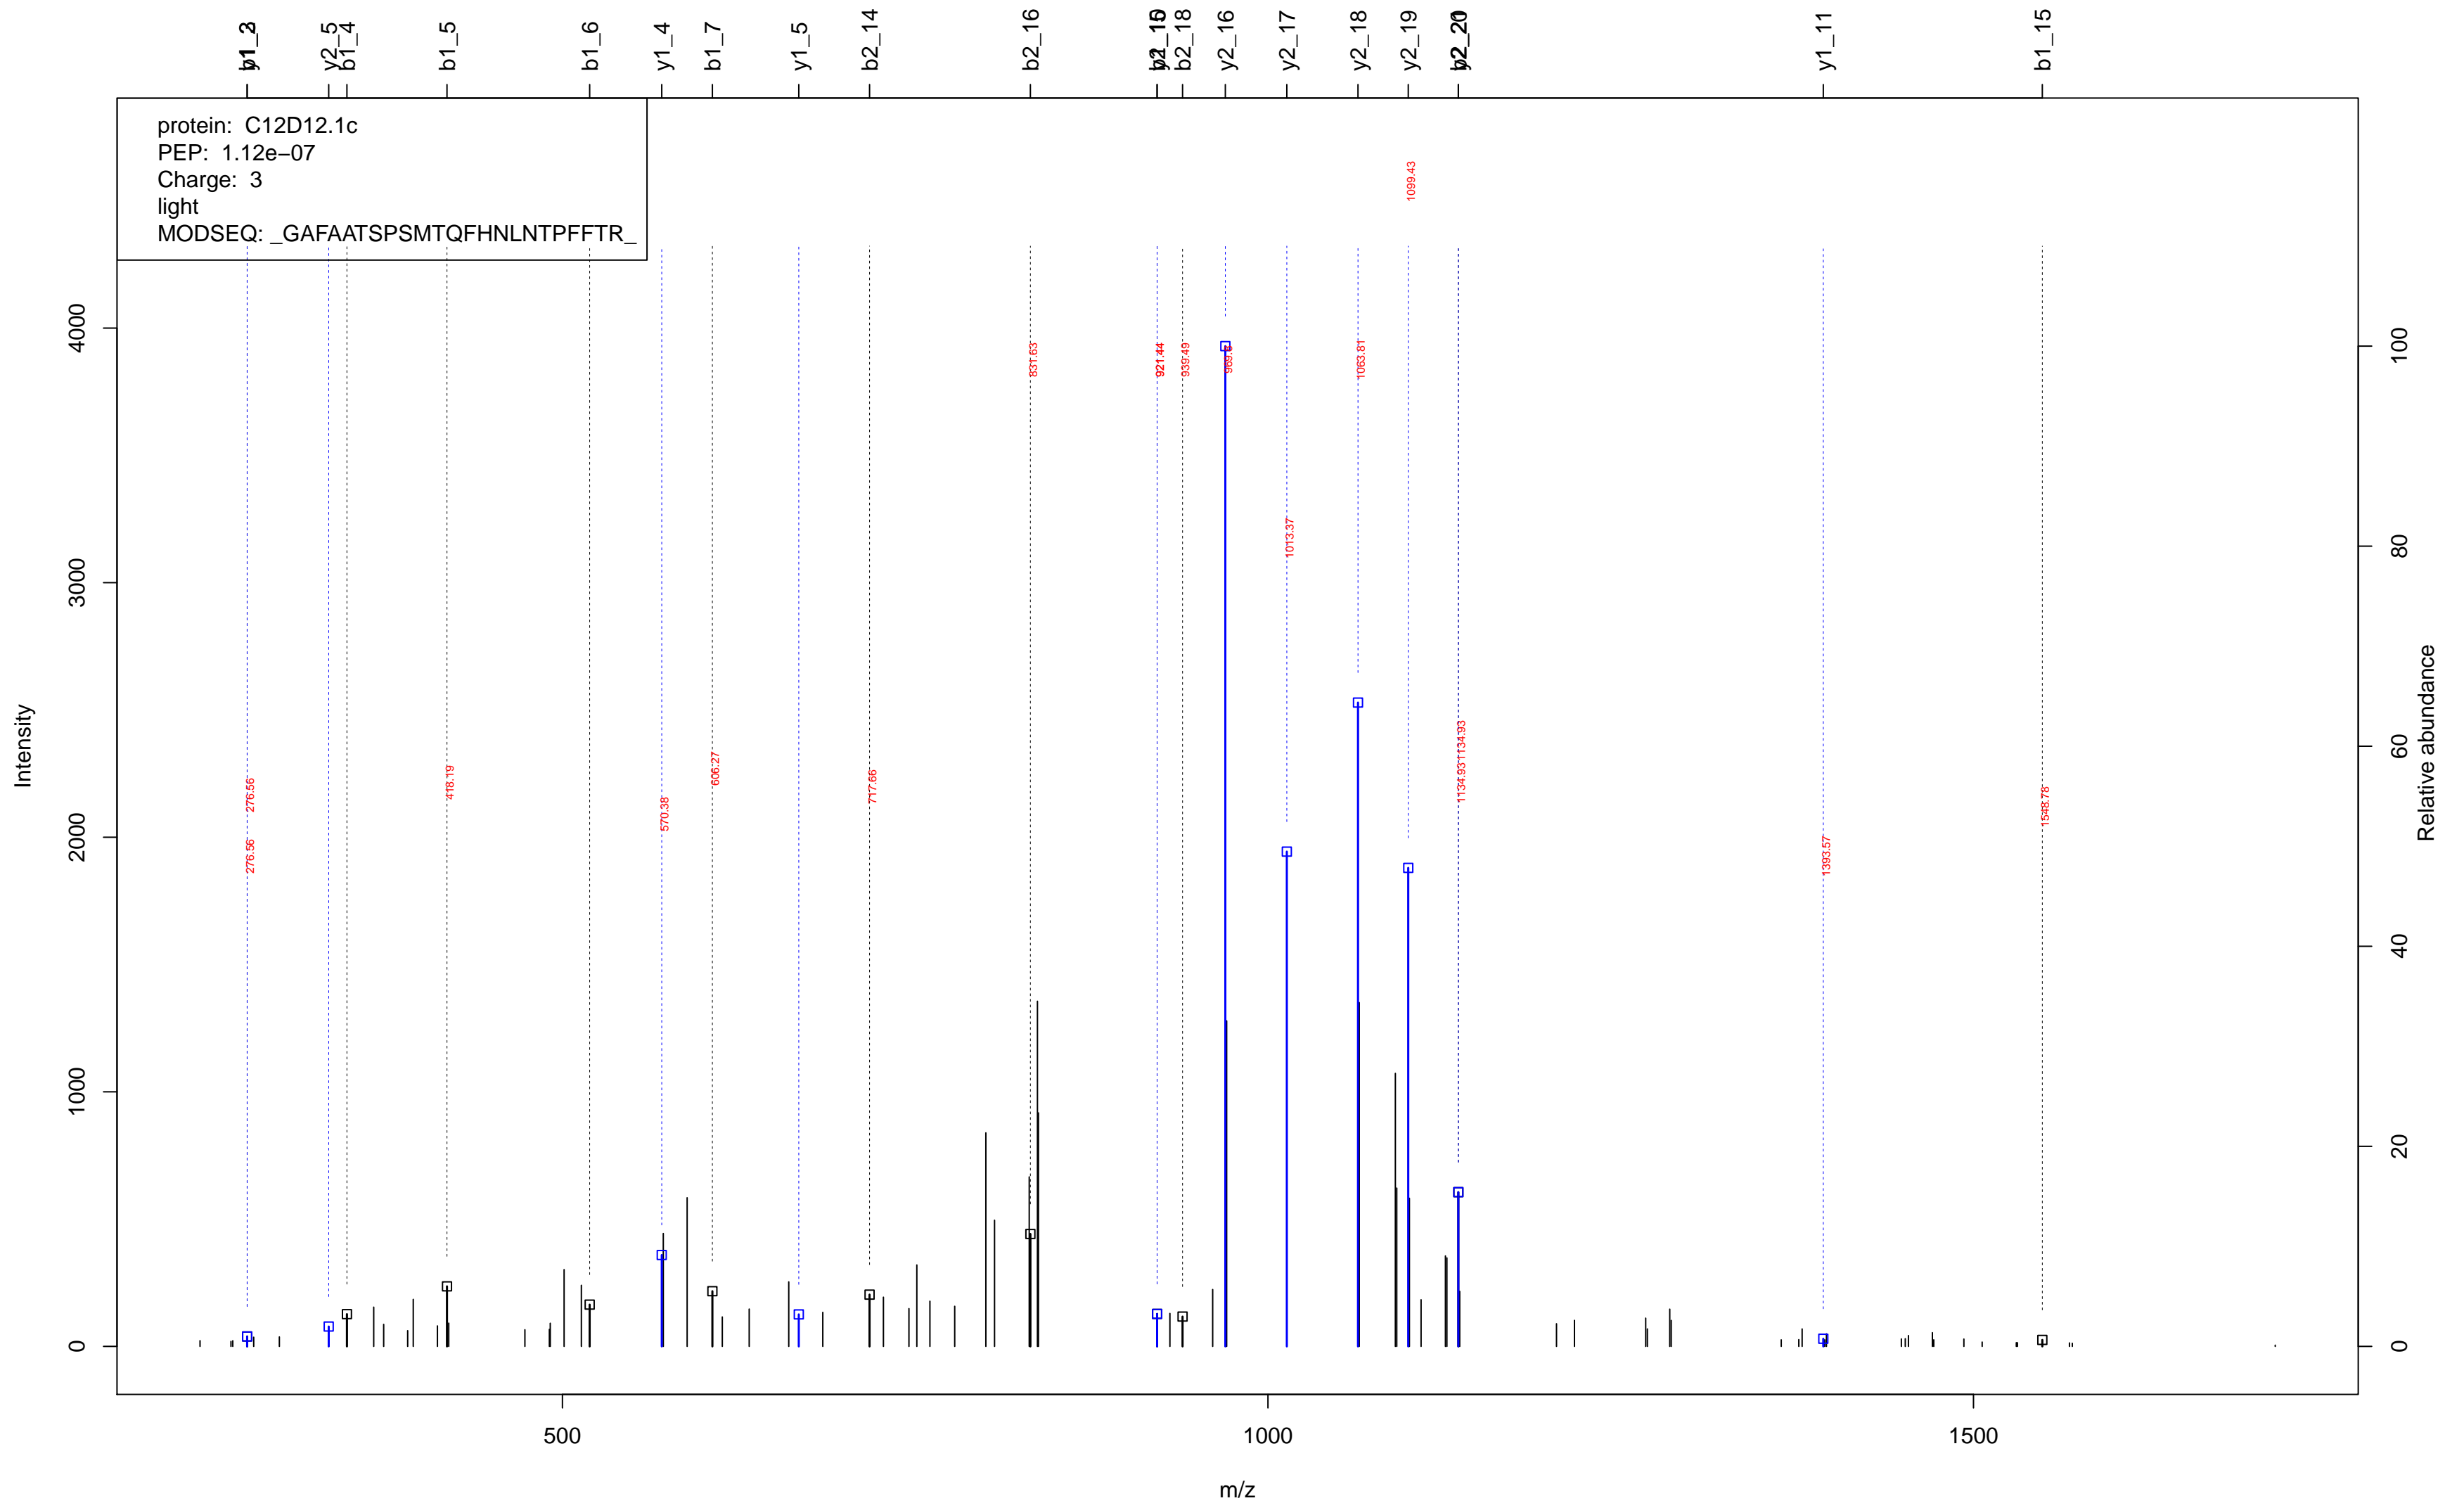

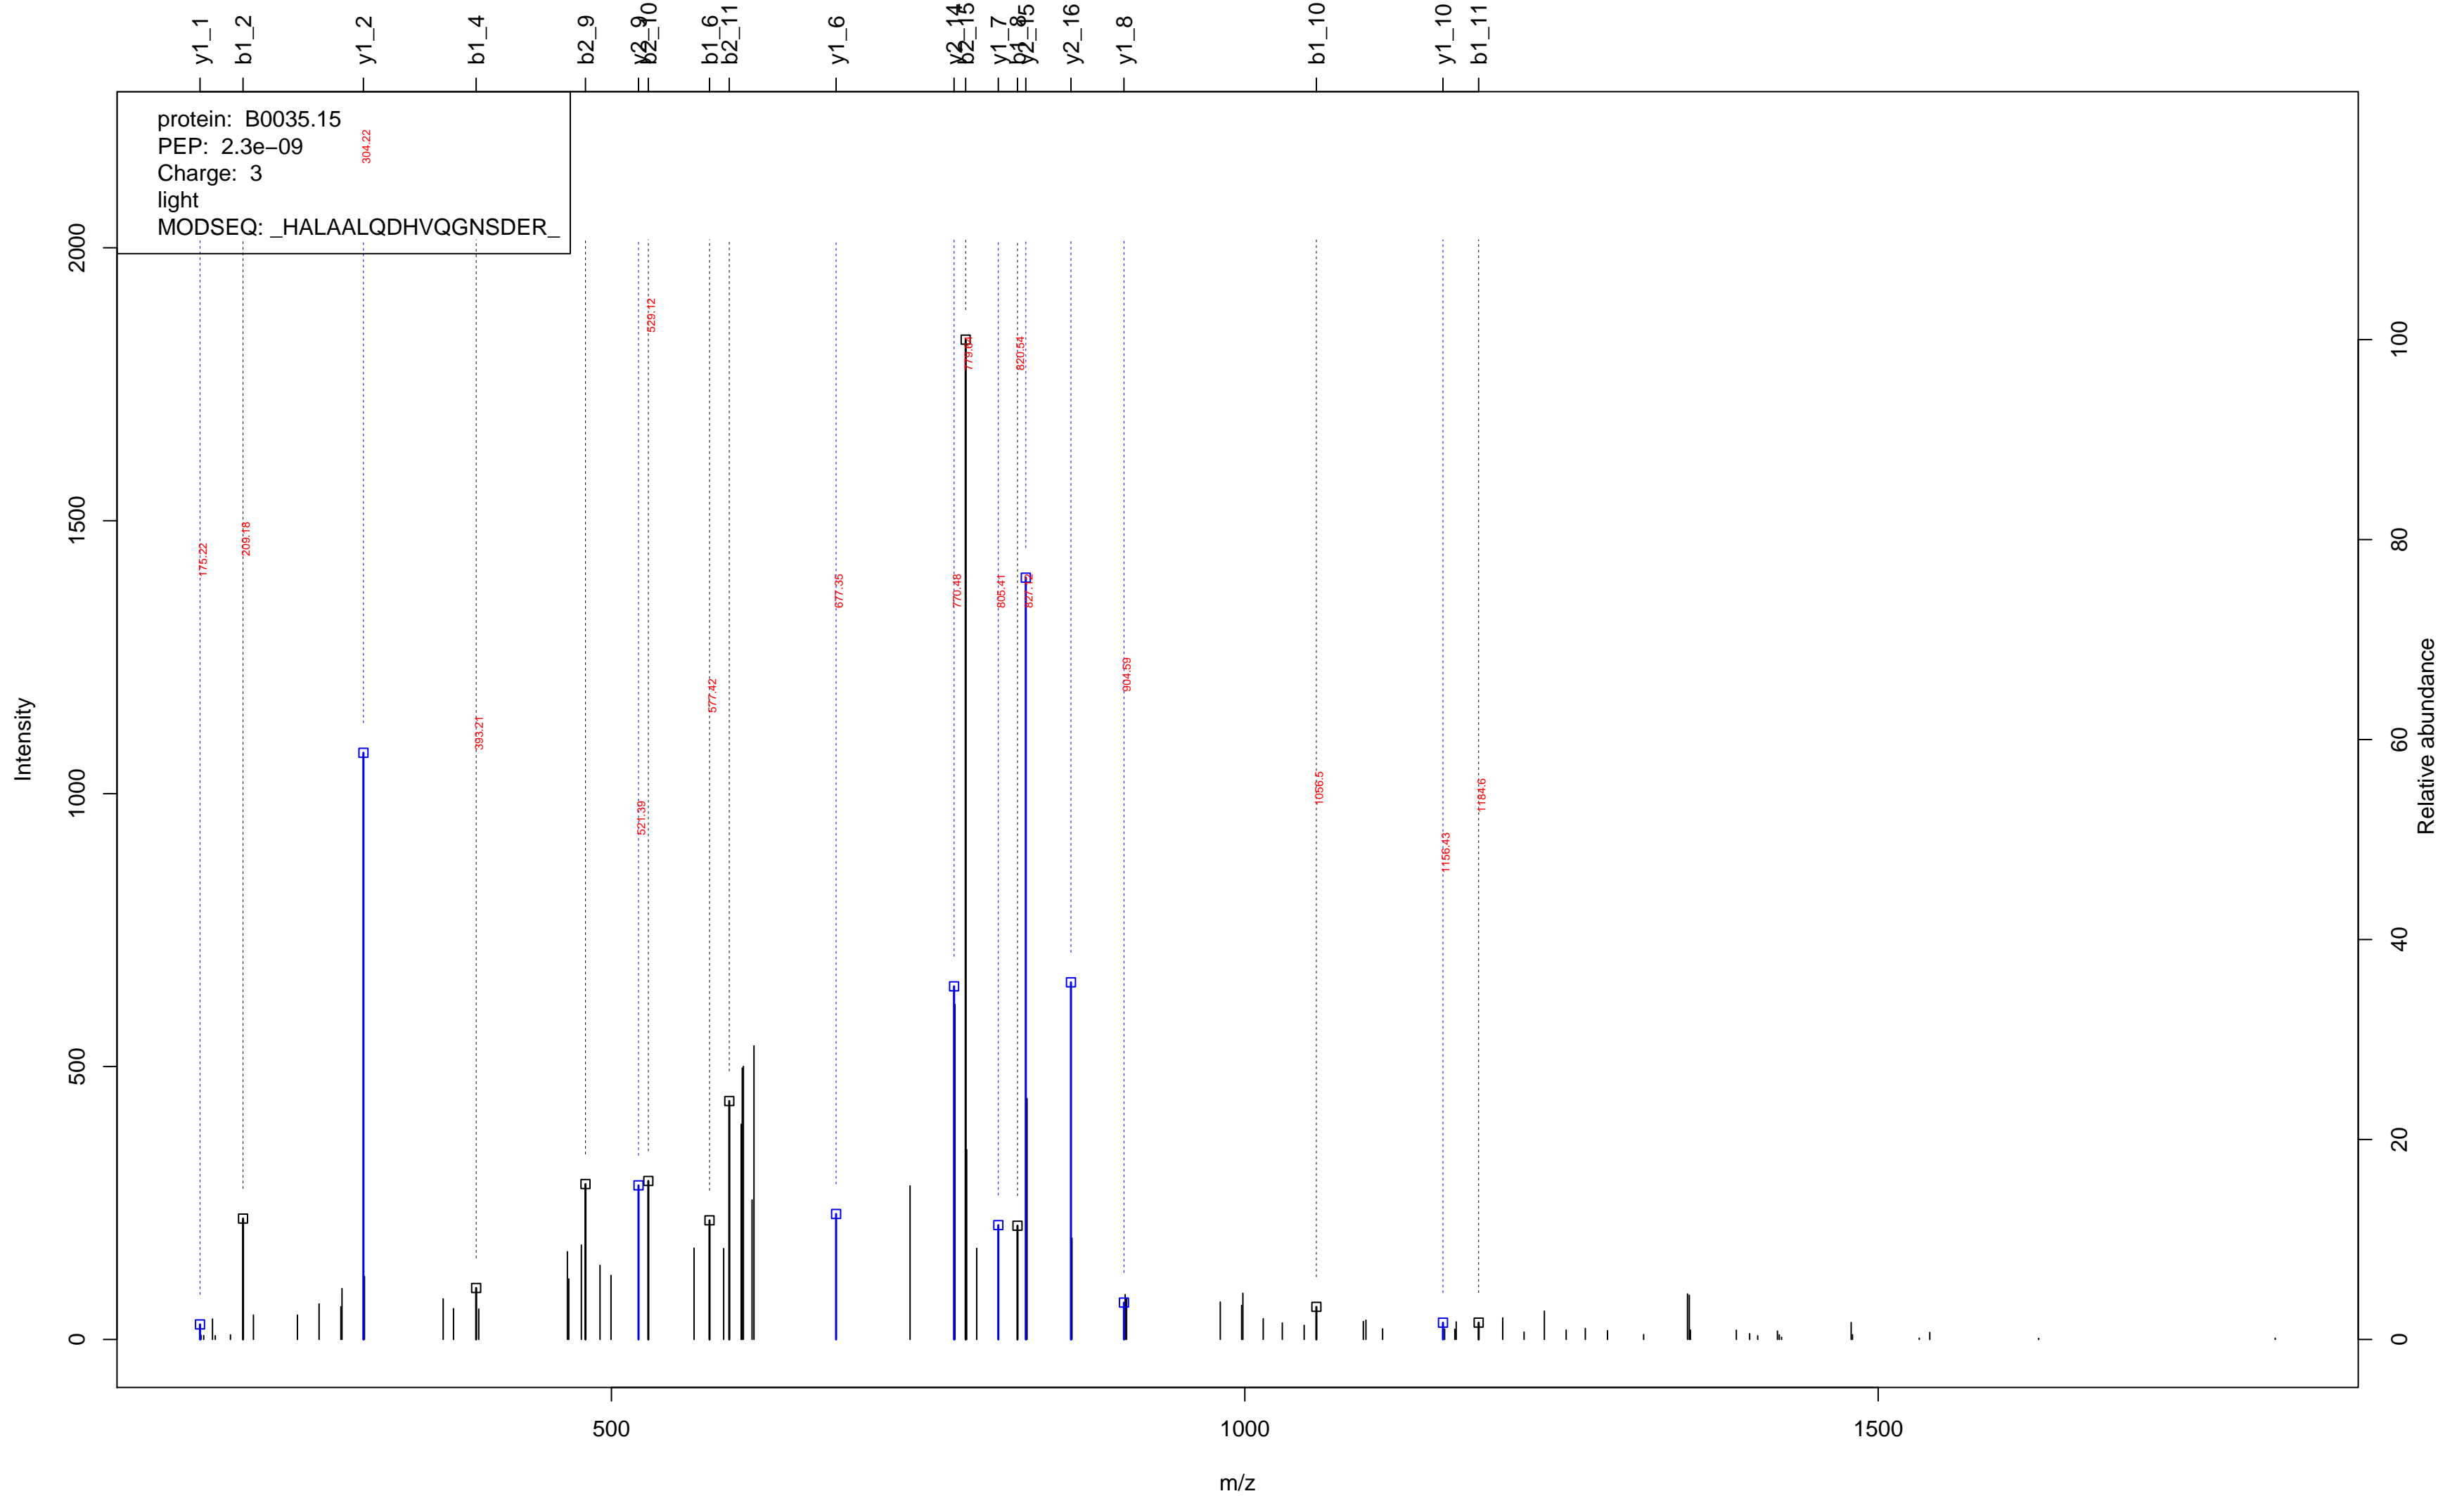



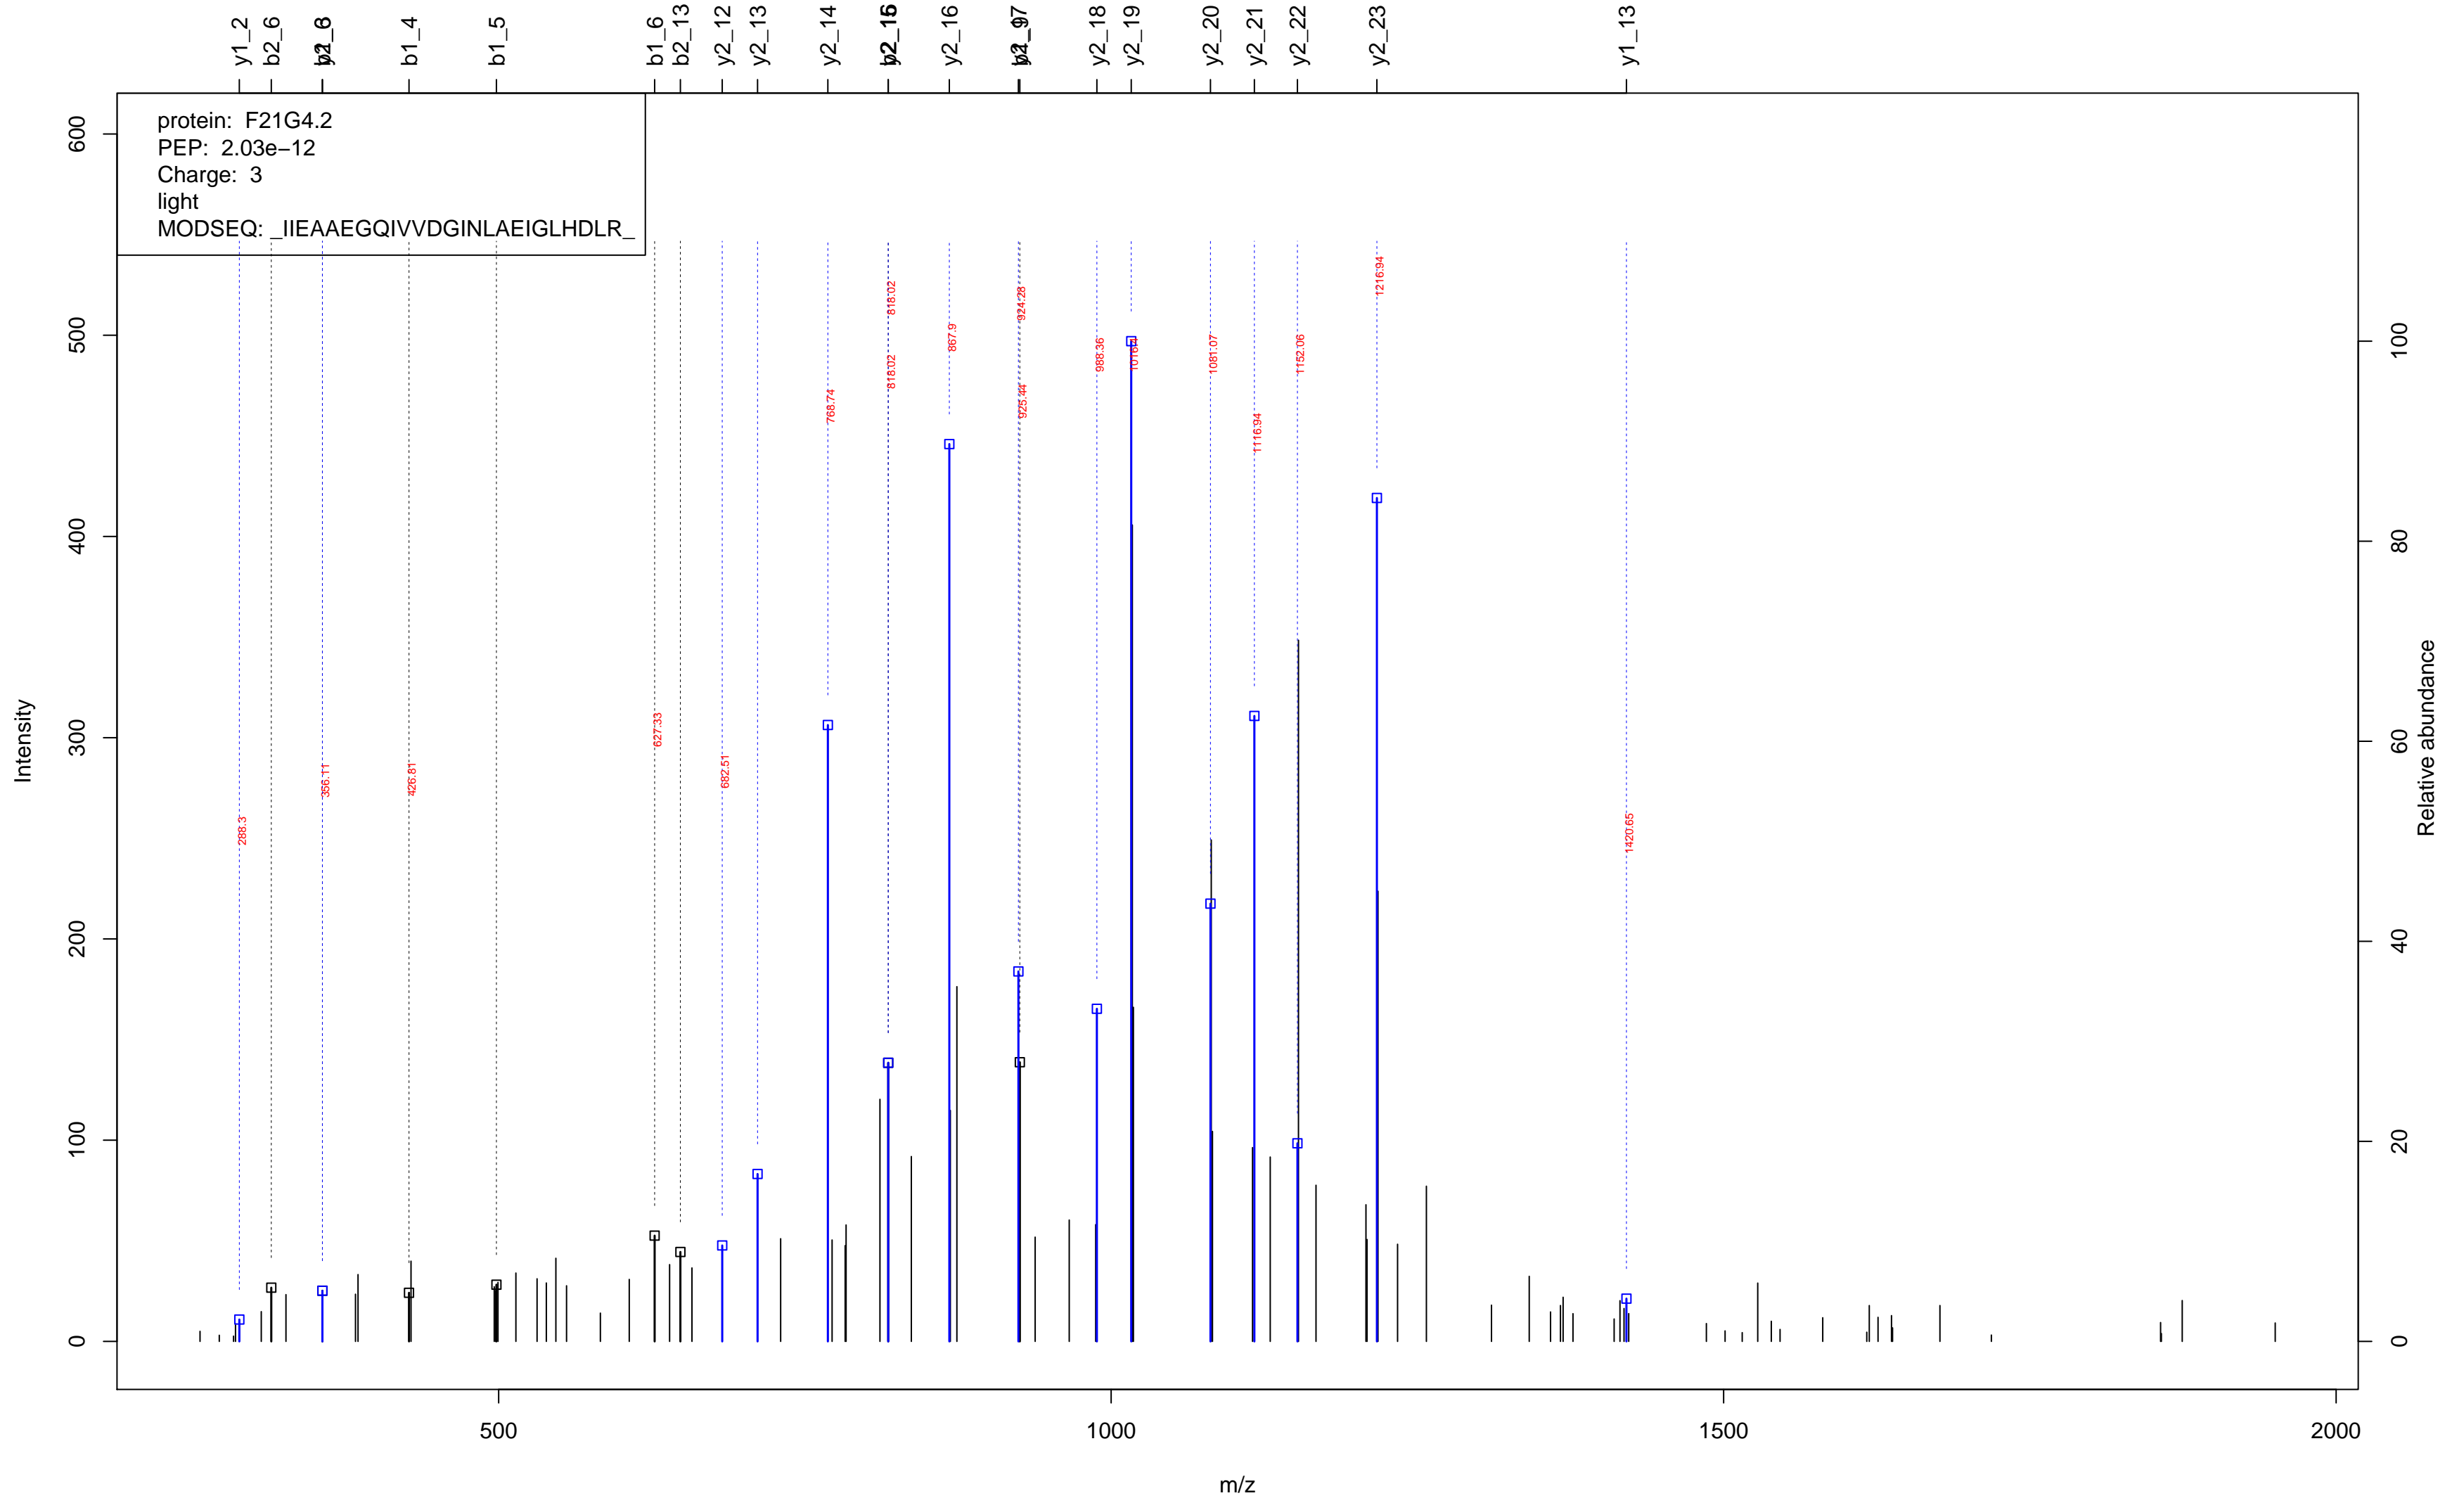

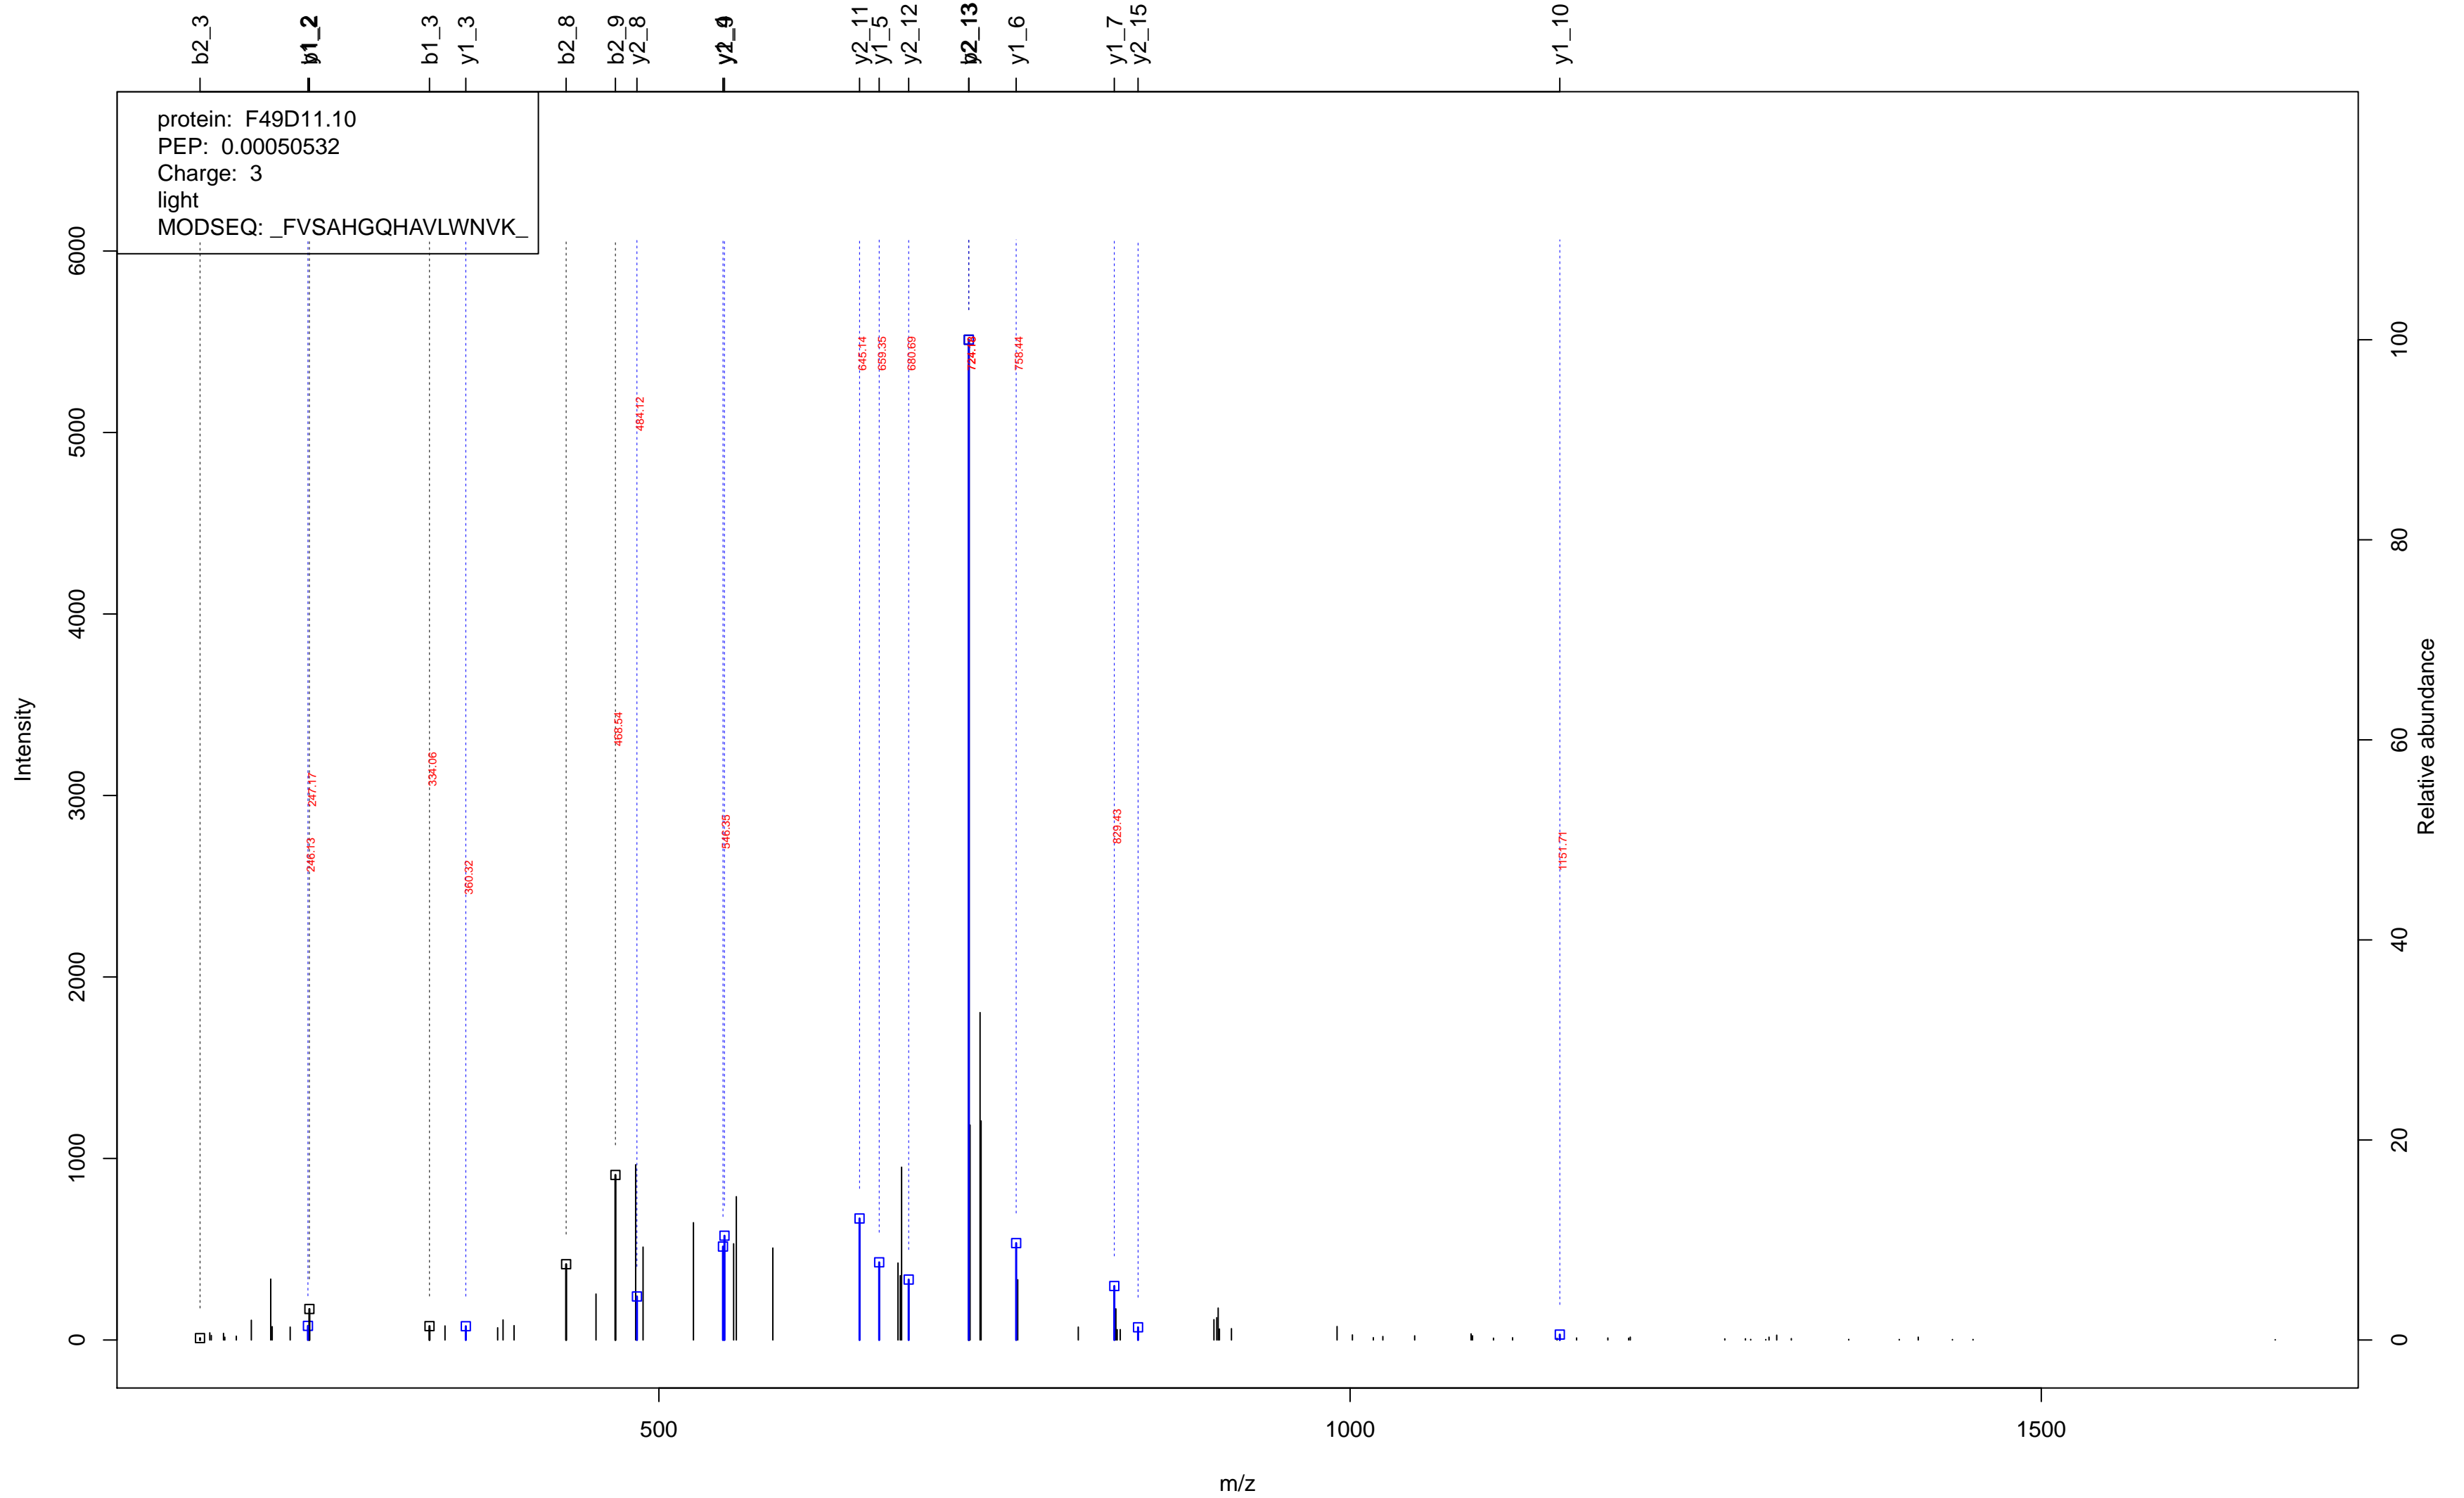

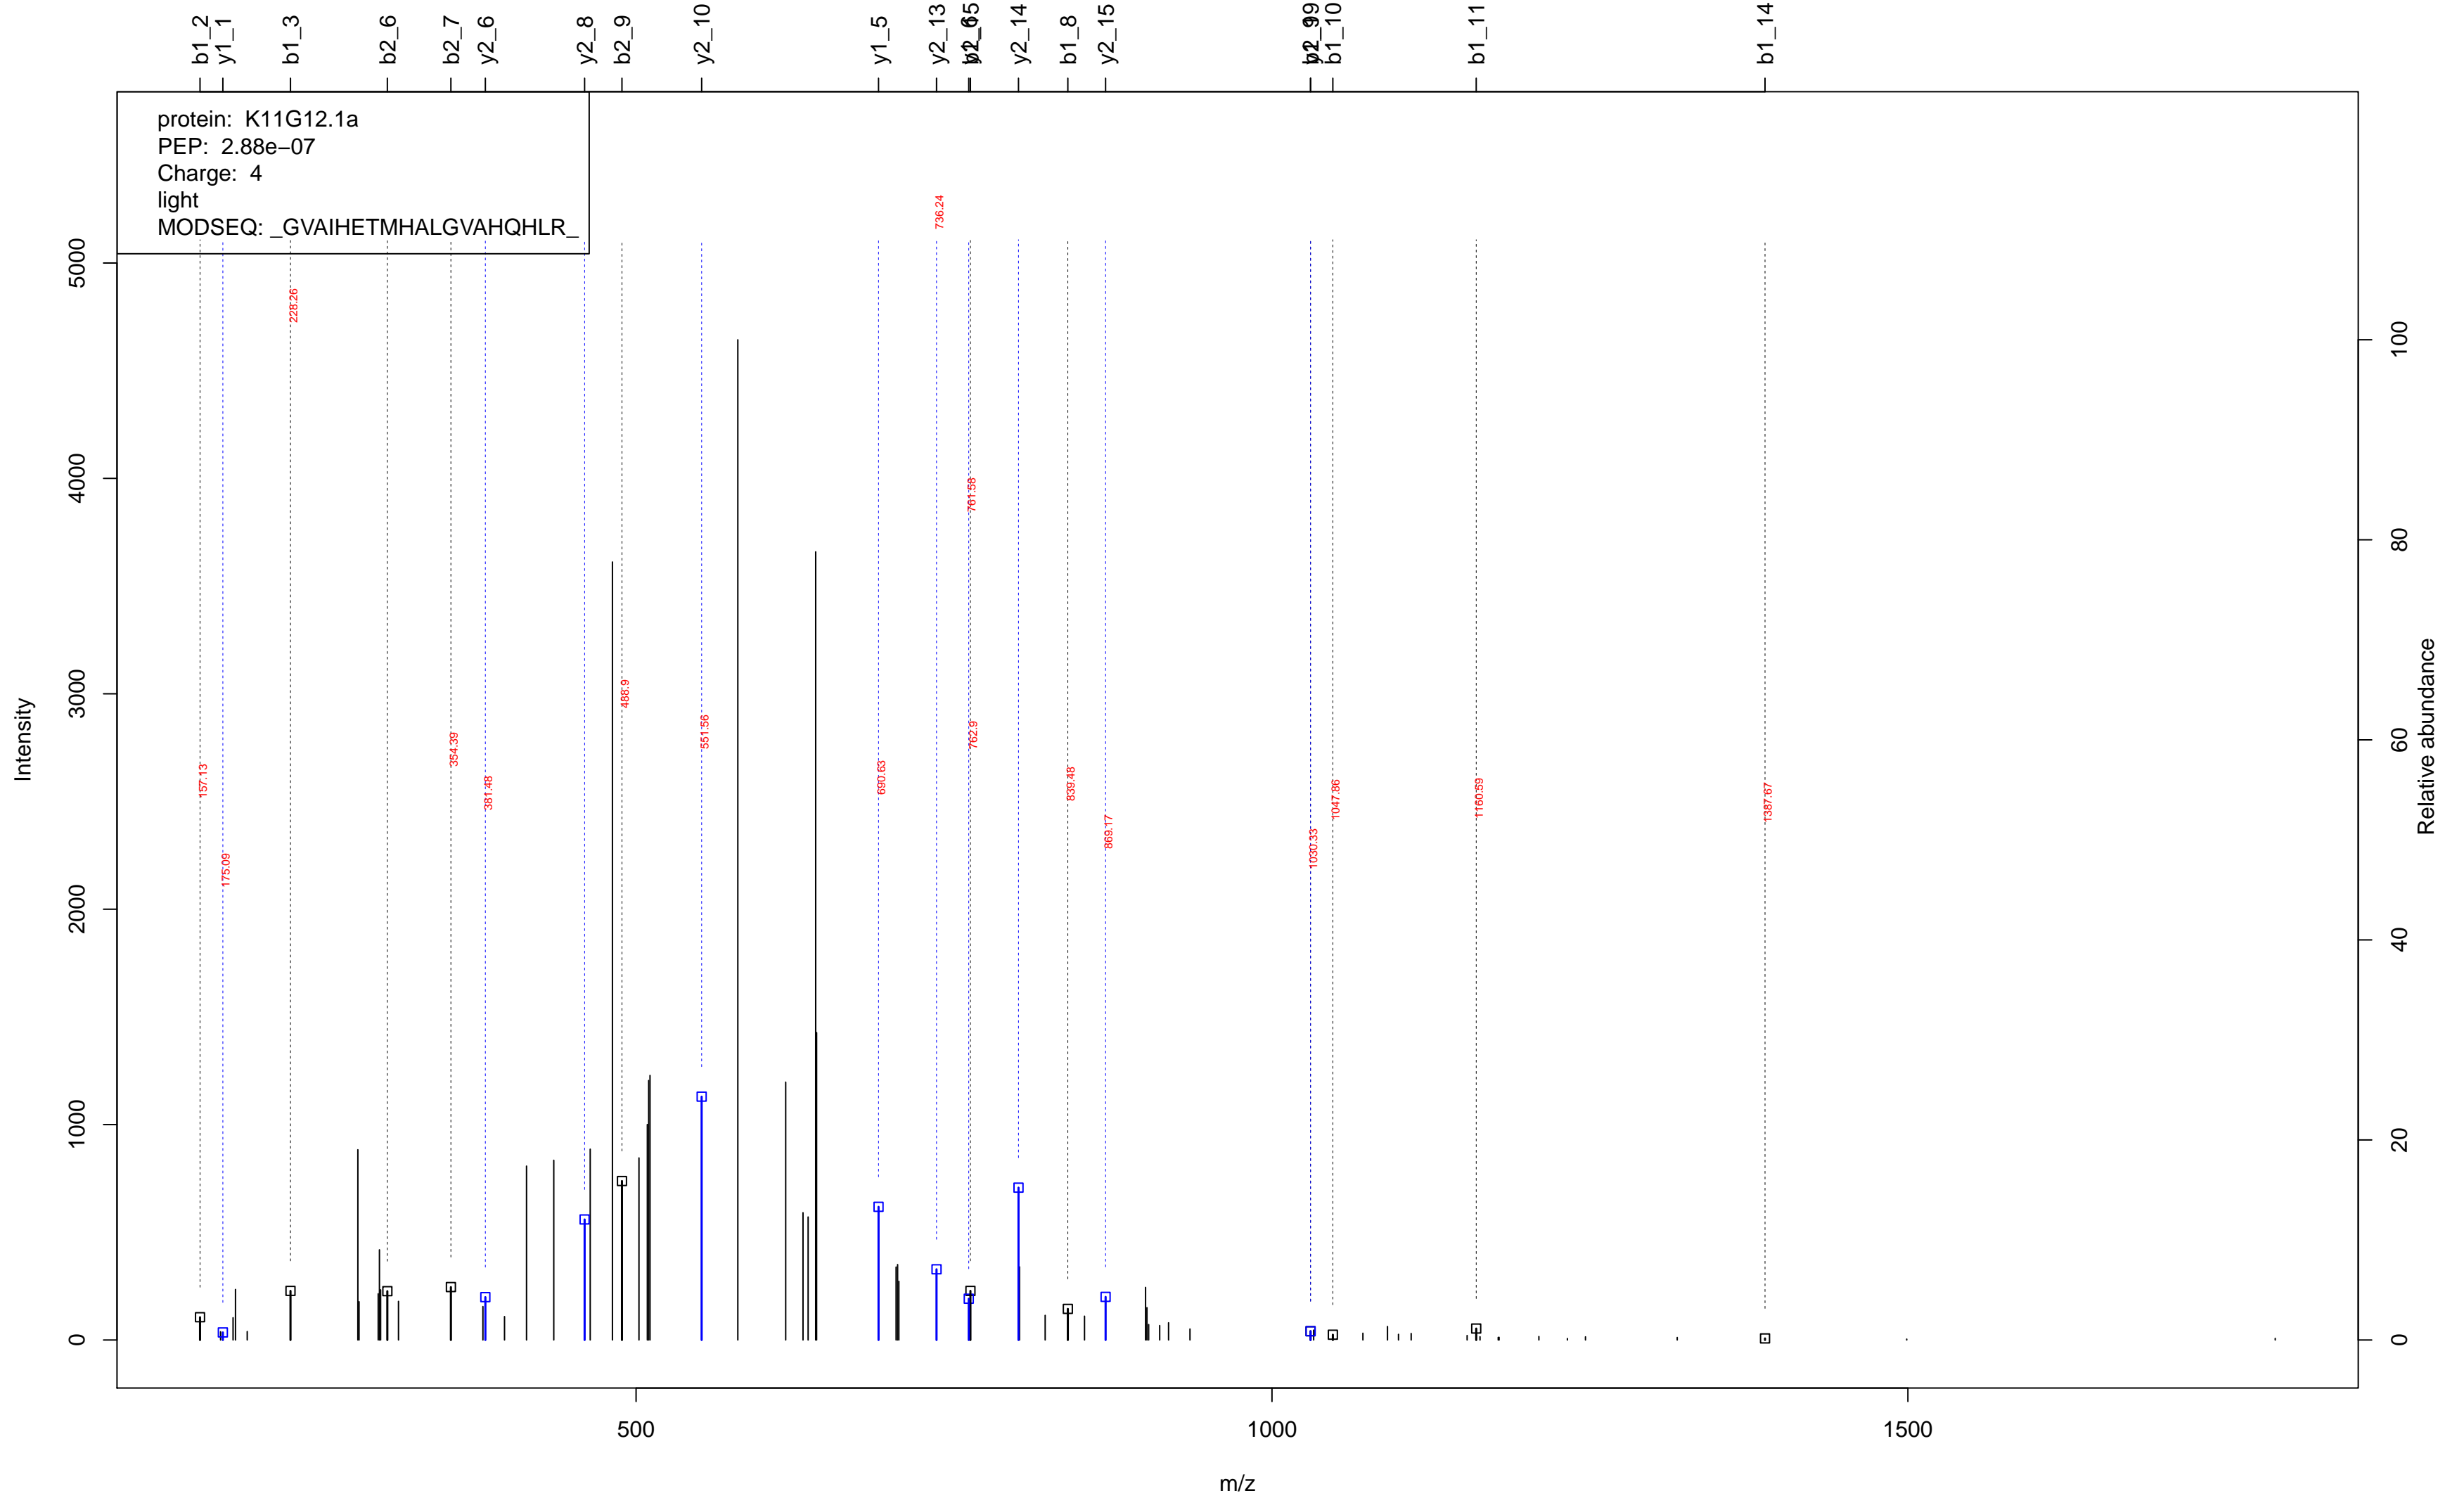

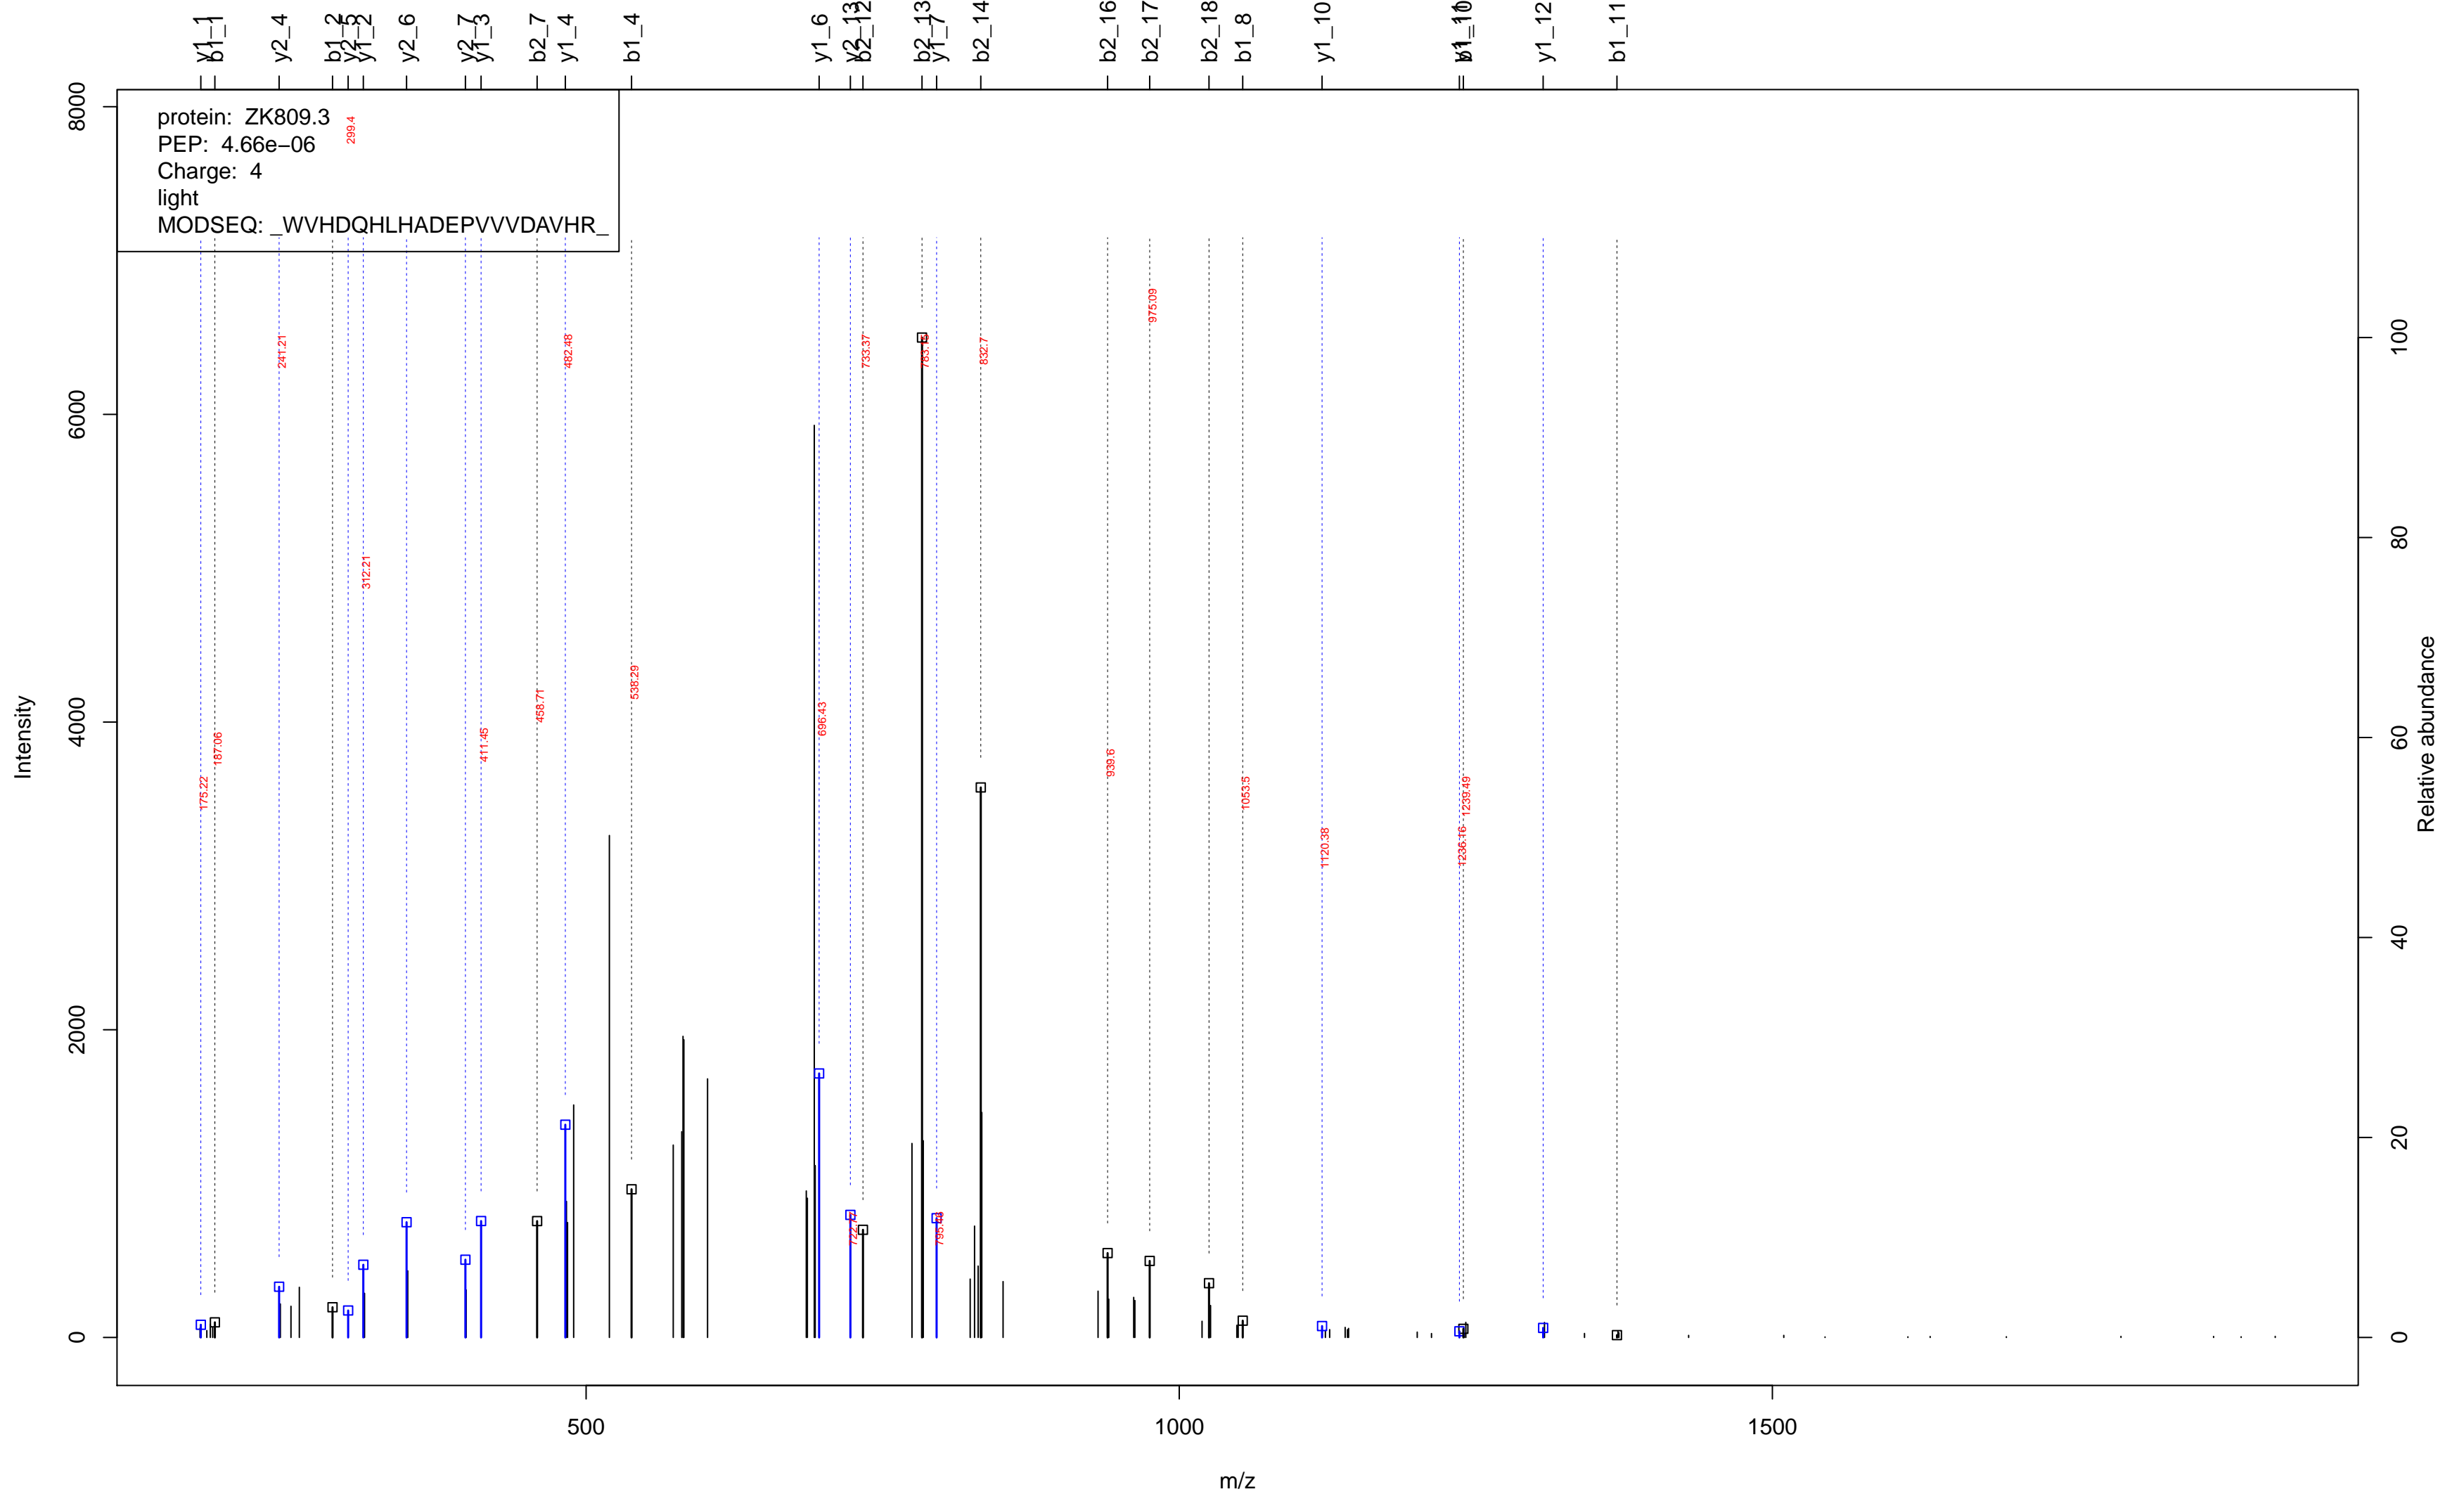

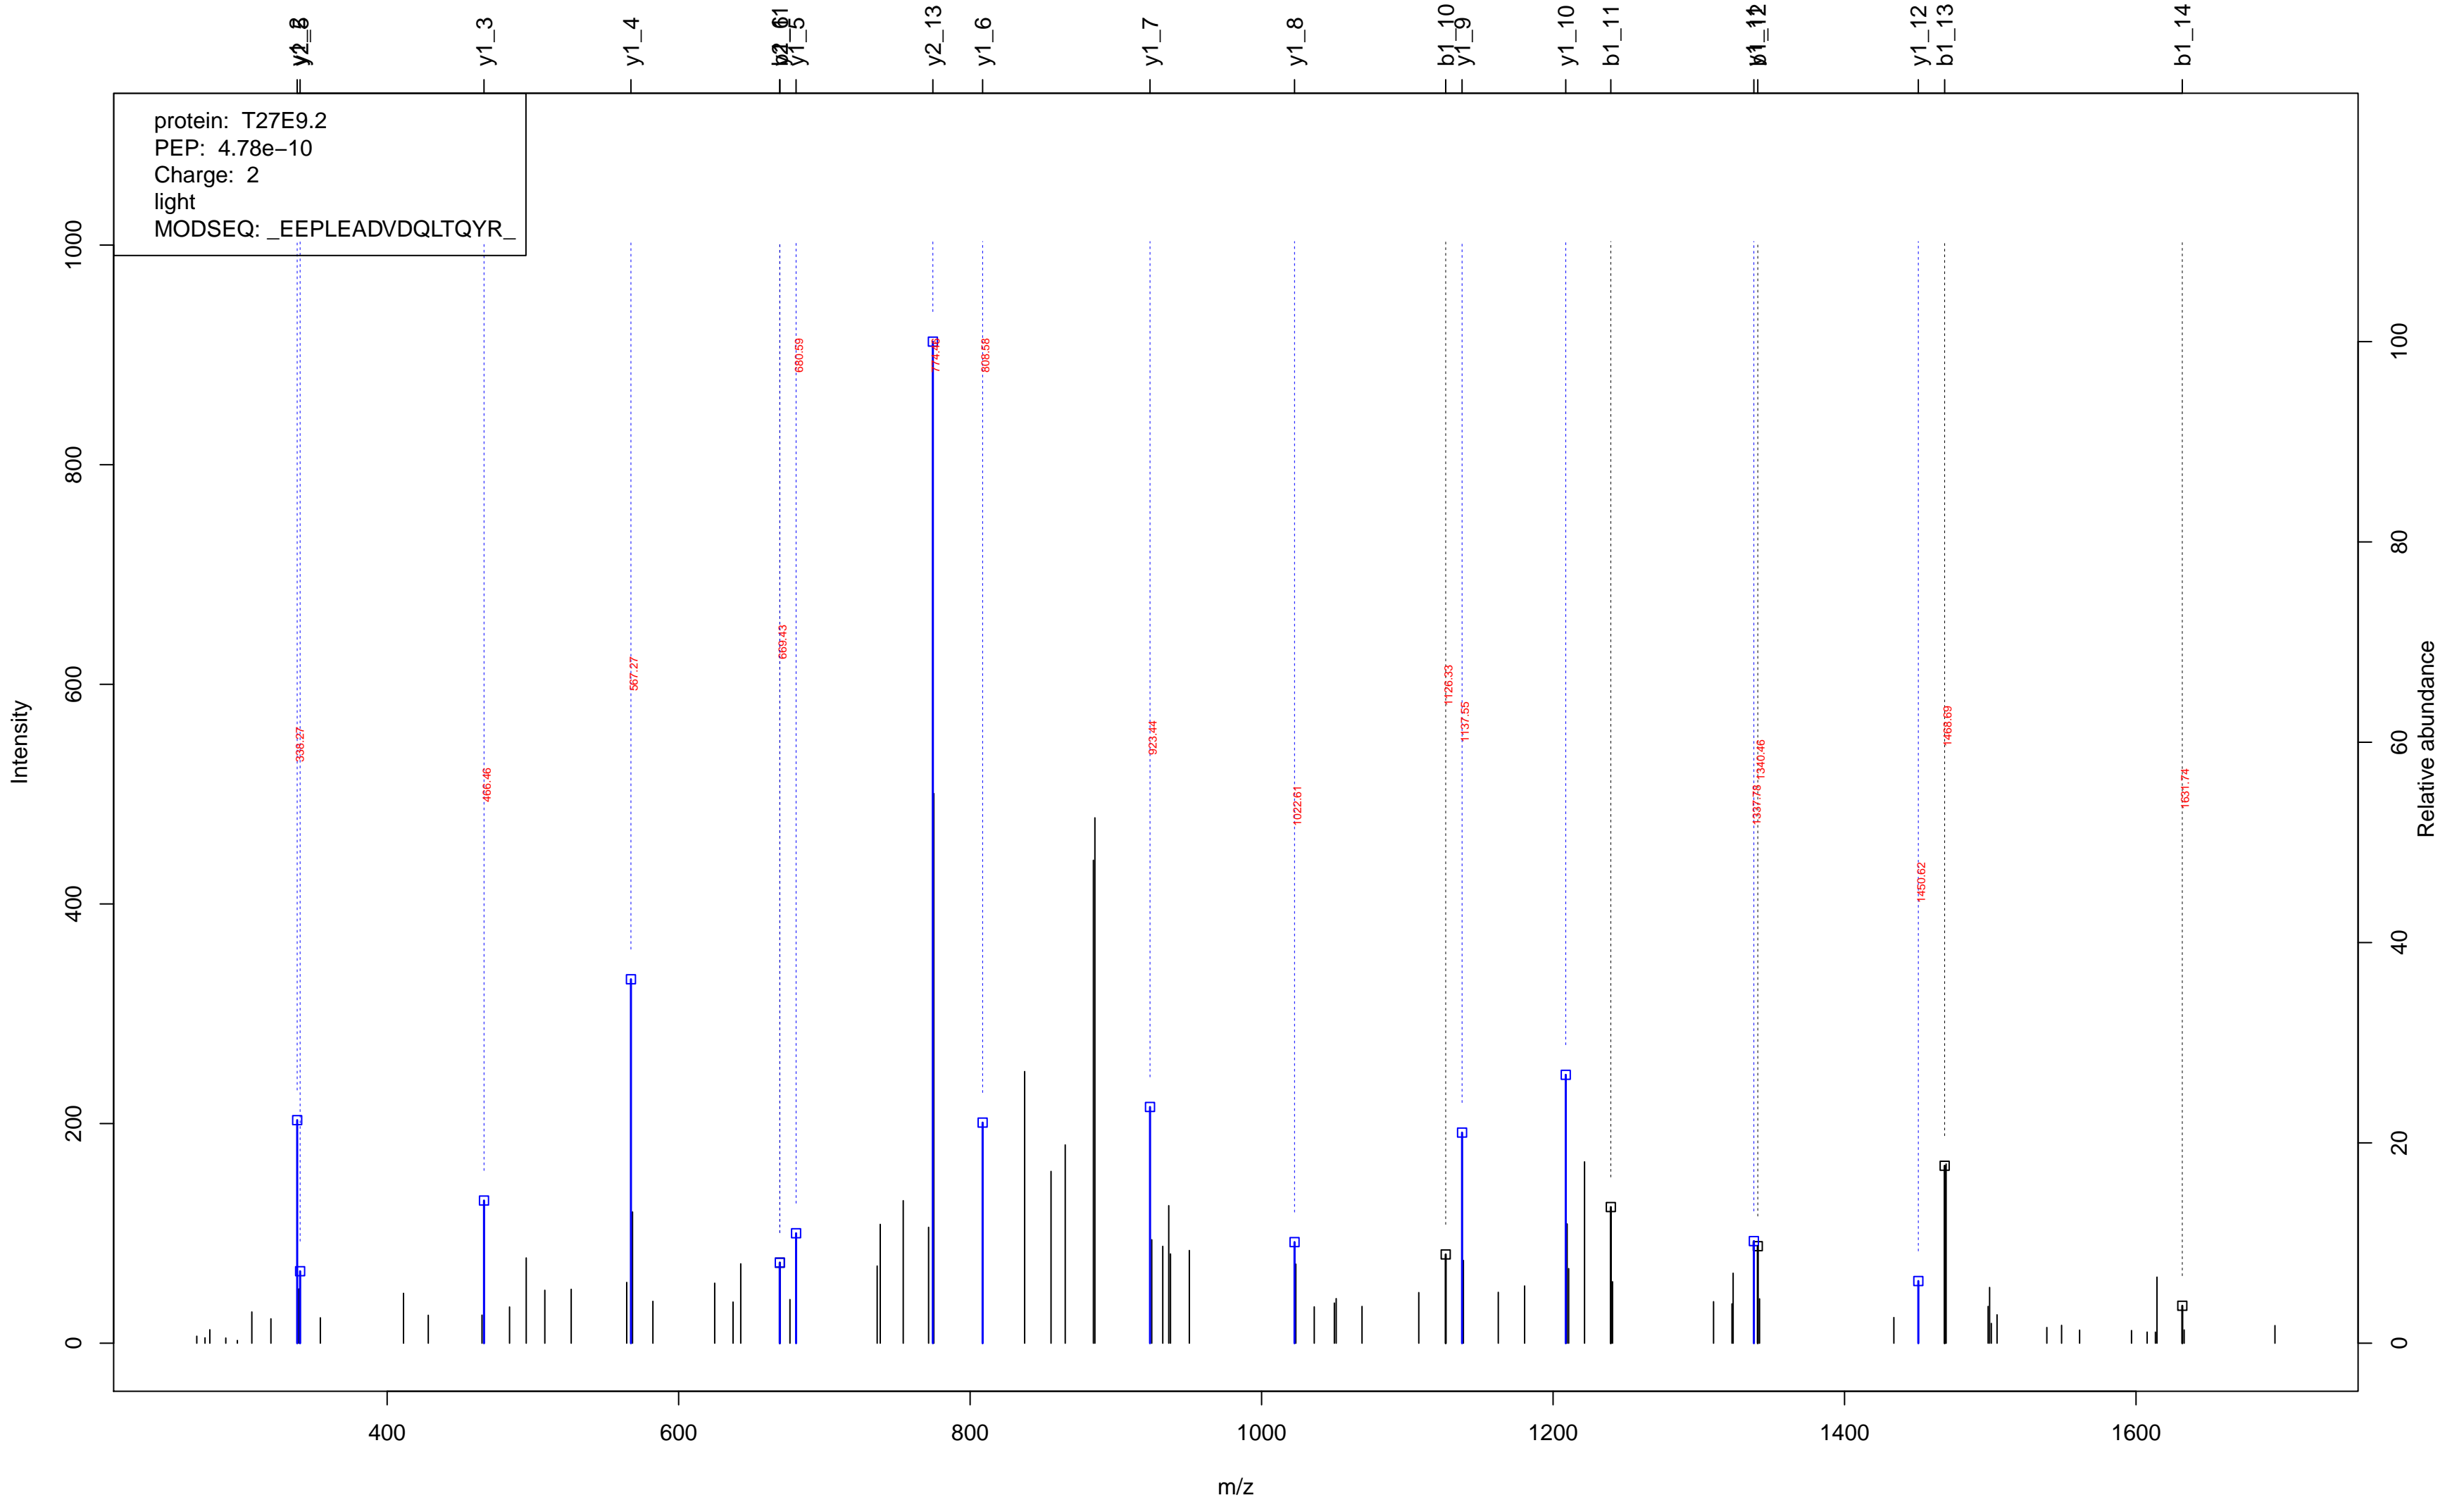

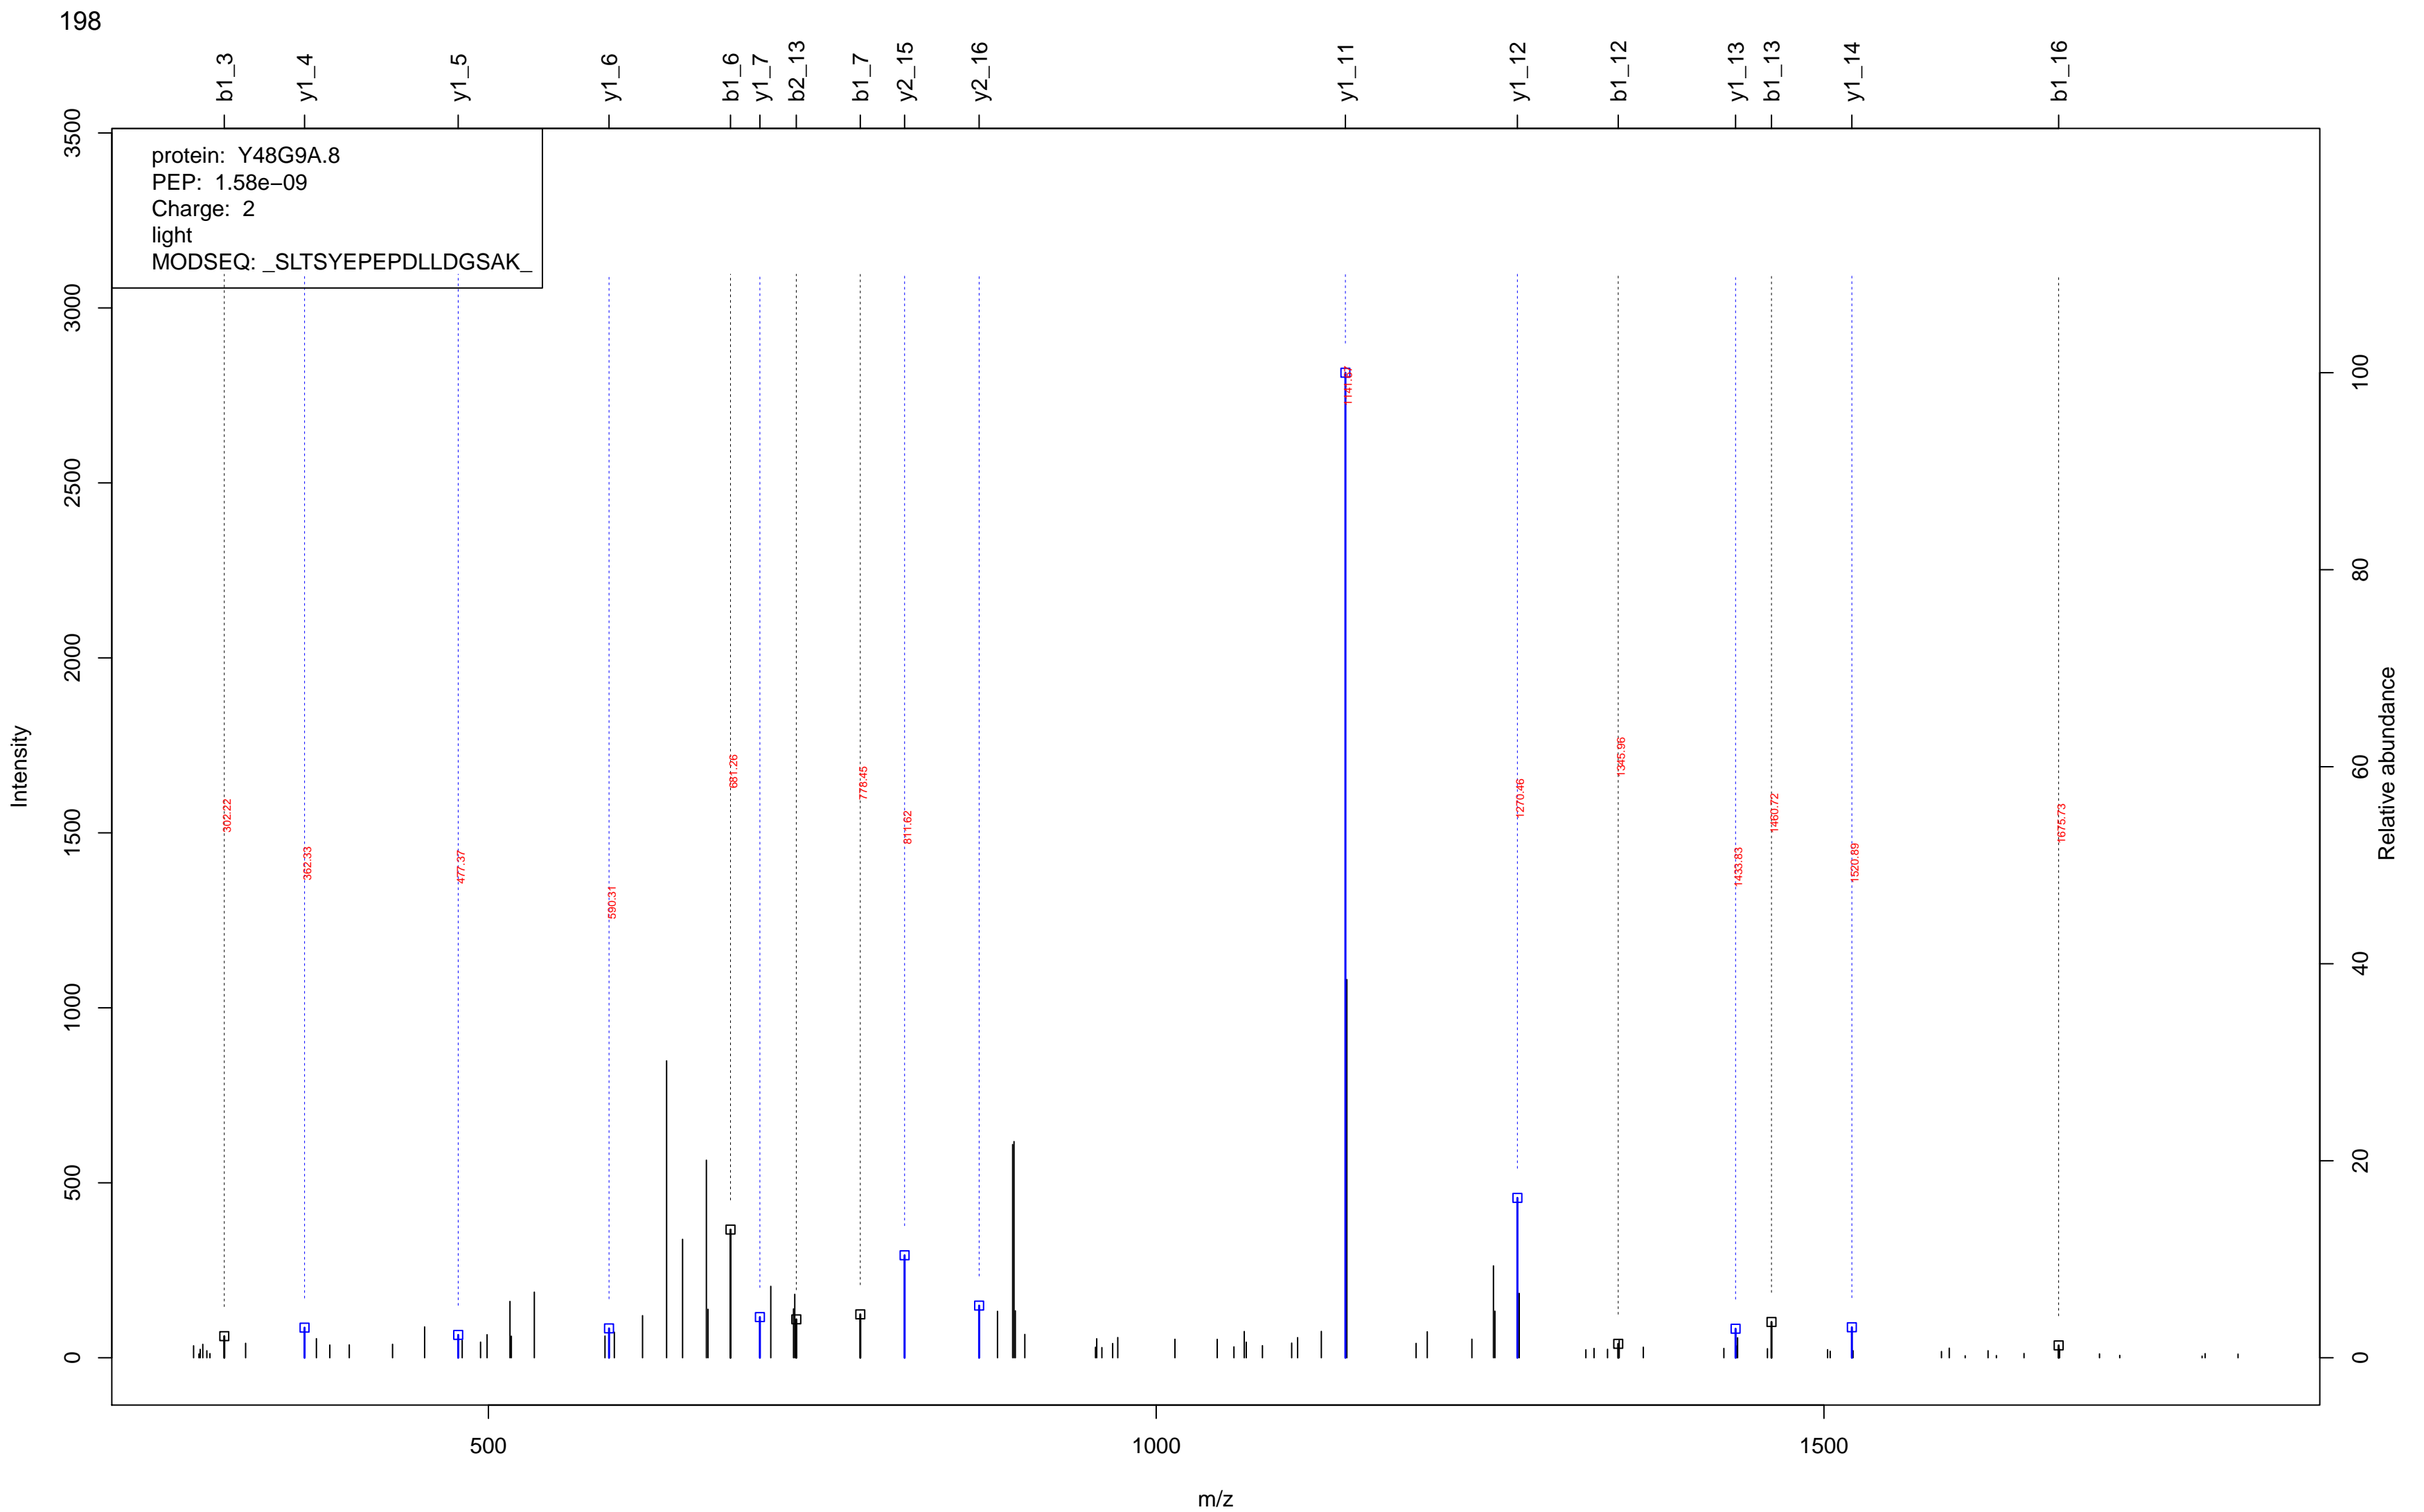

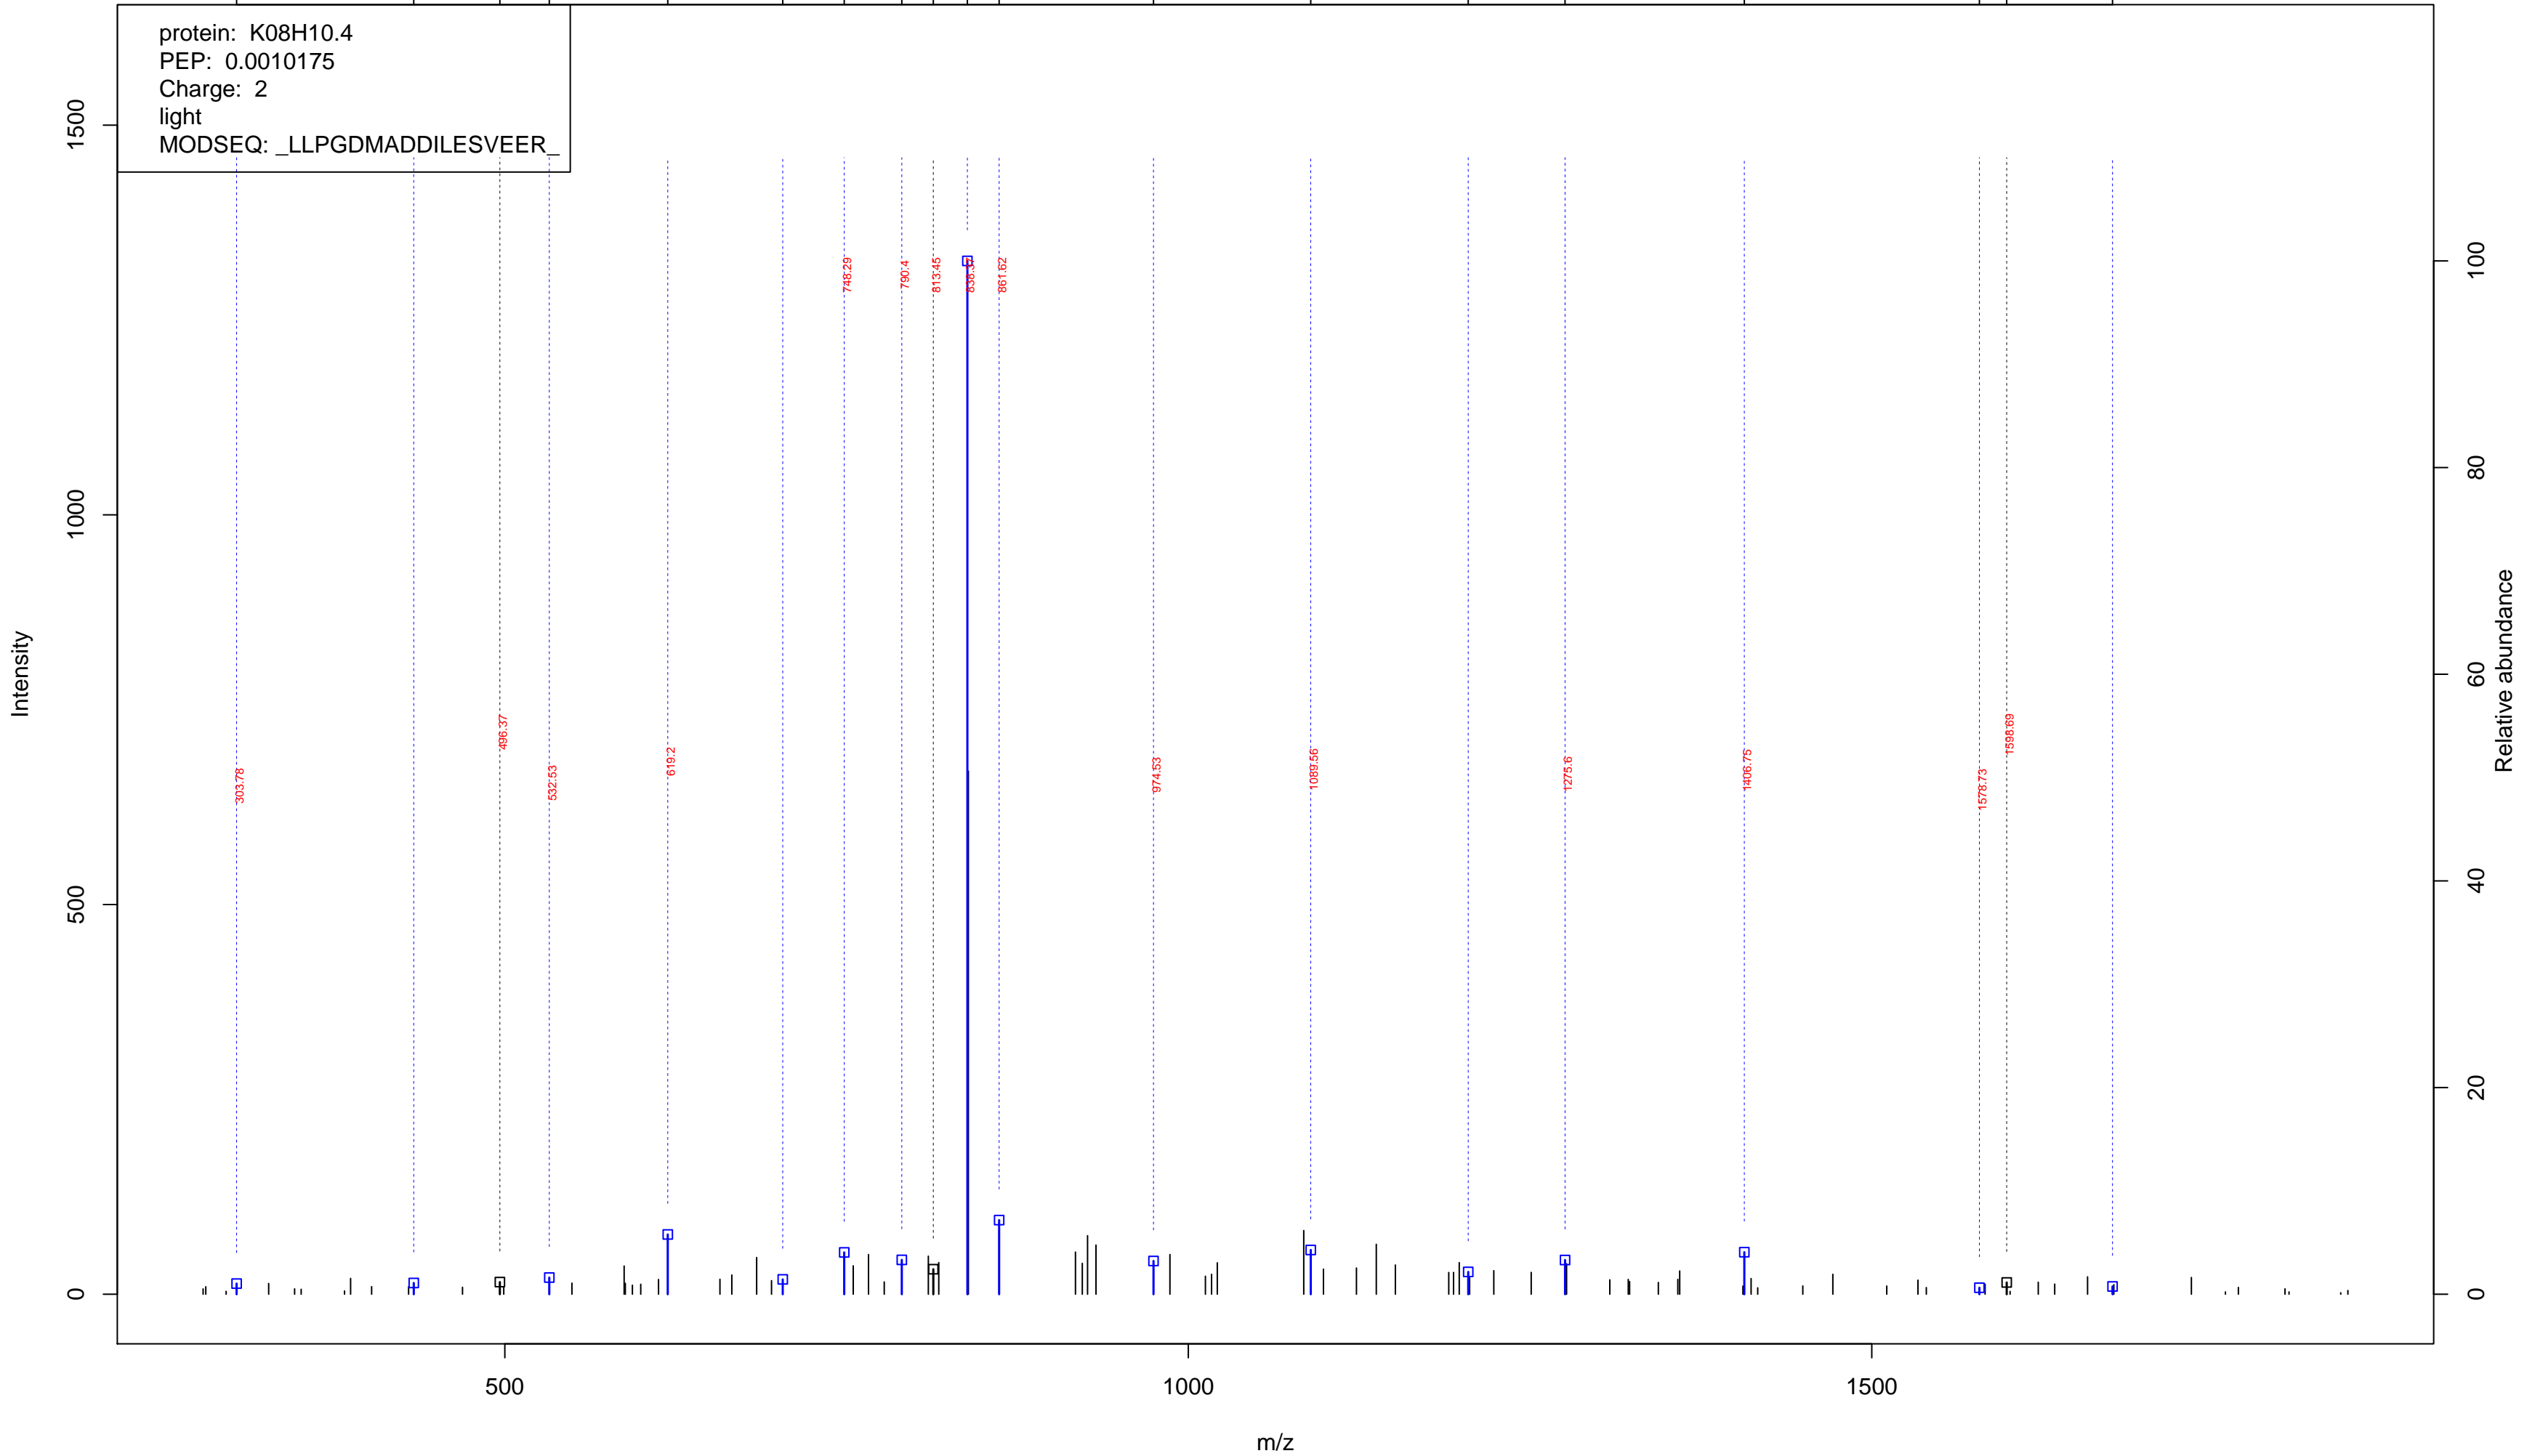

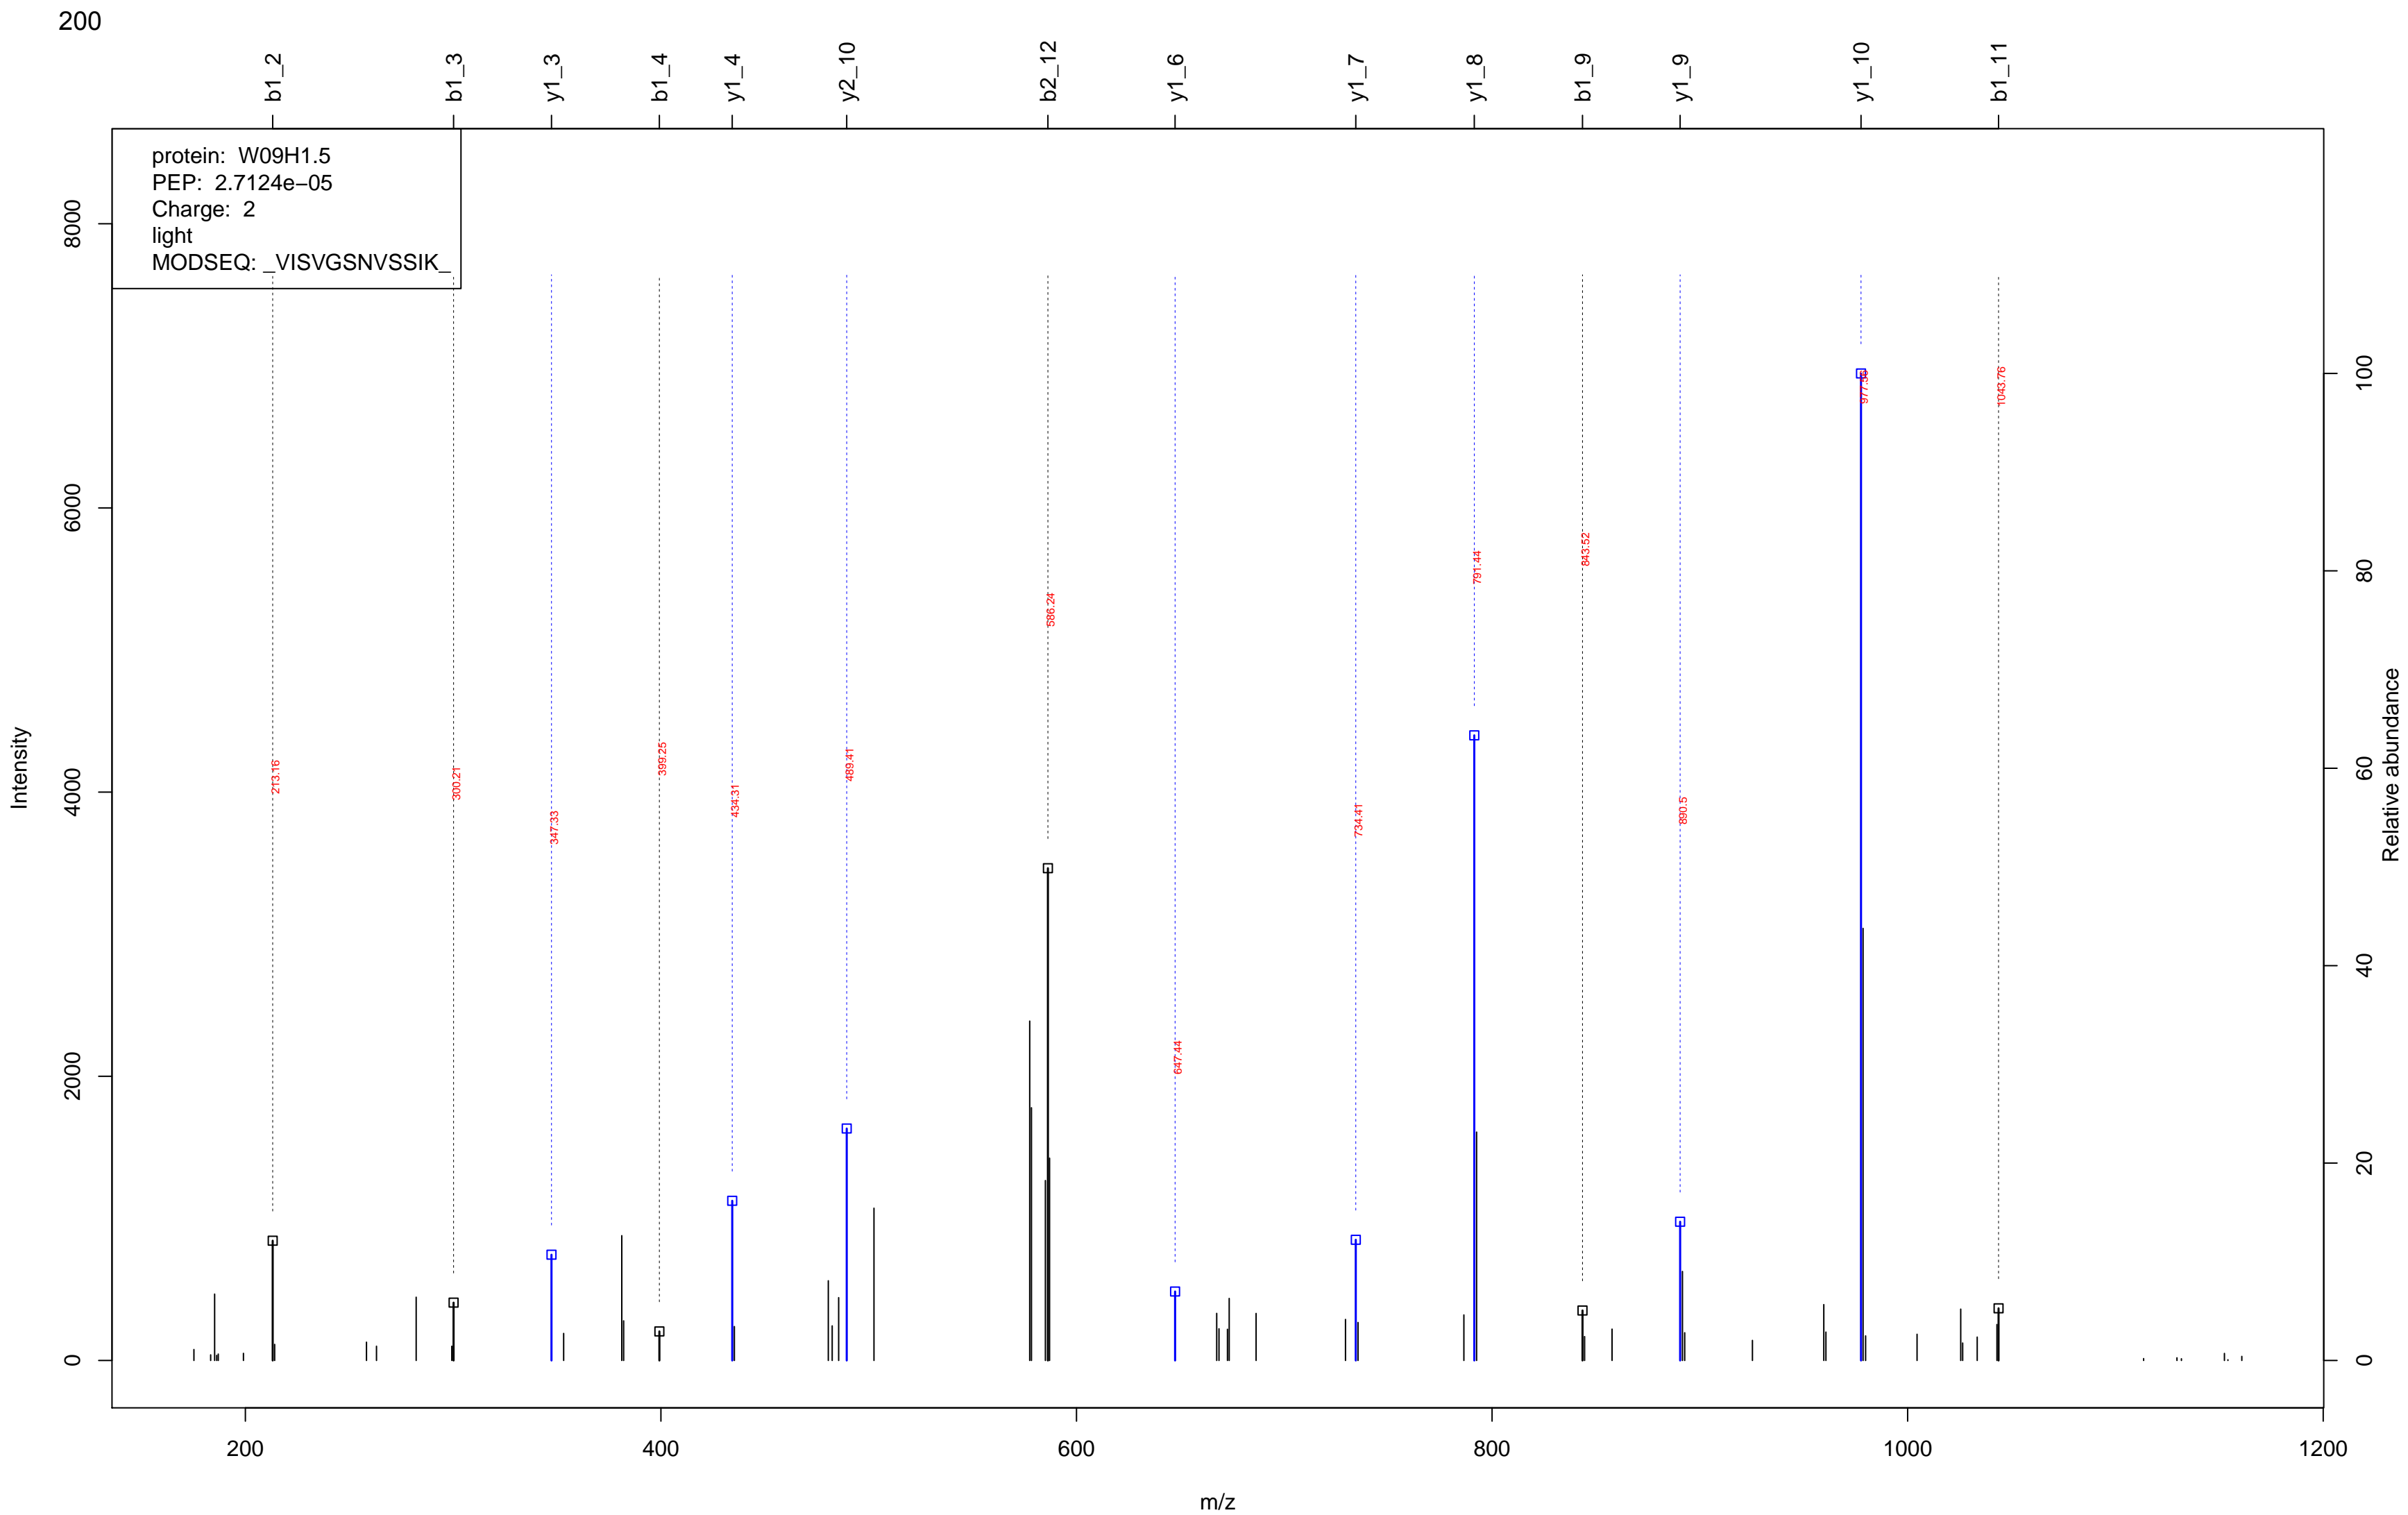



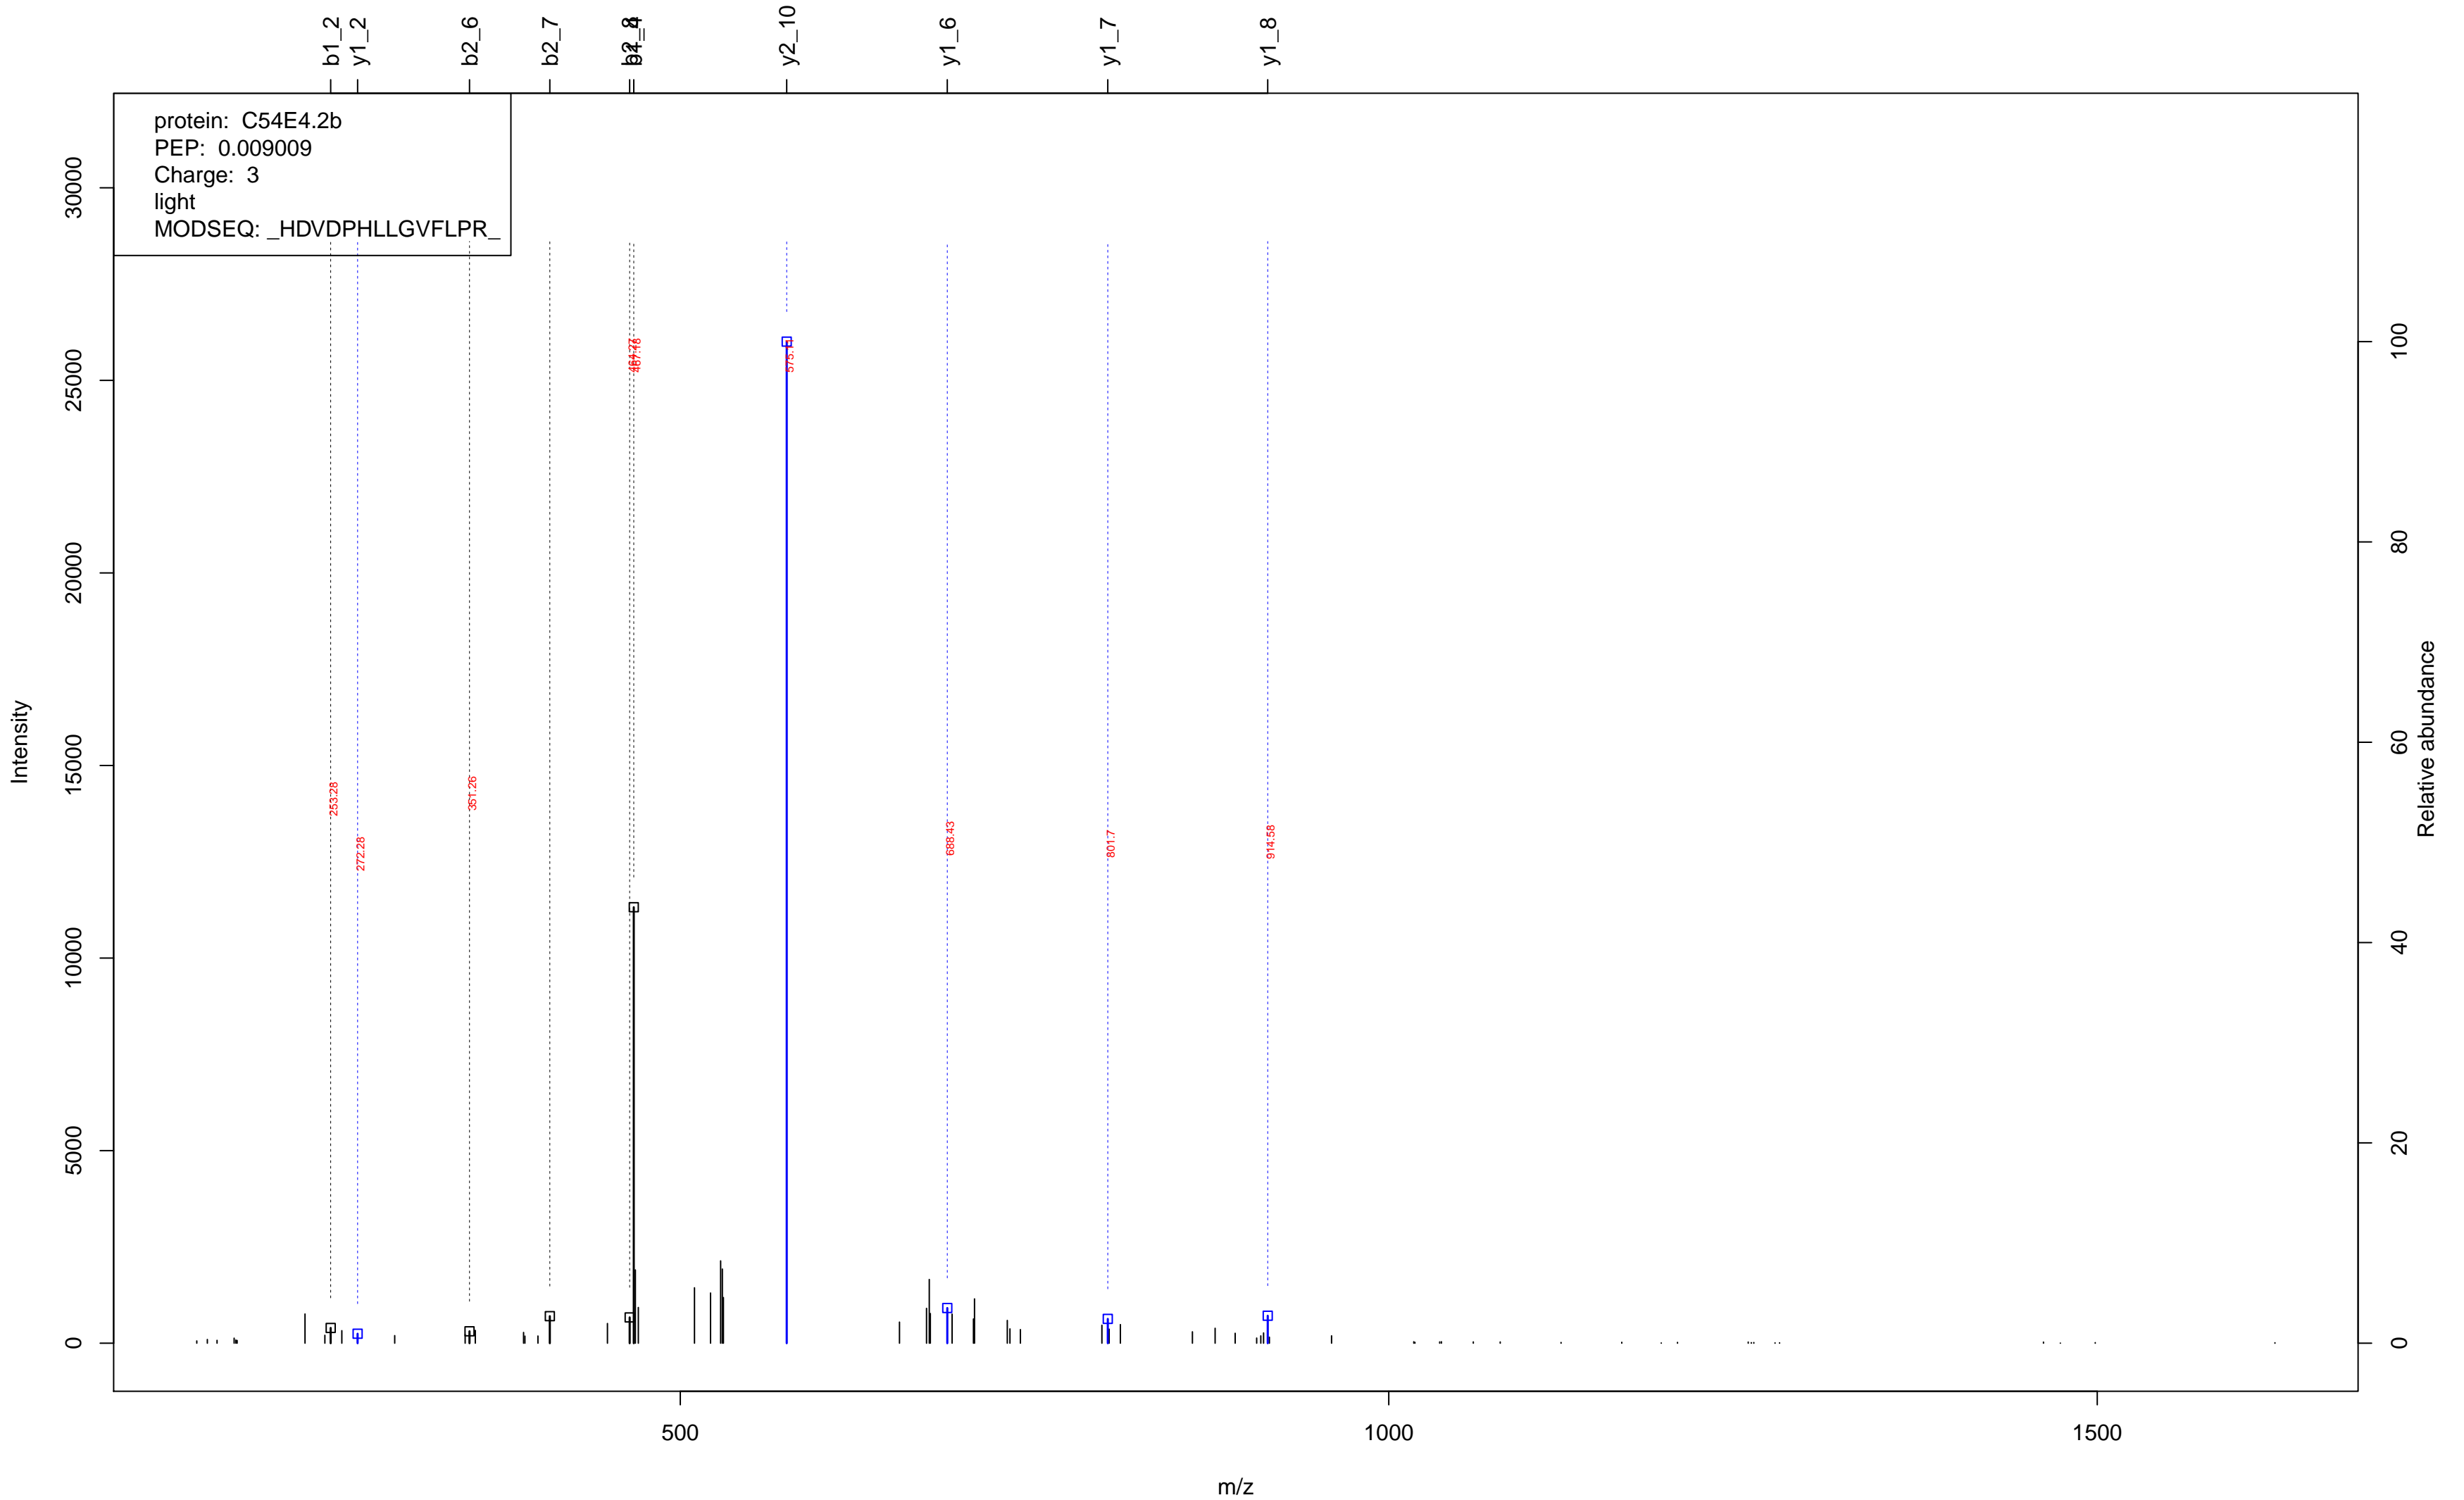

b1\_1 y1\_2 b1\_2 y1\_3 y1\_4 b1\_3 y1\_5 b2\_9 y1\_6 b1\_6 y1\_7 b1\_7 y1\_8 b1\_8

protein: K06A4.5  
PEP: 0.0029925  
Charge: 2  
light  
MODSEQ: \_WFYLTDVVK\_

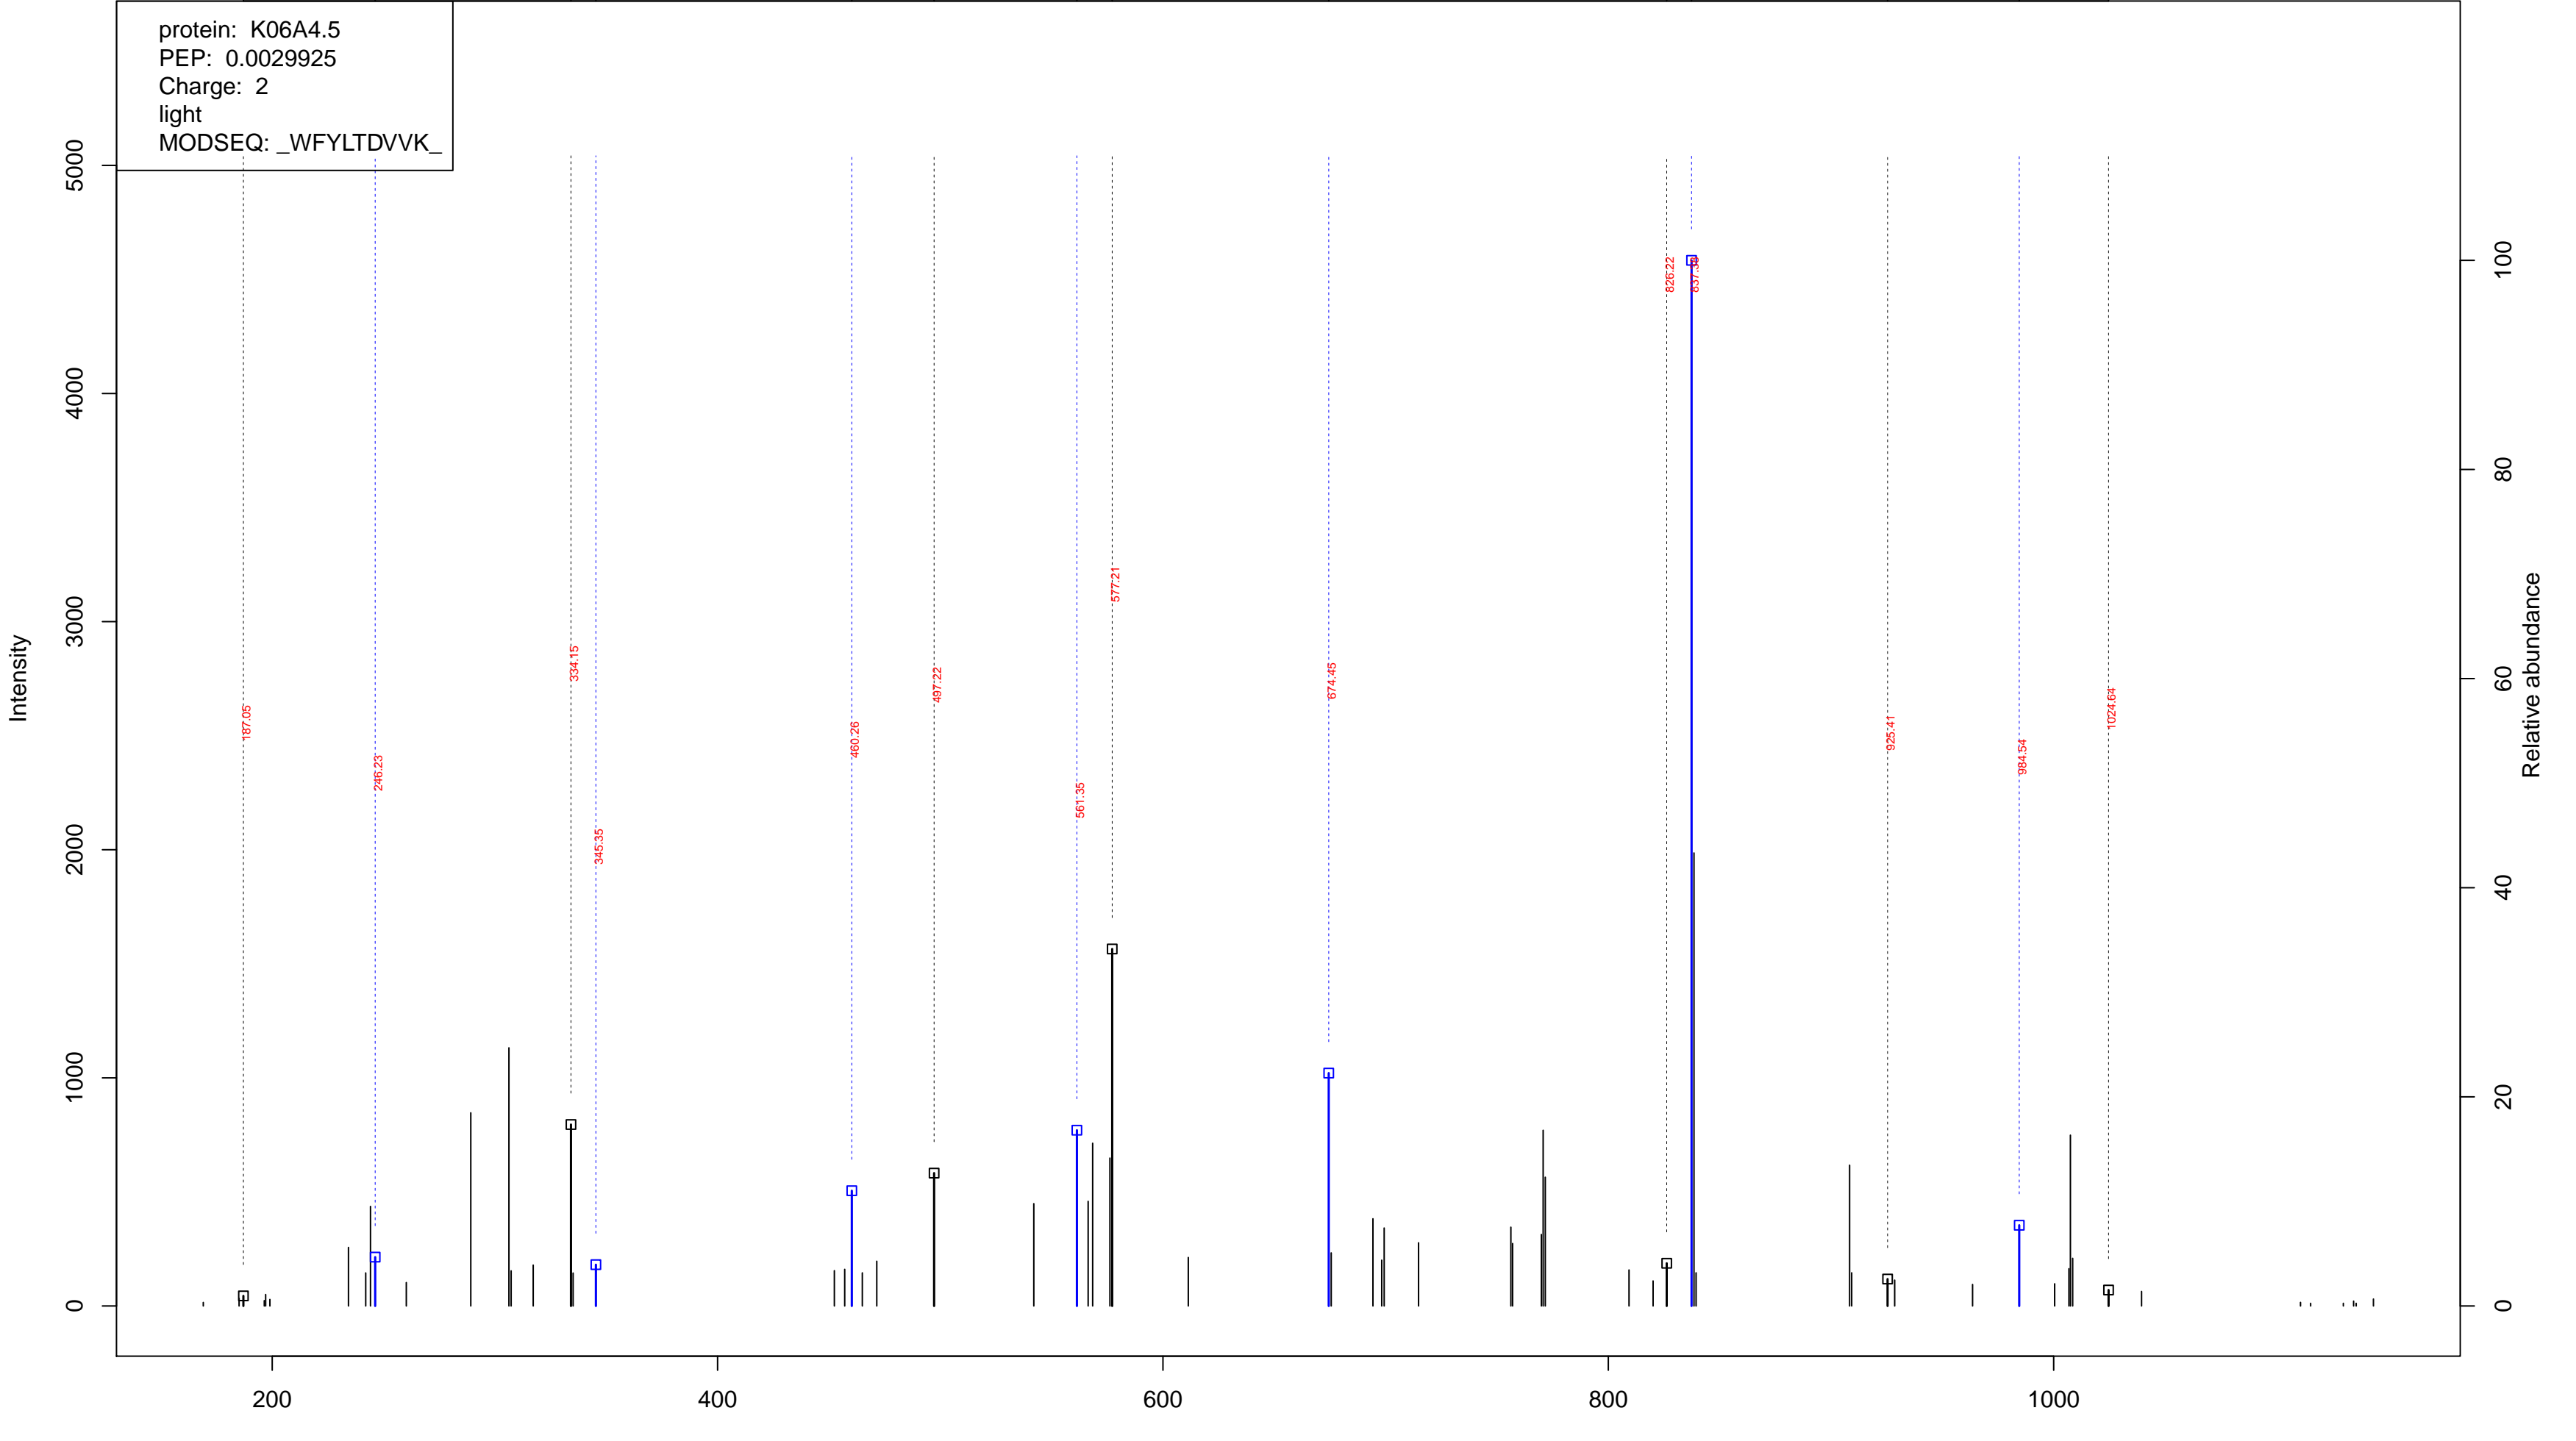

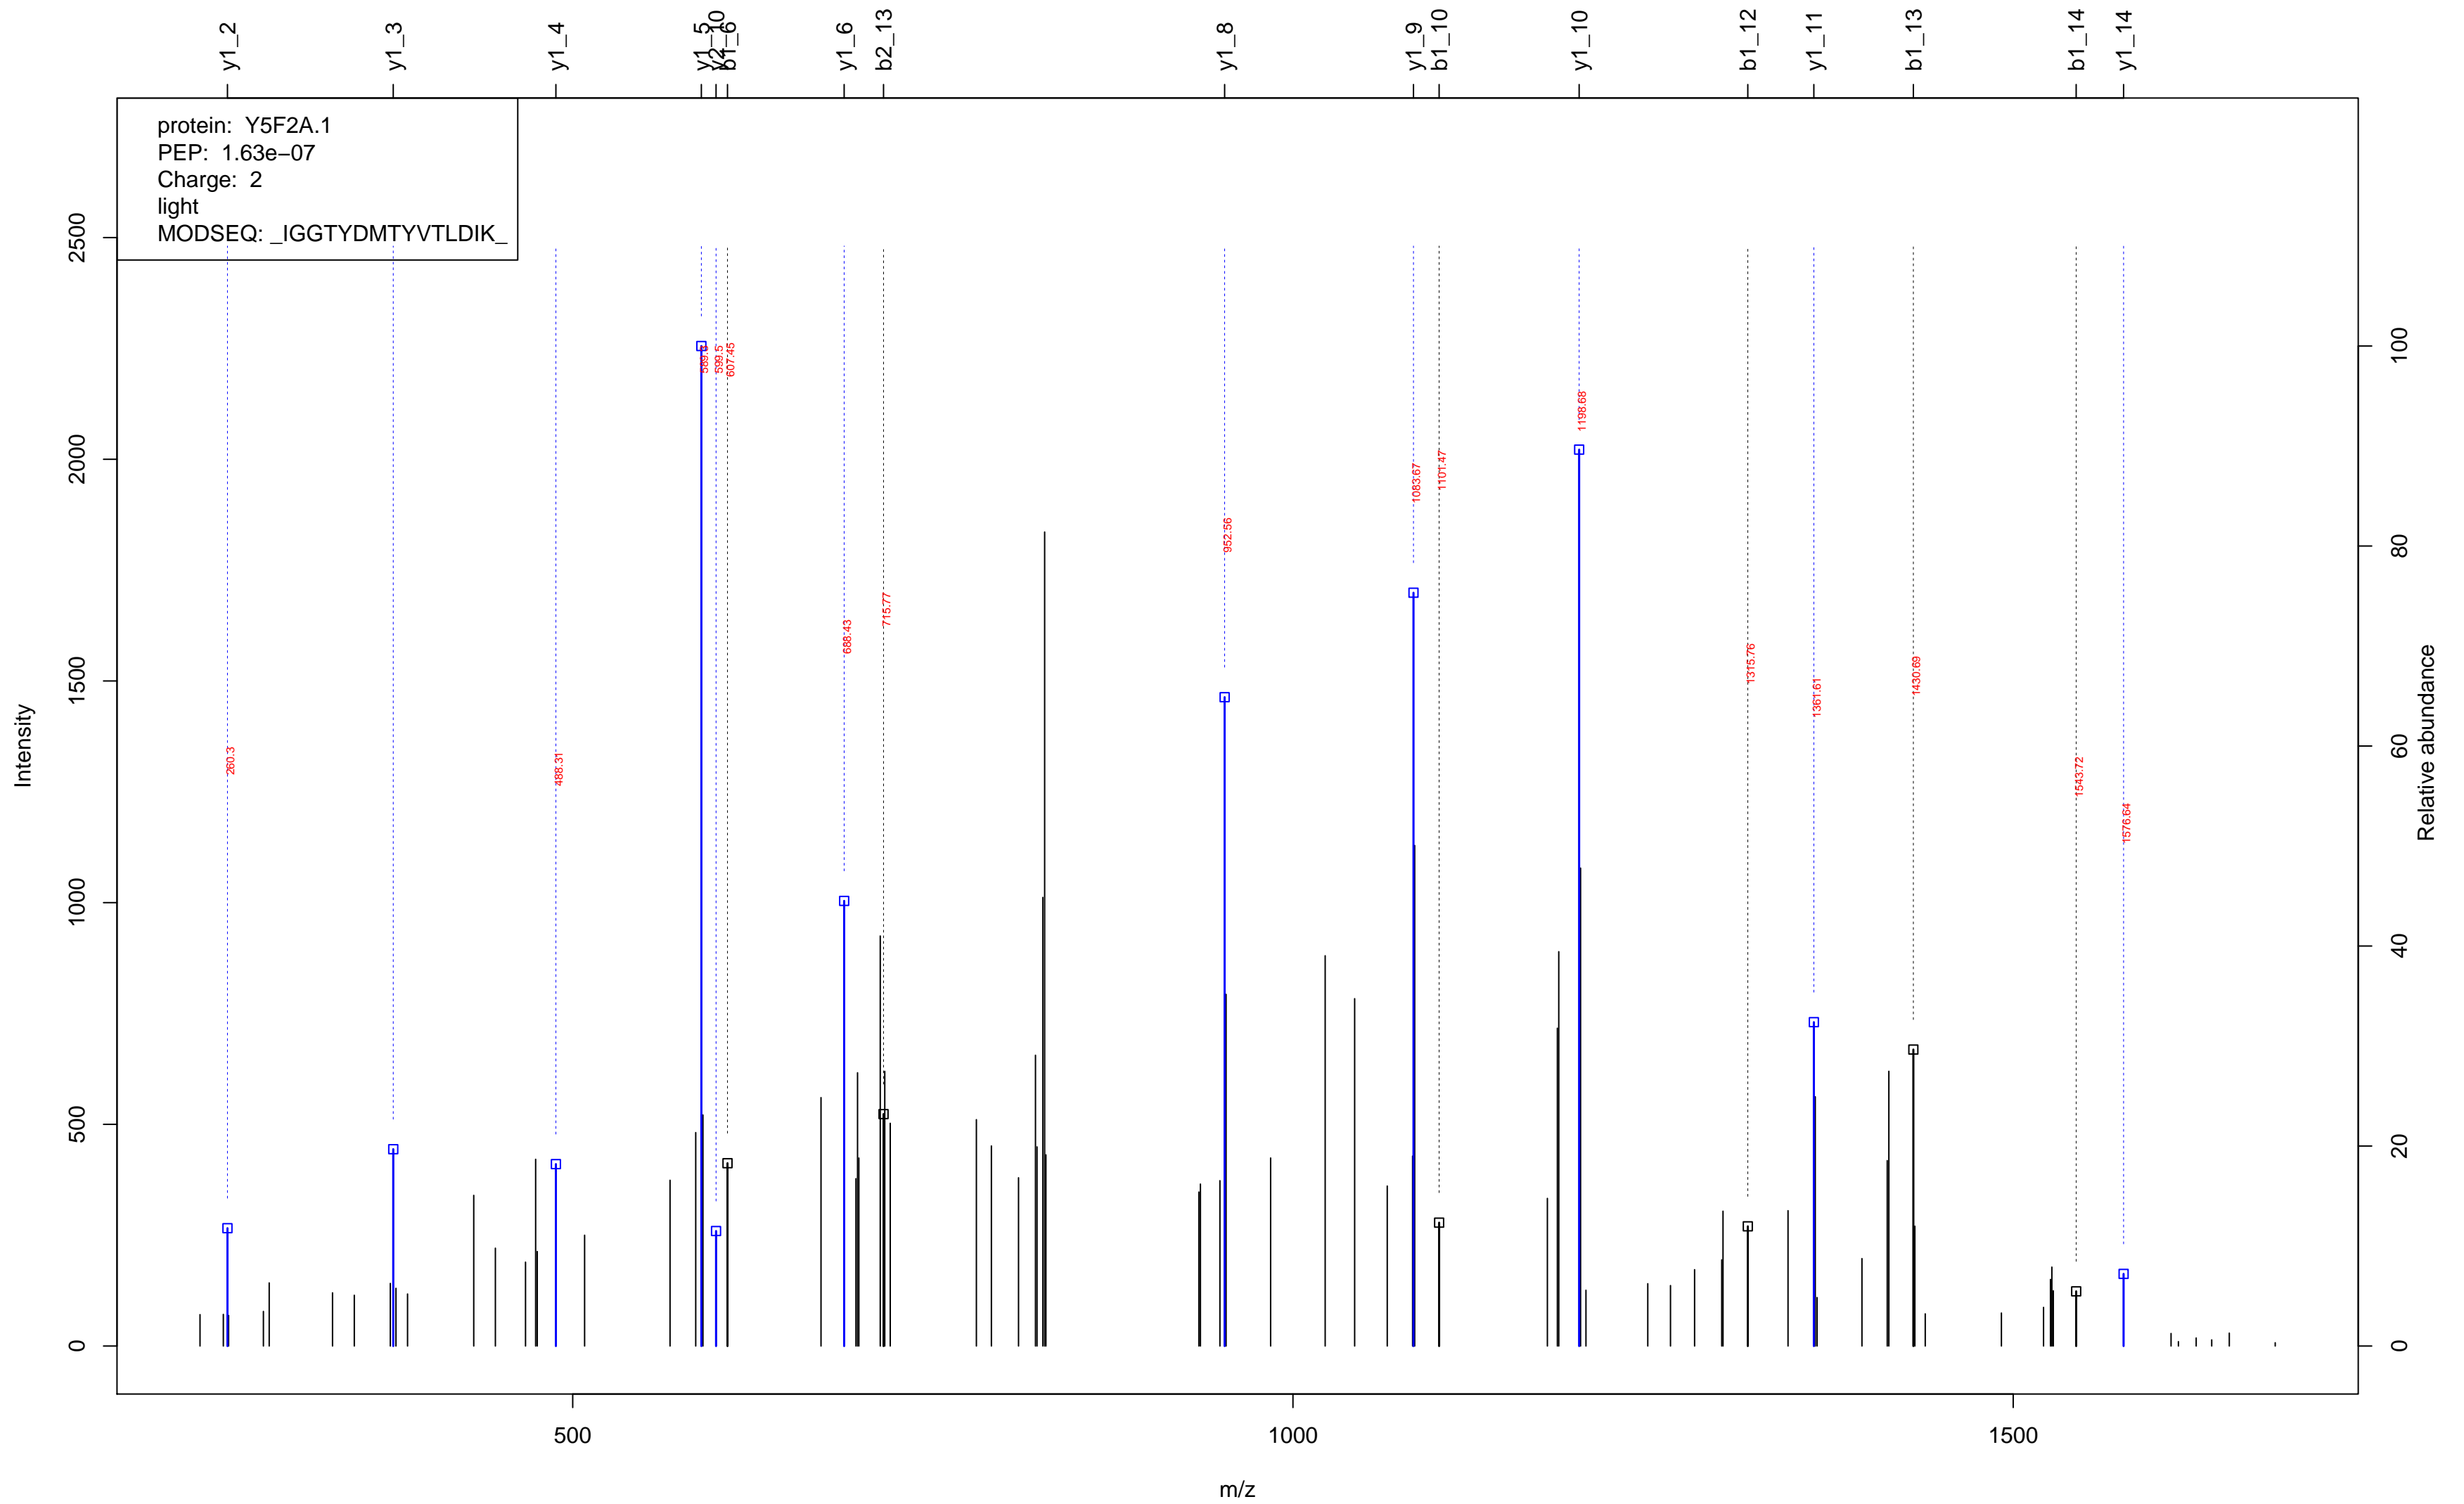

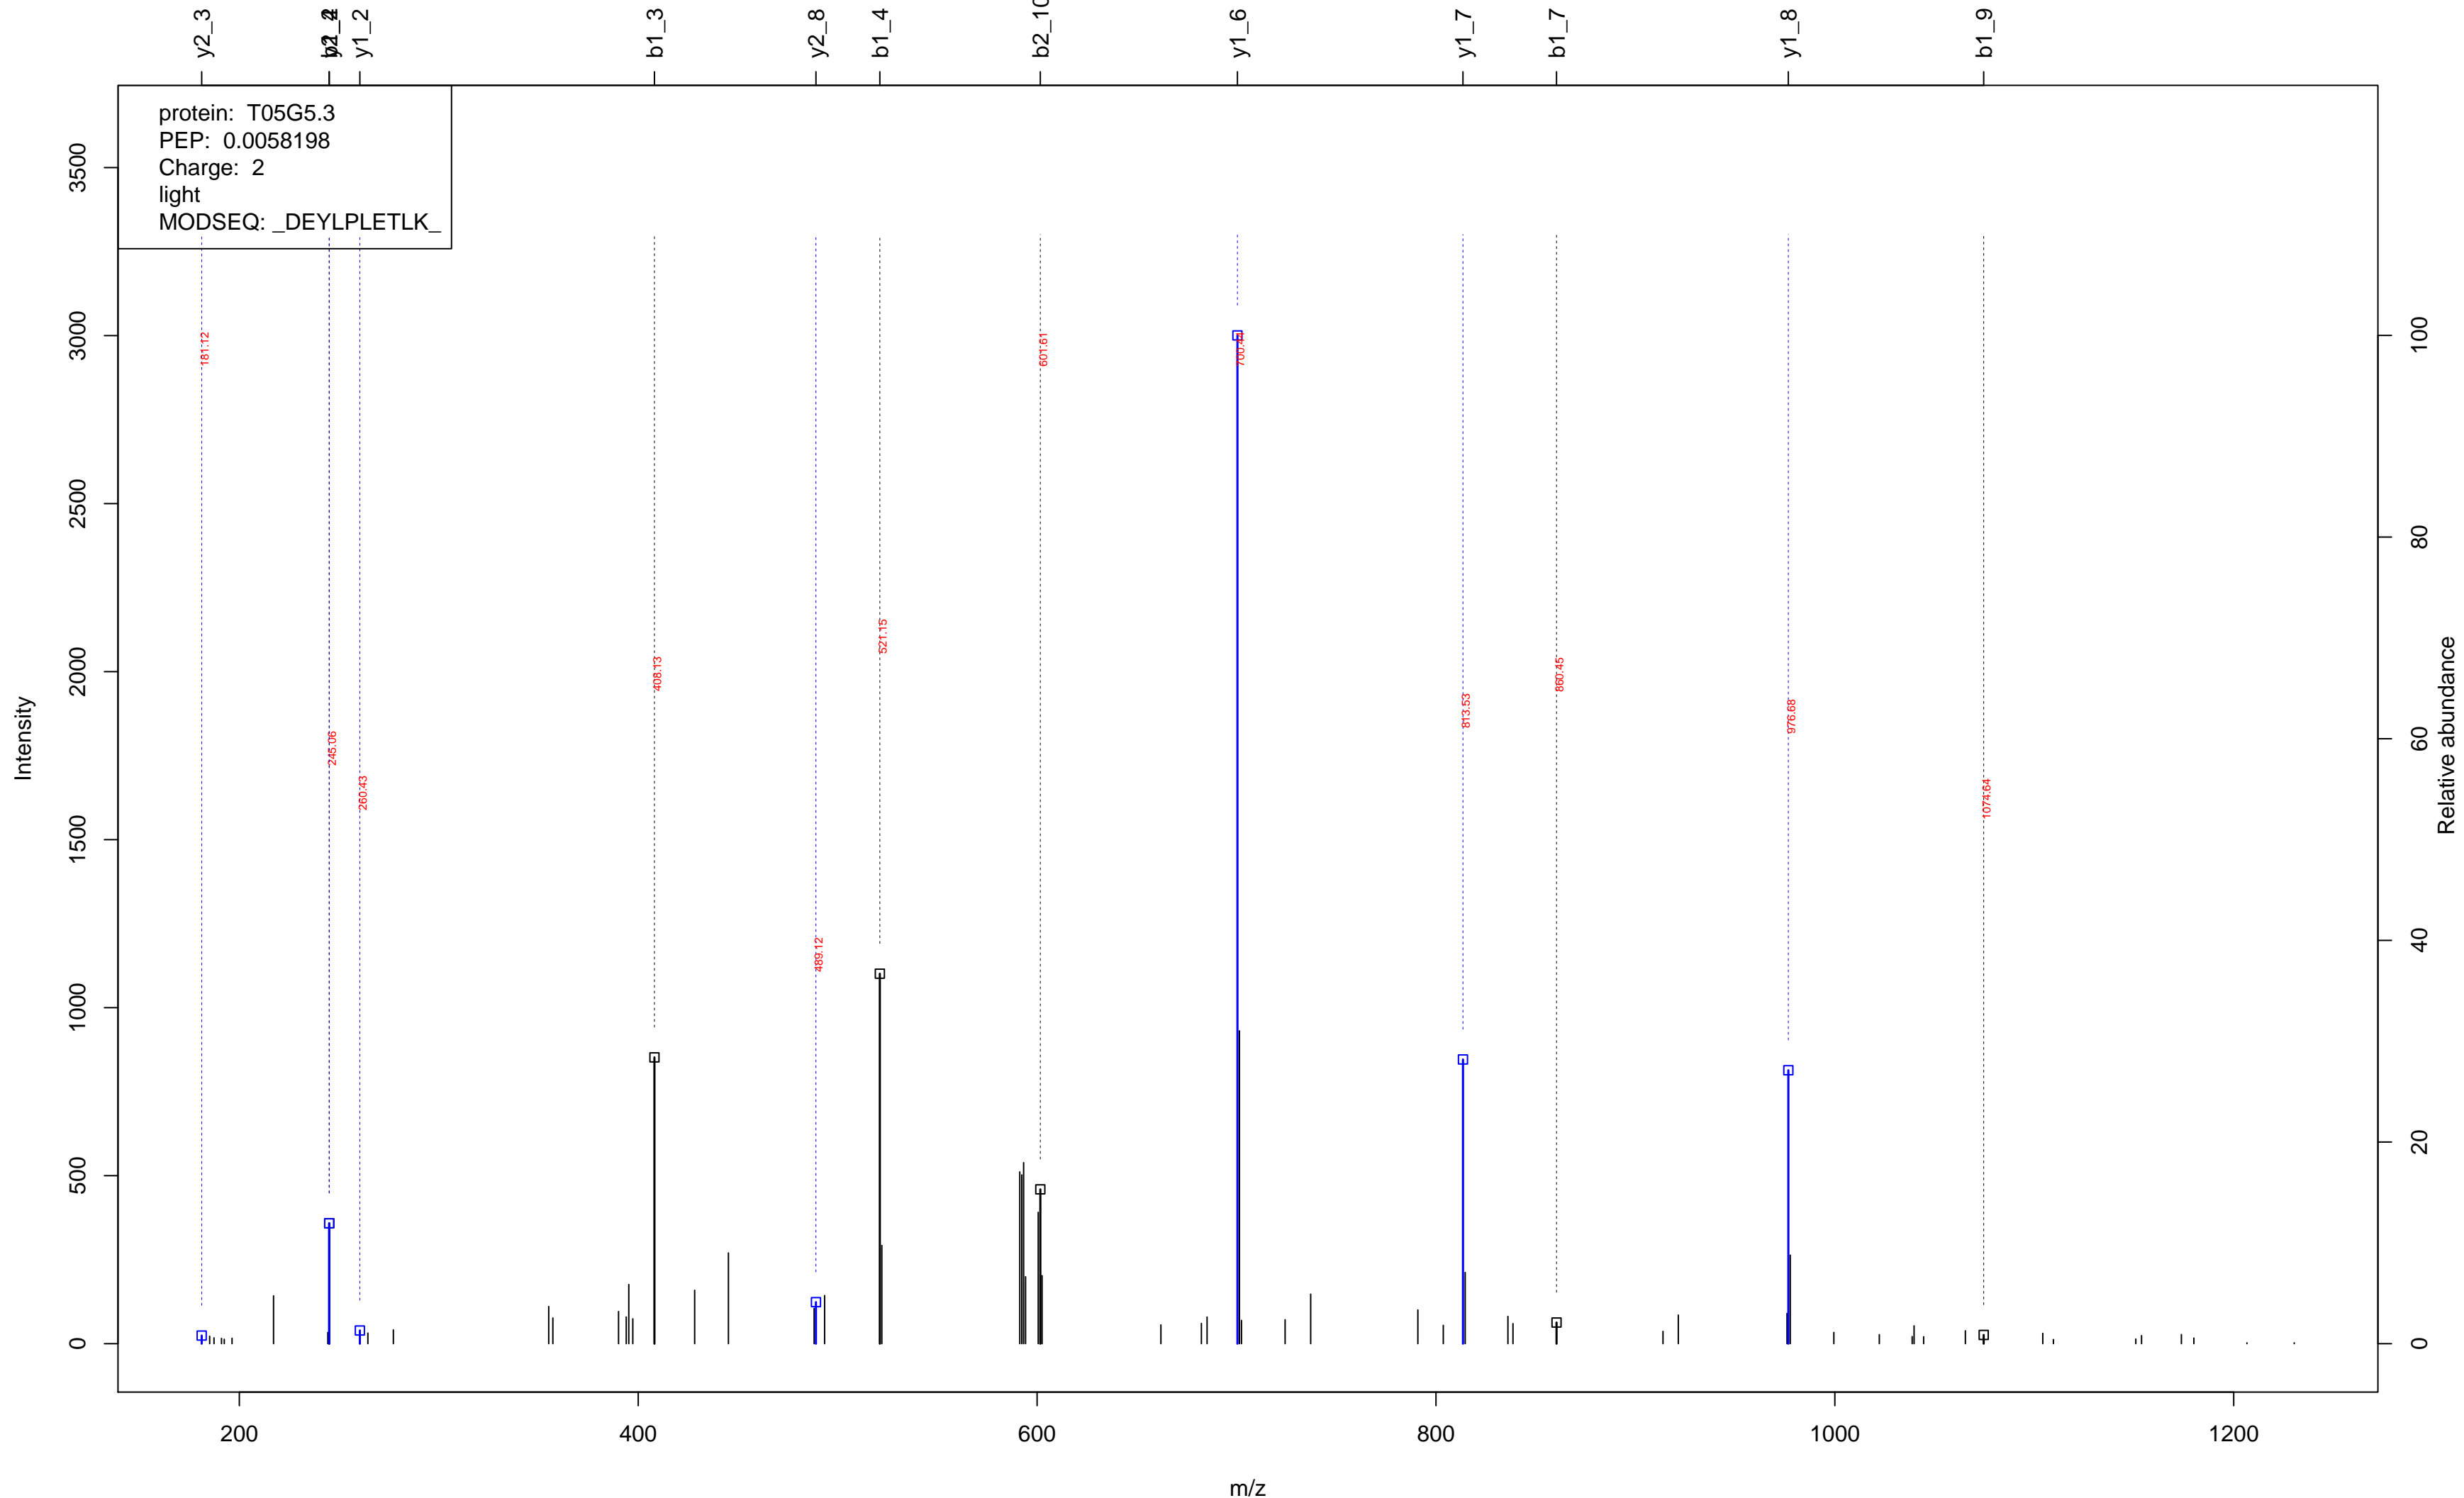

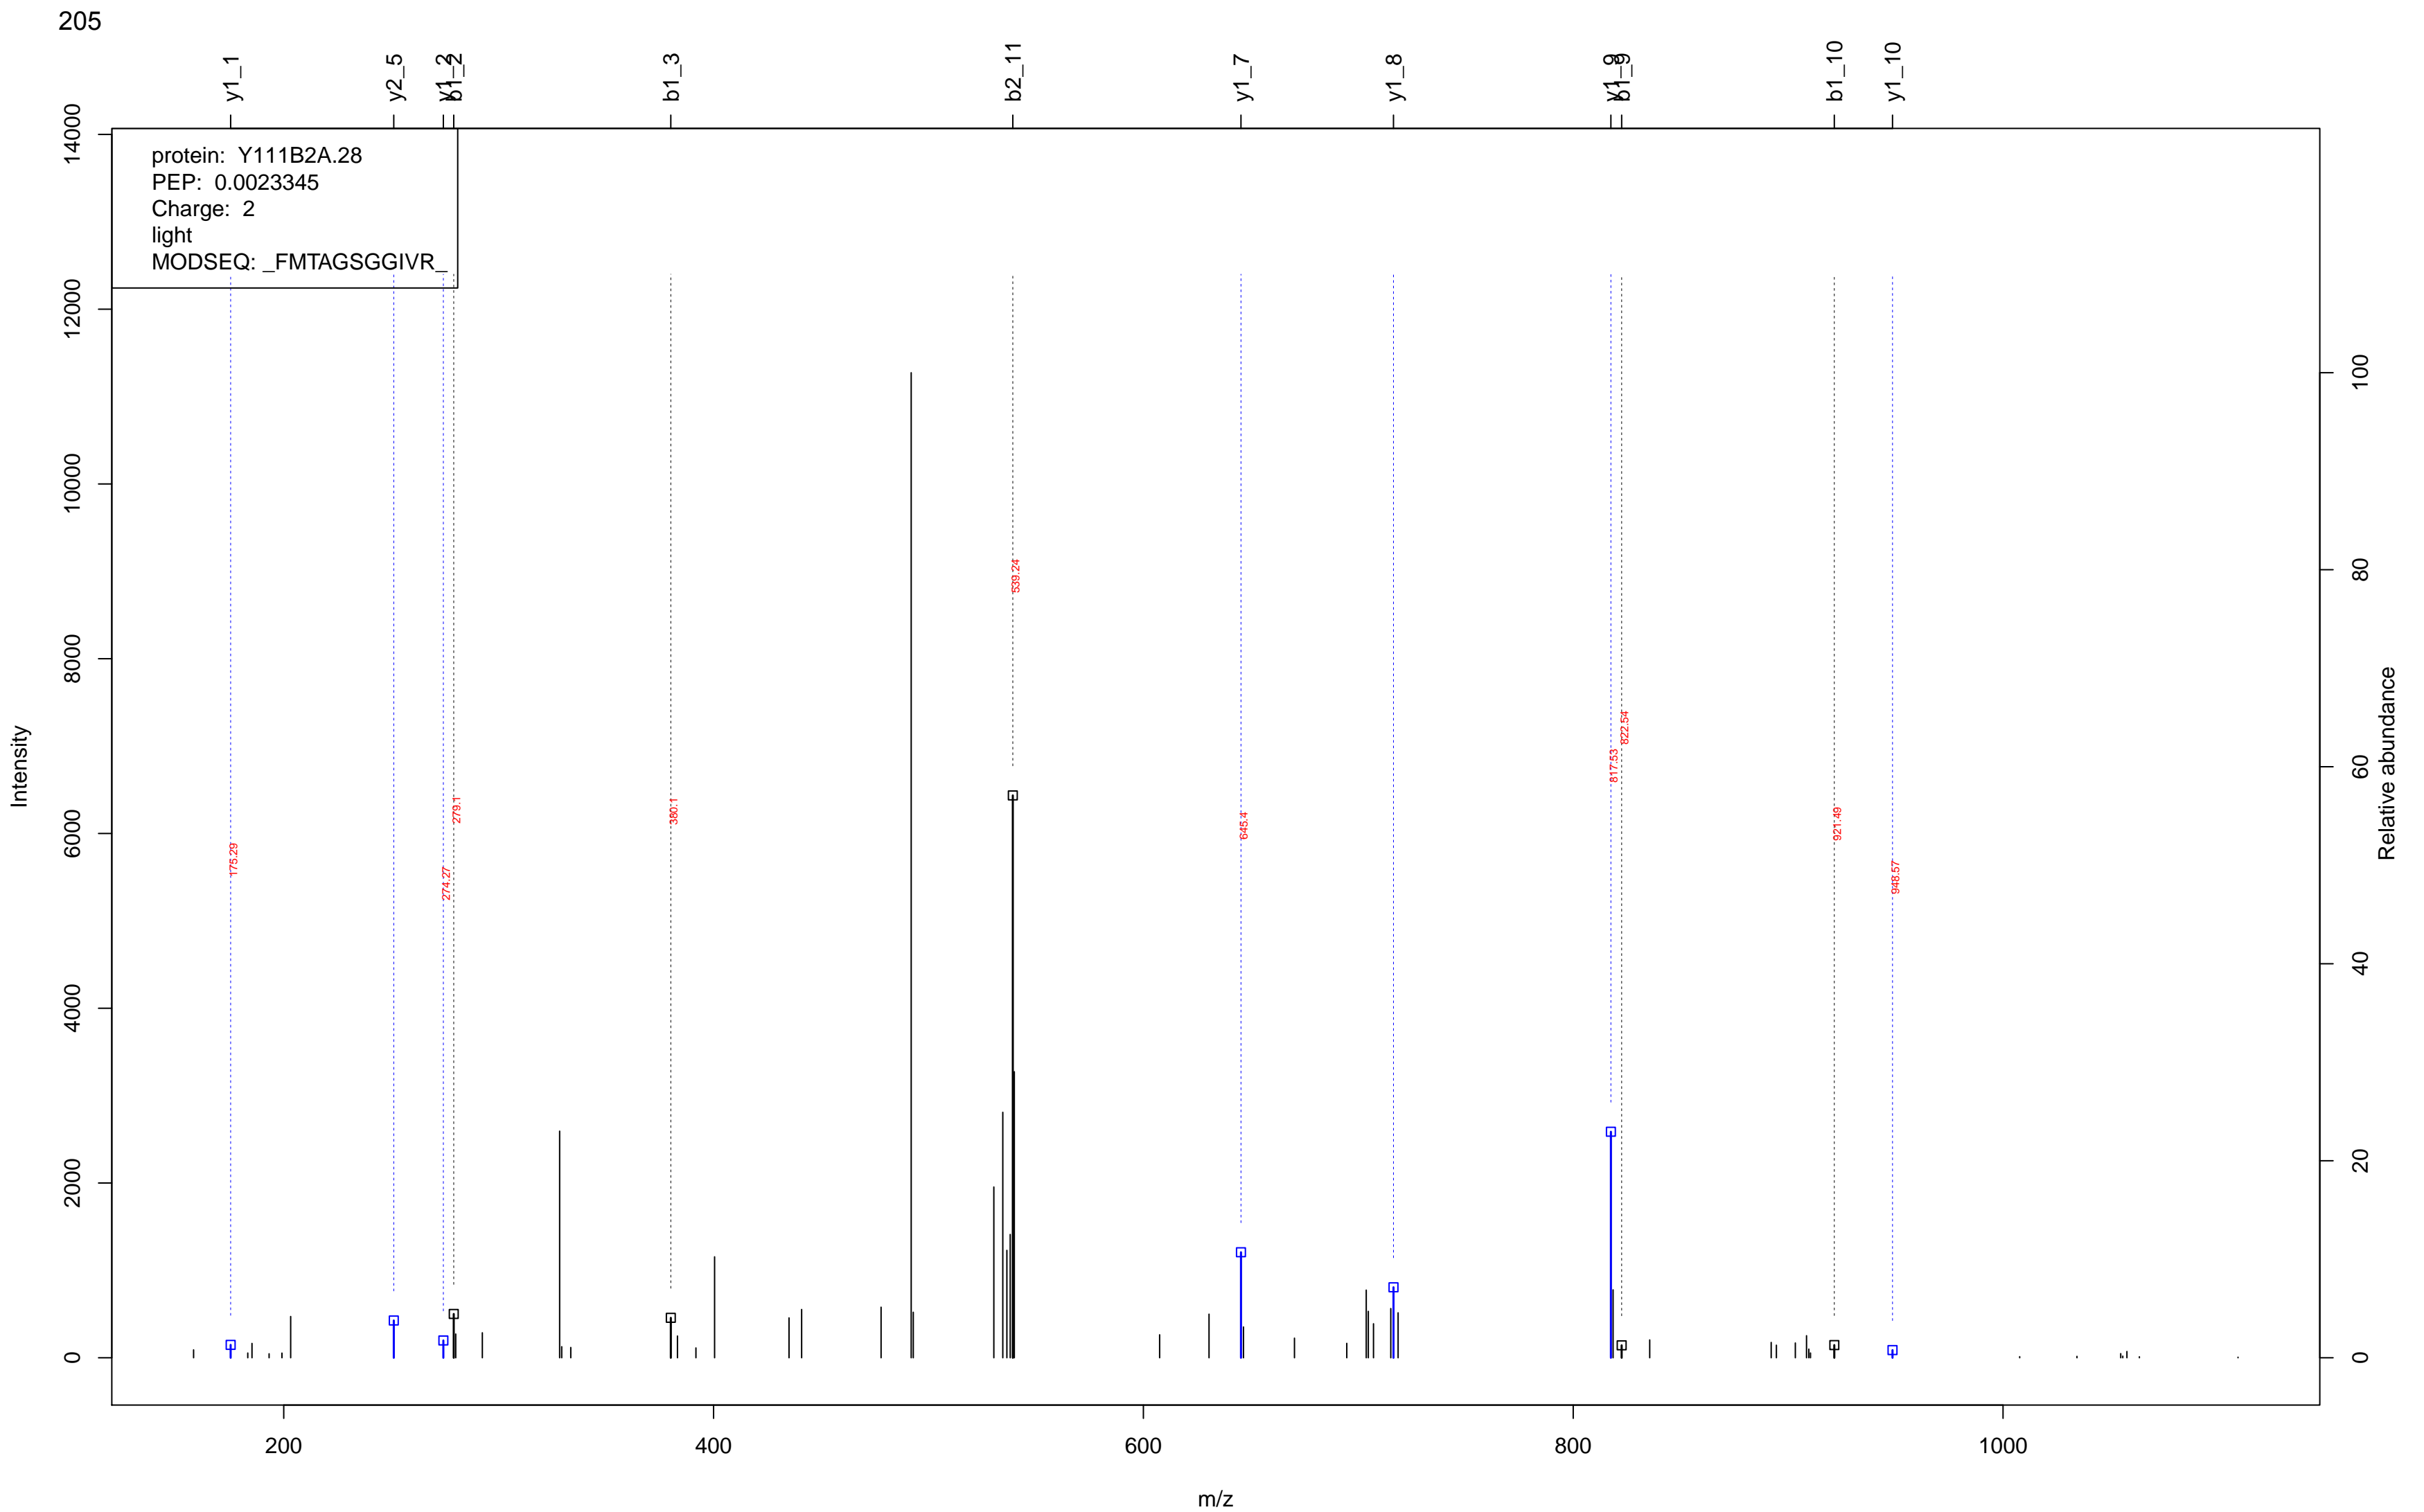

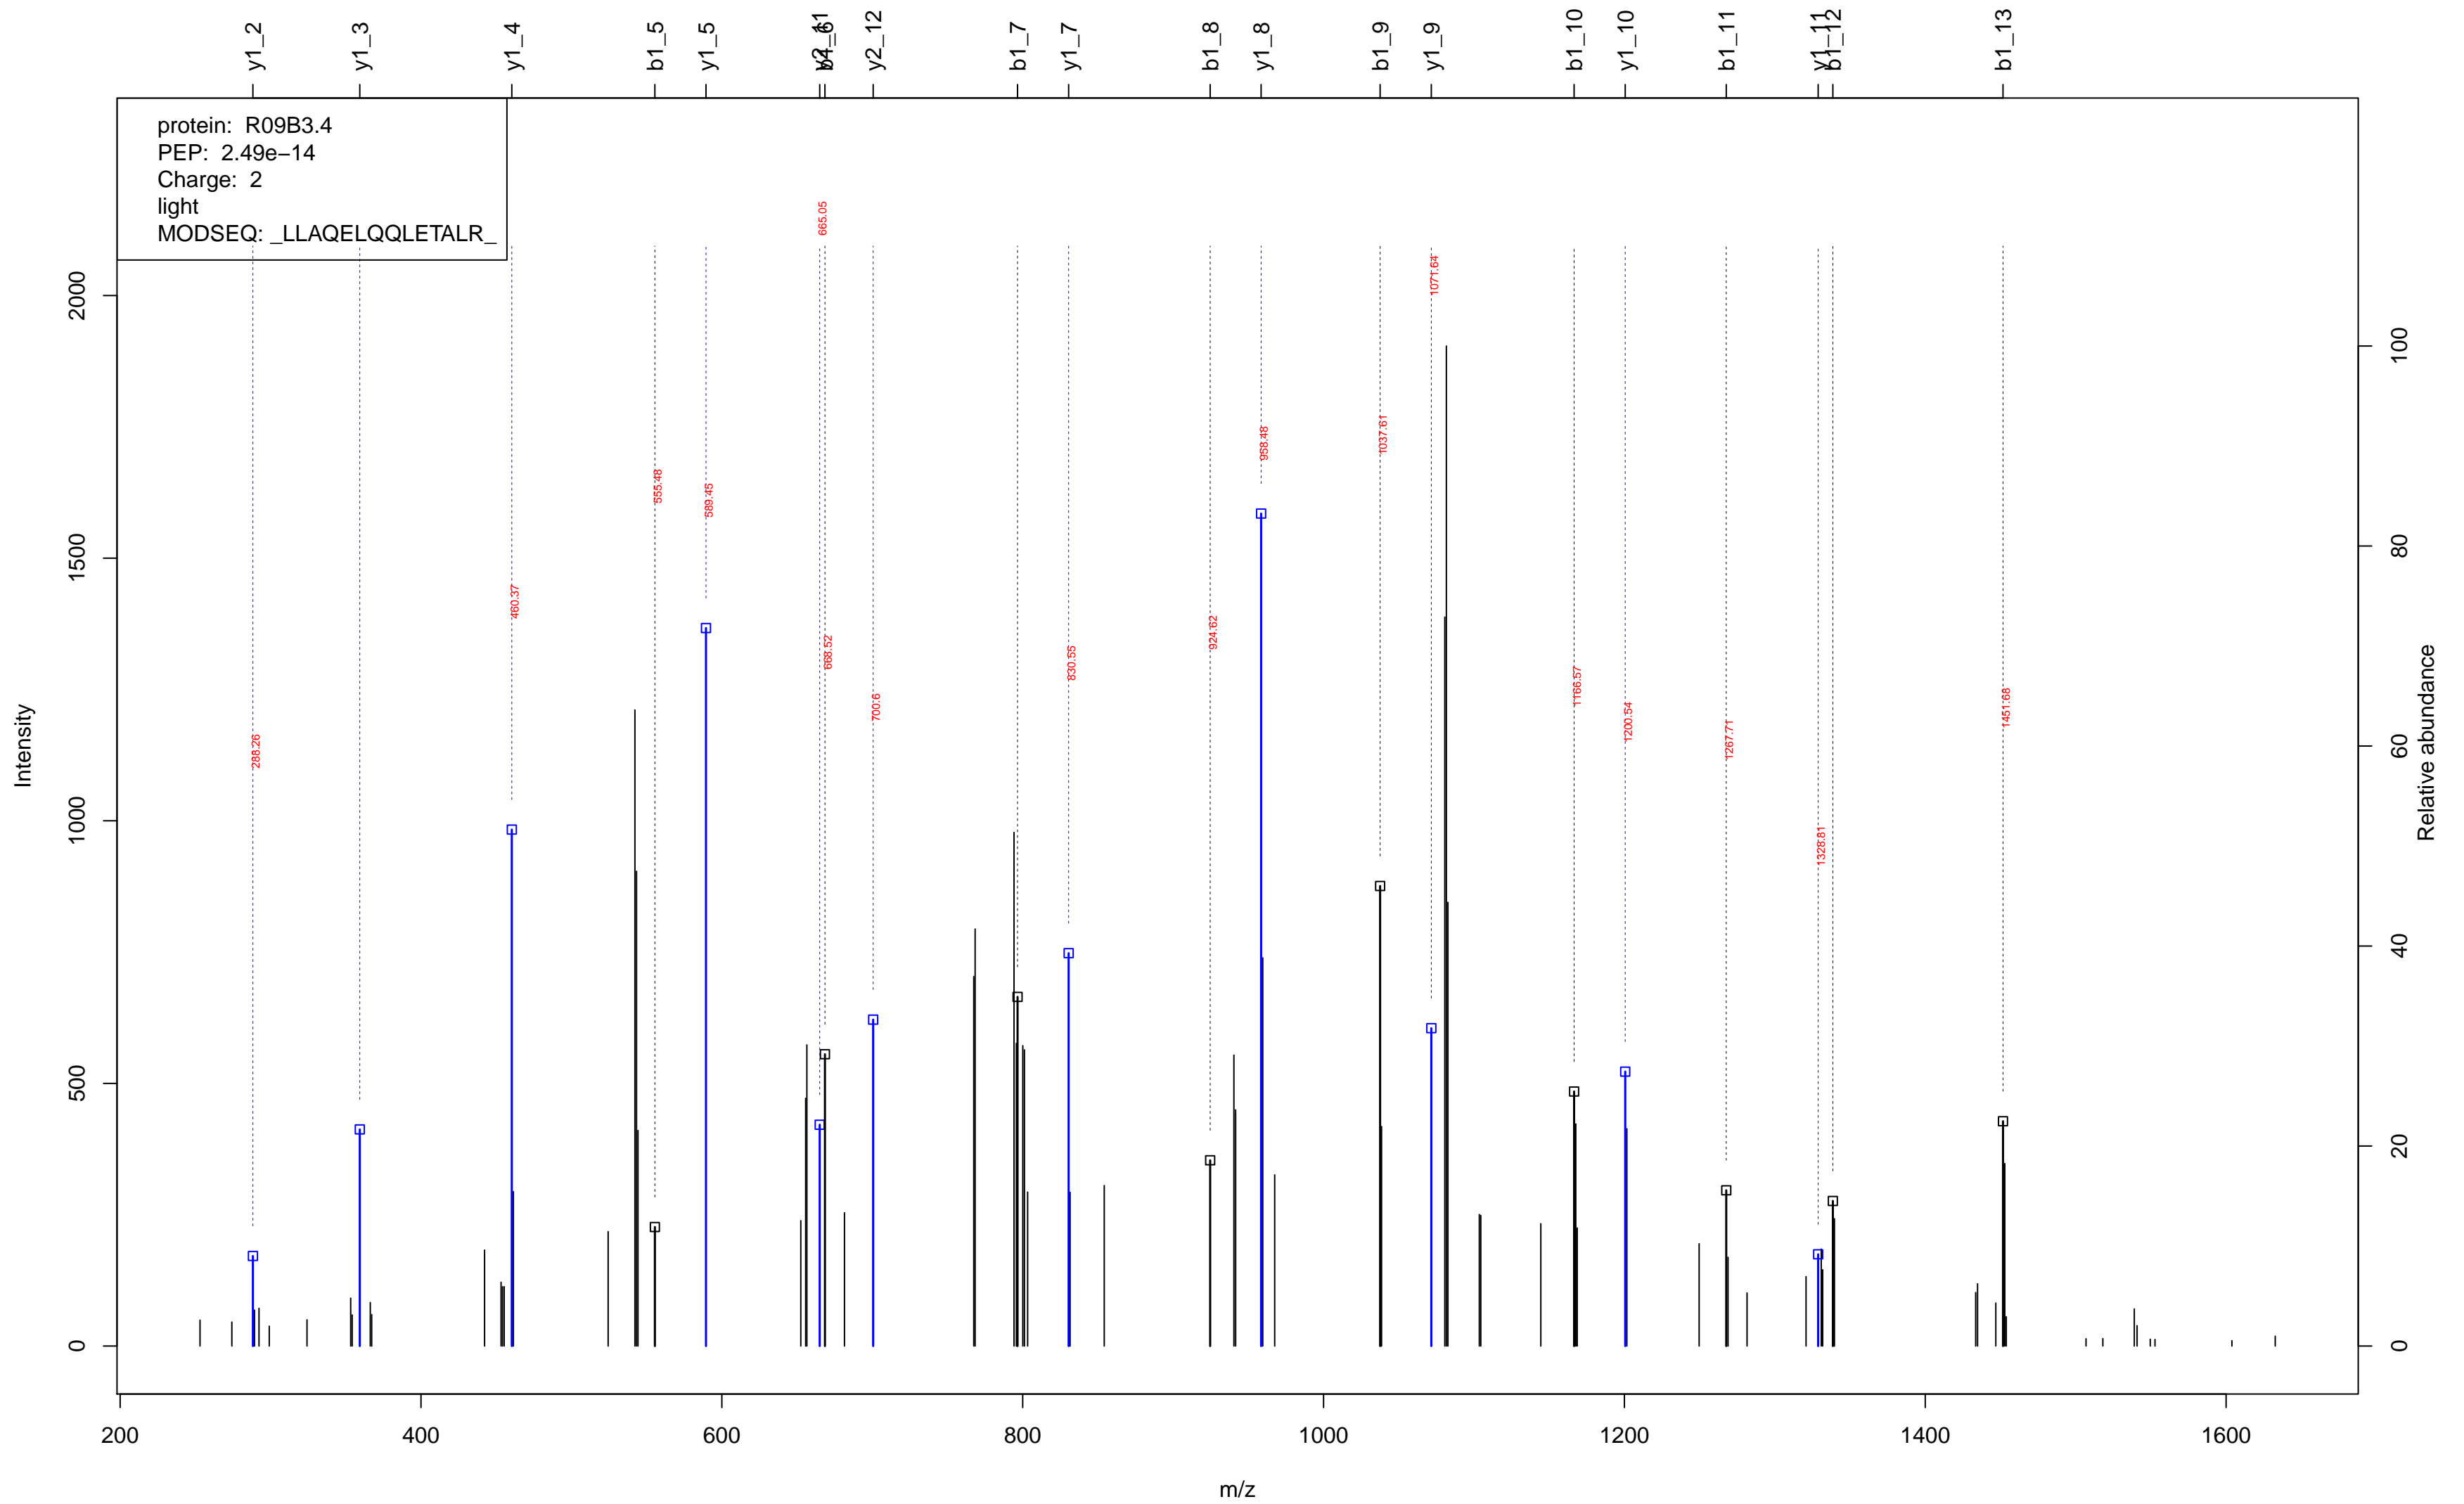

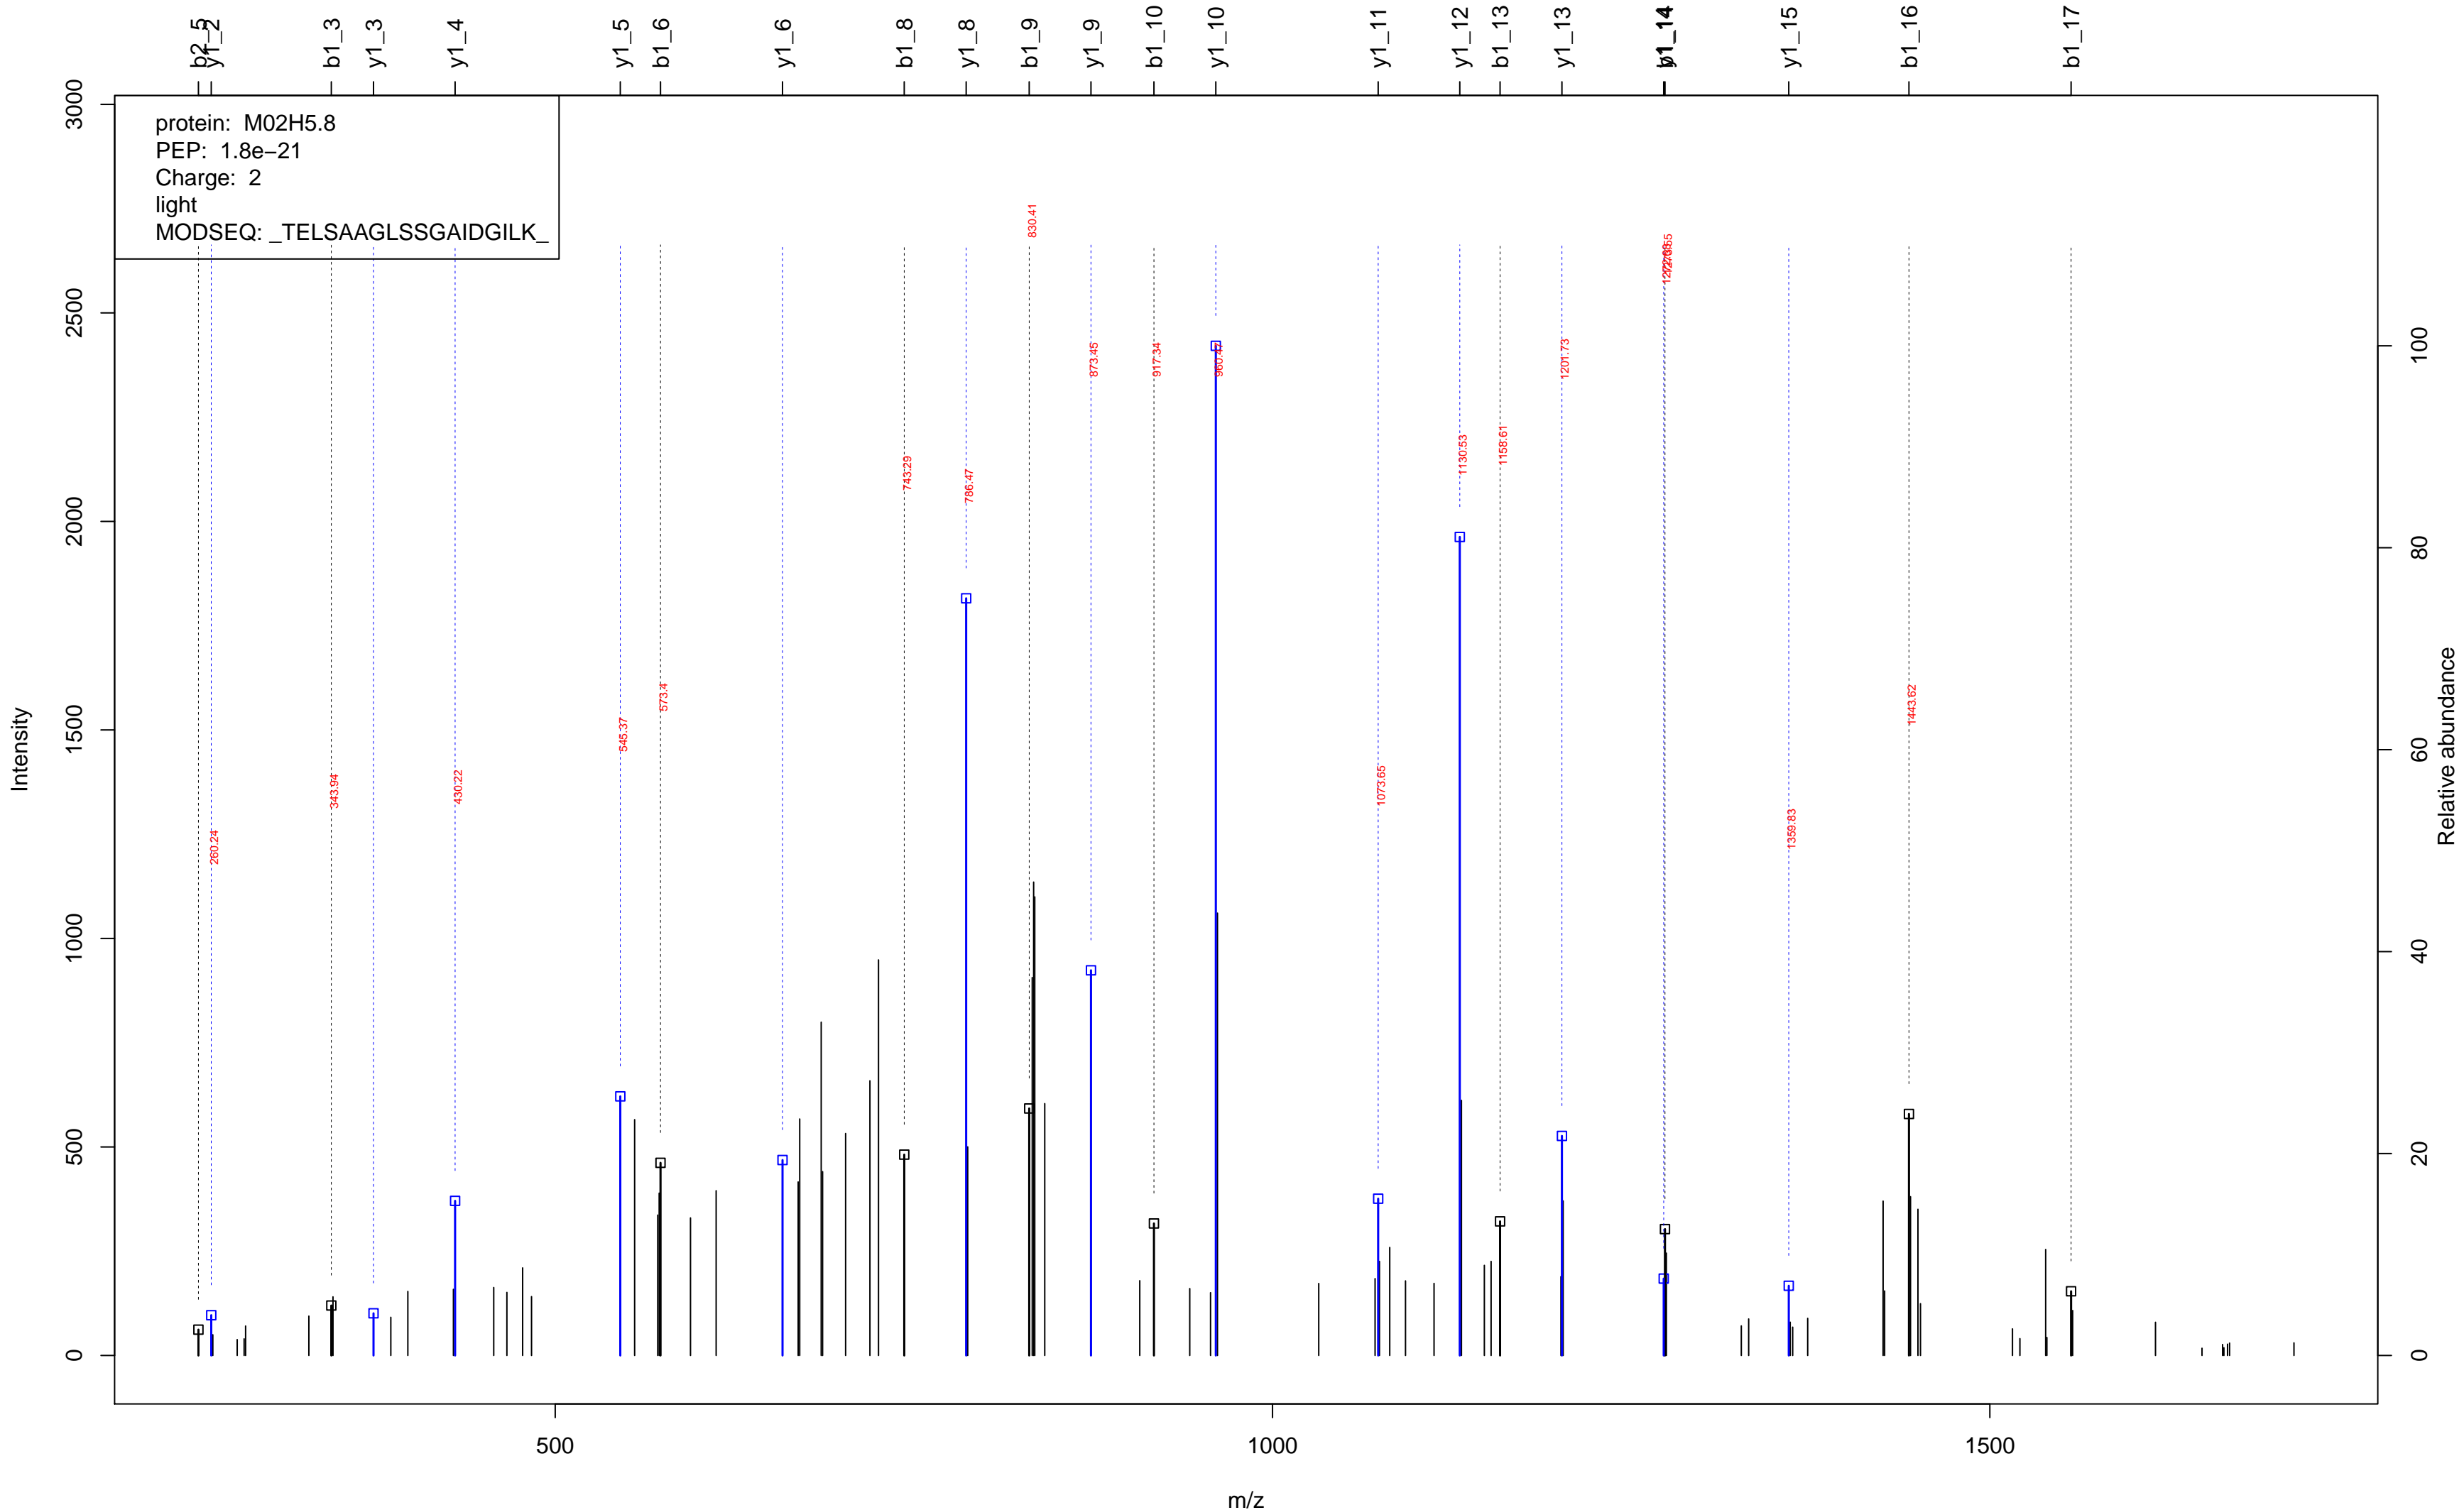

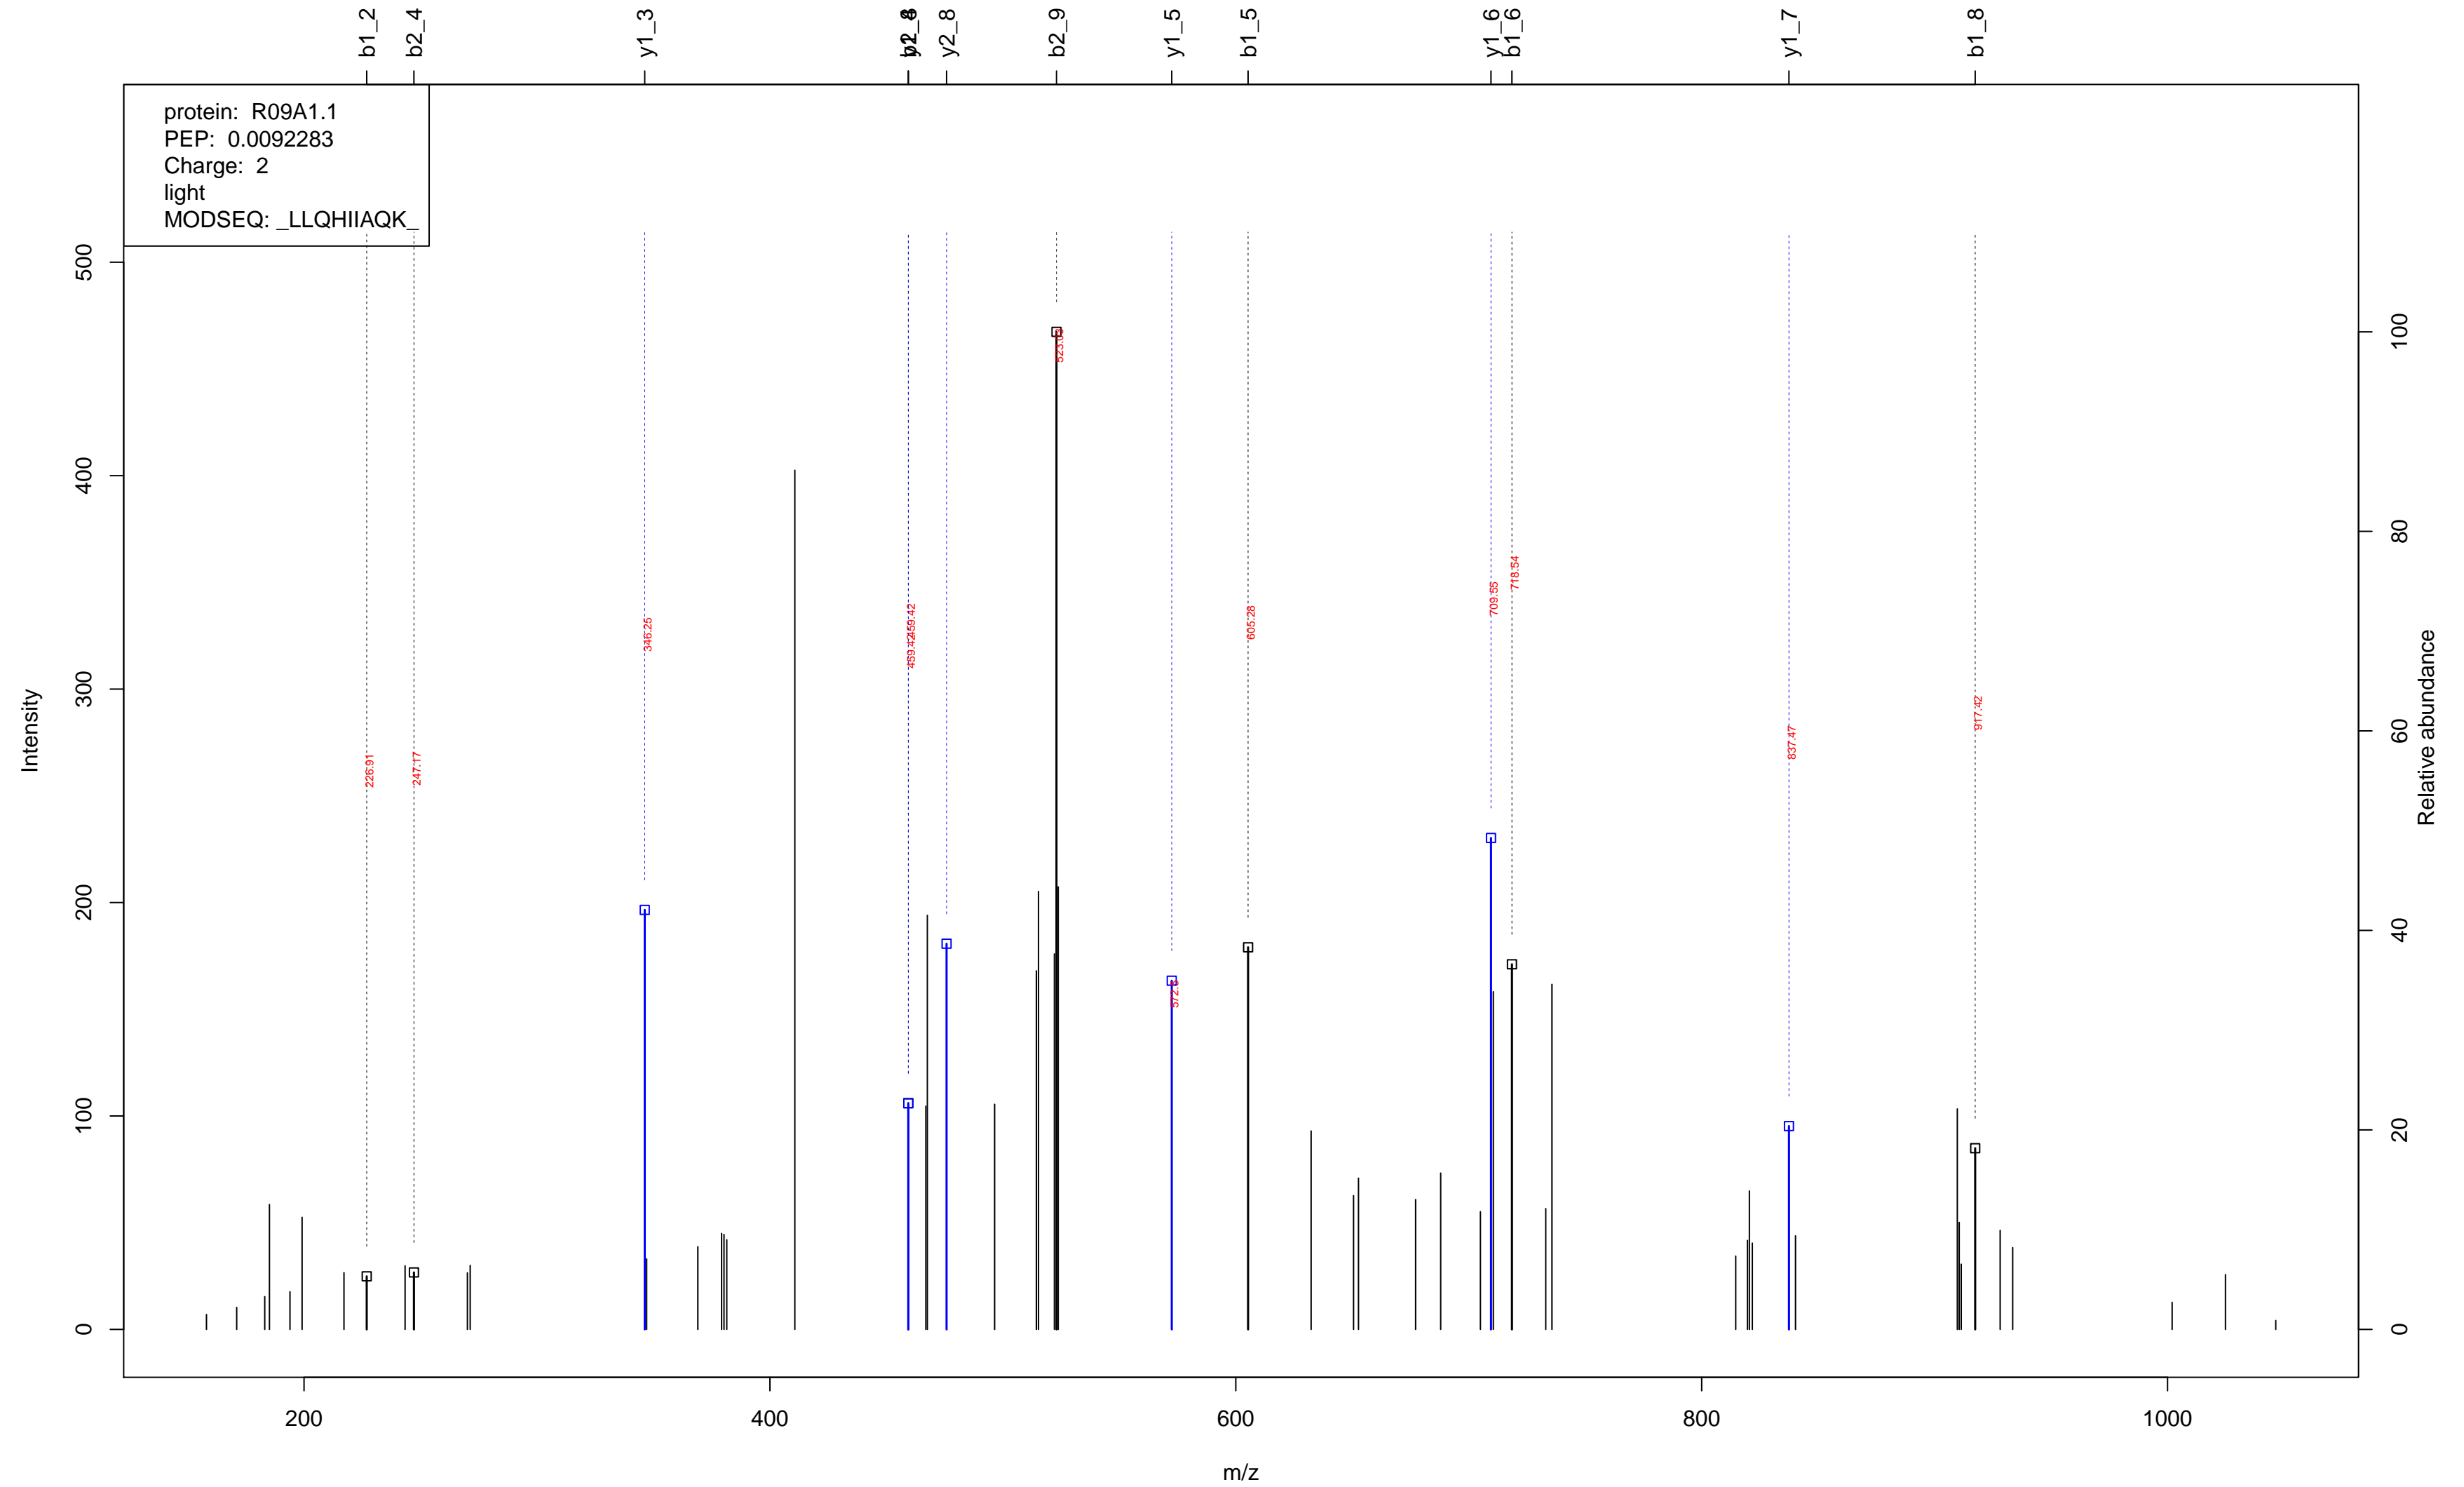



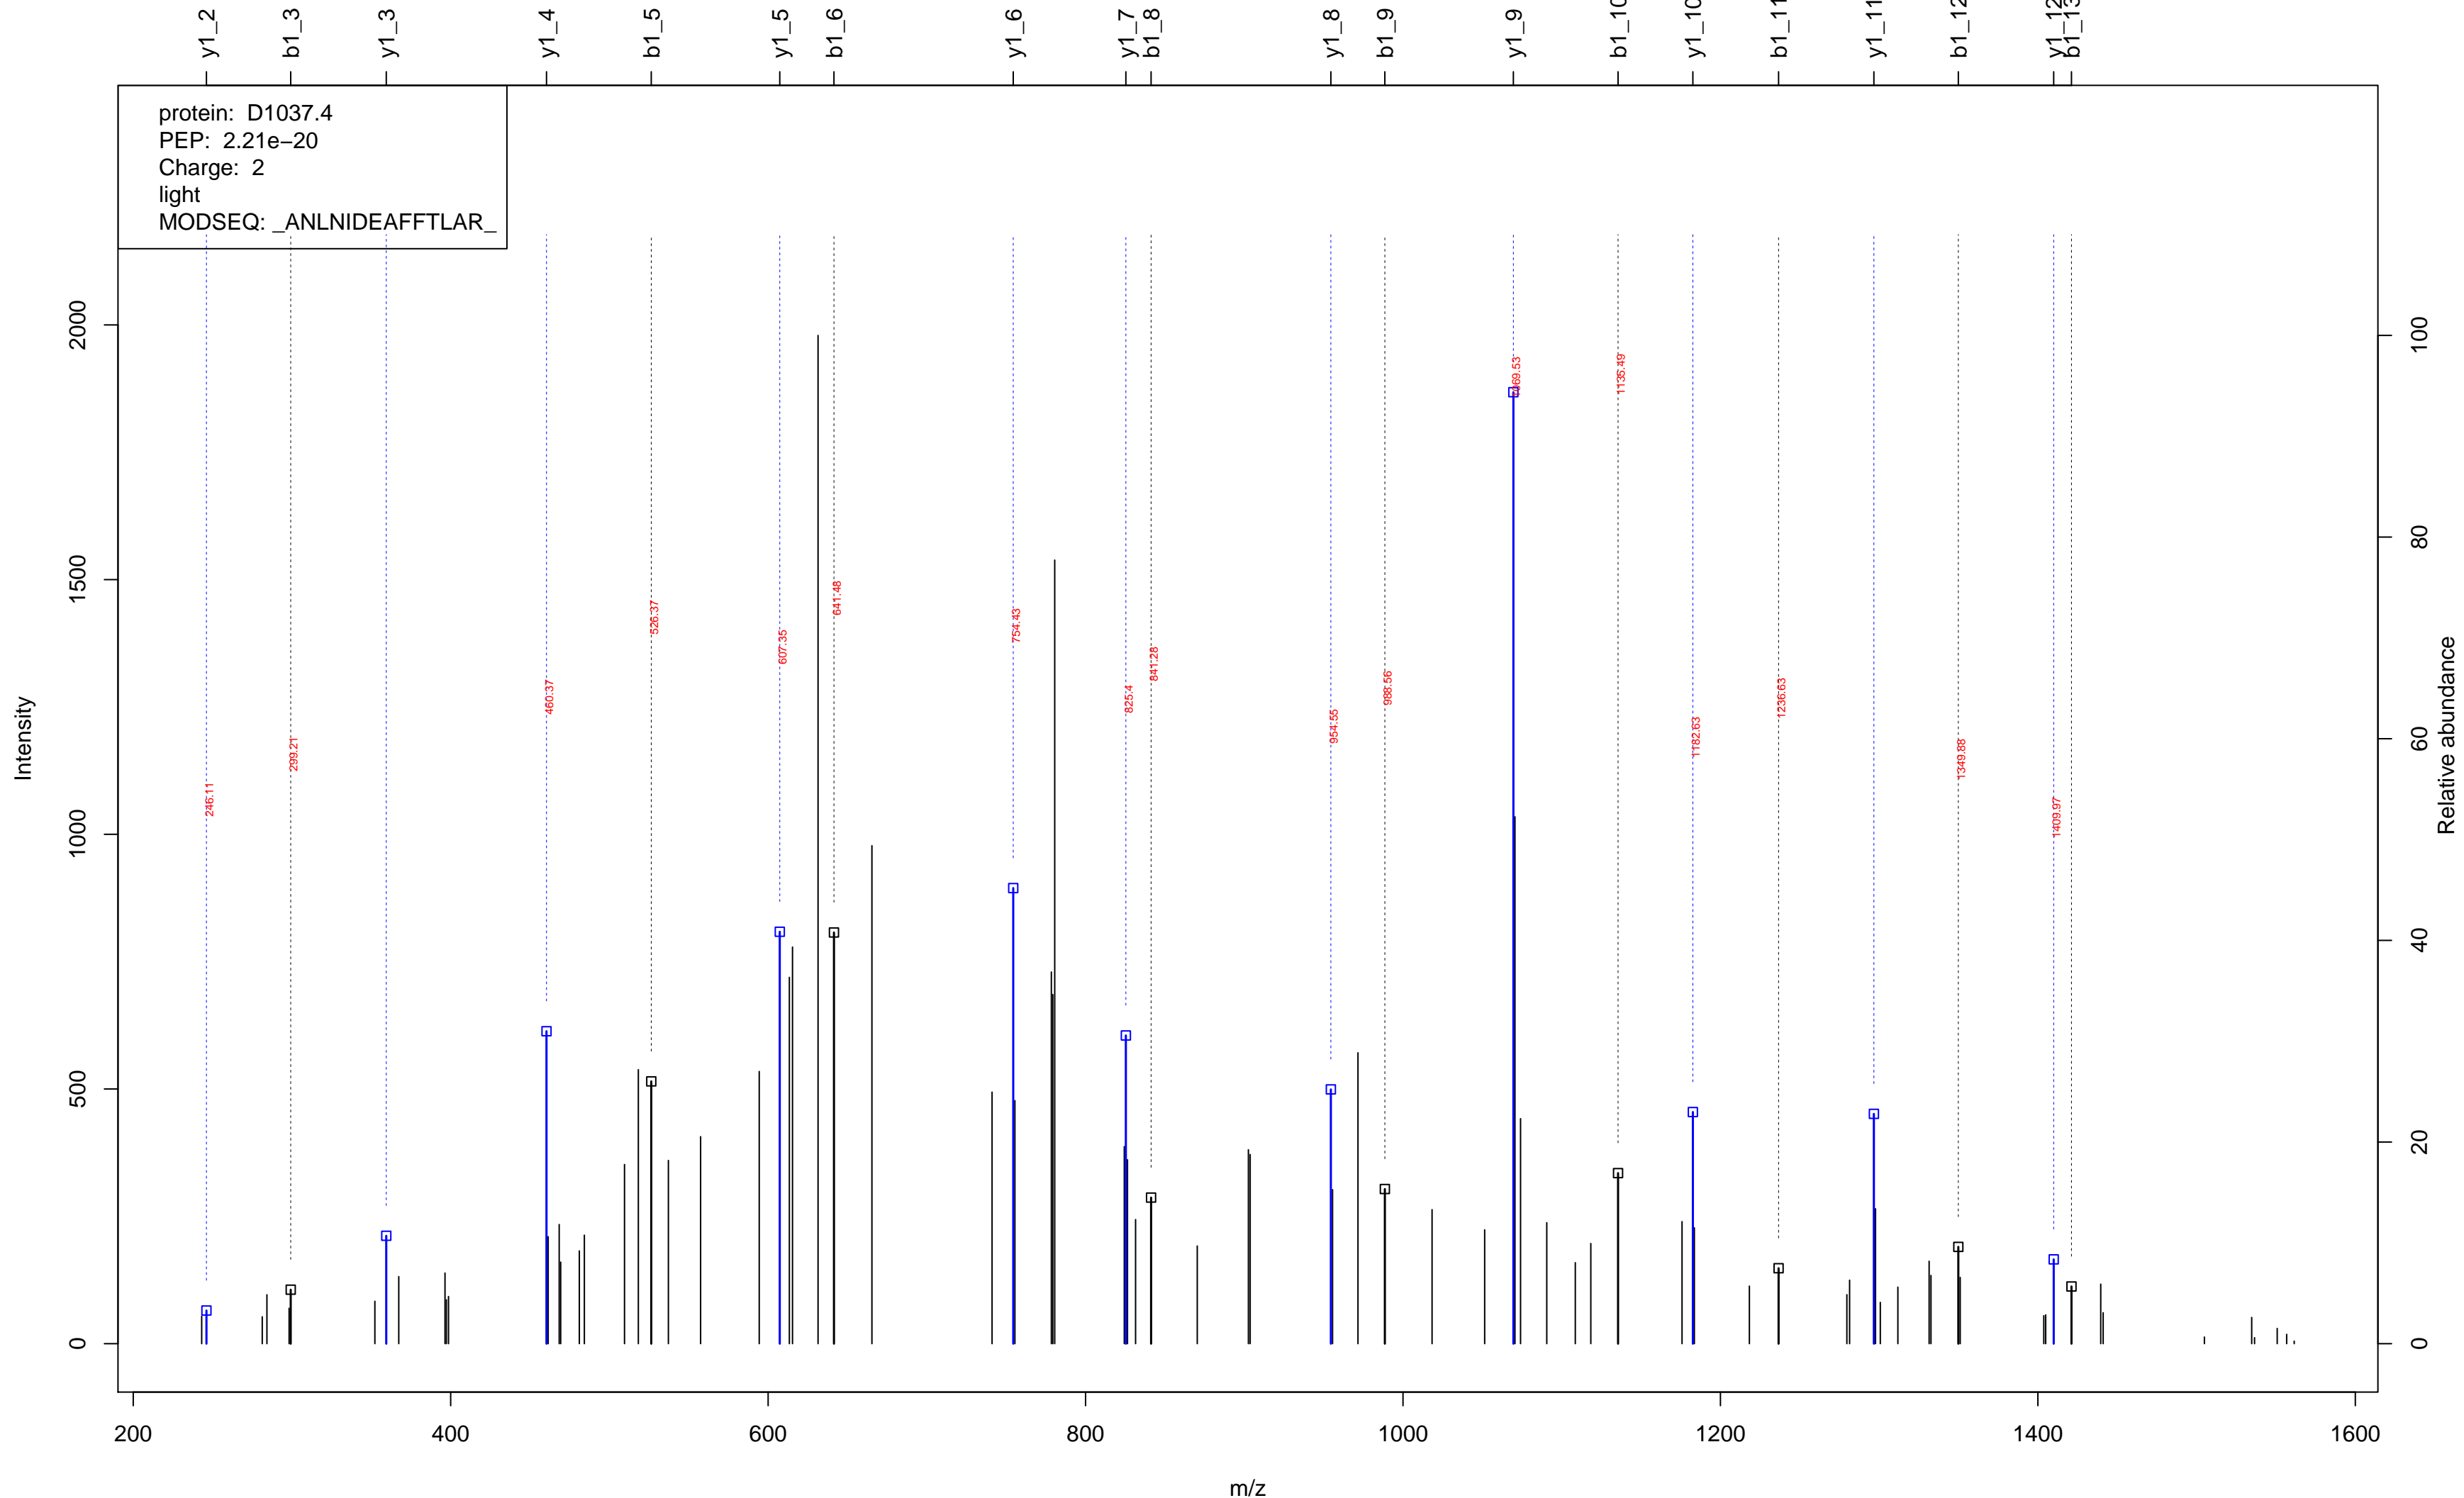

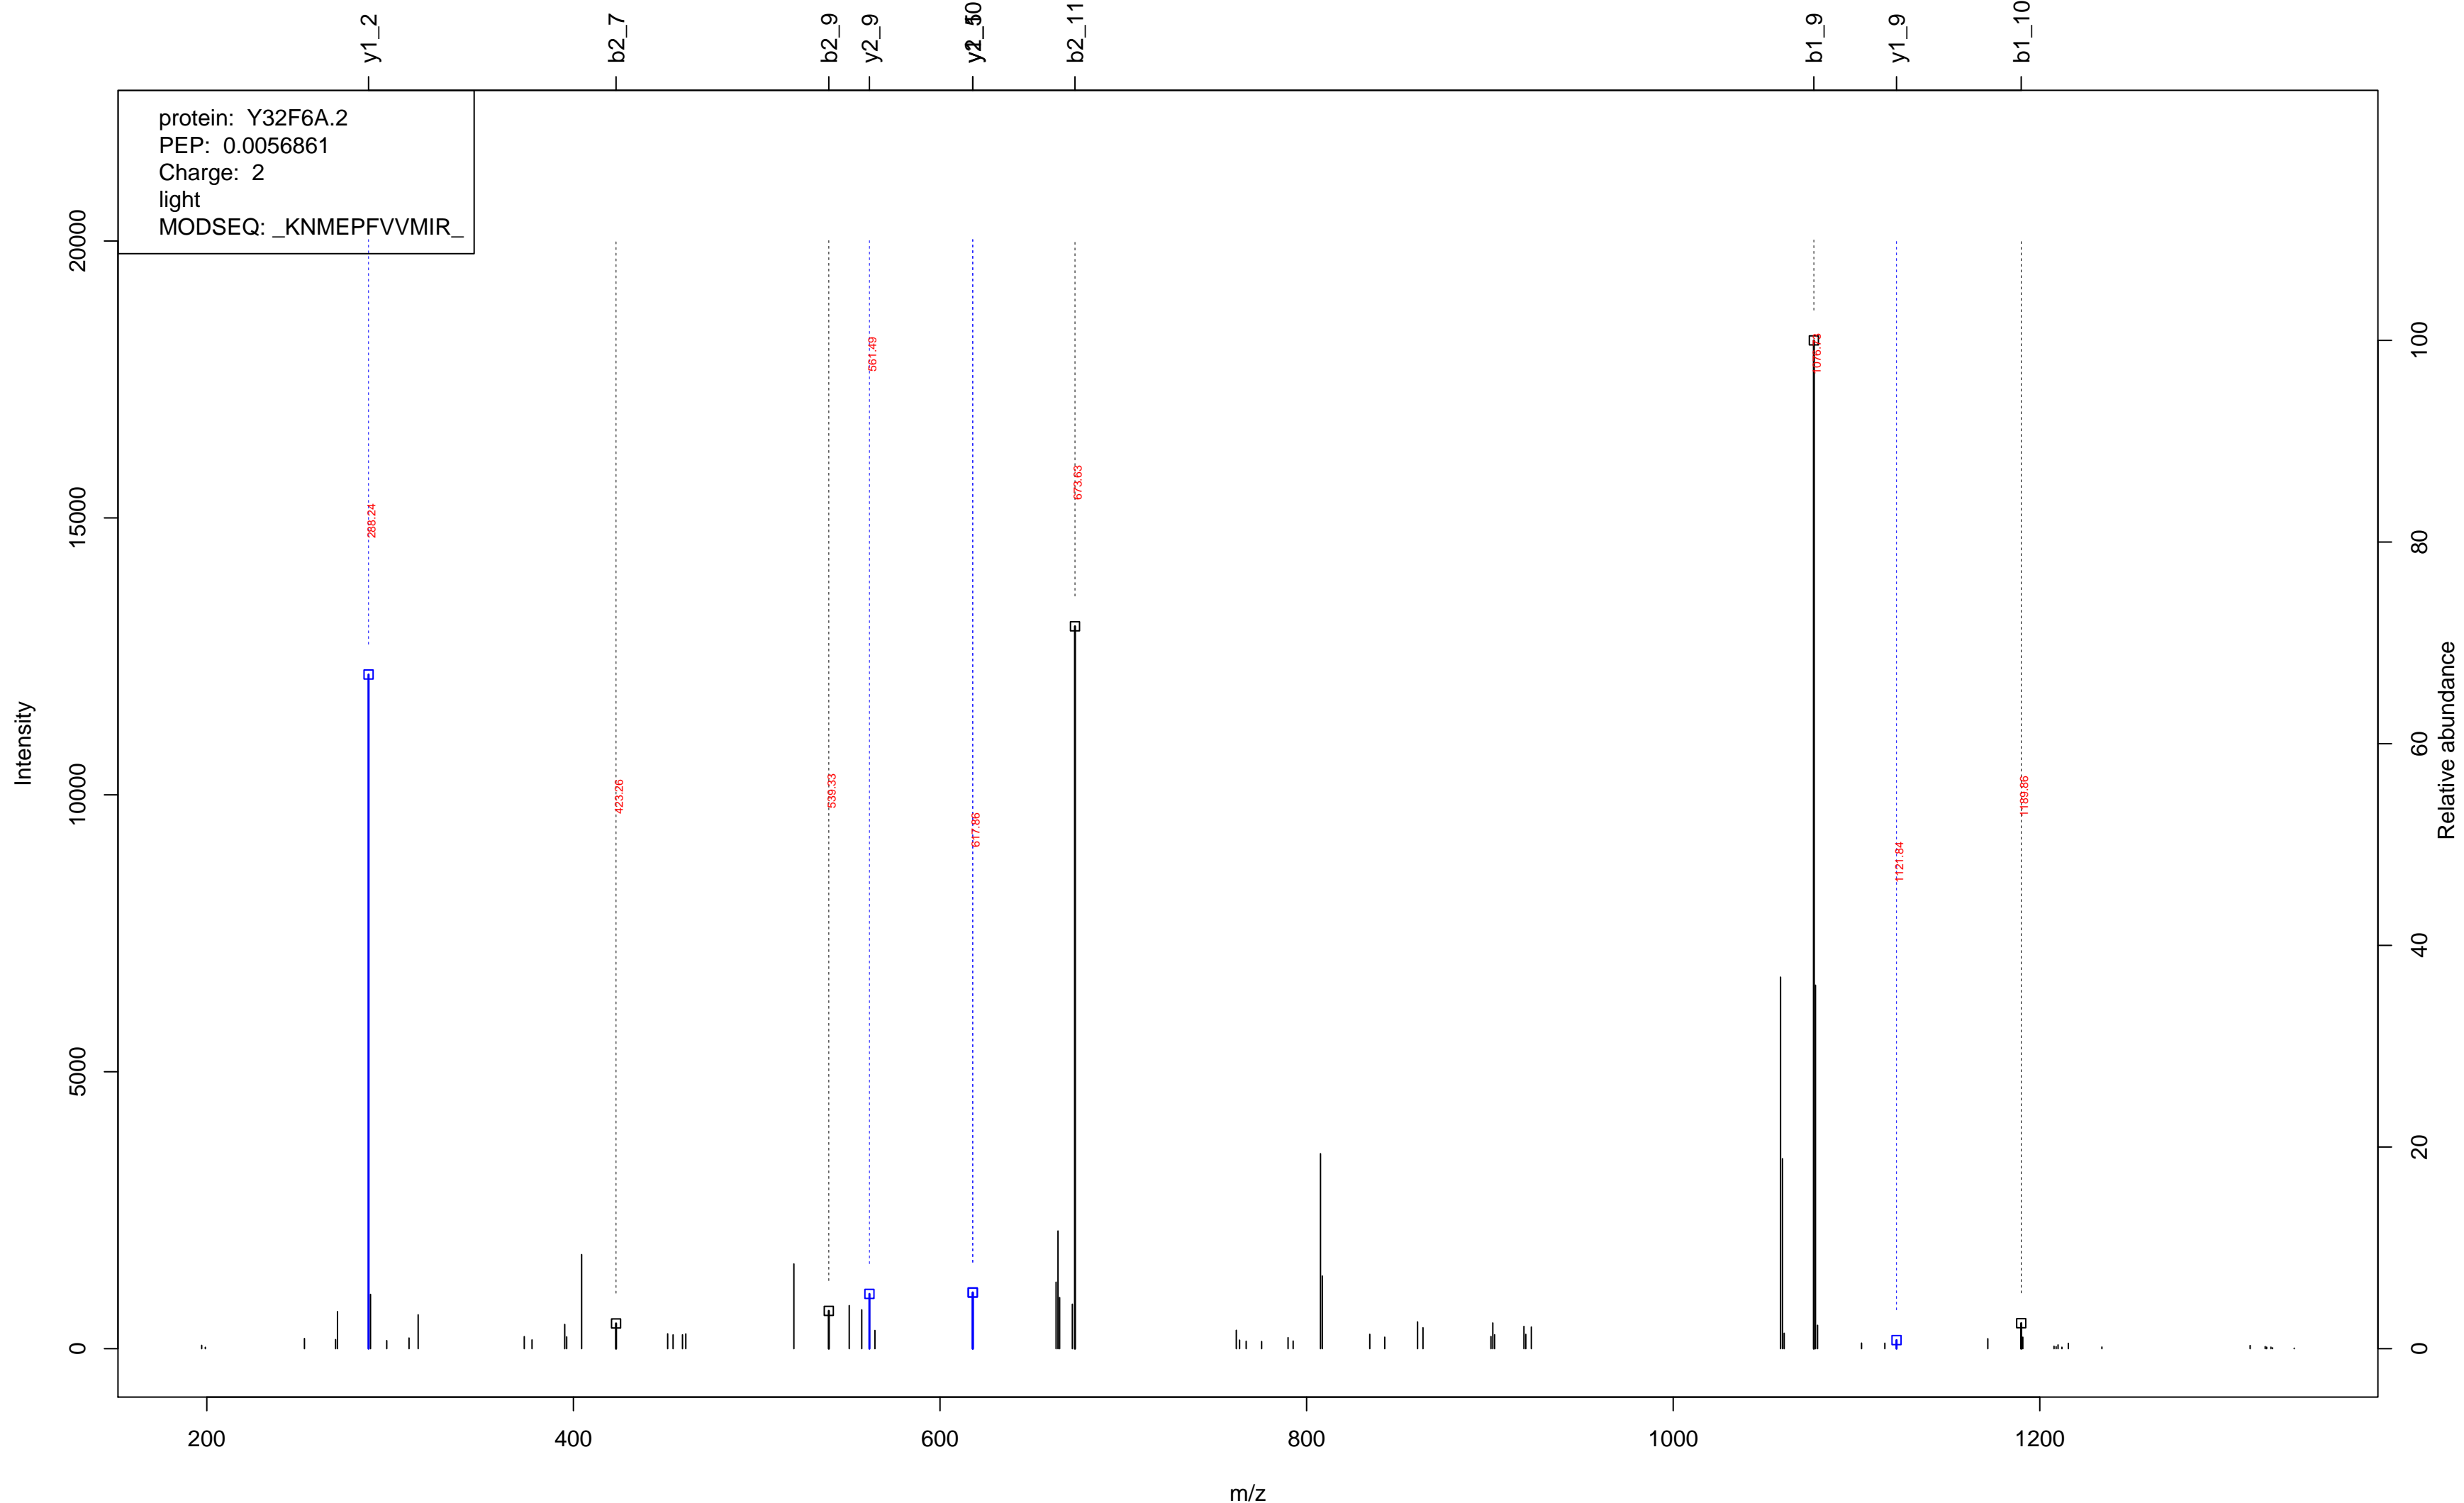

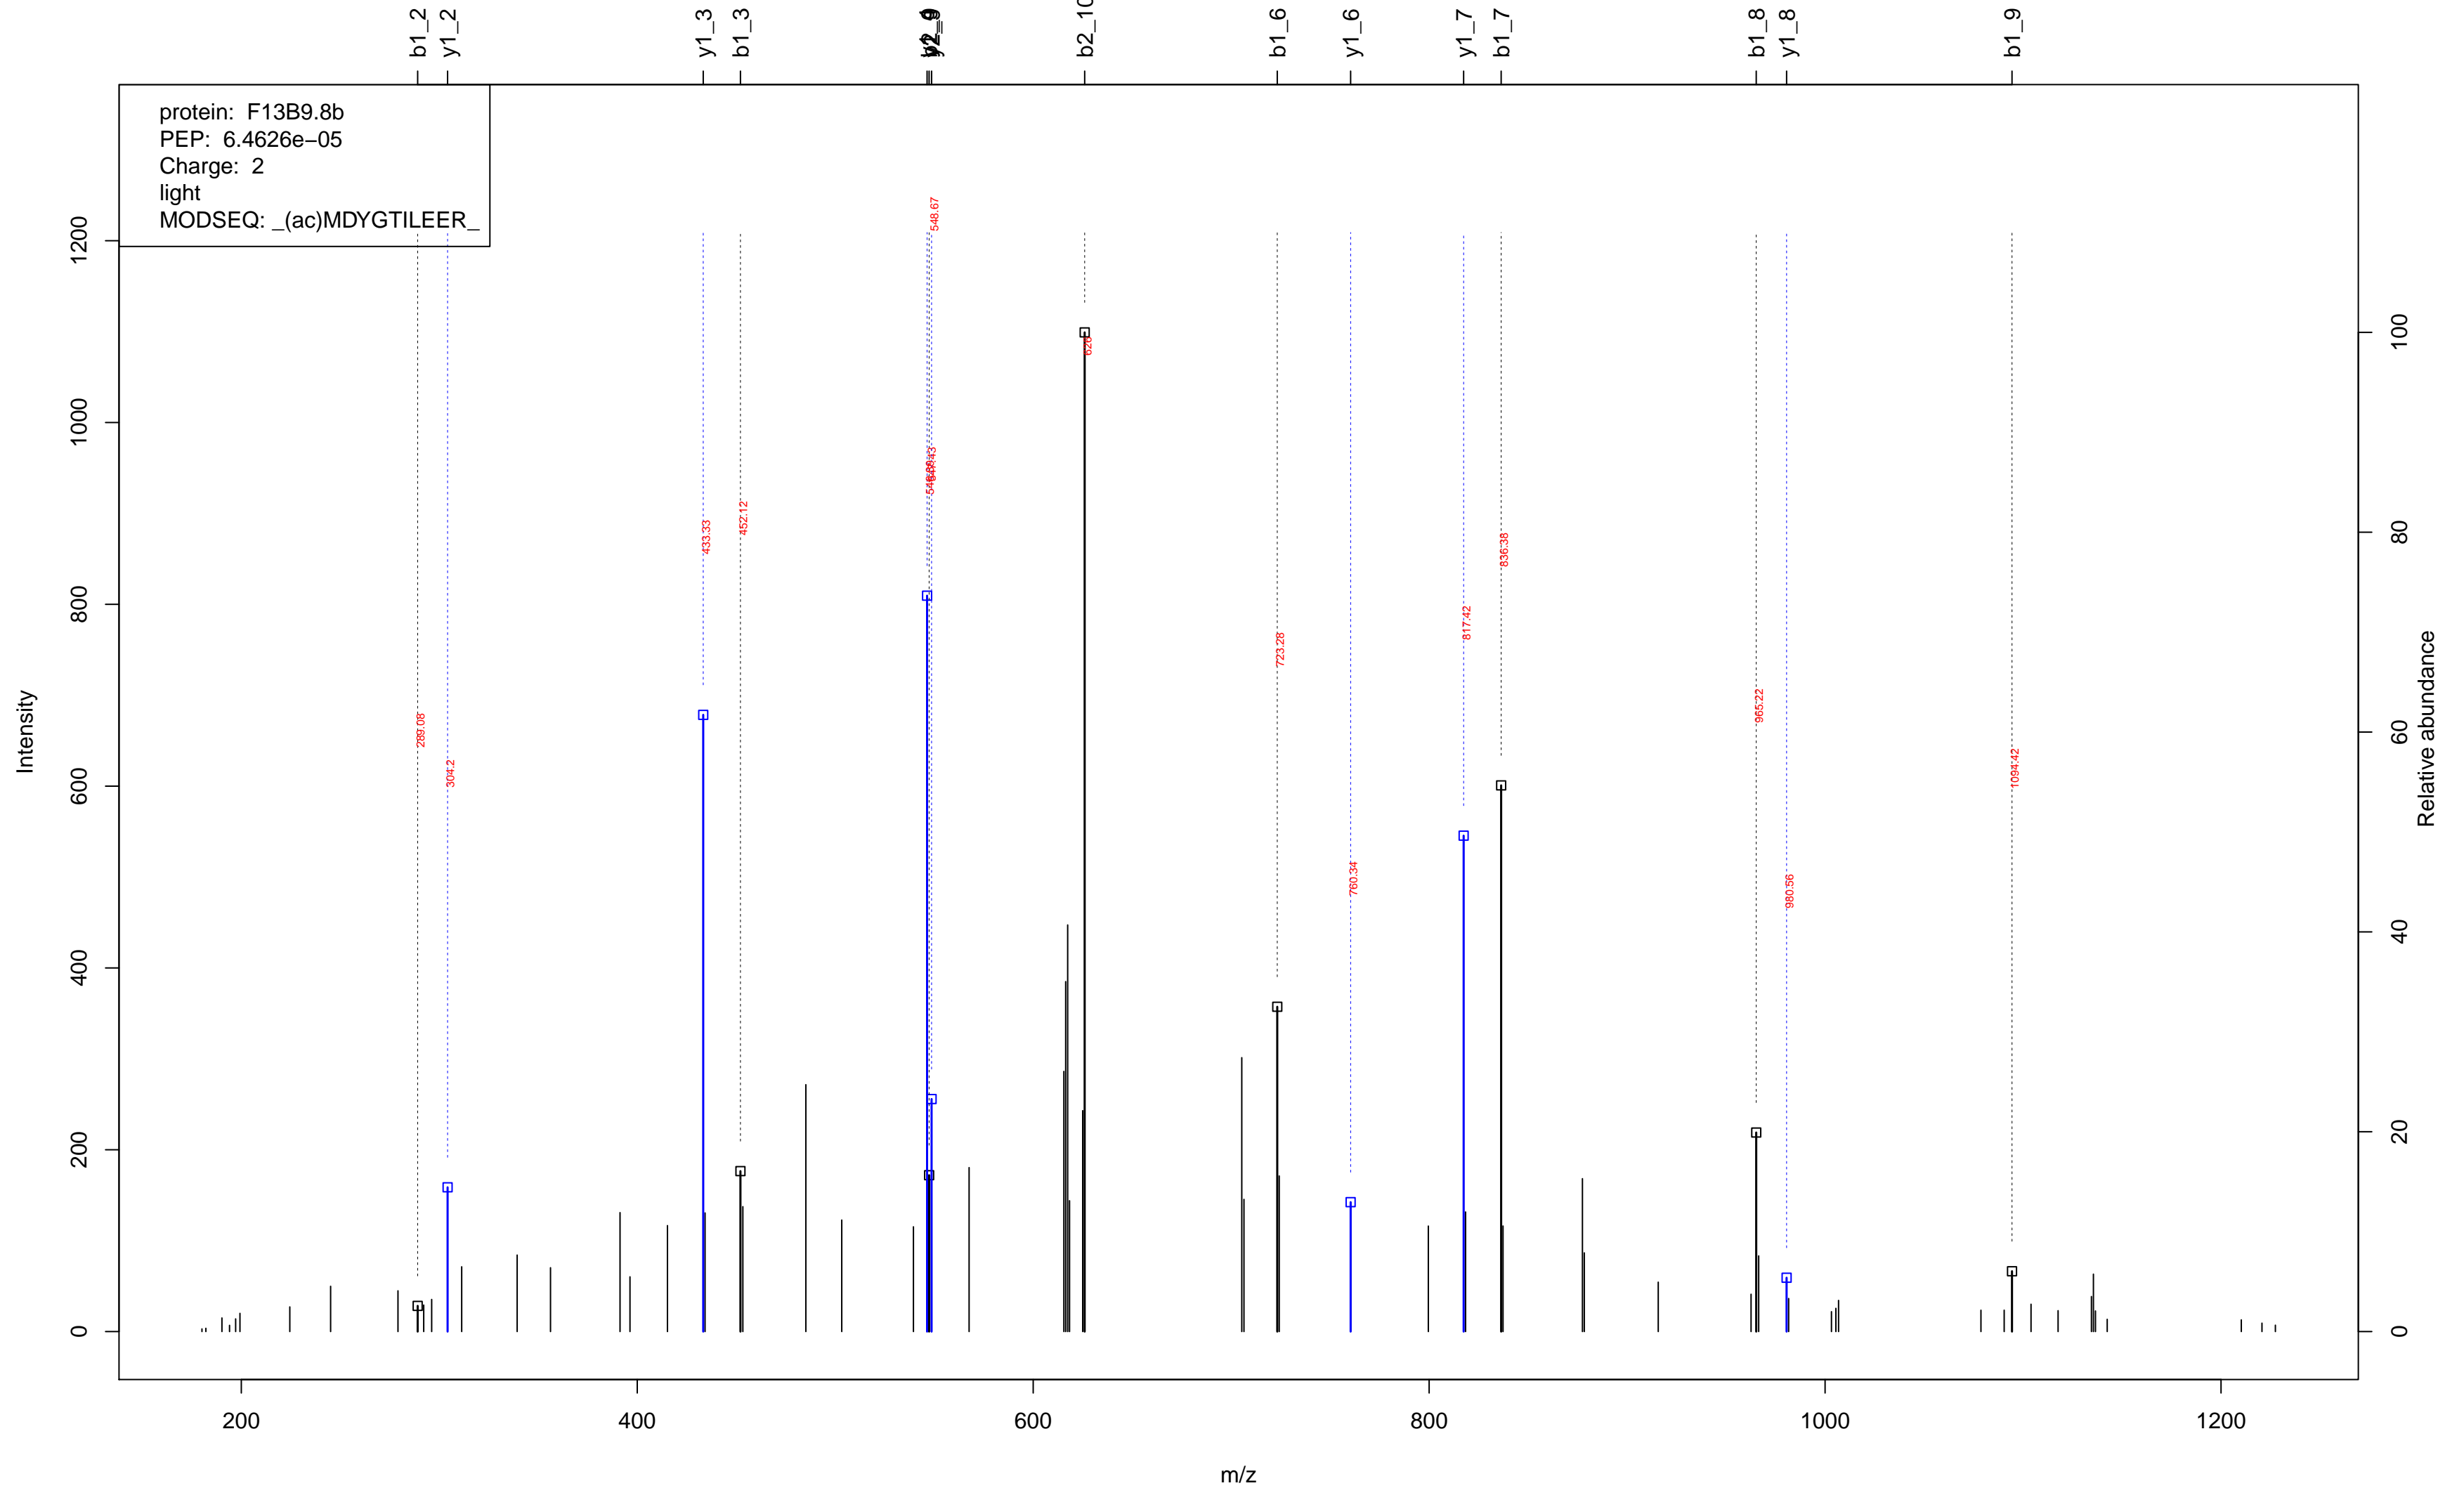

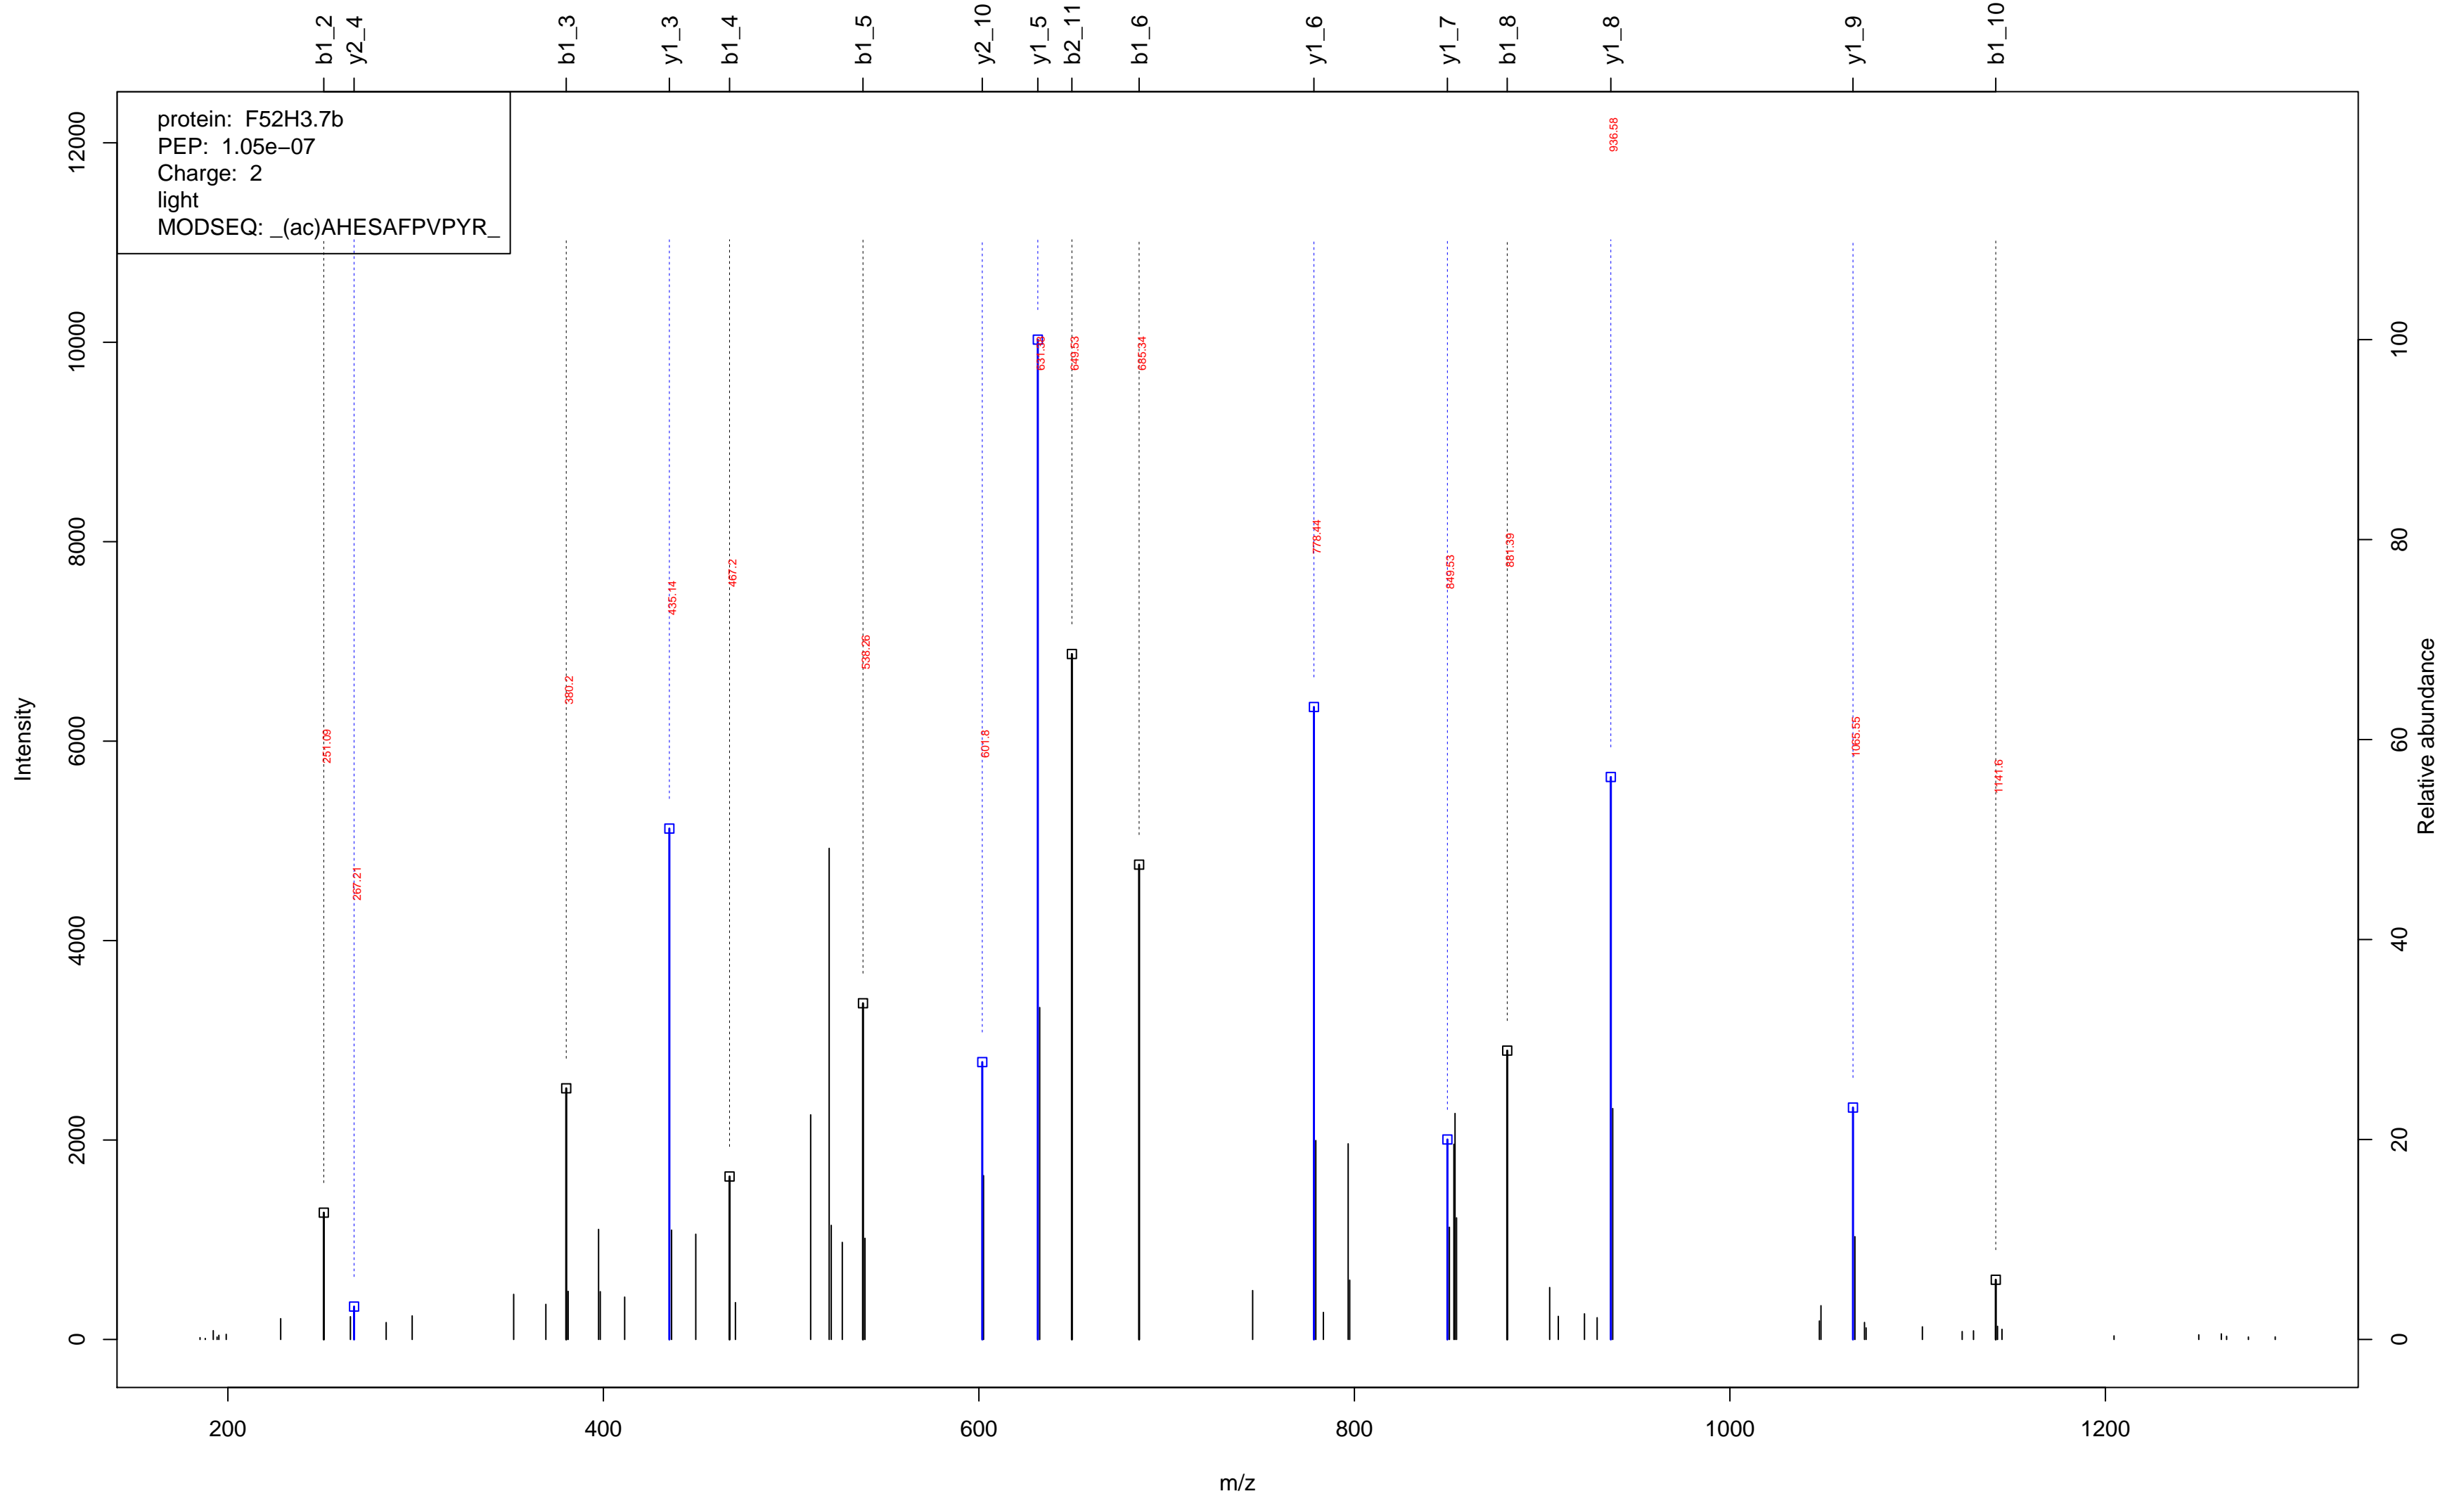

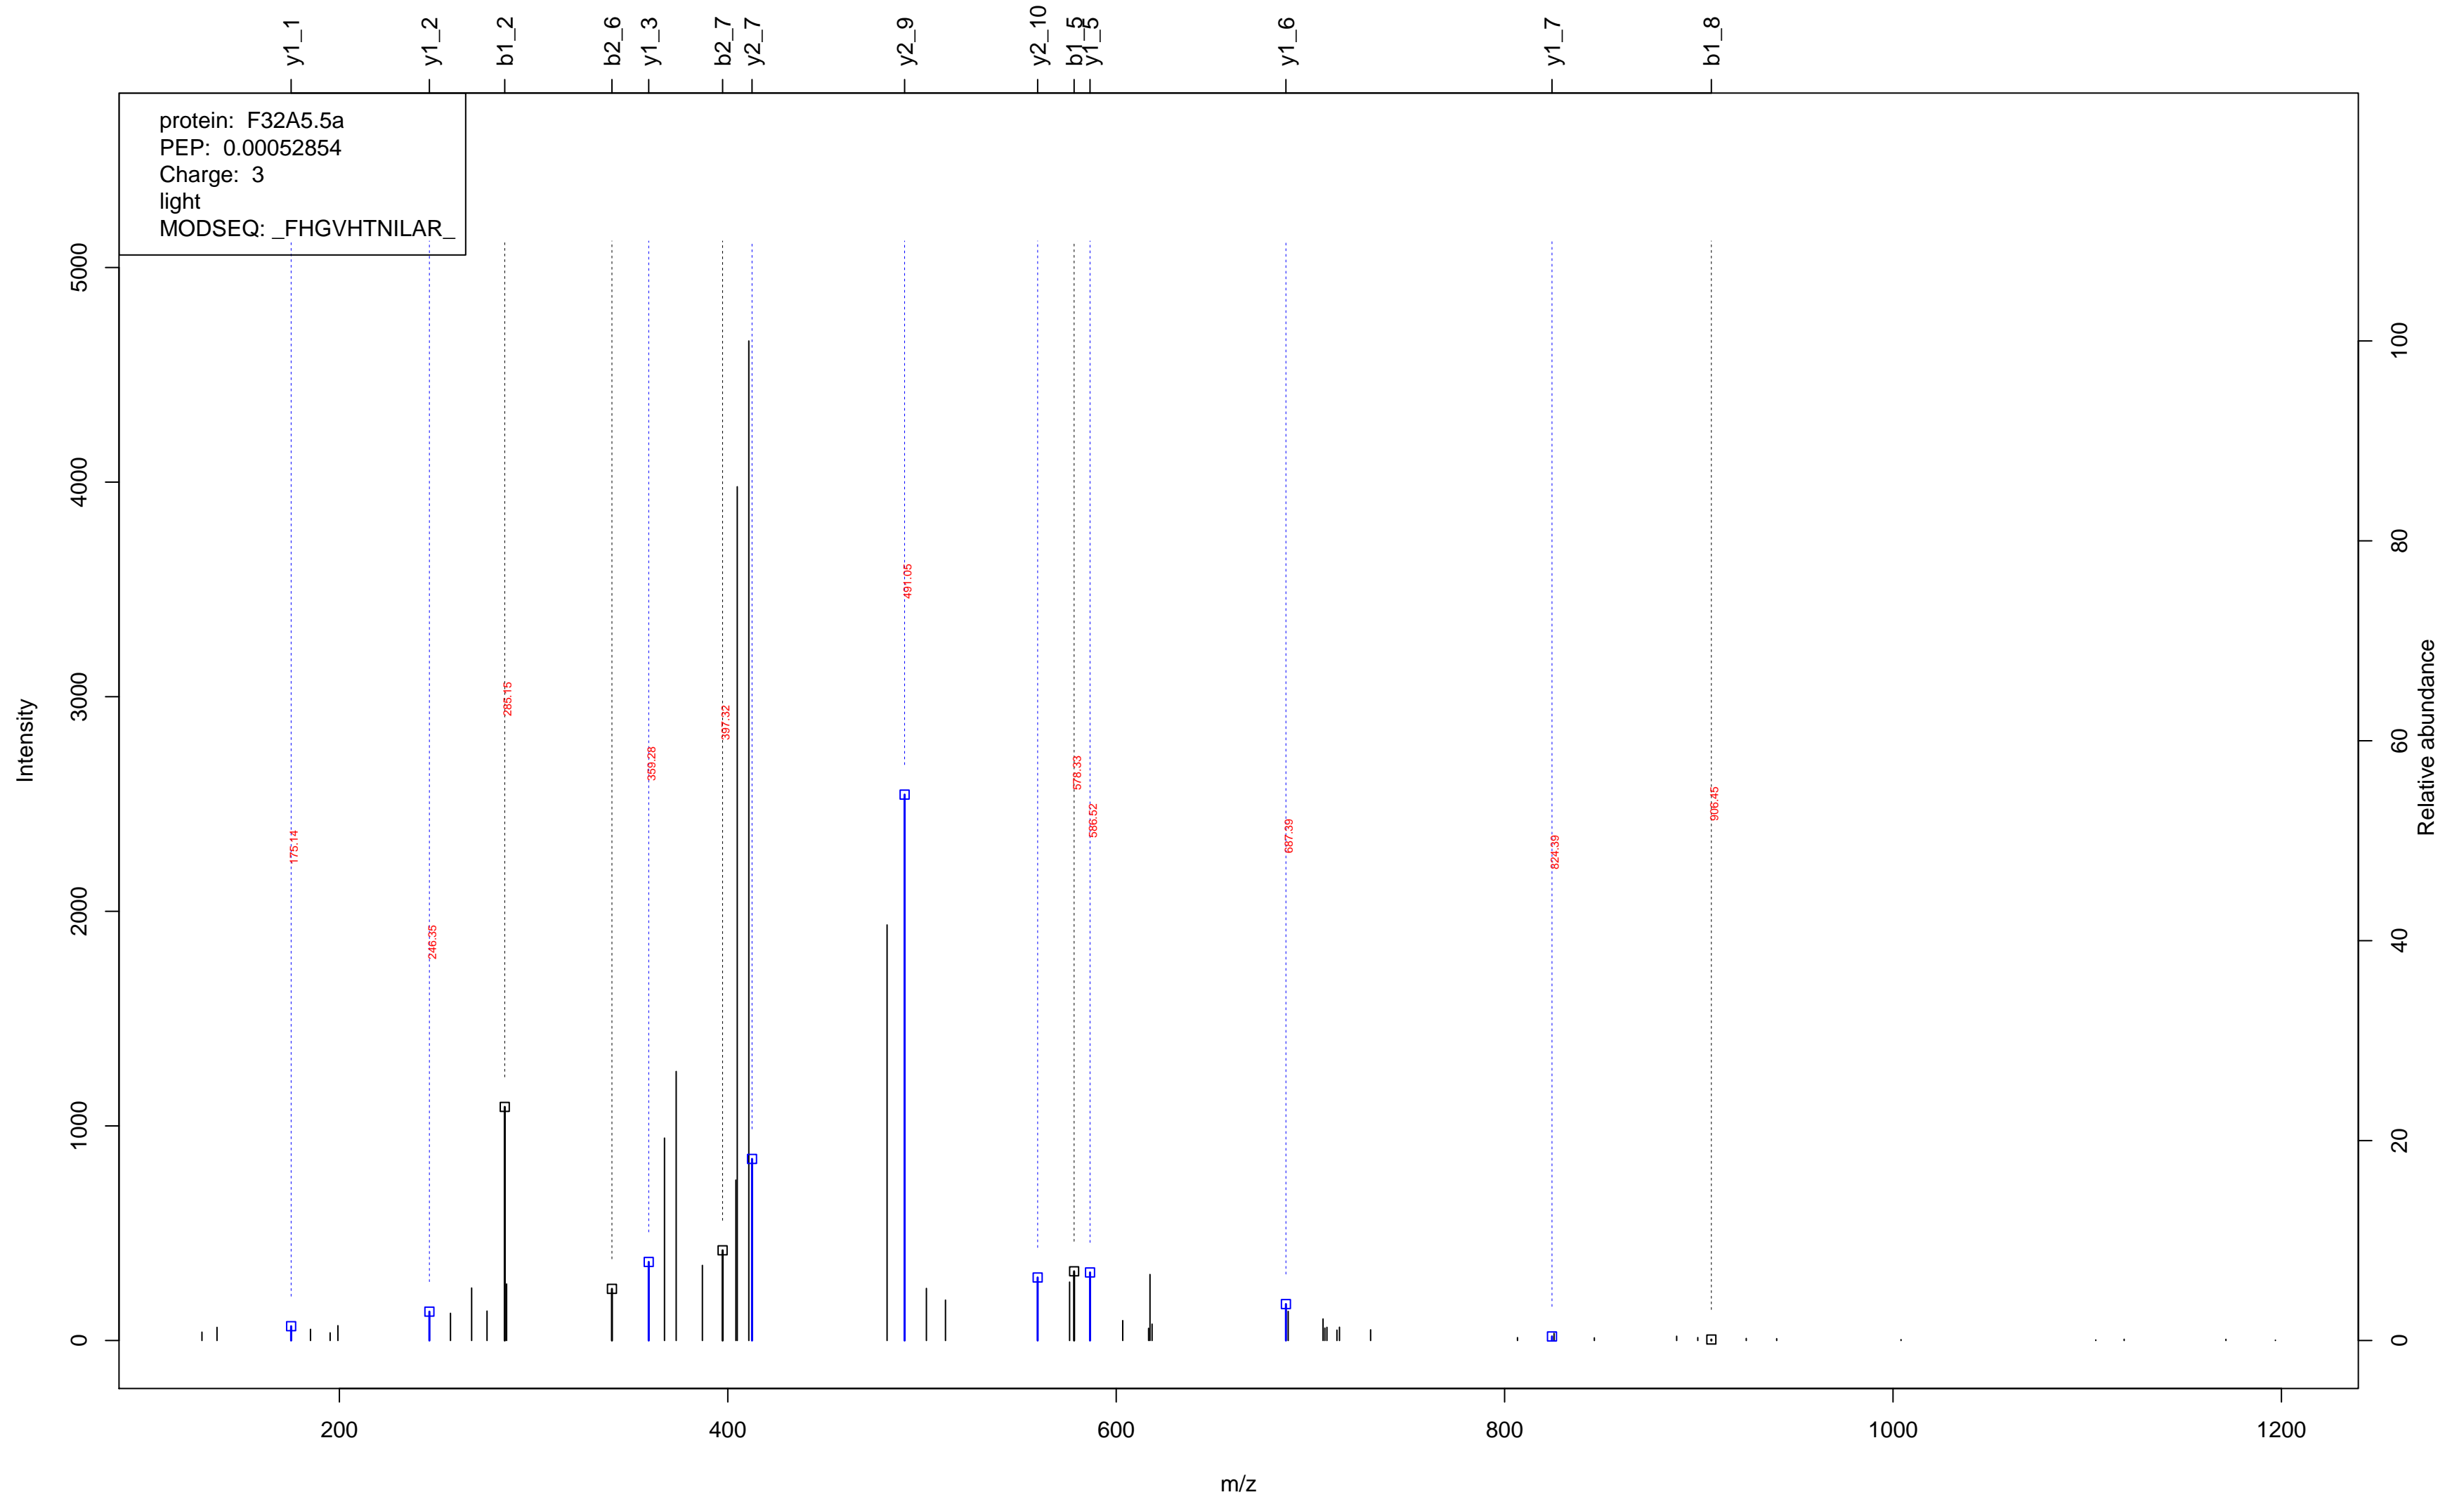

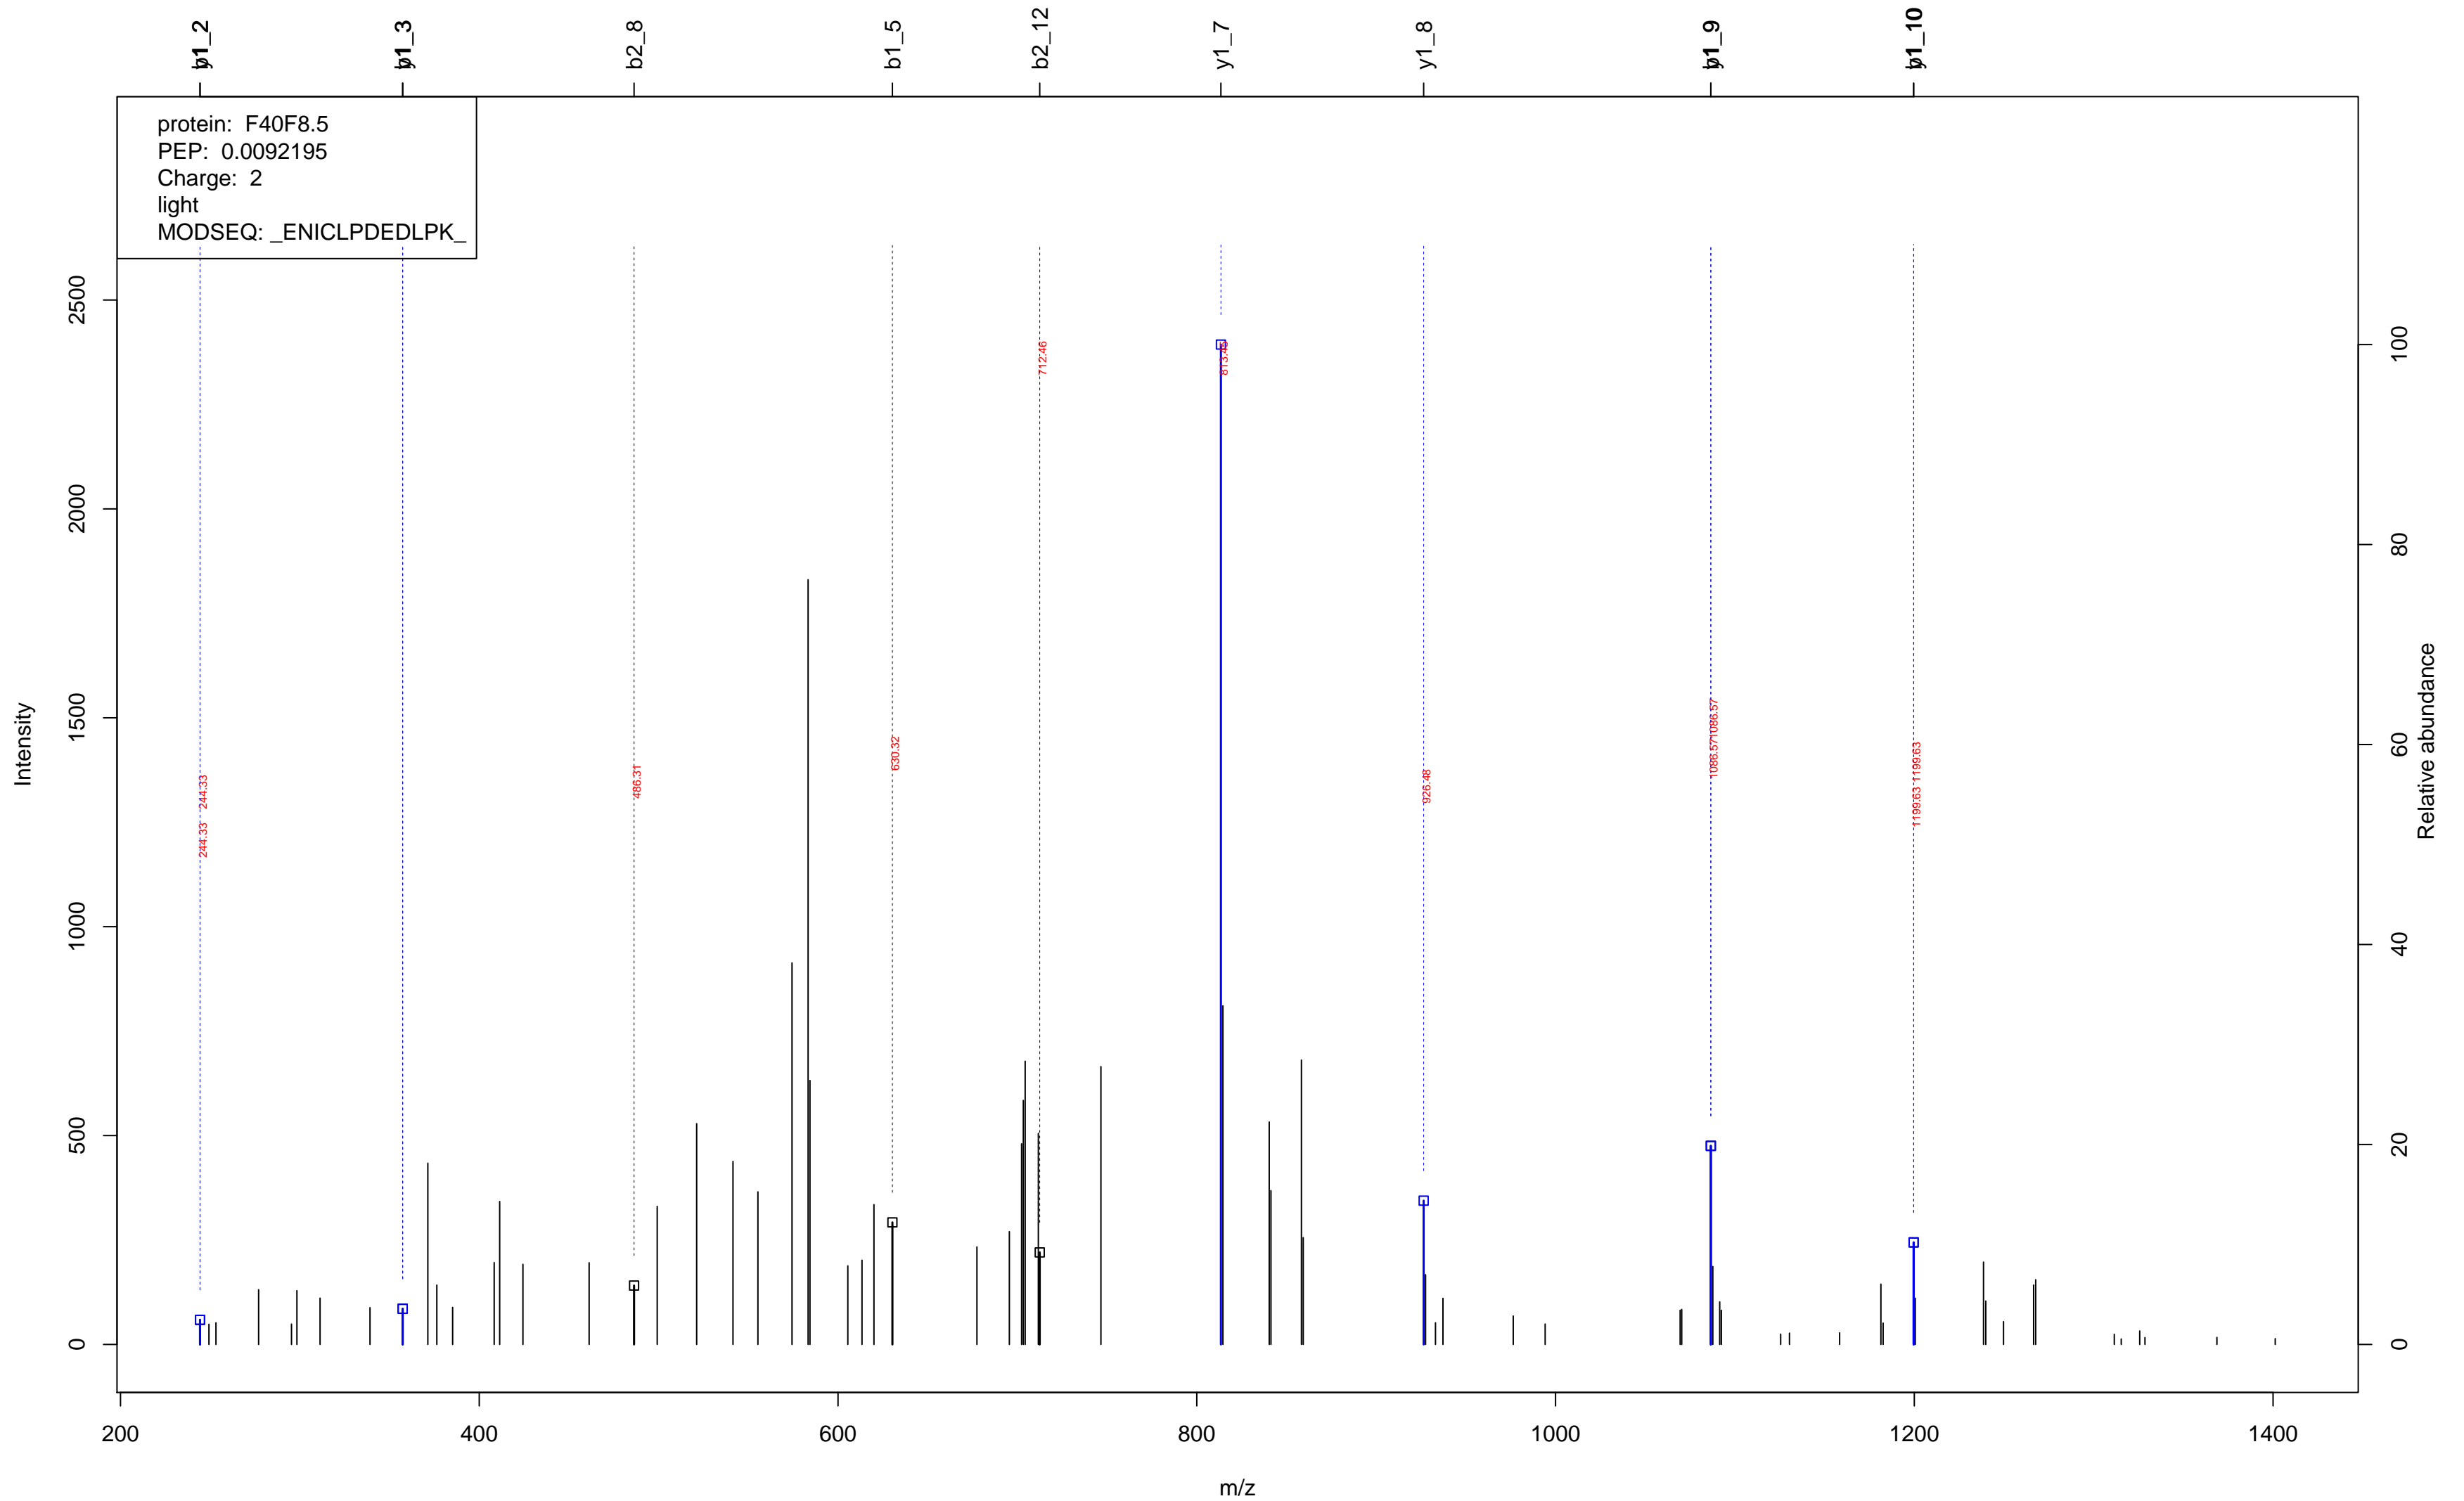

215

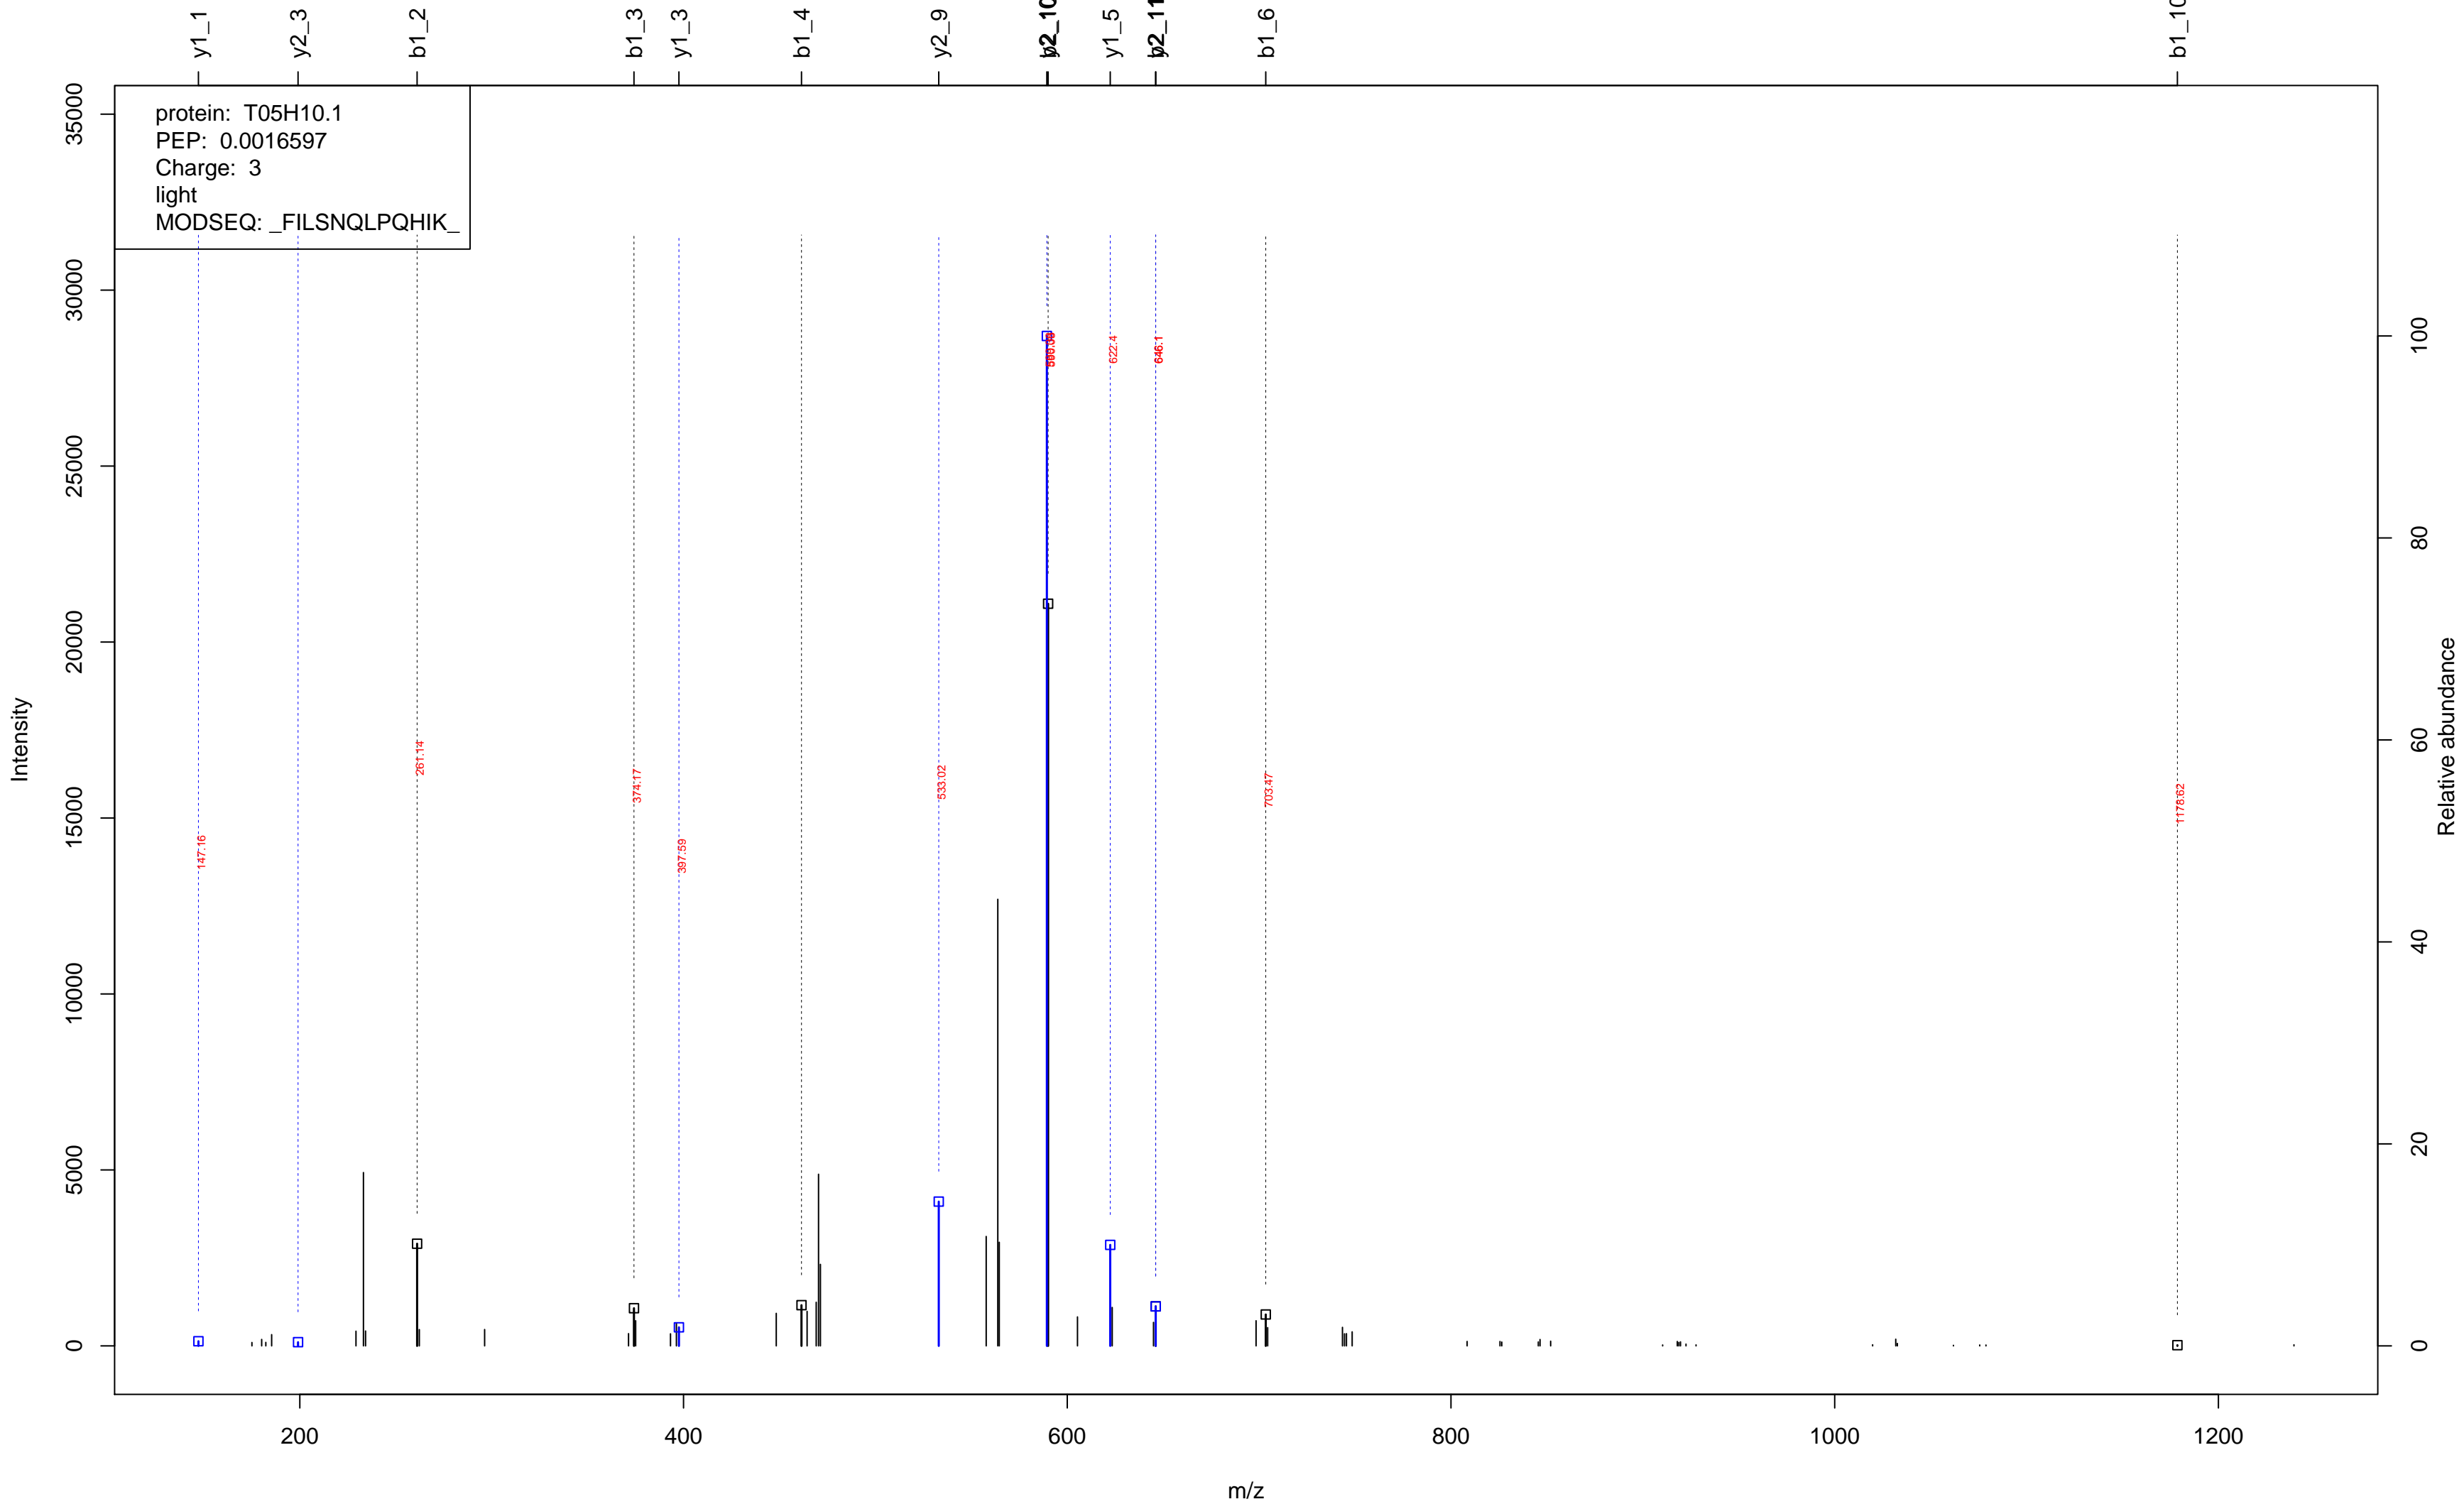

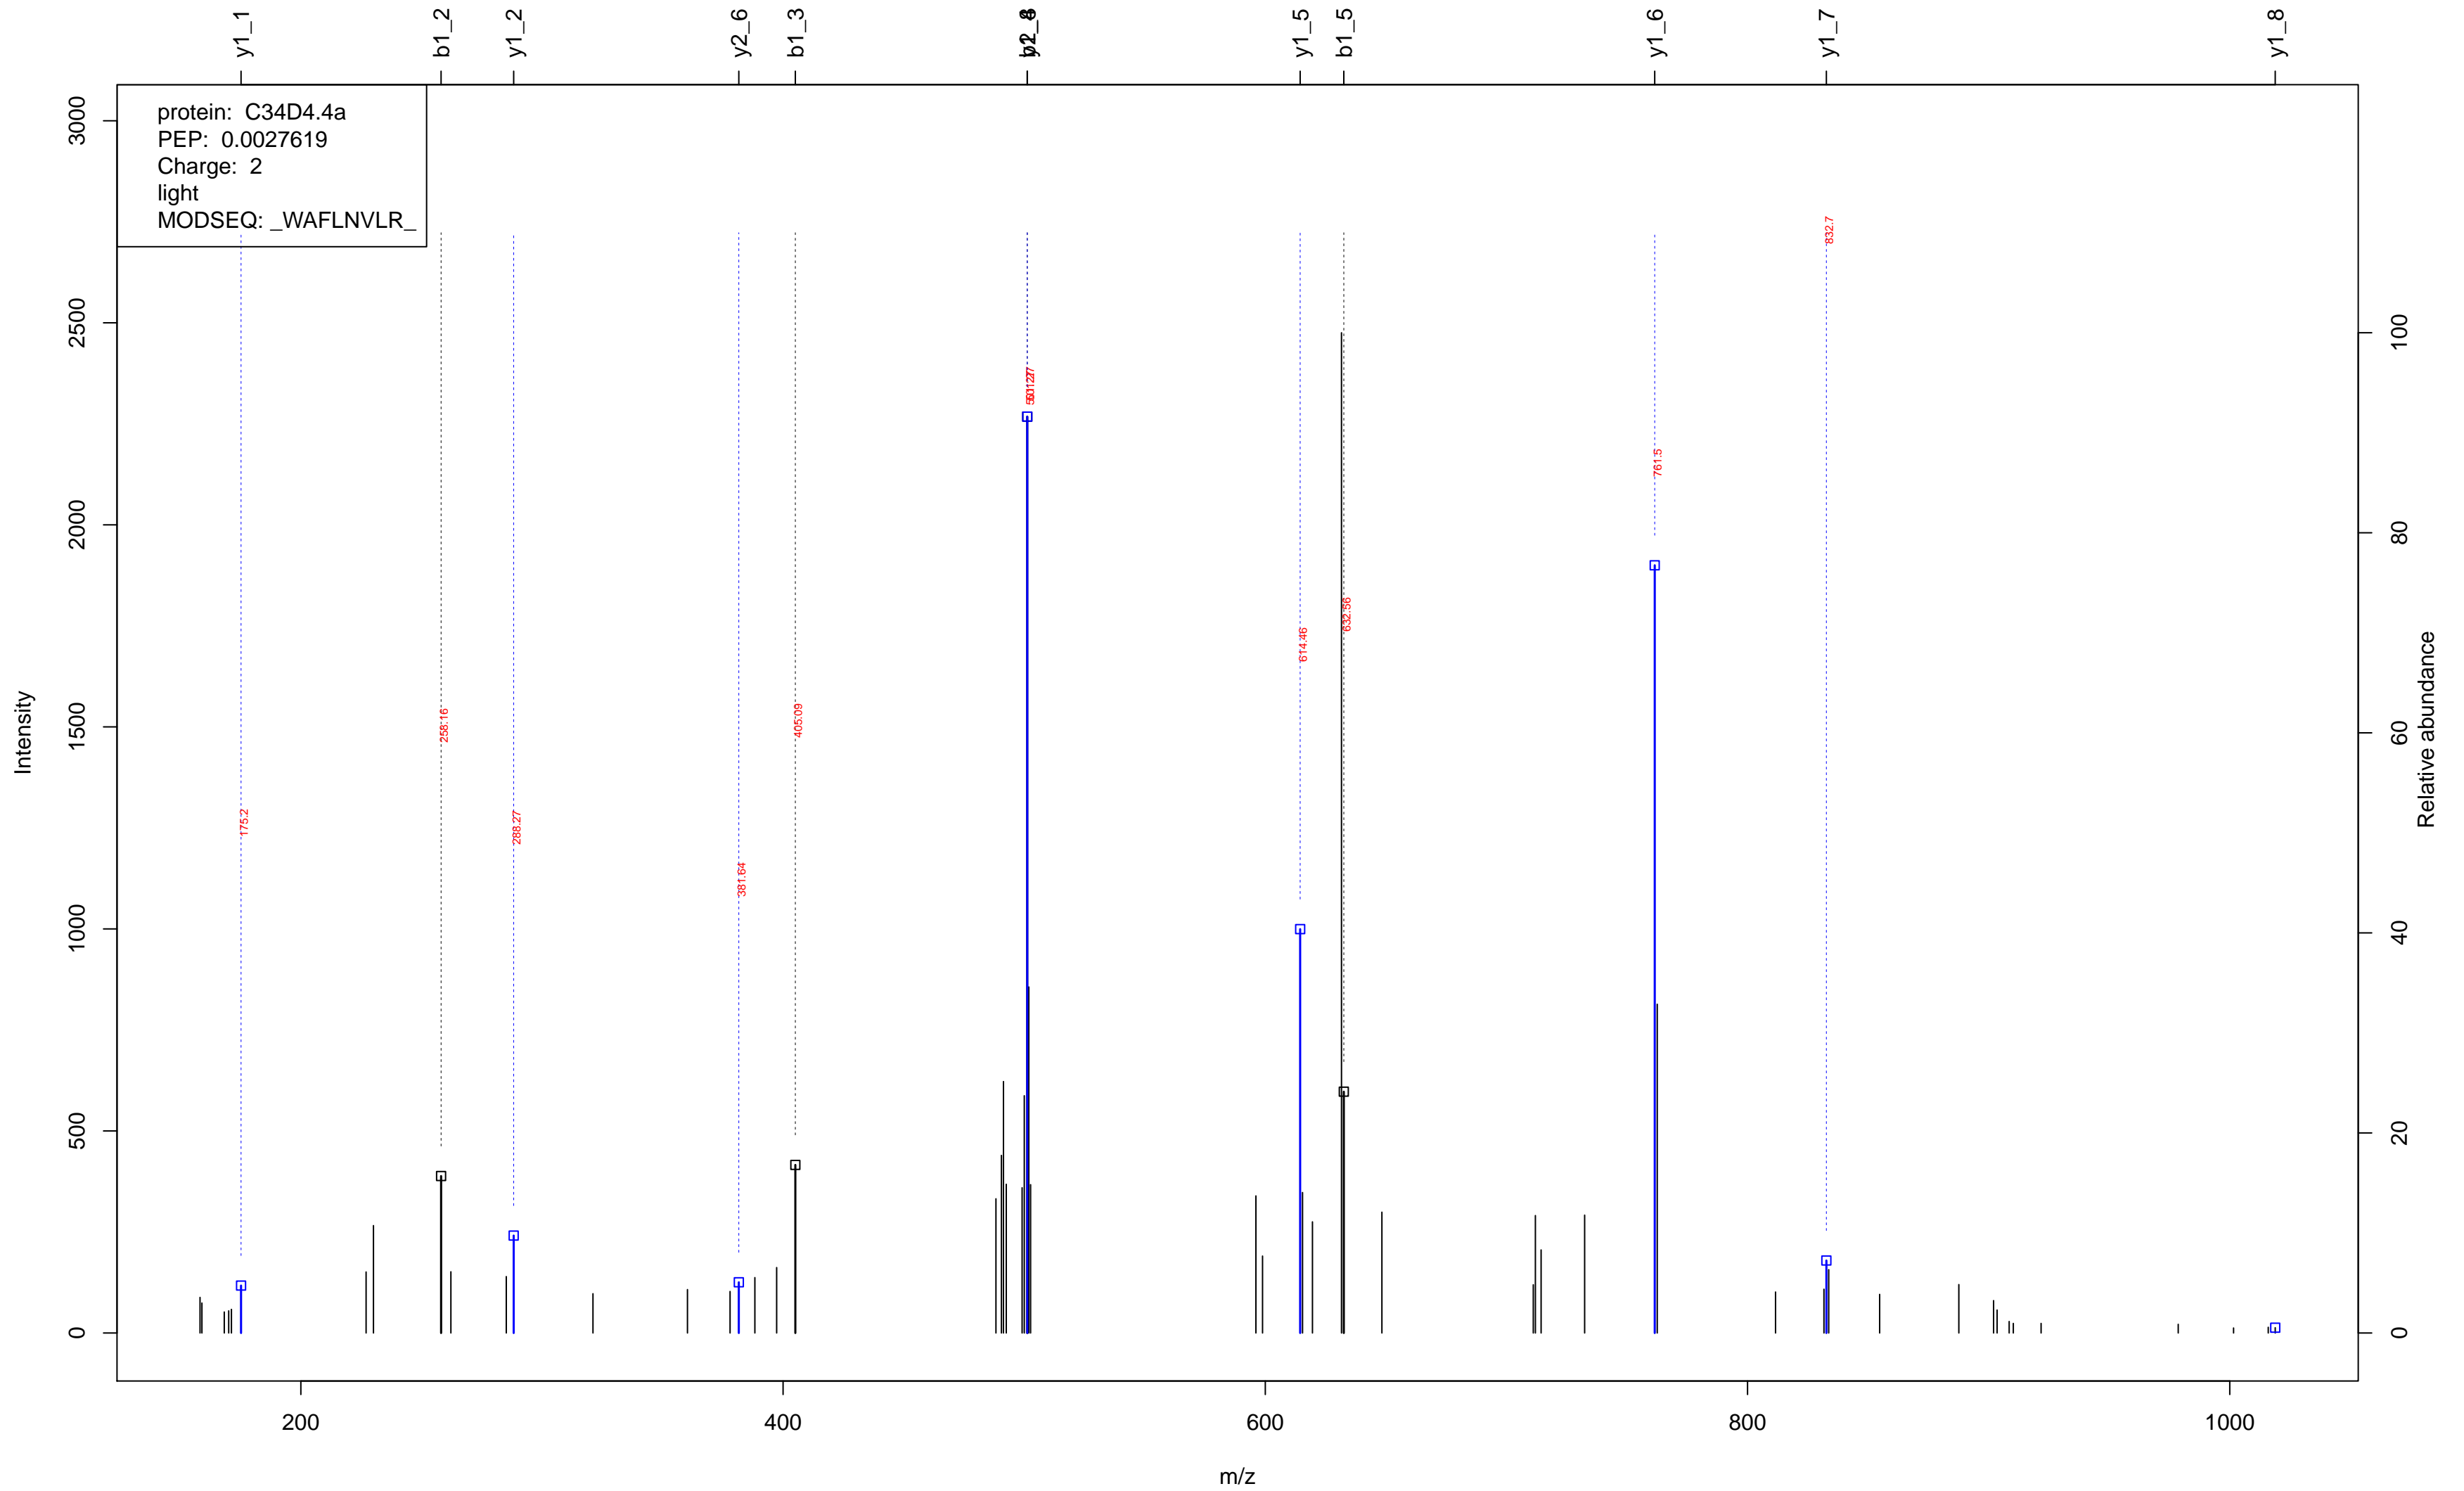



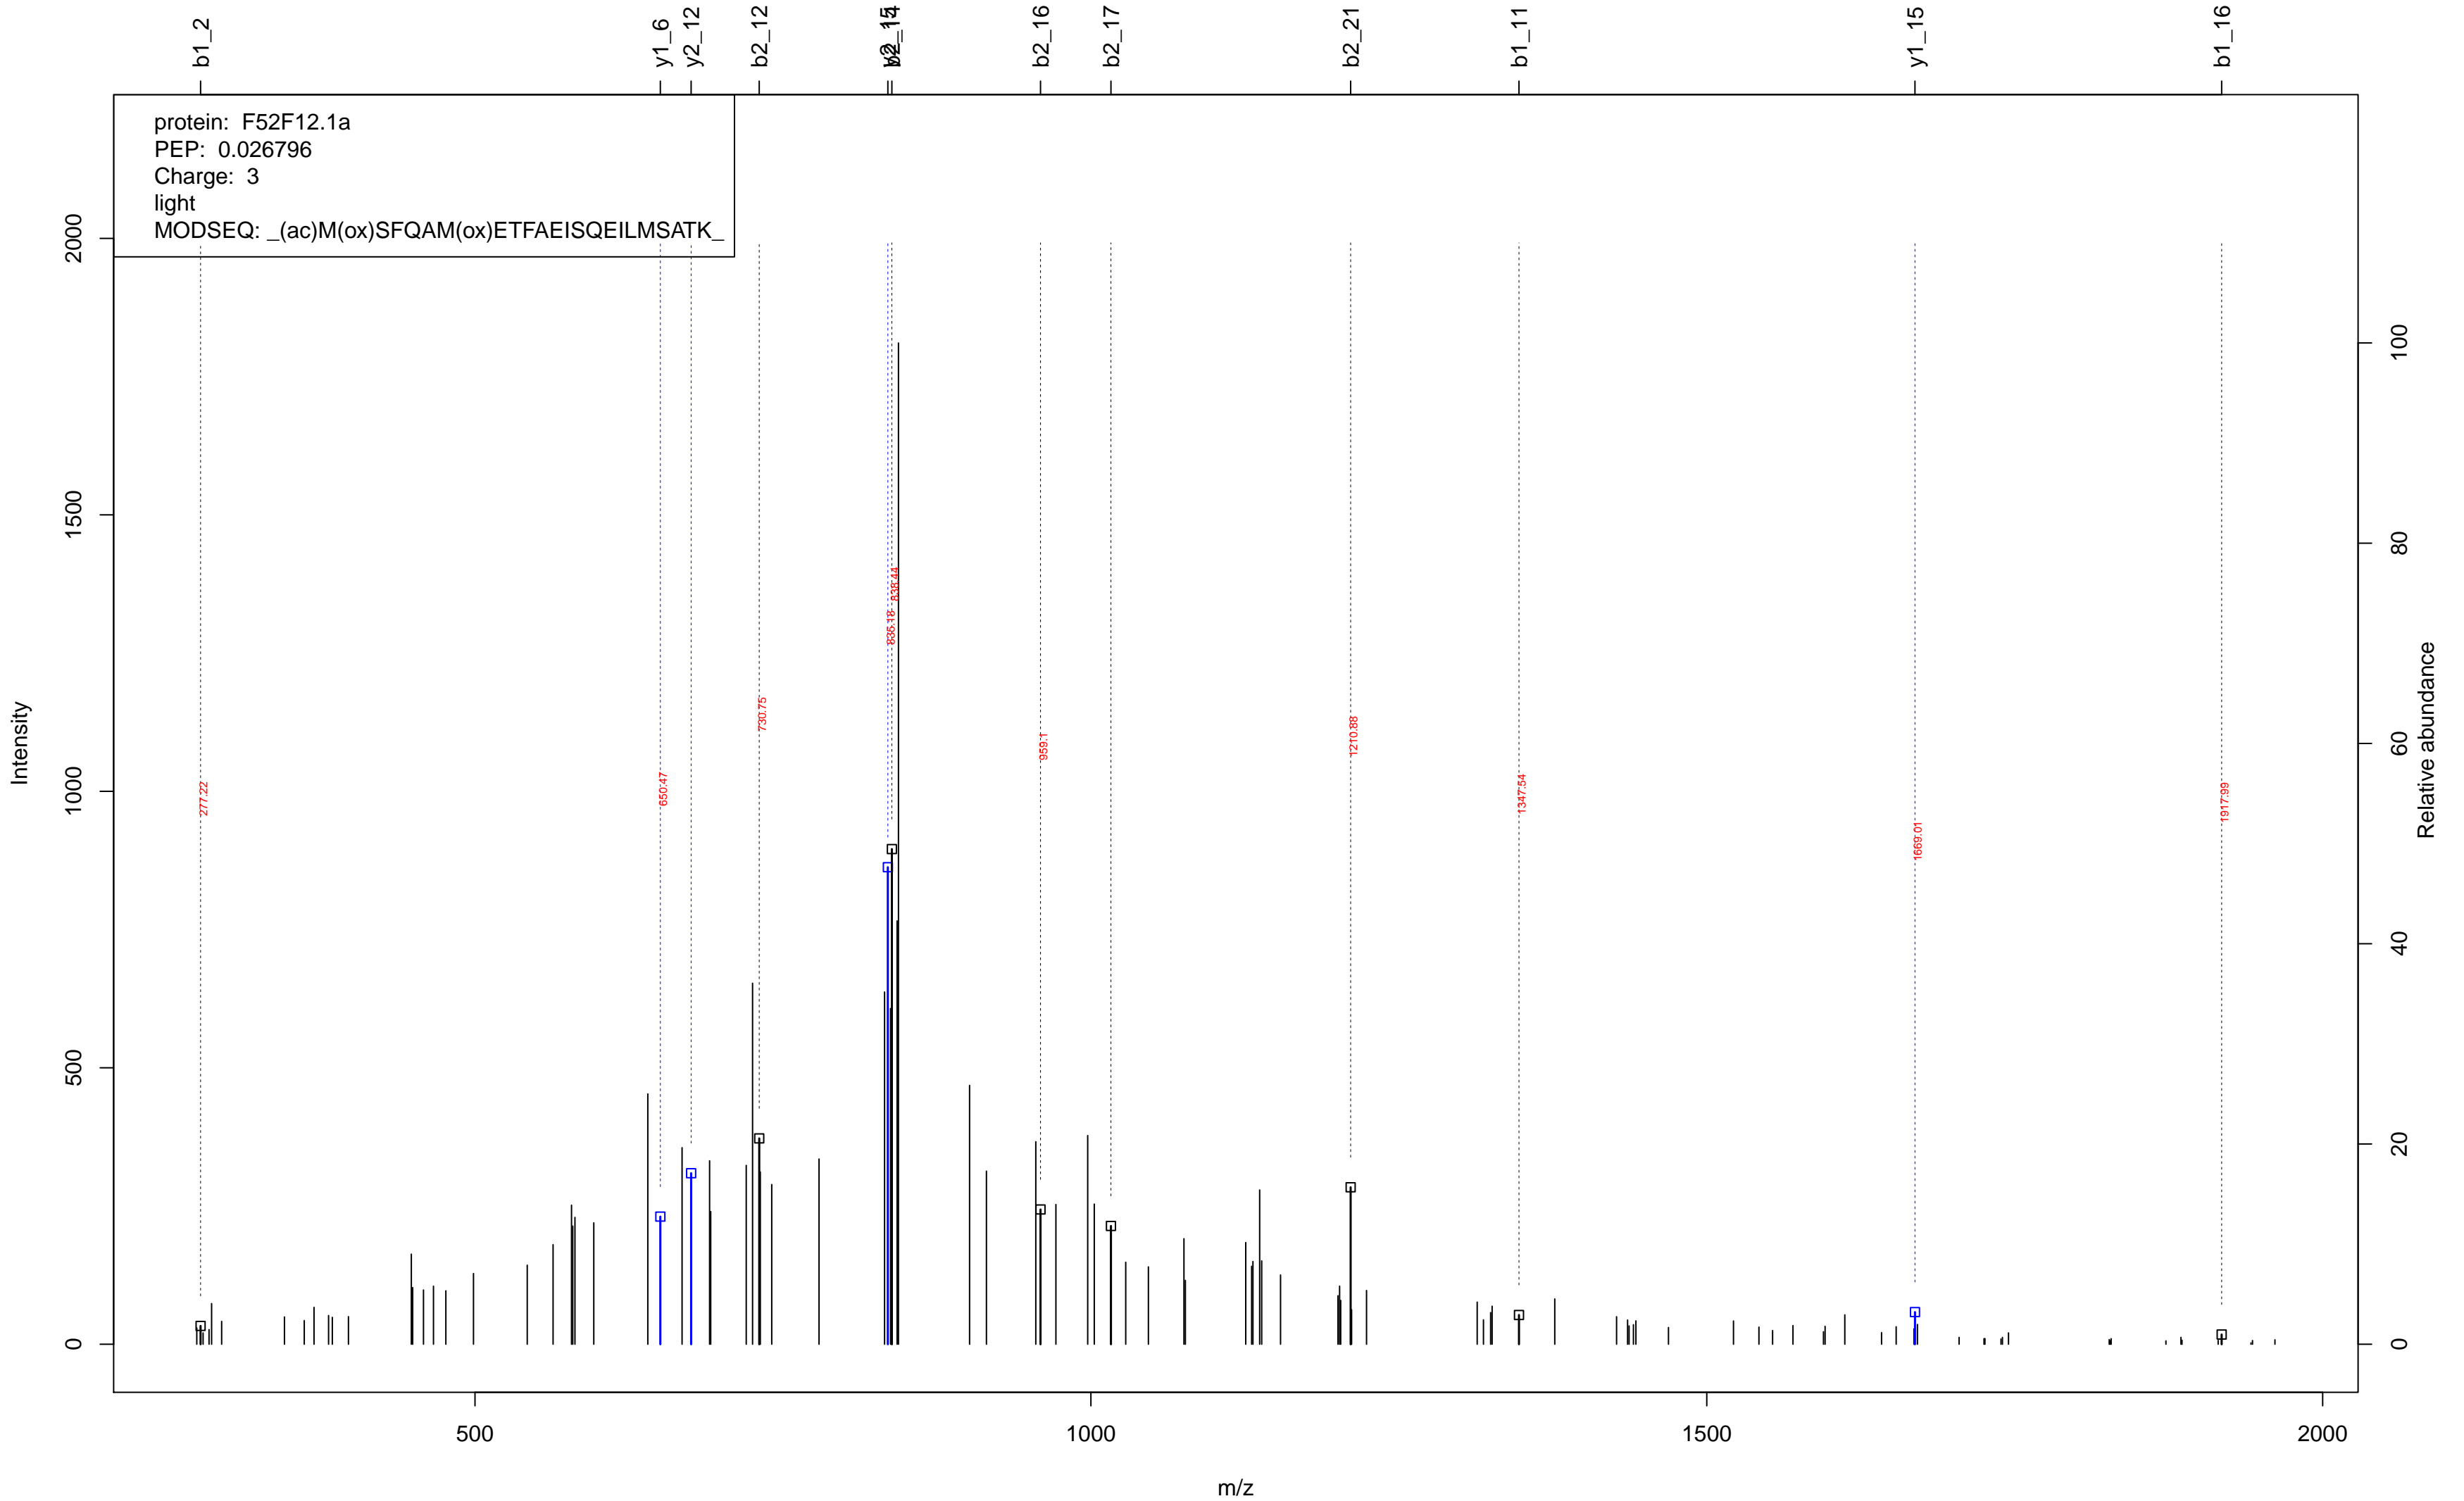

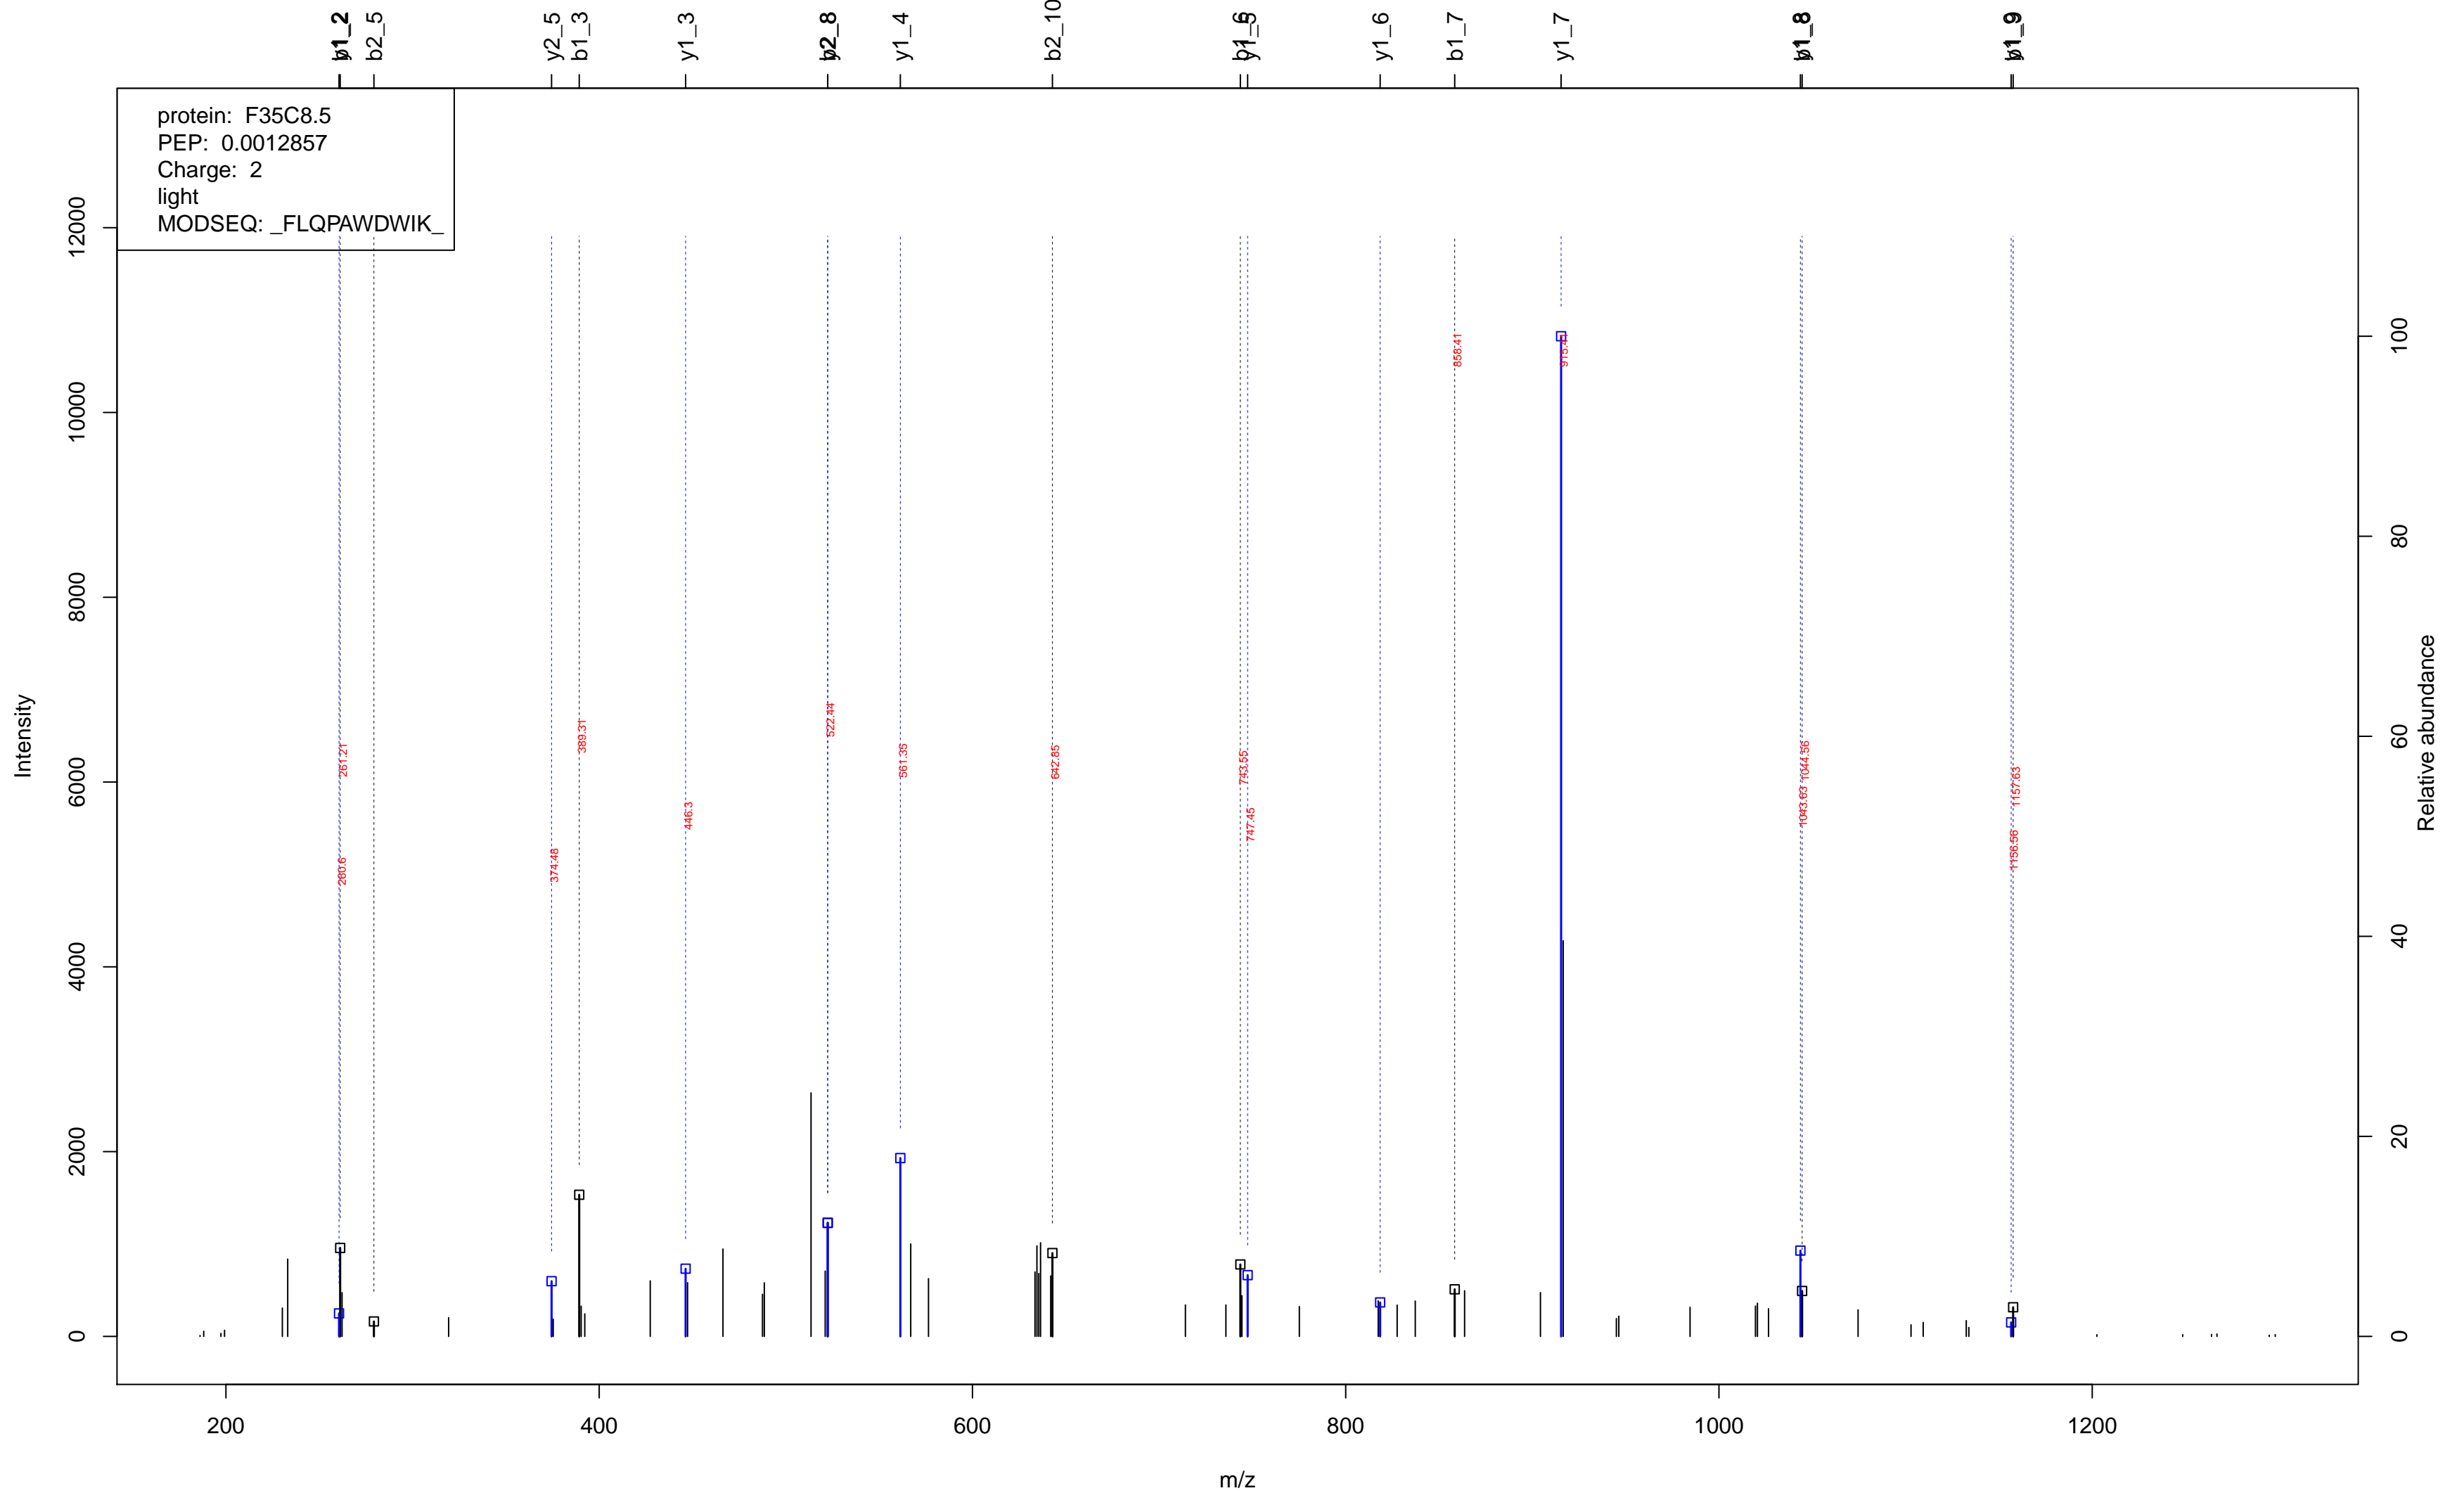

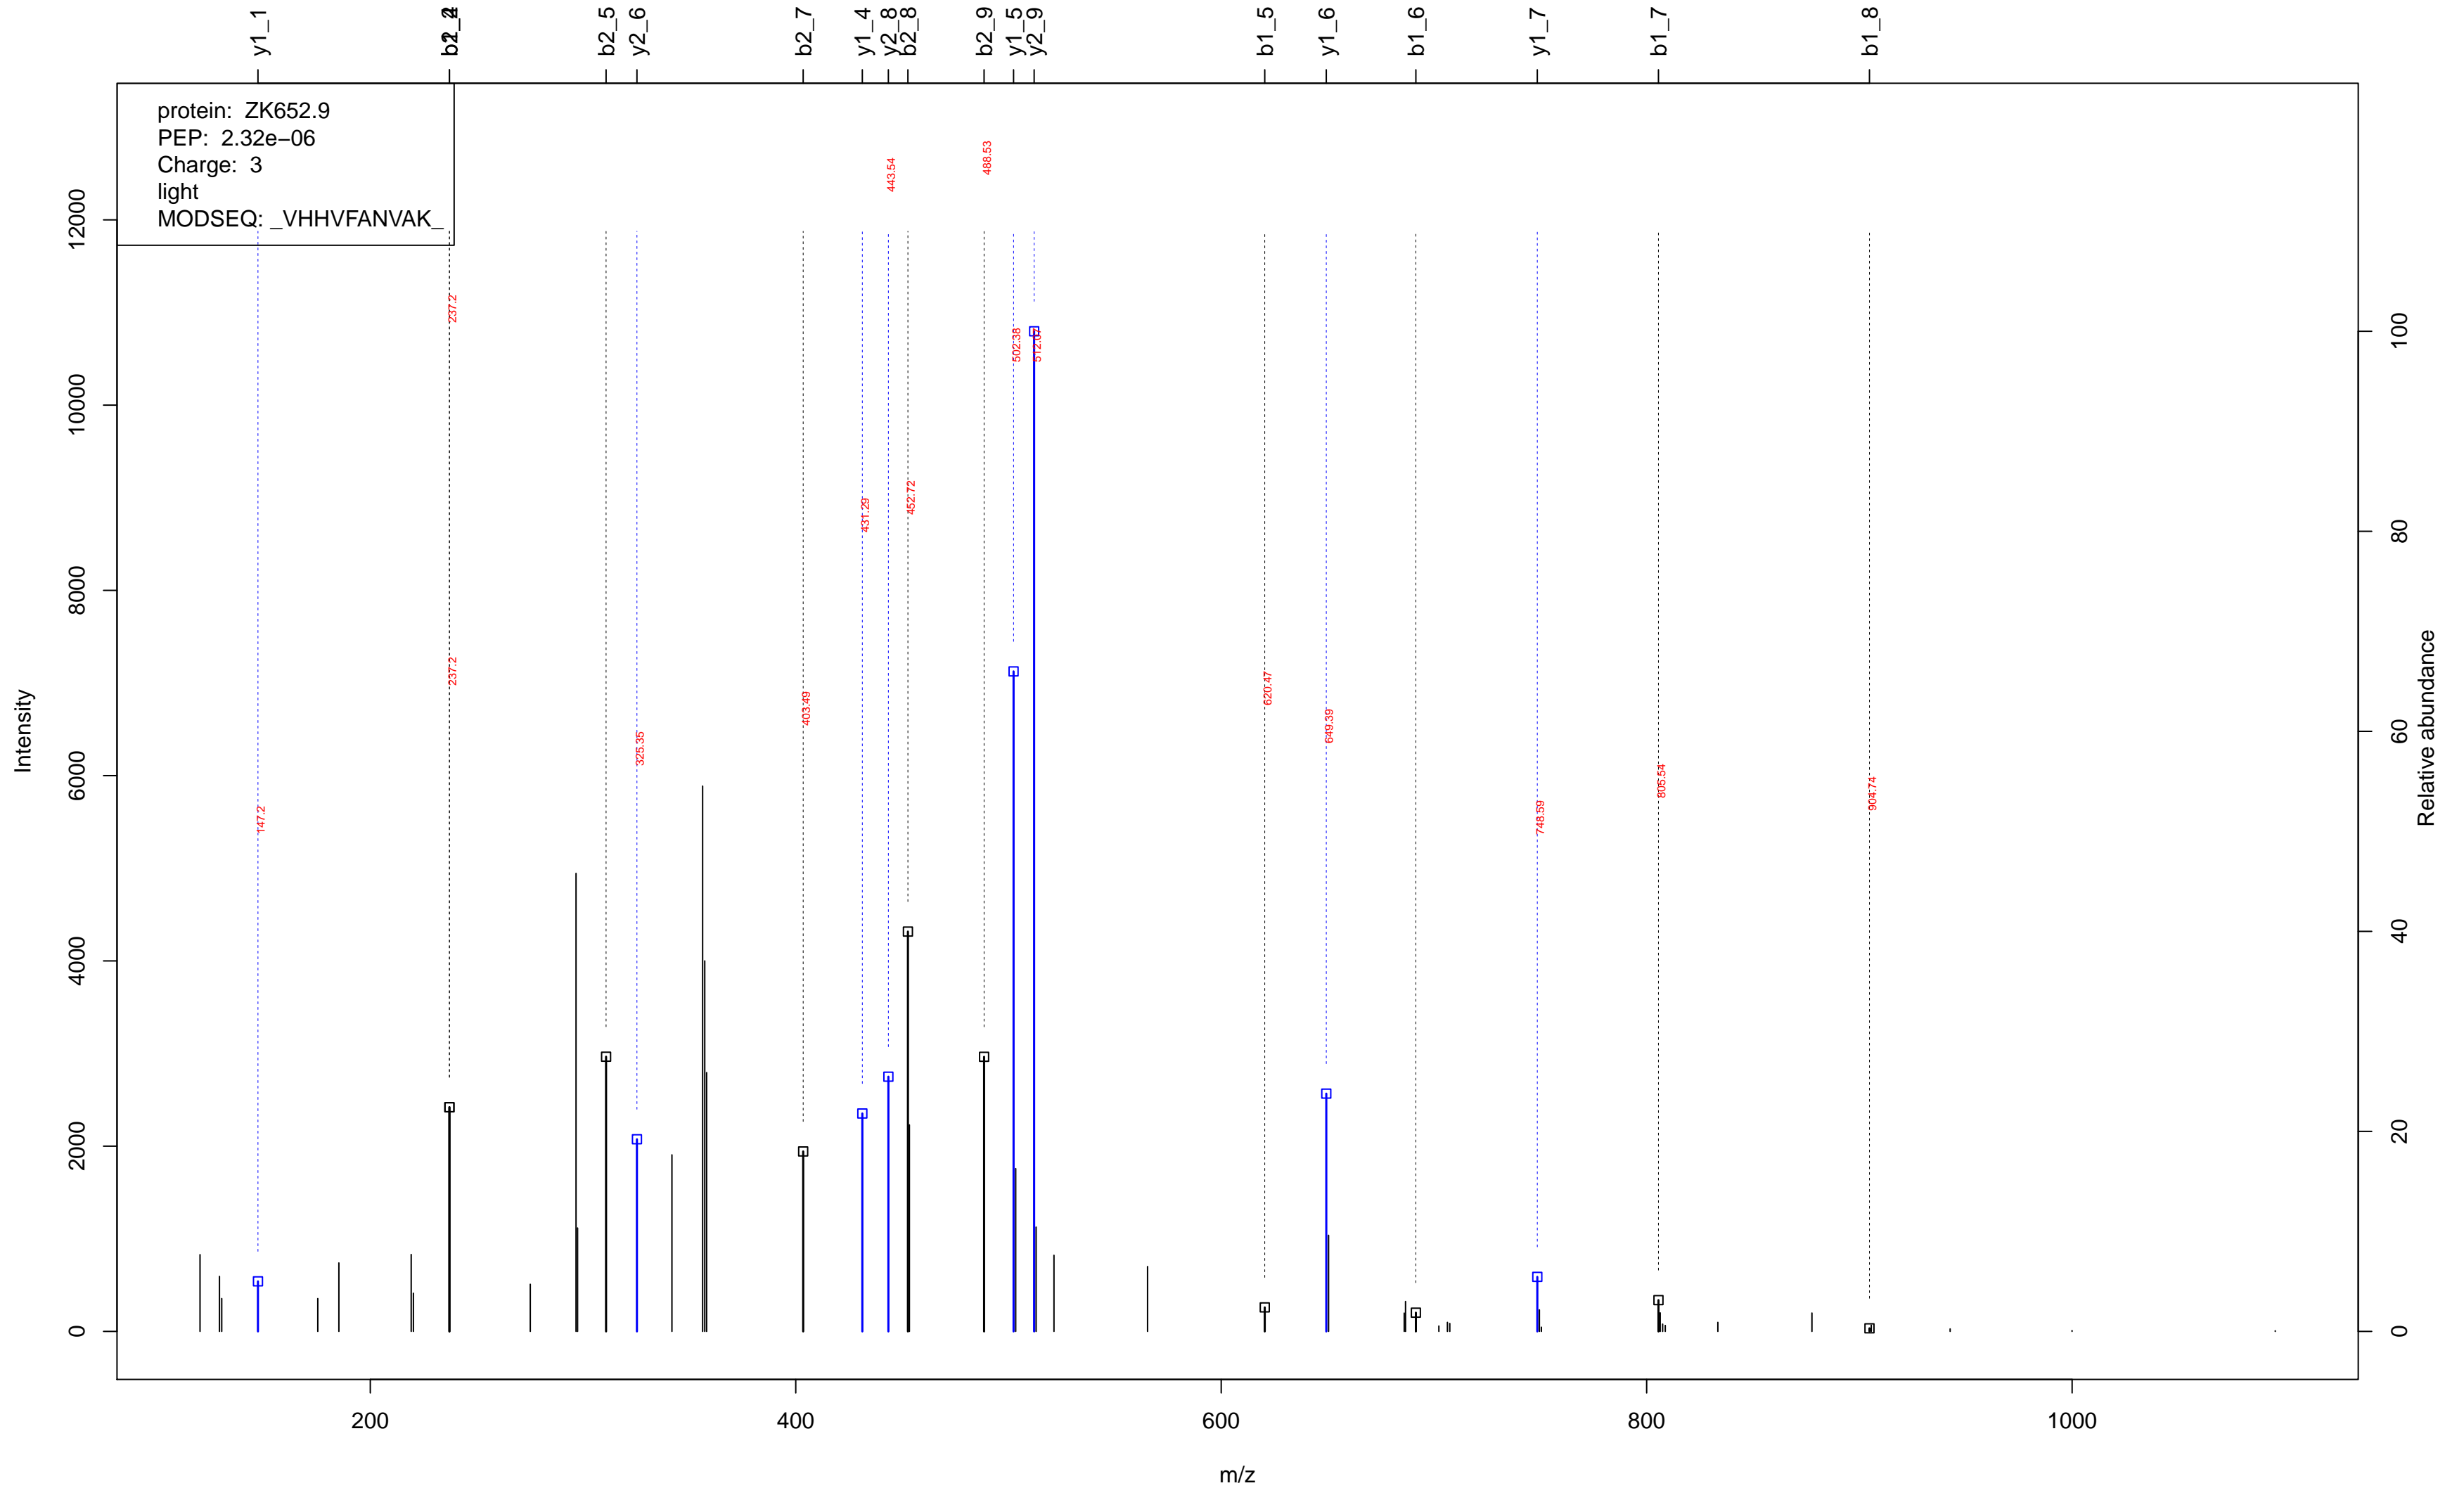

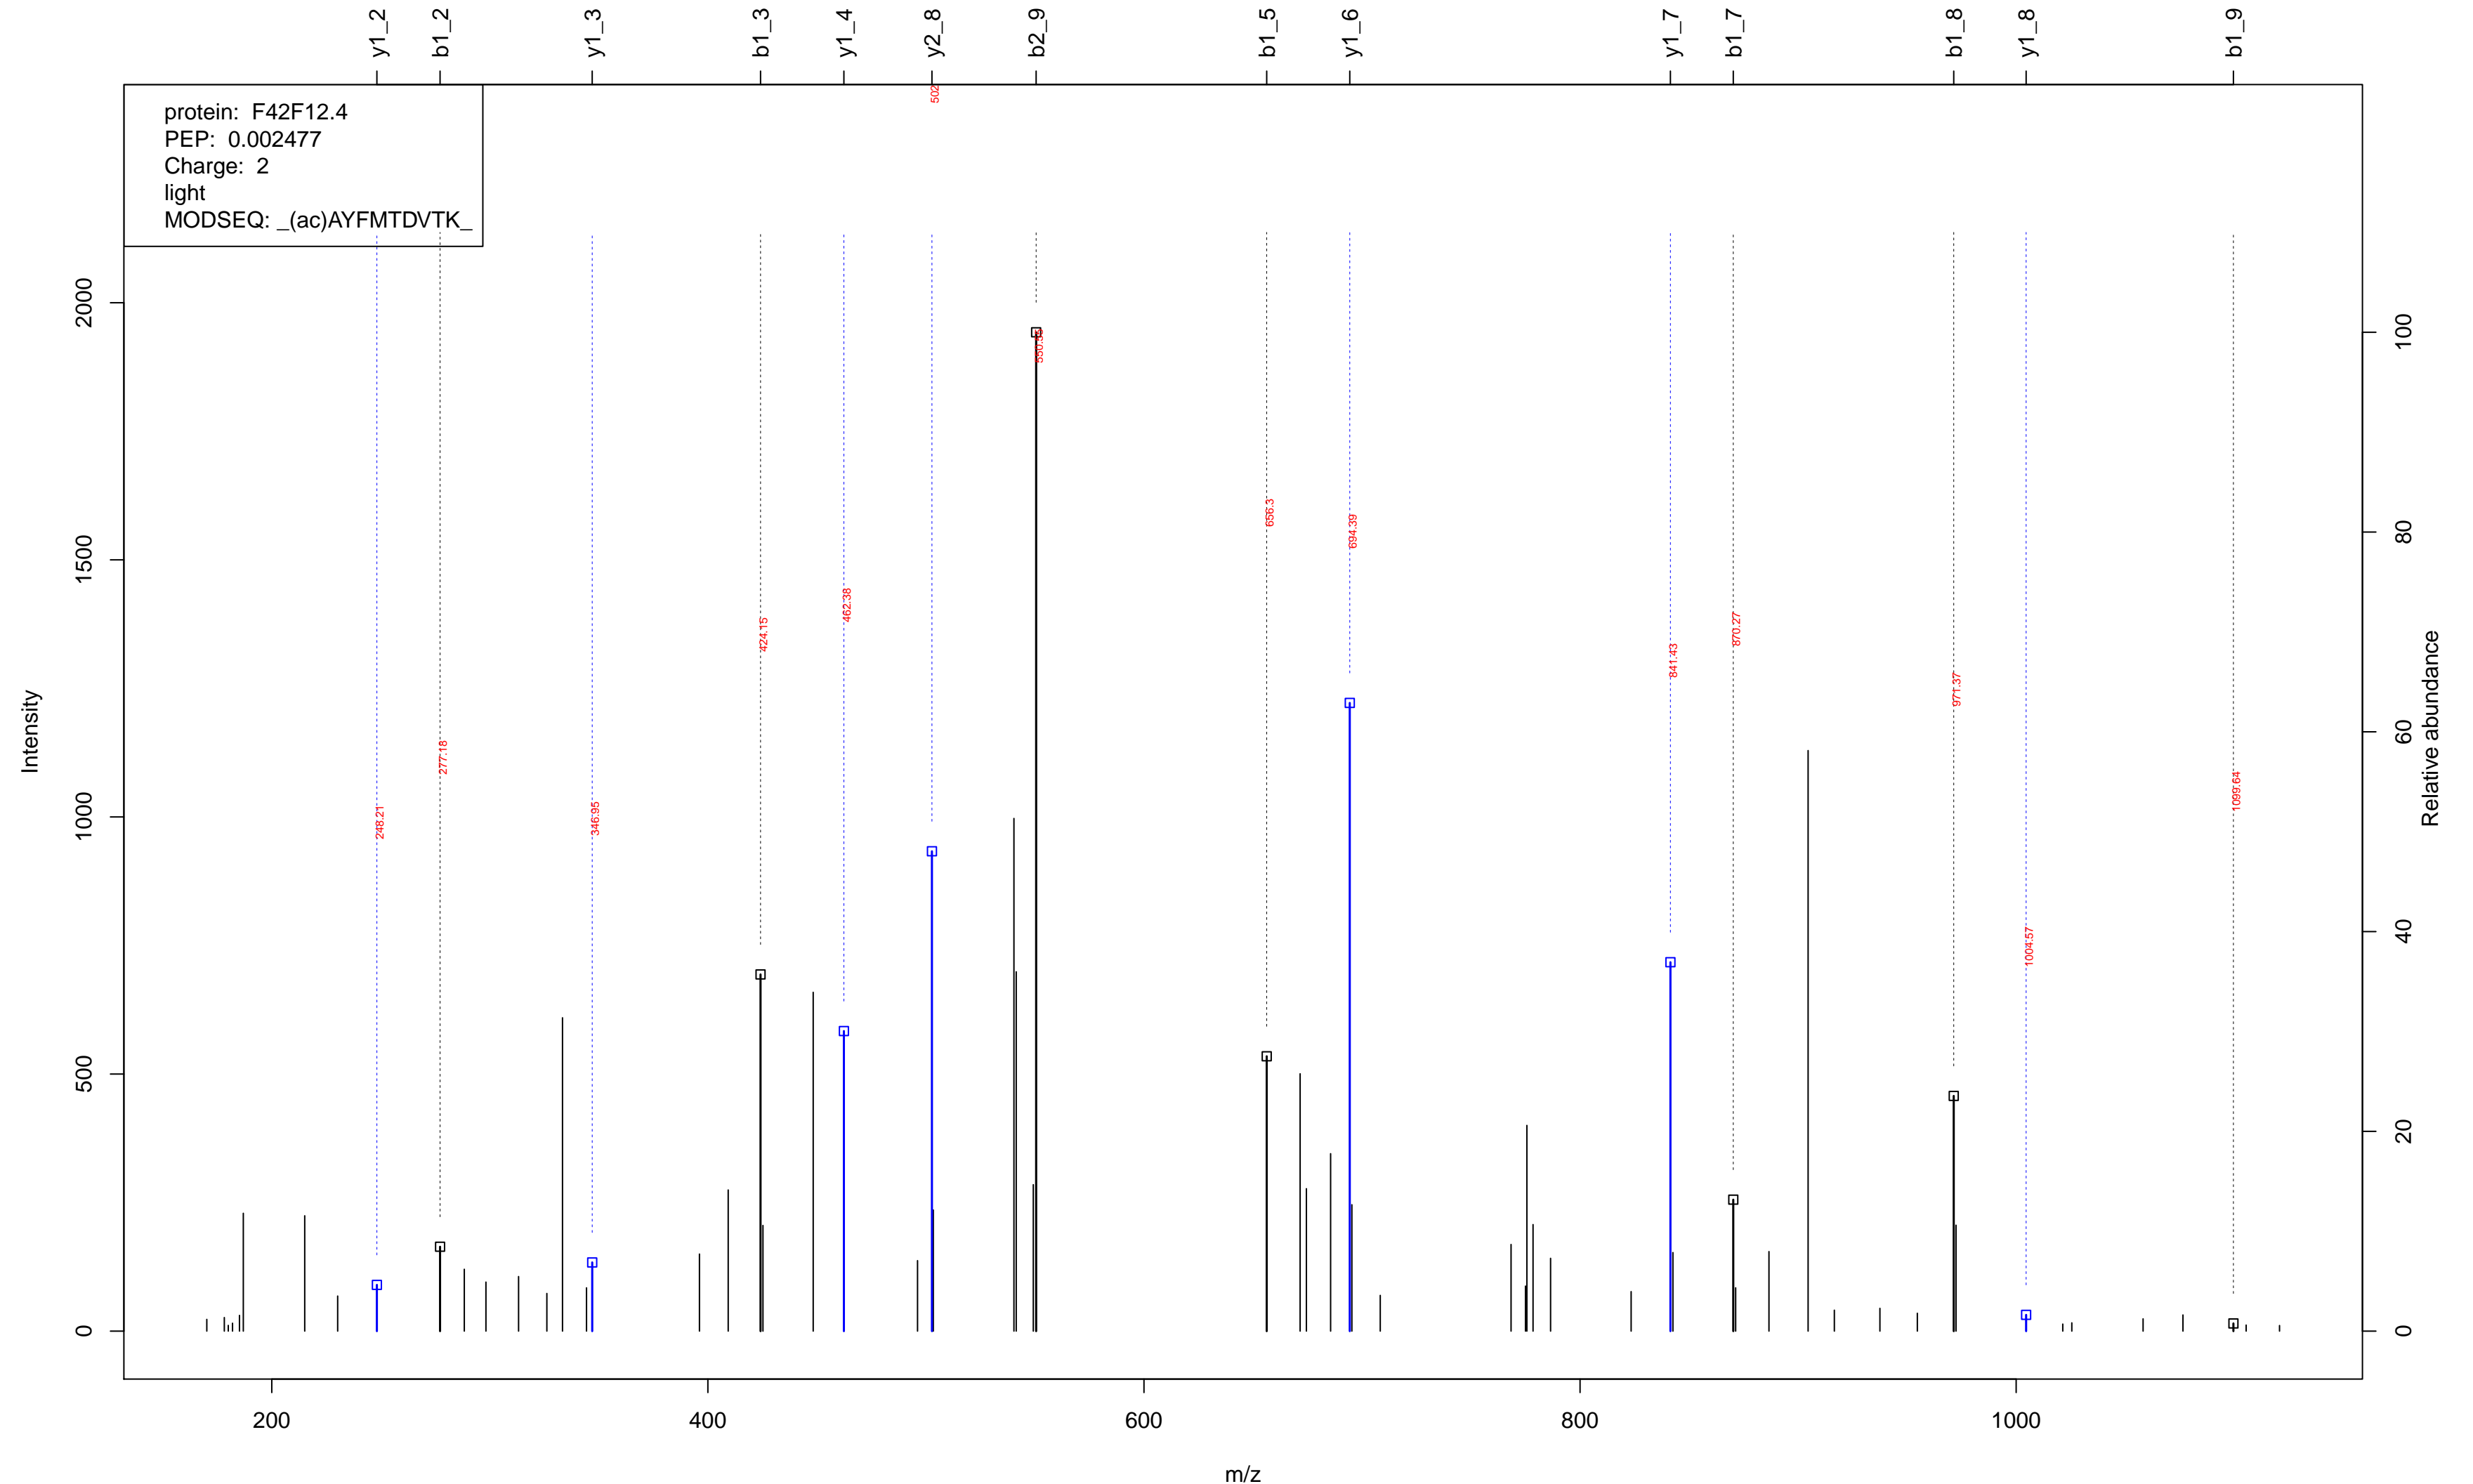

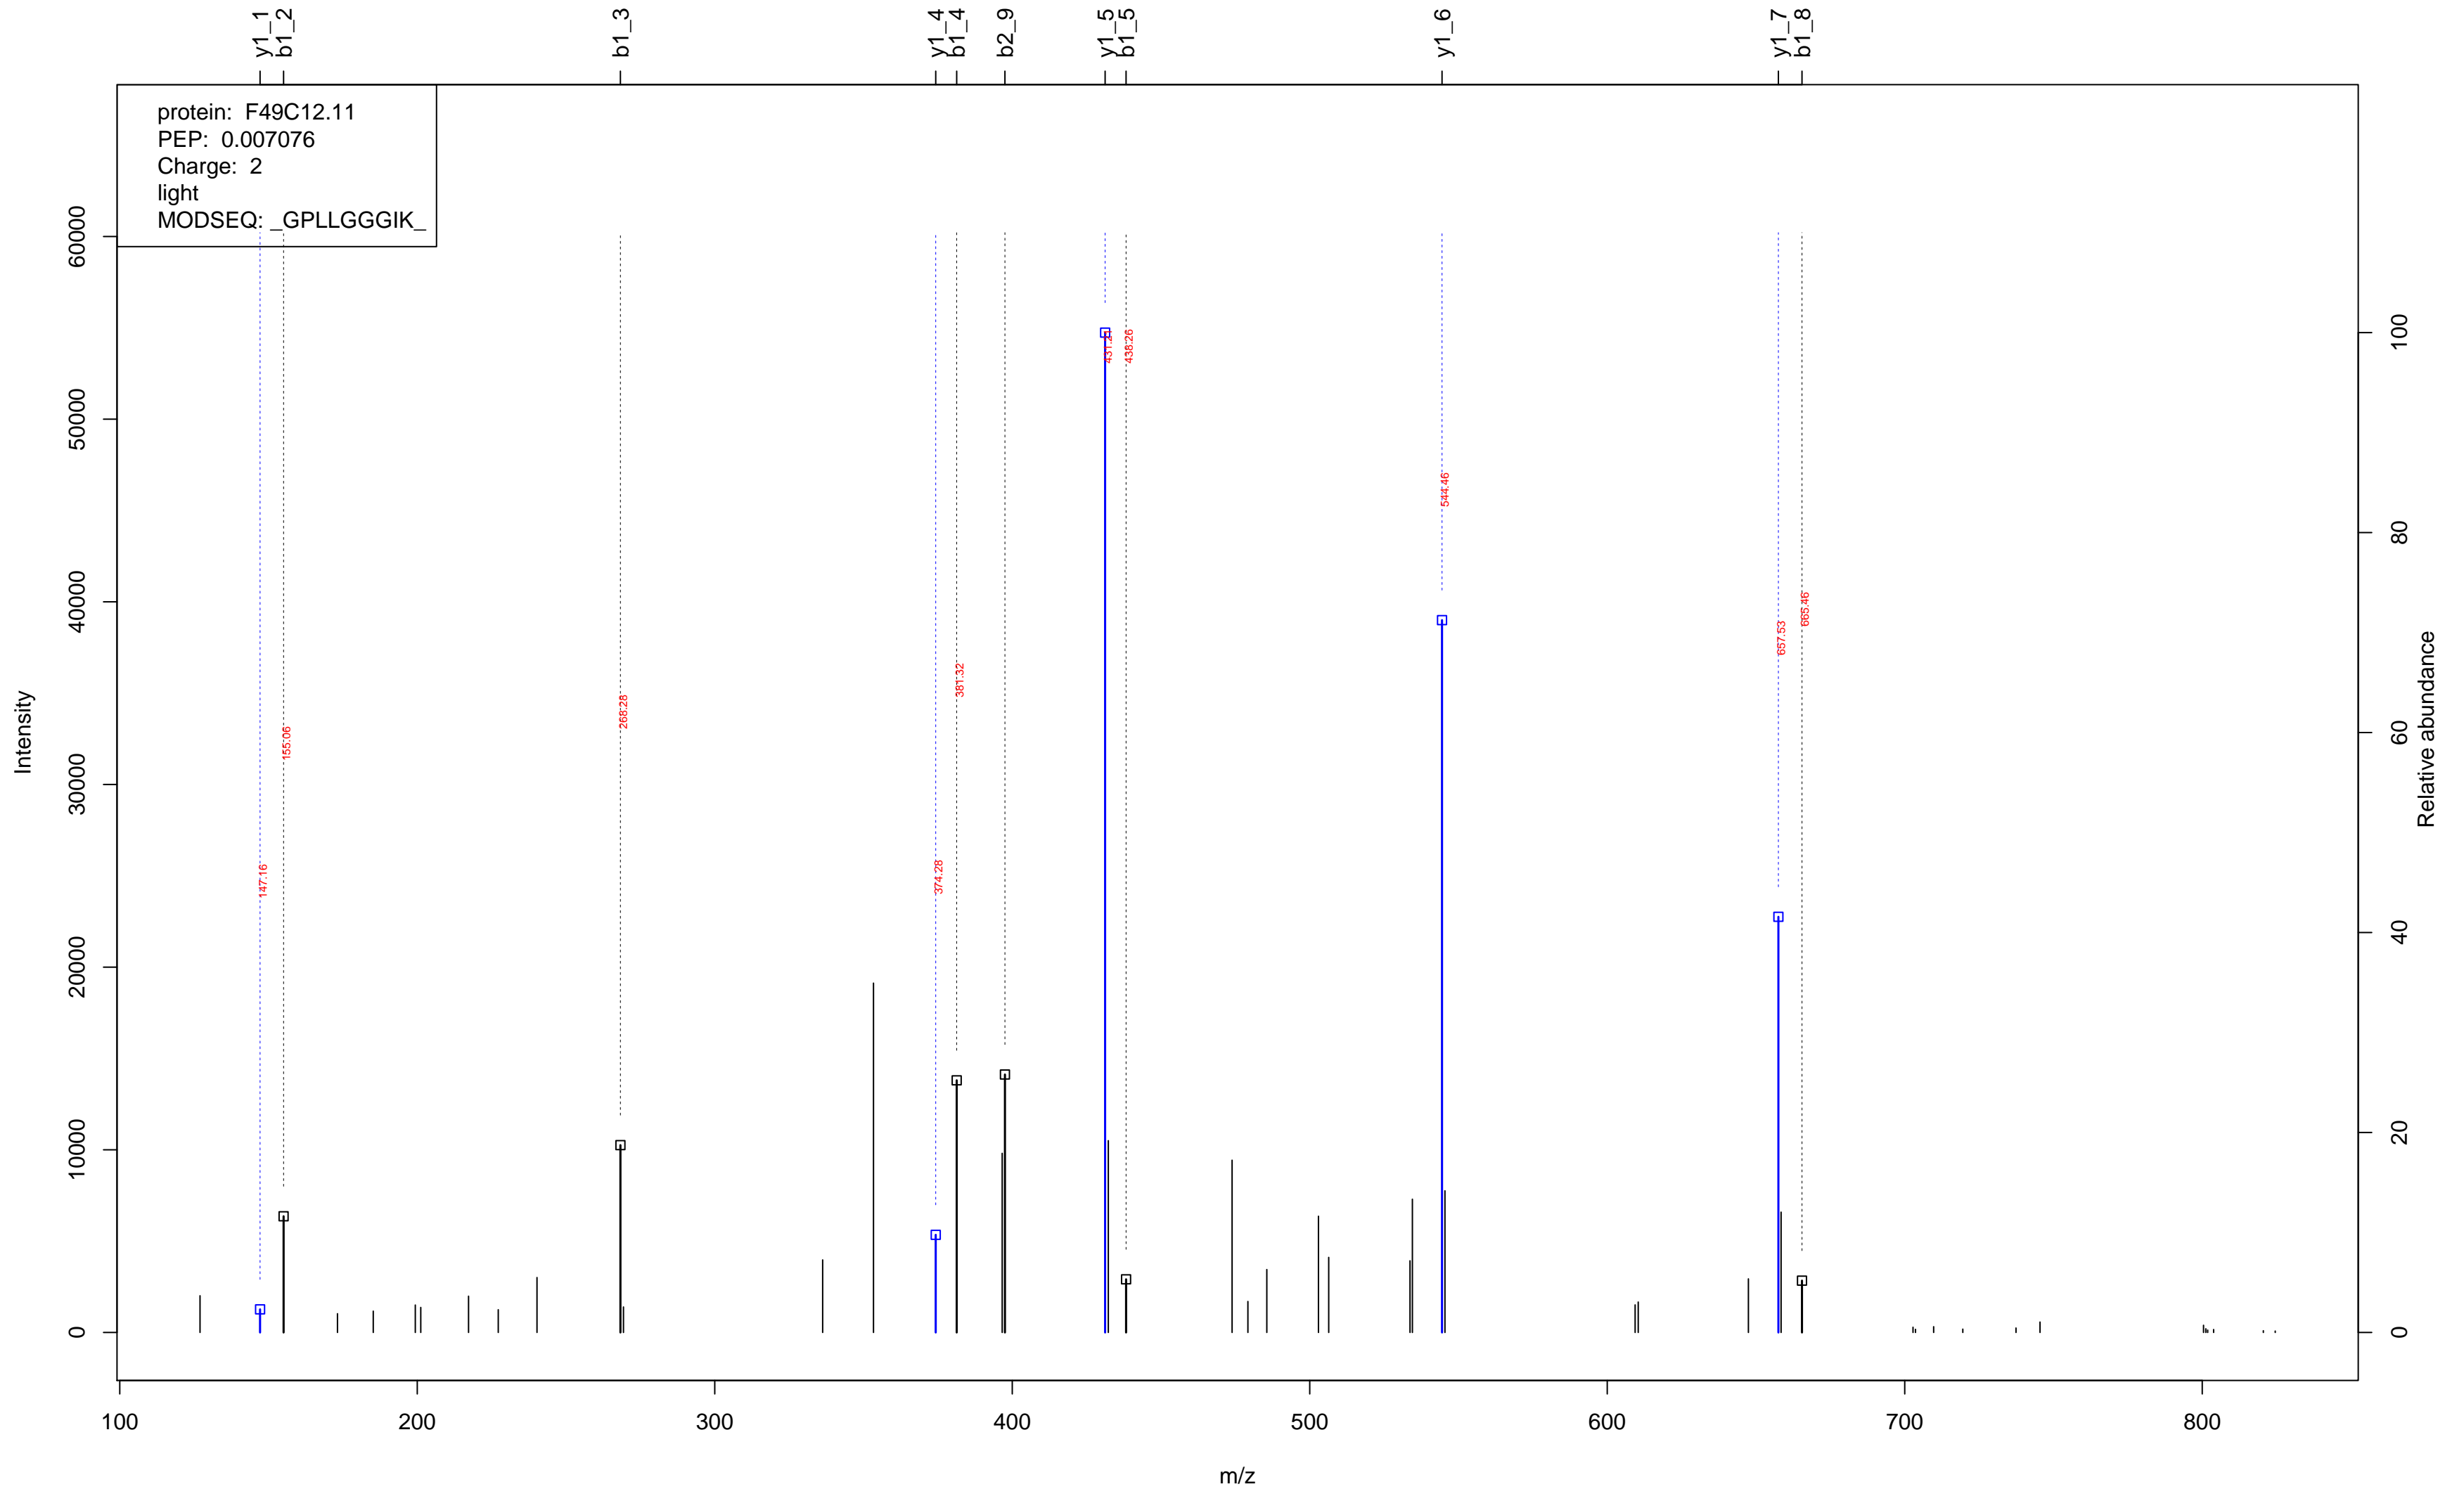

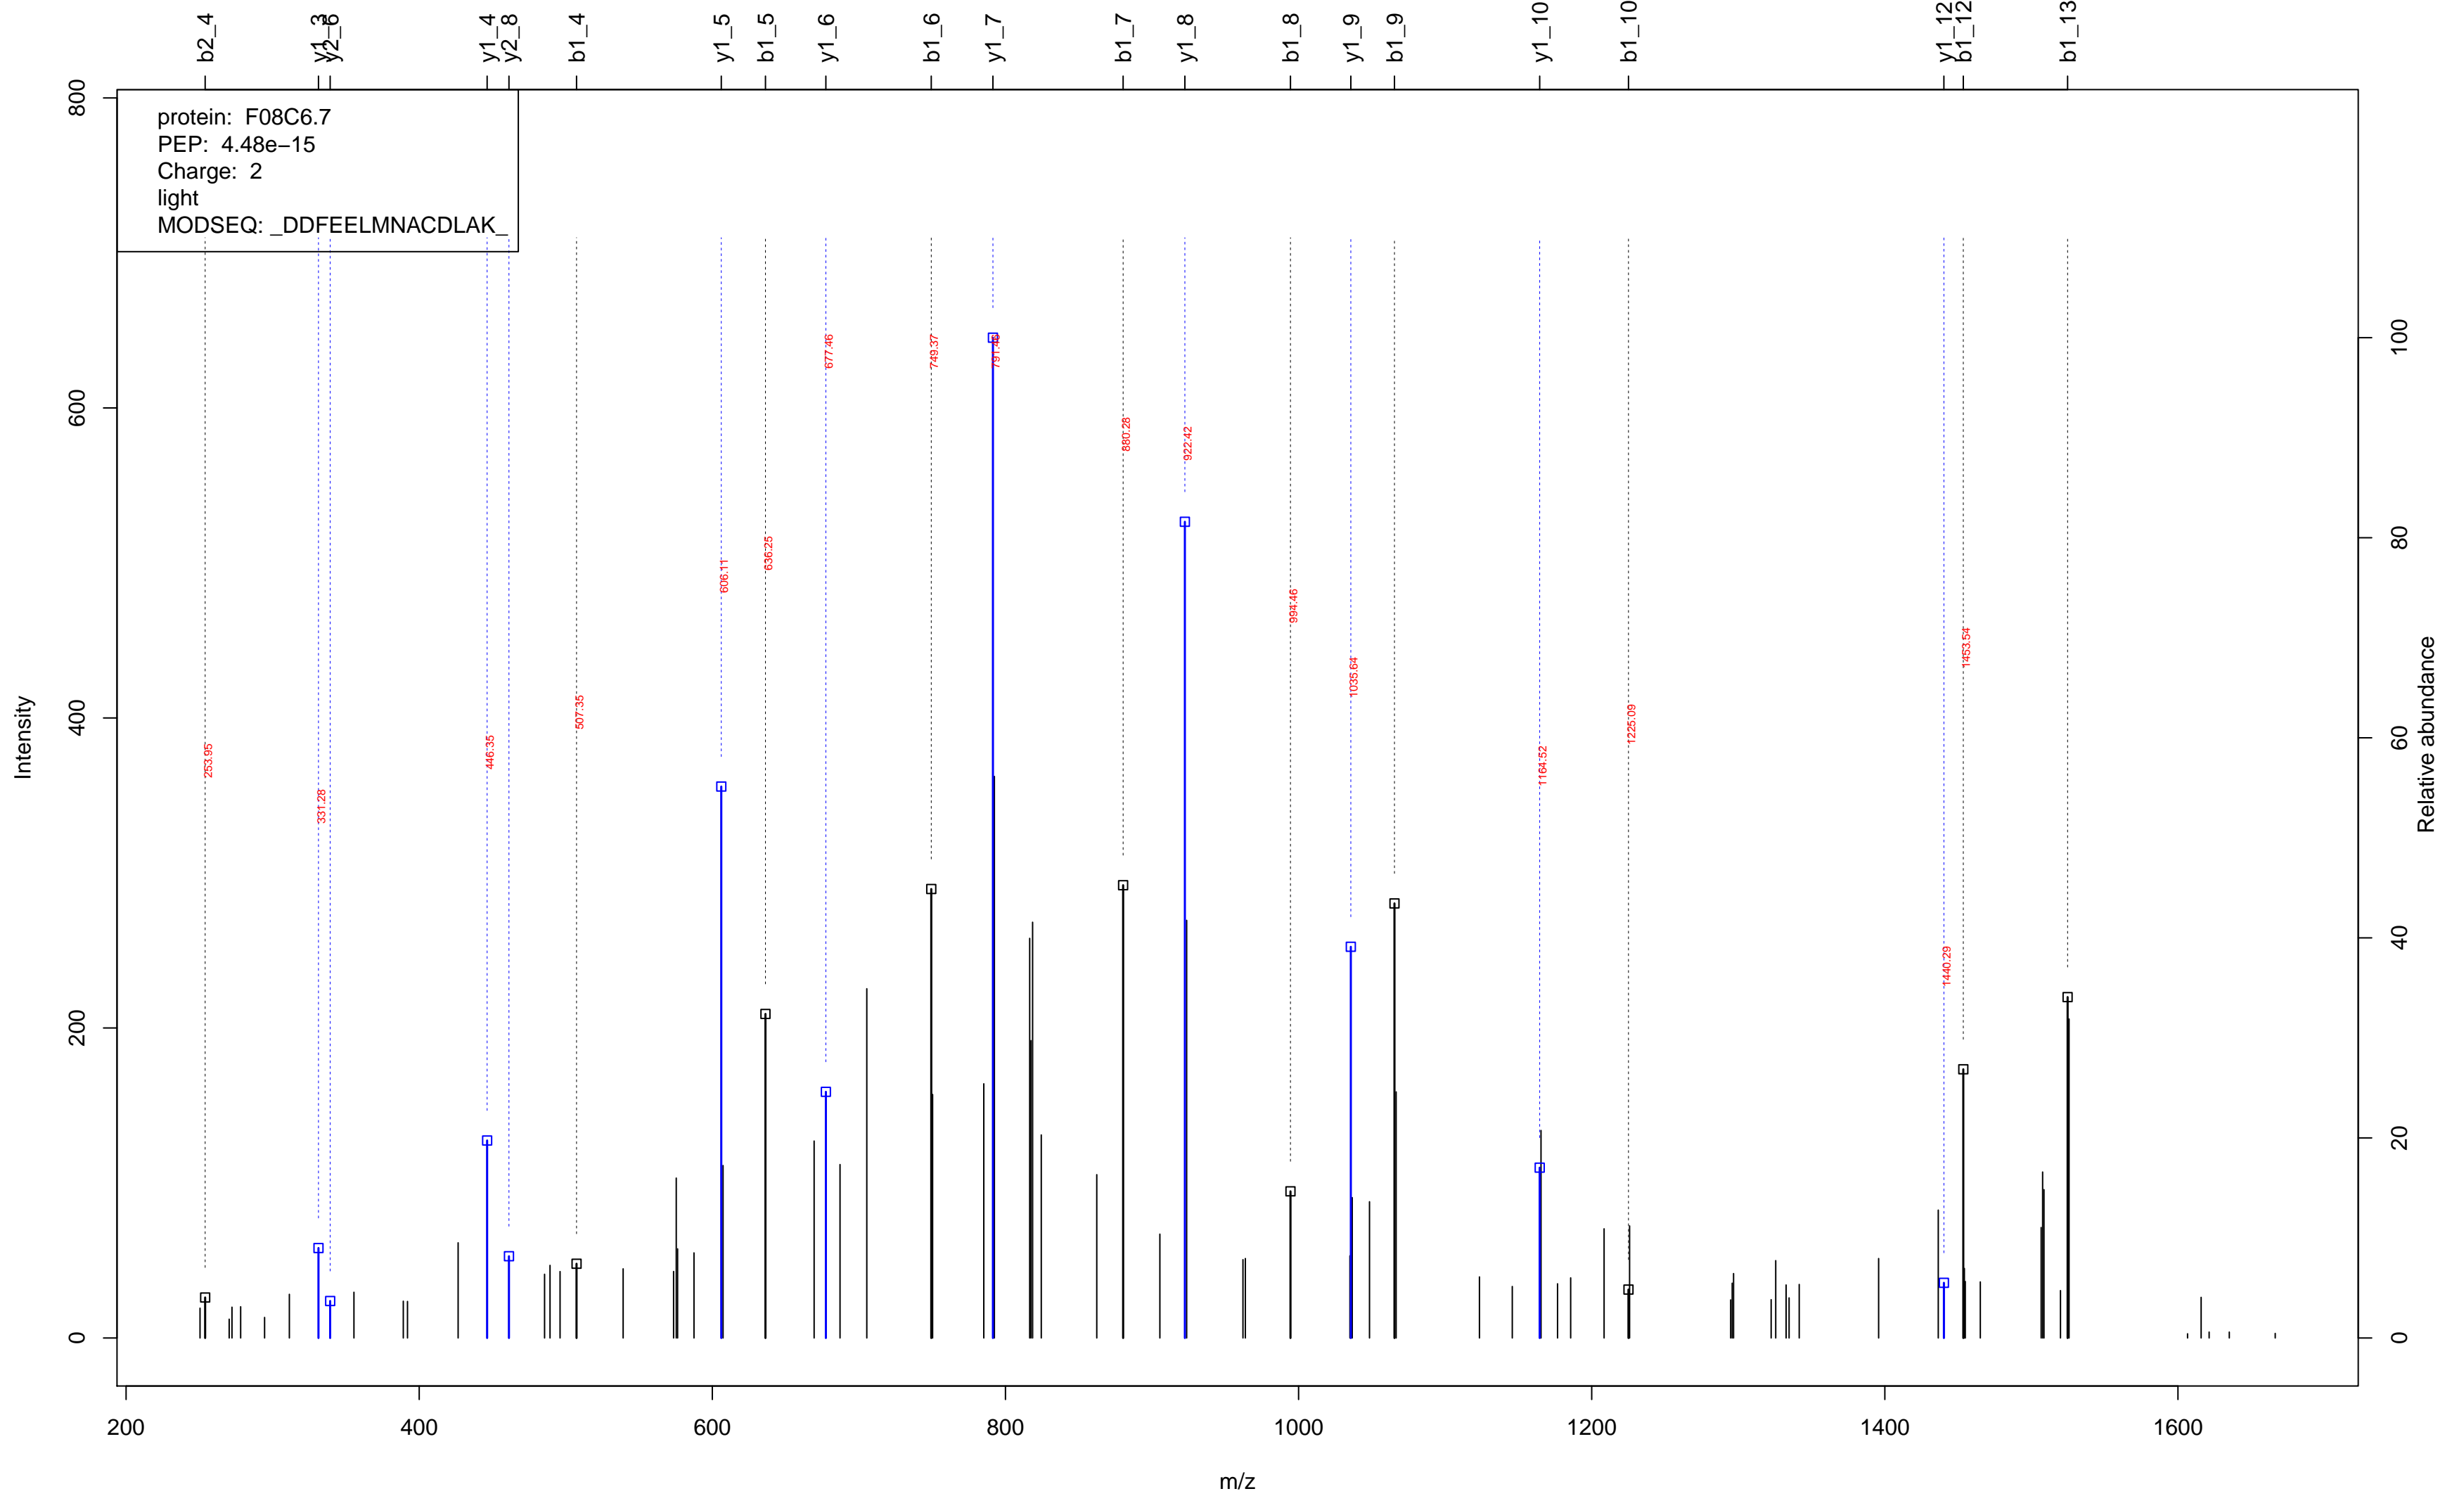

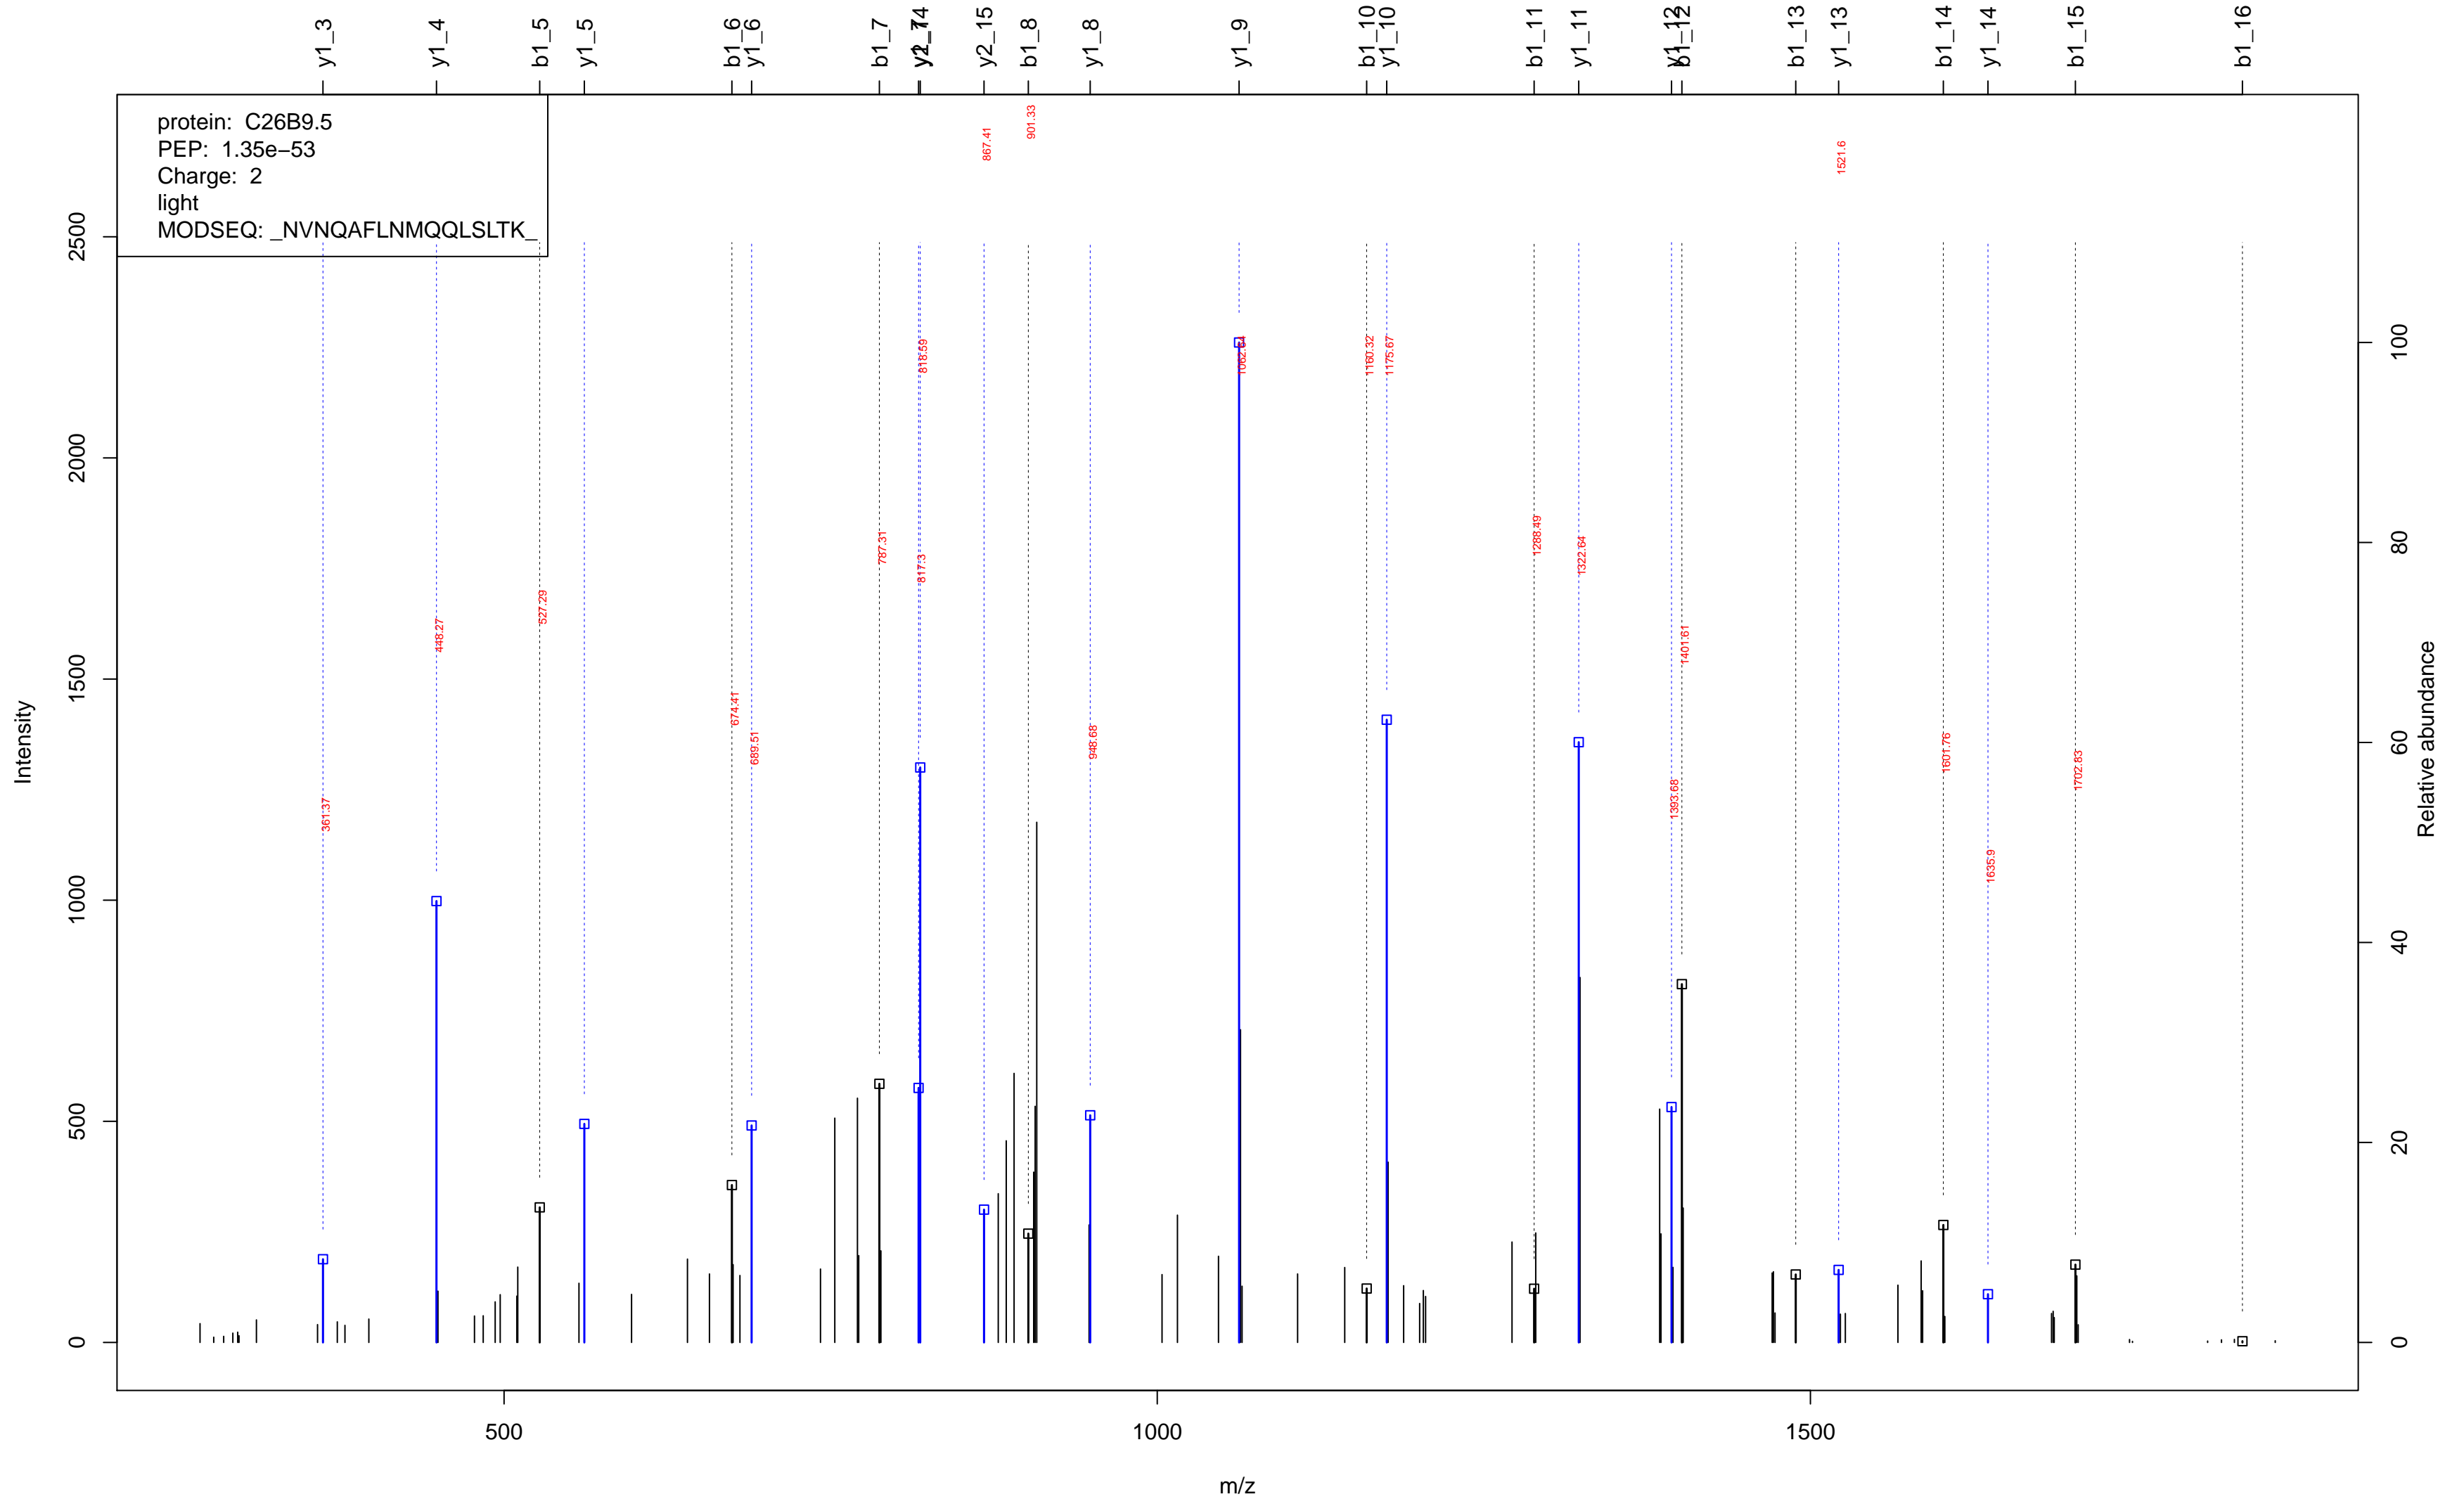

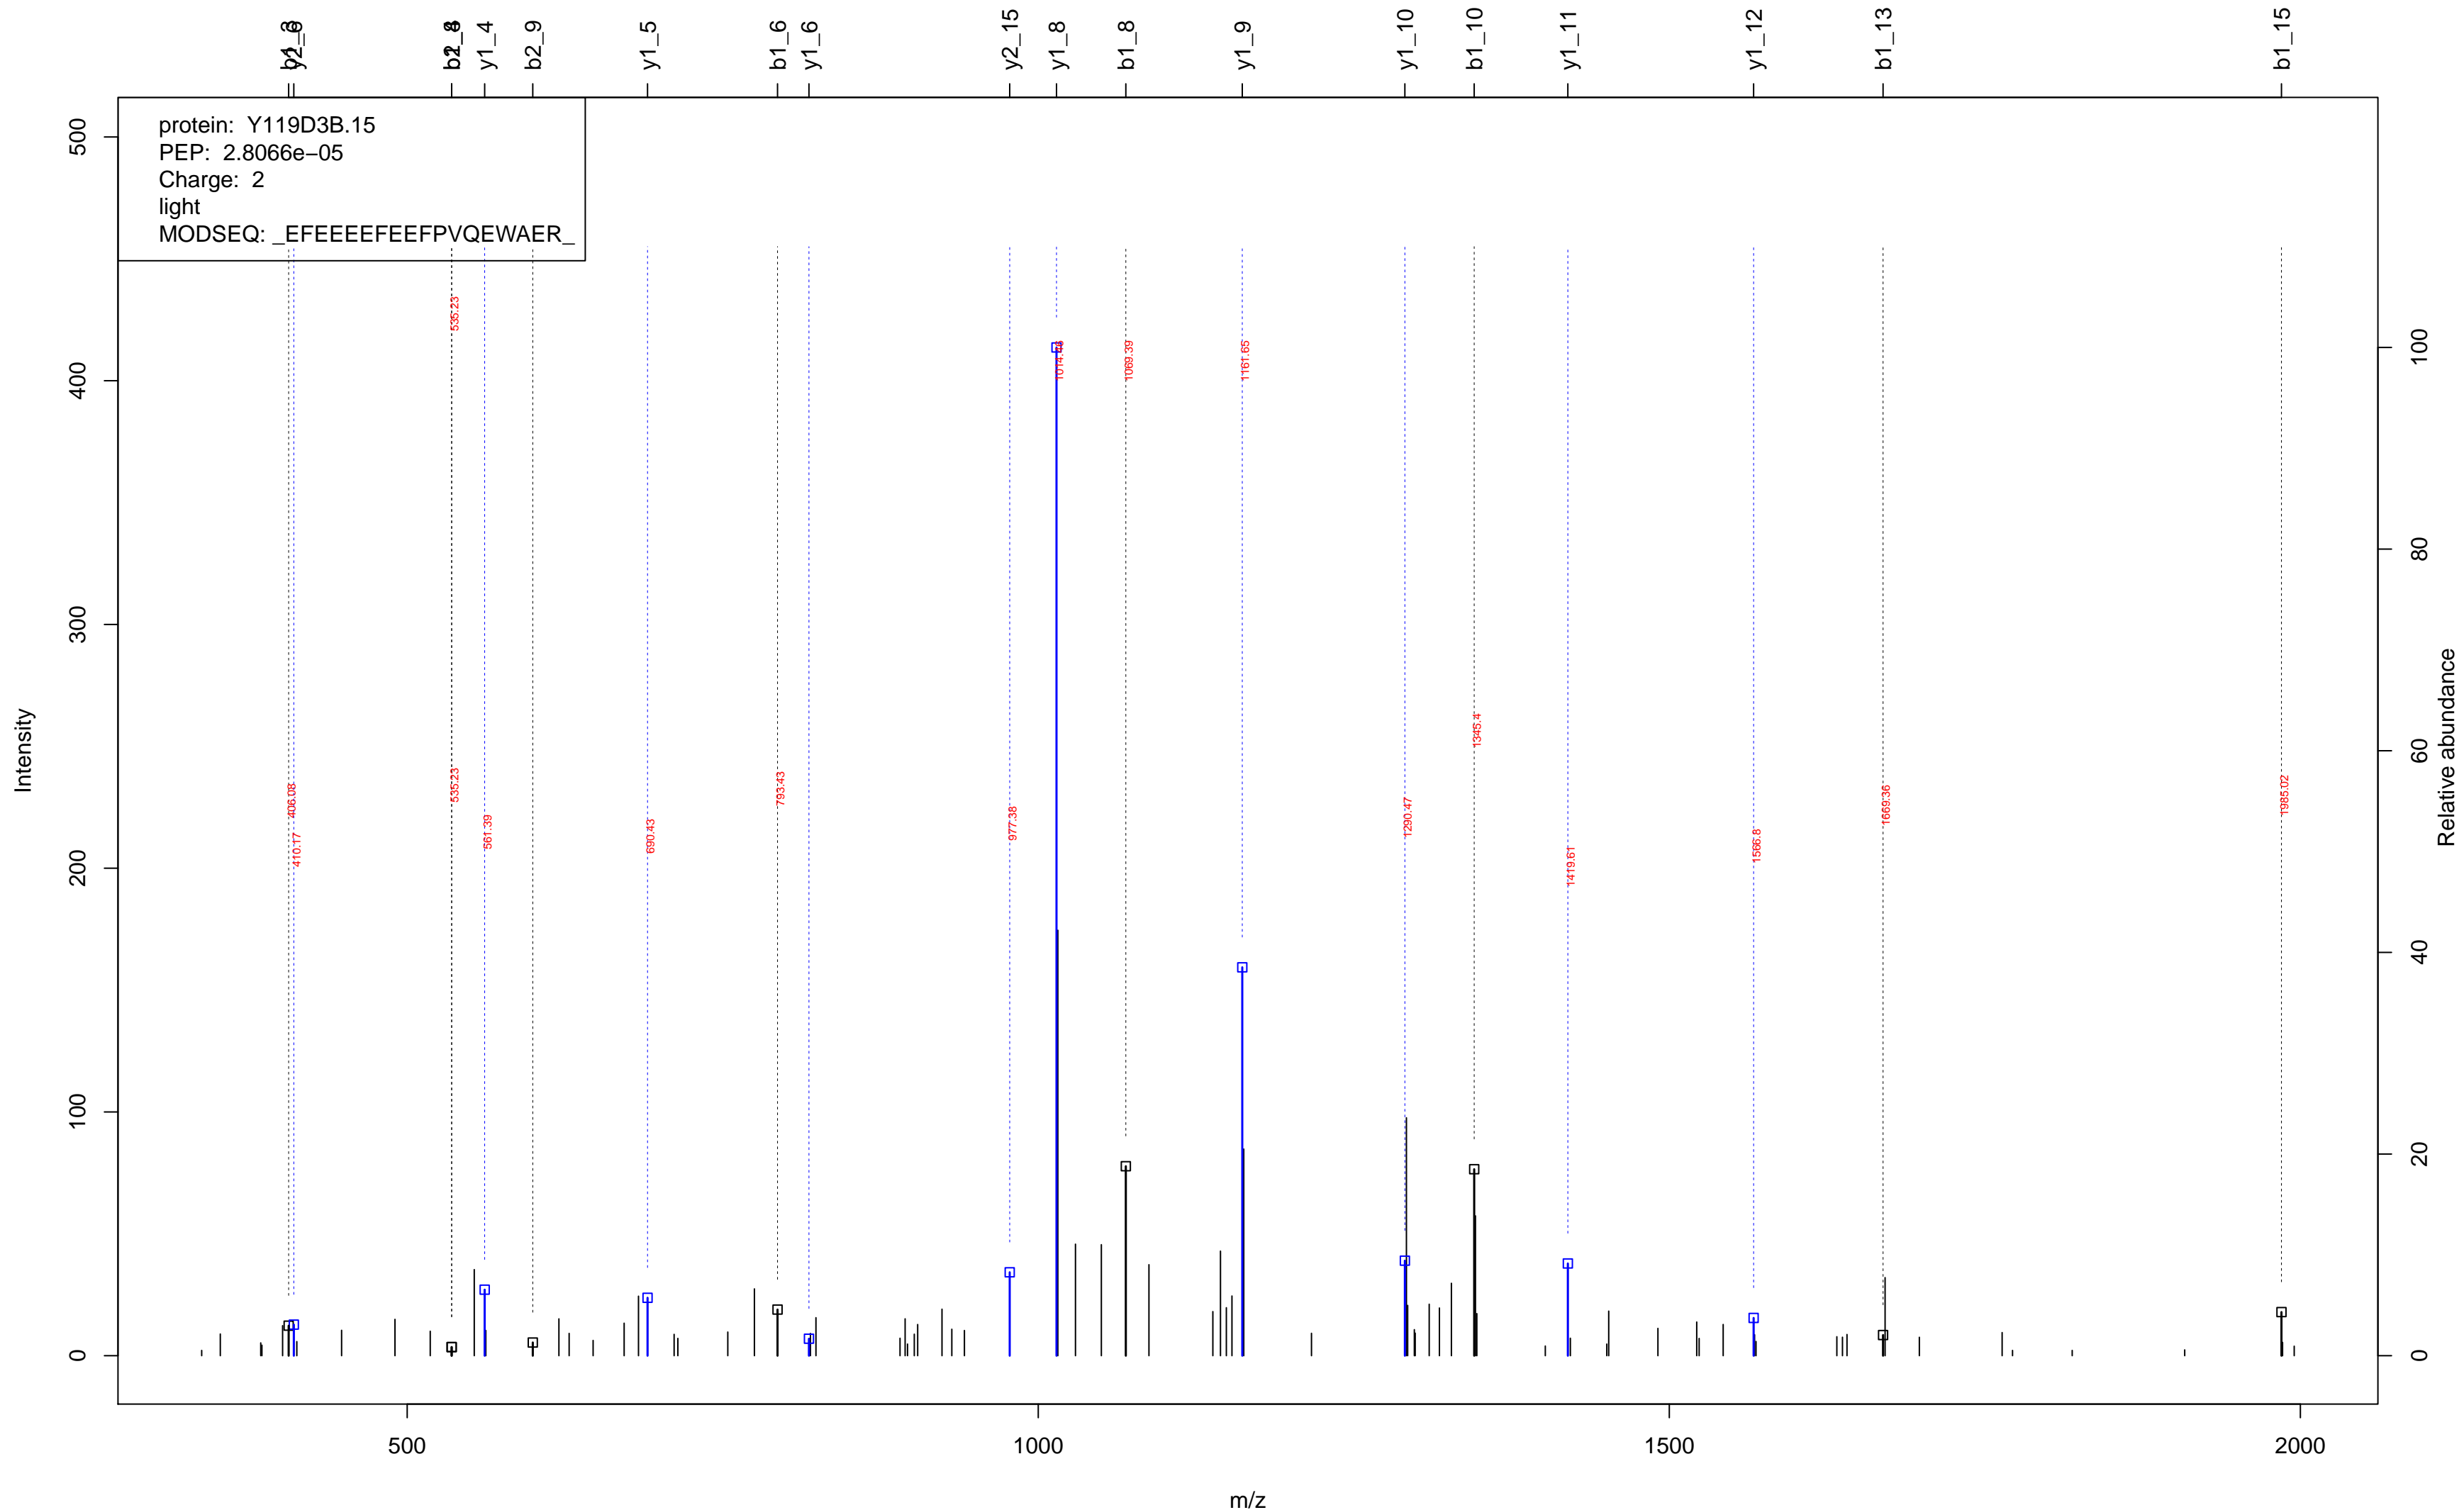



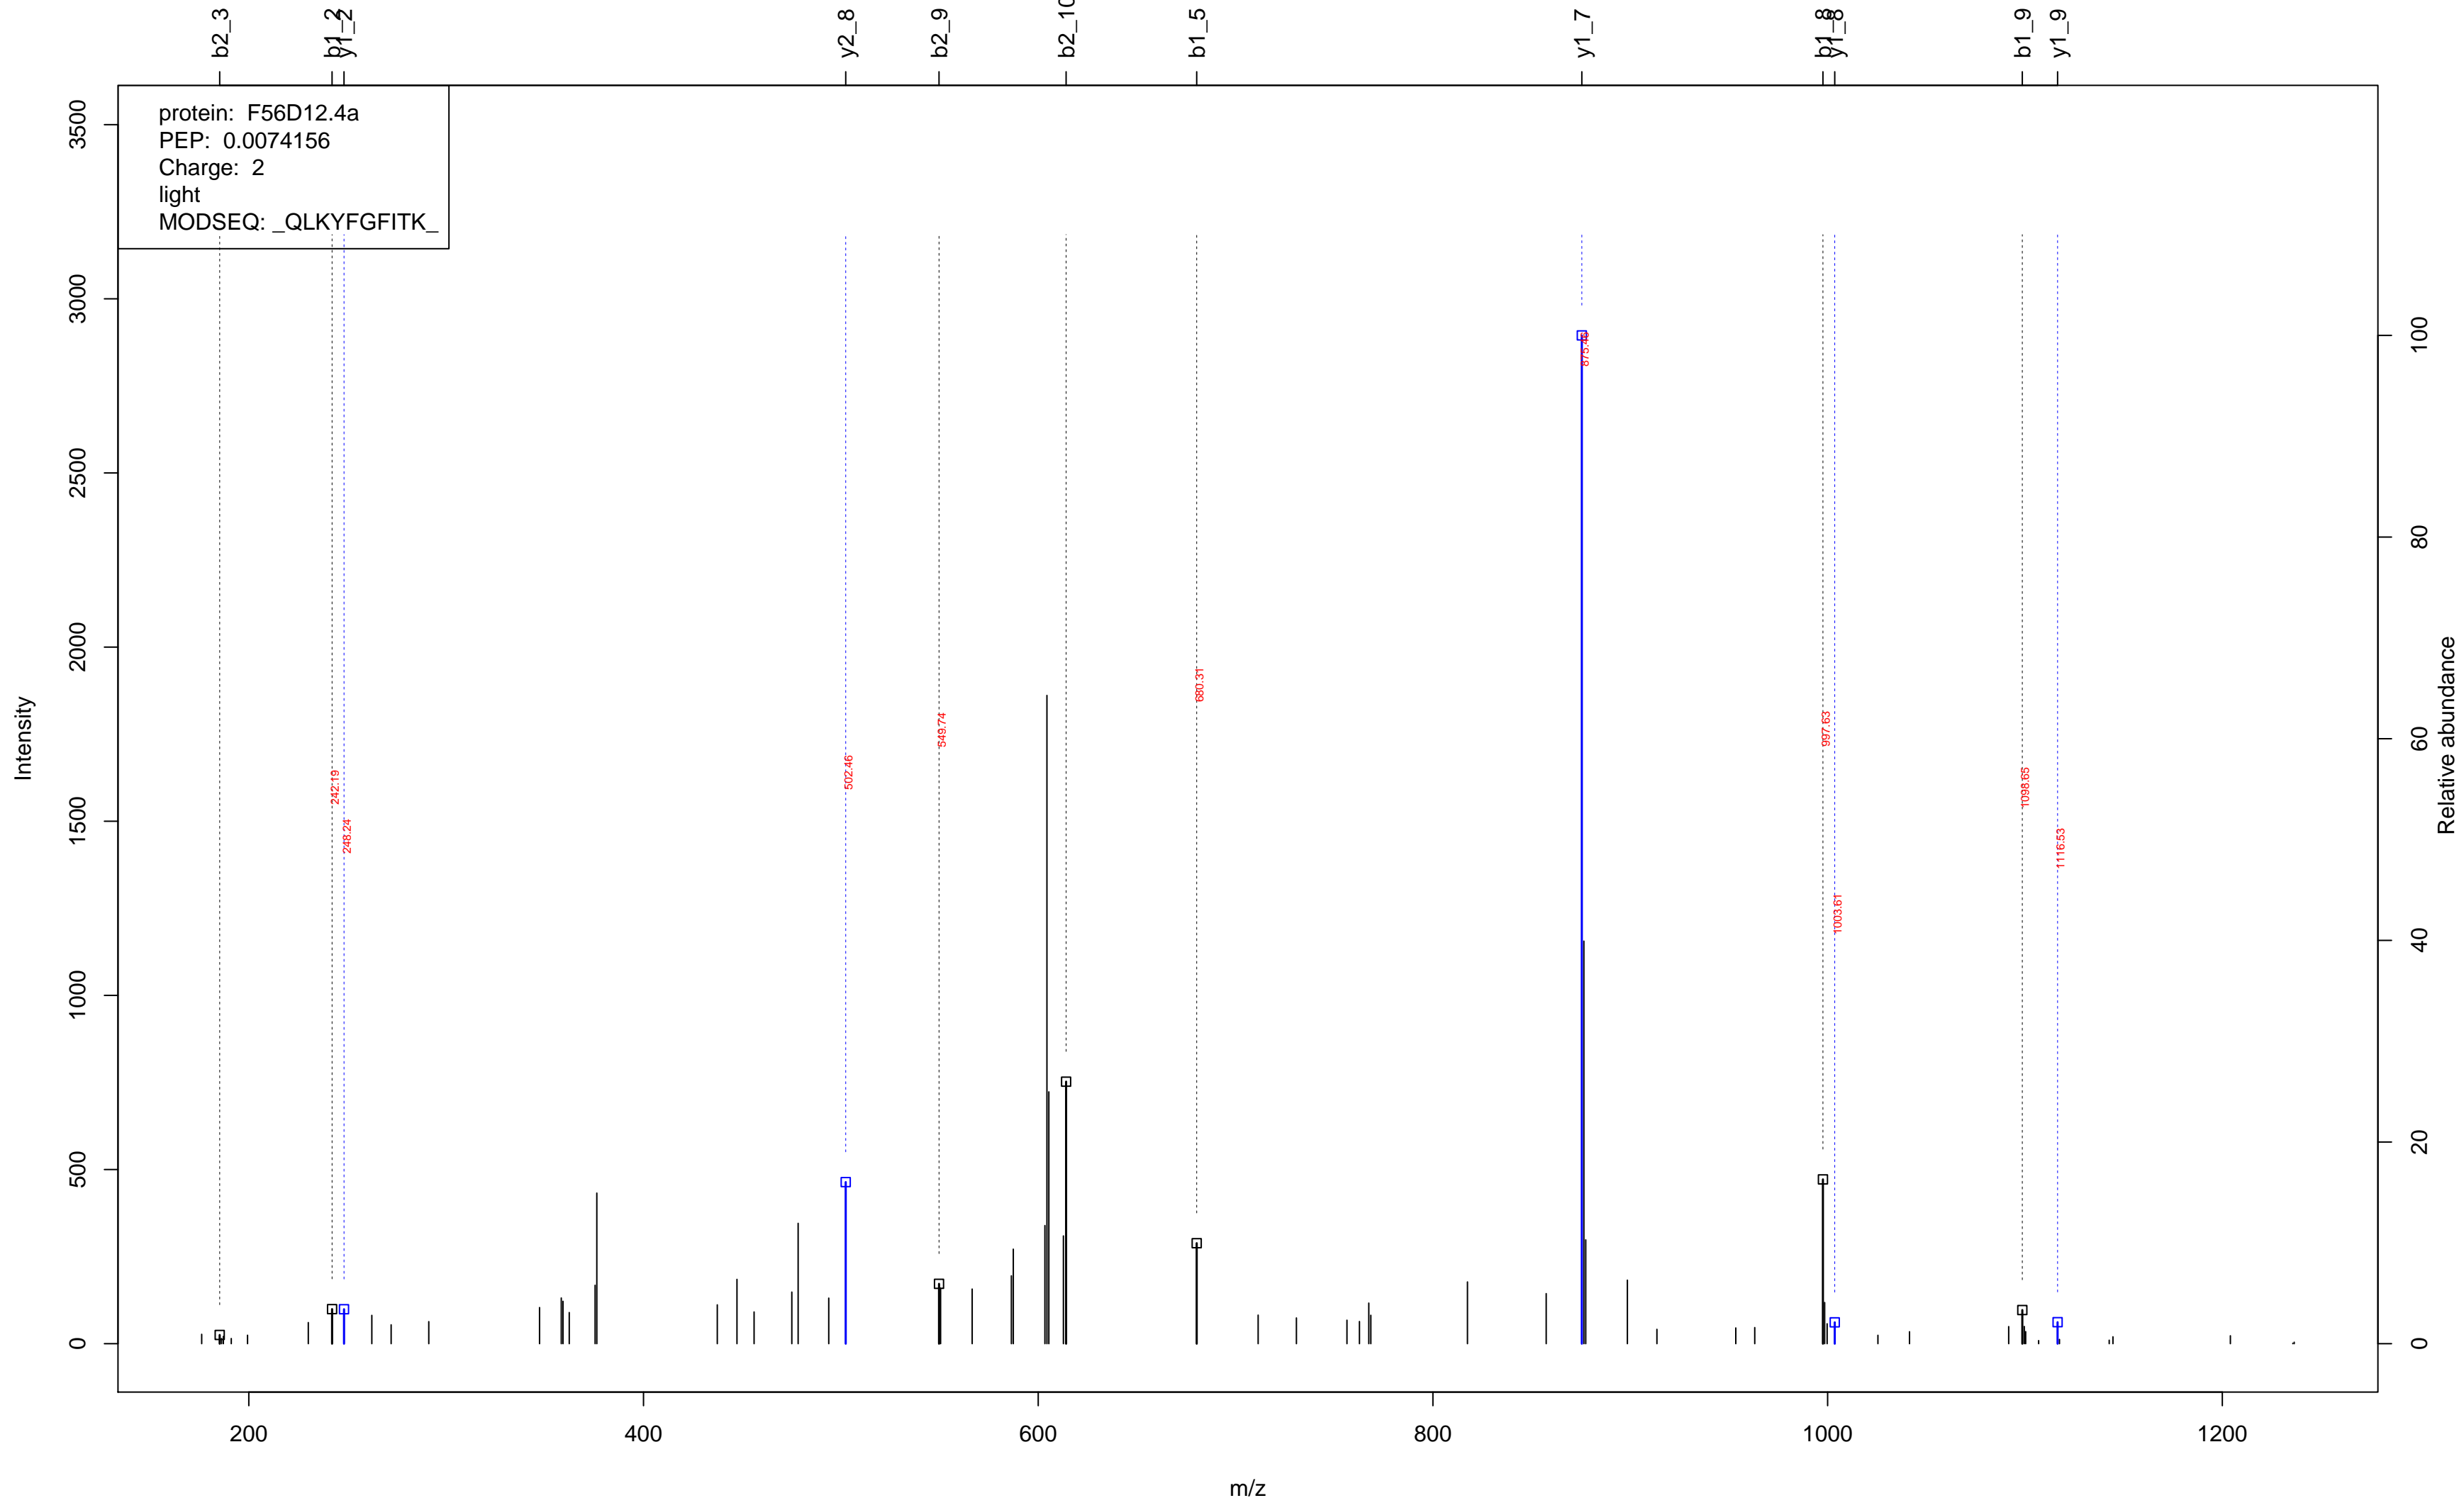

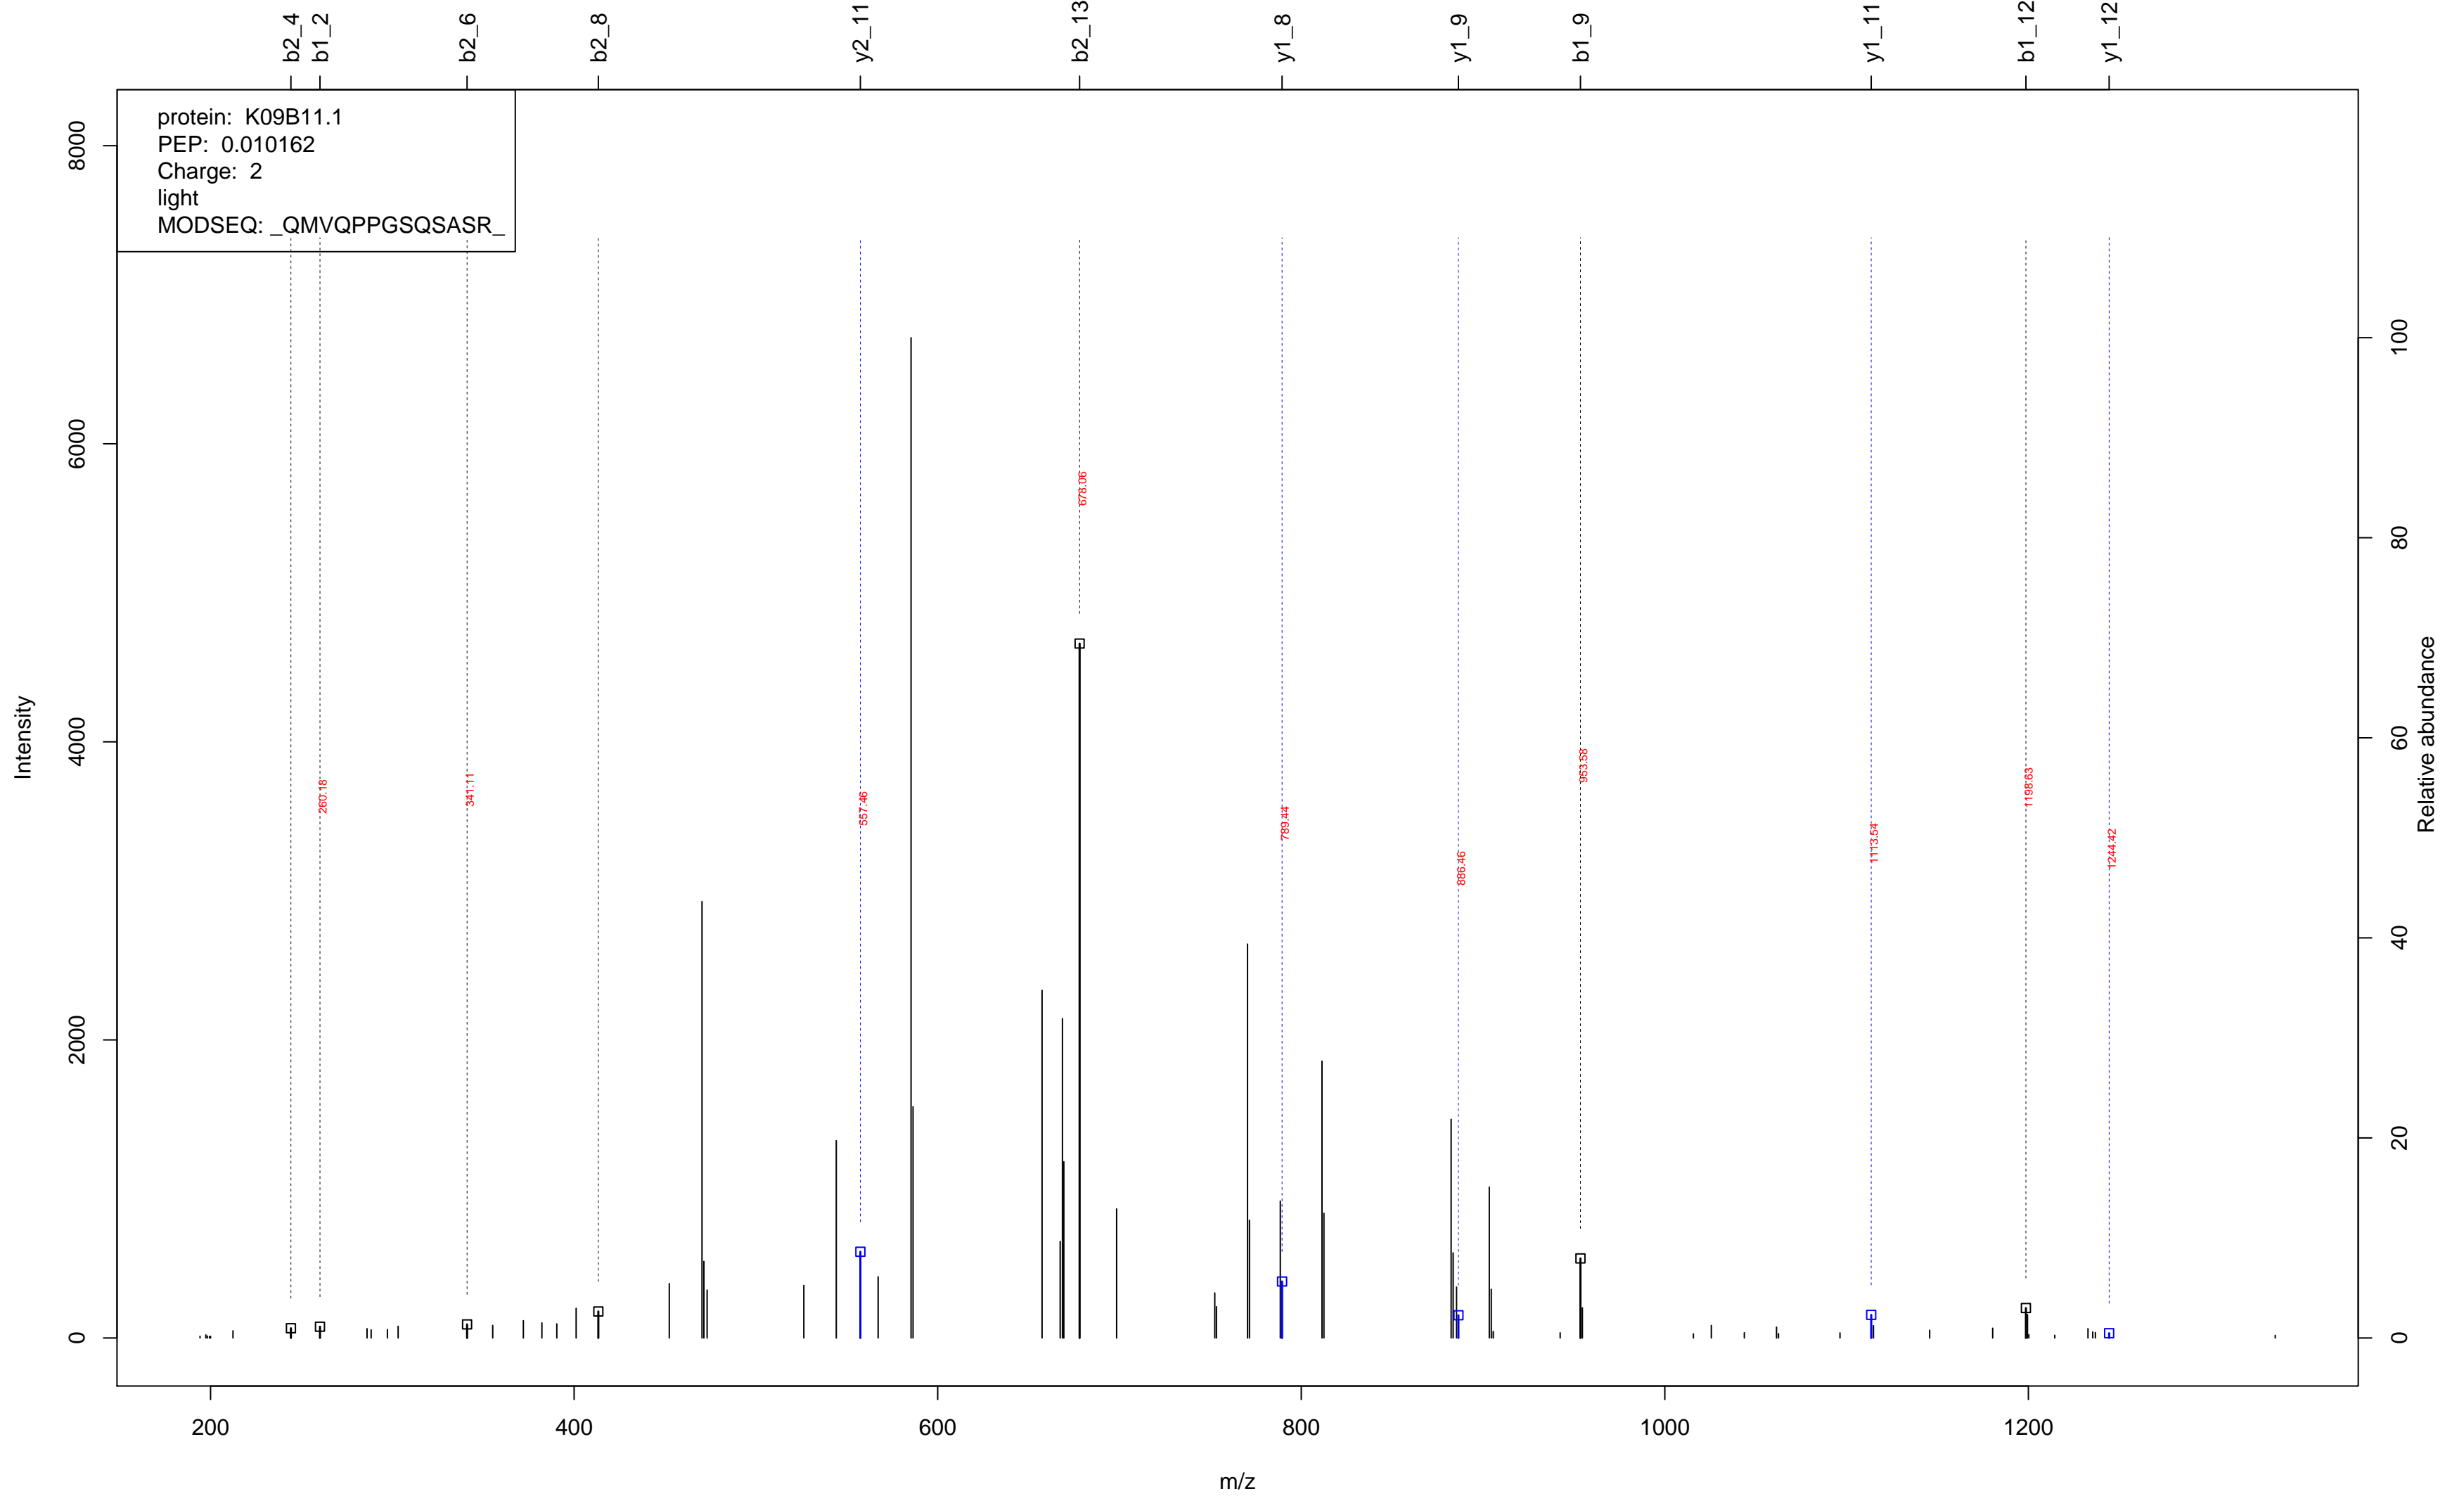

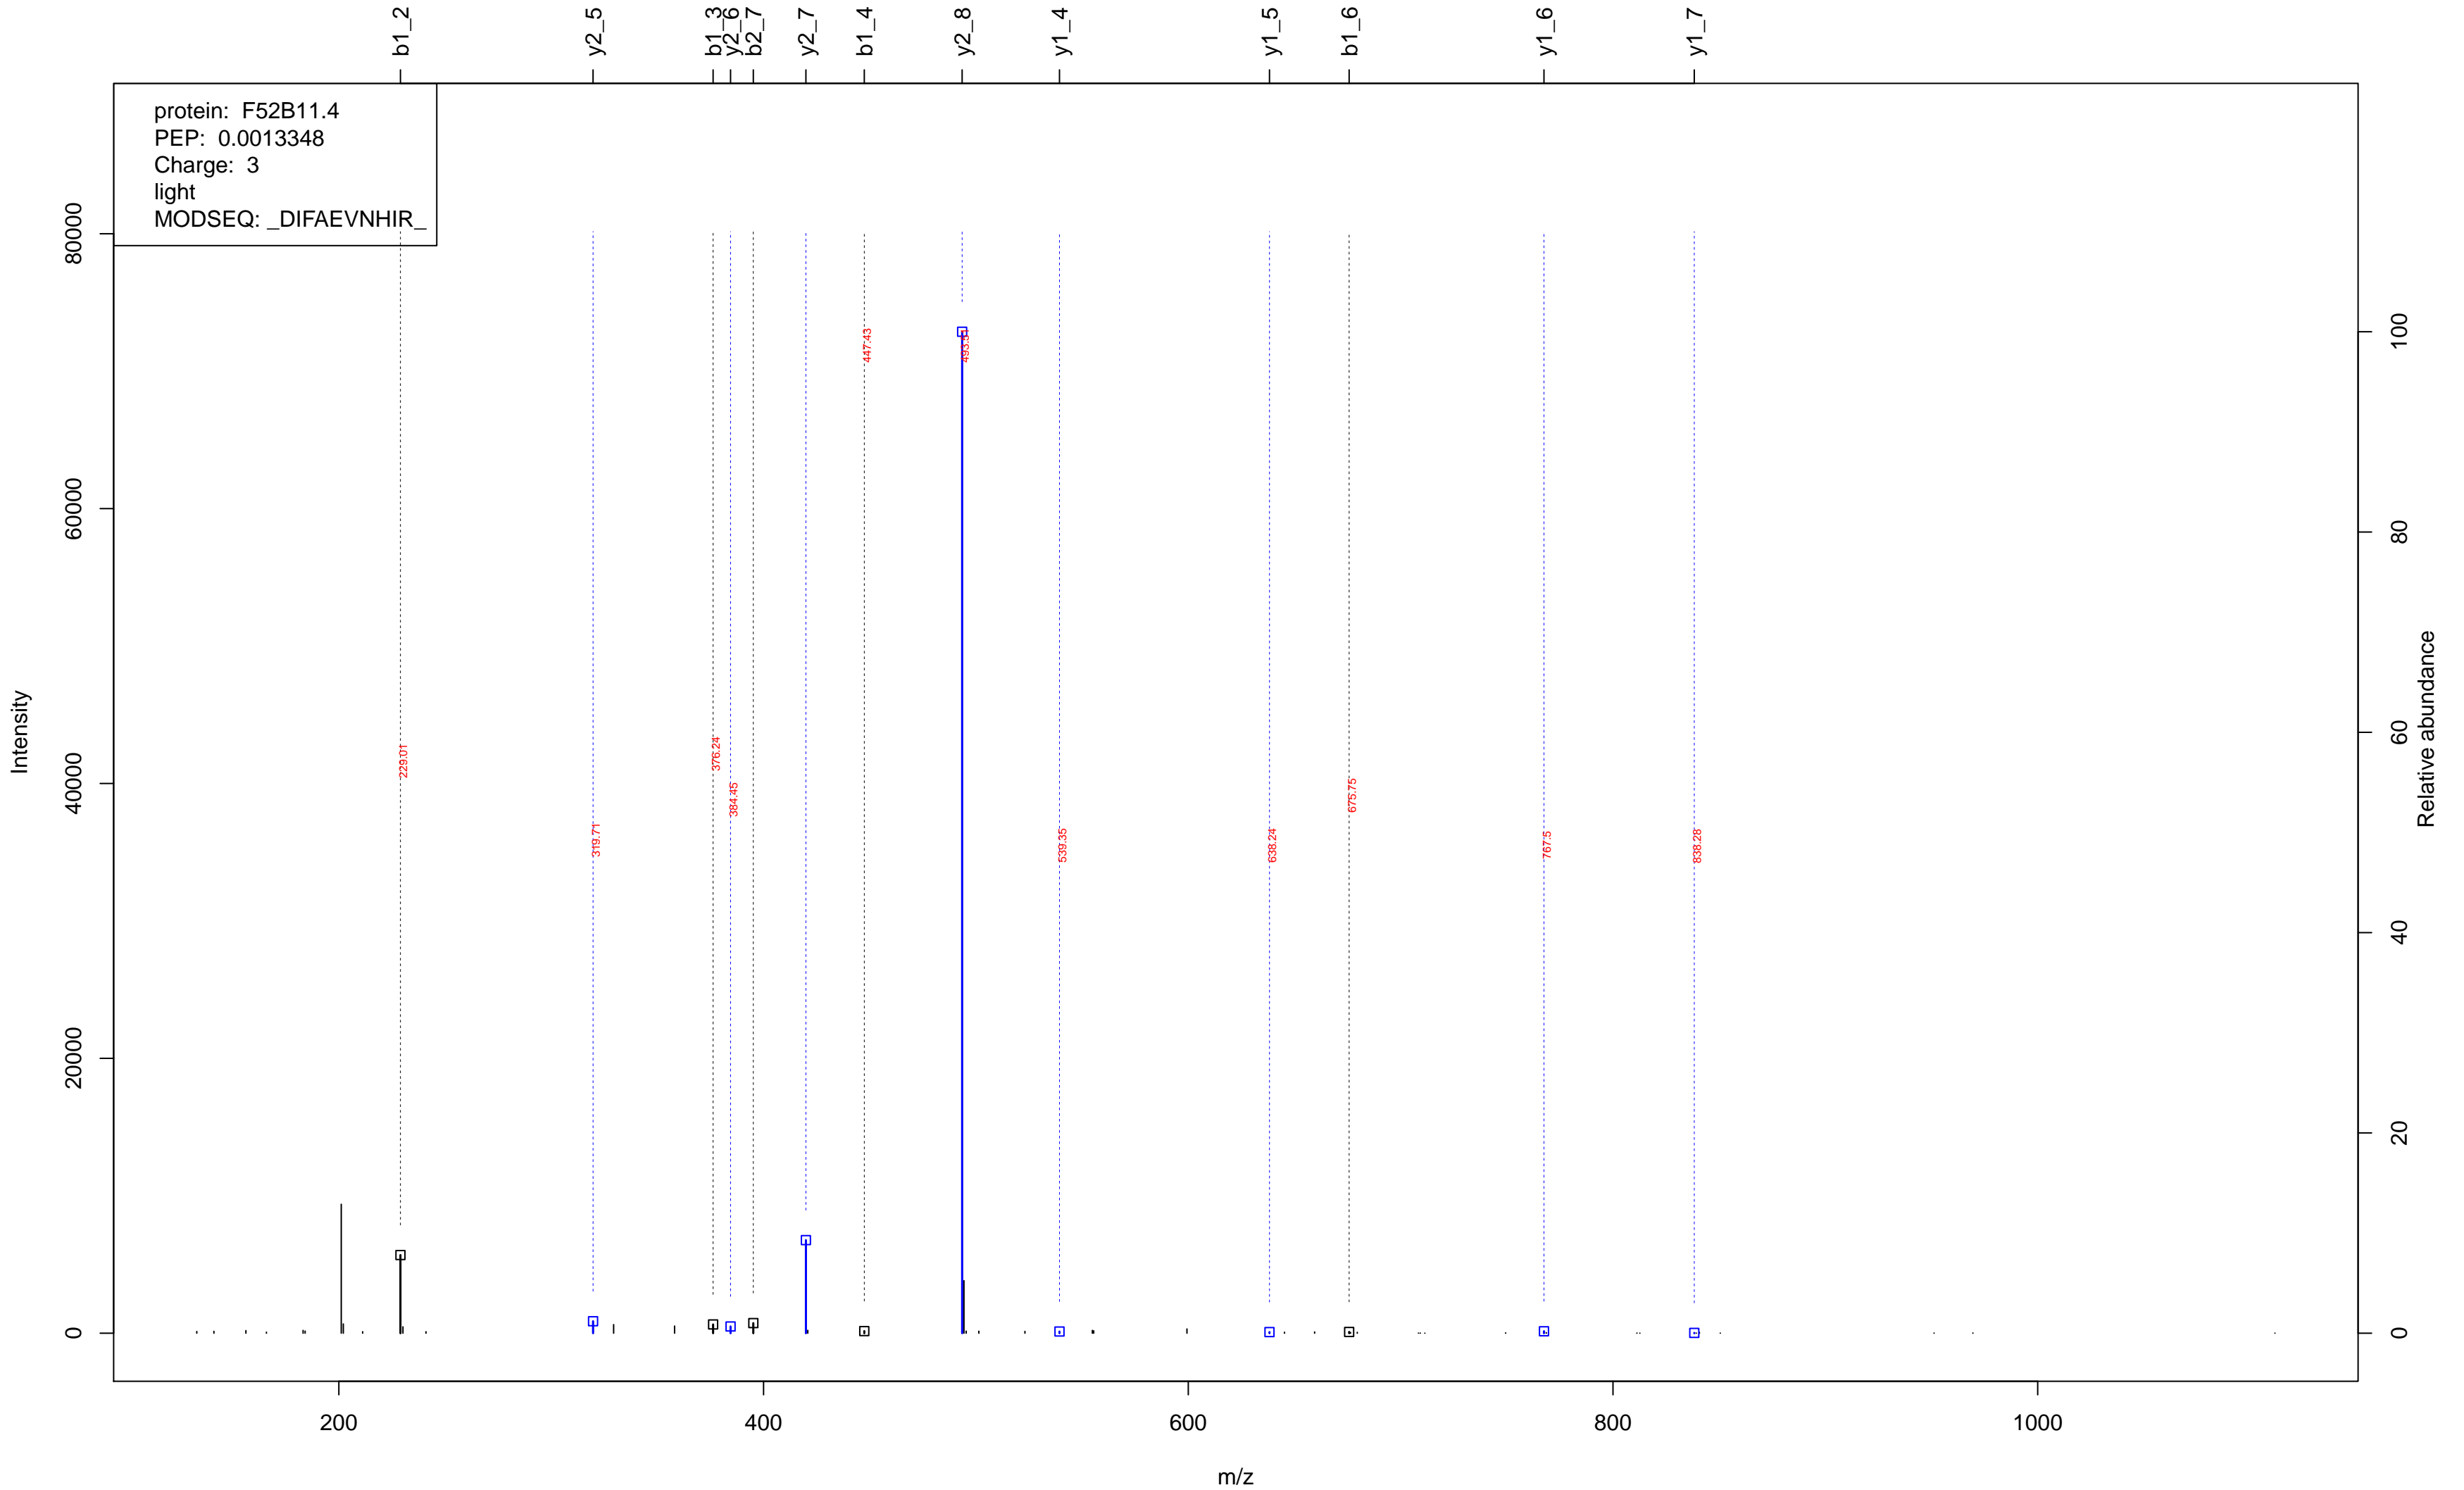

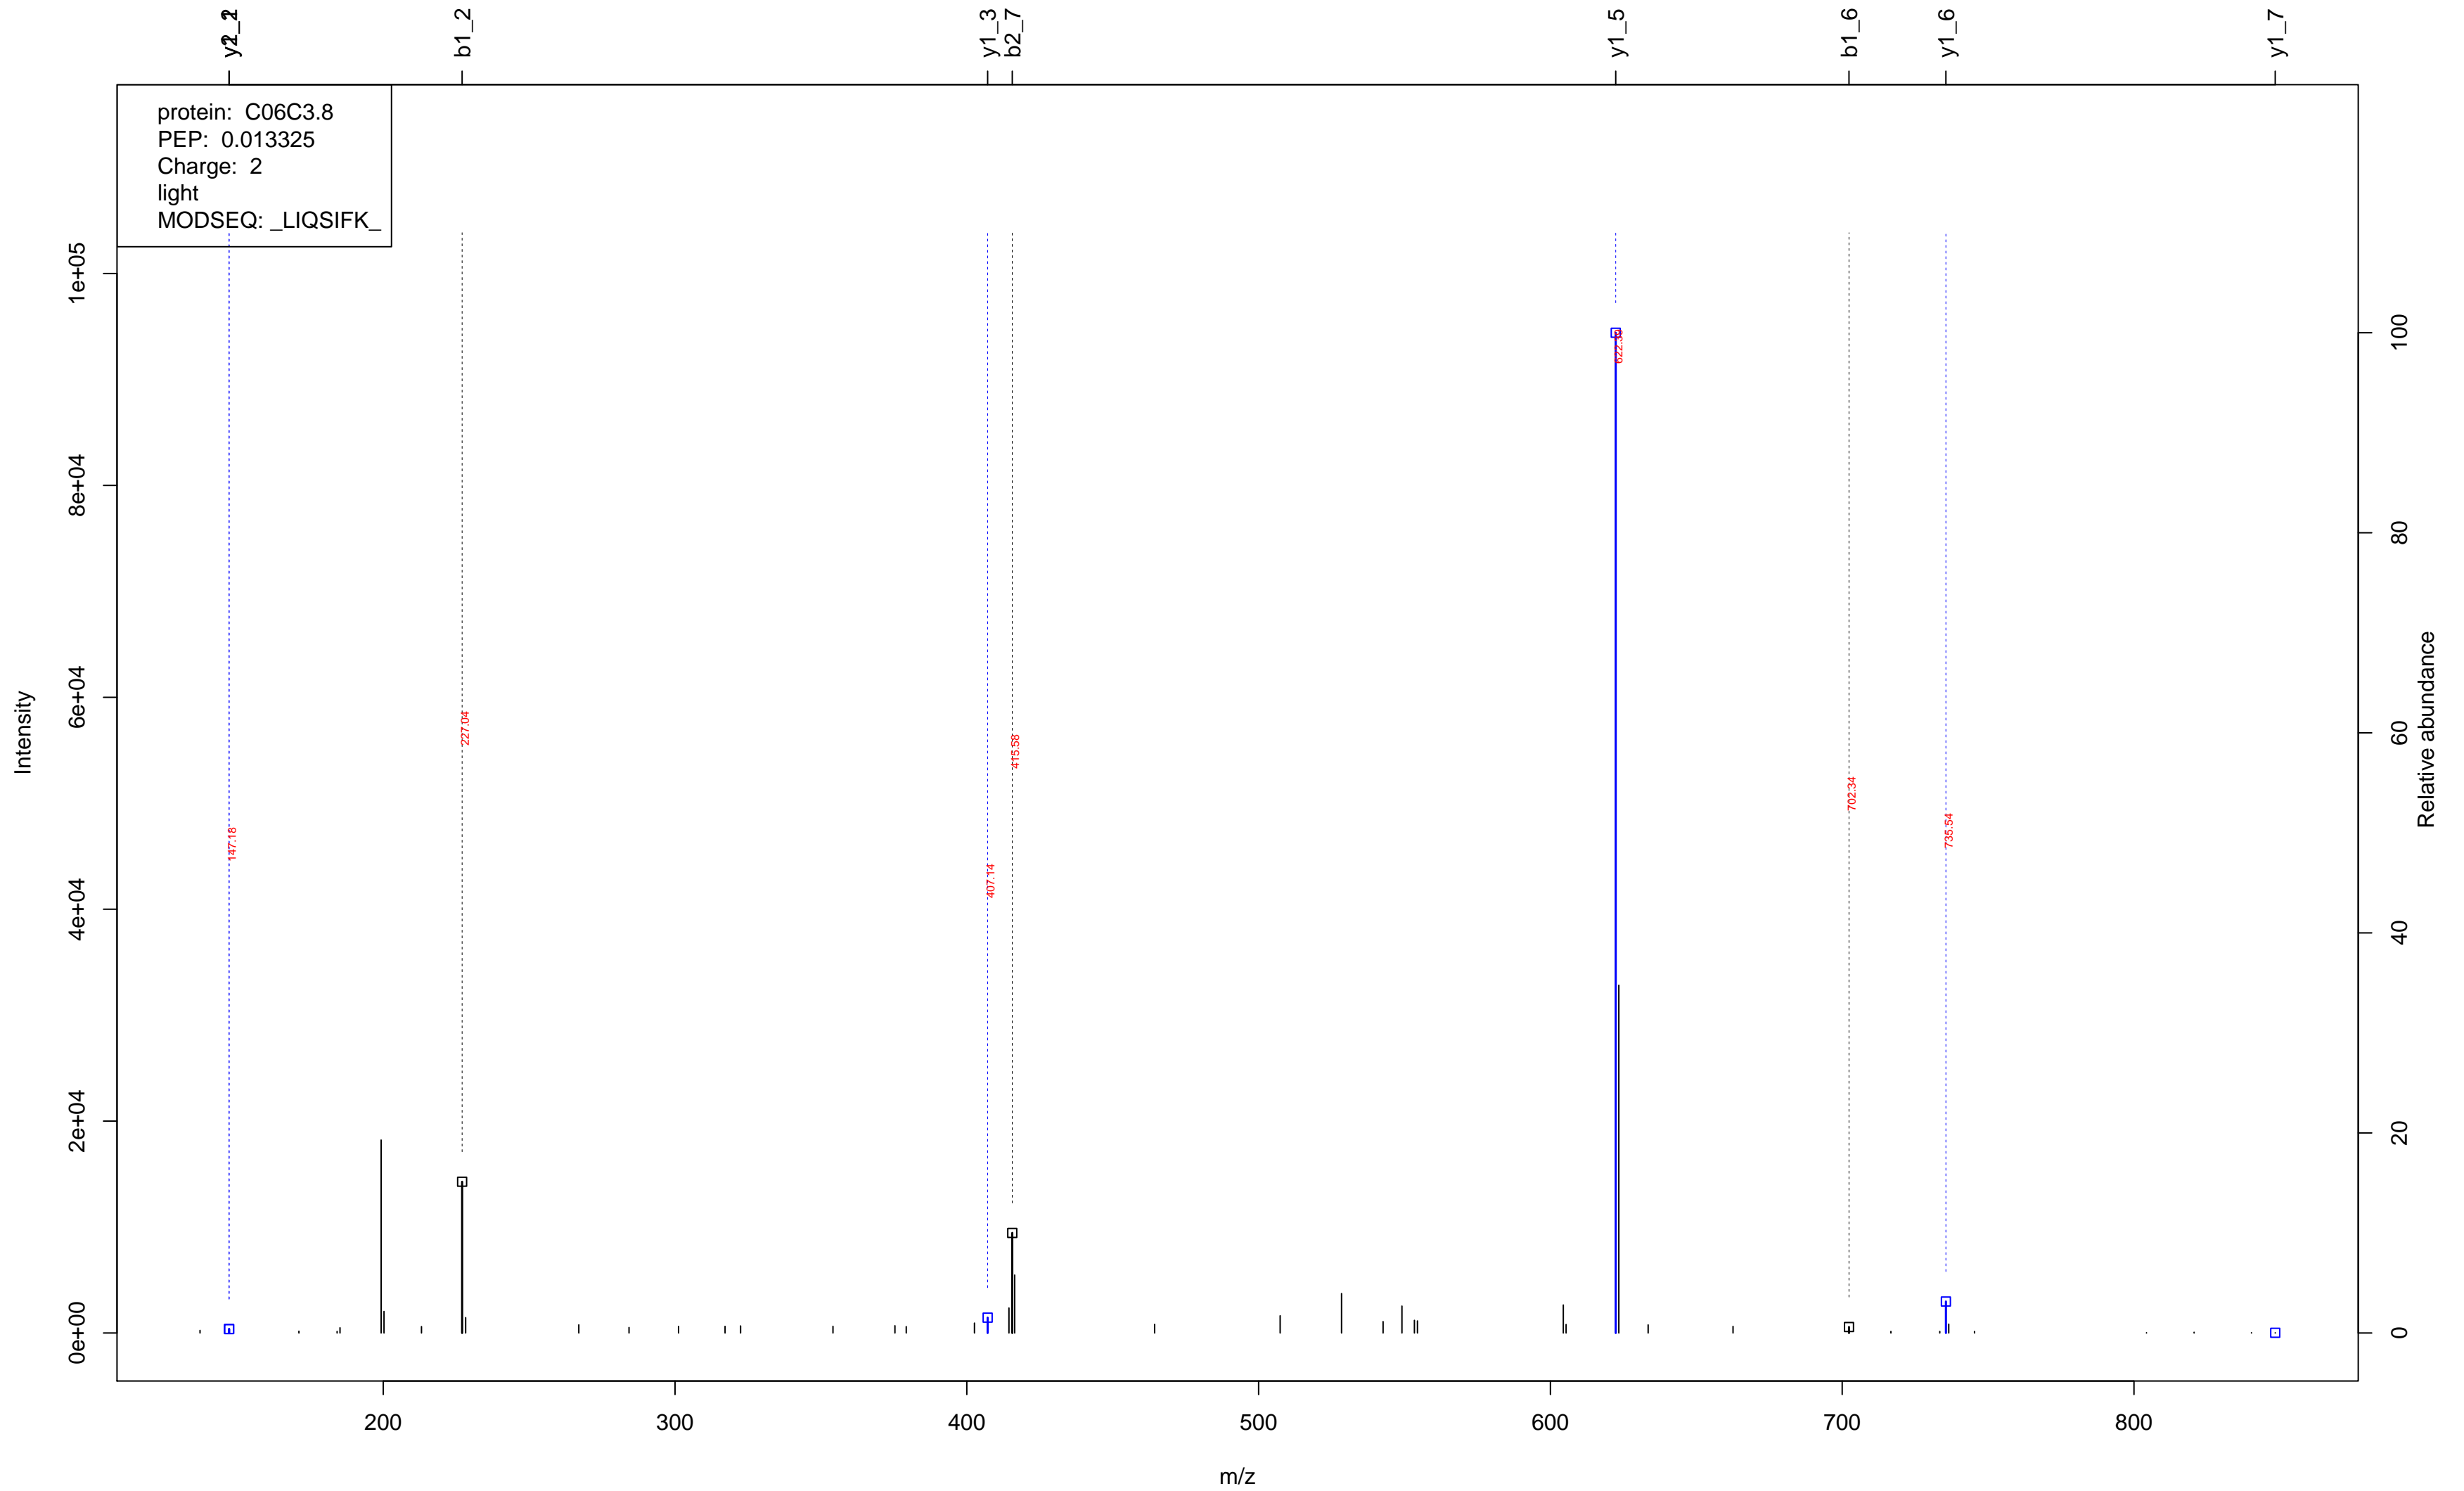

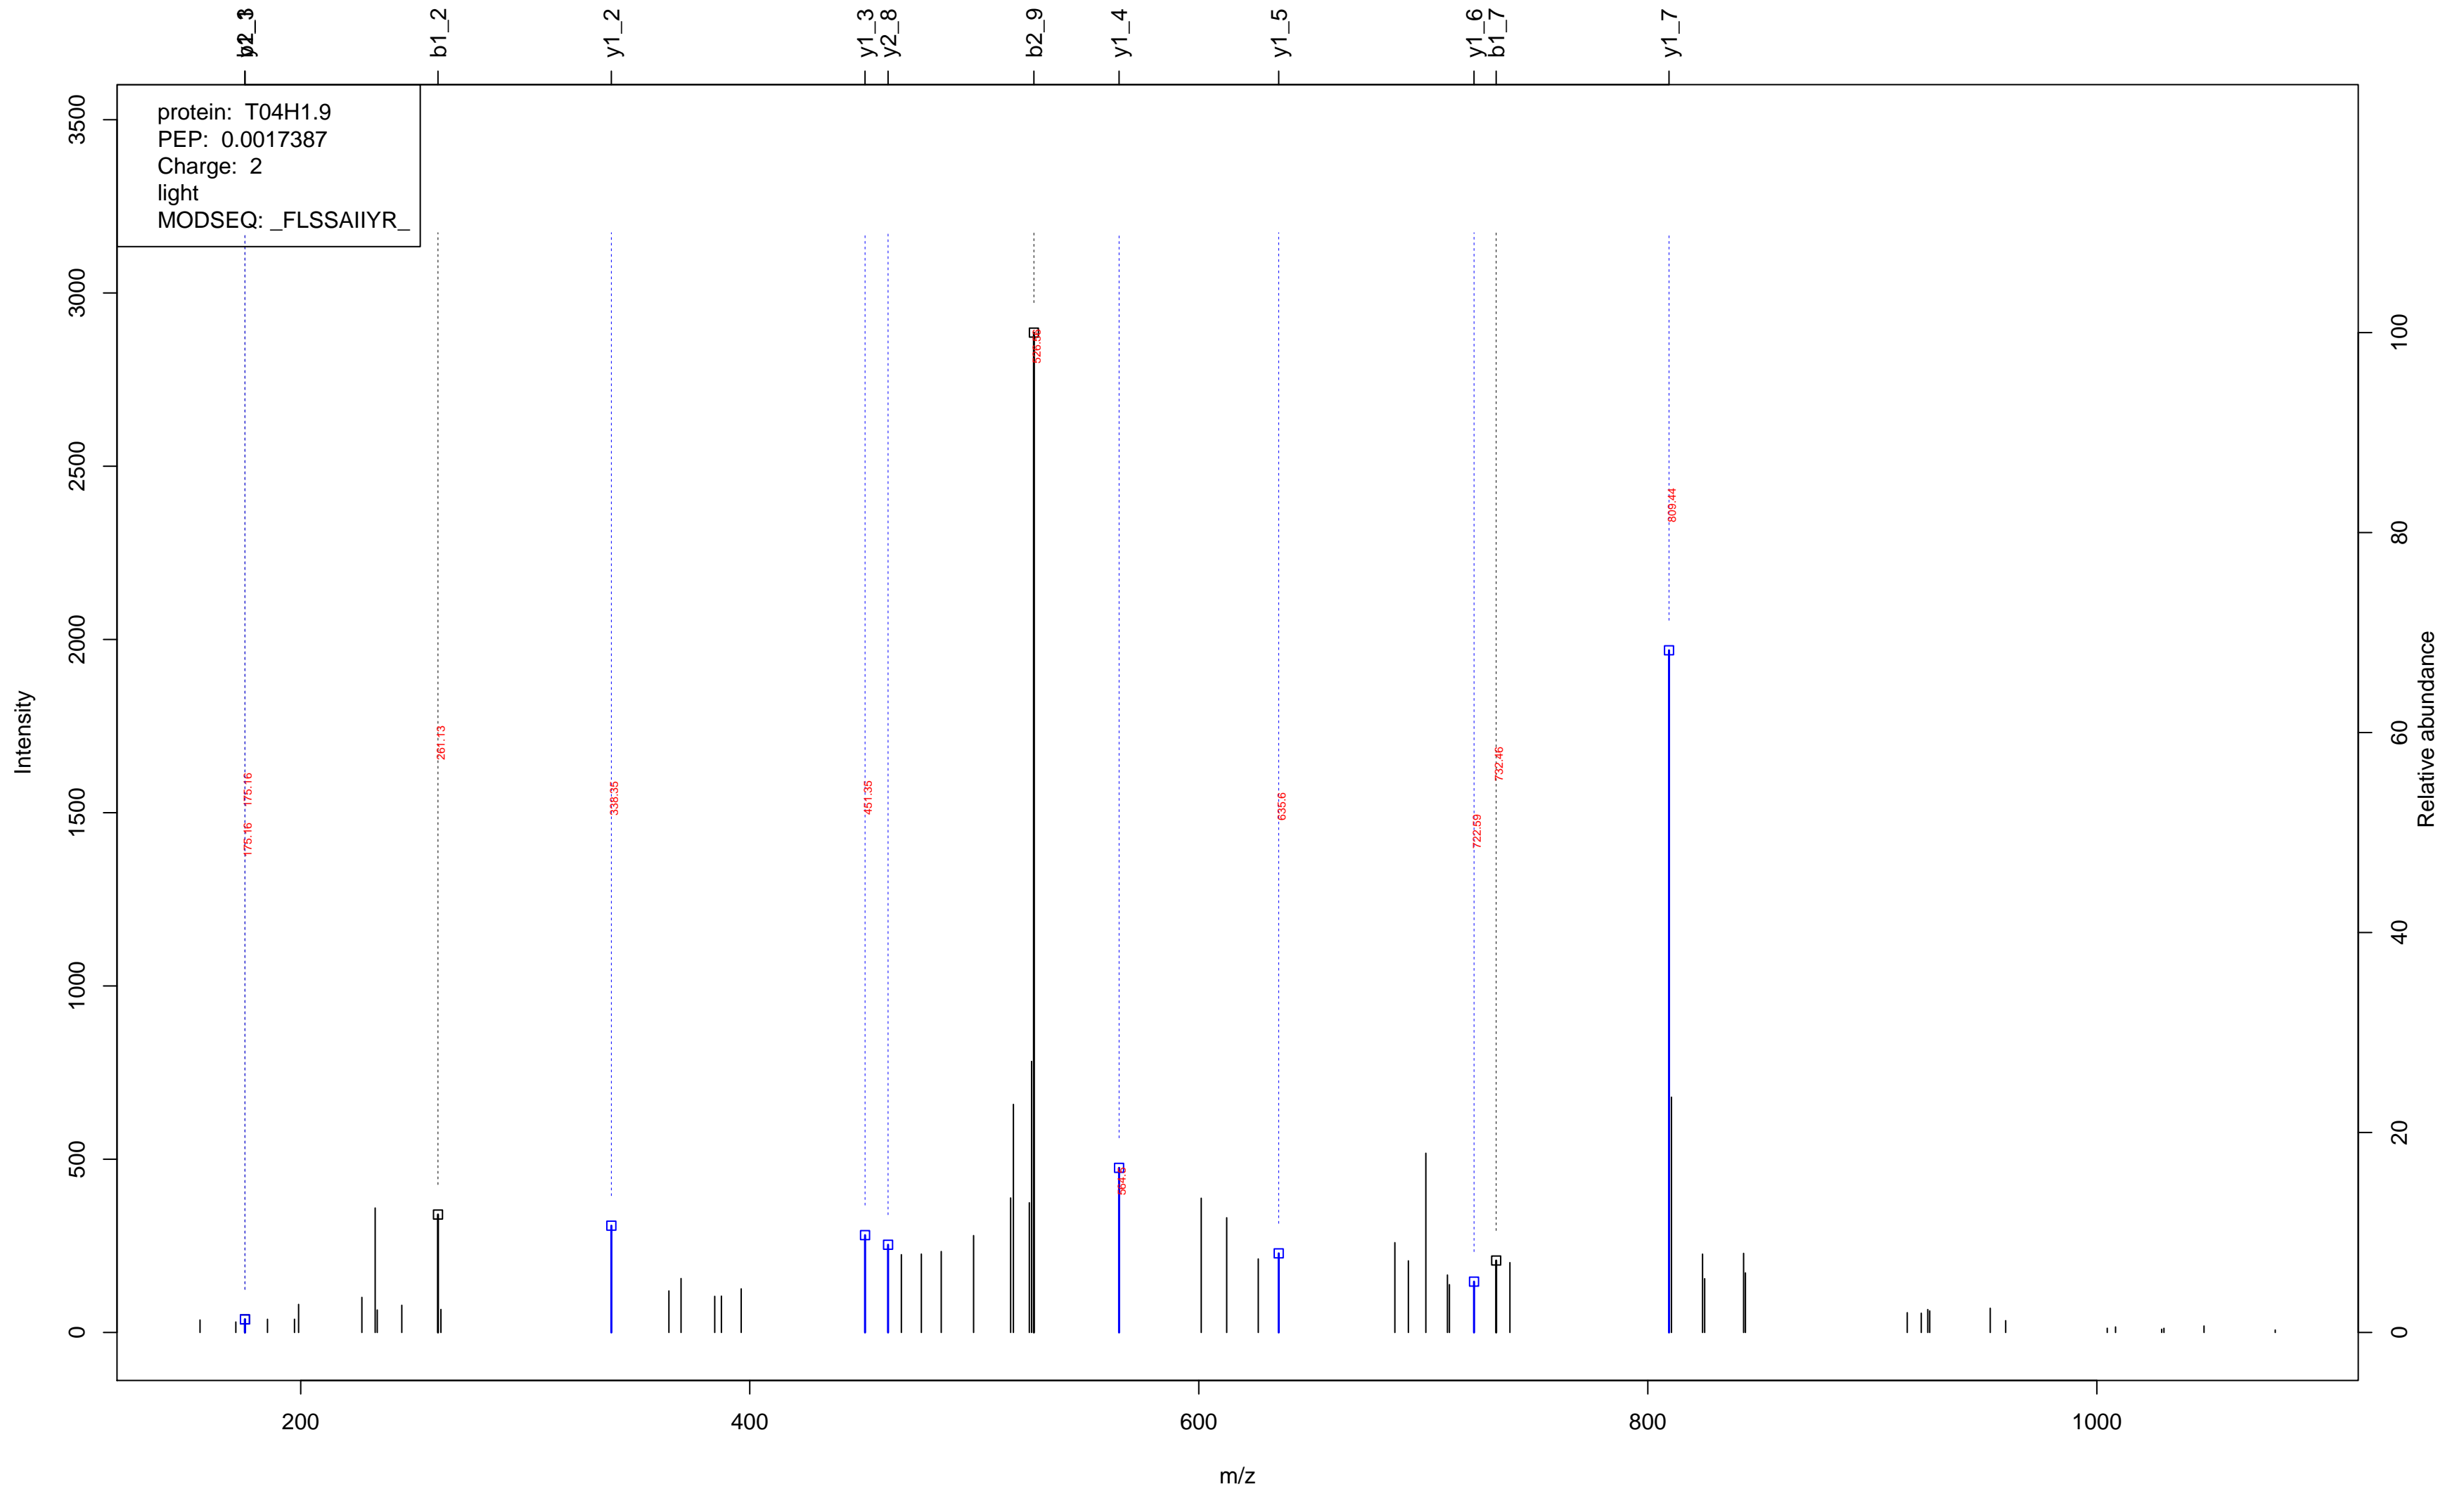

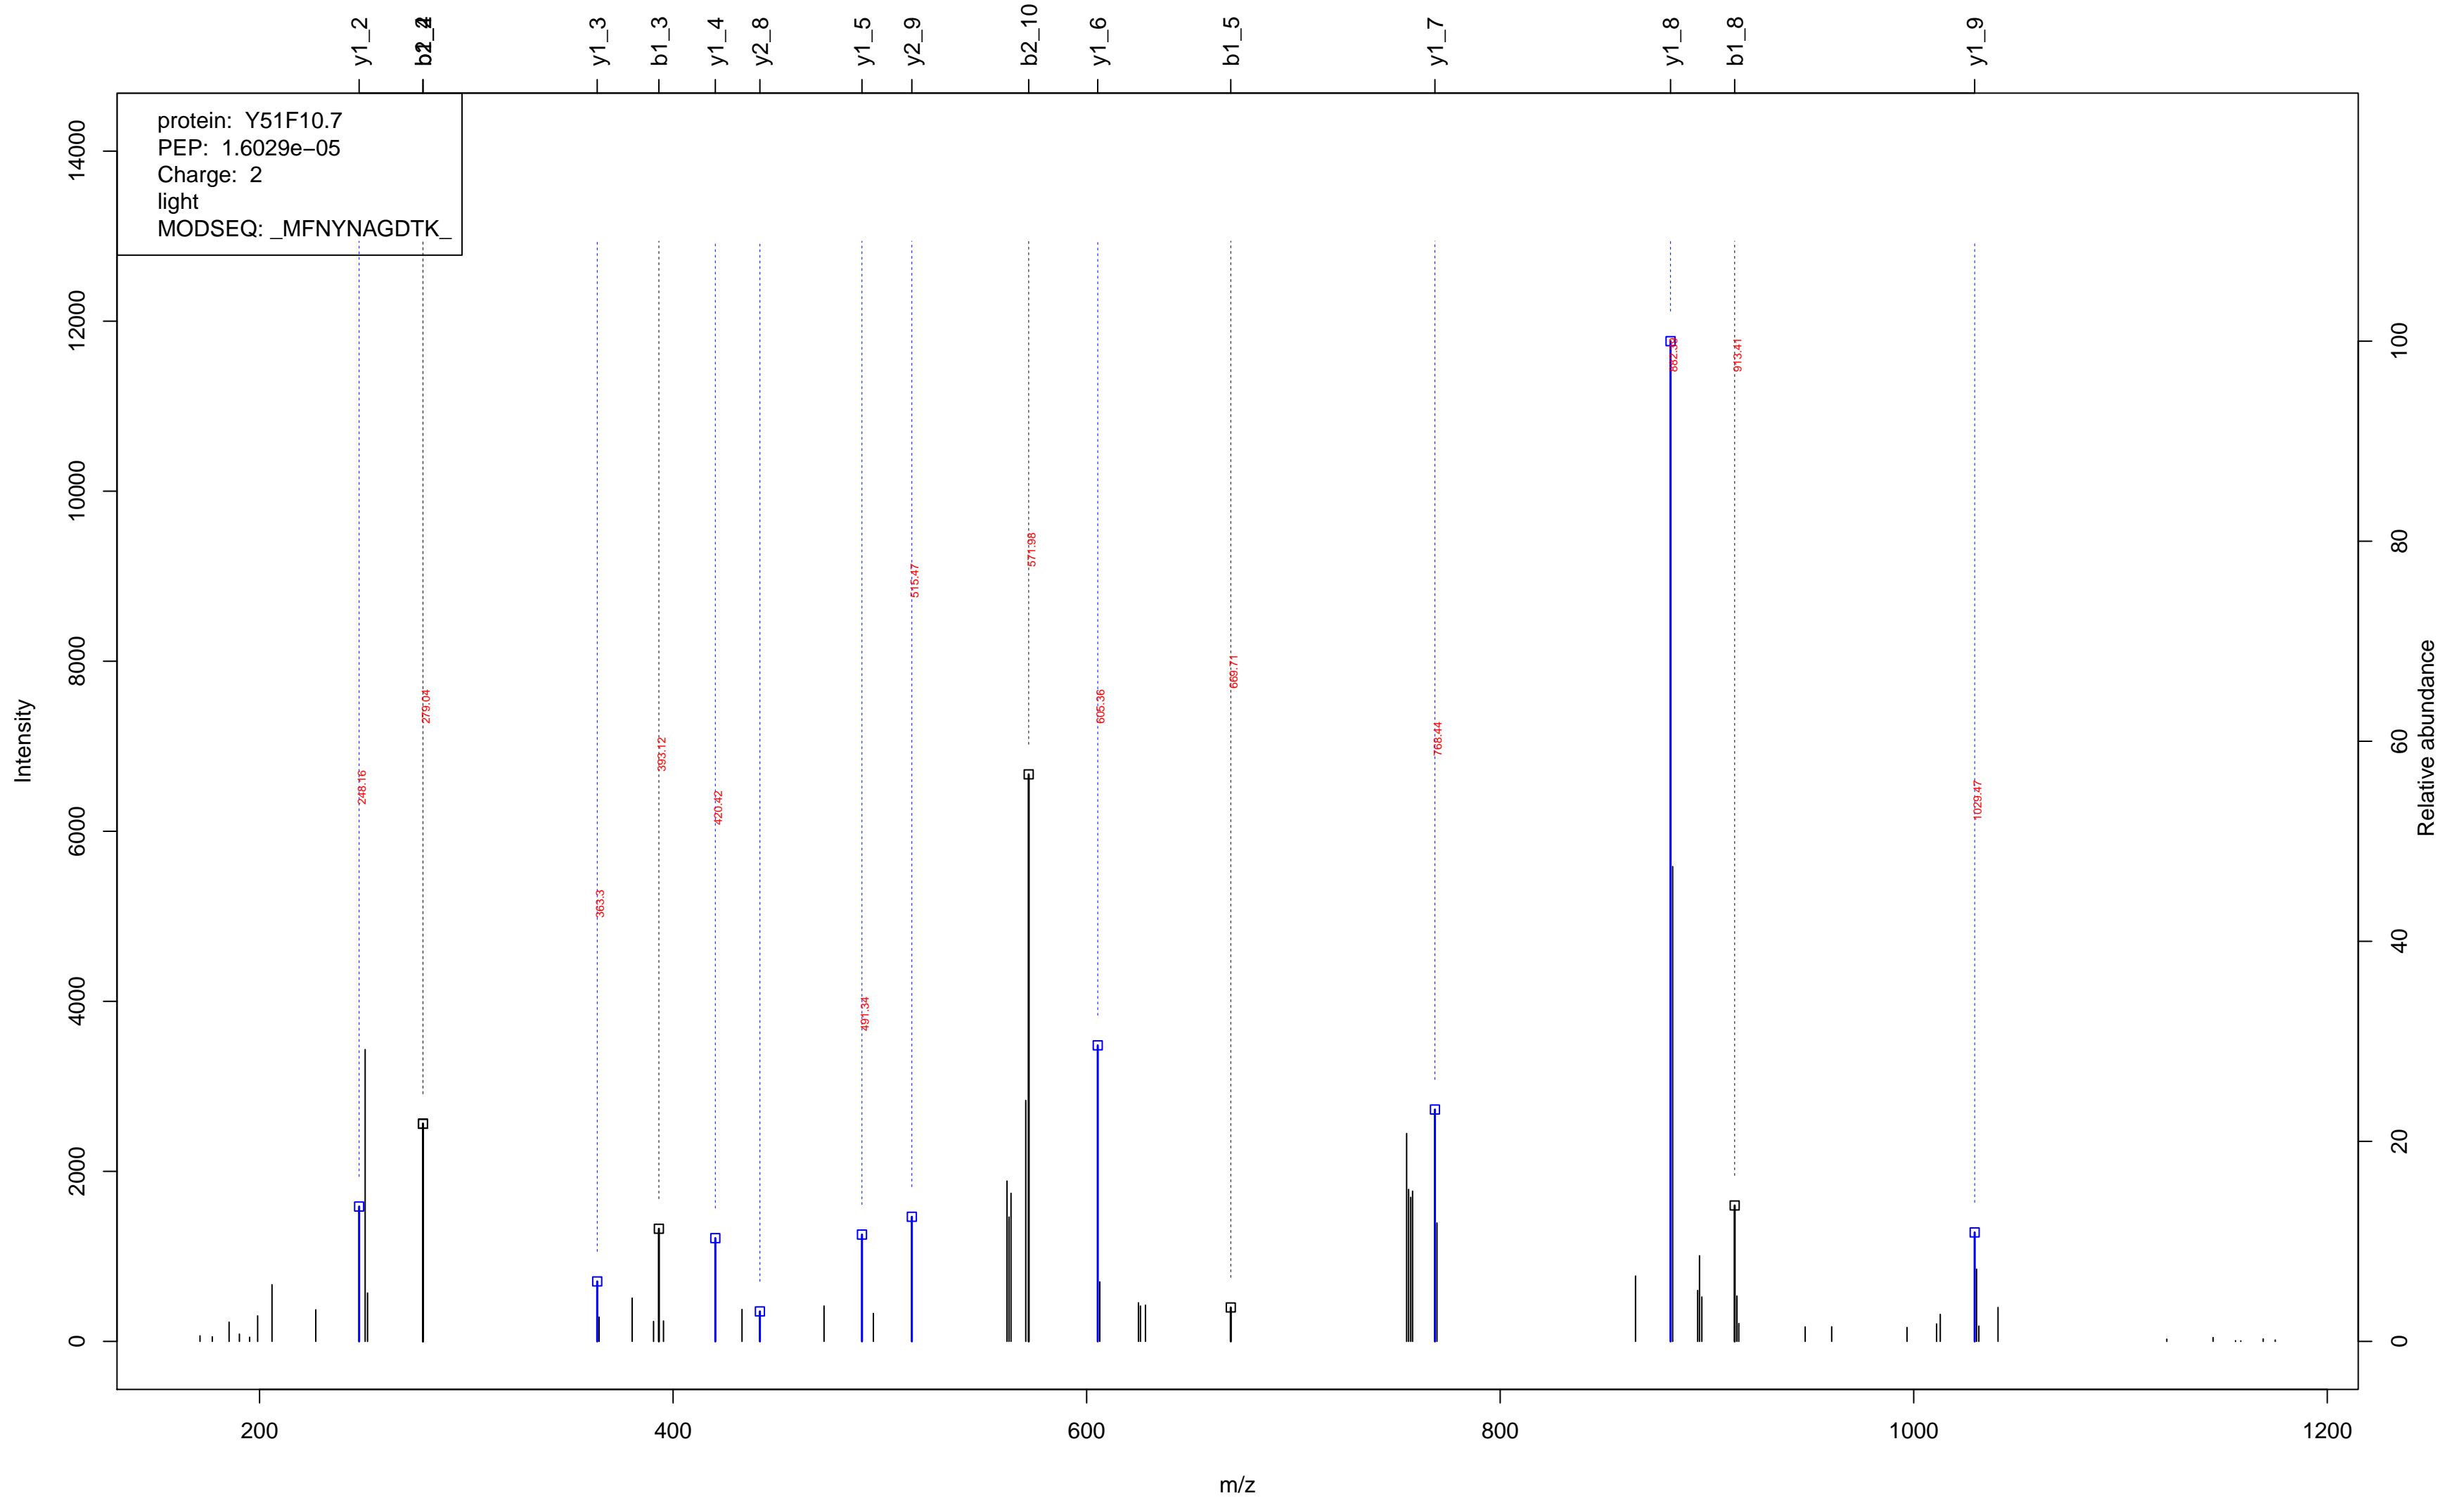

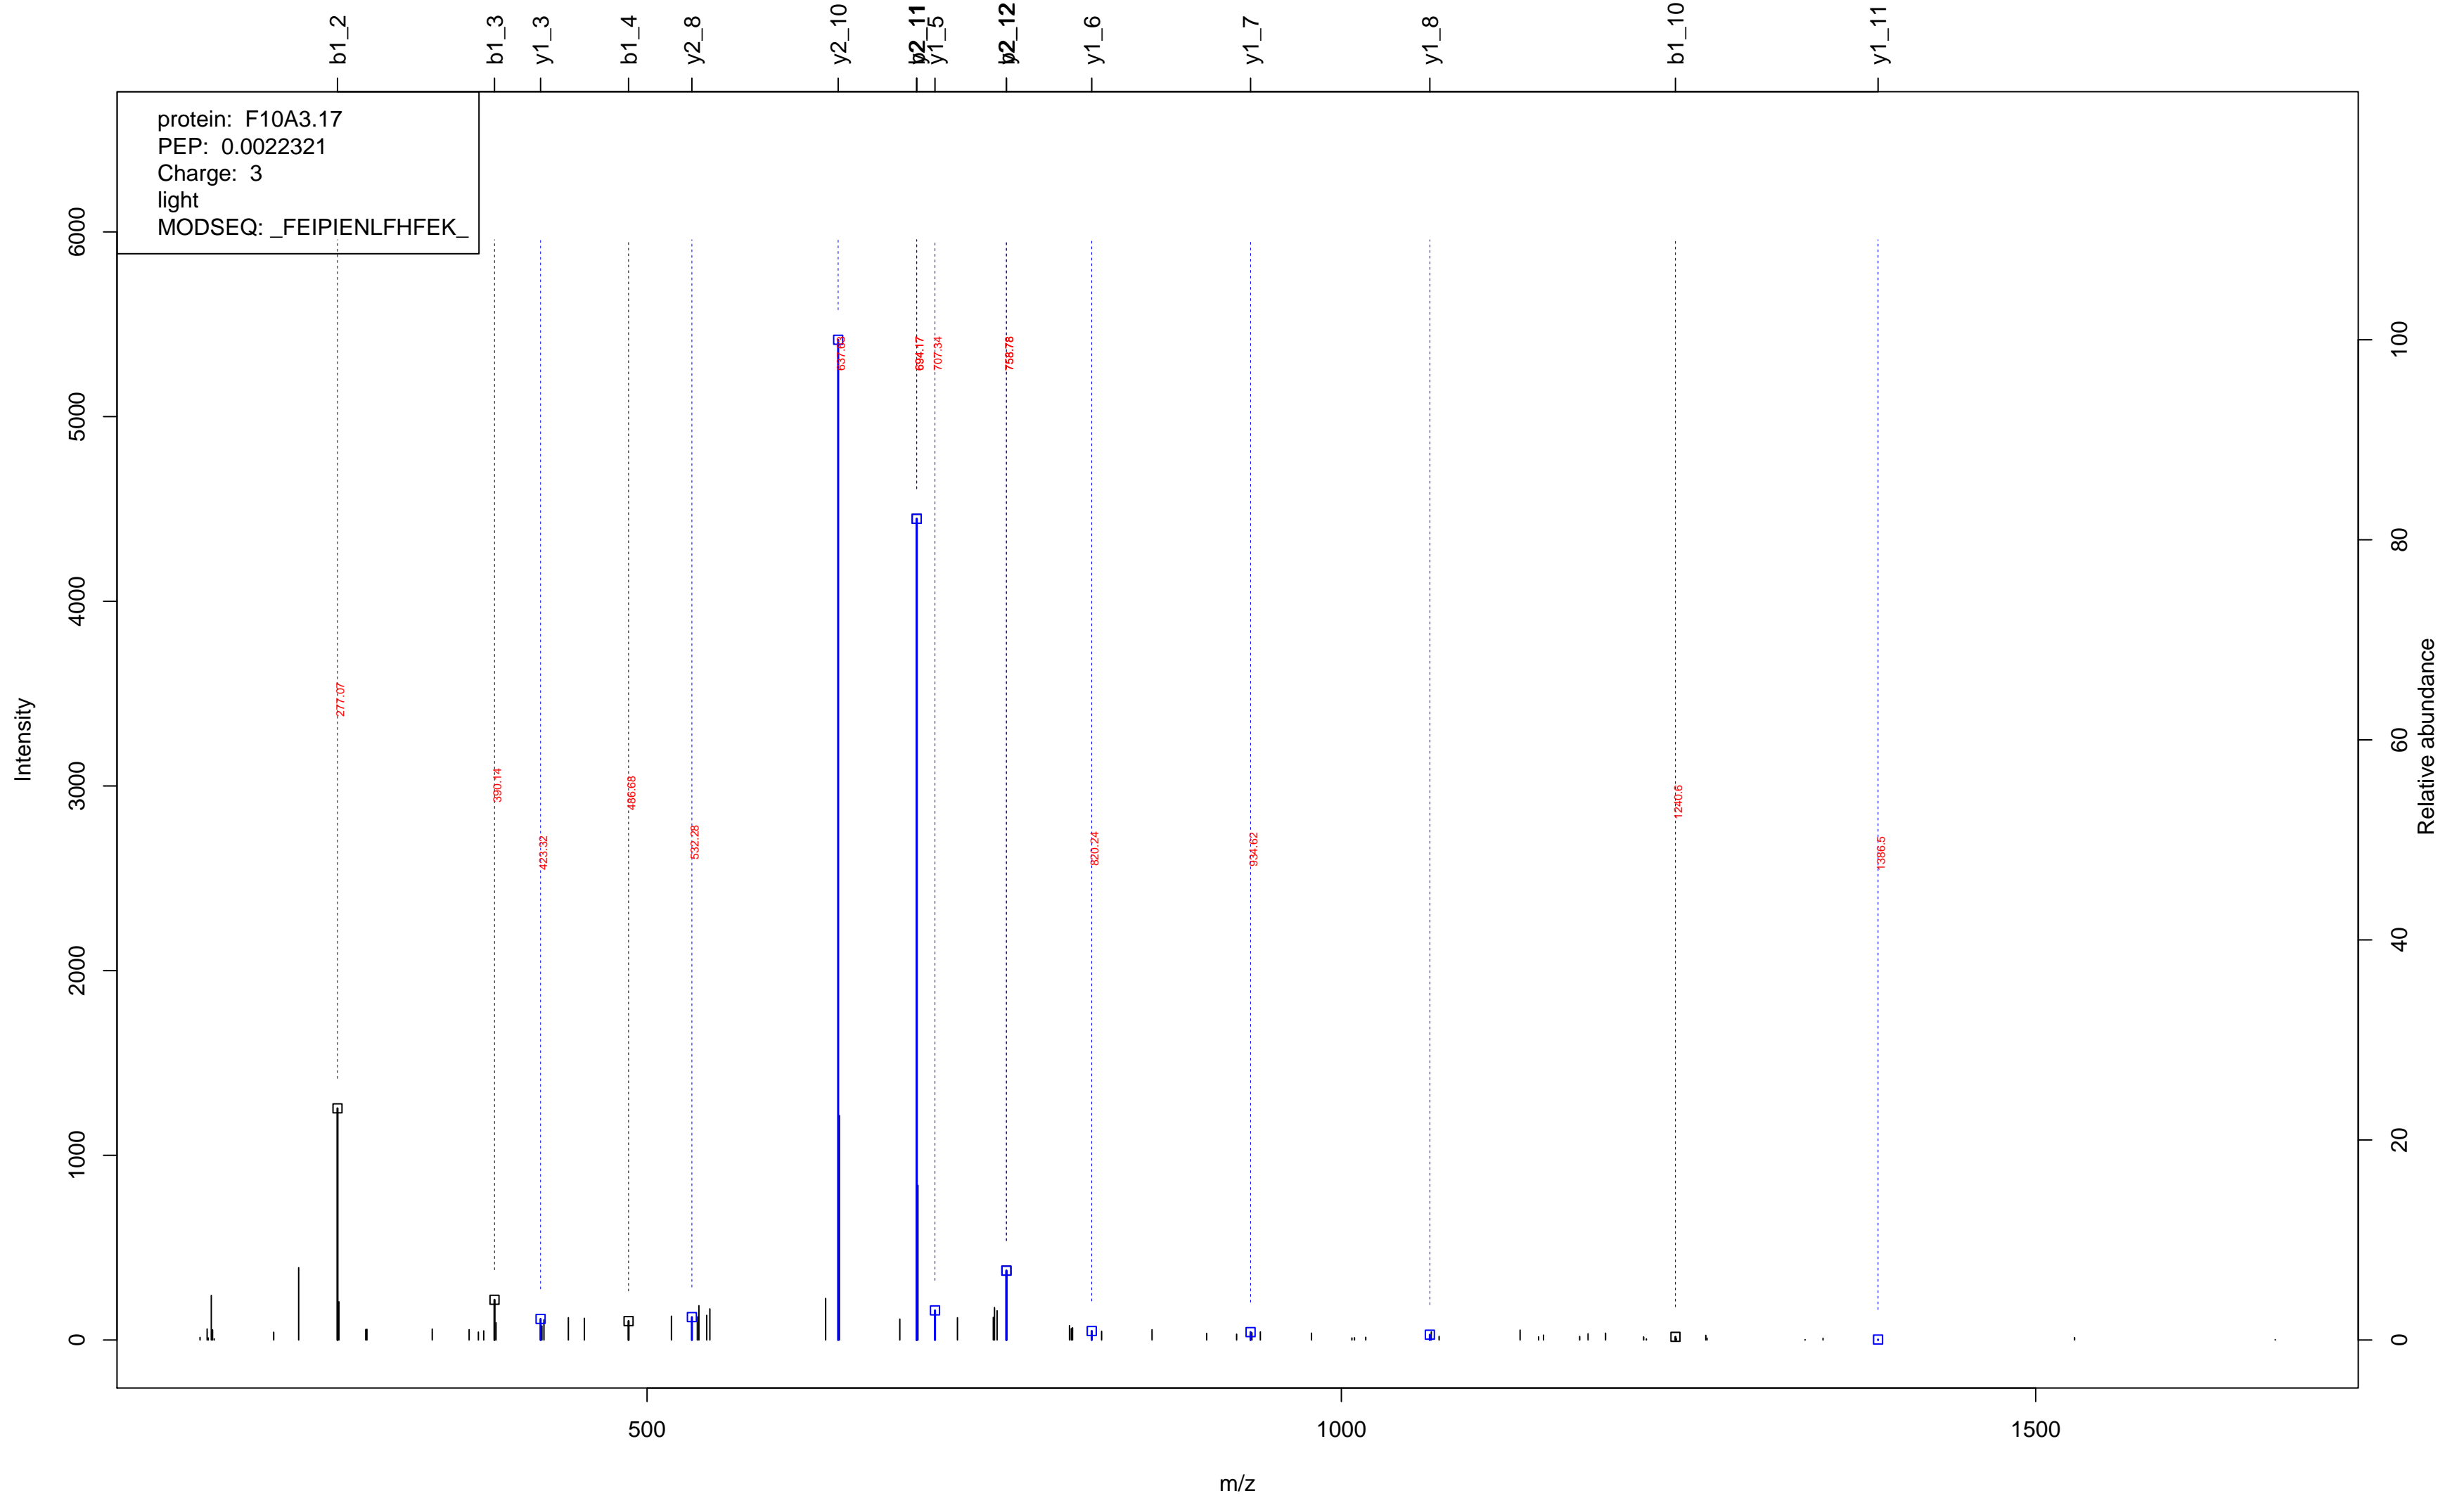

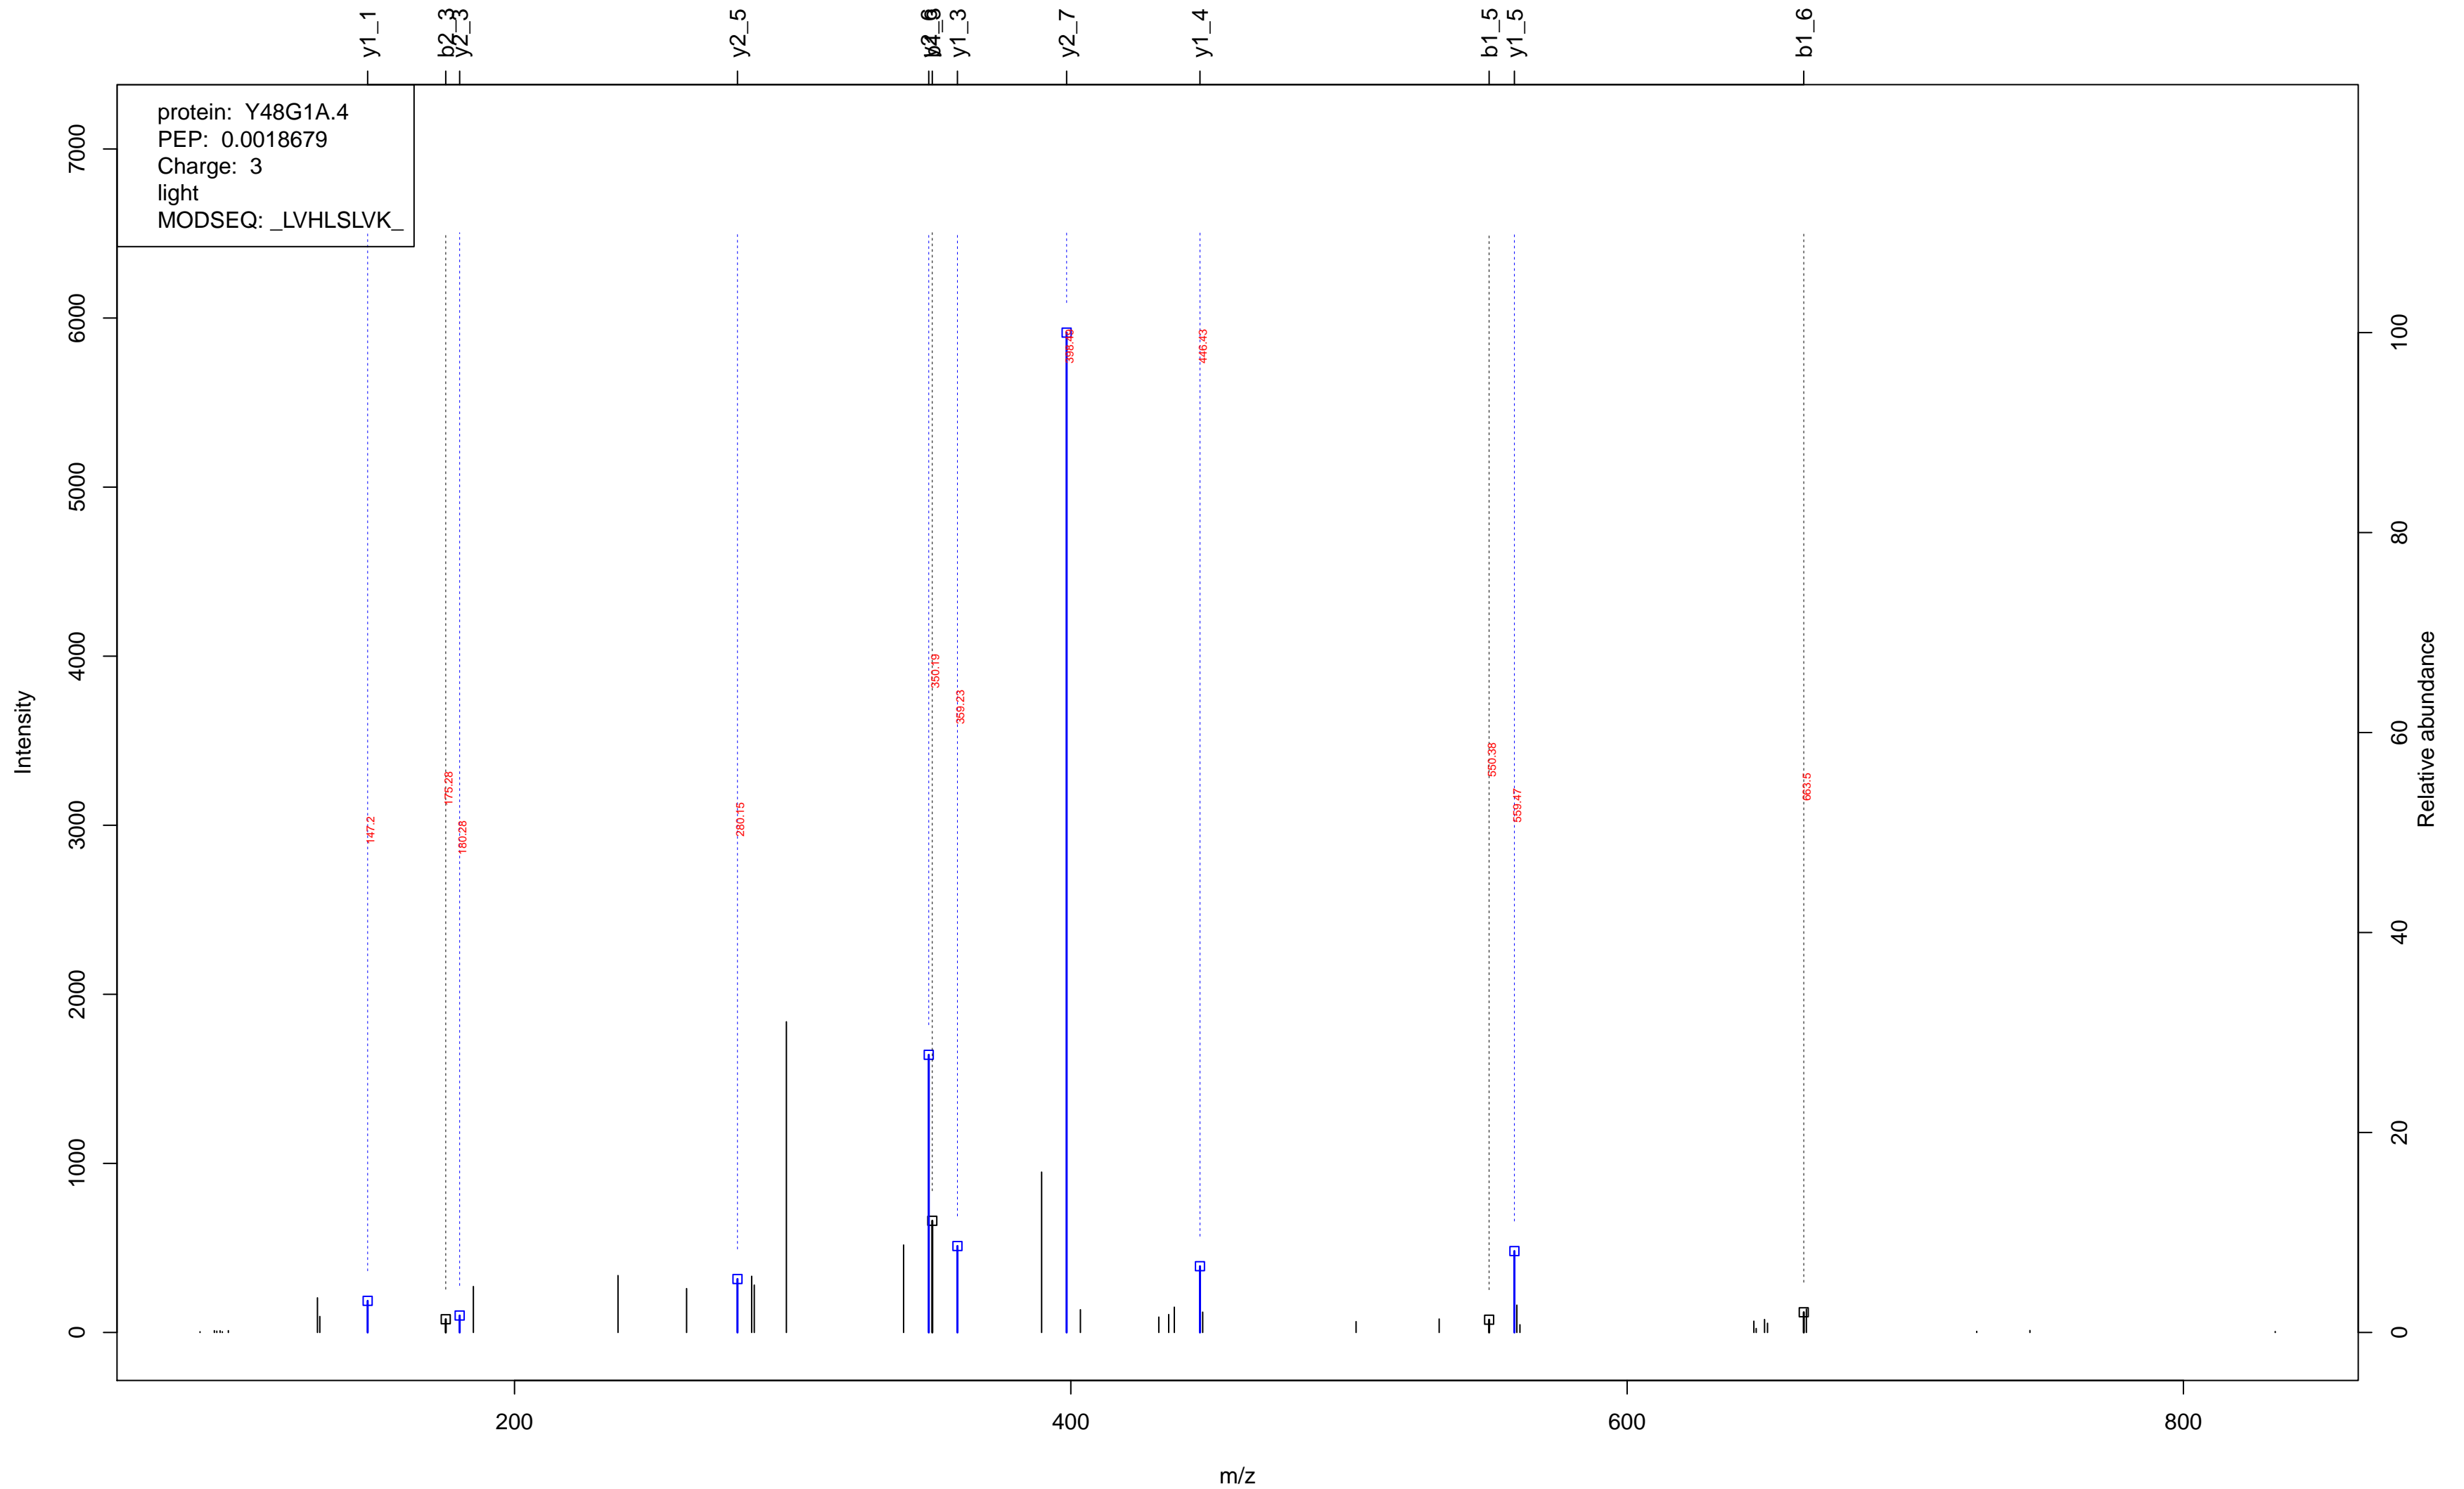



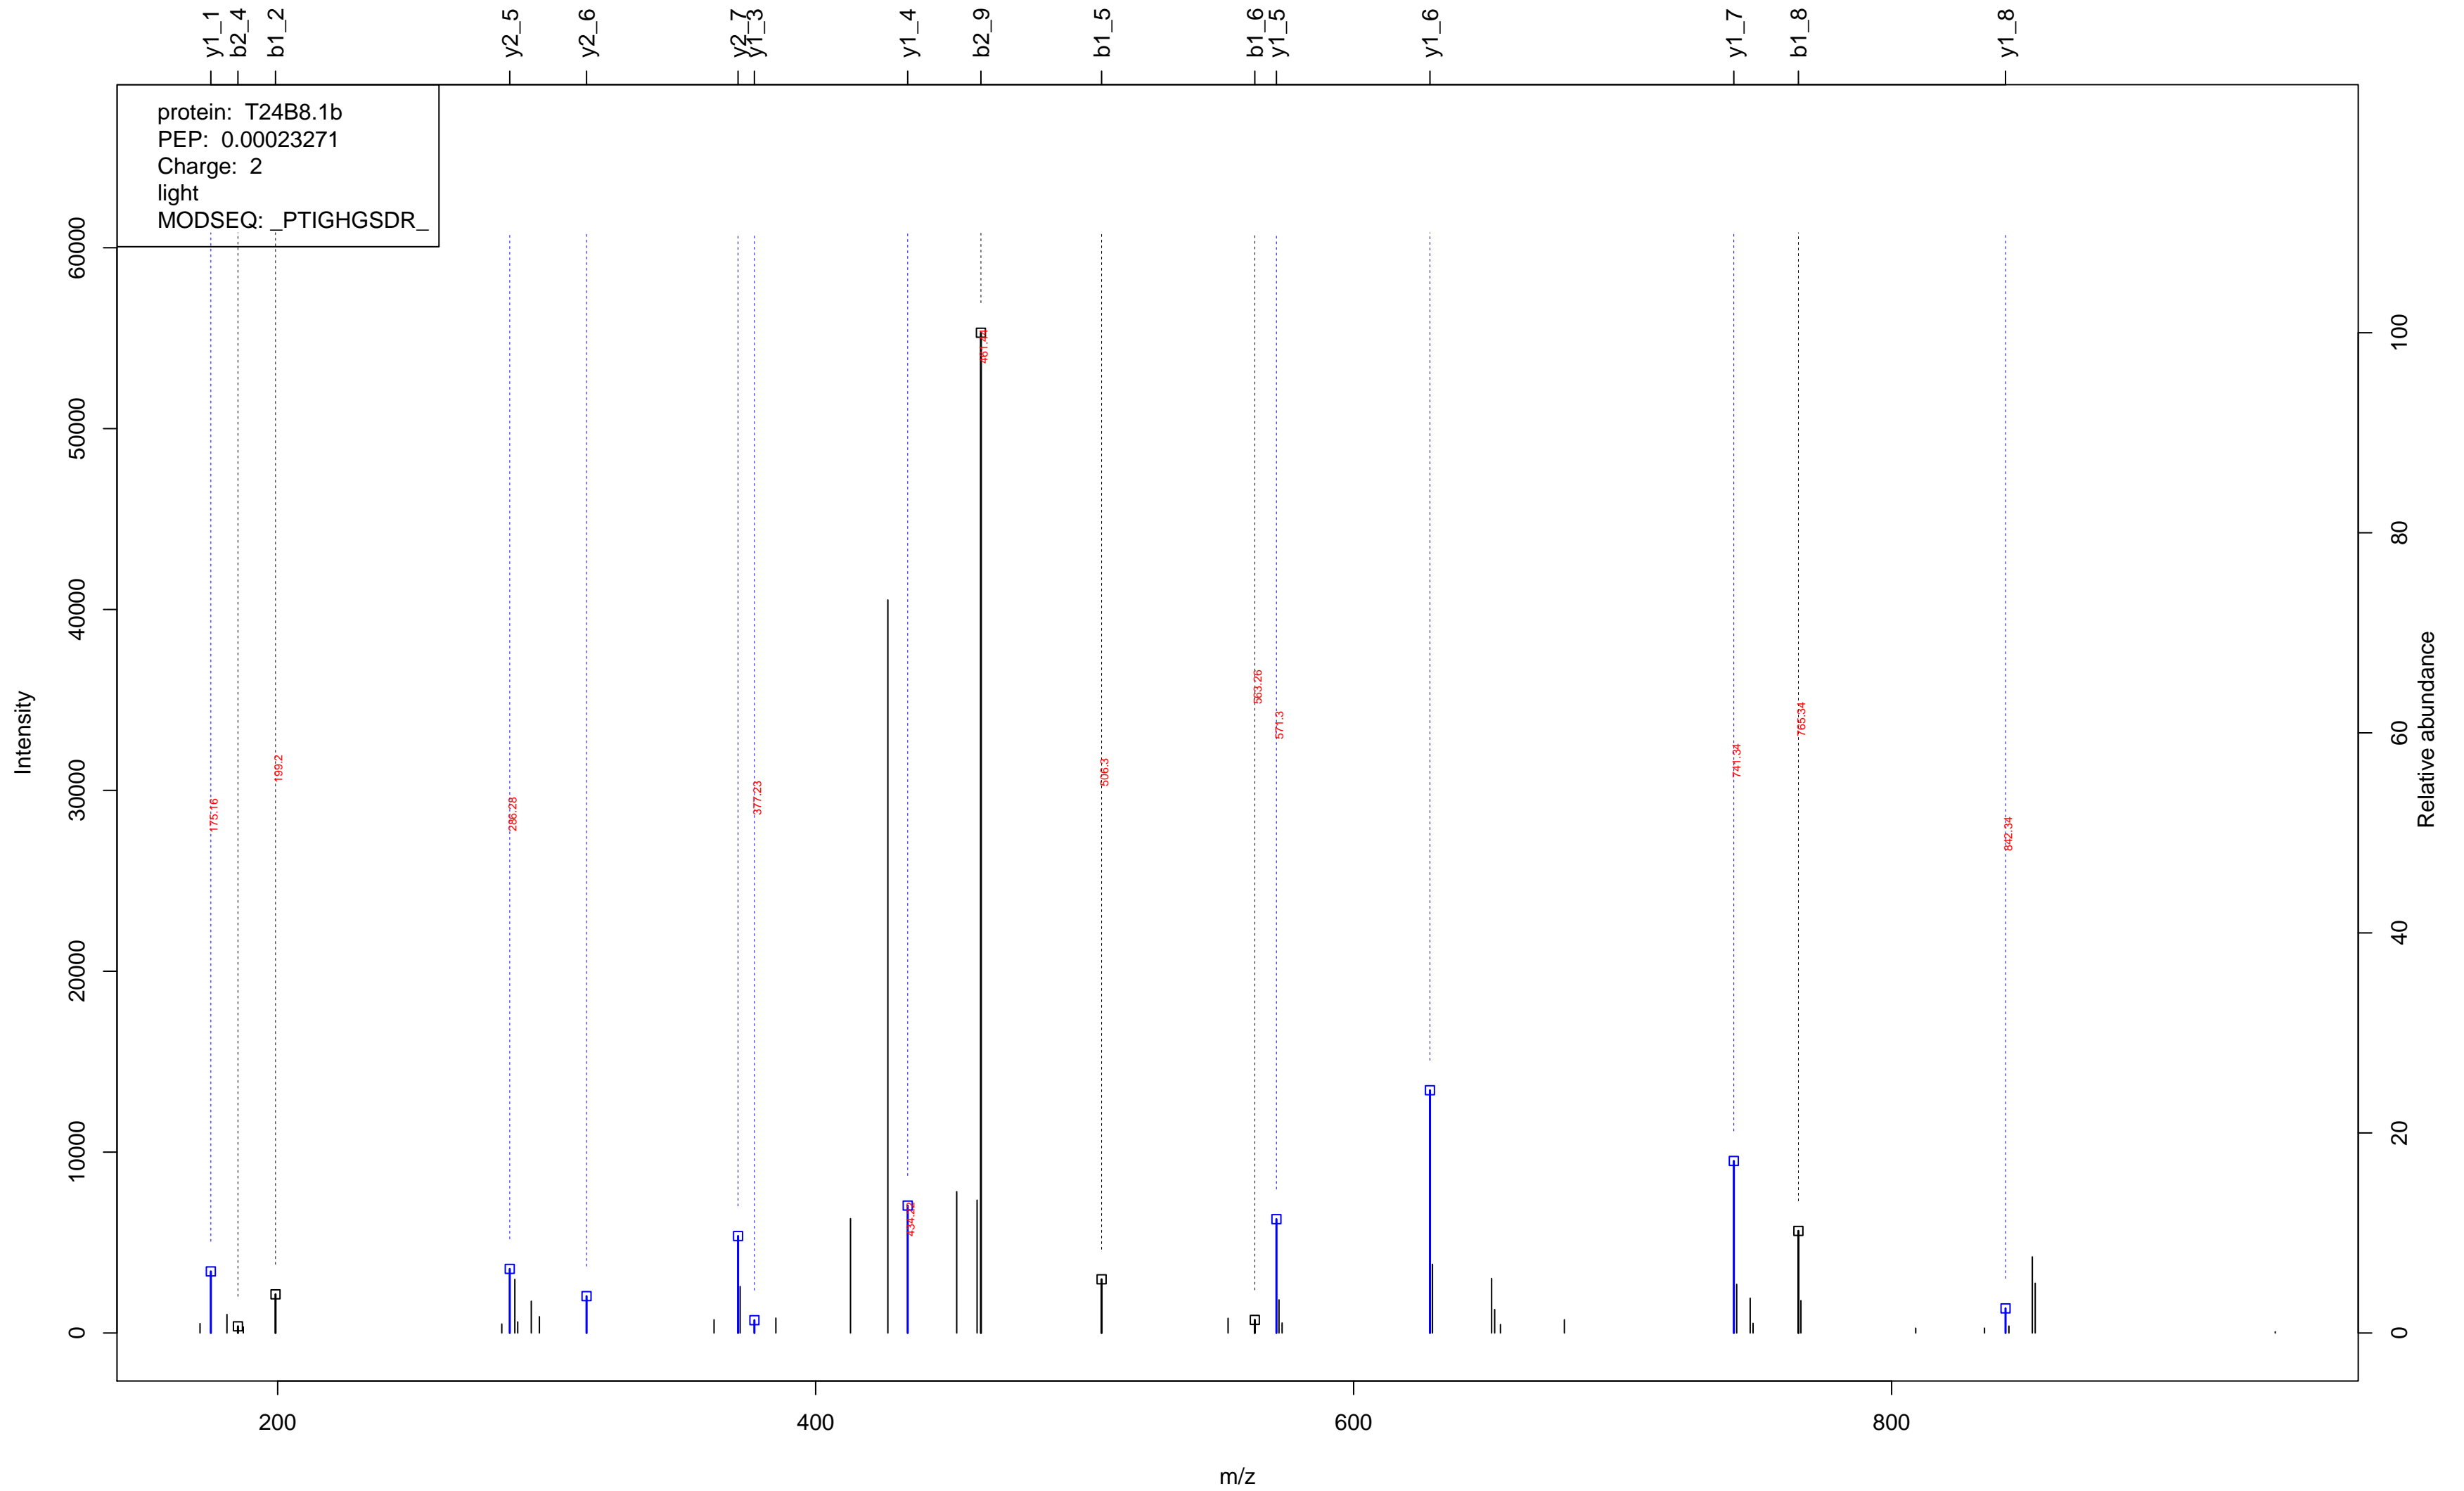

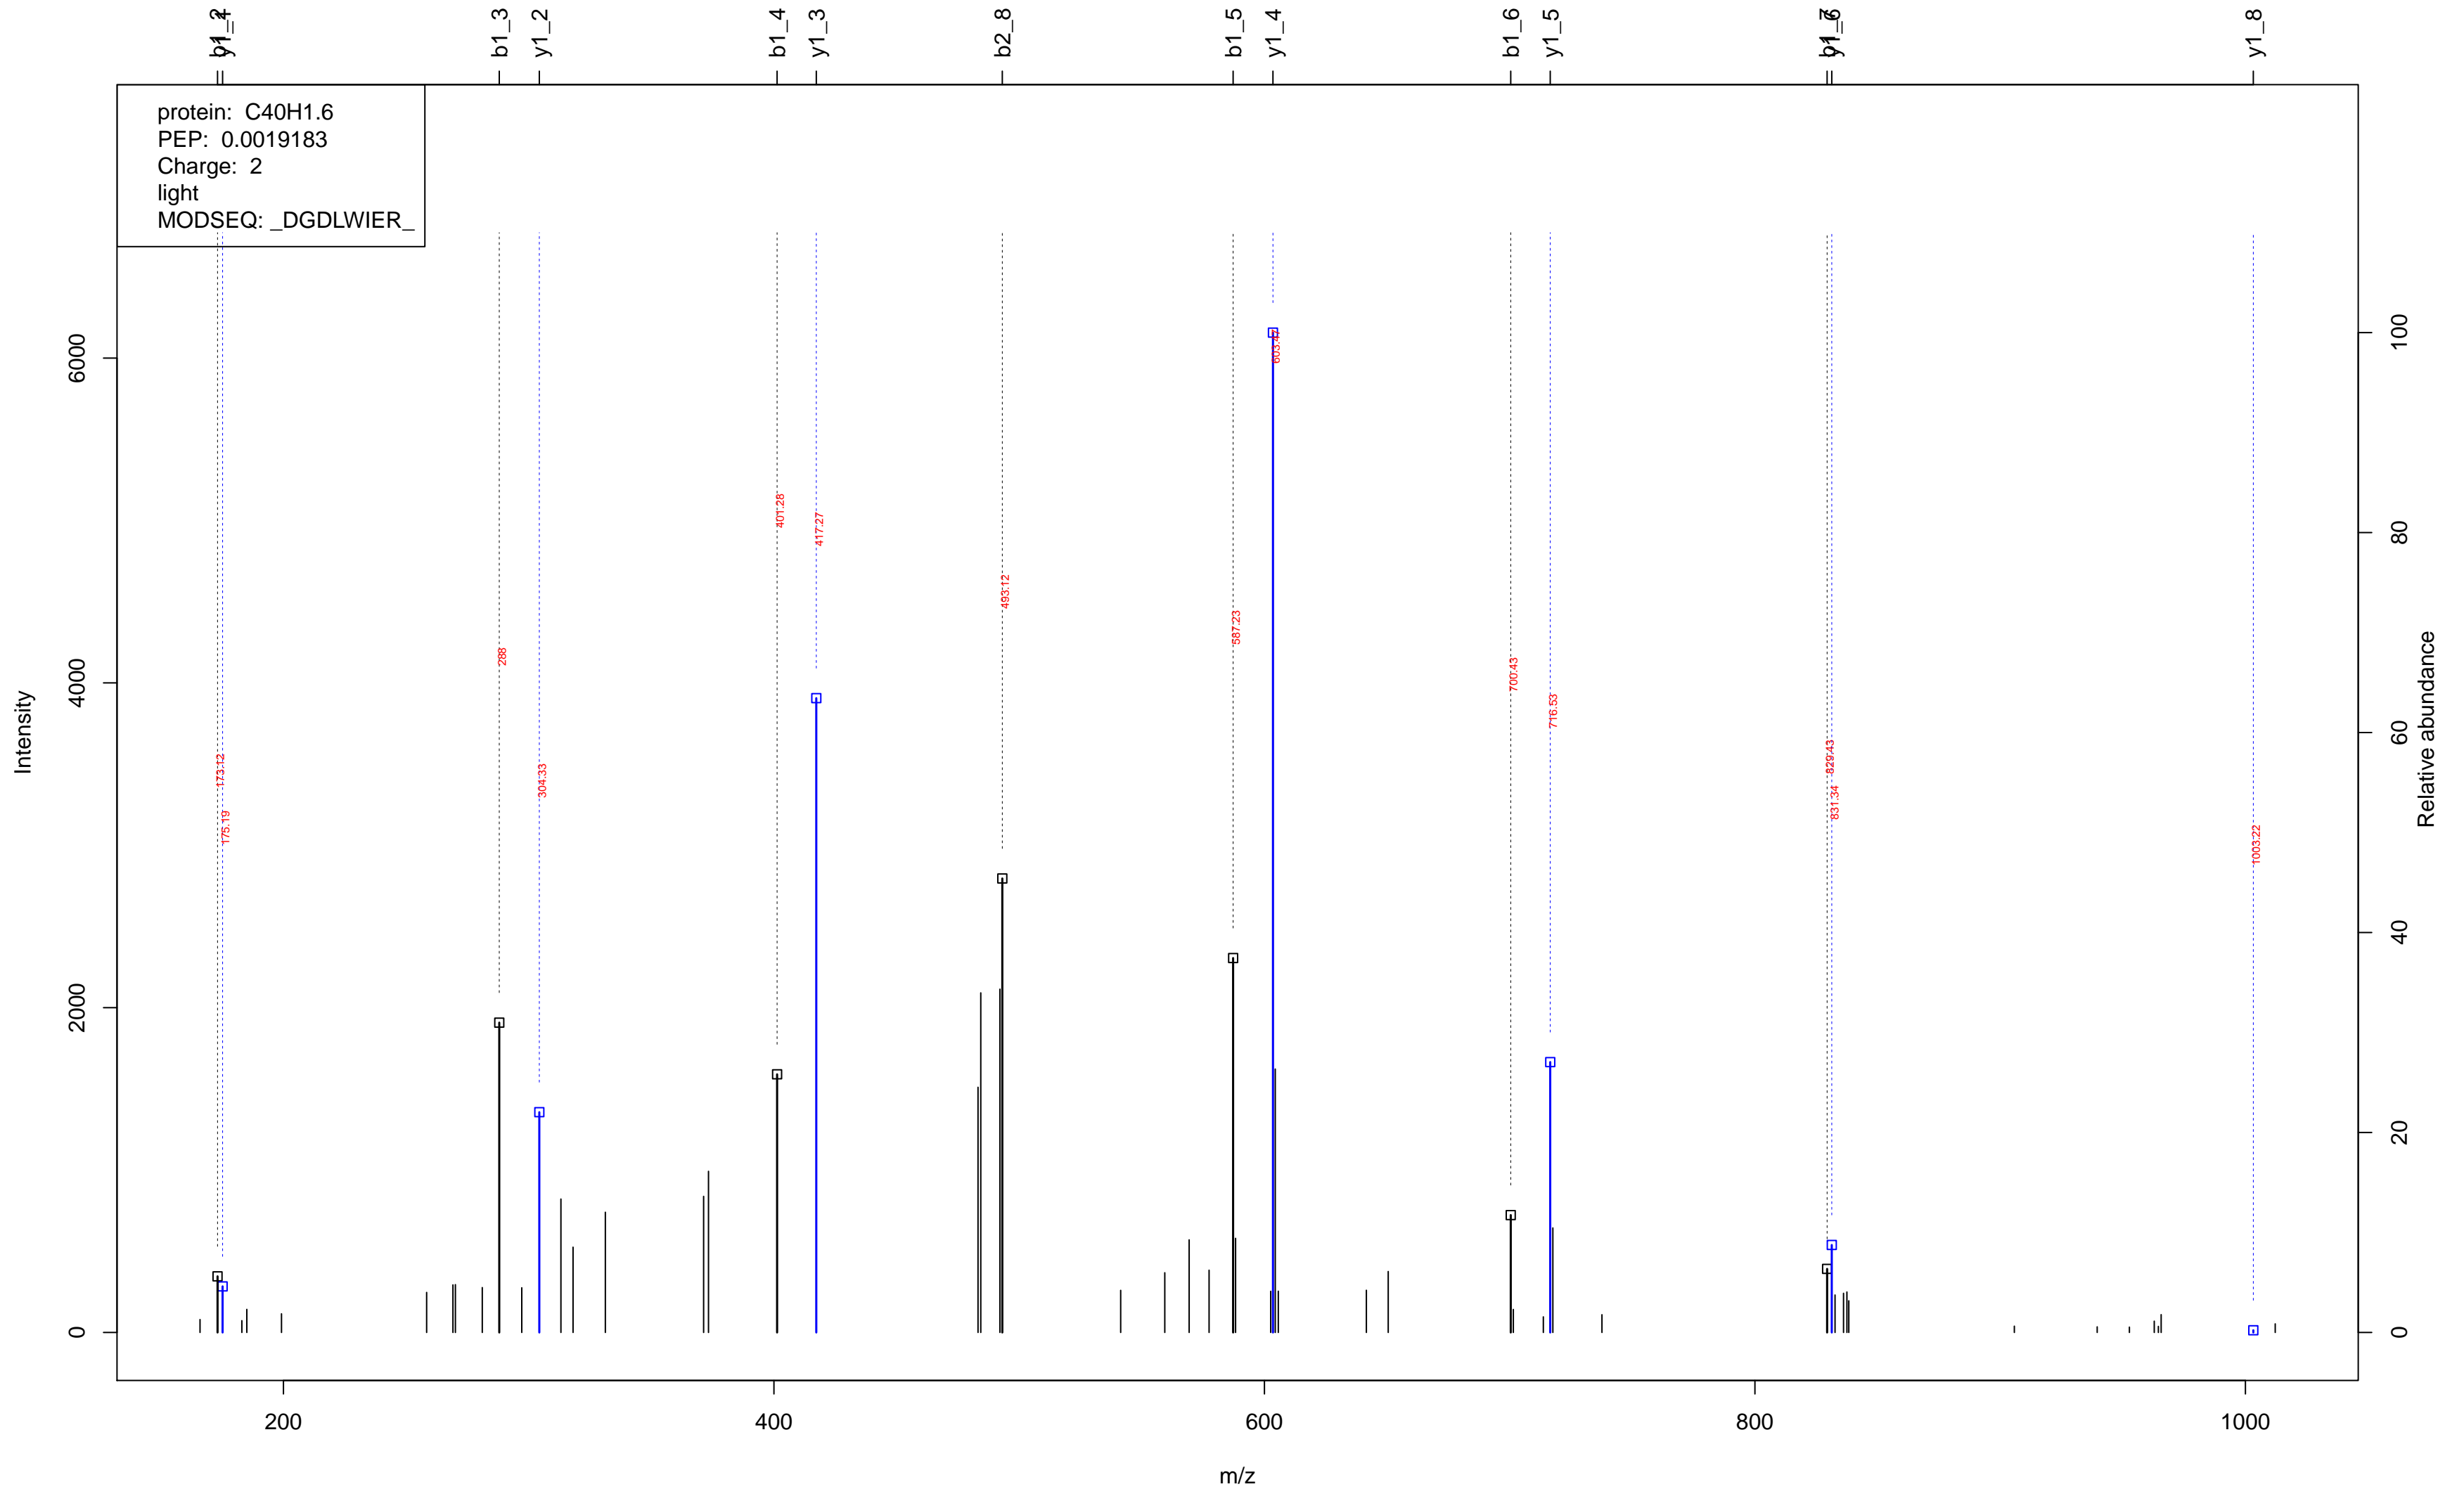

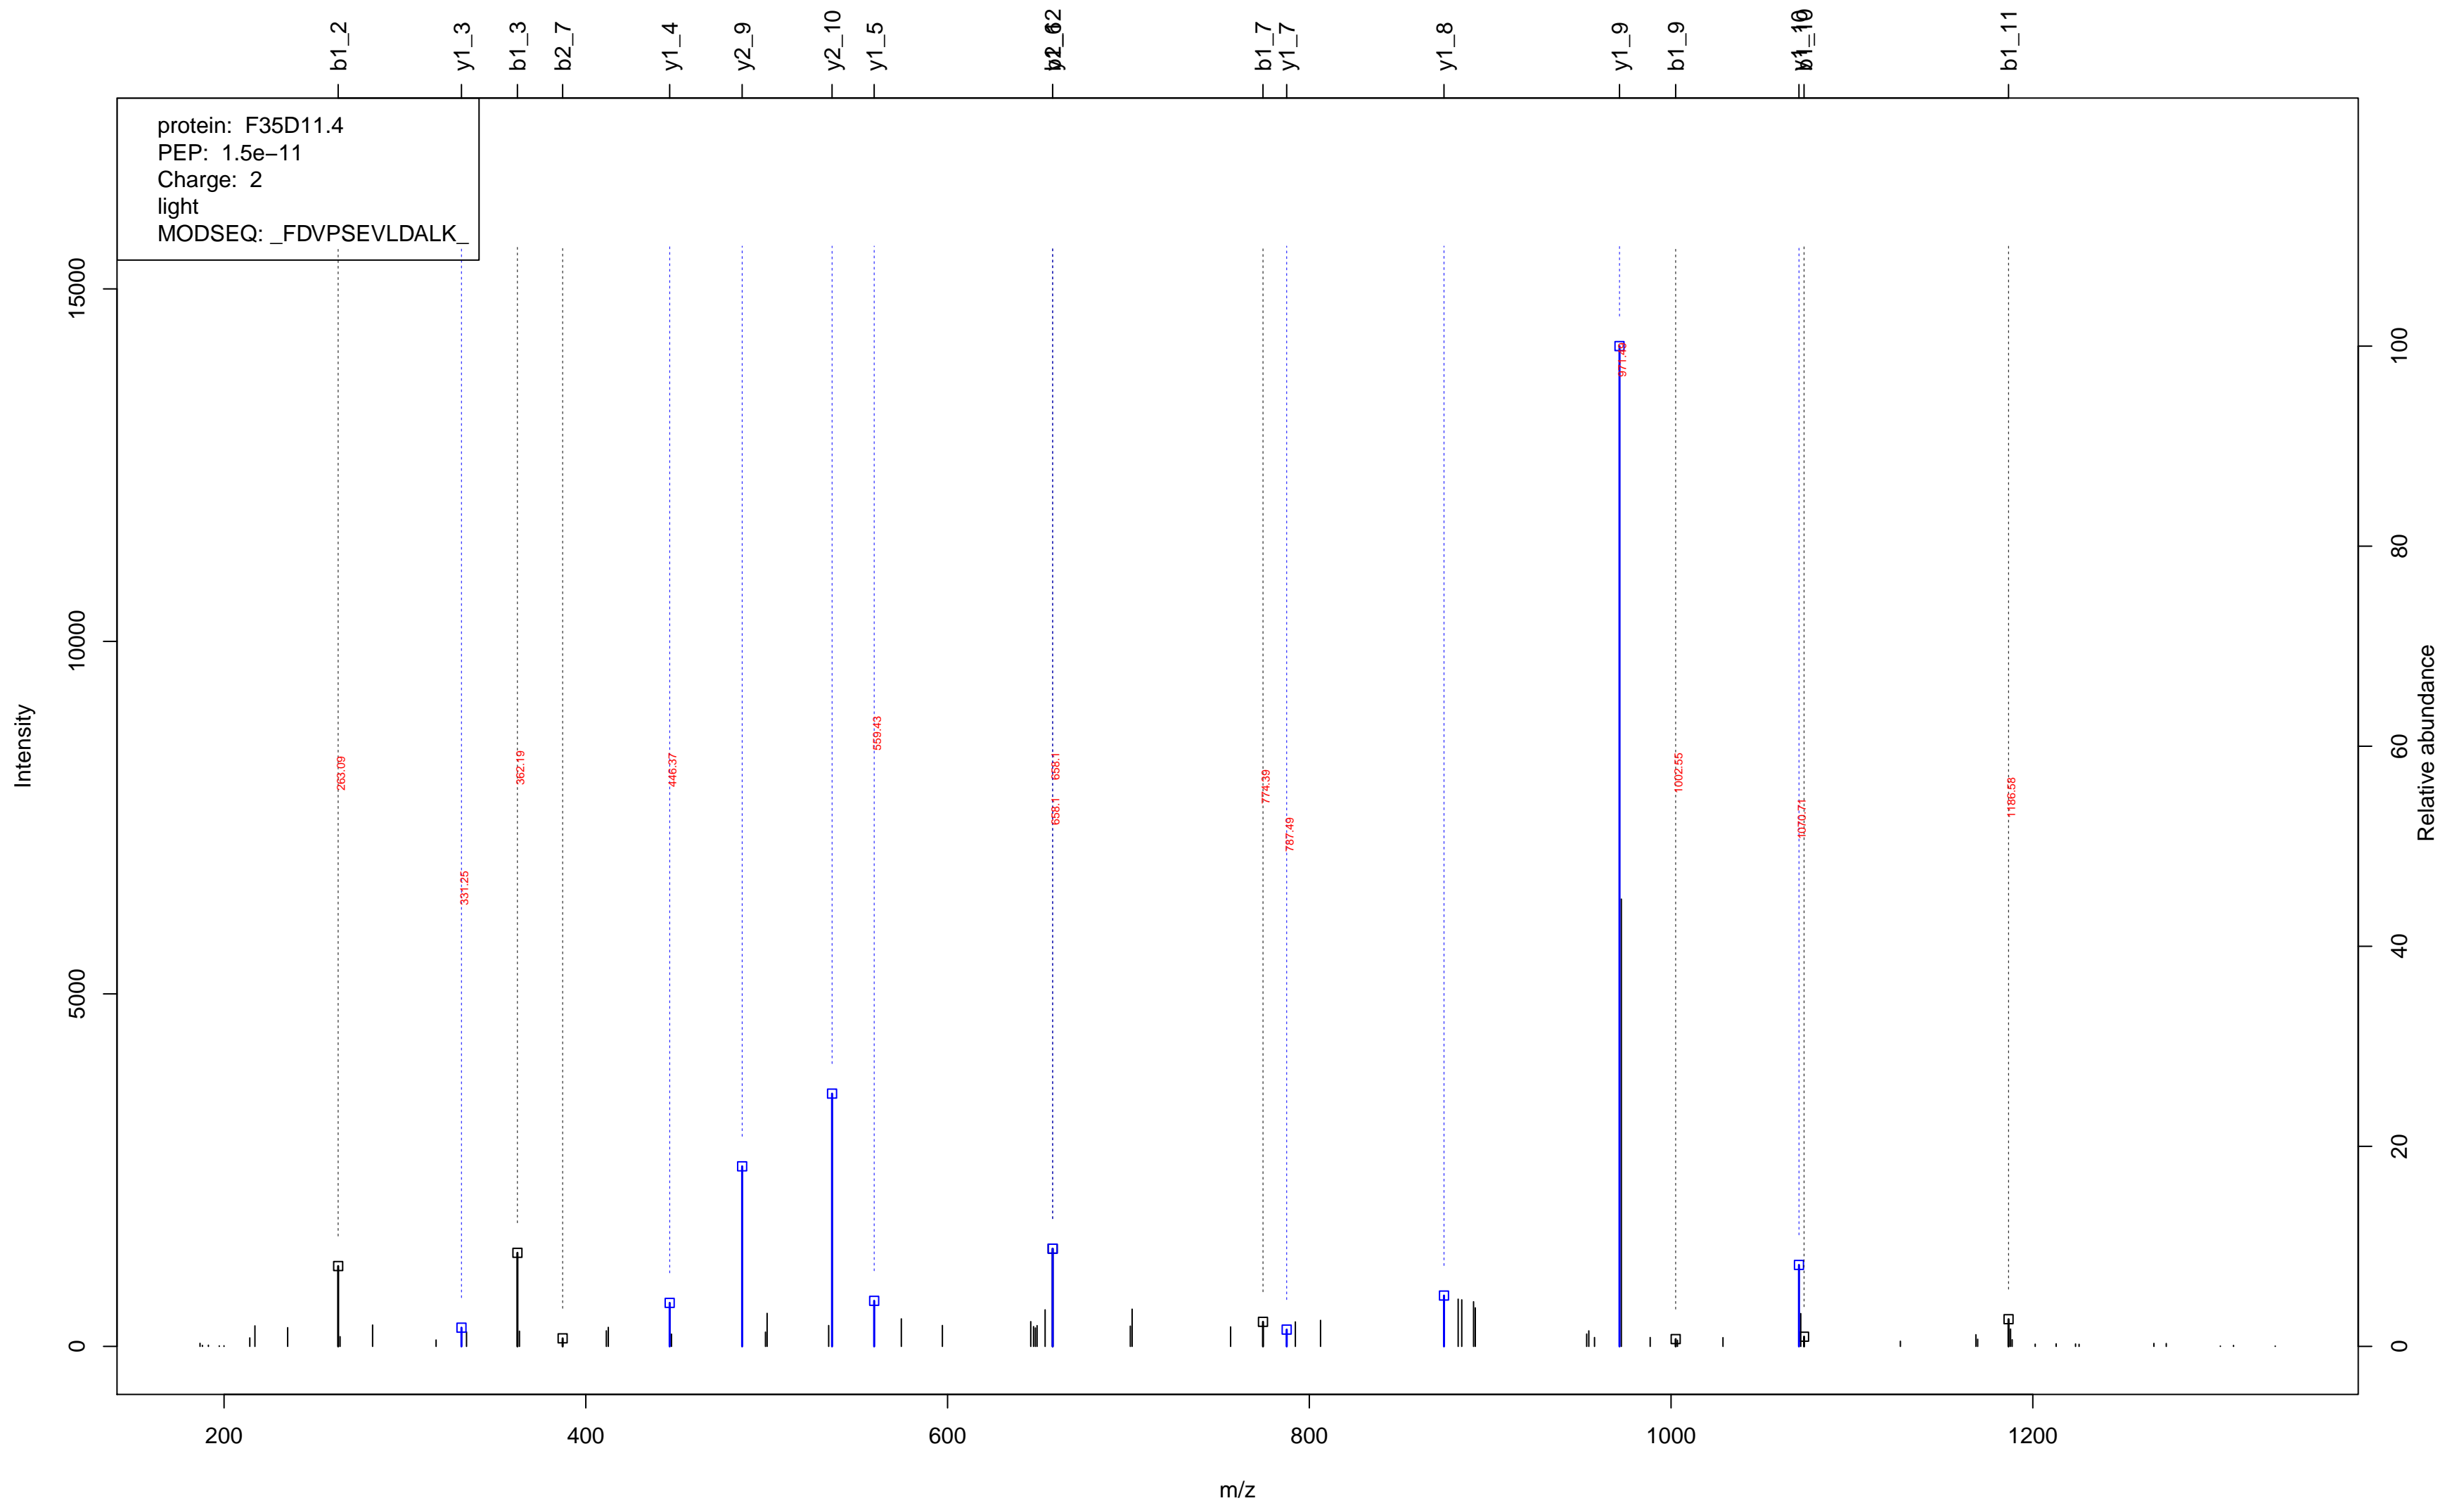

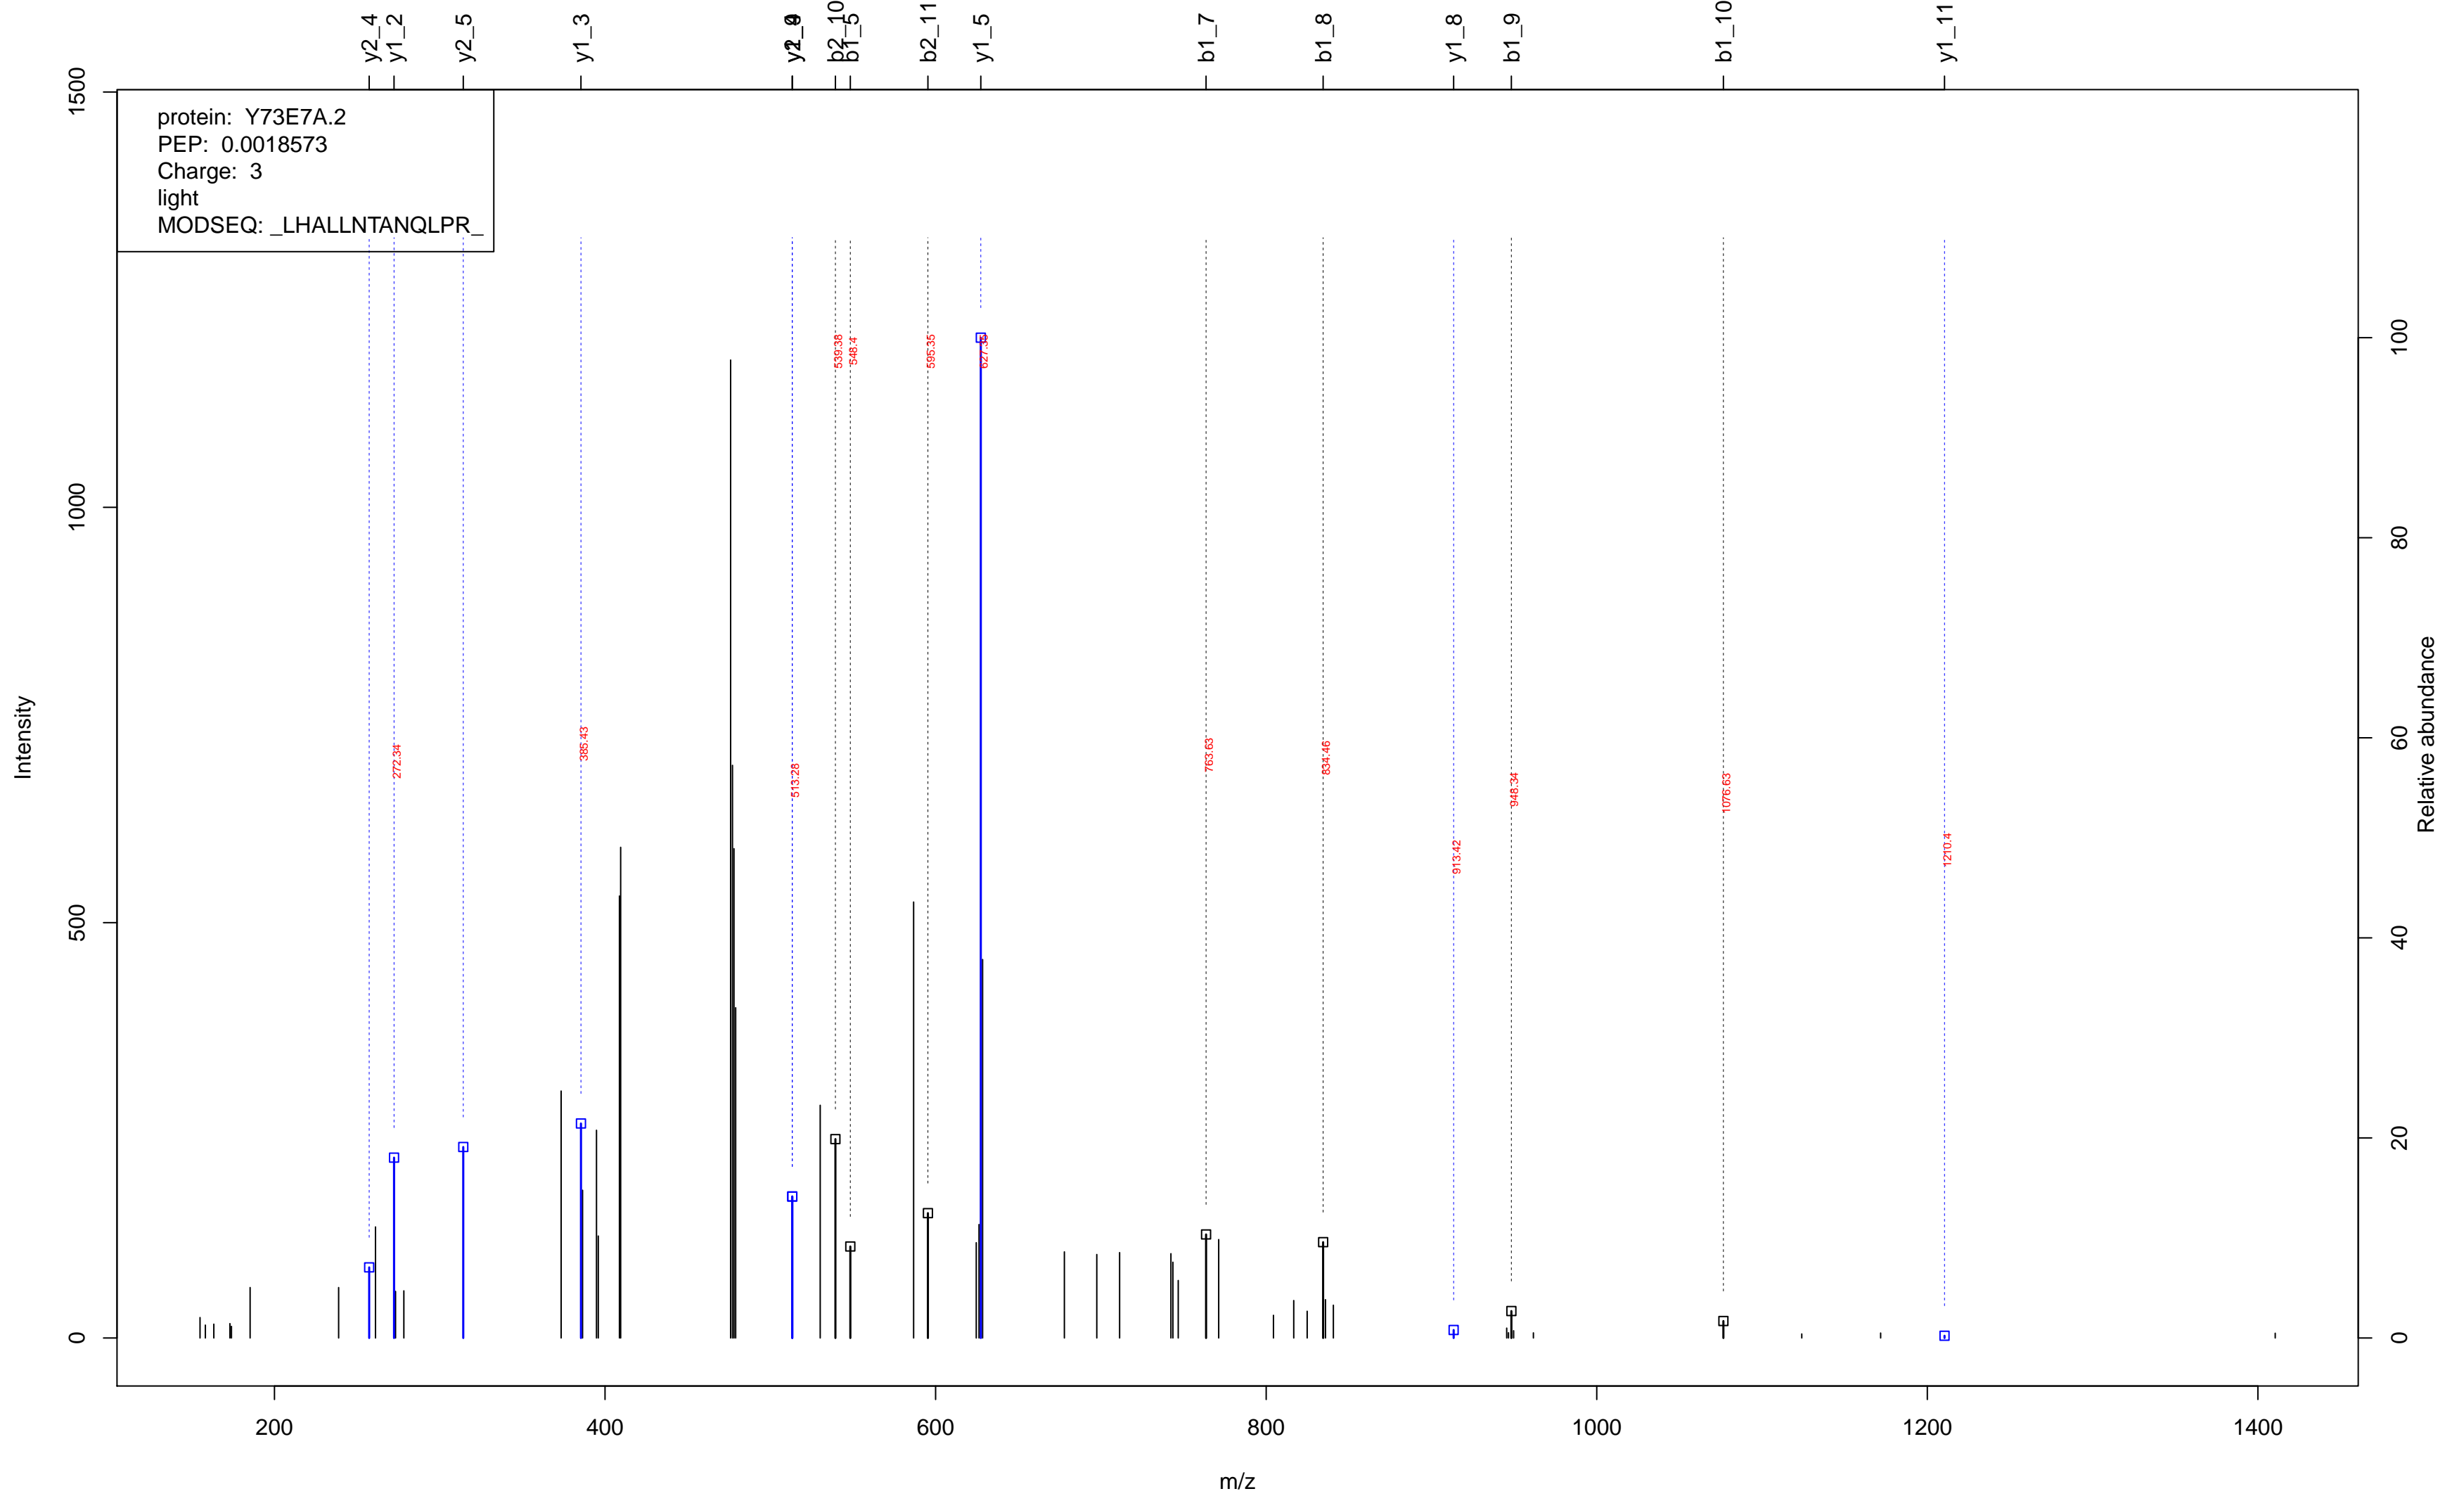

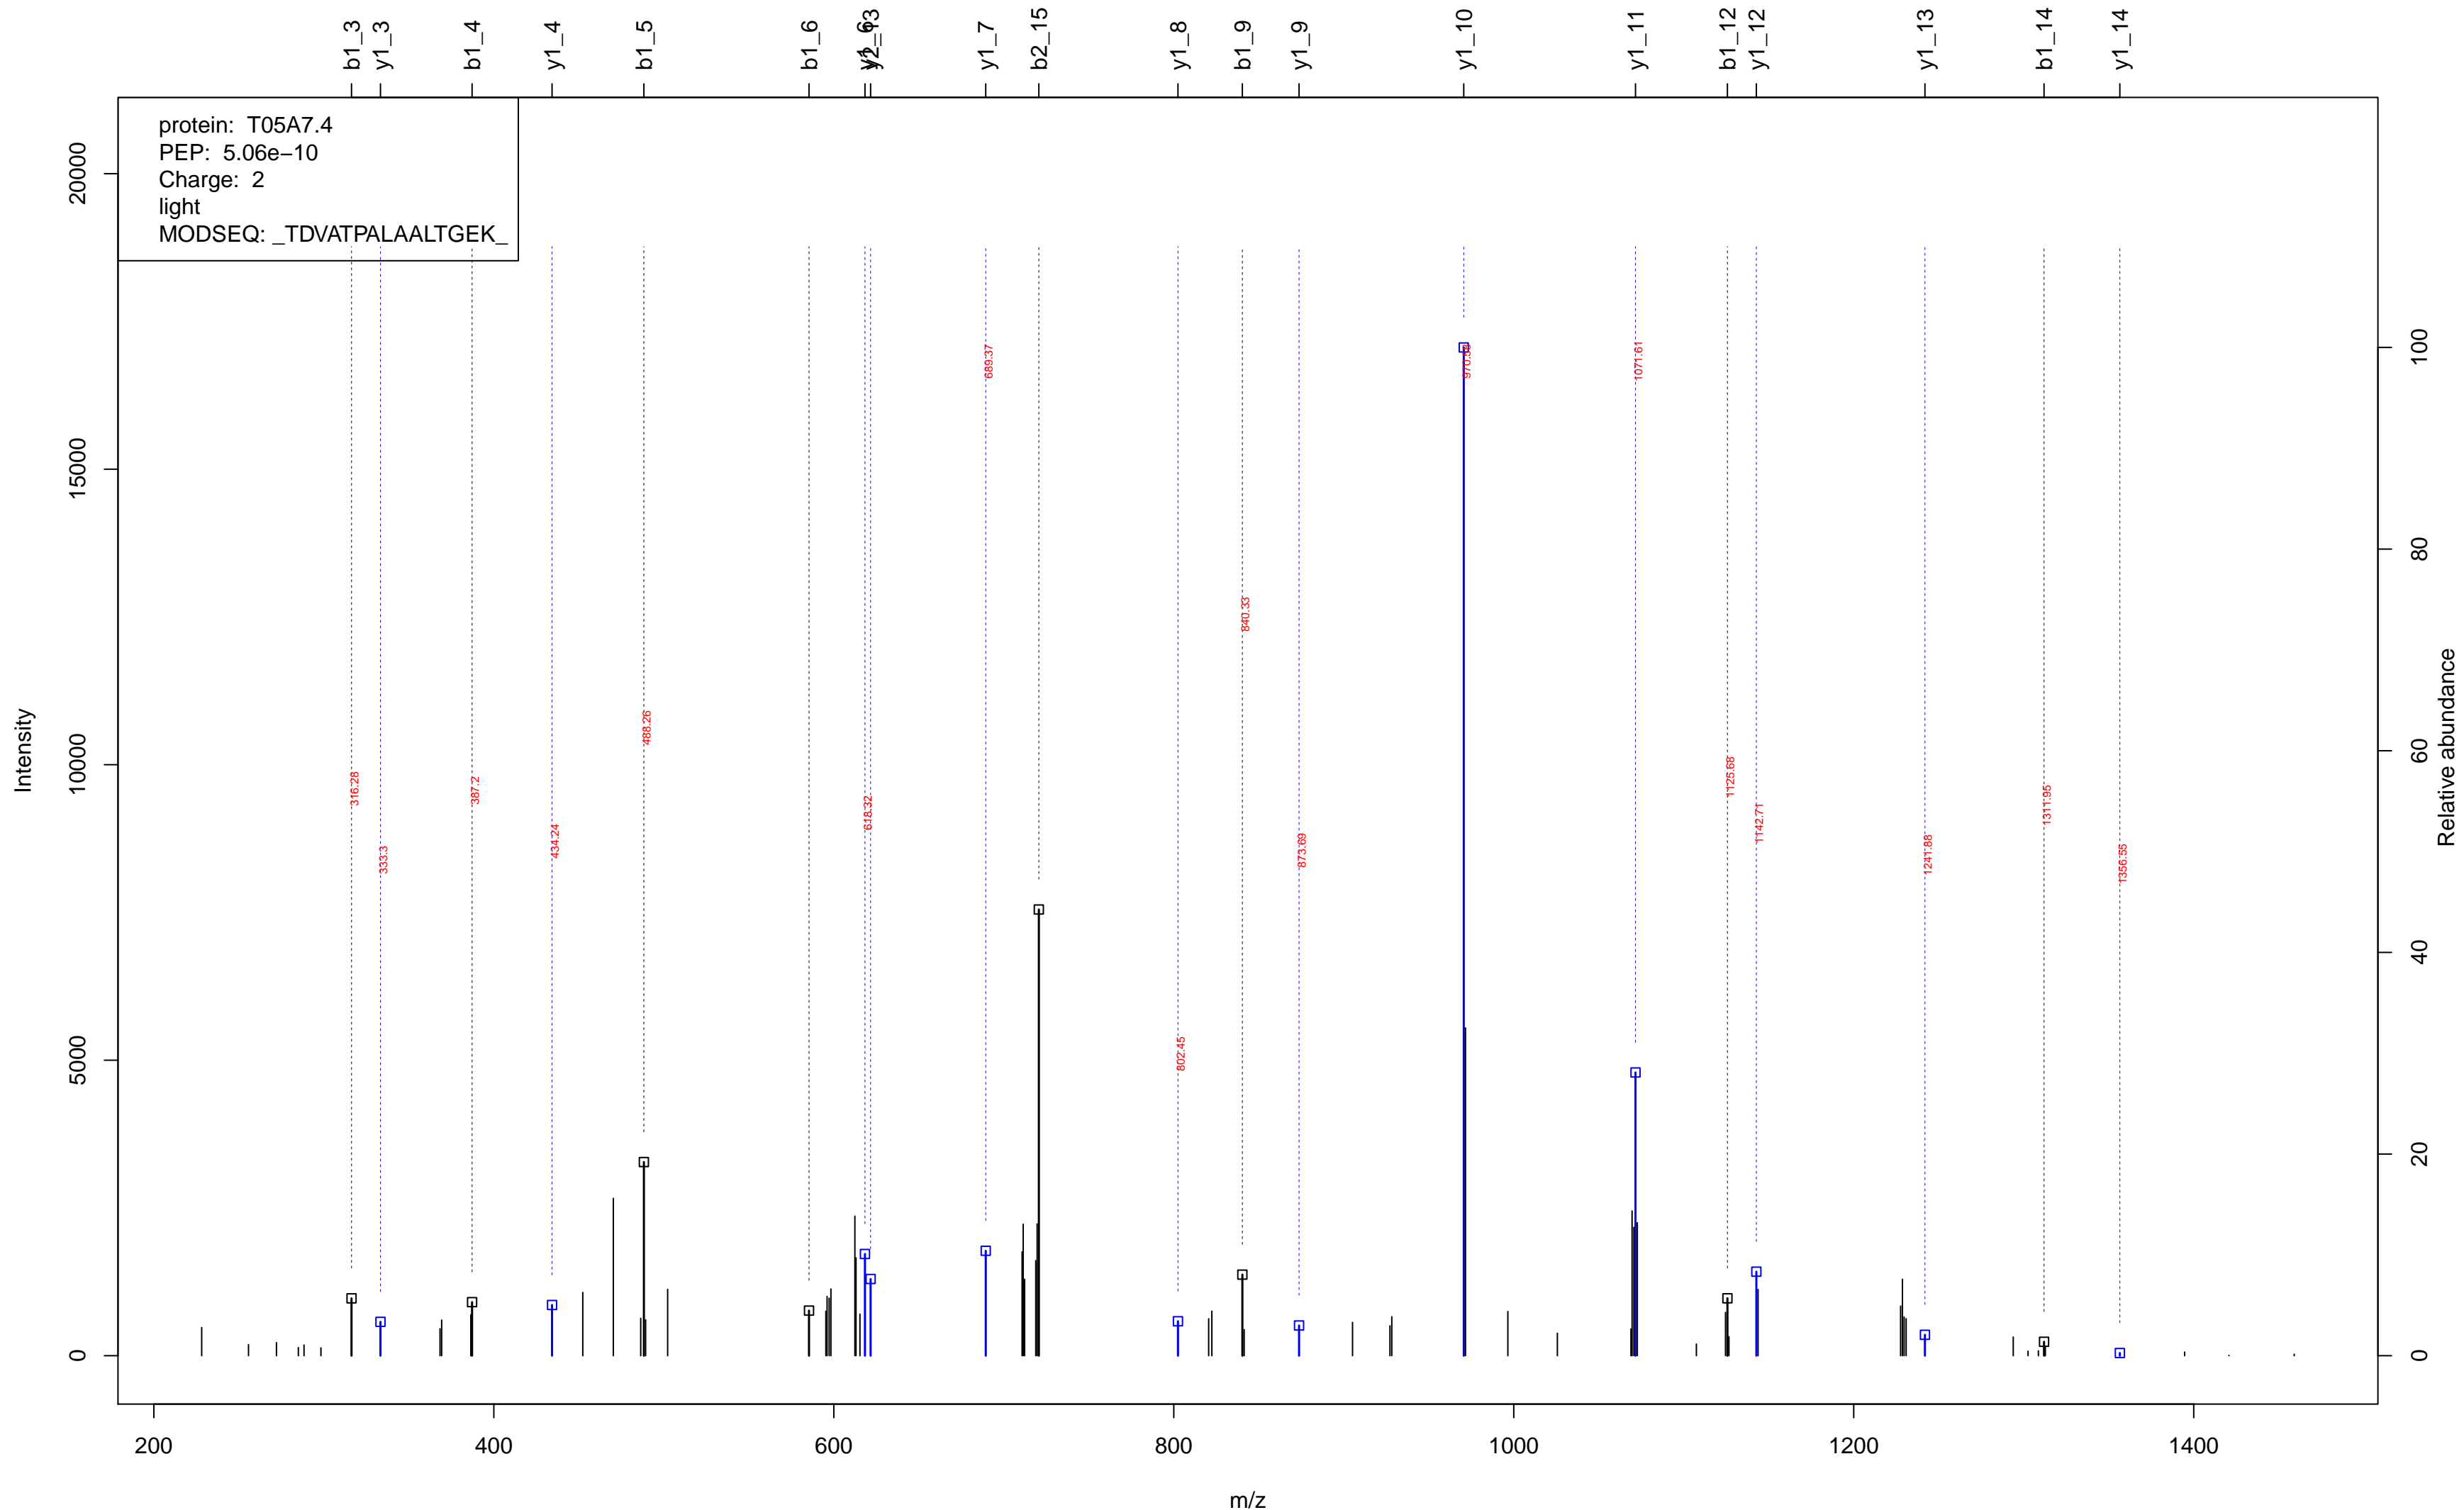

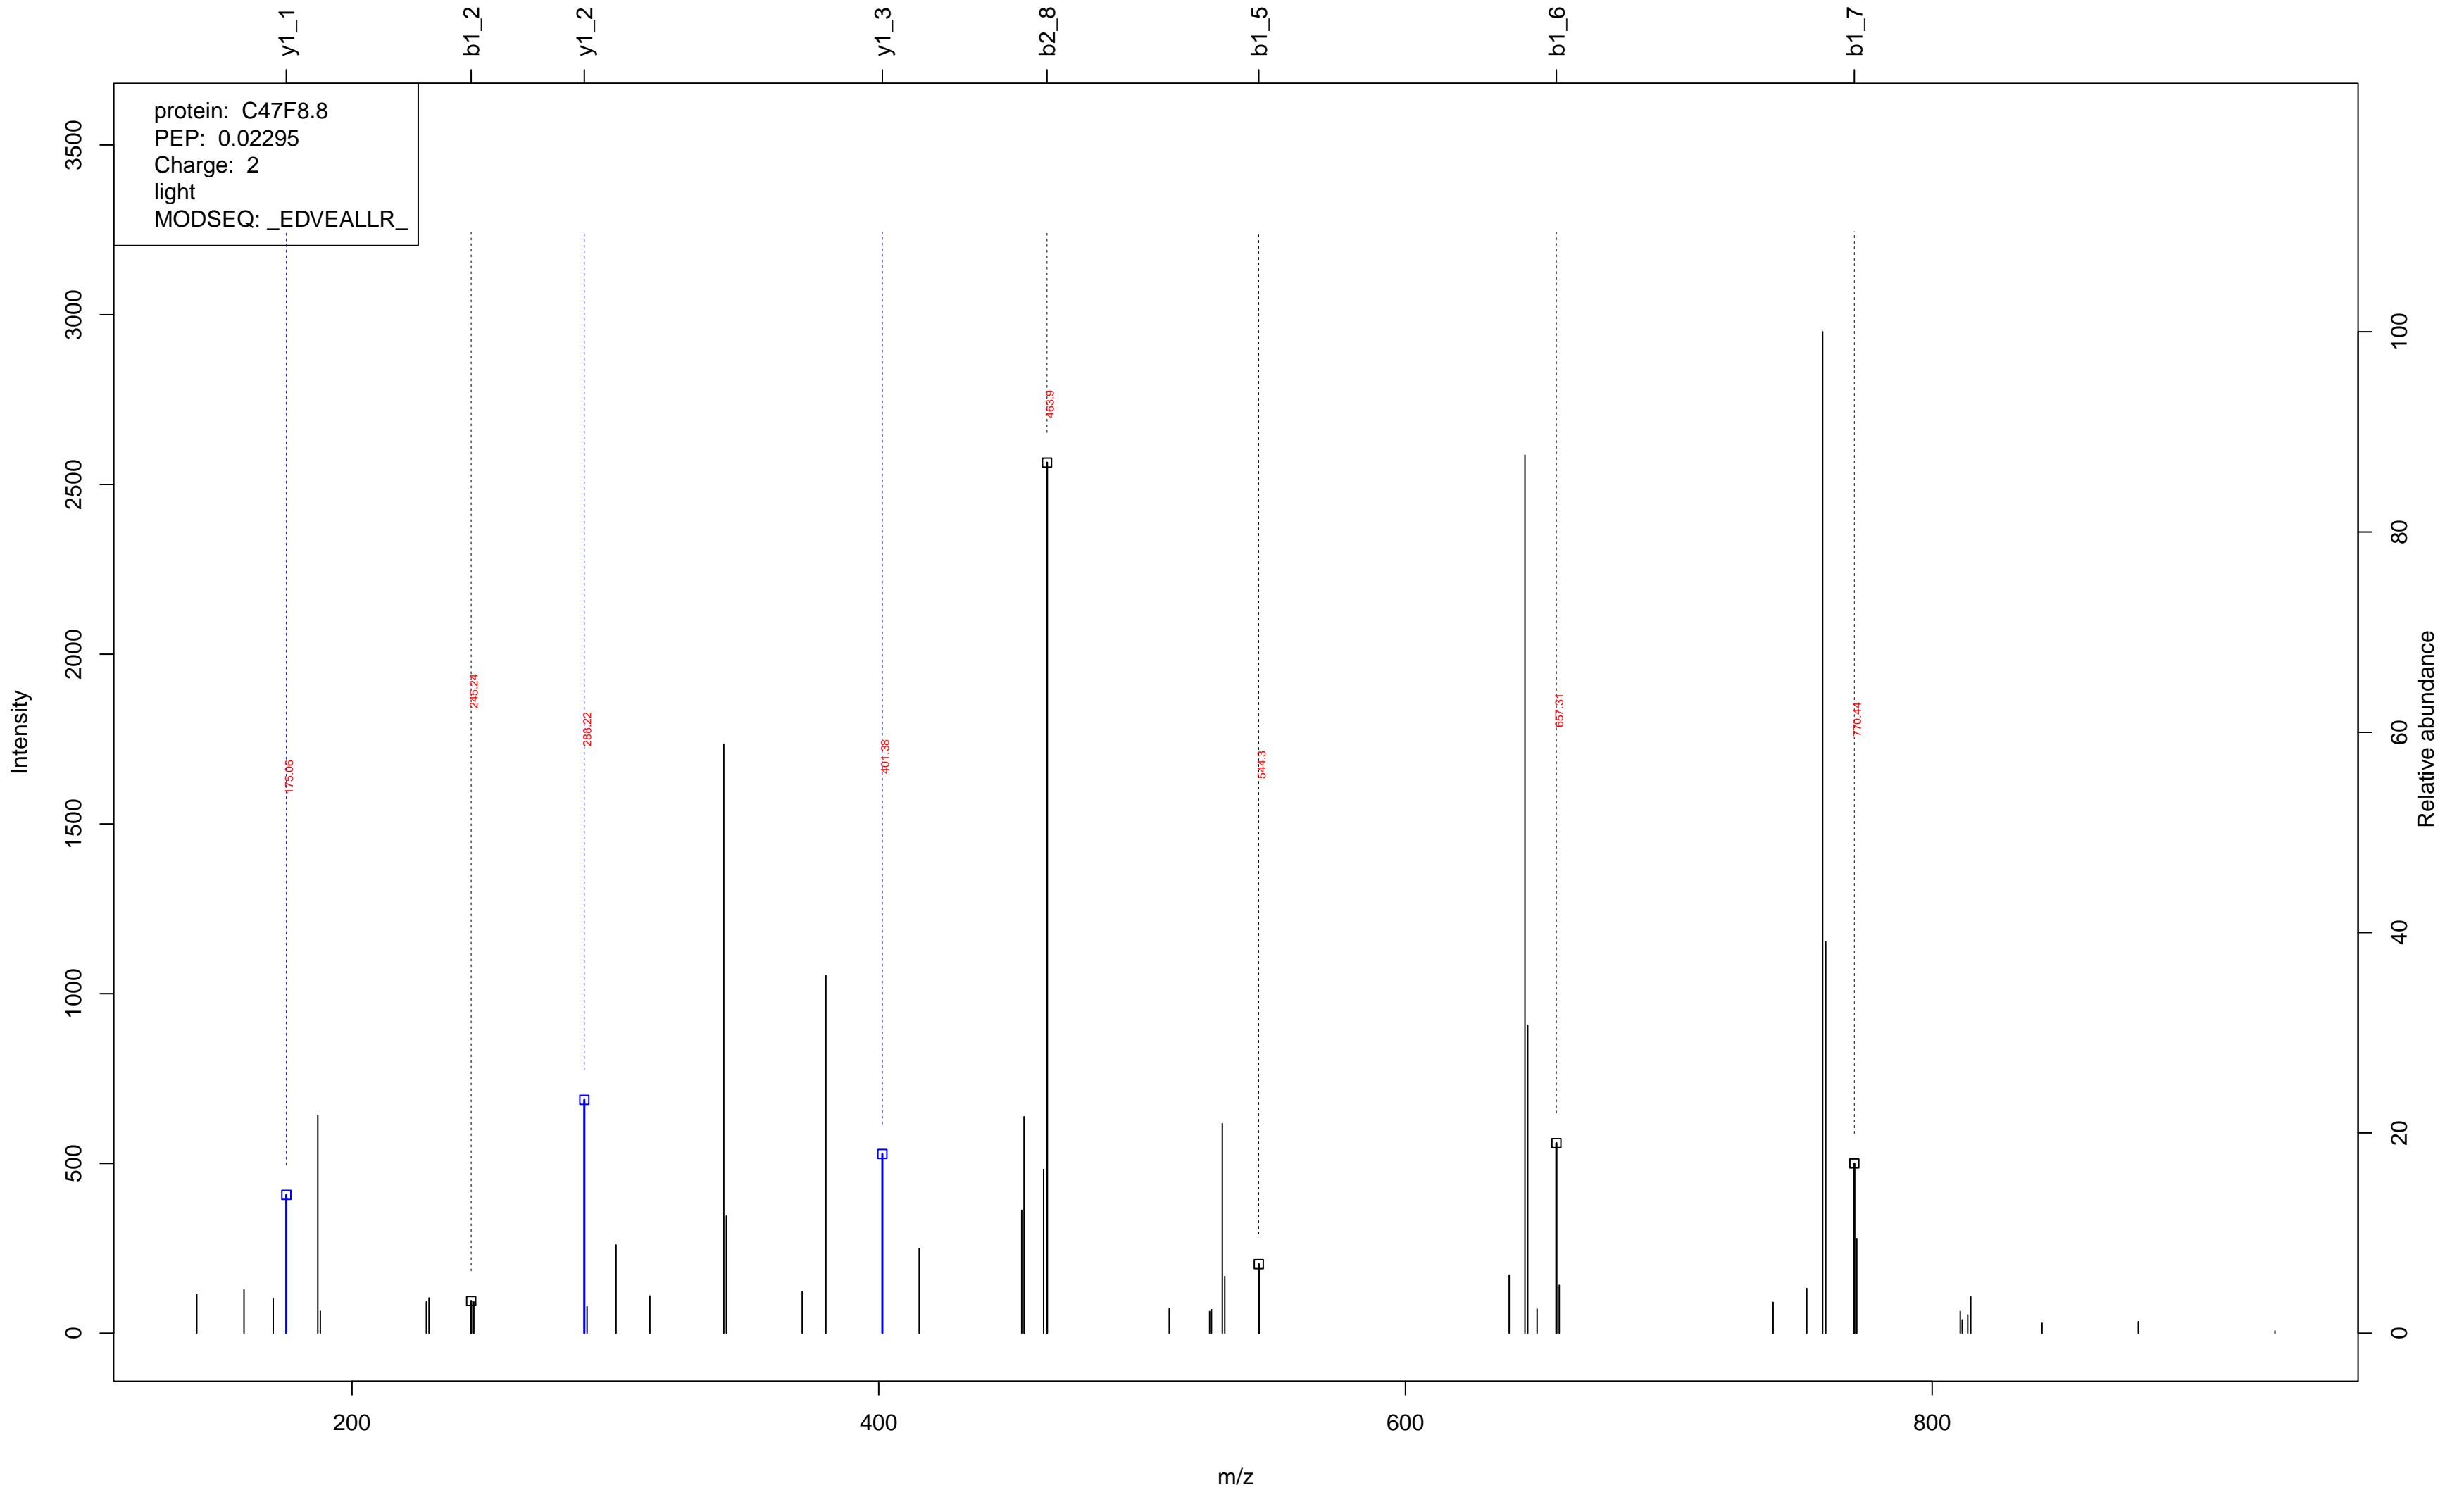

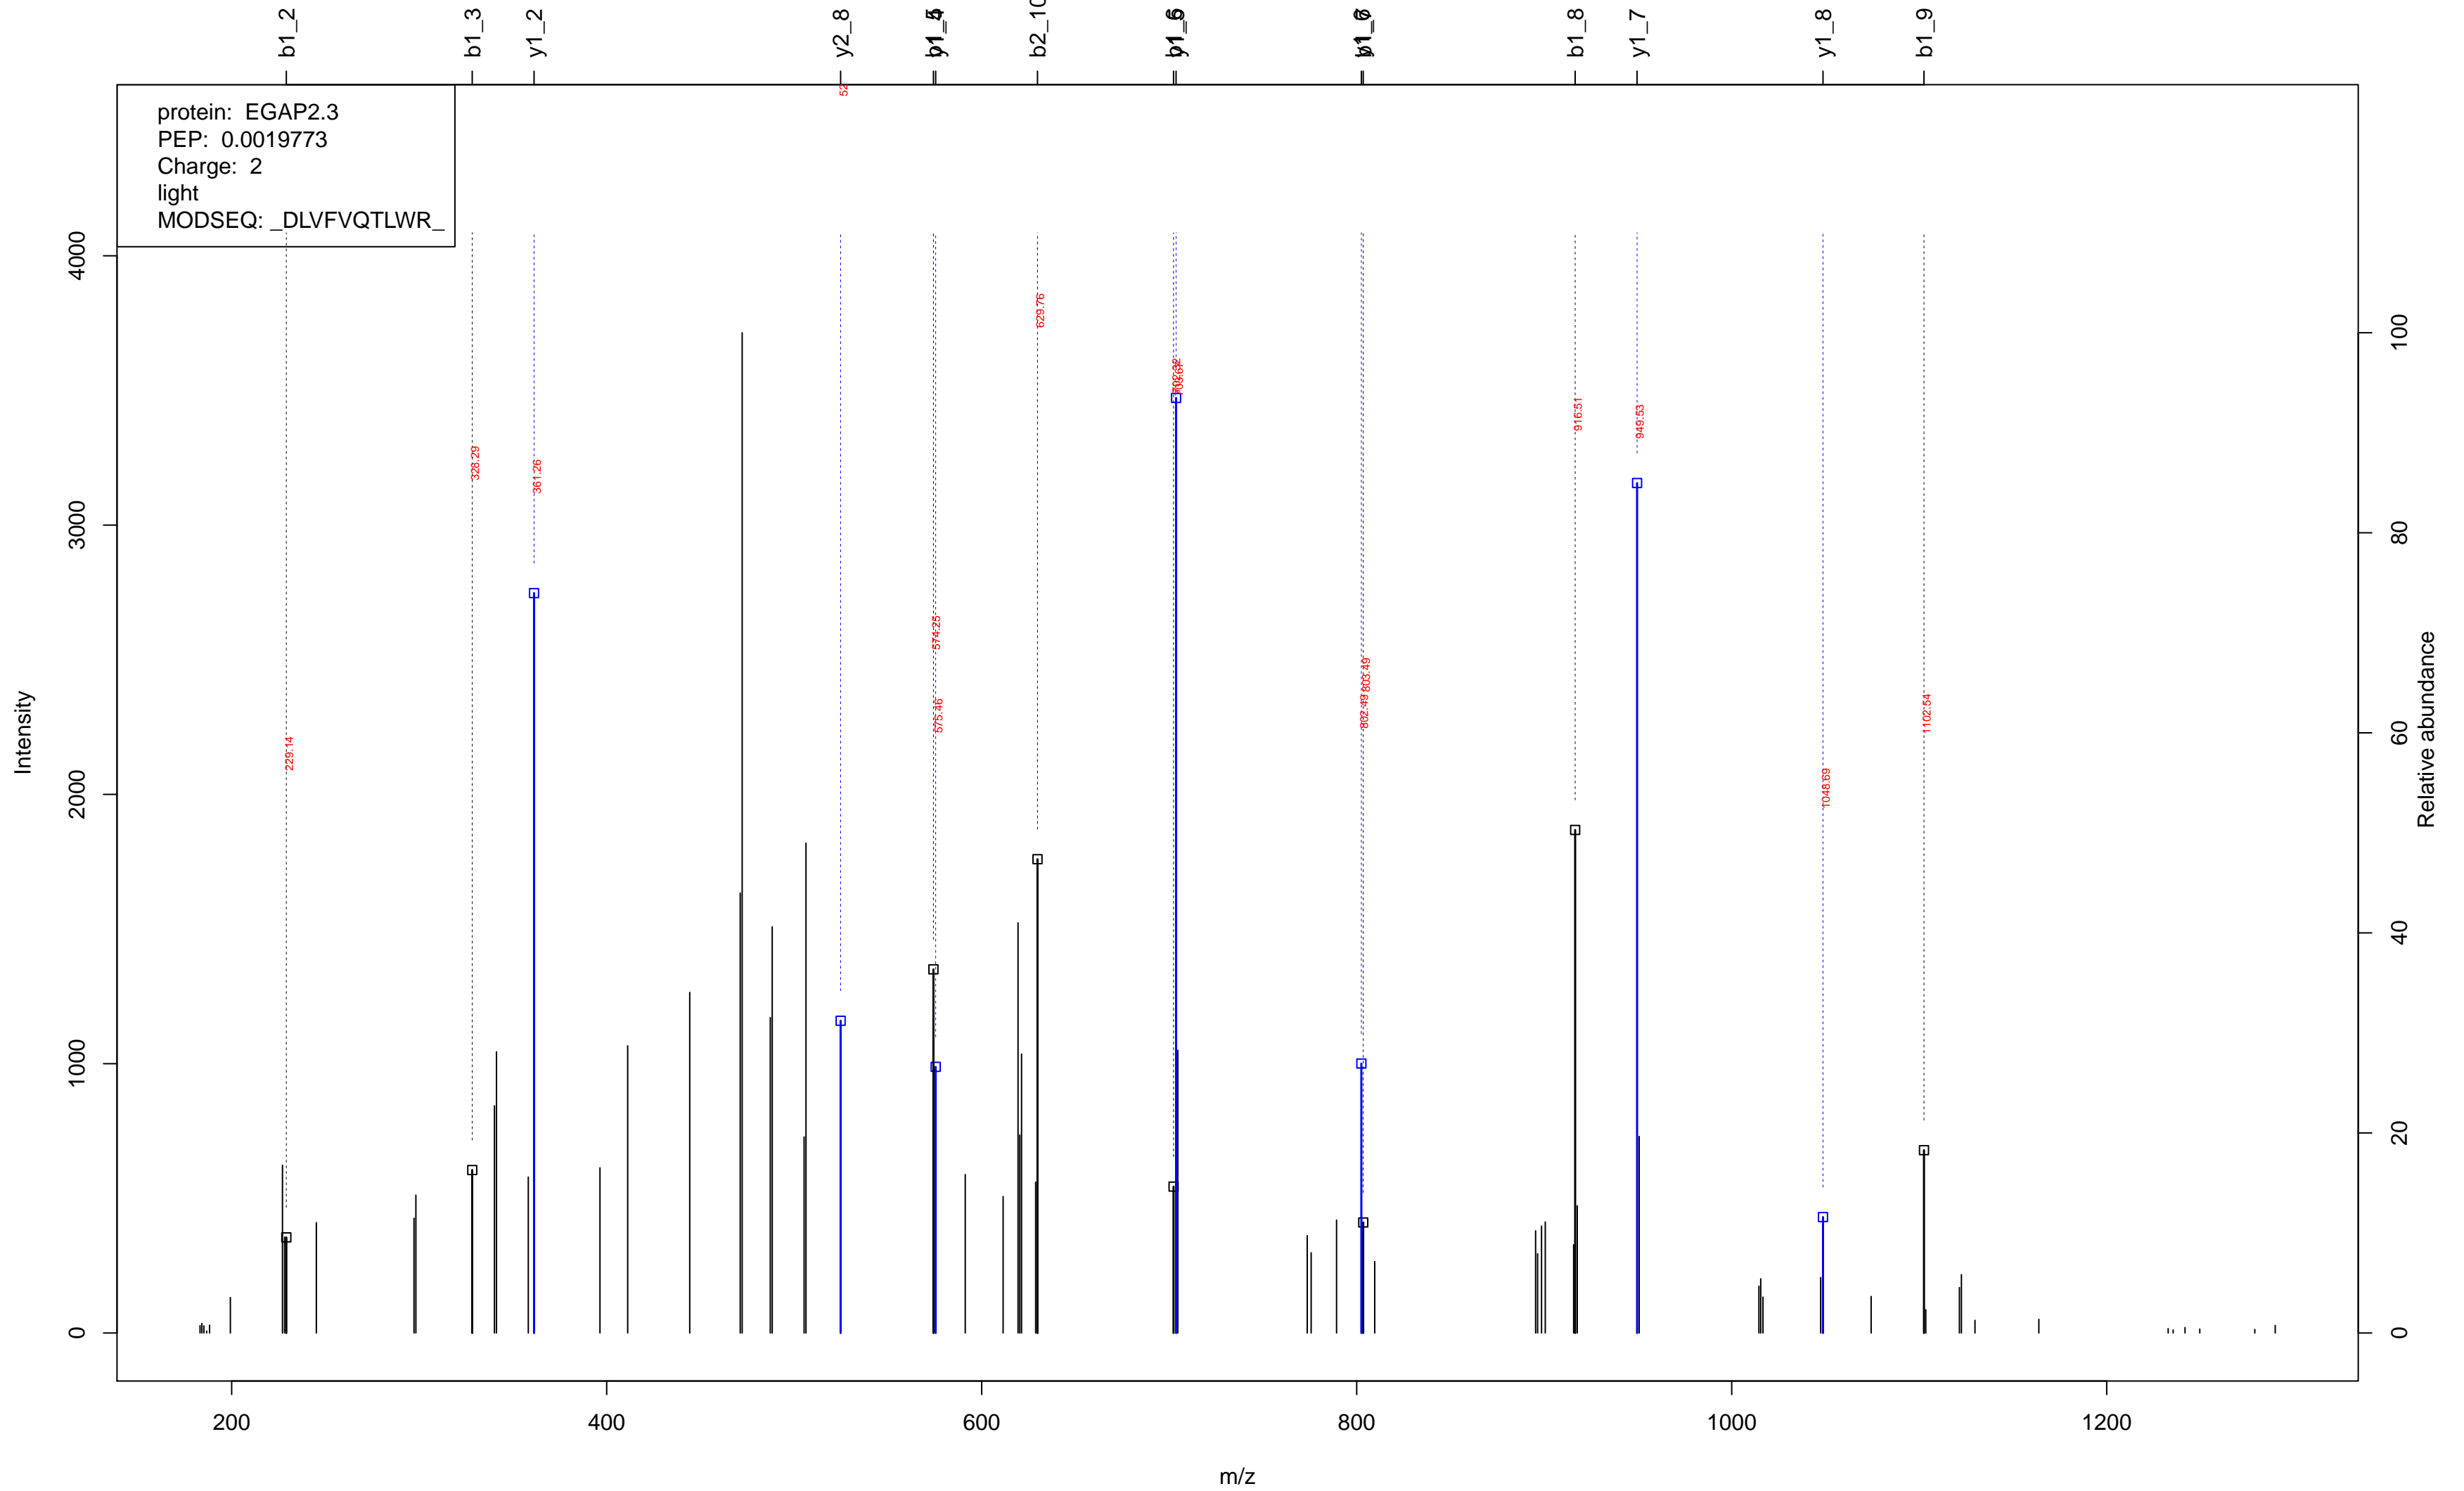

240

b2\_5 y1\_2 y2\_6 y1\_4 y2\_8 y2\_9 y1\_5 b1\_7 y1\_7 b1\_8 y1\_8 b1\_10 b1\_11

protein: C25D7.8  
PEP: 0.0018576  
Charge: 2  
light  
MODSEQ: \_ATELSEVYGEIR\_

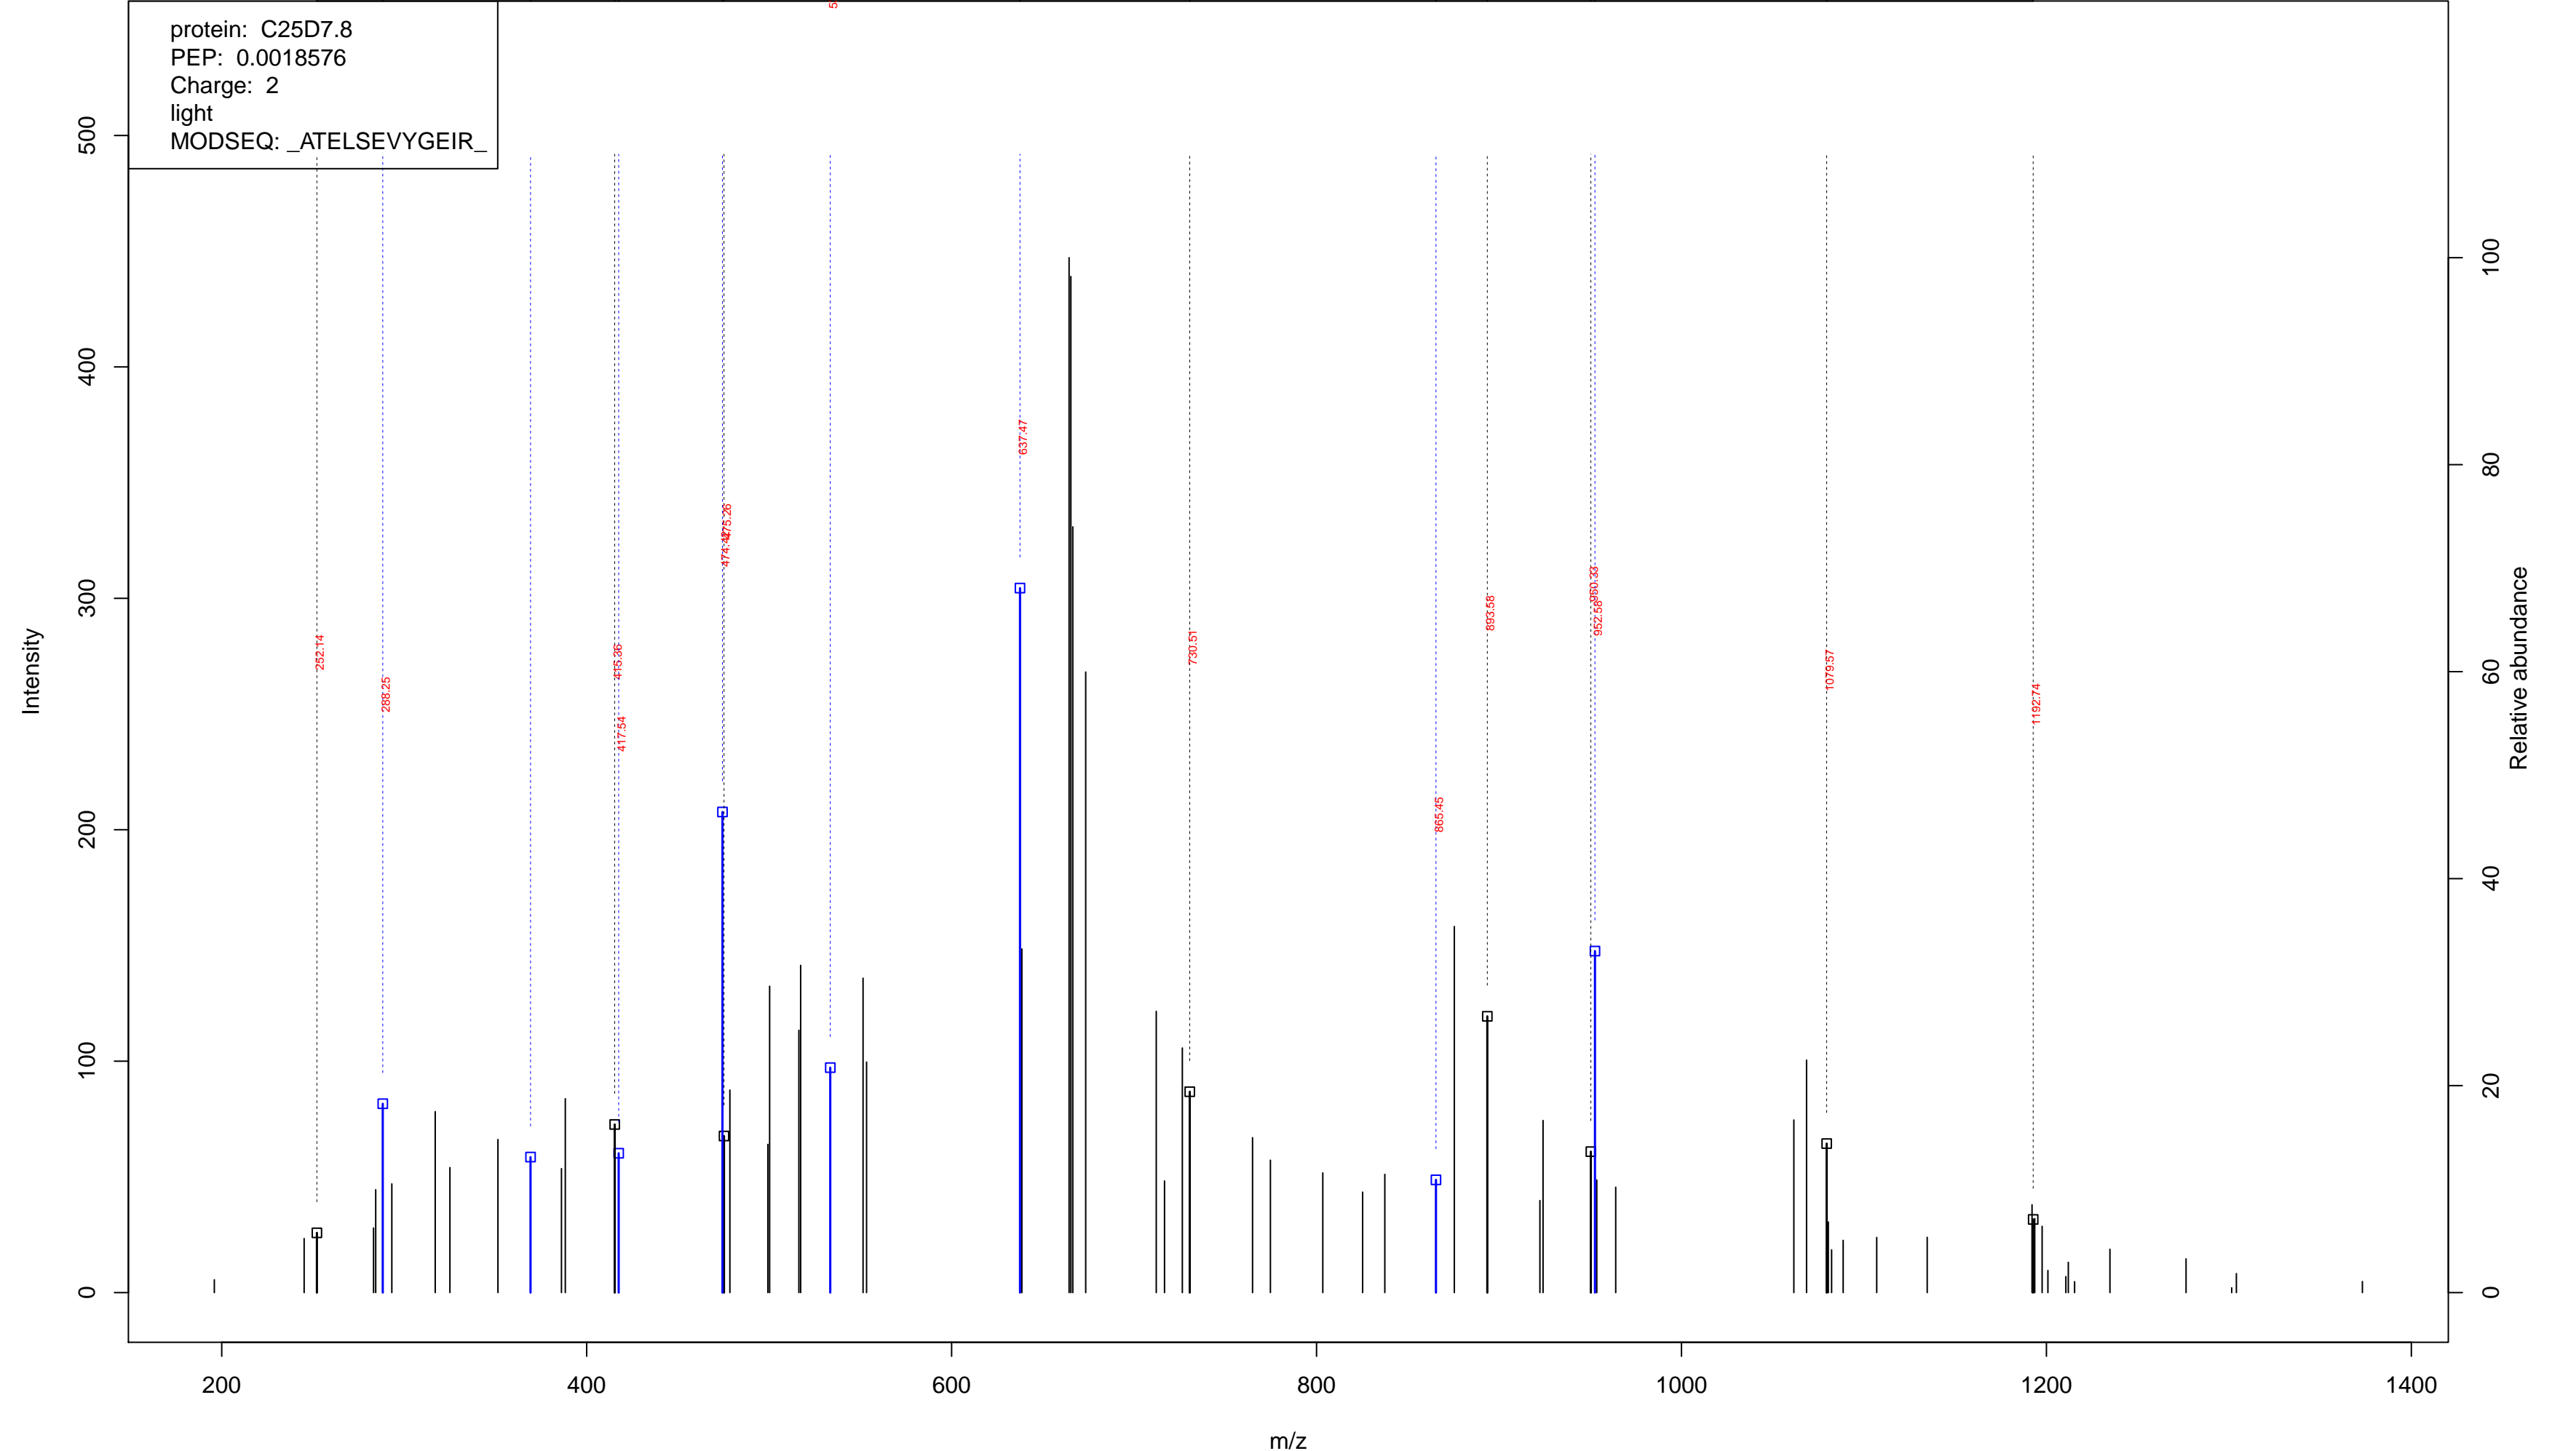



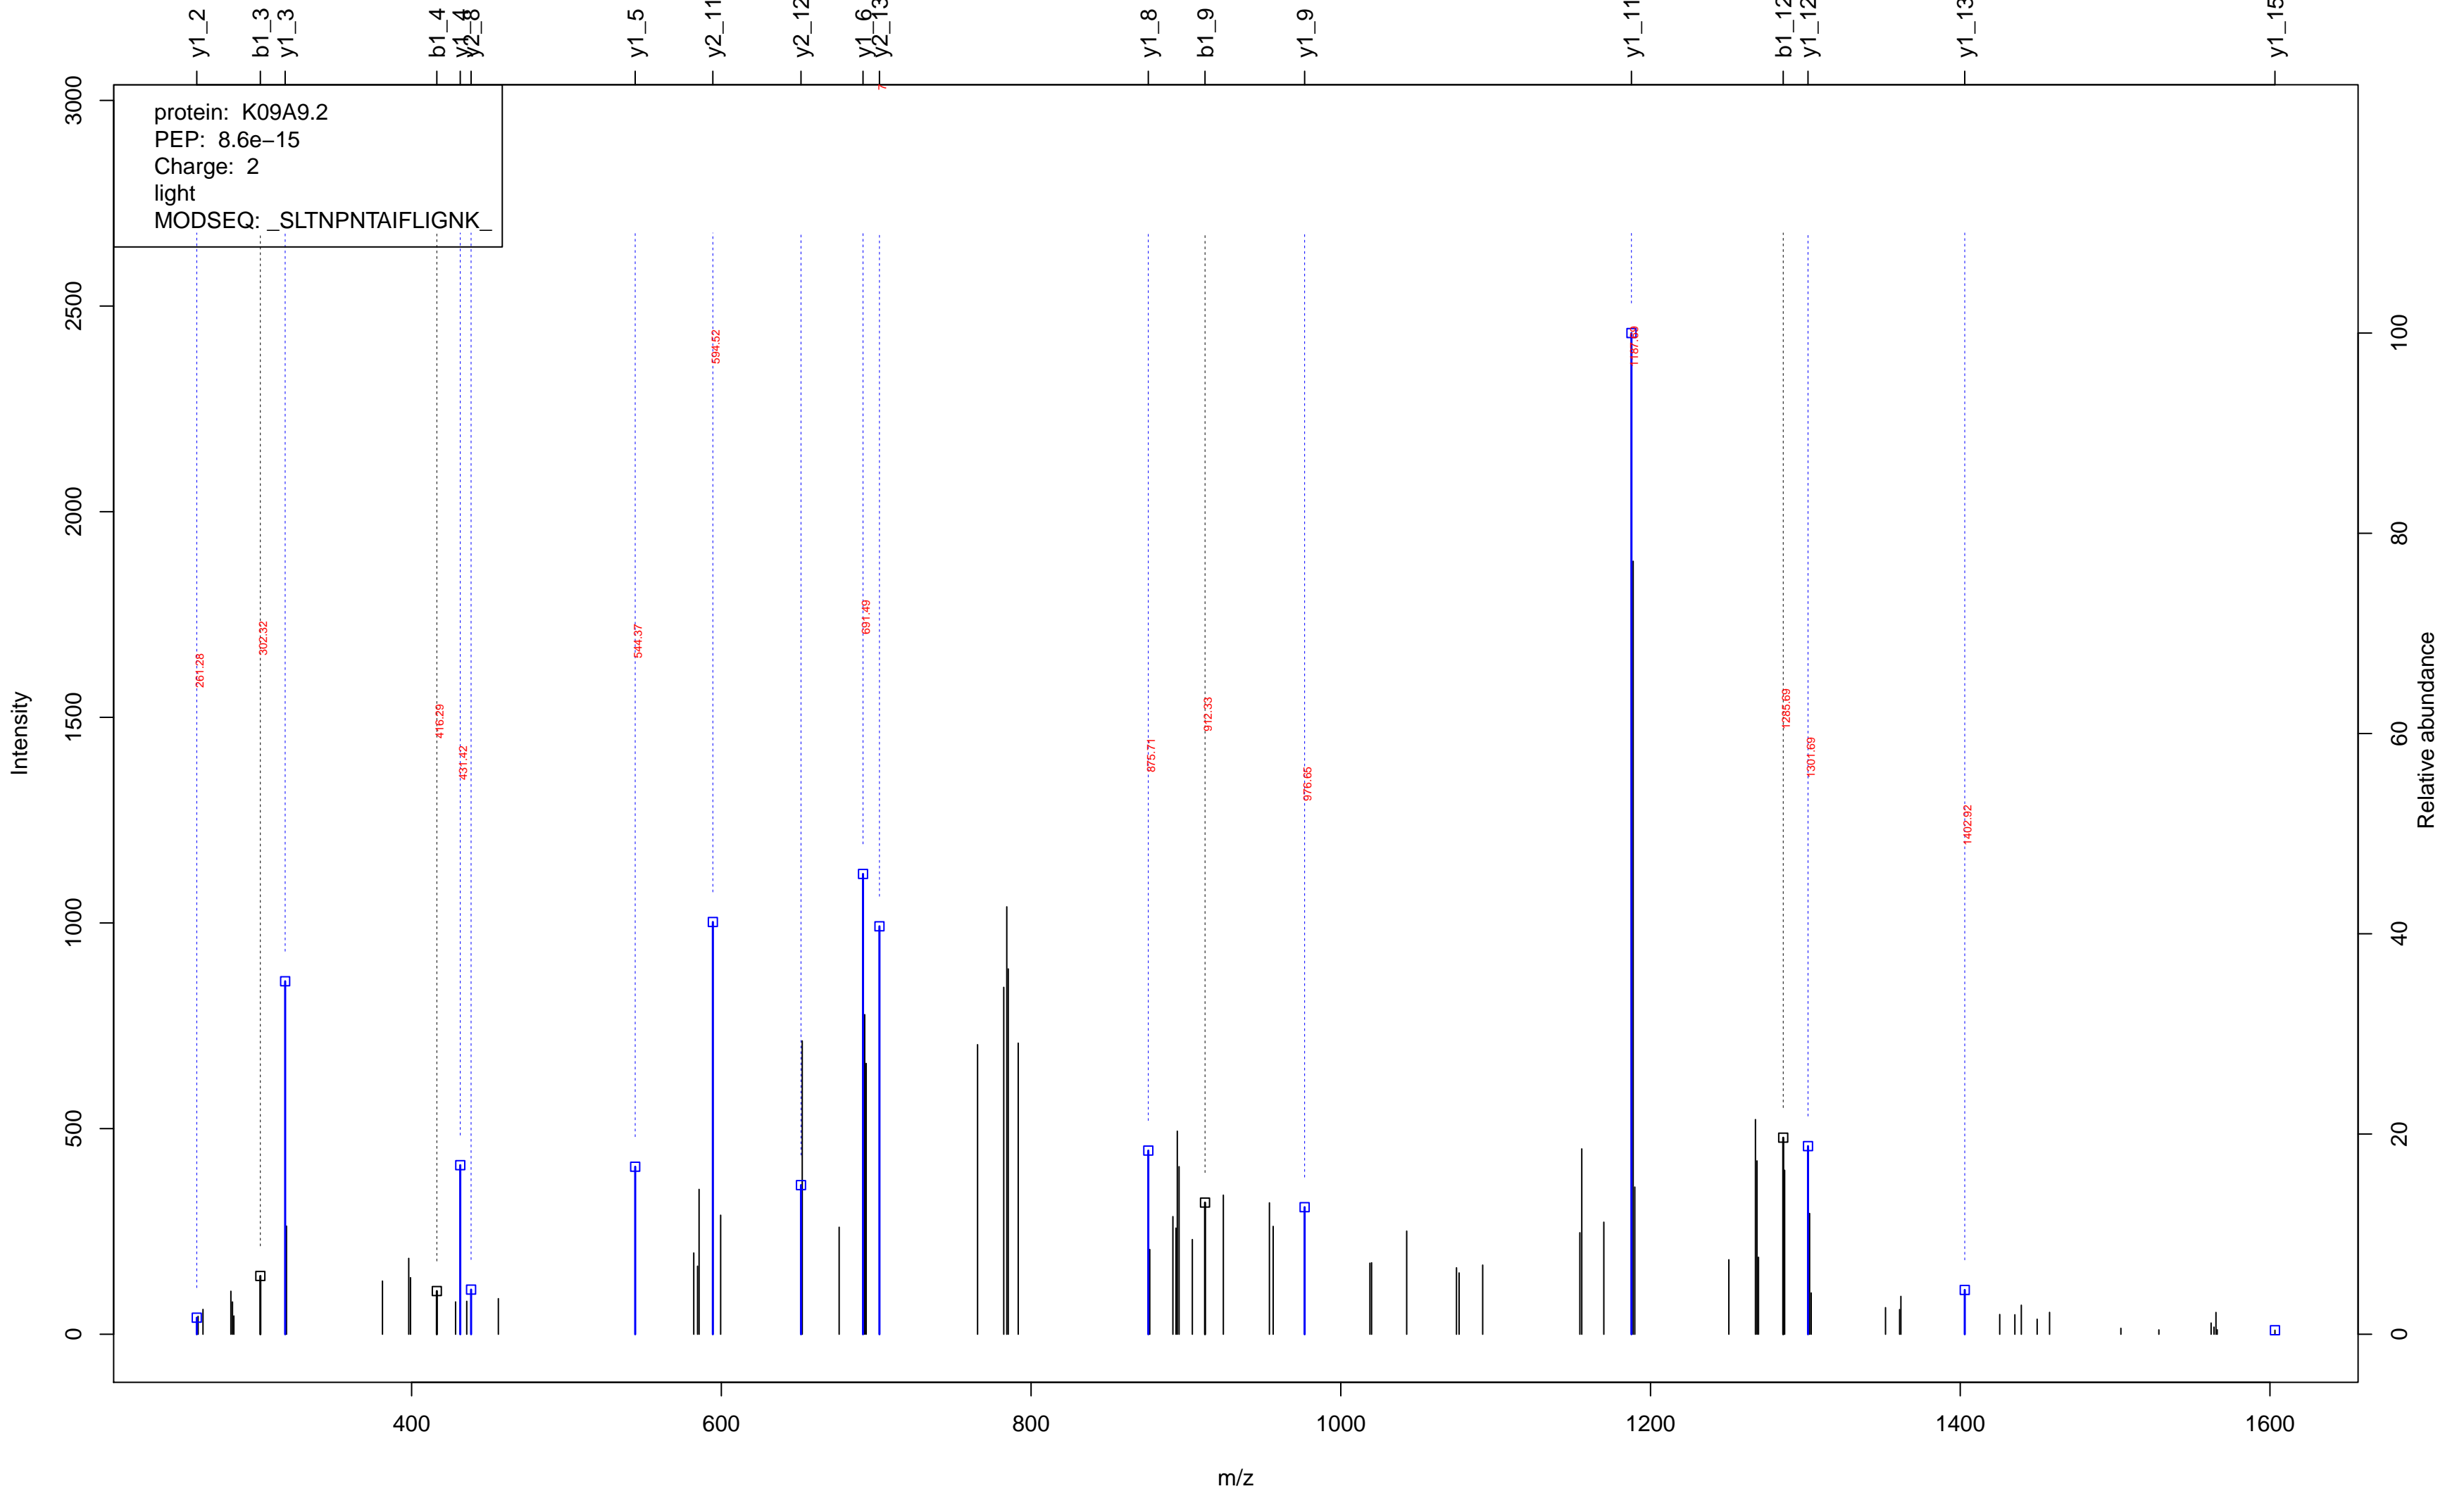

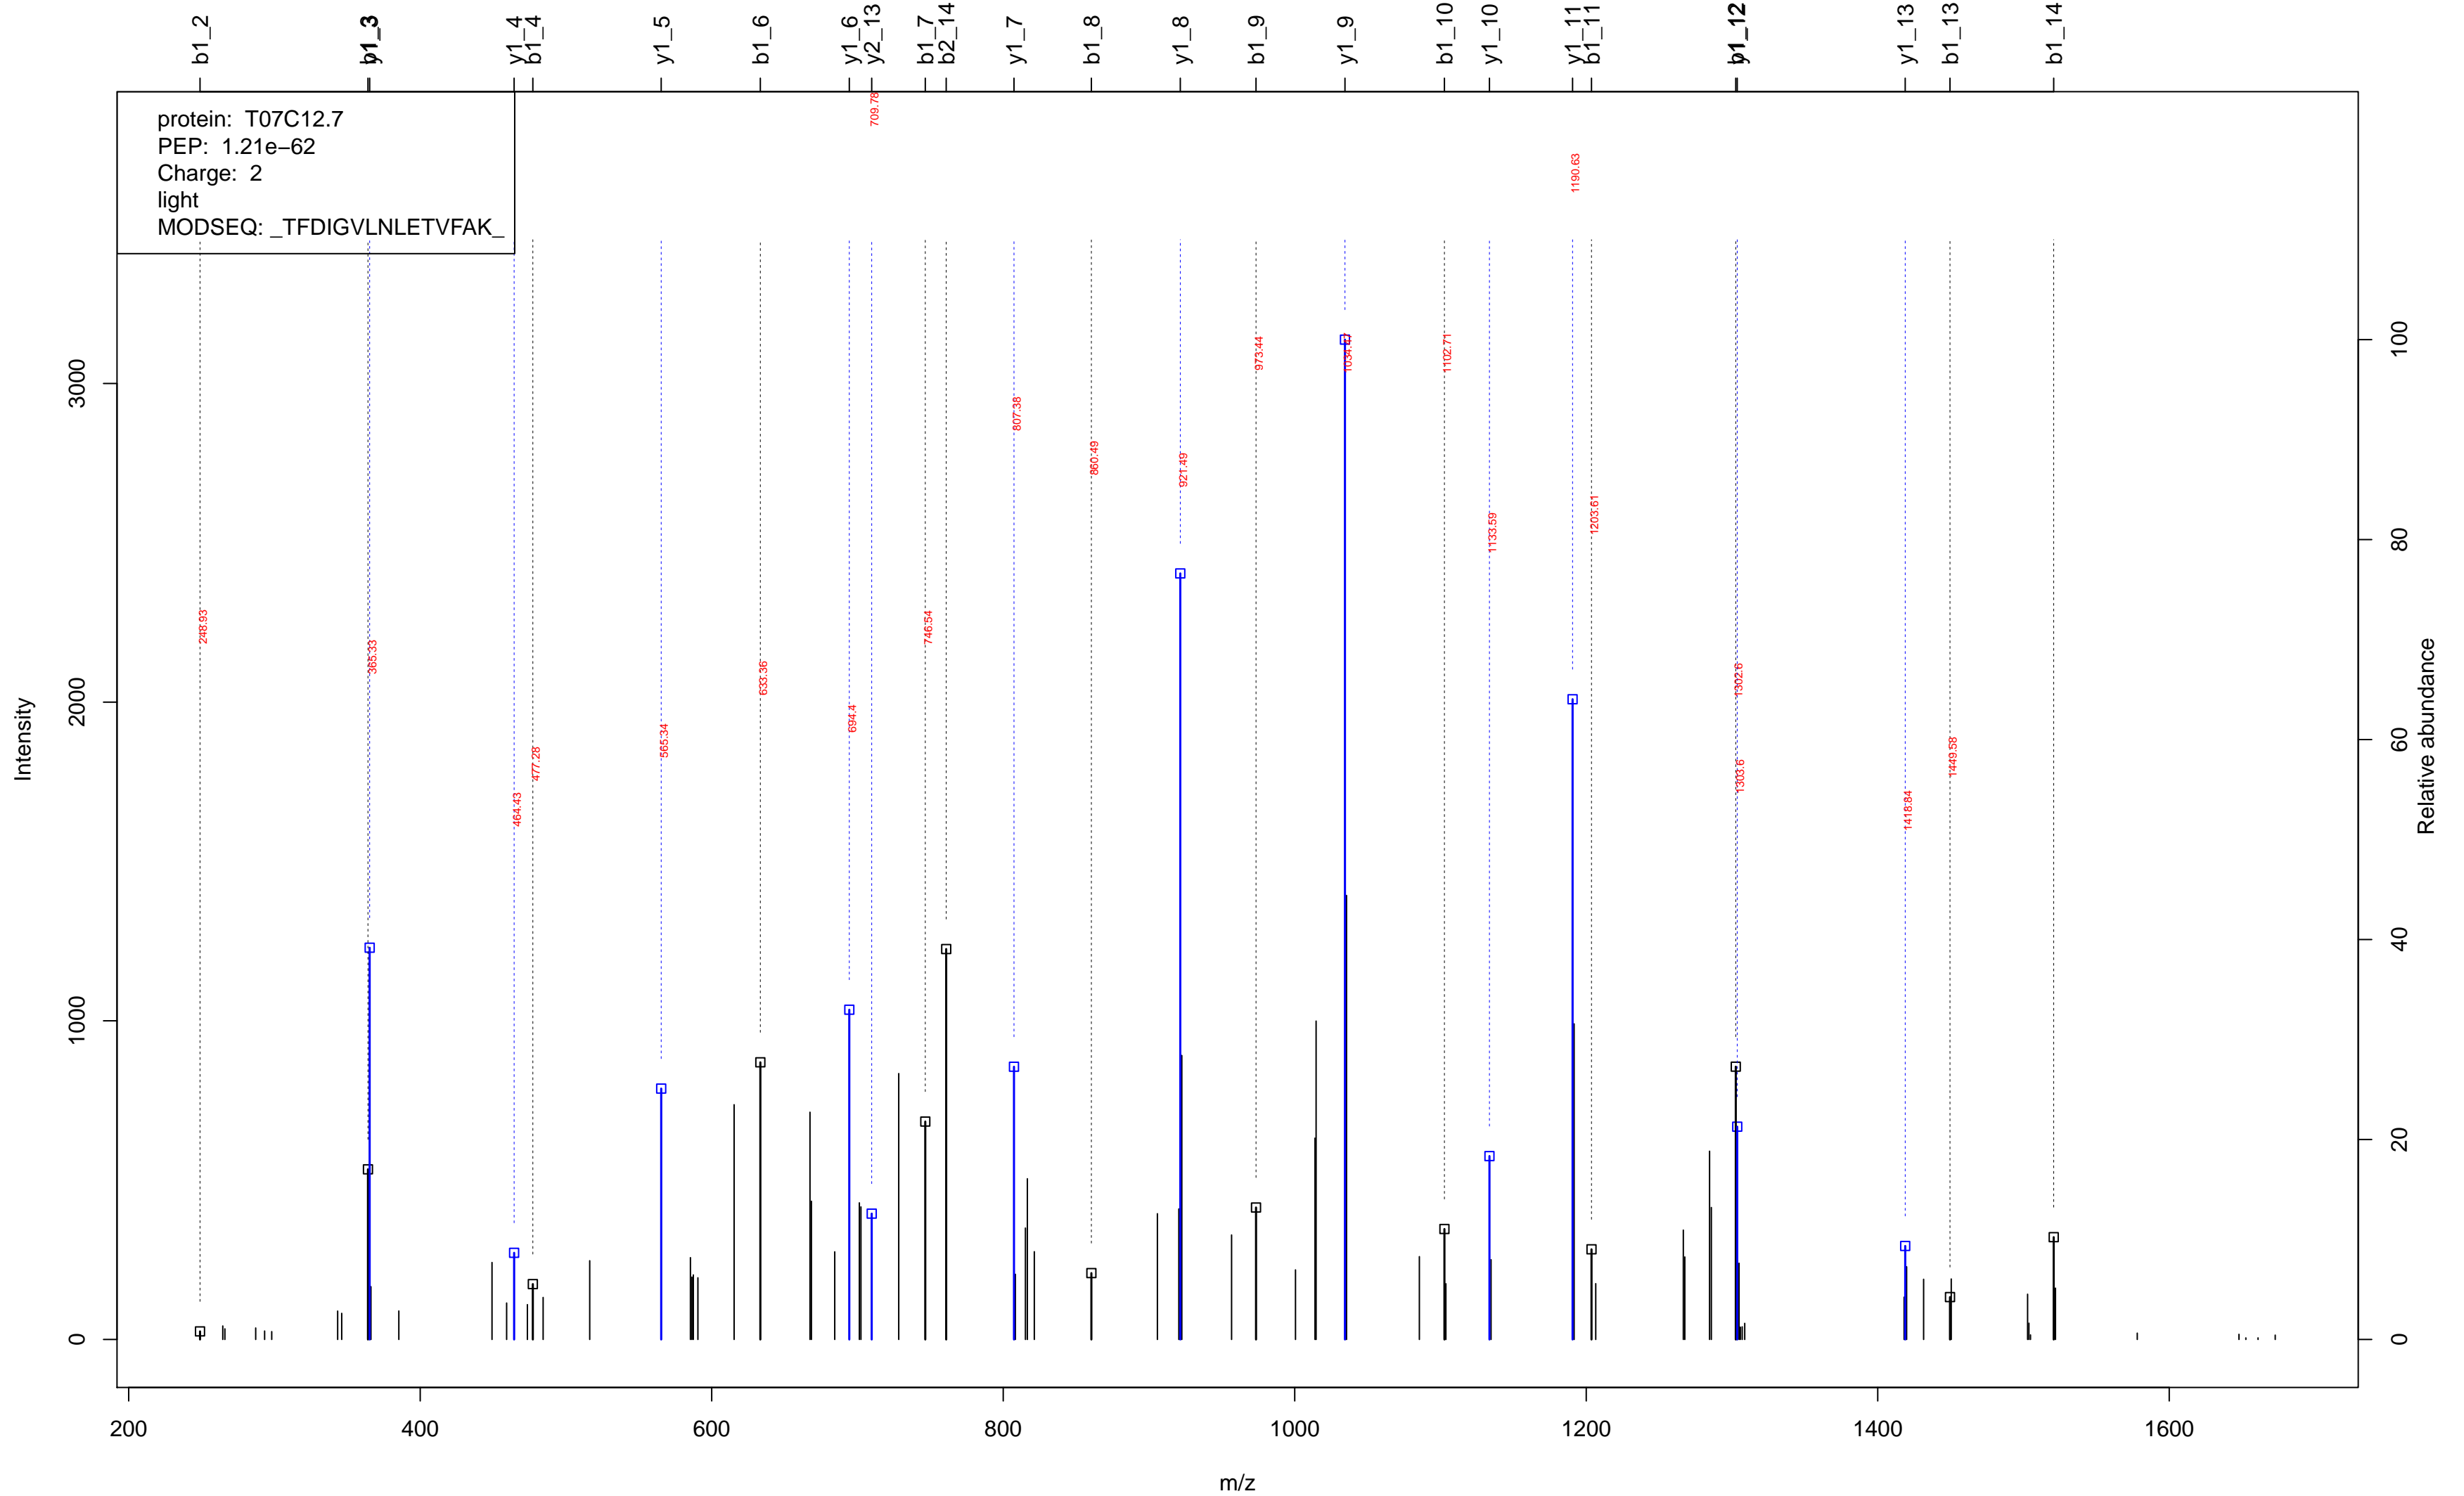

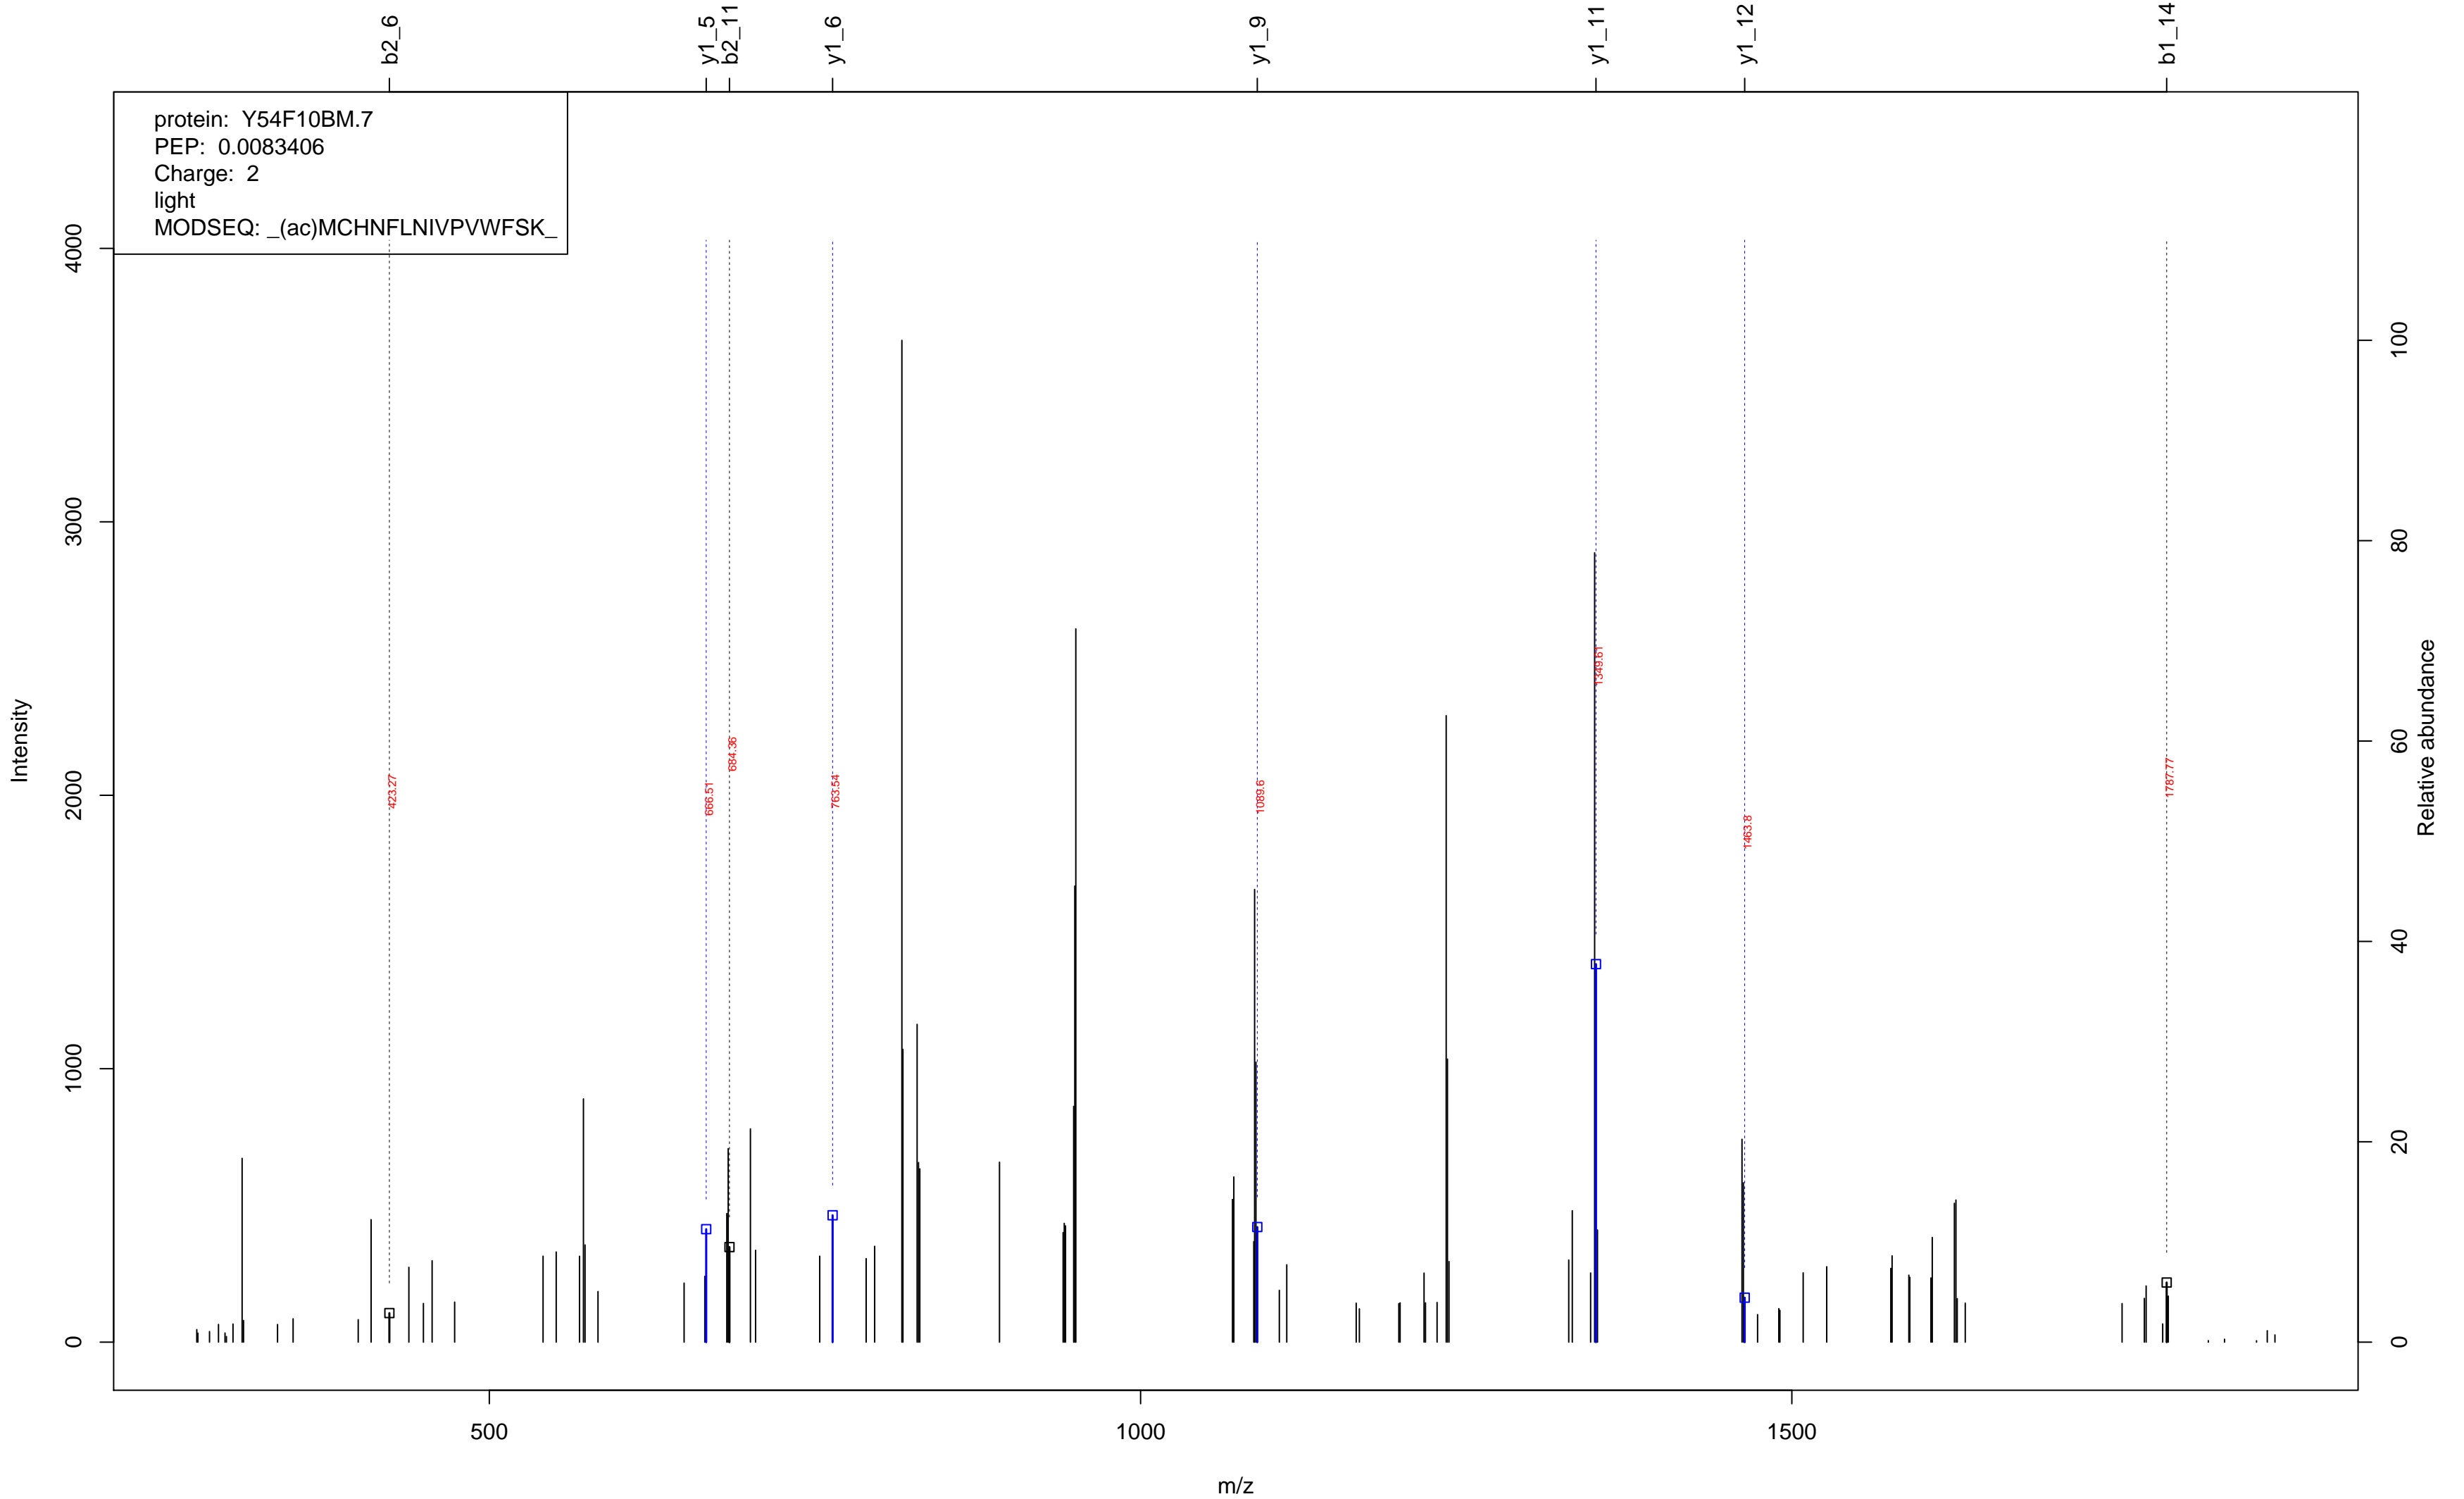

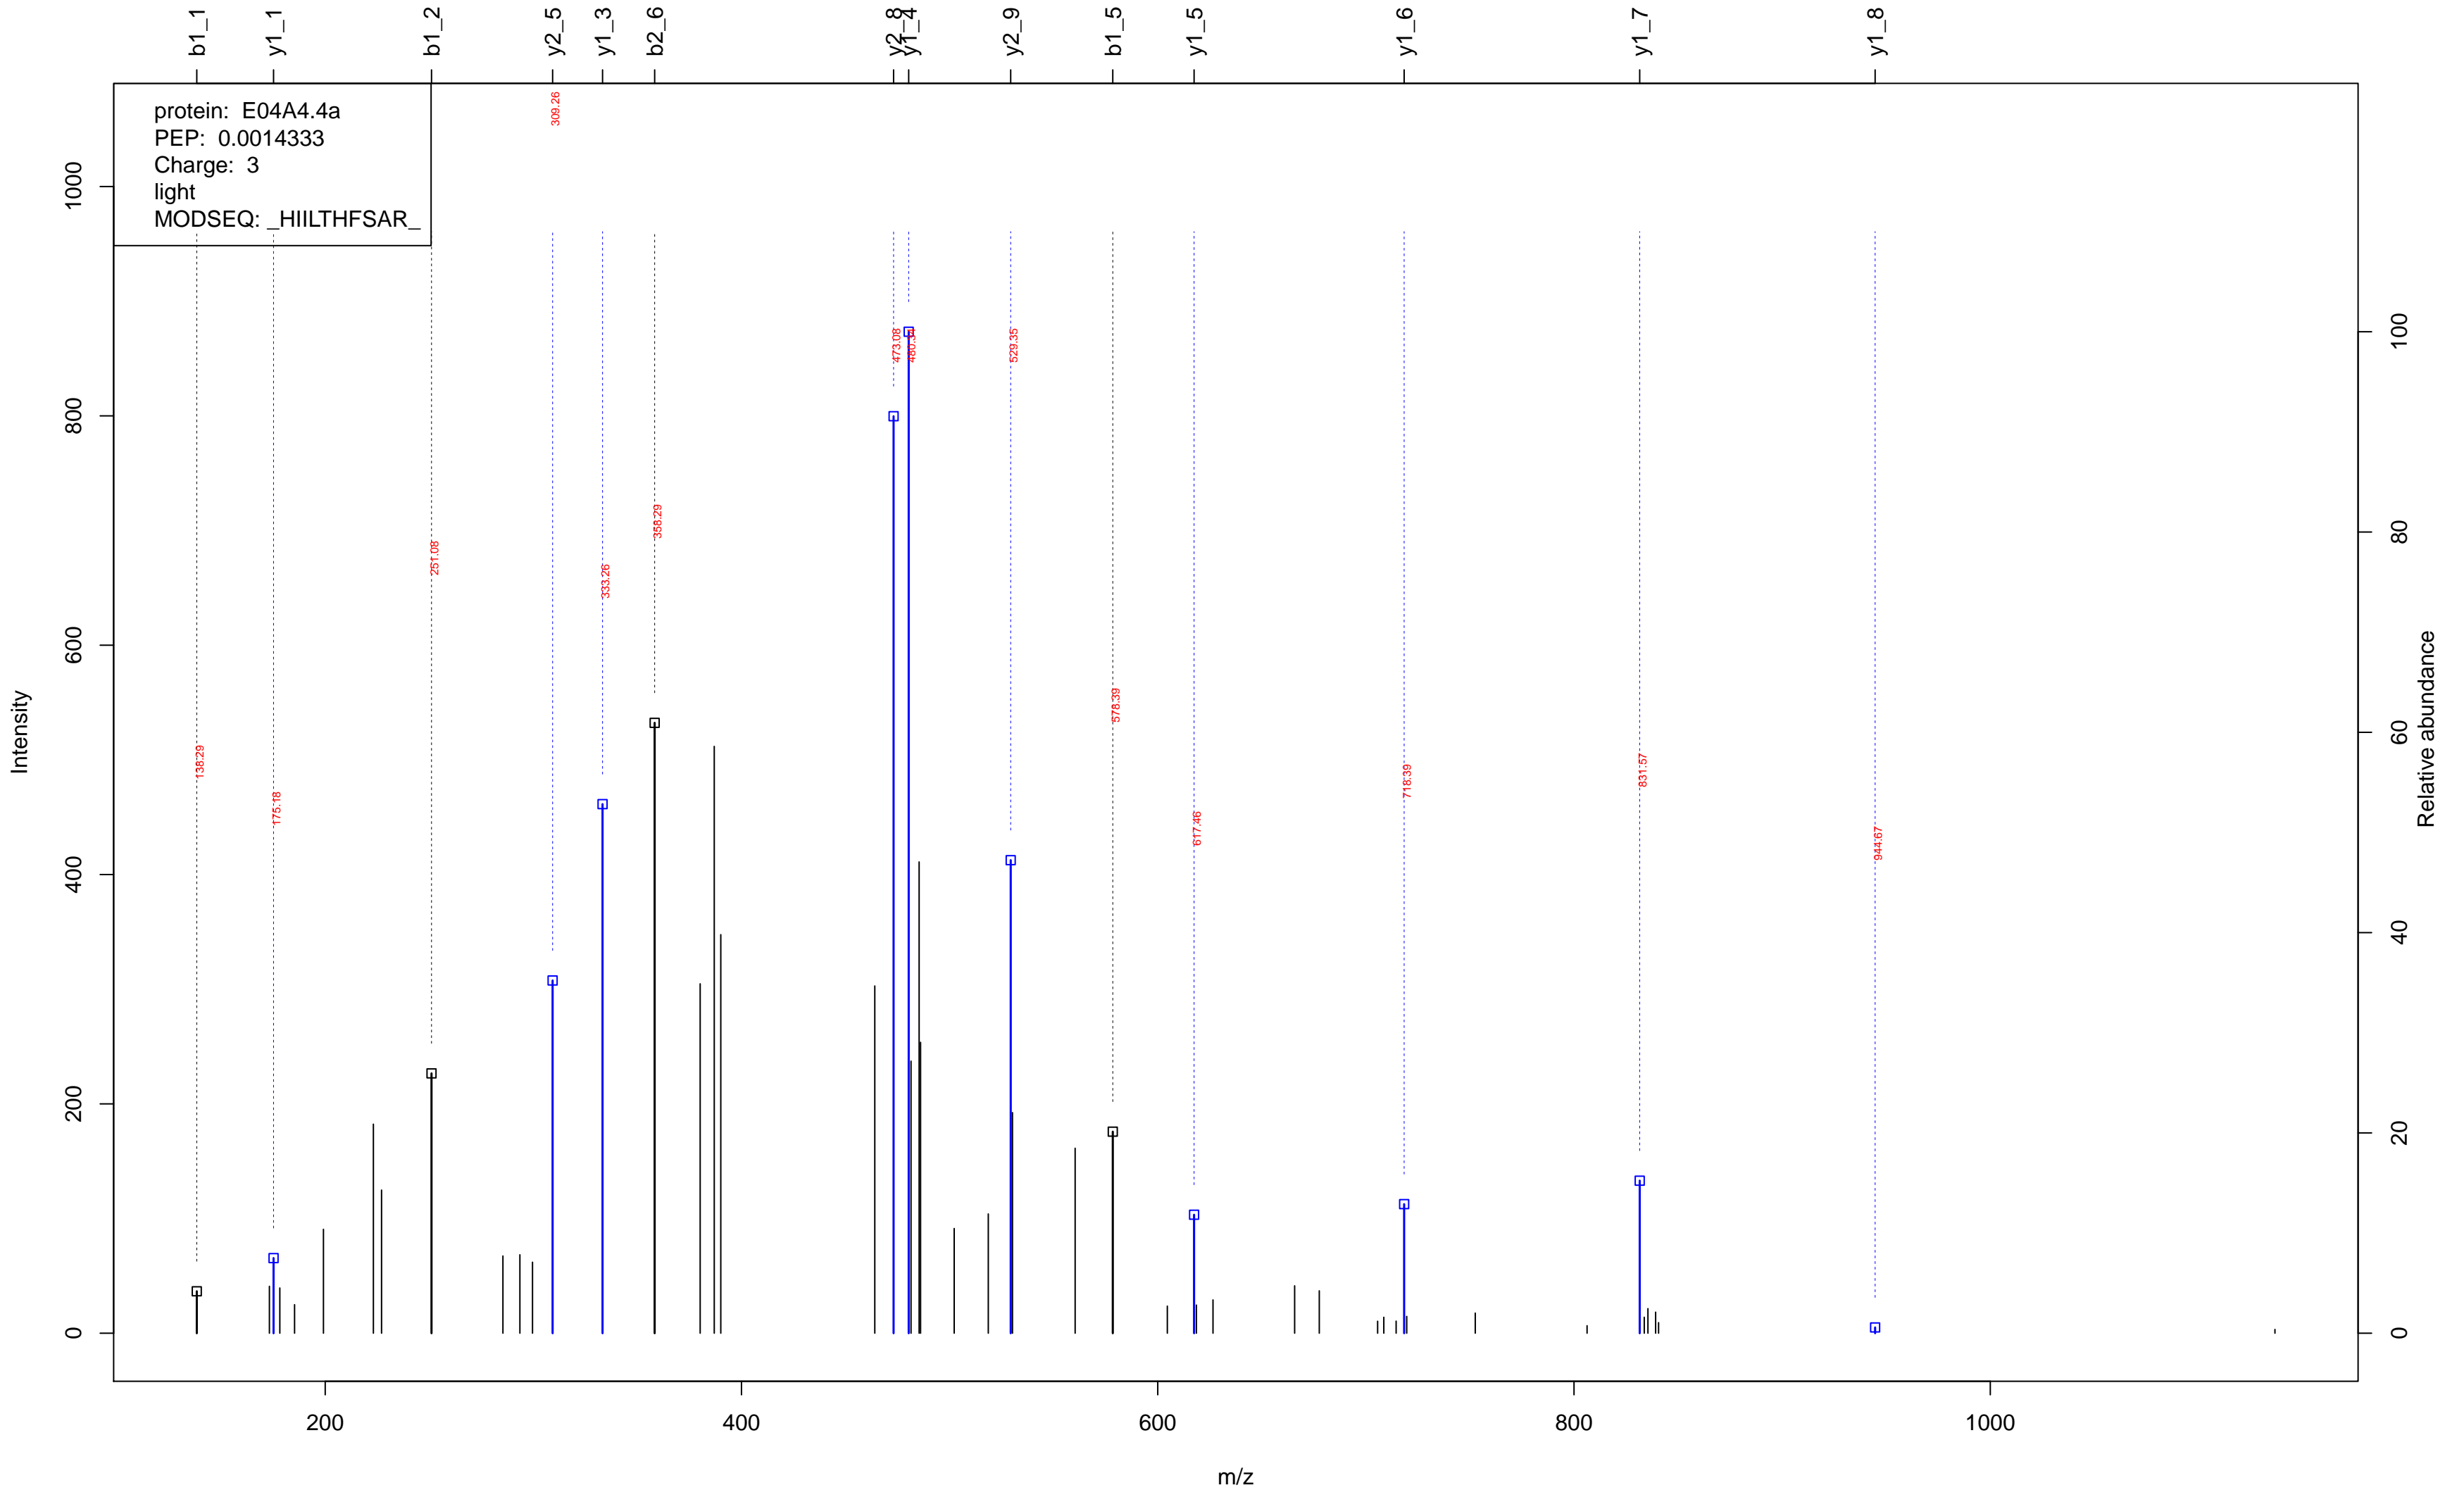

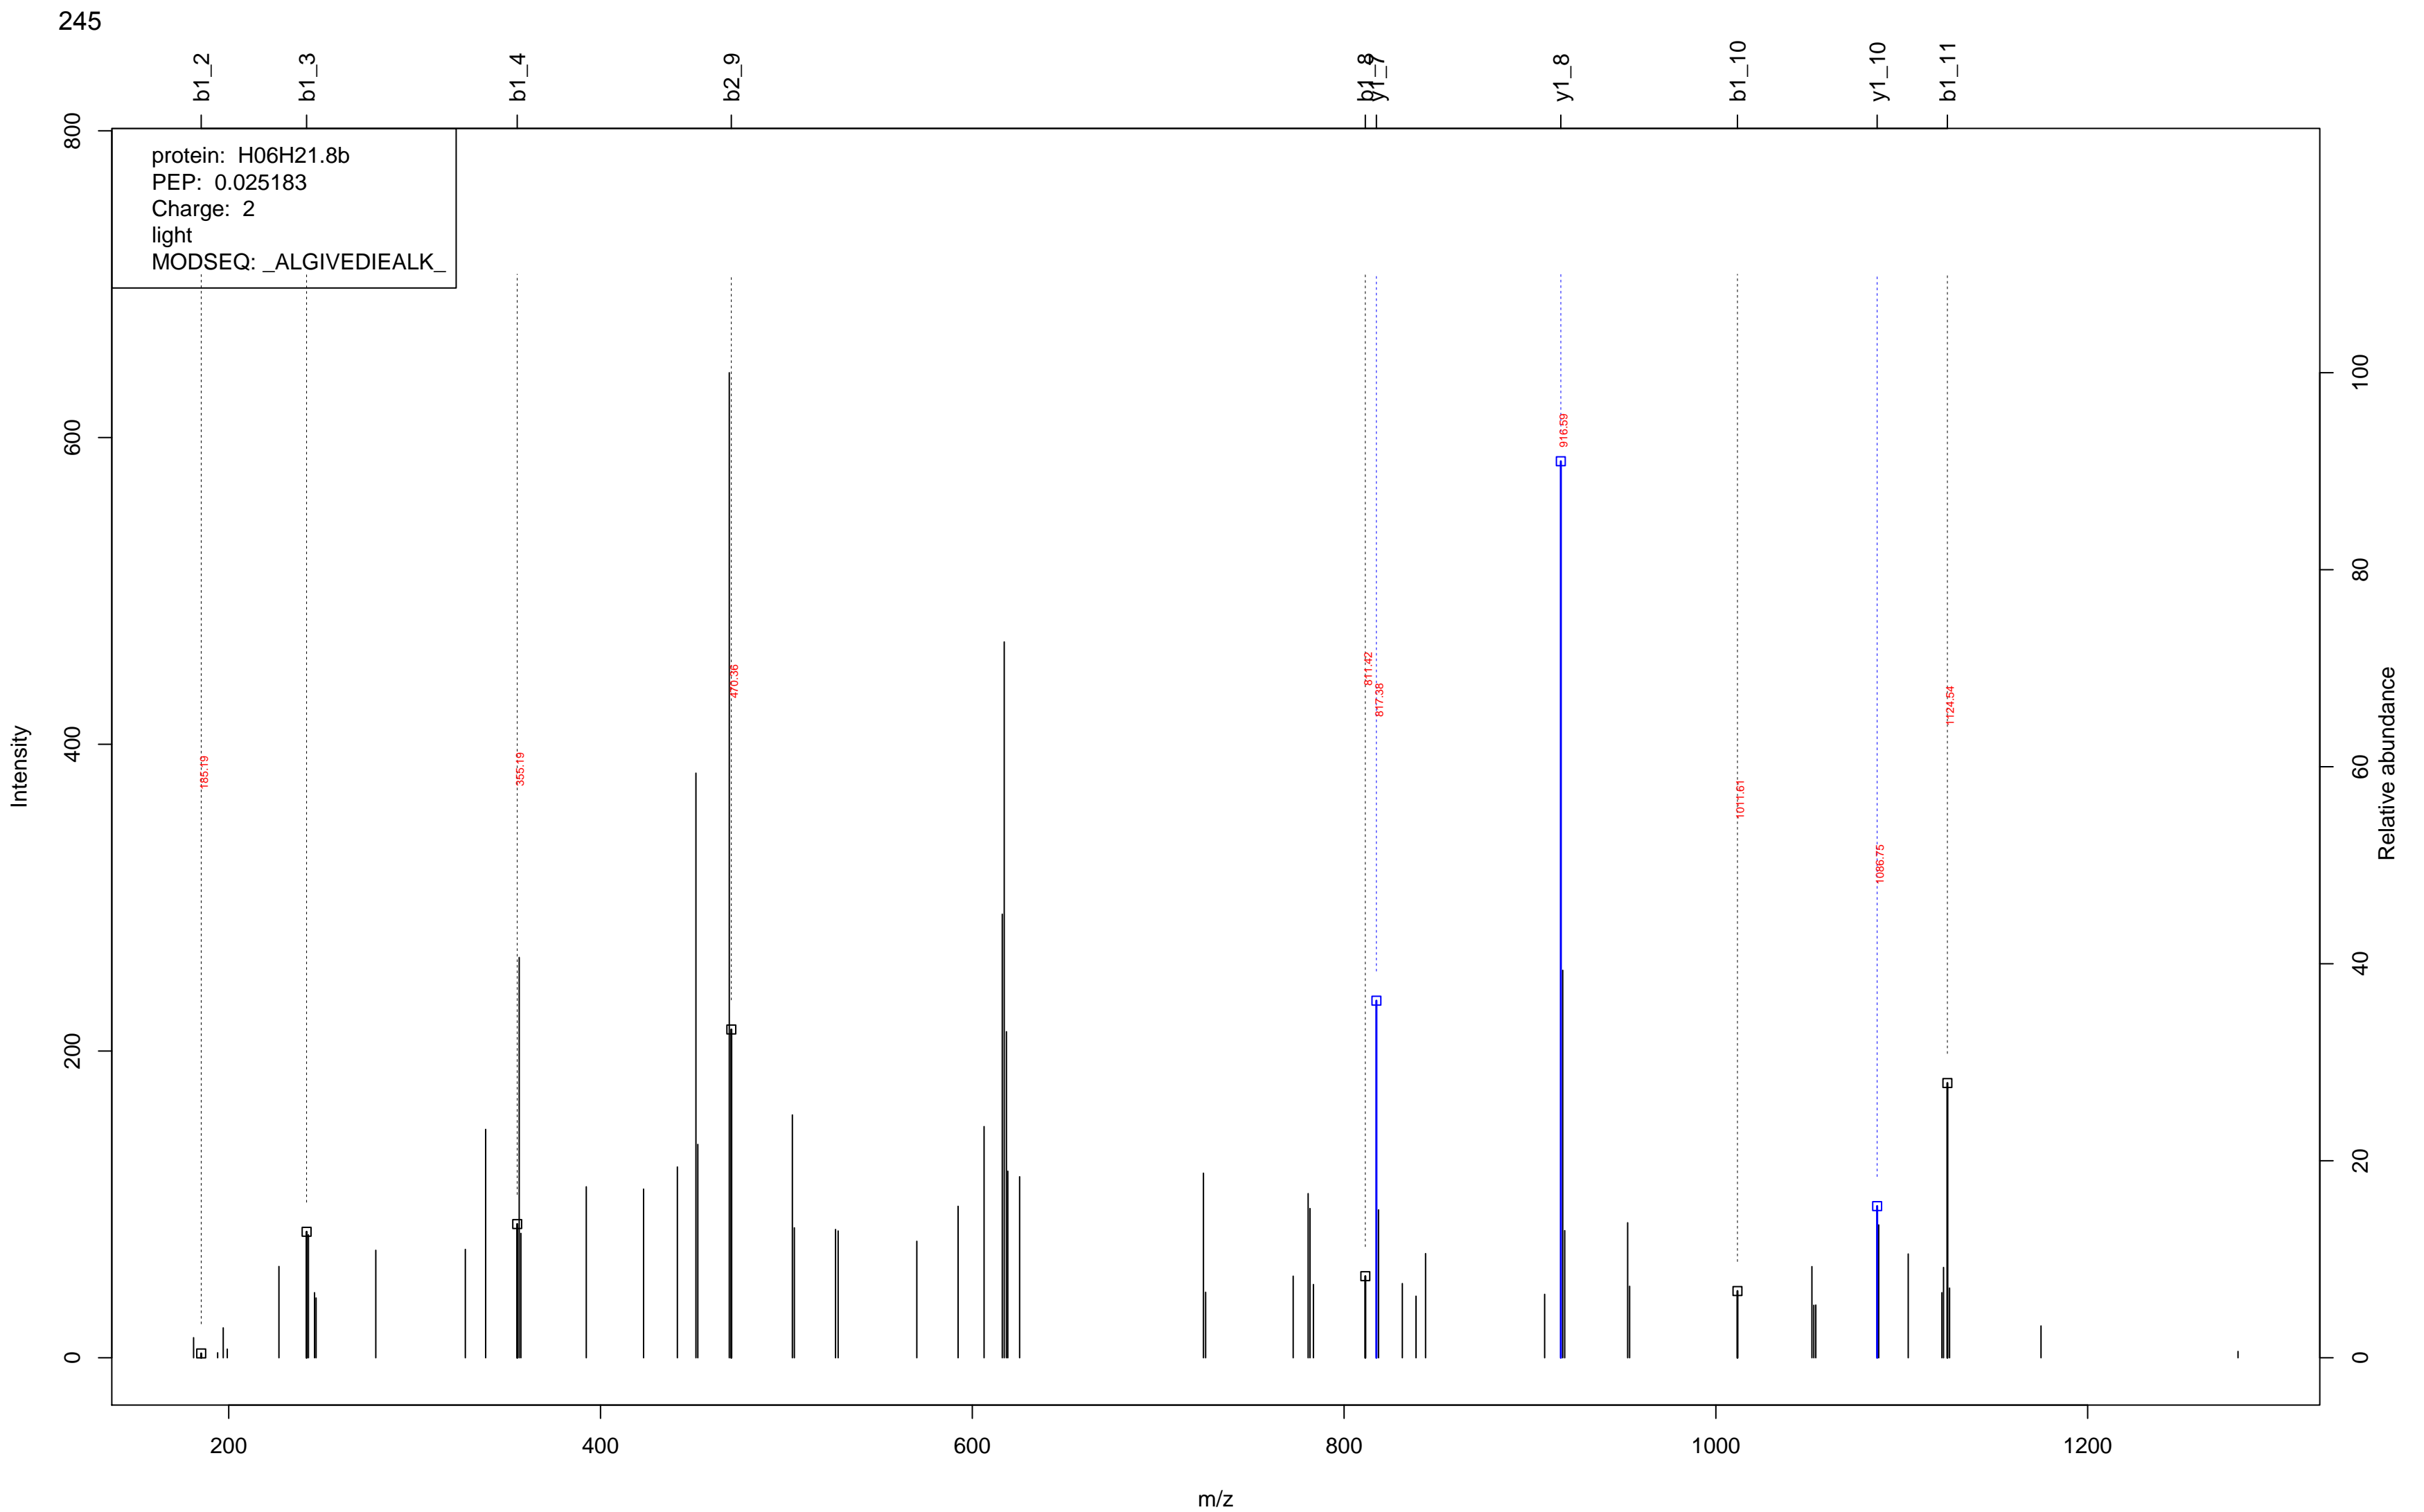

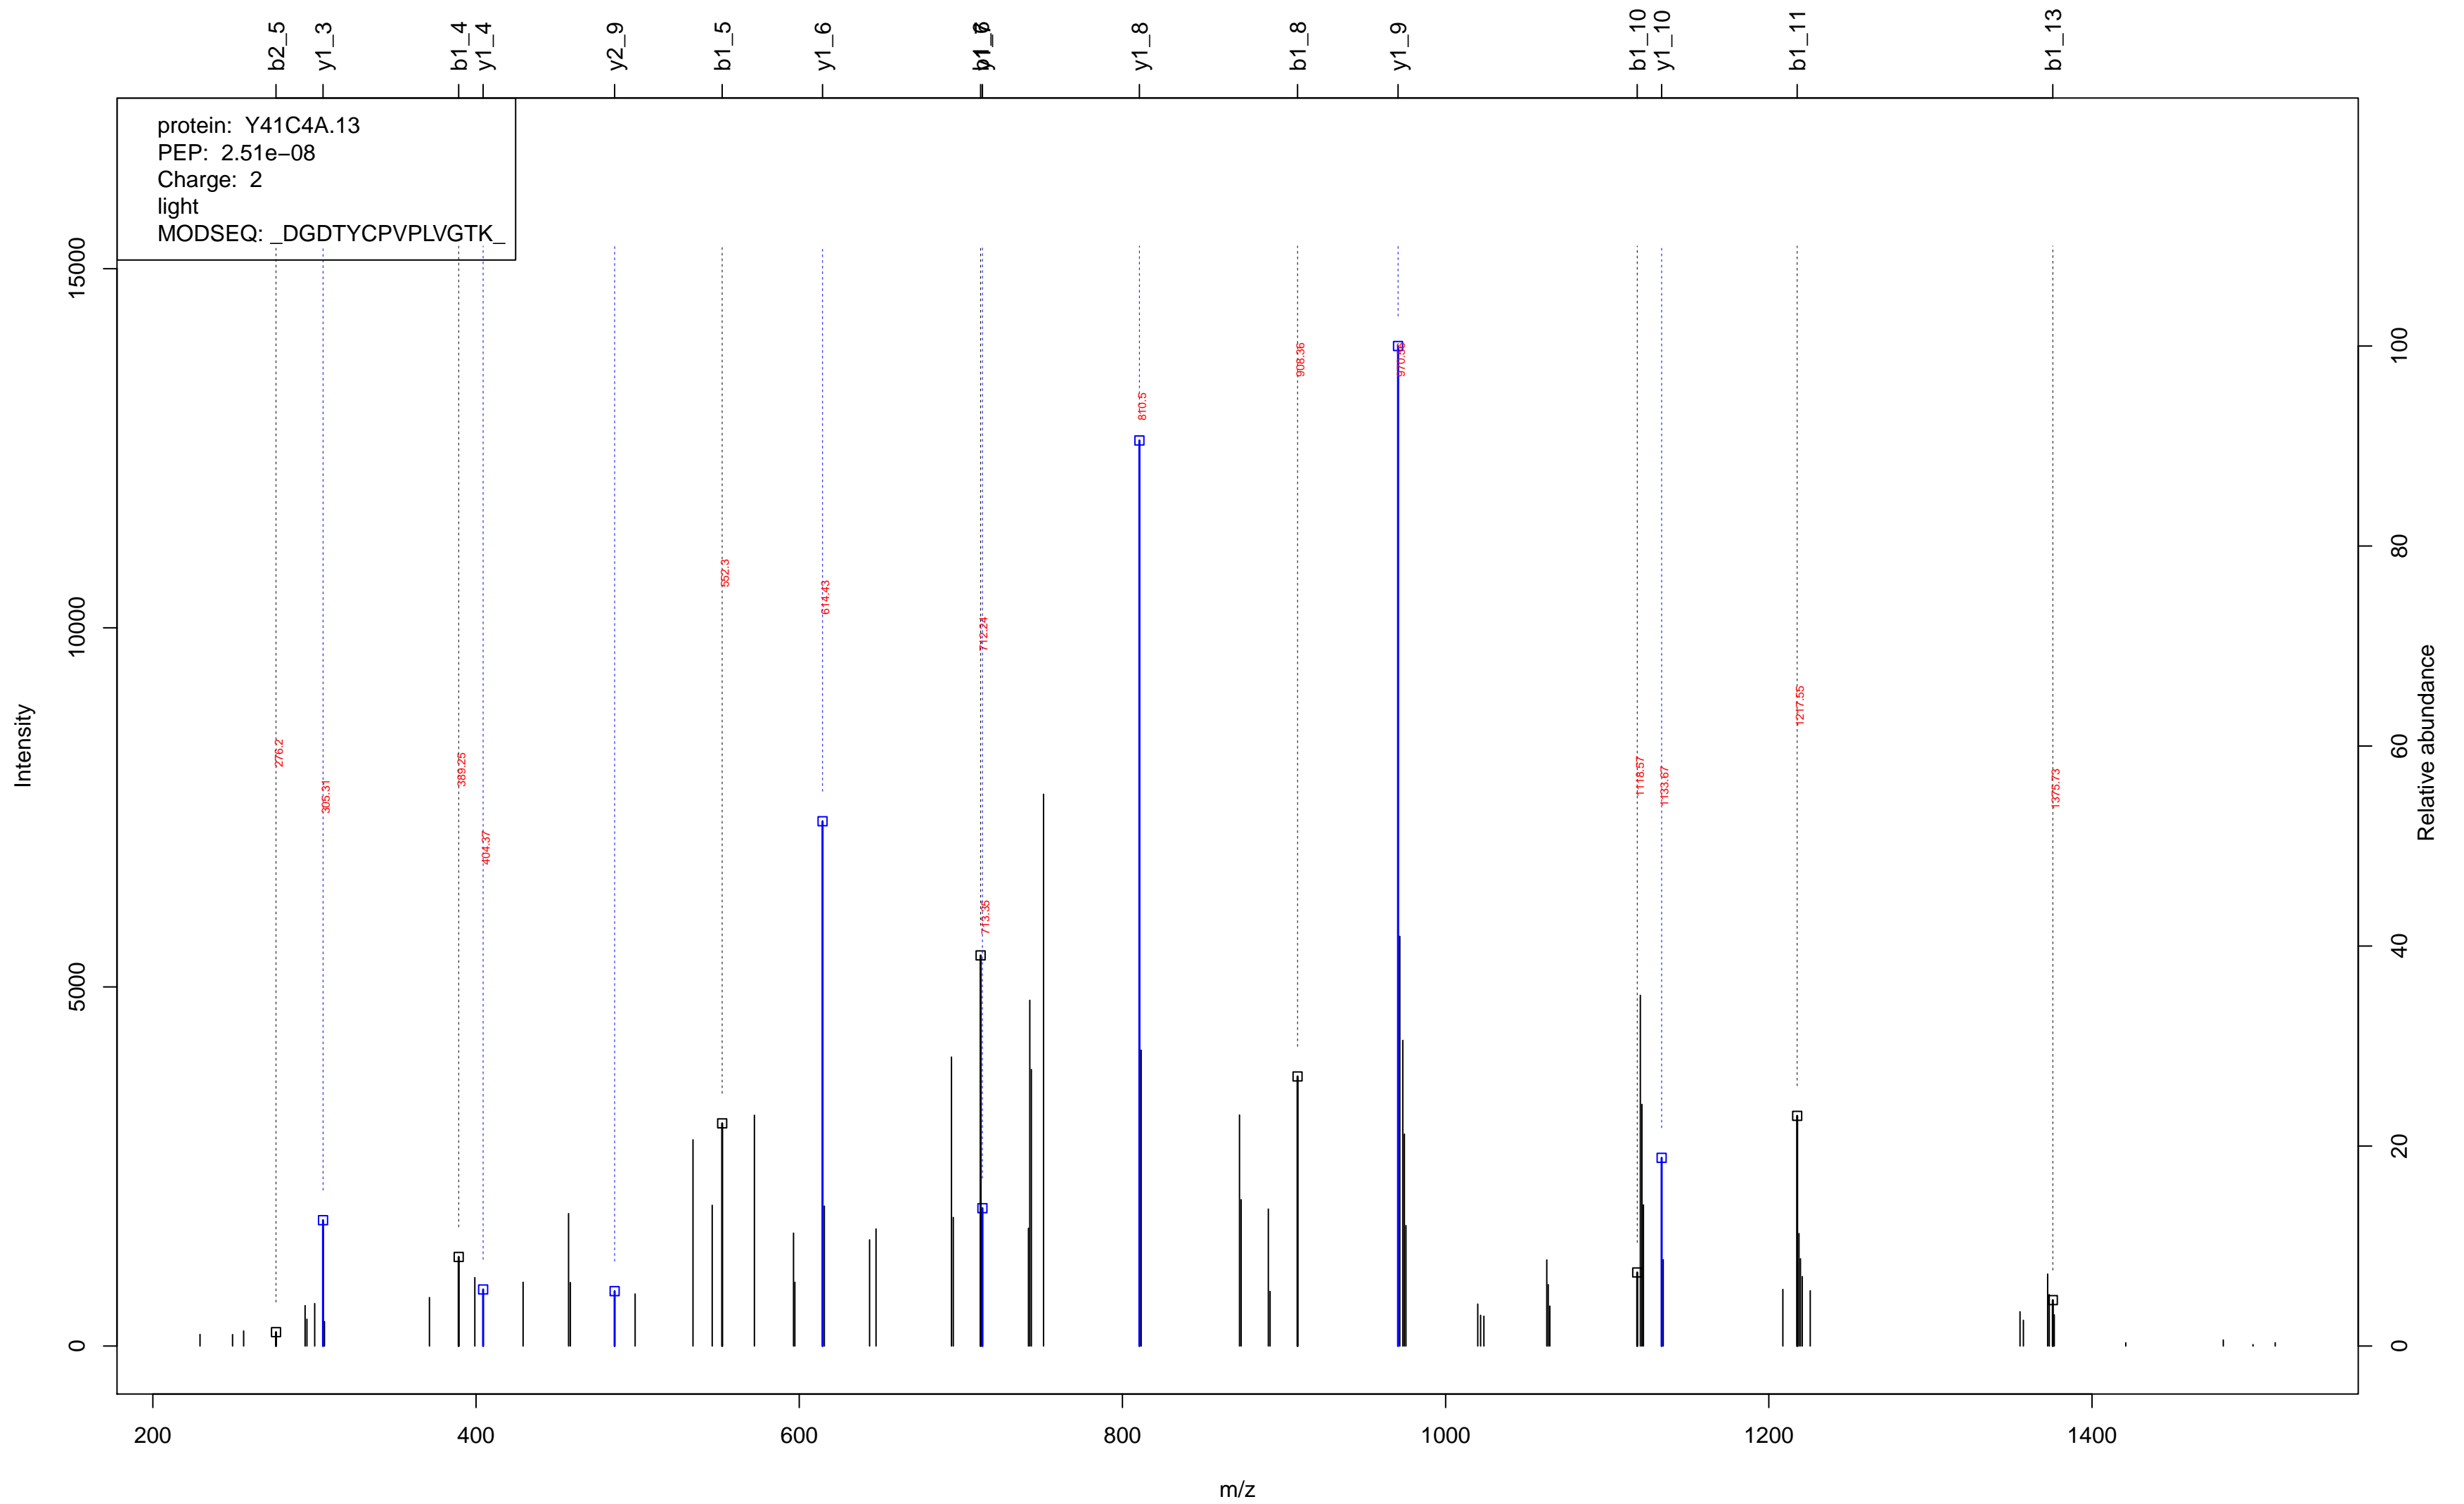

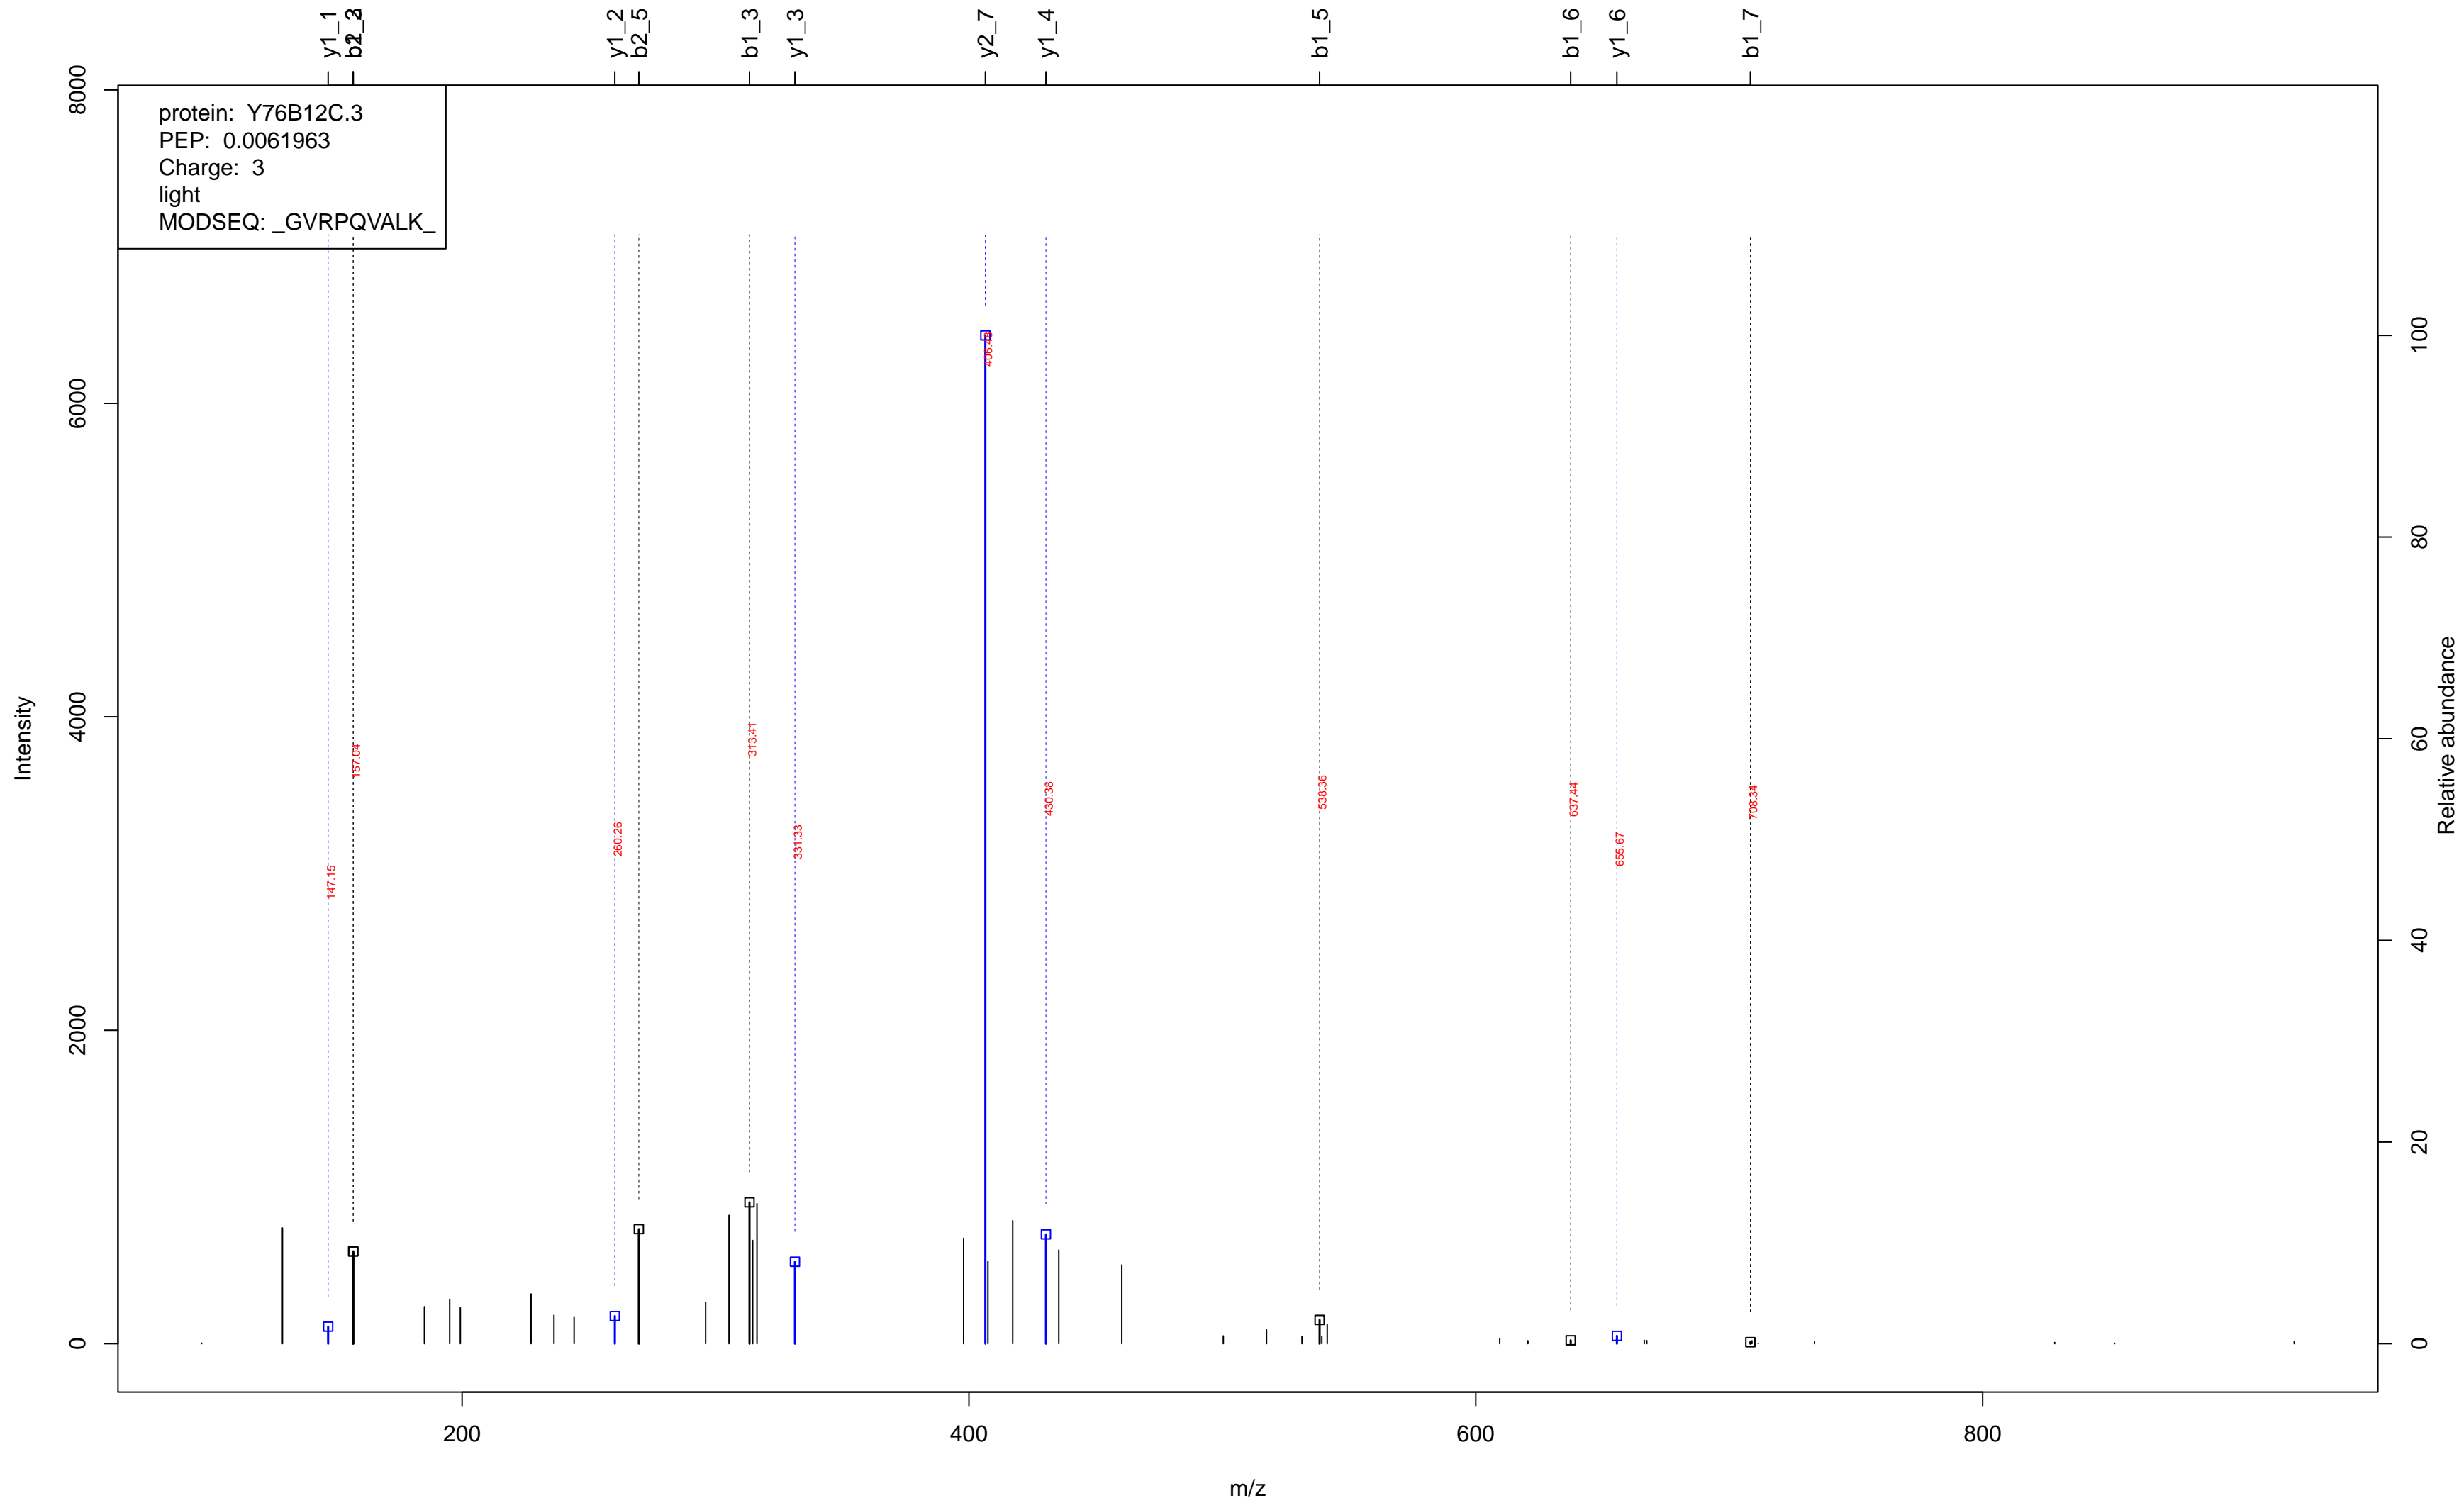

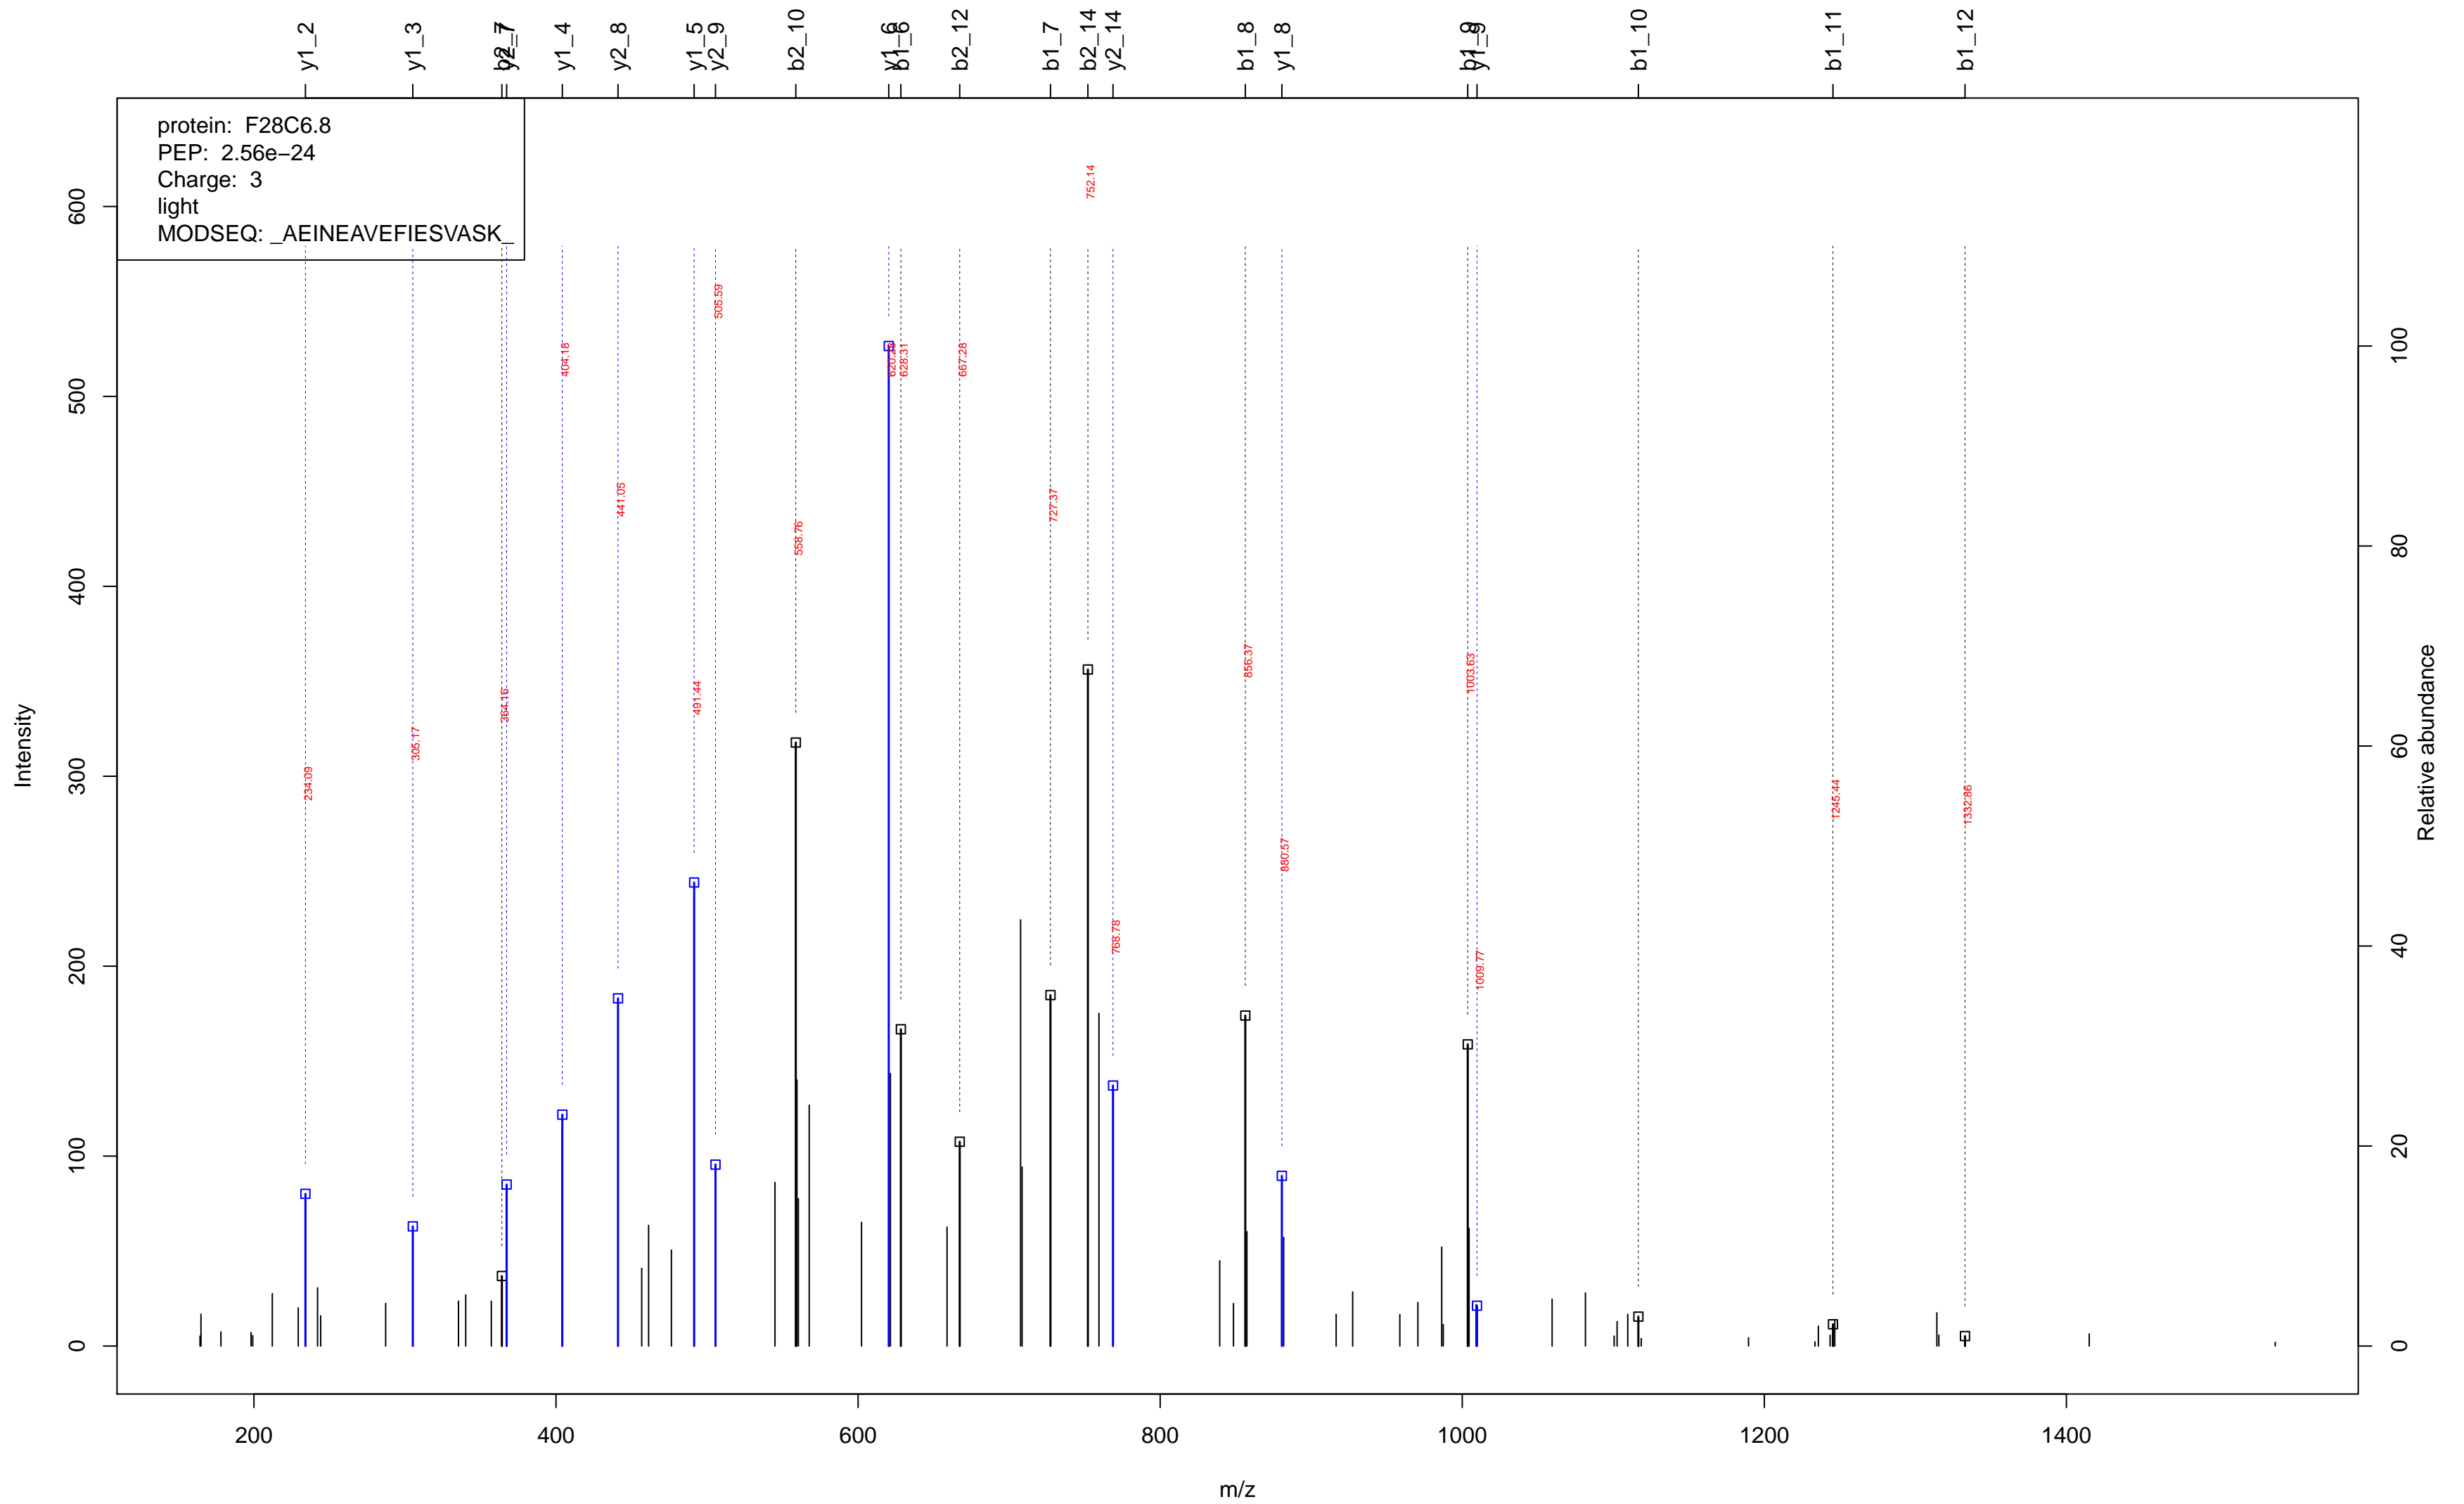



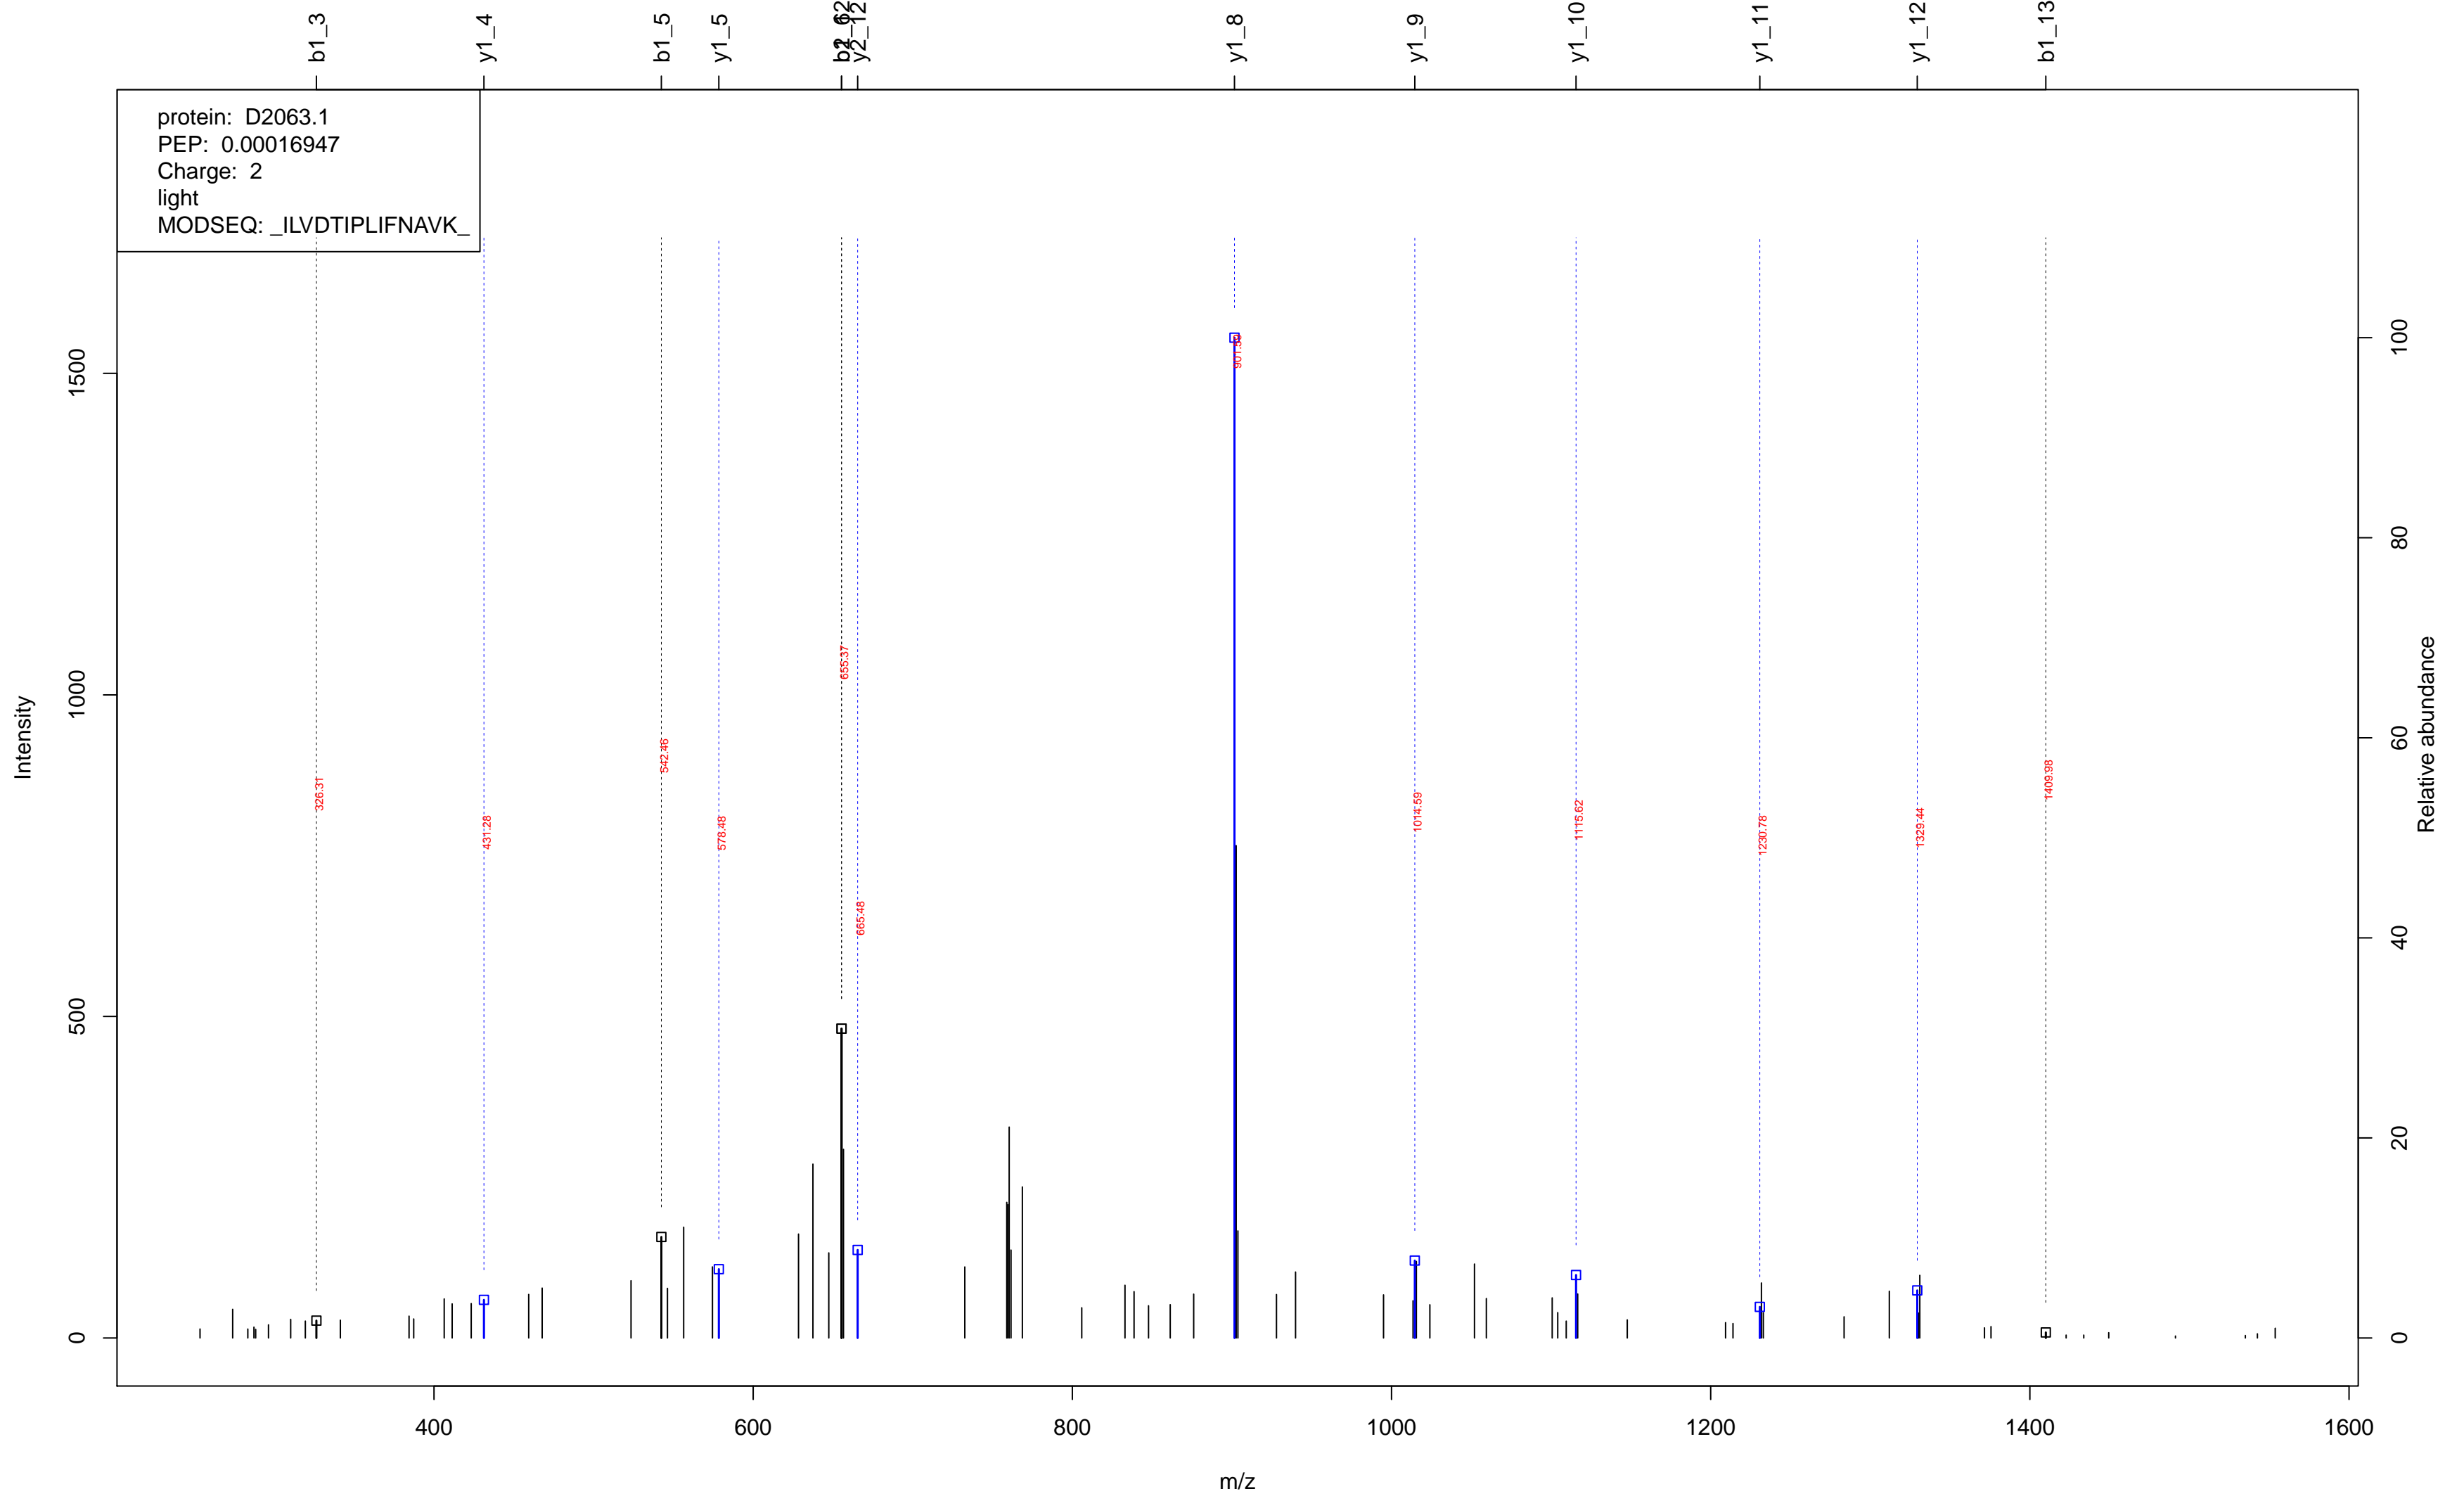

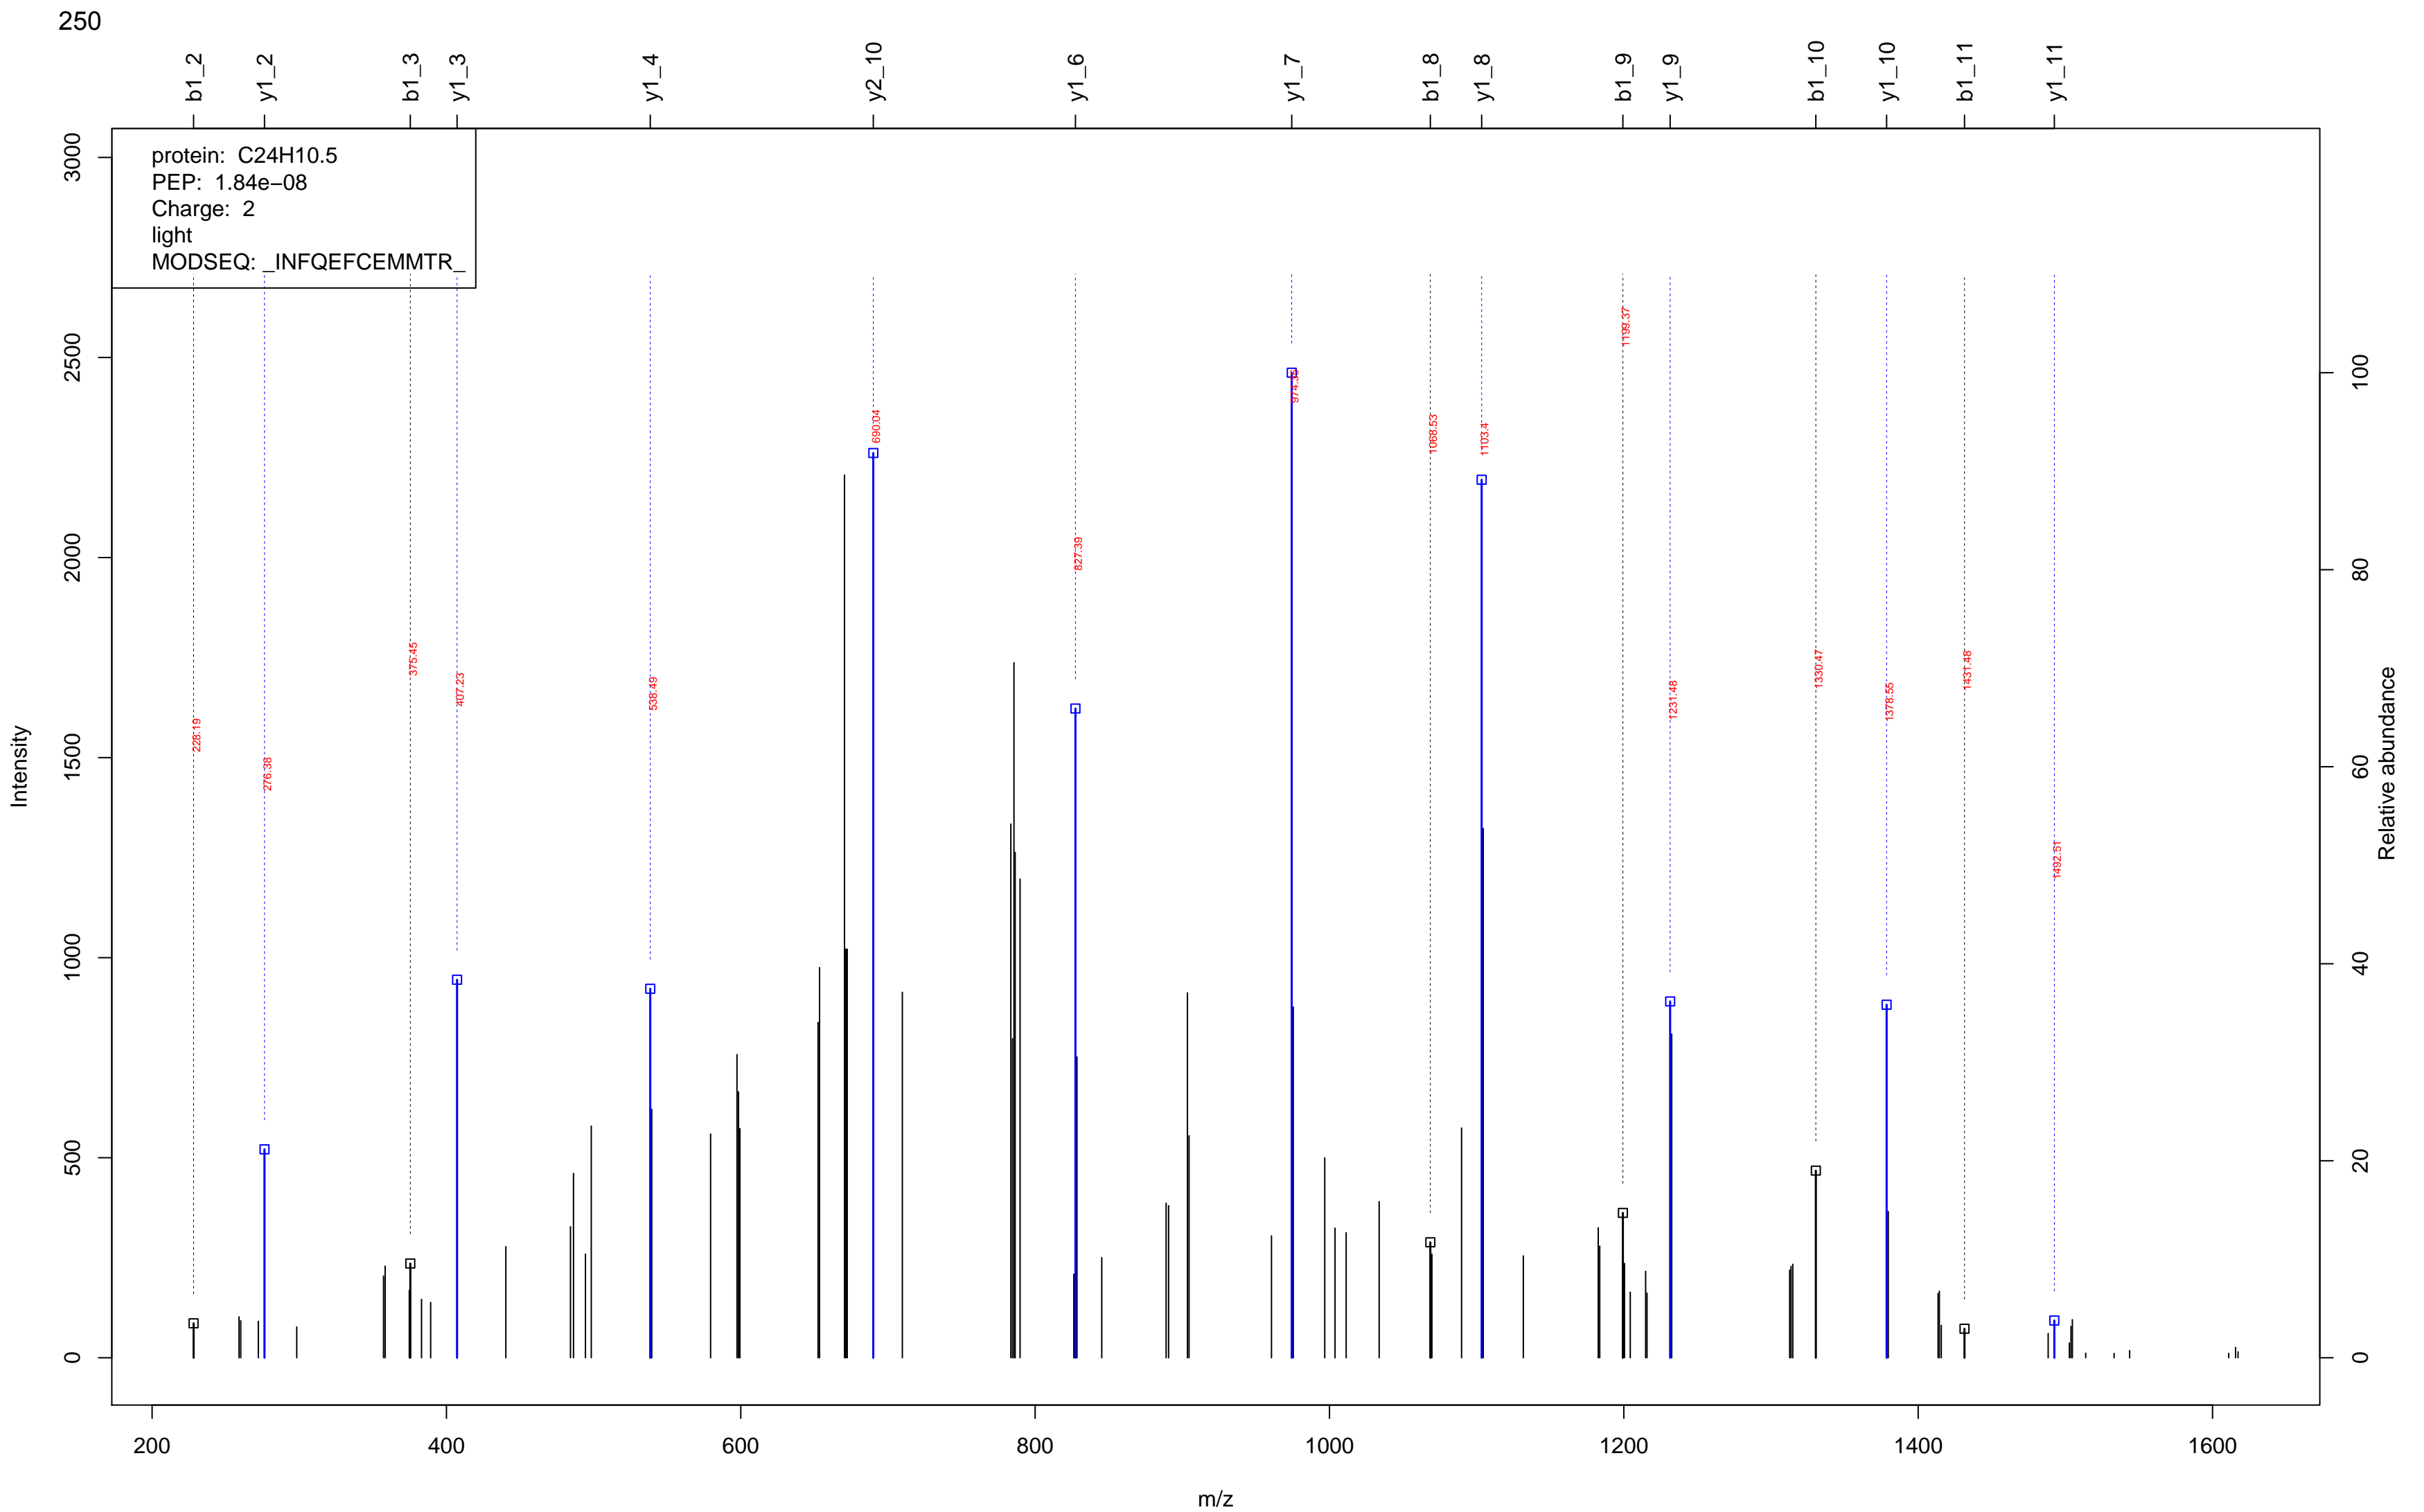

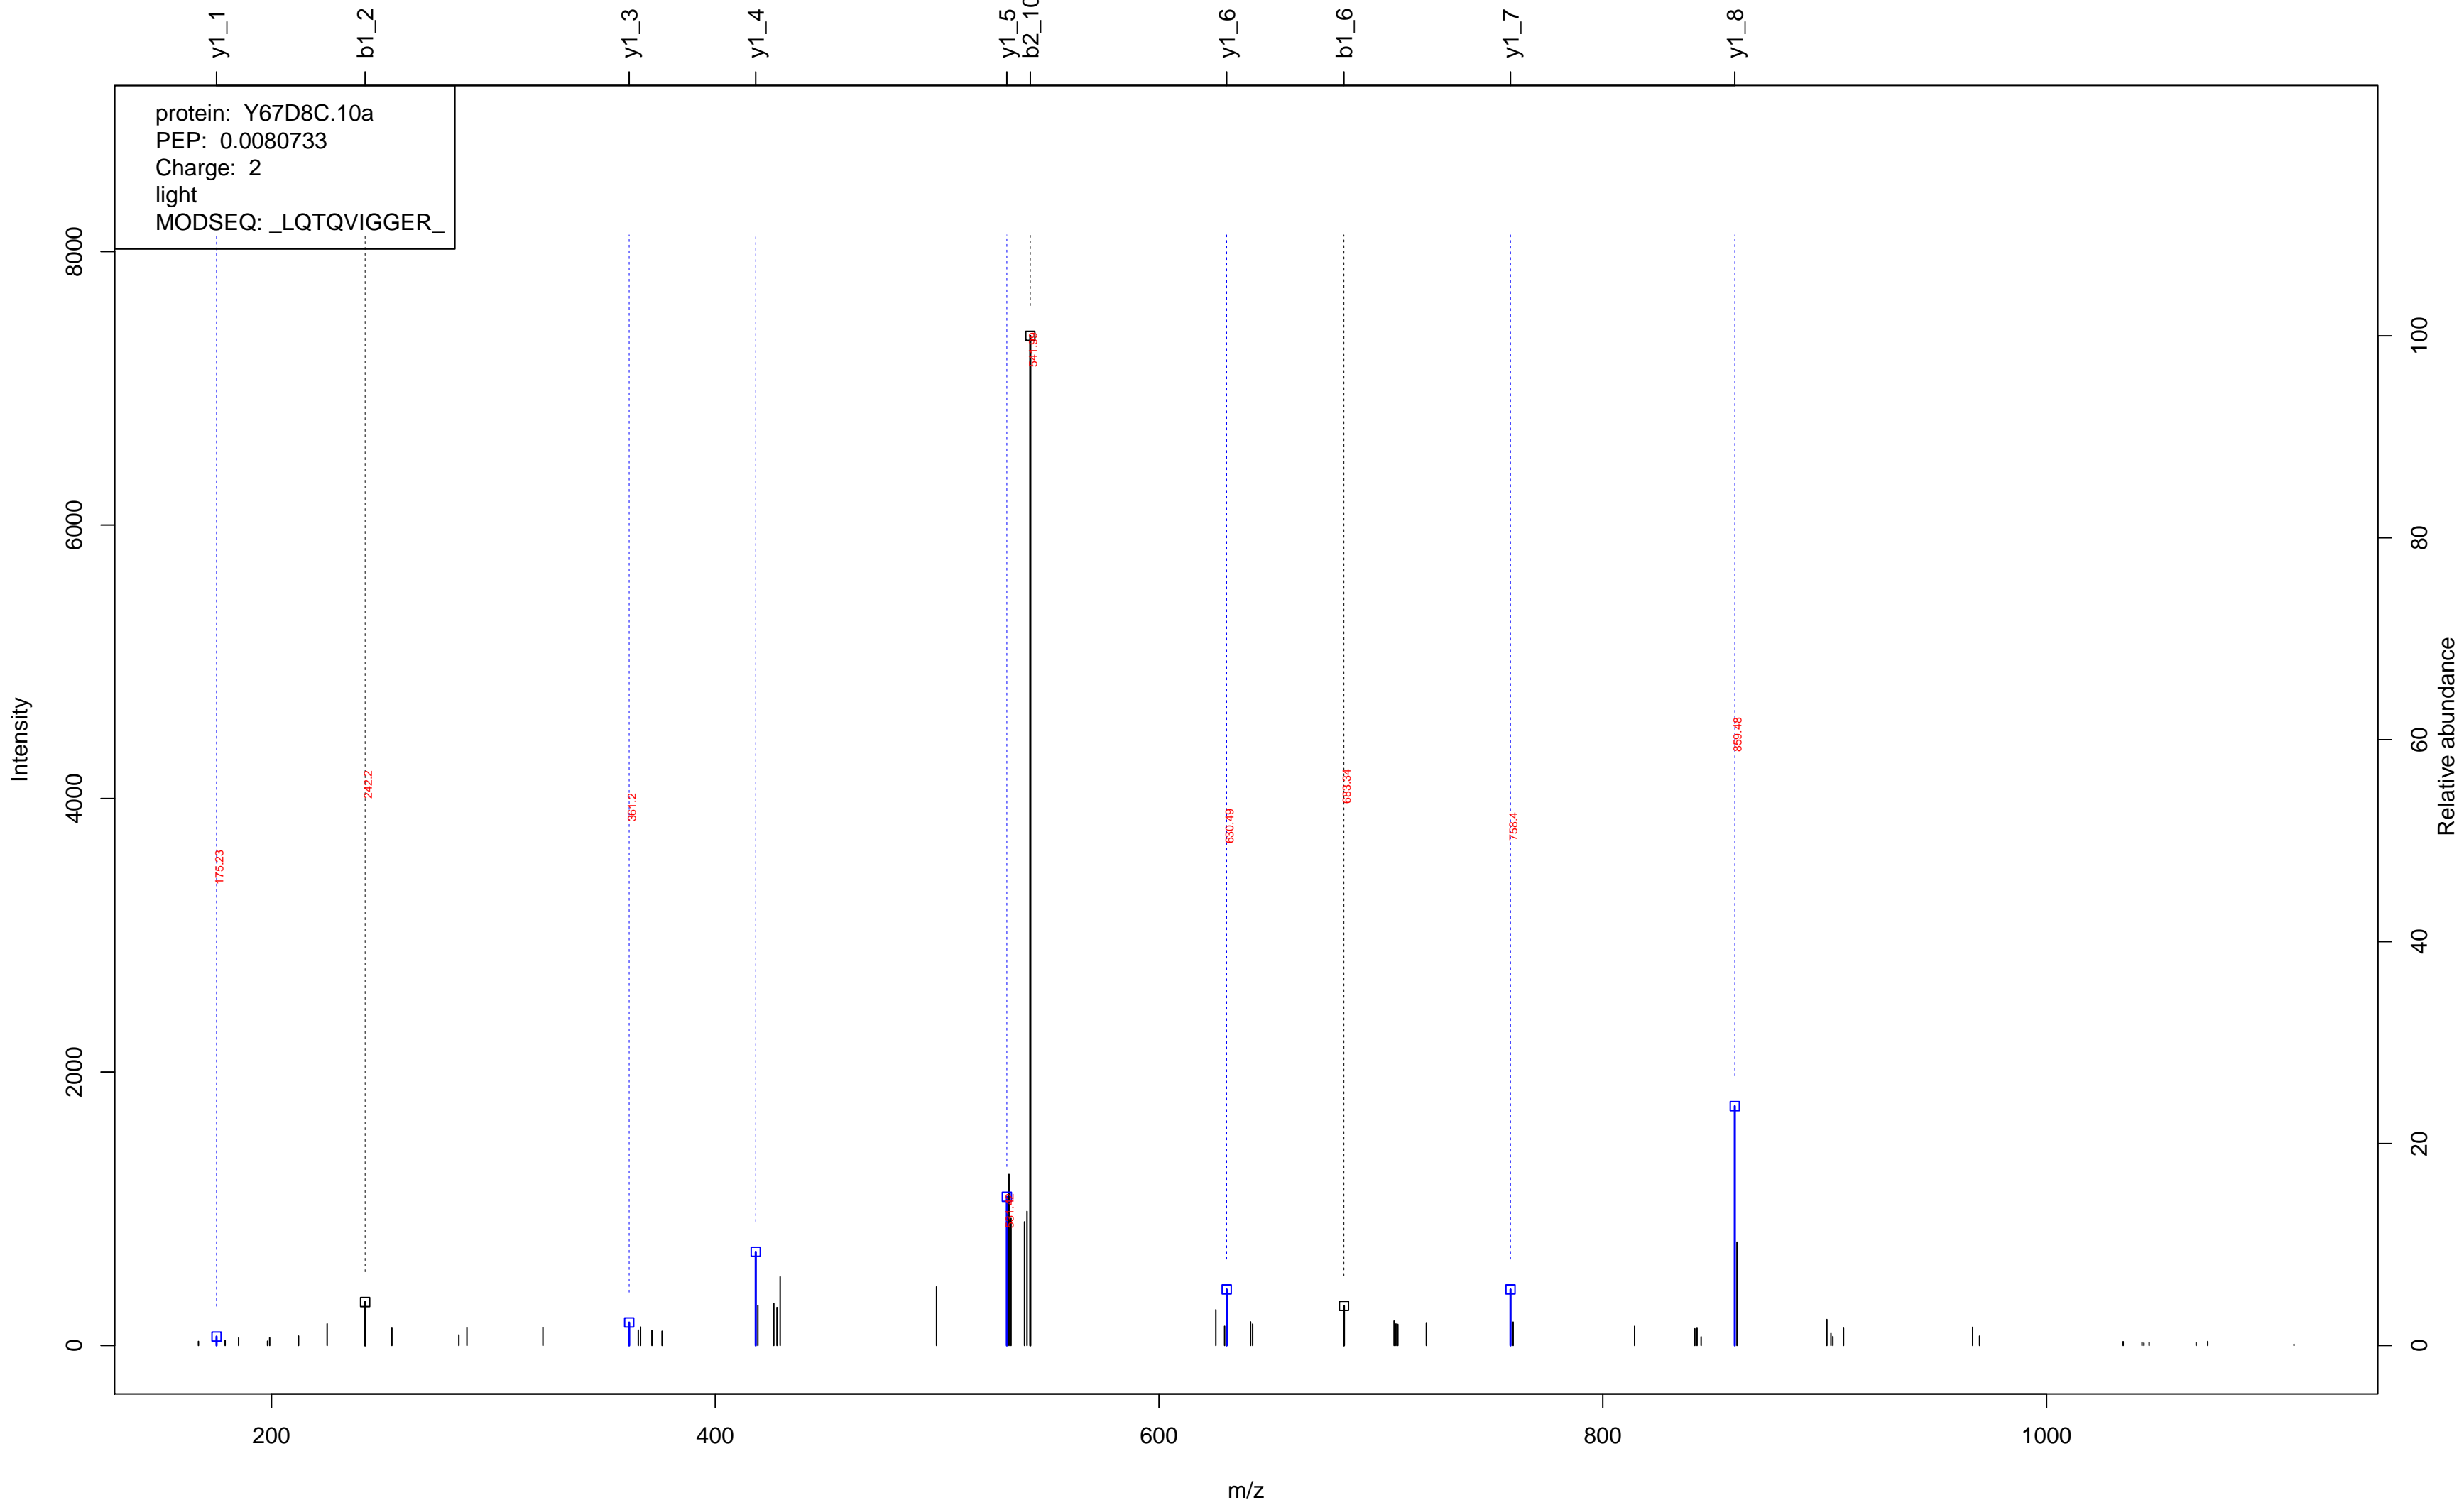

b1\_3 y1\_2 b1\_4 y1\_3 y2\_9 y1\_5 y2\_11 b2\_13 y1\_7 b1\_8 b1\_9 y1\_8 b1\_10 y1\_9 b1\_11 y1\_10 b1\_12

protein: F55H12.4  
 PEP: 8.02e-44  
 Charge: 2  
 light  
 MODSEQ: \_LAAFTEVNSILQR\_

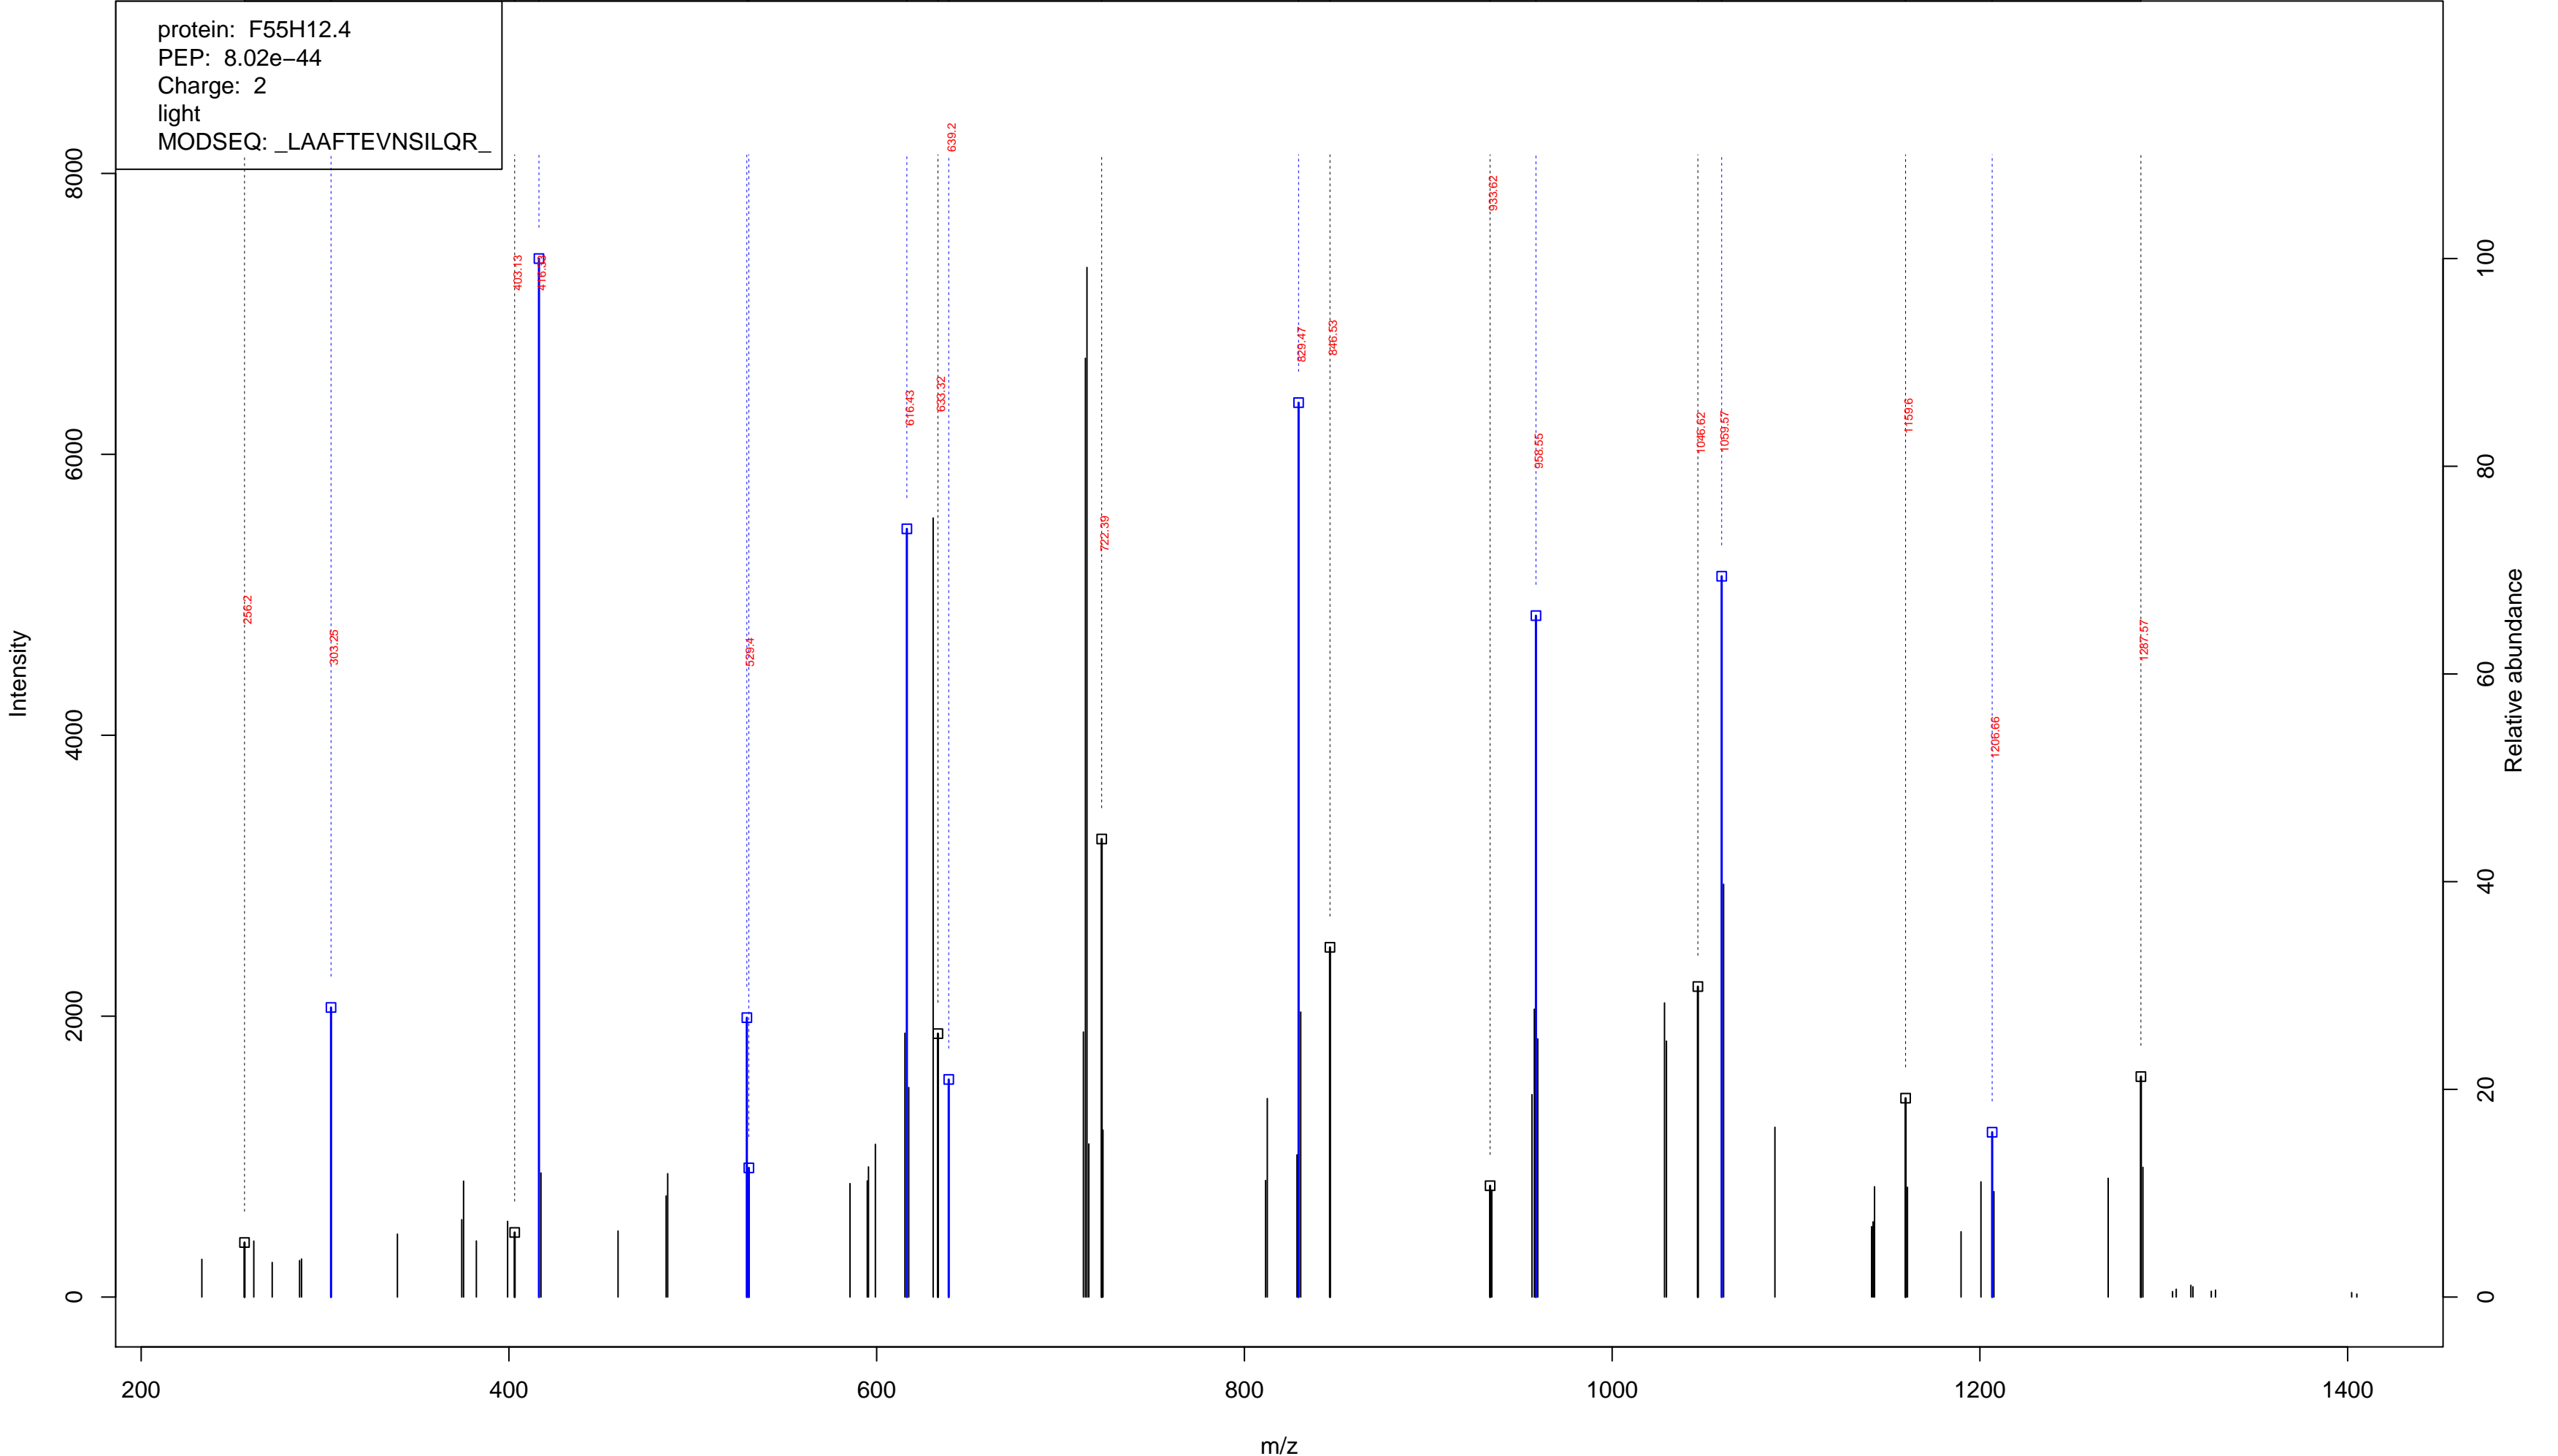

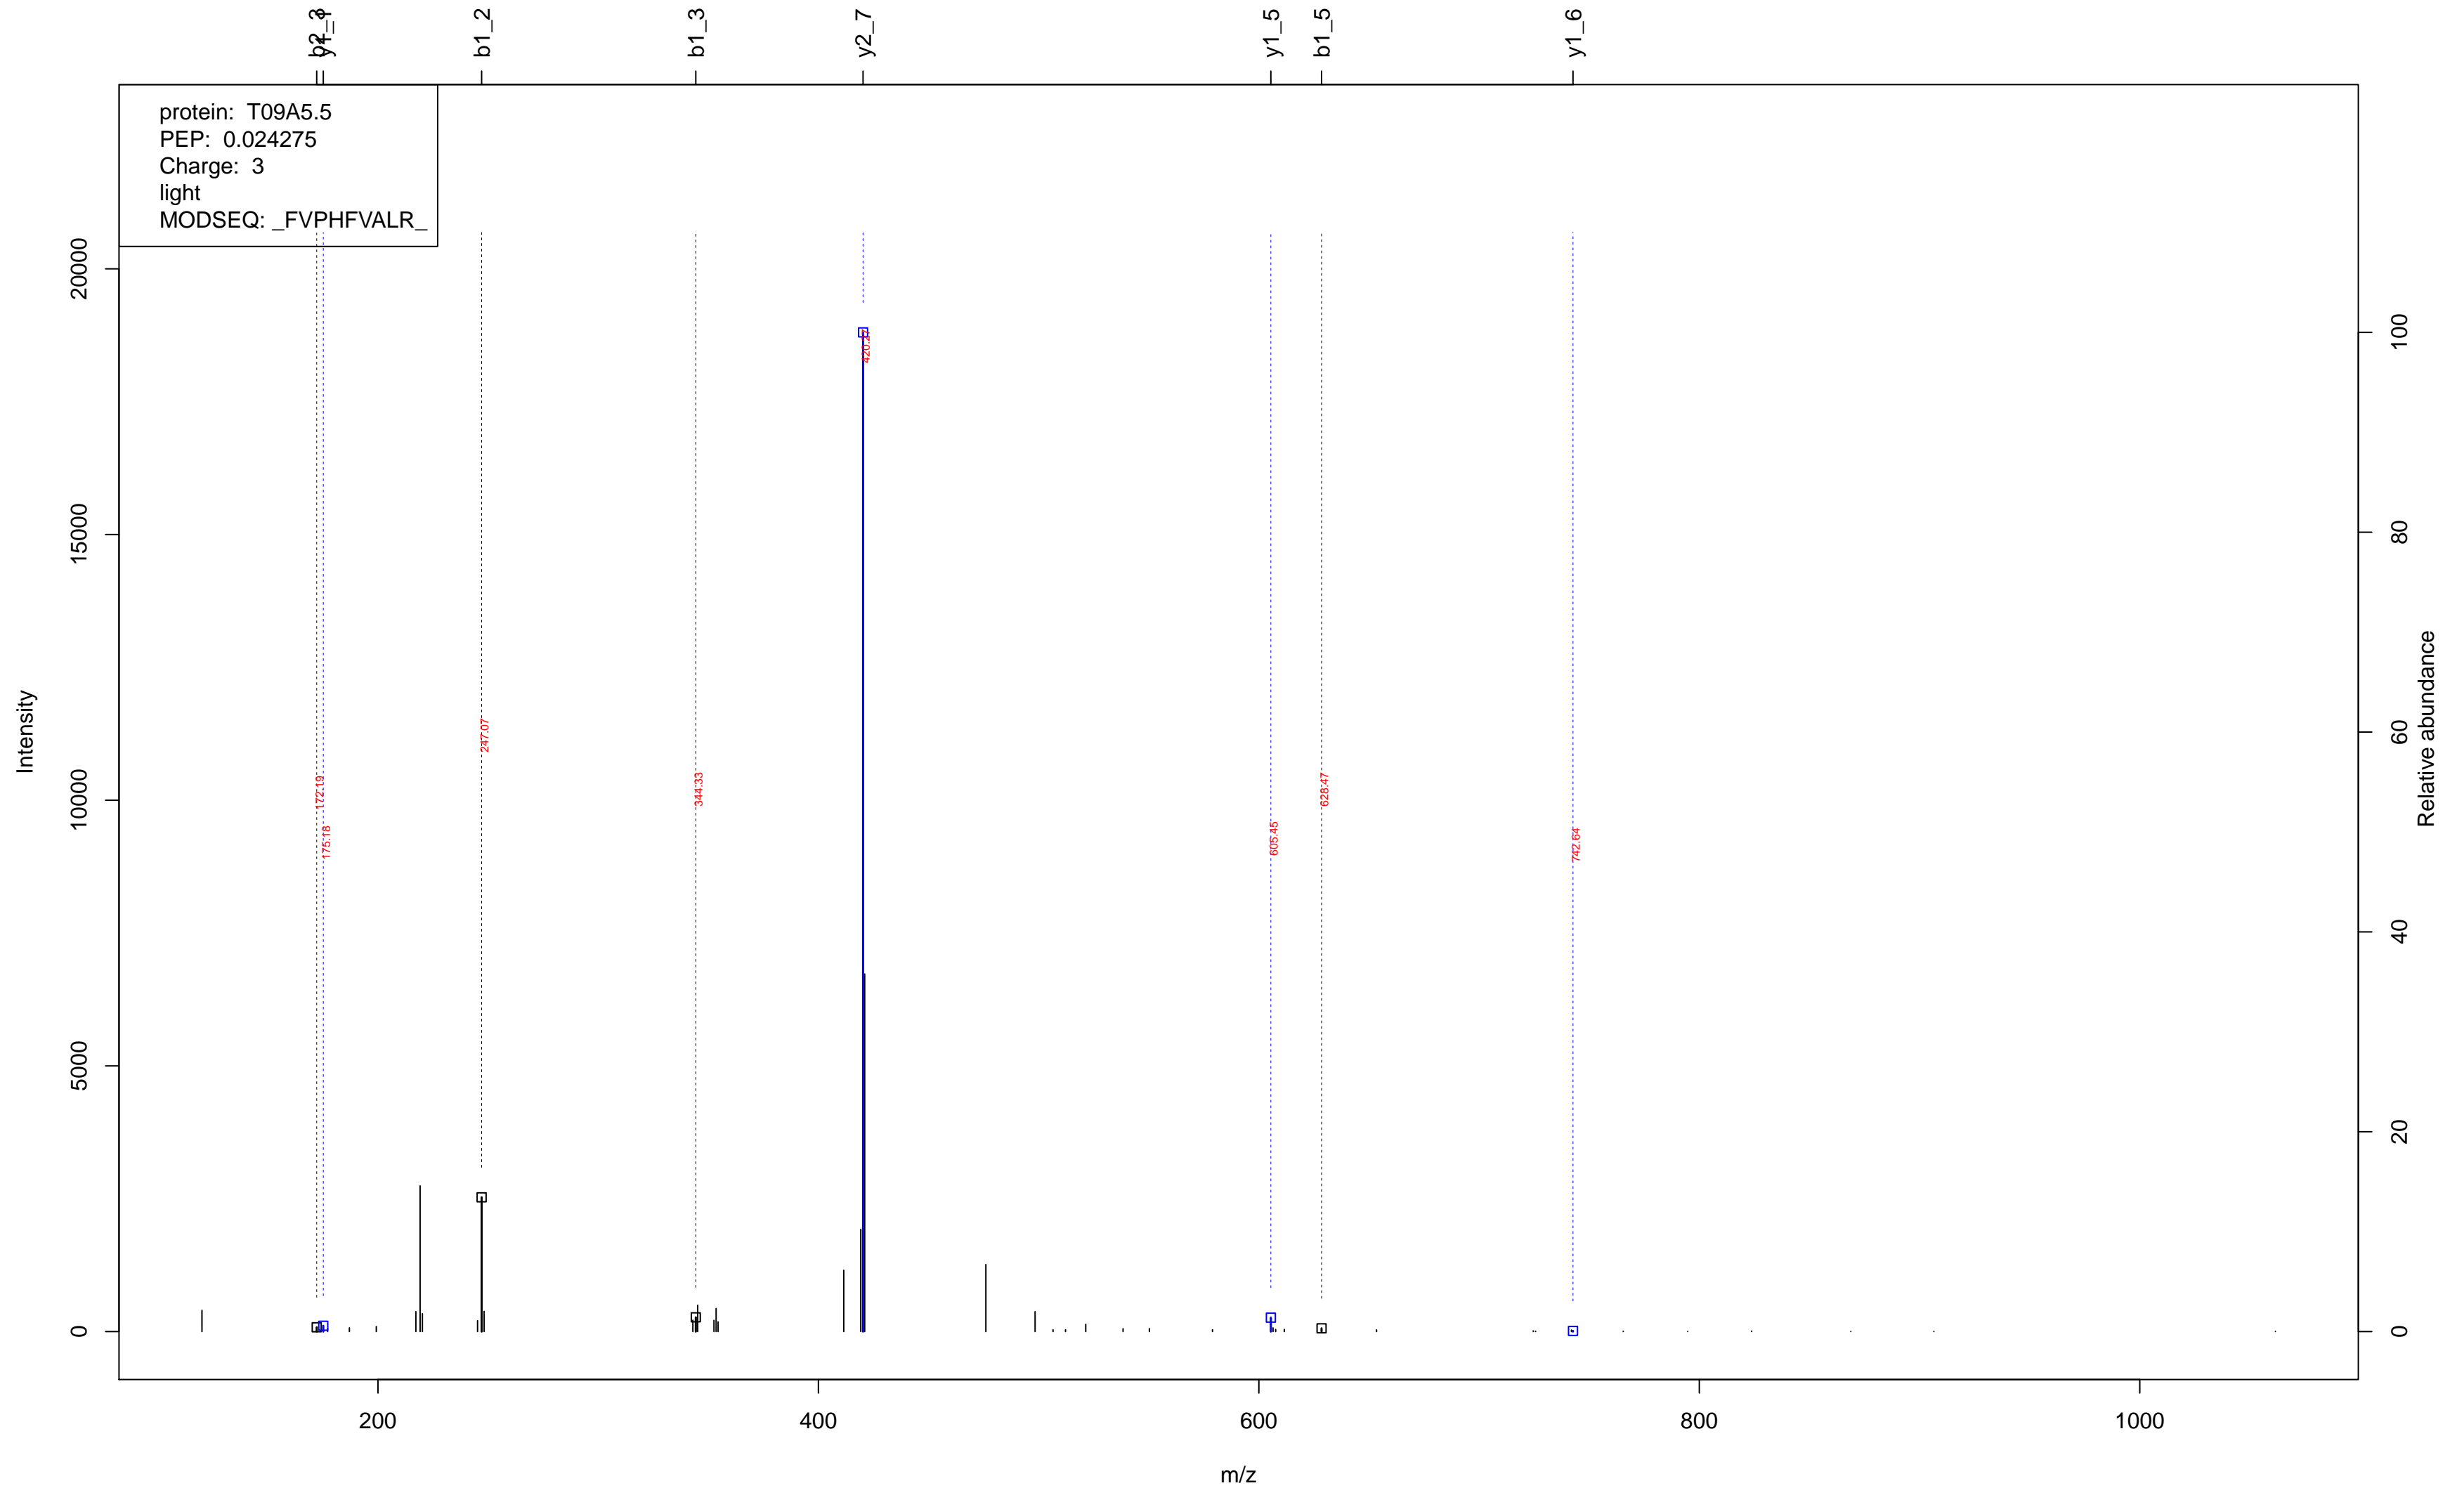

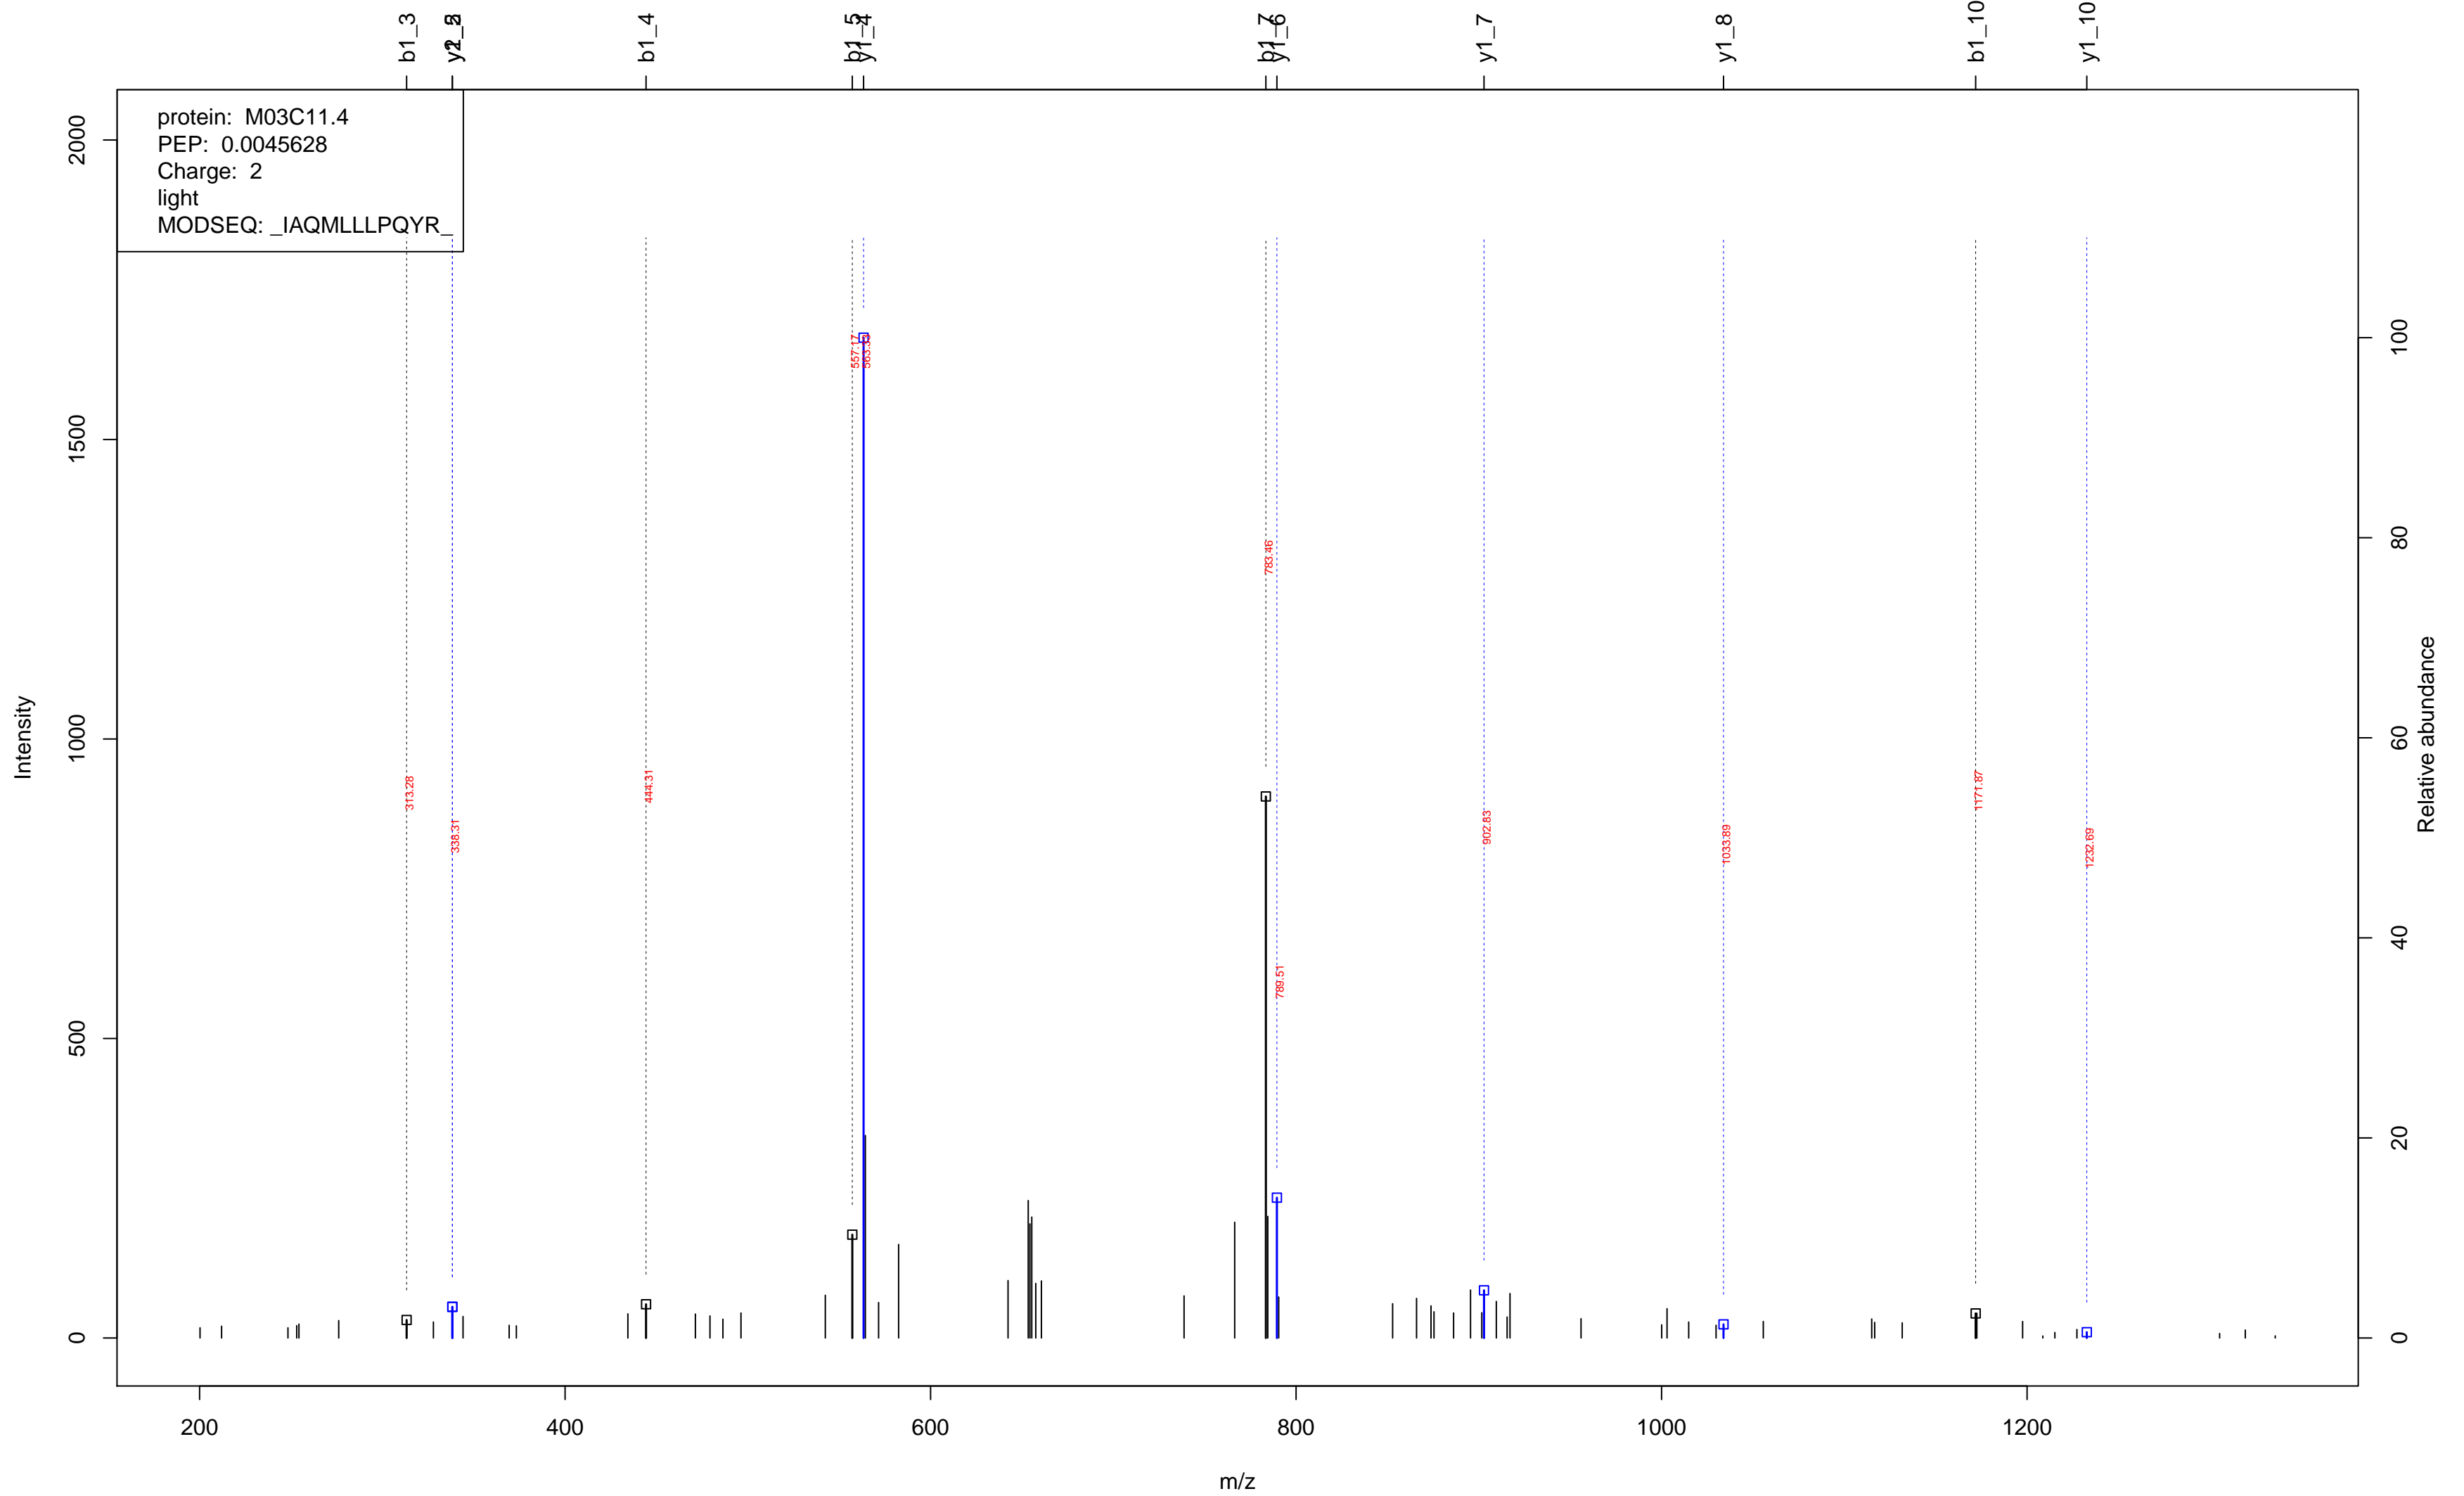

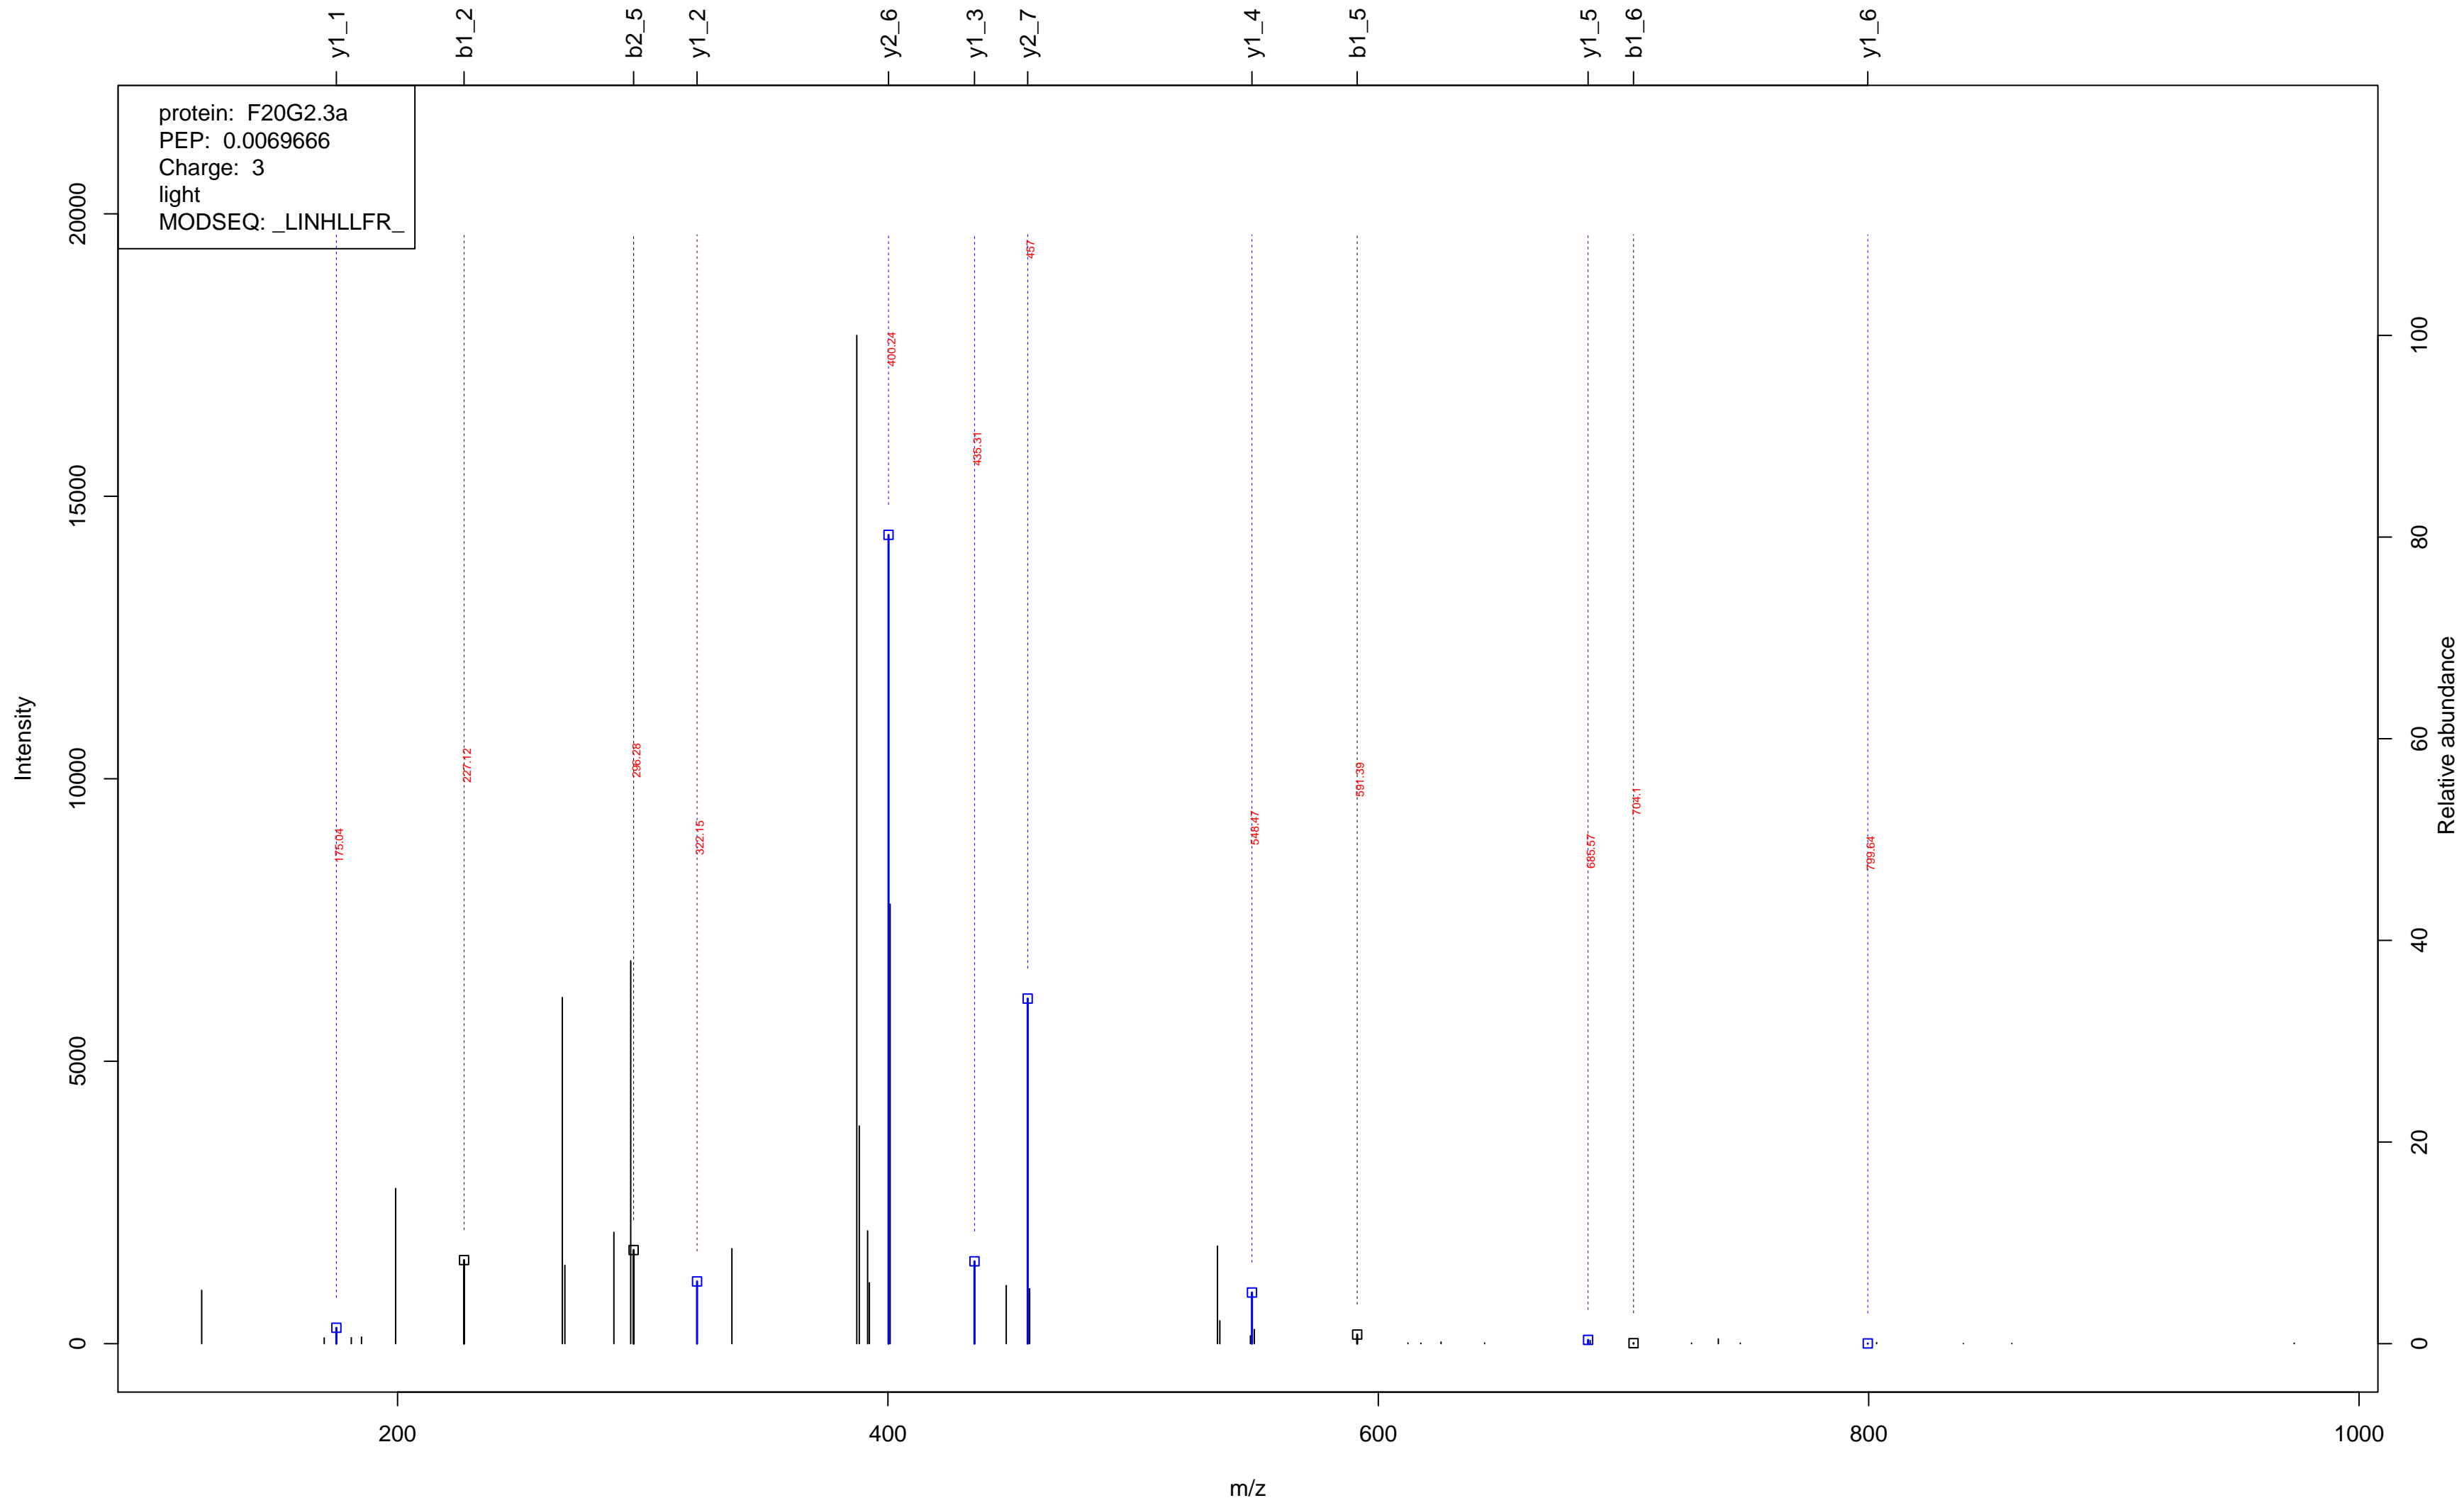

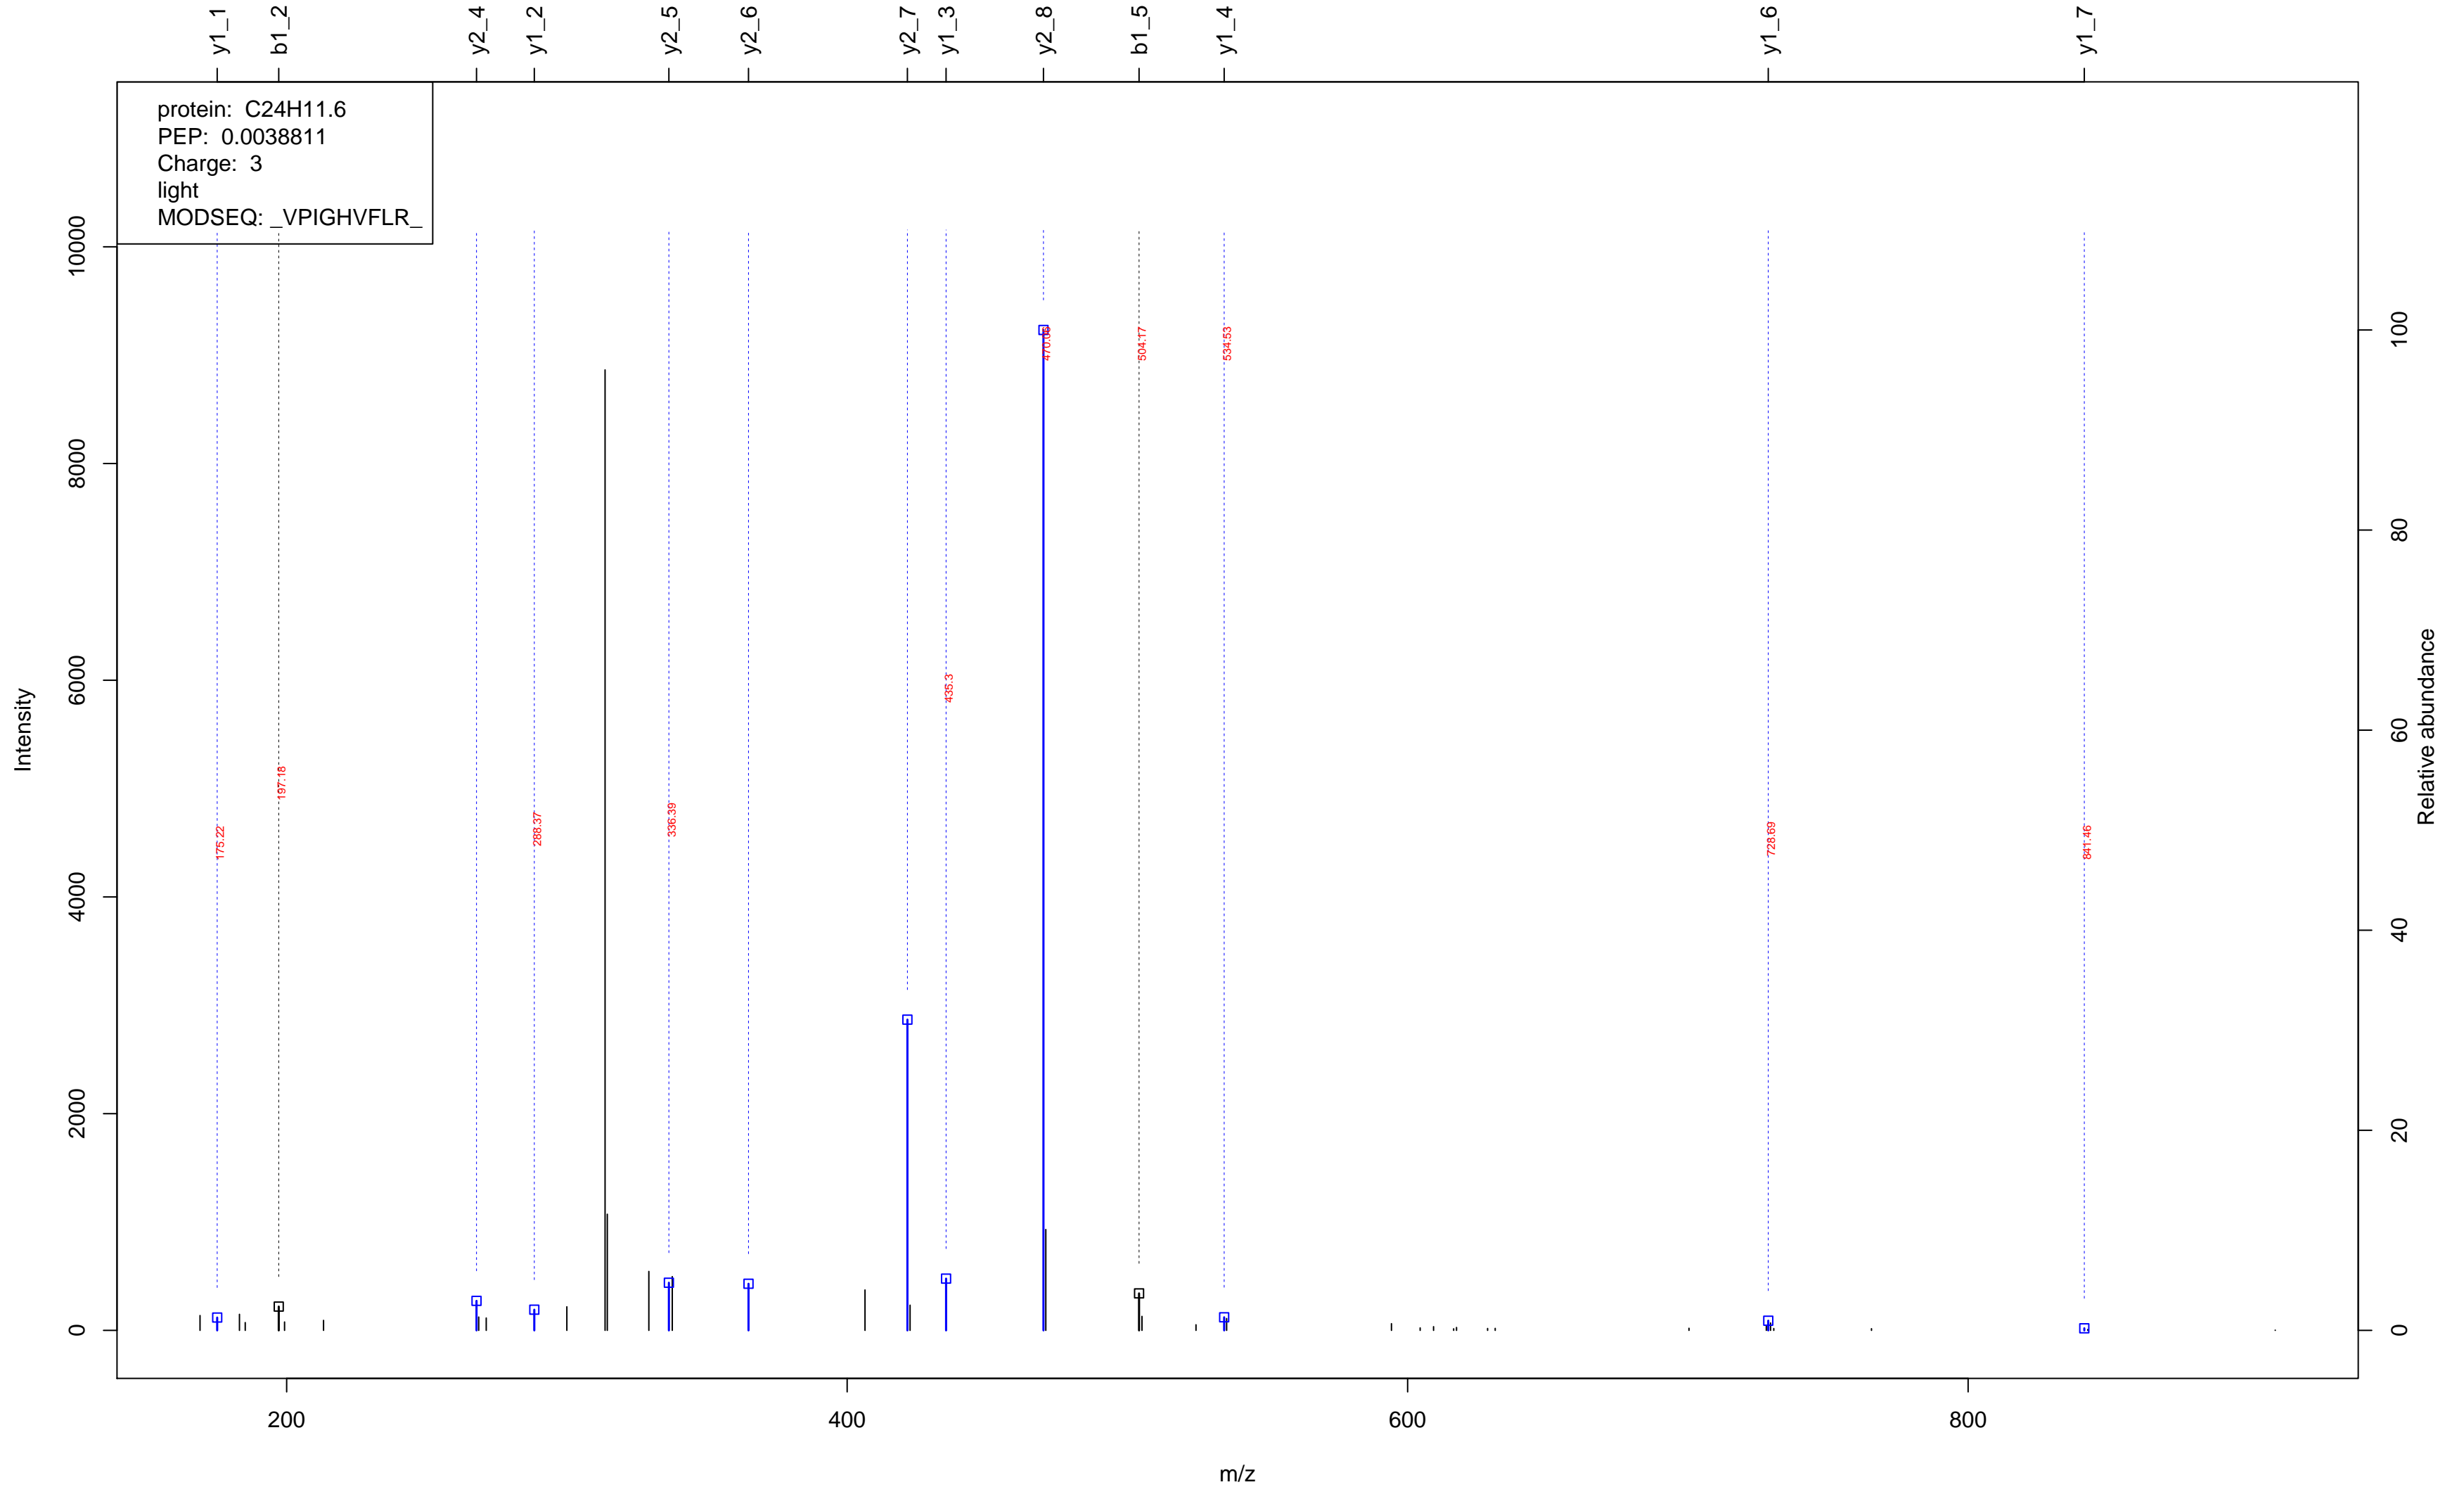



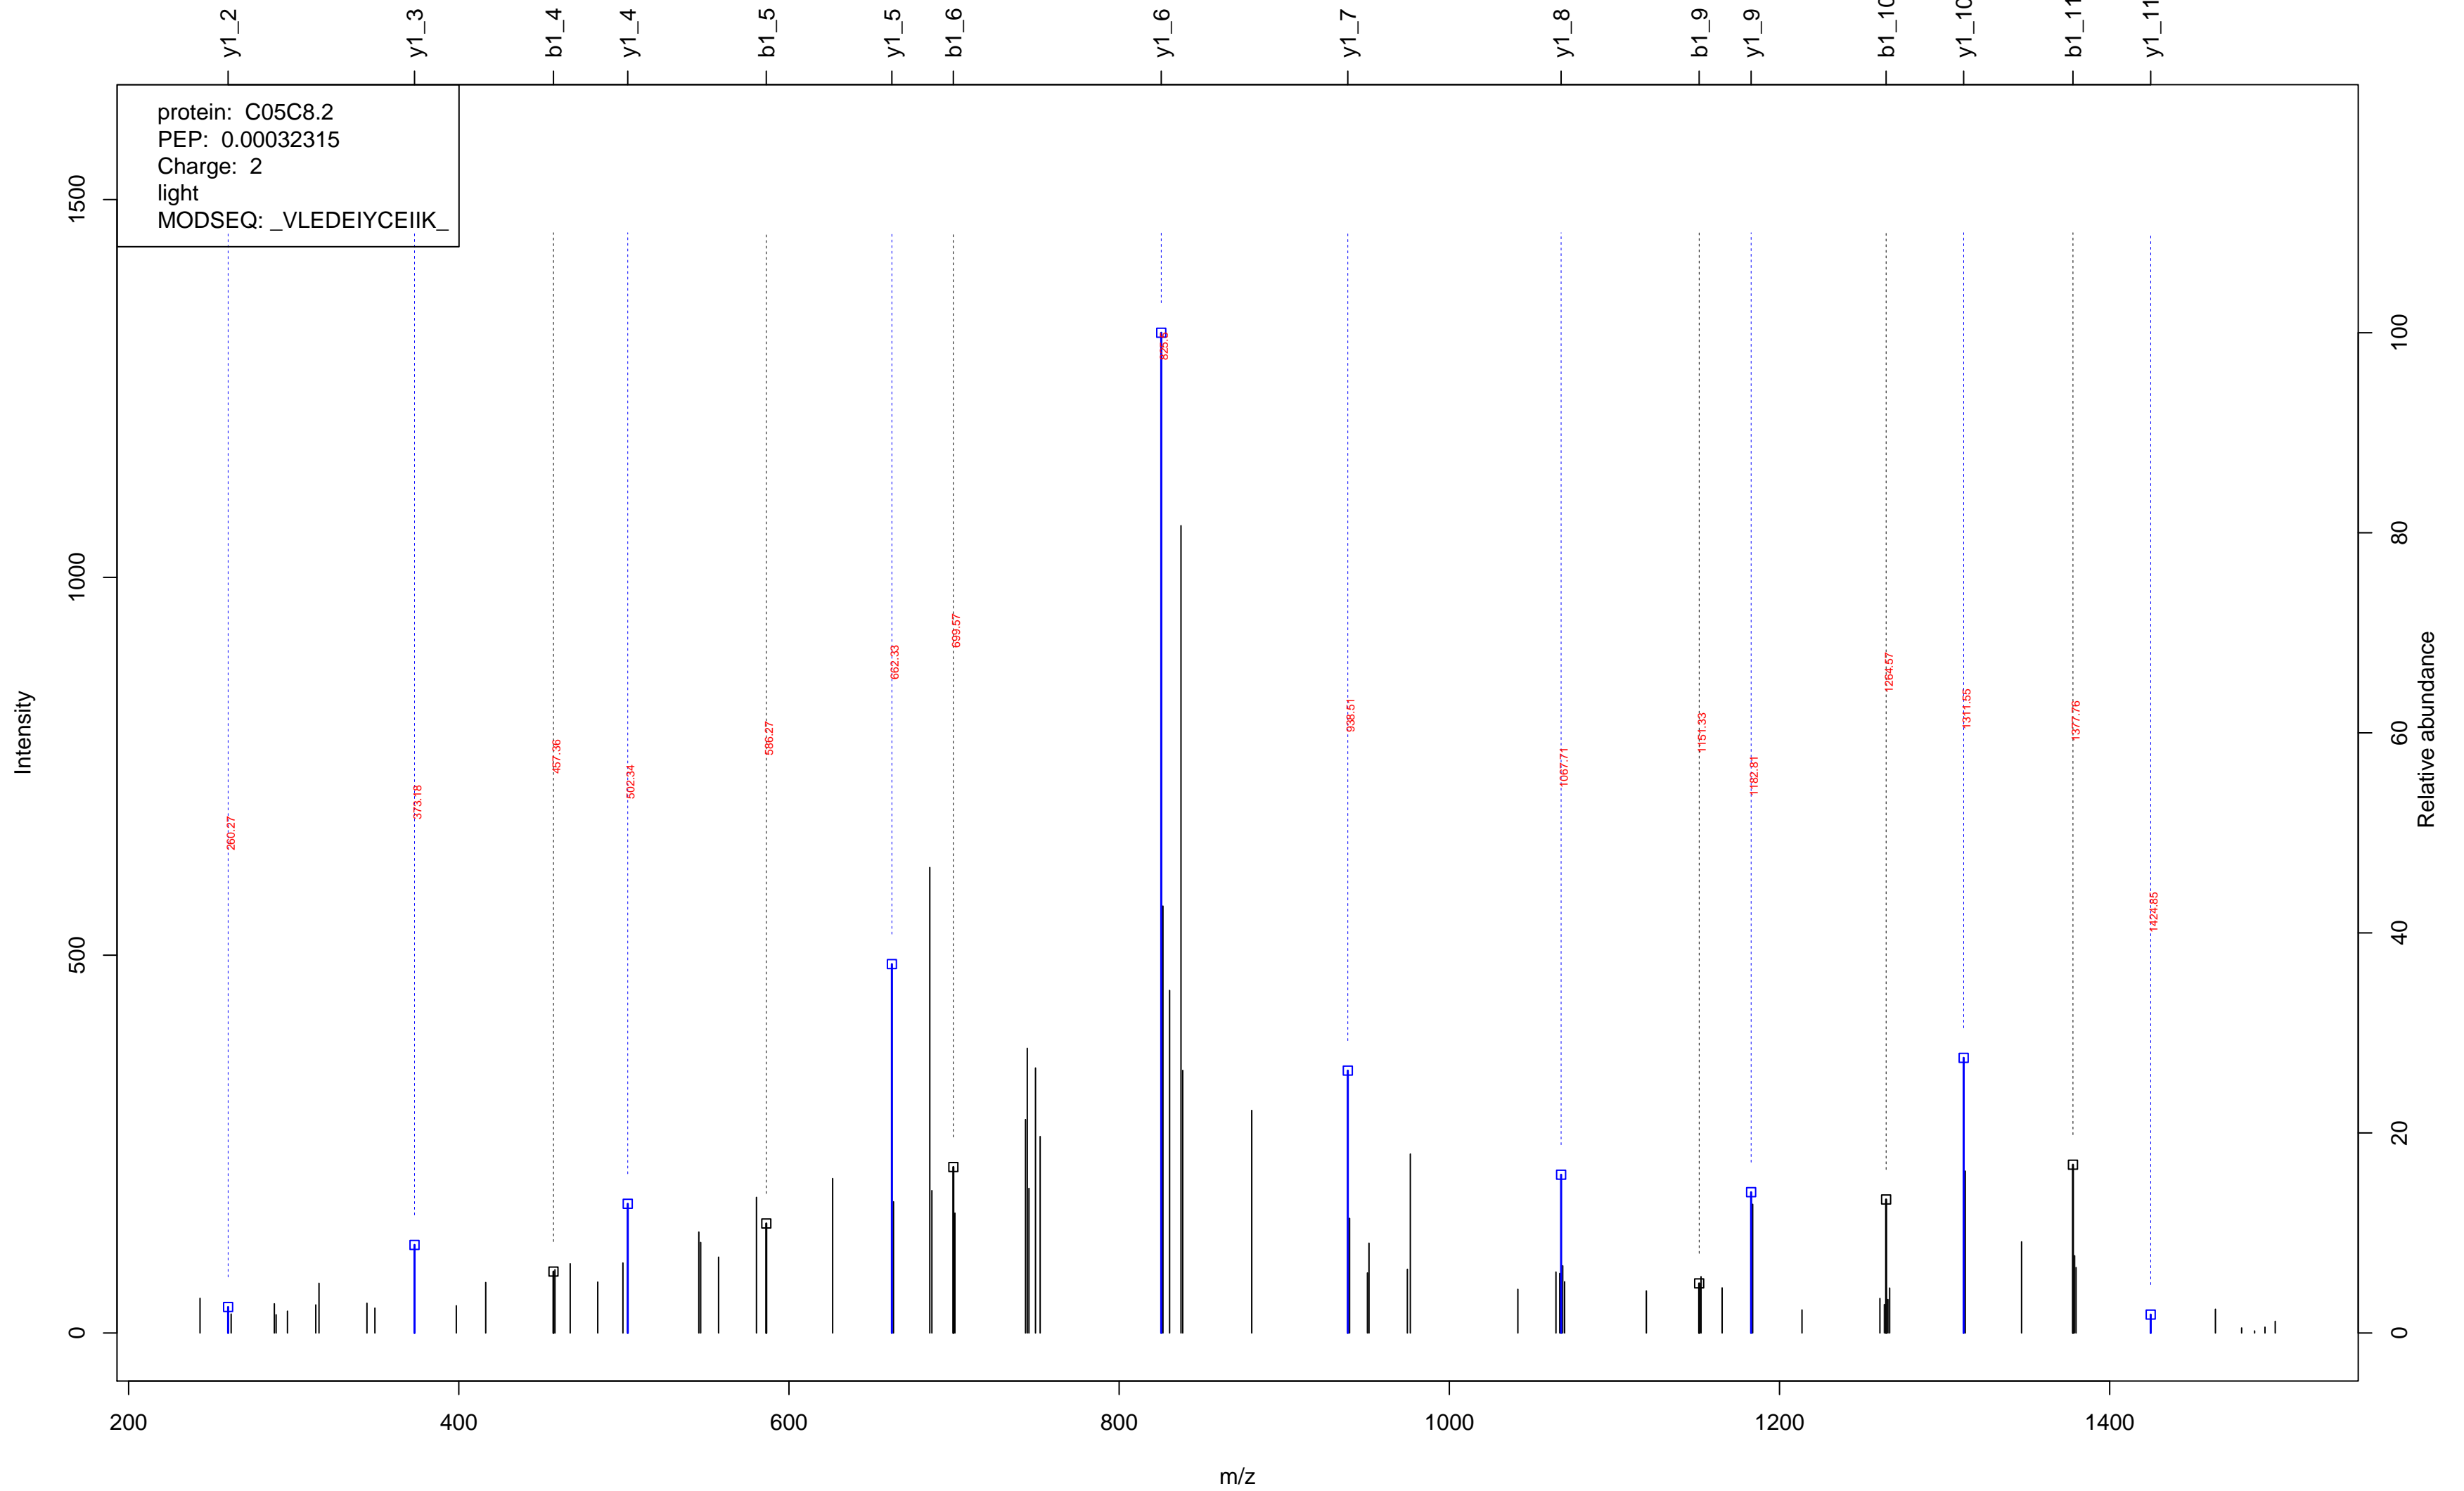

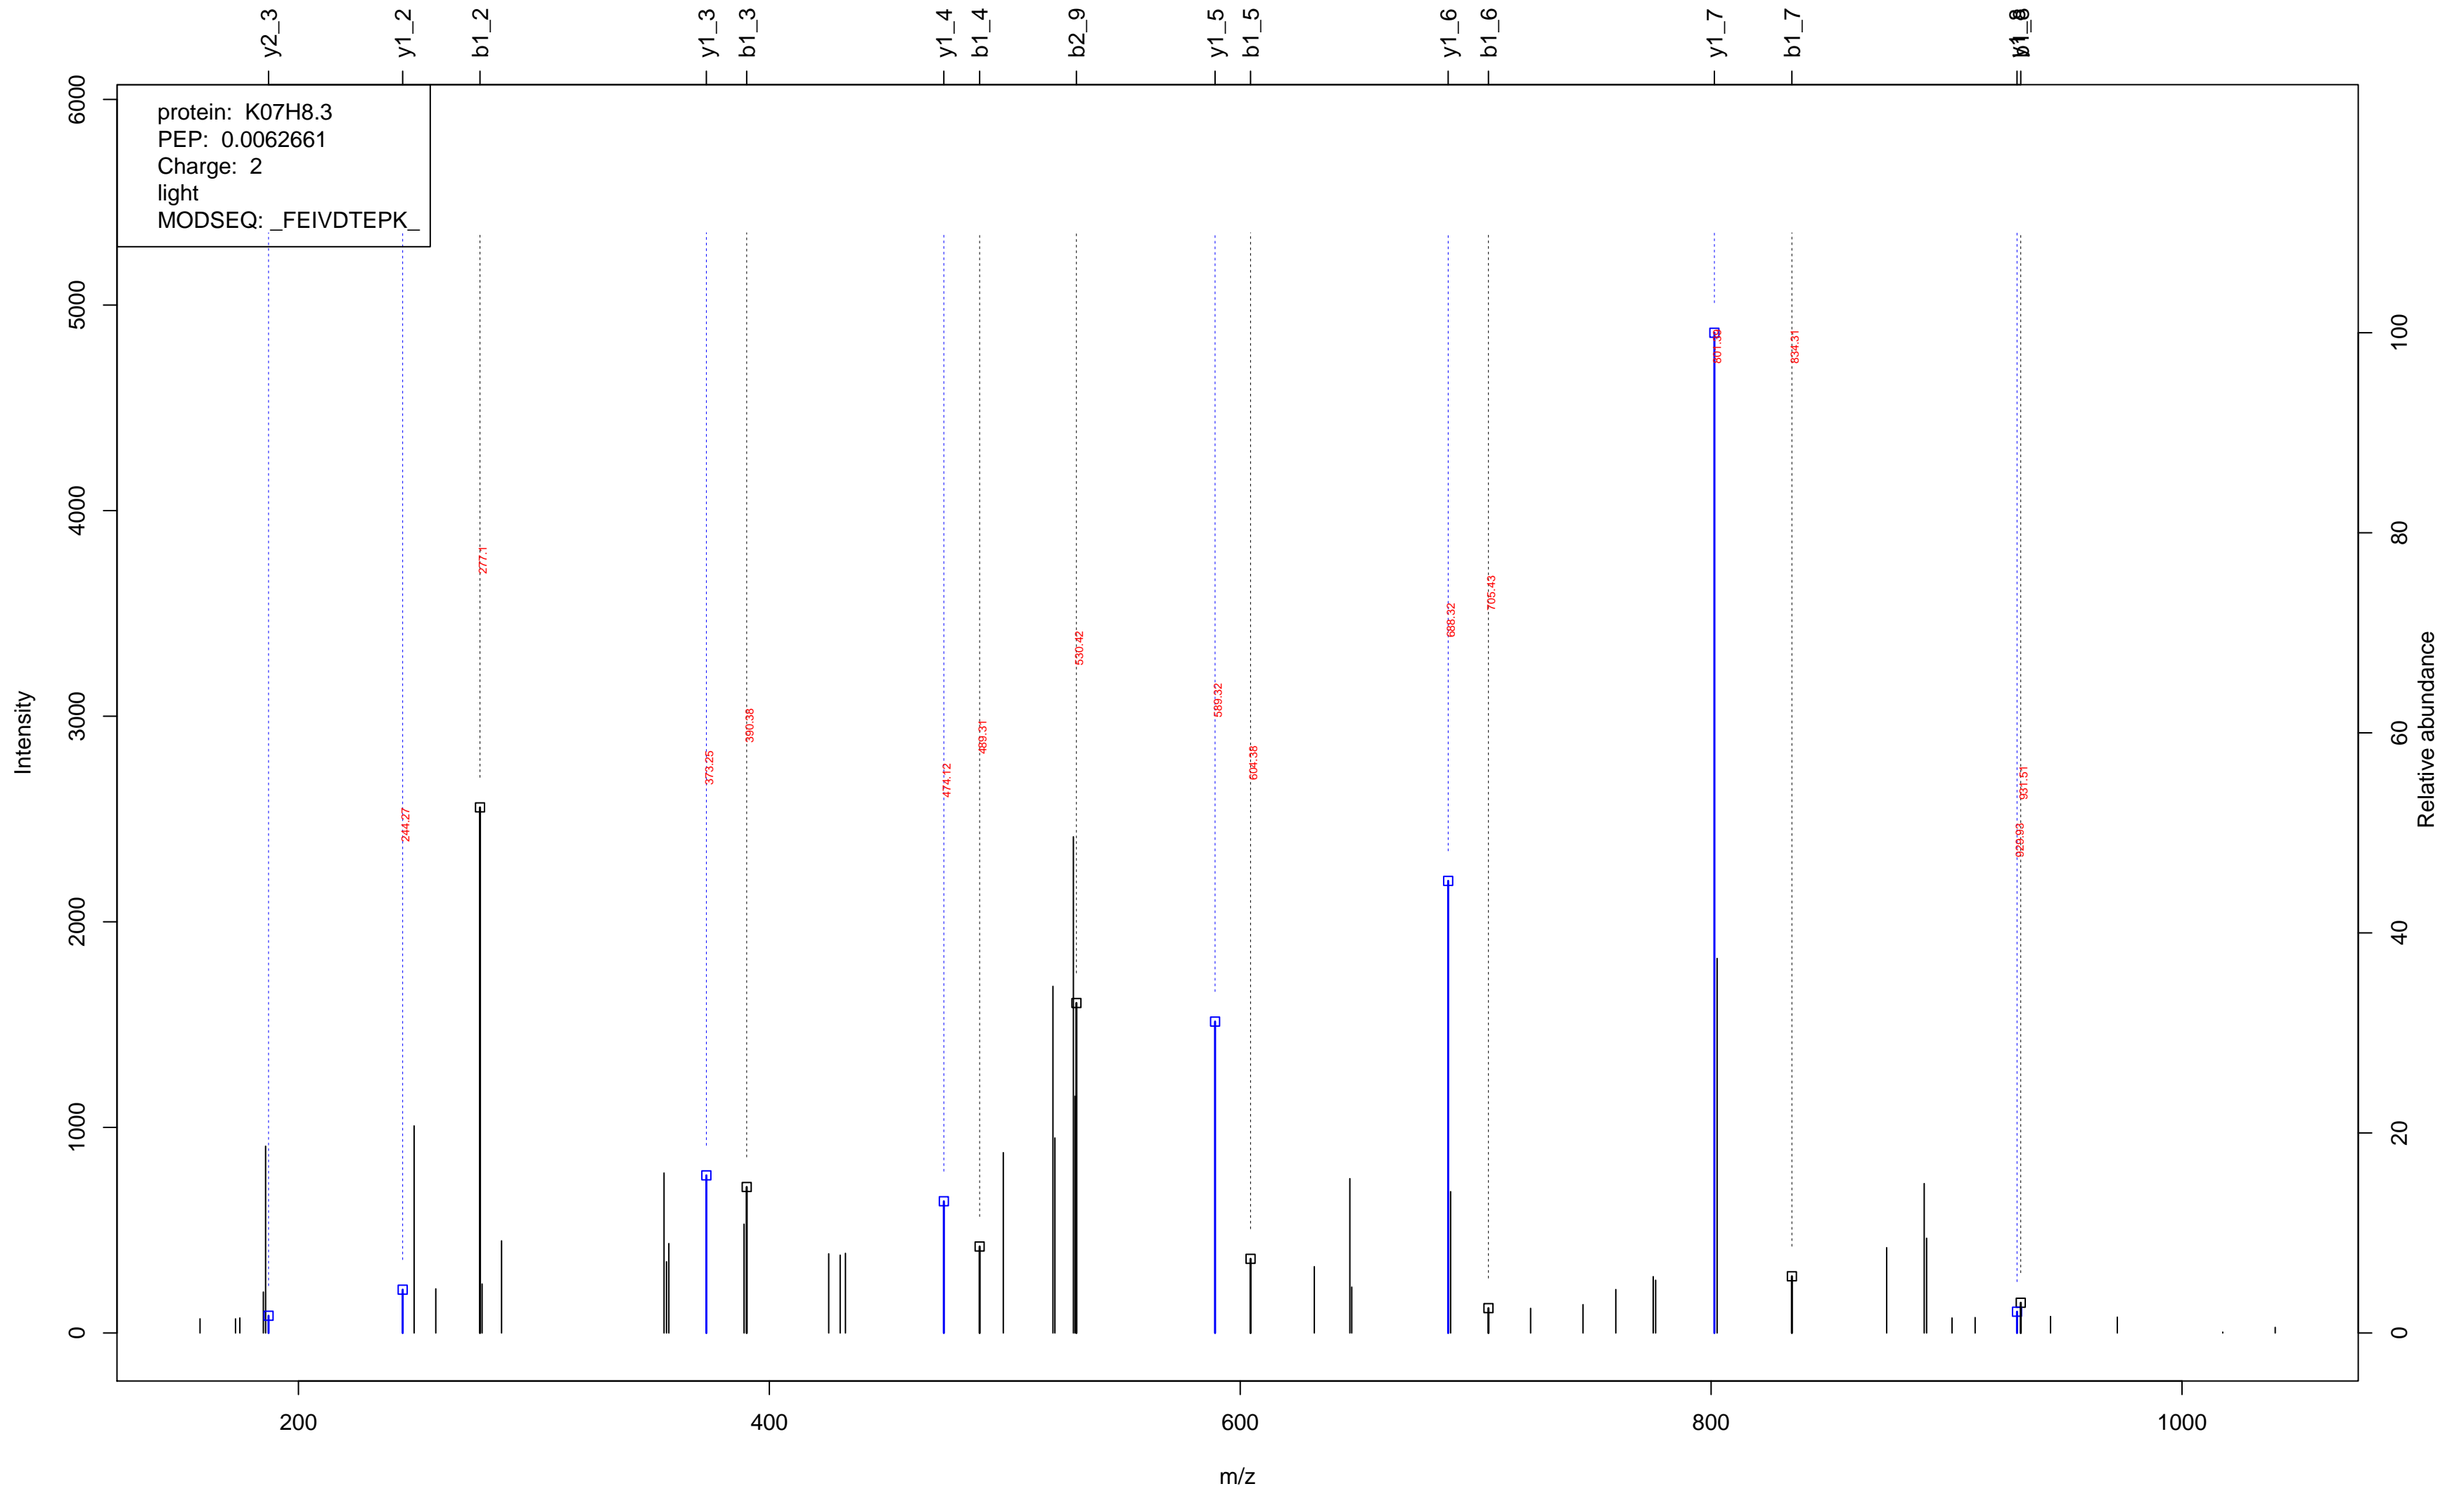

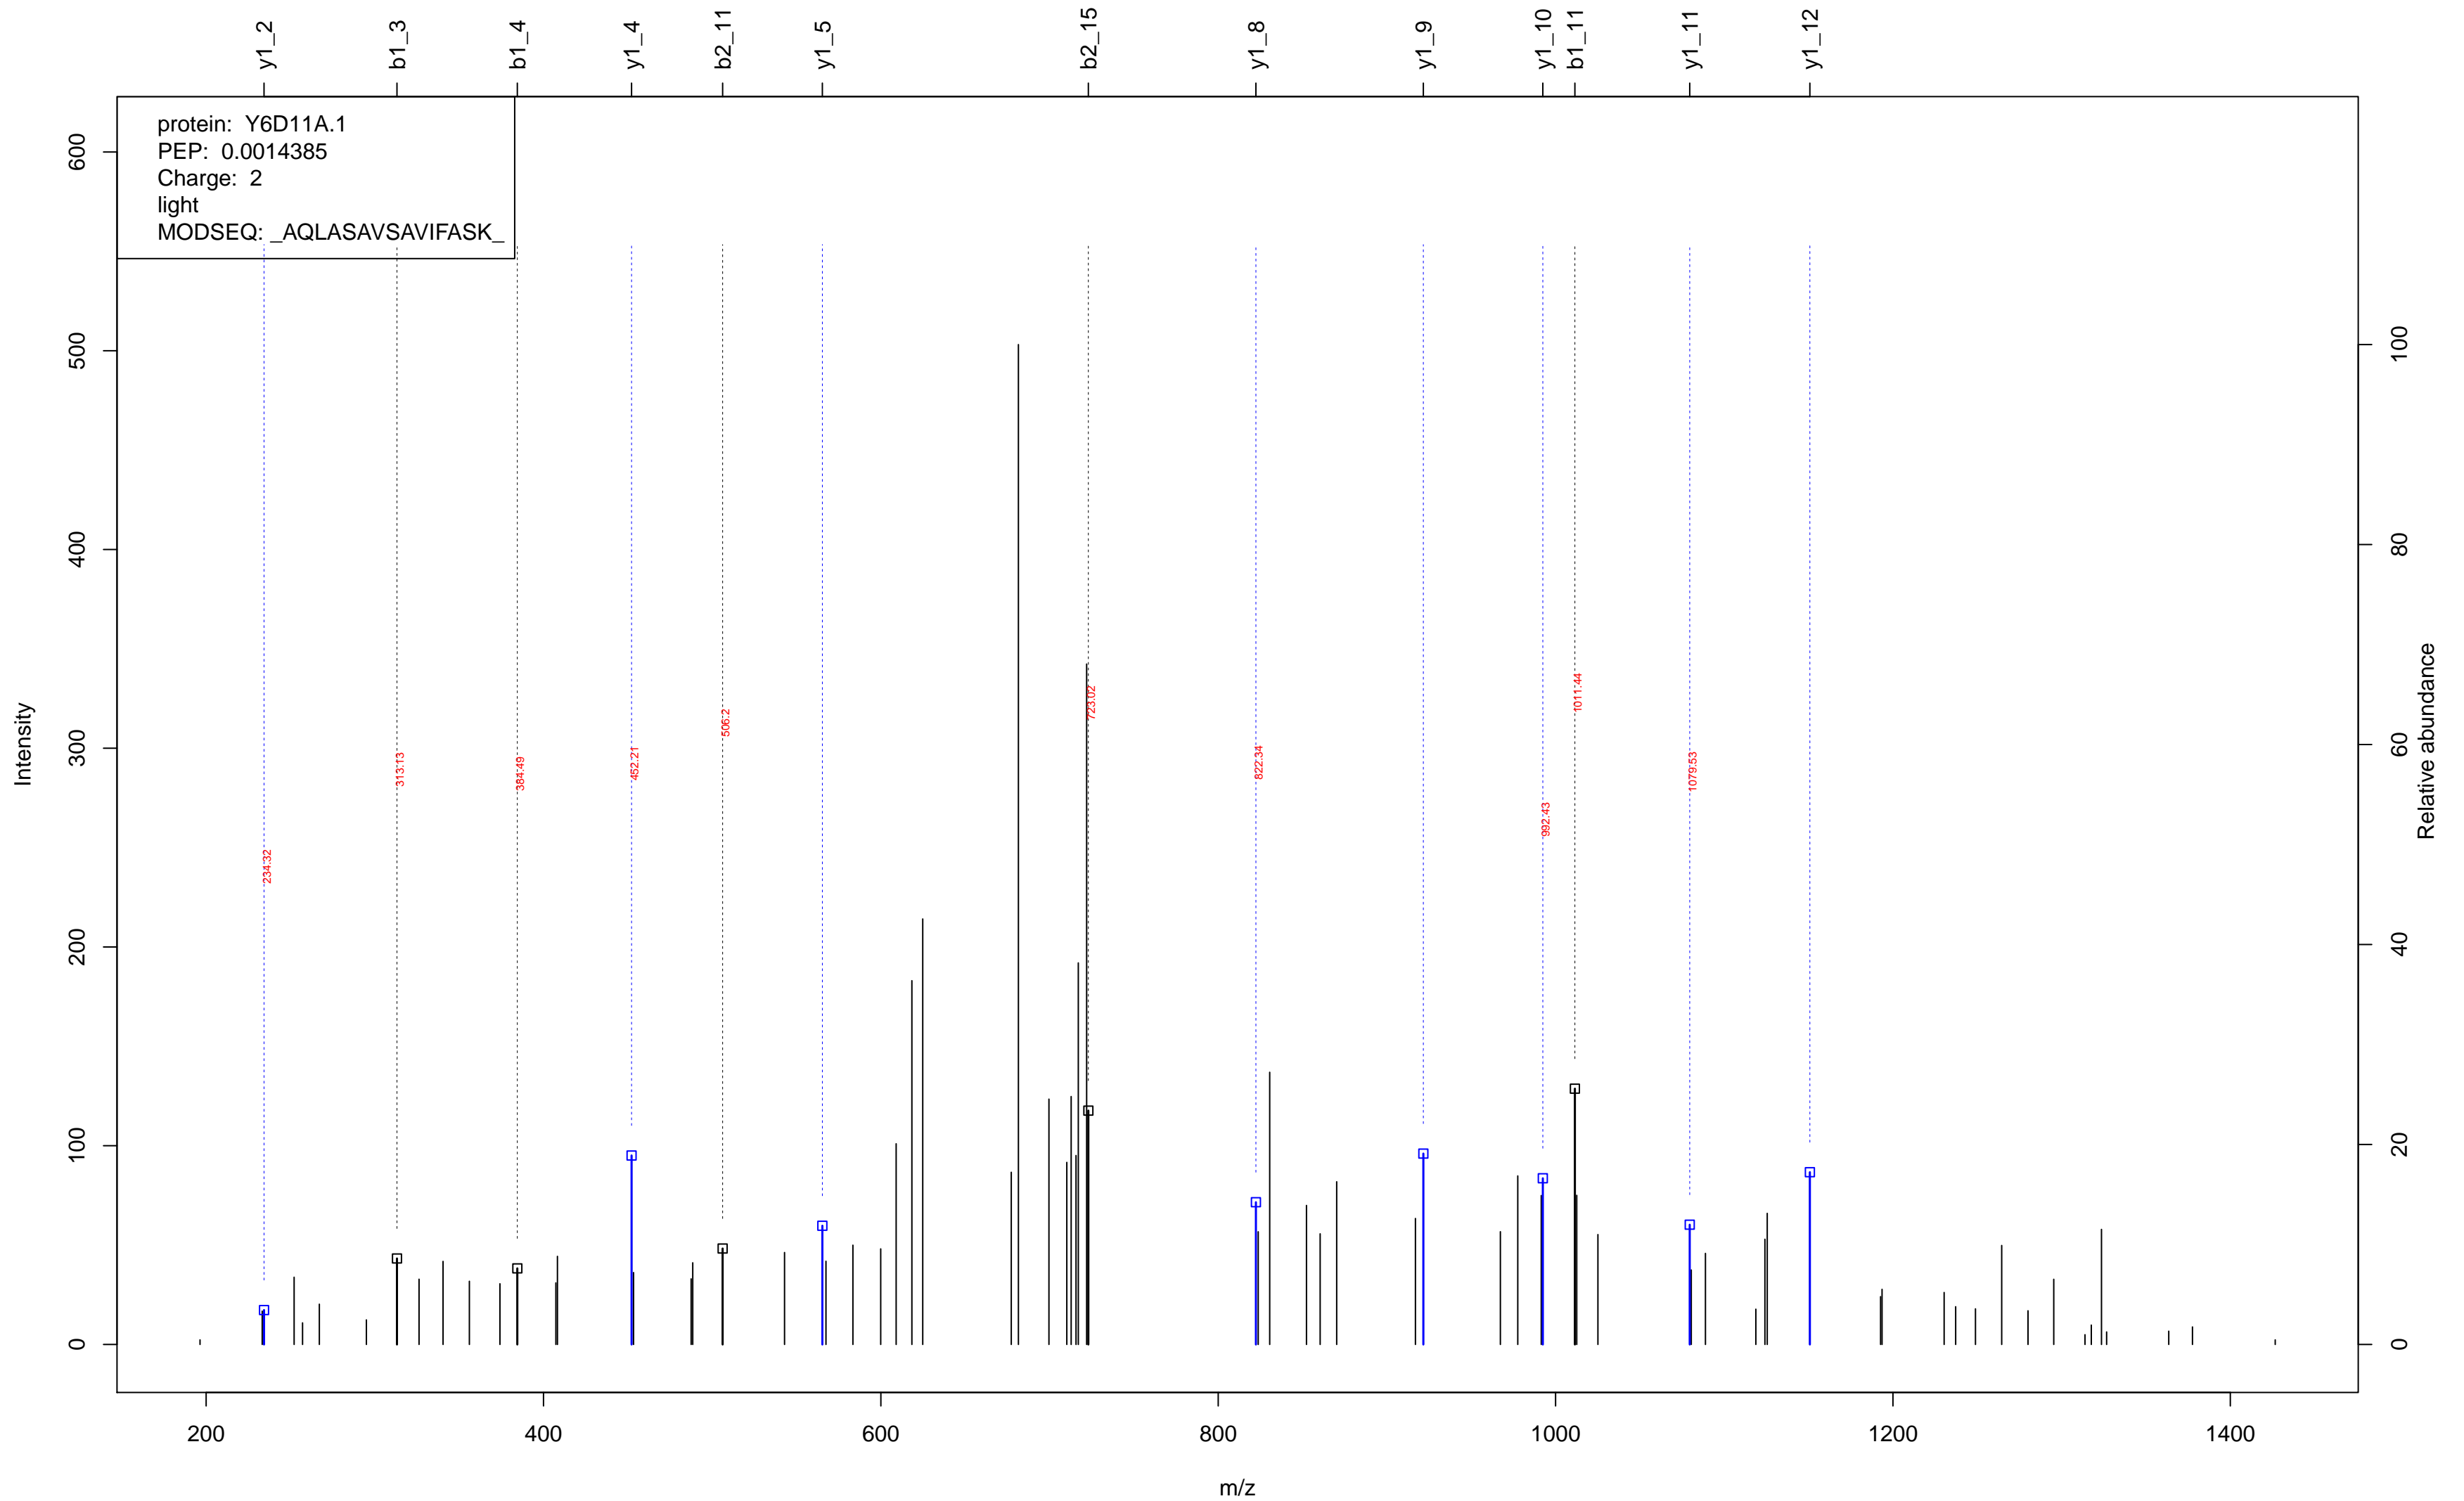

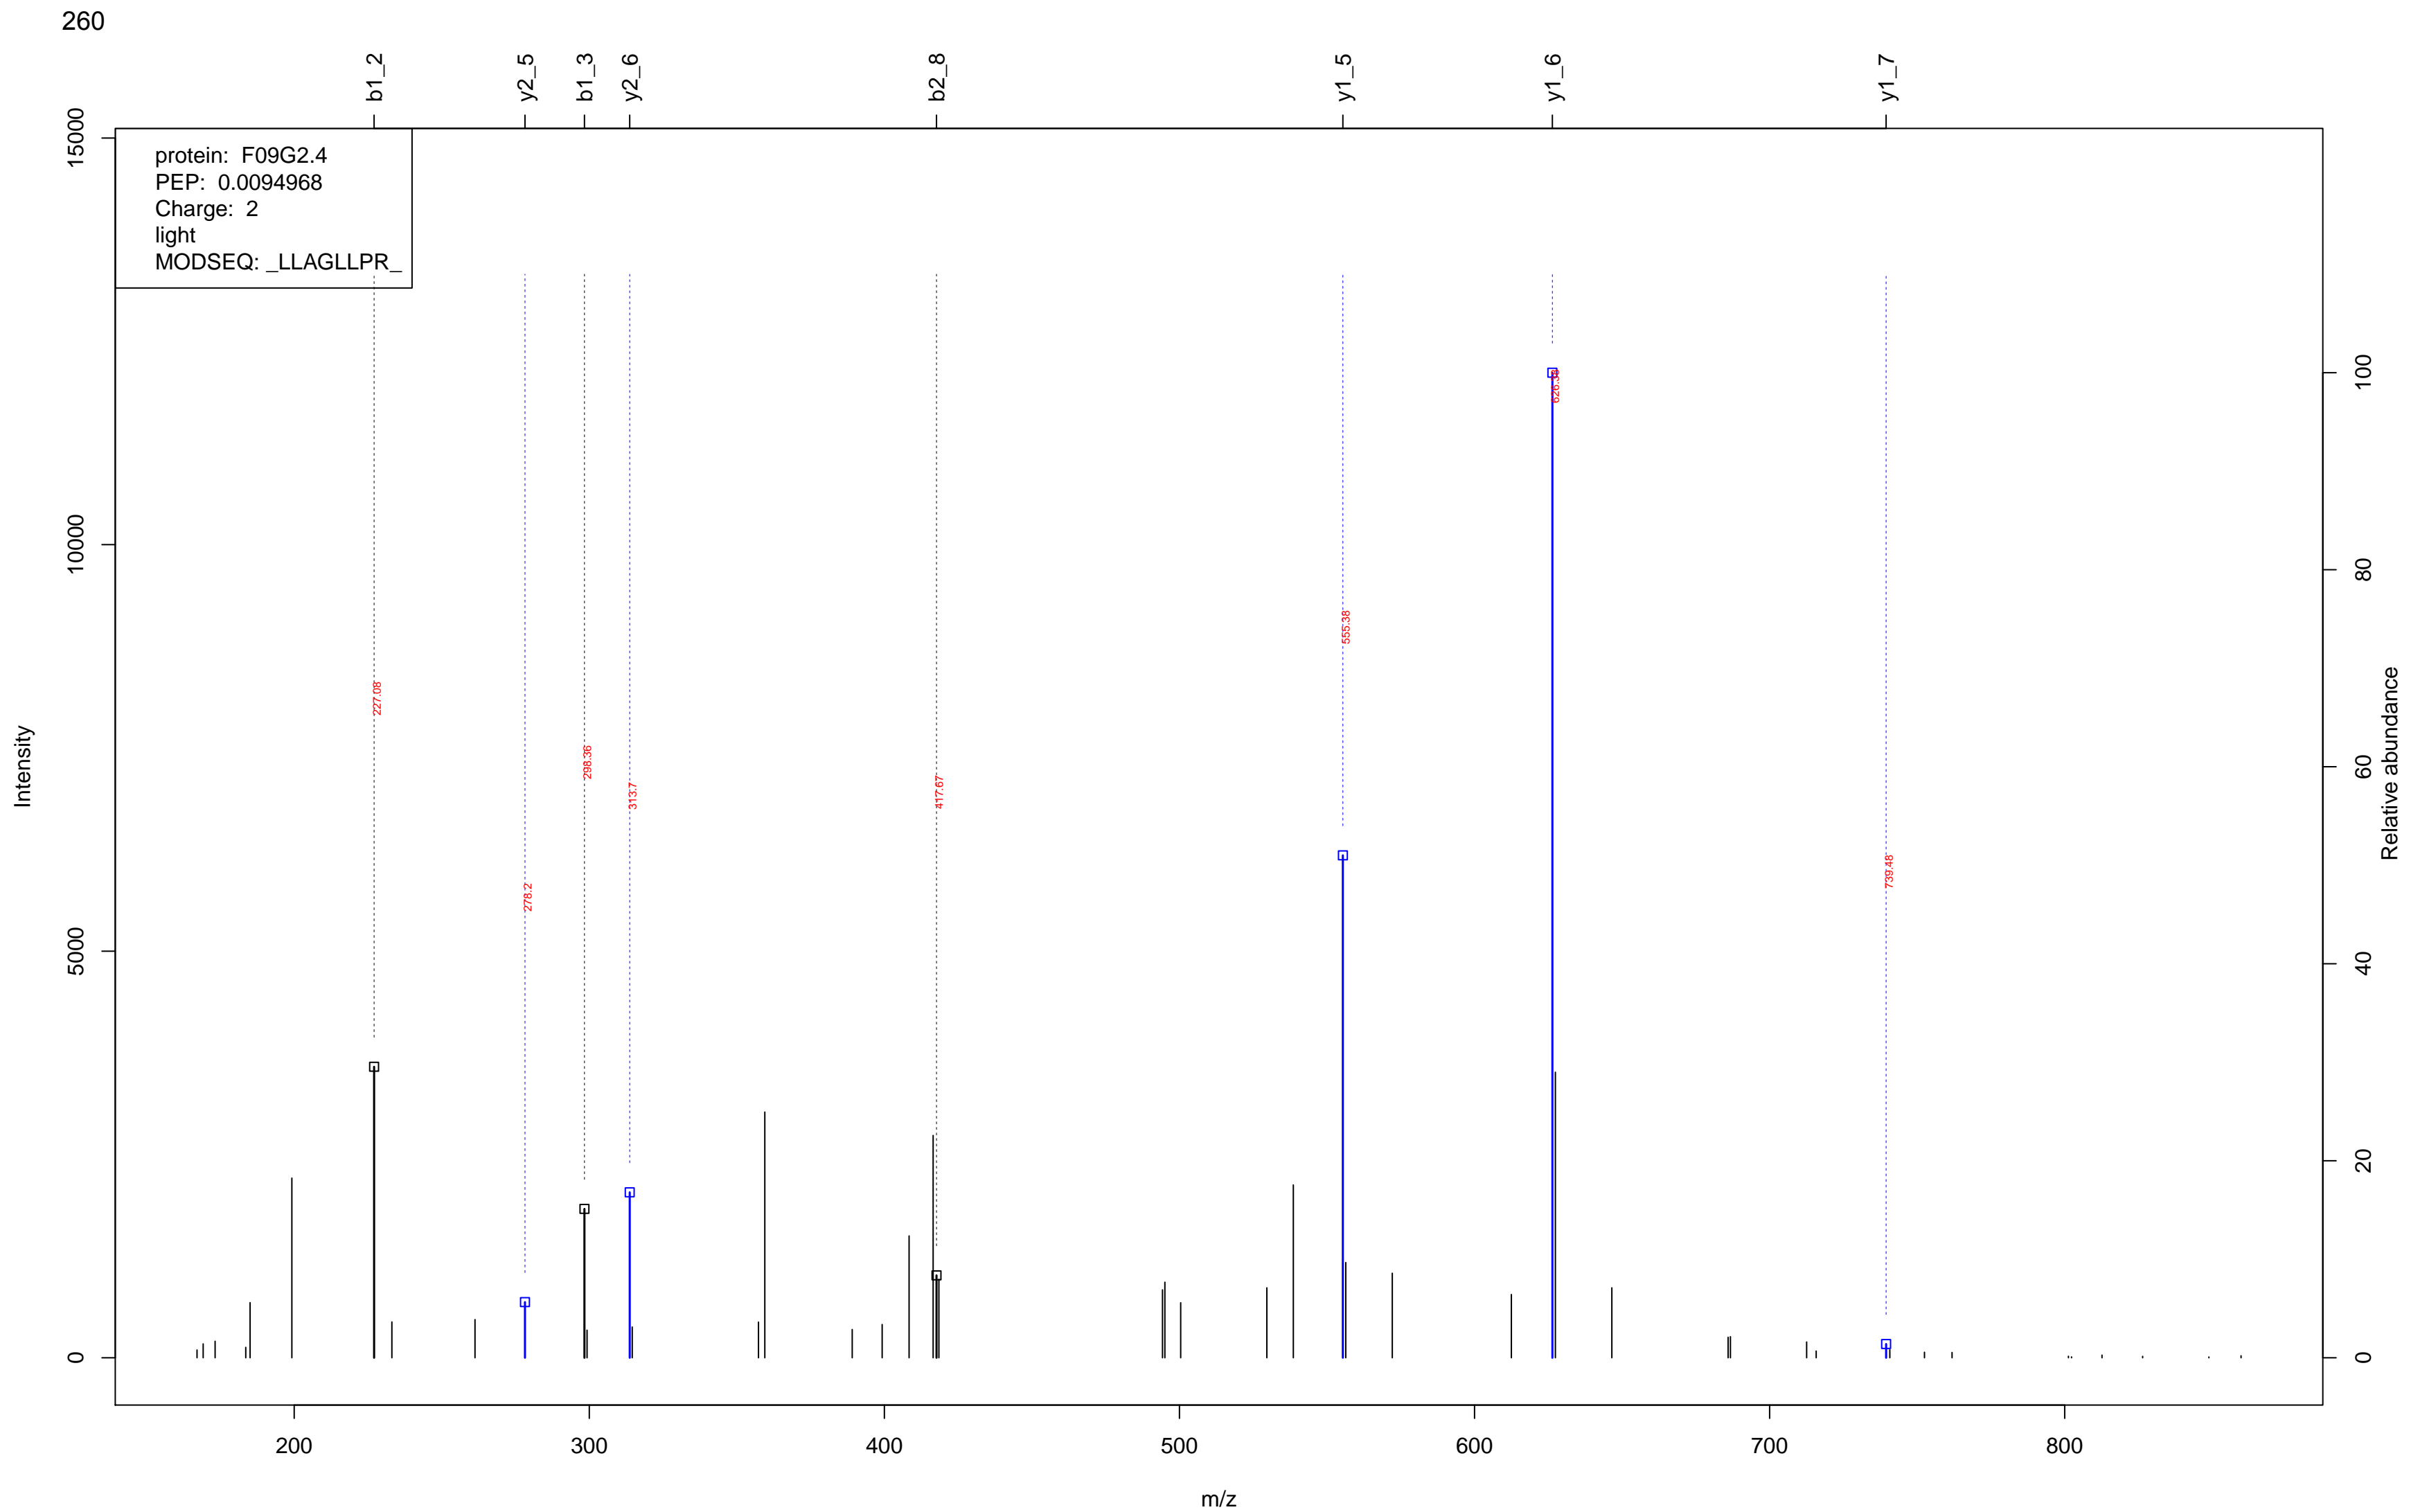

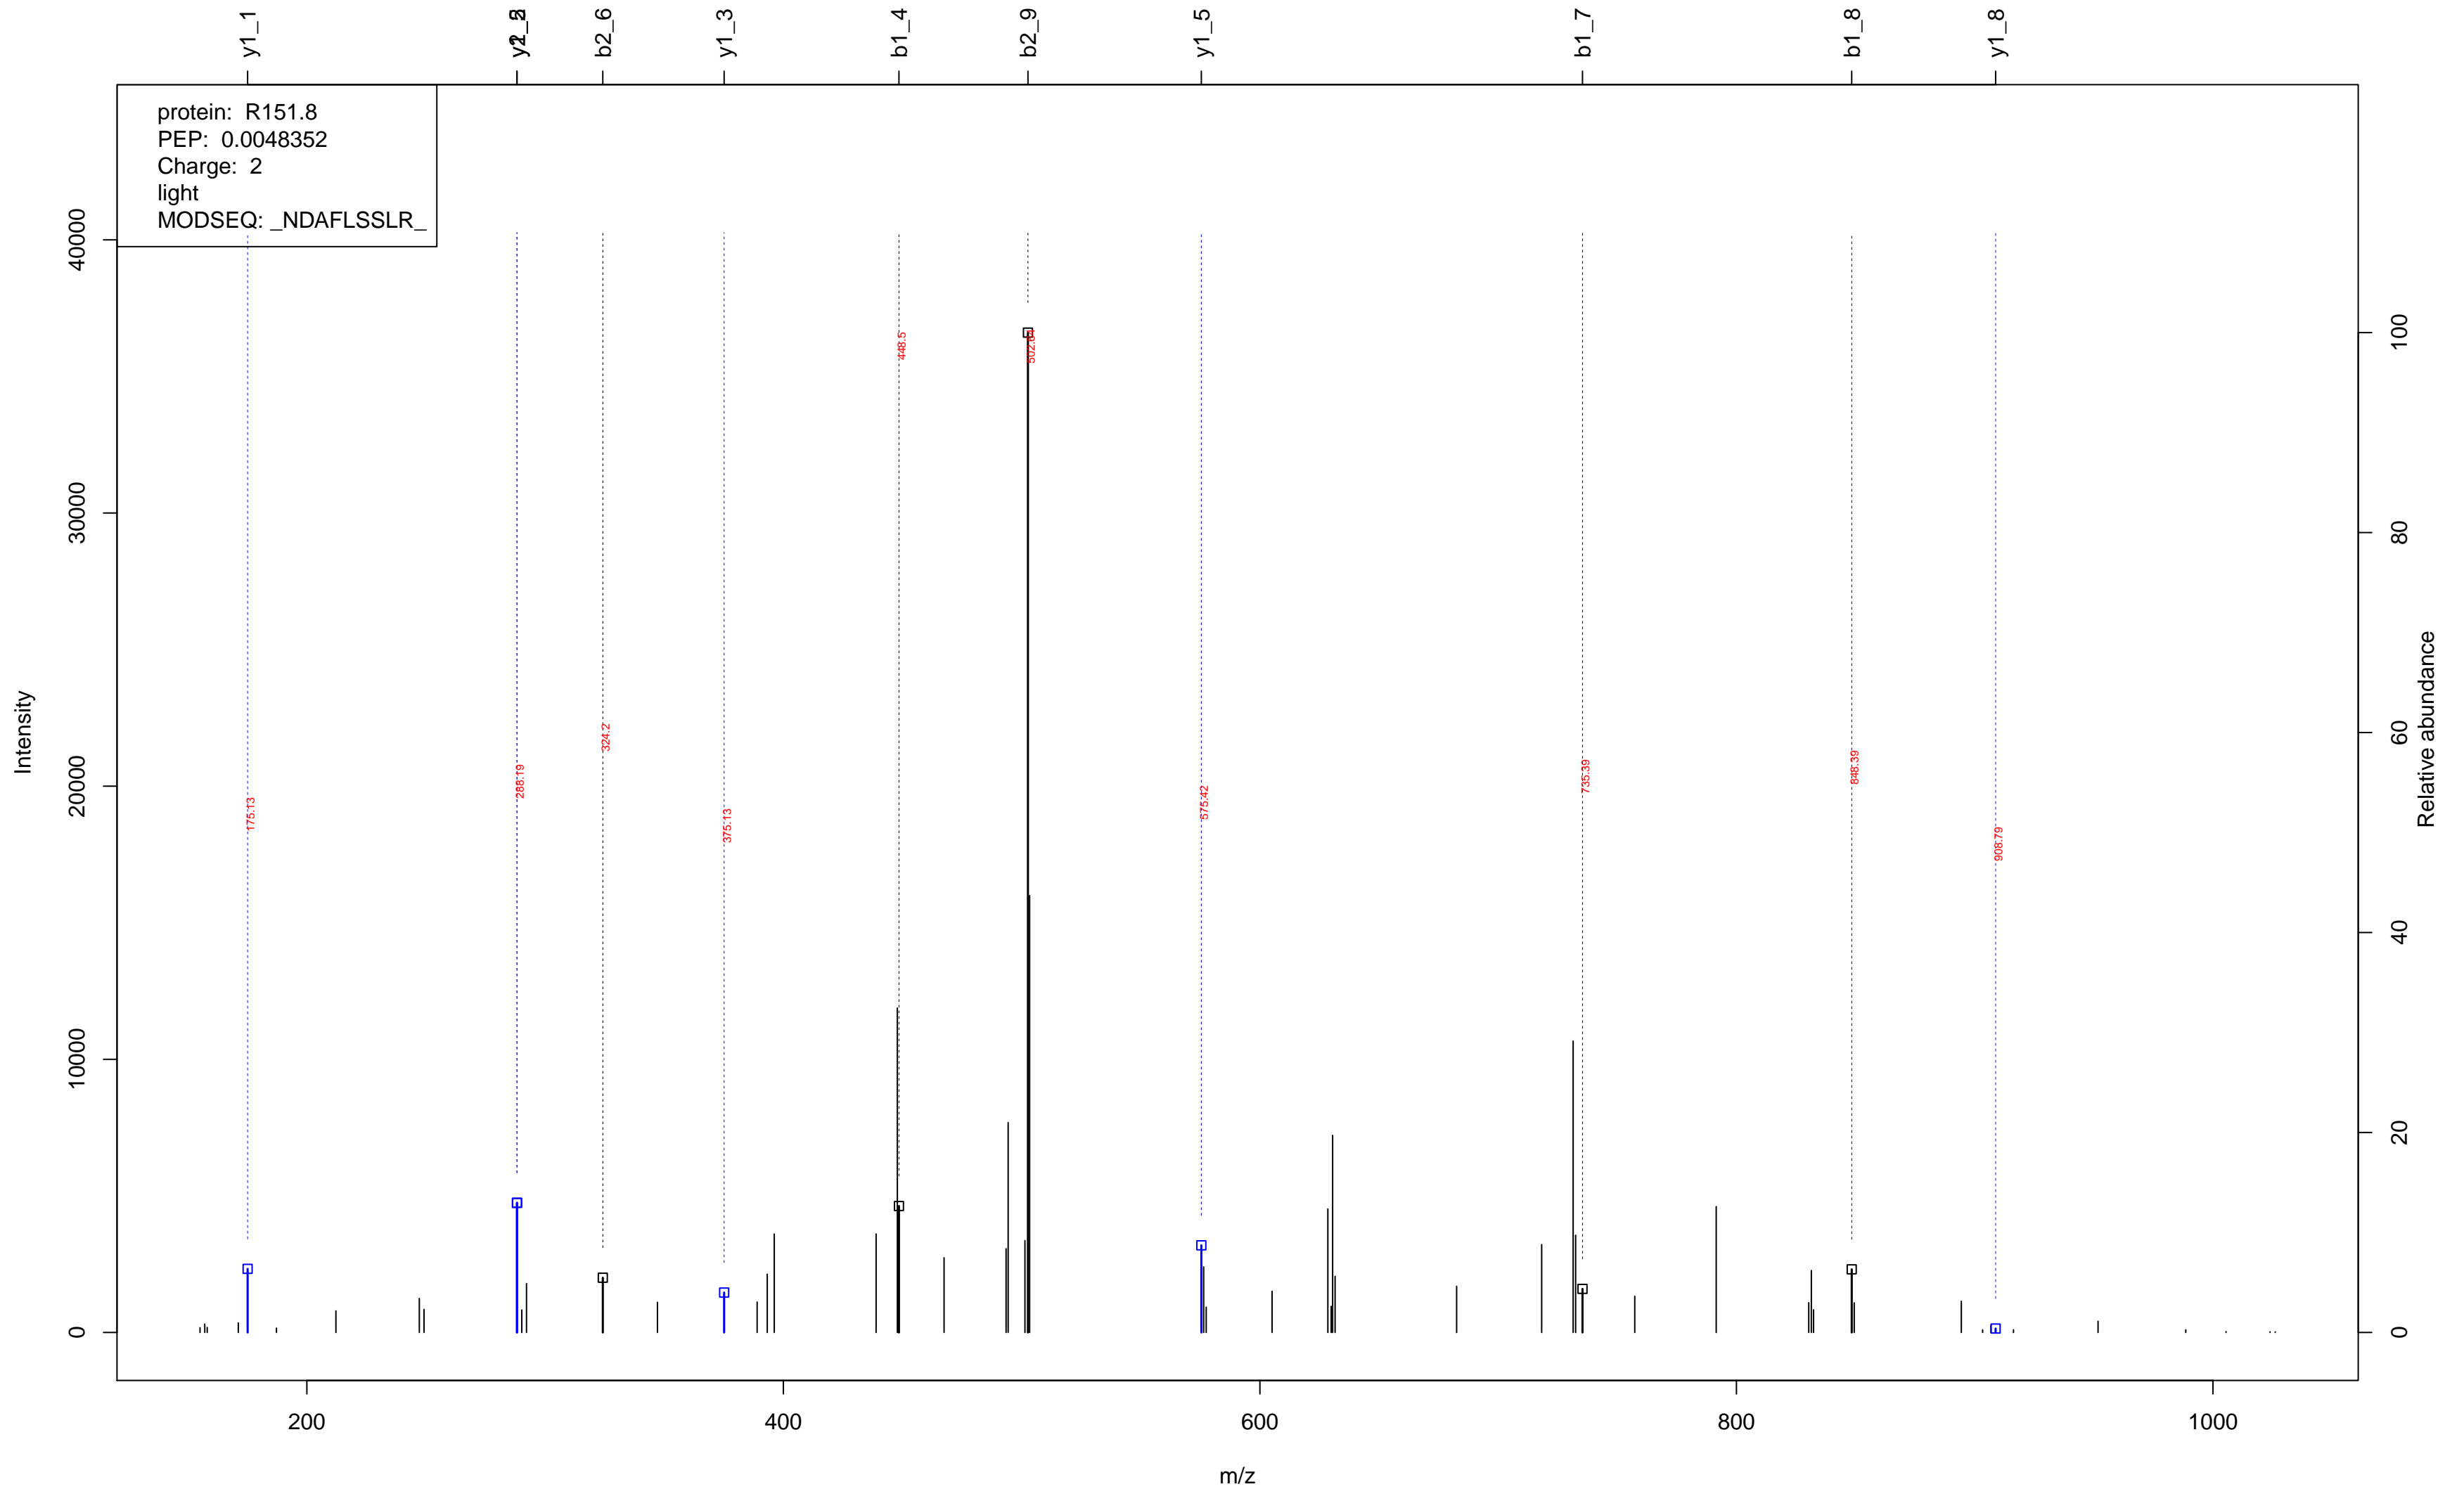

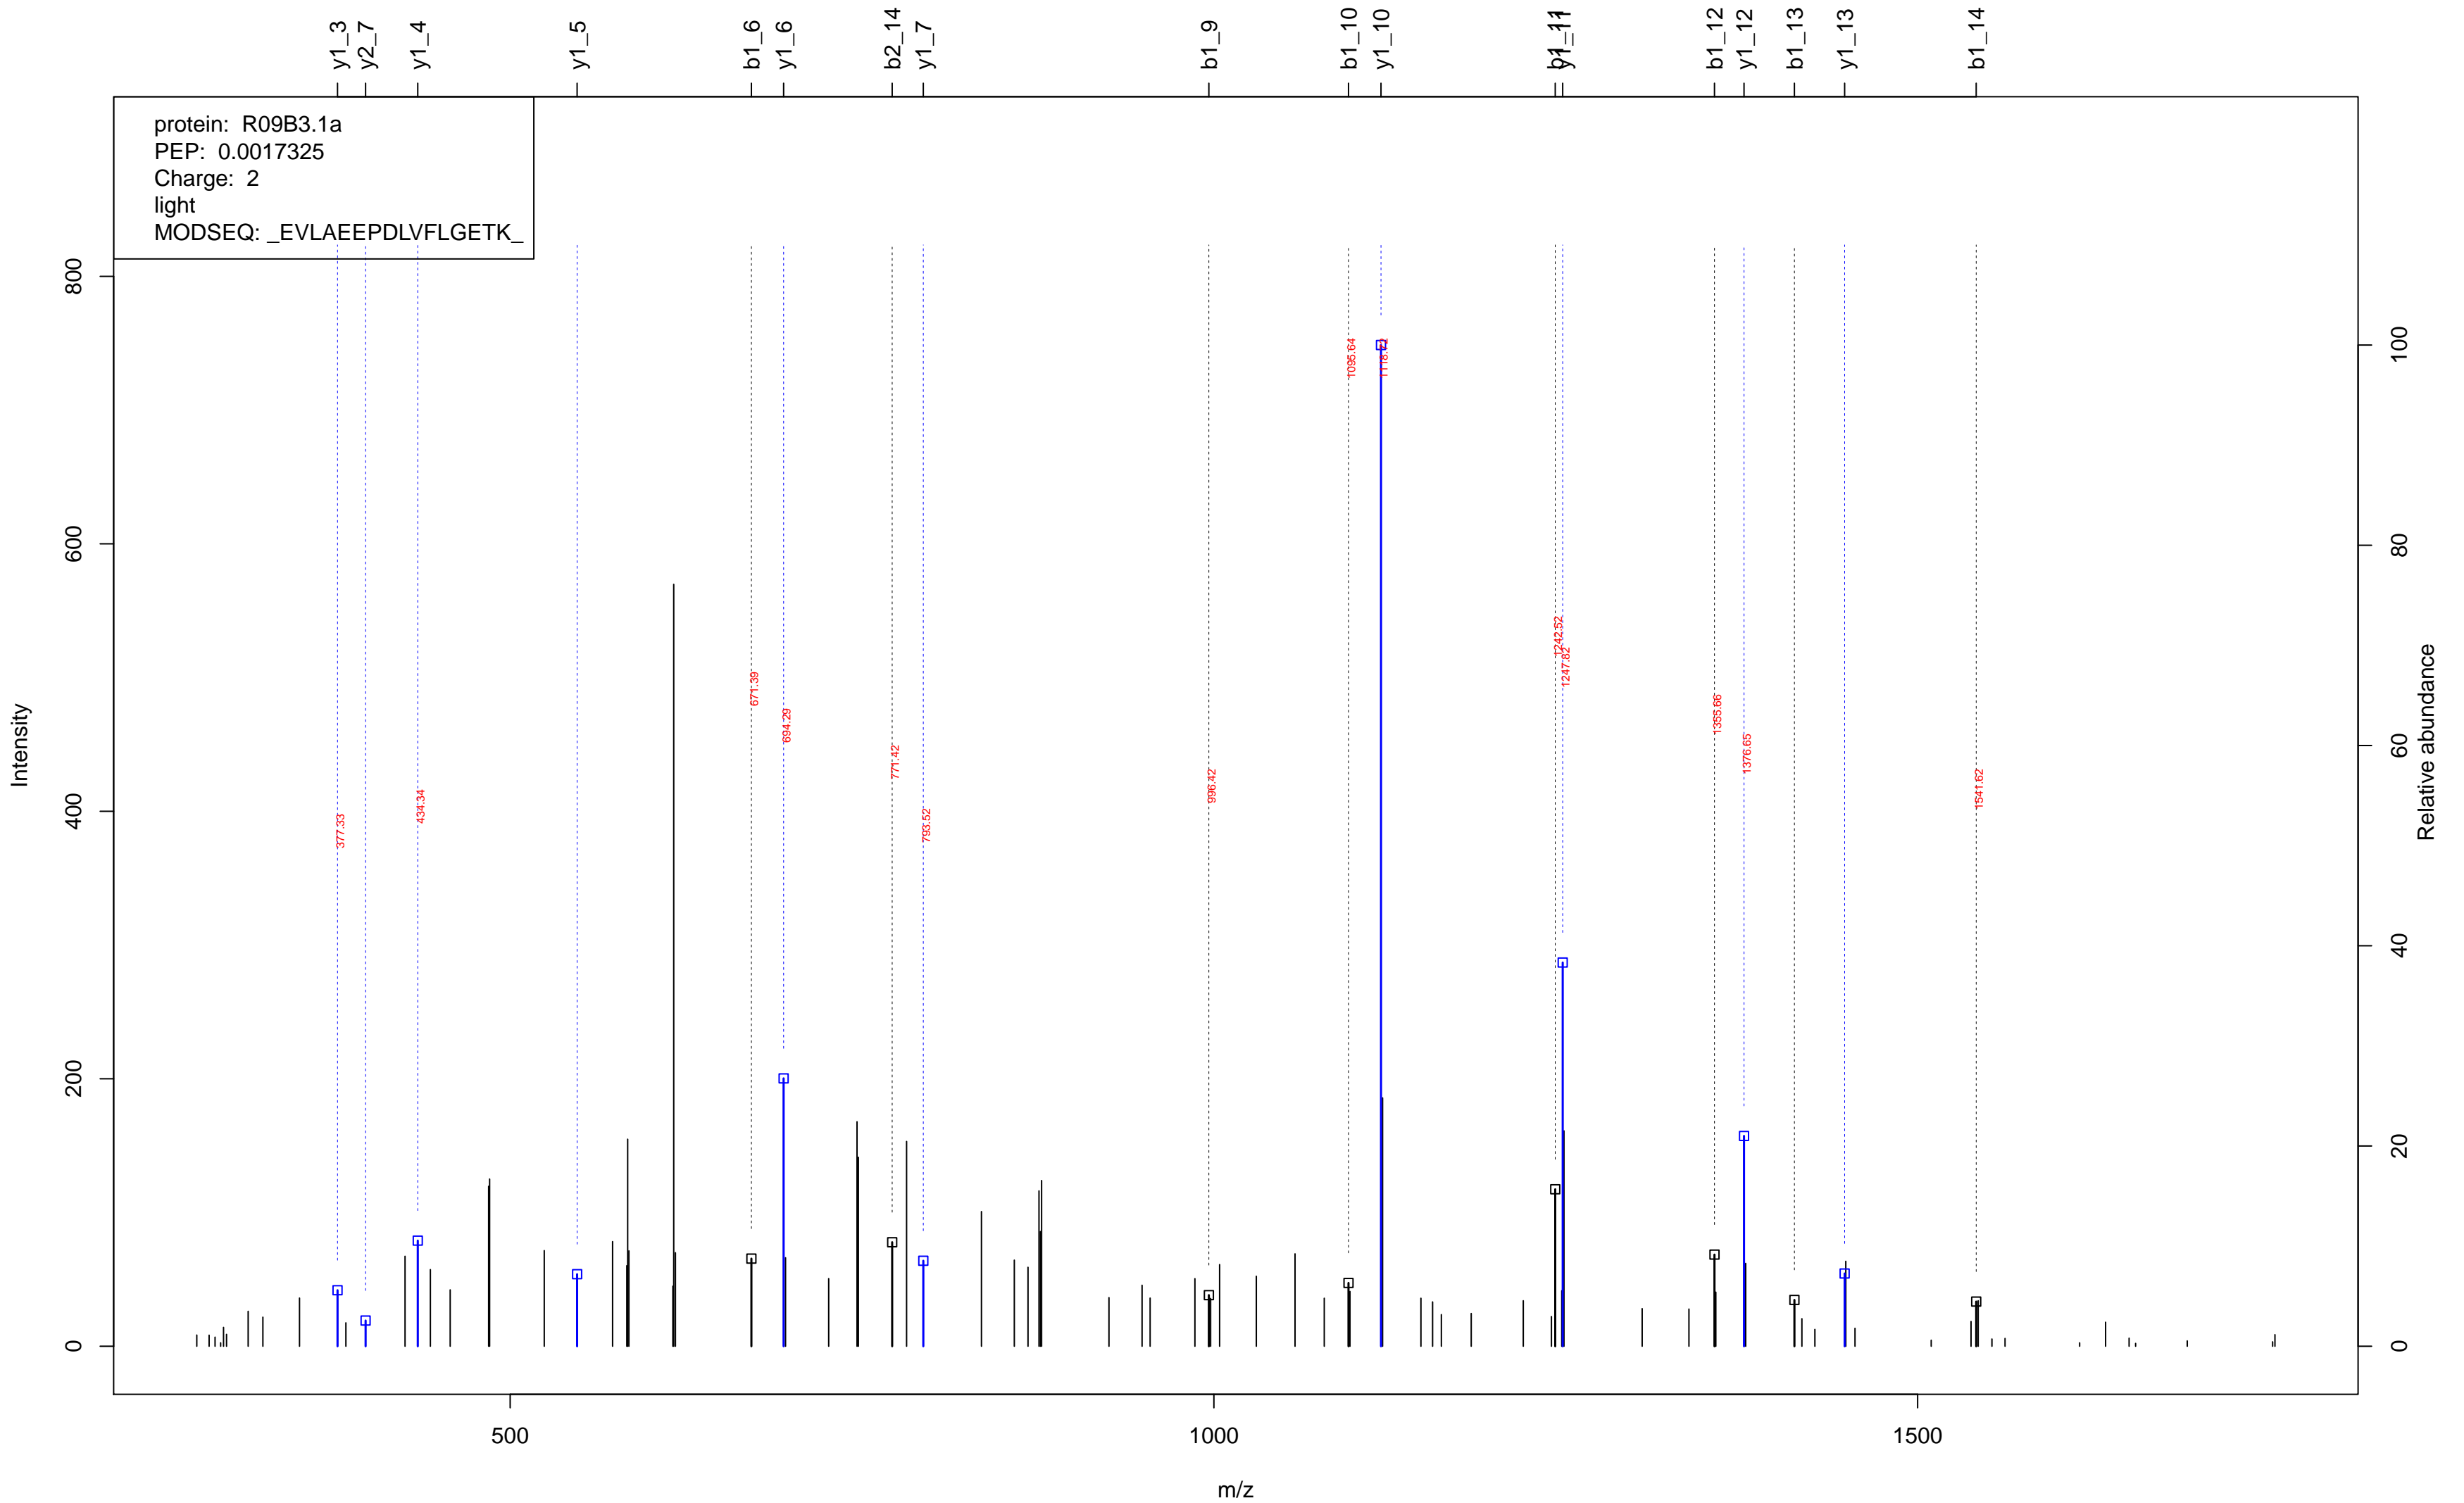

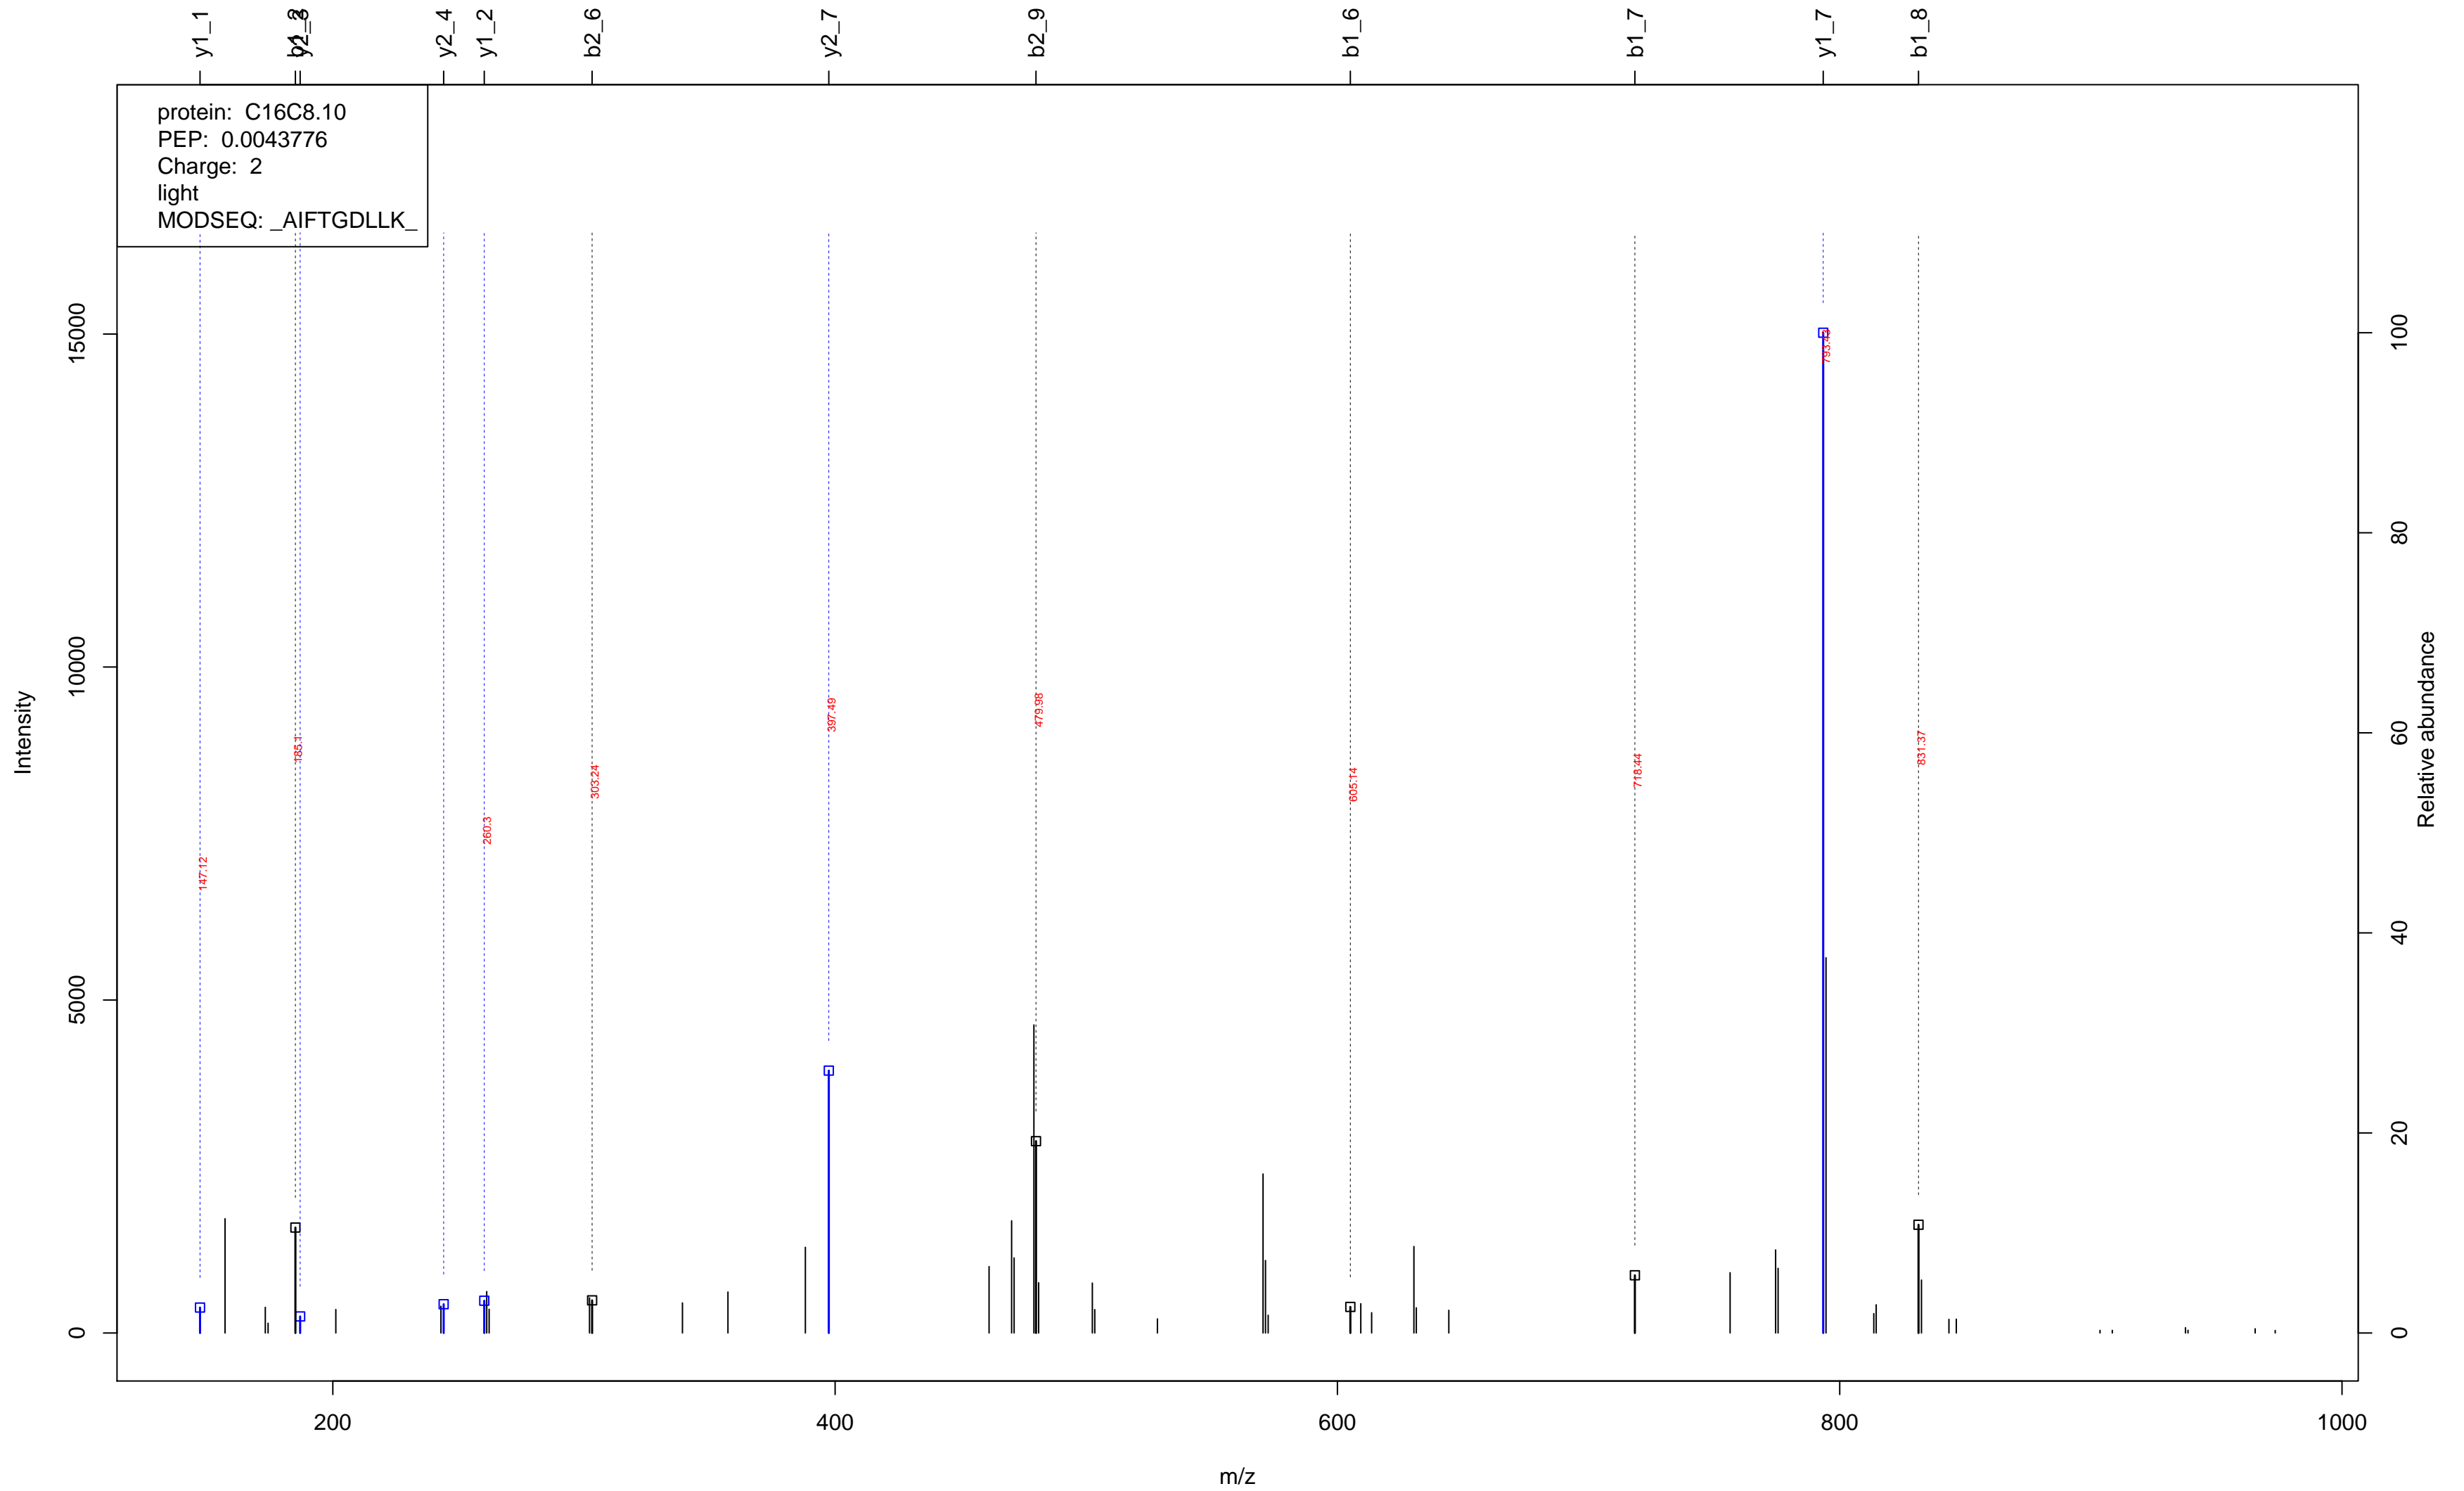

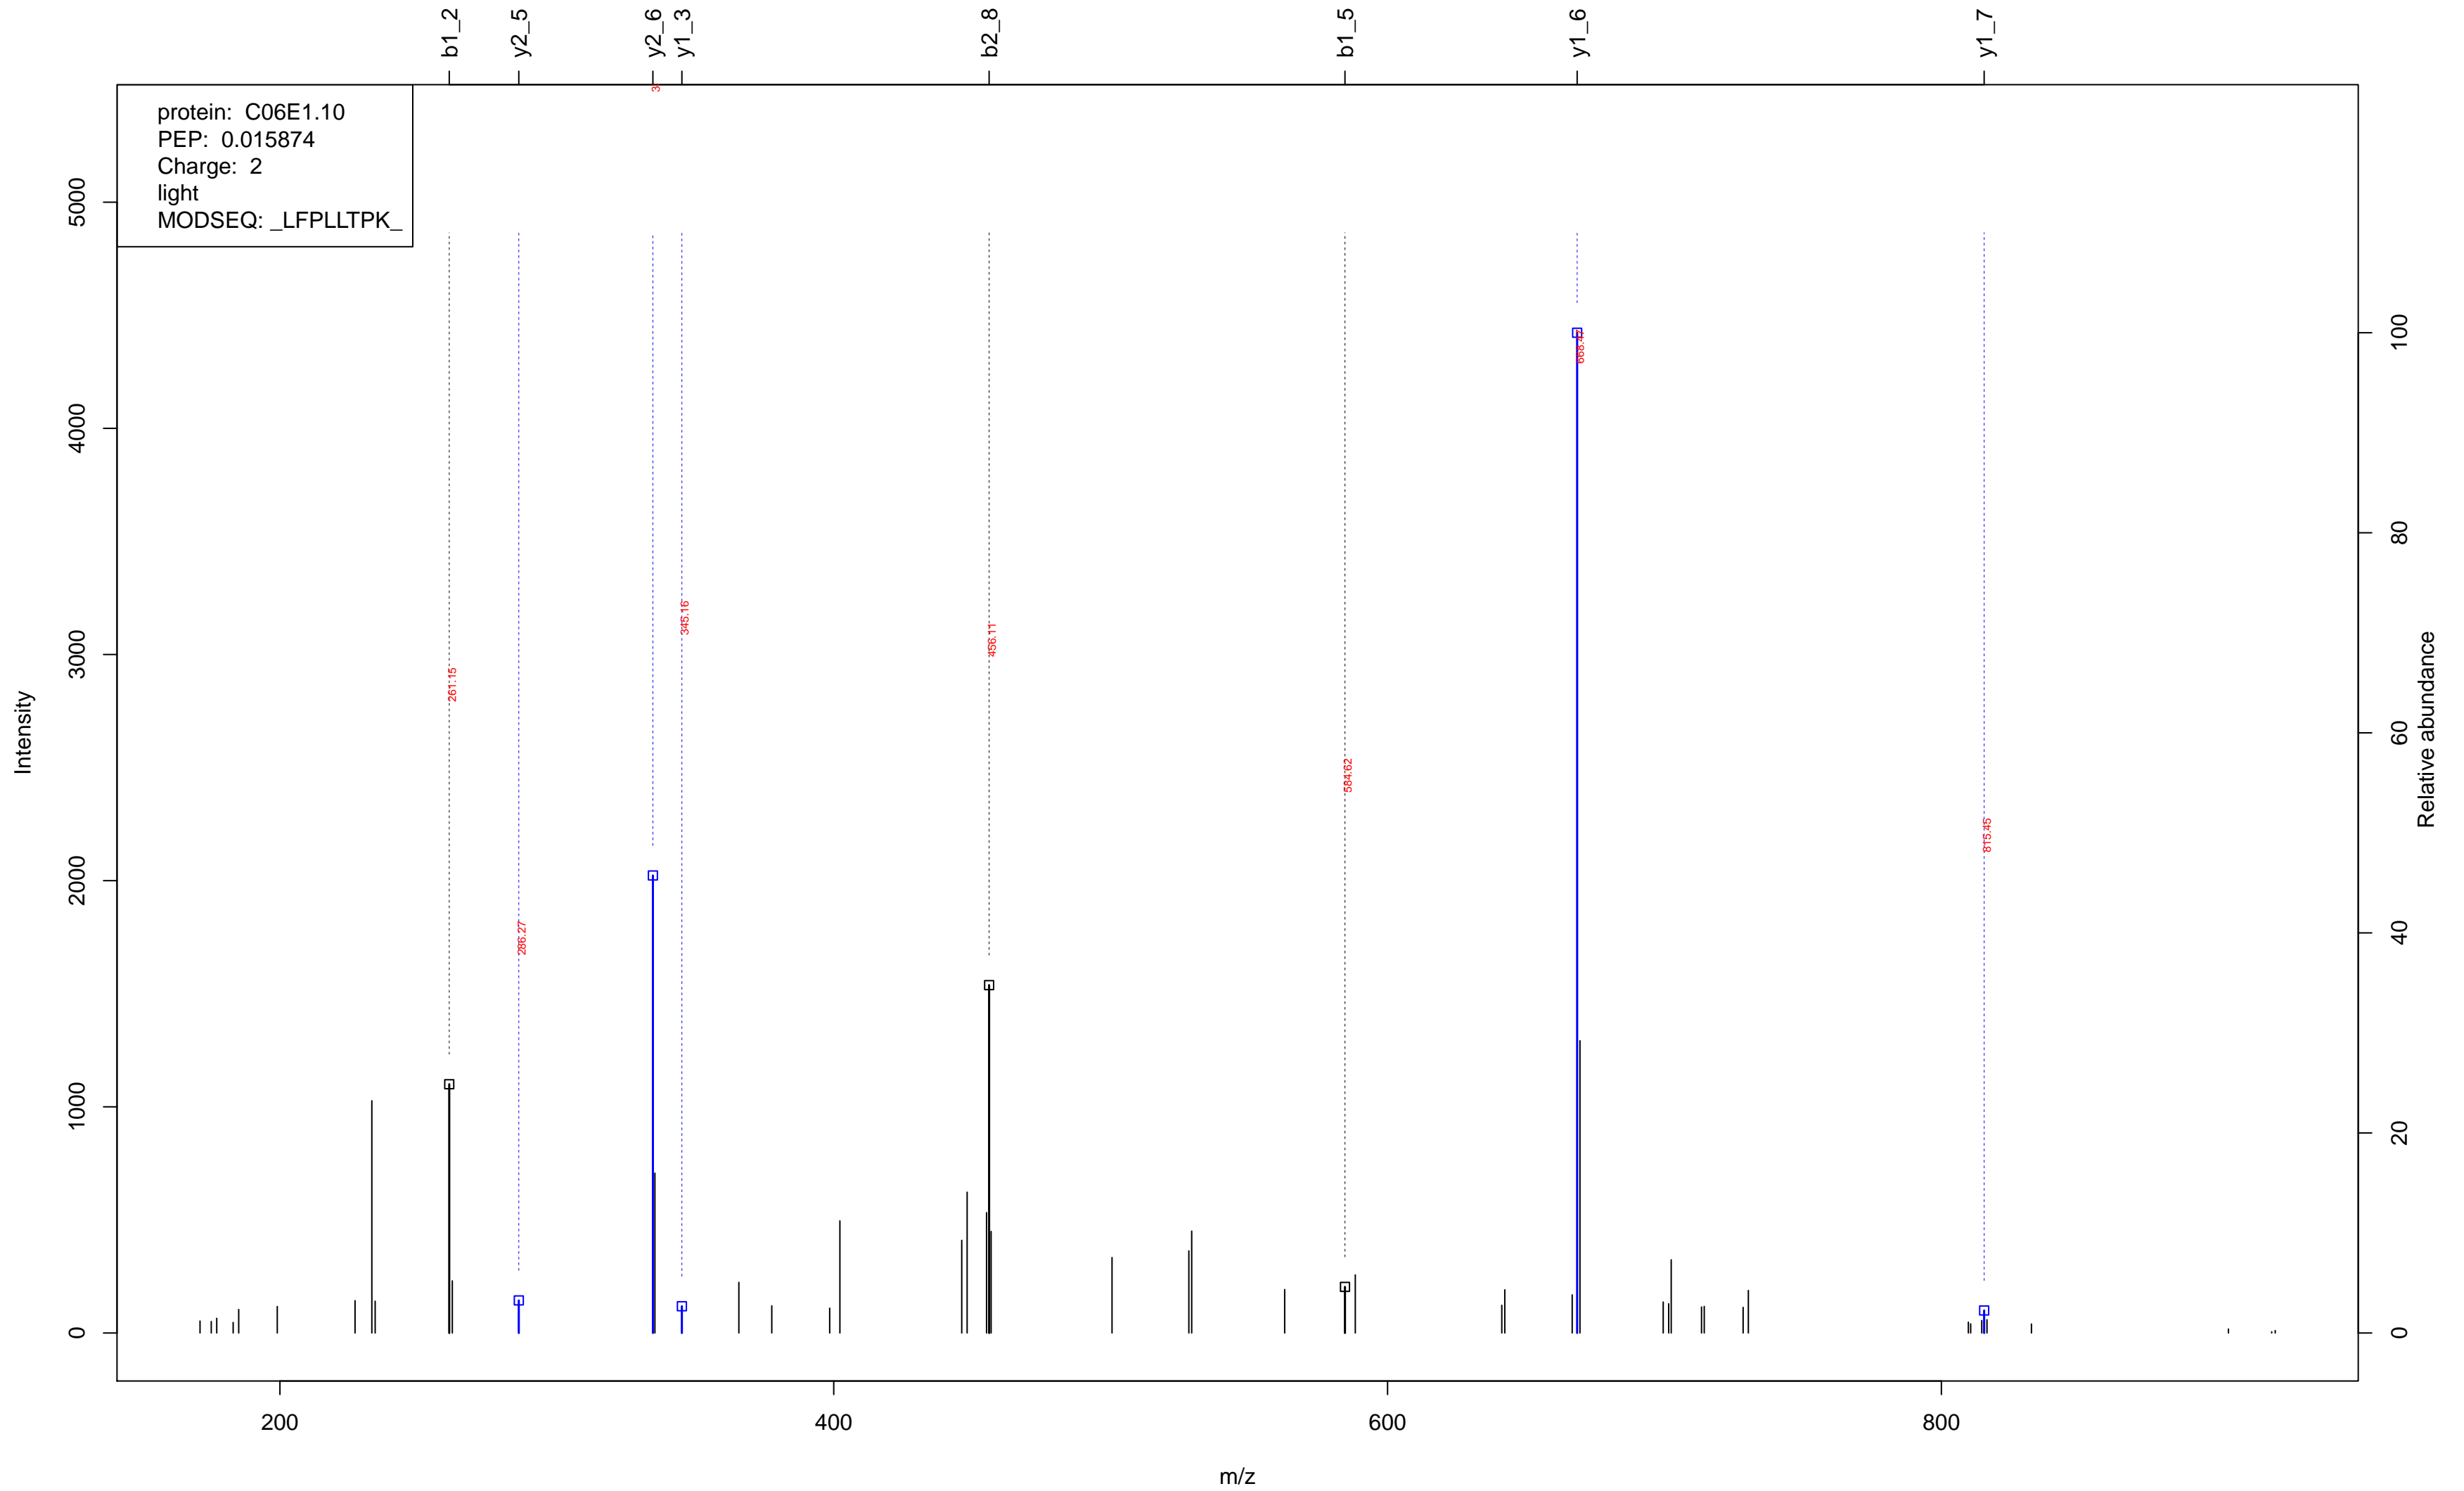



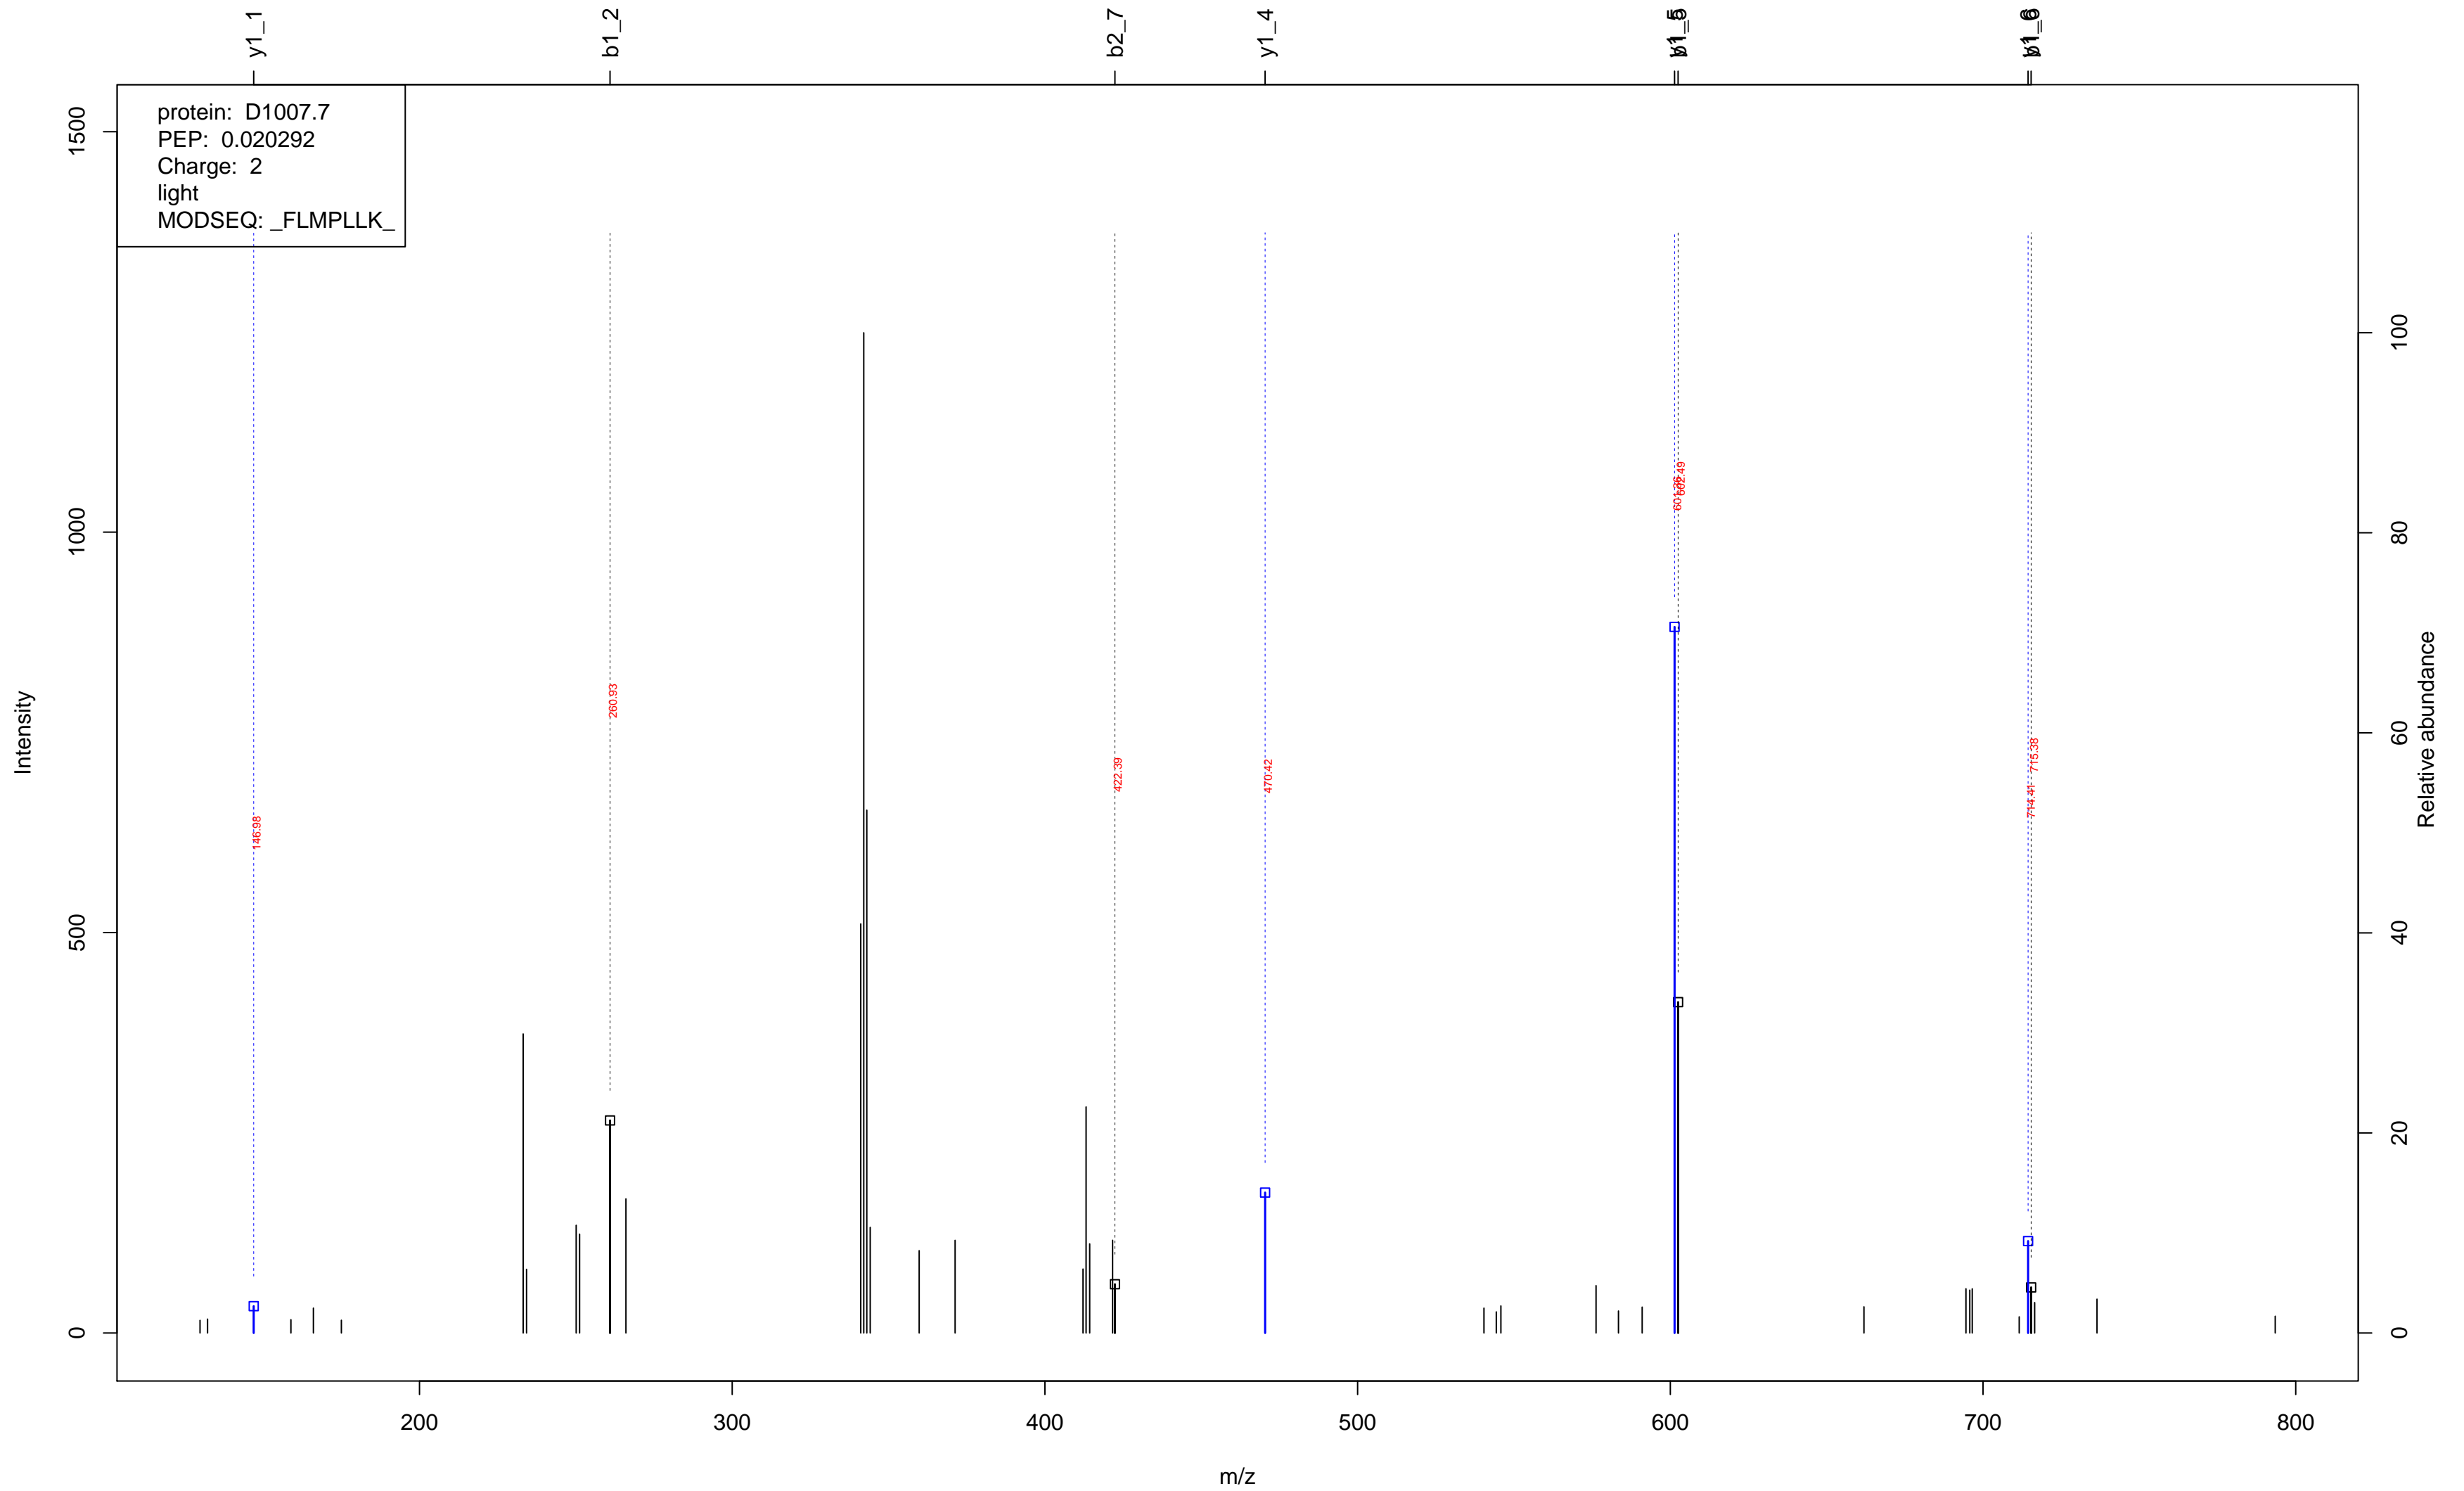

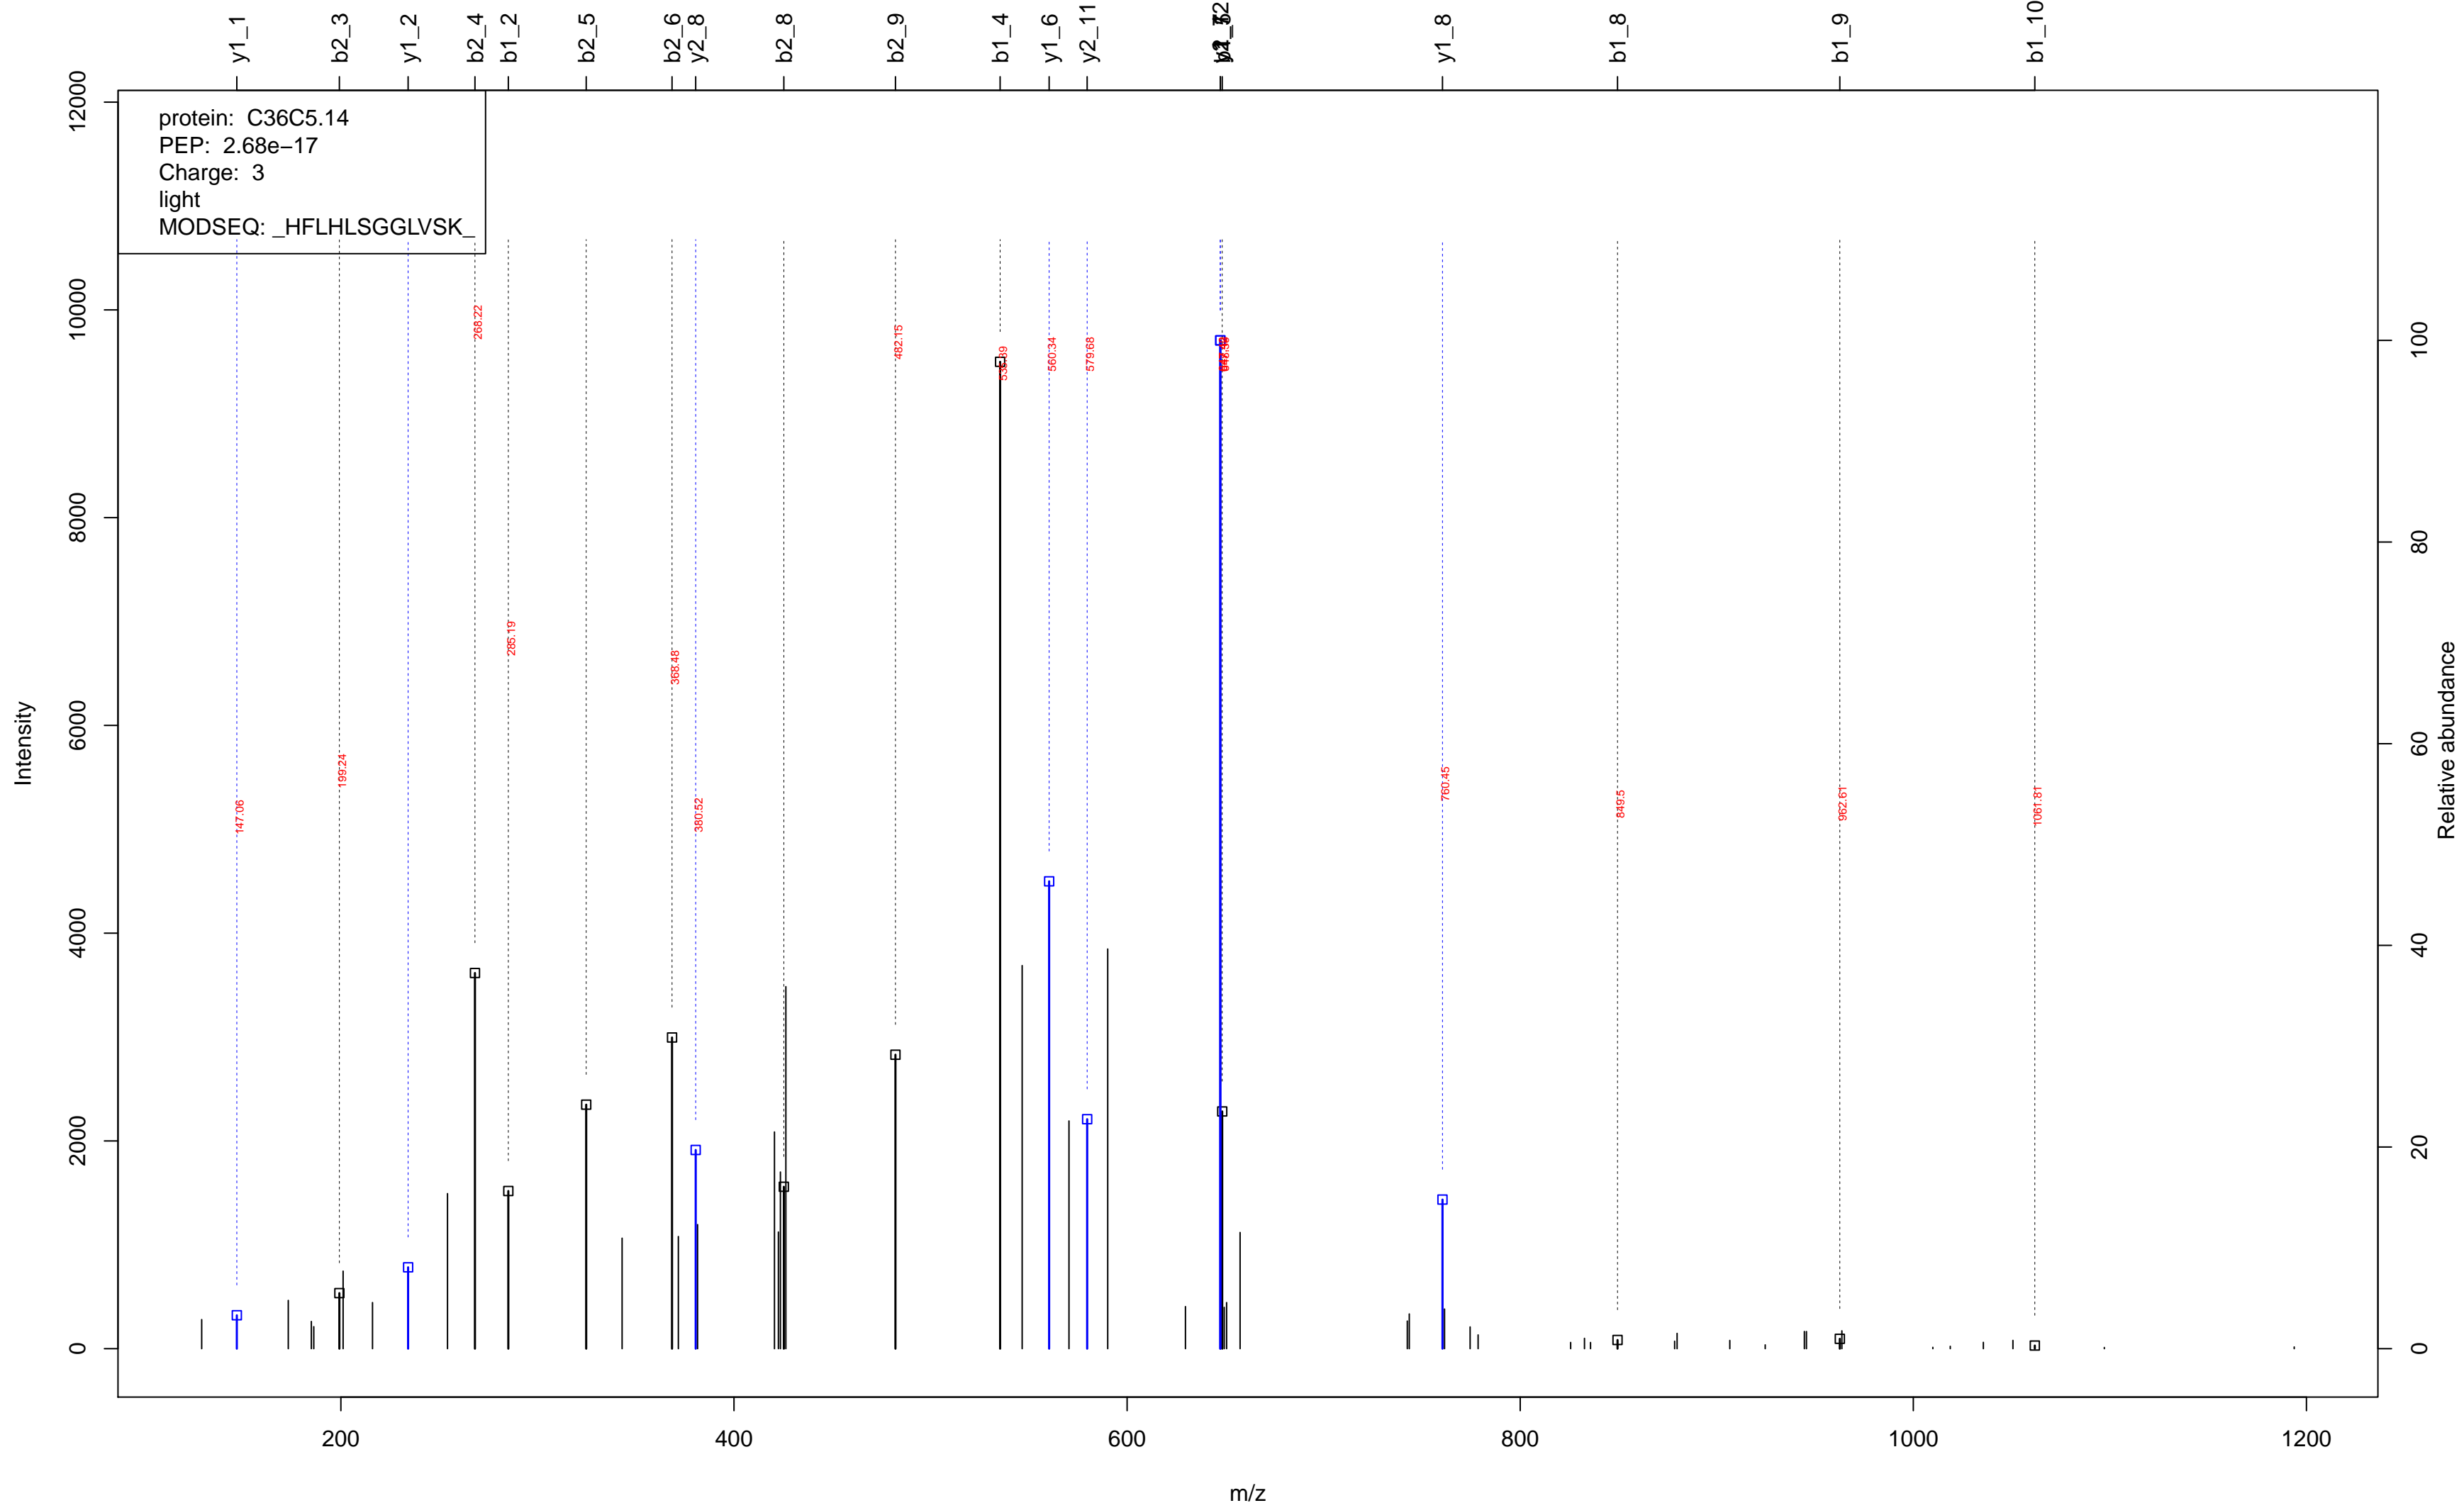

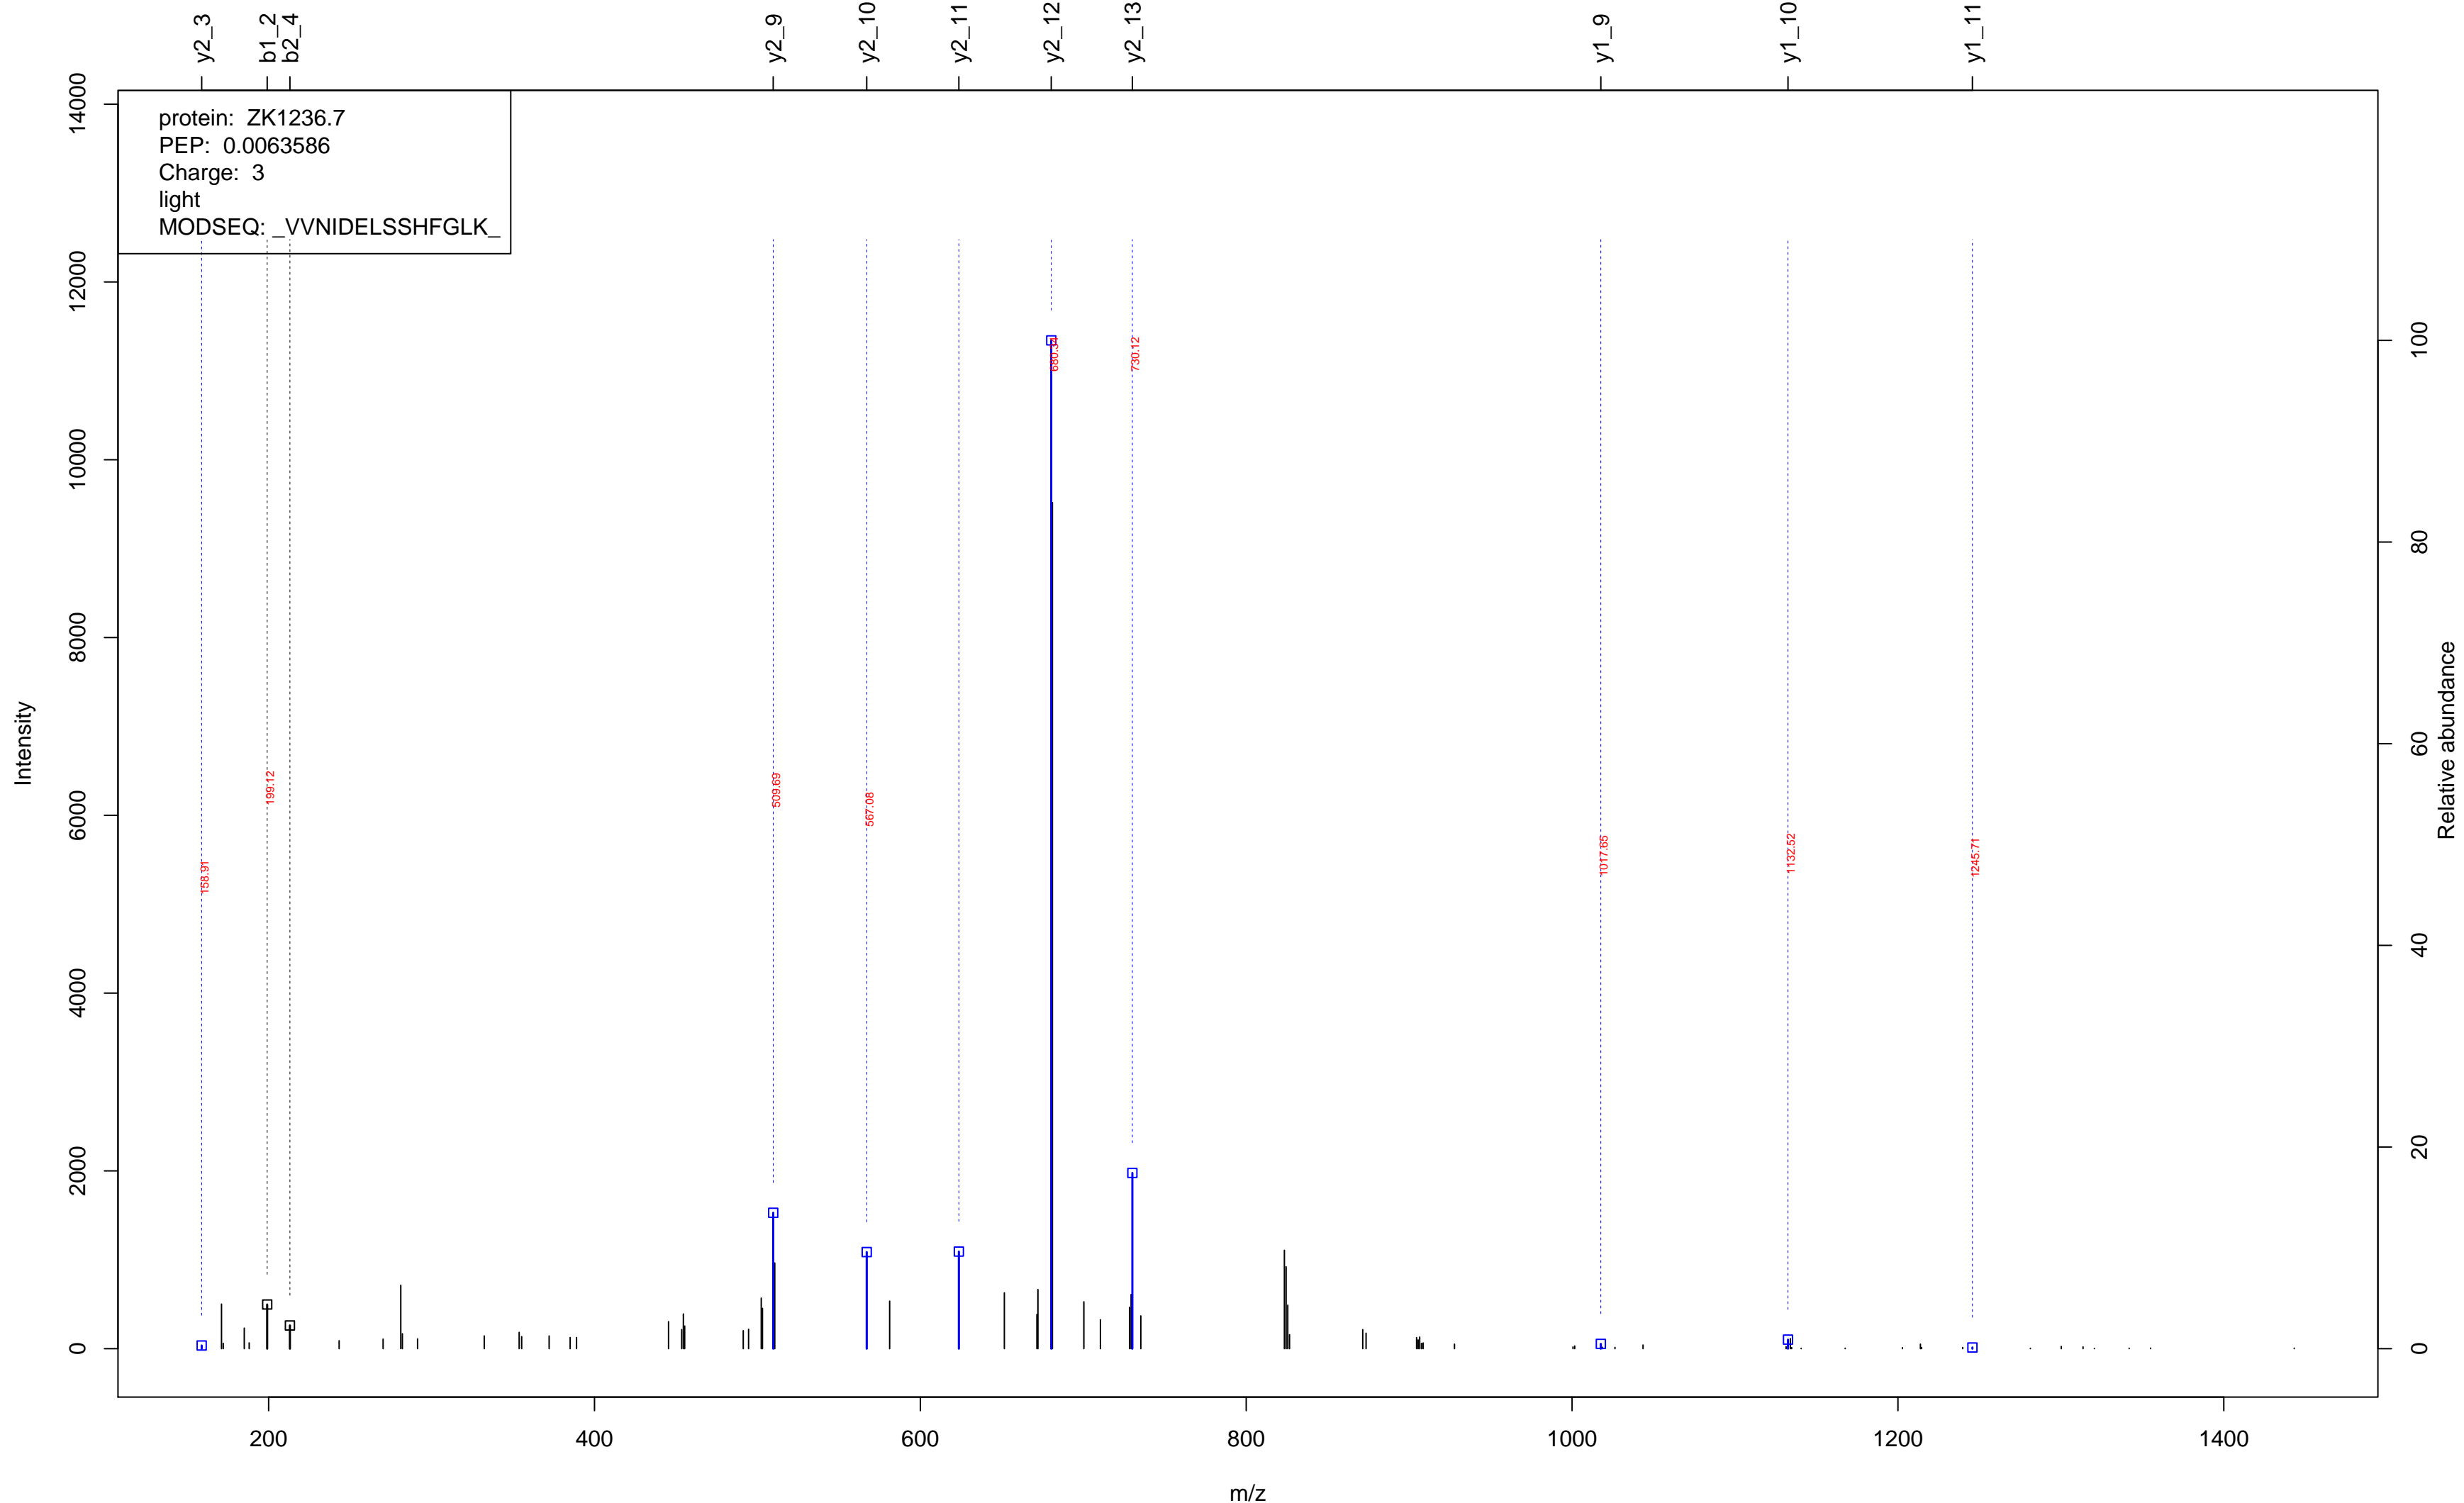

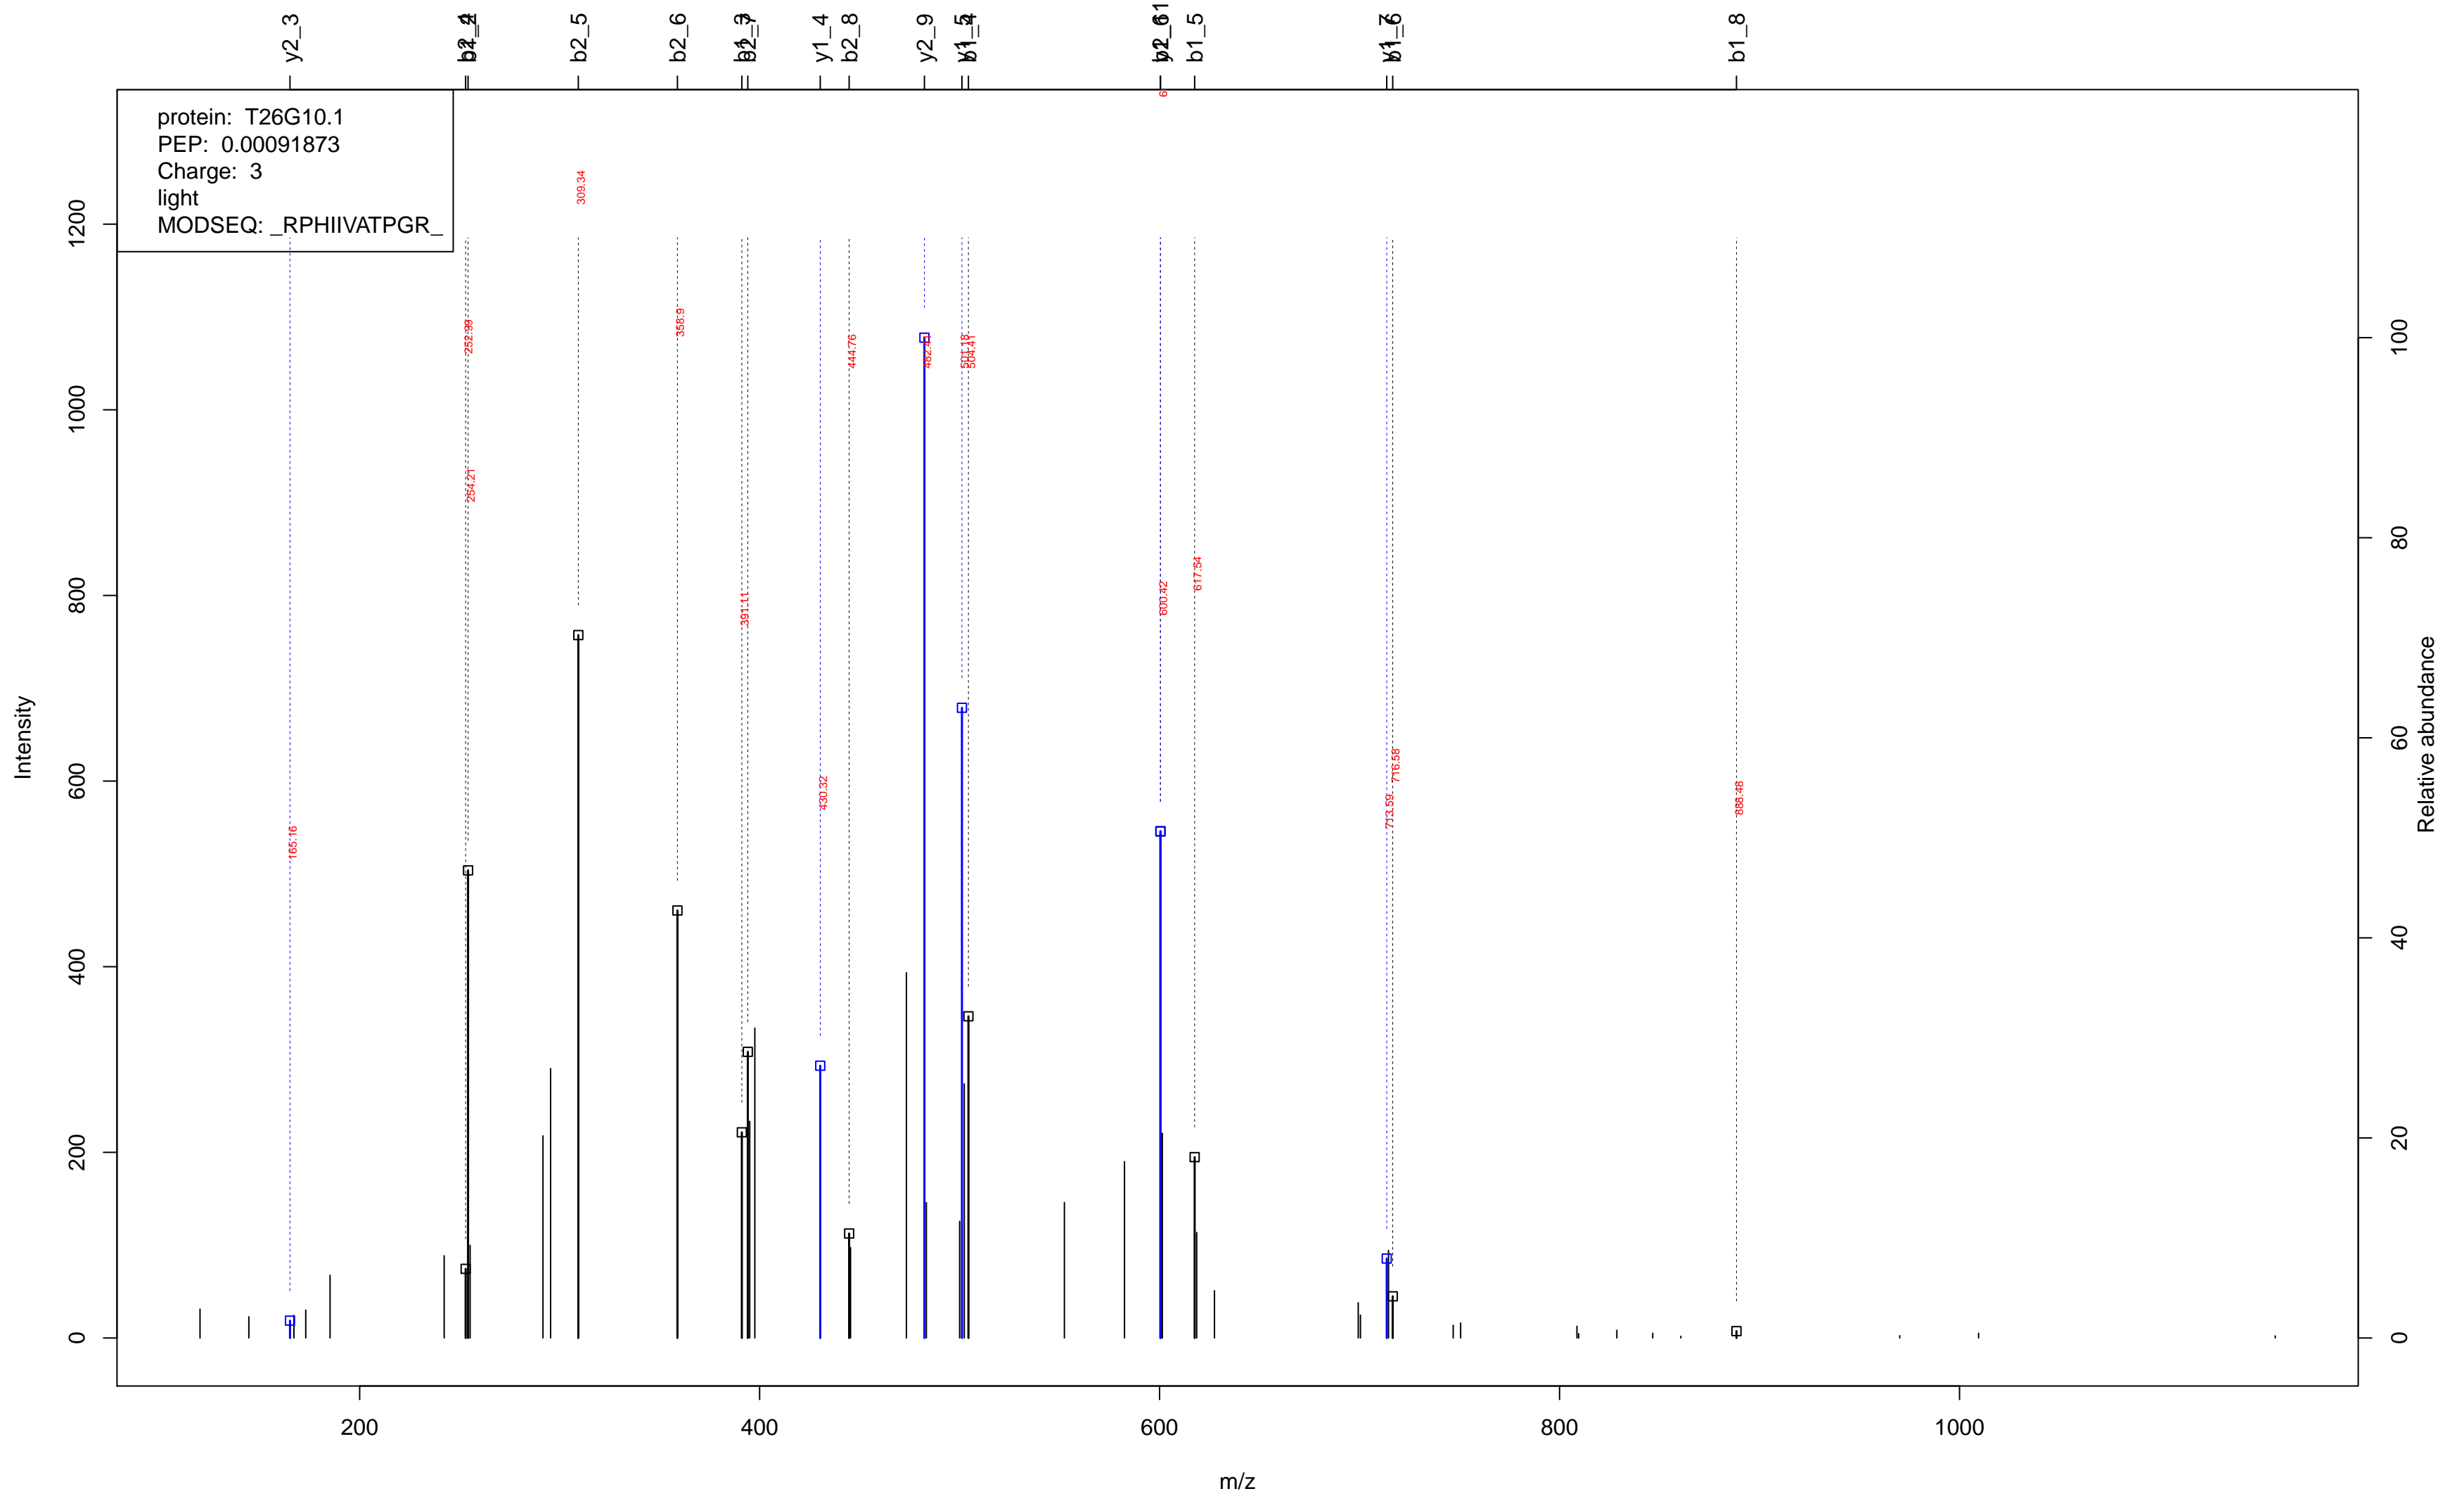

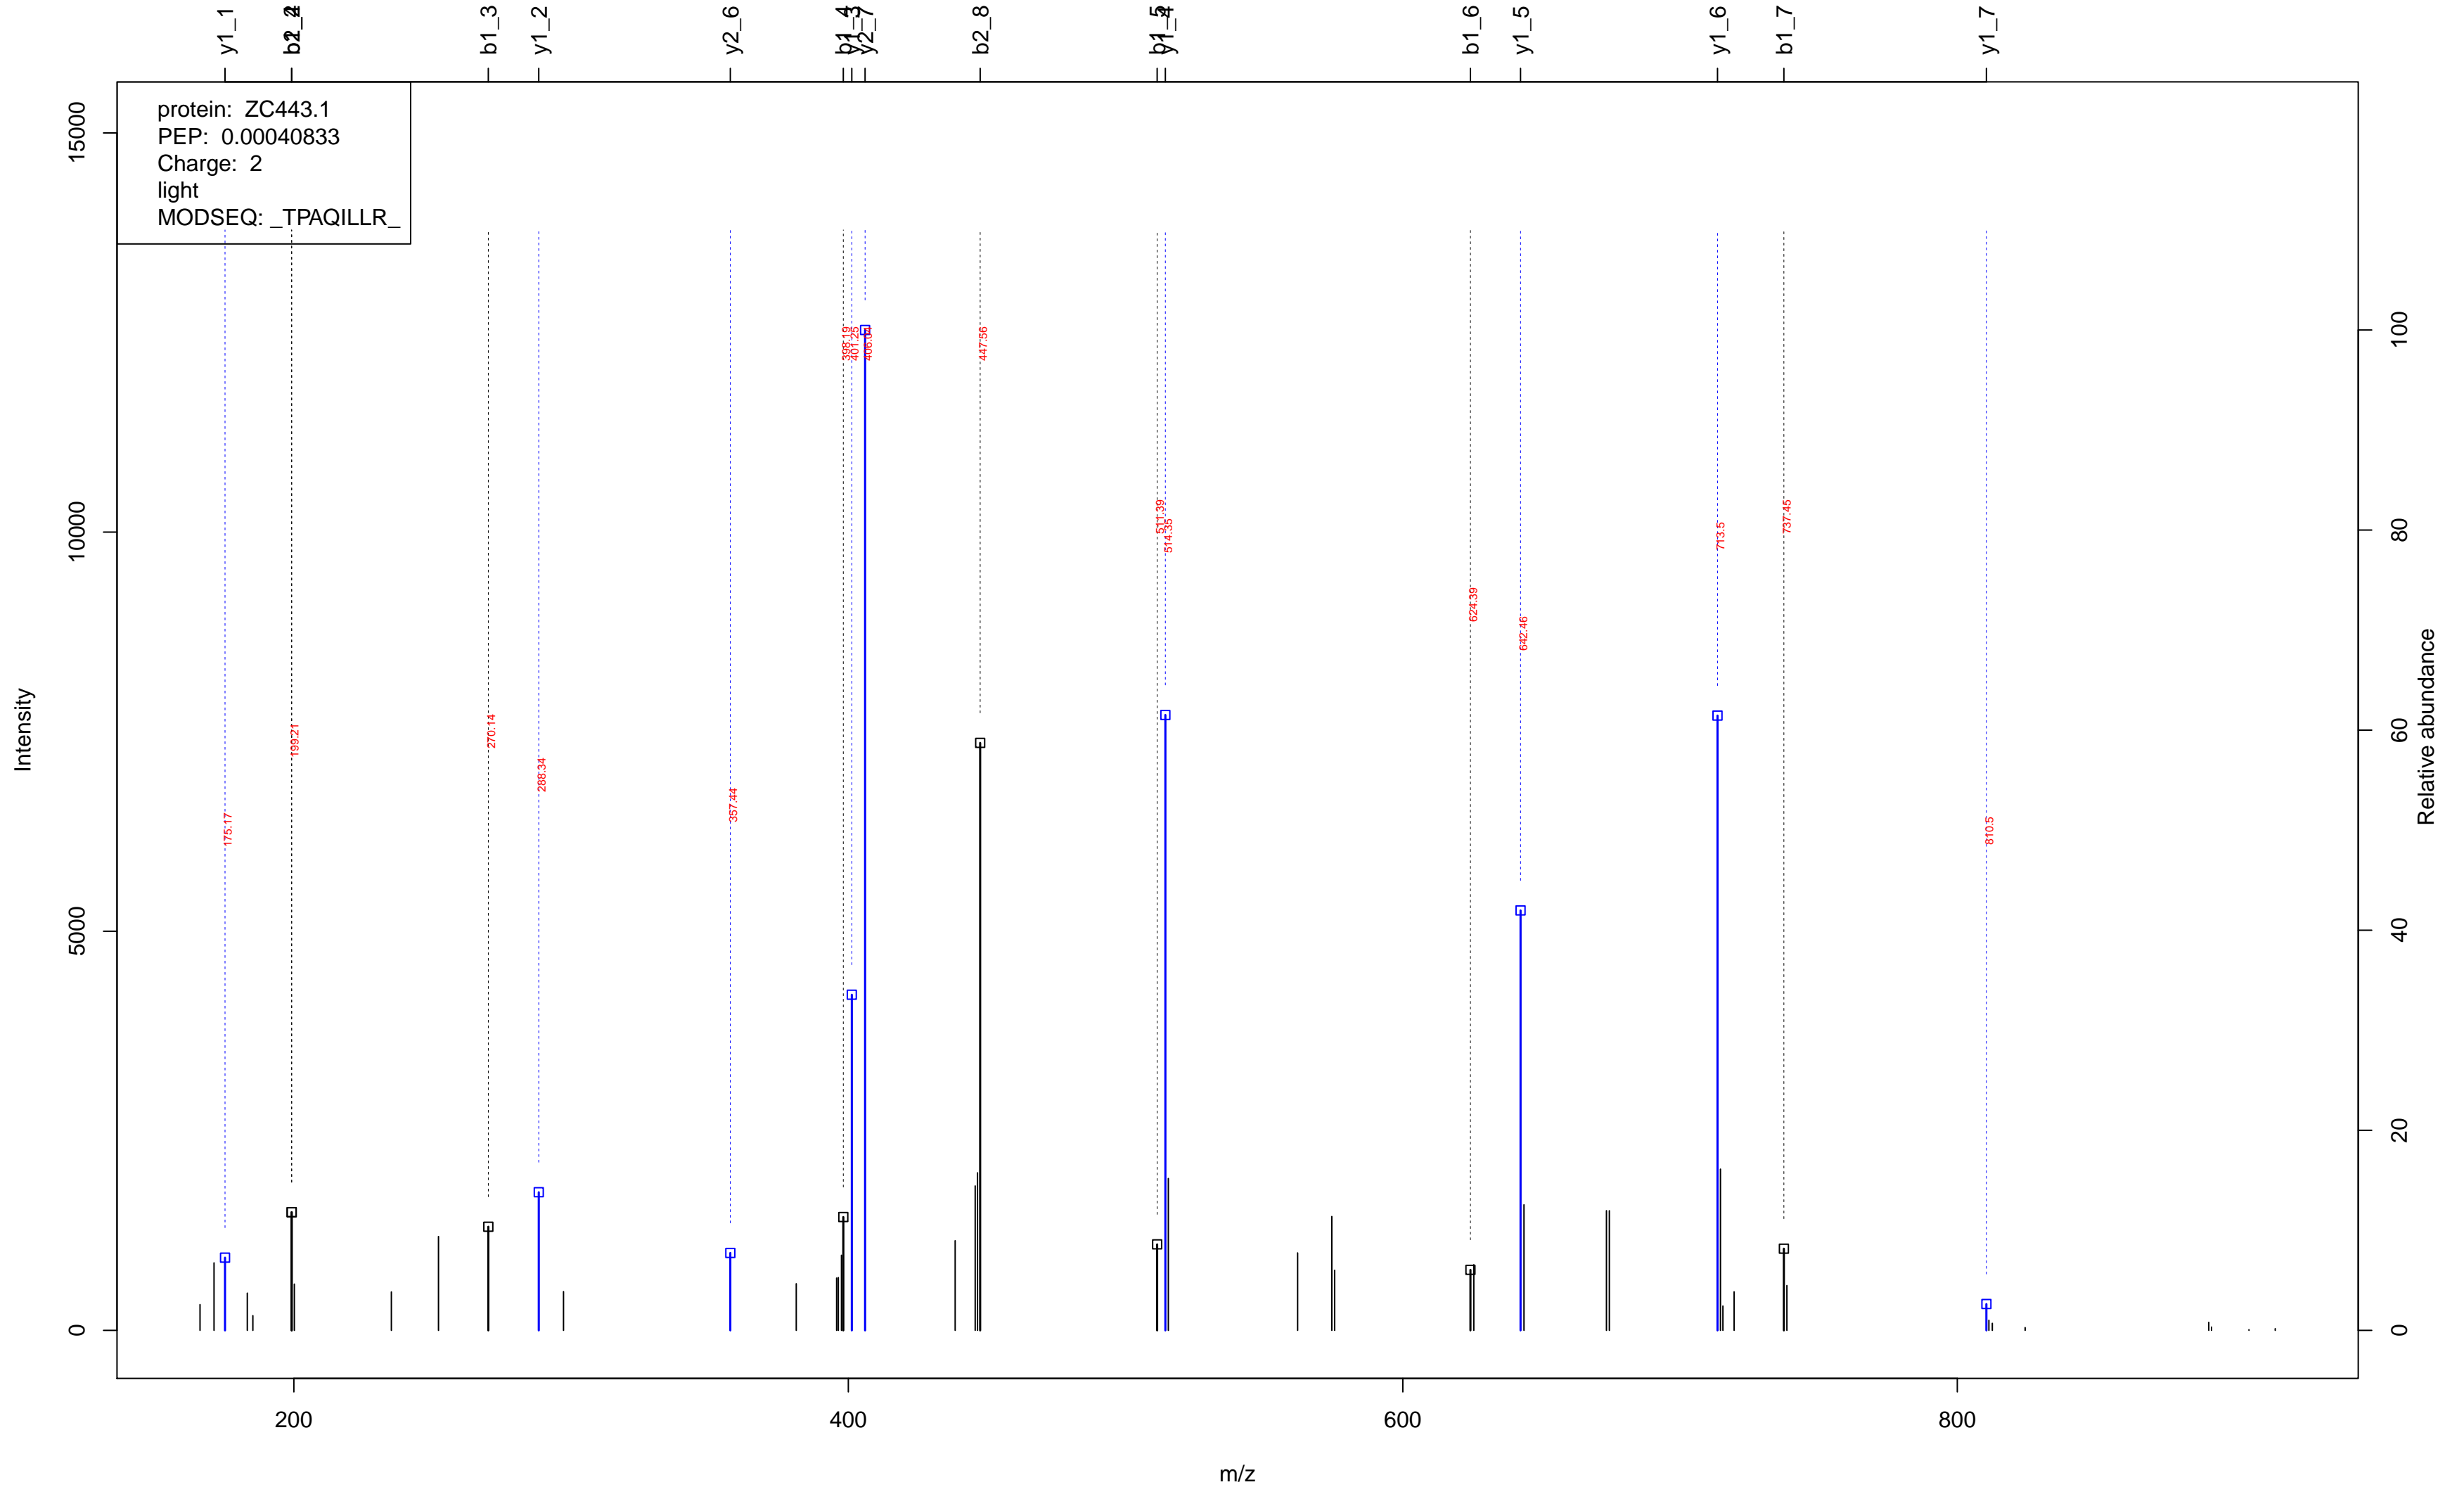

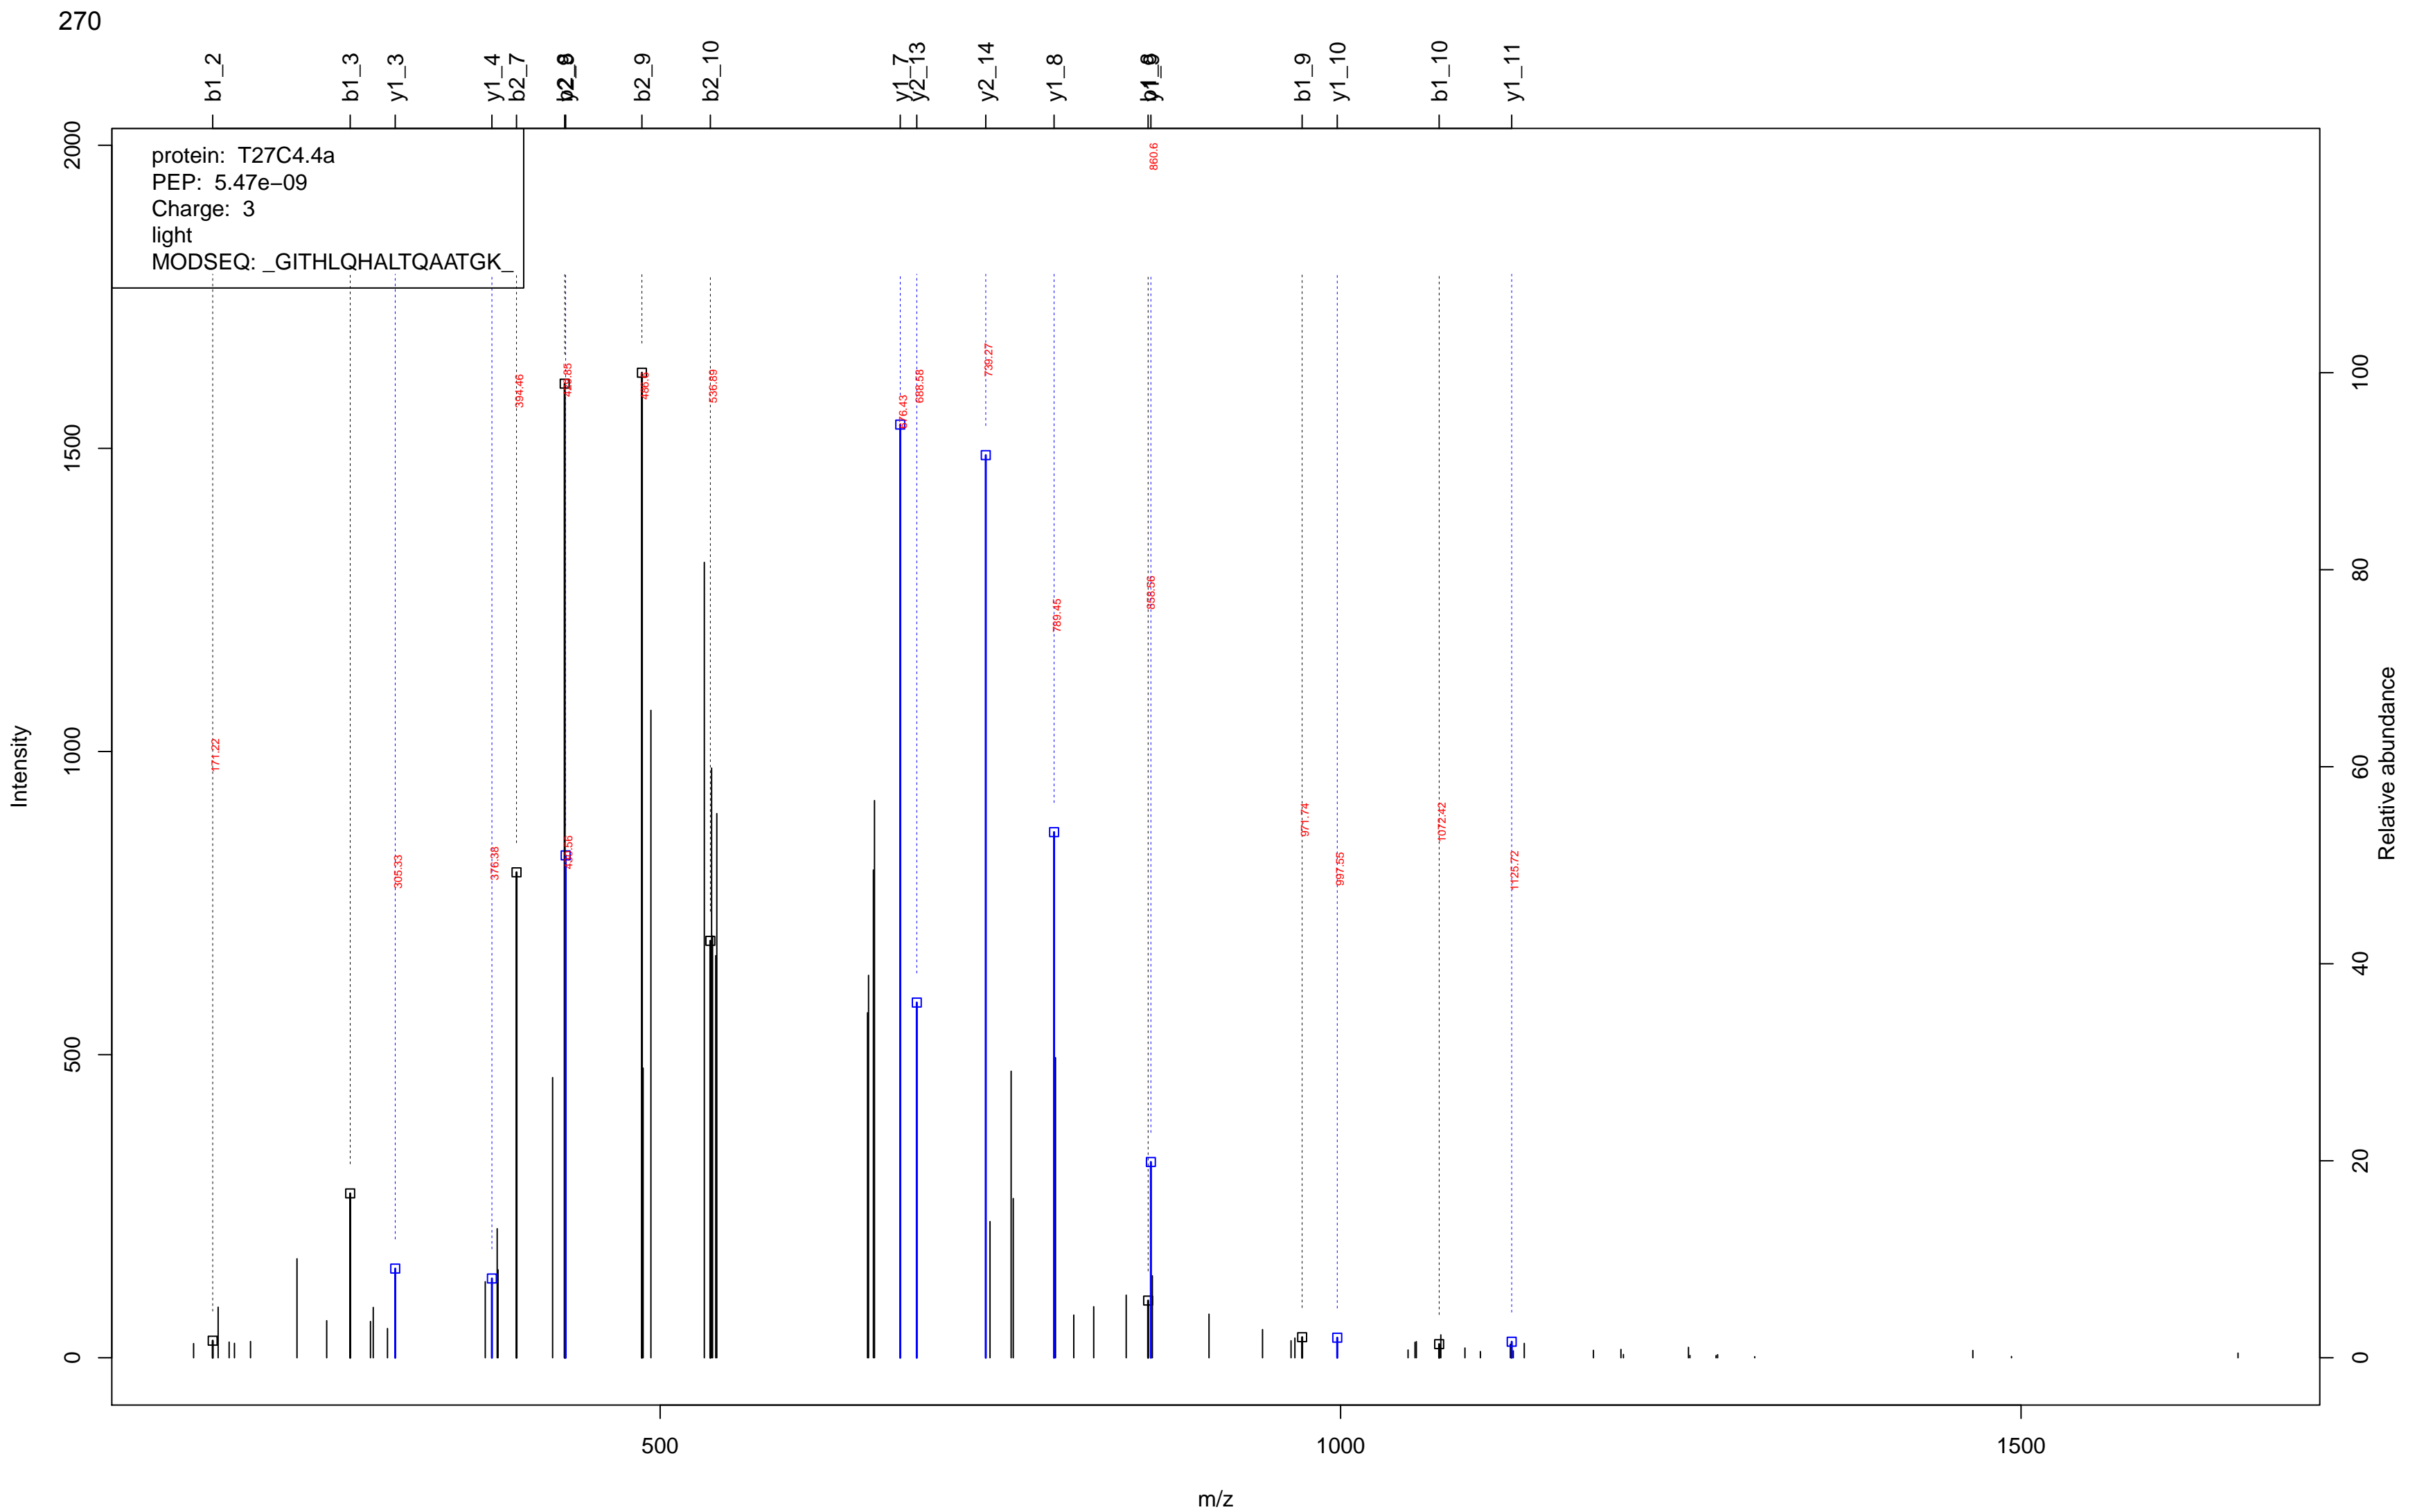

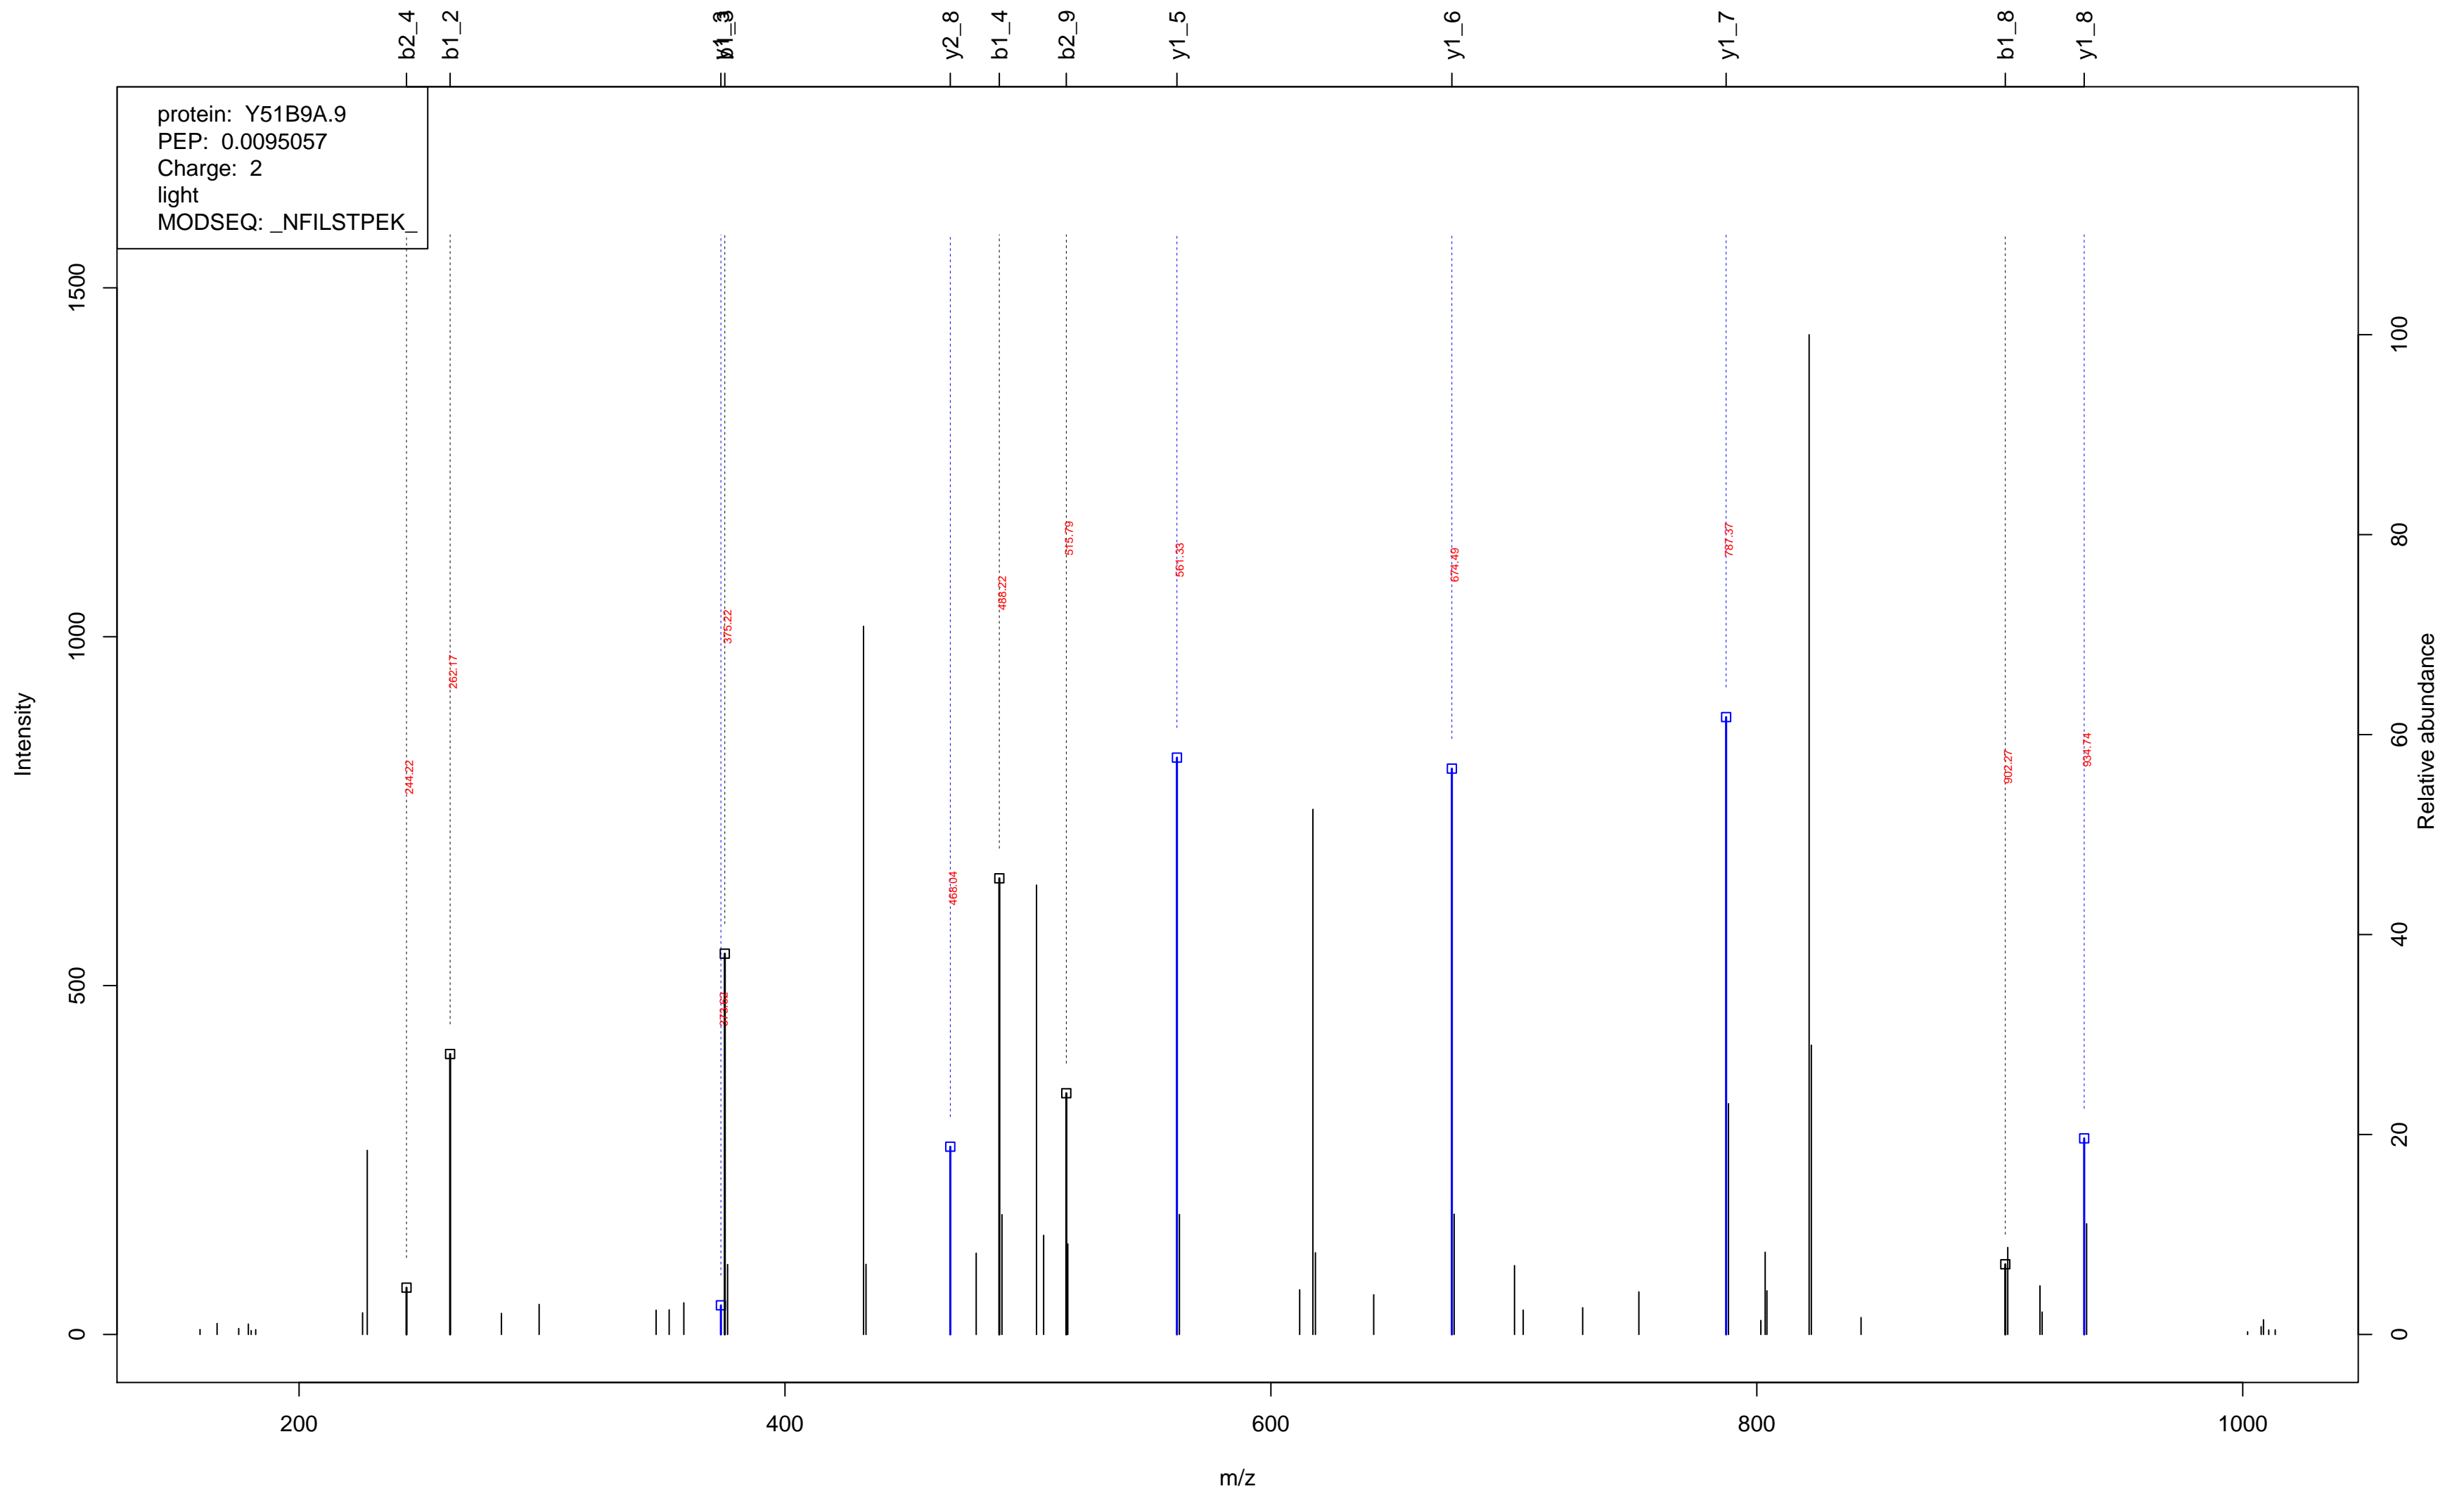

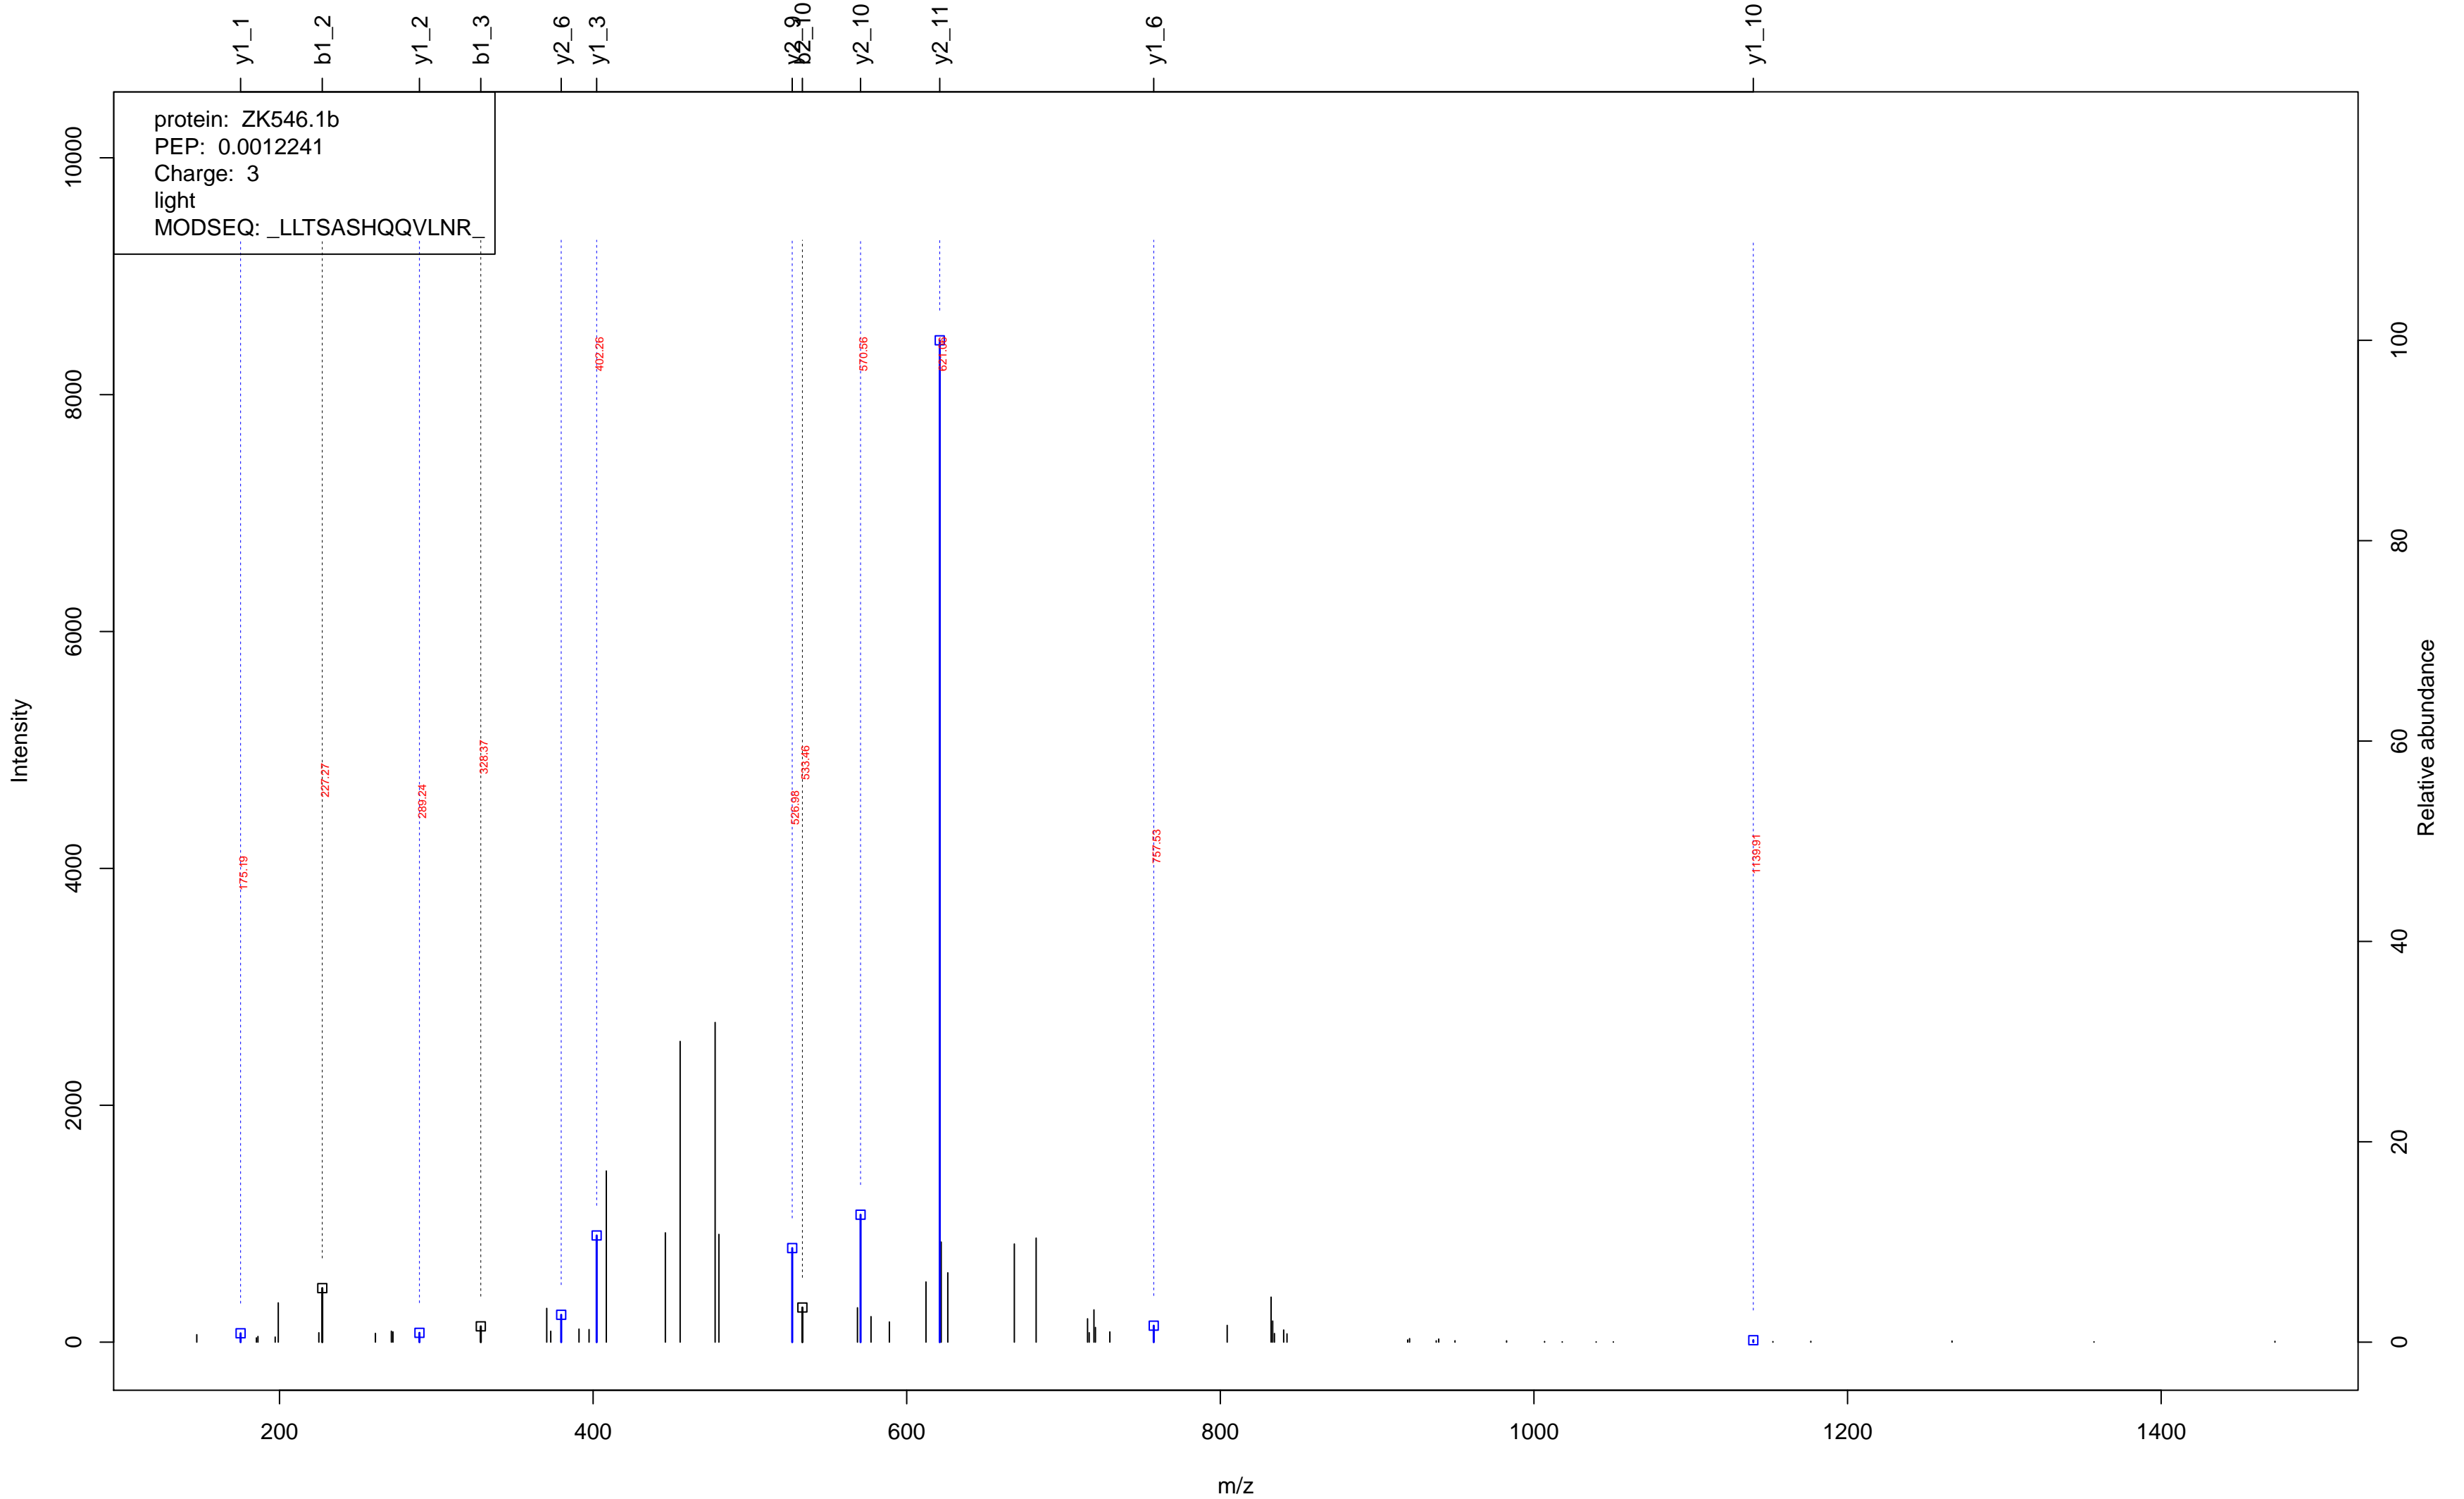



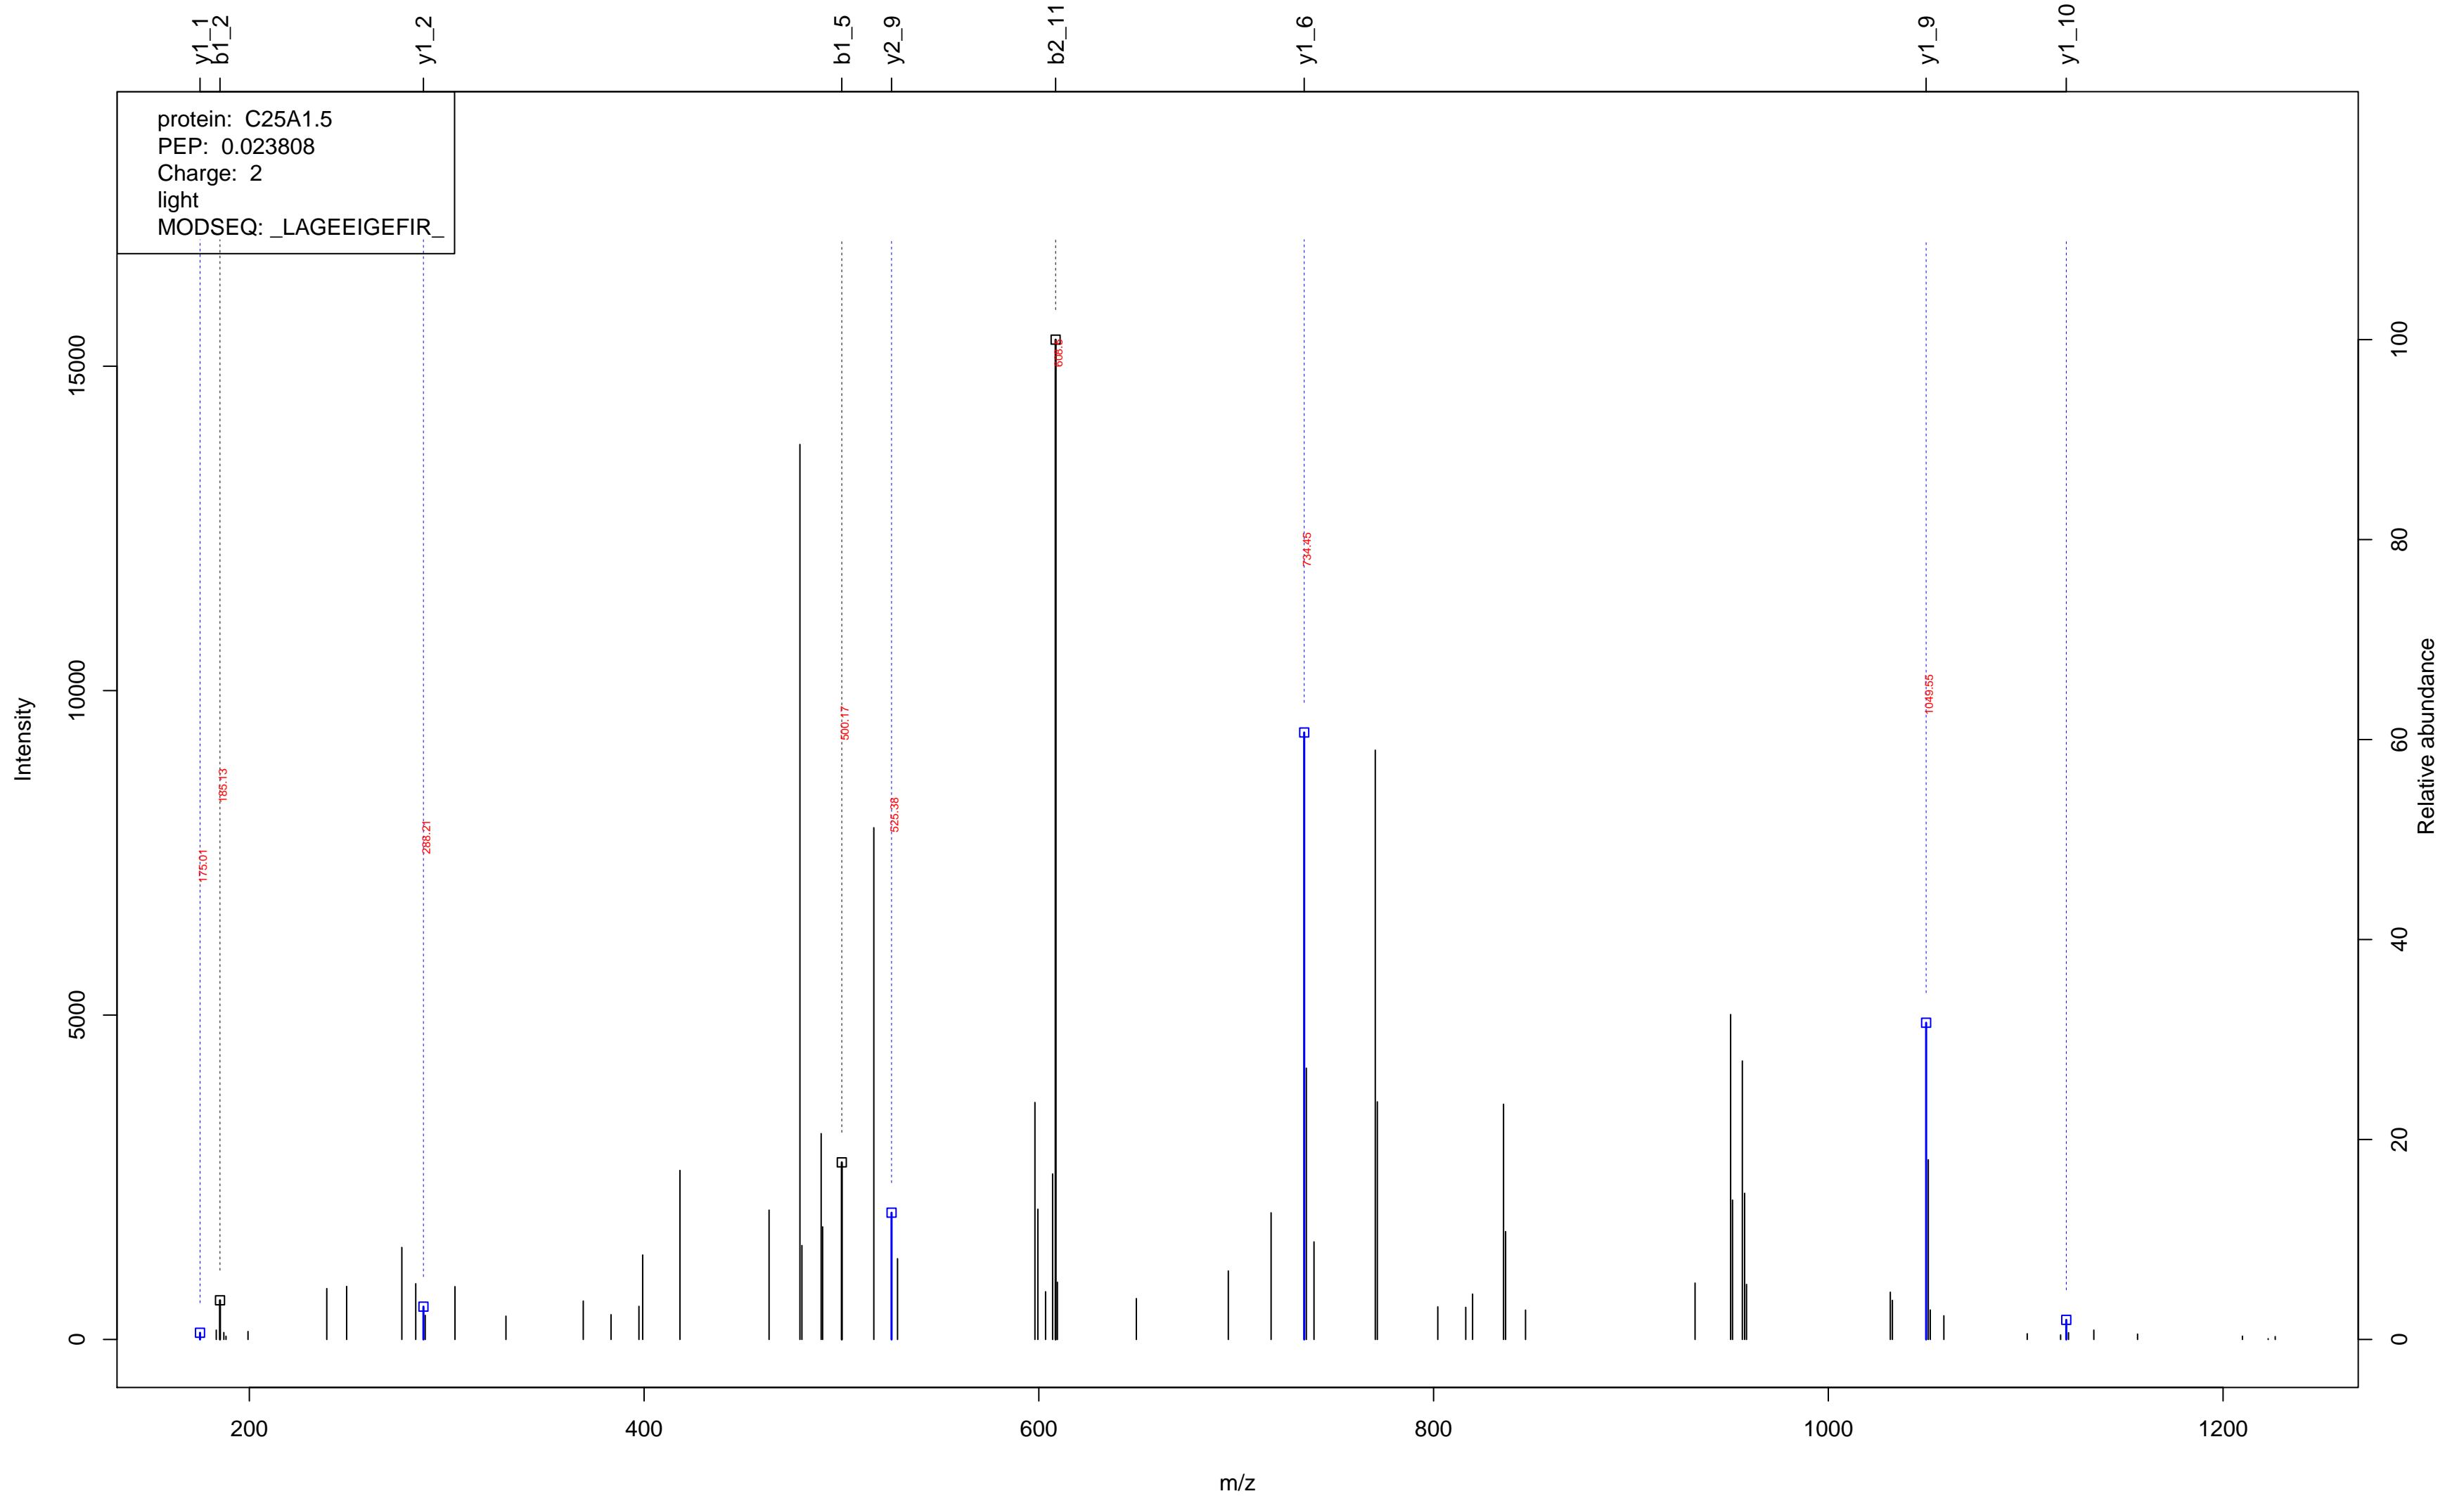

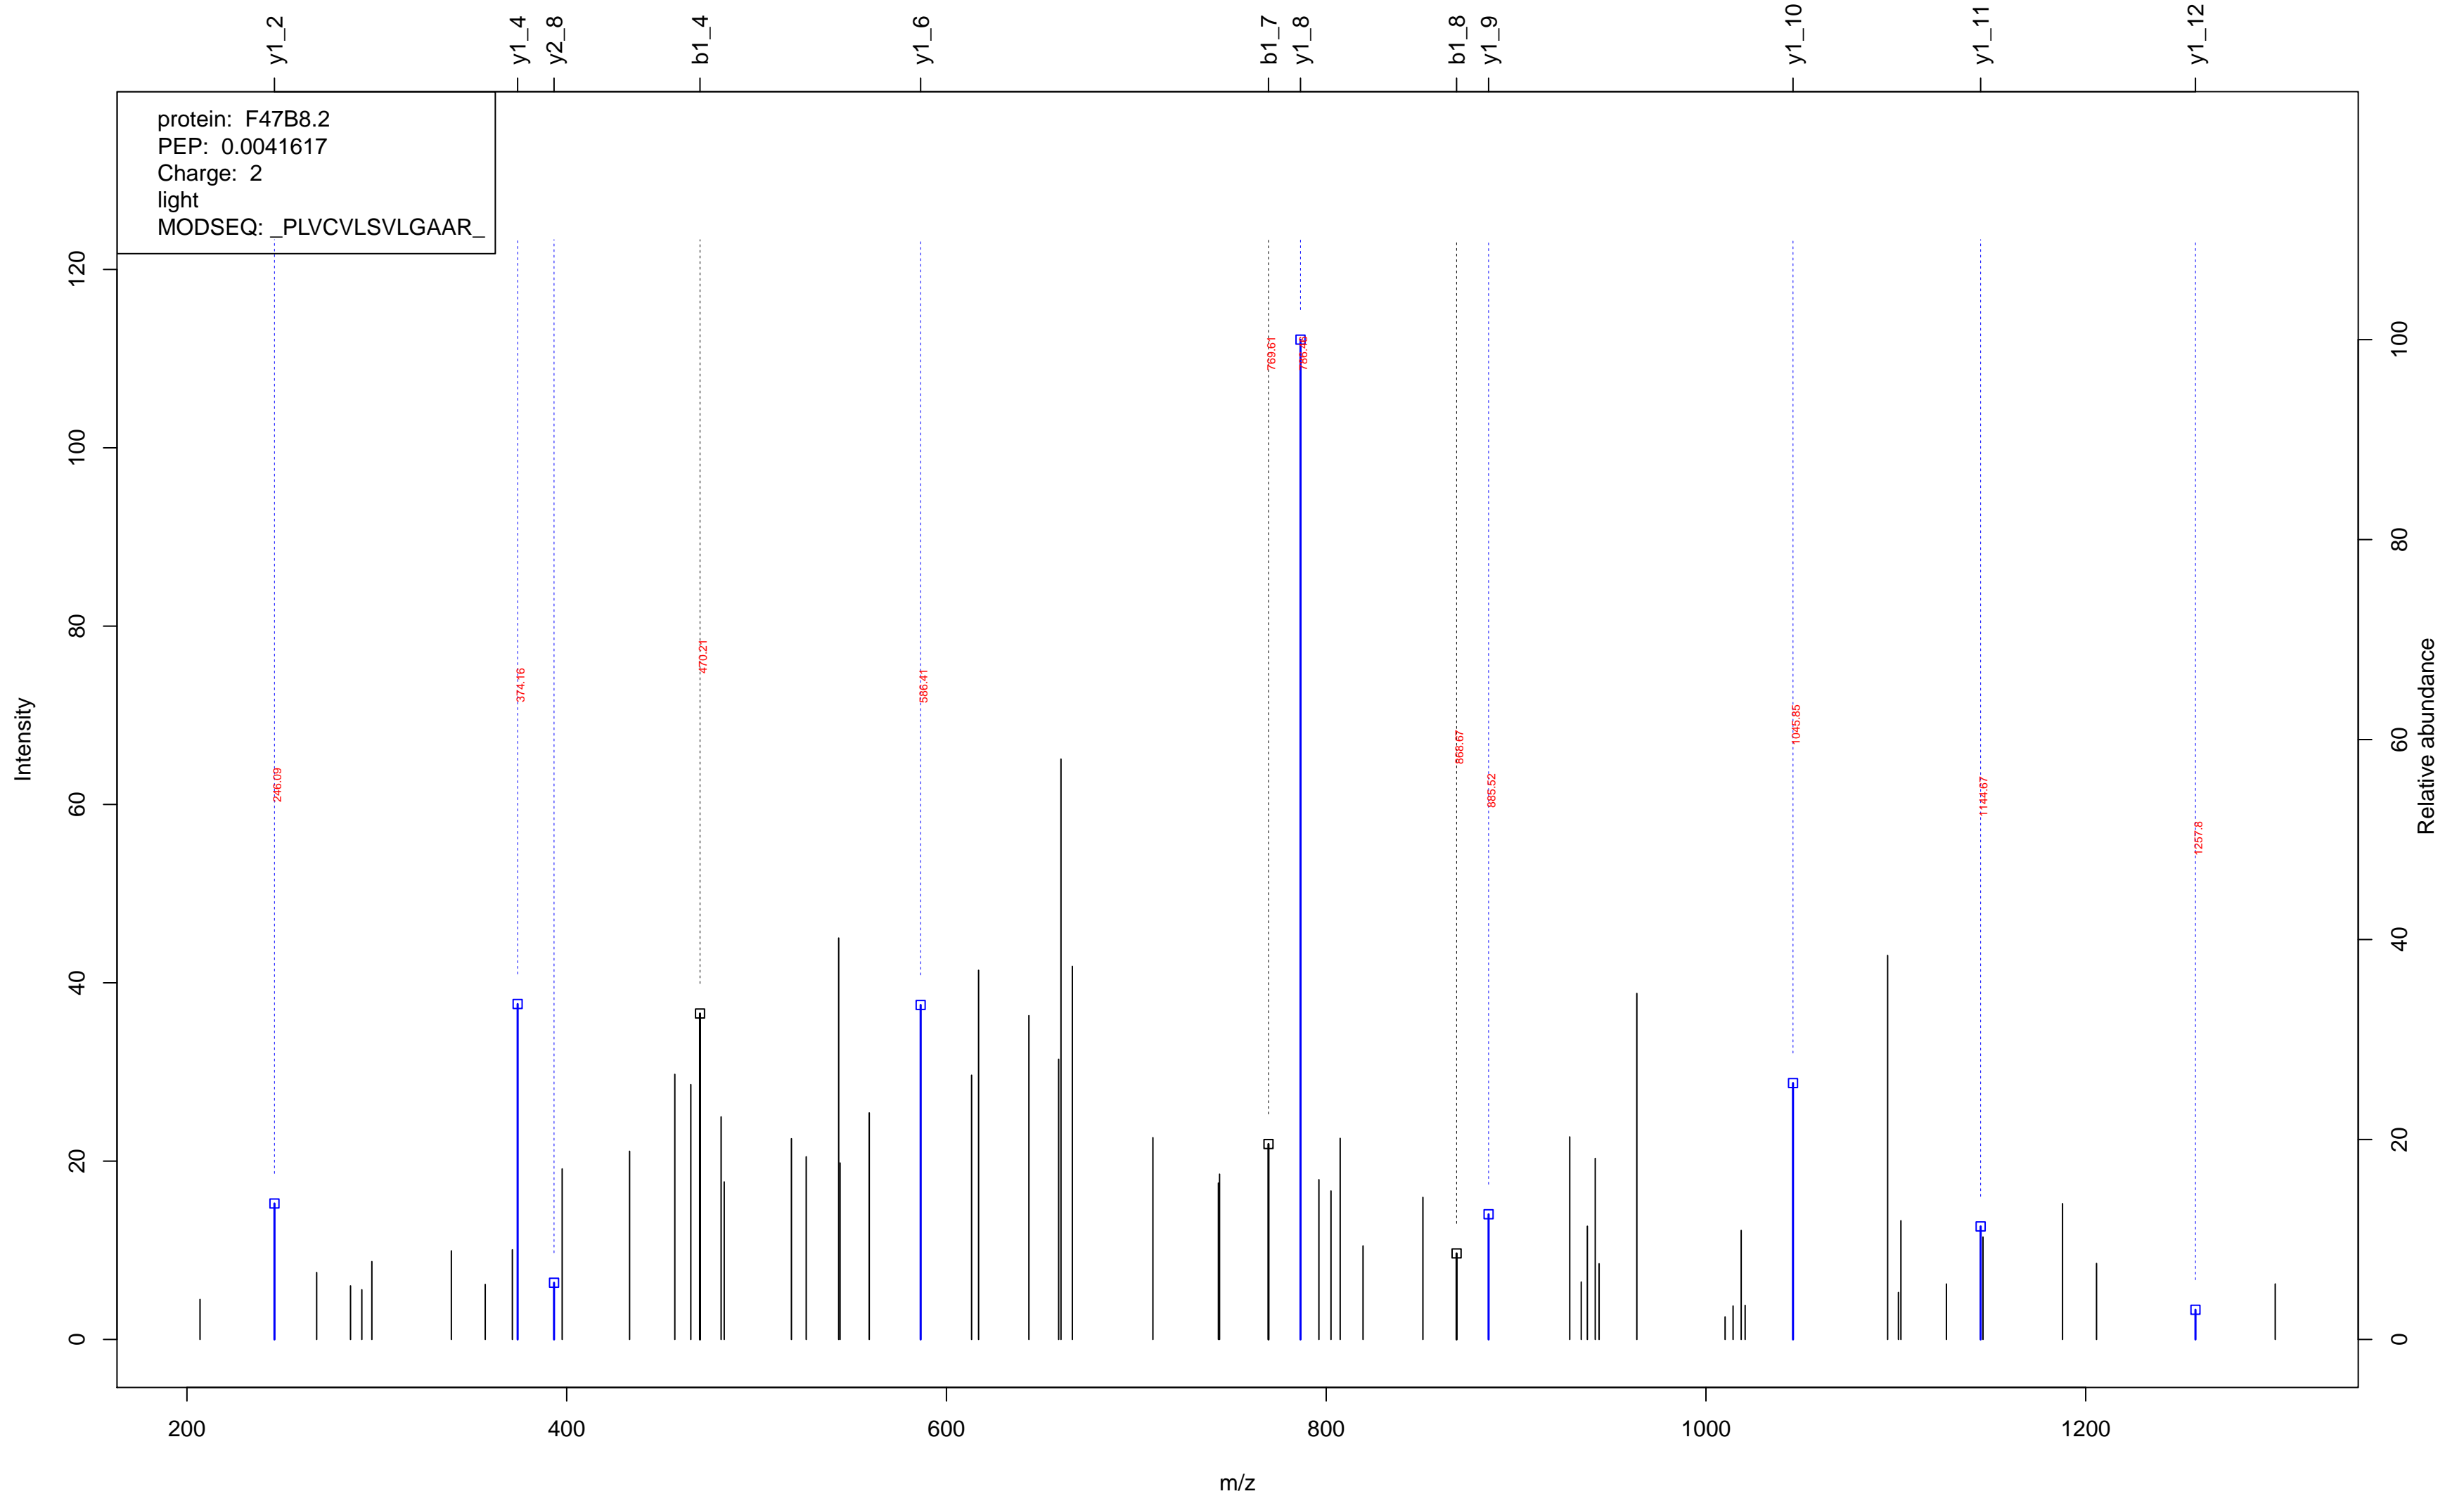

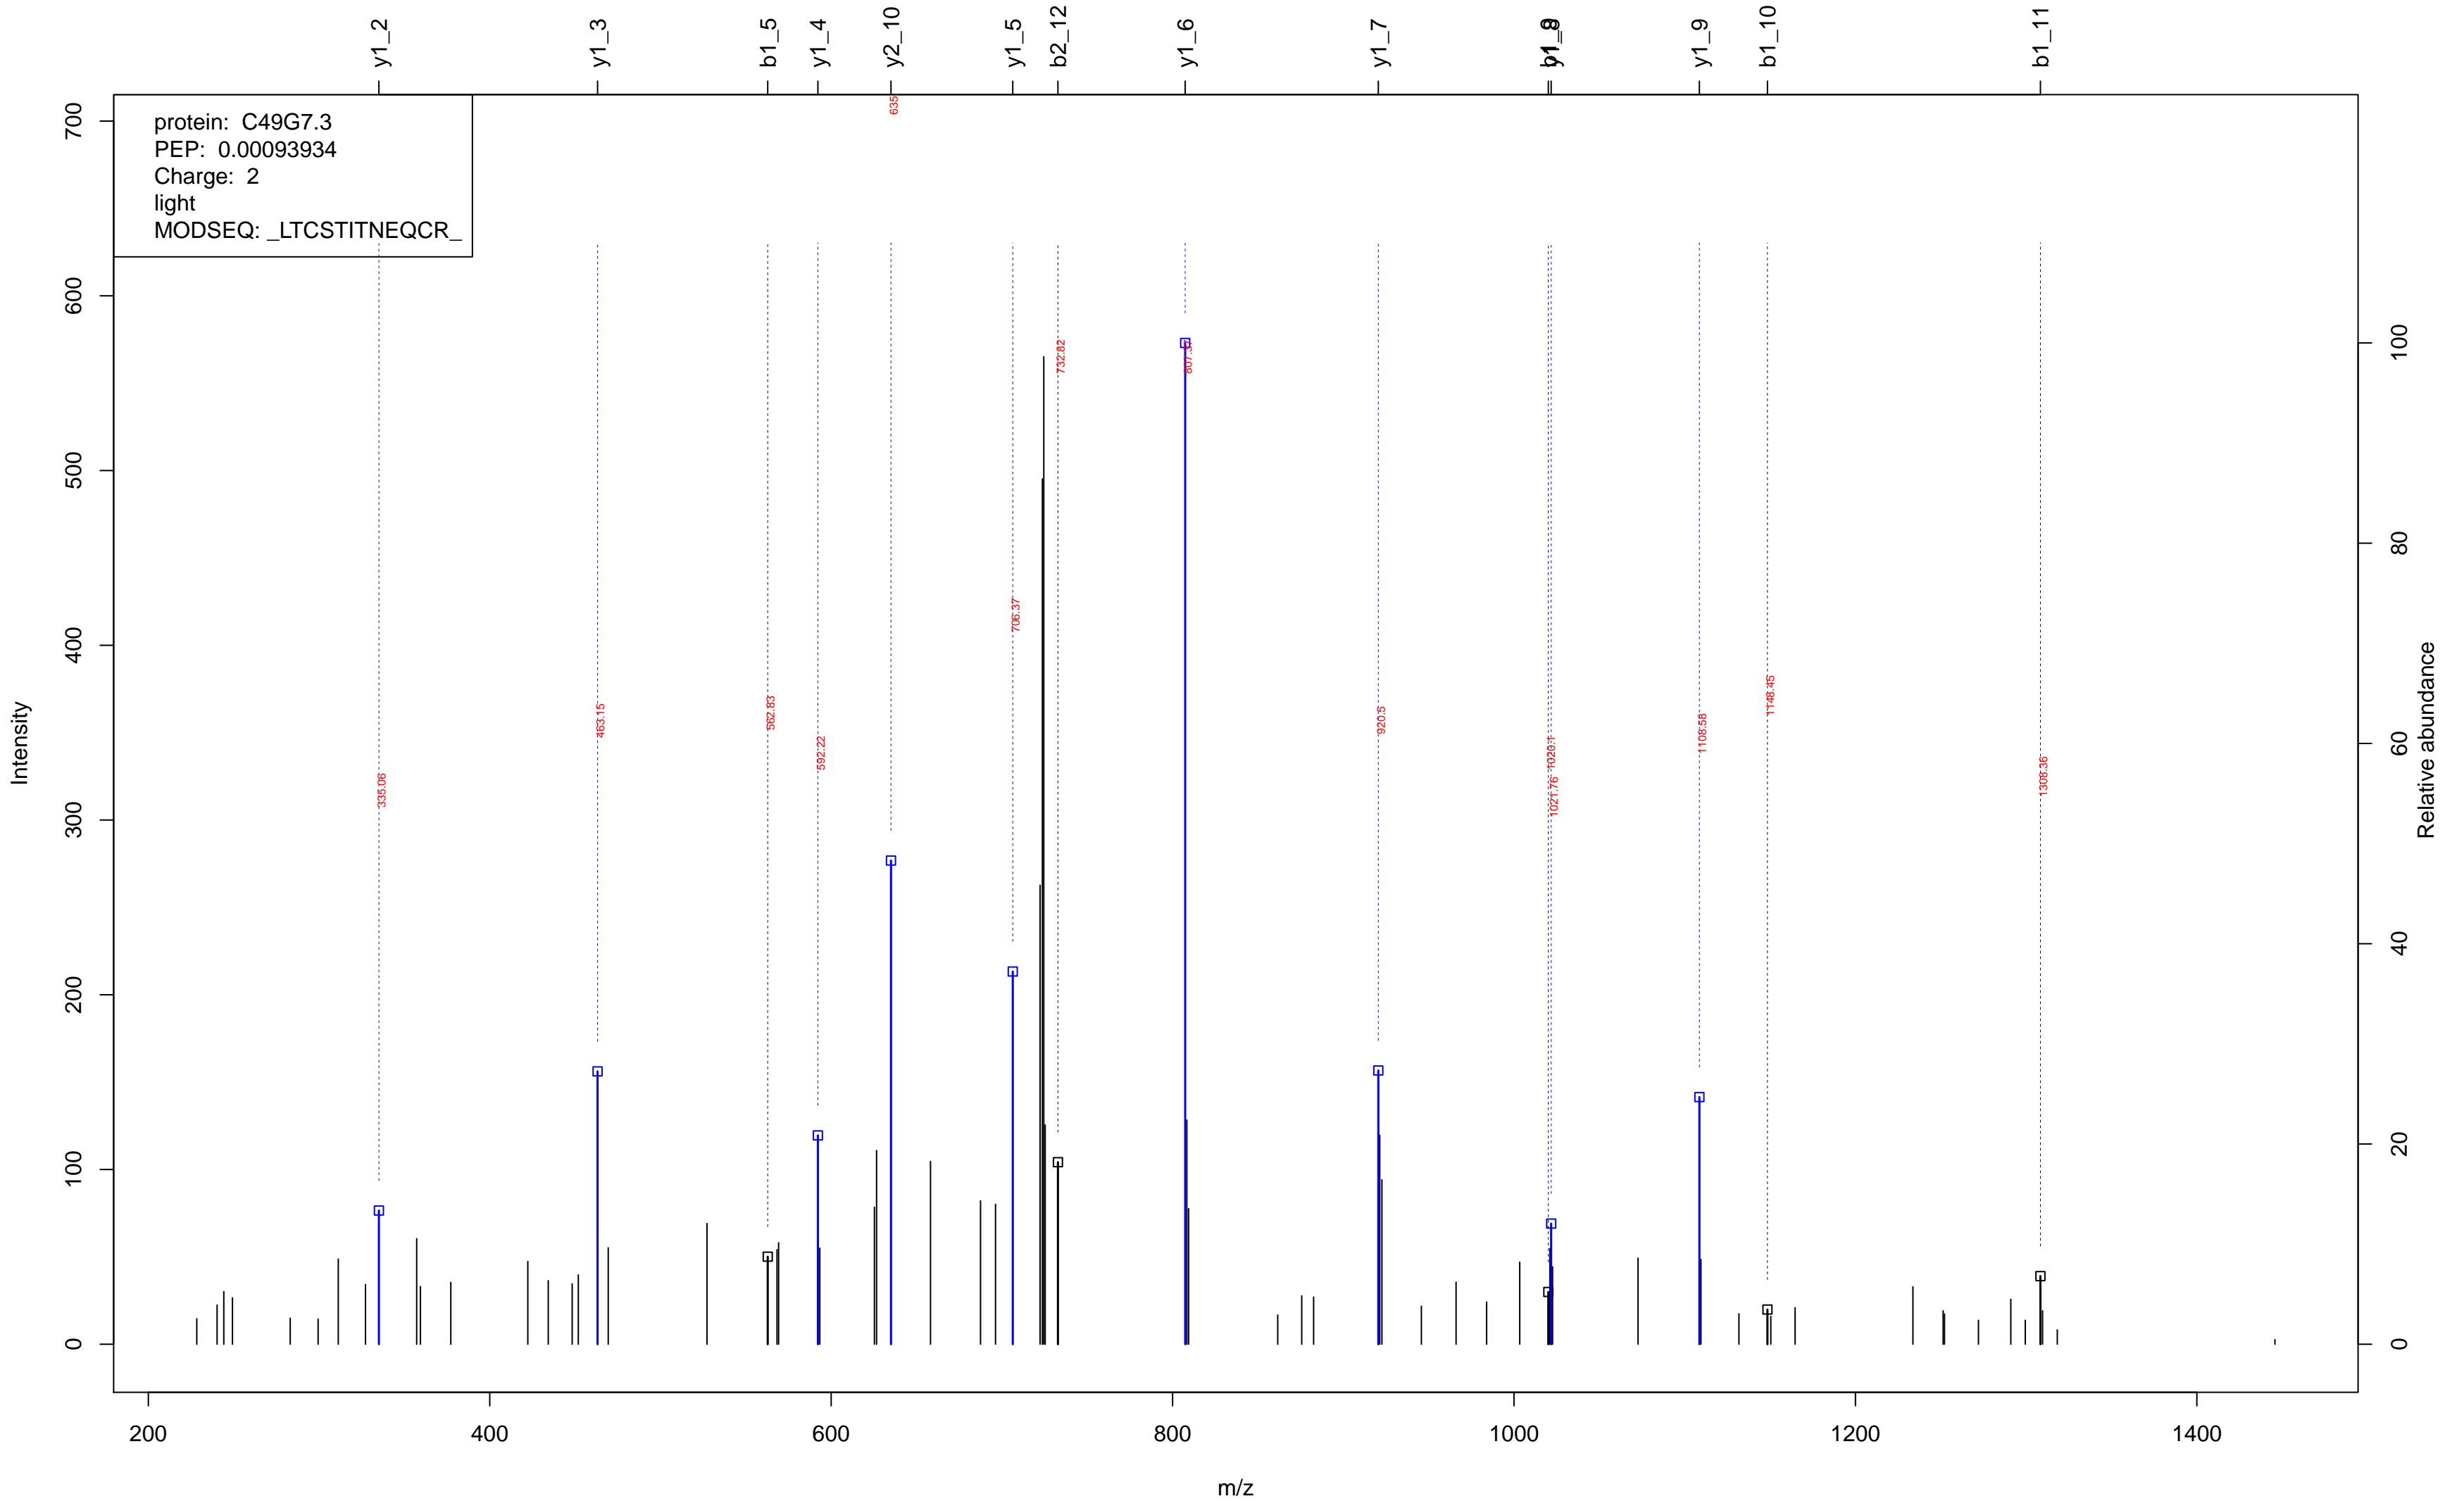

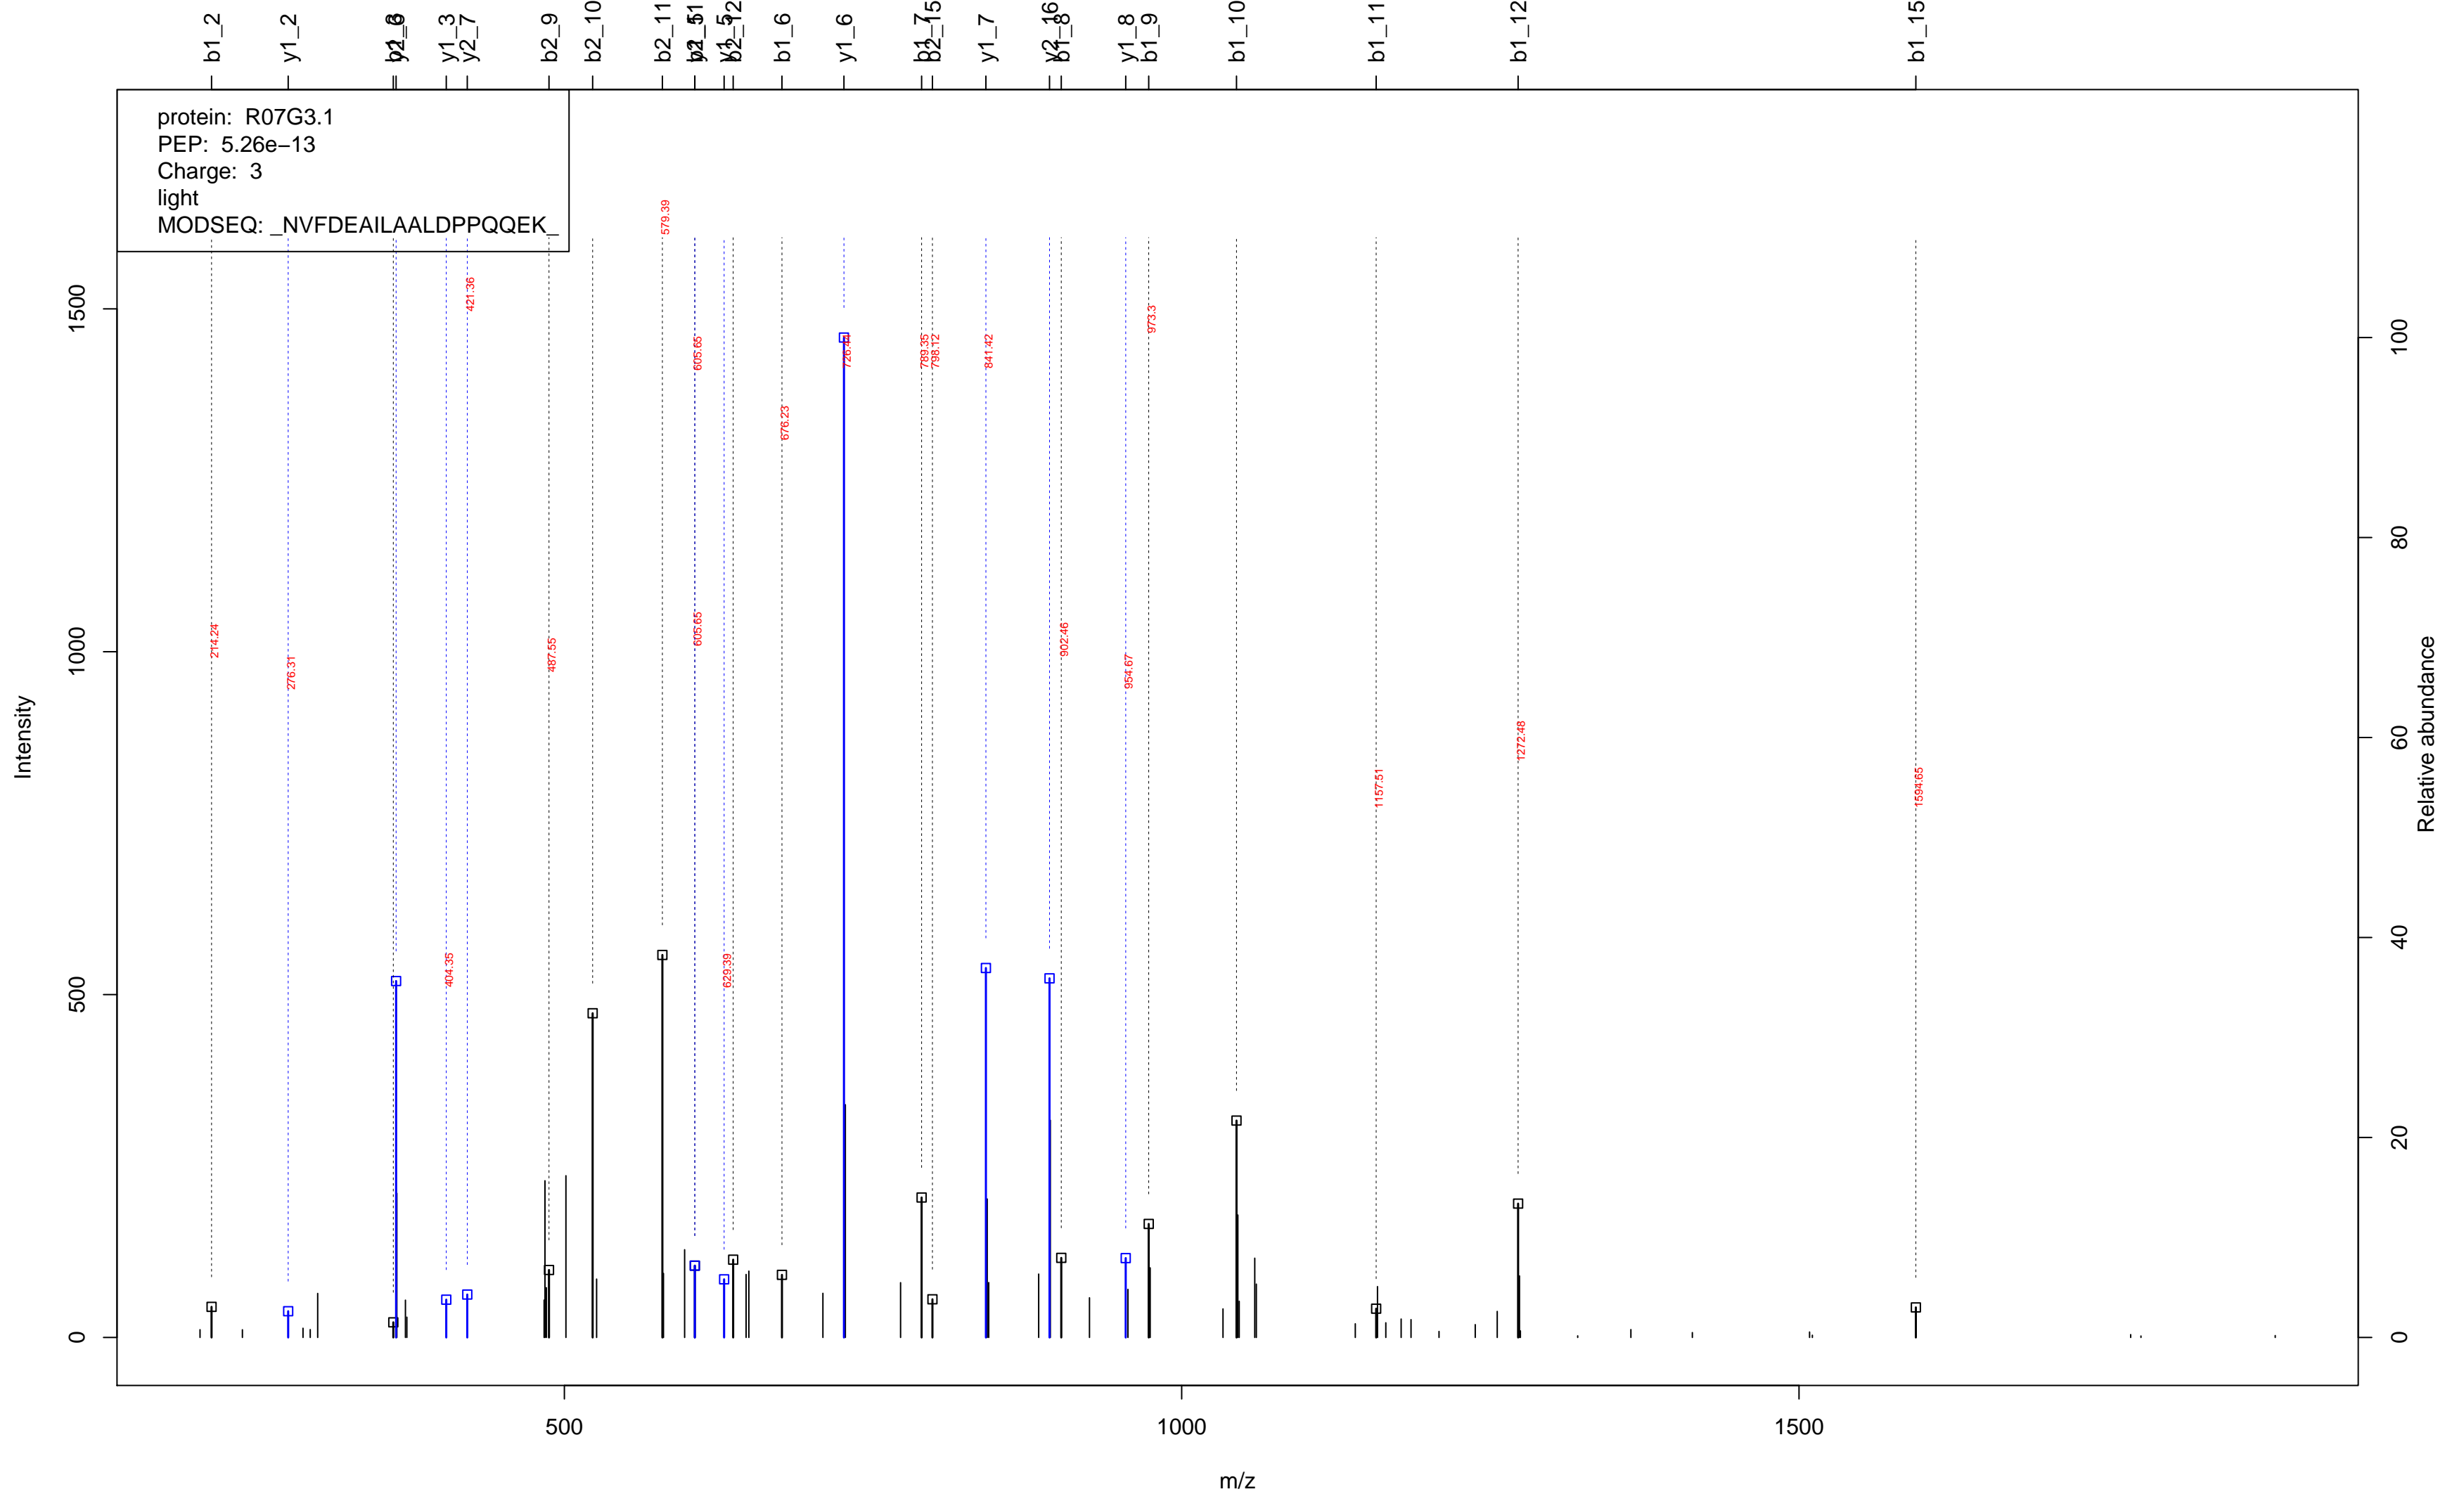

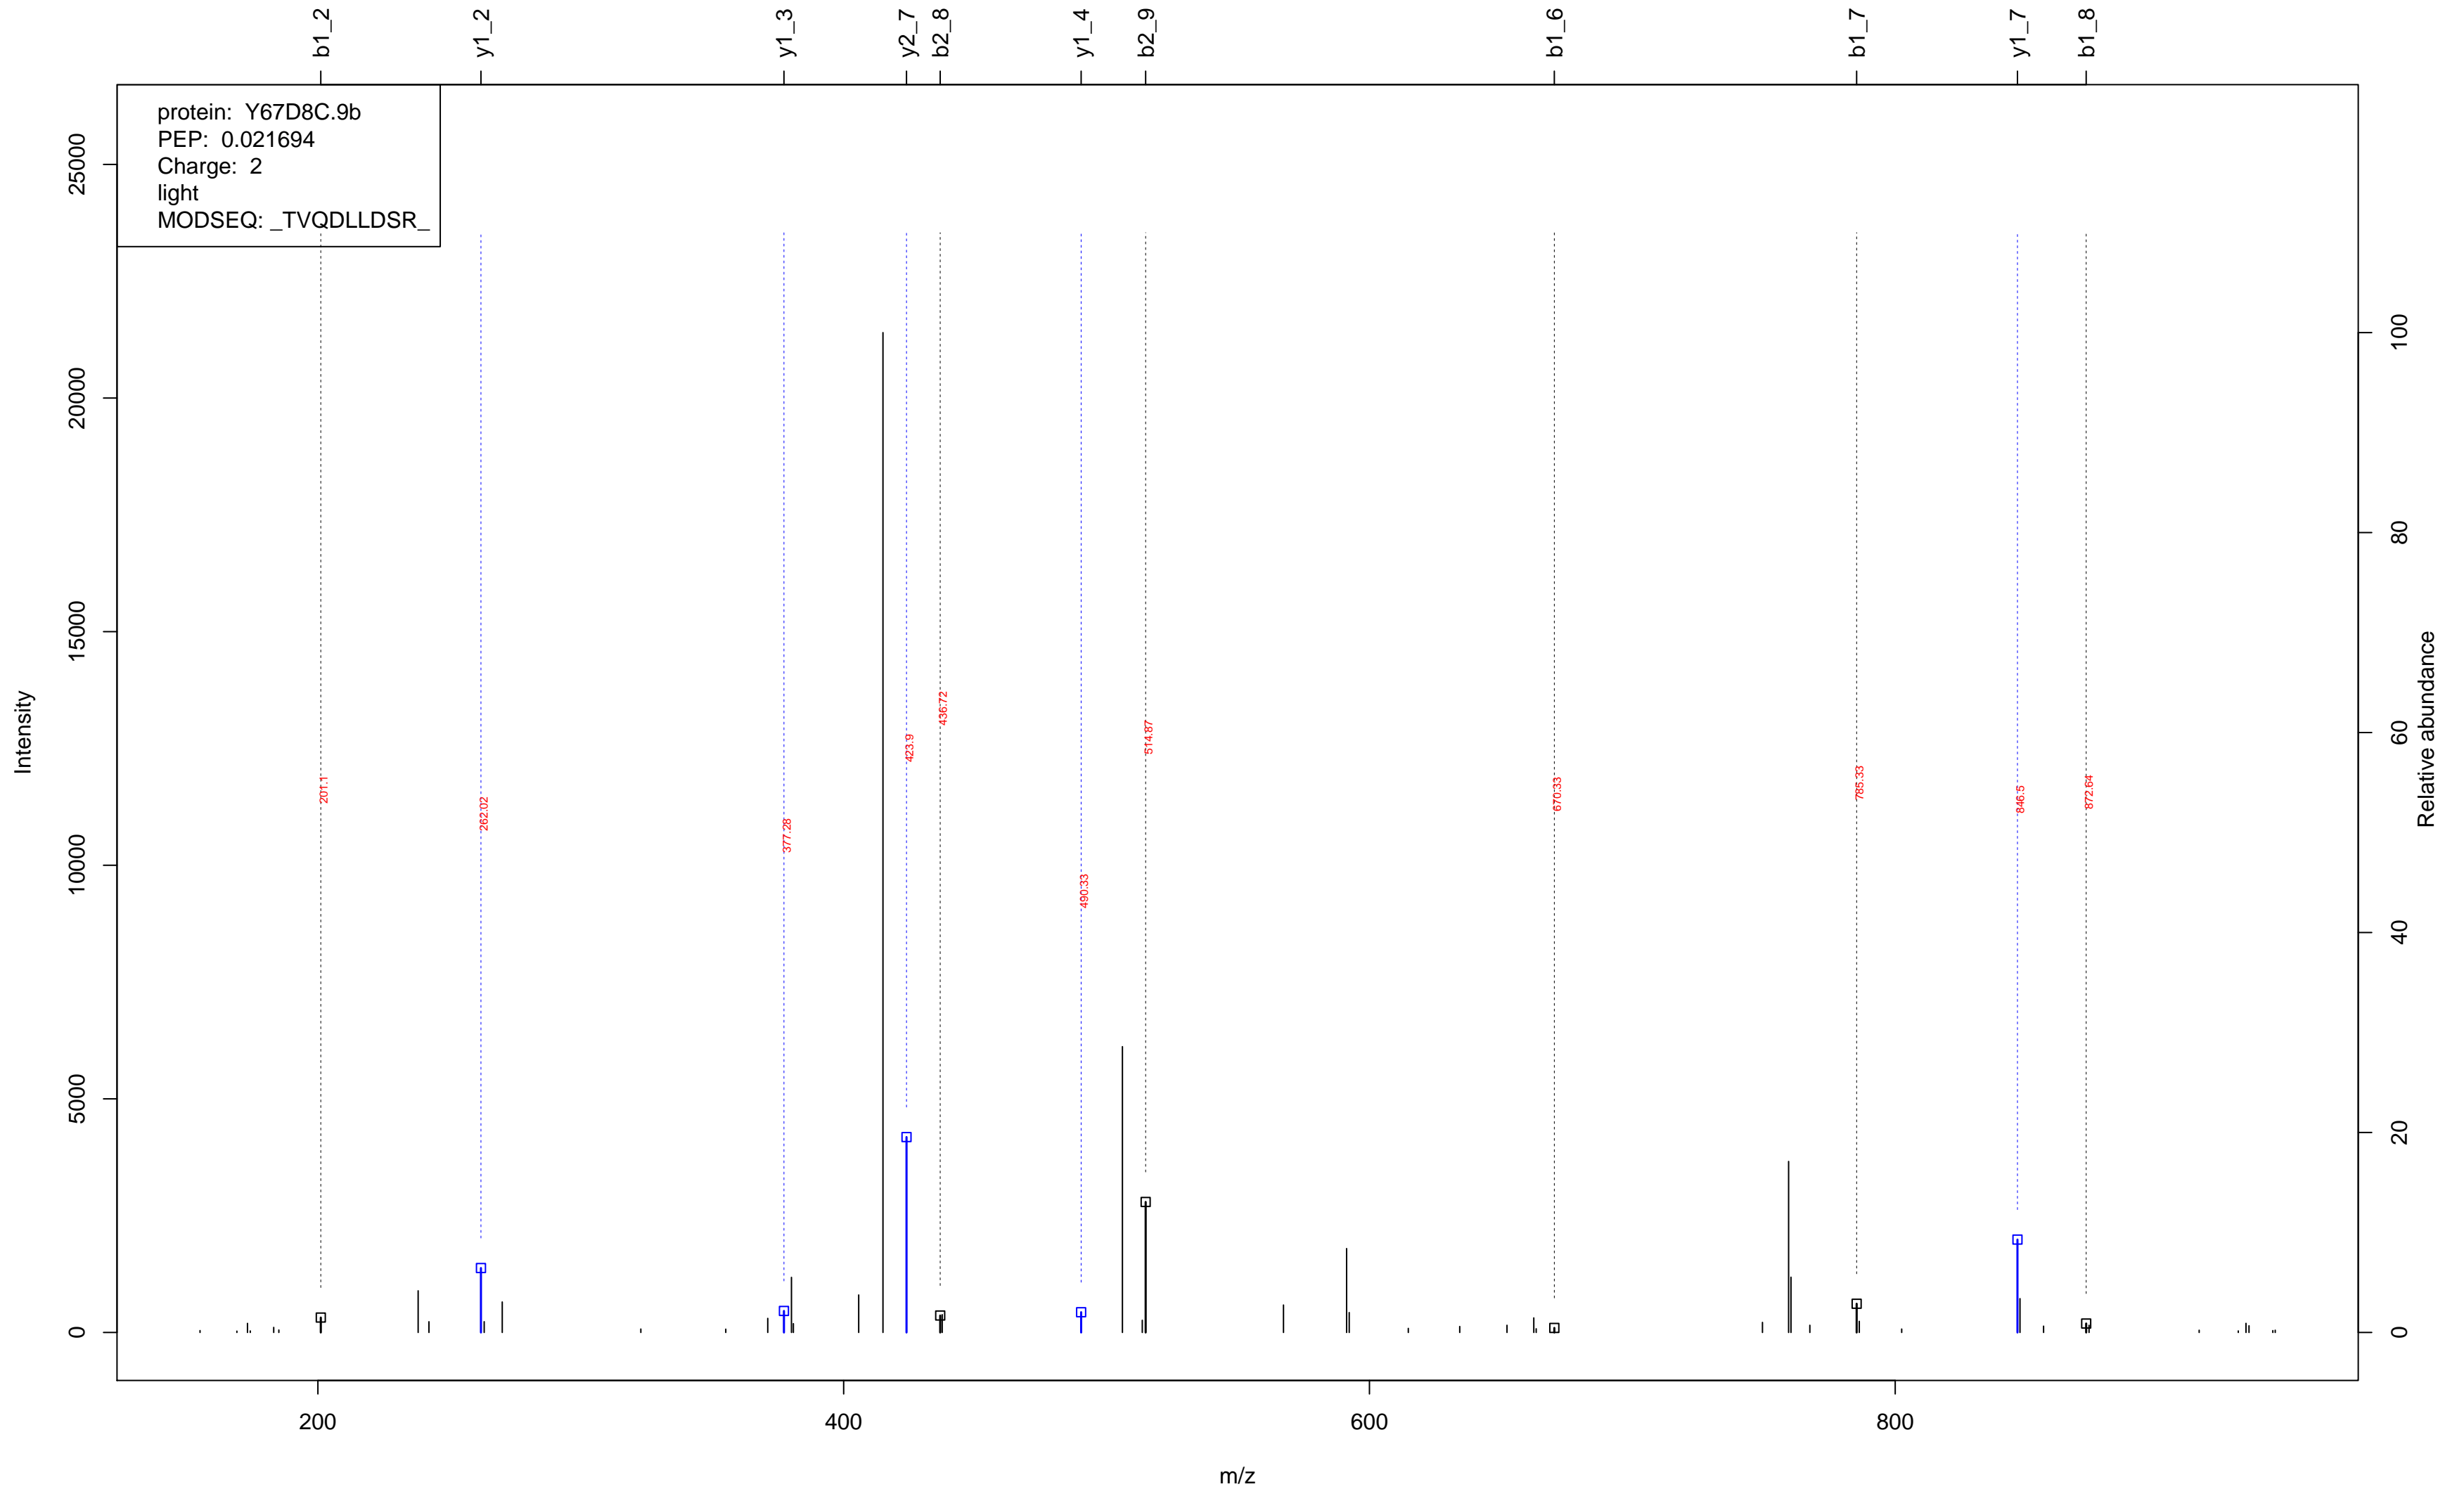

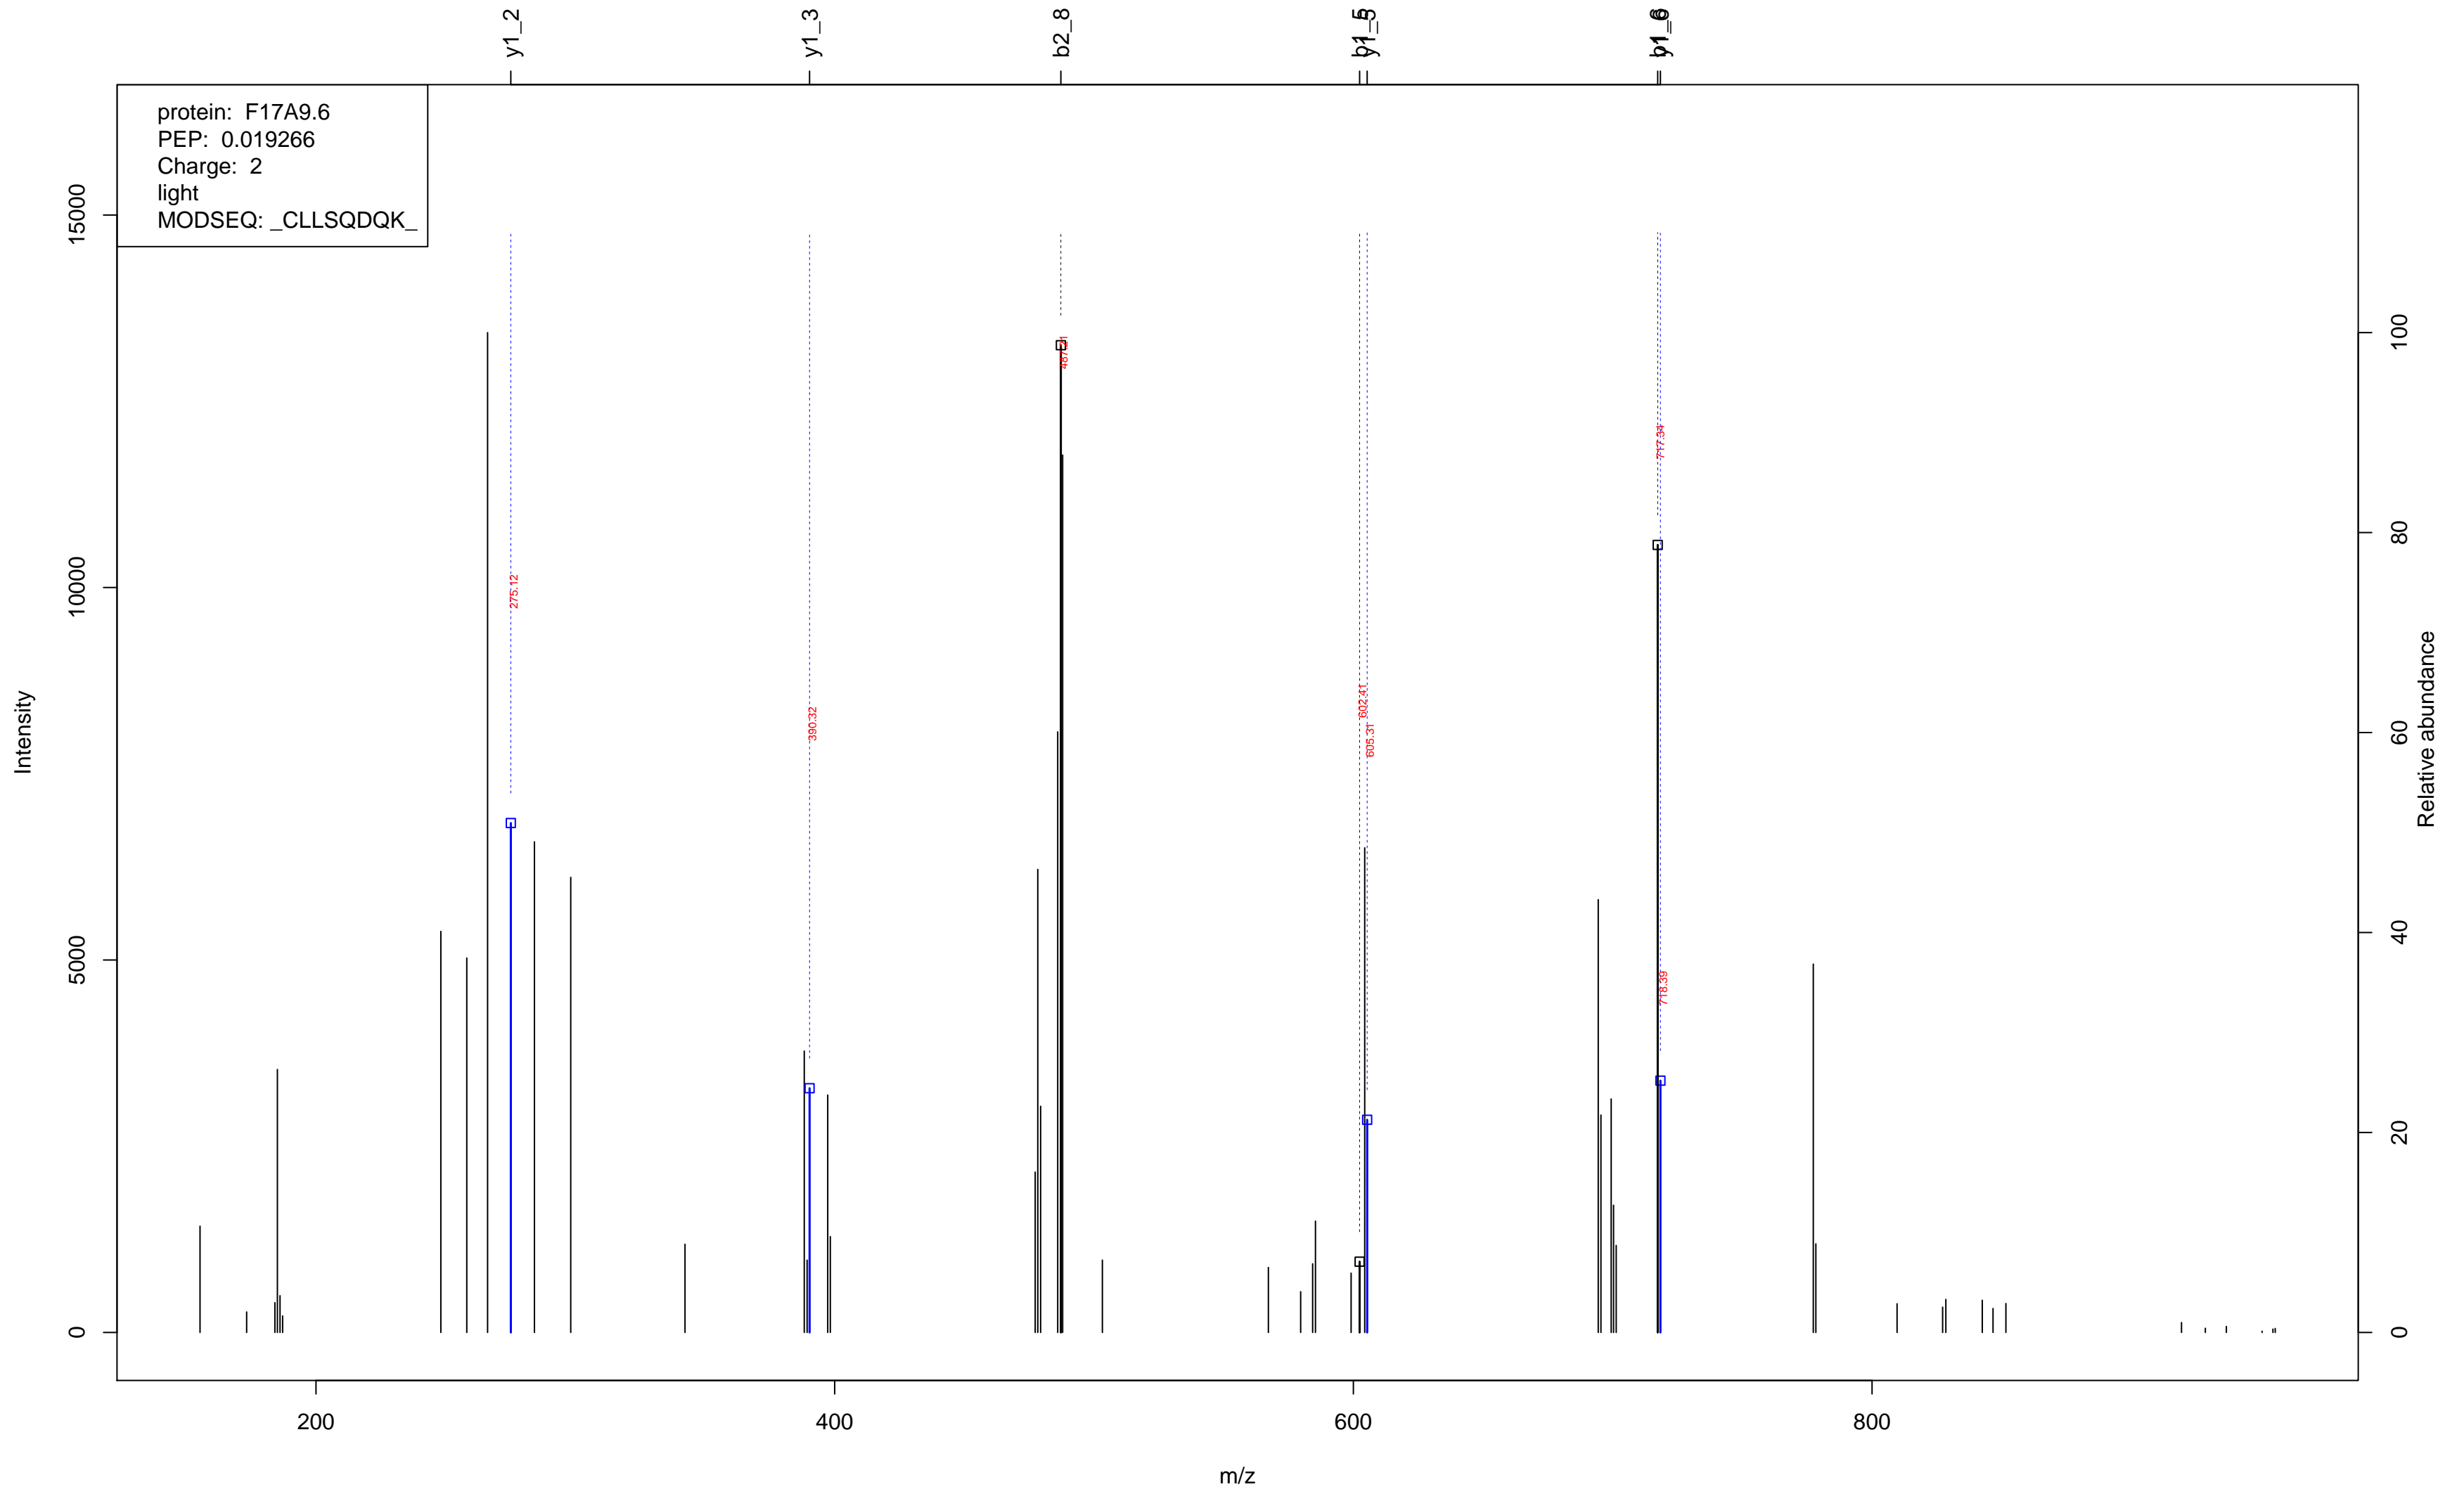

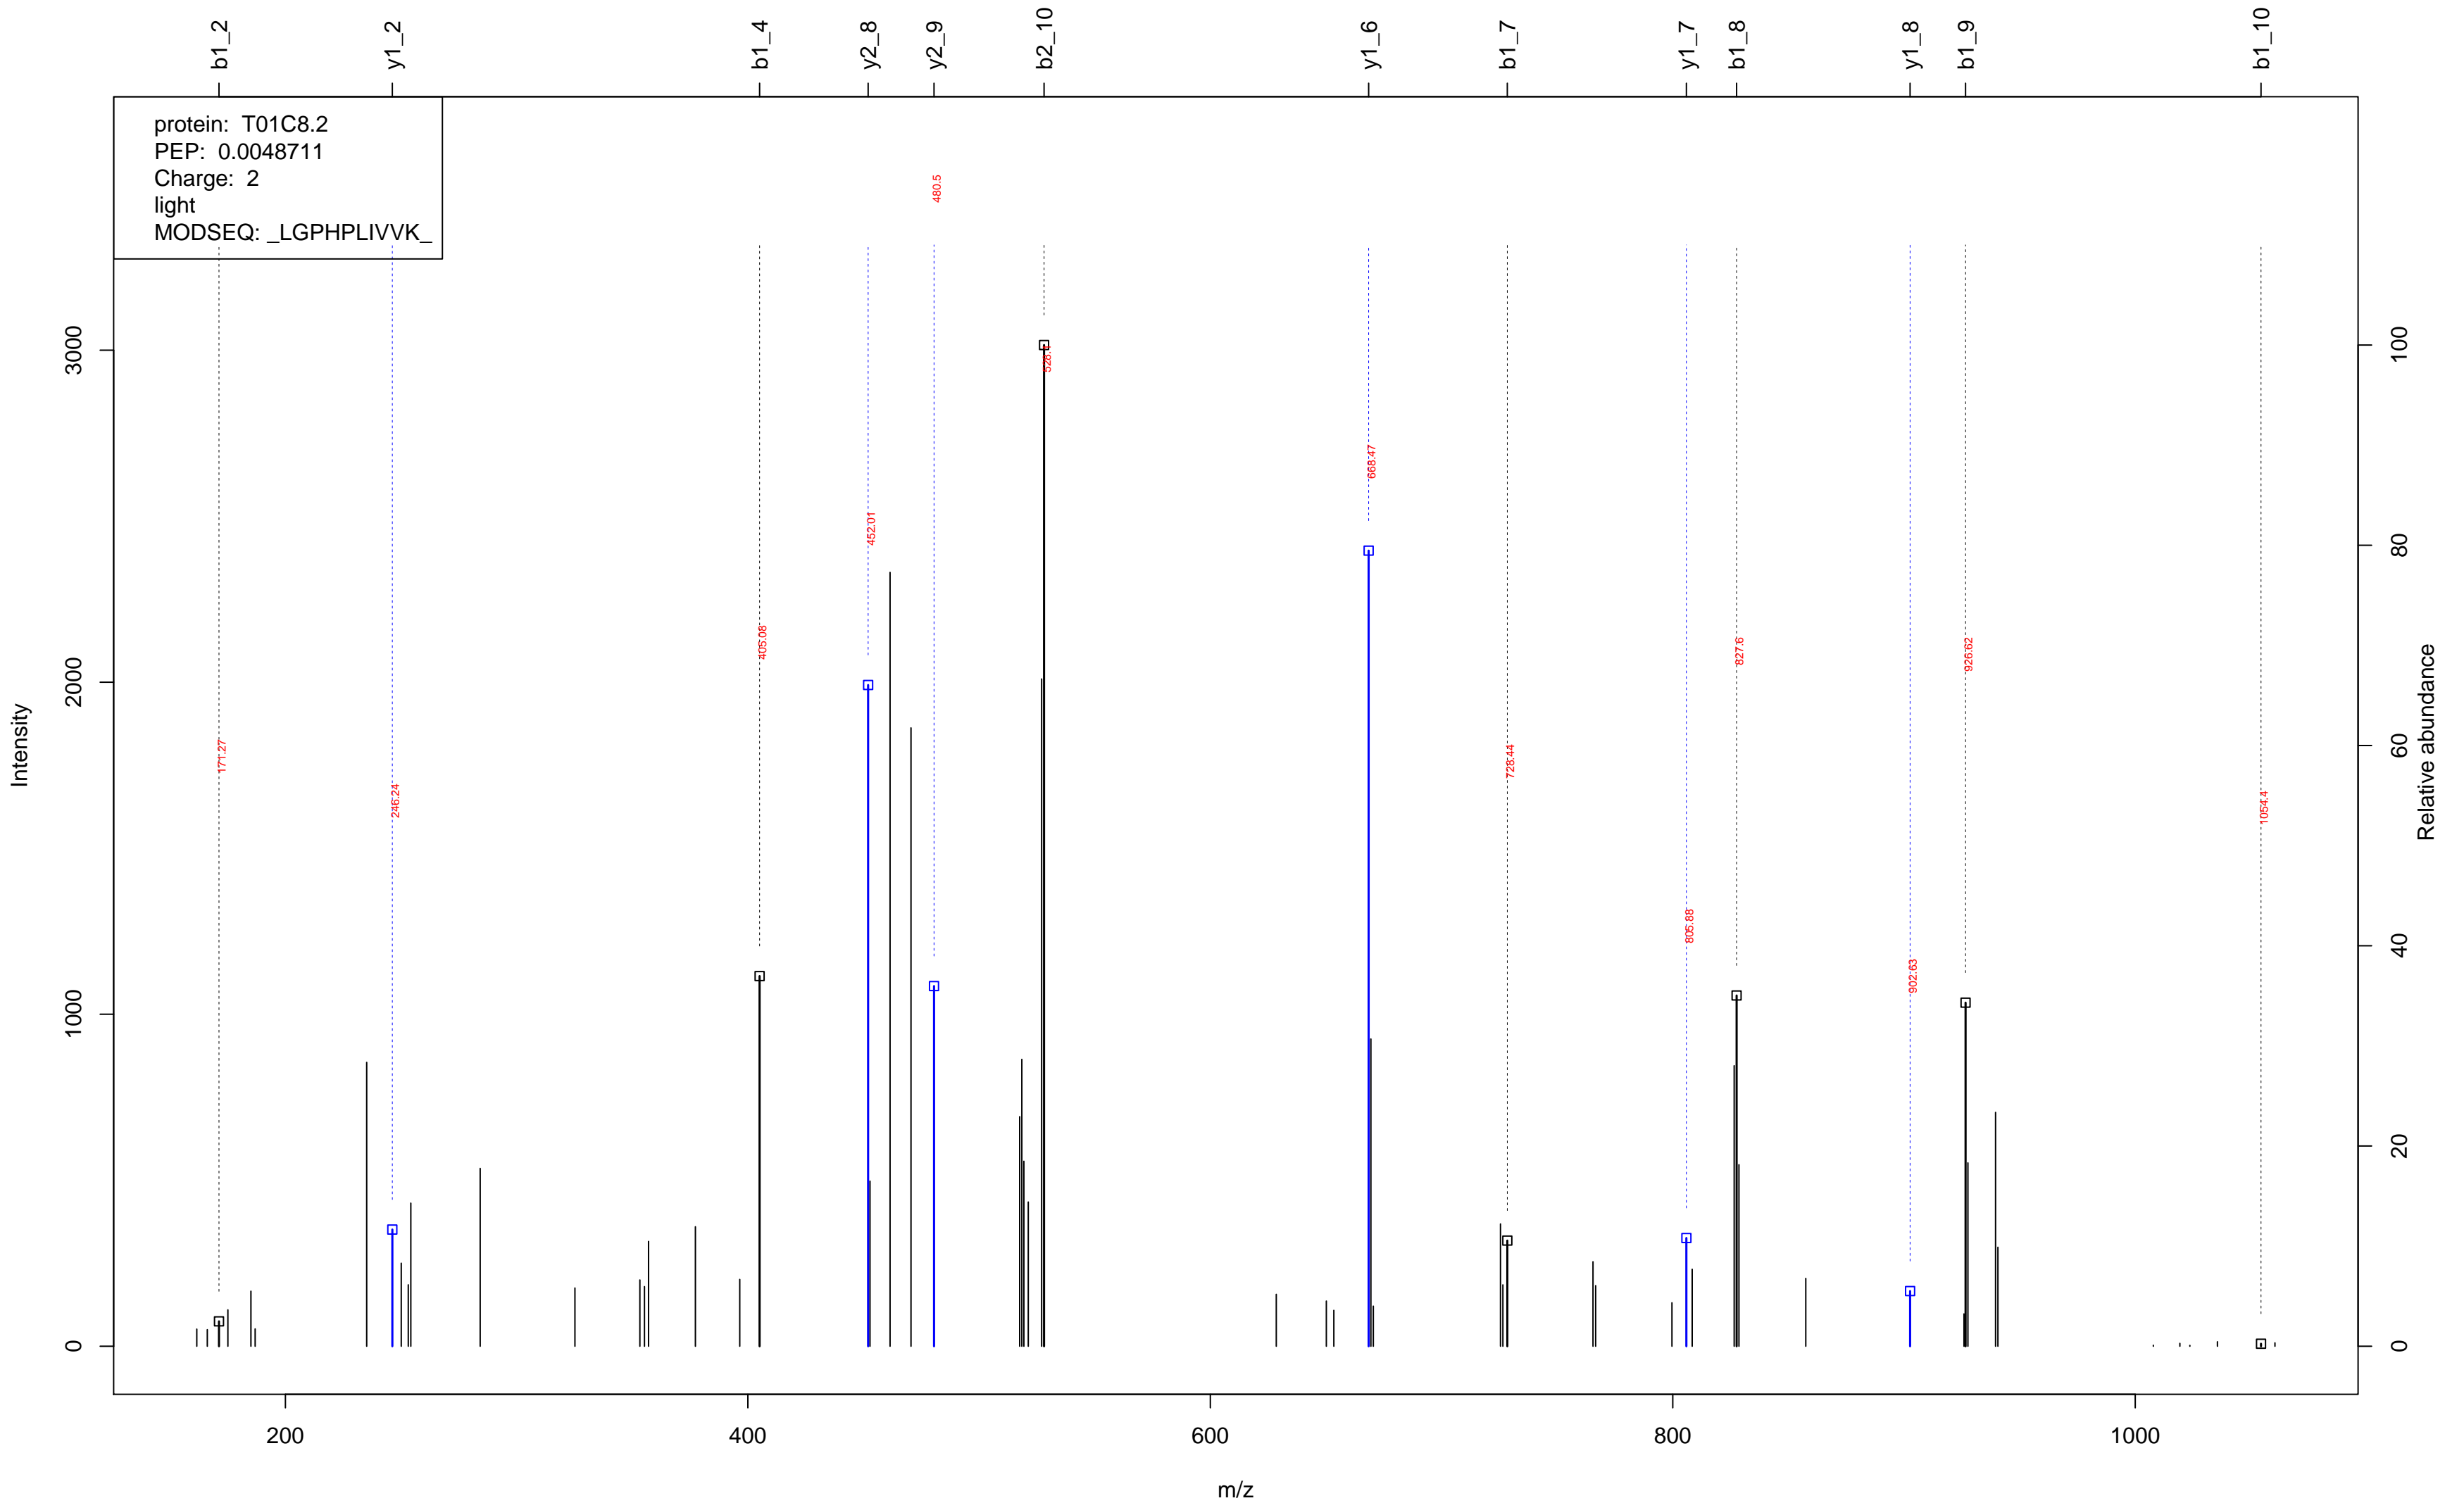

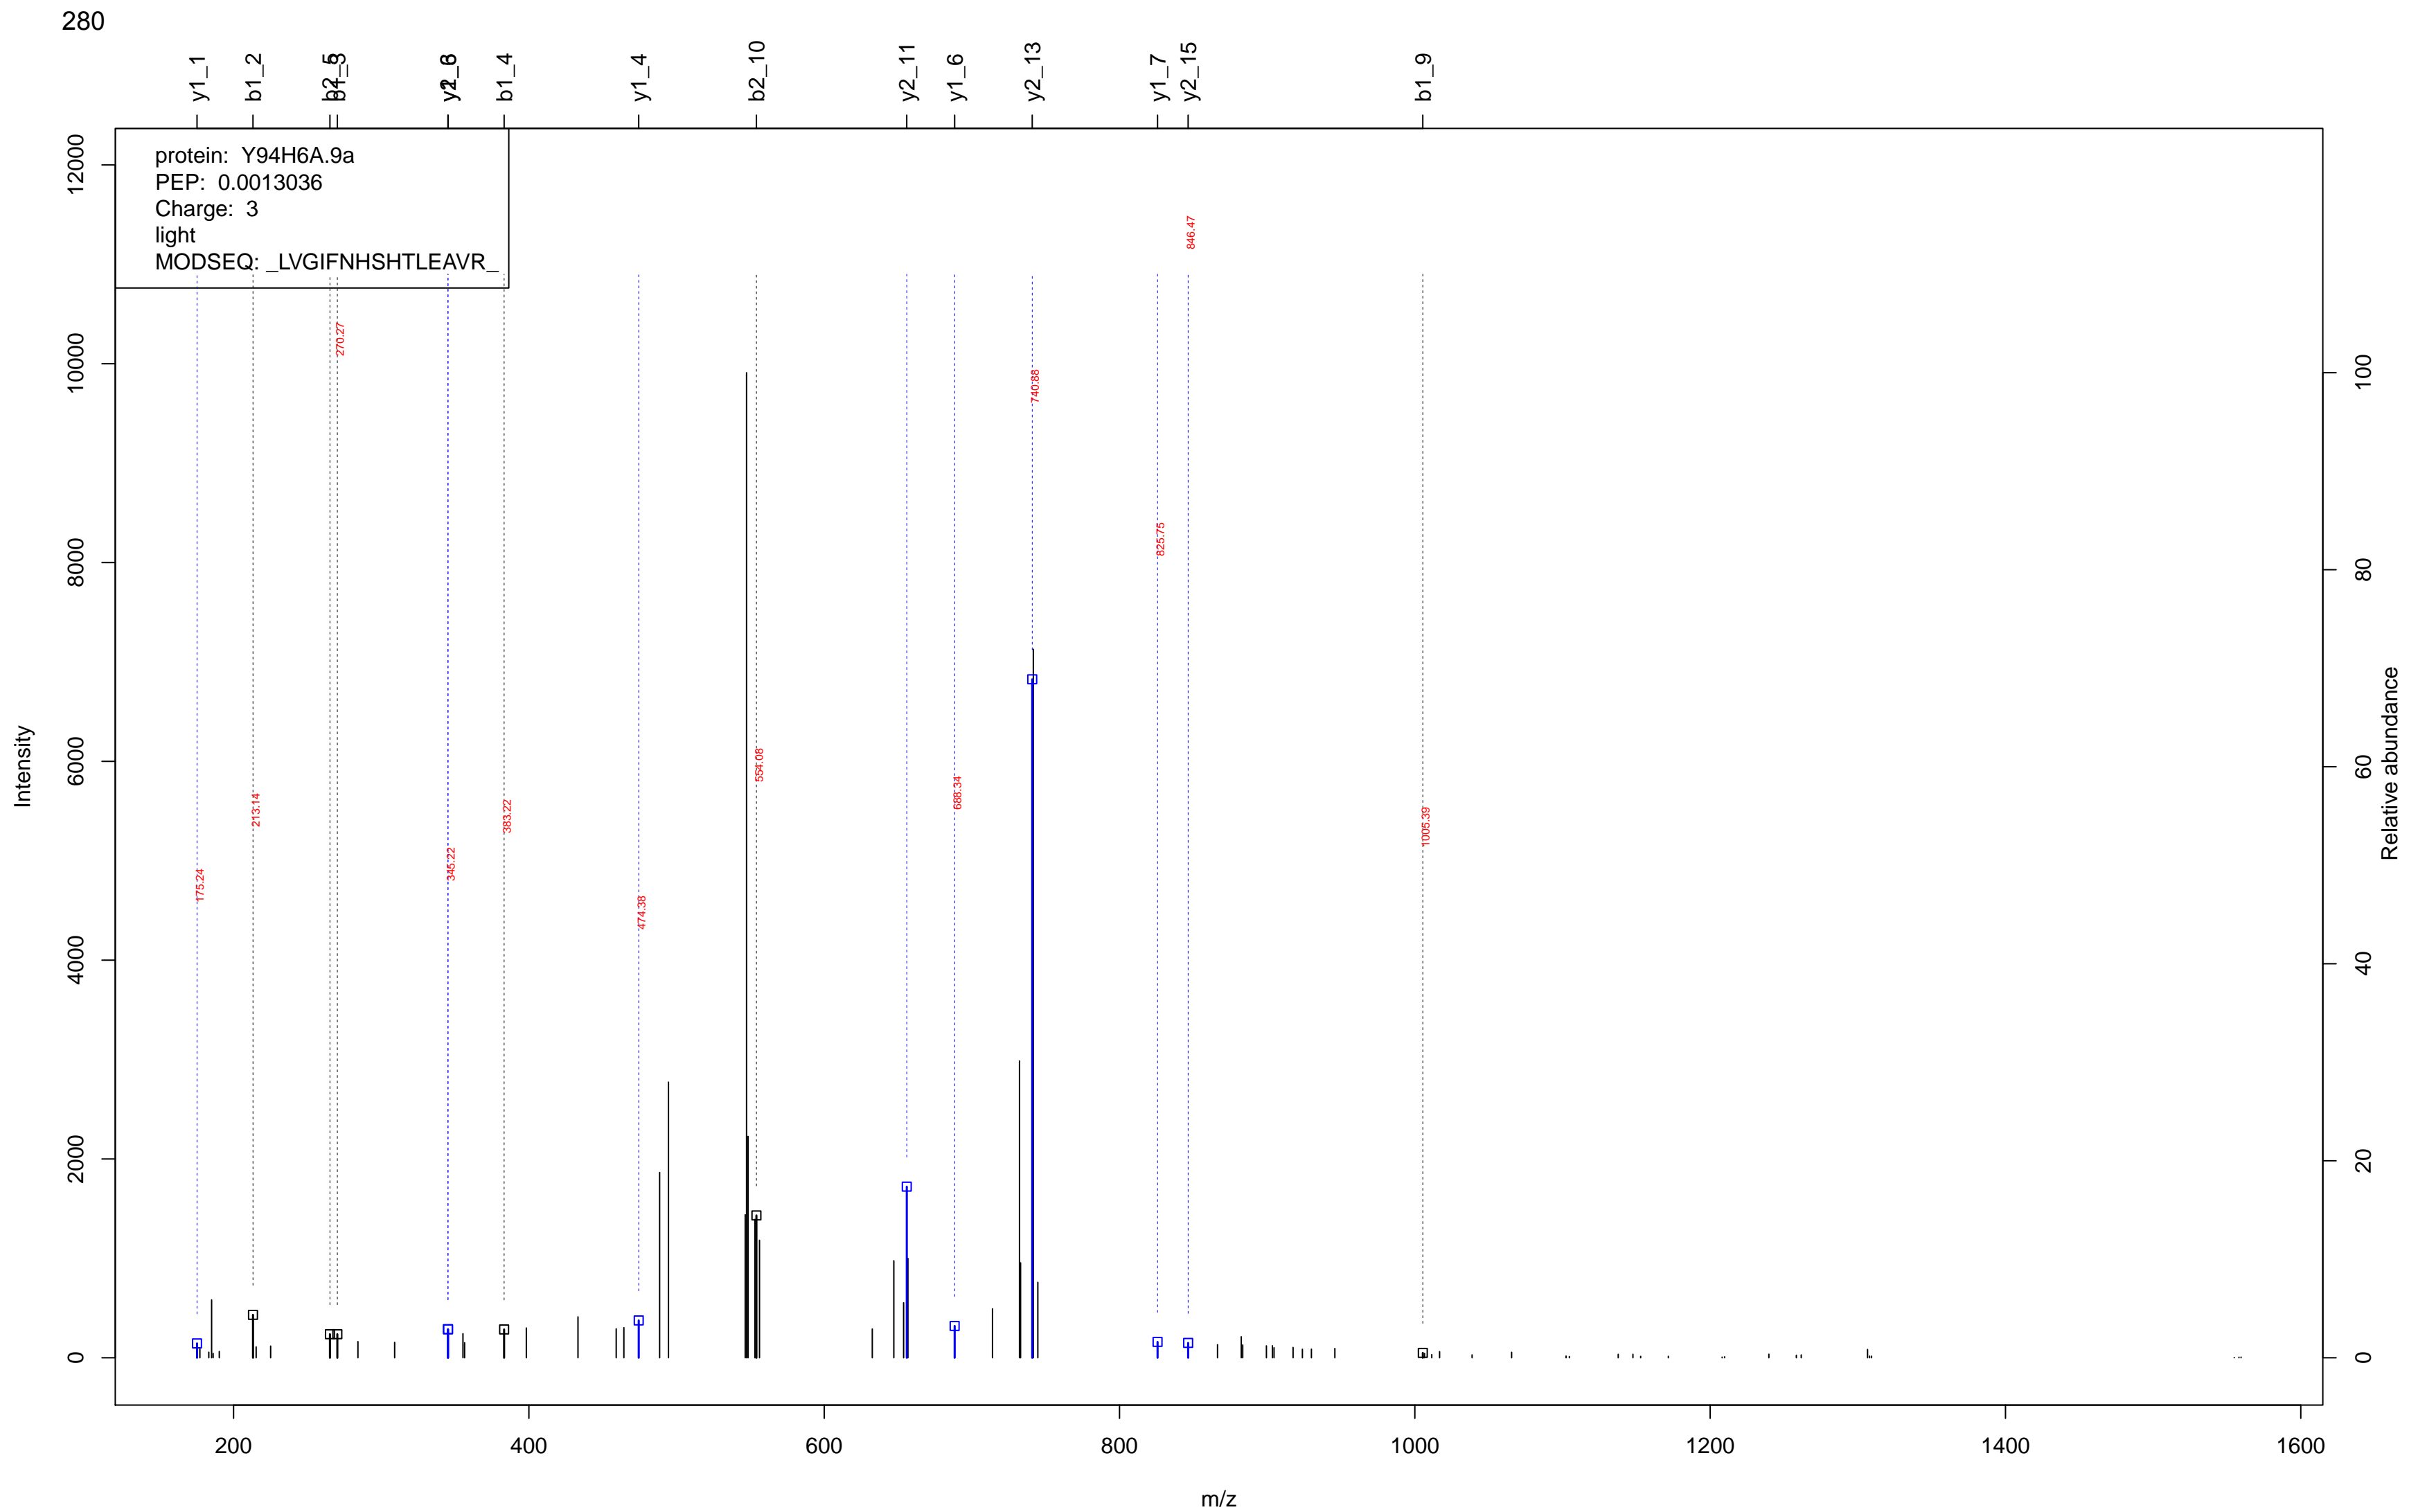



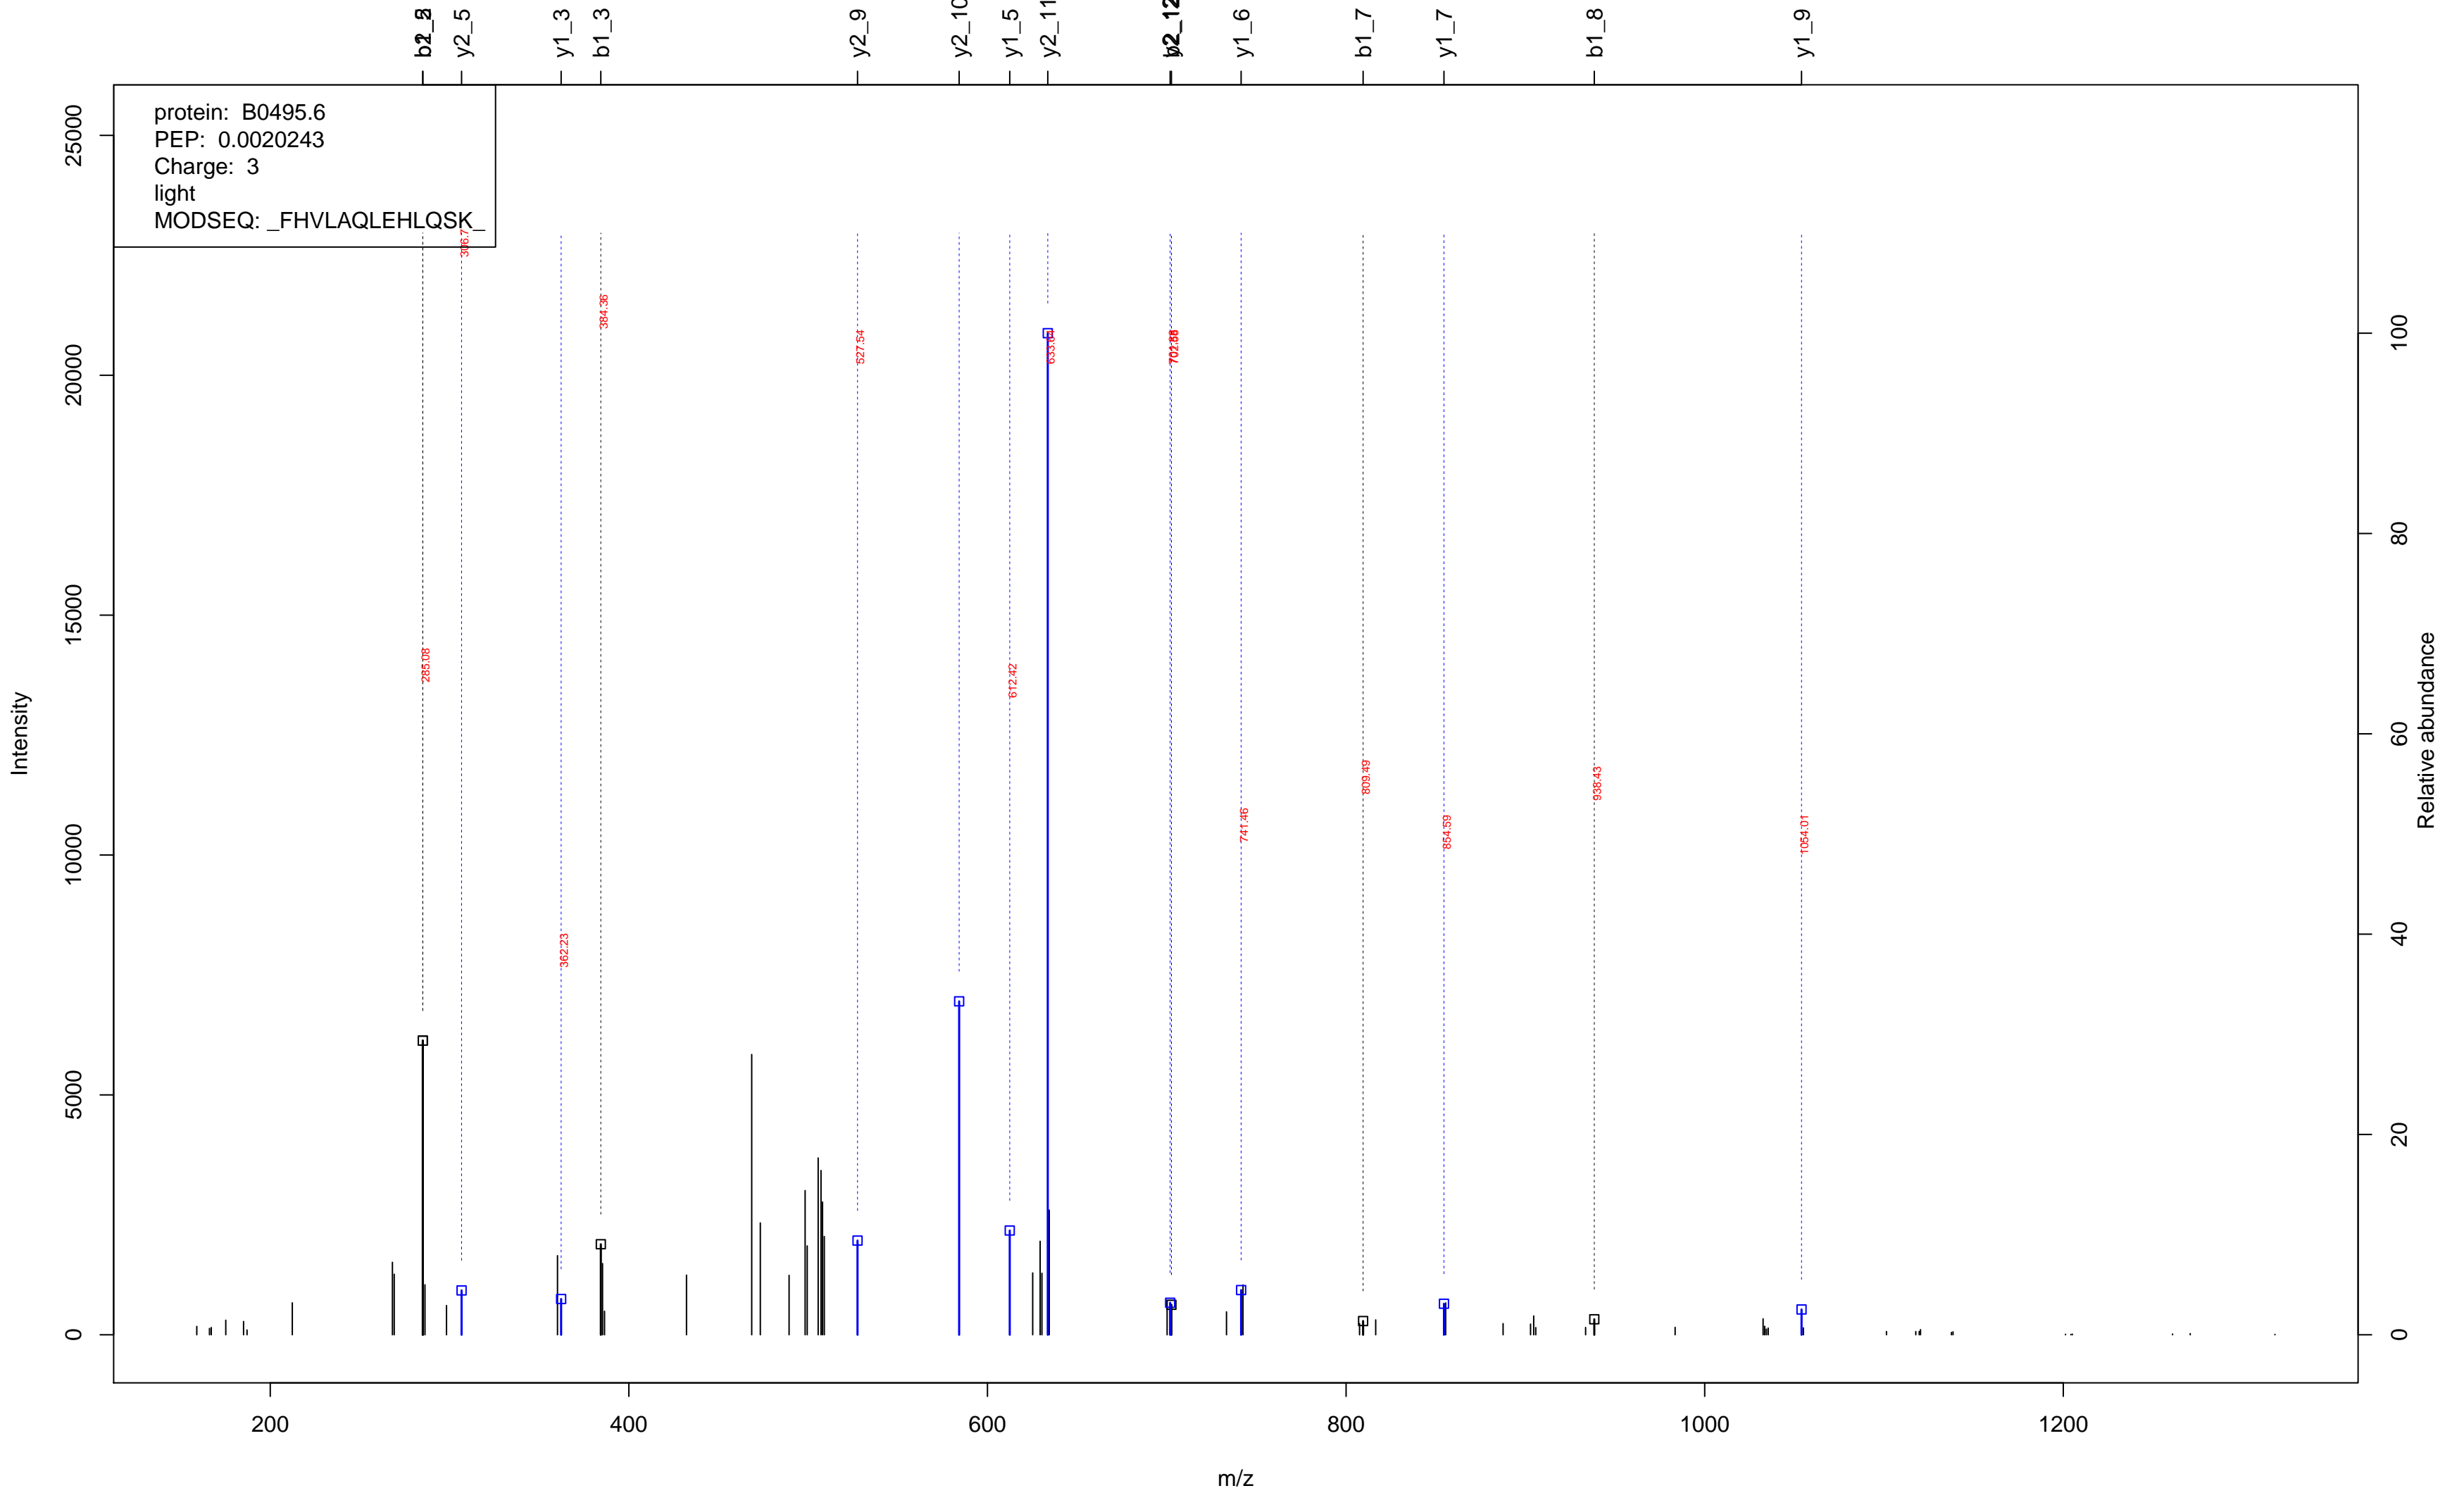

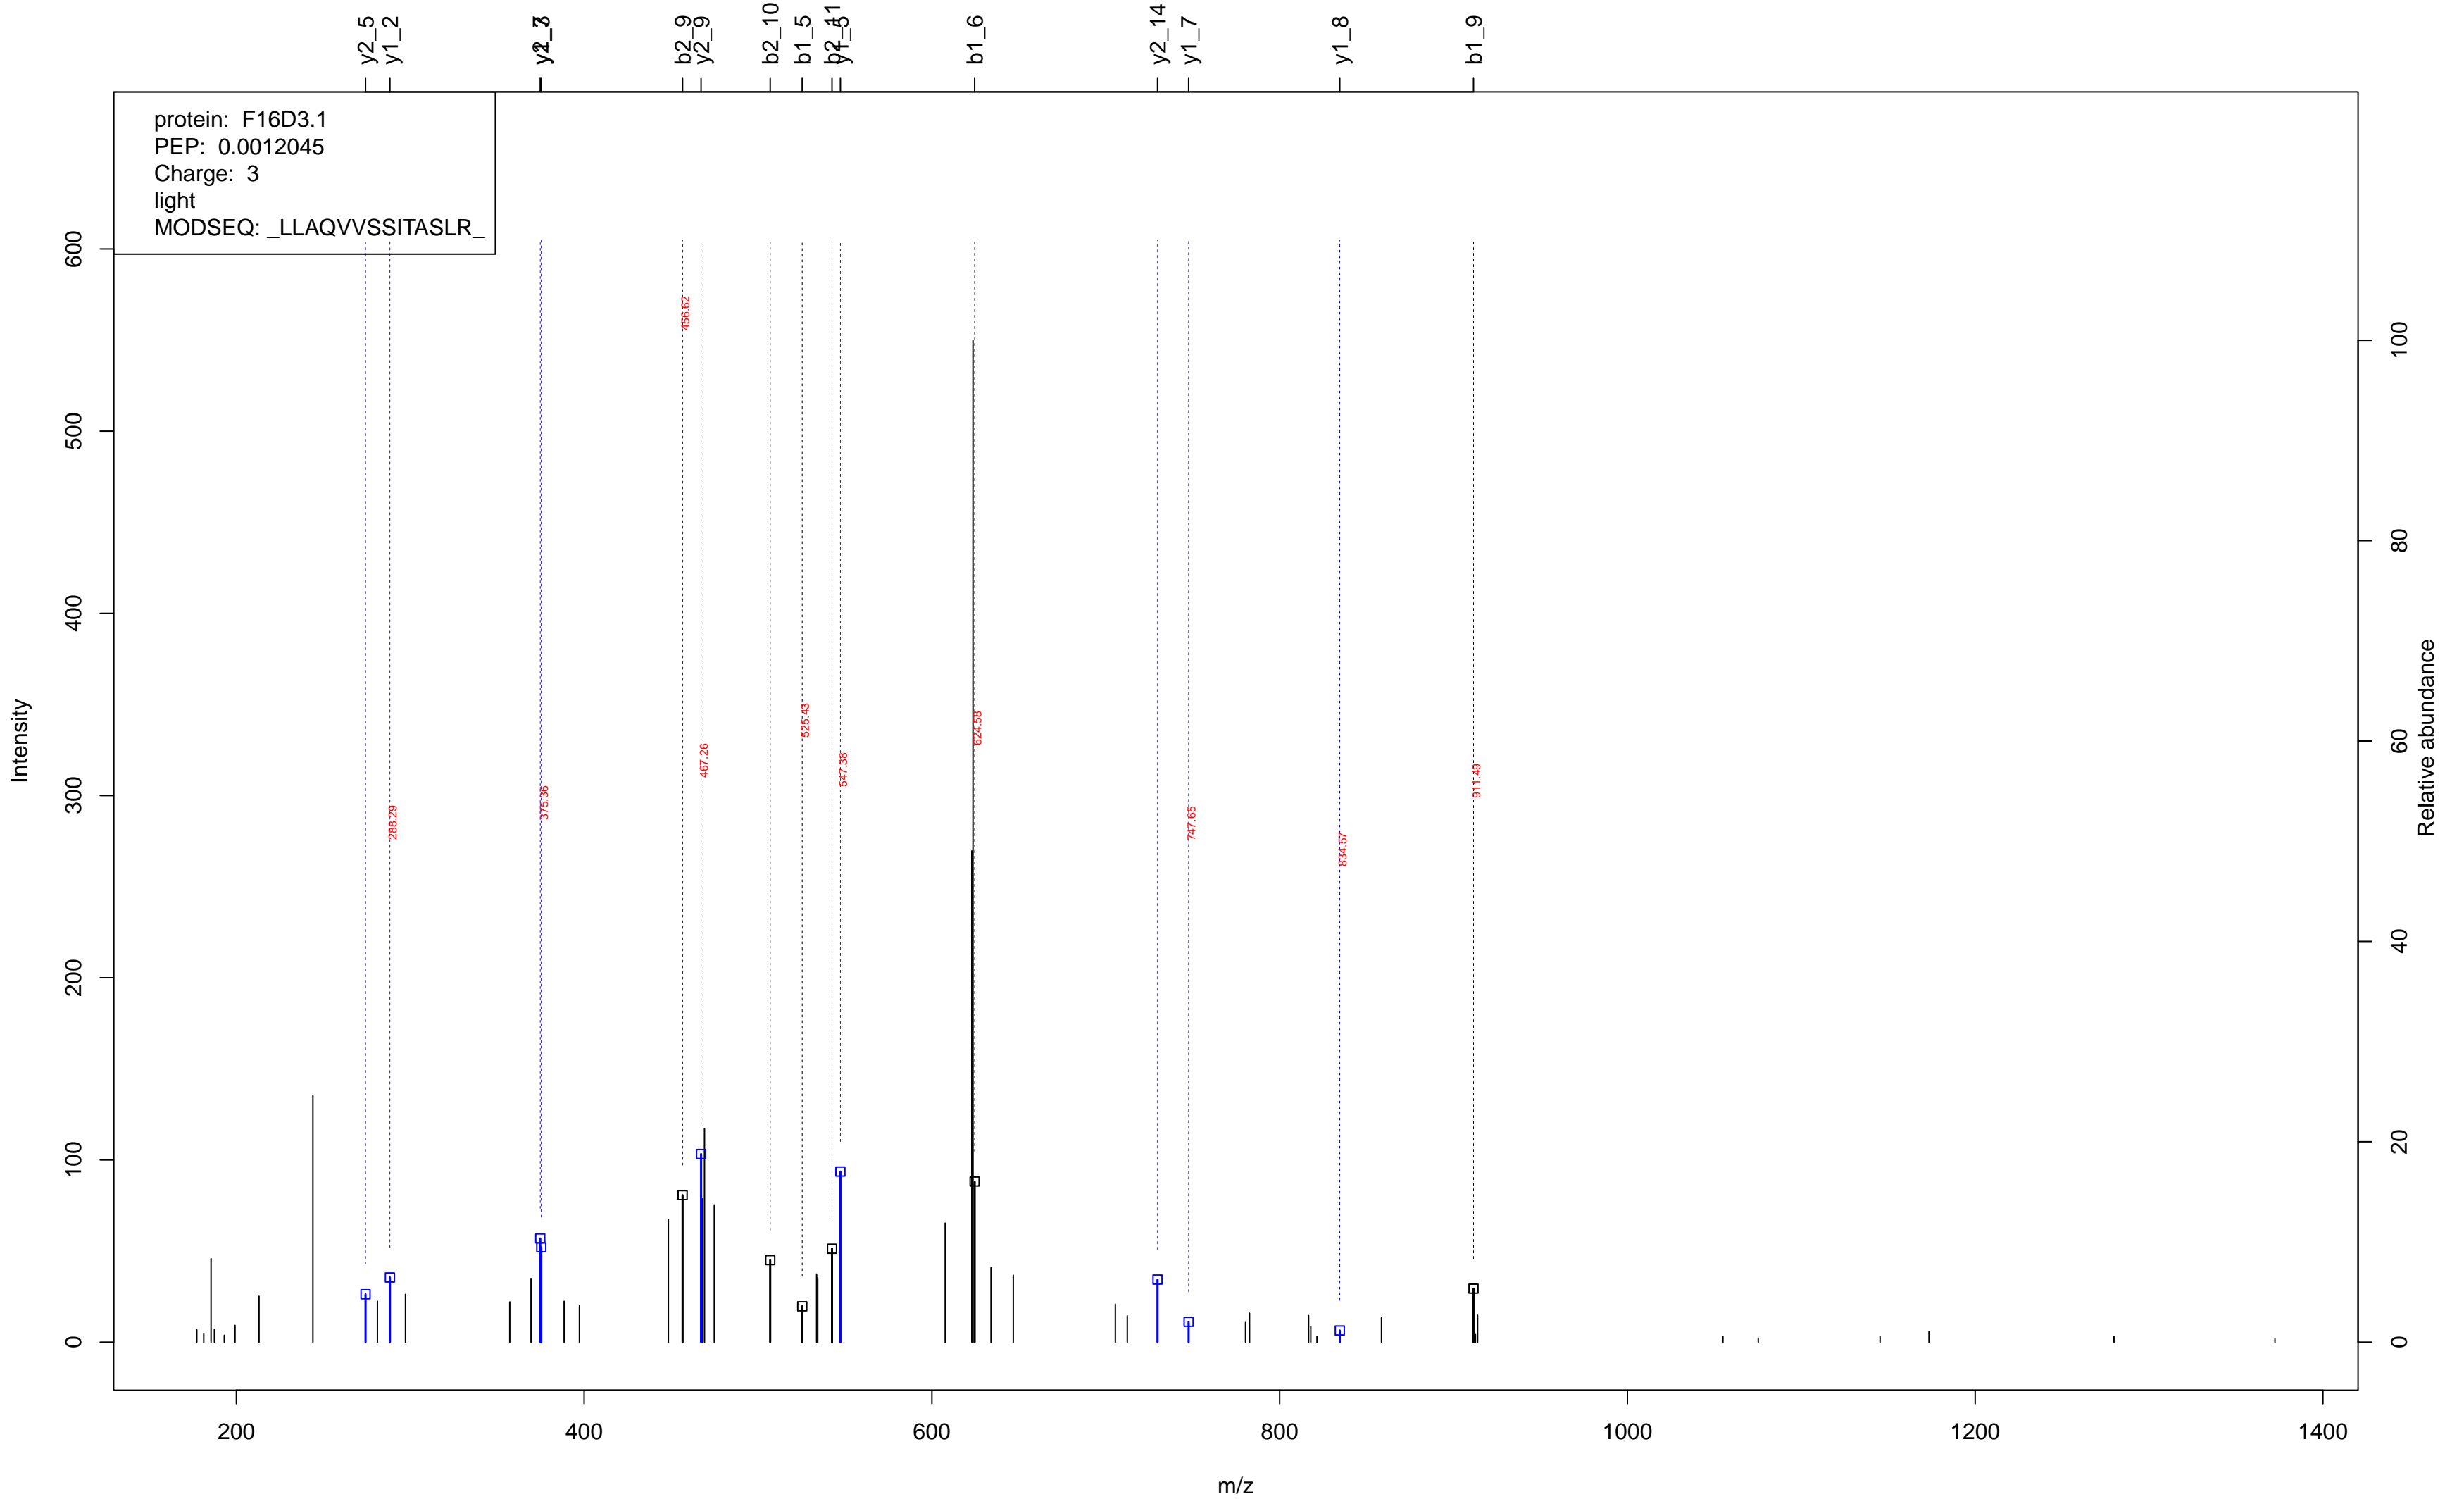

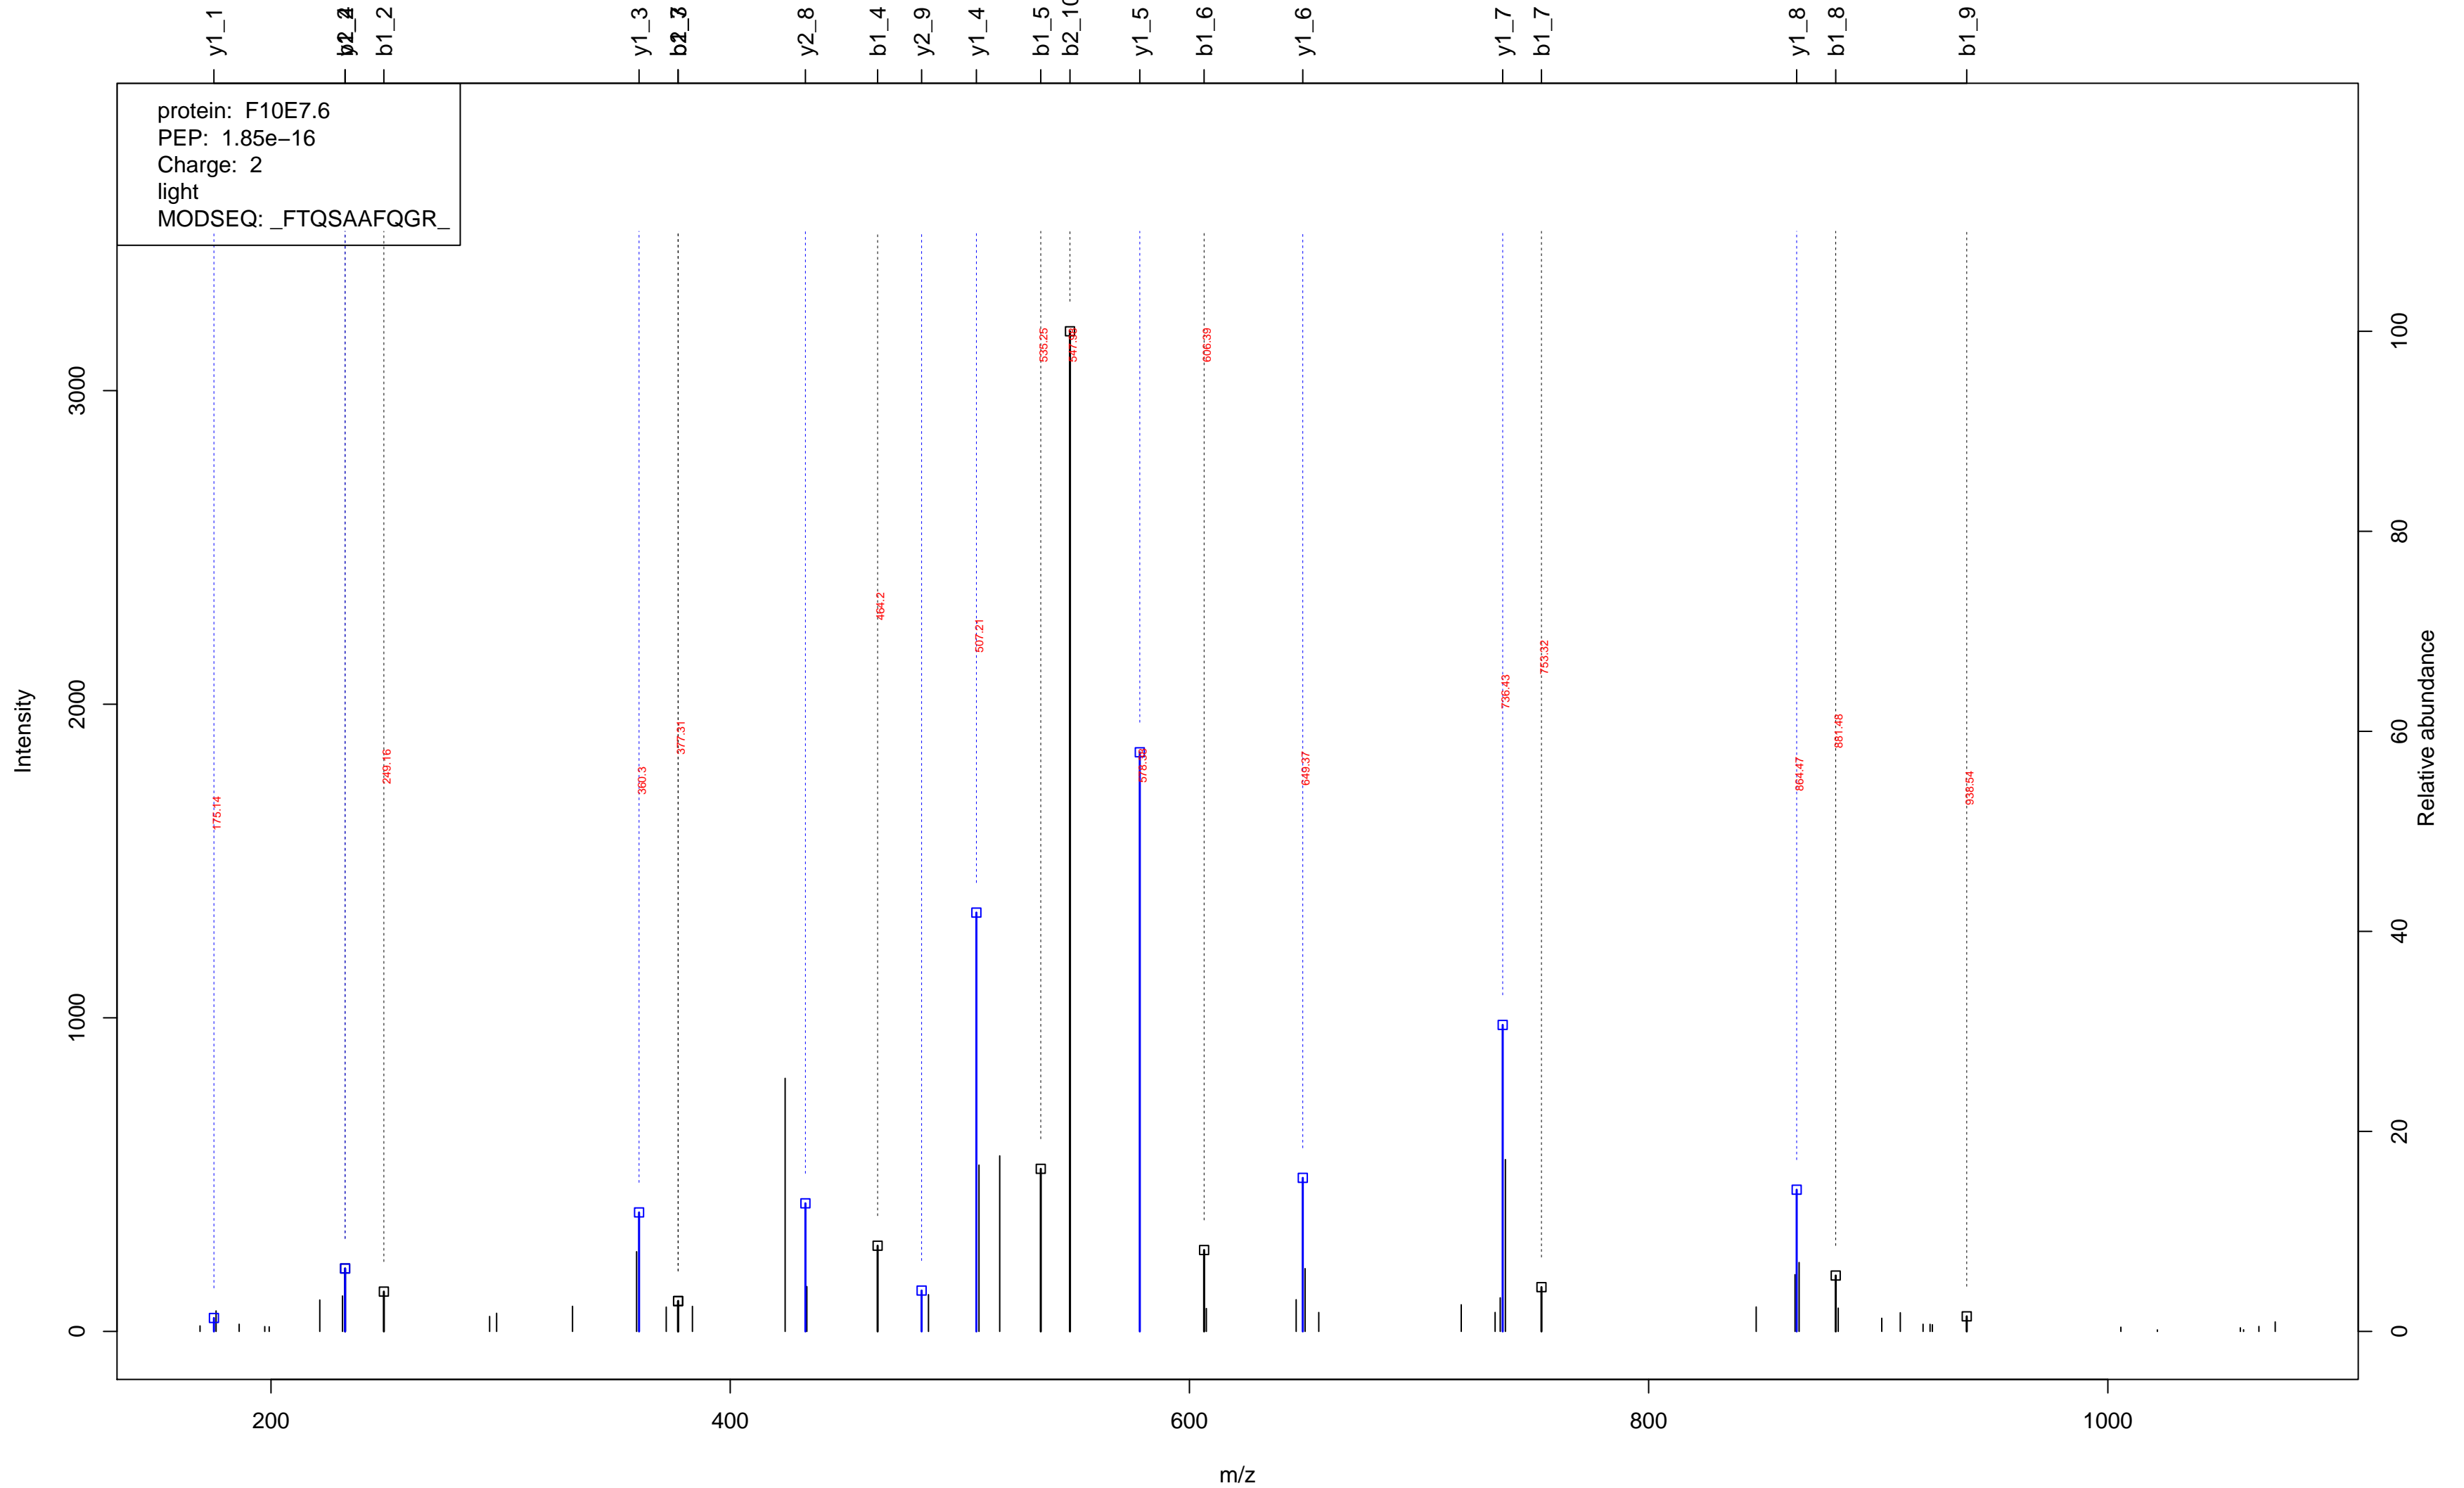

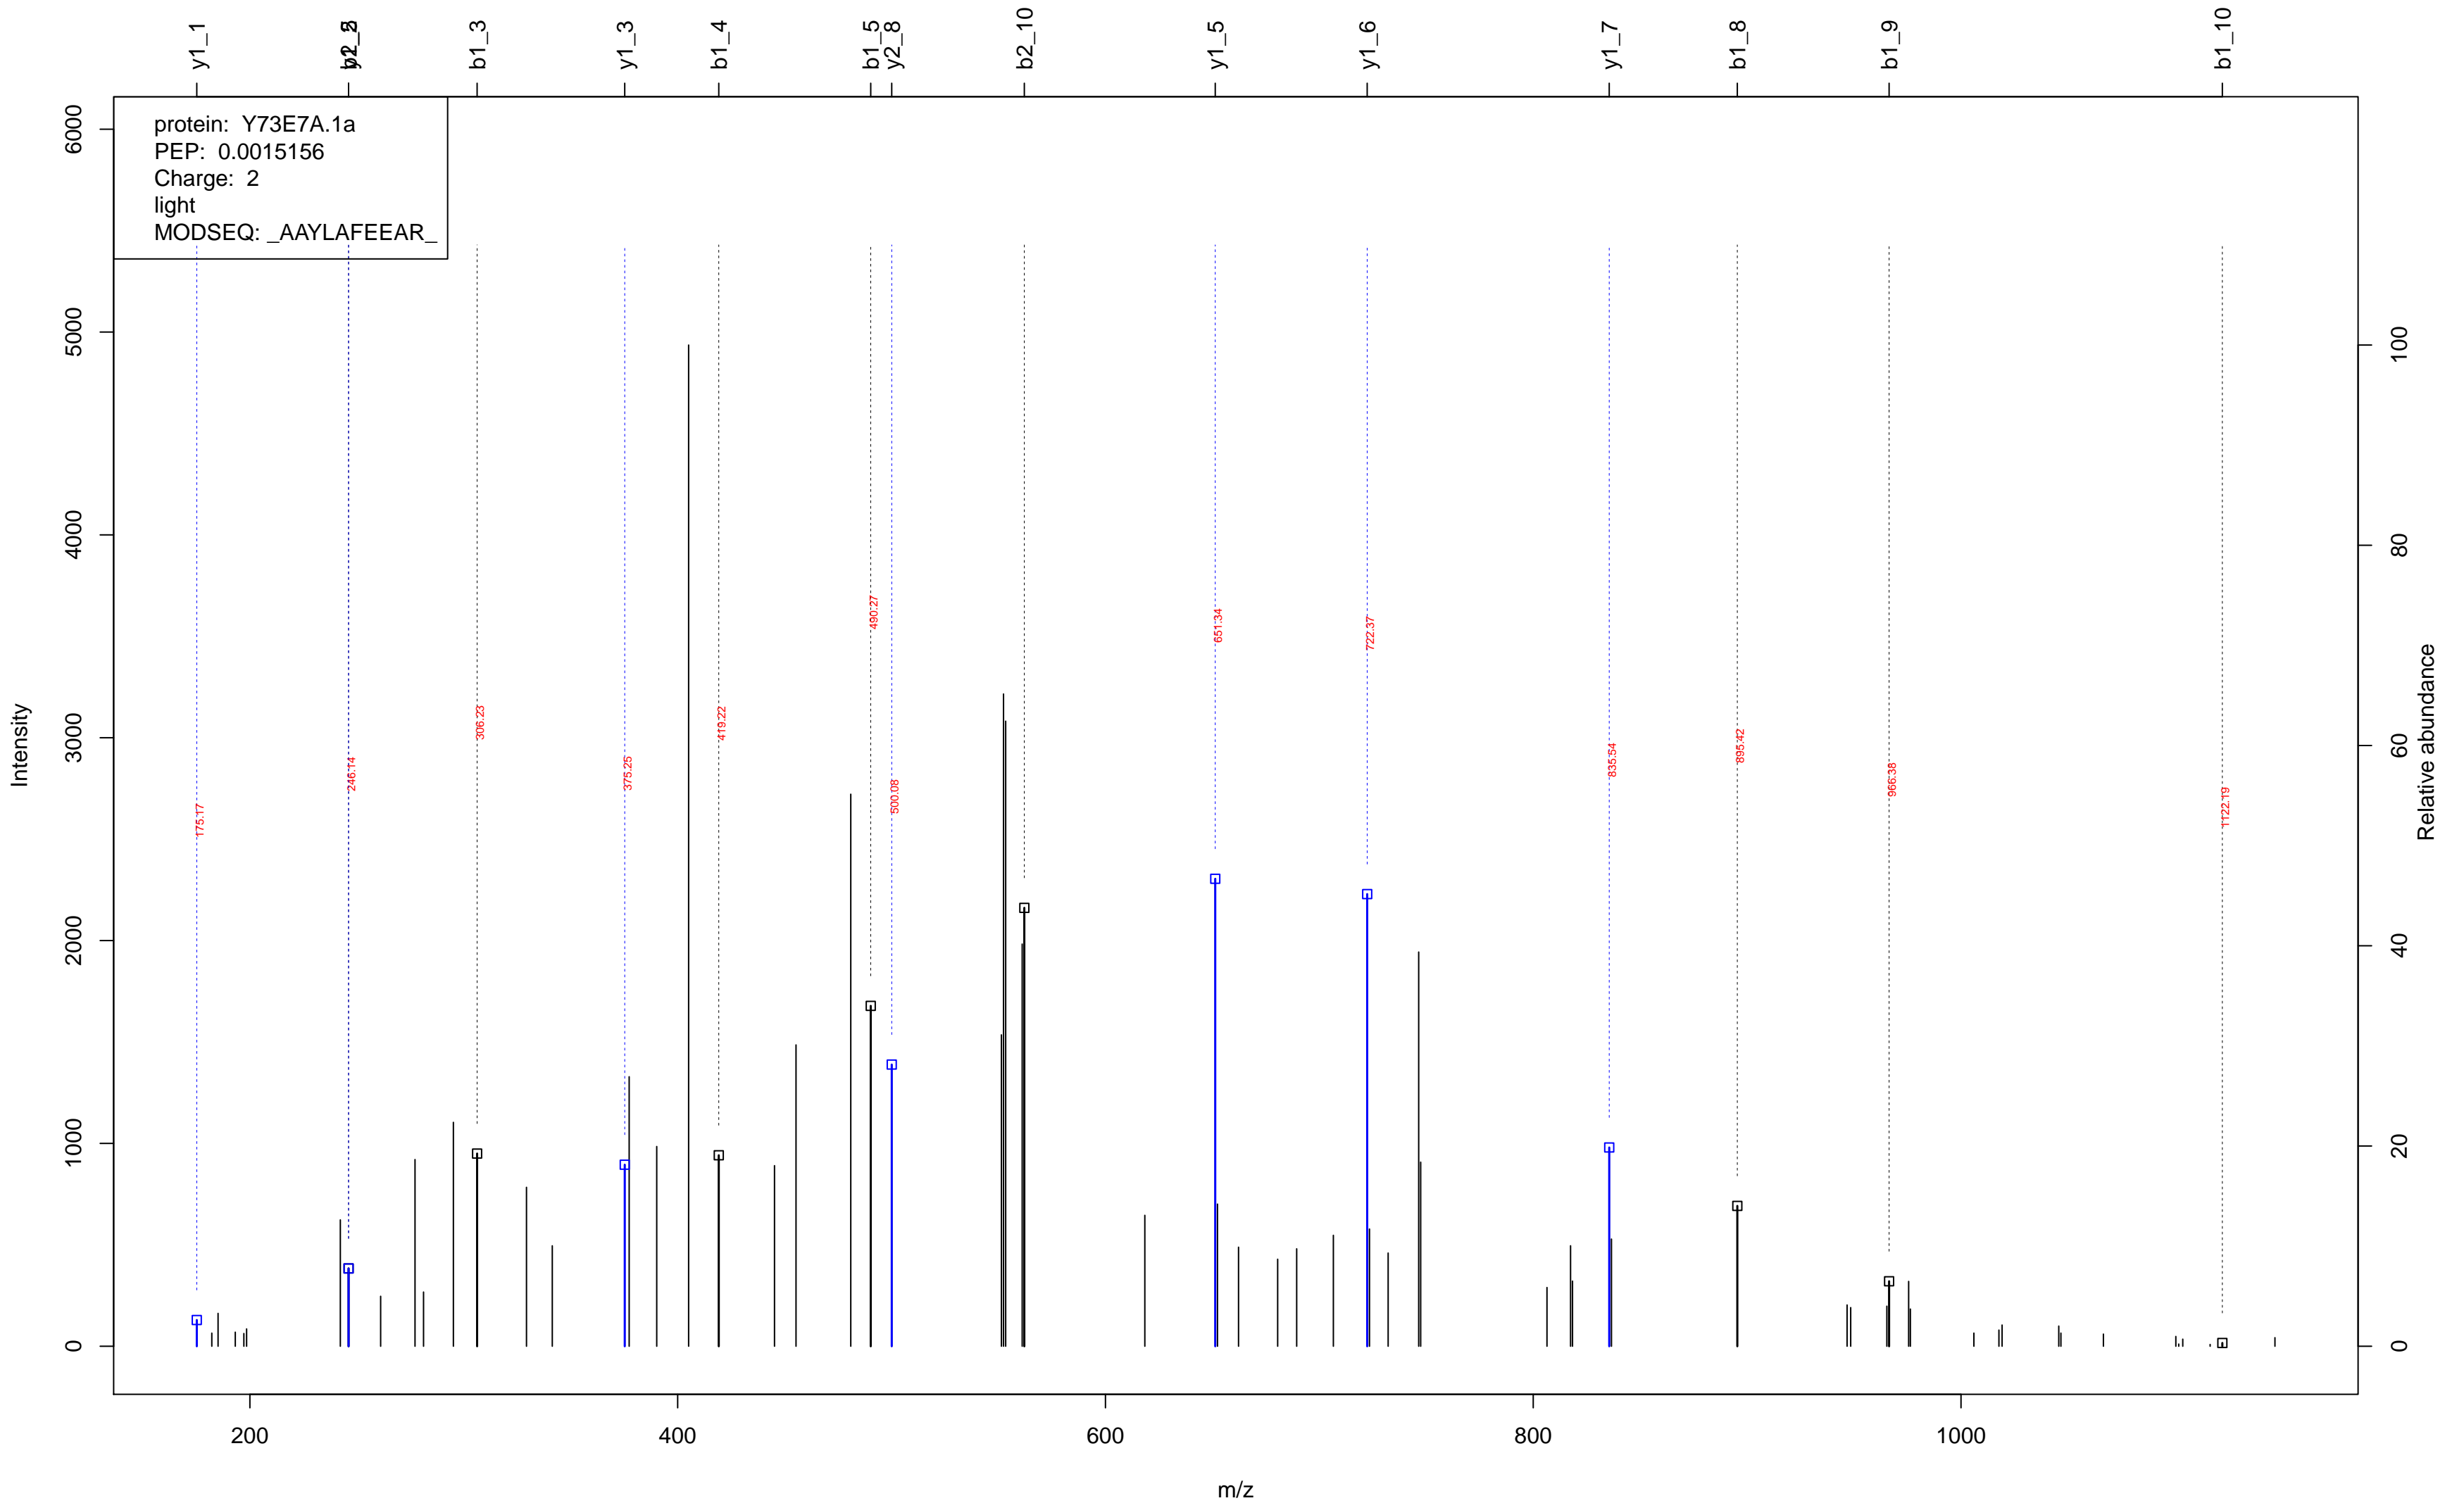

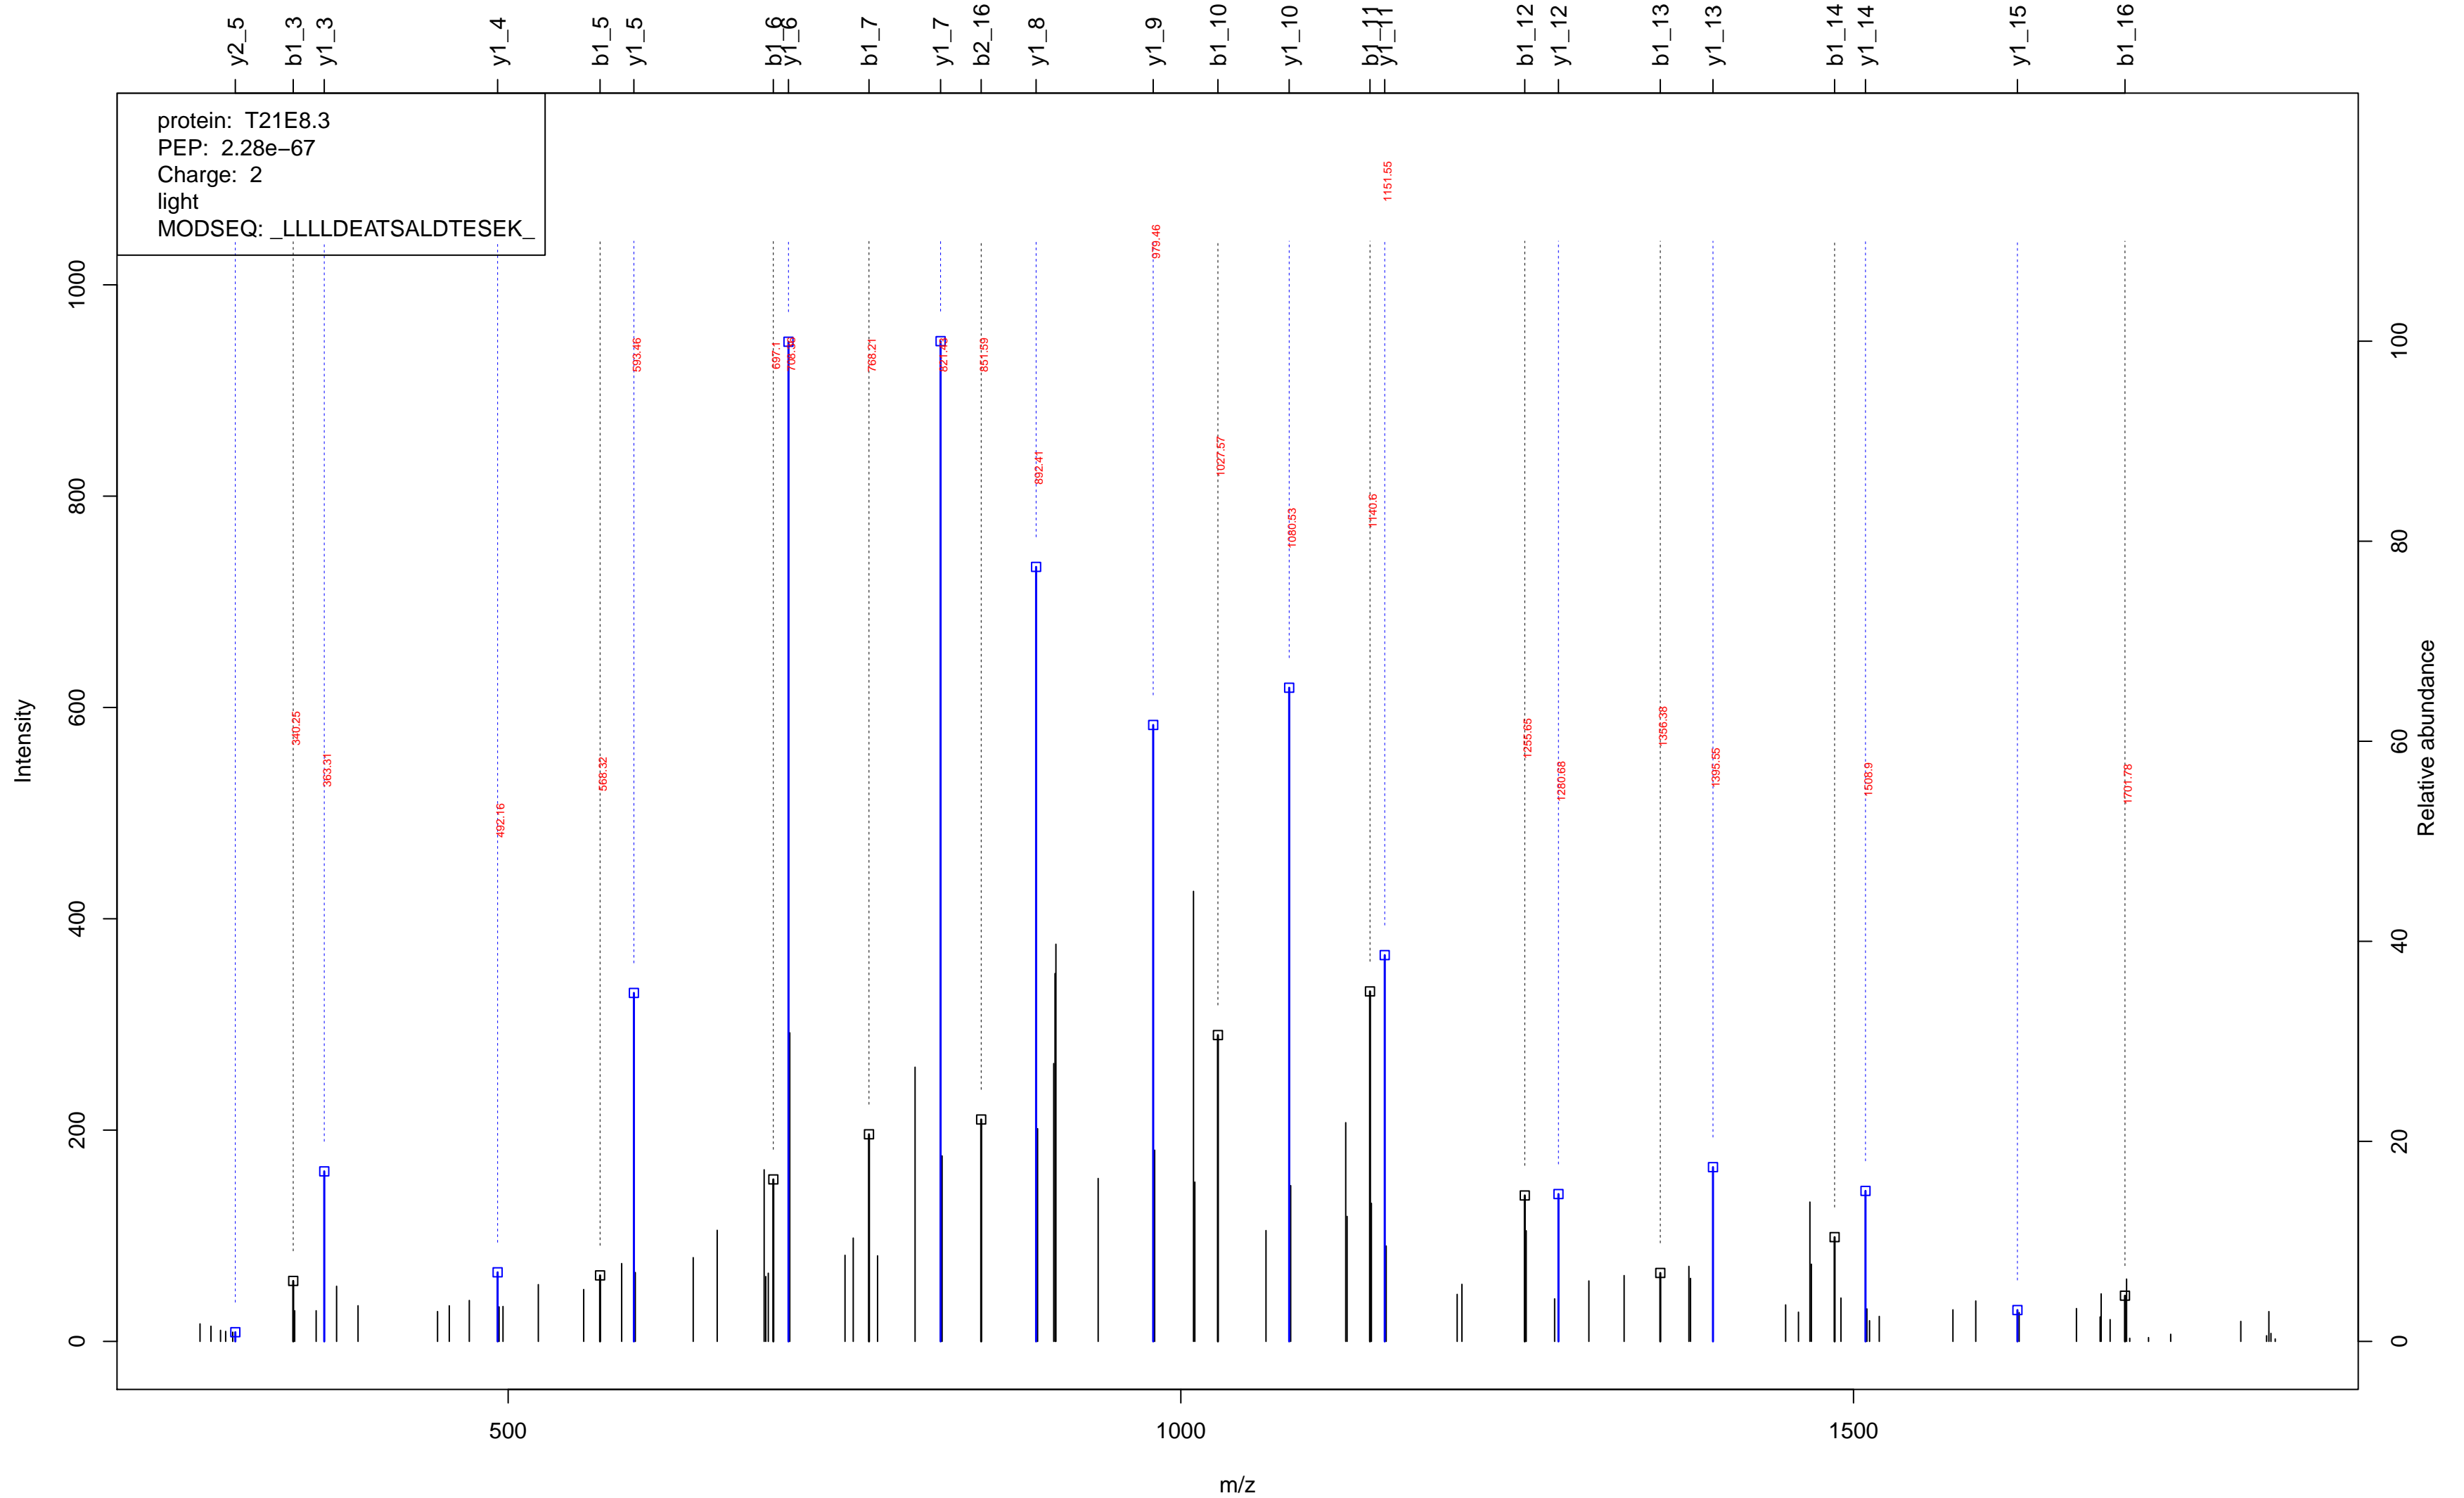

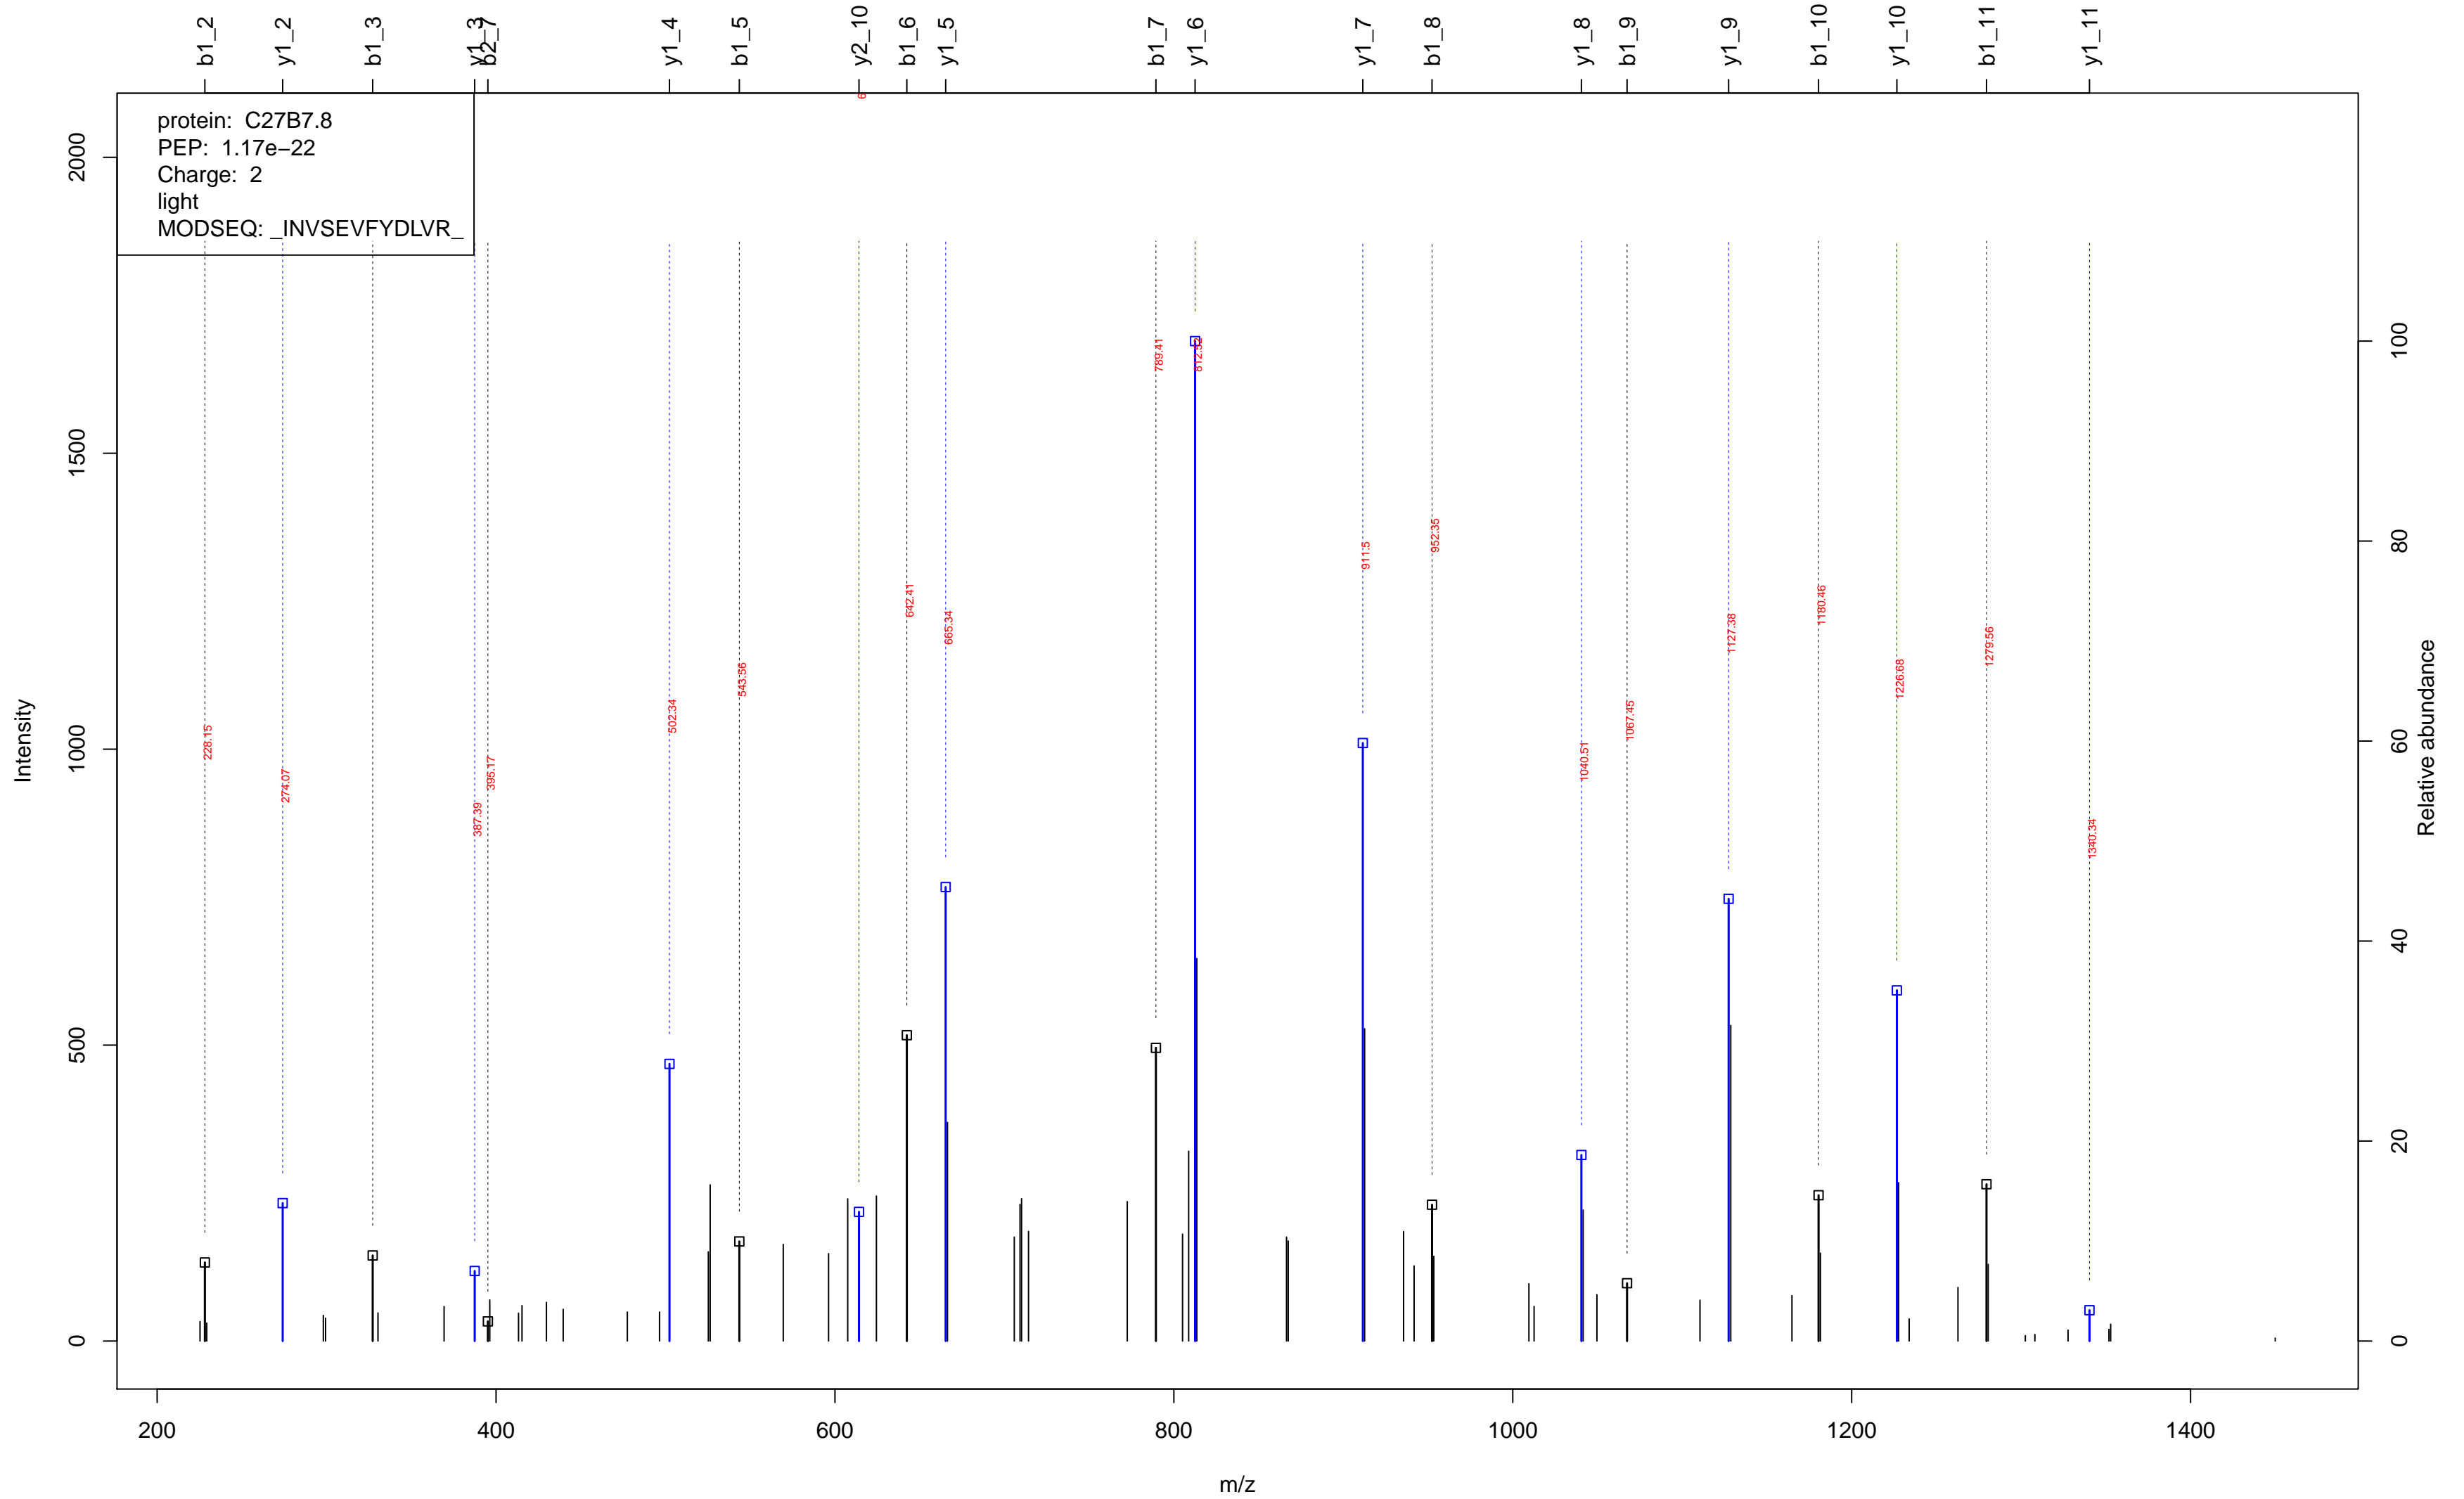

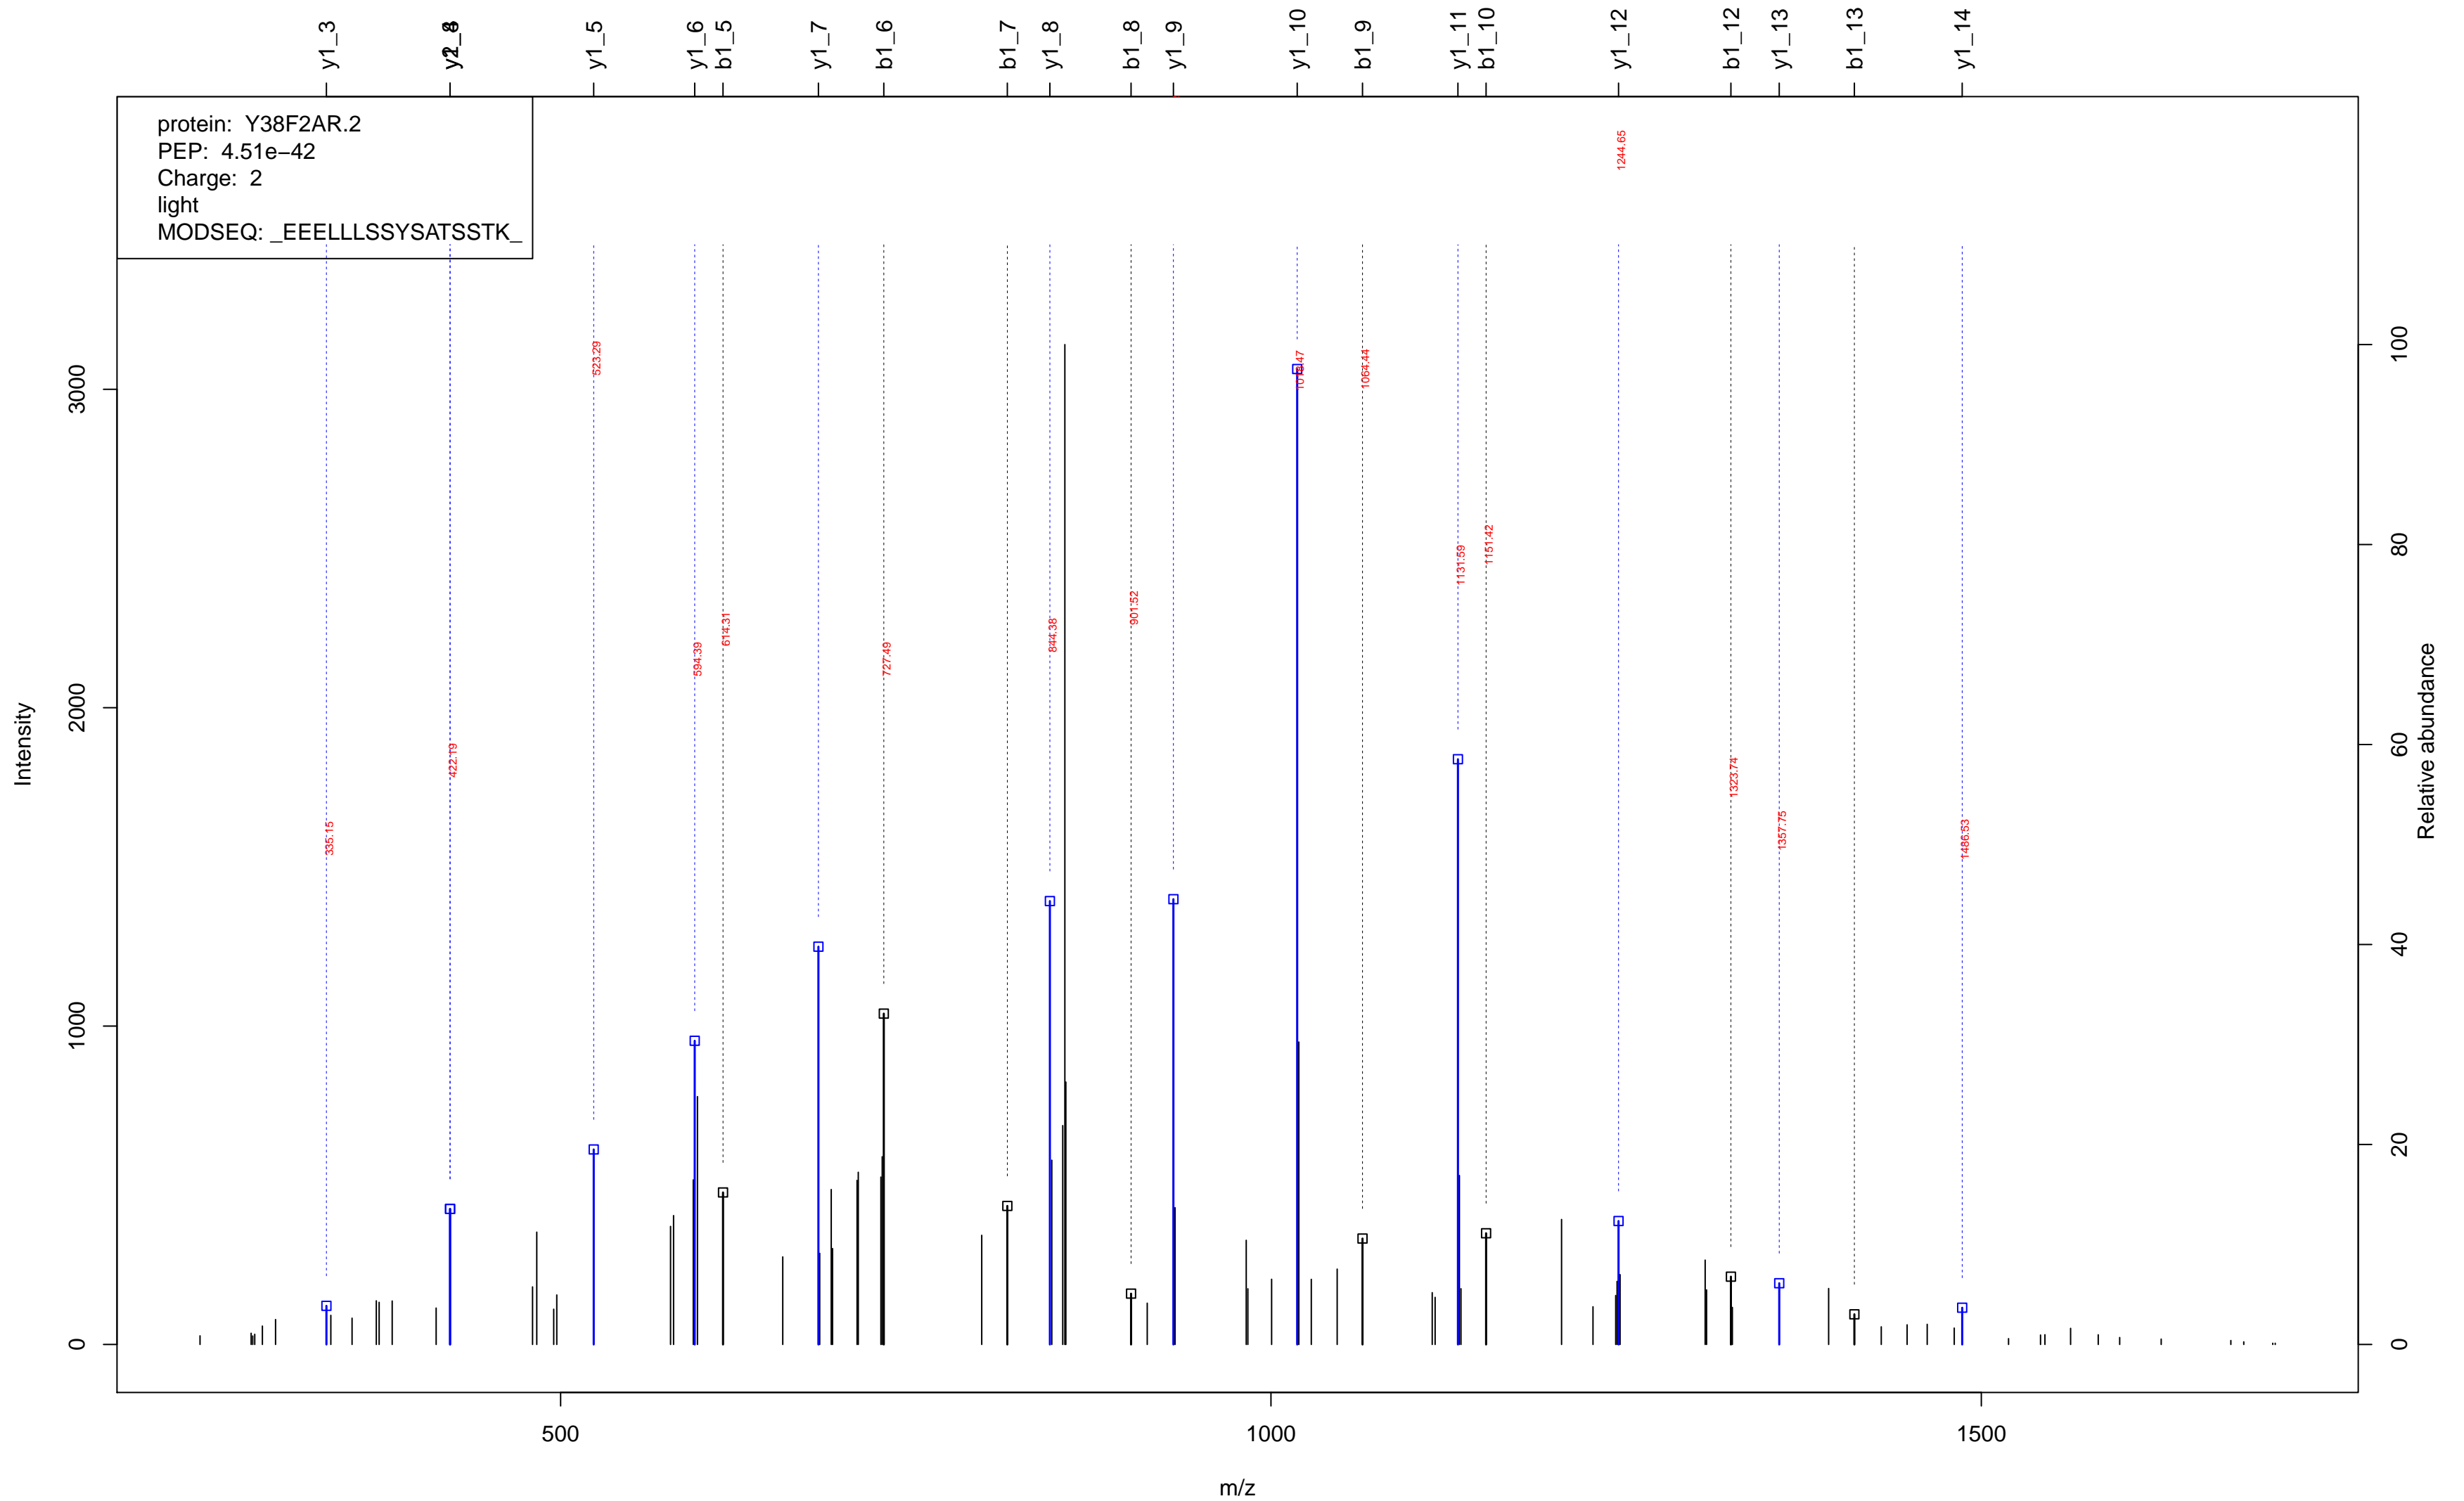

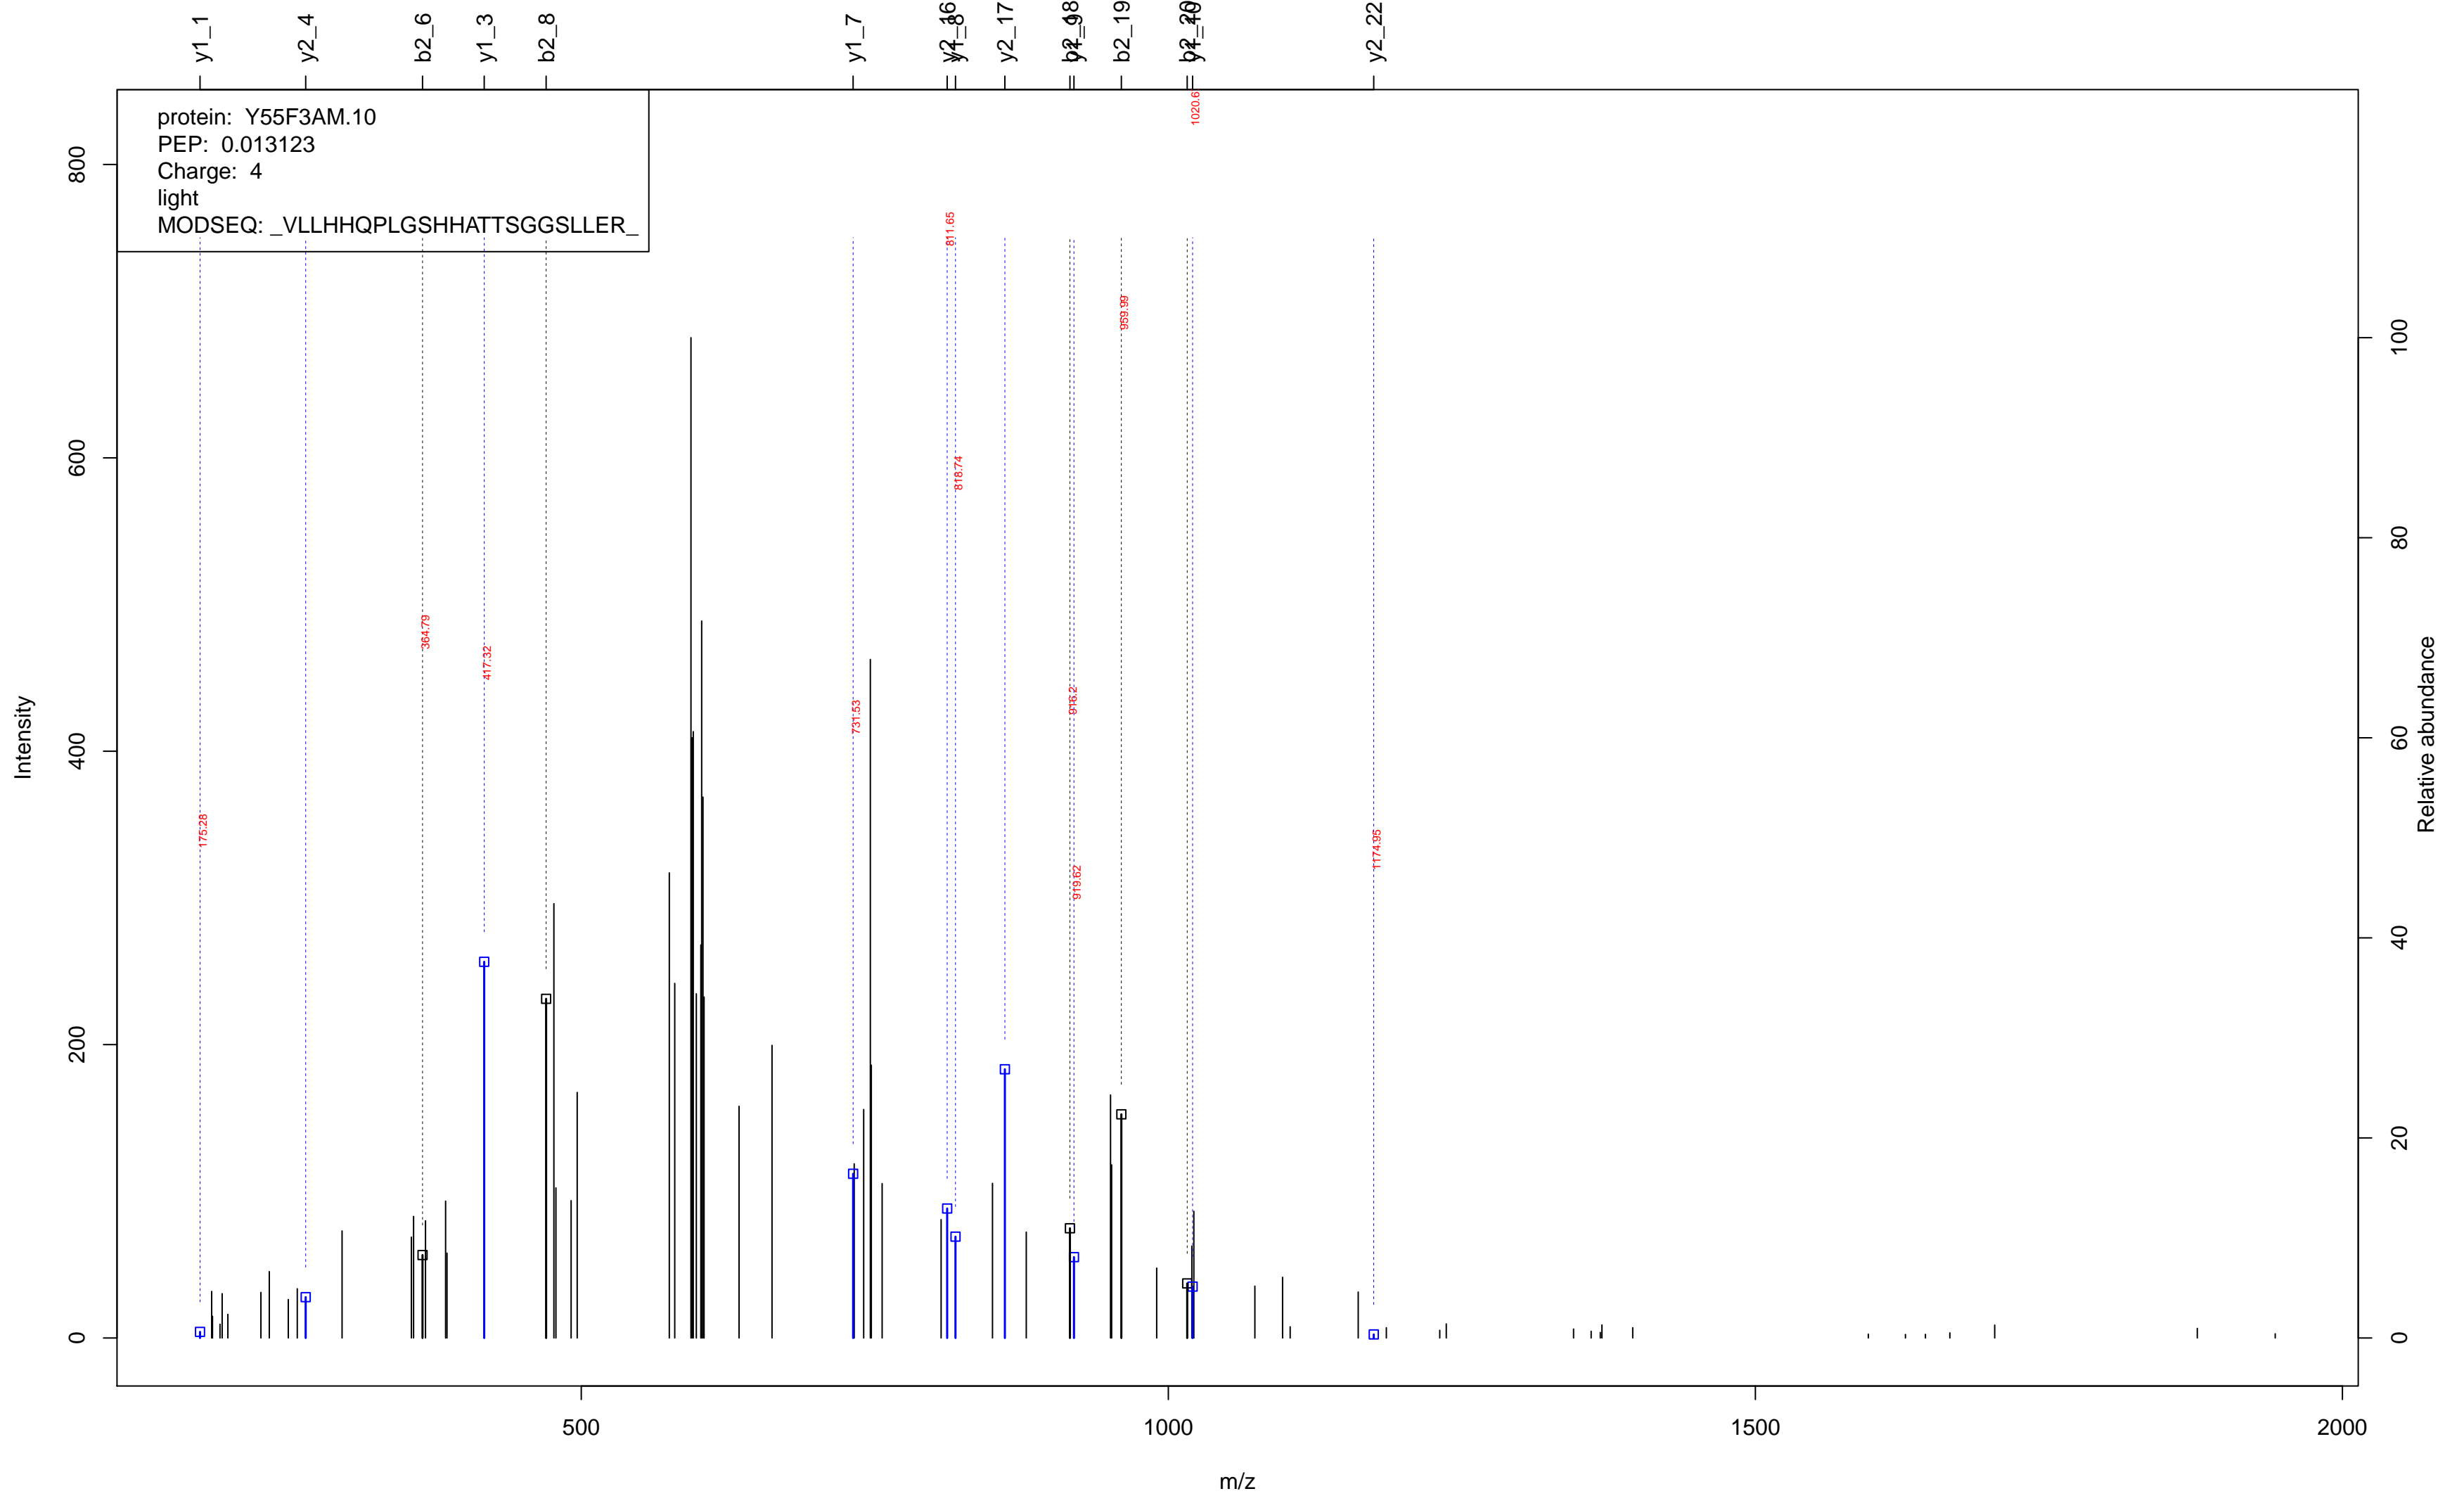



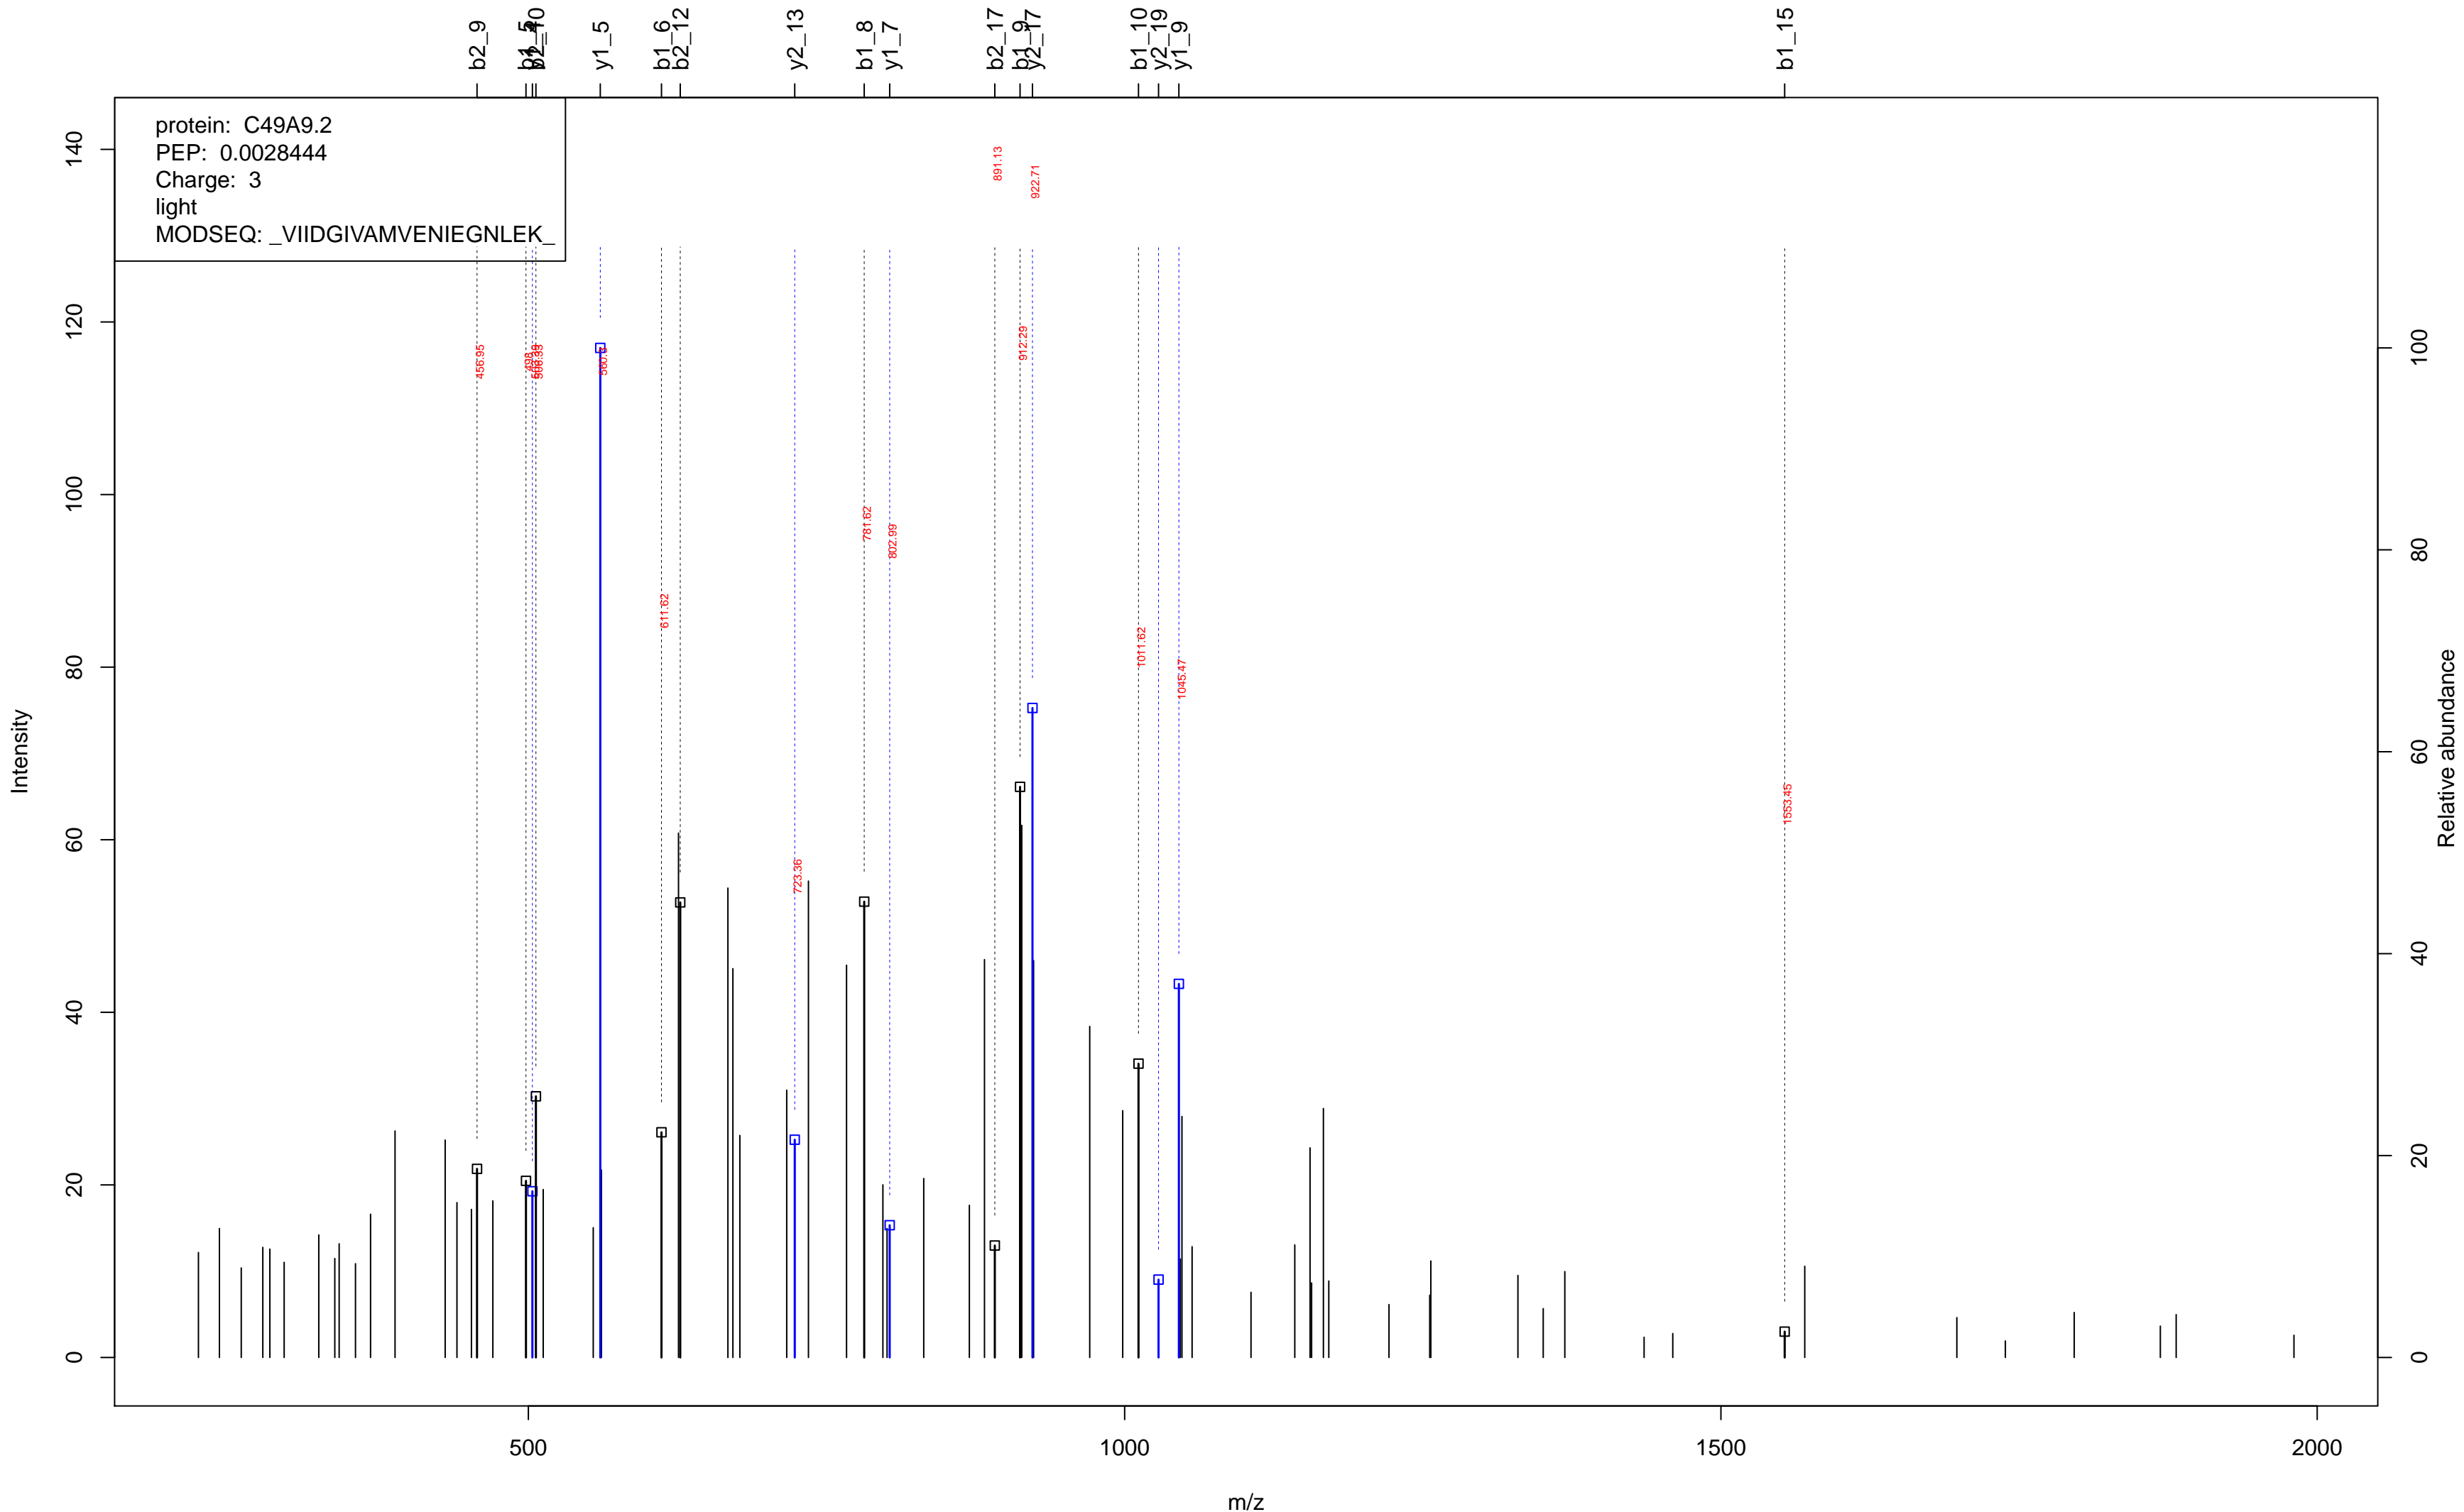

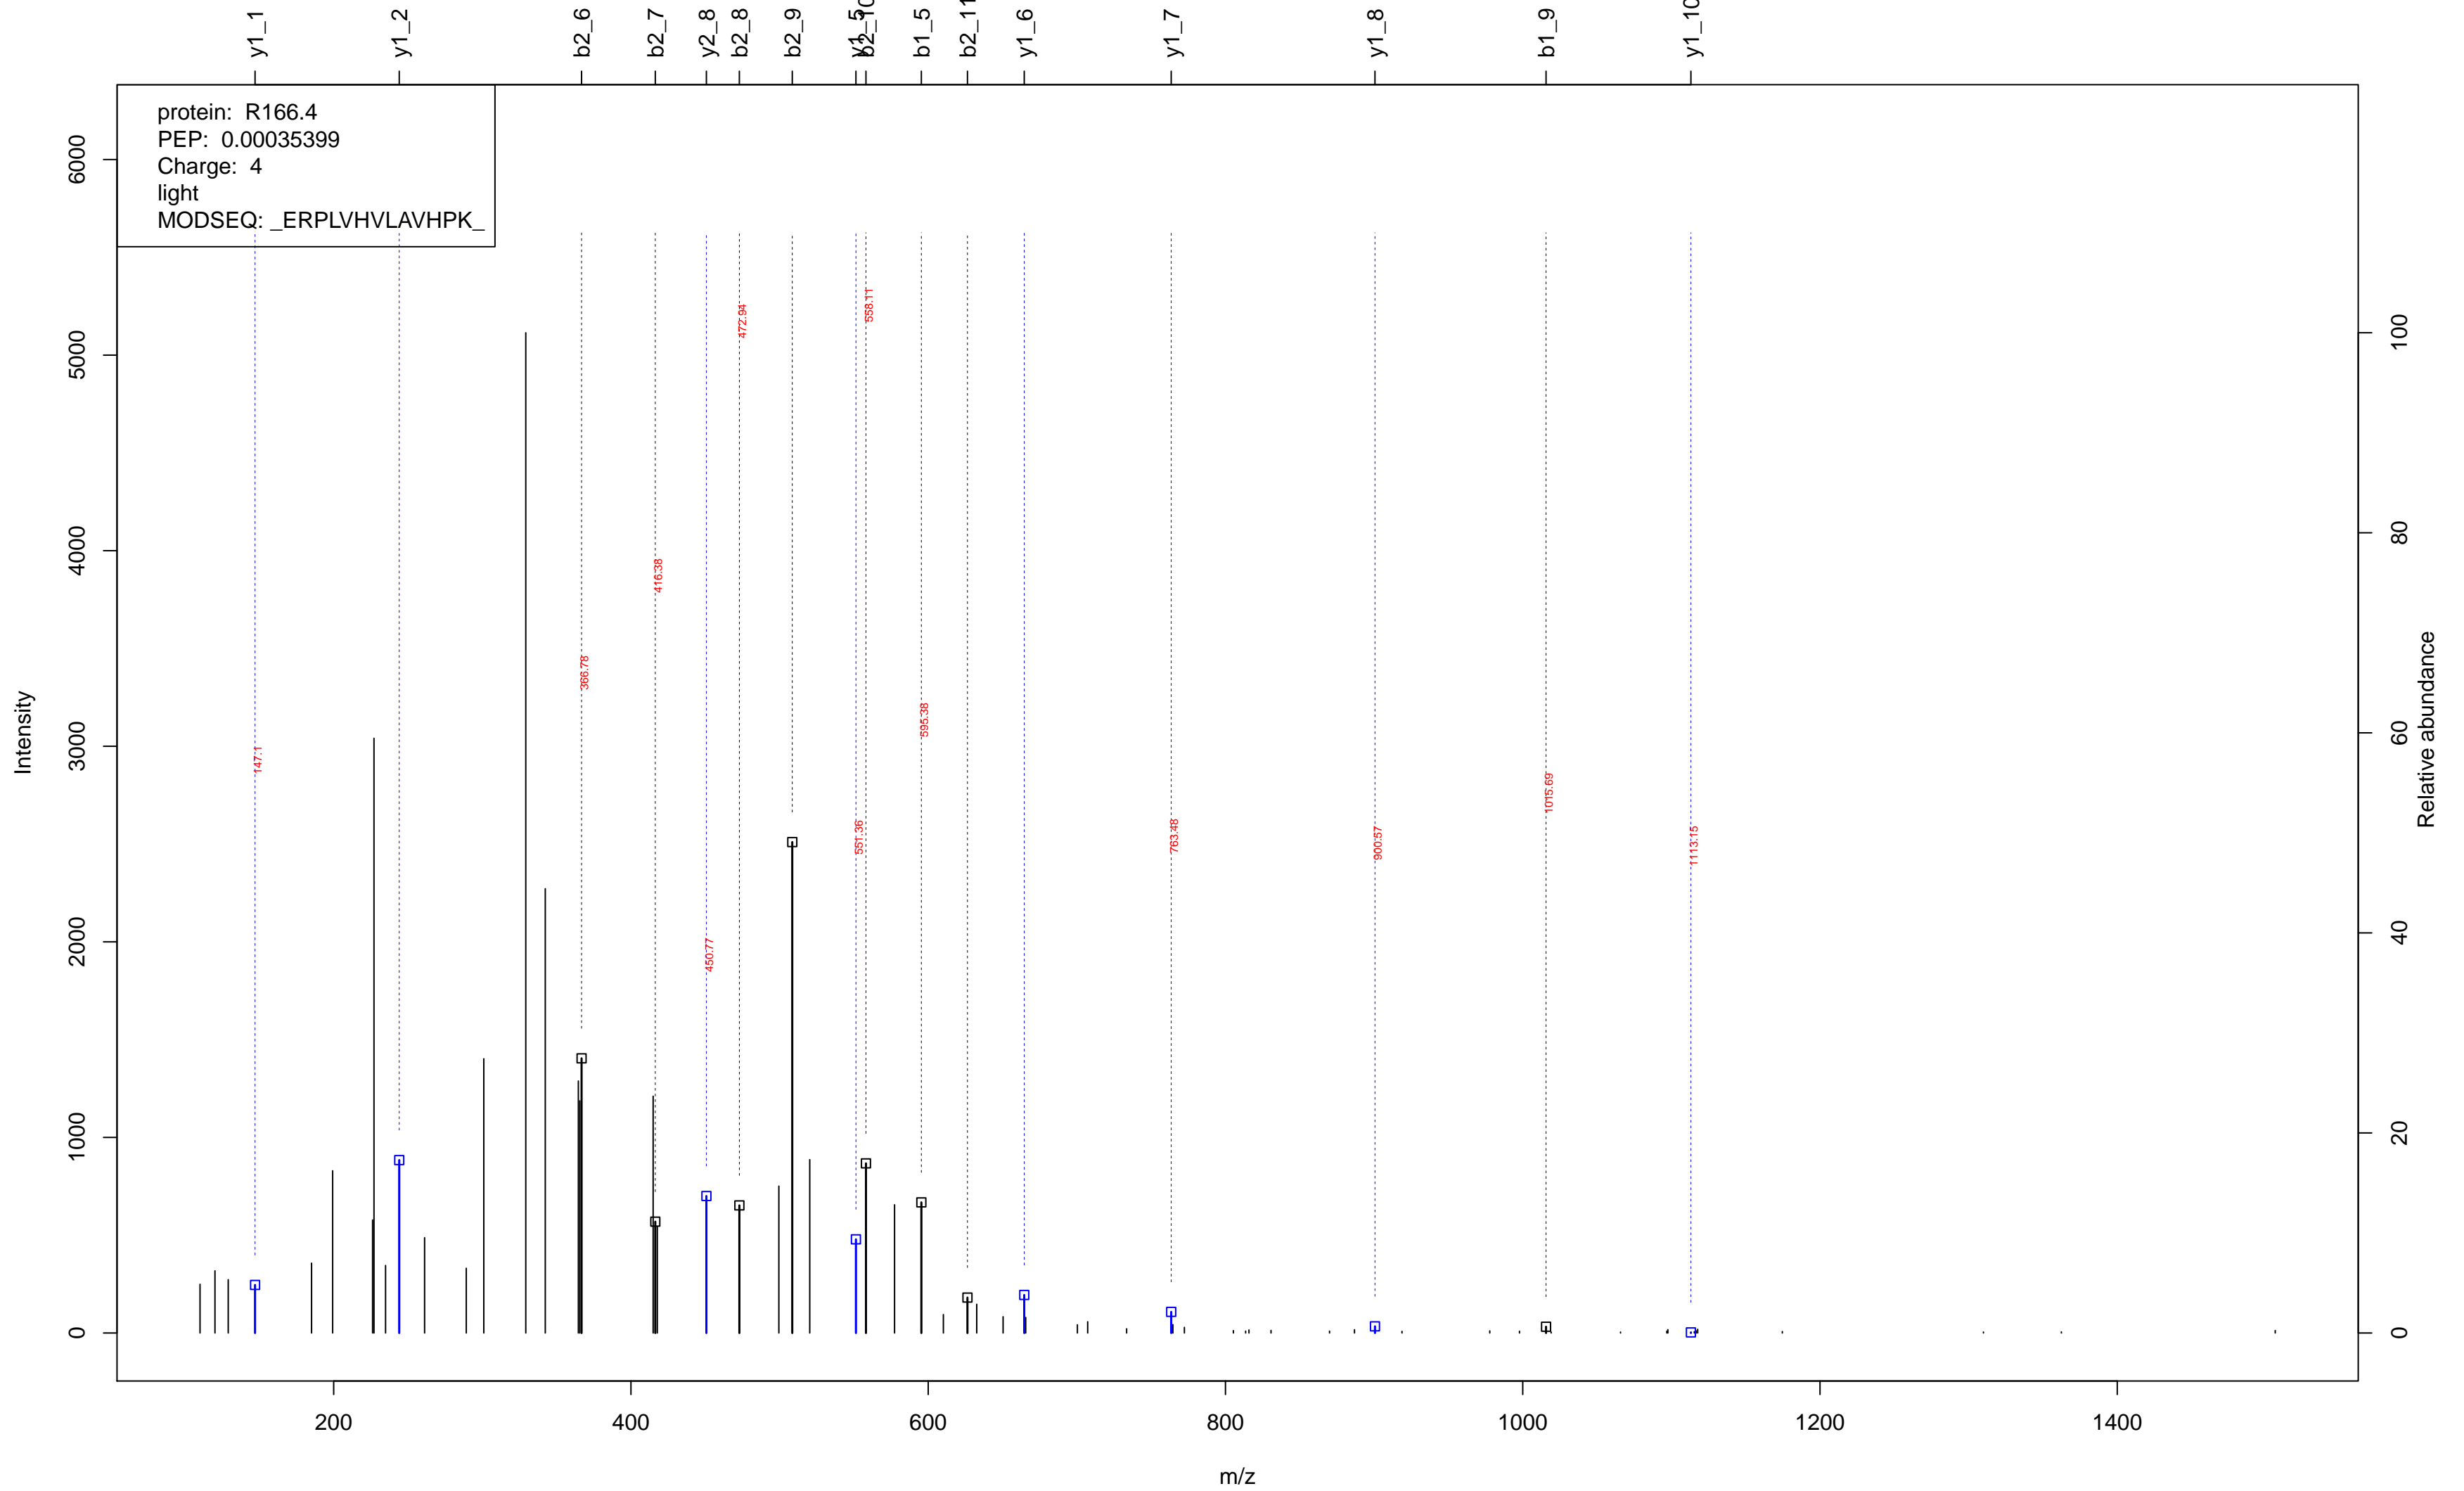

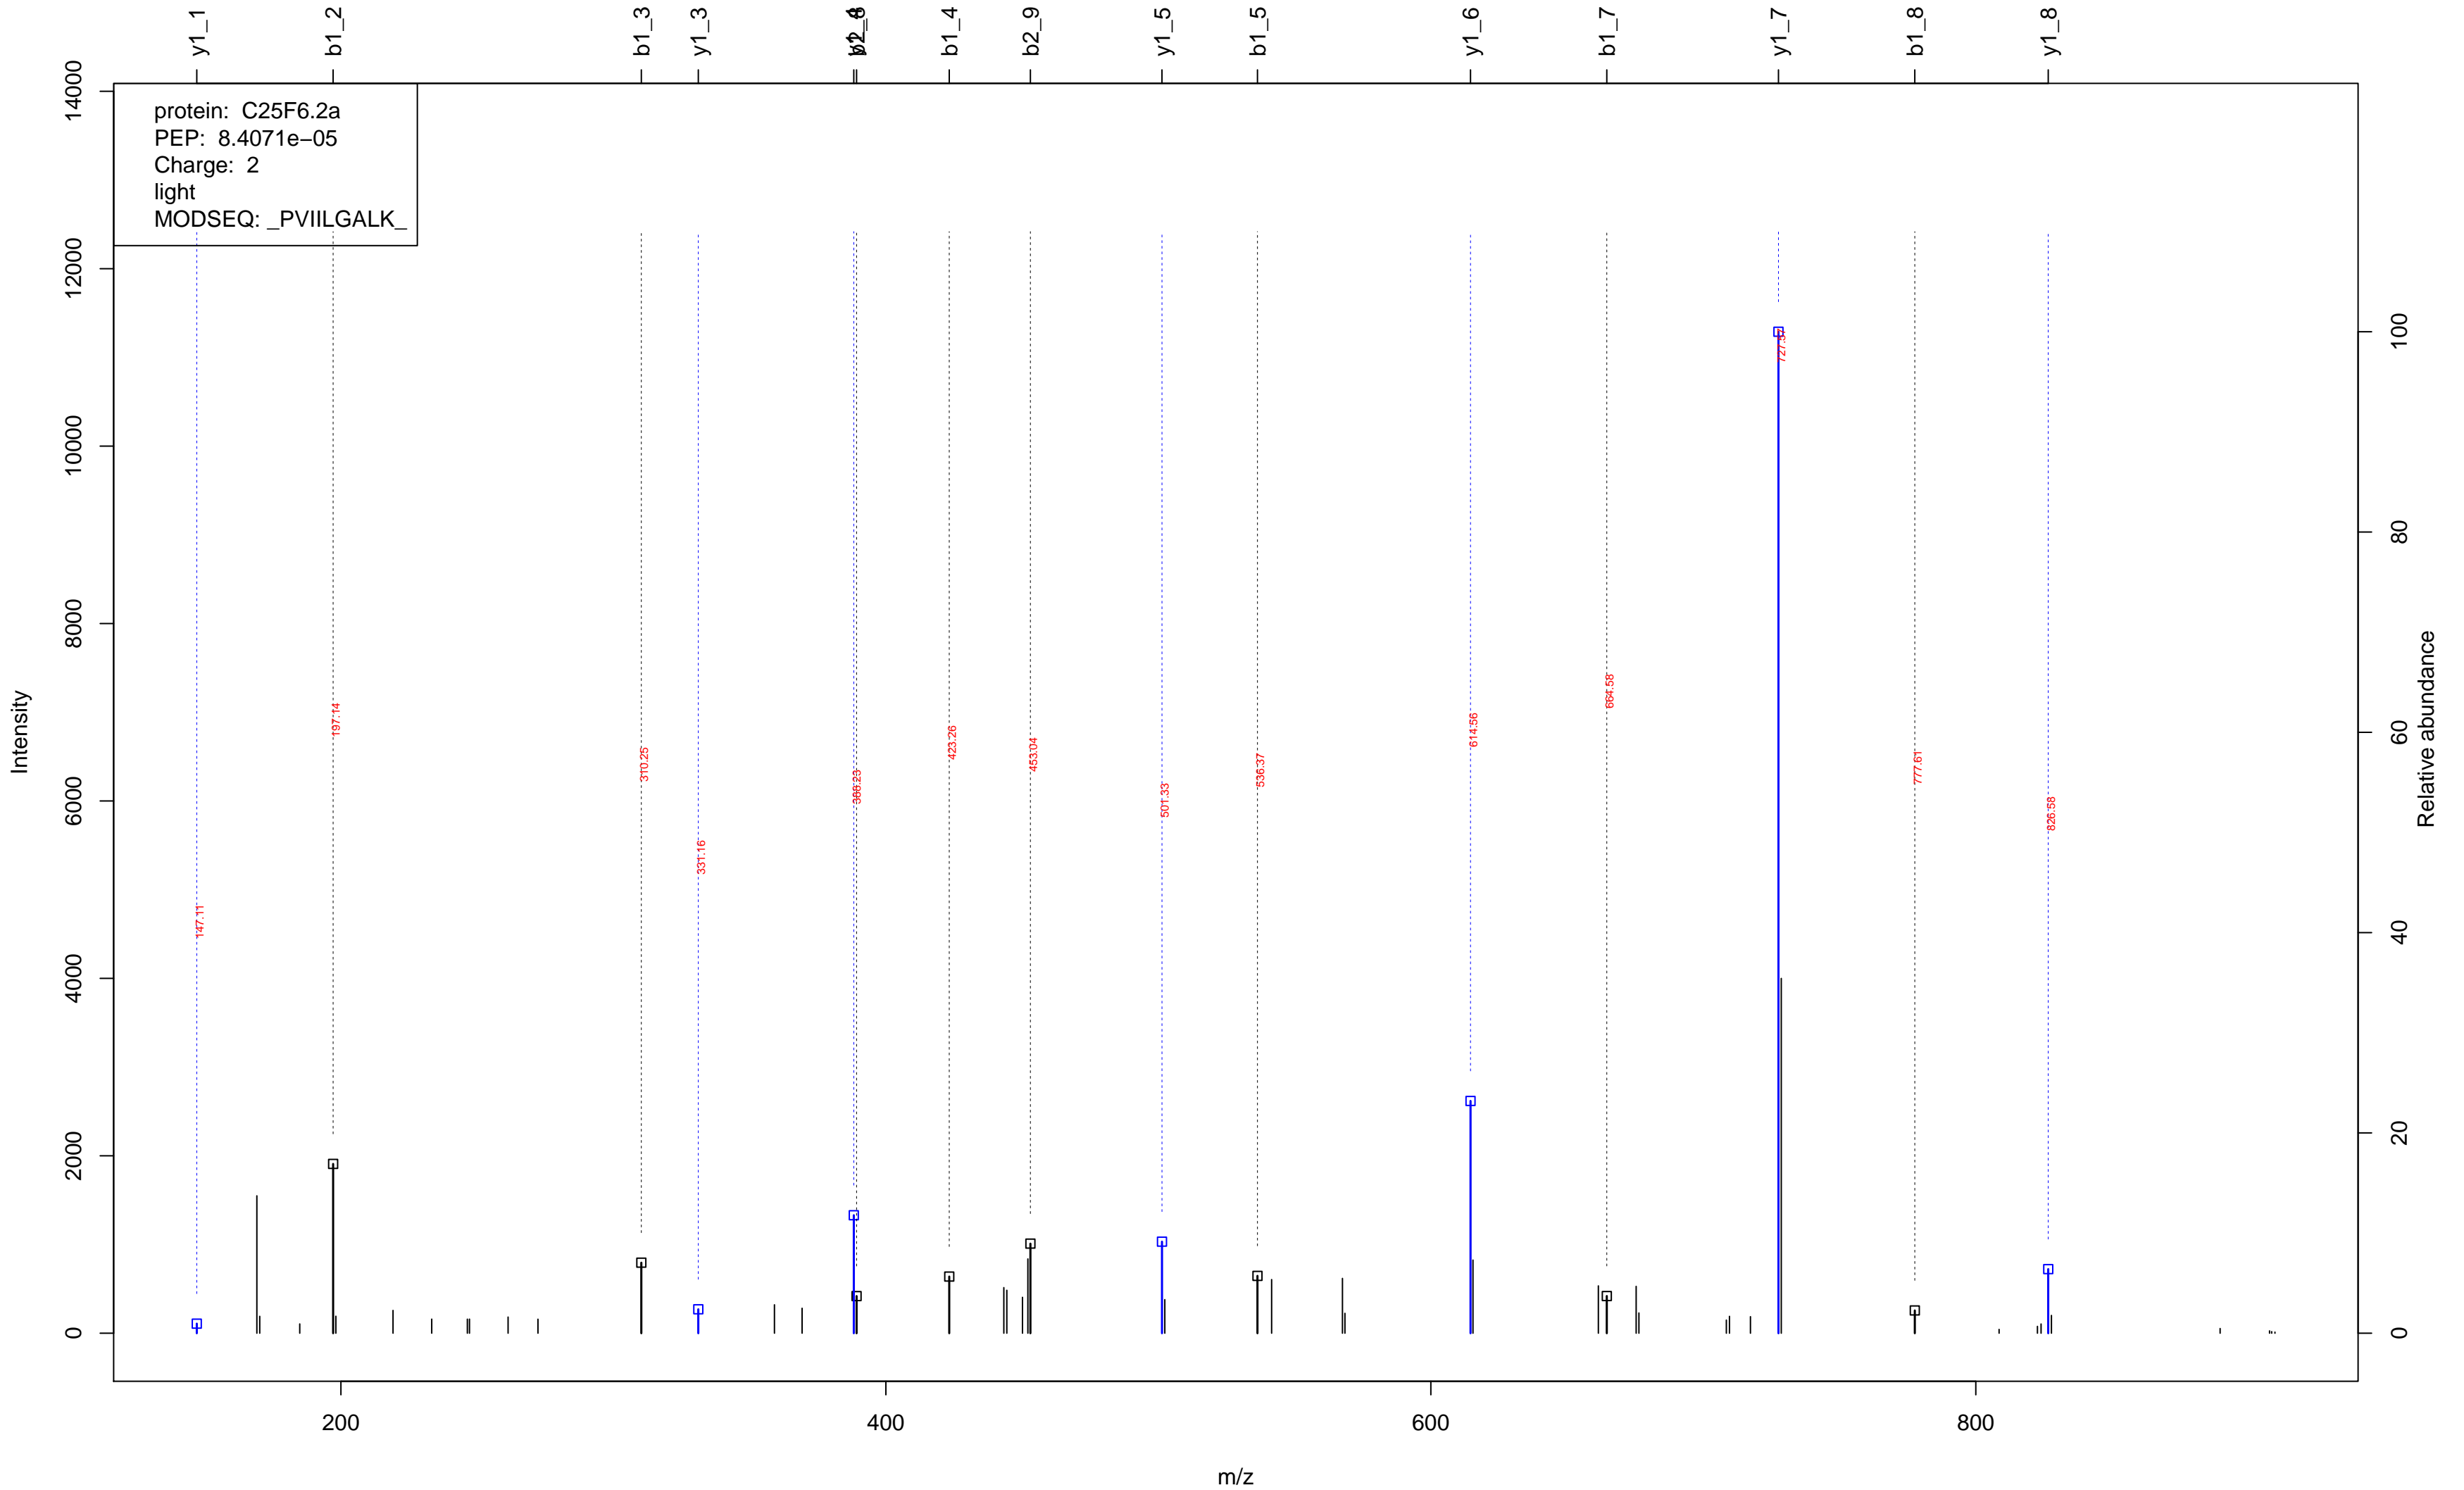

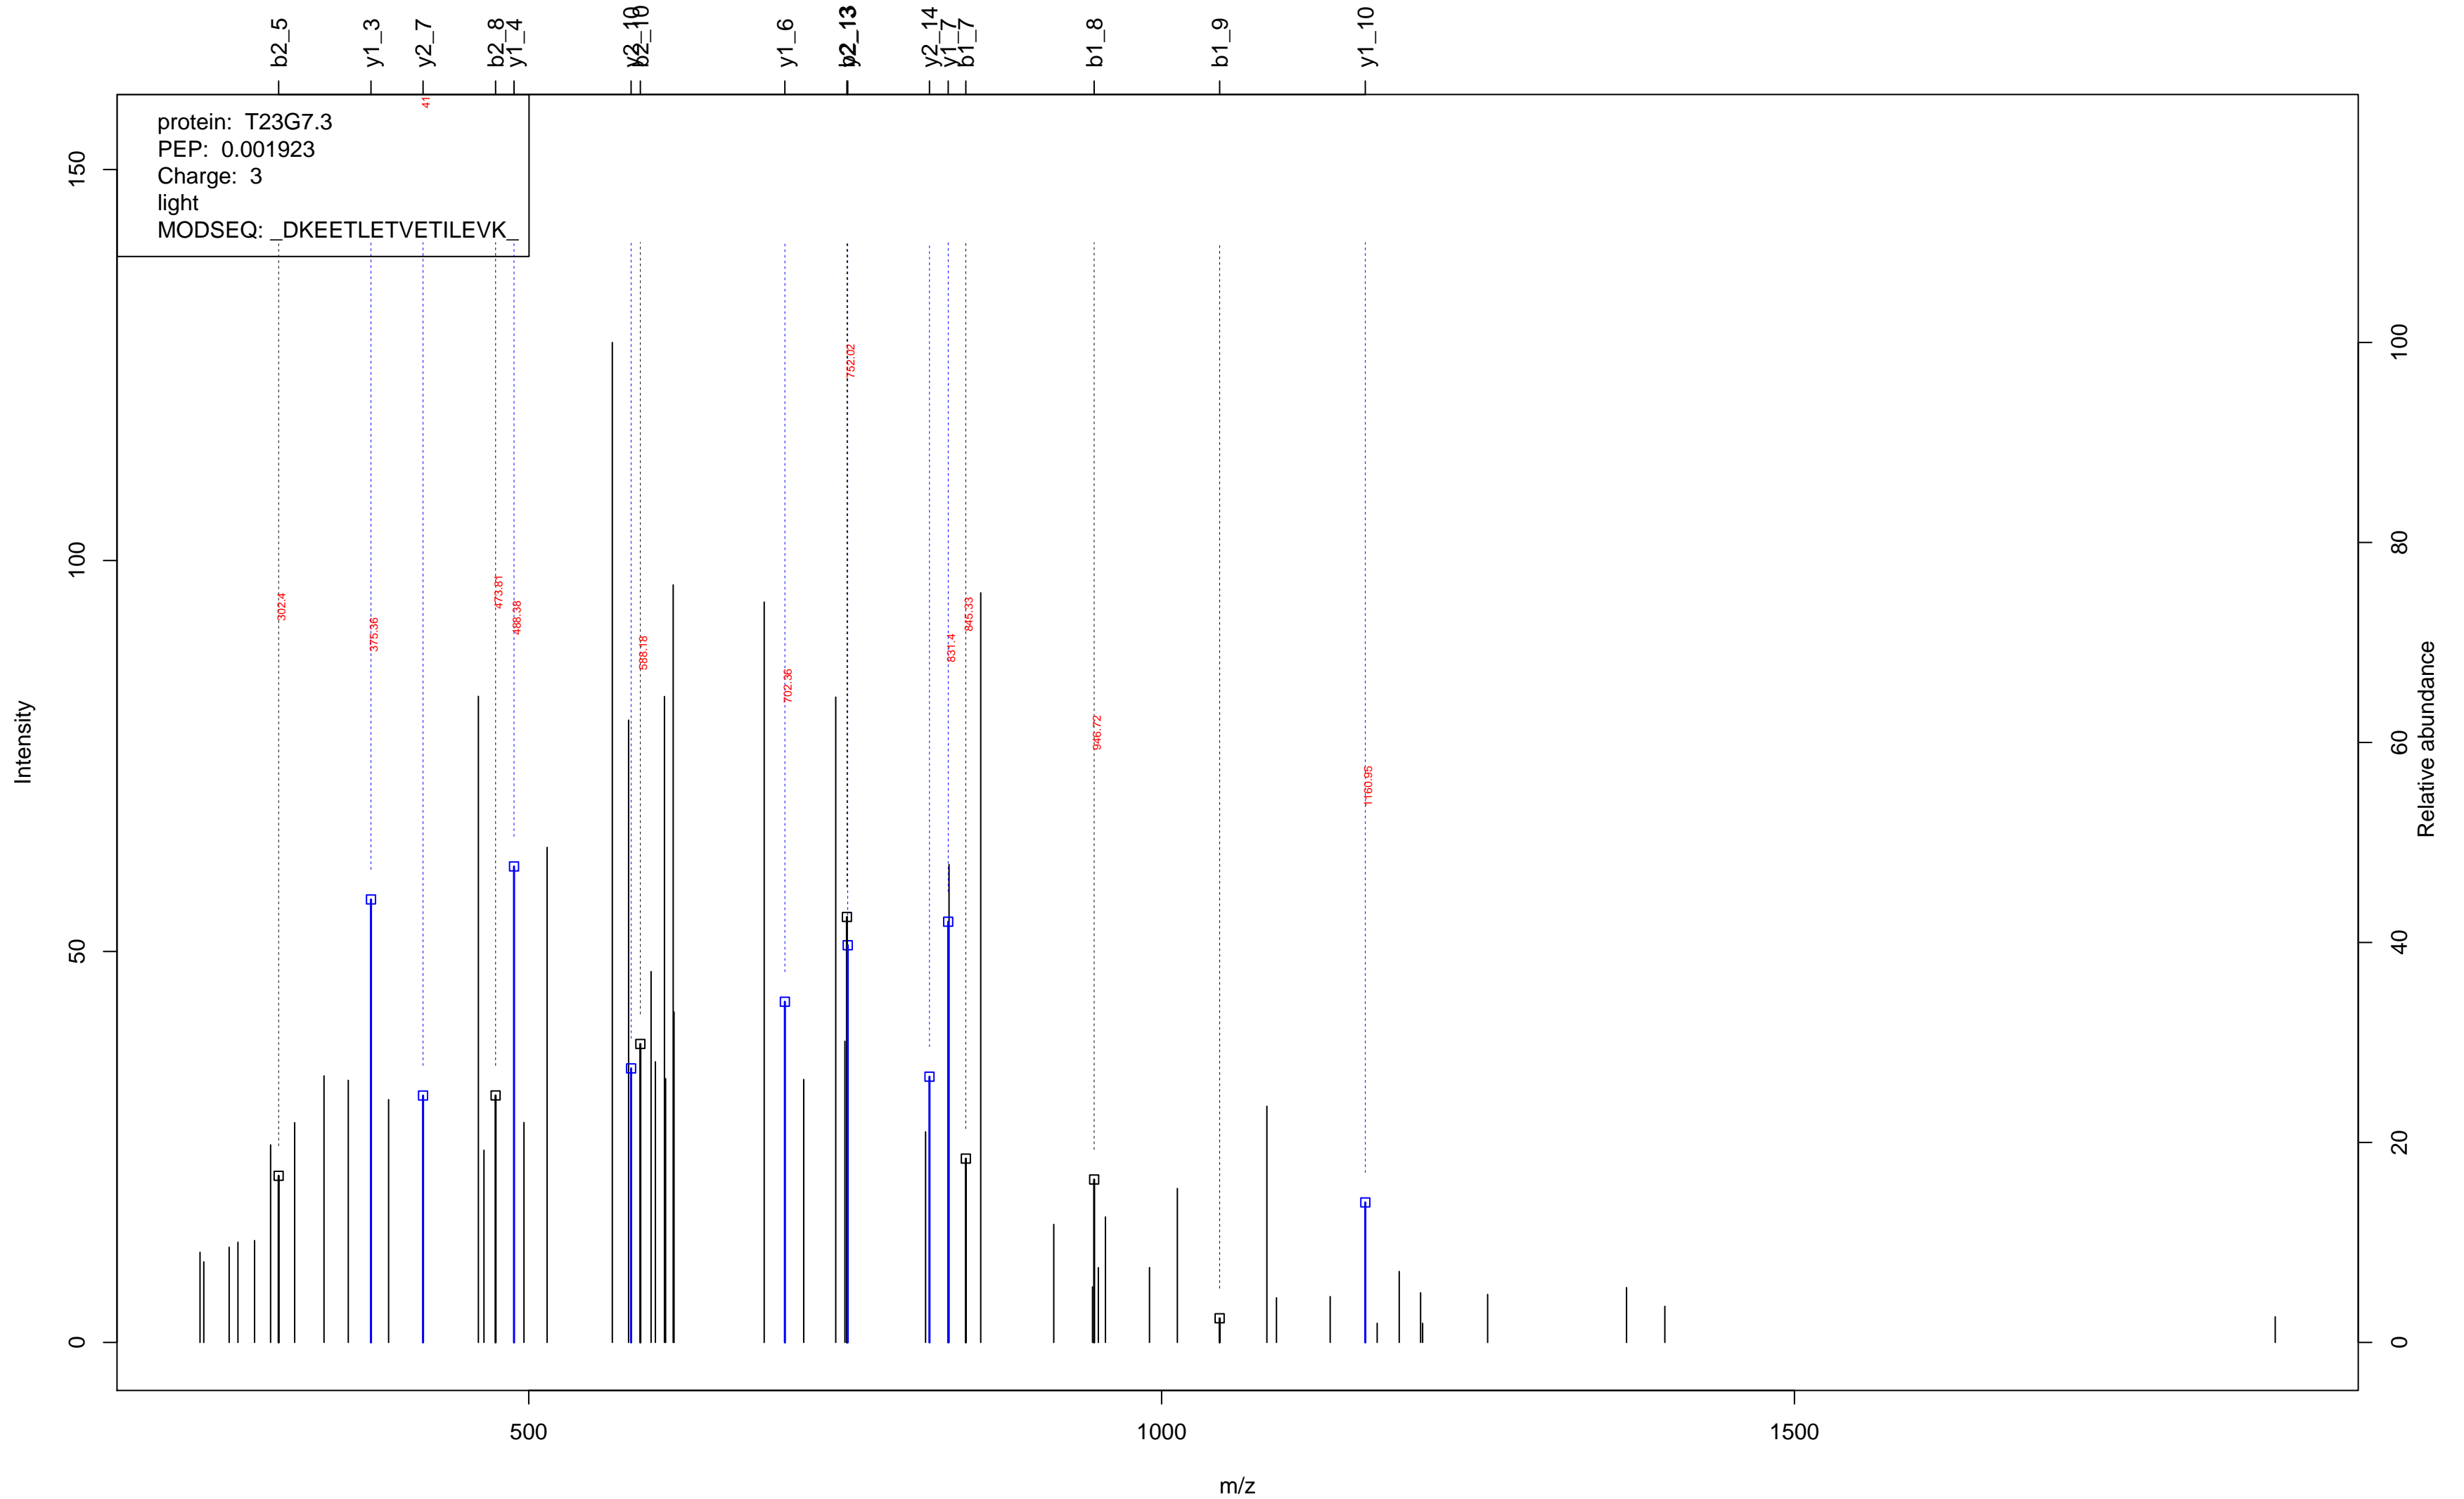

y1\_1

y2\_6

y2\_7

b2\_9

y1\_5

b1\_6

y1\_6

y1\_7

b1\_8

protein: Y81G3A.3b  
PEP: 0.0081424  
Charge: 2  
light  
MODSEQ: \_ENQIVLDER\_

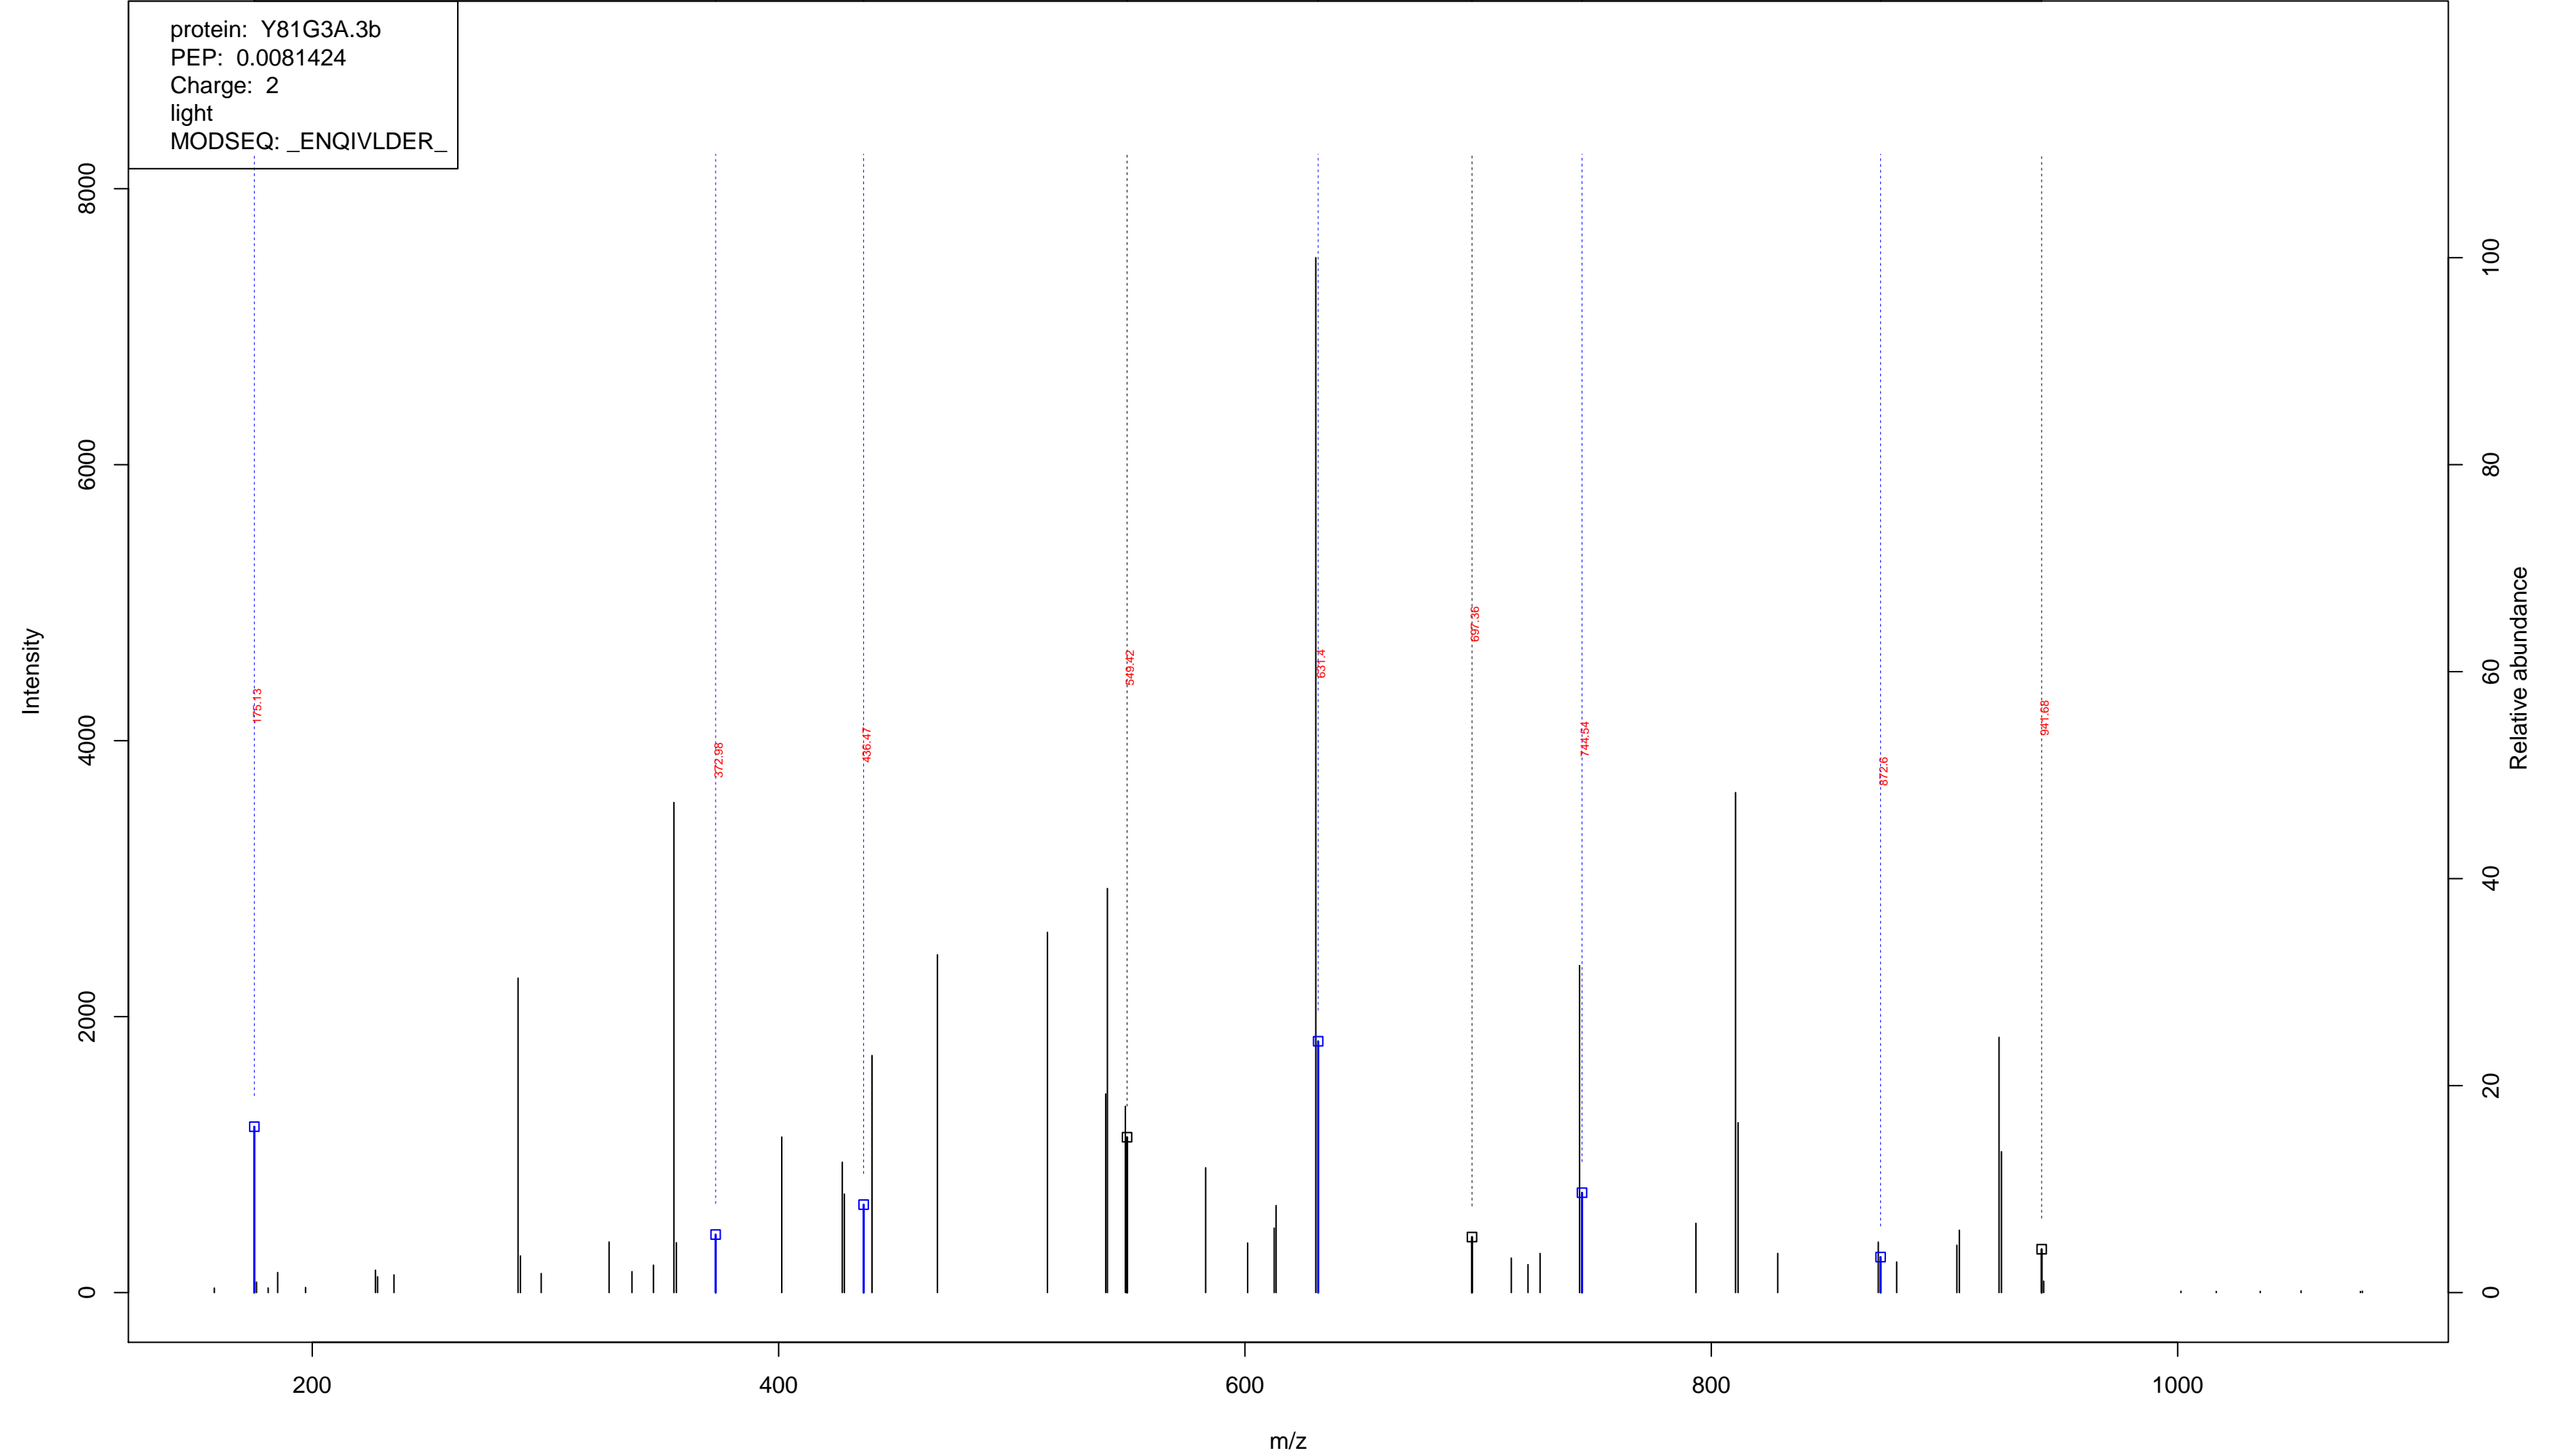

y1\_1 b1\_2 b1\_3 y1\_2 b1\_4 y1\_3 y2\_3 b1\_5 y1\_4 b1\_6 y1\_5 y1\_6 b1\_7 y1\_7

protein: W06A7.3b  
PEP: 6.4495e-05  
Charge: 2  
light  
MODSEQ: \_ILDVIYWR\_

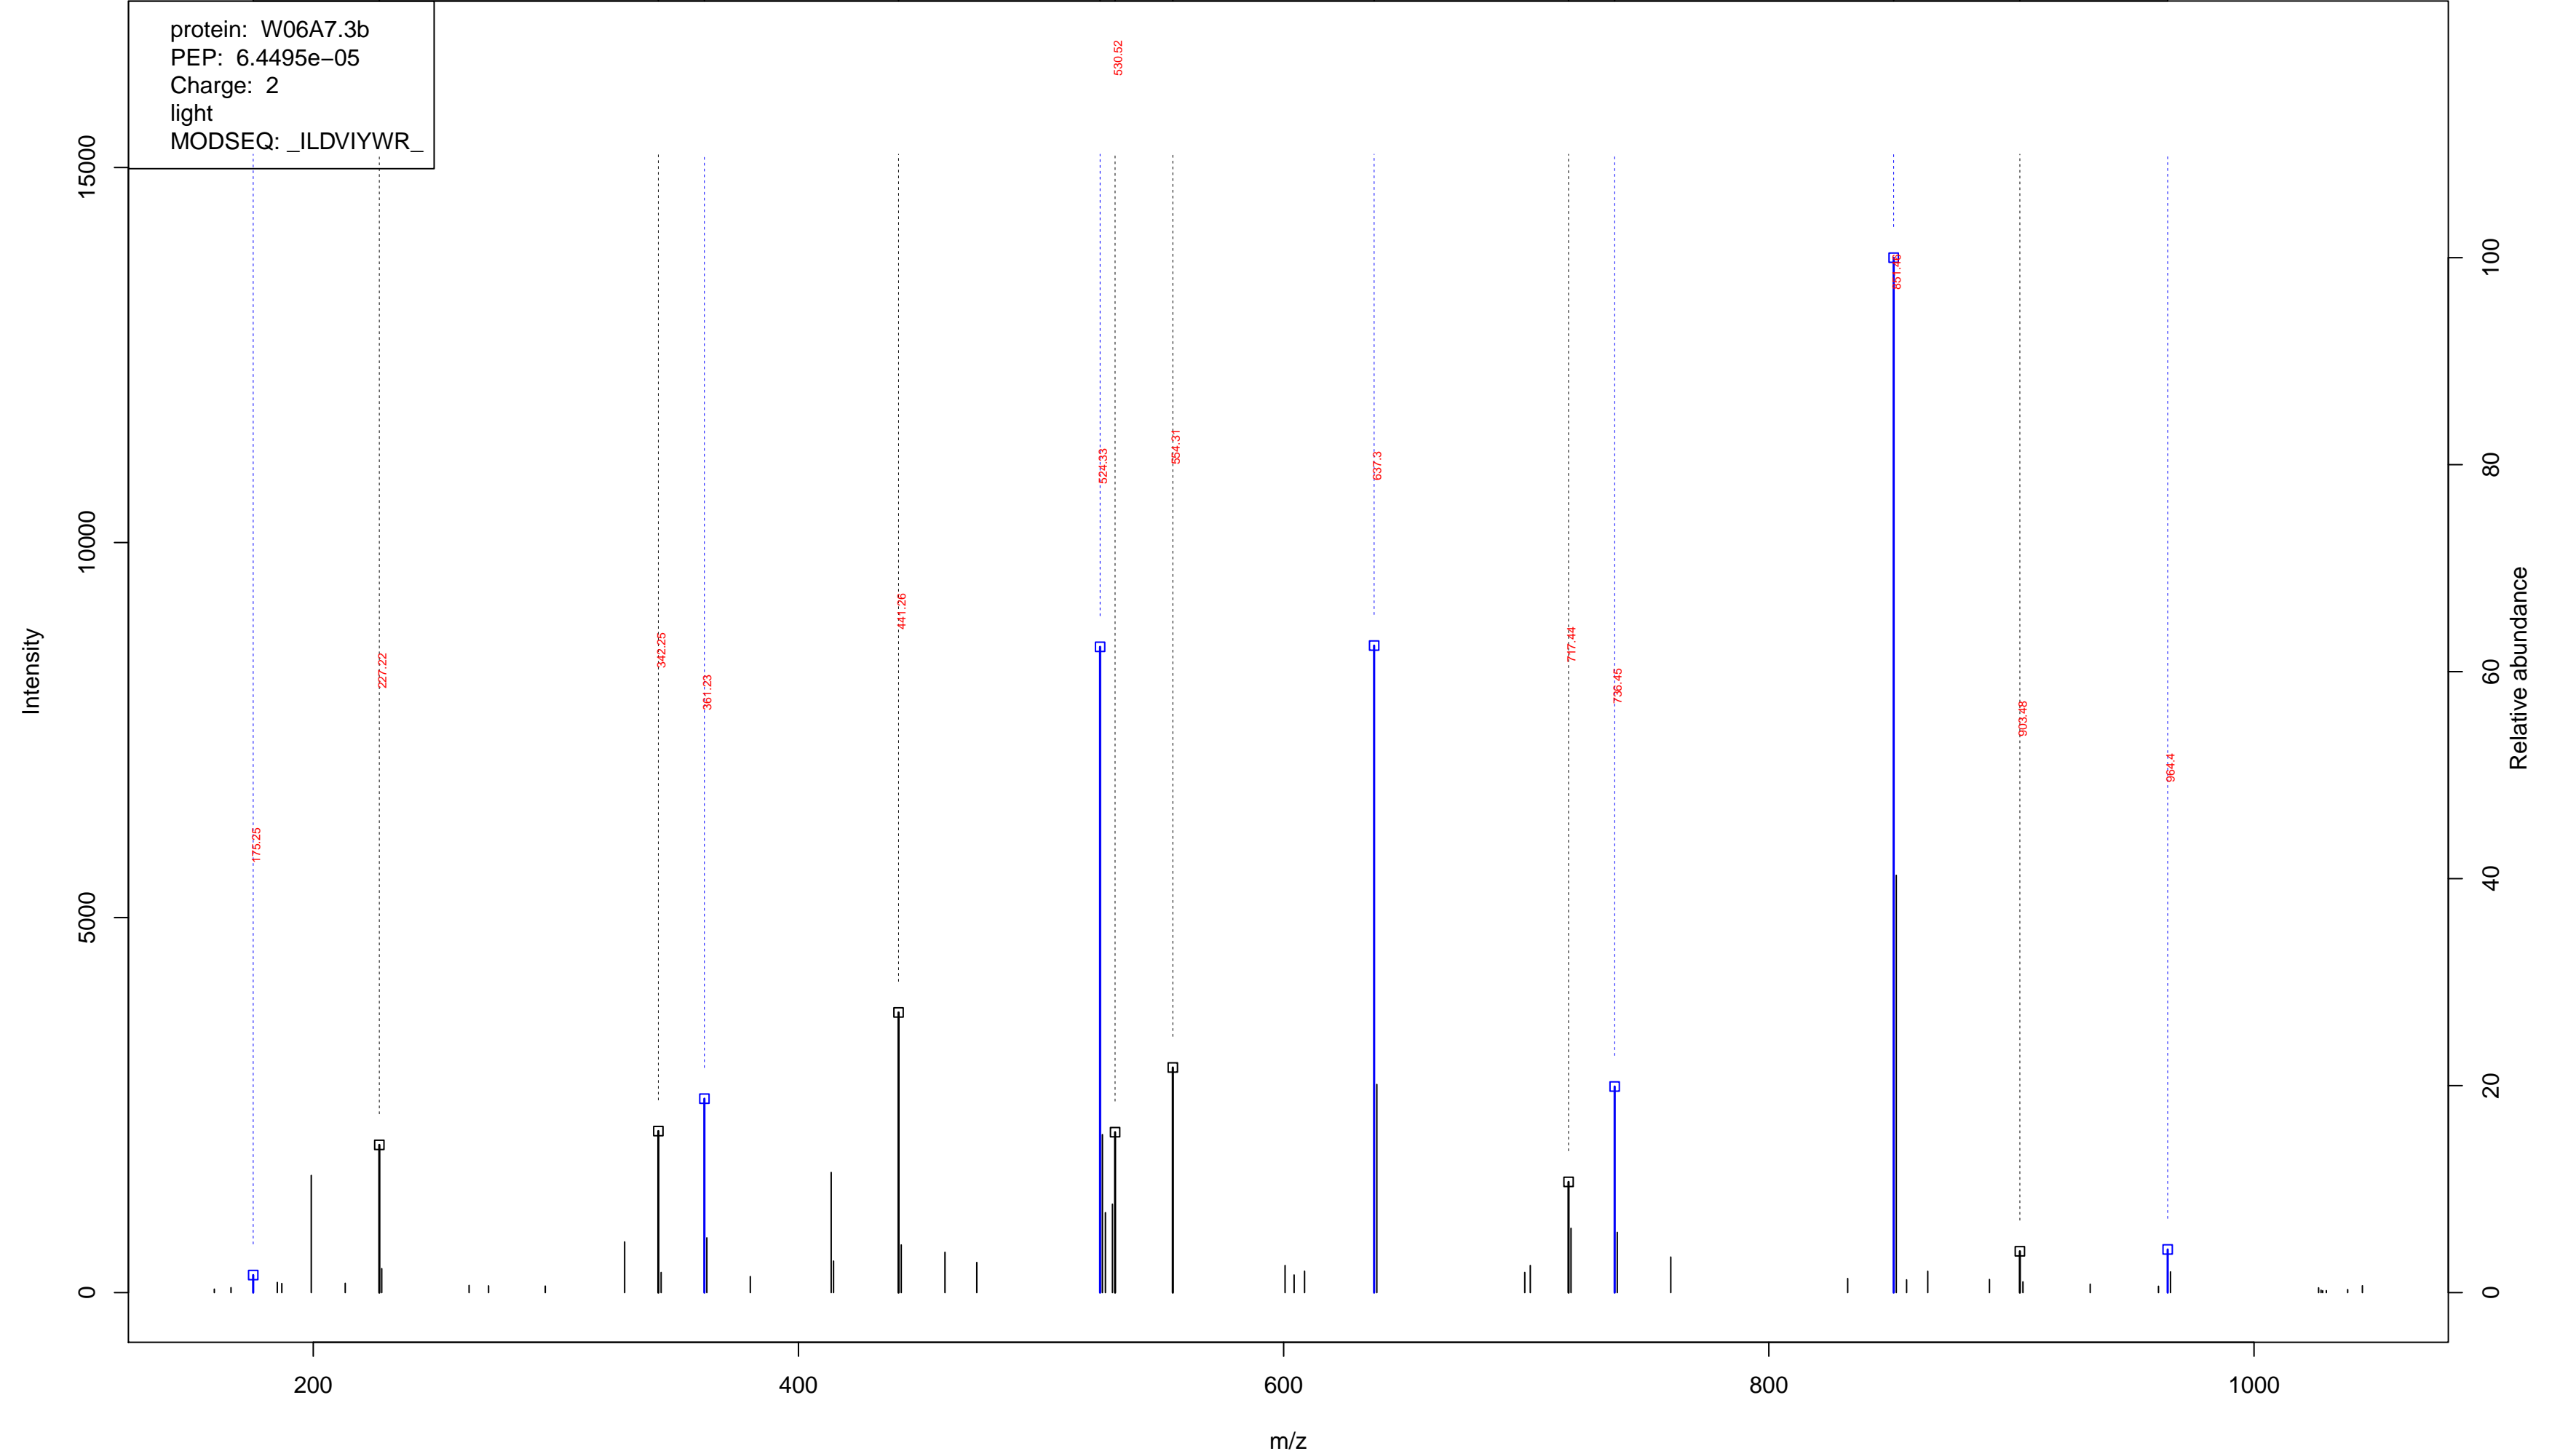

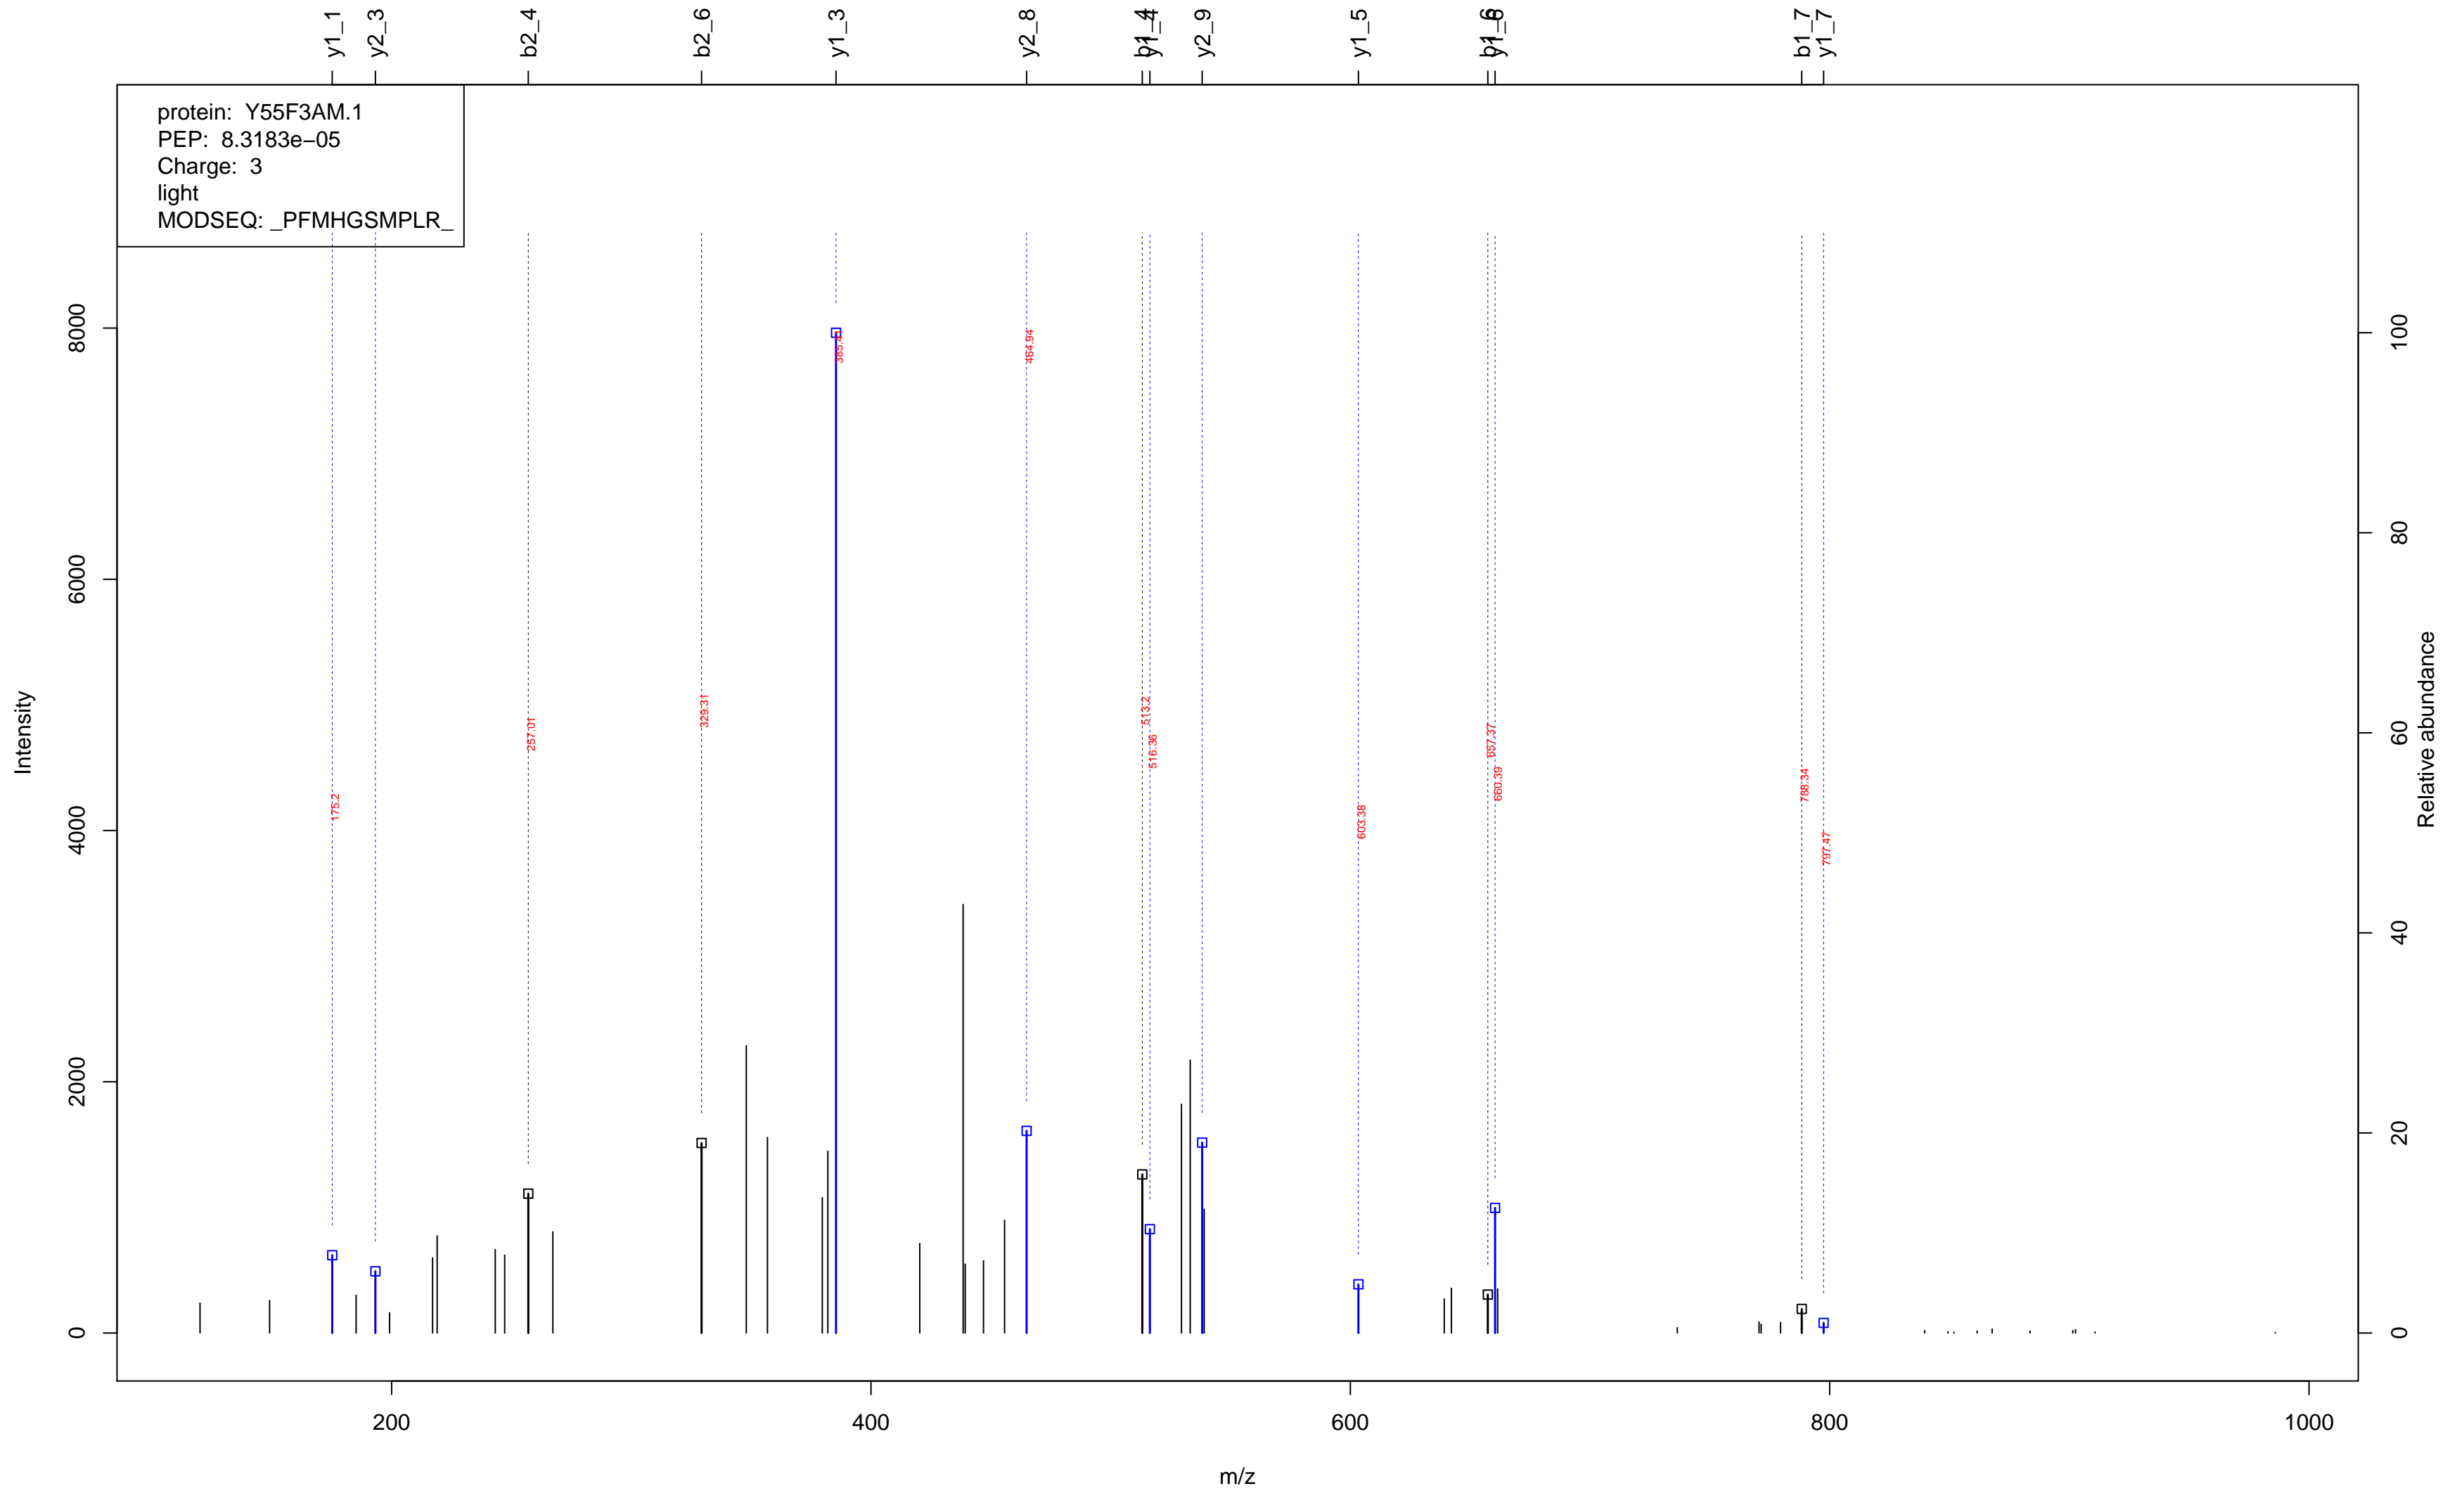

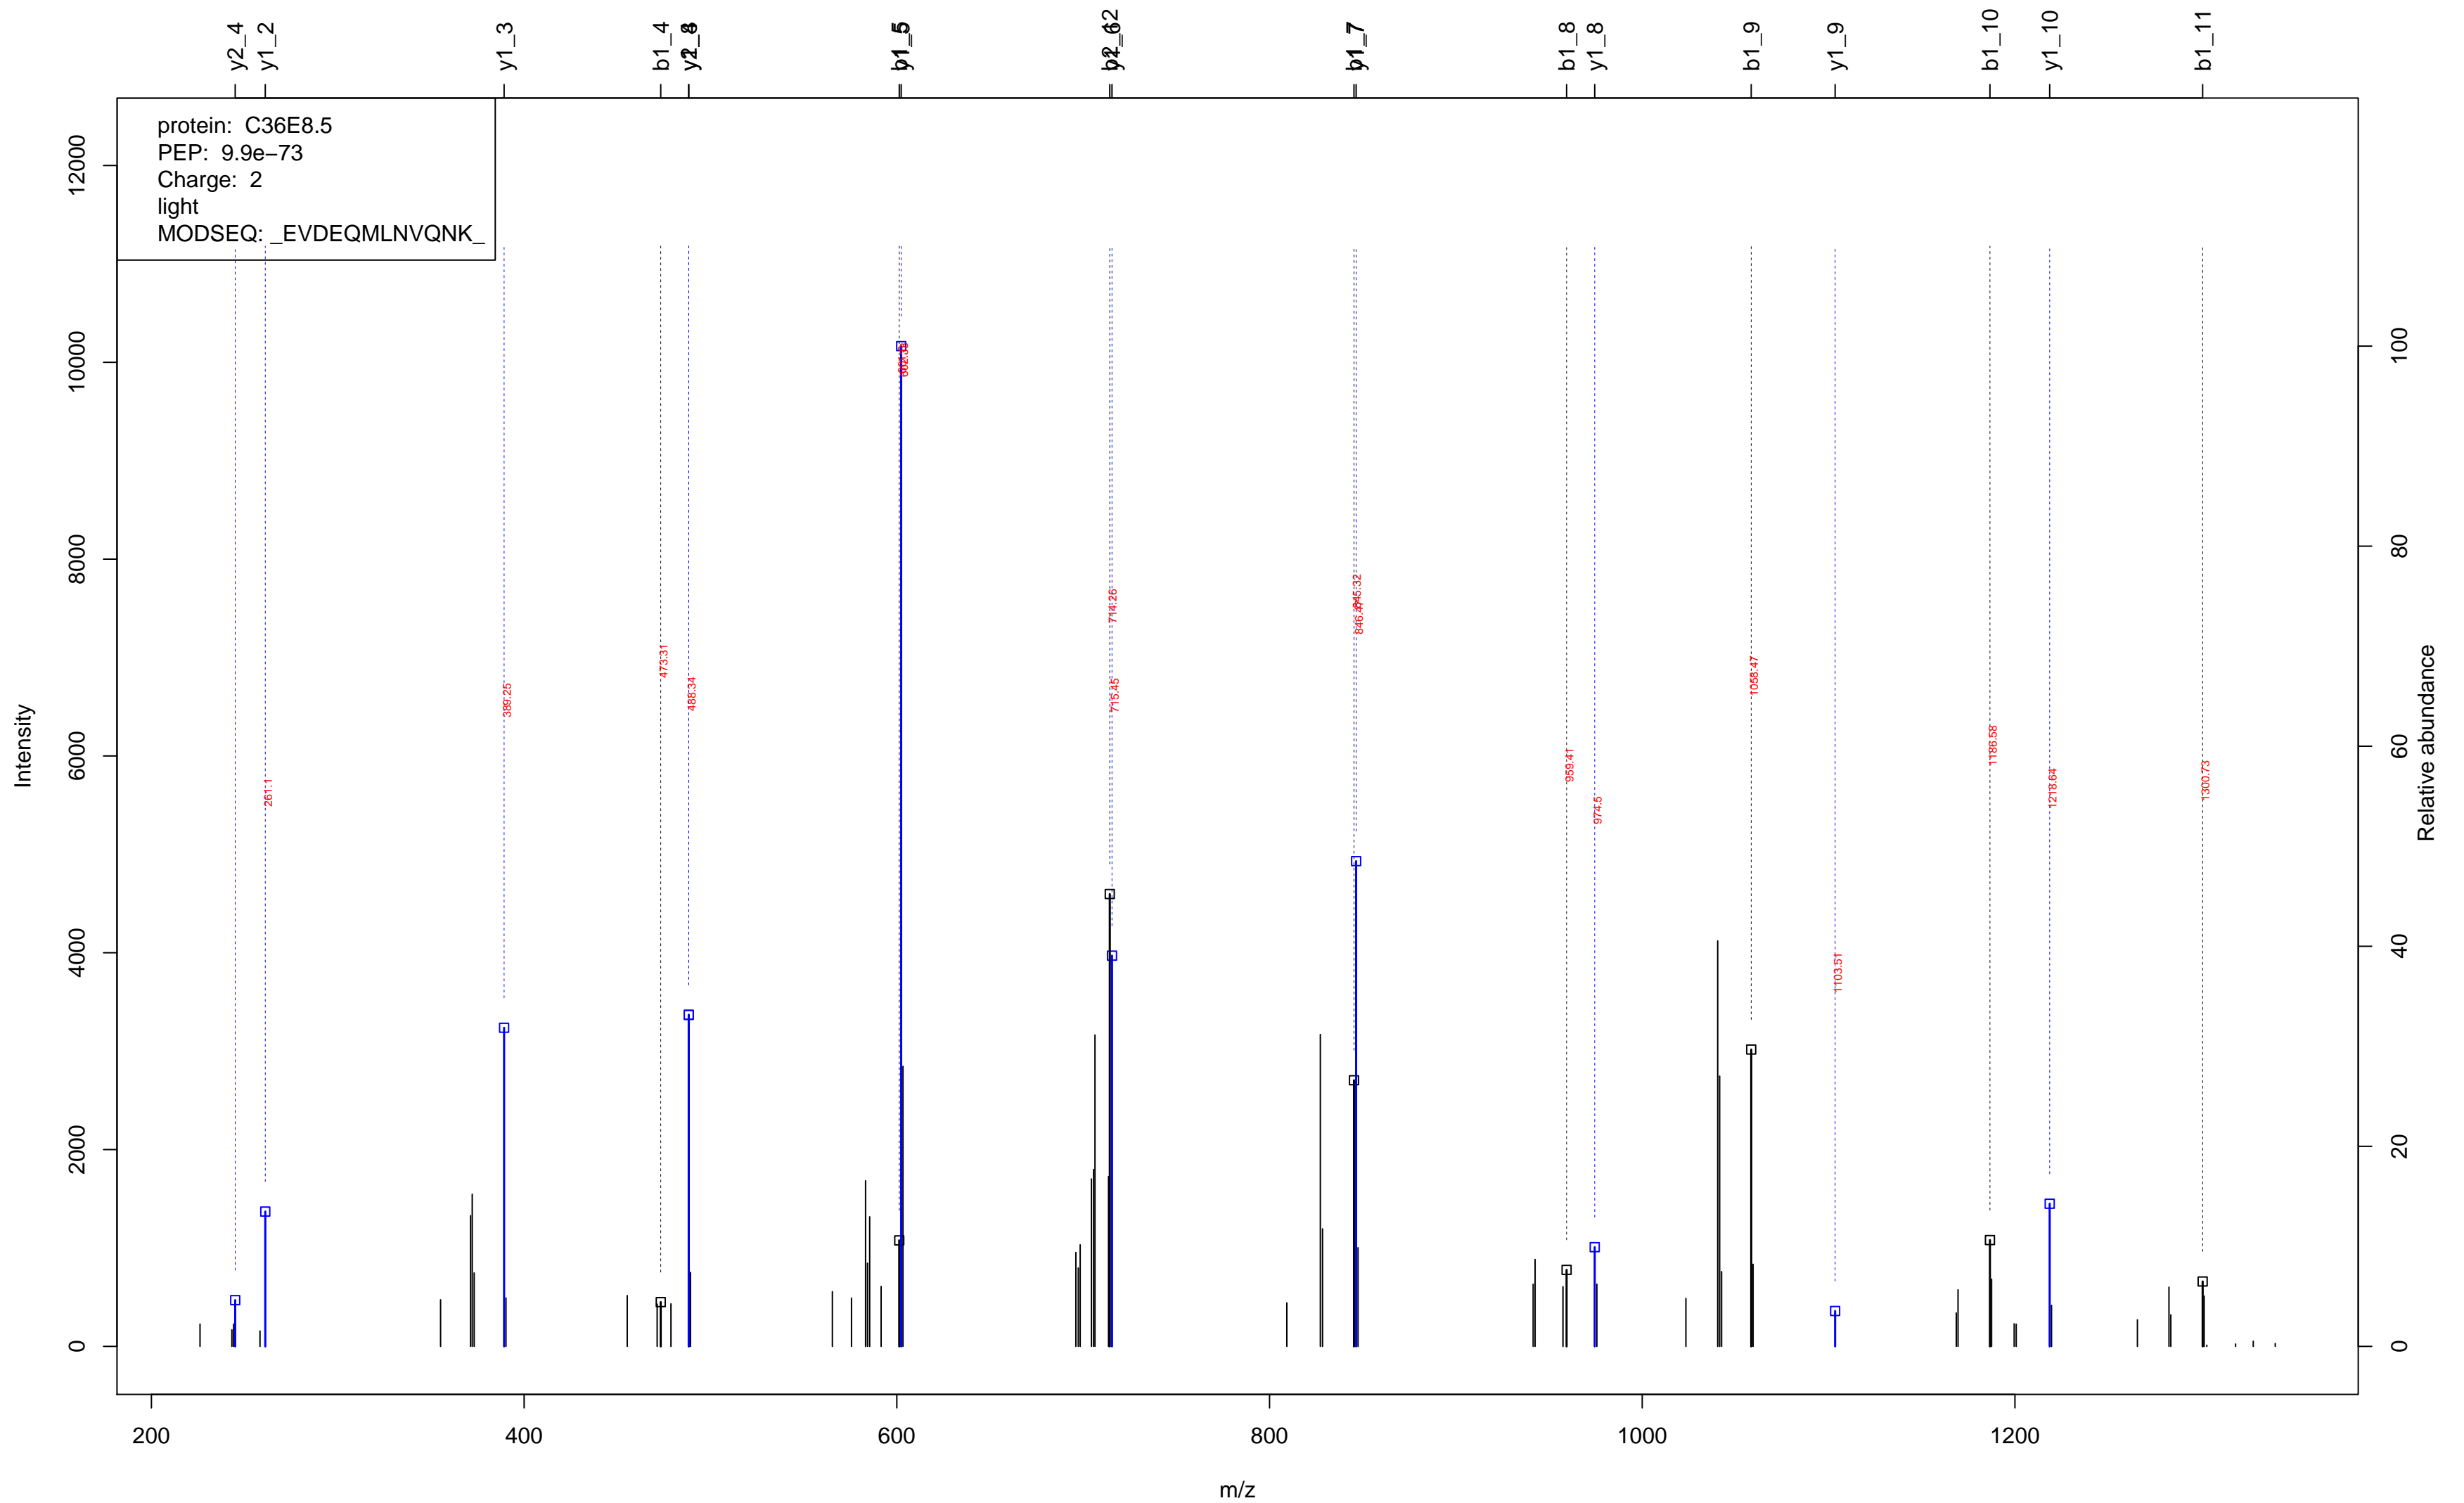



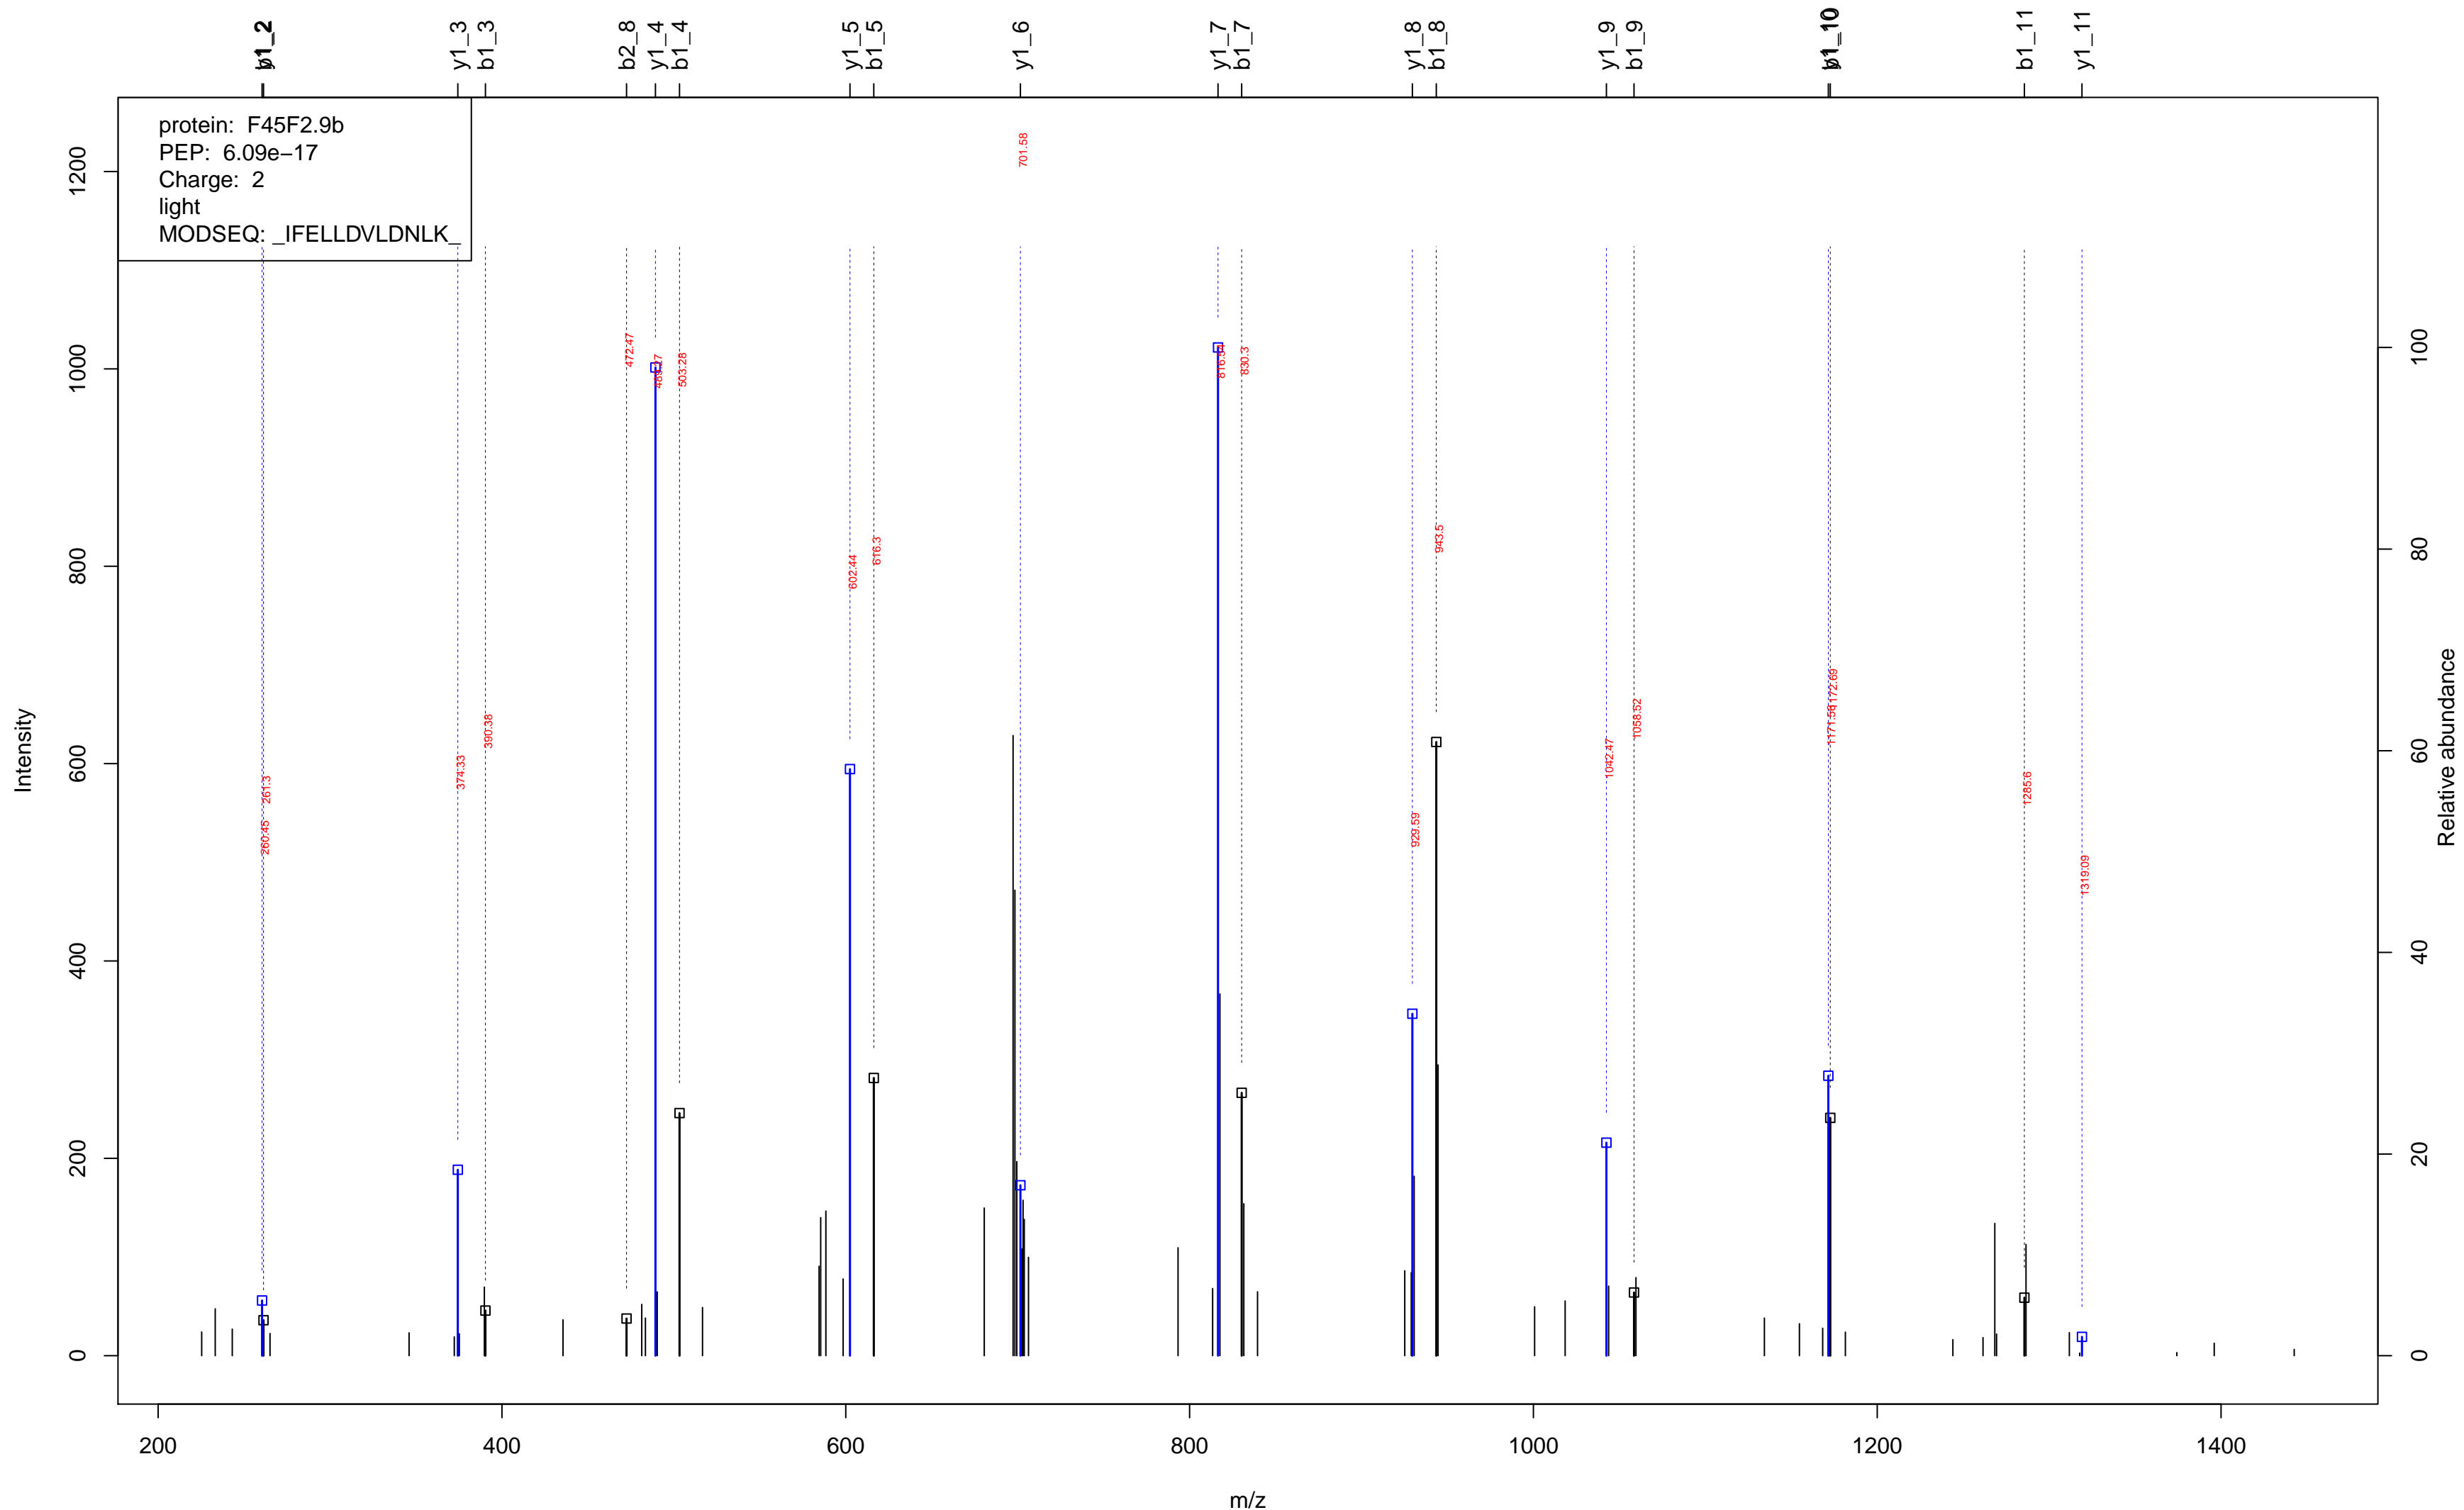

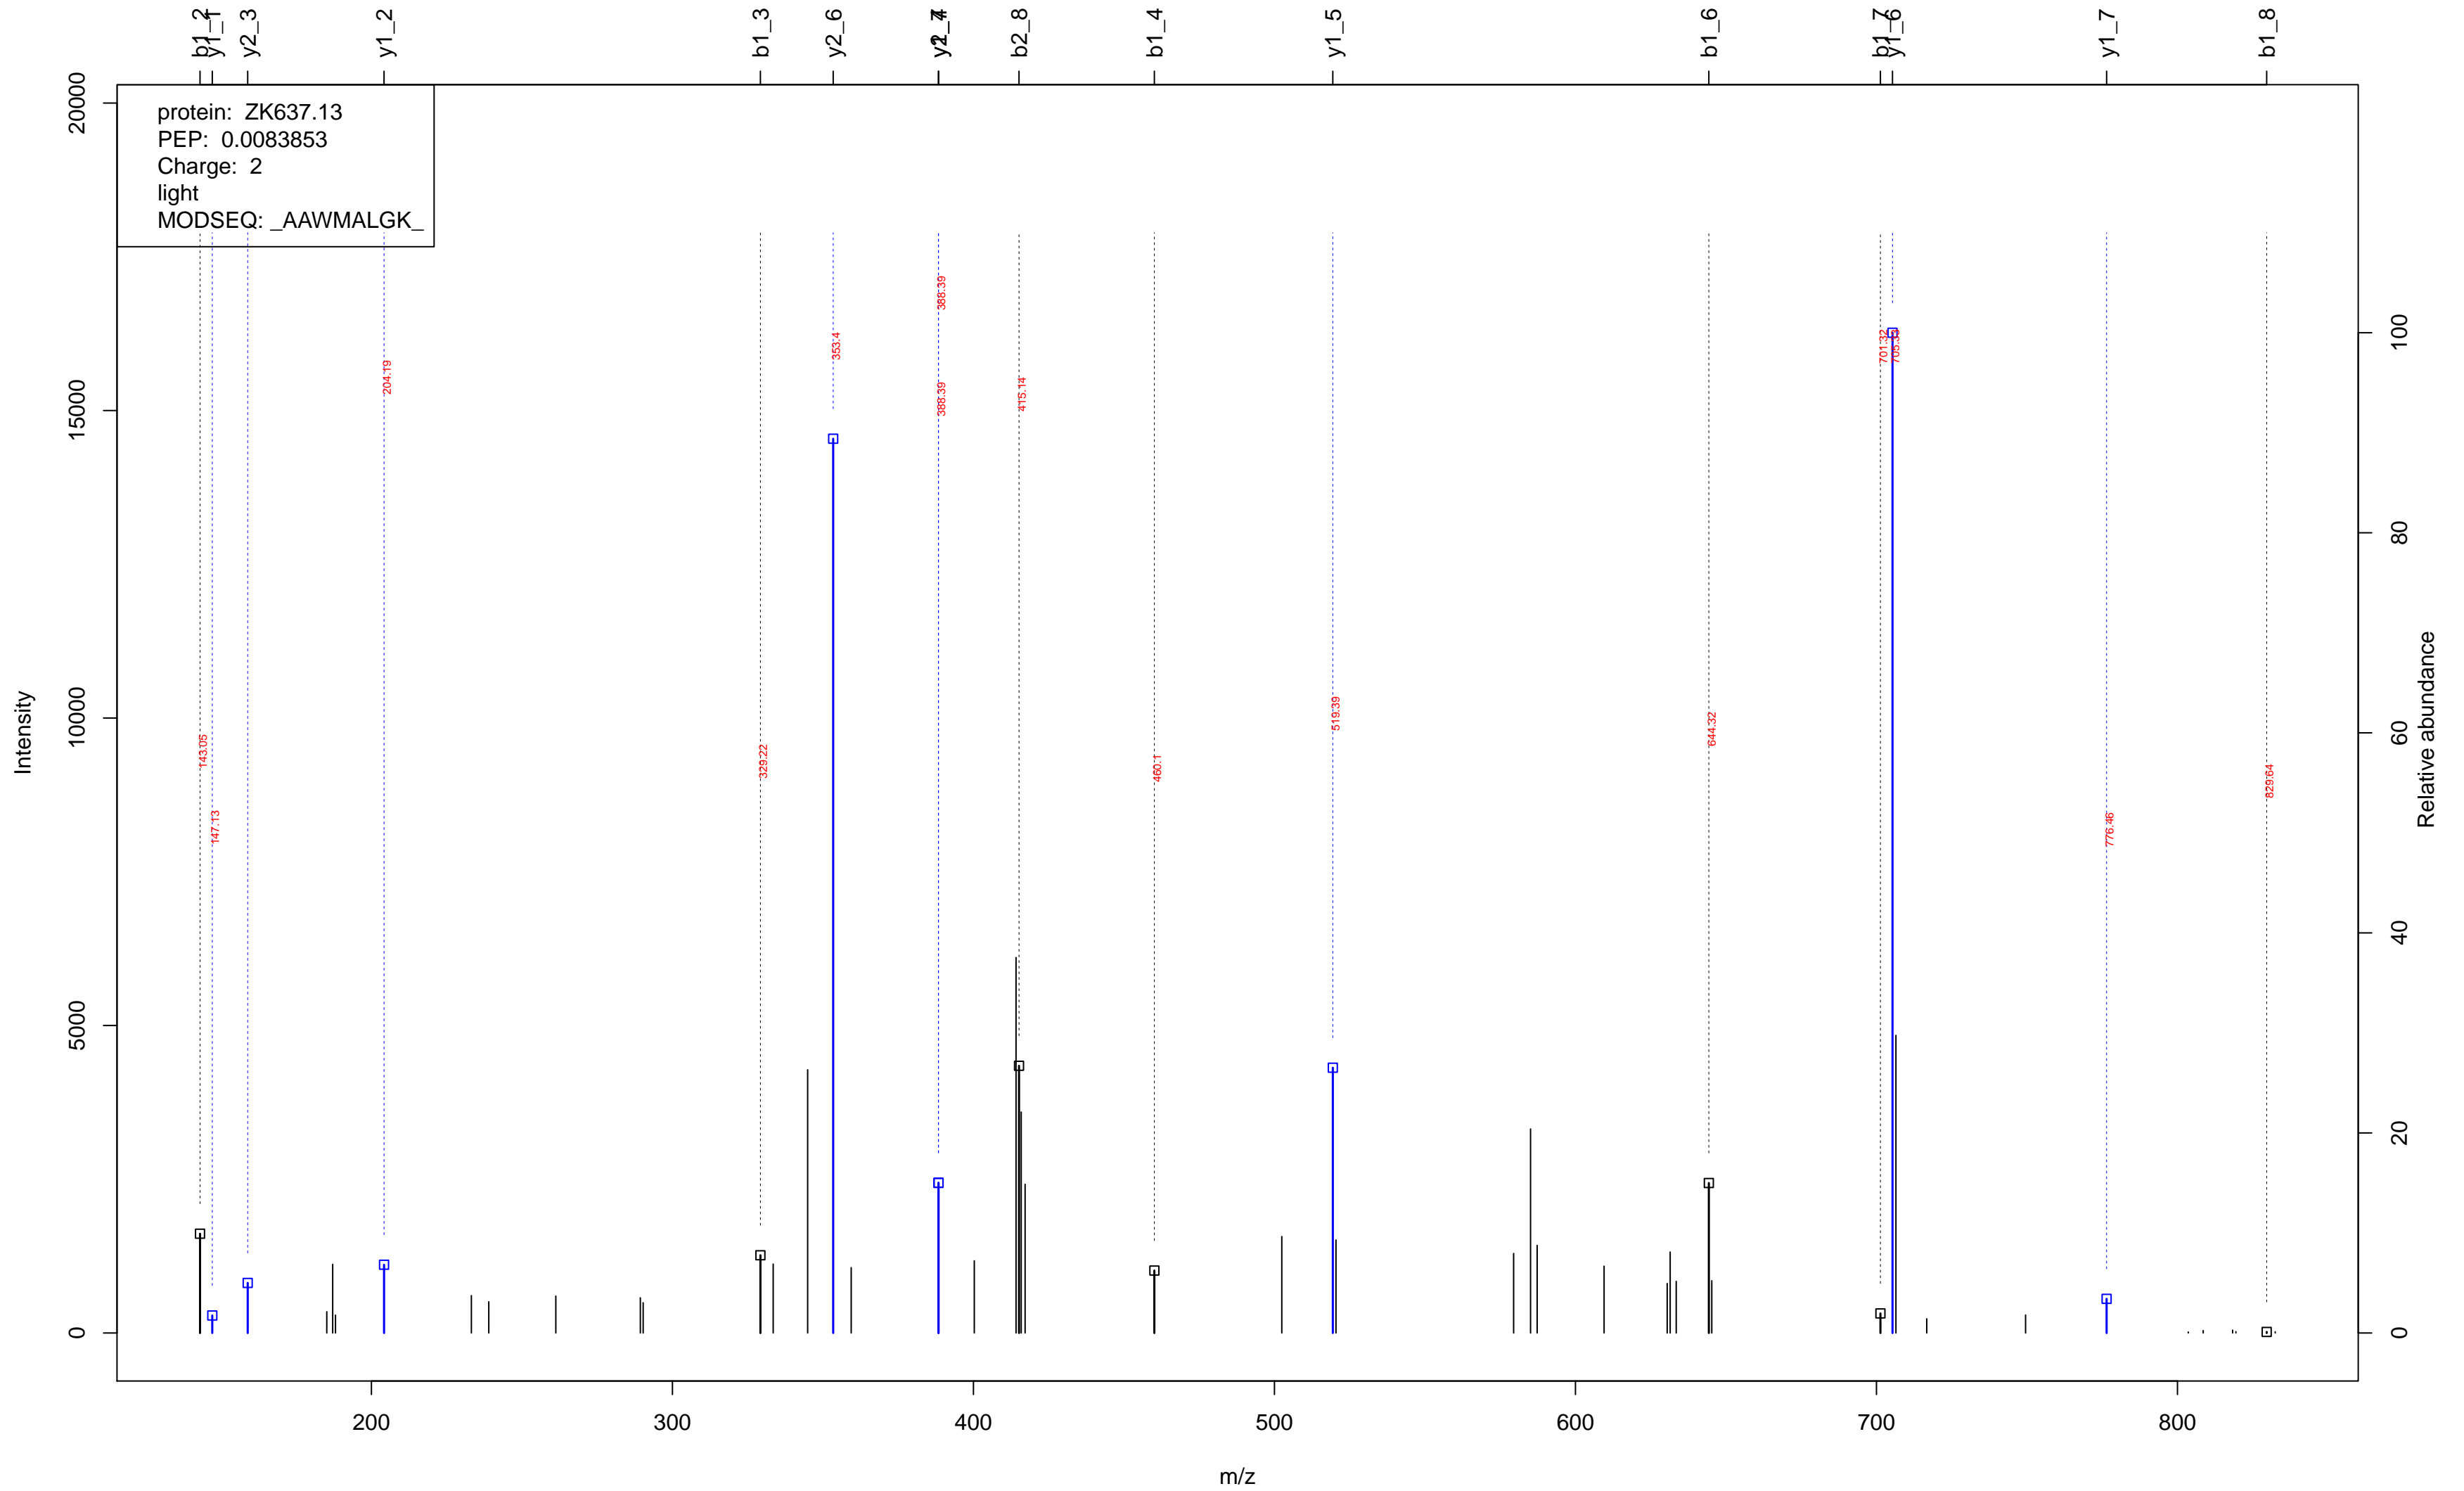

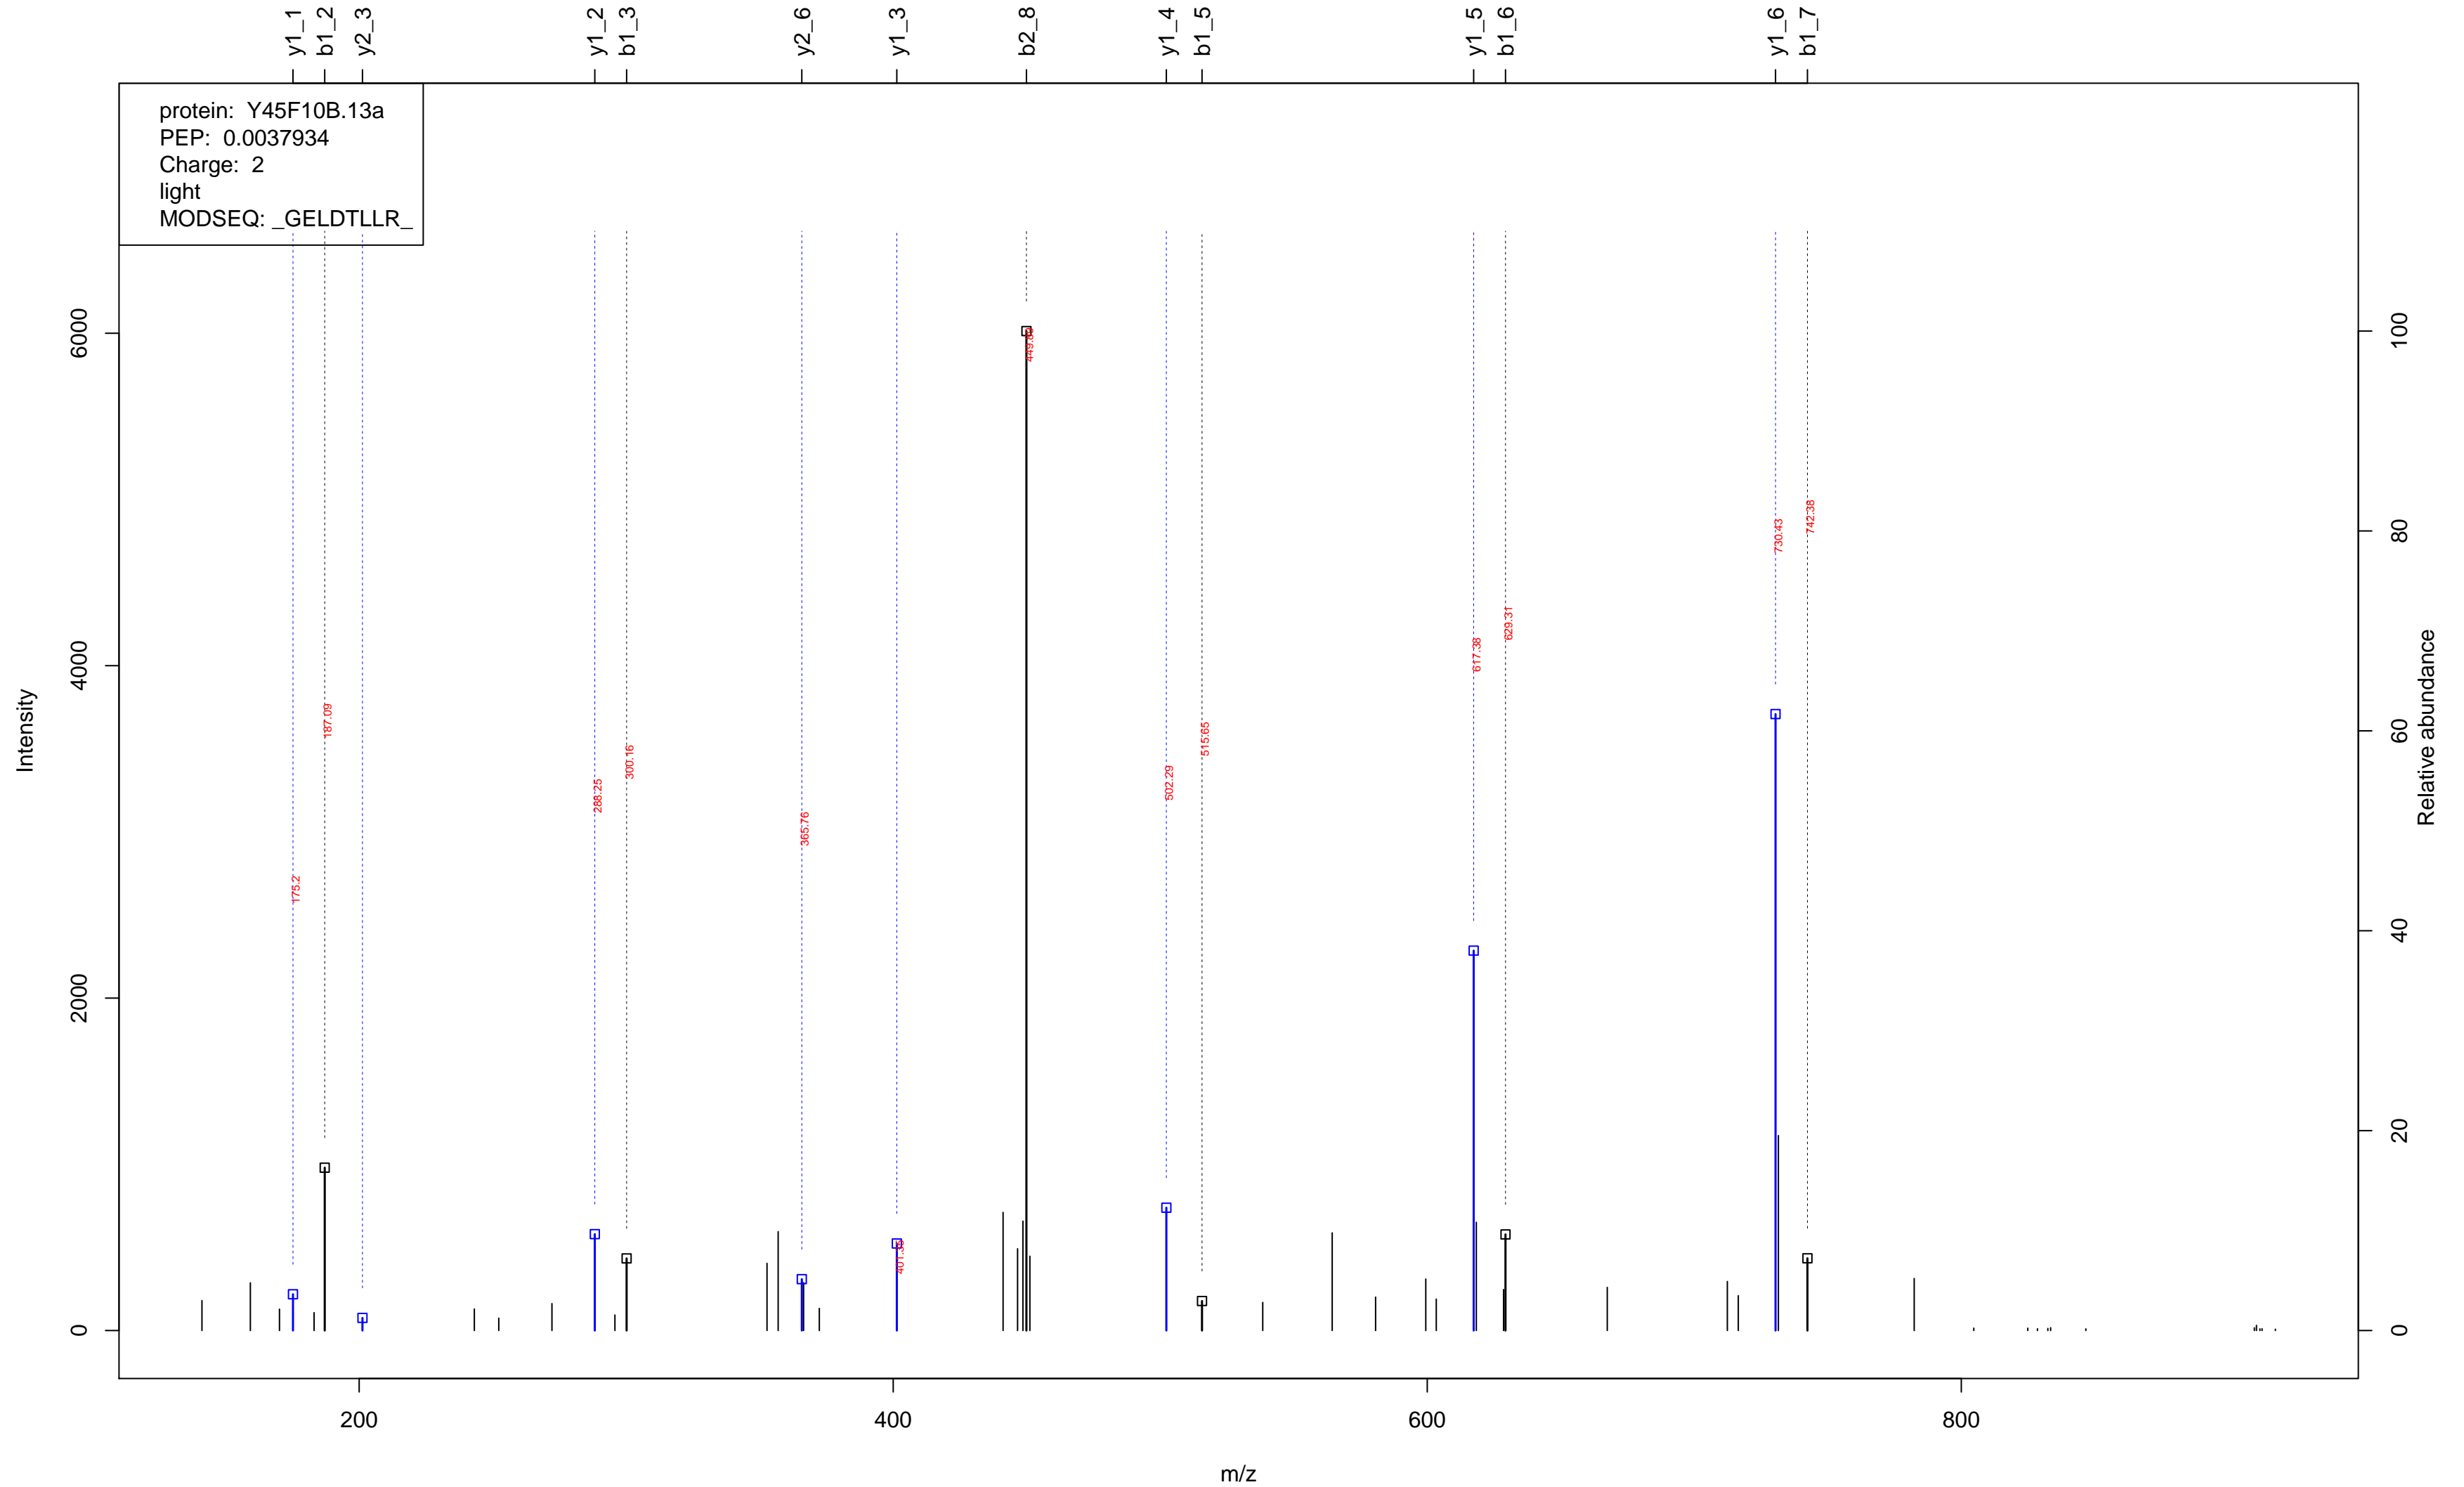

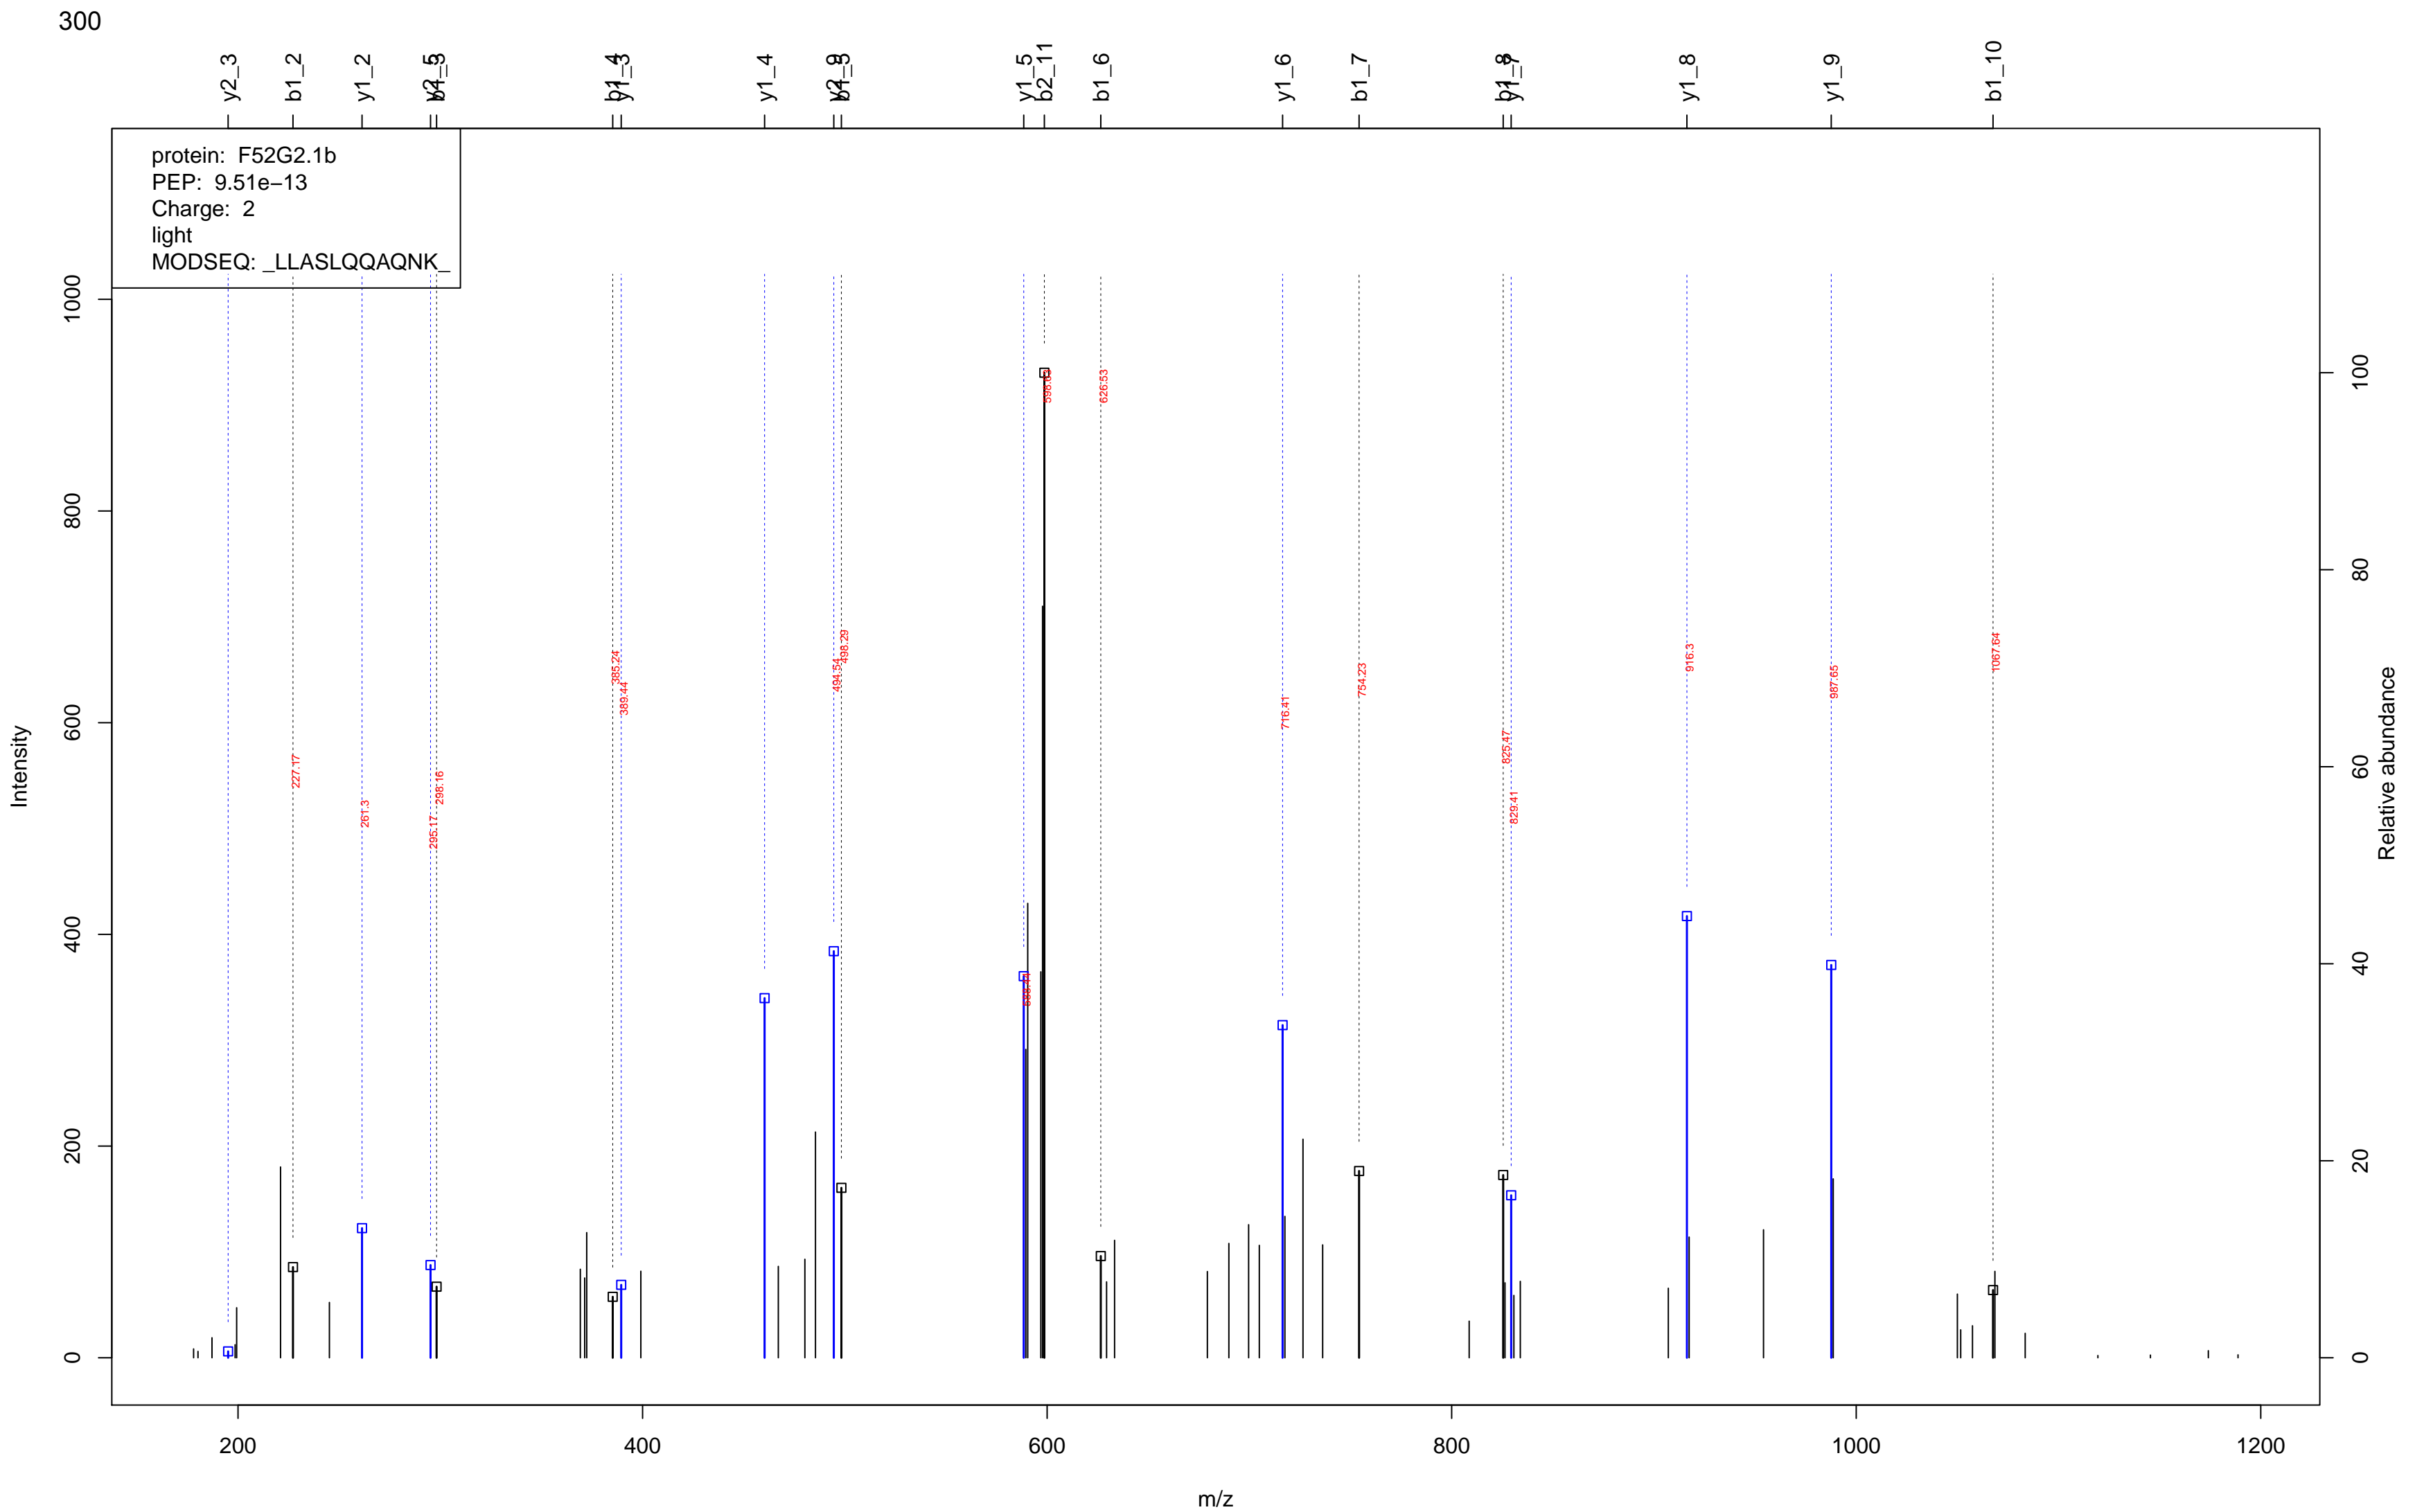

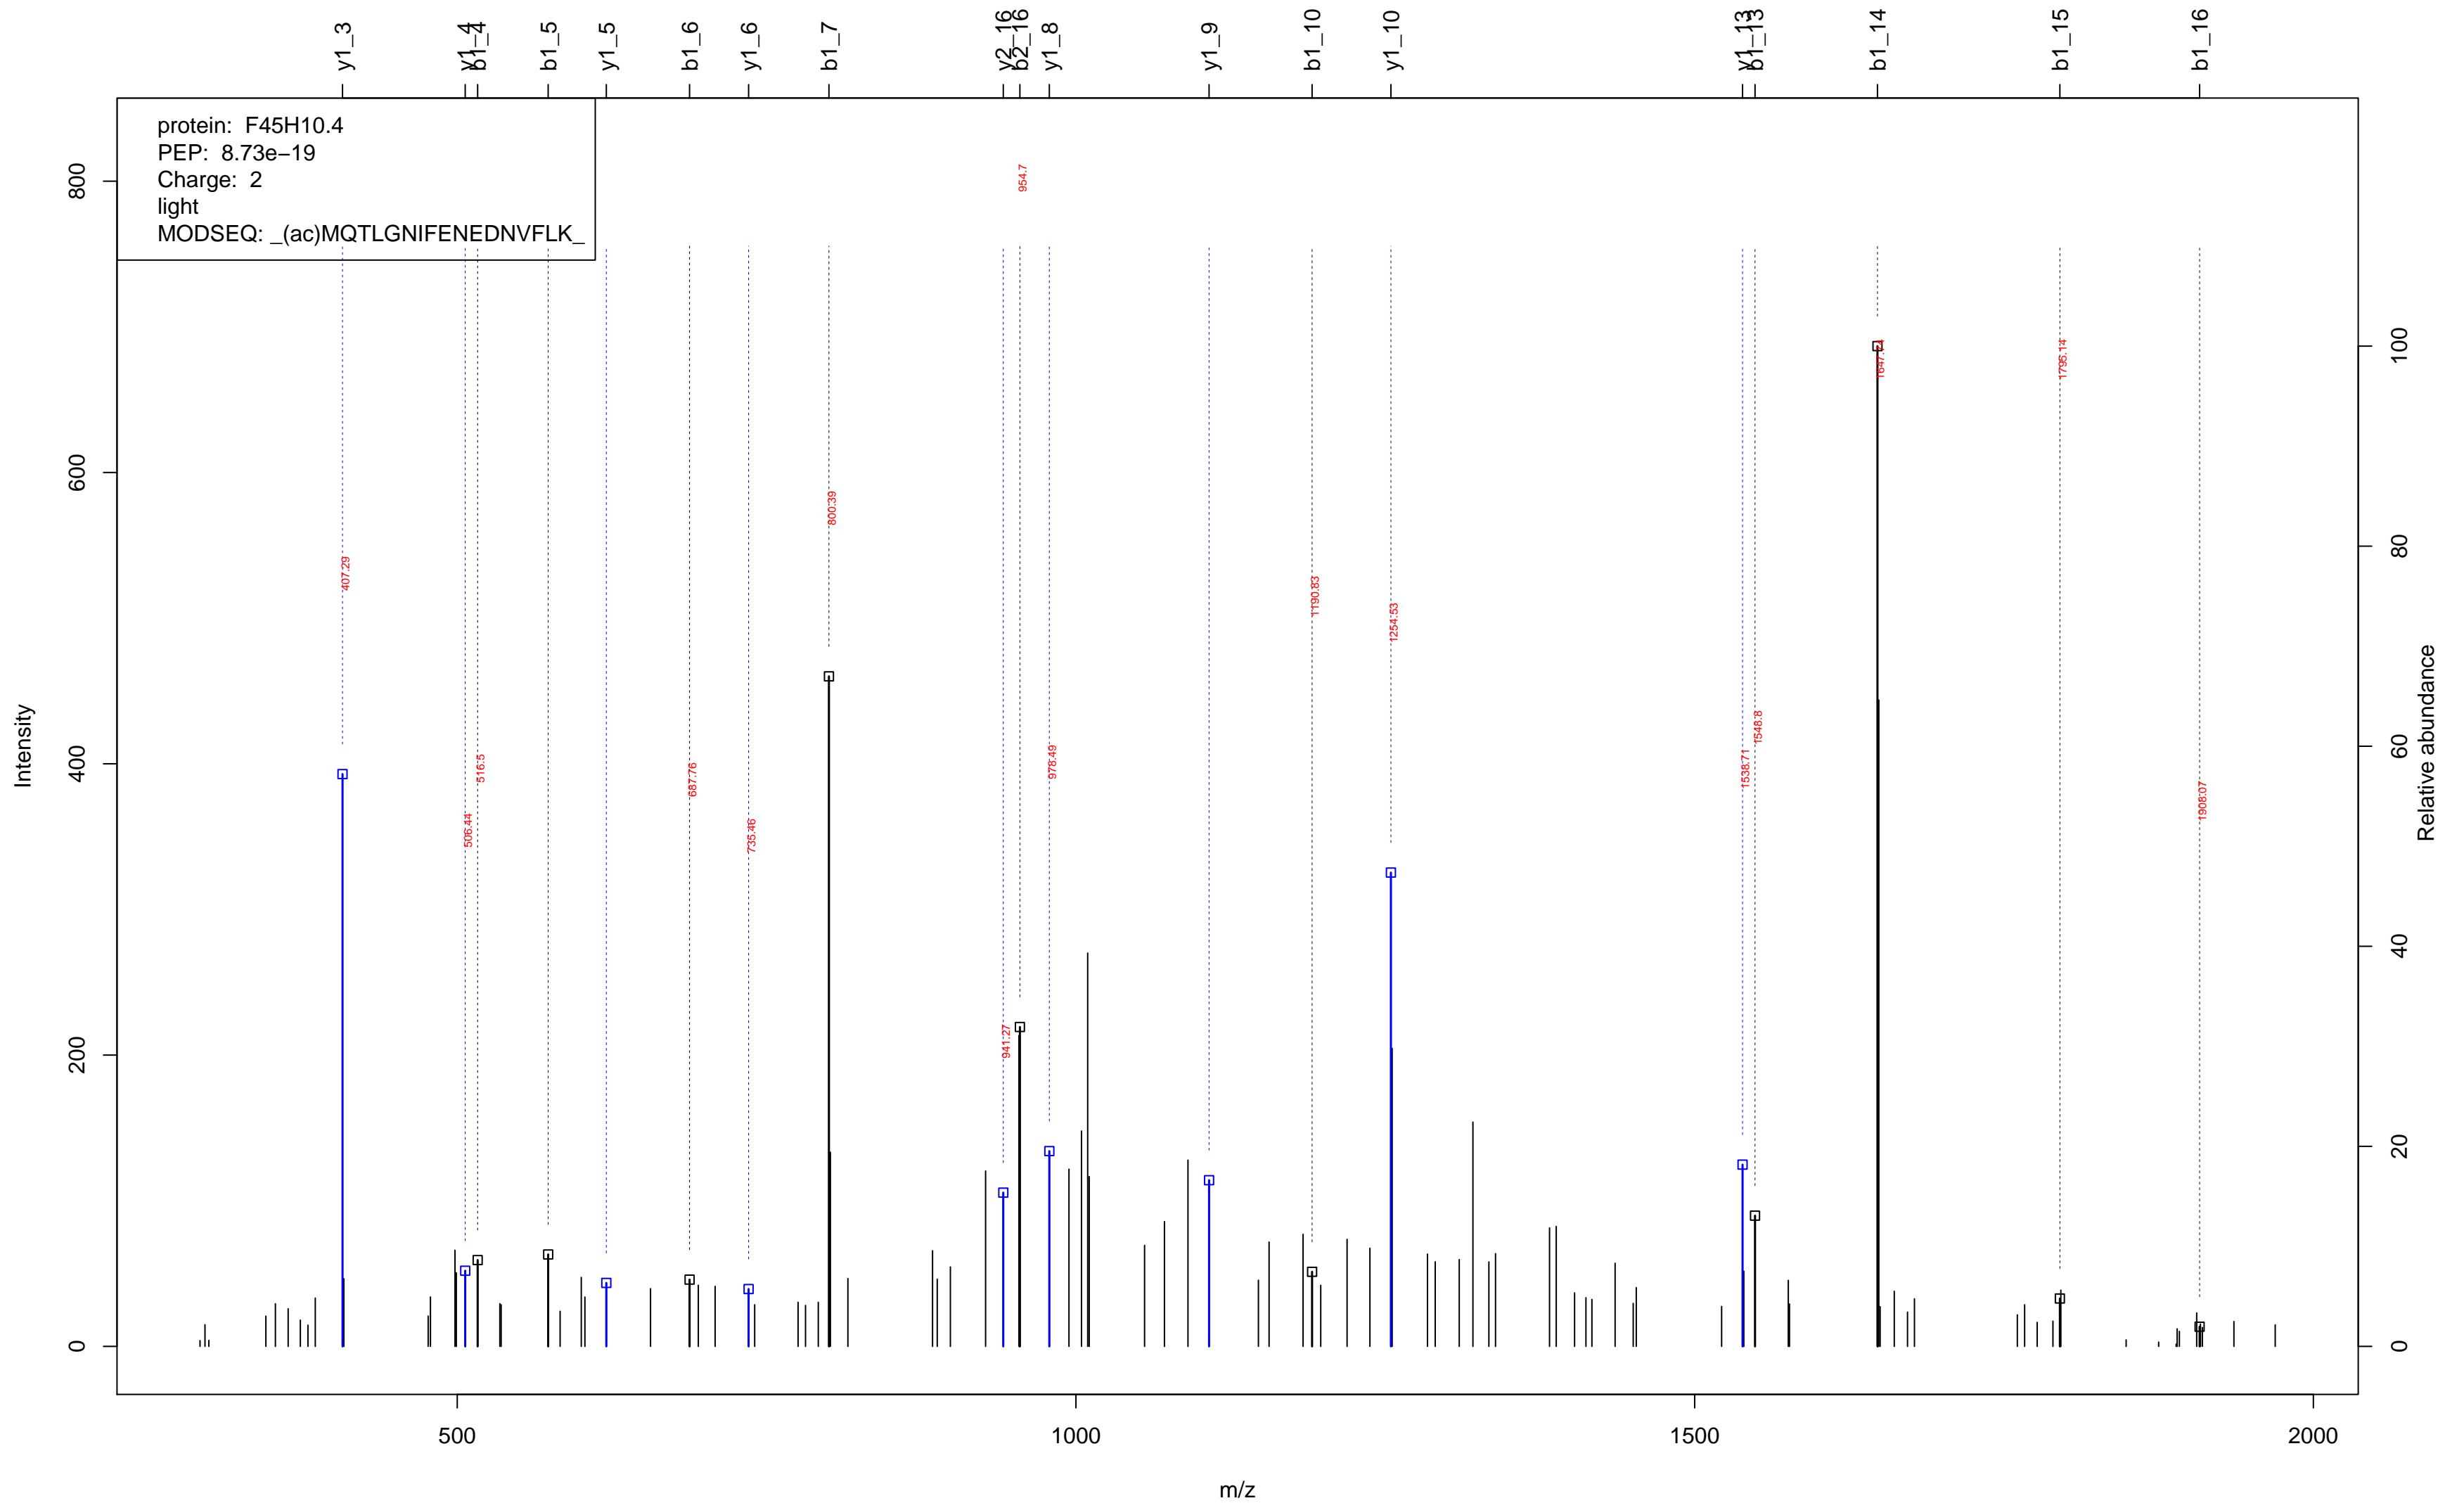

302

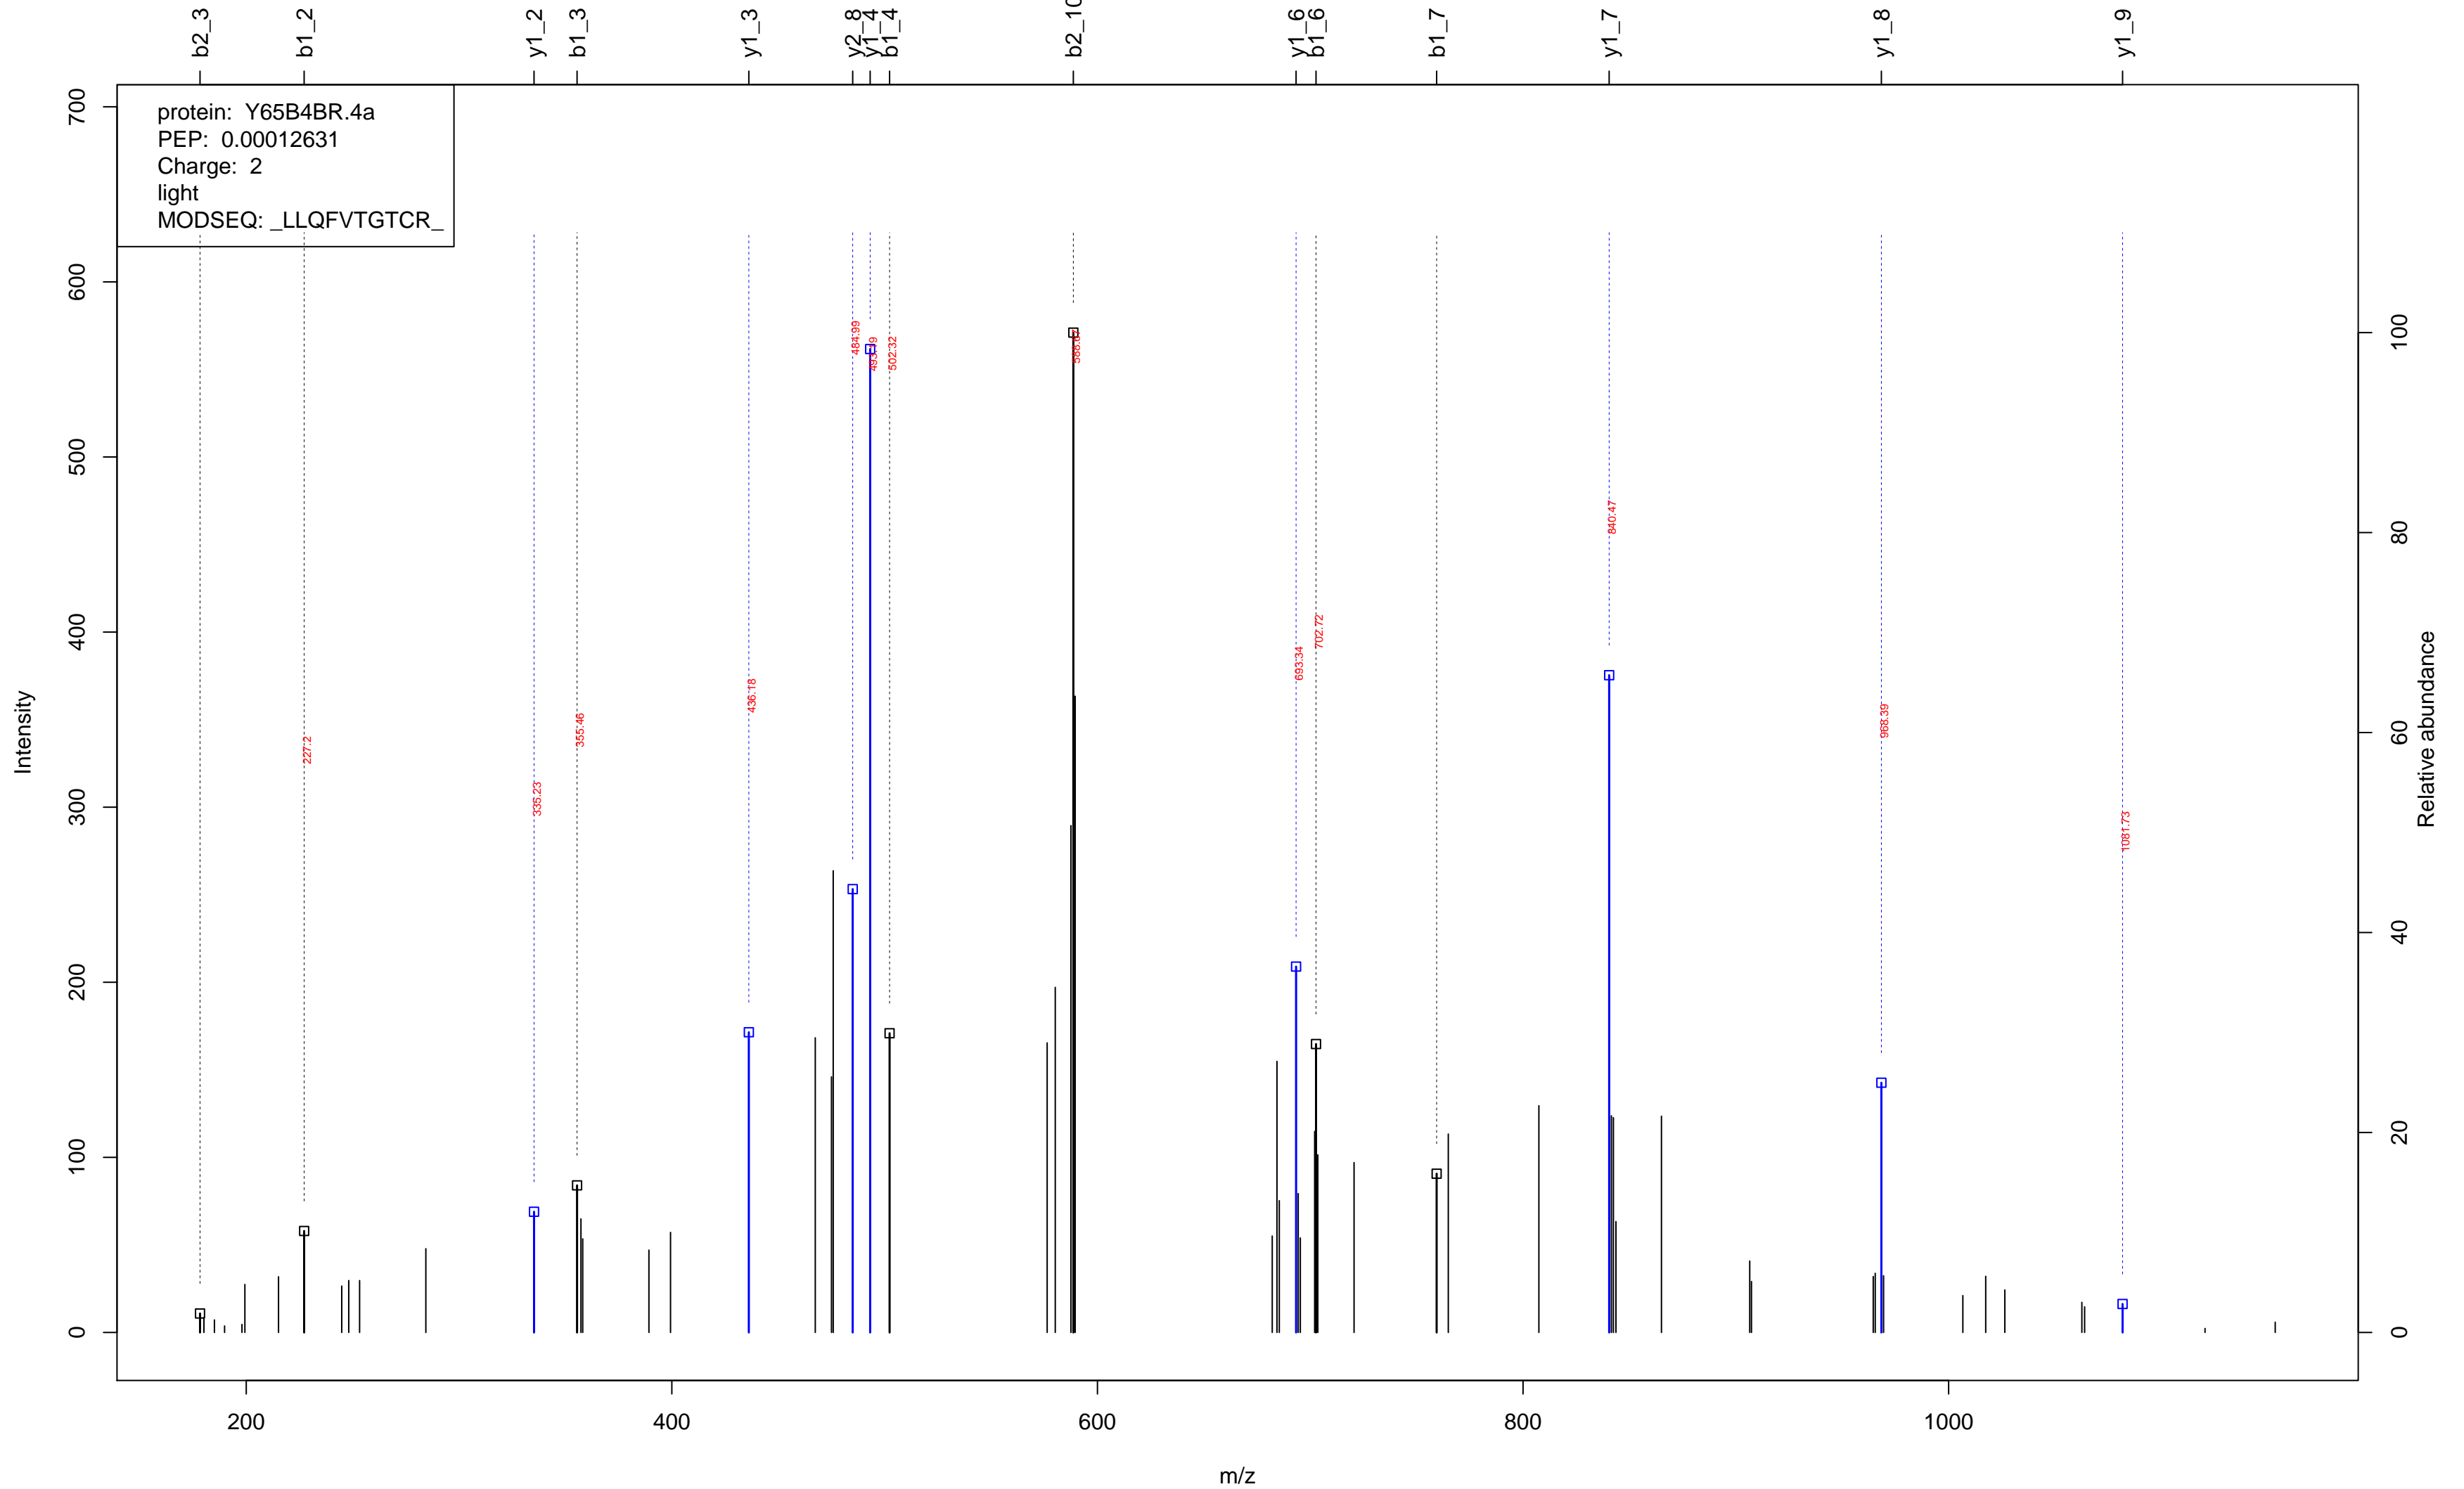

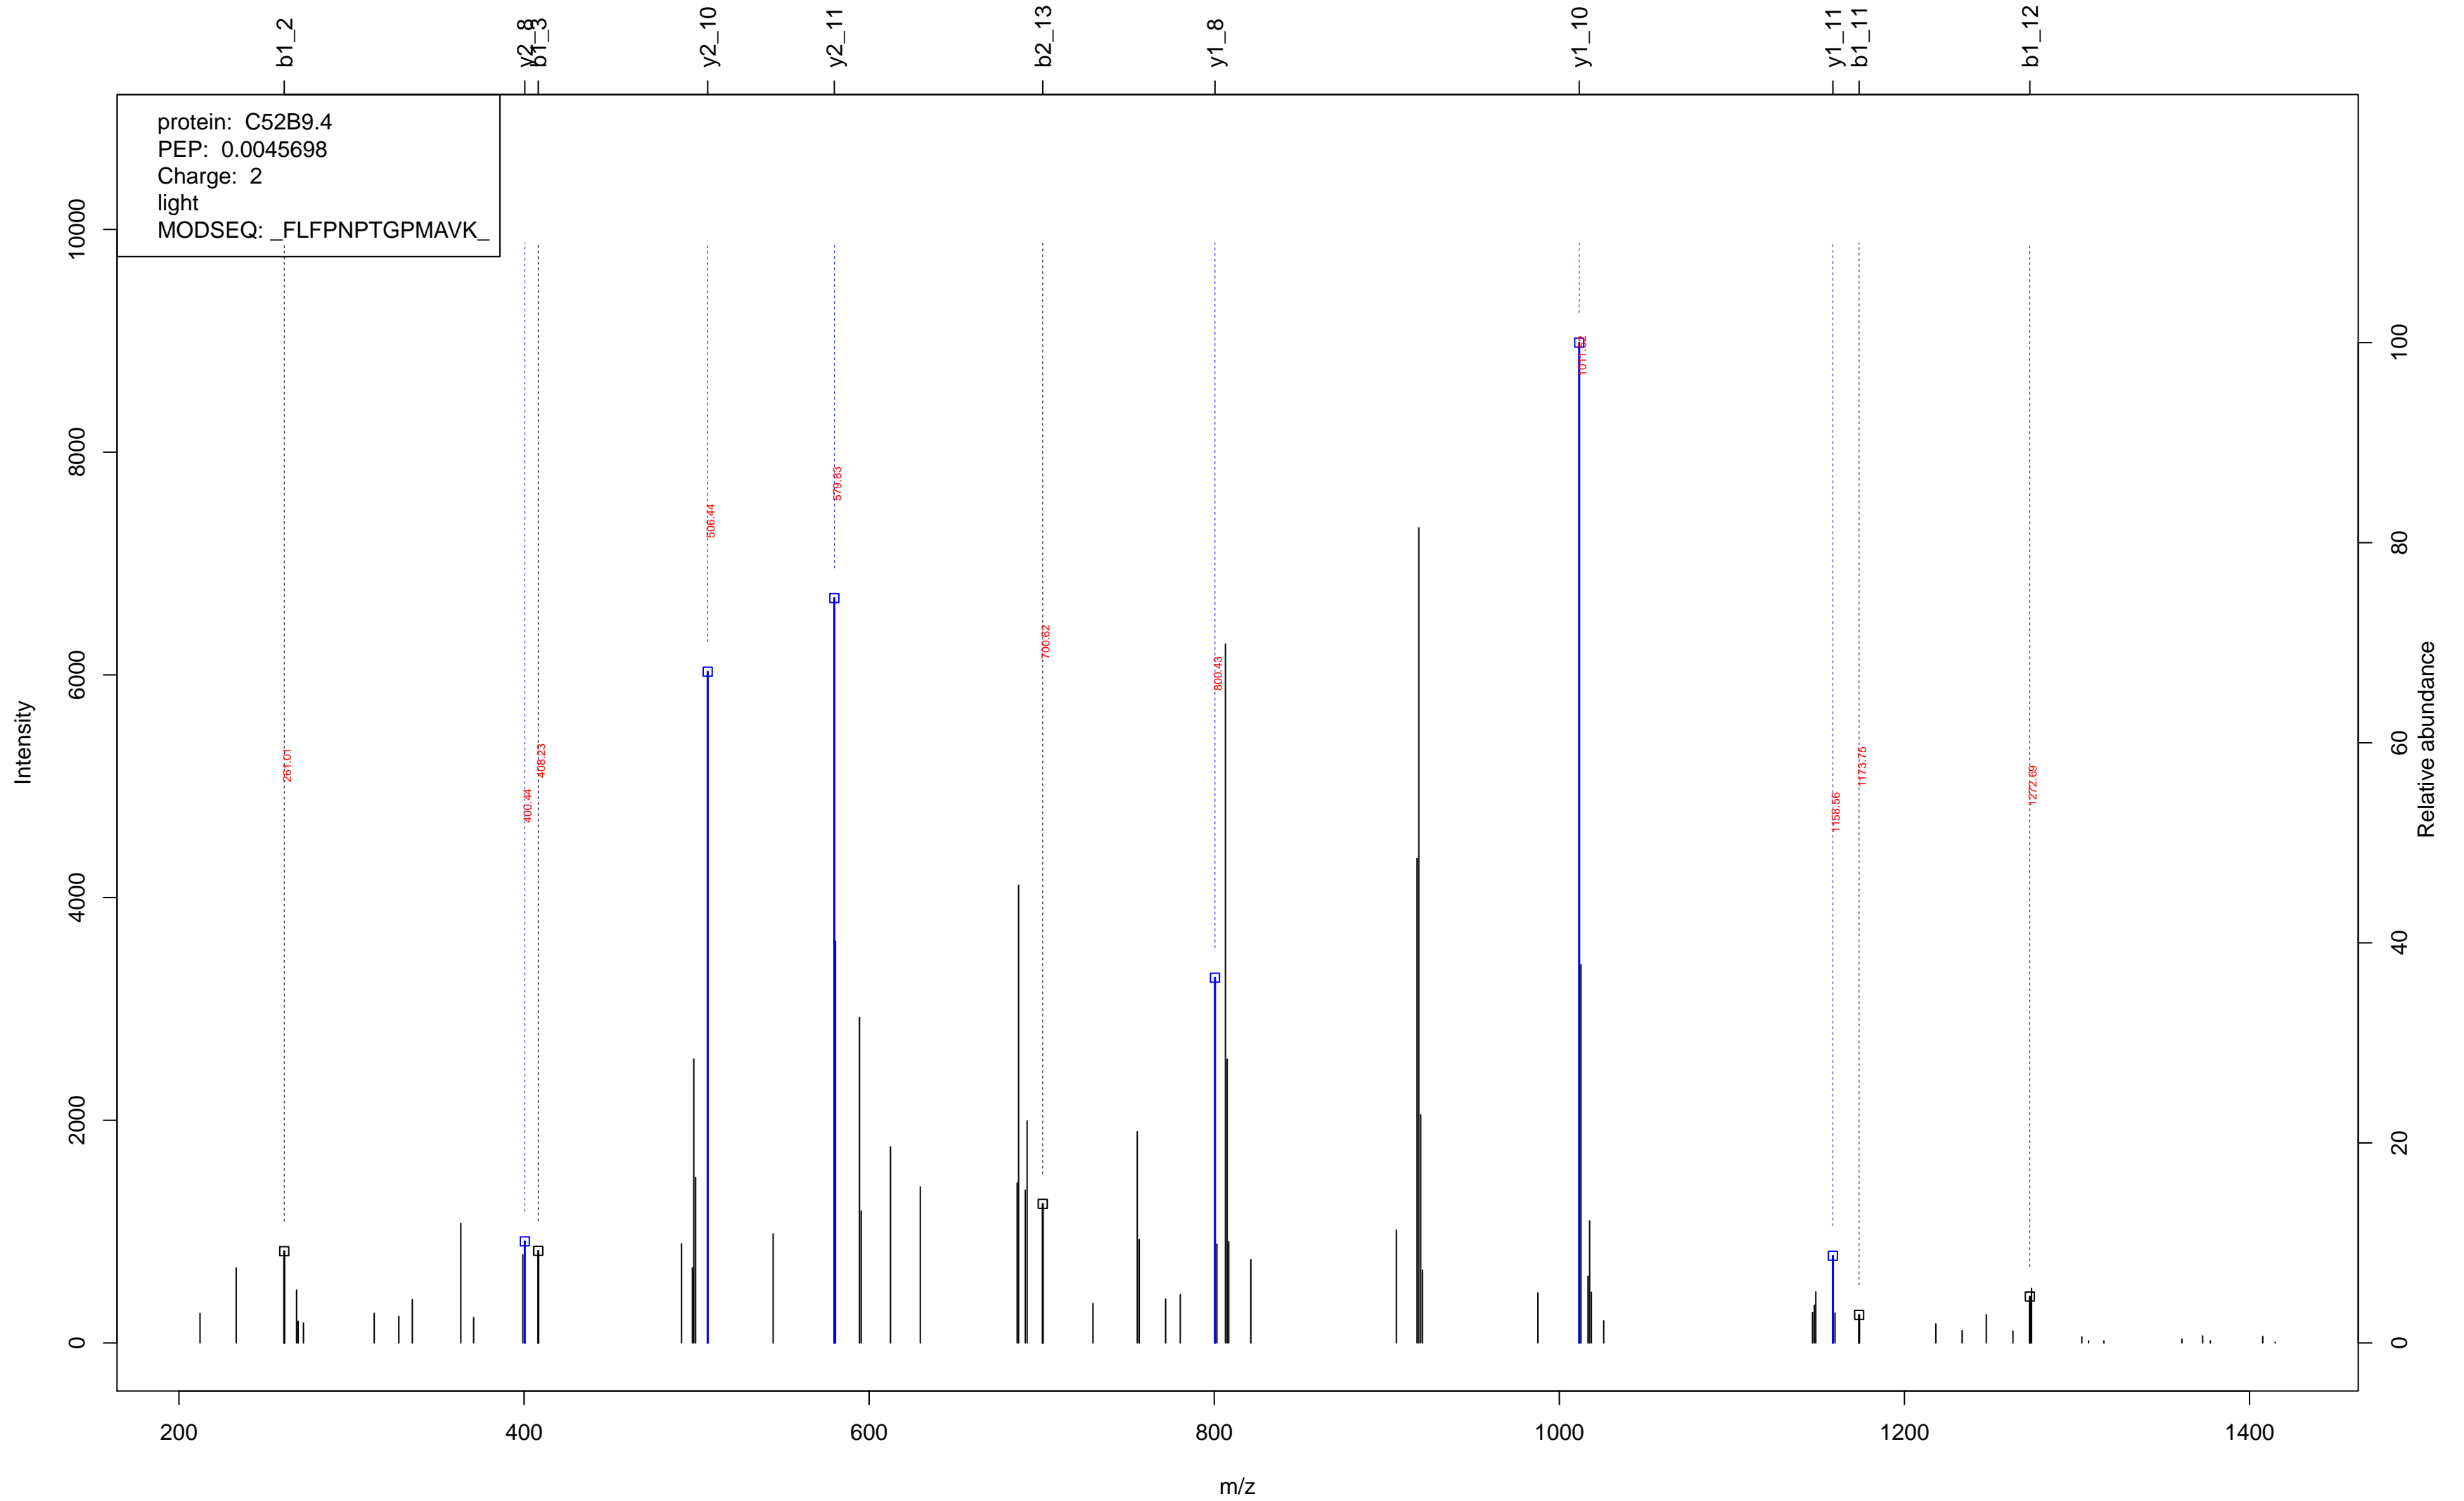

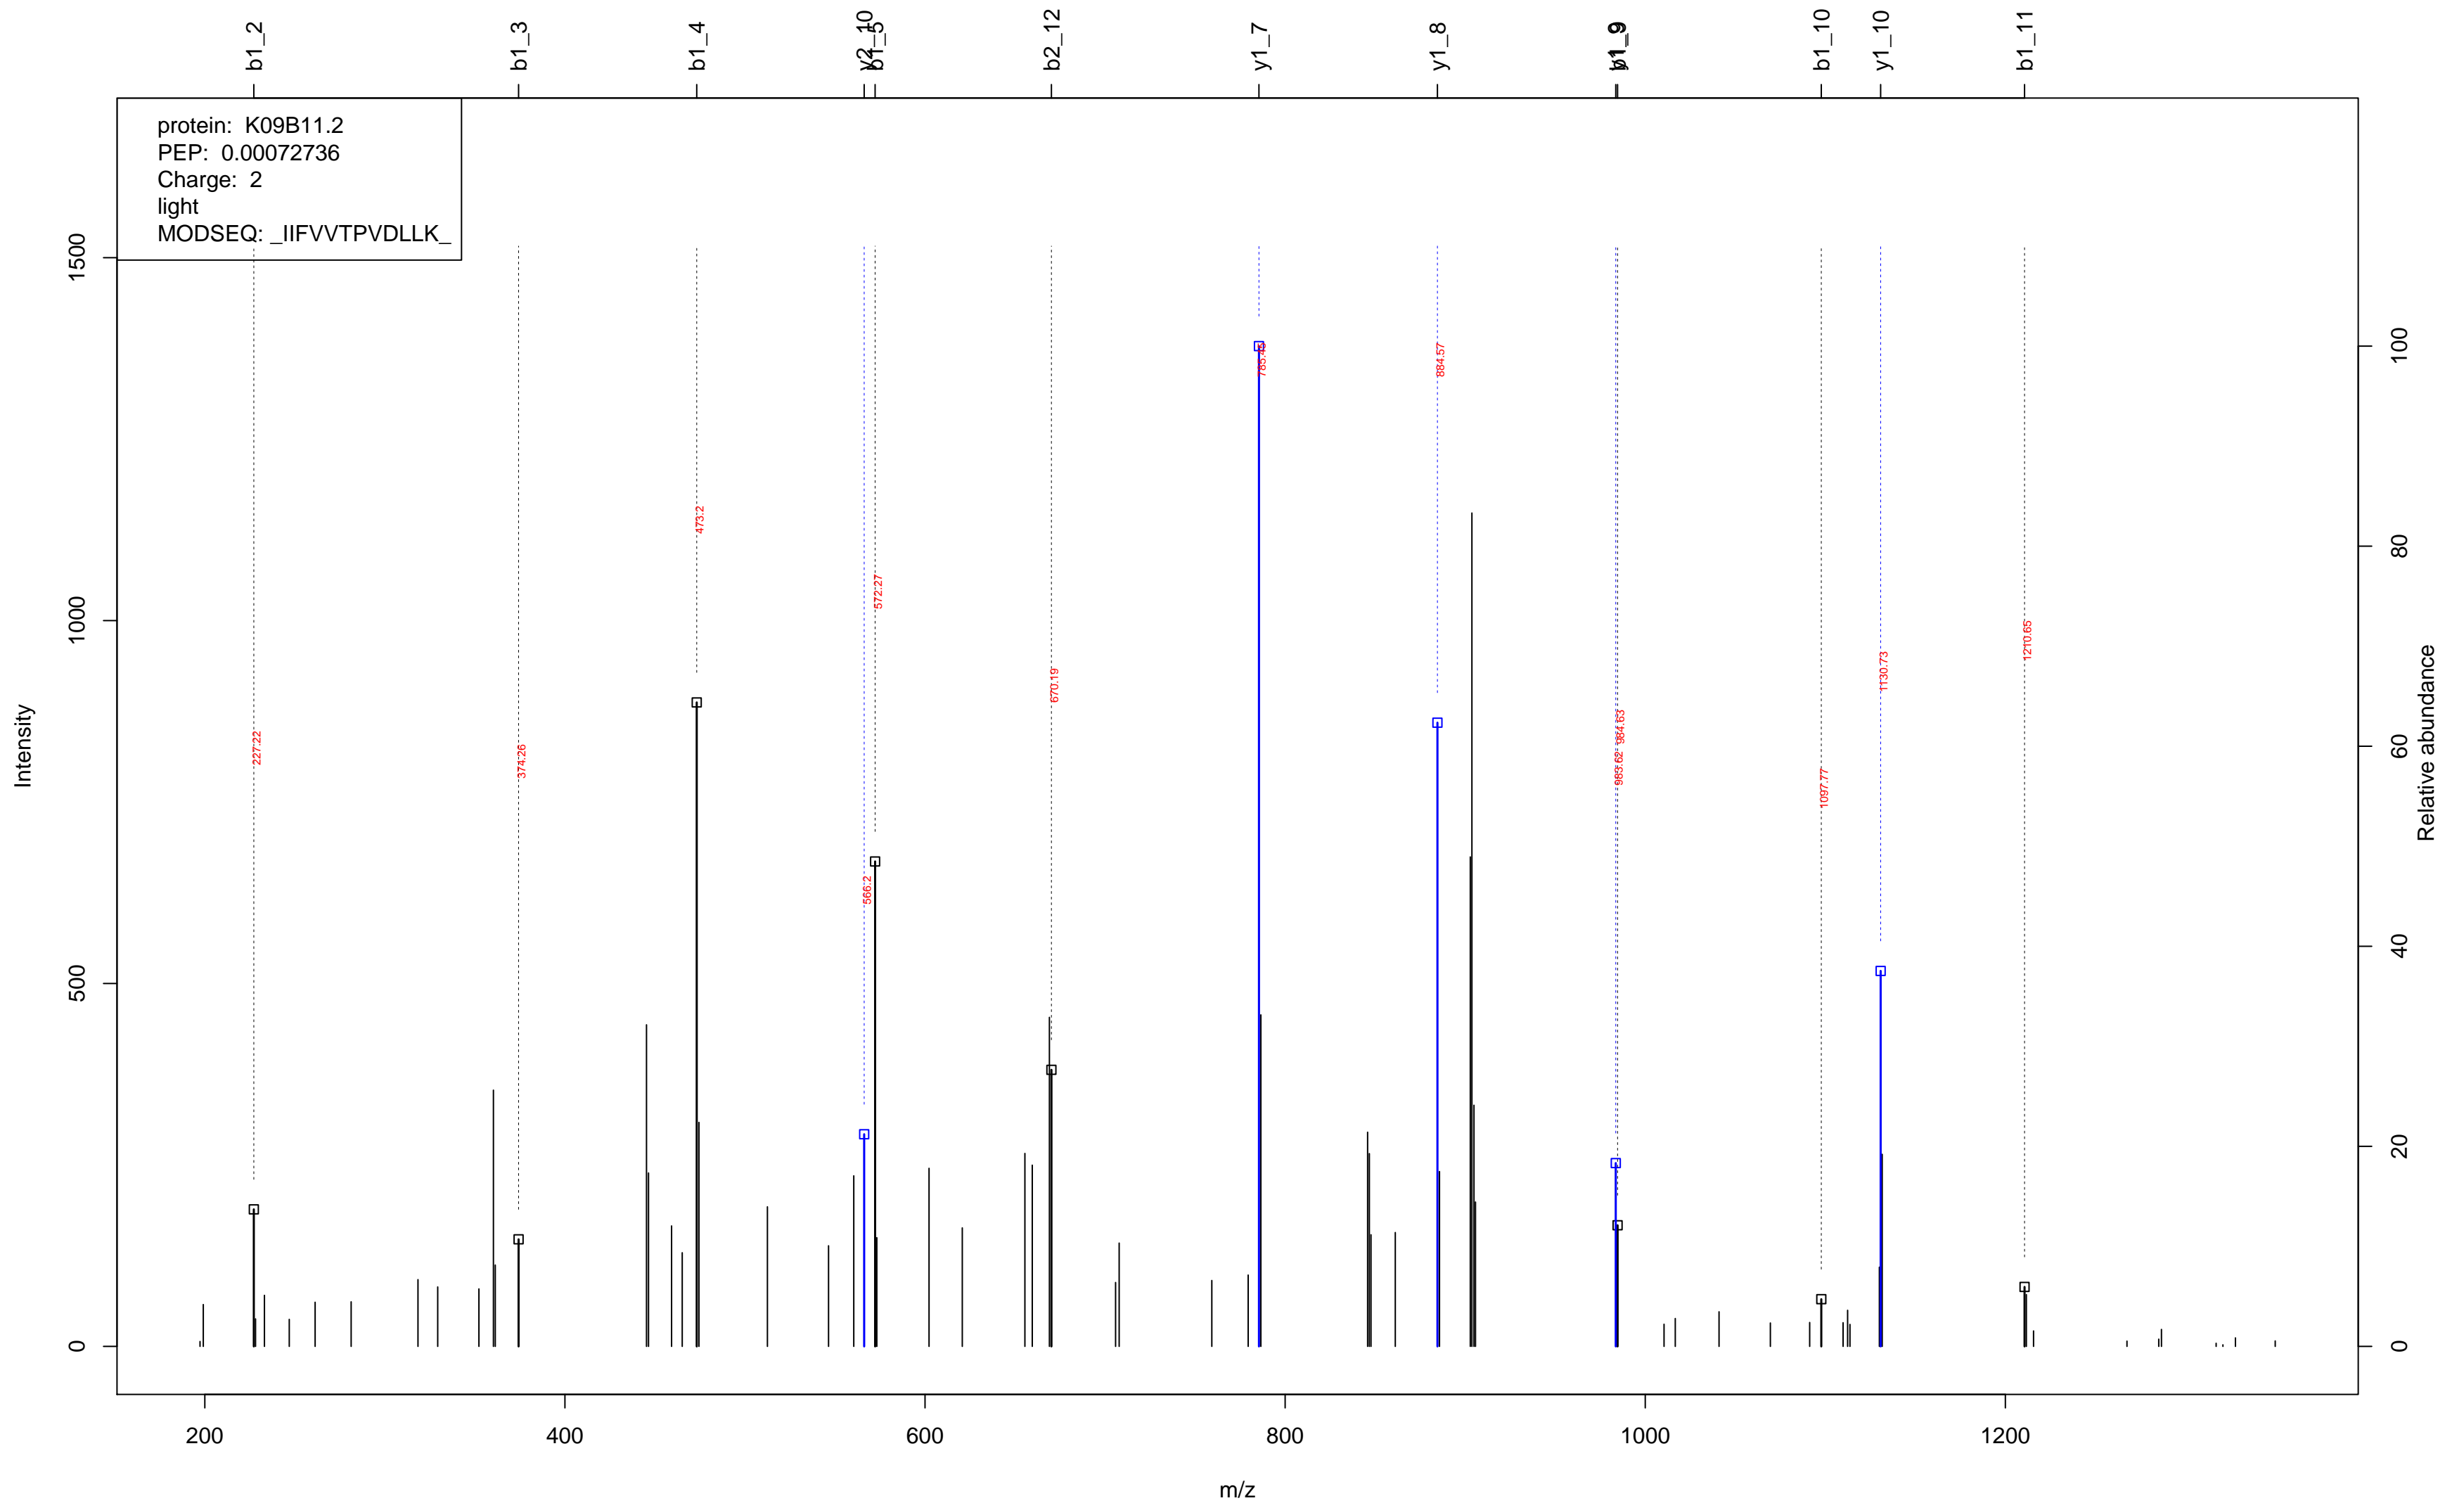



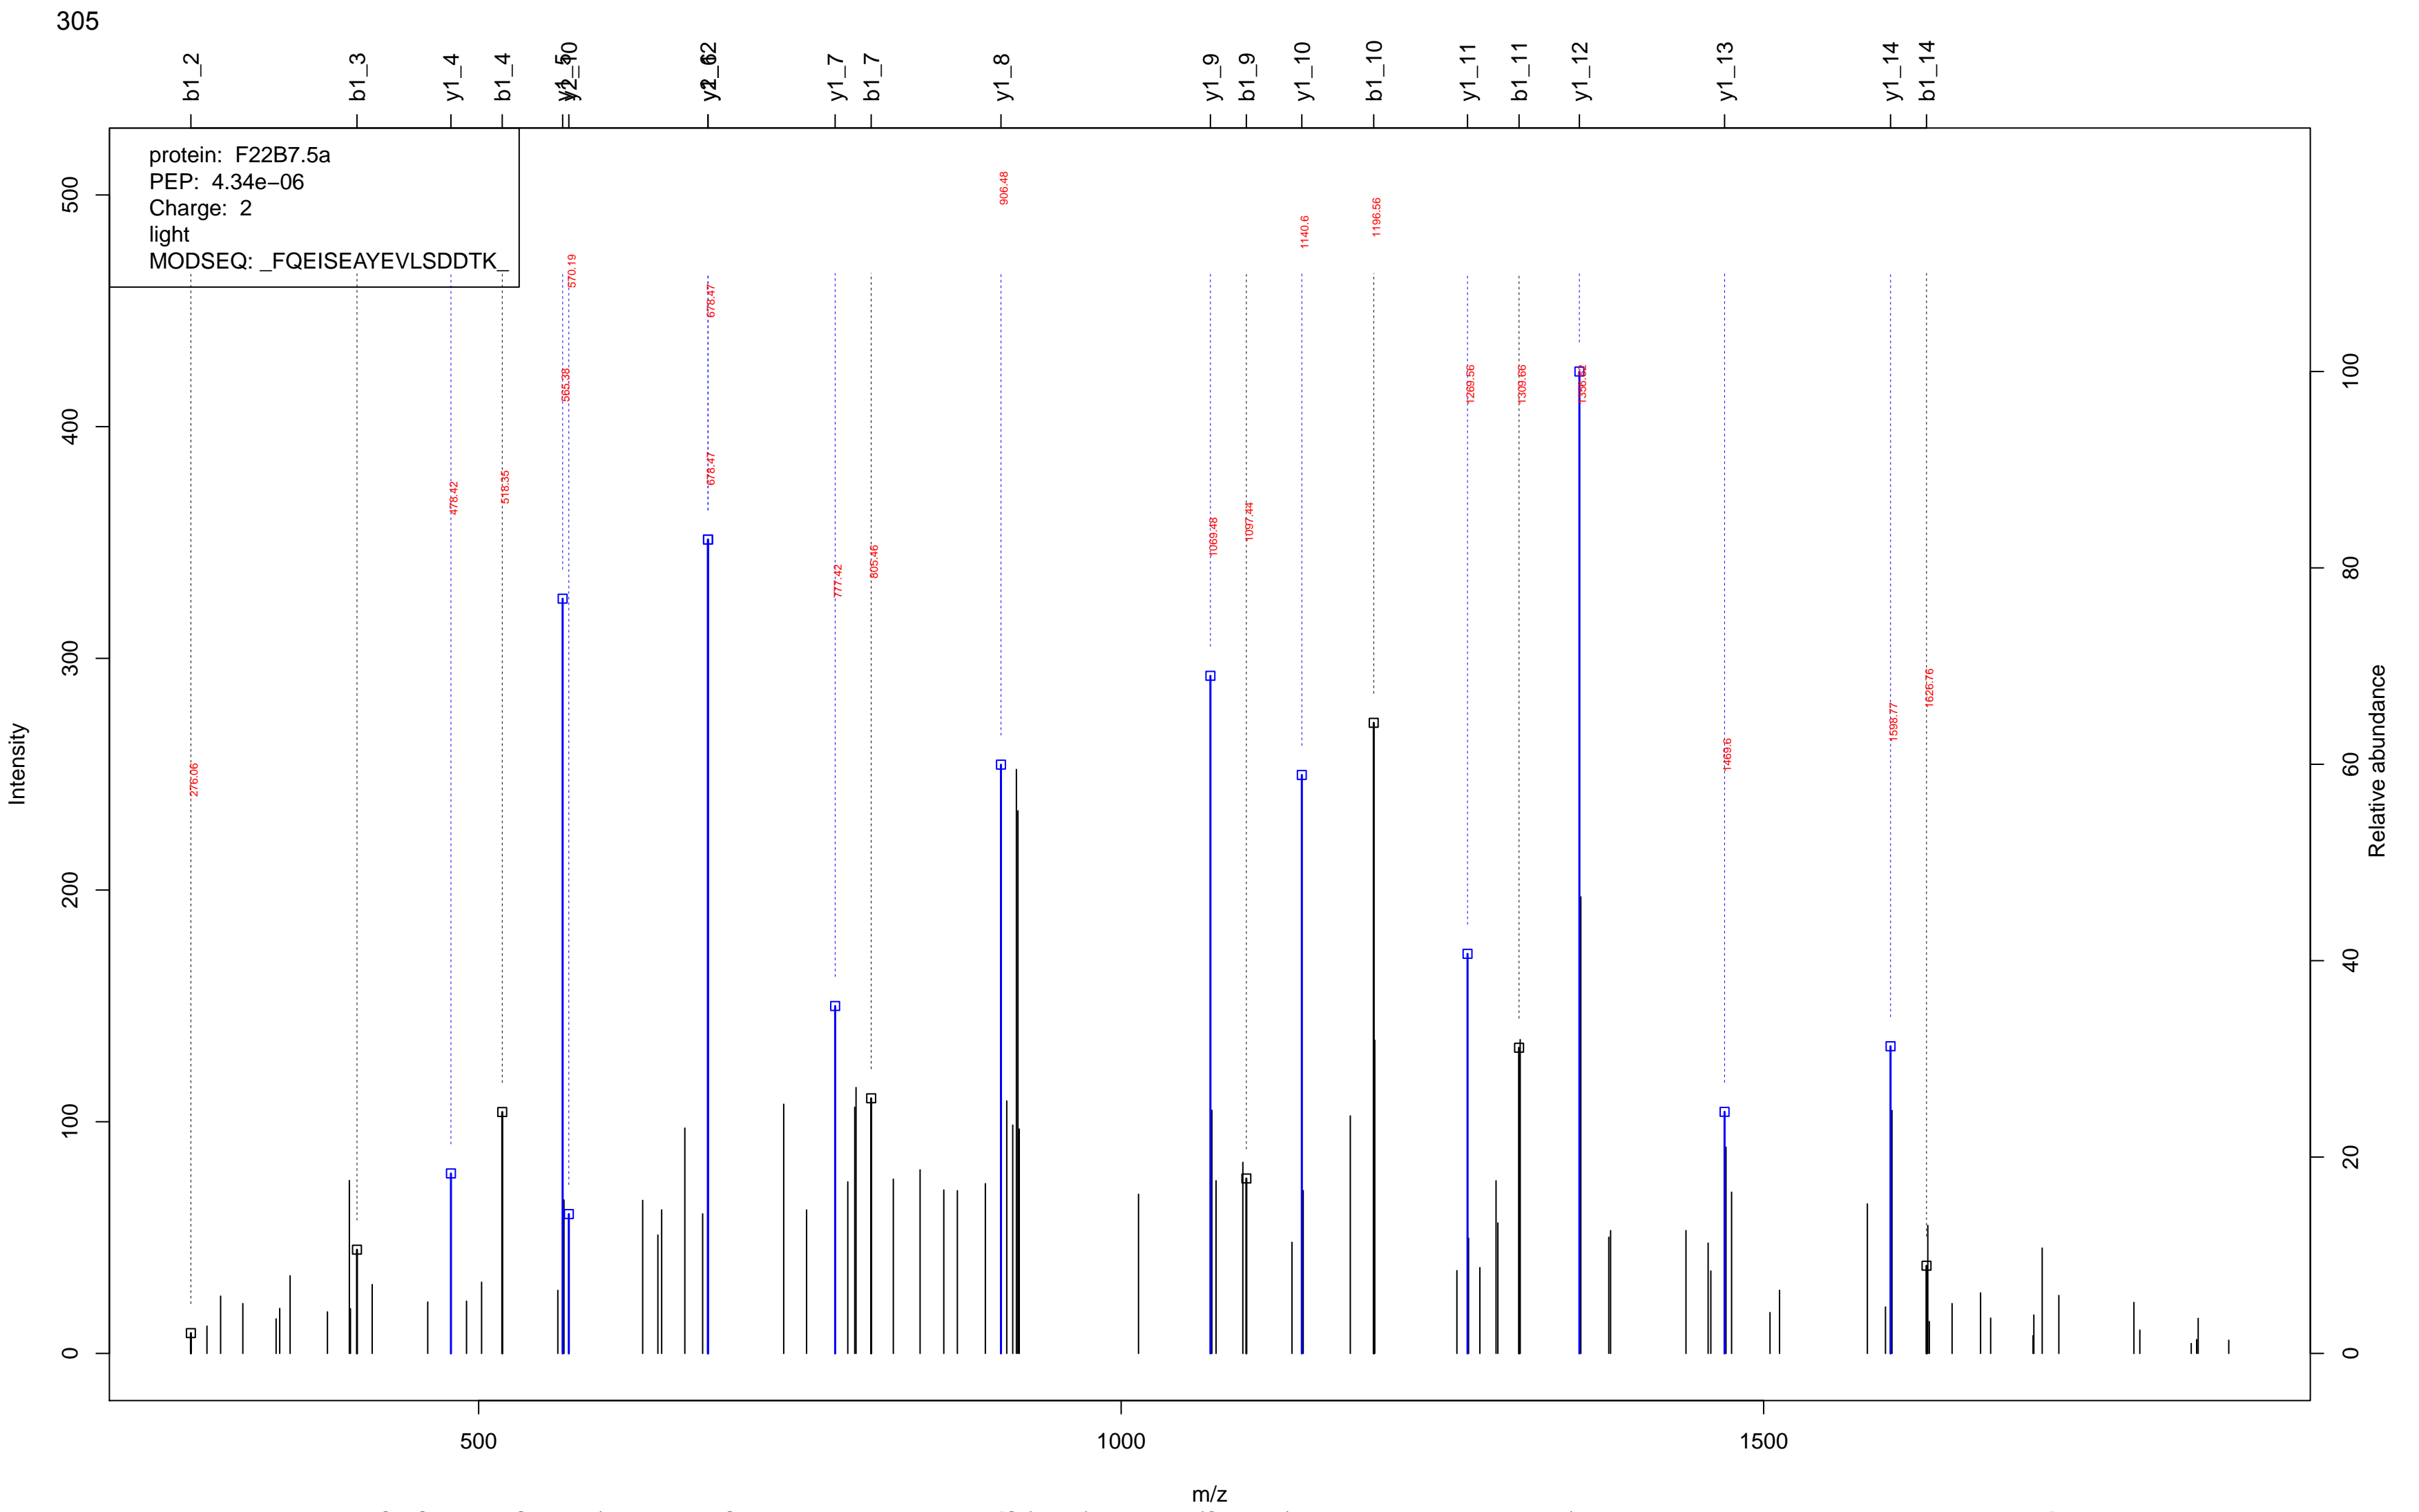

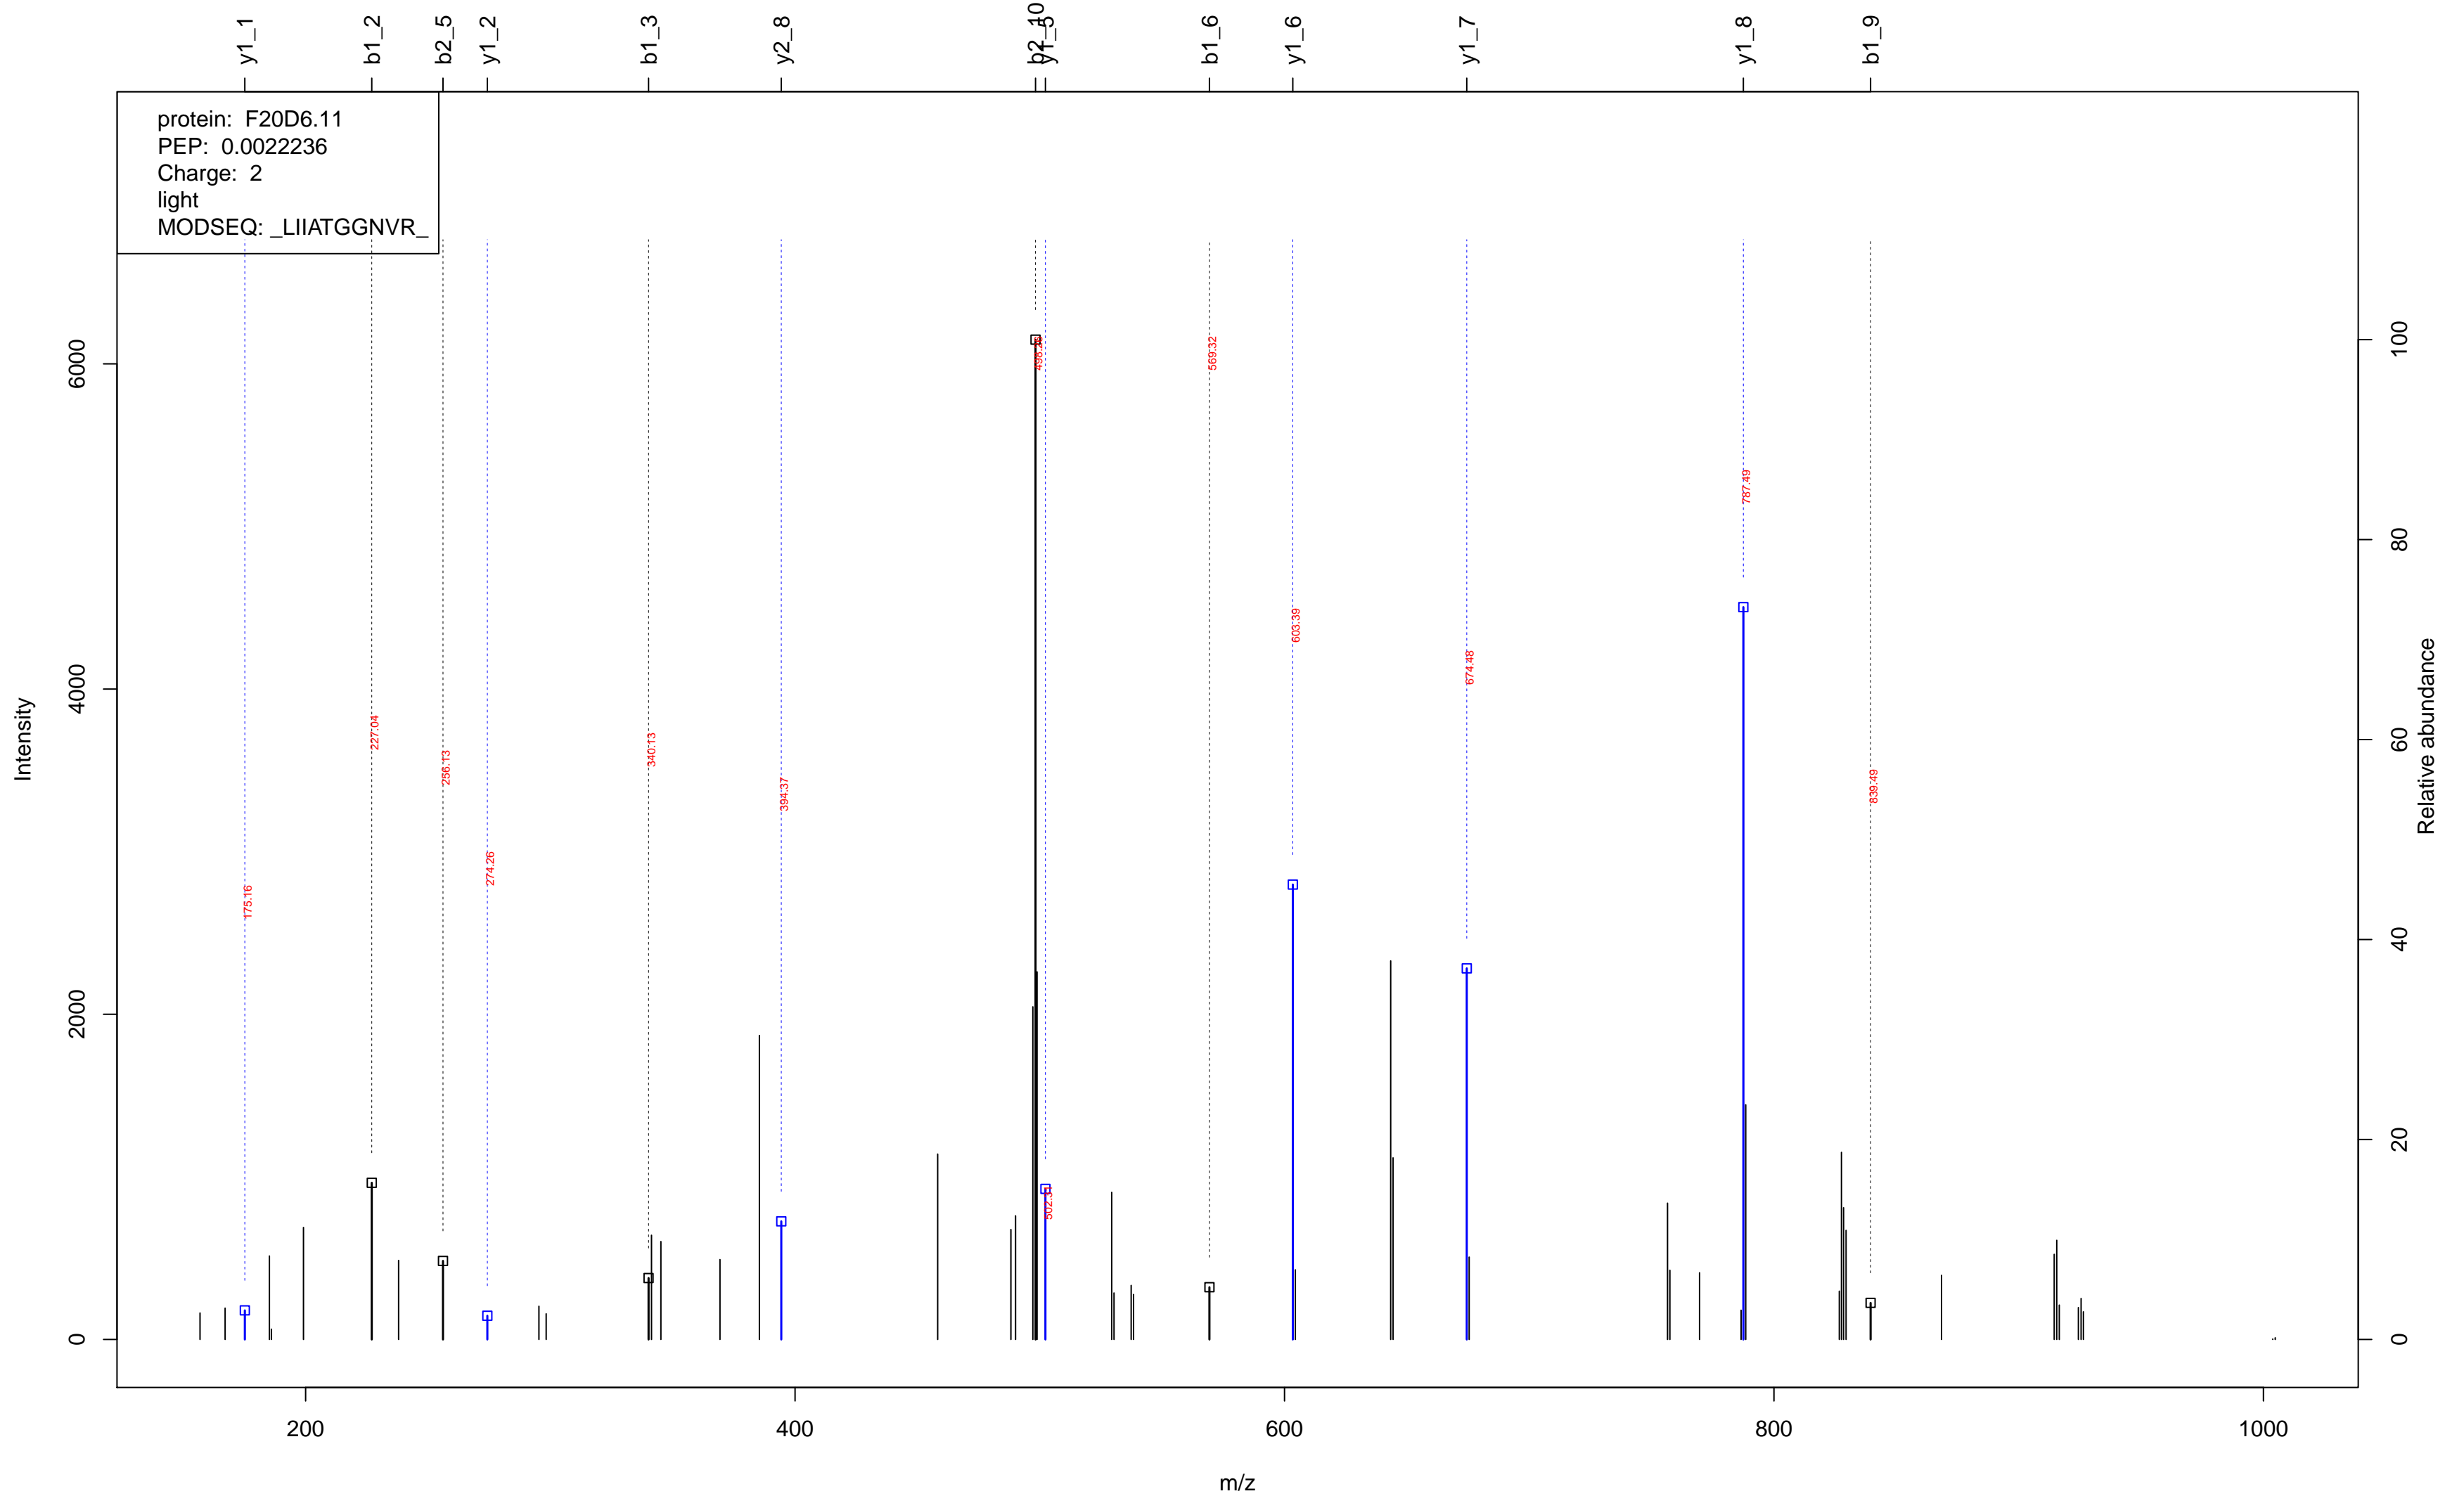

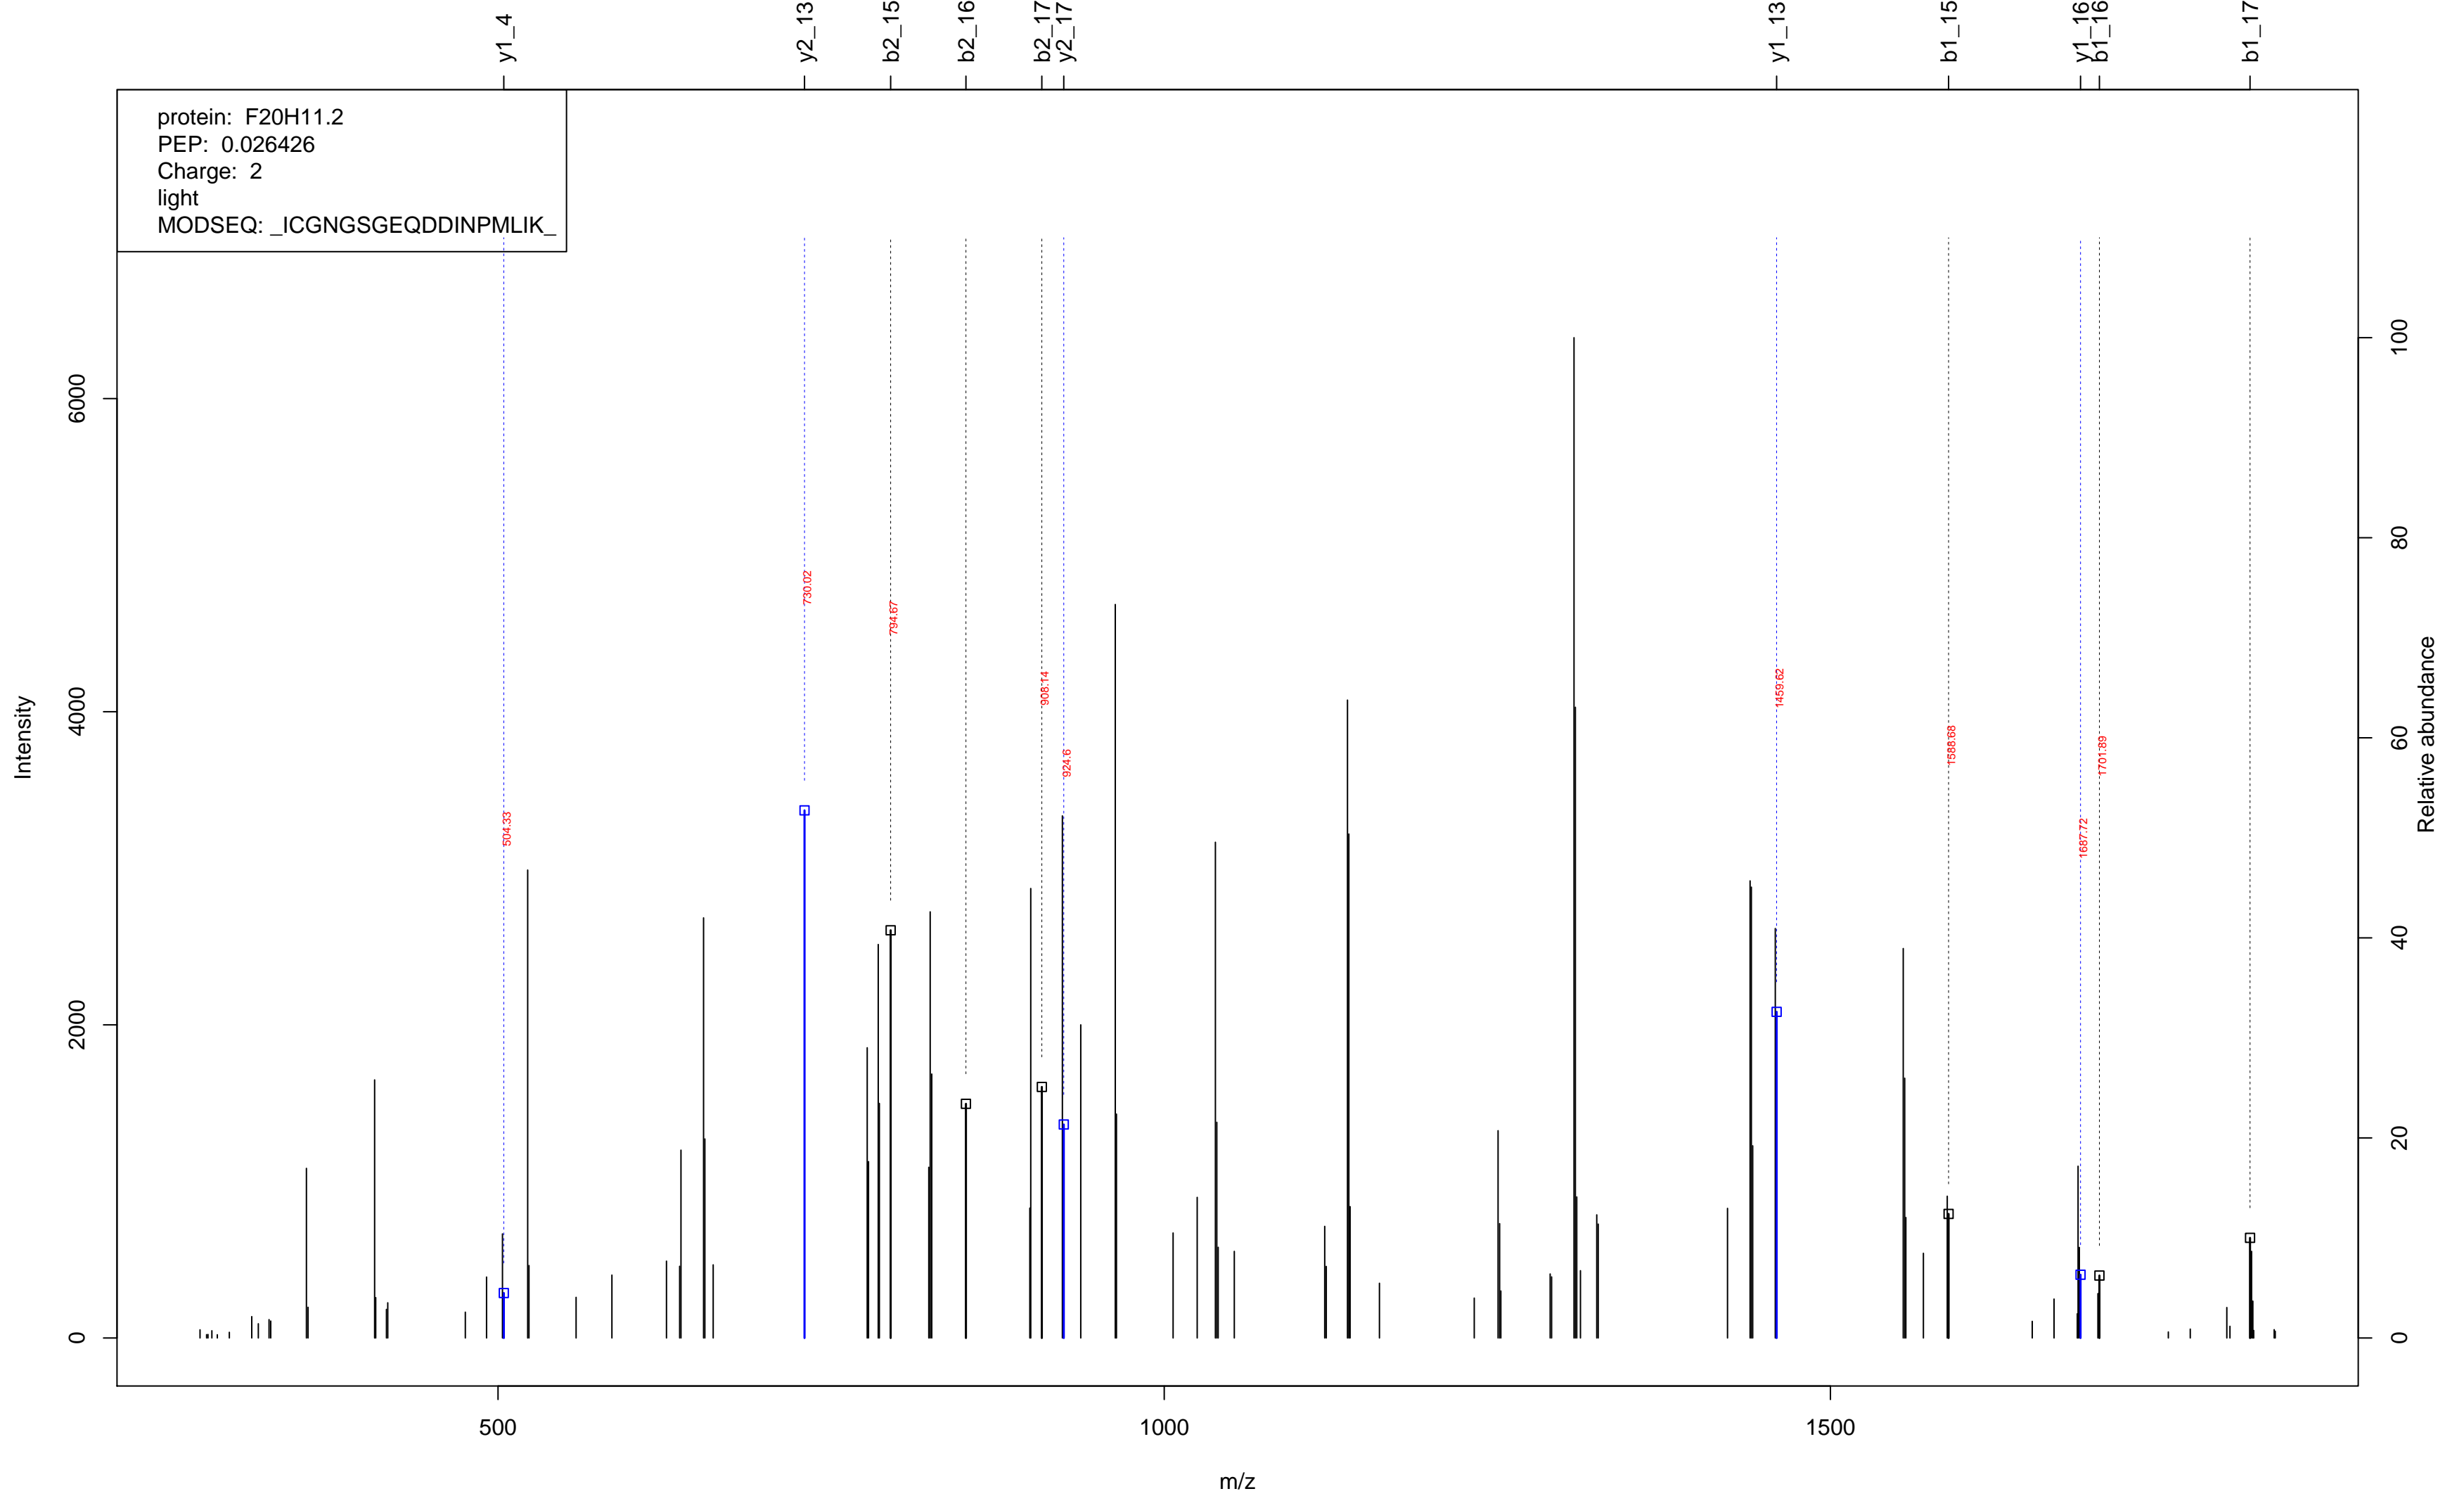

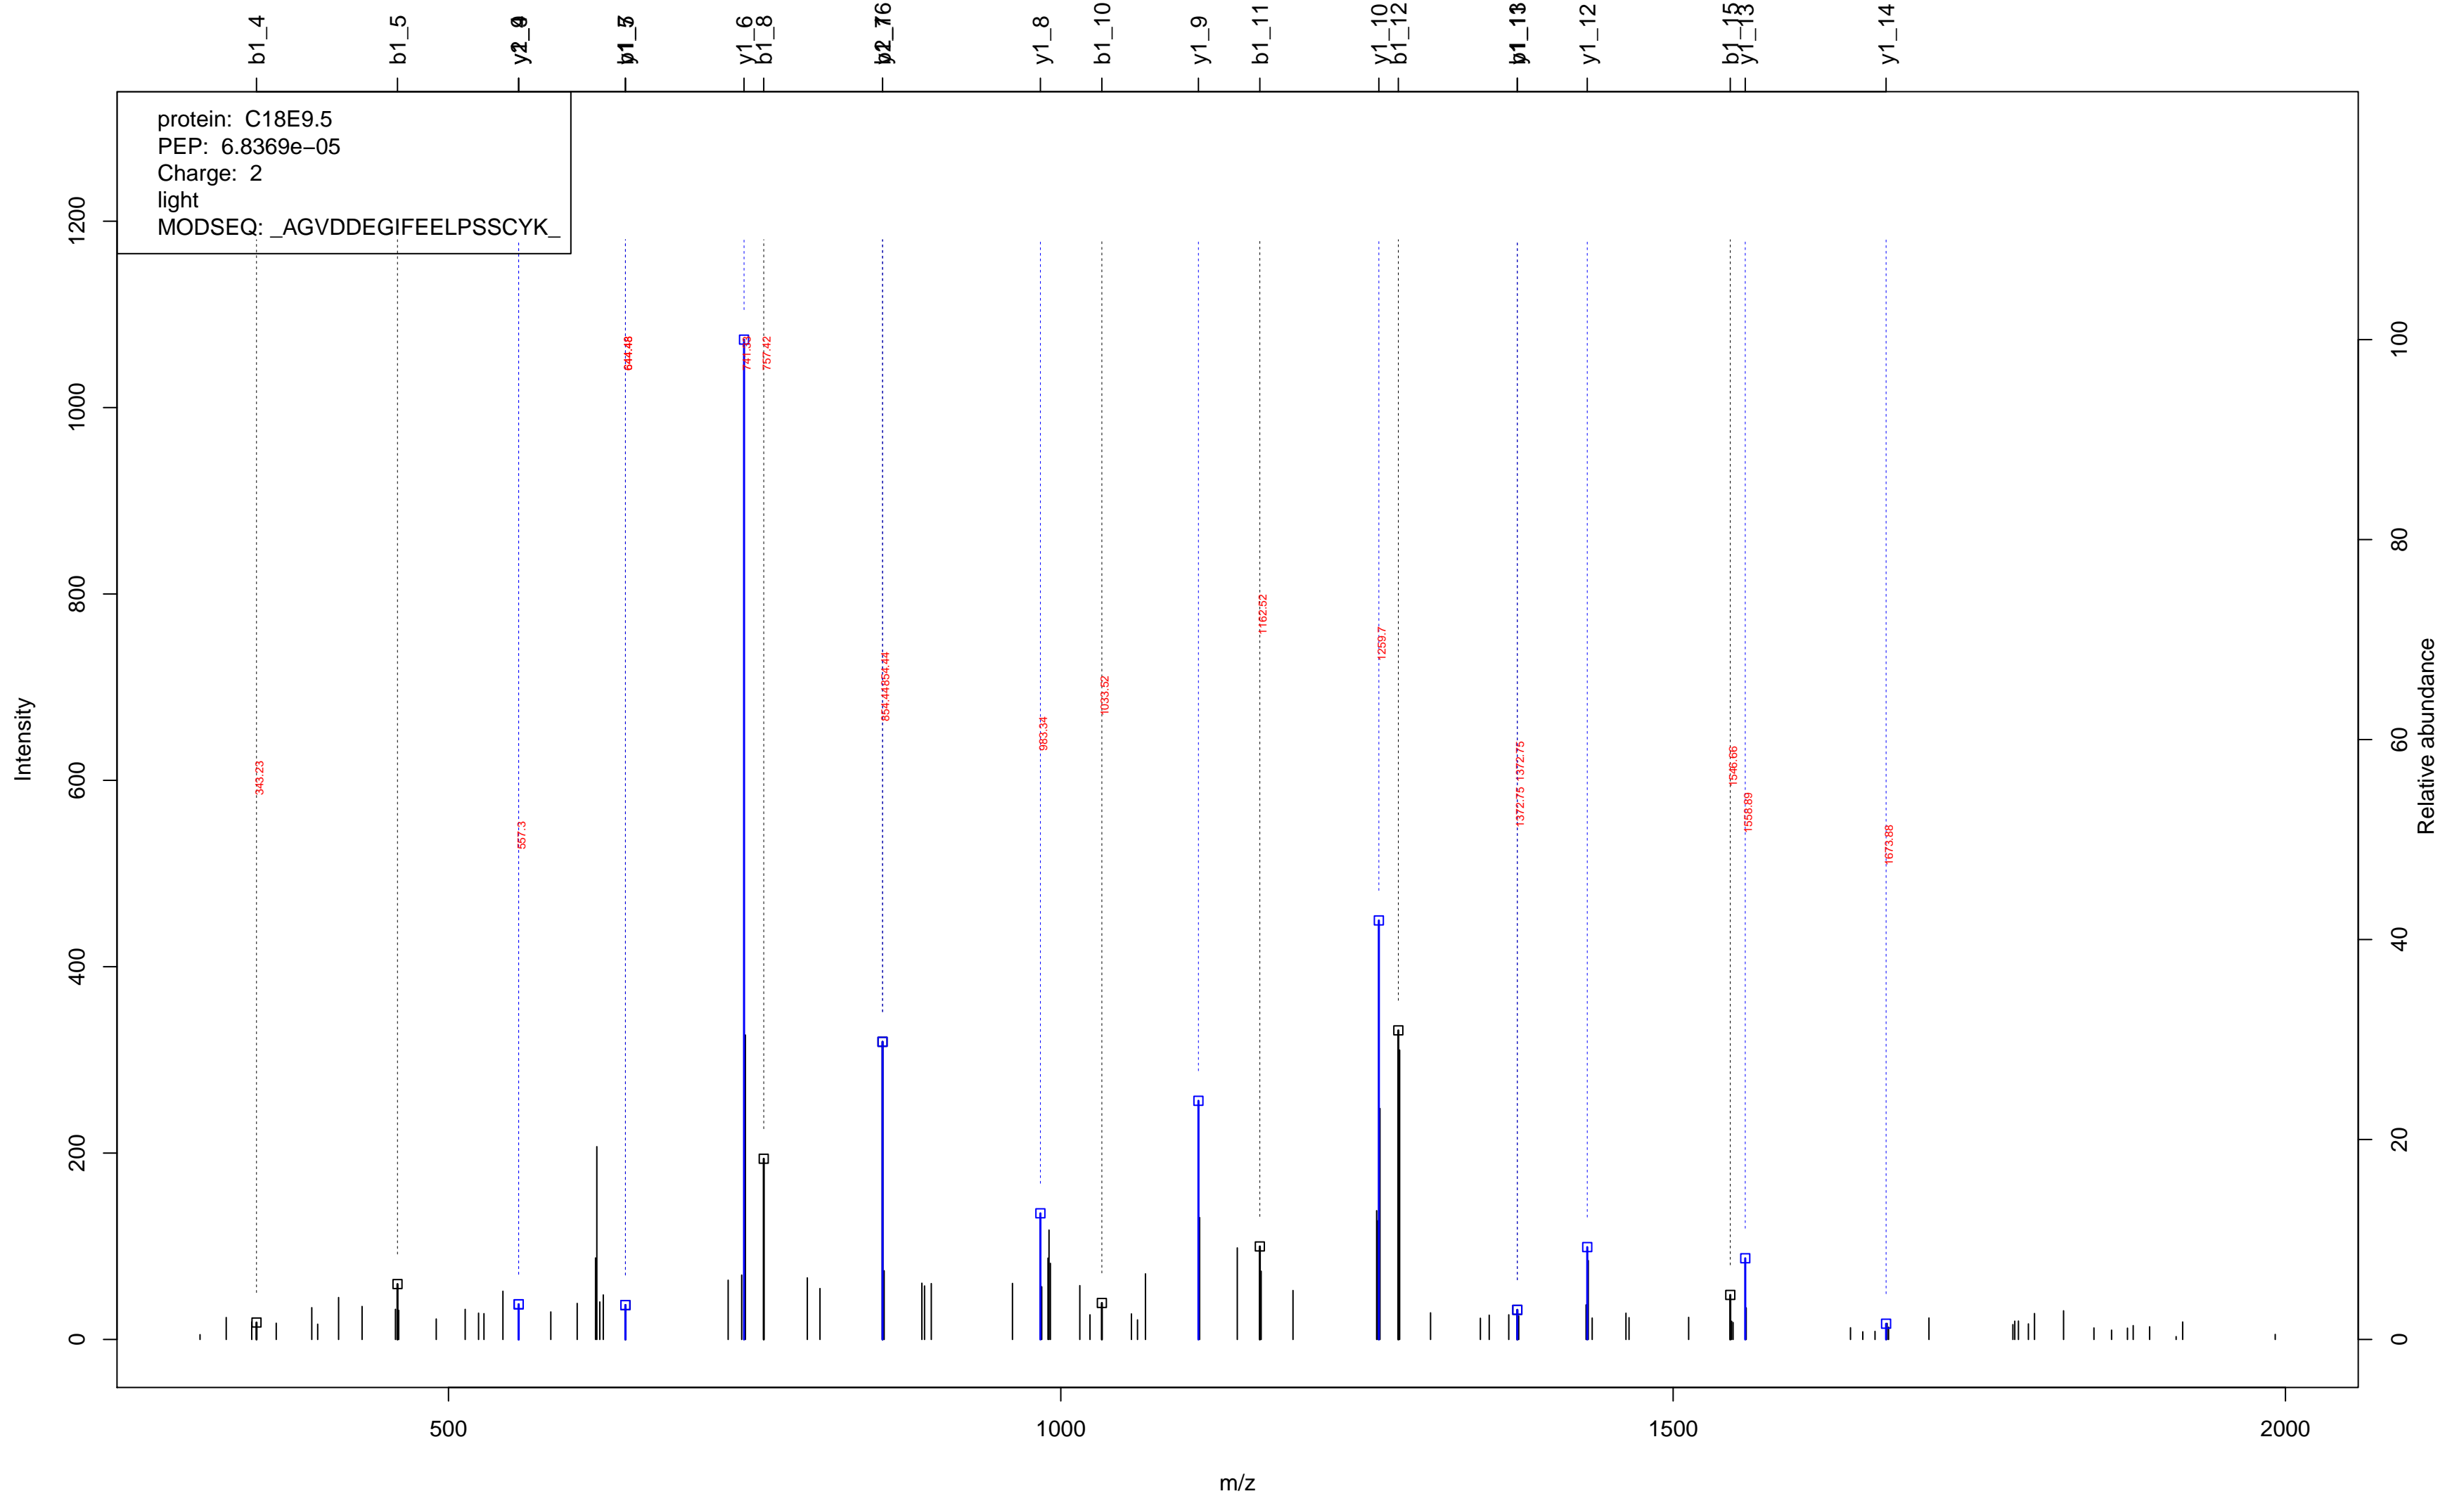

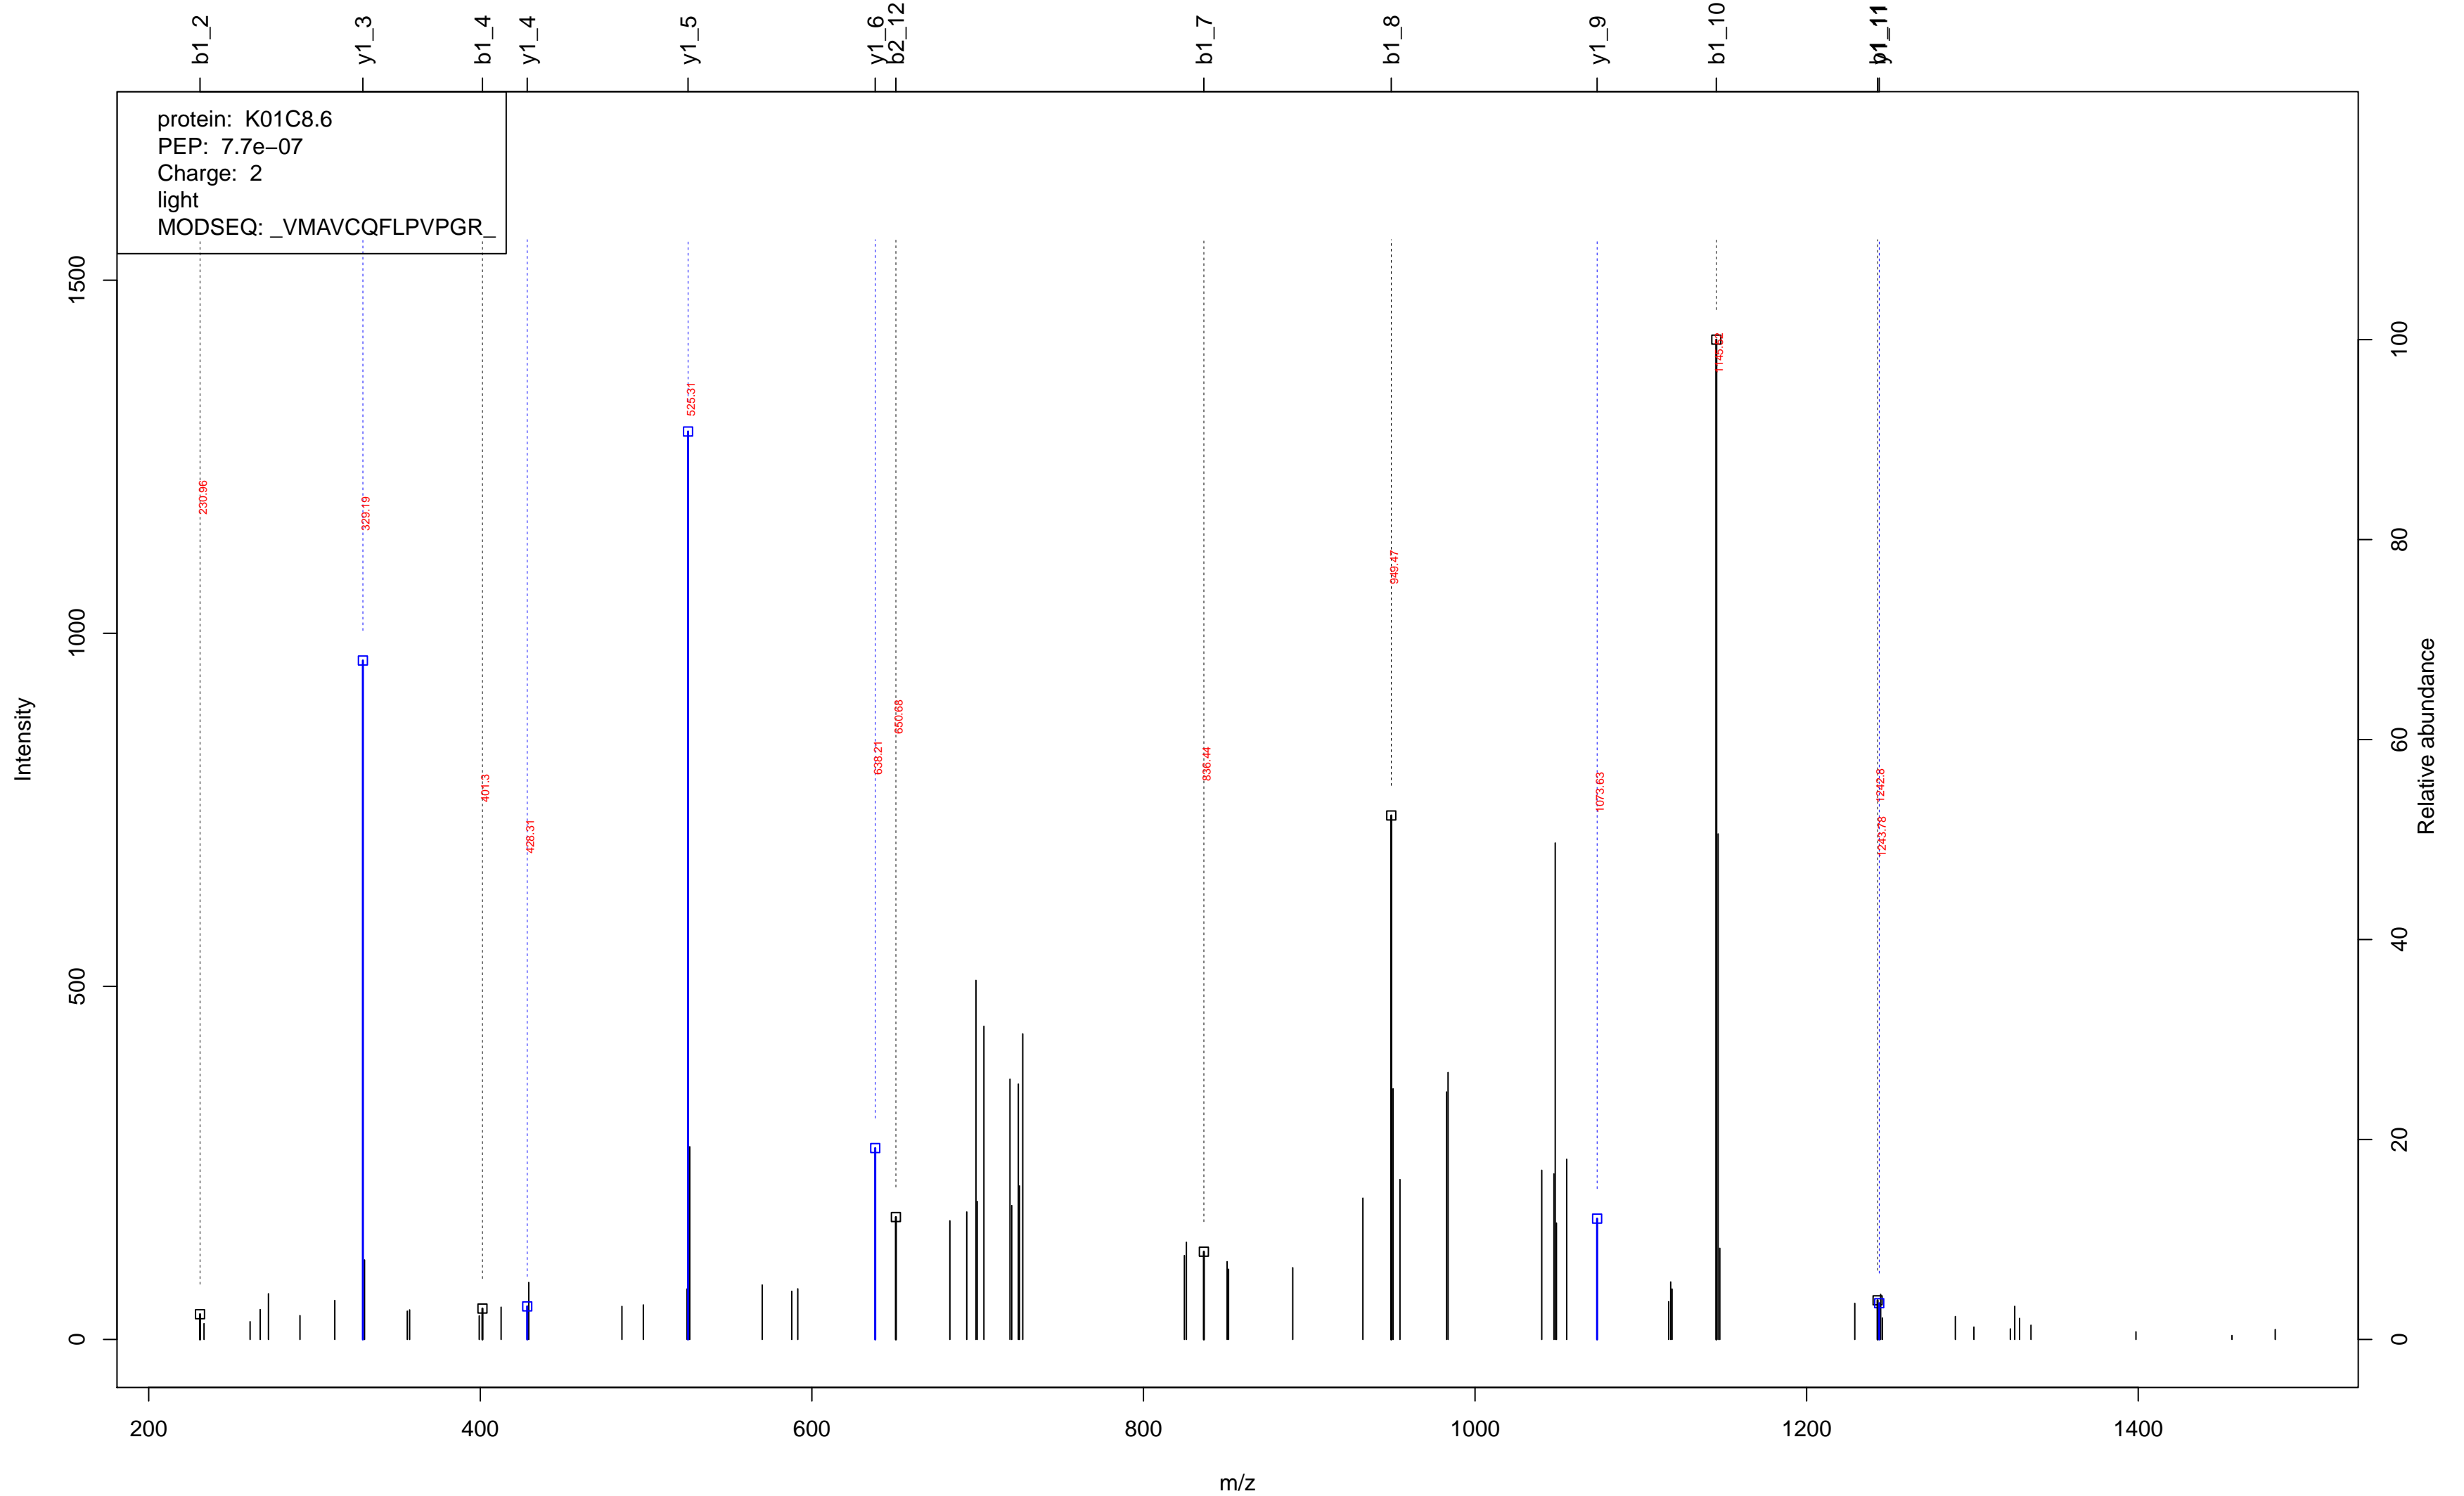

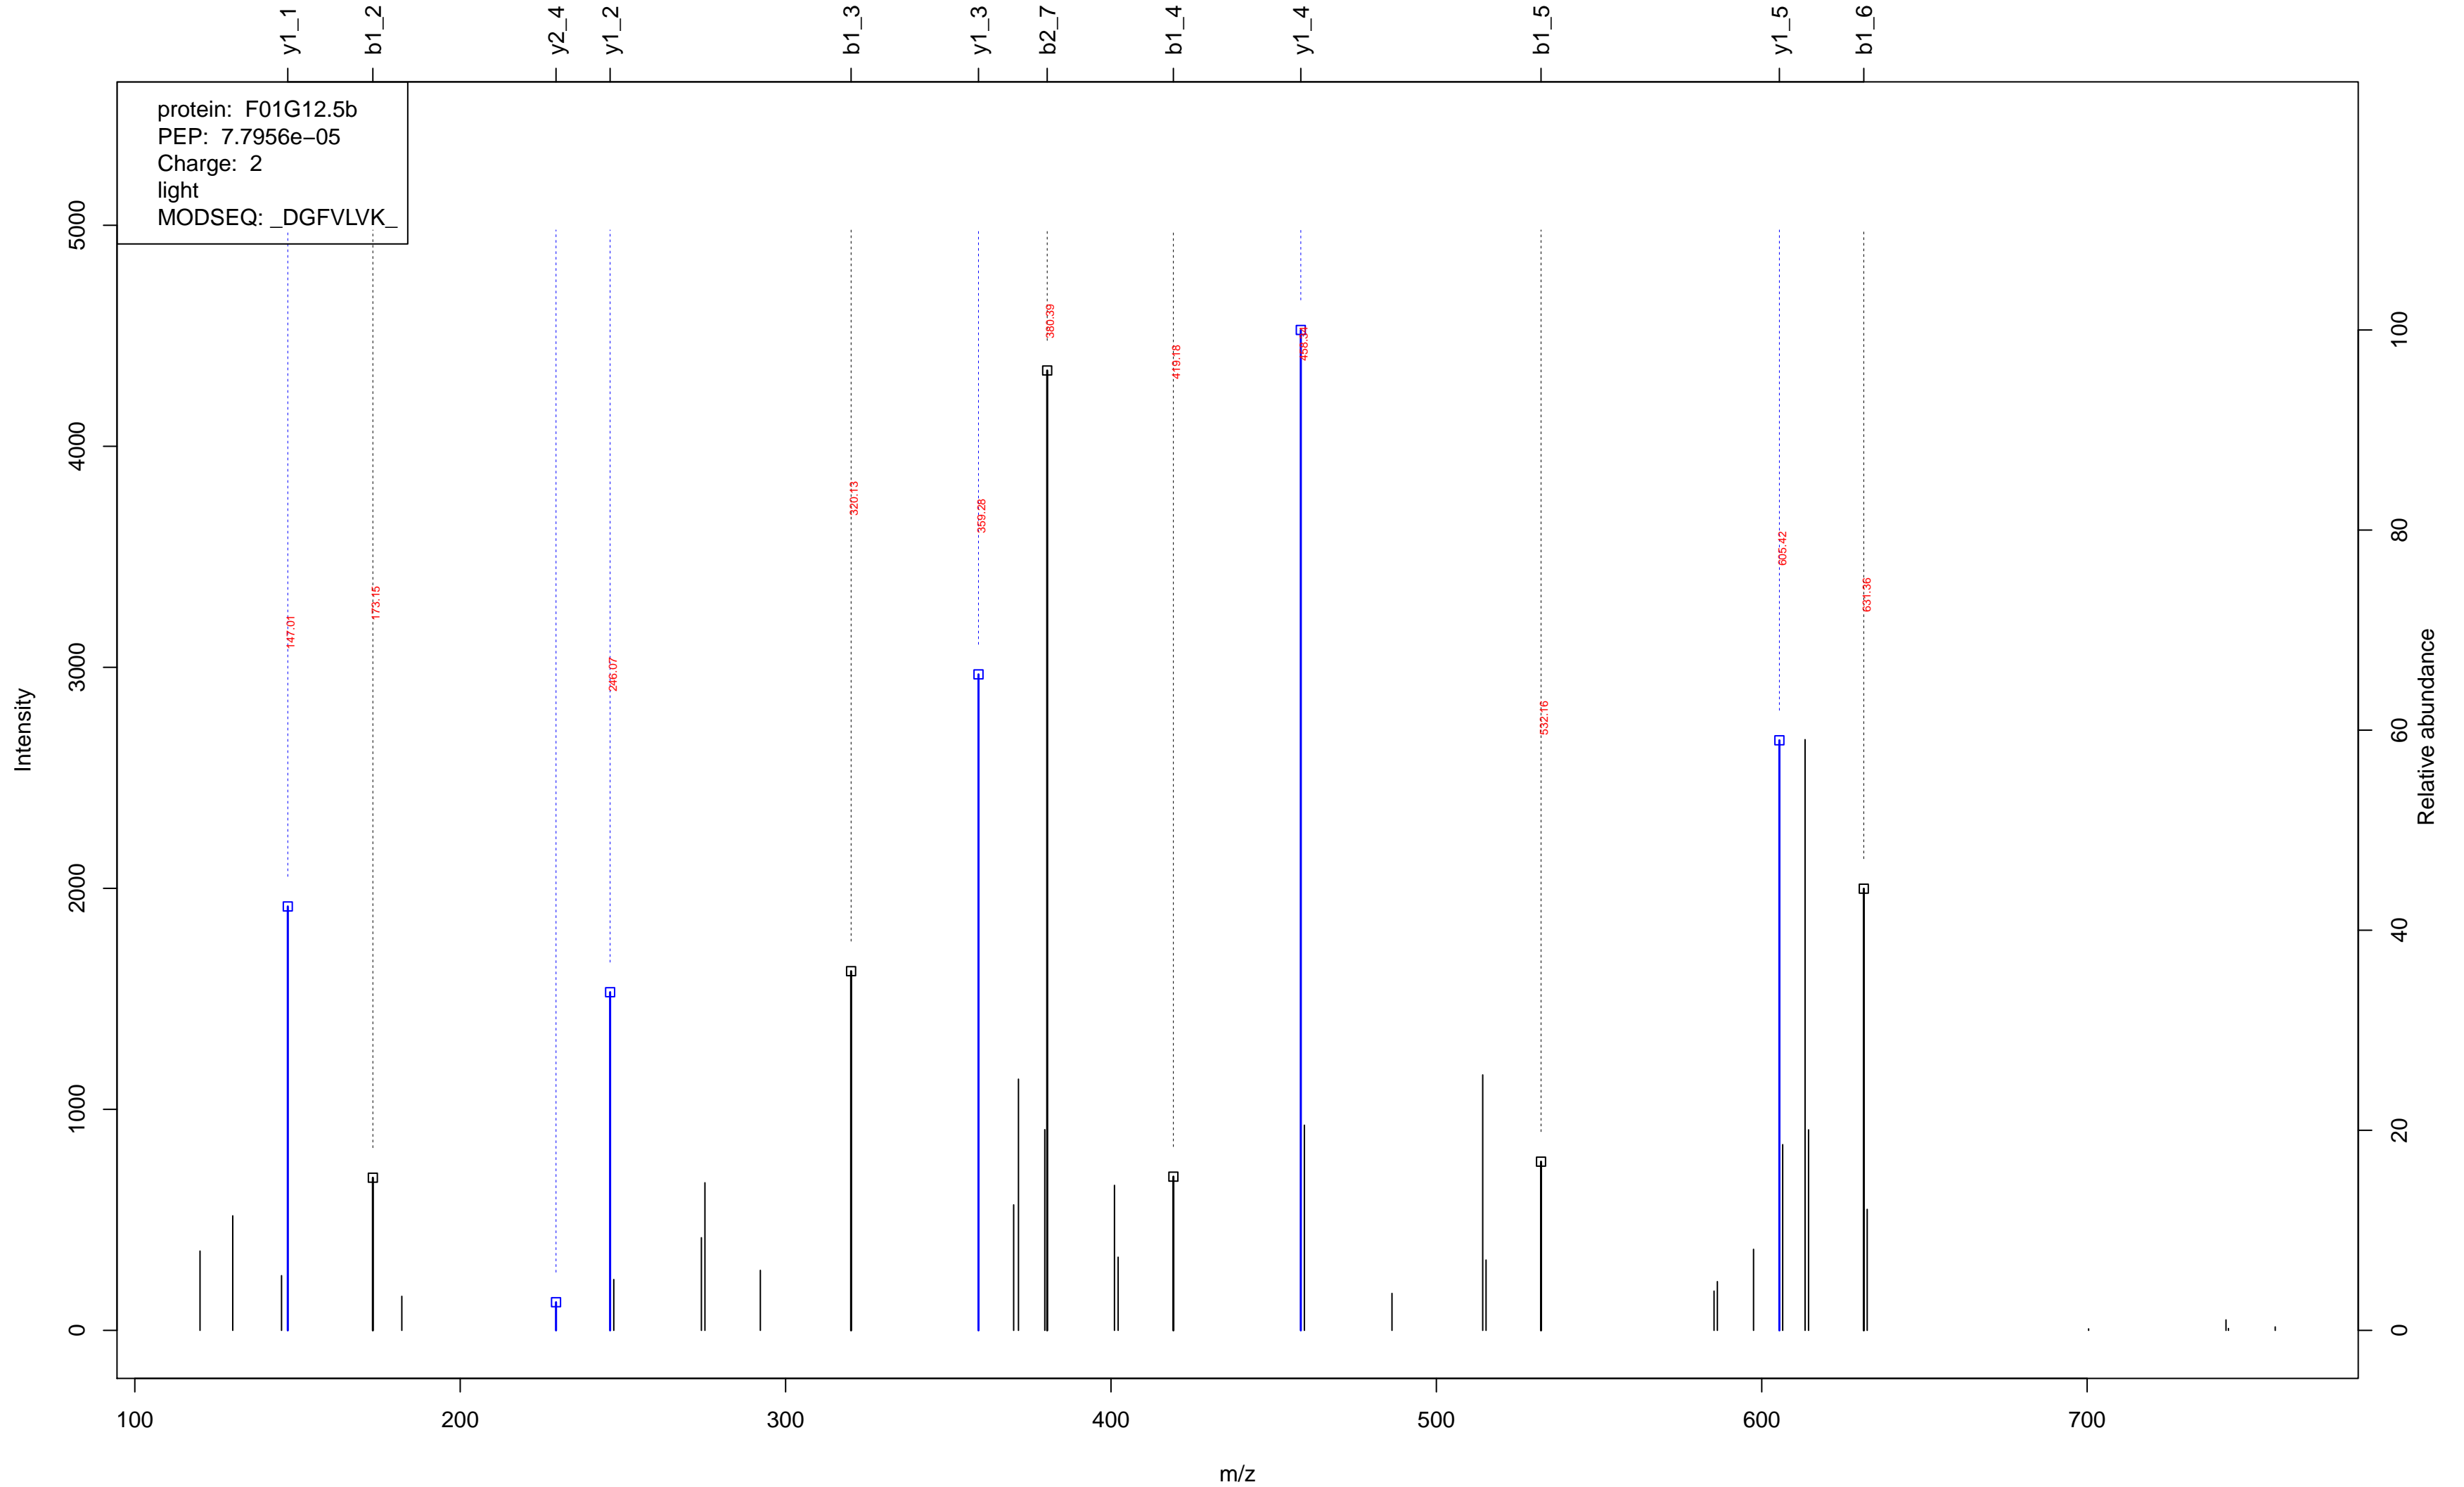

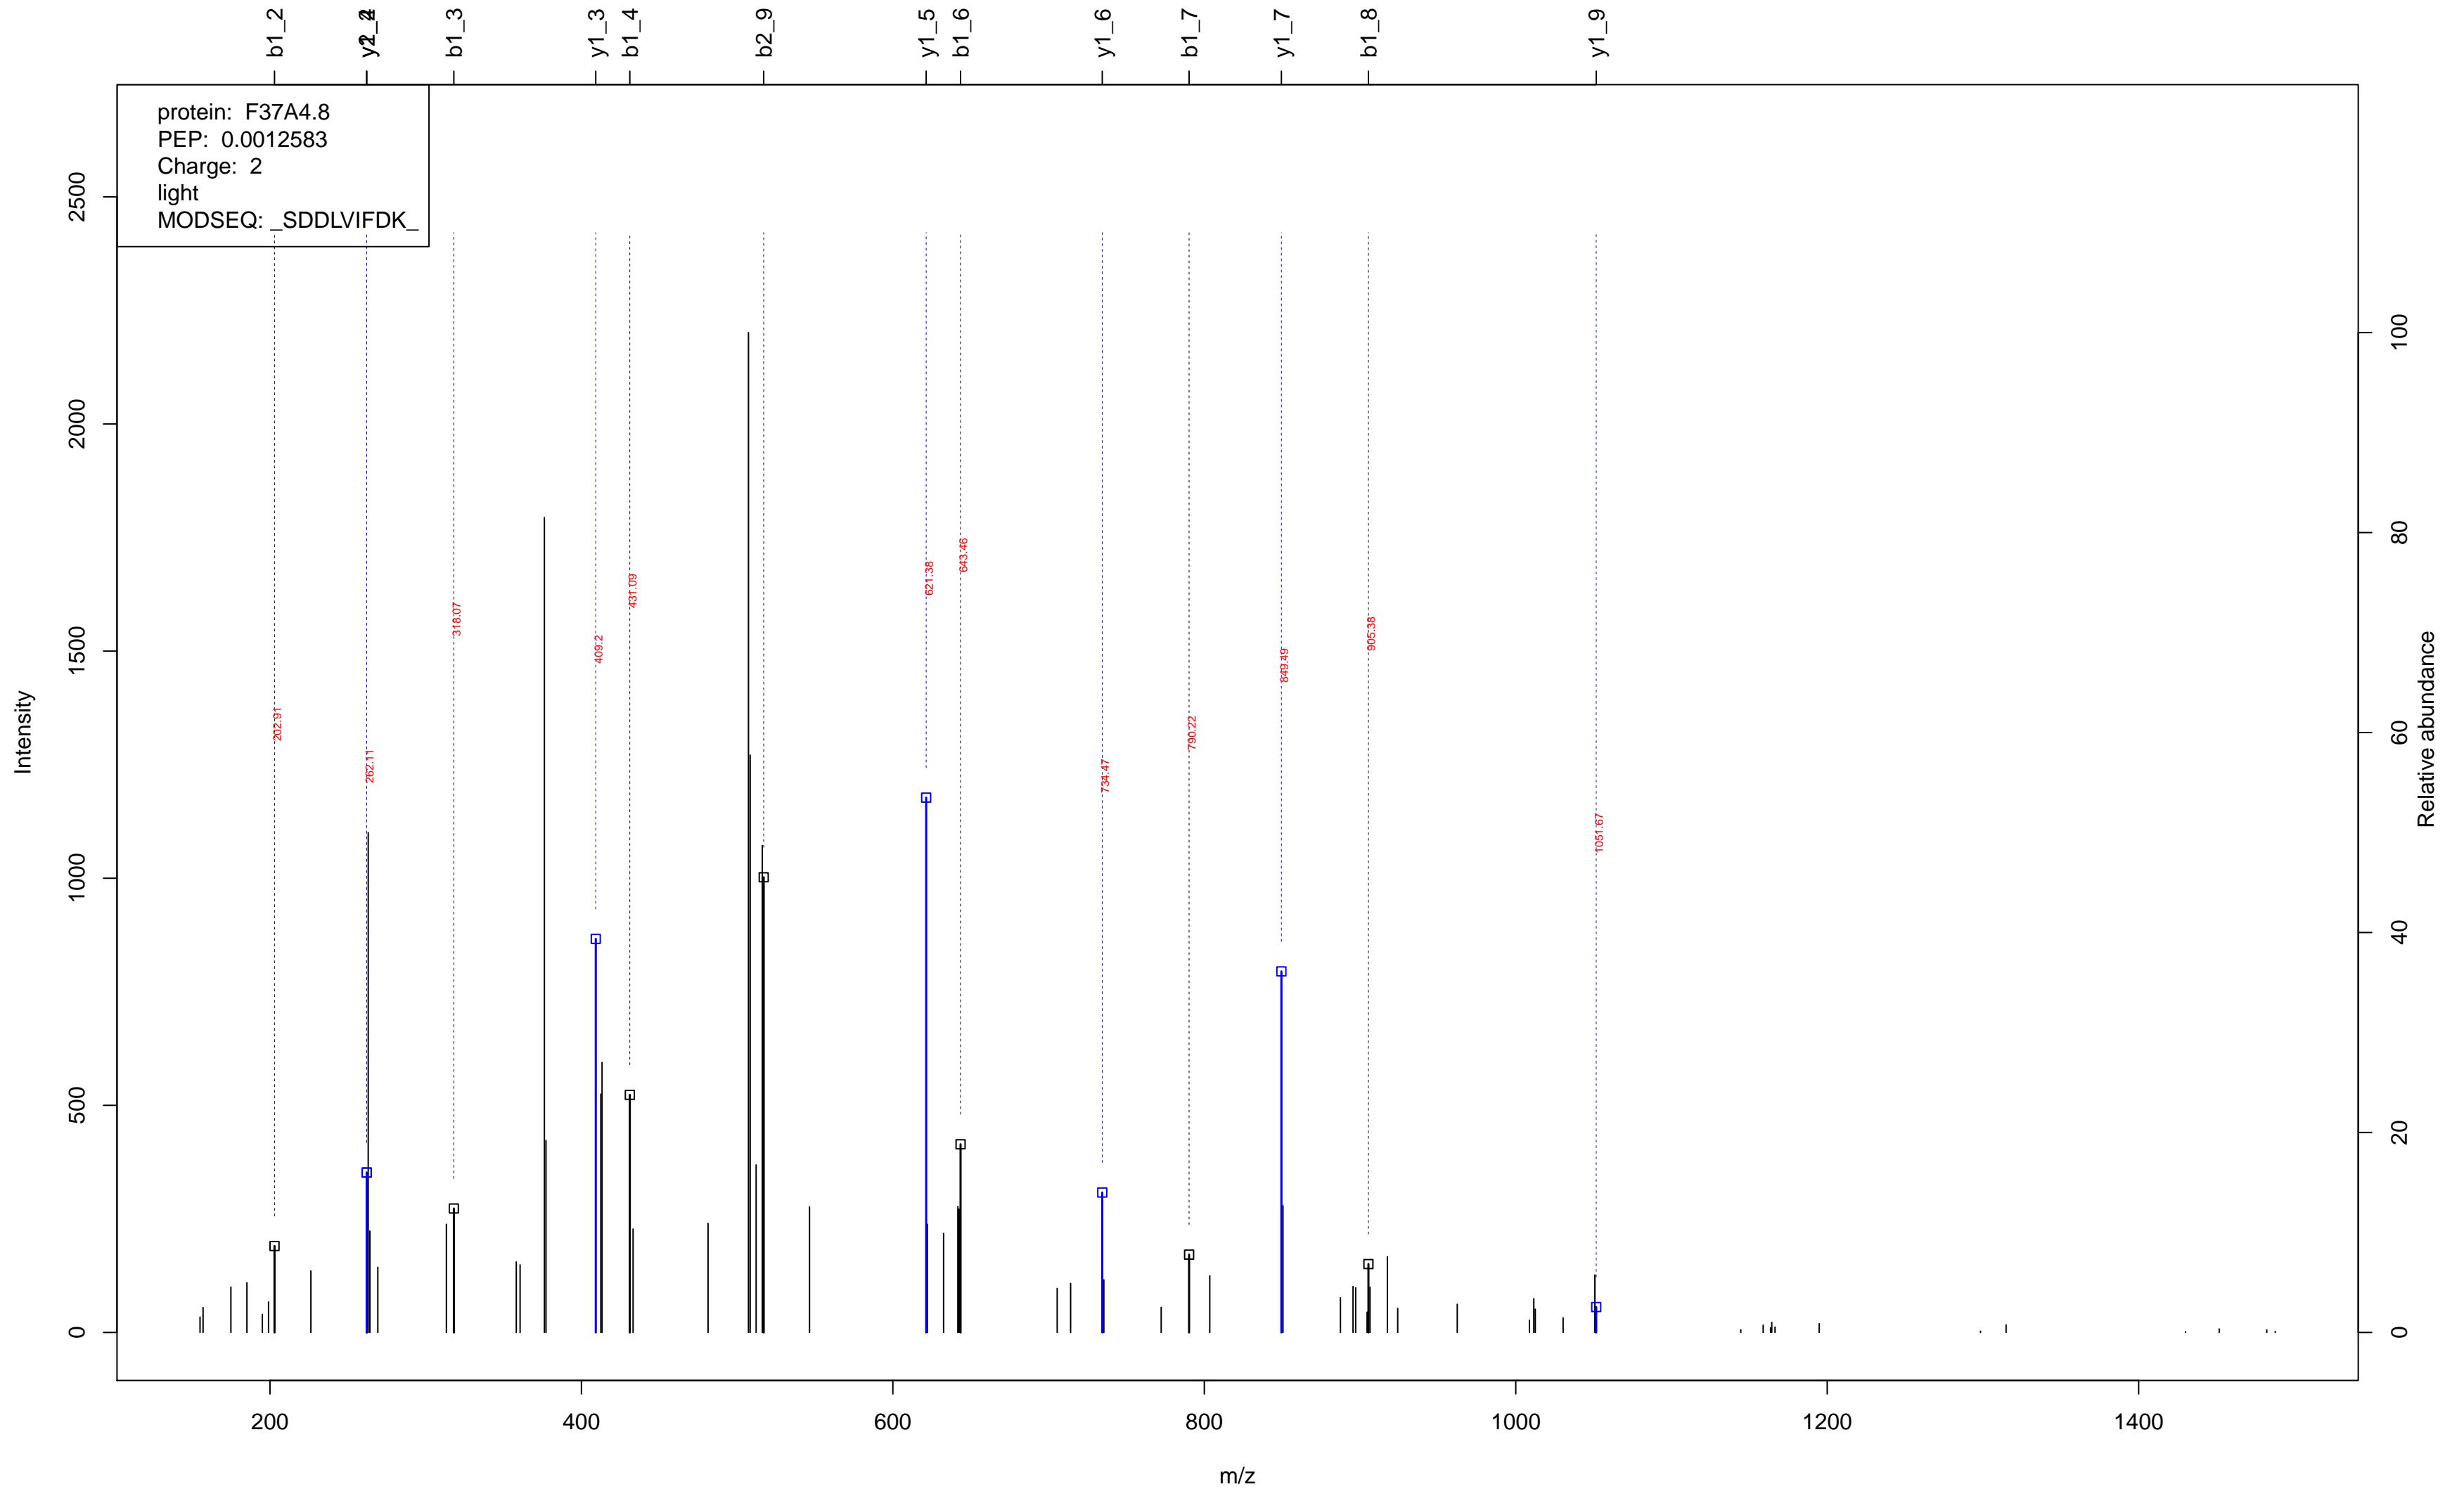

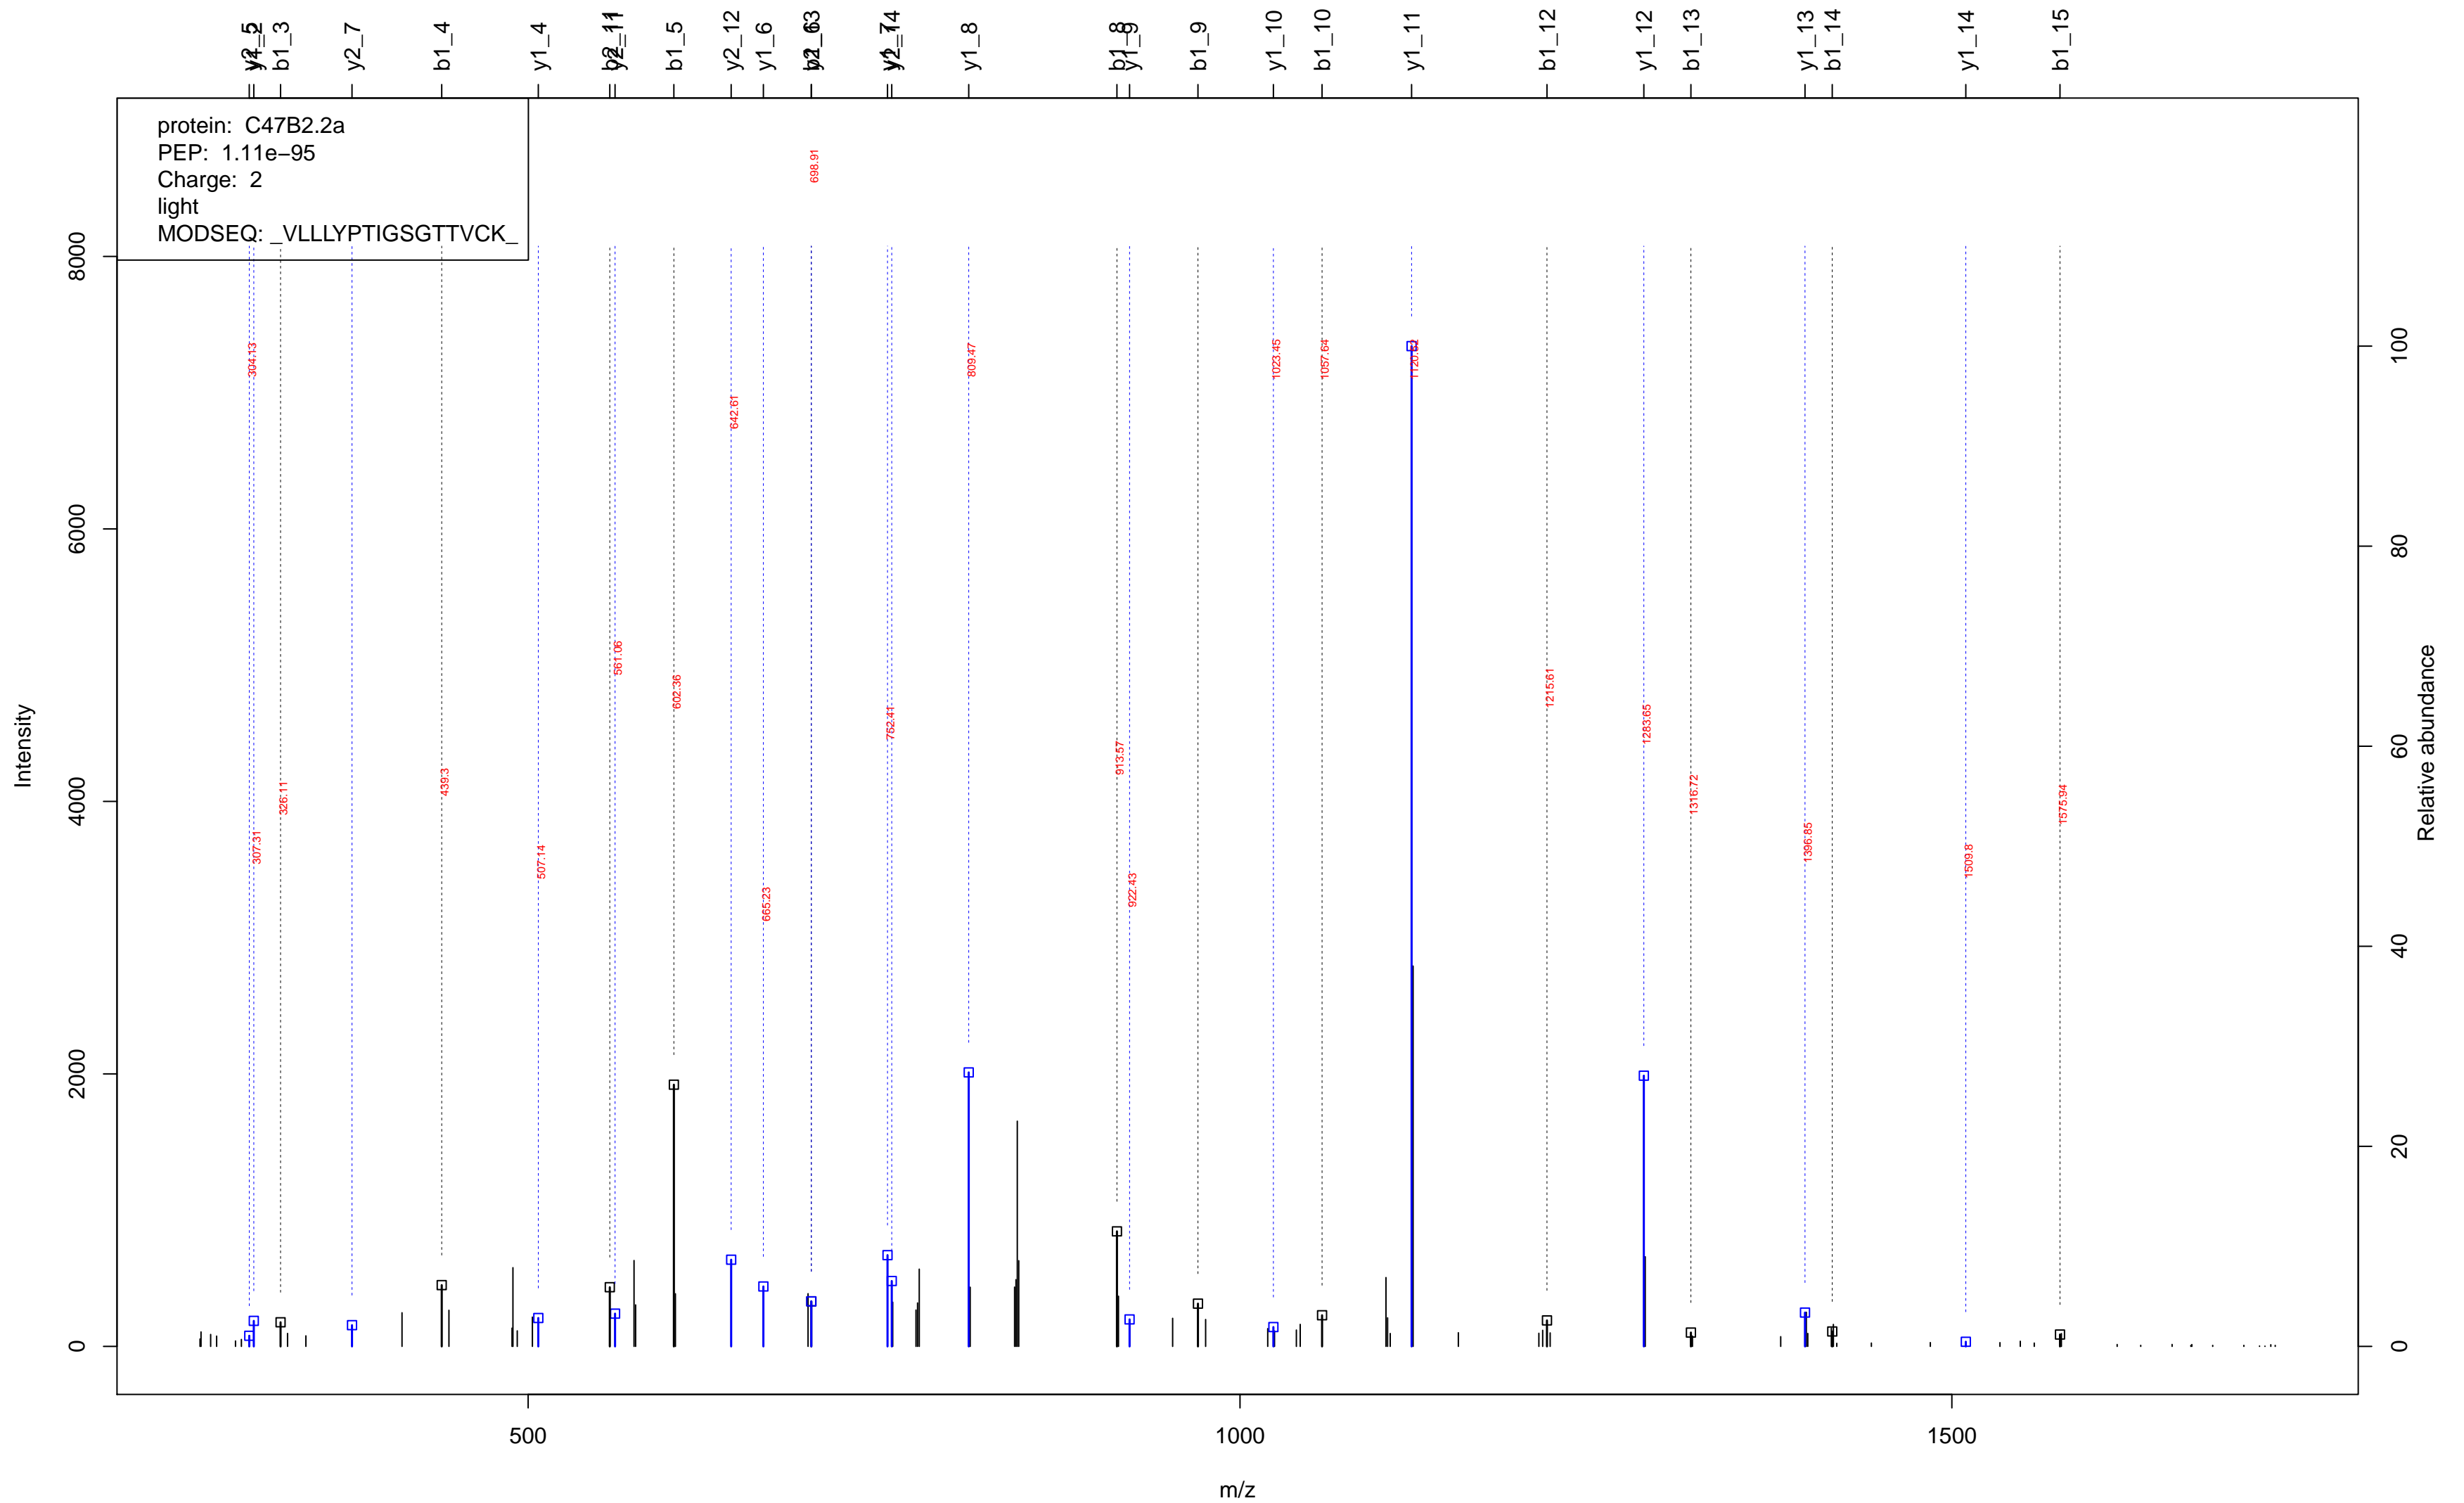



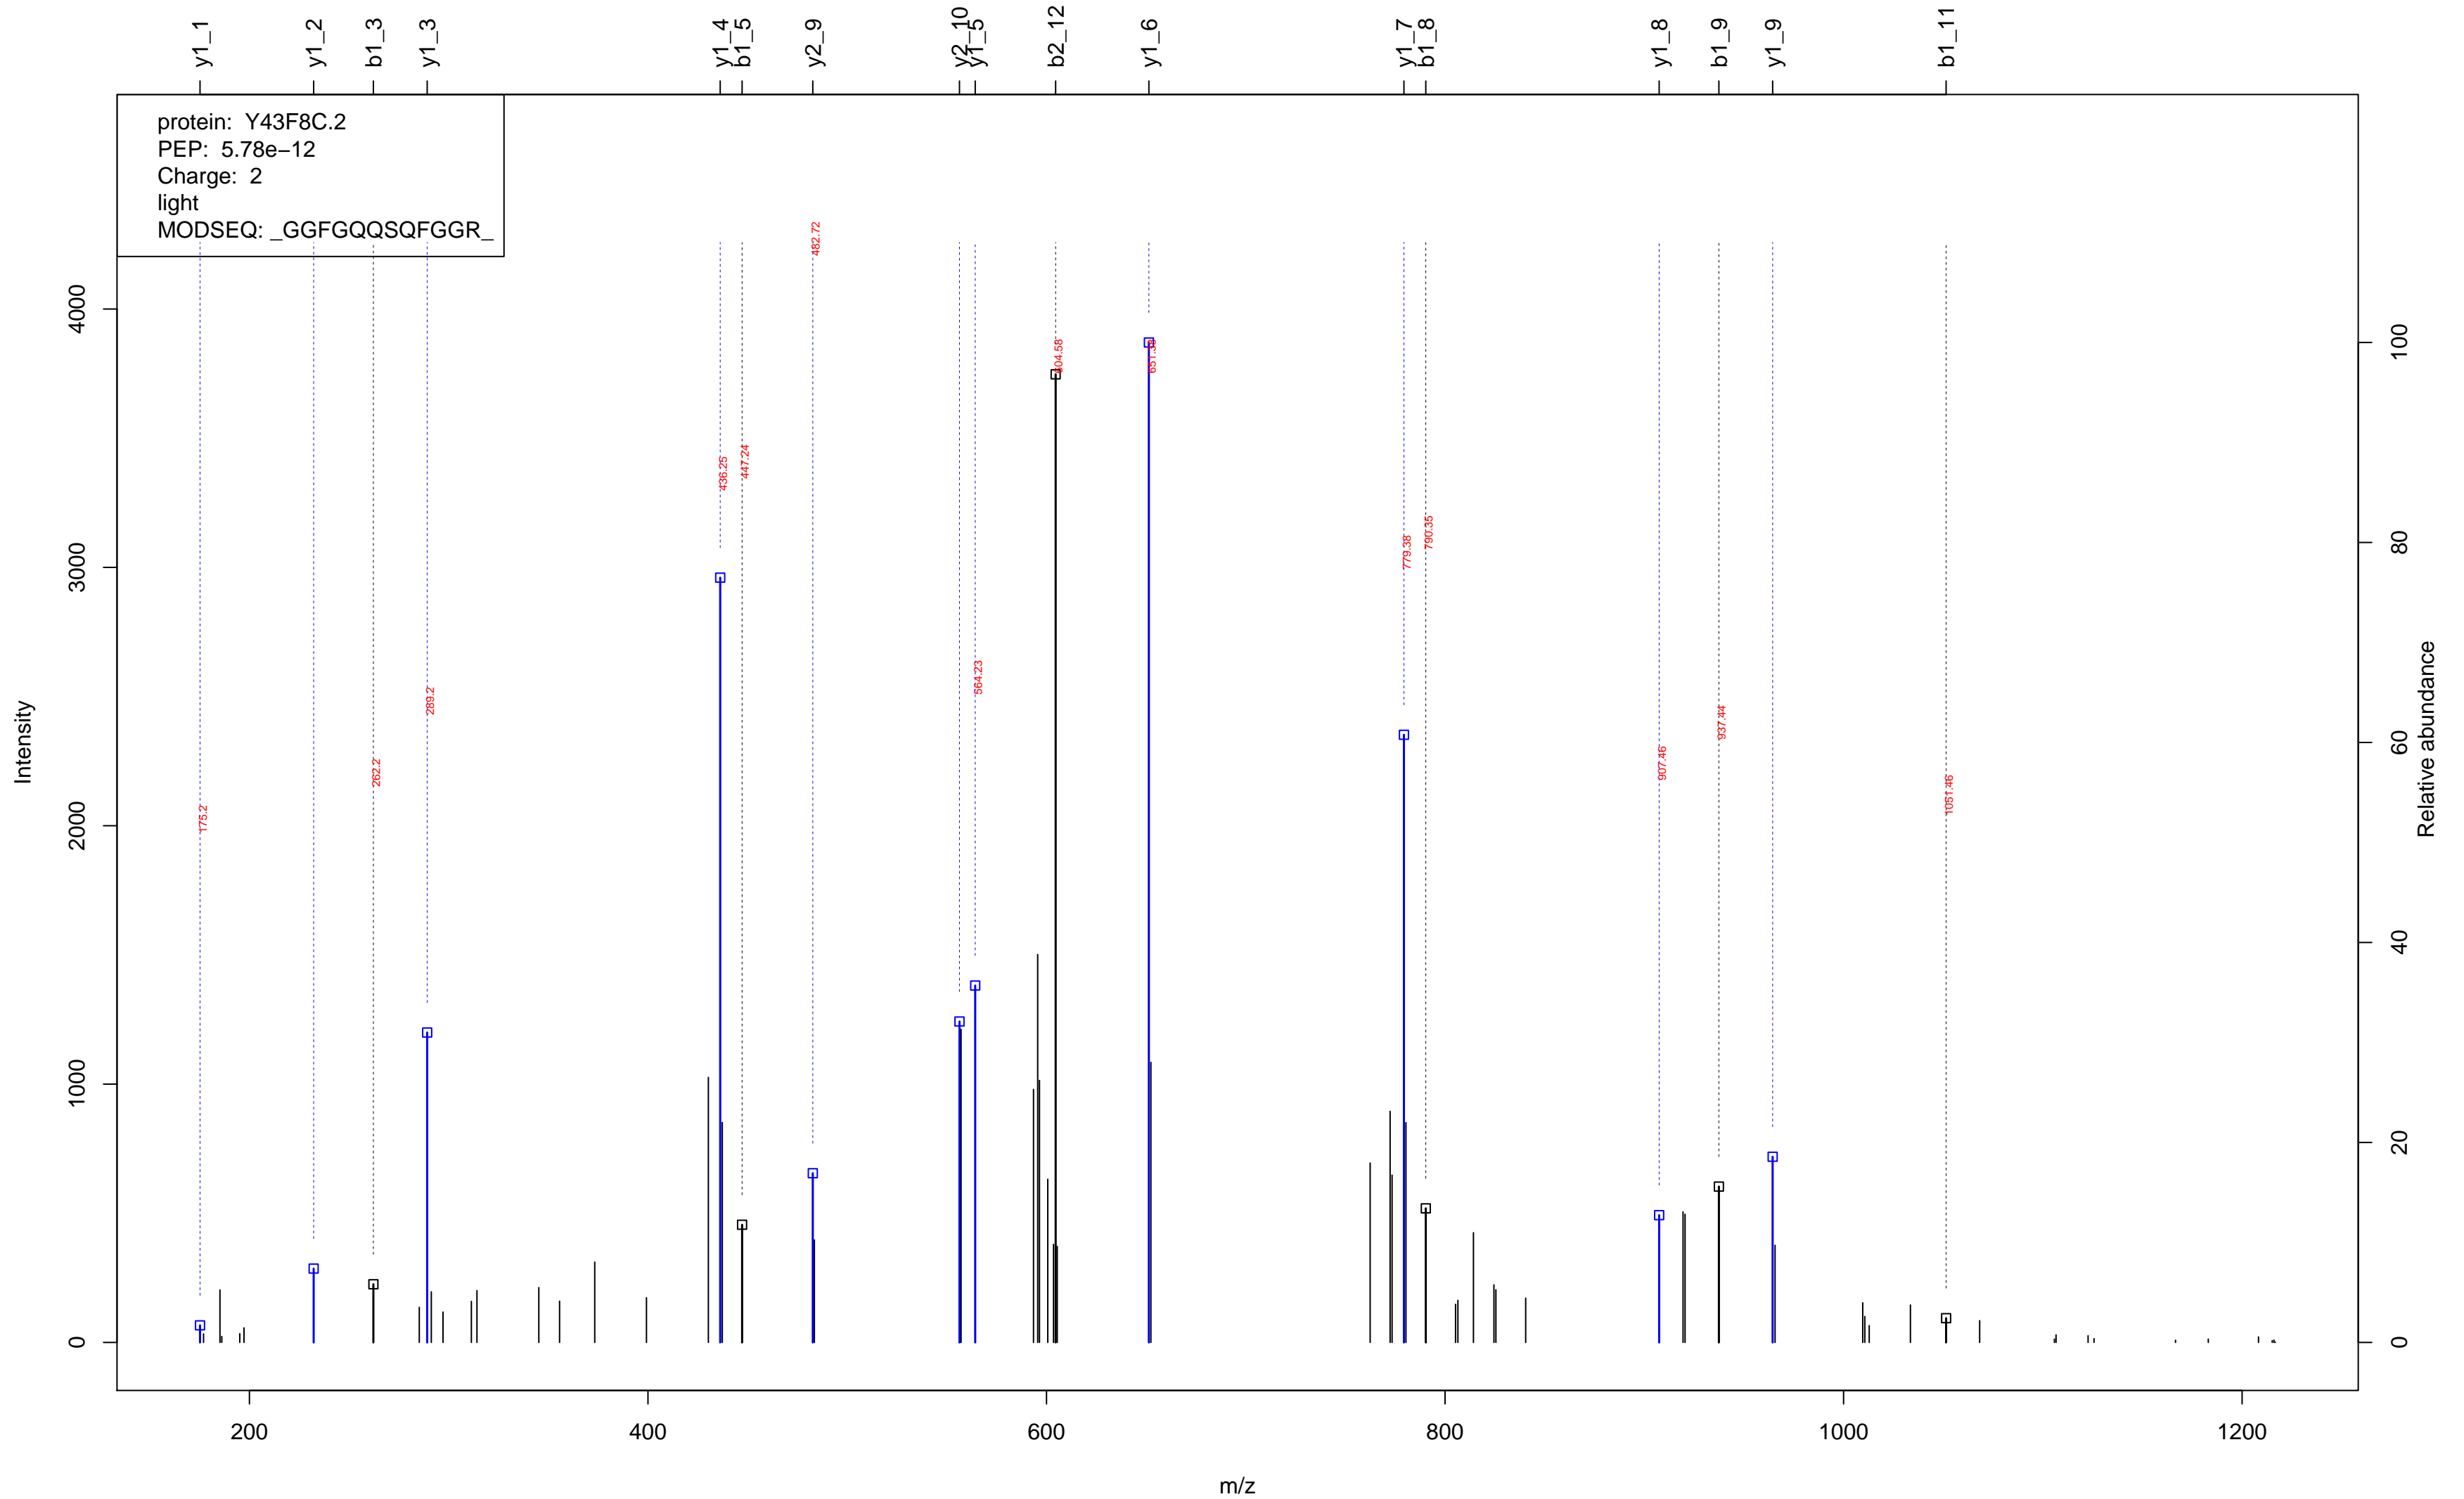

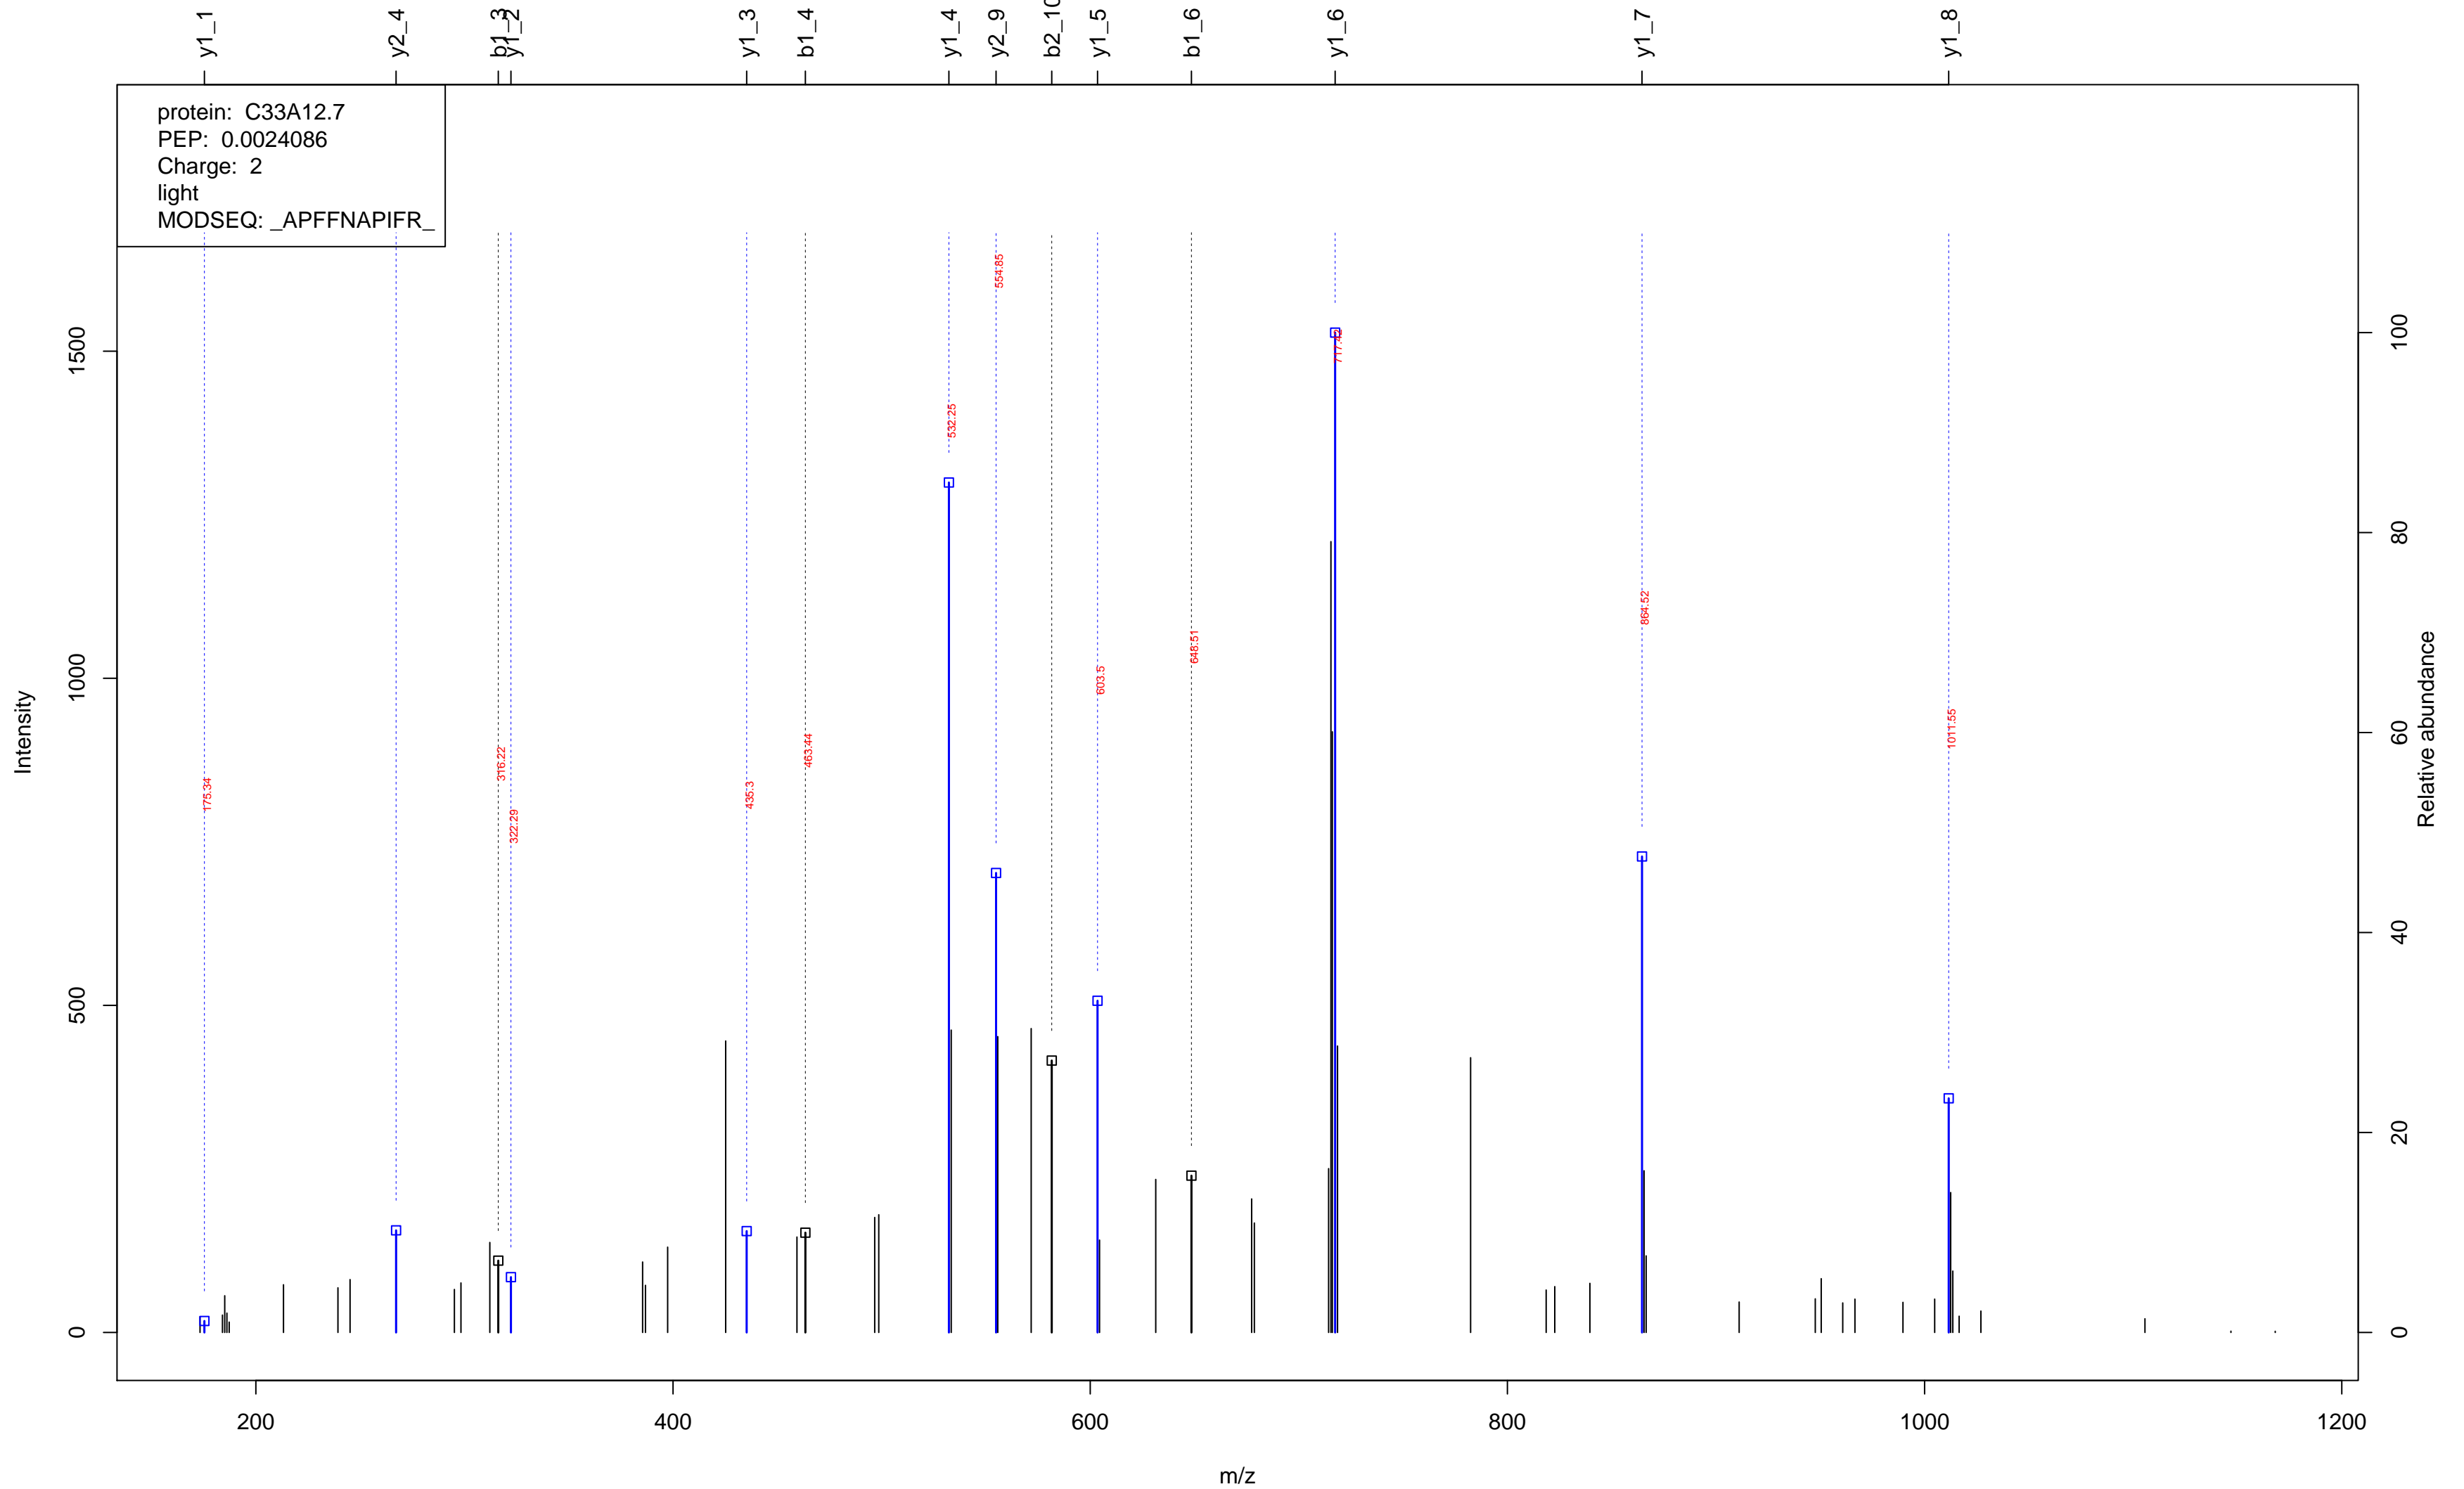

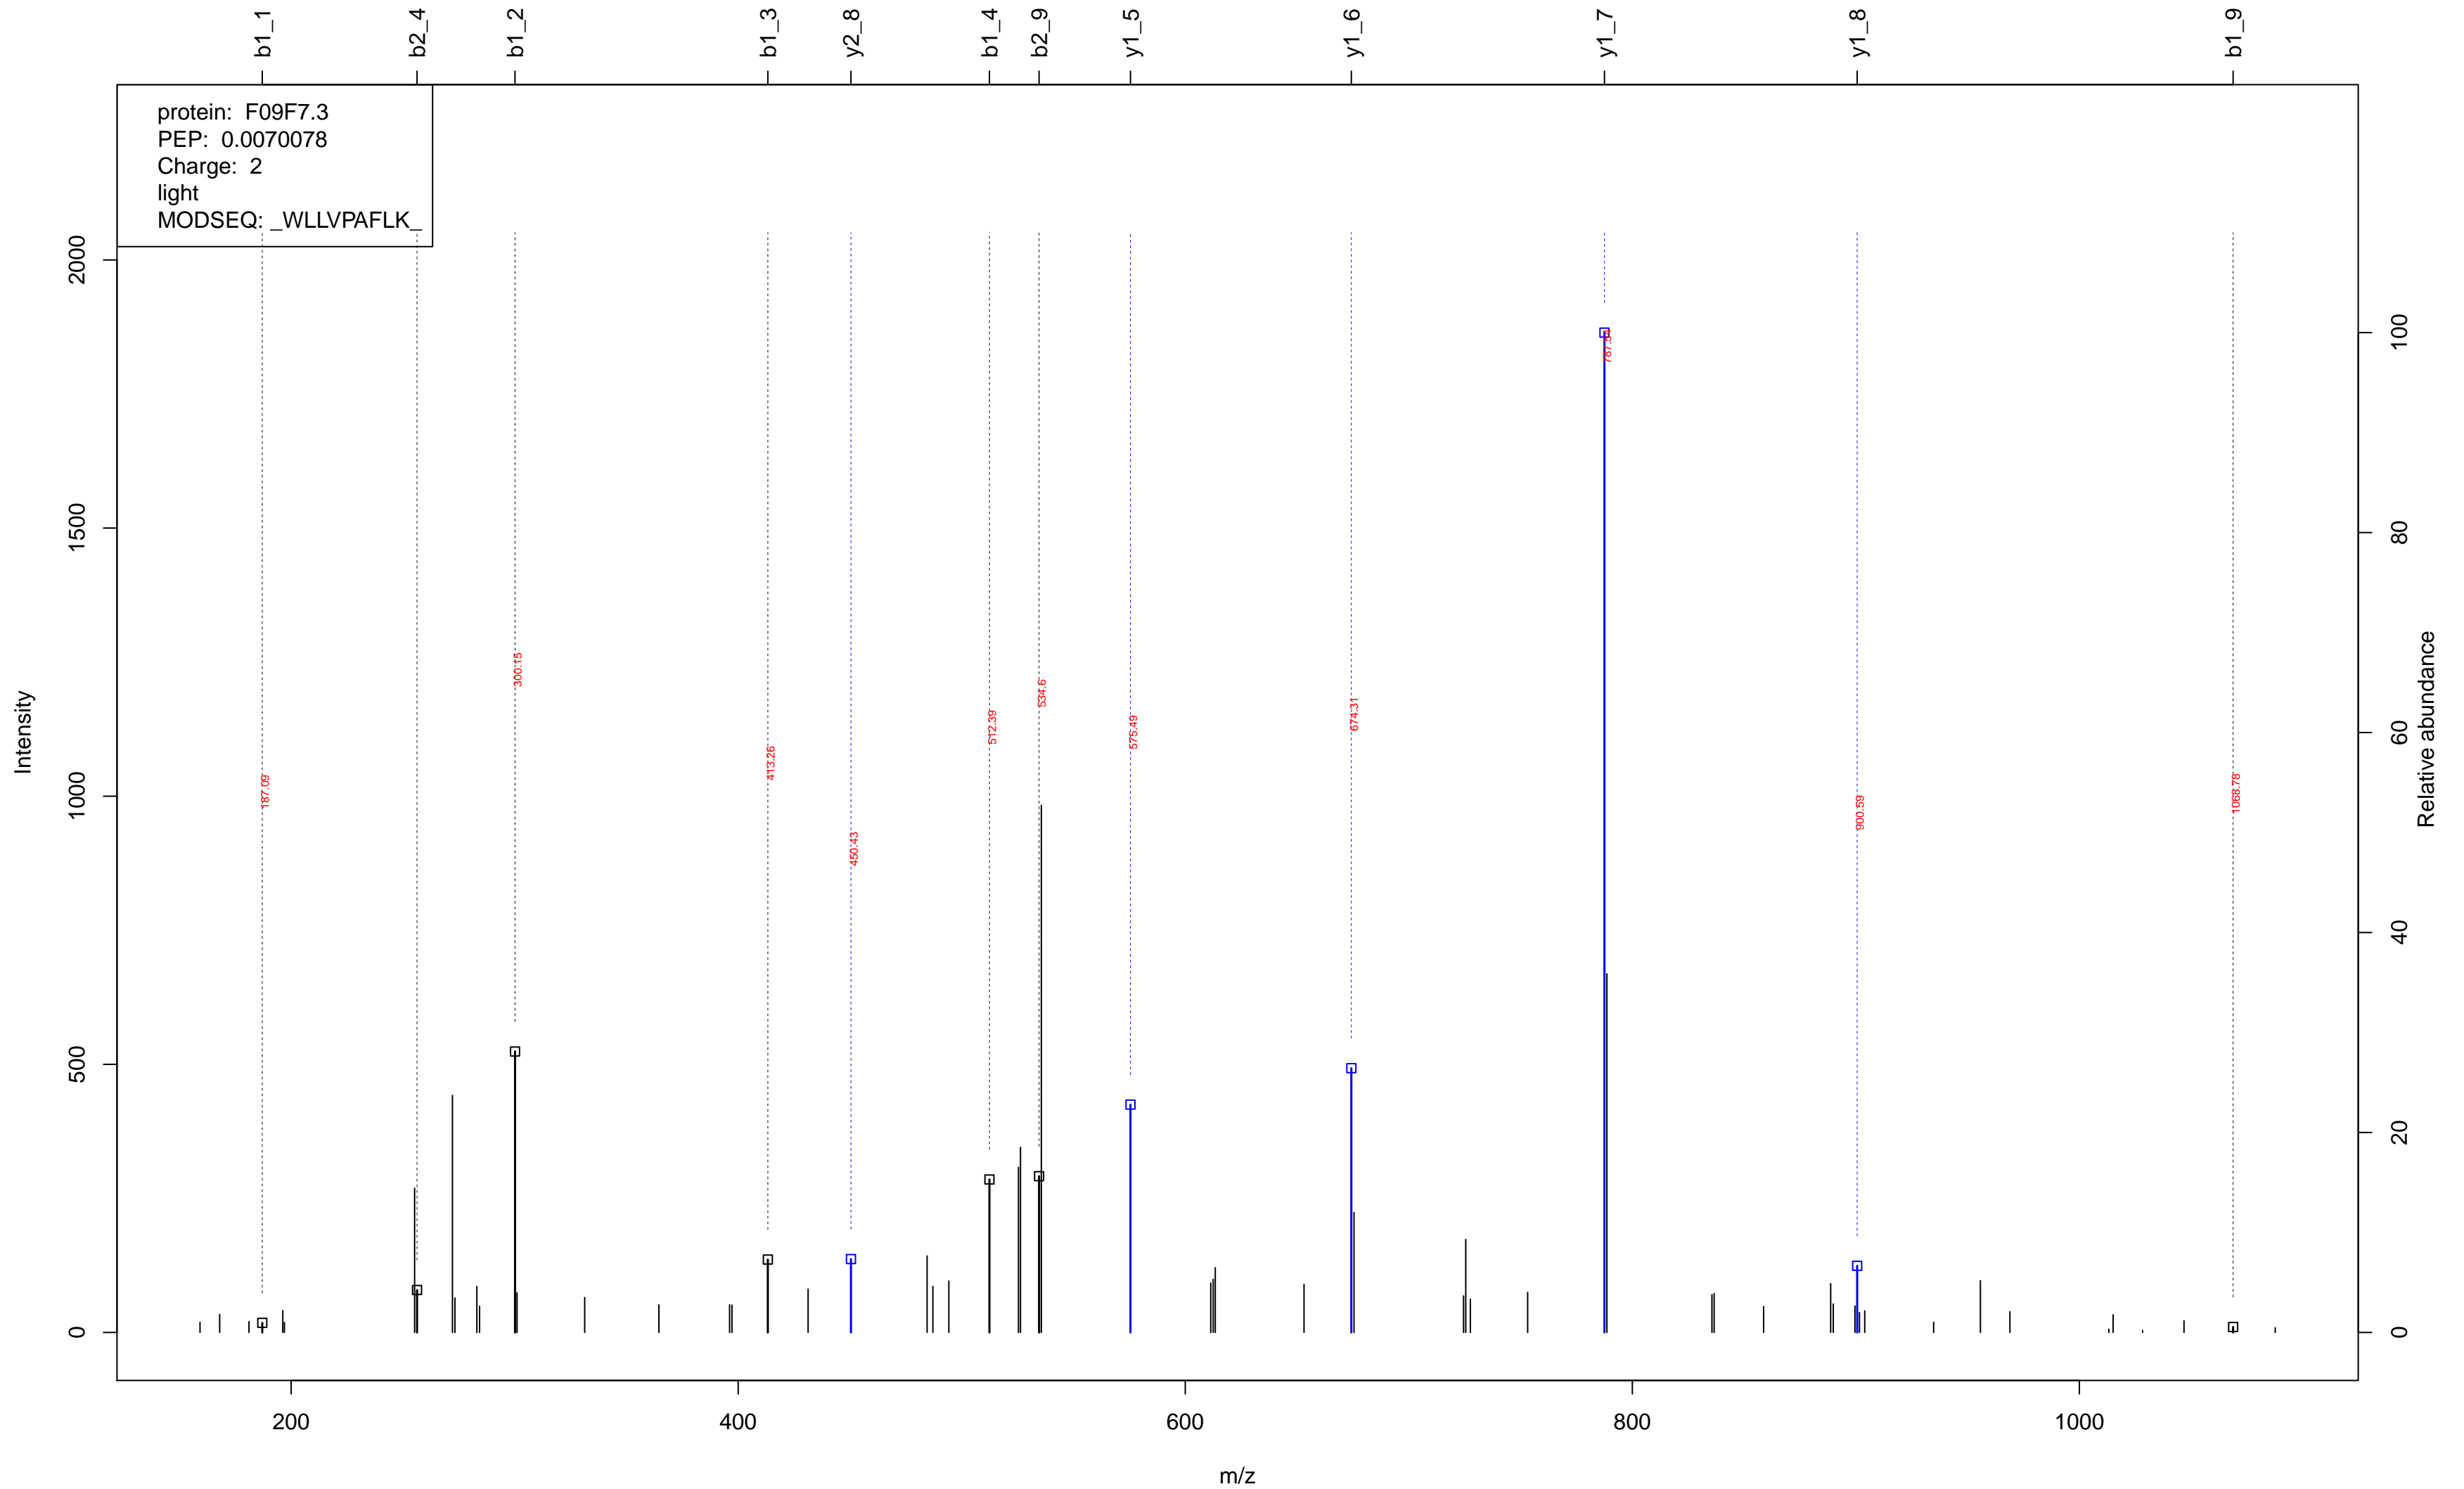

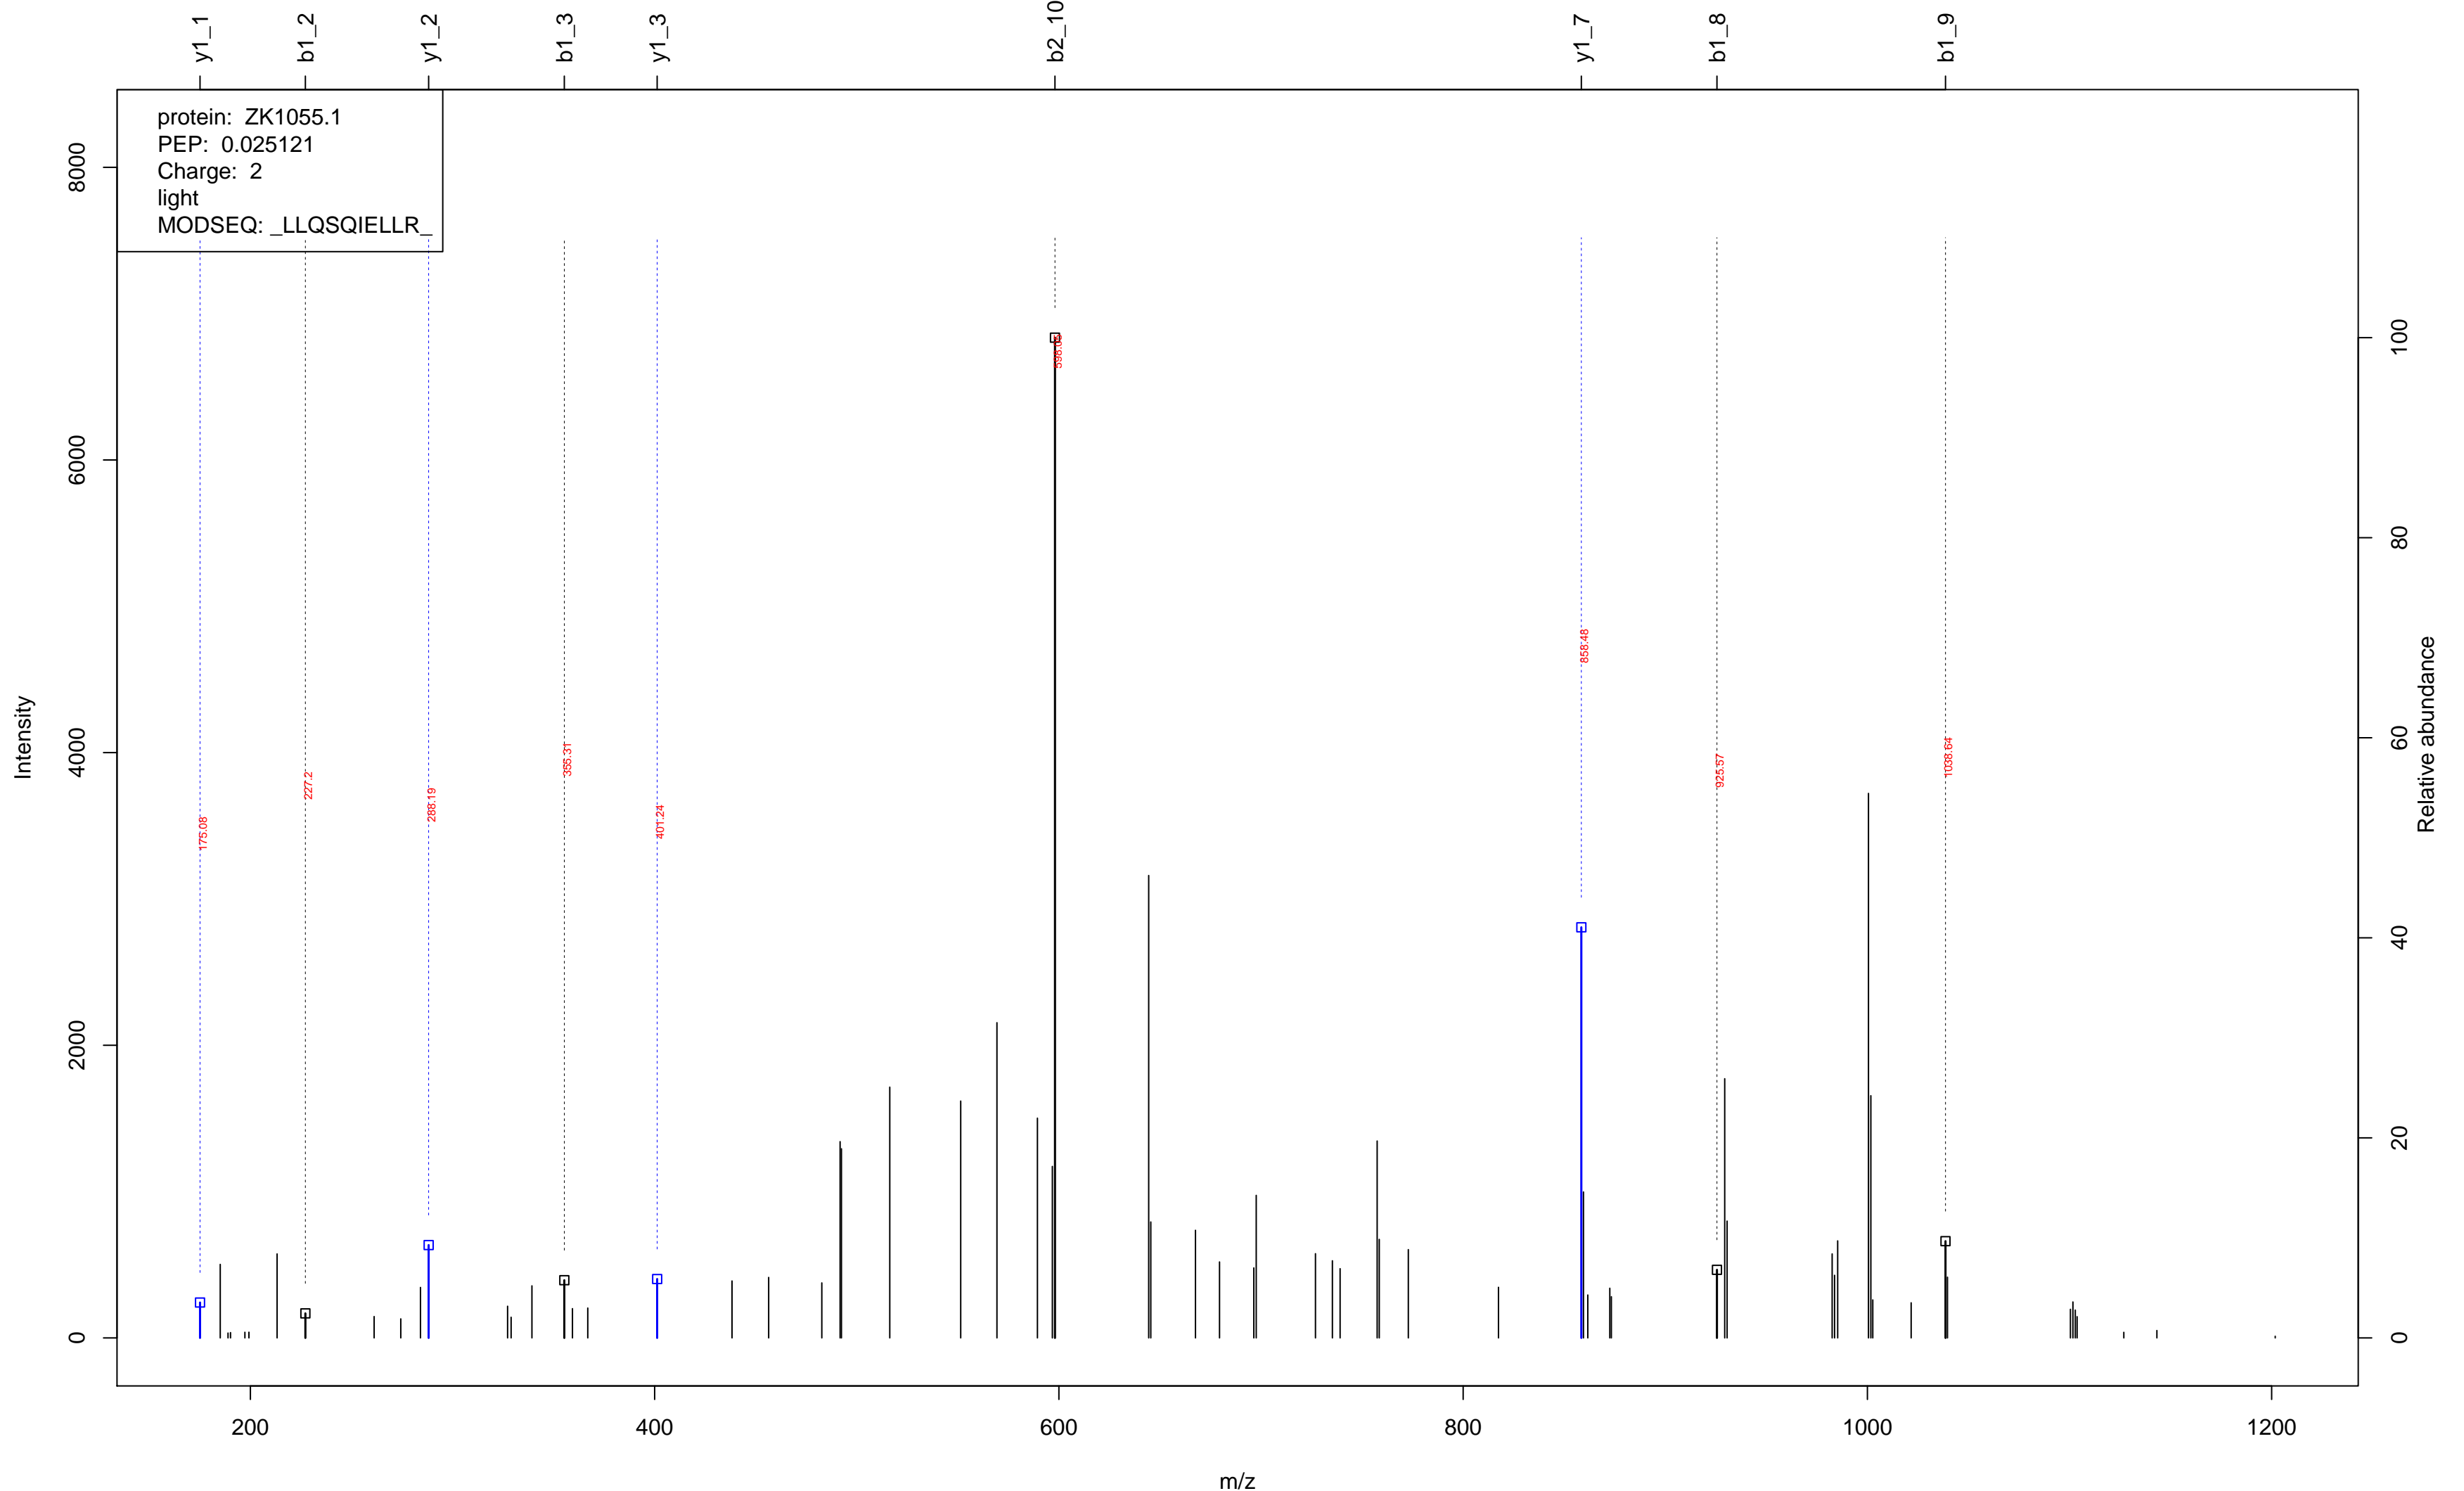

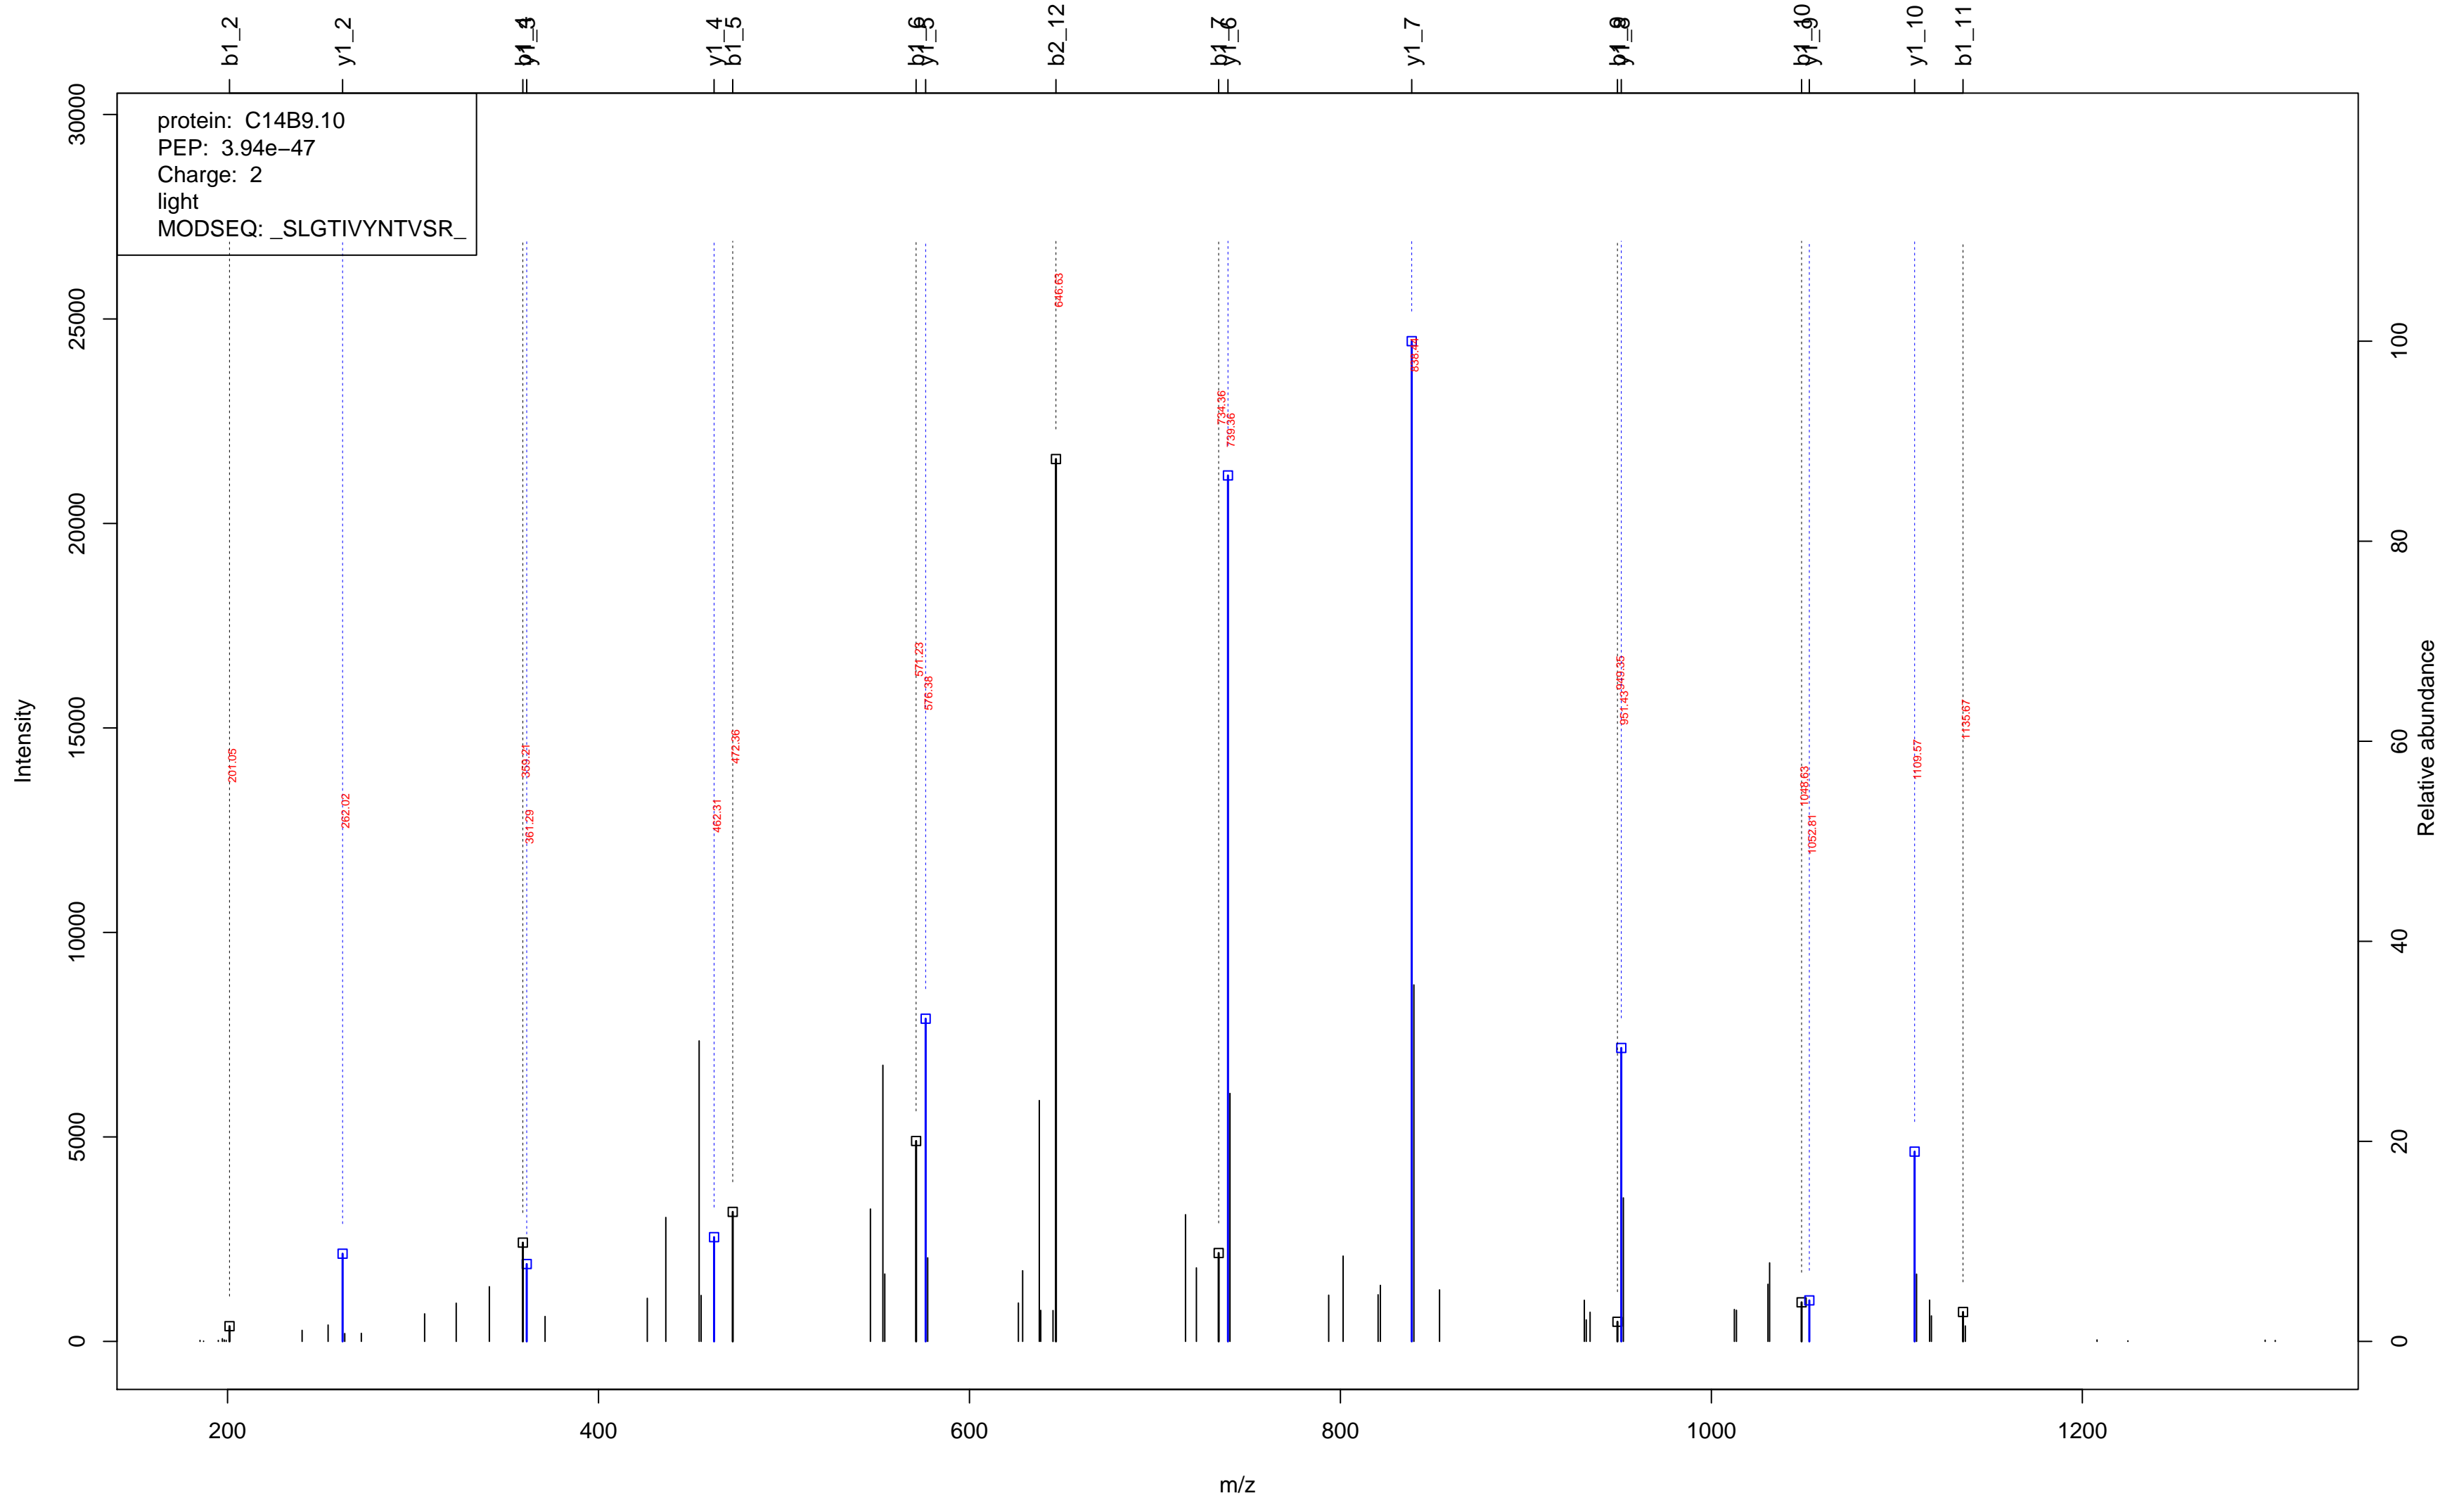

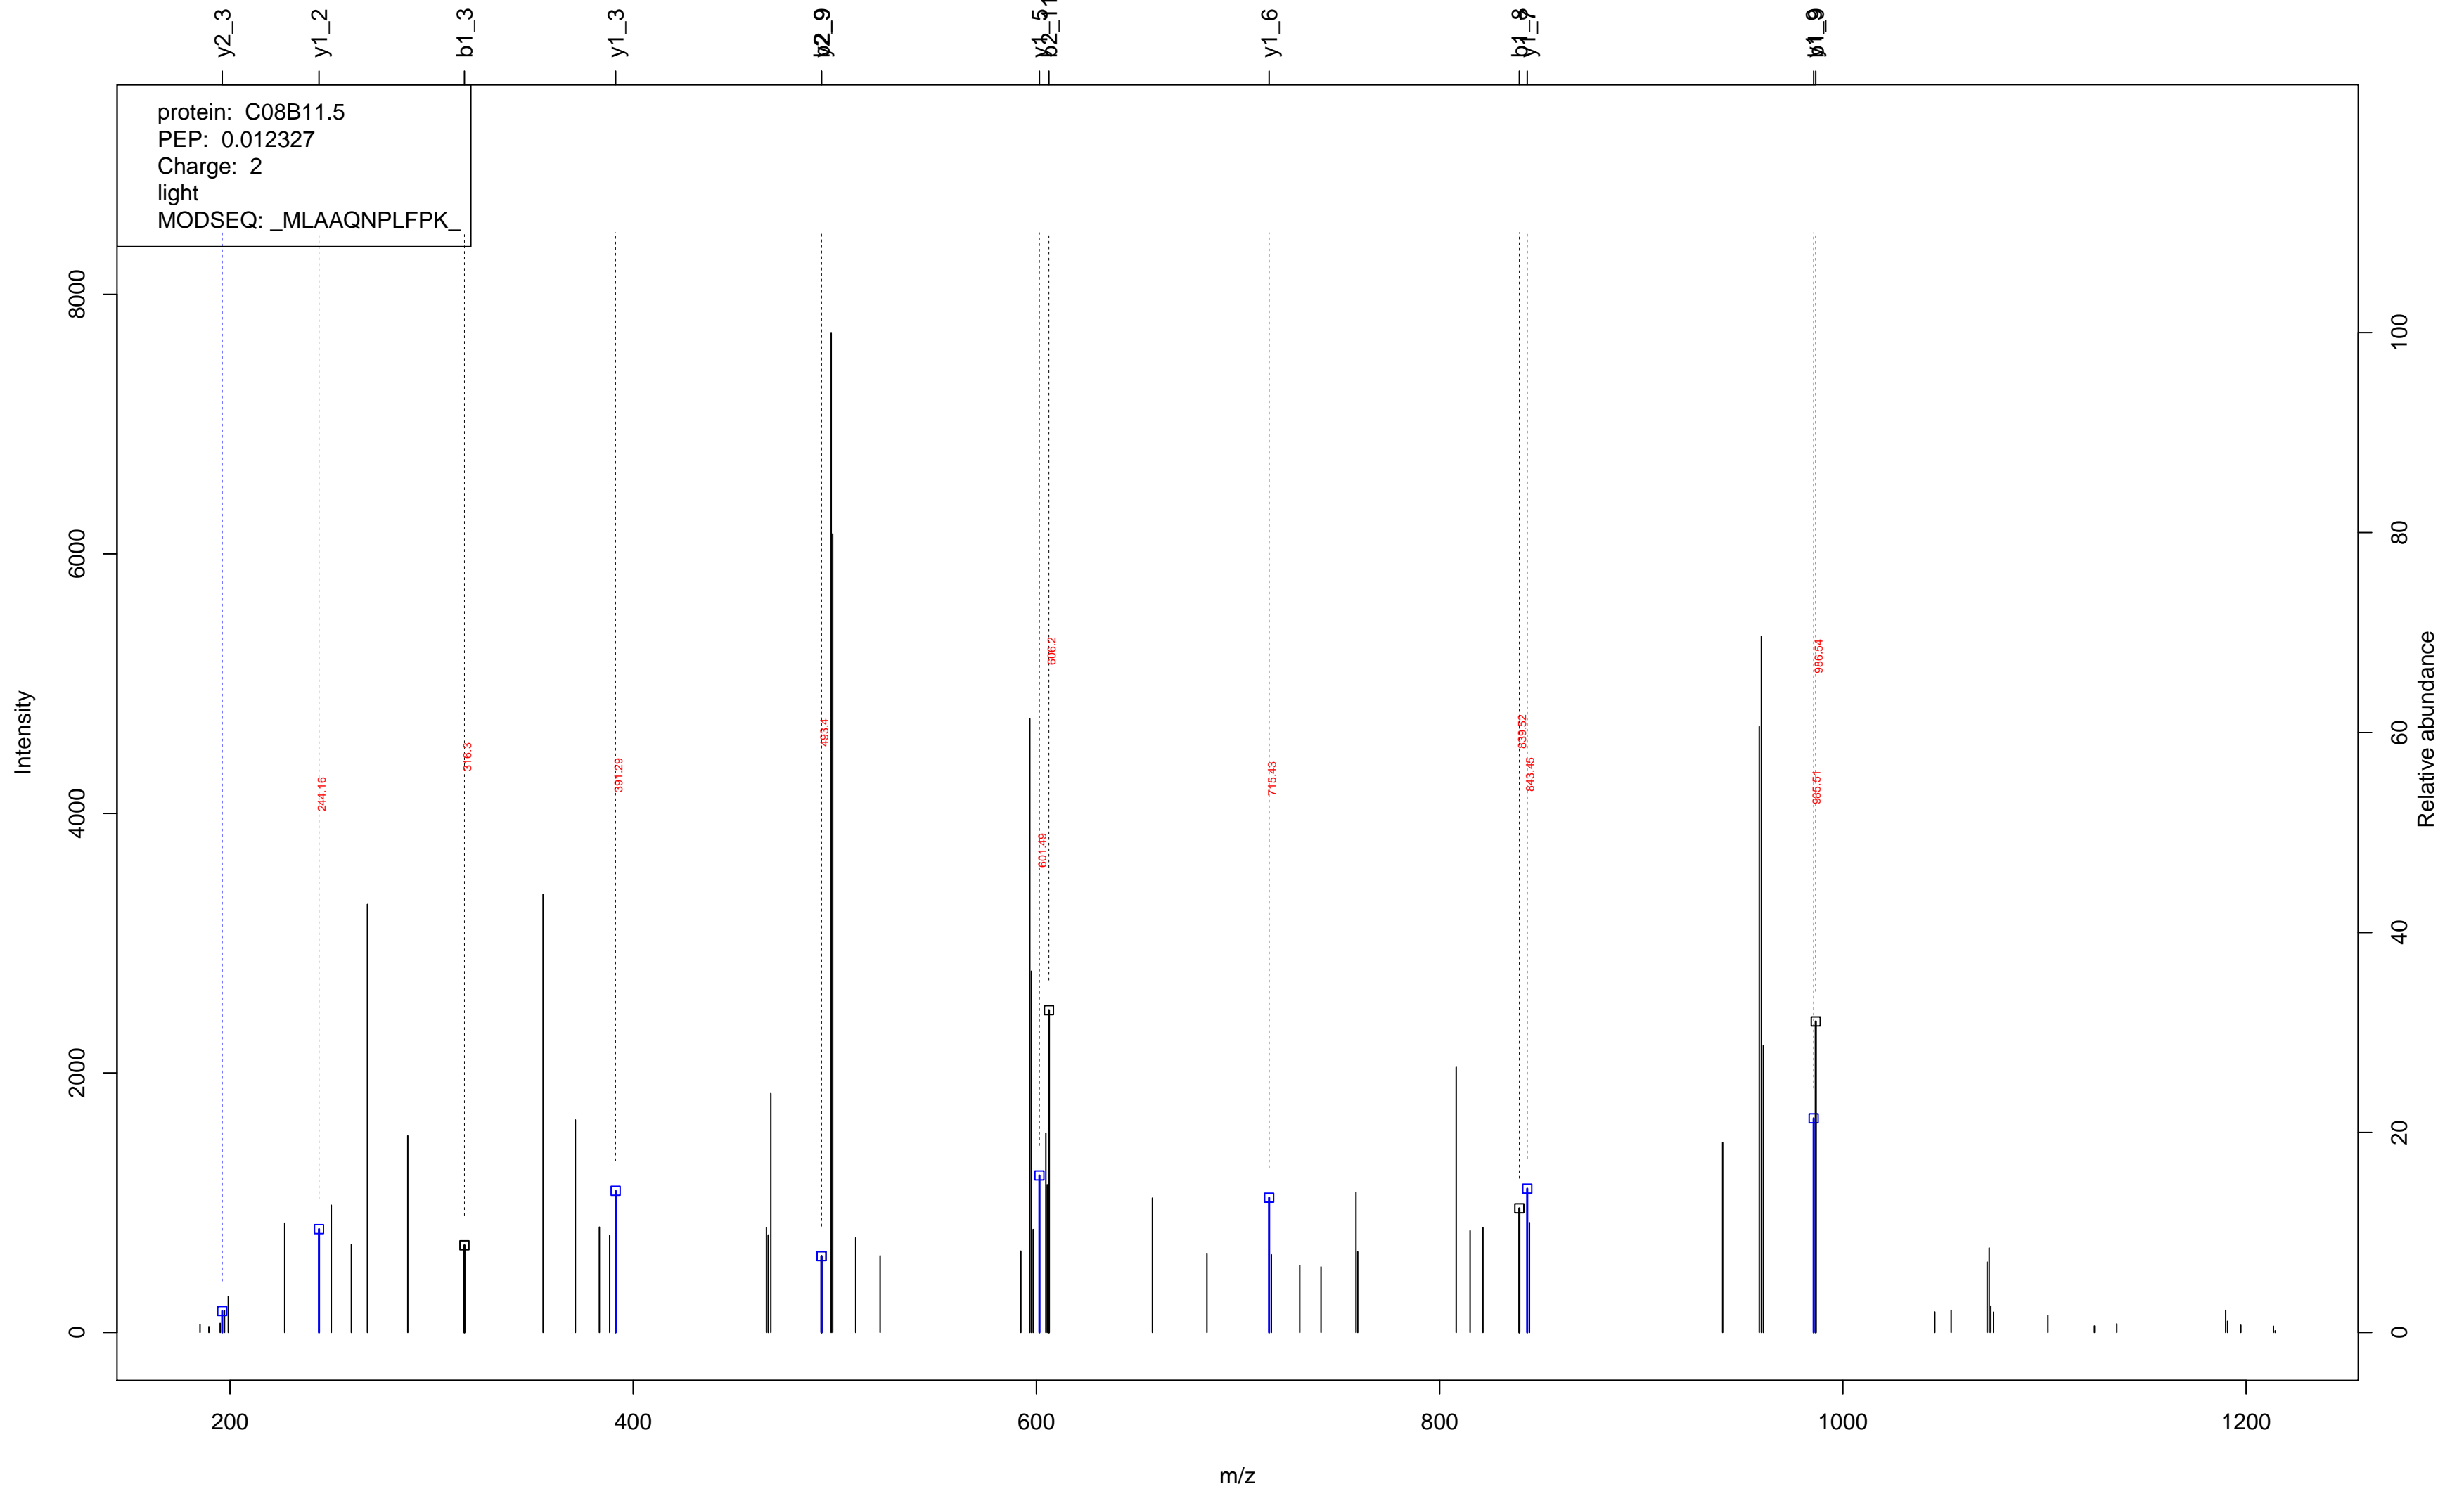

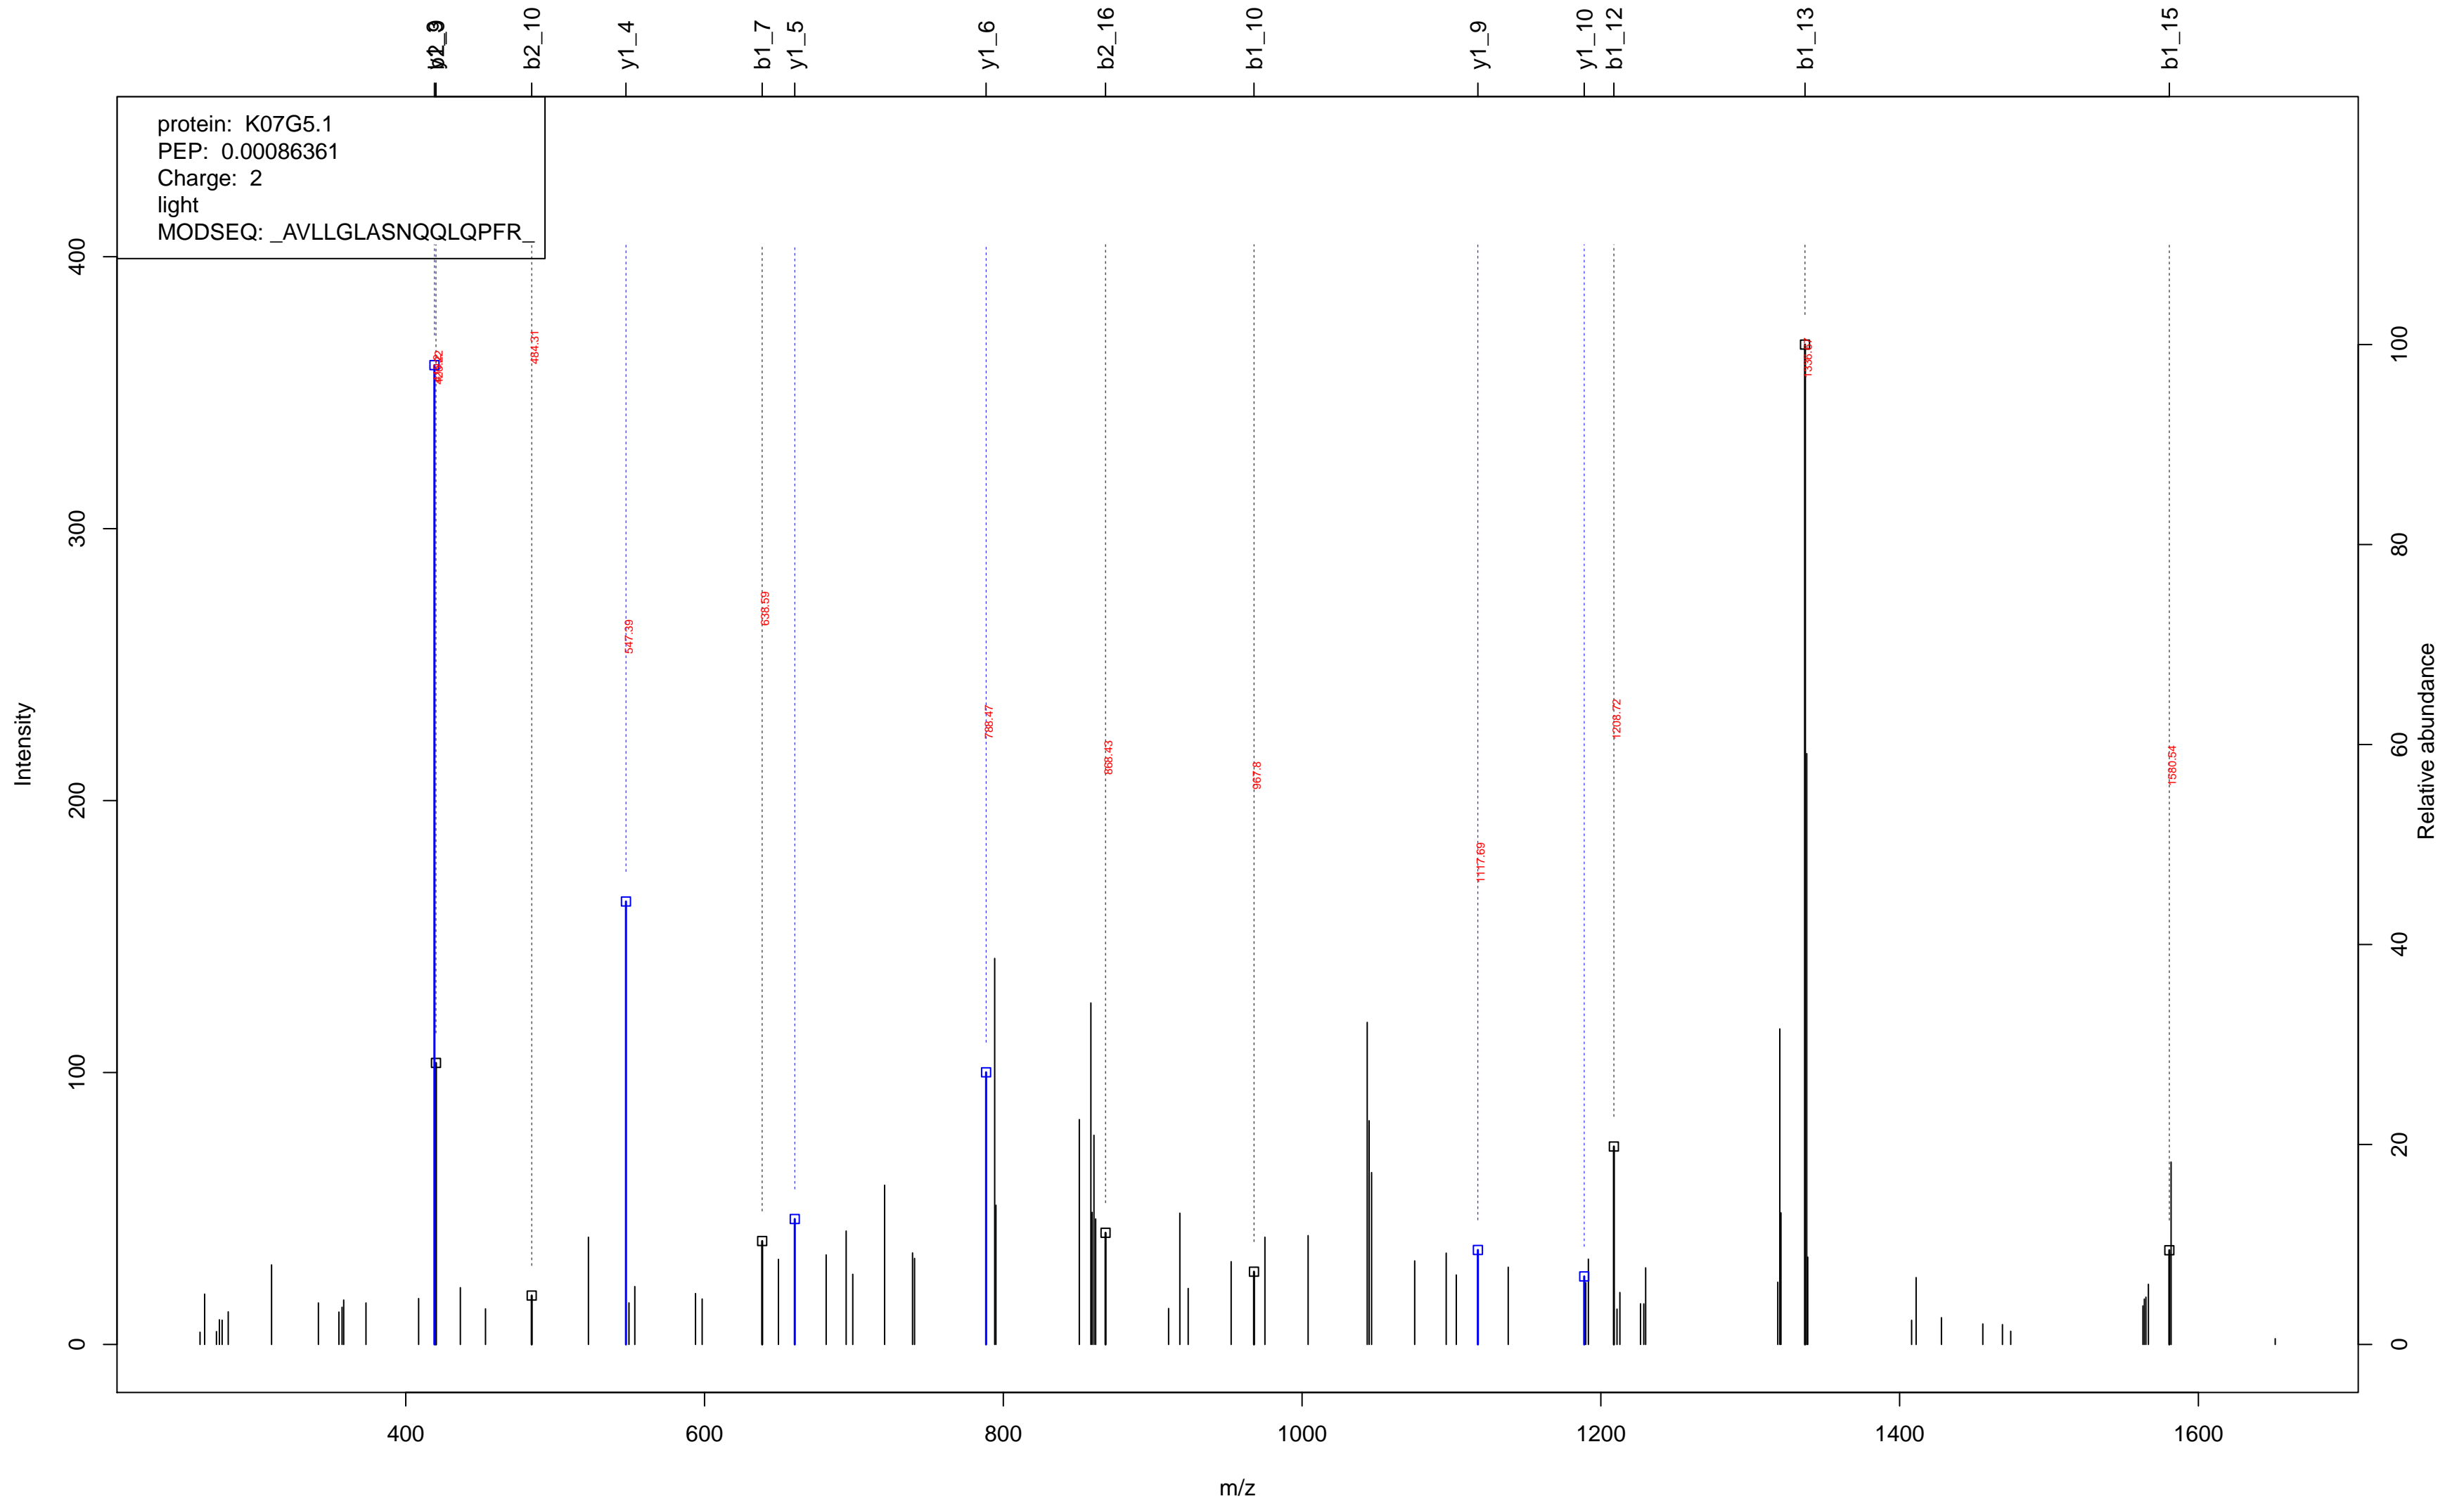

320

y1\_1

b1\_2

y1\_2

y2\_6

b1\_3

y2\_7

y1\_3

b2\_8

y1\_4

y1\_5

y1\_6

b1\_7

y1\_7

protein: Y71H2AL.1  
PEP: 0.0018539  
Charge: 2  
light  
MODSEQ: \_FISLATHR\_

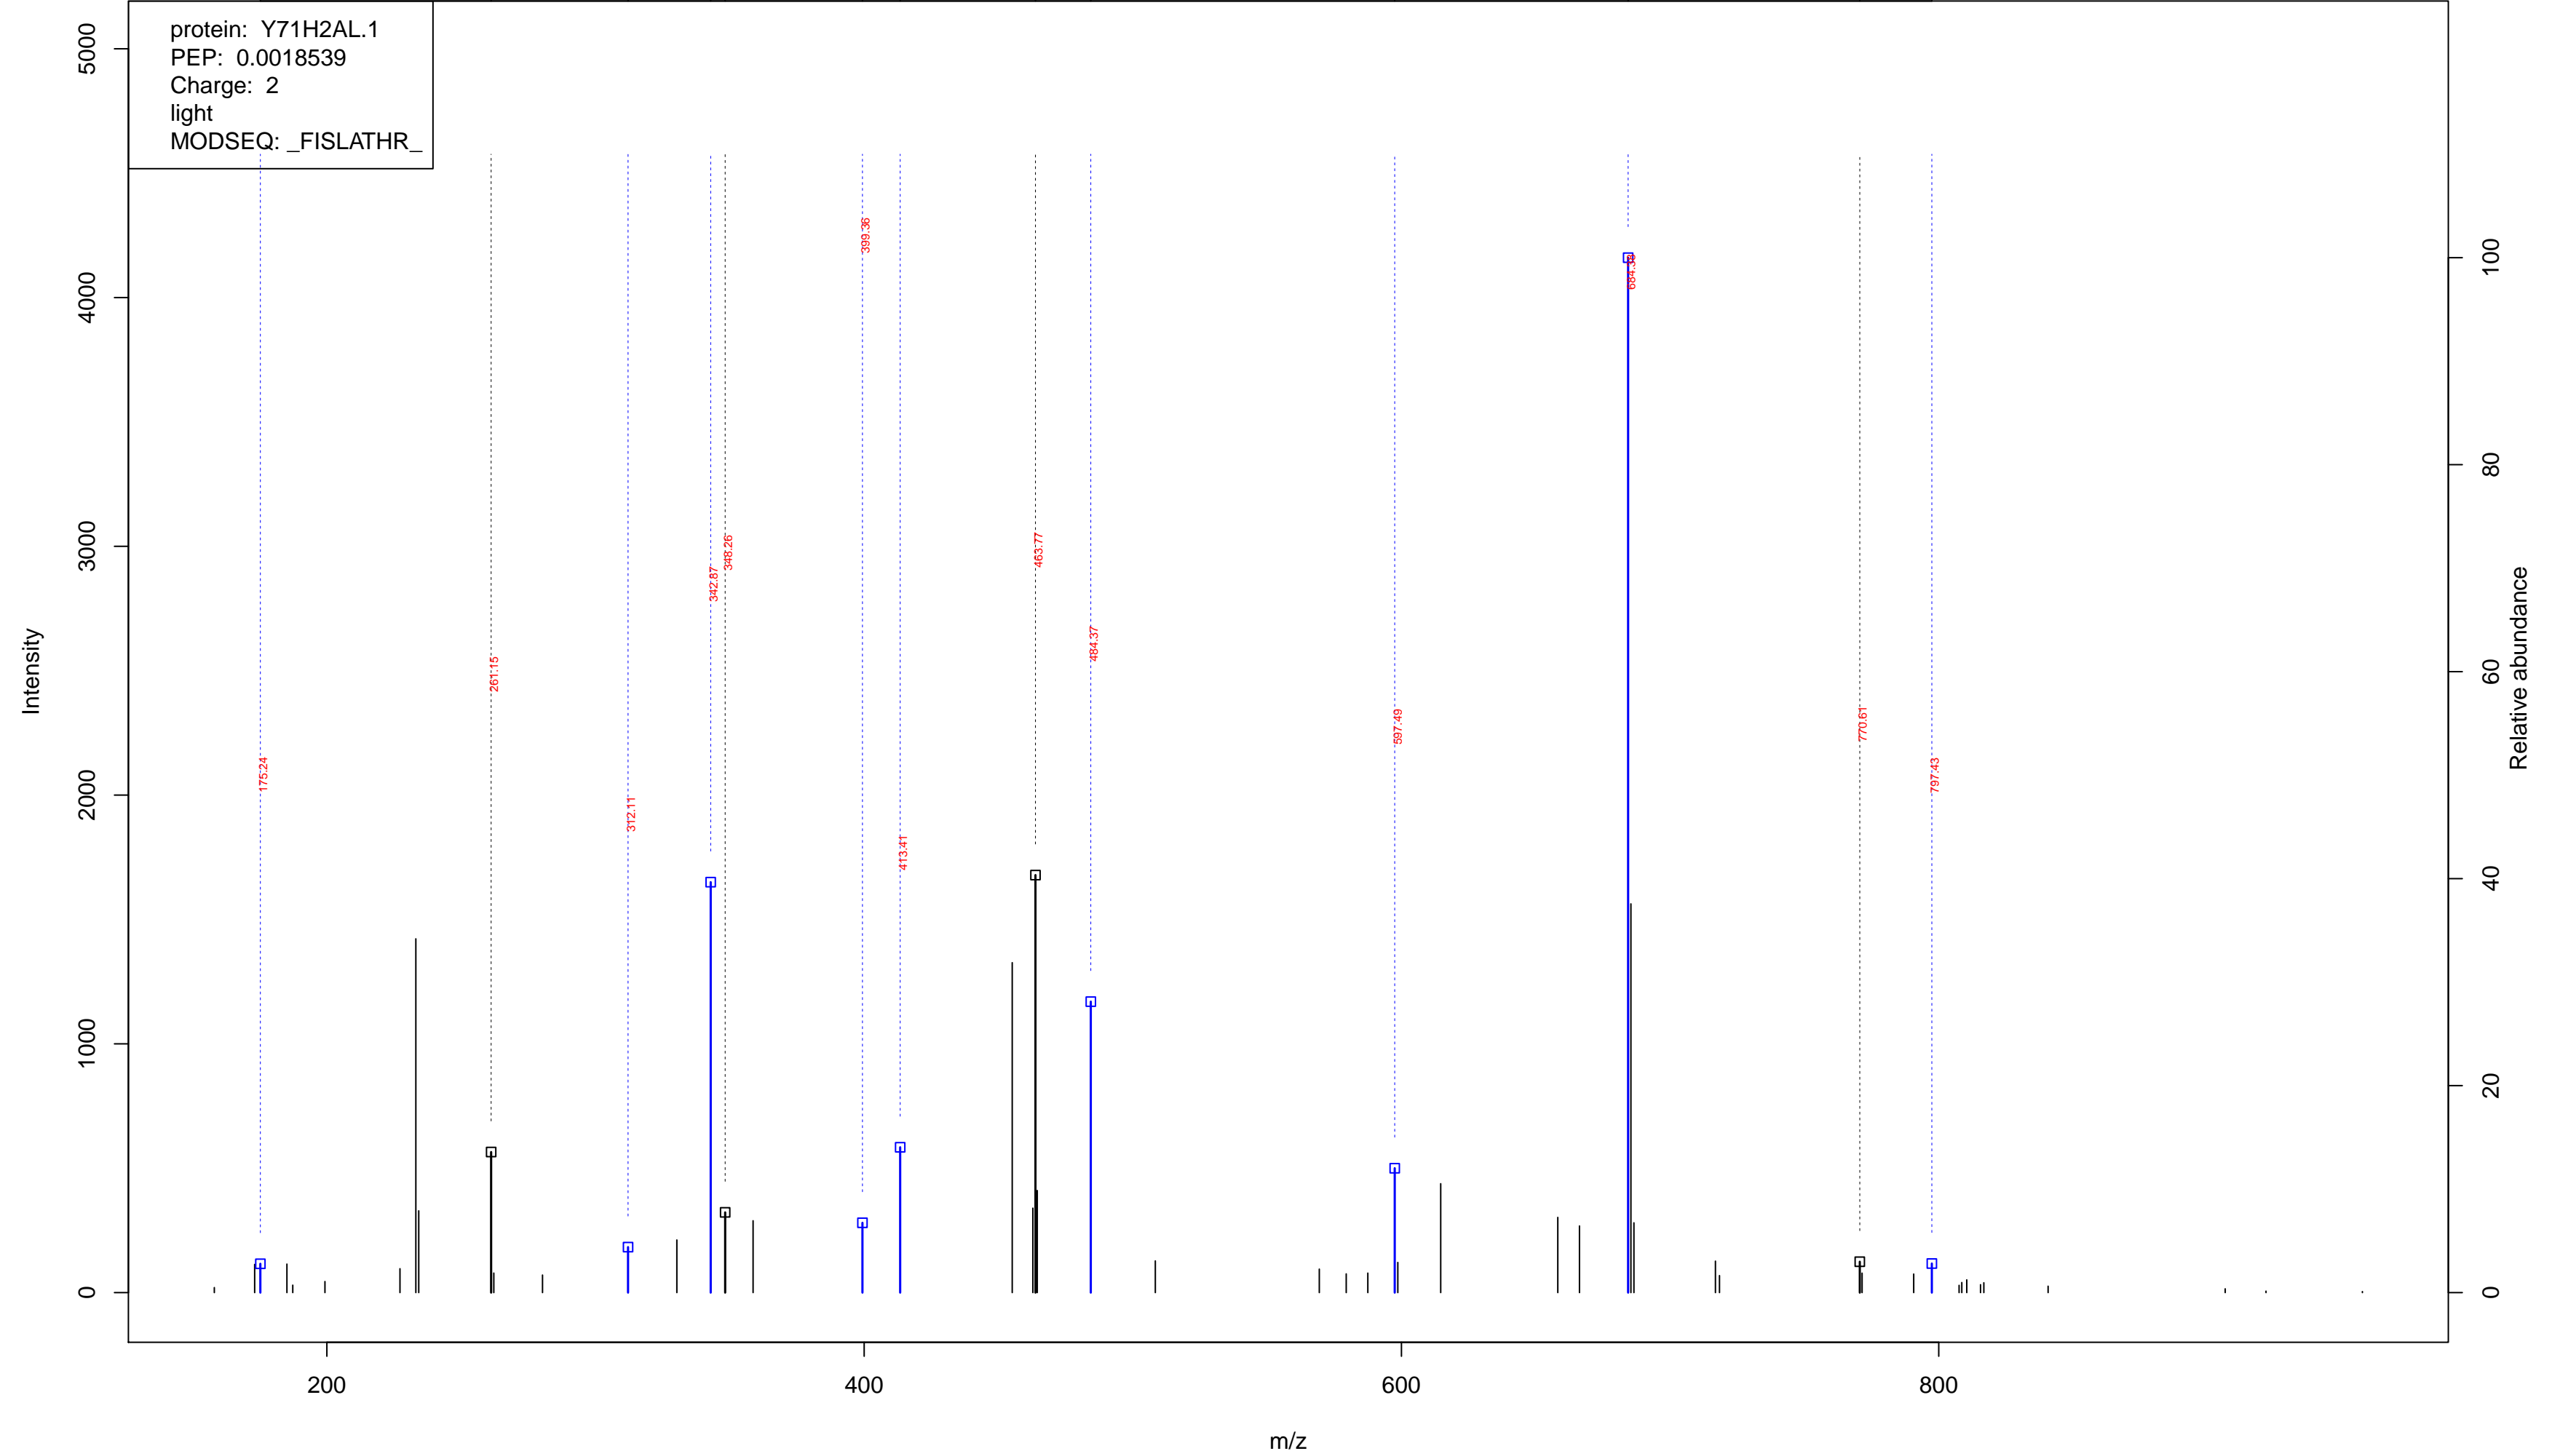



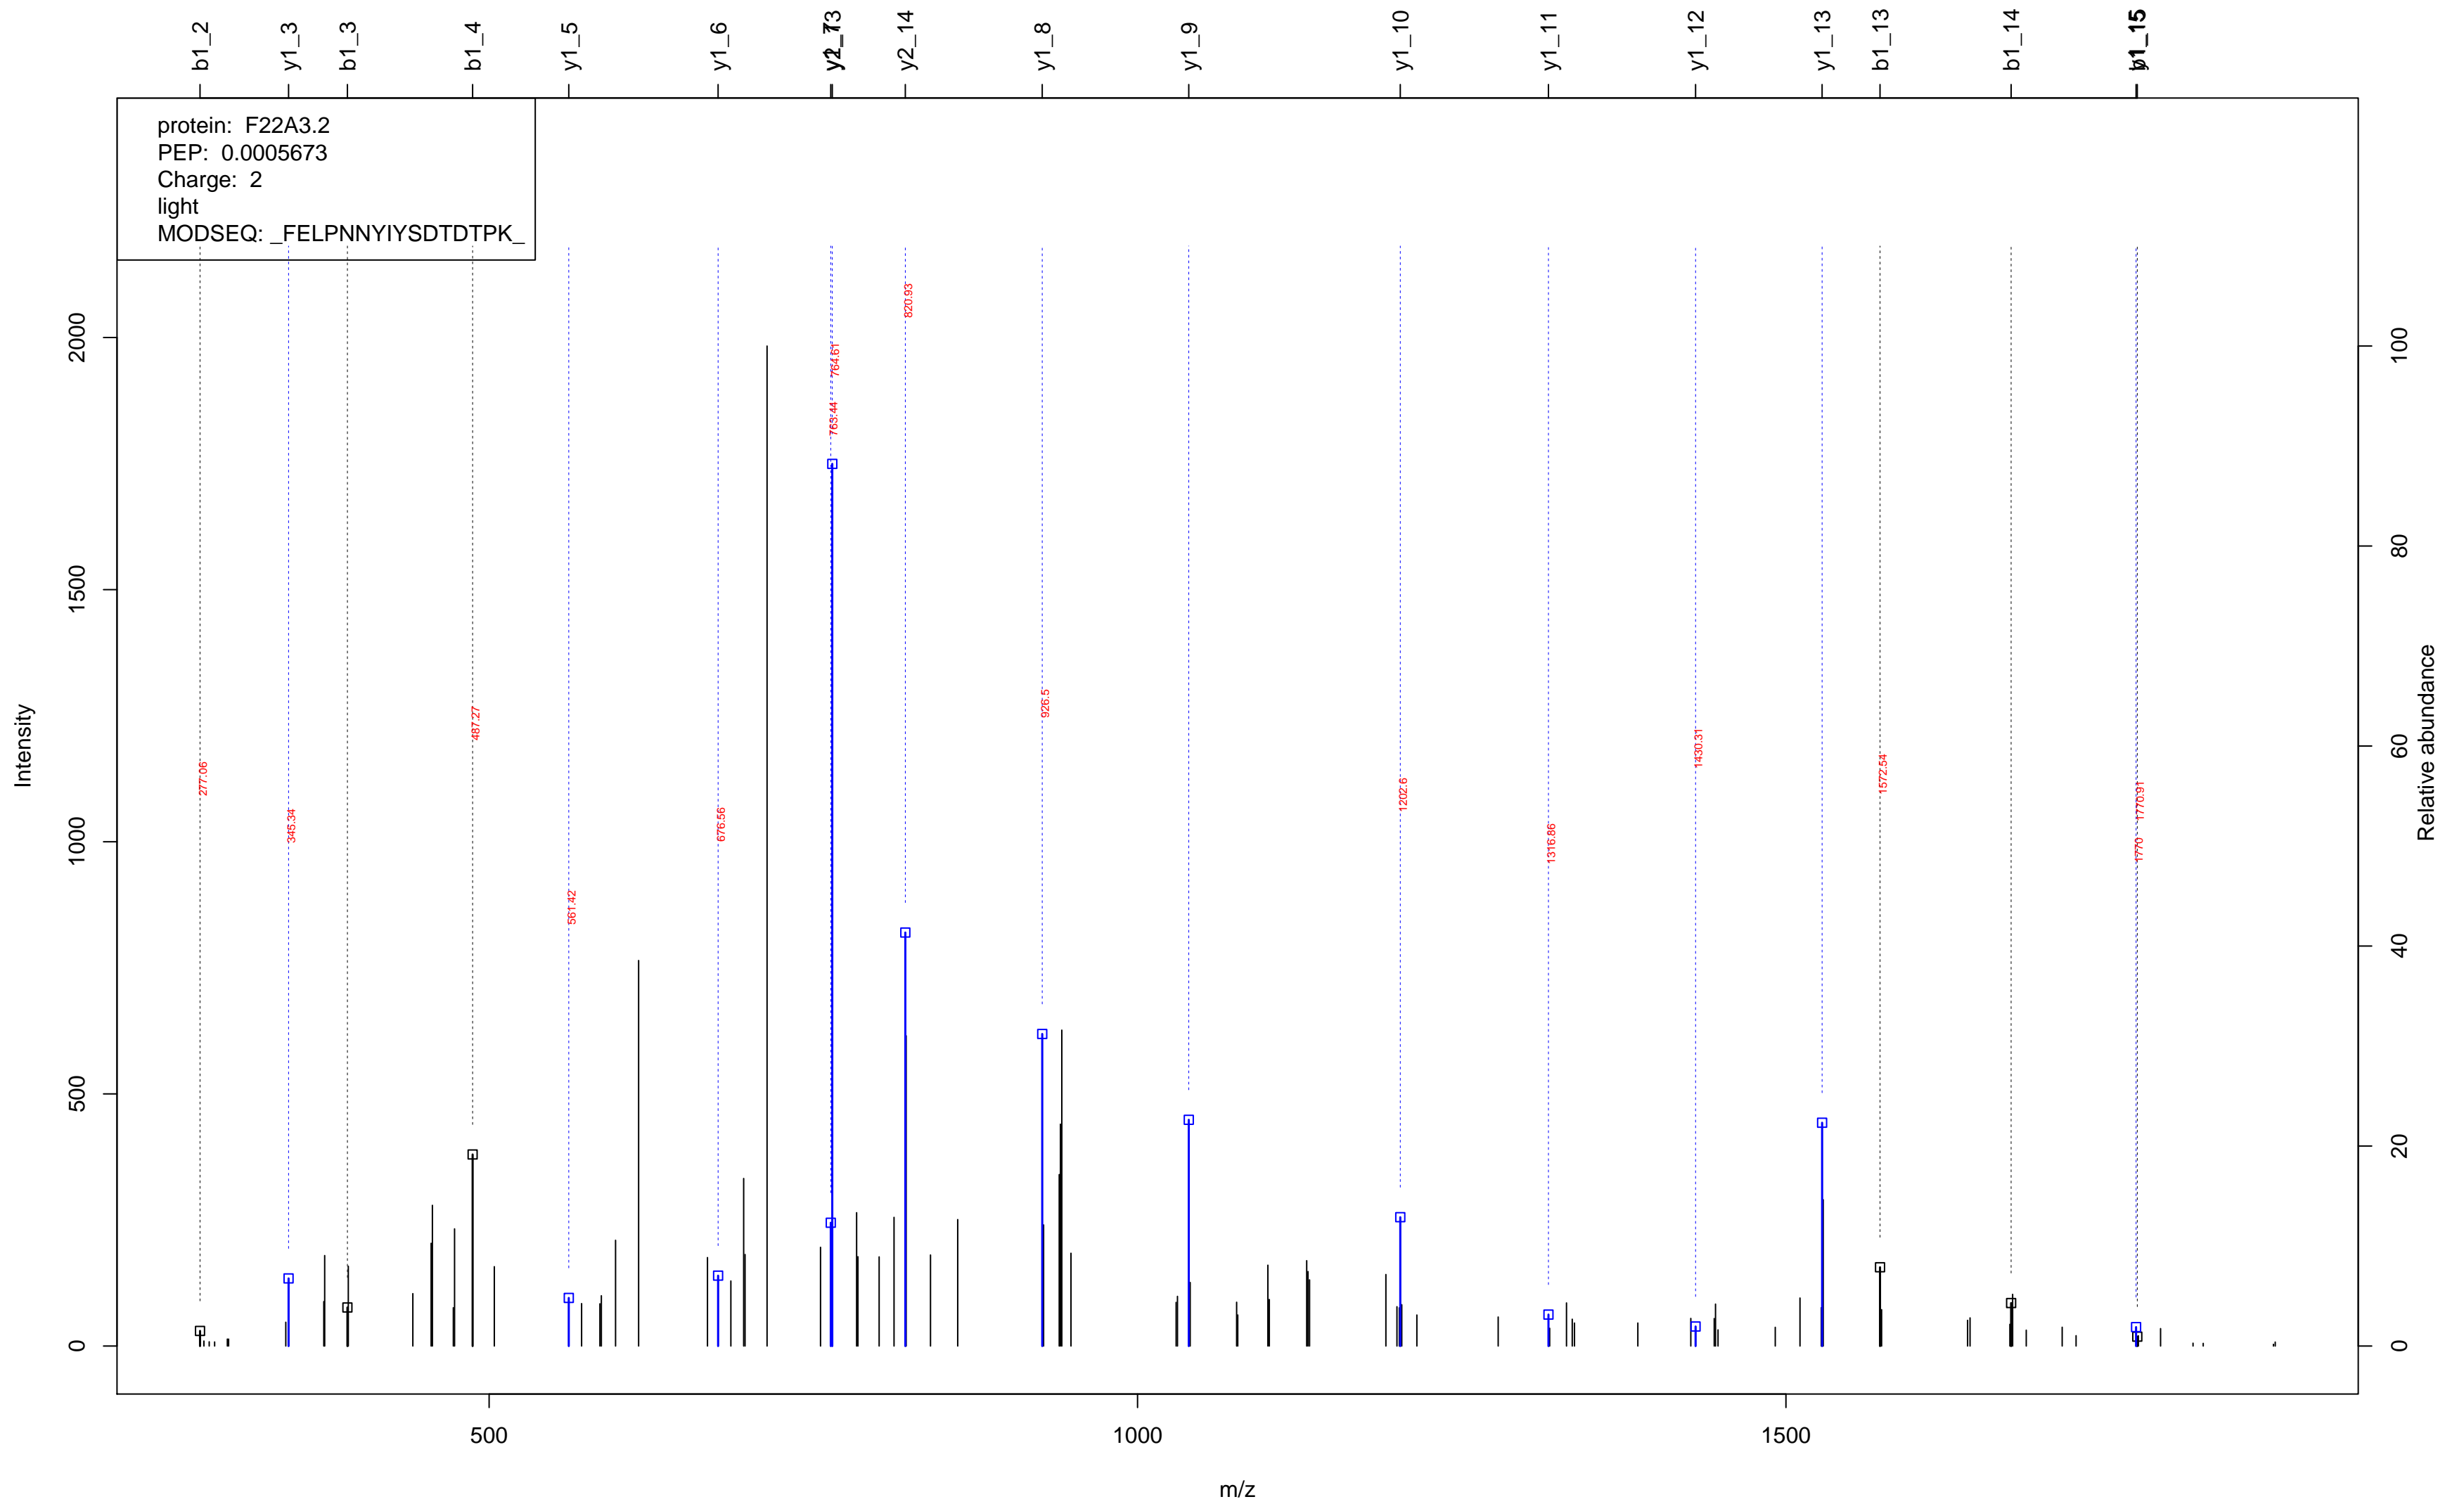

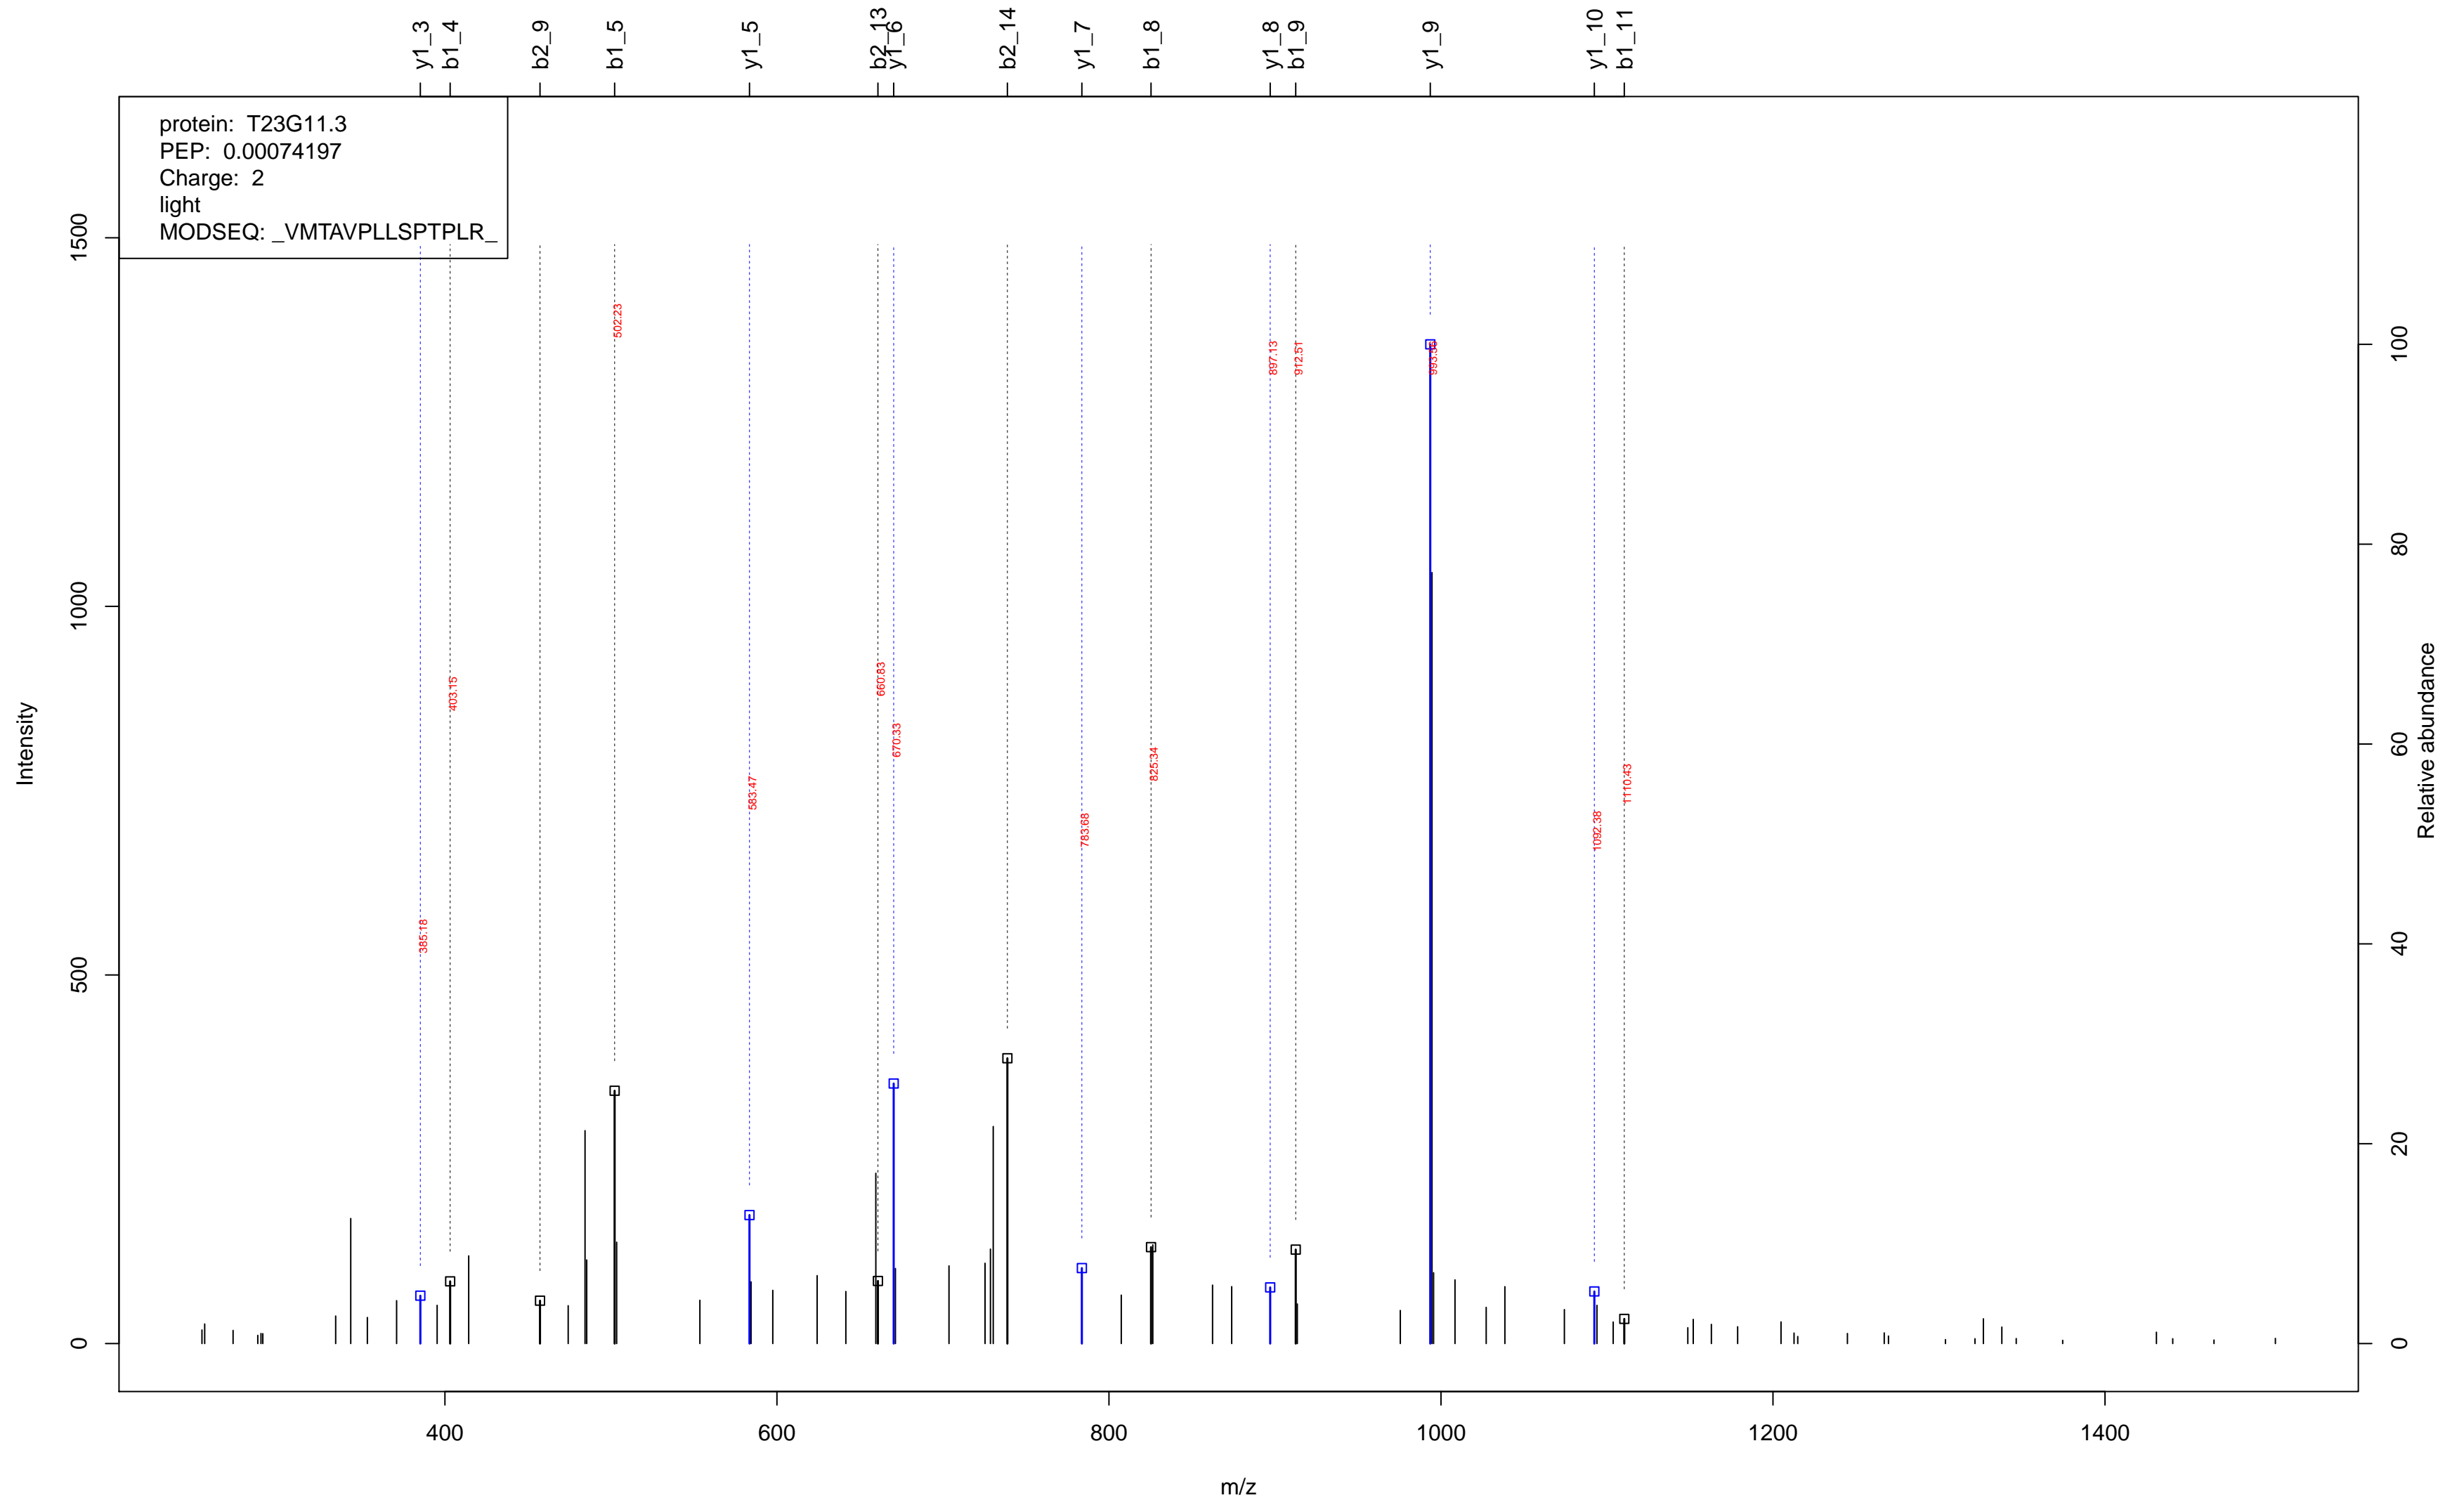

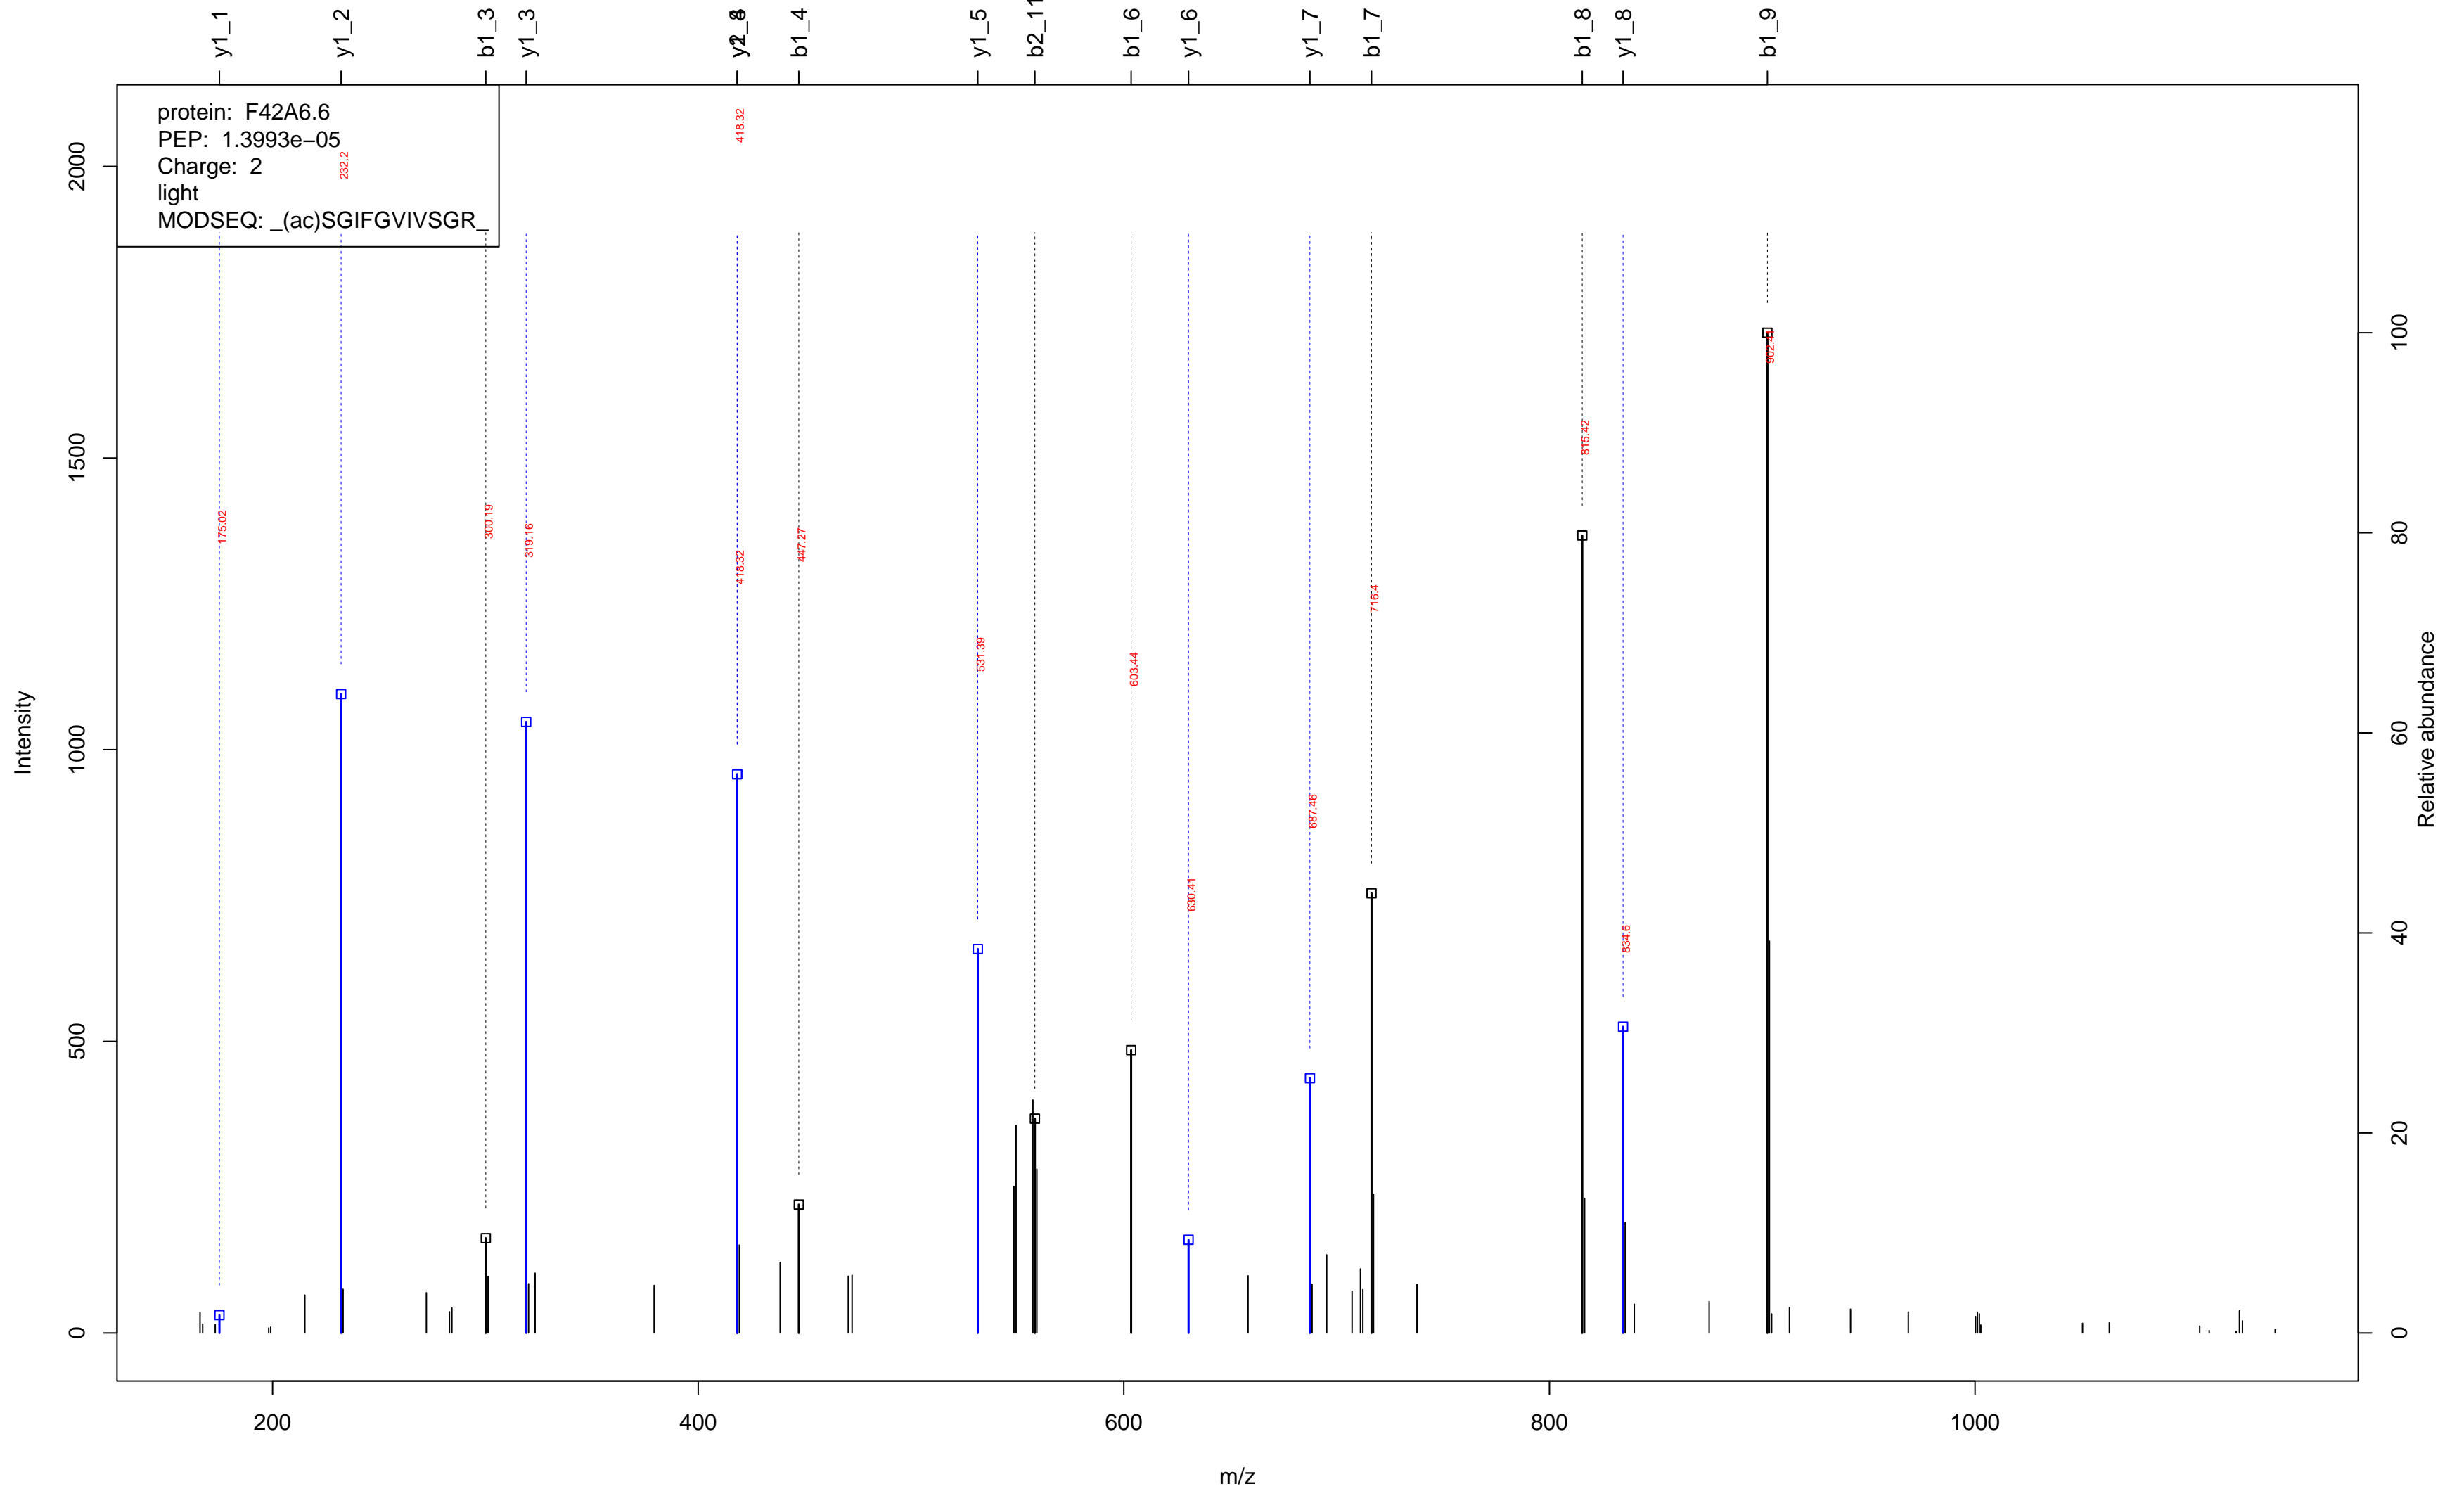

324

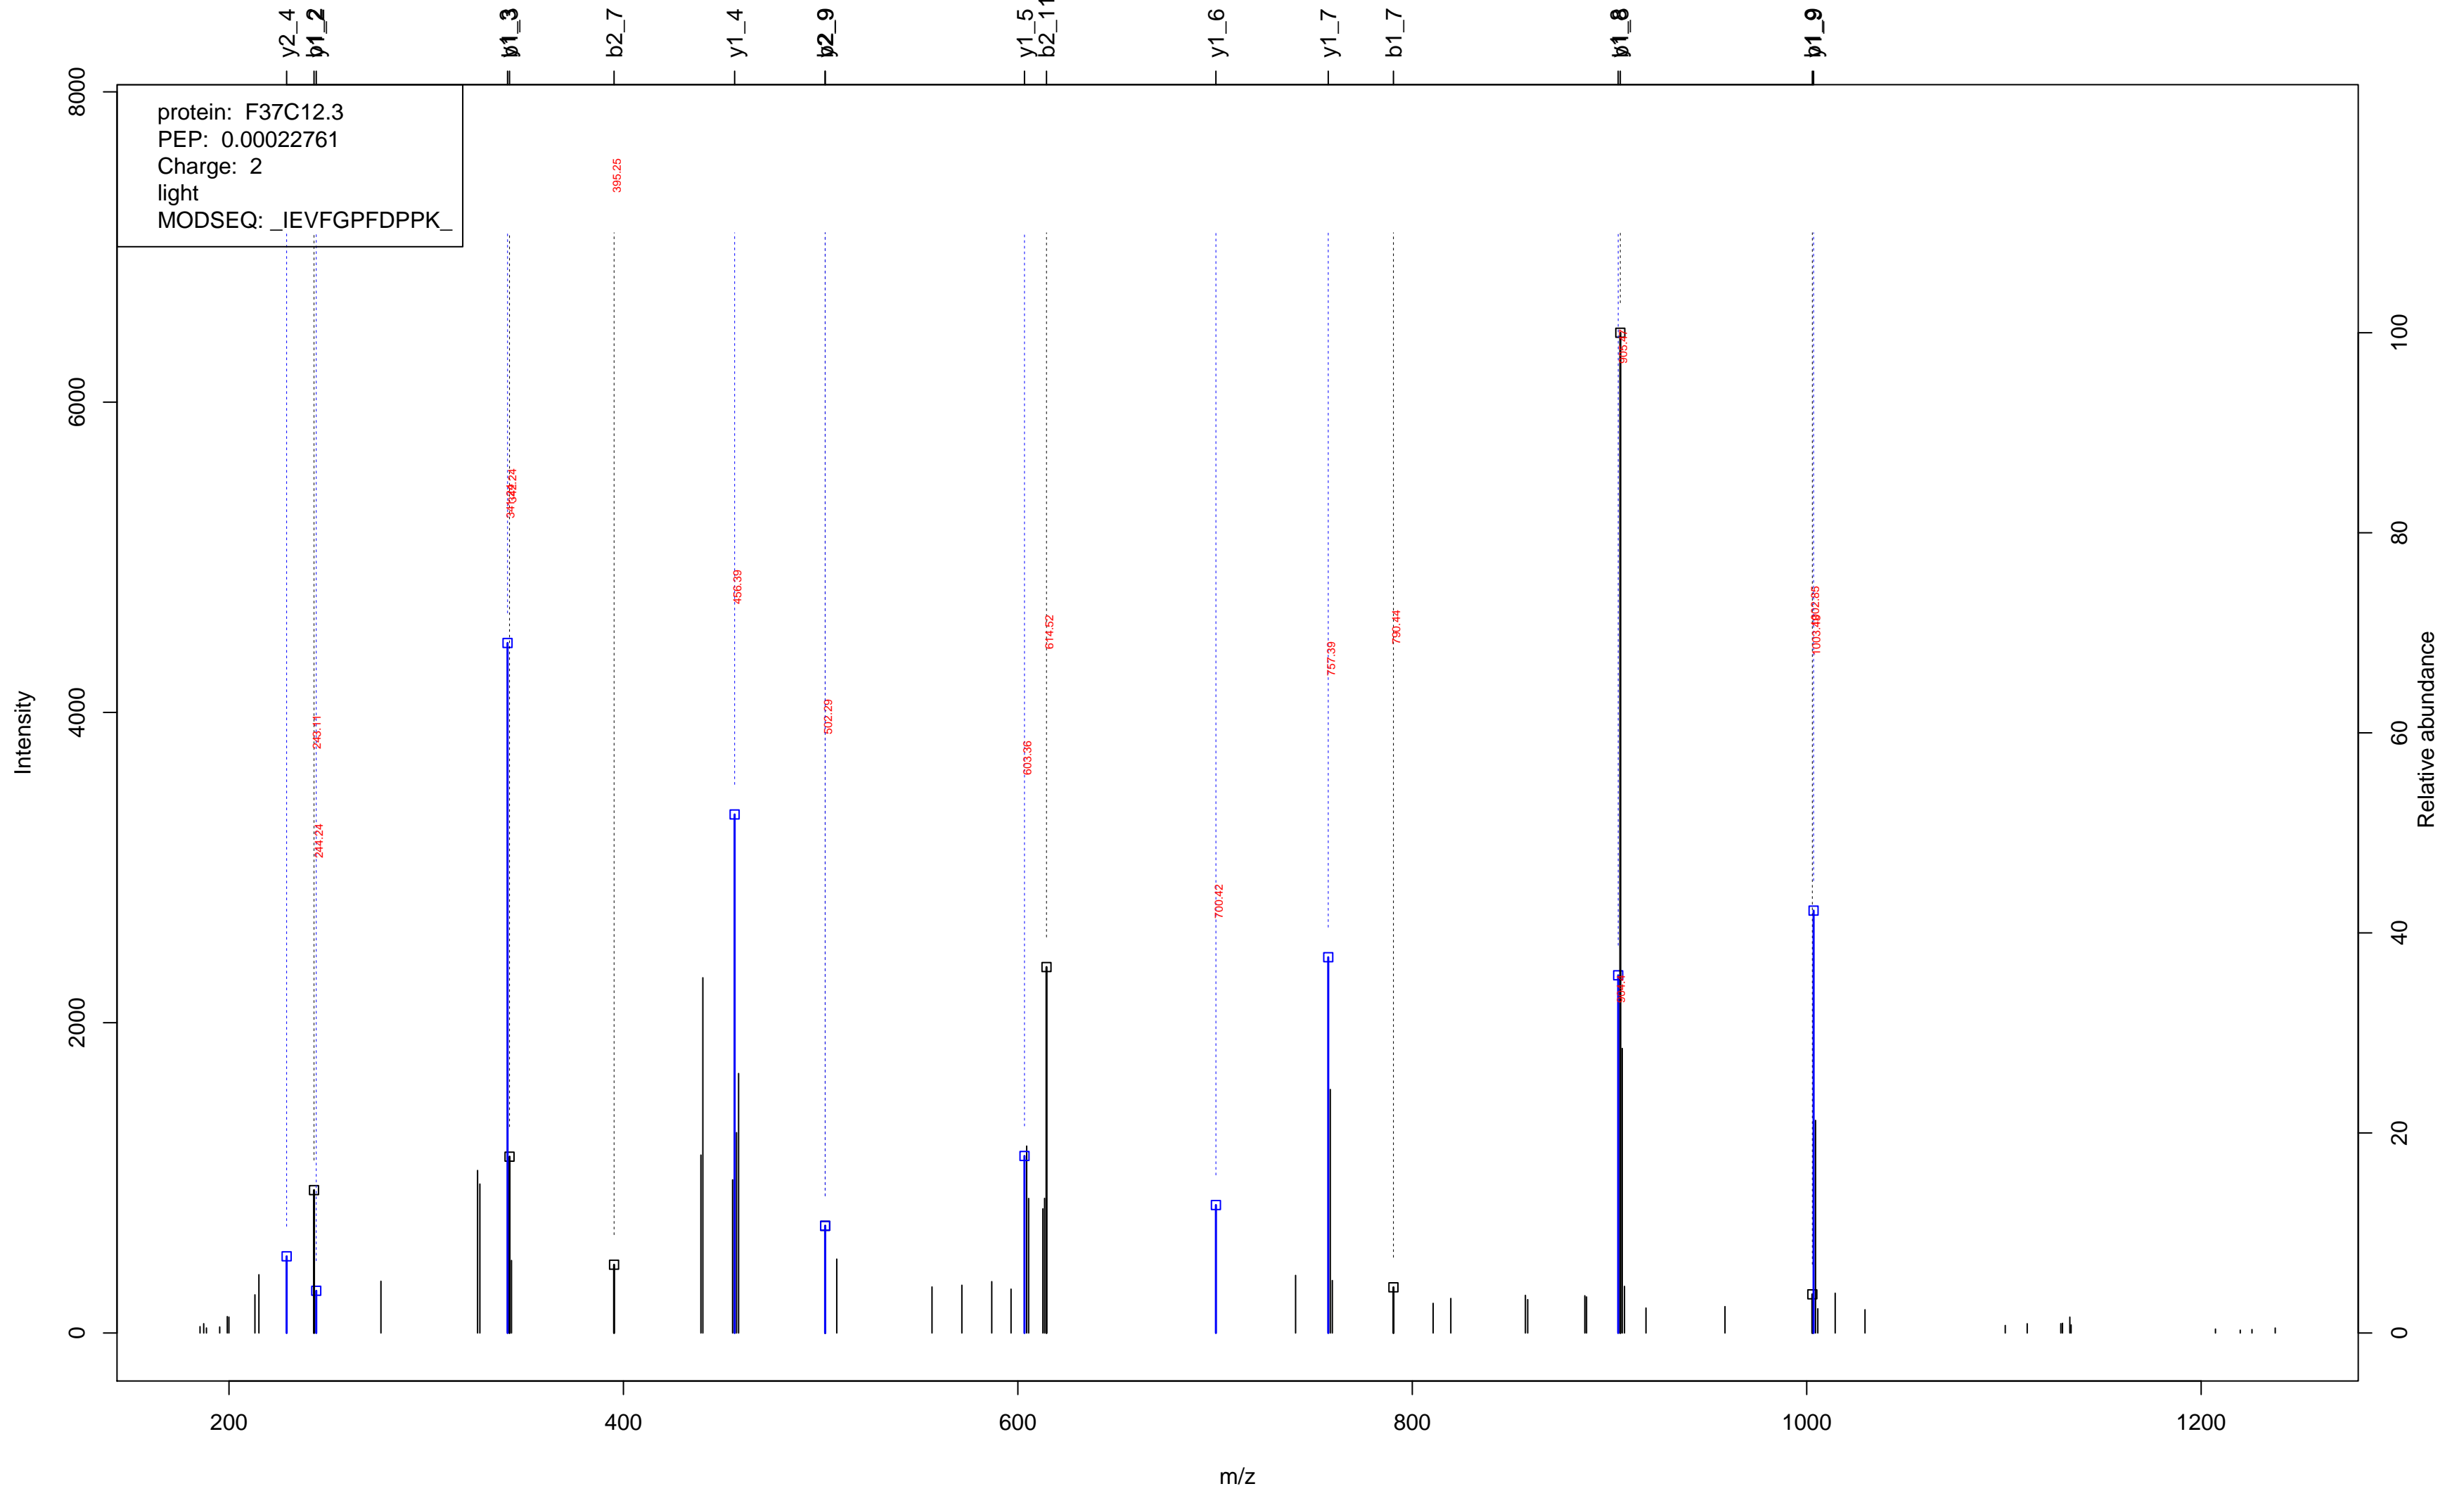

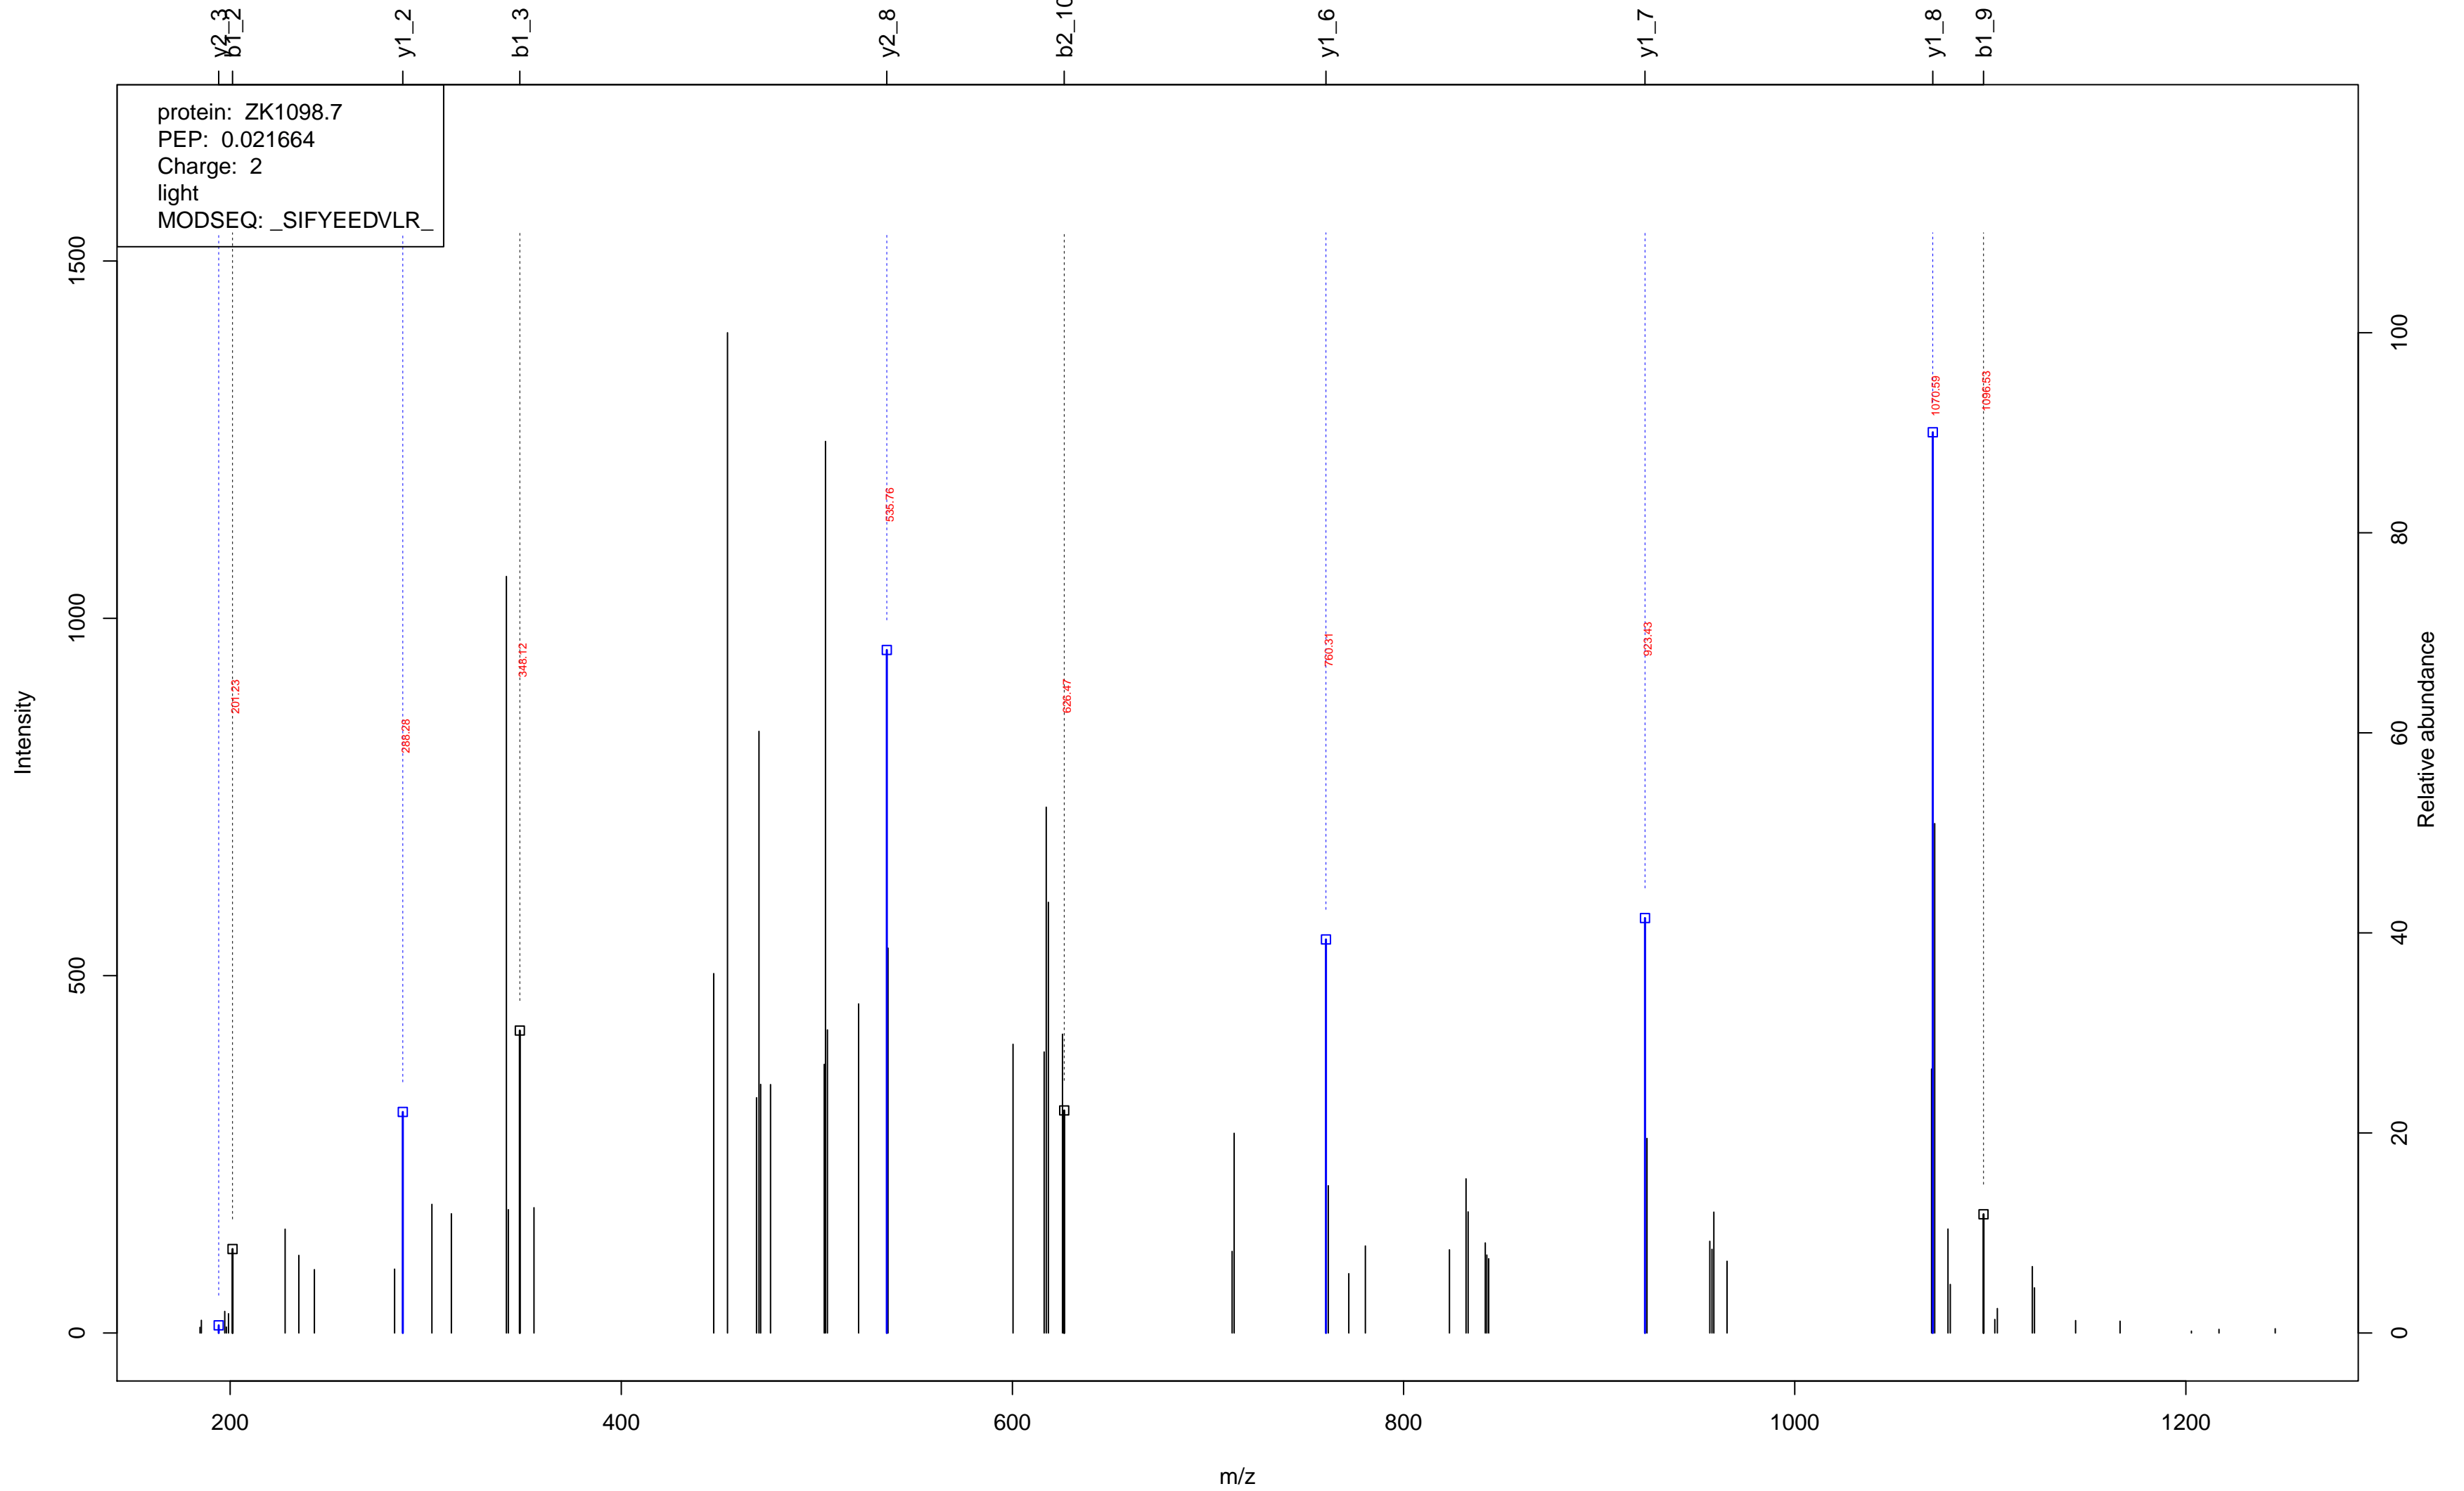

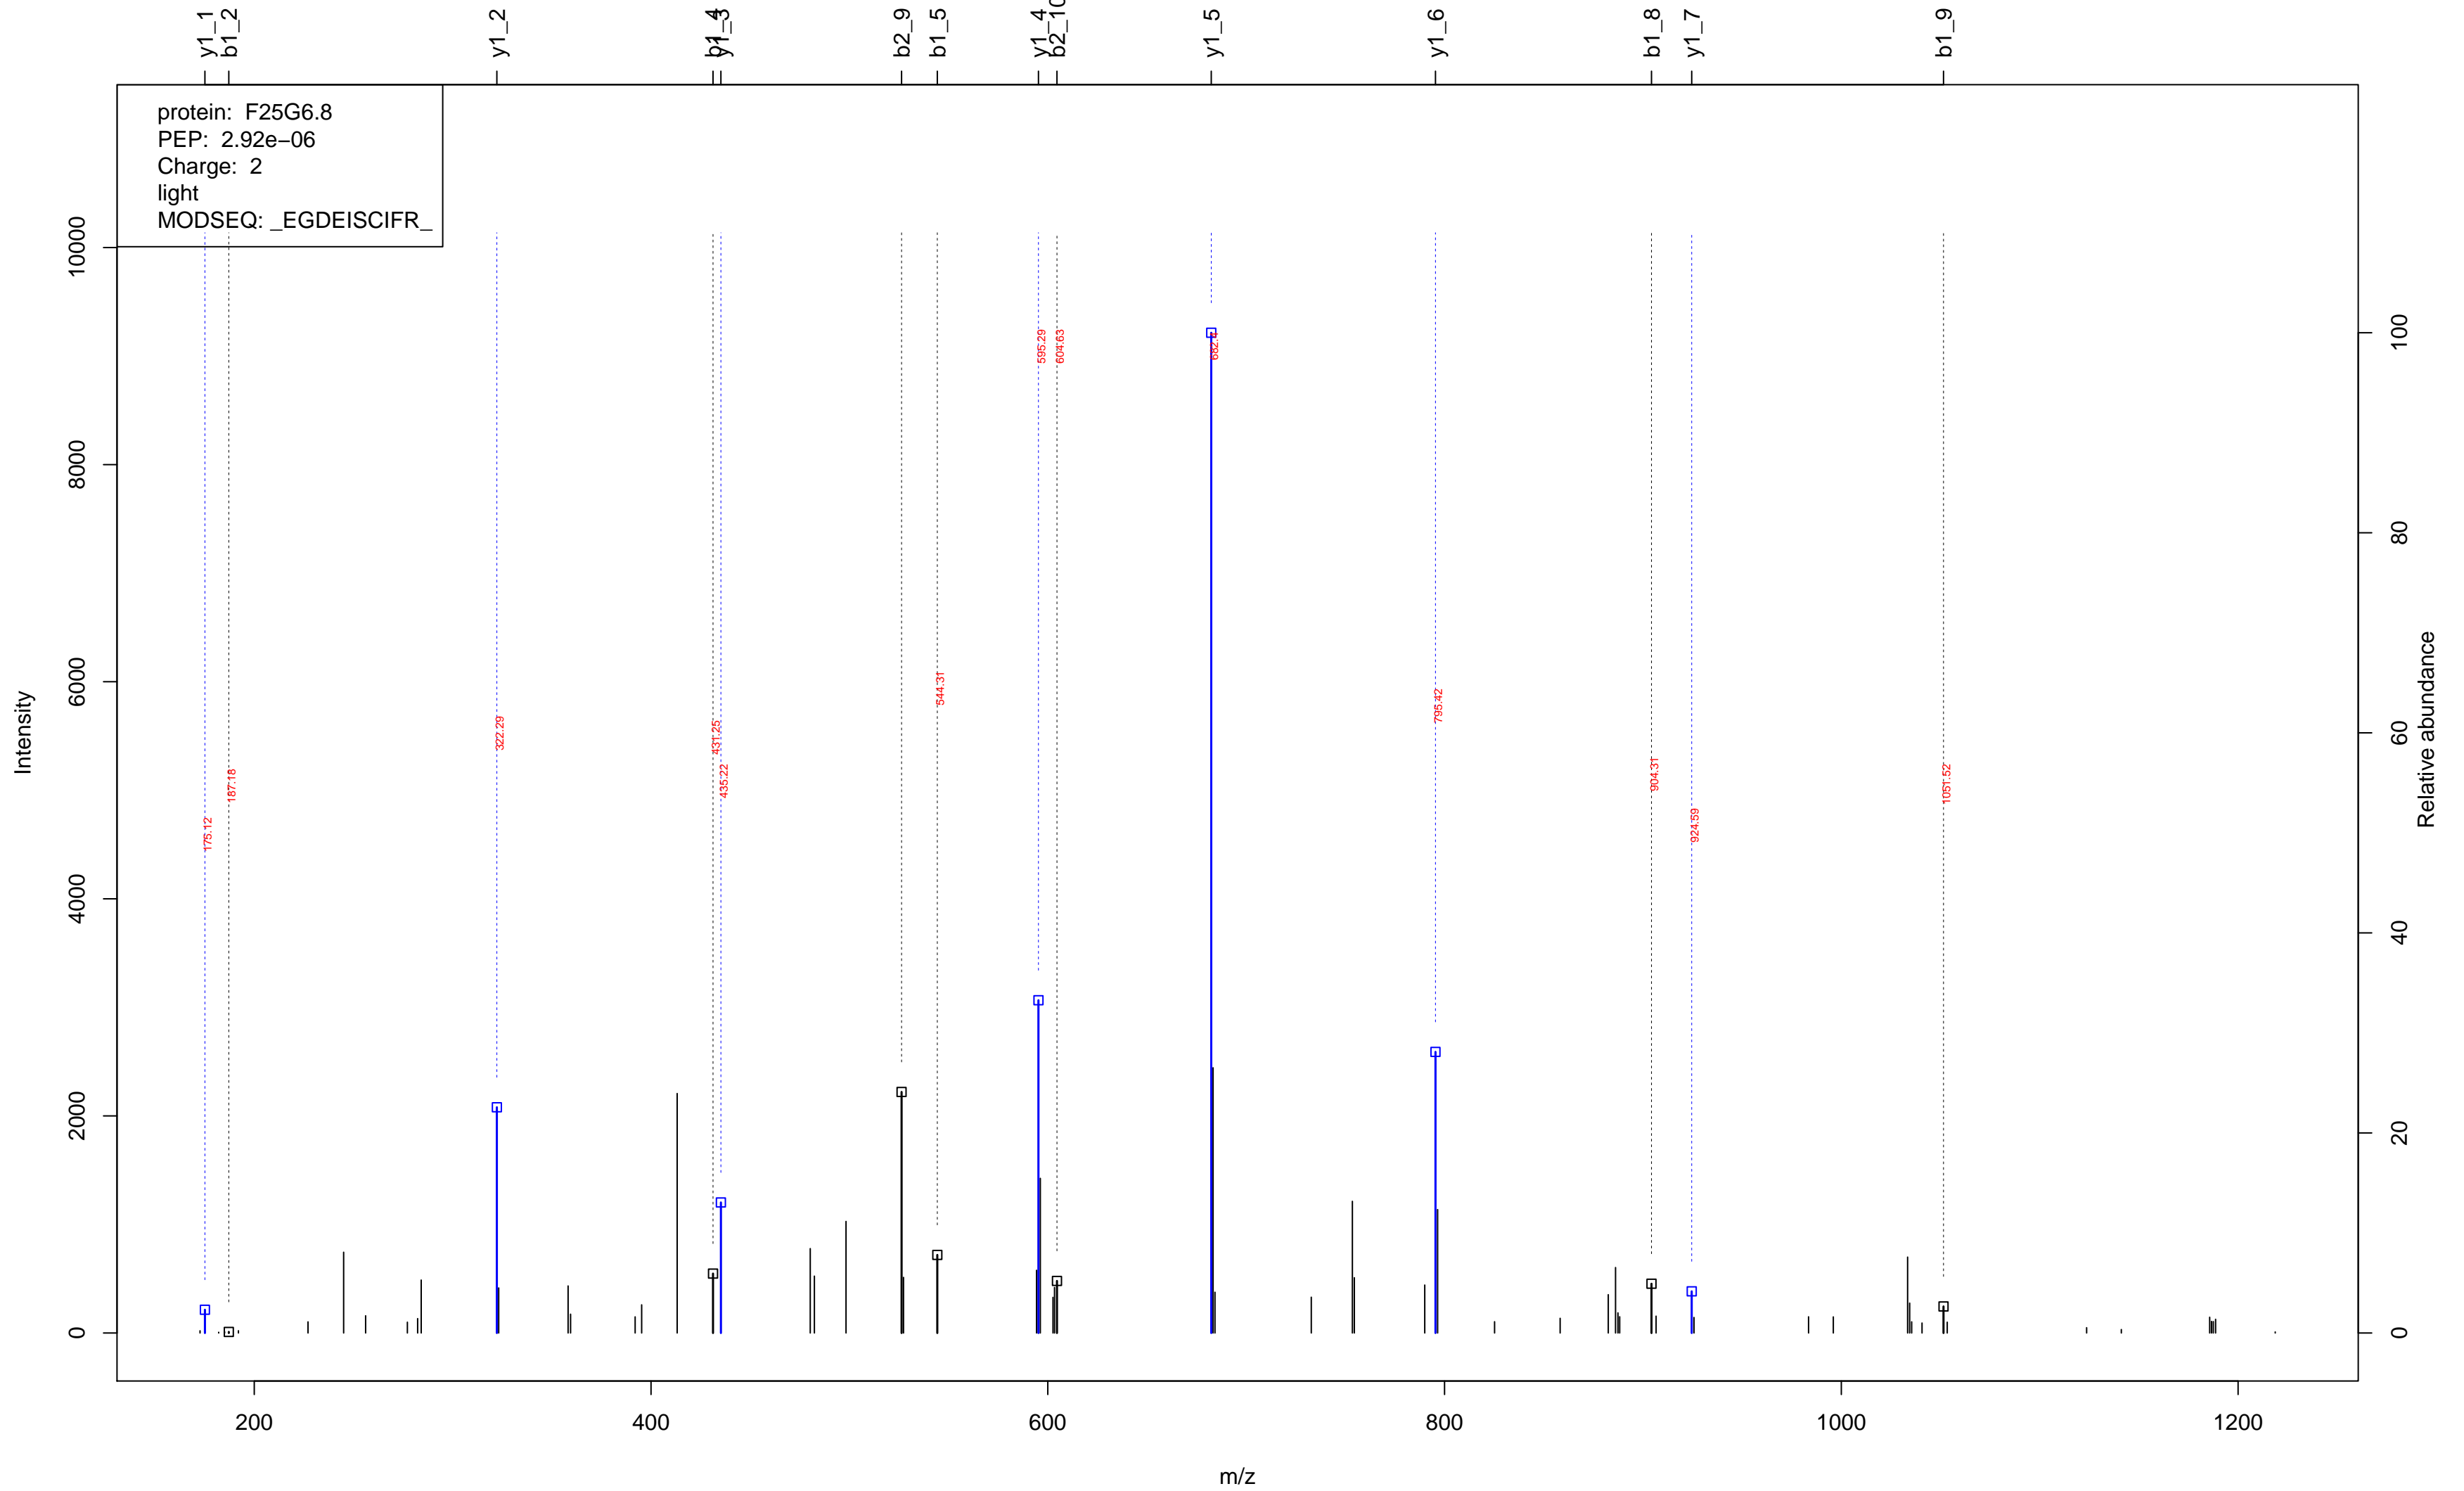

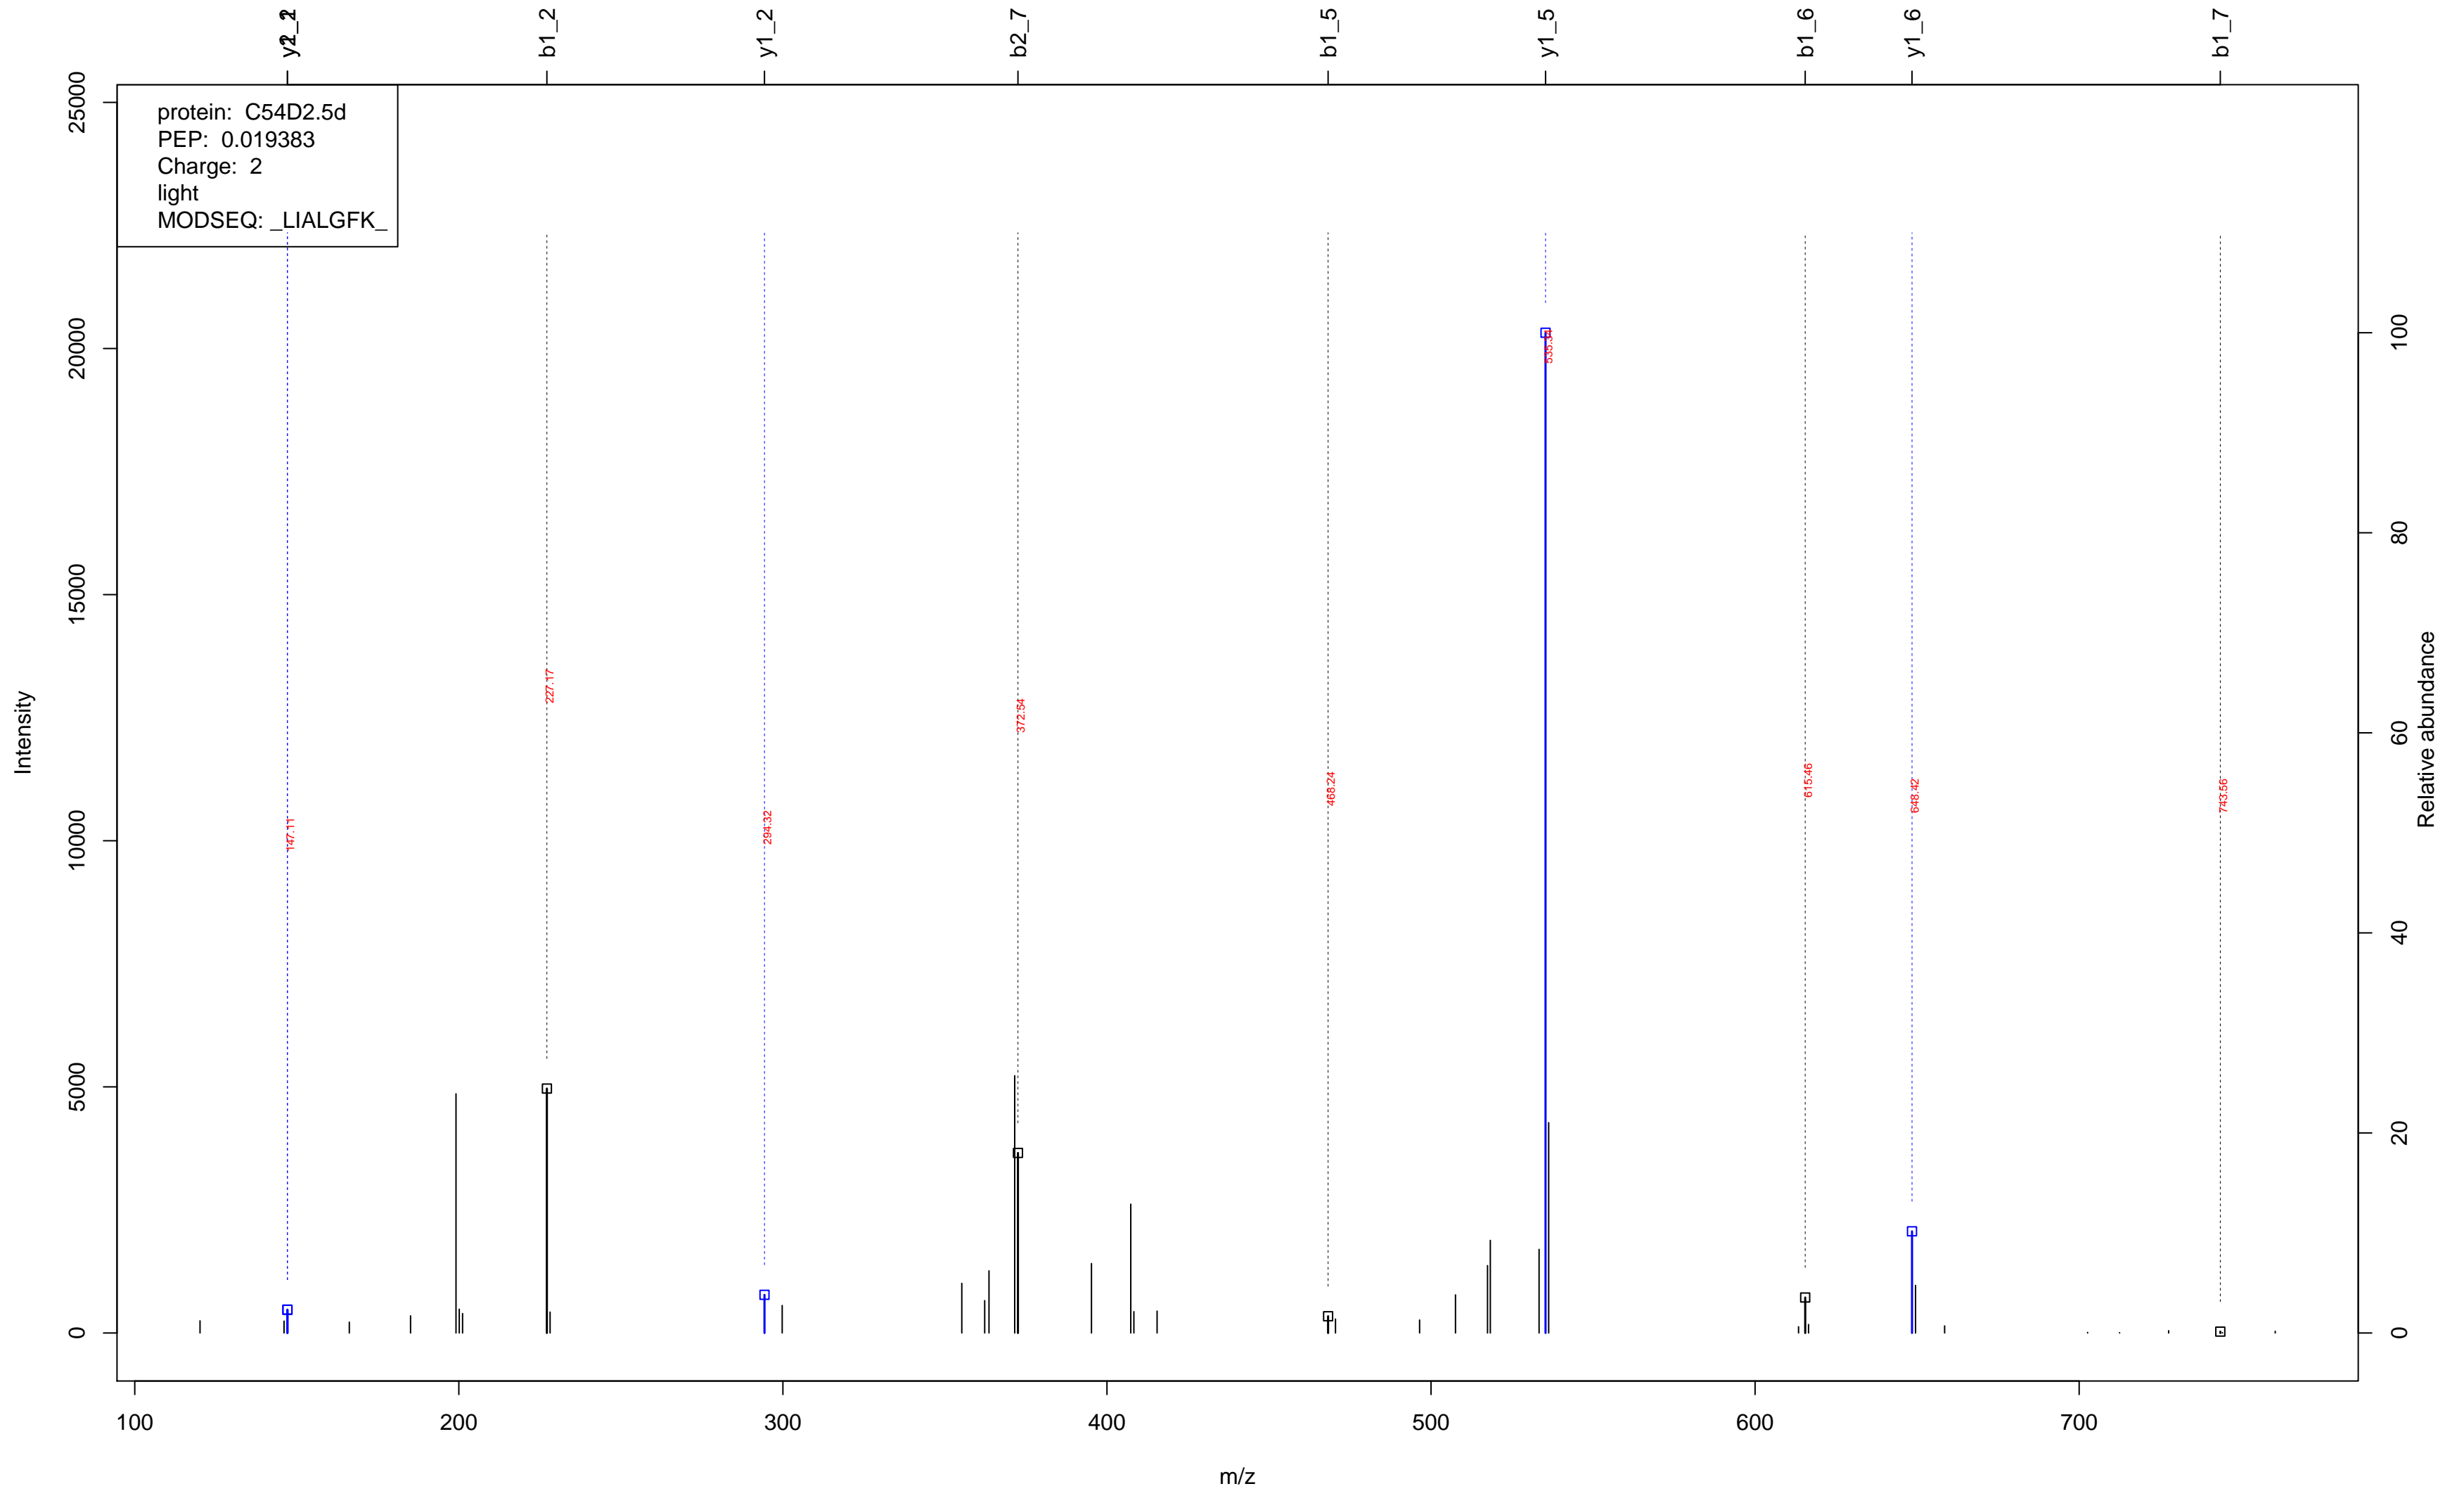

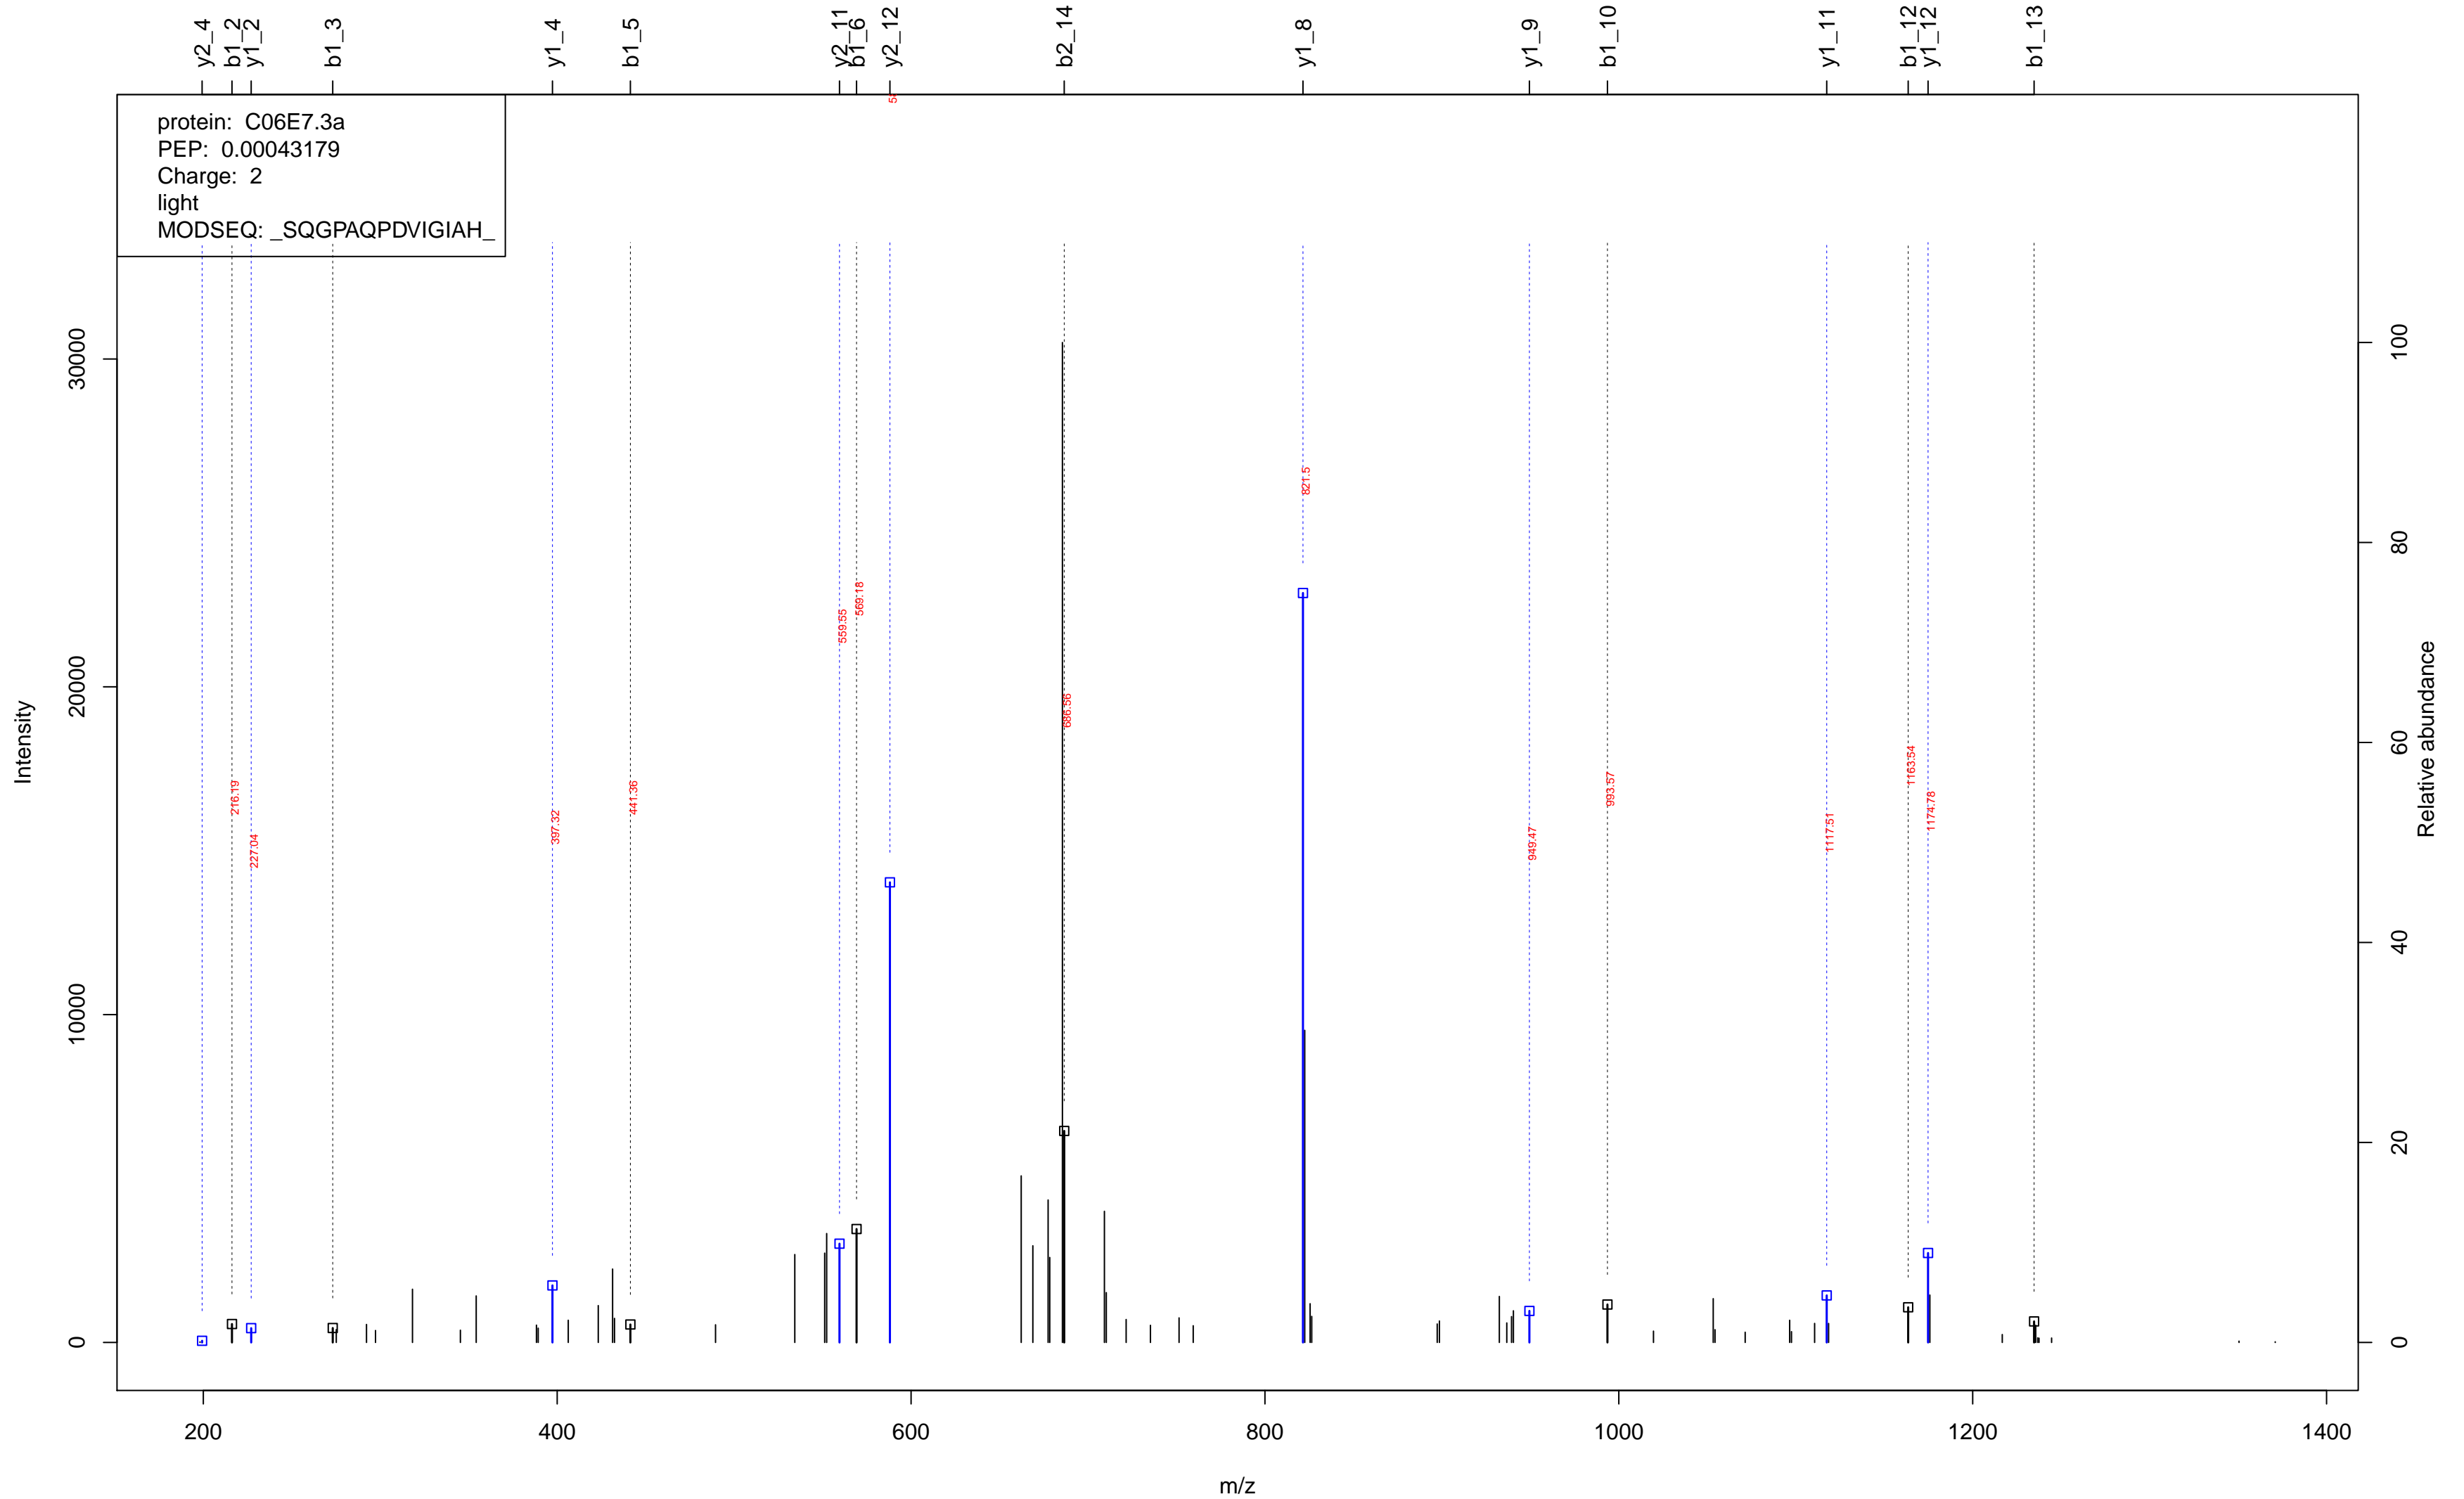



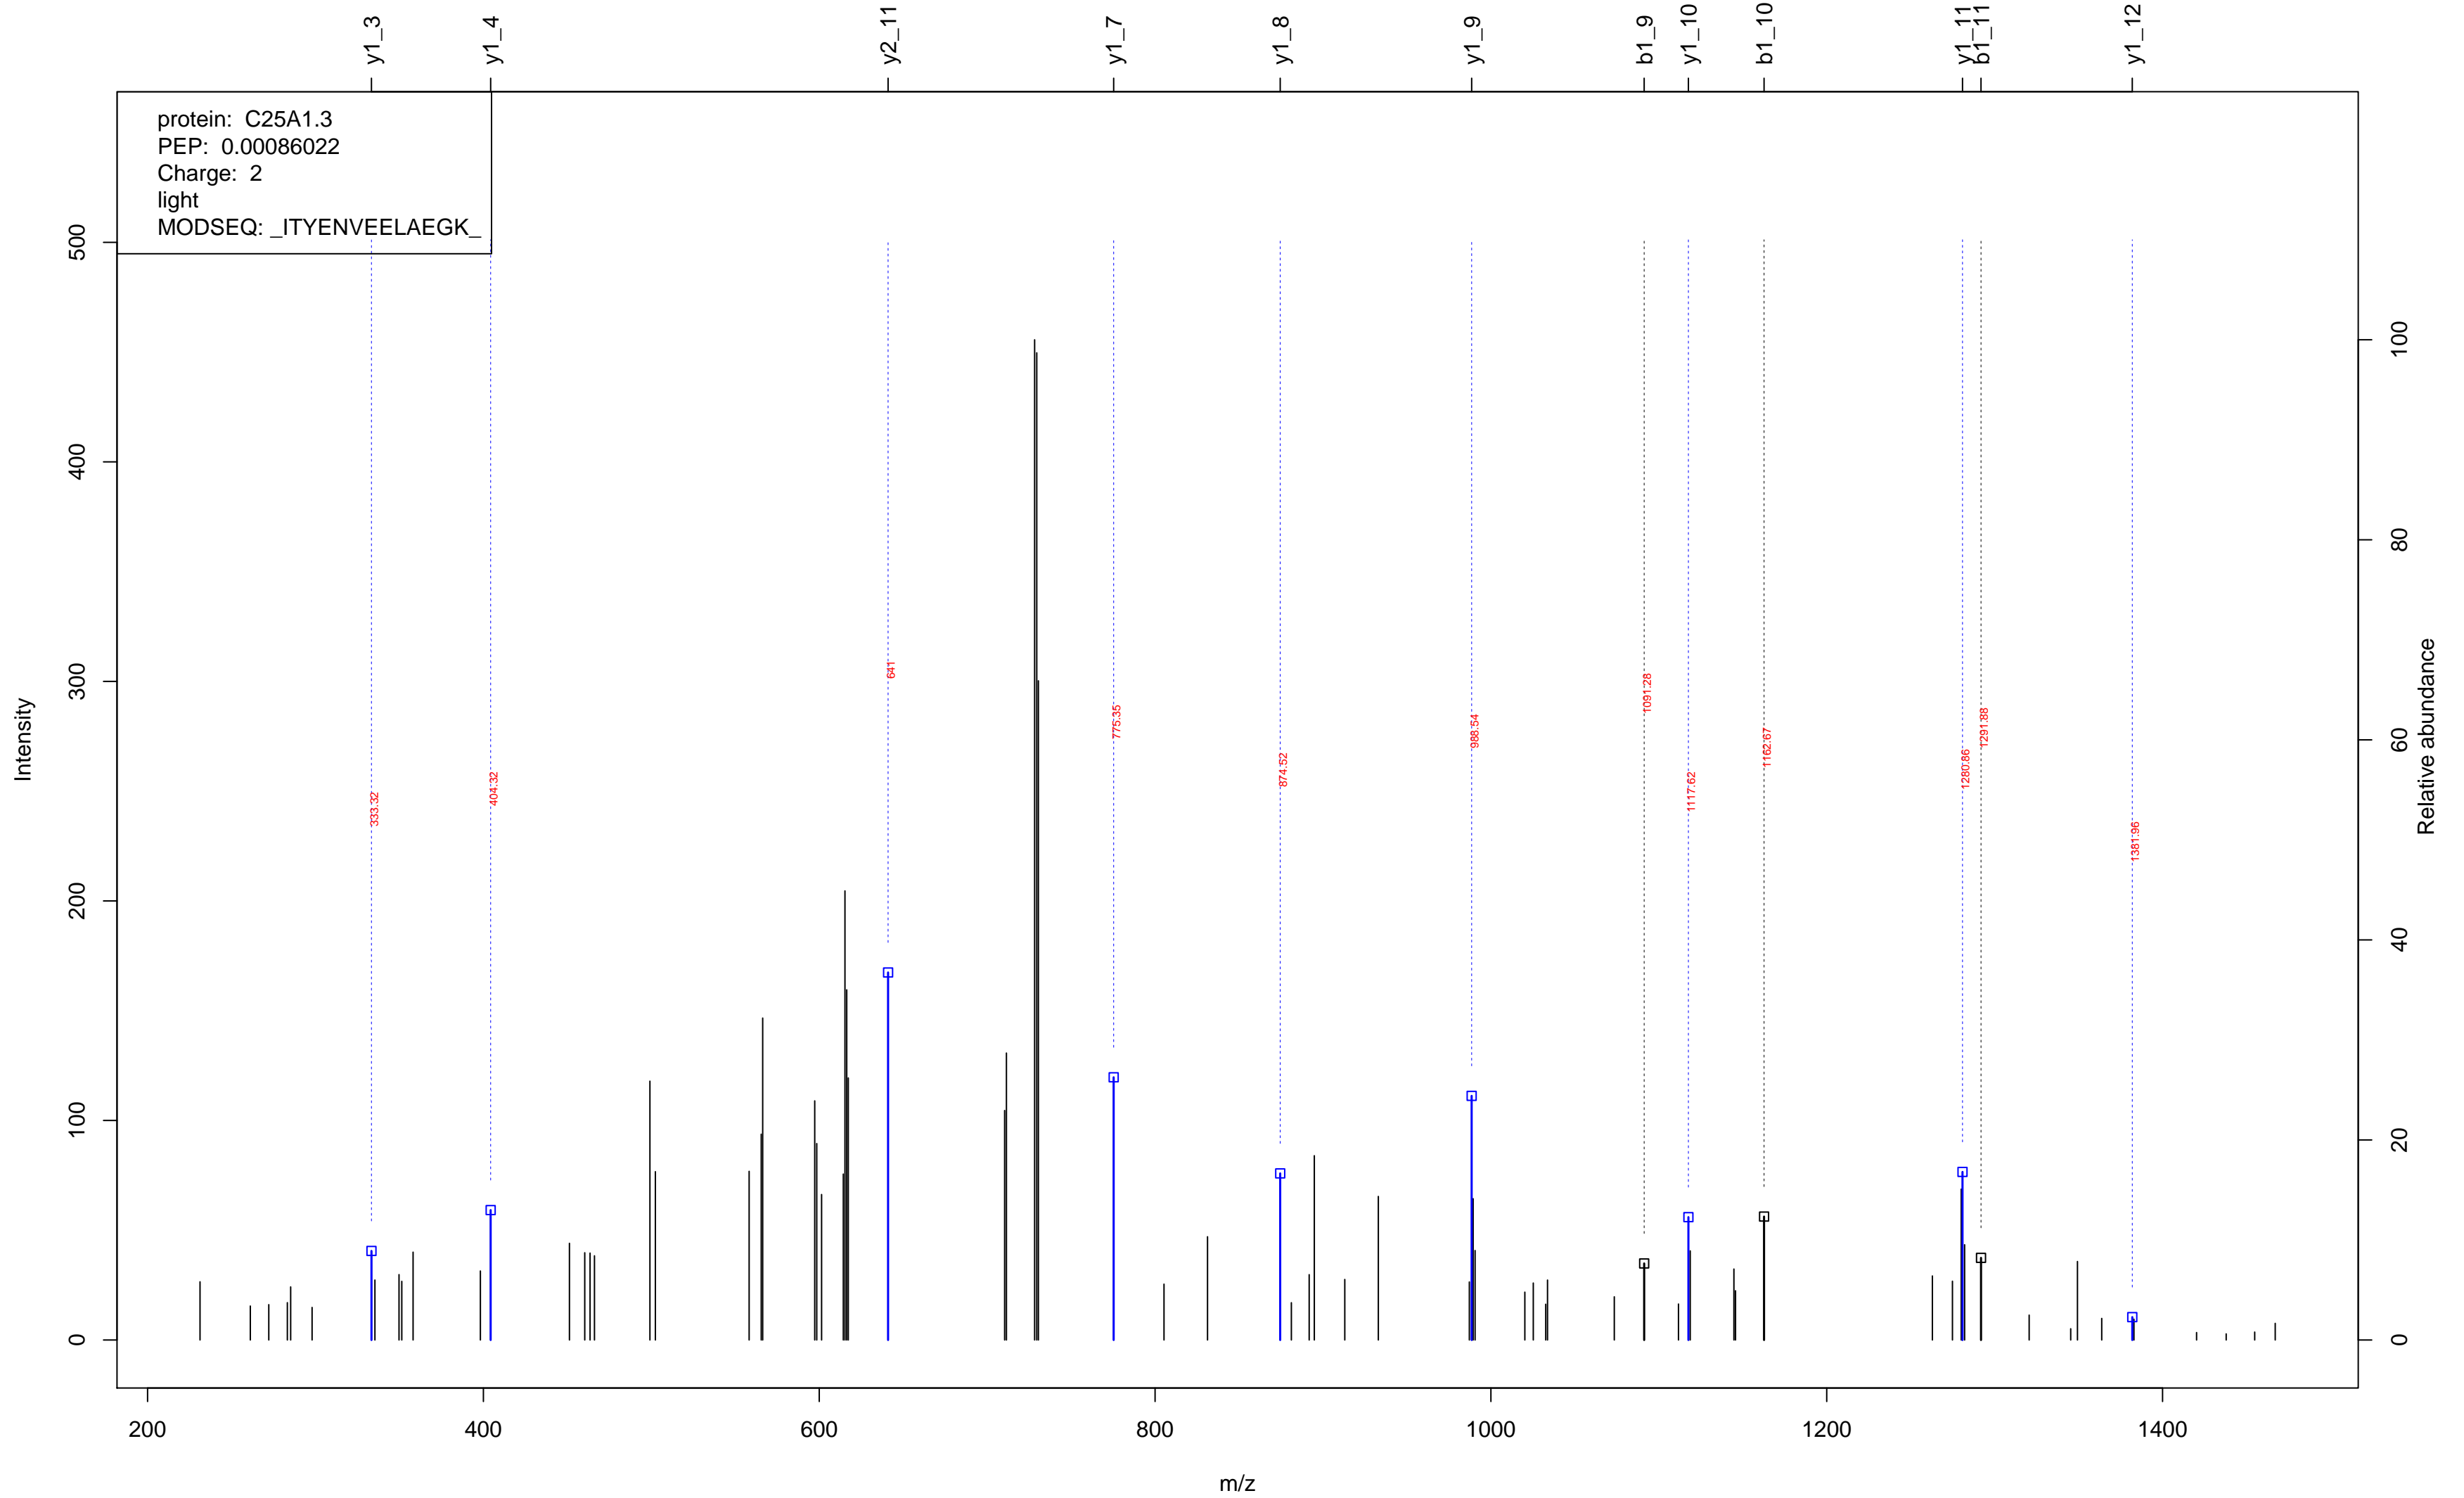

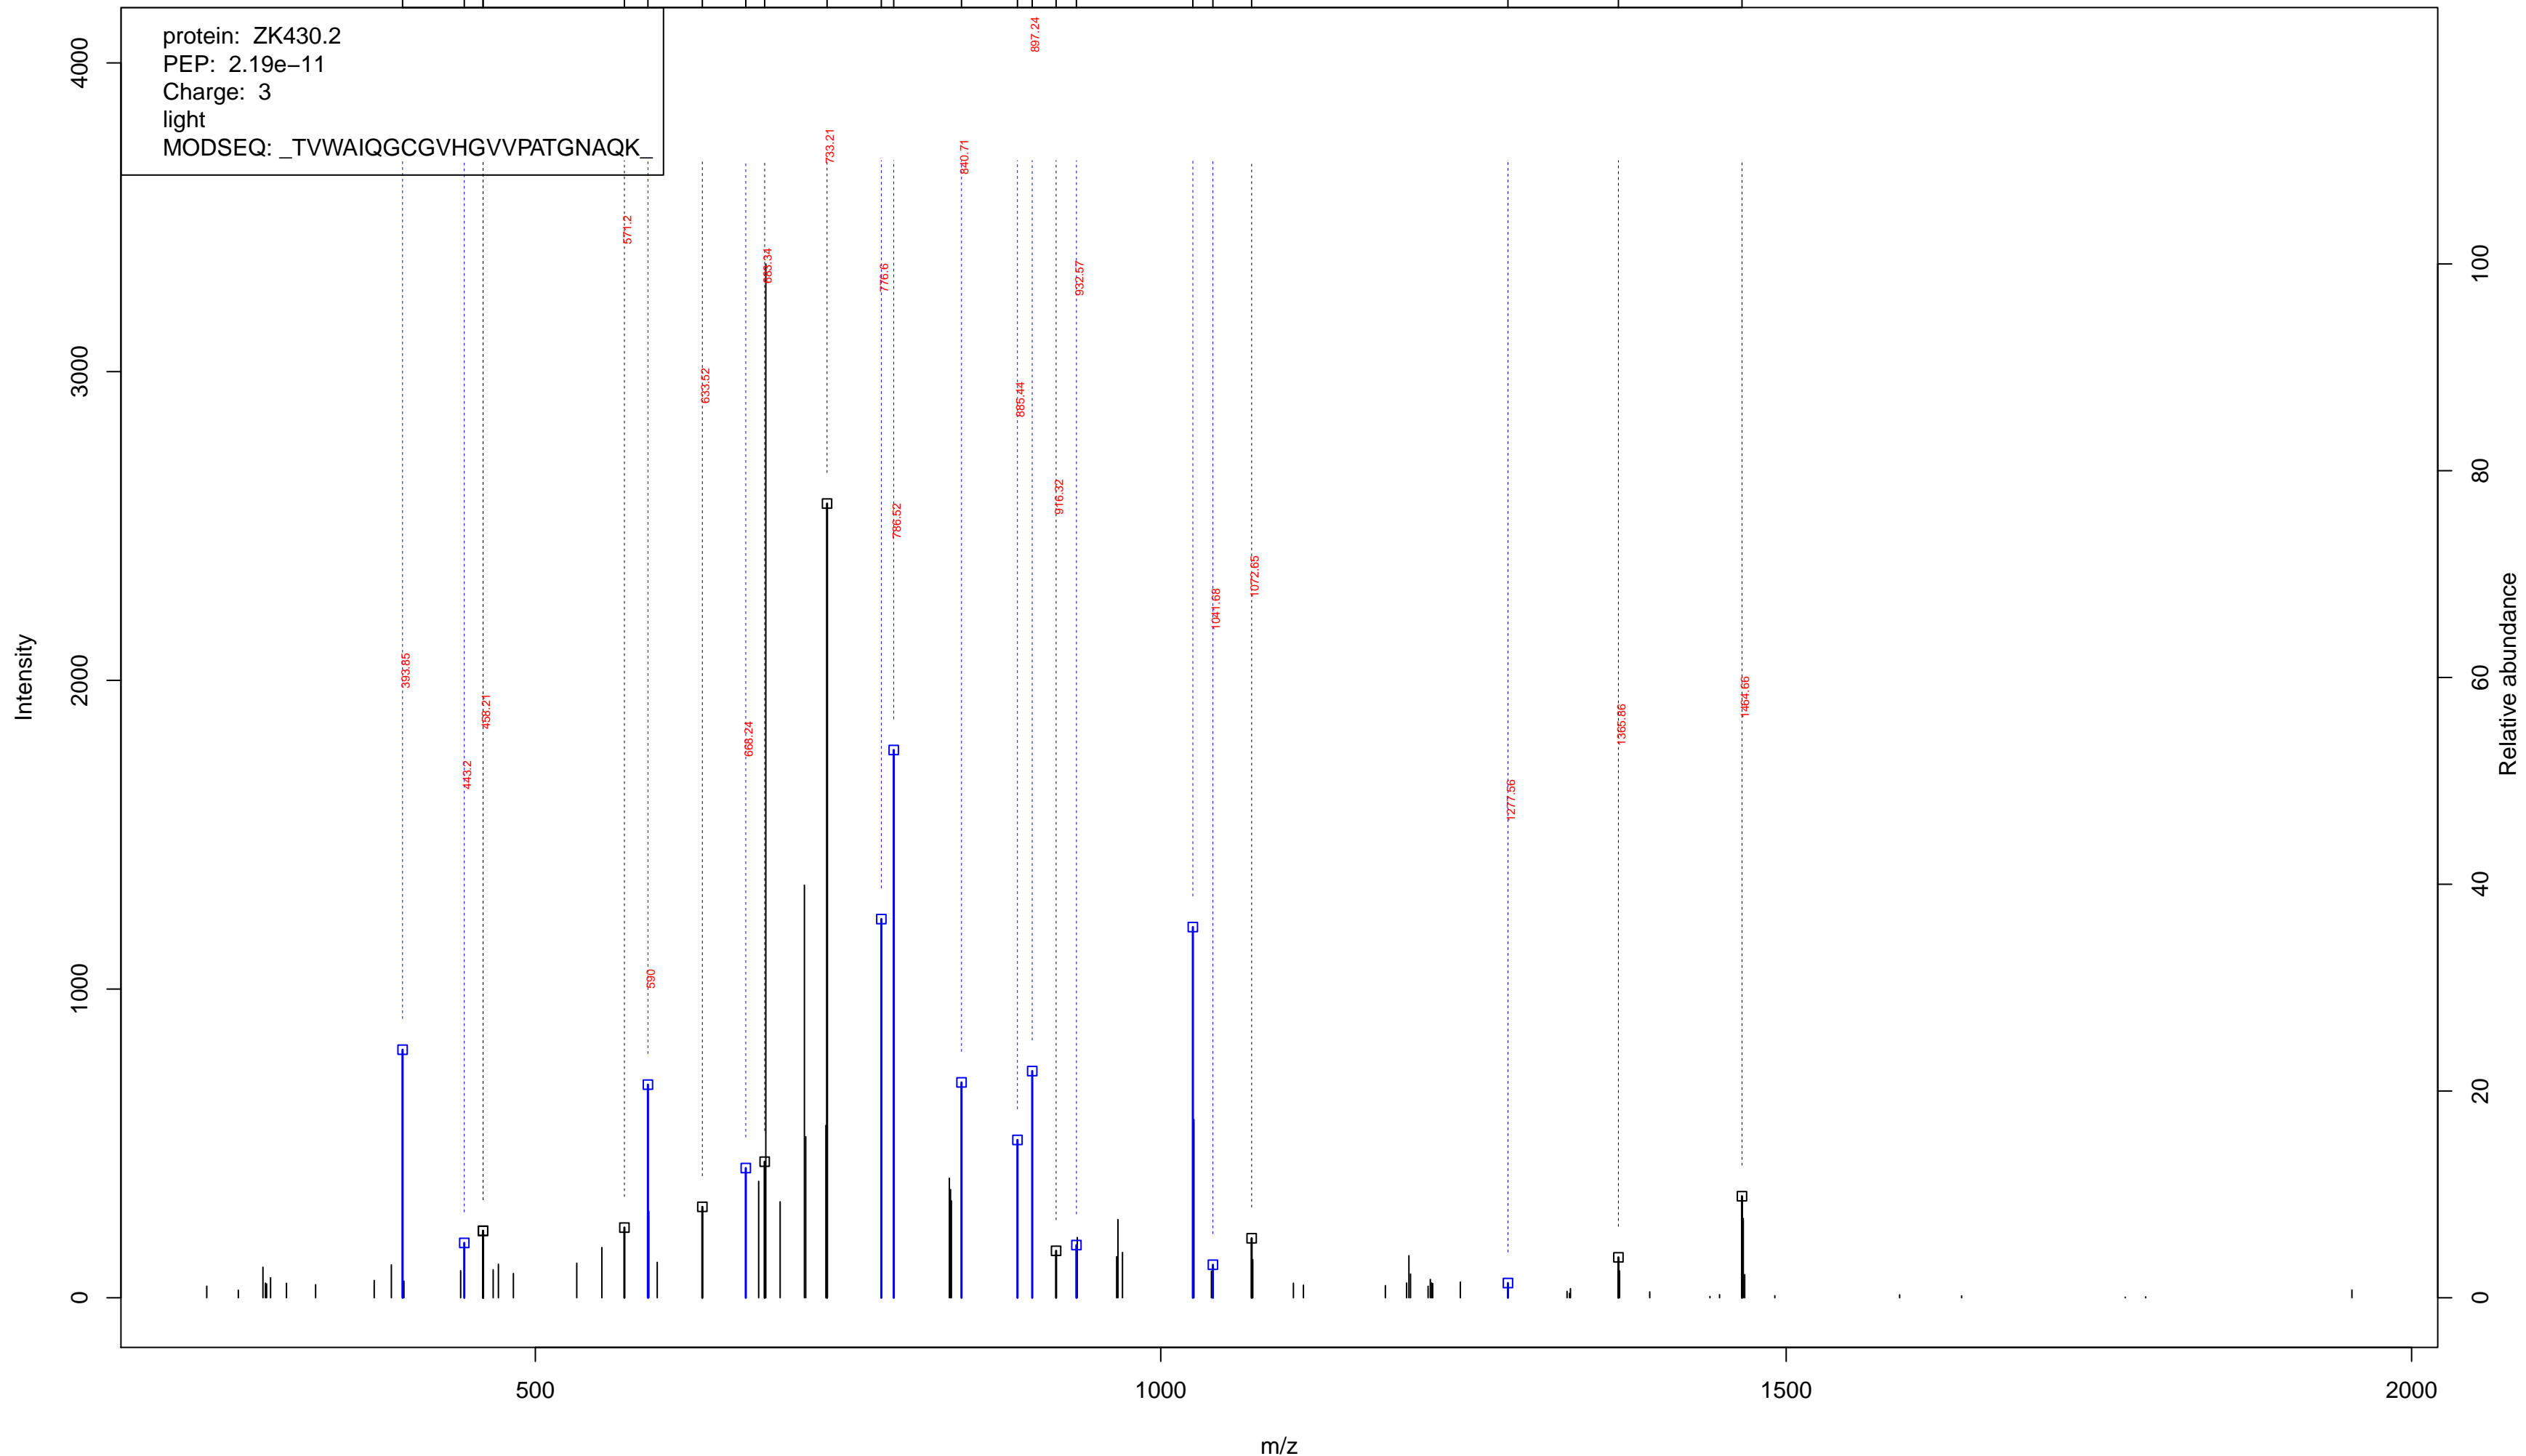

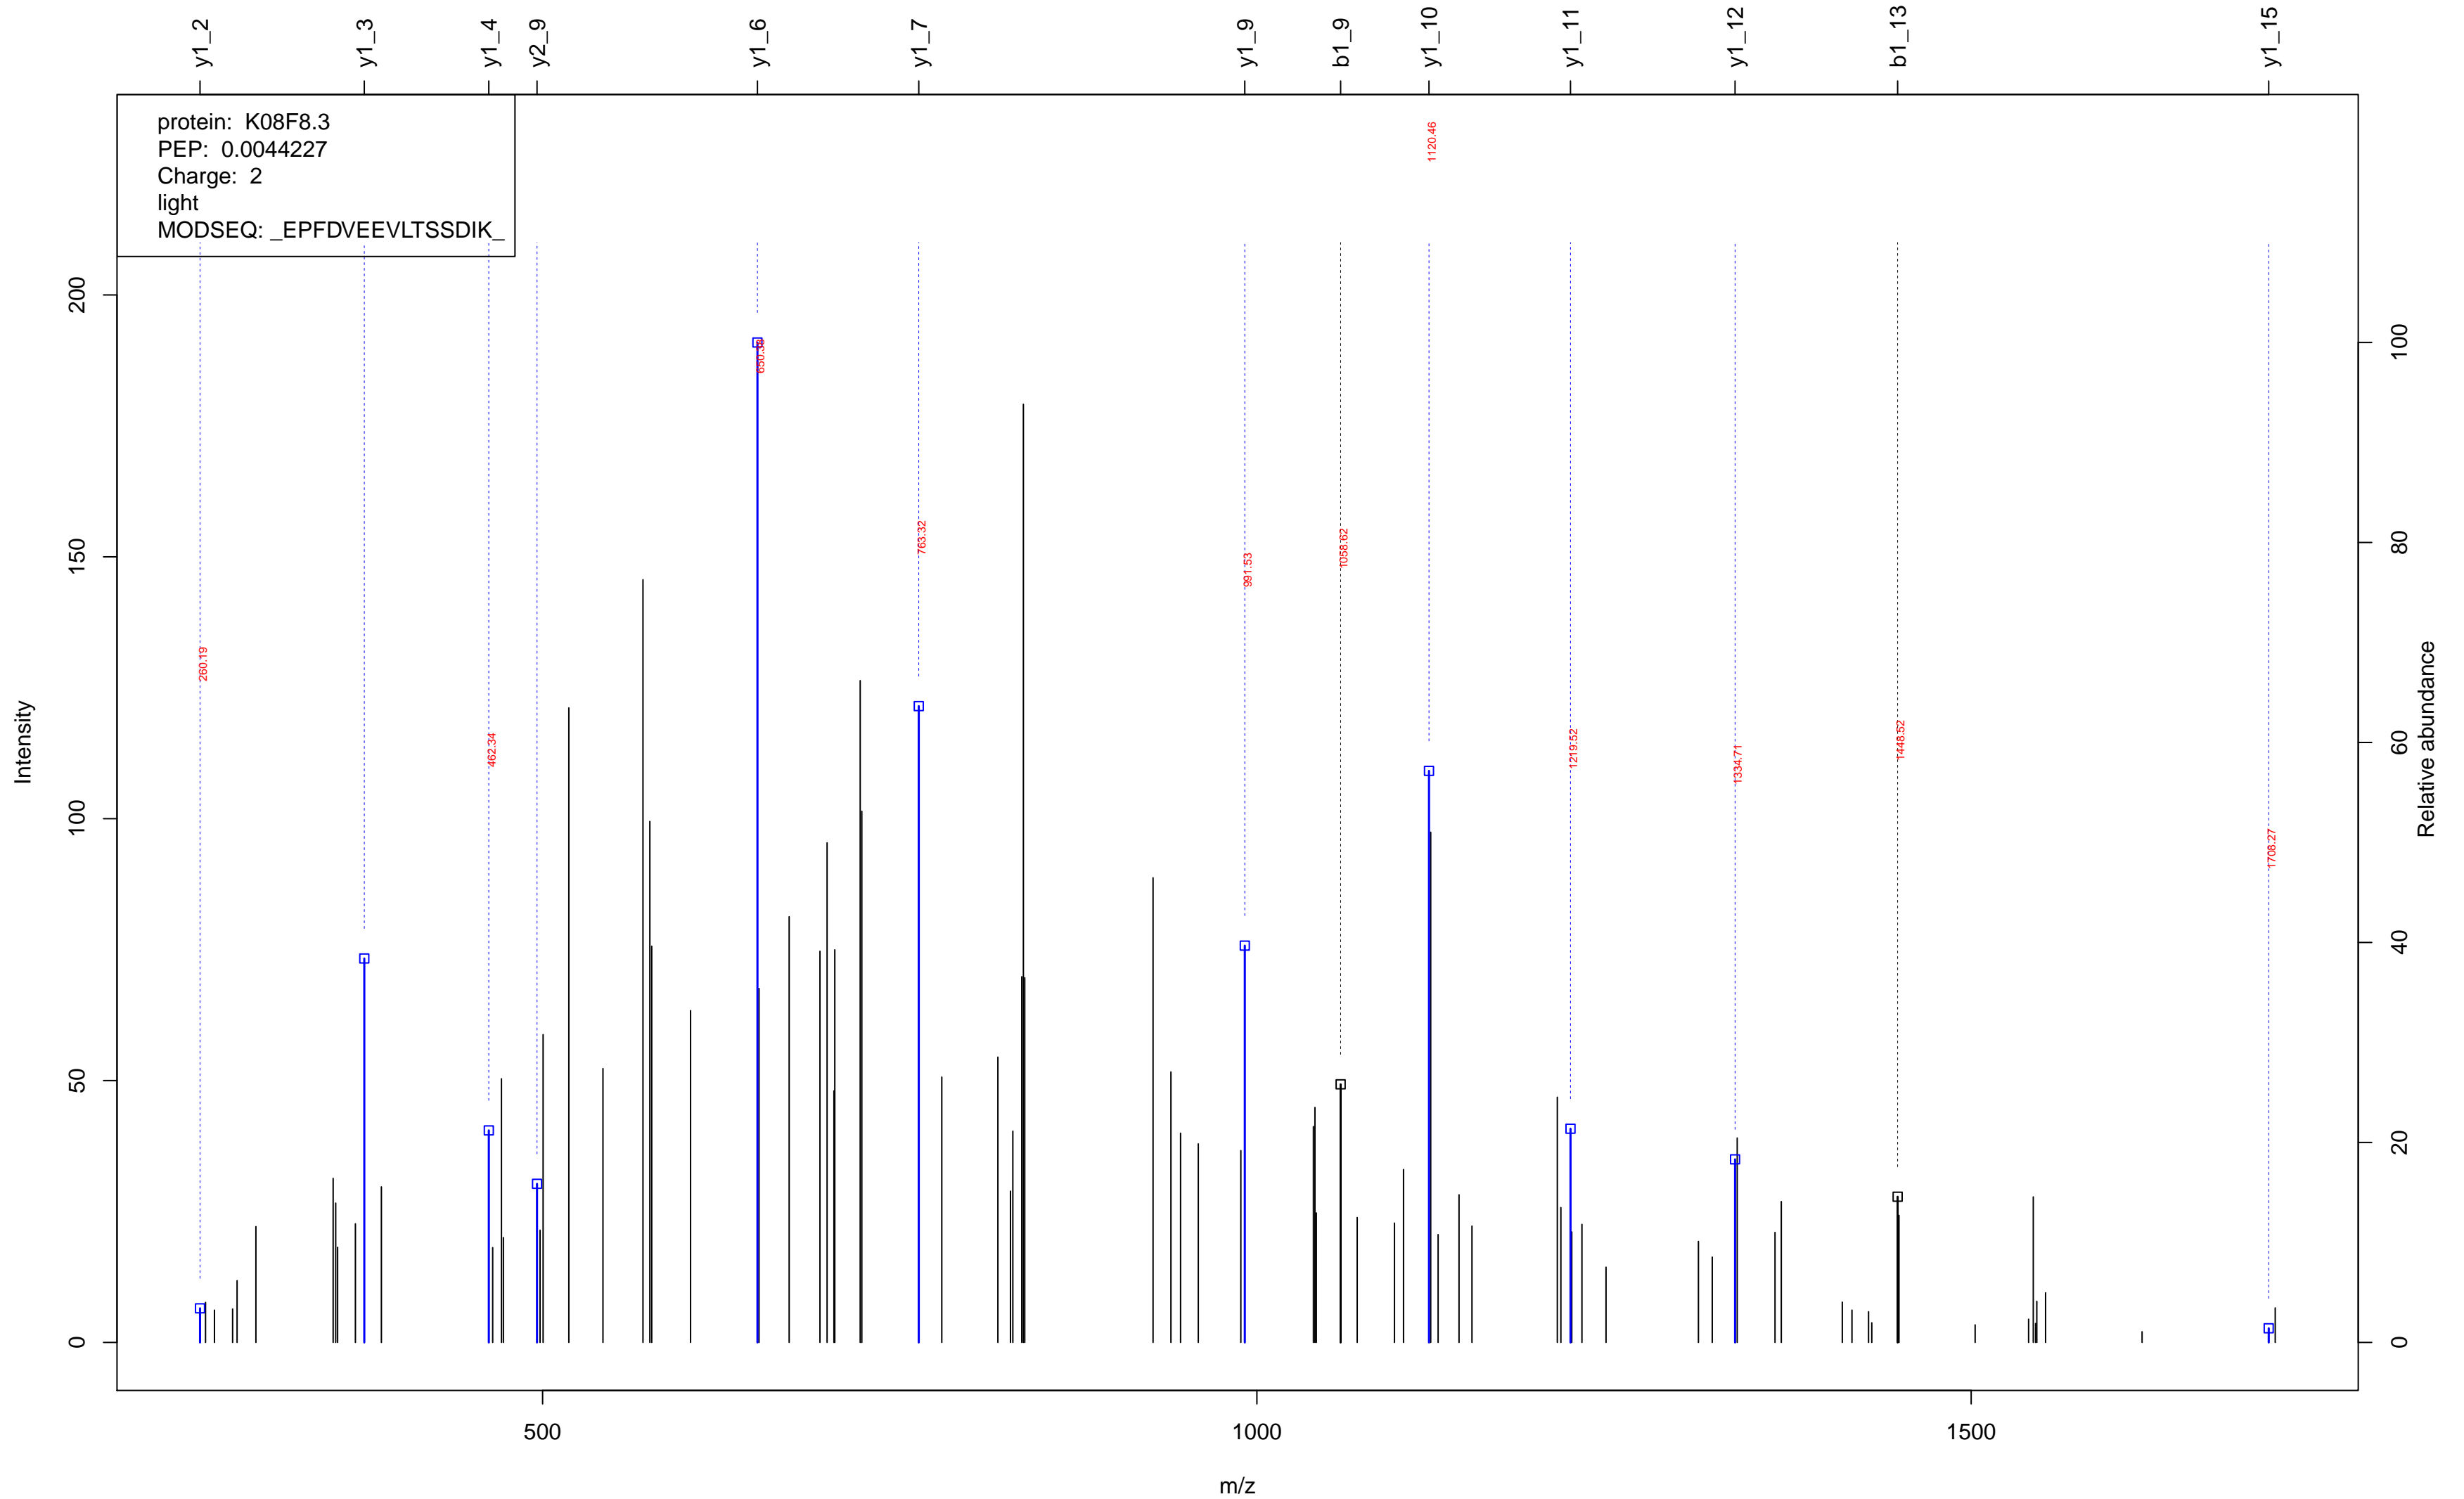

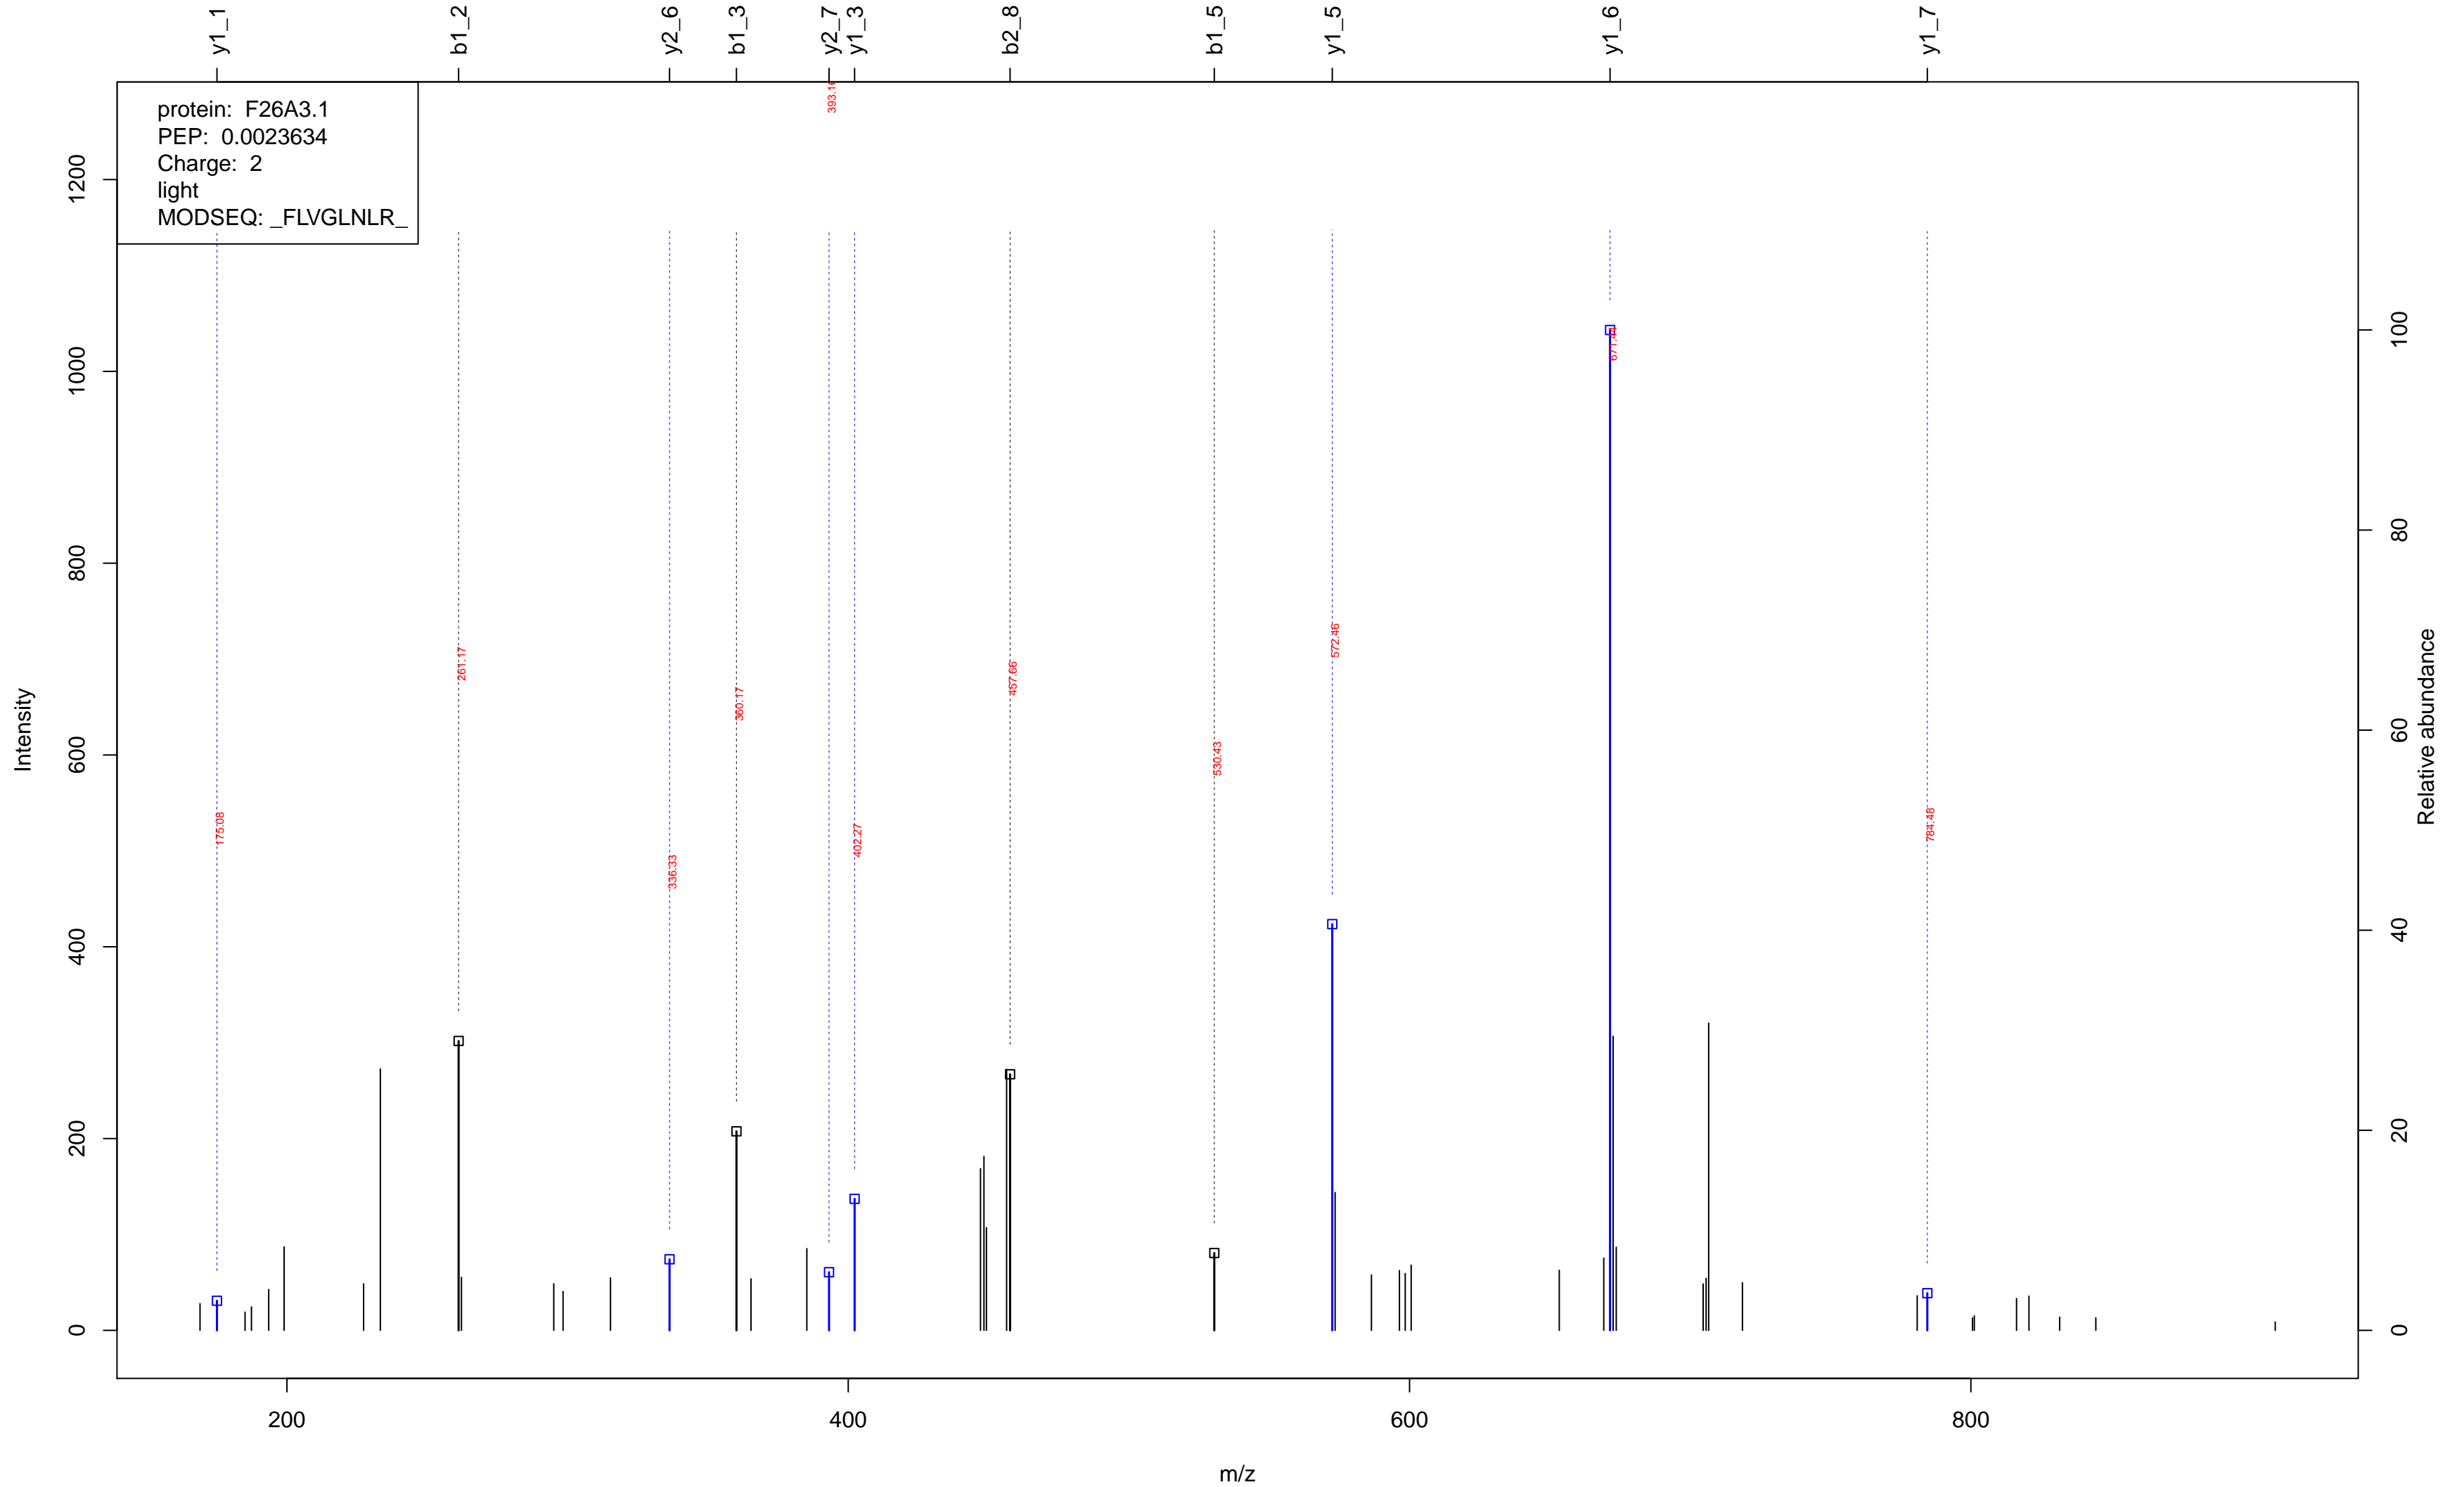

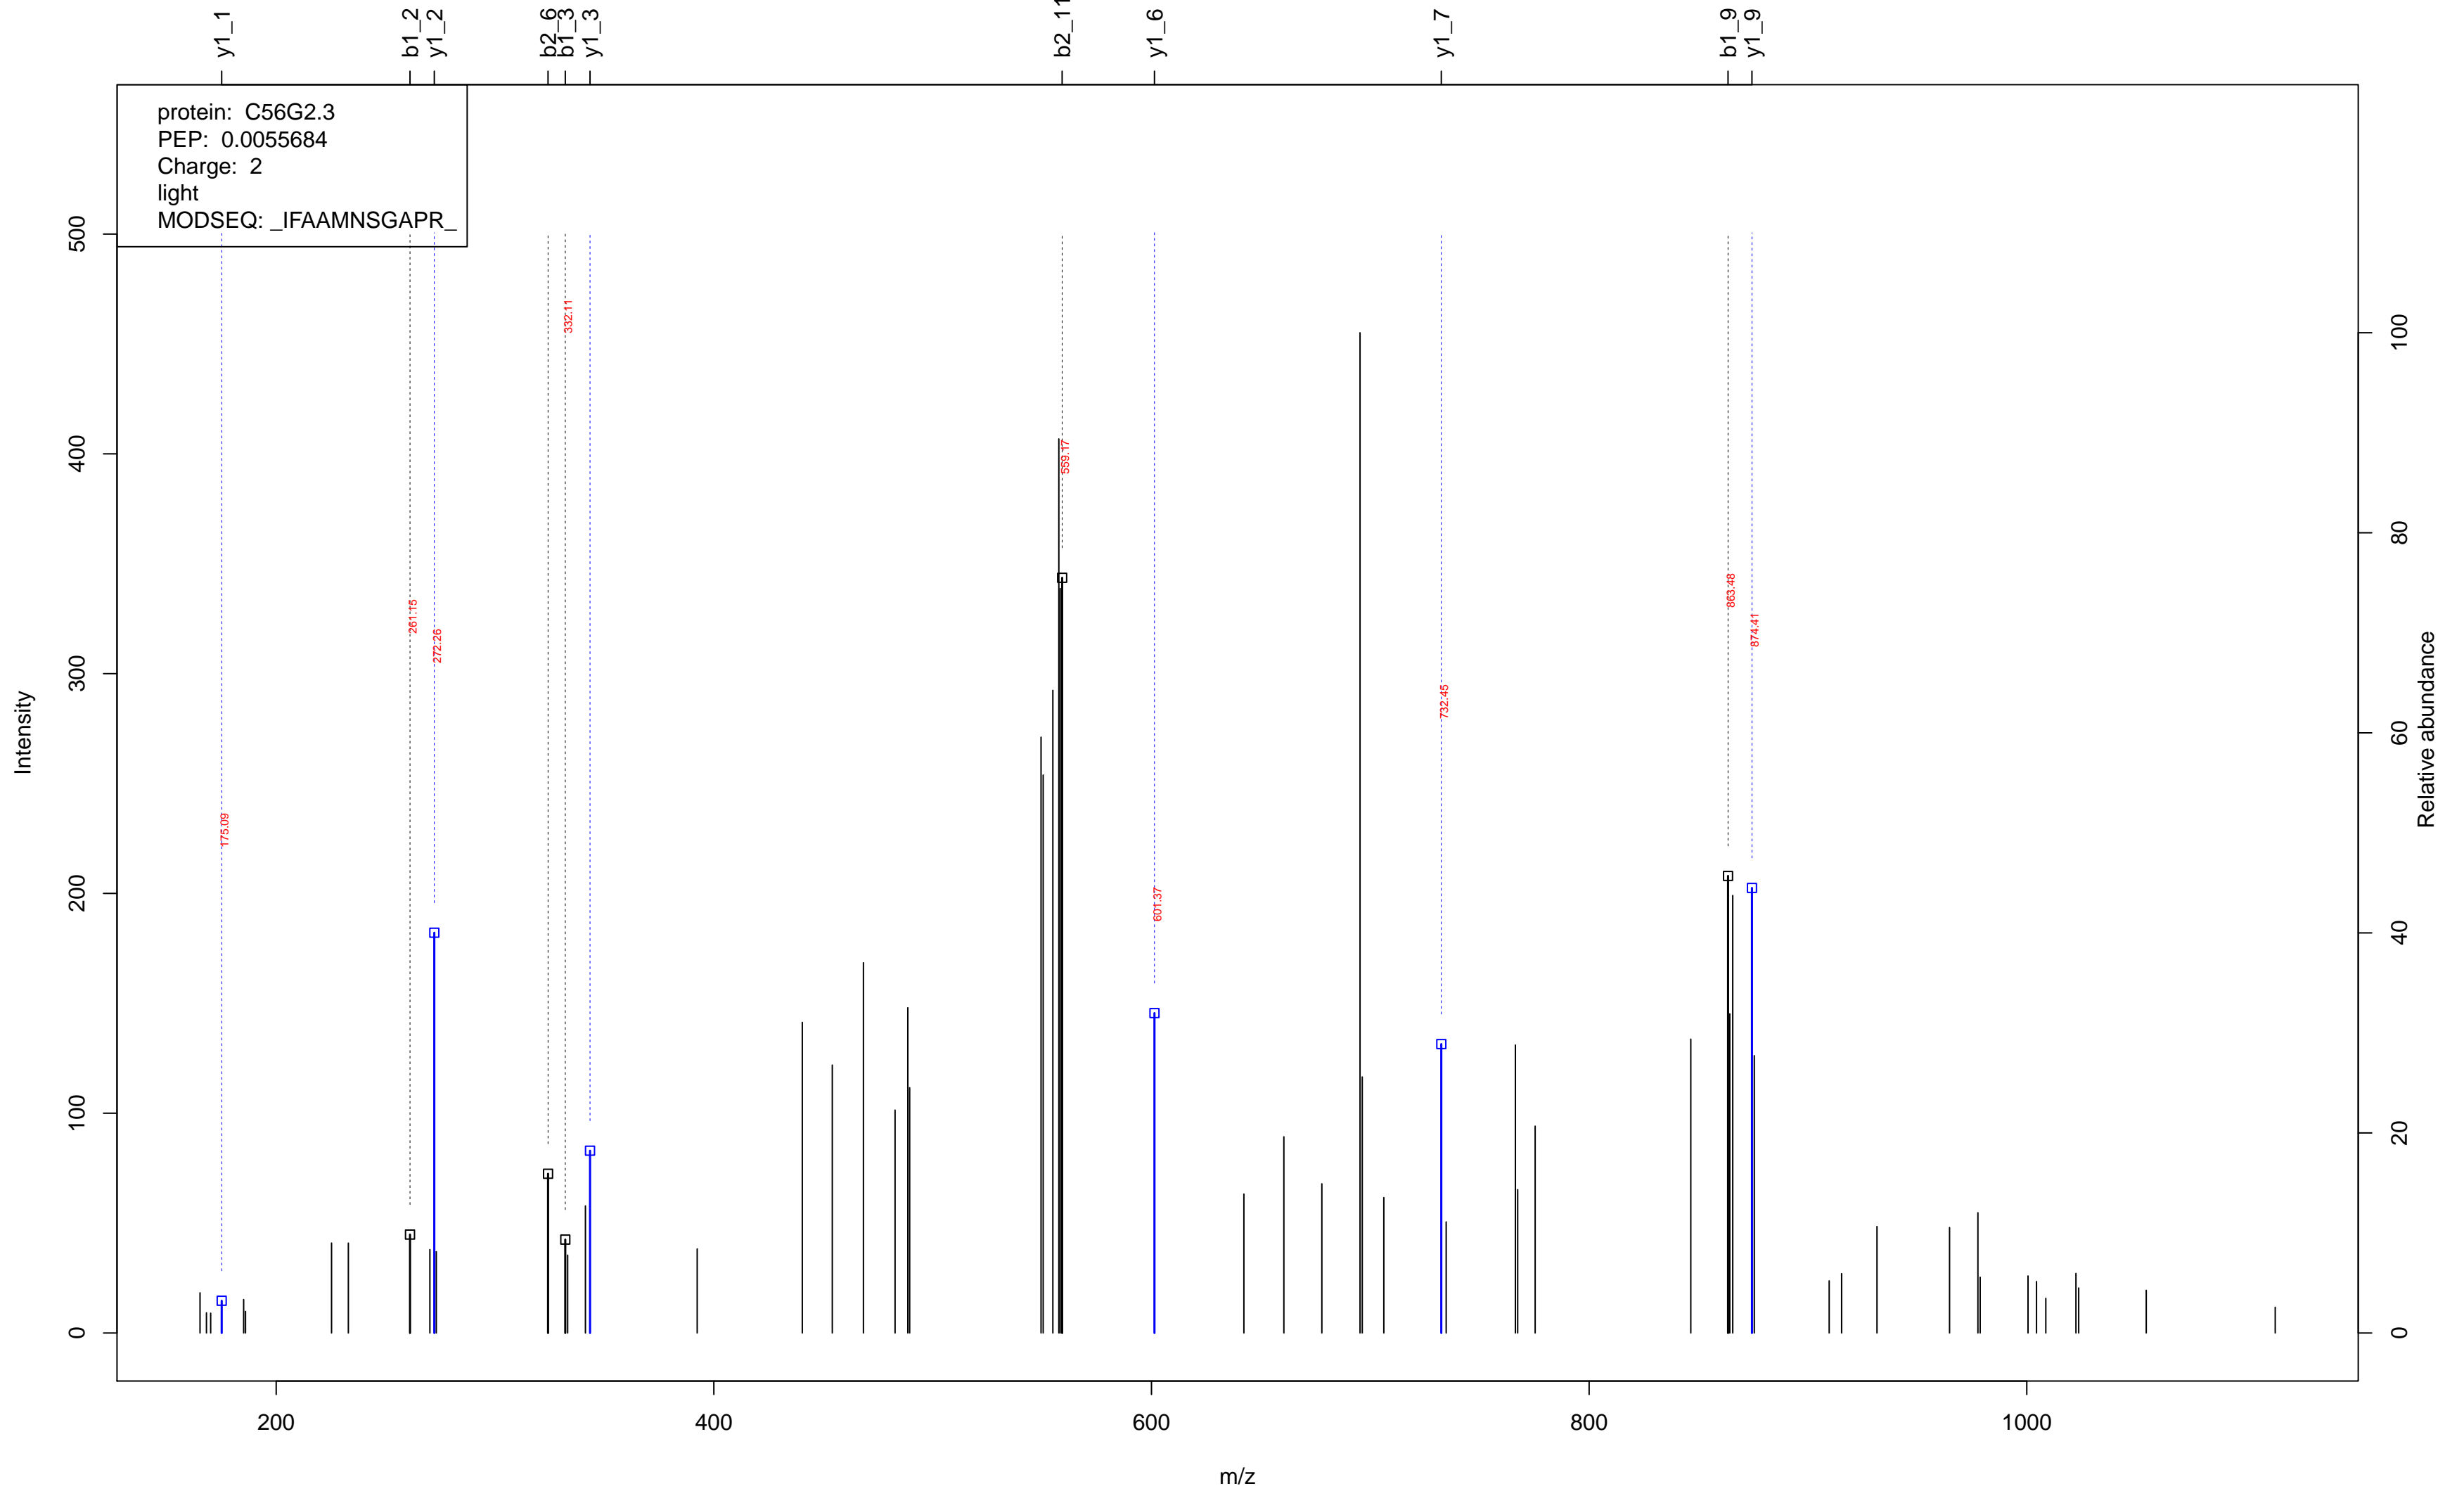

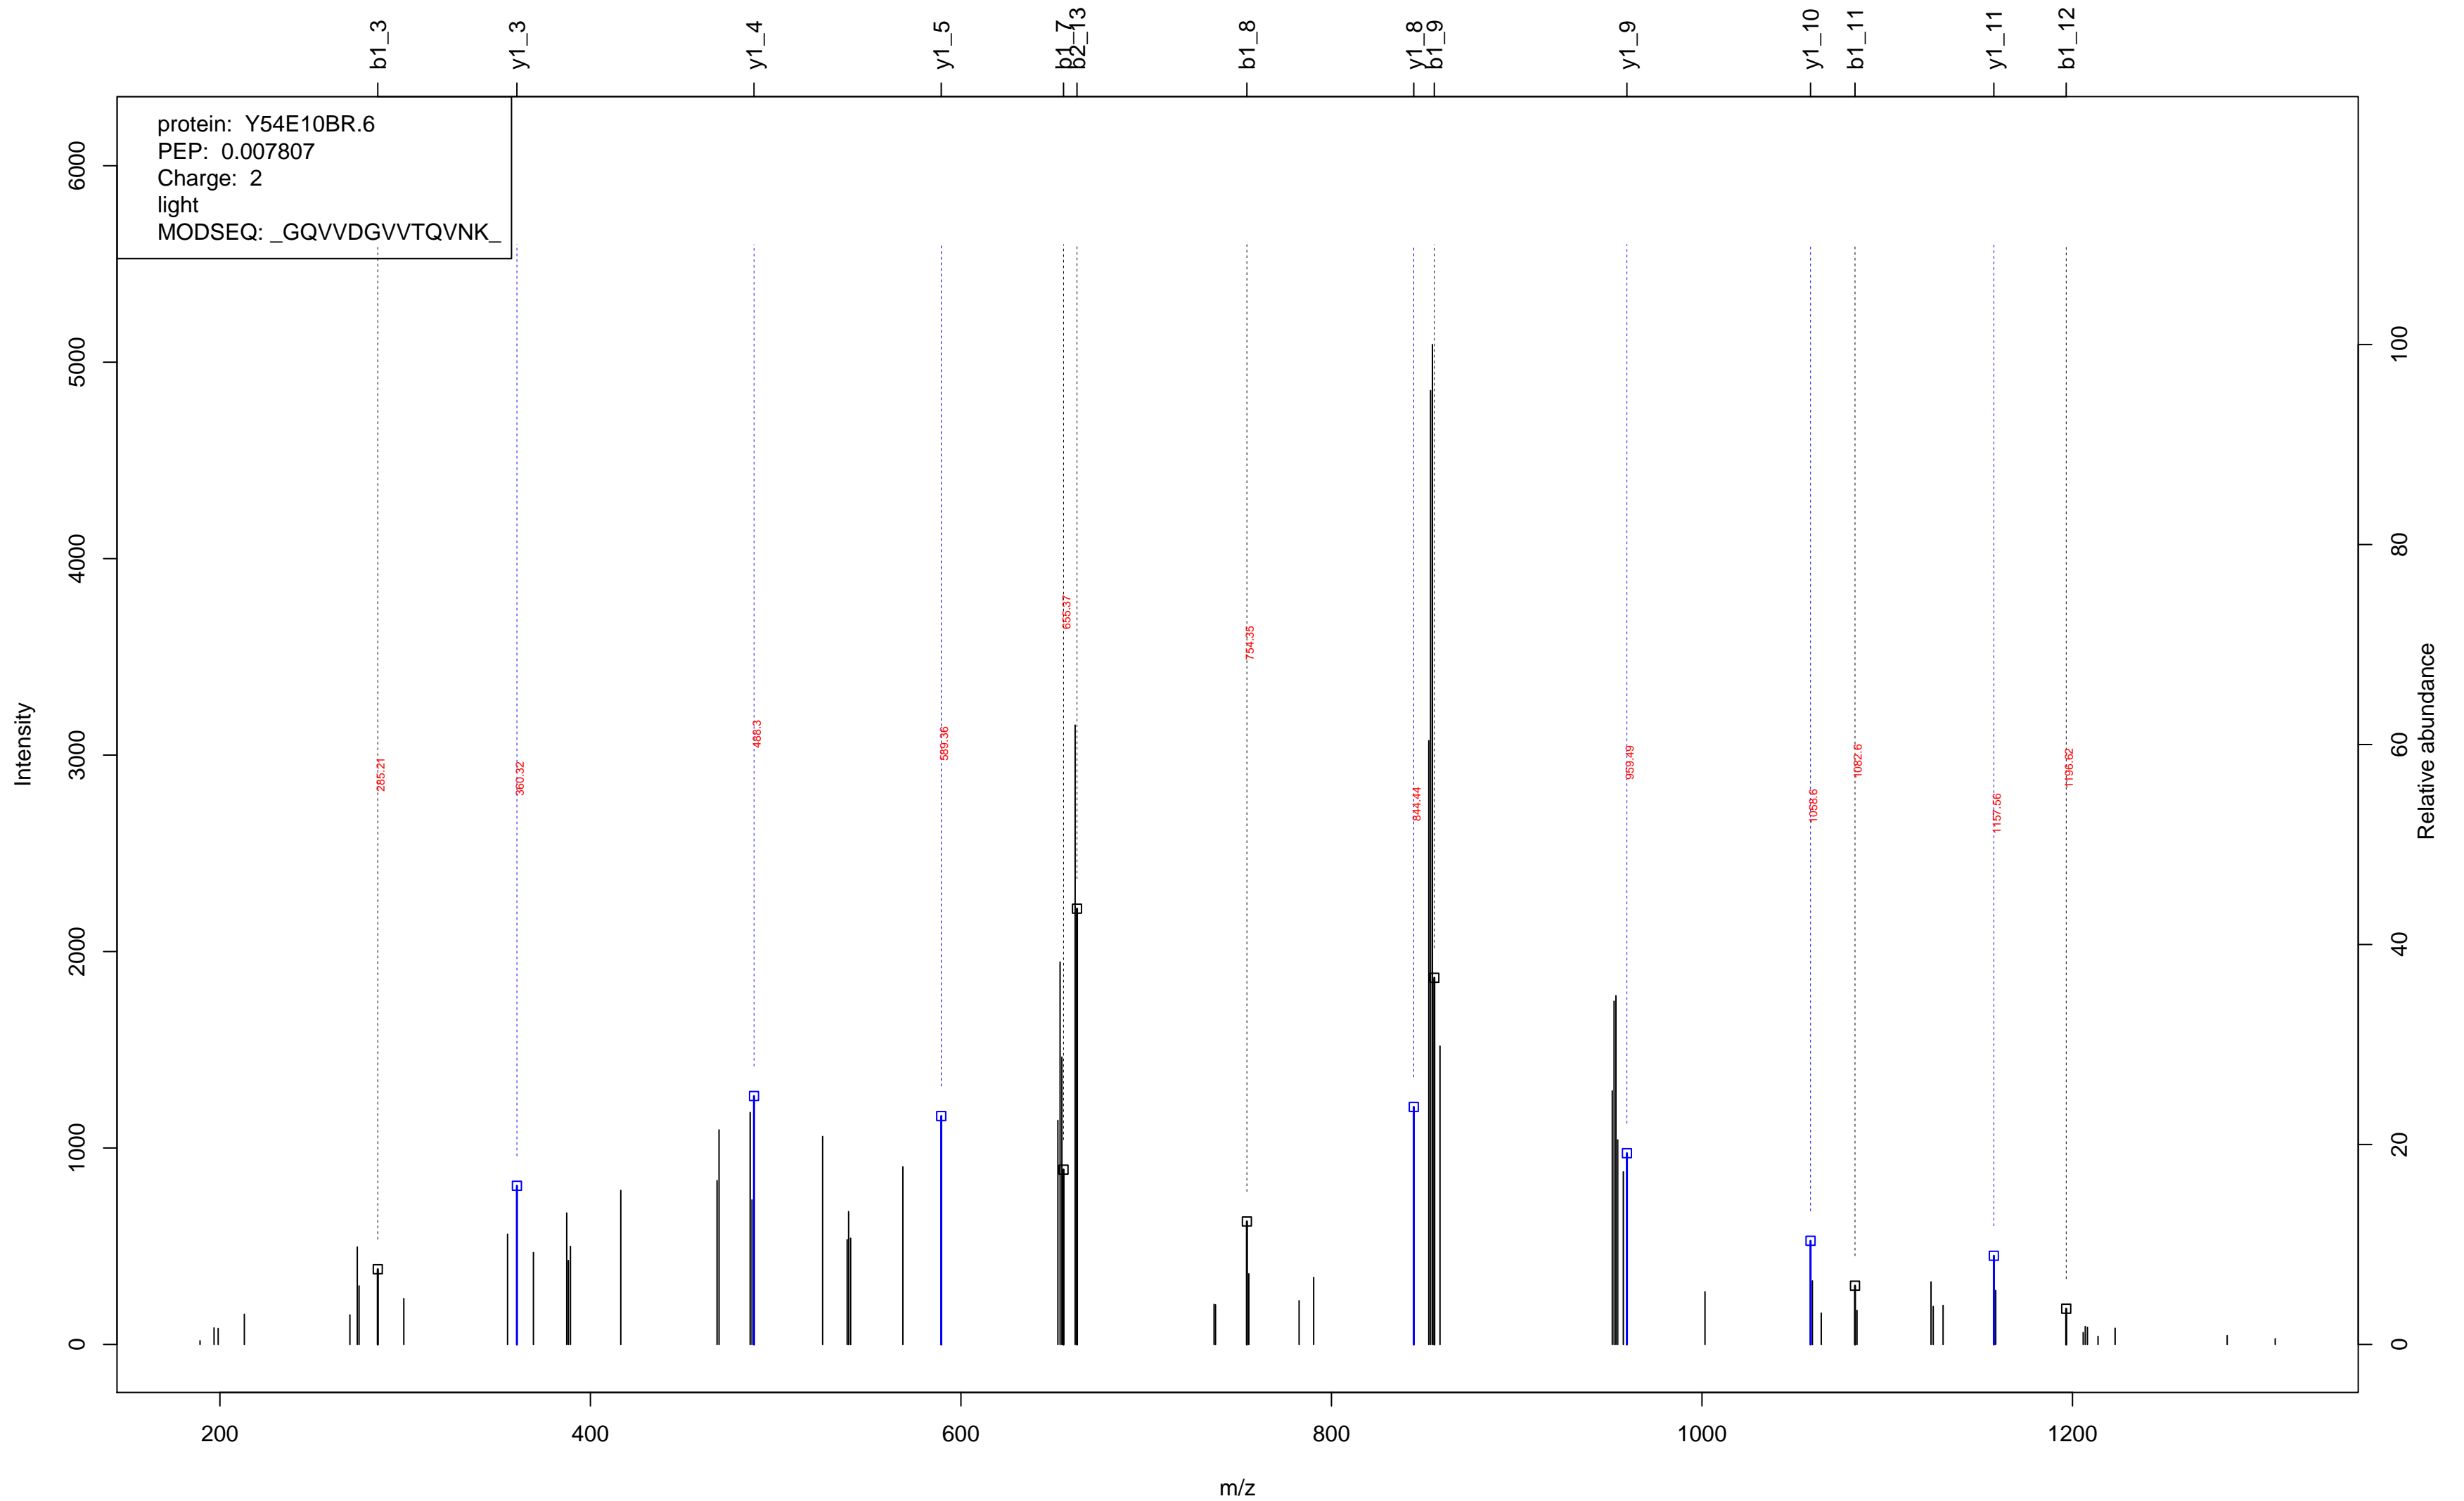

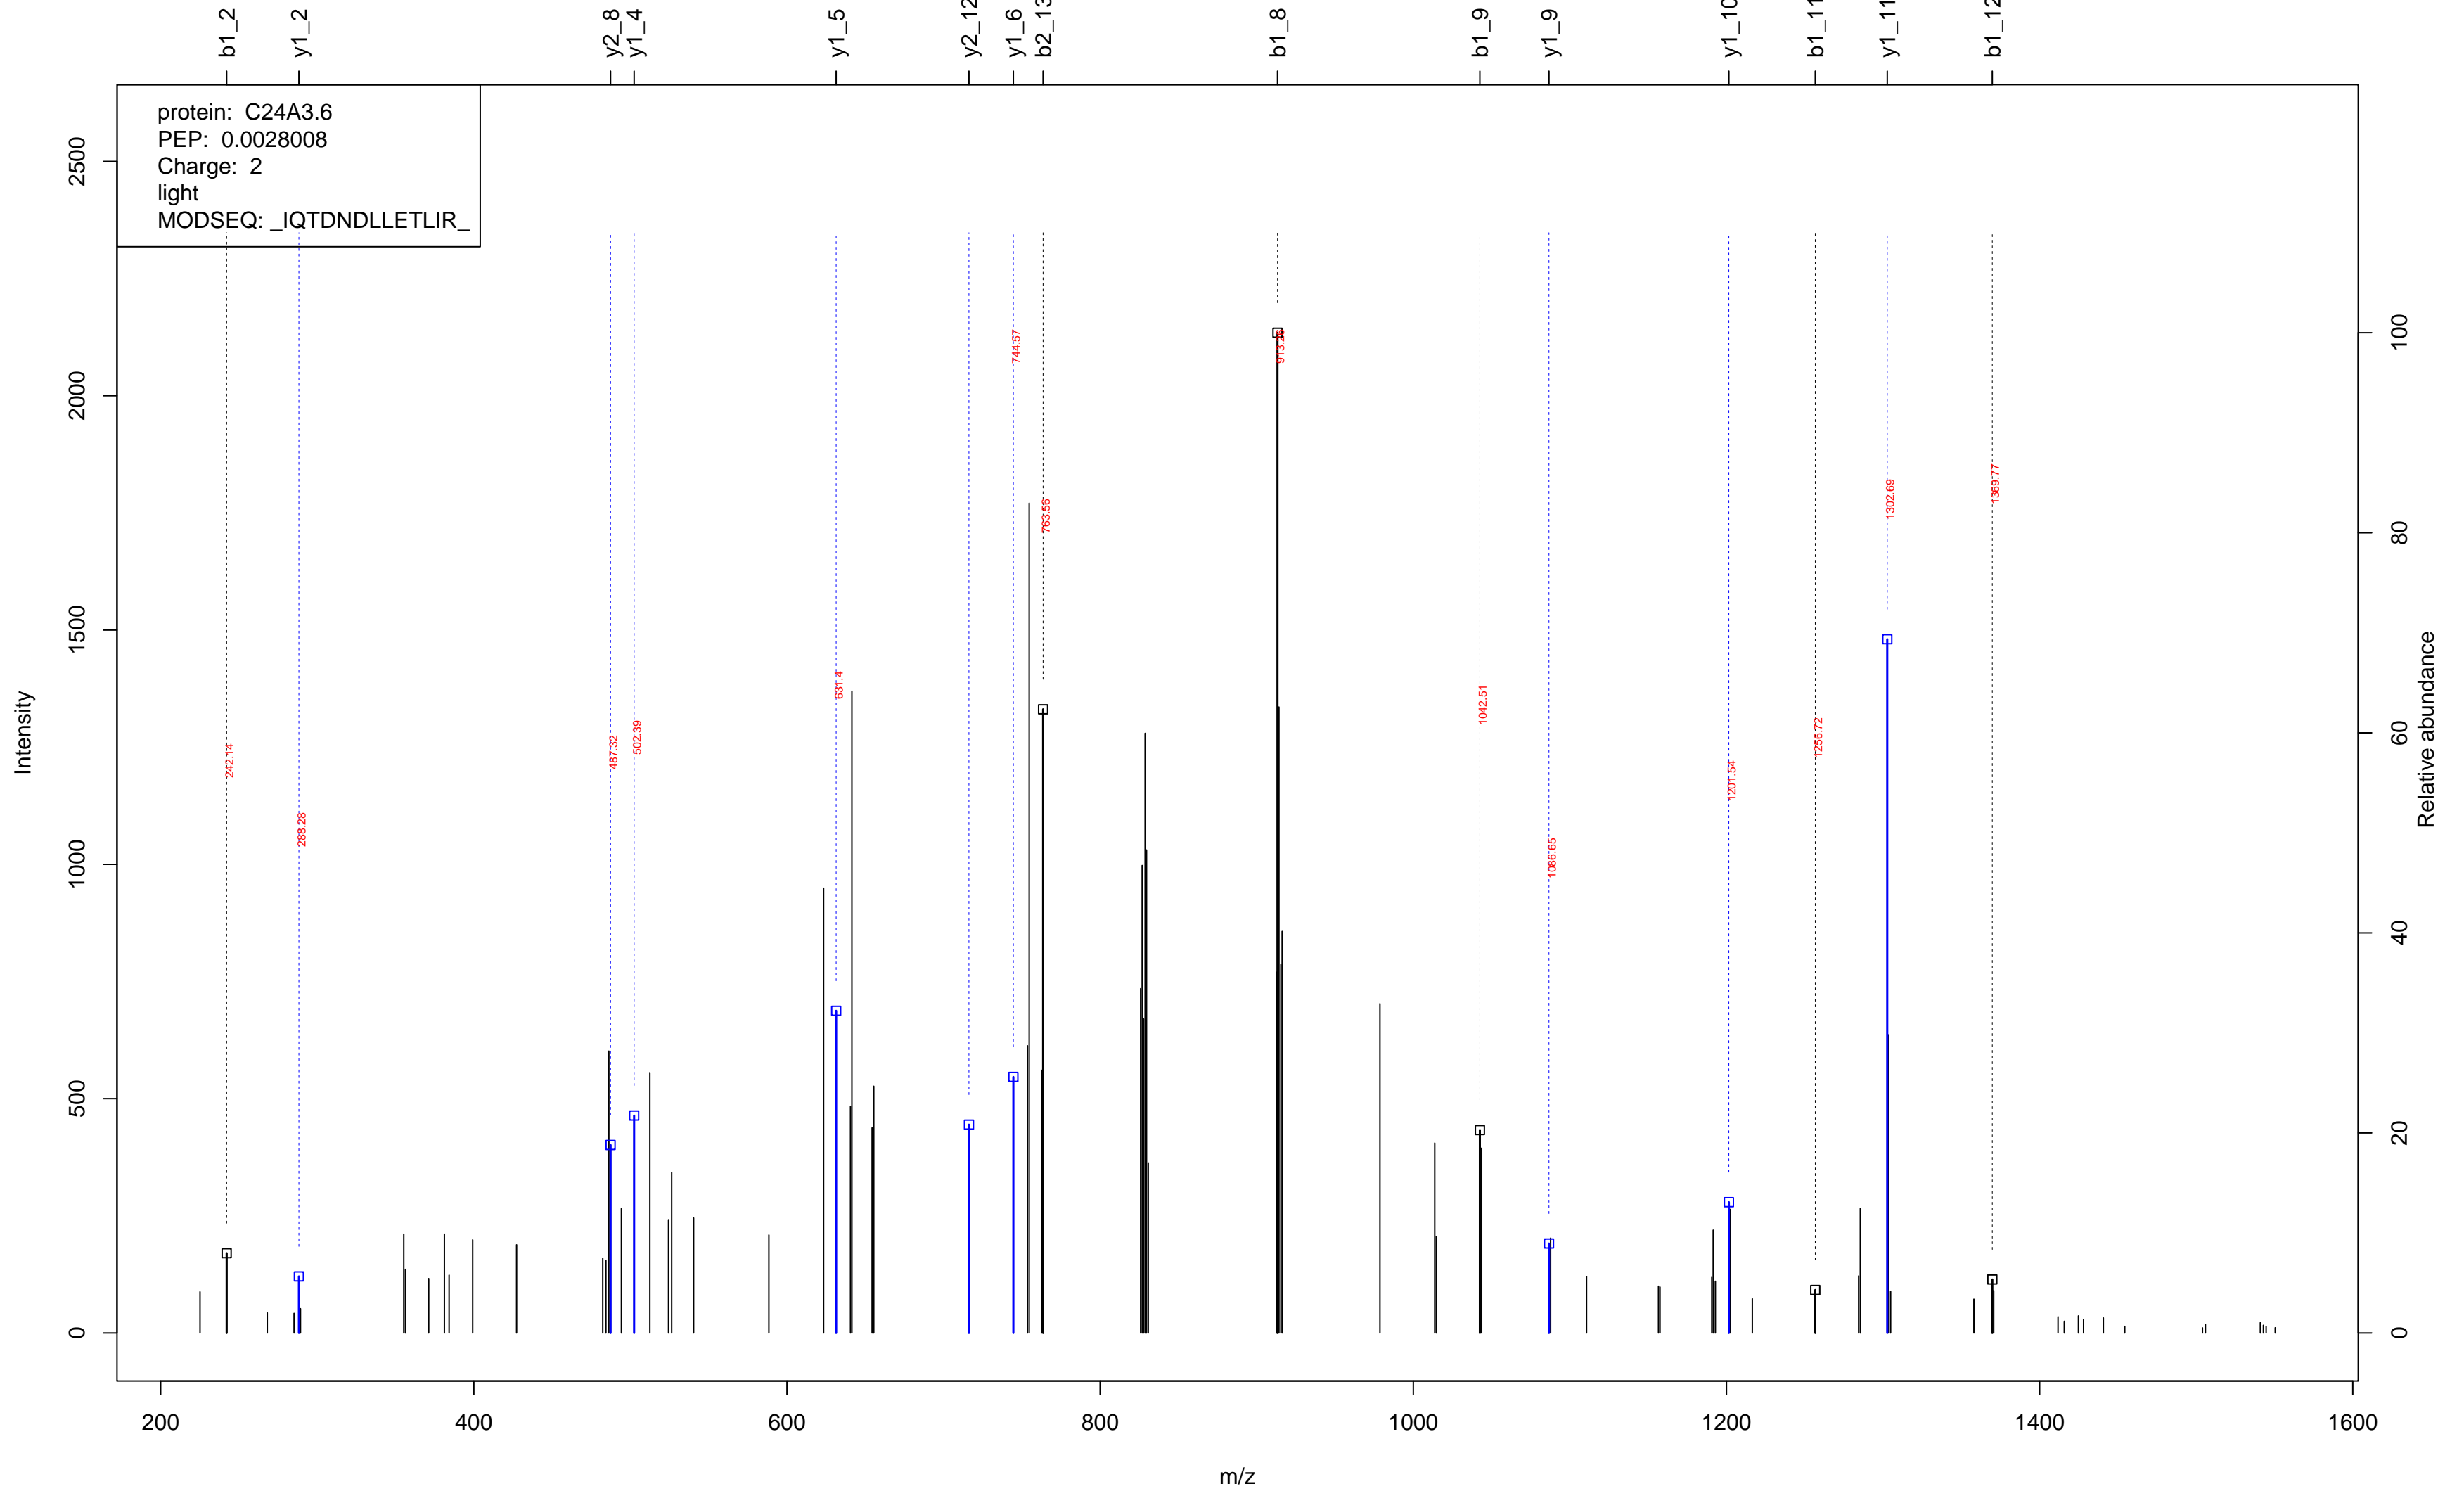

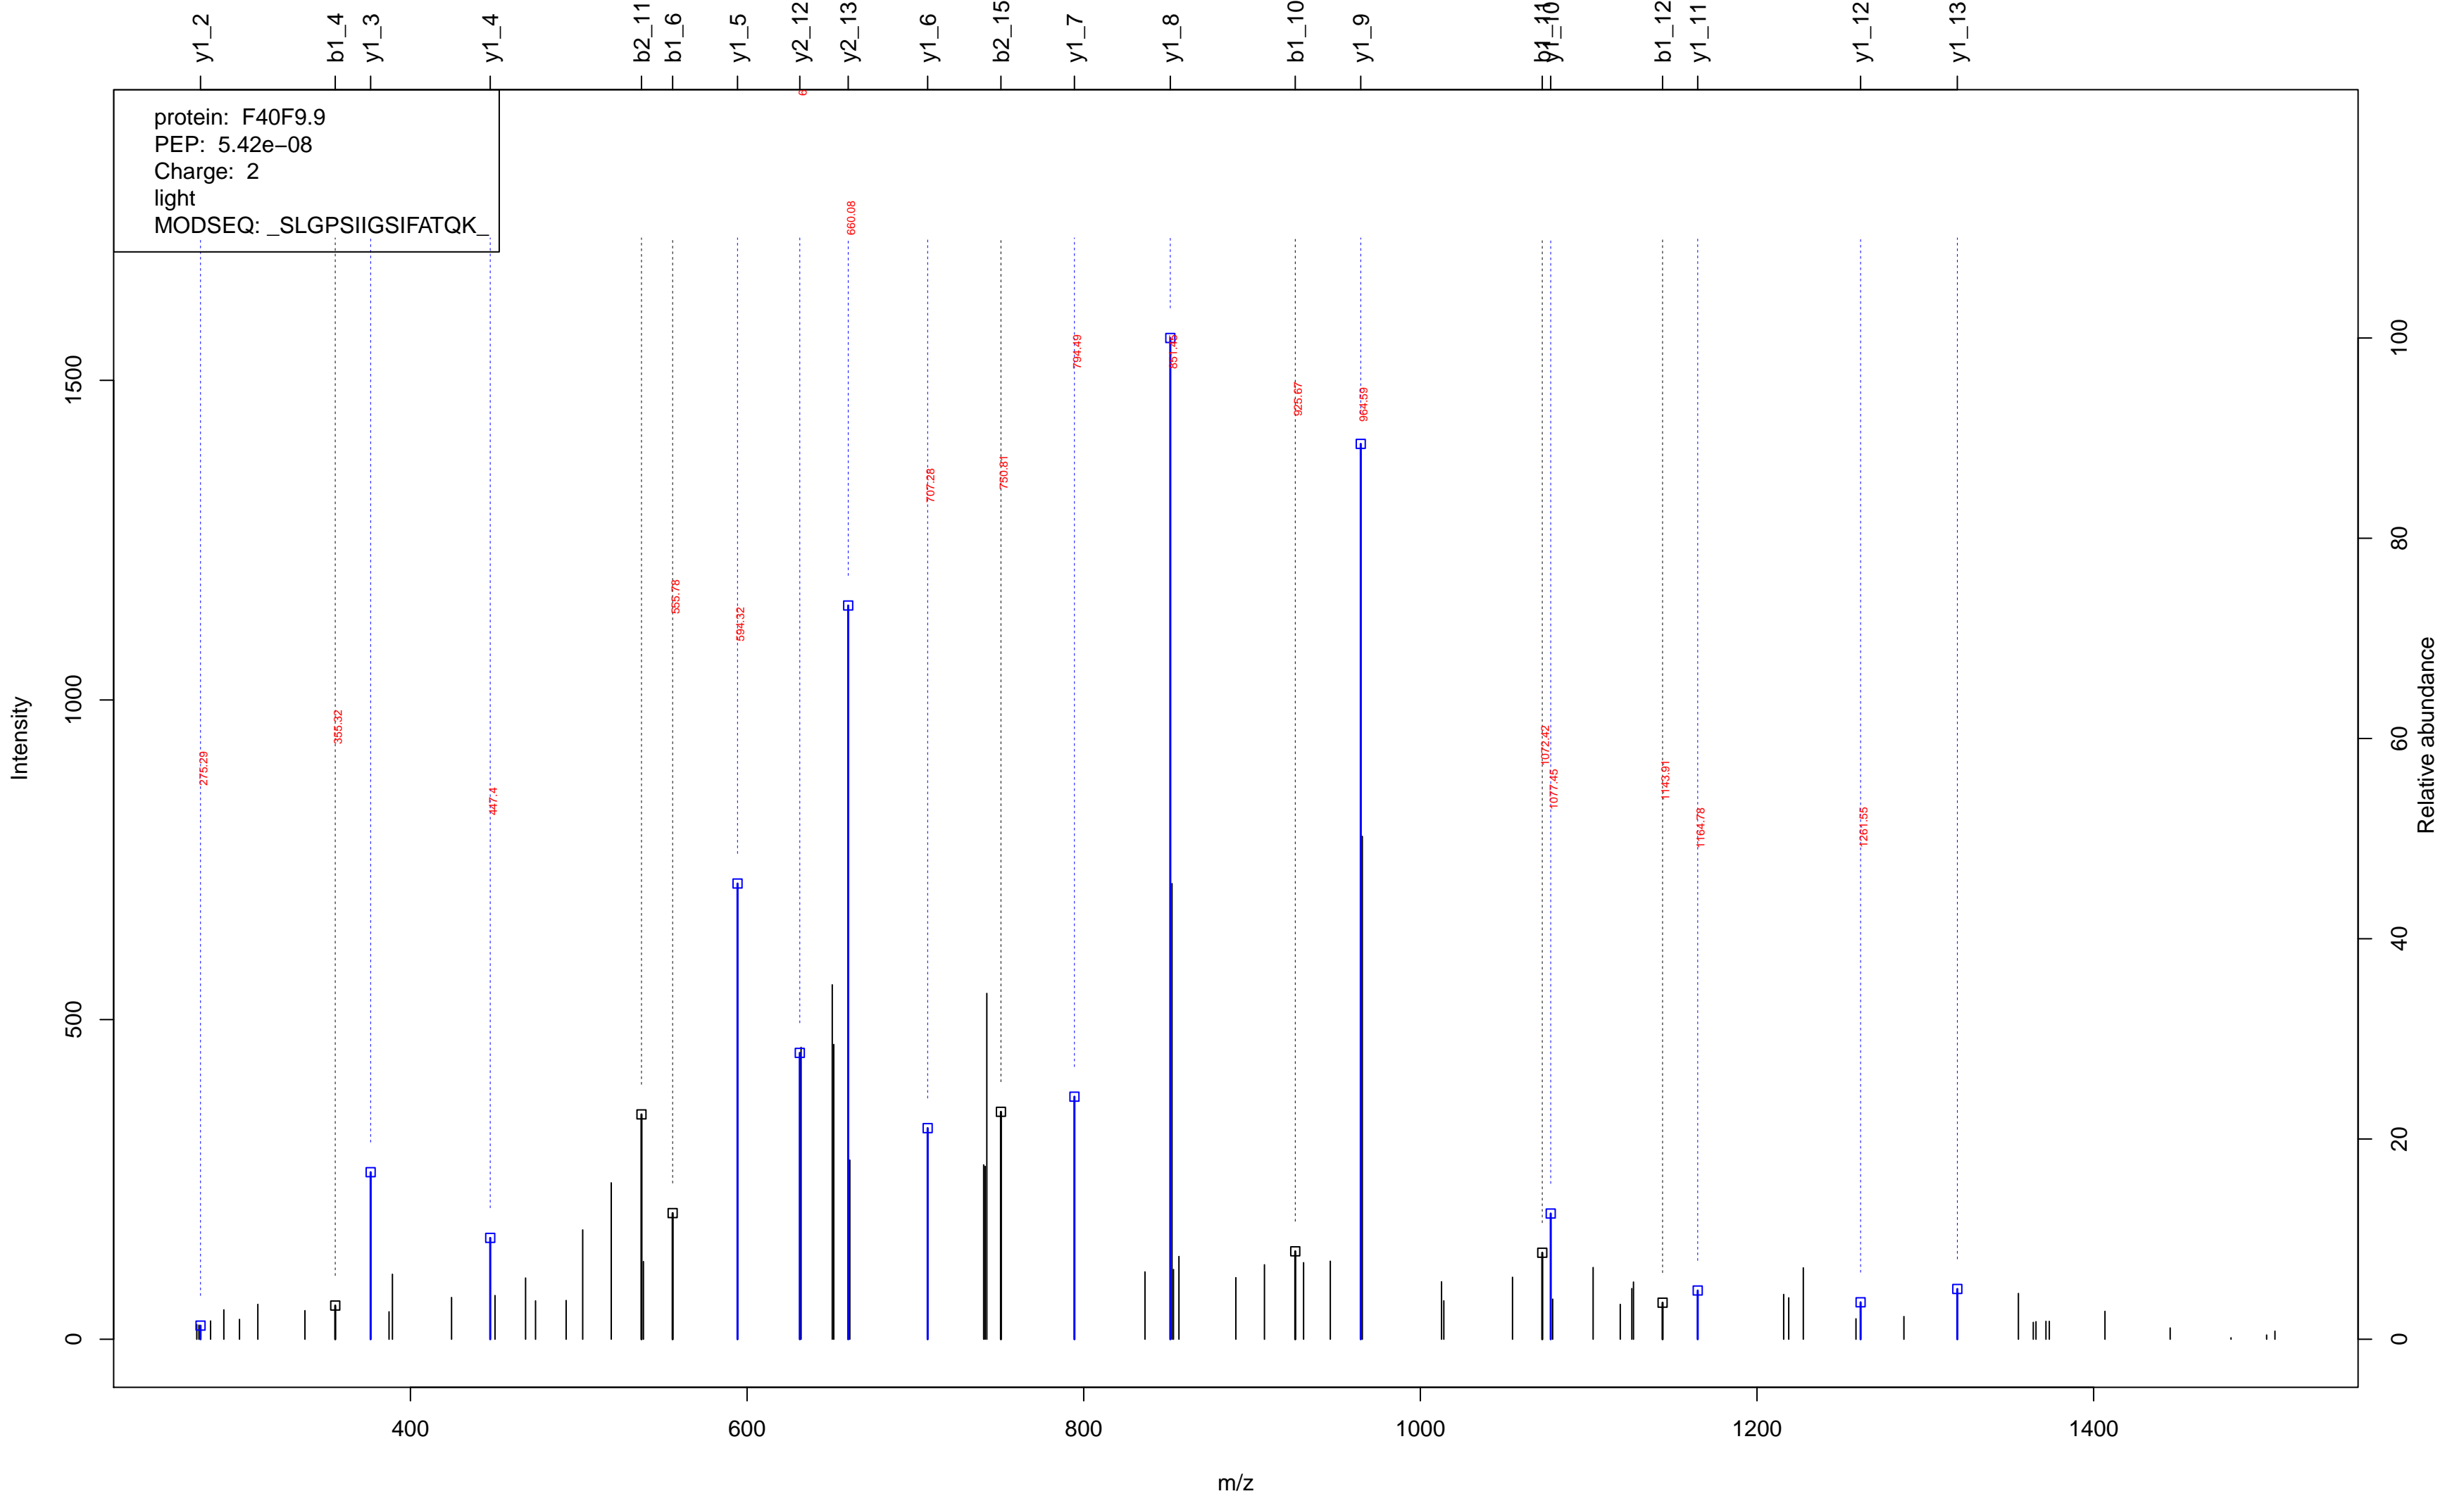



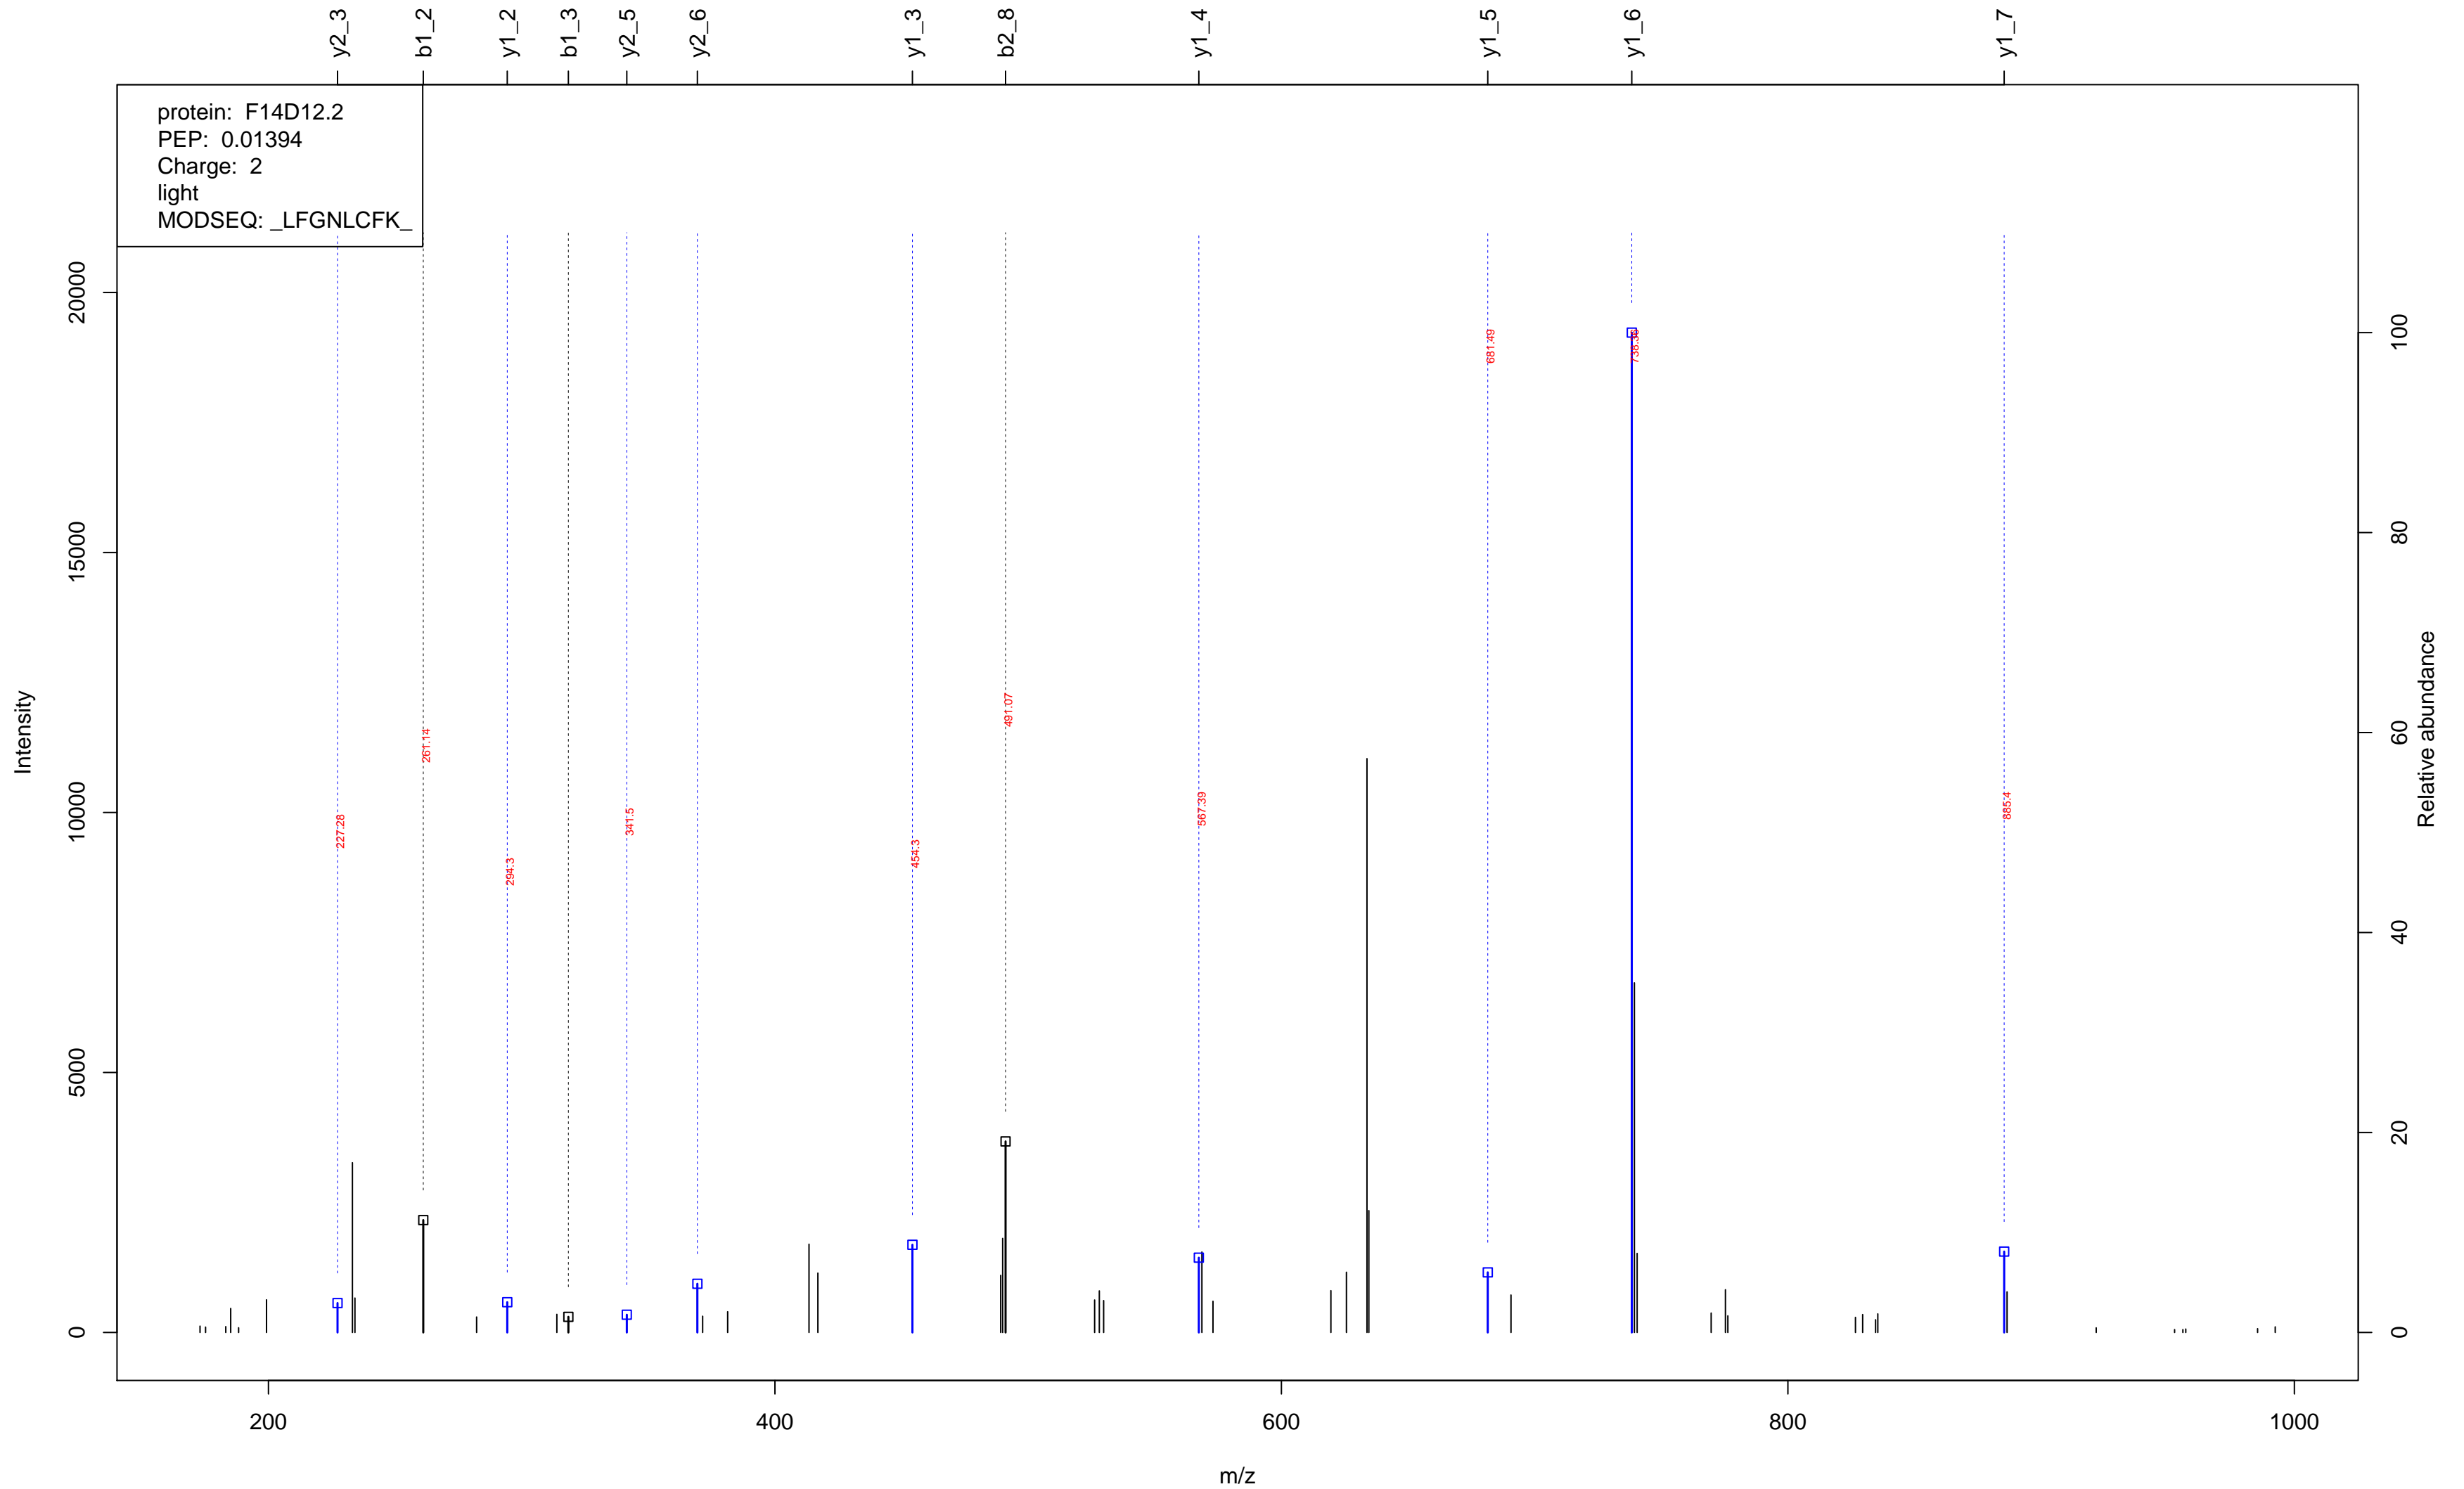

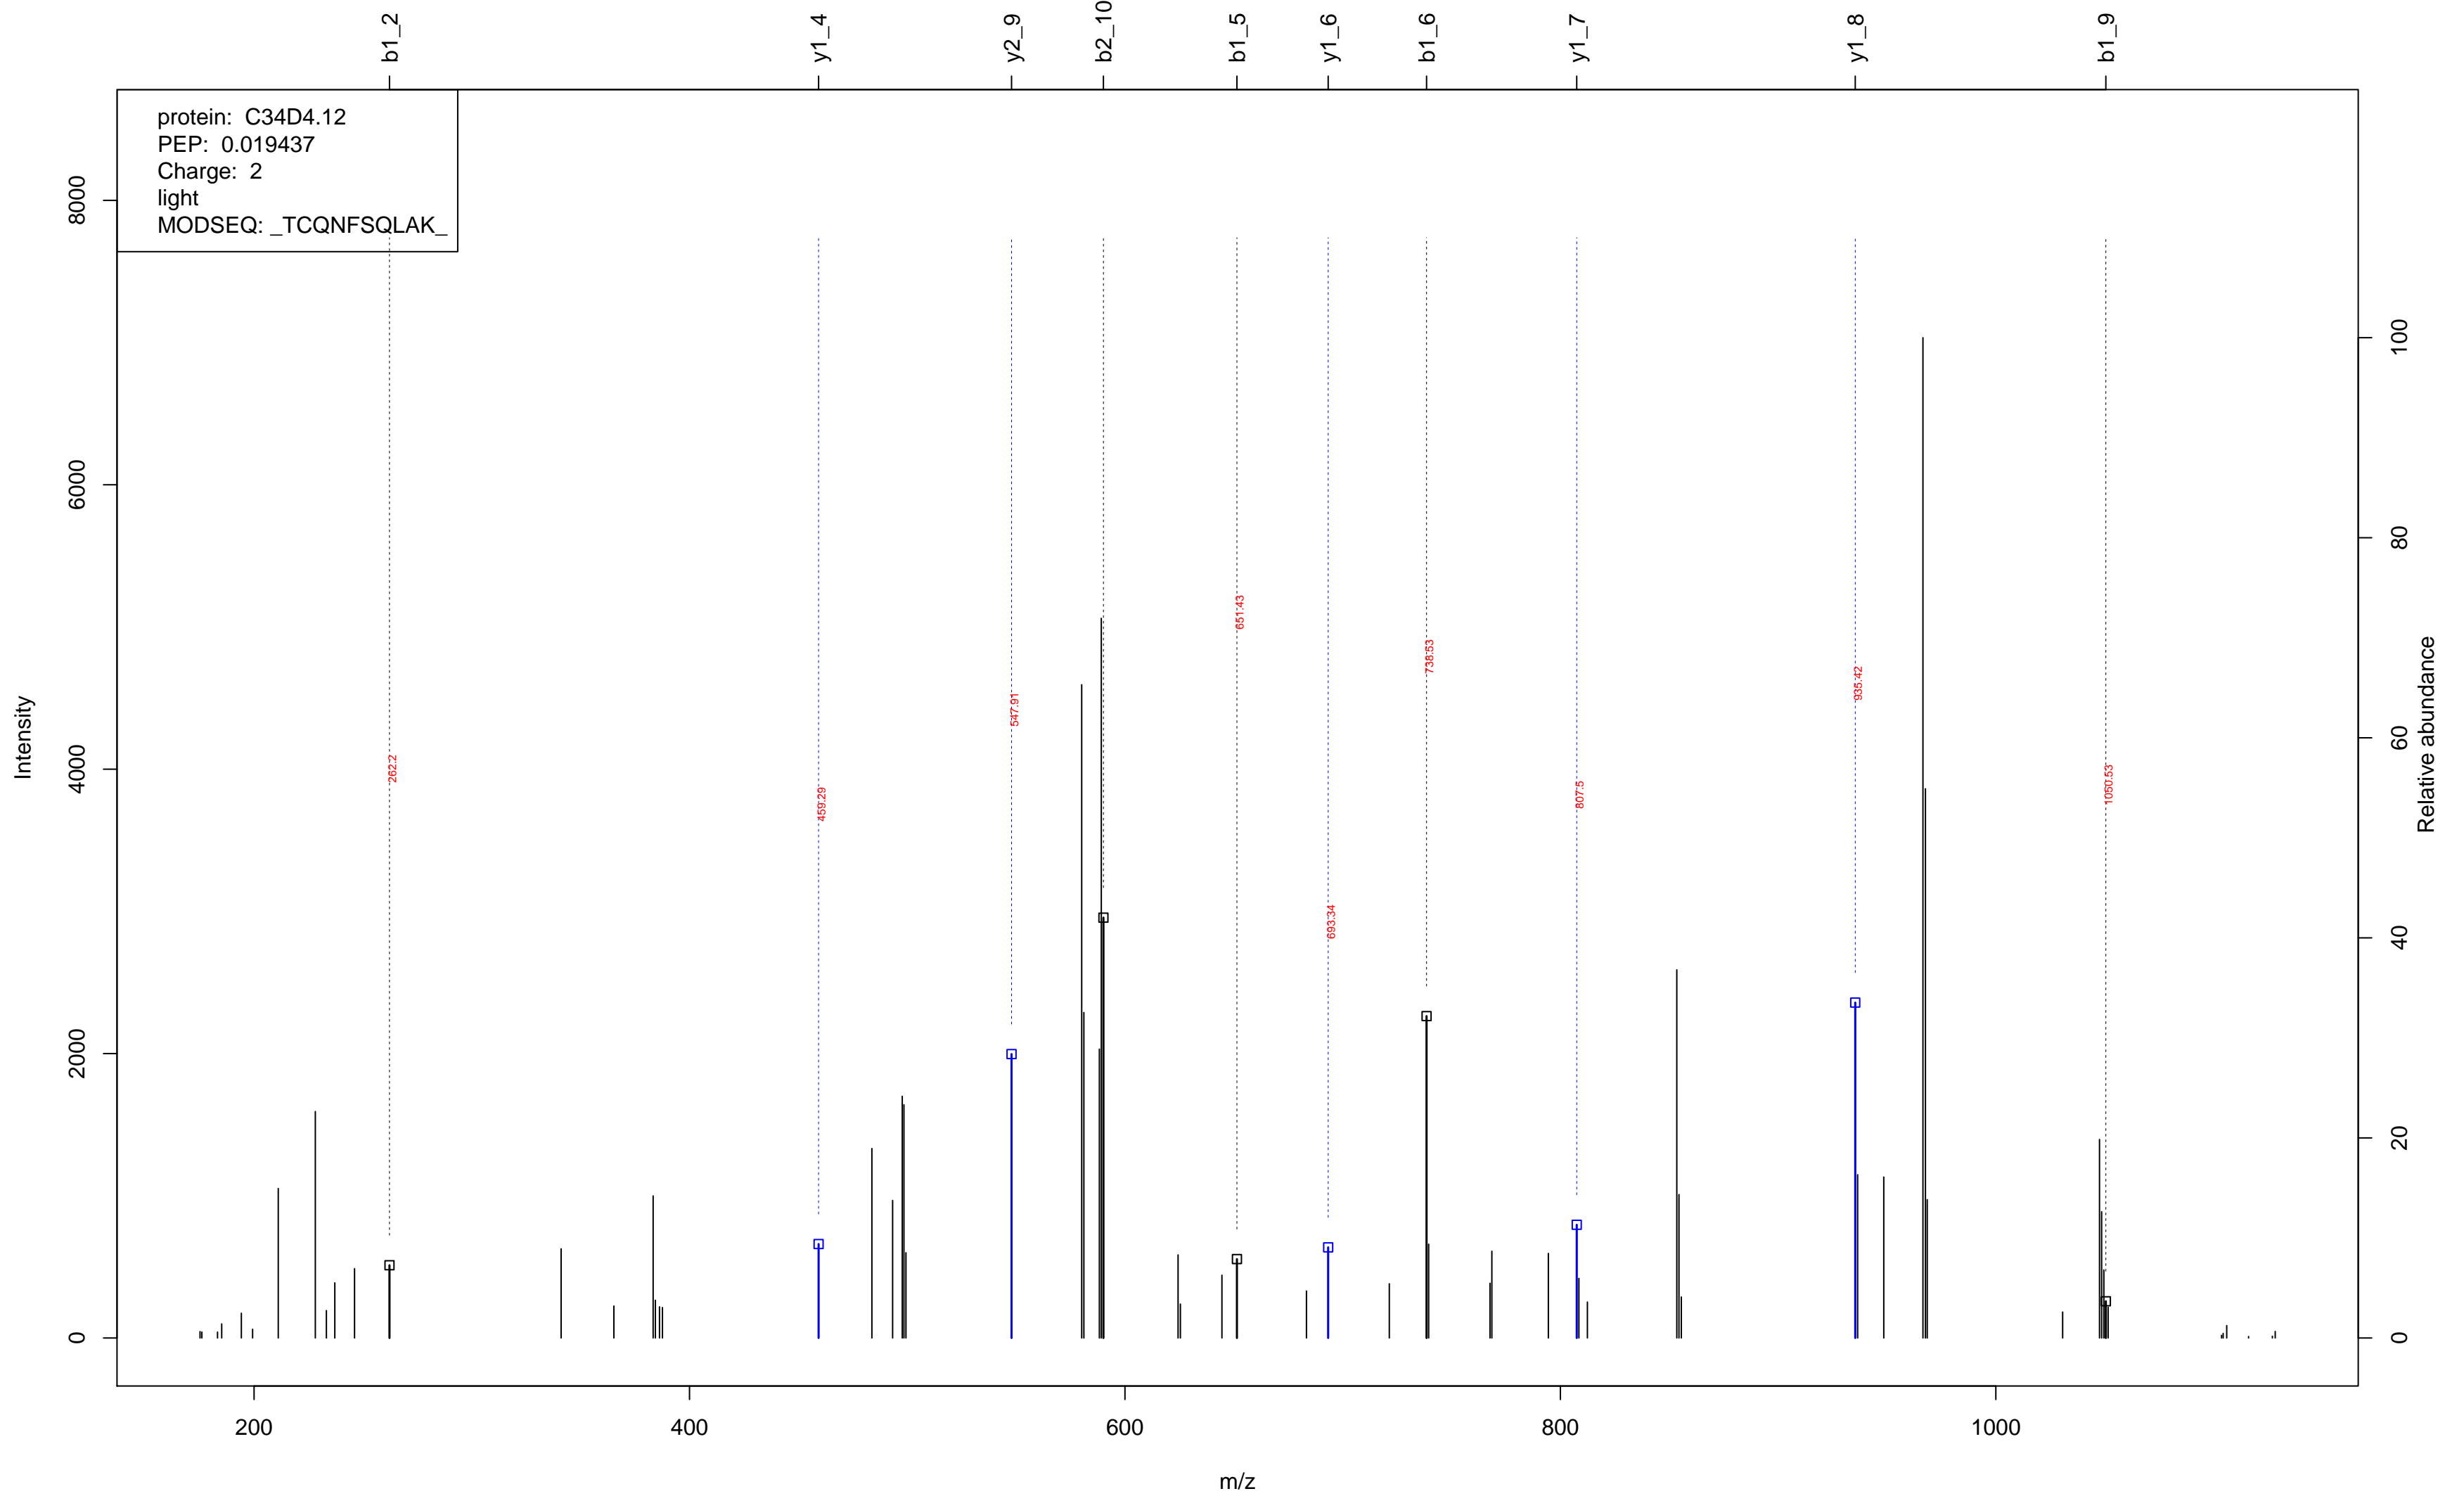

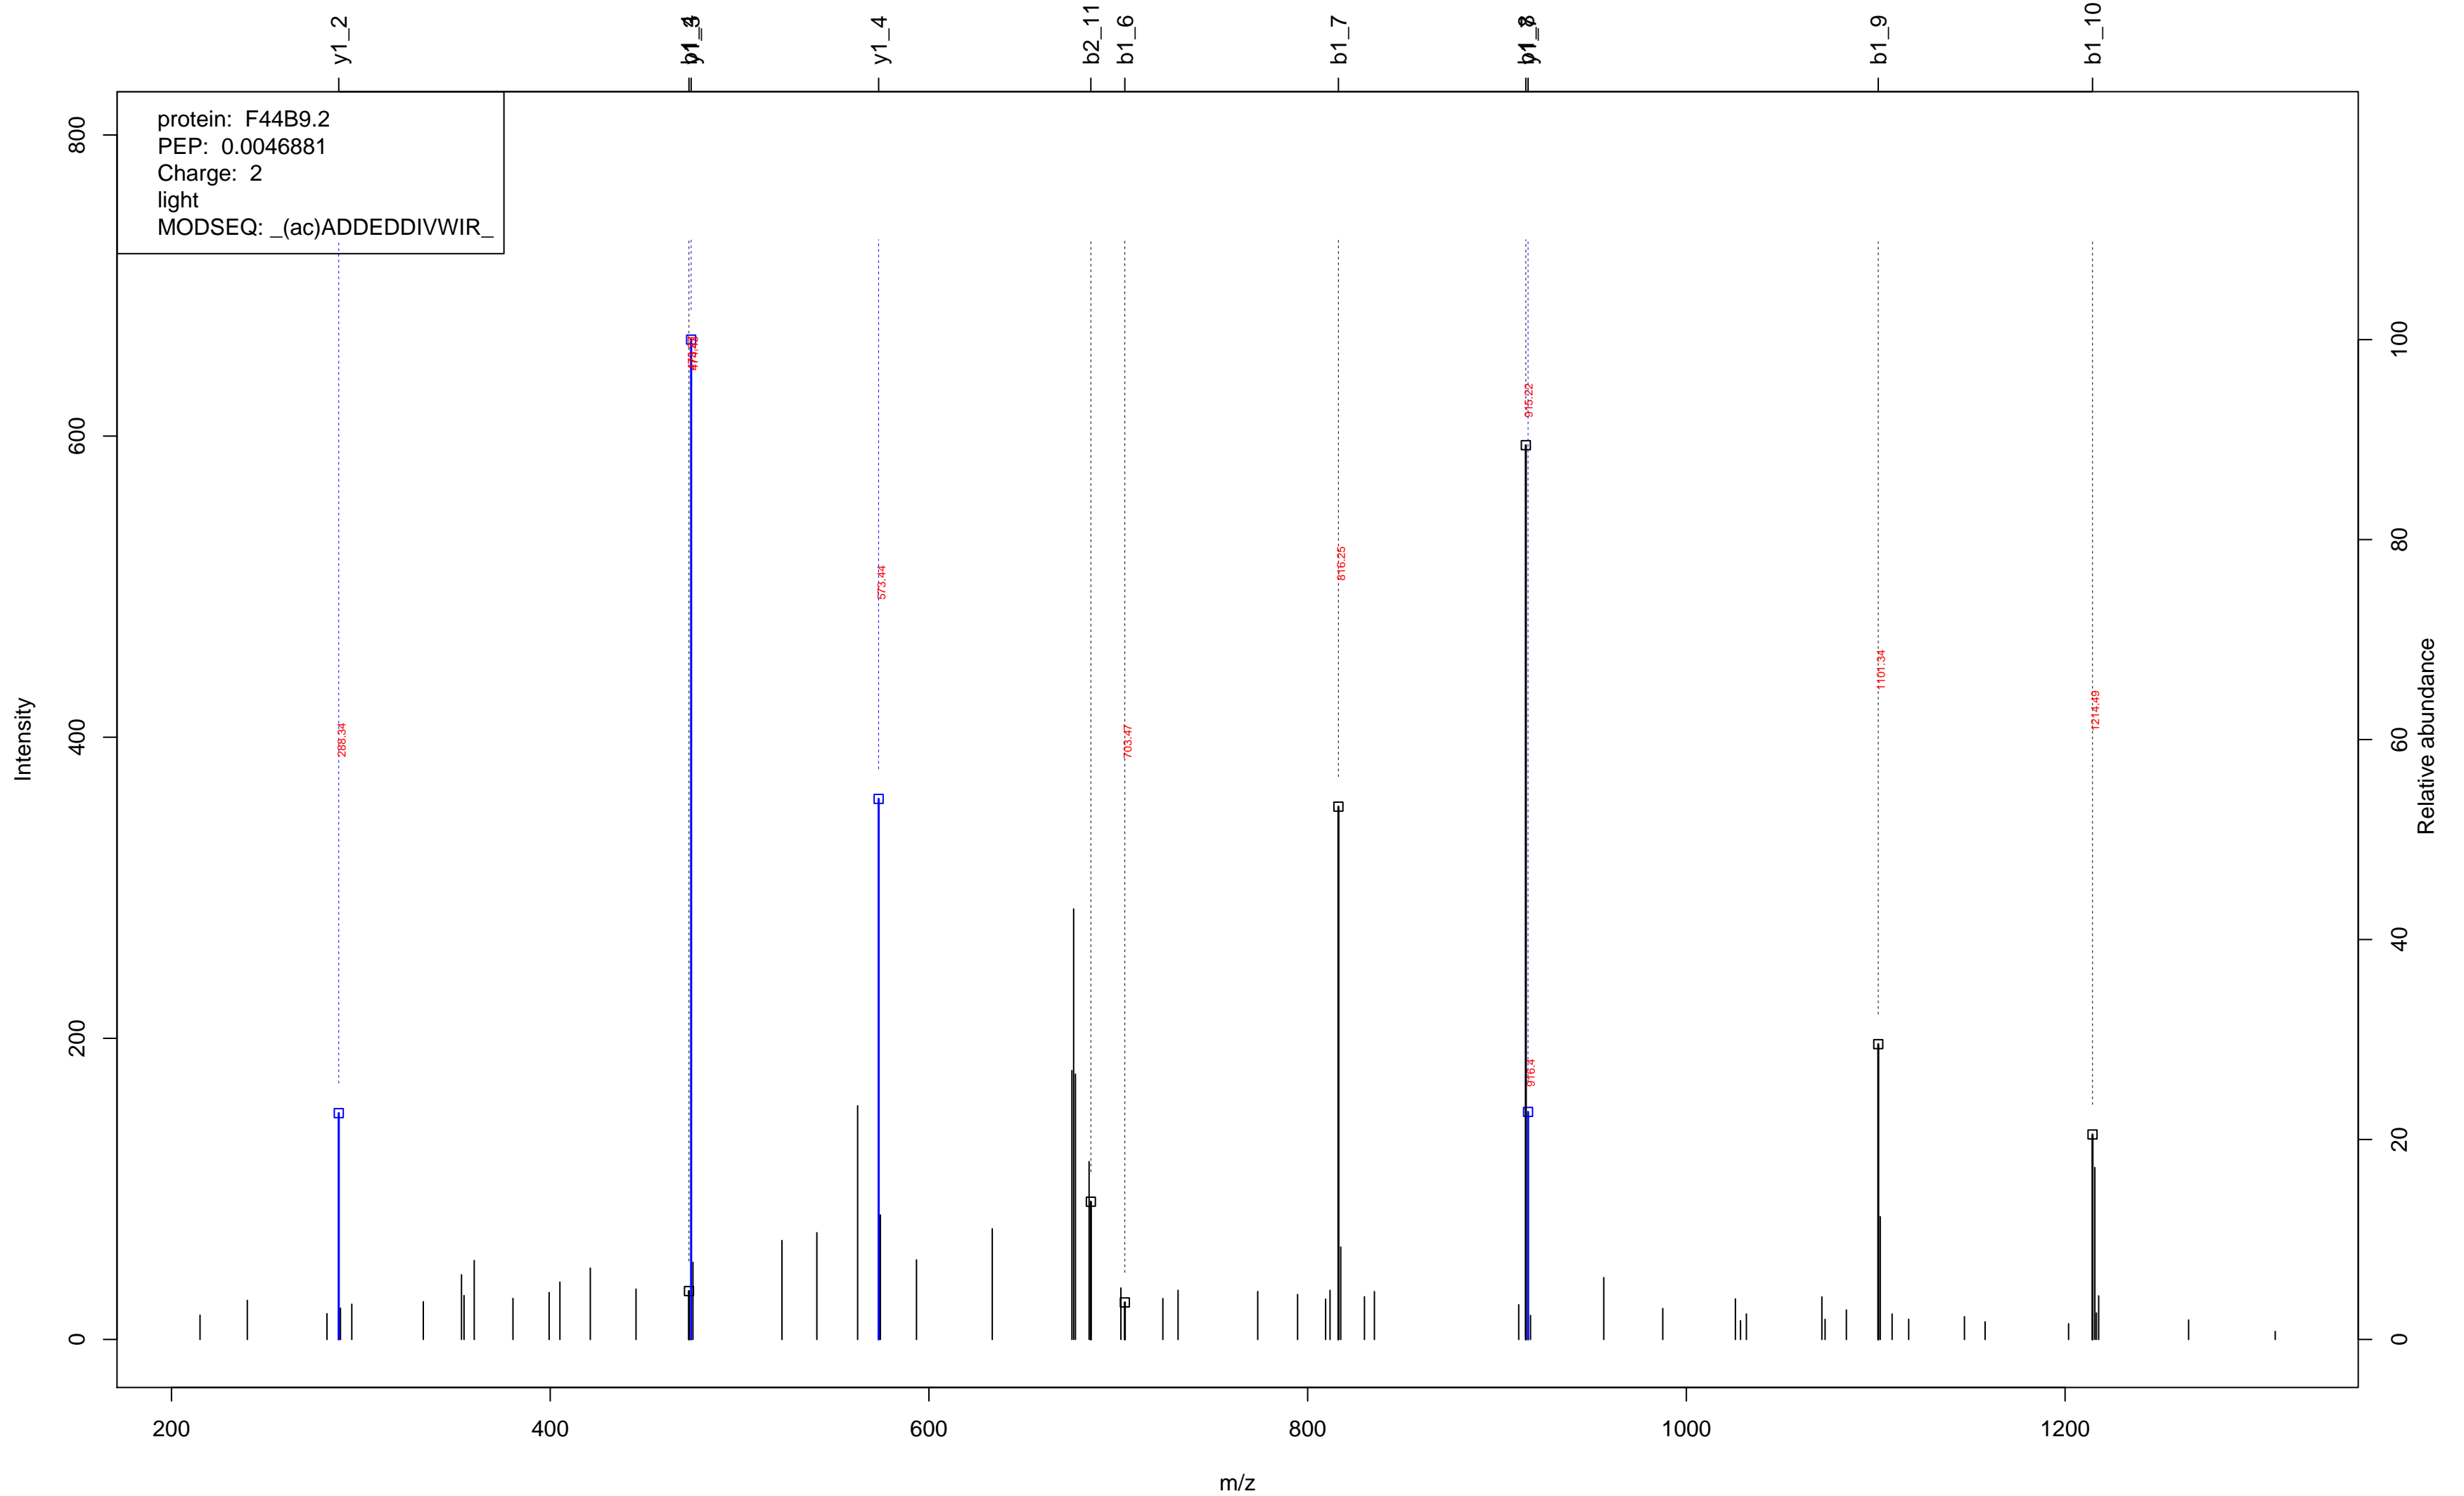

340

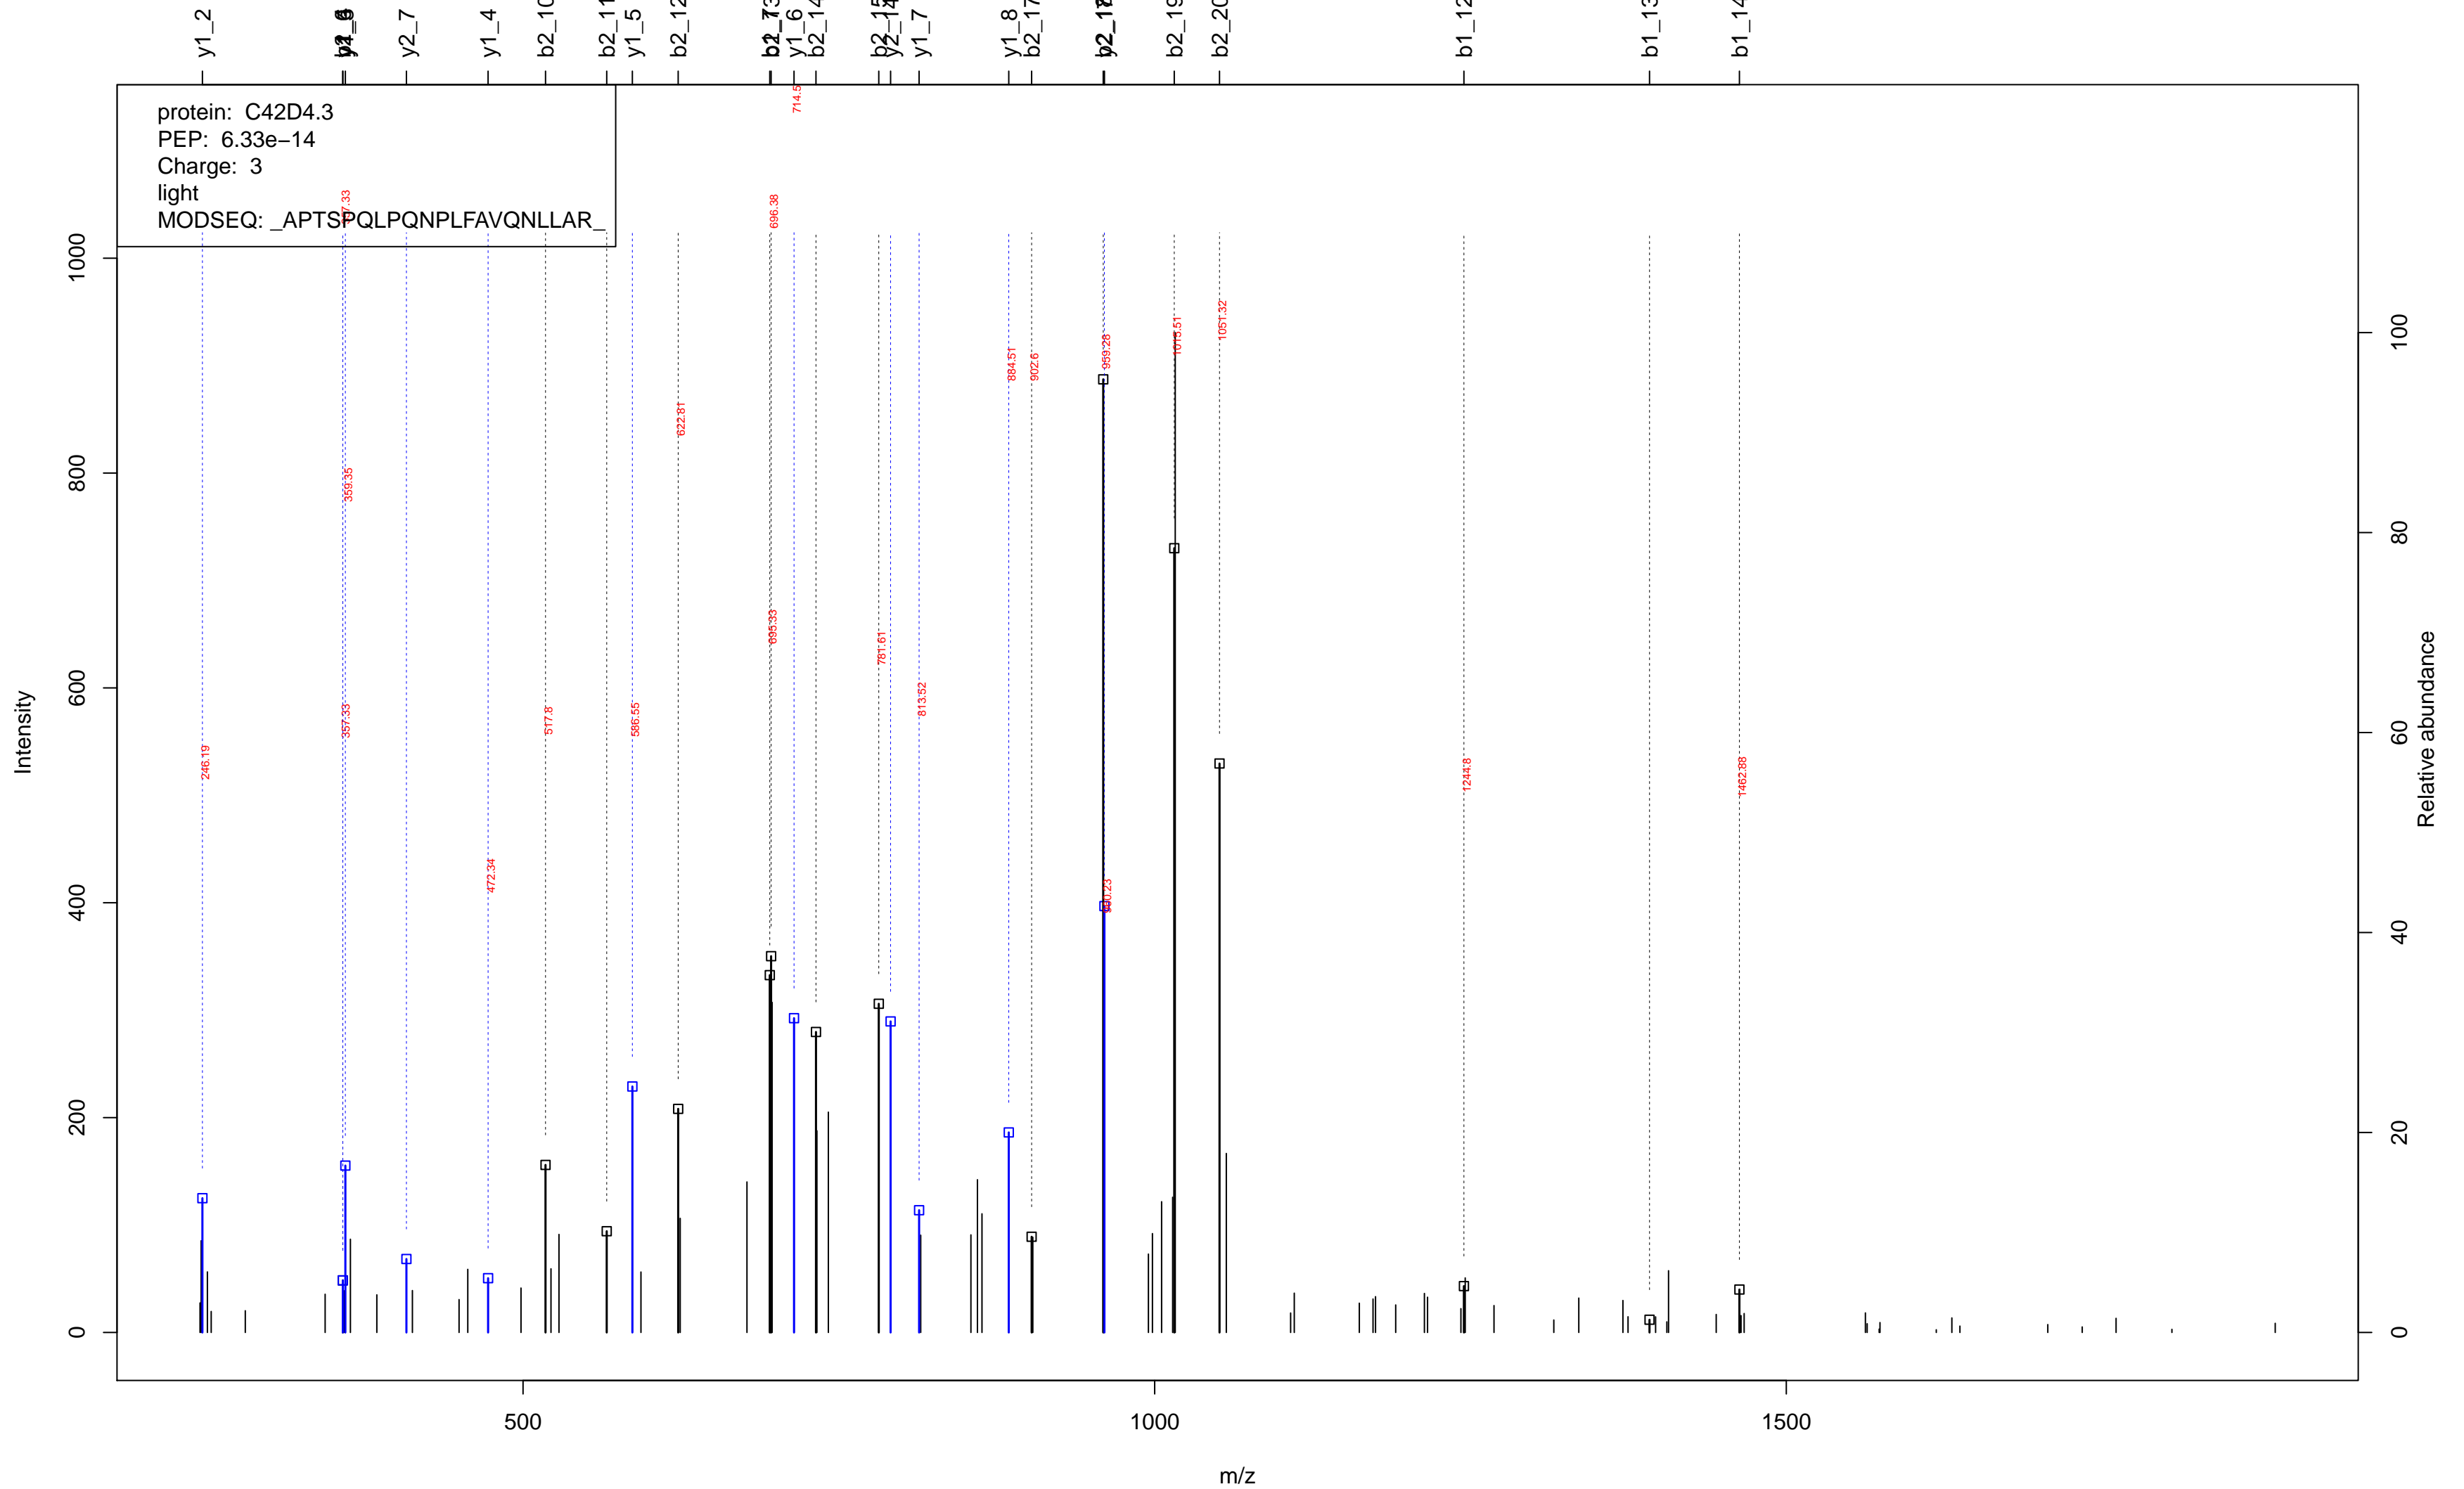

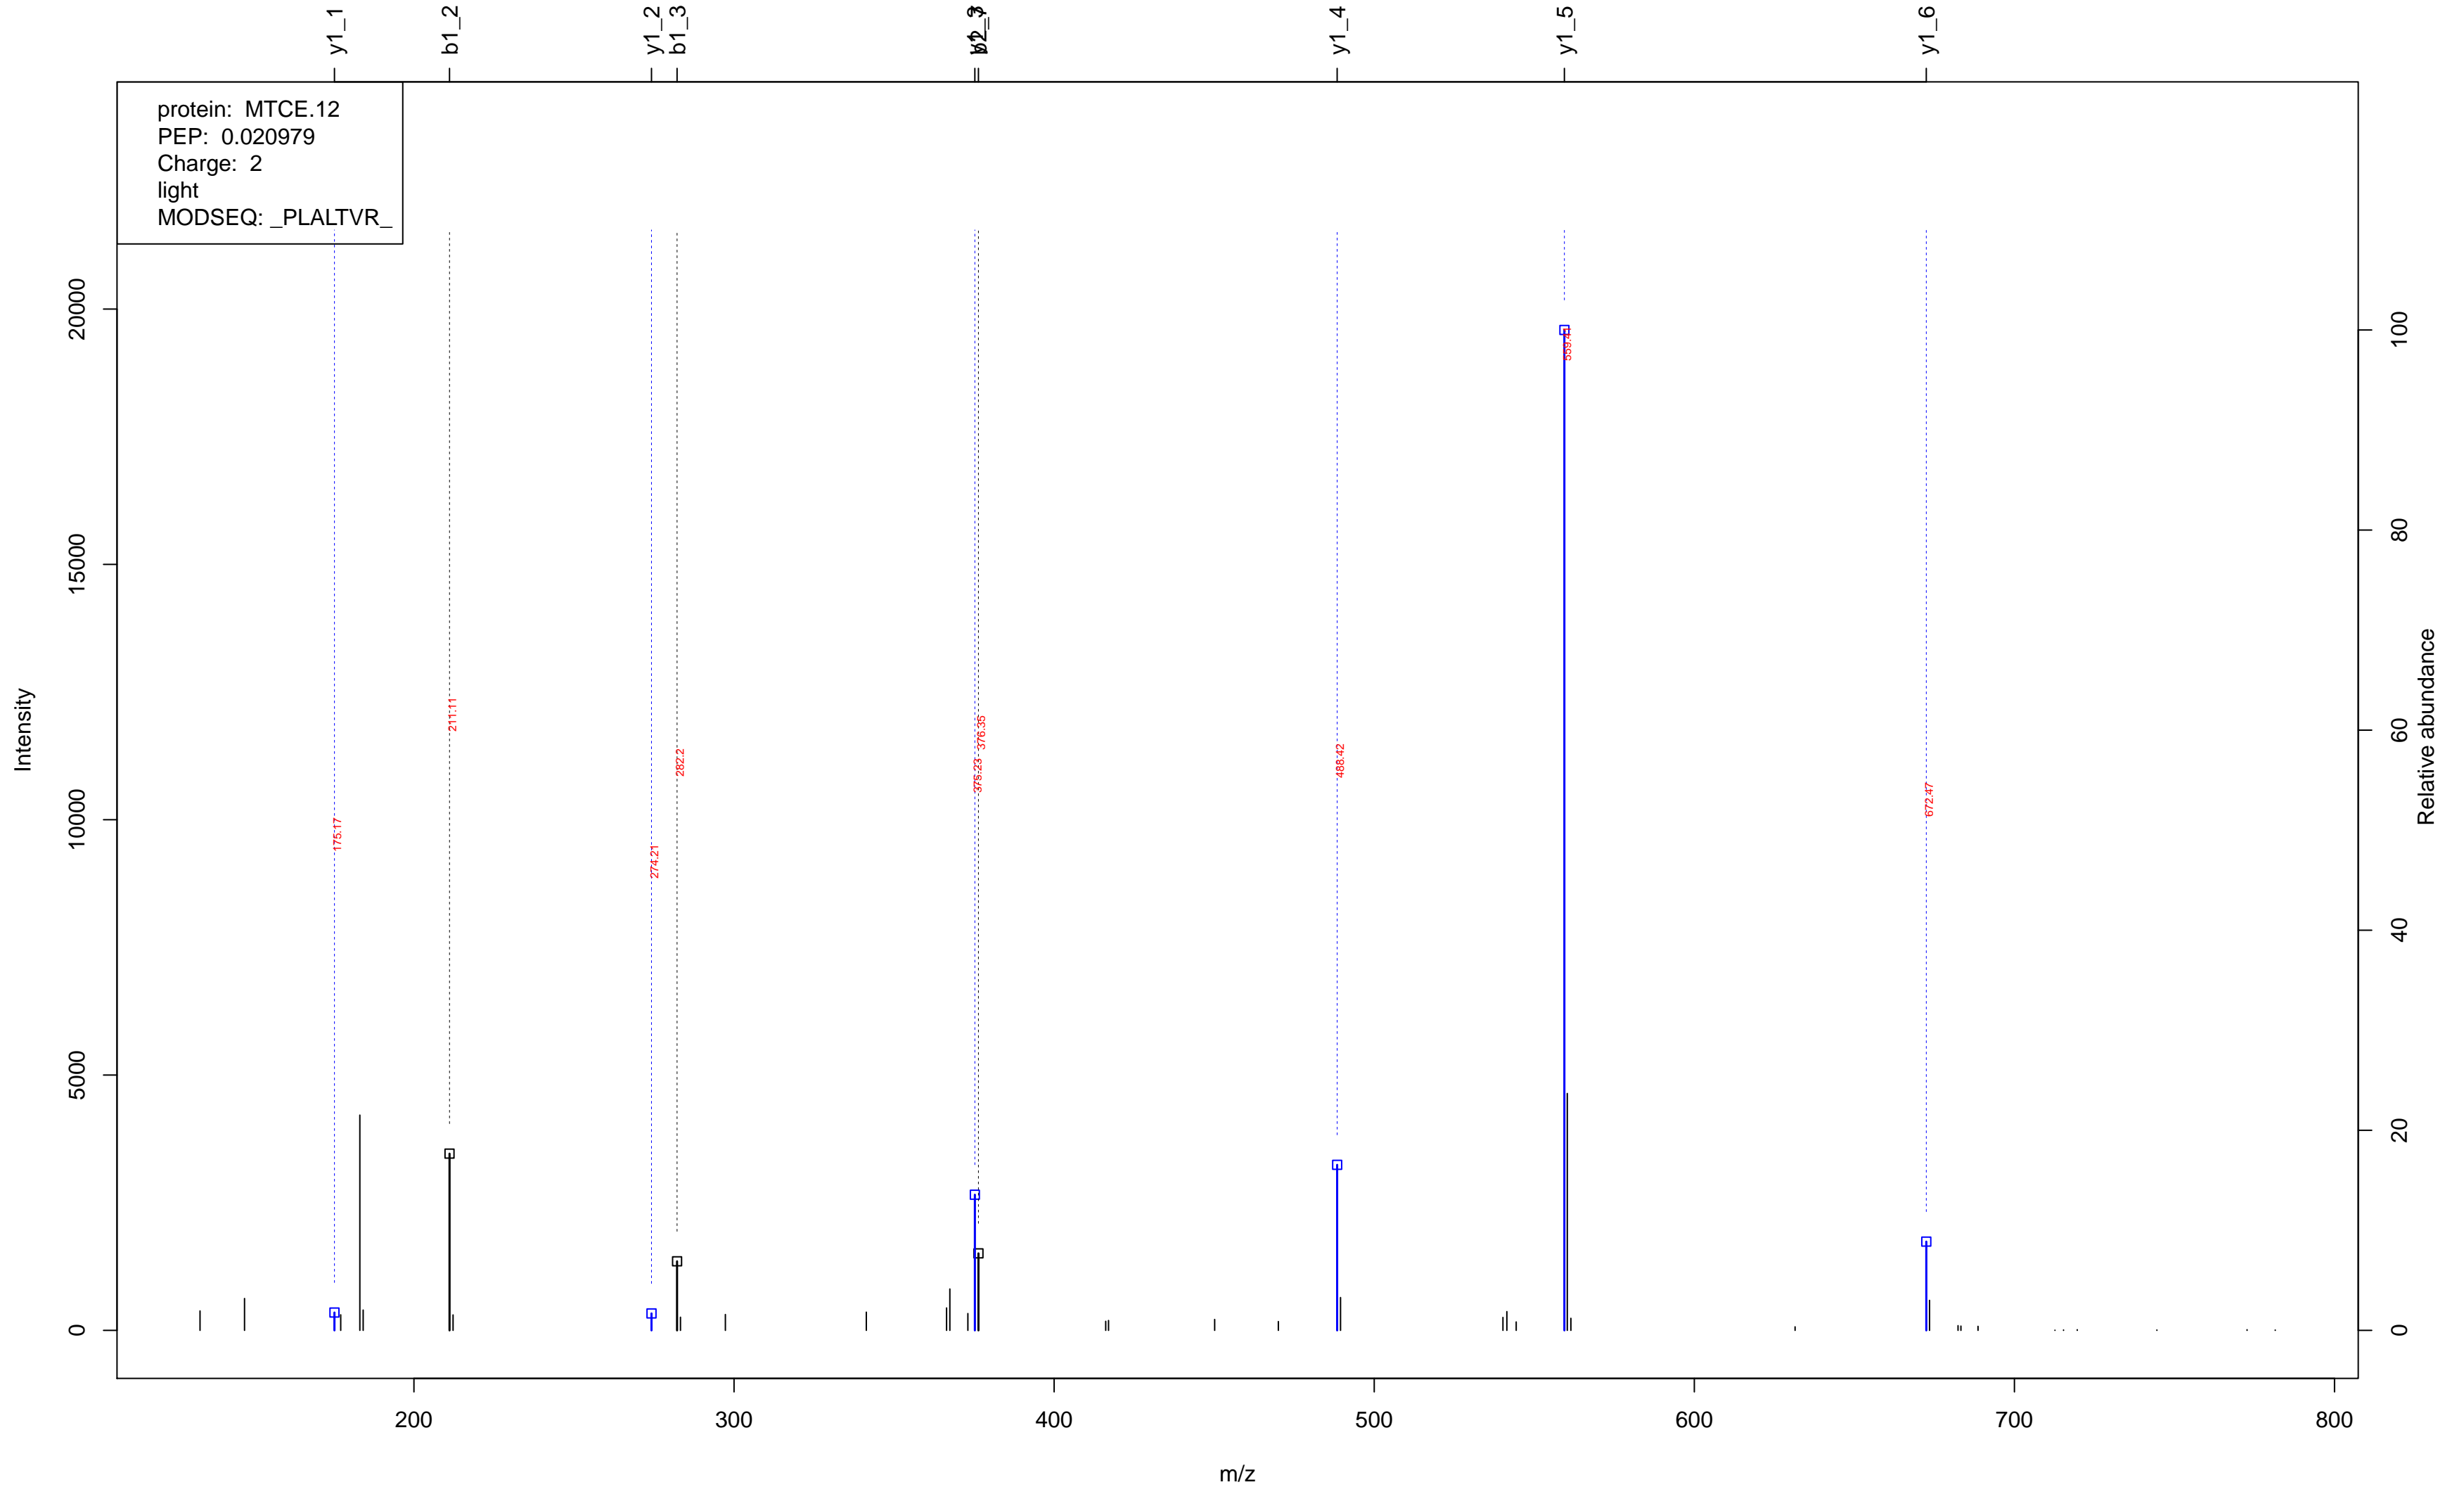

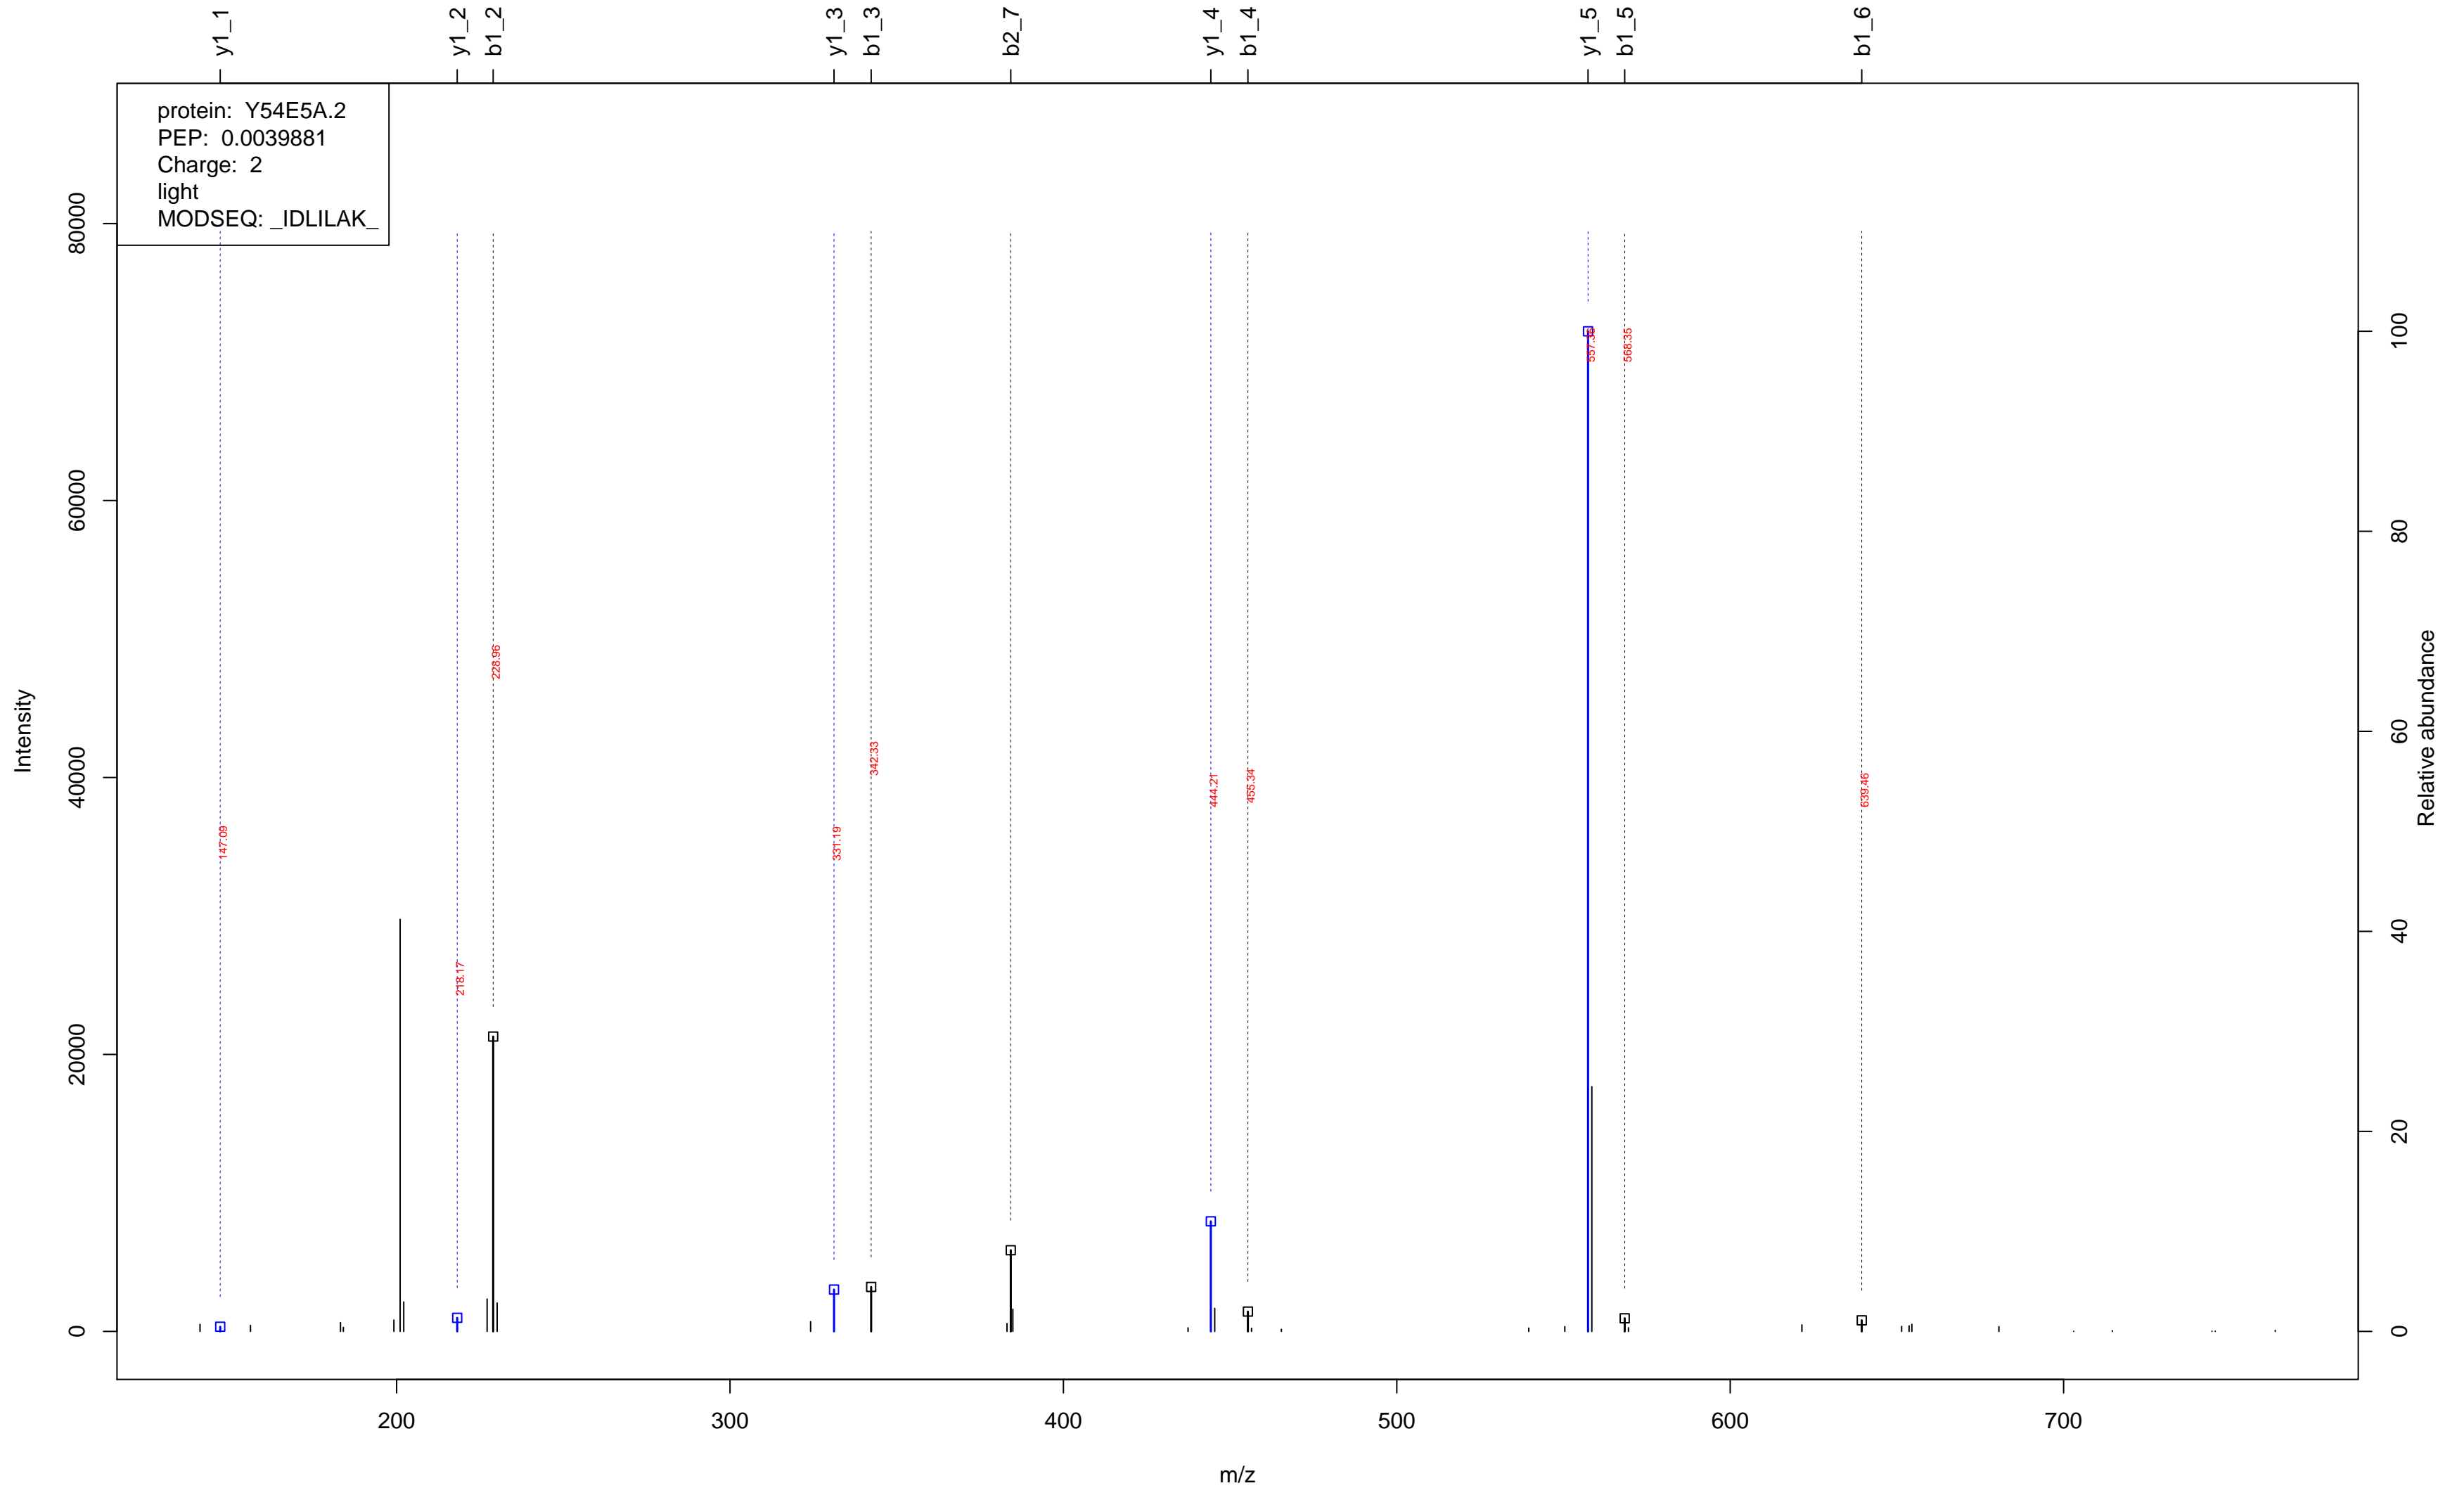

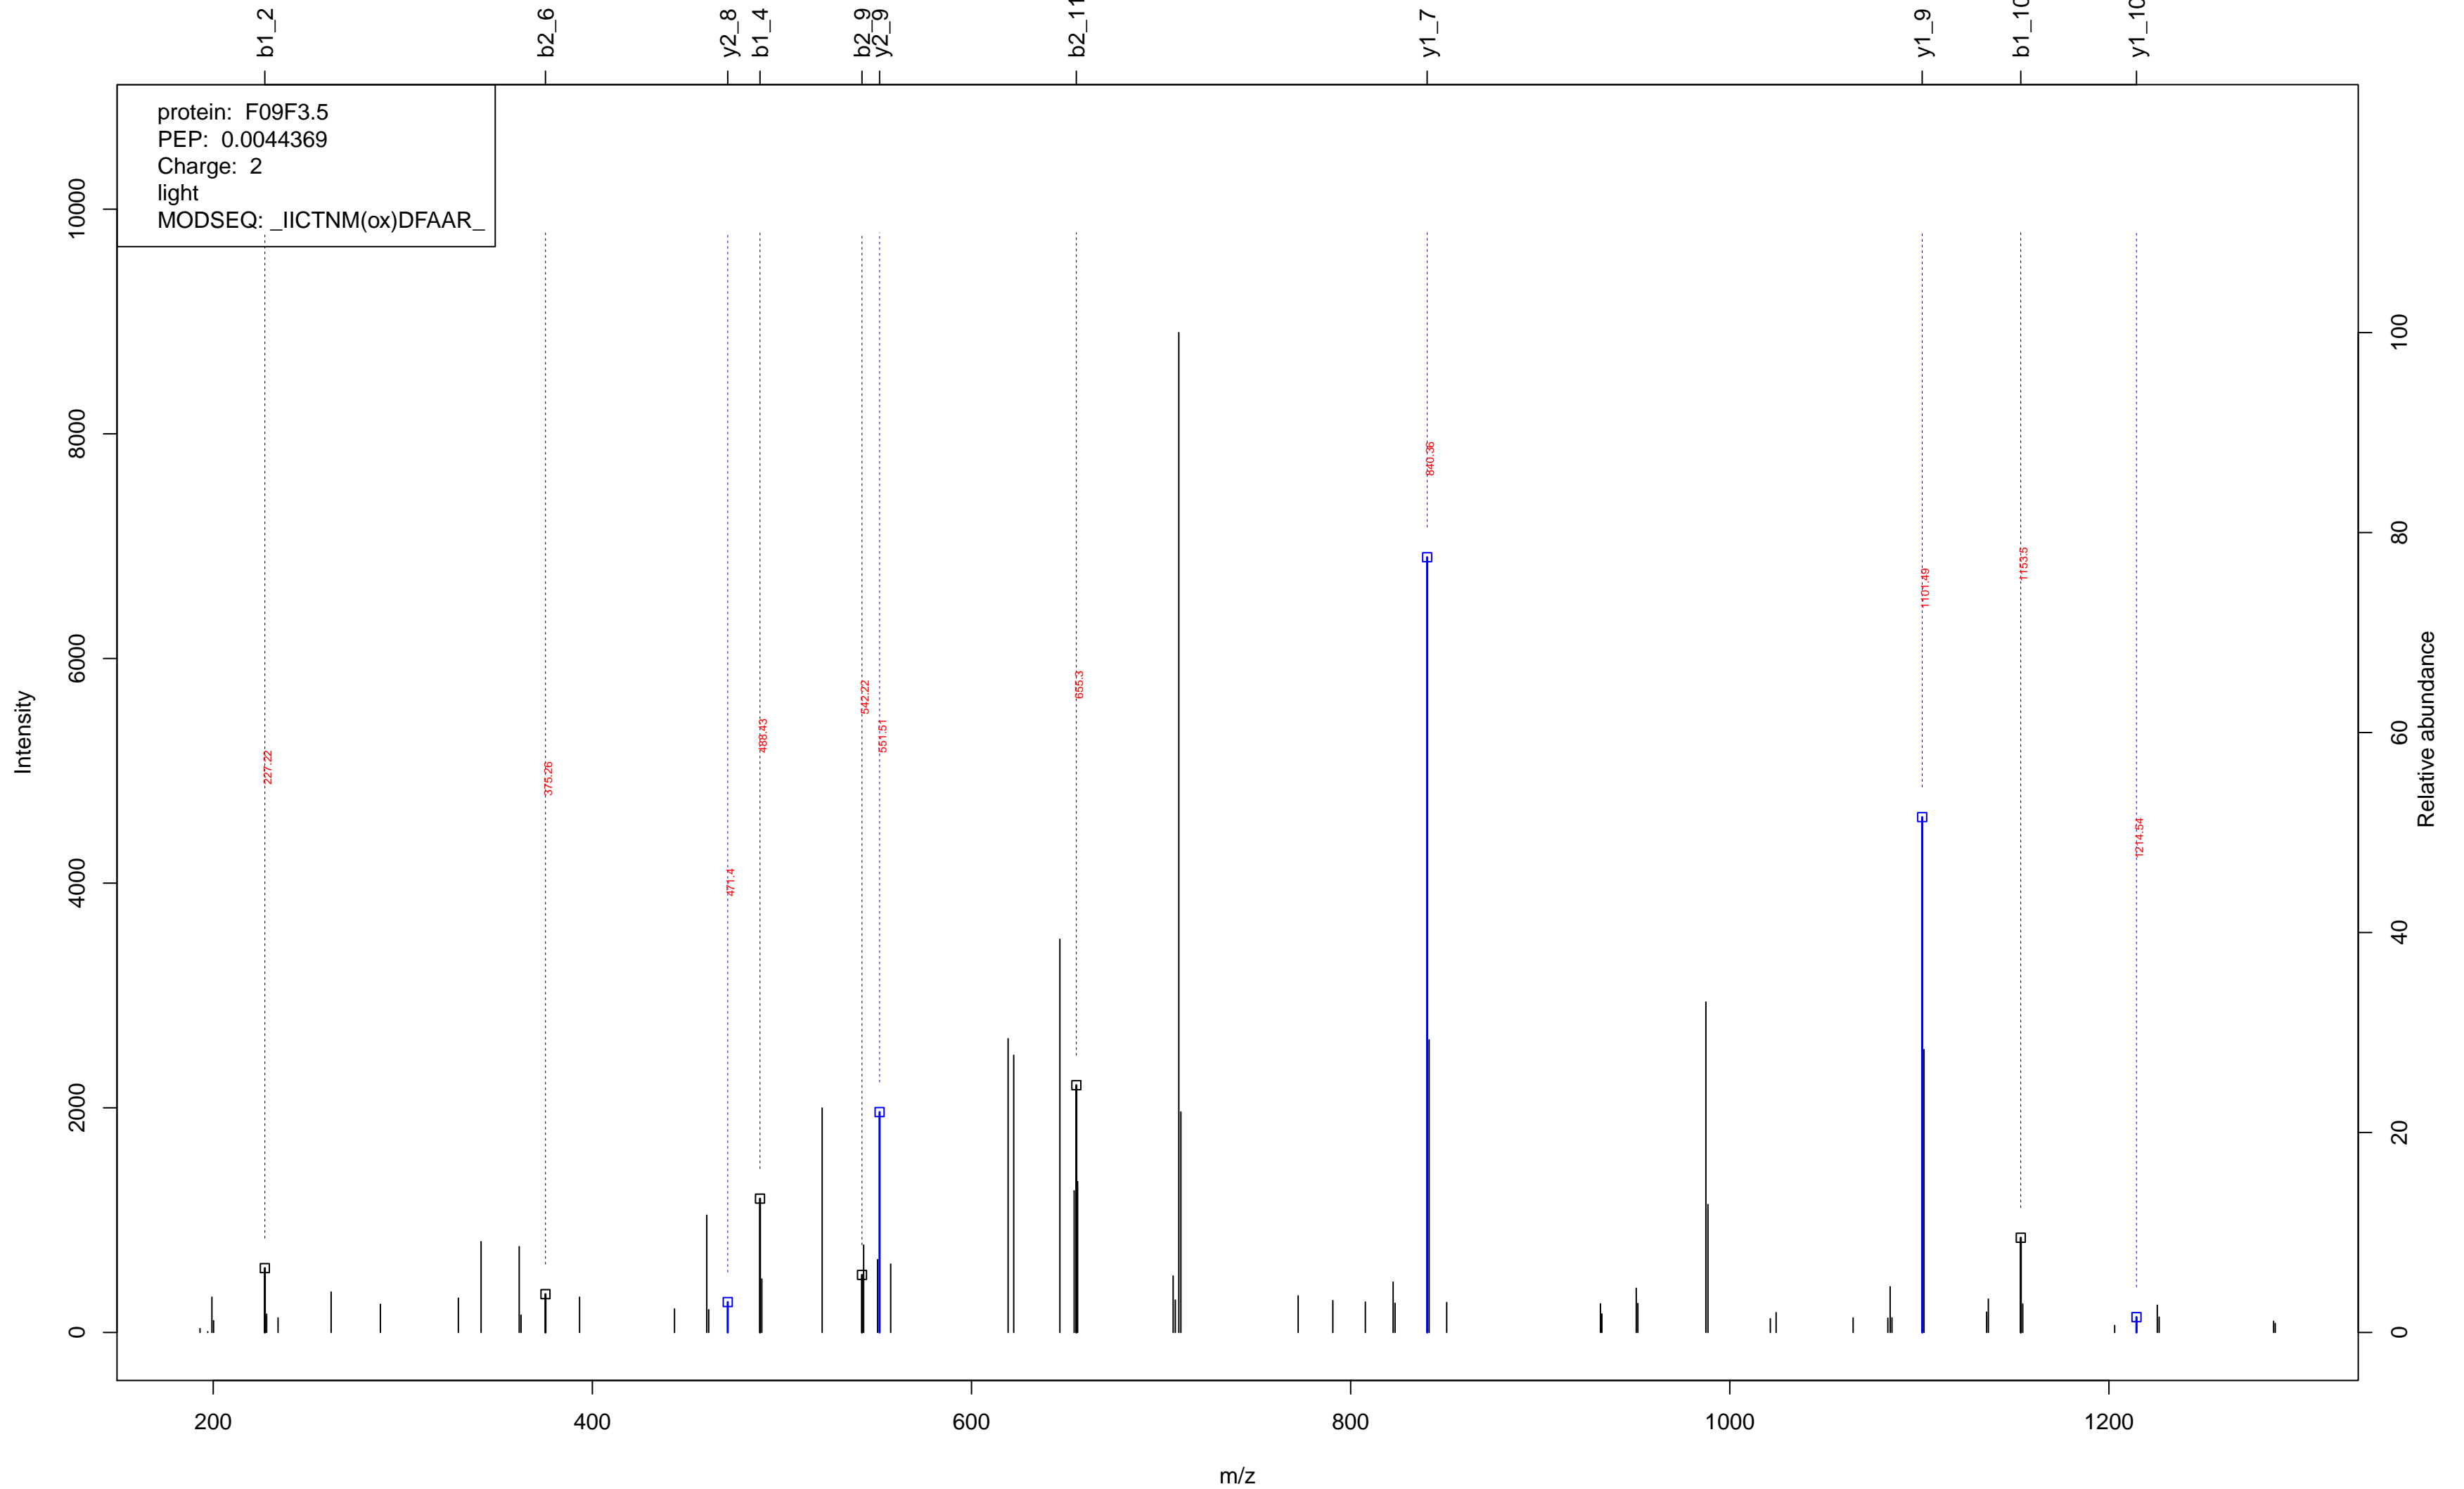

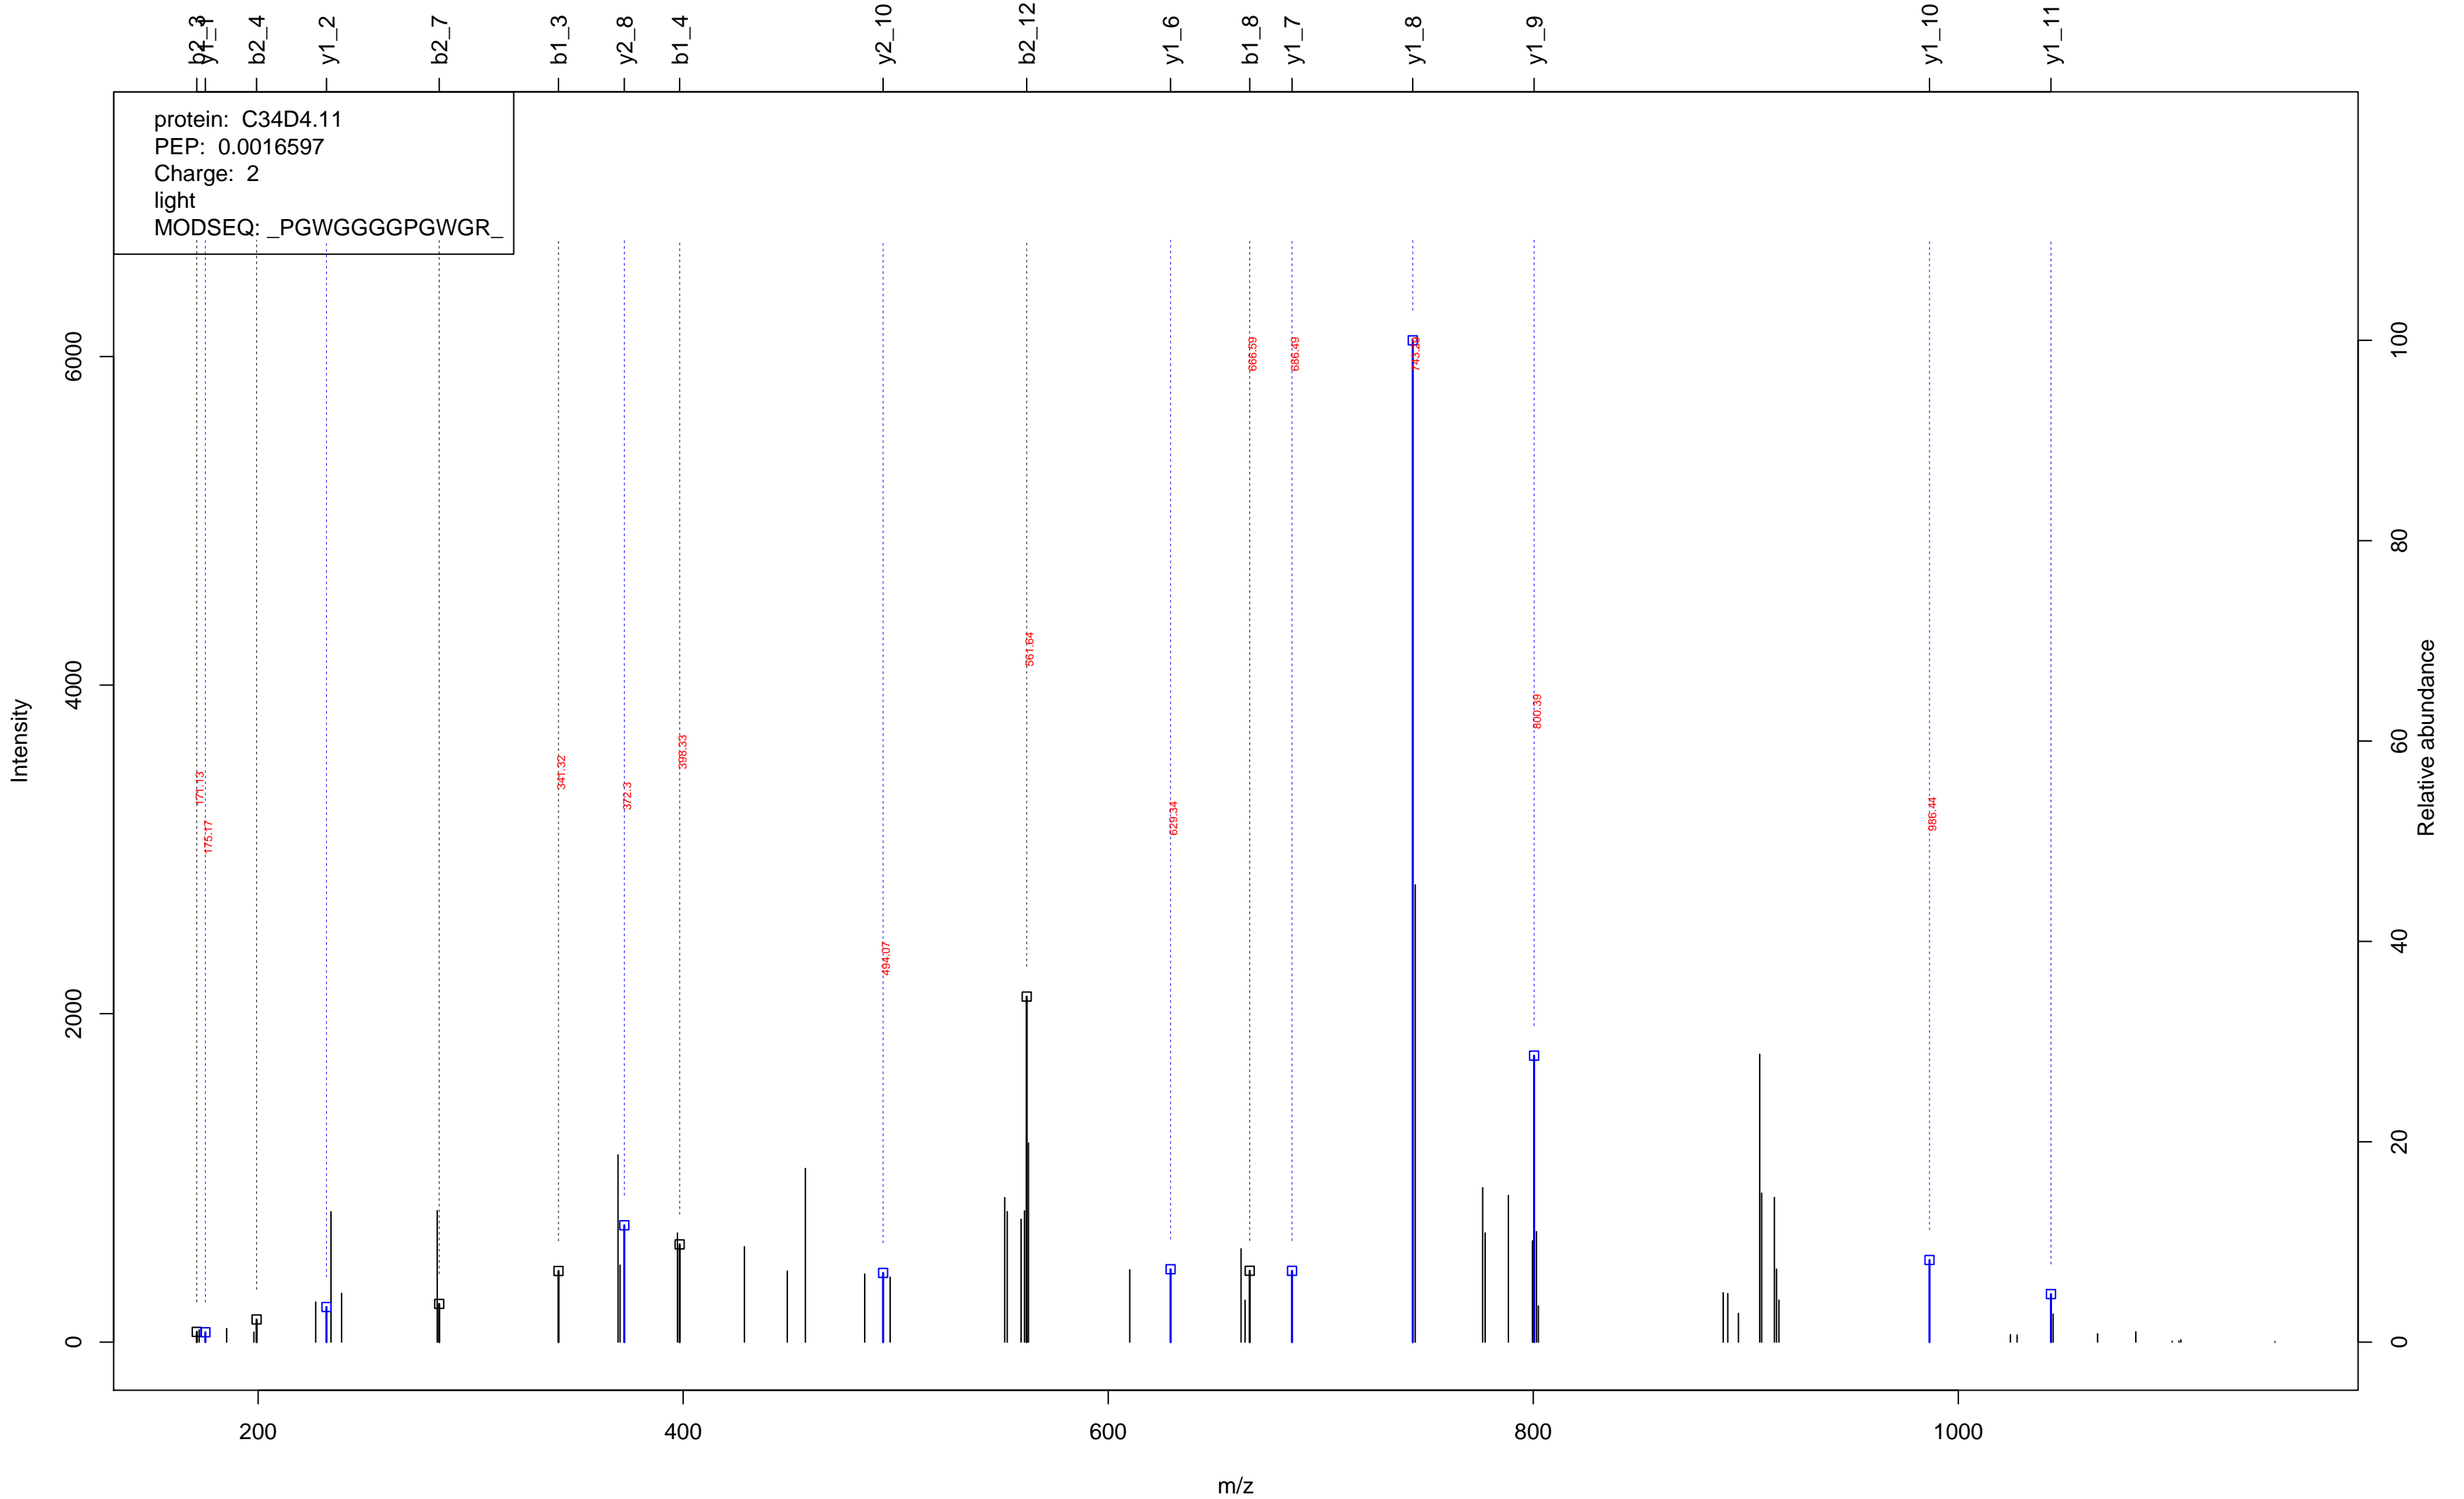



b1\_1

y1\_1

b1\_2

y1\_2

y1\_3

b2\_7

b1\_4

b1\_5

b1\_6

y1\_6

protein: C06A1.5  
PEP: 0.010337  
Charge: 2  
light  
MODSEQ: \_RIPPIVR\_

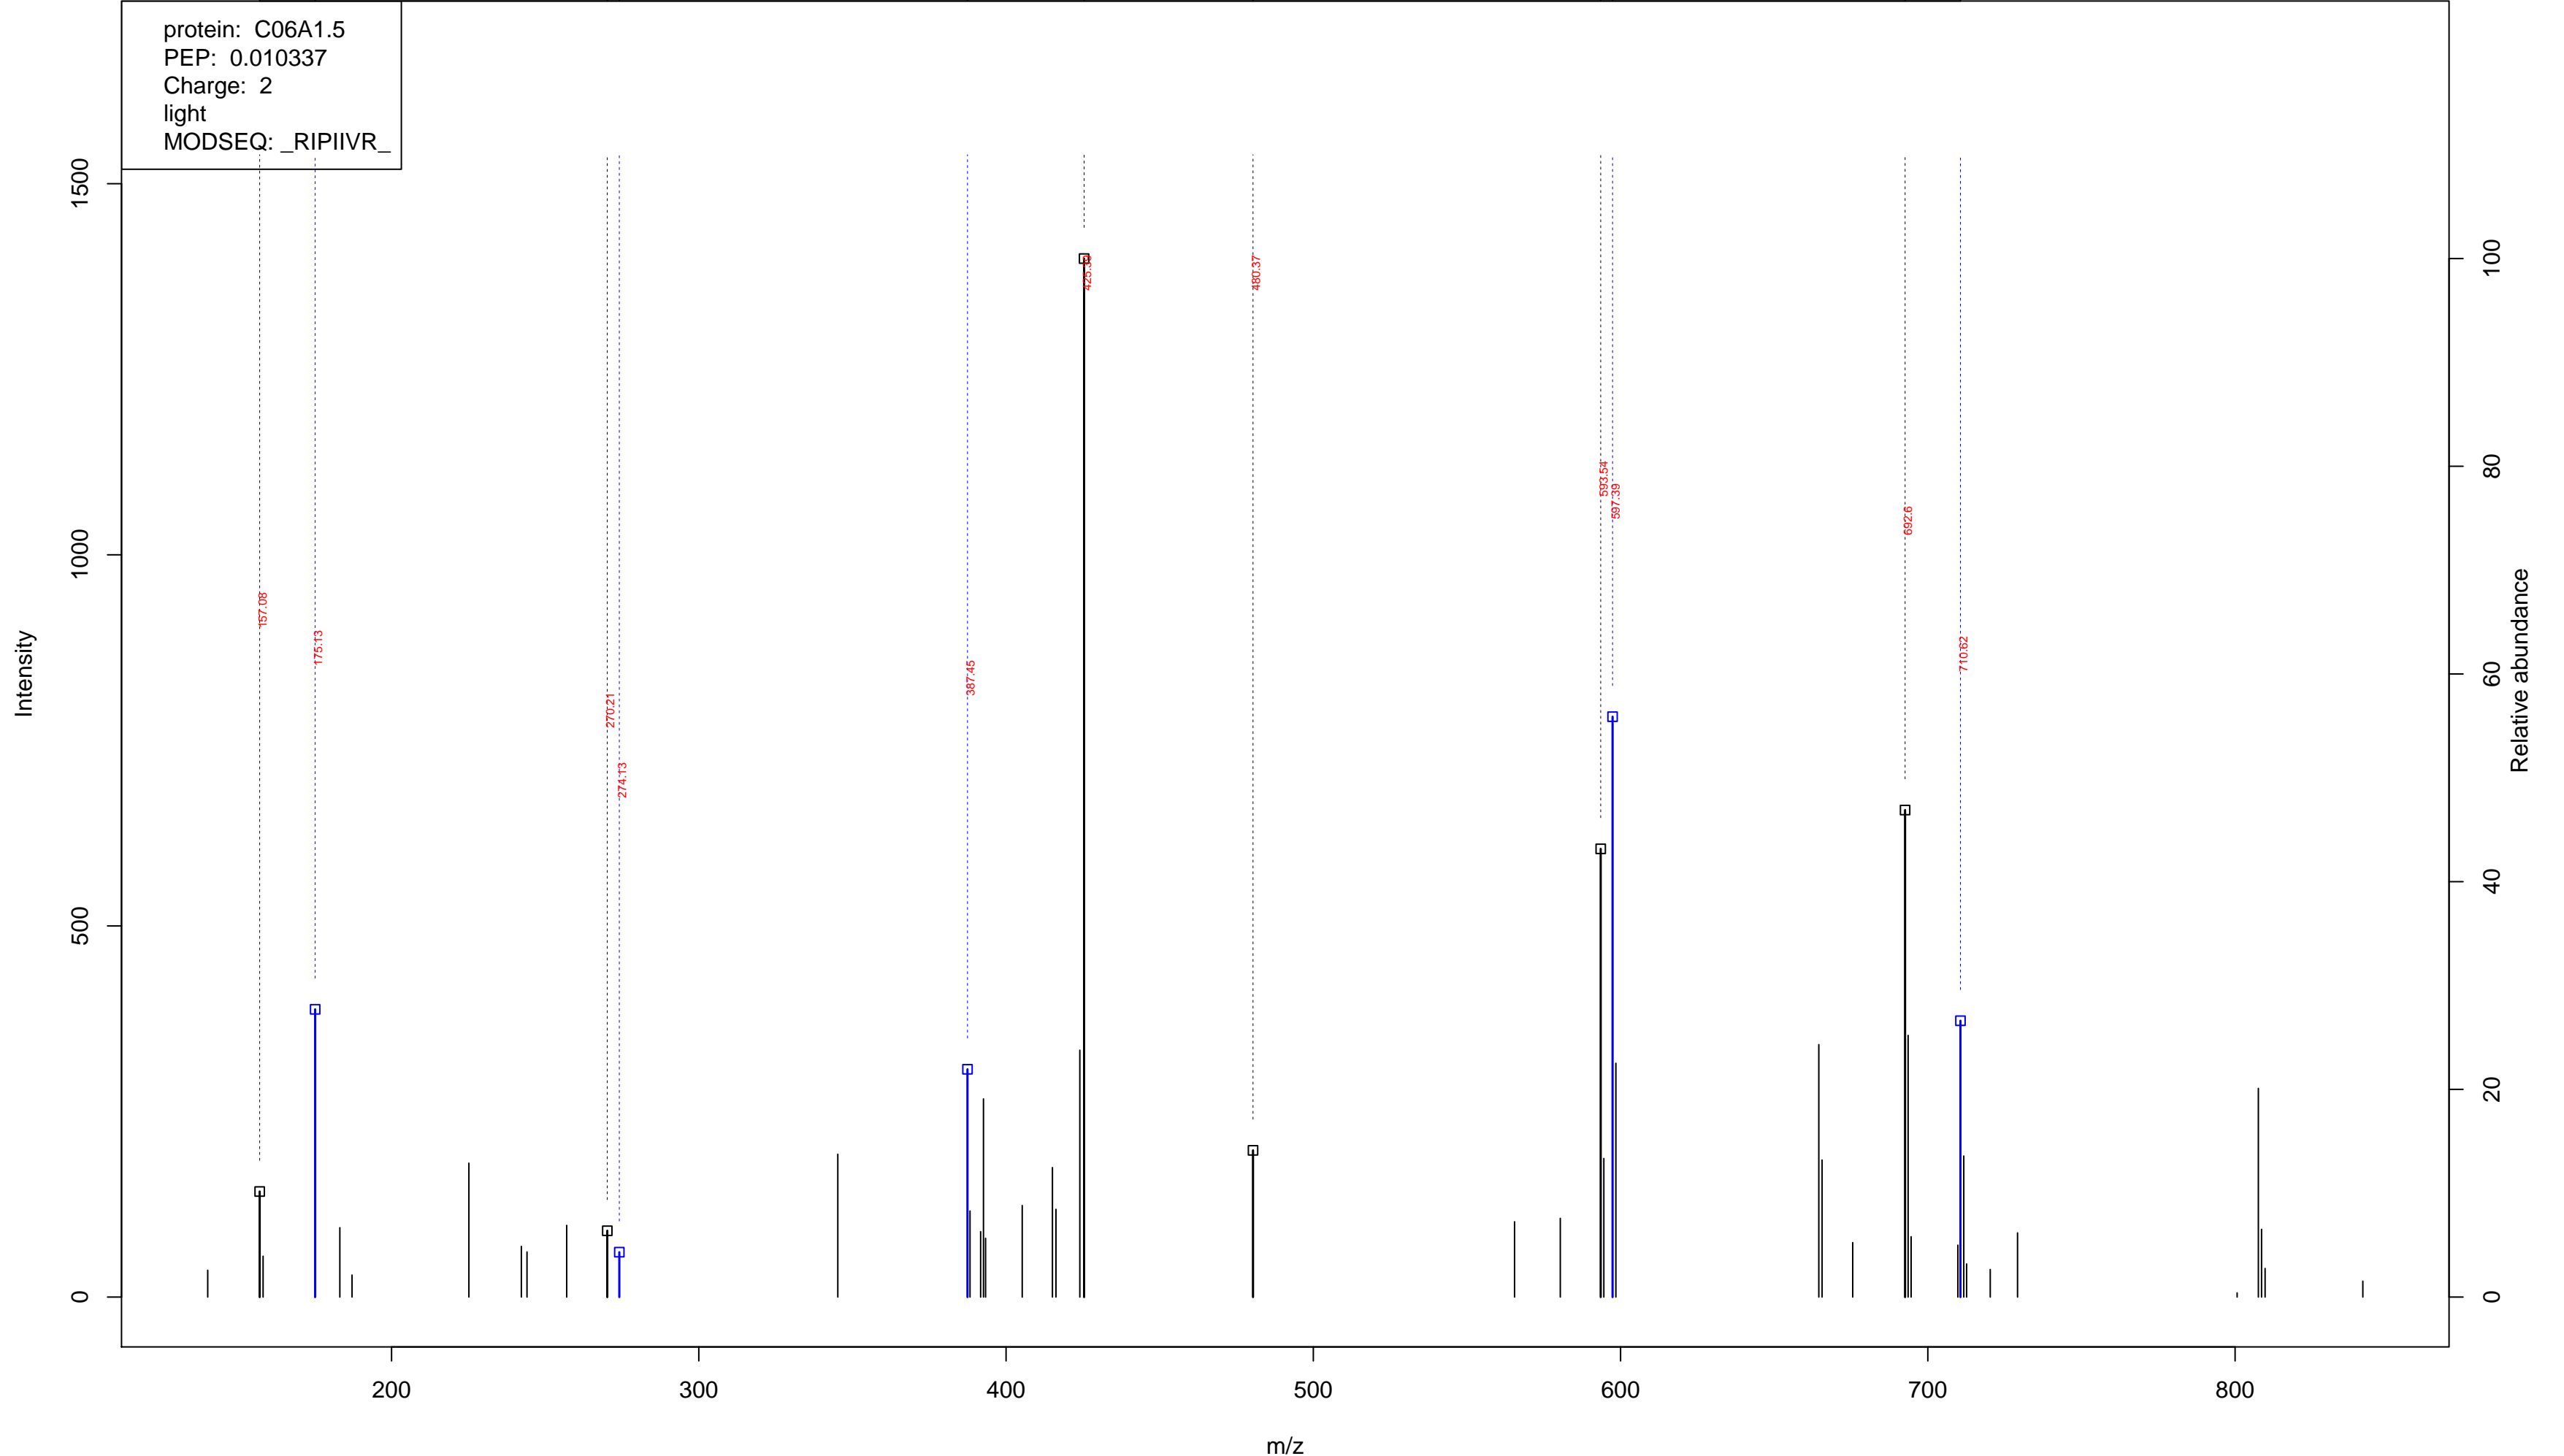

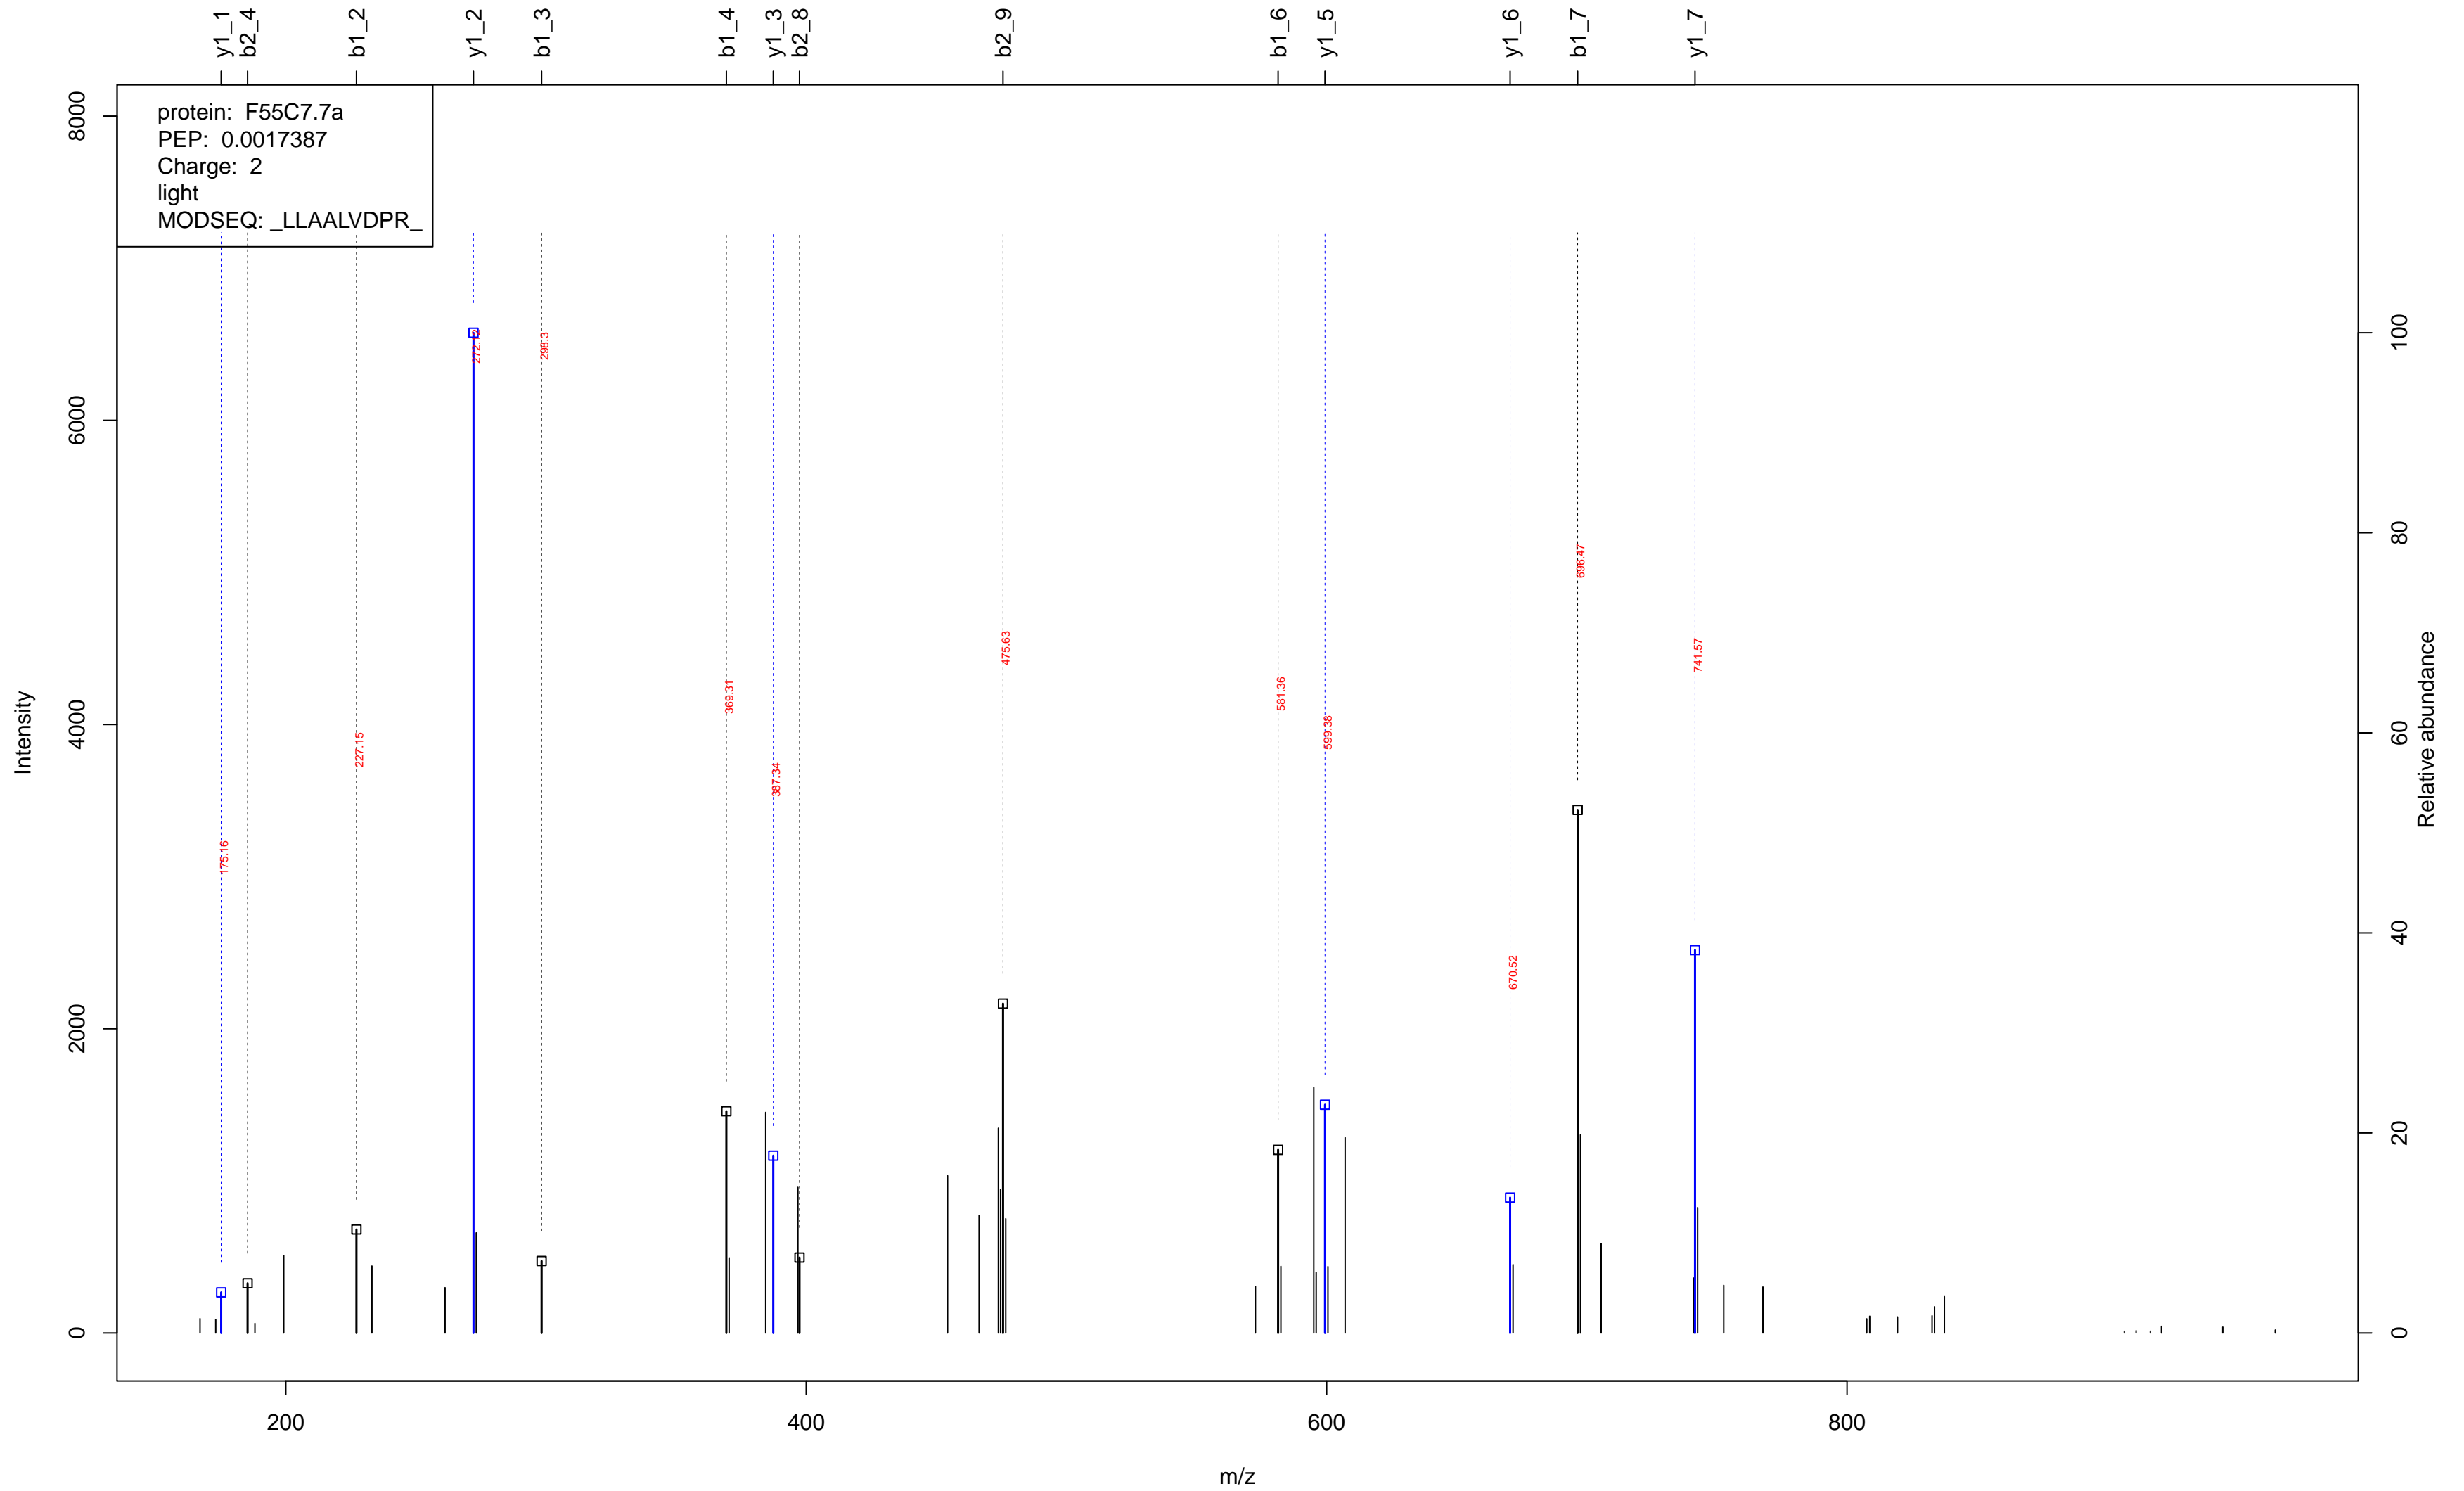

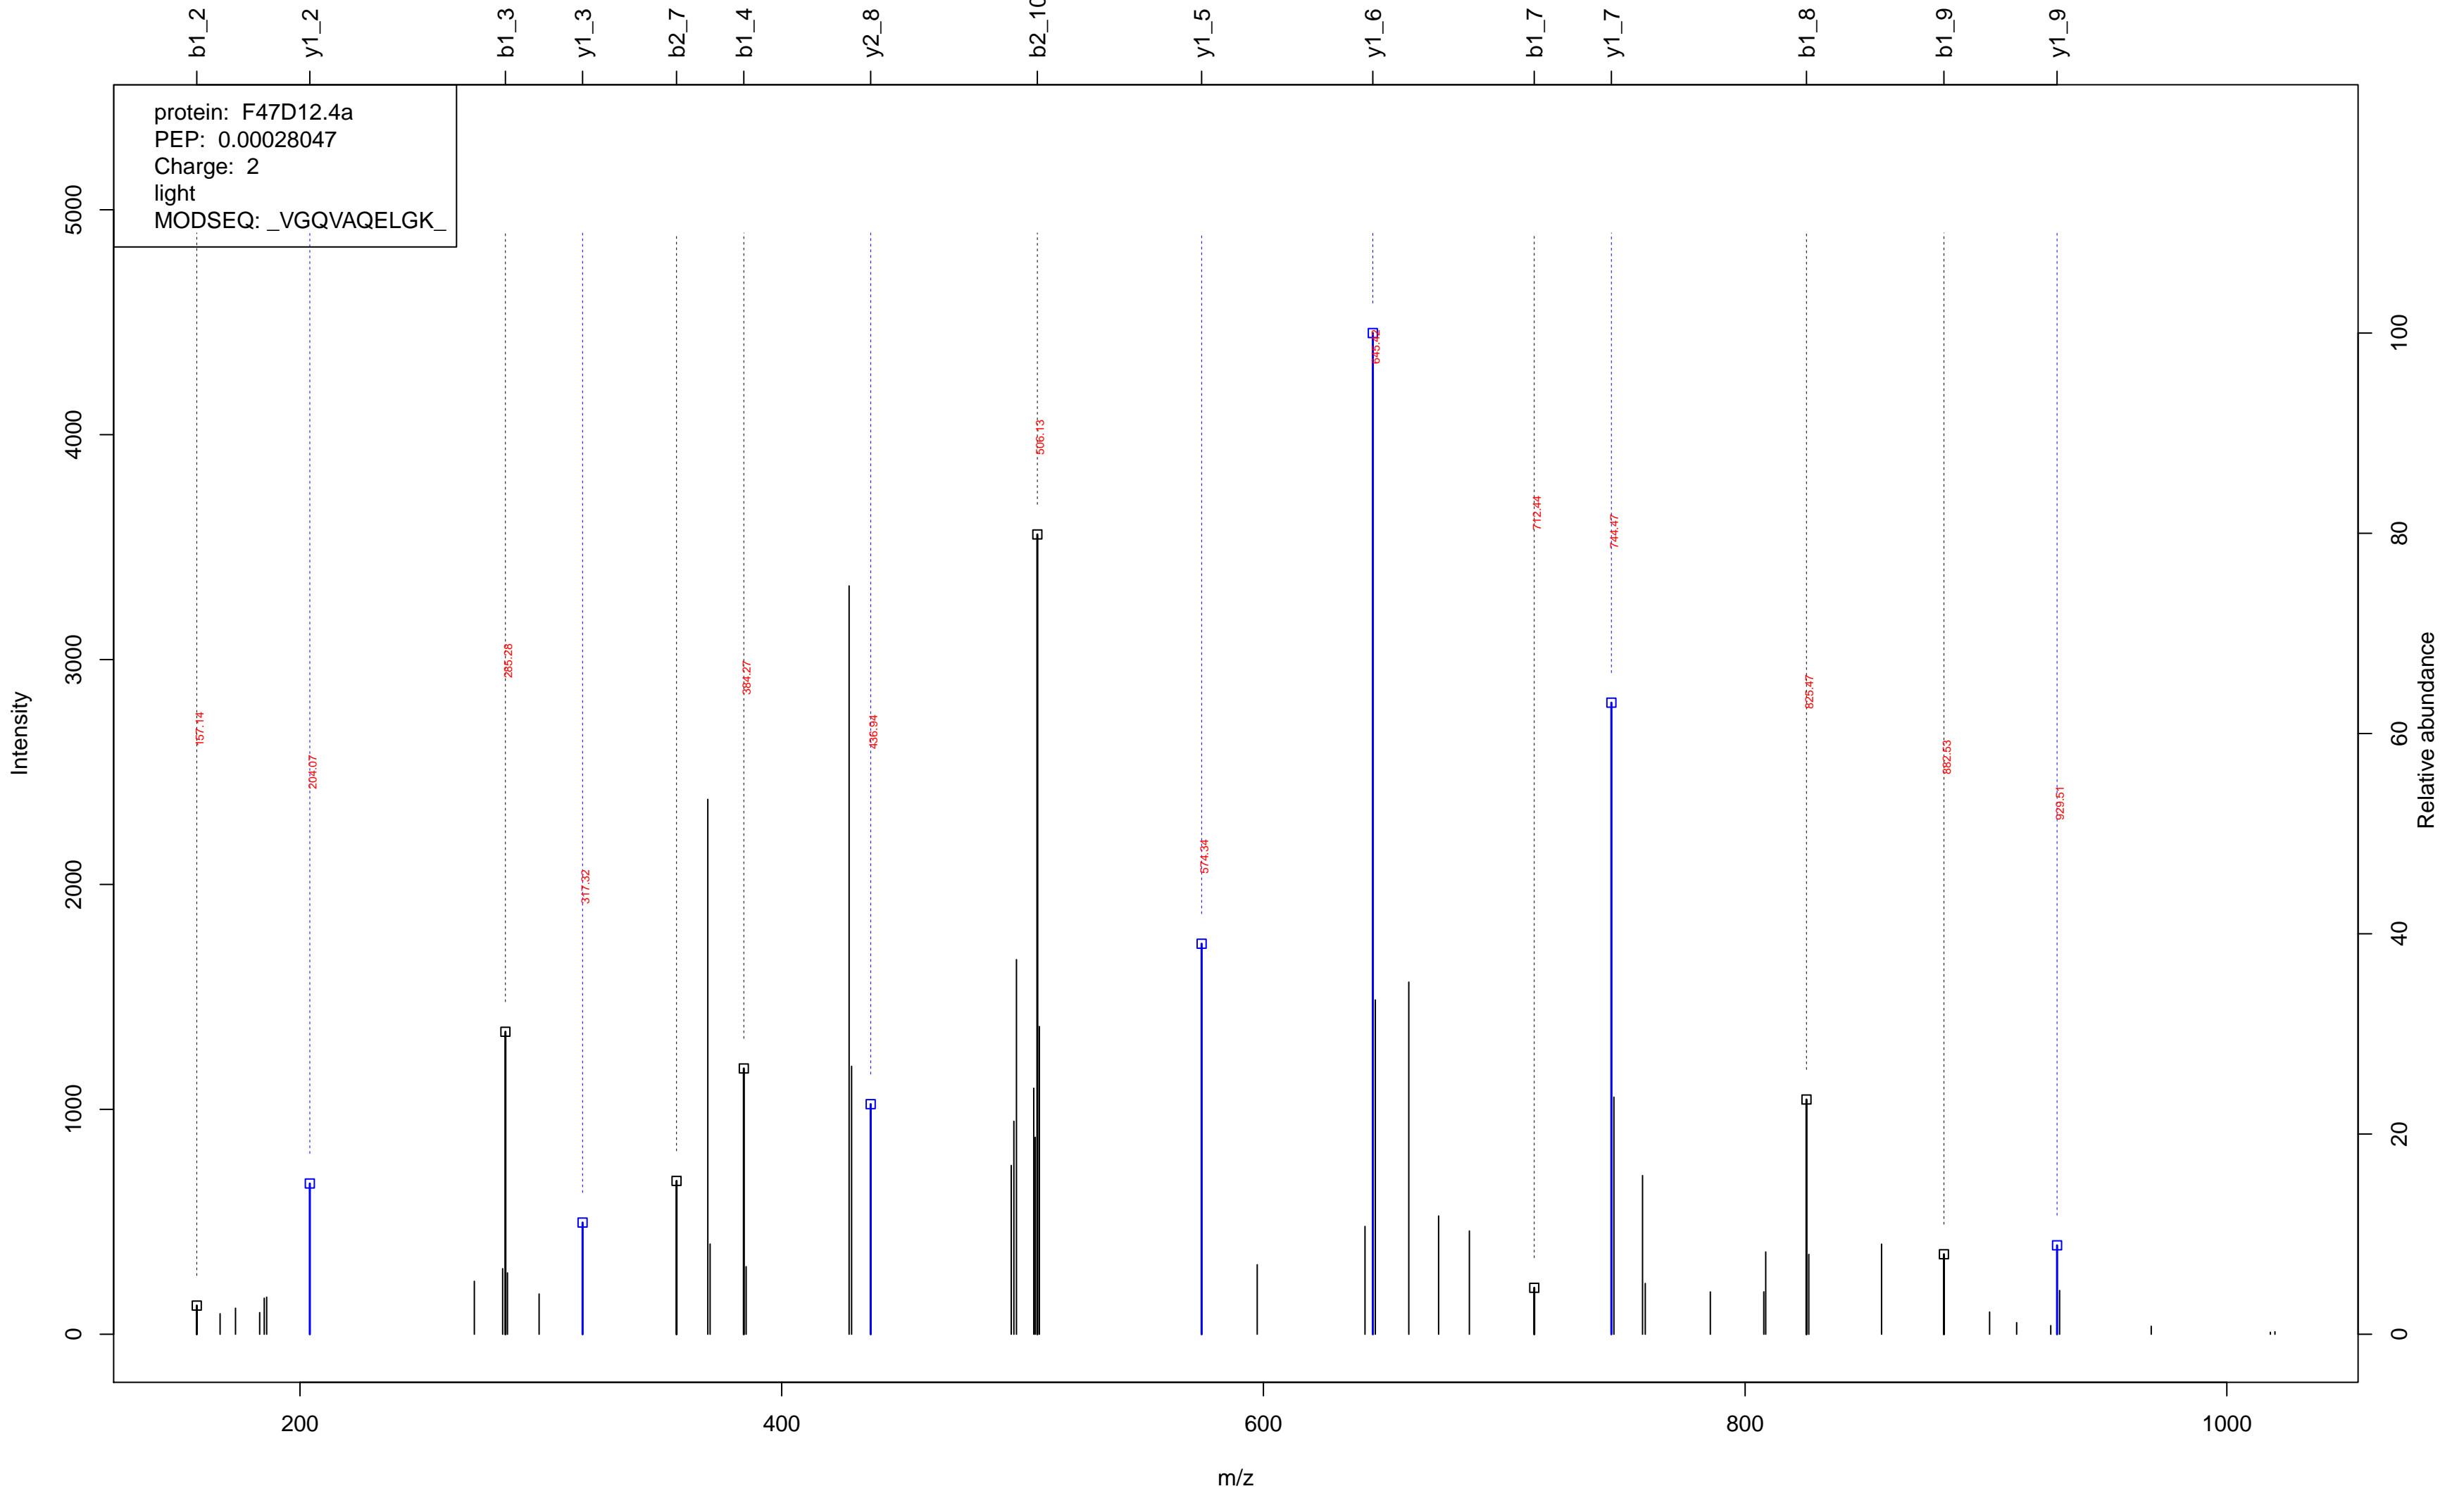

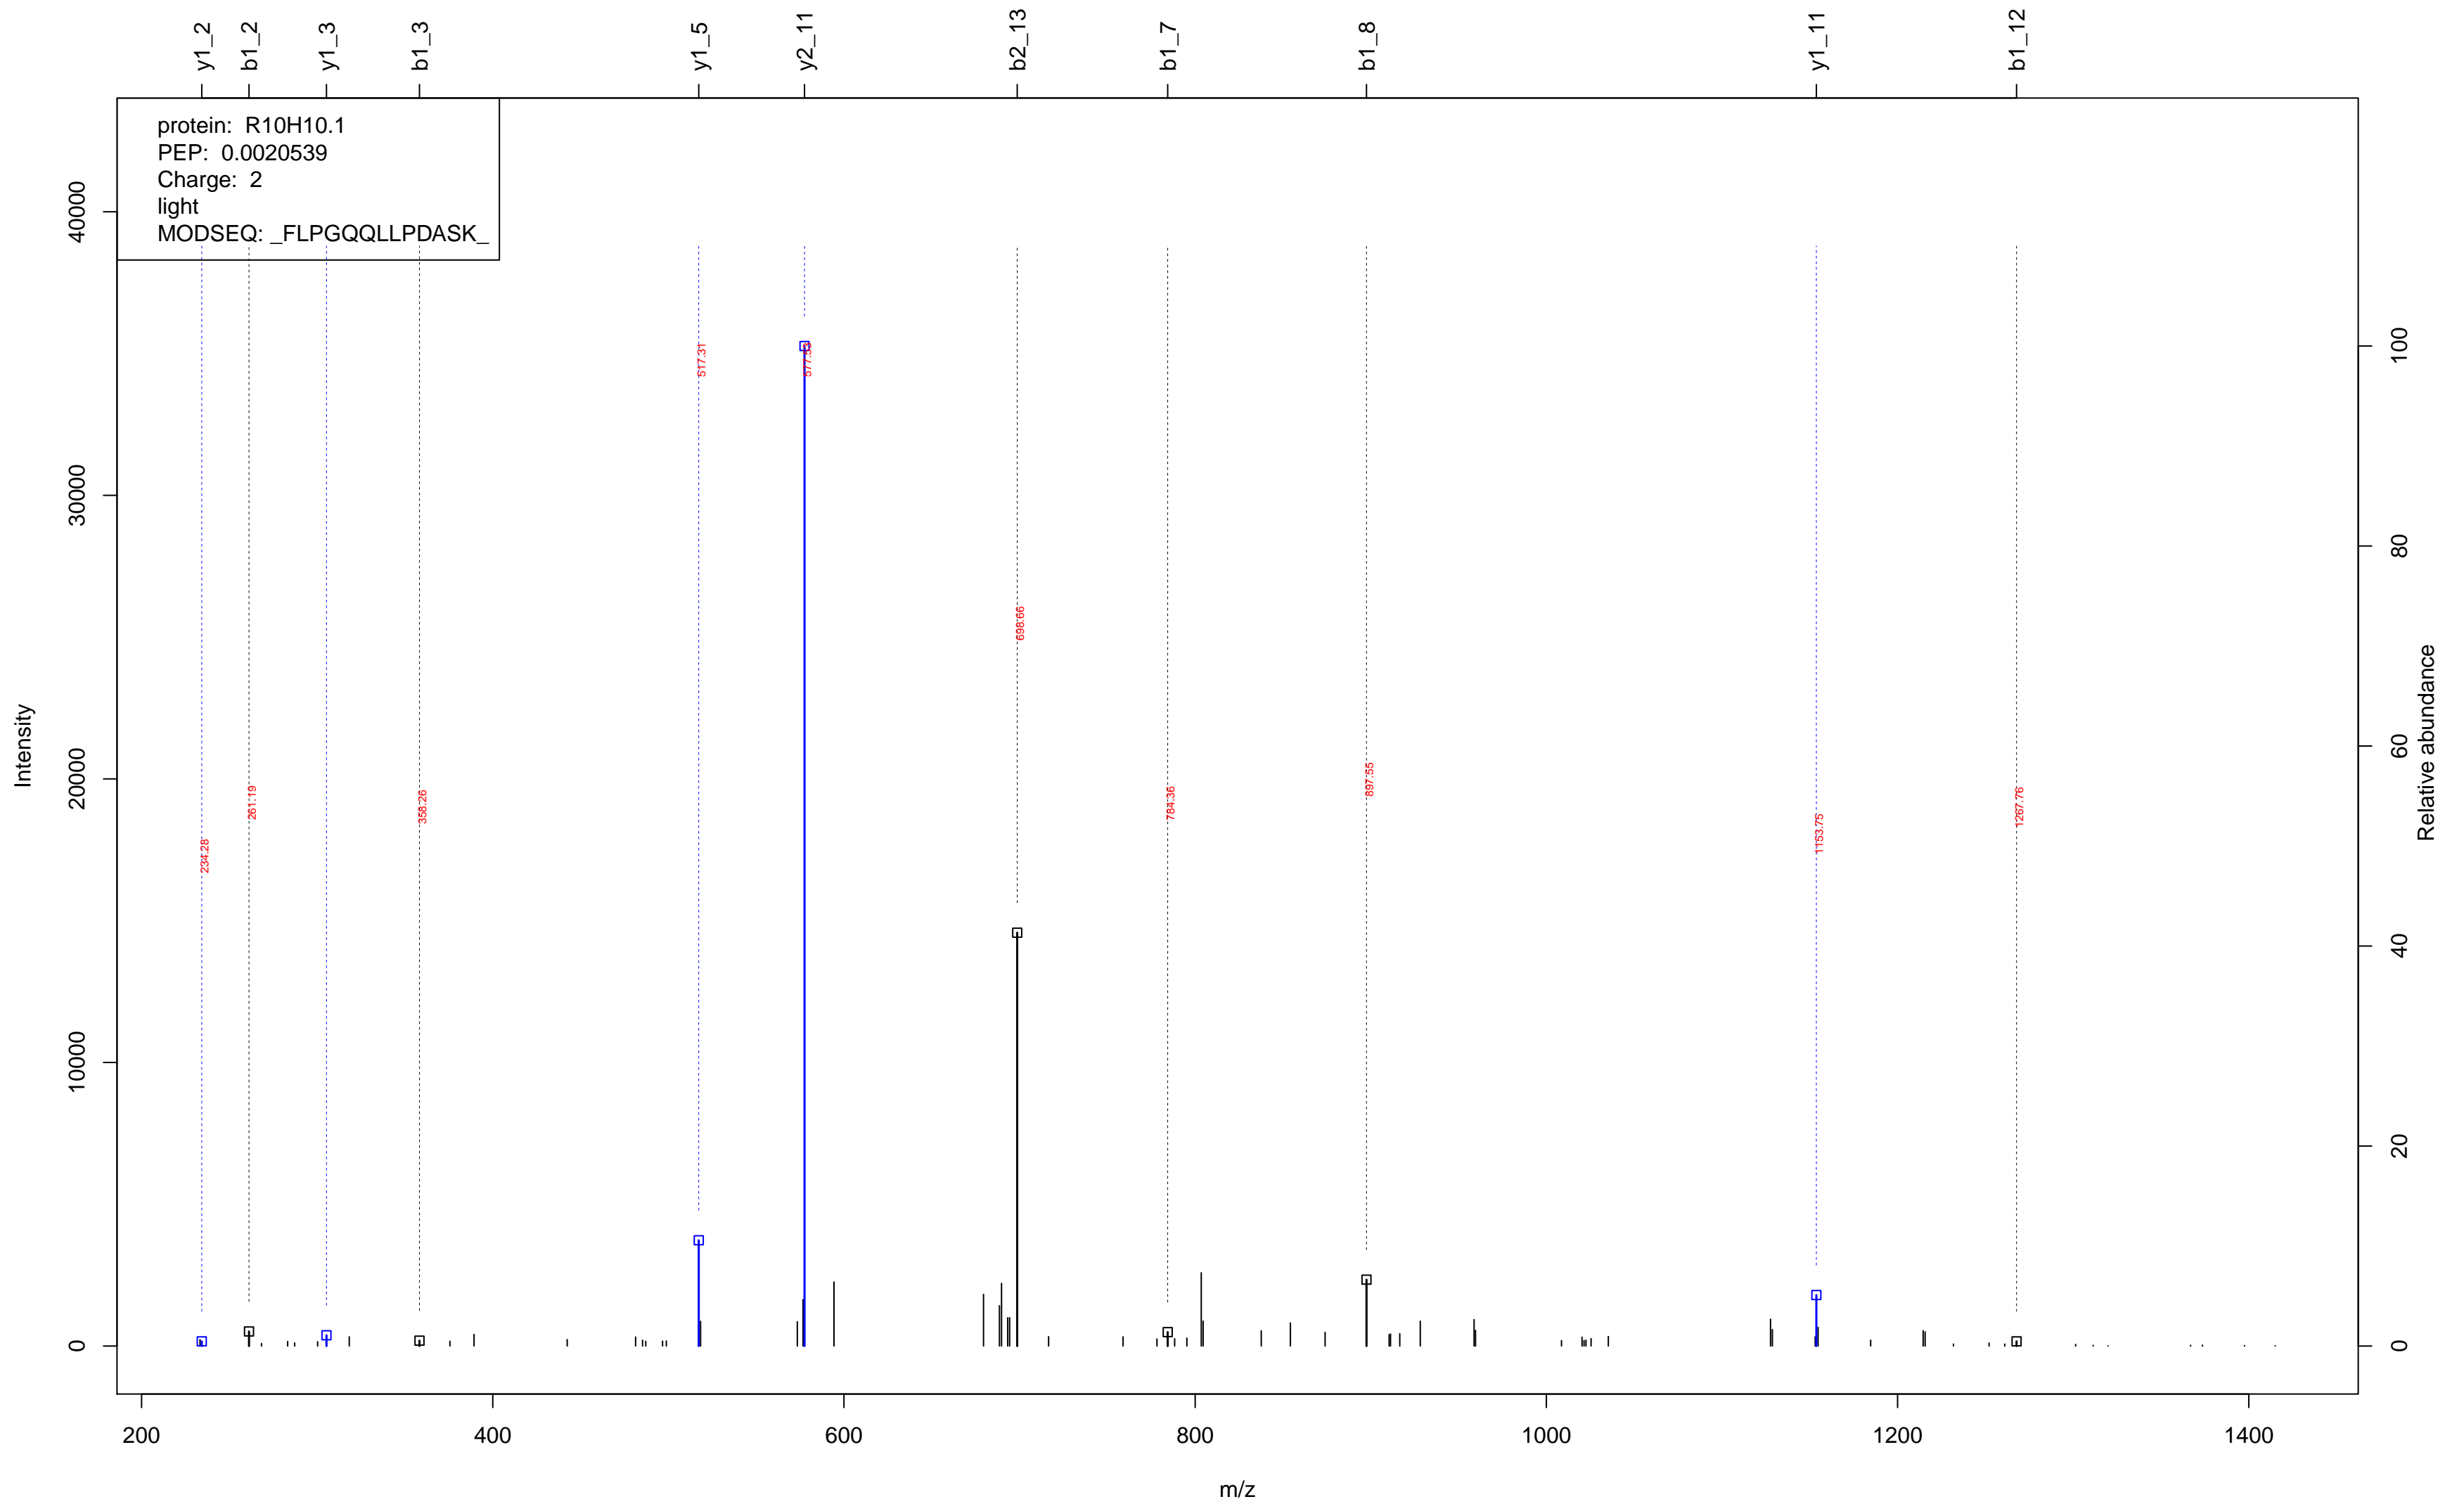

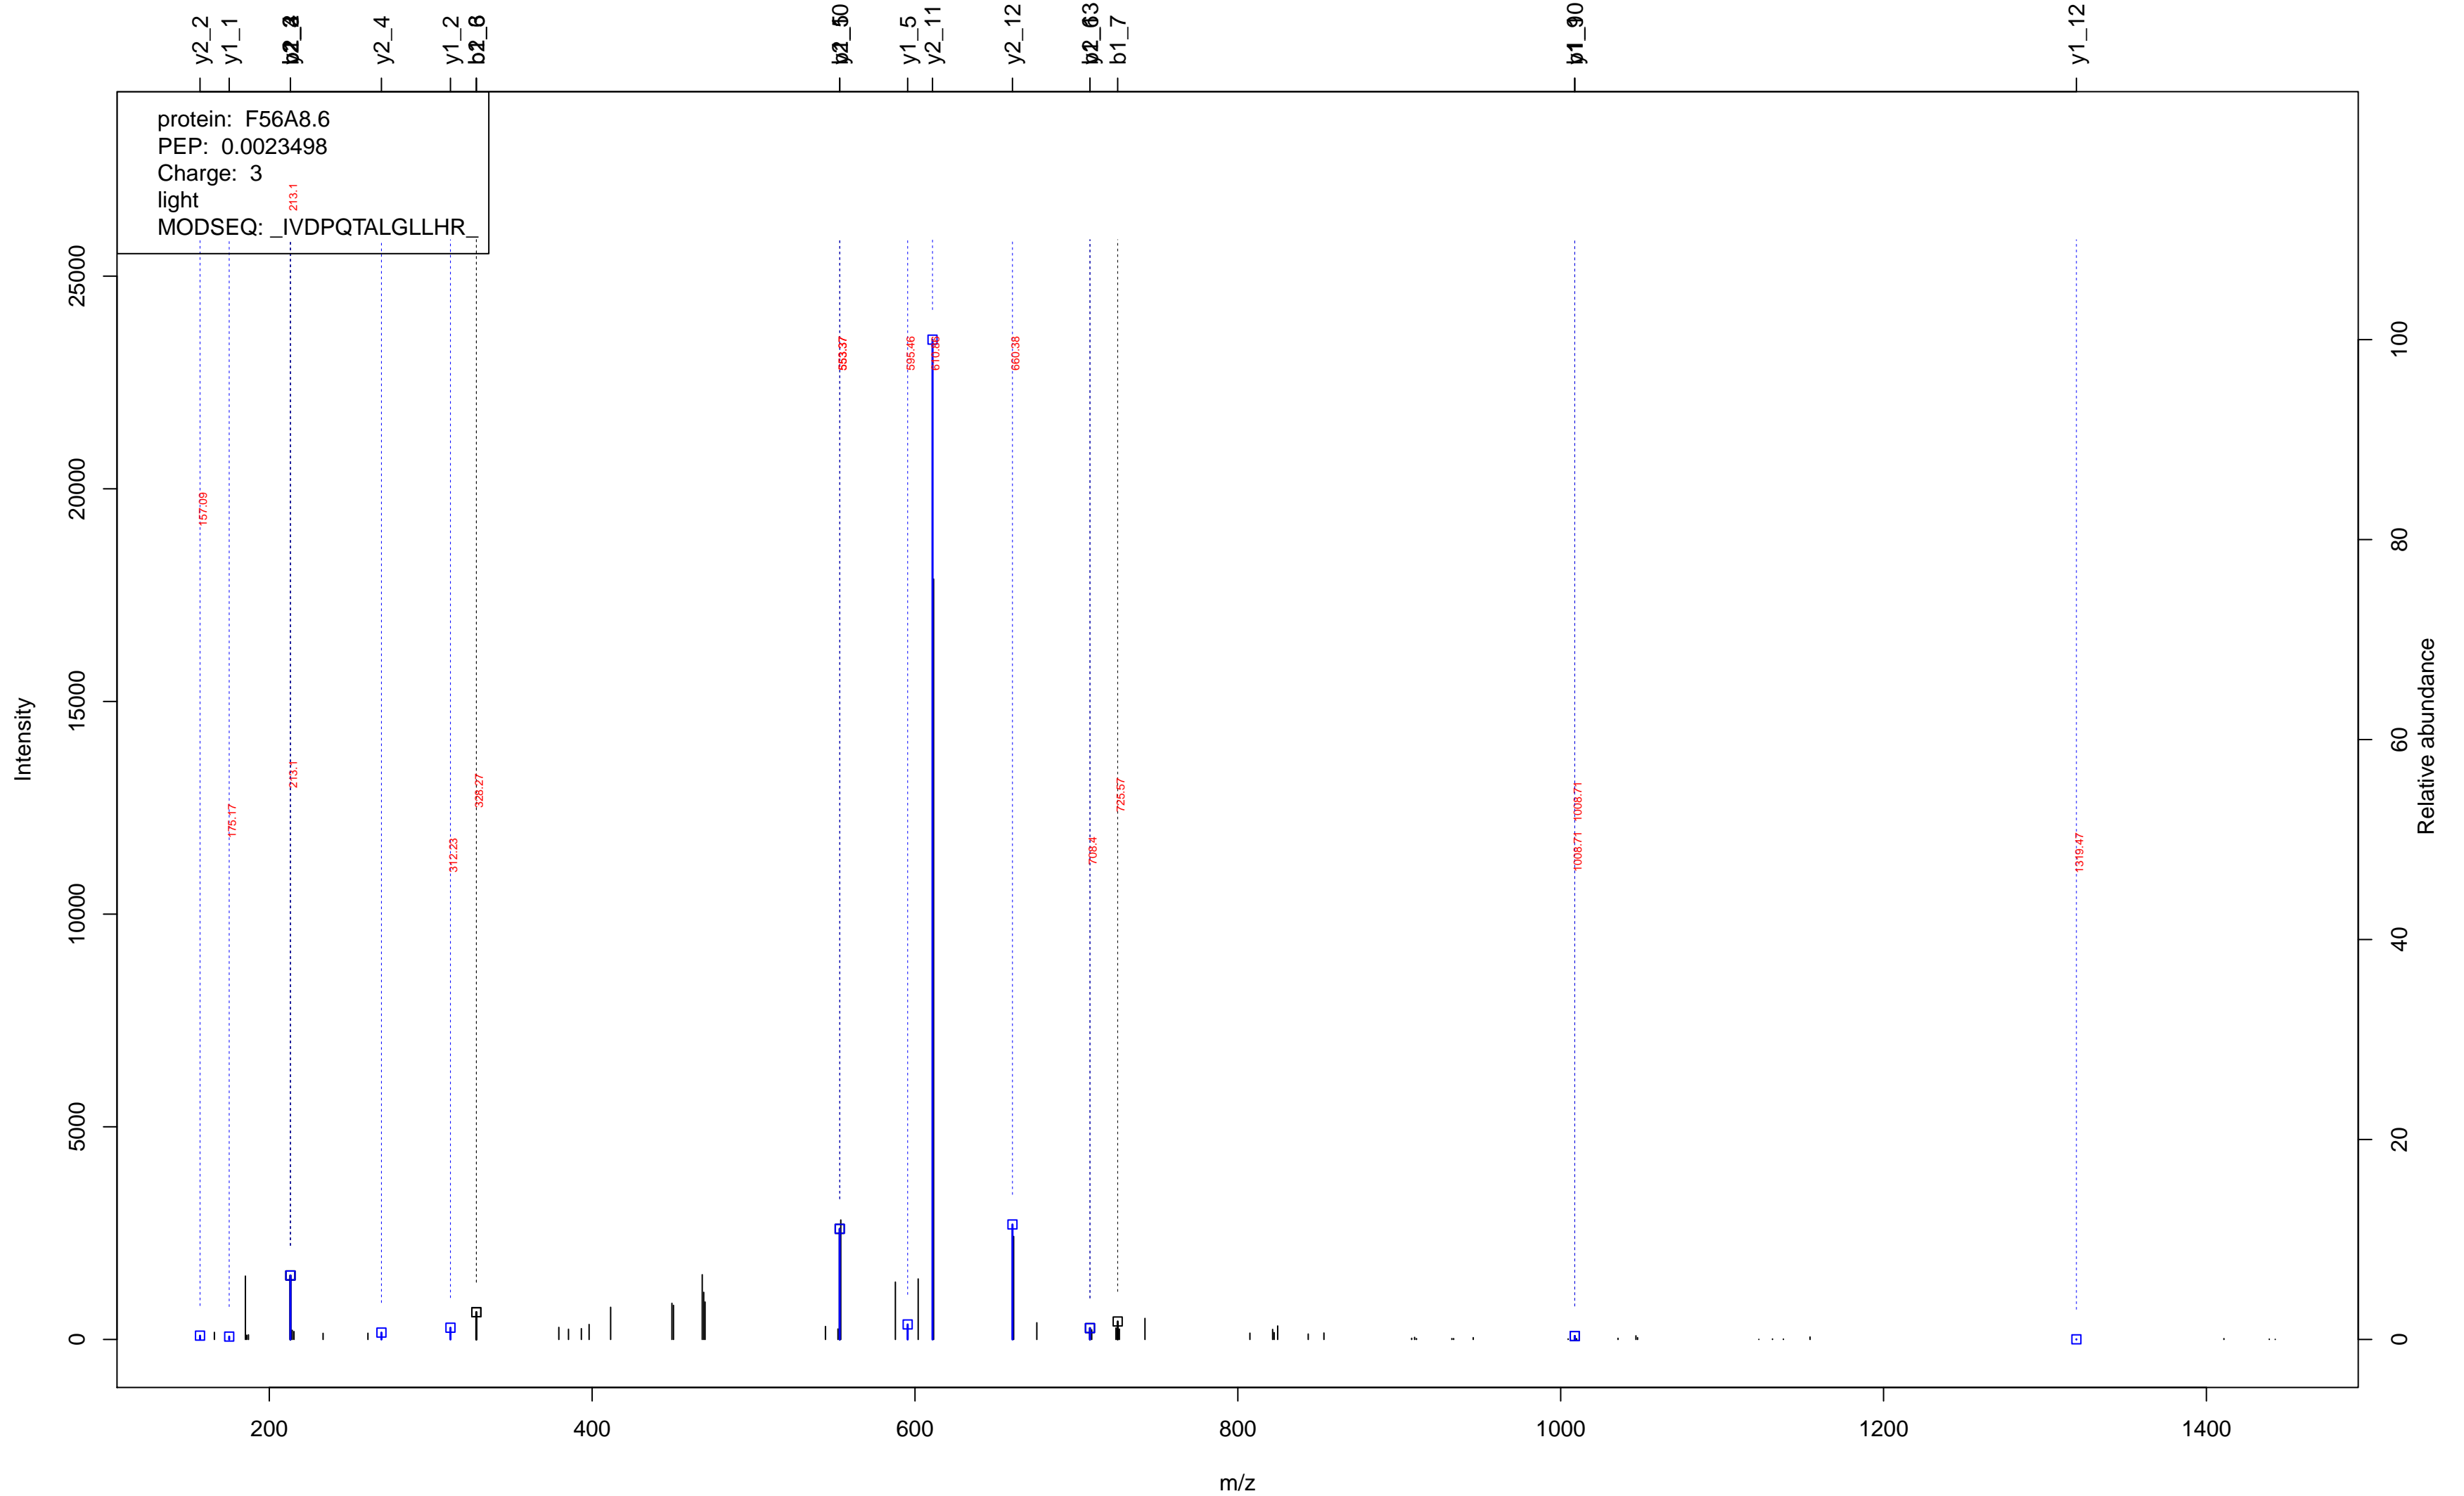

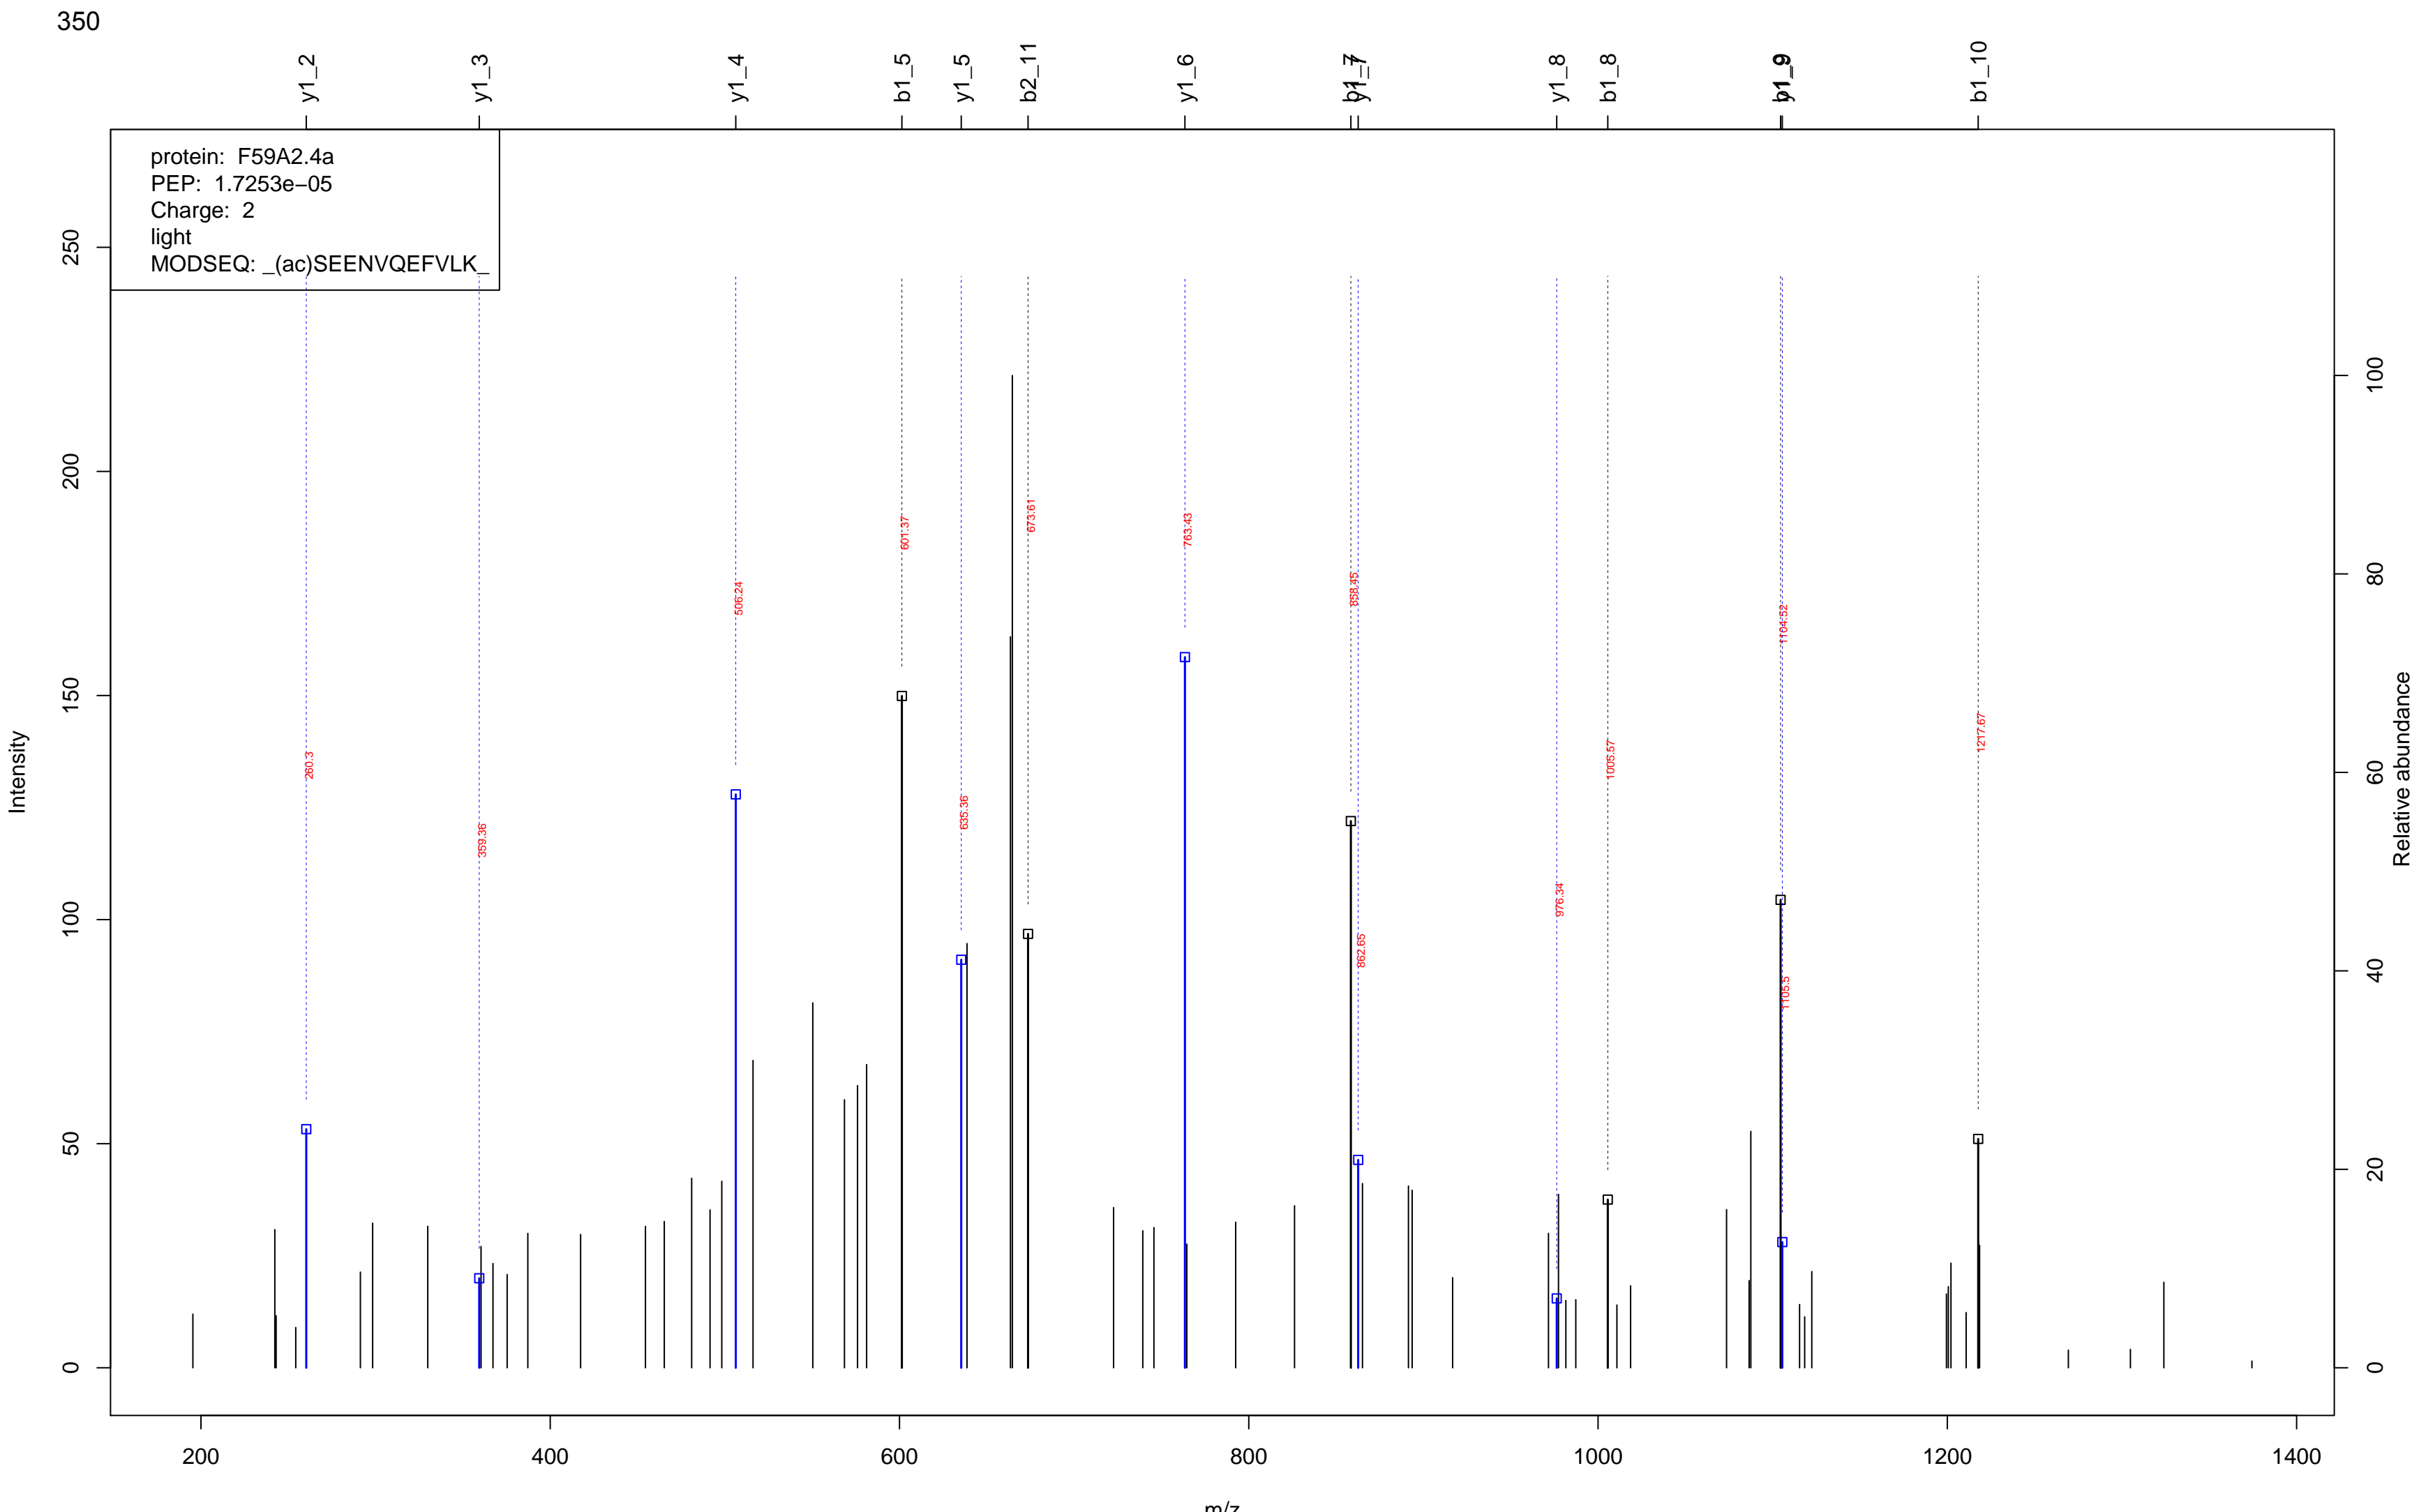

SEENVQEFVLK / File6869 Spectrum7567 scans: 4876 [S:/p743/Proteomics/ORBI\_2/cpanse\_20160211\_peakplot/20130318\_05\_3Biol\_2L4N2h\_7to19.RAW]

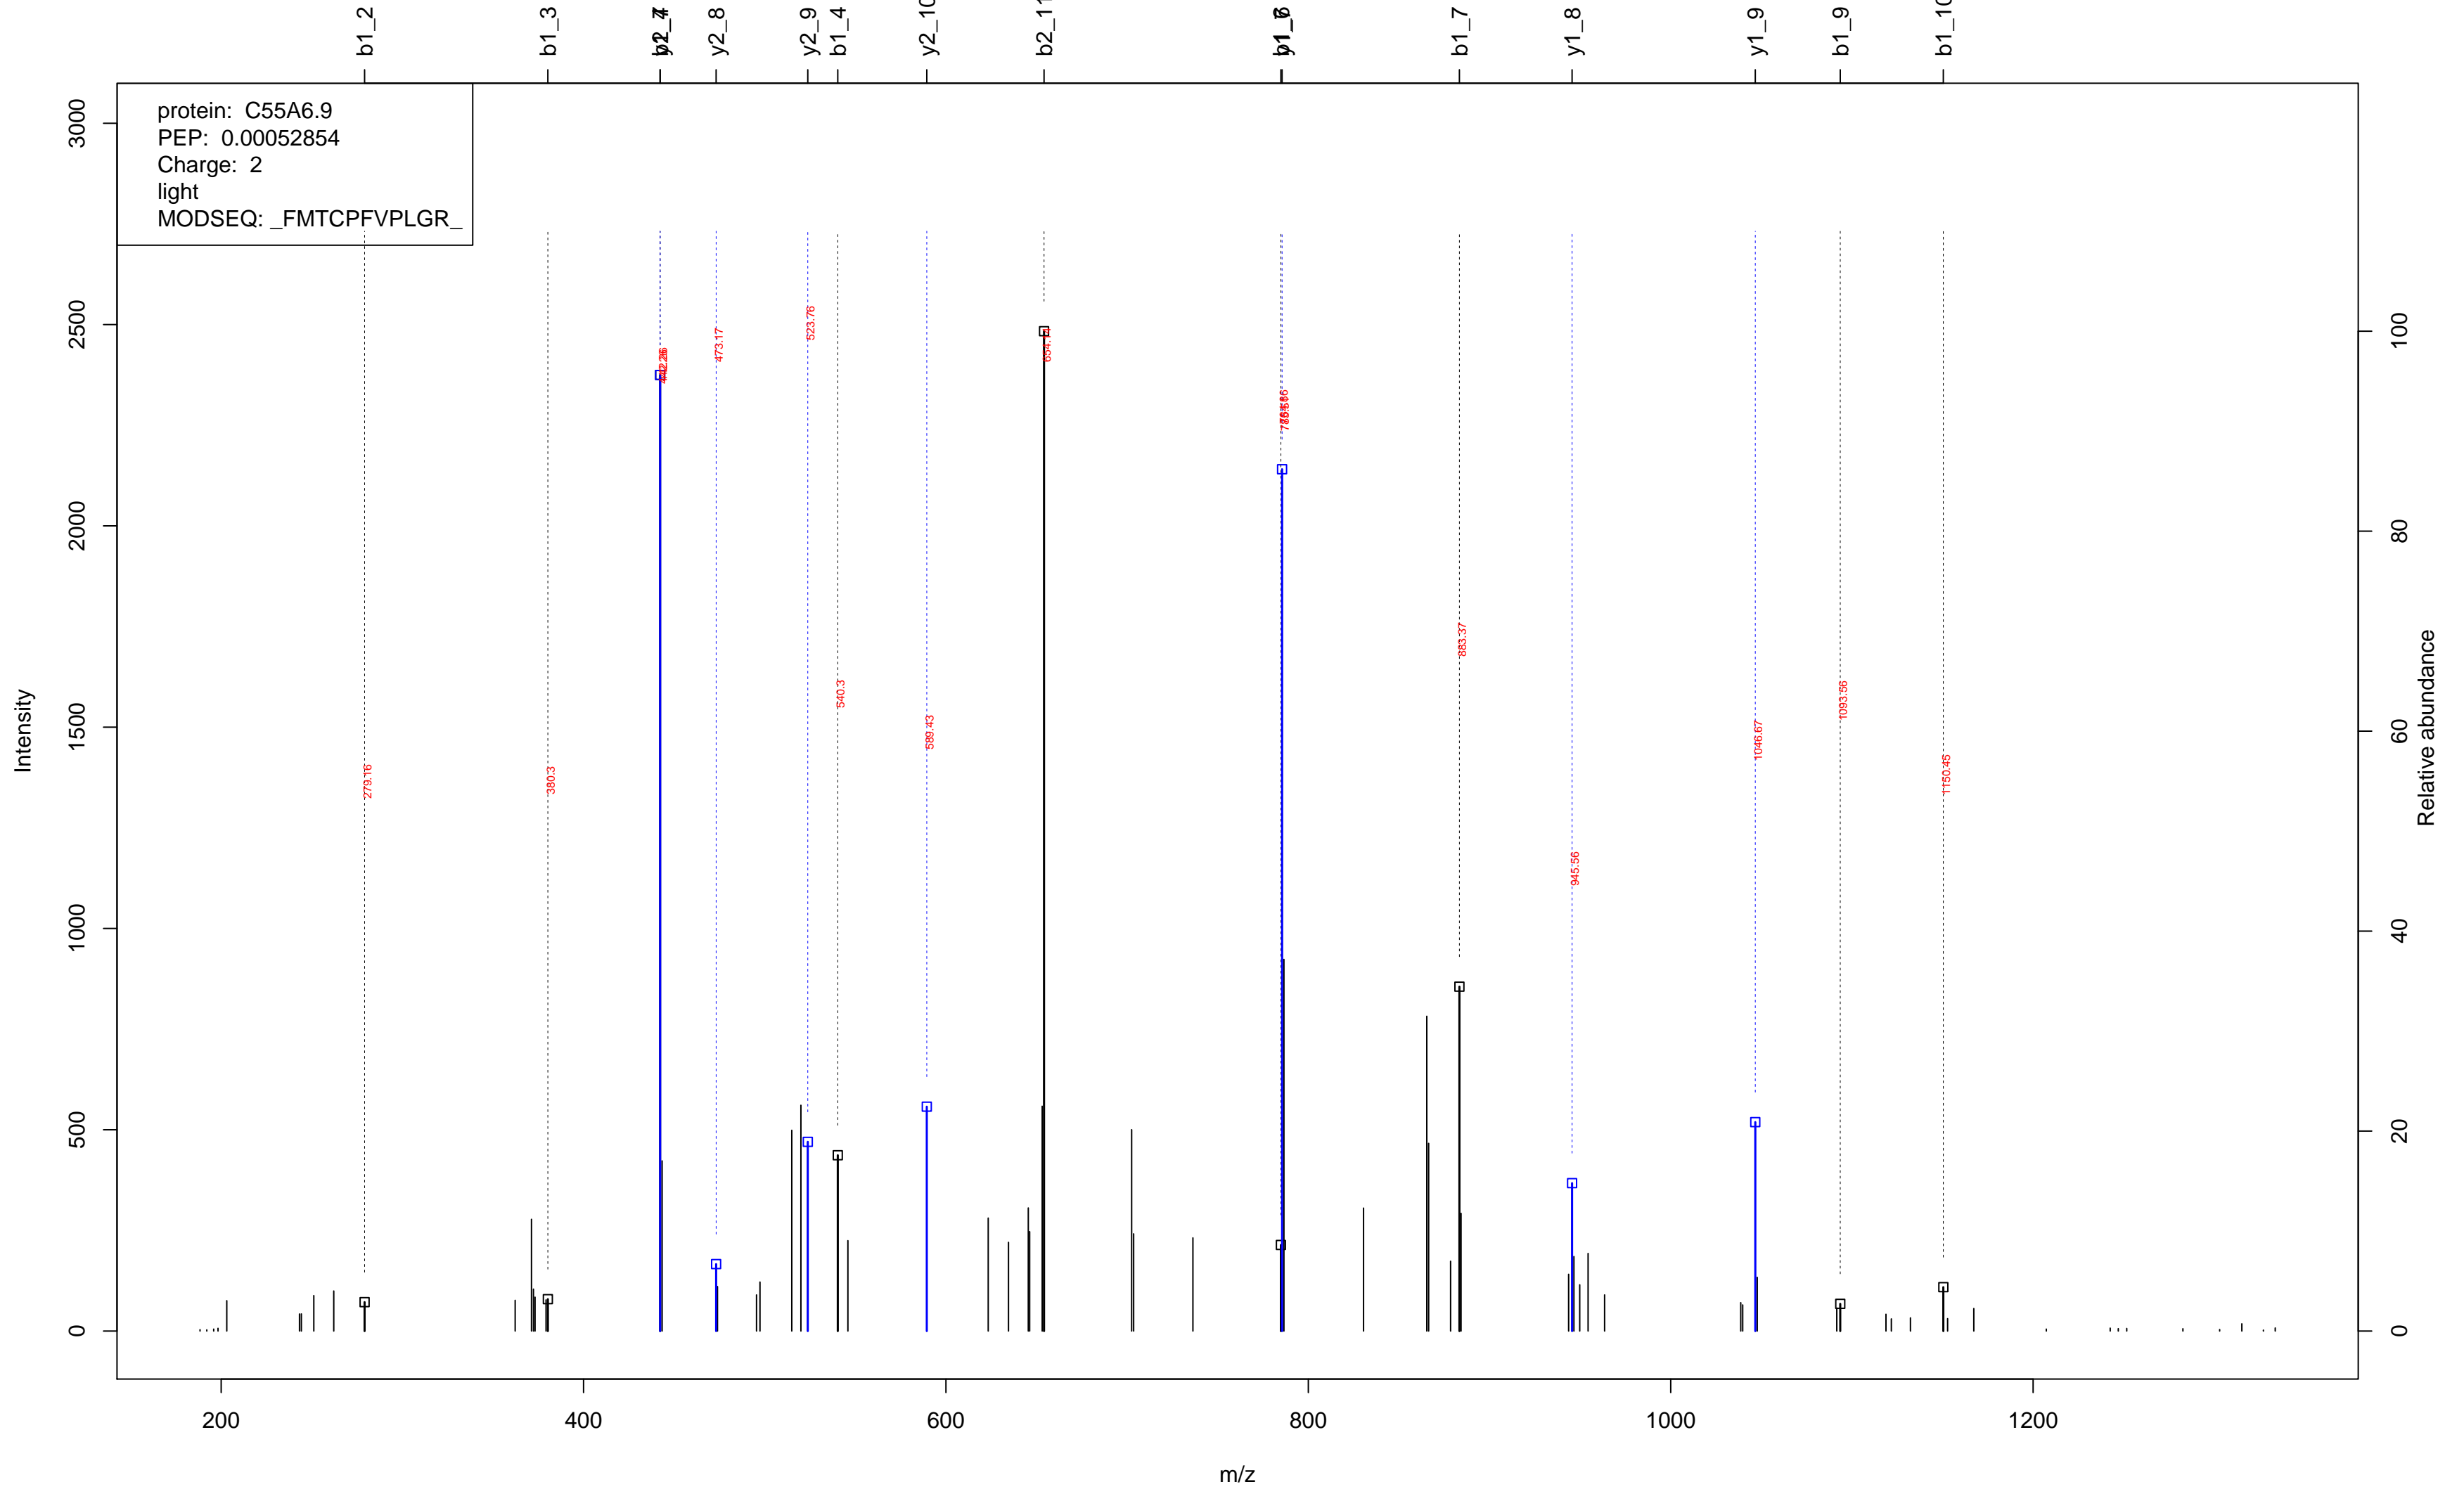

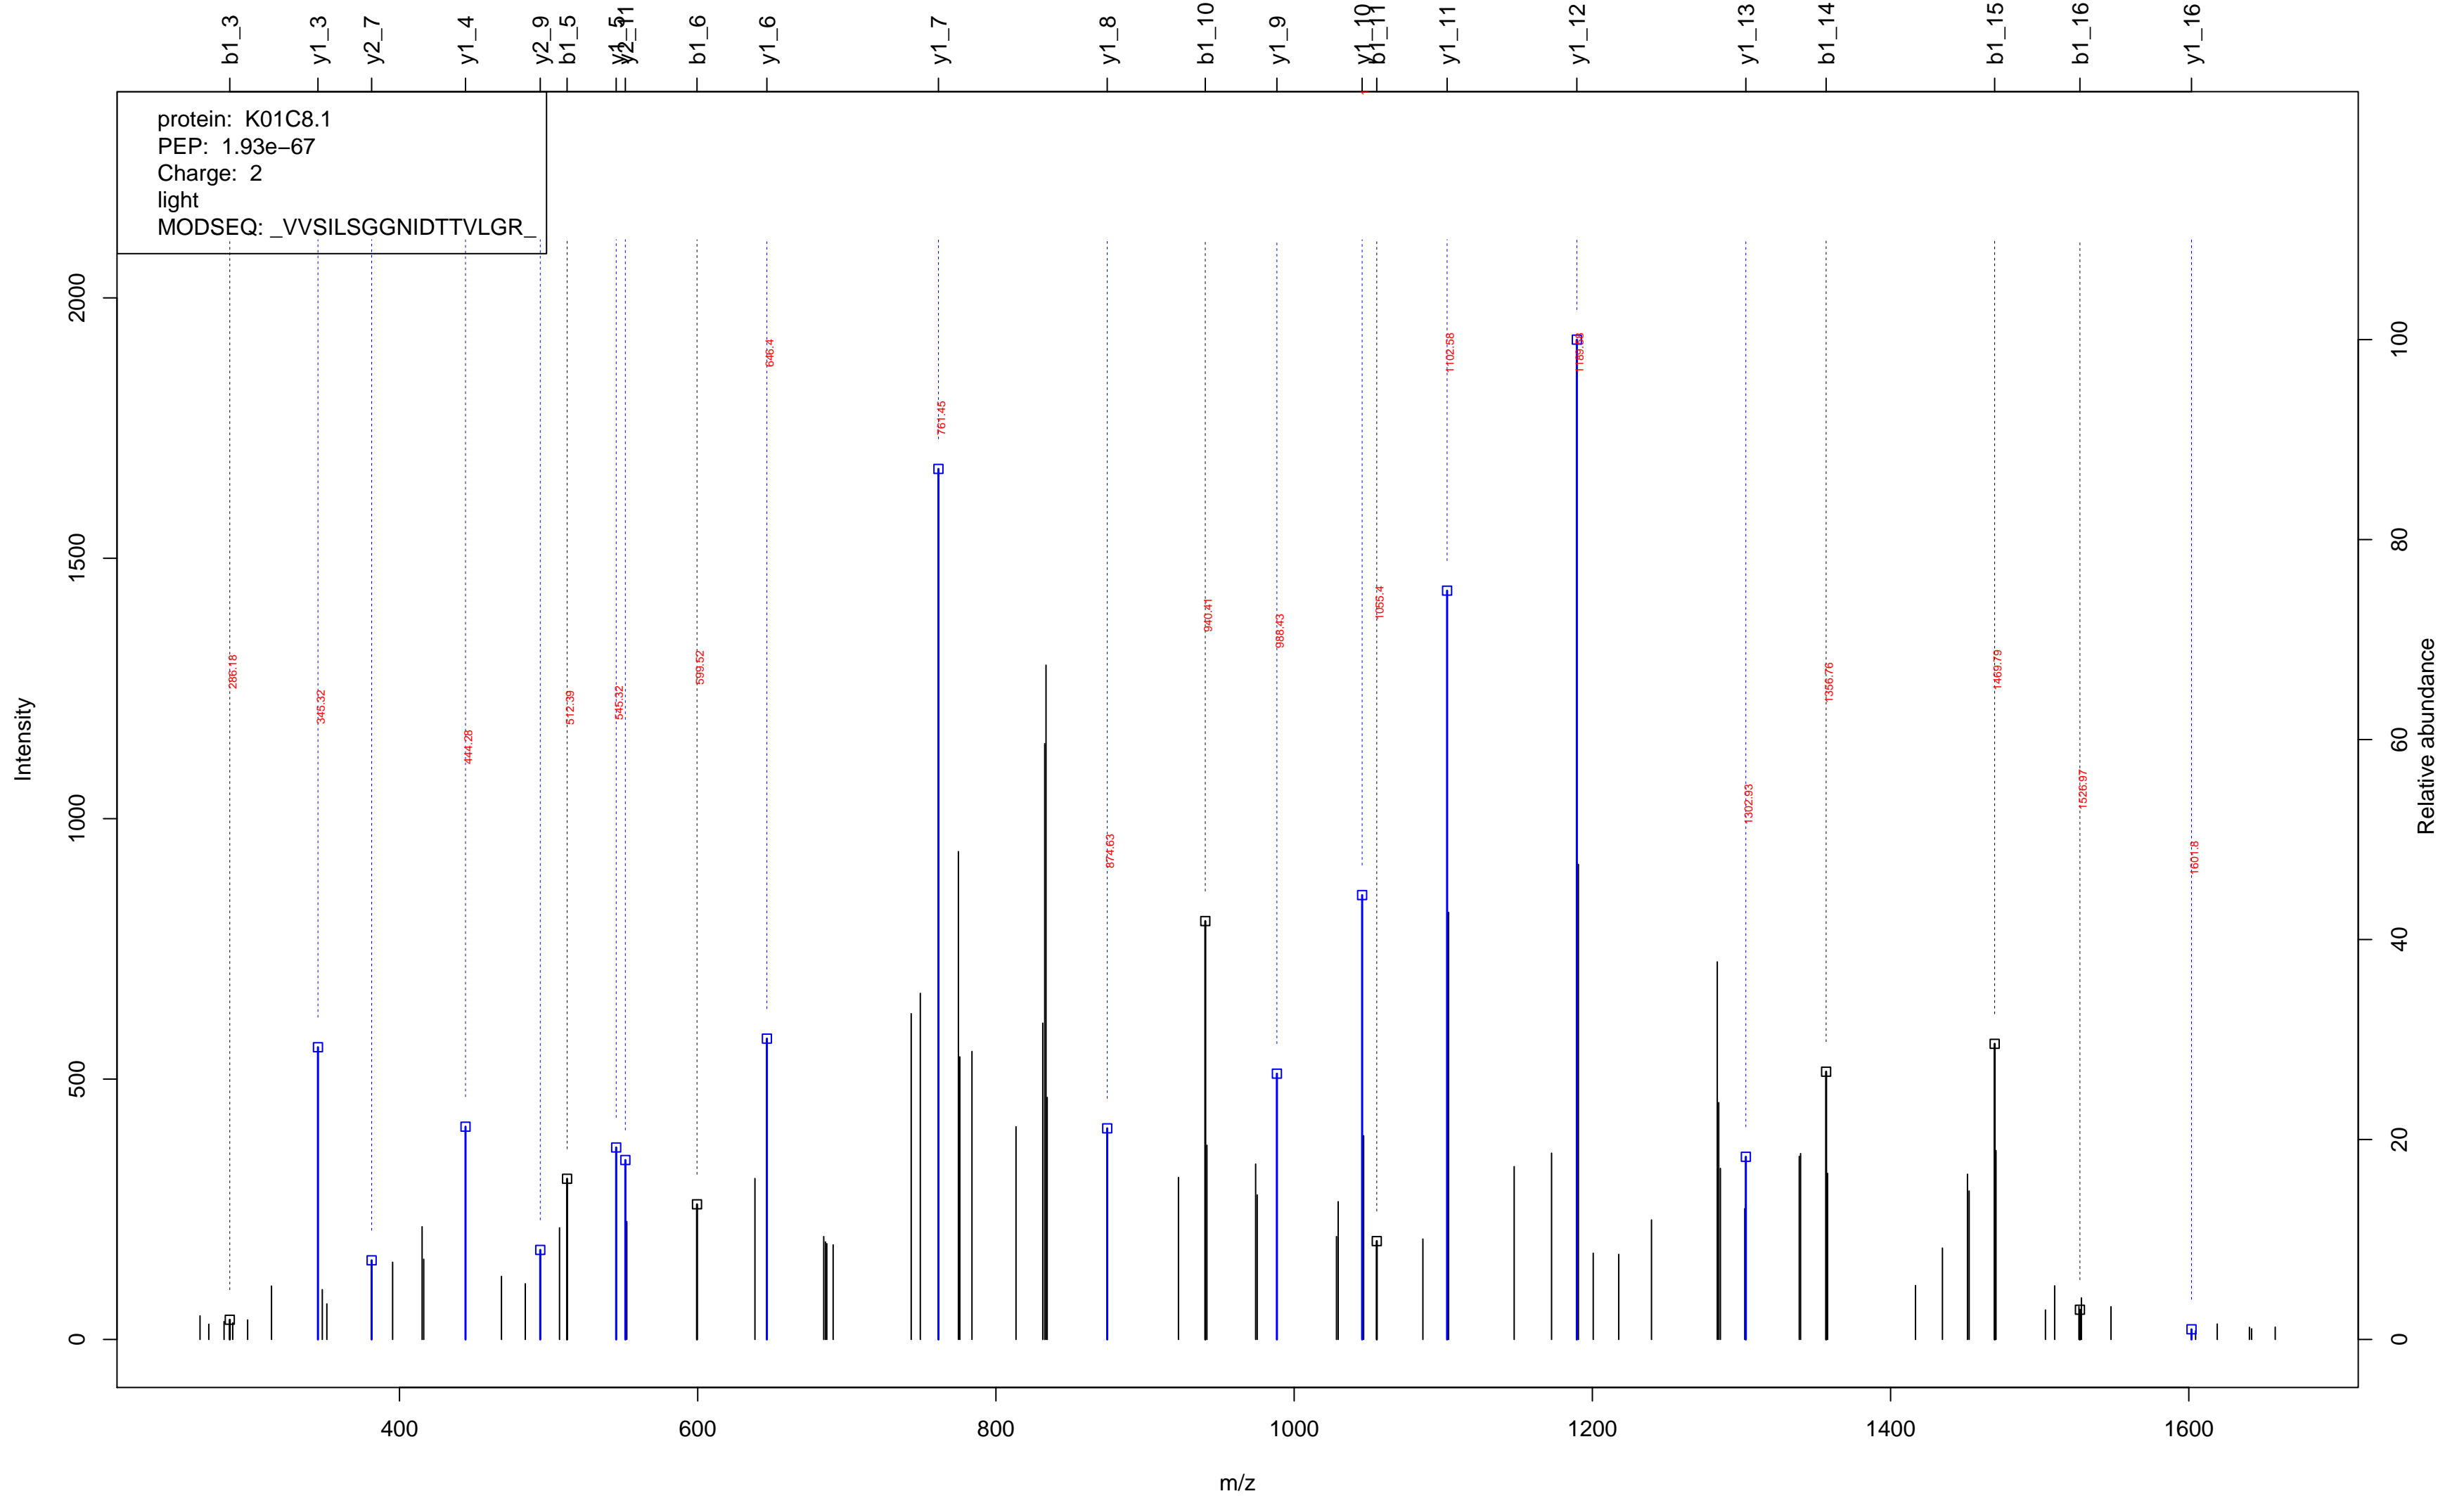



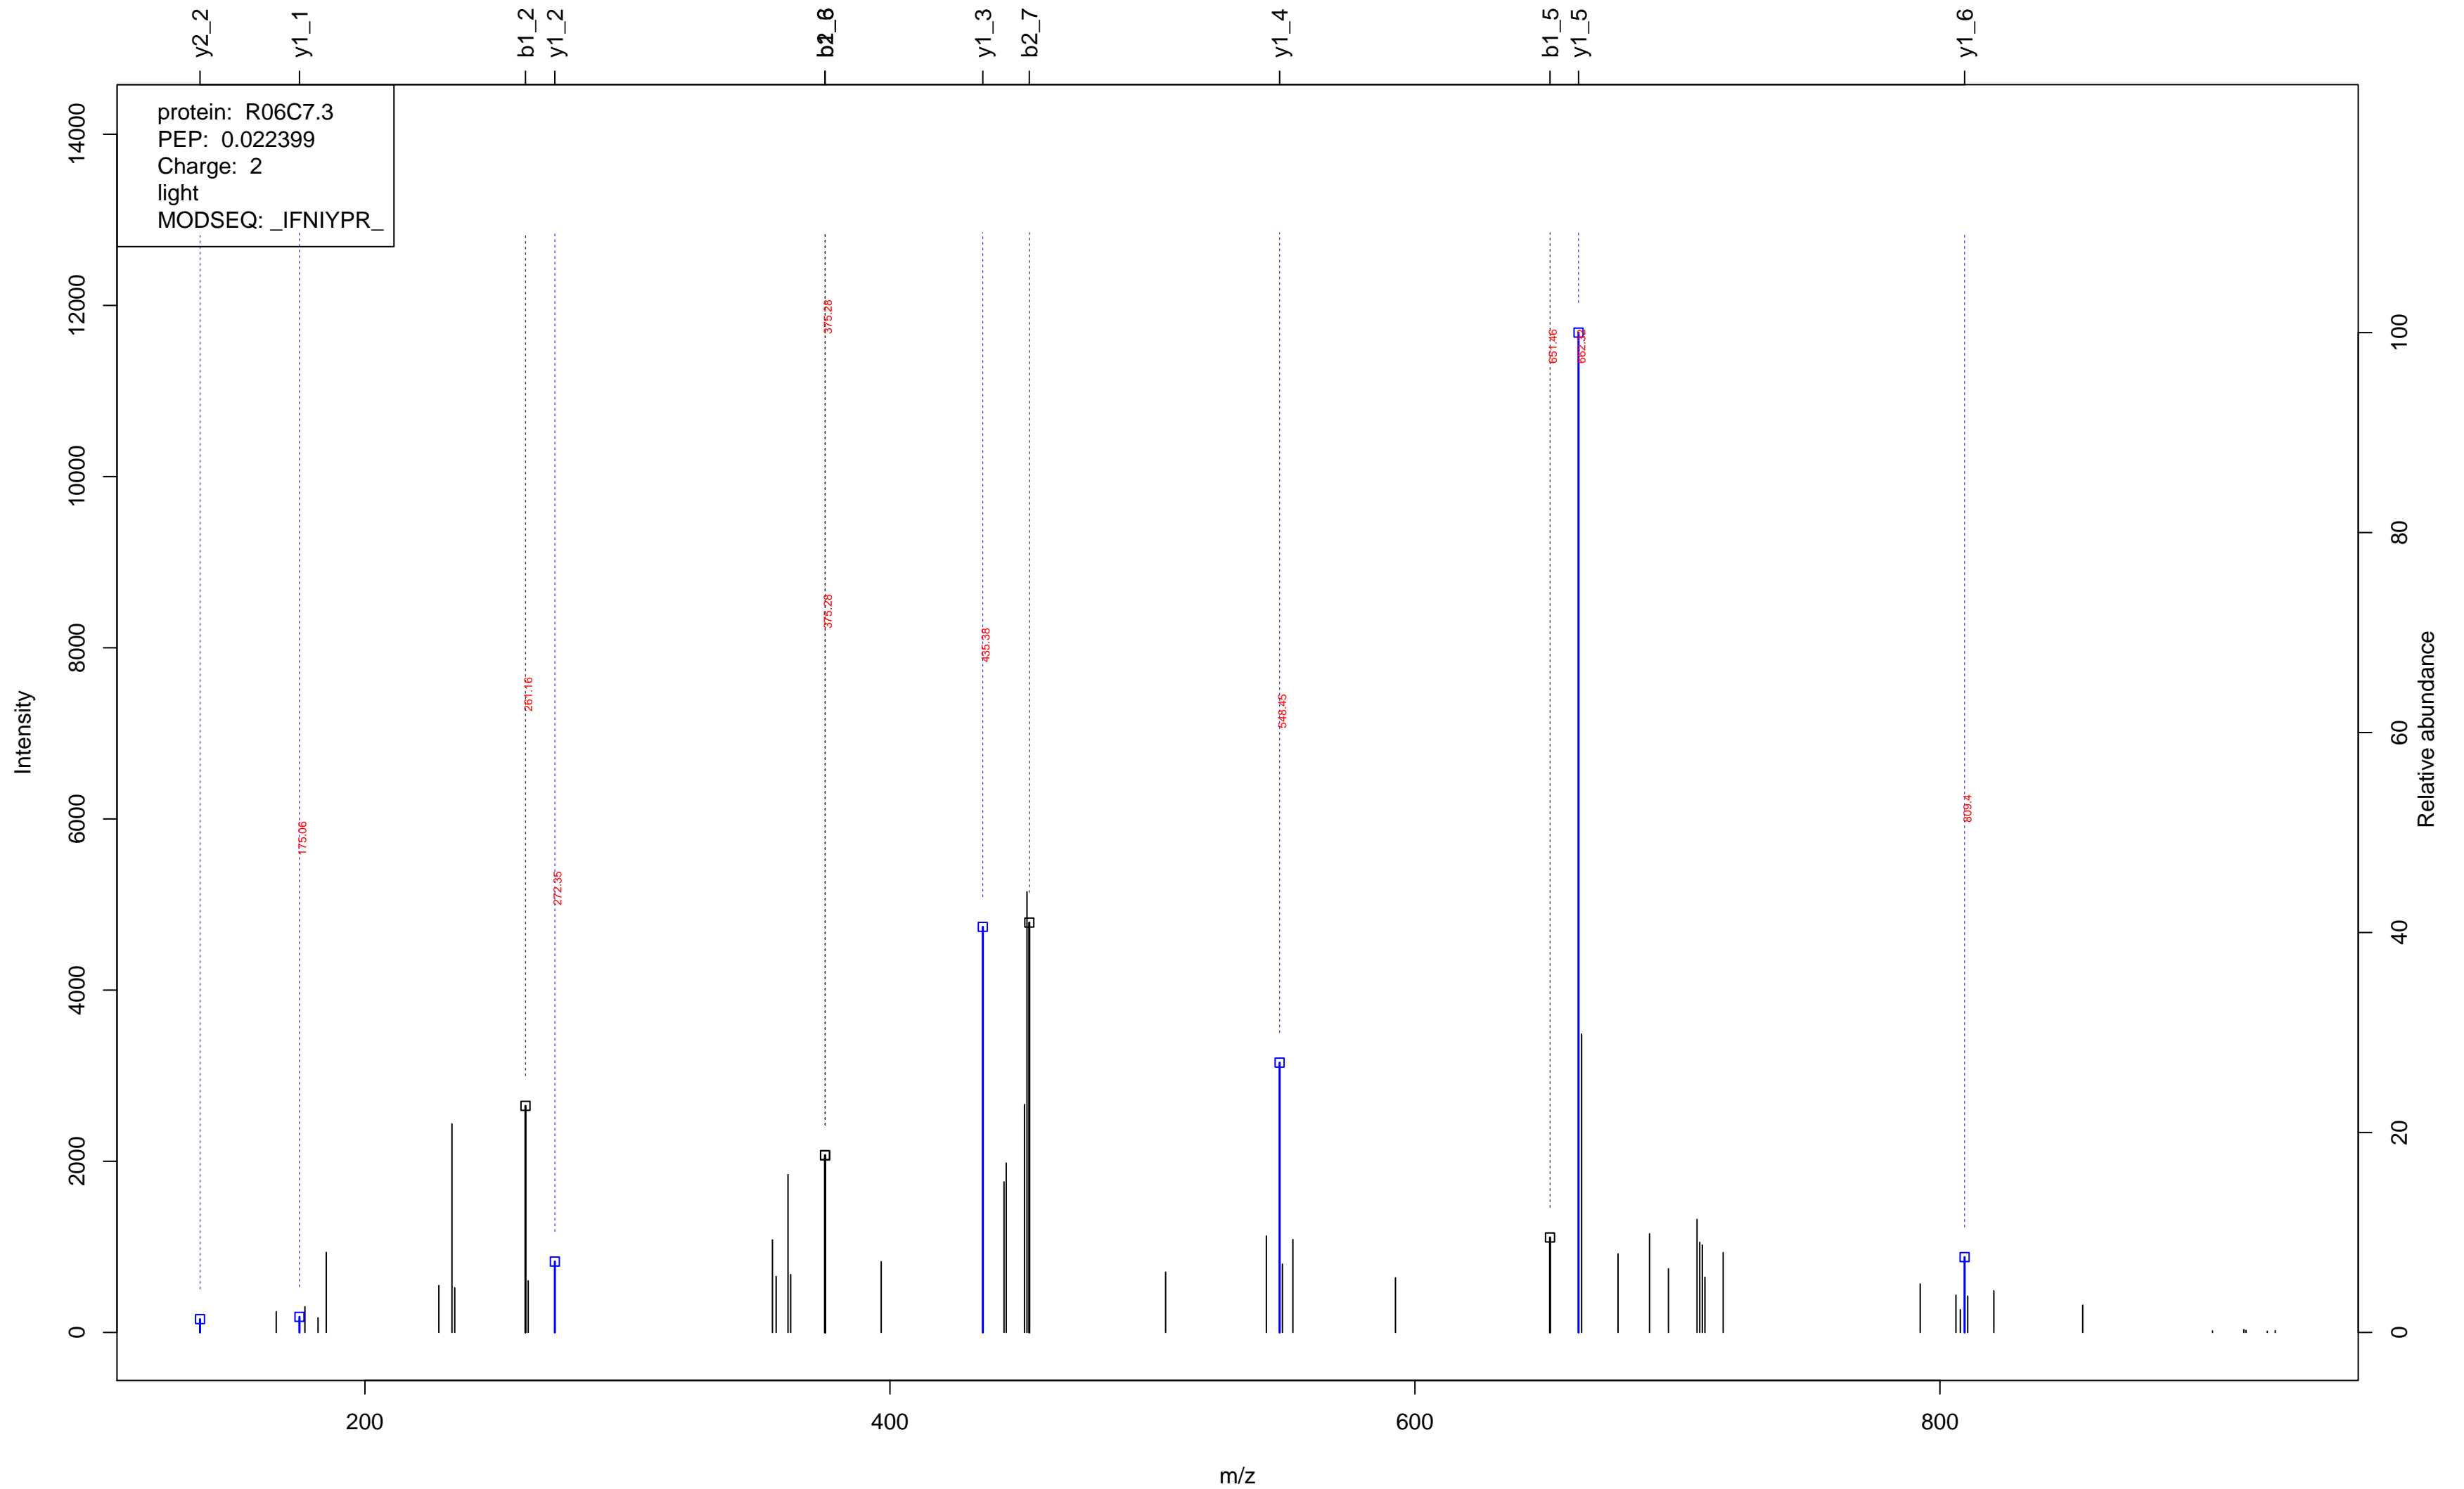

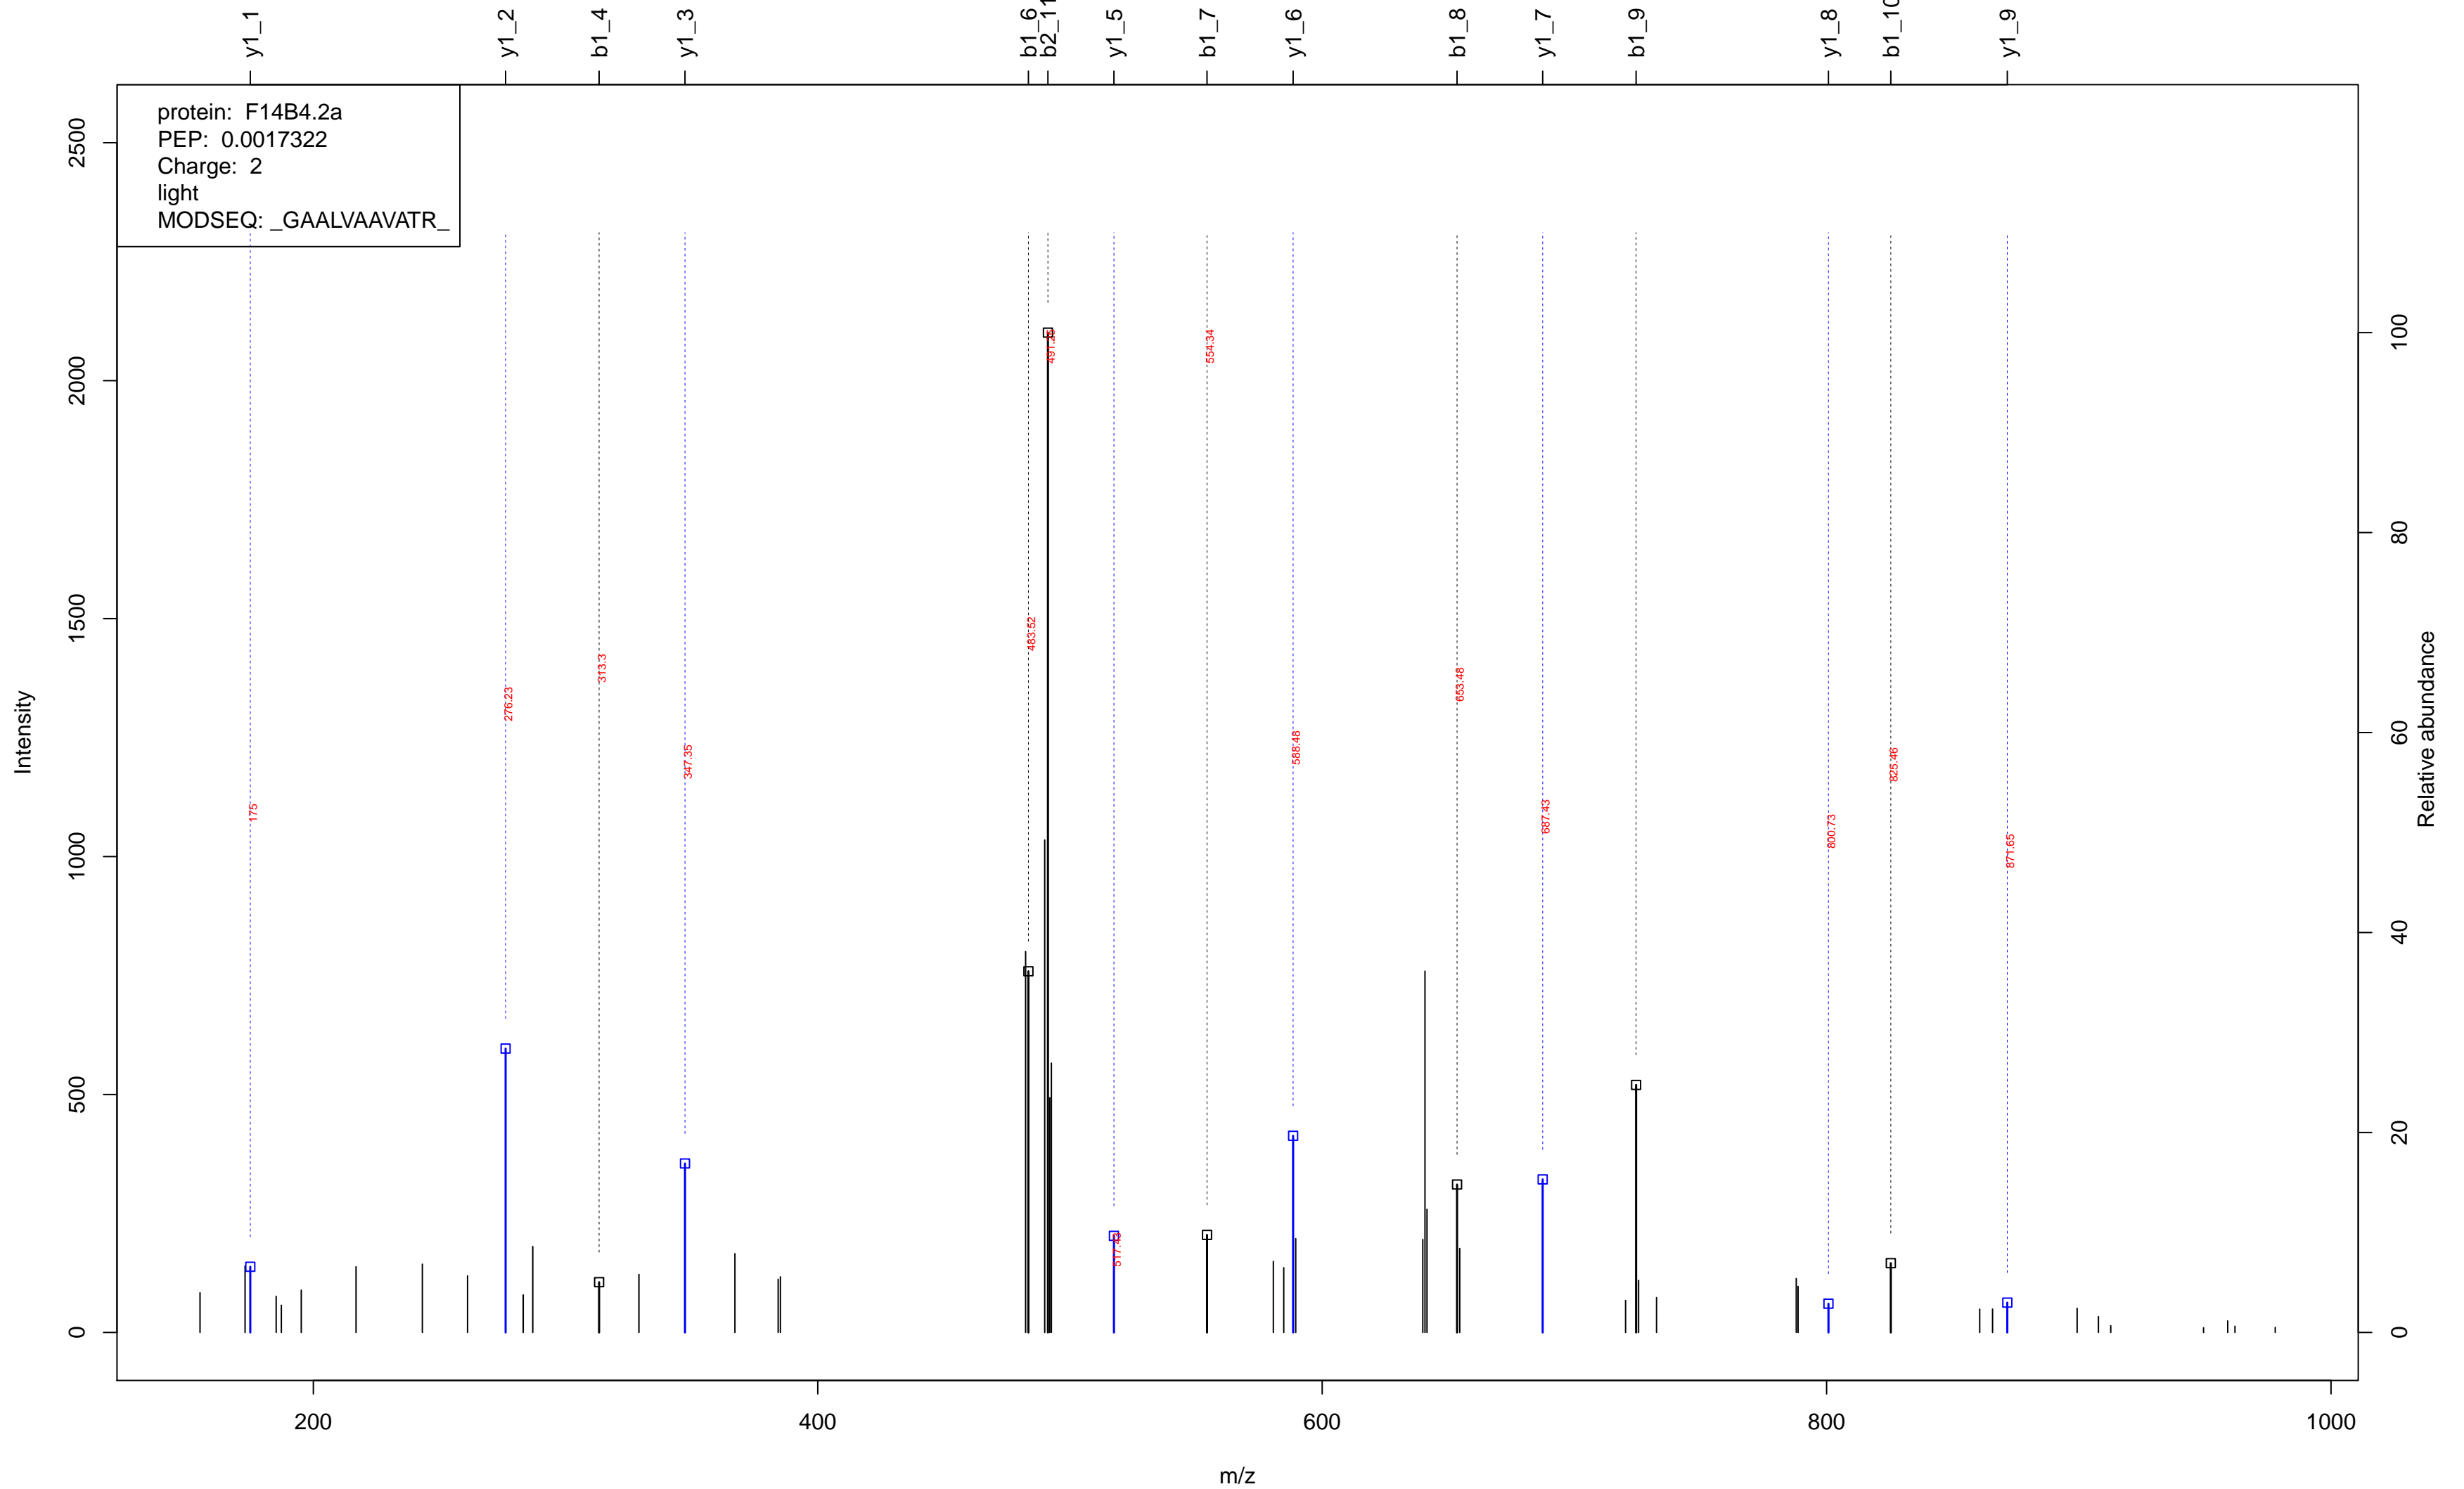

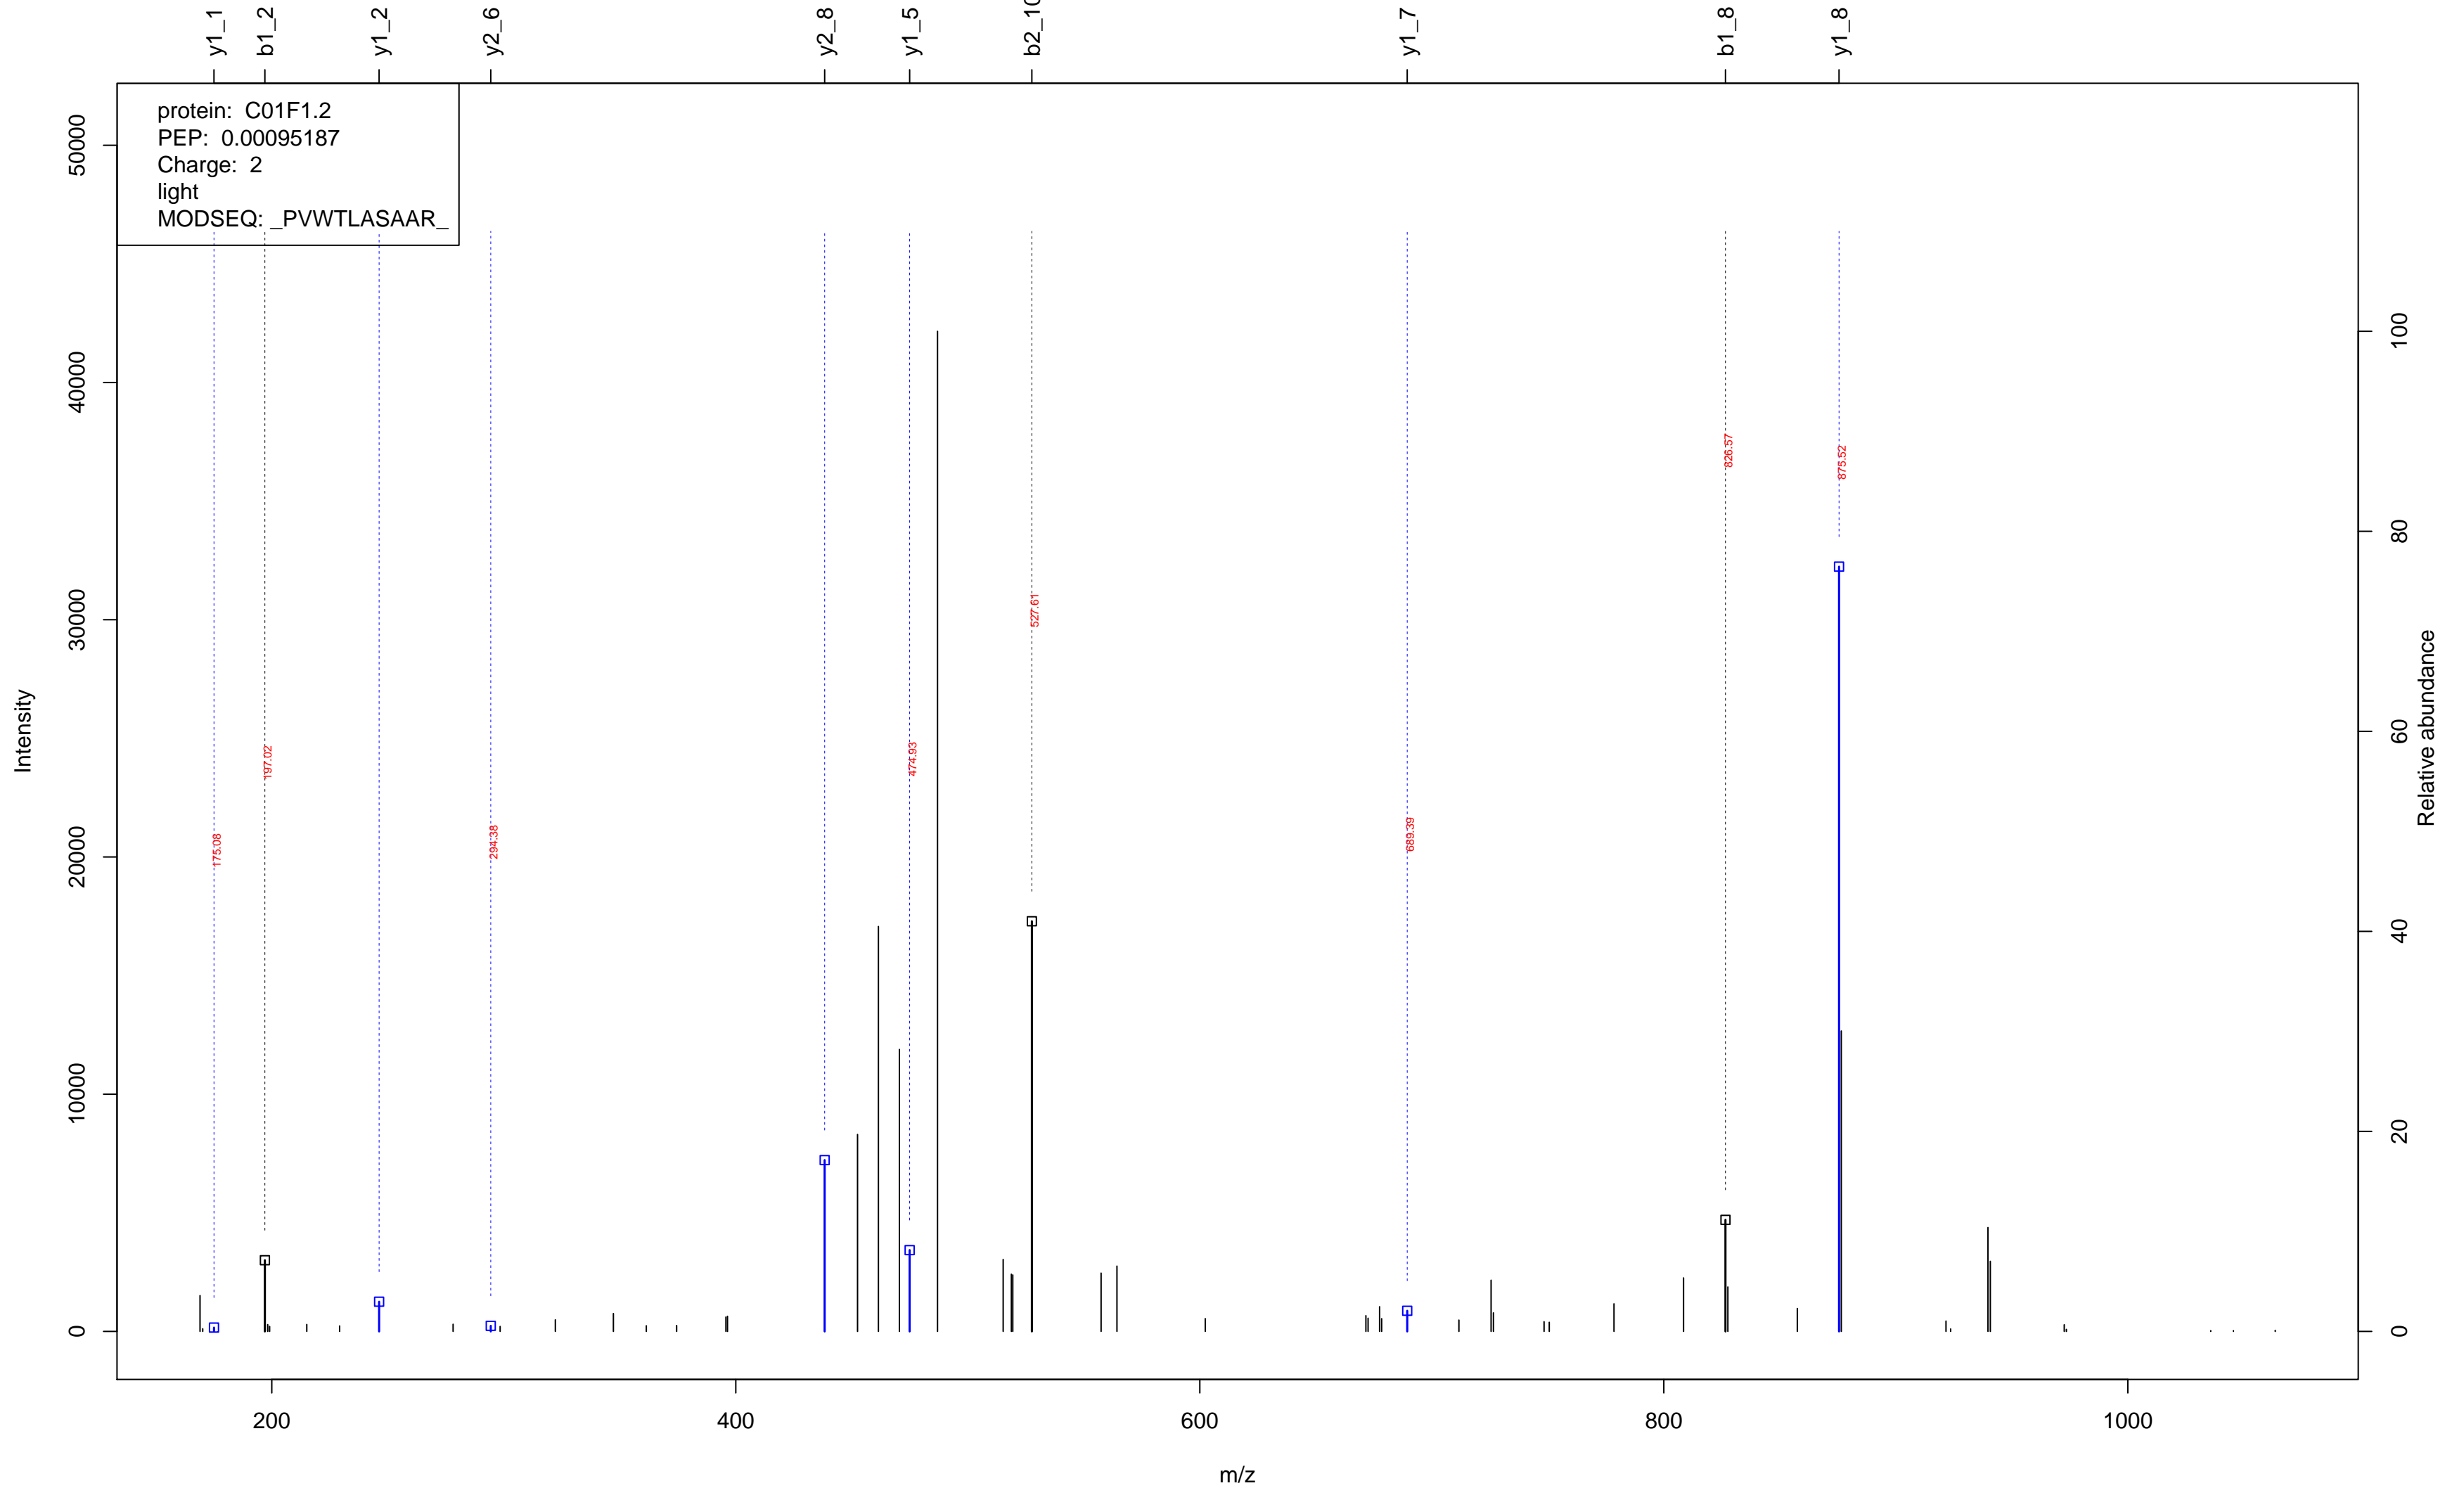

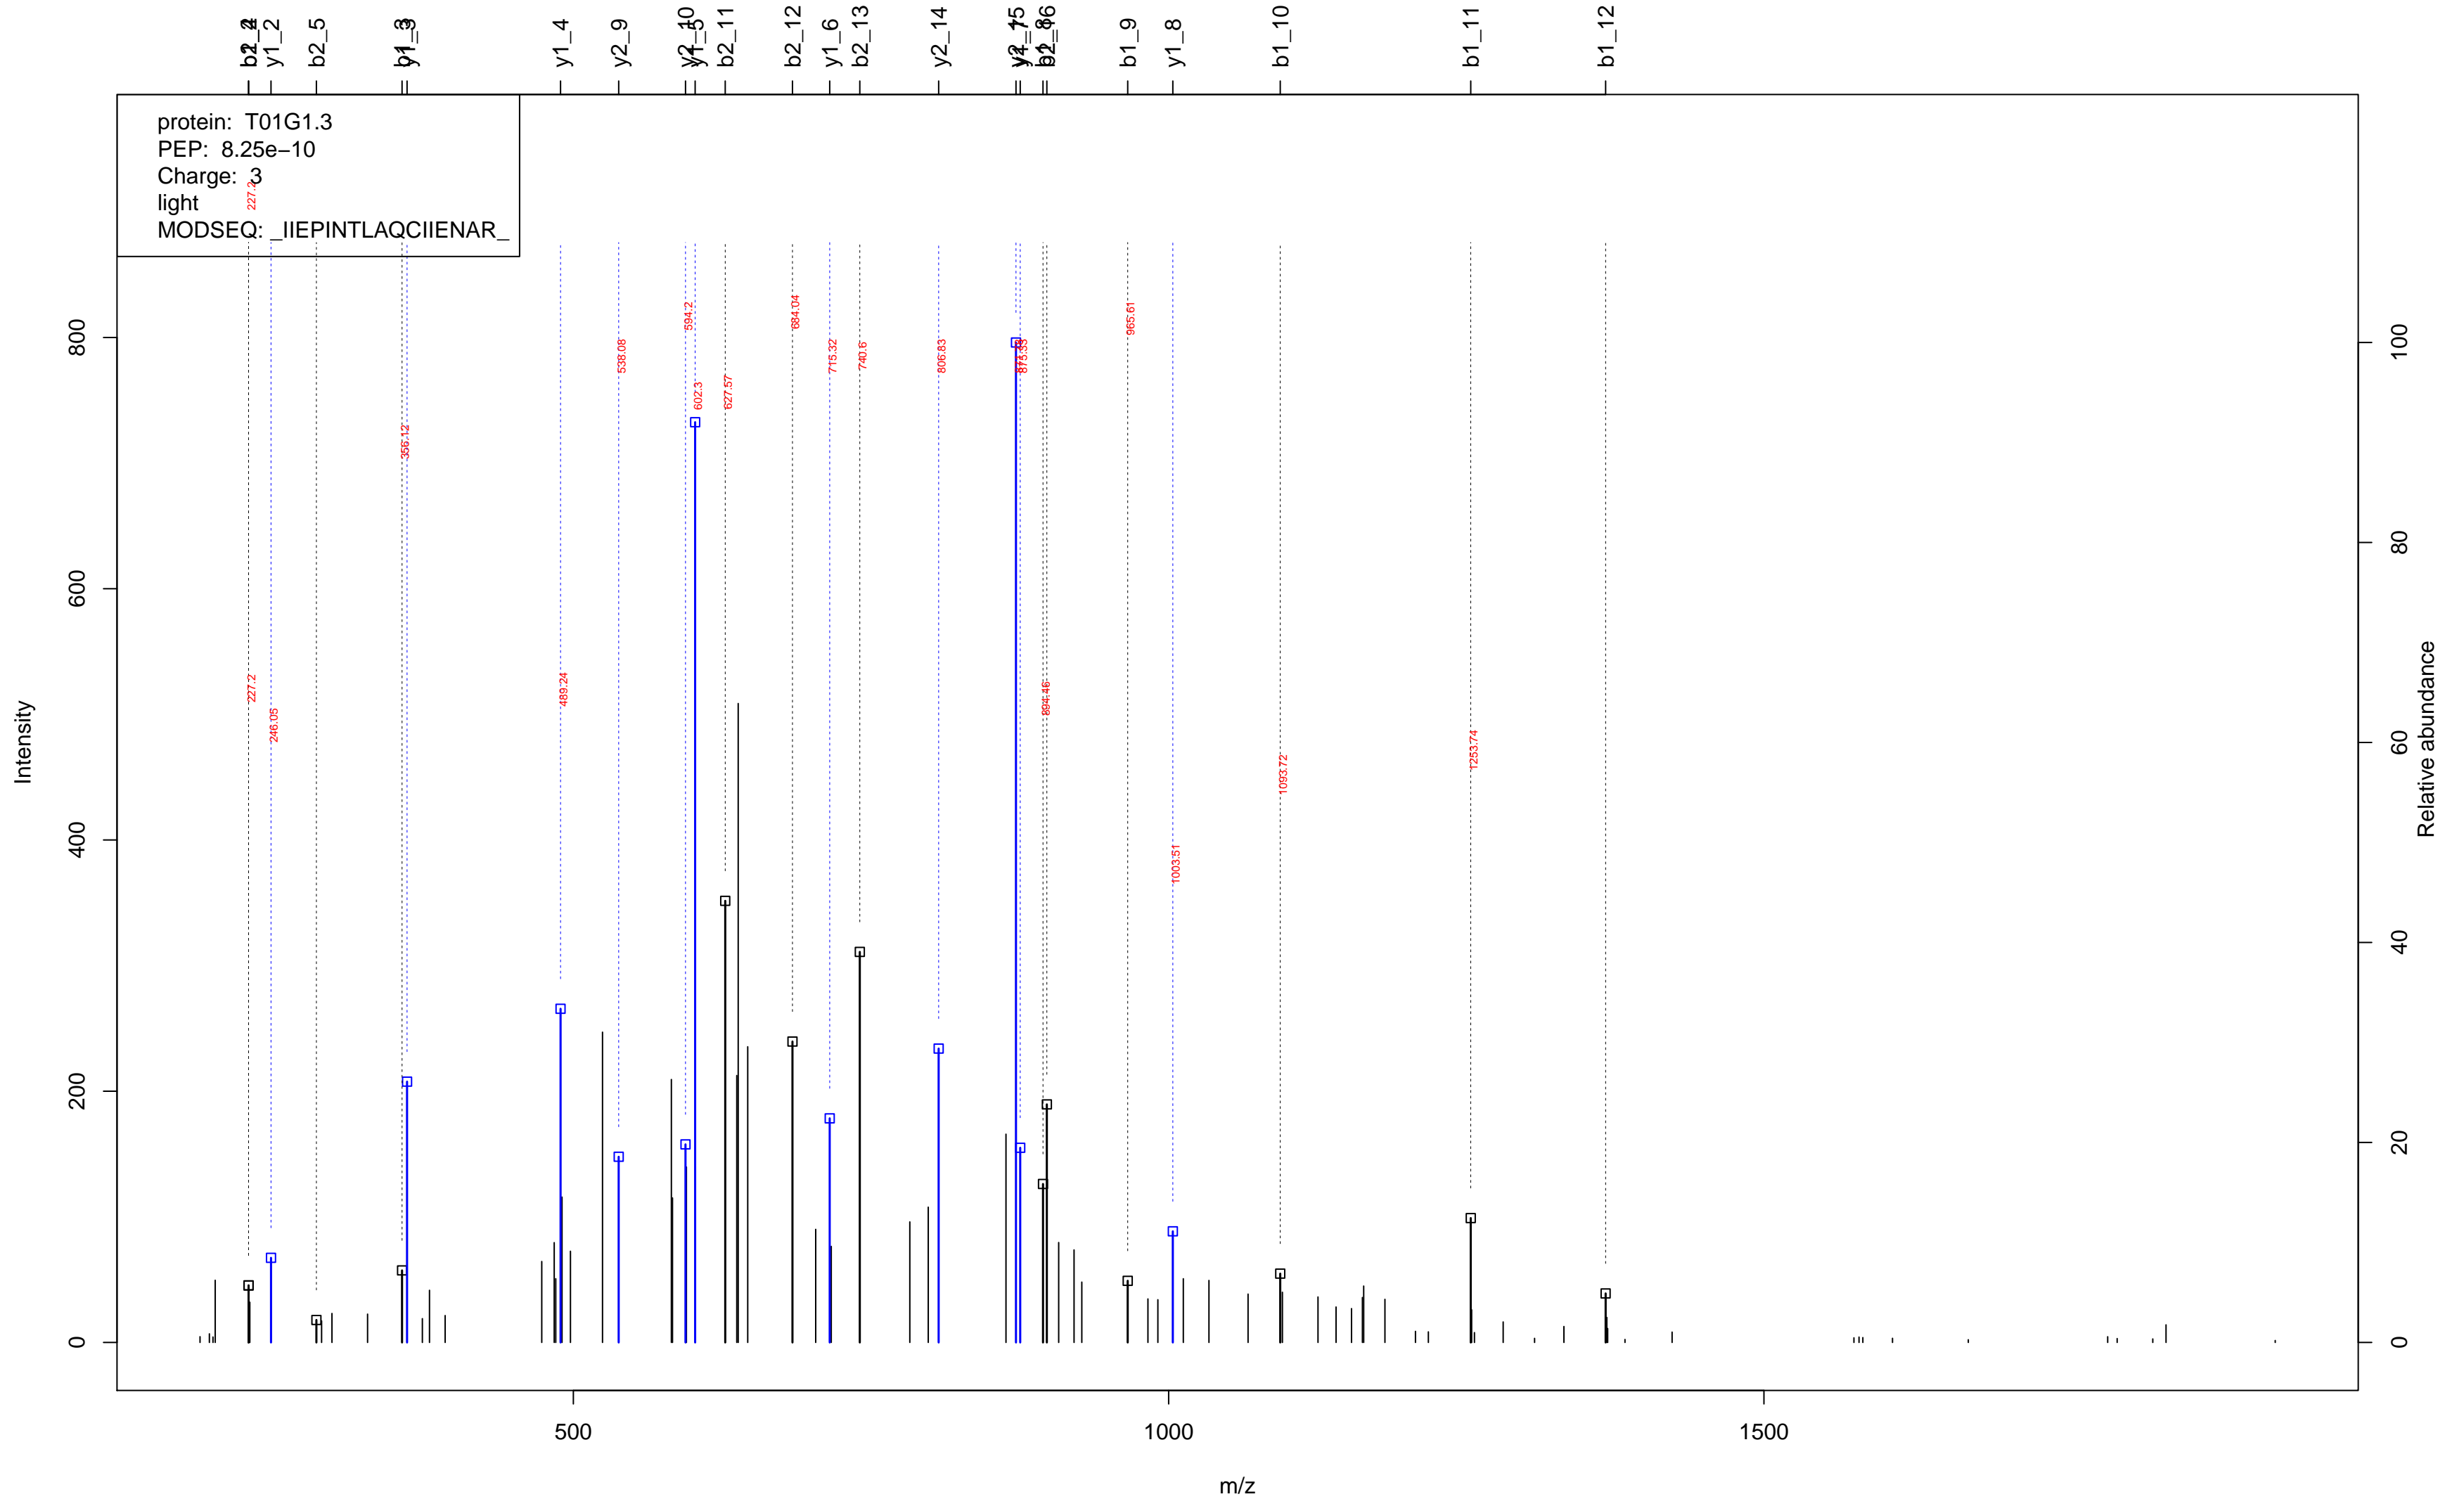

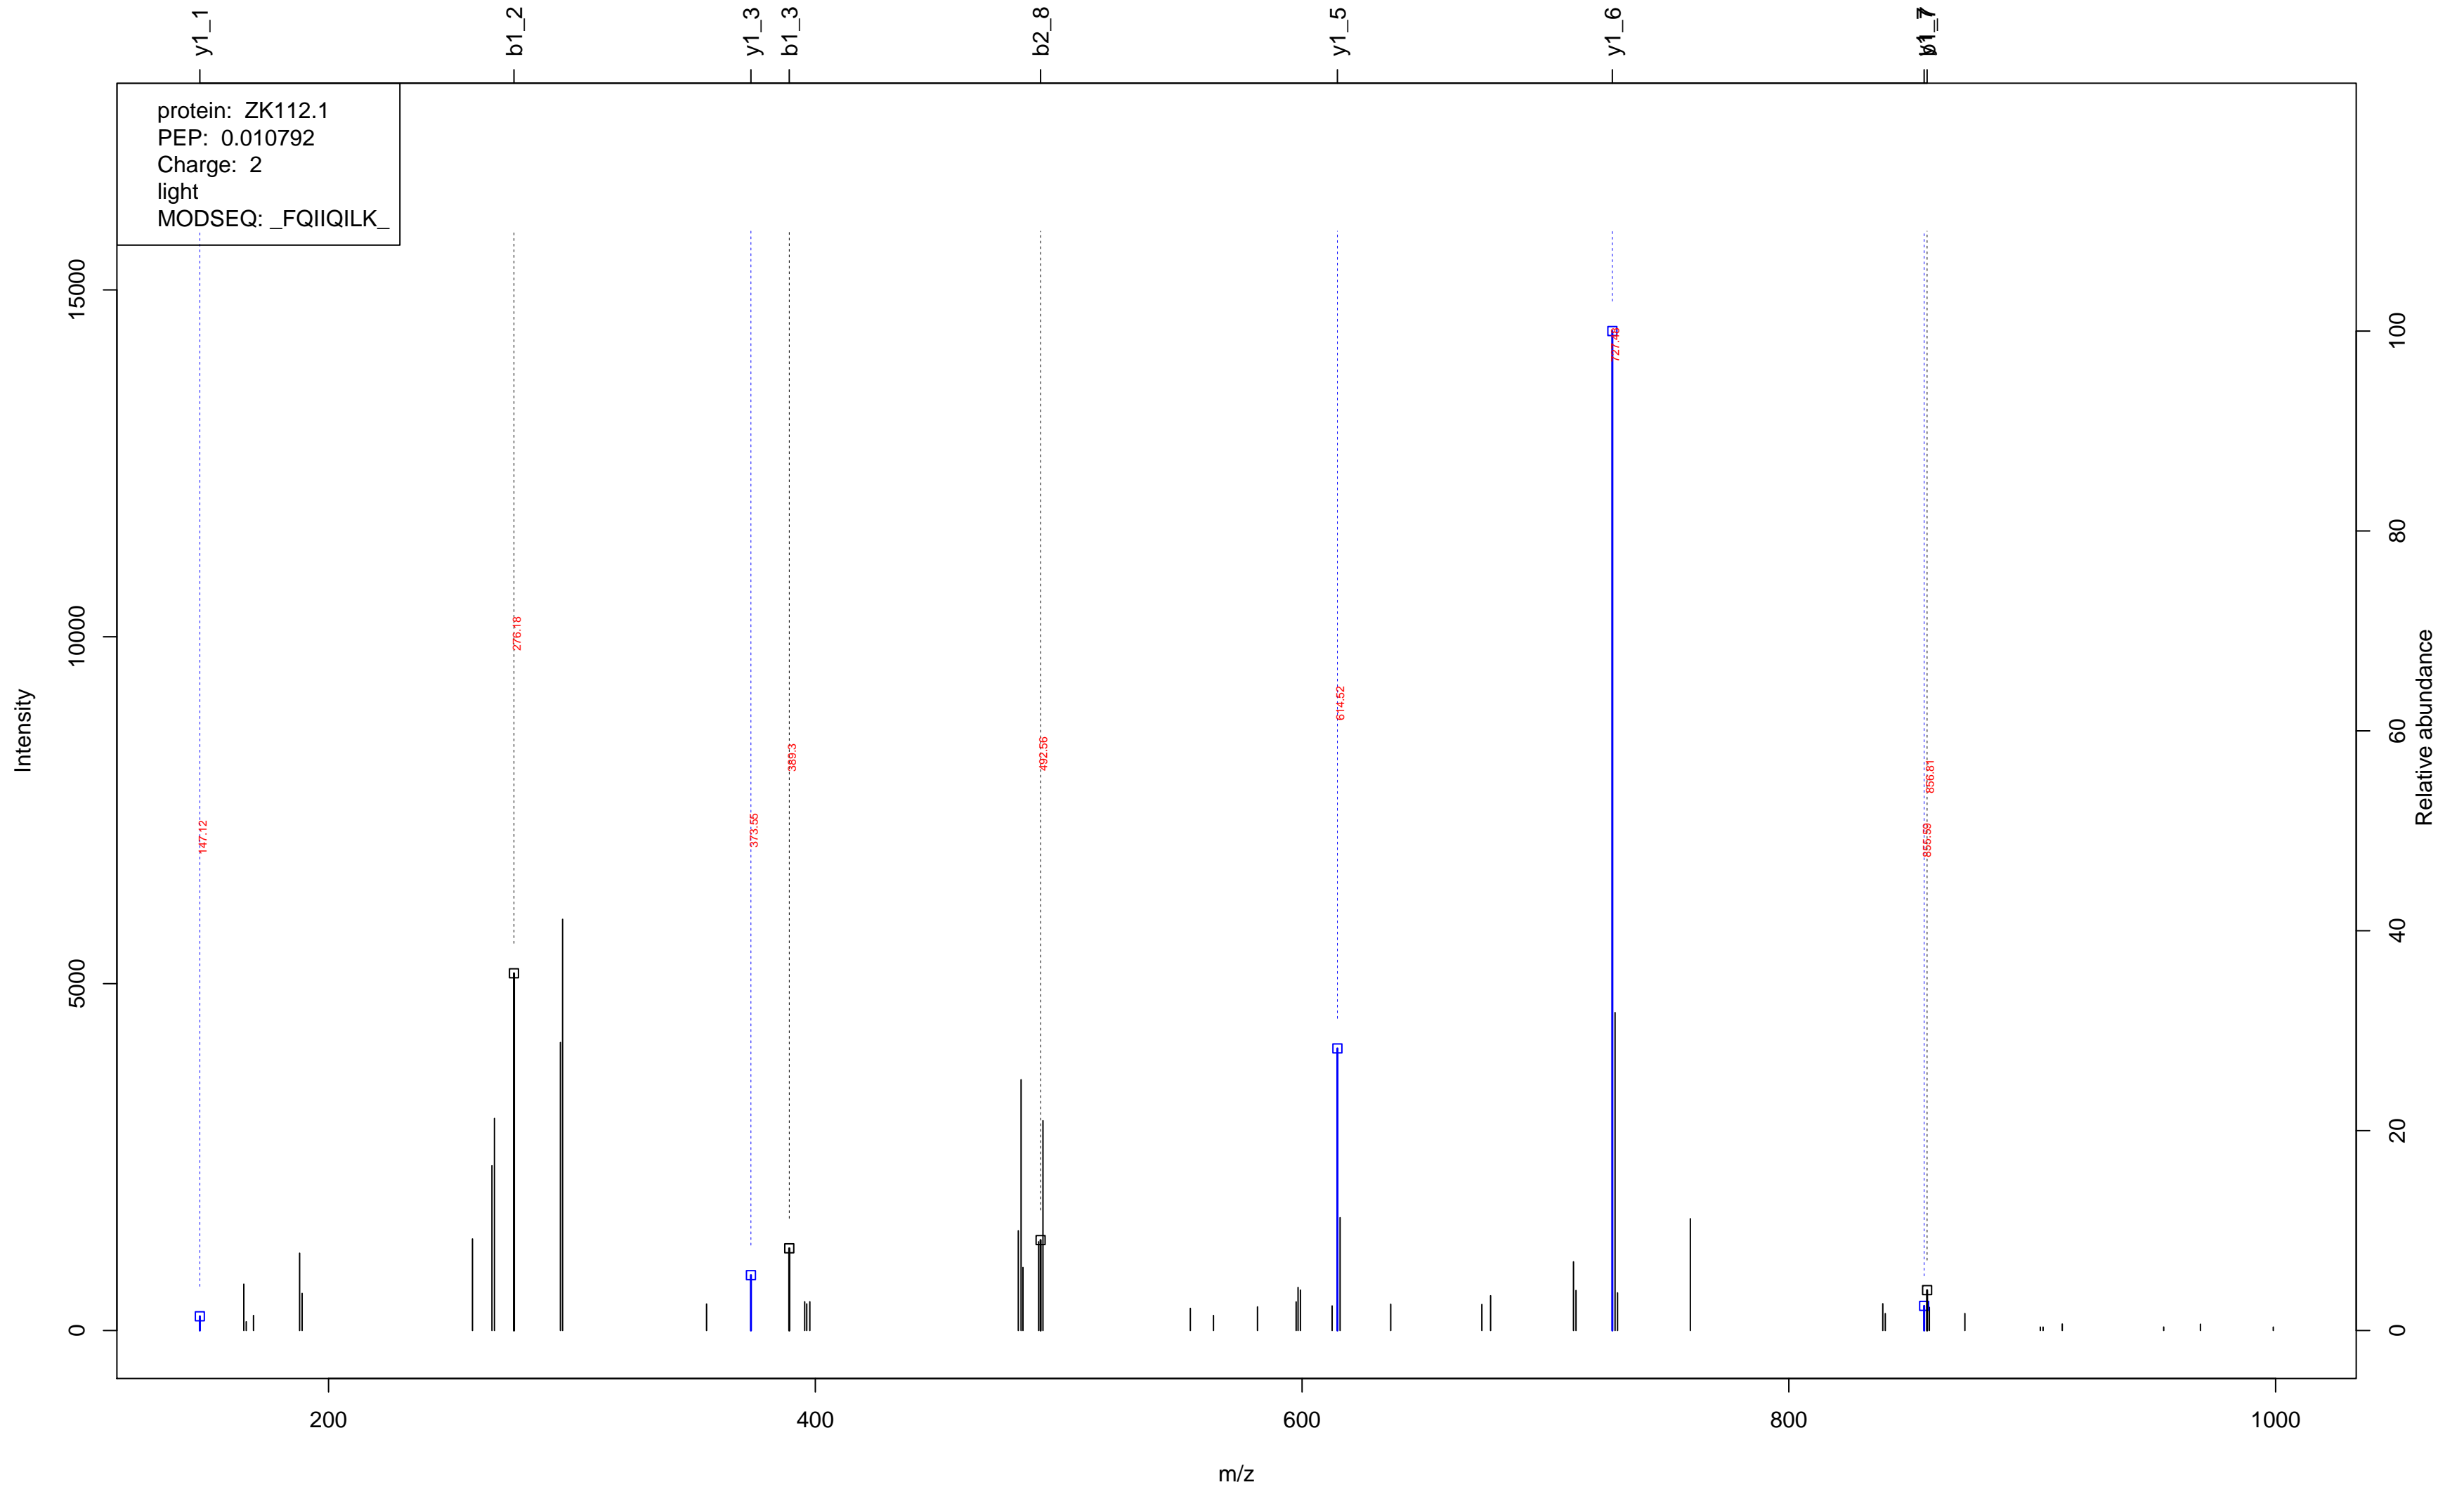

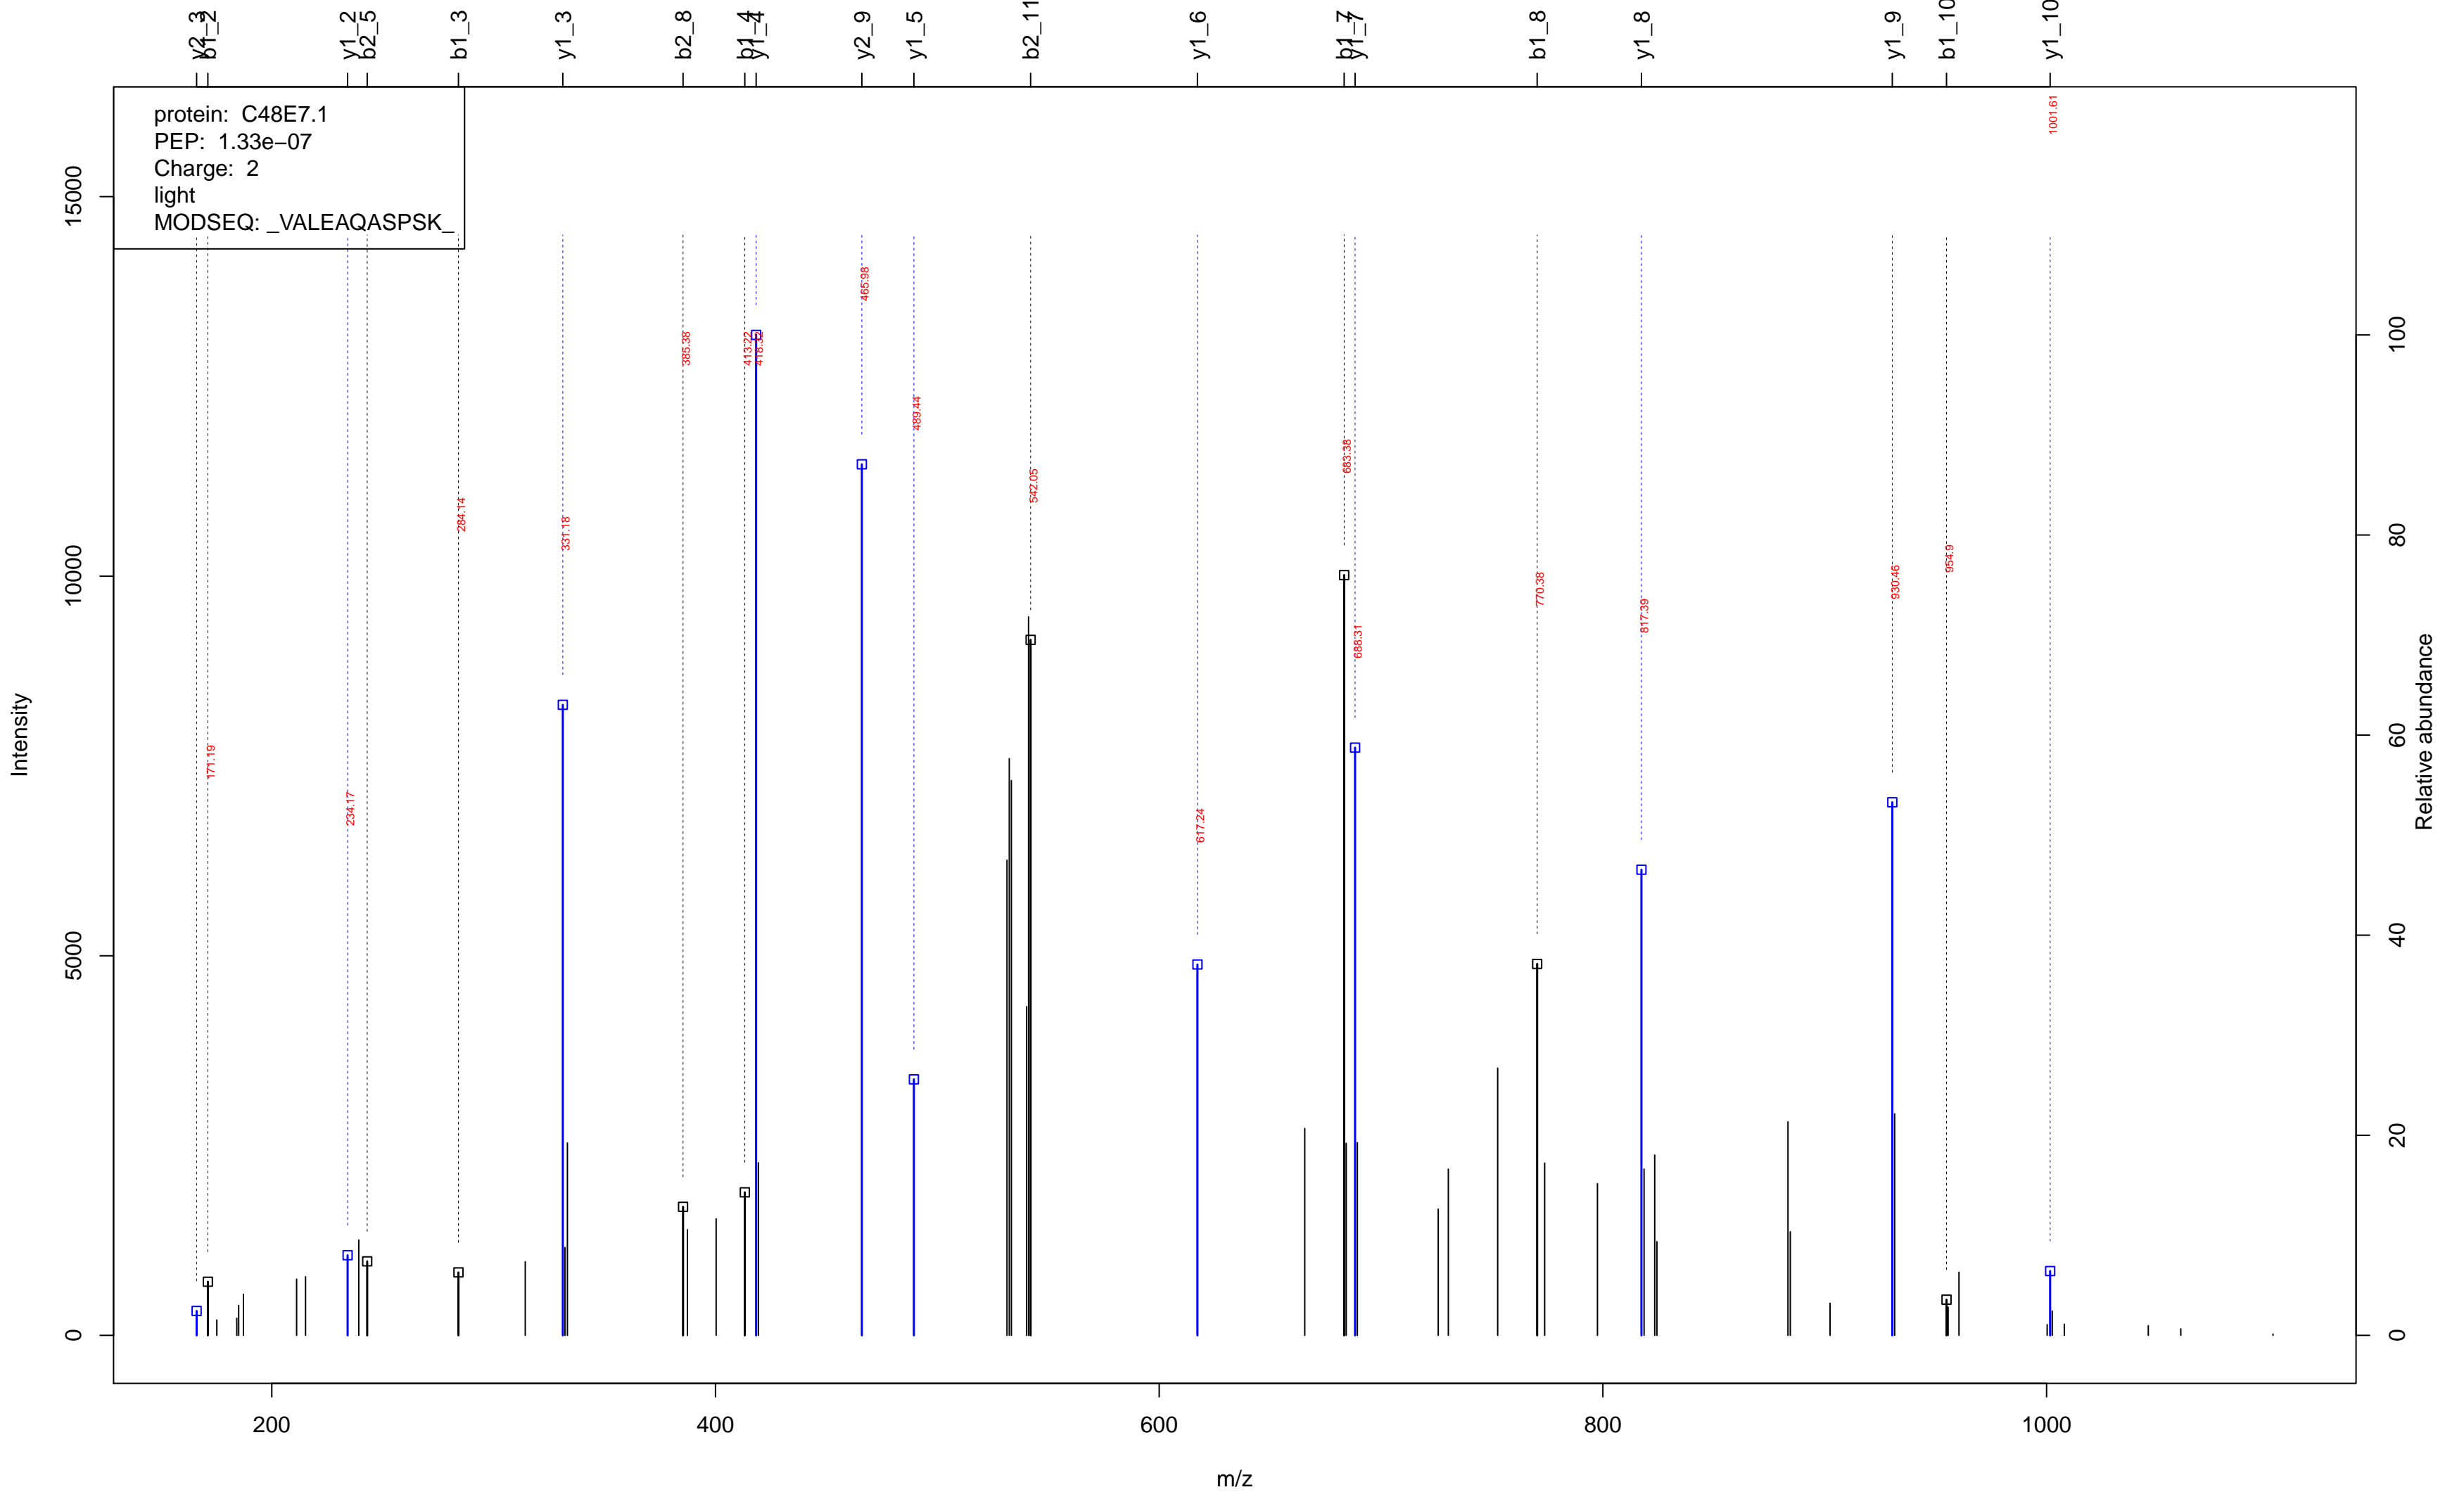

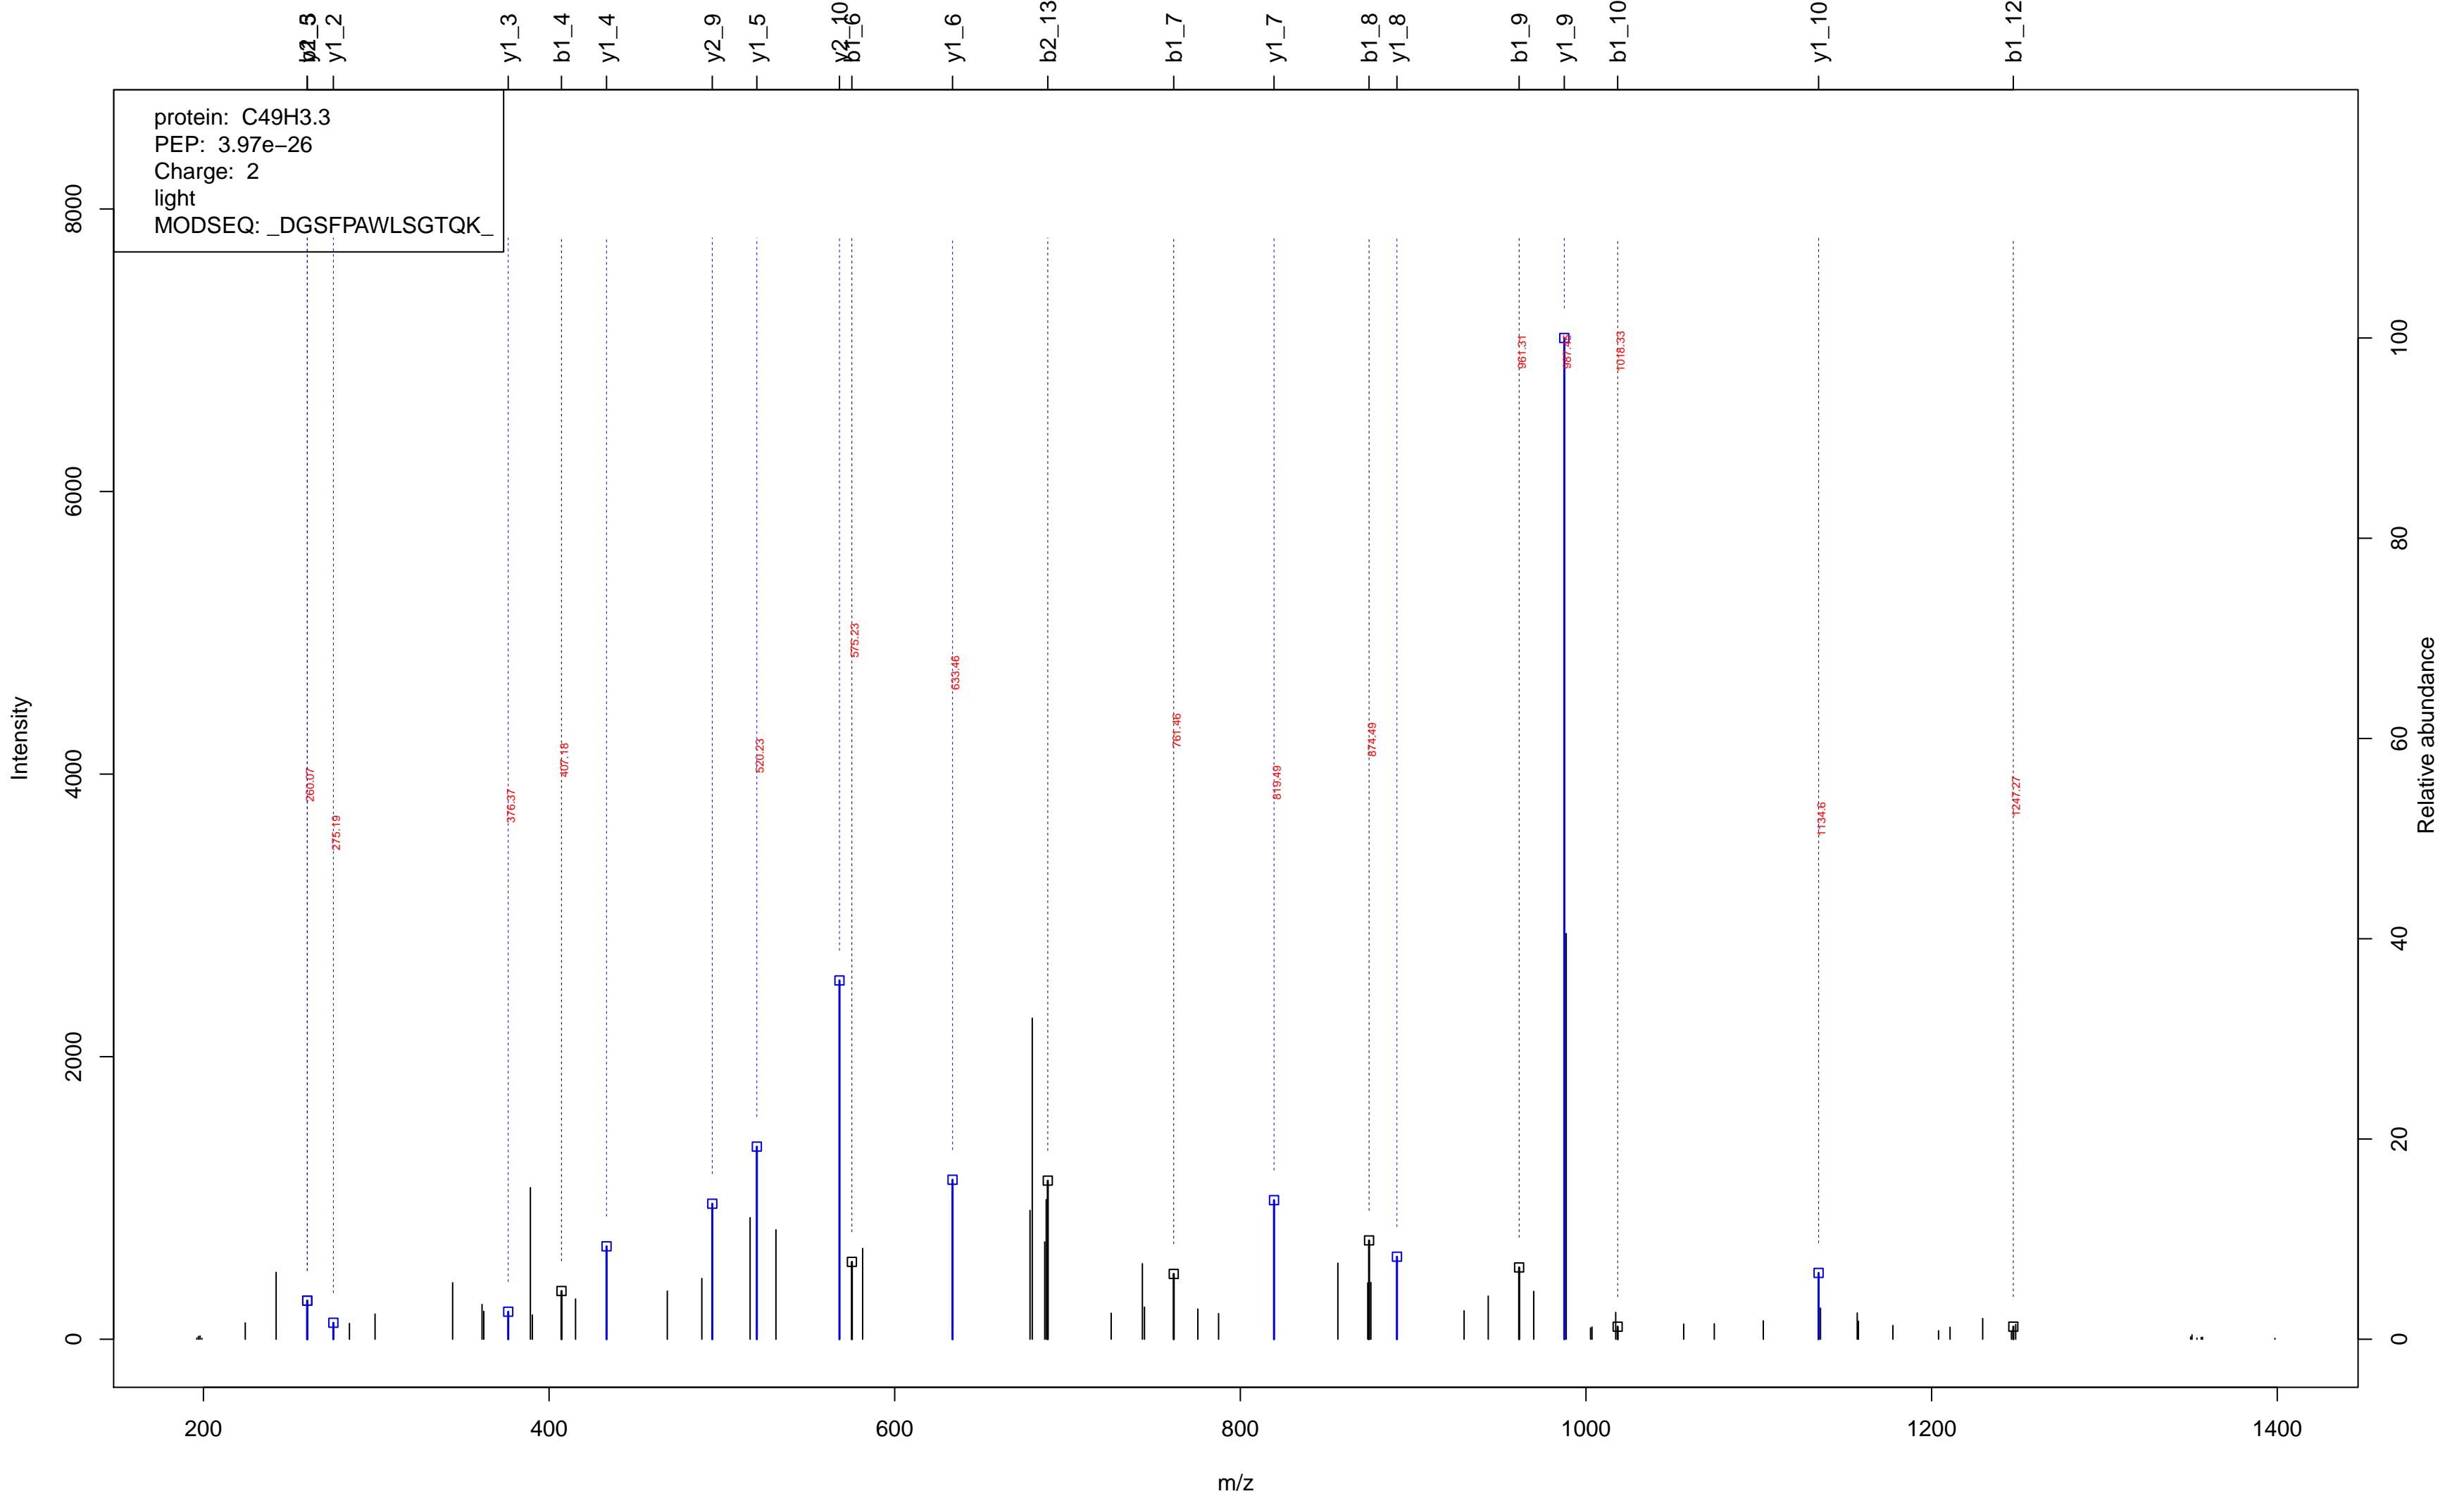

360

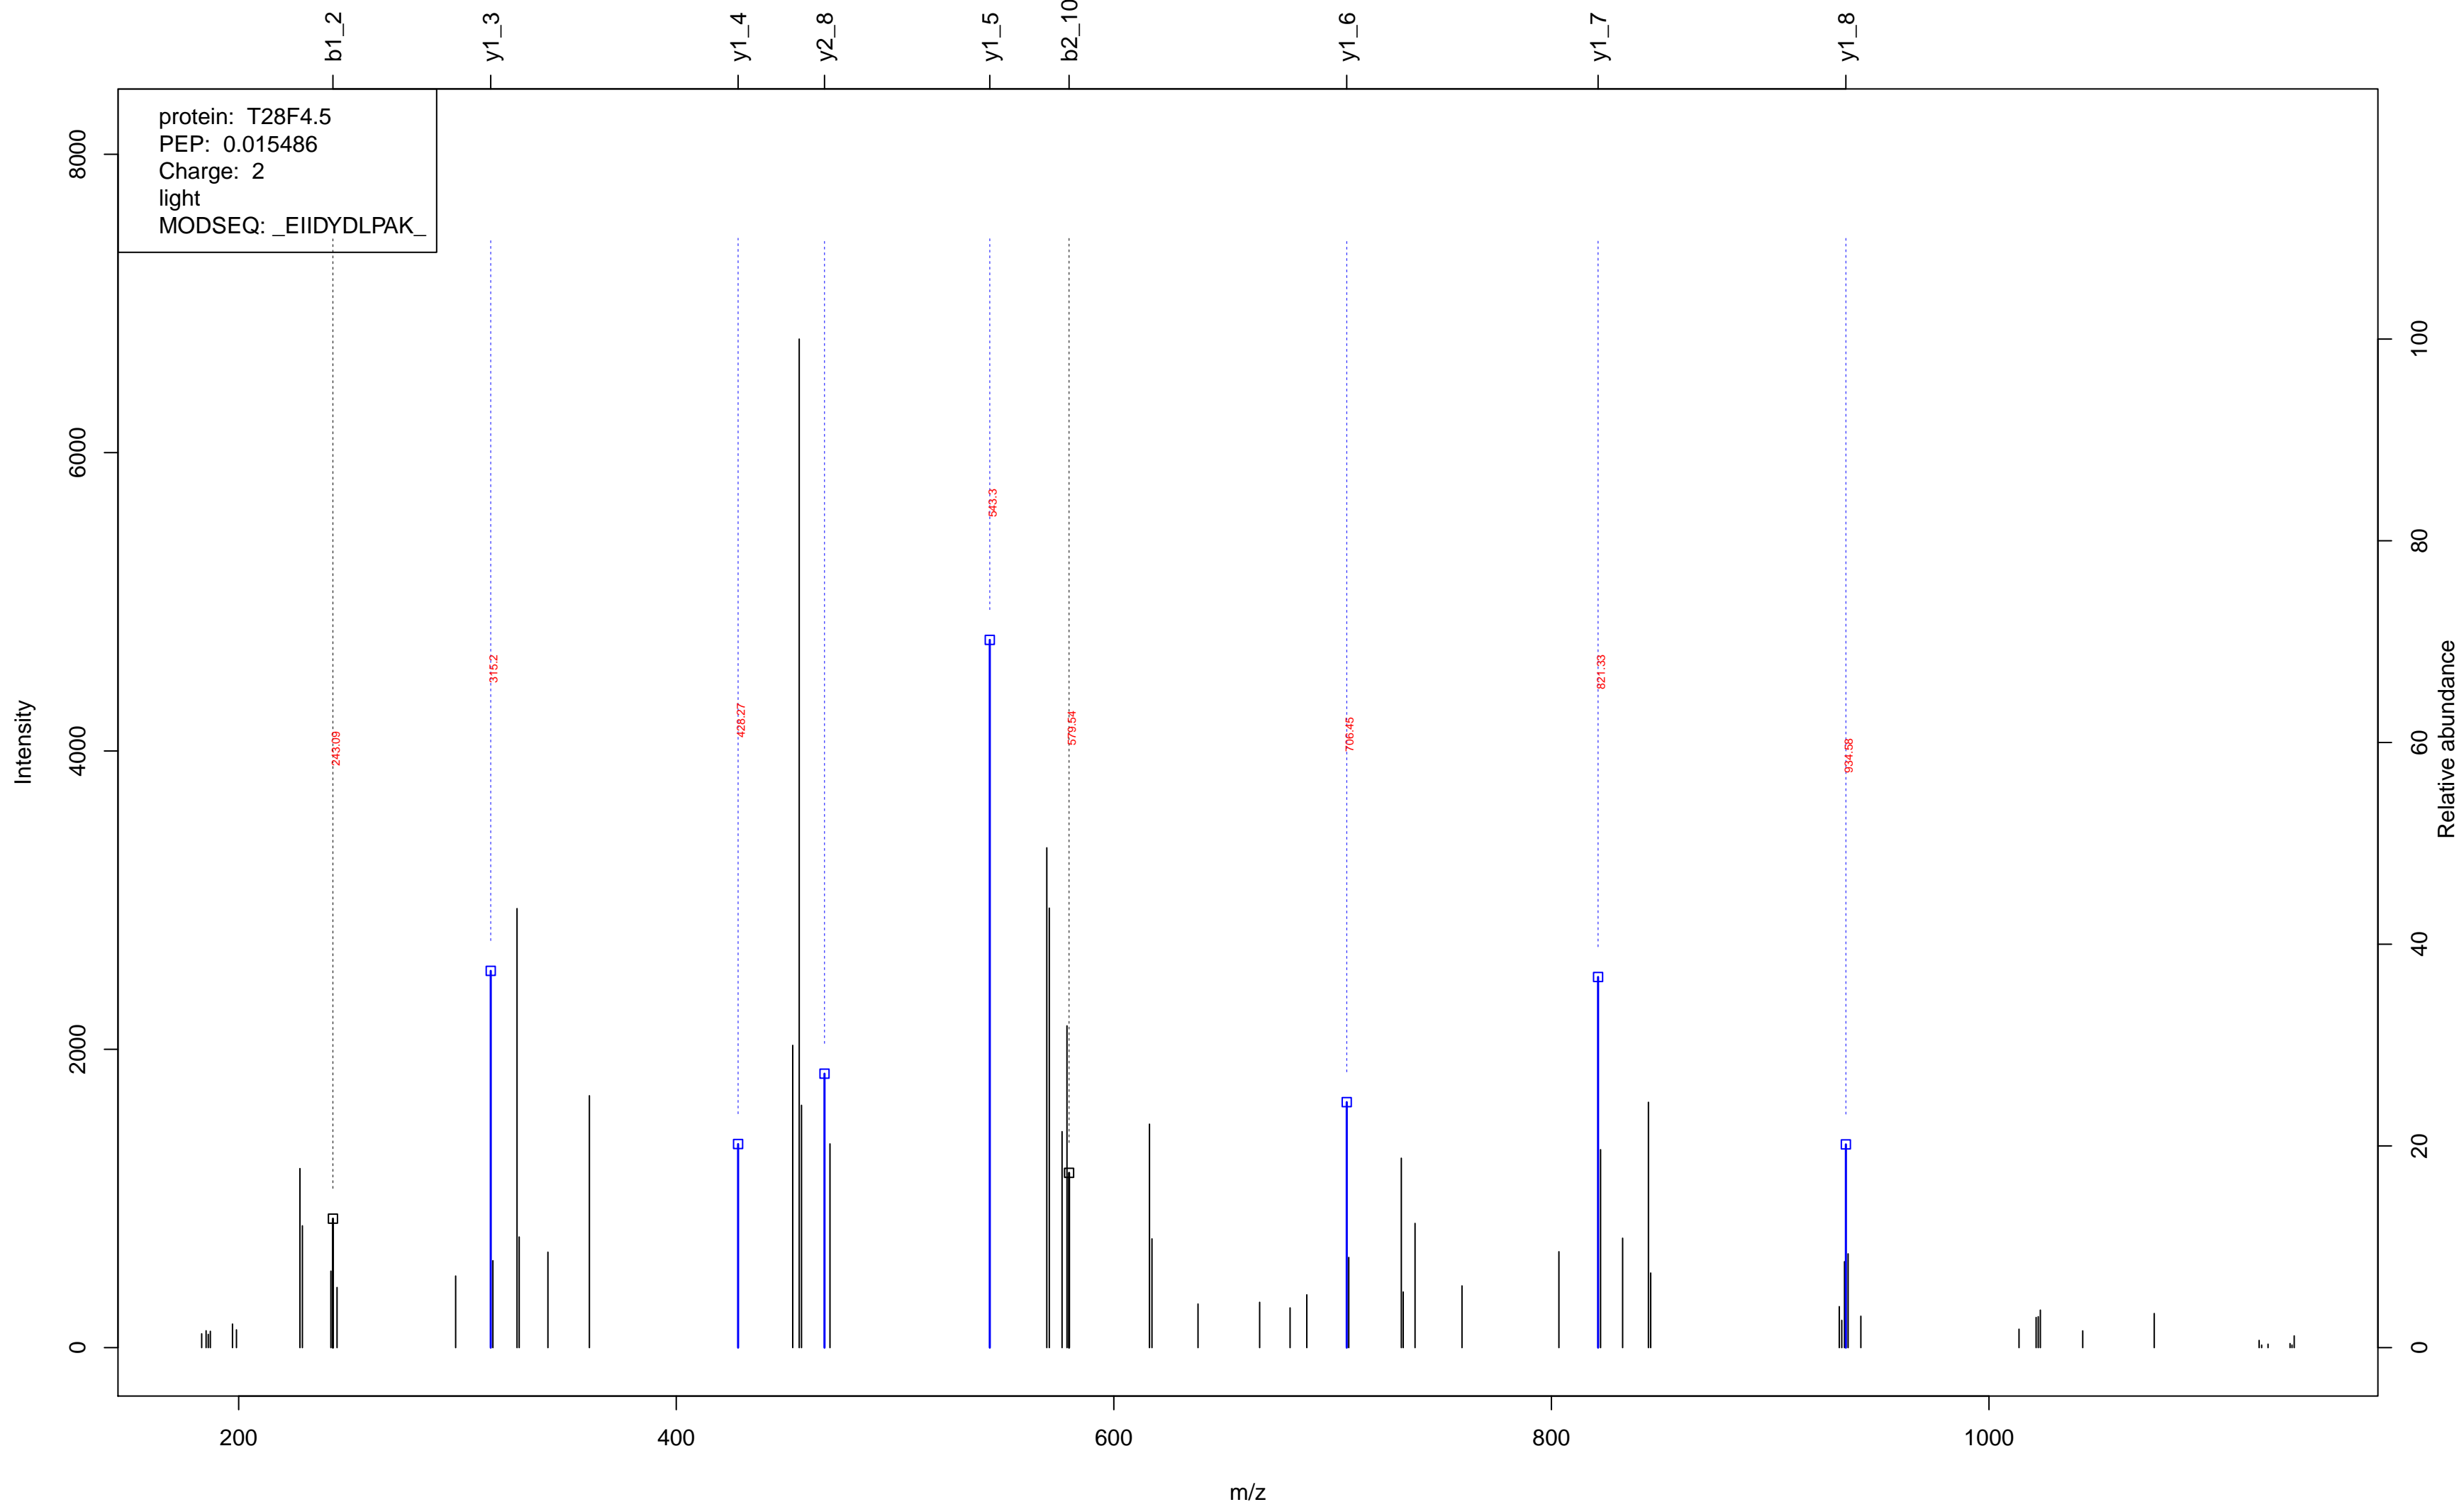

protein: T28F4.5  
PEP: 0.015486  
Charge: 2  
light  
MODSEQ: \_EIIDYDLPAK\_

Intensity

Relative abundance

m/z



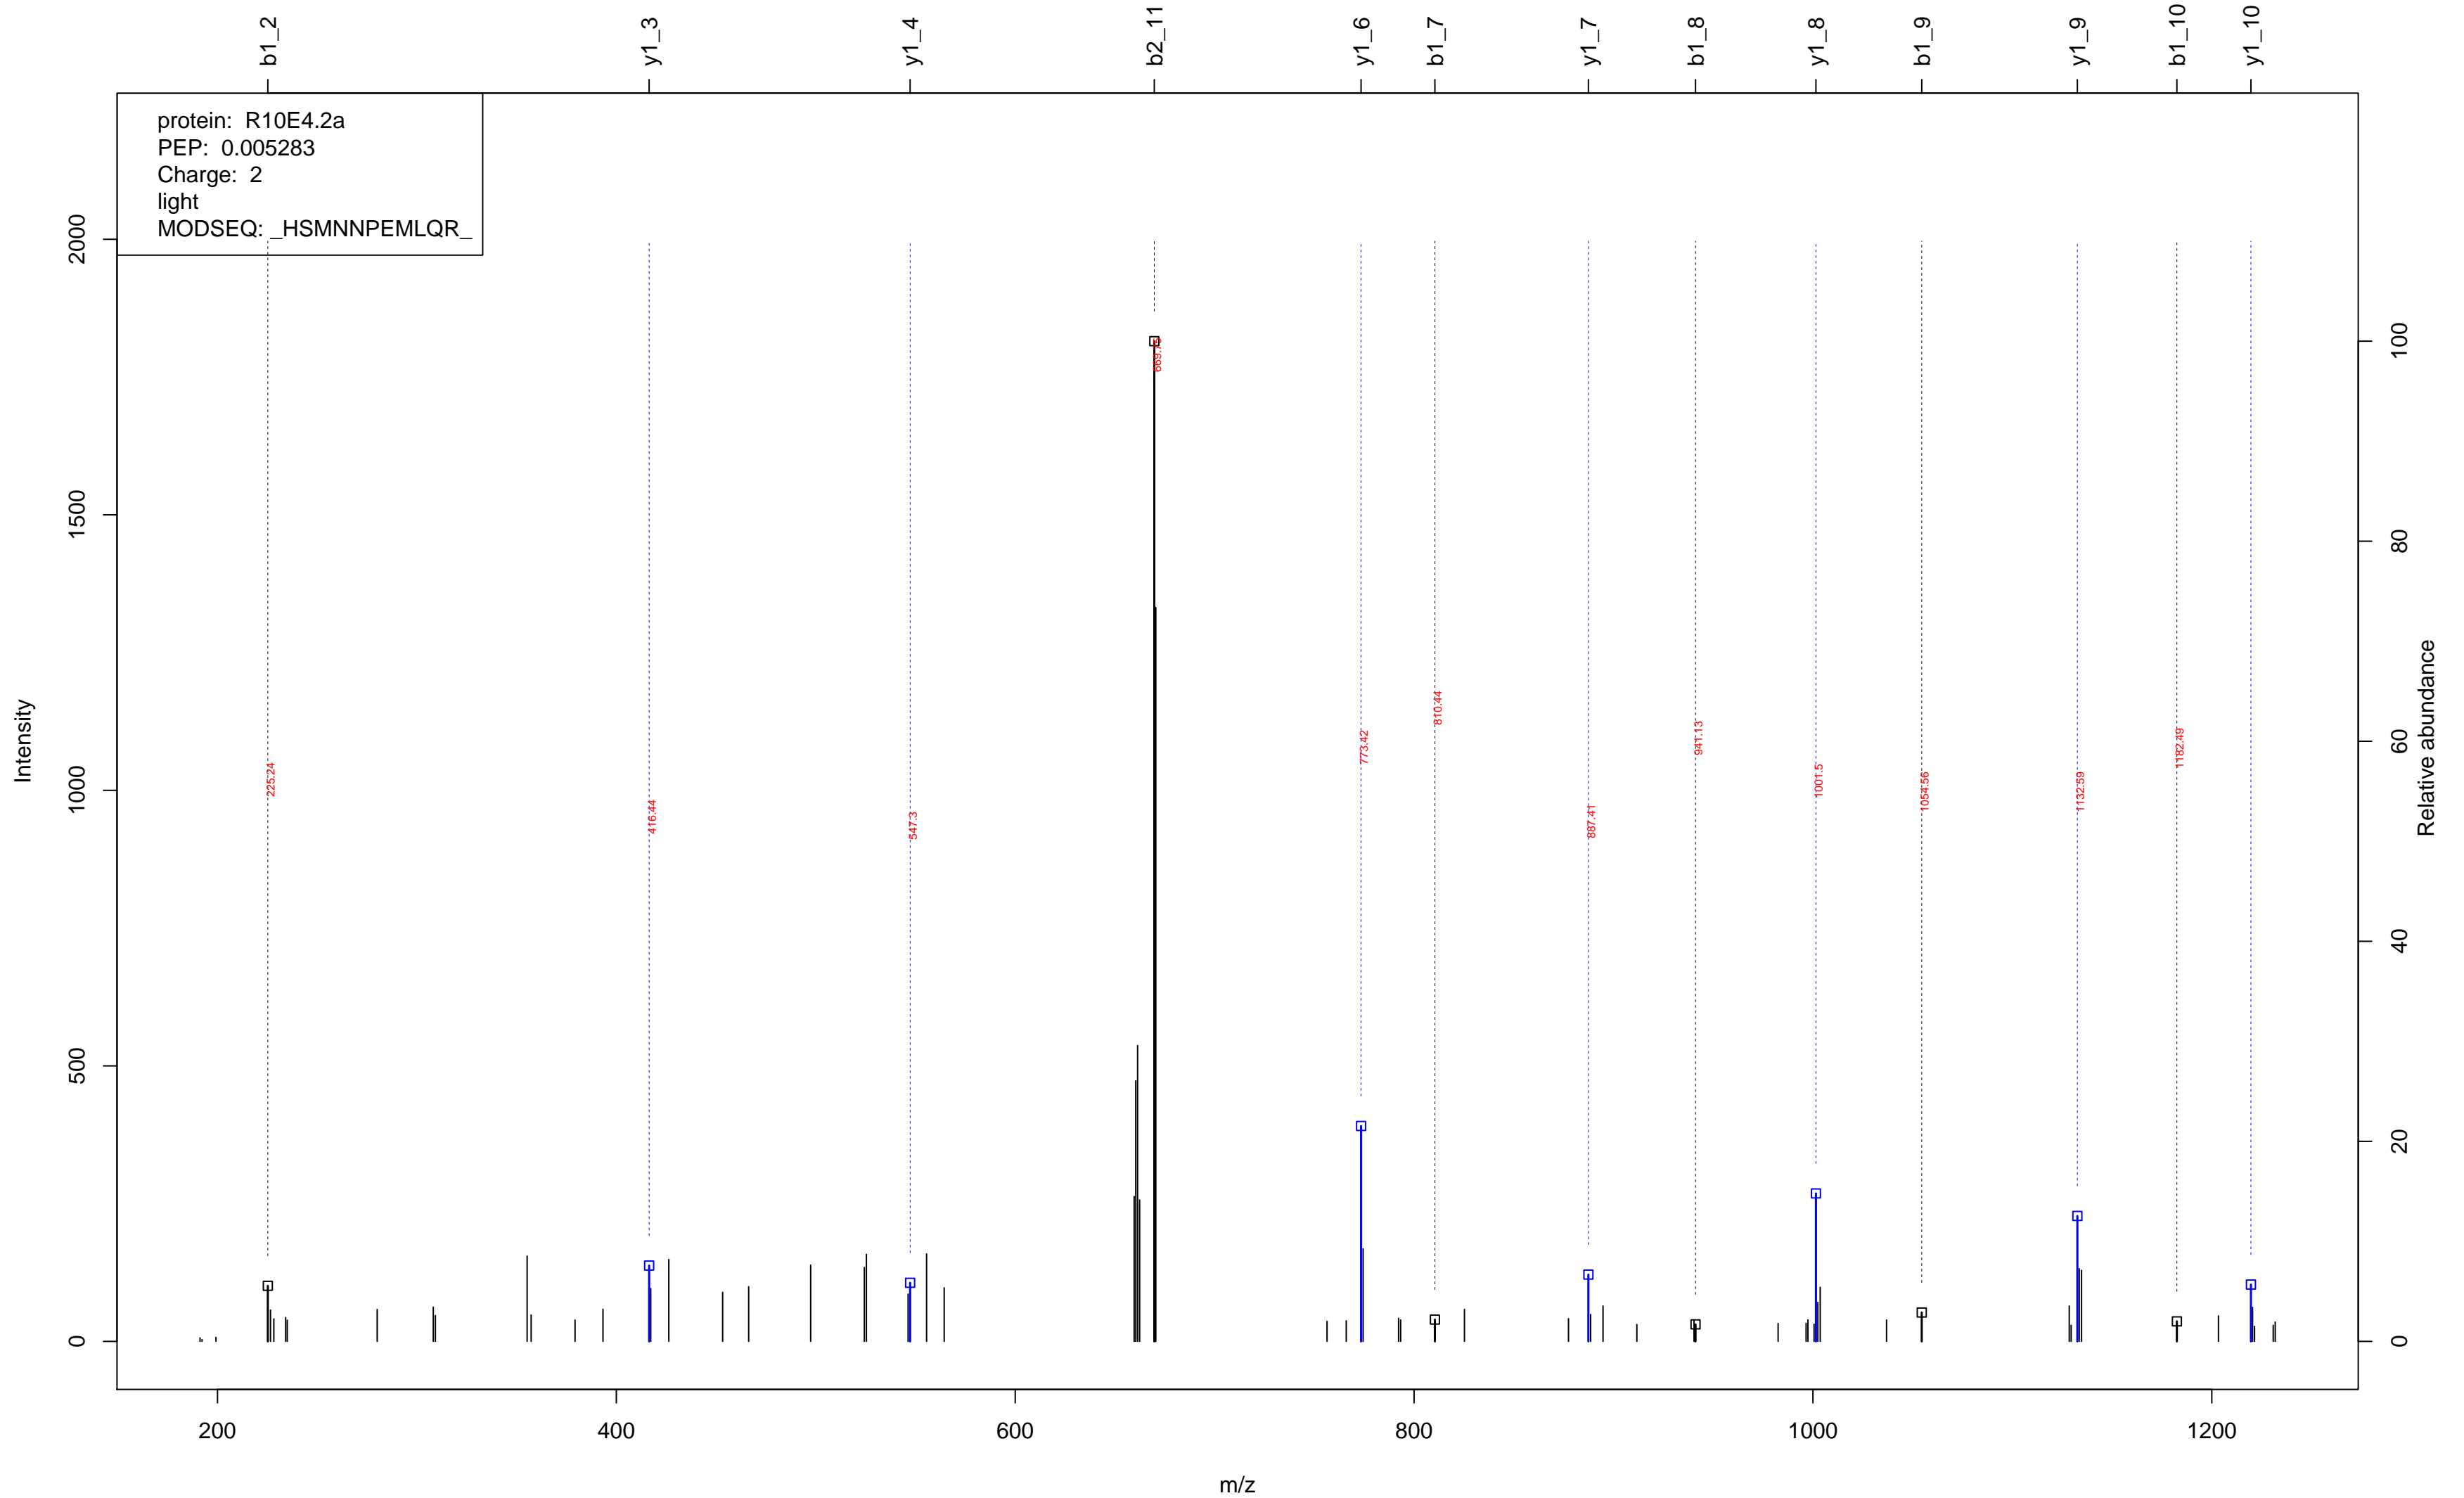

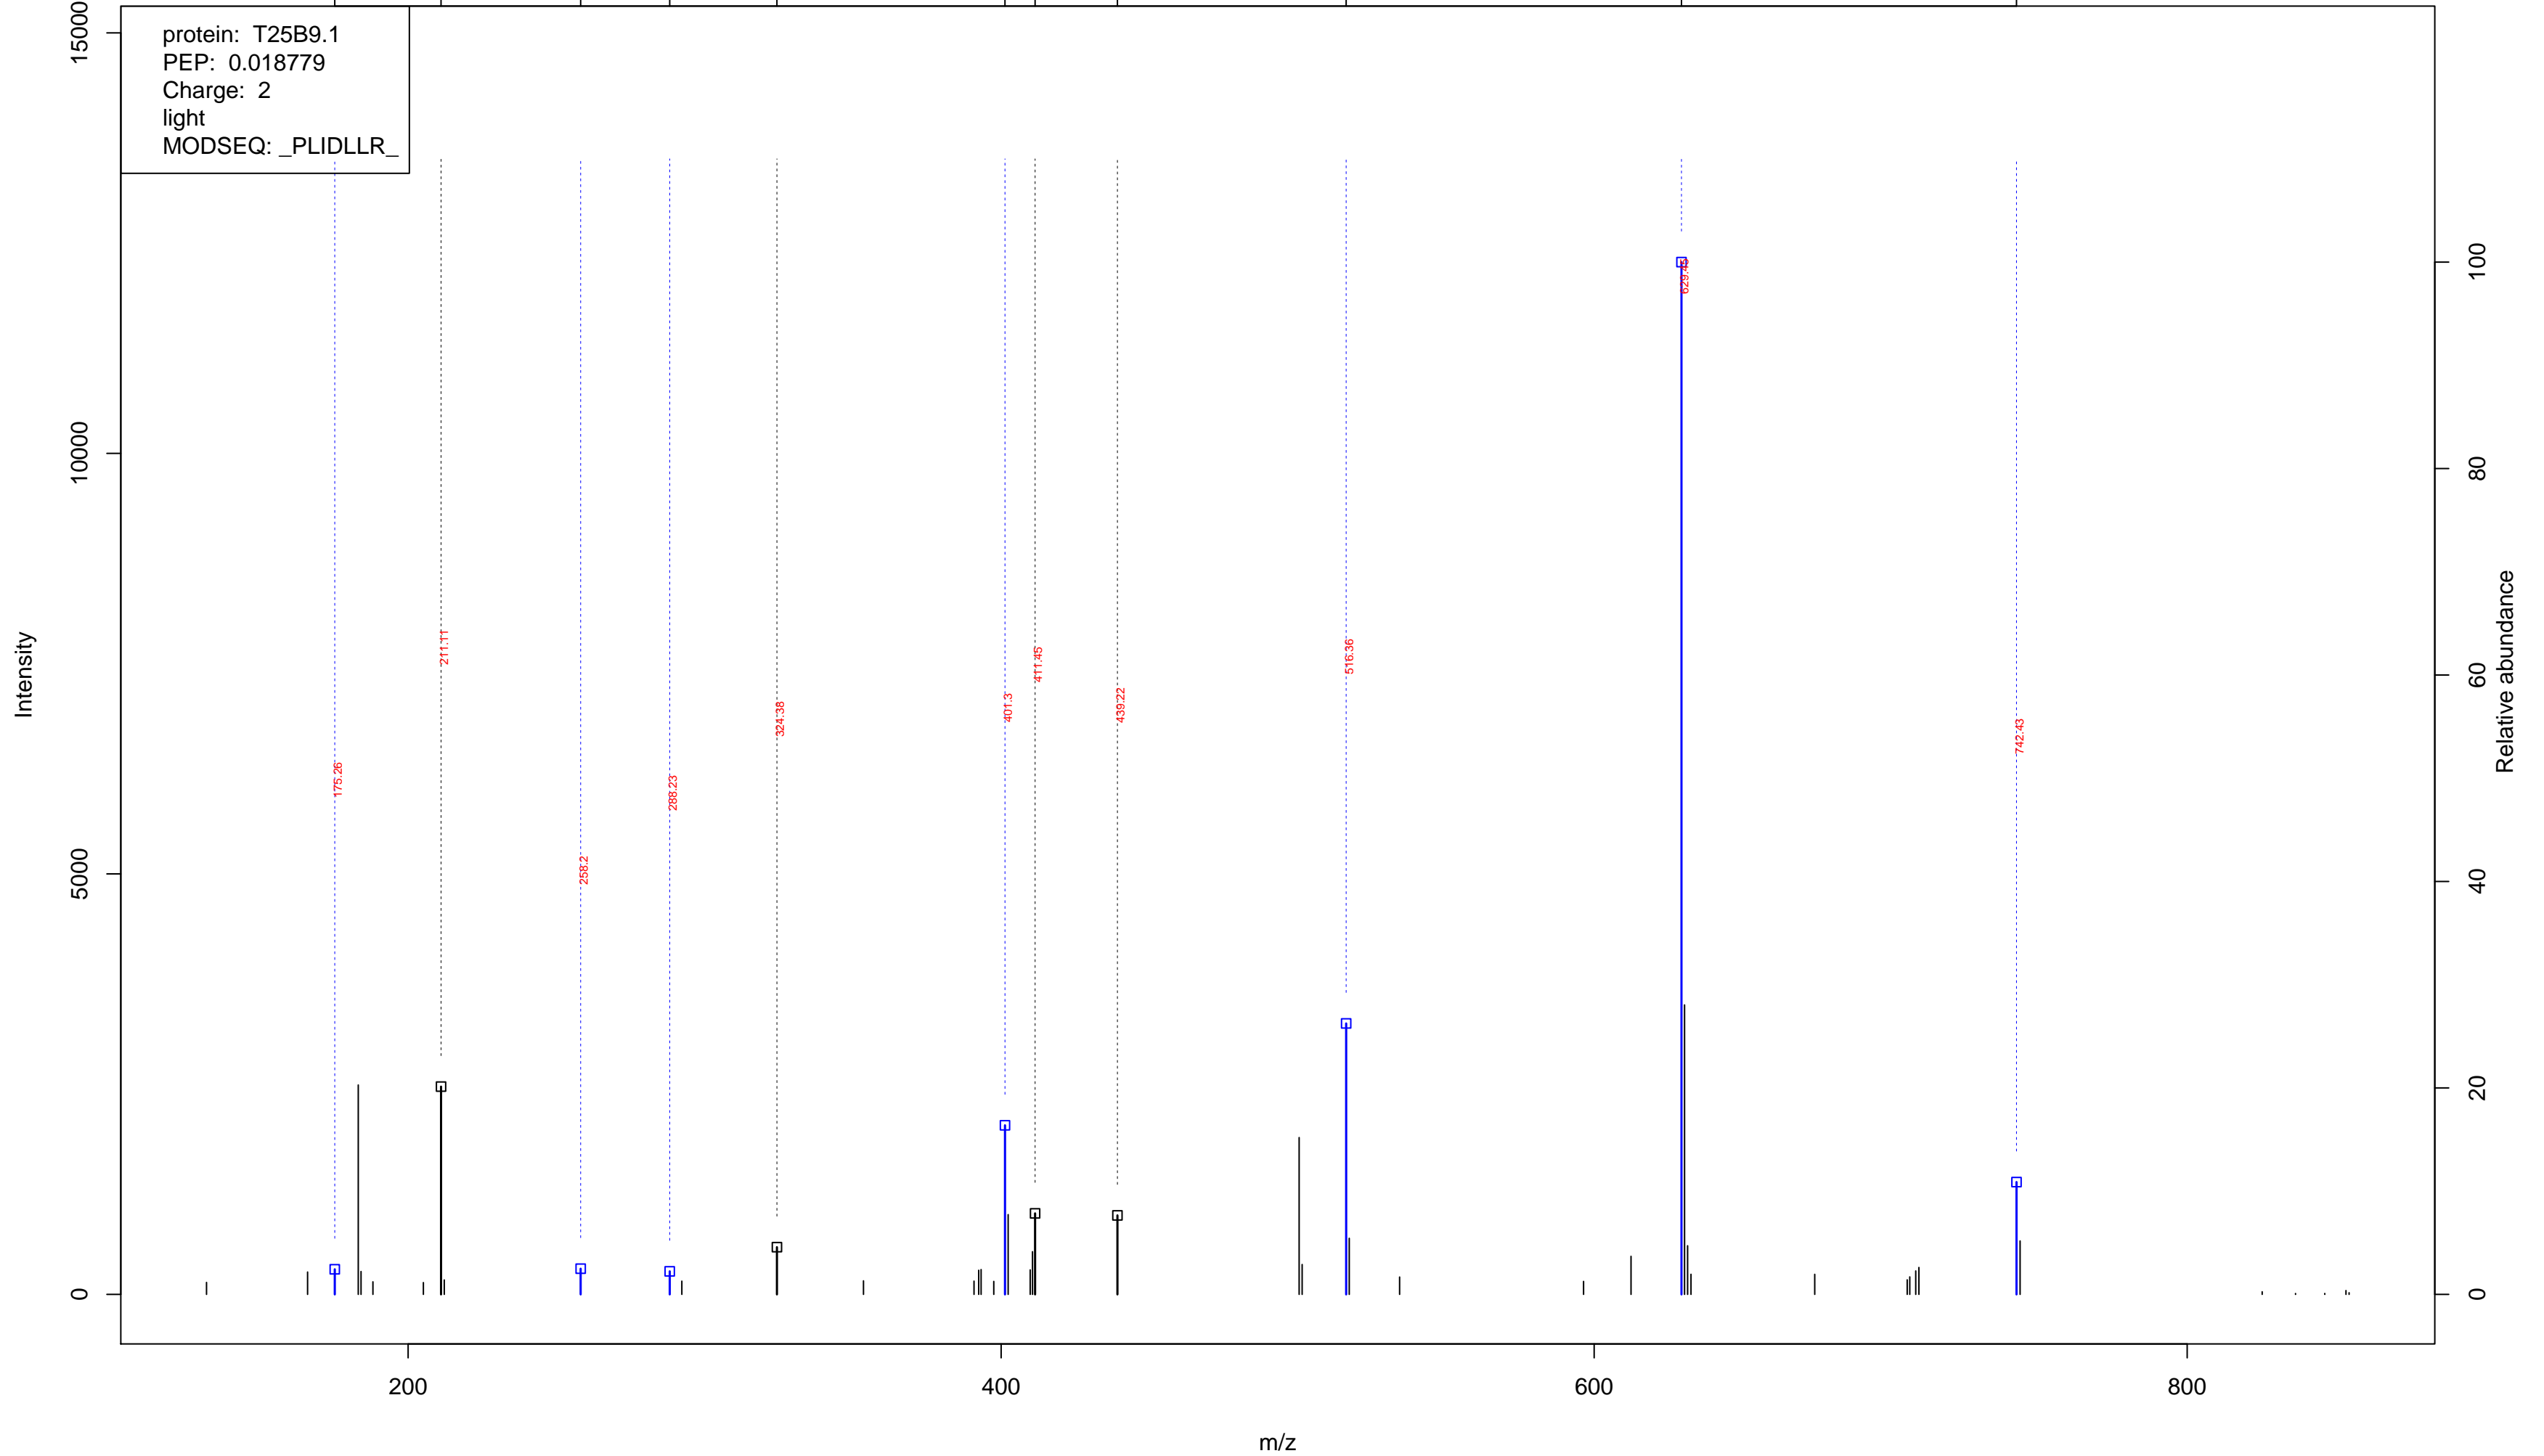

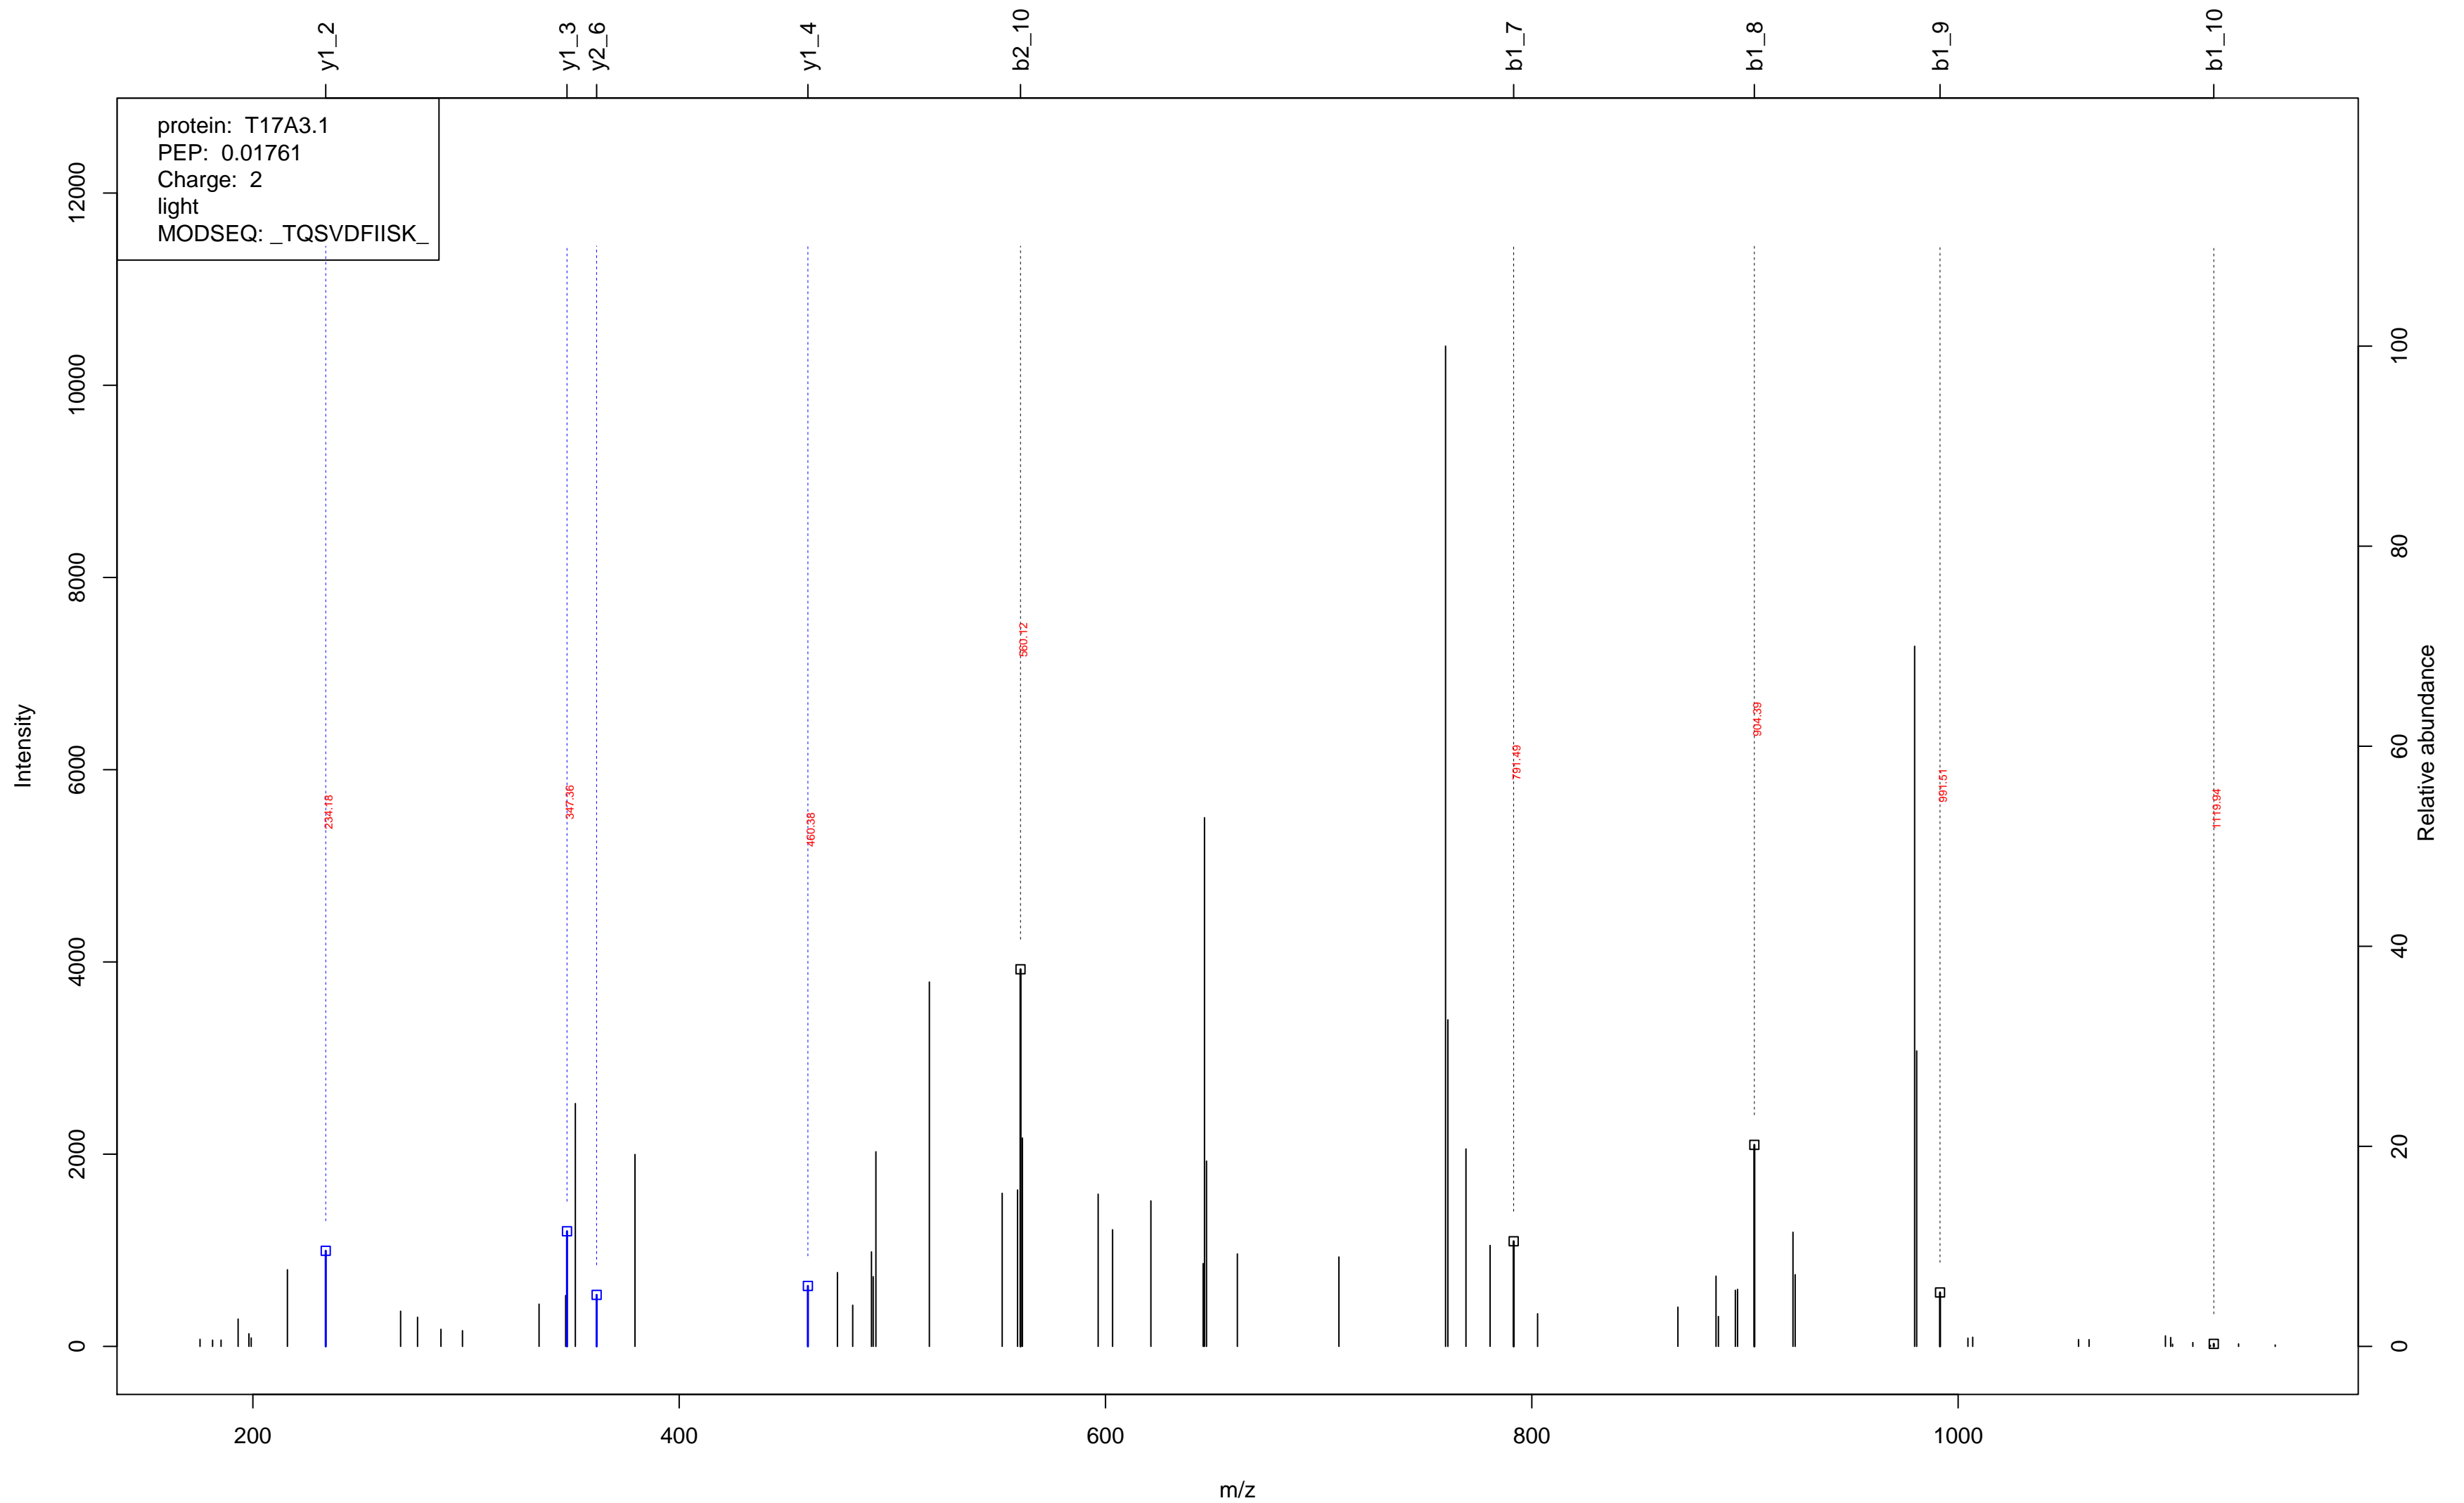

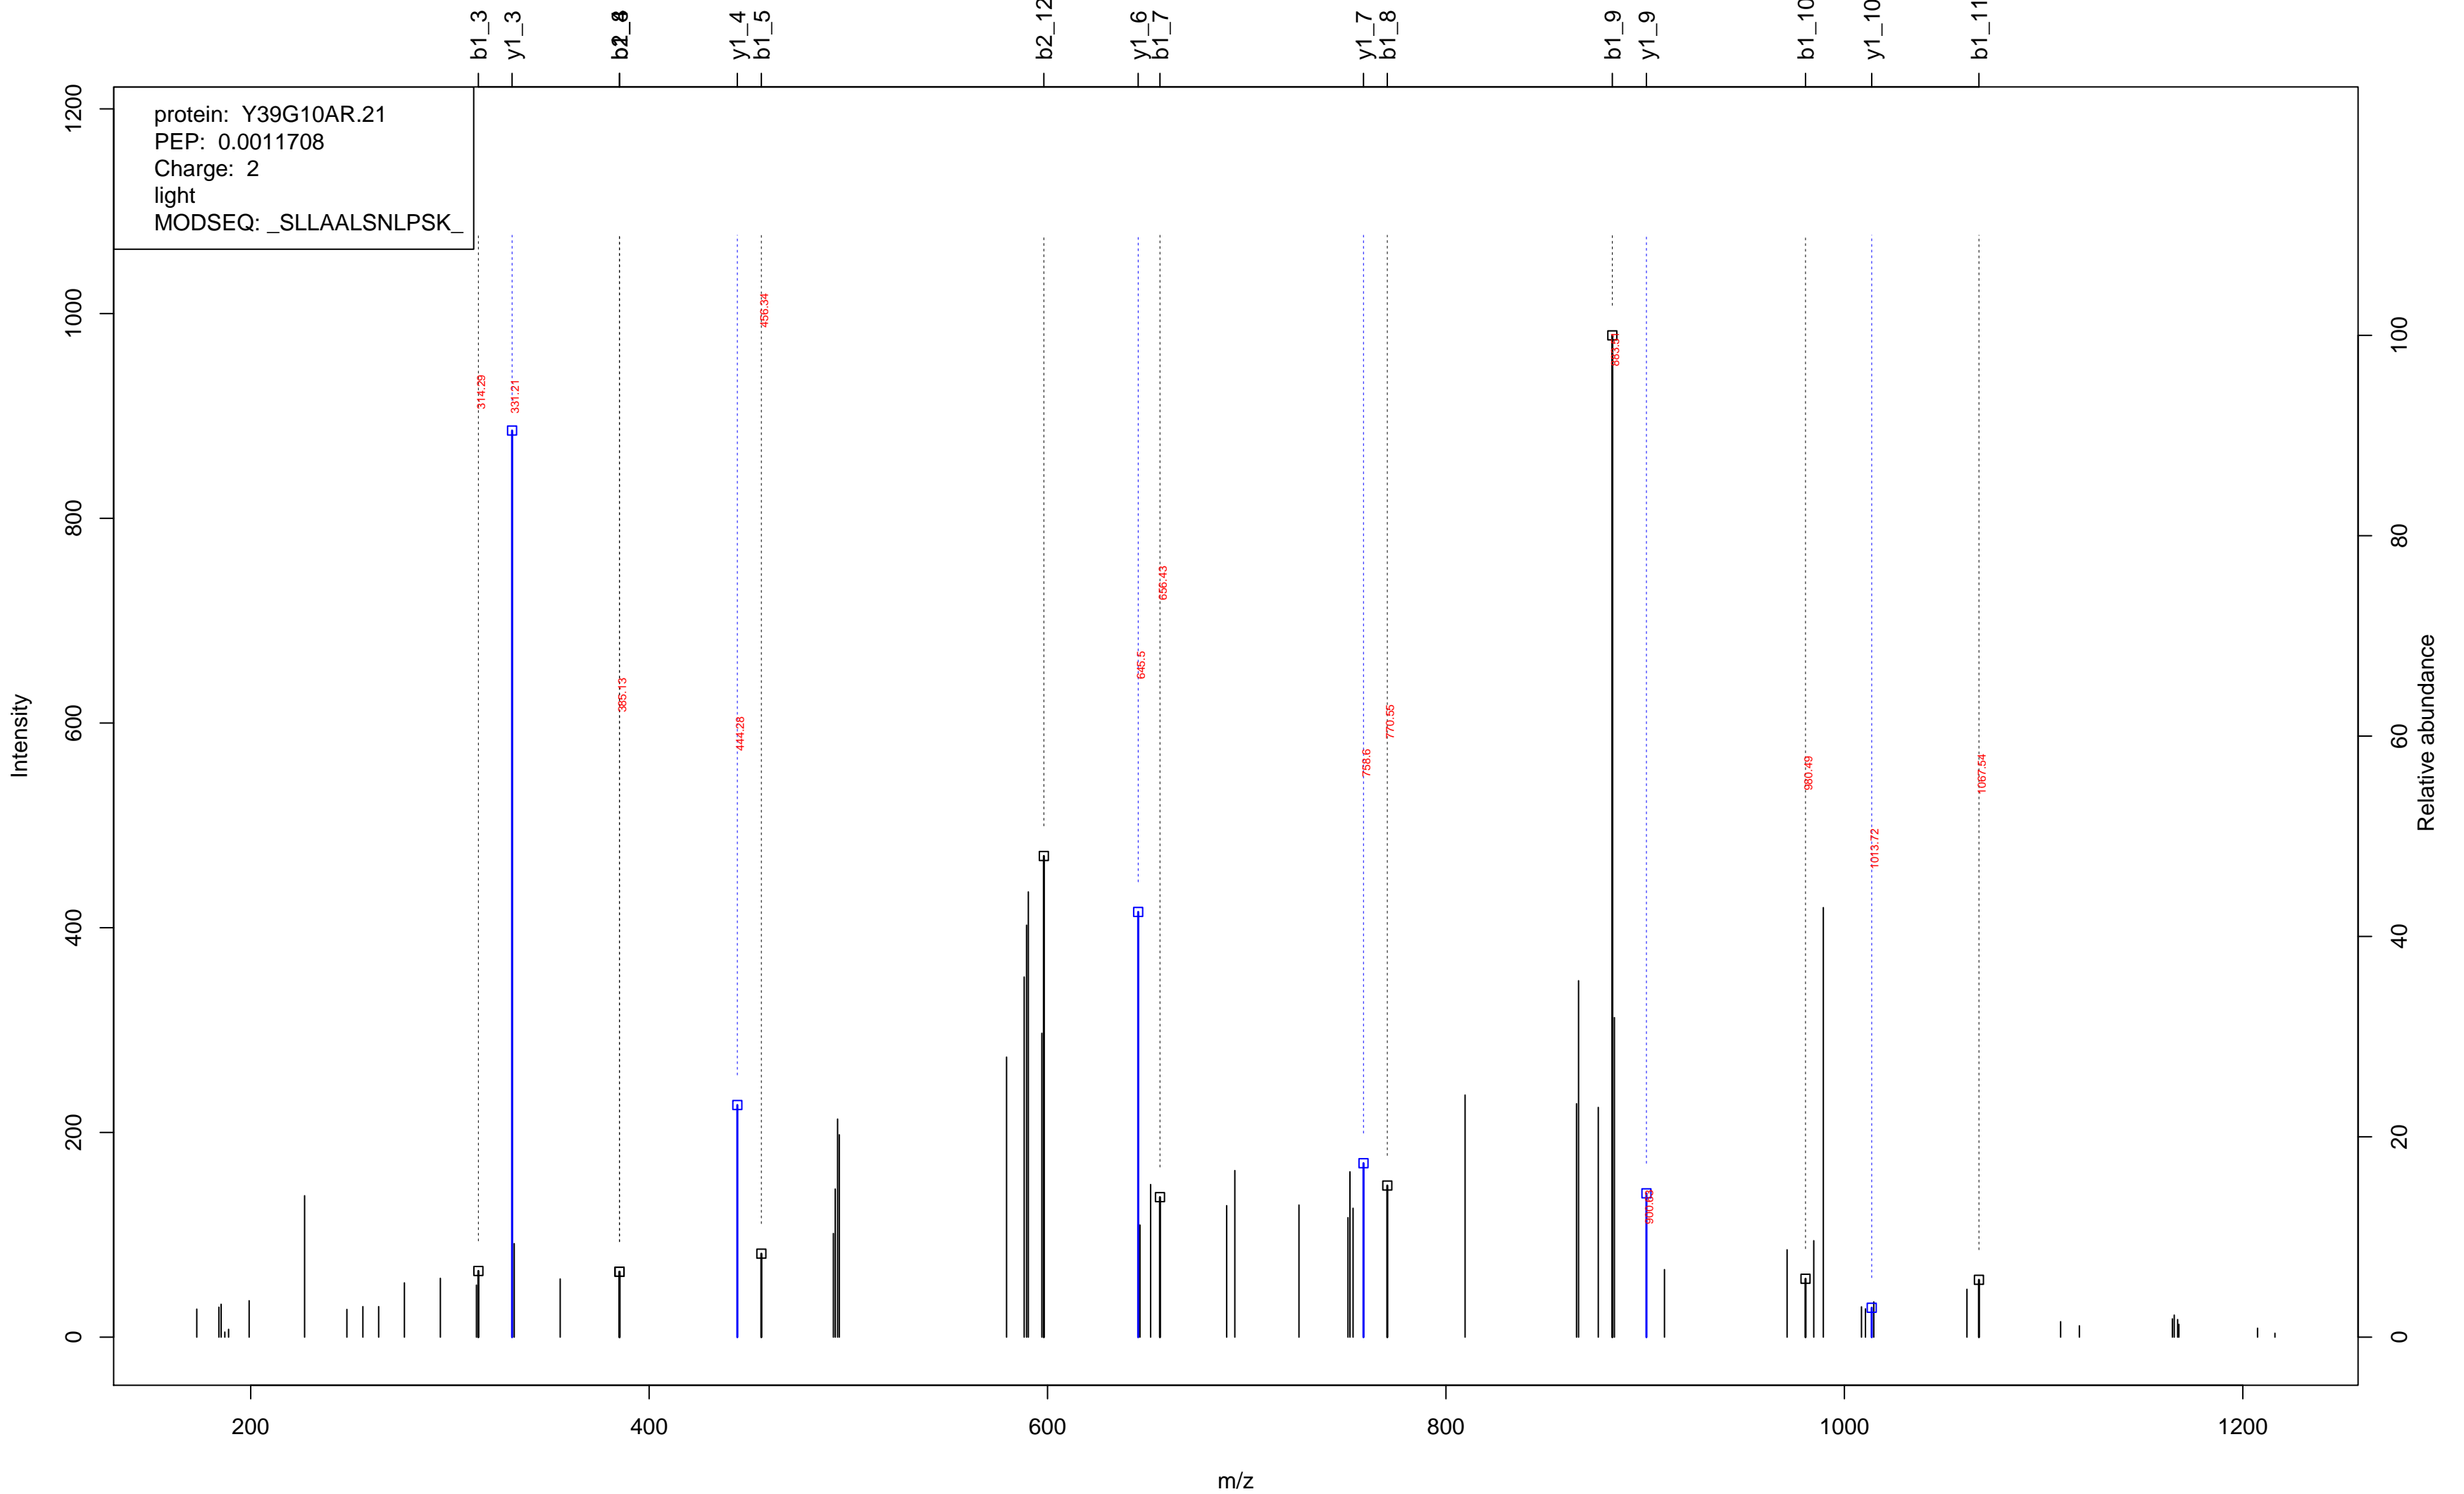

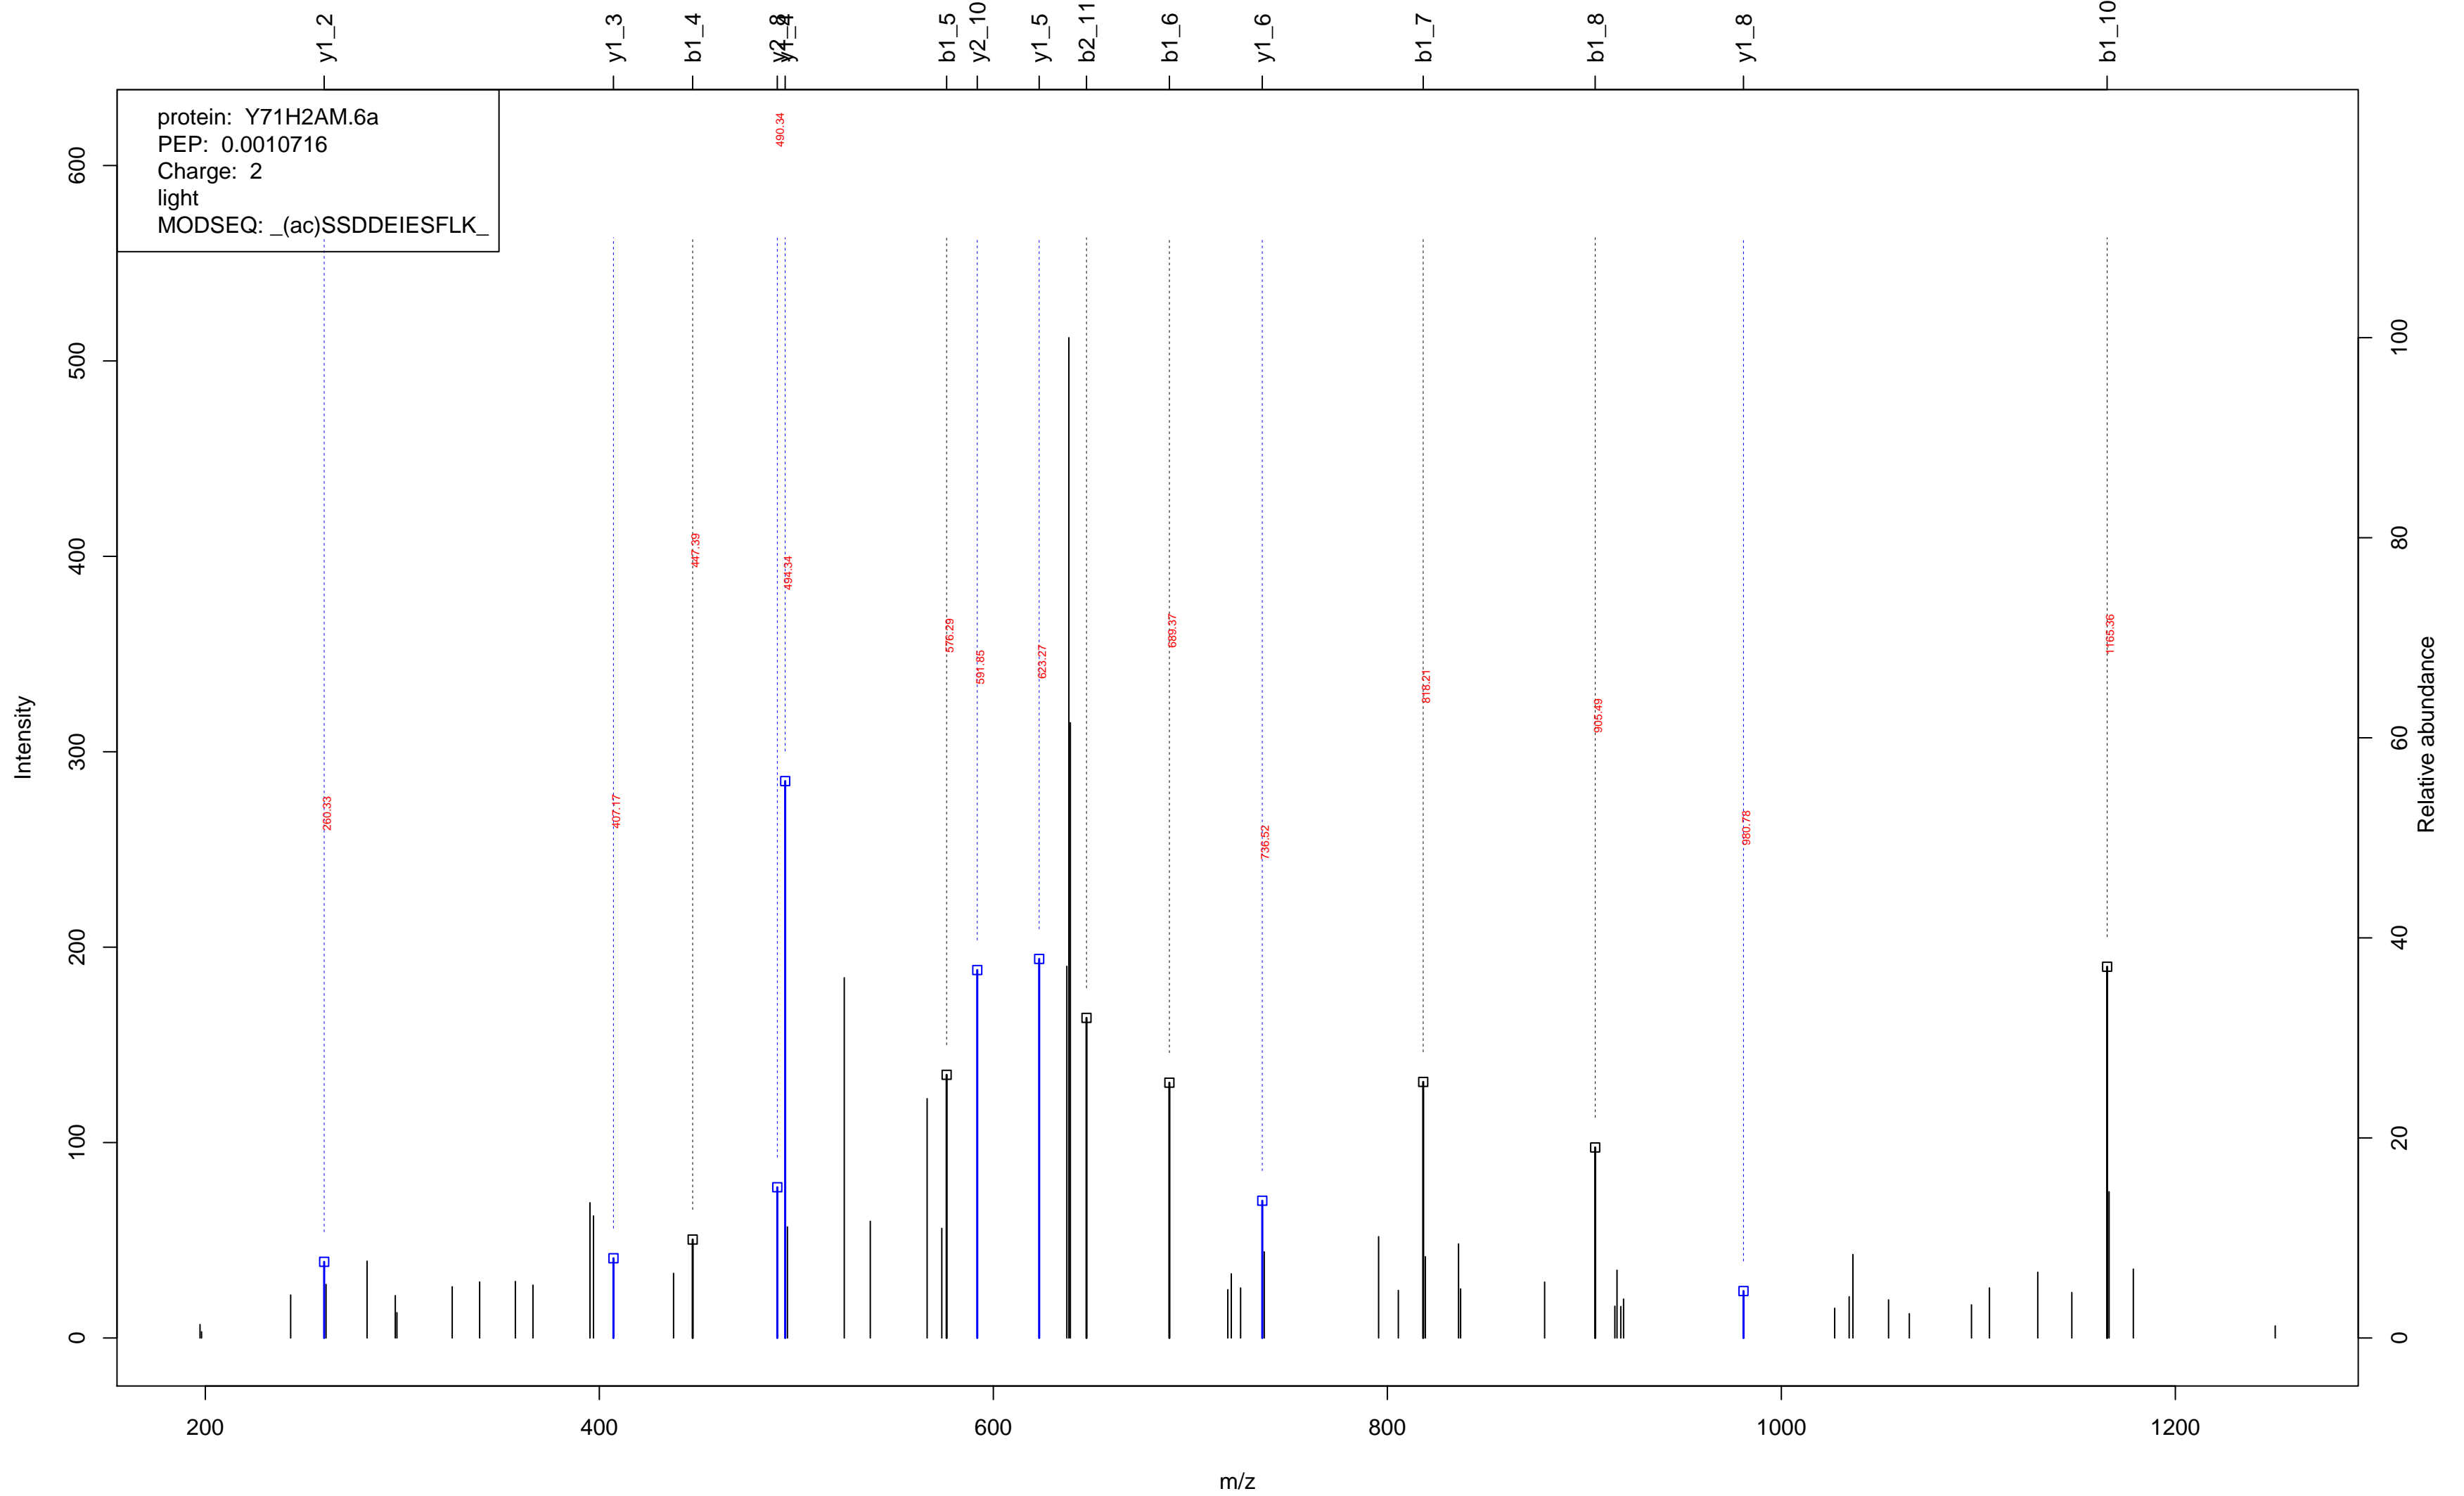

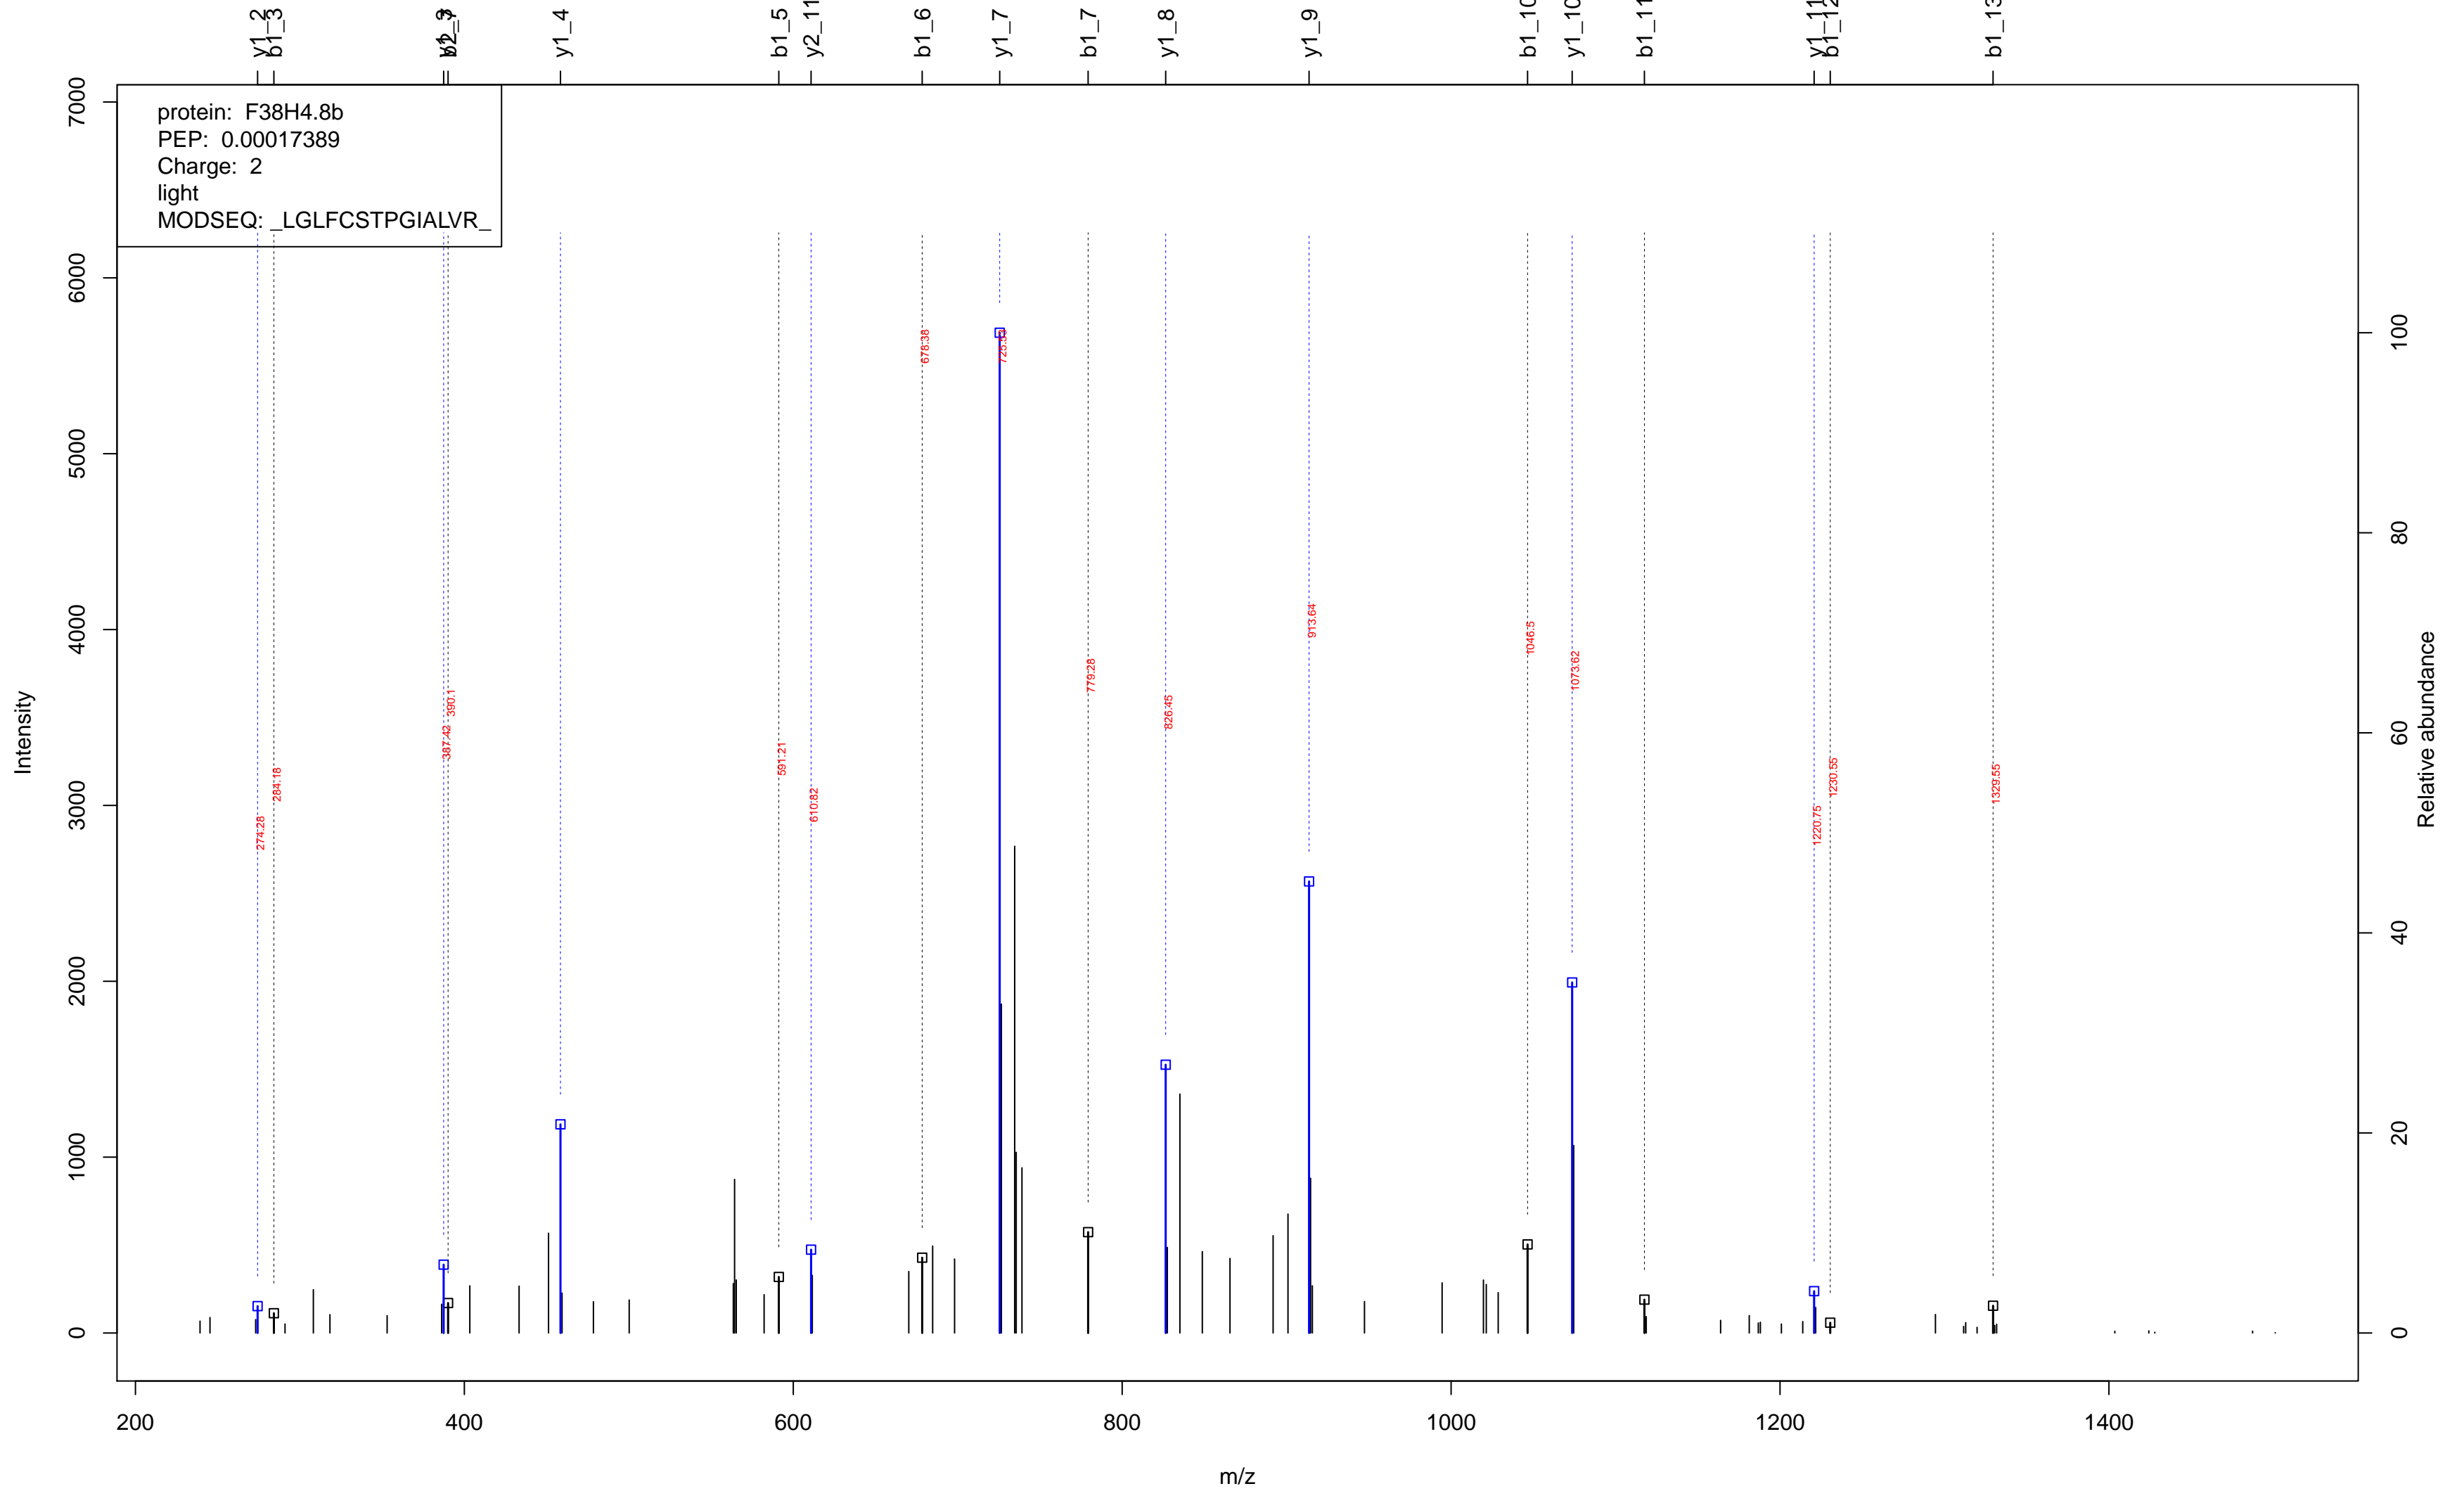

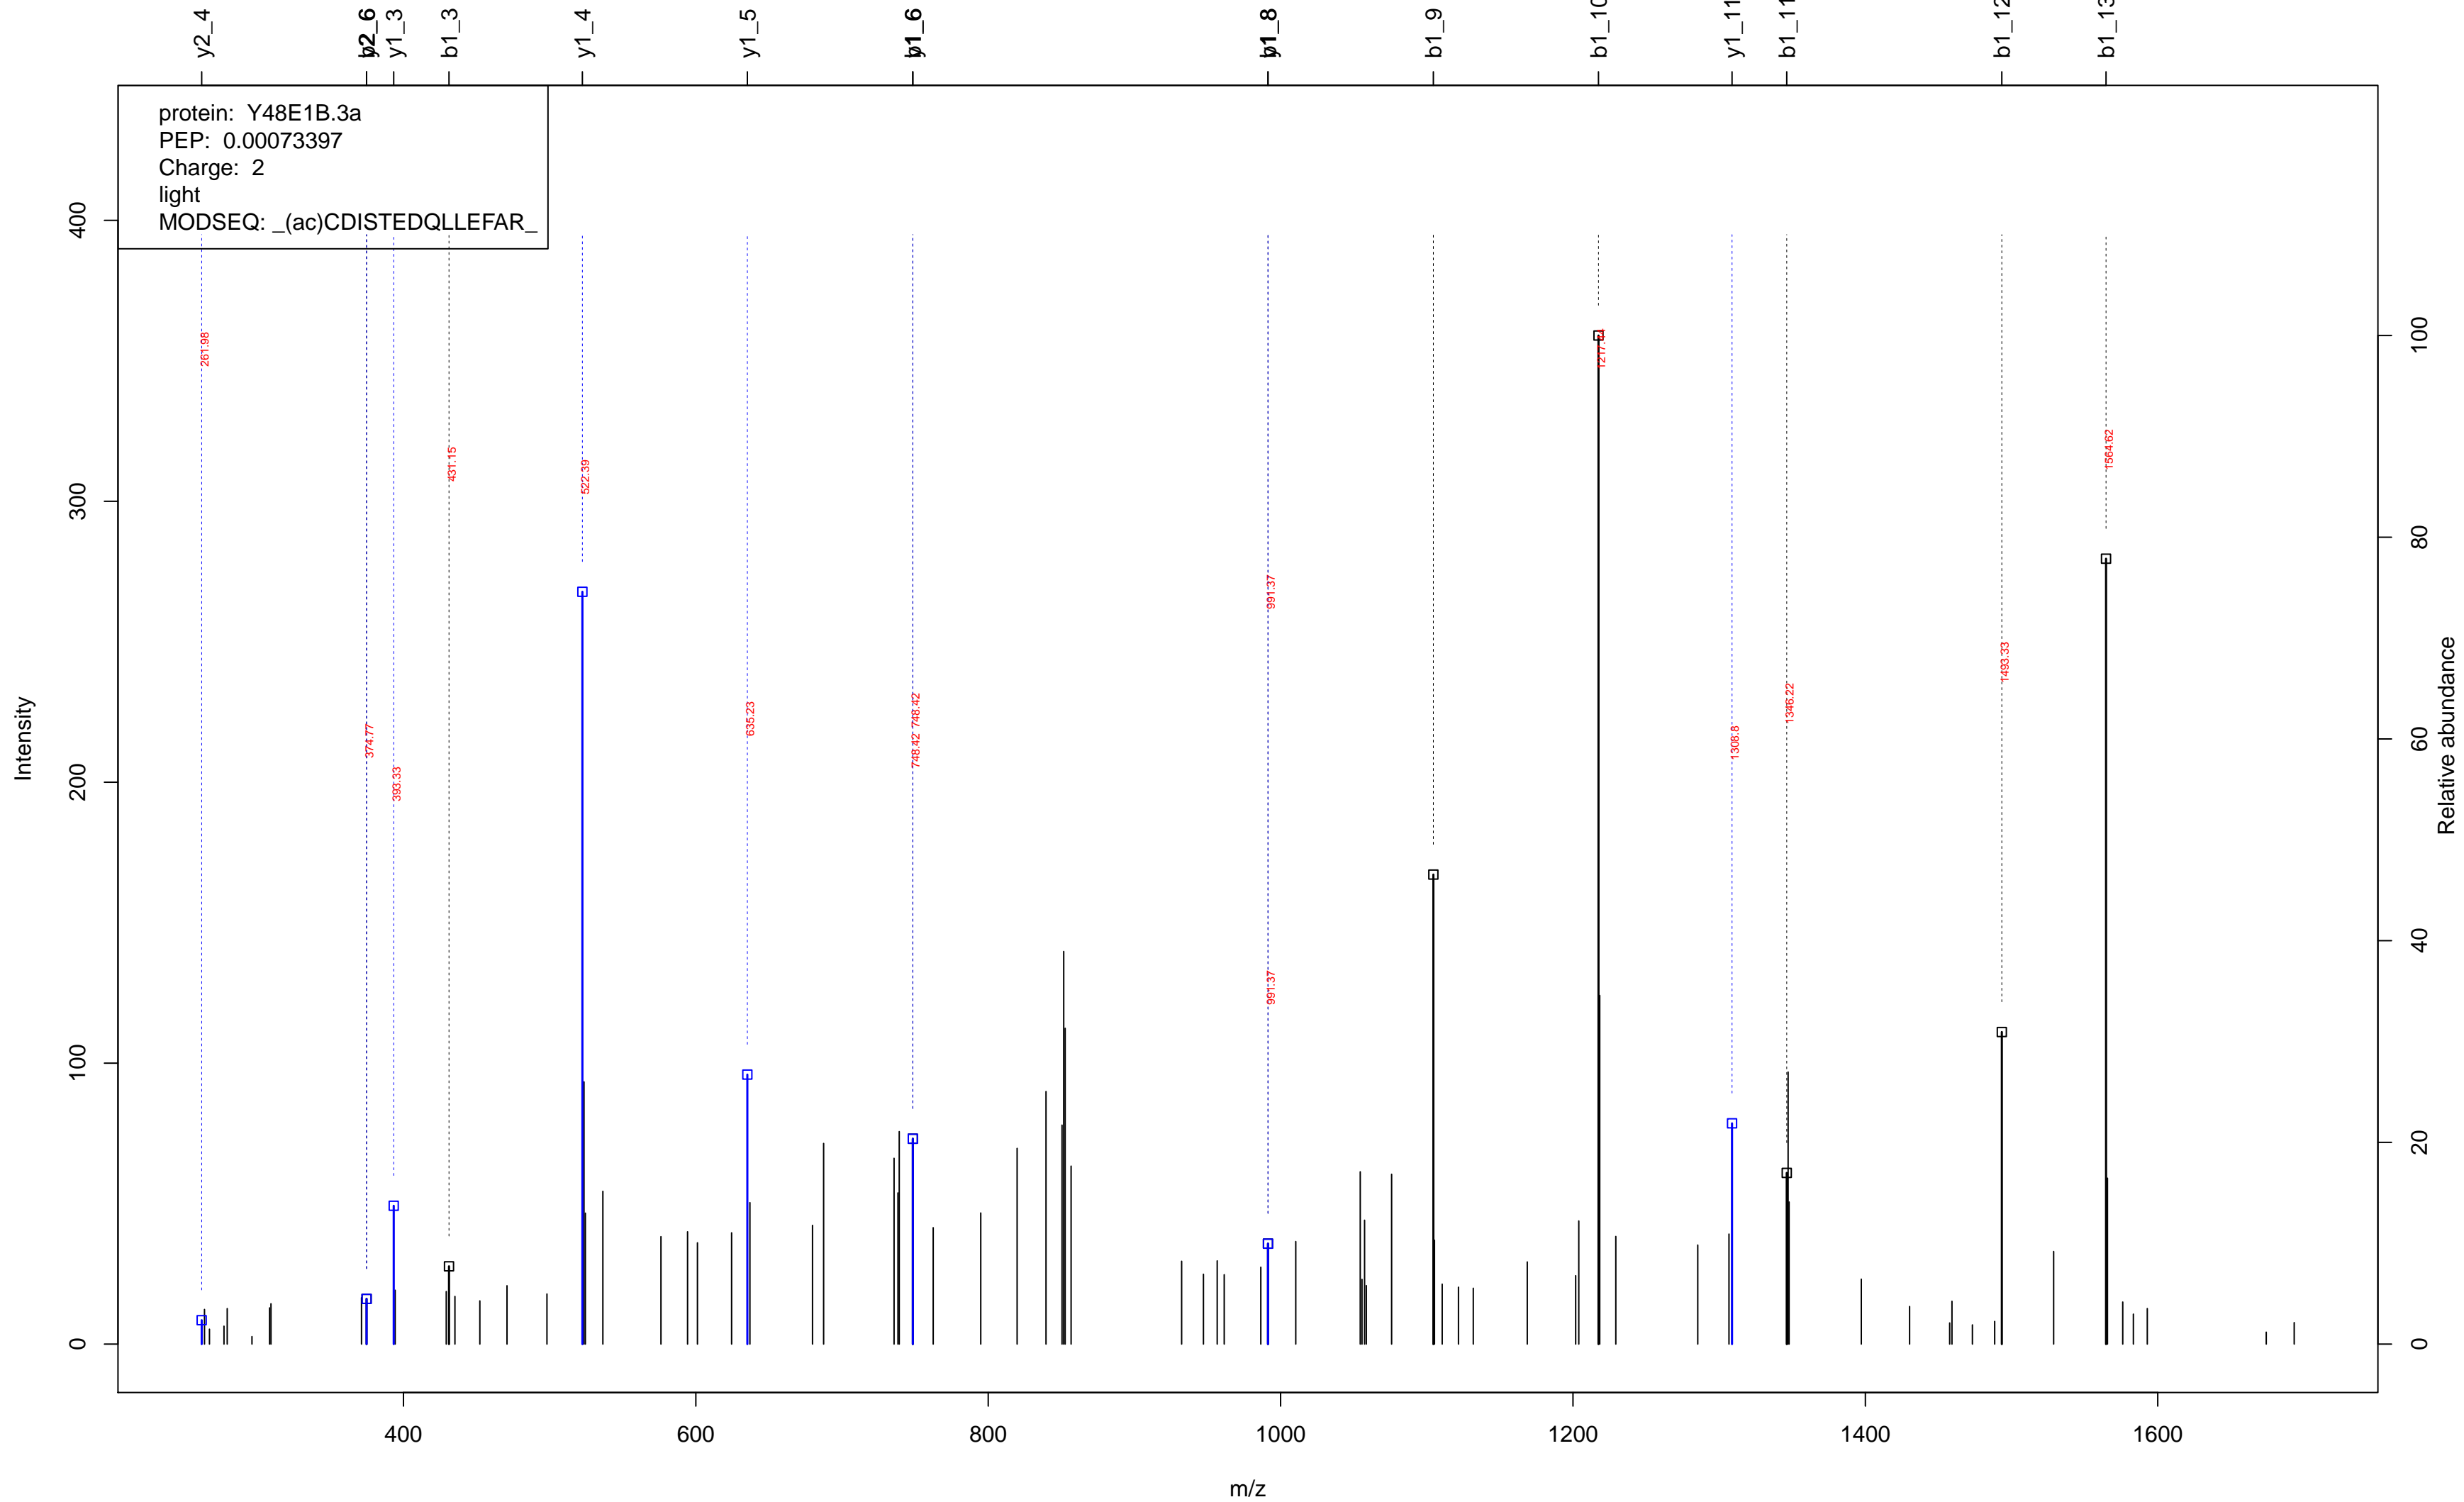

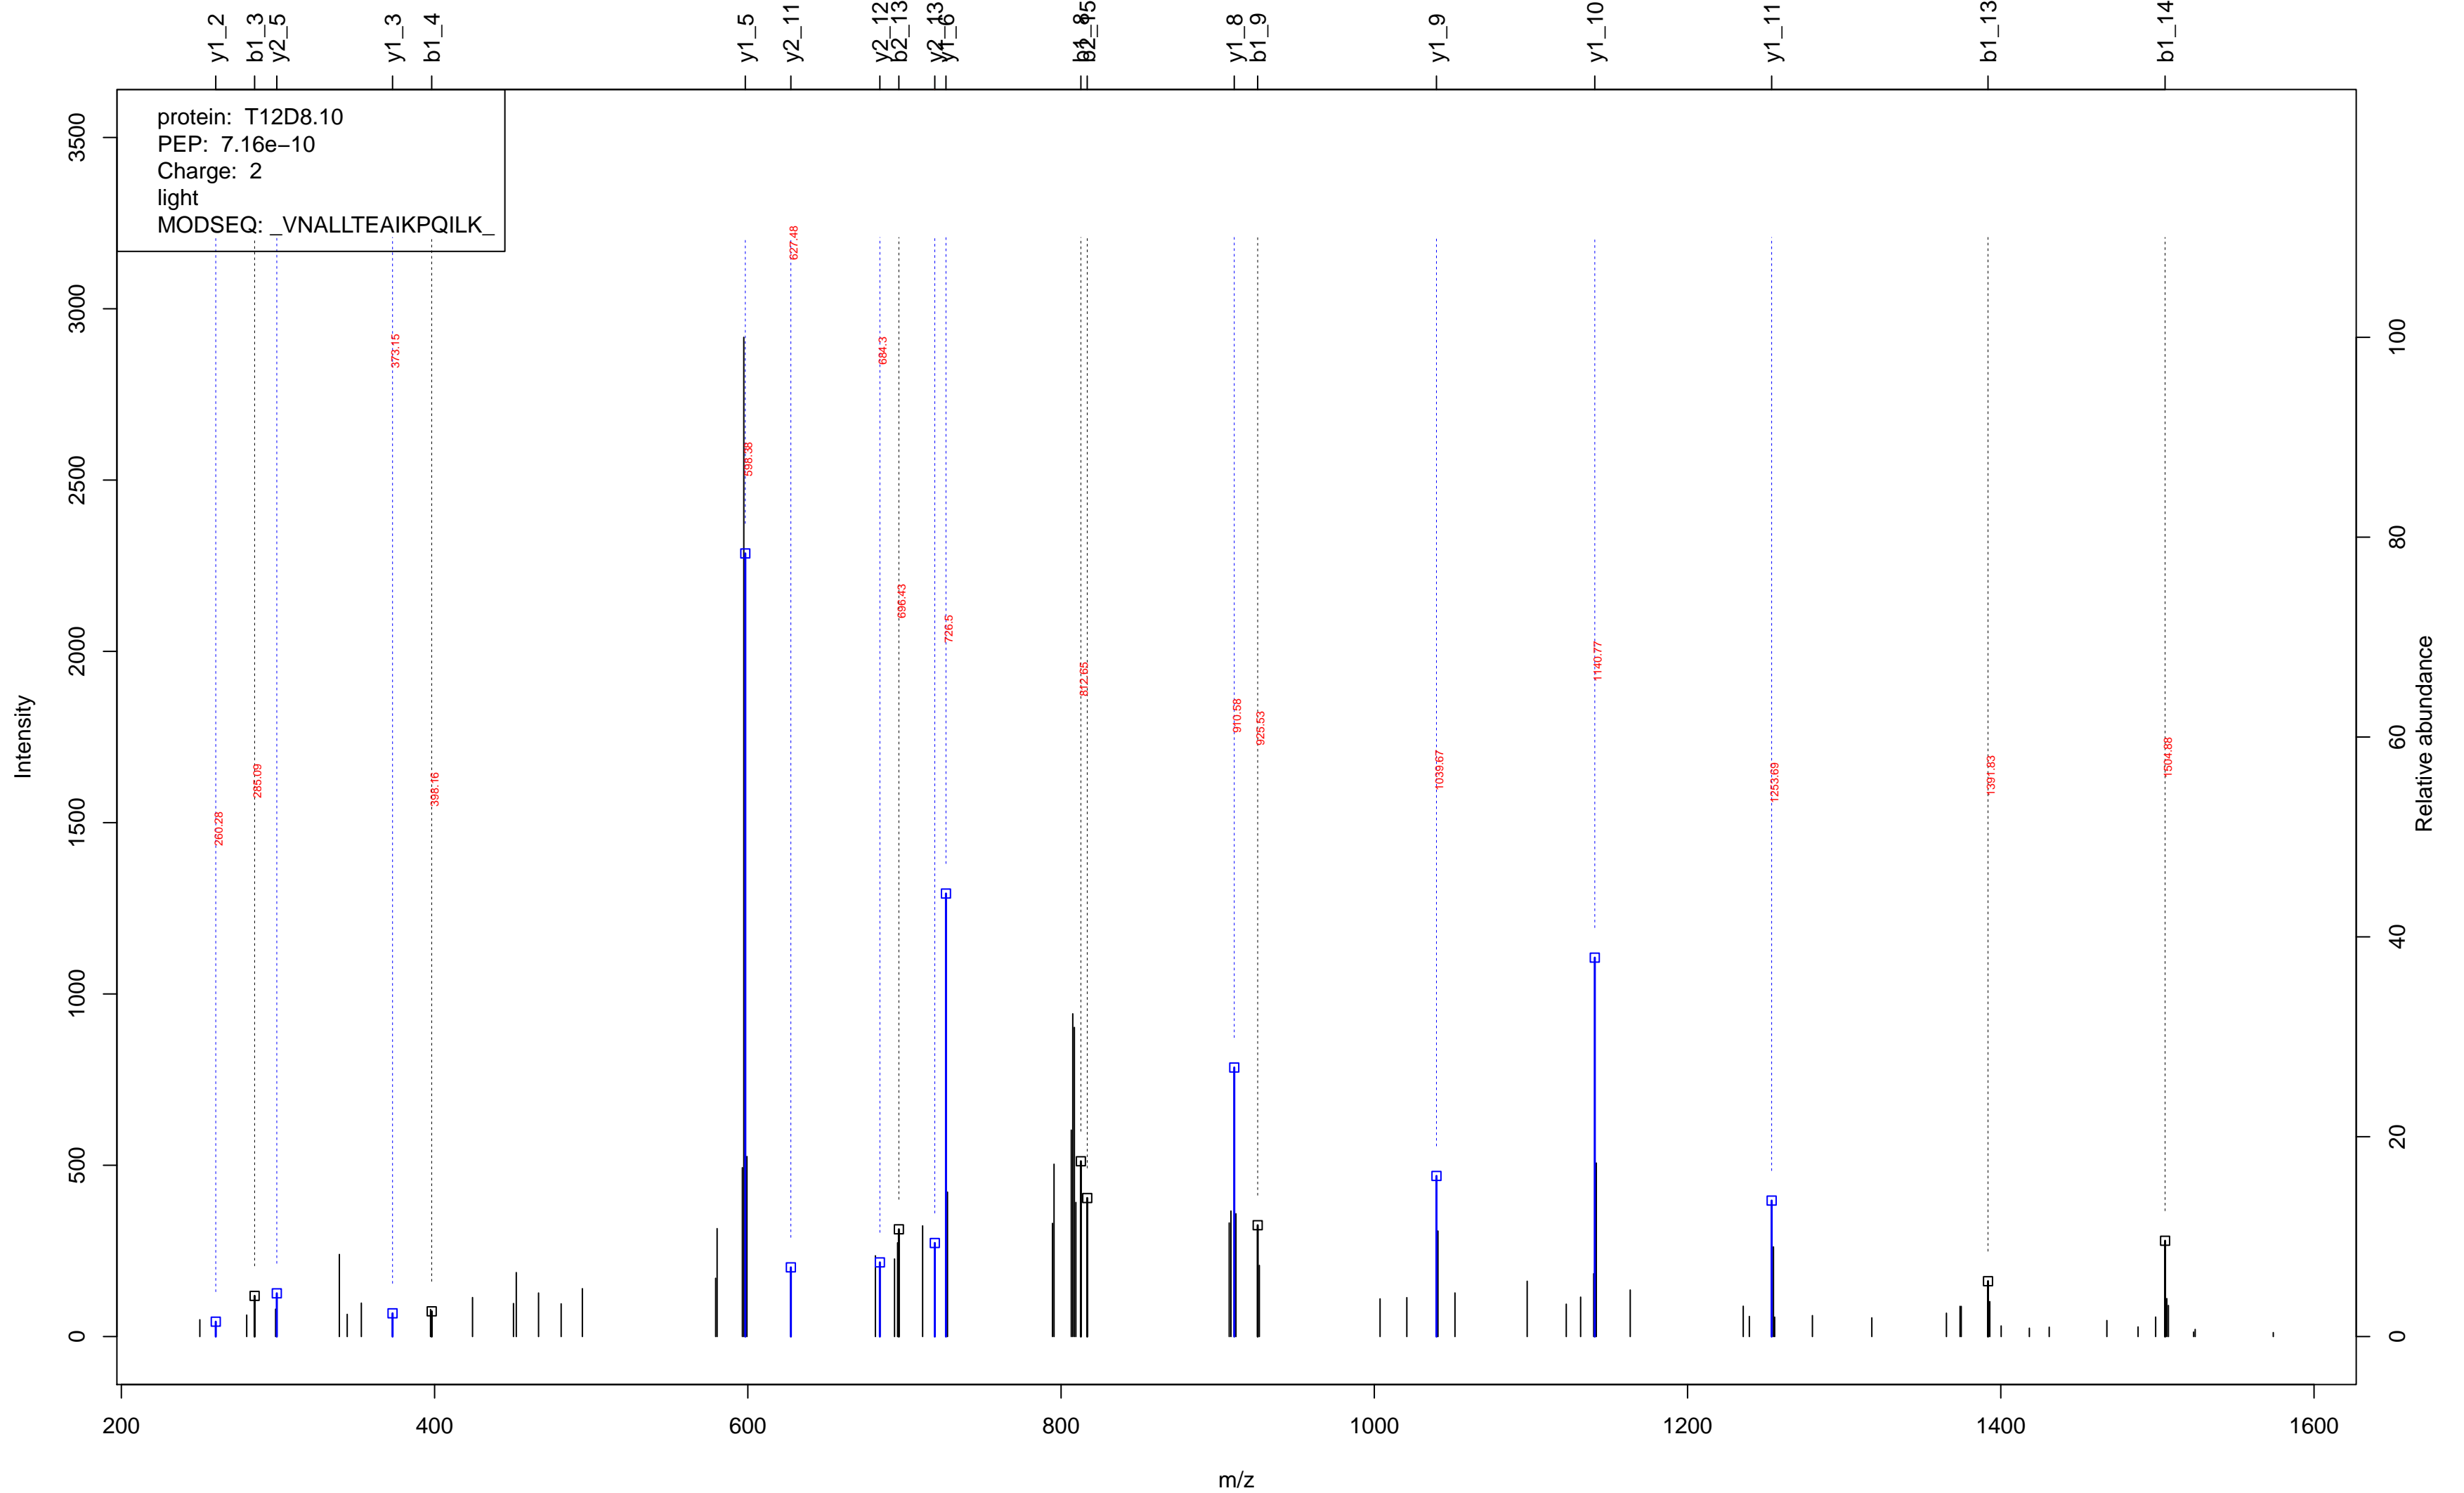



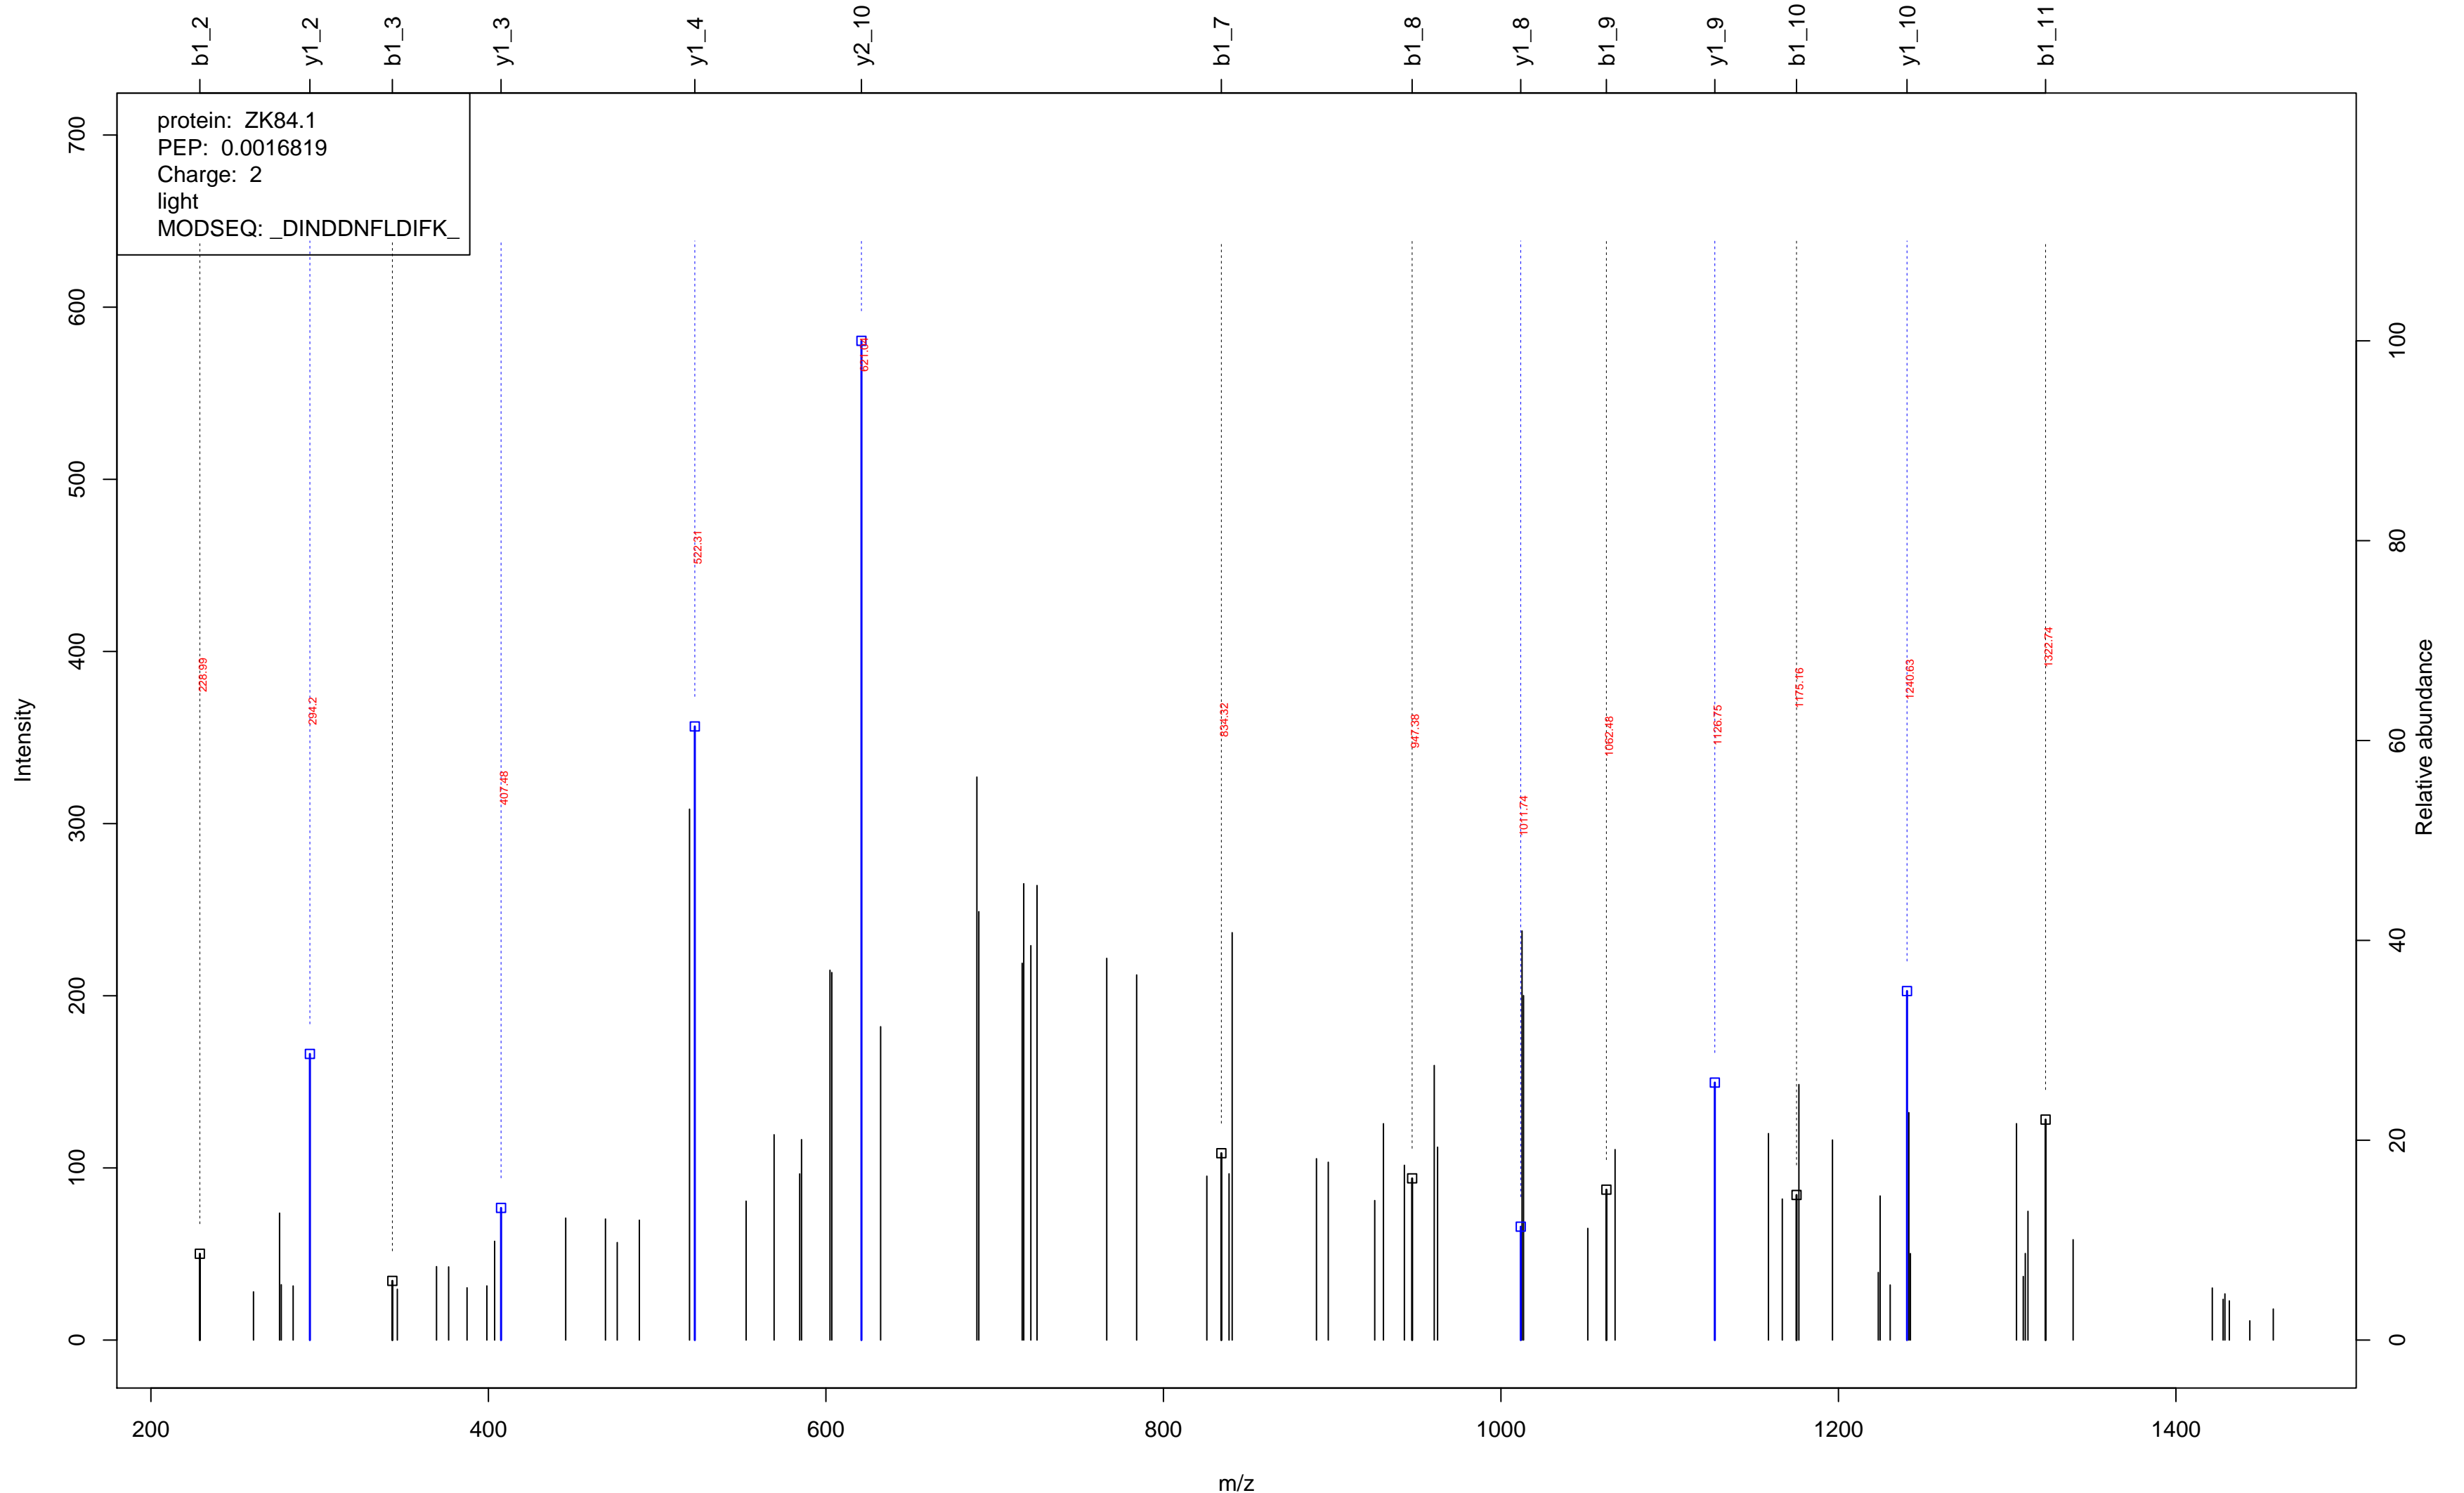

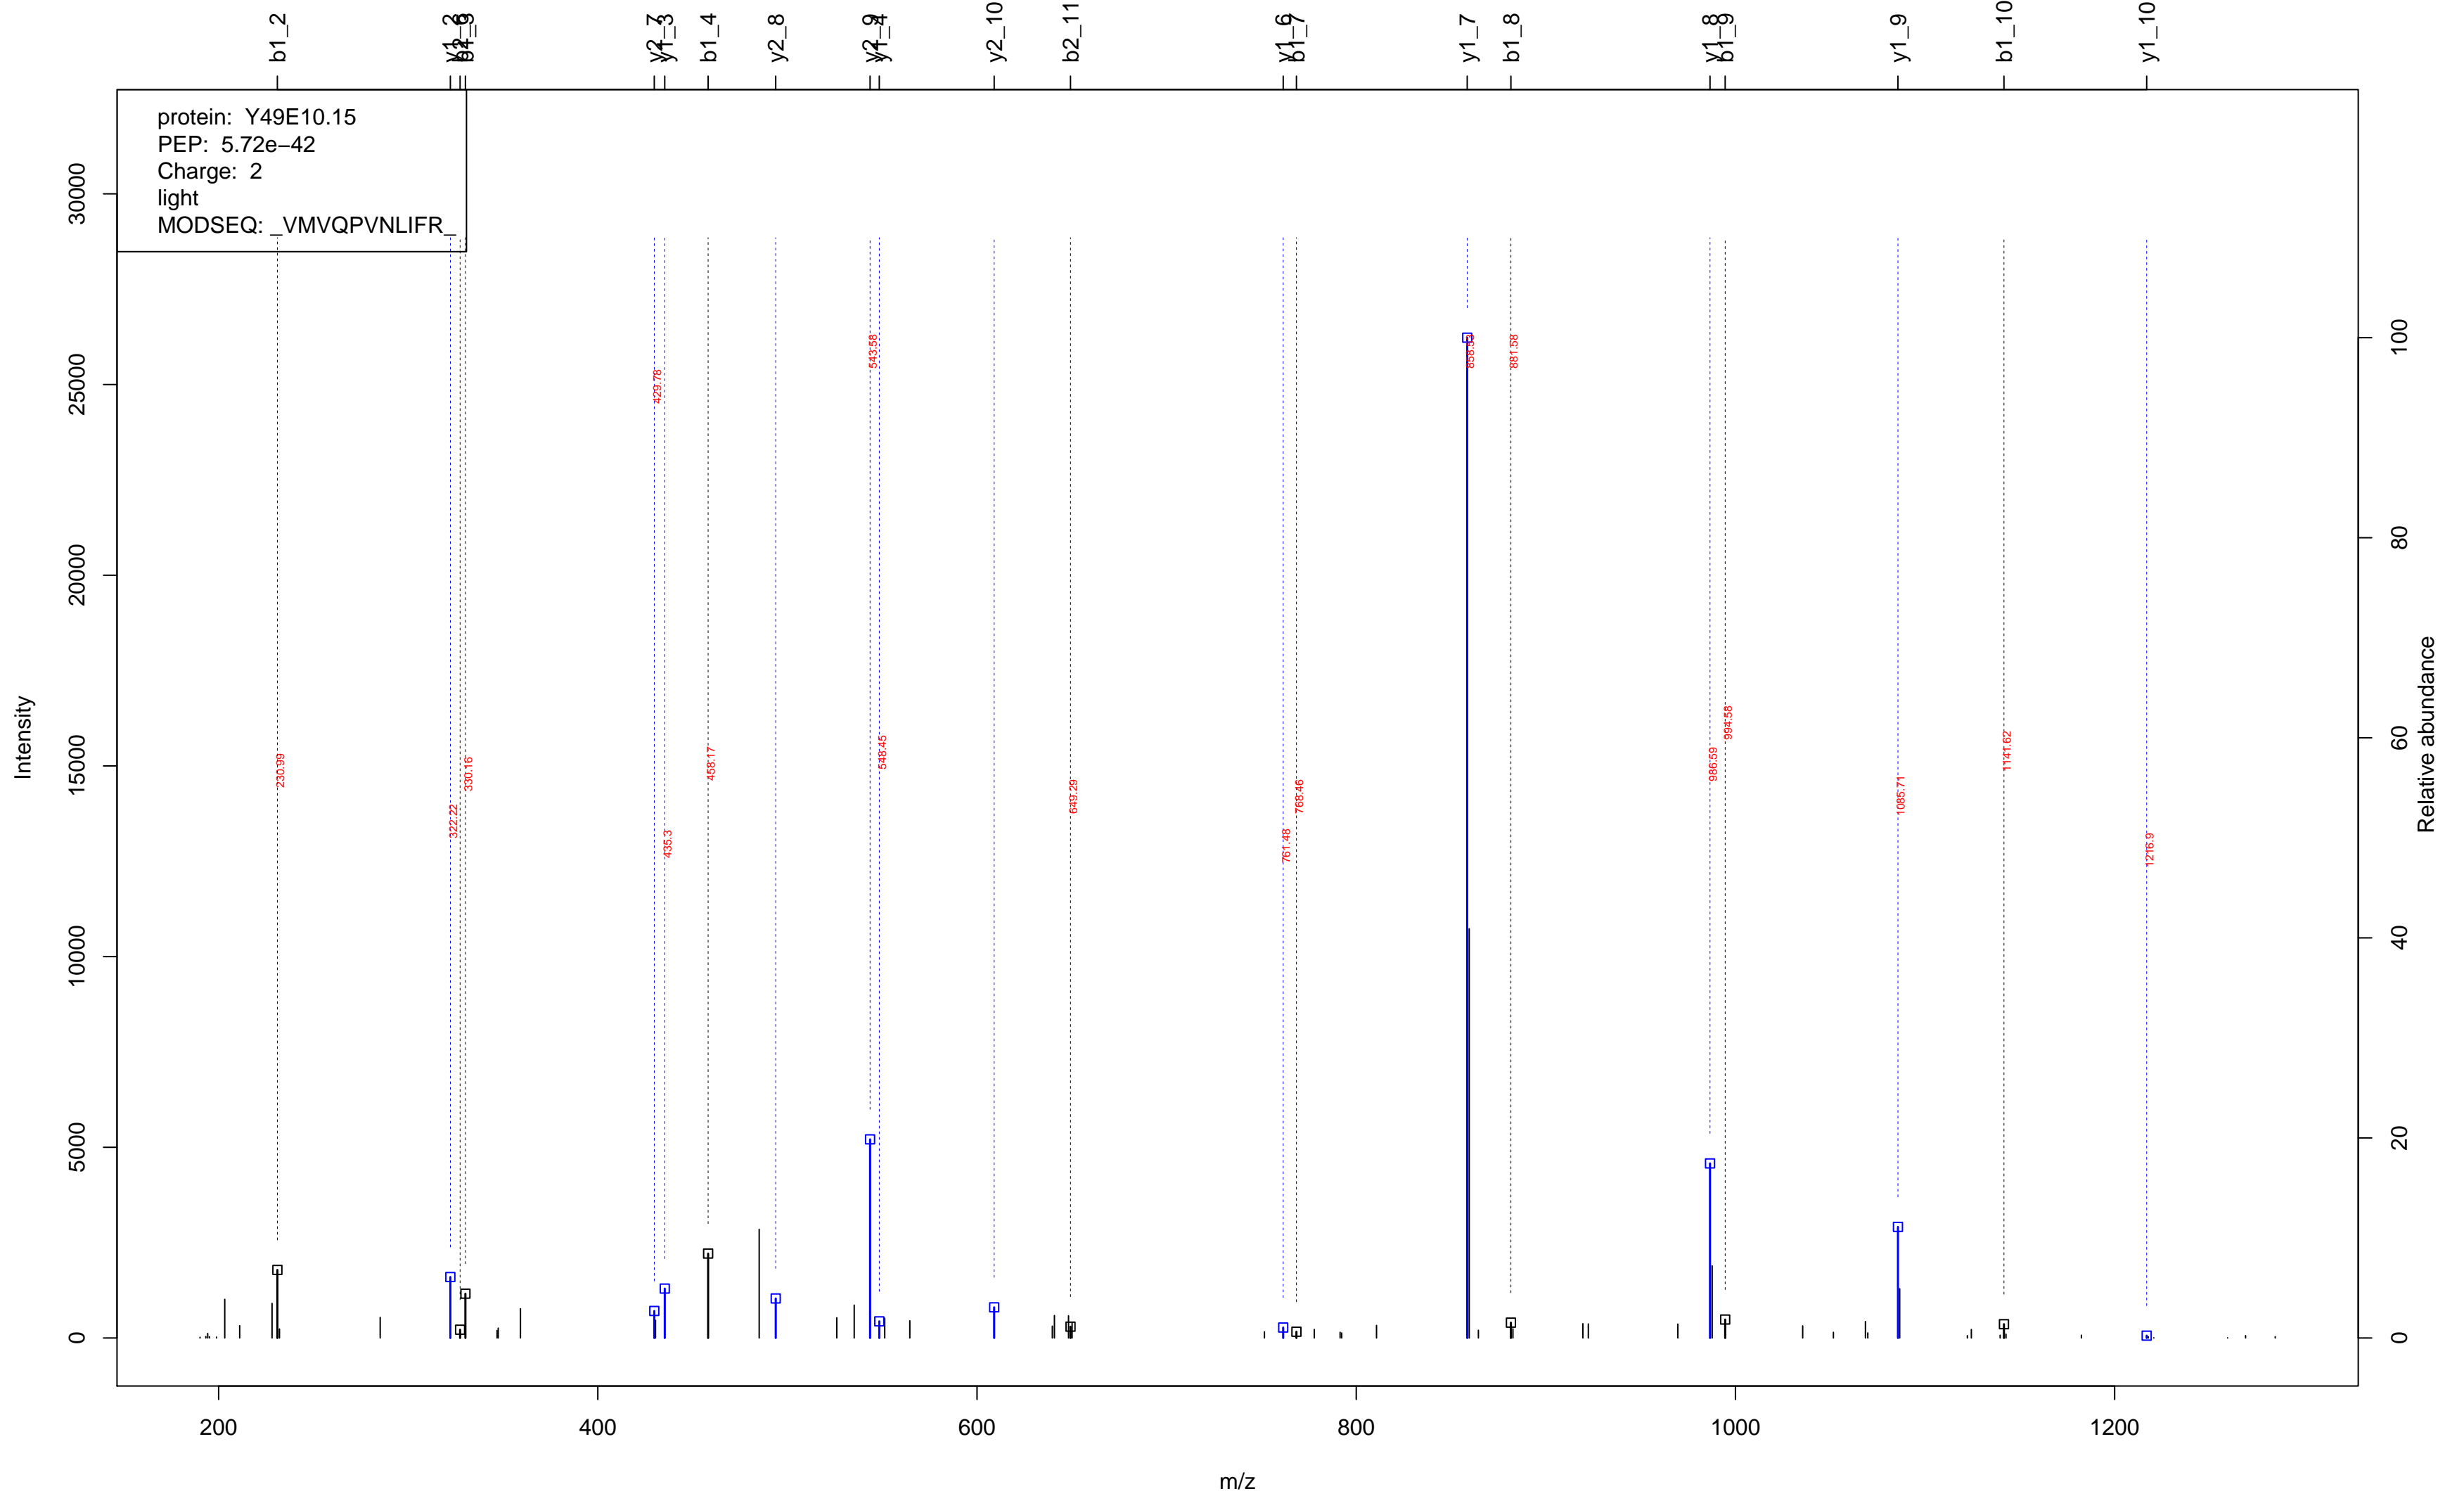

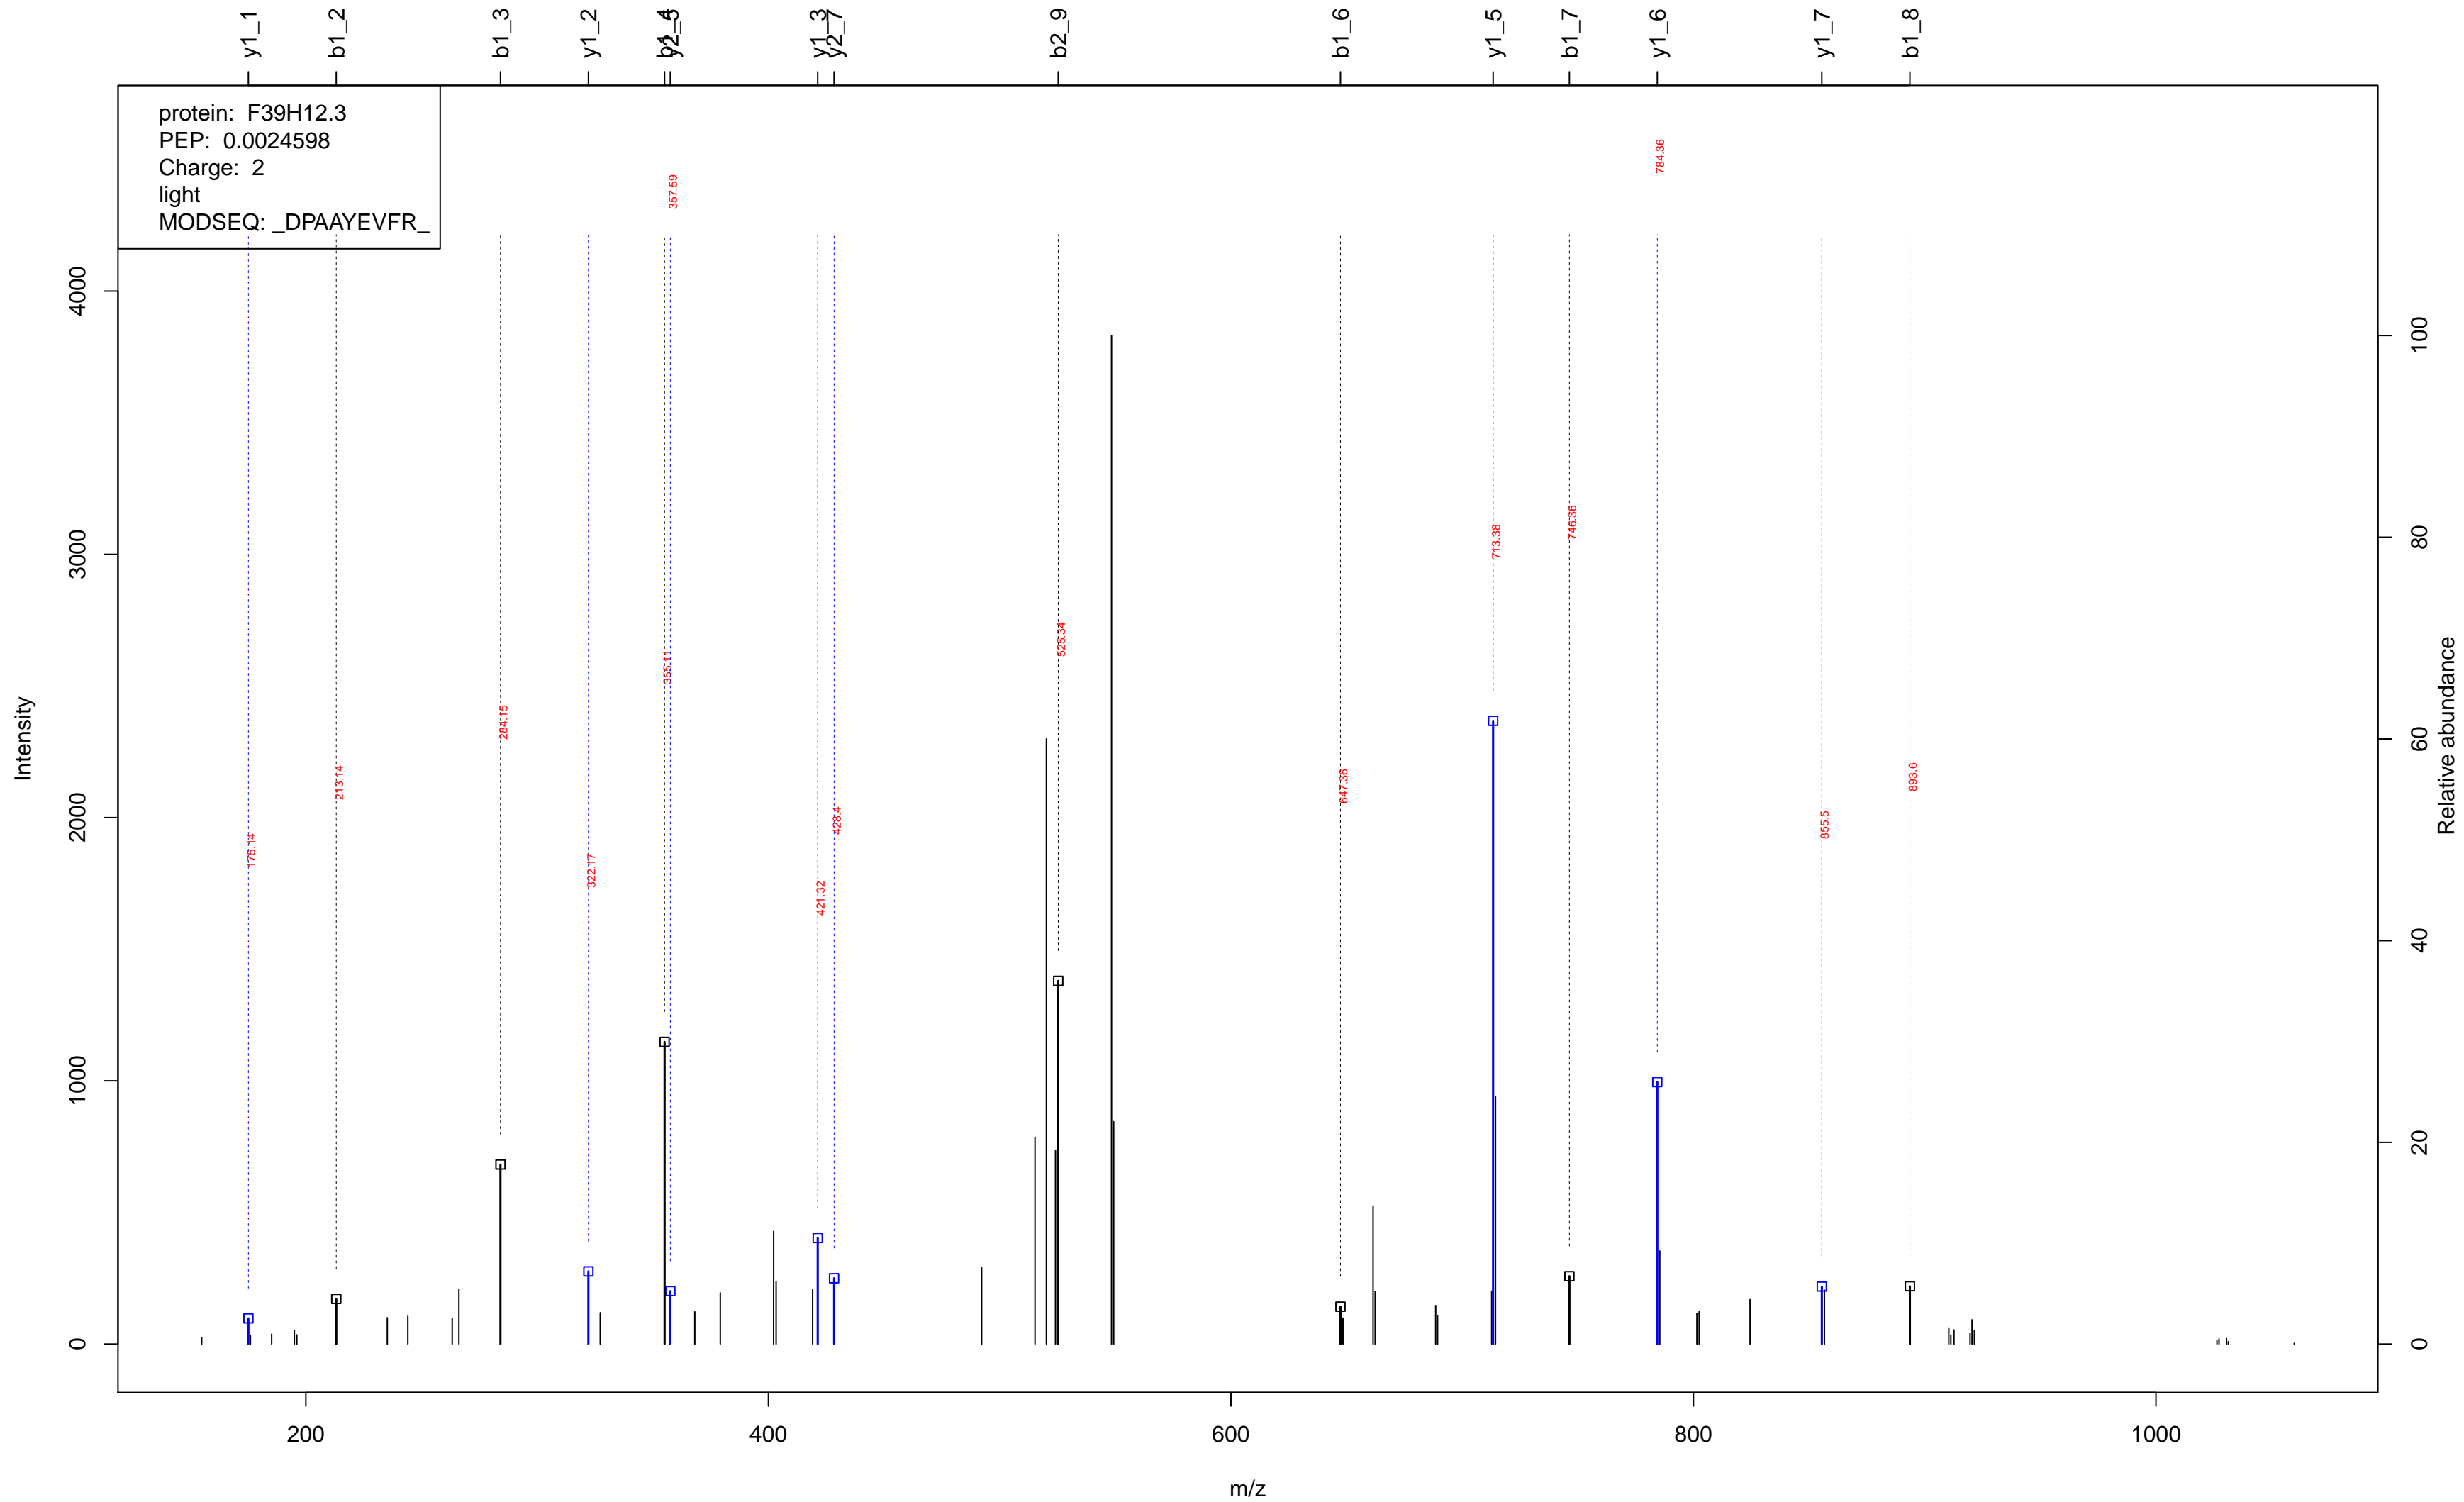

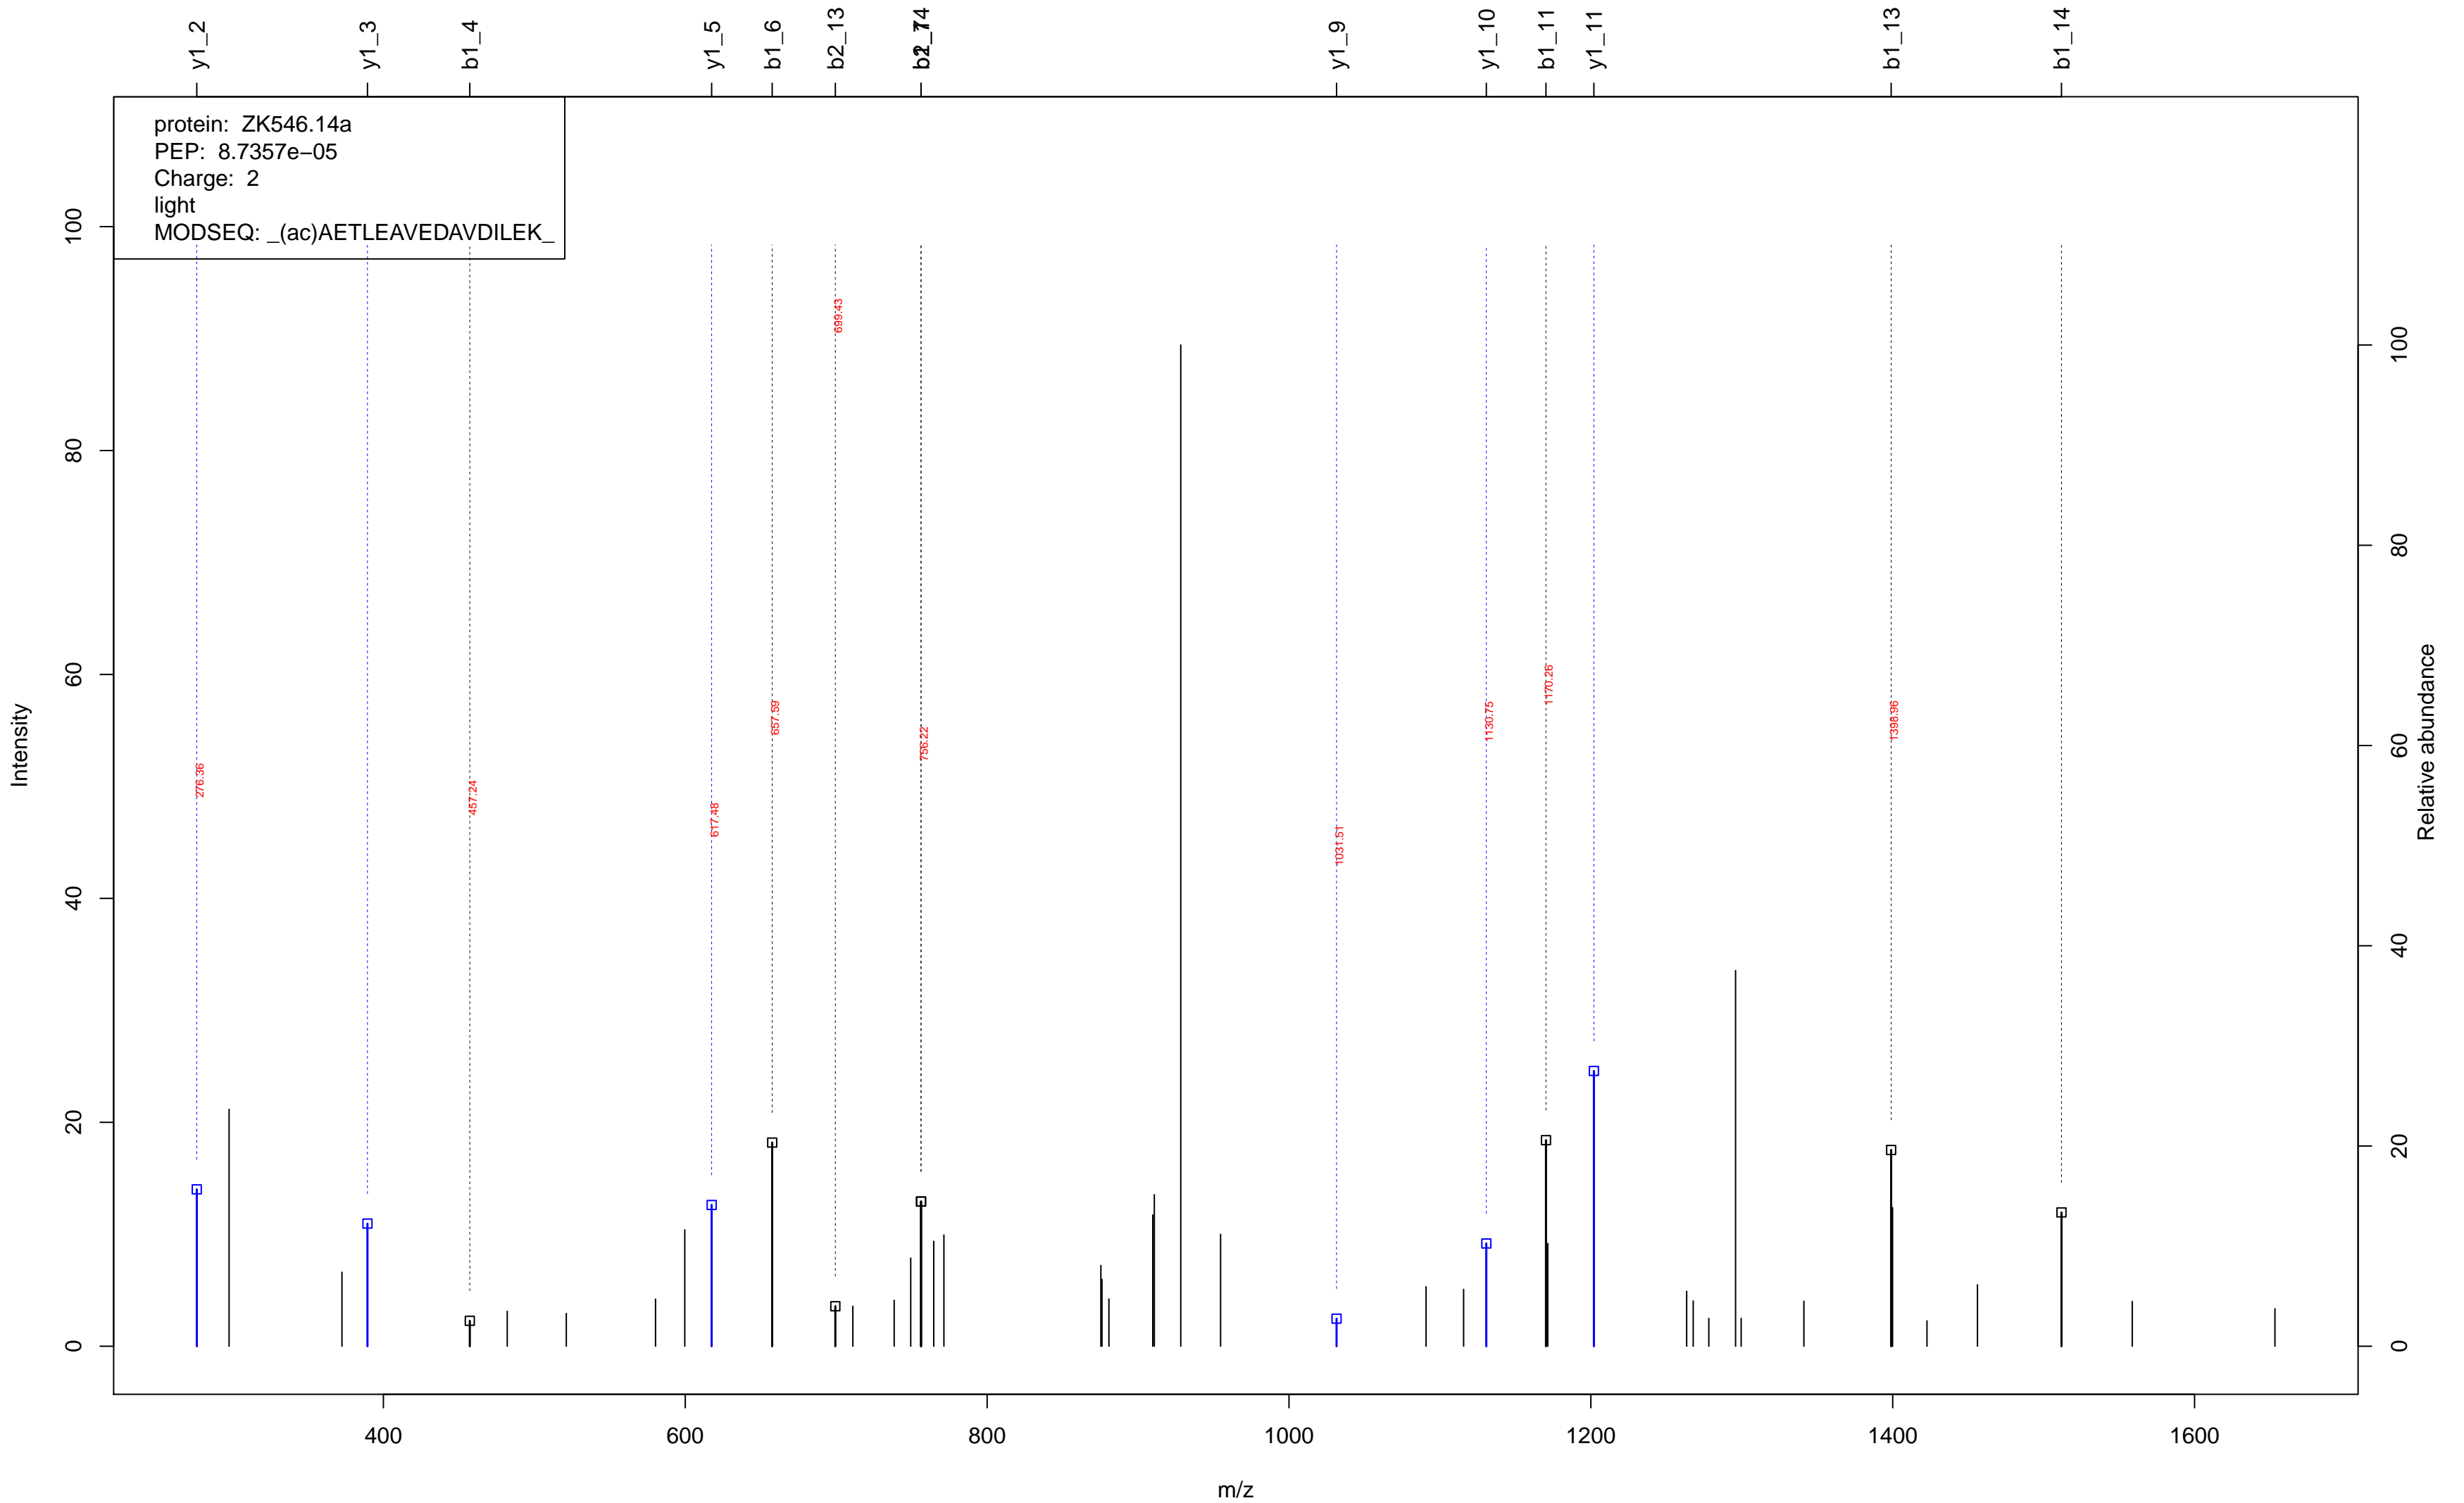

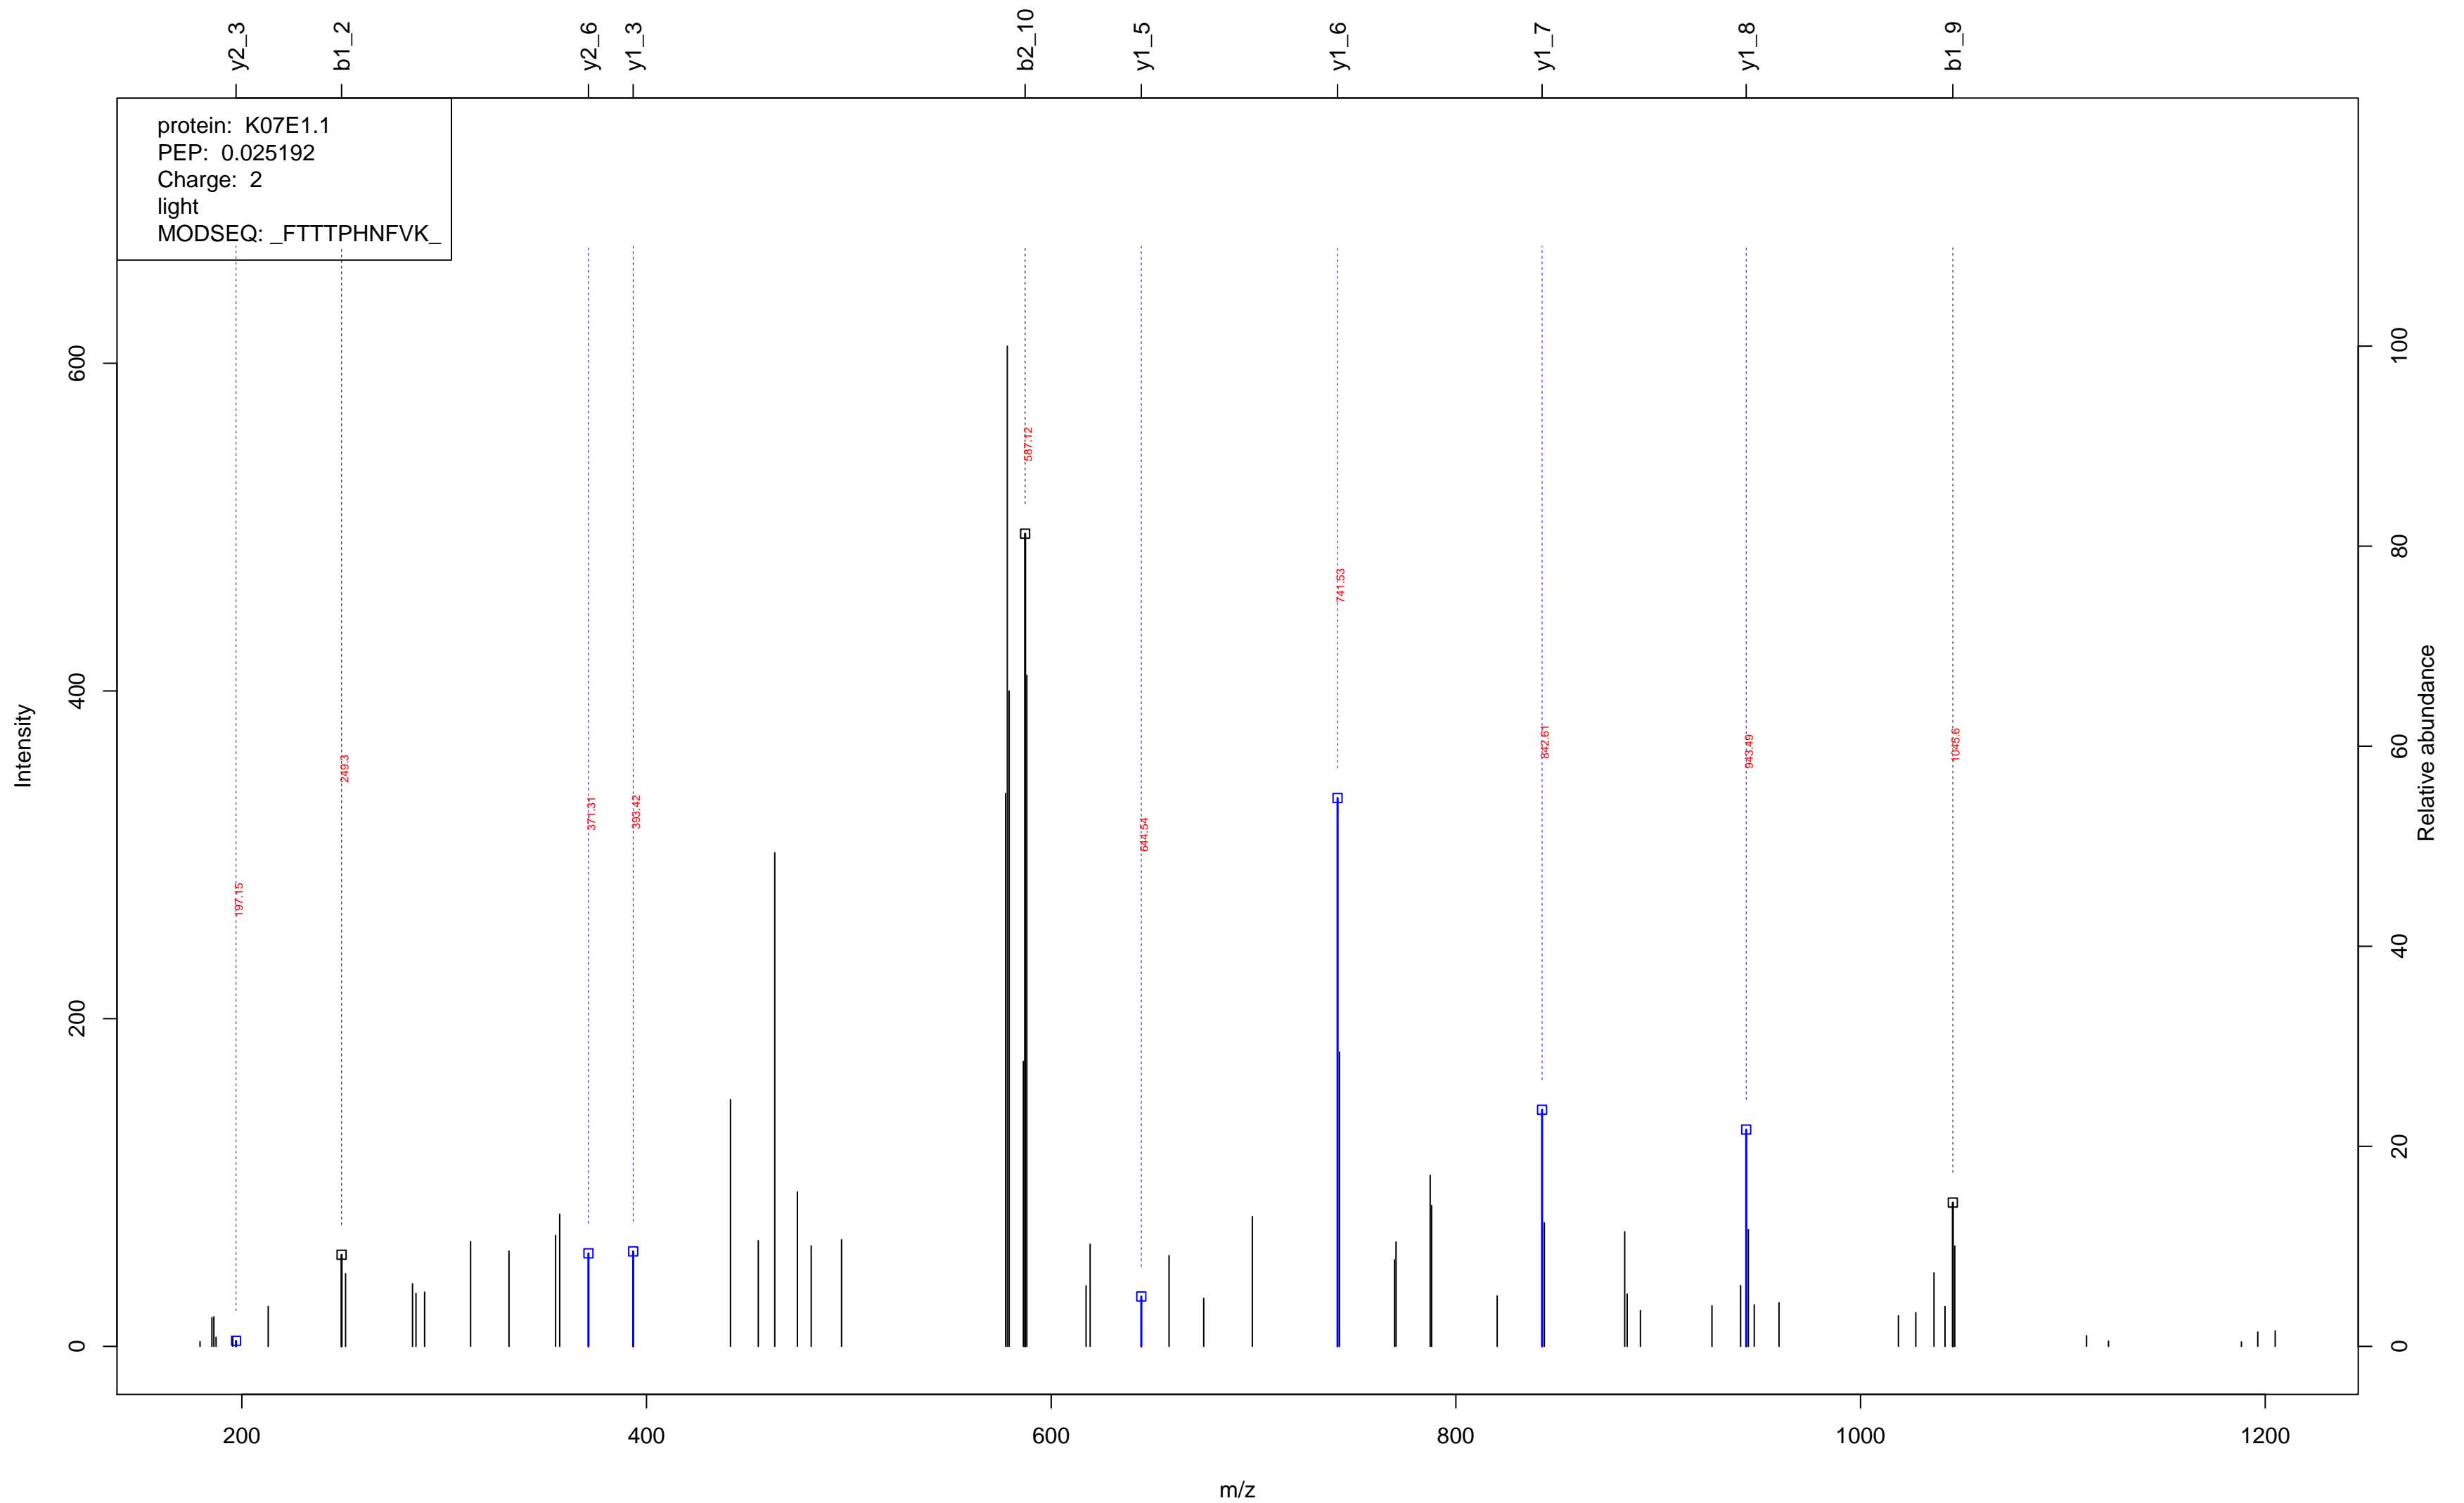

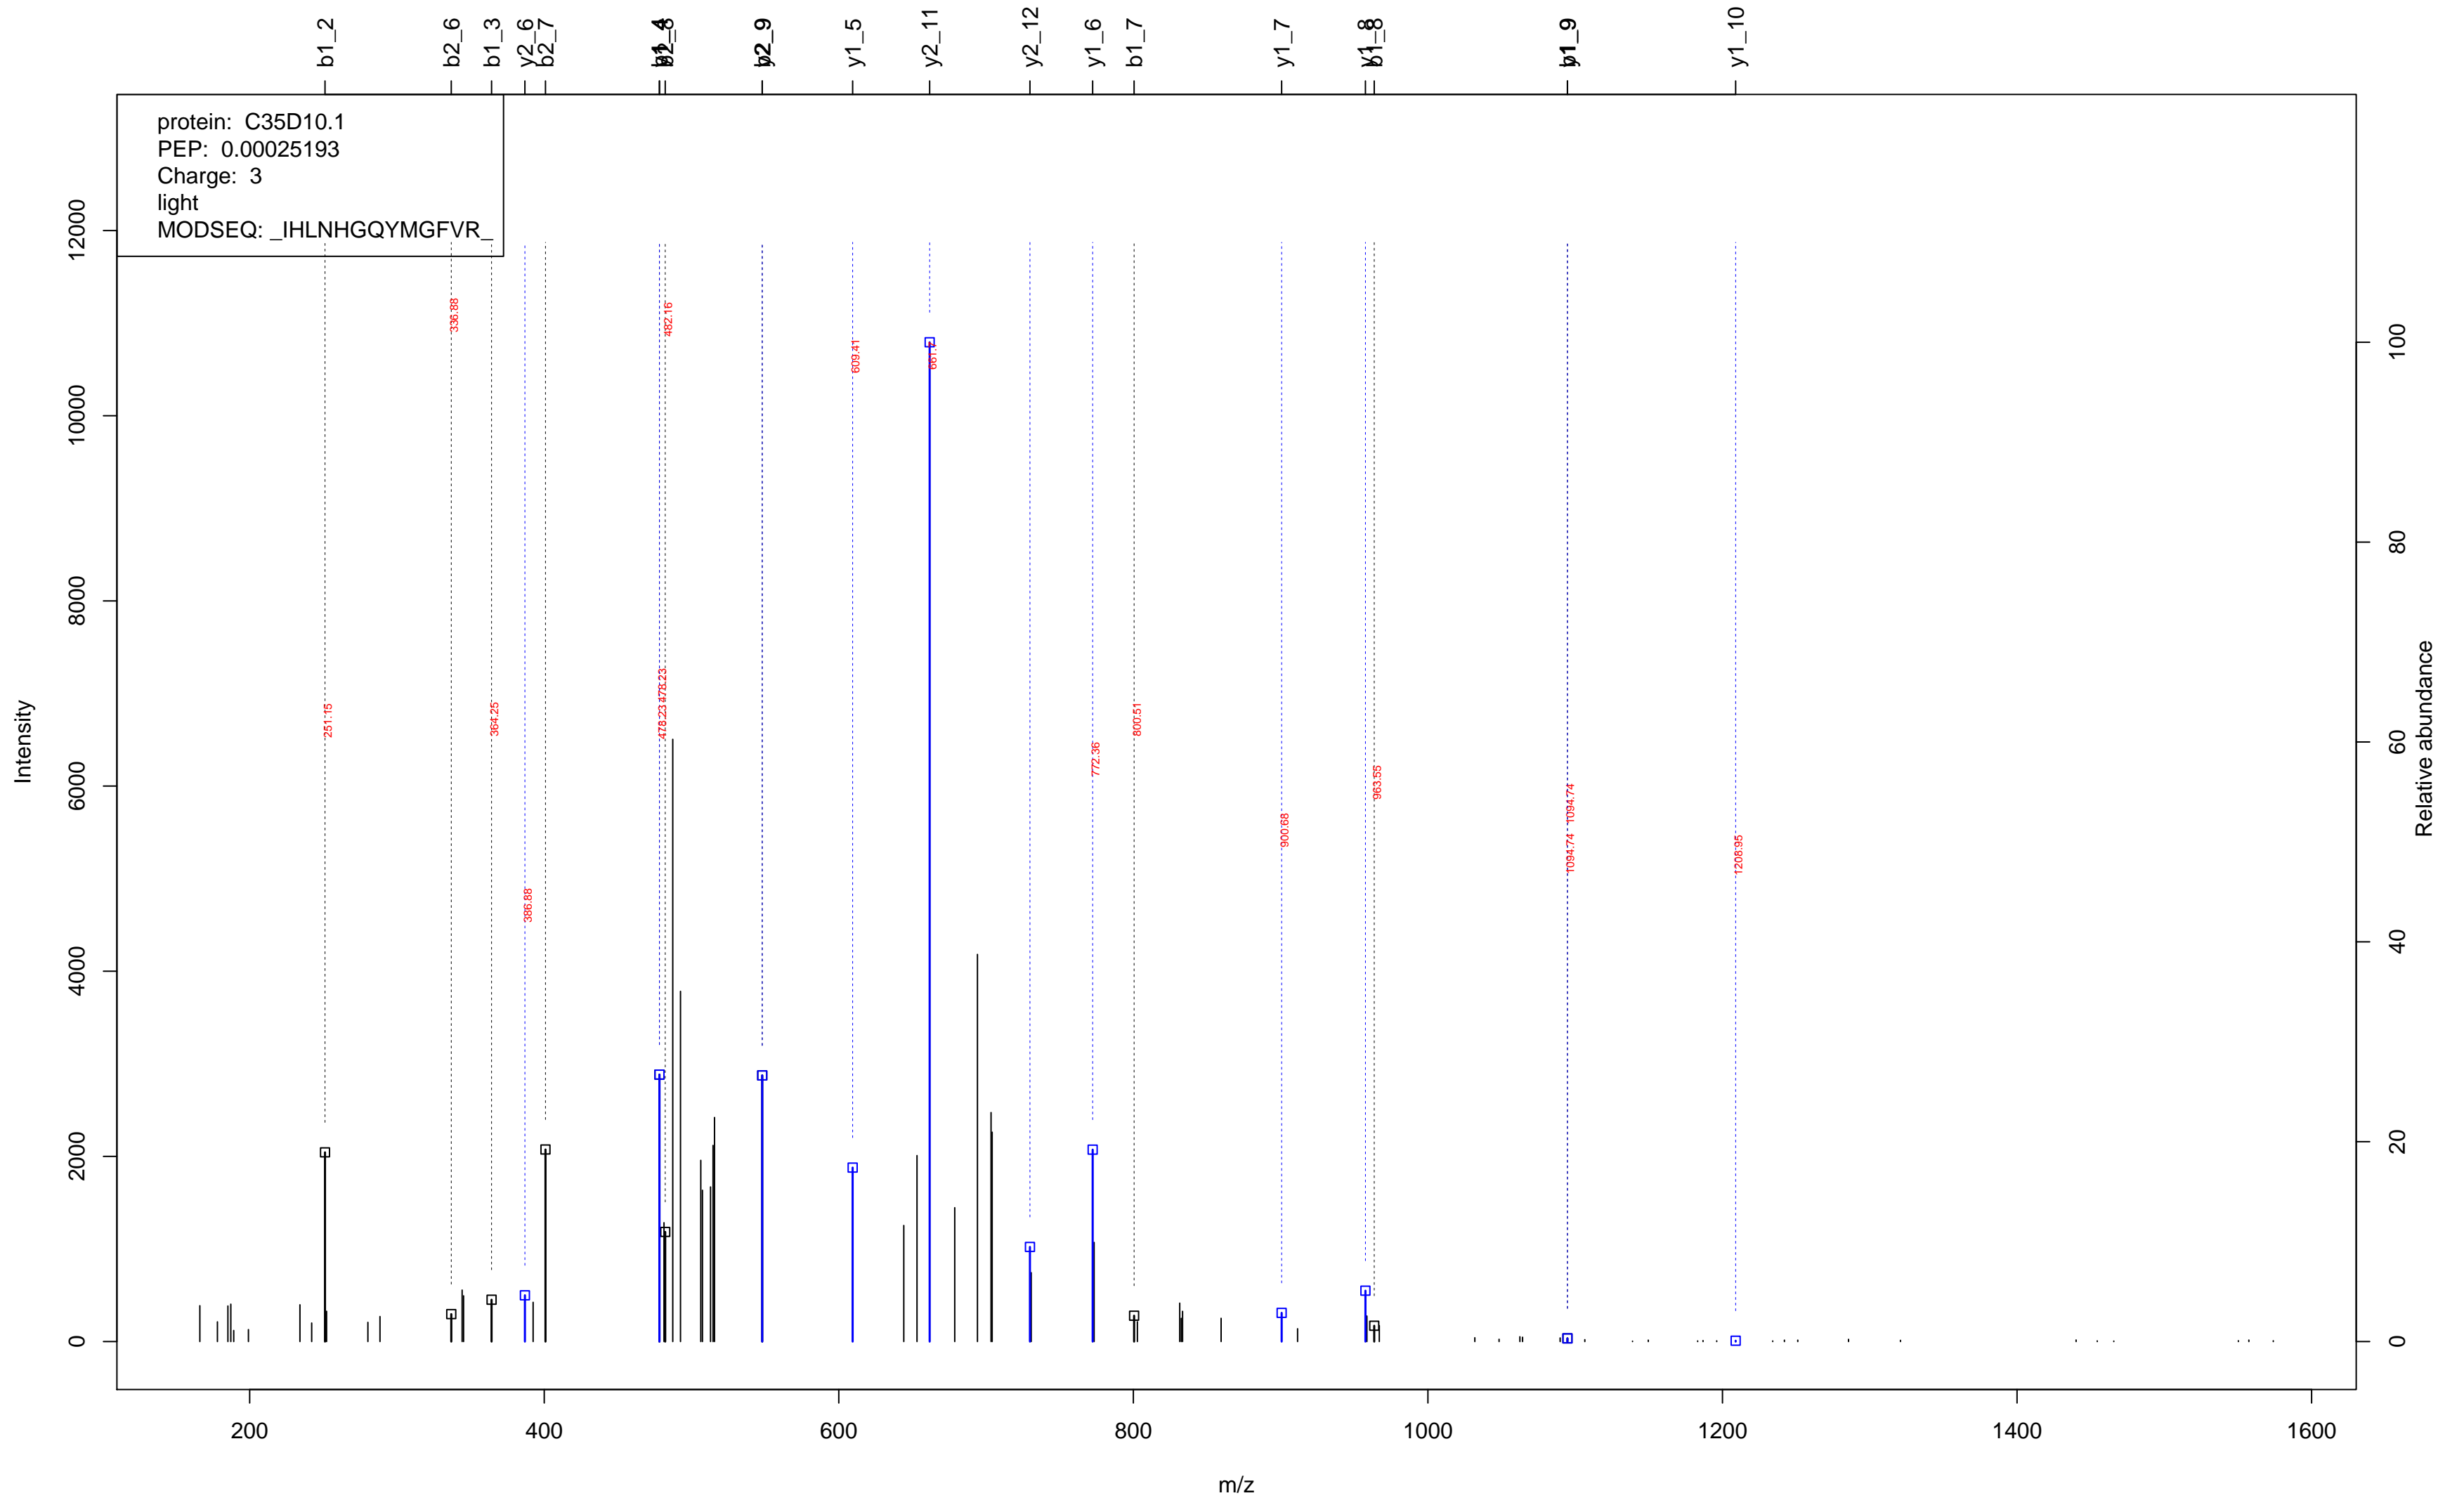

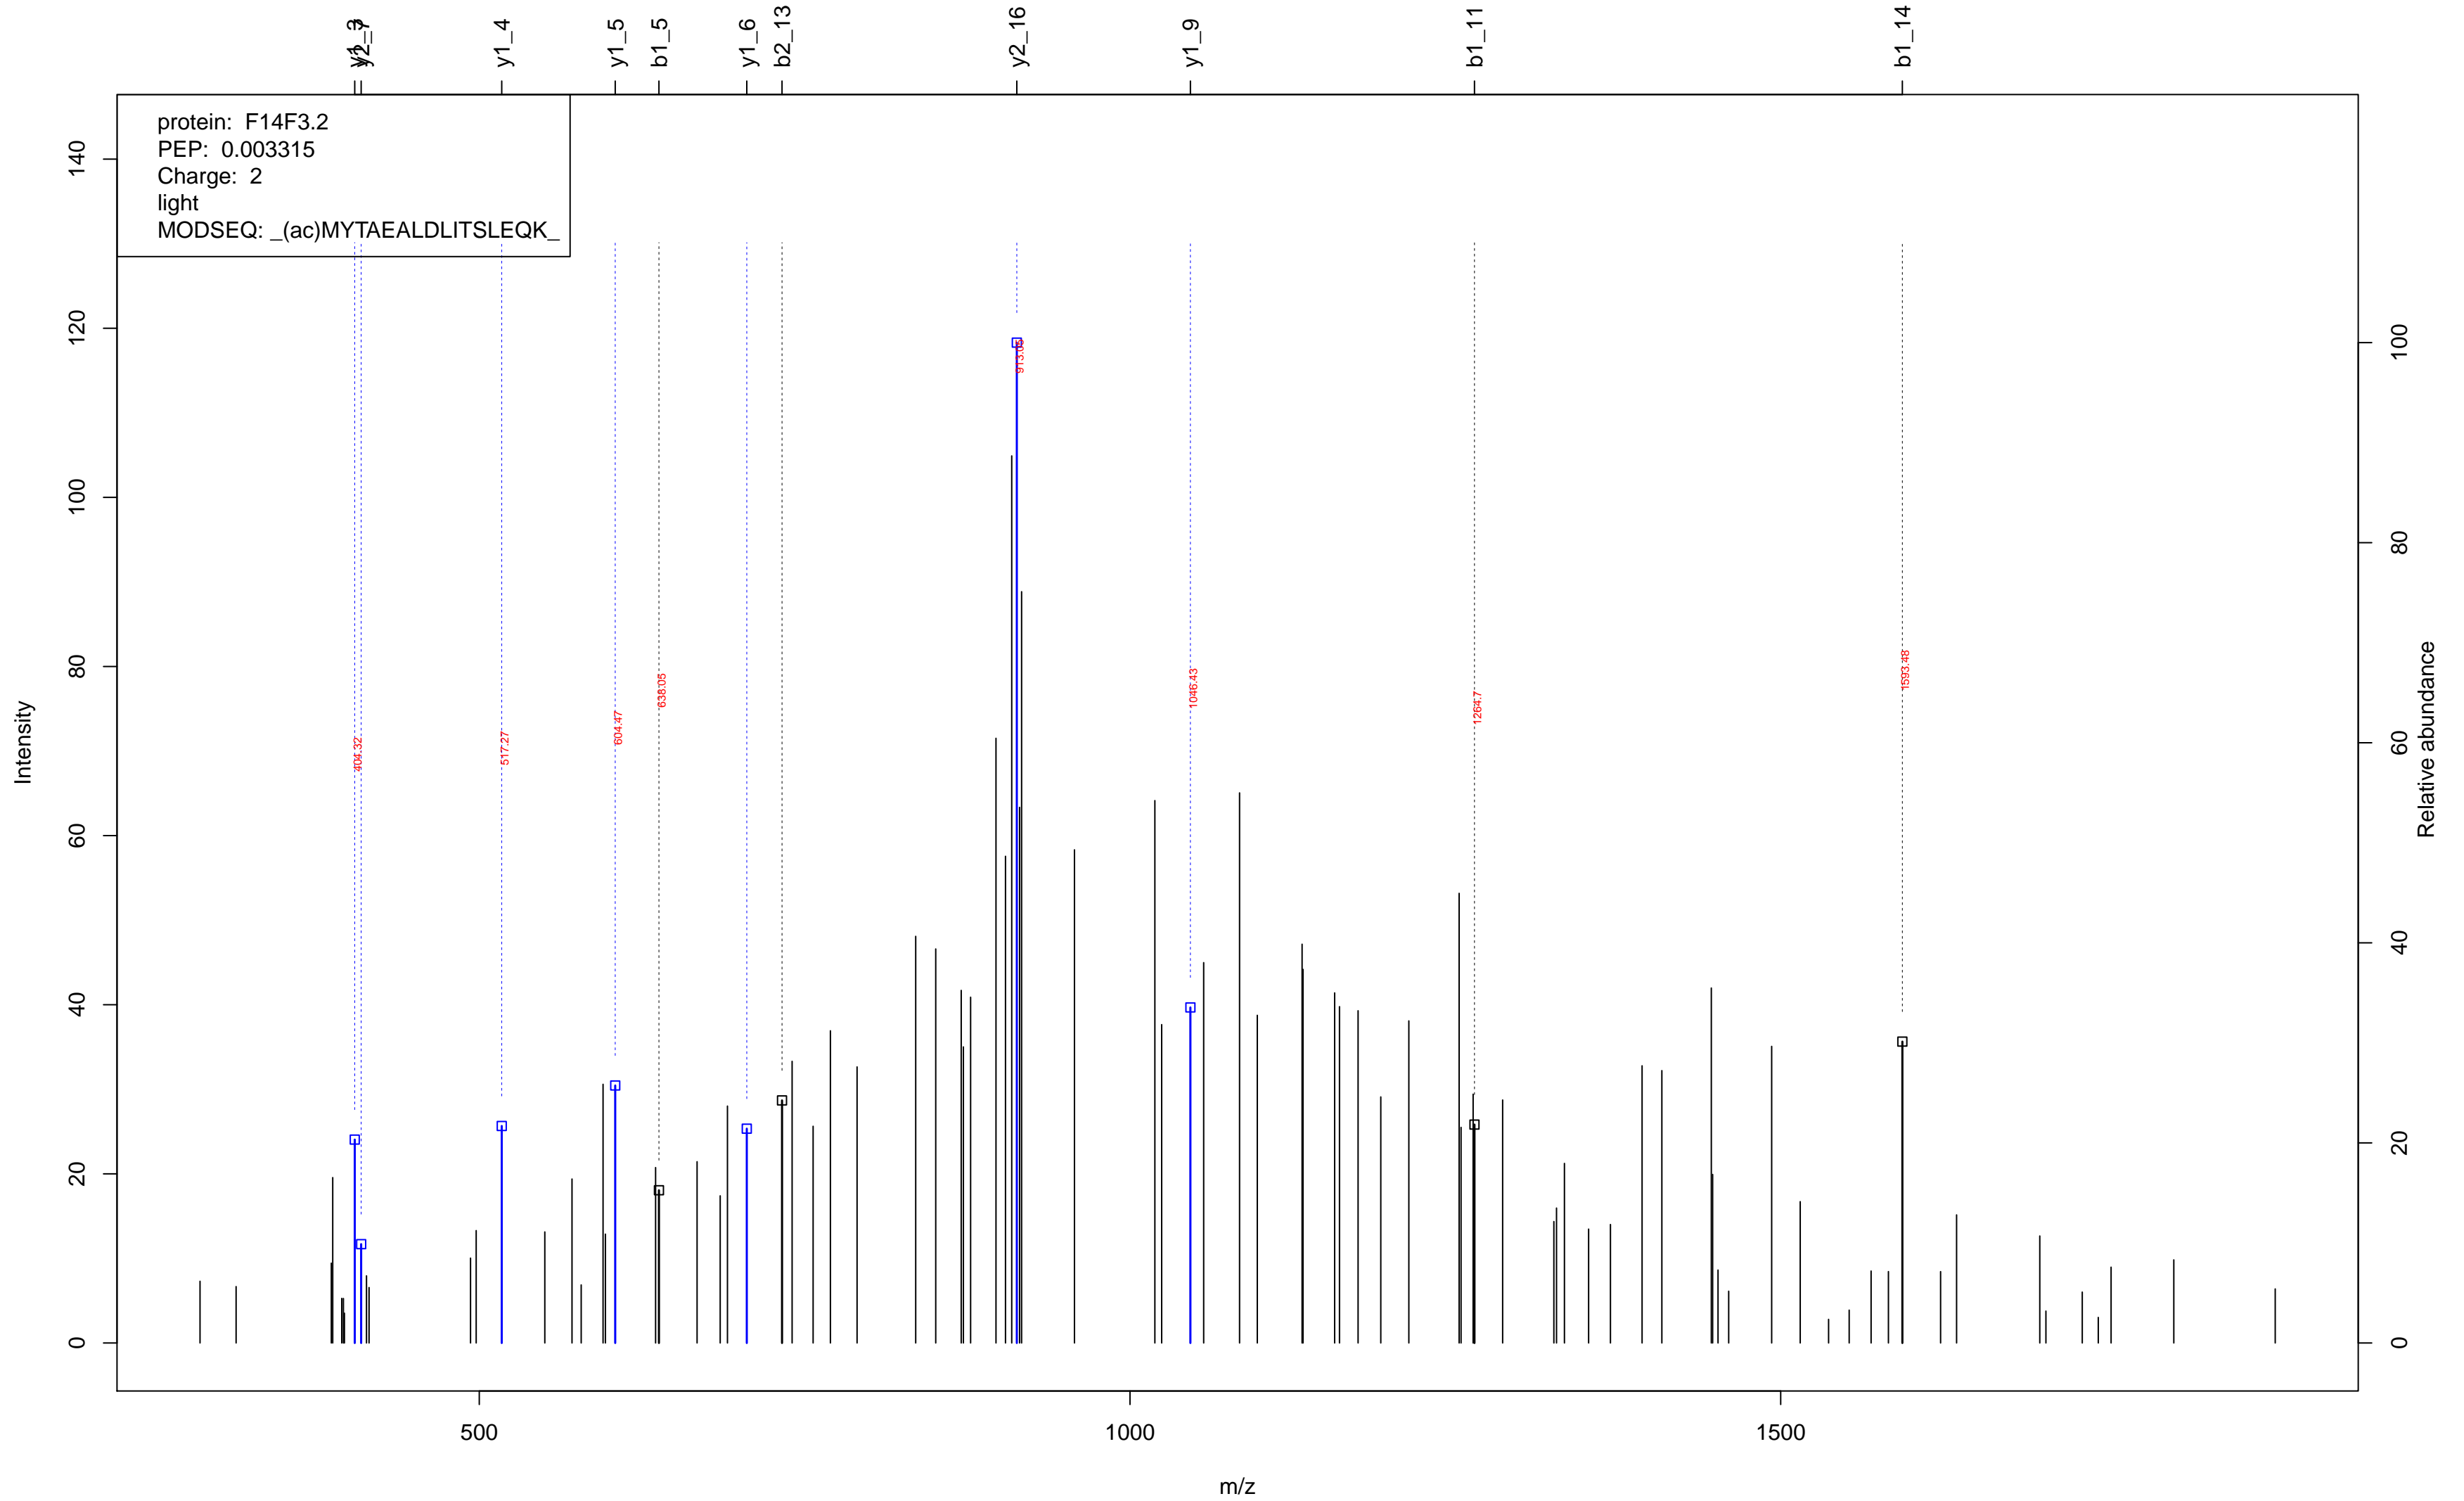

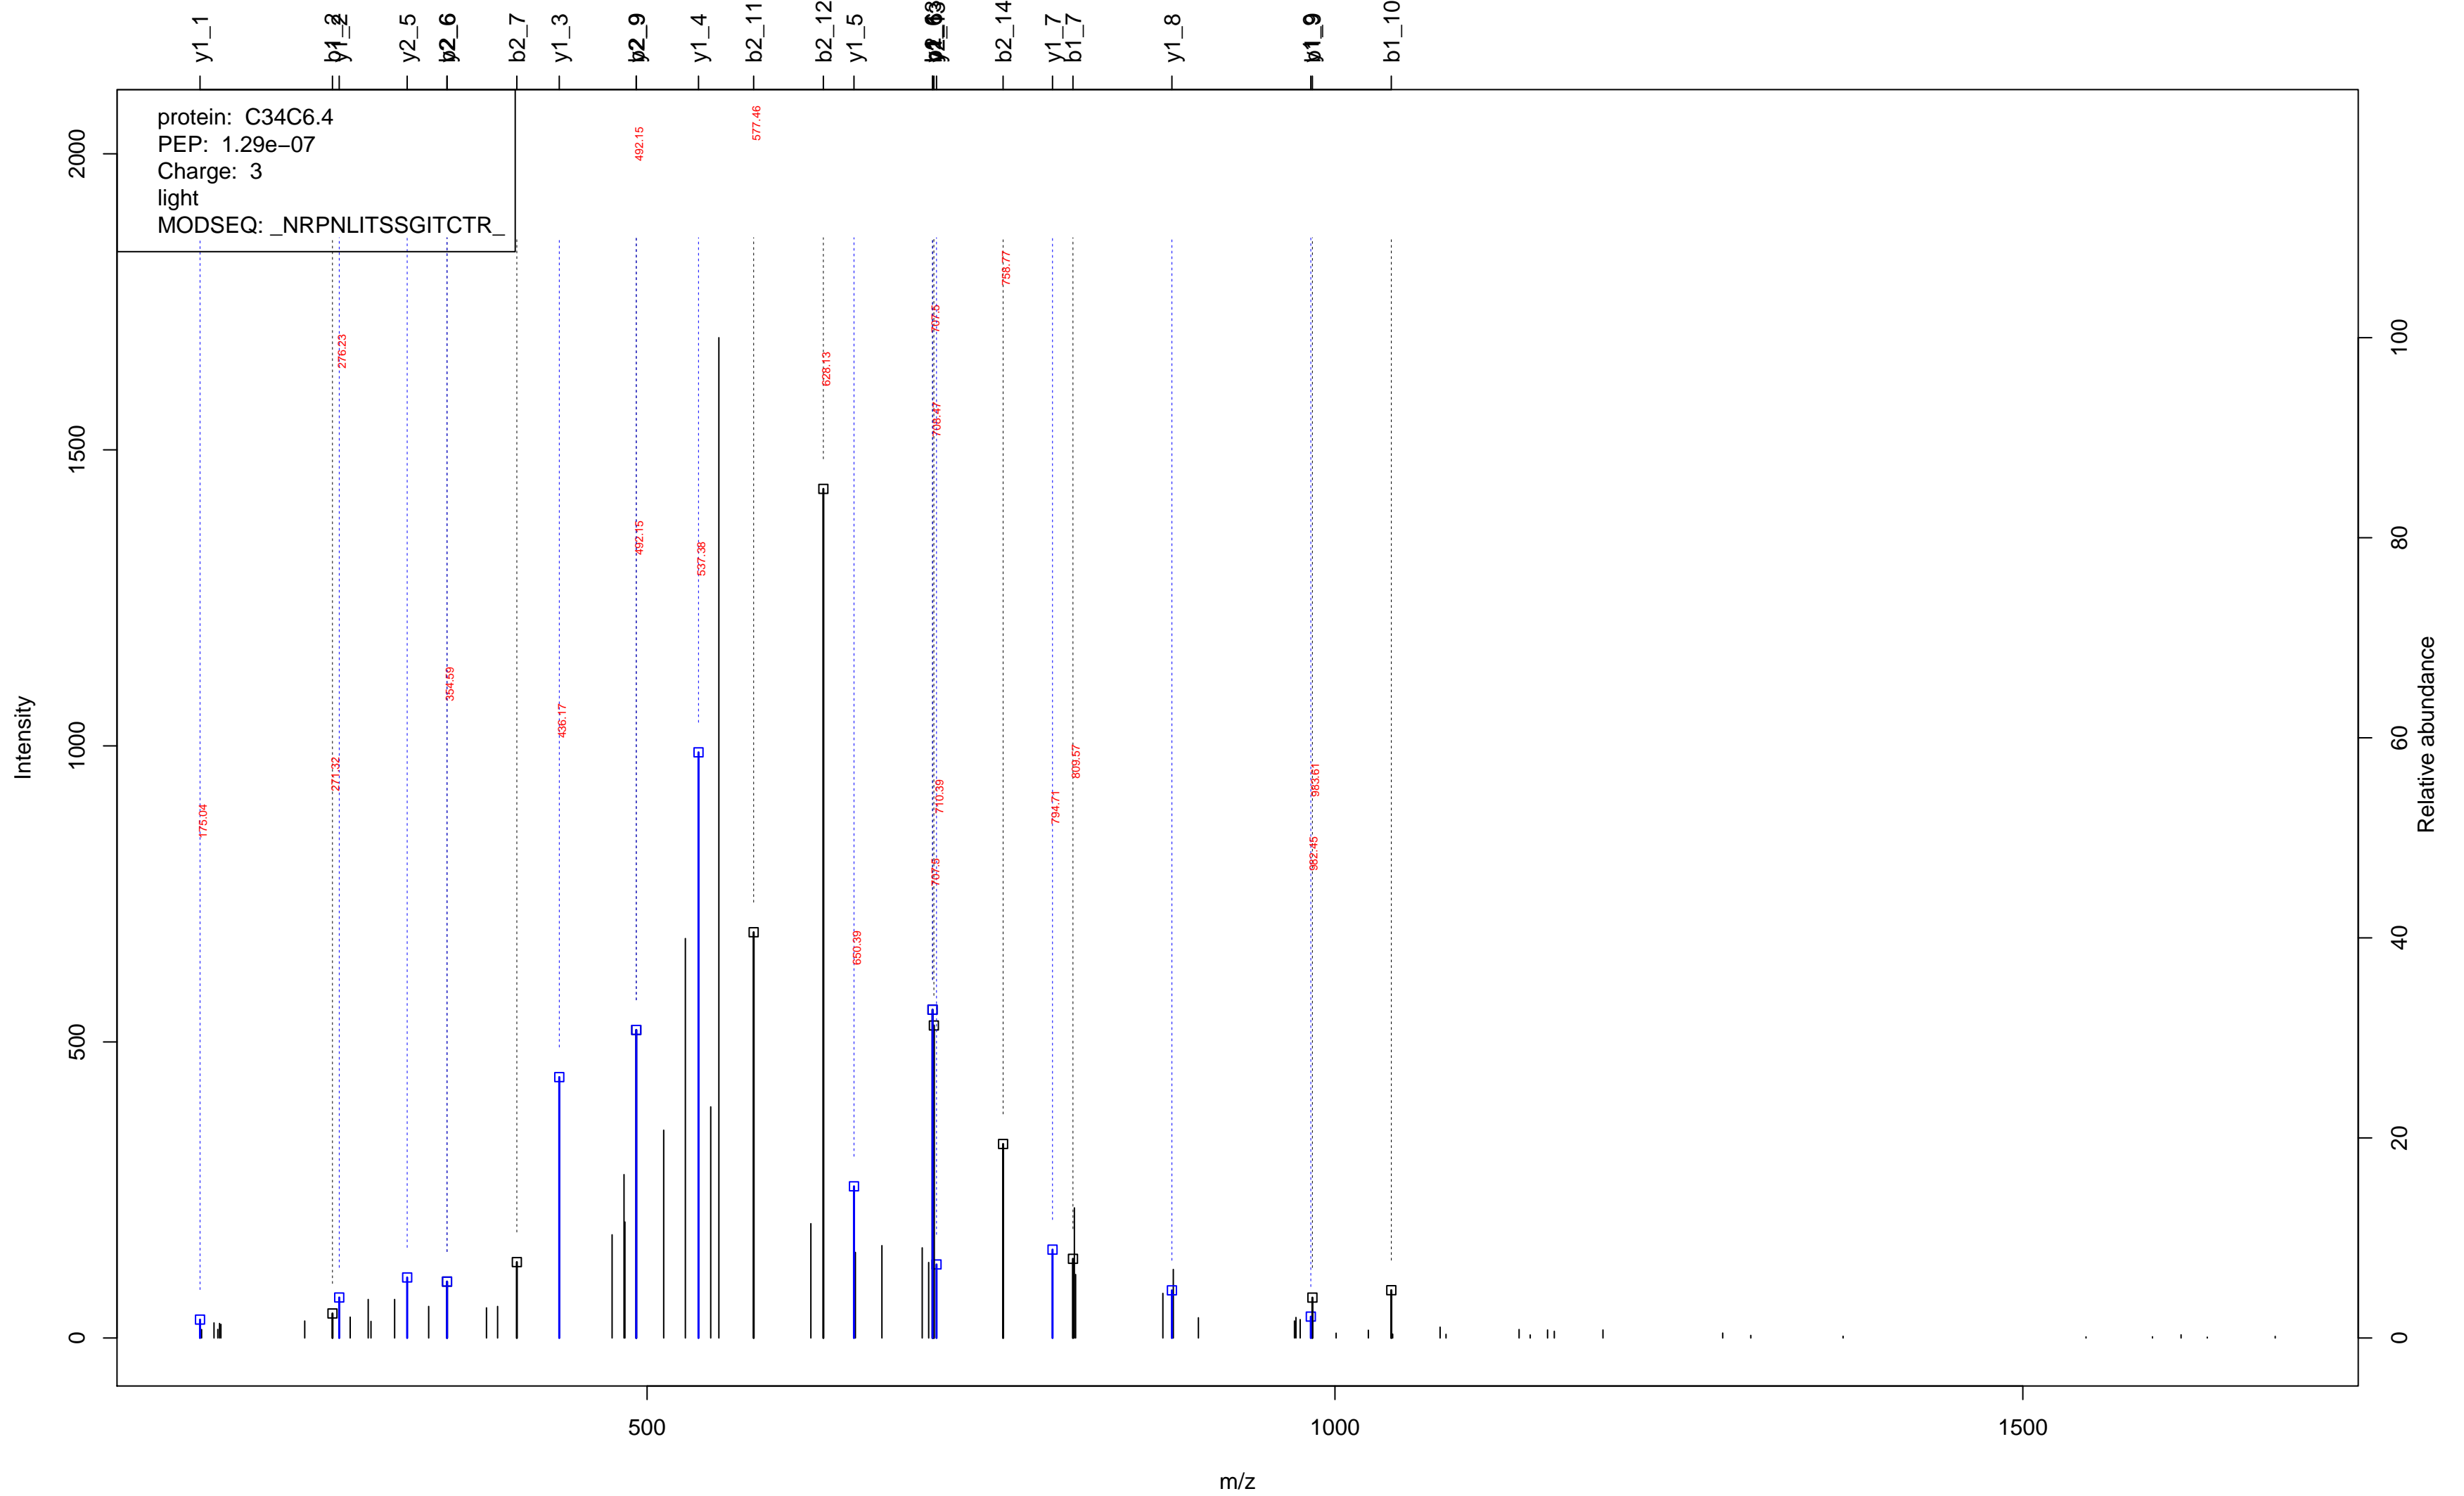



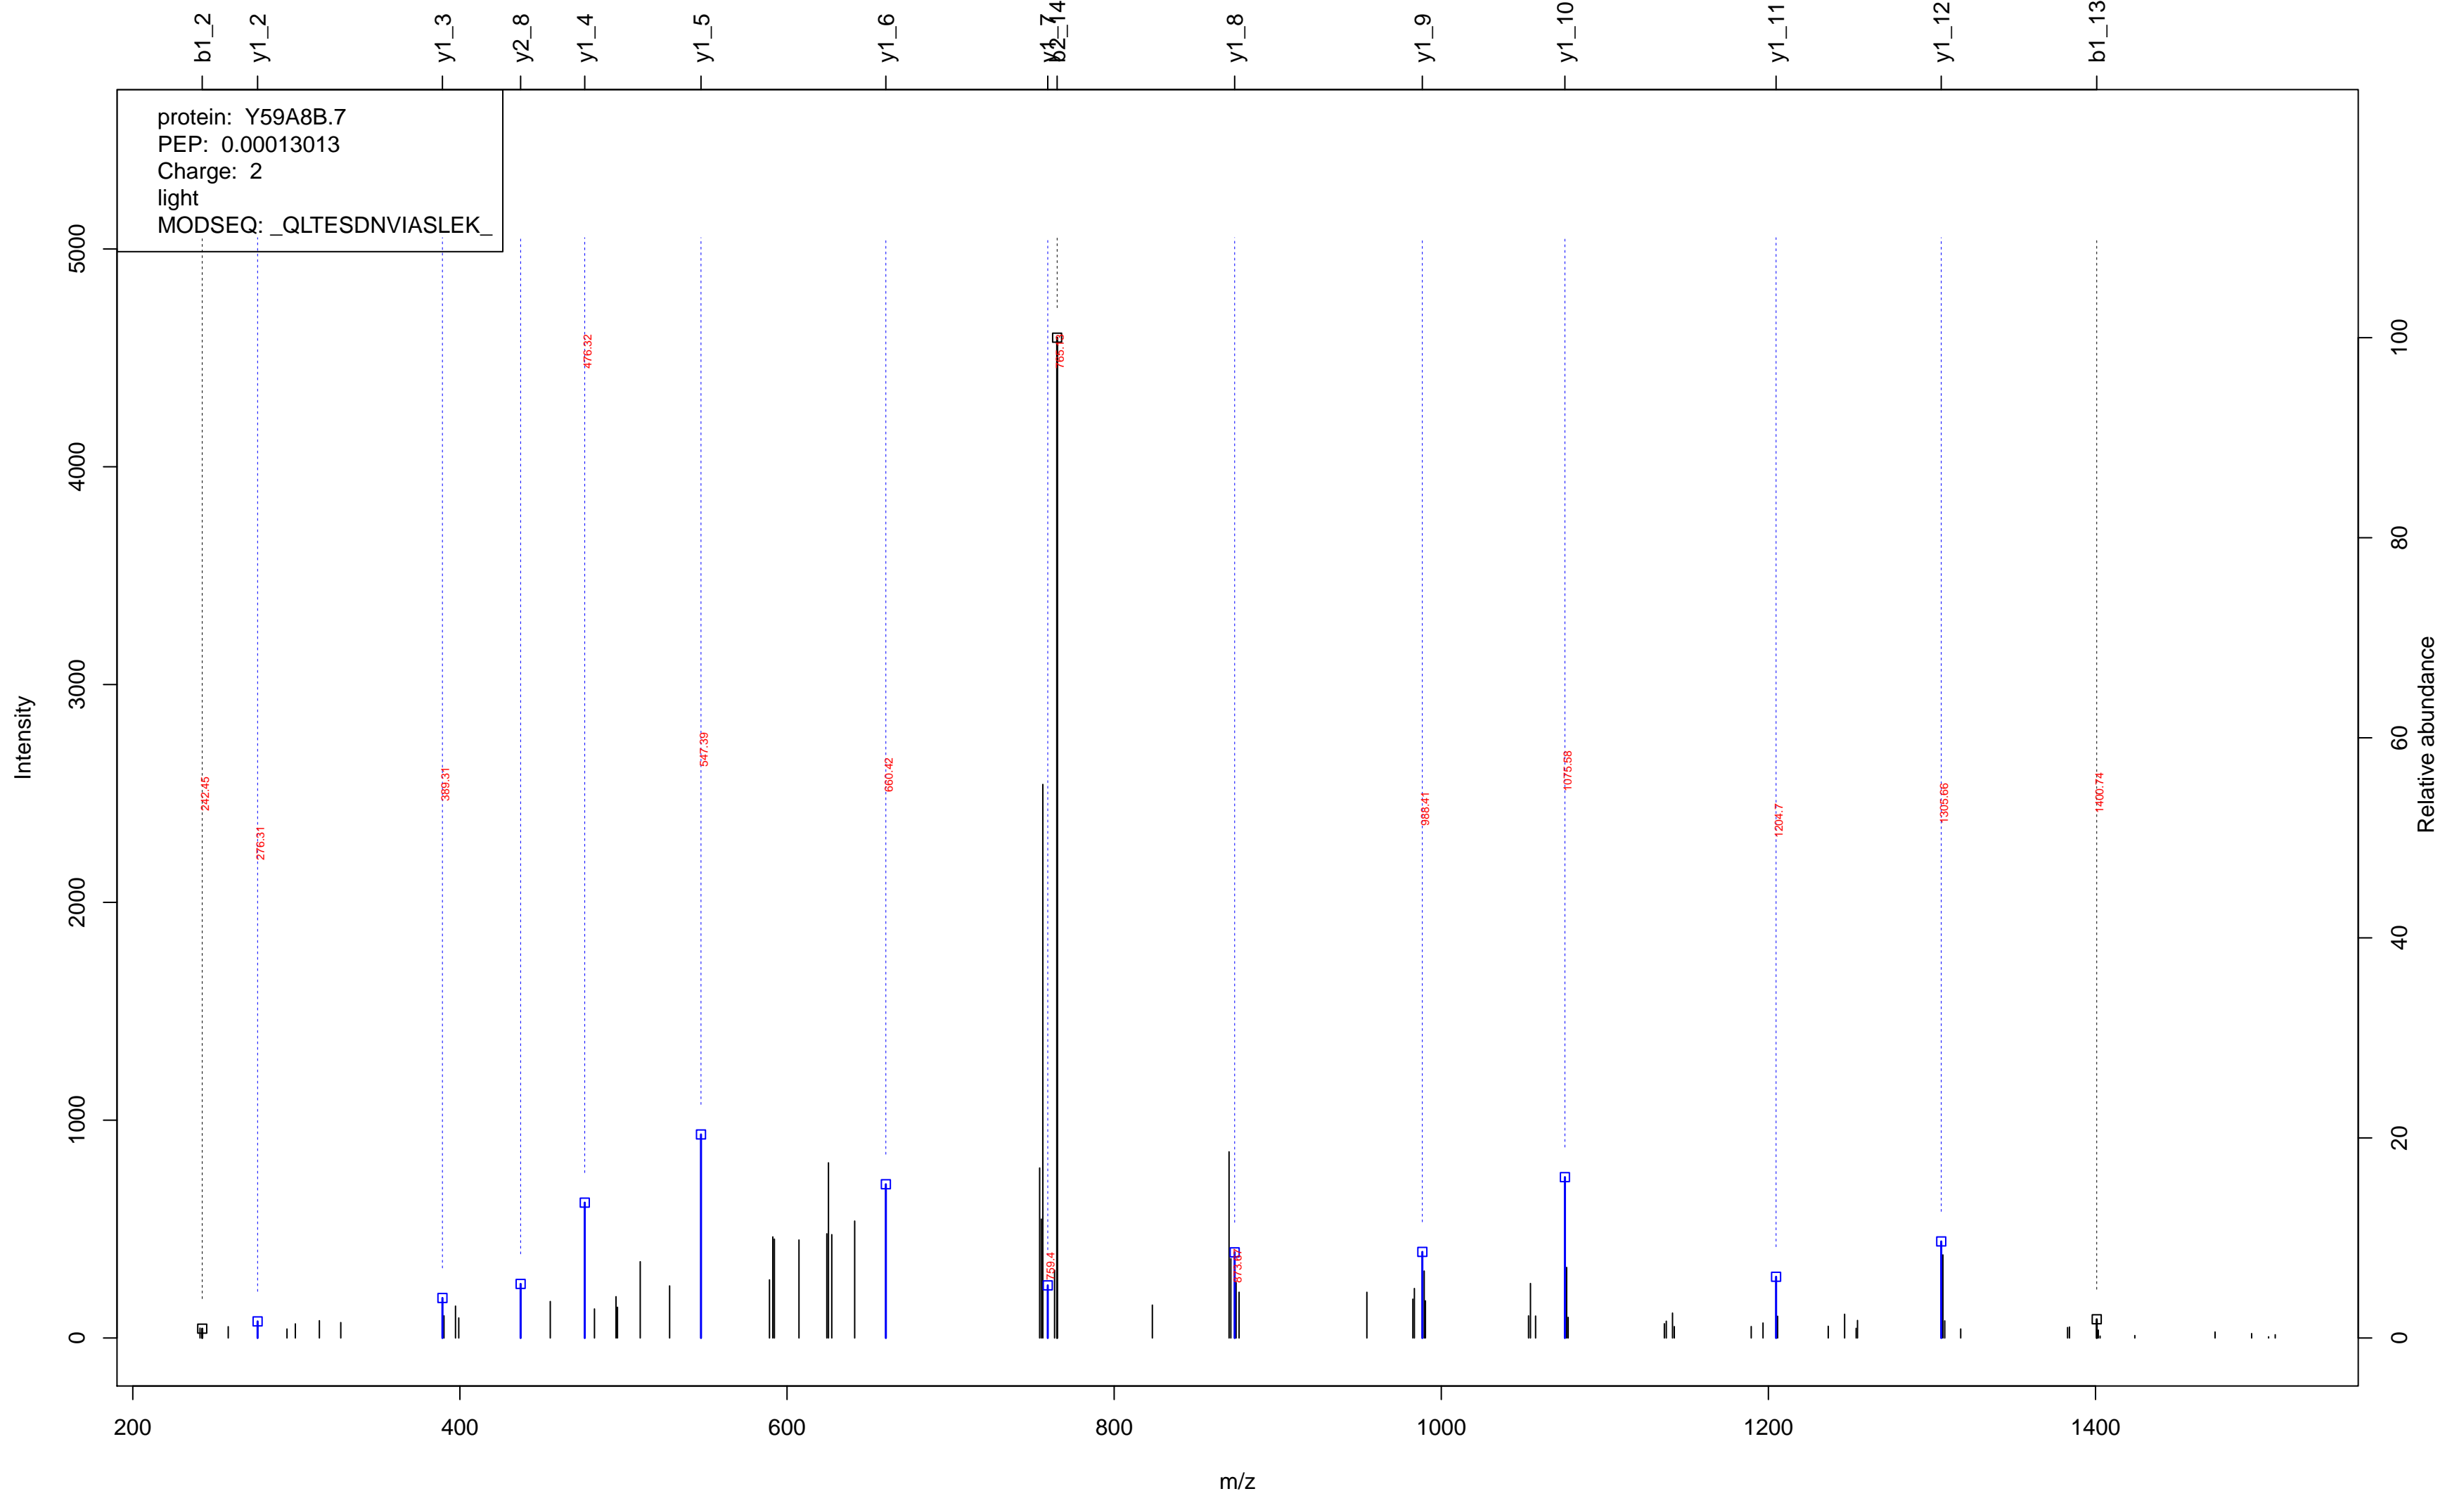

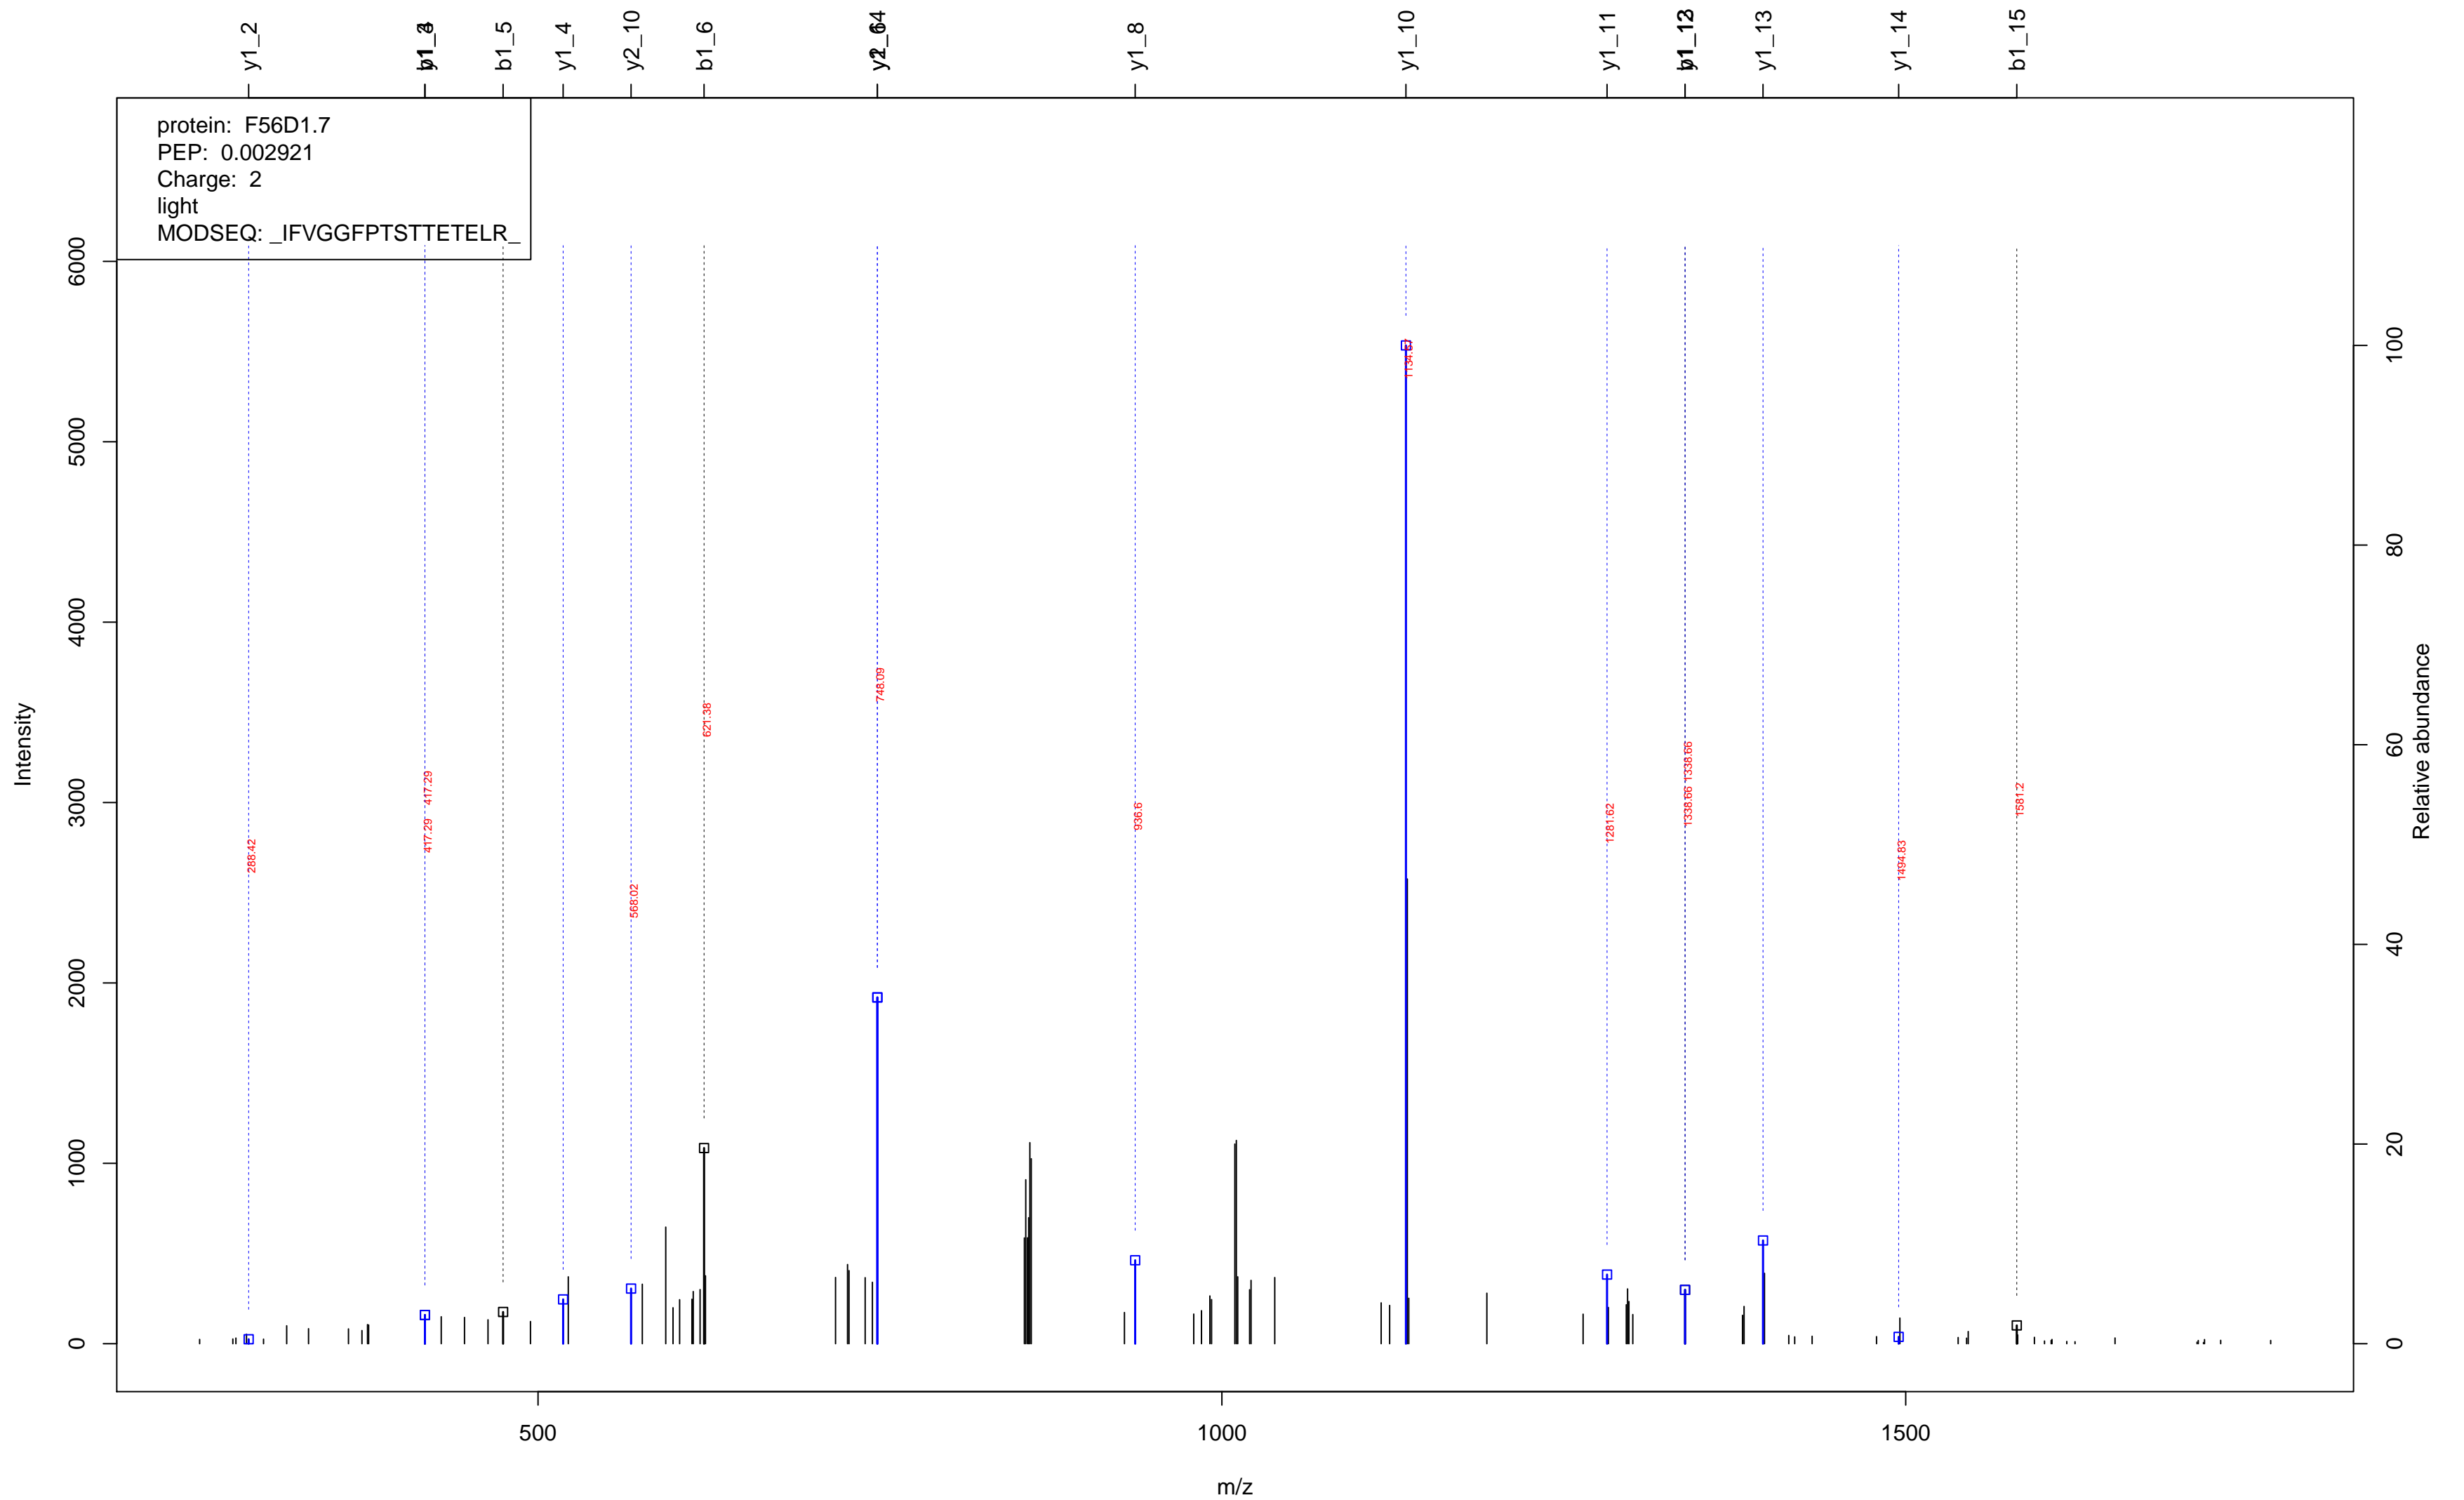

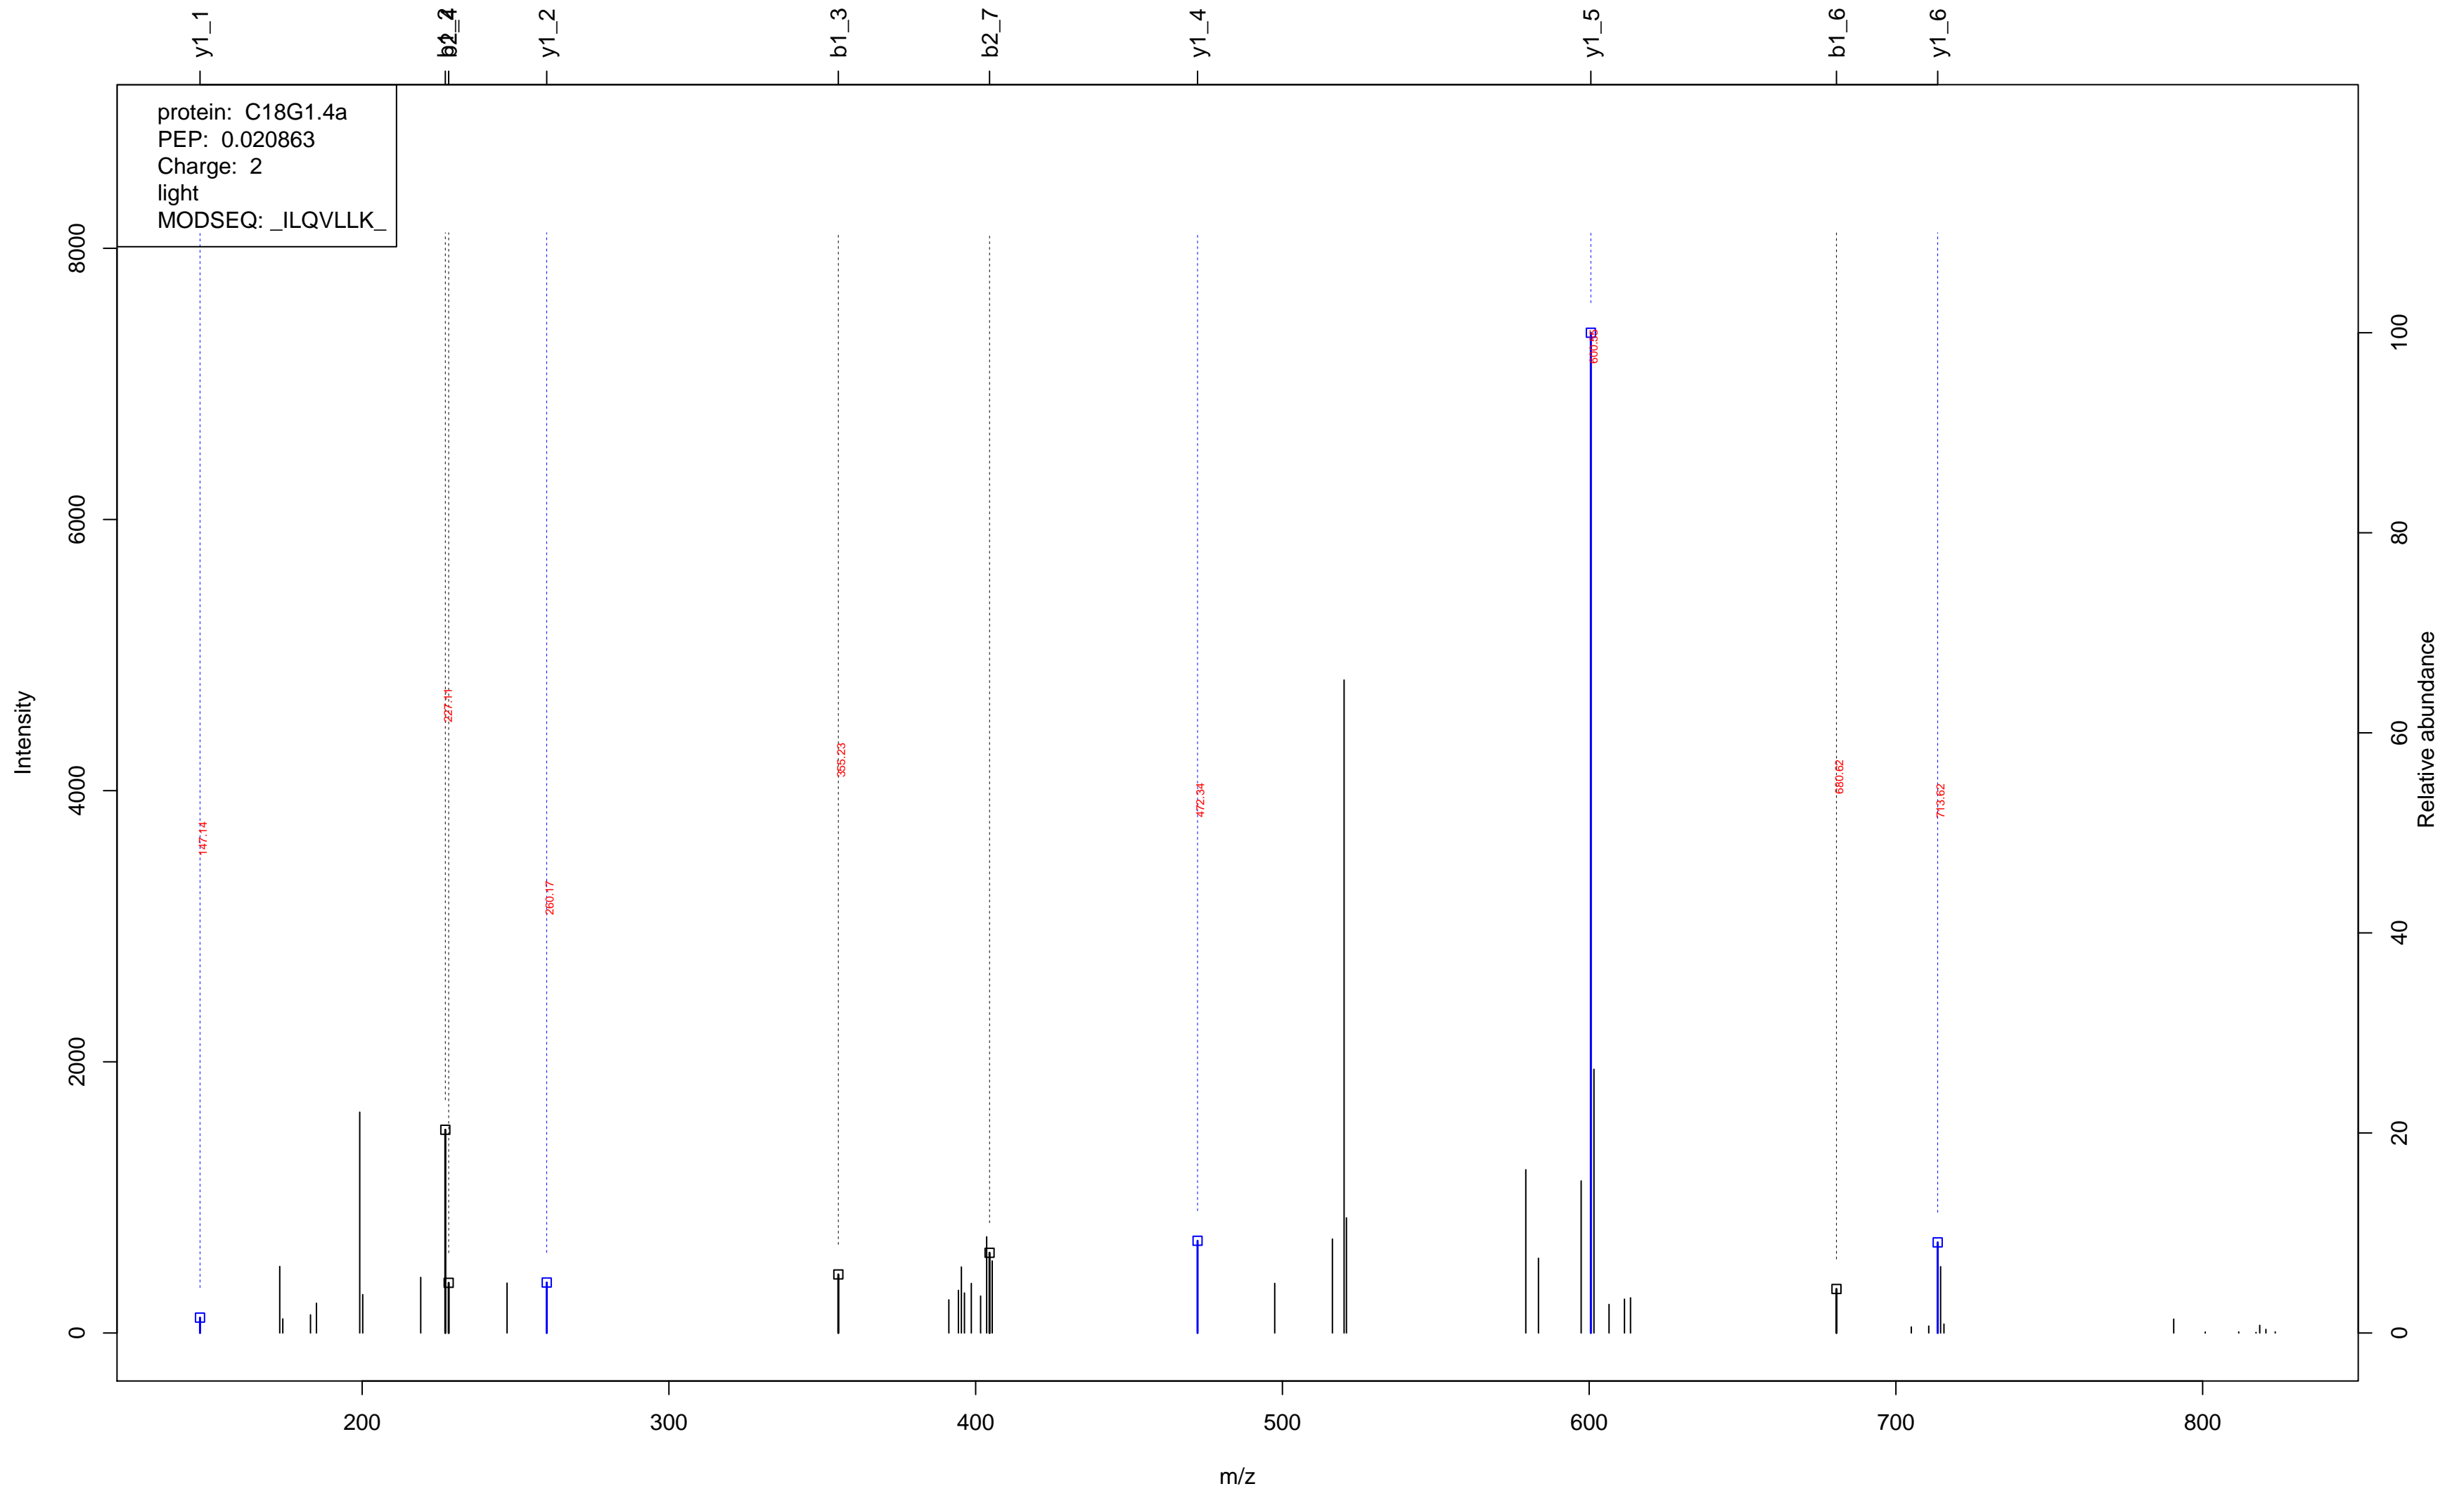

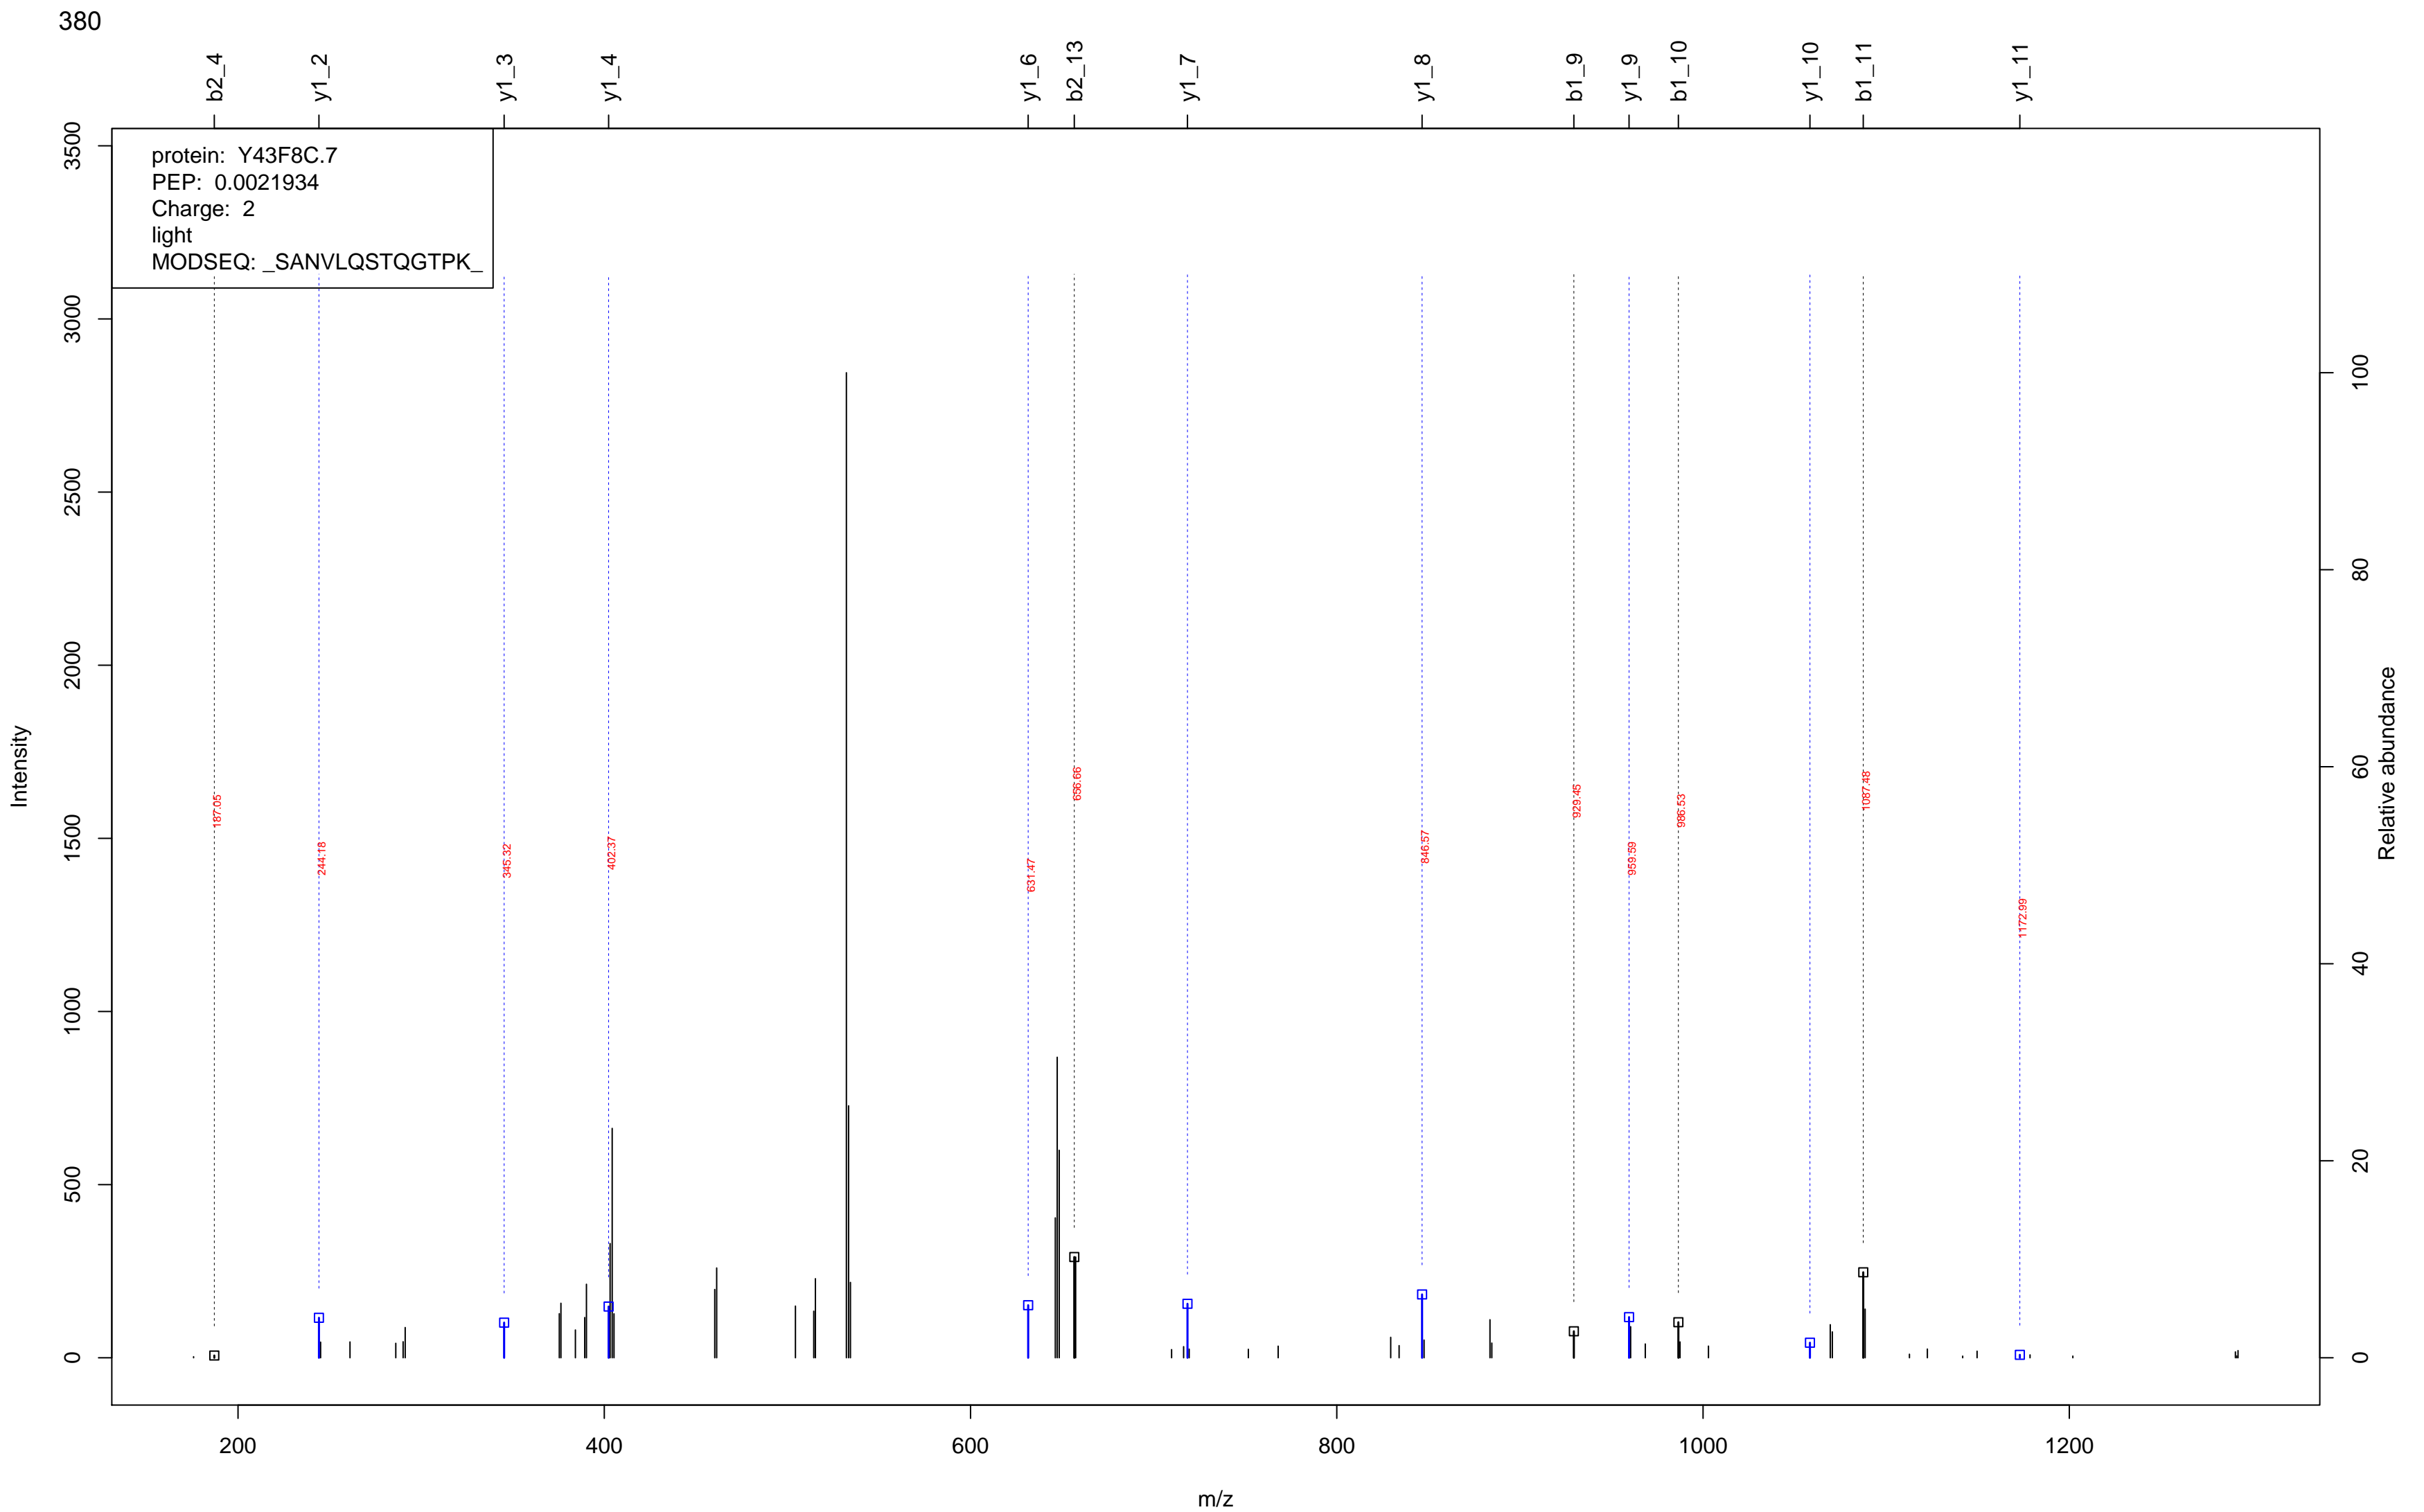

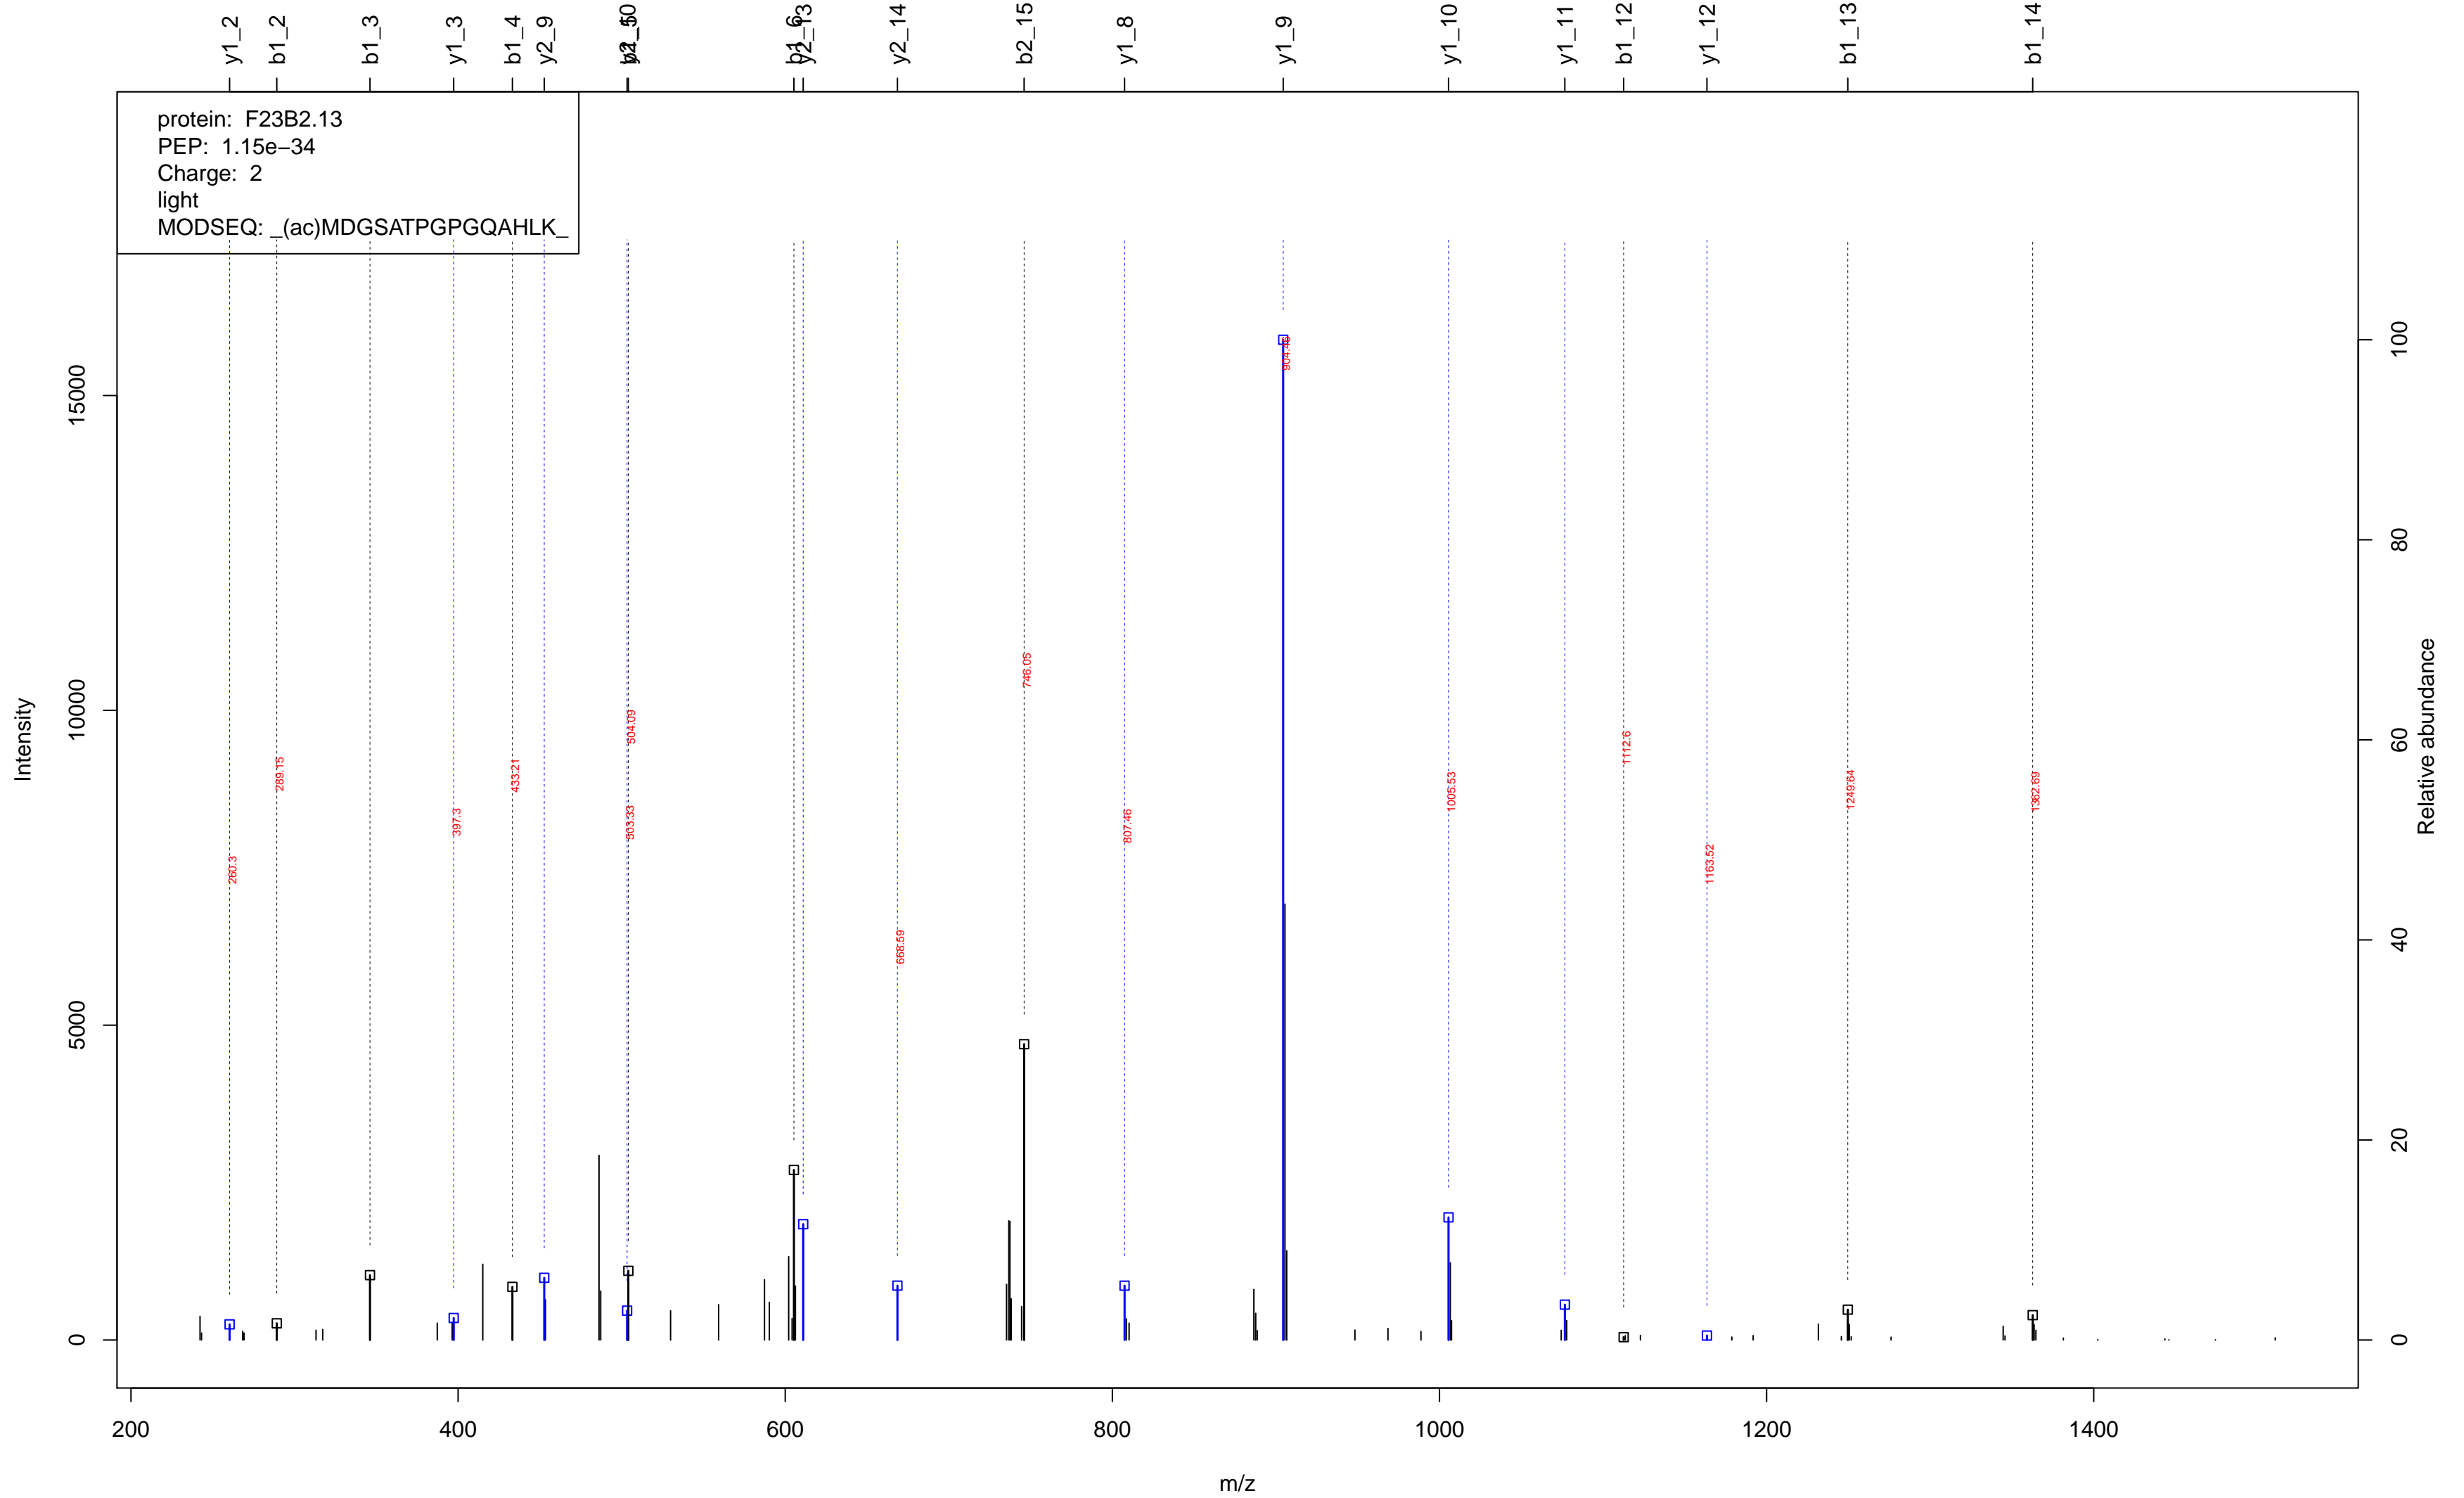

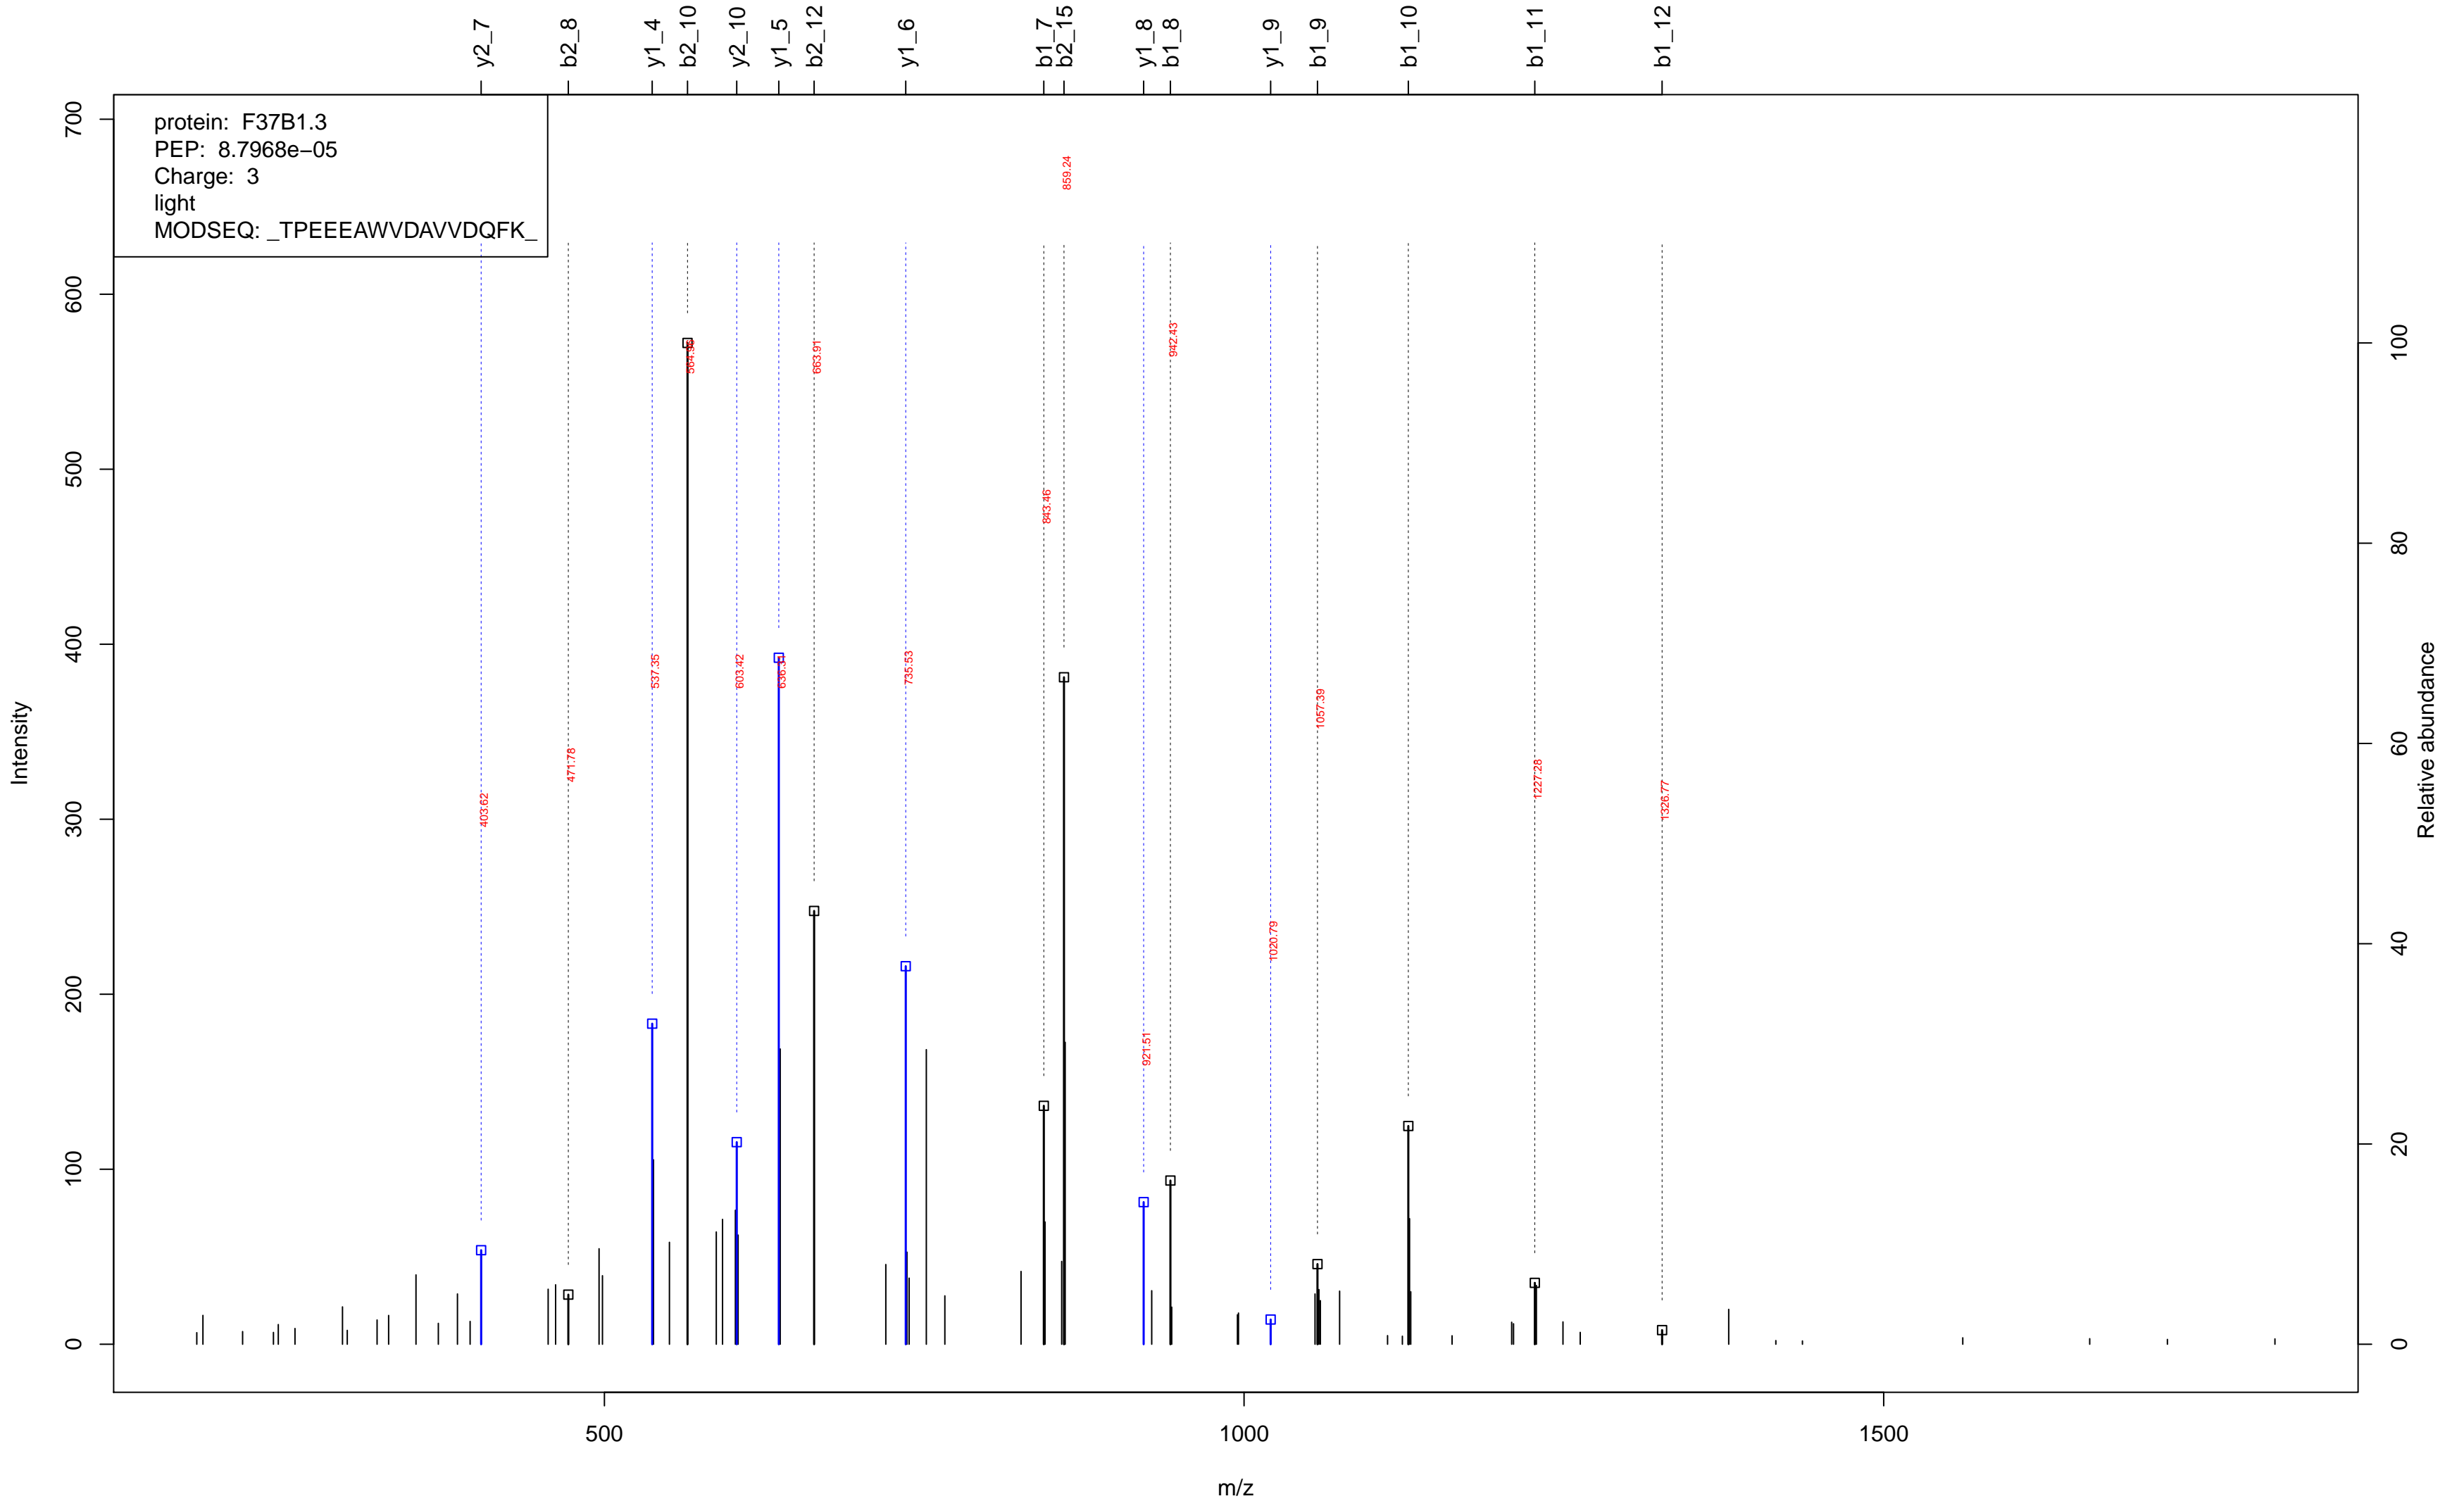

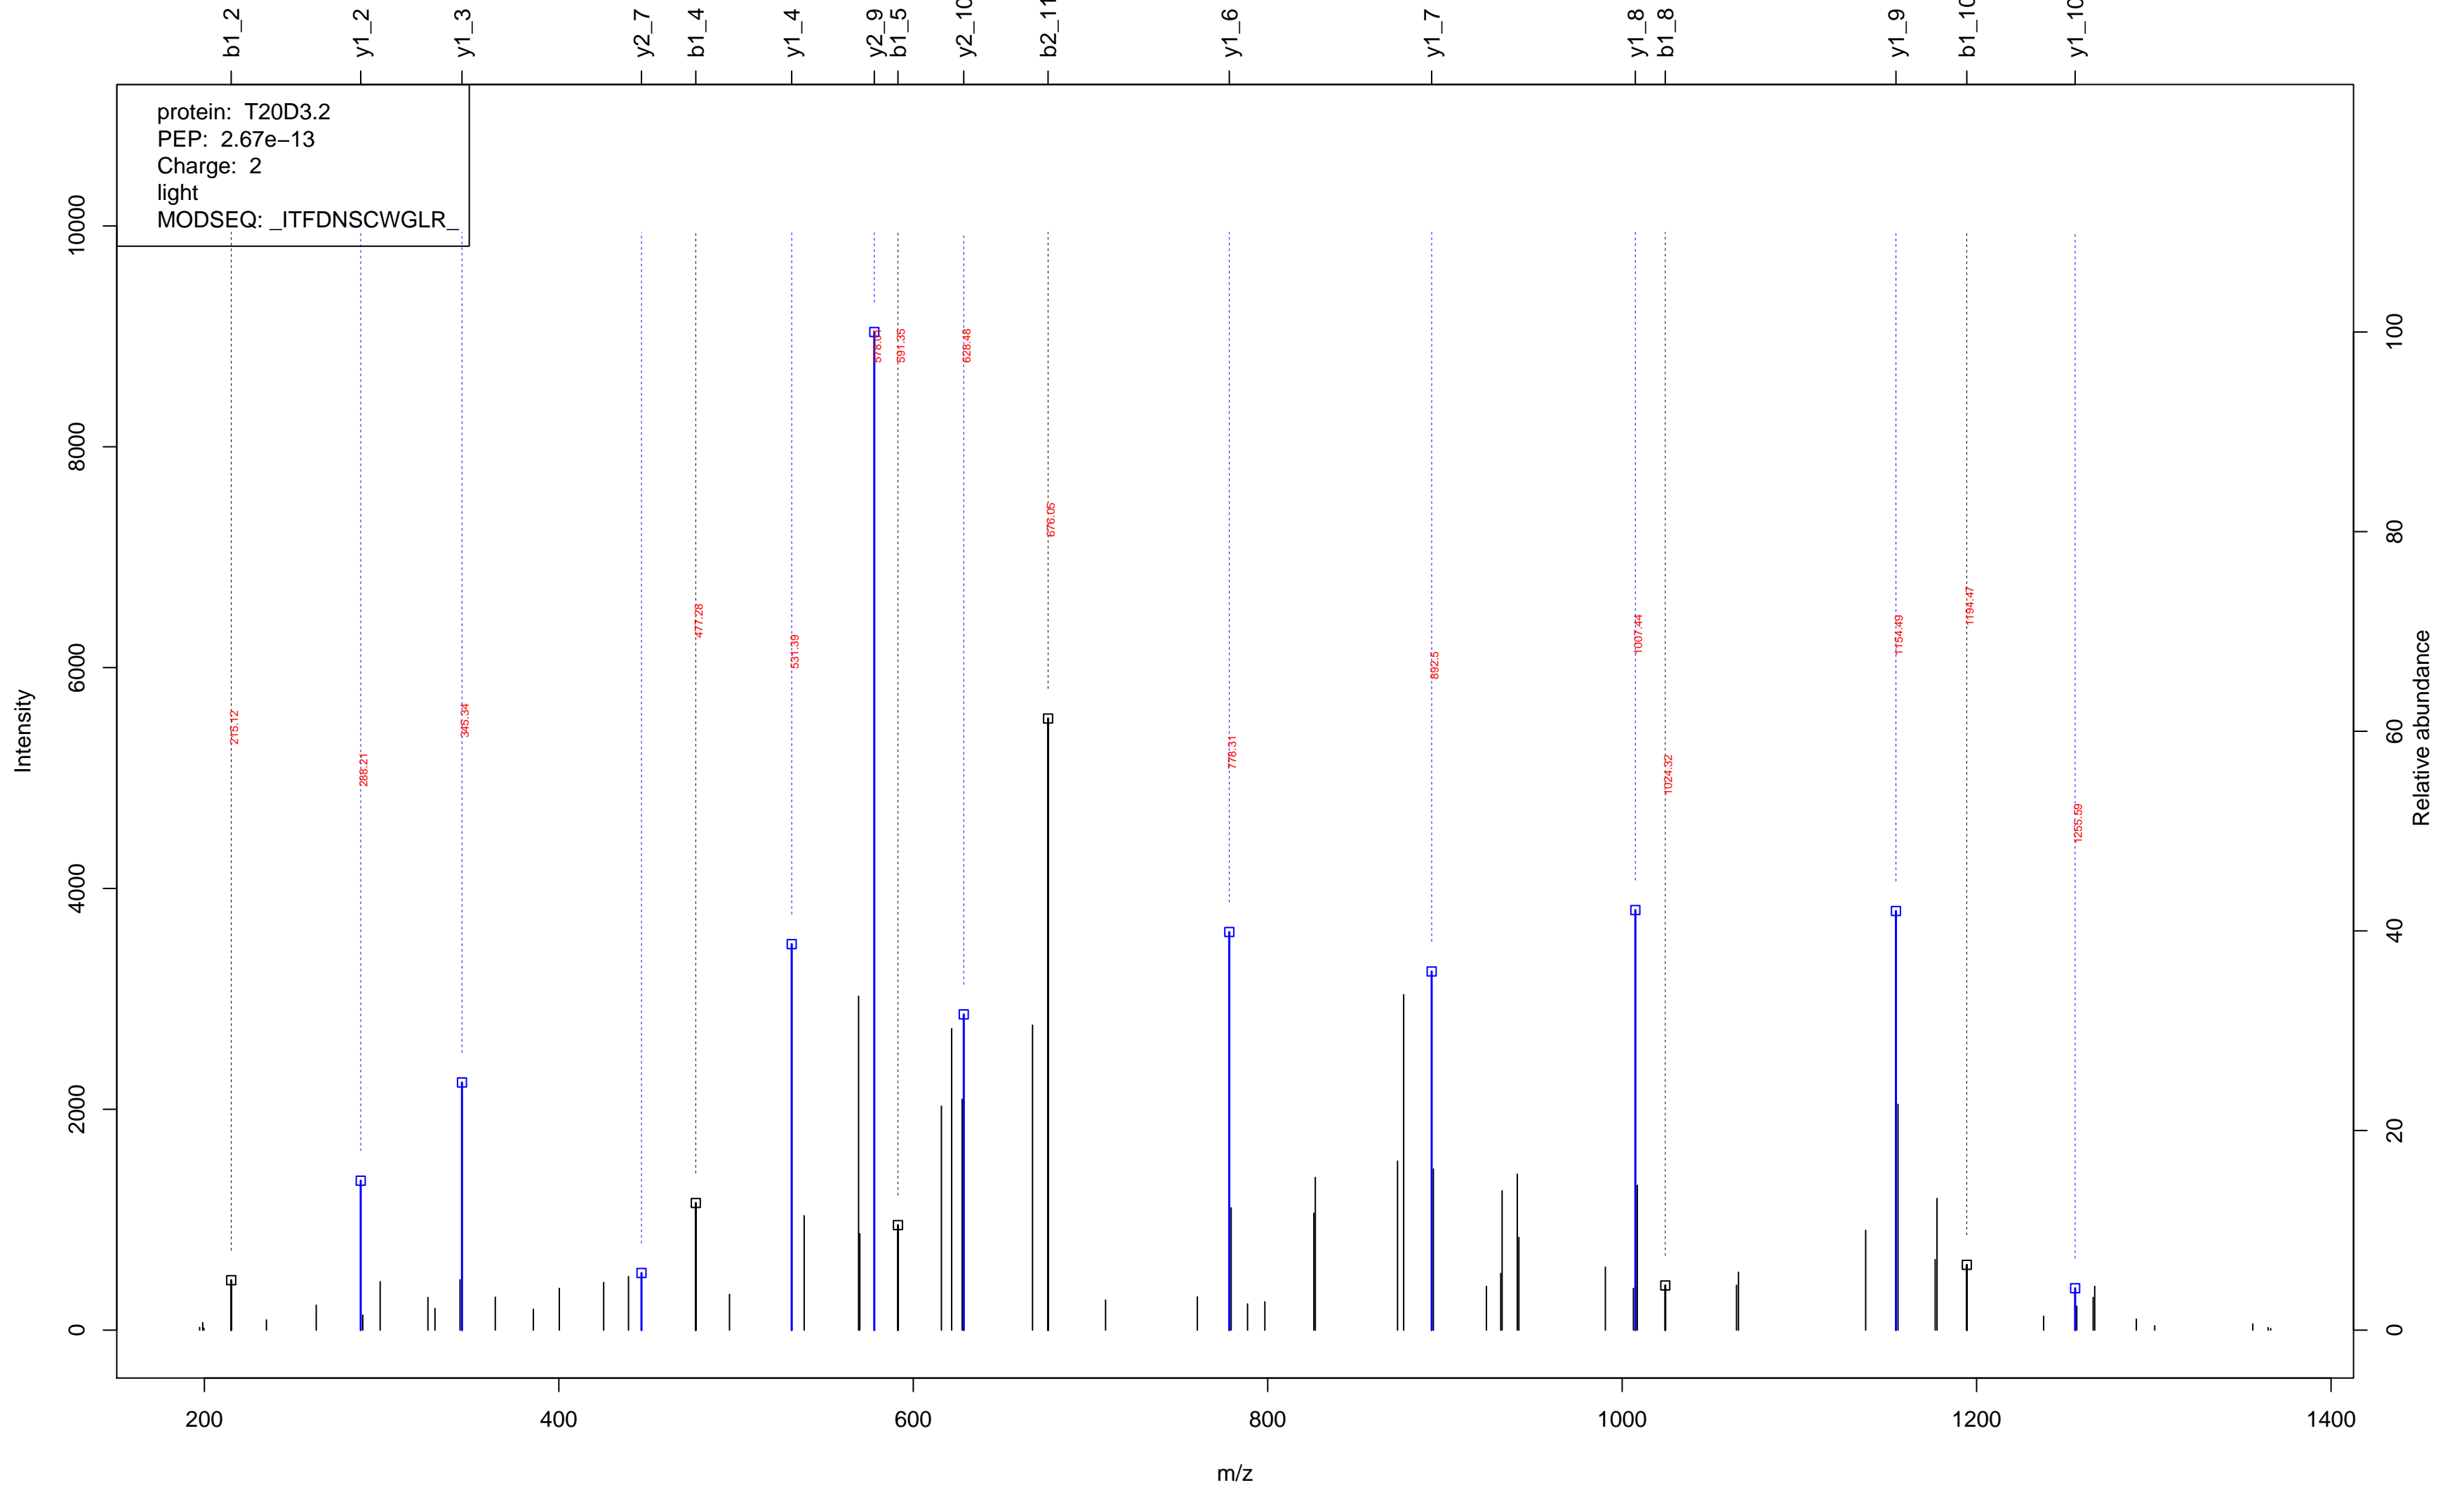

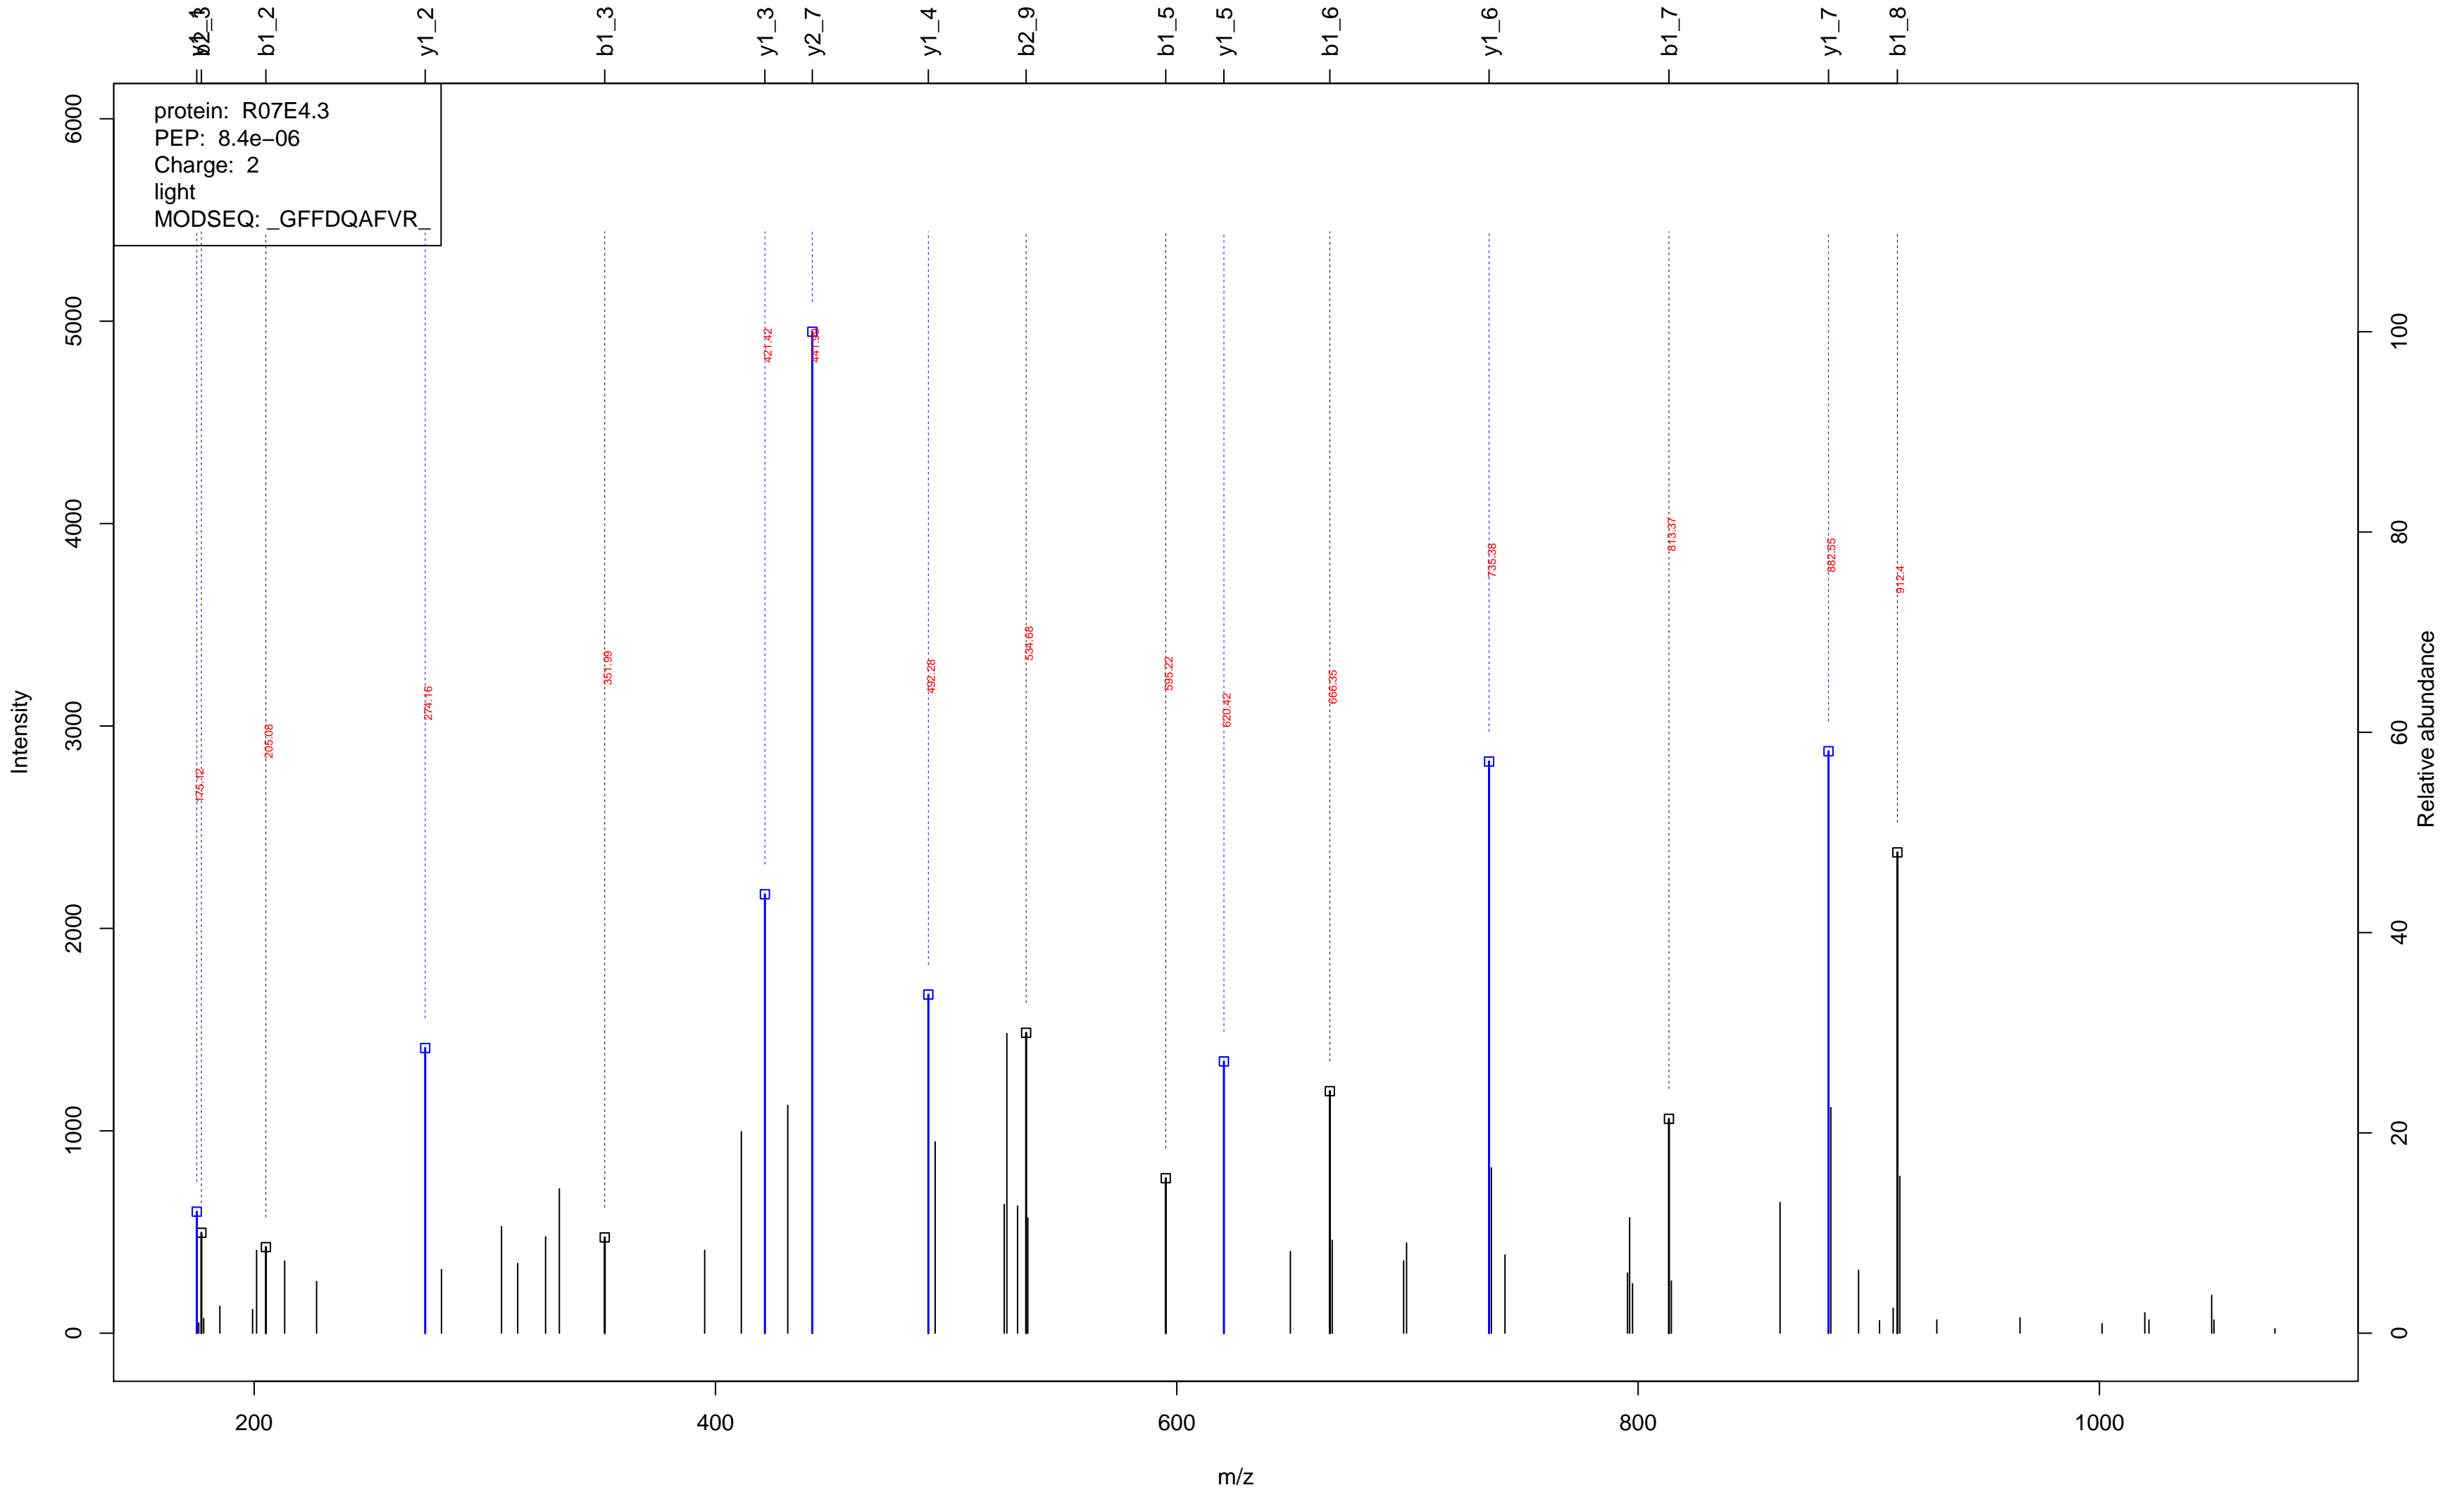



y1\_2 y1\_3 b1\_4 y1\_4 y1\_5 y1\_6 b2\_13 b1\_7 b1\_8 b1\_9 y1\_9 b1\_10 b1\_11 b1\_12

protein: Y97E10AL.3  
PEP: 0.0002939  
Charge: 2  
light  
MODSEQ: \_(ac)TTLRPFDVDMFK\_

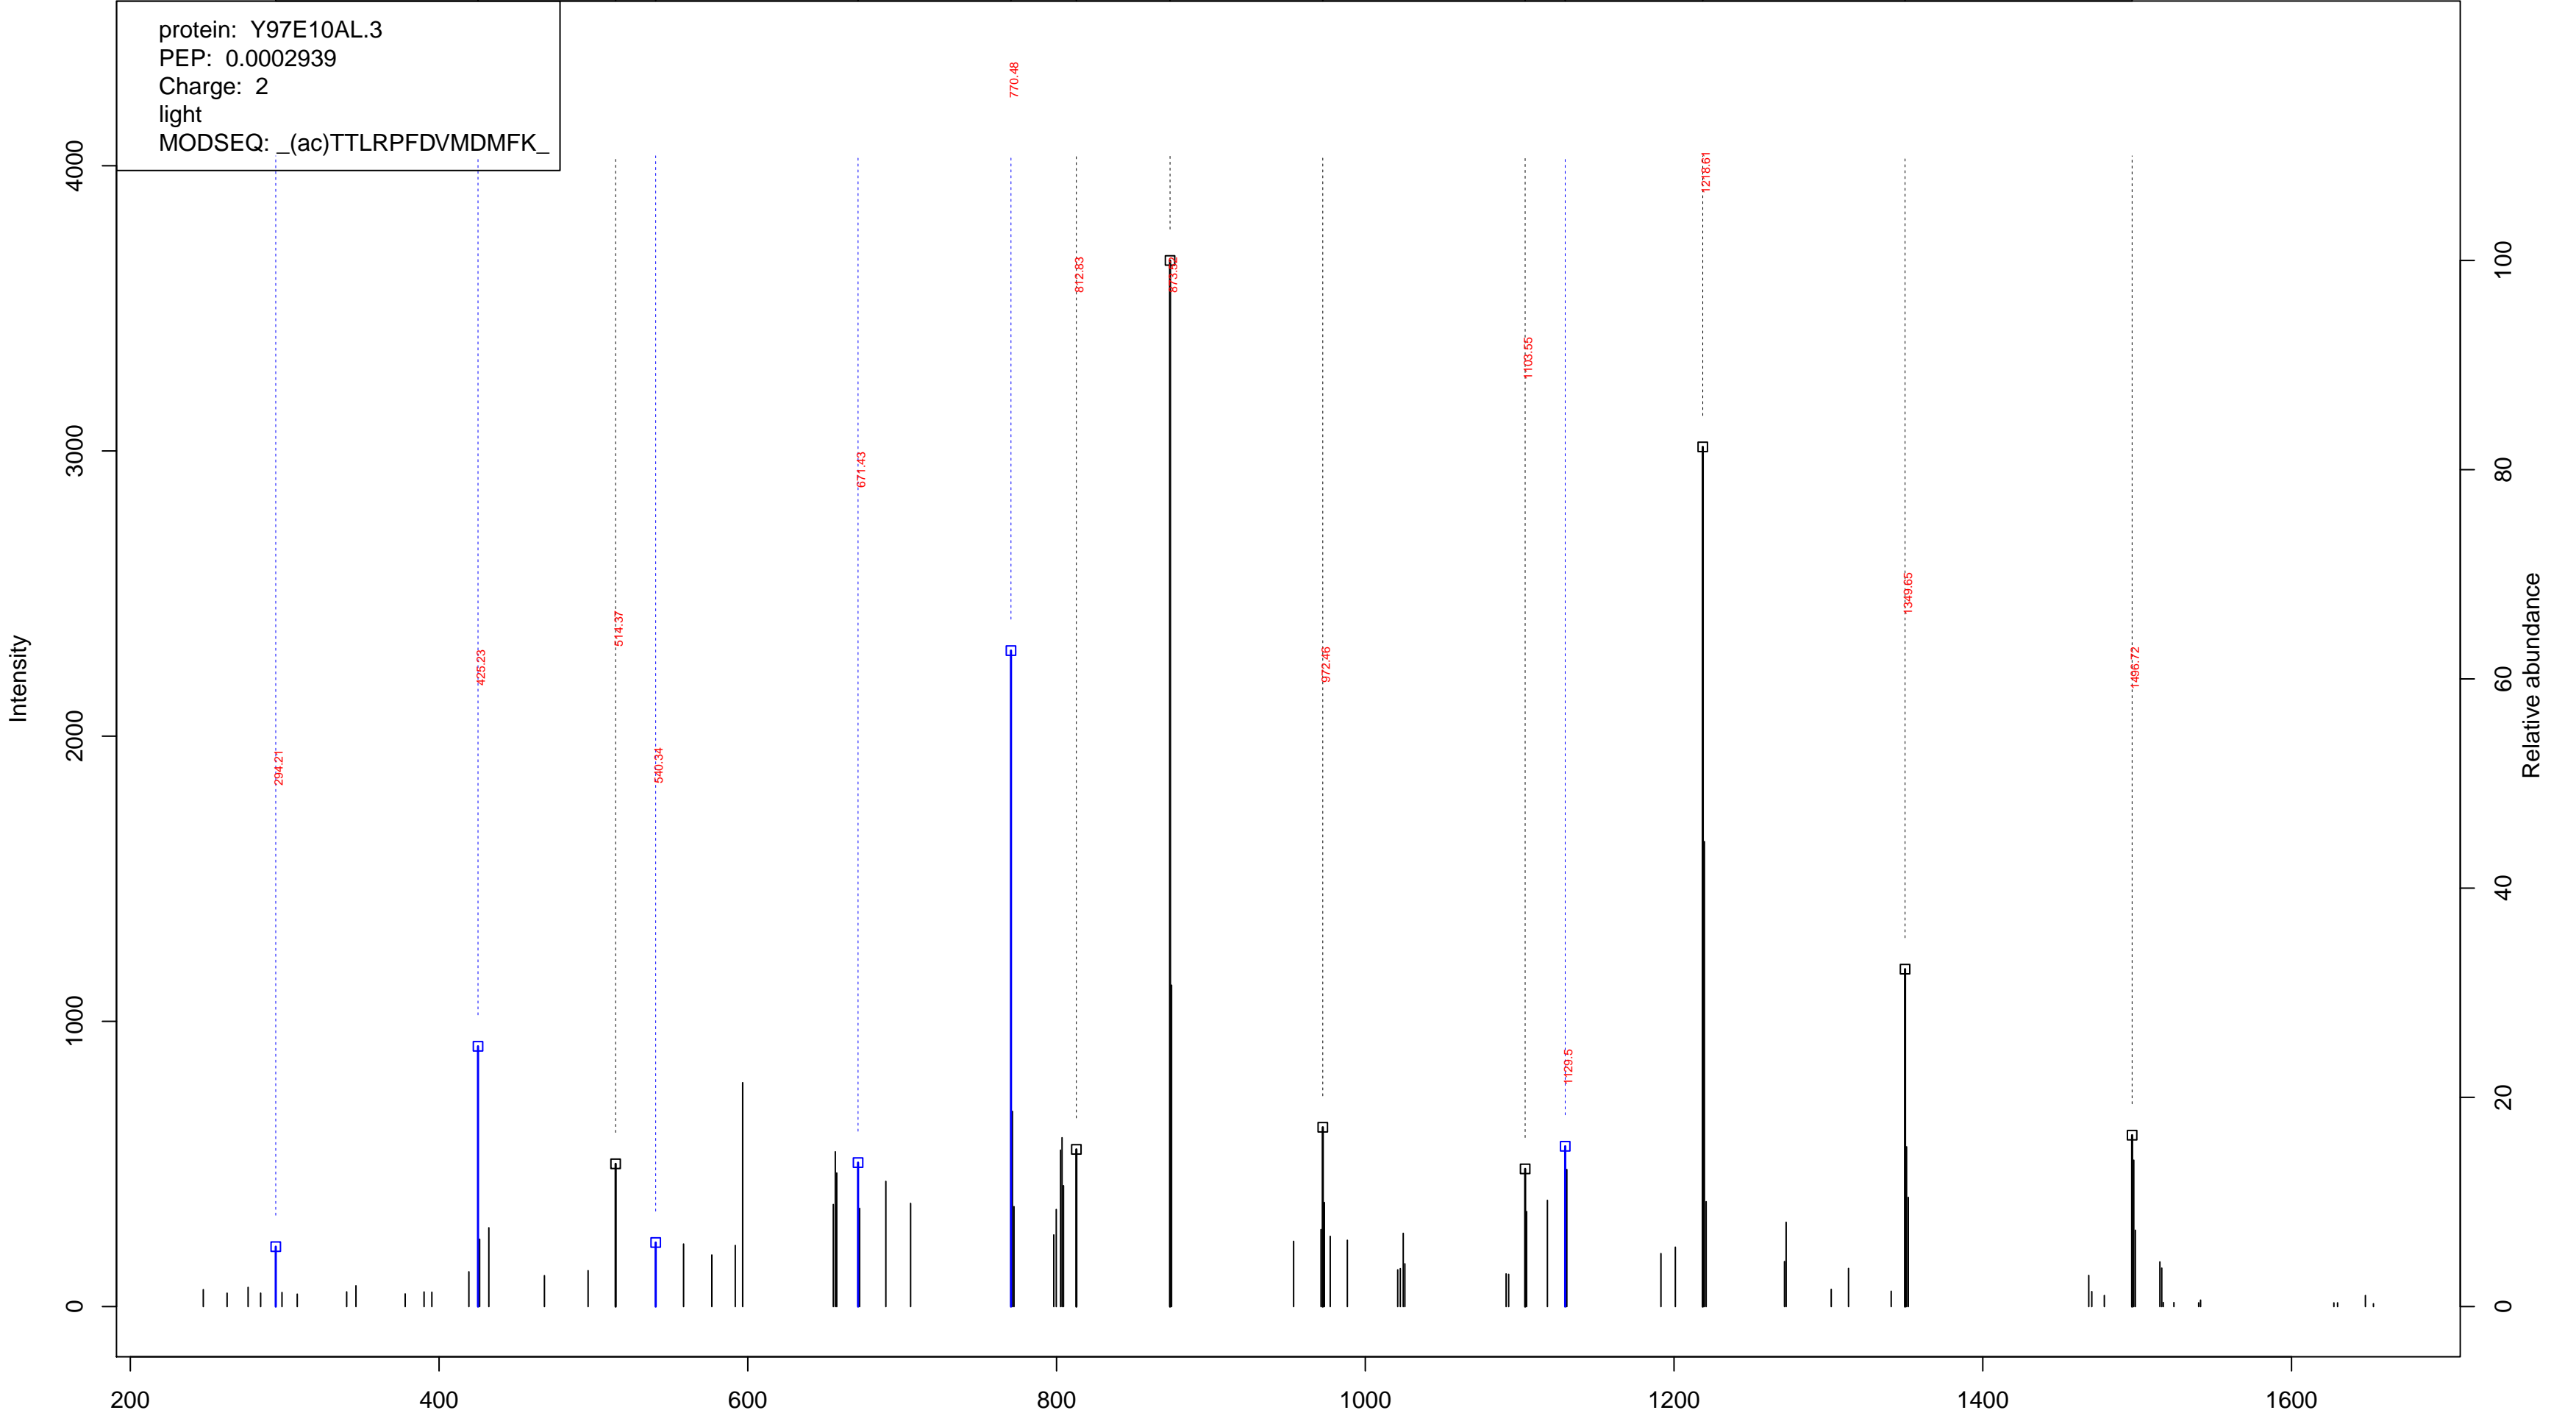

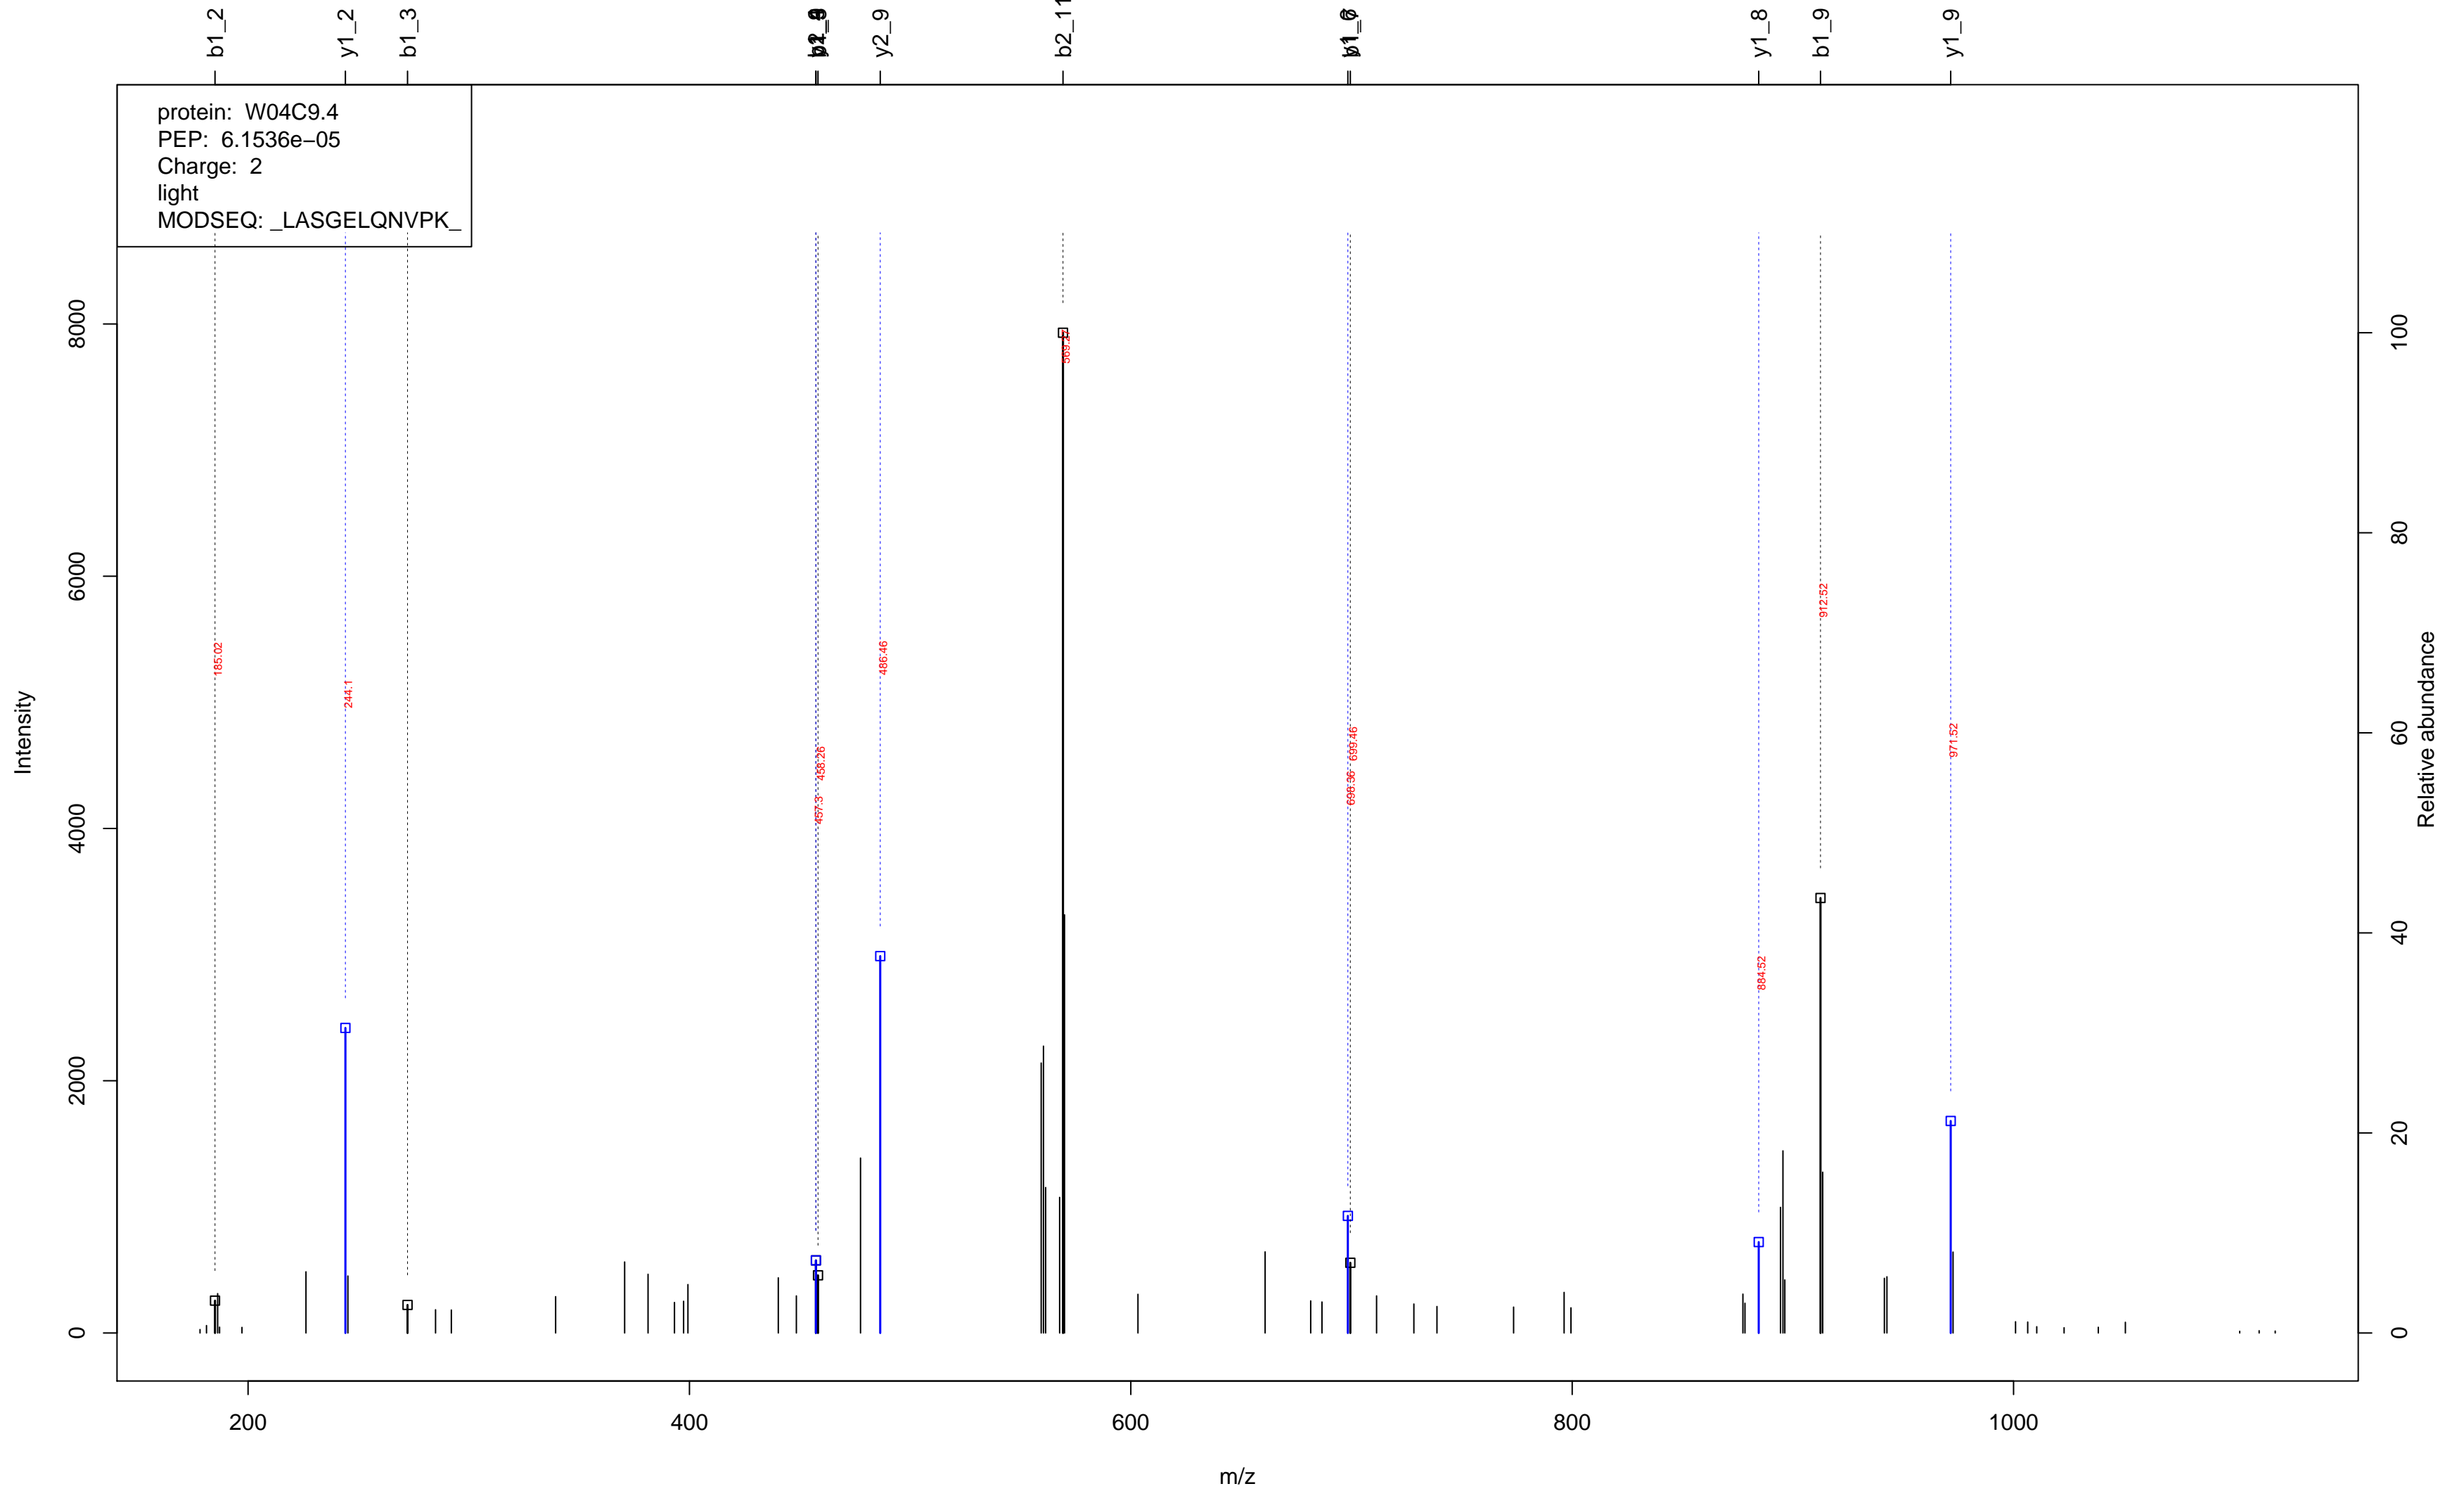

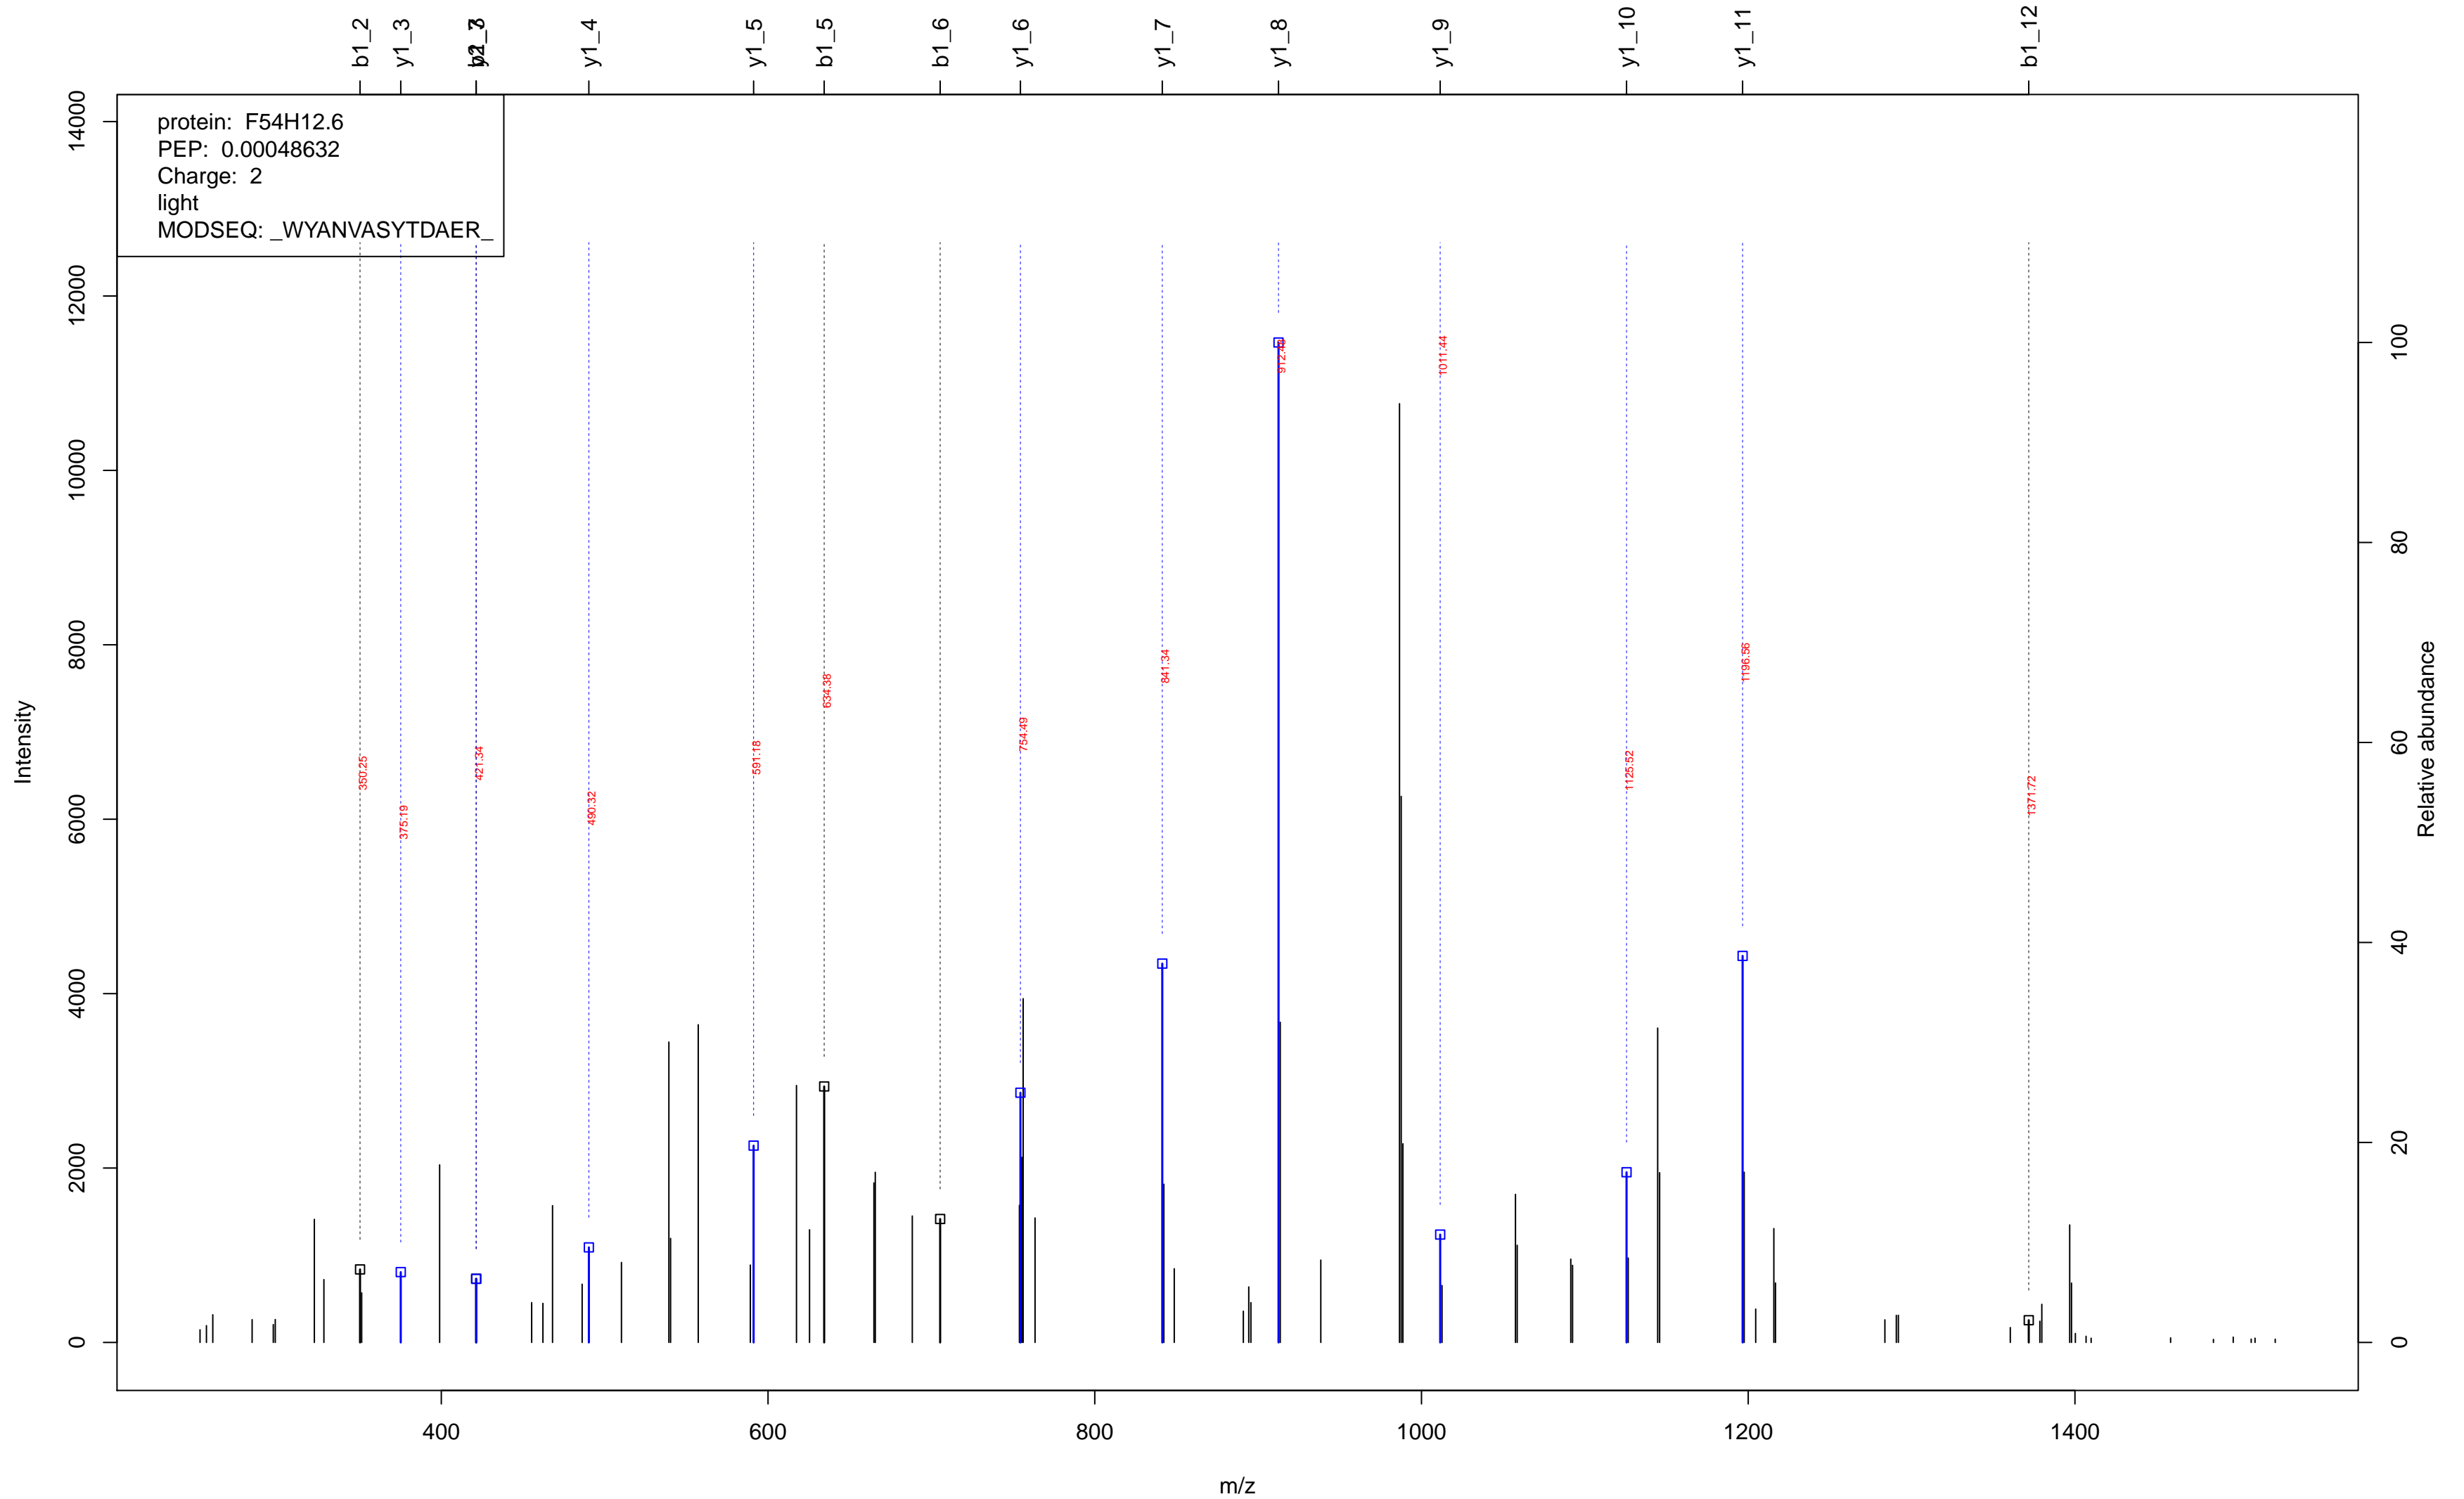

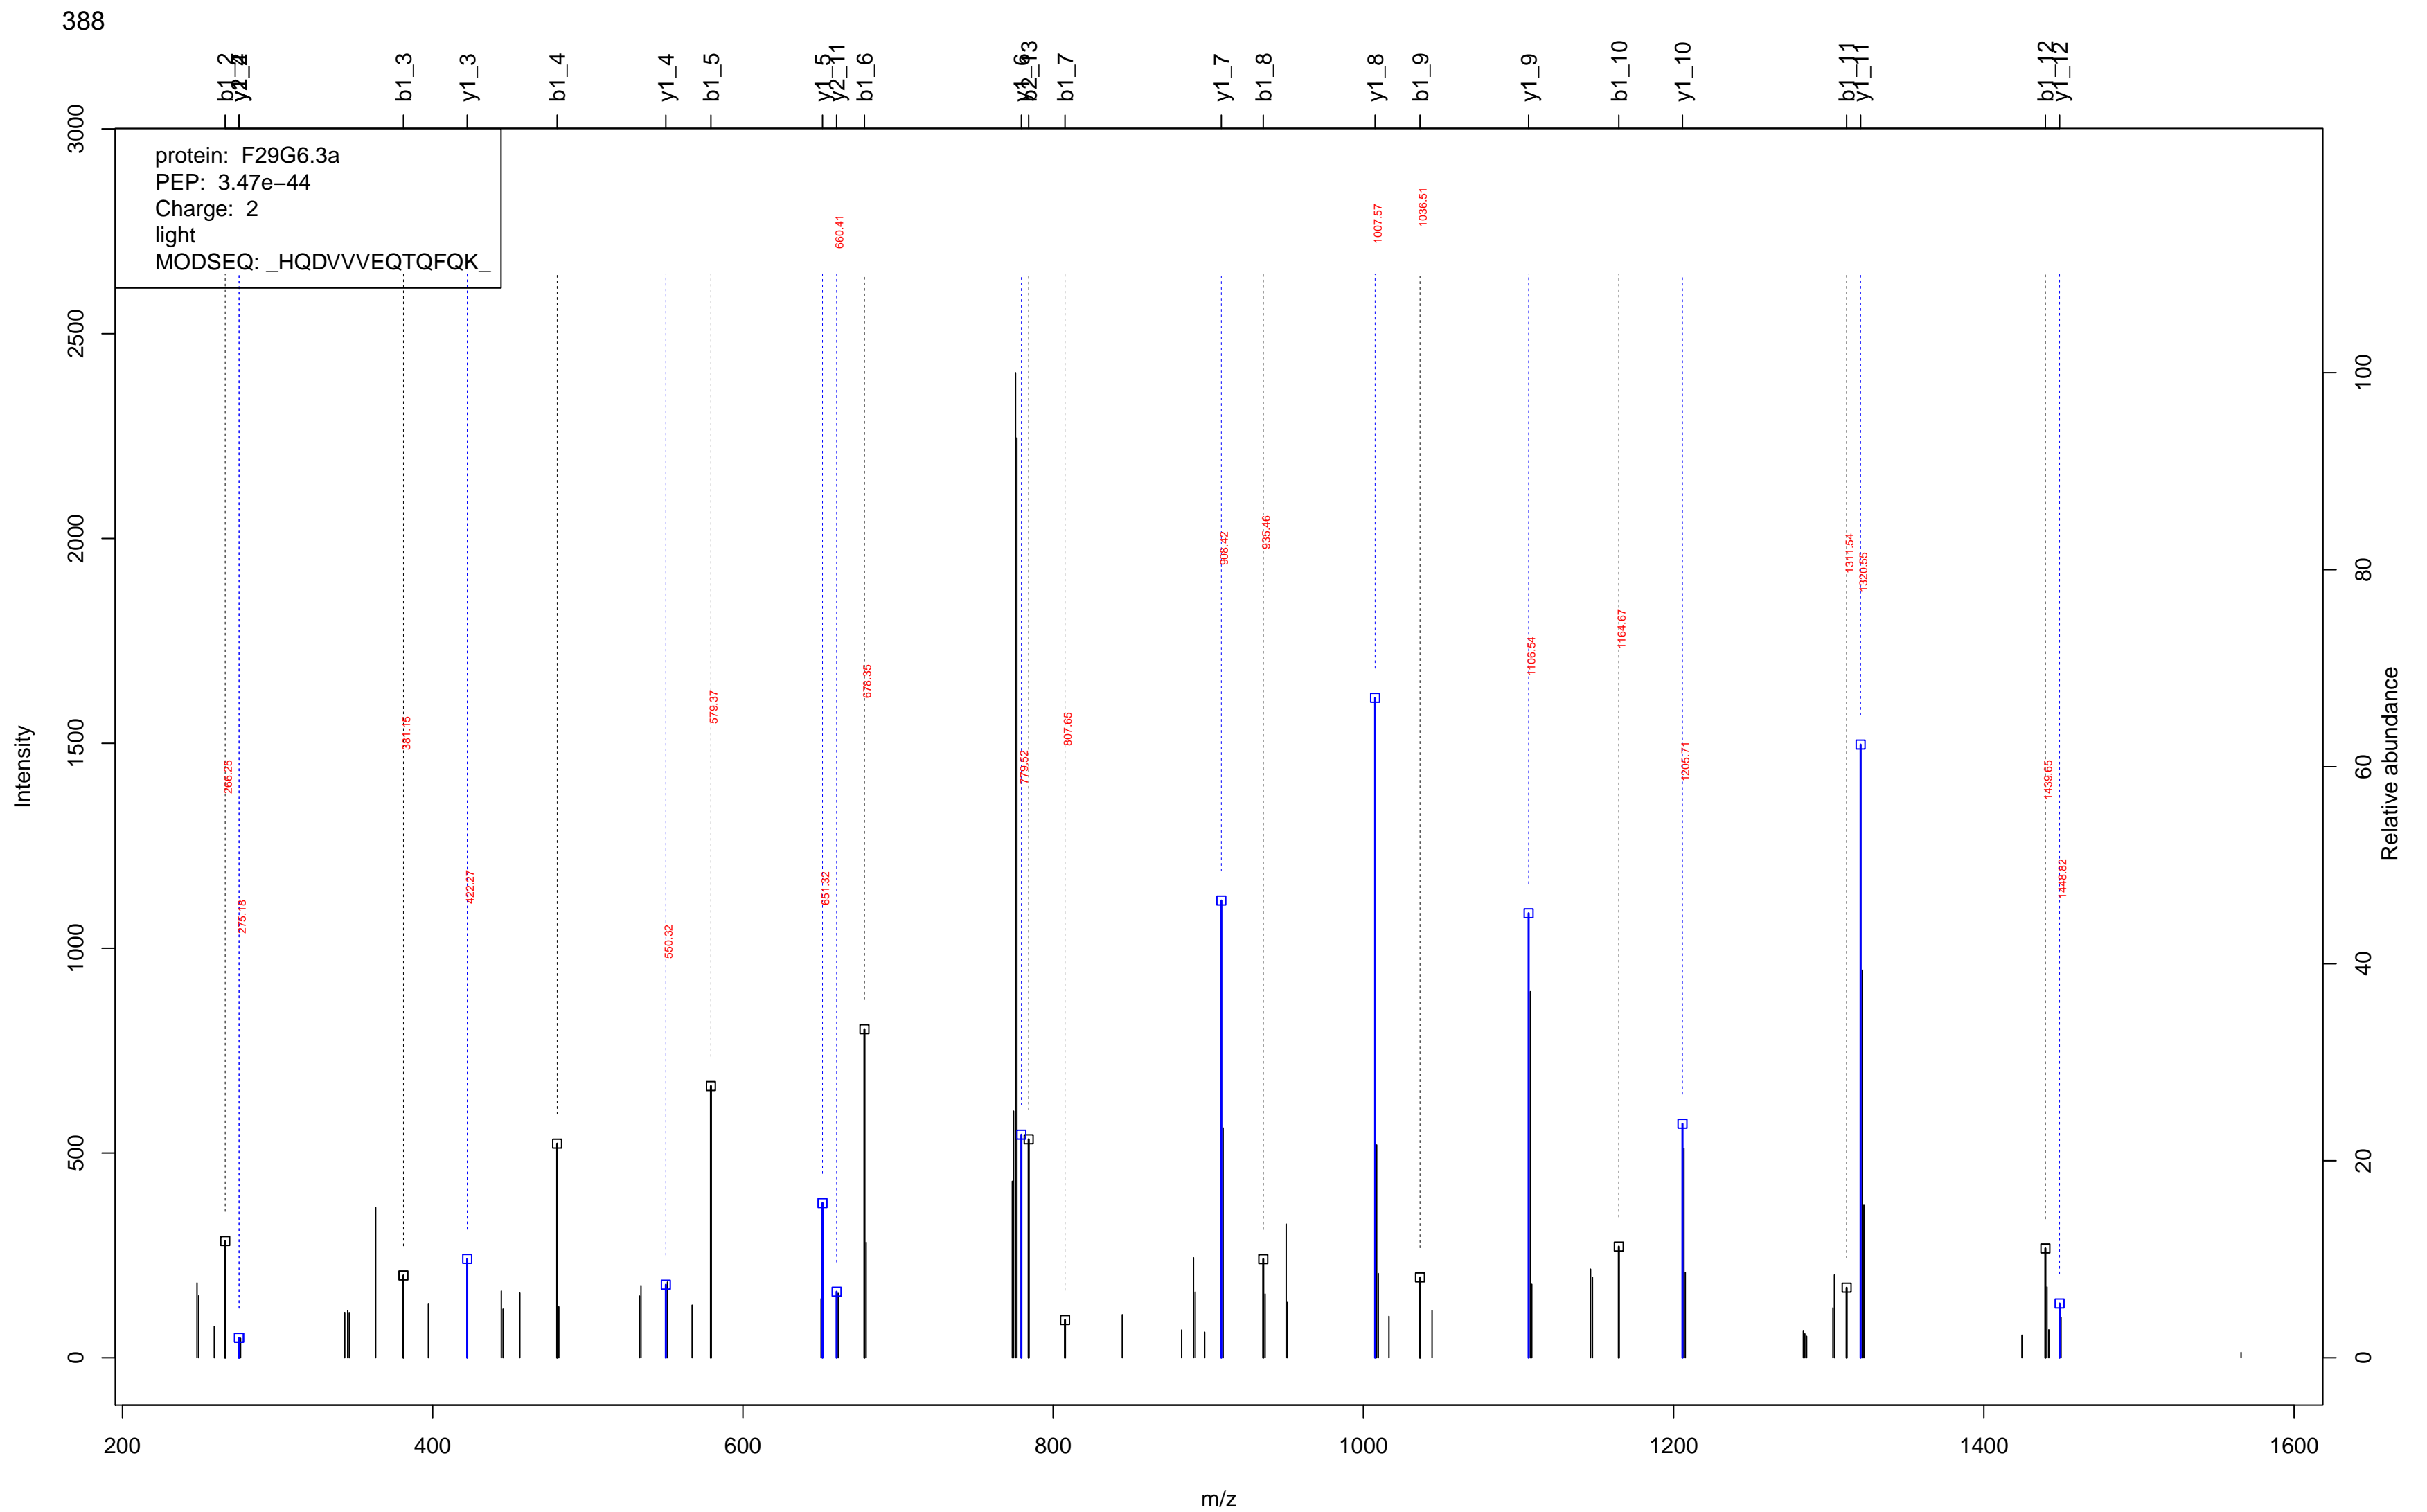

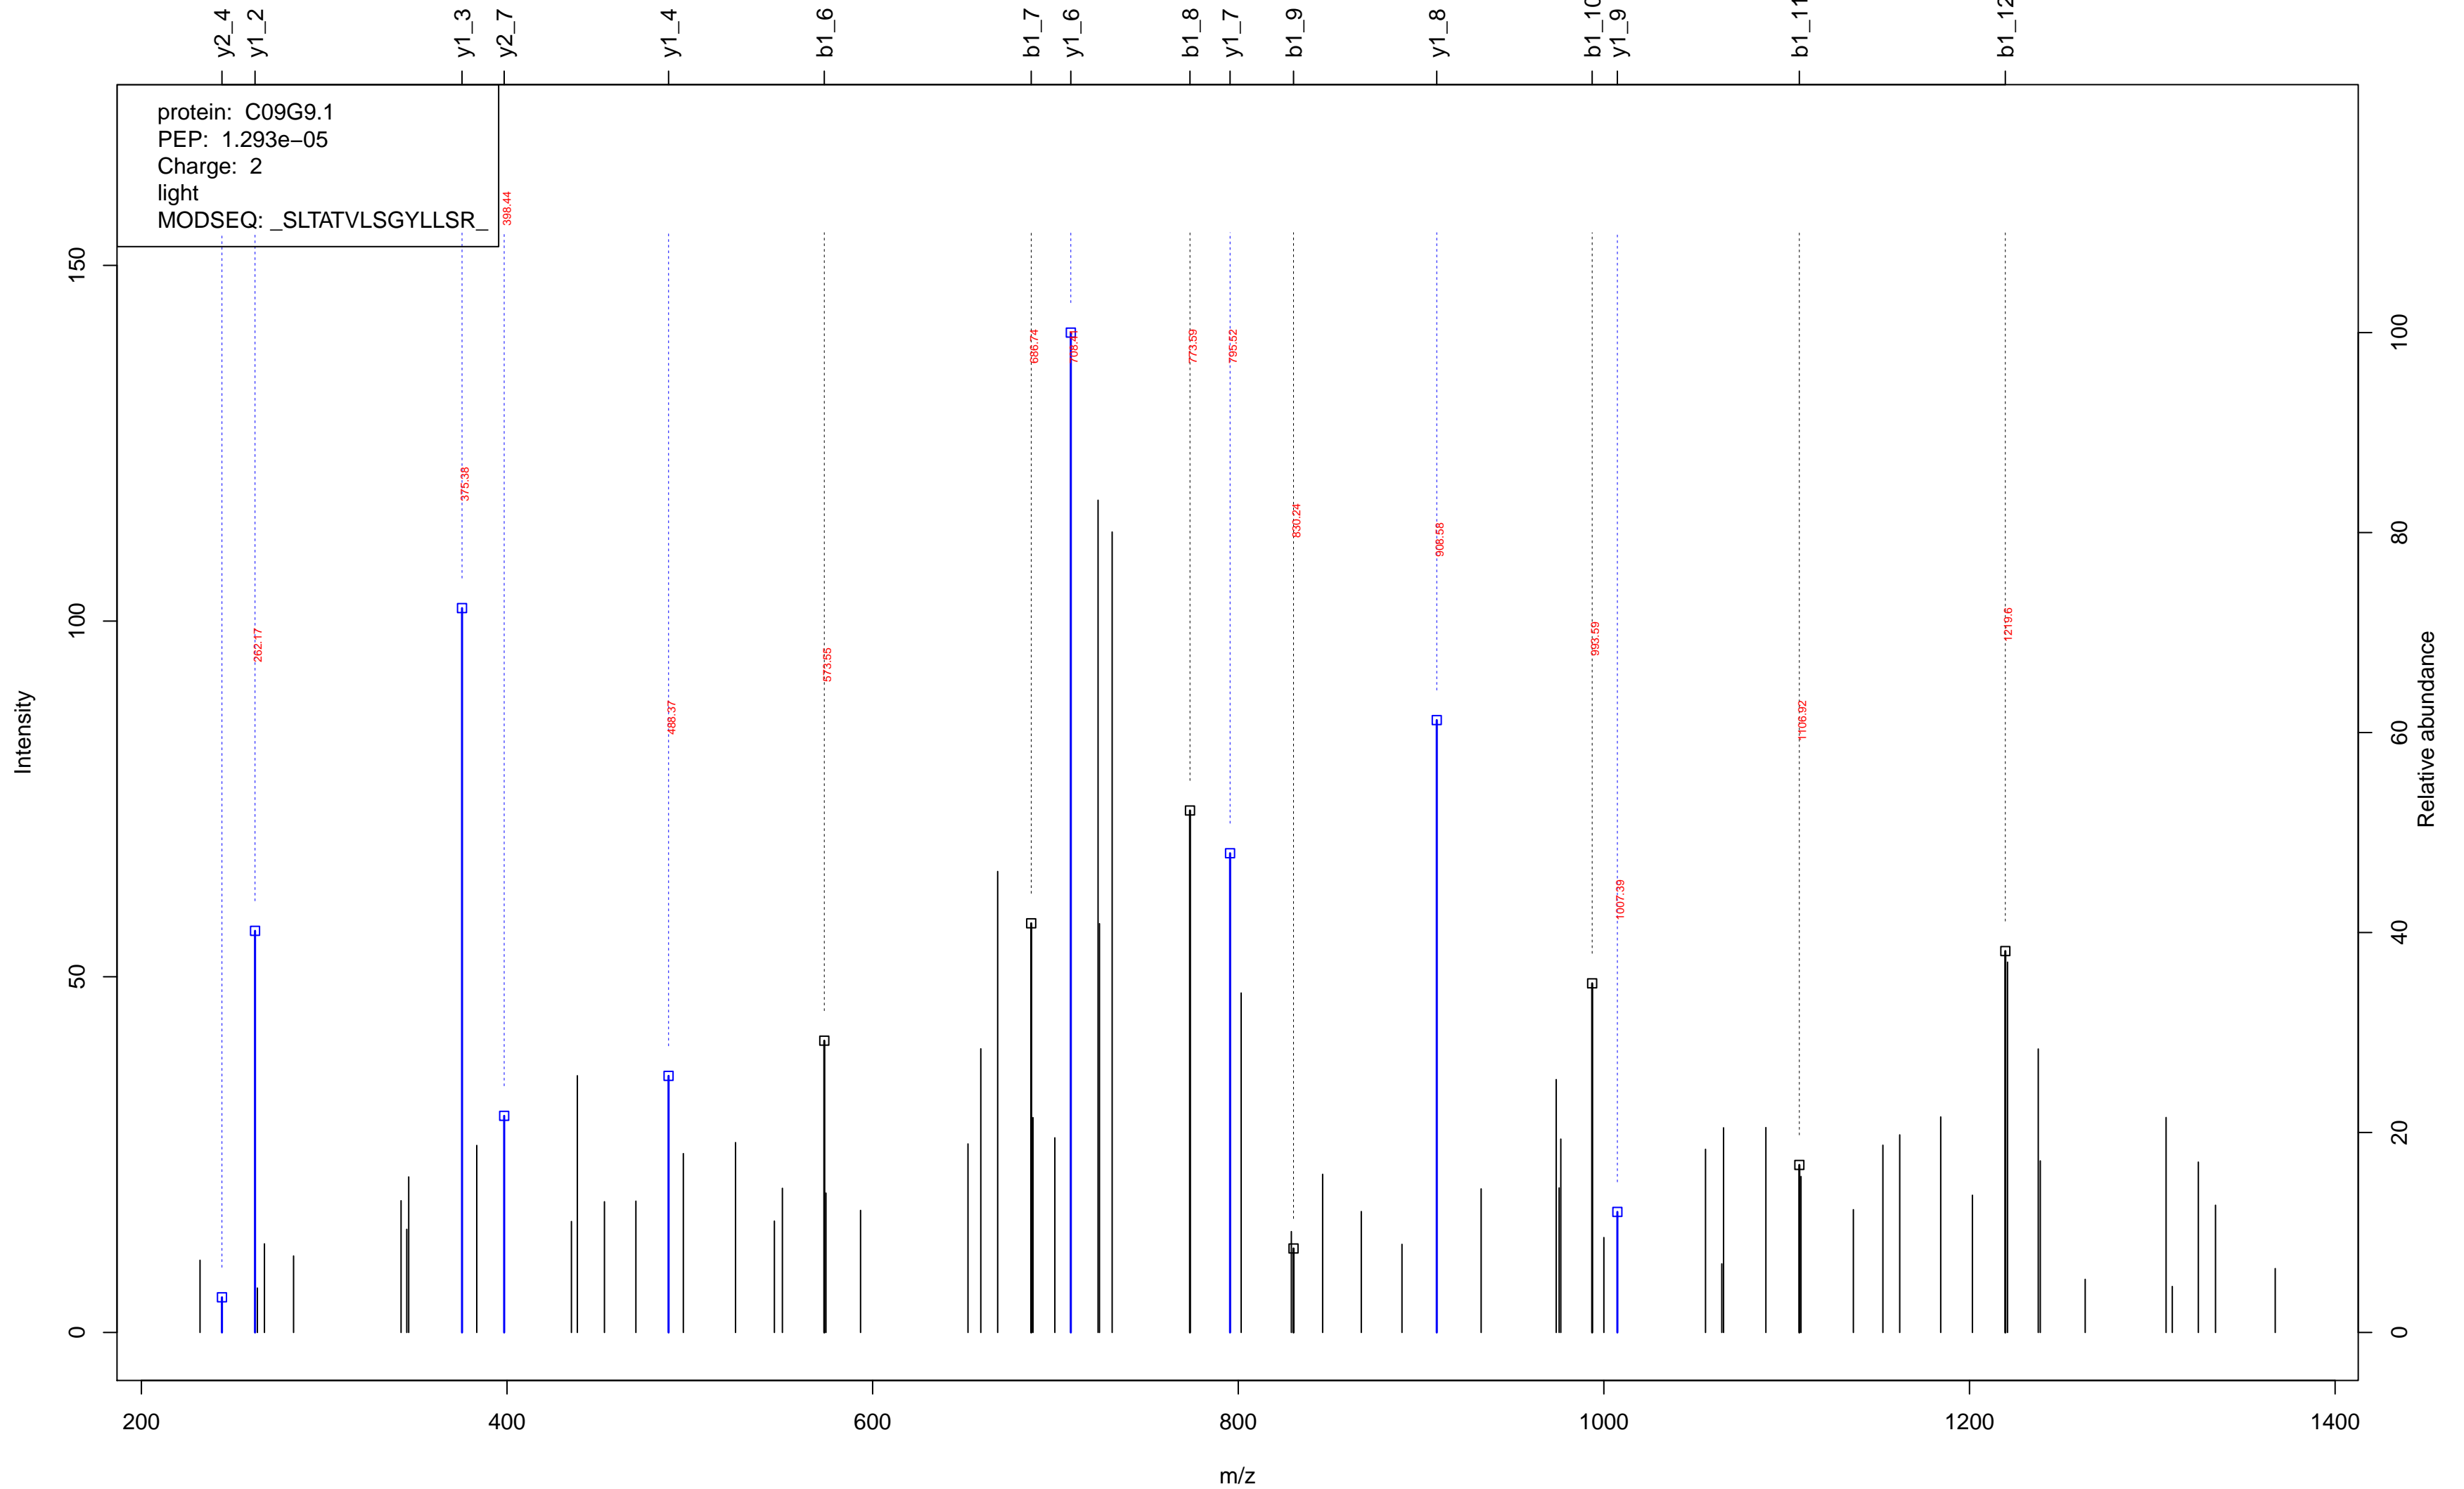

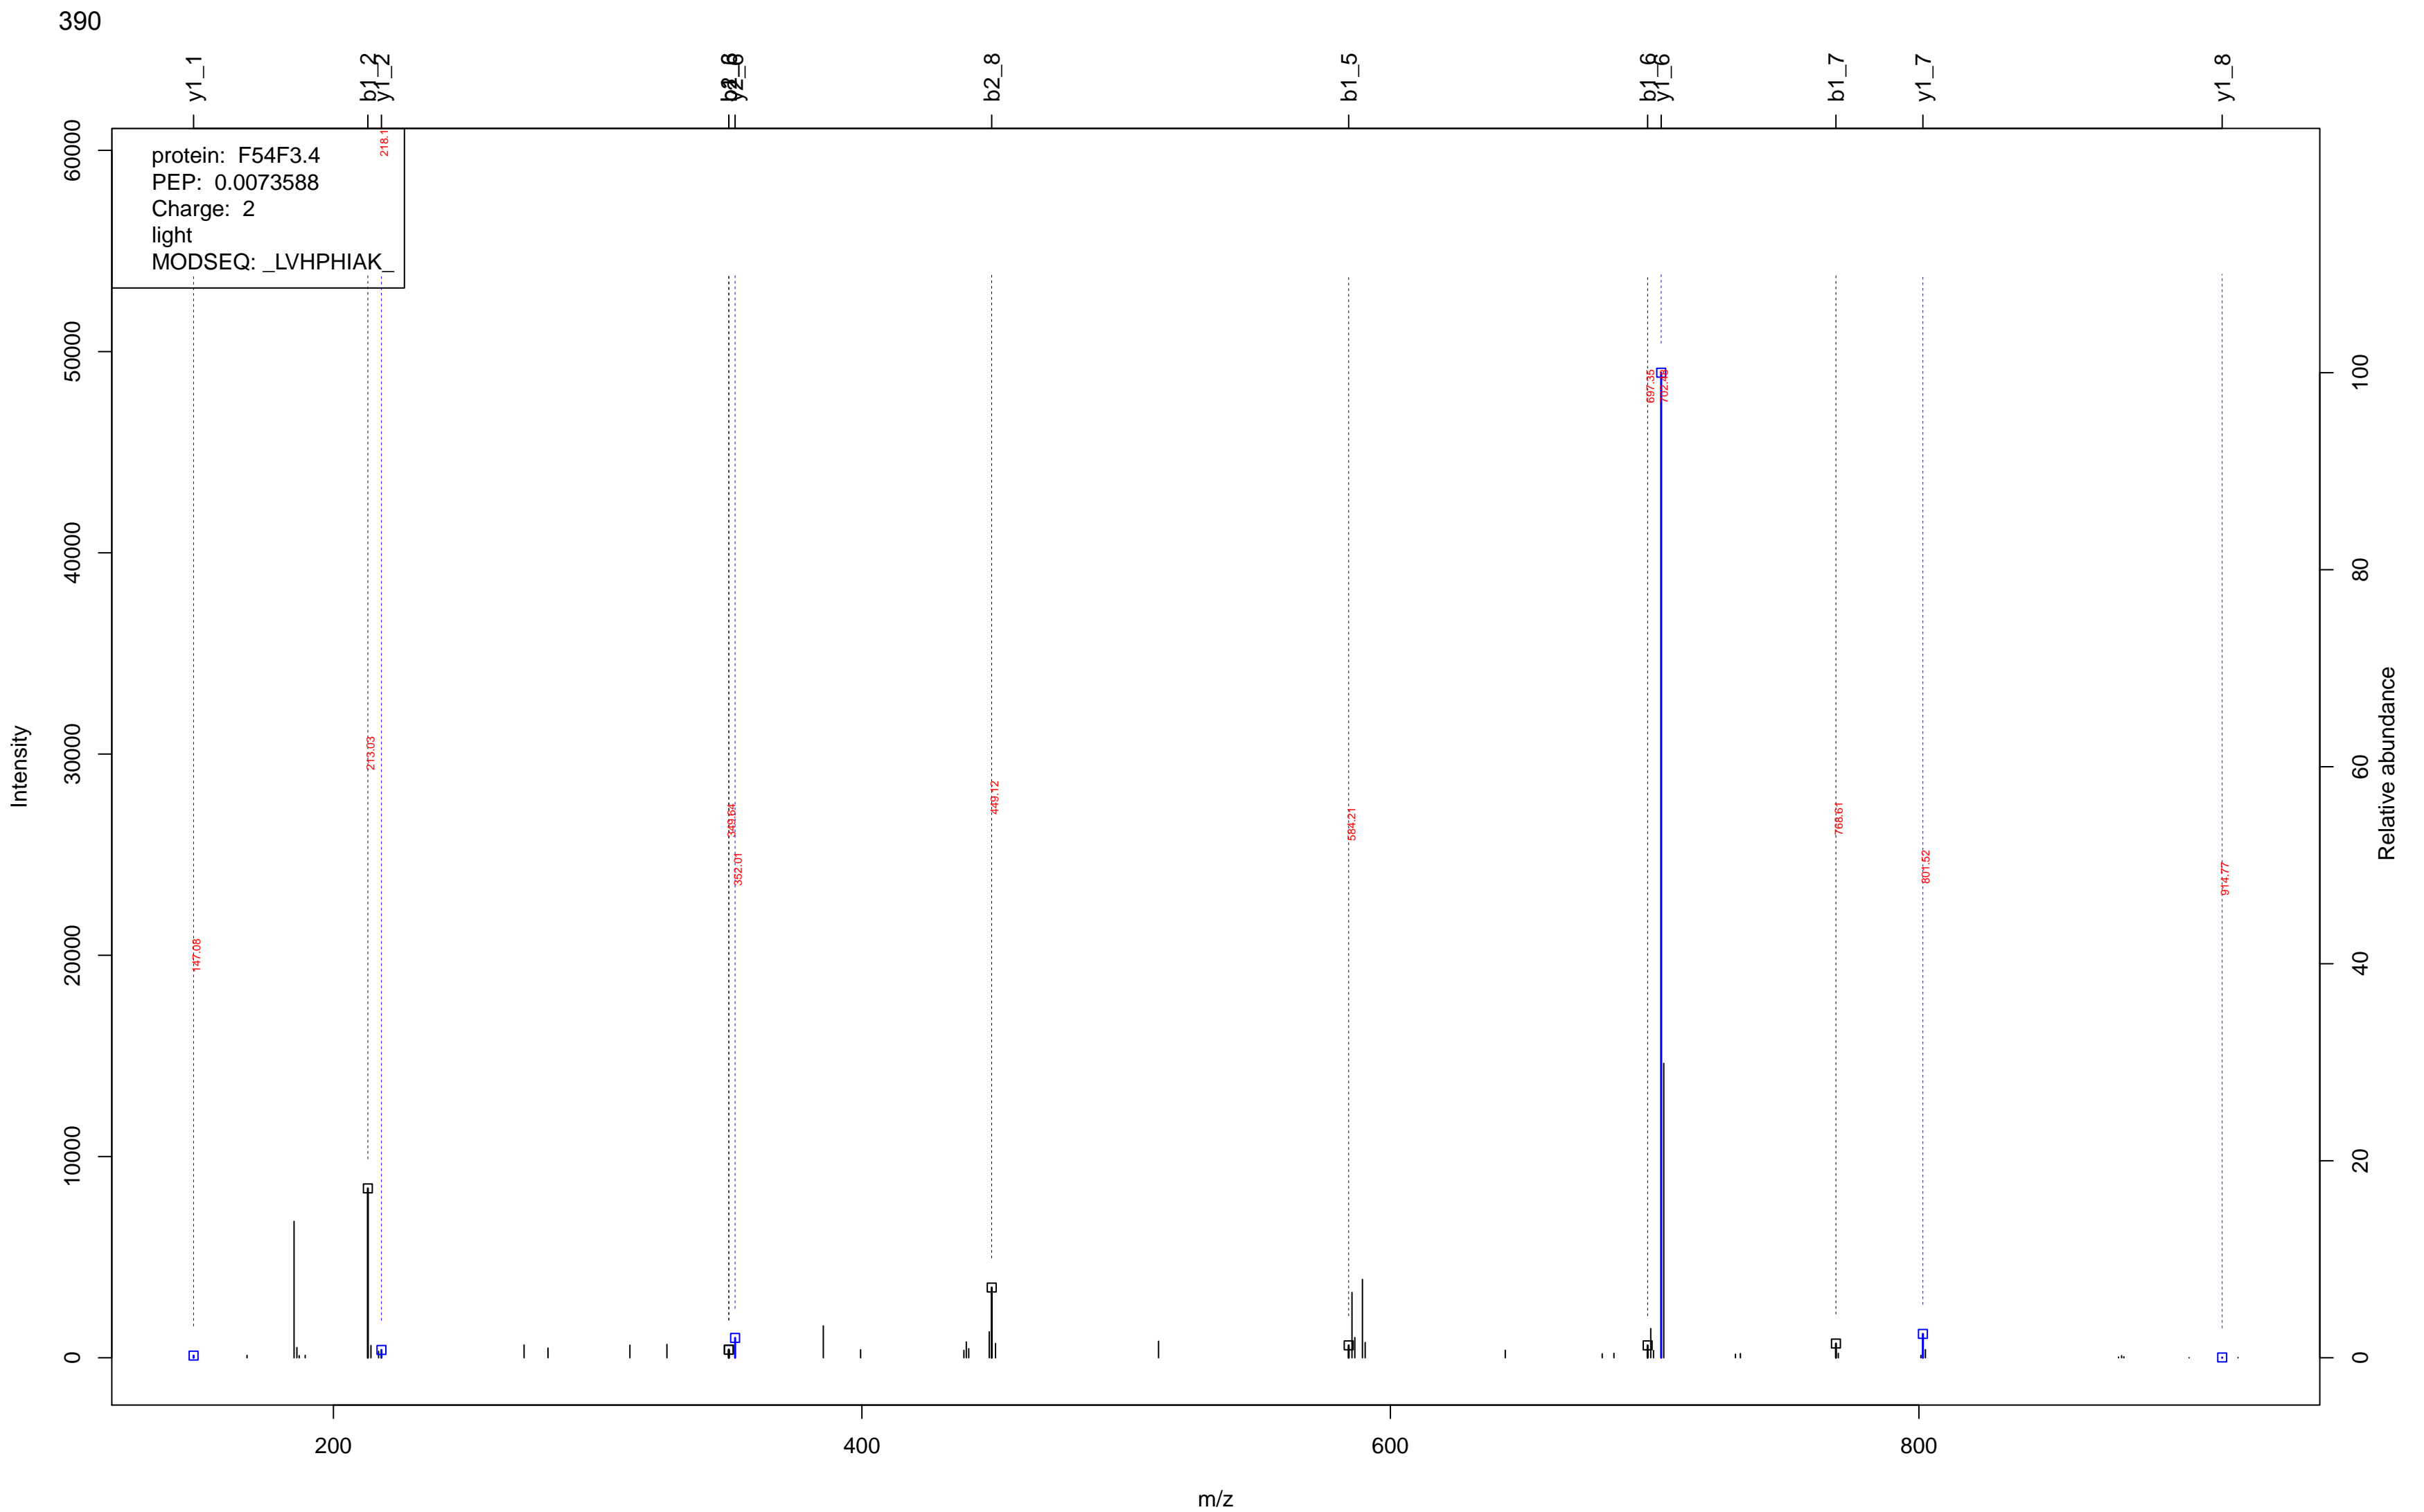

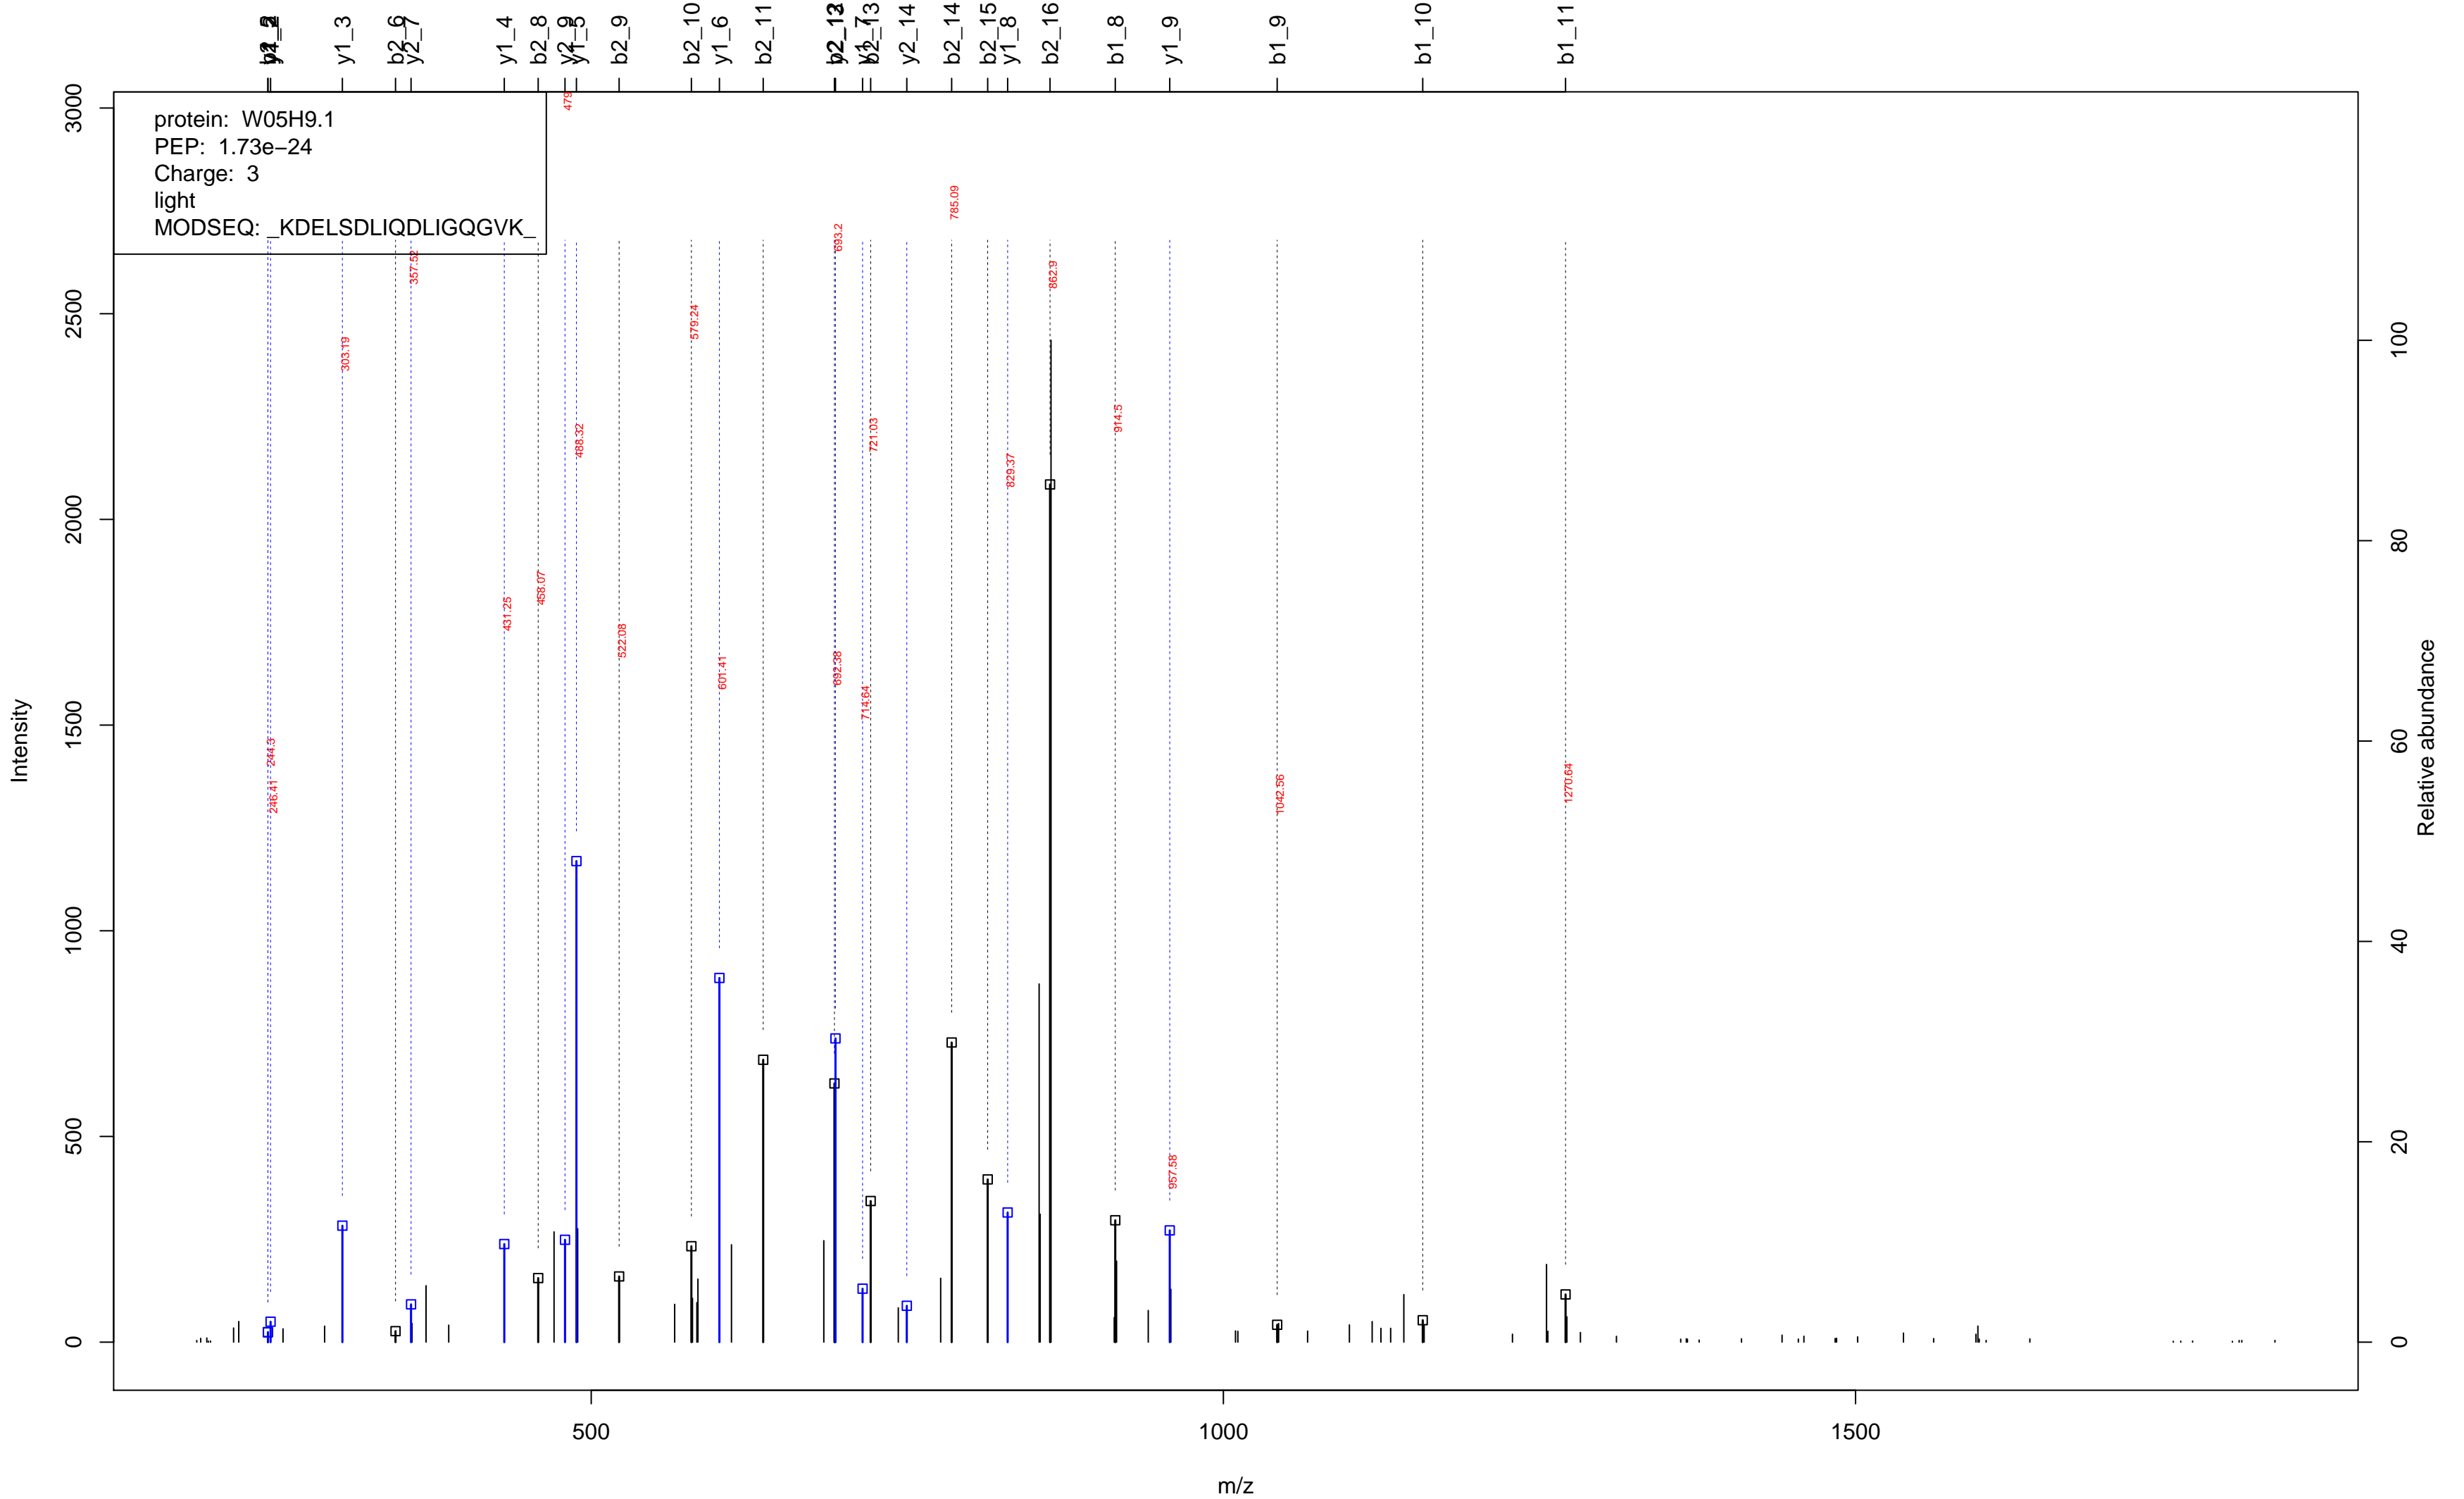

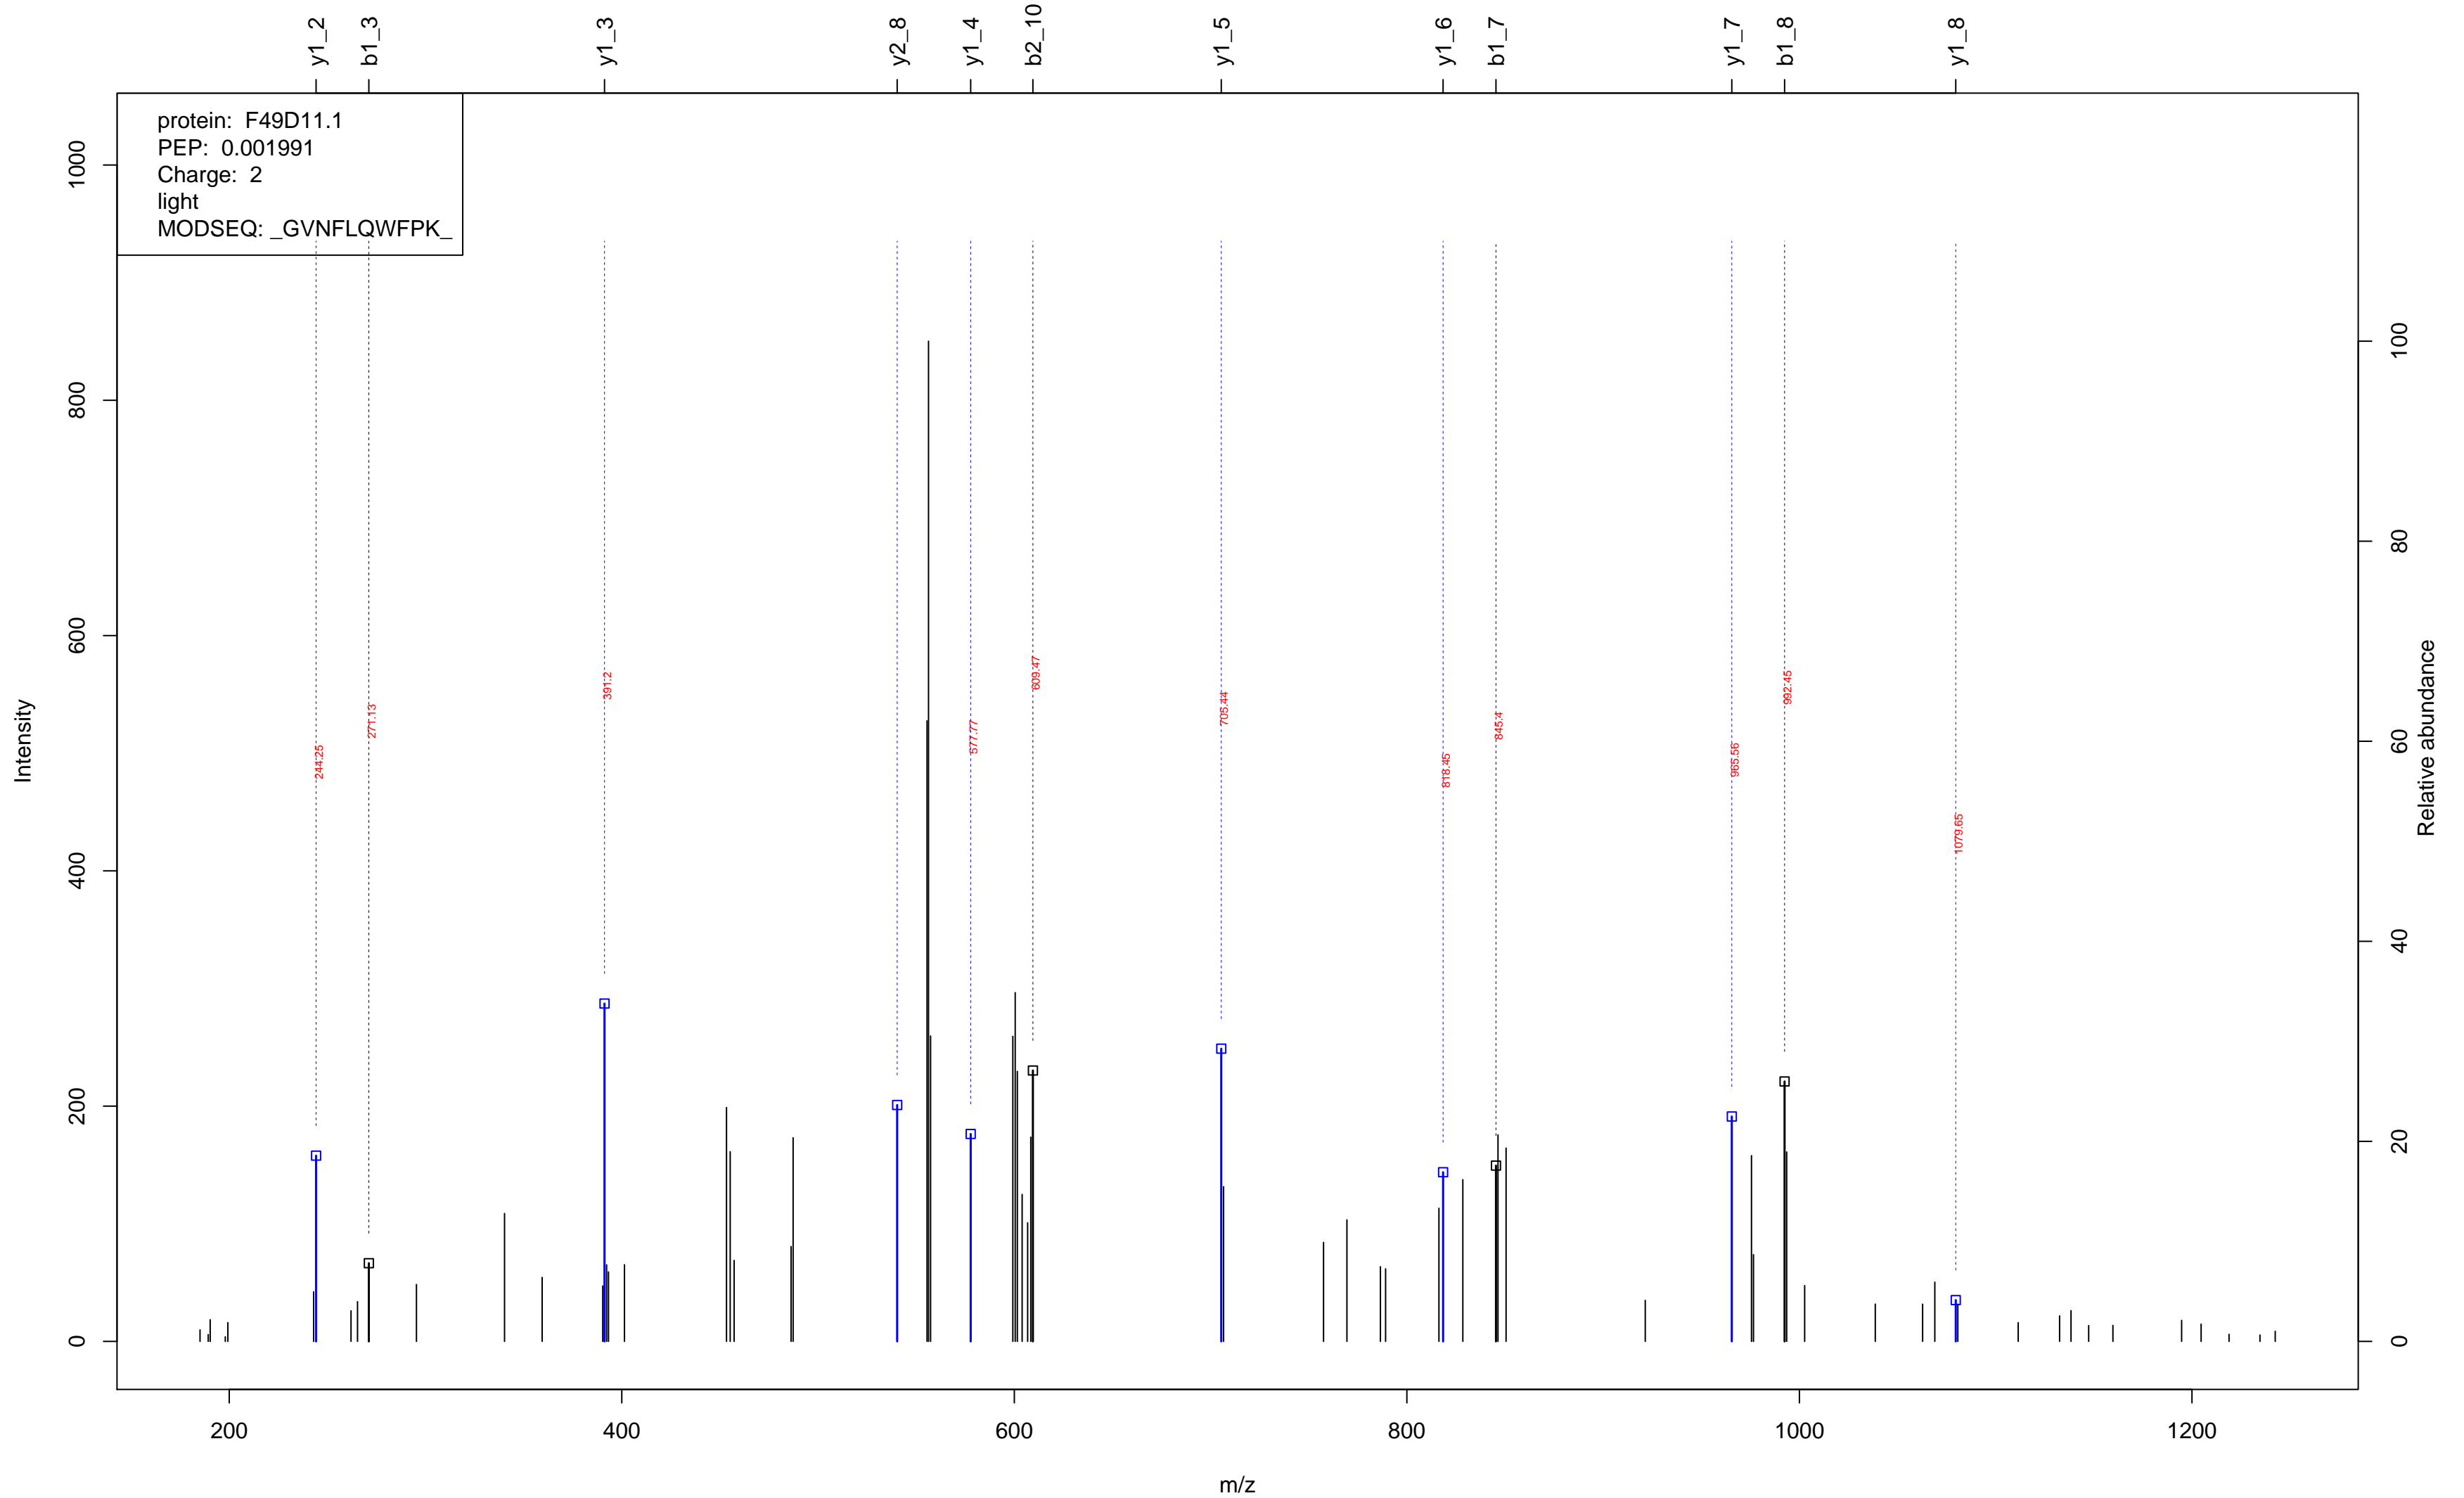



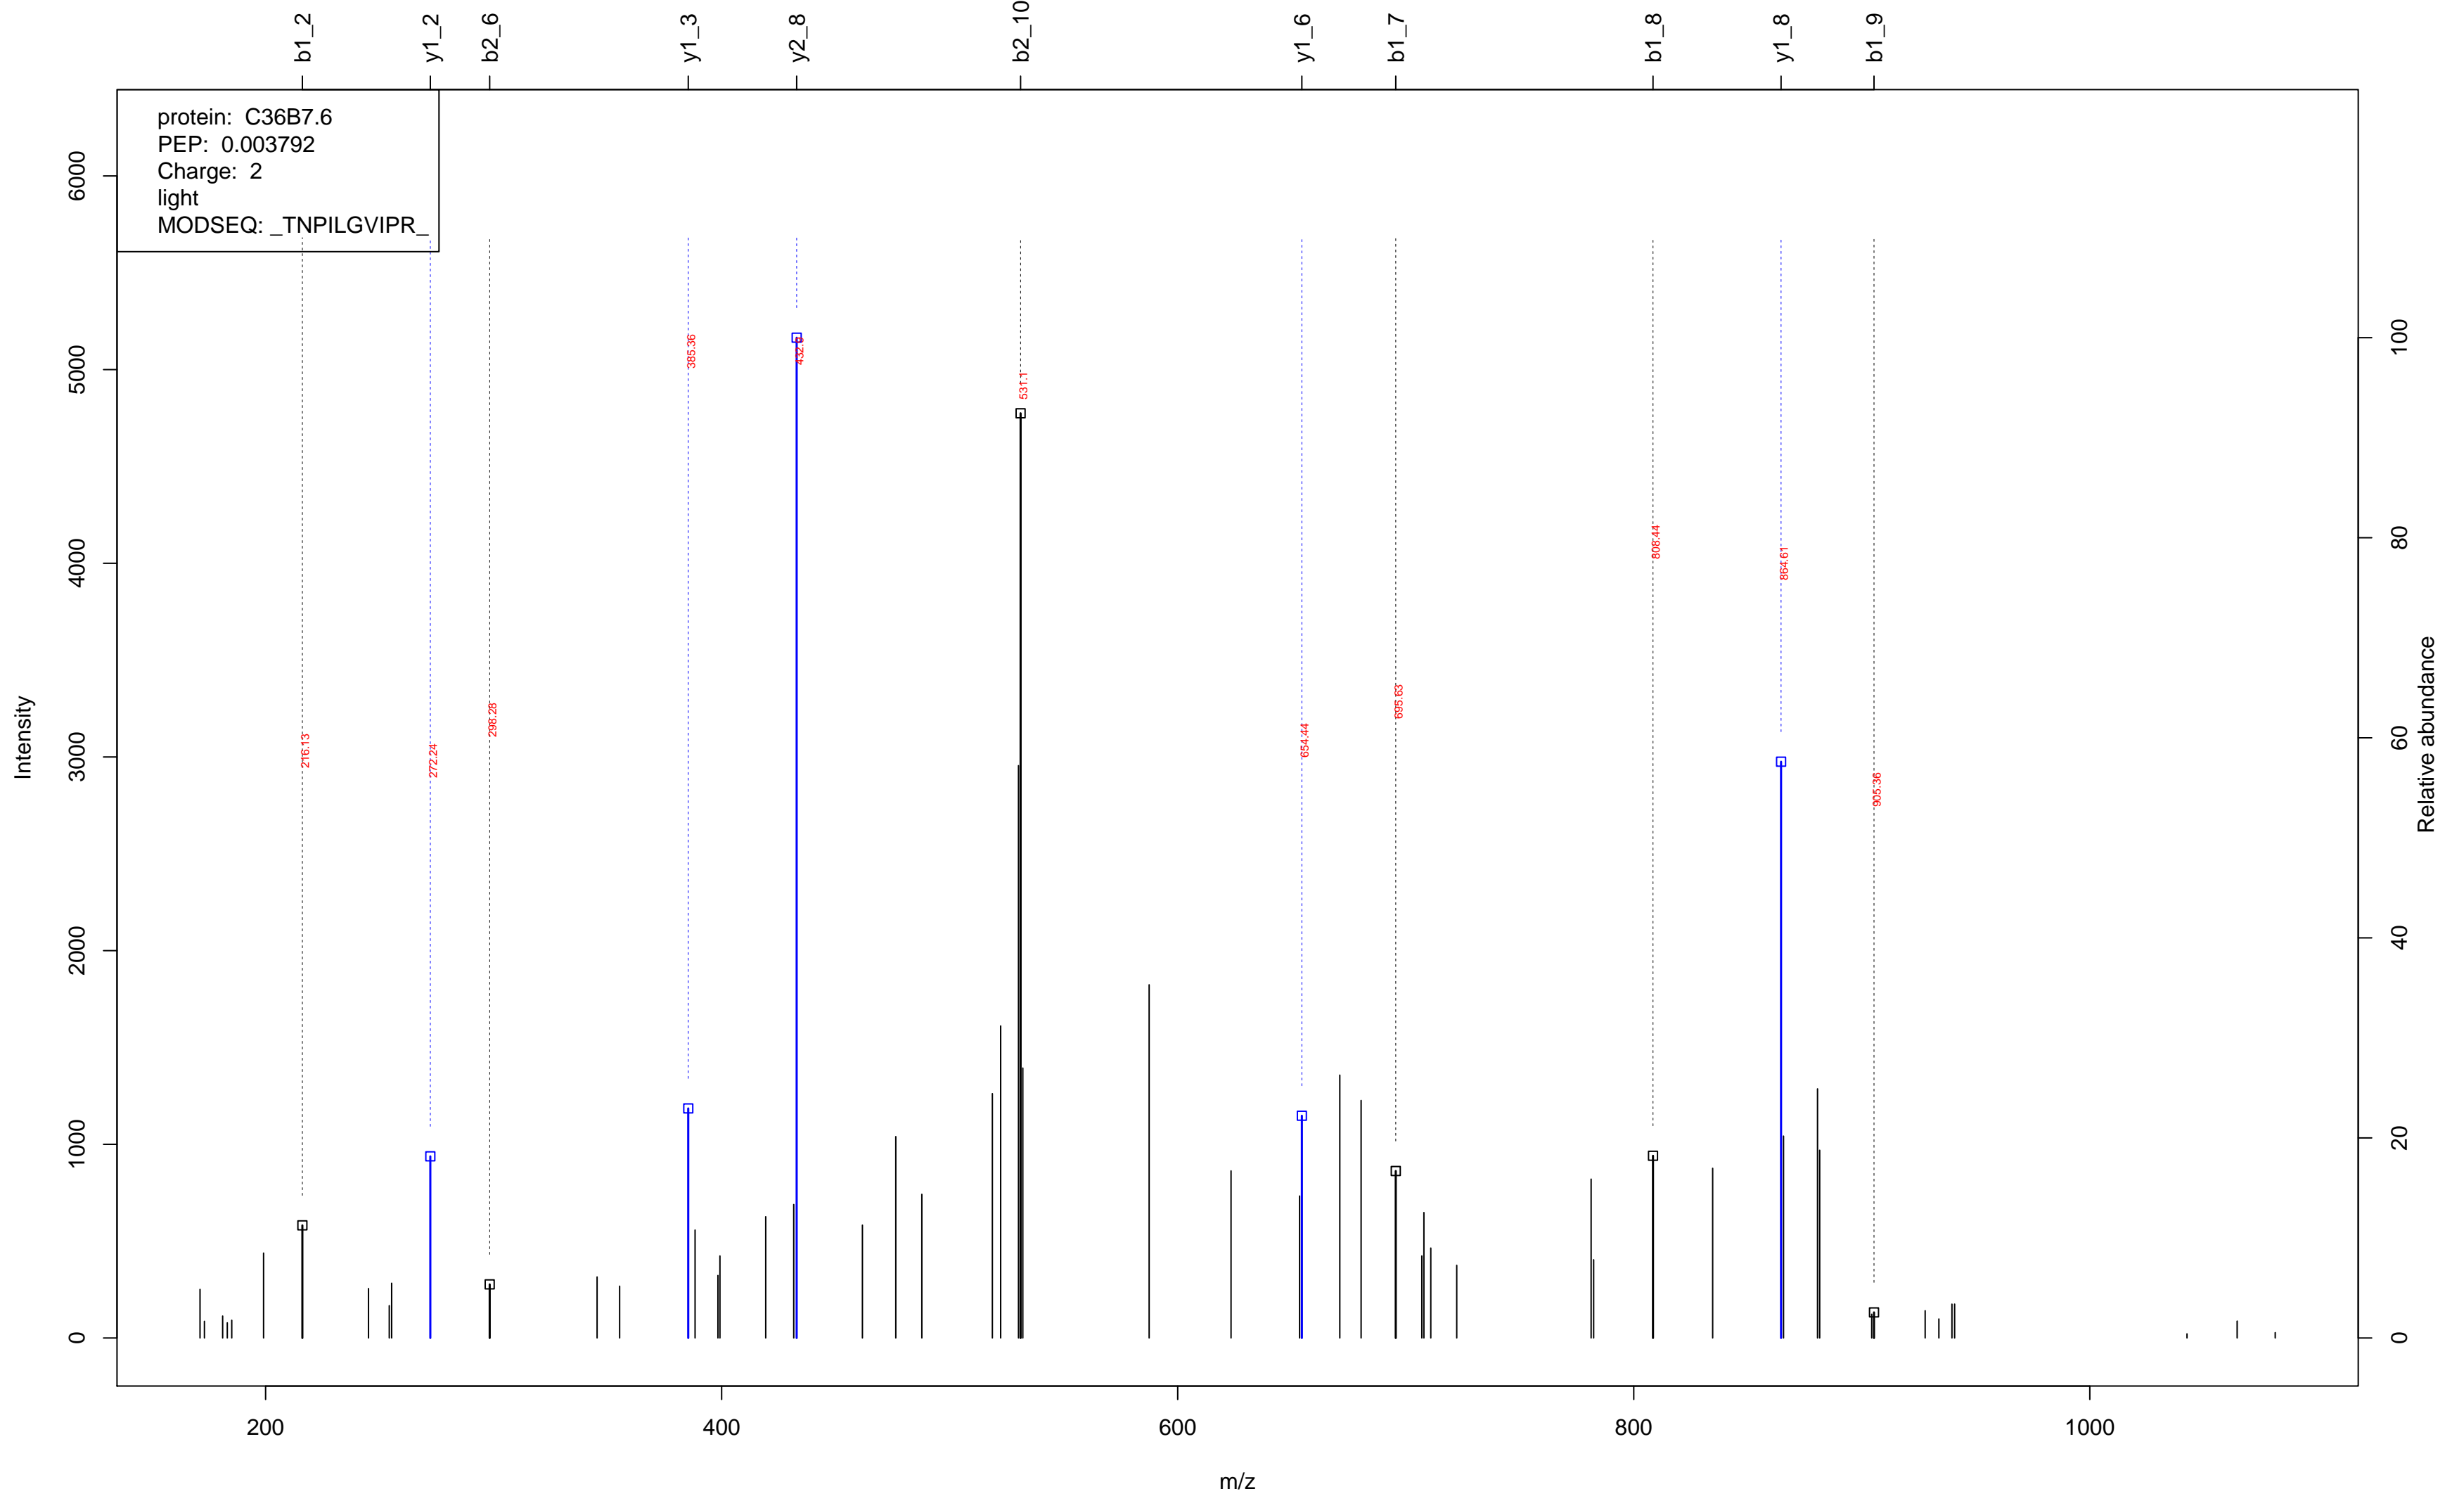

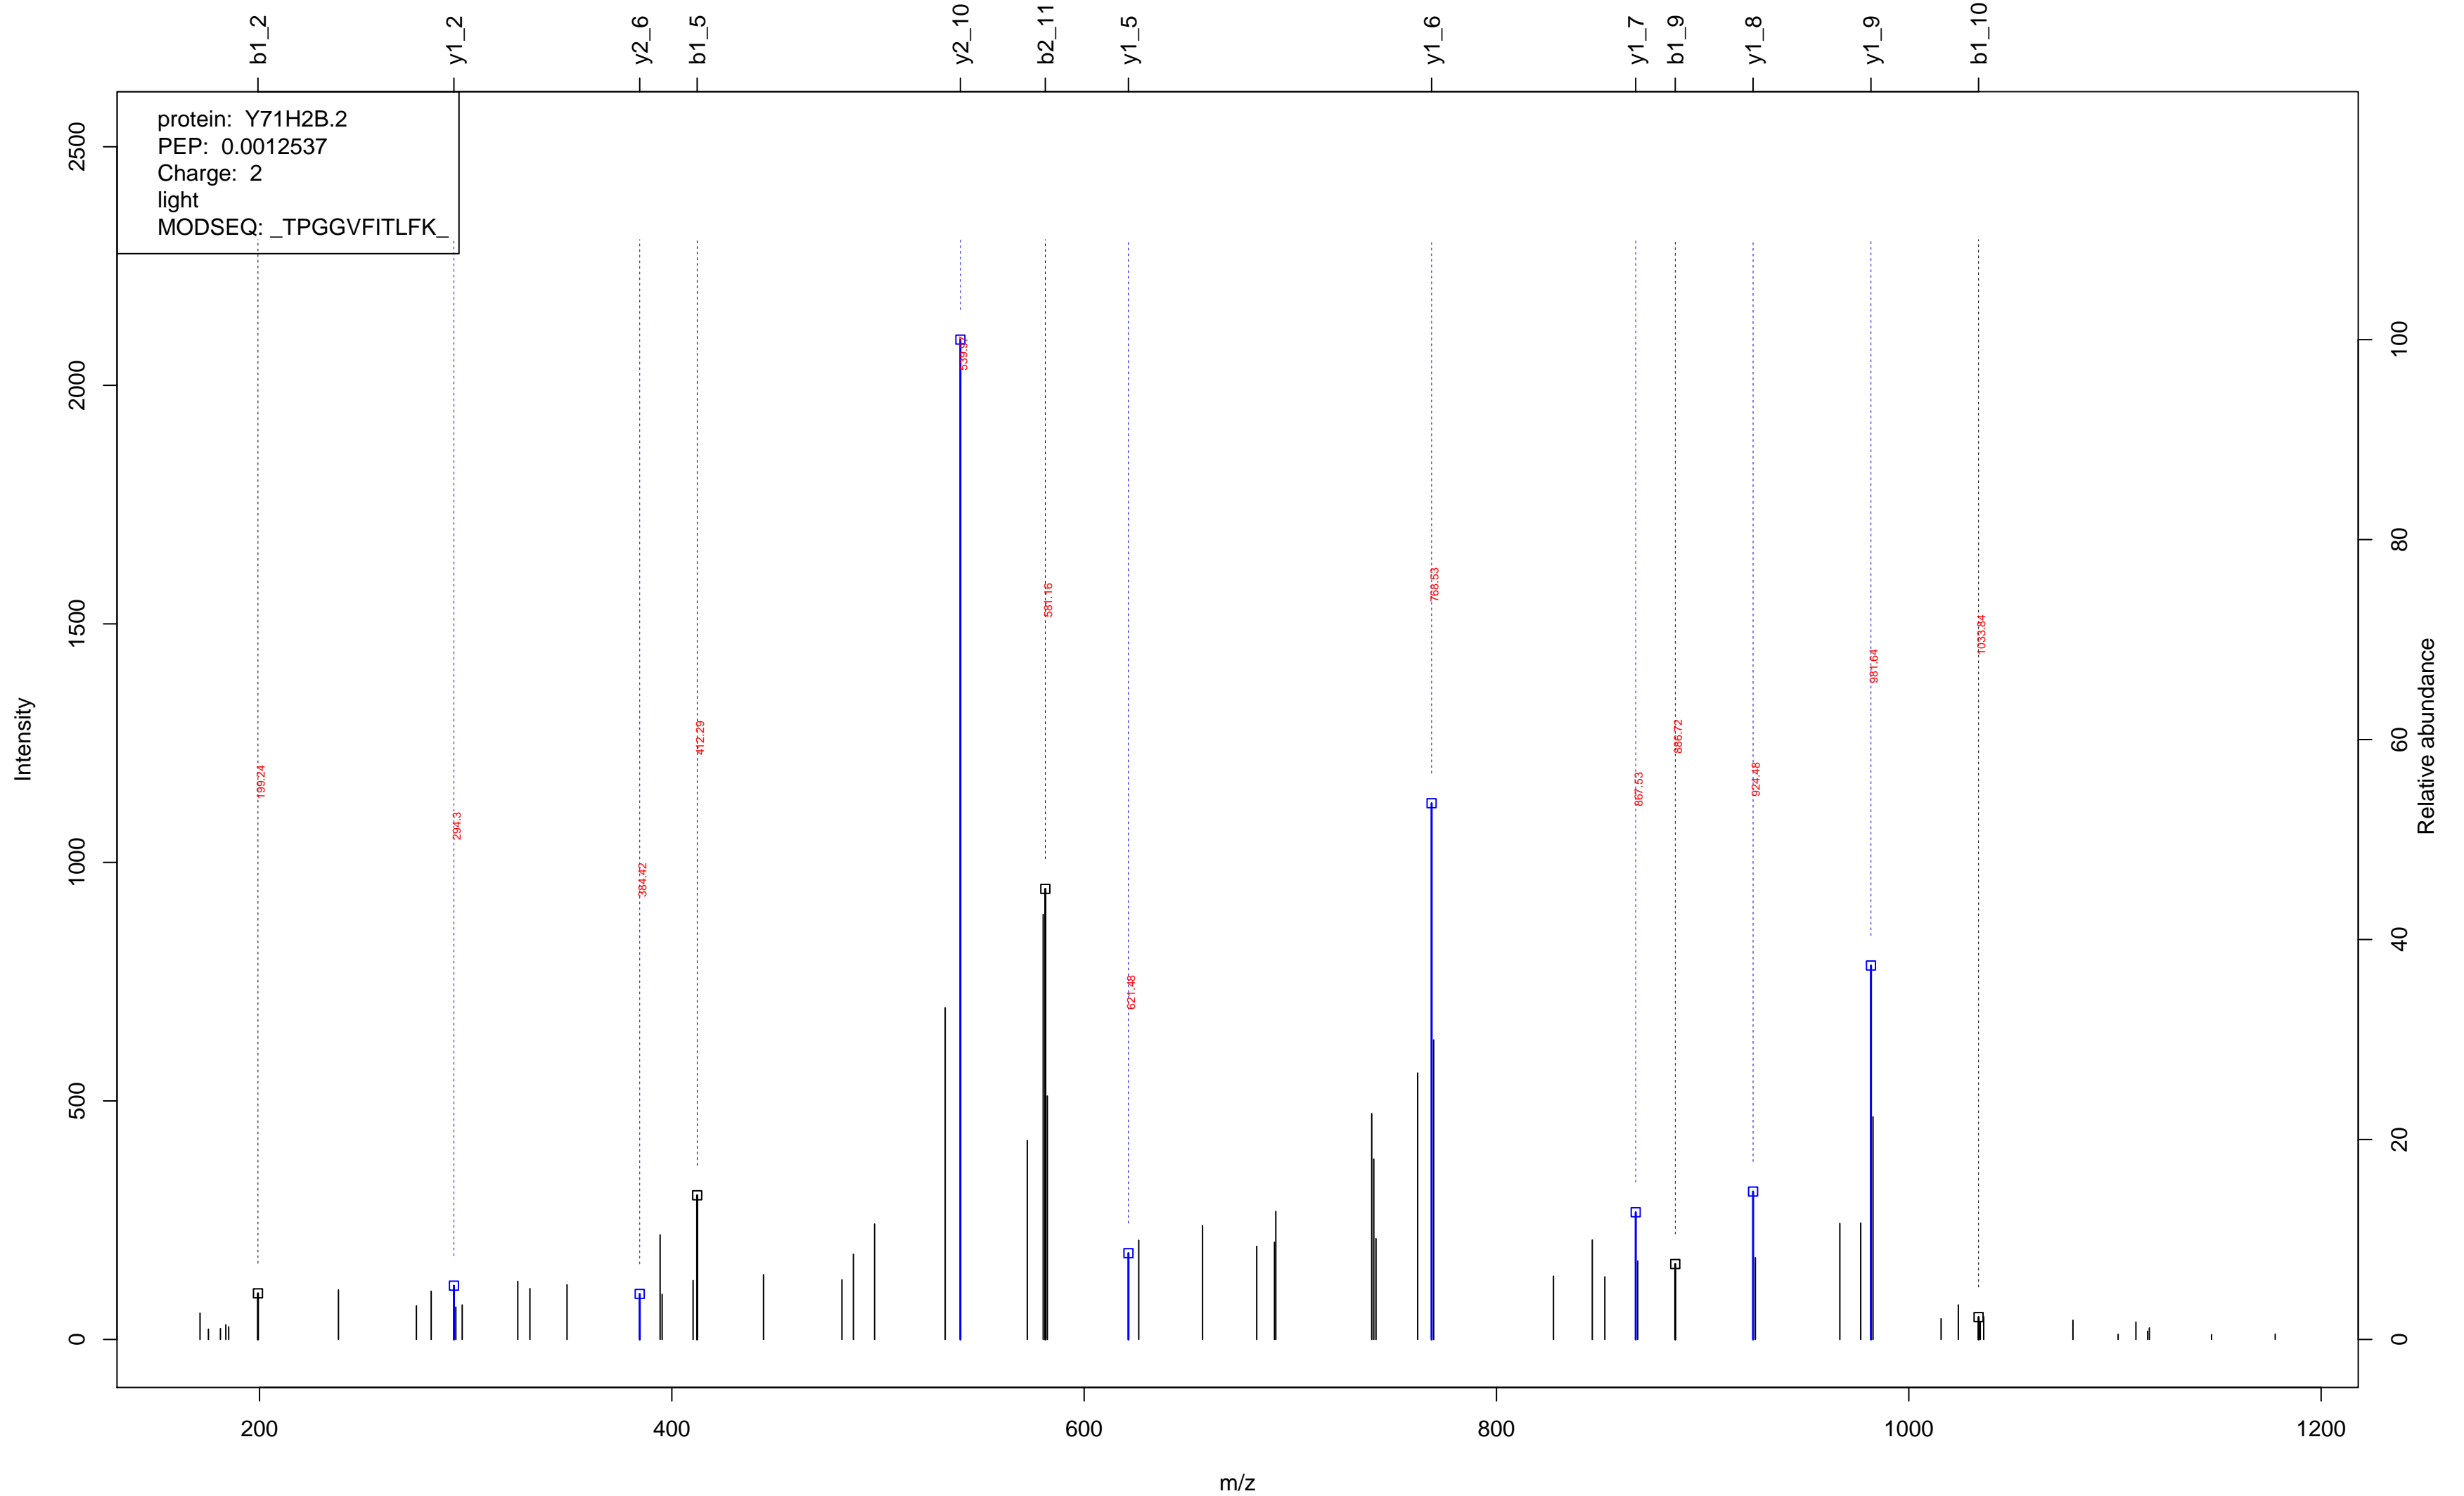

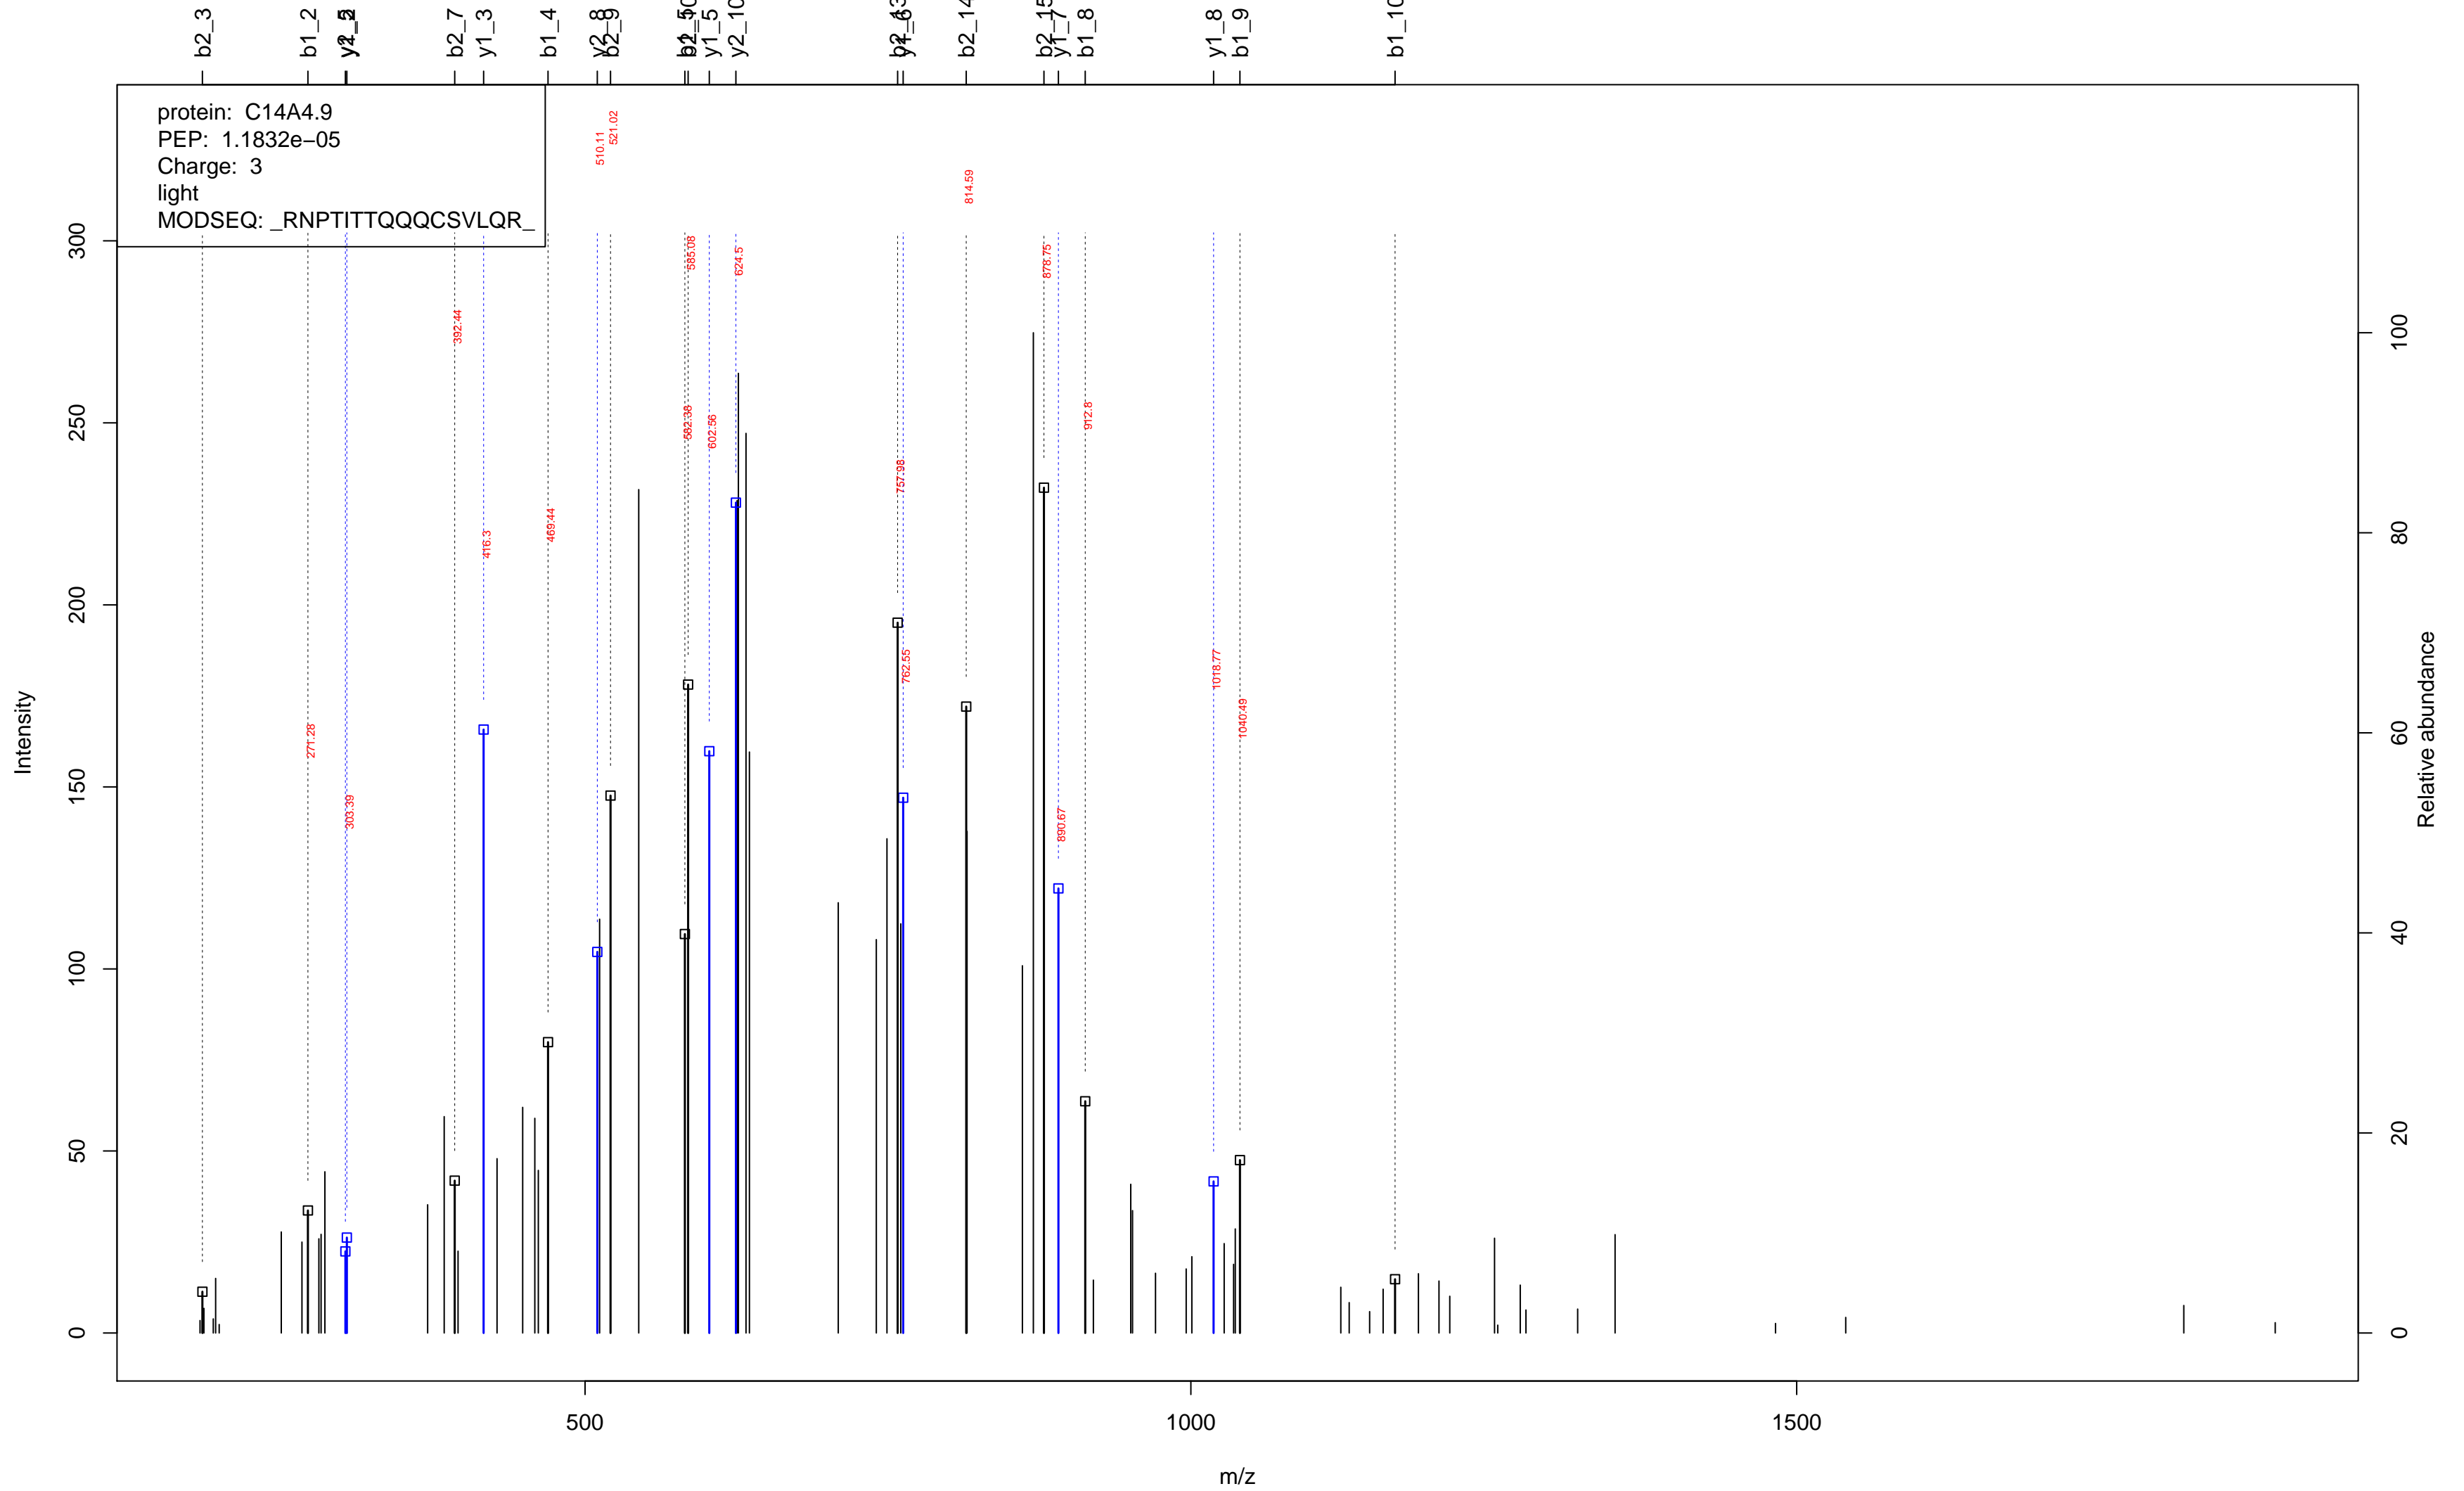

y1\_3 y1\_4 y2\_10 y1\_6 b2\_14 y1\_8 y1\_9 y1\_10 b1\_10 y1\_11 b1\_12 b1\_14

protein: Y48A6B.13  
PEP: 0.00039498  
Charge: 2  
light  
MODSEQ: \_QLQQEDEFITVGK\_

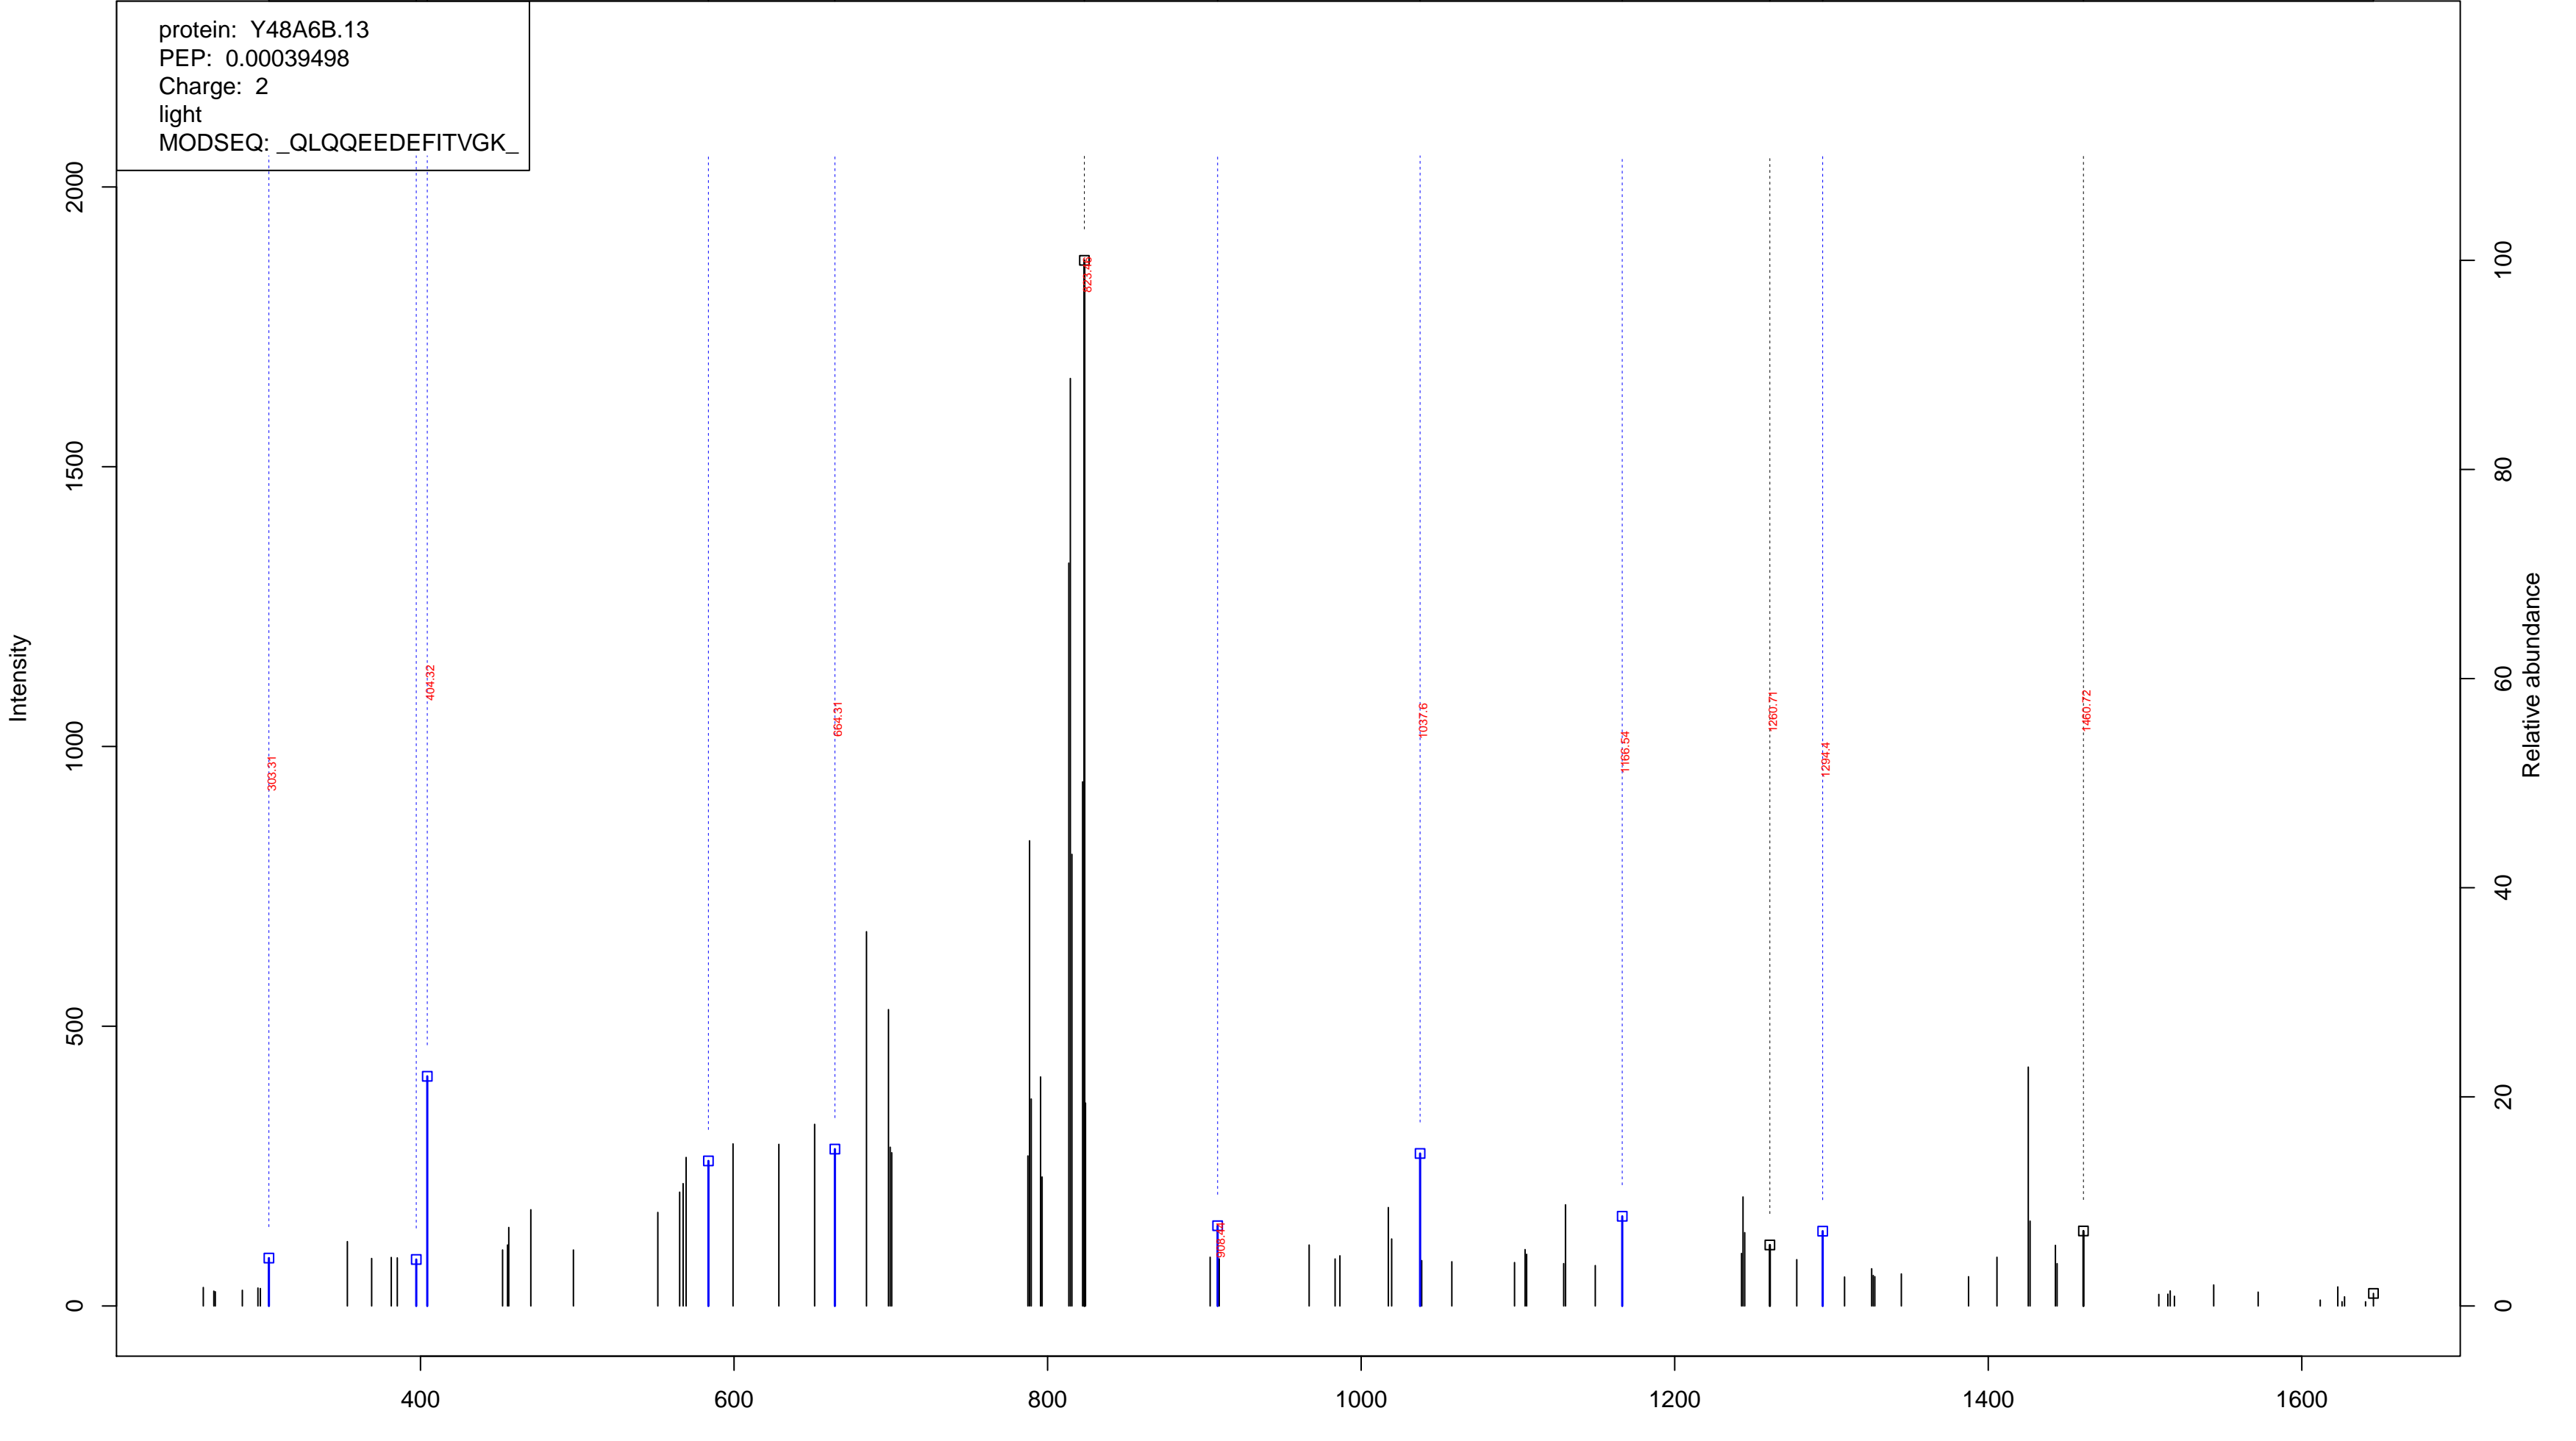

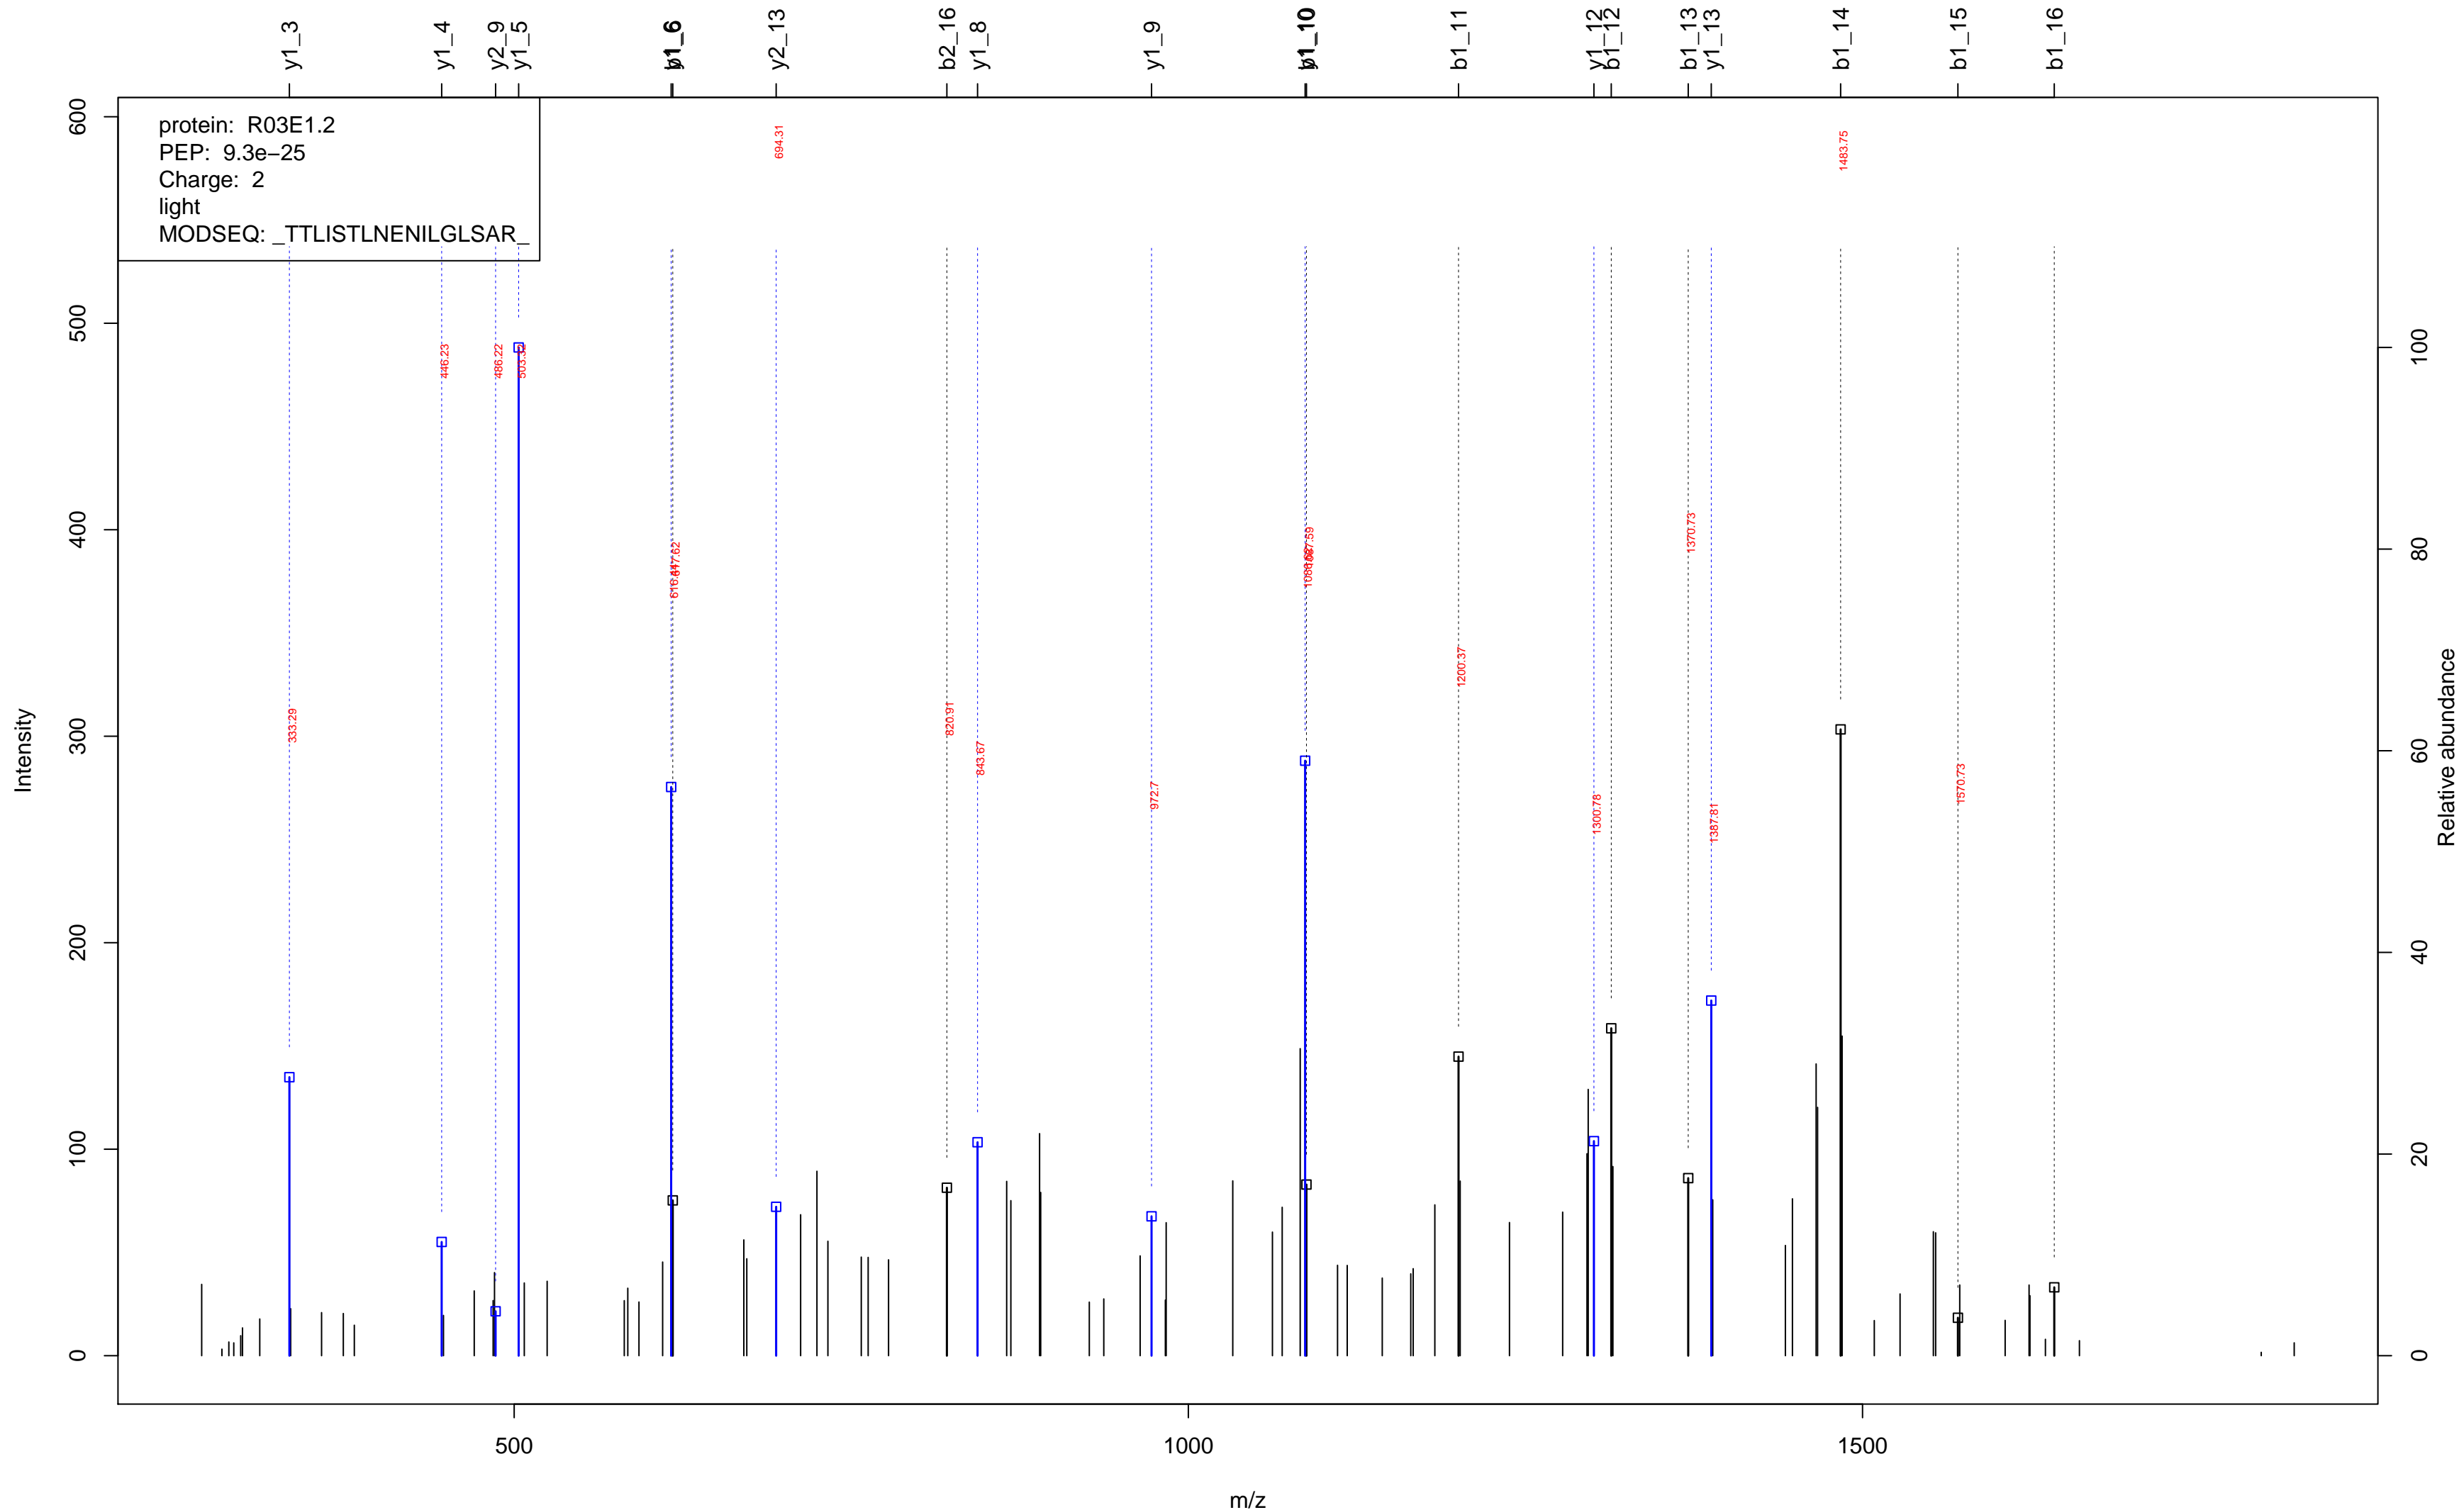

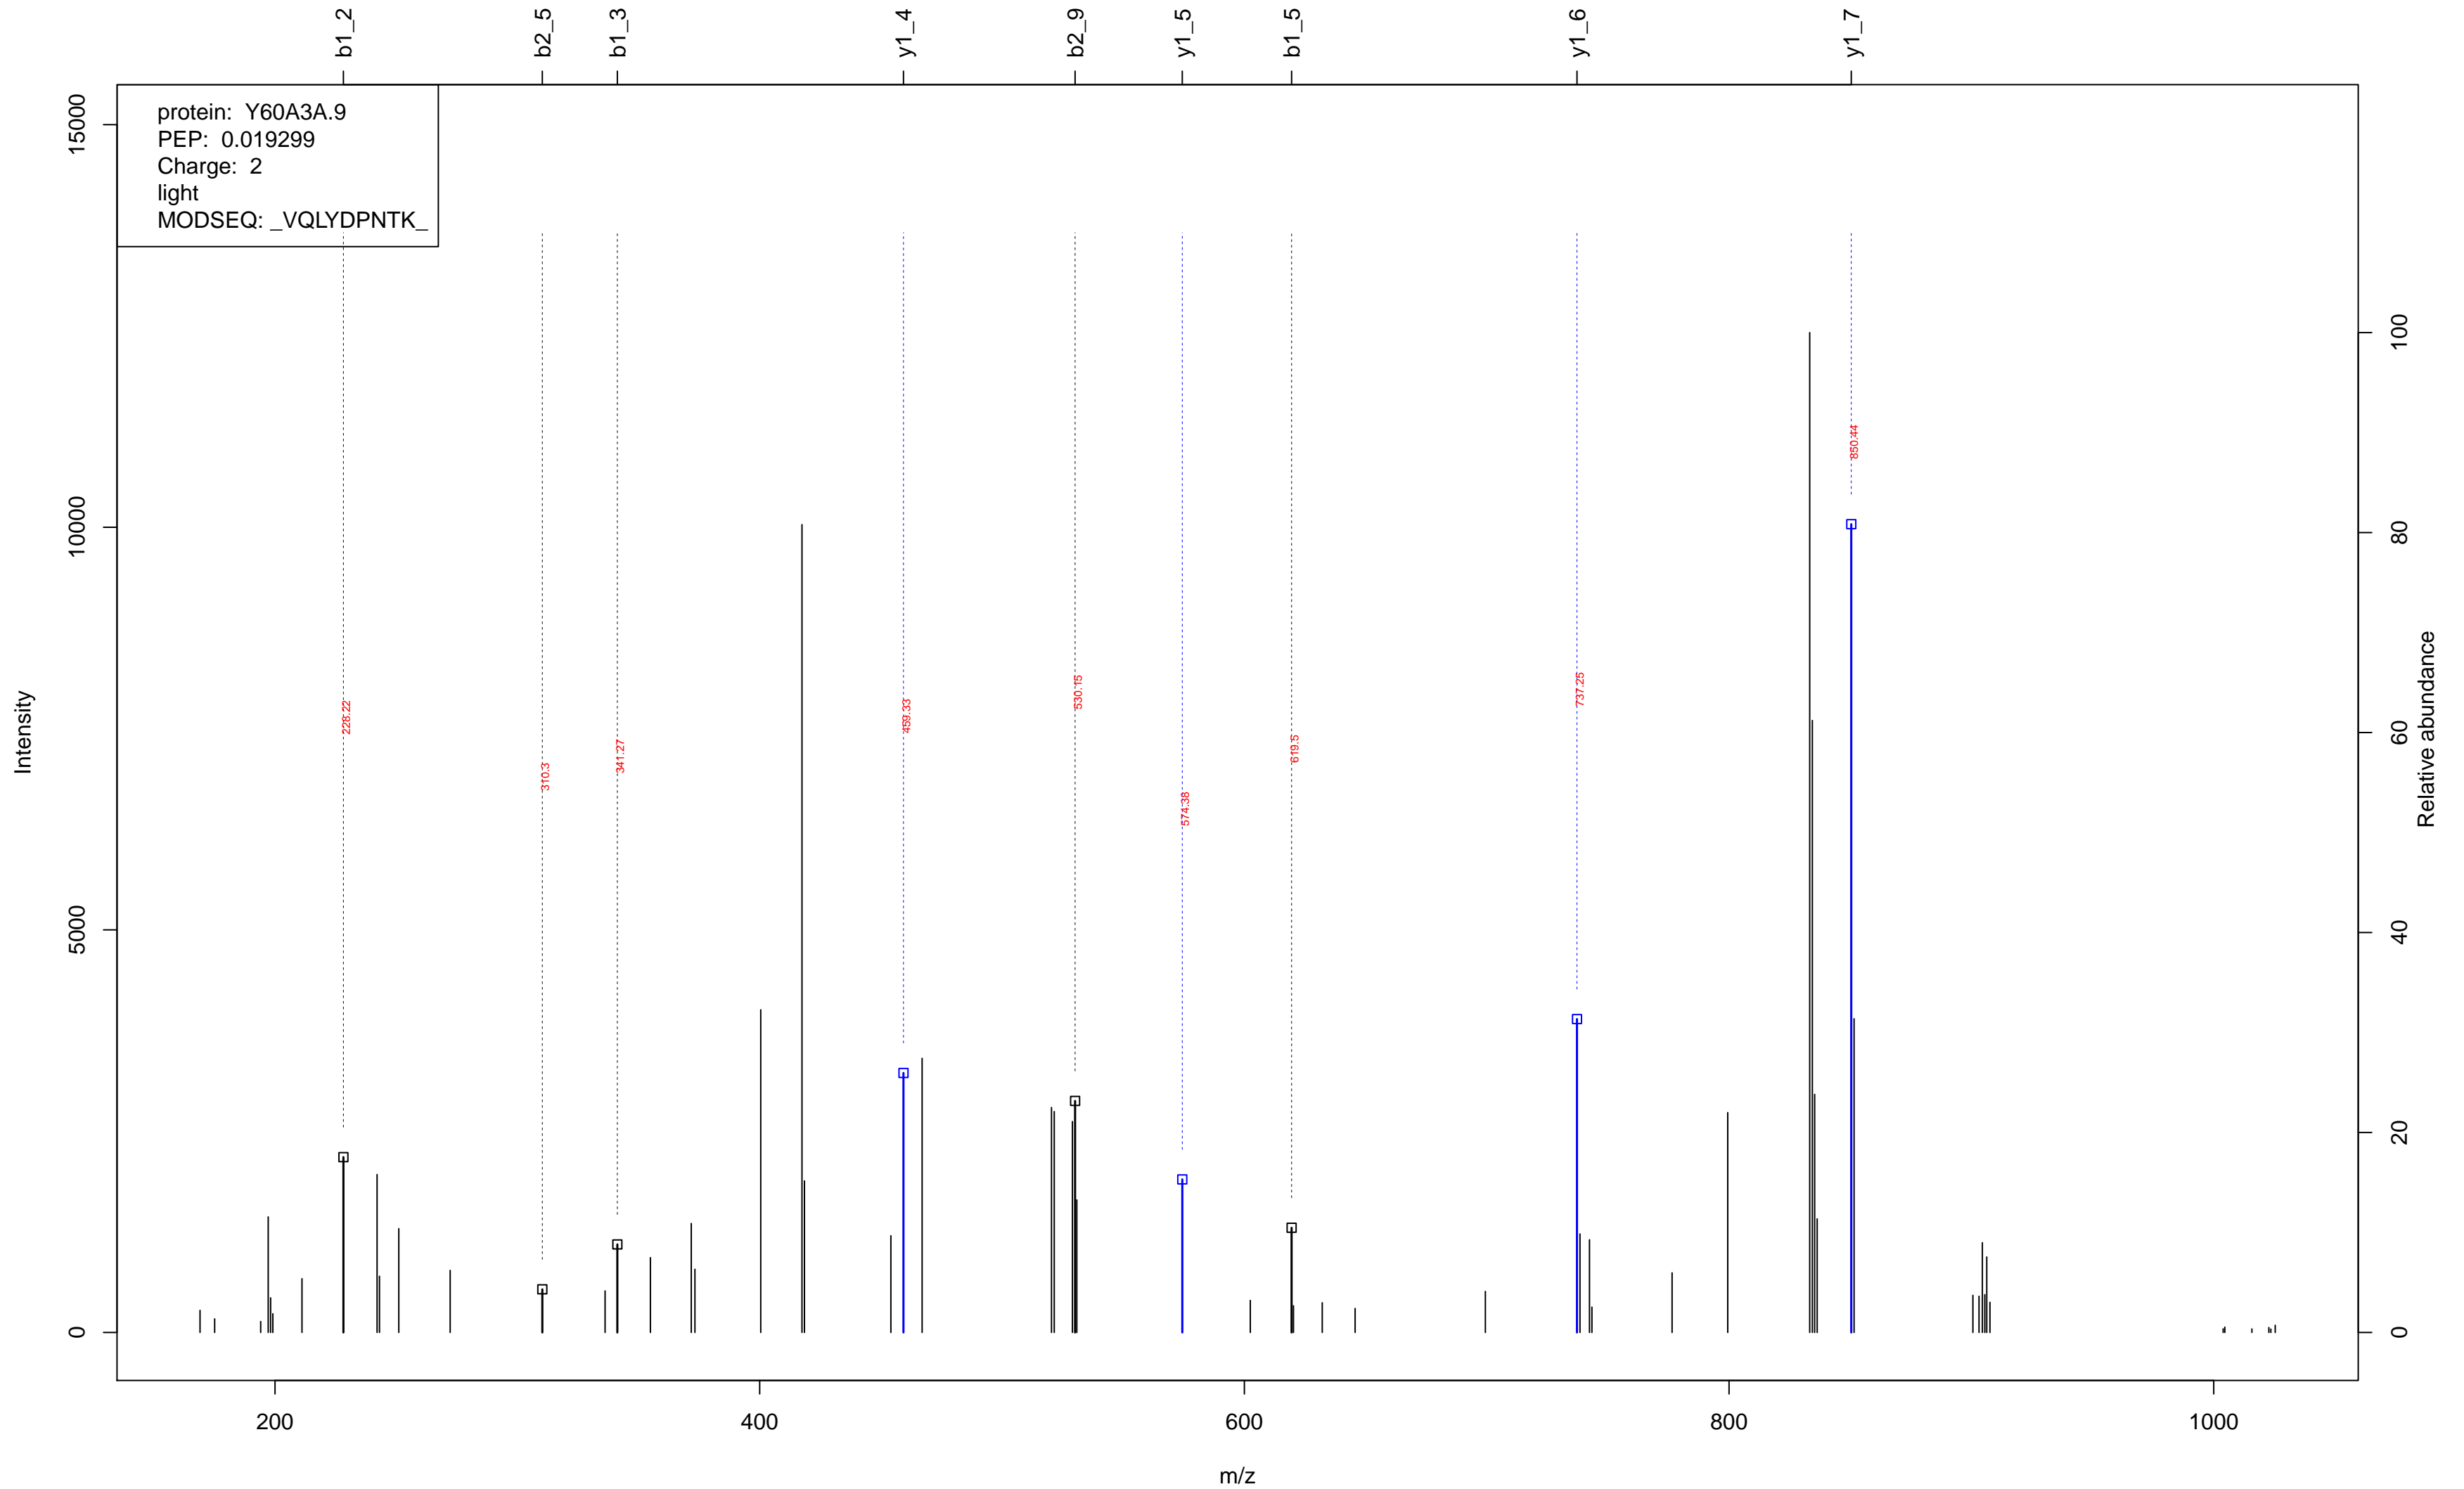

protein: Y60A3A.9  
PEP: 0.019299  
Charge: 2  
light  
MODSEQ: \_VQLYDPNTK\_

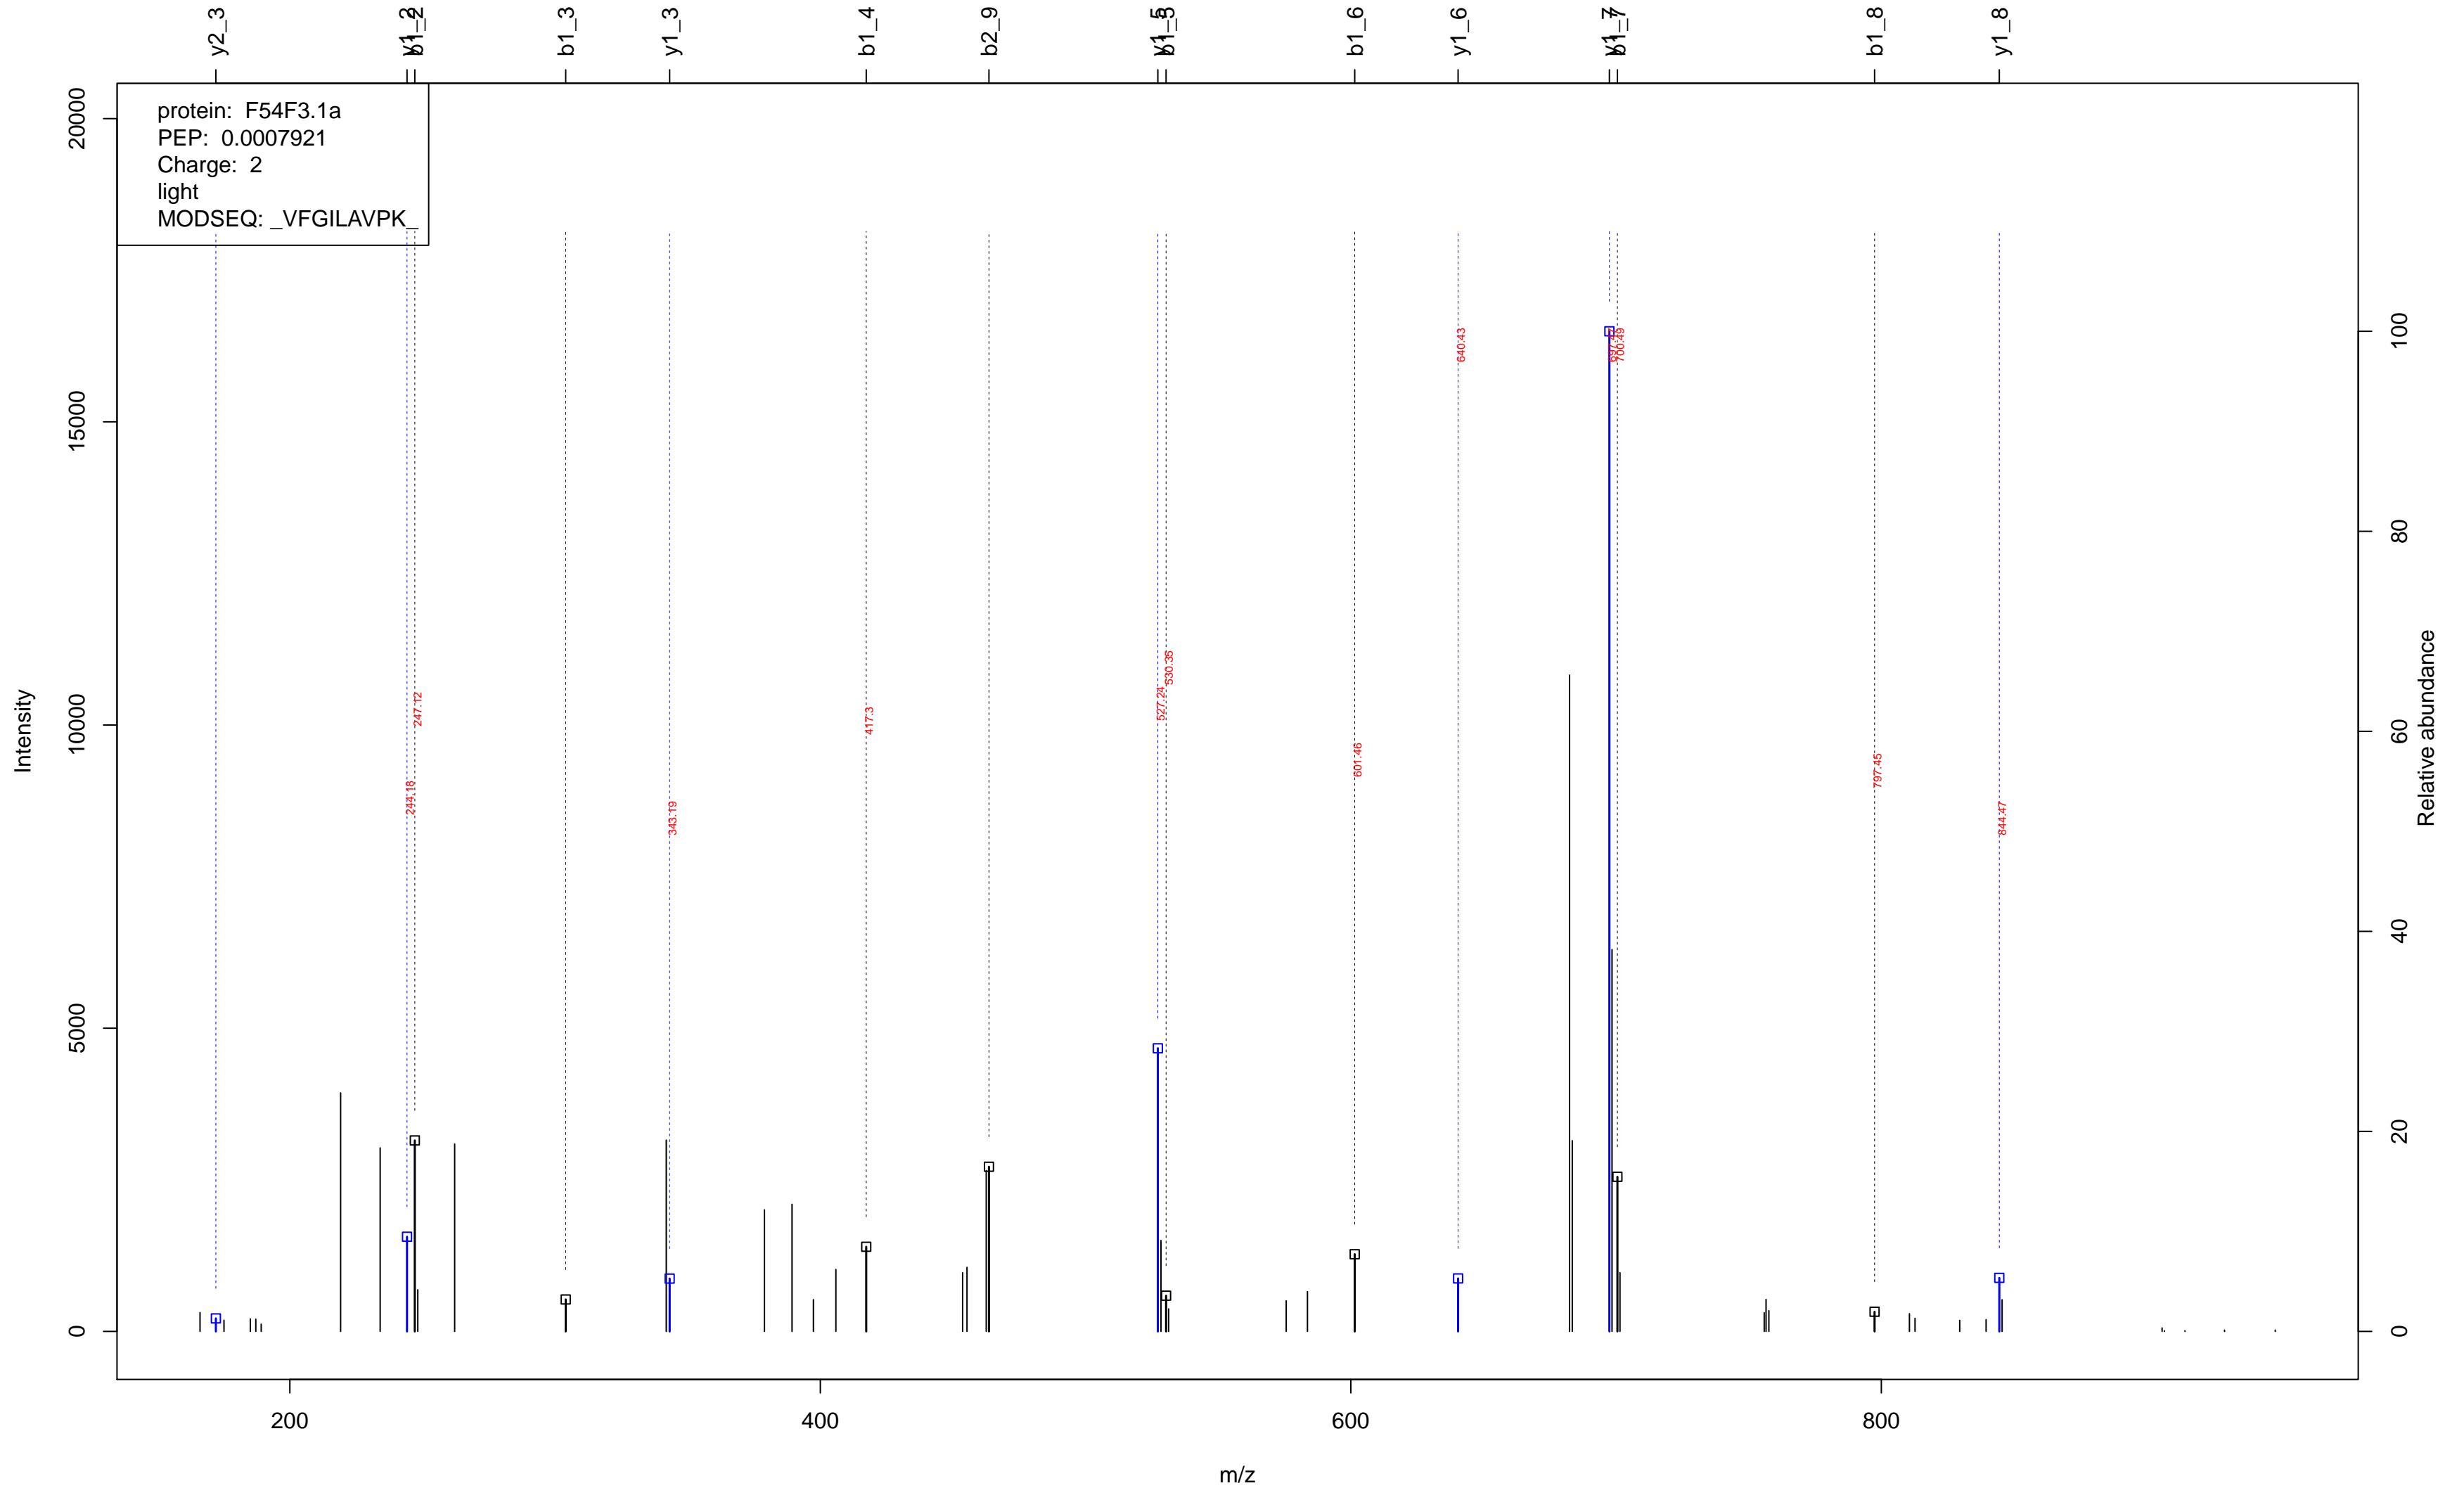

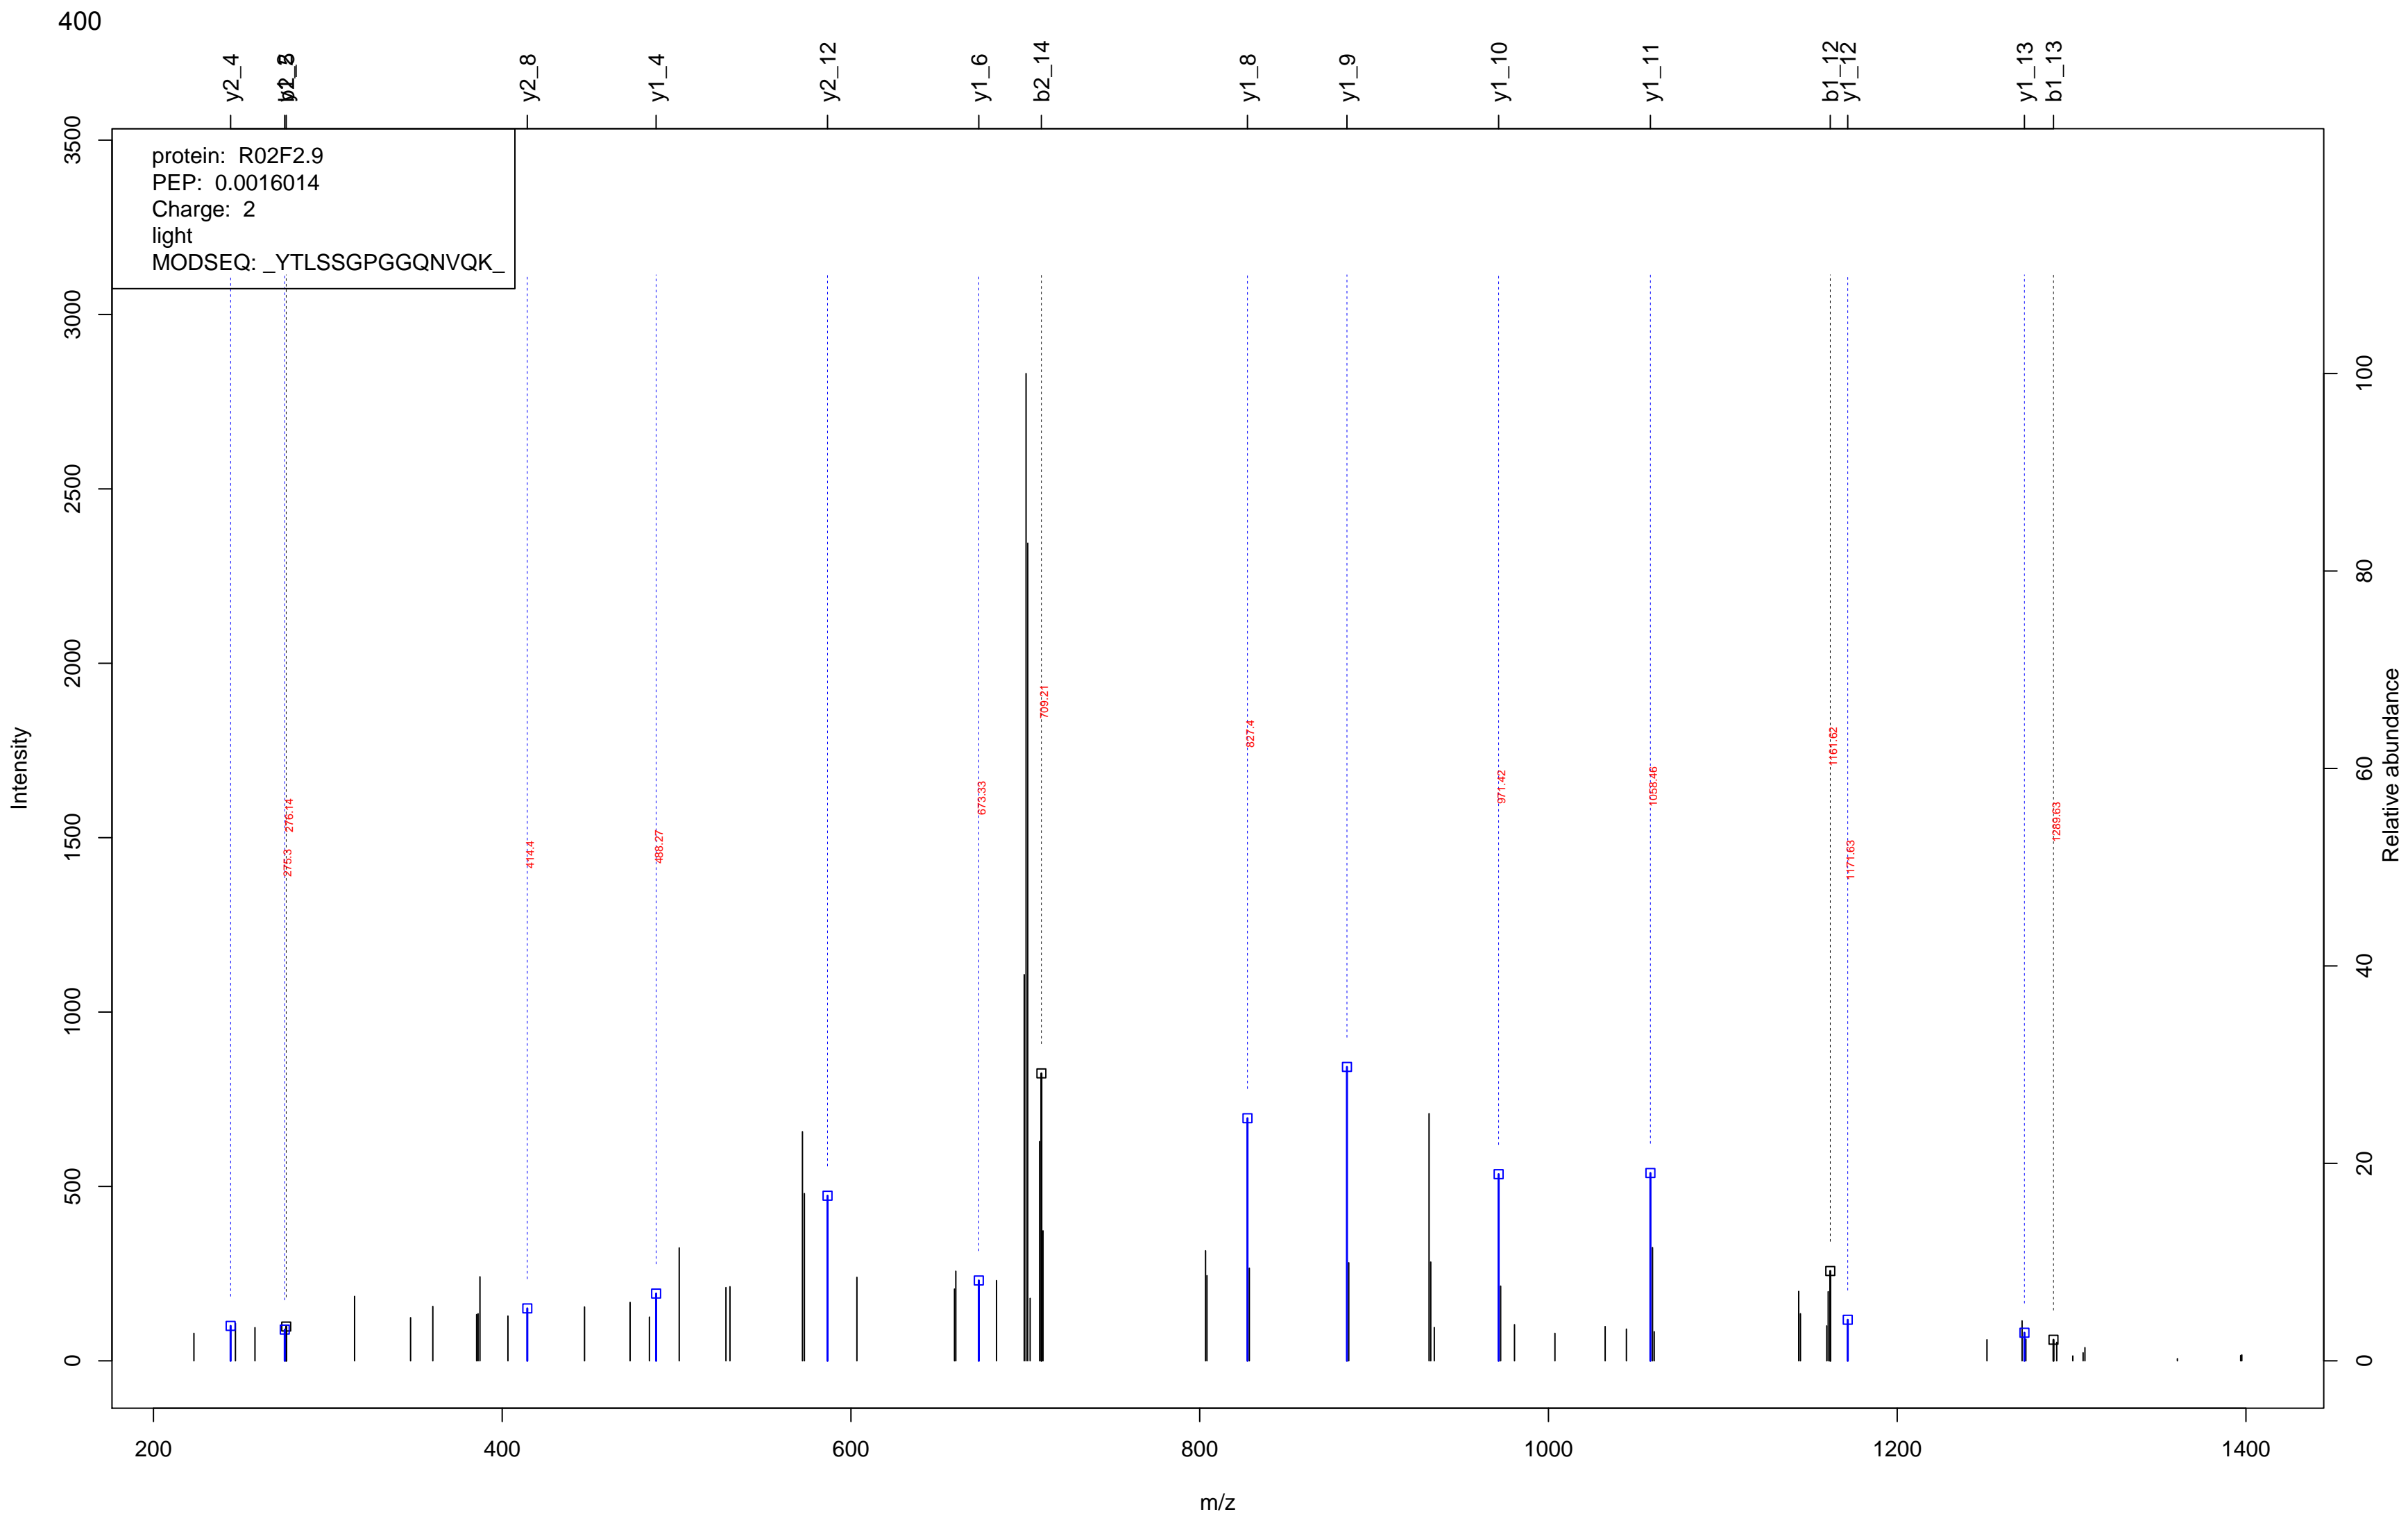



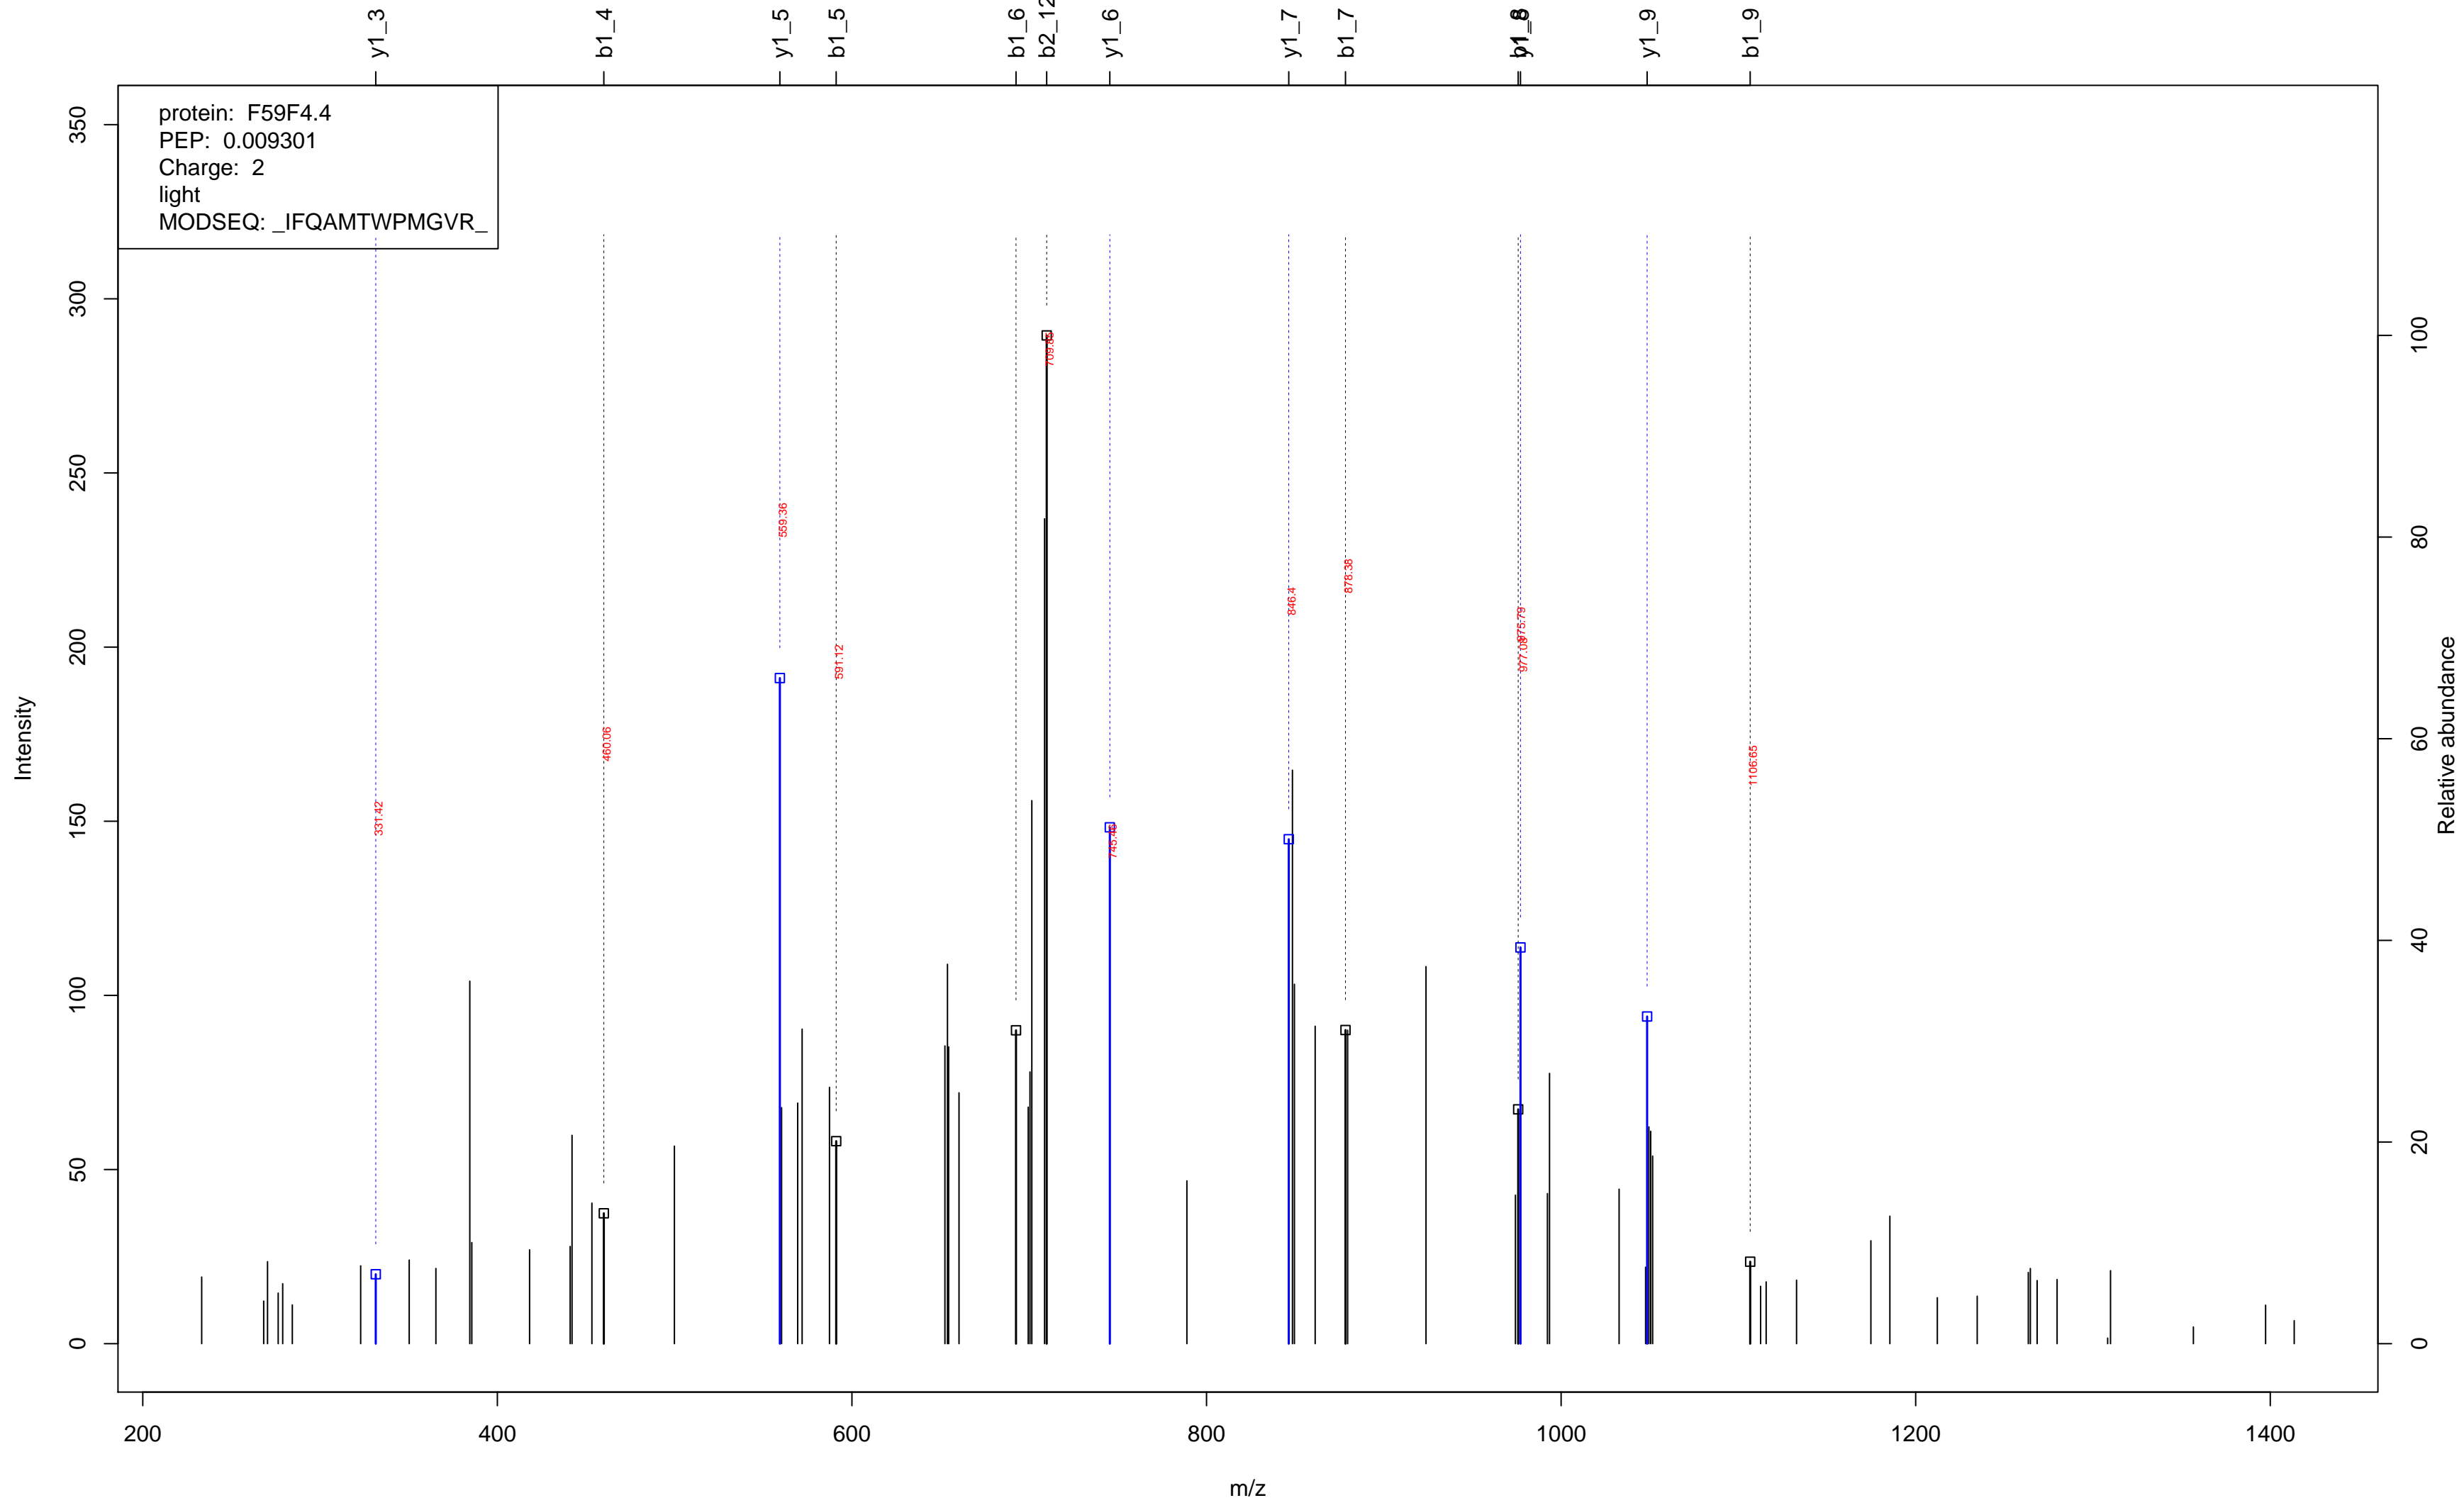

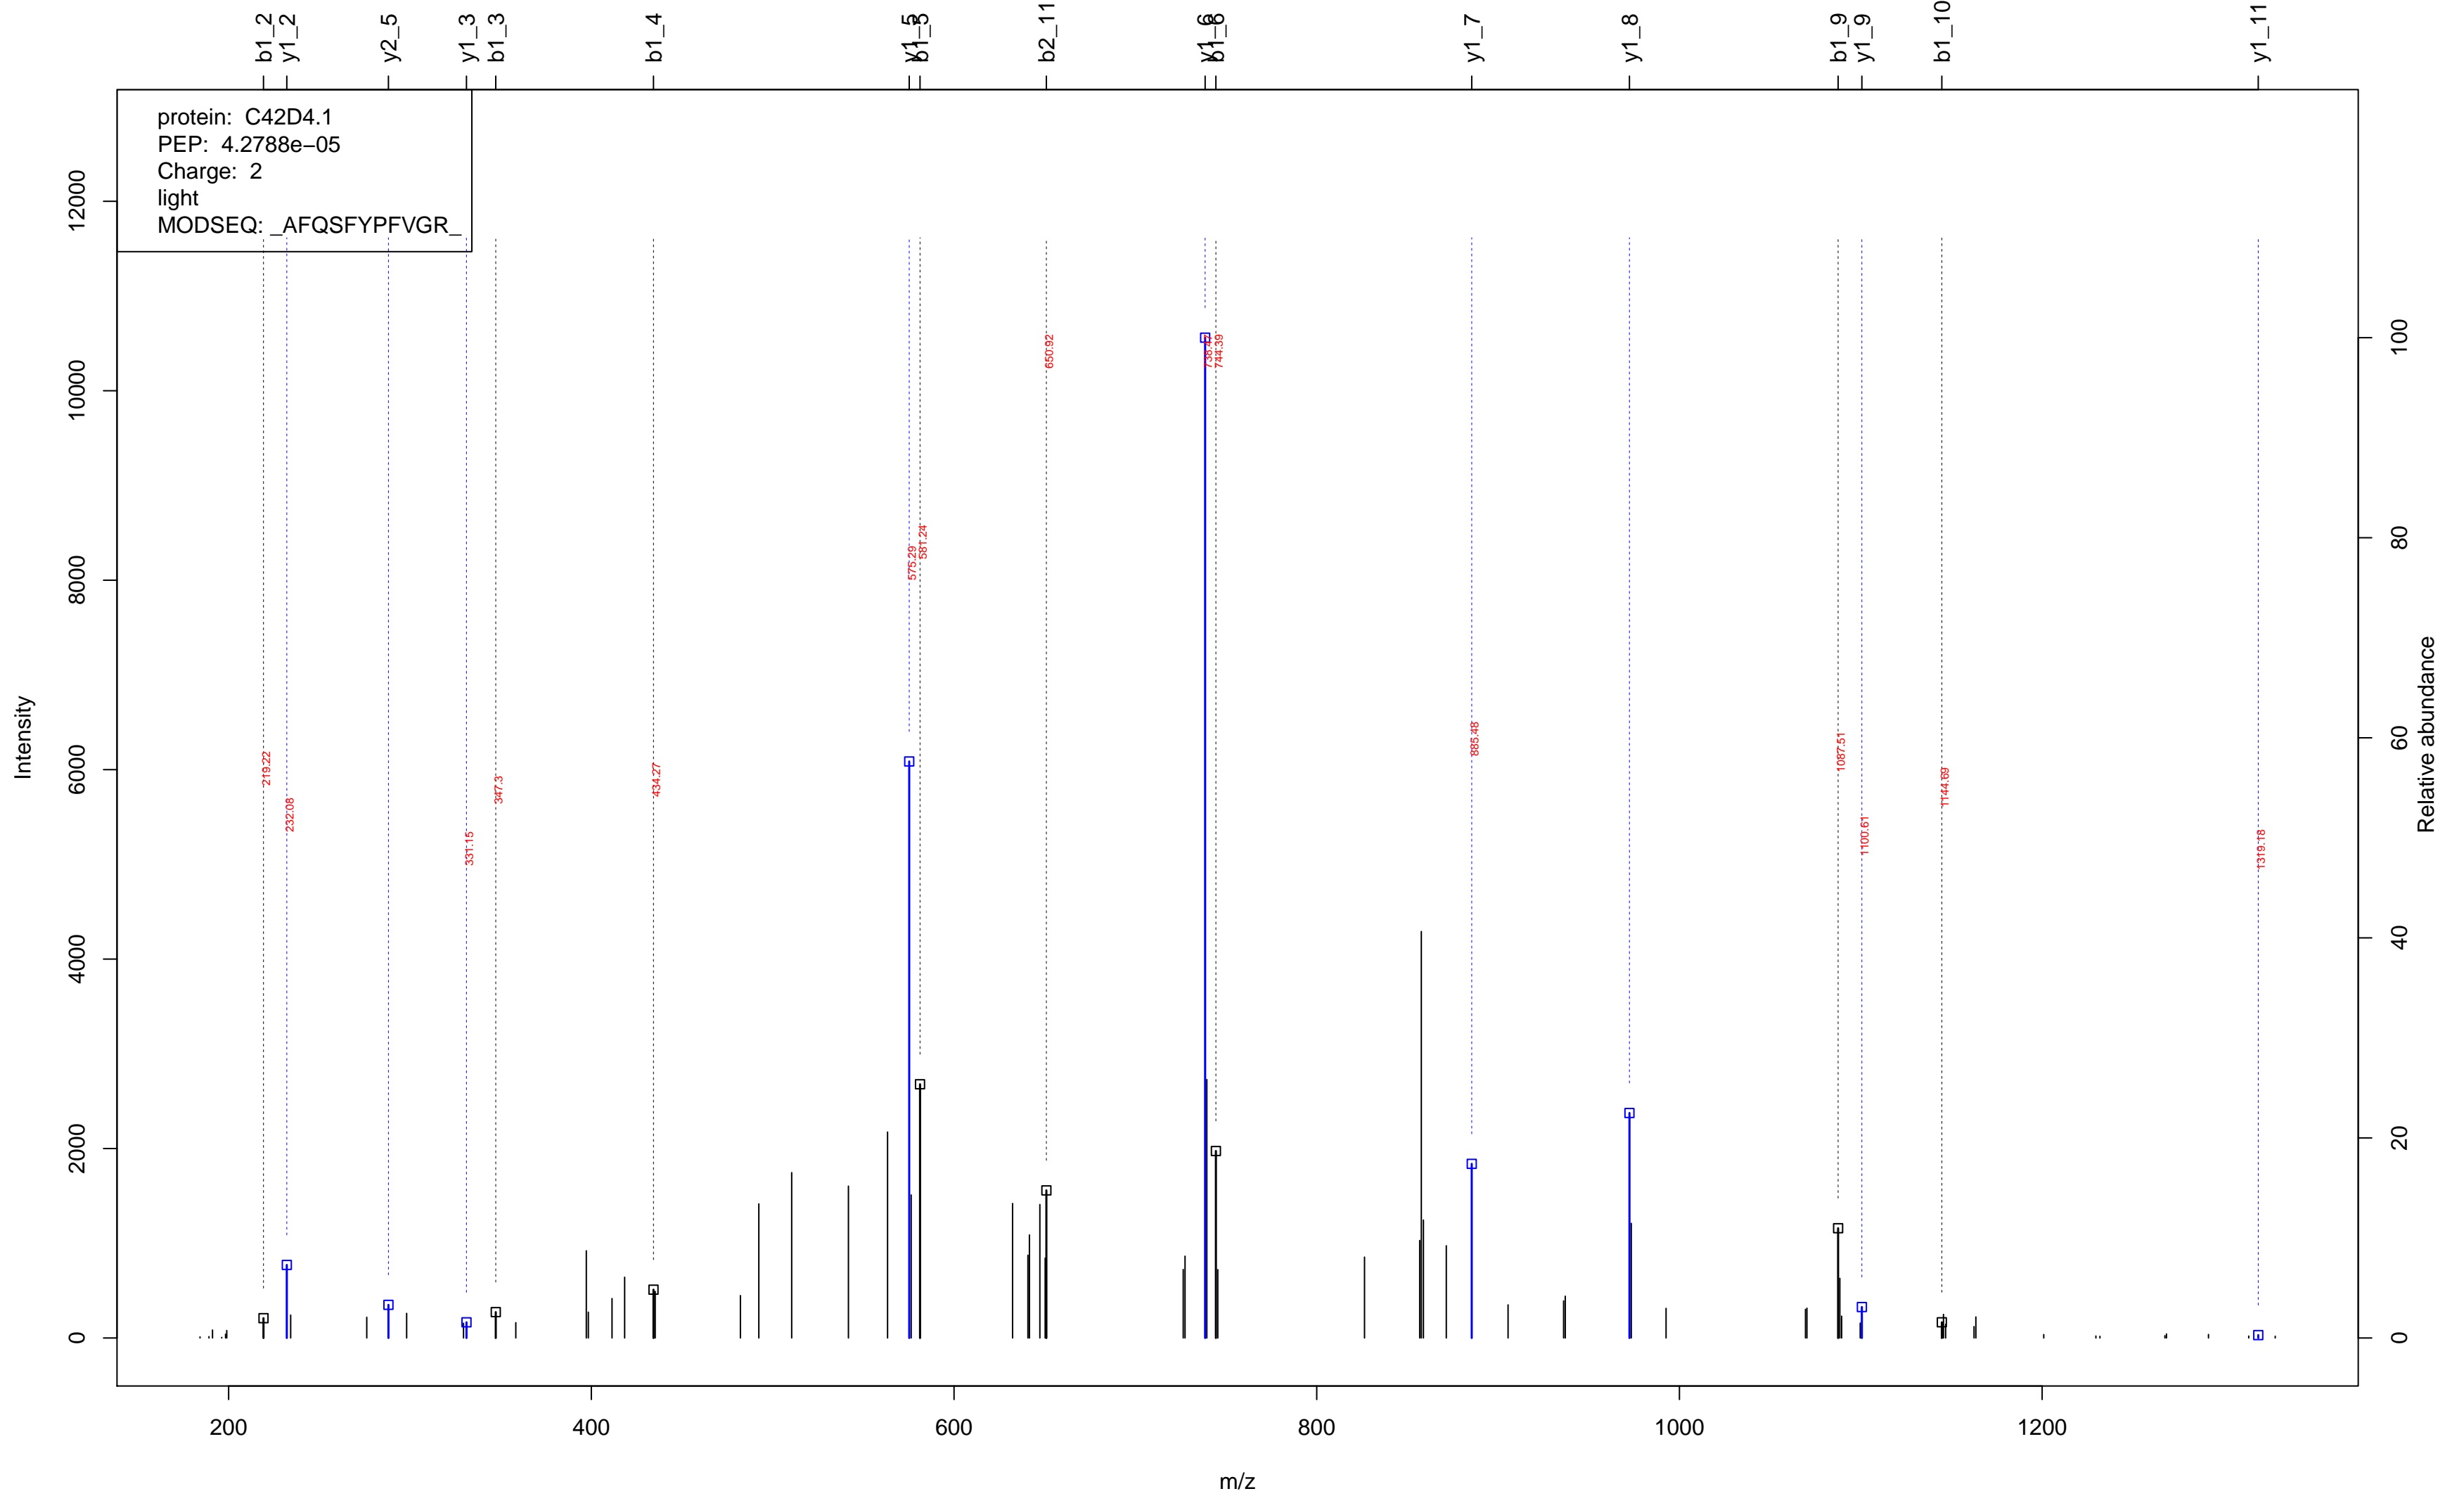

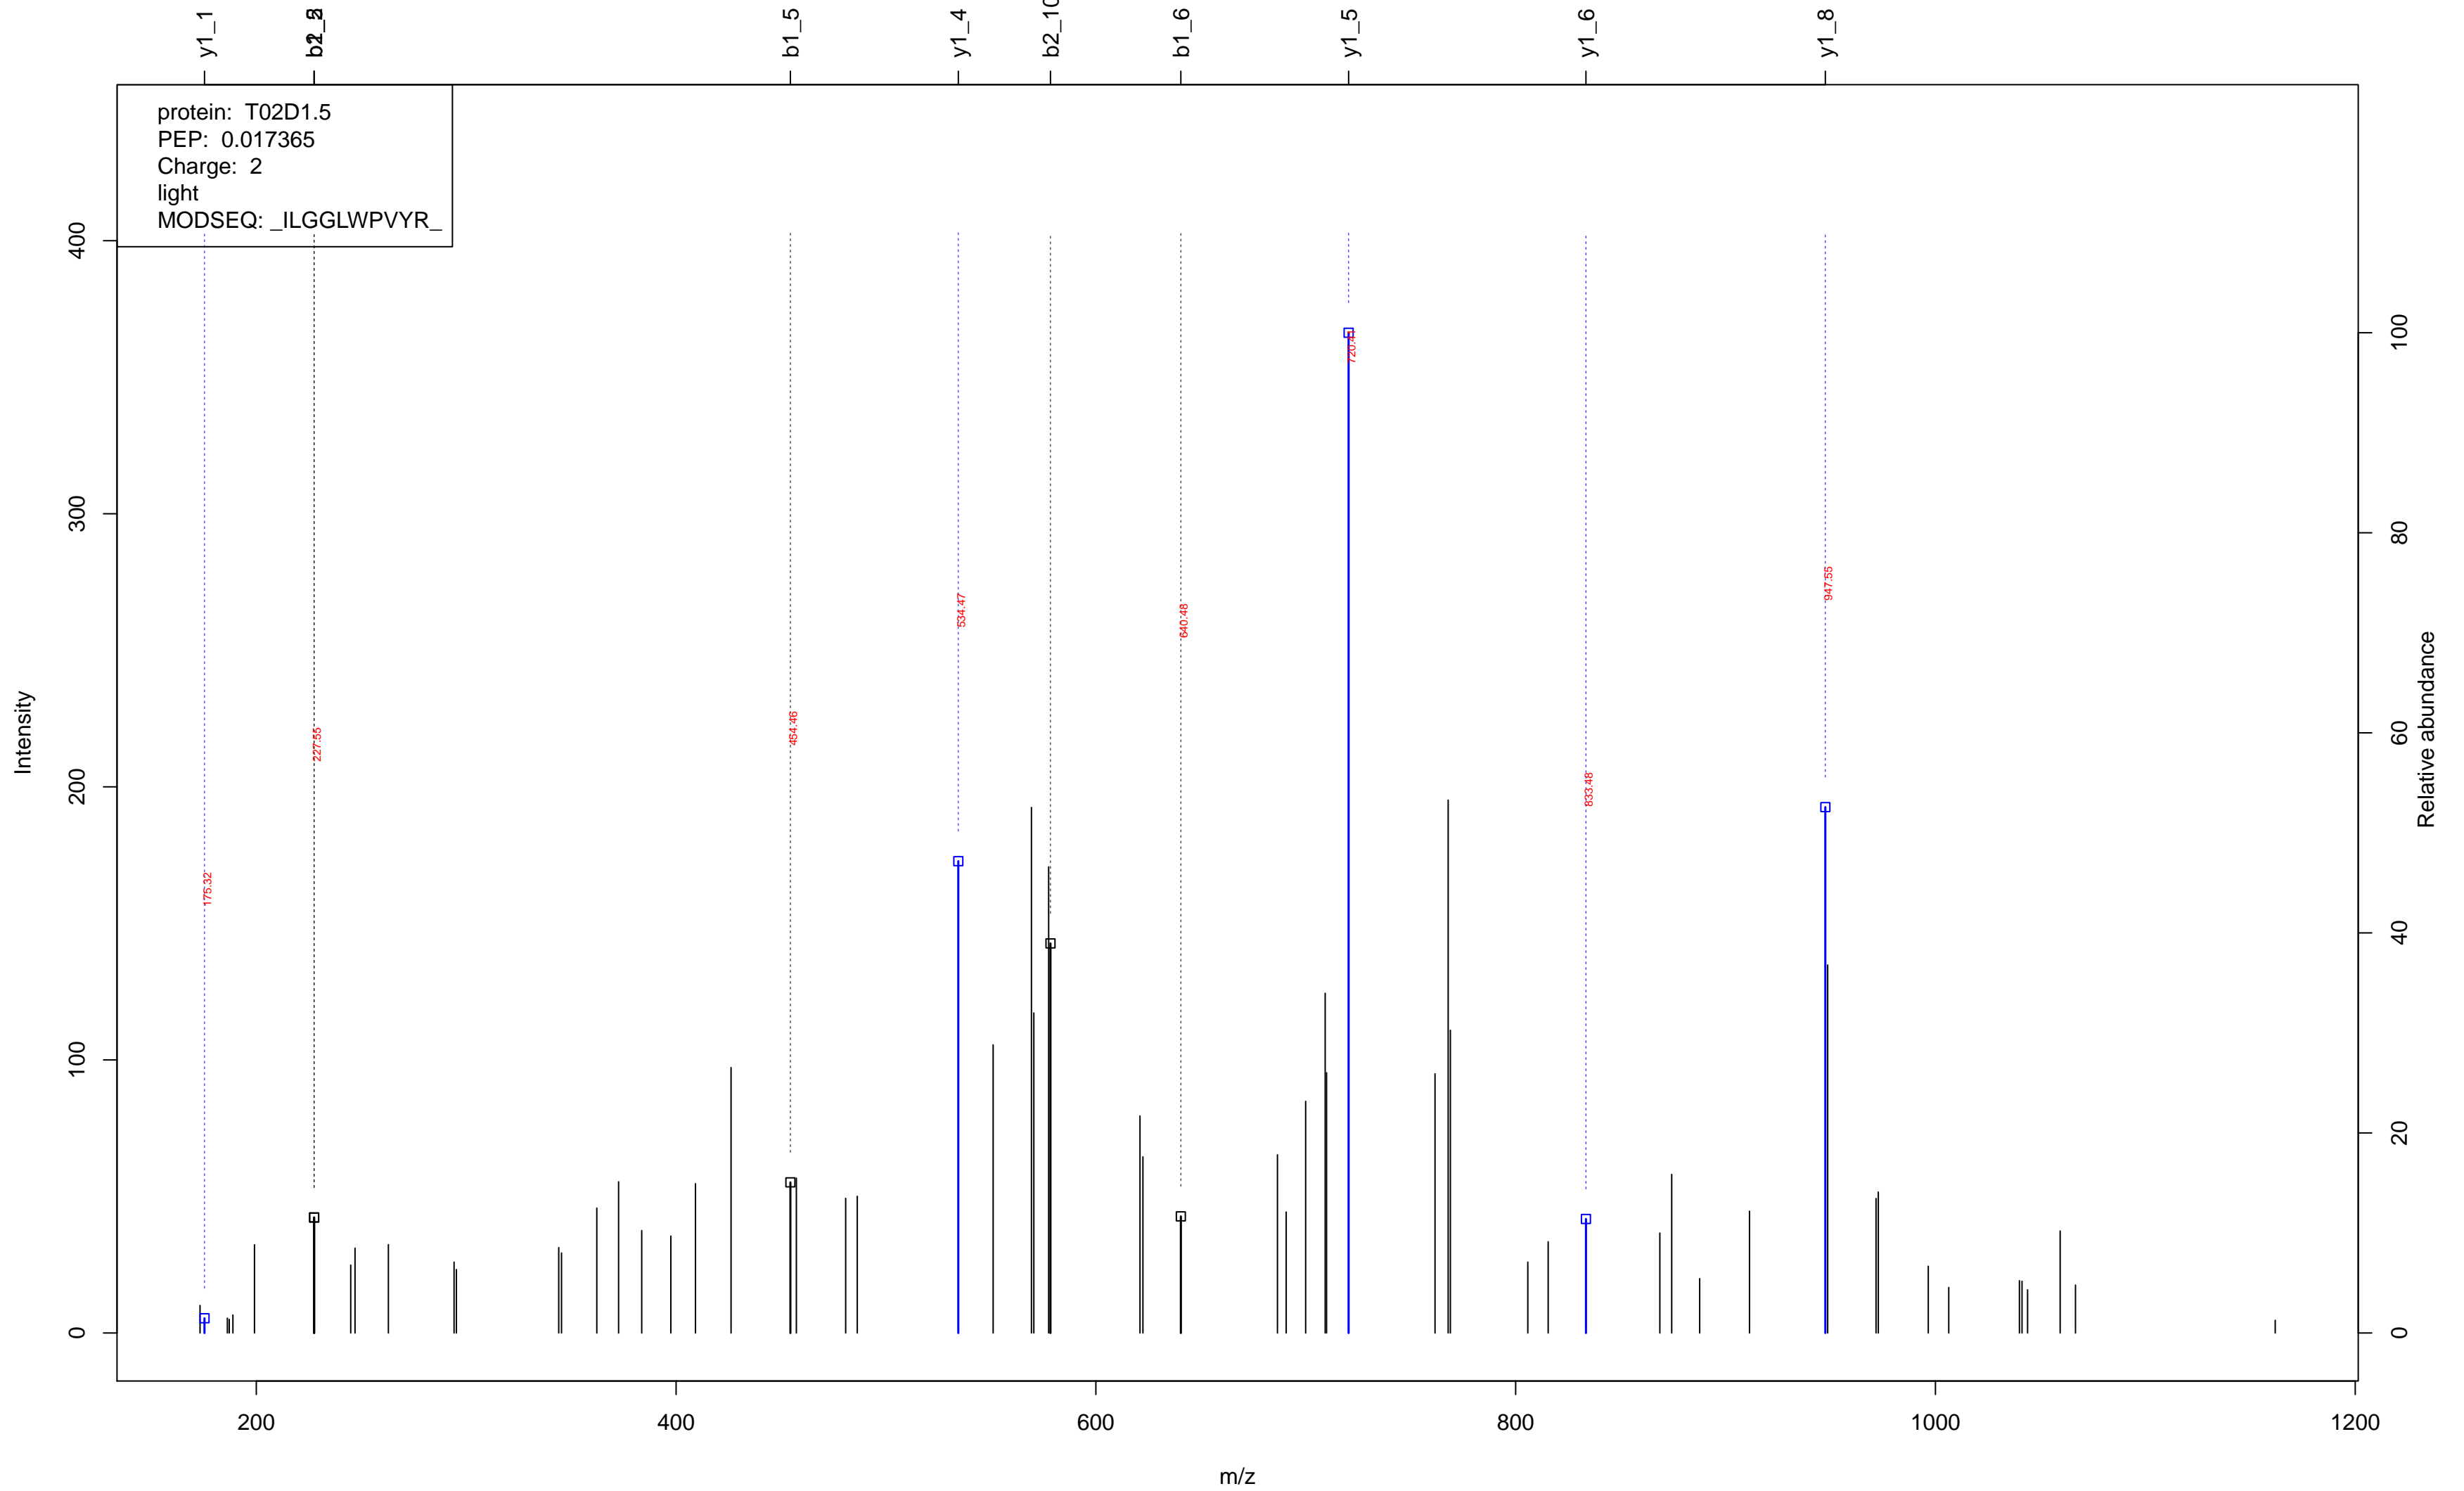

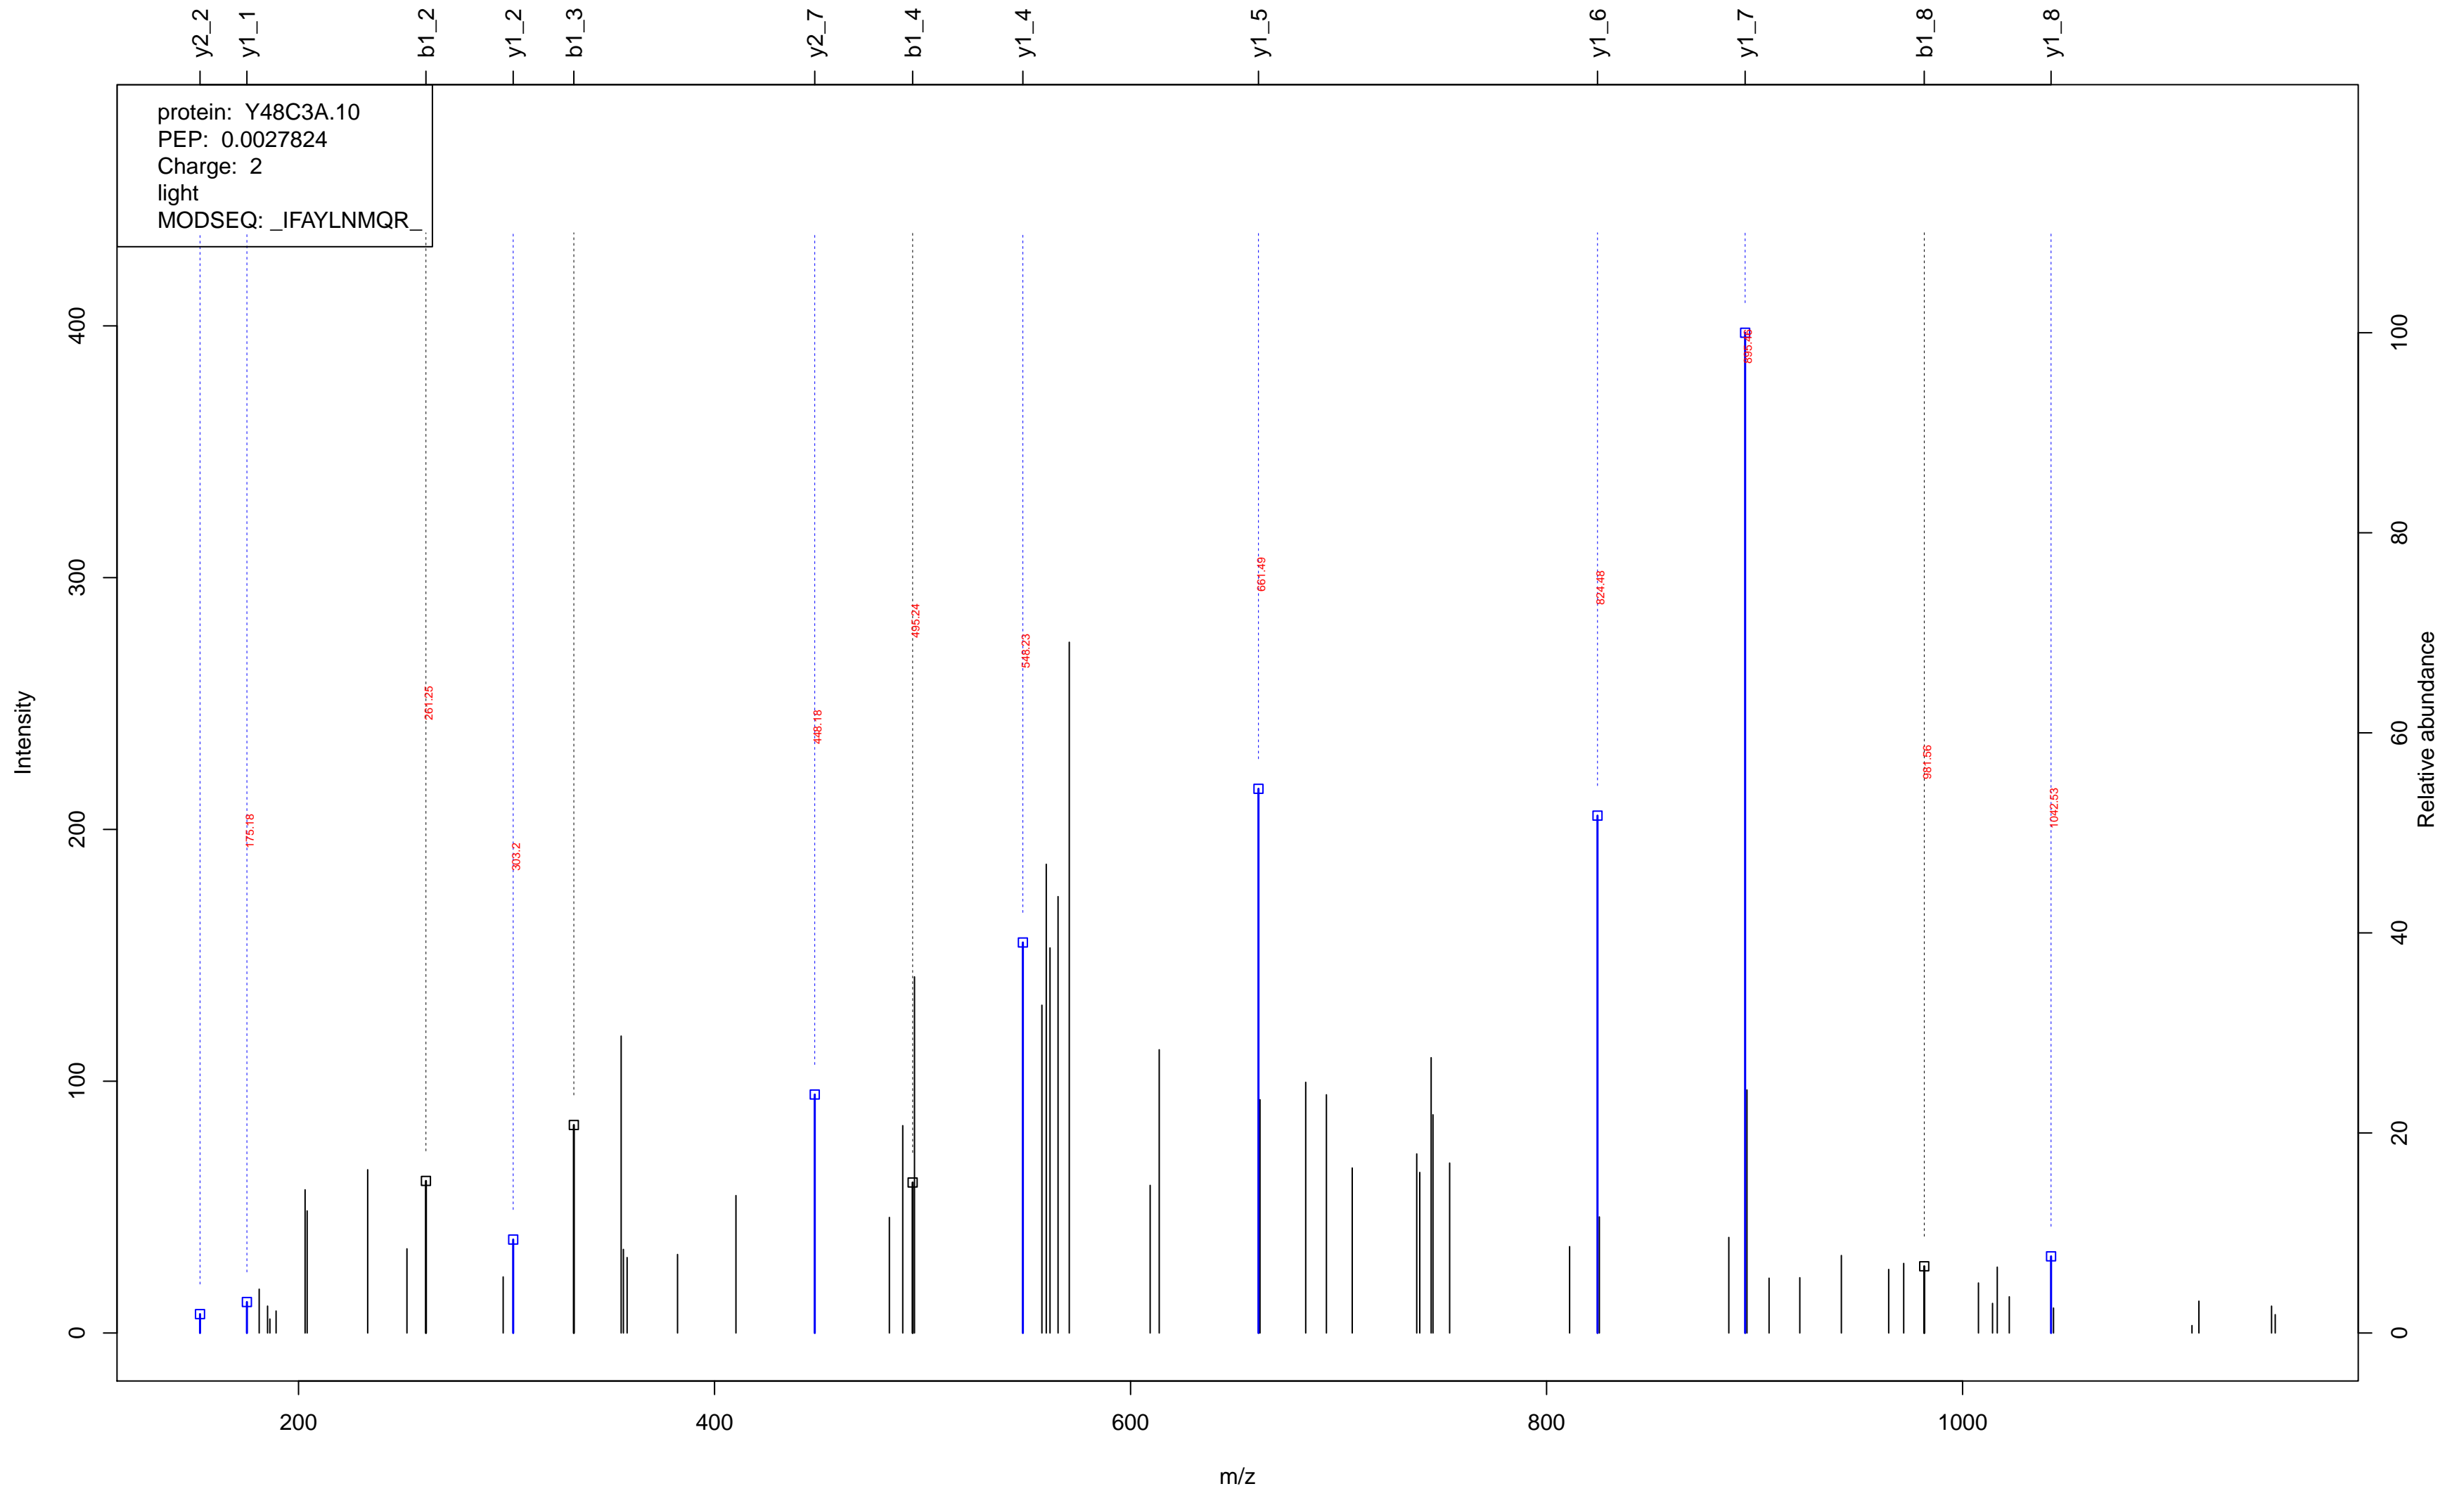

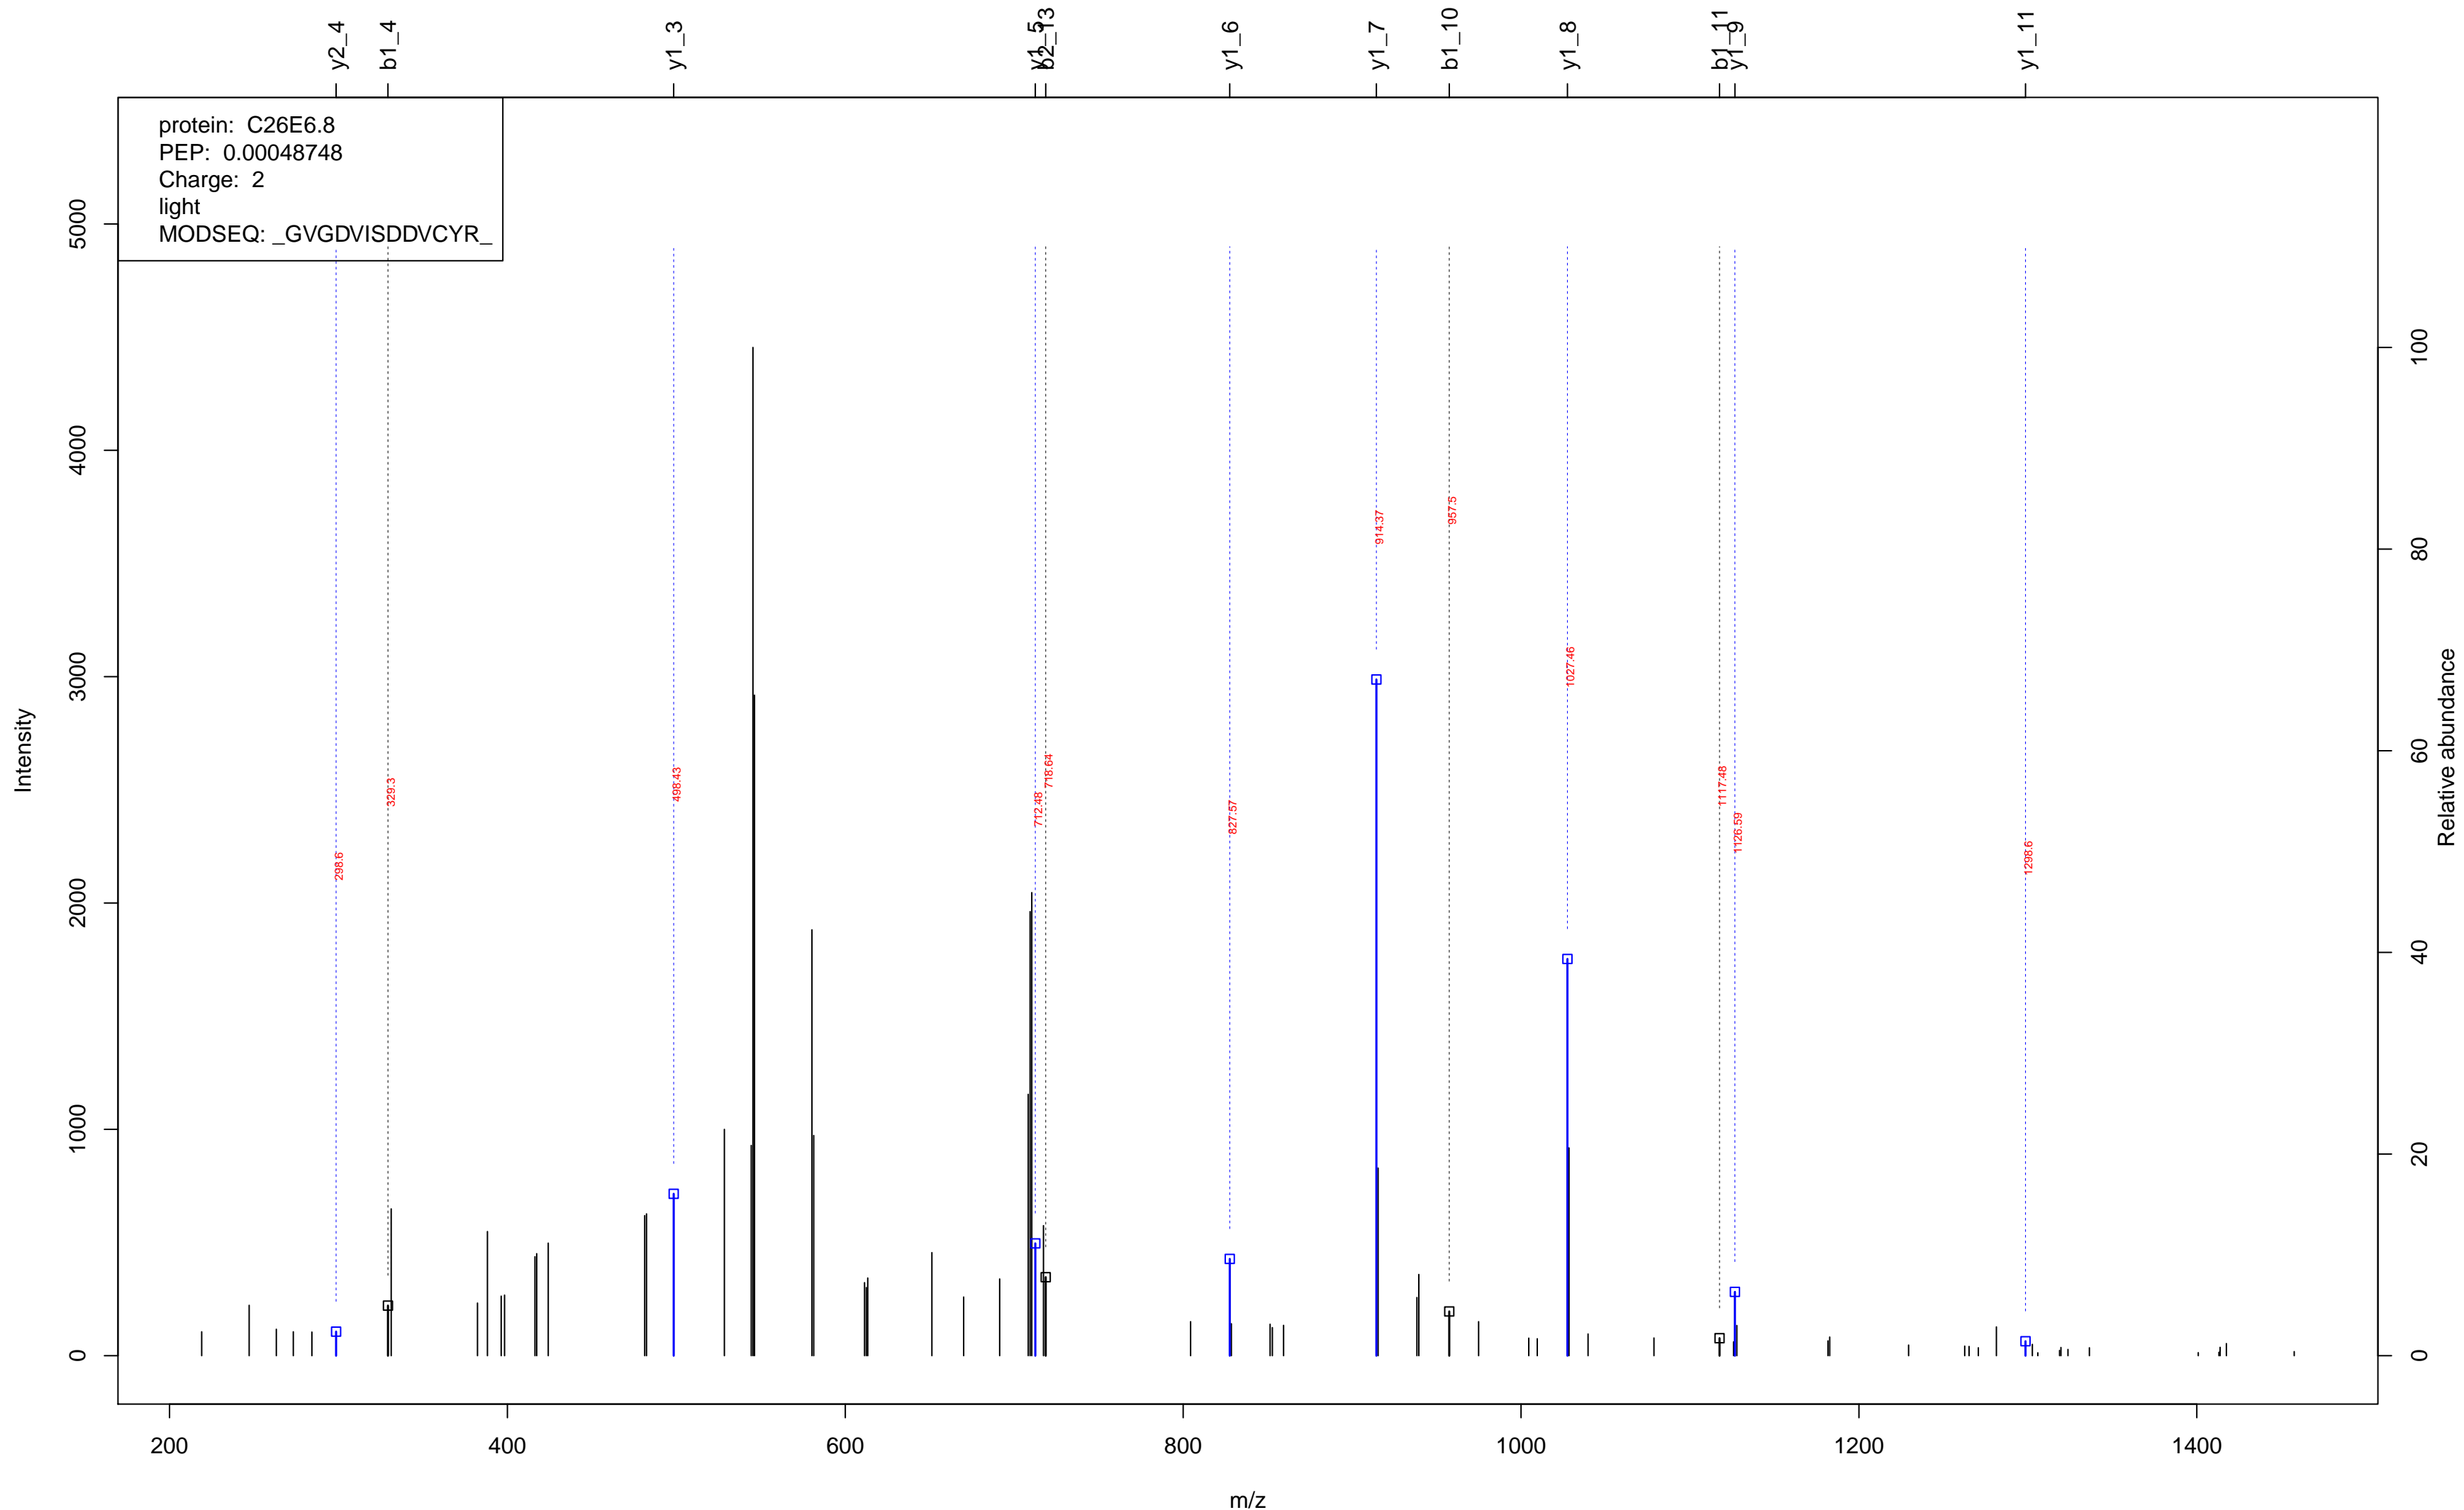

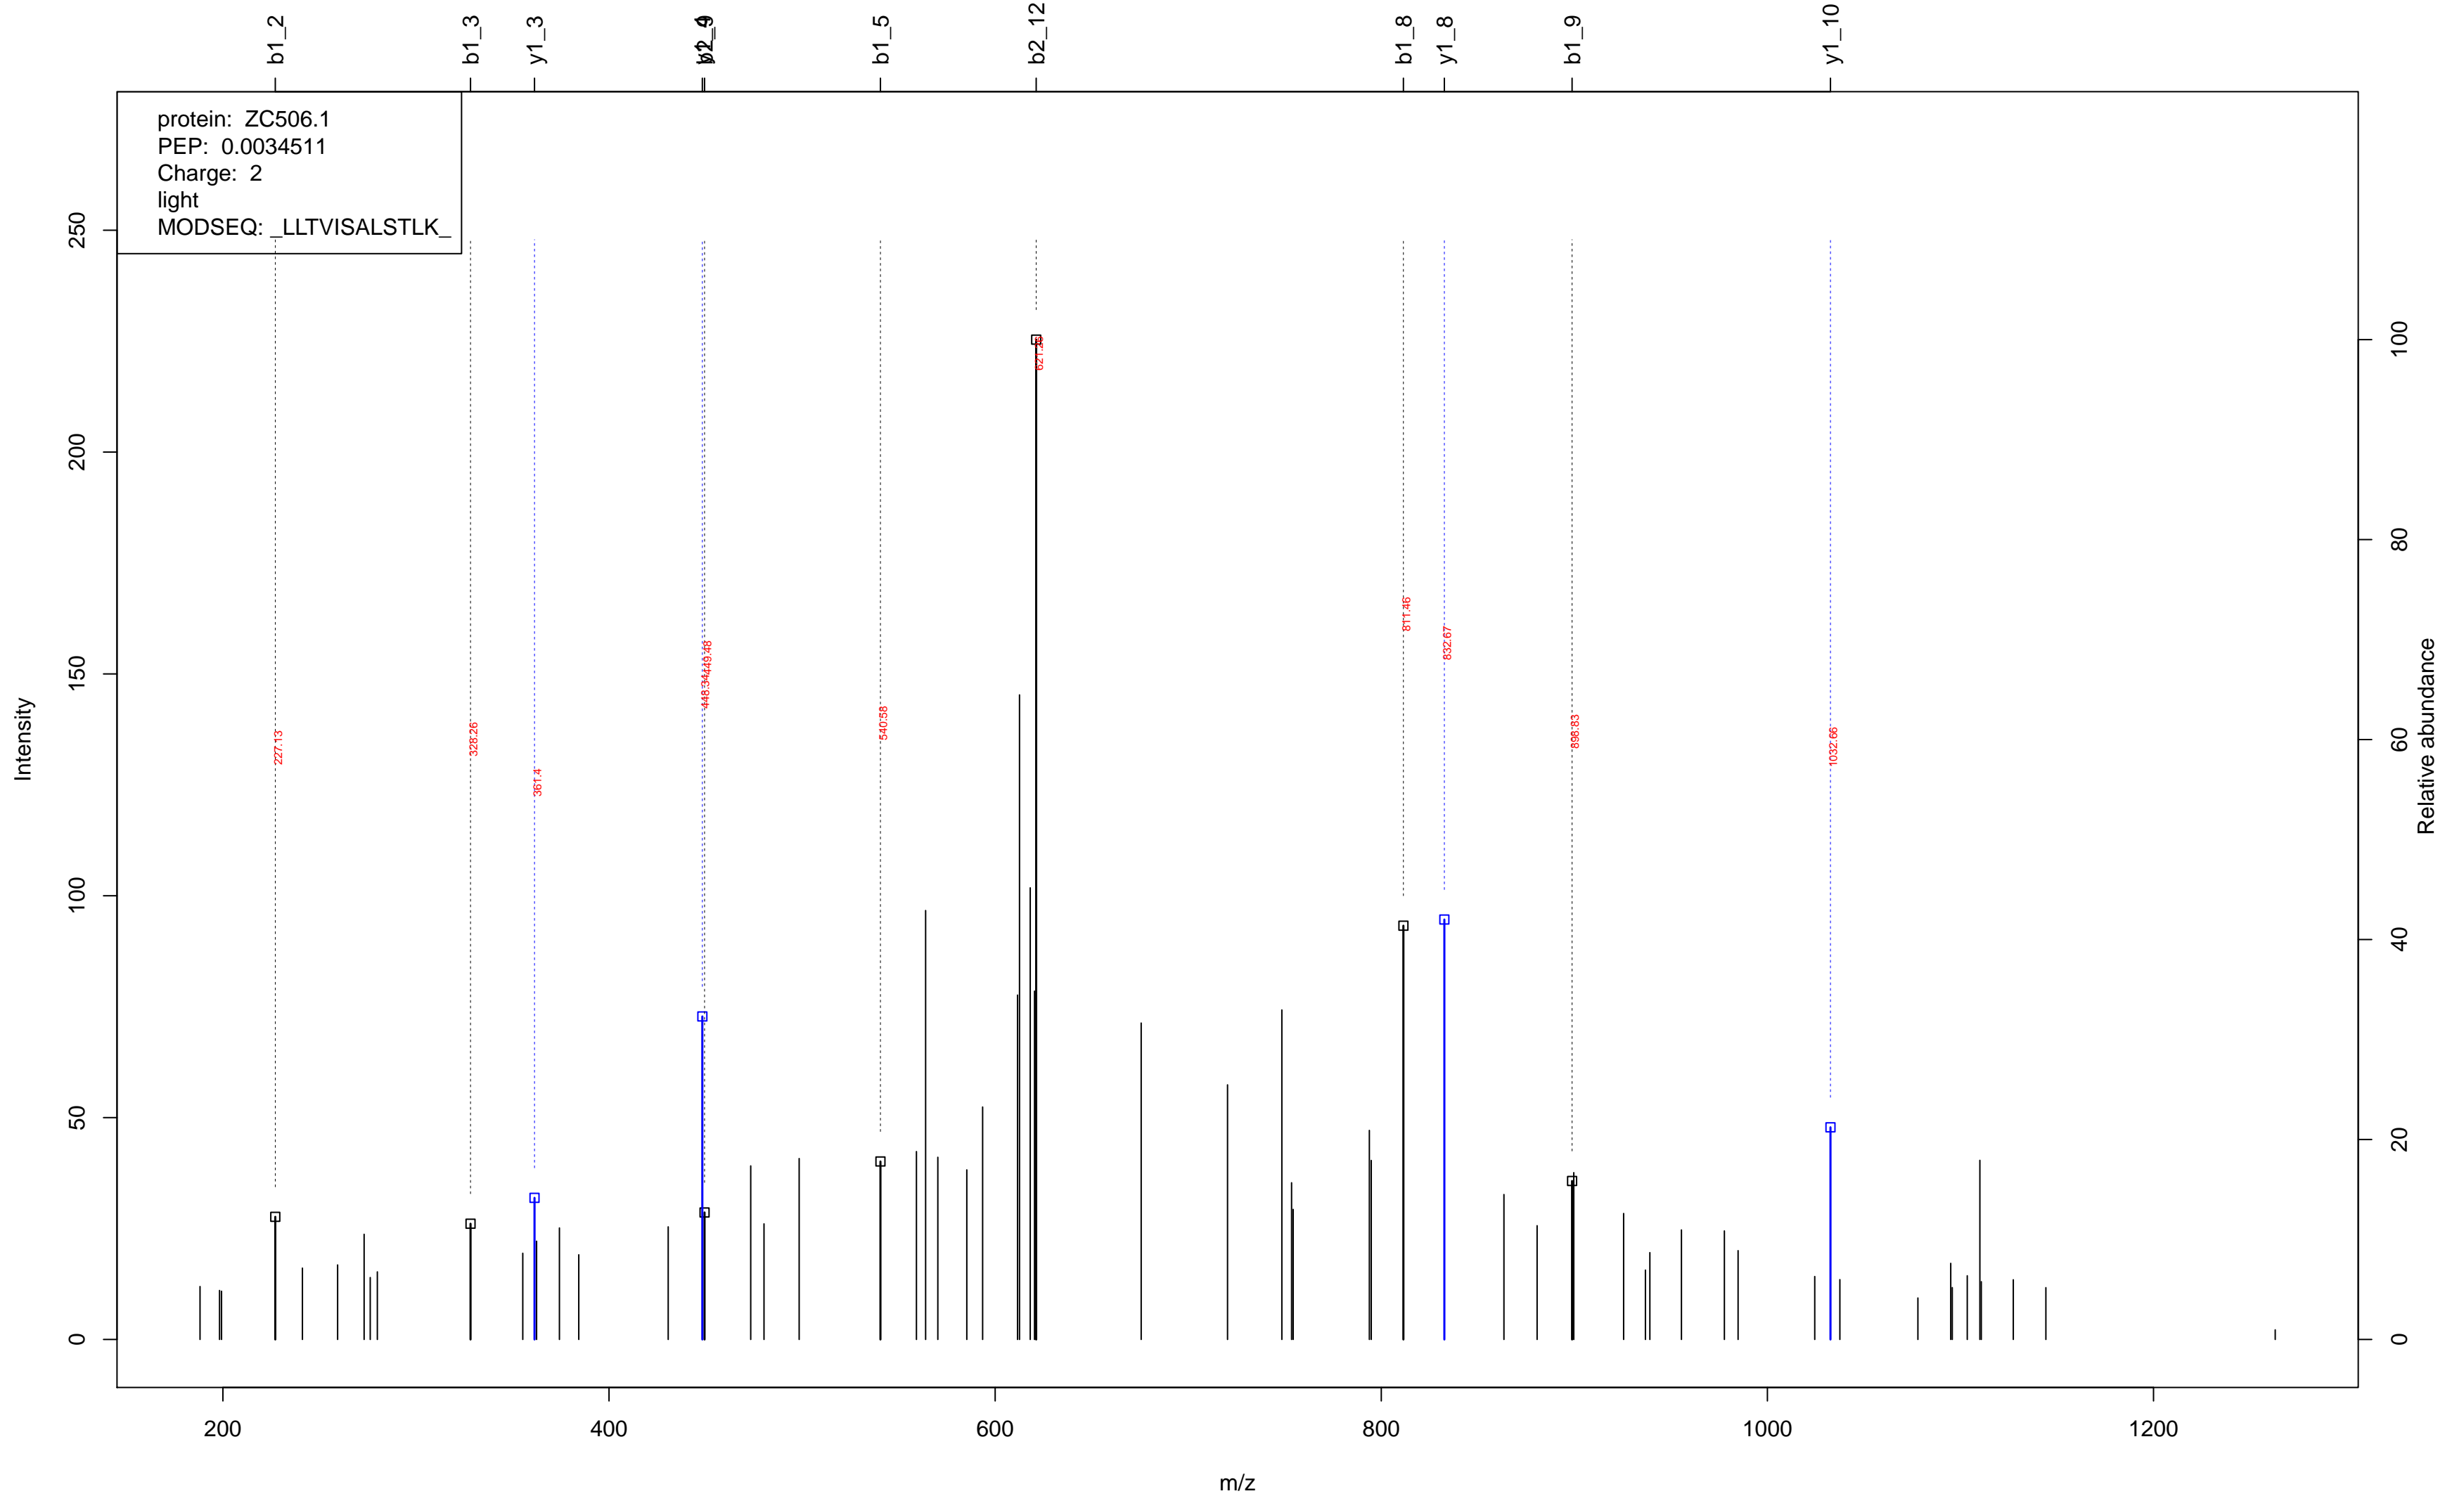

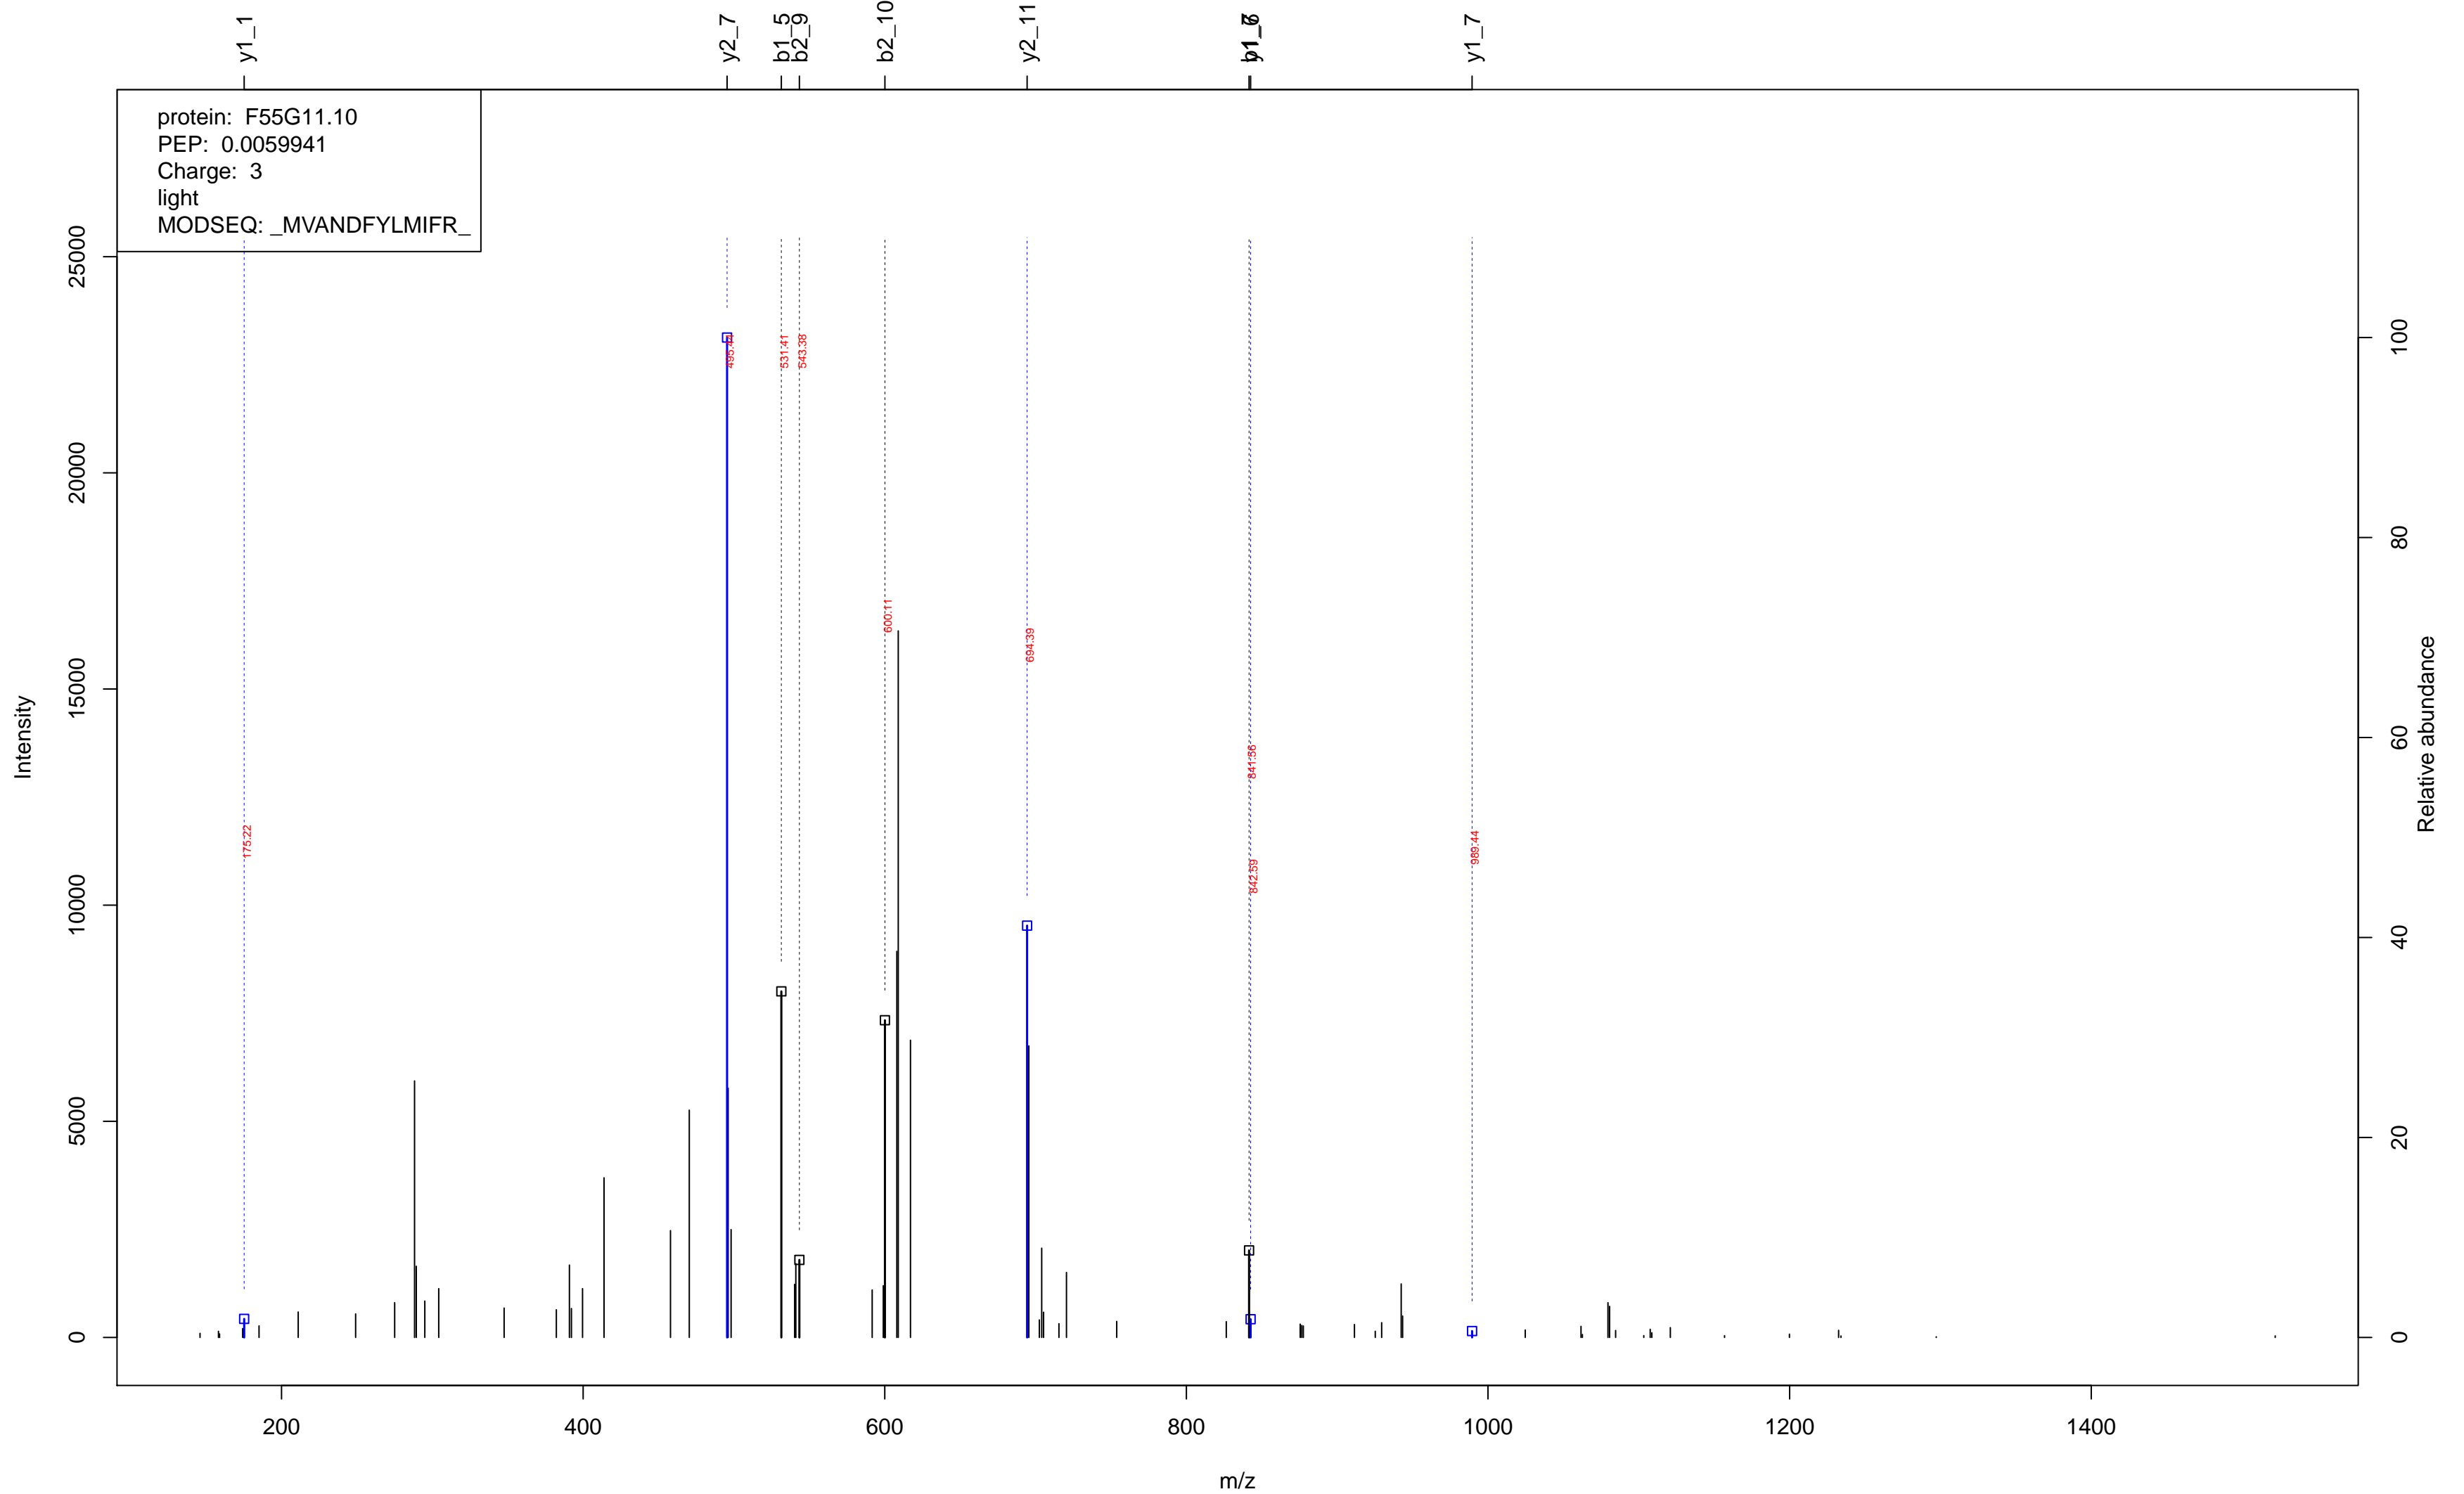

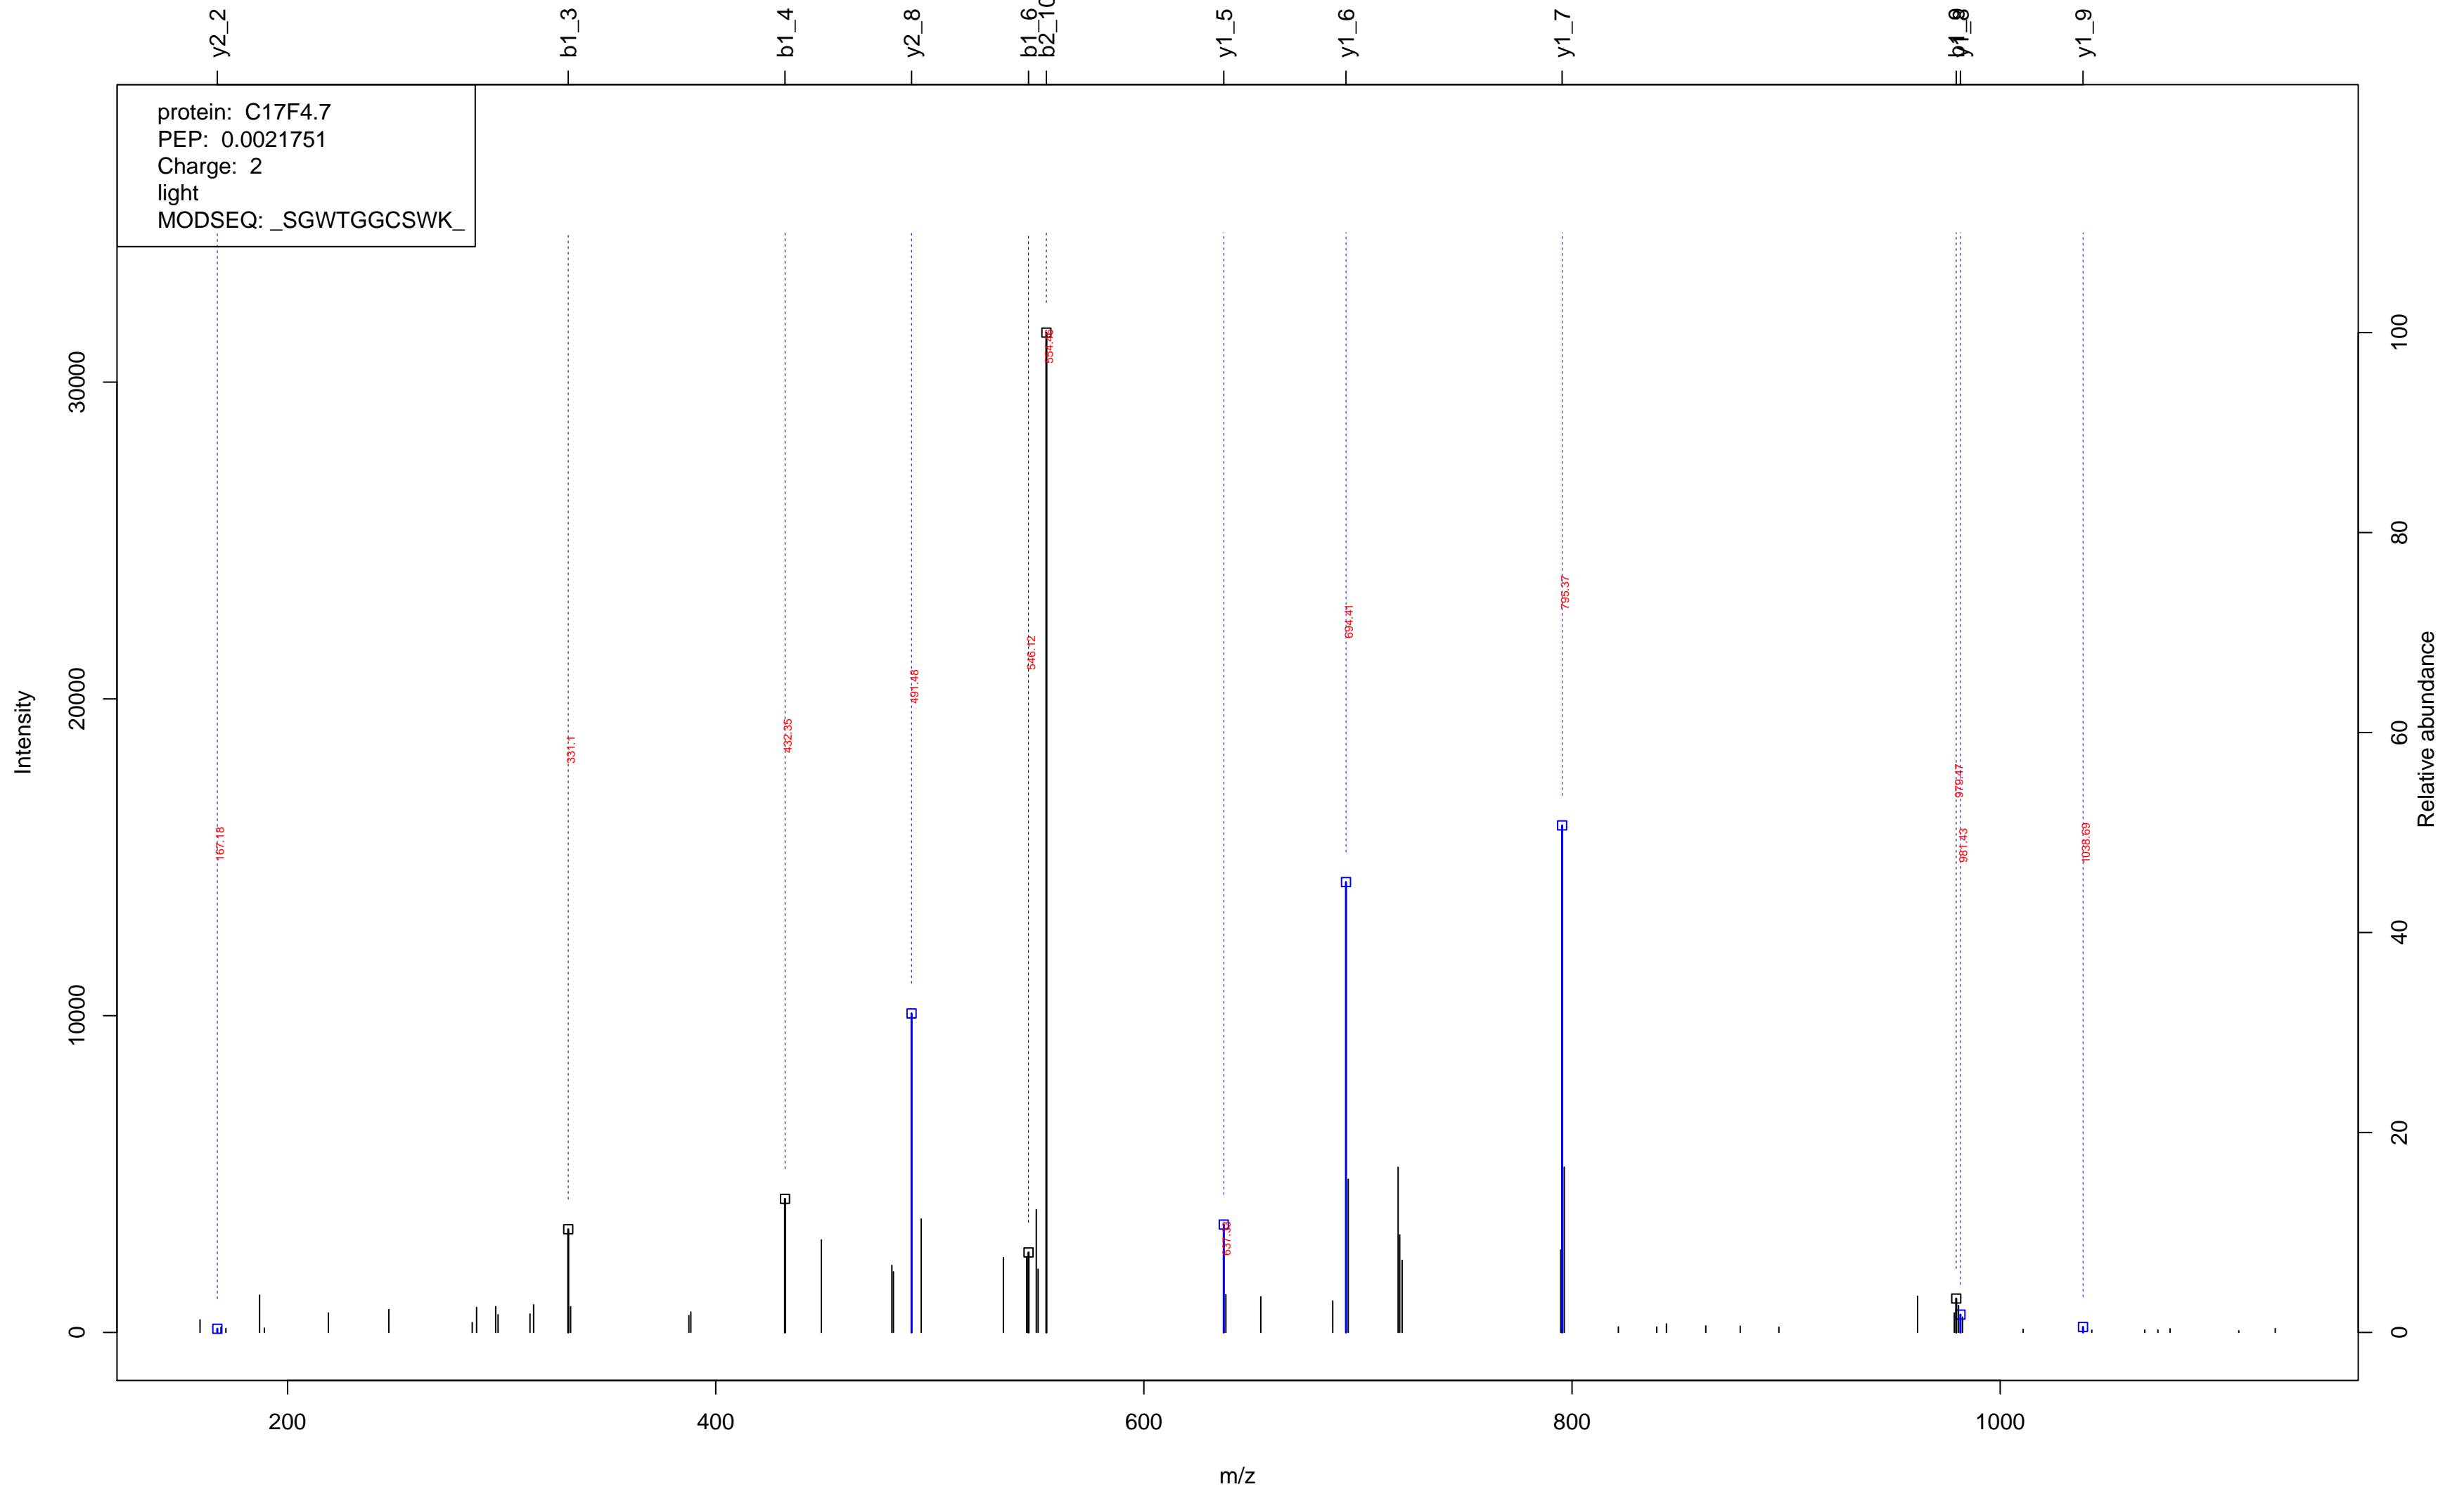



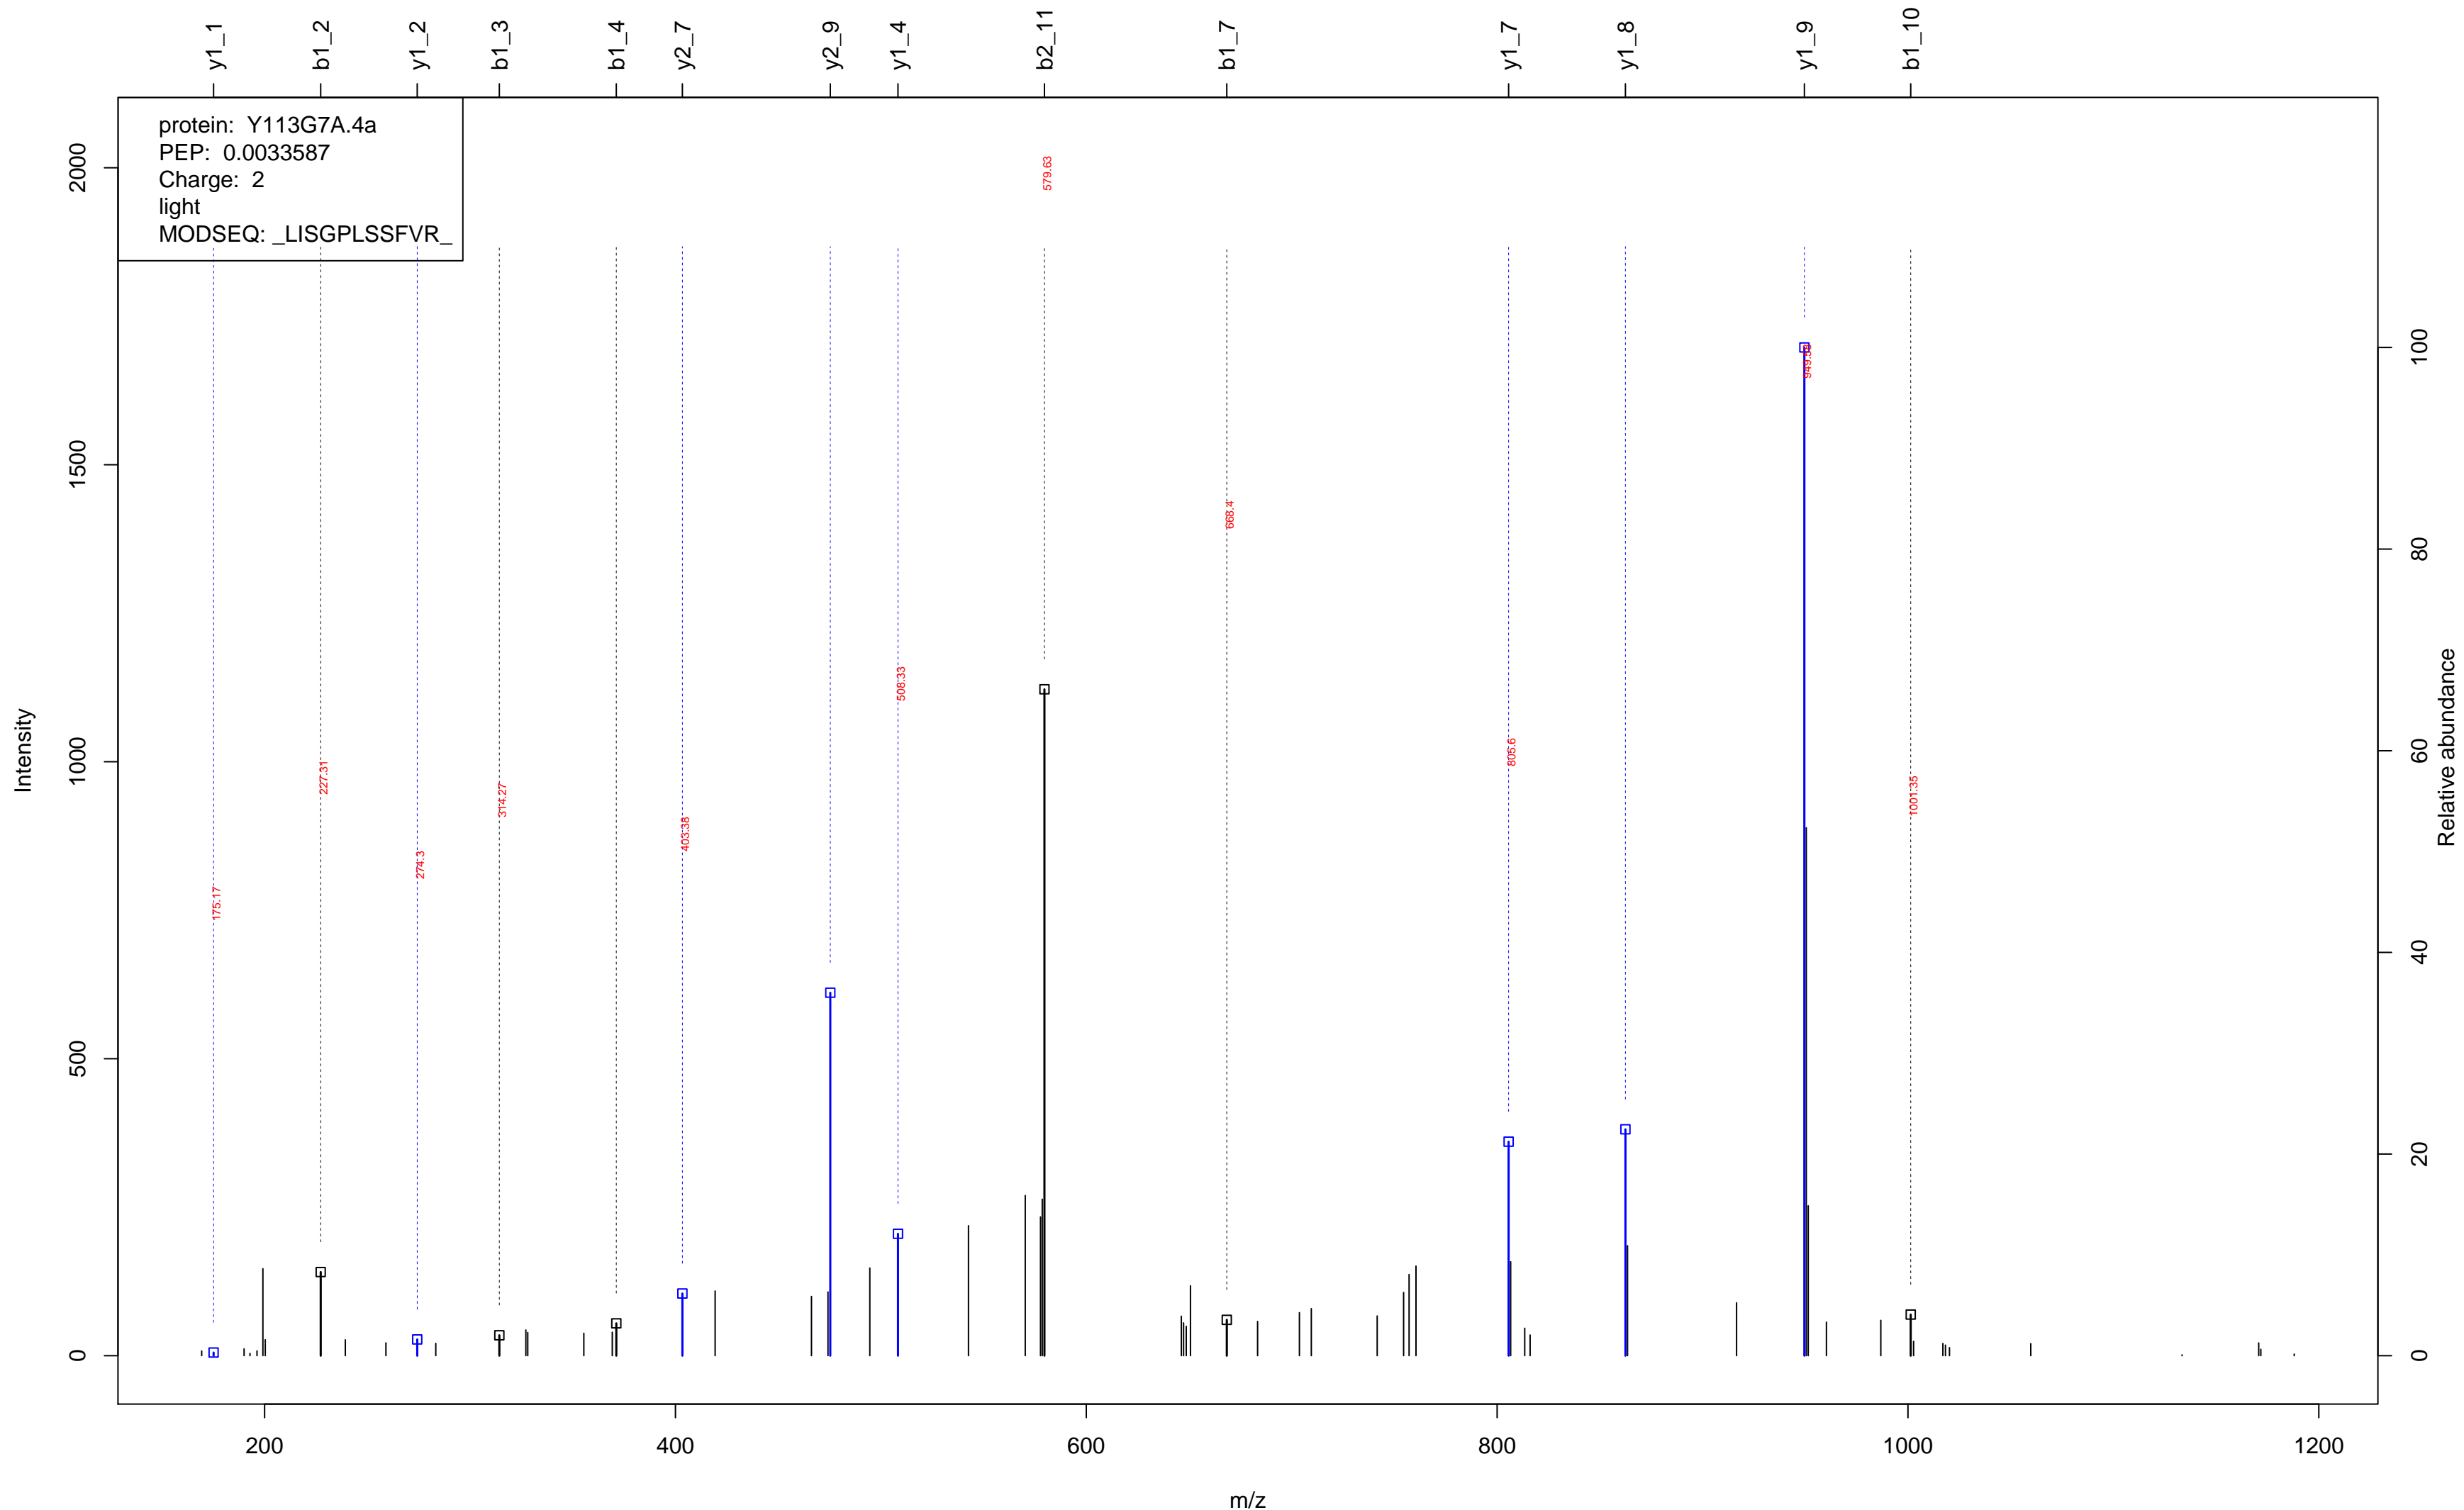

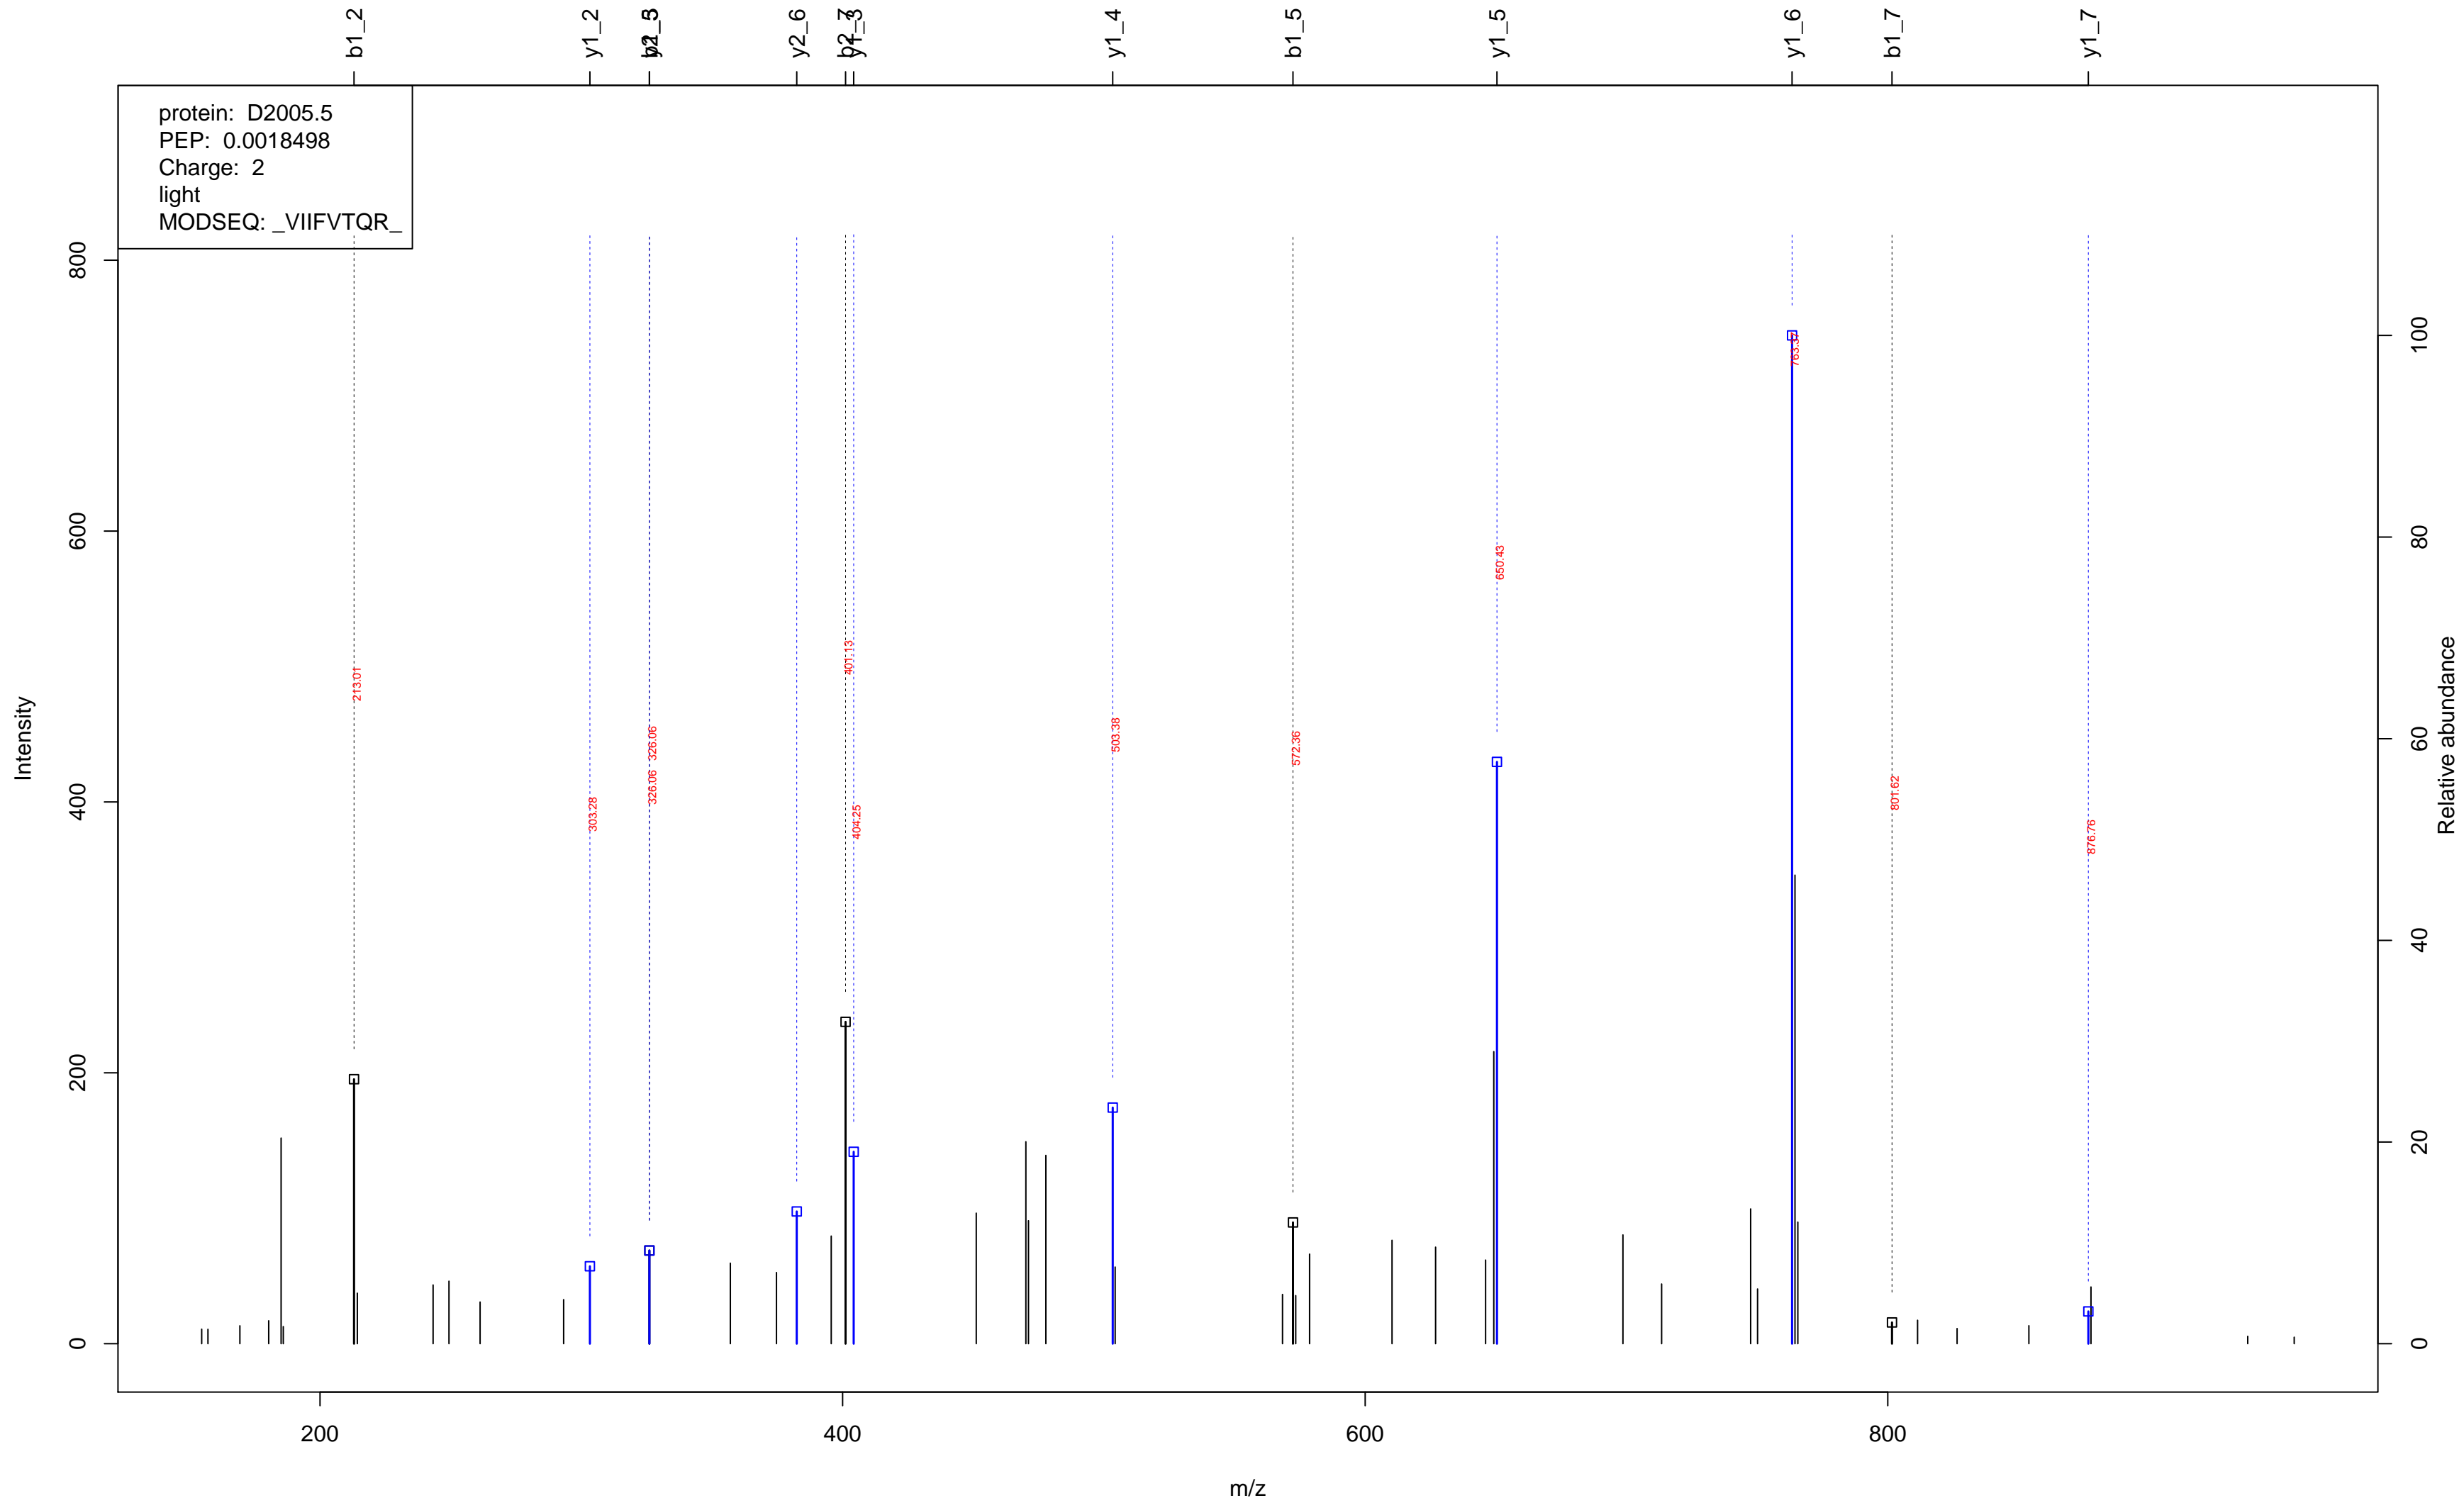

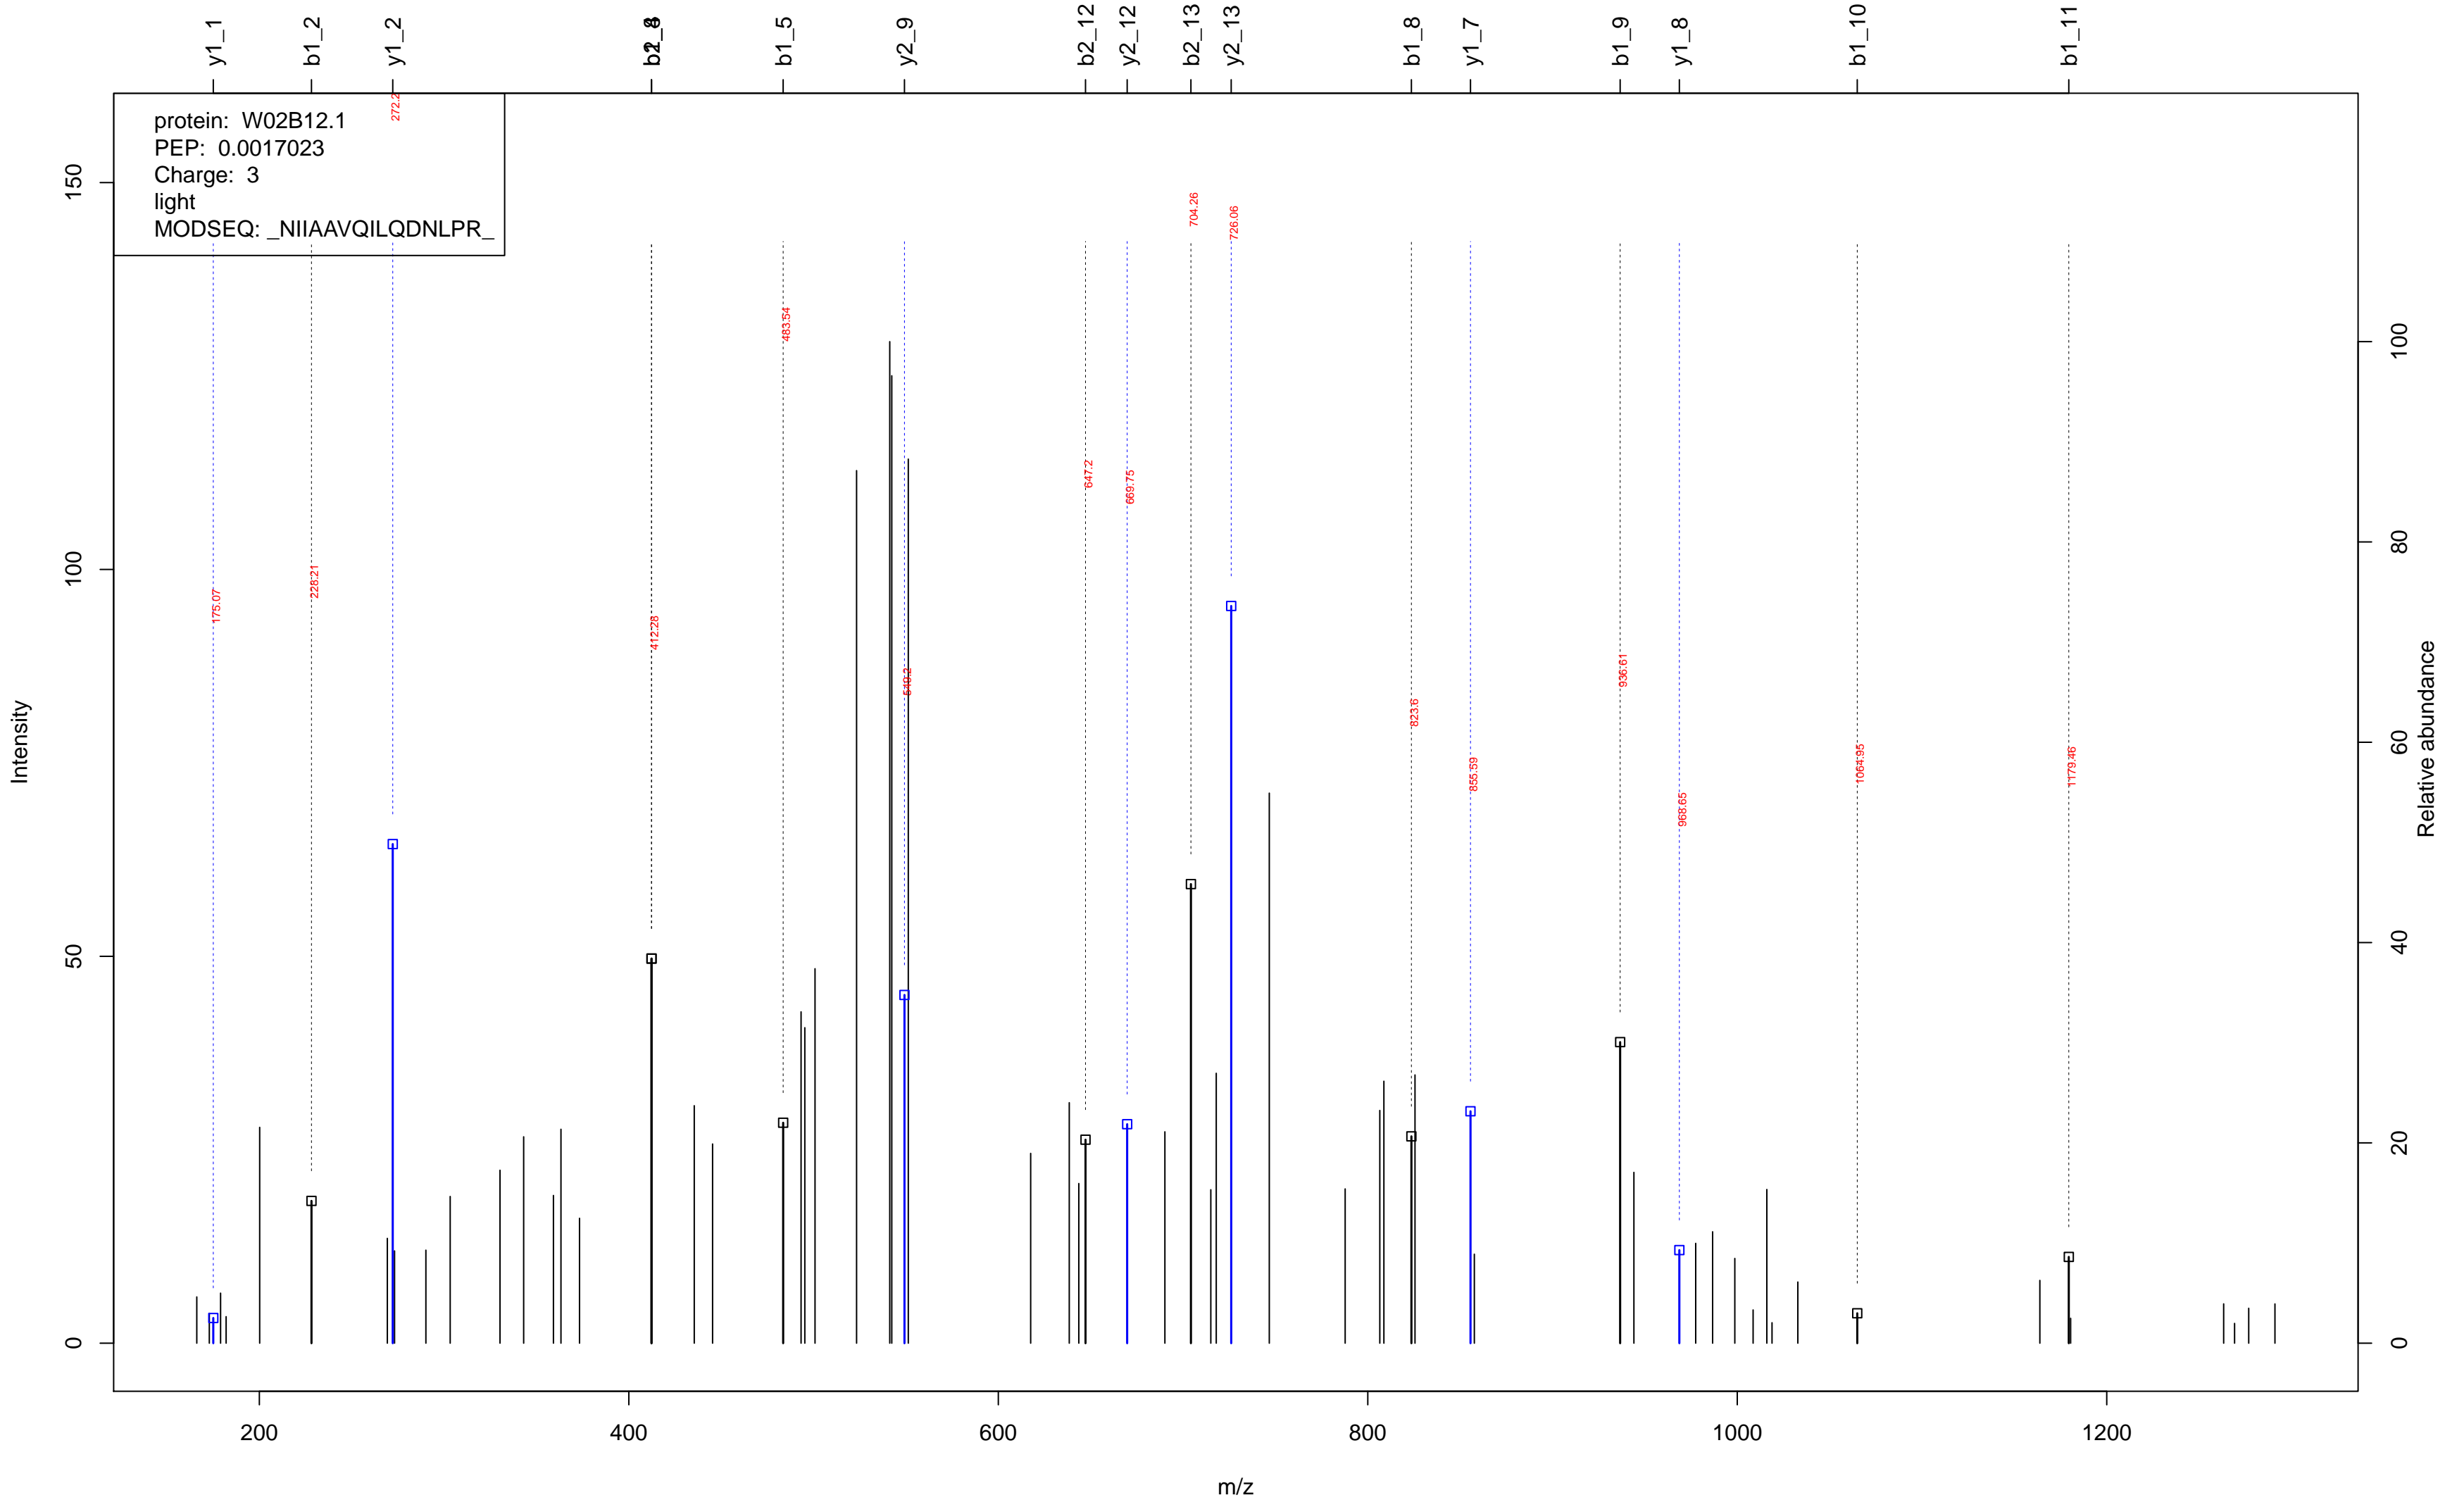

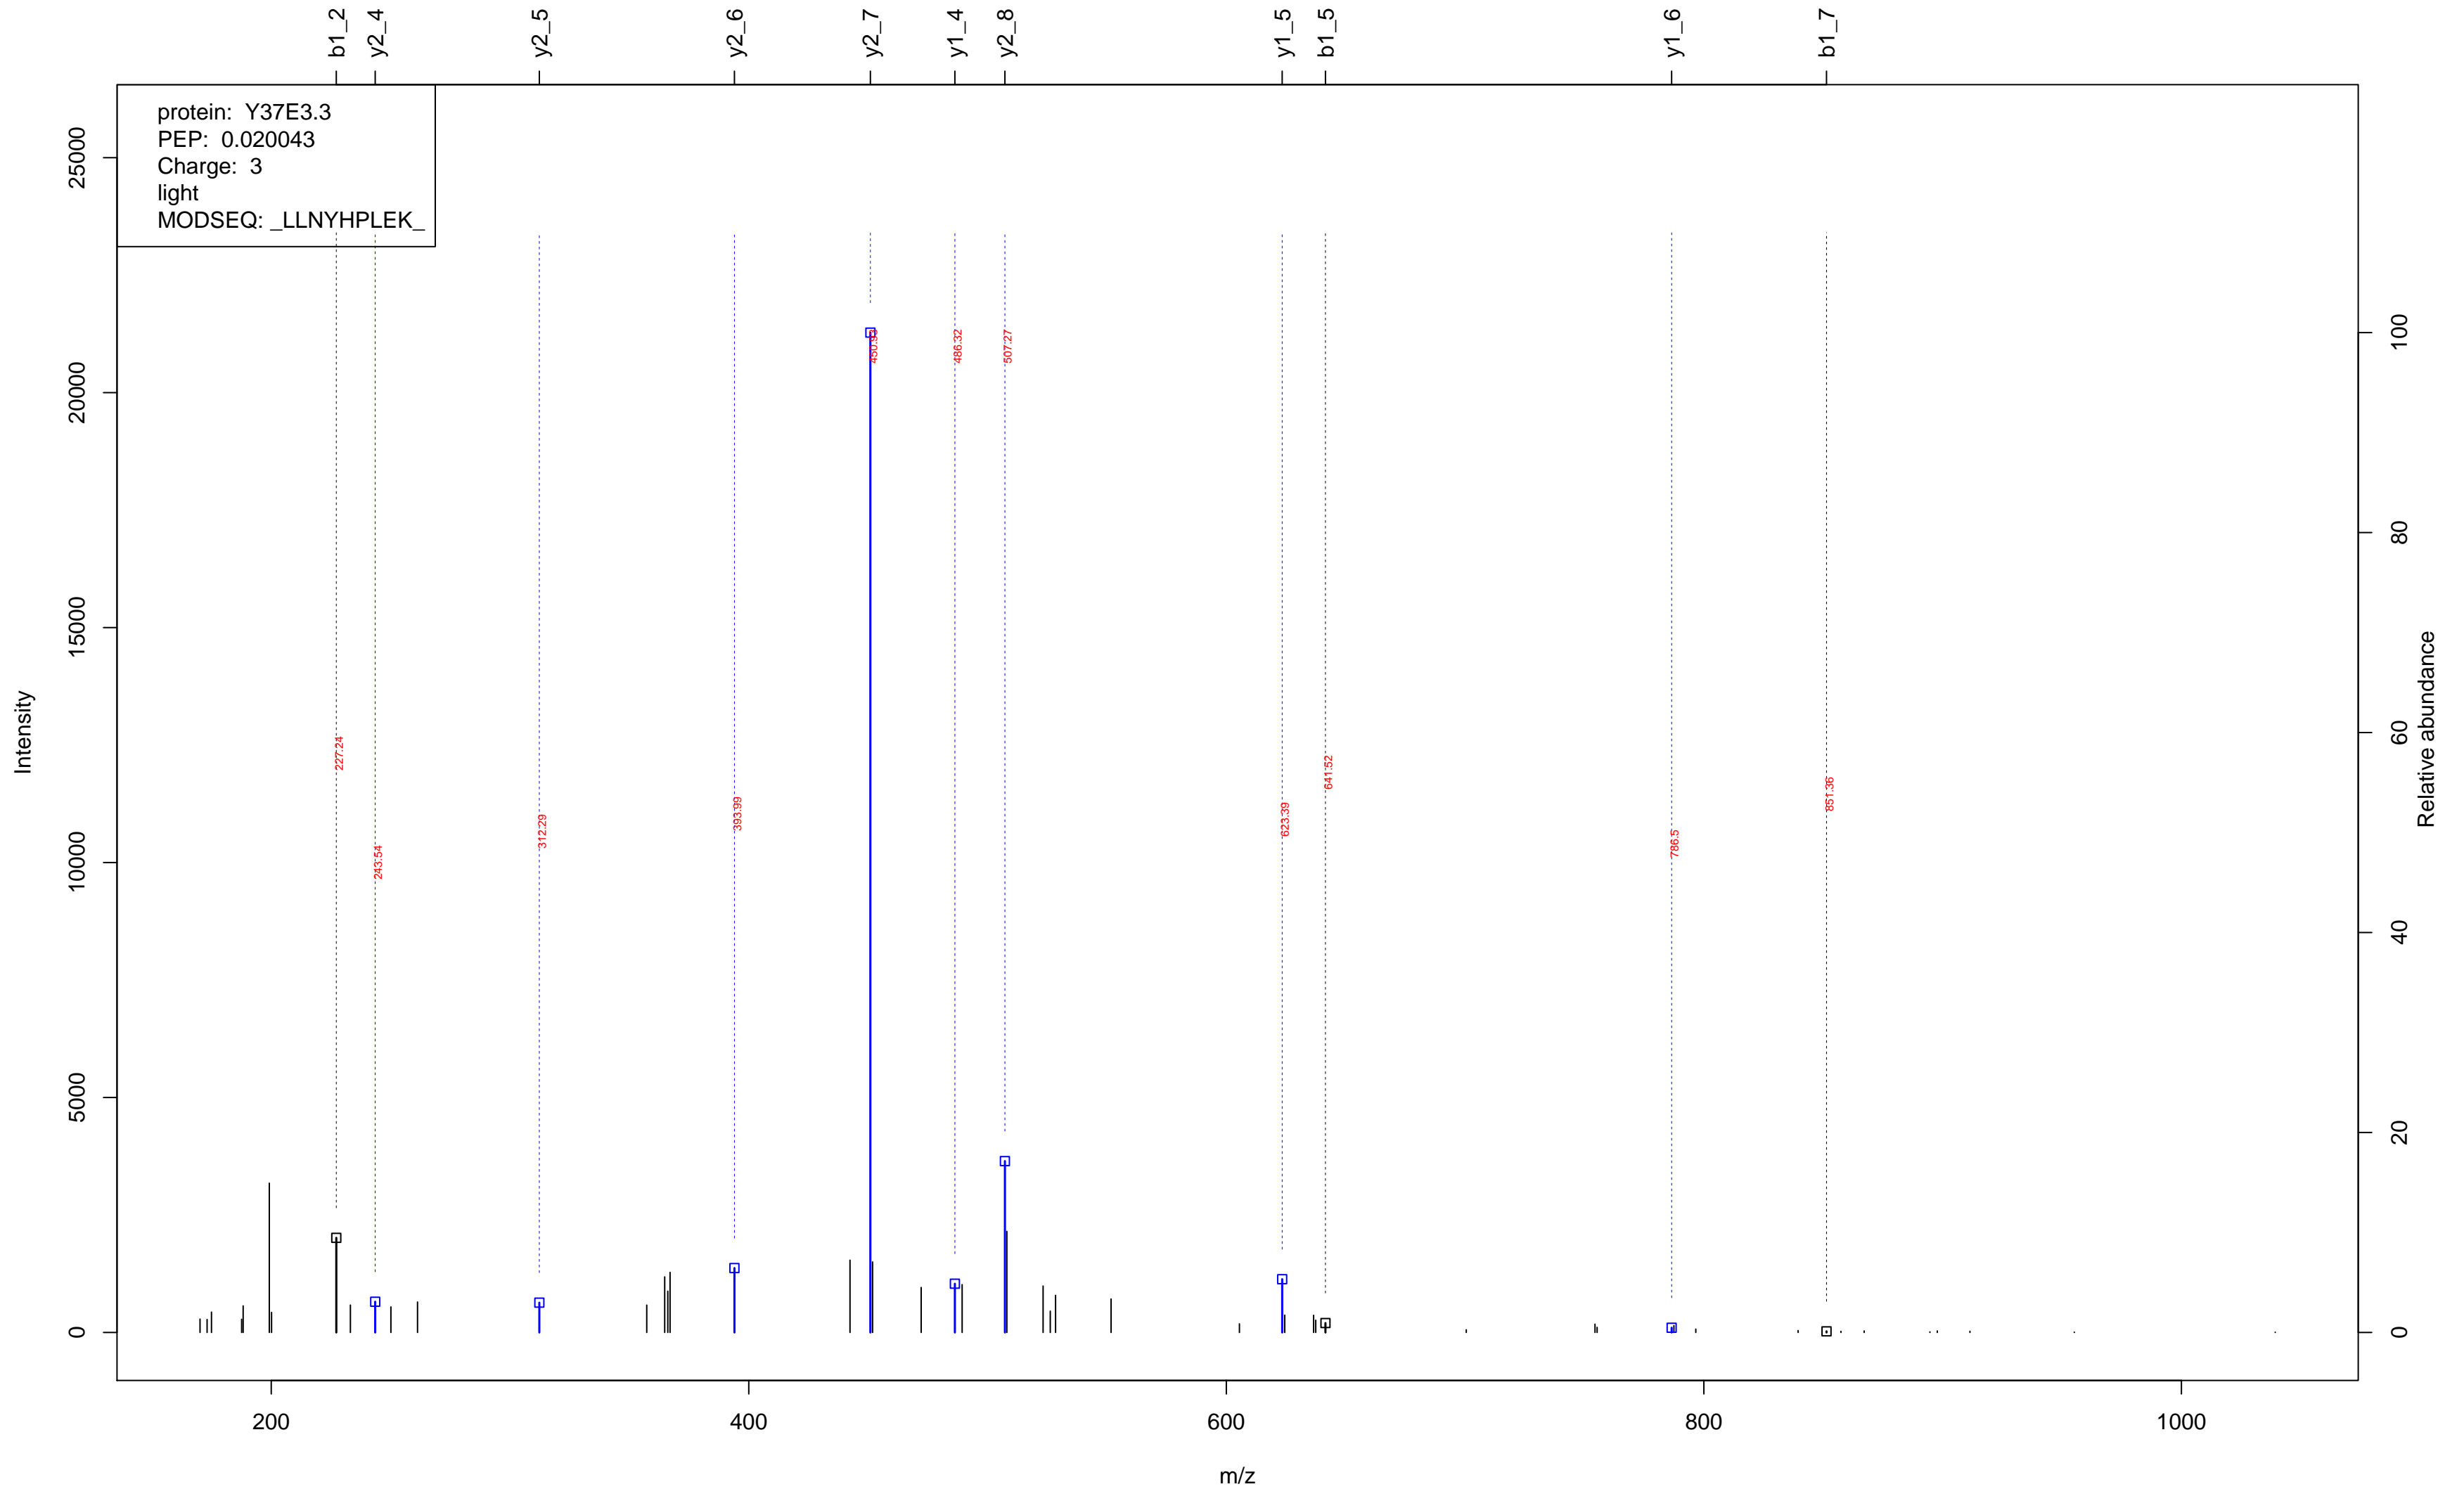

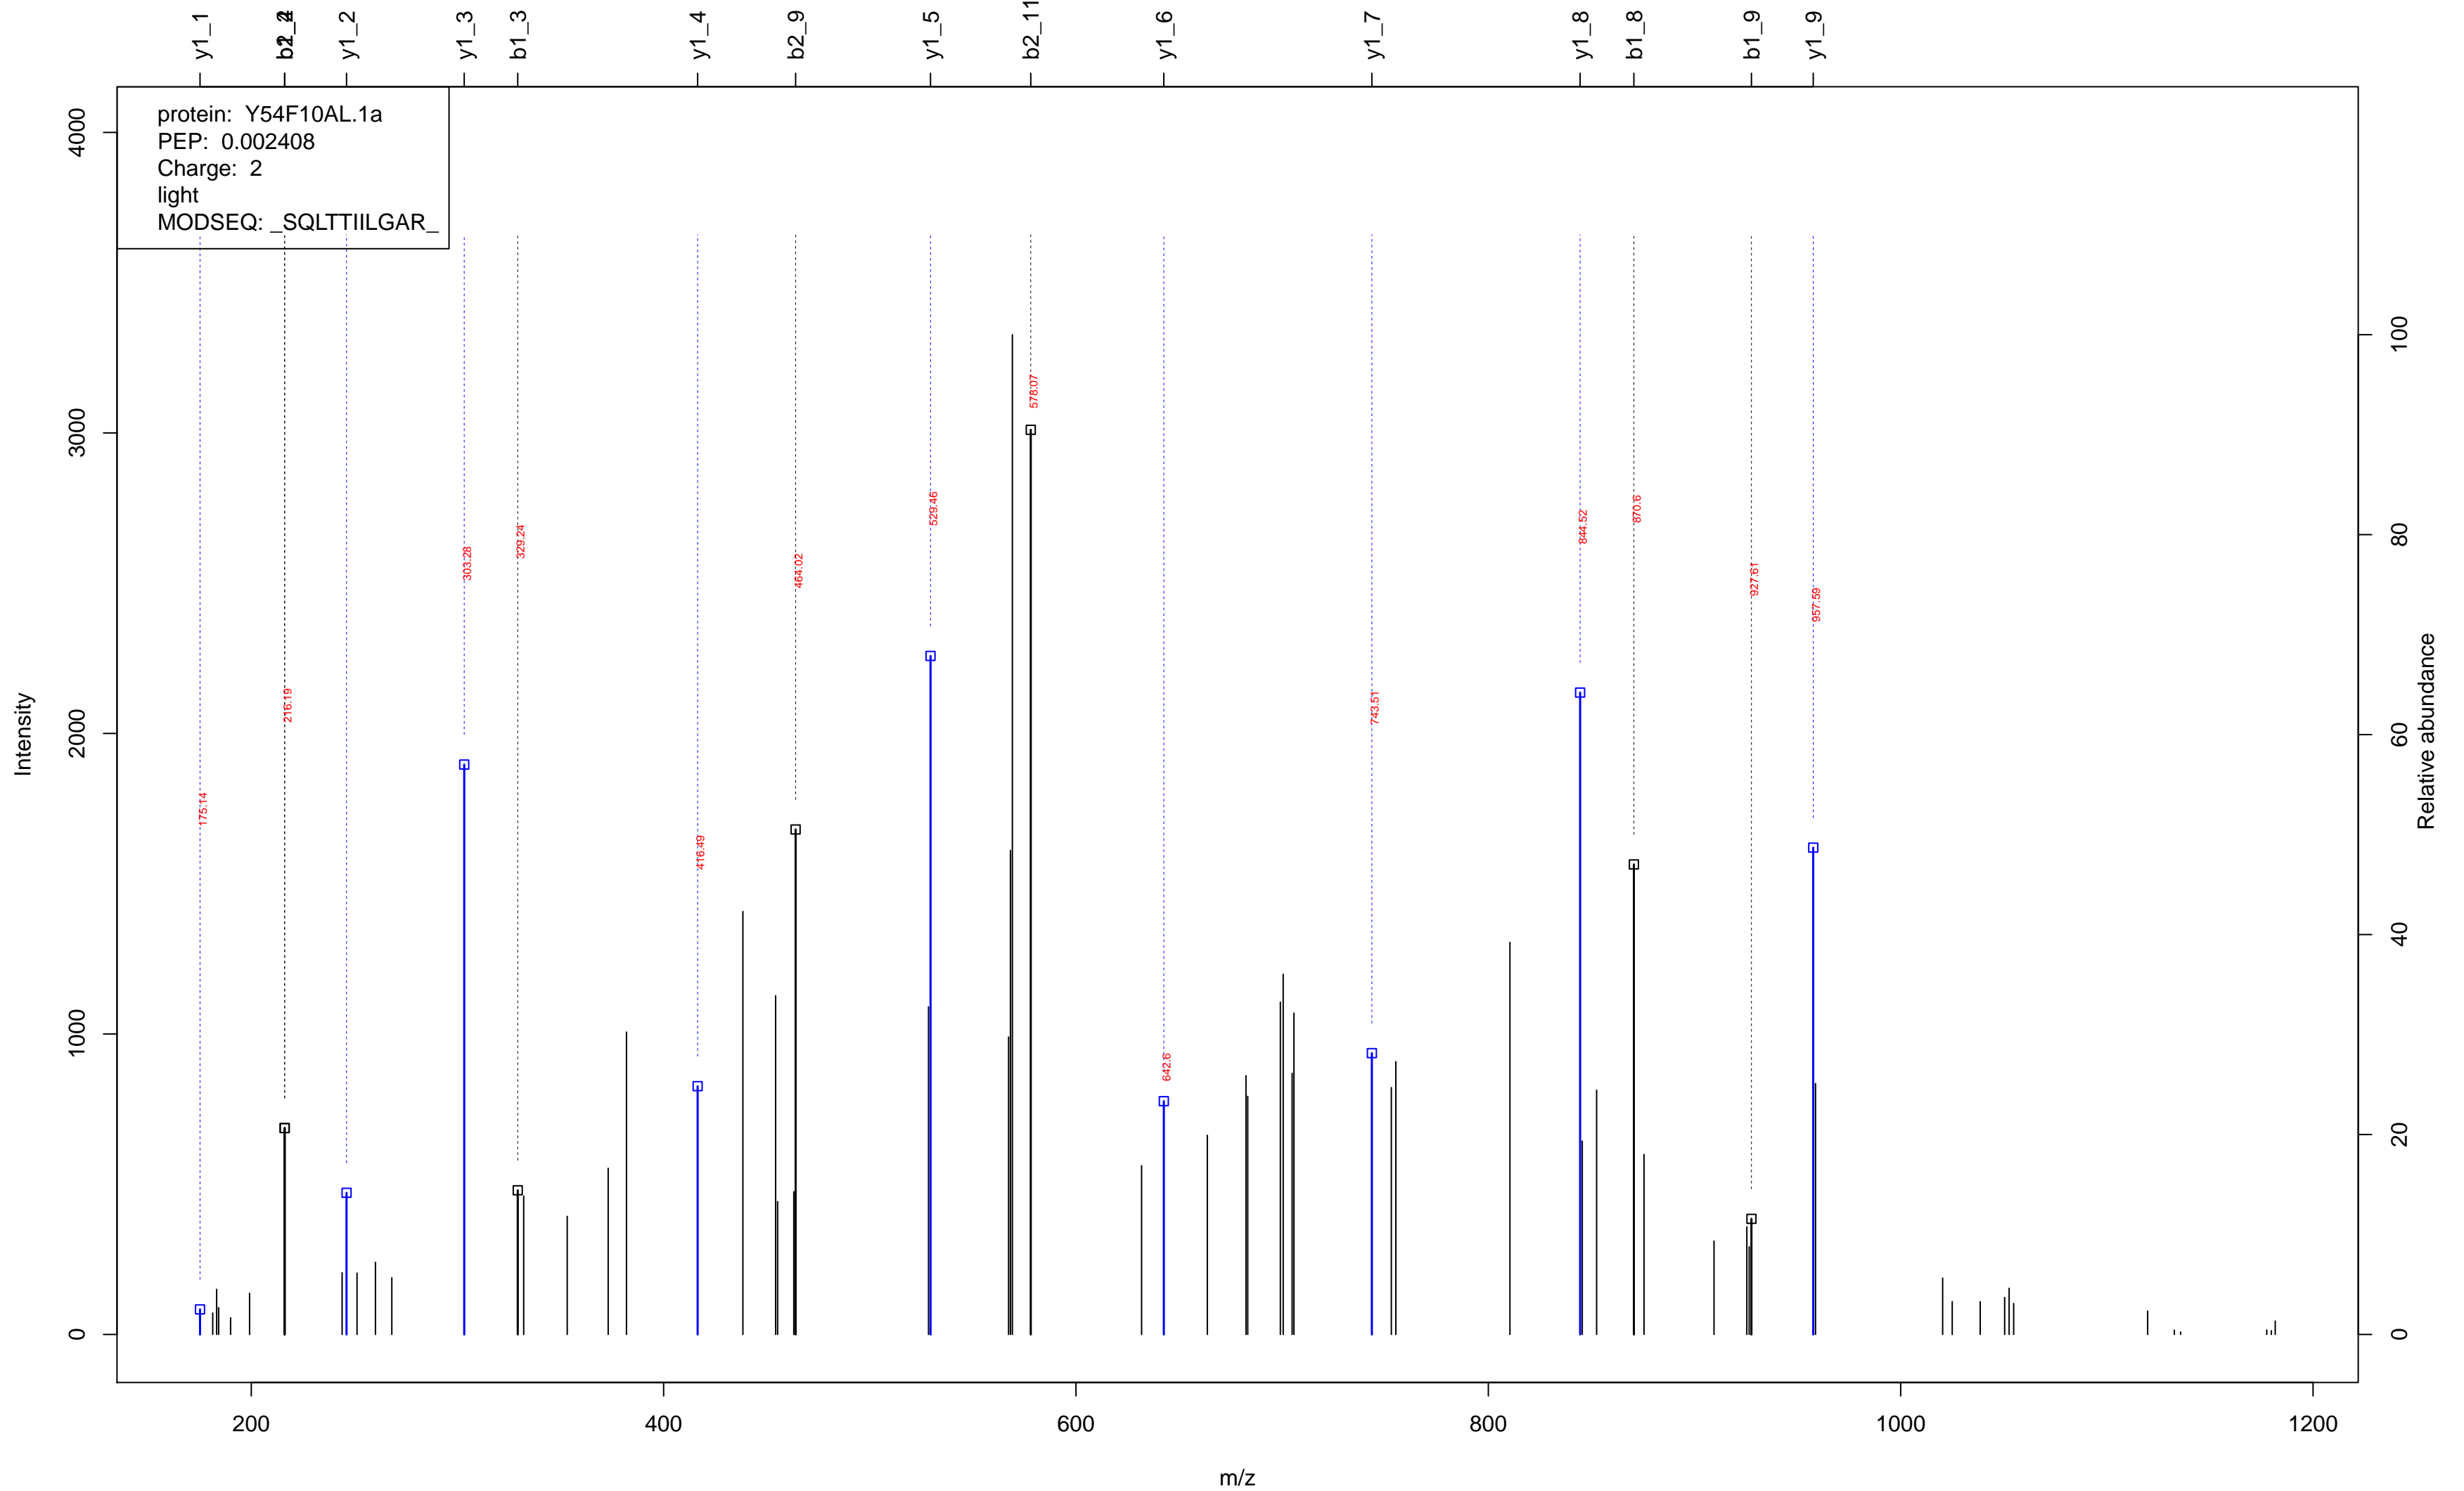

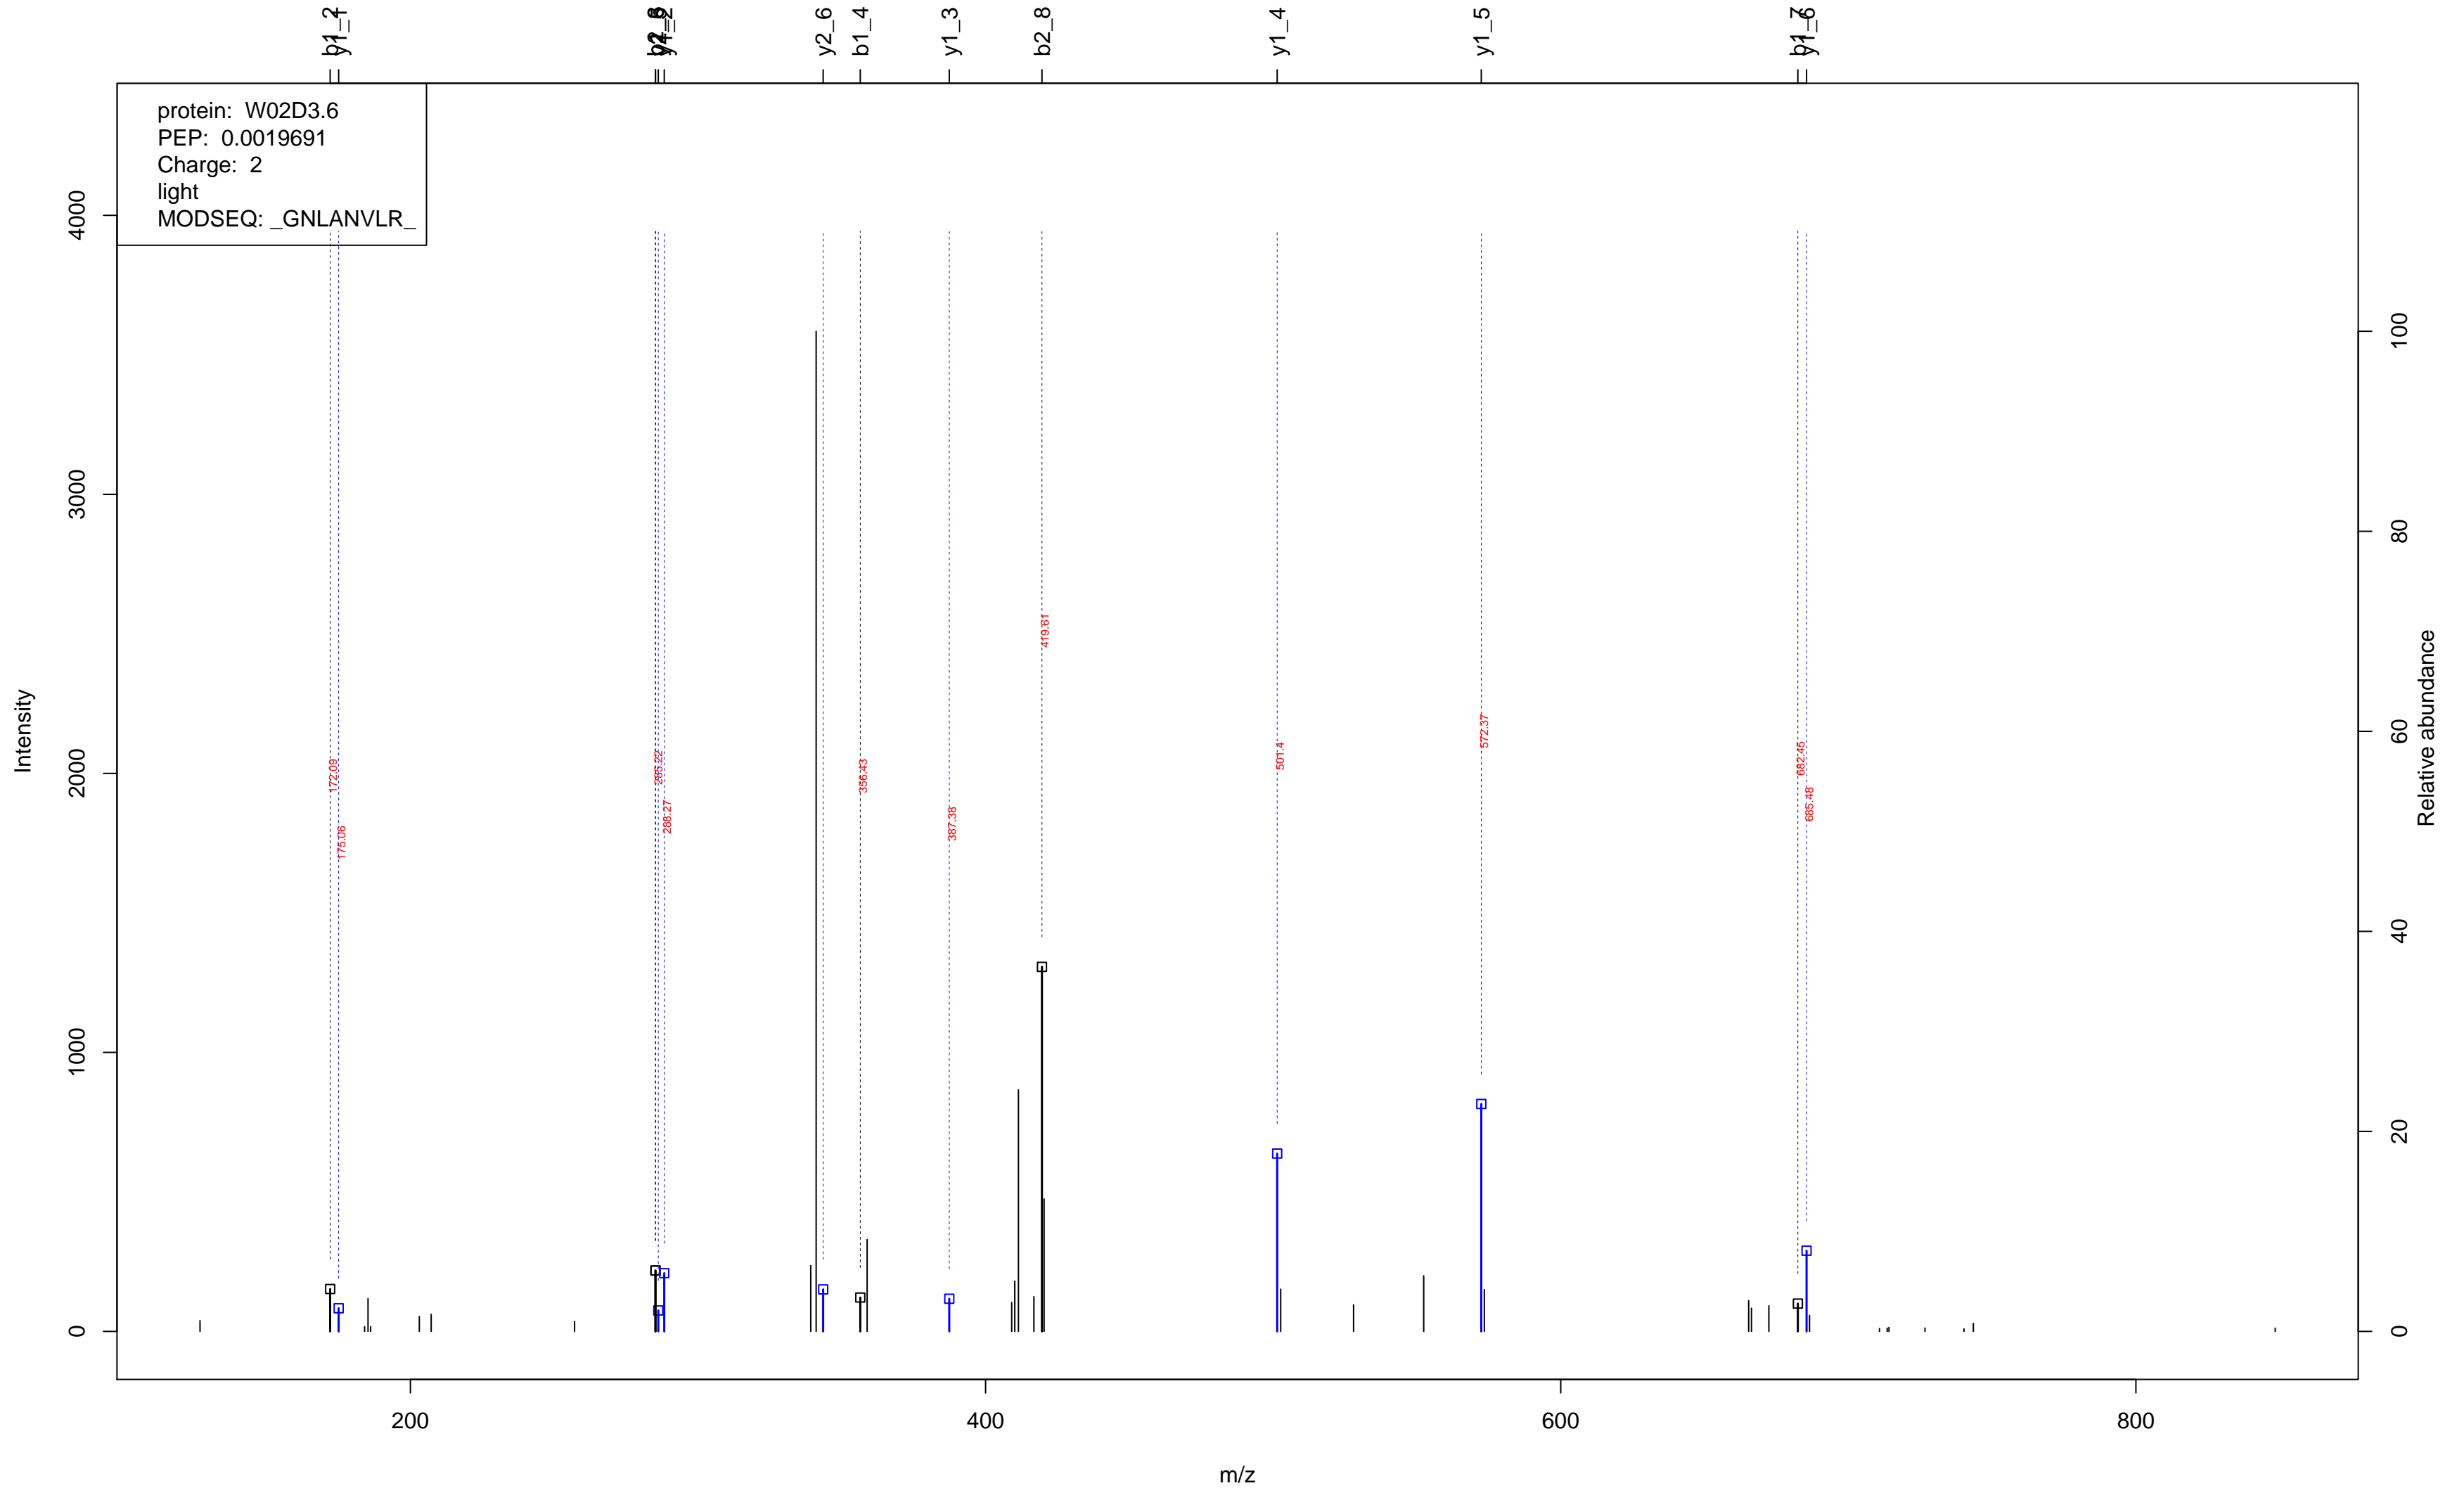

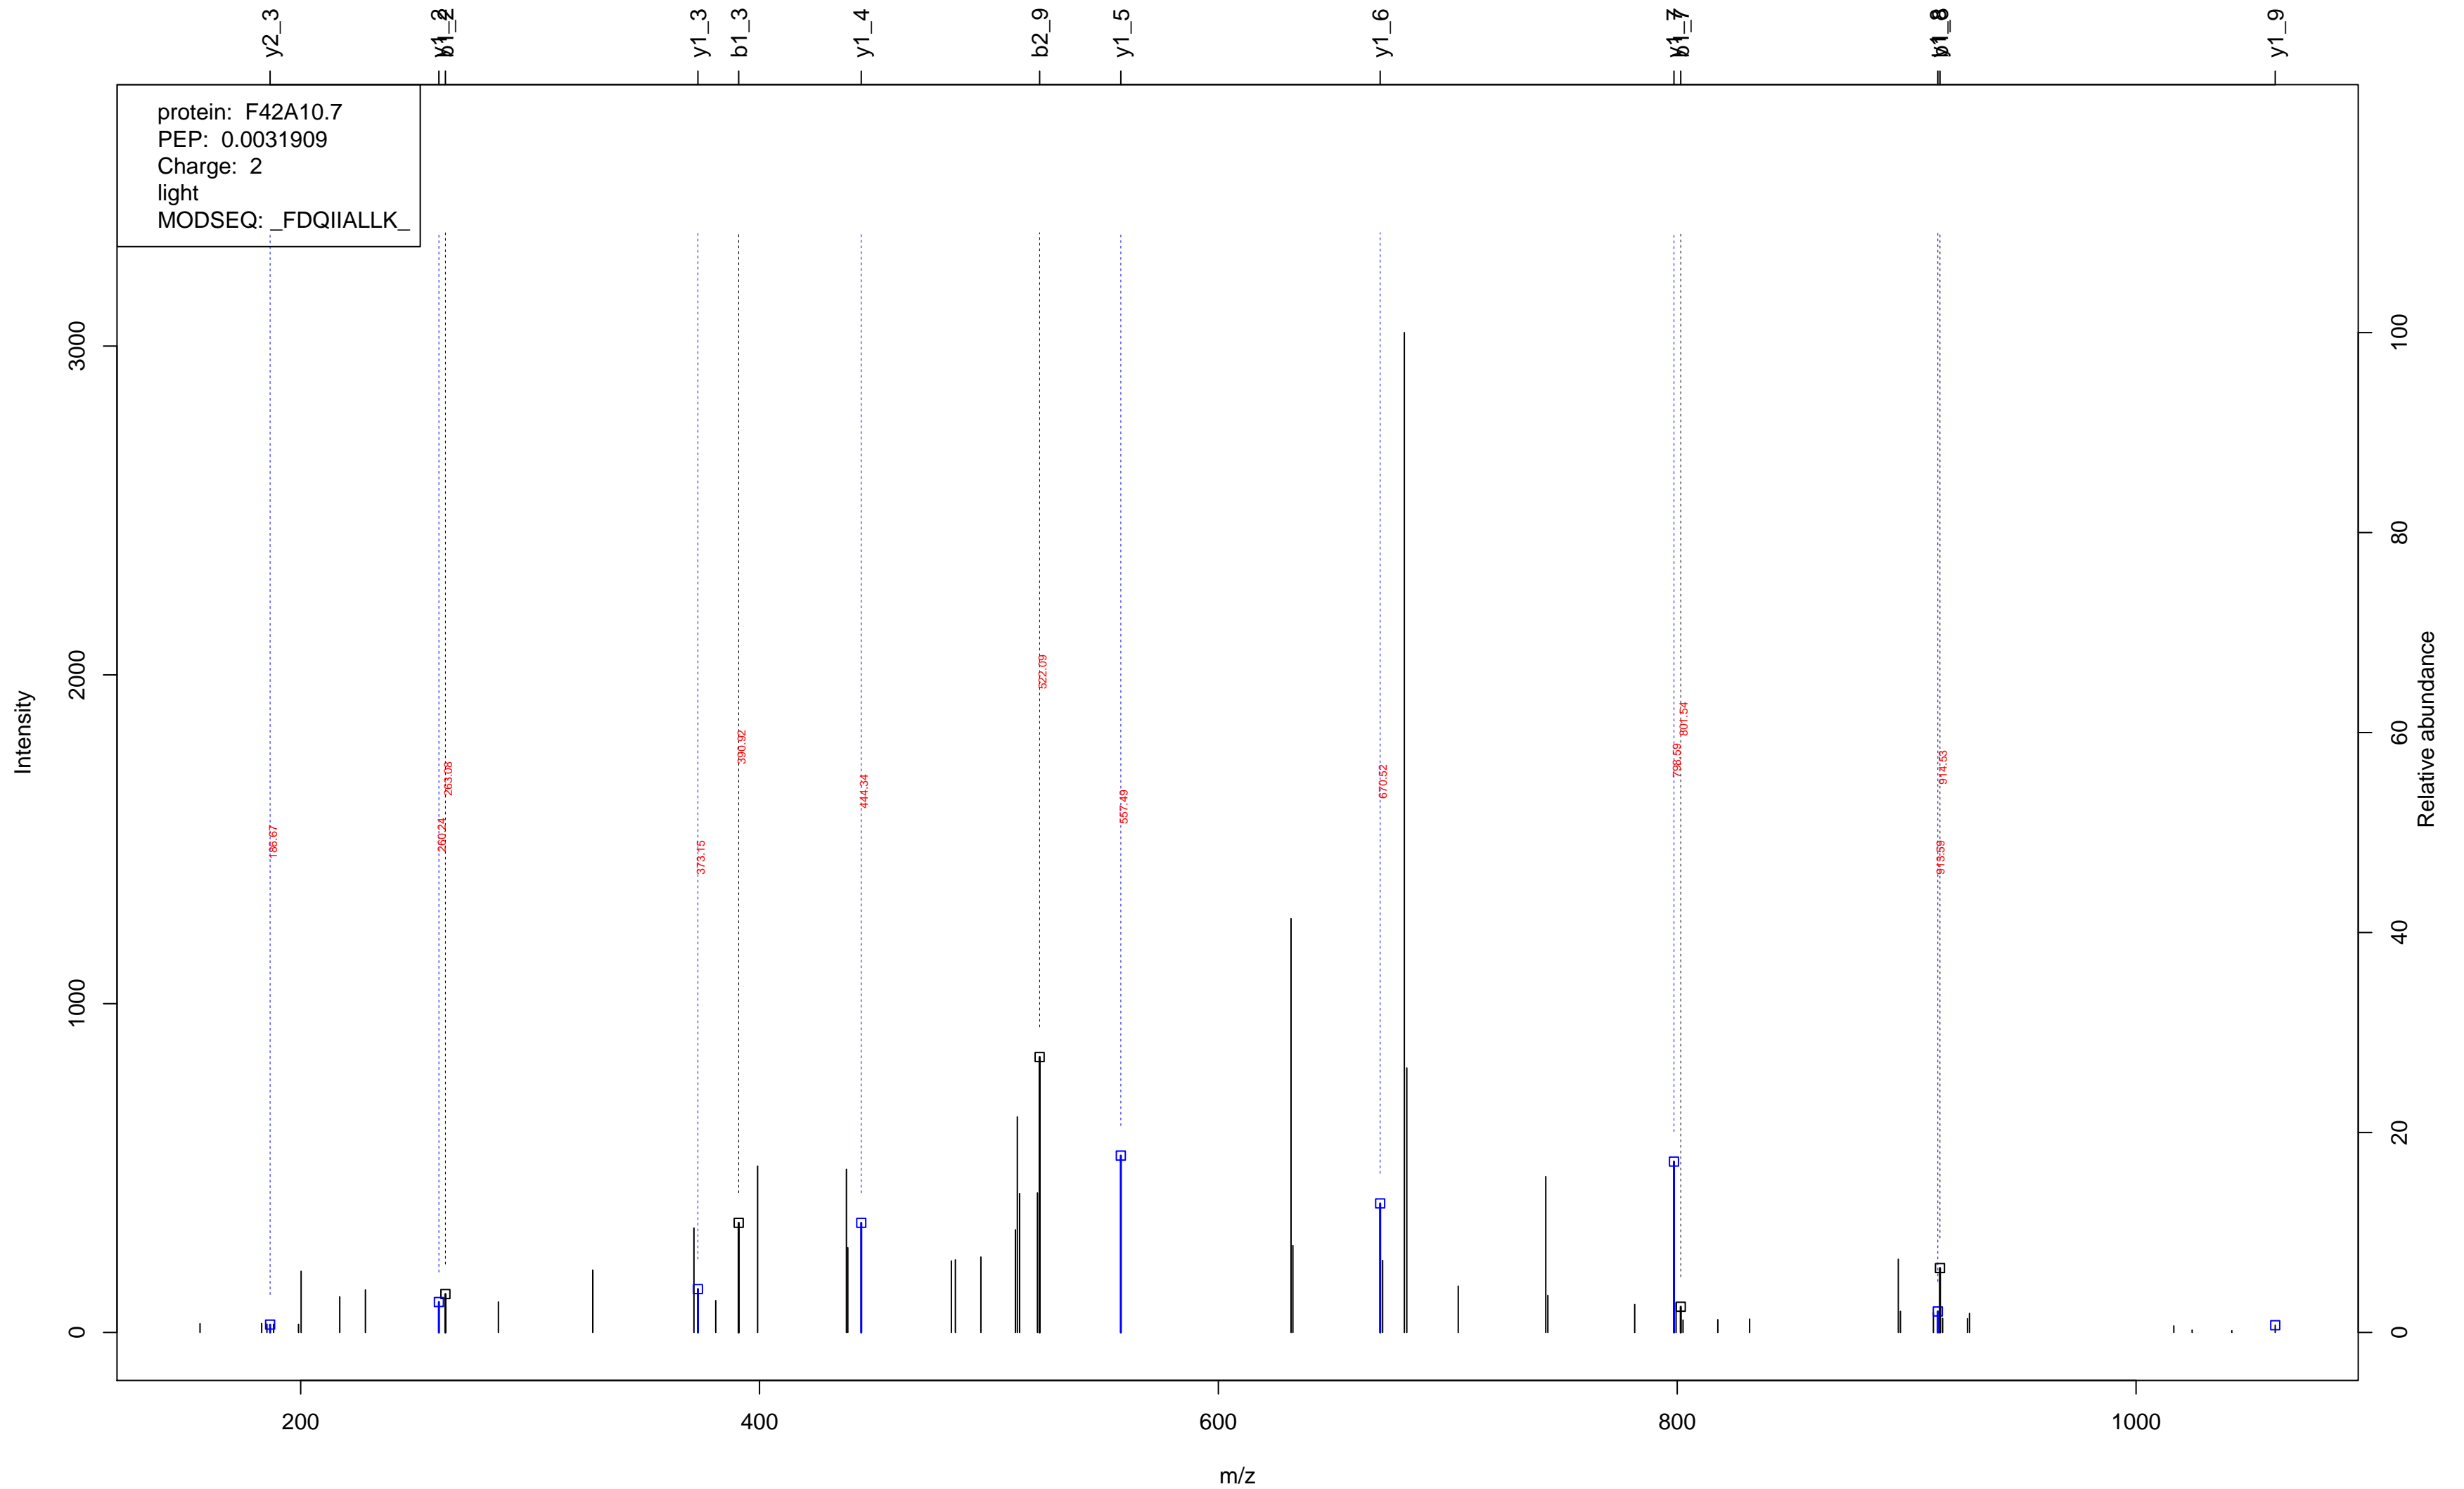

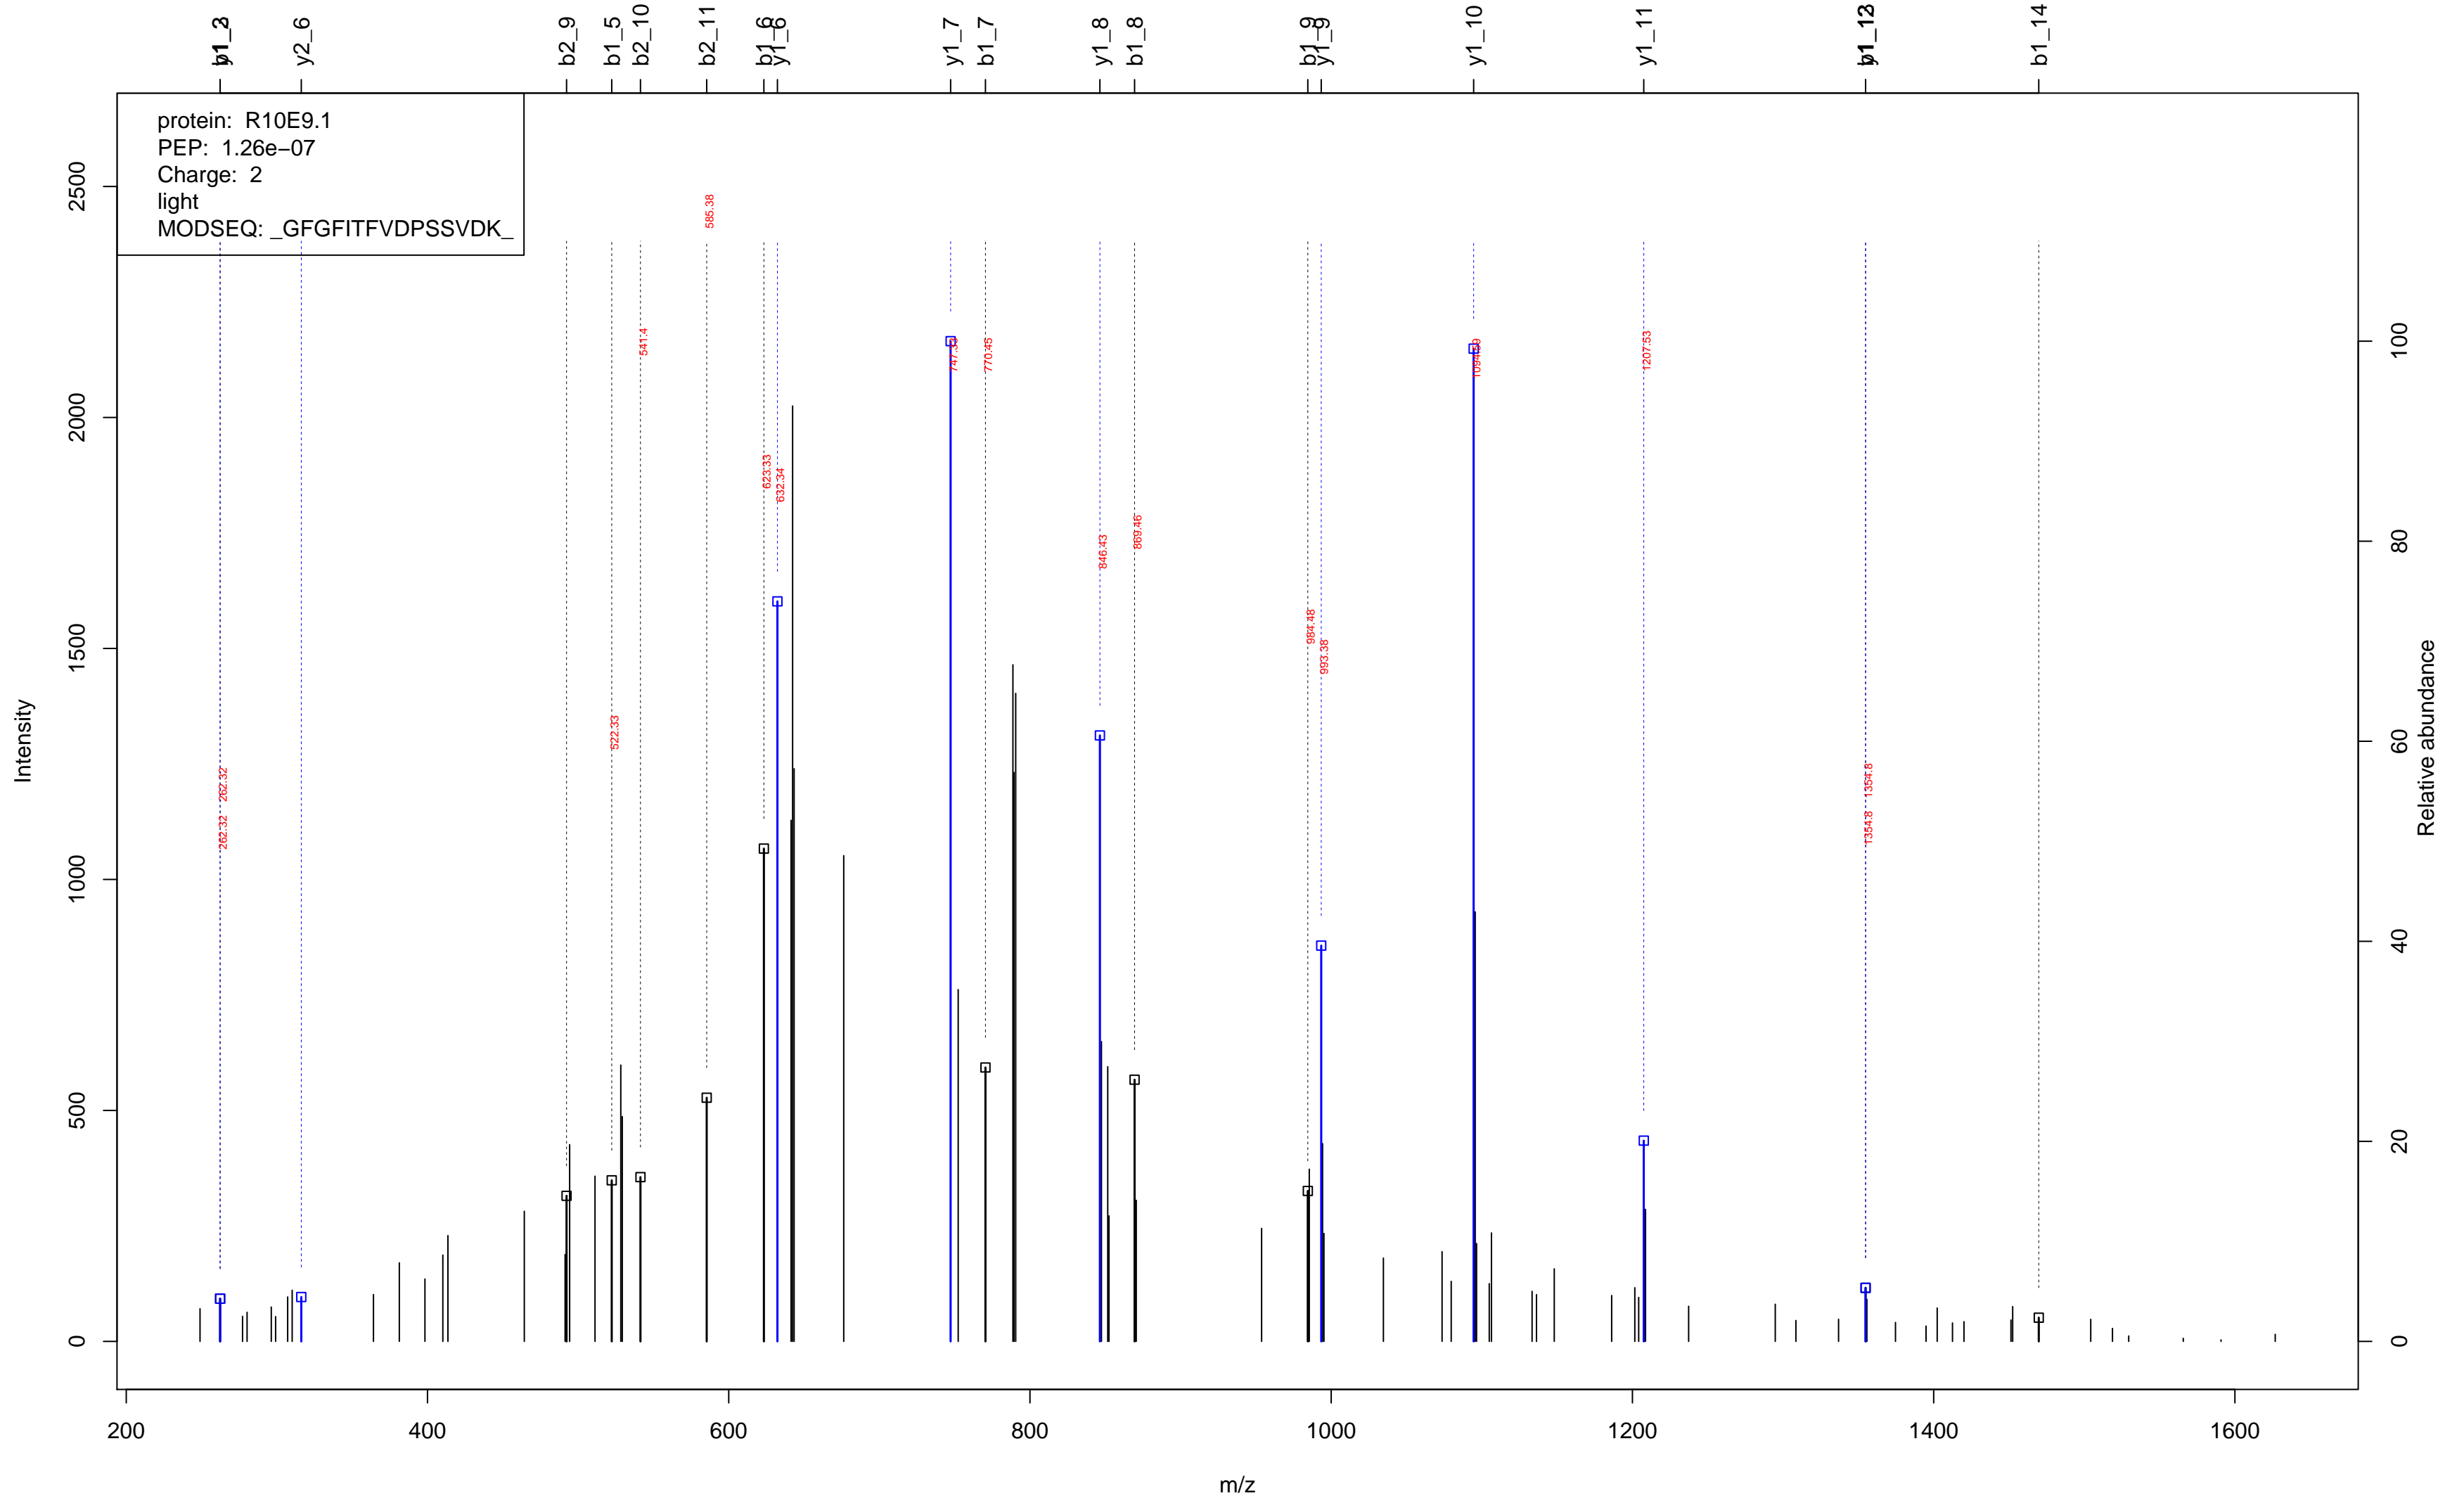



y1\_1                      b1\_2                      b1\_3                      y2\_7                      y1\_4                      b1\_4                      b2\_9                      y1\_5                      b1\_5                      y1\_6                      y1\_7                      y1\_8

protein: F22F7.5  
PEP: 0.0093641  
Charge: 2  
light  
MODSEQ: \_LYGFFPGGR\_

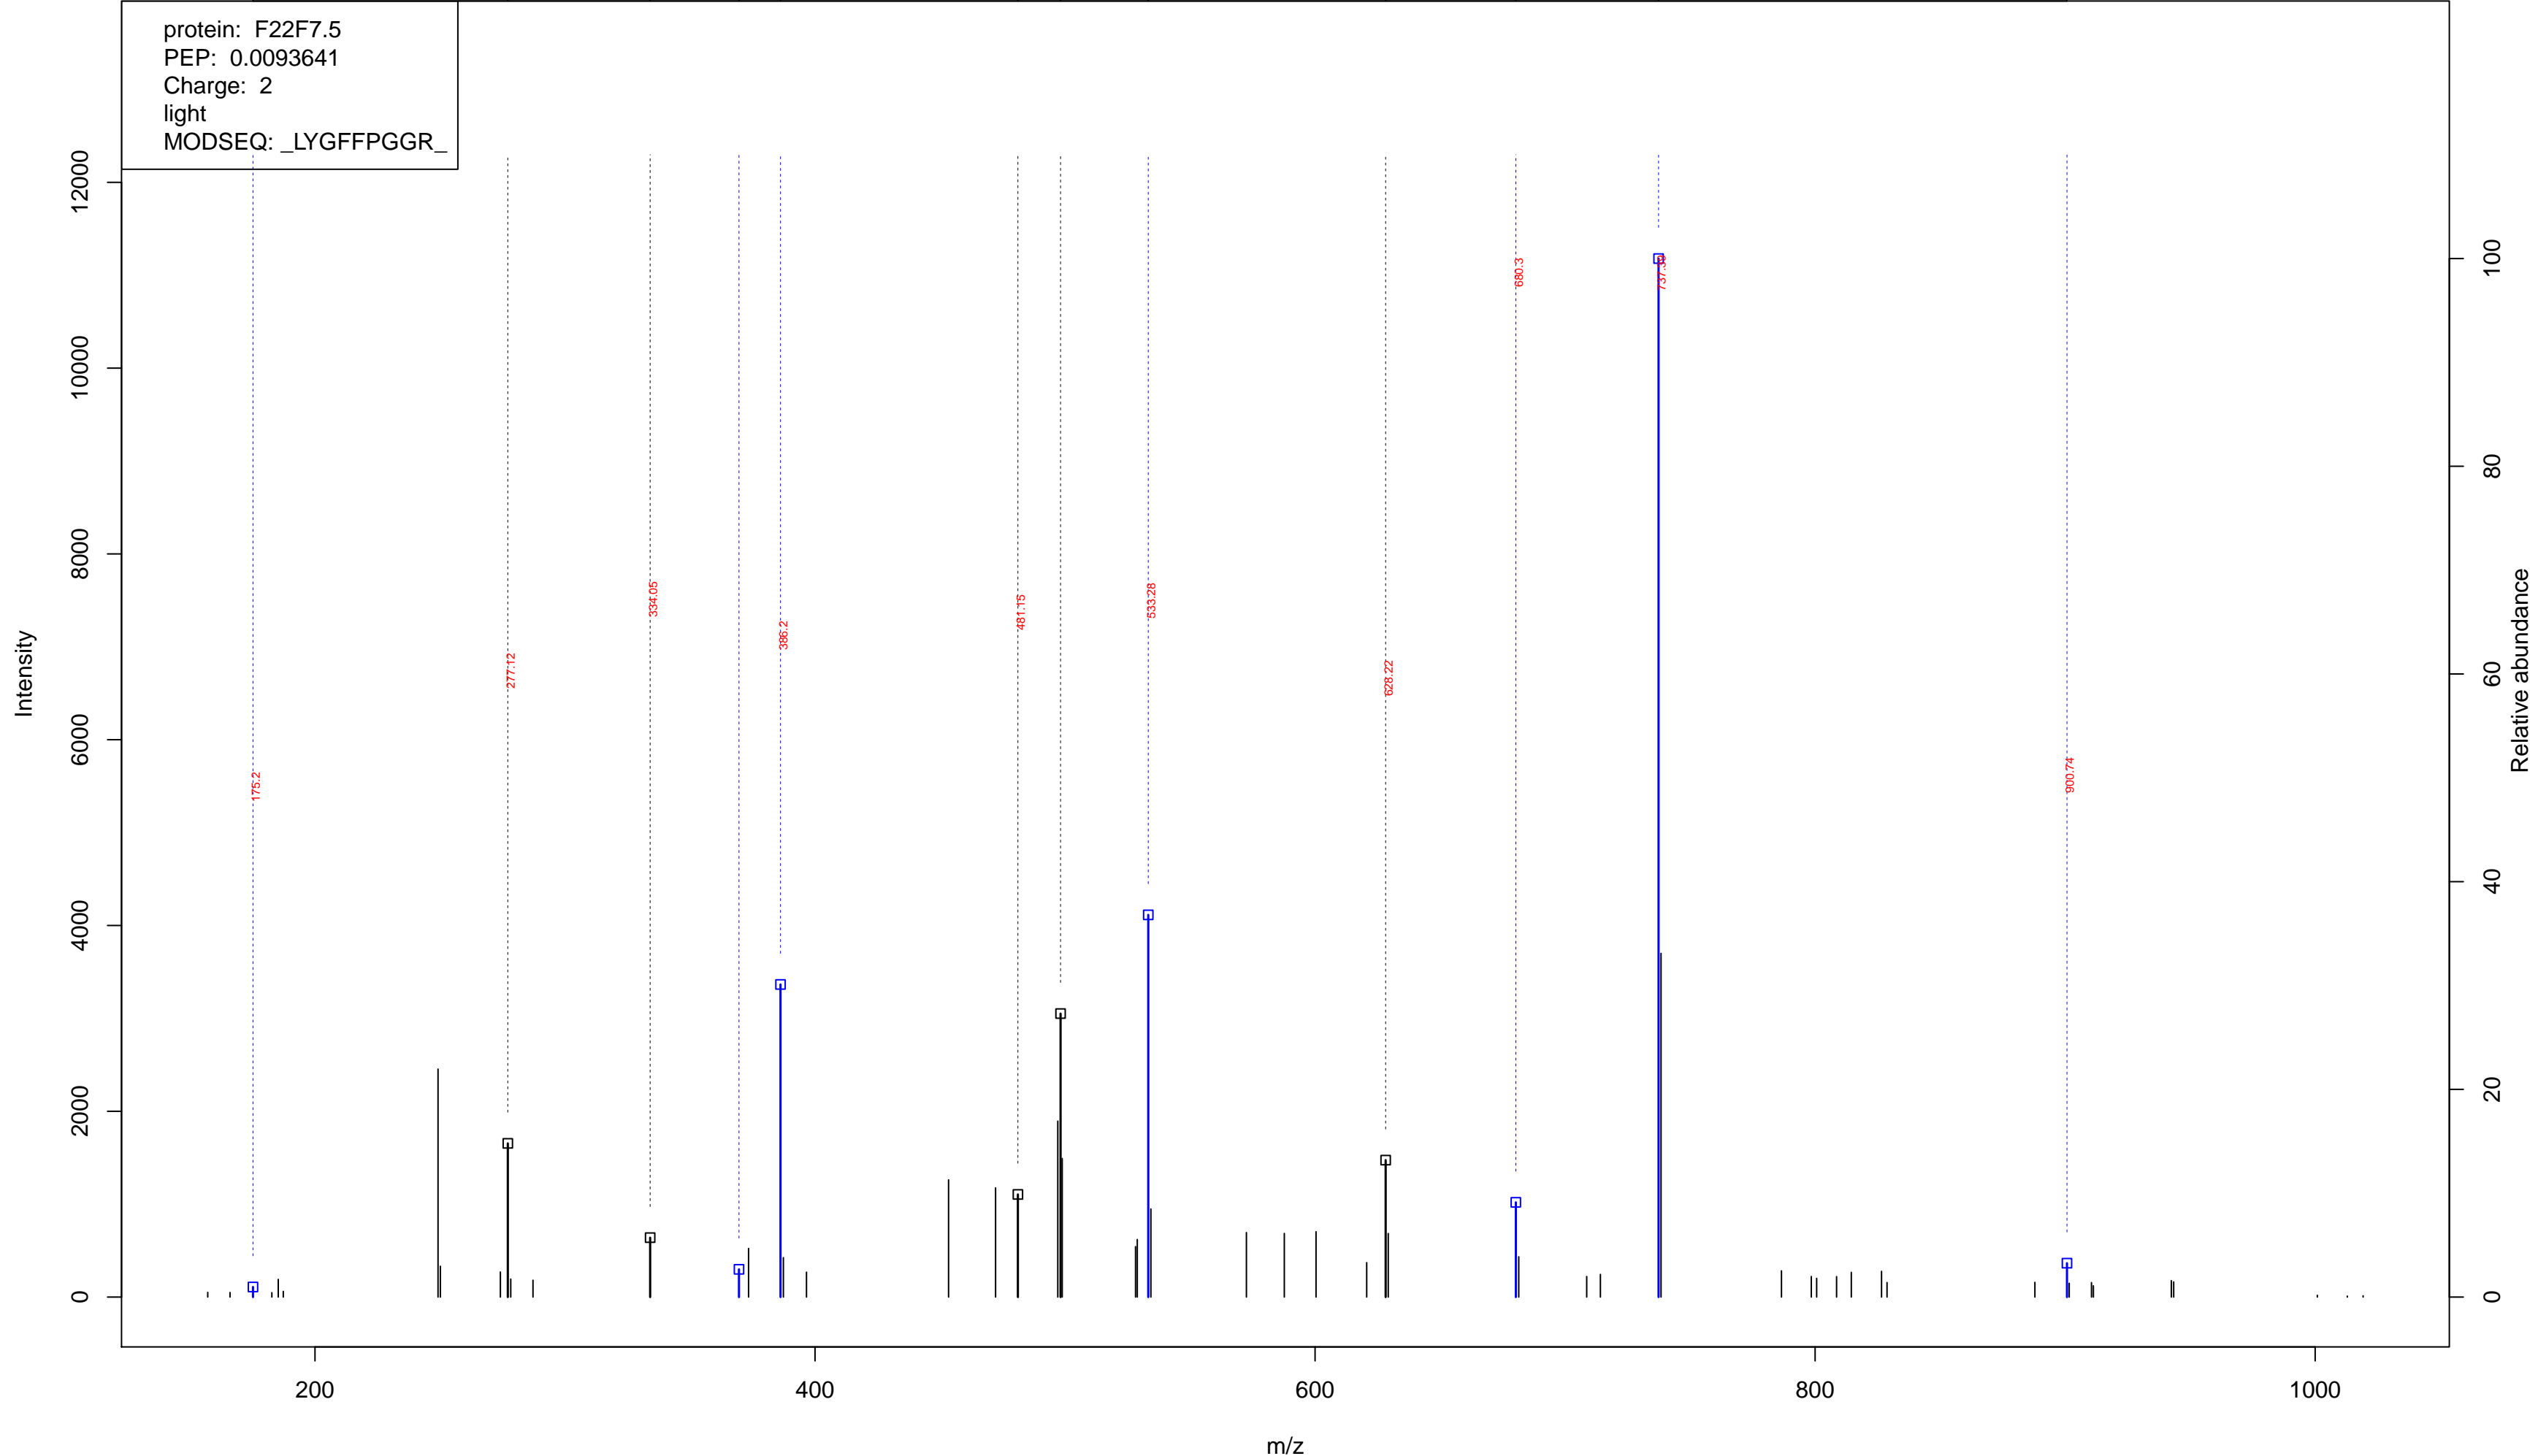

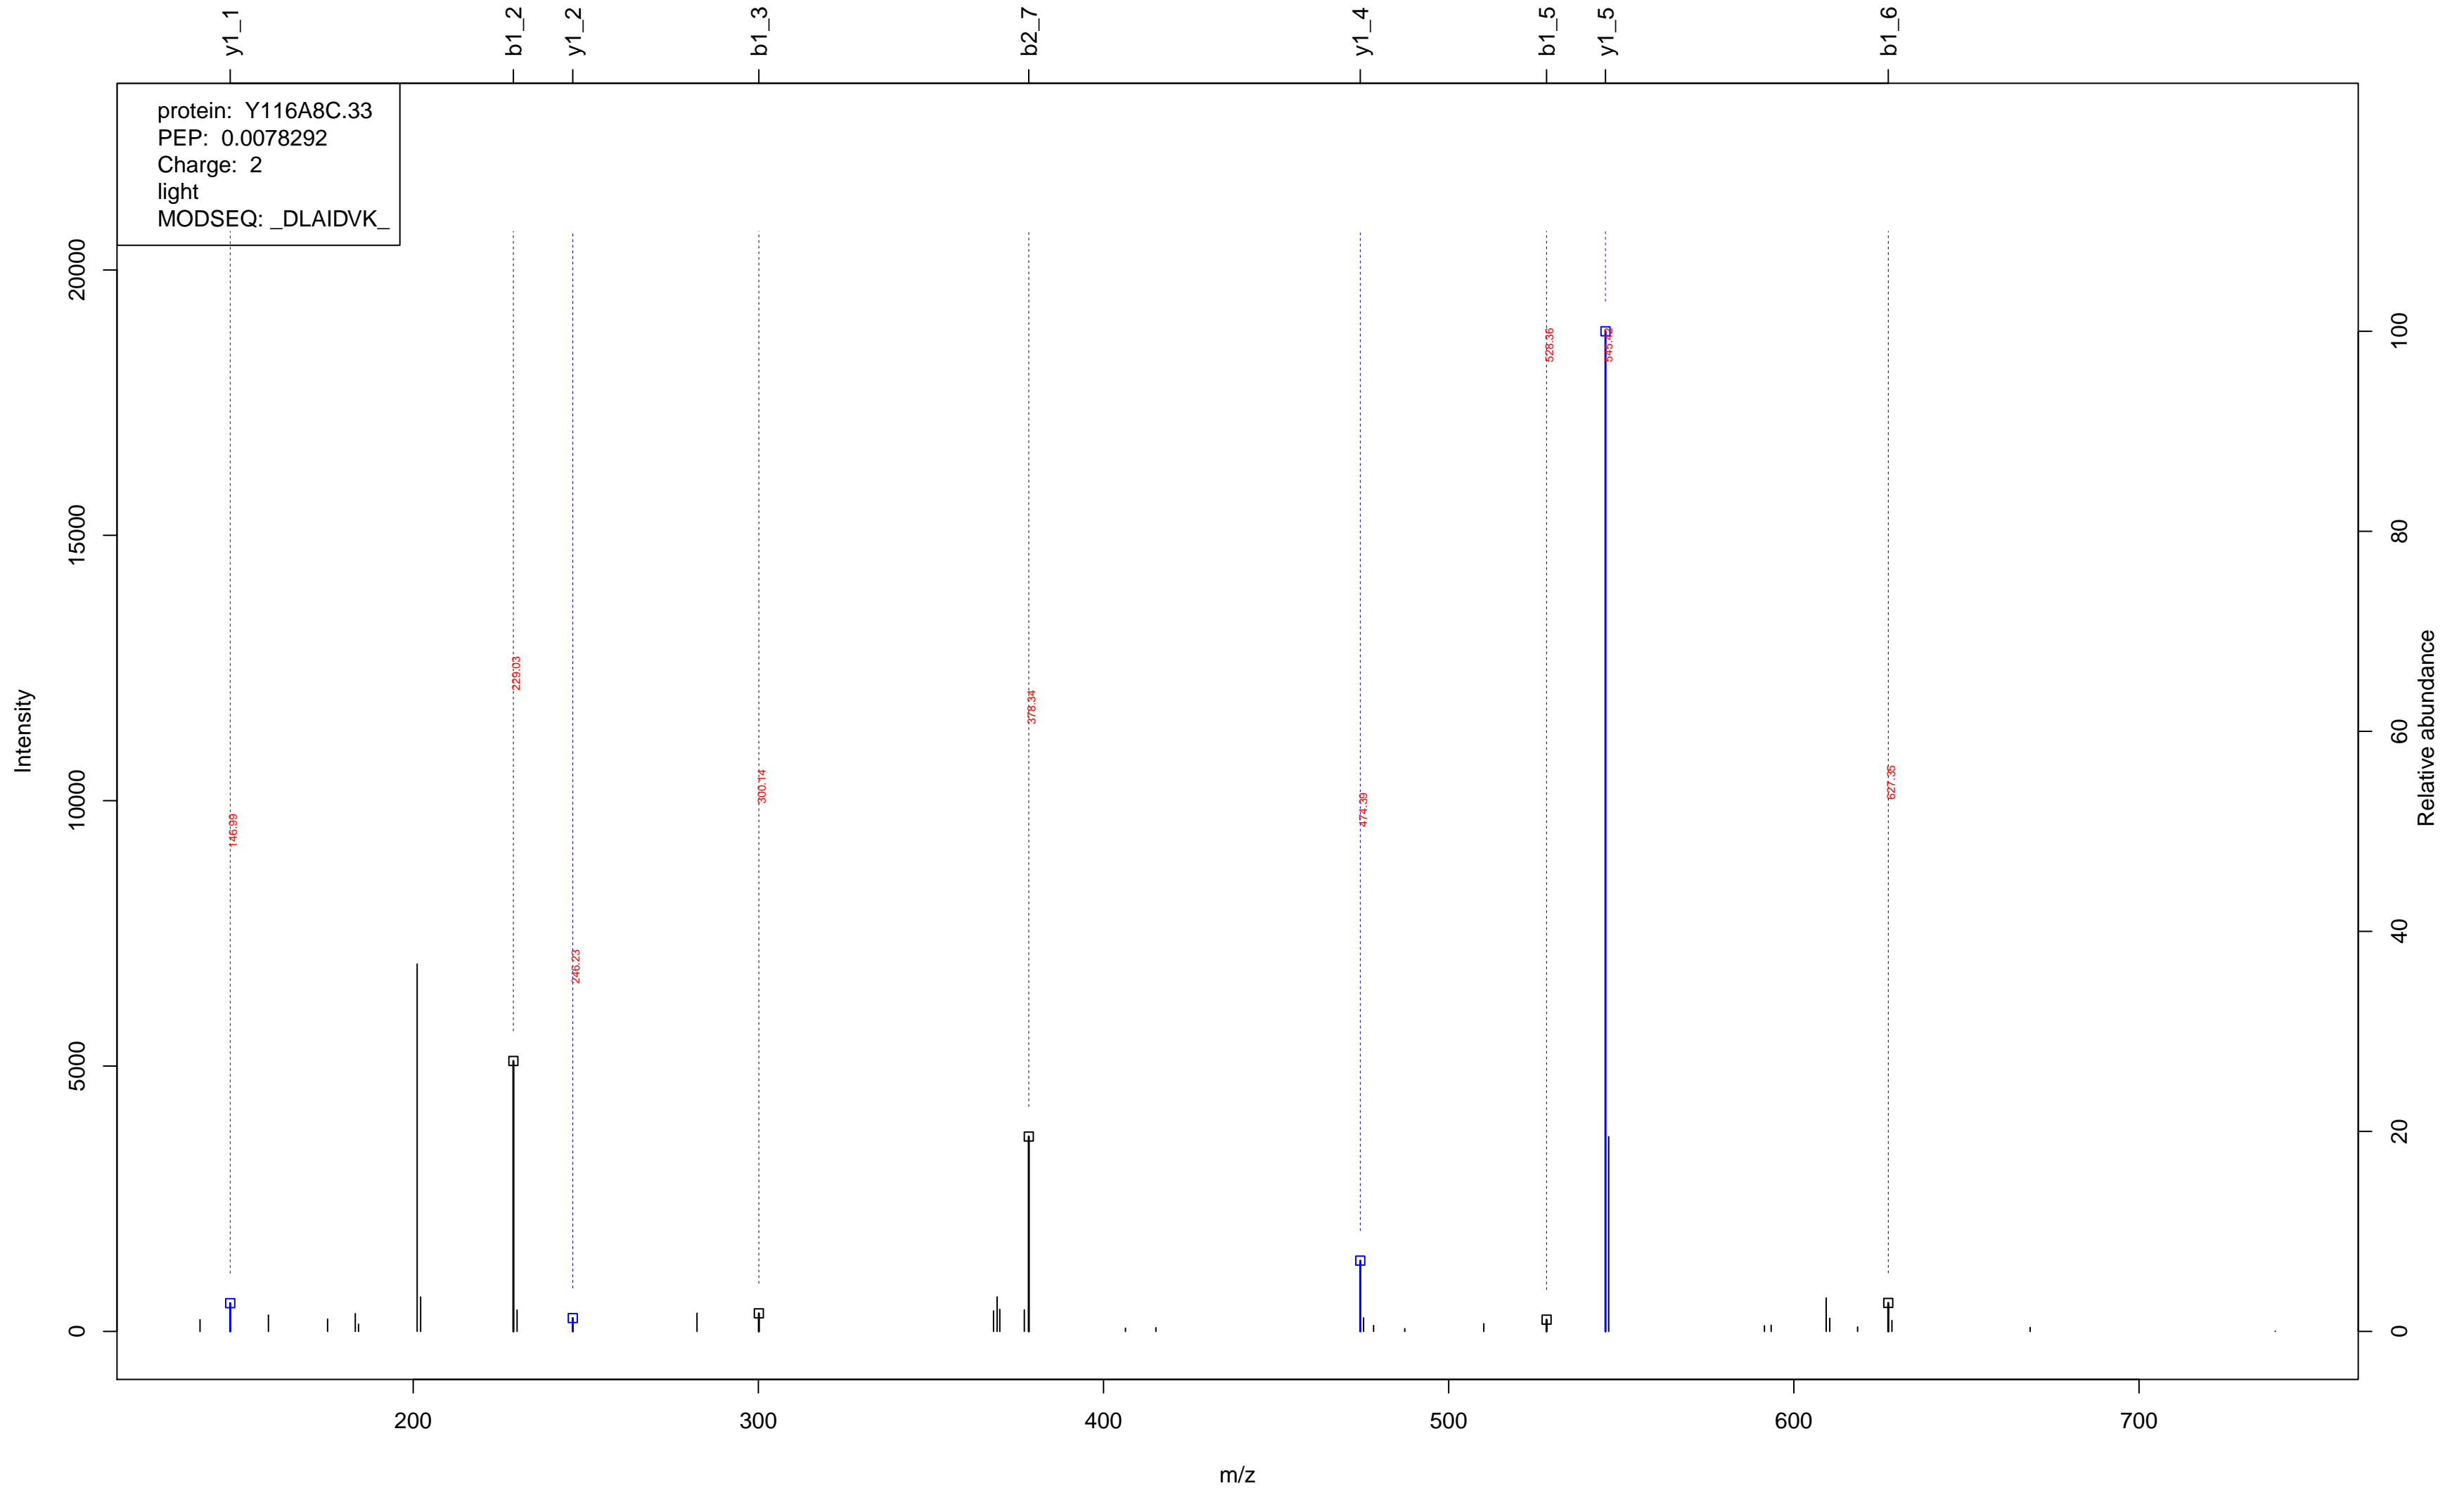

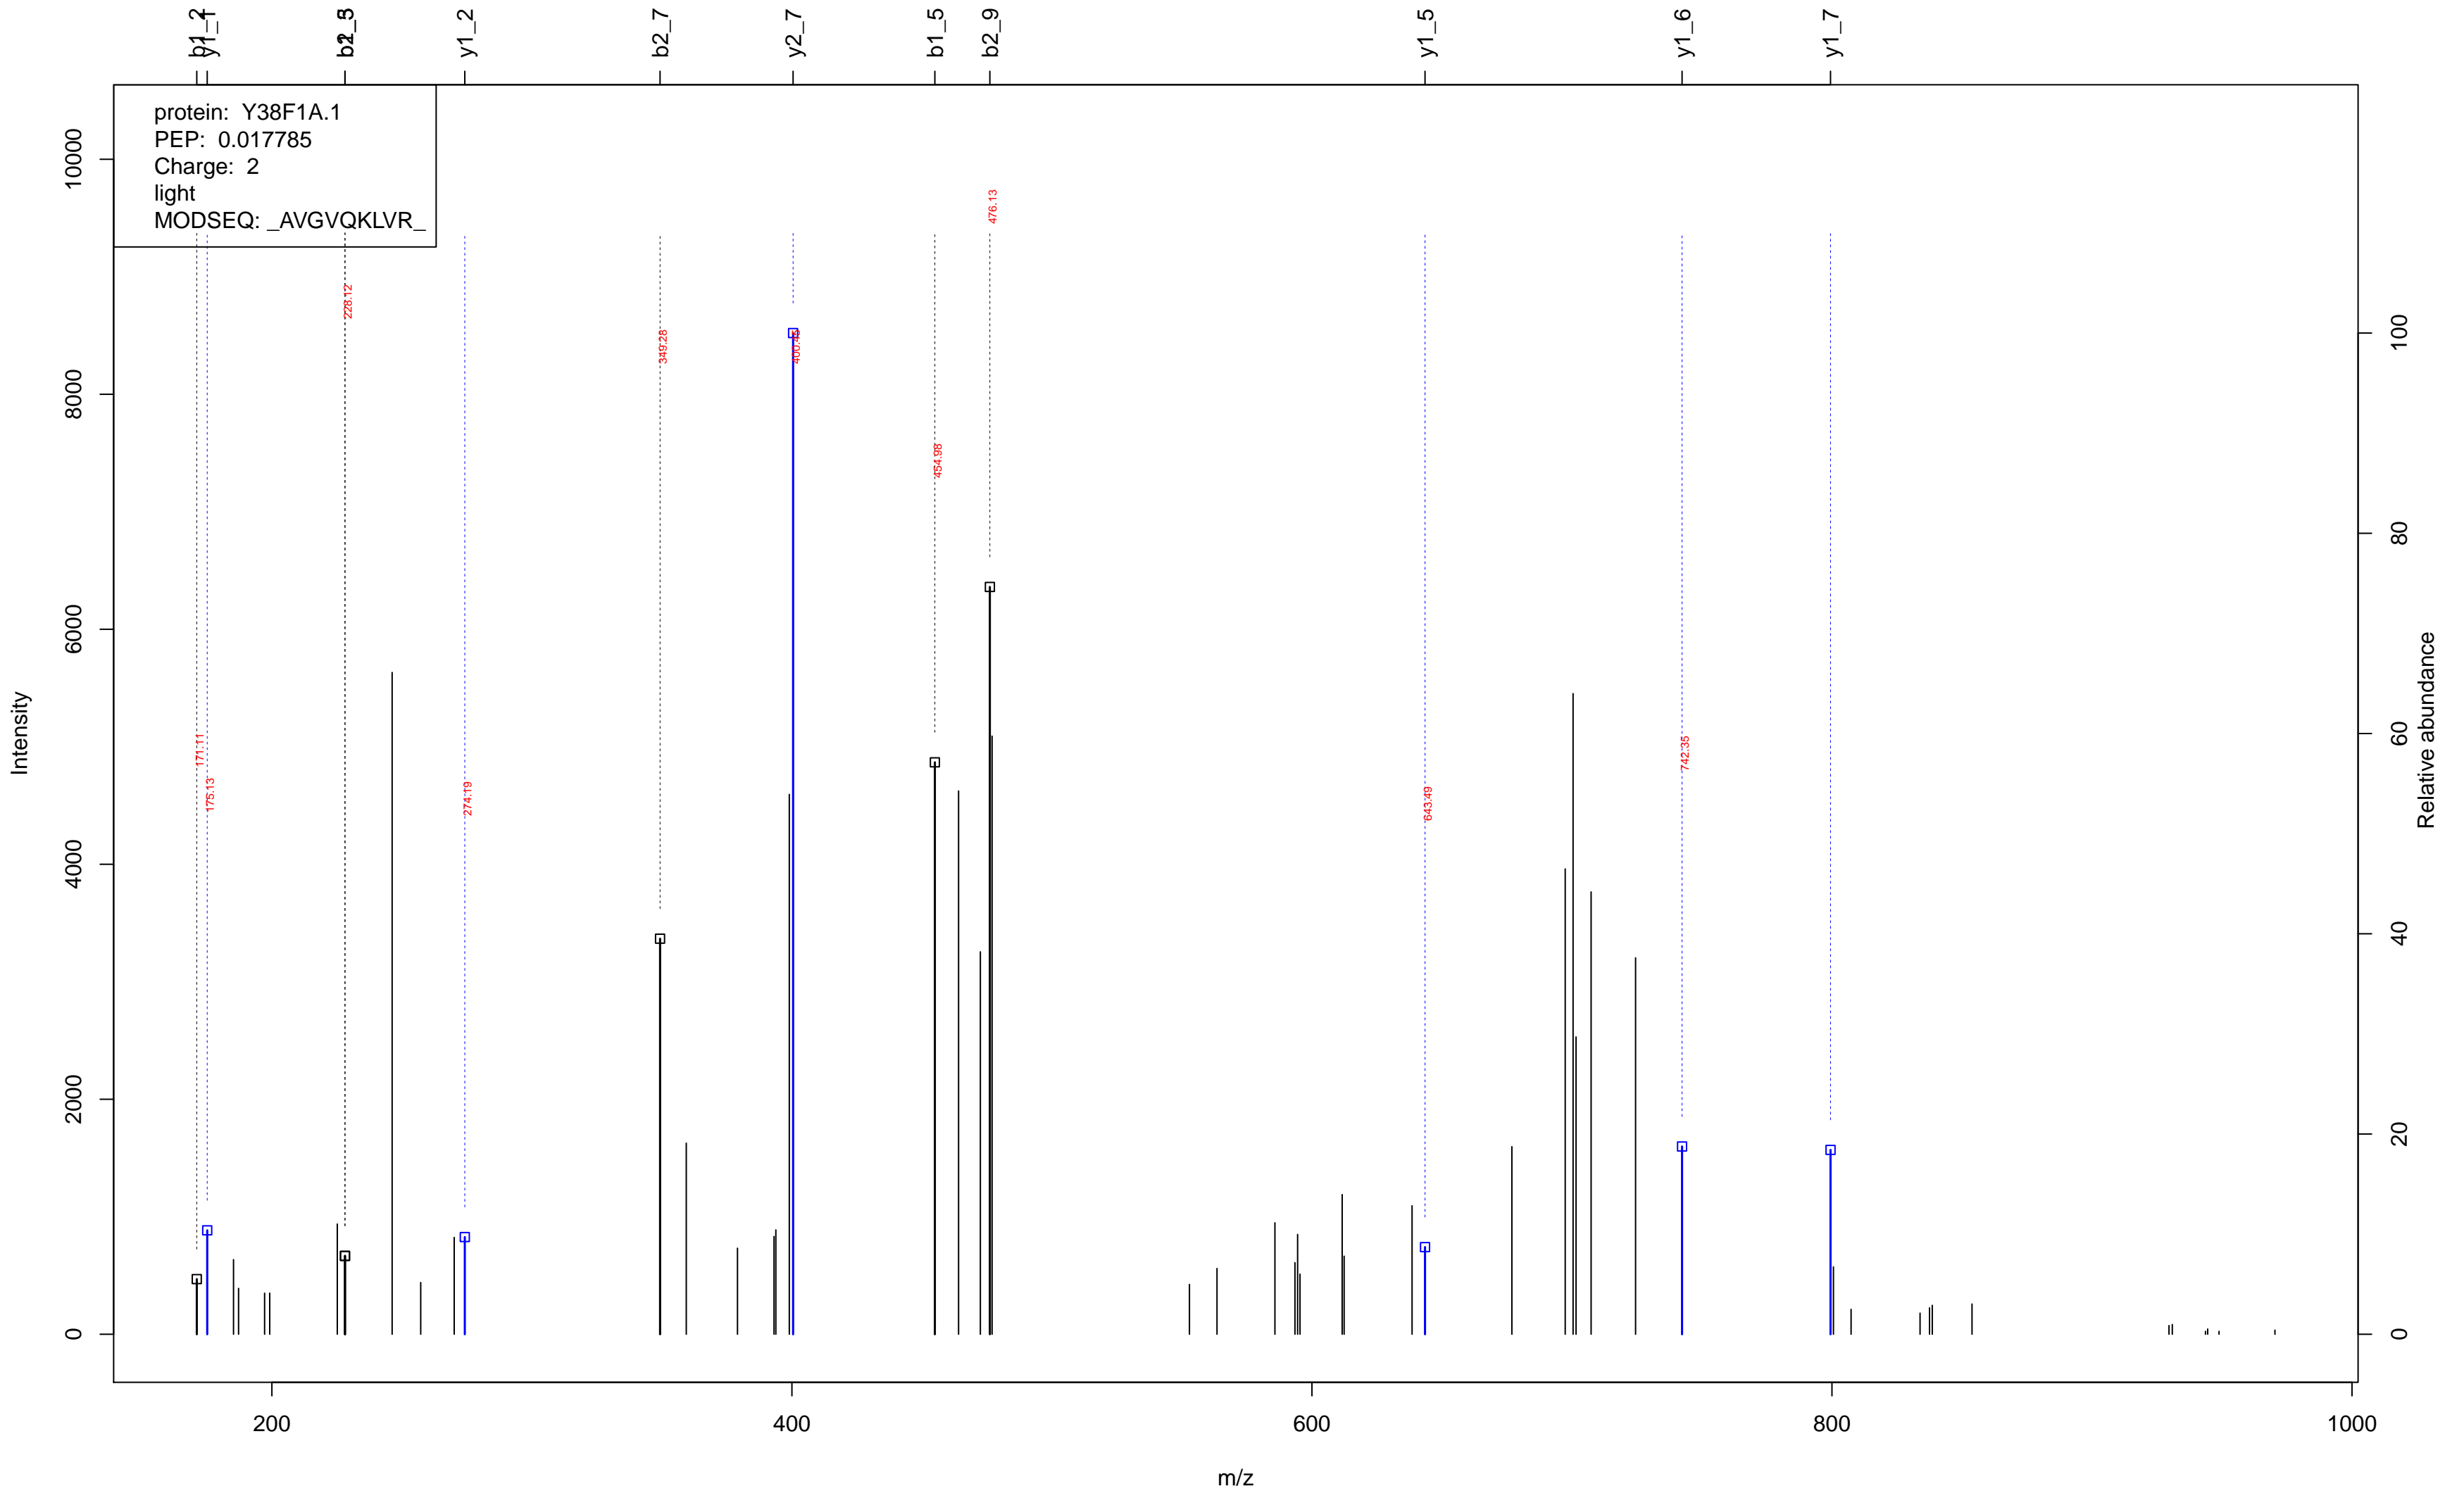

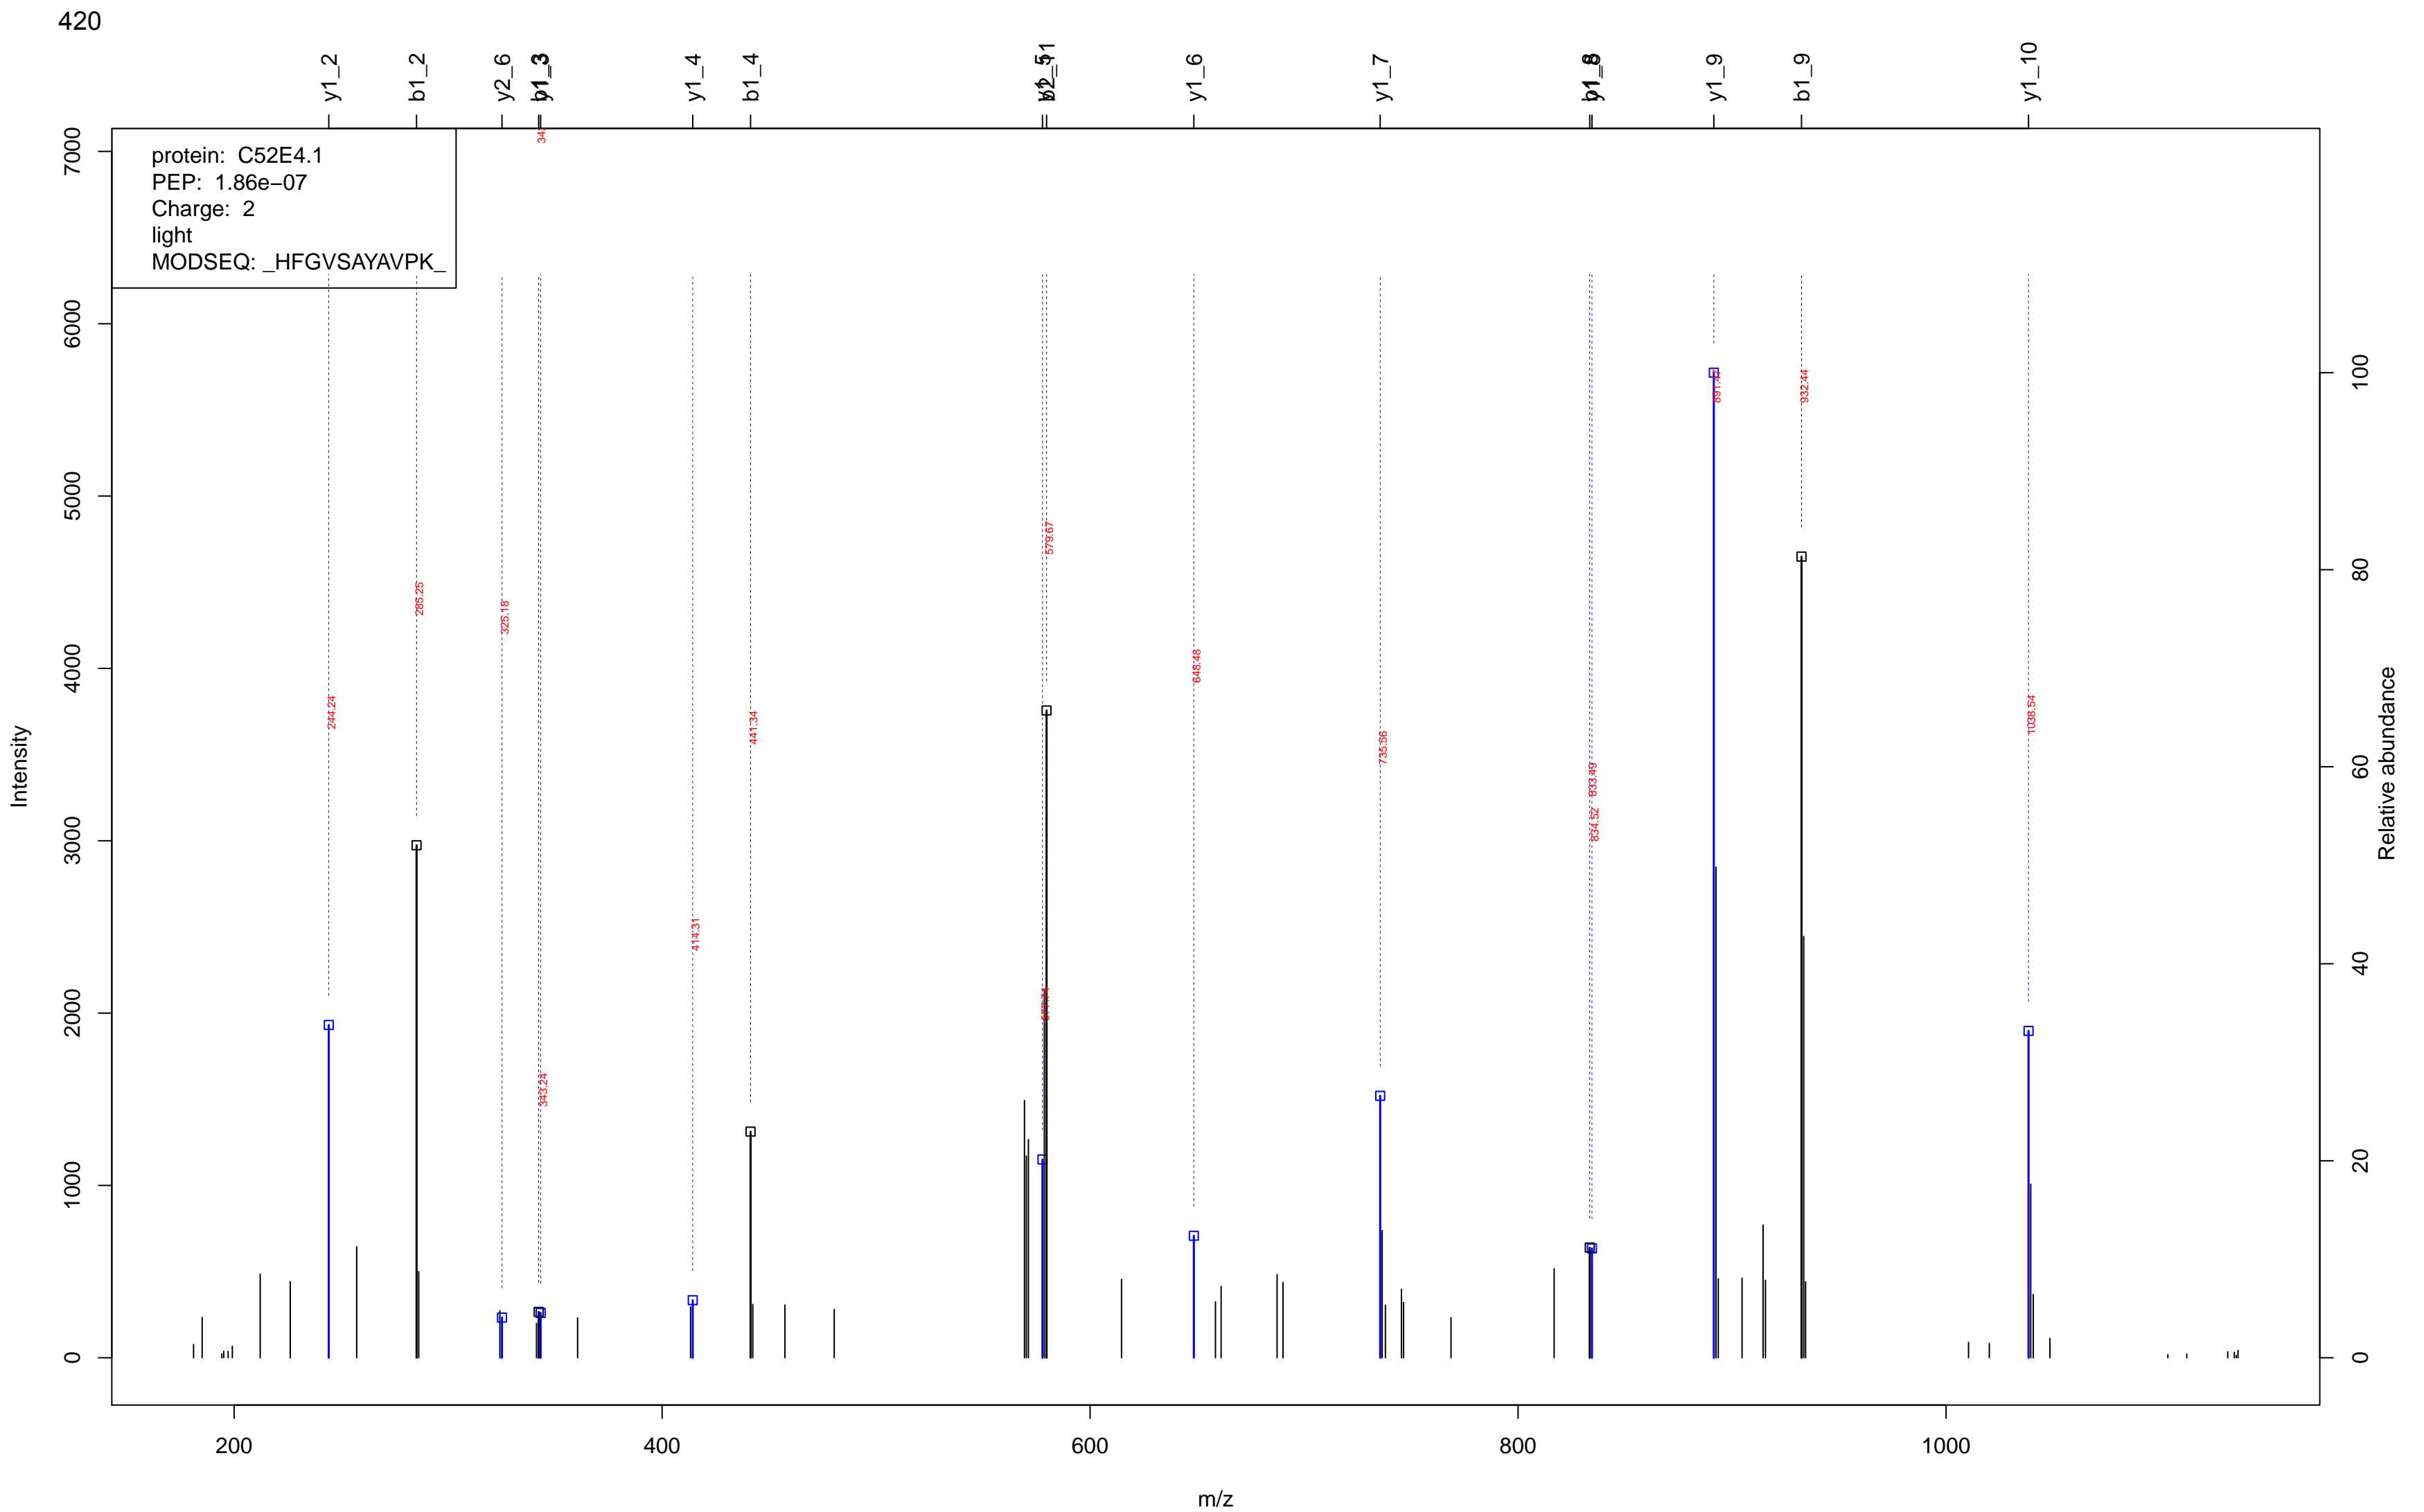

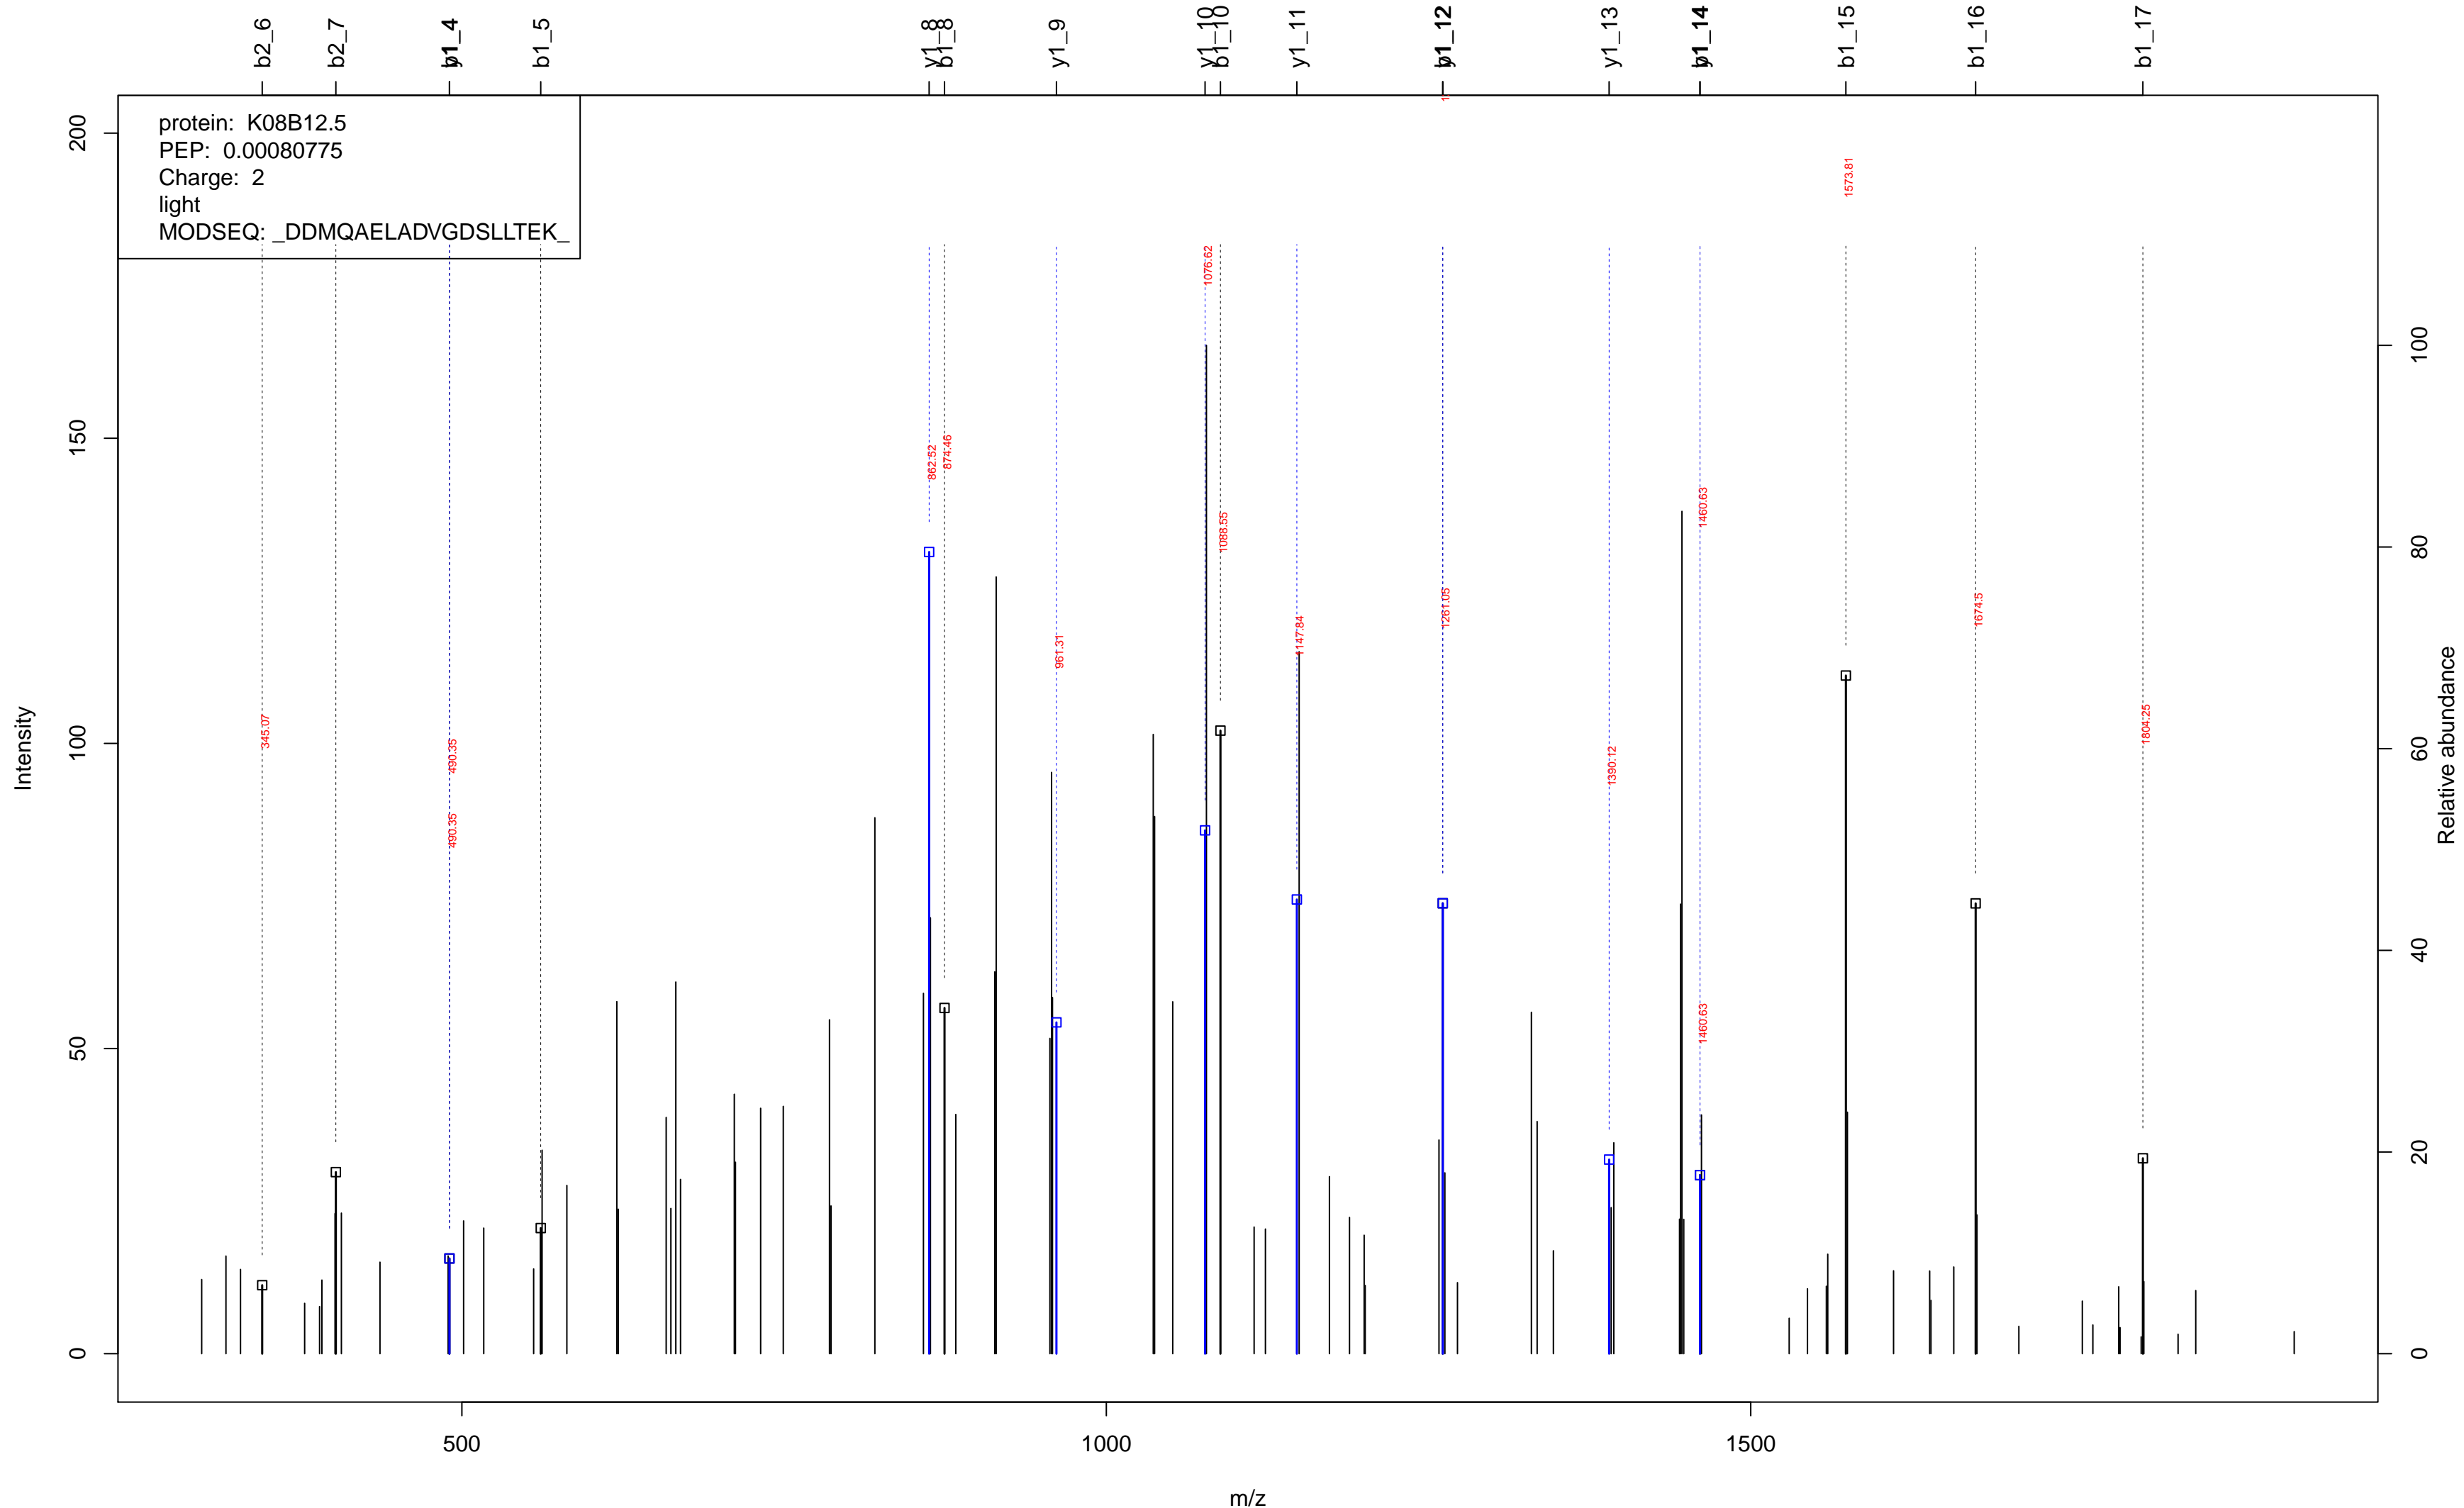

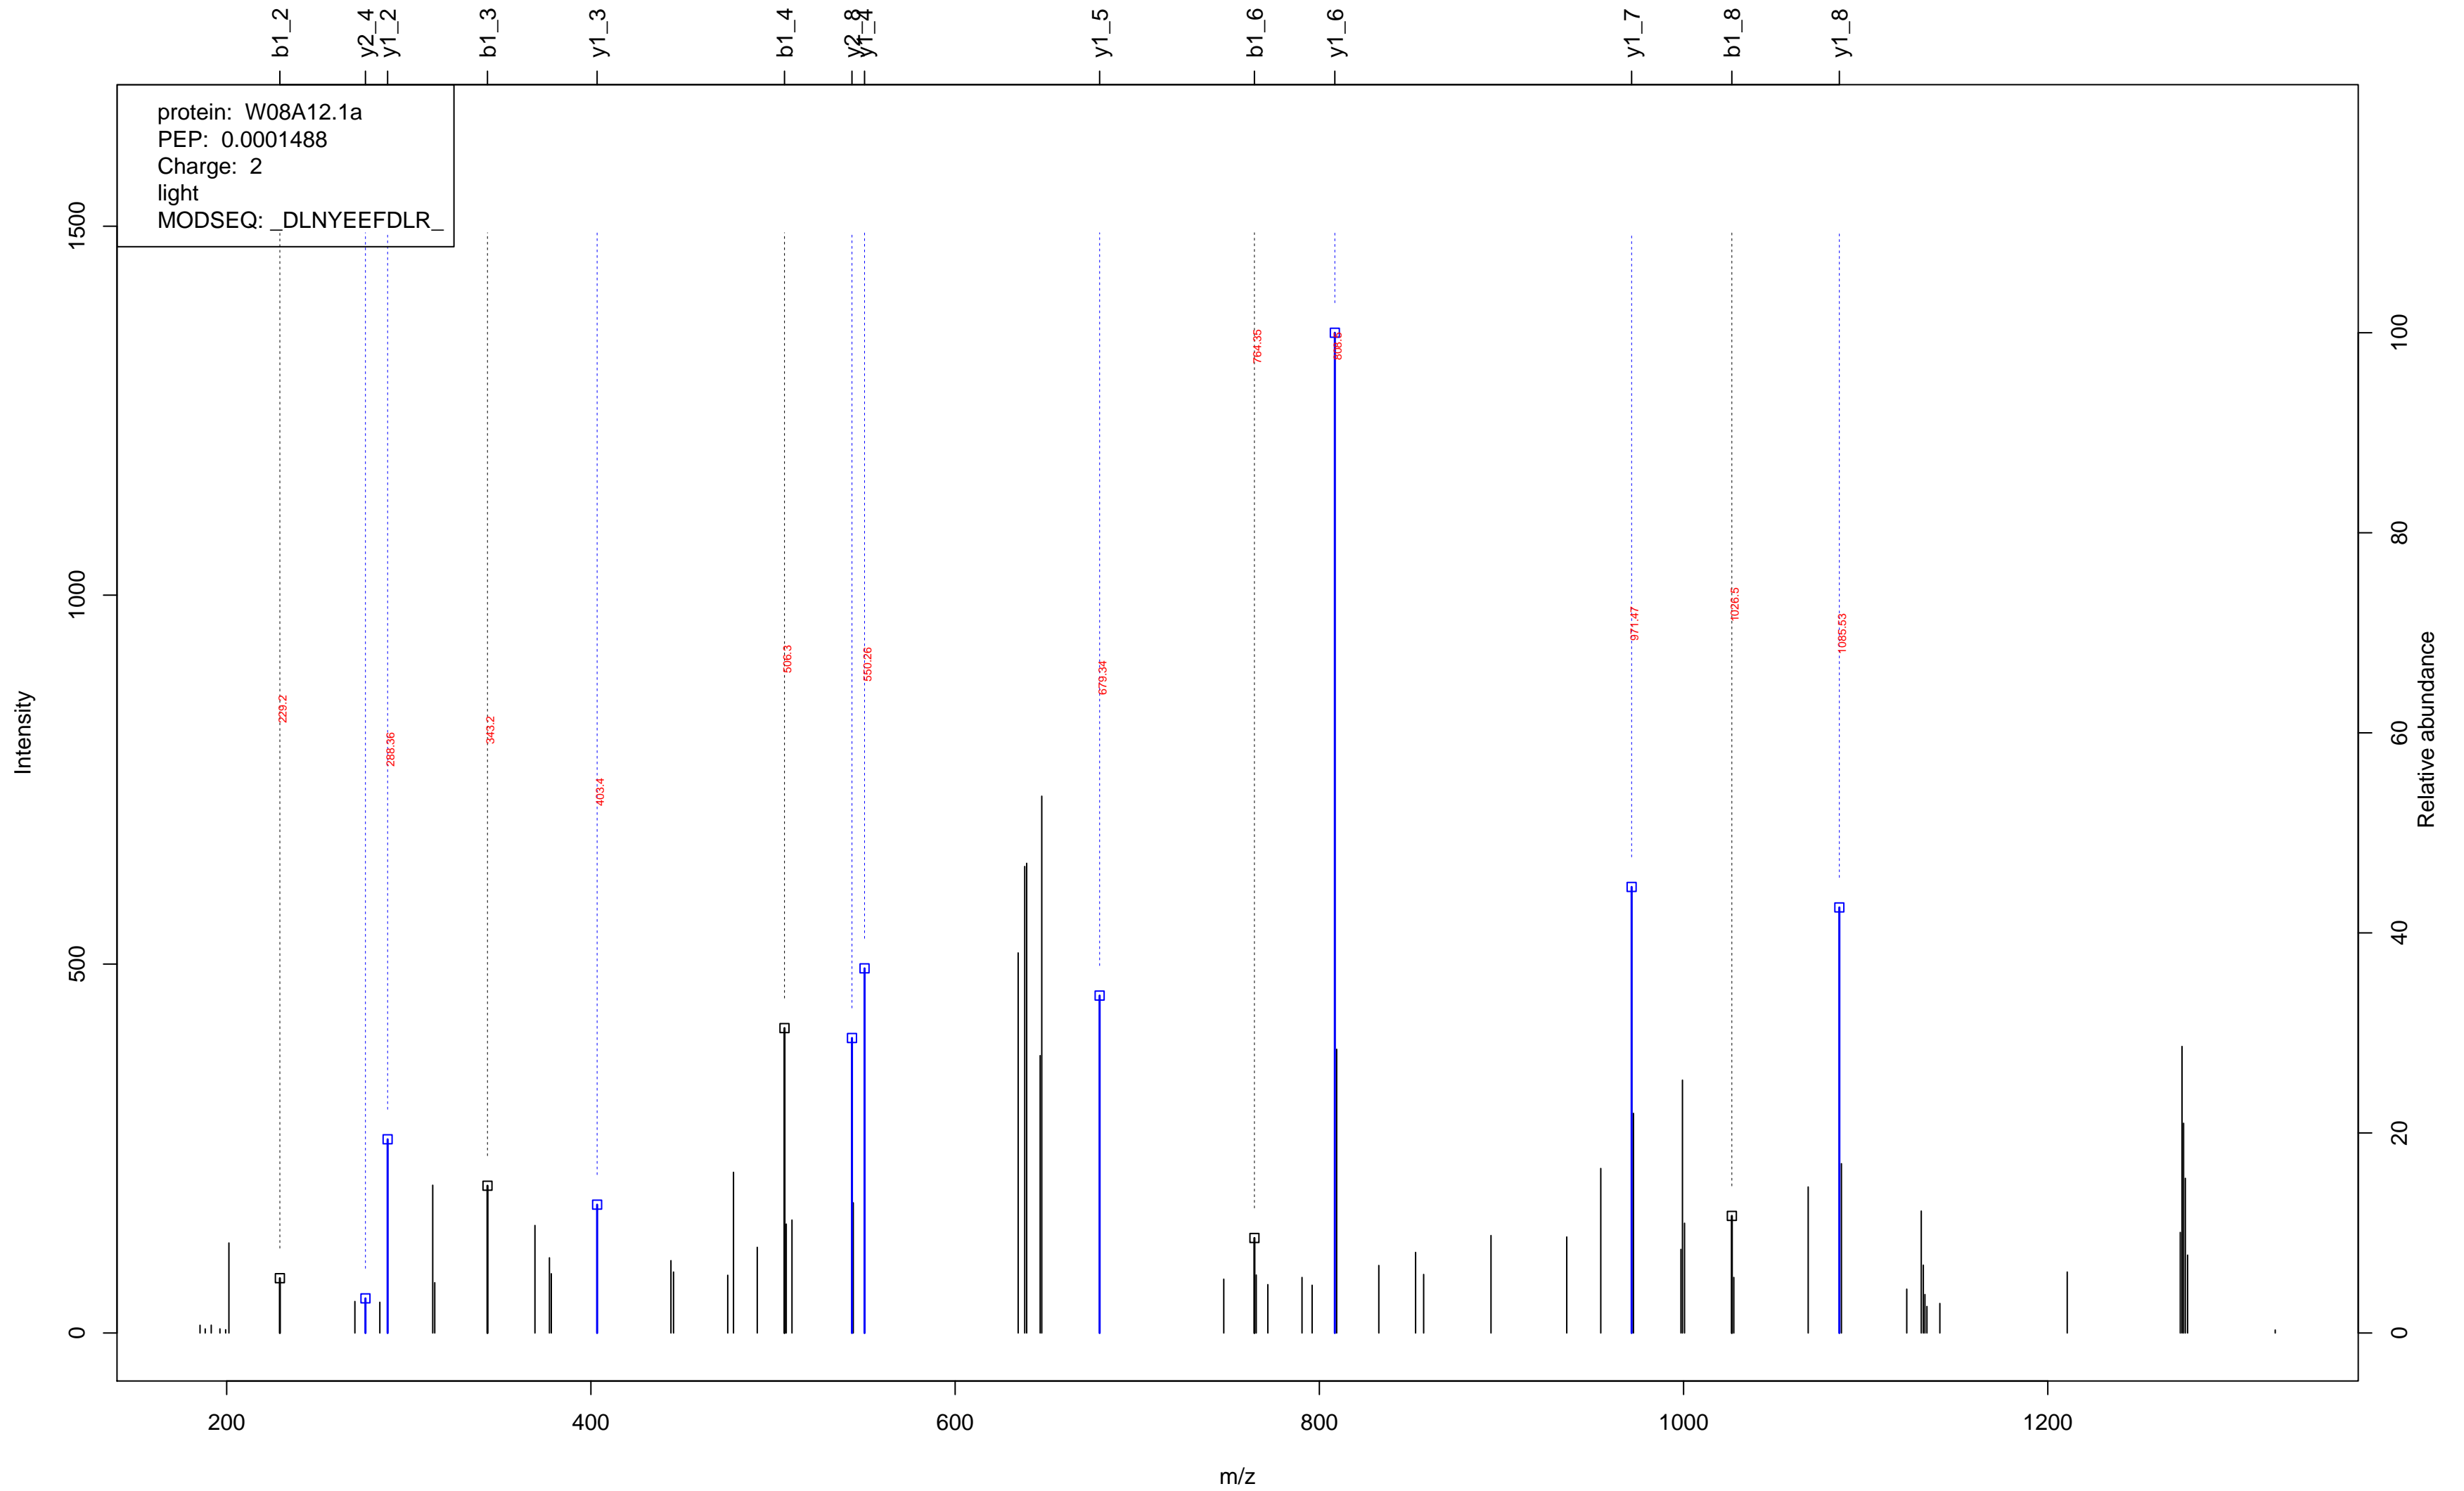

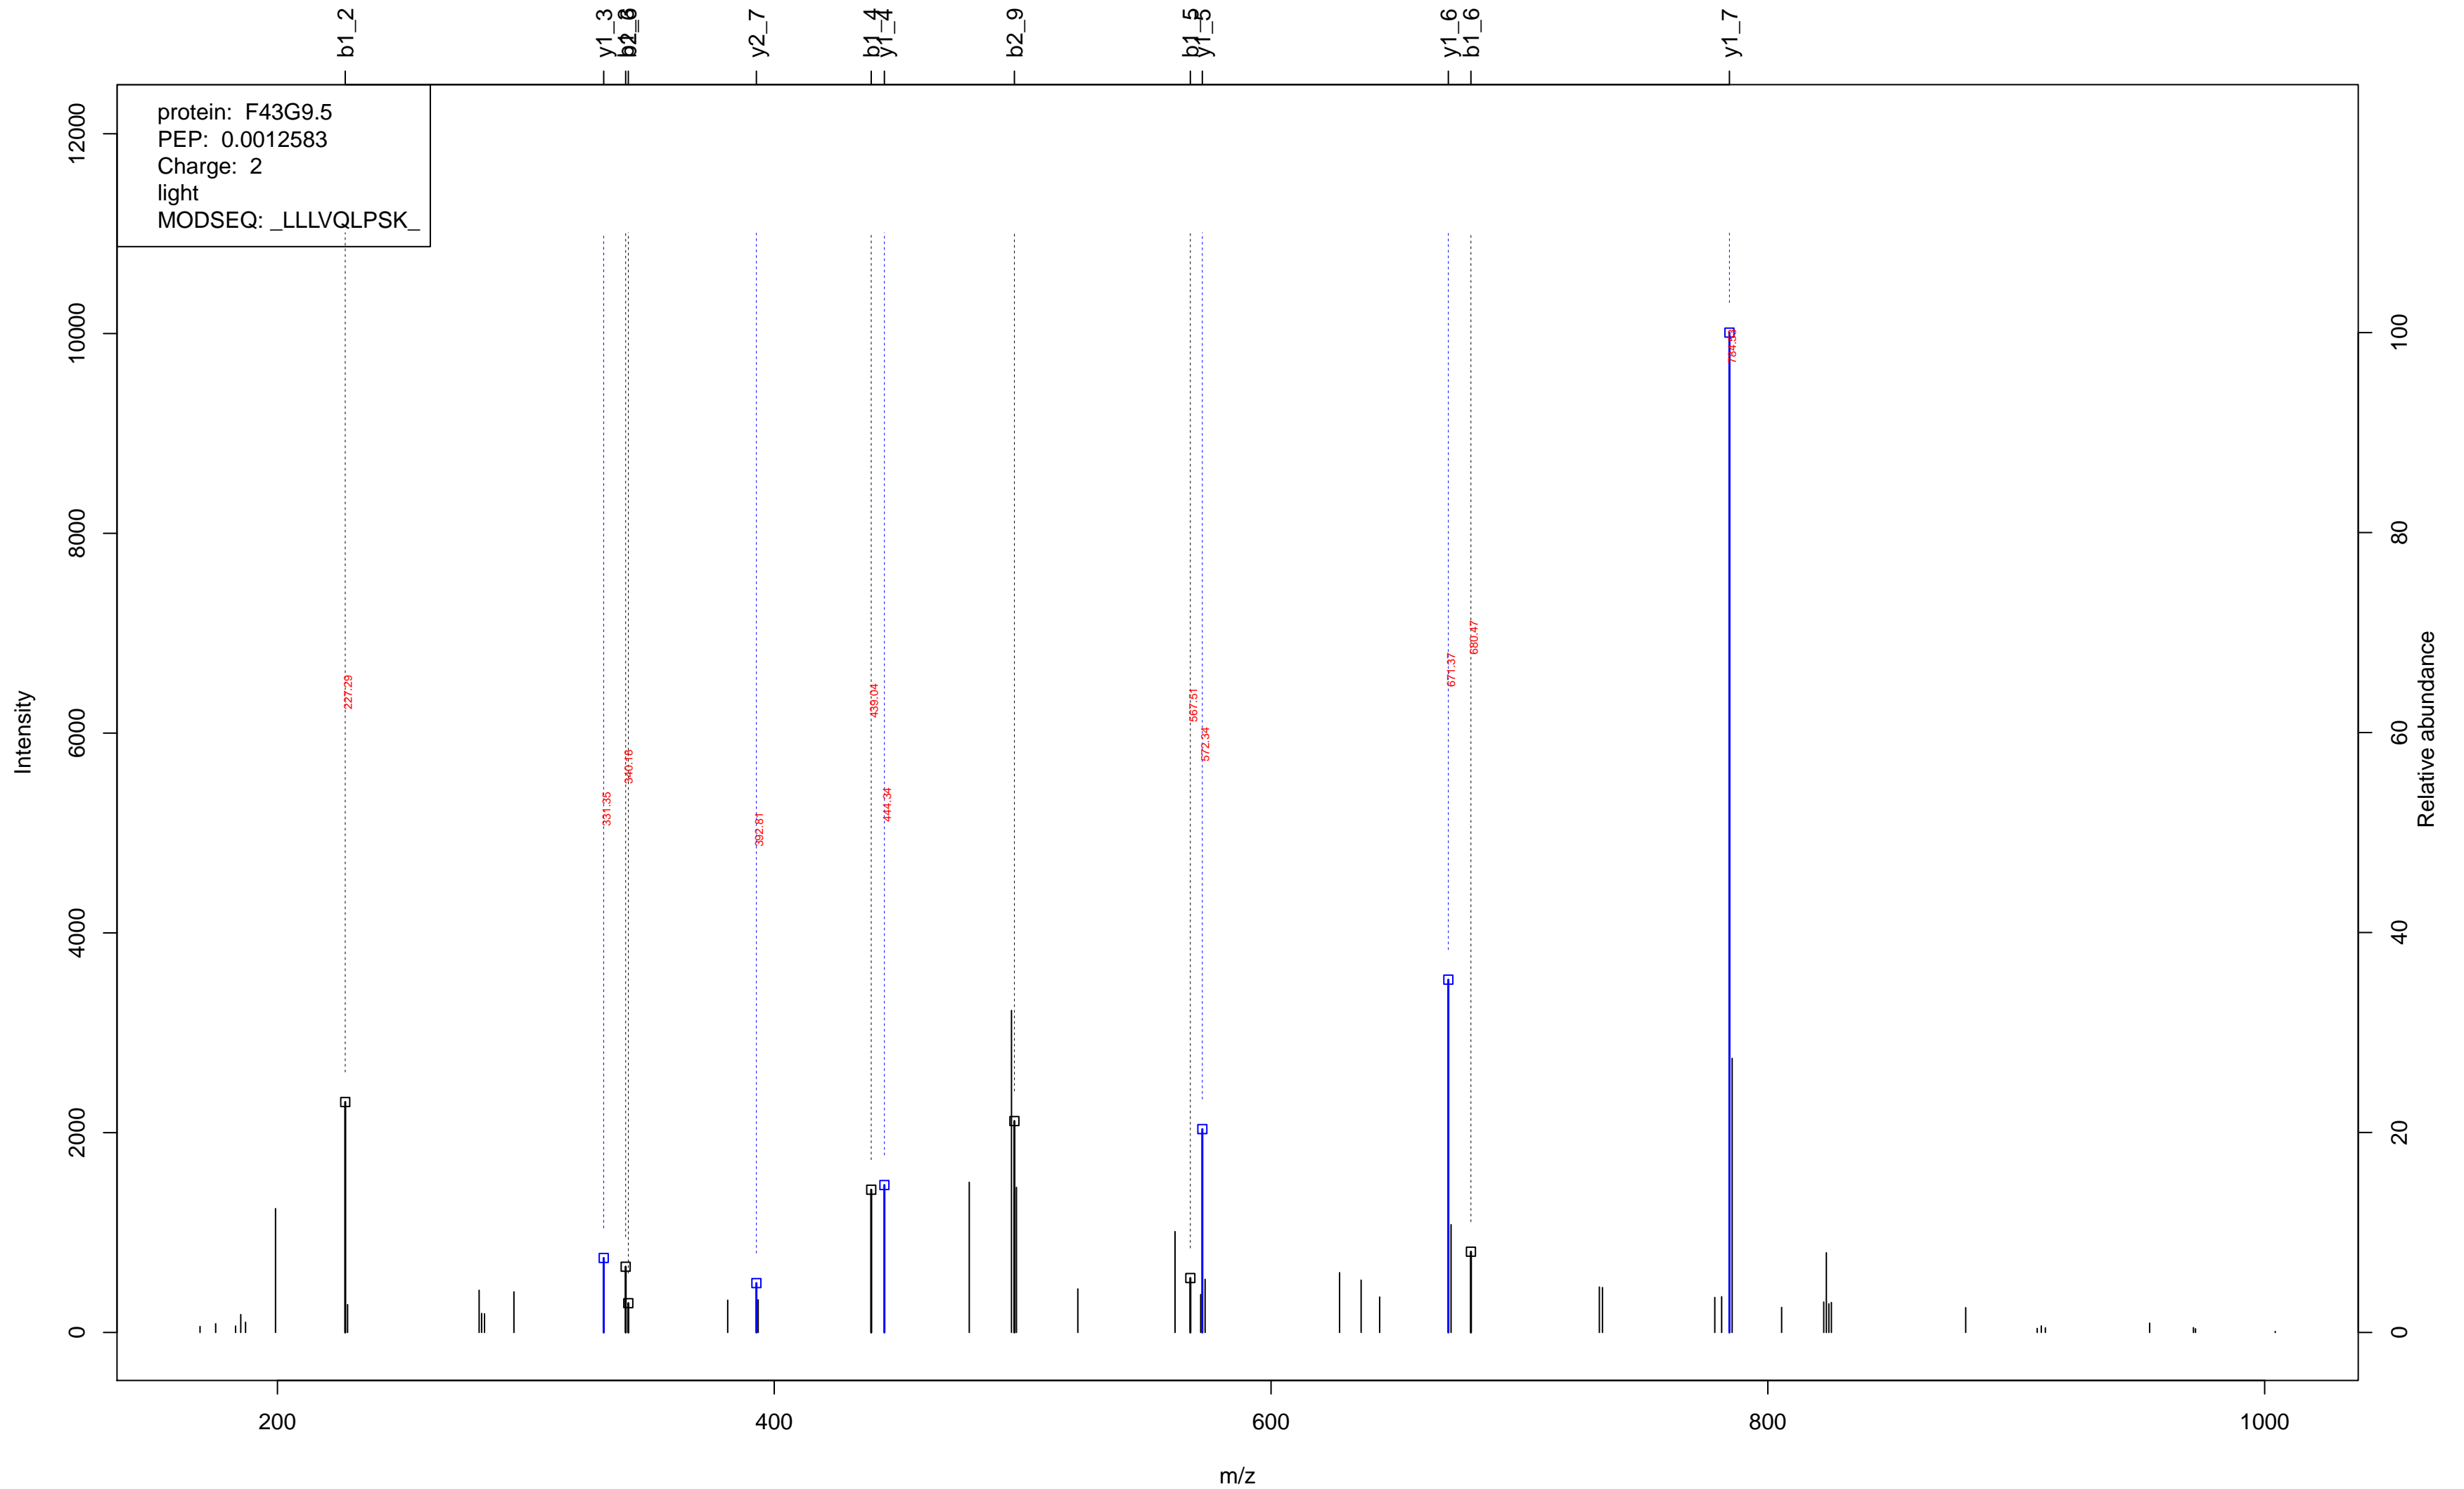

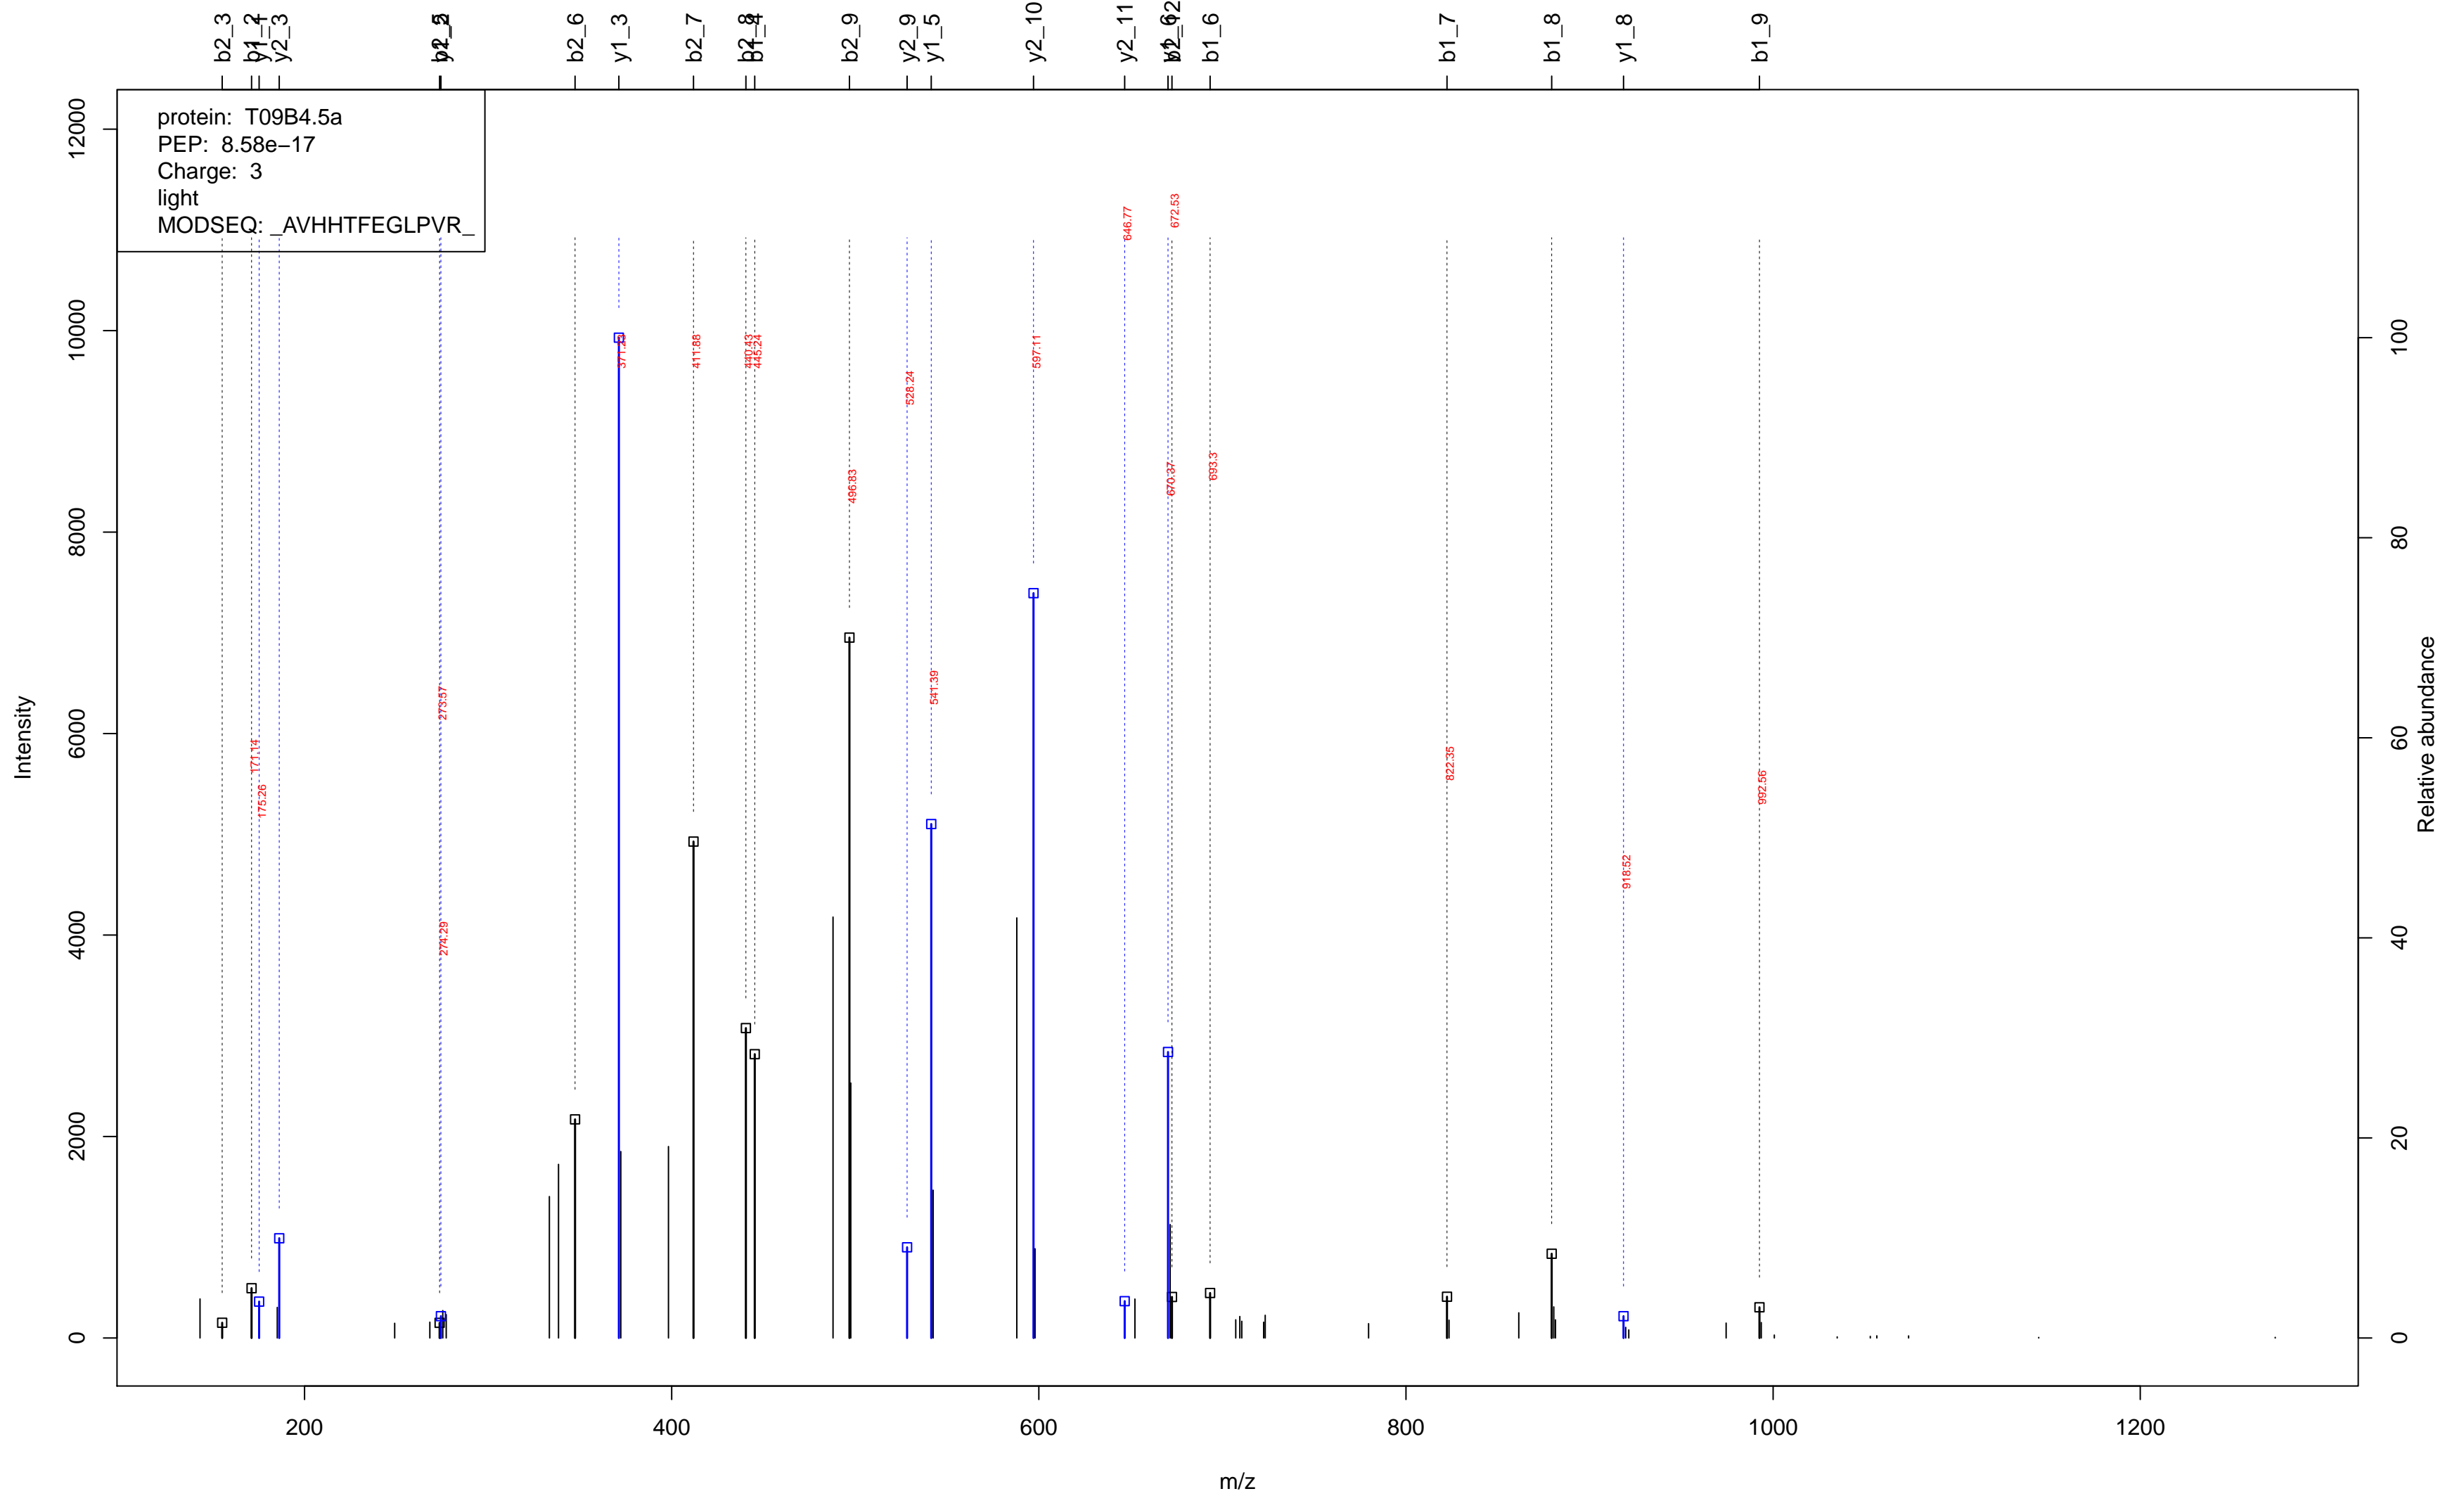



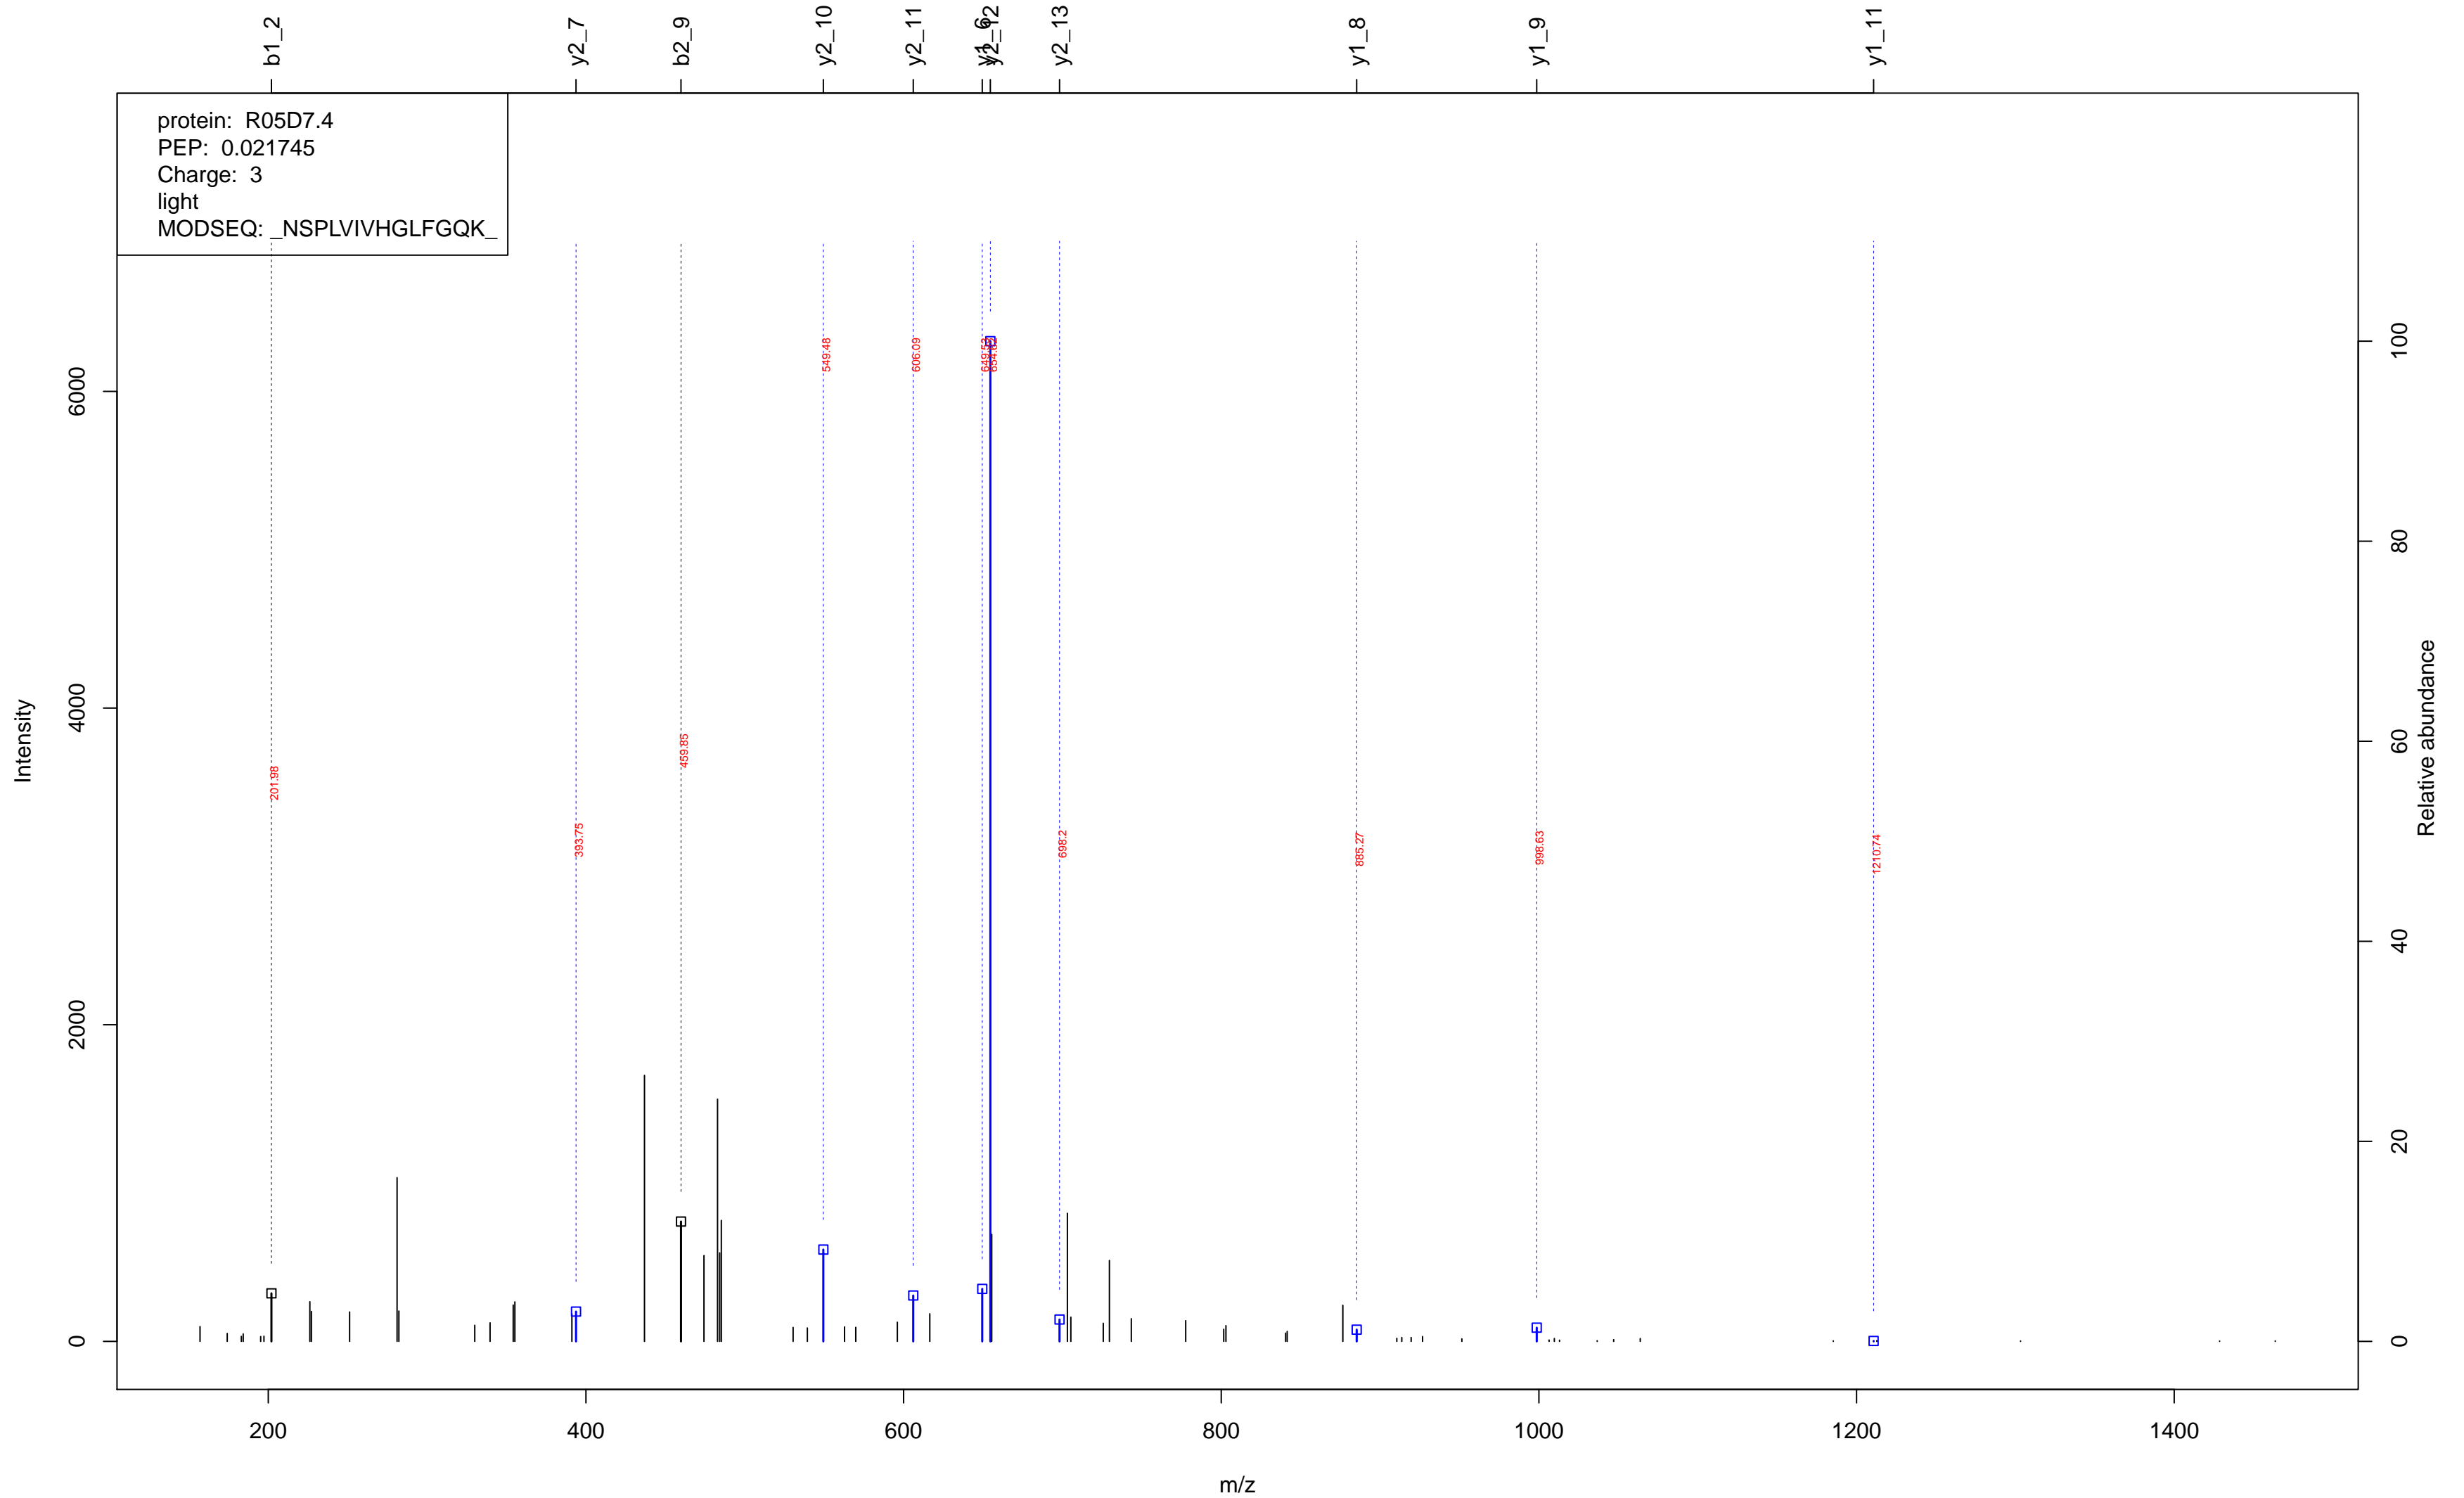

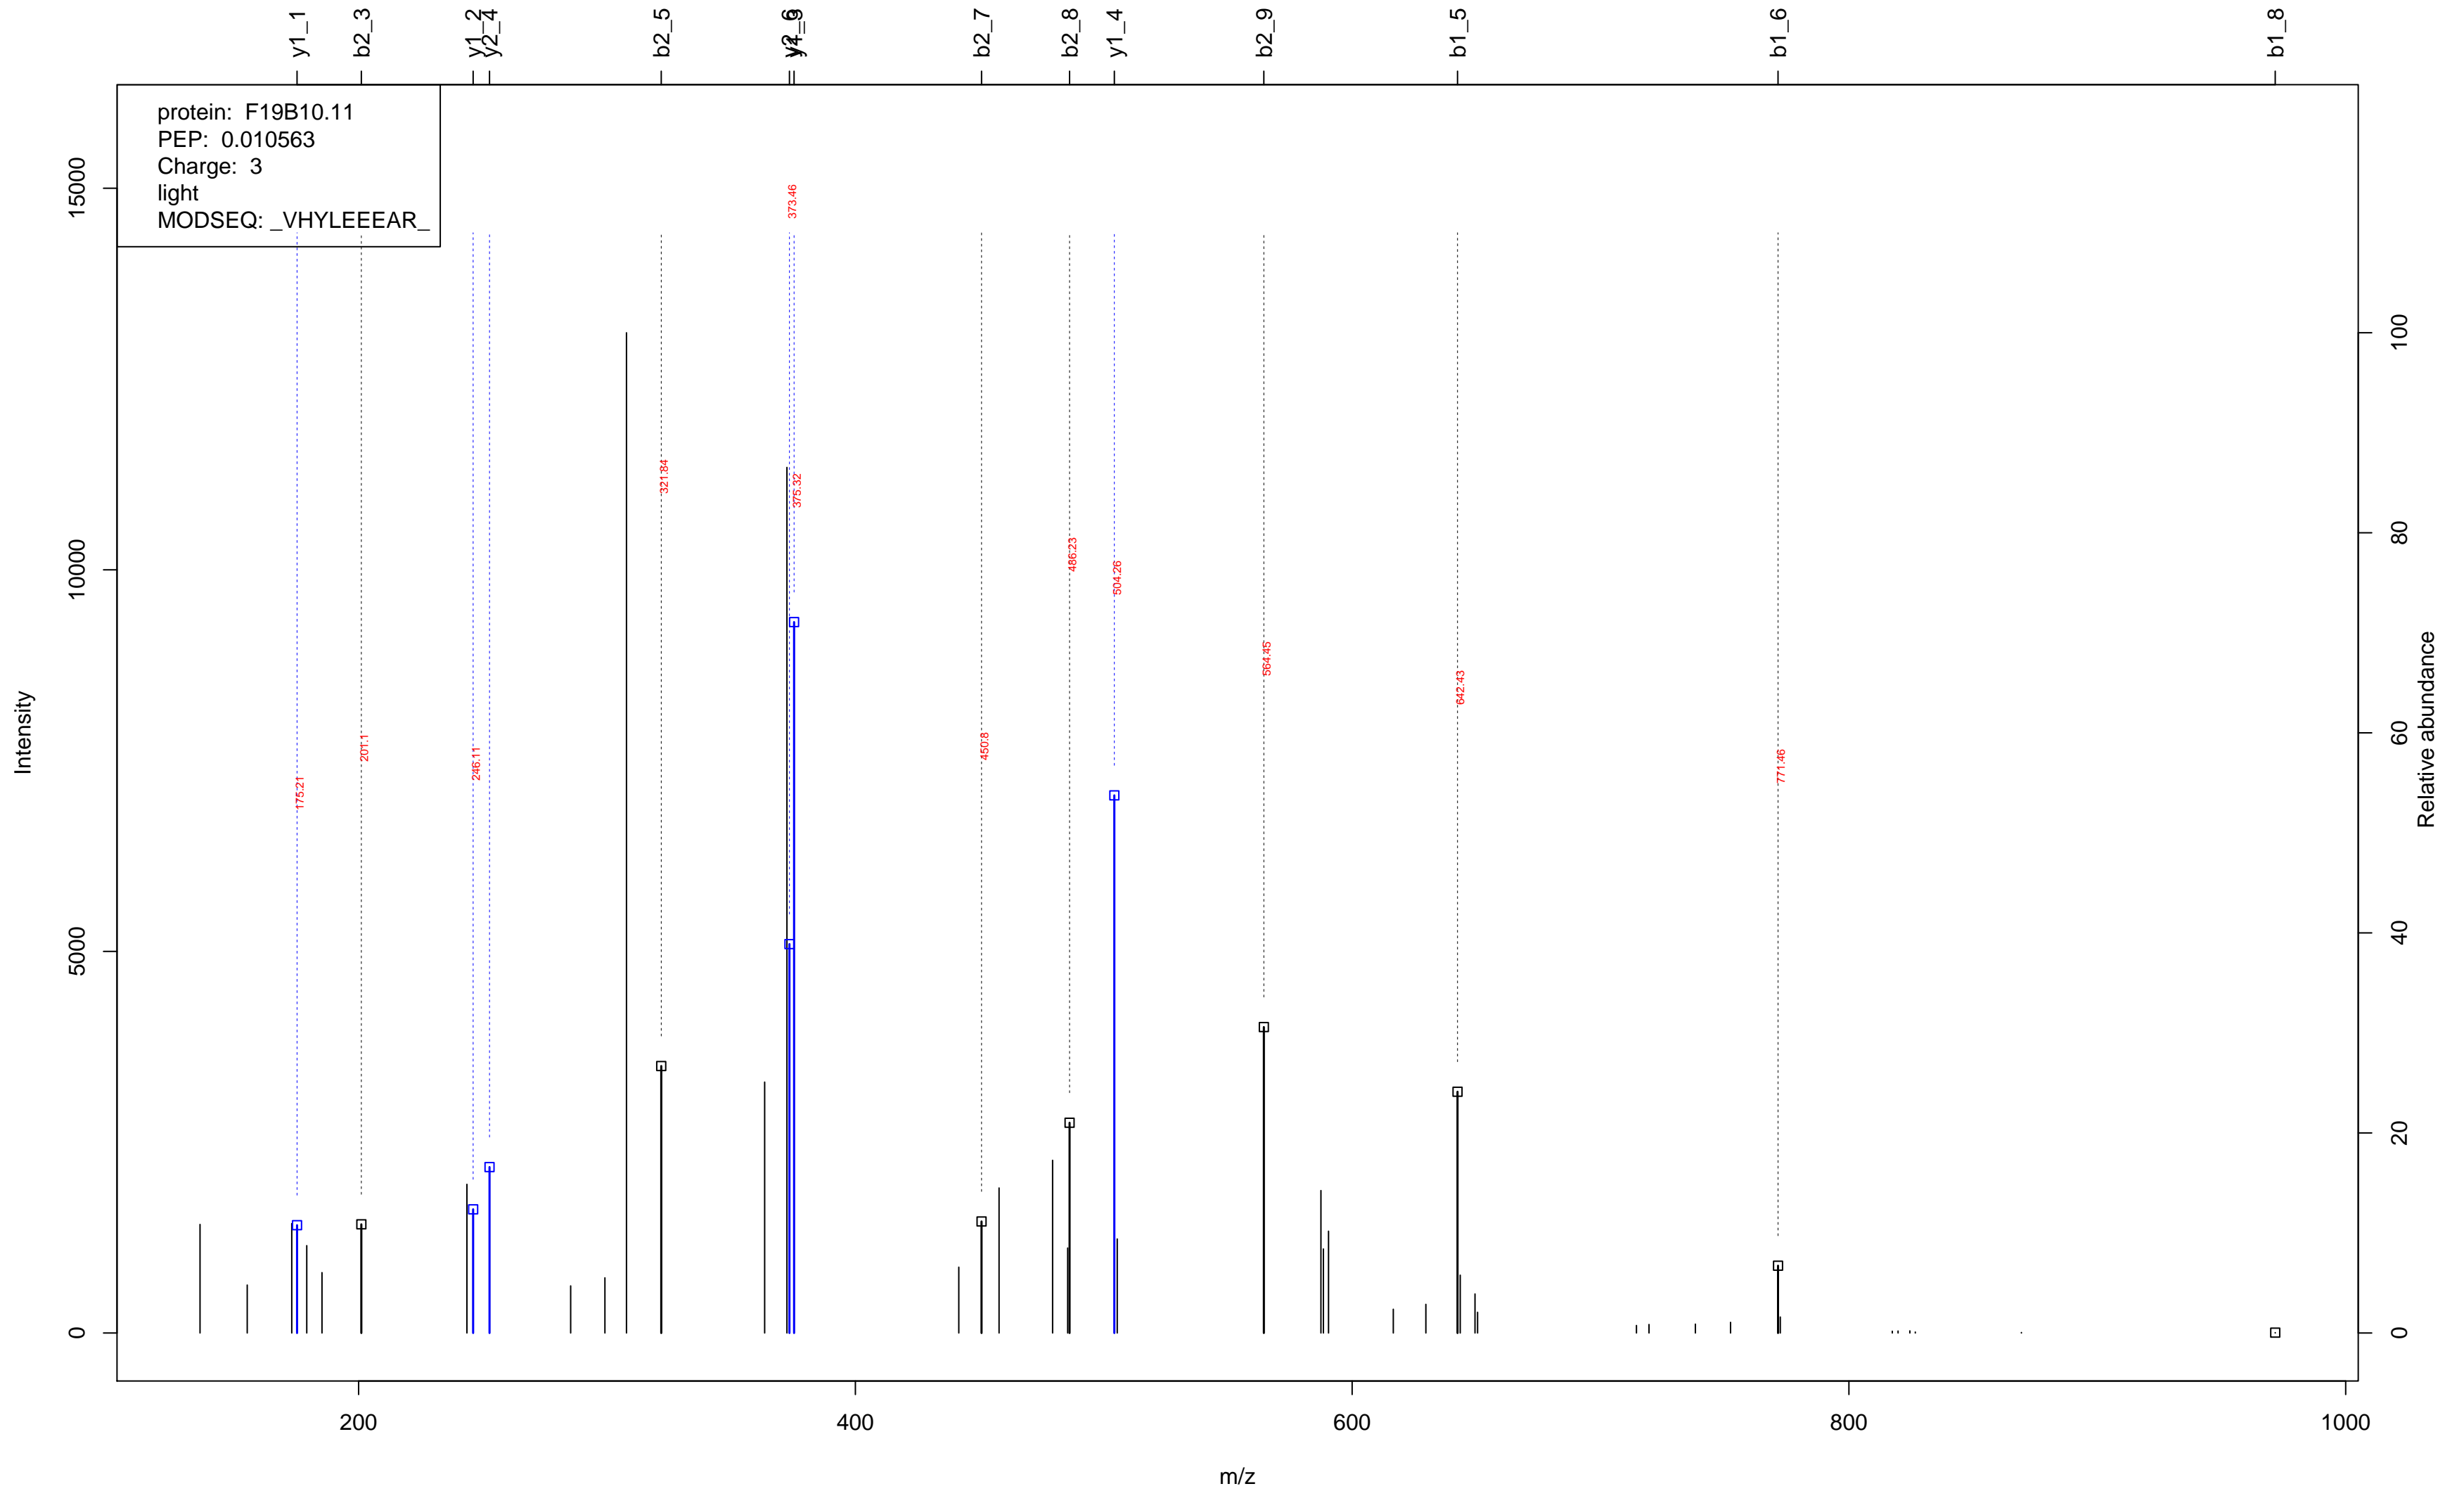

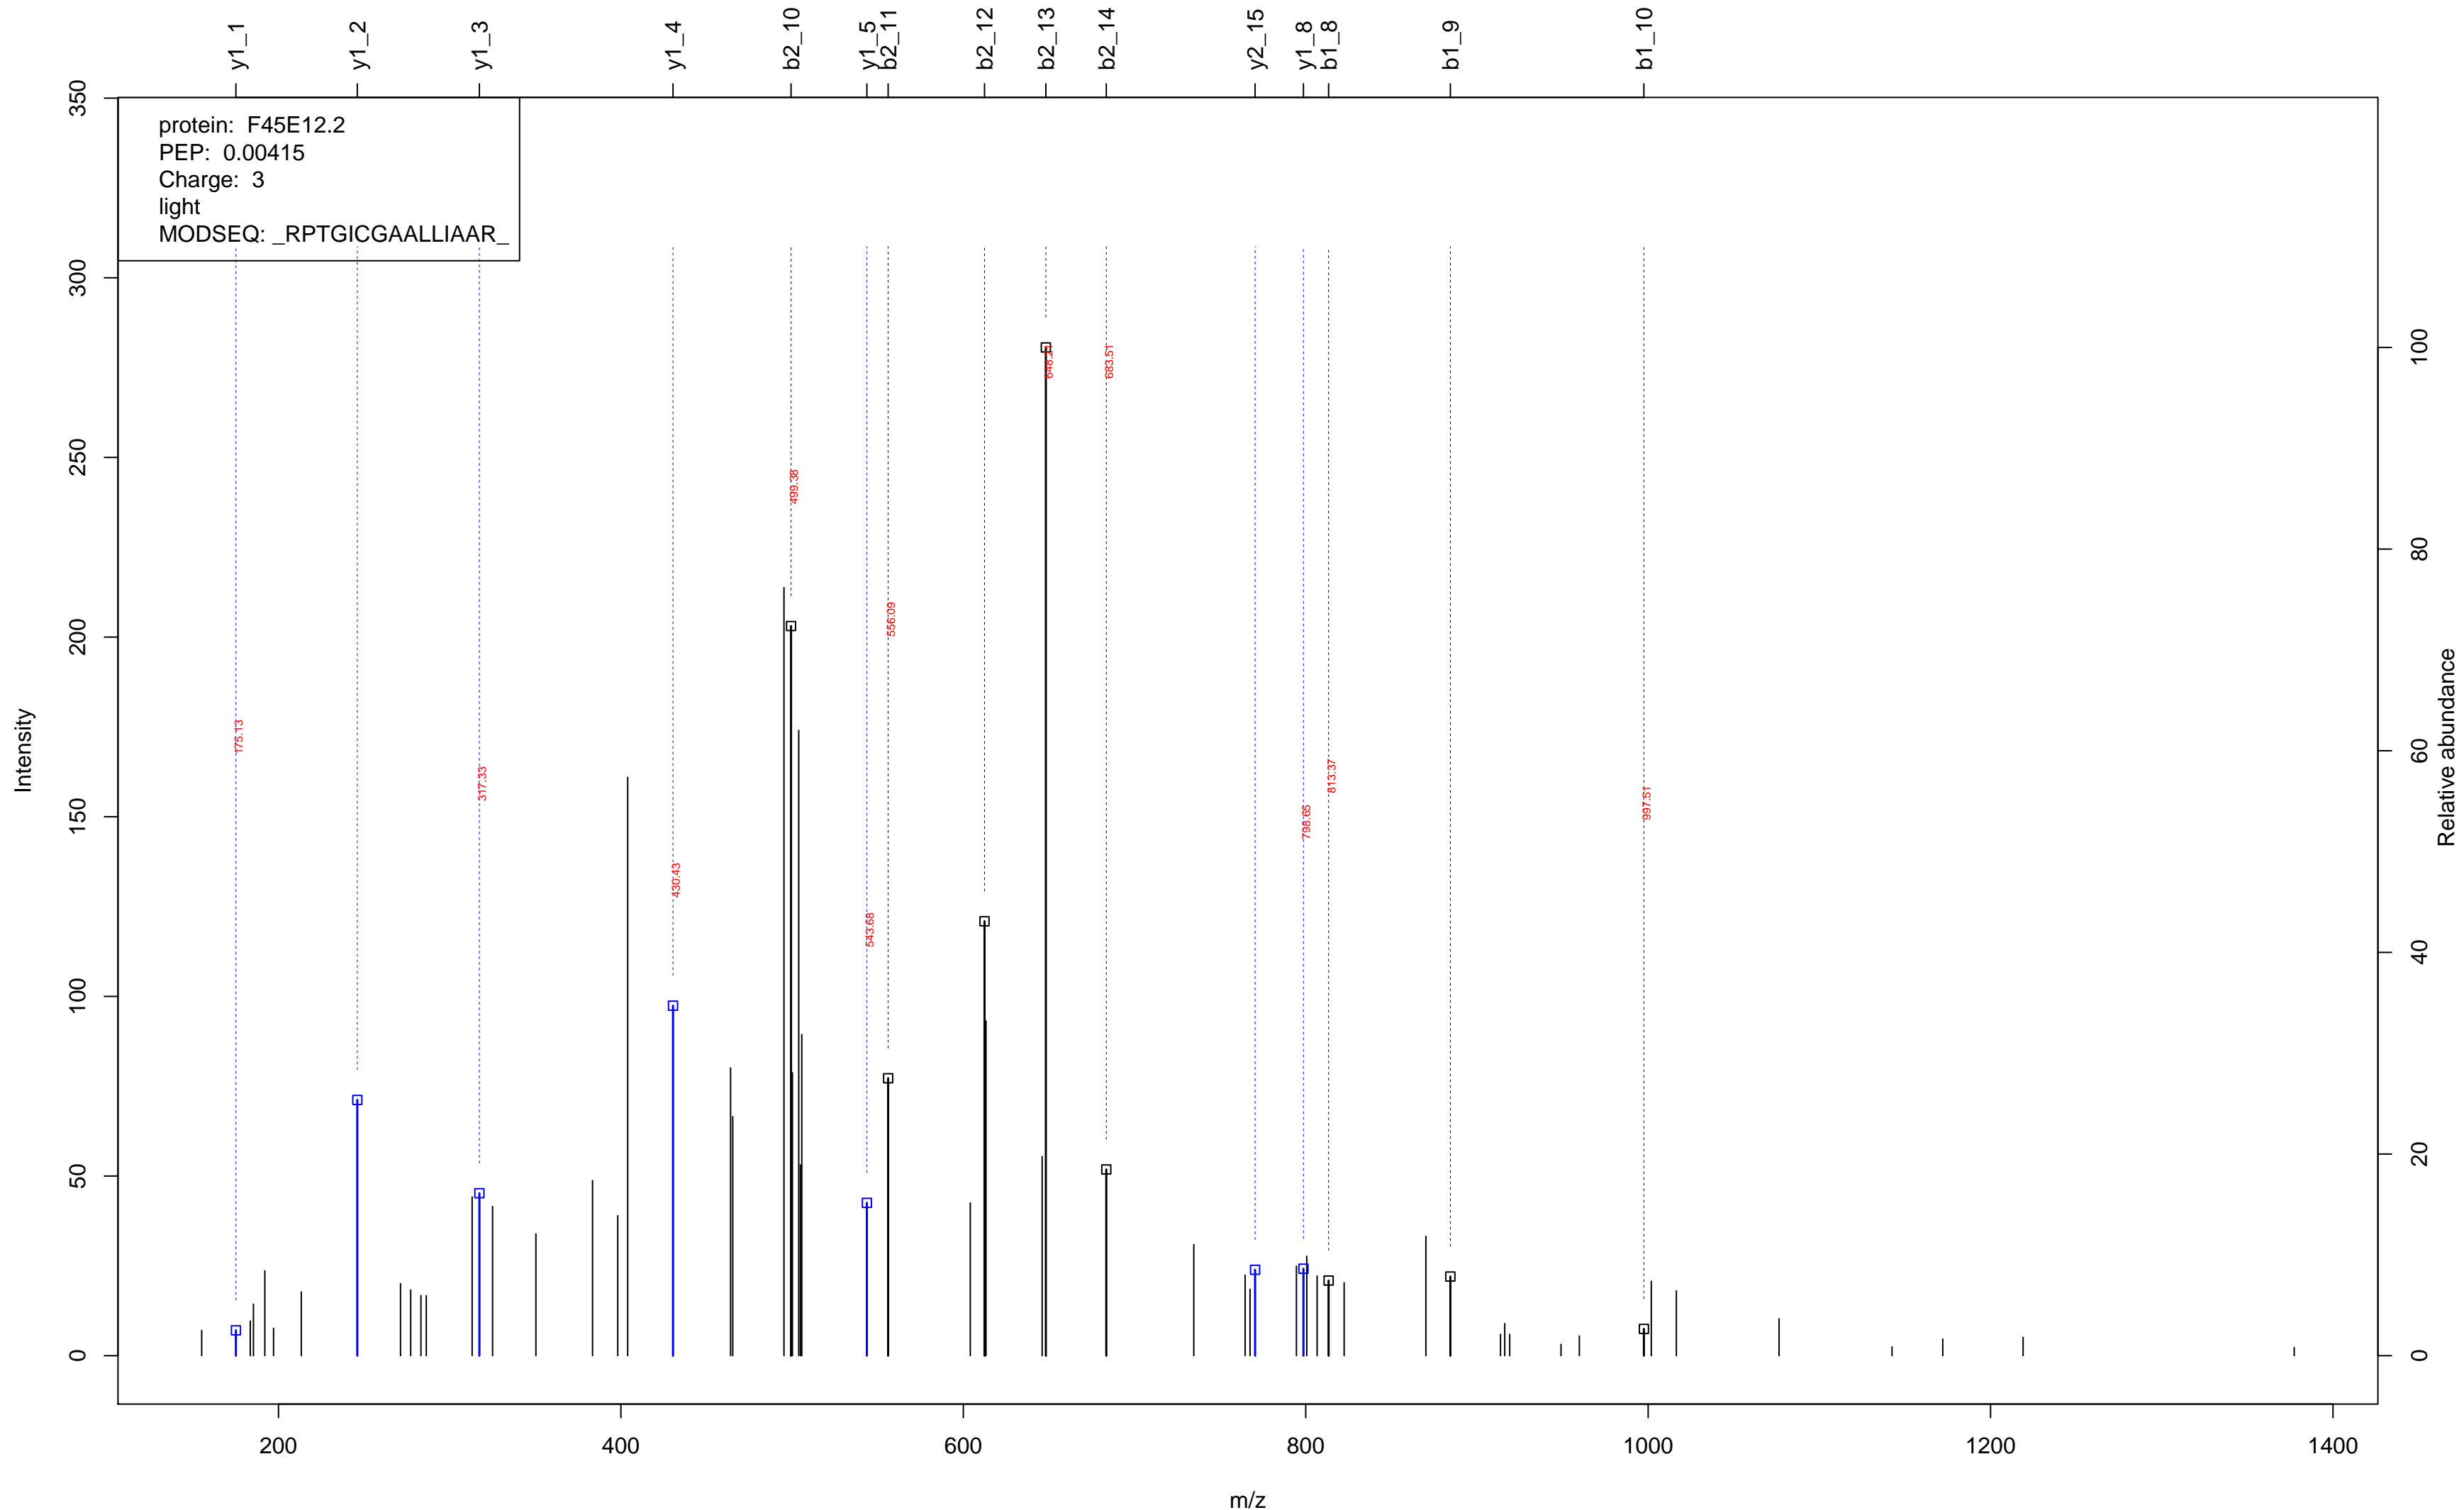

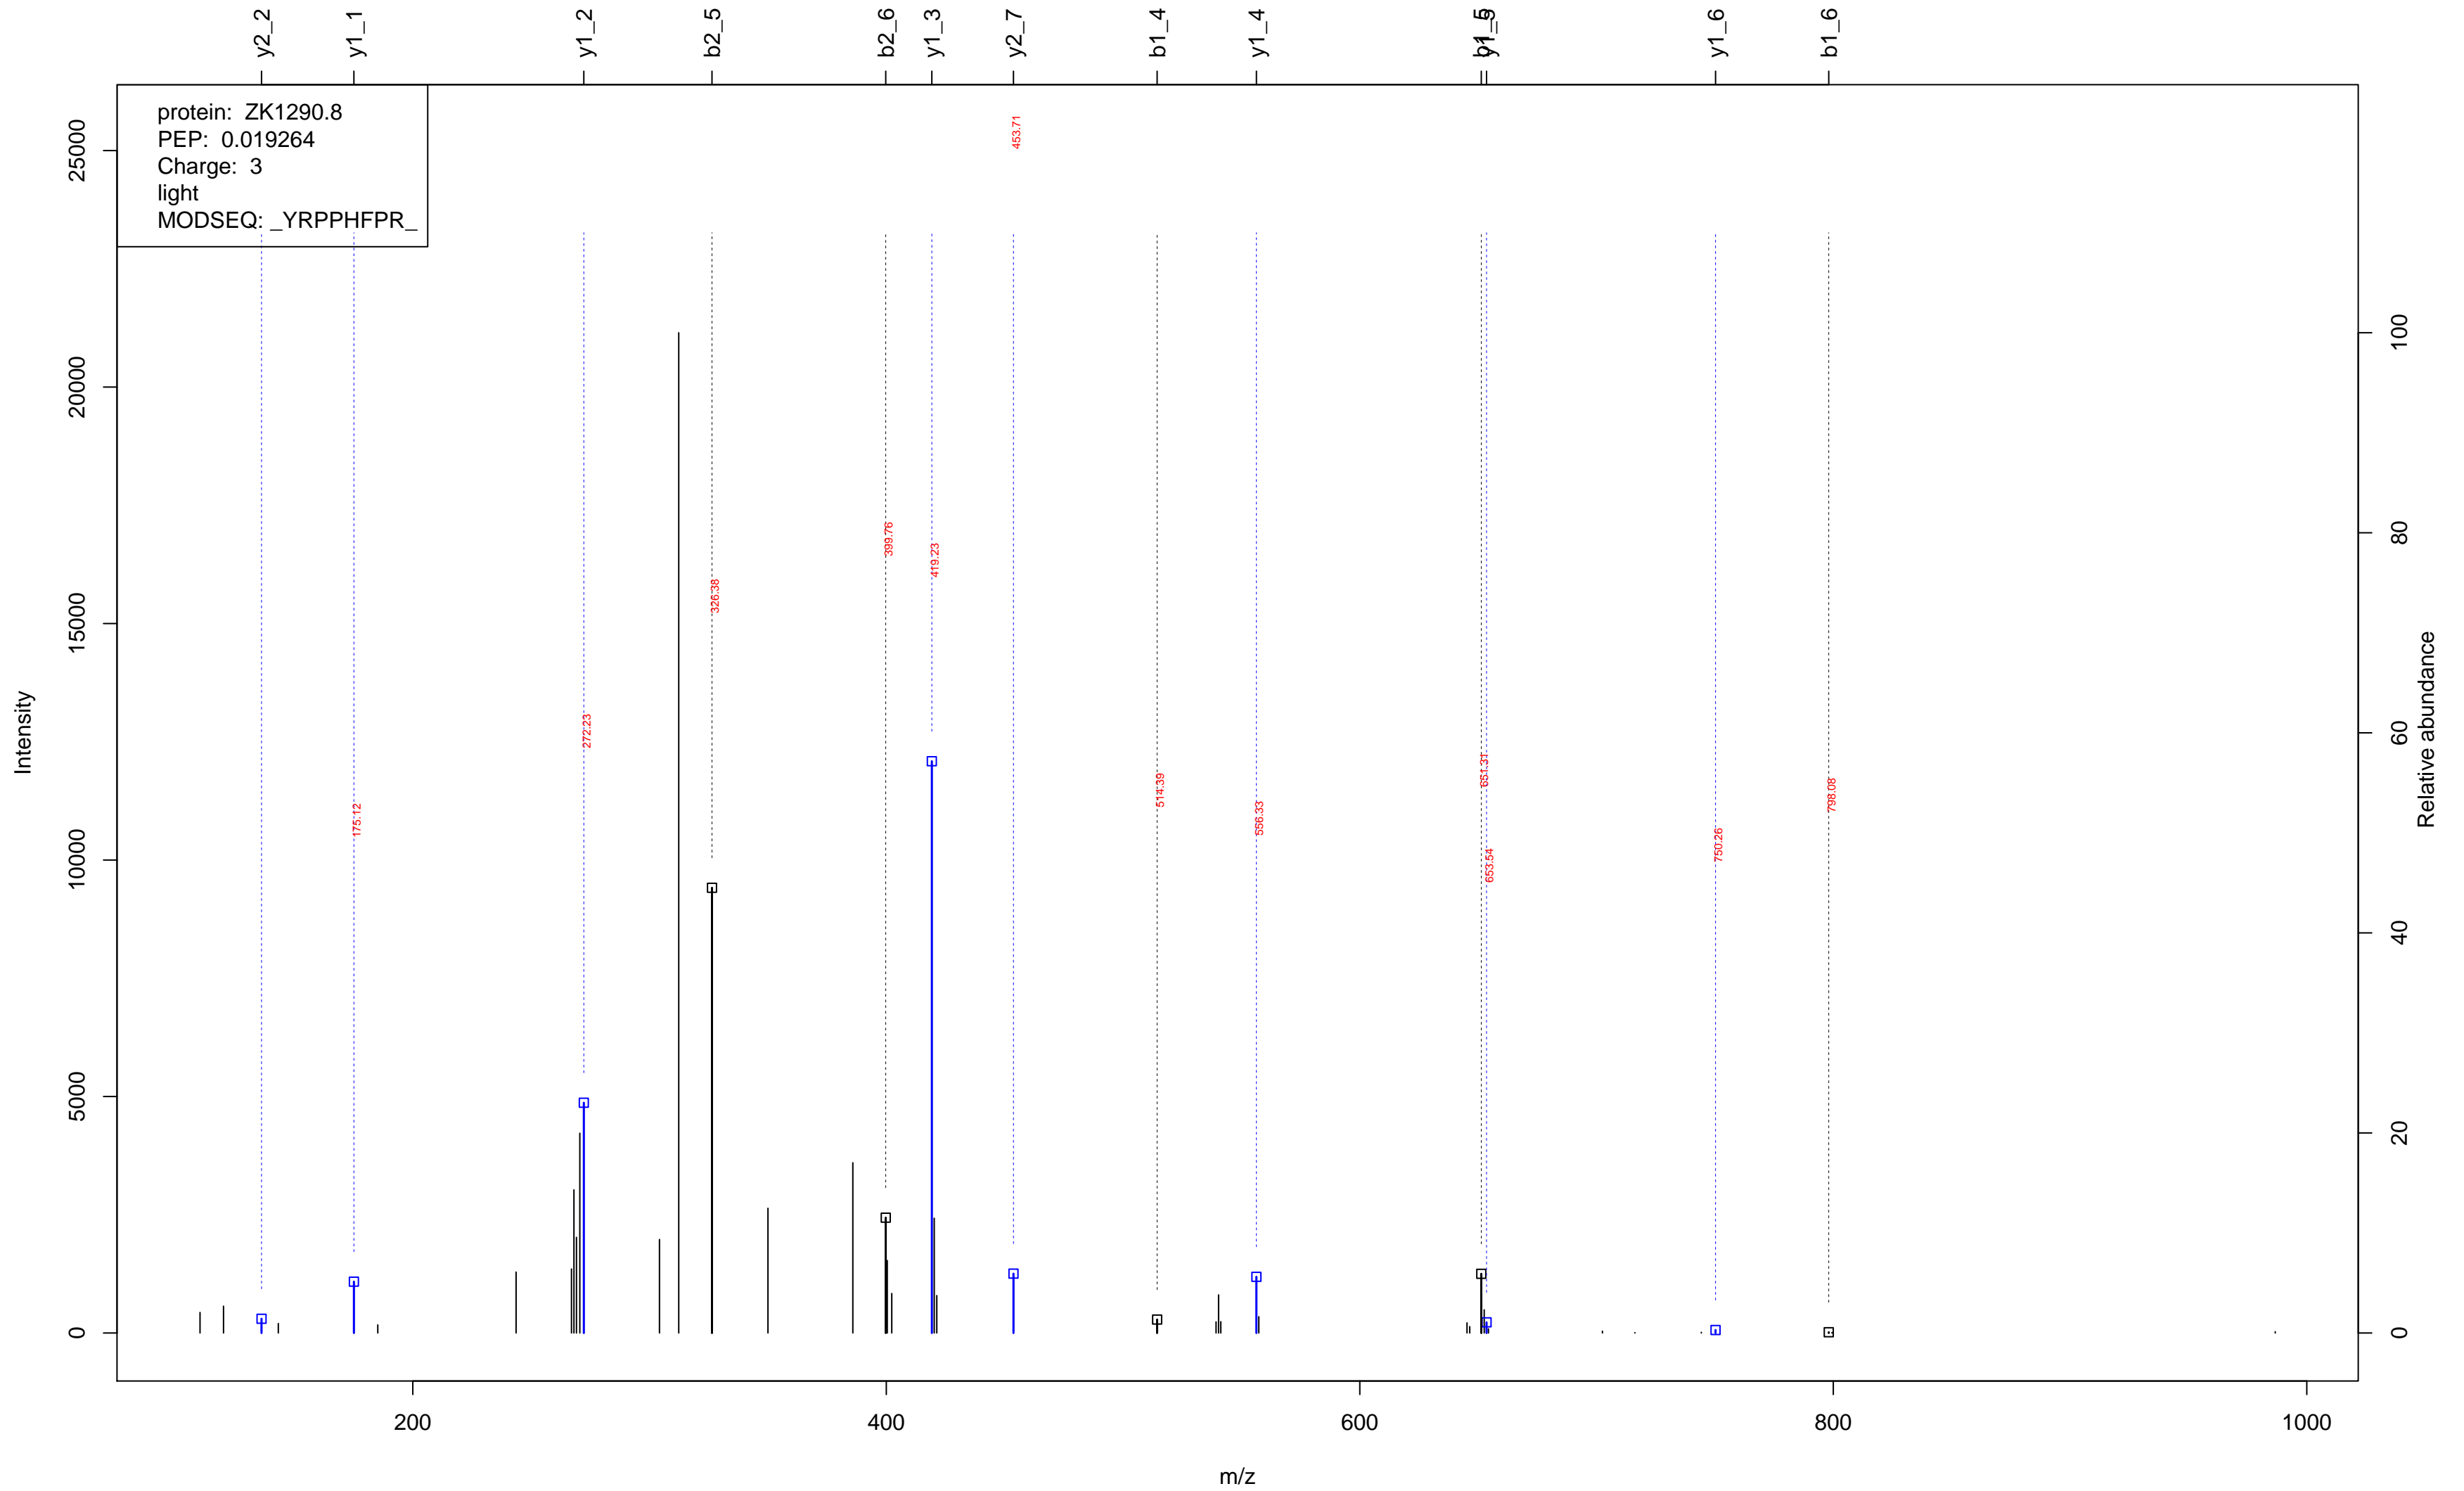

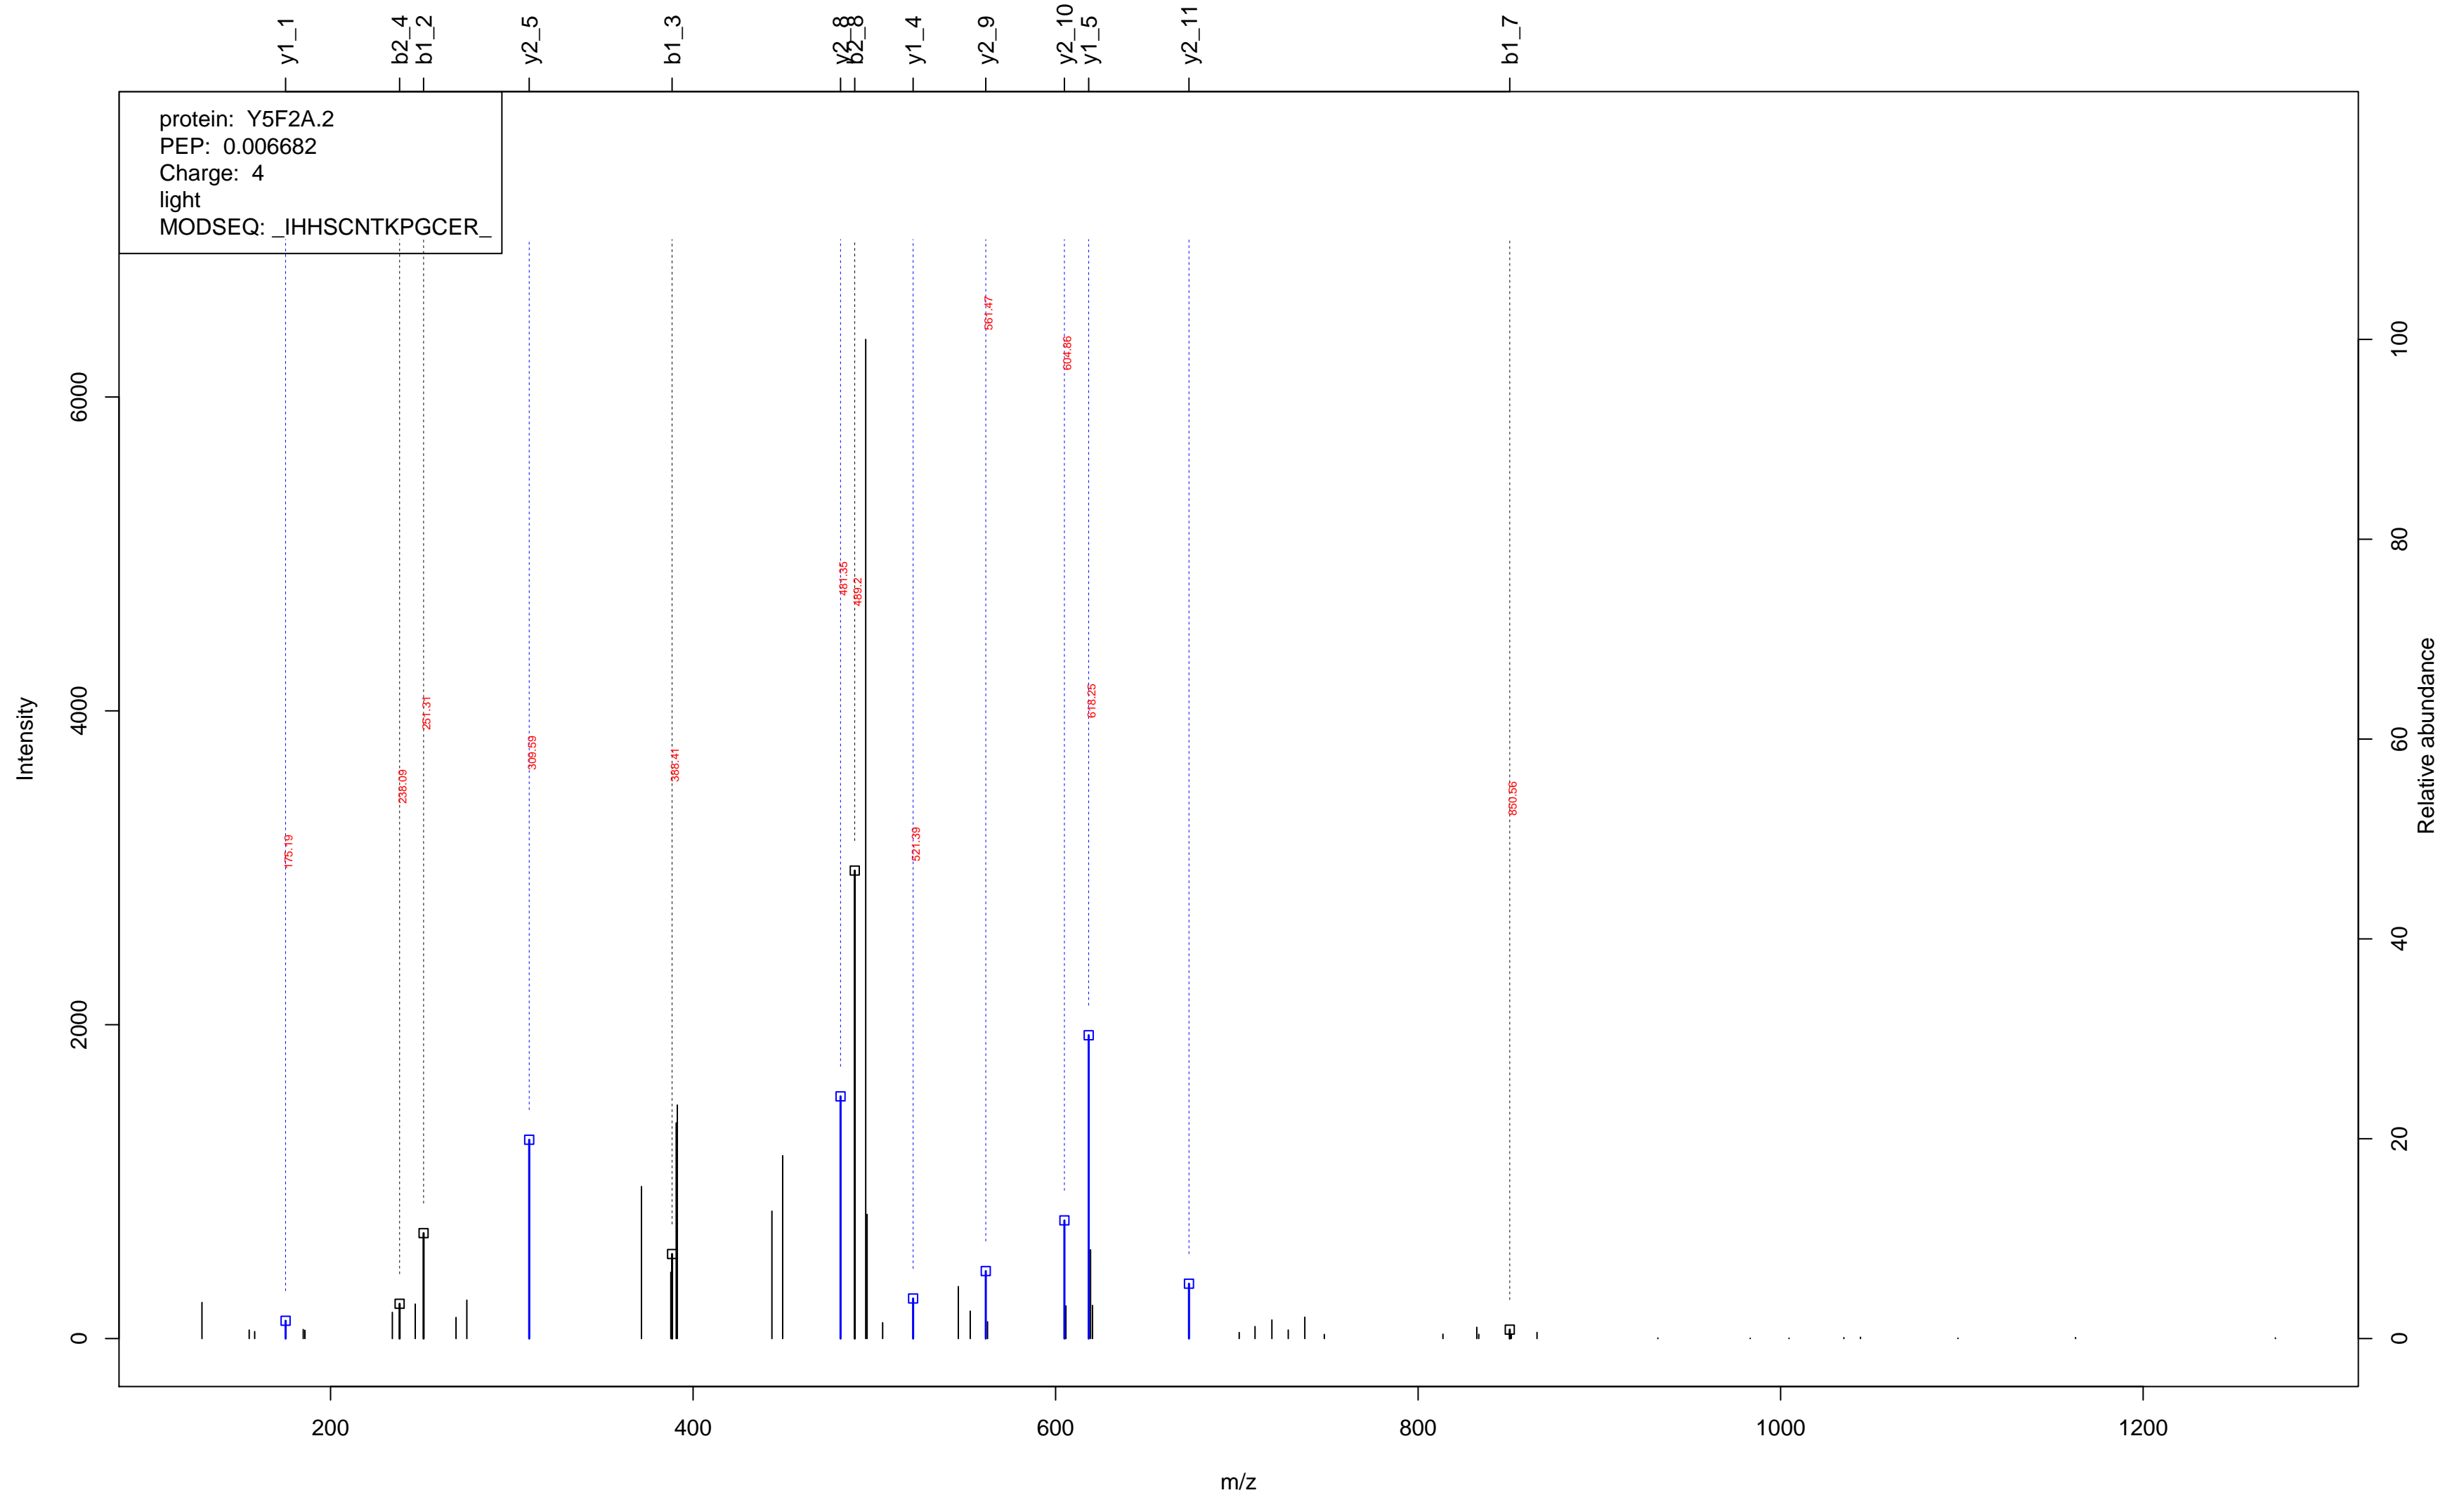

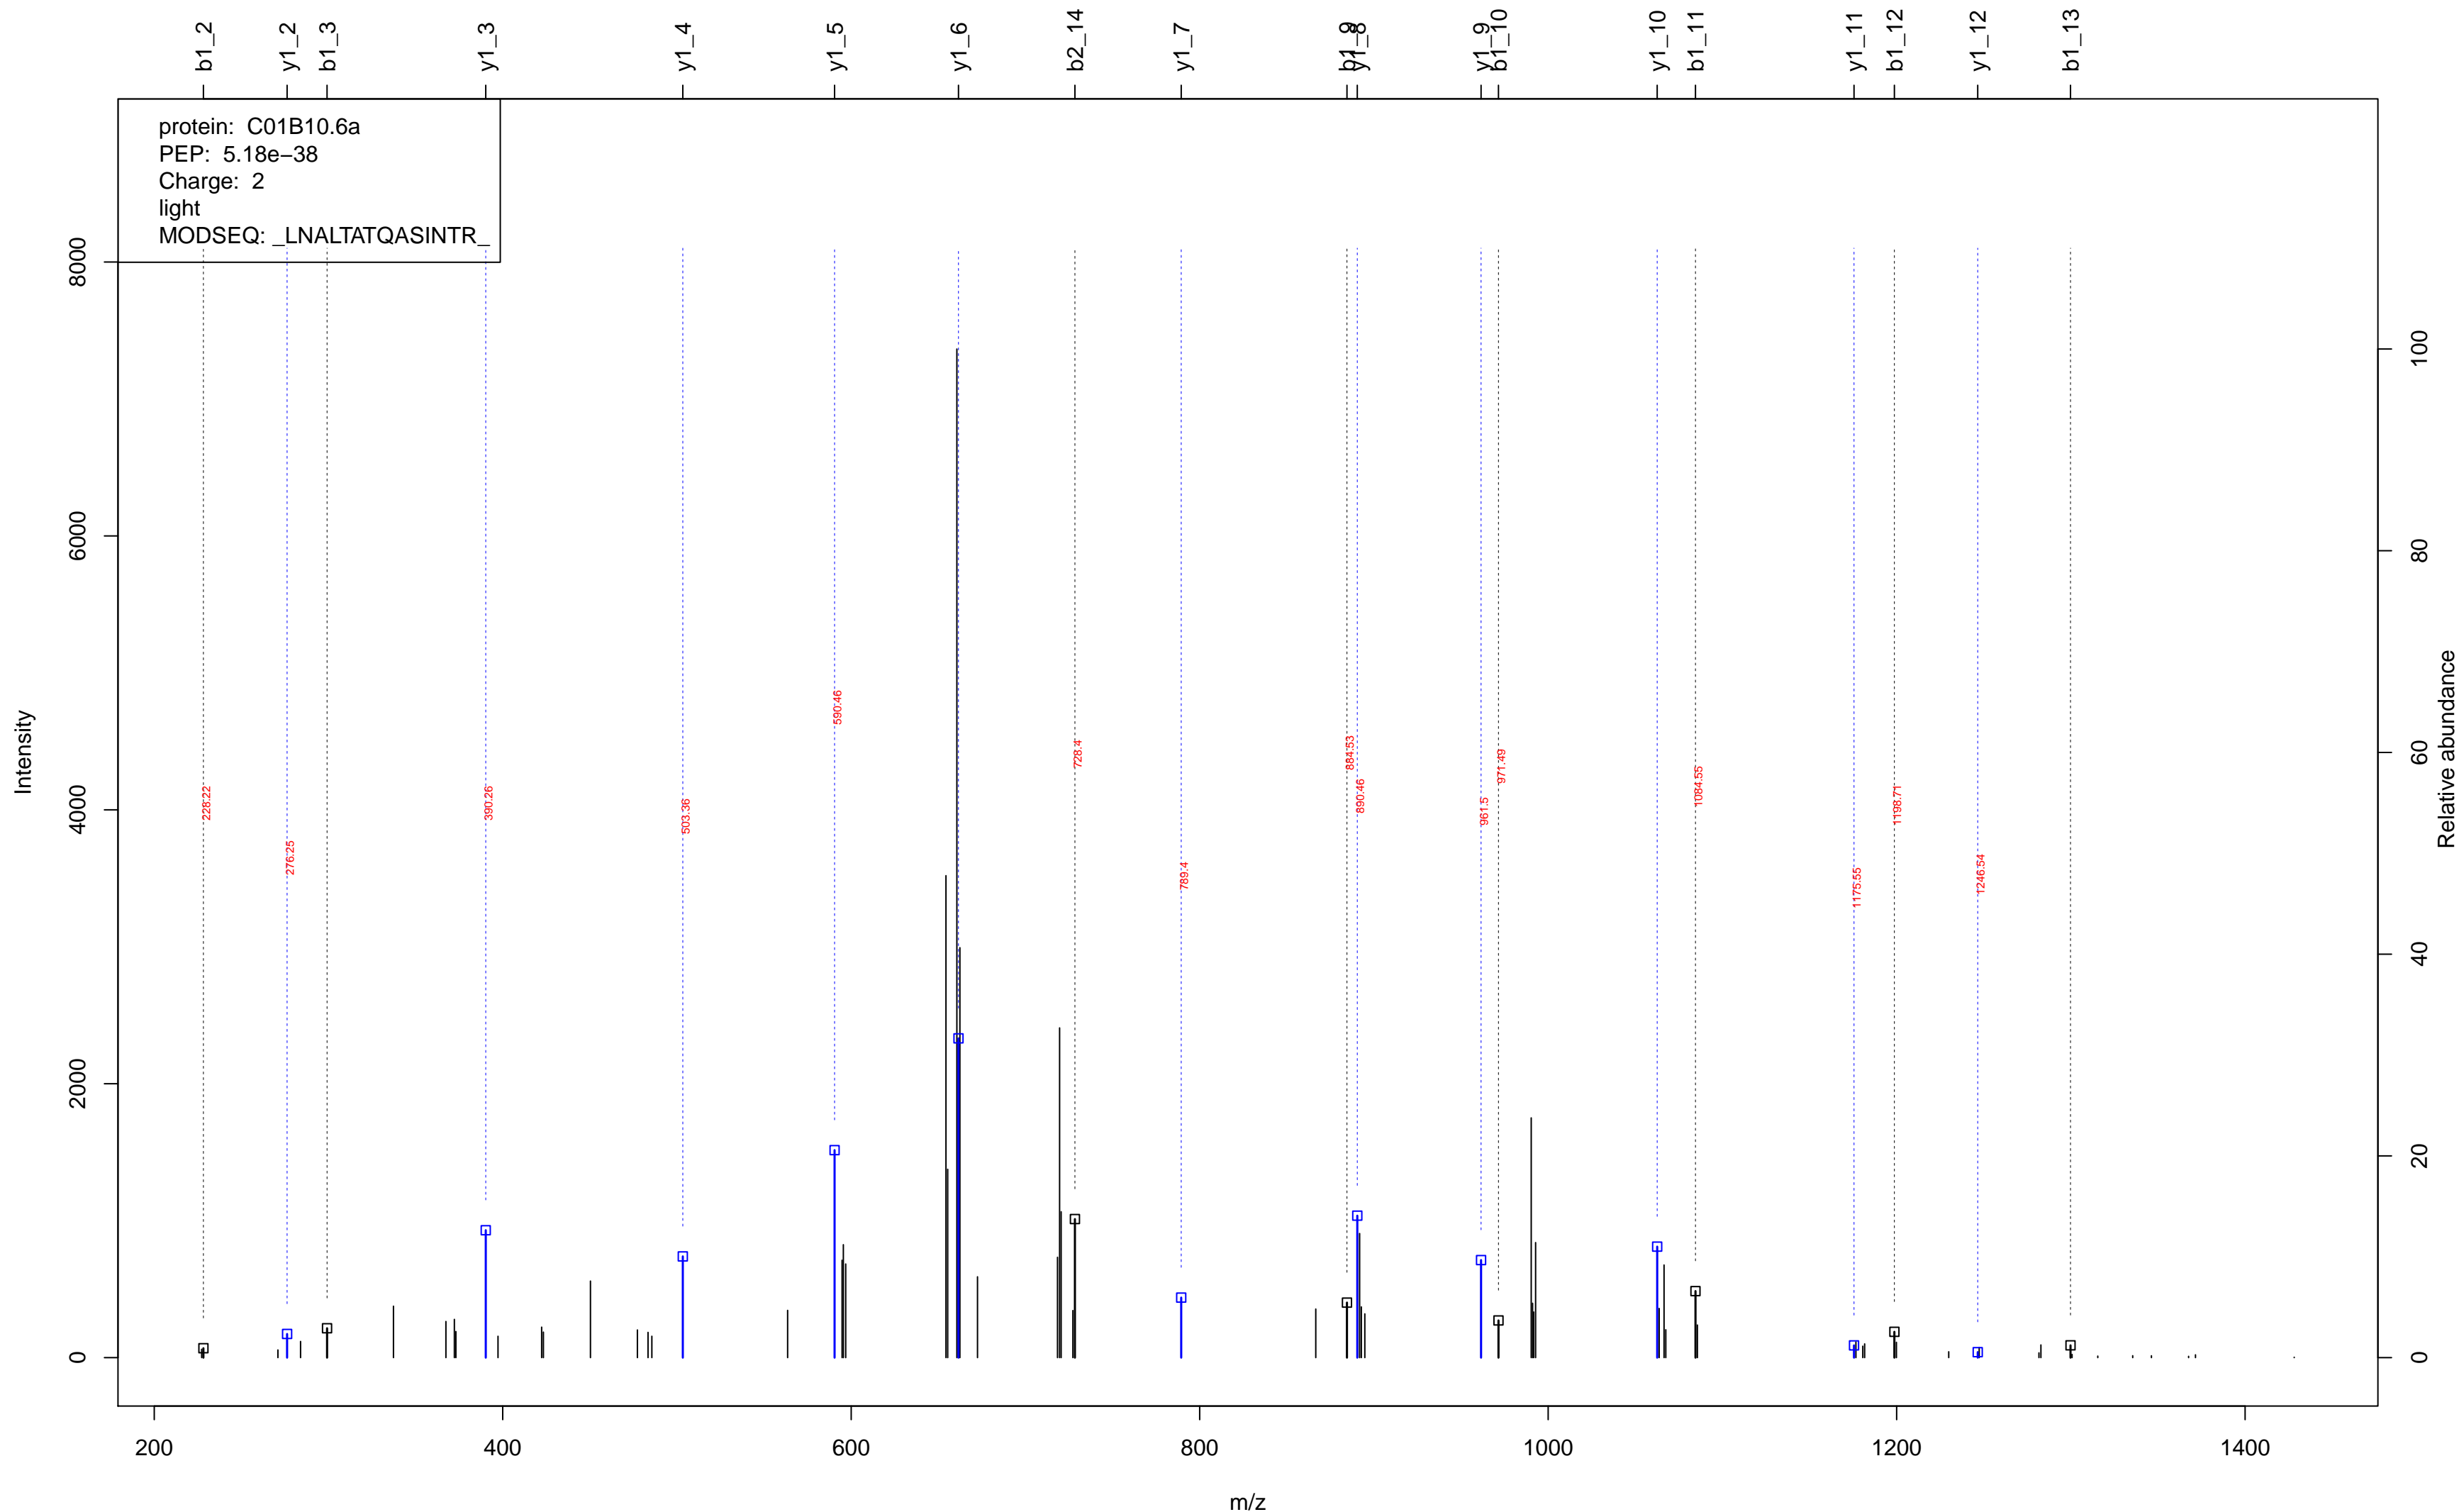

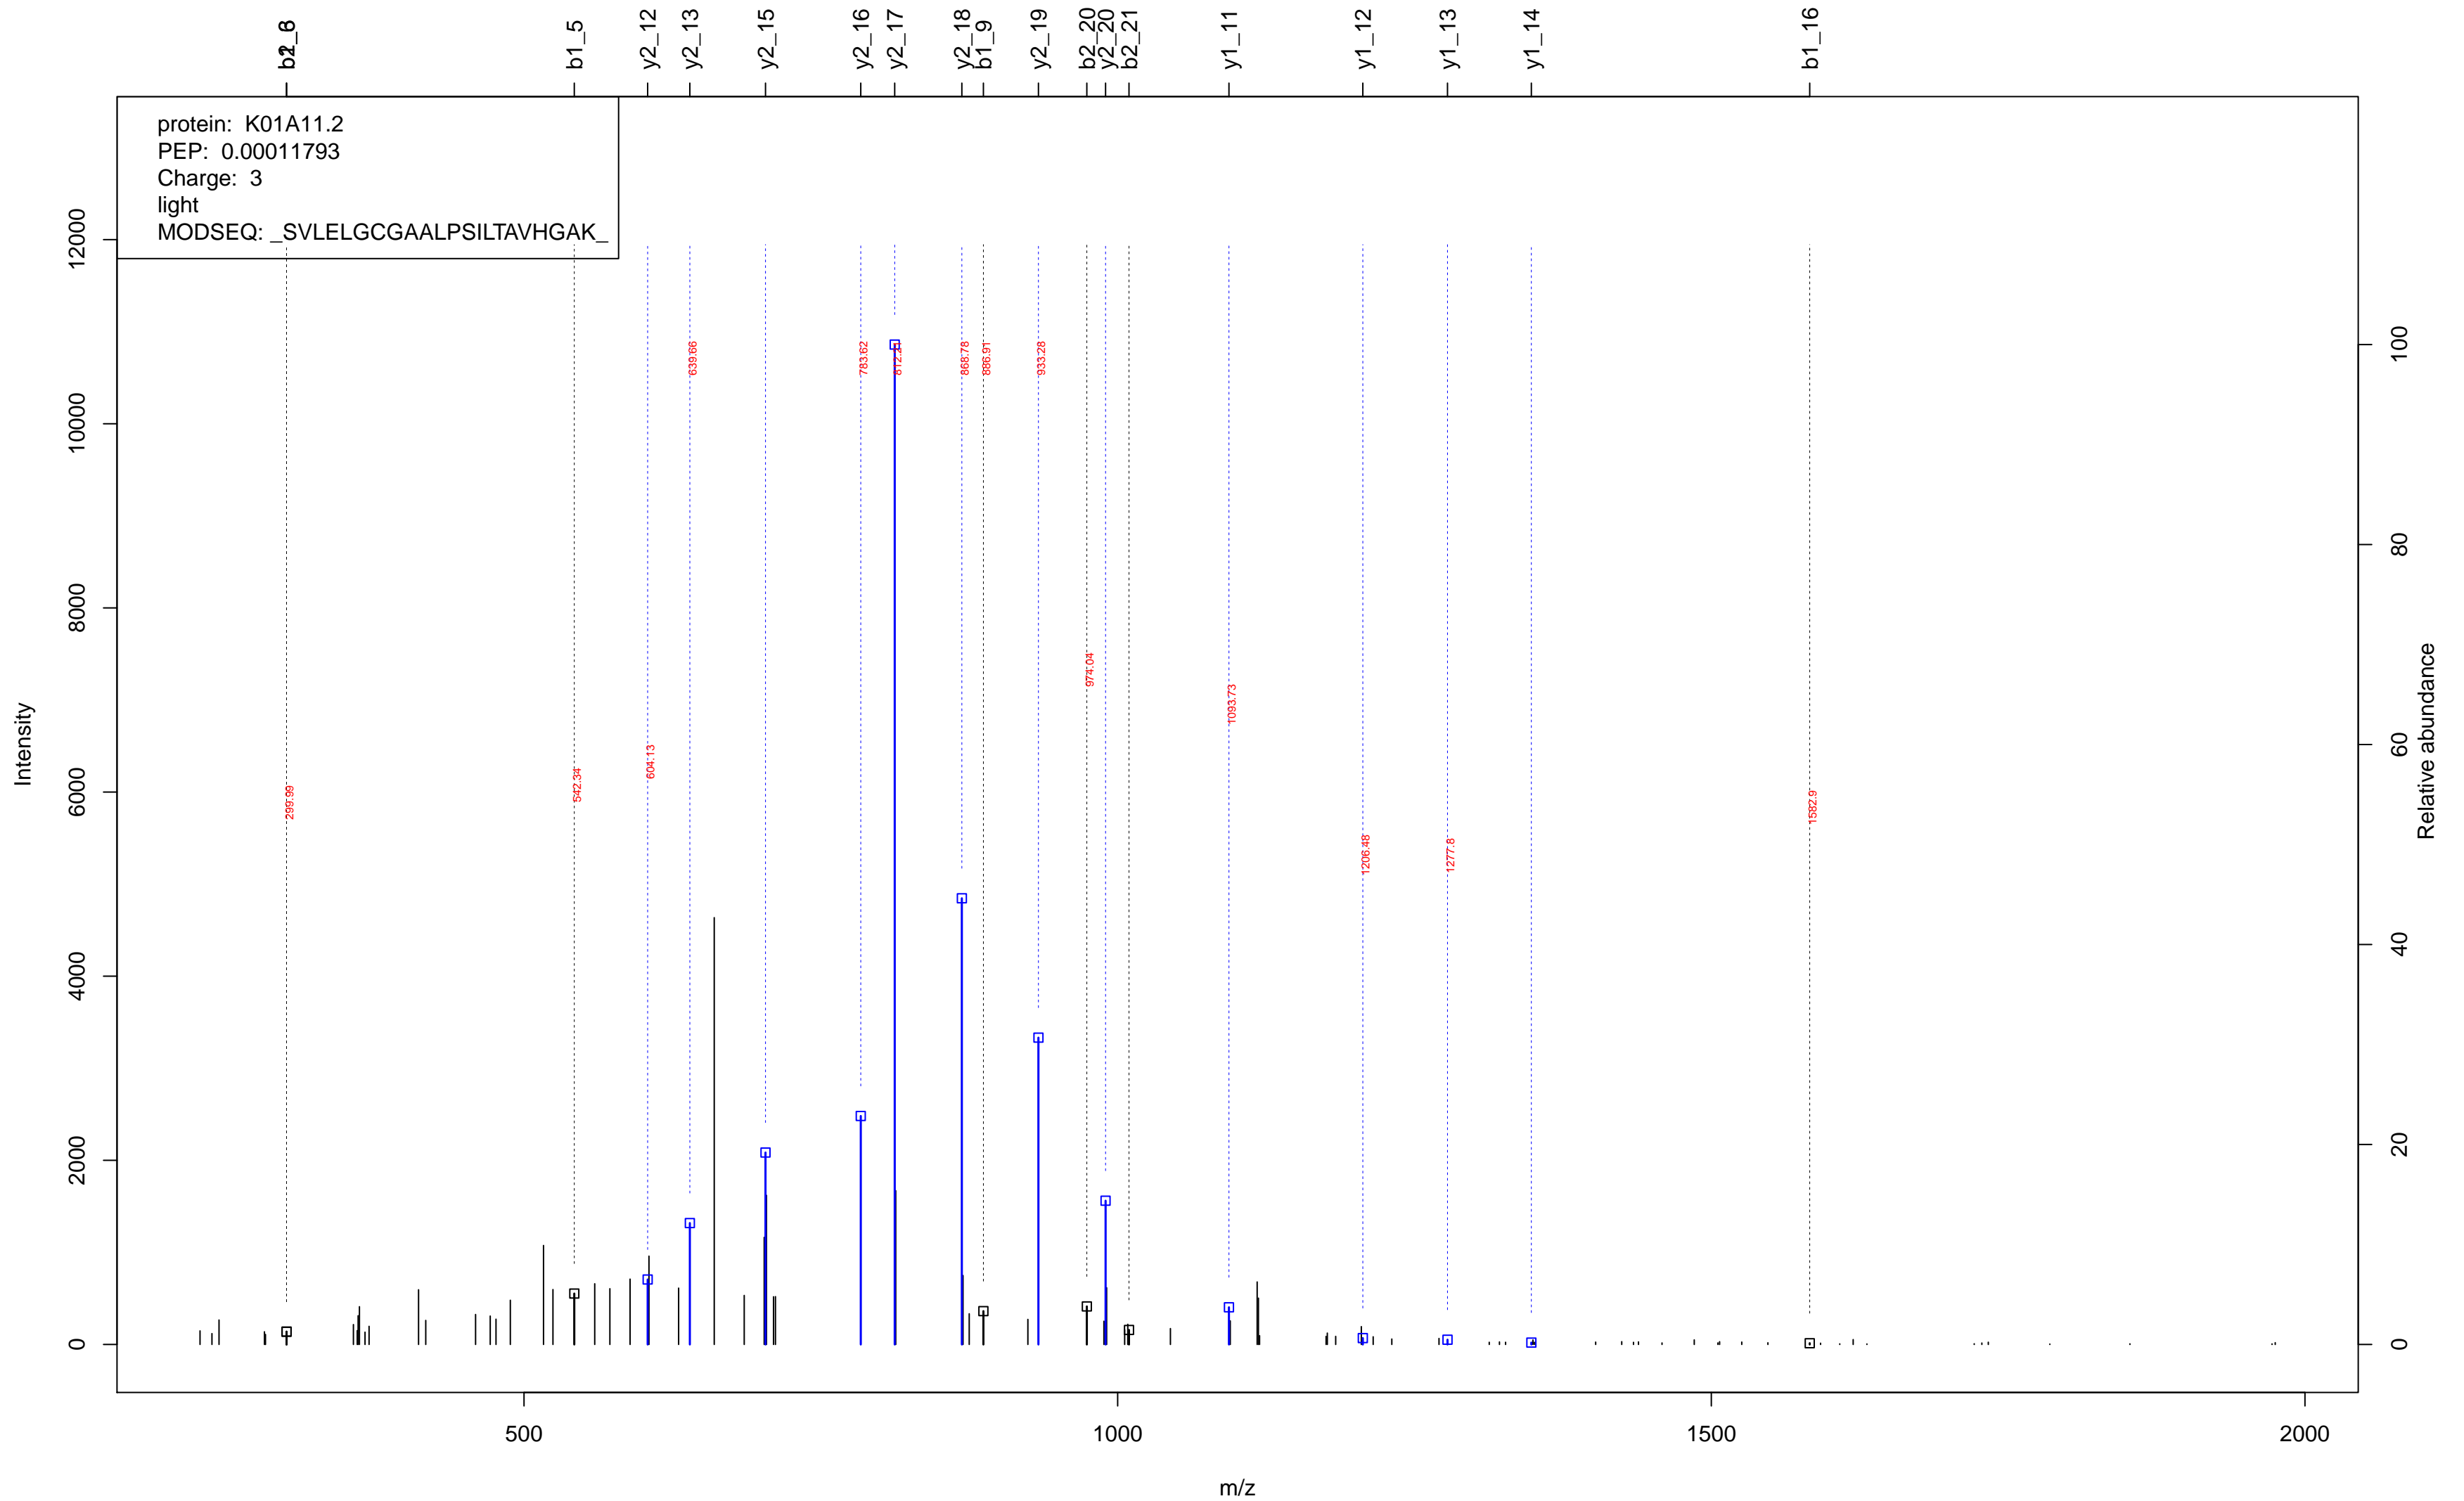

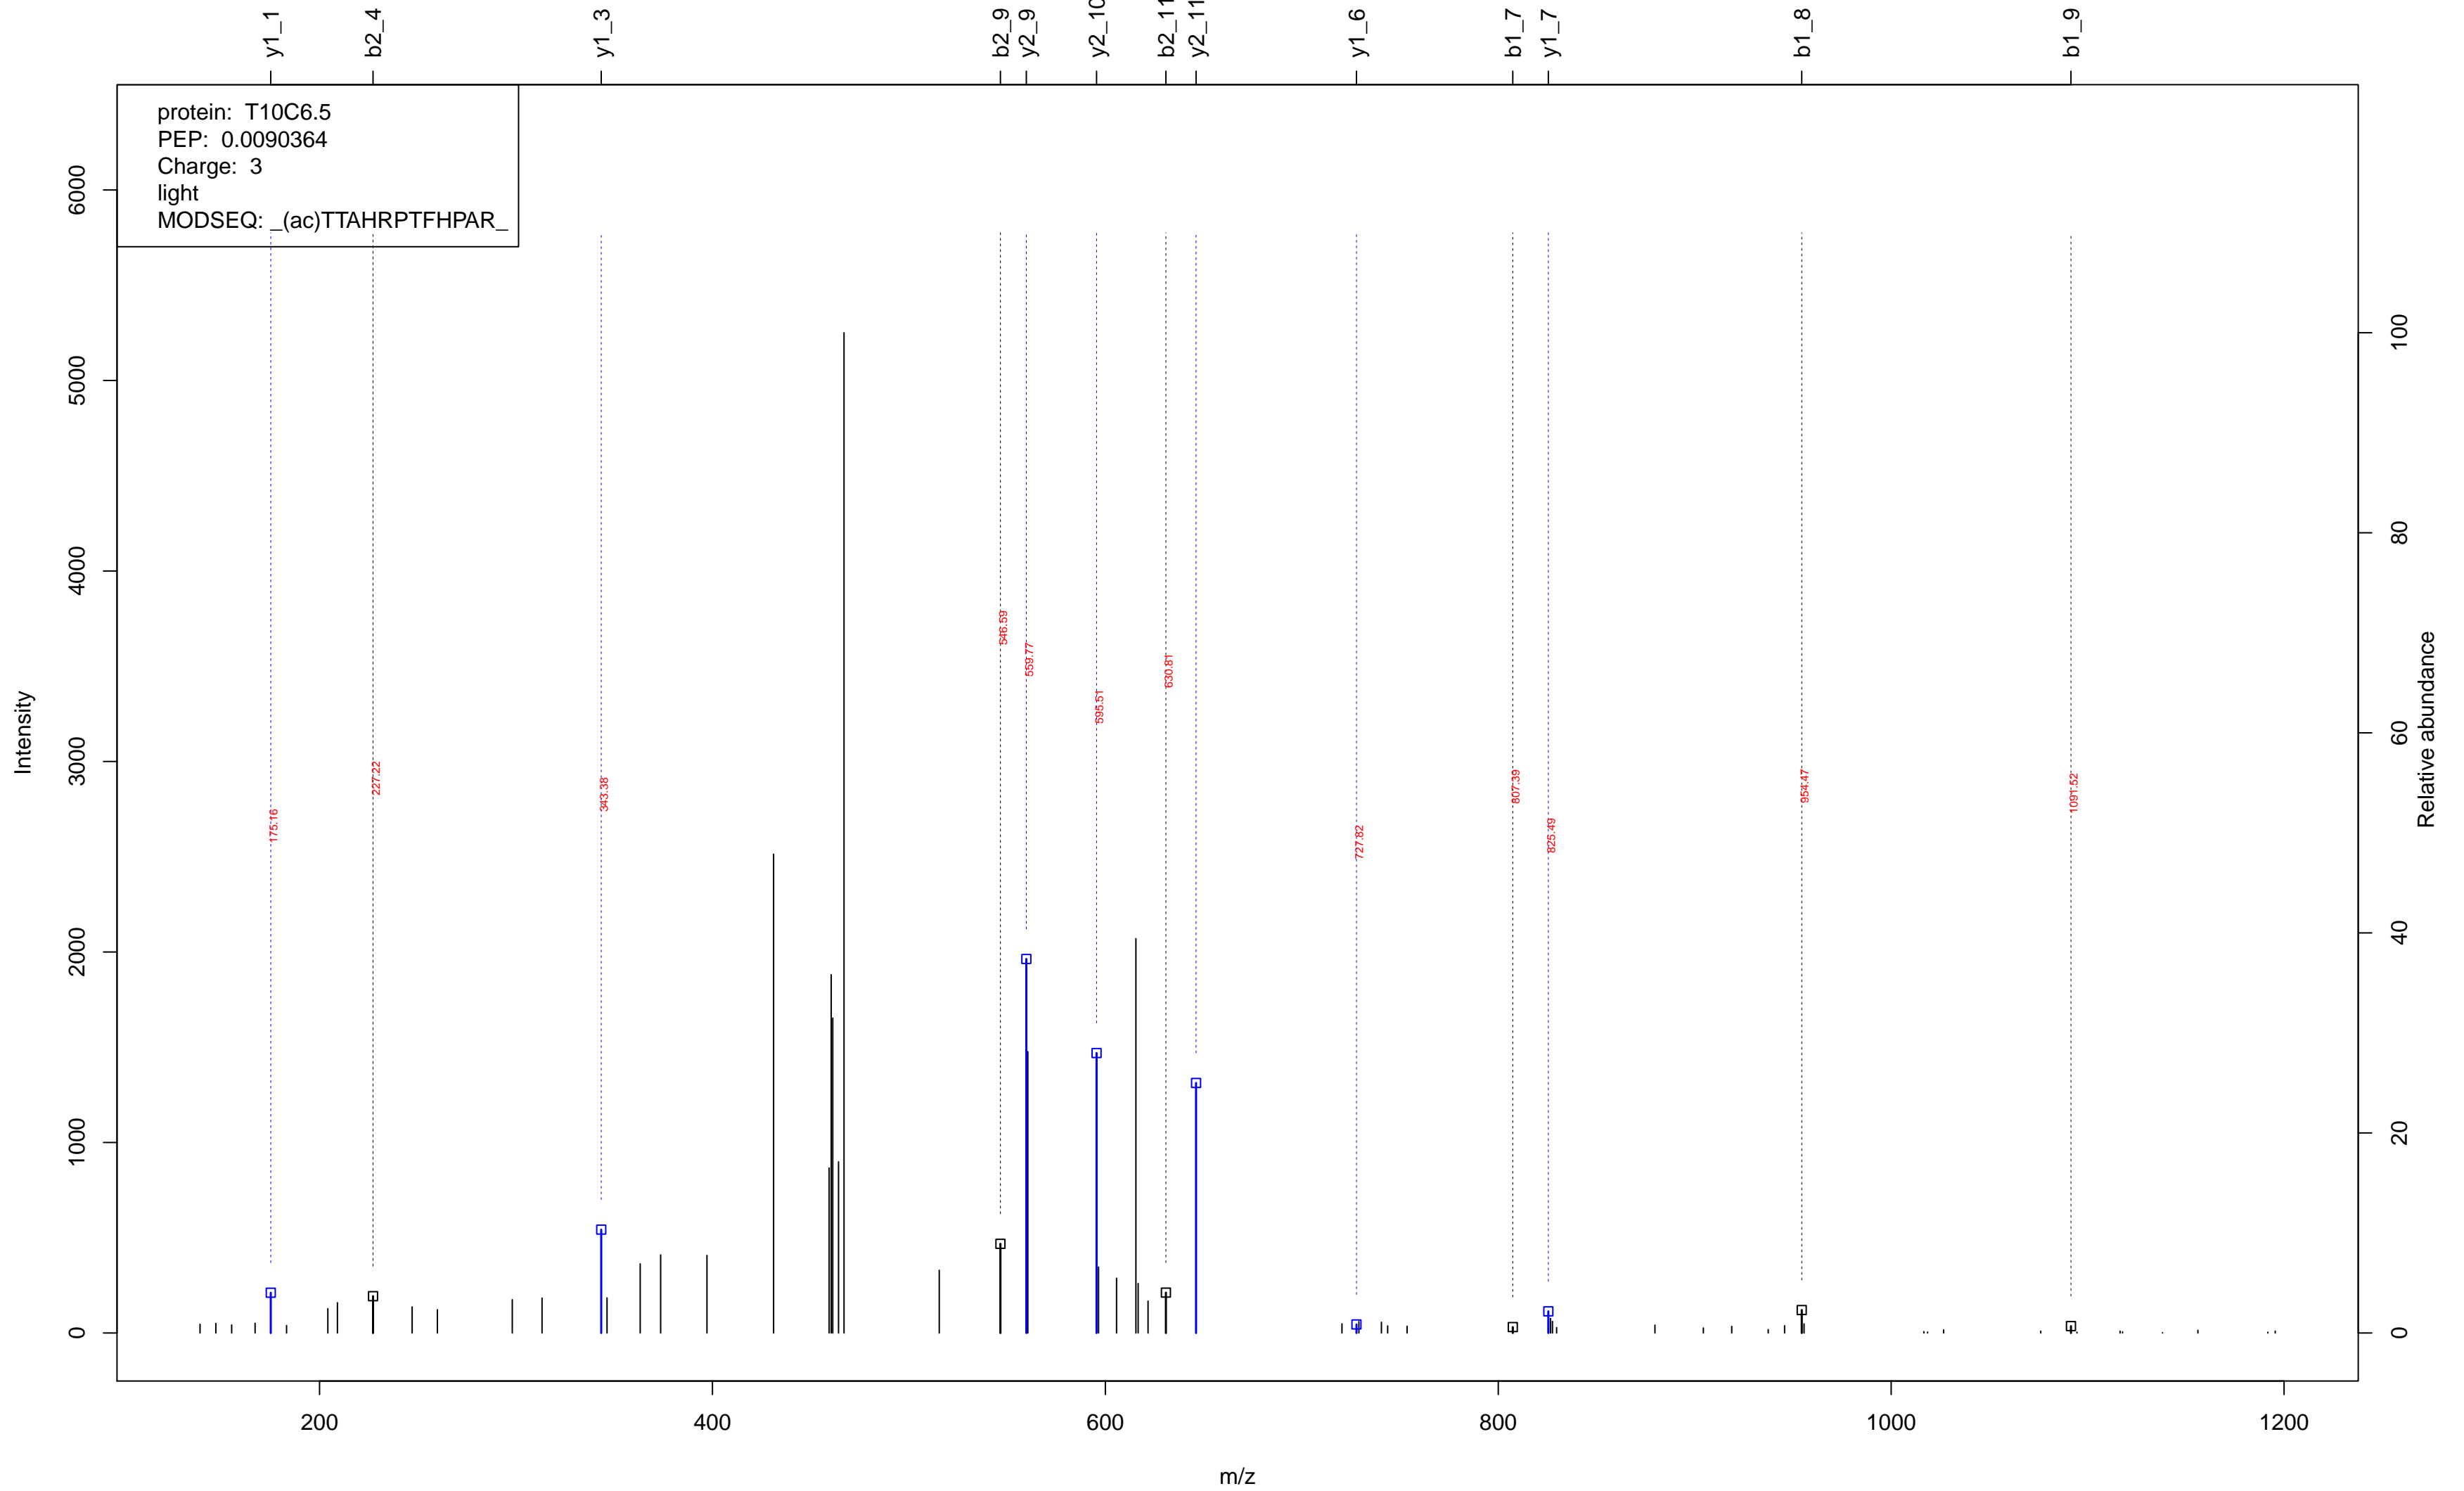



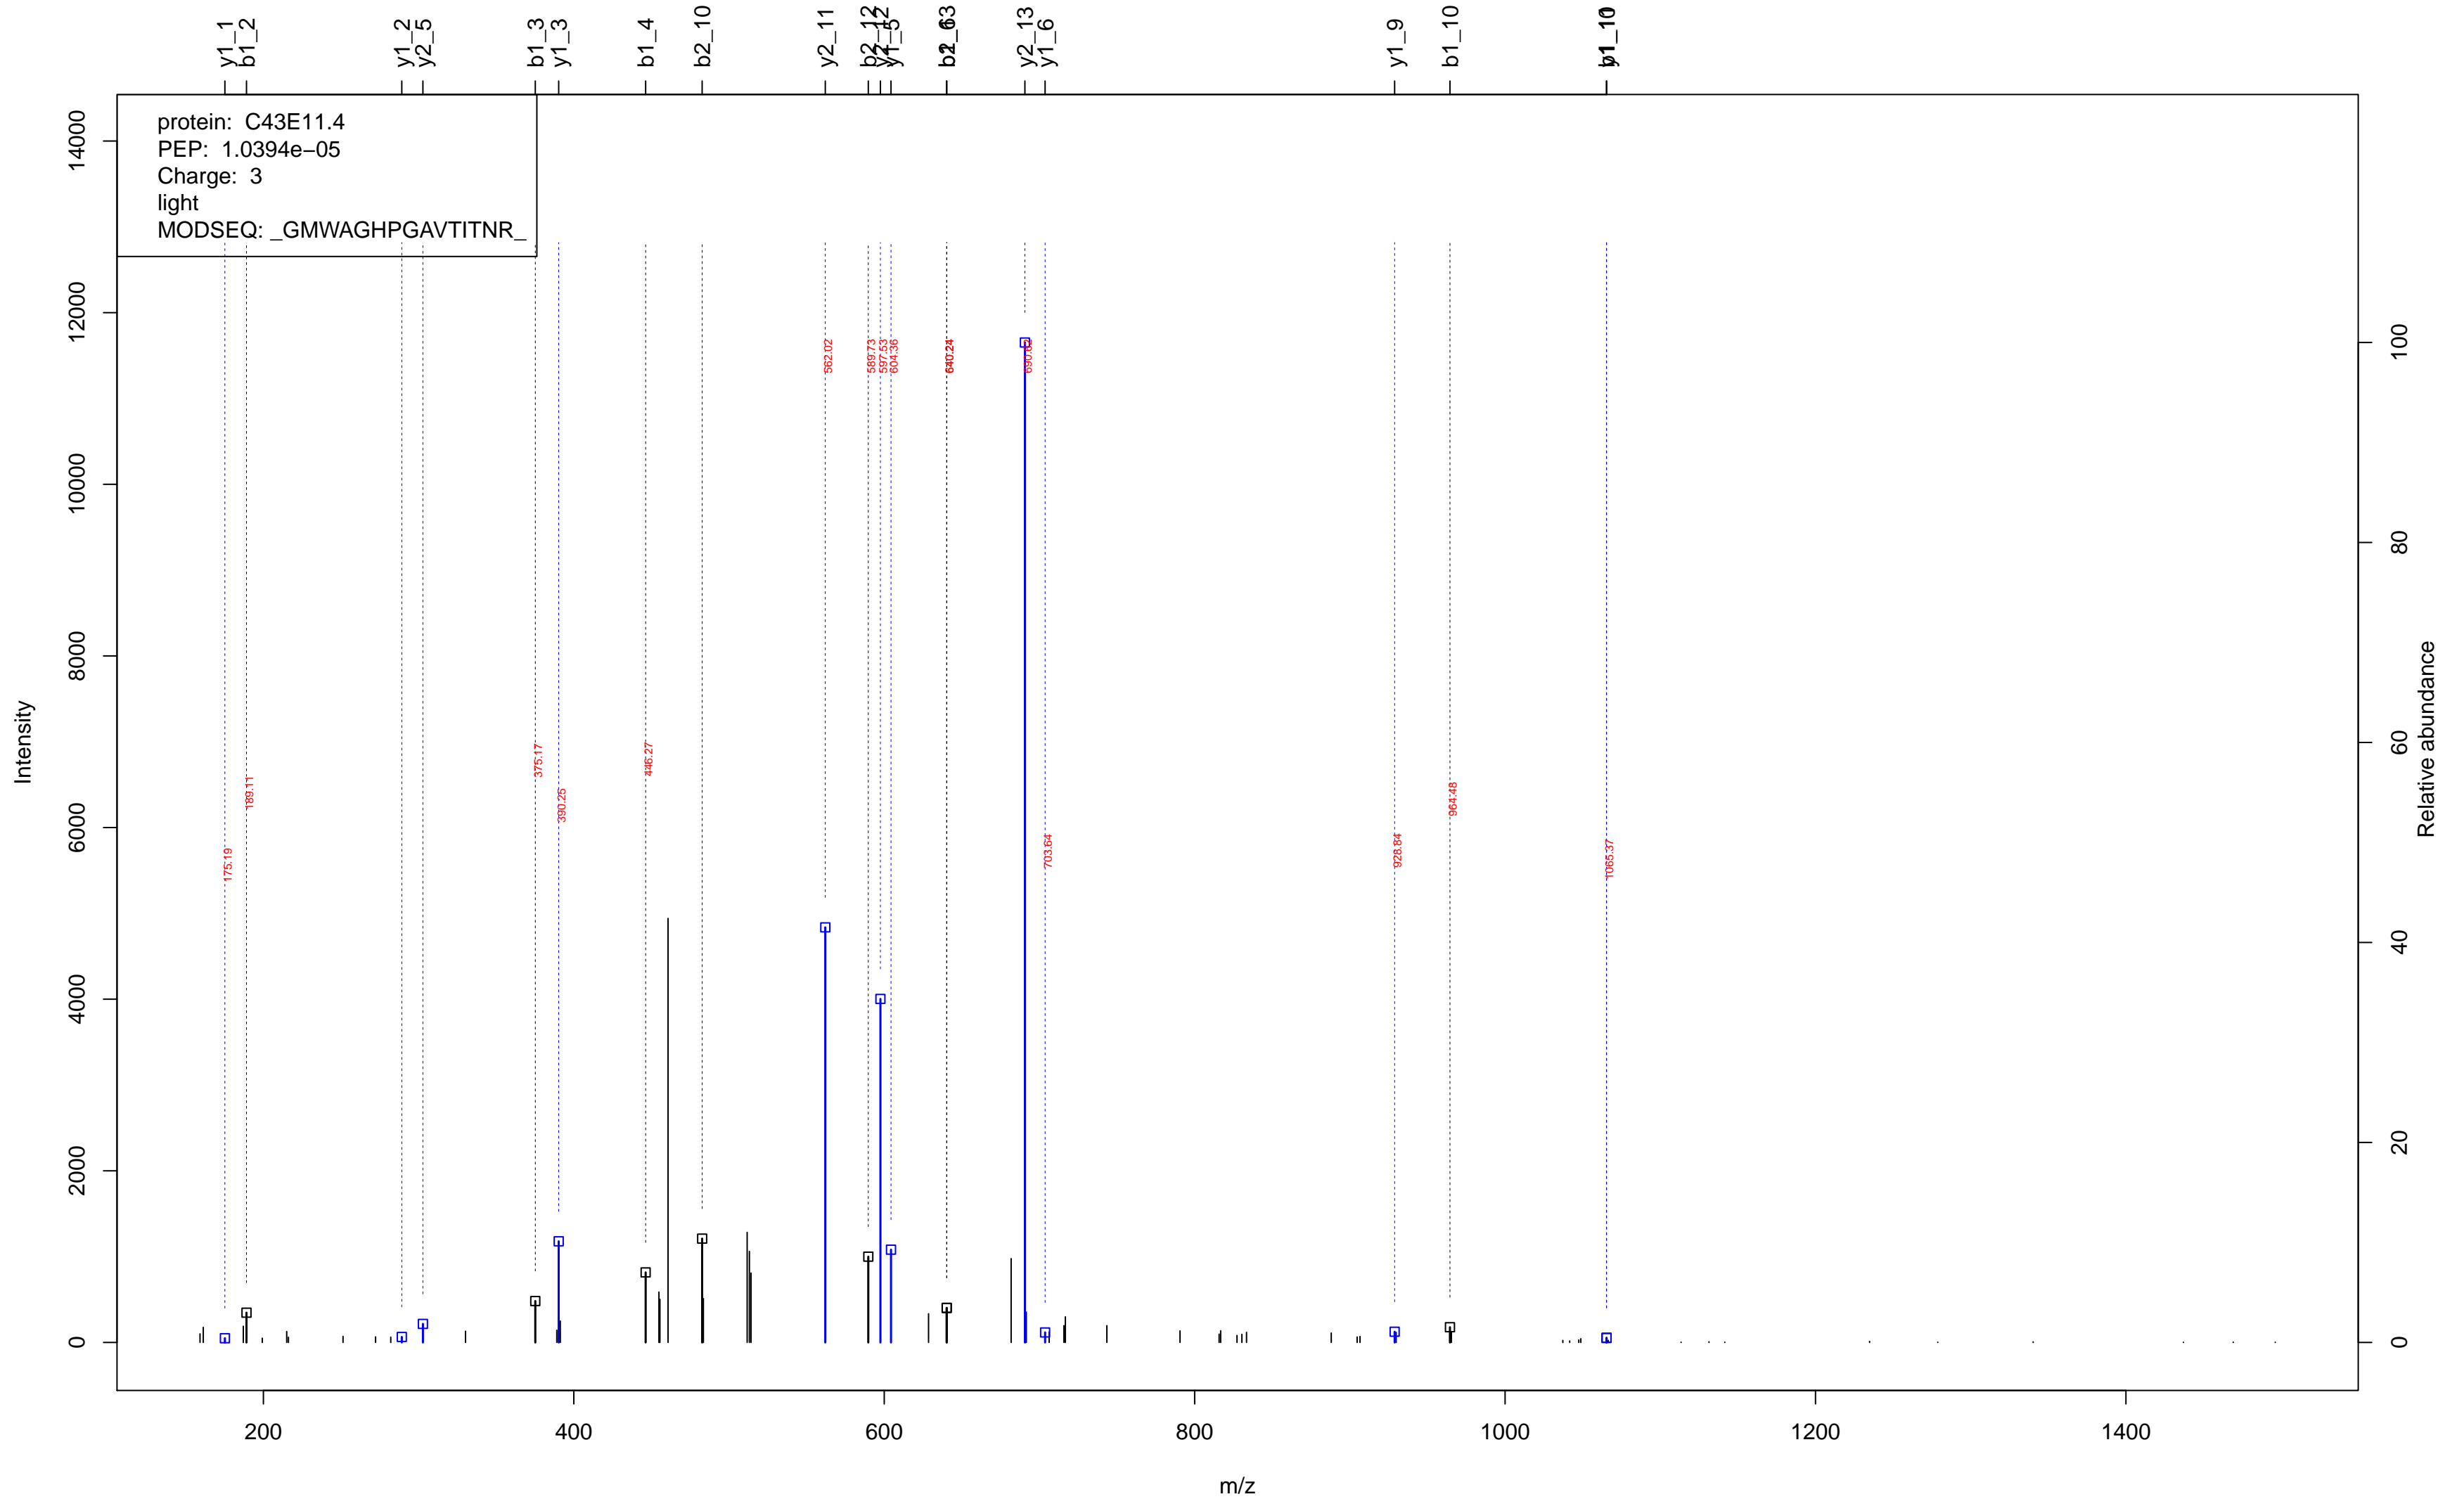

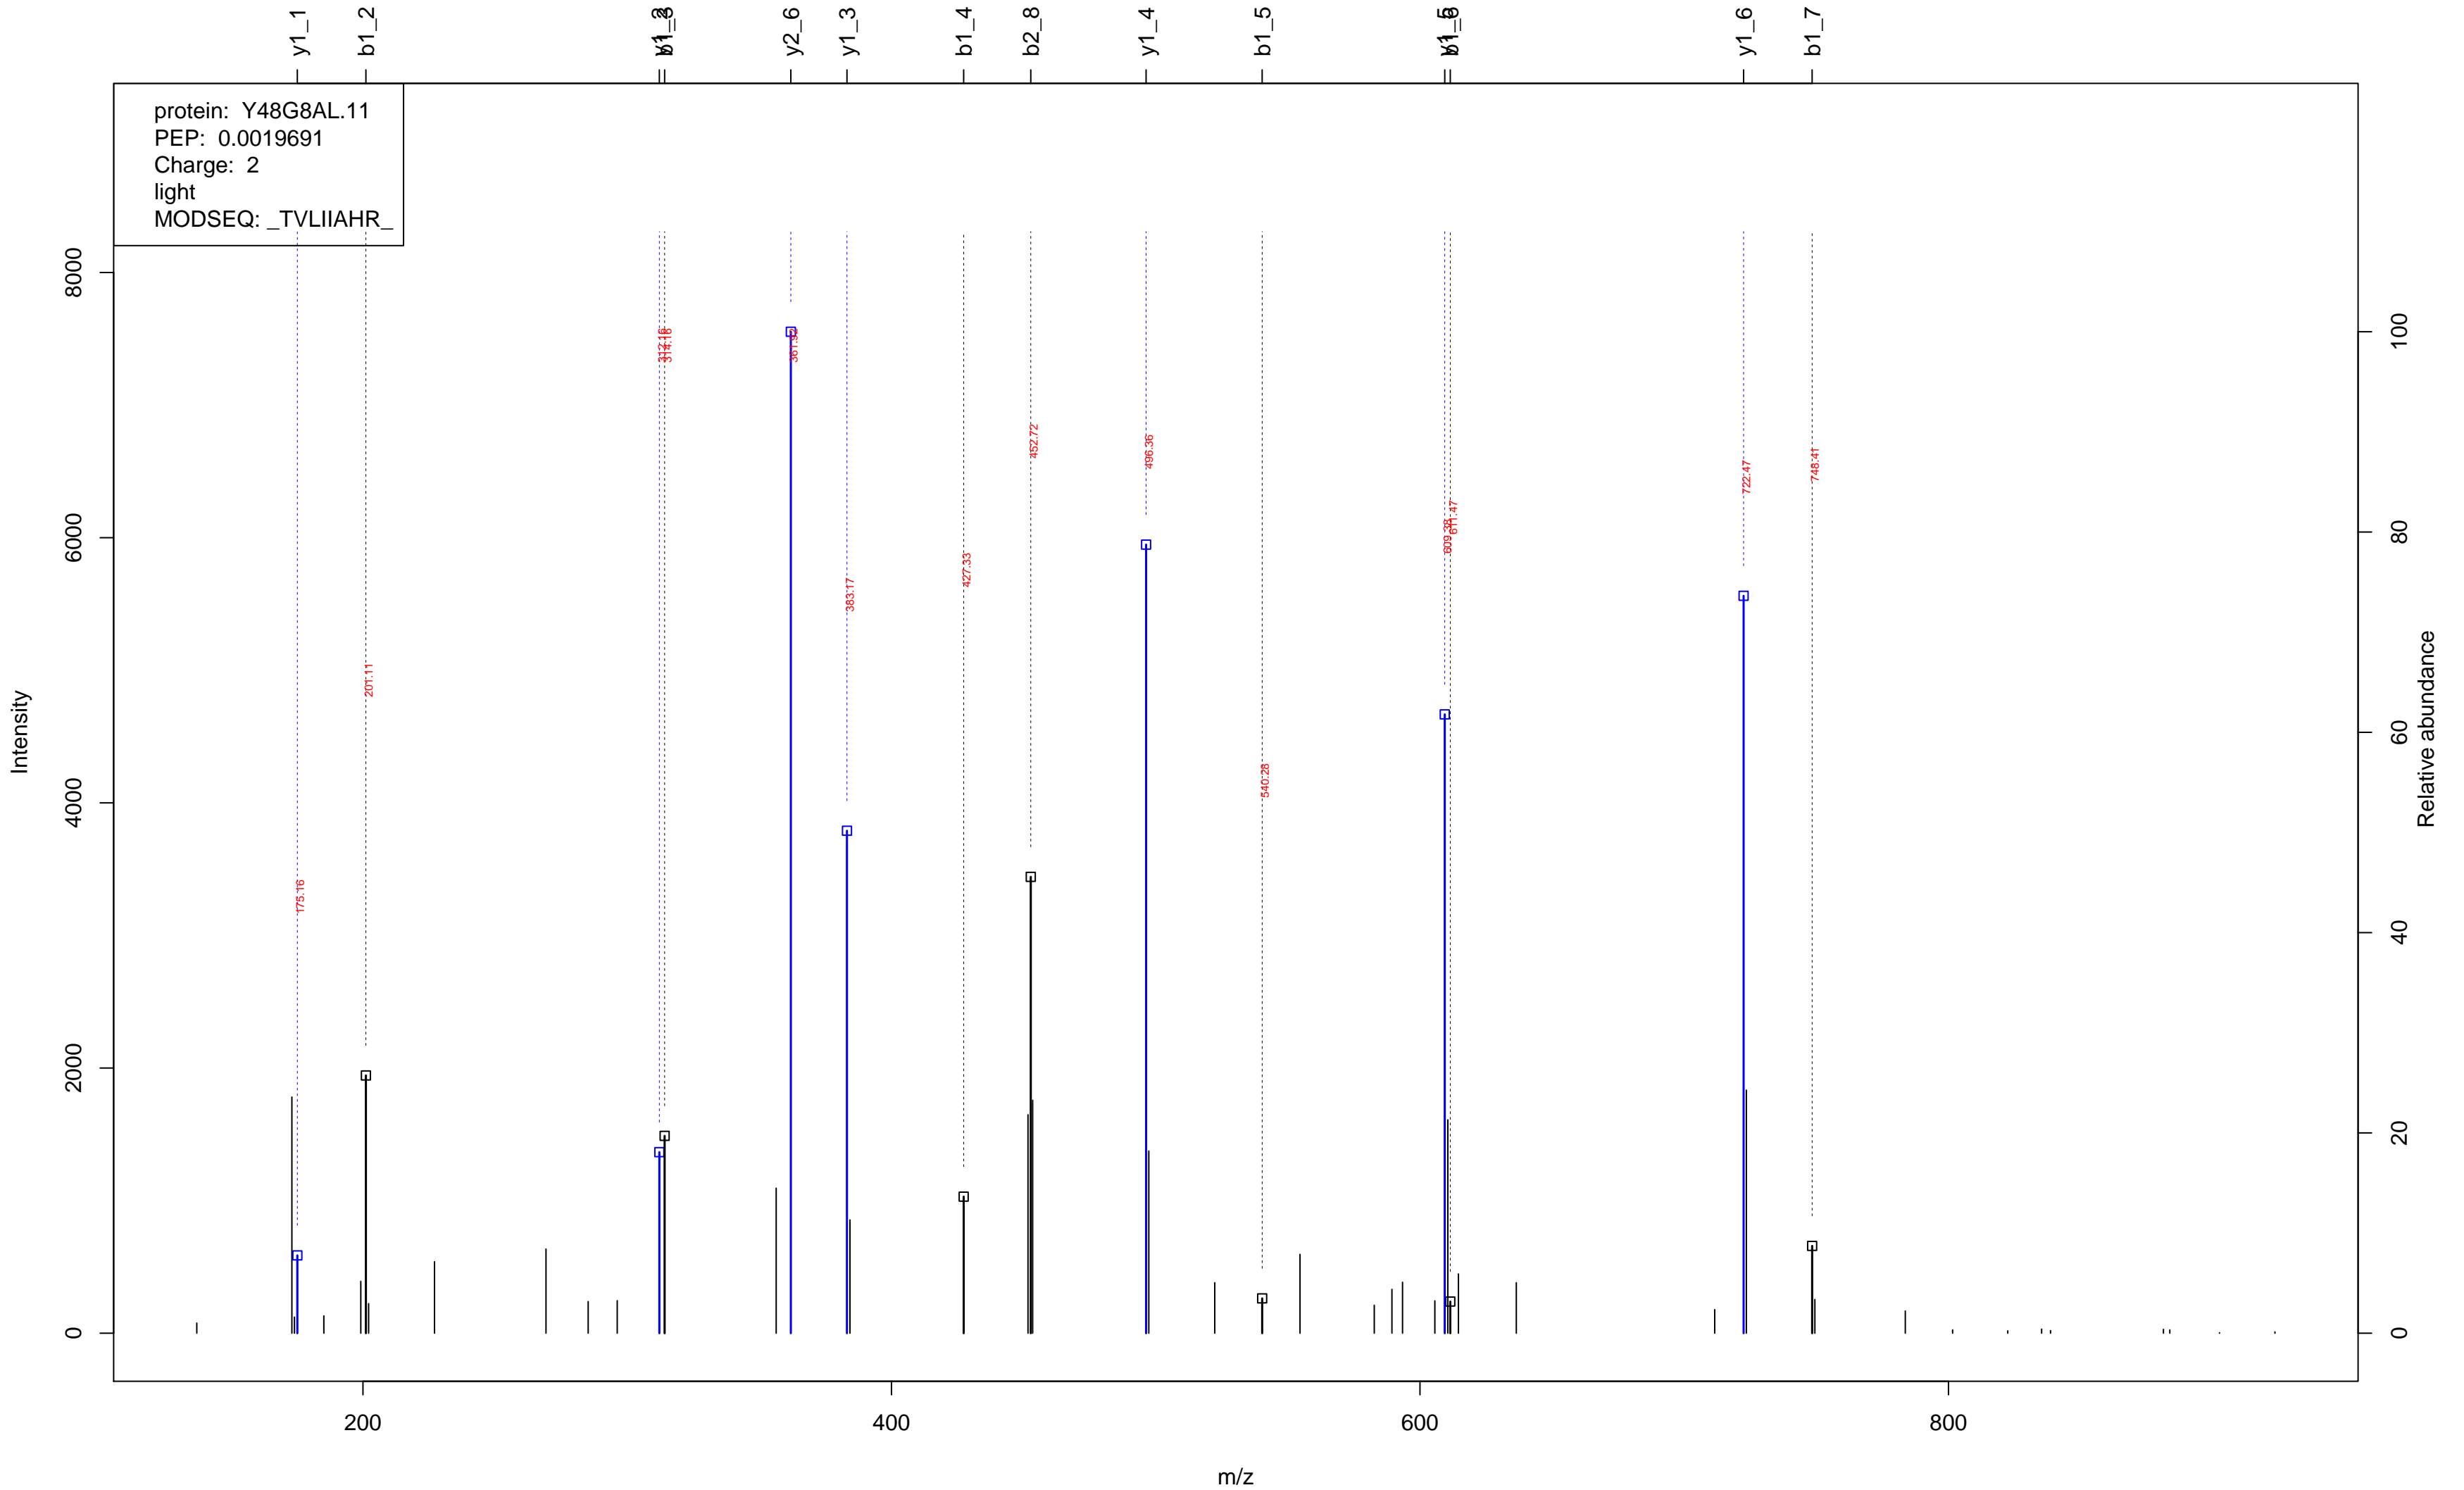

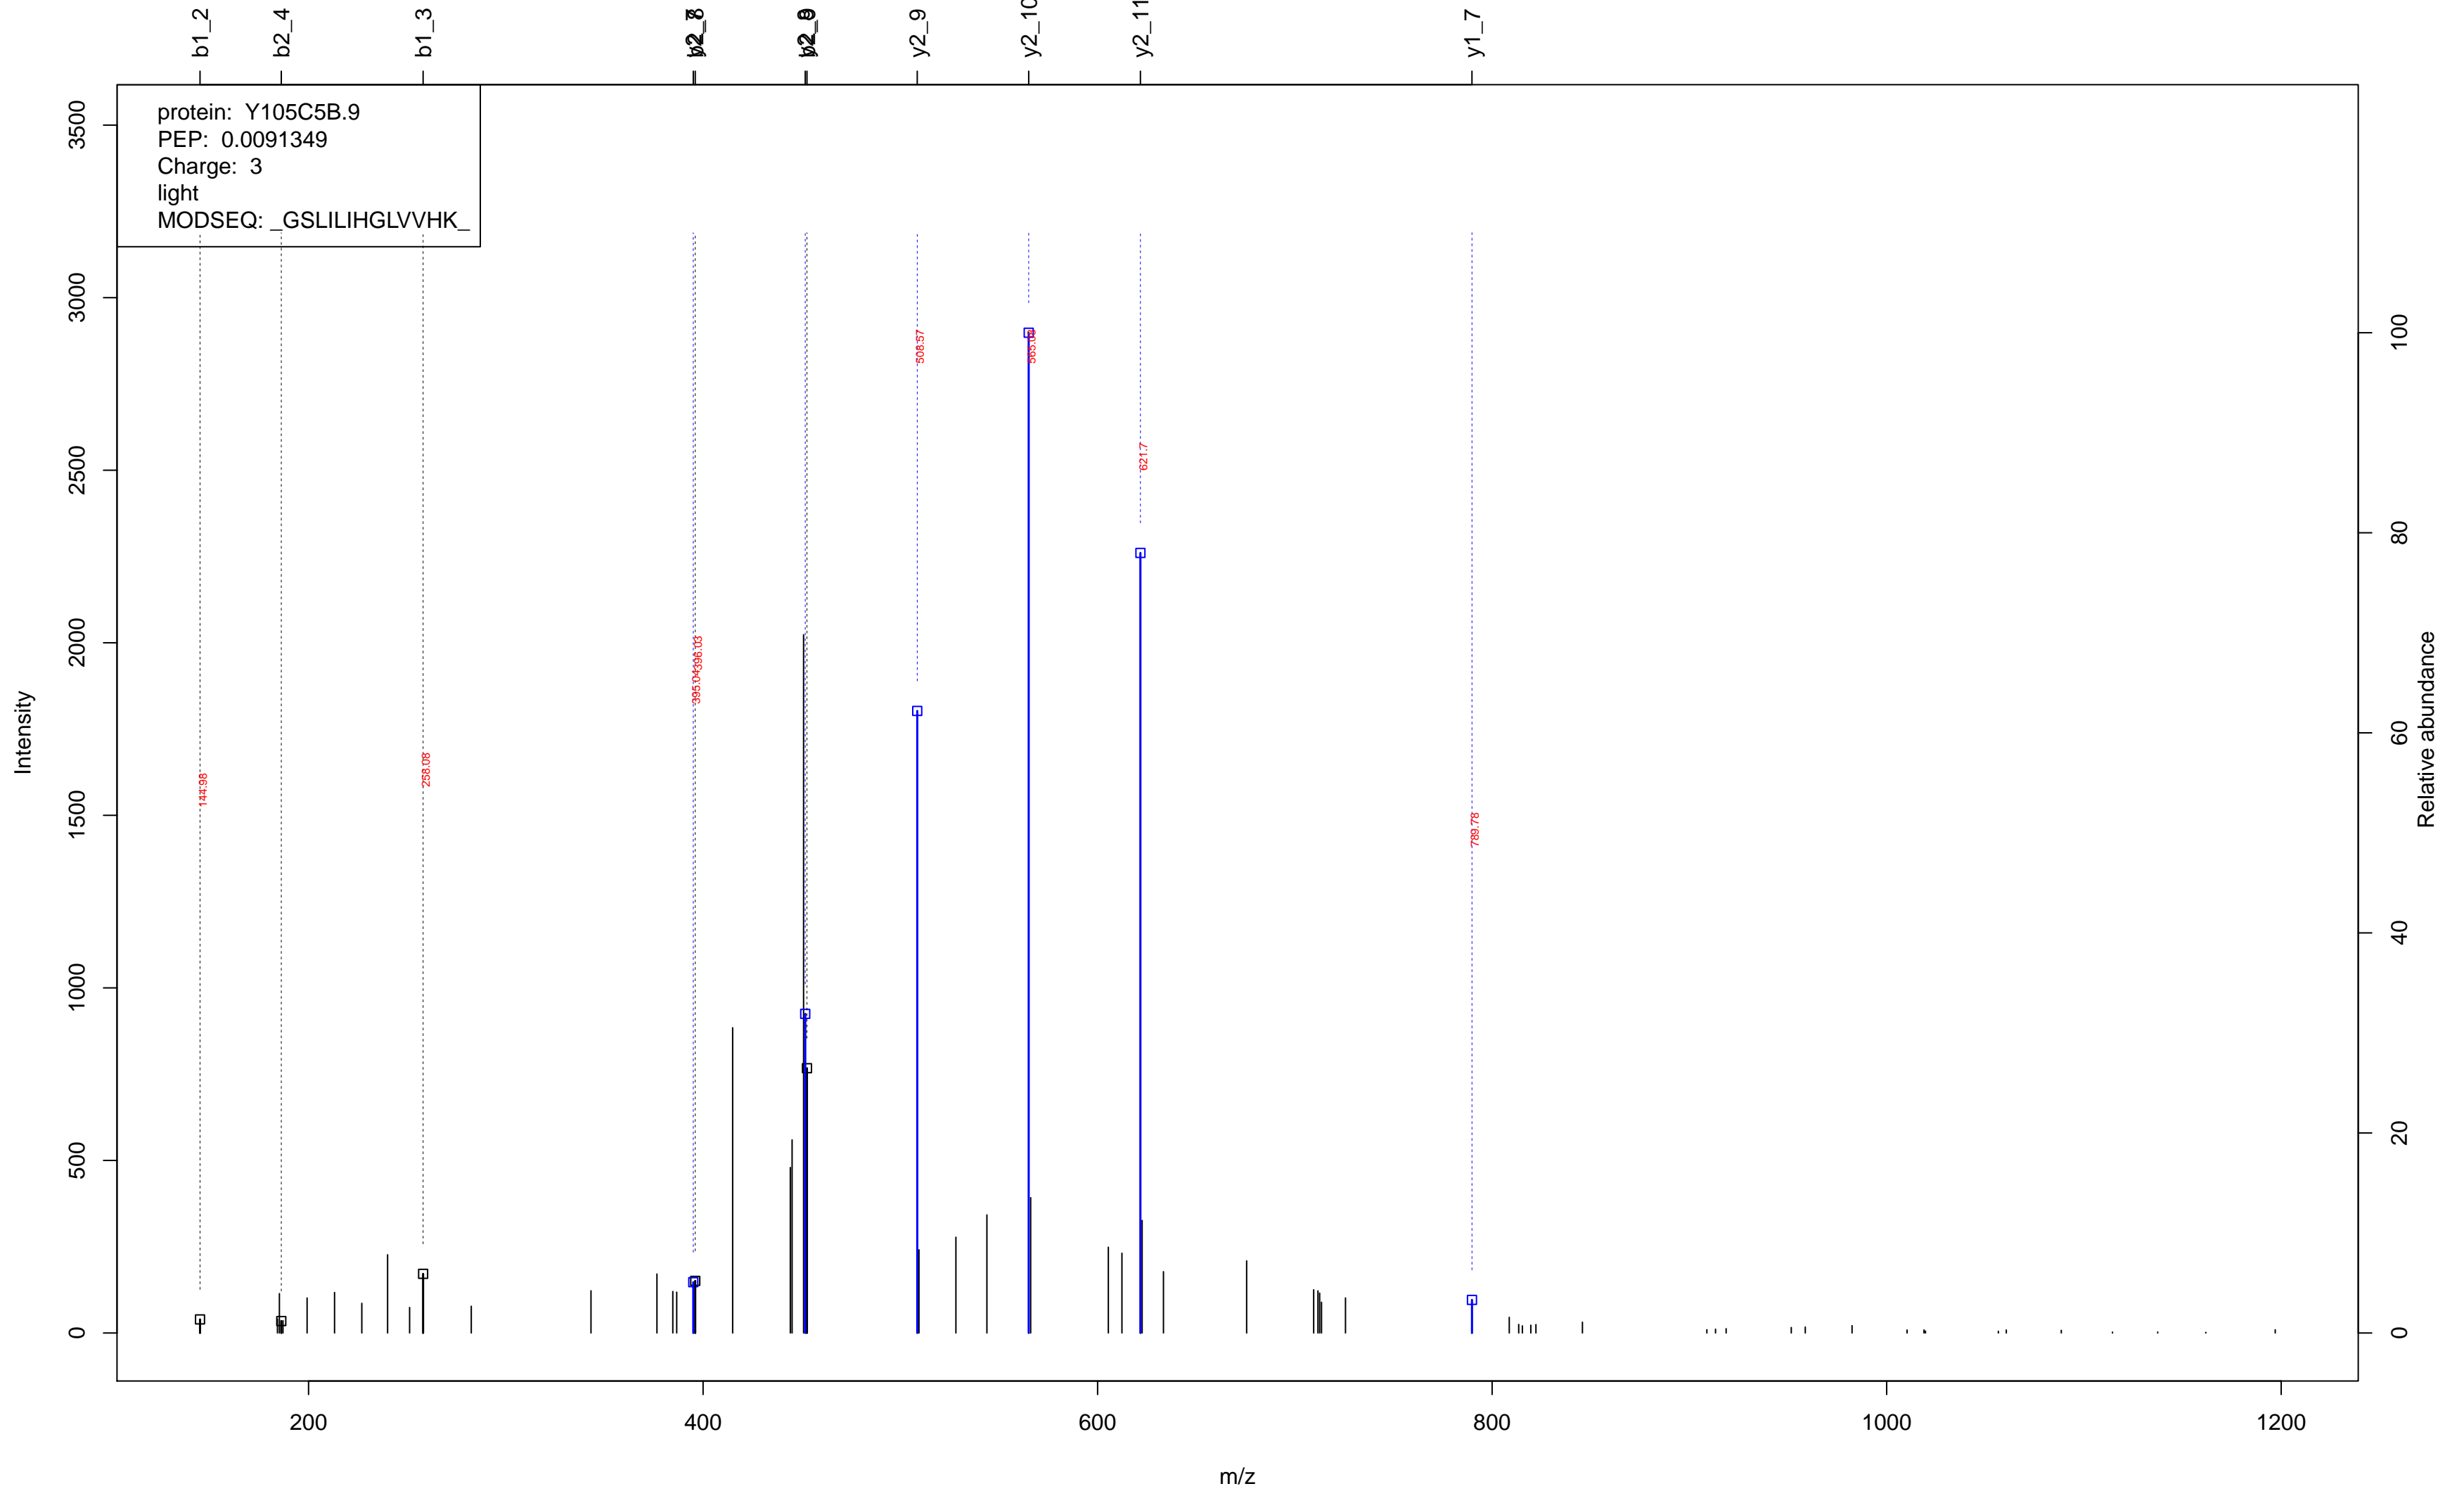

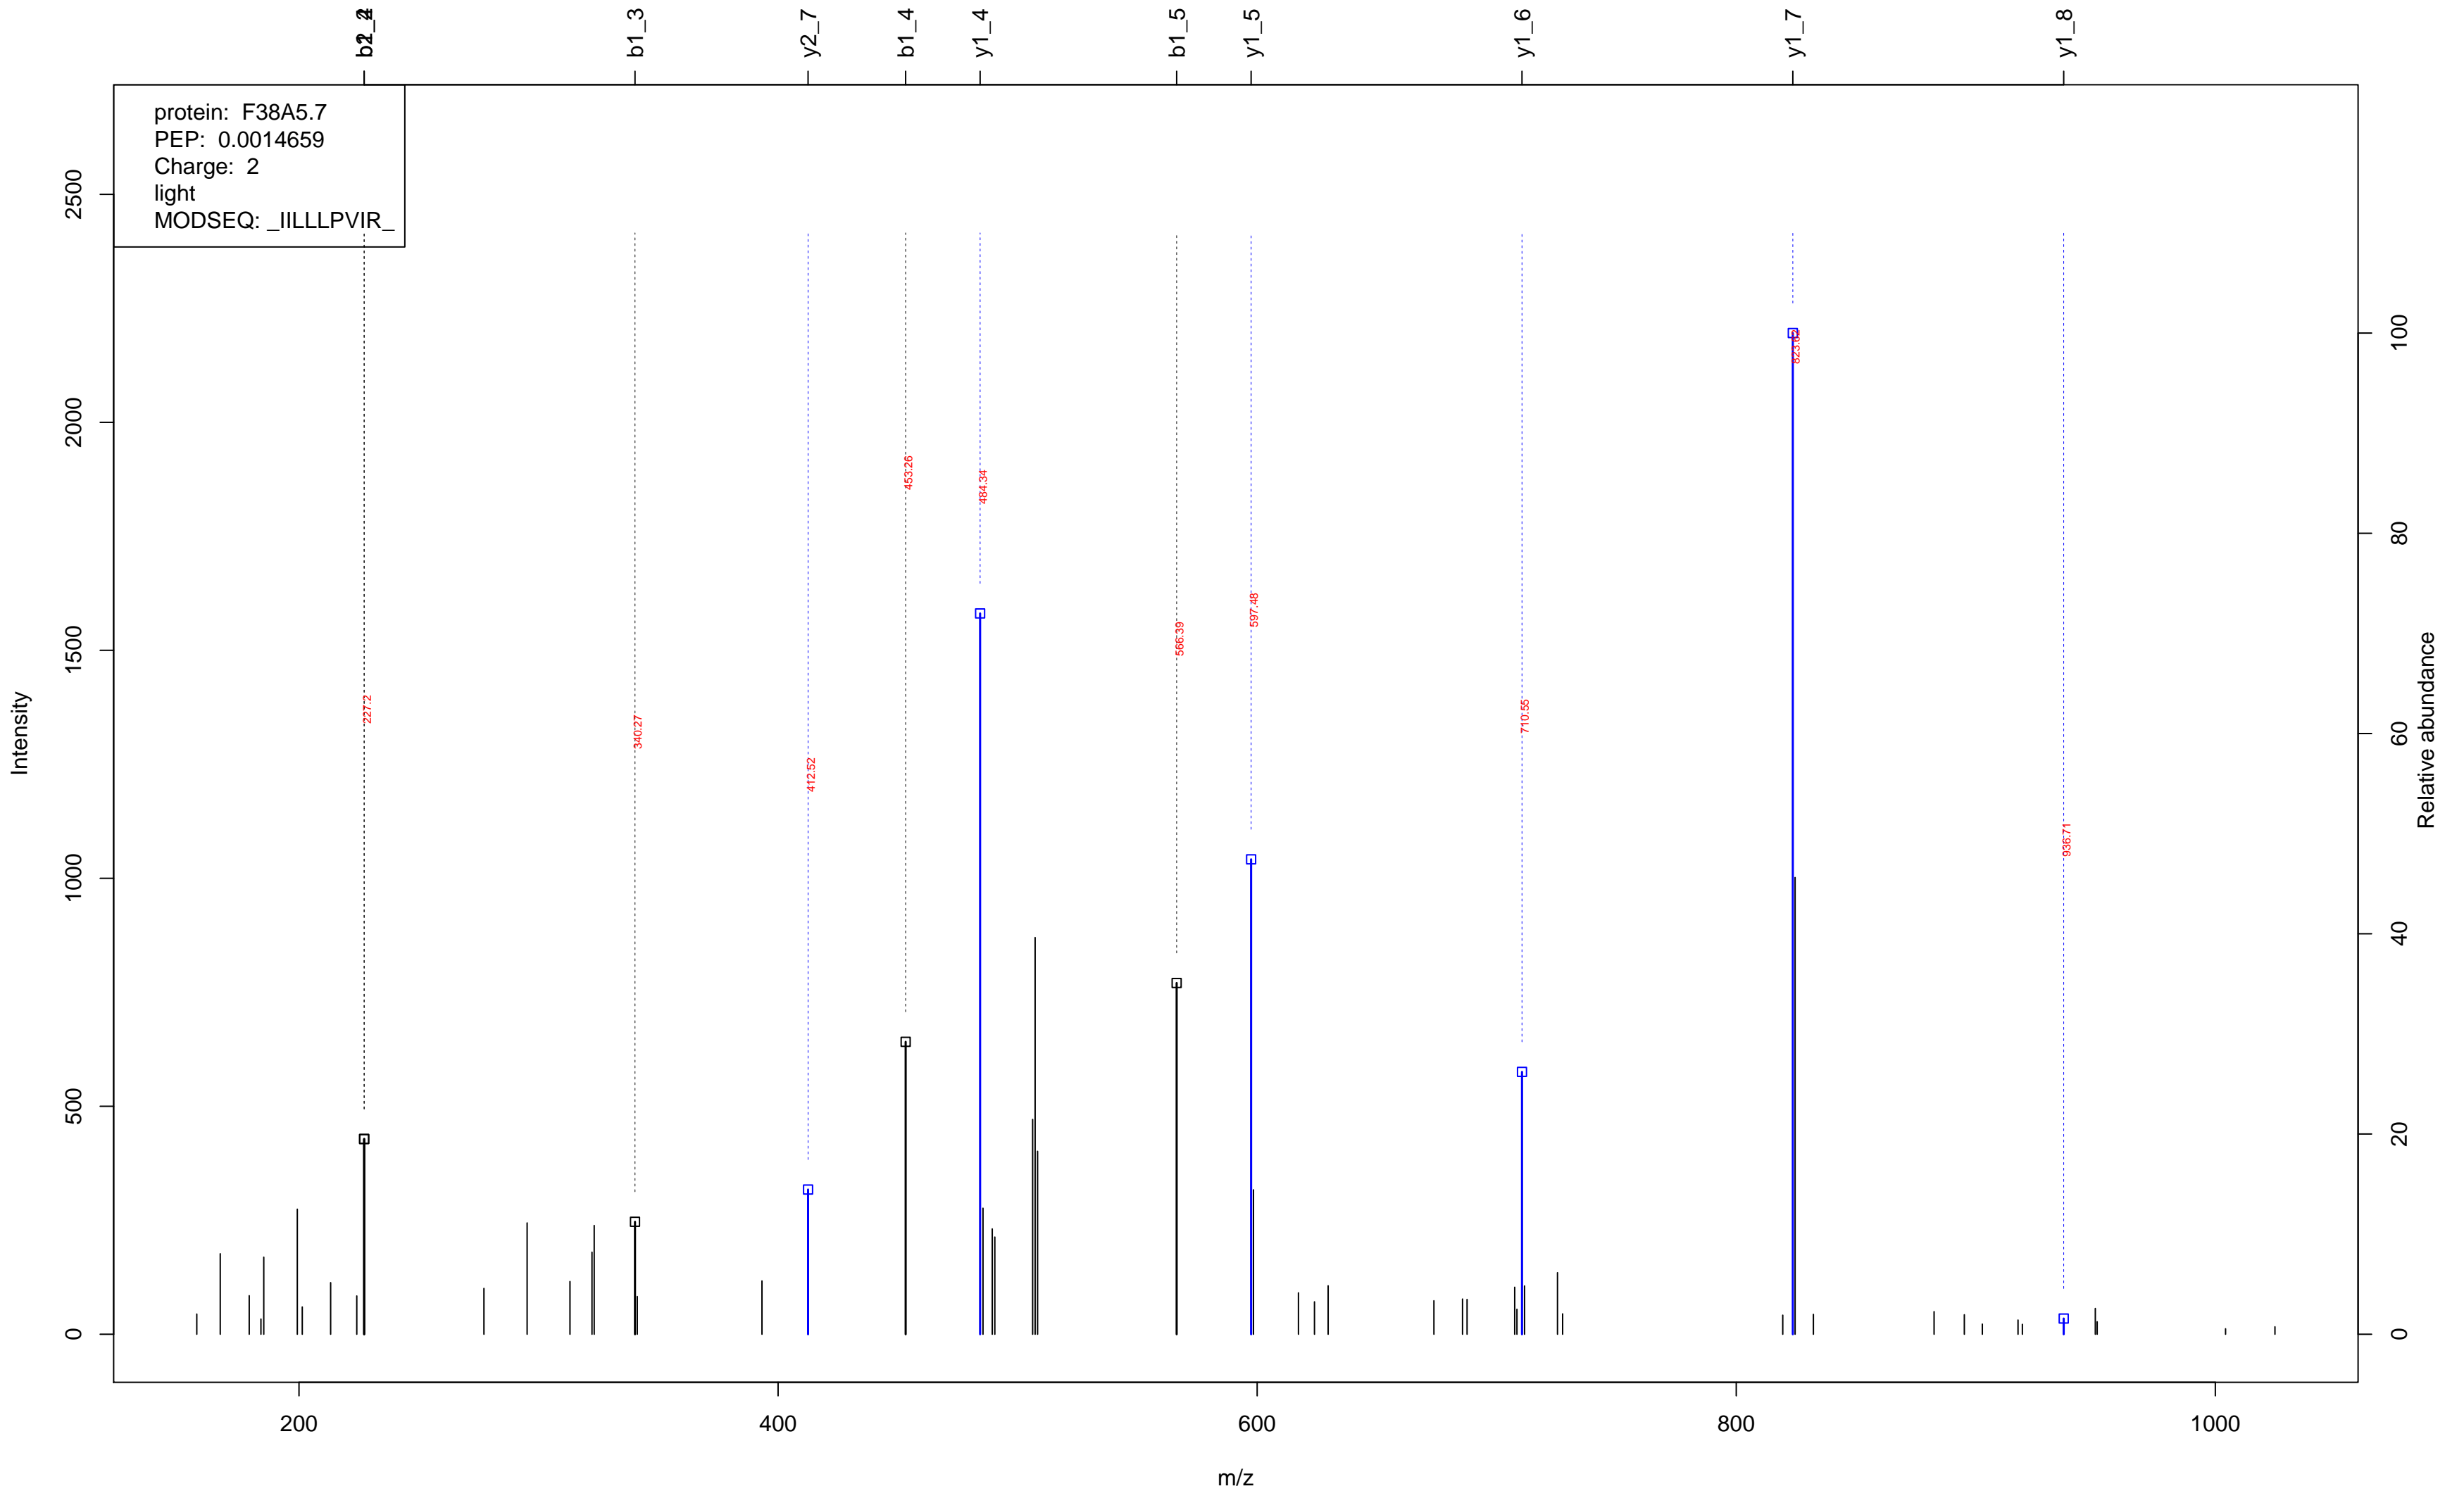

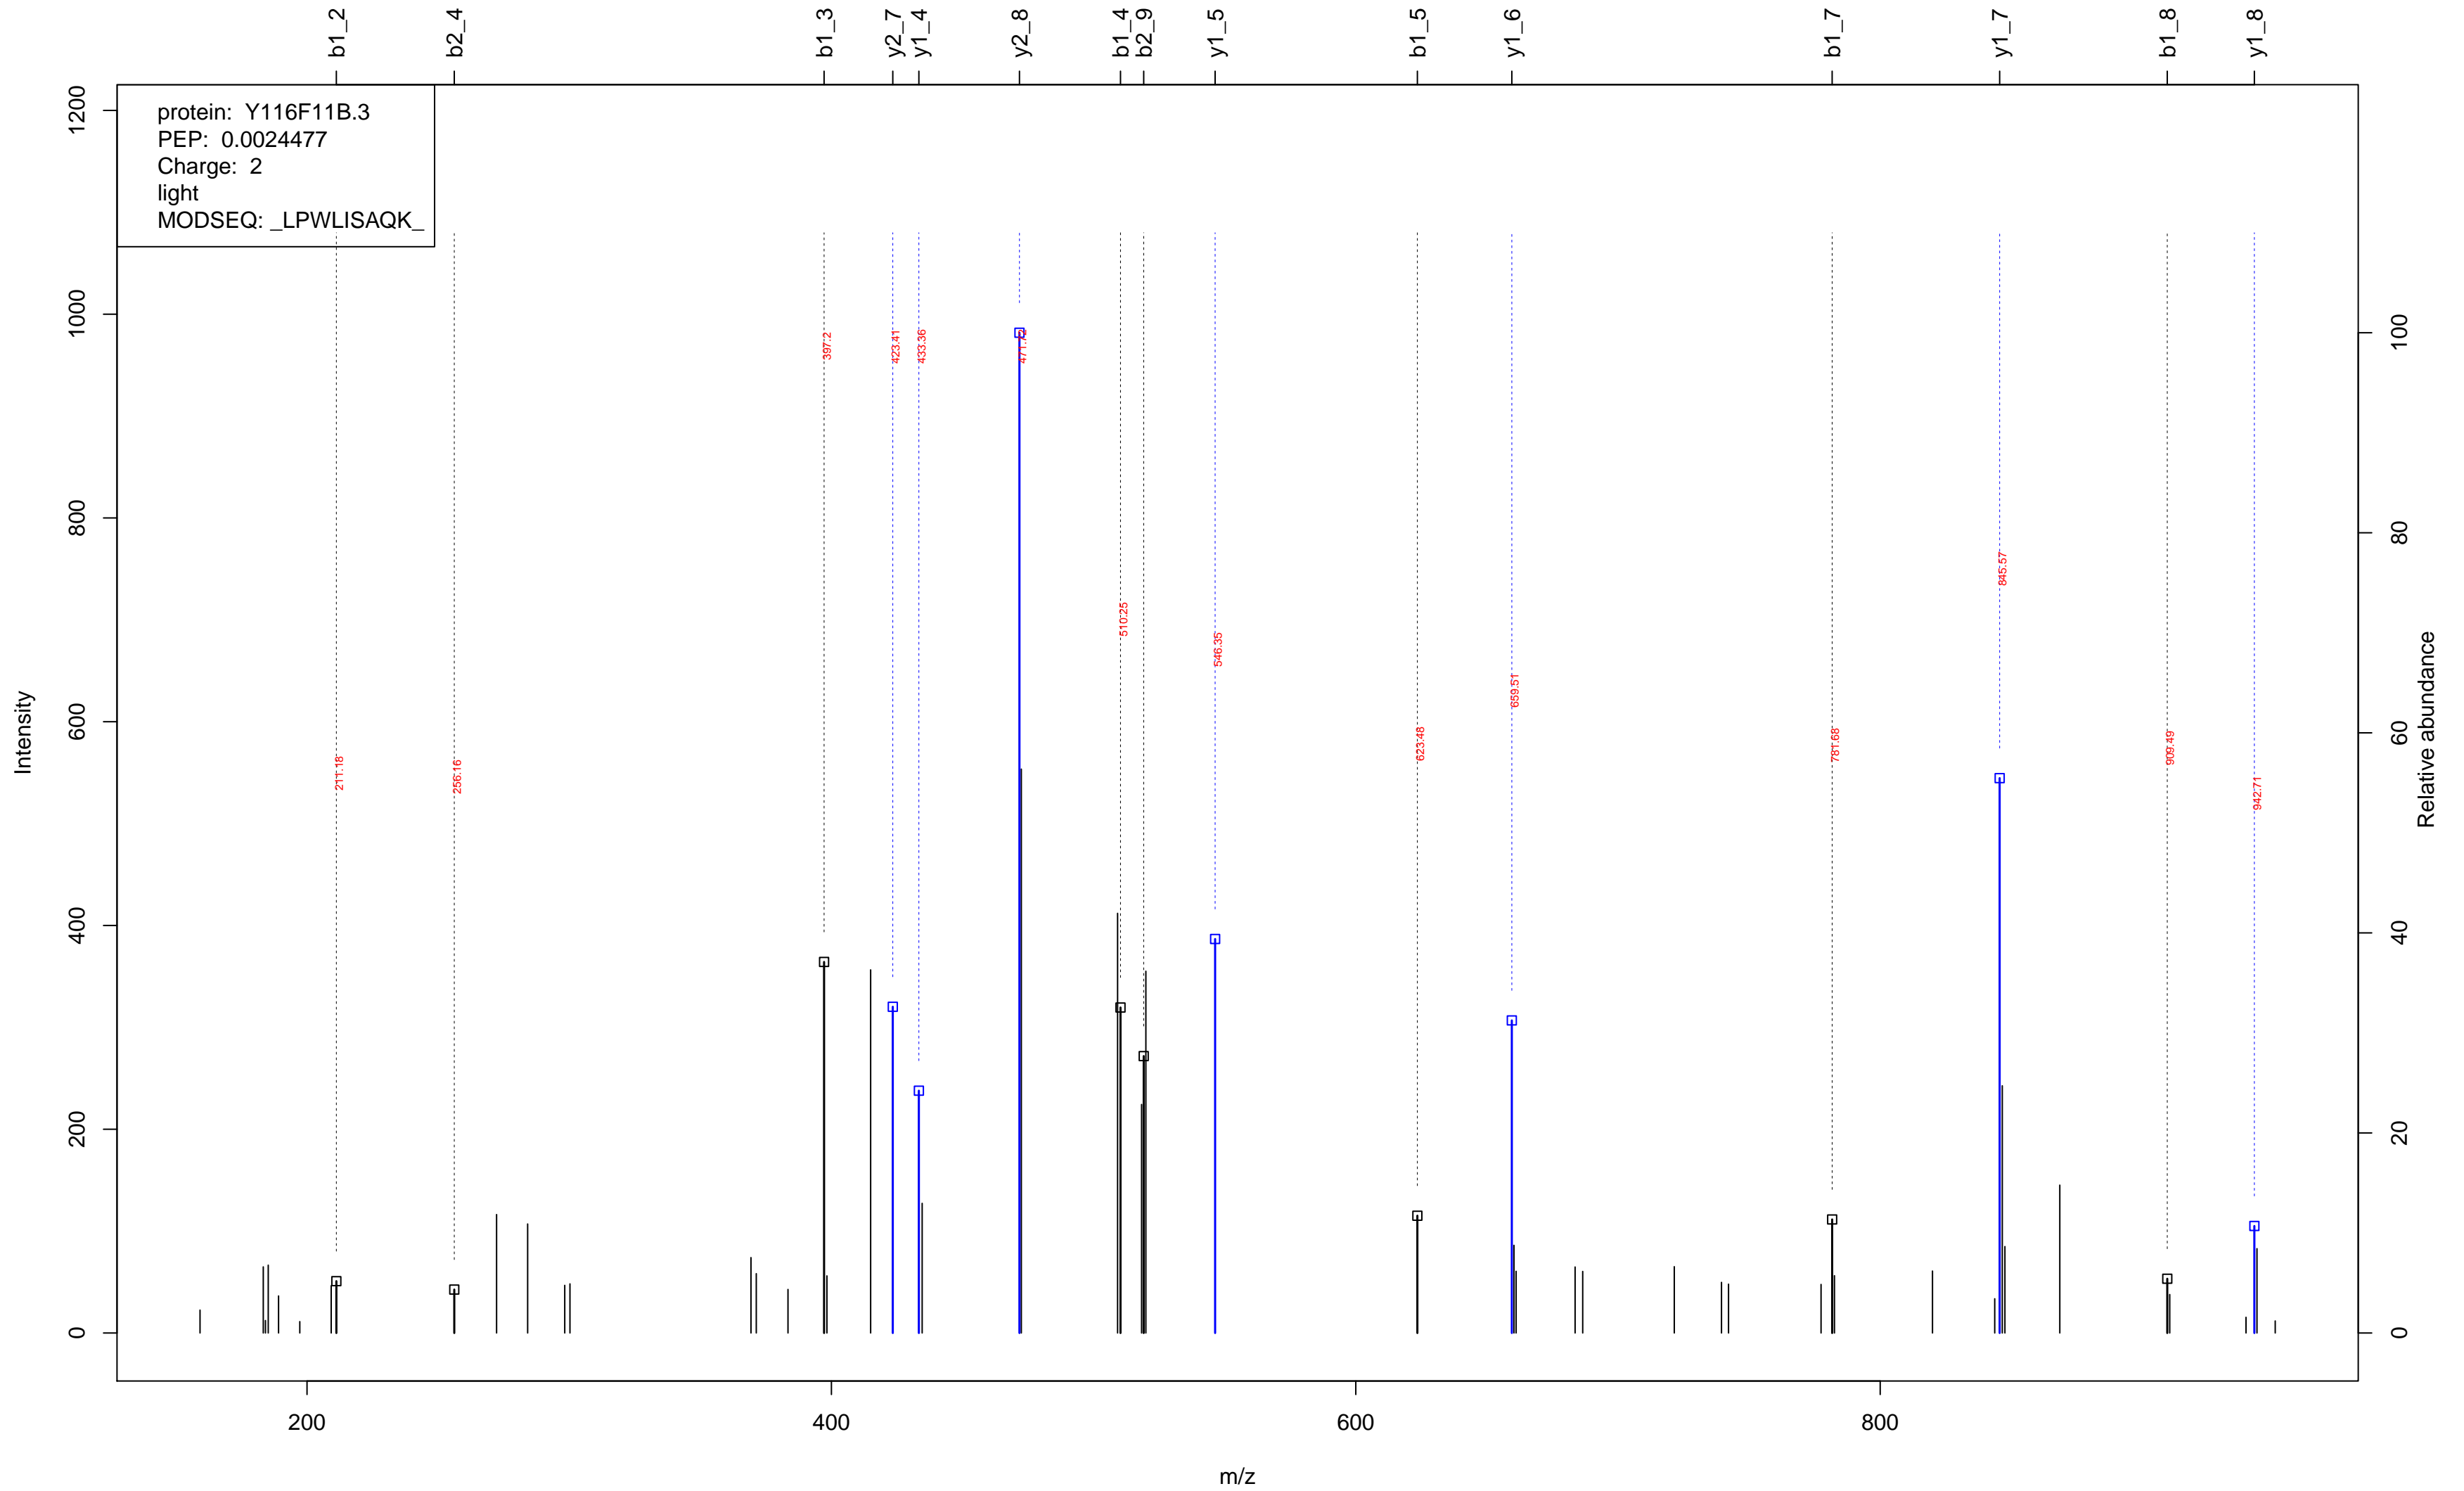

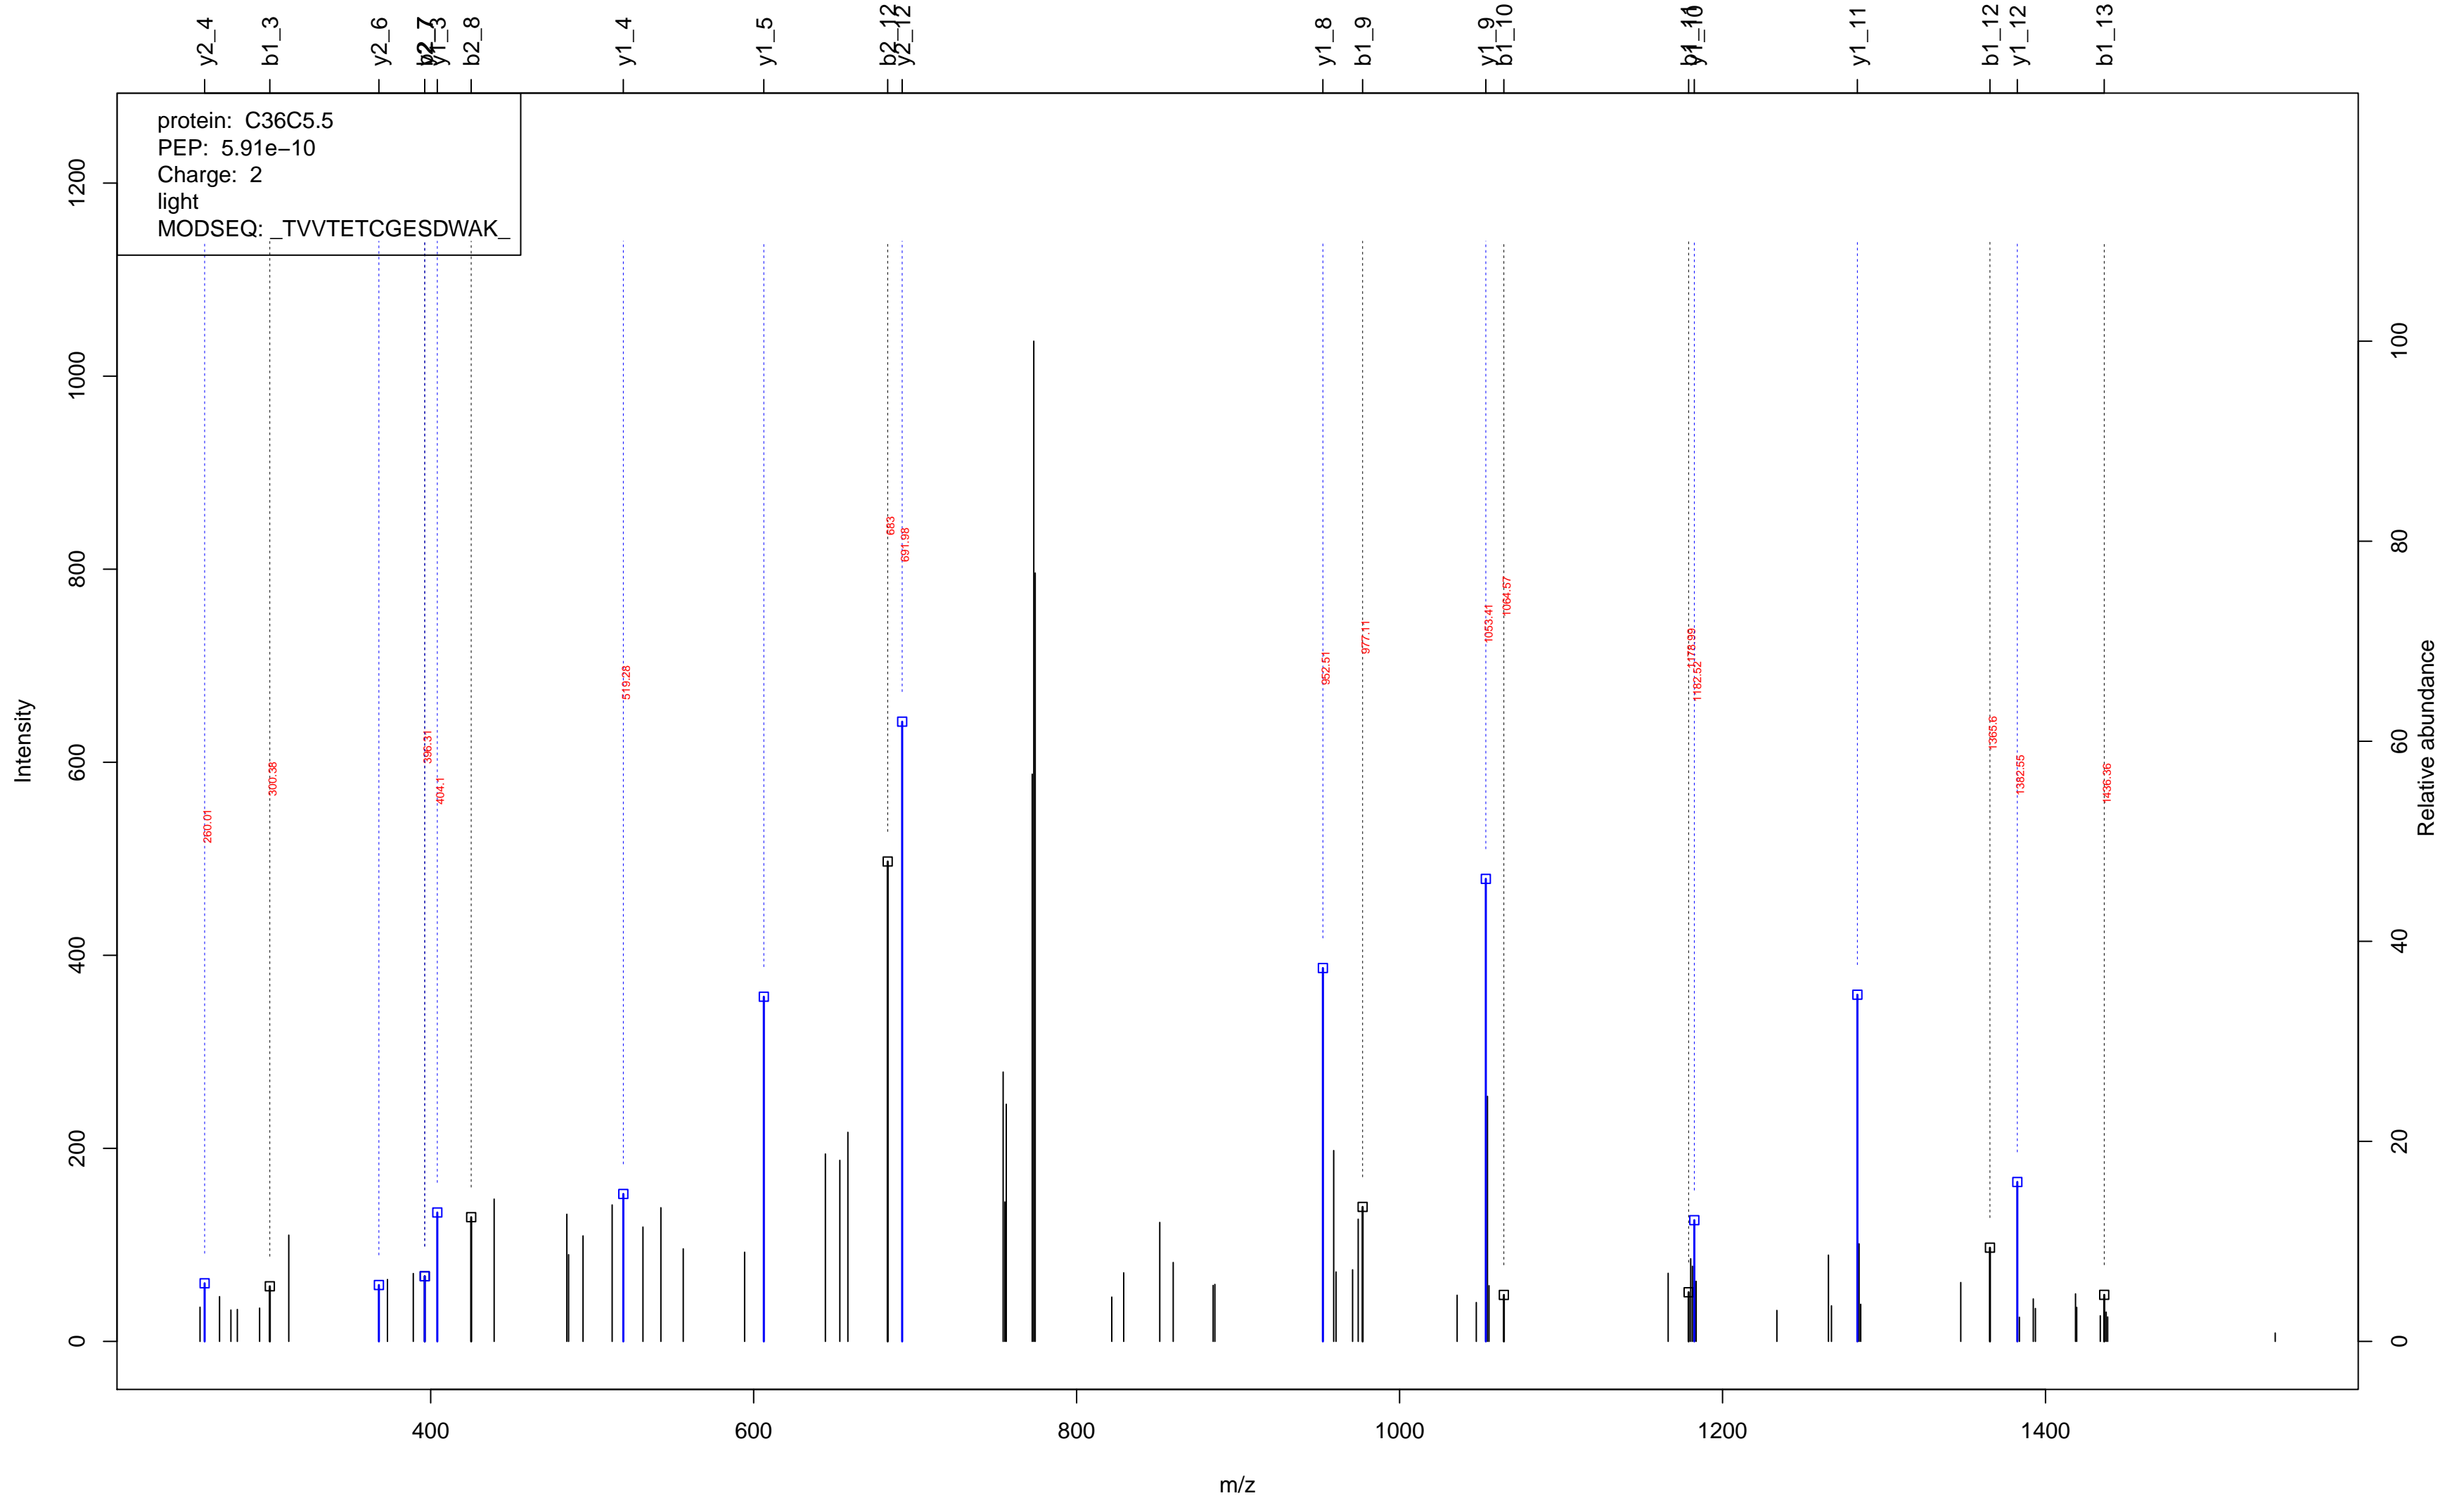

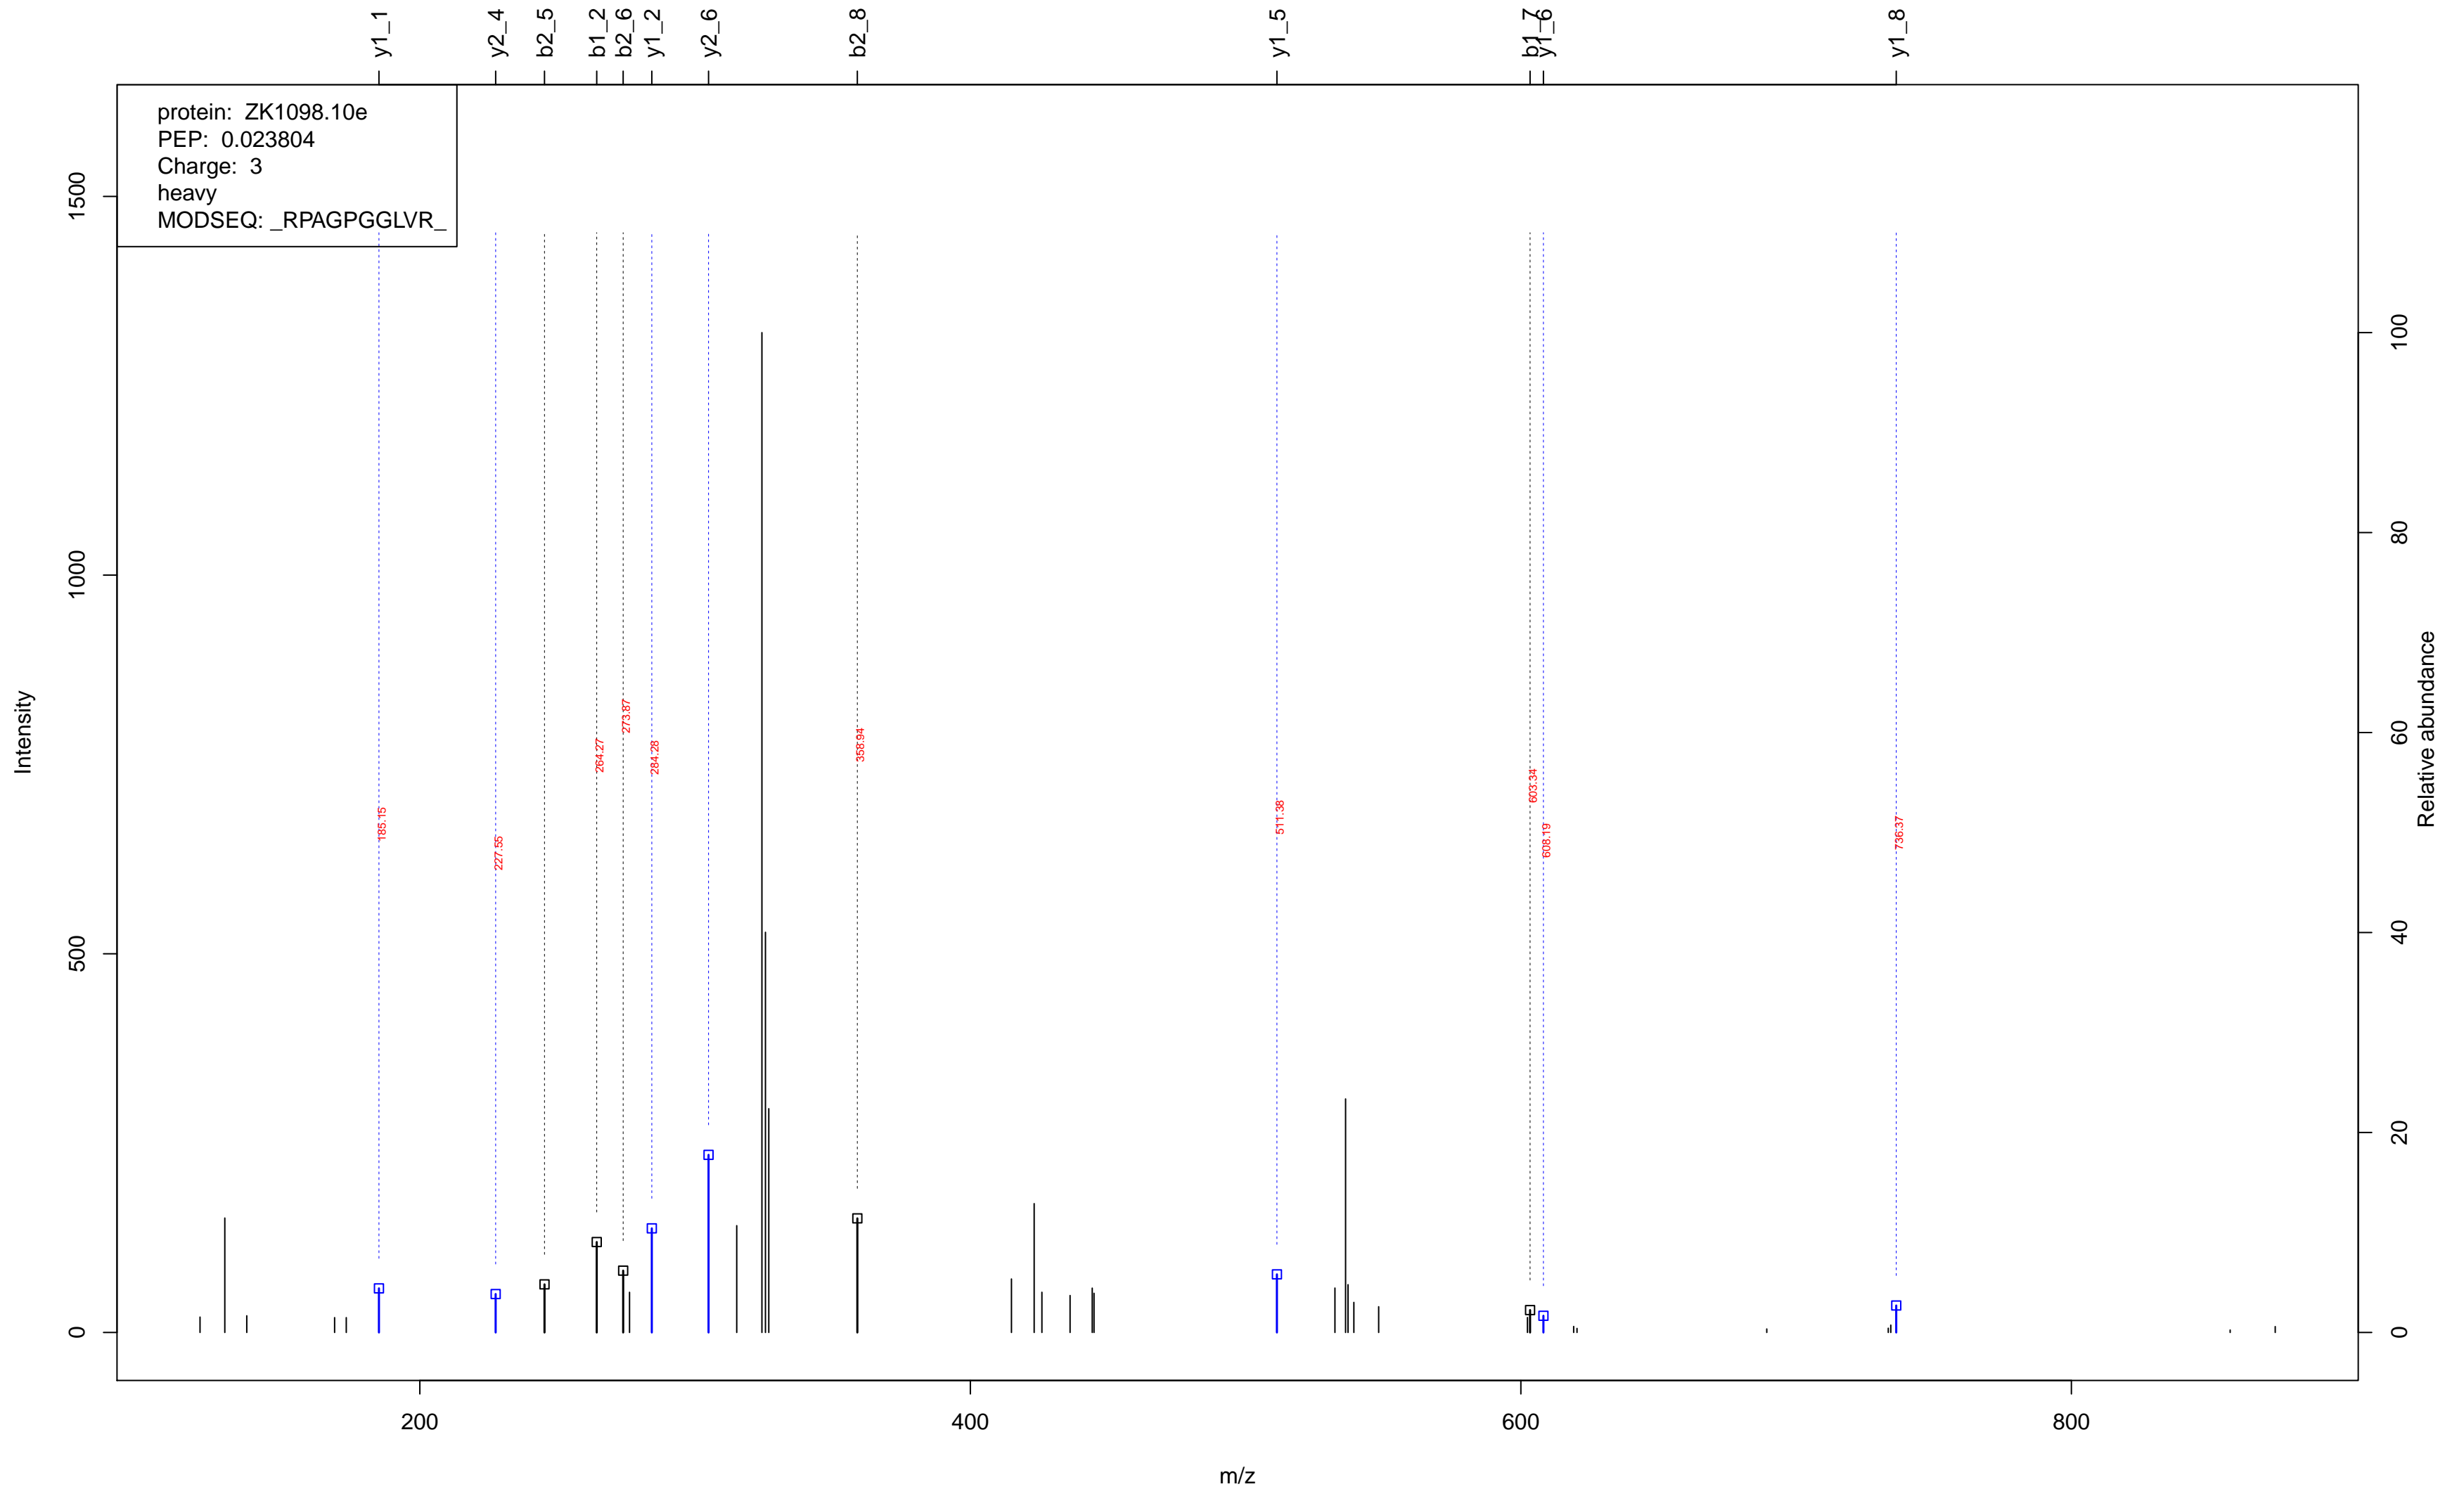

440

b1\_1 y1\_1 y2\_5 y1\_3 y1\_4 b2\_9 b2\_10 y1\_5 b1\_6 b2\_12 y2\_12 b1\_7 b1\_8 b1\_9

protein: K11D9.1a  
PEP: 0.00084085  
Charge: 3  
heavy  
MODSEQ: \_RPTGAFTQHVPVR\_

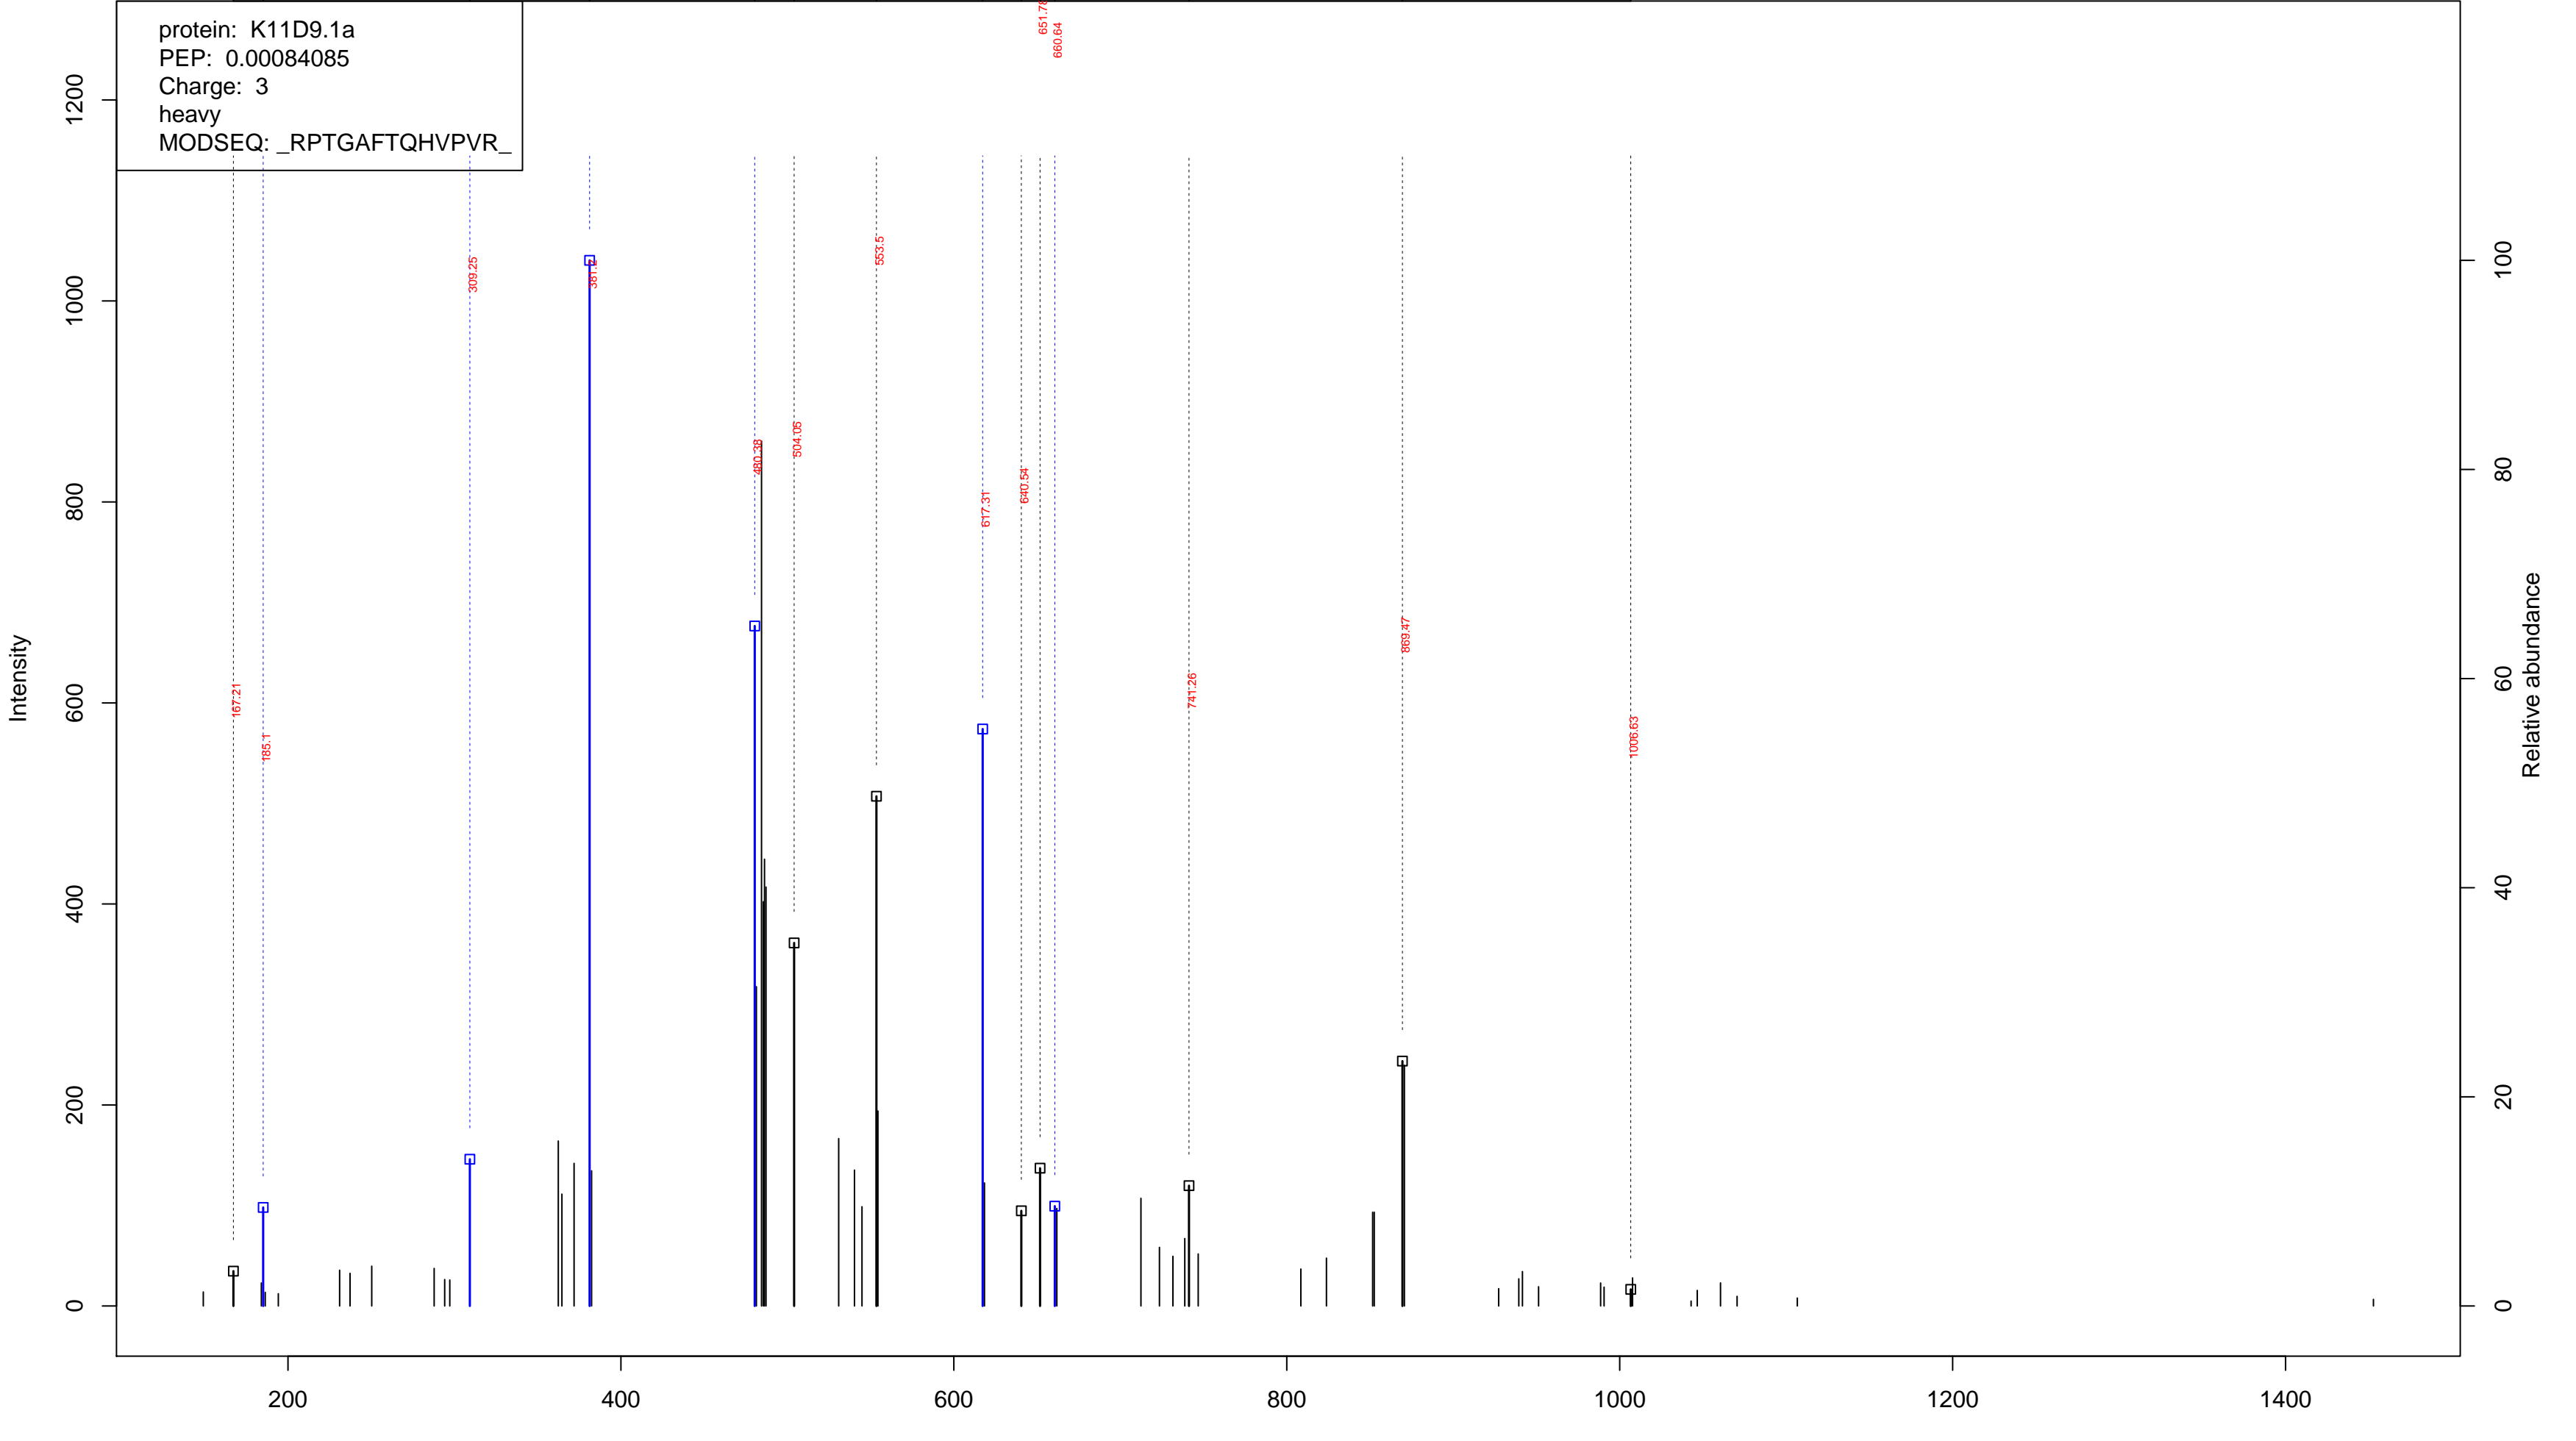



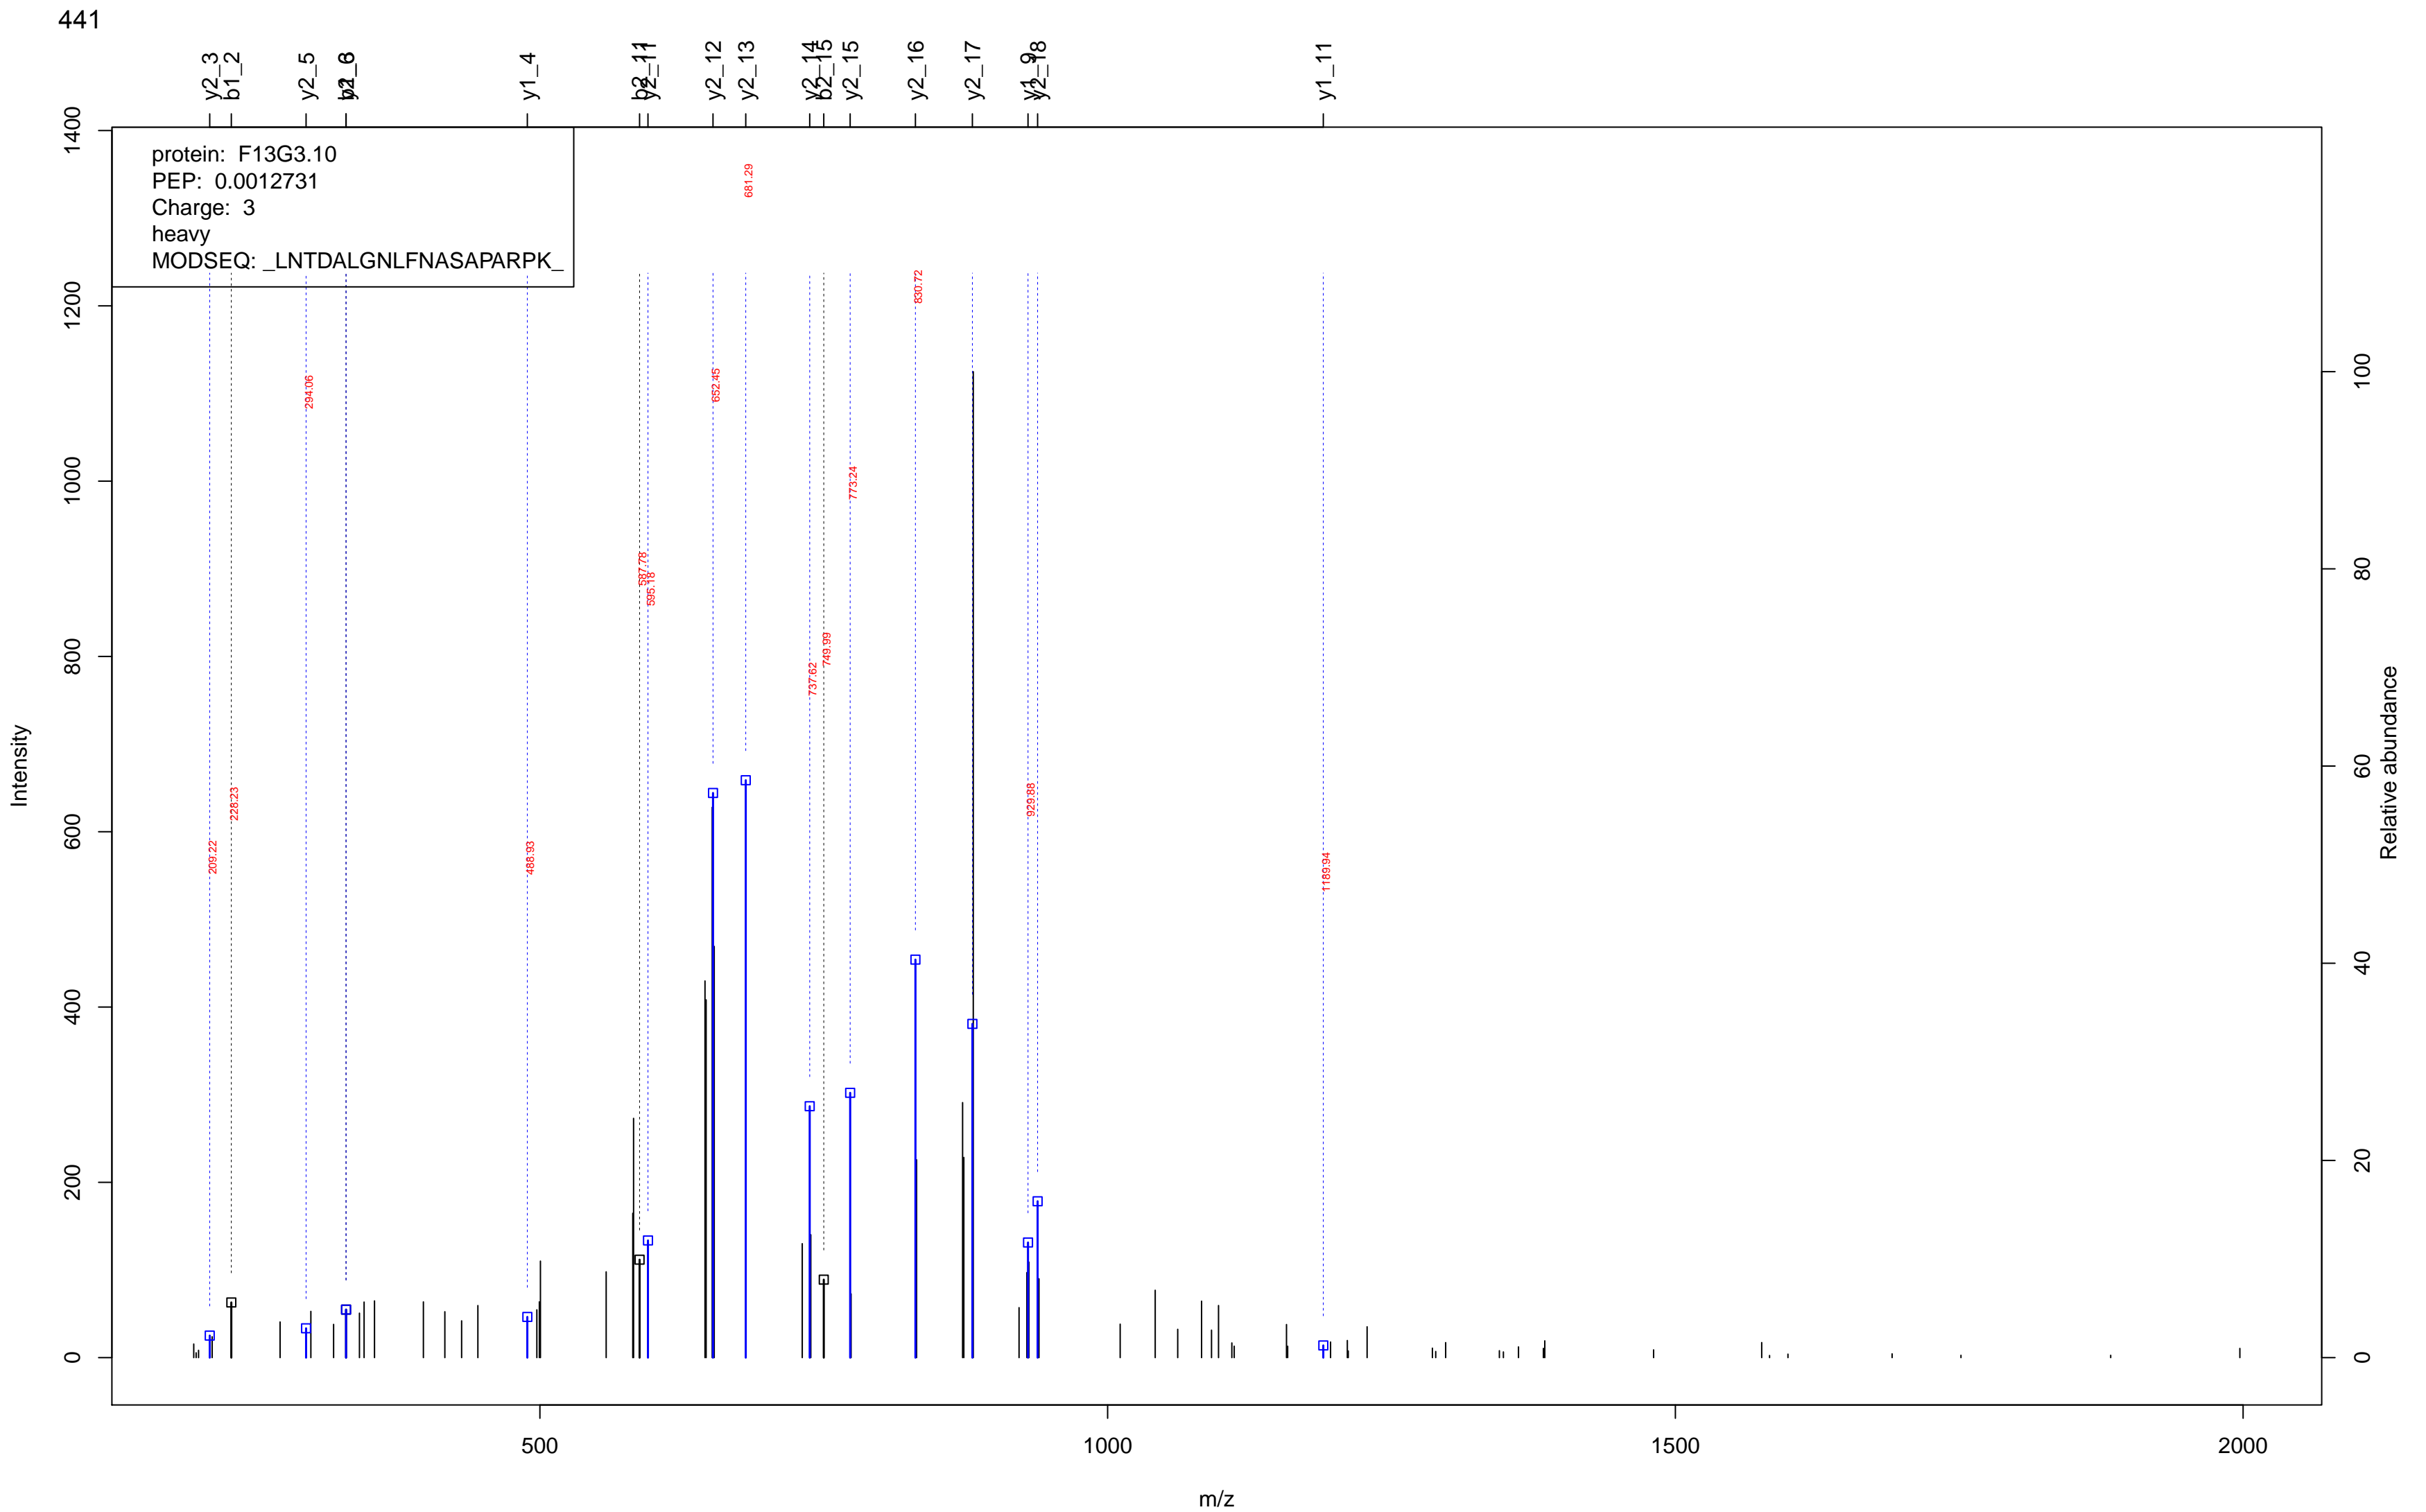

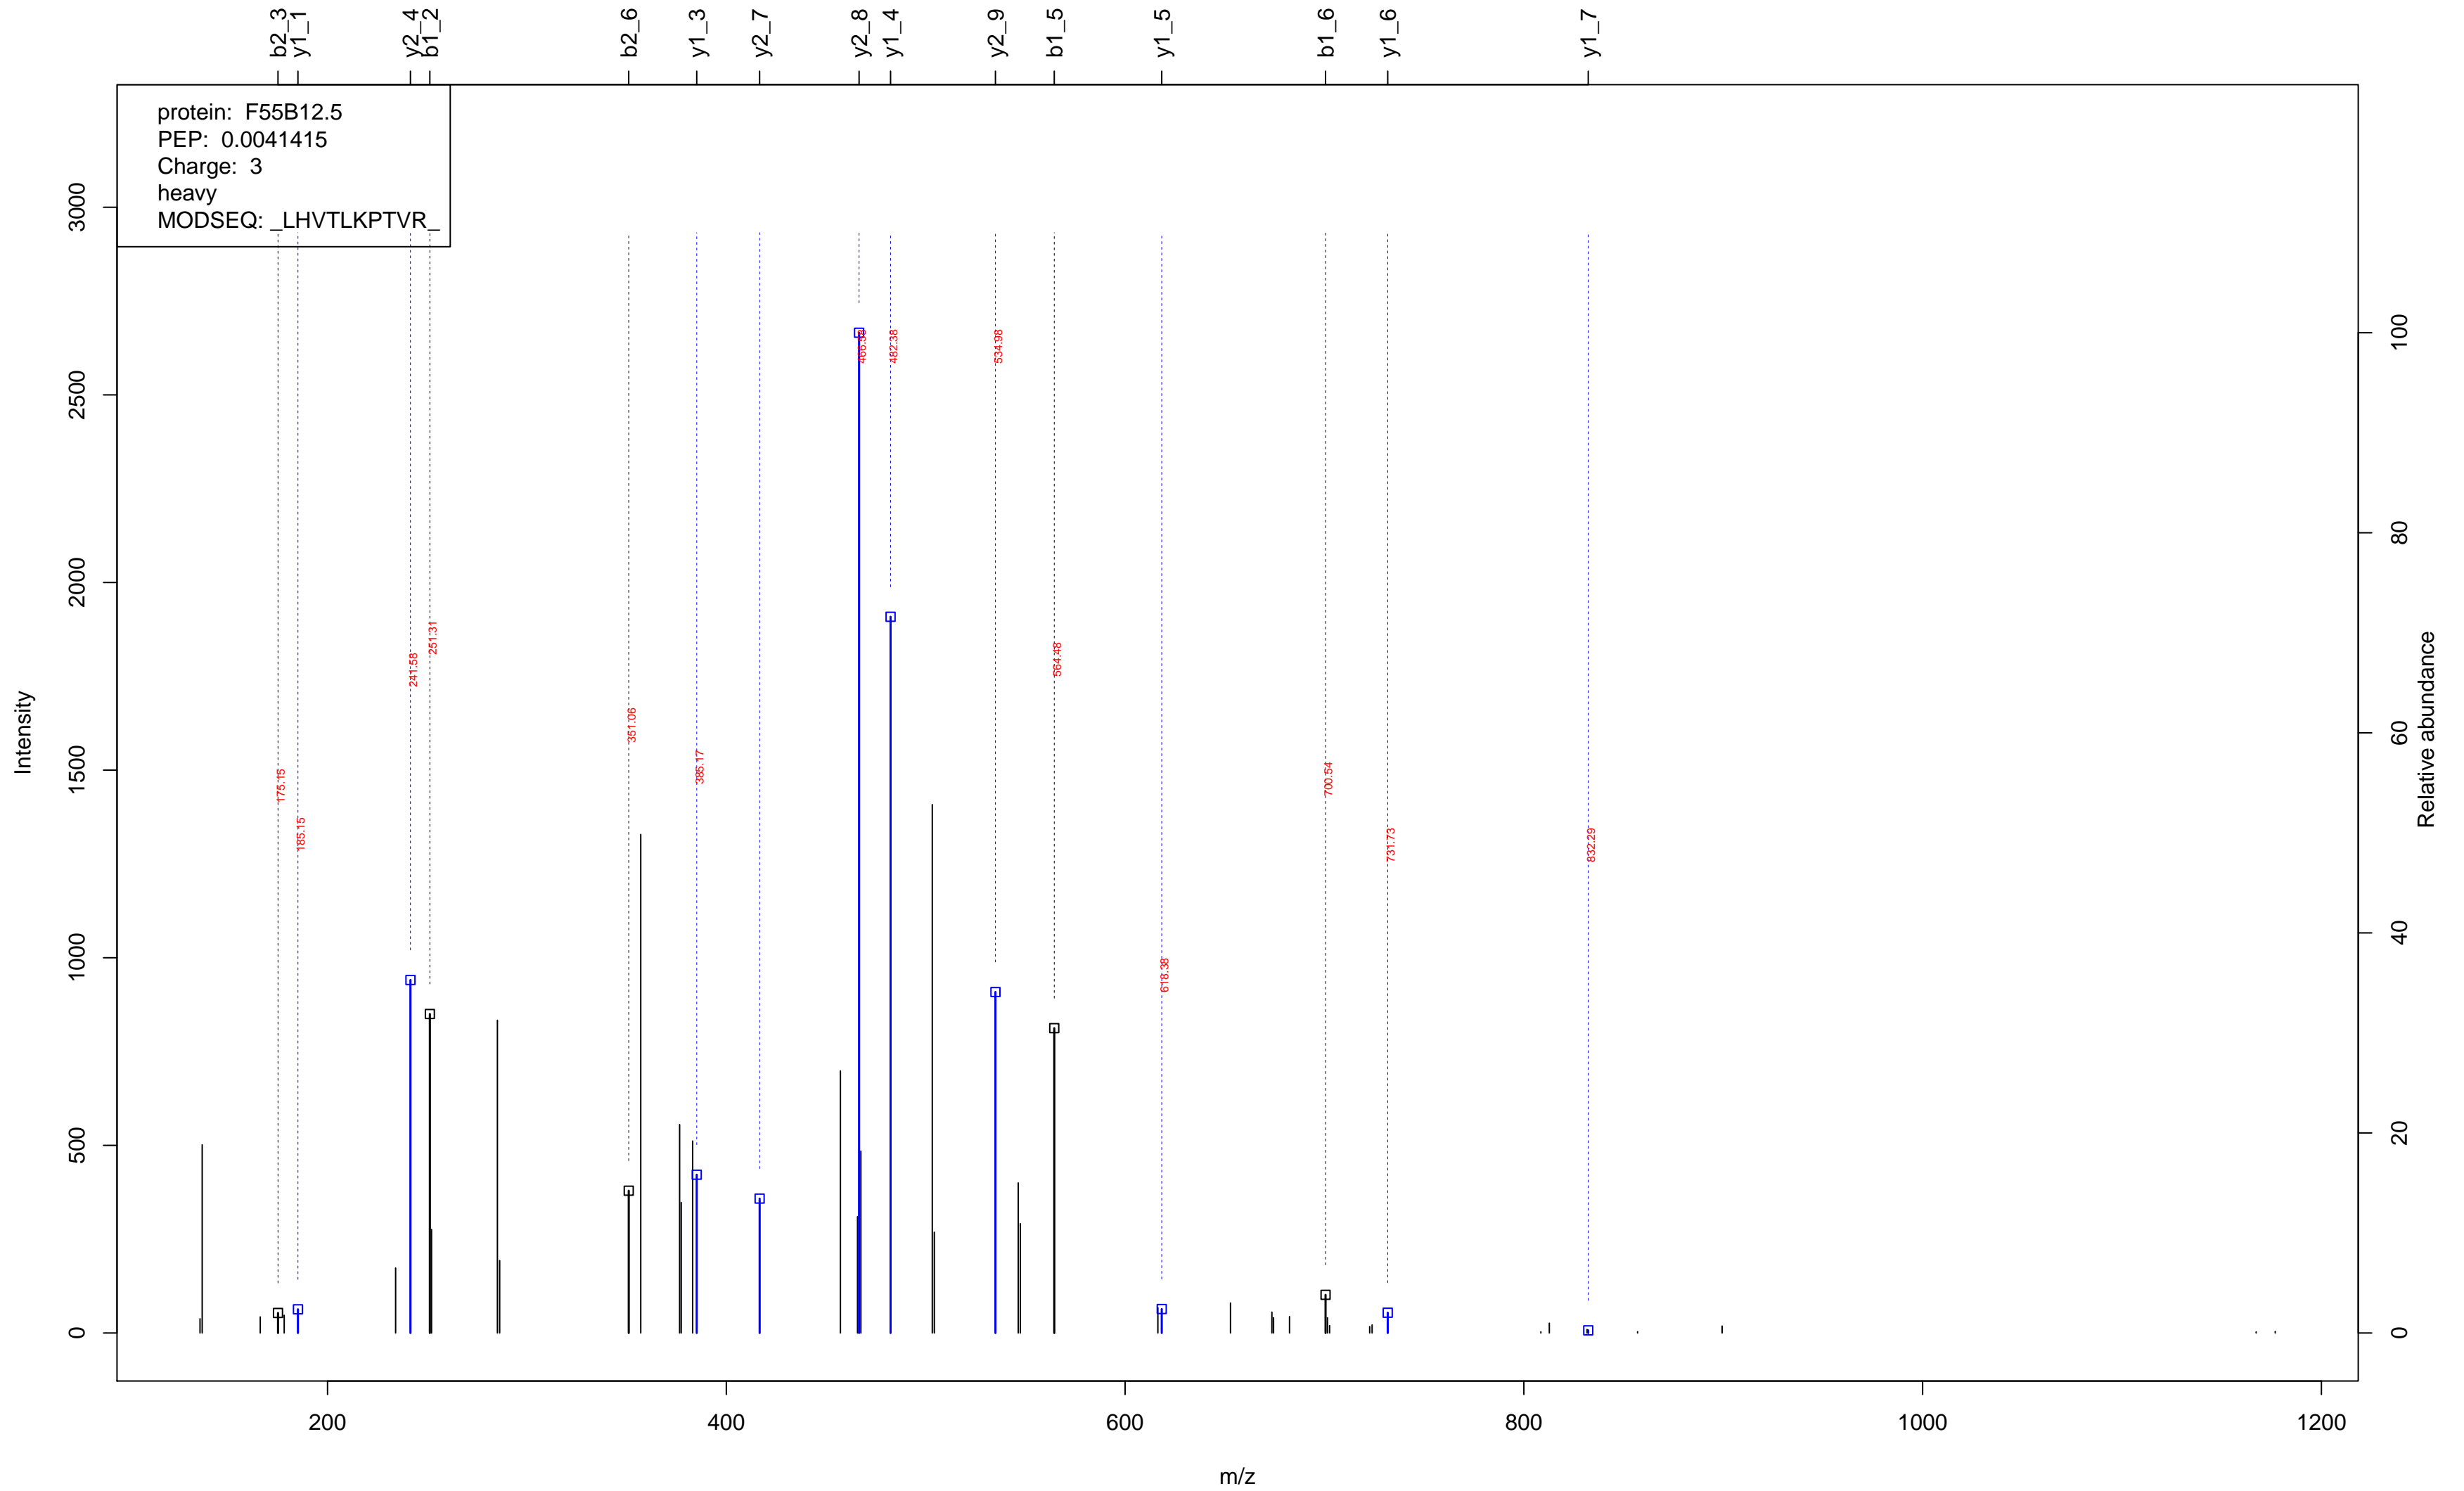

Supplement: 10.1074_M115.052548_mcp.M115.052548-6.pdf [file 10.1074_M115.052548_mcp.M115.052548-6.pdf]
