# Supplementary material
Source: PubMed Central journal article supplement (PMC4858947)
Supplement: 10.1074_M115.052548_mcp.M115.052548-1.pdf [file 10.1074_M115.052548_mcp.M115.052548-1.pdf]

## SUPPLEMENTAL DATA

### NATURAL GENETIC VARIATION DIFFERENTIALLY AFFECTS THE PROTEOME AND TRANSCRIPTOME IN *C. ELEGANS*

Polina Kamkina, L. Basten Snoek, Jonas Grossmann, Rita J. M. Volkers, Mark G. Sterken, Michael Daube, Bernd Roschitzki, Claudia Fortes, Ralph Schlapbach, Alexander Roth, Christian von Mering, Michael O. Hengartner, Sabine P. Schrimpf, Jan E. Kammenga

Supplemental data consist of 5 Figures and 8 Tables

**FIG. S1. Protein abundance value correction for arginine-to-proline conversion.** *A*, The intensity contribution of heavy proline to the heavy arginine or heavy lysine peaks is proportional to the number of prolines. (y-axis: number of peptides with 1 - 4 prolines). *B*, The proportion of the intensity contribution of heavy proline to the heavy arginine or lysine peak is independent of the signal intensity. *C*, Proline corrected CB4856/N2 iBAQ ratios correlate with the uncorrected iBAQ ratios. *D*, Proline corrected CB4856/N2 protein abundance ratios correlate with the uncorrected protein abundance ratios. The 129 differentially expressed proteins are shown as violet dots. The other quantified proteins are shown in grey.  $r^2_{129}$  - is the regression coefficient for the 129 differentially expressed proteins.  $r^2_T$  - is the regression coefficient for all quantified proteins. The protein abundance and iBAQ ratio regression coefficient is higher for the differentially expressed proteins.

## N2 and CB4856 Proteome and Transcriptome Comparison

FIG. S2. **Peptide intensity correlations between the three biological replicates.** *A*, log<sub>2</sub> light peptide intensity correlations. *B*, log<sub>2</sub> heavy peptide intensity correlations. *r* - is the Pearson correlation coefficient for all quantified peptides.

FIG. S3. **The annotated MS/MS spectra of single peptide matches quantified in the first biological replicate.** For all proteins with a single peptide match the annotated MS/MS spectrum with the lowest posterior error probability (PEP) value is plotted. In total, 377 MS/MS spectra were extracted from the corresponding RAW files. Annotation of the spectra was done with matching b- and y-ions (within 0.6 Dalton error tolerance). The dotted blue lines indicate a matching y-ion, a dotted black line indicates a matching b-ion. For precursor masses higher than doubly charged, the multiply charged fragment ions are also plotted. The plots were generated using the R package protViz.

FIG. S4. **The annotated MS/MS spectra of single peptide matches quantified in the second biological replicate.** For all proteins with a single peptide match the annotated MS/MS spectrum with the lowest posterior error probability (PEP) value is plotted. In total, 414 MS/MS spectra were extracted from the corresponding RAW files. Annotation of the spectra was done with matching b- and y-ions (within 0.6 Dalton error tolerance). The dotted blue lines indicate a matching y-ion, a dotted black line indicates a matching b-ion. For precursor masses higher than doubly charged, the multiply charged fragment ions are also plotted. The plots were generated using the R package protViz.

## N2 and CB4856 Proteome and Transcriptome Comparison

**FIG. S5. The annotated MS/MS spectra of single peptide matches quantified in the third biological replicate.** For all proteins with a single peptide match the annotated MS/MS spectrum with the lowest posterior error probability (PEP) value is plotted. In total, 442 MS/MS spectra were extracted from the corresponding RAW files. Annotation of the spectra was done with matching b- and y-ions (within 0.6 Dalton error tolerance). The dotted blue lines indicate a matching y-ion, a dotted black line indicates a matching b-ion. For precursor masses higher than doubly charged, the multiply charged fragment ions are also plotted. The plots were generated using the R package protViz.

**TABLE S1. Number of proteins identified and quantified in the three different SILAC experiments.**

**TABLE S2. Proteins, peptide sequences, percentage coverage for each protein and number of peptides with and without proline quantified in the three biological replicates.**

**TABLE S3. Gene features.** Transcript and protein levels, and corresponding ratios of the genes quantified in the three biological replicates are listed for each individual sample as well as the mean-values per genotype.

**TABLE S4. Gene enrichments of GO-terms, gene classes, KEGG, protein domains.** WormBook chapters and eQTLs in protein and transcript datasets.

**TABLE S5. Characterization of the 129 differentially expressed proteins.**

## **N2 and CB4856 Proteome and Transcriptome Comparison**

**TABLE S6. List of 377 single peptide matches quantified in the first biological replicate with the lowest posterior error probability (PEP) and the corresponding MS/MS information.**

**TABLE S7. List of 414 single peptide matches quantified in the second biological replicate with the lowest posterior error probability (PEP) and the corresponding MS/MS information.**

**TABLE S8. List of 442 single peptide matches quantified in the third biological replicate with the lowest posterior error probability (PEP) and the corresponding MS/MS information.**
