# Supplementary material
Source: PubMed Central journal article supplement (PMC4858947)

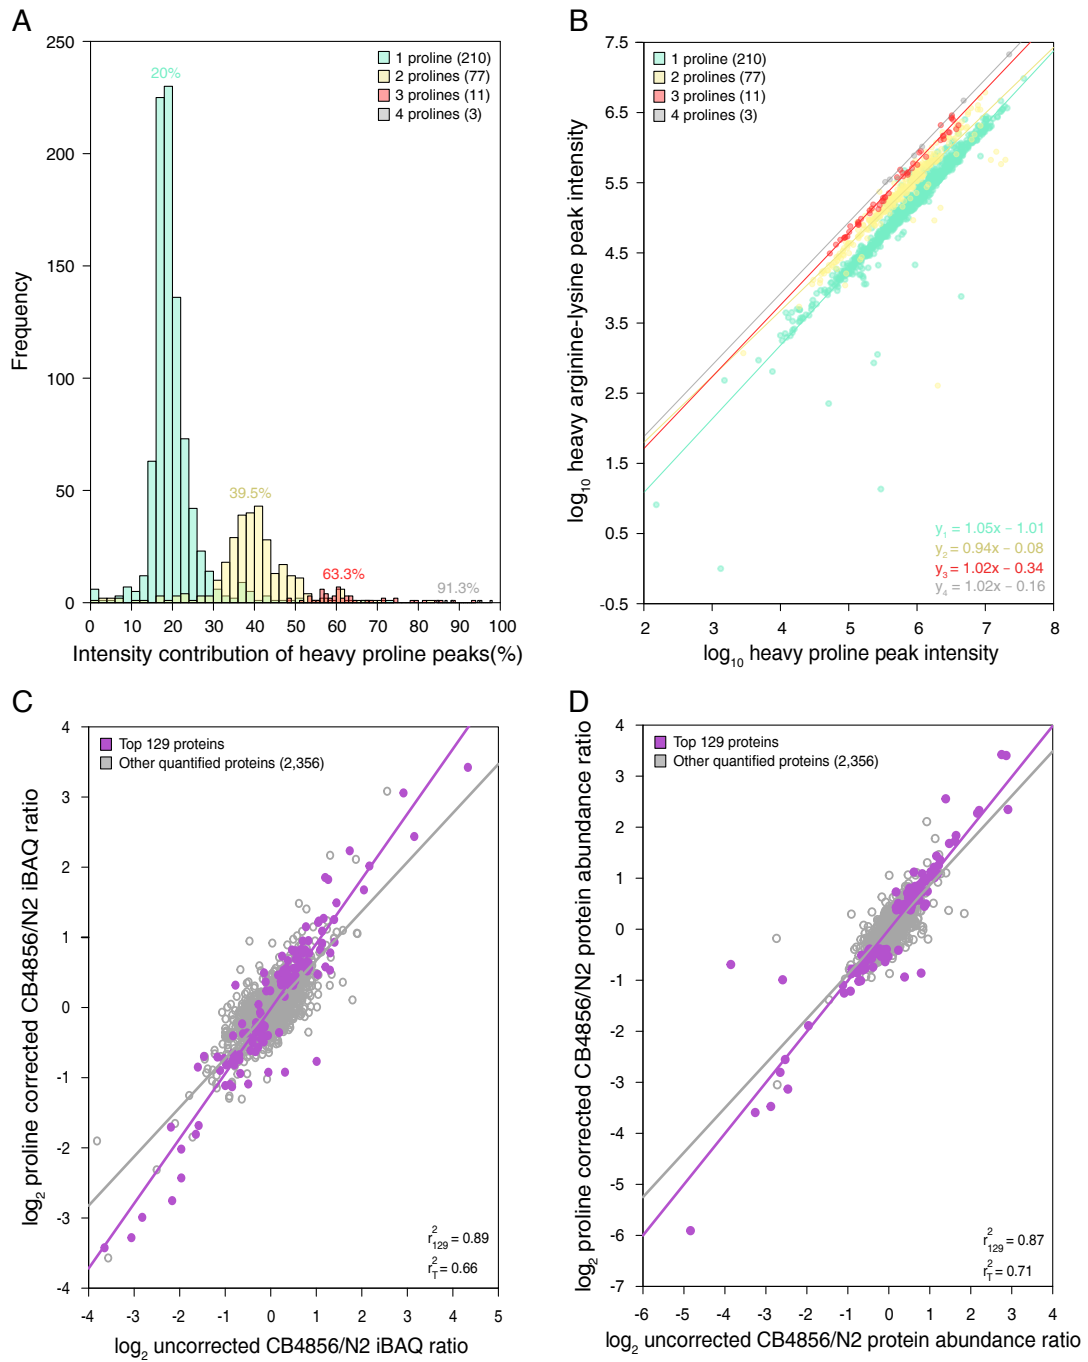

Supplement: 10.1074_M115.052548_mcp.M115.052548-2.pdf [file 10.1074_M115.052548_mcp.M115.052548-2.pdf]

Kamkina *et al*, FIG. S2

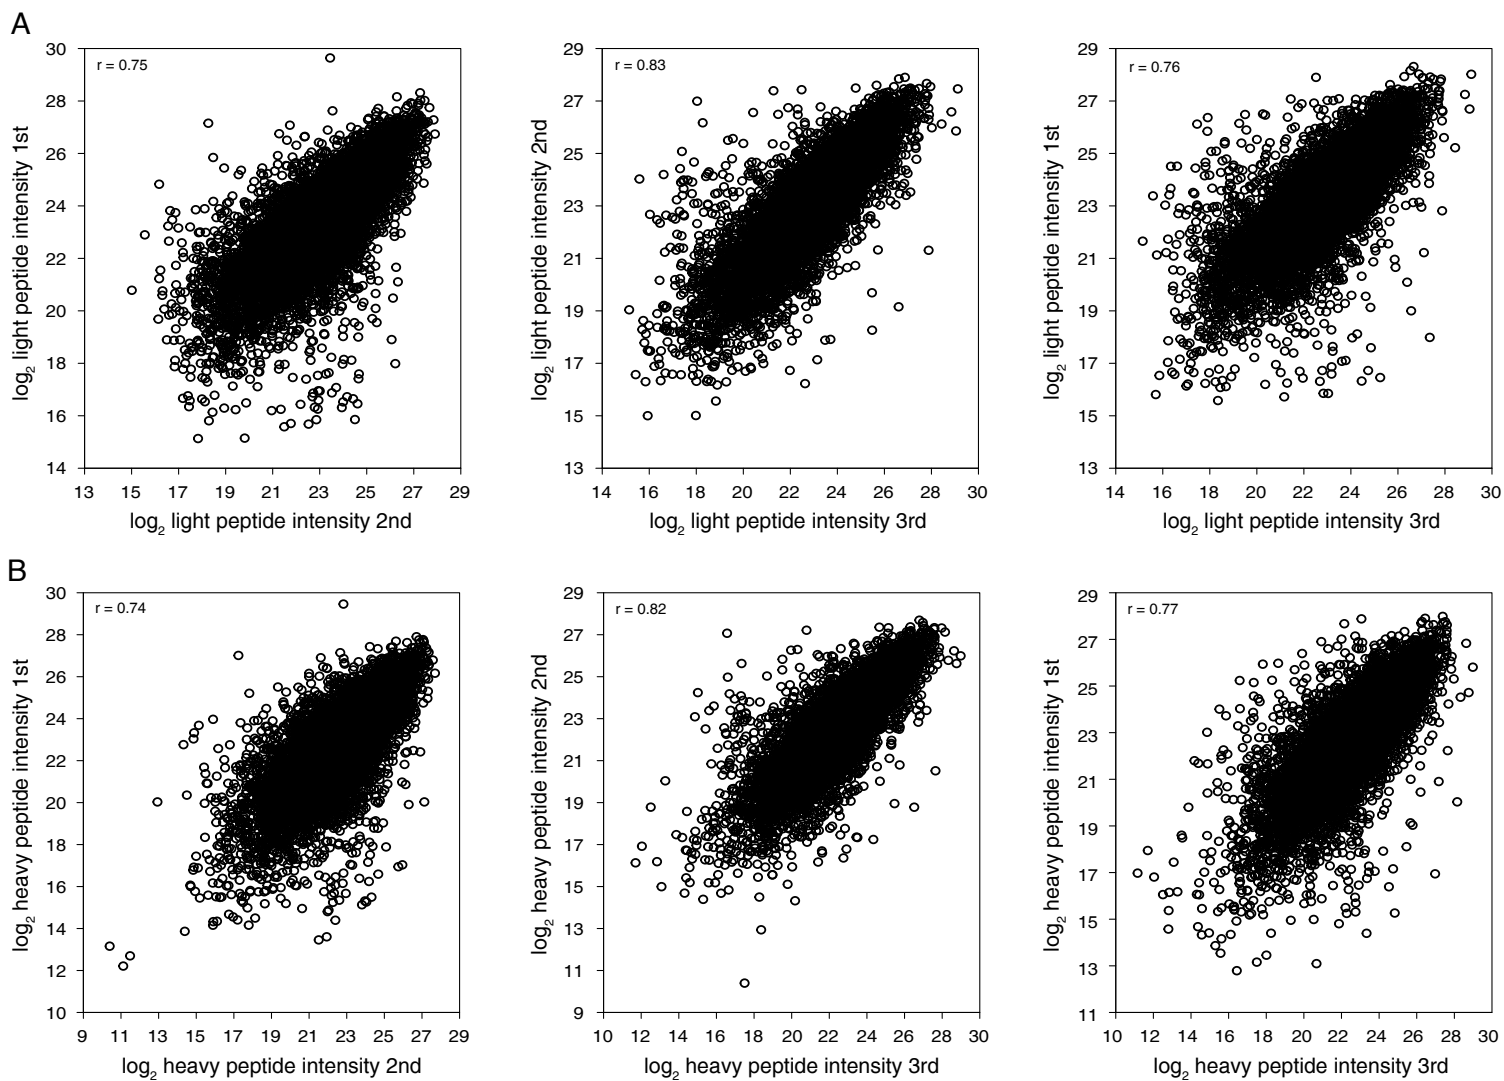

Supplement: 10.1074_M115.052548_mcp.M115.052548-3.pdf [file 10.1074_M115.052548_mcp.M115.052548-3.pdf]
